# Supplementary material for: Increased transmissibility and global spread of SARS-CoV-2 variants of concern as at June 2021
Source: PubMed Central journal article supplement (PMC8212592; doi:10.2807/1560-7917.es.2021.26.24.2100509), 2021-06-17
Supplement: 21-00509_CAMPBELL_supplement2.pdf [file 21-00509_CAMPBELL_supplement2.pdf]

We gratefully acknowledge the following Authors from the Originating laboratories responsible for obtaining the specimens, as well as the Submitting laboratories where the genome data were generated and shared via GISAID, on which this research is based.

All Submitters of data may be contacted directly via [www.gisaid.org](http://www.gisaid.org)

Authors are sorted alphabetically.

| Accession ID                                                                                                                                                                                                                                                                                                                                                                                                                                                                                                                                                                                                                                                                                                                                                                                                                                                                                                                                                                                                                                                                                                                                                                                                                                                                                                                                                                                                                                                                                         | Originating Laboratory                                                                         | Submitting Laboratory                                                                                                      | Authors                                                                                                                                                                                                                                                                                                                                                          |
|------------------------------------------------------------------------------------------------------------------------------------------------------------------------------------------------------------------------------------------------------------------------------------------------------------------------------------------------------------------------------------------------------------------------------------------------------------------------------------------------------------------------------------------------------------------------------------------------------------------------------------------------------------------------------------------------------------------------------------------------------------------------------------------------------------------------------------------------------------------------------------------------------------------------------------------------------------------------------------------------------------------------------------------------------------------------------------------------------------------------------------------------------------------------------------------------------------------------------------------------------------------------------------------------------------------------------------------------------------------------------------------------------------------------------------------------------------------------------------------------------|------------------------------------------------------------------------------------------------|----------------------------------------------------------------------------------------------------------------------------|------------------------------------------------------------------------------------------------------------------------------------------------------------------------------------------------------------------------------------------------------------------------------------------------------------------------------------------------------------------|
| EPI_ISL_1446651 to 1446666,<br>EPI_ISL_1446671, EPI_ISL_1528479 to 1528492                                                                                                                                                                                                                                                                                                                                                                                                                                                                                                                                                                                                                                                                                                                                                                                                                                                                                                                                                                                                                                                                                                                                                                                                                                                                                                                                                                                                                           | "AK State Public Health Lab, State Health Department"                                          | Centers for Disease Control and Prevention Division of Viral Diseases, Pathogen Discovery                                  | Alison Laufer Halpin; Ben L. Rambo-Martin; Clinton R. Paden; Dakota Howard; Darlene Wagner; Dave Wentworth; Dhvani Batra; Jasmine Padilla; Justin Lee; Katie Dillon; Krista Queen; Kristen Knipe; Kristine Lacek; Mark Burroughs; Matthew Schmeier; Mili Sheth; Peter Cook; Sam Shepard; Sarah Nobles; Shoshona Le; Suxiang Tong; Vivien Dugan; Yvette Unoarumhi |
| EPI_ISL_1446456, EPI_ISL_1446459, EPI_ISL_1446462, EPI_ISL_1446465, EPI_ISL_1446468, EPI_ISL_1446471, EPI_ISL_1446473, EPI_ISL_1528291 to 1528293                                                                                                                                                                                                                                                                                                                                                                                                                                                                                                                                                                                                                                                                                                                                                                                                                                                                                                                                                                                                                                                                                                                                                                                                                                                                                                                                                    | "AR Dept. of Health-PHL, Molecular Diagnostics"                                                | Centers for Disease Control and Prevention Division of Viral Diseases, Pathogen Discovery                                  | Alison Laufer Halpin; Ben L. Rambo-Martin; Clinton R. Paden; Dakota Howard; Darlene Wagner; Dave Wentworth; Dhvani Batra; Jasmine Padilla; Justin Lee; Katie Dillon; Krista Queen; Kristen Knipe; Kristine Lacek; Mark Burroughs; Matthew Schmeier; Mili Sheth; Peter Cook; Sam Shepard; Sarah Nobles; Shoshona Le; Suxiang Tong; Vivien Dugan; Yvette Unoarumhi |
| EPI_ISL_1509928 to 1509929, EPI_ISL_1509937                                                                                                                                                                                                                                                                                                                                                                                                                                                                                                                                                                                                                                                                                                                                                                                                                                                                                                                                                                                                                                                                                                                                                                                                                                                                                                                                                                                                                                                          | "AR Dept. of Health-PHL, Molecular Diagnostics"                                                | Genomics and Discovery, Respiratory Viruses Branch, Division of Viral Diseases, Centers for Disease Control and Prevention | Adam Retchless; Anna Kelleher; Anna Montmayeur; Anna Uehara; Brian Lynch; Clinton R. Paden; Haibin Wang; Han Jia Justin Ng; Jing Zhang; Justin Lee; Krista Queen; Mark Burroughs; Peter Cook; Rachel Marine; Suxiang Tong; Yan Li; Ying Tao                                                                                                                      |
| EPI_ISL_1528419                                                                                                                                                                                                                                                                                                                                                                                                                                                                                                                                                                                                                                                                                                                                                                                                                                                                                                                                                                                                                                                                                                                                                                                                                                                                                                                                                                                                                                                                                      | "AZ SPHL, Arizona Department of Health Services"                                               | Centers for Disease Control and Prevention Division of Viral Diseases, Pathogen Discovery                                  | Alison Laufer Halpin; Ben L. Rambo-Martin; Clinton R. Paden; Dakota Howard; Darlene Wagner; Dave Wentworth; Dhvani Batra; Jasmine Padilla; Justin Lee; Katie Dillon; Krista Queen; Kristen Knipe; Kristine Lacek; Mark Burroughs; Matthew Schmeier; Mili Sheth; Peter Cook; Sam Shepard; Sarah Nobles; Shoshona Le; Suxiang Tong; Vivien Dugan; Yvette Unoarumhi |
| EPI_ISL_1446773 to 1446786, EPI_ISL_1446788 to 1446789, EPI_ISL_1446791 to 1446802, EPI_ISL_1446840 to 1446845, EPI_ISL_1447018                                                                                                                                                                                                                                                                                                                                                                                                                                                                                                                                                                                                                                                                                                                                                                                                                                                                                                                                                                                                                                                                                                                                                                                                                                                                                                                                                                      | "CDPH, Viral and Rickettsial Disease Laboratory"                                               | Centers for Disease Control and Prevention Division of Viral Diseases, Pathogen Discovery                                  | Alison Laufer Halpin; Ben L. Rambo-Martin; Clinton R. Paden; Dakota Howard; Darlene Wagner; Dave Wentworth; Dhvani Batra; Jasmine Padilla; Justin Lee; Katie Dillon; Krista Queen; Kristen Knipe; Kristine Lacek; Mark Burroughs; Matthew Schmeier; Mili Sheth; Peter Cook; Sam Shepard; Sarah Nobles; Shoshona Le; Suxiang Tong; Vivien Dugan; Yvette Unoarumhi |
| EPI_ISL_1491516 to 1491517, EPI_ISL_1491522                                                                                                                                                                                                                                                                                                                                                                                                                                                                                                                                                                                                                                                                                                                                                                                                                                                                                                                                                                                                                                                                                                                                                                                                                                                                                                                                                                                                                                                          | "CDPH, Viral and Rickettsial Disease Laboratory"                                               | Genomics and Discovery, Respiratory Viruses Branch, Division of Viral Diseases, Centers for Disease Control and Prevention | Anna Kelleher; Anna Uehara; Brian Lynch; Clinton R. Paden; Haibin Wang; Han Jia Justin Ng; Jing Zhang; Krista Queen; Peter Cook; Suxiang Tong; Yan Li; Ying Tao                                                                                                                                                                                                  |
| EPI_ISL_1528339 to 1528362                                                                                                                                                                                                                                                                                                                                                                                                                                                                                                                                                                                                                                                                                                                                                                                                                                                                                                                                                                                                                                                                                                                                                                                                                                                                                                                                                                                                                                                                           | "CO Dept. of Public Health and Environment, Lab Services Division"                             | Centers for Disease Control and Prevention Division of Viral Diseases, Pathogen Discovery                                  | Alison Laufer Halpin; Ben L. Rambo-Martin; Clinton R. Paden; Dakota Howard; Darlene Wagner; Dave Wentworth; Dhvani Batra; Jasmine Padilla; Justin Lee; Katie Dillon; Krista Queen; Kristen Knipe; Kristine Lacek; Mark Burroughs; Matthew Schmeier; Mili Sheth; Peter Cook; Sam Shepard; Sarah Nobles; Shoshona Le; Suxiang Tong; Vivien Dugan; Yvette Unoarumhi |
| EPI_ISL_1394769 to 1394770, EPI_ISL_1394772 to 1394773, EPI_ISL_1394776 to 1394777, EPI_ISL_1394780, EPI_ISL_1394782, EPI_ISL_1394784, EPI_ISL_1394786 to 1394787, EPI_ISL_1394792, EPI_ISL_1394795 to 1394799, EPI_ISL_1394804, EPI_ISL_1394808, EPI_ISL_1394811, EPI_ISL_1394835                                                                                                                                                                                                                                                                                                                                                                                                                                                                                                                                                                                                                                                                                                                                                                                                                                                                                                                                                                                                                                                                                                                                                                                                                   | "InMedica"                                                                                     | Lithuanian University of Health Sciences Hospital, Department of Genetics and Molecular Medicine                           | Astra Vitkauskienė; Darius Cereskevicius; Inga Nasvytiene; Mantas Sarauskas; Marius Sukys; Rasa Ugenskiene; Renaldas Jurkevicius; Rima Vainoriene; Zivile Zemeckiene                                                                                                                                                                                             |
| EPI_ISL_1446640, EPI_ISL_1446721 to 1446722, EPI_ISL_1446869 to 1446871, EPI_ISL_1446873, EPI_ISL_1446875, EPI_ISL_1446879, EPI_ISL_1446881, EPI_ISL_1446883, EPI_ISL_1446889 to 1446899, EPI_ISL_1446902, EPI_ISL_1446906, EPI_ISL_1446909, EPI_ISL_1446986, EPI_ISL_1528272 to 1528274                                                                                                                                                                                                                                                                                                                                                                                                                                                                                                                                                                                                                                                                                                                                                                                                                                                                                                                                                                                                                                                                                                                                                                                                             | "MN PHL Division, Minnesota Department of Health"                                              | Centers for Disease Control and Prevention Division of Viral Diseases, Pathogen Discovery                                  | Alison Laufer Halpin; Ben L. Rambo-Martin; Clinton R. Paden; Dakota Howard; Darlene Wagner; Dave Wentworth; Dhvani Batra; Jasmine Padilla; Justin Lee; Katie Dillon; Krista Queen; Kristen Knipe; Kristine Lacek; Mark Burroughs; Matthew Schmeier; Mili Sheth; Peter Cook; Sam Shepard; Sarah Nobles; Shoshona Le; Suxiang Tong; Vivien Dugan; Yvette Unoarumhi |
| EPI_ISL_1446386, EPI_ISL_1446389, EPI_ISL_1446392, EPI_ISL_1446395, EPI_ISL_1446398, EPI_ISL_1446401, EPI_ISL_1446404, EPI_ISL_1446406, EPI_ISL_1446409, EPI_ISL_1446632 to 1446633, EPI_ISL_1446635 to 1446639, EPI_ISL_1446868, EPI_ISL_1446874, EPI_ISL_1446876, EPI_ISL_1446878, EPI_ISL_1446884                                                                                                                                                                                                                                                                                                                                                                                                                                                                                                                                                                                                                                                                                                                                                                                                                                                                                                                                                                                                                                                                                                                                                                                                 | "NM Dept. Health, Scientific Laboratory Division "                                             | Centers for Disease Control and Prevention Division of Viral Diseases, Pathogen Discovery                                  | Alison Laufer Halpin; Ben L. Rambo-Martin; Clinton R. Paden; Dakota Howard; Darlene Wagner; Dave Wentworth; Dhvani Batra; Jasmine Padilla; Justin Lee; Katie Dillon; Krista Queen; Kristen Knipe; Kristine Lacek; Mark Burroughs; Matthew Schmeier; Mili Sheth; Peter Cook; Sam Shepard; Sarah Nobles; Shoshona Le; Suxiang Tong; Vivien Dugan; Yvette Unoarumhi |
| EPI_ISL_1446676 to 1446677, EPI_ISL_1447053                                                                                                                                                                                                                                                                                                                                                                                                                                                                                                                                                                                                                                                                                                                                                                                                                                                                                                                                                                                                                                                                                                                                                                                                                                                                                                                                                                                                                                                          | "NYSDOH Wadsworth Center, Virology Lab"                                                        | Centers for Disease Control and Prevention Division of Viral Diseases, Pathogen Discovery                                  | Alison Laufer Halpin; Ben L. Rambo-Martin; Clinton R. Paden; Dakota Howard; Darlene Wagner; Dave Wentworth; Dhvani Batra; Jasmine Padilla; Justin Lee; Katie Dillon; Krista Queen; Kristen Knipe; Kristine Lacek; Mark Burroughs; Matthew Schmeier; Mili Sheth; Peter Cook; Sam Shepard; Sarah Nobles; Shoshona Le; Suxiang Tong; Vivien Dugan; Yvette Unoarumhi |
| EPI_ISL_1446543 to 1446546                                                                                                                                                                                                                                                                                                                                                                                                                                                                                                                                                                                                                                                                                                                                                                                                                                                                                                                                                                                                                                                                                                                                                                                                                                                                                                                                                                                                                                                                           | "OK Public Health Laboratory, Oklahoma State DOH"                                              | Centers for Disease Control and Prevention Division of Viral Diseases, Pathogen Discovery                                  | Alison Laufer Halpin; Ben L. Rambo-Martin; Clinton R. Paden; Dakota Howard; Darlene Wagner; Dave Wentworth; Dhvani Batra; Jasmine Padilla; Justin Lee; Katie Dillon; Krista Queen; Kristen Knipe; Kristine Lacek; Mark Burroughs; Matthew Schmeier; Mili Sheth; Peter Cook; Sam Shepard; Sarah Nobles; Shoshona Le; Suxiang Tong; Vivien Dugan; Yvette Unoarumhi |
| EPI_ISL_1509943                                                                                                                                                                                                                                                                                                                                                                                                                                                                                                                                                                                                                                                                                                                                                                                                                                                                                                                                                                                                                                                                                                                                                                                                                                                                                                                                                                                                                                                                                      | "OK Public Health Laboratory, Oklahoma State DOH"                                              | Genomics and Discovery, Respiratory Viruses Branch, Division of Viral Diseases, Centers for Disease Control and Prevention | Adam Retchless; Anna Kelleher; Anna Montmayeur; Anna Uehara; Brian Lynch; Clinton R. Paden; Haibin Wang; Han Jia Justin Ng; Jing Zhang; Justin Lee; Krista Queen; Mark Burroughs; Peter Cook; Rachel Marine; Suxiang Tong; Yan Li; Ying Tao                                                                                                                      |
| EPI_ISL_1446701, EPI_ISL_1446807 to 1446808, EPI_ISL_1447019 to 1447026, EPI_ISL_1528506 to 1528507                                                                                                                                                                                                                                                                                                                                                                                                                                                                                                                                                                                                                                                                                                                                                                                                                                                                                                                                                                                                                                                                                                                                                                                                                                                                                                                                                                                                  | "PA Department of Health, Bureau of Laboratories"                                              | Centers for Disease Control and Prevention Division of Viral Diseases, Pathogen Discovery                                  | Alison Laufer Halpin; Ben L. Rambo-Martin; Clinton R. Paden; Dakota Howard; Darlene Wagner; Dave Wentworth; Dhvani Batra; Jasmine Padilla; Justin Lee; Katie Dillon; Krista Queen; Kristen Knipe; Kristine Lacek; Mark Burroughs; Matthew Schmeier; Mili Sheth; Peter Cook; Sam Shepard; Sarah Nobles; Shoshona Le; Suxiang Tong; Vivien Dugan; Yvette Unoarumhi |
| EPI_ISL_1408890, EPI_ISL_1448525, EPI_ISL_1478203                                                                                                                                                                                                                                                                                                                                                                                                                                                                                                                                                                                                                                                                                                                                                                                                                                                                                                                                                                                                                                                                                                                                                                                                                                                                                                                                                                                                                                                    | "PA Department of Health, Bureau of Laboratories"                                              | Genomics and Discovery, Respiratory Viruses Branch, Division of Viral Diseases, Centers for Disease Control and Prevention | Anna Kelleher; Anna Uehara; Brian Lynch; Clinton R. Paden; Haibin Wang; Han Jia Justin Ng; Jing Zhang; Krista Queen; Peter Cook; Suxiang Tong; Yan Li; Ying Tao                                                                                                                                                                                                  |
| EPI_ISL_1455671, EPI_ISL_1457126                                                                                                                                                                                                                                                                                                                                                                                                                                                                                                                                                                                                                                                                                                                                                                                                                                                                                                                                                                                                                                                                                                                                                                                                                                                                                                                                                                                                                                                                     | "Stefan S. Nicolau" Institute of Virology                                                      | "Stefan S. Nicolau" Institute of Virology                                                                                  | Adriana Plesa; Alina Nastasie; Ana Iulia Neagu; Anca Botezatu; Camelia Sultana; Carmen Cristina Diaconu; Coralia Bleotu; Cristina Mambet; Denisa Dragu; Gabriela Anton; Ioana Pitica; Iulia Virginia Iancu; Laura Grecu; Laura Neclau; Lilia Matei; Marinelia Bostan; Mihaela Economescu; Mirela Mihaila; Saviana Nedeianu; Simona Ruta                          |
| EPI_ISL_1446641 to 1446650, EPI_ISL_1446738, EPI_ISL_1528397 to 1528398                                                                                                                                                                                                                                                                                                                                                                                                                                                                                                                                                                                                                                                                                                                                                                                                                                                                                                                                                                                                                                                                                                                                                                                                                                                                                                                                                                                                                              | "TX DSHS, Lab Services Section MC 1947"                                                        | Centers for Disease Control and Prevention Division of Viral Diseases, Pathogen Discovery                                  | Alison Laufer Halpin; Ben L. Rambo-Martin; Clinton R. Paden; Dakota Howard; Darlene Wagner; Dave Wentworth; Dhvani Batra; Jasmine Padilla; Justin Lee; Katie Dillon; Krista Queen; Kristen Knipe; Kristine Lacek; Mark Burroughs; Matthew Schmeier; Mili Sheth; Peter Cook; Sam Shepard; Sarah Nobles; Shoshona Le; Suxiang Tong; Vivien Dugan; Yvette Unoarumhi |
| EPI_ISL_1524996 to 1524998                                                                                                                                                                                                                                                                                                                                                                                                                                                                                                                                                                                                                                                                                                                                                                                                                                                                                                                                                                                                                                                                                                                                                                                                                                                                                                                                                                                                                                                                           | #VALUE!                                                                                        | Labo Klinische Biologie, UZA                                                                                               | Basil Britto Xavier; Christine Lammens; Herman Goossens; Jasmine Coppens; Marie Le Mercier; Veerle Matheussens                                                                                                                                                                                                                                                   |
| EPI_ISL_1448509                                                                                                                                                                                                                                                                                                                                                                                                                                                                                                                                                                                                                                                                                                                                                                                                                                                                                                                                                                                                                                                                                                                                                                                                                                                                                                                                                                                                                                                                                      | 1) Laboratorio Cerba 2) Università Milano-Bicocca 3) TaskForce Covid19-Ceinge Regione Campania | TaskForce Covid19-Ceinge Regione Campania                                                                                  | 2) Ettore Capoluongo (3) Alessio Colombo (2) Adelaide Bussini (1) Nicola Perrelli (2) Silvia Cavalli (2) Alice Urbani (2) Giovanni Paoletta (3) Veronica Ferrucci (3) Rossella Tufano (3) Angelo Boccia (3) Massimo Zollo (3) 1) Università Milano-Bicocca 2) Laboratorio Cerba 3) TaskForce Covid19-Ceinge Regione Campania; Francesco Broccoli (1)             |
| EPI_ISL_1410538, EPI_ISL_1410540, EPI_ISL_1410543, EPI_ISL_1410545, EPI_ISL_1410548, EPI_ISL_1410551, EPI_ISL_1410553, EPI_ISL_1410556, EPI_ISL_1410558, EPI_ISL_1410561, EPI_ISL_1410564, EPI_ISL_1410566, EPI_ISL_1410569, EPI_ISL_1410571, EPI_ISL_1410574, EPI_ISL_1410577, EPI_ISL_1410579, EPI_ISL_1410582, EPI_ISL_1410585, EPI_ISL_1410587, EPI_ISL_1410590, EPI_ISL_1410592, EPI_ISL_1410595, EPI_ISL_1410598, EPI_ISL_1410600, EPI_ISL_1410603, EPI_ISL_1410605, EPI_ISL_1410608, EPI_ISL_1410611, EPI_ISL_1410613, EPI_ISL_1410616, EPI_ISL_1410618, EPI_ISL_1410621, EPI_ISL_1410624, EPI_ISL_1410626, EPI_ISL_1410629, EPI_ISL_1410631, EPI_ISL_1410634, EPI_ISL_1410637, EPI_ISL_1410640, EPI_ISL_1410643, EPI_ISL_1410645, EPI_ISL_1410648, EPI_ISL_1410650, EPI_ISL_1410653, EPI_ISL_1410655, EPI_ISL_1410658, EPI_ISL_1410660, EPI_ISL_1410663, EPI_ISL_1410666, EPI_ISL_1410669, EPI_ISL_1410671, EPI_ISL_1410674, EPI_ISL_1410677, EPI_ISL_1410679, EPI_ISL_1410682, EPI_ISL_1410685, EPI_ISL_1410687, EPI_ISL_1410690, EPI_ISL_1410693, EPI_ISL_1410696, EPI_ISL_1410699, EPI_ISL_1410701, EPI_ISL_1410705, EPI_ISL_1410707, EPI_ISL_1410709, EPI_ISL_1410712, EPI_ISL_1410715, EPI_ISL_1410717, EPI_ISL_1410720, EPI_ISL_1410723, EPI_ISL_1410725, EPI_ISL_1410728, EPI_ISL_1410731, EPI_ISL_1410733, EPI_ISL_1410736, EPI_ISL_1410738, EPI_ISL_1410741, EPI_ISL_1410743, EPI_ISL_1410746, EPI_ISL_1410749, EPI_ISL_1410751, EPI_ISL_1410753, EPI_ISL_1410756, EPI_ISL_1410758, |                                                                                                |                                                                                                                            |                                                                                                                                                                                                                                                                                                                                                                  |

|                                                                                                                                                                                                                                                                                                                                                                                                                                                                                                                                                                                                                                                                                                                                                                                       |             |                                                                                                                                                                                                                                                                                                                                                                                                                                                                                                                                                                                                                                                                                                                                                                                  |                                                                                                                                                                                                                                                                                               |                                                                                                                                                                                                                                                                                                                                                                                                                                                                                                                                                                                                                                                                                                                                                                                                                                                                                                                                                                                                                                                                                                                                                                                                                                                                  |
|---------------------------------------------------------------------------------------------------------------------------------------------------------------------------------------------------------------------------------------------------------------------------------------------------------------------------------------------------------------------------------------------------------------------------------------------------------------------------------------------------------------------------------------------------------------------------------------------------------------------------------------------------------------------------------------------------------------------------------------------------------------------------------------|-------------|----------------------------------------------------------------------------------------------------------------------------------------------------------------------------------------------------------------------------------------------------------------------------------------------------------------------------------------------------------------------------------------------------------------------------------------------------------------------------------------------------------------------------------------------------------------------------------------------------------------------------------------------------------------------------------------------------------------------------------------------------------------------------------|-----------------------------------------------------------------------------------------------------------------------------------------------------------------------------------------------------------------------------------------------------------------------------------------------|------------------------------------------------------------------------------------------------------------------------------------------------------------------------------------------------------------------------------------------------------------------------------------------------------------------------------------------------------------------------------------------------------------------------------------------------------------------------------------------------------------------------------------------------------------------------------------------------------------------------------------------------------------------------------------------------------------------------------------------------------------------------------------------------------------------------------------------------------------------------------------------------------------------------------------------------------------------------------------------------------------------------------------------------------------------------------------------------------------------------------------------------------------------------------------------------------------------------------------------------------------------|
| EPI_ISL_1410761, EPI_ISL_1410764, EPI_ISL_1410767, EPI_ISL_1410769, EPI_ISL_1410772, EPI_ISL_1410774, EPI_ISL_1410776, EPI_ISL_1410779, EPI_ISL_1410782, EPI_ISL_1410785, EPI_ISL_1411509 to 1411554, EPI_ISL_1411557, EPI_ISL_1411559, EPI_ISL_1411562, EPI_ISL_1411564, EPI_ISL_1411566, EPI_ISL_1411568, EPI_ISL_1411571, EPI_ISL_1411574, EPI_ISL_1411576, EPI_ISL_1411578, EPI_ISL_1411580, EPI_ISL_1411583, EPI_ISL_1411585, EPI_ISL_1411588, EPI_ISL_1411590, EPI_ISL_1411593, EPI_ISL_1411595, EPI_ISL_1411598, EPI_ISL_1411601, EPI_ISL_1411604, EPI_ISL_1411606, EPI_ISL_1411609, EPI_ISL_1411611, EPI_ISL_1411614, EPI_ISL_1411616, EPI_ISL_1411619, EPI_ISL_1411622, EPI_ISL_1411624, EPI_ISL_1411626, EPI_ISL_1411629, EPI_ISL_1411631, EPI_ISL_1411633, EPI_ISL_1411636 | see above   | 1. Główny Inspektorat Sanitarny. 2. Diagnostyka. Laboratoria Medyczne.                                                                                                                                                                                                                                                                                                                                                                                                                                                                                                                                                                                                                                                                                                           | 1. ViroGenetics - BSL3 Laboratory of Virology, Maopolska Centre of Biotechnology, Jagiellonian University; 2. genXone SA, Research & Development Laboratory                                                                                                                                   | Aleksandra Gidlewicz; Anna Brylak; Gromowski, T.; Grzegorz Nowicki; Jakub Grabowski; Karol Szeszko; Kowalski, M.; Krzysztof Pyrc; Labaj; Lukasz Krych; Maciej Sykulski; Mazur-Panasiuk, N.; Michał Kaszuba; Michał Kowalski; Natalia Drweska-Matelska; Natalia Mazur-Panasiuk; P.P.; Paweł P Labaj; Piotr Szulc; Pyrc, K.; Sylwia Januszczak; Szulc, P.; Tomasz Gromowski                                                                                                                                                                                                                                                                                                                                                                                                                                                                                                                                                                                                                                                                                                                                                                                                                                                                                        |
| EPI_ISL_1396558 to 1396633                                                                                                                                                                                                                                                                                                                                                                                                                                                                                                                                                                                                                                                                                                                                                            |             | 1. Główny Inspektorat Sanitarny. 2. Diagnostyka. Laboratoria Medyczne.                                                                                                                                                                                                                                                                                                                                                                                                                                                                                                                                                                                                                                                                                                           | 1. ViroGenetics - BSL3 Laboratory of Virology, Maopolska Centre of Biotechnology, Jagiellonian University; 2. Diagtron Laboratoria Lukasz Rabalski                                                                                                                                            | Andrzej Horban; Krzysztof Pyrc; Lukasz Rabalski; Maciej Kosinski; Natalia Derewonko; Natalia Mazur-Panasiuk; Piotr Zabek; Sylwia Januszczak; Tomasz Dyda; Tomasz Gromowski                                                                                                                                                                                                                                                                                                                                                                                                                                                                                                                                                                                                                                                                                                                                                                                                                                                                                                                                                                                                                                                                                       |
| EPI_ISL_1402655 to 1402706, EPI_ISL_1406315 to 1406386, EPI_ISL_1502583 to 1502730, EPI_ISL_1502732 to 1502794, EPI_ISL_1524757 to 1524770                                                                                                                                                                                                                                                                                                                                                                                                                                                                                                                                                                                                                                            |             | 1. Główny Inspektorat Sanitarny. 2. Diagnostyka. Laboratoria Medyczne.                                                                                                                                                                                                                                                                                                                                                                                                                                                                                                                                                                                                                                                                                                           | 1. ViroGenetics - BSL3 Laboratory of Virology, Maopolska Centre of Biotechnology, Jagiellonian University; 2. genXone SA, Research & Development Laboratory                                                                                                                                   | Aleksandra Gidlewicz; Anna Brylak; Gromowski, T.; Grzegorz Nowicki; Jakub Grabowski; Karol Szeszko; Kowalski, M.; Labaj; Maciej Sykulski; Mazur-Panasiuk, N.; Michał Kaszuba; Natalia Drweska-Matelska; P.P.; Pyrc, K.; Sylwia Januszczak; Szulc, P.; ukasz Krych                                                                                                                                                                                                                                                                                                                                                                                                                                                                                                                                                                                                                                                                                                                                                                                                                                                                                                                                                                                                |
| EPI_ISL_1402473 to 1402539, EPI_ISL_1497679 to 1497765, EPI_ISL_1499116 to 1499200, EPI_ISL_1499206 to 1499296, EPI_ISL_1499301 to 1499363, EPI_ISL_1500087 to 1500150                                                                                                                                                                                                                                                                                                                                                                                                                                                                                                                                                                                                                |             | 1. Główny Inspektorat Sanitarny. 2. Diagnostyka. Laboratoria Medyczne.                                                                                                                                                                                                                                                                                                                                                                                                                                                                                                                                                                                                                                                                                                           | 1. ViroGenetics - BSL3 Laboratory of Virology, Maopolska Centre of Biotechnology, Jagiellonian University; 2. genXone SA, Research & Development Laboratory                                                                                                                                   | Aleksandra Gidlewicz; Anna Brylak; Gromowski, T.; Grzegorz Nowicki; Jakub Grabowski; Karol Szeszko; Kowalski, M.; Labaj; Maciej Sykulski; Mazur-Panasiuk, N.; Michał Kaszuba; Natalia Drweska-Matelska; P.P.; Pyrc, K.; Sylwia Januszczak; Szulc, P.; ukasz Krych                                                                                                                                                                                                                                                                                                                                                                                                                                                                                                                                                                                                                                                                                                                                                                                                                                                                                                                                                                                                |
| EPI_ISL_451971 to 451987                                                                                                                                                                                                                                                                                                                                                                                                                                                                                                                                                                                                                                                                                                                                                              |             | 1. ViroGenetics - BSL3 Laboratory of Virology, Maopolska Centre of Biotechnology, Jagiellonian University; 2. II Department of Internal Medicine, Faculty of Medicine, Jagiellonian University Medical College; 3. DIAGNOSTYKA Ltd.                                                                                                                                                                                                                                                                                                                                                                                                                                                                                                                                              | 1. ViroGenetics - BSL3 Laboratory of Virology, Maopolska Centre of Biotechnology, Jagiellonian University; 2. II Department of Internal Medicine, Faculty of Medicine, Jagiellonian University Medical College.                                                                               | Jakub Swadba; Krzysztof Pyr; Marcin Surmiak; Marek Sanak; Marta Rogalska-Kupiec; Monika Gsecka-Czapla; Pawe P abaj; Wojciech Branicki                                                                                                                                                                                                                                                                                                                                                                                                                                                                                                                                                                                                                                                                                                                                                                                                                                                                                                                                                                                                                                                                                                                            |
| EPI_ISL_455440 to 455453, EPI_ISL_492066 to 492073                                                                                                                                                                                                                                                                                                                                                                                                                                                                                                                                                                                                                                                                                                                                    |             | 1. ViroGenetics - BSL3 Laboratory of Virology, Maopolska Centre of Biotechnology, Jagiellonian University; 2. II Department of Internal Medicine, Faculty of Medicine, Jagiellonian University Medical College; 3. Narodowy Instytut Zdrowia Publicznego - Pastwowy Zakad Higieny (NIZP-PZH)                                                                                                                                                                                                                                                                                                                                                                                                                                                                                     | 1. ViroGenetics - BSL3 Laboratory of Virology, Maopolska Centre of Biotechnology, Jagiellonian University; 2. II Department of Internal Medicine, Faculty of Medicine, Jagiellonian University Medical College; 3. Narodowy Instytut Zdrowia Publicznego - Pastwowy Zakad Higieny (NIZP-PZH). | Agnieszka Koakowska-Kulesza; Aleksandra A. Zasada; Aleksandra Milewska; Ewelina Hallman-Szeliska; Katarzyna Owczarek; Katarzyna Pancer; Katarzyna Zacharczuk; Krzysztof Pyrc; Magdalena Rzeczkowska; Marek Sanak; Natalia Wolaniuk; Pawe P abaj; Tomasz Wokowicz; Wojciech Branicki                                                                                                                                                                                                                                                                                                                                                                                                                                                                                                                                                                                                                                                                                                                                                                                                                                                                                                                                                                              |
| EPI_ISL_1547375, EPI_ISL_1547388 to 1547392                                                                                                                                                                                                                                                                                                                                                                                                                                                                                                                                                                                                                                                                                                                                           |             | 1.AO Universitaria 'S. Giovanni di Dio e Ruggi D'Aragona, Scuola Medica Salernitana' Hospital / 2.UOC di Virologia e Microbiologia, Università della Campania 'L. Vanvitelli' / 3.AO Universitaria 'Federico II' Napoli Hospital / 4.AORN 'San Giuseppe Moscati' Avellino Hospital / 5.AO 'San Pio - presidio G. Rummo' Benevento Hospital / 6.AO 'Sant'Anna e San Sebastiano' Caserta Hospital / 7.PO 'Maria Santissima Addolorata' Eboli Hospital / 8.Biogen Istituto di Ricerche Genetiche / 9. U.O.C. di Genetica Medica e di Laboratorio A.O.R.N., Azienda Ospedaliera di Rilievo Nazionale Antonio Cardarelli, Napoli / 10. Centro di riferimento Oncologico della Basilicata (IRCCS-CROB), Rionero in Vulture (PZ) / 11. Presidio Ospedaliero di Agropoli, Agropoli (SA). | 1. Genome Research Center for Health (CRGS) / 2. Laboratory of Molecular Medicine and Genomics(LMMGe) / 3. Center for Research in Pure and Applied Mathematics (CRMPA)                                                                                                                        | Alessandro Weisz; Alessandro Weisz (Corresponding Author); Alessia Cossu; Andreina Baj; Aniello Gentile; Annamaria Salvati; Antonello Saccomanno; Arnolfo Petruzzelli; Assunta Sellitto; Caivano Antonella; Carlo Ferravante; D'Auria Fiorella; De Luca Luciana.; Domenico Memoli; Domenico Palumbo; Edmondo Adoriso; Elena Alexandra; Emilia Vaccaro; Fau; Fausto Sessa; Francesca Marciano; Francesca Rizzo (Corresponding Author); Francesco Curcio; Gianluigi Girani; Giorgio Dirani; Giorgio Giurato; Giorgio Giurato (Corresponding Author); Giovanni Nassa; Giovanni Pecoraro; Giuseppe Fenza; Giuseppe Portella; Giusy Giordano; Gregorio Goffredi; Ilaria Terenzi; Jessica Lambertini; Maddalena Schioppa; Marcello Ametrano; Maria Grazia Foti; Maria Landi; Marianna Scrima; Mariano Fiorenza; Mariarosaria Ingino; Marina Tarsitano; Massimiliano Chetta; Massimiliano Galdiero; Maurizio Fumi; Michela Iacobellis; Michele Caraglia; Michele Cennamo; Morena D'Avena; Oriana Strianese; Pasquale Pagliano; Rita Greco; Roberta Tarallo; Rosanna Piluscio; Silvia Zanolì; Simona Sempri; Sonia Amabile; Stefania Marzintotto; Teresa Rocco; Valeria Mirici Cappa; Vincenzo Rocco; Viola Melone; Vittoria Letizia; Vittorio Sambri; Ylenia D'Agostino |
| EPI_ISL_1534286, EPI_ISL_1534290, EPI_ISL_1534296, EPI_ISL_1534327 to 1534330, EPI_ISL_1534374, EPI_ISL_1534401, EPI_ISL_1534418, EPI_ISL_1534429                                                                                                                                                                                                                                                                                                                                                                                                                                                                                                                                                                                                                                     | see above   | 2 Military Hospital wc MAA                                                                                                                                                                                                                                                                                                                                                                                                                                                                                                                                                                                                                                                                                                                                                       | NHLS/UCT                                                                                                                                                                                                                                                                                      | Arash Iranzadeh; Bruna Galvao; Carolyn Williamson; Deelan Doolabh; Diana Hardie; Emmanuel SJ; Innocent Mudau; Kruger Marais; Lynn Tyers; Marvin Hsiao; Stephen Korsman; Tegally H; de Oliveira T                                                                                                                                                                                                                                                                                                                                                                                                                                                                                                                                                                                                                                                                                                                                                                                                                                                                                                                                                                                                                                                                 |
| EPI_ISL_450444                                                                                                                                                                                                                                                                                                                                                                                                                                                                                                                                                                                                                                                                                                                                                                        |             | 20 Dongda Street, Fengtai District, Beijing, Beijing 100071, China                                                                                                                                                                                                                                                                                                                                                                                                                                                                                                                                                                                                                                                                                                               | Dept. OPA, Beijing Institute of Microbiology and Epidemiology                                                                                                                                                                                                                                 | Fan, H.; Fang; Gong; J.H.; L.Q. and Liu, W.; Qi; R.Z.; X.A.; Zhang; Zheng, K.; Zheng, W.                                                                                                                                                                                                                                                                                                                                                                                                                                                                                                                                                                                                                                                                                                                                                                                                                                                                                                                                                                                                                                                                                                                                                                         |
| EPI_ISL_1447961                                                                                                                                                                                                                                                                                                                                                                                                                                                                                                                                                                                                                                                                                                                                                                       | 20210213546 |                                                                                                                                                                                                                                                                                                                                                                                                                                                                                                                                                                                                                                                                                                                                                                                  | TIGEM                                                                                                                                                                                                                                                                                         | Antonio Grimaldi Patrizia Annunziata Francesco Panariello Biancamaria Pierri Claudia Tiberio Valentina Bouche Chiara Colantuono Maria Concetta Cuomo Denise Di Concilio Lucio Di Filippo Anna Manfredi Marcello Salvi Antonio Limone Luigi Atripaldi Pellegrino Cerino Andrea Ballabio Davide Cacchiarelli                                                                                                                                                                                                                                                                                                                                                                                                                                                                                                                                                                                                                                                                                                                                                                                                                                                                                                                                                       |
| EPI_ISL_1447950                                                                                                                                                                                                                                                                                                                                                                                                                                                                                                                                                                                                                                                                                                                                                                       | 20210213554 |                                                                                                                                                                                                                                                                                                                                                                                                                                                                                                                                                                                                                                                                                                                                                                                  | TIGEM                                                                                                                                                                                                                                                                                         | Antonio Grimaldi Patrizia Annunziata Francesco Panariello Biancamaria Pierri Claudia Tiberio Valentina Bouche Chiara Colantuono Maria Concetta Cuomo Denise Di Concilio Lucio Di Filippo Anna Manfredi Marcello Salvi Antonio Limone Luigi Atripaldi Pellegrino Cerino Andrea Ballabio Davide Cacchiarelli                                                                                                                                                                                                                                                                                                                                                                                                                                                                                                                                                                                                                                                                                                                                                                                                                                                                                                                                                       |
| EPI_ISL_1447951                                                                                                                                                                                                                                                                                                                                                                                                                                                                                                                                                                                                                                                                                                                                                                       | 20210213565 |                                                                                                                                                                                                                                                                                                                                                                                                                                                                                                                                                                                                                                                                                                                                                                                  | TIGEM                                                                                                                                                                                                                                                                                         | Antonio Grimaldi Patrizia Annunziata Francesco Panariello Biancamaria Pierri Claudia Tiberio Valentina Bouche Chiara Colantuono Maria Concetta Cuomo Denise Di Concilio Lucio Di Filippo Anna Manfredi Marcello Salvi Antonio Limone Luigi Atripaldi Pellegrino Cerino Andrea Ballabio Davide Cacchiarelli                                                                                                                                                                                                                                                                                                                                                                                                                                                                                                                                                                                                                                                                                                                                                                                                                                                                                                                                                       |
| EPI_ISL_1447958                                                                                                                                                                                                                                                                                                                                                                                                                                                                                                                                                                                                                                                                                                                                                                       | 20210213566 |                                                                                                                                                                                                                                                                                                                                                                                                                                                                                                                                                                                                                                                                                                                                                                                  | TIGEM                                                                                                                                                                                                                                                                                         | Antonio Grimaldi Patrizia Annunziata Francesco Panariello Biancamaria Pierri Claudia Tiberio Valentina Bouche Chiara Colantuono Maria Concetta Cuomo Denise Di Concilio Lucio Di Filippo Anna Manfredi Marcello Salvi Antonio Limone Luigi Atripaldi Pellegrino Cerino Andrea Ballabio Davide Cacchiarelli                                                                                                                                                                                                                                                                                                                                                                                                                                                                                                                                                                                                                                                                                                                                                                                                                                                                                                                                                       |
| EPI_ISL_1447957                                                                                                                                                                                                                                                                                                                                                                                                                                                                                                                                                                                                                                                                                                                                                                       | 20210213570 |                                                                                                                                                                                                                                                                                                                                                                                                                                                                                                                                                                                                                                                                                                                                                                                  | TIGEM                                                                                                                                                                                                                                                                                         | Antonio Grimaldi Patrizia Annunziata Francesco Panariello Biancamaria Pierri Claudia Tiberio Valentina Bouche Chiara Colantuono Maria Concetta Cuomo Denise Di Concilio Lucio Di Filippo Anna Manfredi Marcello Salvi Antonio Limone Luigi Atripaldi Pellegrino Cerino Andrea Ballabio Davide Cacchiarelli                                                                                                                                                                                                                                                                                                                                                                                                                                                                                                                                                                                                                                                                                                                                                                                                                                                                                                                                                       |
| EPI_ISL_1447953                                                                                                                                                                                                                                                                                                                                                                                                                                                                                                                                                                                                                                                                                                                                                                       | 20210213607 |                                                                                                                                                                                                                                                                                                                                                                                                                                                                                                                                                                                                                                                                                                                                                                                  | TIGEM                                                                                                                                                                                                                                                                                         | Antonio Grimaldi Patrizia Annunziata Francesco Panariello Biancamaria Pierri Claudia Tiberio Valentina Bouche Chiara Colantuono Maria Concetta Cuomo Denise Di Concilio Lucio Di Filippo Anna Manfredi Marcello Salvi Antonio Limone Luigi Atripaldi Pellegrino Cerino Andrea Ballabio Davide Cacchiarelli                                                                                                                                                                                                                                                                                                                                                                                                                                                                                                                                                                                                                                                                                                                                                                                                                                                                                                                                                       |
| EPI_ISL_1447952                                                                                                                                                                                                                                                                                                                                                                                                                                                                                                                                                                                                                                                                                                                                                                       | 20210217579 |                                                                                                                                                                                                                                                                                                                                                                                                                                                                                                                                                                                                                                                                                                                                                                                  | TIGEM                                                                                                                                                                                                                                                                                         | Antonio Grimaldi Patrizia Annunziata Francesco Panariello Biancamaria Pierri Claudia Tiberio Valentina Bouche Chiara Colantuono Maria Concetta Cuomo Denise Di Concilio Lucio Di Filippo Anna Manfredi Marcello Salvi Antonio Limone Luigi Atripaldi Pellegrino Cerino Andrea Ballabio Davide Cacchiarelli                                                                                                                                                                                                                                                                                                                                                                                                                                                                                                                                                                                                                                                                                                                                                                                                                                                                                                                                                       |
| EPI_ISL_1447943                                                                                                                                                                                                                                                                                                                                                                                                                                                                                                                                                                                                                                                                                                                                                                       | 20210218154 |                                                                                                                                                                                                                                                                                                                                                                                                                                                                                                                                                                                                                                                                                                                                                                                  | TIGEM                                                                                                                                                                                                                                                                                         | Antonio Grimaldi Patrizia Annunziata Francesco Panariello Biancamaria Pierri Claudia Tiberio Valentina Bouche Chiara Colantuono Maria Concetta Cuomo Denise Di Concilio Lucio Di Filippo Anna Manfredi Marcello Salvi Antonio Limone Luigi Atripaldi Pellegrino Cerino Andrea Ballabio Davide Cacchiarelli                                                                                                                                                                                                                                                                                                                                                                                                                                                                                                                                                                                                                                                                                                                                                                                                                                                                                                                                                       |
| EPI_ISL_1447948                                                                                                                                                                                                                                                                                                                                                                                                                                                                                                                                                                                                                                                                                                                                                                       | 20210218178 |                                                                                                                                                                                                                                                                                                                                                                                                                                                                                                                                                                                                                                                                                                                                                                                  | TIGEM                                                                                                                                                                                                                                                                                         | Antonio Grimaldi Patrizia Annunziata Francesco Panariello Biancamaria Pierri Claudia Tiberio Valentina Bouche Chiara Colantuono Maria Concetta Cuomo Denise Di Concilio Lucio Di Filippo Anna Manfredi Marcello Salvi Antonio Limone Luigi Atripaldi Pellegrino Cerino Andrea Ballabio Davide Cacchiarelli                                                                                                                                                                                                                                                                                                                                                                                                                                                                                                                                                                                                                                                                                                                                                                                                                                                                                                                                                       |
| EPI_ISL_1447970                                                                                                                                                                                                                                                                                                                                                                                                                                                                                                                                                                                                                                                                                                                                                                       | 20210218285 |                                                                                                                                                                                                                                                                                                                                                                                                                                                                                                                                                                                                                                                                                                                                                                                  | TIGEM                                                                                                                                                                                                                                                                                         | Antonio Grimaldi Patrizia Annunziata Francesco Panariello Biancamaria Pierri Claudia Tiberio Valentina Bouche Chiara Colantuono Maria Concetta Cuomo Denise Di Concilio Lucio Di Filippo Anna Manfredi Marcello Salvi Antonio Limone Luigi Atripaldi Pellegrino Cerino Andrea Ballabio Davide Cacchiarelli                                                                                                                                                                                                                                                                                                                                                                                                                                                                                                                                                                                                                                                                                                                                                                                                                                                                                                                                                       |
| EPI_ISL_1447960                                                                                                                                                                                                                                                                                                                                                                                                                                                                                                                                                                                                                                                                                                                                                                       | 20210218311 |                                                                                                                                                                                                                                                                                                                                                                                                                                                                                                                                                                                                                                                                                                                                                                                  | TIGEM                                                                                                                                                                                                                                                                                         | Antonio Grimaldi Patrizia Annunziata Francesco Panariello Biancamaria Pierri Claudia Tiberio Valentina Bouche Chiara Colantuono Maria Concetta Cuomo Denise Di Concilio Lucio Di Filippo Anna Manfredi Marcello Salvi Antonio Limone Luigi Atripaldi Pellegrino Cerino Andrea Ballabio Davide                                                                                                                                                                                                                                                                                                                                                                                                                                                                                                                                                                                                                                                                                                                                                                                                                                                                                                                                                                    |







|                            |                                                |                                                                                                        |                                                                                                                                                                                                                                                                                                            |              |
|----------------------------|------------------------------------------------|--------------------------------------------------------------------------------------------------------|------------------------------------------------------------------------------------------------------------------------------------------------------------------------------------------------------------------------------------------------------------------------------------------------------------|--------------|
|                            |                                                |                                                                                                        |                                                                                                                                                                                                                                                                                                            | Cacchiarelli |
| EPI_ISL_1447975            | 20210305370                                    | TIGEM                                                                                                  | Antonio Grimaldi Patrizia Annunziata Francesco Panariello Biancamaria Pierri Claudia Tiberio Valentina Bouche Chiara Colantuono Maria Concetta Cuomo Denise Di Concilio Lucio Di Filippo Anna Manfredi Marcello Salvi Antonio Limone Luigi Atripaldi Pellegrino Cerino Andrea Ballabio Davide Cacchiarelli |              |
| EPI_ISL_1447976            | 20210305554                                    | TIGEM                                                                                                  | Antonio Grimaldi Patrizia Annunziata Francesco Panariello Biancamaria Pierri Claudia Tiberio Valentina Bouche Chiara Colantuono Maria Concetta Cuomo Denise Di Concilio Lucio Di Filippo Anna Manfredi Marcello Salvi Antonio Limone Luigi Atripaldi Pellegrino Cerino Andrea Ballabio Davide Cacchiarelli |              |
| EPI_ISL_1447977            | 20210305752                                    | TIGEM                                                                                                  | Antonio Grimaldi Patrizia Annunziata Francesco Panariello Biancamaria Pierri Claudia Tiberio Valentina Bouche Chiara Colantuono Maria Concetta Cuomo Denise Di Concilio Lucio Di Filippo Anna Manfredi Marcello Salvi Antonio Limone Luigi Atripaldi Pellegrino Cerino Andrea Ballabio Davide Cacchiarelli |              |
| EPI_ISL_1495749 to 1495759 | 3. Medizinische Abteilung, Hanusch Krankenhaus | Bergthaler laboratory, CeMM Research Center for Molecular Medicine of the Austrian Academy of Sciences | Andreas Bergthaler; Anna Schedl; Bekir Erguner; Benedikt Agerer; Christoph Bock; Fabian Amman; Jan Laine; Lukas Endler; Maelle Le Moing; Martin Senekowitsch; Michael Schuster; Petr Triska; Thomas Penz                                                                                                   |              |
| EPI_ISL_1529005            | 4919 MacCorkle Ave SE, Charleston, WV 25304    | WVU and Marshall University Combined Genomics Core Facilities                                          | "James Denvir; Peter Perrotta; Peter Stoilov; Ryan Percifield"; Wesley Kimble                                                                                                                                                                                                                              |              |
| EPI_ISL_1529003            | 4920 MacCorkle Ave SE, Charleston, WV 25304    | WVU and Marshall University Combined Genomics Core Facilities                                          | "James Denvir; Peter Perrotta; Peter Stoilov; Ryan Percifield"; Wesley Kimble                                                                                                                                                                                                                              |              |
| EPI_ISL_1528876            | 4923 MacCorkle Ave SE, Charleston, WV 25304    | WVU and Marshall University Combined Genomics Core Facilities                                          | "James Denvir; Peter Perrotta; Peter Stoilov; Ryan Percifield"; Wesley Kimble                                                                                                                                                                                                                              |              |
| EPI_ISL_1528900            | 4924 MacCorkle Ave SE, Charleston, WV 25304    | WVU and Marshall University Combined Genomics Core Facilities                                          | "James Denvir; Peter Perrotta; Peter Stoilov; Ryan Percifield"; Wesley Kimble                                                                                                                                                                                                                              |              |
| EPI_ISL_1528871            | 4926 MacCorkle Ave SE, Charleston, WV 25304    | WVU and Marshall University Combined Genomics Core Facilities                                          | "James Denvir; Peter Perrotta; Peter Stoilov; Ryan Percifield"; Wesley Kimble                                                                                                                                                                                                                              |              |
| EPI_ISL_1528899            | 4927 MacCorkle Ave SE, Charleston, WV 25304    | WVU and Marshall University Combined Genomics Core Facilities                                          | "James Denvir; Peter Perrotta; Peter Stoilov; Ryan Percifield"; Wesley Kimble                                                                                                                                                                                                                              |              |
| EPI_ISL_1528894            | 4929 MacCorkle Ave SE, Charleston, WV 25304    | WVU and Marshall University Combined Genomics Core Facilities                                          | "James Denvir; Peter Perrotta; Peter Stoilov; Ryan Percifield"; Wesley Kimble                                                                                                                                                                                                                              |              |
| EPI_ISL_1528902            | 4930 MacCorkle Ave SE, Charleston, WV 25304    | WVU and Marshall University Combined Genomics Core Facilities                                          | "James Denvir; Peter Perrotta; Peter Stoilov; Ryan Percifield"; Wesley Kimble                                                                                                                                                                                                                              |              |
| EPI_ISL_1528896            | 4931 MacCorkle Ave SE, Charleston, WV 25304    | WVU and Marshall University Combined Genomics Core Facilities                                          | "James Denvir; Peter Perrotta; Peter Stoilov; Ryan Percifield"; Wesley Kimble                                                                                                                                                                                                                              |              |
| EPI_ISL_1528877            | 4932 MacCorkle Ave SE, Charleston, WV 25304    | WVU and Marshall University Combined Genomics Core Facilities                                          | "James Denvir; Peter Perrotta; Peter Stoilov; Ryan Percifield"; Wesley Kimble                                                                                                                                                                                                                              |              |
| EPI_ISL_1528886            | 4933 MacCorkle Ave SE, Charleston, WV 25304    | WVU and Marshall University Combined Genomics Core Facilities                                          | "James Denvir; Peter Perrotta; Peter Stoilov; Ryan Percifield"; Wesley Kimble                                                                                                                                                                                                                              |              |
| EPI_ISL_1528897            | 4934 MacCorkle Ave SE, Charleston, WV 25304    | WVU and Marshall University Combined Genomics Core Facilities                                          | "James Denvir; Peter Perrotta; Peter Stoilov; Ryan Percifield"; Wesley Kimble                                                                                                                                                                                                                              |              |
| EPI_ISL_1528873            | 4935 MacCorkle Ave SE, Charleston, WV 25304    | WVU and Marshall University Combined Genomics Core Facilities                                          | "James Denvir; Peter Perrotta; Peter Stoilov; Ryan Percifield"; Wesley Kimble                                                                                                                                                                                                                              |              |
| EPI_ISL_1528892            | 4936 MacCorkle Ave SE, Charleston, WV 25304    | WVU and Marshall University Combined Genomics Core Facilities                                          | "James Denvir; Peter Perrotta; Peter Stoilov; Ryan Percifield"; Wesley Kimble                                                                                                                                                                                                                              |              |
| EPI_ISL_1528895            | 4937 MacCorkle Ave SE, Charleston, WV 25304    | WVU and Marshall University Combined Genomics Core Facilities                                          | "James Denvir; Peter Perrotta; Peter Stoilov; Ryan Percifield"; Wesley Kimble                                                                                                                                                                                                                              |              |
| EPI_ISL_1528908            | 4938 MacCorkle Ave SE, Charleston, WV 25304    | WVU and Marshall University Combined Genomics Core Facilities                                          | "James Denvir; Peter Perrotta; Peter Stoilov; Ryan Percifield"; Wesley Kimble                                                                                                                                                                                                                              |              |
| EPI_ISL_1528898            | 4940 MacCorkle Ave SE, Charleston, WV 25304    | WVU and Marshall University Combined Genomics Core Facilities                                          | "James Denvir; Peter Perrotta; Peter Stoilov; Ryan Percifield"; Wesley Kimble                                                                                                                                                                                                                              |              |
| EPI_ISL_1528874            | 4944 MacCorkle Ave SE, Charleston, WV 25304    | WVU and Marshall University Combined Genomics Core Facilities                                          | "James Denvir; Peter Perrotta; Peter Stoilov; Ryan Percifield"; Wesley Kimble                                                                                                                                                                                                                              |              |
| EPI_ISL_1528872            | 4945 MacCorkle Ave SE, Charleston, WV 25304    | WVU and Marshall University Combined Genomics Core Facilities                                          | "James Denvir; Peter Perrotta; Peter Stoilov; Ryan Percifield"; Wesley Kimble                                                                                                                                                                                                                              |              |
| EPI_ISL_1528893            | 4948 MacCorkle Ave SE, Charleston, WV 25304    | WVU and Marshall University Combined Genomics Core Facilities                                          | "James Denvir; Peter Perrotta; Peter Stoilov; Ryan Percifield"; Wesley Kimble                                                                                                                                                                                                                              |              |
| EPI_ISL_1528920            | 4949 MacCorkle Ave SE, Charleston, WV 25304    | WVU and Marshall University Combined Genomics Core Facilities                                          | "James Denvir; Peter Perrotta; Peter Stoilov; Ryan Percifield"; Wesley Kimble                                                                                                                                                                                                                              |              |
| EPI_ISL_1528901            | 4950 MacCorkle Ave SE, Charleston, WV 25304    | WVU and Marshall University Combined Genomics Core Facilities                                          | "James Denvir; Peter Perrotta; Peter Stoilov; Ryan Percifield"; Wesley Kimble                                                                                                                                                                                                                              |              |
| EPI_ISL_1528909            | 4951 MacCorkle Ave SE, Charleston, WV 25304    | WVU and Marshall University Combined Genomics Core Facilities                                          | "James Denvir; Peter Perrotta; Peter Stoilov; Ryan Percifield"; Wesley Kimble                                                                                                                                                                                                                              |              |
| EPI_ISL_1528888            | 4952 MacCorkle Ave SE, Charleston, WV 25304    | WVU and Marshall University Combined Genomics Core Facilities                                          | "James Denvir; Peter Perrotta; Peter Stoilov; Ryan Percifield"; Wesley Kimble                                                                                                                                                                                                                              |              |
| EPI_ISL_1528875            | 4954 MacCorkle Ave SE, Charleston, WV 25304    | WVU and Marshall University Combined Genomics Core Facilities                                          | "James Denvir; Peter Perrotta; Peter Stoilov; Ryan Percifield"; Wesley Kimble                                                                                                                                                                                                                              |              |
| EPI_ISL_1528907            | 4956 MacCorkle Ave SE, Charleston, WV 25304    | WVU and Marshall University Combined Genomics Core Facilities                                          | "James Denvir; Peter Perrotta; Peter Stoilov; Ryan Percifield"; Wesley Kimble                                                                                                                                                                                                                              |              |
| EPI_ISL_1528921            | 4957 MacCorkle Ave SE, Charleston, WV 25304    | WVU and Marshall University Combined Genomics Core Facilities                                          | "James Denvir; Peter Perrotta; Peter Stoilov; Ryan Percifield"; Wesley Kimble                                                                                                                                                                                                                              |              |
| EPI_ISL_1528889            | 4958 MacCorkle Ave SE, Charleston, WV 25304    | WVU and Marshall University Combined Genomics Core Facilities                                          | "James Denvir; Peter Perrotta; Peter Stoilov; Ryan Percifield"; Wesley Kimble                                                                                                                                                                                                                              |              |
| EPI_ISL_1528905            | 4959 MacCorkle Ave SE, Charleston, WV 25304    | WVU and Marshall University Combined Genomics Core Facilities                                          | "James Denvir; Peter Perrotta; Peter Stoilov; Ryan Percifield"; Wesley Kimble                                                                                                                                                                                                                              |              |
| EPI_ISL_1528903            | 4960 MacCorkle Ave SE, Charleston, WV 25304    | WVU and Marshall University Combined Genomics Core Facilities                                          | "James Denvir; Peter Perrotta; Peter Stoilov; Ryan Percifield"; Wesley Kimble                                                                                                                                                                                                                              |              |

|                                                                                                                                                                                                                                                                                                                                                                                                                                                                                                                                                                                                                                                                                                                               |                                                             | Facilities                                                                                                             |                                                                                                                                                                                                                                                                                                                                                                                                                                                                                                                                                                                      |
|-------------------------------------------------------------------------------------------------------------------------------------------------------------------------------------------------------------------------------------------------------------------------------------------------------------------------------------------------------------------------------------------------------------------------------------------------------------------------------------------------------------------------------------------------------------------------------------------------------------------------------------------------------------------------------------------------------------------------------|-------------------------------------------------------------|------------------------------------------------------------------------------------------------------------------------|--------------------------------------------------------------------------------------------------------------------------------------------------------------------------------------------------------------------------------------------------------------------------------------------------------------------------------------------------------------------------------------------------------------------------------------------------------------------------------------------------------------------------------------------------------------------------------------|
| EPI_ISL_513348 to 513349, EPI_ISL_513402, EPI_ISL_513413, EPI_ISL_526186, EPI_ISL_593646 to 593648                                                                                                                                                                                                                                                                                                                                                                                                                                                                                                                                                                                                                            | 4Cyte Pathology                                             | NSW Health Pathology - Institute of Clinical Pathology and Medical Research; Westmead Hospital; University of Sydney   | CIDM-PH et al.                                                                                                                                                                                                                                                                                                                                                                                                                                                                                                                                                                       |
| EPI_ISL_1492578                                                                                                                                                                                                                                                                                                                                                                                                                                                                                                                                                                                                                                                                                                               | ACISMOM                                                     | INMI Lazzaro Spallanzani IRCCS                                                                                         | A Di Caro; B Bartolini; CEM Gruber; E Giombini; F Messina; F Santini; G Bonfiglio; I Giambini; M Rueca; MM Todini; MR Capobianchi; O Butera                                                                                                                                                                                                                                                                                                                                                                                                                                          |
| EPI_ISL_455042 to 455043, EPI_ISL_455050, EPI_ISL_455074                                                                                                                                                                                                                                                                                                                                                                                                                                                                                                                                                                                                                                                                      | ACT Pathology                                               | NSW Health Pathology - Institute of Clinical Pathology and Medical Research; Westmead Hospital; University of Sydney   | CIDM-PH et al.                                                                                                                                                                                                                                                                                                                                                                                                                                                                                                                                                                       |
| EPI_ISL_498468 to 498548                                                                                                                                                                                                                                                                                                                                                                                                                                                                                                                                                                                                                                                                                                      | ACT Pathology                                               | Schwessinger Lab                                                                                                       | Ashley Jones; Benjamin Schwessinger; Craig Kennedy; Karina Kennedy; Kevin Murray; Megan McDonald; Ming-Dao Chia; Robert Lanfear; Robyn N Hall                                                                                                                                                                                                                                                                                                                                                                                                                                        |
| EPI_ISL_427711, EPI_ISL_427717 to 427719, EPI_ISL_427721                                                                                                                                                                                                                                                                                                                                                                                                                                                                                                                                                                                                                                                                      | ACT Pathology, The Canberra Hospital                        | NSW Health Pathology - Institute of Clinical Pathology and Medical Research; Westmead Hospital; University of Sydney   | Arnott A; Bachmann N; Basile K; Byun R; Carter I; Chang S; Chen SC; Draper J; Dwyer DE for the 2019-nCoV Study Group; Eden JS; Gall M; Gray K; Holmes EC; Kok J; Lam C; Maddocks S; O'Sullivan MV; Propenko M; Rockett R; Sadsad R; Sim E; Sintchenko V; Sorrell T; Timms V                                                                                                                                                                                                                                                                                                          |
| EPI_ISL_451540, EPI_ISL_451588, EPI_ISL_451590 to 451593, EPI_ISL_451595 to 451596, EPI_ISL_451598, EPI_ISL_451612                                                                                                                                                                                                                                                                                                                                                                                                                                                                                                                                                                                                            | ACT pathology                                               | NSW Health Pathology - Institute of Clinical Pathology and Medical Research; Westmead Hospital; University of Sydney   | CIDM-PH et al.                                                                                                                                                                                                                                                                                                                                                                                                                                                                                                                                                                       |
| EPI_ISL_1397424 to 1397443, EPI_ISL_1397711, EPI_ISL_1397721, EPI_ISL_1397723, EPI_ISL_1397731, EPI_ISL_1397733 to 1397735, EPI_ISL_1397738 to 1397739, EPI_ISL_1397741, EPI_ISL_1397743, EPI_ISL_1397745 to 1397751, EPI_ISL_1397766                                                                                                                                                                                                                                                                                                                                                                                                                                                                                         | see above                                                   | ADIRONDACK MEDICAL CENTER                                                                                              | Wadsworth Center, New York State Department of Health                                                                                                                                                                                                                                                                                                                                                                                                                                                                                                                                |
| EPI_ISL_1420644, EPI_ISL_1420646, EPI_ISL_1420703, EPI_ISL_1420751                                                                                                                                                                                                                                                                                                                                                                                                                                                                                                                                                                                                                                                            | AHEPA, Laboratory of Microbiology                           | Greek Genome Center, Biomedical Research Foundation of the Academy of Athens (BRFAA)                                   | Dimitrios Thanos; Emmanouil Athanasiadis; Ioannis Vatsellas; Katerina Zoi; LEMONIA Skoura; Theodoros Loupis                                                                                                                                                                                                                                                                                                                                                                                                                                                                          |
| EPI_ISL_602622 to 602631, EPI_ISL_605784                                                                                                                                                                                                                                                                                                                                                                                                                                                                                                                                                                                                                                                                                      | AHRI-Sigal                                                  | KRISP, KZN Research Innovation and Sequencing Platform                                                                 | Cele S; Gazy I; Giandhari J; Karim F; Pillay S; Sigal A; Sigl A; Sigla; Tegally H; Wilkinson E; de Oliveira T                                                                                                                                                                                                                                                                                                                                                                                                                                                                        |
| EPI_ISL_1494955 to 1494956                                                                                                                                                                                                                                                                                                                                                                                                                                                                                                                                                                                                                                                                                                    | AIDALAB S.A.S                                               | Instituto Nacional de Salud- Dirección de Investigación en Salud Pública                                               | Carlos Franco-Muñoz; Carmen Osorio; Diana Malo; Diego A. Álvarez-Díaz; Diego Andrés Prada; Gerardo Santamaría; Hector Alejandro Ruiz-Moreno; Jhonatan Reales-González; Juan Camilo Martínez; Julian Naizaque; Katherine Laiton-Donato; Lisbeth Pardo; Magdalena Wiesner; Marcela Mercado-Reyes; Maria T. Herrera-Sepúlveda; Marta Lopez Blanco; Martha Lucia Ospina Martinez; Paola Rojas; Sergio Gomez; Sheryll Corchuelo; Ángela Alarcon Cruz                                                                                                                                      |
| EPI_ISL_1446595 to 1446597, EPI_ISL_1446601, EPI_ISL_1446855 to 1446856, EPI_ISL_1446944, EPI_ISL_1447002, EPI_ISL_1528478                                                                                                                                                                                                                                                                                                                                                                                                                                                                                                                                                                                                    | AL Dept. of Public Health Bureau of Clinical Laboratories   | Centers for Disease Control and Prevention Division of Viral Diseases, Pathogen Discovery                              | Alison Laufer Halpin; Ben L. Rambo-Martin; Clinton R. Paden; Dakota Howard; Darlene Wagner; Dave Wentworth; Dhvani Batra; Jasmine Padilla; Justin Lee; Katie Dillon; Krista Queen; Kristen Knipe; Kristine Lacey; Mark Burroughs; Matthew Schmerer; Mili Sheth; Peter Cook; Sam Shepard; Sarah Nobles; Shoshona Le; Suxiang Tong; Vivien Dugan; Yvette Unoarumhi                                                                                                                                                                                                                     |
| EPI_ISL_1447205, EPI_ISL_1447239 to 1447240, EPI_ISL_1447242, EPI_ISL_1447277                                                                                                                                                                                                                                                                                                                                                                                                                                                                                                                                                                                                                                                 | ALAB Grudzieniec                                            | 1. National Institute of Public Health - National Institute of Hygiene; 2. Eurofins Genomics Europe Sequencing GmbH    | ECDC COVID-19 WGS support team; Eurofins Genomics Europe Sequencing Team; Gierczyki Rafa; Sadkowska-Todys Magorzata; Wokowicz Tomasz; Zacharczuk Katarzyna                                                                                                                                                                                                                                                                                                                                                                                                                           |
| EPI_ISL_1538840 to 1538841                                                                                                                                                                                                                                                                                                                                                                                                                                                                                                                                                                                                                                                                                                    | ALAB laboratoria sp. z o. o. Laboratorium Analiz Lekarskich | 1. National Institute of Public Health - National Institute of Hygiene; 2. Eurofins Genomics Europe Sequencing GmbH    | ECDC COVID-19 WGS support team; Eurofins Genomics Europe Sequencing Team; Gierczyki Rafa; Sadkowska-Todys Magorzata; Wokowicz Tomasz; Zacharczuk Katarzyna                                                                                                                                                                                                                                                                                                                                                                                                                           |
| EPI_ISL_1433035, EPI_ISL_1433037, EPI_ISL_1433094, EPI_ISL_1433134, EPI_ISL_1433219, EPI_ISL_1433248, EPI_ISL_1438865, EPI_ISL_1438880, EPI_ISL_1438929, EPI_ISL_1438958, EPI_ISL_1438974, EPI_ISL_1438983, EPI_ISL_1438985, EPI_ISL_1438995, EPI_ISL_1439007, EPI_ISL_1439018                                                                                                                                                                                                                                                                                                                                                                                                                                                | see above                                                   | ALB FILS KLINIKEN GmbH - Institut für Laboratoriumsmedizin<br>Klinik am Eichert Göppingen                              | Robert Koch Institute                                                                                                                                                                                                                                                                                                                                                                                                                                                                                                                                                                |
| EPI_ISL_1397542 to 1397545, EPI_ISL_1397551, EPI_ISL_1397707 to 1397710, EPI_ISL_1397712 to 1397720, EPI_ISL_1397722, EPI_ISL_1397724 to 1397730, EPI_ISL_1397732, EPI_ISL_1397736 to 1397737, EPI_ISL_1397740, EPI_ISL_1397742, EPI_ISL_1397744, EPI_ISL_1397752 to 1397765, EPI_ISL_1397767, EPI_ISL_1397834 to 1397835, EPI_ISL_1397837, EPI_ISL_1397843, EPI_ISL_1397853 to 1397856, EPI_ISL_1397858, EPI_ISL_1397861, EPI_ISL_1397866 to 1397869, EPI_ISL_1397961, EPI_ISL_1398021 to 1398027, EPI_ISL_1398147 to 1398153, EPI_ISL_1398274 to 1398283, EPI_ISL_1461295 to 1461299, EPI_ISL_1462506, EPI_ISL_1462508, EPI_ISL_1465615 to 1465616, EPI_ISL_1465634 to 1465636, EPI_ISL_1465639, EPI_ISL_1482455 to 1482469 | see above                                                   | ALBANY MEDICAL CENTER                                                                                                  | Wadsworth Center, New York State Department of Health                                                                                                                                                                                                                                                                                                                                                                                                                                                                                                                                |
| EPI_ISL_1499457 to 1499473                                                                                                                                                                                                                                                                                                                                                                                                                                                                                                                                                                                                                                                                                                    | ALBANY MEDICAL CENTER HOSPITAL CLINICAL LABORATORIES        | Wadsworth Center, New York State Department of Health                                                                  | Alexis Russel; Alexis Russell; Catharine Prussing; Daryl M. Lamson; Erasmus Schneider; Erica Lasek-Nesselquist; John Kelly; Jonathan Plitnick; Kirsten St. George; Matthew Shudt; Melissa A Leisner; Navjot Singh                                                                                                                                                                                                                                                                                                                                                                    |
| EPI_ISL_471546                                                                                                                                                                                                                                                                                                                                                                                                                                                                                                                                                                                                                                                                                                                | AMA DR Jose Soares Hungria                                  | Instituto Adolfo Lutz, Interdisciplinary Procedures Center, Strategic Laboratory                                       | Claudia Regina Gonçalves; Claudio Tavares Sacchi; Erica Valessa Ramos Gomes                                                                                                                                                                                                                                                                                                                                                                                                                                                                                                          |
| EPI_ISL_523989                                                                                                                                                                                                                                                                                                                                                                                                                                                                                                                                                                                                                                                                                                                | AMA Jardim Joamar                                           | Instituto Adolfo Lutz, Interdisciplinary Procedures Center, Strategic Laboratory                                       | Claudia Regina Gonçalves; Claudio Tavares Sacchi; Erica Valessa Ramos Gomes                                                                                                                                                                                                                                                                                                                                                                                                                                                                                                          |
| EPI_ISL_523990                                                                                                                                                                                                                                                                                                                                                                                                                                                                                                                                                                                                                                                                                                                | AMA Jardim Peri                                             | Instituto Adolfo Lutz, Interdisciplinary Procedures Center, Strategic Laboratory                                       | Claudia Regina Gonçalves; Claudio Tavares Sacchi; Erica Valessa Ramos Gomes                                                                                                                                                                                                                                                                                                                                                                                                                                                                                                          |
| EPI_ISL_1445264, EPI_ISL_1445266 to 1445267, EPI_ISL_1445273 to 1445274                                                                                                                                                                                                                                                                                                                                                                                                                                                                                                                                                                                                                                                       | AMBULATORIO MEDICO DE ESPECIALIDADES DE PERUIBE             | Instituto Butantan / Mendelics                                                                                         | Antonio Jorge Martins; Bibiana Santos; Claudia Renata dos Santos Barros; David Schlessinger; Debora Botequiu Moretti; Dimas Tadeu Covas; Elaine Cristina Marqueze; Elaine Vieira dos Santos; Erika Freitas; Evandra Strazza Rodrigues; Flavia Aburjaille; José Salvatore Leister Patané; João Paulo Kitajima; Luiz Carlos Junior de Alcantara; Maria Carolina Elias; Marta Giovanetti; Rafael dos Santos Bezerra; Raul Machado Neto; Ricardo Haddad; Rodrigo Tocantins Calado.; Sandra Coccuzzo Sampaio; Simone Kashima; Svetoslav Nanev Slavov; Vagner Fonseca; Vincent Louis Viala |
| EPI_ISL_467432 to 467435, EPI_ISL_467449 to 467474                                                                                                                                                                                                                                                                                                                                                                                                                                                                                                                                                                                                                                                                            | AMPATH-DBN                                                  | KRISP, KZN Research Innovation and Sequencing Platform                                                                 | Chimukangara B; Giandhari J; Khan S; Lessells R; Mdlalose K; Pillay S; Tegally H; Wilkinson E; York D; de Oliveira T                                                                                                                                                                                                                                                                                                                                                                                                                                                                 |
| EPI_ISL_458150                                                                                                                                                                                                                                                                                                                                                                                                                                                                                                                                                                                                                                                                                                                | ANOUAL                                                      | ANOUAL                                                                                                                 | Azami Nawfel; Behhida Rachid; Chenaoui Mohamed; El Aliani Aissam; El Ansanri Fatima Zahra; Fekkak Jamal; Jouali Farah; Kasmi Yassine; Kitane Driss Lahlou; Loukman Salma; Marchoudi Nabila                                                                                                                                                                                                                                                                                                                                                                                           |
| EPI_ISL_1547799 to 1547800                                                                                                                                                                                                                                                                                                                                                                                                                                                                                                                                                                                                                                                                                                    | AP SSO                                                      | CSIR-Centre for Cellular and Molecular Biology - INSACOG                                                               | Amreshwar Vodapalli; Ara Sreenivas; B Himasri; Divya Tej Sowpati; Karthik Bharadwaj Tallapaka; Krishna Khairam; Lamuk Zaveri; Onkar Kulkarni; Rakesh K Mishra; Sharath Chandra Thota; Shreekant Verma; Sofia Banu; Viswagithe S L                                                                                                                                                                                                                                                                                                                                                    |
| EPI_ISL_1516317 to 1516321                                                                                                                                                                                                                                                                                                                                                                                                                                                                                                                                                                                                                                                                                                    | AR Dept. of Health-PHL, Molecular Diagnostics               | Centers for Disease Control and Prevention Division of Viral Diseases, Pathogen Discovery                              | Alison Laufer Halpin; Ben L. Rambo-Martin; Clinton R. Paden; Dakota Howard; Darlene Wagner; Dave Wentworth; Dhvani Batra; Jasmine Padilla; Justin Lee; Katie Dillon; Krista Queen; Kristen Knipe; Kristine Lacey; Mark Burroughs; Matthew Schmerer; Mili Sheth; Peter Cook; Sam Shepard; Sarah Nobles; Shoshona Le; Suxiang Tong; Vivien Dugan; Yvette Unoarumhi                                                                                                                                                                                                                     |
| EPI_ISL_450800, EPI_ISL_509663 to 509668, EPI_ISL_509670 to 509685, EPI_ISL_527632 to 527657, EPI_ISL_535650 to 535661, EPI_ISL_576196 to 576197                                                                                                                                                                                                                                                                                                                                                                                                                                                                                                                                                                              | AR Dept. of Health-Public Health Lab                        | Pathogen Discovery, Respiratory Viruses Branch, Division of Viral Diseases, Centers for Disease Control and Prevention | Anna Montmayeur; Anna Uehara; Bettina Bankamp; Brian Lynch; Clinton Paden; Clinton R. Paden; Haibin Wang; Jing Zhang; Krista Queen; Peter Cook; Rachel Marine; Suxiang Tong; Yan Li; Ying Tao; Zachary Weiner                                                                                                                                                                                                                                                                                                                                                                        |
| EPI_ISL_418000 to 418001, EPI_ISL_418004                                                                                                                                                                                                                                                                                                                                                                                                                                                                                                                                                                                                                                                                                      | ARS Algarve - Laboratório Laura Ayres                       | Instituto Nacional de Saude (INSA)                                                                                     | Guomar et al                                                                                                                                                                                                                                                                                                                                                                                                                                                                                                                                                                         |
| EPI_ISL_1527024                                                                                                                                                                                                                                                                                                                                                                                                                                                                                                                                                                                                                                                                                                               | AS Belén Flores                                             | Incienza, Instituto Costarricense de Investigación y Enseñanza en Nutrición y Salud                                    | Barboza-Arguedas E & Centeno-Miranda M; Pérez-Corrales C                                                                                                                                                                                                                                                                                                                                                                                                                                                                                                                             |
| EPI_ISL_445326, EPI_ISL_445363, EPI_ISL_445367                                                                                                                                                                                                                                                                                                                                                                                                                                                                                                                                                                                                                                                                                | ASISTENCIA PUBLICA DR.ALEJANDRO DEL RIO                     | Instituto de Salud Publica de Chile                                                                                    | Alejandra Acevedo; Andrés E Castillo; Bárbara Parra; Carolina Tambley; Gabriel Leal; Jaime Lagos; Jorge Fernandez; Loredana Arata; Patricia Bustos; Paz Tapia; Rodrigo Fasce; Winston Andrade                                                                                                                                                                                                                                                                                                                                                                                        |
| EPI_ISL_1557254 to 1558513, EPI_ISL_1558515 to 1558518, EPI_ISL_1558520                                                                                                                                                                                                                                                                                                                                                                                                                                                                                                                                                                                                                                                       | ASL Napoli 1 Centro                                         | AMES Centro Poldiagnostico Strumentale S.r.l.                                                                          | *Giovanni Savarese; Antonella Di Carlo; Antonio Fico*; Eloisa Evangelista; Luigi D'Amore; Luisa Circelli; Maurizio D'Amora; Monica Ianniello; Nadia Pettilo; Raffaella Ruggiero; Roberto Sirica                                                                                                                                                                                                                                                                                                                                                                                      |





|                                                                                                                                                                                                                                                                                                                                                                                                                                                                                                                                                                                                                                                                                                                                                                                                                                                                                                                                                                                                                                                                                                                                                                                                                                                                                                                                                                                                                                                                                                                                                                                                                                                                                                                                                                                                                                                                                                                                                                                                                                                                                                                                                                                                                                                                                                                                                                                                                                                                                                                                 |           |                                                                                          |                                                                                                                        |                                                                                                                                                                                                                                                                                                                                                                                                                                                                                                                                                                                                                                                                                                                                                               |
|---------------------------------------------------------------------------------------------------------------------------------------------------------------------------------------------------------------------------------------------------------------------------------------------------------------------------------------------------------------------------------------------------------------------------------------------------------------------------------------------------------------------------------------------------------------------------------------------------------------------------------------------------------------------------------------------------------------------------------------------------------------------------------------------------------------------------------------------------------------------------------------------------------------------------------------------------------------------------------------------------------------------------------------------------------------------------------------------------------------------------------------------------------------------------------------------------------------------------------------------------------------------------------------------------------------------------------------------------------------------------------------------------------------------------------------------------------------------------------------------------------------------------------------------------------------------------------------------------------------------------------------------------------------------------------------------------------------------------------------------------------------------------------------------------------------------------------------------------------------------------------------------------------------------------------------------------------------------------------------------------------------------------------------------------------------------------------------------------------------------------------------------------------------------------------------------------------------------------------------------------------------------------------------------------------------------------------------------------------------------------------------------------------------------------------------------------------------------------------------------------------------------------------|-----------|------------------------------------------------------------------------------------------|------------------------------------------------------------------------------------------------------------------------|---------------------------------------------------------------------------------------------------------------------------------------------------------------------------------------------------------------------------------------------------------------------------------------------------------------------------------------------------------------------------------------------------------------------------------------------------------------------------------------------------------------------------------------------------------------------------------------------------------------------------------------------------------------------------------------------------------------------------------------------------------------|
| EPI_ISL_1490507 to 1490510, EPI_ISL_1490513 to 1490514, EPI_ISL_1490526 to 1490529, EPI_ISL_1490531 to 1490533, EPI_ISL_1490557 to 1490563, EPI_ISL_1490565, EPI_ISL_1490567 to 1490568, EPI_ISL_1490588, EPI_ISL_1490590 to 1490594, EPI_ISL_1490596 to 1490597, EPI_ISL_1490602, EPI_ISL_1490608, EPI_ISL_1490626 to 1547624 to 1547626, EPI_ISL_1490631, EPI_ISL_1547507 to 1547510, EPI_ISL_1547514, EPI_ISL_1547517, EPI_ISL_1547533 to 1547543, EPI_ISL_1547546, EPI_ISL_1547584, EPI_ISL_1547589 to 1547592, EPI_ISL_1547602, EPI_ISL_1547604, EPI_ISL_1547608, EPI_ISL_1547611, EPI_ISL_1547616, EPI_ISL_1547621, EPI_ISL_1547624 to 1547626, EPI_ISL_1547653 to 1547654, EPI_ISL_1547657 to 1547662                                                                                                                                                                                                                                                                                                                                                                                                                                                                                                                                                                                                                                                                                                                                                                                                                                                                                                                                                                                                                                                                                                                                                                                                                                                                                                                                                                                                                                                                                                                                                                                                                                                                                                                                                                                                                    | see above | Akershus University Hospital, Department for Microbiology and Infectious Disease Control | Norwegian Institute of Public Health, Department of Virology                                                           | Atiya R Ali; Debech Nadia; Engebretsen Serina Beate; Garcia Llorente Ignacio; Hilde Elshaug; Hilde Synnøve Vollan; Hilde Vollan; Jon Bråte; Kamilla Heddeland Instefjord; Karoline Bragstad; Kathrine Stene-Johansen; Marie Paulsen Madsen; Olav Hungnes; Pedersen Benedikte Nevjen; Rasmus Riis Kopperud                                                                                                                                                                                                                                                                                                                                                                                                                                                     |
| EPI_ISL_480204                                                                                                                                                                                                                                                                                                                                                                                                                                                                                                                                                                                                                                                                                                                                                                                                                                                                                                                                                                                                                                                                                                                                                                                                                                                                                                                                                                                                                                                                                                                                                                                                                                                                                                                                                                                                                                                                                                                                                                                                                                                                                                                                                                                                                                                                                                                                                                                                                                                                                                                  |           | Akita City Public Health Center                                                          | Pathogen Genomics Center, National Institute of Infectious Diseases                                                    | Hajime Kamiya; Kentaro Itokawa; Koichi Ito; Makoto Kuroda; Masanori Hashino; Motoi Suzuki; Rina Tanaka; Tsuyoshi Sekizuka                                                                                                                                                                                                                                                                                                                                                                                                                                                                                                                                                                                                                                     |
| EPI_ISL_1394096 to 1394100, EPI_ISL_1538592, EPI_ISL_1538857, EPI_ISL_1538928                                                                                                                                                                                                                                                                                                                                                                                                                                                                                                                                                                                                                                                                                                                                                                                                                                                                                                                                                                                                                                                                                                                                                                                                                                                                                                                                                                                                                                                                                                                                                                                                                                                                                                                                                                                                                                                                                                                                                                                                                                                                                                                                                                                                                                                                                                                                                                                                                                                   |           | Alab Laboratoria Sp. z o. o.                                                             | 1. National Institute of Public Health - National Institute of Hygiene; 2. Eurofins Genomics Europe Sequencing GmbH    | ECDC COVID-19 WGS support team; Eurofins Genomics Europe Sequencing Team; Gierczyki Rafa; Sadkowska-Todys Magorzata; Wokowicz Tomasz; Zacharczuk Katarzyna                                                                                                                                                                                                                                                                                                                                                                                                                                                                                                                                                                                                    |
| EPI_ISL_509688                                                                                                                                                                                                                                                                                                                                                                                                                                                                                                                                                                                                                                                                                                                                                                                                                                                                                                                                                                                                                                                                                                                                                                                                                                                                                                                                                                                                                                                                                                                                                                                                                                                                                                                                                                                                                                                                                                                                                                                                                                                                                                                                                                                                                                                                                                                                                                                                                                                                                                                  |           | Alabama Department of Public Health Bureau of Clinical Laboratories                      | Pathogen Discovery, Respiratory Viruses Branch, Division of Viral Diseases, Centers for Disease Control and Prevention | Anna Uehara; Clinton Paden; Haibin Wang; Jing Zhang; Krista Queen; Suxiang Tong; Yan Li; Ying Tao                                                                                                                                                                                                                                                                                                                                                                                                                                                                                                                                                                                                                                                             |
| EPI_ISL_454607 to 454613, EPI_ISL_468357 to 468387, EPI_ISL_1477170, EPI_ISL_1477175, EPI_ISL_1477178, EPI_ISL_1477199, EPI_ISL_1477216, EPI_ISL_1477228, EPI_ISL_1477243 to 1477244, EPI_ISL_1477251 to 1477252, EPI_ISL_1477259 to 1477260, EPI_ISL_1477262, EPI_ISL_1477268 to 1477271, EPI_ISL_1477279, EPI_ISL_1477287 to 1477288, EPI_ISL_1477292 to 1477293, EPI_ISL_1477295, EPI_ISL_1477301, EPI_ISL_1477308 to 1477309, EPI_ISL_1477313, EPI_ISL_1477318, EPI_ISL_1477322, EPI_ISL_1477328 to 1477329, EPI_ISL_1477335, EPI_ISL_1477337, EPI_ISL_1477343, EPI_ISL_1477352, EPI_ISL_1477359, EPI_ISL_1477364, EPI_ISL_1477367, EPI_ISL_1477371, EPI_ISL_1477373, EPI_ISL_1477377, EPI_ISL_1477380, EPI_ISL_1477382, EPI_ISL_1477385, EPI_ISL_1477388, EPI_ISL_1477405 to 1477406, EPI_ISL_1477410 to 1477411, EPI_ISL_1477413 to 1477415, EPI_ISL_1477432 to 1477433, EPI_ISL_1477435, EPI_ISL_1477446 to 1477447, EPI_ISL_1477462, EPI_ISL_1477468, EPI_ISL_1477483, EPI_ISL_1477487, EPI_ISL_1477489, EPI_ISL_1477491, EPI_ISL_1477497, EPI_ISL_1477499, EPI_ISL_1477520, EPI_ISL_1477547, EPI_ISL_1477549, EPI_ISL_1477554, EPI_ISL_1477557, EPI_ISL_1477565, EPI_ISL_1477569, EPI_ISL_1477584, EPI_ISL_1477594 to 1477595, EPI_ISL_1477605, EPI_ISL_1477617, EPI_ISL_1477627, EPI_ISL_1477630, EPI_ISL_1477632, EPI_ISL_1477639, EPI_ISL_1477647, EPI_ISL_1477649, EPI_ISL_1477657, EPI_ISL_1477668 to 1477669, EPI_ISL_1477671 to 1477672, EPI_ISL_1477674, EPI_ISL_1477683 to 1477684, EPI_ISL_1477686, EPI_ISL_1477691, EPI_ISL_1477696, EPI_ISL_1477701 to 1477703, EPI_ISL_1477708, EPI_ISL_1477710, EPI_ISL_1477712, EPI_ISL_1477720, EPI_ISL_1477733, EPI_ISL_1477735, EPI_ISL_1477741, EPI_ISL_1477747, EPI_ISL_1477751, EPI_ISL_1477753 to 1477754, EPI_ISL_1477757 to 1477758, EPI_ISL_1477766, EPI_ISL_1477771 to 1477773, EPI_ISL_1477775, EPI_ISL_1477779, EPI_ISL_1477783 to 1477784, EPI_ISL_1477791, EPI_ISL_1477801, EPI_ISL_1477804 to 1477805, EPI_ISL_1477807, EPI_ISL_1477809, EPI_ISL_1477820, EPI_ISL_1477823 to 1477825, EPI_ISL_1477828, EPI_ISL_1477832, EPI_ISL_1477841, EPI_ISL_1477847, EPI_ISL_1477857 to 1477858, EPI_ISL_1477862, EPI_ISL_1477865, EPI_ISL_1477880, EPI_ISL_1477886 to 1477887, EPI_ISL_1477889, EPI_ISL_1477896, EPI_ISL_1477899 to 1477900, EPI_ISL_1477904 to 1477906, EPI_ISL_1477914 to 1477915, EPI_ISL_1477919, EPI_ISL_1477922, EPI_ISL_1477928, EPI_ISL_1477932 to 1477933, EPI_ISL_1477936, EPI_ISL_1477941 to 1477942, EPI_ISL_1477945, EPI_ISL_1477948 | see above | Alameda County Public Health Lab                                                         | Chan-Zuckerberg Biohub                                                                                                 | CZB Ciliahub Consortium                                                                                                                                                                                                                                                                                                                                                                                                                                                                                                                                                                                                                                                                                                                                       |
| EPI_ISL_420303 to 420306, EPI_ISL_424346 to 424347, EPI_ISL_427619 to 427622, EPI_ISL_431013 to 431019, EPI_ISL_435441 to 435444, EPI_ISL_436464, EPI_ISL_437437, EPI_ISL_437513 to 437518, EPI_ISL_437873, EPI_ISL_476898 to 476899, EPI_ISL_492049 to 492063, EPI_ISL_492087, EPI_ISL_512135 to 512157, EPI_ISL_522396 to 522405, EPI_ISL_525758 to 525760, EPI_ISL_528485 to 528537, EPI_ISL_560554 to 560566, EPI_ISL_576111 to 576112, EPI_ISL_586243 to 586266, EPI_ISL_602559 to 602561, EPI_ISL_1483586 to 1483699, EPI_ISL_1529075 to 1529098                                                                                                                                                                                                                                                                                                                                                                                                                                                                                                                                                                                                                                                                                                                                                                                                                                                                                                                                                                                                                                                                                                                                                                                                                                                                                                                                                                                                                                                                                                                                                                                                                                                                                                                                                                                                                                                                                                                                                                          | see above | Alaska State Virology Laboratory                                                         | Alaska State Virology Laboratory                                                                                       | Bortz E; Chen; Chen J et al with Pathogenomics group Dagdag R; Chen, J.; DeRonde, S.; Deuling, H.; Drown DM; Elva House; George W; J; Jack Chen; Kovalenko A; Lisa Smith; Milton E; Ph.D.; Redlinger M; Stephanie DeRonde                                                                                                                                                                                                                                                                                                                                                                                                                                                                                                                                     |
| EPI_ISL_1534281, EPI_ISL_1534336                                                                                                                                                                                                                                                                                                                                                                                                                                                                                                                                                                                                                                                                                                                                                                                                                                                                                                                                                                                                                                                                                                                                                                                                                                                                                                                                                                                                                                                                                                                                                                                                                                                                                                                                                                                                                                                                                                                                                                                                                                                                                                                                                                                                                                                                                                                                                                                                                                                                                                |           | Albertinia Clinic wc AAP                                                                 | NHLS/UCT                                                                                                               | Arash Iranzadeh; Bruna Galvao; Carolyn Williamson; Deelan Doolabh; Diana Hardie; Emmanuel SJ; Innocent Mudau; Kruger Marais; Lynn Tyers; Marvin Hsiao; Stephen Korsman; Tegally H; de Oliveira T                                                                                                                                                                                                                                                                                                                                                                                                                                                                                                                                                              |
| EPI_ISL_1433679 to 1433684, EPI_ISL_1433686, EPI_ISL_1433688 to 1433692, EPI_ISL_1433694 to 1433696, EPI_ISL_1433698 to 1433735                                                                                                                                                                                                                                                                                                                                                                                                                                                                                                                                                                                                                                                                                                                                                                                                                                                                                                                                                                                                                                                                                                                                                                                                                                                                                                                                                                                                                                                                                                                                                                                                                                                                                                                                                                                                                                                                                                                                                                                                                                                                                                                                                                                                                                                                                                                                                                                                 |           | Alexianer DaKS GmbH (eigenes IT-Tochterunternehmen der Alexianer Krankenhäuser)          | Robert Koch Institute                                                                                                  |                                                                                                                                                                                                                                                                                                                                                                                                                                                                                                                                                                                                                                                                                                                                                               |
| EPI_ISL_1385807, EPI_ISL_1385811                                                                                                                                                                                                                                                                                                                                                                                                                                                                                                                                                                                                                                                                                                                                                                                                                                                                                                                                                                                                                                                                                                                                                                                                                                                                                                                                                                                                                                                                                                                                                                                                                                                                                                                                                                                                                                                                                                                                                                                                                                                                                                                                                                                                                                                                                                                                                                                                                                                                                                |           | Alfa Diagnostica LLC                                                                     | ONCOGENE LLC                                                                                                           | ONCOGENE LLC                                                                                                                                                                                                                                                                                                                                                                                                                                                                                                                                                                                                                                                                                                                                                  |
| EPI_ISL_1385804                                                                                                                                                                                                                                                                                                                                                                                                                                                                                                                                                                                                                                                                                                                                                                                                                                                                                                                                                                                                                                                                                                                                                                                                                                                                                                                                                                                                                                                                                                                                                                                                                                                                                                                                                                                                                                                                                                                                                                                                                                                                                                                                                                                                                                                                                                                                                                                                                                                                                                                 |           | Alfa Diagnostica, Republic of Moldova                                                    | ONCOGENE LLC                                                                                                           | ONCOGENE LLC                                                                                                                                                                                                                                                                                                                                                                                                                                                                                                                                                                                                                                                                                                                                                  |
| EPI_ISL_1443683 to 1443698                                                                                                                                                                                                                                                                                                                                                                                                                                                                                                                                                                                                                                                                                                                                                                                                                                                                                                                                                                                                                                                                                                                                                                                                                                                                                                                                                                                                                                                                                                                                                                                                                                                                                                                                                                                                                                                                                                                                                                                                                                                                                                                                                                                                                                                                                                                                                                                                                                                                                                      |           | Algemeen Medisch Labo                                                                    | Labo Klinische Biologie, UZA                                                                                           | Basil Britto Xavier; Christine Lammens; Herman Goossens; Jasmine Coppens; Marie Le Mercier; Veerle Matheeußen                                                                                                                                                                                                                                                                                                                                                                                                                                                                                                                                                                                                                                                 |
| EPI_ISL_1416762 to 1416763, EPI_ISL_1416769 to 1416770, EPI_ISL_1416776, EPI_ISL_1416781, EPI_ISL_1416795 to 1416796, EPI_ISL_1416800, EPI_ISL_1416804, EPI_ISL_1455660, EPI_ISL_1455663                                                                                                                                                                                                                                                                                                                                                                                                                                                                                                                                                                                                                                                                                                                                                                                                                                                                                                                                                                                                                                                                                                                                                                                                                                                                                                                                                                                                                                                                                                                                                                                                                                                                                                                                                                                                                                                                                                                                                                                                                                                                                                                                                                                                                                                                                                                                        | see above | Algemeen Medisch Laboratorium (AML)                                                      | UAntwerp, Laboratory of Medical Microbiology                                                                           | Basil Britto Xavier; Christine Lammens; Herman Goossens; Jasmine Coppens; Marie Le Mercier; Veerle Matheeußen                                                                                                                                                                                                                                                                                                                                                                                                                                                                                                                                                                                                                                                 |
| EPI_ISL_508156 to 508206                                                                                                                                                                                                                                                                                                                                                                                                                                                                                                                                                                                                                                                                                                                                                                                                                                                                                                                                                                                                                                                                                                                                                                                                                                                                                                                                                                                                                                                                                                                                                                                                                                                                                                                                                                                                                                                                                                                                                                                                                                                                                                                                                                                                                                                                                                                                                                                                                                                                                                        |           | All india institute of Medical Sciences Rishikesh                                        | National Institute of Biomedical Genomics                                                                              | Amit Mangla; Arindam Maitra; Deepjyoti Kalita; Ravi Kant; Saumitra Das                                                                                                                                                                                                                                                                                                                                                                                                                                                                                                                                                                                                                                                                                        |
| EPI_ISL_511908 to 511922                                                                                                                                                                                                                                                                                                                                                                                                                                                                                                                                                                                                                                                                                                                                                                                                                                                                                                                                                                                                                                                                                                                                                                                                                                                                                                                                                                                                                                                                                                                                                                                                                                                                                                                                                                                                                                                                                                                                                                                                                                                                                                                                                                                                                                                                                                                                                                                                                                                                                                        |           | All india institute of Medical Sciences Rishikesh                                        | National Institute of Biomedical Genomics - DBT's PAN-INDIA 1000 SARS-CoV-2 RNA Genome Sequencing Consortium           | Amit Mangla; Arindam Maitra; Deepjyoti Kalita; Ravi Kant; Saumitra Das                                                                                                                                                                                                                                                                                                                                                                                                                                                                                                                                                                                                                                                                                        |
| EPI_ISL_514647, EPI_ISL_514649, EPI_ISL_514651                                                                                                                                                                                                                                                                                                                                                                                                                                                                                                                                                                                                                                                                                                                                                                                                                                                                                                                                                                                                                                                                                                                                                                                                                                                                                                                                                                                                                                                                                                                                                                                                                                                                                                                                                                                                                                                                                                                                                                                                                                                                                                                                                                                                                                                                                                                                                                                                                                                                                  |           | Allina Health Laboratory                                                                 | Minnesota Department of Health, Public Health Laboratory                                                               | Jacob Garfin; Matt Plumb; and Xiong Wang                                                                                                                                                                                                                                                                                                                                                                                                                                                                                                                                                                                                                                                                                                                      |
| EPI_ISL_1534288, EPI_ISL_1534371, EPI_ISL_1534384, EPI_ISL_1534454                                                                                                                                                                                                                                                                                                                                                                                                                                                                                                                                                                                                                                                                                                                                                                                                                                                                                                                                                                                                                                                                                                                                                                                                                                                                                                                                                                                                                                                                                                                                                                                                                                                                                                                                                                                                                                                                                                                                                                                                                                                                                                                                                                                                                                                                                                                                                                                                                                                              |           | Alma CDC wc AHC                                                                          | NHLS/UCT                                                                                                               | Arash Iranzadeh; Bruna Galvao; Carolyn Williamson; Deelan Doolabh; Diana Hardie; Emmanuel SJ; Innocent Mudau; Kruger Marais; Lynn Tyers; Marvin Hsiao; Stephen Korsman; Tegally H; de Oliveira T                                                                                                                                                                                                                                                                                                                                                                                                                                                                                                                                                              |
| EPI_ISL_528538                                                                                                                                                                                                                                                                                                                                                                                                                                                                                                                                                                                                                                                                                                                                                                                                                                                                                                                                                                                                                                                                                                                                                                                                                                                                                                                                                                                                                                                                                                                                                                                                                                                                                                                                                                                                                                                                                                                                                                                                                                                                                                                                                                                                                                                                                                                                                                                                                                                                                                                  |           | Alsaifar                                                                                 | Alsaifar                                                                                                               | Andreas Henschel; Ernesto Damiani; Gihan Elsir Ahmed Daw Elbait; Guan Tay; Habiba Alsaifar; Rifat; Samuel Feng                                                                                                                                                                                                                                                                                                                                                                                                                                                                                                                                                                                                                                                |
| EPI_ISL_528686 to 528721                                                                                                                                                                                                                                                                                                                                                                                                                                                                                                                                                                                                                                                                                                                                                                                                                                                                                                                                                                                                                                                                                                                                                                                                                                                                                                                                                                                                                                                                                                                                                                                                                                                                                                                                                                                                                                                                                                                                                                                                                                                                                                                                                                                                                                                                                                                                                                                                                                                                                                        |           | Alsaifar - Khalifa University Abu Dhabi                                                  | Alsaifar - Khalifa University Abu Dhabi                                                                                | Andreas Henschel; Ernesto Damiani; Gihan Daw Elbait; Guan Tay; Habiba Alsaifar; Rifat Hamoudi; Samuel Feng                                                                                                                                                                                                                                                                                                                                                                                                                                                                                                                                                                                                                                                    |
| EPI_ISL_1468667 to 1468670, EPI_ISL_1468673 to 1468675, EPI_ISL_1468680 to 1468682, EPI_ISL_1468684, EPI_ISL_1468688 to 1468689, EPI_ISL_1468692 to 1468693, EPI_ISL_1468695, EPI_ISL_1468697 to 1468699, EPI_ISL_1468701 to 1468702, EPI_ISL_1468704, EPI_ISL_1468706 to 1468708, EPI_ISL_1468710, EPI_ISL_1468712 to 1468716, EPI_ISL_1468718, EPI_ISL_1468720 to 1468721, EPI_ISL_1468723, EPI_ISL_1468726 to 1468729, EPI_ISL_1468732 to 1468734, EPI_ISL_1468737, EPI_ISL_1468740, EPI_ISL_1468748 to 1468749, EPI_ISL_1468752 to 1468753, EPI_ISL_1468763, EPI_ISL_1468765, EPI_ISL_1468767, EPI_ISL_1468769 to 1468773, EPI_ISL_1468776, EPI_ISL_1468778 to 1468780, EPI_ISL_1468783 to 1468788, EPI_ISL_1468790, EPI_ISL_1468792, EPI_ISL_1468795, EPI_ISL_1468797 to 1468798, EPI_ISL_1468800, EPI_ISL_1468802, EPI_ISL_1468804 to 1468809, EPI_ISL_1468811 to 1468813, EPI_ISL_1468820 to 1468828, EPI_ISL_1483053 to 1483054                                                                                                                                                                                                                                                                                                                                                                                                                                                                                                                                                                                                                                                                                                                                                                                                                                                                                                                                                                                                                                                                                                                                                                                                                                                                                                                                                                                                                                                                                                                                                                                         | see above | Altius Institute                                                                         | Seattle Flu Study                                                                                                      | Alex Nguyen; Amanda Adler; Andrew Meuser; Barry R. Lutz; Benjamin Pelle; Caitlin R. Wolf; Chris D. Frazar; Clem Green; Daniel Bates; Deborah A. Nickerson; Elisabeth Brandstetter; Erica Ryke; Hannah Petersen; Helen Y. Chu; Jacob Rodriguez; Janet A. Englund; Jay Shendure; Janet A. Halow; John Stamatoyannopoulos; Joshua Richards; Jover Lee; Julia Wald; Kirsten Fay; Kirsten Lacombe; Kneshay Harper; Lea M. Starita; Mark J. Rieder; Matt Hartman; Matthew Richardson; Matthew Thompson; Melissa Truong; Michael Boeck; Michael Famulare; Misja Icinis; Muhammad Halim; Olivia Waitner; Peter D. Han; Rebecca Bruders; Ryan Alexander; Sadie Patraw; Sofia Olsson; Stephanie DeBaun; Thomas R. Sibley; Tobias Ragoczy; Trevor Bedford; Truong Nguyen |
| EPI_ISL_1520155                                                                                                                                                                                                                                                                                                                                                                                                                                                                                                                                                                                                                                                                                                                                                                                                                                                                                                                                                                                                                                                                                                                                                                                                                                                                                                                                                                                                                                                                                                                                                                                                                                                                                                                                                                                                                                                                                                                                                                                                                                                                                                                                                                                                                                                                                                                                                                                                                                                                                                                 |           | Alverno Laboratories                                                                     | Illinois Department of Public Health - Chicago Lab                                                                     | Ira Heimler; Vineet K. Dhiman                                                                                                                                                                                                                                                                                                                                                                                                                                                                                                                                                                                                                                                                                                                                 |
| EPI_ISL_515544, EPI_ISL_523984, EPI_ISL_523986                                                                                                                                                                                                                                                                                                                                                                                                                                                                                                                                                                                                                                                                                                                                                                                                                                                                                                                                                                                                                                                                                                                                                                                                                                                                                                                                                                                                                                                                                                                                                                                                                                                                                                                                                                                                                                                                                                                                                                                                                                                                                                                                                                                                                                                                                                                                                                                                                                                                                  |           | Arma Dr Jose Soares Hungria                                                              | Instituto Adolfo Lutz, Interdisciplinary Procedures Center, Strategic Laboratory                                       | Claudia Regina Gonçalves; Claudio Tavares Sacchi; Erica Valessa Ramos Gomes                                                                                                                                                                                                                                                                                                                                                                                                                                                                                                                                                                                                                                                                                   |
| EPI_ISL_1534405                                                                                                                                                                                                                                                                                                                                                                                                                                                                                                                                                                                                                                                                                                                                                                                                                                                                                                                                                                                                                                                                                                                                                                                                                                                                                                                                                                                                                                                                                                                                                                                                                                                                                                                                                                                                                                                                                                                                                                                                                                                                                                                                                                                                                                                                                                                                                                                                                                                                                                                 |           | Amalienstein Clinic wc AMS                                                               | NHLS/UCT                                                                                                               | Arash Iranzadeh; Bruna Galvao; Carolyn Williamson; Deelan Doolabh; Diana Hardie; Emmanuel SJ; Innocent Mudau; Kruger Marais; Lynn Tyers; Marvin Hsiao; Stephen Korsman; Tegally H; de Oliveira T                                                                                                                                                                                                                                                                                                                                                                                                                                                                                                                                                              |
| EPI_ISL_569864 to 569886                                                                                                                                                                                                                                                                                                                                                                                                                                                                                                                                                                                                                                                                                                                                                                                                                                                                                                                                                                                                                                                                                                                                                                                                                                                                                                                                                                                                                                                                                                                                                                                                                                                                                                                                                                                                                                                                                                                                                                                                                                                                                                                                                                                                                                                                                                                                                                                                                                                                                                        |           | Amedeo di savoia                                                                         | Crosetto lab, Karolinska Institutet, SciLifeLab                                                                        | Anna Sapino; Luuk Harbers; Maria Grazia Milia; Michele Simonetti; Nicola Crosetto; Ning Zhang; Valeria Ghisetti                                                                                                                                                                                                                                                                                                                                                                                                                                                                                                                                                                                                                                               |
| EPI_ISL_456656                                                                                                                                                                                                                                                                                                                                                                                                                                                                                                                                                                                                                                                                                                                                                                                                                                                                                                                                                                                                                                                                                                                                                                                                                                                                                                                                                                                                                                                                                                                                                                                                                                                                                                                                                                                                                                                                                                                                                                                                                                                                                                                                                                                                                                                                                                                                                                                                                                                                                                                  |           | American Type Culture Collection Inc. (ATCC)                                             | American Type Culture Collection Inc. (ATCC)                                                                           | A.M.; Benton, B.; Chu; D.K.W.; Flores, B.; Frank; J.S.M.; King; M. and Rashid, S.; M.A.; N.P.; Parker; Peiris; Puthuvelil; Riojas; S.P.                                                                                                                                                                                                                                                                                                                                                                                                                                                                                                                                                                                                                       |
| EPI_ISL_414648, EPI_ISL_416457                                                                                                                                                                                                                                                                                                                                                                                                                                                                                                                                                                                                                                                                                                                                                                                                                                                                                                                                                                                                                                                                                                                                                                                                                                                                                                                                                                                                                                                                                                                                                                                                                                                                                                                                                                                                                                                                                                                                                                                                                                                                                                                                                                                                                                                                                                                                                                                                                                                                                                  |           | Andersen Lab, The Scripps Research Institute                                             | Andersen Lab, The Scripps Research Institute                                                                           | Catie Anderson; Emily Spender; Karthik Gangavarapu; Kristian Andersen; Laura Nicholson; Mark Zeller; Raphaelle Klitting; Refugio Robles-Sikisaka; Sarah Topol                                                                                                                                                                                                                                                                                                                                                                                                                                                                                                                                                                                                 |
| EPI_ISL_429991, EPI_ISL_430016                                                                                                                                                                                                                                                                                                                                                                                                                                                                                                                                                                                                                                                                                                                                                                                                                                                                                                                                                                                                                                                                                                                                                                                                                                                                                                                                                                                                                                                                                                                                                                                                                                                                                                                                                                                                                                                                                                                                                                                                                                                                                                                                                                                                                                                                                                                                                                                                                                                                                                  |           | Andersen lab at Scripps Research                                                         | Andersen lab at Scripps Research                                                                                       | SEARCH Alliance San Diego                                                                                                                                                                                                                                                                                                                                                                                                                                                                                                                                                                                                                                                                                                                                     |
| EPI_ISL_450818                                                                                                                                                                                                                                                                                                                                                                                                                                                                                                                                                                                                                                                                                                                                                                                                                                                                                                                                                                                                                                                                                                                                                                                                                                                                                                                                                                                                                                                                                                                                                                                                                                                                                                                                                                                                                                                                                                                                                                                                                                                                                                                                                                                                                                                                                                                                                                                                                                                                                                                  |           | Aneby VC                                                                                 | The Public Health Agency of Sweden                                                                                     | Anna Risberg; Anna-Malin Linde; Karin Tegmark-Wisell; Ken Granath; Maria Lind Karlberg; Mia Brytting; Olov Svartstrom; Oskar Karlsson Lindsjo; Theresa Enkirch                                                                                                                                                                                                                                                                                                                                                                                                                                                                                                                                                                                                |
| EPI_ISL_1384637 to 1384640, EPI_ISL_1510085, EPI_ISL_1510089, EPI_ISL_1510091, EPI_ISL_1510099, EPI_ISL_1510161 to 1510191, EPI_ISL_1510197 to 1510201, EPI_ISL_1510205 to 1510206, EPI_ISL_1510230 to 1510255                                                                                                                                                                                                                                                                                                                                                                                                                                                                                                                                                                                                                                                                                                                                                                                                                                                                                                                                                                                                                                                                                                                                                                                                                                                                                                                                                                                                                                                                                                                                                                                                                                                                                                                                                                                                                                                                                                                                                                                                                                                                                                                                                                                                                                                                                                                  | see above | Anteja laboratorija (UAB Diagnostikos laboratorija)                                      | Vilnius University Hospital Santaros Klinikos, Center of                                                               | Daniel Naumovas; Dovile Ezerskyte; Gytis Dudas; Ingrida Olendraite; Laimonas Griskevicius; Ligita Raugaite; Mindaugas Stoskus; Monika Katenaite;                                                                                                                                                                                                                                                                                                                                                                                                                                                                                                                                                                                                              |

|                                                                                                                                                                                                                                                                                                                                                                                                                                                                                                                                                                                                                                                                                                                                                                                                                                                                                                                                                                                                                                                                                                                                                                                             |                                                                                                     | Laboratory Medicine                                                                                                               | Rimvydas Norvilas                                                                                                                                                                                                                                                                                                                                                                             |
|---------------------------------------------------------------------------------------------------------------------------------------------------------------------------------------------------------------------------------------------------------------------------------------------------------------------------------------------------------------------------------------------------------------------------------------------------------------------------------------------------------------------------------------------------------------------------------------------------------------------------------------------------------------------------------------------------------------------------------------------------------------------------------------------------------------------------------------------------------------------------------------------------------------------------------------------------------------------------------------------------------------------------------------------------------------------------------------------------------------------------------------------------------------------------------------------|-----------------------------------------------------------------------------------------------------|-----------------------------------------------------------------------------------------------------------------------------------|-----------------------------------------------------------------------------------------------------------------------------------------------------------------------------------------------------------------------------------------------------------------------------------------------------------------------------------------------------------------------------------------------|
| EPI_ISL_582127 to 582132                                                                                                                                                                                                                                                                                                                                                                                                                                                                                                                                                                                                                                                                                                                                                                                                                                                                                                                                                                                                                                                                                                                                                                    | Antwerp University Hospital                                                                         | Institute of Tropical Medicine                                                                                                    | Colin Anthony; Philippe Selhorst                                                                                                                                                                                                                                                                                                                                                              |
| EPI_ISL_1443004 to 1443020, EPI_ISL_1443022 to 1443023, EPI_ISL_1510651 to 1510652                                                                                                                                                                                                                                                                                                                                                                                                                                                                                                                                                                                                                                                                                                                                                                                                                                                                                                                                                                                                                                                                                                          | Arcispedale Santa Maria Nuova, Autoimmunità, Allergologia e Biotechnologie Innovative               | Istituto Zooprofilattico Sperimentale della Lombardia e dell'Emilia Romagna (IZSLER), Risk Analysis and Genomic Epidemiology Unit | Alessandro Zerbinì; Erika Scaltriti; Ilaria Menozzi; Lucia Belloni; Marina Morganti; Stefania Croci; Stefano Pongolini                                                                                                                                                                                                                                                                        |
| EPI_ISL_1386123 to 1386126, EPI_ISL_1386129 to 1386133, EPI_ISL_1386224 to 1386234                                                                                                                                                                                                                                                                                                                                                                                                                                                                                                                                                                                                                                                                                                                                                                                                                                                                                                                                                                                                                                                                                                          | Area Biologia Molecolare Istituto Zooprofilattico Sperimentale della Sicilia                        | Area Biologia Molecolare Istituto Zooprofilattico Sperimentale della Sicilia                                                      | BRUNO Federica; BRUNO Gabriella; CASTELLI Germano; COLLURA Rosaria; PIAZZA Angela; REALE Stefano; SCIBETTA Silvia; VITALE Fabrizio                                                                                                                                                                                                                                                            |
| EPI_ISL_512663 to 512664, EPI_ISL_512669, EPI_ISL_527740, EPI_ISL_527749                                                                                                                                                                                                                                                                                                                                                                                                                                                                                                                                                                                                                                                                                                                                                                                                                                                                                                                                                                                                                                                                                                                    | Area De Salud Alajuela Norte - Clinica Dr. Marcial Rodríguez                                        | Incienza, Instituto Costarricense de Investigación y Enseñanza en Nutrición y Salud                                               | Adriana Godínez & Melany Calderon; Claudio Soto-Garita; Estela Cordero; Francisco Duarte; Hebleen Porras                                                                                                                                                                                                                                                                                      |
| EPI_ISL_527756                                                                                                                                                                                                                                                                                                                                                                                                                                                                                                                                                                                                                                                                                                                                                                                                                                                                                                                                                                                                                                                                                                                                                                              | Area De Salud Aserri                                                                                | Incienza, Instituto Costarricense de Investigación y Enseñanza en Nutrición y Salud                                               | Adriana Godínez & Melany Calderon; Claudio Soto-Garita; Estela Cordero; Francisco Duarte; Hebleen Porras                                                                                                                                                                                                                                                                                      |
| EPI_ISL_512668, EPI_ISL_527745, EPI_ISL_527748, EPI_ISL_527751                                                                                                                                                                                                                                                                                                                                                                                                                                                                                                                                                                                                                                                                                                                                                                                                                                                                                                                                                                                                                                                                                                                              | Area De Salud Corredores                                                                            | Incienza, Instituto Costarricense de Investigación y Enseñanza en Nutrición y Salud                                               | Adriana Godínez & Melany Calderon; Claudio Soto-Garita; Estela Cordero; Francisco Duarte; Hebleen Porras                                                                                                                                                                                                                                                                                      |
| EPI_ISL_512653                                                                                                                                                                                                                                                                                                                                                                                                                                                                                                                                                                                                                                                                                                                                                                                                                                                                                                                                                                                                                                                                                                                                                                              | Area De Salud Desamparados 1 - Clinica Dr. Marcial Fallas [Grifo Alto/Desampara]                    | Incienza, Instituto Costarricense de Investigación y Enseñanza en Nutrición y Salud                                               | Adriana Godínez & Melany Calderon; Claudio Soto-Garita; Estela Cordero; Francisco Duarte; Hebleen Porras                                                                                                                                                                                                                                                                                      |
| EPI_ISL_512659                                                                                                                                                                                                                                                                                                                                                                                                                                                                                                                                                                                                                                                                                                                                                                                                                                                                                                                                                                                                                                                                                                                                                                              | Area De Salud Fortuna                                                                               | Incienza, Instituto Costarricense de Investigación y Enseñanza en Nutrición y Salud                                               | Adriana Godínez & Melany Calderon; Claudio Soto-Garita; Estela Cordero; Francisco Duarte; Hebleen Porras                                                                                                                                                                                                                                                                                      |
| EPI_ISL_527757                                                                                                                                                                                                                                                                                                                                                                                                                                                                                                                                                                                                                                                                                                                                                                                                                                                                                                                                                                                                                                                                                                                                                                              | Area De Salud Goicoechea 1                                                                          | Incienza, Instituto Costarricense de Investigación y Enseñanza en Nutrición y Salud                                               | Adriana Godínez & Melany Calderon; Claudio Soto-Garita; Estela Cordero; Francisco Duarte; Hebleen Porras                                                                                                                                                                                                                                                                                      |
| EPI_ISL_512662, EPI_ISL_512666 to 512667, EPI_ISL_512671, EPI_ISL_527746 to 527747, EPI_ISL_527760                                                                                                                                                                                                                                                                                                                                                                                                                                                                                                                                                                                                                                                                                                                                                                                                                                                                                                                                                                                                                                                                                          | Area De Salud La Cruz                                                                               | Incienza, Instituto Costarricense de Investigación y Enseñanza en Nutrición y Salud                                               | Adriana Godínez & Melany Calderon; Claudio Soto-Garita; Estela Cordero; Francisco Duarte; Hebleen Porras                                                                                                                                                                                                                                                                                      |
| EPI_ISL_512660 to 512661                                                                                                                                                                                                                                                                                                                                                                                                                                                                                                                                                                                                                                                                                                                                                                                                                                                                                                                                                                                                                                                                                                                                                                    | Area De Salud Los Chiles                                                                            | Incienza, Instituto Costarricense de Investigación y Enseñanza en Nutrición y Salud                                               | Adriana Godínez & Melany Calderon; Claudio Soto-Garita; Estela Cordero; Francisco Duarte; Hebleen Porras                                                                                                                                                                                                                                                                                      |
| EPI_ISL_512658                                                                                                                                                                                                                                                                                                                                                                                                                                                                                                                                                                                                                                                                                                                                                                                                                                                                                                                                                                                                                                                                                                                                                                              | Area De Salud Orotina-San Mateo [Orotina/Alajuela]                                                  | Incienza, Instituto Costarricense de Investigación y Enseñanza en Nutrición y Salud                                               | Adriana Godínez & Melany Calderon; Claudio Soto-Garita; Estela Cordero; Francisco Duarte; Hebleen Porras                                                                                                                                                                                                                                                                                      |
| EPI_ISL_512656                                                                                                                                                                                                                                                                                                                                                                                                                                                                                                                                                                                                                                                                                                                                                                                                                                                                                                                                                                                                                                                                                                                                                                              | Area De Salud Pavas (Coopesalud) [Pavas/San Jose]                                                   | Incienza, Instituto Costarricense de Investigación y Enseñanza en Nutrición y Salud                                               | Adriana Godínez & Melany Calderon; Claudio Soto-Garita; Estela Cordero; Francisco Duarte; Hebleen Porras                                                                                                                                                                                                                                                                                      |
| EPI_ISL_512657                                                                                                                                                                                                                                                                                                                                                                                                                                                                                                                                                                                                                                                                                                                                                                                                                                                                                                                                                                                                                                                                                                                                                                              | Area De Salud Tibas-Uruca-Merced - Clinica Dr. Clorito Picado [Tibas/San Jose]                      | Incienza, Instituto Costarricense de Investigación y Enseñanza en Nutrición y Salud                                               | Adriana Godínez & Melany Calderon; Claudio Soto-Garita; Estela Cordero; Francisco Duarte; Hebleen Porras                                                                                                                                                                                                                                                                                      |
| EPI_ISL_491446                                                                                                                                                                                                                                                                                                                                                                                                                                                                                                                                                                                                                                                                                                                                                                                                                                                                                                                                                                                                                                                                                                                                                                              | Area de Salud Alajuela Central                                                                      | Incienza, Instituto Costarricense de Investigación y Enseñanza en Nutrición y Salud                                               | Adriana Godínez & Melany Calderon; Claudio Soto-Garita; Estela Cordero; Francisco Duarte; Hebleen Brenes                                                                                                                                                                                                                                                                                      |
| EPI_ISL_434533, EPI_ISL_434535, EPI_ISL_491449                                                                                                                                                                                                                                                                                                                                                                                                                                                                                                                                                                                                                                                                                                                                                                                                                                                                                                                                                                                                                                                                                                                                              | Area de Salud Alajuela Sur                                                                          | Incienza, Instituto Costarricense de Investigación y Enseñanza en Nutrición y Salud                                               | Adriana Godínez & Melany Calderon; Claudio Soto-Garita; Estela Cordero; Francisco Duarte; Hebleen Brenes; Hebleen Porras                                                                                                                                                                                                                                                                      |
| EPI_ISL_491437, EPI_ISL_491444                                                                                                                                                                                                                                                                                                                                                                                                                                                                                                                                                                                                                                                                                                                                                                                                                                                                                                                                                                                                                                                                                                                                                              | Area de Salud Escazu (Coopesana)                                                                    | Incienza, Instituto Costarricense de Investigación y Enseñanza en Nutrición y Salud                                               | Adriana Godínez & Melany Calderon; Claudio Soto-Garita; Estela Cordero; Francisco Duarte; Hebleen Brenes                                                                                                                                                                                                                                                                                      |
| EPI_ISL_491457                                                                                                                                                                                                                                                                                                                                                                                                                                                                                                                                                                                                                                                                                                                                                                                                                                                                                                                                                                                                                                                                                                                                                                              | Area de Salud Los Santos                                                                            | Incienza, Instituto Costarricense de Investigación y Enseñanza en Nutrición y Salud                                               | Adriana Godínez & Melany Calderon; Claudio Soto-Garita; Estela Cordero; Francisco Duarte; Hebleen Brenes                                                                                                                                                                                                                                                                                      |
| EPI_ISL_491445                                                                                                                                                                                                                                                                                                                                                                                                                                                                                                                                                                                                                                                                                                                                                                                                                                                                                                                                                                                                                                                                                                                                                                              | Area de Salud Mata Redonda                                                                          | Incienza, Instituto Costarricense de Investigación y Enseñanza en Nutrición y Salud                                               | Adriana Godínez & Melany Calderon; Claudio Soto-Garita; Estela Cordero; Francisco Duarte; Hebleen Brenes                                                                                                                                                                                                                                                                                      |
| EPI_ISL_434539                                                                                                                                                                                                                                                                                                                                                                                                                                                                                                                                                                                                                                                                                                                                                                                                                                                                                                                                                                                                                                                                                                                                                                              | Area de Salud Orotina                                                                               | Incienza, Instituto Costarricense de Investigación y Enseñanza en Nutrición y Salud                                               | Adriana Godínez & Melany Calderon; Claudio Soto-Garita; Estela Cordero; Francisco Duarte; Hebleen Porras                                                                                                                                                                                                                                                                                      |
| EPI_ISL_1483700                                                                                                                                                                                                                                                                                                                                                                                                                                                                                                                                                                                                                                                                                                                                                                                                                                                                                                                                                                                                                                                                                                                                                                             | Area of Virology, Serology and Virology Division (SAVID), New South Wales Health Pathology Randwick | Area of Virology, Serology and Virology Division (SAVID), New South Wales Health Pathology Randwick                               | Au, J.; Bull, R.; Deveson, I.; Foster, C.; Jean, T.; Rawlinson, W.; Ruiz Silva, M.; Van Haal, S.                                                                                                                                                                                                                                                                                              |
| EPI_ISL_500596 to 500706, EPI_ISL_500717, EPI_ISL_509492 to 509523, EPI_ISL_527008 to 527064, EPI_ISL_527179 to 527180, EPI_ISL_527400, EPI_ISL_530334 to 530340, EPI_ISL_537286 to 537287, EPI_ISL_539327, EPI_ISL_569858, EPI_ISL_577597, EPI_ISL_577604, EPI_ISL_586571                                                                                                                                                                                                                                                                                                                                                                                                                                                                                                                                                                                                                                                                                                                                                                                                                                                                                                                  | Area of Virology, Serology and Virology Division (SAVID), New South Wales Health Pathology Randwick | Area of Virology, Serology and Virology Division (SAVID), New South Wales Health Pathology Randwick                               | Bull, R.; Deveson, I.; Rawlinson; Rawlinson, W.; Van Hal, S.; W                                                                                                                                                                                                                                                                                                                               |
| EPI_ISL_1406433, EPI_ISL_1406435, EPI_ISL_1424504 to 1424508, EPI_ISL_1494718 to 1494723, EPI_ISL_1516747 to 1516748, EPI_ISL_1543924 to 1543927                                                                                                                                                                                                                                                                                                                                                                                                                                                                                                                                                                                                                                                                                                                                                                                                                                                                                                                                                                                                                                            | Area of Virology, Serology and Virology Division (SAVID), New South Wales Health Pathology Randwick | Virology Research Laboratory; Area of Virology, Serology and Virology Division (SAVID), New South Wales Health Pathology Randwick | Au, J.; Bull, R.; Deveson, I.; Foster, C.; Rawlinson, W.; Ruiz Silva, M.; Van Hal, S.; Wong, M.                                                                                                                                                                                                                                                                                               |
| EPI_ISL_406223                                                                                                                                                                                                                                                                                                                                                                                                                                                                                                                                                                                                                                                                                                                                                                                                                                                                                                                                                                                                                                                                                                                                                                              | Arizona Department of Health Services                                                               | Pathogen Discovery, Respiratory Viruses Branch, Division of Viral Diseases, Centers for Disease Control and Prevention            | Anna Uehara; Brett L. Whitaker; Brian Lynch; Clinton R. Paden; Janna' R. Murray; Jing Zhang; Krista Queen; Lijuan Wang; Senthil Kumar K. Sakthivel; Shifaq Kamili; Stephen Lindstrom; Susan I. Gerber; Suxiang Tong; Xiaoyan Lu; Yan Li; Ying Tao                                                                                                                                             |
| EPI_ISL_1443779 to 1443801, EPI_ISL_1447063 to 1447073, EPI_ISL_1503299 to 1503308                                                                                                                                                                                                                                                                                                                                                                                                                                                                                                                                                                                                                                                                                                                                                                                                                                                                                                                                                                                                                                                                                                          | Arizona State Public Health Laboratory                                                              | Arizona State Public Health Laboratory                                                                                            | Jessica Escobar; Katherine Fullerton; Linda Getsinger; Nobuko Fukushima; Stacy White; Trung Huynh; Victor Waddell                                                                                                                                                                                                                                                                             |
| EPI_ISL_1402540, EPI_ISL_1403385, EPI_ISL_1405918 to 1405924, EPI_ISL_1423515, EPI_ISL_1423934 to 1423944, EPI_ISL_1423946 to 1423976, EPI_ISL_1483573 to 1483585, EPI_ISL_1532306 to 1532584                                                                                                                                                                                                                                                                                                                                                                                                                                                                                                                                                                                                                                                                                                                                                                                                                                                                                                                                                                                               | Arizona State University                                                                            | Arizona State University                                                                                                          | Efrem S. Lim; Emily A. Kaelin; Joshua LaBaer; Joy M. Blain; Kristina Buss; LaRinda A. Holland; Neal W Woodbury; Nicholas J. Mellor; Peter T. Skidmore; Rabia Maqsood; Valerie Harris; Vel Murugan                                                                                                                                                                                             |
| EPI_ISL_424668 to 424669, EPI_ISL_424671, EPI_ISL_467372 to 467373                                                                                                                                                                                                                                                                                                                                                                                                                                                                                                                                                                                                                                                                                                                                                                                                                                                                                                                                                                                                                                                                                                                          | Arizona State University Health Services                                                            | Arizona State University                                                                                                          | Arvind Varsani; Bereket Estifanos; Brenda G. Hogue; Efrem S. Lim; Emily A. Kaelin; Jason Steel; LaRinda A. Holland; Lily I. Wu; Matthew Scotch; Nicholas J. Mellor; Peter T. Skidmore; Rabia Maqsood; Roif U. Halden                                                                                                                                                                          |
| EPI_ISL_1436622, EPI_ISL_1436624, EPI_ISL_1436626, EPI_ISL_1436628 to 1436629, EPI_ISL_1436631, EPI_ISL_1436633, EPI_ISL_1436635, EPI_ISL_1436637, EPI_ISL_1436639, EPI_ISL_1436641, EPI_ISL_1436643, EPI_ISL_1436645, EPI_ISL_1436647, EPI_ISL_1436649, EPI_ISL_1436651, EPI_ISL_1436653, EPI_ISL_1436656, EPI_ISL_1436658, EPI_ISL_1436660, EPI_ISL_1436662, EPI_ISL_1436664, EPI_ISL_1436666, EPI_ISL_1436668, EPI_ISL_1436670, EPI_ISL_1436673, EPI_ISL_1436831, EPI_ISL_1436833, EPI_ISL_1436835, EPI_ISL_1436838, EPI_ISL_1436840, EPI_ISL_1436842, EPI_ISL_1436844, EPI_ISL_1436846, EPI_ISL_1436848, EPI_ISL_1436861, EPI_ISL_1436864, EPI_ISL_1436866, EPI_ISL_1436868, EPI_ISL_1436870, EPI_ISL_1436872, EPI_ISL_1436874, EPI_ISL_1436876, EPI_ISL_1436878, EPI_ISL_1436880, EPI_ISL_1436883, EPI_ISL_1436885 to 1436886, EPI_ISL_1436888, EPI_ISL_1436891 to 1436892, EPI_ISL_1436895, EPI_ISL_1436897, EPI_ISL_1436899, EPI_ISL_1437041, EPI_ISL_1437690, EPI_ISL_1437692, EPI_ISL_1437694, EPI_ISL_1437696, EPI_ISL_1437698, EPI_ISL_1437713, EPI_ISL_1437718, EPI_ISL_1437720, EPI_ISL_1437729, EPI_ISL_1437734, EPI_ISL_1437736, EPI_ISL_1438441, EPI_ISL_1559592 to 1559611 |                                                                                                     |                                                                                                                                   |                                                                                                                                                                                                                                                                                                                                                                                               |
| see above                                                                                                                                                                                                                                                                                                                                                                                                                                                                                                                                                                                                                                                                                                                                                                                                                                                                                                                                                                                                                                                                                                                                                                                   | Arlon                                                                                               | Plateforme de testing Namuroise                                                                                                   | ; Céline Maschietto; Degosserie Jonathan; Denis Olivier; Mullier François; Otto Gaetan                                                                                                                                                                                                                                                                                                        |
| EPI_ISL_496518 to 496520, EPI_ISL_496529, EPI_ISL_496533, EPI_ISL_496537 to 496545, EPI_ISL_496602, EPI_ISL_497880 to 497887                                                                                                                                                                                                                                                                                                                                                                                                                                                                                                                                                                                                                                                                                                                                                                                                                                                                                                                                                                                                                                                                | Armed Forces Medical College                                                                        | National Centre For Cell Science                                                                                                  | Arvind Sahu; DBT's PAN-INDIA 1000 SARS-CoV2 RNA genome sequencing consortium; Dhiraj Paul; Girdhari Lal; Janesh Kumar; Kavita Bala Anand; Kunal Jani; Maharashtra COVID-19 Study Group; Manoj Kumar Bhat; Murlidhar Tambe; Radha Chauhan; Rajesh Karyakarte; Rajiv Mohan Gupta; Santosh Karade; Sheldner Pal Singh Shergilli; Sourav Sen; Suvarna Joshi; Vasudevan Seshadri; Yogesh S Shouche |
| EPI_ISL_1389311, EPI_ISL_1465611 to 1465614, EPI_ISL_1516923 to 1516924, EPI_ISL_1517089, EPI_ISL_1517091 to 1517092, EPI_ISL_1517094, EPI_ISL_1517464 to 1517467, EPI_ISL_1517479 to 1517482, EPI_ISL_1528183 to 1528185, EPI_ISL_1528199 to 1528201, EPI_ISL_1528218, EPI_ISL_1528235                                                                                                                                                                                                                                                                                                                                                                                                                                                                                                                                                                                                                                                                                                                                                                                                                                                                                                     | Armies                                                                                              | National Reference Center for Viruses of Respiratory                                                                              | Amaury Vaysse; Angela Brisebarre; Camille Capel; Christophe Malabat; Corinne Maufrais; Damien Mornico; Desroches Marine; Etienne Simon-Lorière;                                                                                                                                                                                                                                               |

|                                                                                                                                                                                                                                                                                                                                                                     |                                                                                                  |                                                                                                                                   |                                                                                                                                                                                                                                                                                                                                                                                                                                                                                                                                                                                                                                            |
|---------------------------------------------------------------------------------------------------------------------------------------------------------------------------------------------------------------------------------------------------------------------------------------------------------------------------------------------------------------------|--------------------------------------------------------------------------------------------------|-----------------------------------------------------------------------------------------------------------------------------------|--------------------------------------------------------------------------------------------------------------------------------------------------------------------------------------------------------------------------------------------------------------------------------------------------------------------------------------------------------------------------------------------------------------------------------------------------------------------------------------------------------------------------------------------------------------------------------------------------------------------------------------------|
|                                                                                                                                                                                                                                                                                                                                                                     |                                                                                                  | Infections, Institut Pasteur, Paris                                                                                               | Frédéric Lemoine; Louise Lefrançois; Marine Desroches; Marion Barbet; Maud Vanpeene; Méline Bizard; Sylvie Behillili; Sylvie van der Werf; Vincent Enouf                                                                                                                                                                                                                                                                                                                                                                                                                                                                                   |
| EPI_ISL_457826                                                                                                                                                                                                                                                                                                                                                      | Army Medical Center - Scientific Department                                                      | Army Medical and Veterinary Research Center                                                                                       | Anna Anselmo; Antonella Fortunato; Florigio Lista; Francesco Giordani; Giovanni Faggioni; Nino D'Amore; Riccardo De Sanctis; Silvia Fillo; Vanessa Vera Fain                                                                                                                                                                                                                                                                                                                                                                                                                                                                               |
| EPI_ISL_457825                                                                                                                                                                                                                                                                                                                                                      | Army Medical Research Center - Scientific Department                                             | Army Medical and Veterinary Research Center                                                                                       | Anna Anselmo; Antonella Fortunato; Florigio Lista; Francesco Giordani; Giovanni Faggioni; Nino D'Amore; Riccardo De Sanctis; Silvia Fillo; Vanessa Vera Fain                                                                                                                                                                                                                                                                                                                                                                                                                                                                               |
| EPI_ISL_539809 to 539812, EPI_ISL_539821                                                                                                                                                                                                                                                                                                                            | Asiaworld Expo Command Post                                                                      | Hong Kong Department of Health                                                                                                    | Alan K.L. Tsang; Dominic N.C. Tsang; Edman T.K. Lam; Peter C.W. Yip; Rickjason C.W. Chan                                                                                                                                                                                                                                                                                                                                                                                                                                                                                                                                                   |
| EPI_ISL_1524868                                                                                                                                                                                                                                                                                                                                                     | Assistenza Domiciliare Integrata (ADI) TERAMO TERAMO(TERAMO)                                     | Istituto Zooprofilattico Sperimentale dell'Abruzzo e Molise "G. Caporale"                                                         | Ancora M; Calistri P; Cammà C; Caporale M; Curini V; Delli Compagni E; Di Domenico M; Di Lollo Valeria; Di Pasquale A; Lorusso A; Mangone I; Marcacci M; Puglia I; Rinaldi A; Savini G; Scialabba S                                                                                                                                                                                                                                                                                                                                                                                                                                        |
| EPI_ISL_1498263, EPI_ISL_1498585, EPI_ISL_1498821 to 1498825, EPI_ISL_1498916, EPI_ISL_1498919, EPI_ISL_1499020, EPI_ISL_1499105, EPI_ISL_1499114, EPI_ISL_1499201 to 1499205, EPI_ISL_1499297 to 1499300                                                                                                                                                           | Associação Fundo de Incentivo à Pesquisa (AFIP)                                                  | Associação Fundo de Incentivo à Pesquisa (AFIP)                                                                                   | Debora R. Ramadan; Erika Rodrigues de Oliveira; Juliana Nogueira Martins Rodrigues; Priscila Farias Tempaku; Sergio Tufik.; Soraya Sgambatti de Andrade                                                                                                                                                                                                                                                                                                                                                                                                                                                                                    |
| see above                                                                                                                                                                                                                                                                                                                                                           | Associação Fundo de Incentivo à Pesquisa (AFIP).                                                 | Associação Fundo de Incentivo à Pesquisa (AFIP).                                                                                  | Debora R. Ramadan; Erika Rodrigues de Oliveira; Juliana Nogueira Martins Rodrigues; Priscila Farias Tempaku; Sergio Tufik.; Soraya Sgambatti de Andrade                                                                                                                                                                                                                                                                                                                                                                                                                                                                                    |
| EPI_ISL_1533436, EPI_ISL_1533443 to 1533444, EPI_ISL_1533446 to 1533447, EPI_ISL_1533449 to 1533450, EPI_ISL_1533452 to 1533530, EPI_ISL_1533539 to 1533563, EPI_ISL_1559385                                                                                                                                                                                        | Atlanta VA Medical Center                                                                        | Genomics and Discovery, Respiratory Viruses Branch, Division of Viral Diseases, Centers for Disease Control and Prevention        | Adam Retchless; Anna Kelleher; Anna Montmayeur; Anna Uehara; Brian Lynch; Clinton R. Paden; Haibin Wang; Han Jia Justin Ng; Jing Zhang; Justin Lee; Krista Queen; Mark Burroughs; Peter Cook; Rachel Marine; Suxiang Tong; Yan Li; Ying Tao                                                                                                                                                                                                                                                                                                                                                                                                |
| see above                                                                                                                                                                                                                                                                                                                                                           | Auckland Hospital                                                                                | Institute of Environmental Science and Research (ESR)                                                                             | Erasmus Smit; Gary McAuliffe; Joep de Lig; Lauren Jelly; Matt Storey; Matthew Blakiston; Sally Roberts; Xiaoyun Ren                                                                                                                                                                                                                                                                                                                                                                                                                                                                                                                        |
| EPI_ISL_413490, EPI_ISL_416519, EPI_ISL_416526                                                                                                                                                                                                                                                                                                                      | Aurora County Clinic                                                                             | South Dakota Public Health Laboratory                                                                                             | Jacob Garfin; Matt Plumb; Xiong Wang; and Chris Carlson                                                                                                                                                                                                                                                                                                                                                                                                                                                                                                                                                                                    |
| EPI_ISL_569616                                                                                                                                                                                                                                                                                                                                                      | Austech Medical Laboratories                                                                     | NSW Health Pathology - Institute of Clinical Pathology and Medical Research; Westmead Hospital; University of Sydney              | CIDM-PH et al.                                                                                                                                                                                                                                                                                                                                                                                                                                                                                                                                                                                                                             |
| EPI_ISL_513340, EPI_ISL_526166 to 526169, EPI_ISL_593649                                                                                                                                                                                                                                                                                                            | Australian Clinical Labs                                                                         | NSW Health Pathology - Institute of Clinical Pathology and Medical Research; Westmead Hospital; University of Sydney              | CIDM-PH et al.                                                                                                                                                                                                                                                                                                                                                                                                                                                                                                                                                                                                                             |
| EPI_ISL_451486, EPI_ISL_451574, EPI_ISL_451599, EPI_ISL_513331, EPI_ISL_544966 to 544967, EPI_ISL_544988, EPI_ISL_545024, EPI_ISL_547597, EPI_ISL_591484                                                                                                                                                                                                            | Australian Clinical Labs (formerly Healthscope Pathology)                                        | NSW Health Pathology - Institute of Clinical Pathology and Medical Research; Westmead Hospital; University of Sydney              | CIDM-PH et al.                                                                                                                                                                                                                                                                                                                                                                                                                                                                                                                                                                                                                             |
| see above                                                                                                                                                                                                                                                                                                                                                           | Austrian Agency for Health and Food Safety (AGES)                                                | Bergthaler laboratory, CeMM Research Center for Molecular Medicine of the Austrian Academy of Sciences                            | Adi Steinrigl; Alexander Lercher; Alexandra Popa; Andreas Bergthaler; Anna Schedl; Bekir Erguner; Benedikt Agerer; Christian Paar; Christoph Bock; Daniela Schmid; Dorothee von Laer; Elisabeth Puchhammer-Stoeckl; Fabian Amman; Franz Allerberger; Gernot Walder; Gregor Hörmann; Guenter Weiss; Gunther Vogl; Henrique Colaco; Jakob-Wendelin Genger; Jan Laine; Judith Aberle; Kinga Rigler-Hohenwarter; Lukas Endler; Maelle Le Moing; Manfred Nairz; Mark Smyth; Martin Senekowitsch; Michael Schuster; Peter Hufnagl; Peter Obrist; Petr Triska; Rainer Gattringer; Sabine Sussitz-Rack; Stephan Aberle; Thomas Penz; Wegene Borena |
| EPI_ISL_475830 to 475886, EPI_ISL_583573 to 583578, EPI_ISL_583630 to 583690, EPI_ISL_583883 to 583892, EPI_ISL_1495407 to 1495465, EPI_ISL_1495627 to 1495718                                                                                                                                                                                                      | Avera McKennan Hospital                                                                          | South Dakota Public Health Laboratory                                                                                             | Jacob Garfin; Matt Plumb; Xiong Wang; and Chris Carlson                                                                                                                                                                                                                                                                                                                                                                                                                                                                                                                                                                                    |
| EPI_ISL_569610, EPI_ISL_569624                                                                                                                                                                                                                                                                                                                                      | Avera Mckennan Laboratory                                                                        | Minnesota Department of Health, Public Health Laboratory                                                                          | Jacob Garfin; Matt Plumb; and Xiong Wang                                                                                                                                                                                                                                                                                                                                                                                                                                                                                                                                                                                                   |
| EPI_ISL_507963 to 507972, EPI_ISL_514645                                                                                                                                                                                                                                                                                                                            | Azienda Ospedaliera San Camillo Forlanini                                                        | INMI Lazzaro Spallanzani IRCCS                                                                                                    | A D'Agostino; A Di Caro; B Bartolini; CEM Gruber; E Giombini; F Basile; F Messina; F Santini; G Bonfiglio; G Parisi; M Rueca; MR Capobianchi; O Butera                                                                                                                                                                                                                                                                                                                                                                                                                                                                                     |
| EPI_ISL_1524739                                                                                                                                                                                                                                                                                                                                                     | Azienda Ospedaliera San Giovanni Addolorata                                                      | INMI Lazzaro Spallanzani IRCCS                                                                                                    | A Di Caro; B Bartolini; CEM Gruber; E Giombini; F Messina; F Santini; G Bonfiglio; M Gaudio; M Rueca; MR Capobianchi; O Butera; PM Placanica                                                                                                                                                                                                                                                                                                                                                                                                                                                                                               |
| EPI_ISL_1492573, EPI_ISL_1496001                                                                                                                                                                                                                                                                                                                                    | Azienda Ospedaliera Terni                                                                        | Istituto Zooprofilattico Sperimentale dell'Abruzzo e Molise "G. Caporale"                                                         | Ancora M; Calistri P; Cammà C; Caporale M; Curini V; Delli Compagni E; Di Domenico M; Di Lollo V; Di Lollo Valeria; Di Pasquale A; Lorusso A; Mangone I; Marcacci M; Palumbo M; Puglia I; Rinaldi A; Savini G; Scaccetti A; Scialabba S                                                                                                                                                                                                                                                                                                                                                                                                    |
| EPI_ISL_1390769, EPI_ISL_1394744 to 1394748, EPI_ISL_1499474 to 1499503, EPI_ISL_1499621 to 1499627, EPI_ISL_1524709 to 1524710                                                                                                                                                                                                                                     | Azienda Ospedaliera Universitaria Integrata Verona                                               | Istituto Zooprofilattico Sperimentale delle Venezie                                                                               | Adelaide Milani; Alessia Schivo; Alice Fusaro; Ambra Pastori; Annalisa Salviato; Antonia Ricci; Calogero Terregino; Edoardo Giussani; Elisa Palumbo; Erika Giorgia Quaranta; Isabella Monne; Luca Tassoni                                                                                                                                                                                                                                                                                                                                                                                                                                  |
| EPI_ISL_1524660 to 1524663                                                                                                                                                                                                                                                                                                                                          | Azienda Ospedaliera Universitaria Integrata Verona                                               | Istituto di Genomica Applicata; Istituto Zooprofilattico Sperimentale delle Venezie                                               | Alessia Schivo; Alice Fusaro; Ambra Pastori; Annalisa Salviato; Antonia Ricci; Calogero Terregino; Davide Scaglione; Edoardo Giussani; Eleonora Paparelli; Erika Giorgia Quaranta; Francesca Bruno; Gabriele Magris; Irena Jurman; Isabella Monne; Luca Tassoni; Maria Varotto; Michele Morgante; Silvia Ormelli; Valeria D'Amico; Vera Vendramin                                                                                                                                                                                                                                                                                          |
| EPI_ISL_1524498 to 1524506                                                                                                                                                                                                                                                                                                                                          |                                                                                                  |                                                                                                                                   |                                                                                                                                                                                                                                                                                                                                                                                                                                                                                                                                                                                                                                            |
| EPI_ISL_1442147, EPI_ISL_1442149, EPI_ISL_1442151, EPI_ISL_1442153, EPI_ISL_1442155, EPI_ISL_1442162, EPI_ISL_1442166, EPI_ISL_1442169, EPI_ISL_1442174, EPI_ISL_1442179, EPI_ISL_1442185, EPI_ISL_1442187, EPI_ISL_1442190, EPI_ISL_1442192, EPI_ISL_1442194, EPI_ISL_1442196, EPI_ISL_1442198, EPI_ISL_1442200, EPI_ISL_1442202, EPI_ISL_1442207, EPI_ISL_1442216 | Azienda Ospedaliero - Universitaria di Modena Policlinico - Virologia e Microbiologia Molecolare | Istituto Zooprofilattico Sperimentale della Lombardia e dell'Emilia Romagna (IZSLER), Risk Analysis and Genomic Epidemiology Unit | Erika Scaltriti; Giulia Fregni Serpini; Ilaria Menozzi; Marina Morganti; Monica Pecorari; Stefano Pongolini; William Gennari                                                                                                                                                                                                                                                                                                                                                                                                                                                                                                               |
| see above                                                                                                                                                                                                                                                                                                                                                           | Azienda Ospedaliero - Universitaria di Modena Policlinico - Virologia e Microbiologia Molecolare | Istituto Zooprofilattico Sperimentale della Lombardia e dell'Emilia Romagna (IZSLER), Risk Analysis and Genomic Epidemiology Unit | Erika Scaltriti; Ilaria Menozzi; Marina Morganti; Monica Pecorari; Stefano Pongolini                                                                                                                                                                                                                                                                                                                                                                                                                                                                                                                                                       |
| EPI_ISL_1442426, EPI_ISL_1442433, EPI_ISL_1442438, EPI_ISL_1442440, EPI_ISL_1442442, EPI_ISL_1442445, EPI_ISL_1442447 to 1442448, EPI_ISL_1442451, EPI_ISL_1442453, EPI_ISL_1442455, EPI_ISL_1442462                                                                                                                                                                | Azienda Sanitaria Locale di Piacenza - Presidio Ospedaliero - Laboratorio di Microbiologia       | Istituto Zooprofilattico Sperimentale della Lombardia e dell'Emilia Romagna (IZSLER), Risk Analysis and Genomic Epidemiology Unit | Erika Scaltriti; Ilaria Menozzi; Lo Cascio Giuliana; Marina Morganti; Peroni Irene; Schiavo Roberta; Stefano Pongolini                                                                                                                                                                                                                                                                                                                                                                                                                                                                                                                     |
| see above                                                                                                                                                                                                                                                                                                                                                           | Azienda Sanitaria Locale di Piacenza - Presidio Ospedaliero - Laboratorio di Microbiologia       | Istituto Zooprofilattico Sperimentale della Lombardia e dell'Emilia Romagna (IZSLER), Risk Analysis and Genomic Epidemiology Unit | Erika Scaltriti; Ilaria Menozzi; Lo Cascio Giuliana; Marina Morganti; Peroni Irene; Schiavo Roberta; Stefano Pongolini                                                                                                                                                                                                                                                                                                                                                                                                                                                                                                                     |
| EPI_ISL_1386112, EPI_ISL_1386115 to 1386117                                                                                                                                                                                                                                                                                                                         | Azienda Sanitaria Locale di Piacenza - Presidio Ospedaliero - Laboratorio di Microbiologia       | U.O. Microbiologia, Laboratorio Unico Centro Servizi - AUSL della Romagna                                                         | Giorgio Dirani; Lo Cascio Giuliana; Schiavo Roberta; Silvia Zannoli; Vittorio Sambri                                                                                                                                                                                                                                                                                                                                                                                                                                                                                                                                                       |
| EPI_ISL_1489740 to 1489741, EPI_ISL_1489743 to 1489757, EPI_ISL_1489759 to 1489834, EPI_ISL_1523544 to 1523583, EPI_ISL_1523585 to 1523639, EPI_ISL_1545669 to 1545673, EPI_ISL_1545675 to 1545703, EPI_ISL_1545705 to 1545763                                                                                                                                      | Azienda Sanitaria dell'Alto Adige Laboratorio Aziendale di Microbiologia e Virologia             | Istituto di Genomica Applicata                                                                                                    | Davide Scaglione; Eleonora Paparelli; Elisa Masi; Elisabetta Giacobazzi; Elisabetta Pagani; Gabriele Magris; Irena Jurman; Irene Bianconi; Michele Morgante; Stefanie Wieser; Vera Vendramin                                                                                                                                                                                                                                                                                                                                                                                                                                               |
| see above                                                                                                                                                                                                                                                                                                                                                           | Azienda Sanitaria dell'Alto Adige Laboratorio Aziendale di Microbiologia e Virologia             | Istituto di Genomica Applicata                                                                                                    | Davide Scaglione; Eleonora Paparelli; Elisa Masi; Elisabetta Giacobazzi; Elisabetta Pagani; Gabriele Magris; Irena Jurman; Irene Bianconi; Michele Morgante; Stefanie Wieser; Vera Vendramin                                                                                                                                                                                                                                                                                                                                                                                                                                               |
| EPI_ISL_1394739 to 1394743                                                                                                                                                                                                                                                                                                                                          | Azienda USL Umbria 2                                                                             | Istituto Zooprofilattico Sperimentale dell'Abruzzo e Molise "G. Caporale"                                                         | Ancora M; Calistri P; Cammà C; Caporale M; Curini V; Di Domenico M; Di Lollo Valeria; Di Pasquale A; Lorusso A; Mangone I; Marcacci M; Pistoni E; Proietti A; Puglia I; Rinaldi A; Savini G; Scialabba S                                                                                                                                                                                                                                                                                                                                                                                                                                   |
| EPI_ISL_496521 to 496523, EPI_ISL_496527 to 496528, EPI_ISL_496530, EPI_ISL_496534, EPI_ISL_496546 to 496554, EPI_ISL_497888 to 497891                                                                                                                                                                                                                              | B.J. Govt. Medical College                                                                       | National Centre For Cell Science                                                                                                  | Arvind Sahu; DBT's PAN-INDIA 1000 SARS-CoV2 RNA genome sequencing consortium; Dhiraj Paul; Giridhari Lal; Janesh Kumar; Kavita Bala Anand; Kunal Jani; Maharashtra COVID-19 Study Group; Manoj Kumar Bhat; Murlidhar Tambe; Radha Chauhan; Rajesh Karyakarte; Rajiv Mohan Gupta; Santosh Karate; Shelinder Pal Singh Shergill; Sourav Sen; Suvarna Joshi; Vasudevan Seshadri; Yogesh S Shouche                                                                                                                                                                                                                                             |
| EPI_ISL_435049 to 435054, EPI_ISL_437445 to 437454, EPI_ISL_444456 to 444481, EPI_ISL_447030 to 447046, EPI_ISL_458086 to 458102, EPI_ISL_461483 to 461506, EPI_ISL_467041 to 467054, EPI_ISL_469024 to 469028, EPI_ISL_495014 to 495019                                                                                                                            | B.J. Medical College and Civil hospital                                                          | Gujarat Biotechnology Research Center                                                                                             | ; A M Kadri; Afzal Ansari; Akanksha Verma; Amit Kanani; Anjali Rajwar; Ankit Hinsu; Apurvasinh Puvar; Armi Chaudhari; Bhavesh Modi; Bhavya Jindal; Binita Aring; Camellia Chakraborty; Chaitanya Joshi; Dhaval Vaghela; Dinesh Kumar; Dipa Kinariwala; Dipeshwari Shewale; Disha Patel; Fenil Patel; Gaurishankar Shrimali; Geeta Vaghela; Harsh Bakshi; Jarvi Ravai; Kairavi Joshi; Kamlesh J Upadhyay; Komal Patel; Labdhi Pandya; Madhvi Joshi; Maharshi Pandya; Monika Gandhi; Neelam Nathani; Neeta Khandelwal; Neha Rajpara; Nidhi Patel; Nidhi Sood; Nikha Trivedi; Nirav Mungalpara; Nitin                                         |
| see above                                                                                                                                                                                                                                                                                                                                                           | B.J. Medical College and Civil hospital                                                          | Gujarat Biotechnology Research Center                                                                                             | ; A M Kadri; Afzal Ansari; Akanksha Verma; Amit Kanani; Anjali Rajwar; Ankit Hinsu; Apurvasinh Puvar; Armi Chaudhari; Bhavesh Modi; Bhavya Jindal; Binita Aring; Camellia Chakraborty; Chaitanya Joshi; Dhaval Vaghela; Dinesh Kumar; Dipa Kinariwala; Dipeshwari Shewale; Disha Patel; Fenil Patel; Gaurishankar Shrimali; Geeta Vaghela; Harsh Bakshi; Jarvi Ravai; Kairavi Joshi; Kamlesh J Upadhyay; Komal Patel; Labdhi Pandya; Madhvi Joshi; Maharshi Pandya; Monika Gandhi; Neelam Nathani; Neeta Khandelwal; Neha Rajpara; Nidhi Patel; Nidhi Sood; Nikha Trivedi; Nirav Mungalpara; Nitin                                         |

|                                                                                                                                                                                                                                                                                                           |           |                                                                                     |                                                                                                                                                                                                                     |                                                                                                                                                                                                                                                                                                                                                                                                                                                                      |
|-----------------------------------------------------------------------------------------------------------------------------------------------------------------------------------------------------------------------------------------------------------------------------------------------------------|-----------|-------------------------------------------------------------------------------------|---------------------------------------------------------------------------------------------------------------------------------------------------------------------------------------------------------------------|----------------------------------------------------------------------------------------------------------------------------------------------------------------------------------------------------------------------------------------------------------------------------------------------------------------------------------------------------------------------------------------------------------------------------------------------------------------------|
|                                                                                                                                                                                                                                                                                                           |           |                                                                                     |                                                                                                                                                                                                                     | Savaliya; Pinal Trivedi; Pooja P Doshi; Pragya Sharma; Pranay Shah; Pritesh Sabara; Priti Pandita; Priyanka P Vatsa; R D Dixit; Raghawendra Kumar; Ramesh Pandit; Ramesh Patel; Sanjay Kapadia; Sharmistha Majumdar; Siddhant Kumar; Snehal Bagatharia; Sonia Barve; Tejas Shah; Umang Mishra; Vasudha Sharma; Zarna Patel; Zuber Saiyed                                                                                                                             |
| EPI_ISL_512058 to 512065, EPI_ISL_514581 to 514609, EPI_ISL_524713 to 524729, EPI_ISL_525421 to 525422, EPI_ISL_586513 to 586530, EPI_ISL_590689, EPI_ISL_1544110 to 1544117                                                                                                                              | see above | B.J. Medical College and Civil hospital, Ahmedabad                                  | Gujarat Biotechnology Research Centre                                                                                                                                                                               | A M Kadri; Afzal Ansari; Apurvasinh Puvar; Chaitanya Joshi; Dinesh Kumar; Dipa Kinariwala; Harsh Bakshi; Janvi Raval; Kamlesh J Upadhyay; Komal Patel; Labdhi Pandya; Madhvi Joshi; Maharshi Pandya; Monika Gandhi; Nidhi Patel; Nikha Trivedi; Nitesh Shah; Nitin Savaliya; Pinal Trivedi; Pranay Shah; R D Dixit; Raghawendra Kumar; Ramesh Pandit; Sanjay Kapadia; Sonal Sharma; Twinkle Soni; Umang Mishra; Zarna Patel; Zuber Saiyed                            |
| EPI_ISL_1385820                                                                                                                                                                                                                                                                                           |           | BANGALORE MEDICAL COLLEGE AND RESEARCH INSTITUTE                                    | INSACOG-KA, NIMHANS                                                                                                                                                                                                 | Anita S Desai; Anson Kunjumon George; Chitra Pattabiraman; Darshan Sreenivas; Nakka Vijay Kiran Reddy; Pramada Prasad; V Ravi                                                                                                                                                                                                                                                                                                                                        |
| EPI_ISL_1534704 to 1534705                                                                                                                                                                                                                                                                                |           | BBKL Surabaya                                                                       | National Institute of Health Research and Development                                                                                                                                                               | Arie Ardiansyah Nugraha; Hana Apsari Pawestri; Hartanti Dian Ikwati; Kartika Dewi Puspa; Krisna Pangesti; Nelly Puspandari; Subangkit; Vivi Setiawaty                                                                                                                                                                                                                                                                                                                |
| EPI_ISL_1385817 to 1385819, EPI_ISL_1385821 to 1385824, EPI_ISL_1385826 to 1385828, EPI_ISL_1385837 to 1385838, EPI_ISL_1396654                                                                                                                                                                           |           | BBMP Urban PHC                                                                      | INSACOG-KA, NIMHANS                                                                                                                                                                                                 | Anita S Desai; Anson Kunjumon George; Chitra Pattabiraman; Darshan Sreenivas; Nakka Vijay Kiran Reddy; Pramada Prasad; V Ravi                                                                                                                                                                                                                                                                                                                                        |
| EPI_ISL_1469239                                                                                                                                                                                                                                                                                           |           | BBTKL PP Jakarta                                                                    | National Institute of Health Research and Development                                                                                                                                                               | Arie Ardiansyah Nugraha; Hana Apsari Pawestri; Hartanti Dian Ikwati; Kartika Dewi Puspa; Krisna Pangesti; Nelly Puspandari; Subangkit; Vivi Setiawaty                                                                                                                                                                                                                                                                                                                |
| EPI_ISL_412965, EPI_ISL_415577 to 415590, EPI_ISL_418816 to 418859                                                                                                                                                                                                                                        |           | BCCDC Public Health Laboratory                                                      | BCCDC Public Health Laboratory                                                                                                                                                                                      | Choi; Gilmour; Harrigan; Hoang; Kamelian; Krajden; Lapointe; Lee; Levett; Li; Loman; Prystajecy; Quick; Sekirov; Snutch; Tyson                                                                                                                                                                                                                                                                                                                                       |
| EPI_ISL_486395, EPI_ISL_515933, EPI_ISL_515937, EPI_ISL_516075                                                                                                                                                                                                                                            |           | BIMS                                                                                | Department of Neurovirology, National Institute of Mental Health and Neuroscience (NIMHANS)                                                                                                                         | Anita Desai; Chitra Pattabiraman; Harsha PK; Manjunatha Venkataswamy; Pramada Prasad; Ravi Vasanthapuram; Risha Rasheed; Shafeeq S Hameed; Vijayalakshmi Reddy                                                                                                                                                                                                                                                                                                       |
| EPI_ISL_1397694 to 1397699, EPI_ISL_1397912 to 1397913                                                                                                                                                                                                                                                    |           | BIO-REFERENCE LABORATORIES                                                          | Wadsworth Center, New York State Department of Health                                                                                                                                                               | Alexis Russel; Daryl M. Lamson; Erasmus Schneider; Erica Lasek-Nesselquist; John Kelly; Jonathan Plitnick; Kirsten St. George; Matthew Shudt; Melissa A Leisner; Navjot Singh                                                                                                                                                                                                                                                                                        |
| EPI_ISL_1418249 to 1418251, EPI_ISL_1461078, EPI_ISL_1461080, EPI_ISL_1461082, EPI_ISL_1461085, EPI_ISL_1461087, EPI_ISL_1461089, EPI_ISL_1461091 to 1461092, EPI_ISL_1461094, EPI_ISL_1461096, EPI_ISL_1461098, EPI_ISL_1461100 to 1461101, EPI_ISL_1461103, EPI_ISL_1461105, EPI_ISL_1461107 to 1461108 | see above | BIOMNIS LYON                                                                        | CNR Virus des Infections Respiratoires - France SUD                                                                                                                                                                 | Antonin Bal; Bruno Lina; Gregory Destras; Gwendolyne Burfin; Hadrien Regue; Laurence Josset; Martine Valette; Quentin Semanas                                                                                                                                                                                                                                                                                                                                        |
| EPI_ISL_1396844 to 1396882                                                                                                                                                                                                                                                                                |           | BIOPATH                                                                             | Department of Virology, Henri Mondor University Hospital, Assistance Publique Hôpitaux de Paris, Université Paris-Est Créteil, INSERM U955                                                                          | Alexandre Soulier; Christophe Rodriguez; Elisabeth Trawinski; Guillaume Gricourt; Jean-Michel Pawlotsky; Melissa N'Debi; Slim Fourati; Vanessa Demontant                                                                                                                                                                                                                                                                                                             |
| EPI_ISL_1461124 to 1461130, EPI_ISL_1461132 to 1461134                                                                                                                                                                                                                                                    |           | BIOSELLAL                                                                           | CNR Virus des Infections Respiratoires - France SUD                                                                                                                                                                 | Antonin Bal; Bruno Lina; Gregory Destras; Gwendolyne Burfin; Hadrien Regue; Laurence Josset; Martine Valette; Quentin Semanas                                                                                                                                                                                                                                                                                                                                        |
| EPI_ISL_1482408 to 1482409, EPI_ISL_1482446 to 1482453                                                                                                                                                                                                                                                    |           | BOSTON HEART DIAGNOSTICS CORP                                                       | Wadsworth Center, New York State Department of Health                                                                                                                                                               | Alexis Russell; Catharine Prussing; Daryl M. Lamson; Erasmus Schneider; Erica Lasek-Nesselquist; John Kelly; Jonathan Plitnick; Kirsten St. George; Matthew Shudt; Melissa A Leisner; Navjot Singh                                                                                                                                                                                                                                                                   |
| EPI_ISL_500716                                                                                                                                                                                                                                                                                            |           | BSL3 Lab Pendik Veterinary Control Institute                                        | Department of Medicinal Genetics, Bursa Uluda University, Faculty of medicine By Sehime Gulsun Temel, Adem Alemdar, Kadir Yeliba                                                                                    | Ahmet SAIT; Cumhur ADIAY; Fahriye SARAC; Hakan ENUL; Kadir YESILBAG; Mustafa HASOKSUZ; Oguz KARABEY; Orbay SAYI; Osman ERGANIS; Serdar UZAR                                                                                                                                                                                                                                                                                                                          |
| EPI_ISL_491476                                                                                                                                                                                                                                                                                            |           | BSL3 Lab, Pendik Veterinary Control Ensttute                                        | Genomic Laboratory (GLAB), Istanbul Technical University                                                                                                                                                            | Ahmet SAIT; Cumhur ADIAY; Fahriye SARAC; Hakan ENUL; Kadir YESILBAG; Mustafa HASOKSUZ; Oguz KARABEY; Orbay SAYI; Osman ERGANIS; Serdar UZAR                                                                                                                                                                                                                                                                                                                          |
| EPI_ISL_574619 to 574623                                                                                                                                                                                                                                                                                  |           | BTKLPP Kelas I Manado                                                               | Eijkman Institute for Molecular Biology, Ministry of Research and Technology/National Agency for Research and Innovation                                                                                            | Amin Soebandrio; David H Mujono; Edison Johar; Frilasita A Yudhaputri; Herawati Sudoyo; Hidayat Trimarsanto; Iskandar A Adnan; Khin Saw Myint; Safarina G Malik; Willy Agustine                                                                                                                                                                                                                                                                                      |
| EPI_ISL_1534690 to 1534696                                                                                                                                                                                                                                                                                |           | BTKLPP kelas 1 Batam                                                                | National Institute of Health Research and Development                                                                                                                                                               | Arie Ardiansyah Nugraha; Budi Santosa; Hana Apsari Pawestri; Hartanti Dian Ikwati; Ida Neni Haryanti; Ismail; Kartika Dewi Puspa; Krisna Pangesti; Nelly Puspandari; Subangkit; Vivi Setiawaty                                                                                                                                                                                                                                                                       |
| EPI_ISL_445362                                                                                                                                                                                                                                                                                            |           | BUPA SERVICIOS CLINICOS S.A                                                         | Instituto de Salud Publica de Chile                                                                                                                                                                                 | Alejandra Acevedo; Andrés E Castillo; Bárbara Parra; Carolina Tambley; Gabriel Leal; Jaime Lagos; Jorge Fernandez; Loredana Arata; Patricia Bustos; Paz Tapia; Rodrigo Fasce; Winston Andrade                                                                                                                                                                                                                                                                        |
| EPI_ISL_538506 to 538507, EPI_ISL_538512                                                                                                                                                                                                                                                                  |           | Balai Penelitian dan Pengembangan Biomedis Papua                                    | National Institute of Health Research and Development                                                                                                                                                               | A; AA; HA; HD; HML; Hutapea; Ikwati; KD; KNA; M; Nugraha; Oktavian; Paisal; Pangesti; Pasaribu; Pawestri; Puspa; Setiawaty, V.; Soekarso; Subangkit; T                                                                                                                                                                                                                                                                                                               |
| EPI_ISL_1394766, EPI_ISL_1394768, EPI_ISL_1394778, EPI_ISL_1394791, EPI_ISL_1394810, EPI_ISL_1394815, EPI_ISL_1394819, EPI_ISL_1394823, EPI_ISL_1394830, EPI_ISL_1540543, EPI_ISL_1540548, EPI_ISL_1540551, EPI_ISL_1540560, EPI_ISL_1540562 to 1540563, EPI_ISL_1540570 to 1540572, EPI_ISL_1540582      | see above | Baltic Medics                                                                       | Lithuanian University of Health Sciences Hospital, Department of Genetics and Molecular Medicine                                                                                                                    | Astra Vitkauskiene; Darius Cereskevicius; Inga Nasvytiene; Mantas Sarauskas; Marius Sukys; Rasa Ugenskiene; Renaldas Jurkevicius; Rima Vainoriene; Zivile Zemeckiene                                                                                                                                                                                                                                                                                                 |
| EPI_ISL_403963                                                                                                                                                                                                                                                                                            |           | Bamrasnaradura Hospital                                                             | 1. Department of Medical Sciences, Ministry of Public Health, Thailand 2. Thai Red Cross Emerging Infectious Diseases - Health Science Centre 3. Department of Disease Control, Ministry of Public Health, Thailand | Buathong; Chittaganpitch; Malinee; Mekha; Nanthawan; Okada; Parmnen; Phuygun; Pilailuk; Rome; Siripaporn; Sittiporn; Sunthareeya; Supaporn; Thanadachakul; Thanutsapa; Wacharapluesadee; Waicharoen; Warawan; Wongboot                                                                                                                                                                                                                                               |
| EPI_ISL_434693 to 434694, EPI_ISL_434696                                                                                                                                                                                                                                                                  |           | Bamrasnaradura hospital                                                             | National Institute of Health, Department of medical Sciences, Ministry of Public Health, Thailand                                                                                                                   | Chittaganpitch; Malinee; Okada; Parmnen; Phuygun; Pilailuk; Siripaporn; Sittiporn; Sunthareeya; Thanadachakul; Thanutsapa; Waicharoen; Warawan; Wongboot                                                                                                                                                                                                                                                                                                             |
| EPI_ISL_469048, EPI_ISL_475026 to 475029, EPI_ISL_476867 to 476868                                                                                                                                                                                                                                        |           | Banas Medical College and Research Institute                                        | Gujarat Biotechnology Research Centre                                                                                                                                                                               | A M Kadri; Afzal Ansari; Ankit Hinsu; Apurvasinh Puvar; Chaitanya Joshi; Dinesh Kumar; Fenil Patel; Harsh Bakshi; Janvi Raval; Komal Patel; Labdhi Pandya; Madhvi Joshi; Maharshi Pandya; Monika Gandhi; Neelam Nathani; Neha Rajpara; Nidhi Patel; Nikha Trivedi; Nitin Savaliya; Pinal Trivedi; Pritesh Sabara; Priti Pandita; R D Dixit; Radhika Khara; Raghawendra Kumar; Snehal Bagatharia; Sunil R Joshi; Tejas Shah; Viren S Doshi; Zarna Patel; Zuber Saiyed |
| EPI_ISL_450339 to 450345                                                                                                                                                                                                                                                                                  |           | Bangladesh Institute of Tropical & Infectious Diseases, COVID-19 Testing Laboratory | Basic and Applied Research on Jute Project                                                                                                                                                                          | A S M Anwarul Huq; AMAM Zonaid Siddiki; Eaftekhair Ahmed Rana; Emdadul Mannan Emdad; Goutam Buddha Das; M A Hassan Chowdhury; Md. Monjurul Alam; Md. Nazmul Haq Rony; Md. Sabbir Hossain; Md. Samiul Haque; Md. Shahidul Islam; Md. Shakeel Ahmed; Md. Sharifur Rahman; Paritous Kumar Biswas; Rasel Ahmed; Shah Md Tamim Kabir                                                                                                                                      |
| EPI_ISL_539886                                                                                                                                                                                                                                                                                            |           | Barnakuten                                                                          | The Public Health Agency of Sweden                                                                                                                                                                                  | Anna Risberg; Anna-Malin Linde; Karin Tegmark-Wisell; Maria Lind Karlberg; Mattias Haukland; Mia Brytting; Olov Svartstrom; Oskar Karlsson Lindsjo; Reza Advani; Sandra Brodsson; Theresa Enkirch                                                                                                                                                                                                                                                                    |
| EPI_ISL_1391410                                                                                                                                                                                                                                                                                           |           | Barts Health NHS Trust                                                              | Barts Health NHS TRust                                                                                                                                                                                              | BROAD; Beatrix; CUTINO-MOGUEL; Claire; David; Dola; Esin; HARRINGTON; KARAA; KELE; KULASEGARAN-SHYLINI; Maria-Teresa; OWOYEMI; Raghavendran                                                                                                                                                                                                                                                                                                                          |
| EPI_ISL_1391409, EPI_ISL_1391411 to 1391412, EPI_ISL_1391414                                                                                                                                                                                                                                              |           | Barts Health NHS Trust                                                              | Barts Health NHS Trust                                                                                                                                                                                              | BROAD; Beatrix; CUTINO-MOGUEL; Claire; David; Dola; Esin; HARRINGTON; KARAA; KELE; KULASEGARAN-SHYLINI; Maria-Teresa; OWOYEMI; Raghavendran                                                                                                                                                                                                                                                                                                                          |
| EPI_ISL_1474801 to 1474828                                                                                                                                                                                                                                                                                |           | Barts Health NHS Trust                                                              | COVID-19 Genomics UK (COG-UK) Consortium                                                                                                                                                                            | BROAD; Beatrix; CUTINO-MOGUEL; Claire; David; Dola; HARRINGTON; KELE; KULASEGARAN-SHYLINI; Maria-Teresa; OWOYEMI; Raghavendran                                                                                                                                                                                                                                                                                                                                       |
| EPI_ISL_541752, EPI_ISL_541754 to 541755, EPI_ISL_541757 to 541766, EPI_ISL_541768 to 541772, EPI_ISL_541775 to 541783                                                                                                                                                                                    |           | Barts Health NHS Trust                                                              | Wellcome Sanger Institute for the COVID-19 Genomics UK (COG-UK) consortium                                                                                                                                          | Beatrix Kele; Cordelia Langford; David Harrington and Alex Alderton; David K. Jackson; Dominic Kwiatkowski; Ewan Harrison; Ian Johnston; John Sillitoe on behalf of the Wellcome Sanger Institute COVID-19 Surveillance Team; Mark Hopkins; Roberto Amato; Sonia Goncalves; Teresa Cutino-Moguel                                                                                                                                                                     |
| EPI_ISL_1538414                                                                                                                                                                                                                                                                                           |           | Basurto University Hospital                                                         | Biocruces                                                                                                                                                                                                           | Ana de la Hoz; Estibaliz Ugalde Zarraga; José Luis Díaz de Tuesta del Arco; Mikel Gallego Rodrigo; Mikel Urrutikoetxea-Gutierrez; Mª Carmen Nieto Toboso                                                                                                                                                                                                                                                                                                             |

|                                                                                                                                                                                                                                                                                                                                                                                                                                                                                                                                                                                                                                                                                                                                                                                                                                                                                                                                                                        |                                                                                                                             |                                                                                                                          |                                                                                                                                                                                                                                                                                                                                                                                   |
|------------------------------------------------------------------------------------------------------------------------------------------------------------------------------------------------------------------------------------------------------------------------------------------------------------------------------------------------------------------------------------------------------------------------------------------------------------------------------------------------------------------------------------------------------------------------------------------------------------------------------------------------------------------------------------------------------------------------------------------------------------------------------------------------------------------------------------------------------------------------------------------------------------------------------------------------------------------------|-----------------------------------------------------------------------------------------------------------------------------|--------------------------------------------------------------------------------------------------------------------------|-----------------------------------------------------------------------------------------------------------------------------------------------------------------------------------------------------------------------------------------------------------------------------------------------------------------------------------------------------------------------------------|
| EPI_ISL_1538413                                                                                                                                                                                                                                                                                                                                                                                                                                                                                                                                                                                                                                                                                                                                                                                                                                                                                                                                                        | Basurto University Hospital Microbiology Lab                                                                                | Biocruces                                                                                                                | Ana de la Hoz; Estibalez Ugalde Zarraga; Jose Luis Díaz de Tuesta del Arco; Mikel Gallego Rodrigo; Mikel Urrutikoetxea-Gutierrez; M <sup>a</sup> Carmen Nieto Toboso                                                                                                                                                                                                              |
| EPI_ISL_444022, EPI_ISL_445078 to 445084, EPI_ISL_501167 to 501174, EPI_ISL_513294                                                                                                                                                                                                                                                                                                                                                                                                                                                                                                                                                                                                                                                                                                                                                                                                                                                                                     | Baylor College of Medicine                                                                                                  | Baylor College of Medicine: HGSC                                                                                         | David Henke; Donna Muzny; Erin Nicholson; George Weissenberger; Ginger Metcalf; Harsha Doddapaneni; Hsu Chao; Hua Shen; Joseph F. Petrosino; Kavya Kottapalli; Kristi L. Hoffman; Matthew C. Ross; Matthew Wong; Pedro Piedra; Qingchang Meng; Richard Suggang; Sara J.J. Cregeen; Sejal Salvi; Tulin Ayvaz; Vasanthi Avadhanula; Vipin Menon; Yimithi Meiheerguli; Zeineen Momin |
| EPI_ISL_1400800                                                                                                                                                                                                                                                                                                                                                                                                                                                                                                                                                                                                                                                                                                                                                                                                                                                                                                                                                        | Baylor Esoteric + Molecular Lab                                                                                             | Baylor Esoteric + Molecular Lab                                                                                          | Dawn Richards; Elizabeth Forrester                                                                                                                                                                                                                                                                                                                                                |
| EPI_ISL_1443344, EPI_ISL_1443512, EPI_ISL_1443601, EPI_ISL_1489935, EPI_ISL_1489939, EPI_ISL_1490190, EPI_ISL_1490222, EPI_ISL_1490227, EPI_ISL_1490251, EPI_ISL_1490652, EPI_ISL_1490660, EPI_ISL_1490667, EPI_ISL_1490711, EPI_ISL_1490716, EPI_ISL_1490749, EPI_ISL_1490817, EPI_ISL_1490897, EPI_ISL_1491054, EPI_ISL_1491361, EPI_ISL_1491366, EPI_ISL_1491387 to 1491388, EPI_ISL_1493105, EPI_ISL_1493109, EPI_ISL_1493123, EPI_ISL_1497766, EPI_ISL_1498094, EPI_ISL_1498096                                                                                                                                                                                                                                                                                                                                                                                                                                                                                   | Baylor Esoteric and Molecular Lab                                                                                           | Baylor Esoteric and Molecular Lab                                                                                        | Elizabeth Forrester and Dawn Richards                                                                                                                                                                                                                                                                                                                                             |
| see above                                                                                                                                                                                                                                                                                                                                                                                                                                                                                                                                                                                                                                                                                                                                                                                                                                                                                                                                                              | Baylor Esoteric and Molecular Lab                                                                                           | Baylor Esoteric and Molecular Lab                                                                                        |                                                                                                                                                                                                                                                                                                                                                                                   |
| EPI_ISL_1391413                                                                                                                                                                                                                                                                                                                                                                                                                                                                                                                                                                                                                                                                                                                                                                                                                                                                                                                                                        | Baylor Scott & White-Irving                                                                                                 | Baylor Scott & White-Temple                                                                                              | Ari Rao; Caitlin Maloney; Kimberly Walker; Linden Morales; Marcus Volz; Shelby Hendrickson                                                                                                                                                                                                                                                                                        |
| EPI_ISL_1391416, EPI_ISL_1391421, EPI_ISL_1391621                                                                                                                                                                                                                                                                                                                                                                                                                                                                                                                                                                                                                                                                                                                                                                                                                                                                                                                      | Baylor Scott & White-Temple                                                                                                 | Baylor Scott & White-Temple                                                                                              | Ari Rao; Caitlin Maloney; Kimberly Walker; Linden Morales; Marcus Volz; Shelby Hendrickson                                                                                                                                                                                                                                                                                        |
| EPI_ISL_1391415                                                                                                                                                                                                                                                                                                                                                                                                                                                                                                                                                                                                                                                                                                                                                                                                                                                                                                                                                        | Baylor Scott & White-Waxahachie                                                                                             | Baylor Scott & White-Temple                                                                                              | Ari Rao; Caitlin Maloney; Kimberly Walker; Linden Morales; Marcus Volz; Shelby Hendrickson                                                                                                                                                                                                                                                                                        |
| EPI_ISL_412386                                                                                                                                                                                                                                                                                                                                                                                                                                                                                                                                                                                                                                                                                                                                                                                                                                                                                                                                                         | Beijing Ditan Hospital, Capital Medical University                                                                          | National Institute for Communicable Disease Control and Prevention, Chinese Center for Disease Control and Prevention    | Biao Kan; Chuansheng Li; Fangfang Jin; Haijian Zhou; Haofeng Xiong; Hebing Guo; Huizhu Wang; Jianbo Tan; Jie Gong; Jingjing Hao; Jingyuan Liu; Lili Gao; Lin Pu; Ming Zhang; Pan Xiang; Ruihong Li; Xiaoping Chen; Xin Lu; Xinmin Xu; Yajie Wang; Yanwen Xiong; Yao Sun; Yufeng Liu                                                                                               |
| EPI_ISL_424355 to 424360                                                                                                                                                                                                                                                                                                                                                                                                                                                                                                                                                                                                                                                                                                                                                                                                                                                                                                                                               | Beijing Institute of Microbiology and Epidemiology                                                                          | Beijing Institute of Microbiology and Epidemiology                                                                       | B. and Cui, Y.; Fan, H.; Guo, Y.; Hou, J.; Li, Mi, Z.; Mu, J.; Qin, E.; Song, Y.; Teng, Y.; Wu, Y.; Xu, Z.; Yang, R.; Yong, Y.; Zhang, X.                                                                                                                                                                                                                                         |
| EPI_ISL_509711 to 509714                                                                                                                                                                                                                                                                                                                                                                                                                                                                                                                                                                                                                                                                                                                                                                                                                                                                                                                                               | Belize Ministry of Health                                                                                                   | Pathogen Discovery, Respiratory Viruses Branch, Division of Viral Diseases, Centers for Disease Control and Prevention   | Anna Uehara; Clinton Paden; Haibin Wang; Jing Zhang; Krista Queen; Suxiang Tong; Yan Li; Ying Tao                                                                                                                                                                                                                                                                                 |
| EPI_ISL_569609                                                                                                                                                                                                                                                                                                                                                                                                                                                                                                                                                                                                                                                                                                                                                                                                                                                                                                                                                         | Bennet County Hospital                                                                                                      | South Dakota Public Health Laboratory                                                                                    | Jacob Garfin; Matt Plumb; Xiong Wang; and Chris Carlson                                                                                                                                                                                                                                                                                                                           |
| EPI_ISL_1423010 to 1423014, EPI_ISL_1423112 to 1423124, EPI_ISL_1423203 to 1423210, EPI_ISL_1423213 to 1423227, EPI_ISL_1423246 to 1423256, EPI_ISL_1423326 to 1423340, EPI_ISL_1528579 to 1528600, EPI_ISL_1528745 to 1528755, EPI_ISL_1529029 to 1529074                                                                                                                                                                                                                                                                                                                                                                                                                                                                                                                                                                                                                                                                                                             | Berkeley Medical Center                                                                                                     | WVU and Marshall University Combined Genomics Core Facilities                                                            | *James Denvir; Peter Perrotta; Peter Stoilov; Ryan Percifield*; Wesley Kimble                                                                                                                                                                                                                                                                                                     |
| see above                                                                                                                                                                                                                                                                                                                                                                                                                                                                                                                                                                                                                                                                                                                                                                                                                                                                                                                                                              | Berkeley Medical Center                                                                                                     | WVU and Marshall University Combined Genomics Core Facilities                                                            |                                                                                                                                                                                                                                                                                                                                                                                   |
| EPI_ISL_430843                                                                                                                                                                                                                                                                                                                                                                                                                                                                                                                                                                                                                                                                                                                                                                                                                                                                                                                                                         | Bethany Hospital                                                                                                            | Research Institute for Tropical Medicine                                                                                 | Bautista; Bruner, K.; C.S.; C.T.; D.L.; Demetria; E.S.; F.G.M.; I.A.P.; Manalo; Medado; Mercado; O.J.T.; Onza; Polotan                                                                                                                                                                                                                                                            |
| EPI_ISL_569618 to 569619                                                                                                                                                                                                                                                                                                                                                                                                                                                                                                                                                                                                                                                                                                                                                                                                                                                                                                                                               | Bethel Lutheran Home                                                                                                        | South Dakota Public Health Laboratory                                                                                    | Jacob Garfin; Matt Plumb; Xiong Wang; and Chris Carlson                                                                                                                                                                                                                                                                                                                           |
| EPI_ISL_457824                                                                                                                                                                                                                                                                                                                                                                                                                                                                                                                                                                                                                                                                                                                                                                                                                                                                                                                                                         | Bezmailem Vakif University, Dept Microbiology, Medical School, Fatih, Istanbul, Turkey                                      | Bezmailem Vakif University, Medical School & Beykoz Institute of Life Sciences & Biotechnology                           | Blige Sumbul; Elif Karaaslan; Filiz Guney; Mehmet Z. Doymaz; Merve Kalkan; Nesibe Cetin                                                                                                                                                                                                                                                                                           |
| EPI_ISL_1388112, EPI_ISL_1388230, EPI_ISL_1388355 to 1388356, EPI_ISL_1388457, EPI_ISL_1388536, EPI_ISL_1388542, EPI_ISL_1388544, EPI_ISL_1388546 to 1388548, EPI_ISL_1388606, EPI_ISL_1388608, EPI_ISL_1388610, EPI_ISL_1388612, EPI_ISL_1388614, EPI_ISL_1388616, EPI_ISL_1388657, EPI_ISL_1388687, EPI_ISL_1388689, EPI_ISL_1388701, EPI_ISL_1388703, EPI_ISL_1388705, EPI_ISL_1388842                                                                                                                                                                                                                                                                                                                                                                                                                                                                                                                                                                              | Bioanalytika AG                                                                                                             | University Hospital Basel, Clinical Bacteriology                                                                         | Adrian Egli; Adrian Härr; Alfredo Mari; Hans Hirsch; Helena MB Seth-Smith; Julia Bielicki; Karoline Leuzinger; Madlen Stange; Manuel Battegay; Tim Roloff                                                                                                                                                                                                                         |
| see above                                                                                                                                                                                                                                                                                                                                                                                                                                                                                                                                                                                                                                                                                                                                                                                                                                                                                                                                                              | Bioanalytika AG                                                                                                             | University Hospital Basel, Clinical Bacteriology                                                                         |                                                                                                                                                                                                                                                                                                                                                                                   |
| EPI_ISL_1502568 to 1502582                                                                                                                                                                                                                                                                                                                                                                                                                                                                                                                                                                                                                                                                                                                                                                                                                                                                                                                                             | Biochemistry and Molecular Biology Department-Faculty of Medicine, Al-Quds University                                       | Biochemistry and Molecular Biology Department-Faculty of Medicine, Al-Quds University                                    | Al-Jawabreh, A.; Dumaldi, K.; Ereqat, S.; Nasereddin, A.                                                                                                                                                                                                                                                                                                                          |
| EPI_ISL_1389139 to 1389142, EPI_ISL_1389144 to 1389155, EPI_ISL_1476741, EPI_ISL_1476746 to 1476747, EPI_ISL_1476752, EPI_ISL_1476754, EPI_ISL_1476756 to 1476759, EPI_ISL_1476762 to 1476813, EPI_ISL_1476815 to 1476850, EPI_ISL_1476853 to 1476858, EPI_ISL_1476860, EPI_ISL_1476867, EPI_ISL_1476872, EPI_ISL_1476874, EPI_ISL_1476878, EPI_ISL_1476880, EPI_ISL_1476892, EPI_ISL_1476895 to 1476897, EPI_ISL_1476899 to 1476900                                                                                                                                                                                                                                                                                                                                                                                                                                                                                                                                   | Bioinformatics and Biostatistics Lab, Advanced Sequencing Facility                                                          | COVID-19 Genomics UK (COG-UK) Consortium                                                                                 | Aengus Stewart; Chelsea Sawyer; Harshil Patel; Jerome Nicod; Laura Cubitt; Margaret Crawford                                                                                                                                                                                                                                                                                      |
| see above                                                                                                                                                                                                                                                                                                                                                                                                                                                                                                                                                                                                                                                                                                                                                                                                                                                                                                                                                              | Bioinformatics and Biostatistics Lab, Advanced Sequencing Facility                                                          | COVID-19 Genomics UK (COG-UK) Consortium                                                                                 |                                                                                                                                                                                                                                                                                                                                                                                   |
| EPI_ISL_429992 to 430009, EPI_ISL_430011 to 430015, EPI_ISL_434516, EPI_ISL_450186 to 450189                                                                                                                                                                                                                                                                                                                                                                                                                                                                                                                                                                                                                                                                                                                                                                                                                                                                           | Biolab Diagnostic Laboratories                                                                                              | Andersen lab at Scripps Research                                                                                         | Ahmad Tibi; Amid Abdelnour with SEARCH Alliance San Diego; Issa Abu-Dayyeh; Lama Hussein; Lina Mohammad; Zein Naber                                                                                                                                                                                                                                                               |
| EPI_ISL_1404588, EPI_ISL_1404614, EPI_ISL_1405965, EPI_ISL_1406143, EPI_ISL_1406151, EPI_ISL_1406179, EPI_ISL_1406183, EPI_ISL_1406189, EPI_ISL_1406195, EPI_ISL_1406202, EPI_ISL_1406239                                                                                                                                                                                                                                                                                                                                                                                                                                                                                                                                                                                                                                                                                                                                                                              | Biolab Diagnostic Laboratories                                                                                              | Biolab Diagnostic Laboratories                                                                                           | Ahmad Tibi; Amid Abdelnour; Badia Sadeddin; Eiad Atwa; Issa Abu-Dayyeh; Lama Hussein; Shayma Ali                                                                                                                                                                                                                                                                                  |
| see above                                                                                                                                                                                                                                                                                                                                                                                                                                                                                                                                                                                                                                                                                                                                                                                                                                                                                                                                                              | Biolab Diagnostic Laboratories                                                                                              | Biolab Diagnostic Laboratories                                                                                           |                                                                                                                                                                                                                                                                                                                                                                                   |
| EPI_ISL_527007                                                                                                                                                                                                                                                                                                                                                                                                                                                                                                                                                                                                                                                                                                                                                                                                                                                                                                                                                         | Biological Prevention, Army                                                                                                 | Biological Prevention, Army                                                                                              | A.E.; A.F.; A.M.; Ageez; B.E.; Elhoseiny; Gad; Harty; M.D.; M.F.; M.G.; Seadawy; Shabaan; Shamel                                                                                                                                                                                                                                                                                  |
| EPI_ISL_526975 to 527006                                                                                                                                                                                                                                                                                                                                                                                                                                                                                                                                                                                                                                                                                                                                                                                                                                                                                                                                               | Biological prevention, army                                                                                                 | Biological prevention, army                                                                                              | A.E.; A.F.; A.M.; Ageez; B.E.; Elhoseiny; Elhosieny; Gad; Harty; M.D.; M.F.; M.G.; Seadawy; Shabaan; Shamel                                                                                                                                                                                                                                                                       |
| EPI_ISL_510526, EPI_ISL_510532                                                                                                                                                                                                                                                                                                                                                                                                                                                                                                                                                                                                                                                                                                                                                                                                                                                                                                                                         | Biological prevention, army                                                                                                 | Biological prevention, army                                                                                              | A.A.; A.F.; A.M. and Soliman; Ali; Amer; B.E.; B.S.; Elnabrawy; ElGohary; Elhoseiny; Elhosieny; Elnagdy; Elnakeeb; Gad; H.A.; Harty; Hassan; Kandeil; Karam; M.A.; M.D.; M.F.; M.G.; M.M. and Gad; Raouf; Seadawy; Shamel; T.A.; W.A.; Y.A.; k.E.                                                                                                                                 |
| EPI_ISL_1524330 to 1524381                                                                                                                                                                                                                                                                                                                                                                                                                                                                                                                                                                                                                                                                                                                                                                                                                                                                                                                                             | Biology Department, College of Science, Al Muthanna University and Public Health Laboratory, Al-Muthanna Health Directorate | Department of Virology, Faculty of Medicine, University of Helsinki, Helsinki, Finland generated and submitted to GISAID | Alaa Hameed; Ali Jasim; Hussein Alburkat; Murad Munahi; Nihad Al-Rashedi; Olii Vapalahti; Tarja Sironen; Teemu Smura                                                                                                                                                                                                                                                              |
| EPI_ISL_582029 to 582030                                                                                                                                                                                                                                                                                                                                                                                                                                                                                                                                                                                                                                                                                                                                                                                                                                                                                                                                               | Biology Department, College of Science, Al-Muthanna University                                                              | International Centre for Genetic Engineering and Biotechnology (ICGEB) and ARGO Open Lab Platform                        | Alessandro Marcello; Danilo Licastro; Nihad Al-Rashedi; Simeone Dal Monego; Sreejith Rajasekharan                                                                                                                                                                                                                                                                                 |
| EPI_ISL_505003                                                                                                                                                                                                                                                                                                                                                                                                                                                                                                                                                                                                                                                                                                                                                                                                                                                                                                                                                         | Biology Dpt                                                                                                                 | Microbiology and Infections Diseases                                                                                     | Annabelle Garnier; Audrey Ferrier-Rembert; Clarisse Vigne; Emilie Tessier; Emmanuelle Billon-Denis; Flora Nolent; Isabelle Drouet; Jean-Nicolas Tournier; Jessica Denis; Laurence Cheutin; Noémie Verguet; Olivier Ferraris; Olivier Gorgé                                                                                                                                        |
| EPI_ISL_506041                                                                                                                                                                                                                                                                                                                                                                                                                                                                                                                                                                                                                                                                                                                                                                                                                                                                                                                                                         | Biology Dpt, HIA Percy                                                                                                      | Microbiology and Infectious Diseases Dpt                                                                                 | Annabelle Garnier; Audrey Ferrier-Rembert; Clarisse Vigne; Emilie Tessier; Emmanuelle Billon-Denis; Flora Nolent; Isabelle Drouet; Jean-Nicolas Tournier; Jessica Denis; Laurence Cheutin; Noémie Verguet; Olivier Ferraris; Olivier Gorgé                                                                                                                                        |
| EPI_ISL_1388384, EPI_ISL_1388807, EPI_ISL_1388809 to 1388810, EPI_ISL_1388812 to 1388813                                                                                                                                                                                                                                                                                                                                                                                                                                                                                                                                                                                                                                                                                                                                                                                                                                                                               | Biolytix AG                                                                                                                 | University Hospital Basel, Clinical Bacteriology                                                                         | Adrian Egli; Alfredo Mari; Hans Hirsch; Helena MB Seth-Smith; Julia Bielicki; Karoline Leuzinger; Madlen Stange; Manuel Battegay; Simon Fuchs; Tim Roloff                                                                                                                                                                                                                         |
| EPI_ISL_1420638 to 1420643, EPI_ISL_1420645, EPI_ISL_1420647 to 1420659, EPI_ISL_1420661 to 1420702, EPI_ISL_1420704 to 1420723, EPI_ISL_1420733 to 1420750, EPI_ISL_1420752 to 1420786                                                                                                                                                                                                                                                                                                                                                                                                                                                                                                                                                                                                                                                                                                                                                                                | Biomedical Research Foundation of the Academy of Athens (BRFAA)                                                             | Greek Genome Center, Biomedical Research Foundation of the Academy of Athens (BRFAA)                                     | Dimitrios Thanos; Emmanouil Athanasiadis; Ioannis Vatsellas; Katerina Zoi; Theodoros Loupis                                                                                                                                                                                                                                                                                       |
| see above                                                                                                                                                                                                                                                                                                                                                                                                                                                                                                                                                                                                                                                                                                                                                                                                                                                                                                                                                              | Biomedical Research Foundation of the Academy of Athens (BRFAA)                                                             | Greek Genome Center, Biomedical Research Foundation of the Academy of Athens (BRFAA)                                     |                                                                                                                                                                                                                                                                                                                                                                                   |
| EPI_ISL_516079 to 516088                                                                                                                                                                                                                                                                                                                                                                                                                                                                                                                                                                                                                                                                                                                                                                                                                                                                                                                                               | Biomedical Sciences and Public Health, Polytechnic University of Marche                                                     | Biomedical Sciences and Public Health, Polytechnic University of Marche                                                  | Alessandrini, F.; Bagnarelli, P.; Caucci, S.; Di Sante, L.; Melchionda, F.; Menzo, S.; Onofri, V.; Tagliabracchi, A.; Turchi, C.                                                                                                                                                                                                                                                  |
| EPI_ISL_1498381 to 1498584, EPI_ISL_1498586 to 1498820, EPI_ISL_1522575, EPI_ISL_1522594, EPI_ISL_1522599, EPI_ISL_1522602, EPI_ISL_1522605, EPI_ISL_1522613, EPI_ISL_1522622, EPI_ISL_1522633, EPI_ISL_1522636, EPI_ISL_1522653 to 1522654, EPI_ISL_1522657, EPI_ISL_1522667, EPI_ISL_1522674, EPI_ISL_1522676, EPI_ISL_1522678, EPI_ISL_1522708, EPI_ISL_1522714 to 1522715, EPI_ISL_1522728, EPI_ISL_1522730, EPI_ISL_1522733, EPI_ISL_1522737, EPI_ISL_1522739 to 1522740, EPI_ISL_1522743 to 1522744, EPI_ISL_1522748, EPI_ISL_1522754, EPI_ISL_1522758, EPI_ISL_1522769 to 1522770, EPI_ISL_1522781, EPI_ISL_1522783 to 1522785, EPI_ISL_1522839, EPI_ISL_1522801 to 1522839, EPI_ISL_1523027 to 1523039, EPI_ISL_1523133, EPI_ISL_1523135 to 1523136, EPI_ISL_1523162, EPI_ISL_1523166, EPI_ISL_1523194, EPI_ISL_1523200, EPI_ISL_1523205, EPI_ISL_1523209, EPI_ISL_1523212, EPI_ISL_1523215 to 1523218, EPI_ISL_1523224 to 1523251, EPI_ISL_1523345 to 1523346 | BioneXt Lab                                                                                                                 | Laboratoire national de sante, Microbiology, Microbial Genomics Platform                                                 | Anke Wienecke-Baldacchino; Catherine Ragimbeau; Fatu Djabi; Jessica Tapp; Lise Pignon; Raoul Salmon; Tamir Abdelrahman; Thibault Ferrandon                                                                                                                                                                                                                                        |
| see above                                                                                                                                                                                                                                                                                                                                                                                                                                                                                                                                                                                                                                                                                                                                                                                                                                                                                                                                                              | BioneXt Lab                                                                                                                 | Laboratoire national de sante, Microbiology, Microbial Genomics Platform                                                 |                                                                                                                                                                                                                                                                                                                                                                                   |

| EPI_ISL_458287                                                                                                                                                                                                                                                                                                                                                                                                                                                                                                                                                                                                                                                                                                                                                                                                                                                                                                                                                                                                                                                                                                                                                                                                                                                                                                                                                                                                                                                                                                                                                                                                                                                                                                                                                                                                                                                                                                                                                                                                                                                                                                                                                                                                                                                                                                                                                                                                                                                                                                                                                                                                                                                                                                                                                                                                                                                                                                                                                                                                                                                                                                                                                                                                                                                                                                                                                                                                                                                                                                                                                                                                                                                                                                                                                                                                                                                                                                                                                                                                                                                                                                                                                                                                                                                                                                                                                                                                                                                                                                                                                                                                                                                                                                                             | Biosafety Department PCL3                                                                                                           | Biosafety Department PCL3                                                                                              | A. and El Kabbaj, S.; Lemriss, S.; Souiri                                                                                                                                                                                                                                       |                                                                                                                                                                                                                                                                                                                                                                                                                                                         |
|--------------------------------------------------------------------------------------------------------------------------------------------------------------------------------------------------------------------------------------------------------------------------------------------------------------------------------------------------------------------------------------------------------------------------------------------------------------------------------------------------------------------------------------------------------------------------------------------------------------------------------------------------------------------------------------------------------------------------------------------------------------------------------------------------------------------------------------------------------------------------------------------------------------------------------------------------------------------------------------------------------------------------------------------------------------------------------------------------------------------------------------------------------------------------------------------------------------------------------------------------------------------------------------------------------------------------------------------------------------------------------------------------------------------------------------------------------------------------------------------------------------------------------------------------------------------------------------------------------------------------------------------------------------------------------------------------------------------------------------------------------------------------------------------------------------------------------------------------------------------------------------------------------------------------------------------------------------------------------------------------------------------------------------------------------------------------------------------------------------------------------------------------------------------------------------------------------------------------------------------------------------------------------------------------------------------------------------------------------------------------------------------------------------------------------------------------------------------------------------------------------------------------------------------------------------------------------------------------------------------------------------------------------------------------------------------------------------------------------------------------------------------------------------------------------------------------------------------------------------------------------------------------------------------------------------------------------------------------------------------------------------------------------------------------------------------------------------------------------------------------------------------------------------------------------------------------------------------------------------------------------------------------------------------------------------------------------------------------------------------------------------------------------------------------------------------------------------------------------------------------------------------------------------------------------------------------------------------------------------------------------------------------------------------------------------------------------------------------------------------------------------------------------------------------------------------------------------------------------------------------------------------------------------------------------------------------------------------------------------------------------------------------------------------------------------------------------------------------------------------------------------------------------------------------------------------------------------------------------------------------------------------------------------------------------------------------------------------------------------------------------------------------------------------------------------------------------------------------------------------------------------------------------------------------------------------------------------------------------------------------------------------------------------------------------------------------------------------------------------------|-------------------------------------------------------------------------------------------------------------------------------------|------------------------------------------------------------------------------------------------------------------------|---------------------------------------------------------------------------------------------------------------------------------------------------------------------------------------------------------------------------------------------------------------------------------|---------------------------------------------------------------------------------------------------------------------------------------------------------------------------------------------------------------------------------------------------------------------------------------------------------------------------------------------------------------------------------------------------------------------------------------------------------|
| EPI_ISL_1432939, EPI_ISL_1432943, EPI_ISL_1432945, EPI_ISL_1432952, EPI_ISL_1432954, EPI_ISL_1432958, EPI_ISL_1432963, EPI_ISL_1432970, EPI_ISL_1432978, EPI_ISL_1432991, EPI_ISL_1433000, EPI_ISL_1433002, EPI_ISL_1433004, EPI_ISL_1433015, EPI_ISL_1433017, EPI_ISL_1433019, EPI_ISL_1433023, EPI_ISL_1433048, EPI_ISL_1433050, EPI_ISL_1433052, EPI_ISL_1433059, EPI_ISL_1433061 to 1433066, EPI_ISL_1433069, EPI_ISL_1433071, EPI_ISL_1433073 to 1433074, EPI_ISL_1433080, EPI_ISL_1433086, EPI_ISL_1433088, EPI_ISL_1433090, EPI_ISL_1433097, EPI_ISL_1433101, EPI_ISL_1433106, EPI_ISL_1433115 to 1433116, EPI_ISL_1433119, EPI_ISL_1433128, EPI_ISL_1433132, EPI_ISL_1433133, EPI_ISL_1433137 to 1433139, EPI_ISL_1433145, EPI_ISL_1433152, EPI_ISL_1433159 to 1433162, EPI_ISL_1433165 to 1433167, EPI_ISL_1433169 to 1433171, EPI_ISL_1433173, EPI_ISL_1433177 to 1433178, EPI_ISL_1433180 to 1433183, EPI_ISL_1433185 to 1433186, EPI_ISL_1433194, EPI_ISL_1433196, EPI_ISL_1433198 to 1433199, EPI_ISL_1433205, EPI_ISL_1433210 to 1433212, EPI_ISL_1433217 to 1433218, EPI_ISL_1433221, EPI_ISL_1433224, EPI_ISL_1433226, EPI_ISL_1433232, EPI_ISL_1433234, EPI_ISL_1433236, EPI_ISL_1433240, EPI_ISL_1433244 to 1433245, EPI_ISL_1433247, EPI_ISL_1433249 to 1433250, EPI_ISL_1433253, EPI_ISL_1433262, EPI_ISL_1433267, EPI_ISL_1433271, EPI_ISL_1433273 to 1433274, EPI_ISL_1433278, EPI_ISL_1433282 to 1433283, EPI_ISL_1433300, EPI_ISL_1433305, EPI_ISL_1433308 to 1433309, EPI_ISL_1433311, EPI_ISL_1433321, EPI_ISL_1433323, EPI_ISL_1433325, EPI_ISL_1433327, EPI_ISL_1433329, EPI_ISL_1433334, EPI_ISL_1433340, EPI_ISL_1433360, EPI_ISL_1433362, EPI_ISL_1433372, EPI_ISL_1433374, EPI_ISL_1433376, EPI_ISL_1433378, EPI_ISL_1436304, EPI_ISL_1436305, EPI_ISL_1436307, EPI_ISL_1436866, EPI_ISL_1438693, EPI_ISL_1438696 to 1438699, EPI_ISL_1438704 to 1438705, EPI_ISL_1438710 to 1438711, EPI_ISL_1438717, EPI_ISL_1438721, EPI_ISL_1438723 to 1438724, EPI_ISL_1438729 to 1438730, EPI_ISL_1438732, EPI_ISL_1438739 to 1438741, EPI_ISL_1438743 to 1438744, EPI_ISL_1438746 to 1438747, EPI_ISL_1438749 to 1438751, EPI_ISL_1438753 to 1438758, EPI_ISL_1438764 to 1438765, EPI_ISL_1438767 to 1438768, EPI_ISL_1438770, EPI_ISL_1438773 to 1438777, EPI_ISL_1438781 to 1438782, EPI_ISL_1438788, EPI_ISL_1438790, EPI_ISL_1438792 to 1438794, EPI_ISL_1438796, EPI_ISL_1438800 to 1438804, EPI_ISL_1438807, EPI_ISL_1438810, EPI_ISL_1438816, EPI_ISL_1438818, EPI_ISL_1438820, EPI_ISL_1438822, EPI_ISL_1438827 to 1438828, EPI_ISL_1438830, EPI_ISL_1438832, EPI_ISL_1438837, EPI_ISL_1438839 to 1438840, EPI_ISL_1438844, EPI_ISL_1438848, EPI_ISL_1438850, EPI_ISL_1438853, EPI_ISL_1438857 to 1438858, EPI_ISL_1438860, EPI_ISL_1438864, EPI_ISL_1438866, EPI_ISL_1438868, EPI_ISL_1438875 to 1438877, EPI_ISL_1438881, EPI_ISL_1438883, EPI_ISL_1438885 to 1438886, EPI_ISL_1438888, EPI_ISL_1438890 to 1438891, EPI_ISL_1438895, EPI_ISL_1438898 to 1438899, EPI_ISL_1438902, EPI_ISL_1438906, EPI_ISL_1438911, EPI_ISL_1438913, EPI_ISL_1438915 to 1438916, EPI_ISL_1438921 to 1438923, EPI_ISL_1438930, EPI_ISL_1438933, EPI_ISL_1438936, EPI_ISL_1438944 to 1438945, EPI_ISL_1438948 to 1438953, EPI_ISL_1438956 to 1438957, EPI_ISL_1438960, EPI_ISL_1438962 to 1438968, EPI_ISL_1438970, EPI_ISL_1438975, EPI_ISL_1438979, EPI_ISL_1438977 to 1438979, EPI_ISL_1438981 to 1438982, EPI_ISL_1438987 to 1438988, EPI_ISL_1438990, EPI_ISL_1438993 to 1438994, EPI_ISL_1438996 to 1438999, EPI_ISL_1439006, EPI_ISL_1439013, EPI_ISL_1439015, EPI_ISL_1439023, EPI_ISL_1439026, EPI_ISL_1439026, EPI_ISL_1439037, EPI_ISL_1439039, EPI_ISL_1439047, EPI_ISL_1439057 to 1439058, EPI_ISL_1439067, EPI_ISL_1439076, EPI_ISL_1439081 to 1439082, EPI_ISL_1439086, EPI_ISL_1439089 to 1439090, EPI_ISL_1439094, EPI_ISL_1439105, EPI_ISL_1439111, EPI_ISL_1439115, EPI_ISL_1439117, EPI_ISL_1439123, EPI_ISL_1439132, EPI_ISL_1439139 to 1439140, EPI_ISL_1439143, EPI_ISL_1439150 to 1439151, EPI_ISL_1439153, EPI_ISL_1439156, EPI_ISL_1439166 to 1439169, EPI_ISL_1439179, EPI_ISL_1439181 to 1439182, EPI_ISL_1439185, EPI_ISL_1439187 to 1439188, EPI_ISL_1439190 to 1439191, EPI_ISL_1439196, EPI_ISL_1439198, EPI_ISL_1439205 to 1439206, EPI_ISL_1439214 to 1439215, EPI_ISL_1439223, EPI_ISL_1439227, EPI_ISL_1439231, EPI_ISL_1439242, EPI_ISL_1439251, EPI_ISL_1439255, EPI_ISL_1439257 to 1439259, EPI_ISL_1439261 to 1439263, EPI_ISL_1439274, EPI_ISL_1439276, EPI_ISL_1439280, EPI_ISL_1439295, EPI_ISL_1439309, EPI_ISL_1439311, EPI_ISL_1439319, EPI_ISL_1439325 to 1439326, EPI_ISL_1439330, EPI_ISL_1439336 to 1439338, EPI_ISL_1439350, EPI_ISL_1439358 to 1439360, EPI_ISL_1439364 | see above                                                                                                                           | Bioscientia Labor Wermsdorf                                                                                            | Robert Koch Institute                                                                                                                                                                                                                                                           |                                                                                                                                                                                                                                                                                                                                                                                                                                                         |
| EPI_ISL_1432947, EPI_ISL_1432982, EPI_ISL_1432995, EPI_ISL_1433067, EPI_ISL_1433087, EPI_ISL_1433092, EPI_ISL_1433117, EPI_ISL_1433121, EPI_ISL_1433129, EPI_ISL_1433136, EPI_ISL_1433144, EPI_ISL_1433179, EPI_ISL_1433192, EPI_ISL_1433209, EPI_ISL_1433213, EPI_ISL_1433230, EPI_ISL_1433286, EPI_ISL_1433338, EPI_ISL_1439158, EPI_ISL_1439237, EPI_ISL_1439243, EPI_ISL_1439327, EPI_ISL_1439340, EPI_ISL_1439344                                                                                                                                                                                                                                                                                                                                                                                                                                                                                                                                                                                                                                                                                                                                                                                                                                                                                                                                                                                                                                                                                                                                                                                                                                                                                                                                                                                                                                                                                                                                                                                                                                                                                                                                                                                                                                                                                                                                                                                                                                                                                                                                                                                                                                                                                                                                                                                                                                                                                                                                                                                                                                                                                                                                                                                                                                                                                                                                                                                                                                                                                                                                                                                                                                                                                                                                                                                                                                                                                                                                                                                                                                                                                                                                                                                                                                                                                                                                                                                                                                                                                                                                                                                                                                                                                                                     | see above                                                                                                                           | Bioscientia MVZ Labor Karlsruhe GmbH                                                                                   | Robert Koch Institute                                                                                                                                                                                                                                                           |                                                                                                                                                                                                                                                                                                                                                                                                                                                         |
| EPI_ISL_450813, EPI_ISL_475540                                                                                                                                                                                                                                                                                                                                                                                                                                                                                                                                                                                                                                                                                                                                                                                                                                                                                                                                                                                                                                                                                                                                                                                                                                                                                                                                                                                                                                                                                                                                                                                                                                                                                                                                                                                                                                                                                                                                                                                                                                                                                                                                                                                                                                                                                                                                                                                                                                                                                                                                                                                                                                                                                                                                                                                                                                                                                                                                                                                                                                                                                                                                                                                                                                                                                                                                                                                                                                                                                                                                                                                                                                                                                                                                                                                                                                                                                                                                                                                                                                                                                                                                                                                                                                                                                                                                                                                                                                                                                                                                                                                                                                                                                                             | Bla Kustens halsocentral                                                                                                            | The Public Health Agency of Sweden                                                                                     | Anna Risberg; Anna-Malin Lindé; Karin Tegmark-Wisell; Maria Lind Karlberg; Mattias Haukland; Mia Brytting; Olof Norrby; Olov Svartstrom; Oskar Karlsson Lindsjö; Reza Advani; Sandra Brodsson; Theresa Enkirch                                                                  |                                                                                                                                                                                                                                                                                                                                                                                                                                                         |
| EPI_ISL_1534276, EPI_ISL_1534449                                                                                                                                                                                                                                                                                                                                                                                                                                                                                                                                                                                                                                                                                                                                                                                                                                                                                                                                                                                                                                                                                                                                                                                                                                                                                                                                                                                                                                                                                                                                                                                                                                                                                                                                                                                                                                                                                                                                                                                                                                                                                                                                                                                                                                                                                                                                                                                                                                                                                                                                                                                                                                                                                                                                                                                                                                                                                                                                                                                                                                                                                                                                                                                                                                                                                                                                                                                                                                                                                                                                                                                                                                                                                                                                                                                                                                                                                                                                                                                                                                                                                                                                                                                                                                                                                                                                                                                                                                                                                                                                                                                                                                                                                                           | Bongolethu Clinic wc BLC                                                                                                            | NHLS/UCT                                                                                                               | Arash Iranzadeh; Bruna Galvao; Carolyn Williamson; Deelan Doolabh; Diana Hardie; Emmanuel SJ; Innocent Mudau; Kruger Marais; Lynn Tyers; Marvin Hsiao; Stephen Korsman; Tegally H; de Oliveira T                                                                                |                                                                                                                                                                                                                                                                                                                                                                                                                                                         |
| EPI_ISL_596453                                                                                                                                                                                                                                                                                                                                                                                                                                                                                                                                                                                                                                                                                                                                                                                                                                                                                                                                                                                                                                                                                                                                                                                                                                                                                                                                                                                                                                                                                                                                                                                                                                                                                                                                                                                                                                                                                                                                                                                                                                                                                                                                                                                                                                                                                                                                                                                                                                                                                                                                                                                                                                                                                                                                                                                                                                                                                                                                                                                                                                                                                                                                                                                                                                                                                                                                                                                                                                                                                                                                                                                                                                                                                                                                                                                                                                                                                                                                                                                                                                                                                                                                                                                                                                                                                                                                                                                                                                                                                                                                                                                                                                                                                                                             | Booali Laboratory, Qom, Iran. Department of Virology, School of Public Health, Tehran University of Medical Sciences, Tehran, Iran. | Genetics Research Center, University of Social Welfare and Rehabilitation Sciences                                     | Ali Jafarpour; Azam Ghaziasadi; Hossein Najmabadi; Khadjeh Jalalvand; Kimia Kahrizi; Marzieh Mohseni; Mohammad Khazeni; Seyed Amir Momeni; Seyed Mohammad Jazayeri; Seyedeh elham Mortazavi; Zohreh Fattahi                                                                     |                                                                                                                                                                                                                                                                                                                                                                                                                                                         |
| EPI_ISL_1393841 to 1393862                                                                                                                                                                                                                                                                                                                                                                                                                                                                                                                                                                                                                                                                                                                                                                                                                                                                                                                                                                                                                                                                                                                                                                                                                                                                                                                                                                                                                                                                                                                                                                                                                                                                                                                                                                                                                                                                                                                                                                                                                                                                                                                                                                                                                                                                                                                                                                                                                                                                                                                                                                                                                                                                                                                                                                                                                                                                                                                                                                                                                                                                                                                                                                                                                                                                                                                                                                                                                                                                                                                                                                                                                                                                                                                                                                                                                                                                                                                                                                                                                                                                                                                                                                                                                                                                                                                                                                                                                                                                                                                                                                                                                                                                                                                 | Borlamed Medyczne Laboratorium Diagnostyczne                                                                                        | 1. National Institute of Public Health - National Institute of Hygiene; 2. Eurofins Genomics Europe Sequencing GmbH    | ECDC COVID-19 WGS support team; Eurofins Genomics Europe Sequencing Team; Gierczyki Rafa; Sadkowska-Todys Magorzata; Wokowicz Tomasz; Zacharczuk Katarzyna                                                                                                                      |                                                                                                                                                                                                                                                                                                                                                                                                                                                         |
| EPI_ISL_1516827 to 1516881, EPI_ISL_1524873 to 1524885, EPI_ISL_1532841 to 1532854                                                                                                                                                                                                                                                                                                                                                                                                                                                                                                                                                                                                                                                                                                                                                                                                                                                                                                                                                                                                                                                                                                                                                                                                                                                                                                                                                                                                                                                                                                                                                                                                                                                                                                                                                                                                                                                                                                                                                                                                                                                                                                                                                                                                                                                                                                                                                                                                                                                                                                                                                                                                                                                                                                                                                                                                                                                                                                                                                                                                                                                                                                                                                                                                                                                                                                                                                                                                                                                                                                                                                                                                                                                                                                                                                                                                                                                                                                                                                                                                                                                                                                                                                                                                                                                                                                                                                                                                                                                                                                                                                                                                                                                         | Botswana Harvard HIV Reference Laboratory                                                                                           | Botswana Harvard HIV Reference Laboratory                                                                              | Boitumelo Zuze; Botshelo Radibe; David Lawrence; Dorcas Maruapula; Joseph Makhema; Legodile Koopole; Mosepele Mosepele; Roger Shapiro; Shahin Lockman; Sikhulile Dorcas Maruapula; Sikhulile Wonderfull T. Choga; Simani Gaseitsiwe; Theongbho Mphoyakgosi; Wonderfull T. Choga |                                                                                                                                                                                                                                                                                                                                                                                                                                                         |
| EPI_ISL_437433                                                                                                                                                                                                                                                                                                                                                                                                                                                                                                                                                                                                                                                                                                                                                                                                                                                                                                                                                                                                                                                                                                                                                                                                                                                                                                                                                                                                                                                                                                                                                                                                                                                                                                                                                                                                                                                                                                                                                                                                                                                                                                                                                                                                                                                                                                                                                                                                                                                                                                                                                                                                                                                                                                                                                                                                                                                                                                                                                                                                                                                                                                                                                                                                                                                                                                                                                                                                                                                                                                                                                                                                                                                                                                                                                                                                                                                                                                                                                                                                                                                                                                                                                                                                                                                                                                                                                                                                                                                                                                                                                                                                                                                                                                                             | Bozeman Health Deaconess Hospital                                                                                                   | Wiedenhft lab, Montana State University                                                                                | Anna Nemudraia; Artem Nemudryi; Blake Wiedenhft; Kevin Surya; Murat Buyukyoruk; Royce Wilkinson; Tanner Wiegand                                                                                                                                                                 |                                                                                                                                                                                                                                                                                                                                                                                                                                                         |
| EPI_ISL_437434                                                                                                                                                                                                                                                                                                                                                                                                                                                                                                                                                                                                                                                                                                                                                                                                                                                                                                                                                                                                                                                                                                                                                                                                                                                                                                                                                                                                                                                                                                                                                                                                                                                                                                                                                                                                                                                                                                                                                                                                                                                                                                                                                                                                                                                                                                                                                                                                                                                                                                                                                                                                                                                                                                                                                                                                                                                                                                                                                                                                                                                                                                                                                                                                                                                                                                                                                                                                                                                                                                                                                                                                                                                                                                                                                                                                                                                                                                                                                                                                                                                                                                                                                                                                                                                                                                                                                                                                                                                                                                                                                                                                                                                                                                                             | Bozeman Water Reclamation Facility                                                                                                  | Wiedenhft lab, Montana State University                                                                                | Anna Nemudraia; Artem Nemudryi; Blake Wiedenhft; Kevin Surya; Murat Buyukyoruk; Royce Wilkinson; Tanner Wiegand                                                                                                                                                                 |                                                                                                                                                                                                                                                                                                                                                                                                                                                         |
| EPI_ISL_1534363                                                                                                                                                                                                                                                                                                                                                                                                                                                                                                                                                                                                                                                                                                                                                                                                                                                                                                                                                                                                                                                                                                                                                                                                                                                                                                                                                                                                                                                                                                                                                                                                                                                                                                                                                                                                                                                                                                                                                                                                                                                                                                                                                                                                                                                                                                                                                                                                                                                                                                                                                                                                                                                                                                                                                                                                                                                                                                                                                                                                                                                                                                                                                                                                                                                                                                                                                                                                                                                                                                                                                                                                                                                                                                                                                                                                                                                                                                                                                                                                                                                                                                                                                                                                                                                                                                                                                                                                                                                                                                                                                                                                                                                                                                                            | Bredasdorp Clinic wc BDC                                                                                                            | NHLS/UCT                                                                                                               | Arash Iranzadeh; Bruna Galvao; Carolyn Williamson; Deelan Doolabh; Diana Hardie; Emmanuel SJ; Innocent Mudau; Kruger Marais; Lynn Tyers; Marvin Hsiao; Stephen Korsman; Tegally H; de Oliveira T                                                                                |                                                                                                                                                                                                                                                                                                                                                                                                                                                         |
| EPI_ISL_420799 to 420801                                                                                                                                                                                                                                                                                                                                                                                                                                                                                                                                                                                                                                                                                                                                                                                                                                                                                                                                                                                                                                                                                                                                                                                                                                                                                                                                                                                                                                                                                                                                                                                                                                                                                                                                                                                                                                                                                                                                                                                                                                                                                                                                                                                                                                                                                                                                                                                                                                                                                                                                                                                                                                                                                                                                                                                                                                                                                                                                                                                                                                                                                                                                                                                                                                                                                                                                                                                                                                                                                                                                                                                                                                                                                                                                                                                                                                                                                                                                                                                                                                                                                                                                                                                                                                                                                                                                                                                                                                                                                                                                                                                                                                                                                                                   | Brian D. Allgood Army Community Hospital                                                                                            | Pathogen Discovery, Respiratory Viruses Branch, Division of Viral Diseases, Centers for Disease Control and Prevention | Alison S. Laufer Halpin; Anne Uehara; Christopher A. Elkins; Clinton R. Paden; Haibin Wang; Jasmine Padilla; Jing Zhang; Justin Lee; Krista Queen; Mary S. Keckler; Rachel Marine; Suxiang Tong; Yan Li; Ying Tao                                                               |                                                                                                                                                                                                                                                                                                                                                                                                                                                         |
| EPI_ISL_593478 to 593480, EPI_ISL_593553 to 593558                                                                                                                                                                                                                                                                                                                                                                                                                                                                                                                                                                                                                                                                                                                                                                                                                                                                                                                                                                                                                                                                                                                                                                                                                                                                                                                                                                                                                                                                                                                                                                                                                                                                                                                                                                                                                                                                                                                                                                                                                                                                                                                                                                                                                                                                                                                                                                                                                                                                                                                                                                                                                                                                                                                                                                                                                                                                                                                                                                                                                                                                                                                                                                                                                                                                                                                                                                                                                                                                                                                                                                                                                                                                                                                                                                                                                                                                                                                                                                                                                                                                                                                                                                                                                                                                                                                                                                                                                                                                                                                                                                                                                                                                                         | Brigham and Women's Hospital                                                                                                        | Jonathan Li Laboratory                                                                                                 | James Regan; Jonathan Z. Li; Manish C. Choudhary                                                                                                                                                                                                                                |                                                                                                                                                                                                                                                                                                                                                                                                                                                         |
| EPI_ISL_1407254 to 1407333, EPI_ISL_1413141, EPI_ISL_1413144, EPI_ISL_1413147, EPI_ISL_1413150, EPI_ISL_1413152, EPI_ISL_1413154, EPI_ISL_1413157, EPI_ISL_1413160, EPI_ISL_1413163, EPI_ISL_1413165, EPI_ISL_1413168, EPI_ISL_1413171, EPI_ISL_1413173, EPI_ISL_1413176, EPI_ISL_1413179, EPI_ISL_1413181, EPI_ISL_1413184, EPI_ISL_1413187, EPI_ISL_1413191, EPI_ISL_1413193, EPI_ISL_1413196, EPI_ISL_1413199, EPI_ISL_1413202, EPI_ISL_1413204, EPI_ISL_1413207, EPI_ISL_1413209, EPI_ISL_1413212, EPI_ISL_1413215, EPI_ISL_1413218, EPI_ISL_1413221, EPI_ISL_1413224, EPI_ISL_1413226, EPI_ISL_1413229, EPI_ISL_1413232, EPI_ISL_1413235, EPI_ISL_1413238, EPI_ISL_1413241, EPI_ISL_1413243, EPI_ISL_1413246, EPI_ISL_1413249, EPI_ISL_1413251, EPI_ISL_1413254, EPI_ISL_1413257, EPI_ISL_1413260, EPI_ISL_1413269, EPI_ISL_1413272, EPI_ISL_1413274, EPI_ISL_1413277, EPI_ISL_1413280, EPI_ISL_1413282, EPI_ISL_1413285, EPI_ISL_1413287, EPI_ISL_1413290, EPI_ISL_1413293, EPI_ISL_1413296, EPI_ISL_1413299, EPI_ISL_1413302, EPI_ISL_1413304, EPI_ISL_1413307, EPI_ISL_1413309, EPI_ISL_1413311, EPI_ISL_1413314, EPI_ISL_1413316, EPI_ISL_1413319, EPI_ISL_1413322, EPI_ISL_1413325, EPI_ISL_1413328, EPI_ISL_1413330, EPI_ISL_1413333, EPI_ISL_1413336, EPI_ISL_1413339, EPI_ISL_1413341, EPI_ISL_1413344, EPI_ISL_1413347, EPI_ISL_1413350, EPI_ISL_1413352, EPI_ISL_1413355, EPI_ISL_1413358, EPI_ISL_1413361, EPI_ISL_1413363, EPI_ISL_1413366, EPI_ISL_1413369, EPI_ISL_1413372, EPI_ISL_1413374, EPI_ISL_1413377, EPI_ISL_1413380, EPI_ISL_1413382, EPI_ISL_1413385, EPI_ISL_1413388, EPI_ISL_1413390, EPI_ISL_1413393, EPI_ISL_1413396, EPI_ISL_1413399, EPI_ISL_1413401, EPI_ISL_1413404, EPI_ISL_1413407, EPI_ISL_1413410, EPI_ISL_1413413, EPI_ISL_1413416, EPI_ISL_1413418, EPI_ISL_1413421, EPI_ISL_1413424, EPI_ISL_1413426, EPI_ISL_1413429, EPI_ISL_1413431, EPI_ISL_1413434, EPI_ISL_1413437, EPI_ISL_1413440, EPI_ISL_1413442, EPI_ISL_1413445, EPI_ISL_1413447, EPI_ISL_1413450, EPI_ISL_1413452, EPI_ISL_1413455, EPI_ISL_1413458, EPI_ISL_1413460, EPI_ISL_1413463, EPI_ISL_1413465, EPI_ISL_1413468, EPI_ISL_1413471, EPI_ISL_1413473, EPI_ISL_1413476, EPI_ISL_1413479, EPI_ISL_1413482, EPI_ISL_1413485, EPI_ISL_1413488, EPI_ISL_1413490, EPI_ISL_1413493, EPI_ISL_1413496, EPI_ISL_1413498, EPI_ISL_1413501, EPI_ISL_1413504, EPI_ISL_1413506, EPI_ISL_1413509, EPI_ISL_1413511, EPI_ISL_1413789, EPI_ISL_1413792, EPI_ISL_1413794, EPI_ISL_1413797, EPI_ISL_1413799, EPI_ISL_1413803, EPI_ISL_1413805, EPI_ISL_1413807, EPI_ISL_1413810, EPI_ISL_1413813, EPI_ISL_1413815, EPI_ISL_1413818, EPI_ISL_1413821, EPI_ISL_1413823, EPI_ISL_1413826, EPI_ISL_1413829, EPI_ISL_1413831, EPI_ISL_1413835, EPI_ISL_1413837, EPI_ISL_1413840, EPI_ISL_1413842, EPI_ISL_1413845, EPI_ISL_1413848, EPI_ISL_1413851, EPI_ISL_1413853, EPI_ISL_1413856, EPI_ISL_1413859, EPI_ISL_1413861, EPI_ISL_1413864, EPI_ISL_1516446 to 1516597, EPI_ISL_1516665 to 1516745                                                                                                                                                                                                                                                                                                                                                                                                                                                                                                                                                                                                                                                                                                                                                                                                                                                                                                                                                                                                                                                                                                                                                                                                                                                                                                                                                                                                                                                                                                                                                                                                                                                                                                                                                     | see above                                                                                                                           | Broad Institute Clinical Research Sequencing Platform                                                                  | Infectious Disease Program, Broad Institute of Harvard and MIT                                                                                                                                                                                                                  | Adams, G.; B.L.; B.W.; Bauer, M.; Birren; Blumenstiel, B.; Brown, C.; Carter, A.; Chaluvadi, S.; D.J.; DeFelice, M.; DeRuff, K.; Dodge, S.; Gabriel, S.; Gallagher, G.; Gladden-Young, A.; Granger, B.; J.E.; K.J.; Lagerborg, K.; Larkin, K.; Lee, M.; Lemieux, L.; Loreth, C.; Madoff, L.; McGovern, S.; Meldrim, J.; Normandin, E.; P.C.; Park; Pearlman, L.; Reilly, S.; Rudy, M.; Sabeti; Sledge, S.; Tomkins-Tinch, C.; Vicente, G.; and MacInnis |
| EPI_ISL_1534396                                                                                                                                                                                                                                                                                                                                                                                                                                                                                                                                                                                                                                                                                                                                                                                                                                                                                                                                                                                                                                                                                                                                                                                                                                                                                                                                                                                                                                                                                                                                                                                                                                                                                                                                                                                                                                                                                                                                                                                                                                                                                                                                                                                                                                                                                                                                                                                                                                                                                                                                                                                                                                                                                                                                                                                                                                                                                                                                                                                                                                                                                                                                                                                                                                                                                                                                                                                                                                                                                                                                                                                                                                                                                                                                                                                                                                                                                                                                                                                                                                                                                                                                                                                                                                                                                                                                                                                                                                                                                                                                                                                                                                                                                                                            | Brooklyn Chest Hospital wc BCH                                                                                                      | NHLS/UCT                                                                                                               | Arash Iranzadeh; Bruna Galvao; Carolyn Williamson; Deelan Doolabh; Diana Hardie; Emmanuel SJ; Innocent Mudau; Kruger Marais; Lynn Tyers; Marvin Hsiao; Stephen Korsman; Tegally H; de Oliveira T                                                                                |                                                                                                                                                                                                                                                                                                                                                                                                                                                         |
| EPI_ISL_603248, EPI_ISL_605791                                                                                                                                                                                                                                                                                                                                                                                                                                                                                                                                                                                                                                                                                                                                                                                                                                                                                                                                                                                                                                                                                                                                                                                                                                                                                                                                                                                                                                                                                                                                                                                                                                                                                                                                                                                                                                                                                                                                                                                                                                                                                                                                                                                                                                                                                                                                                                                                                                                                                                                                                                                                                                                                                                                                                                                                                                                                                                                                                                                                                                                                                                                                                                                                                                                                                                                                                                                                                                                                                                                                                                                                                                                                                                                                                                                                                                                                                                                                                                                                                                                                                                                                                                                                                                                                                                                                                                                                                                                                                                                                                                                                                                                                                                             | Brotman Baty Institute for Precision Medicine                                                                                       | Brotman Baty Institute for Precision Medicine                                                                          | Benjamin Pelle; Caitlin R. Wolf; Chris D. Frazier; Christina M. Lockwood; Deborah A. Nickerson; Erica Ryke; Helen Y. Chu; Jay Shendure; Jennifer K. Logue; Jover Lee; Lea M. Starita; Mark J. Rieder; Peter D. Han; Trevor Bedford                                              |                                                                                                                                                                                                                                                                                                                                                                                                                                                         |
| EPI_ISL_1501128 to 1501136, EPI_ISL_1501170 to 1501173, EPI_ISL_1501211 to 1501217, EPI_ISL_1501258 to 1501267                                                                                                                                                                                                                                                                                                                                                                                                                                                                                                                                                                                                                                                                                                                                                                                                                                                                                                                                                                                                                                                                                                                                                                                                                                                                                                                                                                                                                                                                                                                                                                                                                                                                                                                                                                                                                                                                                                                                                                                                                                                                                                                                                                                                                                                                                                                                                                                                                                                                                                                                                                                                                                                                                                                                                                                                                                                                                                                                                                                                                                                                                                                                                                                                                                                                                                                                                                                                                                                                                                                                                                                                                                                                                                                                                                                                                                                                                                                                                                                                                                                                                                                                                                                                                                                                                                                                                                                                                                                                                                                                                                                                                             | Broussais                                                                                                                           | HEGP - Laboratoire de Virologie                                                                                        | David Veyer                                                                                                                                                                                                                                                                     |                                                                                                                                                                                                                                                                                                                                                                                                                                                         |
| EPI_ISL_1394042 to 1394062, EPI_ISL_1425544                                                                                                                                                                                                                                                                                                                                                                                                                                                                                                                                                                                                                                                                                                                                                                                                                                                                                                                                                                                                                                                                                                                                                                                                                                                                                                                                                                                                                                                                                                                                                                                                                                                                                                                                                                                                                                                                                                                                                                                                                                                                                                                                                                                                                                                                                                                                                                                                                                                                                                                                                                                                                                                                                                                                                                                                                                                                                                                                                                                                                                                                                                                                                                                                                                                                                                                                                                                                                                                                                                                                                                                                                                                                                                                                                                                                                                                                                                                                                                                                                                                                                                                                                                                                                                                                                                                                                                                                                                                                                                                                                                                                                                                                                                | Bruss                                                                                                                               | 1. National Institute of Public Health - National Institute of Hygiene; 2. Eurofins Genomics Europe Sequencing GmbH    | ECDC COVID-19 WGS support team; Eurofins Genomics Europe Sequencing Team; Gierczyki Rafa; Sadkowska-Todys Magorzata; Wokowicz Tomasz; Zacharczuk Katarzyna                                                                                                                      |                                                                                                                                                                                                                                                                                                                                                                                                                                                         |
| EPI_ISL_414520 to 414521                                                                                                                                                                                                                                                                                                                                                                                                                                                                                                                                                                                                                                                                                                                                                                                                                                                                                                                                                                                                                                                                                                                                                                                                                                                                                                                                                                                                                                                                                                                                                                                                                                                                                                                                                                                                                                                                                                                                                                                                                                                                                                                                                                                                                                                                                                                                                                                                                                                                                                                                                                                                                                                                                                                                                                                                                                                                                                                                                                                                                                                                                                                                                                                                                                                                                                                                                                                                                                                                                                                                                                                                                                                                                                                                                                                                                                                                                                                                                                                                                                                                                                                                                                                                                                                                                                                                                                                                                                                                                                                                                                                                                                                                                                                   | Bundeswehr Institute of Microbiology                                                                                                | Bundeswehr Institute of Microbiology                                                                                   | Markus H Antwerpen and Roman Wölfel; Mathias C Walter                                                                                                                                                                                                                           |                                                                                                                                                                                                                                                                                                                                                                                                                                                         |
| EPI_ISL_424981 to 424982, EPI_ISL_424984 to 424986, EPI_ISL_424988 to 424990, EPI_ISL_424992                                                                                                                                                                                                                                                                                                                                                                                                                                                                                                                                                                                                                                                                                                                                                                                                                                                                                                                                                                                                                                                                                                                                                                                                                                                                                                                                                                                                                                                                                                                                                                                                                                                                                                                                                                                                                                                                                                                                                                                                                                                                                                                                                                                                                                                                                                                                                                                                                                                                                                                                                                                                                                                                                                                                                                                                                                                                                                                                                                                                                                                                                                                                                                                                                                                                                                                                                                                                                                                                                                                                                                                                                                                                                                                                                                                                                                                                                                                                                                                                                                                                                                                                                                                                                                                                                                                                                                                                                                                                                                                                                                                                                                               | Bureau of Laboratories, Michigan Department of Health and Human Services                                                            | Michigan Department of Health and Human Services                                                                       | Blankenship HM; Riner D; Soehnlén MK                                                                                                                                                                                                                                            |                                                                                                                                                                                                                                                                                                                                                                                                                                                         |
| EPI_ISL_450832                                                                                                                                                                                                                                                                                                                                                                                                                                                                                                                                                                                                                                                                                                                                                                                                                                                                                                                                                                                                                                                                                                                                                                                                                                                                                                                                                                                                                                                                                                                                                                                                                                                                                                                                                                                                                                                                                                                                                                                                                                                                                                                                                                                                                                                                                                                                                                                                                                                                                                                                                                                                                                                                                                                                                                                                                                                                                                                                                                                                                                                                                                                                                                                                                                                                                                                                                                                                                                                                                                                                                                                                                                                                                                                                                                                                                                                                                                                                                                                                                                                                                                                                                                                                                                                                                                                                                                                                                                                                                                                                                                                                                                                                                                                             | Byjorden vardcentral                                                                                                                | The Public Health Agency of Sweden                                                                                     | Anna Risberg; Anna-Malin Lindé; Karin Tegmark-Wisell; Maria Lind Karlberg; Mia Brytting; Olov Svartstrom; Oskar Karlsson Lindsjö; Pernilla Brunman; Theresa Enkirch                                                                                                             |                                                                                                                                                                                                                                                                                                                                                                                                                                                         |
| EPI_ISL_524476                                                                                                                                                                                                                                                                                                                                                                                                                                                                                                                                                                                                                                                                                                                                                                                                                                                                                                                                                                                                                                                                                                                                                                                                                                                                                                                                                                                                                                                                                                                                                                                                                                                                                                                                                                                                                                                                                                                                                                                                                                                                                                                                                                                                                                                                                                                                                                                                                                                                                                                                                                                                                                                                                                                                                                                                                                                                                                                                                                                                                                                                                                                                                                                                                                                                                                                                                                                                                                                                                                                                                                                                                                                                                                                                                                                                                                                                                                                                                                                                                                                                                                                                                                                                                                                                                                                                                                                                                                                                                                                                                                                                                                                                                                                             | Bülach Hospital                                                                                                                     | Institute of Medical Virology, University of Zurich                                                                    | Alexandra Trkola; Andrea Zbinden; Fiona Steiner; Gabriela Ziltener; Jon Huder; Jürg Böni; Maryam Zaheri; Michael Huber; Patrick Redli; Riccarda Capaul; Stefan Schmutz; Verena Kufner                                                                                           |                                                                                                                                                                                                                                                                                                                                                                                                                                                         |
| EPI_ISL_445320                                                                                                                                                                                                                                                                                                                                                                                                                                                                                                                                                                                                                                                                                                                                                                                                                                                                                                                                                                                                                                                                                                                                                                                                                                                                                                                                                                                                                                                                                                                                                                                                                                                                                                                                                                                                                                                                                                                                                                                                                                                                                                                                                                                                                                                                                                                                                                                                                                                                                                                                                                                                                                                                                                                                                                                                                                                                                                                                                                                                                                                                                                                                                                                                                                                                                                                                                                                                                                                                                                                                                                                                                                                                                                                                                                                                                                                                                                                                                                                                                                                                                                                                                                                                                                                                                                                                                                                                                                                                                                                                                                                                                                                                                                                             | C.C.SALUD FAMILIAR PADRE FELIX DONOSO G.                                                                                            | Instituto de Salud Pública de Chile                                                                                    | Alejandra Acevedo; Andrés E Castillo; Bárbara Parra; Carolina Tambley; Gabriel Leal; Jaime Lagos; Jorge Fernandez; Loredana Arata; Patricia Bustos; Paz Tapia; Rodrigo Fasce; Winston Andrade                                                                                   |                                                                                                                                                                                                                                                                                                                                                                                                                                                         |
| EPI_ISL_445318                                                                                                                                                                                                                                                                                                                                                                                                                                                                                                                                                                                                                                                                                                                                                                                                                                                                                                                                                                                                                                                                                                                                                                                                                                                                                                                                                                                                                                                                                                                                                                                                                                                                                                                                                                                                                                                                                                                                                                                                                                                                                                                                                                                                                                                                                                                                                                                                                                                                                                                                                                                                                                                                                                                                                                                                                                                                                                                                                                                                                                                                                                                                                                                                                                                                                                                                                                                                                                                                                                                                                                                                                                                                                                                                                                                                                                                                                                                                                                                                                                                                                                                                                                                                                                                                                                                                                                                                                                                                                                                                                                                                                                                                                                                             | C.DE SALUD FAMILIAR PABLO NERUDA                                                                                                    | Instituto de Salud Pública de Chile                                                                                    | Alejandra Acevedo; Andrés E Castillo; Bárbara Parra; Carolina Tambley; Gabriel Leal; Jaime Lagos; Jorge Fernandez; Loredana Arata; Patricia Bustos;                                                                                                                             |                                                                                                                                                                                                                                                                                                                                                                                                                                                         |

| EPI_ISL_539531                                                                                                                                                                                                                                                                                                                                                                                                                                                                                                                                                                                                                                                                                                                                                                                                                                                                                                                                                                                                                                                                                                                                                                                                                                                                                                                                                                                                                                                                                                                                                                                                                                                                                                                                                                                                                                                                                                                                                                                                                                                                                                                                                                                                                                                                                                                                                                                                                                                                                                                                                                                                                                                                                                                                                                                                                                                                                                                                                                                                                                                                                                                                                                                                                                                                                                                                                                                                                                                                                                                                                                                                                                                                                                                                                                                                                                                                                                                                                                                                                                                                                                                                                                                                                                                                                                                                                                                                                                                                                                                                                                                                                                                                                                                                                                                                                                                                                                                                                                                                                                                                                                                                                                                                                                                                                                                                                                                                                                                                                                                                                                                                                                                                                                                                                                                                                                                                                                                                                                                                                                                                                                                                                                                                                                                                 | C.H.U Nuestra Señora de Candelaria                                                                                           | Instituto de Salud Carlos III                                                                                                    | A. Monzón; F. Casas; I. J. Jiménez; Iglesias-Caballero; M. Camarero; M. Cuesta; M. González-Esguevillas; M. Molinero Calarmita; M. Zaballos; O. Díez; P. Jiménez; S. Juliá; S. Pozo; S. Varona                                                                                                                                                                  |
|--------------------------------------------------------------------------------------------------------------------------------------------------------------------------------------------------------------------------------------------------------------------------------------------------------------------------------------------------------------------------------------------------------------------------------------------------------------------------------------------------------------------------------------------------------------------------------------------------------------------------------------------------------------------------------------------------------------------------------------------------------------------------------------------------------------------------------------------------------------------------------------------------------------------------------------------------------------------------------------------------------------------------------------------------------------------------------------------------------------------------------------------------------------------------------------------------------------------------------------------------------------------------------------------------------------------------------------------------------------------------------------------------------------------------------------------------------------------------------------------------------------------------------------------------------------------------------------------------------------------------------------------------------------------------------------------------------------------------------------------------------------------------------------------------------------------------------------------------------------------------------------------------------------------------------------------------------------------------------------------------------------------------------------------------------------------------------------------------------------------------------------------------------------------------------------------------------------------------------------------------------------------------------------------------------------------------------------------------------------------------------------------------------------------------------------------------------------------------------------------------------------------------------------------------------------------------------------------------------------------------------------------------------------------------------------------------------------------------------------------------------------------------------------------------------------------------------------------------------------------------------------------------------------------------------------------------------------------------------------------------------------------------------------------------------------------------------------------------------------------------------------------------------------------------------------------------------------------------------------------------------------------------------------------------------------------------------------------------------------------------------------------------------------------------------------------------------------------------------------------------------------------------------------------------------------------------------------------------------------------------------------------------------------------------------------------------------------------------------------------------------------------------------------------------------------------------------------------------------------------------------------------------------------------------------------------------------------------------------------------------------------------------------------------------------------------------------------------------------------------------------------------------------------------------------------------------------------------------------------------------------------------------------------------------------------------------------------------------------------------------------------------------------------------------------------------------------------------------------------------------------------------------------------------------------------------------------------------------------------------------------------------------------------------------------------------------------------------------------------------------------------------------------------------------------------------------------------------------------------------------------------------------------------------------------------------------------------------------------------------------------------------------------------------------------------------------------------------------------------------------------------------------------------------------------------------------------------------------------------------------------------------------------------------------------------------------------------------------------------------------------------------------------------------------------------------------------------------------------------------------------------------------------------------------------------------------------------------------------------------------------------------------------------------------------------------------------------------------------------------------------------------------------------------------------------------------------------------------------------------------------------------------------------------------------------------------------------------------------------------------------------------------------------------------------------------------------------------------------------------------------------------------------------------------------------------------------------------------------------------------------------------------------|------------------------------------------------------------------------------------------------------------------------------|----------------------------------------------------------------------------------------------------------------------------------|-----------------------------------------------------------------------------------------------------------------------------------------------------------------------------------------------------------------------------------------------------------------------------------------------------------------------------------------------------------------|
| EPI_ISL_1477167 to 1477188, EPI_ISL_1477171, EPI_ISL_1477177, EPI_ISL_1477179, EPI_ISL_1477181 to 1477182, EPI_ISL_1477184 to 1477188, EPI_ISL_1477190 to 1477194, EPI_ISL_1477196 to 1477198, EPI_ISL_1477200 to 1477205, EPI_ISL_1477209 to 1477215, EPI_ISL_1477217, EPI_ISL_1477219, EPI_ISL_1477221 to 1477223, EPI_ISL_1477225, EPI_ISL_1477229 to 1477233, EPI_ISL_1477237 to 1477238, EPI_ISL_1477240 to 1477242, EPI_ISL_1477245 to 1477246, EPI_ISL_1477248, EPI_ISL_1477250, EPI_ISL_1477253 to 1477254, EPI_ISL_1477256, EPI_ISL_1477258, EPI_ISL_1477261, EPI_ISL_1477263, EPI_ISL_1477265 to 1477267, EPI_ISL_1477273 to 1477275, EPI_ISL_1477278, EPI_ISL_1477281, EPI_ISL_1477283, EPI_ISL_1477285 to 1477286, EPI_ISL_1477289, EPI_ISL_1477291, EPI_ISL_1477297 to 1477298, EPI_ISL_1477300, EPI_ISL_1477302 to 1477305, EPI_ISL_1477307, EPI_ISL_1477310 to 1477311, EPI_ISL_1477314 to 1477317, EPI_ISL_1477319 to 1477321, EPI_ISL_1477323 to 1477324, EPI_ISL_1477327, EPI_ISL_1477330 to 1477331, EPI_ISL_1477333, EPI_ISL_1477336, EPI_ISL_1477338, EPI_ISL_1477342, EPI_ISL_1477344 to 1477345, EPI_ISL_1477347, EPI_ISL_1477349 to 1477351, EPI_ISL_1477353, EPI_ISL_1477356 to 1477358, EPI_ISL_1477360 to 1477363, EPI_ISL_1477365 to 1477366, EPI_ISL_1477368 to 1477370, EPI_ISL_1477372, EPI_ISL_1477374, EPI_ISL_1477378, EPI_ISL_1477383 to 1477384, EPI_ISL_1477386 to 1477387, EPI_ISL_1477390 to 1477393, EPI_ISL_1477395, EPI_ISL_1477398, EPI_ISL_1477400, EPI_ISL_1477402 to 1477404, EPI_ISL_1477407, EPI_ISL_1477409, EPI_ISL_1477416, EPI_ISL_1477418 to 1477429, EPI_ISL_1477431, EPI_ISL_1477434, EPI_ISL_1477437 to 1477440, EPI_ISL_1477442, EPI_ISL_1477444, EPI_ISL_1477448 to 1477453, EPI_ISL_1477456 to 1477460, EPI_ISL_1477463 to 1477465, EPI_ISL_1477467, EPI_ISL_1477469 to 1477482, EPI_ISL_1477485, EPI_ISL_1477488, EPI_ISL_1477490, EPI_ISL_1477492 to 1477493, EPI_ISL_1477500, EPI_ISL_1477502 to 1477506, EPI_ISL_1477508 to 1477509, EPI_ISL_1477511 to 1477517, EPI_ISL_1477521 to 1477528, EPI_ISL_1477531 to 1477533, EPI_ISL_1477536 to 1477539, EPI_ISL_1477542 to 1477544, EPI_ISL_1477548 to 1477549, EPI_ISL_1477551, EPI_ISL_1477553, EPI_ISL_1477555 to 1477556, EPI_ISL_1477559 to 1477563, EPI_ISL_1477567 to 1477568, EPI_ISL_1477570 to 1477571, EPI_ISL_1477573 to 1477574, EPI_ISL_1477576 to 1477577, EPI_ISL_1477580, EPI_ISL_1477583, EPI_ISL_1477585 to 1477589, EPI_ISL_1477591 to 1477593, EPI_ISL_1477596 to 1477597, EPI_ISL_1477599 to 1477602, EPI_ISL_1477604, EPI_ISL_1477606 to 1477610, EPI_ISL_1477612 to 1477616, EPI_ISL_1477618 to 1477621, EPI_ISL_1477623 to 1477625, EPI_ISL_1477628 to 1477629, EPI_ISL_1477631, EPI_ISL_1477633, EPI_ISL_1477635 to 1477636, EPI_ISL_1477638, EPI_ISL_1477640 to 1477643, EPI_ISL_1477645 to 1477646, EPI_ISL_1477648, EPI_ISL_1477650 to 1477654, EPI_ISL_1477656, EPI_ISL_1477658 to 1477662, EPI_ISL_1477663 to 1477667, EPI_ISL_1477673, EPI_ISL_1477678, EPI_ISL_1477680, EPI_ISL_1477687, EPI_ISL_1477692 to 1477694, EPI_ISL_1477700, EPI_ISL_1477705, EPI_ISL_1477707, EPI_ISL_1477709, EPI_ISL_1477711, EPI_ISL_1477715, EPI_ISL_1477717 to 1477719, EPI_ISL_1477721, EPI_ISL_1477723, EPI_ISL_1477725, EPI_ISL_1477728, EPI_ISL_1477736, EPI_ISL_1477740, EPI_ISL_1477742, EPI_ISL_1477756, EPI_ISL_1477759, EPI_ISL_1477763, EPI_ISL_1477769, EPI_ISL_1477777 to 1477778, EPI_ISL_1477786 to 1477787, EPI_ISL_1477792, EPI_ISL_1477796, EPI_ISL_1477798, EPI_ISL_1477803, EPI_ISL_1477808, EPI_ISL_1477811 to 1477812, EPI_ISL_1477819, EPI_ISL_1477830 to 1477831, EPI_ISL_1477837 to 1477838, EPI_ISL_1477840, EPI_ISL_1477848, EPI_ISL_1477852 to 1477853, EPI_ISL_1477855, EPI_ISL_1477868, EPI_ISL_1477873, EPI_ISL_1477875, EPI_ISL_1477877, EPI_ISL_1477883 to 1477884, EPI_ISL_1477890 to 1477891, EPI_ISL_1477897, EPI_ISL_1477901, EPI_ISL_1477903, EPI_ISL_1477908, EPI_ISL_1477913, EPI_ISL_1477919, EPI_ISL_1477920 to 1477921, EPI_ISL_1477924, EPI_ISL_1477929, EPI_ISL_1477934, EPI_ISL_1477938, EPI_ISL_1477940, EPI_ISL_1477949, EPI_ISL_1477959, EPI_ISL_1477964, EPI_ISL_1477968 to 1477969, EPI_ISL_1477971, EPI_ISL_1477978, EPI_ISL_1477984 to 1477985, EPI_ISL_1477988 to 1477989, EPI_ISL_1477994, EPI_ISL_1477996, EPI_ISL_1478001, EPI_ISL_1478004, EPI_ISL_1478016, EPI_ISL_1478029, EPI_ISL_1478033, EPI_ISL_1478042, EPI_ISL_1478051, EPI_ISL_1478056, EPI_ISL_1478060, EPI_ISL_1478064, EPI_ISL_1478068, EPI_ISL_1478071, EPI_ISL_1478073, EPI_ISL_1478076, EPI_ISL_1478079, EPI_ISL_1478085, EPI_ISL_1478100, EPI_ISL_1478104, EPI_ISL_1478109, EPI_ISL_1478112 to 1478116, EPI_ISL_1478119, EPI_ISL_1478127, EPI_ISL_1478130, EPI_ISL_1478132, EPI_ISL_1478137, EPI_ISL_1478142, EPI_ISL_1478144, EPI_ISL_1478146, EPI_ISL_1478148, EPI_ISL_1478151, EPI_ISL_1478158, EPI_ISL_1478166 to 1478168, EPI_ISL_1478173, EPI_ISL_1478178, EPI_ISL_1478183 to 1478185, EPI_ISL_1478191, EPI_ISL_1478194, EPI_ISL_1478201, EPI_ISL_1529100, EPI_ISL_1529104 to 1529105, EPI_ISL_1529111 to 1529112, EPI_ISL_1529114 to 1529118, EPI_ISL_1529120, EPI_ISL_1529125 to 1529126, EPI_ISL_1529130, EPI_ISL_1529132, EPI_ISL_1529136, EPI_ISL_1529139 to 1529143, EPI_ISL_1529145 to 1529146, EPI_ISL_1529150, EPI_ISL_1529153, EPI_ISL_1529156 to 1529157, EPI_ISL_1529159 to 1529160, EPI_ISL_1529162, EPI_ISL_1529169 to 1529170, EPI_ISL_1529172, EPI_ISL_1529174 to 1529175, EPI_ISL_1529178, EPI_ISL_1529182, EPI_ISL_1529184, EPI_ISL_1529187, EPI_ISL_1529189, EPI_ISL_1529192, EPI_ISL_1529197 to 1529201, EPI_ISL_1529203, EPI_ISL_1529214 to 1529215, EPI_ISL_1529215, EPI_ISL_1529219 to 1529220, EPI_ISL_1529222 to 1529223, EPI_ISL_1529230 to 1529231, EPI_ISL_1529233, EPI_ISL_1529242 to 1529244, EPI_ISL_1529249, EPI_ISL_1529254, EPI_ISL_1529257, EPI_ISL_1529260, EPI_ISL_1529264 to 1529266, EPI_ISL_1529276 to 1529278, EPI_ISL_1529286, EPI_ISL_1529288 to 1529291, EPI_ISL_1529294, EPI_ISL_1529299, EPI_ISL_1529303, EPI_ISL_1529306 to 1529307, EPI_ISL_1529312 to 1529315, EPI_ISL_1529319, EPI_ISL_1529321, EPI_ISL_1529324 to 1529326, EPI_ISL_1529332 to 1529333, EPI_ISL_1529335, EPI_ISL_1529337 to 1529339, EPI_ISL_1529359 to 1529363, EPI_ISL_1529366, EPI_ISL_1529369 | CA DPH Viral and Rickettsial Disease Laboratory                                                                              | Chan-Zuckerberg Biohub                                                                                                           | CZB Ciliahub Consortium                                                                                                                                                                                                                                                                                                                                         |
| see above                                                                                                                                                                                                                                                                                                                                                                                                                                                                                                                                                                                                                                                                                                                                                                                                                                                                                                                                                                                                                                                                                                                                                                                                                                                                                                                                                                                                                                                                                                                                                                                                                                                                                                                                                                                                                                                                                                                                                                                                                                                                                                                                                                                                                                                                                                                                                                                                                                                                                                                                                                                                                                                                                                                                                                                                                                                                                                                                                                                                                                                                                                                                                                                                                                                                                                                                                                                                                                                                                                                                                                                                                                                                                                                                                                                                                                                                                                                                                                                                                                                                                                                                                                                                                                                                                                                                                                                                                                                                                                                                                                                                                                                                                                                                                                                                                                                                                                                                                                                                                                                                                                                                                                                                                                                                                                                                                                                                                                                                                                                                                                                                                                                                                                                                                                                                                                                                                                                                                                                                                                                                                                                                                                                                                                                                      | CA, CDPH, Viral and Rickettsial Disease Laboratory                                                                           | Pathogen Discovery, Respiratory Viruses Branch, Division of Viral Diseases, Centers for Disease Control and Prevention           | Anna Uehara; Brian Lynch; Clinton R. Paden; Haibin Wang; Jing Zhang; Krista Queen; Peter Cook; Suxiang Tong; Yan Li; Ying Tao                                                                                                                                                                                                                                   |
| EPI_ISL_1446714 to 1446715, EPI_ISL_1447049 to 1447051, EPI_ISL_1516381                                                                                                                                                                                                                                                                                                                                                                                                                                                                                                                                                                                                                                                                                                                                                                                                                                                                                                                                                                                                                                                                                                                                                                                                                                                                                                                                                                                                                                                                                                                                                                                                                                                                                                                                                                                                                                                                                                                                                                                                                                                                                                                                                                                                                                                                                                                                                                                                                                                                                                                                                                                                                                                                                                                                                                                                                                                                                                                                                                                                                                                                                                                                                                                                                                                                                                                                                                                                                                                                                                                                                                                                                                                                                                                                                                                                                                                                                                                                                                                                                                                                                                                                                                                                                                                                                                                                                                                                                                                                                                                                                                                                                                                                                                                                                                                                                                                                                                                                                                                                                                                                                                                                                                                                                                                                                                                                                                                                                                                                                                                                                                                                                                                                                                                                                                                                                                                                                                                                                                                                                                                                                                                                                                                                        | CA-Los Angeles County Public Health Laboratory                                                                               | Centers for Disease Control and Prevention Division of Viral Diseases, Pathogen Discovery                                        | Alison Laufer Halpin; Ben L. Rambo-Martin; Clinton R. Paden; Dakota Howard; Darlene Wagner; Dave Wentworth; Dhvani Batra; Jasmine Padilla; Justin Lee; Katie Dillon; Krista Queen; Kristen Knipe; Kristine Lacey; Mark Burroughs; Matthew Scherer; Mili Sheth; Peter Cook; Sam Shepard; Sarah Nobles; Shoshona Le; Suxiang Tong; Vivien Dugan; Yvette Unoarumhi |
| EPI_ISL_1553808                                                                                                                                                                                                                                                                                                                                                                                                                                                                                                                                                                                                                                                                                                                                                                                                                                                                                                                                                                                                                                                                                                                                                                                                                                                                                                                                                                                                                                                                                                                                                                                                                                                                                                                                                                                                                                                                                                                                                                                                                                                                                                                                                                                                                                                                                                                                                                                                                                                                                                                                                                                                                                                                                                                                                                                                                                                                                                                                                                                                                                                                                                                                                                                                                                                                                                                                                                                                                                                                                                                                                                                                                                                                                                                                                                                                                                                                                                                                                                                                                                                                                                                                                                                                                                                                                                                                                                                                                                                                                                                                                                                                                                                                                                                                                                                                                                                                                                                                                                                                                                                                                                                                                                                                                                                                                                                                                                                                                                                                                                                                                                                                                                                                                                                                                                                                                                                                                                                                                                                                                                                                                                                                                                                                                                                                | CAP DE L'ESQUIROL                                                                                                            | Banc de Sang i Teixits                                                                                                           | Carlos Hobeich; Francisco Vidal; Irene Corrales; Lorena Ramírez; María Glòria Soria; Natália Comes; Nina Borrás; Noemí Gonzalez; Silvia Sauleda                                                                                                                                                                                                                 |
| EPI_ISL_1553801 to 1553802, EPI_ISL_1553806 to 1553807                                                                                                                                                                                                                                                                                                                                                                                                                                                                                                                                                                                                                                                                                                                                                                                                                                                                                                                                                                                                                                                                                                                                                                                                                                                                                                                                                                                                                                                                                                                                                                                                                                                                                                                                                                                                                                                                                                                                                                                                                                                                                                                                                                                                                                                                                                                                                                                                                                                                                                                                                                                                                                                                                                                                                                                                                                                                                                                                                                                                                                                                                                                                                                                                                                                                                                                                                                                                                                                                                                                                                                                                                                                                                                                                                                                                                                                                                                                                                                                                                                                                                                                                                                                                                                                                                                                                                                                                                                                                                                                                                                                                                                                                                                                                                                                                                                                                                                                                                                                                                                                                                                                                                                                                                                                                                                                                                                                                                                                                                                                                                                                                                                                                                                                                                                                                                                                                                                                                                                                                                                                                                                                                                                                                                         | CAP EL REMEI                                                                                                                 | Banc de Sang i Teixits                                                                                                           | Carlos Hobeich; Francisco Vidal; Irene Corrales; Lorena Ramírez; María Glòria Soria; Natália Comes; Nina Borrás; Noemí Gonzalez; Silvia Sauleda                                                                                                                                                                                                                 |
| EPI_ISL_1553804, EPI_ISL_1553809, EPI_ISL_1553818, EPI_ISL_1553826, EPI_ISL_1553828, EPI_ISL_1553830, EPI_ISL_1553843, EPI_ISL_1553846                                                                                                                                                                                                                                                                                                                                                                                                                                                                                                                                                                                                                                                                                                                                                                                                                                                                                                                                                                                                                                                                                                                                                                                                                                                                                                                                                                                                                                                                                                                                                                                                                                                                                                                                                                                                                                                                                                                                                                                                                                                                                                                                                                                                                                                                                                                                                                                                                                                                                                                                                                                                                                                                                                                                                                                                                                                                                                                                                                                                                                                                                                                                                                                                                                                                                                                                                                                                                                                                                                                                                                                                                                                                                                                                                                                                                                                                                                                                                                                                                                                                                                                                                                                                                                                                                                                                                                                                                                                                                                                                                                                                                                                                                                                                                                                                                                                                                                                                                                                                                                                                                                                                                                                                                                                                                                                                                                                                                                                                                                                                                                                                                                                                                                                                                                                                                                                                                                                                                                                                                                                                                                                                         | CAP MANLLEU                                                                                                                  | Banc de Sang i Teixits                                                                                                           | Carlos Hobeich; Francisco Vidal; Irene Corrales; Lorena Ramírez; María Glòria Soria; Natália Comes; Nina Borrás; Noemí Gonzalez; Silvia Sauleda                                                                                                                                                                                                                 |
| see above                                                                                                                                                                                                                                                                                                                                                                                                                                                                                                                                                                                                                                                                                                                                                                                                                                                                                                                                                                                                                                                                                                                                                                                                                                                                                                                                                                                                                                                                                                                                                                                                                                                                                                                                                                                                                                                                                                                                                                                                                                                                                                                                                                                                                                                                                                                                                                                                                                                                                                                                                                                                                                                                                                                                                                                                                                                                                                                                                                                                                                                                                                                                                                                                                                                                                                                                                                                                                                                                                                                                                                                                                                                                                                                                                                                                                                                                                                                                                                                                                                                                                                                                                                                                                                                                                                                                                                                                                                                                                                                                                                                                                                                                                                                                                                                                                                                                                                                                                                                                                                                                                                                                                                                                                                                                                                                                                                                                                                                                                                                                                                                                                                                                                                                                                                                                                                                                                                                                                                                                                                                                                                                                                                                                                                                                      | CAP PRATS DE LLUÇANÈS                                                                                                        | Banc de Sang i Teixits                                                                                                           | Carlos Hobeich; Francisco Vidal; Irene Corrales; Lorena Ramírez; María Glòria Soria; Natália Comes; Nina Borrás; Noemí Gonzalez; Silvia Sauleda                                                                                                                                                                                                                 |
| EPI_ISL_1553805                                                                                                                                                                                                                                                                                                                                                                                                                                                                                                                                                                                                                                                                                                                                                                                                                                                                                                                                                                                                                                                                                                                                                                                                                                                                                                                                                                                                                                                                                                                                                                                                                                                                                                                                                                                                                                                                                                                                                                                                                                                                                                                                                                                                                                                                                                                                                                                                                                                                                                                                                                                                                                                                                                                                                                                                                                                                                                                                                                                                                                                                                                                                                                                                                                                                                                                                                                                                                                                                                                                                                                                                                                                                                                                                                                                                                                                                                                                                                                                                                                                                                                                                                                                                                                                                                                                                                                                                                                                                                                                                                                                                                                                                                                                                                                                                                                                                                                                                                                                                                                                                                                                                                                                                                                                                                                                                                                                                                                                                                                                                                                                                                                                                                                                                                                                                                                                                                                                                                                                                                                                                                                                                                                                                                                                                | CAP RODA DE TER                                                                                                              | Banc de Sang i Teixits                                                                                                           | Carlos Hobeich; Francisco Vidal; Irene Corrales; Lorena Ramírez; María Glòria Soria; Natália Comes; Nina Borrás; Noemí Gonzalez; Silvia Sauleda                                                                                                                                                                                                                 |
| EPI_ISL_1553815 to 1553816, EPI_ISL_1553842                                                                                                                                                                                                                                                                                                                                                                                                                                                                                                                                                                                                                                                                                                                                                                                                                                                                                                                                                                                                                                                                                                                                                                                                                                                                                                                                                                                                                                                                                                                                                                                                                                                                                                                                                                                                                                                                                                                                                                                                                                                                                                                                                                                                                                                                                                                                                                                                                                                                                                                                                                                                                                                                                                                                                                                                                                                                                                                                                                                                                                                                                                                                                                                                                                                                                                                                                                                                                                                                                                                                                                                                                                                                                                                                                                                                                                                                                                                                                                                                                                                                                                                                                                                                                                                                                                                                                                                                                                                                                                                                                                                                                                                                                                                                                                                                                                                                                                                                                                                                                                                                                                                                                                                                                                                                                                                                                                                                                                                                                                                                                                                                                                                                                                                                                                                                                                                                                                                                                                                                                                                                                                                                                                                                                                    | CAP ROGER DE FLOR                                                                                                            | Banc de Sang i Teixits                                                                                                           | Carlos Hobeich; Francisco Vidal; Irene Corrales; Lorena Ramírez; María Glòria Soria; Natália Comes; Nina Borrás; Noemí Gonzalez; Silvia Sauleda                                                                                                                                                                                                                 |
| EPI_ISL_1553803, EPI_ISL_1553847                                                                                                                                                                                                                                                                                                                                                                                                                                                                                                                                                                                                                                                                                                                                                                                                                                                                                                                                                                                                                                                                                                                                                                                                                                                                                                                                                                                                                                                                                                                                                                                                                                                                                                                                                                                                                                                                                                                                                                                                                                                                                                                                                                                                                                                                                                                                                                                                                                                                                                                                                                                                                                                                                                                                                                                                                                                                                                                                                                                                                                                                                                                                                                                                                                                                                                                                                                                                                                                                                                                                                                                                                                                                                                                                                                                                                                                                                                                                                                                                                                                                                                                                                                                                                                                                                                                                                                                                                                                                                                                                                                                                                                                                                                                                                                                                                                                                                                                                                                                                                                                                                                                                                                                                                                                                                                                                                                                                                                                                                                                                                                                                                                                                                                                                                                                                                                                                                                                                                                                                                                                                                                                                                                                                                                               | CAP SAGRADA FAMILIA                                                                                                          | Banc de Sang i Teixits                                                                                                           | Carlos Hobeich; Francisco Vidal; Irene Corrales; Lorena Ramírez; María Glòria Soria; Natália Comes; Nina Borrás; Noemí Gonzalez; Silvia Sauleda                                                                                                                                                                                                                 |
| EPI_ISL_1553832                                                                                                                                                                                                                                                                                                                                                                                                                                                                                                                                                                                                                                                                                                                                                                                                                                                                                                                                                                                                                                                                                                                                                                                                                                                                                                                                                                                                                                                                                                                                                                                                                                                                                                                                                                                                                                                                                                                                                                                                                                                                                                                                                                                                                                                                                                                                                                                                                                                                                                                                                                                                                                                                                                                                                                                                                                                                                                                                                                                                                                                                                                                                                                                                                                                                                                                                                                                                                                                                                                                                                                                                                                                                                                                                                                                                                                                                                                                                                                                                                                                                                                                                                                                                                                                                                                                                                                                                                                                                                                                                                                                                                                                                                                                                                                                                                                                                                                                                                                                                                                                                                                                                                                                                                                                                                                                                                                                                                                                                                                                                                                                                                                                                                                                                                                                                                                                                                                                                                                                                                                                                                                                                                                                                                                                                | CAP SANT HIPÒLIT DE VOLTREGÀ                                                                                                 | Banc de Sang i Teixits                                                                                                           | Carlos Hobeich; Francisco Vidal; Irene Corrales; Lorena Ramírez; María Glòria Soria; Natália Comes; Nina Borrás; Noemí Gonzalez; Silvia Sauleda                                                                                                                                                                                                                 |
| EPI_ISL_1553821 to 1553822, EPI_ISL_1553840                                                                                                                                                                                                                                                                                                                                                                                                                                                                                                                                                                                                                                                                                                                                                                                                                                                                                                                                                                                                                                                                                                                                                                                                                                                                                                                                                                                                                                                                                                                                                                                                                                                                                                                                                                                                                                                                                                                                                                                                                                                                                                                                                                                                                                                                                                                                                                                                                                                                                                                                                                                                                                                                                                                                                                                                                                                                                                                                                                                                                                                                                                                                                                                                                                                                                                                                                                                                                                                                                                                                                                                                                                                                                                                                                                                                                                                                                                                                                                                                                                                                                                                                                                                                                                                                                                                                                                                                                                                                                                                                                                                                                                                                                                                                                                                                                                                                                                                                                                                                                                                                                                                                                                                                                                                                                                                                                                                                                                                                                                                                                                                                                                                                                                                                                                                                                                                                                                                                                                                                                                                                                                                                                                                                                                    | CAP SANT JULIÀ DE VILATORTA                                                                                                  | Banc de Sang i Teixits                                                                                                           | Carlos Hobeich; Francisco Vidal; Irene Corrales; Lorena Ramírez; María Glòria Soria; Natália Comes; Nina Borrás; Noemí Gonzalez; Silvia Sauleda                                                                                                                                                                                                                 |
| EPI_ISL_1553838                                                                                                                                                                                                                                                                                                                                                                                                                                                                                                                                                                                                                                                                                                                                                                                                                                                                                                                                                                                                                                                                                                                                                                                                                                                                                                                                                                                                                                                                                                                                                                                                                                                                                                                                                                                                                                                                                                                                                                                                                                                                                                                                                                                                                                                                                                                                                                                                                                                                                                                                                                                                                                                                                                                                                                                                                                                                                                                                                                                                                                                                                                                                                                                                                                                                                                                                                                                                                                                                                                                                                                                                                                                                                                                                                                                                                                                                                                                                                                                                                                                                                                                                                                                                                                                                                                                                                                                                                                                                                                                                                                                                                                                                                                                                                                                                                                                                                                                                                                                                                                                                                                                                                                                                                                                                                                                                                                                                                                                                                                                                                                                                                                                                                                                                                                                                                                                                                                                                                                                                                                                                                                                                                                                                                                                                | CAP SANT PERE DE TORELLÓ                                                                                                     | Banc de Sang i Teixits                                                                                                           | Carlos Hobeich; Francisco Vidal; Irene Corrales; Lorena Ramírez; María Glòria Soria; Natália Comes; Nina Borrás; Noemí Gonzalez; Silvia Sauleda                                                                                                                                                                                                                 |
| EPI_ISL_1553839                                                                                                                                                                                                                                                                                                                                                                                                                                                                                                                                                                                                                                                                                                                                                                                                                                                                                                                                                                                                                                                                                                                                                                                                                                                                                                                                                                                                                                                                                                                                                                                                                                                                                                                                                                                                                                                                                                                                                                                                                                                                                                                                                                                                                                                                                                                                                                                                                                                                                                                                                                                                                                                                                                                                                                                                                                                                                                                                                                                                                                                                                                                                                                                                                                                                                                                                                                                                                                                                                                                                                                                                                                                                                                                                                                                                                                                                                                                                                                                                                                                                                                                                                                                                                                                                                                                                                                                                                                                                                                                                                                                                                                                                                                                                                                                                                                                                                                                                                                                                                                                                                                                                                                                                                                                                                                                                                                                                                                                                                                                                                                                                                                                                                                                                                                                                                                                                                                                                                                                                                                                                                                                                                                                                                                                                | CAP SANT QUIRZE DE BESORA                                                                                                    | Banc de Sang i Teixits                                                                                                           | Carlos Hobeich; Francisco Vidal; Irene Corrales; Lorena Ramírez; María Glòria Soria; Natália Comes; Nina Borrás; Noemí Gonzalez; Silvia Sauleda                                                                                                                                                                                                                 |
| EPI_ISL_1553823                                                                                                                                                                                                                                                                                                                                                                                                                                                                                                                                                                                                                                                                                                                                                                                                                                                                                                                                                                                                                                                                                                                                                                                                                                                                                                                                                                                                                                                                                                                                                                                                                                                                                                                                                                                                                                                                                                                                                                                                                                                                                                                                                                                                                                                                                                                                                                                                                                                                                                                                                                                                                                                                                                                                                                                                                                                                                                                                                                                                                                                                                                                                                                                                                                                                                                                                                                                                                                                                                                                                                                                                                                                                                                                                                                                                                                                                                                                                                                                                                                                                                                                                                                                                                                                                                                                                                                                                                                                                                                                                                                                                                                                                                                                                                                                                                                                                                                                                                                                                                                                                                                                                                                                                                                                                                                                                                                                                                                                                                                                                                                                                                                                                                                                                                                                                                                                                                                                                                                                                                                                                                                                                                                                                                                                                | CAP TONA                                                                                                                     | Banc de Sang i Teixits                                                                                                           | Carlos Hobeich; Francisco Vidal; Irene Corrales; Lorena Ramírez; María Glòria Soria; Natália Comes; Nina Borrás; Noemí Gonzalez; Silvia Sauleda                                                                                                                                                                                                                 |
| EPI_ISL_1529145 to 1529146, EPI_ISL_1529150, EPI_ISL_1529153, EPI_ISL_1529156 to 1529157, EPI_ISL_1529159 to 1529160, EPI_ISL_1529162, EPI_ISL_1529169 to 1529170, EPI_ISL_1529172, EPI_ISL_1529174 to 1529175, EPI_ISL_1529178, EPI_ISL_1529182, EPI_ISL_1529184, EPI_ISL_1529187, EPI_ISL_1529189, EPI_ISL_1529192, EPI_ISL_1529197 to 1529201, EPI_ISL_1529203, EPI_ISL_1529214 to 1529215, EPI_ISL_1529215, EPI_ISL_1529219 to 1529220, EPI_ISL_1529222 to 1529223, EPI_ISL_1529230 to 1529231, EPI_ISL_1529233, EPI_ISL_1529242 to 1529244, EPI_ISL_1529249, EPI_ISL_1529254, EPI_ISL_1529257, EPI_ISL_1529260, EPI_ISL_1529264 to 1529266, EPI_ISL_1529276 to 1529278, EPI_ISL_1529286, EPI_ISL_1529288 to 1529291, EPI_ISL_1529294, EPI_ISL_1529299, EPI_ISL_1529303, EPI_ISL_1529306 to 1529307, EPI_ISL_1529312 to 1529315, EPI_ISL_1529319, EPI_ISL_1529321, EPI_ISL_1529324 to 1529326, EPI_ISL_1529332 to 1529333, EPI_ISL_1529335, EPI_ISL_1529337 to 1529339, EPI_ISL_1529359 to 1529363, EPI_ISL_1529366, EPI_ISL_1529369                                                                                                                                                                                                                                                                                                                                                                                                                                                                                                                                                                                                                                                                                                                                                                                                                                                                                                                                                                                                                                                                                                                                                                                                                                                                                                                                                                                                                                                                                                                                                                                                                                                                                                                                                                                                                                                                                                                                                                                                                                                                                                                                                                                                                                                                                                                                                                                                                                                                                                                                                                                                                                                                                                                                                                                                                                                                                                                                                                                                                                                                                                                                                                                                                                                                                                                                                                                                                                                                                                                                                                                                                                                                                                                                                                                                                                                                                                                                                                                                                                                                                                                                                                                                                                                                                                                                                                                                                                                                                                                                                                                                                                                                                                                                                                                                                                                                                                                                                                                                                                                                                                                                                                                                                                       | EPI_ISL_1553810, EPI_ISL_1553817, EPI_ISL_1553824, EPI_ISL_1553829, EPI_ISL_1553833                                          | EPI_ISL_1553800, EPI_ISL_1553811, EPI_ISL_1553819, EPI_ISL_1553825, EPI_ISL_1553827, EPI_ISL_1553841, EPI_ISL_1553844 to 1553845 | see above                                                                                                                                                                                                                                                                                                                                                       |
| EPI_ISL_1553812 to 1553813, EPI_ISL_1553831, EPI_ISL_1553834 to 1553837                                                                                                                                                                                                                                                                                                                                                                                                                                                                                                                                                                                                                                                                                                                                                                                                                                                                                                                                                                                                                                                                                                                                                                                                                                                                                                                                                                                                                                                                                                                                                                                                                                                                                                                                                                                                                                                                                                                                                                                                                                                                                                                                                                                                                                                                                                                                                                                                                                                                                                                                                                                                                                                                                                                                                                                                                                                                                                                                                                                                                                                                                                                                                                                                                                                                                                                                                                                                                                                                                                                                                                                                                                                                                                                                                                                                                                                                                                                                                                                                                                                                                                                                                                                                                                                                                                                                                                                                                                                                                                                                                                                                                                                                                                                                                                                                                                                                                                                                                                                                                                                                                                                                                                                                                                                                                                                                                                                                                                                                                                                                                                                                                                                                                                                                                                                                                                                                                                                                                                                                                                                                                                                                                                                                        | CAP TORELLÓ                                                                                                                  | Banc de Sang i Teixits                                                                                                           | Carlos Hobeich; Francisco Vidal; Irene Corrales; Lorena Ramírez; María Glòria Soria; Natália Comes; Nina Borrás; Noemí Gonzalez; Silvia Sauleda                                                                                                                                                                                                                 |
| EPI_ISL_1553812 to 1553813, EPI_ISL_1553831, EPI_ISL_1553834 to 1553837                                                                                                                                                                                                                                                                                                                                                                                                                                                                                                                                                                                                                                                                                                                                                                                                                                                                                                                                                                                                                                                                                                                                                                                                                                                                                                                                                                                                                                                                                                                                                                                                                                                                                                                                                                                                                                                                                                                                                                                                                                                                                                                                                                                                                                                                                                                                                                                                                                                                                                                                                                                                                                                                                                                                                                                                                                                                                                                                                                                                                                                                                                                                                                                                                                                                                                                                                                                                                                                                                                                                                                                                                                                                                                                                                                                                                                                                                                                                                                                                                                                                                                                                                                                                                                                                                                                                                                                                                                                                                                                                                                                                                                                                                                                                                                                                                                                                                                                                                                                                                                                                                                                                                                                                                                                                                                                                                                                                                                                                                                                                                                                                                                                                                                                                                                                                                                                                                                                                                                                                                                                                                                                                                                                                        | CAP VIC NORD                                                                                                                 | Banc de Sang i Teixits                                                                                                           | Carlos Hobeich; Francisco Vidal; Irene Corrales; Lorena Ramírez; María Glòria Soria; Natália Comes; Nina Borrás; Noemí Gonzalez; Silvia Sauleda                                                                                                                                                                                                                 |
| EPI_ISL_1461204                                                                                                                                                                                                                                                                                                                                                                                                                                                                                                                                                                                                                                                                                                                                                                                                                                                                                                                                                                                                                                                                                                                                                                                                                                                                                                                                                                                                                                                                                                                                                                                                                                                                                                                                                                                                                                                                                                                                                                                                                                                                                                                                                                                                                                                                                                                                                                                                                                                                                                                                                                                                                                                                                                                                                                                                                                                                                                                                                                                                                                                                                                                                                                                                                                                                                                                                                                                                                                                                                                                                                                                                                                                                                                                                                                                                                                                                                                                                                                                                                                                                                                                                                                                                                                                                                                                                                                                                                                                                                                                                                                                                                                                                                                                                                                                                                                                                                                                                                                                                                                                                                                                                                                                                                                                                                                                                                                                                                                                                                                                                                                                                                                                                                                                                                                                                                                                                                                                                                                                                                                                                                                                                                                                                                                                                | CAPRISA                                                                                                                      | KRISP, KZN Research Innovation and Sequencing Platform                                                                           | Chimukangara B; Giandhari J; Khan S; Lessells R; Mdlalose K; Pillay S; Tegally H; Wilkinson E; York D; de Oliveira T                                                                                                                                                                                                                                            |
| EPI_ISL_586549 to 586550, EPI_ISL_586555 to 586561, EPI_ISL_590690                                                                                                                                                                                                                                                                                                                                                                                                                                                                                                                                                                                                                                                                                                                                                                                                                                                                                                                                                                                                                                                                                                                                                                                                                                                                                                                                                                                                                                                                                                                                                                                                                                                                                                                                                                                                                                                                                                                                                                                                                                                                                                                                                                                                                                                                                                                                                                                                                                                                                                                                                                                                                                                                                                                                                                                                                                                                                                                                                                                                                                                                                                                                                                                                                                                                                                                                                                                                                                                                                                                                                                                                                                                                                                                                                                                                                                                                                                                                                                                                                                                                                                                                                                                                                                                                                                                                                                                                                                                                                                                                                                                                                                                                                                                                                                                                                                                                                                                                                                                                                                                                                                                                                                                                                                                                                                                                                                                                                                                                                                                                                                                                                                                                                                                                                                                                                                                                                                                                                                                                                                                                                                                                                                                                             | CCC,Veraval                                                                                                                  | Gujarat Biotechnology Research Centre                                                                                            | A M Kadri; Afzal Ansari; Apurvasinh Puvar; Chaitanya Joshi; Dinesh Kumar; Harsh Bakshi; Janvi Raval; Jignesh Parmar; Jitendra Bamrotia; Komal Patel; Labdhi Pandya; Madhvi Joshi; Maharshi Pandya; Monika Gandhi; Nidhi Patel; Nikha Trivedi; Nitin Savaliya; Pinal Trivedi; R D Dixit; Raghawendra Kumar; Zarna Patel; Zuber Saiyed                            |
| EPI_ISL_1461204                                                                                                                                                                                                                                                                                                                                                                                                                                                                                                                                                                                                                                                                                                                                                                                                                                                                                                                                                                                                                                                                                                                                                                                                                                                                                                                                                                                                                                                                                                                                                                                                                                                                                                                                                                                                                                                                                                                                                                                                                                                                                                                                                                                                                                                                                                                                                                                                                                                                                                                                                                                                                                                                                                                                                                                                                                                                                                                                                                                                                                                                                                                                                                                                                                                                                                                                                                                                                                                                                                                                                                                                                                                                                                                                                                                                                                                                                                                                                                                                                                                                                                                                                                                                                                                                                                                                                                                                                                                                                                                                                                                                                                                                                                                                                                                                                                                                                                                                                                                                                                                                                                                                                                                                                                                                                                                                                                                                                                                                                                                                                                                                                                                                                                                                                                                                                                                                                                                                                                                                                                                                                                                                                                                                                                                                | CDP CH THONON                                                                                                                | CNR Virus des Infections Respiratoires - France SUD                                                                              | Antonin Bal; Bruno Lina; Gregory Destras; Gwendolynne Burfin; Hadrien Regue; Laurence Josset; Martine Valette; Quentin Semanas                                                                                                                                                                                                                                  |
| EPI_ISL_1406589, EPI_ISL_1406649, EPI_ISL_1483772, EPI_ISL_1547441 to 1547444                                                                                                                                                                                                                                                                                                                                                                                                                                                                                                                                                                                                                                                                                                                                                                                                                                                                                                                                                                                                                                                                                                                                                                                                                                                                                                                                                                                                                                                                                                                                                                                                                                                                                                                                                                                                                                                                                                                                                                                                                                                                                                                                                                                                                                                                                                                                                                                                                                                                                                                                                                                                                                                                                                                                                                                                                                                                                                                                                                                                                                                                                                                                                                                                                                                                                                                                                                                                                                                                                                                                                                                                                                                                                                                                                                                                                                                                                                                                                                                                                                                                                                                                                                                                                                                                                                                                                                                                                                                                                                                                                                                                                                                                                                                                                                                                                                                                                                                                                                                                                                                                                                                                                                                                                                                                                                                                                                                                                                                                                                                                                                                                                                                                                                                                                                                                                                                                                                                                                                                                                                                                                                                                                                                                  | CDP COVID MONTLUCON                                                                                                          | CHU Clermont-Ferrand, service de virologie                                                                                       | Bisseux Maxime; Combes Patricia; Henquell Cécile; Mirand Audrey                                                                                                                                                                                                                                                                                                 |
| EPI_ISL_1418301                                                                                                                                                                                                                                                                                                                                                                                                                                                                                                                                                                                                                                                                                                                                                                                                                                                                                                                                                                                                                                                                                                                                                                                                                                                                                                                                                                                                                                                                                                                                                                                                                                                                                                                                                                                                                                                                                                                                                                                                                                                                                                                                                                                                                                                                                                                                                                                                                                                                                                                                                                                                                                                                                                                                                                                                                                                                                                                                                                                                                                                                                                                                                                                                                                                                                                                                                                                                                                                                                                                                                                                                                                                                                                                                                                                                                                                                                                                                                                                                                                                                                                                                                                                                                                                                                                                                                                                                                                                                                                                                                                                                                                                                                                                                                                                                                                                                                                                                                                                                                                                                                                                                                                                                                                                                                                                                                                                                                                                                                                                                                                                                                                                                                                                                                                                                                                                                                                                                                                                                                                                                                                                                                                                                                                                                | CDP PIERRE OUDOT                                                                                                             | CNR Virus des Infections Respiratoires - France SUD                                                                              | Antonin Bal; Bruno Lina; Gregory Destras; Gwendolynne Burfin; Hadrien Regue; Laurence Josset; Martine Valette; Quentin Semanas                                                                                                                                                                                                                                  |
| EPI_ISL_535662 to 535715                                                                                                                                                                                                                                                                                                                                                                                                                                                                                                                                                                                                                                                                                                                                                                                                                                                                                                                                                                                                                                                                                                                                                                                                                                                                                                                                                                                                                                                                                                                                                                                                                                                                                                                                                                                                                                                                                                                                                                                                                                                                                                                                                                                                                                                                                                                                                                                                                                                                                                                                                                                                                                                                                                                                                                                                                                                                                                                                                                                                                                                                                                                                                                                                                                                                                                                                                                                                                                                                                                                                                                                                                                                                                                                                                                                                                                                                                                                                                                                                                                                                                                                                                                                                                                                                                                                                                                                                                                                                                                                                                                                                                                                                                                                                                                                                                                                                                                                                                                                                                                                                                                                                                                                                                                                                                                                                                                                                                                                                                                                                                                                                                                                                                                                                                                                                                                                                                                                                                                                                                                                                                                                                                                                                                                                       | CDPH, Microbial Diseases Laboratory                                                                                          | Pathogen Discovery, Respiratory Viruses Branch, Division of Viral Diseases, Centers for Disease Control and Prevention           | Anna Uehara; Brian Lynch; Clinton R. Paden; Haibin Wang; Jing Zhang; Krista Queen; Rachel Marine; Suxiang Tong; Yan Li; Ying Tao                                                                                                                                                                                                                                |
| EPI_ISL_1483240                                                                                                                                                                                                                                                                                                                                                                                                                                                                                                                                                                                                                                                                                                                                                                                                                                                                                                                                                                                                                                                                                                                                                                                                                                                                                                                                                                                                                                                                                                                                                                                                                                                                                                                                                                                                                                                                                                                                                                                                                                                                                                                                                                                                                                                                                                                                                                                                                                                                                                                                                                                                                                                                                                                                                                                                                                                                                                                                                                                                                                                                                                                                                                                                                                                                                                                                                                                                                                                                                                                                                                                                                                                                                                                                                                                                                                                                                                                                                                                                                                                                                                                                                                                                                                                                                                                                                                                                                                                                                                                                                                                                                                                                                                                                                                                                                                                                                                                                                                                                                                                                                                                                                                                                                                                                                                                                                                                                                                                                                                                                                                                                                                                                                                                                                                                                                                                                                                                                                                                                                                                                                                                                                                                                                                                                | CDPH, Viral and Rickettsial Disease Laboratory                                                                               | Pathogen Discovery, Respiratory Viruses Branch, Division of Viral Diseases, Centers for Disease Control and Prevention           | Anna Kelleher; Anna Uehara; Brian Lynch; Clinton R. Paden; Haibin Wang; Han Jia Justin Ng; Jing Zhang; Krista Queen; Peter Cook; Suxiang Tong; Yan Li; Ying Tao                                                                                                                                                                                                 |
| EPI_ISL_486852                                                                                                                                                                                                                                                                                                                                                                                                                                                                                                                                                                                                                                                                                                                                                                                                                                                                                                                                                                                                                                                                                                                                                                                                                                                                                                                                                                                                                                                                                                                                                                                                                                                                                                                                                                                                                                                                                                                                                                                                                                                                                                                                                                                                                                                                                                                                                                                                                                                                                                                                                                                                                                                                                                                                                                                                                                                                                                                                                                                                                                                                                                                                                                                                                                                                                                                                                                                                                                                                                                                                                                                                                                                                                                                                                                                                                                                                                                                                                                                                                                                                                                                                                                                                                                                                                                                                                                                                                                                                                                                                                                                                                                                                                                                                                                                                                                                                                                                                                                                                                                                                                                                                                                                                                                                                                                                                                                                                                                                                                                                                                                                                                                                                                                                                                                                                                                                                                                                                                                                                                                                                                                                                                                                                                                                                 | CDRI/SGPGI                                                                                                                   | CSIR-CDR/SGPGI                                                                                                                   | Dharam Veer Singh; Rahul Vishvkarma; Rajender Singh; Ravishankar Ramachandran; Saumya Sarkar; Tapas Kumar Kundu; Uday Ghoshal; Ujjala Ghoshal                                                                                                                                                                                                                   |
| EPI_ISL_1461168 to 1461178                                                                                                                                                                                                                                                                                                                                                                                                                                                                                                                                                                                                                                                                                                                                                                                                                                                                                                                                                                                                                                                                                                                                                                                                                                                                                                                                                                                                                                                                                                                                                                                                                                                                                                                                                                                                                                                                                                                                                                                                                                                                                                                                                                                                                                                                                                                                                                                                                                                                                                                                                                                                                                                                                                                                                                                                                                                                                                                                                                                                                                                                                                                                                                                                                                                                                                                                                                                                                                                                                                                                                                                                                                                                                                                                                                                                                                                                                                                                                                                                                                                                                                                                                                                                                                                                                                                                                                                                                                                                                                                                                                                                                                                                                                                                                                                                                                                                                                                                                                                                                                                                                                                                                                                                                                                                                                                                                                                                                                                                                                                                                                                                                                                                                                                                                                                                                                                                                                                                                                                                                                                                                                                                                                                                                                                     | CEDIBIO UNILAB TOULOUSE                                                                                                      | CNR Virus des Infections Respiratoires - France SUD                                                                              | Antonin Bal; Bruno Lina; Gregory Destras; Gwendolynne Burfin; Hadrien Regue; Laurence Josset; Martine Valette; Quentin Semanas                                                                                                                                                                                                                                  |
| EPI_ISL_605780 to 605782                                                                                                                                                                                                                                                                                                                                                                                                                                                                                                                                                                                                                                                                                                                                                                                                                                                                                                                                                                                                                                                                                                                                                                                                                                                                                                                                                                                                                                                                                                                                                                                                                                                                                                                                                                                                                                                                                                                                                                                                                                                                                                                                                                                                                                                                                                                                                                                                                                                                                                                                                                                                                                                                                                                                                                                                                                                                                                                                                                                                                                                                                                                                                                                                                                                                                                                                                                                                                                                                                                                                                                                                                                                                                                                                                                                                                                                                                                                                                                                                                                                                                                                                                                                                                                                                                                                                                                                                                                                                                                                                                                                                                                                                                                                                                                                                                                                                                                                                                                                                                                                                                                                                                                                                                                                                                                                                                                                                                                                                                                                                                                                                                                                                                                                                                                                                                                                                                                                                                                                                                                                                                                                                                                                                                                                       | CEIRS Data Processing and Coordinating Center, St. Jude Center of Excellence for Influenza Research and Surveillance (CEIRS) | CEIRS Data Processing and Coordinating Center, St. Jude Center of Excellence for Influenza Research and Surveillance (CEIRS)     | A.E.; Ali; El-Guindy; El-Sayes, M.; El-Shesheny, R.; El-Taweel, A.; Gomaa, M.; Kamel; Kandeil, A.; Kayali, G.; Kayed; Kutkat, O.; M.A.; M.N.; Mahmoud; Mahrous, N.; Moatasm, Y.; Mostafa, A.; N.M.; Naguib, A.; Roshdy; S.H.; Shehata, M.; Showky, S.; W.H.; Webby, R.                                                                                          |
| EPI_ISL_1418248                                                                                                                                                                                                                                                                                                                                                                                                                                                                                                                                                                                                                                                                                                                                                                                                                                                                                                                                                                                                                                                                                                                                                                                                                                                                                                                                                                                                                                                                                                                                                                                                                                                                                                                                                                                                                                                                                                                                                                                                                                                                                                                                                                                                                                                                                                                                                                                                                                                                                                                                                                                                                                                                                                                                                                                                                                                                                                                                                                                                                                                                                                                                                                                                                                                                                                                                                                                                                                                                                                                                                                                                                                                                                                                                                                                                                                                                                                                                                                                                                                                                                                                                                                                                                                                                                                                                                                                                                                                                                                                                                                                                                                                                                                                                                                                                                                                                                                                                                                                                                                                                                                                                                                                                                                                                                                                                                                                                                                                                                                                                                                                                                                                                                                                                                                                                                                                                                                                                                                                                                                                                                                                                                                                                                                                                | CENTRE HOSPITALIER BELLEVUE                                                                                                  | CNR Virus des Infections Respiratoires - France SUD                                                                              | Antonin Bal; Bruno Lina; Gregory Destras; Gwendolynne Burfin; Hadrien Regue; Laurence Josset; Martine Valette; Quentin Semanas                                                                                                                                                                                                                                  |
| EPI_ISL_1418243, EPI_ISL_1461056, EPI_ISL_1461058, EPI_ISL_1526376 to 1526377, EPI_ISL_1526446, EPI_ISL_1526450 to 1526452, EPI_ISL_1526454 to 1526455                                                                                                                                                                                                                                                                                                                                                                                                                                                                                                                                                                                                                                                                                                                                                                                                                                                                                                                                                                                                                                                                                                                                                                                                                                                                                                                                                                                                                                                                                                                                                                                                                                                                                                                                                                                                                                                                                                                                                                                                                                                                                                                                                                                                                                                                                                                                                                                                                                                                                                                                                                                                                                                                                                                                                                                                                                                                                                                                                                                                                                                                                                                                                                                                                                                                                                                                                                                                                                                                                                                                                                                                                                                                                                                                                                                                                                                                                                                                                                                                                                                                                                                                                                                                                                                                                                                                                                                                                                                                                                                                                                                                                                                                                                                                                                                                                                                                                                                                                                                                                                                                                                                                                                                                                                                                                                                                                                                                                                                                                                                                                                                                                                                                                                                                                                                                                                                                                                                                                                                                                                                                                                                         |                                                                                                                              |                                                                                                                                  |                                                                                                                                                                                                                                                                                                                                                                 |

|                                                                                                                                                                                                                                                                                                                                                                         |                                                              |                                                        |                                                                                                                                                                                                                                                                                                                                                                                                                                                                                                                                                                                    |
|-------------------------------------------------------------------------------------------------------------------------------------------------------------------------------------------------------------------------------------------------------------------------------------------------------------------------------------------------------------------------|--------------------------------------------------------------|--------------------------------------------------------|------------------------------------------------------------------------------------------------------------------------------------------------------------------------------------------------------------------------------------------------------------------------------------------------------------------------------------------------------------------------------------------------------------------------------------------------------------------------------------------------------------------------------------------------------------------------------------|
| see above                                                                                                                                                                                                                                                                                                                                                               | CENTRE HOSPITALIER DE BOURG EN BRESSE                        | CNR Virus des Infections Respiratoires - France SUD    | Antonin Bal; Bruno Lina; Gregory Destras; Gwendolynne Burfin; Hadrien Regue; Laurence Josset; Martine Valette; Quentin Semanas                                                                                                                                                                                                                                                                                                                                                                                                                                                     |
| EPI_ISL_1418204, EPI_ISL_1418206, EPI_ISL_1418208, EPI_ISL_1433820, EPI_ISL_1461013, EPI_ISL_1461017 to 1461018, EPI_ISL_1461046 to 1461048, EPI_ISL_1526107 to 1526108, EPI_ISL_1526167, EPI_ISL_1526196, EPI_ISL_1526253 to 1526254, EPI_ISL_1526369, EPI_ISL_1526392 to 1526394                                                                                      |                                                              |                                                        |                                                                                                                                                                                                                                                                                                                                                                                                                                                                                                                                                                                    |
| see above                                                                                                                                                                                                                                                                                                                                                               | CENTRE HOSPITALIER DU HAUT BUGEY                             | CNR Virus des Infections Respiratoires - France SUD    | Antonin Bal; Bruno Lina; Gregory Destras; Gwendolynne Burfin; Hadrien Regue; Laurence Josset; Martine Valette; Quentin Semanas                                                                                                                                                                                                                                                                                                                                                                                                                                                     |
| EPI_ISL_1461165                                                                                                                                                                                                                                                                                                                                                         | CENTRE HOSPITALIER E. BOREL                                  | CNR Virus des Infections Respiratoires - France SUD    | Antonin Bal; Bruno Lina; Gregory Destras; Gwendolynne Burfin; Hadrien Regue; Laurence Josset; Martine Valette; Quentin Semanas                                                                                                                                                                                                                                                                                                                                                                                                                                                     |
| EPI_ISL_1418230, EPI_ISL_1418240, EPI_ISL_1461020 to 1461021, EPI_ISL_1461039, EPI_ISL_1461122, EPI_ISL_1461142 to 1461144, EPI_ISL_1461152, EPI_ISL_1526075, EPI_ISL_1526105, EPI_ISL_1526127, EPI_ISL_1526162, EPI_ISL_1526183, EPI_ISL_1526202 to 1526203, EPI_ISL_1526359, EPI_ISL_1526374, EPI_ISL_1526406 to 1526409, EPI_ISL_1526412, EPI_ISL_1526447 to 1526449 |                                                              |                                                        |                                                                                                                                                                                                                                                                                                                                                                                                                                                                                                                                                                                    |
| see above                                                                                                                                                                                                                                                                                                                                                               | CENTRE HOSPITALIER LUCIEN HUSSEL                             | CNR Virus des Infections Respiratoires - France SUD    | Antonin Bal; Bruno Lina; Gregory Destras; Gwendolynne Burfin; Hadrien Regue; Laurence Josset; Martine Valette; Quentin Semanas                                                                                                                                                                                                                                                                                                                                                                                                                                                     |
| EPI_ISL_1433793, EPI_ISL_1434243, EPI_ISL_1461033, EPI_ISL_1461045, EPI_ISL_1461148, EPI_ISL_1526094, EPI_ISL_1526113, EPI_ISL_1526142, EPI_ISL_1526177, EPI_ISL_1526220, EPI_ISL_1526244, EPI_ISL_1526248, EPI_ISL_1526258, EPI_ISL_1526277, EPI_ISL_1526328, EPI_ISL_1526355, EPI_ISL_1526424 to 1526425, EPI_ISL_1526453                                             |                                                              |                                                        |                                                                                                                                                                                                                                                                                                                                                                                                                                                                                                                                                                                    |
| see above                                                                                                                                                                                                                                                                                                                                                               | CENTRE HOSPITALIER PIERRE OUDOT                              | CNR Virus des Infections Respiratoires - France SUD    | Antonin Bal; Bruno Lina; Gregory Destras; Gwendolynne Burfin; Hadrien Regue; Laurence Josset; Martine Valette; Quentin Semanas                                                                                                                                                                                                                                                                                                                                                                                                                                                     |
| EPI_ISL_1461071                                                                                                                                                                                                                                                                                                                                                         | CENTRE HOSPITALIER POITIERS                                  | CNR Virus des Infections Respiratoires - France SUD    | Antonin Bal; Bruno Lina; Gregory Destras; Gwendolynne Burfin; Hadrien Regue; Laurence Josset; Martine Valette; Quentin Semanas                                                                                                                                                                                                                                                                                                                                                                                                                                                     |
| EPI_ISL_1418247, EPI_ISL_1461008, EPI_ISL_1461037, EPI_ISL_1461041, EPI_ISL_1461072, EPI_ISL_1461166 to 1461167, EPI_ISL_1526120 to 1526122, EPI_ISL_1526155 to 1526156, EPI_ISL_1526170 to 1526173, EPI_ISL_1526201, EPI_ISL_1526204 to 1526207, EPI_ISL_1526350, EPI_ISL_1526368, EPI_ISL_1526420, EPI_ISL_1526441 to 1526445                                         |                                                              |                                                        |                                                                                                                                                                                                                                                                                                                                                                                                                                                                                                                                                                                    |
| see above                                                                                                                                                                                                                                                                                                                                                               | CENTRE HOSPITALIER ST JOSEPH ST LUC                          | CNR Virus des Infections Respiratoires - France SUD    | Antonin Bal; Bruno Lina; Gregory Destras; Gwendolynne Burfin; Hadrien Regue; Laurence Josset; Martine Valette; Quentin Semanas                                                                                                                                                                                                                                                                                                                                                                                                                                                     |
| EPI_ISL_1418256                                                                                                                                                                                                                                                                                                                                                         | CENTRE HOSPITALIER SUD GIRONDE                               | CNR Virus des Infections Respiratoires - France SUD    | Antonin Bal; Bruno Lina; Gregory Destras; Gwendolynne Burfin; Hadrien Regue; Laurence Josset; Martine Valette; Quentin Semanas                                                                                                                                                                                                                                                                                                                                                                                                                                                     |
| EPI_ISL_1469658                                                                                                                                                                                                                                                                                                                                                         | CENTRO DE ESPECIALIDADES TRIUNFO                             | Epiclin                                                | Ana Paula Muterle; Carolina Comerlato; Eliana Márcia Da Ros Wendland; Fernando Hayashi Sant'Anna; Janira Prichula; Juliana Comerlato                                                                                                                                                                                                                                                                                                                                                                                                                                               |
| EPI_ISL_1511237                                                                                                                                                                                                                                                                                                                                                         | CENTRO DE MILITAR DE VETERINARIA                             | Instituto de Salud Carlos III                          | A. Monzón; DANIEL; F. Casas; I. Jiménez; I.FERNANDEZ MOREIRA; Iglesias-Caballero; M. Sandoñi; P. Zaballos; S. Camarero; S. Cuesta; S. Pozo; S. Varona; V. Vázquez-Morón                                                                                                                                                                                                                                                                                                                                                                                                            |
| EPI_ISL_1445147 to 1445152                                                                                                                                                                                                                                                                                                                                              | CENTRO DE REFERENCIA DO IDOSO DR HUMBERTO MENDES DE CARVALHO | Instituto Butantan / Mendelics                         | Antonio Jorge Martins; Bibiana Santos; Claudia Renata dos Santos Barros; David Schlesinger; Debora Botequio Moretti; Dimas Tadeu Covas; Elaine Cristina Marqueze; Elaine Vieira dos Santos; Erika Freitas; Evandra Strazza Rodrigues; Flavia Aburjaile; José Salvatore Leister Patané; João Paulo Kitajima; Luiz Carlos Junior de Alcantara; Maria Carolina Elias; Marta Giovanetti; Rafael dos Santos Bezerra; Raul Machado Neto; Ricardo Haddad; Rodrigo Tocantins Calado.; Sandra Coccuzzo Sampaio; Simone Kashima; Svetoslav Nanev Slavov; Vagner Fonseca; Vincent Louis Viala |
| EPI_ISL_1469596, EPI_ISL_1469642, EPI_ISL_1469730, EPI_ISL_1469732, EPI_ISL_1469737, EPI_ISL_1469742, EPI_ISL_1479125                                                                                                                                                                                                                                                   |                                                              |                                                        |                                                                                                                                                                                                                                                                                                                                                                                                                                                                                                                                                                                    |
| see above                                                                                                                                                                                                                                                                                                                                                               | CENTRO DE REFERENCIA EM SINDROMES GRIPAIS                    | Epiclin                                                | Ana Paula Muterle; Carolina Comerlato; Eliana Márcia Da Ros Wendland; Fernando Hayashi Sant'Anna; Janira Prichula; Juliana Comerlato                                                                                                                                                                                                                                                                                                                                                                                                                                               |
| EPI_ISL_1445195                                                                                                                                                                                                                                                                                                                                                         | CENTRO DE SAUDE DE BORA                                      | Instituto Butantan / Mendelics                         | Antonio Jorge Martins; Bibiana Santos; Claudia Renata dos Santos Barros; David Schlesinger; Debora Botequio Moretti; Dimas Tadeu Covas; Elaine Cristina Marqueze; Elaine Vieira dos Santos; Erika Freitas; Evandra Strazza Rodrigues; Flavia Aburjaile; José Salvatore Leister Patané; João Paulo Kitajima; Luiz Carlos Junior de Alcantara; Maria Carolina Elias; Marta Giovanetti; Rafael dos Santos Bezerra; Raul Machado Neto; Ricardo Haddad; Rodrigo Tocantins Calado.; Sandra Coccuzzo Sampaio; Simone Kashima; Svetoslav Nanev Slavov; Vagner Fonseca; Vincent Louis Viala |
| EPI_ISL_1445197                                                                                                                                                                                                                                                                                                                                                         | CENTRO DE SAUDE DE JULIO MESQUITA                            | Instituto Butantan / Mendelics                         | Antonio Jorge Martins; Bibiana Santos; Claudia Renata dos Santos Barros; David Schlesinger; Debora Botequio Moretti; Dimas Tadeu Covas; Elaine Cristina Marqueze; Elaine Vieira dos Santos; Erika Freitas; Evandra Strazza Rodrigues; Flavia Aburjaile; José Salvatore Leister Patané; João Paulo Kitajima; Luiz Carlos Junior de Alcantara; Maria Carolina Elias; Marta Giovanetti; Rafael dos Santos Bezerra; Raul Machado Neto; Ricardo Haddad; Rodrigo Tocantins Calado.; Sandra Coccuzzo Sampaio; Simone Kashima; Svetoslav Nanev Slavov; Vagner Fonseca; Vincent Louis Viala |
| EPI_ISL_1469662, EPI_ISL_1469706                                                                                                                                                                                                                                                                                                                                        | CENTRO DE SAUDE DR BRUNO CASSEL                              | Epiclin                                                | Ana Paula Muterle; Carolina Comerlato; Eliana Márcia Da Ros Wendland; Fernando Hayashi Sant'Anna; Janira Prichula; Juliana Comerlato                                                                                                                                                                                                                                                                                                                                                                                                                                               |
| EPI_ISL_1445075 to 1445079                                                                                                                                                                                                                                                                                                                                              | CENTRO DE SAUDE II DR GABRIEL MESQUITA VARGEM GDE DO SUL     | Instituto Butantan / Mendelics                         | Antonio Jorge Martins; Bibiana Santos; Claudia Renata dos Santos Barros; David Schlesinger; Debora Botequio Moretti; Dimas Tadeu Covas; Elaine Cristina Marqueze; Elaine Vieira dos Santos; Erika Freitas; Evandra Strazza Rodrigues; Flavia Aburjaile; José Salvatore Leister Patané; João Paulo Kitajima; Luiz Carlos Junior de Alcantara; Maria Carolina Elias; Marta Giovanetti; Rafael dos Santos Bezerra; Raul Machado Neto; Ricardo Haddad; Rodrigo Tocantins Calado.; Sandra Coccuzzo Sampaio; Simone Kashima; Svetoslav Nanev Slavov; Vagner Fonseca; Vincent Louis Viala |
| EPI_ISL_1445086, EPI_ISL_1445089                                                                                                                                                                                                                                                                                                                                        | CENTRO DE SAUDE II MAIRINQUE MAIRINQUE                       | Instituto Butantan / Mendelics                         | Antonio Jorge Martins; Bibiana Santos; Claudia Renata dos Santos Barros; David Schlesinger; Debora Botequio Moretti; Dimas Tadeu Covas; Elaine Cristina Marqueze; Elaine Vieira dos Santos; Erika Freitas; Evandra Strazza Rodrigues; Flavia Aburjaile; José Salvatore Leister Patané; João Paulo Kitajima; Luiz Carlos Junior de Alcantara; Maria Carolina Elias; Marta Giovanetti; Rafael dos Santos Bezerra; Raul Machado Neto; Ricardo Haddad; Rodrigo Tocantins Calado.; Sandra Coccuzzo Sampaio; Simone Kashima; Svetoslav Nanev Slavov; Vagner Fonseca; Vincent Louis Viala |
| EPI_ISL_1445199                                                                                                                                                                                                                                                                                                                                                         | CENTRO DE SAUDE III SALES OLIVEIRA                           | Instituto Butantan / Mendelics                         | Antonio Jorge Martins; Bibiana Santos; Claudia Renata dos Santos Barros; David Schlesinger; Debora Botequio Moretti; Dimas Tadeu Covas; Elaine Cristina Marqueze; Elaine Vieira dos Santos; Erika Freitas; Evandra Strazza Rodrigues; Flavia Aburjaile; José Salvatore Leister Patané; João Paulo Kitajima; Luiz Carlos Junior de Alcantara; Maria Carolina Elias; Marta Giovanetti; Rafael dos Santos Bezerra; Raul Machado Neto; Ricardo Haddad; Rodrigo Tocantins Calado.; Sandra Coccuzzo Sampaio; Simone Kashima; Svetoslav Nanev Slavov; Vagner Fonseca; Vincent Louis Viala |
| EPI_ISL_1445081                                                                                                                                                                                                                                                                                                                                                         | CENTRO DE SAUDE SAO ROQUE DR JOSE CARVALHO BRITO             | Instituto Butantan / Mendelics                         | Antonio Jorge Martins; Bibiana Santos; Claudia Renata dos Santos Barros; David Schlesinger; Debora Botequio Moretti; Dimas Tadeu Covas; Elaine Cristina Marqueze; Elaine Vieira dos Santos; Erika Freitas; Evandra Strazza Rodrigues; Flavia Aburjaile; José Salvatore Leister Patané; João Paulo Kitajima; Luiz Carlos Junior de Alcantara; Maria Carolina Elias; Marta Giovanetti; Rafael dos Santos Bezerra; Raul Machado Neto; Ricardo Haddad; Rodrigo Tocantins Calado.; Sandra Coccuzzo Sampaio; Simone Kashima; Svetoslav Nanev Slavov; Vagner Fonseca; Vincent Louis Viala |
| EPI_ISL_1469574, EPI_ISL_1469628, EPI_ISL_1469682, EPI_ISL_1469698                                                                                                                                                                                                                                                                                                      | CENTRO DE SERVICOS ESPECIALIZADOS SANTA RITA DE CASSIA       | Epiclin                                                | Ana Paula Muterle; Carolina Comerlato; Eliana Márcia Da Ros Wendland; Fernando Hayashi Sant'Anna; Janira Prichula; Juliana Comerlato                                                                                                                                                                                                                                                                                                                                                                                                                                               |
| EPI_ISL_1511224 to 1511225                                                                                                                                                                                                                                                                                                                                              | CENTRO MILITAR DE VETERINARIA                                | Instituto de Salud Carlos III                          | A. Monzón; DANIEL; F. Casas; I. FERNANDEZ MOREIRA; I. Jiménez; M. Camarero; P. Zaballos; S. Cuesta; S. Iglesias-Caballero; S. Pozo; S. Varona; Sandoñi; V. Vázquez-Morón                                                                                                                                                                                                                                                                                                                                                                                                           |
| EPI_ISL_1469584, EPI_ISL_1469629                                                                                                                                                                                                                                                                                                                                        | CENTRO MUNICIPAL DE SAUDE DE ROLANTE                         | Epiclin                                                | Ana Paula Muterle; Carolina Comerlato; Eliana Márcia Da Ros Wendland; Fernando Hayashi Sant'Anna; Janira Prichula; Juliana Comerlato                                                                                                                                                                                                                                                                                                                                                                                                                                               |
| EPI_ISL_445266 to 445267                                                                                                                                                                                                                                                                                                                                                | CENTRO ONCOLOGICO DEL NORTE                                  | Instituto de Salud Publica de Chile                    | Alejandra Acevedo; Andrés E Castillo; Bárbara Parra; Carolina Tambley; Gabriel Leal; Jaime Lagos; Jorge Fernandez; Loredana Arata; Patricia Bustos; Paz Tapia; Rodrigo Fasce; Winston Andrade                                                                                                                                                                                                                                                                                                                                                                                      |
| EPI_ISL_1461004                                                                                                                                                                                                                                                                                                                                                         | CERBALLIANCE CHARENTAIS SAINTES                              | CNR Virus des Infections Respiratoires - France SUD    | Antonin Bal; Bruno Lina; Gregory Destras; Gwendolynne Burfin; Hadrien Regue; Laurence Josset; Martine Valette; Quentin Semanas                                                                                                                                                                                                                                                                                                                                                                                                                                                     |
| EPI_ISL_445316                                                                                                                                                                                                                                                                                                                                                          | CESFAM BALMACEDA DE RENCA                                    | Instituto de Salud Publica de Chile                    | Alejandra Acevedo; Andrés E Castillo; Bárbara Parra; Carolina Tambley; Gabriel Leal; Jaime Lagos; Jorge Fernandez; Loredana Arata; Patricia Bustos; Paz Tapia; Rodrigo Fasce; Winston Andrade                                                                                                                                                                                                                                                                                                                                                                                      |
| EPI_ISL_1520166                                                                                                                                                                                                                                                                                                                                                         | CGH Medical Center                                           | Illinois Department of Public Health - Chicago Lab     | Ira Heimler; Vineet K. Dhiman                                                                                                                                                                                                                                                                                                                                                                                                                                                                                                                                                      |
| EPI_ISL_1478855, EPI_ISL_1553252 to 1553260                                                                                                                                                                                                                                                                                                                             | CGH Medical Center                                           | Illinois Department of Public Health - Springfield Lab | Bryan Sim; Gordon McCall                                                                                                                                                                                                                                                                                                                                                                                                                                                                                                                                                           |
| EPI_ISL_1461074                                                                                                                                                                                                                                                                                                                                                         | CH ALBI                                                      | CNR Virus des Infections Respiratoires - France SUD    | Antonin Bal; Bruno Lina; Gregory Destras; Gwendolynne Burfin; Hadrien Regue; Laurence Josset; Martine Valette; Quentin Semanas                                                                                                                                                                                                                                                                                                                                                                                                                                                     |
| EPI_ISL_1418257 to 1418259, EPI_ISL_1526351                                                                                                                                                                                                                                                                                                                             | CH ANTIBES - JUAN LES PINS                                   | CNR Virus des Infections Respiratoires - France SUD    | Antonin Bal; Bruno Lina; Gregory Destras; Gwendolynne Burfin; Hadrien Regue; Laurence Josset; Martine Valette; Quentin Semanas                                                                                                                                                                                                                                                                                                                                                                                                                                                     |
| EPI_ISL_1526071                                                                                                                                                                                                                                                                                                                                                         | CH ARDECHE NORD                                              | CNR Virus des Infections Respiratoires - France SUD    | Antonin Bal; Bruno Lina; Gregory Destras; Gwendolynne Burfin; Hadrien Regue; Laurence Josset; Martine Valette; Quentin Semanas                                                                                                                                                                                                                                                                                                                                                                                                                                                     |
| EPI_ISL_421455, EPI_ISL_421479 to 421480, EPI_ISL_421485 to 421486                                                                                                                                                                                                                                                                                                      | CH Barreiro Montijo                                          | Instituto Nacional de Saude (INSA)                     | Guomar et al                                                                                                                                                                                                                                                                                                                                                                                                                                                                                                                                                                       |
| EPI_ISL_1396708 to 1396710, EPI_ISL_1396739                                                                                                                                                                                                                                                                                                                             | CH Béthune                                                   | CHU Lille - Laboratoire de Virologie                   | AIT YAHYA Emilie; ALIDJINOU Enagnon Kazali; BOCKET Laurence; CREPIN Michel; DEMAY Christophe; ENGELMANN Ilka; GEFFROY Sandrine; GUIGON Aurélie; LAMBERT Valérie; LAZREK Mouna; NOBILLIAUX Florian; PREVOST Brigitte; TCHANTCHOU NJOSSE YANICK; THUILLIER Caroline; TINEZ Claire                                                                                                                                                                                                                                                                                                    |



|                                                                                                                                                                                                                                                                                                            |                                              |                                                                                                                                            |                                                                                                                                                                                                                                                                                 |
|------------------------------------------------------------------------------------------------------------------------------------------------------------------------------------------------------------------------------------------------------------------------------------------------------------|----------------------------------------------|--------------------------------------------------------------------------------------------------------------------------------------------|---------------------------------------------------------------------------------------------------------------------------------------------------------------------------------------------------------------------------------------------------------------------------------|
| EPI_ISL_1433837                                                                                                                                                                                                                                                                                            | CH CAHORS                                    | CNR Virus des Infections Respiratoires - France SUD                                                                                        | Antonin Bal; Bruno Lina; Gregory Destras; Gwendolynne Burfin; Hadrien Regue; Laurence Josset; Martine Valette; Quentin Semanas                                                                                                                                                  |
| EPI_ISL_1396682 to 1396684, EPI_ISL_1396704                                                                                                                                                                                                                                                                | CH Calais                                    | CHU Lille - Laboratoire de Virologie                                                                                                       | AIT YAHYA Emilie; ALIDJINOU Enagnon Kazali; BOCKET Laurence; CREPIN Michel; DEMAY Christophe; ENGELMANN Ilka; GEFFROY Sandrine; GUIGON Aurélie; LAMBERT Valérie; LAZREK Mouna; NOBILLIAUX Florian; PREVOST Brigitte; TCHANTCHOU NJOSSE YANICK; THUILLIER Caroline; TINEZ Claire |
| EPI_ISL_420041, EPI_ISL_420049 to 420050, EPI_ISL_420056 to 420057, EPI_ISL_421500, EPI_ISL_421509 to 421511, EPI_ISL_428353, EPI_ISL_428359 to 428360, EPI_ISL_443309, EPI_ISL_443316                                                                                                                     | see above                                    | CH Compiègne Laboratoire de Biologie                                                                                                       | National Reference Center for Viruses of Respiratory Infections, Institut Pasteur, Paris                                                                                                                                                                                        |
| EPI_ISL_1396678, EPI_ISL_1396693, EPI_ISL_1396711 to 1396712, EPI_ISL_1396720, EPI_ISL_1396738                                                                                                                                                                                                             | CH Douai                                     | CHU Lille - Laboratoire de Virologie                                                                                                       | Angela Brisebarre; Etienne Simon-Lorière; Flora Donati; Marion Barbet; Maud Vanpeene; Mélanie Albert; Méline Bizard; Olivia Raulin; Raulin Olivia; Sylvie Behilli; Sylvie van der Werf; Vincent Enouf                                                                           |
| EPI_ISL_1396675, EPI_ISL_1396703, EPI_ISL_1396735, EPI_ISL_1396740                                                                                                                                                                                                                                         | CH Dunkerque                                 | CHU Lille - Laboratoire de Virologie                                                                                                       | AIT YAHYA Emilie; ALIDJINOU Enagnon Kazali; BOCKET Laurence; CREPIN Michel; DEMAY Christophe; ENGELMANN Ilka; GEFFROY Sandrine; GUIGON Aurélie; LAMBERT Valérie; LAZREK Mouna; NOBILLIAUX Florian; PREVOST Brigitte; TCHANTCHOU NJOSSE YANICK; THUILLIER Caroline; TINEZ Claire |
| EPI_ISL_1461027, EPI_ISL_1461073, EPI_ISL_1461135, EPI_ISL_1461153                                                                                                                                                                                                                                         | CH GIVORS                                    | CNR Virus des Infections Respiratoires - France SUD                                                                                        | Antonin Bal; Bruno Lina; Gregory Destras; Gwendolynne Burfin; Hadrien Regue; Laurence Josset; Martine Valette; Quentin Semanas                                                                                                                                                  |
| EPI_ISL_416493, EPI_ISL_420044, EPI_ISL_420053, EPI_ISL_428350                                                                                                                                                                                                                                             | CH Jean de Navarre Laboratoire de Biologie   | National Reference Center for Viruses of Respiratory Infections, Institut Pasteur, Paris                                                   | Angela Brisebarre; Etienne Simon-Lorière; Flora Donati; Marion Barbet; Maud Vanpeene; Mélanie Albert; Méline Bizard; Méline Albert; Sylvie Behilli; Sylvie van der Werf; Vincent Enouf                                                                                          |
| EPI_ISL_428358, EPI_ISL_428366                                                                                                                                                                                                                                                                             | CH Jeanne de Navarre Laboratoire de Biologie | National Reference Center for Viruses of Respiratory Infections, Institut Pasteur, Paris                                                   | Angela Brisebarre; Etienne Simon-Lorière; Flora Donati; Marion Barbet; Maud Vanpeene; Mélanie Albert; Méline Bizard; Sylvie Behilli; Sylvie van der Werf; Vincent Enouf                                                                                                         |
| EPI_ISL_1396685                                                                                                                                                                                                                                                                                            | CH Lens                                      | CHU Lille - Laboratoire de Virologie                                                                                                       | AIT YAHYA Emilie; ALIDJINOU Enagnon Kazali; BOCKET Laurence; CREPIN Michel; DEMAY Christophe; ENGELMANN Ilka; GEFFROY Sandrine; GUIGON Aurélie; LAMBERT Valérie; LAZREK Mouna; NOBILLIAUX Florian; PREVOST Brigitte; TCHANTCHOU NJOSSE YANICK; THUILLIER Caroline; TINEZ Claire |
| EPI_ISL_1434014, EPI_ISL_1434201, EPI_ISL_1434203, EPI_ISL_1434257                                                                                                                                                                                                                                         | CH METROPOLE SAVOIE                          | CNR Virus des Infections Respiratoires - France SUD                                                                                        | Antonin Bal; Bruno Lina; Gregory Destras; Gwendolynne Burfin; Hadrien Regue; Laurence Josset; Martine Valette; Quentin Semanas                                                                                                                                                  |
| EPI_ISL_1433935, EPI_ISL_1433937, EPI_ISL_1434077                                                                                                                                                                                                                                                          | CH MOULINS YZEURE                            | CNR Virus des Infections Respiratoires - France SUD                                                                                        | Antonin Bal; Bruno Lina; Gregory Destras; Gwendolynne Burfin; Hadrien Regue; Laurence Josset; Martine Valette; Quentin Semanas                                                                                                                                                  |
| EPI_ISL_1434195                                                                                                                                                                                                                                                                                            | CH NIORT                                     | CNR Virus des Infections Respiratoires - France SUD                                                                                        | Antonin Bal; Bruno Lina; Gregory Destras; Gwendolynne Burfin; Hadrien Regue; Laurence Josset; Martine Valette; Quentin Semanas                                                                                                                                                  |
| EPI_ISL_1396679 to 1396680, EPI_ISL_1396713                                                                                                                                                                                                                                                                | CH Roubaix                                   | CHU Lille - Laboratoire de Virologie                                                                                                       | AIT YAHYA Emilie; ALIDJINOU Enagnon Kazali; BOCKET Laurence; CREPIN Michel; DEMAY Christophe; ENGELMANN Ilka; GEFFROY Sandrine; GUIGON Aurélie; LAMBERT Valérie; LAZREK Mouna; NOBILLIAUX Florian; PREVOST Brigitte; TCHANTCHOU NJOSSE YANICK; THUILLIER Caroline; TINEZ Claire |
| EPI_ISL_1434044, EPI_ISL_1457763                                                                                                                                                                                                                                                                           | CH SAINTONGES                                | CNR Virus des Infections Respiratoires - France SUD                                                                                        | Antonin Bal; Bruno Lina; Gregory Destras; Gwendolynne Burfin; Hadrien Regue; Laurence Josset; Martine Valette; Quentin Semanas                                                                                                                                                  |
| EPI_ISL_1396676 to 1396677, EPI_ISL_1396691 to 1396692, EPI_ISL_1396721                                                                                                                                                                                                                                    | CH Saint-Philibert                           | CHU Lille - Laboratoire de Virologie                                                                                                       | AIT YAHYA Emilie; ALIDJINOU Enagnon Kazali; BOCKET Laurence; CREPIN Michel; DEMAY Christophe; ENGELMANN Ilka; GEFFROY Sandrine; GUIGON Aurélie; LAMBERT Valérie; LAZREK Mouna; NOBILLIAUX Florian; PREVOST Brigitte; TCHANTCHOU NJOSSE YANICK; THUILLIER Caroline; TINEZ Claire |
| EPI_ISL_1396681, EPI_ISL_1396689, EPI_ISL_1396718                                                                                                                                                                                                                                                          | CH Seclin                                    | CHU Lille - Laboratoire de Virologie                                                                                                       | AIT YAHYA Emilie; ALIDJINOU Enagnon Kazali; BOCKET Laurence; CREPIN Michel; DEMAY Christophe; ENGELMANN Ilka; GEFFROY Sandrine; GUIGON Aurélie; LAMBERT Valérie; LAZREK Mouna; NOBILLIAUX Florian; PREVOST Brigitte; TCHANTCHOU NJOSSE YANICK; THUILLIER Caroline; TINEZ Claire |
| EPI_ISL_1396690                                                                                                                                                                                                                                                                                            | CH Tourcoing                                 | CHU Lille - Laboratoire de Virologie                                                                                                       | AIT YAHYA Emilie; ALIDJINOU Enagnon Kazali; BOCKET Laurence; CREPIN Michel; DEMAY Christophe; ENGELMANN Ilka; GEFFROY Sandrine; GUIGON Aurélie; LAMBERT Valérie; LAZREK Mouna; NOBILLIAUX Florian; PREVOST Brigitte; TCHANTCHOU NJOSSE YANICK; THUILLIER Caroline; TINEZ Claire |
| EPI_ISL_1418260 to 1418261                                                                                                                                                                                                                                                                                 | CH VALENCE                                   | CNR Virus des Infections Respiratoires - France SUD                                                                                        | Antonin Bal; Bruno Lina; Gregory Destras; Gwendolynne Burfin; Hadrien Regue; Laurence Josset; Martine Valette; Quentin Semanas                                                                                                                                                  |
| EPI_ISL_421482 to 421484                                                                                                                                                                                                                                                                                   | CH VN Gaia - Espinho                         | Instituto Nacional de Saude (INSA)                                                                                                         | Guimar et al                                                                                                                                                                                                                                                                    |
| EPI_ISL_1396736 to 1396737                                                                                                                                                                                                                                                                                 | CH Valenciennes                              | CHU Lille - Laboratoire de Virologie                                                                                                       | AIT YAHYA Emilie; ALIDJINOU Enagnon Kazali; BOCKET Laurence; CREPIN Michel; DEMAY Christophe; ENGELMANN Ilka; GEFFROY Sandrine; GUIGON Aurélie; LAMBERT Valérie; LAZREK Mouna; NOBILLIAUX Florian; PREVOST Brigitte; TCHANTCHOU NJOSSE YANICK; THUILLIER Caroline; TINEZ Claire |
| EPI_ISL_1526097, EPI_ISL_1526102, EPI_ISL_1526112, EPI_ISL_1526123, EPI_ISL_1526128, EPI_ISL_1526135, EPI_ISL_1526138 to 1526139, EPI_ISL_1526161, EPI_ISL_1526168, EPI_ISL_1526188, EPI_ISL_1526217, EPI_ISL_1526225, EPI_ISL_1526299, EPI_ISL_1526341, EPI_ISL_1526363, EPI_ISL_1526383, EPI_ISL_1526404 | see above                                    | CH de GIVORS                                                                                                                               | CNR Virus des Infections Respiratoires - France SUD                                                                                                                                                                                                                             |
| EPI_ISL_1396829 to 1396833                                                                                                                                                                                                                                                                                 | CH. CHARLES NICOLLE                          | Department of Virology, Henri Mondor University Hospital, Assistance Publique Hôpitaux de Paris, Université Paris-Est Créteil, INSERM U955 | Antonin Bal; Bruno Lina; Gregory Destras; Gwendolynne Burfin; Hadrien Regue; Laurence Josset; Martine Valette; Quentin Semanas                                                                                                                                                  |
| EPI_ISL_1396812                                                                                                                                                                                                                                                                                            | CH. CLEMENCEAU                               | Department of Virology, Henri Mondor University Hospital, Assistance Publique Hôpitaux de Paris, Université Paris-Est Créteil, INSERM U955 | Alexandre Soulier; Christophe Rodriguez; Elisabeth Trawinski; Guillaume Gricourt; Jean-Michel Pawlotsky; Melissa N'Debi; Slim Fourati; Vanessa Demontant                                                                                                                        |
| EPI_ISL_1404509 to 1404510                                                                                                                                                                                                                                                                                 | CH. ROBERT DEBRE                             | Department of Virology, Henri Mondor University Hospital, Assistance Publique Hôpitaux de Paris, Université Paris-Est Créteil, INSERM U955 | Alexandre Soulier; Christophe Rodriguez; Elisabeth Trawinski; Guillaume Gricourt; Jean-Michel Pawlotsky; Melissa N'Debi; Slim Fourati; Vanessa Demontant                                                                                                                        |
| EPI_ISL_1396837 to 1396843, EPI_ISL_1396884 to 1396890, EPI_ISL_1404463 to 1404474, EPI_ISL_1404477 to 1404481, EPI_ISL_1404565                                                                                                                                                                            | CH.INTERCOMMUNAL DE CRETEIL                  | Department of Virology, Henri Mondor University Hospital, Assistance Publique Hôpitaux de Paris, Université Paris-Est Créteil, INSERM U955 | Alexandre Soulier; Christophe Rodriguez; Elisabeth Trawinski; Guillaume Gricourt; Jean-Michel Pawlotsky; Melissa N'Debi; Slim Fourati; Vanessa Demontant                                                                                                                        |
| EPI_ISL_1396892, EPI_ISL_1404451 to 1404458                                                                                                                                                                                                                                                                | CH.de LONS LE SAUNIER                        | Department of Virology, Henri Mondor University Hospital, Assistance Publique Hôpitaux de Paris, Université Paris-Est Créteil, INSERM U955 | Alexandre Soulier; Christophe Rodriguez; Elisabeth Trawinski; Guillaume Gricourt; Jean-Michel Pawlotsky; Melissa N'Debi; Slim Fourati; Vanessa Demontant                                                                                                                        |
| EPI_ISL_418006                                                                                                                                                                                                                                                                                             | CHBarreiro Montijo                           | Instituto Nacional de Saude (INSA)                                                                                                         | Guimar et al                                                                                                                                                                                                                                                                    |
| EPI_ISL_1392648 to 1392649                                                                                                                                                                                                                                                                                 | CHD Vendée                                   | CHU Nantes Virology                                                                                                                        | Audrey Rodallec; Berthe-Marie Imbert-Marcille; Cecile Le Boterff; Celine Bressollette-Bodin; Thomas Drumel                                                                                                                                                                      |
| EPI_ISL_1404461 to 1404462                                                                                                                                                                                                                                                                                 | CHI VILLENEUVE ST GEORGES                    | Department of Virology, Henri Mondor University Hospital, Assistance Publique Hôpitaux de Paris, Université Paris-Est Créteil, INSERM U955 | Alexandre Soulier; Christophe Rodriguez; Elisabeth Trawinski; Guillaume Gricourt; Jean-Michel Pawlotsky; Melissa N'Debi; Slim Fourati; Vanessa Demontant                                                                                                                        |
| EPI_ISL_418017                                                                                                                                                                                                                                                                                             | CHMT                                         | Instituto Nacional de Saude (INSA)                                                                                                         | Guimar et al                                                                                                                                                                                                                                                                    |
| EPI_ISL_1492732                                                                                                                                                                                                                                                                                            | CHR de La Citadelle                          | GIGA Medical Genomics                                                                                                                      | Bouchra Boujemla; Cécile Meex; Keith Durkin; Maria Artesi; Marie-Pierre Hayette; Nathalie Renotte; Pierrette Melin; Raphaël Boreux; Sébastien Bontems; Vincent Bours                                                                                                            |

|                                                                                                                                                                                                                                                                                                                                                               |                                                                        |                                                                                          |                                                                                                                                                                                                                                                                                                                                                                                                                                                  |                                                                                                                                                                                                                                                                                  |
|---------------------------------------------------------------------------------------------------------------------------------------------------------------------------------------------------------------------------------------------------------------------------------------------------------------------------------------------------------------|------------------------------------------------------------------------|------------------------------------------------------------------------------------------|--------------------------------------------------------------------------------------------------------------------------------------------------------------------------------------------------------------------------------------------------------------------------------------------------------------------------------------------------------------------------------------------------------------------------------------------------|----------------------------------------------------------------------------------------------------------------------------------------------------------------------------------------------------------------------------------------------------------------------------------|
| EPI_ISL_1494954                                                                                                                                                                                                                                                                                                                                               | CHRISTUS SINERGIA - Clínica Farallones                                 | Instituto Nacional de Salud- Dirección de Investigación en Salud Pública                 | Carlos Franco-Muñoz; Carmen Osorio; Diana Malo; Diego A. Álvarez-Díaz; Diego Andrés Prada; Gerardo Santamaría; Hector Alejandro Ruiz-Moreno; Jhonnatan Reales-González; Juan Camilo Martínez; Julian Naizaque; Katherine Laiton-Donato; Lisseth Pardo; Magdalena Wiesner; Marcelo Mercado-Reyes; María T. Herrera-Sepúlveda; Marta Lopez Blanco; Martha Lucía Ospina Martínez; Paola Rojas; Sergio Gomez; Sheryll Corchuelo; Ángela Alarcon Cruz |                                                                                                                                                                                                                                                                                  |
| EPI_ISL_418222                                                                                                                                                                                                                                                                                                                                                | CHRU Bretonneau - Serv. Bacterio-Virol.                                | National Reference Center for Viruses of Respiratory Infections, Institut Pasteur, Paris | Angela Brisebarre; Etienne Simon-Lorière; Fabiana Gambaro; Flora Donati; Julien Marlet; Marion Barbet; Maud Vanpeene; Mélanie Albert; Méline Bizard; Sylvie Behillil; Sylvie van der Werf; Vincent Enouf                                                                                                                                                                                                                                         |                                                                                                                                                                                                                                                                                  |
| EPI_ISL_416502, EPI_ISL_443289 to 443294                                                                                                                                                                                                                                                                                                                      | CHRU Pontchaillou - Laboratoire de Virologie                           | National Reference Center for Viruses of Respiratory Infections, Institut Pasteur, Paris | Angela Brisebarre; Etienne Simon-Lorière; Flora Donati; Gisèle Lagathu; Marion Barbet; Maud Vanpeene; Mélanie Albert; Méline Bizard; Méline Albert; Sylvie Behillil; Sylvie van der Werf; Vincent Enouf                                                                                                                                                                                                                                          |                                                                                                                                                                                                                                                                                  |
| EPI_ISL_613545 to 613559, EPI_ISL_614281                                                                                                                                                                                                                                                                                                                      | CHRU Pontchaillou - Laboratoire de Virologie 2, rue Henri Le Guilloux  | National Reference Center for Viruses of Respiratory Infections, Institut Pasteur, Paris | Angela Brisebarre; Camille Capel; Etienne Simon-Lorière; Gisèle Lagathu; Marion Barbet; Maud Vanpeene; Méline Bizard; Sylvie Behillil; Sylvie van der Werf; Vincent Enouf                                                                                                                                                                                                                                                                        |                                                                                                                                                                                                                                                                                  |
| EPI_ISL_418027, EPI_ISL_421453, EPI_ISL_421464 to 421465                                                                                                                                                                                                                                                                                                      | CHTMAD                                                                 | Instituto Nacional de Saude (INSA)                                                       | Guimar et al                                                                                                                                                                                                                                                                                                                                                                                                                                     |                                                                                                                                                                                                                                                                                  |
| EPI_ISL_418219, EPI_ISL_443265 to 443283                                                                                                                                                                                                                                                                                                                      | CHU - Hôpital Cavale Blanche - Labo. de Virologie                      | National Reference Center for Viruses of Respiratory Infections, Institut Pasteur, Paris | Angela Brisebarre; Etienne Simon-Lorière; Fabiana Gambaro; Flora Donati; Léa Pilorge; Marion Barbet; Maud Vanpeene; Mélanie Albert; Méline Bizard; Sylvie Behillil; Sylvie van der Werf; Vincent Enouf                                                                                                                                                                                                                                           |                                                                                                                                                                                                                                                                                  |
| EPI_ISL_1433814, EPI_ISL_1433816, EPI_ISL_1433841, EPI_ISL_1433843, EPI_ISL_1433847, EPI_ISL_1433849, EPI_ISL_1433851, EPI_ISL_1433853, EPI_ISL_1433855, EPI_ISL_1433857, EPI_ISL_1433859, EPI_ISL_1433861, EPI_ISL_1433865, EPI_ISL_1433869, EPI_ISL_1433871, EPI_ISL_1433873, EPI_ISL_1433997, EPI_ISL_1433999, EPI_ISL_1434001, EPI_ISL_1457757 to 1457758 | see above                                                              | CHU BORDEAUX - GH ST ANDRE                                                               | CNR Virus des Infections Respiratoires - France SUD                                                                                                                                                                                                                                                                                                                                                                                              | Antonin Bal; Bruno Lina; Gregory Destras; Gwendolyne Burfin; Hadrien Regue; Laurence Josset; Martine Valette; Quentin Semanas                                                                                                                                                    |
| EPI_ISL_1433894, EPI_ISL_1434018, EPI_ISL_1434021, EPI_ISL_1434025, EPI_ISL_1434029 to 1434030, EPI_ISL_1434035, EPI_ISL_1434037, EPI_ISL_1434239                                                                                                                                                                                                             | see above                                                              | CHU CLERMONT FERRAND                                                                     | CNR Virus des Infections Respiratoires - France SUD                                                                                                                                                                                                                                                                                                                                                                                              | Antonin Bal; Bruno Lina; Gregory Destras; Gwendolyne Burfin; Hadrien Regue; Laurence Josset; Martine Valette; Quentin Semanas                                                                                                                                                    |
| EPI_ISL_418002                                                                                                                                                                                                                                                                                                                                                | CHU Coimbra                                                            | Instituto Nacional de Saude (INSA)                                                       | Guimar et al                                                                                                                                                                                                                                                                                                                                                                                                                                     |                                                                                                                                                                                                                                                                                  |
| EPI_ISL_418005                                                                                                                                                                                                                                                                                                                                                | CHU Coimbra - Pediátrico                                               | Instituto Nacional de Saude (INSA)                                                       | Guimar et al                                                                                                                                                                                                                                                                                                                                                                                                                                     |                                                                                                                                                                                                                                                                                  |
| EPI_ISL_1433791, EPI_ISL_1433795, EPI_ISL_1433797, EPI_ISL_1433799, EPI_ISL_1433834, EPI_ISL_1433839, EPI_ISL_1433845, EPI_ISL_1433863, EPI_ISL_1433867, EPI_ISL_1434186, EPI_ISL_1434188, EPI_ISL_1434219, EPI_ISL_1434221, EPI_ISL_1434247, EPI_ISL_1434249, EPI_ISL_1434252                                                                                | see above                                                              | CHU GRENOBLE                                                                             | CNR Virus des Infections Respiratoires - France SUD                                                                                                                                                                                                                                                                                                                                                                                              | Antonin Bal; Bruno Lina; Gregory Destras; Gwendolyne Burfin; Hadrien Regue; Laurence Josset; Martine Valette; Quentin Semanas                                                                                                                                                    |
| EPI_ISL_416751 to 416752                                                                                                                                                                                                                                                                                                                                      | CHU Gabriel Montpied                                                   | CNR Virus des Infections Respiratoires - France SUD                                      | Alexandre; Antonin; Bal; Bouscambert-Duchamp; Brengel-Pesce; Bruno.; Cheynet; Destras; Florence; Gaymard; Gregory; Josset; Karen; Laurence; Lina; Martine; Maude; Morfin-Sherpa; Valette; Valérie                                                                                                                                                                                                                                                |                                                                                                                                                                                                                                                                                  |
| EPI_ISL_1433931, EPI_ISL_1433933, EPI_ISL_1434071, EPI_ISL_1434073, EPI_ISL_1434075                                                                                                                                                                                                                                                                           | CHU LIMOGES                                                            | CNR Virus des Infections Respiratoires - France SUD                                      | Antonin Bal; Bruno Lina; Gregory Destras; Gwendolyne Burfin; Hadrien Regue; Laurence Josset; Martine Valette; Quentin Semanas                                                                                                                                                                                                                                                                                                                    |                                                                                                                                                                                                                                                                                  |
| EPI_ISL_1396667 to 1396674, EPI_ISL_1396686 to 1396688, EPI_ISL_1396694 to 1396702, EPI_ISL_1396705 to 1396707, EPI_ISL_1396714 to 1396717, EPI_ISL_1396719, EPI_ISL_1396722 to 1396734                                                                                                                                                                       | see above                                                              | CHU Lille                                                                                | CHU Lille - Laboratoire de Virologie                                                                                                                                                                                                                                                                                                                                                                                                             | AIT YAHYA Emilie; ALIDJINOUC Enagnon Kazali; BOCKET Laurence; CREPIN Michel; DEMAY Christophe; ENGELMANN Ilka; GEFFROY Sandrine; GUIGON Aurélie; LAMBERT Valérie; LAZREK Mouna; NOBILLIAUX Florian; PREVOST Brigitte; TCHANTCHOU NJOSSE YANICK; THUILLIER Caroline; TINEZ Claire |
| EPI_ISL_1433892, EPI_ISL_1433896, EPI_ISL_1434017, EPI_ISL_1434023, EPI_ISL_1434027, EPI_ISL_1434032, EPI_ISL_1457761                                                                                                                                                                                                                                         | see above                                                              | CHU MONTAUBAN                                                                            | CNR Virus des Infections Respiratoires - France SUD                                                                                                                                                                                                                                                                                                                                                                                              | Antonin Bal; Bruno Lina; Gregory Destras; Gwendolyne Burfin; Hadrien Regue; Laurence Josset; Martine Valette; Quentin Semanas                                                                                                                                                    |
| EPI_ISL_1461640 to 1461648, EPI_ISL_1524907 to 1524912                                                                                                                                                                                                                                                                                                        | CHU NIMES                                                              | CHU NIMES                                                                                | Agathe Boudet; Marie-josée Carles; Sophie Bravo; Stephan Robin                                                                                                                                                                                                                                                                                                                                                                                   |                                                                                                                                                                                                                                                                                  |
| EPI_ISL_1392647                                                                                                                                                                                                                                                                                                                                               | CHU Nantes Virology                                                    | CHU Nantes Virology                                                                      | Audrey Rodallec; Berthe-Marie Imbert-Marcille; Celine Bressollette-Bodin; Thomas Drumel                                                                                                                                                                                                                                                                                                                                                          |                                                                                                                                                                                                                                                                                  |
| EPI_ISL_1461191 to 1461194                                                                                                                                                                                                                                                                                                                                    | CHU POITIERS                                                           | CNR Virus des Infections Respiratoires - France SUD                                      | Antonin Bal; Bruno Lina; Gregory Destras; Gwendolyne Burfin; Hadrien Regue; Laurence Josset; Martine Valette; Quentin Semanas                                                                                                                                                                                                                                                                                                                    |                                                                                                                                                                                                                                                                                  |
| EPI_ISL_1409708                                                                                                                                                                                                                                                                                                                                               | CHU Pontchaillou                                                       | CHU Pontchaillou                                                                         | DE TAYRAC Marie; DENOUAL Florent; DUFOUR Marie José; ETCHEVERRY Amandine; GALIBERT Marie Dominique; GROLHIER Claire; JAGLINE Steven; PRONIER Charlotte; SASSI Mohamed; THIBAUT Vincent                                                                                                                                                                                                                                                           |                                                                                                                                                                                                                                                                                  |
| EPI_ISL_591099, EPI_ISL_591541 to 591547, EPI_ISL_593855 to 593901, EPI_ISL_603216 to 603220, EPI_ISL_1420815 to 1420821, EPI_ISL_1425079, EPI_ISL_1448425, EPI_ISL_1511115 to 1511120                                                                                                                                                                        | see above                                                              | CHU Purpan - Laboratoire de Virologie - Institut Fédératif de Biologie                   | CHU Purpan - Laboratoire de Virologie - Institut Fédératif de Biologie                                                                                                                                                                                                                                                                                                                                                                           | Agnès Harter; Boyer P.; Carcenac R.; Dubois M.; Harter A.; Izopet J.; Jacques Izopet; Justine Latour; Latour J.; Martine Dubois; Nicolas Jeanne; Noémie Ranger; Pauline Boyer; Pauline Tremeaux; Ranger N.; Romain Carcenac; Tremeaux P.                                         |
| EPI_ISL_434626 to 434635, EPI_ISL_482879 to 482889                                                                                                                                                                                                                                                                                                            | CHU Purpan - Laboratoire de Virologie - Institut Fédératif de Biologie | Laboratoire de virologie - École Nationale Vétérinaire de Toulouse                       | Guillaume Croville; Jacques Izopet; Jean-Luc Guérin                                                                                                                                                                                                                                                                                                                                                                                              |                                                                                                                                                                                                                                                                                  |
| EPI_ISL_1526231 to 1526243, EPI_ISL_1526245 to 1526247                                                                                                                                                                                                                                                                                                        | CHU REUNION                                                            | CNR Virus des Infections Respiratoires - France SUD                                      | Antonin Bal; Bruno Lina; Gregory Destras; Gwendolyne Burfin; Hadrien Regue; Laurence Josset; Martine Valette; Quentin Semanas                                                                                                                                                                                                                                                                                                                    |                                                                                                                                                                                                                                                                                  |
| EPI_ISL_1433785, EPI_ISL_1433789, EPI_ISL_1433824, EPI_ISL_1433826, EPI_ISL_1433828, EPI_ISL_1433830, EPI_ISL_1433832 to 1433833, EPI_ISL_1433836, EPI_ISL_1433875, EPI_ISL_1433989, EPI_ISL_1433991, EPI_ISL_1433993, EPI_ISL_1433995, EPI_ISL_1461015 to 1461016, EPI_ISL_1461181, EPI_ISL_1461188, EPI_ISL_1461190                                         | see above                                                              | CHU ST ETIENNE HOPITAL NORD                                                              | CNR Virus des Infections Respiratoires - France SUD                                                                                                                                                                                                                                                                                                                                                                                              | Antonin Bal; Bruno Lina; Gregory Destras; Gwendolyne Burfin; Hadrien Regue; Laurence Josset; Martine Valette; Quentin Semanas                                                                                                                                                    |
| EPI_ISL_535732, EPI_ISL_535801                                                                                                                                                                                                                                                                                                                                | CHU Sainte-Justine                                                     | Laboratoire de santé publique du Québec                                                  | Guillaume Bourque; Ioannis Ragoussis; Jesse Shapiro; Mark Lathrop and Michel Roger; Mark Lathrop and Michel Roger on behalf of the CoVSeQ research group; Sandrine Moreira                                                                                                                                                                                                                                                                       |                                                                                                                                                                                                                                                                                  |
| EPI_ISL_1461111 to 1461112, EPI_ISL_1461114, EPI_ISL_1461116 to 1461120                                                                                                                                                                                                                                                                                       | CHU TOULOUSE                                                           | CNR Virus des Infections Respiratoires - France SUD                                      | Antonin Bal; Bruno Lina; Gregory Destras; Gwendolyne Burfin; Hadrien Regue; Laurence Josset; Martine Valette; Quentin Semanas                                                                                                                                                                                                                                                                                                                    |                                                                                                                                                                                                                                                                                  |
| EPI_ISL_443261 to 443264                                                                                                                                                                                                                                                                                                                                      | CHU de Dijon - Laboratoire de Virologie                                | National Reference Center for Viruses of Respiratory Infections, Institut Pasteur, Paris | Angela Brisebarre; Etienne Simon-Lorière; Flora Donati; Jean-Baptiste Bour; Marion Barbet; Maud Vanpeene; Mélanie Albert; Méline Bizard; Sylvie Behillil; Sylvie van der Werf; Vincent Enouf                                                                                                                                                                                                                                                     |                                                                                                                                                                                                                                                                                  |
| EPI_ISL_418024                                                                                                                                                                                                                                                                                                                                                | CHUA - Faro                                                            | Instituto Nacional de Saude (INSA)                                                       | Guimar et al                                                                                                                                                                                                                                                                                                                                                                                                                                     |                                                                                                                                                                                                                                                                                  |
| EPI_ISL_1448431 to 1448508                                                                                                                                                                                                                                                                                                                                    | CHUGA-IBP-laboratoire de Virologie                                     | IBP-laboratoire de virologie                                                             | Anne Signori -Schmuck; Anne-Karen Faure; Aurélie Truffot; Benjamin Nemoz; Julien Andréani; Julien Lupo; Léa Ponderand; Pascal Poignard; Patrice Morand; Raphaël Germi; Sylvie Larrat                                                                                                                                                                                                                                                             |                                                                                                                                                                                                                                                                                  |
| EPI_ISL_535736 to 535737, EPI_ISL_535741, EPI_ISL_535772 to 535775, EPI_ISL_535781 to 535782, EPI_ISL_535784 to 535785, EPI_ISL_535822 to 535825, EPI_ISL_535828                                                                                                                                                                                              | see above                                                              | CHUL-LABO MULTI / MICRO                                                                  | Laboratoire de santé publique du Québec                                                                                                                                                                                                                                                                                                                                                                                                          | Guillaume Bourque; Ioannis Ragoussis; Jesse Shapiro; Mark Lathrop and Michel Roger; Mark Lathrop and Michel Roger on behalf of the CoVSeQ research group; Sandrine Moreira                                                                                                       |
| EPI_ISL_417988, EPI_ISL_417990 to 417991, EPI_ISL_417994 to 417996, EPI_ISL_418010 to 418016                                                                                                                                                                                                                                                                  | CHULC - H Curry Cabral                                                 | Instituto Nacional de Saude (INSA)                                                       | Guimar et al                                                                                                                                                                                                                                                                                                                                                                                                                                     |                                                                                                                                                                                                                                                                                  |
| EPI_ISL_417992 to 417993                                                                                                                                                                                                                                                                                                                                      | CHULC - H D Estefania                                                  | Instituto Nacional de Saude (INSA)                                                       | Guimar et al                                                                                                                                                                                                                                                                                                                                                                                                                                     |                                                                                                                                                                                                                                                                                  |
| EPI_ISL_535726, EPI_ISL_535729 to 535730, EPI_ISL_535735, EPI_ISL_535740, EPI_ISL_535753 to 535754, EPI_ISL_535760, EPI_ISL_535783, EPI_ISL_535789, EPI_ISL_535802, EPI_ISL_535806, EPI_ISL_535814, EPI_ISL_535826 to 535827, EPI_ISL_535830, EPI_ISL_535832                                                                                                  | see above                                                              | CHUM - Microbiologie - Hôpital Saint-Luc                                                 | Laboratoire de santé publique du Québec                                                                                                                                                                                                                                                                                                                                                                                                          | Guillaume Bourque; Ioannis Ragoussis; Jesse Shapiro; Mark Lathrop and Michel Roger; Mark Lathrop and Michel Roger on behalf of the CoVSeQ                                                                                                                                        |

|                                                                                                                                                                                                                                                                                                                                                                                                                                                                                                                                                                                                                                                                                                                                                                                                                                                                                                                                                                                                                                                                                                                                                                                                                                                                                                                                                                                                                                                                                                                                                                                                                                                                                                                                                                                                                                                                                                                                                                                                                                                                                                                                                                                                                                                                                                                                                                                                                                                                                                                                                                                                                                                                                                                                                                                                                                                                                                                                                                                                                     |                                                     |                                                                                                                                               |                                                                                                                                                                                                                                                                                                                                                                                                                                                                                                                                                                                  |
|---------------------------------------------------------------------------------------------------------------------------------------------------------------------------------------------------------------------------------------------------------------------------------------------------------------------------------------------------------------------------------------------------------------------------------------------------------------------------------------------------------------------------------------------------------------------------------------------------------------------------------------------------------------------------------------------------------------------------------------------------------------------------------------------------------------------------------------------------------------------------------------------------------------------------------------------------------------------------------------------------------------------------------------------------------------------------------------------------------------------------------------------------------------------------------------------------------------------------------------------------------------------------------------------------------------------------------------------------------------------------------------------------------------------------------------------------------------------------------------------------------------------------------------------------------------------------------------------------------------------------------------------------------------------------------------------------------------------------------------------------------------------------------------------------------------------------------------------------------------------------------------------------------------------------------------------------------------------------------------------------------------------------------------------------------------------------------------------------------------------------------------------------------------------------------------------------------------------------------------------------------------------------------------------------------------------------------------------------------------------------------------------------------------------------------------------------------------------------------------------------------------------------------------------------------------------------------------------------------------------------------------------------------------------------------------------------------------------------------------------------------------------------------------------------------------------------------------------------------------------------------------------------------------------------------------------------------------------------------------------------------------------|-----------------------------------------------------|-----------------------------------------------------------------------------------------------------------------------------------------------|----------------------------------------------------------------------------------------------------------------------------------------------------------------------------------------------------------------------------------------------------------------------------------------------------------------------------------------------------------------------------------------------------------------------------------------------------------------------------------------------------------------------------------------------------------------------------------|
|                                                                                                                                                                                                                                                                                                                                                                                                                                                                                                                                                                                                                                                                                                                                                                                                                                                                                                                                                                                                                                                                                                                                                                                                                                                                                                                                                                                                                                                                                                                                                                                                                                                                                                                                                                                                                                                                                                                                                                                                                                                                                                                                                                                                                                                                                                                                                                                                                                                                                                                                                                                                                                                                                                                                                                                                                                                                                                                                                                                                                     |                                                     |                                                                                                                                               | research group; Sandrine Moreira                                                                                                                                                                                                                                                                                                                                                                                                                                                                                                                                                 |
| EPI_ISL_1517297 to 1517300, EPI_ISL_1517304 to 1517305, EPI_ISL_1517307 to 1517320, EPI_ISL_1517322 to 1517334, EPI_ISL_1517336 to 1517337, EPI_ISL_1517340 to 1517357, EPI_ISL_1517359 to 1517372, EPI_ISL_1517374 to 1517383, EPI_ISL_1545184, EPI_ISL_1545187, EPI_ISL_1545190 to 1545197, EPI_ISL_1545199 to 1545200, EPI_ISL_1545202 to 1545206, EPI_ISL_1545208 to 1545220, EPI_ISL_1545222, EPI_ISL_1545224, EPI_ISL_1545231, EPI_ISL_1545233 to 1545235, EPI_ISL_1545237 to 1545247, EPI_ISL_1545257                                                                                                                                                                                                                                                                                                                                                                                                                                                                                                                                                                                                                                                                                                                                                                                                                                                                                                                                                                                                                                                                                                                                                                                                                                                                                                                                                                                                                                                                                                                                                                                                                                                                                                                                                                                                                                                                                                                                                                                                                                                                                                                                                                                                                                                                                                                                                                                                                                                                                                        | CHUV                                                | Laboratory of genomics and metagenomics<br>Claire Bertelli; Damien Jacot; Gilbert Greub; SÃ©bastien Aebly; SÃ©bastien Aebly; Trestan Pillonel |                                                                                                                                                                                                                                                                                                                                                                                                                                                                                                                                                                                  |
| see above                                                                                                                                                                                                                                                                                                                                                                                                                                                                                                                                                                                                                                                                                                                                                                                                                                                                                                                                                                                                                                                                                                                                                                                                                                                                                                                                                                                                                                                                                                                                                                                                                                                                                                                                                                                                                                                                                                                                                                                                                                                                                                                                                                                                                                                                                                                                                                                                                                                                                                                                                                                                                                                                                                                                                                                                                                                                                                                                                                                                           |                                                     |                                                                                                                                               |                                                                                                                                                                                                                                                                                                                                                                                                                                                                                                                                                                                  |
| EPI_ISL_1403082 to 1403087, EPI_ISL_1403089 to 1403092, EPI_ISL_1443187 to 1443189, EPI_ISL_1443191 to 1443195, EPI_ISL_1448527 to 1448528, EPI_ISL_1451467, EPI_ISL_1451470, EPI_ISL_1451473, EPI_ISL_1451476, EPI_ISL_1451479, EPI_ISL_1451482, EPI_ISL_1451485, EPI_ISL_1451488, EPI_ISL_1451491, EPI_ISL_1451494, EPI_ISL_1454688, EPI_ISL_1545445 to 1545450, EPI_ISL_1545632 to 1545641, EPI_ISL_1545643 to 1545667                                                                                                                                                                                                                                                                                                                                                                                                                                                                                                                                                                                                                                                                                                                                                                                                                                                                                                                                                                                                                                                                                                                                                                                                                                                                                                                                                                                                                                                                                                                                                                                                                                                                                                                                                                                                                                                                                                                                                                                                                                                                                                                                                                                                                                                                                                                                                                                                                                                                                                                                                                                           | CHWAPI - SITE NOTRE DAME                            | Institut de Pathologie et Genetique (IPG)                                                                                                     | JÃ©rÃ©mie Gras; Pascale Hilbert                                                                                                                                                                                                                                                                                                                                                                                                                                                                                                                                                  |
| see above                                                                                                                                                                                                                                                                                                                                                                                                                                                                                                                                                                                                                                                                                                                                                                                                                                                                                                                                                                                                                                                                                                                                                                                                                                                                                                                                                                                                                                                                                                                                                                                                                                                                                                                                                                                                                                                                                                                                                                                                                                                                                                                                                                                                                                                                                                                                                                                                                                                                                                                                                                                                                                                                                                                                                                                                                                                                                                                                                                                                           |                                                     |                                                                                                                                               |                                                                                                                                                                                                                                                                                                                                                                                                                                                                                                                                                                                  |
| EPI_ISL_487446 to 487466                                                                                                                                                                                                                                                                                                                                                                                                                                                                                                                                                                                                                                                                                                                                                                                                                                                                                                                                                                                                                                                                                                                                                                                                                                                                                                                                                                                                                                                                                                                                                                                                                                                                                                                                                                                                                                                                                                                                                                                                                                                                                                                                                                                                                                                                                                                                                                                                                                                                                                                                                                                                                                                                                                                                                                                                                                                                                                                                                                                            | CICM-Mali                                           | Bundeswehr Institut of Microbiology                                                                                                           | Antwerpen; Bestehorn-Willmann; DÃ¼rr; Heitzer; Kouriba; Maiga; Quedraogo; Rehn; SangarÃ©; Sogodogo; TraorÃ©; Walter; WÃ¶lfel; Zimmermann                                                                                                                                                                                                                                                                                                                                                                                                                                         |
| EPI_ISL_445245, EPI_ISL_445248, EPI_ISL_445250, EPI_ISL_445253 to 445255, EPI_ISL_445258, EPI_ISL_445260                                                                                                                                                                                                                                                                                                                                                                                                                                                                                                                                                                                                                                                                                                                                                                                                                                                                                                                                                                                                                                                                                                                                                                                                                                                                                                                                                                                                                                                                                                                                                                                                                                                                                                                                                                                                                                                                                                                                                                                                                                                                                                                                                                                                                                                                                                                                                                                                                                                                                                                                                                                                                                                                                                                                                                                                                                                                                                            | CLINICA ALEMANA DE SANTIAGO S.A.                    | Instituto de Salud Publica de Chile                                                                                                           | Alejandra Acevedo; AndrÃ©s E Castillo; BÃ¡rbara Parra; Carolina Tambley; Gabriel Leal; Jaime Lagos; Jorge Fernandez; Loredana Arata; Patricia Bustos; Paz Tapia; Rodrigo Fasce; Winston Andrade                                                                                                                                                                                                                                                                                                                                                                                  |
| EPI_ISL_445272, EPI_ISL_445285, EPI_ISL_445287                                                                                                                                                                                                                                                                                                                                                                                                                                                                                                                                                                                                                                                                                                                                                                                                                                                                                                                                                                                                                                                                                                                                                                                                                                                                                                                                                                                                                                                                                                                                                                                                                                                                                                                                                                                                                                                                                                                                                                                                                                                                                                                                                                                                                                                                                                                                                                                                                                                                                                                                                                                                                                                                                                                                                                                                                                                                                                                                                                      | CLINICA CIUDAD DEL MAR                              | Instituto de Salud Publica de Chile                                                                                                           | Alejandra Acevedo; AndrÃ©s E Castillo; BÃ¡rbara Parra; Carolina Tambley; Gabriel Leal; Jaime Lagos; Jorge Fernandez; Loredana Arata; Patricia Bustos; Paz Tapia; Rodrigo Fasce; Winston Andrade                                                                                                                                                                                                                                                                                                                                                                                  |
| EPI_ISL_445297                                                                                                                                                                                                                                                                                                                                                                                                                                                                                                                                                                                                                                                                                                                                                                                                                                                                                                                                                                                                                                                                                                                                                                                                                                                                                                                                                                                                                                                                                                                                                                                                                                                                                                                                                                                                                                                                                                                                                                                                                                                                                                                                                                                                                                                                                                                                                                                                                                                                                                                                                                                                                                                                                                                                                                                                                                                                                                                                                                                                      | CLINICA INTEGRAL S.A.                               | Instituto de Salud Publica de Chile                                                                                                           | Alejandra Acevedo; AndrÃ©s E Castillo; BÃ¡rbara Parra; Carolina Tambley; Gabriel Leal; Jaime Lagos; Jorge Fernandez; Loredana Arata; Patricia Bustos; Paz Tapia; Rodrigo Fasce; Winston Andrade                                                                                                                                                                                                                                                                                                                                                                                  |
| EPI_ISL_445256, EPI_ISL_445259                                                                                                                                                                                                                                                                                                                                                                                                                                                                                                                                                                                                                                                                                                                                                                                                                                                                                                                                                                                                                                                                                                                                                                                                                                                                                                                                                                                                                                                                                                                                                                                                                                                                                                                                                                                                                                                                                                                                                                                                                                                                                                                                                                                                                                                                                                                                                                                                                                                                                                                                                                                                                                                                                                                                                                                                                                                                                                                                                                                      | CLINICA LAS CONDES S.A.                             | Instituto de Salud Publica de Chile                                                                                                           | Alejandra Acevedo; AndrÃ©s E Castillo; BÃ¡rbara Parra; Carolina Tambley; Gabriel Leal; Jaime Lagos; Jorge Fernandez; Loredana Arata; Patricia Bustos; Paz Tapia; Rodrigo Fasce; Winston Andrade                                                                                                                                                                                                                                                                                                                                                                                  |
| EPI_ISL_445282 to 445283, EPI_ISL_445290 to 445292, EPI_ISL_445299                                                                                                                                                                                                                                                                                                                                                                                                                                                                                                                                                                                                                                                                                                                                                                                                                                                                                                                                                                                                                                                                                                                                                                                                                                                                                                                                                                                                                                                                                                                                                                                                                                                                                                                                                                                                                                                                                                                                                                                                                                                                                                                                                                                                                                                                                                                                                                                                                                                                                                                                                                                                                                                                                                                                                                                                                                                                                                                                                  | CLINICA MAGALLANES S.A.                             | Instituto de Salud Publica de Chile                                                                                                           | Alejandra Acevedo; AndrÃ©s E Castillo; BÃ¡rbara Parra; Carolina Tambley; Gabriel Leal; Jaime Lagos; Jorge Fernandez; Loredana Arata; Patricia Bustos; Paz Tapia; Rodrigo Fasce; Winston Andrade                                                                                                                                                                                                                                                                                                                                                                                  |
| EPI_ISL_445264                                                                                                                                                                                                                                                                                                                                                                                                                                                                                                                                                                                                                                                                                                                                                                                                                                                                                                                                                                                                                                                                                                                                                                                                                                                                                                                                                                                                                                                                                                                                                                                                                                                                                                                                                                                                                                                                                                                                                                                                                                                                                                                                                                                                                                                                                                                                                                                                                                                                                                                                                                                                                                                                                                                                                                                                                                                                                                                                                                                                      | CLINICA REDSALUD VITACURA.                          | Instituto de Salud Publica de Chile                                                                                                           | Alejandra Acevedo; AndrÃ©s E Castillo; BÃ¡rbara Parra; Carolina Tambley; Gabriel Leal; Jaime Lagos; Jorge Fernandez; Loredana Arata; Patricia Bustos; Paz Tapia; Rodrigo Fasce; Winston Andrade                                                                                                                                                                                                                                                                                                                                                                                  |
| EPI_ISL_445249                                                                                                                                                                                                                                                                                                                                                                                                                                                                                                                                                                                                                                                                                                                                                                                                                                                                                                                                                                                                                                                                                                                                                                                                                                                                                                                                                                                                                                                                                                                                                                                                                                                                                                                                                                                                                                                                                                                                                                                                                                                                                                                                                                                                                                                                                                                                                                                                                                                                                                                                                                                                                                                                                                                                                                                                                                                                                                                                                                                                      | CLINICA SANTA MARIA S.A.                            | Instituto de Salud Publica de Chile                                                                                                           | Alejandra Acevedo; AndrÃ©s E Castillo; BÃ¡rbara Parra; Carolina Tambley; Gabriel Leal; Jaime Lagos; Jorge Fernandez; Loredana Arata; Patricia Bustos; Paz Tapia; Rodrigo Fasce; Winston Andrade                                                                                                                                                                                                                                                                                                                                                                                  |
| EPI_ISL_445257, EPI_ISL_445262                                                                                                                                                                                                                                                                                                                                                                                                                                                                                                                                                                                                                                                                                                                                                                                                                                                                                                                                                                                                                                                                                                                                                                                                                                                                                                                                                                                                                                                                                                                                                                                                                                                                                                                                                                                                                                                                                                                                                                                                                                                                                                                                                                                                                                                                                                                                                                                                                                                                                                                                                                                                                                                                                                                                                                                                                                                                                                                                                                                      | CLINICA TABANCURA                                   | Instituto de Salud Publica de Chile                                                                                                           | Alejandra Acevedo; AndrÃ©s E Castillo; BÃ¡rbara Parra; Carolina Tambley; Gabriel Leal; Jaime Lagos; Jorge Fernandez; Loredana Arata; Patricia Bustos; Paz Tapia; Rodrigo Fasce; Winston Andrade                                                                                                                                                                                                                                                                                                                                                                                  |
| EPI_ISL_445306, EPI_ISL_445312, EPI_ISL_445315, EPI_ISL_445361                                                                                                                                                                                                                                                                                                                                                                                                                                                                                                                                                                                                                                                                                                                                                                                                                                                                                                                                                                                                                                                                                                                                                                                                                                                                                                                                                                                                                                                                                                                                                                                                                                                                                                                                                                                                                                                                                                                                                                                                                                                                                                                                                                                                                                                                                                                                                                                                                                                                                                                                                                                                                                                                                                                                                                                                                                                                                                                                                      | CLINICA UC SAN CARLOS DE APOQUINDO                  | Instituto de Salud Publica de Chile                                                                                                           | Alejandra Acevedo; AndrÃ©s E Castillo; BÃ¡rbara Parra; Carolina Tambley; Gabriel Leal; Jaime Lagos; Jorge Fernandez; Loredana Arata; Patricia Bustos; Paz Tapia; Rodrigo Fasce; Winston Andrade                                                                                                                                                                                                                                                                                                                                                                                  |
| EPI_ISL_445334                                                                                                                                                                                                                                                                                                                                                                                                                                                                                                                                                                                                                                                                                                                                                                                                                                                                                                                                                                                                                                                                                                                                                                                                                                                                                                                                                                                                                                                                                                                                                                                                                                                                                                                                                                                                                                                                                                                                                                                                                                                                                                                                                                                                                                                                                                                                                                                                                                                                                                                                                                                                                                                                                                                                                                                                                                                                                                                                                                                                      | CLINICA UNIVERSITARIA DE PUERTO MONTT S.A.          | Instituto de Salud Publica de Chile                                                                                                           | Alejandra Acevedo; AndrÃ©s E Castillo; BÃ¡rbara Parra; Carolina Tambley; Gabriel Leal; Jaime Lagos; Jorge Fernandez; Loredana Arata; Patricia Bustos; Paz Tapia; Rodrigo Fasce; Winston Andrade                                                                                                                                                                                                                                                                                                                                                                                  |
| EPI_ISL_445330                                                                                                                                                                                                                                                                                                                                                                                                                                                                                                                                                                                                                                                                                                                                                                                                                                                                                                                                                                                                                                                                                                                                                                                                                                                                                                                                                                                                                                                                                                                                                                                                                                                                                                                                                                                                                                                                                                                                                                                                                                                                                                                                                                                                                                                                                                                                                                                                                                                                                                                                                                                                                                                                                                                                                                                                                                                                                                                                                                                                      | CLINICA VESPUCCIO S. A.                             | Instituto de Salud Publica de Chile                                                                                                           | Alejandra Acevedo; AndrÃ©s E Castillo; BÃ¡rbara Parra; Carolina Tambley; Gabriel Leal; Jaime Lagos; Jorge Fernandez; Loredana Arata; Patricia Bustos; Paz Tapia; Rodrigo Fasce; Winston Andrade                                                                                                                                                                                                                                                                                                                                                                                  |
| EPI_ISL_536310                                                                                                                                                                                                                                                                                                                                                                                                                                                                                                                                                                                                                                                                                                                                                                                                                                                                                                                                                                                                                                                                                                                                                                                                                                                                                                                                                                                                                                                                                                                                                                                                                                                                                                                                                                                                                                                                                                                                                                                                                                                                                                                                                                                                                                                                                                                                                                                                                                                                                                                                                                                                                                                                                                                                                                                                                                                                                                                                                                                                      | CLSC et Centre d'HÃ©bergement la Petite-Nation      | Laboratoire de santÃ© publique du QuÃ©bec                                                                                                     | Guillaume Bourque; Ioannis Ragoussis; Jesse Shapiro; Mark Lathrop and Michel Roger on behalf of the CoVSeQ research group; Sandrine Moreira                                                                                                                                                                                                                                                                                                                                                                                                                                      |
| EPI_ISL_1392800 to 1392806, EPI_ISL_1402337 to 1402353, EPI_ISL_1420787                                                                                                                                                                                                                                                                                                                                                                                                                                                                                                                                                                                                                                                                                                                                                                                                                                                                                                                                                                                                                                                                                                                                                                                                                                                                                                                                                                                                                                                                                                                                                                                                                                                                                                                                                                                                                                                                                                                                                                                                                                                                                                                                                                                                                                                                                                                                                                                                                                                                                                                                                                                                                                                                                                                                                                                                                                                                                                                                             | CMBG FN Brno                                        | CMBG FN Brno                                                                                                                                  | Bezdicek M.; Lengrova V.; Svaton J.                                                                                                                                                                                                                                                                                                                                                                                                                                                                                                                                              |
| EPI_ISL_420043, EPI_ISL_420061                                                                                                                                                                                                                                                                                                                                                                                                                                                                                                                                                                                                                                                                                                                                                                                                                                                                                                                                                                                                                                                                                                                                                                                                                                                                                                                                                                                                                                                                                                                                                                                                                                                                                                                                                                                                                                                                                                                                                                                                                                                                                                                                                                                                                                                                                                                                                                                                                                                                                                                                                                                                                                                                                                                                                                                                                                                                                                                                                                                      | CMIP                                                | National Reference Center for Viruses of Respiratory Infections, Institut Pasteur, Paris                                                      | Angela Brisebarre; Etienne Simon-LoriÃ¨re; Flora Donati; Marion Barbet; Maud Vanpeene; MÃ©lanie Albert; MÃ©line Bizard; Sylvie Behillil; Sylvie van der Werf; Vincent Enouf                                                                                                                                                                                                                                                                                                                                                                                                      |
| EPI_ISL_539492, EPI_ISL_547584, EPI_ISL_560320 to 560321                                                                                                                                                                                                                                                                                                                                                                                                                                                                                                                                                                                                                                                                                                                                                                                                                                                                                                                                                                                                                                                                                                                                                                                                                                                                                                                                                                                                                                                                                                                                                                                                                                                                                                                                                                                                                                                                                                                                                                                                                                                                                                                                                                                                                                                                                                                                                                                                                                                                                                                                                                                                                                                                                                                                                                                                                                                                                                                                                            | CMS, Roorkee                                        | CSIR-Institute of Microbial Technology                                                                                                        | Amandeep Kaur; Anu Singh; Ashwani Kumar; Debarghya Ghose; Dipak Dutta; Harsh Goar; Kanika Bansal; Navin Baid; Poushali Chakraborty; Prabhu B. Patil; Rajesh Kumar Mishra; Sanjeet Kumar; Sanjeev Khosla                                                                                                                                                                                                                                                                                                                                                                          |
| EPI_ISL_410486, EPI_ISL_416745 to 416746, EPI_ISL_508912 to 508930, EPI_ISL_508933, EPI_ISL_508937, EPI_ISL_508939 to 508940, EPI_ISL_508942, EPI_ISL_508945, EPI_ISL_508948, EPI_ISL_508951, EPI_ISL_508953 to 508957, EPI_ISL_508961 to 508965, EPI_ISL_508967, EPI_ISL_508969 to 508974, EPI_ISL_508976 to 508977, EPI_ISL_508979 to 508987, EPI_ISL_508989 to 509002, EPI_ISL_525536 to 525538, EPI_ISL_525540 to 525543, EPI_ISL_578176 to 578177, EPI_ISL_582110 to 582120, EPI_ISL_582122, EPI_ISL_582508, EPI_ISL_1418187 to 1418191, EPI_ISL_1418193, EPI_ISL_1418201 to 1418203, EPI_ISL_1418209 to 1418217, EPI_ISL_1418219, EPI_ISL_1418229, EPI_ISL_1418231 to 1418239, EPI_ISL_1418242, EPI_ISL_1418244 to 1418246, EPI_ISL_1418300, EPI_ISL_1418302 to 1418307, EPI_ISL_1433822, EPI_ISL_1433985, EPI_ISL_1433987, EPI_ISL_1433989, EPI_ISL_1434245, EPI_ISL_1461003, EPI_ISL_1461005 to 1461007, EPI_ISL_1461009 to 1461012, EPI_ISL_1461014, EPI_ISL_1461019, EPI_ISL_1461022 to 1461026, EPI_ISL_1461028 to 1461032, EPI_ISL_1461034 to 1461036, EPI_ISL_1461038, EPI_ISL_1461040, EPI_ISL_1461042 to 1461044, EPI_ISL_1461049 to 1461051, EPI_ISL_1461053 to 1461055, EPI_ISL_1461057, EPI_ISL_1461059 to 1461070, EPI_ISL_1461075 to 1461076, EPI_ISL_1461109, EPI_ISL_1461121, EPI_ISL_1461123, EPI_ISL_1461131, EPI_ISL_1461138 to 1461141, EPI_ISL_1461145 to 1461147, EPI_ISL_1461149 to 1461151, EPI_ISL_1461154 to 1461164, EPI_ISL_1461195 to 1461203, EPI_ISL_1461205 to 1461245, EPI_ISL_1461247 to 1461252, EPI_ISL_1526072 to 1526074, EPI_ISL_1526076 to 1526093, EPI_ISL_1526095 to 1526096, EPI_ISL_1526098 to 1526101, EPI_ISL_1526103 to 1526104, EPI_ISL_1526106, EPI_ISL_1526109 to 1526111, EPI_ISL_1526114 to 1526119, EPI_ISL_1526124 to 1526126, EPI_ISL_1526129 to 1526134, EPI_ISL_1526136 to 1526137, EPI_ISL_1526140 to 1526141, EPI_ISL_1526143 to 1526154, EPI_ISL_1526157 to 1526160, EPI_ISL_1526163 to 1526166, EPI_ISL_1526169, EPI_ISL_1526174 to 1526176, EPI_ISL_1526178 to 1526182, EPI_ISL_1526184 to 1526187, EPI_ISL_1526189 to 1526195, EPI_ISL_1526197 to 1526200, EPI_ISL_1526208 to 1526219, EPI_ISL_1526221 to 1526224, EPI_ISL_1526226 to 1526230, EPI_ISL_1526249 to 1526252, EPI_ISL_1526255 to 1526257, EPI_ISL_1526259 to 1526263, EPI_ISL_1526265 to 1526267, EPI_ISL_1526272, EPI_ISL_1526281, EPI_ISL_1526287, EPI_ISL_1526313, EPI_ISL_1526317, EPI_ISL_1526327, EPI_ISL_1526329 to 1526340, EPI_ISL_1526342 to 1526343, EPI_ISL_1526346 to 1526349, EPI_ISL_1526352 to 1526354, EPI_ISL_1526356 to 1526358, EPI_ISL_1526360 to 1526362, EPI_ISL_1526364 to 1526367, EPI_ISL_1526370 to 1526373, EPI_ISL_1526375, EPI_ISL_1526378 to 1526382, EPI_ISL_1526384 to 1526388, EPI_ISL_1526391, EPI_ISL_1526401 to 1526403, EPI_ISL_1526405, EPI_ISL_1526410 to 1526411, EPI_ISL_1526413 to 1526419, EPI_ISL_1526421 to 1526423, EPI_ISL_1526426 to 1526440, EPI_ISL_1526456 to 1526566, EPI_ISL_1526568 to 1526584, EPI_ISL_1526586 to 1526605 | CNR Virus des Infections Respiratoires - France SUD | CNR Virus des Infections Respiratoires - France SUD                                                                                           | Alexandre; Alexandre Gaymard; Antonin; Antonin Bal; Bal; Bouscambert-Duchamp; Brengel-Pesce; Bruno Lina; Bruno.; Carine Moustaud; Cheynet; Destras; Emilie Frobert; Florence; Florence Morfin-Sherpa; Gaymard; Gregory; Gregory Destras; Gregory Queromes; Gwendolyne Burfin; Hadrien Regue; Hadrien RÃ©gue; Josset; Karen; Laurence; Laurence Josset; Lina; Martine; Martine Valette; Maude; Maude Bouscambert-Duchamp; Morfin-Sherpa; Quentin Semanas; Raphaelle Lamy; Solenne Brun; Valette; ValÃ©rie                                                                         |
| see above                                                                                                                                                                                                                                                                                                                                                                                                                                                                                                                                                                                                                                                                                                                                                                                                                                                                                                                                                                                                                                                                                                                                                                                                                                                                                                                                                                                                                                                                                                                                                                                                                                                                                                                                                                                                                                                                                                                                                                                                                                                                                                                                                                                                                                                                                                                                                                                                                                                                                                                                                                                                                                                                                                                                                                                                                                                                                                                                                                                                           |                                                     |                                                                                                                                               |                                                                                                                                                                                                                                                                                                                                                                                                                                                                                                                                                                                  |
| EPI_ISL_452127 to 452130                                                                                                                                                                                                                                                                                                                                                                                                                                                                                                                                                                                                                                                                                                                                                                                                                                                                                                                                                                                                                                                                                                                                                                                                                                                                                                                                                                                                                                                                                                                                                                                                                                                                                                                                                                                                                                                                                                                                                                                                                                                                                                                                                                                                                                                                                                                                                                                                                                                                                                                                                                                                                                                                                                                                                                                                                                                                                                                                                                                            | CO Department of Public Health and Environment      | Pathogen Discovery, Respiratory Viruses Branch, Division of Viral Diseases, Centers for Disease Control and Prevention                        | Alison S. Laufer Halpin; Anna Montmayeur; Anna Uehara; Christopher A. Elkins; Clinton R. Paden; Haichang Wang; Jing Zhang; Krista Queen; Mary S. Keckler; Rachel Marine; Xuefeng Tong; Yan Li; Ying Tao; Zachary Weiner                                                                                                                                                                                                                                                                                                                                                          |
| EPI_ISL_416994, EPI_ISL_418248 to 418249                                                                                                                                                                                                                                                                                                                                                                                                                                                                                                                                                                                                                                                                                                                                                                                                                                                                                                                                                                                                                                                                                                                                                                                                                                                                                                                                                                                                                                                                                                                                                                                                                                                                                                                                                                                                                                                                                                                                                                                                                                                                                                                                                                                                                                                                                                                                                                                                                                                                                                                                                                                                                                                                                                                                                                                                                                                                                                                                                                            | COMPLEJO ASISTENCIAL UNIVERSITARIO DE BURGOS        | Instituto de Salud Carlos III                                                                                                                 | A. MonzÃ³n; F. Casas; G. Hospital; -----; I. JimÃ©nez; I. Megias-Lobon G.; Iglesias-Caballero; M. Camarero; M. Camarero S. Pozo F. Casas I. JimÃ©nez P. JimÃ©nez M. Zaballos A. MonzÃ³n; M. Cuesta; M. GonzÃ¡lez-Esquivillas; M. Molinero Calamita; M. Zaballos; P. JimÃ©nez; S. JuliÃ¡; S. JuliÃ¡ M. Cuesta I. Megias LobÃ³n; S. Pozo; S. Varona                                                                                                                                                                                                                                |
| EPI_ISL_1445109 to 1445110, EPI_ISL_1445114 to 1445118                                                                                                                                                                                                                                                                                                                                                                                                                                                                                                                                                                                                                                                                                                                                                                                                                                                                                                                                                                                                                                                                                                                                                                                                                                                                                                                                                                                                                                                                                                                                                                                                                                                                                                                                                                                                                                                                                                                                                                                                                                                                                                                                                                                                                                                                                                                                                                                                                                                                                                                                                                                                                                                                                                                                                                                                                                                                                                                                                              | COMPLEXO HOSPITALAR OURO VERDE DE CAMPINAS          | Instituto Butantan / MendelÃ©s                                                                                                                | Antonio Jorge Martins; Bibiana Santos; Claudia Renata dos Santos Barros; David Schlesinger; Debora Botequiu Moretti; Dimas Tadeu Covas; Elaine Cristina Marquize; Elaine Vieira dos Santos; Erika Freitas; Evandra Strazza Rodrigues; Flavia Aburjalje; JosÃ© Salvatore Leister PatanÃ©; JoÃ£o Paulo Kitajima; Luiz Carlos Junior de Alcantara; Maria Carolina Elias; Marta Giovanetti; Rafael dos Santos Bezerra; Raul Machado Neto; Ricardo Haddad; Rodrigo Tocantins Calado.; Sandra Coccuzzo Sampaio; Simone Kashima; Svetoslava Slavov; Vagner Fonseca; Vincent Louis Viala |
| EPI_ISL_1509967, EPI_ISL_1509973, EPI_ISL_1509978, EPI_ISL_1509988, EPI_ISL_1509997 to 1509998, EPI_ISL_1510032, EPI_ISL_1510708 to 1510711, EPI_ISL_1510713 to 1510718, EPI_ISL_1510730 to 1510735, EPI_ISL_1510744 to 1510746, EPI_ISL_1511218 to 1511221, EPI_ISL_1511223                                                                                                                                                                                                                                                                                                                                                                                                                                                                                                                                                                                                                                                                                                                                                                                                                                                                                                                                                                                                                                                                                                                                                                                                                                                                                                                                                                                                                                                                                                                                                                                                                                                                                                                                                                                                                                                                                                                                                                                                                                                                                                                                                                                                                                                                                                                                                                                                                                                                                                                                                                                                                                                                                                                                        | CONSEJERIA DE SANIDAD Y ASUNTOS SOCIALES            | Instituto de Salud Carlos III                                                                                                                 | A. MonzÃ³n; F. Casas; GONZALO; I. GUTIERREZ AVILA; I. JimÃ©nez; I.GUTIERREZ AVILA; Iglesias-Caballero; M. Camarero; M. Sandonis; P. Zaballos; S. Camarero; S. Cuesta; S. Iglesias-Caballero; S. Pozo; S. Varona; Sandonis; V. Camarero; V. VÃ¡zquez-MorÃ³n; VÃ¡zquez-MorÃ³n                                                                                                                                                                                                                                                                                                      |
| see above                                                                                                                                                                                                                                                                                                                                                                                                                                                                                                                                                                                                                                                                                                                                                                                                                                                                                                                                                                                                                                                                                                                                                                                                                                                                                                                                                                                                                                                                                                                                                                                                                                                                                                                                                                                                                                                                                                                                                                                                                                                                                                                                                                                                                                                                                                                                                                                                                                                                                                                                                                                                                                                                                                                                                                                                                                                                                                                                                                                                           |                                                     |                                                                                                                                               |                                                                                                                                                                                                                                                                                                                                                                                                                                                                                                                                                                                  |
| EPI_ISL_434538                                                                                                                                                                                                                                                                                                                                                                                                                                                                                                                                                                                                                                                                                                                                                                                                                                                                                                                                                                                                                                                                                                                                                                                                                                                                                                                                                                                                                                                                                                                                                                                                                                                                                                                                                                                                                                                                                                                                                                                                                                                                                                                                                                                                                                                                                                                                                                                                                                                                                                                                                                                                                                                                                                                                                                                                                                                                                                                                                                                                      | COOPESAIN                                           | Incienza, Instituto Costarricense de InvestigaciÃ³n y EnseÃ±anza en NutriciÃ³n y Salud                                                        | Adriana Godinez & Melany Calderon; Claudio Soto-Garita; Estela Cordero; Francisco Duarte; Hebleen Porras                                                                                                                                                                                                                                                                                                                                                                                                                                                                         |
| EPI_ISL_1527013                                                                                                                                                                                                                                                                                                                                                                                                                                                                                                                                                                                                                                                                                                                                                                                                                                                                                                                                                                                                                                                                                                                                                                                                                                                                                                                                                                                                                                                                                                                                                                                                                                                                                                                                                                                                                                                                                                                                                                                                                                                                                                                                                                                                                                                                                                                                                                                                                                                                                                                                                                                                                                                                                                                                                                                                                                                                                                                                                                                                     | COOPESAIN-TIBÃ¡S                                    | Incienza, Instituto Costarricense de InvestigaciÃ³n y EnseÃ±anza en NutriciÃ³n y Salud                                                        | Barboza-Arguedas E & Flores-LeÃ³n G; PÃ©rez-Corrales C                                                                                                                                                                                                                                                                                                                                                                                                                                                                                                                           |
| EPI_ISL_1527014                                                                                                                                                                                                                                                                                                                                                                                                                                                                                                                                                                                                                                                                                                                                                                                                                                                                                                                                                                                                                                                                                                                                                                                                                                                                                                                                                                                                                                                                                                                                                                                                                                                                                                                                                                                                                                                                                                                                                                                                                                                                                                                                                                                                                                                                                                                                                                                                                                                                                                                                                                                                                                                                                                                                                                                                                                                                                                                                                                                                     | COOPESIBA BARVA                                     | Incienza, Instituto Costarricense de InvestigaciÃ³n y EnseÃ±anza en NutriciÃ³n y Salud                                                        | Barboza-Arguedas E & Kellerman-Montero K; PÃ©rez-Corrales C                                                                                                                                                                                                                                                                                                                                                                                                                                                                                                                      |
| EPI_ISL_1469604, EPI_ISL_1469608, EPI_ISL_1469635 to 1469636, EPI_ISL_1469641, EPI_ISL_1469715, EPI_ISL_1469735, EPI_ISL_1469782                                                                                                                                                                                                                                                                                                                                                                                                                                                                                                                                                                                                                                                                                                                                                                                                                                                                                                                                                                                                                                                                                                                                                                                                                                                                                                                                                                                                                                                                                                                                                                                                                                                                                                                                                                                                                                                                                                                                                                                                                                                                                                                                                                                                                                                                                                                                                                                                                                                                                                                                                                                                                                                                                                                                                                                                                                                                                    |                                                     |                                                                                                                                               |                                                                                                                                                                                                                                                                                                                                                                                                                                                                                                                                                                                  |



|                                                                                                                                                                                                                                                                                                                    |                                                                                                                                      |                                                                                                                                                      |                                                                                                                                                                                                                                                                                                                                                                                                                                                                                                                                                                                                         |
|--------------------------------------------------------------------------------------------------------------------------------------------------------------------------------------------------------------------------------------------------------------------------------------------------------------------|--------------------------------------------------------------------------------------------------------------------------------------|------------------------------------------------------------------------------------------------------------------------------------------------------|---------------------------------------------------------------------------------------------------------------------------------------------------------------------------------------------------------------------------------------------------------------------------------------------------------------------------------------------------------------------------------------------------------------------------------------------------------------------------------------------------------------------------------------------------------------------------------------------------------|
| EPI_ISL_536337, EPI_ISL_536365 to 536366<br>EPI_ISL_515938 to 515942                                                                                                                                                                                                                                               | CV RAMAN HOSPITAL                                                                                                                    | Department of Neurovirology, National Institute of Mental Health and Neuroscience (NIMHANS)                                                          | Anita Desai; Chitra Pattabiraman; Harsha PK; Manjunatha Venkataswamy; Pramada Prasad; Ravi Vasanthapuram; Risha Rasheed; Shafeeq S Hameed; Vijayalakshmi Reddy                                                                                                                                                                                                                                                                                                                                                                                                                                          |
| EPI_ISL_486383, EPI_ISL_486881                                                                                                                                                                                                                                                                                     | CV Raman Hospital                                                                                                                    | Department of Neurovirology, National Institute of Mental Health and Neuroscience (NIMHANS)                                                          | Anita Desai; Chitra Pattabiraman; Harsha PK; Manjunatha Venkataswamy; Ravi Vasanthapuram; Risha Rasheed; Shafeeq S Hameed; Vijayalakshmi Reddy                                                                                                                                                                                                                                                                                                                                                                                                                                                          |
| EPI_ISL_428364, EPI_ISL_428367, EPI_ISL_443300 to 443302, EPI_ISL_443306, EPI_ISL_443311 to 443313, EPI_ISL_443317                                                                                                                                                                                                 | Cabinet Médical                                                                                                                      | National Reference Center for Viruses of Respiratory Infections, Institut Pasteur, Paris                                                             | Angela Brisebarre; Etienne Simon-Lorière; Flora Donati; Marion Barbet; Maud Vanpeene; Mélanie Albert; Méline Bizard; Sylvie Behillil; Sylvie van der Werf; Vincent Enouf                                                                                                                                                                                                                                                                                                                                                                                                                                |
| EPI_ISL_1443190, EPI_ISL_1545642<br>EPI_ISL_418235                                                                                                                                                                                                                                                                 | Cabinet Priv<br>Cabinet médical                                                                                                      | Institut de Pathologie et Genetique (IPG)<br>National Reference Center for Viruses of Respiratory Infections, Institut Pasteur, Paris                | Jérémie Gras; Pascale Hilbert<br>Angela Brisebarre; Etienne Simon-Lorière; Flora Donati; Marion Barbet; Maud Vanpeene; Mélanie Albert; Méline Bizard; Sylvie Behillil; Sylvie van der Werf; Vincent Enouf                                                                                                                                                                                                                                                                                                                                                                                               |
| EPI_ISL_418812 to 418813, EPI_ISL_429807, EPI_ISL_429817 to 429820, EPI_ISL_482474 to 482475, EPI_ISL_482478, EPI_ISL_482480 to 482484                                                                                                                                                                             | Cadham Provincial Laboratory                                                                                                         | National Microbiology Laboratory                                                                                                                     | ; Anna Majer; David Alexander; Elsie Grudeski; Gary Van Domselaar; Grace Seo; Jared Bullard; Jennifer Tanner; Kerry Dust; Kristyn Burak; Matthew Gilmour; Morag Graham; Natalie Knox; Nathalie Bastien; Paul Van Caesele; Philip Mabon; Rhiannon Huzarewich; Russell Mandes; Russell Mandez; Shari Tyson; Timothy Booth; Yan Li                                                                                                                                                                                                                                                                         |
| EPI_ISL_582242 to 582249, EPI_ISL_582251 to 582286, EPI_ISL_582288 to 582306, EPI_ISL_582308, EPI_ISL_582311 to 582343, EPI_ISL_582345 to 582347, EPI_ISL_582349 to 582397, EPI_ISL_582399 to 582414, EPI_ISL_582416 to 582420, EPI_ISL_582422 to 582443, EPI_ISL_582445 to 582507                                 | see above                                                                                                                            | National Microbiology Laboratory (NML)                                                                                                               | Anna Majer; Anneliese Landgraf; CanCOGeN's metadata curation team; Darian Hole; David Alexander; Elsie Grudeski; Gary Van Domselaar; Grace Seo; Jared Bullard; Jennifer Tanner; Kerry Dust; Madison Chapel; Morag Graham; Natalie Knox; Nathalie Bastien; Paul Van Caesele; Philip Mabon; Public Health Agency of Canada CanCOGeN team; Rhiannon Huzarewich; Russell Mandes; Shari Tyson; Timothy Booth; Yan Li                                                                                                                                                                                         |
| EPI_ISL_444794                                                                                                                                                                                                                                                                                                     | Cairns Hospital                                                                                                                      | Public Health Virology Laboratory                                                                                                                    | Alyssa Pyke; Amanda De Jong; Andrew Van Den Hurk; Bixing Huang; Carmel Taylor; David Warrilow; Doris Genge; Elisabeth Gamez; Glen Hewitson; Ian Maxwell Mackay; Inga Sultana; Jamie McMahon; Jean Barcelon; Judy Northill; Mitchell Finger; Natalie Simpson; Neelima Nair; Peter Burtonclay; Peter Moore; Sarah Wheatley; Sean Moody; Sonja Hall-Mendelin; Timothy Gardam; and Frederick Moore                                                                                                                                                                                                          |
| EPI_ISL_408009 to 408010                                                                                                                                                                                                                                                                                           | California Department of Health                                                                                                      | Pathogen Discovery, Respiratory Viruses Branch, Division of Viral Diseases, Centers for Diseases Control and Prevention                              | Anna Uehara; Brett L. Whitaker; Brian Lynch; Clinton Paden; Janna' R. Murray; Jing Zhang; Krista Queen; Lijuan Wang; Senthil Kumar K. Sakthivel; Shifaq Kamili; Stephen Lindstrom; Susan I. Gerber; Suxiang Tong; Xiaoyan Lu; Yan Li; Ying Tao                                                                                                                                                                                                                                                                                                                                                          |
| EPI_ISL_408008                                                                                                                                                                                                                                                                                                     | California Department of Health                                                                                                      | Pathogen Discovery, Respiratory Viruses Branch, Division of Viral Diseases, Centers for Disease Control and Prevention                               | Anna Uehara; Brett L. Whitaker; Brian Lynch; Clinton Paden; Janna' R. Murray; Jing Zhang; Krista Queen; Lijuan Wang; Senthil Kumar K. Sakthivel; Shifaq Kamili; Stephen Lindstrom; Susan I. Gerber; Suxiang Tong; Xiaoyan Lu; Yan Li; Ying Tao                                                                                                                                                                                                                                                                                                                                                          |
| EPI_ISL_515894 to 515929<br>EPI_ISL_413930                                                                                                                                                                                                                                                                         | California Department of Public Health<br>California Department of Public Health                                                     | California Department of Public Health<br>Chiu Laboratory UCSF-Abbott Viral Diagnostics and Discovery Center University of California, San Francisco | CDPH IDLB COVIDNet<br>Alicia Sotomayor-Gonzalez; Allan Gopez; Chao-Yang Pan; Debra A. Wadford; Guixia Yu; Hugo Guevara; Scot Federman; Steve Miller; Wei Gu; Xianding Deng; and Charles Y. Chiu                                                                                                                                                                                                                                                                                                                                                                                                         |
| EPI_ISL_413557 to 413559, EPI_ISL_413561, EPI_ISL_413922, EPI_ISL_413924 to 413926, EPI_ISL_413928, EPI_ISL_413931, EPI_ISL_417322 to 417329, EPI_ISL_429875 to 429876, EPI_ISL_429881                                                                                                                             | see above                                                                                                                            | Chiu Laboratory, University of California, San Francisco                                                                                             | Chao-Yang Pan; Debra A. Wadford; Hugo Guevara; Scot Federman; Wei Gu; Xianding Deng; and Charles Y. Chiu                                                                                                                                                                                                                                                                                                                                                                                                                                                                                                |
| EPI_ISL_406034, EPI_ISL_406036, EPI_ISL_410044, EPI_ISL_411954 to 411955                                                                                                                                                                                                                                           | California Department of Public Health                                                                                               | Pathogen Discovery, Respiratory Viruses Branch, Division of Viral Diseases, Centers for Diseases Control and Prevention                              | Anna Uehara; Brett L. Whitaker; Brian Lynch; Clinton R. Paden; Haibin Wang; Janna' R. Murray; Jing Zhang; Krista Queen; Lijuan Wang; Senthil Kumar K. Sakthivel; Shifaq Kamili; Stephen Lindstrom; Susan I. Gerber; Suxiang Tong; Xiaoyan Lu; Yan Li; Ying Tao                                                                                                                                                                                                                                                                                                                                          |
| EPI_ISL_412862, EPI_ISL_419554, EPI_ISL_594458                                                                                                                                                                                                                                                                     | California Department of Public Health                                                                                               | Pathogen Discovery, Respiratory Viruses Branch, Division of Viral Diseases, Centers for Disease Control and Prevention                               | Anna Uehara; Brett L. Whitaker; Brian Lynch; Clinton Paden; Clinton R. Paden; Haibin Wang; Janna' R. Murray; Jasmine Padilla; Jing Zhang; Julu Bhatnagar; Justin Lee; Krista Queen; Lijuan Wang; Senthil Kumar K. Sakthivel; Shifaq Kamili; Stephen Lindstrom; Susan I. Gerber; Suxiang Tong; Xiaoyan Lu; Yan Li; Ying Tao                                                                                                                                                                                                                                                                              |
| EPI_ISL_418865<br>EPI_ISL_1534294, EPI_ISL_1534383, EPI_ISL_1534404                                                                                                                                                                                                                                                | California Department of Public Health<br>Calitzdorp (Bergsig) Clinic wc CDC                                                         | University of California, San Francisco<br>NHLS/UCT                                                                                                  | Chao-Yang Pan; Debra A. Wadford; Hugo Guevara; Scot Federman; Wei Gu; Xianding Deng; and Charles Y. Chiu<br>Arash Iranzadeh; Bruna Galvao; Carolyn Williamson; Deelan Doolabh; Diana Hardie; Emmanuel SJ; Innocent Mudau; Kruger Marais; Lynn Tyers; Marvin Hsiao; Stephen Korsman; Tegally H; de Oliveira T                                                                                                                                                                                                                                                                                            |
| EPI_ISL_447594                                                                                                                                                                                                                                                                                                     | Caloundra Hospital                                                                                                                   | Public Health Virology Laboratory                                                                                                                    | Alyssa Pyke; Amanda De Jong; Andrew Van Den Hurk; Bixing Huang; Carmel Taylor; David Warrilow; Doris Genge; Elisabeth Gamez; Glen Hewitson; Ian Maxwell Mackay; Inga Sultana; Jamie McMahon; Jean Barcelon; Judy Northill; Mitchell Finger; Natalie Simpson; Neelima Nair; Peter Burtonclay; Peter Moore; Sarah Wheatley; Sean Moody; Sonja Hall-Mendelin; Timothy Gardam; and Frederick Moore                                                                                                                                                                                                          |
| EPI_ISL_1532800, EPI_ISL_1532803, EPI_ISL_1532812                                                                                                                                                                                                                                                                  | Cambodian National Public Health Laboratory, National Institute of Public Health                                                     | Virology Unit, Institut Pasteur du Cambodge                                                                                                          | Chau Darapeak; Chin Savuth; Erik A Karlsson; Kraing Sidonn; Leakhena Pum; Ly Sovann; Sokhoun Yann; Teypuita Ou; Veasna Duong; Yi Sengdoeurn                                                                                                                                                                                                                                                                                                                                                                                                                                                             |
| EPI_ISL_1423125, EPI_ISL_1423127                                                                                                                                                                                                                                                                                   | Camden Clark Medical Center                                                                                                          | WVU and Marshall University Combined Genomics Core Facilities                                                                                        | "James Denvir; Peter Perrotta; Peter Stoilov; Ryan Percifield"; Wesley Kimble                                                                                                                                                                                                                                                                                                                                                                                                                                                                                                                           |
| EPI_ISL_576371 to 576373<br>EPI_ISL_447054                                                                                                                                                                                                                                                                         | Cancer Biology Department, National Cancer Institute<br>Cantacuzino National Military-Medical Institute for Research and Development | Cancer Biology Department, National Cancer Institute<br>Cantacuzino Institute                                                                        | A.N.; Abouelhoda, M.; Ahmed; H.K.; Hafez; Hamdy; M.M.; M.S.; O.S.; Soliman; Zekri<br>A.Cretu; L.Ustea; M.Lazar                                                                                                                                                                                                                                                                                                                                                                                                                                                                                          |
| EPI_ISL_456321 to 456322, EPI_ISL_456348 to 456375, EPI_ISL_536792, EPI_ISL_547980 to 547985, EPI_ISL_548116 to 548118, EPI_ISL_548129, EPI_ISL_548134, EPI_ISL_548138 to 548140, EPI_ISL_579060 to 579092, EPI_ISL_579220 to 579227, EPI_ISL_579426 to 579452, EPI_ISL_579454 to 579471, EPI_ISL_579473 to 579506 | see above                                                                                                                            | Institute of Environmental Science and Research (ESR)                                                                                                | Anja Werno; Antje van der Linden; Arlo Upton; Chris Mansell; David Hammer; Dragana Drinkovic; Erasmus Smit; Gary McAuliffe; Hana Sofia Andersson; Hermes Perez; James Ussher; Jill Sherwood; Jing Wang; Joep de Ligt; Josh Freeman; Julia Howard; Juliet Elvy; Lauren Jelly; Mary DeAlmeida; Matt Blakiston; Matt Storey; Matthew Rogers; Max Bloomfield; Michael Addidle; Michelle Balm; Muhammad Faisal; Nikki Freed; Olin Silander; Sally Roberts; Sarah Jefferies; Sharmini Muttaiah; Susan Morpeth; Susan Taylor; Timothy Blackmore; Yani Sathyendran; Veronica Playle; Virginia Hope; Xiaoyun Ren |
| EPI_ISL_524478                                                                                                                                                                                                                                                                                                     | Cantonal Hospital Winterthur                                                                                                         | Institute of Medical Virology, University of Zurich                                                                                                  | Alexandra Trkola; Andrea Zbinden; Fiona Steiner; Gabriela Ziltener; Jon Huder; Jürg Böni; Maryam Zaheri; Michael Huber; Patrick Redli; Riccarda Capaul; Stefan Schmutz; Verena Kufner                                                                                                                                                                                                                                                                                                                                                                                                                   |
| EPI_ISL_534230 to 534233, EPI_ISL_560981                                                                                                                                                                                                                                                                           | Capio S:t Gorans sjukhus                                                                                                             | The Public Health Agency of Sweden                                                                                                                   | Anna Risberg; Anna-Malin Linde; Karin Tegmark-Wisell; Maria Lind Karlberg; Mattias Haukland; Mia Bryting; Olov Svartstrom; Oskar Karlsson Lindsjo; Petra Edquist; Reza Advani; Sandra Brodesson                                                                                                                                                                                                                                                                                                                                                                                                         |
| EPI_ISL_491472                                                                                                                                                                                                                                                                                                     | Cardinal Santos Medical Center                                                                                                       | Research Institute for Tropical Medicine                                                                                                             | Catalino Demetria; Criselda Bautista; Daria Manalo; Edelwisa Mercado; Francisco Gerardo Polotan; Inez Andrea Medado; Kirstyn Brunker; Ma. Angelica Tujan; Othoniel Jan Onza                                                                                                                                                                                                                                                                                                                                                                                                                             |
| EPI_ISL_583504 to 583505                                                                                                                                                                                                                                                                                           | Casa de Saude Stella Maris                                                                                                           | Instituto Adolfo Lutz, Interdisciplinary Procedures Center, Strategic Laboratory                                                                     | Claudia Regina Gonçalves; Claudio Tavares Sacchi; Erica Valessa Ramos Gomes; Karoline Rodrigues Campos                                                                                                                                                                                                                                                                                                                                                                                                                                                                                                  |
| EPI_ISL_1478887, EPI_ISL_1478908 to 1478909                                                                                                                                                                                                                                                                        | Cass County Health Department                                                                                                        | Illinois Department of Public Health - Springfield Lab                                                                                               | Bryan Sim; Gordon McCall                                                                                                                                                                                                                                                                                                                                                                                                                                                                                                                                                                                |
| EPI_ISL_467809, EPI_ISL_475574 to 475716                                                                                                                                                                                                                                                                           | Cedars-Sinai Medical Center, Department of Pathology & Laboratory Medicine, Molecular Pathology Laboratory                           | Cedars-Sinai Medical Center, Molecular Pathology Laboratory of Department of Pathology & Laboratory Medicine and Genomic Core                        | Brian Davis; Eric Vail; Jasmine T Plummer; Jean Lopategui; Jianbo Song; John Paul Govindavari; Jong Taek Kim; Stephanie Chen; Wenjuan Zhang                                                                                                                                                                                                                                                                                                                                                                                                                                                             |
| EPI_ISL_1393658, EPI_ISL_1538438, EPI_ISL_1538553, EPI_ISL_1538760, EPI_ISL_1538871, EPI_ISL_1538900 to 1538901, EPI_ISL_1539033, EPI_ISL_1539145, EPI_ISL_1539181                                                                                                                                                 | see above                                                                                                                            | Cell-t<br>1. National Institute of Public Health - National Institute of Hygiene; 2. Eurofins Genomics Europe Sequencing GmbH                        | ECDC COVID-19 WGS support team; Eurofins Genomics Europe Sequencing Team; Gierczyki Rafa; Sadkowska-Todys Magorzata; Wokowicz Tomasz; Zacharczuk Katarzyna                                                                                                                                                                                                                                                                                                                                                                                                                                              |

|                                                                                                                                                                                                                                                                                                                                                                                                                                                                                                                                                                                                                                                                                            |                                                                                                                                                                                  |                                                                                                                                                                                 |                                                                                                                                                                                                                                                                                                                                                                                                                                                                                                                                                                                                 |
|--------------------------------------------------------------------------------------------------------------------------------------------------------------------------------------------------------------------------------------------------------------------------------------------------------------------------------------------------------------------------------------------------------------------------------------------------------------------------------------------------------------------------------------------------------------------------------------------------------------------------------------------------------------------------------------------|----------------------------------------------------------------------------------------------------------------------------------------------------------------------------------|---------------------------------------------------------------------------------------------------------------------------------------------------------------------------------|-------------------------------------------------------------------------------------------------------------------------------------------------------------------------------------------------------------------------------------------------------------------------------------------------------------------------------------------------------------------------------------------------------------------------------------------------------------------------------------------------------------------------------------------------------------------------------------------------|
| EPI_ISL_450413                                                                                                                                                                                                                                                                                                                                                                                                                                                                                                                                                                                                                                                                             | Center for Diagnostics, Institute of Medical Microbiology, Virology and Hygiene                                                                                                  | University Medical Center Hamburg-Eppendorf                                                                                                                                     | Huang, J.; Pfefferle; S. and Fischer, N.                                                                                                                                                                                                                                                                                                                                                                                                                                                                                                                                                        |
| EPI_ISL_459856 to 459864, EPI_ISL_468752, EPI_ISL_468760                                                                                                                                                                                                                                                                                                                                                                                                                                                                                                                                                                                                                                   | Center for Genome Regulation (CRG)                                                                                                                                               | Center for Mathematical Modeling and Center for Genome Regulation, Santiago, Chile                                                                                              | Allende ML; Gaete A; González M.; Maass A; Palma R; Travisany D; Urra C; Varas M                                                                                                                                                                                                                                                                                                                                                                                                                                                                                                                |
| EPI_ISL_479663 to 479675, EPI_ISL_481283                                                                                                                                                                                                                                                                                                                                                                                                                                                                                                                                                                                                                                                   | Center for Genomics and System Biology, New York University                                                                                                                      | Center for Genomics and System Biology, New York University                                                                                                                     | Banakis, S.; Borenstein; Cornelius, A.; D. and Ghedin, E.; E. S.; Fleming, A.; Ghedin, E.; Gresham, D.; Herati, R.; Johnson, K.; Khalfan, M.; Kottkamp, A.; M.J.; Mulligan; Raabe, V.; Roder, A.; Samanovic, M.; Ulrich, R.                                                                                                                                                                                                                                                                                                                                                                     |
| EPI_ISL_516783 to 516785, EPI_ISL_522439 to 522453, EPI_ISL_522455 to 522464, EPI_ISL_522467 to 522473, EPI_ISL_522476, EPI_ISL_522477 to 522483, EPI_ISL_522485, EPI_ISL_522491 to 522497, EPI_ISL_522502, EPI_ISL_522505, EPI_ISL_522508, EPI_ISL_522510, EPI_ISL_522515 to 522516, EPI_ISL_522518, EPI_ISL_526730 to 526731, EPI_ISL_526734 to 526746                                                                                                                                                                                                                                                                                                                                   | Center for Laboratory Control of Infectious Diseases, Korea Centers for Diseases Control and Prevention                                                                          | Center for Laboratory Control of Infectious Diseases, Korea Centers for Diseases Control and Prevention                                                                         | Ae Kyung Park; Eunkyung Shin; Heui Man Kim; Jeong-Min Kim; Jin Sun No; Junyoung Kim; Myung Guk Han; Yoon-Seok Chung                                                                                                                                                                                                                                                                                                                                                                                                                                                                             |
| see above                                                                                                                                                                                                                                                                                                                                                                                                                                                                                                                                                                                                                                                                                  | Center for Laboratory Medicine St. Gallen                                                                                                                                        | Center for Laboratory Medicine St. Gallen                                                                                                                                       | Yannick Gerth                                                                                                                                                                                                                                                                                                                                                                                                                                                                                                                                                                                   |
| EPI_ISL_1546044, EPI_ISL_1546046, EPI_ISL_1546048, EPI_ISL_1546051, EPI_ISL_1546053, EPI_ISL_1546057, EPI_ISL_1546060, EPI_ISL_1546062, EPI_ISL_1546064, EPI_ISL_1546066, EPI_ISL_1546068, EPI_ISL_1546070, EPI_ISL_1546073, EPI_ISL_1546075, EPI_ISL_1546077, EPI_ISL_1546079, EPI_ISL_1546082, EPI_ISL_1546084, EPI_ISL_1546086 to 1546091, EPI_ISL_1546094, EPI_ISL_1546096, EPI_ISL_1546100, EPI_ISL_1546104, EPI_ISL_1546106, EPI_ISL_1546109, EPI_ISL_1546111, EPI_ISL_1546113 to 1546114, EPI_ISL_1546117, EPI_ISL_1546119, EPI_ISL_1546121, EPI_ISL_1546123, EPI_ISL_1546125, EPI_ISL_1546127, EPI_ISL_1546130, EPI_ISL_1546132, EPI_ISL_1546134, EPI_ISL_1546136, EPI_ISL_1546138 | Center for Research and Innovation, Faculty of Medical Technology, Mahidol University                                                                                            | Center for Research and Innovation, Faculty of Medical Technology, Mahidol University                                                                                           | Anek Mungaoangklang; Hatairat Lerdsamran; Jarunee Prasertsopon; Kamolthip Atsawawanunt; Kantima Sangsirirut; Nattakan Thinpan; Pilaipan Puthavathana; Prabda Praphasiri; Somrak Sirikhetkon; Tisuda Chanmanee                                                                                                                                                                                                                                                                                                                                                                                   |
| see above                                                                                                                                                                                                                                                                                                                                                                                                                                                                                                                                                                                                                                                                                  | Center for Research and Innovation, Faculty of Medical Technology, Mahidol University                                                                                            | Bergthaler laboratory, CeMM Research Center for Molecular Medicine of the Austrian Academy of Sciences                                                                          | Adi Steinrigl; Alexander Lercher; Alexandra Popa; Andreas Bergthaler; Benedikt Agerer; Christian Paar; Christoph Bock; Daniela Schmid; Dorothee von Laer; Elisabeth Puchhammer-Stoeckl; Elisabeth Puchhammer-Stöckl; Franz Allerberger; Gernot Walder; Gregor Hörmann; Guenter Weiss; Gunther Vogl; Henrique Colaco; Jakob-Wendelin Genger; Jan Laine; Judith Aberle; Kinga Rigler-Hohenwarter; Lukas Endler; Manfred Nairz; Mark Smyth; Martin Senekowitsch; Michael Schuster; Peter Hufnagl; Peter Obrist; Rainer Gattringer; Sabine Sussitz-Rack; Stephan Aberle; Thomas Penz; Wegene Borena |
| EPI_ISL_419654 to 419674, EPI_ISL_437993 to 438128, EPI_ISL_475770 to 475812, EPI_ISL_583563 to 583571, EPI_ISL_583692 to 583726, EPI_ISL_583869 to 583882                                                                                                                                                                                                                                                                                                                                                                                                                                                                                                                                 | Center for Virology, Medical University of Vienna                                                                                                                                | Research Center for Genetic Engineering and Biotechnology "Georgi D. Efremov", Macedonian Academy of Sciences and Arts                                                          | RCGEB - MASA                                                                                                                                                                                                                                                                                                                                                                                                                                                                                                                                                                                    |
| EPI_ISL_516414 to 516425                                                                                                                                                                                                                                                                                                                                                                                                                                                                                                                                                                                                                                                                   | Center for public health - Skopje                                                                                                                                                | Research Center for Genetic Engineering and Biotechnology "Georgi D. Efremov", Macedonian Academy of Sciences and Arts                                                          | RCGEB - MASA                                                                                                                                                                                                                                                                                                                                                                                                                                                                                                                                                                                    |
| EPI_ISL_1400492, EPI_ISL_1400525, EPI_ISL_1400552                                                                                                                                                                                                                                                                                                                                                                                                                                                                                                                                                                                                                                          | Center of Hygiene and Epidemiology in Belgorod Region                                                                                                                            | WHO National Influenza Centre Russian Federation                                                                                                                                | Andrey Komissarov; Anna Ivanova; Artem Fadeev; Daria Danilenko; Dmitry Bazhenov; Dmitry Lioznov; Elena Nabieva; Georgii Bazykin; Ksenia Safina; Kseniya Komissarova; Lyudmila Berdinskikh; Maria Pisareva; Maria Timofeeva; Tamila Musaeva; Veronika Eder                                                                                                                                                                                                                                                                                                                                       |
| EPI_ISL_523950                                                                                                                                                                                                                                                                                                                                                                                                                                                                                                                                                                                                                                                                             | Center of Medical Microbiology, Virology, and Hospital Hygiene, University of Duesseldorf                                                                                        | Center of Medical Microbiology, Virology, and Hospital Hygiene, Heinrich Heine University Düsseldorf                                                                            | Alexander Dilthey; Andreas Walker; Daniel Strelow; Hendrik Streeck; Jessica Nicolai; Jörg Timm; Klaus Pfeffer; Malte Kohns Vasconcelos; Marek Korencak; Maximilian Damagnez; Tobias Wienemann; Torsten Houwaart                                                                                                                                                                                                                                                                                                                                                                                 |
| EPI_ISL_413488, EPI_ISL_414497 to 414499, EPI_ISL_414504 to 414509, EPI_ISL_414574, EPI_ISL_417457 to 417468, EPI_ISL_419541 to 419552, EPI_ISL_425120 to 425140, EPI_ISL_452180, EPI_ISL_523927 to 523929, EPI_ISL_523931 to 523949, EPI_ISL_602510 to 602517, EPI_ISL_602533 to 602552                                                                                                                                                                                                                                                                                                                                                                                                   | Center of Medical Microbiology, Virology, and Hospital Hygiene, University of Duesseldorf                                                                                        | Center of Medical Microbiology, Virology, and Hospital Hygiene, University of Duesseldorf                                                                                       | Alexander Dilthey; Andreas Walker; Björn-Erik Jensen; Björn-Erik Jensen; Daniel Strelow; Detlef Kindgen-Milles; Hendrik Streeck; Jessica Nicolai; Jorg Timm; Jörg Timm; Klaus Pfeffer; Lisanna Hülse; Malte Kohns Vasconcelos; Marcel Andree; Marek Korencak; Maximilian Damagnez; Nadine Lübke; Ortwin Adams; Sandra Hauka; Tina Senff; Tobias Wienemann; Torsten Feldt; Torsten Houwaart                                                                                                                                                                                                      |
| see above                                                                                                                                                                                                                                                                                                                                                                                                                                                                                                                                                                                                                                                                                  | Center of Medical Microbiology, Virology, and Hospital Hygiene, University of Duesseldorf                                                                                        | Center of Medical Microbiology, Virology, and Hospital Hygiene, University of Duesseldorf                                                                                       | Alexander Dilthey; Andreas Walker; Björn-Erik Jensen; Björn-Erik Jensen; Daniel Strelow; Detlef Kindgen-Milles; Hendrik Streeck; Jessica Nicolai; Jorg Timm; Jörg Timm; Klaus Pfeffer; Lisanna Hülse; Malte Kohns Vasconcelos; Marcel Andree; Marek Korencak; Maximilian Damagnez; Nadine Lübke; Ortwin Adams; Sandra Hauka; Tina Senff; Tobias Wienemann; Torsten Feldt; Torsten Houwaart                                                                                                                                                                                                      |
| EPI_ISL_523930                                                                                                                                                                                                                                                                                                                                                                                                                                                                                                                                                                                                                                                                             | Center of Medical Microbiology, Virology, and Hospital Hygiene, University of Duesseldorf                                                                                        | Universitätstr.1 40225 Düsseldorf Germany                                                                                                                                       | Alexander Dilthey; Andreas Walker; Björn-Erik Jensen; Björn-Erik Jensen; Daniel Strelow; Hendrik Streeck; Jessica Nicolai; Jörg Timm; Klaus Pfeffer; Malte Kohns Vasconcelos; Marek Korencak; Maximilian Damagnez; Tobias Wienemann; Torsten Houwaart                                                                                                                                                                                                                                                                                                                                           |
| EPI_ISL_430820                                                                                                                                                                                                                                                                                                                                                                                                                                                                                                                                                                                                                                                                             | Center of Scientific Excellence for Influenza Viruses, National Research Centre (NRC), Egypt.                                                                                    | Center of Scientific Excellence for Influenza Viruses, National Research Centre (NRC), Egypt.                                                                                   | Abo Shama; Ahmed E Kayed; Ahmed El-Taweel; Ahmed Kandeil; Ahmed Mostafa; Amal Naguib; M Noura; Mahmoud Shehata; Mina Kamel; Mohamed Ahmed Ali; Mohamed El Sayes; Mokhtar Gomaa; Nancy M. El Guindy; Omnia Kutkat; Rabeh El-Shesheny; Sara Mahmoud; Shymaa Showky Ahmed; Wael Roshdy; Yassmin Moatasim                                                                                                                                                                                                                                                                                           |
| EPI_ISL_430819                                                                                                                                                                                                                                                                                                                                                                                                                                                                                                                                                                                                                                                                             | Center of Scientific Excellence for Influenza Viruses, National Research Centre (NRC), Egypt.                                                                                    | Center of Scientific Excellence for Influenza Viruses, National Research Centre (NRC), Egypt.                                                                                   | Abo Shama; Ahmed E Kayed; Ahmed El-Taweel; Ahmed Kandeil; Ahmed Mostafa; Amal Naguib; M Noura; Mahmoud Shehata; Mina Kamel; Mohamed Ahmed Ali; Mohamed El Sayes; Mokhtar Gomaa; Nancy M. El Guindy; Omnia Kutkat; Rabeh El-Shesheny; Sara Mahmoud; Shymaa Showky Ahmed; Wael Roshdy; Yassmin Moatasim                                                                                                                                                                                                                                                                                           |
| EPI_ISL_429852 to 429855, EPI_ISL_495459                                                                                                                                                                                                                                                                                                                                                                                                                                                                                                                                                                                                                                                   | Centers for Disease Control and Prevention of Lishui                                                                                                                             | Department of InspectionCenters for Disease Control and Prevention of Lishui                                                                                                    | Ji Jiansong; Ji Qiaoying; Wang Xiaoguang; Ye Bifeng; Ye Ling                                                                                                                                                                                                                                                                                                                                                                                                                                                                                                                                    |
| EPI_ISL_539495                                                                                                                                                                                                                                                                                                                                                                                                                                                                                                                                                                                                                                                                             | Centers for Disease Control and Prevention, Dengue Branch                                                                                                                        | Centers for Disease Control and Prevention, Dengue Branch                                                                                                                       | Betzabel Flores; Diego Sainz de la Peña; Gabriela Paz-Bailey; Gilberto A. Santiago; Glenda Gonzalez; Janice Perez; Jorge Bertran; Jorge L. Munoz-Jordan; Keyla Charriez; Vanessa Rivera-Amill                                                                                                                                                                                                                                                                                                                                                                                                   |
| EPI_ISL_406031, EPI_ISL_420082 to 420085, EPI_ISL_421641, EPI_ISL_421651, EPI_ISL_428488 to 428491, EPI_ISL_429882 to 429884                                                                                                                                                                                                                                                                                                                                                                                                                                                                                                                                                               | Centers for Disease Control, R.O.C. (Taiwan)                                                                                                                                     | Centers for Disease Control, R.O.C. (Taiwan)                                                                                                                                    | Ji-Rong Yang; Jung-Jung Mu; Ming-Tsan Liu; Ming-Tsan-Liu; Shu-Ying Li; Yu-Chi Lin; Yu-Chi-Lin                                                                                                                                                                                                                                                                                                                                                                                                                                                                                                   |
| EPI_ISL_457750, EPI_ISL_459962 to 459964                                                                                                                                                                                                                                                                                                                                                                                                                                                                                                                                                                                                                                                   | Centogene AG                                                                                                                                                                     | Centogene AG                                                                                                                                                                    | Dr. Krishna Kumar Kandaswamy; Prof. Dr. Peter Bauer                                                                                                                                                                                                                                                                                                                                                                                                                                                                                                                                             |
| EPI_ISL_1479160 to 1479201                                                                                                                                                                                                                                                                                                                                                                                                                                                                                                                                                                                                                                                                 | Centracare Laboratory Services                                                                                                                                                   | Minnesota Department of Health, Public Health Laboratory                                                                                                                        | Alexandra Lorentz; Jacob Garfin; Matt Plumb; and Xiong Wang                                                                                                                                                                                                                                                                                                                                                                                                                                                                                                                                     |
| EPI_ISL_455583, EPI_ISL_455594                                                                                                                                                                                                                                                                                                                                                                                                                                                                                                                                                                                                                                                             | Central Chest Institute of Thailand                                                                                                                                              | National Institute of Health, Department of medical Sciences, Ministry of Public Health, Thailand                                                                               | Chittaganpitch; Malinee; Okada; Parmmen; Phuygun; Pilailuk; Siripaporn; Sittiporn; Sunthareeya; Thanadachakul; Thanutsapa; Waicharoen; Warawan; Wongboot                                                                                                                                                                                                                                                                                                                                                                                                                                        |
| EPI_ISL_1520156 to 1520157                                                                                                                                                                                                                                                                                                                                                                                                                                                                                                                                                                                                                                                                 | Central DuPage Hospital                                                                                                                                                          | Illinois Department of Public Health - Chicago Lab                                                                                                                              | Ira Heimler; Vineet K. Dhiman                                                                                                                                                                                                                                                                                                                                                                                                                                                                                                                                                                   |
| EPI_ISL_529032                                                                                                                                                                                                                                                                                                                                                                                                                                                                                                                                                                                                                                                                             | Central Molecular Microbiology Laboratory and Next Generation Sequencing Reference Laboratory, Clinical and Chemical Pathology Department, Faculty of Medicine, CAIRO UNIVERSITY | Next Generation Sequencing Reference Laboratory, Faculty of Medicine, CAIRO UNIVERSITY and The Center for Genome and Microbiome Research, Faculty of Pharmacy, CAIRO UNIVERSITY | May Abdelfattah; May Sherif Soliman; Ramy Karam Aziz                                                                                                                                                                                                                                                                                                                                                                                                                                                                                                                                            |
| EPI_ISL_529031                                                                                                                                                                                                                                                                                                                                                                                                                                                                                                                                                                                                                                                                             | Central Molecular Microbiology Laboratory, Clinical and Chemical Pathology Department, Faculty of Medicine, CAIRO UNIVERSITY                                                     | Next Generation Sequencing Reference Laboratory, Faculty of Medicine, Cairo University and The Center for Genome and Microbiome Research, Faculty of Pharmacy, CAIRO UNIVERSITY | May Abdelfattah; May Sherif Soliman; Ramy Karam Aziz                                                                                                                                                                                                                                                                                                                                                                                                                                                                                                                                            |
| EPI_ISL_429664 to 429703                                                                                                                                                                                                                                                                                                                                                                                                                                                                                                                                                                                                                                                                   | Central Public Health Laboratory/Octávio Magalhães Institute (IOM) from the Ezequiel Dias Foundation (FUNED)                                                                     | Instituto Octávio Magalhães / Fundação Ezequiel Dias (IOM/FUNED)                                                                                                                | Joilson Xavier; Luiz Carlos Junior Alcantara; Marcos Vinicius Silva; Marluce Aparecida Assunção Oliveira; Marta Giovanetti; Talita Adelfino; Vagner Fonseca                                                                                                                                                                                                                                                                                                                                                                                                                                     |
| EPI_ISL_447250 to 447251                                                                                                                                                                                                                                                                                                                                                                                                                                                                                                                                                                                                                                                                   | Central Virology Laboratory                                                                                                                                                      | Central Virology Laboratory                                                                                                                                                     | Danit Sofer; Efrat Bucris; Ella Mendelson; Michal Mandelboim; Neta Zuckerman; Oran Erster; Orna Mor                                                                                                                                                                                                                                                                                                                                                                                                                                                                                             |
| EPI_ISL_419211                                                                                                                                                                                                                                                                                                                                                                                                                                                                                                                                                                                                                                                                             | Central Virology Laboratory                                                                                                                                                      | Israel Institute for Biological Research                                                                                                                                        | Adj Beth-Din; Anat Zvi; Boaz Politi; Dana Stein; Einat Vitner; Gadi Segal; Gili Regev-Yochay; Hadas Tamir; Hagit Achdout; Inbar Cohen-Gihon; Lilach Cherry; Michal Mandelboim; Nir Paran; Ofir Israeli; Ohad Shifman; Oran Erster; Orly Laskar; Sharon Melamed; Shay Weiss; Shmuel C. Shapira; Shmuel Yitzhaki; Tomer Israely; Yfat Yahalom Ronen                                                                                                                                                                                                                                               |
| EPI_ISL_430842                                                                                                                                                                                                                                                                                                                                                                                                                                                                                                                                                                                                                                                                             | Central chest Institute of Thailand                                                                                                                                              | National Institute of Health, Department of medical Sciences, Ministry of Public Health, Thailand                                                                               | Chittaganpitch; Malinee; Okada; Parmmen; Phuygun; Pilailuk; Siripaporn; Sittiporn; Sunthareeya; Thanadachakul; Thanutsapa; Waicharoen; Warawan; Wongboot                                                                                                                                                                                                                                                                                                                                                                                                                                        |
| EPI_ISL_486410, EPI_ISL_486417                                                                                                                                                                                                                                                                                                                                                                                                                                                                                                                                                                                                                                                             | Centrala laboratorija                                                                                                                                                            | Latvian Biomedical Research and Study Centre                                                                                                                                    | Ivars Silamielis; Jana Oste; Jnis Kliviš; Kaspars Megnis; Marta Priedte; Monta Ustinova; Stella Lapia; Uga Dumpis; Vita Rovte; ikita Zrelavs                                                                                                                                                                                                                                                                                                                                                                                                                                                    |
| EPI_ISL_548256                                                                                                                                                                                                                                                                                                                                                                                                                                                                                                                                                                                                                                                                             | Centralsjukhuset                                                                                                                                                                 | The Public Health Agency of Sweden                                                                                                                                              | Anna Risberg; Anna-Malin Linde; Karin Tegmark-Wisell; Maria Lind Karlberg; Mattias Haukland; Mia Brytting; Olov Svartstrom; Oskar Karlsson Lindsjö; Petra Edquist; Reza Advani; Sandra Broddesson                                                                                                                                                                                                                                                                                                                                                                                               |
| EPI_ISL_1406454, EPI_ISL_1406472, EPI_ISL_1406486, EPI_ISL_1406585, EPI_ISL_1406590, EPI_ISL_1406594, EPI_ISL_1406599, EPI_ISL_1406606, EPI_ISL_1406616, EPI_ISL_1406619, EPI_ISL_1406639 to 1406640, EPI_ISL_1406656, EPI_ISL_1406664, EPI_ISL_1483780 to 1483782, EPI_ISL_1547454                                                                                                                                                                                                                                                                                                                                                                                                        |                                                                                                                                                                                  |                                                                                                                                                                                 |                                                                                                                                                                                                                                                                                                                                                                                                                                                                                                                                                                                                 |

|                                                                                                                                                                                                                                                                                                                                                                                                                                                                                                                                                                                                                                                                                                                                                                                                                                                                                                                                                                                                                                                                                                                                                                                                                                                                                                                                                                                                                                                                                                                                                                                                                                                                                                                                                                                                                                                                                                                                                                                                                                                                                     |                                                                              |                                                                                          |                                                                                                                                                                                                                                                                                                                                                                                                                                       |
|-------------------------------------------------------------------------------------------------------------------------------------------------------------------------------------------------------------------------------------------------------------------------------------------------------------------------------------------------------------------------------------------------------------------------------------------------------------------------------------------------------------------------------------------------------------------------------------------------------------------------------------------------------------------------------------------------------------------------------------------------------------------------------------------------------------------------------------------------------------------------------------------------------------------------------------------------------------------------------------------------------------------------------------------------------------------------------------------------------------------------------------------------------------------------------------------------------------------------------------------------------------------------------------------------------------------------------------------------------------------------------------------------------------------------------------------------------------------------------------------------------------------------------------------------------------------------------------------------------------------------------------------------------------------------------------------------------------------------------------------------------------------------------------------------------------------------------------------------------------------------------------------------------------------------------------------------------------------------------------------------------------------------------------------------------------------------------------|------------------------------------------------------------------------------|------------------------------------------------------------------------------------------|---------------------------------------------------------------------------------------------------------------------------------------------------------------------------------------------------------------------------------------------------------------------------------------------------------------------------------------------------------------------------------------------------------------------------------------|
| see above                                                                                                                                                                                                                                                                                                                                                                                                                                                                                                                                                                                                                                                                                                                                                                                                                                                                                                                                                                                                                                                                                                                                                                                                                                                                                                                                                                                                                                                                                                                                                                                                                                                                                                                                                                                                                                                                                                                                                                                                                                                                           | Centre De Prelevement COVID RIOM                                             | CHU Clermont-Ferrand, service de virologie                                               | Bisseux Maxime; Combes Patricia; Henquell Cécile; Mirand Audrey                                                                                                                                                                                                                                                                                                                                                                       |
| EPI_ISL_1483771, EPI_ISL_1547456                                                                                                                                                                                                                                                                                                                                                                                                                                                                                                                                                                                                                                                                                                                                                                                                                                                                                                                                                                                                                                                                                                                                                                                                                                                                                                                                                                                                                                                                                                                                                                                                                                                                                                                                                                                                                                                                                                                                                                                                                                                    | Centre De Prélèvement COVID VICHY                                            | CHU Clermont-Ferrand, service de virologie                                               | Bisseux Maxime; Combes Patricia; Henquell Cécile; Mirand Audrey                                                                                                                                                                                                                                                                                                                                                                       |
| EPI_ISL_1406459, EPI_ISL_1406498, EPI_ISL_1406507, EPI_ISL_1406518, EPI_ISL_1406549, EPI_ISL_1406597, EPI_ISL_1406652, EPI_ISL_1406657, EPI_ISL_1490235                                                                                                                                                                                                                                                                                                                                                                                                                                                                                                                                                                                                                                                                                                                                                                                                                                                                                                                                                                                                                                                                                                                                                                                                                                                                                                                                                                                                                                                                                                                                                                                                                                                                                                                                                                                                                                                                                                                             | Centre De Prélèvement COVID VICHY                                            | CHU Clermont-Ferrand, service de virologie                                               | Bisseux Maxime; Combes Patricia; Henquell Cécile; Mirand Audrey                                                                                                                                                                                                                                                                                                                                                                       |
| see above                                                                                                                                                                                                                                                                                                                                                                                                                                                                                                                                                                                                                                                                                                                                                                                                                                                                                                                                                                                                                                                                                                                                                                                                                                                                                                                                                                                                                                                                                                                                                                                                                                                                                                                                                                                                                                                                                                                                                                                                                                                                           | Centre For Biotechnology Research and Development                            | Centre For Biotechnology Research and Development                                        | C.N. and Michuki; D.K.; G.N.; J.O.; Kimotho, J.; Matoke-Muhia; Matoke-Muhia, D.; Muuo; Ochwoto, M.; S.L.; S.N.; Symeker; Waruhui; Zablon                                                                                                                                                                                                                                                                                              |
| EPI_ISL_457999 to 458000                                                                                                                                                                                                                                                                                                                                                                                                                                                                                                                                                                                                                                                                                                                                                                                                                                                                                                                                                                                                                                                                                                                                                                                                                                                                                                                                                                                                                                                                                                                                                                                                                                                                                                                                                                                                                                                                                                                                                                                                                                                            | Centre Hospitalier Universitaire de Rouen Laboratoire de Virologie           | National Reference Center for Viruses of Respiratory Infections, Institut Pasteur, Paris | Angela Brisebarre; Etienne Simon-Lorière; Flora Donati; Flora Donati Vincent Enouf; Jean-Christophe Plantier; Marion Barbet; Maud Vanpeene; Méline Bizard; Méline Albert; Sylvie Behillil; Sylvie van der Werf; Vincent Enouf                                                                                                                                                                                                         |
| EPI_ISL_414624, EPI_ISL_416494                                                                                                                                                                                                                                                                                                                                                                                                                                                                                                                                                                                                                                                                                                                                                                                                                                                                                                                                                                                                                                                                                                                                                                                                                                                                                                                                                                                                                                                                                                                                                                                                                                                                                                                                                                                                                                                                                                                                                                                                                                                      | Centre Hospitalier Alpes Lemman                                              | CNR Virus des Infections Respiratoires - France SUD                                      | Alexandre Gaymard; Antonin Bal; Bruno Lina; Carine Moustaud; Florence Morfin-Sherpa; Gregory Destras; Gwendolynne Burfin; Laurence Josset; Martine Valette; Maude Bouscambert-Duchamp; Raphaëlle Lamy; Solenne Brun                                                                                                                                                                                                                   |
| EPI_ISL_508958, EPI_ISL_509012                                                                                                                                                                                                                                                                                                                                                                                                                                                                                                                                                                                                                                                                                                                                                                                                                                                                                                                                                                                                                                                                                                                                                                                                                                                                                                                                                                                                                                                                                                                                                                                                                                                                                                                                                                                                                                                                                                                                                                                                                                                      |                                                                              |                                                                                          |                                                                                                                                                                                                                                                                                                                                                                                                                                       |
| EPI_ISL_414627 to 414630, EPI_ISL_414634 to 414638, EPI_ISL_415653 to 415654, EPI_ISL_416495 to 416497, EPI_ISL_418218, EPI_ISL_418220 to 418221, EPI_ISL_418223 to 418225, EPI_ISL_418227 to 418228, EPI_ISL_418231, EPI_ISL_418236 to 418239, EPI_ISL_429968                                                                                                                                                                                                                                                                                                                                                                                                                                                                                                                                                                                                                                                                                                                                                                                                                                                                                                                                                                                                                                                                                                                                                                                                                                                                                                                                                                                                                                                                                                                                                                                                                                                                                                                                                                                                                      | Centre Hospitalier Compiegne Laboratoire de Biologie                         | National Reference Center for Viruses of Respiratory Infections, Institut Pasteur, Paris | Angela Brisebarre; Etienne Simon-Lorière; Fabiana Gambaro; Flora Donati; Flora Donati Vincent Enouf; Marion Barbet; Maud Vanpeene; Mélanie Albert; Méline Bizard; Méline Albert; Raulin Olivia; Sylvie Behillil; Sylvie van der Werf; Vincent Enouf                                                                                                                                                                                   |
| see above                                                                                                                                                                                                                                                                                                                                                                                                                                                                                                                                                                                                                                                                                                                                                                                                                                                                                                                                                                                                                                                                                                                                                                                                                                                                                                                                                                                                                                                                                                                                                                                                                                                                                                                                                                                                                                                                                                                                                                                                                                                                           | Centre Hospitalier Lucien Hussel                                             | CNR Virus des Infections Respiratoires - France SUD                                      | Alexandre Gaymard; Antonin Bal; Bruno Lina; Carine Moustaud; Florence Morfin-Sherpa; Gregory Destras; Gwendolynne Burfin; Laurence Josset; Martine Valette; Maude Bouscambert-Duchamp; Raphaëlle Lamy; Solenne Brun                                                                                                                                                                                                                   |
| EPI_ISL_418428, EPI_ISL_508947                                                                                                                                                                                                                                                                                                                                                                                                                                                                                                                                                                                                                                                                                                                                                                                                                                                                                                                                                                                                                                                                                                                                                                                                                                                                                                                                                                                                                                                                                                                                                                                                                                                                                                                                                                                                                                                                                                                                                                                                                                                      |                                                                              |                                                                                          |                                                                                                                                                                                                                                                                                                                                                                                                                                       |
| EPI_ISL_1406575, EPI_ISL_1406650, EPI_ISL_1483754, EPI_ISL_1547426, EPI_ISL_1547428, EPI_ISL_1547452                                                                                                                                                                                                                                                                                                                                                                                                                                                                                                                                                                                                                                                                                                                                                                                                                                                                                                                                                                                                                                                                                                                                                                                                                                                                                                                                                                                                                                                                                                                                                                                                                                                                                                                                                                                                                                                                                                                                                                                | Centre Hospitalier Paul Ardier                                               | CHU Clermont-Ferrand, service de virologie                                               | Bisseux Maxime; Combes Patricia; Henquell Cécile; Mirand Audrey                                                                                                                                                                                                                                                                                                                                                                       |
| EPI_ISL_508966, EPI_ISL_508975, EPI_ISL_508998                                                                                                                                                                                                                                                                                                                                                                                                                                                                                                                                                                                                                                                                                                                                                                                                                                                                                                                                                                                                                                                                                                                                                                                                                                                                                                                                                                                                                                                                                                                                                                                                                                                                                                                                                                                                                                                                                                                                                                                                                                      | Centre Hospitalier Pierre Oudot                                              | CNR Virus des Infections Respiratoires - France SUD                                      | Alexandre Gaymard; Antonin Bal; Bruno Lina; Carine Moustaud; Florence Morfin-Sherpa; Gregory Destras; Gwendolynne Burfin; Laurence Josset; Martine Valette; Maude Bouscambert-Duchamp; Raphaëlle Lamy; Solenne Brun                                                                                                                                                                                                                   |
| EPI_ISL_1406443, EPI_ISL_1406447, EPI_ISL_1406471, EPI_ISL_1406487, EPI_ISL_1406499, EPI_ISL_1406528 to 1406529, EPI_ISL_1406588, EPI_ISL_1406603, EPI_ISL_1406634, EPI_ISL_1406670, EPI_ISL_1483729, EPI_ISL_1483752, EPI_ISL_1483756, EPI_ISL_1547429, EPI_ISL_1547434, EPI_ISL_1547460                                                                                                                                                                                                                                                                                                                                                                                                                                                                                                                                                                                                                                                                                                                                                                                                                                                                                                                                                                                                                                                                                                                                                                                                                                                                                                                                                                                                                                                                                                                                                                                                                                                                                                                                                                                           | Centre Hospitalier RIOM                                                      | CHU Clermont-Ferrand, service de virologie                                               | Bisseux Maxime; Combes Patricia; Henquell Cécile; Mirand Audrey                                                                                                                                                                                                                                                                                                                                                                       |
| see above                                                                                                                                                                                                                                                                                                                                                                                                                                                                                                                                                                                                                                                                                                                                                                                                                                                                                                                                                                                                                                                                                                                                                                                                                                                                                                                                                                                                                                                                                                                                                                                                                                                                                                                                                                                                                                                                                                                                                                                                                                                                           | Centre Hospitalier René Dubois Laboratoire de Microbiologie - Bât A          | National Reference Center for Viruses of Respiratory Infections, Institut Pasteur, Paris | Angela Brisebarre; Flora Donati Vincent Enouf; Marion Barbet; Maud Vanpeene; Méline Bizard; Méline Albert; Pascale Martres; Sylvie Behillil; Sylvie van der Werf                                                                                                                                                                                                                                                                      |
| EPI_ISL_414633                                                                                                                                                                                                                                                                                                                                                                                                                                                                                                                                                                                                                                                                                                                                                                                                                                                                                                                                                                                                                                                                                                                                                                                                                                                                                                                                                                                                                                                                                                                                                                                                                                                                                                                                                                                                                                                                                                                                                                                                                                                                      |                                                                              |                                                                                          |                                                                                                                                                                                                                                                                                                                                                                                                                                       |
| EPI_ISL_414625                                                                                                                                                                                                                                                                                                                                                                                                                                                                                                                                                                                                                                                                                                                                                                                                                                                                                                                                                                                                                                                                                                                                                                                                                                                                                                                                                                                                                                                                                                                                                                                                                                                                                                                                                                                                                                                                                                                                                                                                                                                                      | Centre Hospitalier Régional Universitaire de Nantes Laboratoire de Virologie | National Reference Center for Viruses of Respiratory Infections, Institut Pasteur, Paris | Angela Brisebarre; Flora Donati Vincent Enouf; Marianne Coste-Buret; Marion Barbet; Maud Vanpeene; Méline Bizard; Méline Albert; Sylvie Behillil; Sylvie van der Werf                                                                                                                                                                                                                                                                 |
| EPI_ISL_535787 to 535788, EPI_ISL_535790, EPI_ISL_535842 to 535844, EPI_ISL_535870 to 535871, EPI_ISL_535894 to 535896, EPI_ISL_535907, EPI_ISL_535931 to 535935, EPI_ISL_535955, EPI_ISL_536002, EPI_ISL_536005 to 536006, EPI_ISL_536009, EPI_ISL_536012, EPI_ISL_536014 to 536016, EPI_ISL_536047 to 536048, EPI_ISL_536050, EPI_ISL_536052 to 536054, EPI_ISL_536059 to 536060, EPI_ISL_536063, EPI_ISL_536073 to 536074, EPI_ISL_536076, EPI_ISL_536079, EPI_ISL_536119 to 536120, EPI_ISL_536123, EPI_ISL_536126, EPI_ISL_536129 to 536130, EPI_ISL_536133 to 536134, EPI_ISL_536138, EPI_ISL_536151, EPI_ISL_536153 to 536154, EPI_ISL_536381, EPI_ISL_560415                                                                                                                                                                                                                                                                                                                                                                                                                                                                                                                                                                                                                                                                                                                                                                                                                                                                                                                                                                                                                                                                                                                                                                                                                                                                                                                                                                                                                |                                                                              |                                                                                          |                                                                                                                                                                                                                                                                                                                                                                                                                                       |
| see above                                                                                                                                                                                                                                                                                                                                                                                                                                                                                                                                                                                                                                                                                                                                                                                                                                                                                                                                                                                                                                                                                                                                                                                                                                                                                                                                                                                                                                                                                                                                                                                                                                                                                                                                                                                                                                                                                                                                                                                                                                                                           | Centre Hospitalier Régional de Lanaudière                                    | Laboratoire de santé publique du Québec                                                  | Guillaume Bourque; Ioannis Ragoussis; Jesse Shapiro; Mark Lathrop and Michel Roger; Mark Lathrop and Michel Roger on behalf of the CoVSeQ research group; Sandrine Moreira                                                                                                                                                                                                                                                            |
| EPI_ISL_418418 to 418419, EPI_ISL_420617, EPI_ISL_508879 to 508880, EPI_ISL_508959 to 508960                                                                                                                                                                                                                                                                                                                                                                                                                                                                                                                                                                                                                                                                                                                                                                                                                                                                                                                                                                                                                                                                                                                                                                                                                                                                                                                                                                                                                                                                                                                                                                                                                                                                                                                                                                                                                                                                                                                                                                                        | Centre Hospitalier Saint Joseph Saint Luc                                    | CNR Virus des Infections Respiratoires - France SUD                                      | Alexandre Gaymard; Antonin Bal; Bruno Lina; Carine Moustaud; Florence Morfin-Sherpa; Gregory Destras; Gwendolynne Burfin; Laurence Josset; Martine Valette; Maude Bouscambert-Duchamp; Raphaëlle Lamy; Solenne Brun                                                                                                                                                                                                                   |
| EPI_ISL_1406437 to 1406438, EPI_ISL_1406440 to 1406441, EPI_ISL_1406444 to 1406445, EPI_ISL_1406448 to 1406451, EPI_ISL_1406455, EPI_ISL_1406457, EPI_ISL_1406460, EPI_ISL_1406462, EPI_ISL_1406464 to 1406470, EPI_ISL_1406474 to 1406476, EPI_ISL_1406479 to 1406483, EPI_ISL_1406485, EPI_ISL_1406488 to 1406496, EPI_ISL_1406501 to 1406506, EPI_ISL_1406508 to 1406511, EPI_ISL_1406513 to 1406517, EPI_ISL_1406519 to 1406527, EPI_ISL_1406532, EPI_ISL_1406534, EPI_ISL_1406536 to 1406543, EPI_ISL_1406546 to 1406548, EPI_ISL_1406550 to 1406570, EPI_ISL_1406572 to 1406573, EPI_ISL_1406576 to 1406584, EPI_ISL_1406586, EPI_ISL_1406591, EPI_ISL_1406595, EPI_ISL_1406600, EPI_ISL_1406602, EPI_ISL_1406604 to 1406605, EPI_ISL_1406607, EPI_ISL_1406609 to 1406610, EPI_ISL_1406612 to 1406615, EPI_ISL_1406617, EPI_ISL_1406620 to 1406622, EPI_ISL_1406624 to 1406629, EPI_ISL_1406631 to 1406633, EPI_ISL_1406635 to 1406636, EPI_ISL_1406638, EPI_ISL_1406641 to 1406648, EPI_ISL_1406653 to 1406655, EPI_ISL_1406658 to 1406659, EPI_ISL_1406665, EPI_ISL_1406666 to 1406668, EPI_ISL_1406675, EPI_ISL_1406680, EPI_ISL_1406683 to 1406687, EPI_ISL_1483708 to 1483709, EPI_ISL_1483711 to 1483718, EPI_ISL_1483721 to 1483723, EPI_ISL_1483725, EPI_ISL_1483727 to 1483728, EPI_ISL_1483730 to 1483737, EPI_ISL_1483739, EPI_ISL_1483742 to 1483747, EPI_ISL_1483749 to 1483751, EPI_ISL_1483753, EPI_ISL_1483755, EPI_ISL_1483757 to 1483758, EPI_ISL_1483762 to 1483768, EPI_ISL_1483773 to 1483776, EPI_ISL_1483783 to 1483787, EPI_ISL_1490230, EPI_ISL_1490232, EPI_ISL_1490236, EPI_ISL_1490238 to 1490243, EPI_ISL_1492562 to 1492563, EPI_ISL_1547393 to 1547396, EPI_ISL_1547399, EPI_ISL_1547401 to 1547406, EPI_ISL_1547408 to 1547411, EPI_ISL_1547413 to 1547416, EPI_ISL_1547418 to 1547420, EPI_ISL_1547422 to 1547425, EPI_ISL_1547430 to 1547433, EPI_ISL_1547435 to 1547440, EPI_ISL_1547445 to 1547446, EPI_ISL_1547448 to 1547451, EPI_ISL_1547455, EPI_ISL_1547457 to 1547458, EPI_ISL_1547463 to 1547464, EPI_ISL_1547468, EPI_ISL_1547471 |                                                                              |                                                                                          |                                                                                                                                                                                                                                                                                                                                                                                                                                       |
| see above                                                                                                                                                                                                                                                                                                                                                                                                                                                                                                                                                                                                                                                                                                                                                                                                                                                                                                                                                                                                                                                                                                                                                                                                                                                                                                                                                                                                                                                                                                                                                                                                                                                                                                                                                                                                                                                                                                                                                                                                                                                                           | Centre Hospitalier Universitaire Clermont-Ferrand                            | CHU Clermont-Ferrand, service de virologie                                               | Bisseux Maxime; Combes Patricia; Henquell Cécile; Mirand Audrey                                                                                                                                                                                                                                                                                                                                                                       |
| EPI_ISL_416757, EPI_ISL_417340, EPI_ISL_418426, EPI_ISL_419183, EPI_ISL_419185 to 419186, EPI_ISL_420620, EPI_ISL_508938, EPI_ISL_508944, EPI_ISL_508968, EPI_ISL_525539, EPI_ISL_582121                                                                                                                                                                                                                                                                                                                                                                                                                                                                                                                                                                                                                                                                                                                                                                                                                                                                                                                                                                                                                                                                                                                                                                                                                                                                                                                                                                                                                                                                                                                                                                                                                                                                                                                                                                                                                                                                                            | Centre Hospitalier de Bourg en Bresse                                        | CNR Virus des Infections Respiratoires - France SUD                                      | Alexandre; Alexandre Gaymard; Antonin; Antonin Bal; Bal; Bouscambert-Duchamp; Brengel-Pesce; Bruno Lina; Bruno.; Carine Moustaud; Cheynet; Destras; Florence; Florence Morfin-Sherpa; Gaymard; Gregory; Gregory Destras; Gwendolynne Burfin; Hadrien Règue; Josset; Karen; Laurence; Laurence Josset; Lina; Martine; Martine Valette; Maude; Maude Bouscambert-Duchamp; Morfin-Sherpa; Raphaëlle Lamy; Solenne Brun; Valette; Valérie |
| see above                                                                                                                                                                                                                                                                                                                                                                                                                                                                                                                                                                                                                                                                                                                                                                                                                                                                                                                                                                                                                                                                                                                                                                                                                                                                                                                                                                                                                                                                                                                                                                                                                                                                                                                                                                                                                                                                                                                                                                                                                                                                           | Centre Hospitalier de Macon                                                  | CNR Virus des Infections Respiratoires - France SUD                                      | Alexandre Gaymard; Antonin Bal; Bruno Lina; Carine Moustaud; Florence Morfin-Sherpa; Gregory Destras; Gwendolynne Burfin; Laurence Josset; Martine Valette; Maude Bouscambert-Duchamp; Raphaëlle Lamy; Solenne Brun                                                                                                                                                                                                                   |
| EPI_ISL_417338, EPI_ISL_418413, EPI_ISL_419174 to 419176, EPI_ISL_419187 to 419188, EPI_ISL_420612 to 420614, EPI_ISL_508875 to 508876, EPI_ISL_508941, EPI_ISL_508943, EPI_ISL_508946, EPI_ISL_508949 to 508950, EPI_ISL_508952, EPI_ISL_509005                                                                                                                                                                                                                                                                                                                                                                                                                                                                                                                                                                                                                                                                                                                                                                                                                                                                                                                                                                                                                                                                                                                                                                                                                                                                                                                                                                                                                                                                                                                                                                                                                                                                                                                                                                                                                                    | Centre Hospitalier de Valence                                                | CNR Virus des Infections Respiratoires - France SUD                                      | Alexandre; Alexandre Gaymard; Antonin; Antonin Bal; Bal; Bouscambert-Duchamp; Brengel-Pesce; Bruno Lina; Bruno.; Carine Moustaud; Cheynet; Destras; Florence; Florence Morfin-Sherpa; Gaymard; Gregory; Gregory Destras; Gwendolynne Burfin; Josset; Karen; Laurence; Laurence Josset; Lina; Martine; Martine Valette; Maude; Maude Bouscambert-Duchamp; Morfin-Sherpa; Raphaëlle Lamy; Solenne Brun; Valette; Valérie                |
| see above                                                                                                                                                                                                                                                                                                                                                                                                                                                                                                                                                                                                                                                                                                                                                                                                                                                                                                                                                                                                                                                                                                                                                                                                                                                                                                                                                                                                                                                                                                                                                                                                                                                                                                                                                                                                                                                                                                                                                                                                                                                                           | Centre Hospitalier de Villefranche                                           | CNR Virus des Infections Respiratoires - France SUD                                      | Alexandre Gaymard; Antonin Bal; Bruno Lina; Carine Moustaud; Florence Morfin-Sherpa; Gregory Destras; Gwendolynne Burfin; Laurence Josset; Martine Valette; Maude Bouscambert-Duchamp; Raphaëlle Lamy; Solenne Brun                                                                                                                                                                                                                   |
| EPI_ISL_508932, EPI_ISL_508978, EPI_ISL_509006, EPI_ISL_509015                                                                                                                                                                                                                                                                                                                                                                                                                                                                                                                                                                                                                                                                                                                                                                                                                                                                                                                                                                                                                                                                                                                                                                                                                                                                                                                                                                                                                                                                                                                                                                                                                                                                                                                                                                                                                                                                                                                                                                                                                      | Centre Hospitalier des Vals d'Ardeche                                        | CNR Virus des Infections Respiratoires - France SUD                                      | Alexandre Gaymard; Antonin Bal; Bruno Lina; Carine Moustaud; Florence Morfin-Sherpa; Gregory Destras; Gwendolynne Burfin; Laurence Josset; Martine Valette; Maude Bouscambert-Duchamp; Raphaëlle Lamy; Solenne Brun                                                                                                                                                                                                                   |
| EPI_ISL_418412                                                                                                                                                                                                                                                                                                                                                                                                                                                                                                                                                                                                                                                                                                                                                                                                                                                                                                                                                                                                                                                                                                                                                                                                                                                                                                                                                                                                                                                                                                                                                                                                                                                                                                                                                                                                                                                                                                                                                                                                                                                                      |                                                                              |                                                                                          |                                                                                                                                                                                                                                                                                                                                                                                                                                       |
| EPI_ISL_509016                                                                                                                                                                                                                                                                                                                                                                                                                                                                                                                                                                                                                                                                                                                                                                                                                                                                                                                                                                                                                                                                                                                                                                                                                                                                                                                                                                                                                                                                                                                                                                                                                                                                                                                                                                                                                                                                                                                                                                                                                                                                      | Centre Hospitalier du Haut-Bugey                                             | CNR Virus des Infections Respiratoires - France SUD                                      | Alexandre Gaymard; Antonin Bal; Bruno Lina; Carine Moustaud; Florence Morfin-Sherpa; Gregory Destras; Gwendolynne Burfin; Laurence Josset; Martine Valette; Maude Bouscambert-Duchamp; Raphaëlle Lamy; Solenne Brun                                                                                                                                                                                                                   |
| EPI_ISL_1477063 to 1477128, EPI_ISL_1522577, EPI_ISL_1522581, EPI_ISL_1522583, EPI_ISL_1522589, EPI_ISL_1522625, EPI_ISL_1522628, EPI_ISL_1522638, EPI_ISL_1522647, EPI_ISL_1522664, EPI_ISL_1522690, EPI_ISL_1522703, EPI_ISL_1522705, EPI_ISL_1522723 to 1522724, EPI_ISL_1522726, EPI_ISL_1522786 to 1522787, EPI_ISL_1522840 to 1522847, EPI_ISL_1523040 to 1523046, EPI_ISL_1523115, EPI_ISL_1523122, EPI_ISL_1523134, EPI_ISL_1523190, EPI_ISL_1523252 to 1523255                                                                                                                                                                                                                                                                                                                                                                                                                                                                                                                                                                                                                                                                                                                                                                                                                                                                                                                                                                                                                                                                                                                                                                                                                                                                                                                                                                                                                                                                                                                                                                                                             | Centre Hospitalier du Nord                                                   | Laboratoire national de sante, Microbiology, Microbial Genomics Platform                 | Anke Wienecke-Baldacchino; Catherine Ragimbeau; Fatiha Boulmerka; Fatu Djabi; Jessica Tapp; Lise Pignon; Raoul Salmon; Tamir Abdelrahman                                                                                                                                                                                                                                                                                              |
| see above                                                                                                                                                                                                                                                                                                                                                                                                                                                                                                                                                                                                                                                                                                                                                                                                                                                                                                                                                                                                                                                                                                                                                                                                                                                                                                                                                                                                                                                                                                                                                                                                                                                                                                                                                                                                                                                                                                                                                                                                                                                                           | Centre Jean Perrin                                                           | CHU Clermont-Ferrand, service de virologie                                               | Bisseux Maxime; Combes Patricia; Henquell Cécile; Mirand Audrey                                                                                                                                                                                                                                                                                                                                                                       |
| EPI_ISL_1406540, EPI_ISL_1406637, EPI_ISL_1406681, EPI_ISL_1490237                                                                                                                                                                                                                                                                                                                                                                                                                                                                                                                                                                                                                                                                                                                                                                                                                                                                                                                                                                                                                                                                                                                                                                                                                                                                                                                                                                                                                                                                                                                                                                                                                                                                                                                                                                                                                                                                                                                                                                                                                  | Centre Pasteur de Cameroun                                                   | Virology Service, Centre Pasteur of Cameroun                                             | Richard Njouom and Serge Alain SADEUH-Mba                                                                                                                                                                                                                                                                                                                                                                                             |
| EPI_ISL_512873                                                                                                                                                                                                                                                                                                                                                                                                                                                                                                                                                                                                                                                                                                                                                                                                                                                                                                                                                                                                                                                                                                                                                                                                                                                                                                                                                                                                                                                                                                                                                                                                                                                                                                                                                                                                                                                                                                                                                                                                                                                                      | Centre de Biologie humaine CHU Amiens Laboratoire de Virologie 80000 Amiens  | National Reference Center for Viruses of Respiratory Infections, Institut Pasteur, Paris | Angela Brisebarre; Camille Capel; Castelain Sandrine; Etienne Simon-Lorière; Louise LeFrançois; Marion Barbet; Maud Vanpeene; Méline Bizard; Sylvie Behillil; Sylvie van der Werf; Vincent Enouf                                                                                                                                                                                                                                      |
| EPI_ISL_1495973                                                                                                                                                                                                                                                                                                                                                                                                                                                                                                                                                                                                                                                                                                                                                                                                                                                                                                                                                                                                                                                                                                                                                                                                                                                                                                                                                                                                                                                                                                                                                                                                                                                                                                                                                                                                                                                                                                                                                                                                                                                                     | Centre de Recerca en Sanitat Animal (IRTA-CReSA)                             | IrsiCaixa AIDS Research Lab                                                              | A. Valencia; B. Clotet; C. Avila-Nieto; E. Vidal; G. Cantero; I. Blanco; J. Blanco; J. Carrillo; J. Rodon; J. Segalés; J. Vergara-Alert; M. Noguera-Julian; M. Parera; M. Puig; M.T. Terrón; N. Izquierdo-Usero; S. Cruz; V. Guallar                                                                                                                                                                                                  |
| EPI_ISL_482820                                                                                                                                                                                                                                                                                                                                                                                                                                                                                                                                                                                                                                                                                                                                                                                                                                                                                                                                                                                                                                                                                                                                                                                                                                                                                                                                                                                                                                                                                                                                                                                                                                                                                                                                                                                                                                                                                                                                                                                                                                                                      |                                                                              |                                                                                          |                                                                                                                                                                                                                                                                                                                                                                                                                                       |
| EPI_ISL_539573 to 539576                                                                                                                                                                                                                                                                                                                                                                                                                                                                                                                                                                                                                                                                                                                                                                                                                                                                                                                                                                                                                                                                                                                                                                                                                                                                                                                                                                                                                                                                                                                                                                                                                                                                                                                                                                                                                                                                                                                                                                                                                                                            | Centre de Recherches Medicales de Lambarene (CERMEI)                         | Department of Emerging Infectious Diseases, Institute of                                 | Akim A. Adegnikia; Bertrand Lell; Haruka Abe; Jiro Yasuda; Rodrigue Bikangui; Yuri Ushijima                                                                                                                                                                                                                                                                                                                                           |

|                                                                                                                                                                                                                                                                                                                                                                                                                                                                                                                                                                                                                                                                                                                                                                                                                                                                                                                                                                                                                                                                                                                                                                                                                                                                                                                                                                                                                                                                                                                                                                                                                                                                                                                                                                                                                                                                                                                                                                                                                                                                                                                                                                                                                                                                                                                                                                                                                                                                                                                                                                                                                                                                                                                                                                                                                                                                                                                                                                                                                                                                                                                                                                                                                                                                                                                                                                                                                                                                                                                                                                                                                                                                                                                                                                                                                                                                                                                                                                                                                                                                                                                                                                                                                                                                                                                                                                                                                                                                                                                                                                                                                                                                     |                                                                                                                                                                                                                     |                                                                                                                                  |                                                                                                                                                                                                                                                                                                                                                                                                                                                                                                                                                                                                                                                                                                                                                                                                                                                                                                                                                                                                                                                                                                                                                                                                                                                            |  |
|---------------------------------------------------------------------------------------------------------------------------------------------------------------------------------------------------------------------------------------------------------------------------------------------------------------------------------------------------------------------------------------------------------------------------------------------------------------------------------------------------------------------------------------------------------------------------------------------------------------------------------------------------------------------------------------------------------------------------------------------------------------------------------------------------------------------------------------------------------------------------------------------------------------------------------------------------------------------------------------------------------------------------------------------------------------------------------------------------------------------------------------------------------------------------------------------------------------------------------------------------------------------------------------------------------------------------------------------------------------------------------------------------------------------------------------------------------------------------------------------------------------------------------------------------------------------------------------------------------------------------------------------------------------------------------------------------------------------------------------------------------------------------------------------------------------------------------------------------------------------------------------------------------------------------------------------------------------------------------------------------------------------------------------------------------------------------------------------------------------------------------------------------------------------------------------------------------------------------------------------------------------------------------------------------------------------------------------------------------------------------------------------------------------------------------------------------------------------------------------------------------------------------------------------------------------------------------------------------------------------------------------------------------------------------------------------------------------------------------------------------------------------------------------------------------------------------------------------------------------------------------------------------------------------------------------------------------------------------------------------------------------------------------------------------------------------------------------------------------------------------------------------------------------------------------------------------------------------------------------------------------------------------------------------------------------------------------------------------------------------------------------------------------------------------------------------------------------------------------------------------------------------------------------------------------------------------------------------------------------------------------------------------------------------------------------------------------------------------------------------------------------------------------------------------------------------------------------------------------------------------------------------------------------------------------------------------------------------------------------------------------------------------------------------------------------------------------------------------------------------------------------------------------------------------------------------------------------------------------------------------------------------------------------------------------------------------------------------------------------------------------------------------------------------------------------------------------------------------------------------------------------------------------------------------------------------------------------------------------------------------------------------------------------------|---------------------------------------------------------------------------------------------------------------------------------------------------------------------------------------------------------------------|----------------------------------------------------------------------------------------------------------------------------------|------------------------------------------------------------------------------------------------------------------------------------------------------------------------------------------------------------------------------------------------------------------------------------------------------------------------------------------------------------------------------------------------------------------------------------------------------------------------------------------------------------------------------------------------------------------------------------------------------------------------------------------------------------------------------------------------------------------------------------------------------------------------------------------------------------------------------------------------------------------------------------------------------------------------------------------------------------------------------------------------------------------------------------------------------------------------------------------------------------------------------------------------------------------------------------------------------------------------------------------------------------|--|
|                                                                                                                                                                                                                                                                                                                                                                                                                                                                                                                                                                                                                                                                                                                                                                                                                                                                                                                                                                                                                                                                                                                                                                                                                                                                                                                                                                                                                                                                                                                                                                                                                                                                                                                                                                                                                                                                                                                                                                                                                                                                                                                                                                                                                                                                                                                                                                                                                                                                                                                                                                                                                                                                                                                                                                                                                                                                                                                                                                                                                                                                                                                                                                                                                                                                                                                                                                                                                                                                                                                                                                                                                                                                                                                                                                                                                                                                                                                                                                                                                                                                                                                                                                                                                                                                                                                                                                                                                                                                                                                                                                                                                                                                     |                                                                                                                                                                                                                     | Tropical Medicine, Nagasaki University                                                                                           |                                                                                                                                                                                                                                                                                                                                                                                                                                                                                                                                                                                                                                                                                                                                                                                                                                                                                                                                                                                                                                                                                                                                                                                                                                                            |  |
| EPI_ISL_535845, EPI_ISL_535939 to 535940, EPI_ISL_560413 to 560414                                                                                                                                                                                                                                                                                                                                                                                                                                                                                                                                                                                                                                                                                                                                                                                                                                                                                                                                                                                                                                                                                                                                                                                                                                                                                                                                                                                                                                                                                                                                                                                                                                                                                                                                                                                                                                                                                                                                                                                                                                                                                                                                                                                                                                                                                                                                                                                                                                                                                                                                                                                                                                                                                                                                                                                                                                                                                                                                                                                                                                                                                                                                                                                                                                                                                                                                                                                                                                                                                                                                                                                                                                                                                                                                                                                                                                                                                                                                                                                                                                                                                                                                                                                                                                                                                                                                                                                                                                                                                                                                                                                                  | Centre de SSS D'Arhabaska-et-de-l'érable - Hôtel-Dieu                                                                                                                                                               | Laboratoire de santé publique du Québec                                                                                          | Guillaume Bourque; Ioannis Ragoussis; Jesse Shapiro; Mark Lathrop and Michel Roger; Mark Lathrop and Michel Roger on behalf of the CoVSeQ research group; Sandrine Moreira                                                                                                                                                                                                                                                                                                                                                                                                                                                                                                                                                                                                                                                                                                                                                                                                                                                                                                                                                                                                                                                                                 |  |
| EPI_ISL_535724, EPI_ISL_535742 to 535743                                                                                                                                                                                                                                                                                                                                                                                                                                                                                                                                                                                                                                                                                                                                                                                                                                                                                                                                                                                                                                                                                                                                                                                                                                                                                                                                                                                                                                                                                                                                                                                                                                                                                                                                                                                                                                                                                                                                                                                                                                                                                                                                                                                                                                                                                                                                                                                                                                                                                                                                                                                                                                                                                                                                                                                                                                                                                                                                                                                                                                                                                                                                                                                                                                                                                                                                                                                                                                                                                                                                                                                                                                                                                                                                                                                                                                                                                                                                                                                                                                                                                                                                                                                                                                                                                                                                                                                                                                                                                                                                                                                                                            | Centre de SSS La Pommeriaie                                                                                                                                                                                         | Laboratoire de santé publique du Québec                                                                                          | Guillaume Bourque; Ioannis Ragoussis; Jesse Shapiro; Mark Lathrop and Michel Roger; Mark Lathrop and Michel Roger on behalf of the CoVSeQ research group; Sandrine Moreira                                                                                                                                                                                                                                                                                                                                                                                                                                                                                                                                                                                                                                                                                                                                                                                                                                                                                                                                                                                                                                                                                 |  |
| EPI_ISL_535722, EPI_ISL_535747 to 535748, EPI_ISL_535849, EPI_ISL_535916, EPI_ISL_535976 to 535977, EPI_ISL_535979, EPI_ISL_536007, EPI_ISL_536031, EPI_ISL_536034 to 536036, EPI_ISL_536038                                                                                                                                                                                                                                                                                                                                                                                                                                                                                                                                                                                                                                                                                                                                                                                                                                                                                                                                                                                                                                                                                                                                                                                                                                                                                                                                                                                                                                                                                                                                                                                                                                                                                                                                                                                                                                                                                                                                                                                                                                                                                                                                                                                                                                                                                                                                                                                                                                                                                                                                                                                                                                                                                                                                                                                                                                                                                                                                                                                                                                                                                                                                                                                                                                                                                                                                                                                                                                                                                                                                                                                                                                                                                                                                                                                                                                                                                                                                                                                                                                                                                                                                                                                                                                                                                                                                                                                                                                                                        |                                                                                                                                                                                                                     |                                                                                                                                  |                                                                                                                                                                                                                                                                                                                                                                                                                                                                                                                                                                                                                                                                                                                                                                                                                                                                                                                                                                                                                                                                                                                                                                                                                                                            |  |
| see above                                                                                                                                                                                                                                                                                                                                                                                                                                                                                                                                                                                                                                                                                                                                                                                                                                                                                                                                                                                                                                                                                                                                                                                                                                                                                                                                                                                                                                                                                                                                                                                                                                                                                                                                                                                                                                                                                                                                                                                                                                                                                                                                                                                                                                                                                                                                                                                                                                                                                                                                                                                                                                                                                                                                                                                                                                                                                                                                                                                                                                                                                                                                                                                                                                                                                                                                                                                                                                                                                                                                                                                                                                                                                                                                                                                                                                                                                                                                                                                                                                                                                                                                                                                                                                                                                                                                                                                                                                                                                                                                                                                                                                                           | Centre de SSS de Trois-Rivières                                                                                                                                                                                     | Laboratoire de santé publique du Québec                                                                                          | Guillaume Bourque; Ioannis Ragoussis; Jesse Shapiro; Mark Lathrop and Michel Roger; Mark Lathrop and Michel Roger on behalf of the CoVSeQ research group; Sandrine Moreira                                                                                                                                                                                                                                                                                                                                                                                                                                                                                                                                                                                                                                                                                                                                                                                                                                                                                                                                                                                                                                                                                 |  |
| EPI_ISL_535727, EPI_ISL_535776 to 535780, EPI_ISL_535803 to 535805, EPI_ISL_535816, EPI_ISL_535854 to 535855                                                                                                                                                                                                                                                                                                                                                                                                                                                                                                                                                                                                                                                                                                                                                                                                                                                                                                                                                                                                                                                                                                                                                                                                                                                                                                                                                                                                                                                                                                                                                                                                                                                                                                                                                                                                                                                                                                                                                                                                                                                                                                                                                                                                                                                                                                                                                                                                                                                                                                                                                                                                                                                                                                                                                                                                                                                                                                                                                                                                                                                                                                                                                                                                                                                                                                                                                                                                                                                                                                                                                                                                                                                                                                                                                                                                                                                                                                                                                                                                                                                                                                                                                                                                                                                                                                                                                                                                                                                                                                                                                        | Centre de SSS de la Haute-Yamaska                                                                                                                                                                                   | Laboratoire de santé publique du Québec                                                                                          | Guillaume Bourque; Ioannis Ragoussis; Jesse Shapiro; Mark Lathrop and Michel Roger; Mark Lathrop and Michel Roger on behalf of the CoVSeQ research group; Sandrine Moreira                                                                                                                                                                                                                                                                                                                                                                                                                                                                                                                                                                                                                                                                                                                                                                                                                                                                                                                                                                                                                                                                                 |  |
| EPI_ISL_471456 to 471460                                                                                                                                                                                                                                                                                                                                                                                                                                                                                                                                                                                                                                                                                                                                                                                                                                                                                                                                                                                                                                                                                                                                                                                                                                                                                                                                                                                                                                                                                                                                                                                                                                                                                                                                                                                                                                                                                                                                                                                                                                                                                                                                                                                                                                                                                                                                                                                                                                                                                                                                                                                                                                                                                                                                                                                                                                                                                                                                                                                                                                                                                                                                                                                                                                                                                                                                                                                                                                                                                                                                                                                                                                                                                                                                                                                                                                                                                                                                                                                                                                                                                                                                                                                                                                                                                                                                                                                                                                                                                                                                                                                                                                            | Centre de Virologie des Maladies Tropicales                                                                                                                                                                         | Functional Genomic Platform/Service Analyses Biologie/UATRS/ Centre National Pour la Recherche Scientifique Et Technique (CNRST) | Abdelillah LARAQUI; Abdelkader LAATIRIS; Ahmed REGGAD; Elmstafa EL FAHIME; Farida HILALI; Hicham EL ANNAZ; Idriss-Amine LAHLOU; Khalid ENNIBI; Marouane MELLOUL; Mly Abdelaziz ELALAOUI; Mostafa ELOUENNASS; Nadia TOUIL; Rachid ABI; Rida TAGAJDID; Safae ELKOCHE; Sanaa ALAOUI-Amine; Tahar BAJJOU; Yassine SEKHSOKH; Youssef AKHOUD; Zohour KASMY                                                                                                                                                                                                                                                                                                                                                                                                                                                                                                                                                                                                                                                                                                                                                                                                                                                                                                       |  |
| EPI_ISL_535808                                                                                                                                                                                                                                                                                                                                                                                                                                                                                                                                                                                                                                                                                                                                                                                                                                                                                                                                                                                                                                                                                                                                                                                                                                                                                                                                                                                                                                                                                                                                                                                                                                                                                                                                                                                                                                                                                                                                                                                                                                                                                                                                                                                                                                                                                                                                                                                                                                                                                                                                                                                                                                                                                                                                                                                                                                                                                                                                                                                                                                                                                                                                                                                                                                                                                                                                                                                                                                                                                                                                                                                                                                                                                                                                                                                                                                                                                                                                                                                                                                                                                                                                                                                                                                                                                                                                                                                                                                                                                                                                                                                                                                                      | Centre de santé Chibougamau                                                                                                                                                                                         | Laboratoire de santé publique du Québec                                                                                          | Guillaume Bourque; Ioannis Ragoussis; Jesse Shapiro; Mark Lathrop and Michel Roger; Sandrine Moreira                                                                                                                                                                                                                                                                                                                                                                                                                                                                                                                                                                                                                                                                                                                                                                                                                                                                                                                                                                                                                                                                                                                                                       |  |
| EPI_ISL_443310                                                                                                                                                                                                                                                                                                                                                                                                                                                                                                                                                                                                                                                                                                                                                                                                                                                                                                                                                                                                                                                                                                                                                                                                                                                                                                                                                                                                                                                                                                                                                                                                                                                                                                                                                                                                                                                                                                                                                                                                                                                                                                                                                                                                                                                                                                                                                                                                                                                                                                                                                                                                                                                                                                                                                                                                                                                                                                                                                                                                                                                                                                                                                                                                                                                                                                                                                                                                                                                                                                                                                                                                                                                                                                                                                                                                                                                                                                                                                                                                                                                                                                                                                                                                                                                                                                                                                                                                                                                                                                                                                                                                                                                      | Centre de santé Filiers                                                                                                                                                                                             | National Reference Center for Viruses of Respiratory Infections, Institut Pasteur, Paris                                         | Angela Brisebarre; Etienne Simon-Lorière; Flora Donati; Marion Barbet; Maud Vanpeene; Mélanie Albert; Méline Bizard; Sylvie Behilli; Sylvie van der Werf; Vincent Enouf                                                                                                                                                                                                                                                                                                                                                                                                                                                                                                                                                                                                                                                                                                                                                                                                                                                                                                                                                                                                                                                                                    |  |
| EPI_ISL_465697, EPI_ISL_536353                                                                                                                                                                                                                                                                                                                                                                                                                                                                                                                                                                                                                                                                                                                                                                                                                                                                                                                                                                                                                                                                                                                                                                                                                                                                                                                                                                                                                                                                                                                                                                                                                                                                                                                                                                                                                                                                                                                                                                                                                                                                                                                                                                                                                                                                                                                                                                                                                                                                                                                                                                                                                                                                                                                                                                                                                                                                                                                                                                                                                                                                                                                                                                                                                                                                                                                                                                                                                                                                                                                                                                                                                                                                                                                                                                                                                                                                                                                                                                                                                                                                                                                                                                                                                                                                                                                                                                                                                                                                                                                                                                                                                                      | Centre de santé Inuulitsivik                                                                                                                                                                                        | Laboratoire de santé publique du Québec                                                                                          | Guillaume Bourque; Ioannis Ragoussis; Jesse Shapiro; Mark Lathrop and Michel Roger on behalf of the CoVSeQ research group; Sandrine Moreira                                                                                                                                                                                                                                                                                                                                                                                                                                                                                                                                                                                                                                                                                                                                                                                                                                                                                                                                                                                                                                                                                                                |  |
| EPI_ISL_483916 to 484217                                                                                                                                                                                                                                                                                                                                                                                                                                                                                                                                                                                                                                                                                                                                                                                                                                                                                                                                                                                                                                                                                                                                                                                                                                                                                                                                                                                                                                                                                                                                                                                                                                                                                                                                                                                                                                                                                                                                                                                                                                                                                                                                                                                                                                                                                                                                                                                                                                                                                                                                                                                                                                                                                                                                                                                                                                                                                                                                                                                                                                                                                                                                                                                                                                                                                                                                                                                                                                                                                                                                                                                                                                                                                                                                                                                                                                                                                                                                                                                                                                                                                                                                                                                                                                                                                                                                                                                                                                                                                                                                                                                                                                            | Centre for Clinical Infection and Diagnostics Research and Genomics Innovation Unit, Guy's and St. Thomas' NHS Trust                                                                                                | COVID-19 Genomics UK (COG-UK) Consortium                                                                                         | Ali Raza Awan; Chloe Fisher; Jonathan Edgeworth; Luke Snell; Penny Cliff; Rahul Batra                                                                                                                                                                                                                                                                                                                                                                                                                                                                                                                                                                                                                                                                                                                                                                                                                                                                                                                                                                                                                                                                                                                                                                      |  |
| EPI_ISL_560649 to 560740, EPI_ISL_561363 to 561369, EPI_ISL_561373 to 561374                                                                                                                                                                                                                                                                                                                                                                                                                                                                                                                                                                                                                                                                                                                                                                                                                                                                                                                                                                                                                                                                                                                                                                                                                                                                                                                                                                                                                                                                                                                                                                                                                                                                                                                                                                                                                                                                                                                                                                                                                                                                                                                                                                                                                                                                                                                                                                                                                                                                                                                                                                                                                                                                                                                                                                                                                                                                                                                                                                                                                                                                                                                                                                                                                                                                                                                                                                                                                                                                                                                                                                                                                                                                                                                                                                                                                                                                                                                                                                                                                                                                                                                                                                                                                                                                                                                                                                                                                                                                                                                                                                                        | Centre for Clinical Infection and Diagnostics Research and Genomics Innovation Unit, Guy's and St. Thomas' NHS Trust                                                                                                | Centre for Clinical Infection and Diagnostics Research and Genomics Innovation Unit, Guy's and St. Thomas' NHS Trust             | Ali Raza Awan; Chloe Fisher; Jonathan Edgeworth; Luke Snell; Rahul Batra                                                                                                                                                                                                                                                                                                                                                                                                                                                                                                                                                                                                                                                                                                                                                                                                                                                                                                                                                                                                                                                                                                                                                                                   |  |
| EPI_ISL_428670 to 428673, EPI_ISL_525476, EPI_ISL_525478 to 525479, EPI_ISL_525481, EPI_ISL_525486, EPI_ISL_525488 to 525489                                                                                                                                                                                                                                                                                                                                                                                                                                                                                                                                                                                                                                                                                                                                                                                                                                                                                                                                                                                                                                                                                                                                                                                                                                                                                                                                                                                                                                                                                                                                                                                                                                                                                                                                                                                                                                                                                                                                                                                                                                                                                                                                                                                                                                                                                                                                                                                                                                                                                                                                                                                                                                                                                                                                                                                                                                                                                                                                                                                                                                                                                                                                                                                                                                                                                                                                                                                                                                                                                                                                                                                                                                                                                                                                                                                                                                                                                                                                                                                                                                                                                                                                                                                                                                                                                                                                                                                                                                                                                                                                        | Centre for Dengue Research                                                                                                                                                                                          | Centre for Dengue Research                                                                                                       | Ananda Wijewickrama; Chandima Jeewandara; Damayanthi Idampitiya; Damayanthi Tdampitiya; Deshni Jayathilaka; Dinuka Ariyaratne; Dinuka Ariyatane; Dinuka Guruge; Diyanath Ranasinghe; Eranga Narangoda; Gathsaurie Neelika Malavige; Laksiri Gomes; Malika Karunaratne; Neelika Malaige; Neelika Malavige; Ruwan Wijayamuni                                                                                                                                                                                                                                                                                                                                                                                                                                                                                                                                                                                                                                                                                                                                                                                                                                                                                                                                 |  |
| EPI_ISL_525474                                                                                                                                                                                                                                                                                                                                                                                                                                                                                                                                                                                                                                                                                                                                                                                                                                                                                                                                                                                                                                                                                                                                                                                                                                                                                                                                                                                                                                                                                                                                                                                                                                                                                                                                                                                                                                                                                                                                                                                                                                                                                                                                                                                                                                                                                                                                                                                                                                                                                                                                                                                                                                                                                                                                                                                                                                                                                                                                                                                                                                                                                                                                                                                                                                                                                                                                                                                                                                                                                                                                                                                                                                                                                                                                                                                                                                                                                                                                                                                                                                                                                                                                                                                                                                                                                                                                                                                                                                                                                                                                                                                                                                                      | Centre for Dengue Research                                                                                                                                                                                          | Centre for Dengue Research, USJ, SL                                                                                              | Chandima Jeewandara; Deshni Jayathilaka; Dinuka Ariyaratne; Dinuka Guruge; Diyanath Ranasinghe; Gathsaurie Neelika Malavige; Laksiri Gomes; Ruwan Wijayamuni                                                                                                                                                                                                                                                                                                                                                                                                                                                                                                                                                                                                                                                                                                                                                                                                                                                                                                                                                                                                                                                                                               |  |
| EPI_ISL_1533803 to 1533851                                                                                                                                                                                                                                                                                                                                                                                                                                                                                                                                                                                                                                                                                                                                                                                                                                                                                                                                                                                                                                                                                                                                                                                                                                                                                                                                                                                                                                                                                                                                                                                                                                                                                                                                                                                                                                                                                                                                                                                                                                                                                                                                                                                                                                                                                                                                                                                                                                                                                                                                                                                                                                                                                                                                                                                                                                                                                                                                                                                                                                                                                                                                                                                                                                                                                                                                                                                                                                                                                                                                                                                                                                                                                                                                                                                                                                                                                                                                                                                                                                                                                                                                                                                                                                                                                                                                                                                                                                                                                                                                                                                                                                          | Centre for Dengue Research and AICBU, Department of Immunology and Molecular Medicine                                                                                                                               | Centre for Dengue Research and AICBU, Department of Immunology and Molecular Medicine                                            | Chandima Jeewandara; Deshan Madhusanka; Deshni Jayathilaka; Dinuka Ariyaratne; Diyanath Ranasinghe; Gathsaurie Neelika Malavige; Laksiri Gomes                                                                                                                                                                                                                                                                                                                                                                                                                                                                                                                                                                                                                                                                                                                                                                                                                                                                                                                                                                                                                                                                                                             |  |
| EPI_ISL_602564                                                                                                                                                                                                                                                                                                                                                                                                                                                                                                                                                                                                                                                                                                                                                                                                                                                                                                                                                                                                                                                                                                                                                                                                                                                                                                                                                                                                                                                                                                                                                                                                                                                                                                                                                                                                                                                                                                                                                                                                                                                                                                                                                                                                                                                                                                                                                                                                                                                                                                                                                                                                                                                                                                                                                                                                                                                                                                                                                                                                                                                                                                                                                                                                                                                                                                                                                                                                                                                                                                                                                                                                                                                                                                                                                                                                                                                                                                                                                                                                                                                                                                                                                                                                                                                                                                                                                                                                                                                                                                                                                                                                                                                      | Centre for Dengue Research, Department of Immunology and Molecular Medicine                                                                                                                                         | Centre for Dengue Research                                                                                                       | Ananda Wijewickrama; Chandima Jeewandara; Deshni Jayathilaka; Dinuka Ariyaratne; Diyanath Ranasinghe; Gathsaurie Neelika Malavige; Laksiri Gomes; Malika Karunaratne                                                                                                                                                                                                                                                                                                                                                                                                                                                                                                                                                                                                                                                                                                                                                                                                                                                                                                                                                                                                                                                                                       |  |
| EPI_ISL_602566 to 602576                                                                                                                                                                                                                                                                                                                                                                                                                                                                                                                                                                                                                                                                                                                                                                                                                                                                                                                                                                                                                                                                                                                                                                                                                                                                                                                                                                                                                                                                                                                                                                                                                                                                                                                                                                                                                                                                                                                                                                                                                                                                                                                                                                                                                                                                                                                                                                                                                                                                                                                                                                                                                                                                                                                                                                                                                                                                                                                                                                                                                                                                                                                                                                                                                                                                                                                                                                                                                                                                                                                                                                                                                                                                                                                                                                                                                                                                                                                                                                                                                                                                                                                                                                                                                                                                                                                                                                                                                                                                                                                                                                                                                                            | Centre for Dengue Research, Department of Immunology and Molecular Medicine                                                                                                                                         | Centre for Dengue Research, Department of Immunology and Molecular Medicine                                                      | Ananda Wijewickrama; Chandima Jeewandara; Deshni Jayathilaka; Dinuka Ariyaratne; Dinuka Guruge; Diyanath Ranasinghe; Gathsaurie Neelika Malavige; Laksiri Gomes; Malika Karunaratne; Ruwan Wijayamuni                                                                                                                                                                                                                                                                                                                                                                                                                                                                                                                                                                                                                                                                                                                                                                                                                                                                                                                                                                                                                                                      |  |
| EPI_ISL_602565                                                                                                                                                                                                                                                                                                                                                                                                                                                                                                                                                                                                                                                                                                                                                                                                                                                                                                                                                                                                                                                                                                                                                                                                                                                                                                                                                                                                                                                                                                                                                                                                                                                                                                                                                                                                                                                                                                                                                                                                                                                                                                                                                                                                                                                                                                                                                                                                                                                                                                                                                                                                                                                                                                                                                                                                                                                                                                                                                                                                                                                                                                                                                                                                                                                                                                                                                                                                                                                                                                                                                                                                                                                                                                                                                                                                                                                                                                                                                                                                                                                                                                                                                                                                                                                                                                                                                                                                                                                                                                                                                                                                                                                      | Centre for Dengue Research, Department of Immunology and Molecular Medicine                                                                                                                                         | Centre for Dengue Research, Department of Immunology and Molecular Medicine                                                      | Chandima Jeewandara; Deshni Jayathilaka; Dinuka Ariyaratne; Dinuka Guruge; Diyanath Ranasinghe; Gathsaurie Neelika Malavige; Laksiri Gomes; Ruwan Wijayamuni                                                                                                                                                                                                                                                                                                                                                                                                                                                                                                                                                                                                                                                                                                                                                                                                                                                                                                                                                                                                                                                                                               |  |
| EPI_ISL_453666 to 453695, EPI_ISL_461970 to 461981, EPI_ISL_461983 to 461997, EPI_ISL_475239 to 475265, EPI_ISL_475267 to 475293, EPI_ISL_475295 to 475303, EPI_ISL_475306 to 475341, EPI_ISL_479175 to 479181, EPI_ISL_479183 to 479194, EPI_ISL_484407 to 484408, EPI_ISL_484410 to 484432, EPI_ISL_493615 to 493623, EPI_ISL_493625 to 493665, EPI_ISL_499270 to 499329, EPI_ISL_507131 to 507157, EPI_ISL_512384 to 512388, EPI_ISL_512392 to 512435, EPI_ISL_514455 to 514457, EPI_ISL_514459 to 514466, EPI_ISL_514468 to 514513, EPI_ISL_517510 to 517530, EPI_ISL_517532 to 517541, EPI_ISL_526433 to 526436, EPI_ISL_529272, EPI_ISL_529303, EPI_ISL_529341 to 529352, EPI_ISL_529352 to 529373 to 529377, EPI_ISL_529431 to 529432, EPI_ISL_529465, EPI_ISL_529481, EPI_ISL_529491, EPI_ISL_529511, EPI_ISL_529525, EPI_ISL_529668 to 529674, EPI_ISL_535024 to 535025, EPI_ISL_535027 to 535042, EPI_ISL_549341, EPI_ISL_549343, EPI_ISL_549360, EPI_ISL_549363 to 549364, EPI_ISL_549366, EPI_ISL_549460 to 549476, EPI_ISL_559983, EPI_ISL_572715 to 572716, EPI_ISL_572721, EPI_ISL_573253 to 573265, EPI_ISL_573870, EPI_ISL_577040 to 577076, EPI_ISL_577193 to 577205, EPI_ISL_577207 to 577219, EPI_ISL_577299 to 577345, EPI_ISL_577381 to 577382, EPI_ISL_577385 to 577400, EPI_ISL_577545 to 577546, EPI_ISL_584168 to 584187, EPI_ISL_584193 to 584195, EPI_ISL_584200 to 584206, EPI_ISL_584212 to 584216, EPI_ISL_584809 to 584810, EPI_ISL_595100 to 595114, EPI_ISL_611526, EPI_ISL_611532, EPI_ISL_611535, EPI_ISL_611537 to 611538, EPI_ISL_611555, EPI_ISL_611557, EPI_ISL_611585, EPI_ISL_611589 to 611590, EPI_ISL_611592, EPI_ISL_611599, EPI_ISL_611638 to 611639, EPI_ISL_611689, EPI_ISL_611754 to 611755, EPI_ISL_611761, EPI_ISL_611763, EPI_ISL_611771 to 611773, EPI_ISL_611841, EPI_ISL_611916, EPI_ISL_611925, EPI_ISL_611927 to 611928, EPI_ISL_611933 to 611934, EPI_ISL_611957 to 611960, EPI_ISL_611962, EPI_ISL_611983, EPI_ISL_611998, EPI_ISL_612068 to 612069, EPI_ISL_612082, EPI_ISL_612089, EPI_ISL_612092, EPI_ISL_612094, EPI_ISL_613282 to 613298, EPI_ISL_613302 to 613306, EPI_ISL_1386409, EPI_ISL_1386932, EPI_ISL_1388643, EPI_ISL_1388646 to 1388647, EPI_ISL_1388649, EPI_ISL_1388651, EPI_ISL_1388660 to 1388661, EPI_ISL_1388664 to 1388665, EPI_ISL_1388672, EPI_ISL_1388674, EPI_ISL_1388676 to 1388677, EPI_ISL_1388680, EPI_ISL_1388682, EPI_ISL_1388684, EPI_ISL_1388686, EPI_ISL_1388688, EPI_ISL_1388690, EPI_ISL_1388692, EPI_ISL_1388694, EPI_ISL_1388696, EPI_ISL_1388698, EPI_ISL_1388700, EPI_ISL_1388702, EPI_ISL_1388704, EPI_ISL_1388706, EPI_ISL_1388708, EPI_ISL_1388710, EPI_ISL_1388712, EPI_ISL_1388714 to 1388715, EPI_ISL_1388717, EPI_ISL_1388719, EPI_ISL_1388721, EPI_ISL_1388724 to 1388725, EPI_ISL_1388728, EPI_ISL_1388730, EPI_ISL_1388732, EPI_ISL_1388734, EPI_ISL_1388736, EPI_ISL_1388738 to 1388739, EPI_ISL_1388743, EPI_ISL_1388745, EPI_ISL_1388747, EPI_ISL_1388749, EPI_ISL_1388752, EPI_ISL_1388754, EPI_ISL_1388756, EPI_ISL_1388758, EPI_ISL_1388760, EPI_ISL_1388764, EPI_ISL_1388766, EPI_ISL_1388768, EPI_ISL_1388770, EPI_ISL_1388772, EPI_ISL_1388775, EPI_ISL_1388777, EPI_ISL_1388779, EPI_ISL_1388782, EPI_ISL_1388784, EPI_ISL_1388786, EPI_ISL_1388788, EPI_ISL_1388790, EPI_ISL_1388792, EPI_ISL_1388794, EPI_ISL_1388796, EPI_ISL_1388798, EPI_ISL_1388800, EPI_ISL_1388802, EPI_ISL_1388804, EPI_ISL_1388806, EPI_ISL_1388808, EPI_ISL_1388810, EPI_ISL_1388812, EPI_ISL_1388814, EPI_ISL_1388816, EPI_ISL_1388818, EPI_ISL_1388820, EPI_ISL_1388822, EPI_ISL_1388824, EPI_ISL_1388826, EPI_ISL_1388828, EPI_ISL_1388830, EPI_ISL_1388832, EPI_ISL_1388834, EPI_ISL_1388836, EPI_ISL_1388838, EPI_ISL_1388840, EPI_ISL_1388842, EPI_ISL_1388844, EPI_ISL_1388846, EPI_ISL_1388848, EPI_ISL_1388850, EPI_ISL_1388852, EPI_ISL_1388854, EPI_ISL_1388856, EPI_ISL_1388858, EPI_ISL_1388860, EPI_ISL_1388862, EPI_ISL_1388864, EPI_ISL_1388866, EPI_ISL_1388868, EPI_ISL_1388870, EPI_ISL_1388872, EPI_ISL_1388874, EPI_ISL_1388876, EPI_ISL_1388878, EPI_ISL_1388880, EPI_ISL_1388882, EPI_ISL_1388884, EPI_ISL_1388886, EPI_ISL_1388888, EPI_ISL_1388890, EPI_ISL_1388892, EPI_ISL_1388894, EPI_ISL_1388896, EPI_ISL_1388898, EPI_ISL_1388900, EPI_ISL_1388902, EPI_ISL_1388904, EPI_ISL_1388906, EPI_ISL_1388908, EPI_ISL_1388910, EPI_ISL_1388912, EPI_ISL_1388914, EPI_ISL_1388917, EPI_ISL_1388919, EPI_ISL_1388921, EPI_ISL_1388923, EPI_ISL_1388925, EPI_ISL_1388927, EPI_ISL_1388929, EPI_ISL_1388931, EPI_ISL_1476549 to 1476565, EPI_ISL_1476665, EPI_ISL_1476672 to 1476685, EPI_ISL_1547230 to 1547258, EPI_ISL_1547300 to 1547309 |                                                                                                                                                                                                                     |                                                                                                                                  |                                                                                                                                                                                                                                                                                                                                                                                                                                                                                                                                                                                                                                                                                                                                                                                                                                                                                                                                                                                                                                                                                                                                                                                                                                                            |  |
| see above                                                                                                                                                                                                                                                                                                                                                                                                                                                                                                                                                                                                                                                                                                                                                                                                                                                                                                                                                                                                                                                                                                                                                                                                                                                                                                                                                                                                                                                                                                                                                                                                                                                                                                                                                                                                                                                                                                                                                                                                                                                                                                                                                                                                                                                                                                                                                                                                                                                                                                                                                                                                                                                                                                                                                                                                                                                                                                                                                                                                                                                                                                                                                                                                                                                                                                                                                                                                                                                                                                                                                                                                                                                                                                                                                                                                                                                                                                                                                                                                                                                                                                                                                                                                                                                                                                                                                                                                                                                                                                                                                                                                                                                           | Centre for Enzyme Innovation, University of Portsmouth / Translational Research Laboratory, Portsmouth Hospitals NHS Trust                                                                                          | COVID-19 Genomics UK (COG-UK) Consortium                                                                                         | ; Allyson Lloyd; Angela Beckett; Anoop Chauhan; Christopher Fearn; Ethan Butcher; Garry Scarlett; Kate Cook; Katie Loveson; Kelly Bicknell; Robert Impey; Salman Goudarzi; Samuel Robson; Sarah Wyllie; Scott Elliott; Sharon Glaysheer; Yann Bourgeois                                                                                                                                                                                                                                                                                                                                                                                                                                                                                                                                                                                                                                                                                                                                                                                                                                                                                                                                                                                                    |  |
| EPI_ISL_453665                                                                                                                                                                                                                                                                                                                                                                                                                                                                                                                                                                                                                                                                                                                                                                                                                                                                                                                                                                                                                                                                                                                                                                                                                                                                                                                                                                                                                                                                                                                                                                                                                                                                                                                                                                                                                                                                                                                                                                                                                                                                                                                                                                                                                                                                                                                                                                                                                                                                                                                                                                                                                                                                                                                                                                                                                                                                                                                                                                                                                                                                                                                                                                                                                                                                                                                                                                                                                                                                                                                                                                                                                                                                                                                                                                                                                                                                                                                                                                                                                                                                                                                                                                                                                                                                                                                                                                                                                                                                                                                                                                                                                                                      | Centre for Enzyme Innovation, University of Portsmouth / Translational Research Laboratory, Portsmouth Hospitals NHS Trust                                                                                          | University of Portsmouth                                                                                                         | ; Allyson Lloyd; Angela Beckett; Anoop Chauhan; Ethan Butcher; Garry Scarlett; Kelly Bicknell; Robert Impey; Samuel Robson; Sarah Wyllie; Scott Elliott; Sharon Glaysheer; Yann Bourgeois                                                                                                                                                                                                                                                                                                                                                                                                                                                                                                                                                                                                                                                                                                                                                                                                                                                                                                                                                                                                                                                                  |  |
| EPI_ISL_413550                                                                                                                                                                                                                                                                                                                                                                                                                                                                                                                                                                                                                                                                                                                                                                                                                                                                                                                                                                                                                                                                                                                                                                                                                                                                                                                                                                                                                                                                                                                                                                                                                                                                                                                                                                                                                                                                                                                                                                                                                                                                                                                                                                                                                                                                                                                                                                                                                                                                                                                                                                                                                                                                                                                                                                                                                                                                                                                                                                                                                                                                                                                                                                                                                                                                                                                                                                                                                                                                                                                                                                                                                                                                                                                                                                                                                                                                                                                                                                                                                                                                                                                                                                                                                                                                                                                                                                                                                                                                                                                                                                                                                                                      | Centre for Human and Zoonotic Virology (CHAZVY), College of Medicine University of Lagos/Lagos University Teaching Hospital (LUTH), part of the Laboratory Network of the Nigeria Centre for Disease Control (NCDC) | African Centre of Excellence for Genomics of Infectious Diseases (ACEGID), Redeemer's University, Ede, Osun State, Nigeria       | Ajogbasile F.V.; Folarin O.A.; Ihekweazu C. Happi C.T.; Kayode A.; Oguzie J.; Oluniyi P.E.                                                                                                                                                                                                                                                                                                                                                                                                                                                                                                                                                                                                                                                                                                                                                                                                                                                                                                                                                                                                                                                                                                                                                                 |  |
| EPI_ISL_413596, EPI_ISL_413598 to 413599                                                                                                                                                                                                                                                                                                                                                                                                                                                                                                                                                                                                                                                                                                                                                                                                                                                                                                                                                                                                                                                                                                                                                                                                                                                                                                                                                                                                                                                                                                                                                                                                                                                                                                                                                                                                                                                                                                                                                                                                                                                                                                                                                                                                                                                                                                                                                                                                                                                                                                                                                                                                                                                                                                                                                                                                                                                                                                                                                                                                                                                                                                                                                                                                                                                                                                                                                                                                                                                                                                                                                                                                                                                                                                                                                                                                                                                                                                                                                                                                                                                                                                                                                                                                                                                                                                                                                                                                                                                                                                                                                                                                                            | Centre for Infectious Diseases and Microbiology - Public Health                                                                                                                                                     | NSW Health Pathology - Institute of Clinical Pathology and Medical Research; Westmead Hospital; University of Sydney             | Carter I; Chen SC; Eden J-S; Gall; Gray K; Holmes EC; Kok J and Dwyer DE for the 2019-nCoV Study Group*; Lam C; M; Maddocks S; O'Sullivan MV; Rahman H; Rockett R; Sintchenko V; Timms; V                                                                                                                                                                                                                                                                                                                                                                                                                                                                                                                                                                                                                                                                                                                                                                                                                                                                                                                                                                                                                                                                  |  |
| EPI_ISL_407893, EPI_ISL_408976, EPI_ISL_412975, EPI_ISL_413213 to 413214, EPI_ISL_413594 to 413595, EPI_ISL_417030                                                                                                                                                                                                                                                                                                                                                                                                                                                                                                                                                                                                                                                                                                                                                                                                                                                                                                                                                                                                                                                                                                                                                                                                                                                                                                                                                                                                                                                                                                                                                                                                                                                                                                                                                                                                                                                                                                                                                                                                                                                                                                                                                                                                                                                                                                                                                                                                                                                                                                                                                                                                                                                                                                                                                                                                                                                                                                                                                                                                                                                                                                                                                                                                                                                                                                                                                                                                                                                                                                                                                                                                                                                                                                                                                                                                                                                                                                                                                                                                                                                                                                                                                                                                                                                                                                                                                                                                                                                                                                                                                  | Centre for Infectious Diseases and Microbiology Laboratory Services                                                                                                                                                 | NSW Health Pathology - Institute of Clinical Pathology and Medical Research; Westmead Hospital; University of Sydney             | ; A; Alicia; Carter I; Chen SC; Eden J-S; Gall; Gray K; Holmes EC; Kok J and Dwyer DE for the 2019-nCoV Study Group; Kok J and Dwyer DE for the 2019-nCoV Study Group*; Lam C; M; Maddocks S; O'Sullivan MV; Rahman H; Rockett R; Sadsad R; Sintchenko V; Timms; V                                                                                                                                                                                                                                                                                                                                                                                                                                                                                                                                                                                                                                                                                                                                                                                                                                                                                                                                                                                         |  |
| EPI_ISL_417383 to 417412, EPI_ISL_427643 to 427710, EPI_ISL_427712 to 427716, EPI_ISL_427720, EPI_ISL_427722 to 427808                                                                                                                                                                                                                                                                                                                                                                                                                                                                                                                                                                                                                                                                                                                                                                                                                                                                                                                                                                                                                                                                                                                                                                                                                                                                                                                                                                                                                                                                                                                                                                                                                                                                                                                                                                                                                                                                                                                                                                                                                                                                                                                                                                                                                                                                                                                                                                                                                                                                                                                                                                                                                                                                                                                                                                                                                                                                                                                                                                                                                                                                                                                                                                                                                                                                                                                                                                                                                                                                                                                                                                                                                                                                                                                                                                                                                                                                                                                                                                                                                                                                                                                                                                                                                                                                                                                                                                                                                                                                                                                                              | Centre for Infectious Diseases and Microbiology Public Health                                                                                                                                                       | NSW Health Pathology - Institute of Clinical Pathology and Medical Research; Westmead Hospital; University of Sydney             | Arnott A; Arnott A and Sadsad R for the 2019-nCoV Study Group; Bachmann N; Basile K; Byun R; Carter I; Carter I and Rahman H for the 2019-nCoV Study Group; Chang S; Chen SC; Chen SC and Maddocks S for the 2019-nCoV Study Group; Draper J; Dwyer DE; Dwyer DE and Rockett R for the 2019-nCoV Study Group; Dwyer DE for the 2019-nCoV Study Group; Eden J-S; Eden J-S and Lam C for the 2019-nCoV Study Group; Eden JS; Gall M; Gall M and Arnott A for the 2019-nCoV Study Group; Gray K; Gray K and Timms V for the 2019-nCoV Study Group; Holmes EC; Holmes EC and O'Sullivan MV for the 2019-nCoV Study Group; Kok J; Kok J and Dwyer DE for the 2019-nCoV Study Group; Lam C; Lam C and Gray K for the 2019-nCoV Study Group; Maddocks S; Maddocks S and Kok J for the 2019-nCoV Study Group; O'Sullivan MV; O'Sullivan MV and Sintchenko V for the 2019-nCoV Study Group; Propenko M; Rahman H; Rahman H and Holmes EC for the 2019-nCoV Study Group; Rockett R; Rockett R and Eden J-S for the 2019-nCoV Study Group; Sadsad R; Sadsad R and Carter I for the 2019-nCoV Study Group; Sim E; Sintchenko V; Sintchenko V and Chen SC for the 2019-nCoV Study Group; Sorrell T; Timms; Timms V; Timms V and Gall M for the 2019-nCoV Study Group; V |  |
| EPI_ISL_413597                                                                                                                                                                                                                                                                                                                                                                                                                                                                                                                                                                                                                                                                                                                                                                                                                                                                                                                                                                                                                                                                                                                                                                                                                                                                                                                                                                                                                                                                                                                                                                                                                                                                                                                                                                                                                                                                                                                                                                                                                                                                                                                                                                                                                                                                                                                                                                                                                                                                                                                                                                                                                                                                                                                                                                                                                                                                                                                                                                                                                                                                                                                                                                                                                                                                                                                                                                                                                                                                                                                                                                                                                                                                                                                                                                                                                                                                                                                                                                                                                                                                                                                                                                                                                                                                                                                                                                                                                                                                                                                                                                                                                                                      | Centre for Infectious Diseases and Microbiology - Public Health                                                                                                                                                     | NSW Health Pathology - Institute of Clinical Pathology and                                                                       | Carter I; Chen SC; Eden J-S; Gall; Gray K; Holmes EC; Kok J and Dwyer DE for the 2019-nCoV Study Group*; Lam C; M; Maddocks S; O'Sullivan MV;                                                                                                                                                                                                                                                                                                                                                                                                                                                                                                                                                                                                                                                                                                                                                                                                                                                                                                                                                                                                                                                                                                              |  |



Medical Research; Westmead Hospital; University of Sydney

Rahman H; Rockett R; Sintchenko V; Timms; V

|                                                                                                                                                                                                                                                                                                                                                                                                                                                                                                                                                                                                              |                                                                                                                      |                                                                            |                                                                                     |                                                                                                                                                                                                                                                                                                                                                                                                                                                 |
|--------------------------------------------------------------------------------------------------------------------------------------------------------------------------------------------------------------------------------------------------------------------------------------------------------------------------------------------------------------------------------------------------------------------------------------------------------------------------------------------------------------------------------------------------------------------------------------------------------------|----------------------------------------------------------------------------------------------------------------------|----------------------------------------------------------------------------|-------------------------------------------------------------------------------------|-------------------------------------------------------------------------------------------------------------------------------------------------------------------------------------------------------------------------------------------------------------------------------------------------------------------------------------------------------------------------------------------------------------------------------------------------|
| EPI_ISL_450302 to 450303, EPI_ISL_465688 to 465690, EPI_ISL_535960, EPI_ISL_535980 to 535981, EPI_ISL_536000, EPI_ISL_536004, EPI_ISL_536023, EPI_ISL_536043, EPI_ISL_536045, EPI_ISL_536080, EPI_ISL_536104, EPI_ISL_536141 to 536142, EPI_ISL_536145, EPI_ISL_536155 to 536156, EPI_ISL_536159, EPI_ISL_536162, EPI_ISL_536182 to 536184, EPI_ISL_536211 to 536212, EPI_ISL_536218 to 536221, EPI_ISL_536224, EPI_ISL_536232, EPI_ISL_536240 to 536241, EPI_ISL_536255, EPI_ISL_536283, EPI_ISL_536315, EPI_ISL_536325, EPI_ISL_536329, EPI_ISL_536348, EPI_ISL_536368 to 536370, EPI_ISL_536376 to 536378 | see above                                                                                                            | Centre hospitalier Anna-Laberge                                            | Laboratoire de santé publique du Québec                                             | Guillaume Bourque; Ioannis Ragoussis; Jesse Shapiro; Mark Lathrop and Michel Roger; Mark Lathrop and Michel Roger on behalf of the CoVSeQ research group; Sandrine Moreira                                                                                                                                                                                                                                                                      |
| EPI_ISL_1406456, EPI_ISL_1406477, EPI_ISL_1406512, EPI_ISL_1406533, EPI_ISL_1406592, EPI_ISL_1406601, EPI_ISL_1406608, EPI_ISL_1406618, EPI_ISL_1483719 to 1483720, EPI_ISL_1483726, EPI_ISL_1547397 to 1547398, EPI_ISL_1547407, EPI_ISL_1547417, EPI_ISL_1547461                                                                                                                                                                                                                                                                                                                                           | see above                                                                                                            | Centre hospitalier D'AURILLAC                                              | CHU Clermont-Ferrand, service de virologie                                          | Bisseux Maxime; Combes Patricia; Henquell Cécile; Mirand Audrey                                                                                                                                                                                                                                                                                                                                                                                 |
| EPI_ISL_508934 to 508936                                                                                                                                                                                                                                                                                                                                                                                                                                                                                                                                                                                     | EPI_ISL_508934 to 508936                                                                                             | Centre hospitalier Métropole Savoie                                        | CNR Virus des Infections Respiratoires - France SUD                                 | Alexandre Gaymard; Antonin Bal; Bruno Lina; Carine Moustaud; Florence Morfin-Sherpa; Gregory Destras; Gwendolyn Burfin; Laurence Josset; Martine Valette; Maude Bouscambert-Duchamp; Raphaëlle Lamy; Solenne Brun                                                                                                                                                                                                                               |
| EPI_ISL_535746, EPI_ISL_535767 to 535768                                                                                                                                                                                                                                                                                                                                                                                                                                                                                                                                                                     | EPI_ISL_535746, EPI_ISL_535767 to 535768                                                                             | Centre hospitalier de St-Mary                                              | Laboratoire de santé publique du Québec                                             | Guillaume Bourque; Ioannis Ragoussis; Jesse Shapiro; Mark Lathrop and Michel Roger; Sandrine Moreira                                                                                                                                                                                                                                                                                                                                            |
| EPI_ISL_535807, EPI_ISL_535872 to 535873, EPI_ISL_535958 to 535959, EPI_ISL_536115, EPI_ISL_536199, EPI_ISL_536204                                                                                                                                                                                                                                                                                                                                                                                                                                                                                           | EPI_ISL_535807, EPI_ISL_535872 to 535873, EPI_ISL_535958 to 535959, EPI_ISL_536115, EPI_ISL_536199, EPI_ISL_536204   | Centre hospitalier régional du Grand Portage                               | Laboratoire de santé publique du Québec                                             | Guillaume Bourque; Ioannis Ragoussis; Jesse Shapiro; Mark Lathrop and Michel Roger; Mark Lathrop and Michel Roger on behalf of the CoVSeQ research group; Sandrine Moreira                                                                                                                                                                                                                                                                      |
| EPI_ISL_413647, EPI_ISL_417997 to 417999                                                                                                                                                                                                                                                                                                                                                                                                                                                                                                                                                                     | EPI_ISL_413647, EPI_ISL_417997 to 417999                                                                             | Centro Hospital do Porto, E.P.E. - H. Geral de Santo Antonio               | Instituto Nacional de Saude (INSA)                                                  | Guiomar et al; Helena Ramos; Inês Costa; Joana Isidro; Joana Mendonça; João Paulo Gomes; Luís Vieira; Pedro Pechirra; Raquel Guiomar; Vítor Borges                                                                                                                                                                                                                                                                                              |
| EPI_ISL_1494714 to 1494716, EPI_ISL_1494757 to 1494811, EPI_ISL_1494875 to 1494914                                                                                                                                                                                                                                                                                                                                                                                                                                                                                                                           | EPI_ISL_1494714 to 1494716, EPI_ISL_1494757 to 1494811, EPI_ISL_1494875 to 1494914                                   | Centro Hospitalar de Entre o Douro e Vouga (CHEDV)                         | Institute of Biomedicine (IBIMED), Universidade de Aveiro                           | Gabriela Moura; Miguel Pinheiro and Manuel Santos; Patricia Arinto; Sofia Marques                                                                                                                                                                                                                                                                                                                                                               |
| EPI_ISL_1494812 to 1494874, EPI_ISL_1516760 to 1516761                                                                                                                                                                                                                                                                                                                                                                                                                                                                                                                                                       | EPI_ISL_1494812 to 1494874, EPI_ISL_1516760 to 1516761                                                               | Centro Hospitalar do Baixo Vouga (CHBV)                                    | Institute of Biomedicine (IBIMED), Universidade de Aveiro                           | Gabriela Moura; Miguel Pinheiro and Manuel Santos; Patricia Arinto; Sofia Marques                                                                                                                                                                                                                                                                                                                                                               |
| EPI_ISL_417986 to 417987, EPI_ISL_417989                                                                                                                                                                                                                                                                                                                                                                                                                                                                                                                                                                     | EPI_ISL_417986 to 417987, EPI_ISL_417989                                                                             | Centro Hospitalar e Universitario de Sao Joao, Porto                       | Instituto Nacional de Saude (INSA)                                                  | Guiomar et al                                                                                                                                                                                                                                                                                                                                                                                                                                   |
| EPI_ISL_413648                                                                                                                                                                                                                                                                                                                                                                                                                                                                                                                                                                                               | EPI_ISL_413648                                                                                                       | Centro Hospitalar e Universitário de Sao Joao, Porto                       | Instituto Nacional de Saude (INSA)                                                  | Inês Costa; Joana Isidro; Joana Mendonça; João Paulo Gomes; João Tiago Guimarães; Luís Vieira; Pedro Pechirra; Raquel Guiomar; Vítor Borges                                                                                                                                                                                                                                                                                                     |
| EPI_ISL_515547                                                                                                                                                                                                                                                                                                                                                                                                                                                                                                                                                                                               | EPI_ISL_515547                                                                                                       | Centro Medico da Policia Militar do Estado de Sao Paulo                    | Instituto Adolfo Lutz, Interdisciplinary Procedures Center, Strategic Laboratory    | Claudia Regina Gonçalves; Claudio Tavares Sacchi; Erica Valessa Ramos Gomes                                                                                                                                                                                                                                                                                                                                                                     |
| EPI_ISL_1469655, EPI_ISL_1469776                                                                                                                                                                                                                                                                                                                                                                                                                                                                                                                                                                             | EPI_ISL_1469655, EPI_ISL_1469776                                                                                     | Centro Municipal de Saúde de Rolante                                       | Epiclin                                                                             | Ana Paula Muterle; Carolina Comerlato; Eliana Márcia Da Ros Wendland; Fernando Hayashi Sant'Anna; Janira Prichula; Juliana Comerlato                                                                                                                                                                                                                                                                                                            |
| EPI_ISL_512670, EPI_ISL_527742, EPI_ISL_527755                                                                                                                                                                                                                                                                                                                                                                                                                                                                                                                                                               | EPI_ISL_512670, EPI_ISL_527742, EPI_ISL_527755                                                                       | Centro Nacional De Rehabilitacion Humberto Araya Rojas (Cenare)            | Inciensa, Instituto Costarricense de Investigación y Enseñanza en Nutrición y Salud | Adriana Godínez & Melany Calderon; Claudio Soto-Garita; Estela Cordero; Francisco Duarte; Hebleen Porras                                                                                                                                                                                                                                                                                                                                        |
| EPI_ISL_1494948                                                                                                                                                                                                                                                                                                                                                                                                                                                                                                                                                                                              | EPI_ISL_1494948                                                                                                      | Centro de Atención y Diagnóstico de Enfermedades Infecciosas               | Instituto Nacional de Salud- Dirección de Investigación en Salud Pública            | Carlos Franco-Muñoz; Carmen Osorio; Diana Malo; Diego A. Álvarez-Díaz; Diego Andrés Prada; Gerardo Santamaría; Hector Alejandro Ruiz-Moreno; Jhonatan Reales-González; Juan Camilo Martínez; Julian Naizaque; Katherine Laiton-Donato; Lisseth Pardo; Magdalena Wiesner; Marcela Mercado-Reyes; Maria T. Herrera-Sepúlveda; Marta Lopez Blanco; Martha Lucia Ospina Martínez; Paola Rojas; Sergio Gomez; Sheryll Corchuelo; Ángela Alarcon Cruz |
| EPI_ISL_1468452                                                                                                                                                                                                                                                                                                                                                                                                                                                                                                                                                                                              | EPI_ISL_1468452                                                                                                      | Centro de Atendimento COVID                                                | Instituto Adolfo Lutz, Interdisciplinary Procedures Center, Strategic Laboratory    | Caio Vinicius Dias Lopes; Claudia Regina Gonçalves; Claudio Tavares Sacchi; Erica Valessa Ramos Gomes; Karoline Rodrigues Campos                                                                                                                                                                                                                                                                                                                |
| EPI_ISL_483065, EPI_ISL_509430 to 509435, EPI_ISL_510536, EPI_ISL_529139                                                                                                                                                                                                                                                                                                                                                                                                                                                                                                                                     | EPI_ISL_483065, EPI_ISL_509430 to 509435, EPI_ISL_510536, EPI_ISL_529139                                             | Centro de Desenvolvimento Tecnológico em Saude, Fundacao Oswaldo Cruz      | Centro de Desenvolvimento Tecnológico em Saude, Fundacao Oswaldo Cruz               | A.D.; Barroso; C.Q.; C.Q. and Medeiros; De Paula; F.B.; Ferreira; Fintelman-Rodrigues, N.; Gregorio; J.S.; M.A.; M.L.; Medeiros; Oliveira; S.P.; Sacramento; Saraiva; Souza; T.M.; Tschoeke, D.                                                                                                                                                                                                                                                 |
| EPI_ISL_510541, EPI_ISL_529140                                                                                                                                                                                                                                                                                                                                                                                                                                                                                                                                                                               | EPI_ISL_510541, EPI_ISL_529140                                                                                       | Centro de Desenvolvimento Tecnológico em Saude, Fundacao Oswaldo Cruz      | Centro de Desenvolvimento Tecnológico em Saude, Fundacao Oswaldo Cruz               | A.D.; C.Q.; C.Q. and Medeiros; De Paula; F.B.; Ferreira; Fintelman-Rodrigues, N.; M.A.; Medeiros; Sacramento; Saraiva; Souza; T.M.                                                                                                                                                                                                                                                                                                              |
| EPI_ISL_1531807 to 1531941                                                                                                                                                                                                                                                                                                                                                                                                                                                                                                                                                                                   | EPI_ISL_1531807 to 1531941                                                                                           | Centro de Diagnostico COVID-19 UABC Tijuana                                | Andersen lab at Scripps Research                                                    | German Ibarra; Jonathan Vincent Baena; Jorge Luis Jimenez Niebla; Manuel Sanchez Alavez; Oscar Efen Zazueta Fierro; SEARCH Alliance San Diego with Idanya Rubi Serafin Higuera                                                                                                                                                                                                                                                                  |
| EPI_ISL_1469729, EPI_ISL_1469779                                                                                                                                                                                                                                                                                                                                                                                                                                                                                                                                                                             | EPI_ISL_1469729, EPI_ISL_1469779                                                                                     | Centro de Especialidades Triunfo                                           | Epiclin                                                                             | Ana Paula Muterle; Carolina Comerlato; Eliana Márcia Da Ros Wendland; Fernando Hayashi Sant'Anna; Janira Prichula; Juliana Comerlato                                                                                                                                                                                                                                                                                                            |
| EPI_ISL_1469108 to 1469119                                                                                                                                                                                                                                                                                                                                                                                                                                                                                                                                                                                   | EPI_ISL_1469108 to 1469119                                                                                           | Centro de Investigación en Ciencias de la Salud y Biomedicina              | CINVESTAV                                                                           | Andreu Comas; Sofia Bernal                                                                                                                                                                                                                                                                                                                                                                                                                      |
| EPI_ISL_491933 to 491935, EPI_ISL_491941, EPI_ISL_527818 to 527819, EPI_ISL_594118                                                                                                                                                                                                                                                                                                                                                                                                                                                                                                                           | EPI_ISL_491933 to 491935, EPI_ISL_491941, EPI_ISL_527818 to 527819, EPI_ISL_594118                                   | Centro de Investigaciones, Universidad de Especialidades Espíritu Santo    | Institute of Microbiology, Universidad San Francisco de Quito                       | Belén Prado-Vivar; Bernardo Gutiérrez; Derly Andrade; Edith Lopez; Fernando Espinoza; Gabriel Morey; Gabriel Trueba; Jose Pedro Barberan; Juan Carlos Fernandez; Juan José Guadalupe; Michelle Grunauer; Monica Becerra-Wong; Patricio Rojas-Silva; Paul Cárdenas; Ruben Armas; Sully Márquez; Verónica Barragán                                                                                                                                |
| EPI_ISL_468761 to 468764, EPI_ISL_500369 to 500372, EPI_ISL_500374 to 500381, EPI_ISL_500383, EPI_ISL_500385 to 500458, EPI_ISL_537382 to 537466, EPI_ISL_537811 to 537873, EPI_ISL_1534182 to 1534244                                                                                                                                                                                                                                                                                                                                                                                                       | see above                                                                                                            | Centro de Investigación Biomedica de La Rioja - Hospital San Pedro Logroño | SeqCOVID-SPAIN consortium/IBV(CSIC)                                                 | José Manuel Azcona Gutiérrez; María Pilar Bea Escudero; María de Toro; Miriam Blasco Alberdi and SeqCOVID-SPAIN consortium                                                                                                                                                                                                                                                                                                                      |
| EPI_ISL_1494674, EPI_ISL_1494717                                                                                                                                                                                                                                                                                                                                                                                                                                                                                                                                                                             | EPI_ISL_1494674, EPI_ISL_1494717                                                                                     | Centro de Investigación en Ciencias de la Salud y Biomedicina, U.A.S.L.P.  | Centro de Investigación en Ciencias de la Salud y Biomedicina, U.A.S.L.P.           | MD PhD Sofía Bernal Silva                                                                                                                                                                                                                                                                                                                                                                                                                       |
| EPI_ISL_1500471, EPI_ISL_1500515, EPI_ISL_1500639, EPI_ISL_1500866                                                                                                                                                                                                                                                                                                                                                                                                                                                                                                                                           | EPI_ISL_1500471, EPI_ISL_1500515, EPI_ISL_1500639, EPI_ISL_1500866                                                   | Centro de Investigación en Ciencias de la Salud y Biomedicina, U.A.S.L.P.  | Centro de Investigación en Ciencias de la Salud y Biomedicina, U.A.S.L.P.           | MD PhD Sofía Bernal Silva                                                                                                                                                                                                                                                                                                                                                                                                                       |
| EPI_ISL_1494724 to 1494730                                                                                                                                                                                                                                                                                                                                                                                                                                                                                                                                                                                   | EPI_ISL_1494724 to 1494730                                                                                           | Centro de Investigación en Ciencias de la Salud y Biomedicina, U.A.S.L.P.  | Centro de Investigación en Ciencias de la Salud y Biomedicina, U.A.S.L.P.           | MD PhD Sofía Bernal Silva                                                                                                                                                                                                                                                                                                                                                                                                                       |
| EPI_ISL_1469603, EPI_ISL_1469667, EPI_ISL_1469741, EPI_ISL_1469749, EPI_ISL_1469777, EPI_ISL_1469806                                                                                                                                                                                                                                                                                                                                                                                                                                                                                                         | EPI_ISL_1469603, EPI_ISL_1469667, EPI_ISL_1469741, EPI_ISL_1469749, EPI_ISL_1469777, EPI_ISL_1469806                 | Centro de Referência em Síndromes Gripais                                  | Epiclin                                                                             | Ana Paula Muterle; Carolina Comerlato; Eliana Márcia Da Ros Wendland; Fernando Hayashi Sant'Anna; Janira Prichula; Juliana Comerlato                                                                                                                                                                                                                                                                                                            |
| EPI_ISL_583491                                                                                                                                                                                                                                                                                                                                                                                                                                                                                                                                                                                               | EPI_ISL_583491                                                                                                       | Centro de Saude Esf Iv Zona Rual Domingos de SJ Rio Pardo                  | Instituto Adolfo Lutz, Interdisciplinary Procedures Center, Strategic Laboratory    | Claudia Regina Gonçalves; Claudio Tavares Sacchi; Erica Valessa Ramos Gomes; Karoline Rodrigues Campos                                                                                                                                                                                                                                                                                                                                          |
| EPI_ISL_471543, EPI_ISL_583500                                                                                                                                                                                                                                                                                                                                                                                                                                                                                                                                                                               | EPI_ISL_471543, EPI_ISL_583500                                                                                       | Centro de Saude I Tacito Leite de Carvalho e Silva                         | Instituto Adolfo Lutz, Interdisciplinary Procedures Center, Strategic Laboratory    | Claudia Regina Gonçalves; Claudio Tavares Sacchi; Erica Valessa Ramos Gomes; Karoline Rodrigues Campos                                                                                                                                                                                                                                                                                                                                          |
| EPI_ISL_1493572, EPI_ISL_1493591                                                                                                                                                                                                                                                                                                                                                                                                                                                                                                                                                                             | EPI_ISL_1493572, EPI_ISL_1493591                                                                                     | Centro de Saude II Dr Alcides Facundo Arroyo                               | Instituto Adolfo Lutz, Interdisciplinary Procedures Center, Strategic Laboratory    | Caio Vinicius Dias Lopes; Claudia Regina Gonçalves; Claudio Tavares Sacchi; Erica Valessa Ramos Gomes; Karoline Rodrigues Campos                                                                                                                                                                                                                                                                                                                |
| EPI_ISL_1520129 to 1520137                                                                                                                                                                                                                                                                                                                                                                                                                                                                                                                                                                                   | EPI_ISL_1520129 to 1520137                                                                                           | Centro de Saude II Dr Jose Paione Mococa                                   | Instituto Adolfo Lutz, Interdisciplinary Procedures Center, Strategic Laboratory    | Caio Vinicius Dias Lopes; Claudia Regina Gonçalves; Claudio Tavares Sacchi; Erica Valessa Ramos Gomes; Karoline Rodrigues Campos                                                                                                                                                                                                                                                                                                                |
| EPI_ISL_1520117 to 1520128                                                                                                                                                                                                                                                                                                                                                                                                                                                                                                                                                                                   | EPI_ISL_1520117 to 1520128                                                                                           | Centro de Saude II Dr Jose de Felipe Espito Santo do Pinhal SP             | Instituto Adolfo Lutz, Interdisciplinary Procedures Center, Strategic Laboratory    | Caio Vinicius Dias Lopes; Claudia Regina Gonçalves; Claudio Tavares Sacchi; Erica Valessa Ramos Gomes; Karoline Rodrigues Campos                                                                                                                                                                                                                                                                                                                |
| EPI_ISL_1533689 to 1533691                                                                                                                                                                                                                                                                                                                                                                                                                                                                                                                                                                                   | EPI_ISL_1533689 to 1533691                                                                                           | Centro de Saude II Dr. Jose Paione Mococa                                  | Instituto Adolfo Lutz, Interdisciplinary Procedures Center, Strategic Laboratory    | Caio Vinicius Dias Lopes; Claudia Regina Gonçalves; Claudio Tavares Sacchi; Erica Valessa Ramos Gomes; Karoline Rodrigues Campos; Leonardo Jose Tadeu de Araujo                                                                                                                                                                                                                                                                                 |
| EPI_ISL_1468411, EPI_ISL_1468426 to 1468427, EPI_ISL_1468429 to 1468430, EPI_ISL_1468463, EPI_ISL_1468472 to 1468473                                                                                                                                                                                                                                                                                                                                                                                                                                                                                         | EPI_ISL_1468411, EPI_ISL_1468426 to 1468427, EPI_ISL_1468429 to 1468430, EPI_ISL_1468463, EPI_ISL_1468472 to 1468473 | Centro de Saude II Matao                                                   | Instituto Adolfo Lutz, Interdisciplinary Procedures Center, Strategic Laboratory    | Caio Vinicius Dias Lopes; Claudia Regina Gonçalves; Claudio Tavares Sacchi; Erica Valessa Ramos Gomes; Karoline Rodrigues Campos                                                                                                                                                                                                                                                                                                                |

|                                                                                                                                                                                                                                                                                                                                                                                                                                                                                                                                                                                                                                                                                                                                                                                              |                                                                                                              |                                                                                                                                                     |                                                                                                                                                                                                                                                                                                                                                                                                                       |
|----------------------------------------------------------------------------------------------------------------------------------------------------------------------------------------------------------------------------------------------------------------------------------------------------------------------------------------------------------------------------------------------------------------------------------------------------------------------------------------------------------------------------------------------------------------------------------------------------------------------------------------------------------------------------------------------------------------------------------------------------------------------------------------------|--------------------------------------------------------------------------------------------------------------|-----------------------------------------------------------------------------------------------------------------------------------------------------|-----------------------------------------------------------------------------------------------------------------------------------------------------------------------------------------------------------------------------------------------------------------------------------------------------------------------------------------------------------------------------------------------------------------------|
| EPI_ISL_1469821                                                                                                                                                                                                                                                                                                                                                                                                                                                                                                                                                                                                                                                                                                                                                                              | Centro de Saúde Bruno Cassel                                                                                 | Epiclin                                                                                                                                             | Ana Paula Muterle; Carolina Comerlato; Eliana Márcia Da Ros Wendland; Fernando Hayashi Sant'Anna; Janira Prichula; Juliana Comerlato                                                                                                                                                                                                                                                                                  |
| EPI_ISL_1469557                                                                                                                                                                                                                                                                                                                                                                                                                                                                                                                                                                                                                                                                                                                                                                              | Centro de Serviços Especializados Santa Rita                                                                 | Epiclin                                                                                                                                             | Ana Paula Muterle; Carolina Comerlato; Eliana Márcia Da Ros Wendland; Fernando Hayashi Sant'Anna; Janira Prichula; Juliana Comerlato                                                                                                                                                                                                                                                                                  |
| EPI_ISL_1396412 to 1396424, EPI_ISL_1396426 to 1396427, EPI_ISL_1396429 to 1396518                                                                                                                                                                                                                                                                                                                                                                                                                                                                                                                                                                                                                                                                                                           | Centro de Tecnología en Salud Pública de la Universidad Nacional de Rosario                                  | Laboratorio Mixto de Biotecnología Acuática (LMBA) on behalf of 'Proyecto Argentino Interinstitucional de genómica de SARS-CoV-2' (PAIS Consortium) | Adriana Giri; Agustina Cerri; Ana Cavatorta; Ana Paletta; Diego Chouhy; Elisa Bolatti; Elizabeth Tapia (argenTAG); Federico Remes Lenicov; Flavio Spetale; Gastón Viarengo; Ignacio García Labari; Javier Murillo; Joaquín Ezepeleta; Julian Acosta; Laura Angelone; Leandro Ciappina; María Re; Pablo Casal; Pilar Bulacio; Silvana Spinelli; Silvia Arranz; Sofía Lavista Llanos; Vanina Villanova; Victoria Posner |
| EPI_ISL_468305, EPI_ISL_468307                                                                                                                                                                                                                                                                                                                                                                                                                                                                                                                                                                                                                                                                                                                                                               | Centro de Vigilância a Saude de Diadema                                                                      | Instituto Adolfo Lutz, Interdisciplinary Procedures Center, Strategic Laboratory                                                                    | Claudia Regina Gonçalves; Claudio Tavares Sacchi; Erica Valessa Ramos Gomes                                                                                                                                                                                                                                                                                                                                           |
| EPI_ISL_1392889 to 1392891                                                                                                                                                                                                                                                                                                                                                                                                                                                                                                                                                                                                                                                                                                                                                                   | Centrum Badawczo-Rozwojowe Invicta (Invicta sp. z o.o.)                                                      | Diagtron Laboratoria                                                                                                                                | Celina Cybulska; Karolina Gackowska; Krzysztof Lukaszczyk; Lukasz Rabalski; Maciej Kosinski; Natalia Derewonko                                                                                                                                                                                                                                                                                                        |
| EPI_ISL_1393778 to 1393779, EPI_ISL_1393793, EPI_ISL_1393802 to 1393804, EPI_ISL_1538617 to 1538619, EPI_ISL_1538963                                                                                                                                                                                                                                                                                                                                                                                                                                                                                                                                                                                                                                                                         | Centrum Medycyny Klinicznej dr n. med. Karol Majewski                                                        | 1. National Institute of Public Health - National Institute of Hygiene; 2. Eurofins Genomics Europe Sequencing GmbH                                 | ECDC COVID-19 WGS support team; Eurofins Genomics Europe Sequencing Team; Gierczyki Rafa; Sadkowska-Todys Magorzata; Wokowicz Tomasz; Zacharczuk Katarzyna                                                                                                                                                                                                                                                            |
| EPI_ISL_1394224 to 1394227, EPI_ISL_1394229 to 1394230                                                                                                                                                                                                                                                                                                                                                                                                                                                                                                                                                                                                                                                                                                                                       | Centrum Medycyny Klinicznej dr n. med. Karol Majewski Di MEDICAL                                             | 1. National Institute of Public Health - National Institute of Hygiene; 2. Eurofins Genomics Europe Sequencing GmbH                                 | ECDC COVID-19 WGS support team; Eurofins Genomics Europe Sequencing Team; Gierczyki Rafa; Sadkowska-Todys Magorzata; Wokowicz Tomasz; Zacharczuk Katarzyna                                                                                                                                                                                                                                                            |
| EPI_ISL_1394228                                                                                                                                                                                                                                                                                                                                                                                                                                                                                                                                                                                                                                                                                                                                                                              | Centrum Medycyny Klinicznej dr n. med. Karol Majewski Di MEDICALi                                            | 1. National Institute of Public Health - National Institute of Hygiene; 2. Eurofins Genomics Europe Sequencing GmbH                                 | ECDC COVID-19 WGS support team; Eurofins Genomics Europe Sequencing Team; Gierczyki Rafa; Sadkowska-Todys Magorzata; Wokowicz Tomasz; Zacharczuk Katarzyna                                                                                                                                                                                                                                                            |
| EPI_ISL_1538614                                                                                                                                                                                                                                                                                                                                                                                                                                                                                                                                                                                                                                                                                                                                                                              | Centrum Medycyny Klinicznej dr n. med. Karol Majewski -DiMedical                                             | 1. National Institute of Public Health - National Institute of Hygiene; 2. Eurofins Genomics Europe Sequencing GmbH                                 | ECDC COVID-19 WGS support team; Eurofins Genomics Europe Sequencing Team; Gierczyki Rafa; Sadkowska-Todys Magorzata; Wokowicz Tomasz; Zacharczuk Katarzyna                                                                                                                                                                                                                                                            |
| EPI_ISL_1393805 to 1393807, EPI_ISL_1394203 to 1394209, EPI_ISL_1394212 to 1394213, EPI_ISL_1394218 to 1394221, EPI_ISL_1538464, EPI_ISL_1538527, EPI_ISL_1538535, EPI_ISL_1538612 to 1538613, EPI_ISL_1538615 to 1538616, EPI_ISL_1538620 to 1538624, EPI_ISL_1538786 to 1538787, EPI_ISL_1538794 to 1538795, EPI_ISL_1538864, EPI_ISL_1538962, EPI_ISL_1538964, EPI_ISL_1539053, EPI_ISL_1539117 to 1539120, EPI_ISL_1539130 to 1539132, EPI_ISL_1539176, EPI_ISL_1539202                                                                                                                                                                                                                                                                                                                  | Centrum Medycyny Klinicznej dr n. med. Karol Majewski - DiMedical                                            | 1. National Institute of Public Health - National Institute of Hygiene; 2. Eurofins Genomics Europe Sequencing GmbH                                 | ECDC COVID-19 WGS support team; Eurofins Genomics Europe Sequencing Team; Gierczyki Rafa; Sadkowska-Todys Magorzata; Wokowicz Tomasz; Zacharczuk Katarzyna                                                                                                                                                                                                                                                            |
| see above                                                                                                                                                                                                                                                                                                                                                                                                                                                                                                                                                                                                                                                                                                                                                                                    | Centrum Medycyny Klinicznej dr n. med. Karol Majewski - DiMedical                                            | 1. National Institute of Public Health - National Institute of Hygiene; 2. Eurofins Genomics Europe Sequencing GmbH                                 | ECDC COVID-19 WGS support team; Eurofins Genomics Europe Sequencing Team; Gierczyki Rafa; Sadkowska-Todys Magorzata; Wokowicz Tomasz; Zacharczuk Katarzyna                                                                                                                                                                                                                                                            |
| EPI_ISL_1393727 to 1393738, EPI_ISL_1394283 to 1394289, EPI_ISL_1425552 to 1425553, EPI_ISL_1538440                                                                                                                                                                                                                                                                                                                                                                                                                                                                                                                                                                                                                                                                                          | Centrum Medyczne MEDYK Sp. z o.o., Sp.k. Zakad Diagnostyki Medycznej                                         | 1. National Institute of Public Health - National Institute of Hygiene; 2. Eurofins Genomics Europe Sequencing GmbH                                 | ECDC COVID-19 WGS support team; Eurofins Genomics Europe Sequencing Team; Gierczyki Rafa; Sadkowska-Todys Magorzata; Wokowicz Tomasz; Zacharczuk Katarzyna                                                                                                                                                                                                                                                            |
| EPI_ISL_450520 to 450524                                                                                                                                                                                                                                                                                                                                                                                                                                                                                                                                                                                                                                                                                                                                                                     | Centrl Laboratorija                                                                                          | Latvian Biomedical Research and Study Centre                                                                                                        | Ivars Silamielis; Jana Oste; Jnis Kloviš; Kaspars Megnis; Marta Priedte; Monta Ustinova; Stella Lapia; Uga Dumpis; Vita Rovte; ikita Zrelovs                                                                                                                                                                                                                                                                          |
| EPI_ISL_486390 to 486391, EPI_ISL_486411 to 486416, EPI_ISL_486418 to 486421, EPI_ISL_486437, EPI_ISL_492988 to 492992, EPI_ISL_501286 to 501289, EPI_ISL_501808, EPI_ISL_501817, EPI_ISL_501895 to 501896, EPI_ISL_501915, EPI_ISL_501922, EPI_ISL_515196, EPI_ISL_534200 to 534202, EPI_ISL_534206 to 534208, EPI_ISL_534210 to 534211, EPI_ISL_534220, EPI_ISL_534222 to 534223                                                                                                                                                                                                                                                                                                                                                                                                           | Centrl laboratorija                                                                                          | Latvian Biomedical Research and Study Centre                                                                                                        | Ivars Silamielis; Jana Oste; Jnis Kloviš; Jnis Pjalkovskis; Kaspars Megnis; Marta Priedte; Monta Ustinova; Stella Lapia; Uga Dumpis; Vita Rovte; ikita Zrelovs                                                                                                                                                                                                                                                        |
| see above                                                                                                                                                                                                                                                                                                                                                                                                                                                                                                                                                                                                                                                                                                                                                                                    | Centrl laboratorija                                                                                          | Latvian Biomedical Research and Study Centre                                                                                                        | Ivars Silamielis; Jana Oste; Jnis Kloviš; Jnis Pjalkovskis; Kaspars Megnis; Marta Priedte; Monta Ustinova; Stella Lapia; Uga Dumpis; Vita Rovte; ikita Zrelovs                                                                                                                                                                                                                                                        |
| EPI_ISL_1404144                                                                                                                                                                                                                                                                                                                                                                                                                                                                                                                                                                                                                                                                                                                                                                              | Cerballiance IDFest                                                                                          | Cerba Lab                                                                                                                                           | Benazra M; Haim-Boukobza S; Lecorche E; Olivi M; Roquebert B; Trombert-Paolantoni S                                                                                                                                                                                                                                                                                                                                   |
| EPI_ISL_1547506                                                                                                                                                                                                                                                                                                                                                                                                                                                                                                                                                                                                                                                                                                                                                                              | Cerballiance Pont Audemer                                                                                    | Cerba Lab                                                                                                                                           | Haim-Boukobza S; Lecorche E; Leriche A; Prigent A; Roquebert B; Trombert-Paolantoni S; Verdurme L                                                                                                                                                                                                                                                                                                                     |
| EPI_ISL_1403780                                                                                                                                                                                                                                                                                                                                                                                                                                                                                                                                                                                                                                                                                                                                                                              | Cerballiance site les Clayes                                                                                 | Cerba Lab                                                                                                                                           | Benazra M; Haim-Boukobza S; Lecorche E; Olivi M; Roquebert B; Trombert-Paolantoni S                                                                                                                                                                                                                                                                                                                                   |
| EPI_ISL_1404374                                                                                                                                                                                                                                                                                                                                                                                                                                                                                                                                                                                                                                                                                                                                                                              | Cerballiance Les Clayes                                                                                      | Cerba Lab                                                                                                                                           | Benazra M; Haim-Boukobza S; Lecorche E; Olivi M; Trombert-Paolantoni S; Zimmer S                                                                                                                                                                                                                                                                                                                                      |
| EPI_ISL_516629 to 516645                                                                                                                                                                                                                                                                                                                                                                                                                                                                                                                                                                                                                                                                                                                                                                     | Charite Universitätsmedizin Berlin, Institut für Virologie/Labor Berlin                                      | Charite Universitätsmedizin Berlin, Institut für Virologie/Labor Berlin                                                                             | Barbara Muhlemann; Christian Drosten; Julia Schneider; Jörn Beheim-Schwarzbach; Talitha Veith; Terry Jones; Victor M Corman                                                                                                                                                                                                                                                                                           |
| EPI_ISL_406862                                                                                                                                                                                                                                                                                                                                                                                                                                                                                                                                                                                                                                                                                                                                                                               | Charité Universitätsmedizin Berlin, Institute of Virology; Institut für Mikrobiologie der Bundeswehr, Munich | Charité Universitätsmedizin Berlin, Institute of Virology                                                                                           | Barbara Muhlemann; Christian Drosten; Julia Schneider; Markus Antwerpen; Roman Wölfel; Talitha Veith; Victor M Corman                                                                                                                                                                                                                                                                                                 |
| EPI_ISL_1435333 to 1435340                                                                                                                                                                                                                                                                                                                                                                                                                                                                                                                                                                                                                                                                                                                                                                   | Chemische und Veterinäruntersuchungsamt Münsterland-Emscher-Lippe                                            | Robert Koch Institute                                                                                                                               |                                                                                                                                                                                                                                                                                                                                                                                                                       |
| EPI_ISL_569612 to 569613                                                                                                                                                                                                                                                                                                                                                                                                                                                                                                                                                                                                                                                                                                                                                                     | Cheyenne River Health Center                                                                                 | South Dakota Public Health Laboratory                                                                                                               | Jacob Garfin; Matt Plumb; Xiong Wang; and Chris Carlson                                                                                                                                                                                                                                                                                                                                                               |
| EPI_ISL_419297 to 419298, EPI_ISL_419309 to 419311, EPI_ISL_480004 to 480014, EPI_ISL_1426653 to 1426658, EPI_ISL_1427071 to 1427104, EPI_ISL_1427717 to 1427718, EPI_ISL_1428288 to 1428313, EPI_ISL_1431615, EPI_ISL_1431642 to 1431708, EPI_ISL_1431726, EPI_ISL_1431749 to 1431764, EPI_ISL_1431824 to 1431828, EPI_ISL_1432028, EPI_ISL_1432030, EPI_ISL_1432032, EPI_ISL_1432034 to 1432035, EPI_ISL_1432037, EPI_ISL_1432039, EPI_ISL_1432041, EPI_ISL_1432043, EPI_ISL_1432045, EPI_ISL_1432047, EPI_ISL_1432049, EPI_ISL_1432051, EPI_ISL_1432054, EPI_ISL_1432056, EPI_ISL_1432058, EPI_ISL_1432060, EPI_ISL_1432063 to 1432064, EPI_ISL_1432067, EPI_ISL_1432069, EPI_ISL_1432071, EPI_ISL_1432073, EPI_ISL_1432076 to 1432077, EPI_ISL_1432079, EPI_ISL_1432081, EPI_ISL_1432083 | Pathogen Genomics Center, National Institute of Infectious Diseases                                          | Hajime Kamiya; Kentaro Itokawa; Makoto Kuroda; Masakatsu Taira; Masanori Hashino; Motoi Suzuki; Rina Tanaka; Tsuyoshi Sekizuka; Yushi Hachisu       |                                                                                                                                                                                                                                                                                                                                                                                                                       |
| see above                                                                                                                                                                                                                                                                                                                                                                                                                                                                                                                                                                                                                                                                                                                                                                                    | Chiba Prefectural Institute of Public Health                                                                 | Pathogen Genomics Center, National Institute of Infectious Diseases                                                                                 | Hajime Kamiya; Kentaro Itokawa; Makoto Kuroda; Masakatsu Taira; Masanori Hashino; Motoi Suzuki; Rina Tanaka; Tsuyoshi Sekizuka; Yushi Hachisu                                                                                                                                                                                                                                                                         |
| EPI_ISL_468070 to 468078, EPI_ISL_477125 to 477140, EPI_ISL_492028 to 492031, EPI_ISL_1469964 to 1469986                                                                                                                                                                                                                                                                                                                                                                                                                                                                                                                                                                                                                                                                                     | Child Health Research Foundation                                                                             | Child Health Research Foundation                                                                                                                    | Afroza Akter Tanni; CHRFB Bangladesh Genomics Team; Hafizur Rahman; Maksuda Islam; Md Hafizur Rahman; Md Saiful Islam Sajib; Roly Malaker; Samir K Saha; Senjuti Saha; Syed Mukhtadir Al Sium                                                                                                                                                                                                                         |
| EPI_ISL_437912                                                                                                                                                                                                                                                                                                                                                                                                                                                                                                                                                                                                                                                                                                                                                                               | Child Health Research Foundation                                                                             | Child Health Research Lab                                                                                                                           | Maksuda Islam; Md Hafizur Rahman; Md Hasanuzzaman; Md Saiful Islam Sajib; Md Shahidul Islam; Roly Malaker; Samir K Saha; Senjuti Saha; Zabed B Ahmed                                                                                                                                                                                                                                                                  |
| EPI_ISL_513343 to 513344                                                                                                                                                                                                                                                                                                                                                                                                                                                                                                                                                                                                                                                                                                                                                                     | Children Westmead Hospital                                                                                   | NSW Health Pathology - Institute of Clinical Pathology and Medical Research; Westmead Hospital; University of Sydney                                | CIDM-PH et al.                                                                                                                                                                                                                                                                                                                                                                                                        |
| EPI_ISL_507962                                                                                                                                                                                                                                                                                                                                                                                                                                                                                                                                                                                                                                                                                                                                                                               | Children's Hospitals and Clinics of Minnesota                                                                | Minnesota Department of Health, Public Health Laboratory                                                                                            | Jacob Garfin; Matt Plumb; and Xiong Wang                                                                                                                                                                                                                                                                                                                                                                              |
| EPI_ISL_451548, EPI_ISL_451594, EPI_ISL_451605, EPI_ISL_455068                                                                                                                                                                                                                                                                                                                                                                                                                                                                                                                                                                                                                                                                                                                               | Childrens Hospital Westmead                                                                                  | NSW Health Pathology - Institute of Clinical Pathology and Medical Research; Westmead Hospital; University of Sydney                                | CIDM-PH et al.                                                                                                                                                                                                                                                                                                                                                                                                        |
| EPI_ISL_430722 to 430746                                                                                                                                                                                                                                                                                                                                                                                                                                                                                                                                                                                                                                                                                                                                                                     | Chinese PLA Institute for Disease Control and Prevention                                                     | Chinese PLA Institute for Disease Control and Prevention                                                                                            | Lizhong Li; Peng LiJinhui Li                                                                                                                                                                                                                                                                                                                                                                                          |
| EPI_ISL_417316, EPI_ISL_417330 to 417332, EPI_ISL_429877 to 429878                                                                                                                                                                                                                                                                                                                                                                                                                                                                                                                                                                                                                                                                                                                           | Chiu Laboratory, University of California, San Francisco                                                     | Chiu Laboratory, University of California, San Francisco                                                                                            | Scot Federman; Wei Gu; Xianding Deng; and Charles Y. Chiu                                                                                                                                                                                                                                                                                                                                                             |
| EPI_ISL_443315                                                                                                                                                                                                                                                                                                                                                                                                                                                                                                                                                                                                                                                                                                                                                                               | Château de la Source                                                                                         | National Reference Center for Viruses of Respiratory Infections, Institut Pasteur, Paris                                                            | Angela Brisebarre; Etienne Simon-Lorière; Flora Donati; Marion Barbet; Maud Vanpeene; Mélanie Albert; Méline Bizard; Sylvie Behillili; Sylvie van der Werf; Vincent Enouf                                                                                                                                                                                                                                             |
| EPI_ISL_1398367, EPI_ISL_1398565, EPI_ISL_1398932, EPI_ISL_1398939, EPI_ISL_1398942, EPI_ISL_1398955, EPI_ISL_1398983                                                                                                                                                                                                                                                                                                                                                                                                                                                                                                                                                                                                                                                                        | Cianjur Public Health                                                                                        | West Java Health Laboratory; School of Life Sciences and Technology, Institut Teknologi Bandung                                                     | Azzania Fibriani; Cut Nur Cinthia Alamanda; Ema Rahmawati; Isak Solihin; Kamila Tania; Karimatu Khoirunnisa; Miftahul Faridi; Rifky Waluyajati Rachman; Rini Robiani; Ryan Bayusantika Ristandi                                                                                                                                                                                                                       |
| see above                                                                                                                                                                                                                                                                                                                                                                                                                                                                                                                                                                                                                                                                                                                                                                                    | Cianjur Public Health                                                                                        | West Java Health Laboratory; School of Life Sciences and Technology, Institut Teknologi Bandung                                                     | Azzania Fibriani; Cut Nur Cinthia Alamanda; Ema Rahmawati; Isak Solihin; Kamila Tania; Karimatu Khoirunnisa; Miftahul Faridi; Rifky Waluyajati Rachman; Rini Robiani; Ryan Bayusantika Ristandi                                                                                                                                                                                                                       |
| EPI_ISL_491115                                                                                                                                                                                                                                                                                                                                                                                                                                                                                                                                                                                                                                                                                                                                                                               | Cicin-Sain Lab                                                                                               | Cicin-Sain Lab                                                                                                                                      | Kathrin Eschke; Luka Cicin-Sain; M. Zeeshan Chaudhry; Yeonsu Kim                                                                                                                                                                                                                                                                                                                                                      |
| EPI_ISL_1534697 to 1534700                                                                                                                                                                                                                                                                                                                                                                                                                                                                                                                                                                                                                                                                                                                                                                   | Ciputra Hospital Citra Garden City                                                                           | National Institute of Health Research and Development                                                                                               | Arie Ardiansyah Nugraha; Hana Apsari Pawestri; Hartanti Dian Ikawati; Kartika Dewi Puspa; Krisna Pangesti; Nelly Puspandari; Subangkit; Vivi Setiawaty                                                                                                                                                                                                                                                                |
| EPI_ISL_454646                                                                                                                                                                                                                                                                                                                                                                                                                                                                                                                                                                                                                                                                                                                                                                               | City of El Paso Department of Public Health Laboratory                                                       | Pathogen Discovery, Respiratory Viruses Branch, Division of Viral Diseases, Centers for Disease Control and Prevention                              | Anna Uehara; Clinton R. Paden; Haibin Wang; Jing Zhang; Krista Queen; Michael Bowen; Suxiang Tong; Yan Li; Ying Tao; Zachary Weiner                                                                                                                                                                                                                                                                                   |

|                                                                                                                                                                                                                                                                                                                    |                                                                                                                            |                                                                                                                        |                                                                                                                                                                                                                                                                                                                                                                                                                                                  |
|--------------------------------------------------------------------------------------------------------------------------------------------------------------------------------------------------------------------------------------------------------------------------------------------------------------------|----------------------------------------------------------------------------------------------------------------------------|------------------------------------------------------------------------------------------------------------------------|--------------------------------------------------------------------------------------------------------------------------------------------------------------------------------------------------------------------------------------------------------------------------------------------------------------------------------------------------------------------------------------------------------------------------------------------------|
| EPI_ISL_1493367 to 1493388, EPI_ISL_1494731 to 1494756                                                                                                                                                                                                                                                             | City of Milwaukee Health Department Laboratory                                                                             | City of Milwaukee Health Department Laboratory                                                                         | Sanjib Bhattacharyya                                                                                                                                                                                                                                                                                                                                                                                                                             |
| EPI_ISL_547585 to 547593, EPI_ISL_560318, EPI_ISL_560322 to 560324, EPI_ISL_561337 to 561343                                                                                                                                                                                                                       | Civil Hospital, Panchkula                                                                                                  | CSIR-Institute of Microbial Technology                                                                                 | Amandeep Kaur; Anu Singh; Ashwani Kumar; Debarghya Ghose; Dipak Dutta; Harsh Goar; Kanika Bansal; Navin Baid; Poushali Chakraborty; Prabhu B. Patil; Rajesh Kumar Mishra; Sanjeet Kumar; Sanjeev Khosla                                                                                                                                                                                                                                          |
| EPI_ISL_539483 to 539490, EPI_ISL_561344                                                                                                                                                                                                                                                                           | Civil Hospital, Rupnagar                                                                                                   | CSIR-Institute of Microbial Technology                                                                                 | Amandeep Kaur; Anu Singh; Ashwani Kumar; Debarghya Ghose; Dipak Dutta; Harsh Goar; Kanika Bansal; Navin Baid; Poushali Chakraborty; Prabhu B. Patil; Rajesh Kumar Mishra; Sanjeet Kumar; Sanjeev Khosla                                                                                                                                                                                                                                          |
| EPI_ISL_1424882 to 1425075, EPI_ISL_1435646, EPI_ISL_1435649, EPI_ISL_1435651, EPI_ISL_1435653, EPI_ISL_1435655, EPI_ISL_1435657, EPI_ISL_1435660, EPI_ISL_1435662                                                                                                                                                 |                                                                                                                            |                                                                                                                        |                                                                                                                                                                                                                                                                                                                                                                                                                                                  |
| see above                                                                                                                                                                                                                                                                                                          | Clalit Health Services Laboratories, Israel                                                                                | Stern Lab                                                                                                              | Stern Lab                                                                                                                                                                                                                                                                                                                                                                                                                                        |
| EPI_ISL_1510648 to 1510650                                                                                                                                                                                                                                                                                         | Clinical Reference Laboratory                                                                                              | Kansas Health and Environmental Lab                                                                                    | Ben Olsen; Jonathan Barnell; Mike Grose; and Phil Adam                                                                                                                                                                                                                                                                                                                                                                                           |
| EPI_ISL_1534264                                                                                                                                                                                                                                                                                                    | Clinic-in-Asla                                                                                                             | NHLS/UCT                                                                                                               | Arash Iranzadeh; Bruna Galvao; Carolyn Williamson; Deelan Doolabh; Diana Hardie; Innocent Mudau; Kruger Marais; Lynn Tyers; Marvin Hsiao; Stephen Korsman                                                                                                                                                                                                                                                                                        |
| EPI_ISL_414579                                                                                                                                                                                                                                                                                                     | Clinica Alemana de Santiago, Chile                                                                                         | Instituto de Salud Publica de Chile                                                                                    | Alejandra Acevedo; Andrés E. Castillo; Bárbara Parra; Carolina Tambley; Gabriel Leal; Gisselle Barra; Jaime Lagos; Javier Tognarelli; Jorge Fernández.; Loredana Arata; Patricia Bustos; Paz Tapia; Rodrigo Fasce; Soledad Ulloa; Winston Andrade                                                                                                                                                                                                |
| EPI_ISL_527759                                                                                                                                                                                                                                                                                                     | Clinica Biblica                                                                                                            | Incienza, Instituto Costarricense de Investigación y Enseñanza en Nutrición y Salud                                    | Adriana Godínez & Melany Calderon; Claudio Soto-Garita; Estela Cordero; Francisco Duarte; Hebleen Porras                                                                                                                                                                                                                                                                                                                                         |
| EPI_ISL_414580                                                                                                                                                                                                                                                                                                     | Clinica Santa Maria, Santiago, Chile                                                                                       | Instituto de Salud Publica de Chile                                                                                    | Alejandra Acevedo; Andrés E. Castillo; Bárbara Parra; Carolina Tambley; Gabriel Leal; Gisselle Barra; Jaime Lagos; Javier Tognarelli; Jorge Fernández.; Loredana Arata; Patricia Bustos; Paz Tapia; Rodrigo Fasce; Soledad Ulloa; Winston Andrade                                                                                                                                                                                                |
| EPI_ISL_1494958                                                                                                                                                                                                                                                                                                    | Clinica Universitaria Medicina Integral - Laboratorio Molecular                                                            | Instituto Nacional de Salud- Dirección de Investigación en Salud Pública                                               | Carlos Franco-Muñoz; Carmen Osorio; Diana Malo; Diego A. Álvarez-Díaz; Diego Andrés Prada; Gerardo Santamaría; Hector Alejandro Ruiz-Moreno; Jhonnatan Reales-González; Juan Camilo Martínez; Julian Naizaque; Katherine Laiton-Donato; Lisseth Pardo; Magdalena Wiesner; Marcela Mercado-Reyes; Maria T. Herrera-Sepúlveda; Marta Lopez Blanco; Martha Lucia Ospina Martinez; Paola Rojas; Sergio Gomez; Sheryll Corchuelo; Ángela Alarcon Cruz |
| EPI_ISL_462450 to 462476                                                                                                                                                                                                                                                                                           | Clinical Center, University of Sarajevo                                                                                    | Charite Universitätsmedizin Berlin, Institute of Virology                                                              | Almedina Hadzihasanovic-Moro; Amela Dedeic-Ljubovic; Barbara Muehlemann; Christian Drosten; Irma Salimovic-Besic; Jorn Beheim-Schwarzbach; Julia Schneider; Selma Mutevelic; Suzana Arapic; Talitha Veith; Terry Jones; Victor M Corman                                                                                                                                                                                                          |
| EPI_ISL_421279, EPI_ISL_421281, EPI_ISL_437455 to 437458                                                                                                                                                                                                                                                           | Clinical Diagnostics Laboratory, Diagnostic & Experimental Pathology, Lilly Research Laboratories                          | Clinical Diagnostics Laboratory, Diagnostic & Experimental Pathology, Lilly Research Laboratories                      | Andrew Schade; Angie Fulford; Erin Wray; Jeff Fill; Joe Oakley; John Calley; John McElwee; Leslie O'Neill Reising; Leslie O'Neill Reising; Mayuri Vaidya; Pat Finnegan; Phil Ebert; Rachael Redmond; Sam McNeely; Tim Holzer                                                                                                                                                                                                                     |
| EPI_ISL_516426 to 516431                                                                                                                                                                                                                                                                                           | Clinical Hospital - Shtip                                                                                                  | Research Center for Genetic Engineering and Biotechnology "Georgi D. Efremov", Macedonian Academy of Sciences and Arts | RCGEB - MASA                                                                                                                                                                                                                                                                                                                                                                                                                                     |
| EPI_ISL_1418324                                                                                                                                                                                                                                                                                                    | Clinical Infectious Diseases Hospital Constana                                                                             | National Institute of Infectious Diseases-Prof. Dr. Matei Bals Molecular Diagnostics Laboratory                        | Corina Casangiu; Dan Otelea; Ionelia Nicolae; Leontina Banica; Marius Surleac; Ovidiu Vlaicu; Simona Paraschiv                                                                                                                                                                                                                                                                                                                                   |
| EPI_ISL_424352                                                                                                                                                                                                                                                                                                     | Clinical Laboratory, Fuyang City Center for Disease Control and Prevention                                                 | Clinical Laboratory, Fuyang City Center for Disease Control and Prevention                                             | Ge, B.                                                                                                                                                                                                                                                                                                                                                                                                                                           |
| EPI_ISL_450506                                                                                                                                                                                                                                                                                                     | Clinical Laboratory, Hospital Israelita Albert Einstein                                                                    | Clinical Laboratory, Hospital Israelita Albert Einstein                                                                | Amgarten, D.; Araujo; C.L.P.; D.B.; D.B.L.; Durigon; E.L. and Pinho; J.R.R.; Machado; Malta, F.; Manguieira; R.A.F.; R.R.G.; Santana; de Oliveira                                                                                                                                                                                                                                                                                                |
| EPI_ISL_416432                                                                                                                                                                                                                                                                                                     | Clinical Microbiology Lab                                                                                                  | Infectious Disease Research Department, King Abdullah International Medical Research Center (KAIMRC)                   | Abdulrahman Alswaji; Liliane Okdah; Majed Alghoribi; Michel Doumith; Sadeem Alhayli; Sameera Al Johani                                                                                                                                                                                                                                                                                                                                           |
| EPI_ISL_447419 to 447469                                                                                                                                                                                                                                                                                           | Clinical Microbiology Laboratory, Sheba Medical Center                                                                     | Stern Lab                                                                                                              | Stern Lab                                                                                                                                                                                                                                                                                                                                                                                                                                        |
| EPI_ISL_447383 to 447406, EPI_ISL_447417 to 447418                                                                                                                                                                                                                                                                 | Clinical Microbiology Laboratory, The Baruch Padeh Medical Center, Poriya                                                  | Stern Lab                                                                                                              | Stern Lab                                                                                                                                                                                                                                                                                                                                                                                                                                        |
| EPI_ISL_483570                                                                                                                                                                                                                                                                                                     | Clinical Microbiology Laboratory- Basurto University Hospita                                                               | Biocruces-Bizkaia                                                                                                      | Ana Belén Belén de la Hoz; Estibaliz Ugalde-Zarraga; José Luis Díaz de Tuesta del Arco; Matxalen Vidal-García; Mikel J. Urrutikoetxea-Gutierrez; M <sup>o</sup> Carmen Nieto Toboso                                                                                                                                                                                                                                                              |
| EPI_ISL_483566, EPI_ISL_483571 to 483573, EPI_ISL_486876, EPI_ISL_489833 to 489835, EPI_ISL_490202 to 490204, EPI_ISL_490977                                                                                                                                                                                       | Clinical Microbiology Laboratory- Basurto University Hospital                                                              | Biocruces-Bizkaia                                                                                                      | Ana Belén Belén de la Hoz; Estibaliz Ugalde-Zarraga; José Luis Díaz de Tuesta del Arco; Matxalen Vidal-García; Mikel J. Urrutikoetxea-Gutierrez; M <sup>o</sup> Carmen Nieto Toboso                                                                                                                                                                                                                                                              |
| EPI_ISL_1385842 to 1385953, EPI_ISL_1468475 to 1468531, EPI_ISL_1534017 to 1534018, EPI_ISL_1534020 to 1534033, EPI_ISL_1534035 to 1534070, EPI_ISL_1534072 to 1534073, EPI_ISL_1534076 to 1534081, EPI_ISL_1534083 to 1534095, EPI_ISL_1534097 to 1534122, EPI_ISL_1534124 to 1534133, EPI_ISL_1534136 to 1534159 |                                                                                                                            |                                                                                                                        |                                                                                                                                                                                                                                                                                                                                                                                                                                                  |
| see above                                                                                                                                                                                                                                                                                                          | Clinical Microbiology, Infection Prevention and Control                                                                    | Section for Molecular Diagnostics                                                                                      | Björn Hallström; Jonas Björkman                                                                                                                                                                                                                                                                                                                                                                                                                  |
| EPI_ISL_1443293 to 1443336                                                                                                                                                                                                                                                                                         | Clinical Molecular Microbiology Laboratory, UNC Hospital                                                                   | Dirk Dittmer                                                                                                           | Angelica Juarez; Blossom Damania.; Brent A. Eason; Cameroon Grant; Carolina Caro-Vegas; Cecilia Thompson; Dirk Dittmer; Evelyn Hoffman; Jason Wong; Justin T. Landis; Linda Pluta; Melissa B. Miller; Patricio Cano; Razia Moorad; Ryan McNamara; Shawn Hawken                                                                                                                                                                                   |
| EPI_ISL_1418311 to 1418312                                                                                                                                                                                                                                                                                         | Clinical Pneumology Hospital Iai                                                                                           | National Institute of Infectious Diseases-Prof. Dr. Matei Bals Molecular Diagnostics Laboratory                        | Corina Casangiu; Dan Otelea; Ionelia Nicolae; Leontina Banica; Marius Surleac; Ovidiu Vlaicu; Simona Paraschiv                                                                                                                                                                                                                                                                                                                                   |
| EPI_ISL_1396634 to 1396646, EPI_ISL_1503231                                                                                                                                                                                                                                                                        | Clinical Reference Laboratory                                                                                              | Kansas Health and Environmental Lab                                                                                    | Ben Olsen; Jonathan Barnell; Mike Grose; and Phil Adam                                                                                                                                                                                                                                                                                                                                                                                           |
| EPI_ISL_578697, EPI_ISL_605799 to 605816                                                                                                                                                                                                                                                                           | Clinical Virology Laboratory, Institute of Liver and Biliary Sciences                                                      | ILBS - IGIB                                                                                                            | Abhishek Padhi; Ekta Gupta; Jaswinder Singh Maras; Reshu Agarwal; Sheetalnath Rooge; Shridhar Sivasubbu; Shvetank Sharma; Vinod Scaria                                                                                                                                                                                                                                                                                                           |
| EPI_ISL_447311 to 447330                                                                                                                                                                                                                                                                                           | Clinical Virology Laboratory, Soroka Medical Center and the Faculty of Health Sciences, Ben-Gurion University of the Negev | Stern Lab                                                                                                              | Stern Lab                                                                                                                                                                                                                                                                                                                                                                                                                                        |
| EPI_ISL_447331 to 447382, EPI_ISL_447407 to 447416                                                                                                                                                                                                                                                                 | Clinical Virology Unit, Hadassah Hebrew University Medical Center                                                          | Stern Lab                                                                                                              | Stern Lab                                                                                                                                                                                                                                                                                                                                                                                                                                        |
| EPI_ISL_418230                                                                                                                                                                                                                                                                                                     | Clinique AVERAY LA BROUSTE, Med. Polyvalente                                                                               | National Reference Center for Viruses of Respiratory Infections, Institut Pasteur, Paris                               | Angela Brisebarre; Elsa Ngwem; Etienne Simon-Lorière; Flora Donati; Marion Barbet; Maud Vanpeene; Mélanie Albert; Méline Bizard; Sylvie Behillil; Sylvie van der Werf; Vincent Enouf                                                                                                                                                                                                                                                             |
| EPI_ISL_1527016, EPI_ISL_1527022                                                                                                                                                                                                                                                                                   | Clinica Clorito Picado                                                                                                     | Incienza, Instituto Costarricense de Investigación y Enseñanza en Nutrición y Salud                                    | Barboza-Arguedas E & Salas-Abarca P; Pérez-Corrales C                                                                                                                                                                                                                                                                                                                                                                                            |
| EPI_ISL_1494957                                                                                                                                                                                                                                                                                                    | Clinica Primavera                                                                                                          | Instituto Nacional de Salud- Dirección de Investigación en Salud Pública                                               | Carlos Franco-Muñoz; Carmen Osorio; Diana Malo; Diego A. Álvarez-Díaz; Diego Andrés Prada; Gerardo Santamaría; Hector Alejandro Ruiz-Moreno; Jhonnatan Reales-González; Juan Camilo Martínez; Julian Naizaque; Katherine Laiton-Donato; Lisseth Pardo; Magdalena Wiesner; Marcela Mercado-Reyes; Maria T. Herrera-Sepúlveda; Marta Lopez Blanco; Martha Lucia Ospina Martinez; Paola Rojas; Sergio Gomez; Sheryll Corchuelo; Ángela Alarcon Cruz |
| EPI_ISL_452472 to 452543, EPI_ISL_538082 to 538117, EPI_ISL_538608 to 538612                                                                                                                                                                                                                                       | Clinica Universidad de Navarra. Servicio de Enfermedades Infecciosas y Microbiología clínica                               | SeqCOVID-SPAIN consortium/IBV(CSIC)                                                                                    | Jose Luis del Pozo and SeqCOVID-SPAIN consortium; Mirian Fernández-Alonso                                                                                                                                                                                                                                                                                                                                                                        |
| EPI_ISL_1534273 to 1534274, EPI_ISL_1534298, EPI_ISL_1534340,                                                                                                                                                                                                                                                      | CoVid WC Garden Route                                                                                                      | NHLS/UCT                                                                                                               | Arash Iranzadeh; Bruna Galvao; Carolyn Williamson; Deelan Doolabh; Diana Hardie; Emmanuel SJ; Innocent Mudau; Kruger Marais; Lynn Tyers; Marvin Hsiao; Stephen Korsman; Tegally H; de Oliveira T                                                                                                                                                                                                                                                 |

|                                                                                                                                                                                                                                                                                                                                                                                                                                                                                                                                                                                                                                                                                                                                                                                                                                                                                                                                                                                                                                                                                                                                                                                                                                                                                                                                                                                                                                                                                                                                                                                                                                                                                                                                                                                                                                                                                                                                                                                                                                                                                                                                                                                                                                                                                                                                                                                                                                                                                                                                                                                                                                                                                                                                                                                                                                                                                                                                                                                                                                                                                                                                                                                                                                                                                                                                                                                                        |                                                                                            |                                                                                                 |                                                                                                                                                                                                                                                                                                                                                                                                                                                           |                                 |
|--------------------------------------------------------------------------------------------------------------------------------------------------------------------------------------------------------------------------------------------------------------------------------------------------------------------------------------------------------------------------------------------------------------------------------------------------------------------------------------------------------------------------------------------------------------------------------------------------------------------------------------------------------------------------------------------------------------------------------------------------------------------------------------------------------------------------------------------------------------------------------------------------------------------------------------------------------------------------------------------------------------------------------------------------------------------------------------------------------------------------------------------------------------------------------------------------------------------------------------------------------------------------------------------------------------------------------------------------------------------------------------------------------------------------------------------------------------------------------------------------------------------------------------------------------------------------------------------------------------------------------------------------------------------------------------------------------------------------------------------------------------------------------------------------------------------------------------------------------------------------------------------------------------------------------------------------------------------------------------------------------------------------------------------------------------------------------------------------------------------------------------------------------------------------------------------------------------------------------------------------------------------------------------------------------------------------------------------------------------------------------------------------------------------------------------------------------------------------------------------------------------------------------------------------------------------------------------------------------------------------------------------------------------------------------------------------------------------------------------------------------------------------------------------------------------------------------------------------------------------------------------------------------------------------------------------------------------------------------------------------------------------------------------------------------------------------------------------------------------------------------------------------------------------------------------------------------------------------------------------------------------------------------------------------------------------------------------------------------------------------------------------------------|--------------------------------------------------------------------------------------------|-------------------------------------------------------------------------------------------------|-----------------------------------------------------------------------------------------------------------------------------------------------------------------------------------------------------------------------------------------------------------------------------------------------------------------------------------------------------------------------------------------------------------------------------------------------------------|---------------------------------|
| EPI_ISL_1534355, EPI_ISL_1534395                                                                                                                                                                                                                                                                                                                                                                                                                                                                                                                                                                                                                                                                                                                                                                                                                                                                                                                                                                                                                                                                                                                                                                                                                                                                                                                                                                                                                                                                                                                                                                                                                                                                                                                                                                                                                                                                                                                                                                                                                                                                                                                                                                                                                                                                                                                                                                                                                                                                                                                                                                                                                                                                                                                                                                                                                                                                                                                                                                                                                                                                                                                                                                                                                                                                                                                                                                       |                                                                                            |                                                                                                 |                                                                                                                                                                                                                                                                                                                                                                                                                                                           | S.H. and Jang, Y.; Seo; Seo, S. |
| EPI_ISL_479662, EPI_ISL_591070                                                                                                                                                                                                                                                                                                                                                                                                                                                                                                                                                                                                                                                                                                                                                                                                                                                                                                                                                                                                                                                                                                                                                                                                                                                                                                                                                                                                                                                                                                                                                                                                                                                                                                                                                                                                                                                                                                                                                                                                                                                                                                                                                                                                                                                                                                                                                                                                                                                                                                                                                                                                                                                                                                                                                                                                                                                                                                                                                                                                                                                                                                                                                                                                                                                                                                                                                                         | College of Veterinary Medicine, Chungnam National University                               | College of Veterinary Medicine, Chungnam National University                                    |                                                                                                                                                                                                                                                                                                                                                                                                                                                           |                                 |
| EPI_ISL_1539238 to 1540417                                                                                                                                                                                                                                                                                                                                                                                                                                                                                                                                                                                                                                                                                                                                                                                                                                                                                                                                                                                                                                                                                                                                                                                                                                                                                                                                                                                                                                                                                                                                                                                                                                                                                                                                                                                                                                                                                                                                                                                                                                                                                                                                                                                                                                                                                                                                                                                                                                                                                                                                                                                                                                                                                                                                                                                                                                                                                                                                                                                                                                                                                                                                                                                                                                                                                                                                                                             | Colorado Department of Public Health and Environment                                       | Colorado Department of Public Health and Environment                                            | Diana Ir; Emily A. Travanty; Laura Bankers; Molly C. Hetherington-Rauth; Sarah Elizabeth Totten; Shannon Ely; Shannon R. Matzinger                                                                                                                                                                                                                                                                                                                        |                                 |
| EPI_ISL_527401 to 527488                                                                                                                                                                                                                                                                                                                                                                                                                                                                                                                                                                                                                                                                                                                                                                                                                                                                                                                                                                                                                                                                                                                                                                                                                                                                                                                                                                                                                                                                                                                                                                                                                                                                                                                                                                                                                                                                                                                                                                                                                                                                                                                                                                                                                                                                                                                                                                                                                                                                                                                                                                                                                                                                                                                                                                                                                                                                                                                                                                                                                                                                                                                                                                                                                                                                                                                                                                               | Colorado State University - Ebel Lab                                                       | Colorado State University - Ebel Lab                                                            |                                                                                                                                                                                                                                                                                                                                                                                                                                                           | Greg Ebel et al.                |
| EPI_ISL_1395726 to 1395749, EPI_ISL_1397636 to 1397649, EPI_ISL_1397824 to 1397828, EPI_ISL_1397886 to 1397906, EPI_ISL_1398044 to 1398047, EPI_ISL_1398144 to 1398146, EPI_ISL_1398163 to 1398203, EPI_ISL_1465633, EPI_ISL_1465693 to 1465695, EPI_ISL_1465803 to 1465804, EPI_ISL_1482277, EPI_ISL_1482410                                                                                                                                                                                                                                                                                                                                                                                                                                                                                                                                                                                                                                                                                                                                                                                                                                                                                                                                                                                                                                                                                                                                                                                                                                                                                                                                                                                                                                                                                                                                                                                                                                                                                                                                                                                                                                                                                                                                                                                                                                                                                                                                                                                                                                                                                                                                                                                                                                                                                                                                                                                                                                                                                                                                                                                                                                                                                                                                                                                                                                                                                          |                                                                                            |                                                                                                 |                                                                                                                                                                                                                                                                                                                                                                                                                                                           |                                 |
| see above                                                                                                                                                                                                                                                                                                                                                                                                                                                                                                                                                                                                                                                                                                                                                                                                                                                                                                                                                                                                                                                                                                                                                                                                                                                                                                                                                                                                                                                                                                                                                                                                                                                                                                                                                                                                                                                                                                                                                                                                                                                                                                                                                                                                                                                                                                                                                                                                                                                                                                                                                                                                                                                                                                                                                                                                                                                                                                                                                                                                                                                                                                                                                                                                                                                                                                                                                                                              | Columbia University Irving Medical Center                                                  | Wadsworth Center, New York State Department of Health                                           | Alexis Russel; Alexis Russell; Catharine Prussing; Daryl M. Lamson; Erasmus Schneider; Erica Lasek-Nesselquist; John Kelly; Jonathan Plitnick; Kirsten St. George; Matthew Shudt; Melissa A Leisner; Navjot Singh                                                                                                                                                                                                                                         |                                 |
| EPI_ISL_1494952 to 1494953                                                                                                                                                                                                                                                                                                                                                                                                                                                                                                                                                                                                                                                                                                                                                                                                                                                                                                                                                                                                                                                                                                                                                                                                                                                                                                                                                                                                                                                                                                                                                                                                                                                                                                                                                                                                                                                                                                                                                                                                                                                                                                                                                                                                                                                                                                                                                                                                                                                                                                                                                                                                                                                                                                                                                                                                                                                                                                                                                                                                                                                                                                                                                                                                                                                                                                                                                                             | Comfandi                                                                                   | Instituto Nacional de Salud- Dirección de Investigación en Salud Pública                        | Carlos Franco-Muñoz; Carmen Osorio; Diana Malo; Diego A. Álvarez-Díaz; Diego Andrés Prada; Gerardo Santamaría; Hector Alejandro Ruiz-Moreno; Jhonnatan Reales-González; Juan Camilo Martínez; Julian Naizaque; Katherine Laiton-Donato; Lisseth Pardo; Magdalena Wiesner; Marcela Mercado-Reyes; María T. Herrera-Sepúlveda; Marta Lopez Blanco; Martha Lucia Ospina Martínez; Paola Rojas; Sergio Gomez; Sheryl Corchuelo; Ángela Alarcon Cruz           |                                 |
| EPI_ISL_1516188 to 1516196                                                                                                                                                                                                                                                                                                                                                                                                                                                                                                                                                                                                                                                                                                                                                                                                                                                                                                                                                                                                                                                                                                                                                                                                                                                                                                                                                                                                                                                                                                                                                                                                                                                                                                                                                                                                                                                                                                                                                                                                                                                                                                                                                                                                                                                                                                                                                                                                                                                                                                                                                                                                                                                                                                                                                                                                                                                                                                                                                                                                                                                                                                                                                                                                                                                                                                                                                                             | Commonwealth Healthcare Center                                                             | Centers for Disease Control and Prevention Division of Viral Diseases, Pathogen Discovery       | Alison Laufer Halpin; Ben L. Rambo-Martin; Clinton R. Paden; Dakota Howard; Darlene Wagner; Dave Wentworth; Dhvani Batra; Jasmine Padilla; Justin Lee; Katie Dillon; Krista Queen; Kristen Kripe; Kristine Lacek; Mark Burroughs; Matthew Schmerer; Mili Sheth; Peter Cook; Sam Shepard; Sarah Nobles; Shoshona Le; Suxiang Tong; Vivien Dugan; Yvette Unoarumhi                                                                                          |                                 |
| EPI_ISL_539822 to 539823                                                                                                                                                                                                                                                                                                                                                                                                                                                                                                                                                                                                                                                                                                                                                                                                                                                                                                                                                                                                                                                                                                                                                                                                                                                                                                                                                                                                                                                                                                                                                                                                                                                                                                                                                                                                                                                                                                                                                                                                                                                                                                                                                                                                                                                                                                                                                                                                                                                                                                                                                                                                                                                                                                                                                                                                                                                                                                                                                                                                                                                                                                                                                                                                                                                                                                                                                                               | Communicable Disease Branch                                                                | Hong Kong Department of Health                                                                  | Alan K.L. Tsang; Dominic N.C. Tsang; Edman T.K. Lam; Peter C.W. Yip; Rickjason C.W. Chan                                                                                                                                                                                                                                                                                                                                                                  |                                 |
| EPI_ISL_485401, EPI_ISL_510528, EPI_ISL_510531                                                                                                                                                                                                                                                                                                                                                                                                                                                                                                                                                                                                                                                                                                                                                                                                                                                                                                                                                                                                                                                                                                                                                                                                                                                                                                                                                                                                                                                                                                                                                                                                                                                                                                                                                                                                                                                                                                                                                                                                                                                                                                                                                                                                                                                                                                                                                                                                                                                                                                                                                                                                                                                                                                                                                                                                                                                                                                                                                                                                                                                                                                                                                                                                                                                                                                                                                         | Communicable Disease Laboratory, Public Health Directorate                                 | Communicable Disease Laboratory, Public Health Directorate                                      | Al Wasti; Al-Taif; Al-Wasti, H.; AlWasti, H.; Altaif, Z.; H. and AlTaif, Z.; Shehab, F.; Z. and Shehab, F.; Zaed, A.                                                                                                                                                                                                                                                                                                                                      |                                 |
| EPI_ISL_455328 to 455331, EPI_ISL_539563 to 539564, EPI_ISL_578194                                                                                                                                                                                                                                                                                                                                                                                                                                                                                                                                                                                                                                                                                                                                                                                                                                                                                                                                                                                                                                                                                                                                                                                                                                                                                                                                                                                                                                                                                                                                                                                                                                                                                                                                                                                                                                                                                                                                                                                                                                                                                                                                                                                                                                                                                                                                                                                                                                                                                                                                                                                                                                                                                                                                                                                                                                                                                                                                                                                                                                                                                                                                                                                                                                                                                                                                     | Complejo Hospitalario Universitario La Coruna                                              | Instituto de Salud Carlos III                                                                   | A. Monzón; F. Casas; I; I. Jiménez; Iglesias-Caballero; J. López; M. Camarero; M. Cuesta; M. González-Esguevillas; M. Molinero Calamita; M. Zaballos; M.A Canizares; M.I Paz; P. Jiménez; S. Juliá; S. Pozo; S. Varona                                                                                                                                                                                                                                    |                                 |
| EPI_ISL_474798 to 474831, EPI_ISL_474837 to 474840, EPI_ISL_474847 to 474849, EPI_ISL_474853, EPI_ISL_474901 to 474906, EPI_ISL_474919, EPI_ISL_474921, EPI_ISL_474933, EPI_ISL_474940 to 474941, EPI_ISL_474945 to 474947, EPI_ISL_474951 to 474956, EPI_ISL_500157 to 500159, EPI_ISL_500166, EPI_ISL_500207, EPI_ISL_500218                                                                                                                                                                                                                                                                                                                                                                                                                                                                                                                                                                                                                                                                                                                                                                                                                                                                                                                                                                                                                                                                                                                                                                                                                                                                                                                                                                                                                                                                                                                                                                                                                                                                                                                                                                                                                                                                                                                                                                                                                                                                                                                                                                                                                                                                                                                                                                                                                                                                                                                                                                                                                                                                                                                                                                                                                                                                                                                                                                                                                                                                         |                                                                                            |                                                                                                 |                                                                                                                                                                                                                                                                                                                                                                                                                                                           |                                 |
| see above                                                                                                                                                                                                                                                                                                                                                                                                                                                                                                                                                                                                                                                                                                                                                                                                                                                                                                                                                                                                                                                                                                                                                                                                                                                                                                                                                                                                                                                                                                                                                                                                                                                                                                                                                                                                                                                                                                                                                                                                                                                                                                                                                                                                                                                                                                                                                                                                                                                                                                                                                                                                                                                                                                                                                                                                                                                                                                                                                                                                                                                                                                                                                                                                                                                                                                                                                                                              | Complejo Hospitalario Universitario de Albacete                                            | SeqCOVID-SPAIN consortium/IBV(CSIC)                                                             | Caridad Sainz de Baranda Camino and SeqCOVID-SPAIN consortium; Encarnacion Simarro Córdoba; Julia Lozano Serra; Lorena Robles Fonseca; Monica Parra Grandes                                                                                                                                                                                                                                                                                               |                                 |
| EPI_ISL_1478755 to 1478756                                                                                                                                                                                                                                                                                                                                                                                                                                                                                                                                                                                                                                                                                                                                                                                                                                                                                                                                                                                                                                                                                                                                                                                                                                                                                                                                                                                                                                                                                                                                                                                                                                                                                                                                                                                                                                                                                                                                                                                                                                                                                                                                                                                                                                                                                                                                                                                                                                                                                                                                                                                                                                                                                                                                                                                                                                                                                                                                                                                                                                                                                                                                                                                                                                                                                                                                                                             | Complejo Hospitalario Universitario de Pontevedra                                          | Microbiology Department. Complexo Hospitalario Universitario de Vigo                            | Campello M; Perez S; Regueiro B; Trigo M                                                                                                                                                                                                                                                                                                                                                                                                                  |                                 |
| EPI_ISL_455333                                                                                                                                                                                                                                                                                                                                                                                                                                                                                                                                                                                                                                                                                                                                                                                                                                                                                                                                                                                                                                                                                                                                                                                                                                                                                                                                                                                                                                                                                                                                                                                                                                                                                                                                                                                                                                                                                                                                                                                                                                                                                                                                                                                                                                                                                                                                                                                                                                                                                                                                                                                                                                                                                                                                                                                                                                                                                                                                                                                                                                                                                                                                                                                                                                                                                                                                                                                         | Complejo Hospitalario Universitario de Santiago                                            | Instituto de Salud Carlos III                                                                   | A. Monzón; F. Casas; I; I. Jiménez; Iglesias-Caballero; J. Llovo; M. Camarero; M. Cuesta; M. González-Esguevillas; M. Molinero Calamita; M. Zaballos; P. Jiménez; S. Juliá; S. Pozo; S. Varona                                                                                                                                                                                                                                                            |                                 |
| EPI_ISL_537380 to 537381                                                                                                                                                                                                                                                                                                                                                                                                                                                                                                                                                                                                                                                                                                                                                                                                                                                                                                                                                                                                                                                                                                                                                                                                                                                                                                                                                                                                                                                                                                                                                                                                                                                                                                                                                                                                                                                                                                                                                                                                                                                                                                                                                                                                                                                                                                                                                                                                                                                                                                                                                                                                                                                                                                                                                                                                                                                                                                                                                                                                                                                                                                                                                                                                                                                                                                                                                                               | Complejo Hospitalario Universitario de Vigo                                                | SeqCOVID-SPAIN consortium/IBV(CSIC)                                                             | Benito Regueiro and SeqCOVID-SPAIN consortium                                                                                                                                                                                                                                                                                                                                                                                                             |                                 |
| EPI_ISL_539569 to 539572                                                                                                                                                                                                                                                                                                                                                                                                                                                                                                                                                                                                                                                                                                                                                                                                                                                                                                                                                                                                                                                                                                                                                                                                                                                                                                                                                                                                                                                                                                                                                                                                                                                                                                                                                                                                                                                                                                                                                                                                                                                                                                                                                                                                                                                                                                                                                                                                                                                                                                                                                                                                                                                                                                                                                                                                                                                                                                                                                                                                                                                                                                                                                                                                                                                                                                                                                                               | Complejo Hospitalario de Navarra                                                           | Instituto de Salud Carlos III                                                                   | A. Monzón; F. Casas; I; I. Jiménez; Iglesias-Caballero; J. López; M. Camarero; M. Cuesta; M. González-Esguevillas; M. Molinero Calamita; M. Zaballos; P. Jiménez; S. Juliá; S. Pozo; S. Varona                                                                                                                                                                                                                                                            |                                 |
| EPI_ISL_455334 to 455335, EPI_ISL_578195                                                                                                                                                                                                                                                                                                                                                                                                                                                                                                                                                                                                                                                                                                                                                                                                                                                                                                                                                                                                                                                                                                                                                                                                                                                                                                                                                                                                                                                                                                                                                                                                                                                                                                                                                                                                                                                                                                                                                                                                                                                                                                                                                                                                                                                                                                                                                                                                                                                                                                                                                                                                                                                                                                                                                                                                                                                                                                                                                                                                                                                                                                                                                                                                                                                                                                                                                               | Complejo Hospitalario de Orense                                                            | Instituto de Salud Carlos III                                                                   | A. Monzón; F. Casas; I; I. Jiménez; Iglesias-Caballero; M. Camarero; M. Cuesta; M. Garcia; M. González-Esguevillas; M. Molinero Calamita; M. Paz; M. Zaballos; P. Jiménez; S. Juliá; S. Pozo; S. Varona                                                                                                                                                                                                                                                   |                                 |
| EPI_ISL_583497                                                                                                                                                                                                                                                                                                                                                                                                                                                                                                                                                                                                                                                                                                                                                                                                                                                                                                                                                                                                                                                                                                                                                                                                                                                                                                                                                                                                                                                                                                                                                                                                                                                                                                                                                                                                                                                                                                                                                                                                                                                                                                                                                                                                                                                                                                                                                                                                                                                                                                                                                                                                                                                                                                                                                                                                                                                                                                                                                                                                                                                                                                                                                                                                                                                                                                                                                                                         | Complexo Hospitalar Ouro Verde de Campinas                                                 | Instituto Adolfo Lutz, Interdisciplinary Procedures Center, Strategic Laboratory                | Claudia Regina Gonçalves; Claudio Tavares Ramos Gomes; Karoline Rodrigues Campos                                                                                                                                                                                                                                                                                                                                                                          |                                 |
| EPI_ISL_523970                                                                                                                                                                                                                                                                                                                                                                                                                                                                                                                                                                                                                                                                                                                                                                                                                                                                                                                                                                                                                                                                                                                                                                                                                                                                                                                                                                                                                                                                                                                                                                                                                                                                                                                                                                                                                                                                                                                                                                                                                                                                                                                                                                                                                                                                                                                                                                                                                                                                                                                                                                                                                                                                                                                                                                                                                                                                                                                                                                                                                                                                                                                                                                                                                                                                                                                                                                                         | Conjunto Hospitalar do Mandaqui                                                            | Instituto Adolfo Lutz, Interdisciplinary Procedures Center, Strategic Laboratory                | Claudia Regina Gonçalves; Claudio Tavares Sacchi; Erica Valessa Ramos Gomes                                                                                                                                                                                                                                                                                                                                                                               |                                 |
| EPI_ISL_416416 to 416419, EPI_ISL_435710 to 435719, EPI_ISL_527738, EPI_ISL_527761 to 527785                                                                                                                                                                                                                                                                                                                                                                                                                                                                                                                                                                                                                                                                                                                                                                                                                                                                                                                                                                                                                                                                                                                                                                                                                                                                                                                                                                                                                                                                                                                                                                                                                                                                                                                                                                                                                                                                                                                                                                                                                                                                                                                                                                                                                                                                                                                                                                                                                                                                                                                                                                                                                                                                                                                                                                                                                                                                                                                                                                                                                                                                                                                                                                                                                                                                                                           | Connecticut State Department of Public Health                                              | Grubaugh Lab - Yale School of Public Health                                                     | Adam Moore; Akiko Iwasaki; Albert Ko; Alice Lu; Allison Nelson; Anderson Brito; Anne Wyllie; Anthony Mufombwe; Arnau Casanovas; Catherine Muenker; Chaney Kalinich; Chantal Vogels; Charlese Dela Cruz; Cole Jensen; Ellen Foxman; Isabel Ott; Jafar Razeq; Joseph Fauver; Maria Tokuyama; Marie-Louise Landry; Mary Petrone; Nagarjuna Cheemarla; Nathan Grubaugh; Patrick Wong; Peiwen Lu; Richard Martinello; Saad Omer; Shelli Farhadian; Tara Alpert |                                 |
| EPI_ISL_536222, EPI_ISL_536288                                                                                                                                                                                                                                                                                                                                                                                                                                                                                                                                                                                                                                                                                                                                                                                                                                                                                                                                                                                                                                                                                                                                                                                                                                                                                                                                                                                                                                                                                                                                                                                                                                                                                                                                                                                                                                                                                                                                                                                                                                                                                                                                                                                                                                                                                                                                                                                                                                                                                                                                                                                                                                                                                                                                                                                                                                                                                                                                                                                                                                                                                                                                                                                                                                                                                                                                                                         | Conseil Cri de la SSS de la Baie-James                                                     | Laboratoire de santé publique du Québec                                                         | Guillaume Bourque; Ioannis Ragoussis; Jesse Shapiro; Mark Lathrop and Michel Roger on behalf of the CoVSeQ research group; Sandrine Moreira                                                                                                                                                                                                                                                                                                               |                                 |
| EPI_ISL_455327, EPI_ISL_539526 to 539530                                                                                                                                                                                                                                                                                                                                                                                                                                                                                                                                                                                                                                                                                                                                                                                                                                                                                                                                                                                                                                                                                                                                                                                                                                                                                                                                                                                                                                                                                                                                                                                                                                                                                                                                                                                                                                                                                                                                                                                                                                                                                                                                                                                                                                                                                                                                                                                                                                                                                                                                                                                                                                                                                                                                                                                                                                                                                                                                                                                                                                                                                                                                                                                                                                                                                                                                                               | Consejería de Sanidad y Asuntos Sociales                                                   | Instituto de Salud Carlos III                                                                   | A. Monzón; F. Casas; G. Gutiérrez; I; I. Jiménez; Iglesias-Caballero; M. Camarero; M. Cuesta; M. González-Esguevillas; M. Molinero Calamita; M. Zaballos; P. Jiménez; S. Juliá; S. Pozo; S. Varona                                                                                                                                                                                                                                                        |                                 |
| EPI_ISL_1477675 to 1477676, EPI_ISL_1477679, EPI_ISL_1477685, EPI_ISL_1477689, EPI_ISL_1477697 to 1477698, EPI_ISL_1477704, EPI_ISL_1477713 to 1477714, EPI_ISL_1477716, EPI_ISL_1477724, EPI_ISL_1477732, EPI_ISL_1477737 to 1477739, EPI_ISL_1477743 to 1477744, EPI_ISL_1477746, EPI_ISL_1477748, EPI_ISL_1477760 to 1477761, EPI_ISL_1477764 to 1477765, EPI_ISL_1477770, EPI_ISL_1477774, EPI_ISL_1477788 to 1477789, EPI_ISL_1477794 to 1477795, EPI_ISL_1477802, EPI_ISL_1477806, EPI_ISL_1477810, EPI_ISL_1477813, EPI_ISL_1477815 to 1477816, EPI_ISL_1477821, EPI_ISL_1477826 to 1477827, EPI_ISL_1477829, EPI_ISL_1477833 to 1477835, EPI_ISL_1477843 to 1477844, EPI_ISL_1477849, EPI_ISL_1477851, EPI_ISL_1477861, EPI_ISL_1477864, EPI_ISL_1477866 to 1477867, EPI_ISL_1477869 to 1477870, EPI_ISL_1477872, EPI_ISL_1477876, EPI_ISL_1477894, EPI_ISL_1477898, EPI_ISL_1477910 to 1477911, EPI_ISL_1477916, EPI_ISL_1477918, EPI_ISL_1477927, EPI_ISL_1477930 to 1477931, EPI_ISL_1477939, EPI_ISL_1477944, EPI_ISL_1477946 to 1477947, EPI_ISL_1477950, EPI_ISL_1477952 to 1477953, EPI_ISL_1477956 to 1477957, EPI_ISL_1477960, EPI_ISL_1477962, EPI_ISL_1477966, EPI_ISL_1477972, EPI_ISL_1477977, EPI_ISL_1477980, EPI_ISL_1477990, EPI_ISL_1477993, EPI_ISL_1477995, EPI_ISL_1477998 to 1478000, EPI_ISL_1478002 to 1478003, EPI_ISL_1478005, EPI_ISL_1478057, EPI_ISL_1478069, EPI_ISL_1478072, EPI_ISL_1478078, EPI_ISL_1478086, EPI_ISL_1478088, EPI_ISL_1478090 to 1478091, 1478023, EPI_ISL_1478032, EPI_ISL_1478034 to 1478037, EPI_ISL_1478039 to 1478040, EPI_ISL_1478043, EPI_ISL_1478047, EPI_ISL_1478049, EPI_ISL_1478052 to 1478053, EPI_ISL_1478057, EPI_ISL_1478069, EPI_ISL_1478072, EPI_ISL_1478078, EPI_ISL_1478086, EPI_ISL_1478088, EPI_ISL_1478090 to 1478091, EPI_ISL_1478098 to 1478099, EPI_ISL_1478101, EPI_ISL_1478108, EPI_ISL_1478111, EPI_ISL_1478117, EPI_ISL_1478120, EPI_ISL_1478122, EPI_ISL_1478125 to 1478126, EPI_ISL_1478128, EPI_ISL_1478131, EPI_ISL_1478133, EPI_ISL_1478139, EPI_ISL_1478141, EPI_ISL_1478145, EPI_ISL_1478147, EPI_ISL_1478154 to 1478155, EPI_ISL_1478157, EPI_ISL_1478160, EPI_ISL_1478180 to 1478182, EPI_ISL_1478187 to 1478189, EPI_ISL_1478193, EPI_ISL_1478196 to 1478197, EPI_ISL_1478199, EPI_ISL_1529103, EPI_ISL_1529122 to 1529124, EPI_ISL_1529131, EPI_ISL_1529133 to 1529135, EPI_ISL_1529144, EPI_ISL_1529149, EPI_ISL_1529155, EPI_ISL_1529163 to 1529166, EPI_ISL_1529171, EPI_ISL_1529176 to 1529177, EPI_ISL_1529179, EPI_ISL_1529181, EPI_ISL_1529185 to 1529186, EPI_ISL_1529188, EPI_ISL_1529190, EPI_ISL_1529192 to 1529196, EPI_ISL_1529202, EPI_ISL_1529204, EPI_ISL_1529209 to 1529212, EPI_ISL_1529216 to 1529217, EPI_ISL_1529227 to 1529229, EPI_ISL_1529235 to 1529236, EPI_ISL_1529239, EPI_ISL_1529247, EPI_ISL_1529250 to 1529251, EPI_ISL_1529253, EPI_ISL_1529261, EPI_ISL_1529269, EPI_ISL_1529271 to 1529272, EPI_ISL_1529275, EPI_ISL_1529282, EPI_ISL_1529296 to 1529298, EPI_ISL_1529300 to 1529302, EPI_ISL_1529305, EPI_ISL_1529308, EPI_ISL_1529310, EPI_ISL_1529318, EPI_ISL_1529320, EPI_ISL_1529323 to 1529323, EPI_ISL_1529327 to 1529328, EPI_ISL_1529330 to 1529331, EPI_ISL_1529334, EPI_ISL_1529340, EPI_ISL_1529345 to 1529346, EPI_ISL_1529348, EPI_ISL_1529350, EPI_ISL_1529352 to 1529355, EPI_ISL_1529358, EPI_ISL_1529364 to 1529365, EPI_ISL_1529367 to 1529368 |                                                                                            |                                                                                                 |                                                                                                                                                                                                                                                                                                                                                                                                                                                           |                                 |
| see above                                                                                                                                                                                                                                                                                                                                                                                                                                                                                                                                                                                                                                                                                                                                                                                                                                                                                                                                                                                                                                                                                                                                                                                                                                                                                                                                                                                                                                                                                                                                                                                                                                                                                                                                                                                                                                                                                                                                                                                                                                                                                                                                                                                                                                                                                                                                                                                                                                                                                                                                                                                                                                                                                                                                                                                                                                                                                                                                                                                                                                                                                                                                                                                                                                                                                                                                                                                              | Contra Costa County Public Health Lab                                                      | Chan-Zuckerberg Biohub                                                                          |                                                                                                                                                                                                                                                                                                                                                                                                                                                           | CZB Ctlahub Consortium          |
| EPI_ISL_468615 to 468655, EPI_ISL_548491 to 548492, EPI_ISL_548495, EPI_ISL_548499, EPI_ISL_548501, EPI_ISL_548506 to 548508, EPI_ISL_548510, EPI_ISL_548515 to 548516, EPI_ISL_548520, EPI_ISL_548524, EPI_ISL_548527 to 548528, EPI_ISL_548531, EPI_ISL_548534 to 548535, EPI_ISL_548537 to 548540, EPI_ISL_548545, EPI_ISL_548548 to 548549, EPI_ISL_548552, EPI_ISL_548554, EPI_ISL_548556 to 548558, EPI_ISL_548561, EPI_ISL_548564 to 548567, EPI_ISL_548569, EPI_ISL_548572 to 548575, EPI_ISL_548577, EPI_ISL_548579                                                                                                                                                                                                                                                                                                                                                                                                                                                                                                                                                                                                                                                                                                                                                                                                                                                                                                                                                                                                                                                                                                                                                                                                                                                                                                                                                                                                                                                                                                                                                                                                                                                                                                                                                                                                                                                                                                                                                                                                                                                                                                                                                                                                                                                                                                                                                                                                                                                                                                                                                                                                                                                                                                                                                                                                                                                                           |                                                                                            |                                                                                                 |                                                                                                                                                                                                                                                                                                                                                                                                                                                           |                                 |
| see above                                                                                                                                                                                                                                                                                                                                                                                                                                                                                                                                                                                                                                                                                                                                                                                                                                                                                                                                                                                                                                                                                                                                                                                                                                                                                                                                                                                                                                                                                                                                                                                                                                                                                                                                                                                                                                                                                                                                                                                                                                                                                                                                                                                                                                                                                                                                                                                                                                                                                                                                                                                                                                                                                                                                                                                                                                                                                                                                                                                                                                                                                                                                                                                                                                                                                                                                                                                              | Contra Costa Public Health Lab                                                             | Chan-Zuckerberg Biohub                                                                          |                                                                                                                                                                                                                                                                                                                                                                                                                                                           | CZB Ctlahub Consortium          |
| EPI_ISL_1534334, EPI_ISL_1534399                                                                                                                                                                                                                                                                                                                                                                                                                                                                                                                                                                                                                                                                                                                                                                                                                                                                                                                                                                                                                                                                                                                                                                                                                                                                                                                                                                                                                                                                                                                                                                                                                                                                                                                                                                                                                                                                                                                                                                                                                                                                                                                                                                                                                                                                                                                                                                                                                                                                                                                                                                                                                                                                                                                                                                                                                                                                                                                                                                                                                                                                                                                                                                                                                                                                                                                                                                       | Convillle CDC wc CVC                                                                       | NHLS/UCT                                                                                        | Arash Iranzadeh; Bruna Galvao; Carolyn Williamson; Deelan Doolabh; Diana Hardie; Emmanuel SJ; Innocent Mudau; Kruger Marais; Lynn Tyers; Marvin Hsiao; Stephen Korsman; Tegally H; de Oliveira T                                                                                                                                                                                                                                                          |                                 |
| EPI_ISL_1469766                                                                                                                                                                                                                                                                                                                                                                                                                                                                                                                                                                                                                                                                                                                                                                                                                                                                                                                                                                                                                                                                                                                                                                                                                                                                                                                                                                                                                                                                                                                                                                                                                                                                                                                                                                                                                                                                                                                                                                                                                                                                                                                                                                                                                                                                                                                                                                                                                                                                                                                                                                                                                                                                                                                                                                                                                                                                                                                                                                                                                                                                                                                                                                                                                                                                                                                                                                                        | Coordenadoria Geral de Vigilância em Saúde - Vigilância em Saúde                           | Epiclin                                                                                         | Ana Paula Mutterle; Carolina Comerlato; Eliana Márcia Da Ros Wendland; Fernando Hayashi Sant'Anna; Janira Prichula; Juliana Comerlato                                                                                                                                                                                                                                                                                                                     |                                 |
| EPI_ISL_1439696 to 1439707                                                                                                                                                                                                                                                                                                                                                                                                                                                                                                                                                                                                                                                                                                                                                                                                                                                                                                                                                                                                                                                                                                                                                                                                                                                                                                                                                                                                                                                                                                                                                                                                                                                                                                                                                                                                                                                                                                                                                                                                                                                                                                                                                                                                                                                                                                                                                                                                                                                                                                                                                                                                                                                                                                                                                                                                                                                                                                                                                                                                                                                                                                                                                                                                                                                                                                                                                                             | Corona-Testzentrum ifp Institut für Produktqualität GmbH                                   | Robert Koch Institute                                                                           |                                                                                                                                                                                                                                                                                                                                                                                                                                                           |                                 |
| EPI_ISL_514751                                                                                                                                                                                                                                                                                                                                                                                                                                                                                                                                                                                                                                                                                                                                                                                                                                                                                                                                                                                                                                                                                                                                                                                                                                                                                                                                                                                                                                                                                                                                                                                                                                                                                                                                                                                                                                                                                                                                                                                                                                                                                                                                                                                                                                                                                                                                                                                                                                                                                                                                                                                                                                                                                                                                                                                                                                                                                                                                                                                                                                                                                                                                                                                                                                                                                                                                                                                         | CoronaNet Lab- TaskForce Regione Campania, CEINGE Biotecnologie Avanzate, Via G. Salvatore | CoronaNet Lab- TaskForce Regione Campania, CEINGE Biotecnologie Avanzate, Via G. Salvatore      | Asadzadeh, F.; Atripaldi, L.; Bianchi, M.; Boccia, A.; Borriello, G.; Brandi, S.; Castaldo, G.; Cerino, R.; Chiariotti, L.; Comegna, M.; Ferrucci, V.; Fusco, G.; H.Y.; J.H.; J.M.; Jung, K.S. and Kim; Kong, Dy.; Lee; Marrone, L.; Paoletta, G.; Pascarella, S.; Siciliano, R.; Tiberio, C.; Viscardi, M.; Yun; Zollo, M.                                                                                                                               |                                 |
| EPI_ISL_1553234                                                                                                                                                                                                                                                                                                                                                                                                                                                                                                                                                                                                                                                                                                                                                                                                                                                                                                                                                                                                                                                                                                                                                                                                                                                                                                                                                                                                                                                                                                                                                                                                                                                                                                                                                                                                                                                                                                                                                                                                                                                                                                                                                                                                                                                                                                                                                                                                                                                                                                                                                                                                                                                                                                                                                                                                                                                                                                                                                                                                                                                                                                                                                                                                                                                                                                                                                                                        | Corsing Healthcare                                                                         | Illinois Department of Public Health - Springfield Lab                                          |                                                                                                                                                                                                                                                                                                                                                                                                                                                           | Bryan Sim; Gordon McCall        |
| EPI_ISL_1418323                                                                                                                                                                                                                                                                                                                                                                                                                                                                                                                                                                                                                                                                                                                                                                                                                                                                                                                                                                                                                                                                                                                                                                                                                                                                                                                                                                                                                                                                                                                                                                                                                                                                                                                                                                                                                                                                                                                                                                                                                                                                                                                                                                                                                                                                                                                                                                                                                                                                                                                                                                                                                                                                                                                                                                                                                                                                                                                                                                                                                                                                                                                                                                                                                                                                                                                                                                                        | County Emergency Hospital Piteti                                                           | National Institute of Infectious Diseases-Prof. Dr. Matei Bals Molecular Diagnostics Laboratory | Corina Casangiu; Dan Otelea; Ionelia Nicolae; Leontina Banica; Marius Surface; Ovidiu Vlaicu; Simona Paraschiv                                                                                                                                                                                                                                                                                                                                            |                                 |
| EPI_ISL_454635                                                                                                                                                                                                                                                                                                                                                                                                                                                                                                                                                                                                                                                                                                                                                                                                                                                                                                                                                                                                                                                                                                                                                                                                                                                                                                                                                                                                                                                                                                                                                                                                                                                                                                                                                                                                                                                                                                                                                                                                                                                                                                                                                                                                                                                                                                                                                                                                                                                                                                                                                                                                                                                                                                                                                                                                                                                                                                                                                                                                                                                                                                                                                                                                                                                                                                                                                                                         | County Of San Luis Obispo Public Health Laboratory                                         | Chan-Zuckerberg Biohub                                                                          |                                                                                                                                                                                                                                                                                                                                                                                                                                                           | CZB Ctlahub Consortium          |

|                                                                                                                                                                                                                                                                                                                                                                                                                                                                                                                                                                                                                                                                                                                                                                                                                                                                                                                                                                                                                                                                                                                                                                                                                                                                                                                                                                                                                                                                                                                                                                                                                                                                                                                                                                                                                                                                                                                                                                                                                    |           |                                                                                            |                                                                                                                        |                                                                                                                                                                                                                                                                                                                                                                                                                                                                                                                                                                                     |
|--------------------------------------------------------------------------------------------------------------------------------------------------------------------------------------------------------------------------------------------------------------------------------------------------------------------------------------------------------------------------------------------------------------------------------------------------------------------------------------------------------------------------------------------------------------------------------------------------------------------------------------------------------------------------------------------------------------------------------------------------------------------------------------------------------------------------------------------------------------------------------------------------------------------------------------------------------------------------------------------------------------------------------------------------------------------------------------------------------------------------------------------------------------------------------------------------------------------------------------------------------------------------------------------------------------------------------------------------------------------------------------------------------------------------------------------------------------------------------------------------------------------------------------------------------------------------------------------------------------------------------------------------------------------------------------------------------------------------------------------------------------------------------------------------------------------------------------------------------------------------------------------------------------------------------------------------------------------------------------------------------------------|-----------|--------------------------------------------------------------------------------------------|------------------------------------------------------------------------------------------------------------------------|-------------------------------------------------------------------------------------------------------------------------------------------------------------------------------------------------------------------------------------------------------------------------------------------------------------------------------------------------------------------------------------------------------------------------------------------------------------------------------------------------------------------------------------------------------------------------------------|
| EPI_ISL_468388 to 468437, EPI_ISL_548265, EPI_ISL_548268 to 548269, EPI_ISL_548280 to 548281, EPI_ISL_548284, EPI_ISL_548286, EPI_ISL_548288, EPI_ISL_548292, EPI_ISL_548294 to 548295, EPI_ISL_548304, EPI_ISL_548311, EPI_ISL_548316, EPI_ISL_548322, EPI_ISL_548325, EPI_ISL_548329 to 548330, EPI_ISL_548335 to 548336, EPI_ISL_548347, EPI_ISL_548350 to 548351, EPI_ISL_548357, EPI_ISL_548359 to 548361, EPI_ISL_548365 to 548366, EPI_ISL_548369 to 548370, EPI_ISL_548391, EPI_ISL_548425, EPI_ISL_548428, EPI_ISL_548436, EPI_ISL_548453, EPI_ISL_548457, EPI_ISL_548493, EPI_ISL_548502, EPI_ISL_548504, EPI_ISL_548517, EPI_ISL_548519, EPI_ISL_548521, EPI_ISL_548532, EPI_ISL_548542, EPI_ISL_548544, EPI_ISL_548560, EPI_ISL_548603, EPI_ISL_548631, EPI_ISL_548644, EPI_ISL_548663, EPI_ISL_548671, EPI_ISL_1477436, EPI_ISL_1477454, EPI_ISL_1477530, EPI_ISL_1477550, EPI_ISL_1477564, EPI_ISL_1477626, EPI_ISL_1477634, EPI_ISL_1477965, EPI_ISL_1477992, EPI_ISL_1478006, EPI_ISL_1478018, EPI_ISL_1478025, EPI_ISL_1478044 to 1478045, EPI_ISL_1478061, EPI_ISL_1478070, EPI_ISL_1478074, EPI_ISL_1478080, EPI_ISL_1478118, EPI_ISL_1478136, EPI_ISL_1478174, EPI_ISL_1478179, EPI_ISL_1478195, EPI_ISL_1478198, EPI_ISL_1529127 to 1529129, EPI_ISL_1529147, EPI_ISL_1529161, EPI_ISL_1529168, EPI_ISL_1529208, EPI_ISL_1529213, EPI_ISL_1529225, EPI_ISL_1529232, EPI_ISL_1529237, EPI_ISL_1529246, EPI_ISL_1529255 to 1529256, EPI_ISL_1529268, EPI_ISL_1529270, EPI_ISL_1529279, EPI_ISL_1529285, EPI_ISL_1529292 to 1529293, EPI_ISL_1529311, EPI_ISL_1529329, EPI_ISL_1529341 to 1529343                                                                                                                                                                                                                                                                                                                                                                                                | see above | County of San Luis Obispo Public Health Laboratory                                         | Chan-Zuckerberg Biohub                                                                                                 | CZB Ciliahub Consortium                                                                                                                                                                                                                                                                                                                                                                                                                                                                                                                                                             |
| EPI_ISL_437043 to 437088, EPI_ISL_444023 to 444026                                                                                                                                                                                                                                                                                                                                                                                                                                                                                                                                                                                                                                                                                                                                                                                                                                                                                                                                                                                                                                                                                                                                                                                                                                                                                                                                                                                                                                                                                                                                                                                                                                                                                                                                                                                                                                                                                                                                                                 | see above | County of Santa Clara Public Health                                                        | Chan-Zuckerberg Biohub                                                                                                 | CZB Ciliahub Consortium                                                                                                                                                                                                                                                                                                                                                                                                                                                                                                                                                             |
| EPI_ISL_436641 to 436683, EPI_ISL_454653 to 454689, EPI_ISL_468345 to 468356, EPI_ISL_486115 to 486119, EPI_ISL_513773 to 513788, EPI_ISL_548264, EPI_ISL_548266 to 548267, EPI_ISL_548277, EPI_ISL_548279, EPI_ISL_548282, EPI_ISL_548290, EPI_ISL_548299, EPI_ISL_548302 to 548303, EPI_ISL_548307, EPI_ISL_548310, EPI_ISL_548314, EPI_ISL_548319 to 548321, EPI_ISL_548324, EPI_ISL_548327, EPI_ISL_548331, EPI_ISL_548333, EPI_ISL_548337 to 548345, EPI_ISL_548371, EPI_ISL_548379, EPI_ISL_548384 to 548385, EPI_ISL_548388, EPI_ISL_548392, EPI_ISL_548394 to 548396, EPI_ISL_548399, EPI_ISL_548401, EPI_ISL_548403, EPI_ISL_548407, EPI_ISL_548415, EPI_ISL_548417, EPI_ISL_548419 to 548423, EPI_ISL_548426, EPI_ISL_548429, EPI_ISL_548432 to 548434, EPI_ISL_548437, EPI_ISL_548446, EPI_ISL_548448, EPI_ISL_548451, EPI_ISL_548466, EPI_ISL_548468, EPI_ISL_548470, EPI_ISL_548472, EPI_ISL_548478, EPI_ISL_548482, EPI_ISL_548494, EPI_ISL_548496 to 548498, EPI_ISL_548500, EPI_ISL_548503, EPI_ISL_548509, EPI_ISL_548511 to 548512, EPI_ISL_548514, EPI_ISL_548518, EPI_ISL_548523, EPI_ISL_548525 to 548526, EPI_ISL_548529 to 548530, EPI_ISL_548533, EPI_ISL_548536, EPI_ISL_548541, EPI_ISL_548543, EPI_ISL_548546 to 548547, EPI_ISL_548550 to 548551, EPI_ISL_548553, EPI_ISL_548559, EPI_ISL_548562 to 548563, EPI_ISL_548568, EPI_ISL_548570, EPI_ISL_548576, EPI_ISL_548578, EPI_ISL_548582 to 548584, EPI_ISL_548588, EPI_ISL_548595 to 548598, EPI_ISL_548600, EPI_ISL_548602, EPI_ISL_548604 to 548607, EPI_ISL_548610, EPI_ISL_548612, EPI_ISL_548616 to 548619, EPI_ISL_548621 to 548622, EPI_ISL_548624, EPI_ISL_548629 to 548630, EPI_ISL_548632 to 548633, EPI_ISL_548636, EPI_ISL_548639, EPI_ISL_548642 to 548643, EPI_ISL_548645, EPI_ISL_548647, EPI_ISL_548649 to 548650, EPI_ISL_548652, EPI_ISL_548655 to 548659, EPI_ISL_548661, EPI_ISL_548664, EPI_ISL_548669 to 548670, EPI_ISL_548672 to 548673, EPI_ISL_548676, EPI_ISL_548678 to 548679, EPI_ISL_582581 to 582958 | see above | County of Santa Clara Public Health Department                                             | Chan-Zuckerberg Biohub                                                                                                 | CZB Ciliahub Consortium                                                                                                                                                                                                                                                                                                                                                                                                                                                                                                                                                             |
| EPI_ISL_1534338, EPI_ISL_1534419                                                                                                                                                                                                                                                                                                                                                                                                                                                                                                                                                                                                                                                                                                                                                                                                                                                                                                                                                                                                                                                                                                                                                                                                                                                                                                                                                                                                                                                                                                                                                                                                                                                                                                                                                                                                                                                                                                                                                                                   | see above | Craggs Clinic wc CRG                                                                       | NHLS/UCT                                                                                                               | Arash Iranzadeh; Bruna Galvao; Carolyn Williamson; Deelan Doolabh; Diana Hardie; Emmanuel SJ; Innocent Mudau; Kruger Marais; Lynn Tyers; Marvin Hsiao; Stephen Korsman; Tegally H; de Oliveira T                                                                                                                                                                                                                                                                                                                                                                                    |
| EPI_ISL_1435898, EPI_ISL_1435904, EPI_ISL_1435906, EPI_ISL_1435911, EPI_ISL_1435915, EPI_ISL_1435926, EPI_ISL_1435928, EPI_ISL_1435931, EPI_ISL_1435935, EPI_ISL_1435973, EPI_ISL_1435975, EPI_ISL_1435977, EPI_ISL_1435979, EPI_ISL_1435981, EPI_ISL_1435983, EPI_ISL_1435985, EPI_ISL_1435987, EPI_ISL_1435989, EPI_ISL_1435991 to 1435992, EPI_ISL_1436009, EPI_ISL_1436011, EPI_ISL_1436015, EPI_ISL_1436017, EPI_ISL_1436020, EPI_ISL_1436035, EPI_ISL_1436037, EPI_ISL_1436050, EPI_ISL_1436052, EPI_ISL_1436054, EPI_ISL_1436056, EPI_ISL_1436058, EPI_ISL_1443513 to 1443538, EPI_ISL_1499669 to 1499671                                                                                                                                                                                                                                                                                                                                                                                                                                                                                                                                                                                                                                                                                                                                                                                                                                                                                                                                                                                                                                                                                                                                                                                                                                                                                                                                                                                                   | see above | Croatian Institute of Public Health                                                        | Croatian Institute of Public Health                                                                                    | Irena Tabain; Ivana Ferenak                                                                                                                                                                                                                                                                                                                                                                                                                                                                                                                                                         |
| EPI_ISL_454602                                                                                                                                                                                                                                                                                                                                                                                                                                                                                                                                                                                                                                                                                                                                                                                                                                                                                                                                                                                                                                                                                                                                                                                                                                                                                                                                                                                                                                                                                                                                                                                                                                                                                                                                                                                                                                                                                                                                                                                                     | see above | Croatian Institute of Public Health                                                        | University of Zagreb, Centre for research and knowledge transfer in biotechnology                                      | Anamarija Slovic; Irena Tabain; Jelena Ivancic Jelecki; Tatjana Vilibic-Cavlek                                                                                                                                                                                                                                                                                                                                                                                                                                                                                                      |
| EPI_ISL_1436048                                                                                                                                                                                                                                                                                                                                                                                                                                                                                                                                                                                                                                                                                                                                                                                                                                                                                                                                                                                                                                                                                                                                                                                                                                                                                                                                                                                                                                                                                                                                                                                                                                                                                                                                                                                                                                                                                                                                                                                                    | see above | Croatian Institute of Public Health                                                        | Croatian Institute of Public Health                                                                                    | Irena Tabain; Ivana Ferenak                                                                                                                                                                                                                                                                                                                                                                                                                                                                                                                                                         |
| EPI_ISL_1443274, EPI_ISL_1443289, EPI_ISL_1478857, EPI_ISL_1478910 to 1478911, EPI_ISL_1478913 to 1478918, EPI_ISL_1500204 to 1500205, EPI_ISL_1500232 to 1500234, EPI_ISL_1553184                                                                                                                                                                                                                                                                                                                                                                                                                                                                                                                                                                                                                                                                                                                                                                                                                                                                                                                                                                                                                                                                                                                                                                                                                                                                                                                                                                                                                                                                                                                                                                                                                                                                                                                                                                                                                                 | see above | Crossing Healthcare                                                                        | Illinois Department of Public Health - Springfield Lab                                                                 | Bryan Sim; Gordon McCall                                                                                                                                                                                                                                                                                                                                                                                                                                                                                                                                                            |
| EPI_ISL_1522293, EPI_ISL_1522295, EPI_ISL_1522297, EPI_ISL_1522299, EPI_ISL_1522302, EPI_ISL_1522304, EPI_ISL_1522306, EPI_ISL_1522309, EPI_ISL_1522311, EPI_ISL_1522313, EPI_ISL_1522316, EPI_ISL_1522318, EPI_ISL_1522321, EPI_ISL_1522324, EPI_ISL_1522326, EPI_ISL_1522328, EPI_ISL_1522331, EPI_ISL_1522333, EPI_ISL_1522336, EPI_ISL_1522339, EPI_ISL_1522341, EPI_ISL_1522343, EPI_ISL_1522346, EPI_ISL_1522349, EPI_ISL_1522351, EPI_ISL_1522354, EPI_ISL_1522357, EPI_ISL_1522359, EPI_ISL_1522361, EPI_ISL_1522363, EPI_ISL_1522365, EPI_ISL_1522367 to 1522381                                                                                                                                                                                                                                                                                                                                                                                                                                                                                                                                                                                                                                                                                                                                                                                                                                                                                                                                                                                                                                                                                                                                                                                                                                                                                                                                                                                                                                          | see above | Curative                                                                                   | New Mexico Department of Health Scientific Laboratory                                                                  | Anastacia Griego-Fisher; D'edra Malone; Ellie Johnson; Jennifer Benoit; Linda Salazar; Ratheesh Rajan                                                                                                                                                                                                                                                                                                                                                                                                                                                                               |
| EPI_ISL_1503991                                                                                                                                                                                                                                                                                                                                                                                                                                                                                                                                                                                                                                                                                                                                                                                                                                                                                                                                                                                                                                                                                                                                                                                                                                                                                                                                                                                                                                                                                                                                                                                                                                                                                                                                                                                                                                                                                                                                                                                                    | see above | Curative Labs                                                                              | Los Angeles County PHL                                                                                                 | P. Hemarajata et al.                                                                                                                                                                                                                                                                                                                                                                                                                                                                                                                                                                |
| EPI_ISL_1392907 to 1392915, EPI_ISL_1396554 to 1396555, EPI_ISL_1447084, EPI_ISL_1461634 to 1461637, EPI_ISL_1494554 to 1494556, EPI_ISL_1510636 to 1510640, EPI_ISL_1510647                                                                                                                                                                                                                                                                                                                                                                                                                                                                                                                                                                                                                                                                                                                                                                                                                                                                                                                                                                                                                                                                                                                                                                                                                                                                                                                                                                                                                                                                                                                                                                                                                                                                                                                                                                                                                                       | see above | Cytocheck Laboratory                                                                       | Kansas Health and Environmental Lab                                                                                    | Ben Olsen; Jonathan Barnell; Mike Grose; and Phil Adam                                                                                                                                                                                                                                                                                                                                                                                                                                                                                                                              |
| EPI_ISL_1534270, EPI_ISL_1534284 to 1534285, EPI_ISL_1534297, EPI_ISL_1534436, EPI_ISL_1534439 to 1534440, EPI_ISL_1534460                                                                                                                                                                                                                                                                                                                                                                                                                                                                                                                                                                                                                                                                                                                                                                                                                                                                                                                                                                                                                                                                                                                                                                                                                                                                                                                                                                                                                                                                                                                                                                                                                                                                                                                                                                                                                                                                                         | see above | D'Almeida Clinic wc DAL                                                                    | NHLS/UCT                                                                                                               | Arash Iranzadeh; Bruna Galvao; Carolyn Williamson; Deelan Doolabh; Diana Hardie; Emmanuel SJ; Innocent Mudau; Kruger Marais; Lynn Tyers; Marvin Hsiao; Stephen Korsman; Tegally H; de Oliveira T                                                                                                                                                                                                                                                                                                                                                                                    |
| EPI_ISL_476171 to 476202, EPI_ISL_476209 to 476216, EPI_ISL_476218 to 476219, EPI_ISL_476224 to 476229, EPI_ISL_476232, EPI_ISL_476278 to 476336, EPI_ISL_476350 to 476371                                                                                                                                                                                                                                                                                                                                                                                                                                                                                                                                                                                                                                                                                                                                                                                                                                                                                                                                                                                                                                                                                                                                                                                                                                                                                                                                                                                                                                                                                                                                                                                                                                                                                                                                                                                                                                         | see above | DB Diagnósticos do Brasil                                                                  | Instituto de Medicina Tropical da Universidade de São Paulo                                                            | Camila Alves Maia da Silva; Darlan da Silva Candido; Erika Regina Manuli; Ester Sabino; Flavia Cristina da Silva Sales; Giulia Magalhaes Ferreira; Jaqueline Goes de Jesus; Julien Theze; Mariana Severo Ramundo; Nuno Faria; Samples; Nelson Gaburo Jr; Sequencing; Ingra Moraes Claro; Thais de Moura Coletti                                                                                                                                                                                                                                                                     |
| EPI_ISL_594460                                                                                                                                                                                                                                                                                                                                                                                                                                                                                                                                                                                                                                                                                                                                                                                                                                                                                                                                                                                                                                                                                                                                                                                                                                                                                                                                                                                                                                                                                                                                                                                                                                                                                                                                                                                                                                                                                                                                                                                                     | see above | DC Department of Forensic Sciences                                                         | Pathogen Discovery, Respiratory Viruses Branch, Division of Viral Diseases, Centers for Disease Control and Prevention | Anna Uehara; Clinton Paden; Haibin Wang; Jing Zhang; Julu Bhatnagar; Krista Queen; Suxiang Tong; Yan Li; Ying Tao                                                                                                                                                                                                                                                                                                                                                                                                                                                                   |
| EPI_ISL_436040 to 436043                                                                                                                                                                                                                                                                                                                                                                                                                                                                                                                                                                                                                                                                                                                                                                                                                                                                                                                                                                                                                                                                                                                                                                                                                                                                                                                                                                                                                                                                                                                                                                                                                                                                                                                                                                                                                                                                                                                                                                                           | see above | DC Public Health Lab Dept of Forensic Science                                              | Pathogen Discovery, Respiratory Viruses Branch, Division of Viral Diseases, Centers for Disease Control and Prevention | Anna Uehara; Bettina Bankamp; Clinton R. Paden; Haibin Wang; Jing Zhang; Krista Queen; Suxiang Tong; Yan Li; Ying Tao; Zachary Weiner                                                                                                                                                                                                                                                                                                                                                                                                                                               |
| EPI_ISL_1446970 to 1446973, EPI_ISL_1447048, EPI_ISL_1528442 to 1528443                                                                                                                                                                                                                                                                                                                                                                                                                                                                                                                                                                                                                                                                                                                                                                                                                                                                                                                                                                                                                                                                                                                                                                                                                                                                                                                                                                                                                                                                                                                                                                                                                                                                                                                                                                                                                                                                                                                                            | see above | DC Public Health Lab/ Dept. of Forensic Sciences                                           | Centers for Disease Control and Prevention Division of Viral Diseases, Pathogen Discovery                              | Alison Laufer Halpin; Ben L. Rambo-Martin; Clinton R. Paden; Dakota Howard; Darlene Wagner; Dave Wentworth; Dhvani Batra; Jasmine Padilla; Justin Lee; Katie Dillon; Krista Queen; Kristen Knipe; Kristine Lacey; Mark Burroughs; Matthew Schmerer; Mili Sheth; Peter Cook; Sam Shepard; Sarah Nobles; Shoshona Le; Suxiang Tong; Vivien Dugan; Yvette Unoarumhi                                                                                                                                                                                                                    |
| EPI_ISL_1391372 to 1391392, EPI_ISL_1396407, EPI_ISL_1403613 to 1403614, EPI_ISL_1404576 to 1404587, EPI_ISL_1411004 to 1411007, EPI_ISL_1482632 to 1482646, EPI_ISL_1491523 to 1491524, EPI_ISL_1502075 to 1502086, EPI_ISL_1515798 to 1515799, EPI_ISL_1516749 to 1516752, EPI_ISL_1551362, EPI_ISL_1551364 to 1551365, EPI_ISL_1551367 to 1551368, EPI_ISL_1551370, EPI_ISL_1551372 to 1551373                                                                                                                                                                                                                                                                                                                                                                                                                                                                                                                                                                                                                                                                                                                                                                                                                                                                                                                                                                                                                                                                                                                                                                                                                                                                                                                                                                                                                                                                                                                                                                                                                  | see above | DC Public Health Lab/ Dept. of Forensic Sciences                                           | DC Public Health Lab/ Dept. of Forensic Sciences                                                                       | Brittany Hamilton; Connie Maza; David Payne; Elizabeth Zelaya; Janis Doss; Jocelyn Hauser; Monica Mann; Sarah Scott; Scott Nguyen                                                                                                                                                                                                                                                                                                                                                                                                                                                   |
| EPI_ISL_424852, EPI_ISL_447840, EPI_ISL_576178                                                                                                                                                                                                                                                                                                                                                                                                                                                                                                                                                                                                                                                                                                                                                                                                                                                                                                                                                                                                                                                                                                                                                                                                                                                                                                                                                                                                                                                                                                                                                                                                                                                                                                                                                                                                                                                                                                                                                                     | see above | DC Public Health Lab/ Dept. of Forensic Sciences                                           | Pathogen Discovery, Respiratory Viruses Branch, Division of Viral Diseases, Centers for Disease Control and Prevention | Alison S. Laufer Halpin; Anna Uehara; Brian Lynch; Christopher A. Elkins; Clinton R. Paden; Haibin Wang; Jasmine Padilla; Jing Zhang; Justin Lee; Krista Queen; Mary S. Keckler; Peter Cook; Rachel Marine; Suxiang Tong; Yan Li; Ying Tao                                                                                                                                                                                                                                                                                                                                          |
| EPI_ISL_1446607 to 1446619, EPI_ISL_1528303 to 1528307                                                                                                                                                                                                                                                                                                                                                                                                                                                                                                                                                                                                                                                                                                                                                                                                                                                                                                                                                                                                                                                                                                                                                                                                                                                                                                                                                                                                                                                                                                                                                                                                                                                                                                                                                                                                                                                                                                                                                             | see above | DE Public Health Laboratory                                                                | Centers for Disease Control and Prevention Division of Viral Diseases, Pathogen Discovery                              | Alison Laufer Halpin; Ben L. Rambo-Martin; Clinton R. Paden; Dakota Howard; Darlene Wagner; Dave Wentworth; Dhvani Batra; Jasmine Padilla; Justin Lee; Katie Dillon; Krista Queen; Kristen Knipe; Kristine Lacey; Mark Burroughs; Matthew Schmerer; Mili Sheth; Peter Cook; Sam Shepard; Sarah Nobles; Shoshona Le; Suxiang Tong; Vivien Dugan; Yvette Unoarumhi                                                                                                                                                                                                                    |
| EPI_ISL_1445175                                                                                                                                                                                                                                                                                                                                                                                                                                                                                                                                                                                                                                                                                                                                                                                                                                                                                                                                                                                                                                                                                                                                                                                                                                                                                                                                                                                                                                                                                                                                                                                                                                                                                                                                                                                                                                                                                                                                                                                                    | see above | DEPARTAMENTO DE SAUDE COLETIVA                                                             | Instituto Butantan / Mendelics                                                                                         | Antonio Jorge Martins; Bibiana Santos; Claudia Renata dos Santos Barros; David Schlesinger; Debora Botequiu Moretti; Dimas Tadeu Covas; Elaine Cristina Marqueeze; Elaine Vieira dos Santos; Erika Freitas; Evandra Strazza Rodrigues; Flavia Aburjalje; José Salvatore Leister Patané; João Paulo Kitajima; Luiz Carlos Junior de Alcantara; Maria Carolina Elias; Marta Giovanetti; Rafael dos Santos Bezerra; Raul Machado Neto; Ricardo Haddad; Rodrigo Tocantins Calado.; Sandra Coccuzzo Sampaio; Simone Kashima; Svetoslav Nanev Stavov; Vagner Fonseca; Vincent Louis Viala |
| EPI_ISL_486384, EPI_ISL_486387 to 486389, EPI_ISL_486401 to 486403, EPI_ISL_486405 to 486409, EPI_ISL_515932, EPI_ISL_515934 to 515936, EPI_ISL_515945 to 515949, EPI_ISL_515954 to 515955, EPI_ISL_515957 to 515959, EPI_ISL_515961 to 515962, EPI_ISL_515965, EPI_ISL_583914                                                                                                                                                                                                                                                                                                                                                                                                                                                                                                                                                                                                                                                                                                                                                                                                                                                                                                                                                                                                                                                                                                                                                                                                                                                                                                                                                                                                                                                                                                                                                                                                                                                                                                                                     | see above | DH                                                                                         | Department of Neurovirology, National Institute of Mental Health and Neuroscience (NIMHANS)                            | Anita Desai; Chitra Pattabiraman; Harsha PK; Manjunatha Venkataswamy; Pramada Prasad; Ravi Vasanthapuram; Risha Rasheed; Shafeeq S Hameed; Vijayalakshmi Reddy                                                                                                                                                                                                                                                                                                                                                                                                                      |
| EPI_ISL_1391403                                                                                                                                                                                                                                                                                                                                                                                                                                                                                                                                                                                                                                                                                                                                                                                                                                                                                                                                                                                                                                                                                                                                                                                                                                                                                                                                                                                                                                                                                                                                                                                                                                                                                                                                                                                                                                                                                                                                                                                                    | see above | DIP. PREV. AVEZZANO SERVIZIO DI IGIENE EPIDEMIOLOGIA E SANITA' PUBBLICA                    | Istituto Zooprofilattico Sperimentale dell'Abruzzo e Molise "G. Caporale"                                              | Ancora M; Calistri P; Cammà C; Caporale M; Curini V; Di Domenico M; Di Lollo Valeria; Di Pasquale A; Lorusso A; Mangone I; Marccoli M; Puglia I; Rinaldi A; Savini G; Scialabba S                                                                                                                                                                                                                                                                                                                                                                                                   |
| EPI_ISL_1391238, EPI_ISL_1391241 to 1391247, EPI_ISL_1392667 to 1392669, EPI_ISL_1392672 to 1392673, EPI_ISL_1392675 to 1392679, EPI_ISL_1392711 to 1392712, EPI_ISL_1403512 to 1403513, EPI_ISL_1403541, EPI_ISL_1403544, EPI_ISL_1403546, EPI_ISL_1403584, EPI_ISL_1403601, EPI_ISL_1502475 to 1502479, EPI_ISL_1502481, EPI_ISL_1502512, EPI_ISL_1502514 to 1502516, EPI_ISL_1502519 to 1502521                                                                                                                                                                                                                                                                                                                                                                                                                                                                                                                                                                                                                                                                                                                                                                                                                                                                                                                                                                                                                                                                                                                                                                                                                                                                                                                                                                                                                                                                                                                                                                                                                 | see above | DIP. PREV. AVEZZANO SERVIZIO DI IGIENE EPIDEMIOLOGIA E SANITA' PUBBLICA AVEZZANO(L'AQUILA) | Istituto Zooprofilattico Sperimentale dell'Abruzzo e Molise "G. Caporale"                                              | Ancora M; Calistri P; Cammà C; Caporale M; Curini V; Delli Compagni E; Di Domenico M; Di Lollo Valeria; Di Pasquale A; Lorusso A; Mangone I; Marccoli M; Puglia I; Rinaldi A; Savini G; Scialabba S                                                                                                                                                                                                                                                                                                                                                                                 |
| EPI_ISL_1469558, EPI_ISL_1469566, EPI_ISL_1469579, EPI_ISL_1469590, EPI_ISL_1469594, EPI_ISL_1469611, EPI_ISL_1469633, EPI_ISL_1469637 to 1469638, EPI_ISL_1469652, EPI_ISL_1469659, EPI_ISL_1469663, EPI_ISL_1469674 to 1469675, EPI_ISL_1469677, EPI_ISL_1469679, EPI_ISL_1469681,                                                                                                                                                                                                                                                                                                                                                                                                                                                                                                                                                                                                                                                                                                                                                                                                                                                                                                                                                                                                                                                                                                                                                                                                                                                                                                                                                                                                                                                                                                                                                                                                                                                                                                                               | see above | DIP. PREV. AVEZZANO SERVIZIO DI IGIENE EPIDEMIOLOGIA E SANITA' PUBBLICA AVEZZANO(L'AQUILA) | Istituto Zooprofilattico Sperimentale dell'Abruzzo e Molise "G. Caporale"                                              | Ancora M; Calistri P; Cammà C; Caporale M; Curini V; Delli Compagni E; Di Domenico M; Di Lollo Valeria; Di Pasquale A; Lorusso A; Mangone I; Marccoli M; Puglia I; Rinaldi A; Savini G; Scialabba S                                                                                                                                                                                                                                                                                                                                                                                 |

|                                                                                                                                                                                                                                                                                                                                                                                                                                                                                                                                                                                                                                                                                                                                                                                                                                                                                                                                                                                                                                                                                                                                                                                                                                                                                       |           |                                                                                                           |                                                                                                                                                                                                 |                                                                                                                                                                                                                                                                    |
|---------------------------------------------------------------------------------------------------------------------------------------------------------------------------------------------------------------------------------------------------------------------------------------------------------------------------------------------------------------------------------------------------------------------------------------------------------------------------------------------------------------------------------------------------------------------------------------------------------------------------------------------------------------------------------------------------------------------------------------------------------------------------------------------------------------------------------------------------------------------------------------------------------------------------------------------------------------------------------------------------------------------------------------------------------------------------------------------------------------------------------------------------------------------------------------------------------------------------------------------------------------------------------------|-----------|-----------------------------------------------------------------------------------------------------------|-------------------------------------------------------------------------------------------------------------------------------------------------------------------------------------------------|--------------------------------------------------------------------------------------------------------------------------------------------------------------------------------------------------------------------------------------------------------------------|
| EPI_ISL_1469684, EPI_ISL_1469686, EPI_ISL_1469688, EPI_ISL_1469692, EPI_ISL_1469710, EPI_ISL_1469725, EPI_ISL_1469731, EPI_ISL_1469743, EPI_ISL_1469760, EPI_ISL_1469764, EPI_ISL_1469772, EPI_ISL_1469781, EPI_ISL_1469784, EPI_ISL_1469791, EPI_ISL_1469798, EPI_ISL_1479119, EPI_ISL_1479121                                                                                                                                                                                                                                                                                                                                                                                                                                                                                                                                                                                                                                                                                                                                                                                                                                                                                                                                                                                       | see above | DIRETORIA DE VIGILANCIA EM SAUDE                                                                          | Epiclin                                                                                                                                                                                         | Ana Paula Muterle; Carolina Comerlato; Eliana Márcia Da Ros Wendland; Fernando Hayashi Sant'Anna; Janira Prichula; Juliana Comerlato                                                                                                                               |
| EPI_ISL_1394006 to 1394009, EPI_ISL_1538518, EPI_ISL_1538536, EPI_ISL_1538554, EPI_ISL_1538735 to 1538736, EPI_ISL_1539018, EPI_ISL_1539182, EPI_ISL_1539217                                                                                                                                                                                                                                                                                                                                                                                                                                                                                                                                                                                                                                                                                                                                                                                                                                                                                                                                                                                                                                                                                                                          | see above | DL OBM WSSE w Lublinie                                                                                    | 1. National Institute of Public Health - National Institute of Hygiene; 2. Eurofins Genomics Europe Sequencing GmbH                                                                             | ECDC COVID-19 WGS support team; Eurofins Genomics Europe Sequencing Team; Gierczyki Rafa; Sadkowska-Todys Magorzata; Wokowicz Tomasz; Zacharczuk Katarzyna                                                                                                         |
| EPI_ISL_445213                                                                                                                                                                                                                                                                                                                                                                                                                                                                                                                                                                                                                                                                                                                                                                                                                                                                                                                                                                                                                                                                                                                                                                                                                                                                        |           | DNA Solution Ltd                                                                                          | DNA Solution Ltd                                                                                                                                                                                | Abdul Khaleque; Abu Sufian; Hasan Ul Haider; Kazi Nadim Hasan; MSM Chowdhury; Mala Khan; Mamudul Hasan Razu; Md. Imran Khan; Mizanur Rahman; Mohammad Fazle Alam Rabbi; Mohammed Nafiz Imtiaz Polol                                                                |
| EPI_ISL_445214 to 445217                                                                                                                                                                                                                                                                                                                                                                                                                                                                                                                                                                                                                                                                                                                                                                                                                                                                                                                                                                                                                                                                                                                                                                                                                                                              |           | DNA Solution Ltd.                                                                                         | DNA Solution Ltd.                                                                                                                                                                               | Abdul Khaleque; Abu Sufian; Hasan Ul Haider; Kazi Nadim Hasan; MSM Chowdhury; Mala Khan; Mamudul Hasan Razu; Md. Imran Khan; Mizanur Rahman; Mohammad Fazle Alam Rabbi; Mohammed Nafiz Imtiaz Polol                                                                |
| EPI_ISL_1435783, EPI_ISL_1435785, EPI_ISL_1435787, EPI_ISL_1435789, EPI_ISL_1435791 to 1435792, EPI_ISL_1435794, EPI_ISL_1435796, EPI_ISL_1435798, EPI_ISL_1435800                                                                                                                                                                                                                                                                                                                                                                                                                                                                                                                                                                                                                                                                                                                                                                                                                                                                                                                                                                                                                                                                                                                    | see above | DNALAB Sdn. Bhd.                                                                                          | Malaysia Genome Institute                                                                                                                                                                       | Azrin Ahmad; Enizza Kasim; Irni Suhayu Sapian; Mohd Faizal Abu Bakar; Mohd Noor Mat Isa; Nor Azfa Johari.; Nurhezreen Md Iqbal; Shamsidar Sophie; Siti Noraini Othman; Wong Yong Wee; Yusuf Muhammad Noor                                                          |
| EPI_ISL_1447101, EPI_ISL_1447109, EPI_ISL_1447116, EPI_ISL_1447129 to 1447130, EPI_ISL_1447134, EPI_ISL_1447167 to 1447168, EPI_ISL_1447186                                                                                                                                                                                                                                                                                                                                                                                                                                                                                                                                                                                                                                                                                                                                                                                                                                                                                                                                                                                                                                                                                                                                           | see above | DOHMH Central Harlem                                                                                      | New York City Public Health Laboratory                                                                                                                                                          | Jade Wang; et al.                                                                                                                                                                                                                                                  |
| EPI_ISL_1447093, EPI_ISL_1447096, EPI_ISL_1447118, EPI_ISL_1447123, EPI_ISL_1447133, EPI_ISL_1447156 to 1447157, EPI_ISL_1447169, EPI_ISL_1447193                                                                                                                                                                                                                                                                                                                                                                                                                                                                                                                                                                                                                                                                                                                                                                                                                                                                                                                                                                                                                                                                                                                                     | see above | DOHMH Chelsea                                                                                             | New York City Public Health Laboratory                                                                                                                                                          | Jade Wang; et al.                                                                                                                                                                                                                                                  |
| EPI_ISL_1447088, EPI_ISL_1447095, EPI_ISL_1447126, EPI_ISL_1447136 to 1447137, EPI_ISL_1447139 to 1447142, EPI_ISL_1447144, EPI_ISL_1447147, EPI_ISL_1447155, EPI_ISL_1447160, EPI_ISL_1447165, EPI_ISL_1447171 to 1447172, EPI_ISL_1447185                                                                                                                                                                                                                                                                                                                                                                                                                                                                                                                                                                                                                                                                                                                                                                                                                                                                                                                                                                                                                                           | see above | DOHMH Corona                                                                                              | New York City Public Health Laboratory                                                                                                                                                          | Jade Wang; et al.                                                                                                                                                                                                                                                  |
| EPI_ISL_1447089, EPI_ISL_1447113, EPI_ISL_1447128, EPI_ISL_1447148, EPI_ISL_1447161 to 1447162, EPI_ISL_1447166, EPI_ISL_1447170, EPI_ISL_1447191                                                                                                                                                                                                                                                                                                                                                                                                                                                                                                                                                                                                                                                                                                                                                                                                                                                                                                                                                                                                                                                                                                                                     | see above | DOHMH Crown Heights                                                                                       | New York City Public Health Laboratory                                                                                                                                                          | Jade Wang; et al.                                                                                                                                                                                                                                                  |
| EPI_ISL_1447098, EPI_ISL_1447112, EPI_ISL_1447115, EPI_ISL_1447127, EPI_ISL_1447135, EPI_ISL_1447176, EPI_ISL_1447187                                                                                                                                                                                                                                                                                                                                                                                                                                                                                                                                                                                                                                                                                                                                                                                                                                                                                                                                                                                                                                                                                                                                                                 | see above | DOHMH Fort Greene                                                                                         | New York City Public Health Laboratory                                                                                                                                                          | Jade Wang; et al.                                                                                                                                                                                                                                                  |
| EPI_ISL_1447092, EPI_ISL_1447094, EPI_ISL_1447103, EPI_ISL_1447106, EPI_ISL_1447117, EPI_ISL_1447120 to 1447122, EPI_ISL_1447124 to 1447125, EPI_ISL_1447131 to 1447132, EPI_ISL_1447146, EPI_ISL_1447151 to 1447153, EPI_ISL_1447158 to 1447159, EPI_ISL_1447163 to 1447164, EPI_ISL_1447175, EPI_ISL_1447179 to 1447180, EPI_ISL_1447188 to 1447190, EPI_ISL_1447192                                                                                                                                                                                                                                                                                                                                                                                                                                                                                                                                                                                                                                                                                                                                                                                                                                                                                                                | see above | DOHMH Jamaica                                                                                             | New York City Public Health Laboratory                                                                                                                                                          | Jade Wang; et al.                                                                                                                                                                                                                                                  |
| EPI_ISL_1447087, EPI_ISL_1447090, EPI_ISL_1447097, EPI_ISL_1447108, EPI_ISL_1447110, EPI_ISL_1447181                                                                                                                                                                                                                                                                                                                                                                                                                                                                                                                                                                                                                                                                                                                                                                                                                                                                                                                                                                                                                                                                                                                                                                                  |           | DOHMH Morrisania                                                                                          | New York City Public Health Laboratory                                                                                                                                                          | Jade Wang; et al.                                                                                                                                                                                                                                                  |
| EPI_ISL_1447099, EPI_ISL_1447107, EPI_ISL_1447145, EPI_ISL_1447149 to 1447150, EPI_ISL_1447184                                                                                                                                                                                                                                                                                                                                                                                                                                                                                                                                                                                                                                                                                                                                                                                                                                                                                                                                                                                                                                                                                                                                                                                        |           | DOHMH PHL                                                                                                 | New York City Public Health Laboratory                                                                                                                                                          | Jade Wang; et al.                                                                                                                                                                                                                                                  |
| EPI_ISL_1447105, EPI_ISL_1447154, EPI_ISL_1447173                                                                                                                                                                                                                                                                                                                                                                                                                                                                                                                                                                                                                                                                                                                                                                                                                                                                                                                                                                                                                                                                                                                                                                                                                                     |           | DOHMH Riverside                                                                                           | New York City Public Health Laboratory                                                                                                                                                          | Jade Wang; et al.                                                                                                                                                                                                                                                  |
| EPI_ISL_1534421                                                                                                                                                                                                                                                                                                                                                                                                                                                                                                                                                                                                                                                                                                                                                                                                                                                                                                                                                                                                                                                                                                                                                                                                                                                                       |           | DP Marais Hospital wc DPM                                                                                 | NHLS/UCT                                                                                                                                                                                        | Arash Iranzadeh; Bruna Galvao; Carolyn Williamson; Deelan Doolabh; Diana Hardie; Emmanuel SJ; Innocent Mudau; Kruger Marais; Lynn Tyers; Marvin Hsiao; Stephen Korsman; Tegally H; de Oliveira T                                                                   |
| EPI_ISL_1511139 to 1511197                                                                                                                                                                                                                                                                                                                                                                                                                                                                                                                                                                                                                                                                                                                                                                                                                                                                                                                                                                                                                                                                                                                                                                                                                                                            |           | DPHL                                                                                                      | Delaware Public Health Lab                                                                                                                                                                      | Rebecca Savage                                                                                                                                                                                                                                                     |
| EPI_ISL_1433803, EPI_ISL_1433806, EPI_ISL_1433808, EPI_ISL_1433810, EPI_ISL_1433880, EPI_ISL_1433882, EPI_ISL_1433884, EPI_ISL_1433886, EPI_ISL_1433909, EPI_ISL_1433939, EPI_ISL_1433941, EPI_ISL_1433943, EPI_ISL_1433945, EPI_ISL_1433947, EPI_ISL_1433949, EPI_ISL_1433951, EPI_ISL_1433953, EPI_ISL_1433955, EPI_ISL_1433957, EPI_ISL_1433981, EPI_ISL_1434008, EPI_ISL_1434010, EPI_ISL_1434012, EPI_ISL_1434039, EPI_ISL_1434041 to 1434042, EPI_ISL_1434046, EPI_ISL_1434049, EPI_ISL_1434051, EPI_ISL_1434053, EPI_ISL_1434055, EPI_ISL_1434057, EPI_ISL_1434059, EPI_ISL_1434079, EPI_ISL_1434081, EPI_ISL_1434083, EPI_ISL_1434085, EPI_ISL_1434087, EPI_ISL_1434089, EPI_ISL_1434091, EPI_ISL_1434093, EPI_ISL_1434095, EPI_ISL_1434098 to 1434099, EPI_ISL_1434101, EPI_ISL_1434103, EPI_ISL_1434105, EPI_ISL_1434107, EPI_ISL_1434109, EPI_ISL_1434111 to 1434112, EPI_ISL_1434115 to 1434116, EPI_ISL_1434118, EPI_ISL_1434120, EPI_ISL_1434122, EPI_ISL_1434124, EPI_ISL_1434126, EPI_ISL_1434128 to 1434129, EPI_ISL_1434132, EPI_ISL_1434133, EPI_ISL_1434136, EPI_ISL_1434138, EPI_ISL_1434140, EPI_ISL_1434142, EPI_ISL_1434217, EPI_ISL_1434235, EPI_ISL_1434237, EPI_ISL_1434256, EPI_ISL_1434266, EPI_ISL_1434268, EPI_ISL_1457760, EPI_ISL_1457768 to 1457769 | see above | DYOMEDEA SAUVEGARDE LYON                                                                                  | CNR Virus des Infections Respiratoires - France SUD                                                                                                                                             | Antonin Bai; Bruno Lina; Gregory Destras; Gwendolynne Burfin; Hadrien Regue; Laurence Josset; Martine Valette; Quentin Semanas                                                                                                                                     |
| EPI_ISL_416542 to 416543, EPI_ISL_421652                                                                                                                                                                                                                                                                                                                                                                                                                                                                                                                                                                                                                                                                                                                                                                                                                                                                                                                                                                                                                                                                                                                                                                                                                                              |           | Dasman Diabetes Institute                                                                                 | Dasman Diabetes Institute                                                                                                                                                                       | Ebaa Al-Ozairi; Ebaa AIOzairi; Fahd Al-Mulla; Motasem Melhem; Qais Al-Duwairi; Rasheeba Iqbal; Sara Al-Qabandi; Sumi John                                                                                                                                          |
| EPI_ISL_416541                                                                                                                                                                                                                                                                                                                                                                                                                                                                                                                                                                                                                                                                                                                                                                                                                                                                                                                                                                                                                                                                                                                                                                                                                                                                        |           | Dasman Diabetes Institute and Virology Laboratory Ministry of Health                                      | Dasman Diabetes Institute                                                                                                                                                                       | Ebaa AIOzairi; Fahd Al-Mulla; Motasem Melhem; Qais Al-Duwairi; Rasheeba Iqbal; Sara Al-Qabandi; Sumi John                                                                                                                                                          |
| EPI_ISL_1534365                                                                                                                                                                                                                                                                                                                                                                                                                                                                                                                                                                                                                                                                                                                                                                                                                                                                                                                                                                                                                                                                                                                                                                                                                                                                       |           | De Rust (Blommenek) Clinic wc DRC                                                                         | NHLS/UCT                                                                                                                                                                                        | Arash Iranzadeh; Bruna Galvao; Carolyn Williamson; Deelan Doolabh; Diana Hardie; Emmanuel SJ; Innocent Mudau; Kruger Marais; Lynn Tyers; Marvin Hsiao; Stephen Korsman; Tegally H; de Oliveira T                                                                   |
| EPI_ISL_1524383                                                                                                                                                                                                                                                                                                                                                                                                                                                                                                                                                                                                                                                                                                                                                                                                                                                                                                                                                                                                                                                                                                                                                                                                                                                                       |           | Debswana Orapa Mine Hospital Laboratory                                                                   | Botswana Harvard HIV Reference Laboratory                                                                                                                                                       | Boitumelo Zuze; Botshelo Radibe; David Lawrence; Dorcas Maruapula; Joseph Makhema; Koketo Maotwe; Legodile Kooepile; Lesedi Magama; Mosepele Mosepele; Roger Shapiro; Shahin Lockman; Sikhulle Moyo; Simani Gaseitsiwe; Thongbotho Mphoyakgosi; Wonderful T. Choga |
| EPI_ISL_1500237, EPI_ISL_1553187                                                                                                                                                                                                                                                                                                                                                                                                                                                                                                                                                                                                                                                                                                                                                                                                                                                                                                                                                                                                                                                                                                                                                                                                                                                      |           | Decatur Memorial Hospital                                                                                 | Illinois Department of Public Health - Springfield Lab                                                                                                                                          | Bryan Sim; Gordon McCall                                                                                                                                                                                                                                           |
| EPI_ISL_476022                                                                                                                                                                                                                                                                                                                                                                                                                                                                                                                                                                                                                                                                                                                                                                                                                                                                                                                                                                                                                                                                                                                                                                                                                                                                        |           | Defence Research & Development Establishment                                                              | Defence Research & Development Establishment                                                                                                                                                    | Ambuj Shrivastava; Jyoti S Kumar; Paban Kumar Dash; Shashi Sharma; Sushil Kumar Sharma                                                                                                                                                                             |
| EPI_ISL_476023, EPI_ISL_476840, EPI_ISL_476842, EPI_ISL_476844, EPI_ISL_476846, EPI_ISL_476848 to 476850, EPI_ISL_476852 to 476854, EPI_ISL_476883 to 476886                                                                                                                                                                                                                                                                                                                                                                                                                                                                                                                                                                                                                                                                                                                                                                                                                                                                                                                                                                                                                                                                                                                          | see above | Defence Research & Development Establishment (DRDE)                                                       | Defence Research & Development Establishment (DRDE)                                                                                                                                             | Ambuj Shrivastava; Jyoti S. Kumar; Paban Kumar Dash; Shashi Sharma; Sushil Kumar Sharma                                                                                                                                                                            |
| EPI_ISL_560307, EPI_ISL_560406, EPI_ISL_560567, EPI_ISL_560647 to 560648, EPI_ISL_560741 to 560742, EPI_ISL_561335 to 561336, EPI_ISL_561345 to 561353, EPI_ISL_561356 to 561360, EPI_ISL_561362, EPI_ISL_565830 to 565832, EPI_ISL_566084, EPI_ISL_566108 to 566109, EPI_ISL_574581, EPI_ISL_574584 to 574586, EPI_ISL_574599, EPI_ISL_575335, EPI_ISL_576150 to 576169, EPI_ISL_576222 to 576227, EPI_ISL_582133, EPI_ISL_583246 to 583248, EPI_ISL_583994 to 583995, EPI_ISL_584013 to 584014, EPI_ISL_593937 to 593981                                                                                                                                                                                                                                                                                                                                                                                                                                                                                                                                                                                                                                                                                                                                                            | see above | Delaware Public Health Lab                                                                                | Delaware Public Health Lab                                                                                                                                                                      | Gregory Hovan                                                                                                                                                                                                                                                      |
| EPI_ISL_529147 to 529148                                                                                                                                                                                                                                                                                                                                                                                                                                                                                                                                                                                                                                                                                                                                                                                                                                                                                                                                                                                                                                                                                                                                                                                                                                                              |           | Democritus University of Thrace, Department of Medicine                                                   | Democritus University of Thrace, Department of Medicine                                                                                                                                         | Bampali, M.; Dovrolis, N.; Froukala, E.; Gatzidou, E.; Karakasilios, I.; Kassel, K.; Spanakis, N.; Stavropoulou, A.; Tsakris, A.; Veleza, S.                                                                                                                       |
| EPI_ISL_430796 to 430798, EPI_ISL_430802, EPI_ISL_430805 to 430806, EPI_ISL_430808                                                                                                                                                                                                                                                                                                                                                                                                                                                                                                                                                                                                                                                                                                                                                                                                                                                                                                                                                                                                                                                                                                                                                                                                    |           | Departamento de Biología y genética molecular, IACA Laboratorios.                                         | Área de Secuenciación del Laboratorio de Virología del Hospital de Niños Dr. Ricardo Gutierrez on behalf of 'Proyecto Argentino Interinstitucional de genómica de SARS-CoV-2' (PAIS Consortium) | A; AS; E; Goya; LE; Lusso; MI; MS; Masciovecchio MV; Mistchenko; Nabeas Jodar; Natale; S; Streitenberger ER; Suárez; Tittarelli; Valinotto; Viegas, M.                                                                                                             |
| EPI_ISL_444493                                                                                                                                                                                                                                                                                                                                                                                                                                                                                                                                                                                                                                                                                                                                                                                                                                                                                                                                                                                                                                                                                                                                                                                                                                                                        |           | Departamento de Laboratorios de Salud Pública (DLSP, División Epidemiología, Ministerio de Salud Pública) | Facultad de Ciencias (Sección Genética Evolutiva, Sección Virología).                                                                                                                           | Arbiza; Calleros, L.; Chiparelli, H.; Coppola, L.; Delfraro, A.; Frabasile, S.; Fuques, E.; Goni, N.; Grecco, S.; J. and Perez, R.; Panzera, Y.; Ramos, N.; Ramos, V.; Techera, C.                                                                                 |
| EPI_ISL_508615 to 508686, EPI_ISL_1423762 to 1423792, EPI_ISL_1423849 to 1423857                                                                                                                                                                                                                                                                                                                                                                                                                                                                                                                                                                                                                                                                                                                                                                                                                                                                                                                                                                                                                                                                                                                                                                                                      |           | Departamento de Microbiología, CDB, Hospital Clinic, Barcelona                                            | SeqCOVID-SPAIN consortium/IBV(CSIC)                                                                                                                                                             | Aida Peiró and SeqCOVID-SPAIN consortium; Andrea Vergara; Elisa Rubio; Jéssica Navero; Mikel Martínez                                                                                                                                                              |
| EPI_ISL_603022, EPI_ISL_603034                                                                                                                                                                                                                                                                                                                                                                                                                                                                                                                                                                                                                                                                                                                                                                                                                                                                                                                                                                                                                                                                                                                                                                                                                                                        |           | Departamento de Vigilância à Saúde                                                                        | Instituto Adolfo Lutz, Interdisciplinary Procedures Center, Strategic Laboratory                                                                                                                | Claudia Regina Gonçalves; Claudio Tavares Sacchi; Erica Valessa Ramos Gomes; Karoline Rodrigues Campos                                                                                                                                                             |

|                                                                                                                                                                                                                                                                                                                                                                                                                                                                                                                                                                                                                 |                                                                                                                                                                                         |                                                                                                                                                                                         |                                                                                                                                                                                                                                                                                                                                                                                                                                                                                                                                                                 |
|-----------------------------------------------------------------------------------------------------------------------------------------------------------------------------------------------------------------------------------------------------------------------------------------------------------------------------------------------------------------------------------------------------------------------------------------------------------------------------------------------------------------------------------------------------------------------------------------------------------------|-----------------------------------------------------------------------------------------------------------------------------------------------------------------------------------------|-----------------------------------------------------------------------------------------------------------------------------------------------------------------------------------------|-----------------------------------------------------------------------------------------------------------------------------------------------------------------------------------------------------------------------------------------------------------------------------------------------------------------------------------------------------------------------------------------------------------------------------------------------------------------------------------------------------------------------------------------------------------------|
| EPI_ISL_516922 to 516933                                                                                                                                                                                                                                                                                                                                                                                                                                                                                                                                                                                        | Department for Molecular Diagnostics, Centre for Medical Microbiology, Institute of Public Health of Montenegro                                                                         | Charite Universitätsmedizin Berlin, Institut für Virologie                                                                                                                              | Barbara Muehleman; Christian Drosten; Julia Schneider; Jörn Beheim-Schwarzbach; Marija Govedarica and Danijela Vujošević; Talitha Veith; Terry Jones; Victor M Corman                                                                                                                                                                                                                                                                                                                                                                                           |
| EPI_ISL_420140, EPI_ISL_420142, EPI_ISL_420144                                                                                                                                                                                                                                                                                                                                                                                                                                                                                                                                                                  | Department for Virology, Molecular Biology and Genome Research, R. G. Lugar Center for Public Health Research, National Center for Disease Control and Public Health (NCDC) of Georgia. | Department for Virology, Molecular Biology and Genome Research, R. G. Lugar Center for Public Health Research, National Center for Disease Control and Public Health (NCDC) of Georgia. | Adam Kotorashvili; Amiran Gamkrelidze; Amiran Gamkrelidze.; Ana Papiakauri; Ann Machablishvili; Anna Kasradze; Davit Tsaguria; Ekaterine Khmaladze; Ekaterine Zangaladze; Ekaterine Zghenti; Giorgi Tomashvili; Gvantsa Brachveli; Gvantsa Chanturia; Irma Burjanadze; Ketevan Sidamonidze; Khatuna Zakhashvili; Lela Sabadze; Lela Urushadze; Magda Dgebuadze; Mari Gvashelidze; Mariam Zakalashvili; Marine Murtskhvaladze; Meri Pantsulaia; Nato Kotaria; Nino Berishvili; Paata Imnadze; Roena Sukhiasvili; Tamar Jashiasvili; Tata Imnadze; Tea Tvedoradze |
| EPI_ISL_447055 to 447056, EPI_ISL_470876 to 470877, EPI_ISL_471529, EPI_ISL_477169, EPI_ISL_481380, EPI_ISL_481483                                                                                                                                                                                                                                                                                                                                                                                                                                                                                              | Department for Virology, Molecular Biology and Genome Research, R. G. Lugar Center for Public Health Research, National Center for Disease Control and Public Health (NCDC) of Georgia. | Department for Virology, Molecular Biology and Genome Research, R. G. Lugar Center for Public Health Research, National Center for Disease Control and Public Health (NCDC) of Georgia. | Adam Kotorashvili; Amiran Gamkrelidze.; Ana Papiakauri; Ann Machablishvili; Anna Kasradze; Davit Tsaguria; Ekaterine Khmaladze; Ekaterine Zangaladze; Ekaterine Zghenti; Giorgi Tomashvili; Gvantsa Brachveli; Gvantsa Chanturia; Irma Burjanadze; Ketevan Sidamonidze; Khatuna Zakhashvili; Lela Sabadze; Lela Urushadze; Magda Dgebuadze; Maia Alkhasashvili; Mari Gvashelidze; Mariam Zakalashvili; Marine Murtskhvaladze; Meri Pantsulaia; Nato Kotaria; Nino Berishvili; Paata Imnadze; Roena Sukhiasvili; Tamar Jashiasvili; Tata Imnadze; Tea Tvedoradze |
| EPI_ISL_515082 to 515112                                                                                                                                                                                                                                                                                                                                                                                                                                                                                                                                                                                        | Department of Biochemistry, Cell and Molecular Biology                                                                                                                                  | WACCBP, University of Ghana                                                                                                                                                             | A.K.; Adu, B.; Amenga-Etego; Ampofo, W.; Amuzu; Anang; Arjarquah, A.; Asante, I.; Awandare; Bediako, Y.; Boatemaa, L.; Bonney, E.; Bonney, K.; C.M.; D.S.; Eshun, M.; G.A.; G.B.; J.K.; J.M.; Kotey, E.; Kumordjie, S.; Kyei, L.N.; Magnusen, V.; Morang'ya, M.; Mutungi; Ngoi; Quashie, P.; Tei-Maya, F.                                                                                                                                                                                                                                                       |
| EPI_ISL_429239                                                                                                                                                                                                                                                                                                                                                                                                                                                                                                                                                                                                  | Department of Clinical Laboratory, the First People's Hospital of Yunnan Province                                                                                                       | Department of Clinical Laboratory, the First People's Hospital of Yunnan Province                                                                                                       | Guiqian Zhang; Xin Fan; Ya Xu; Yi Sun; Yu Zhang; Ziqian Duan                                                                                                                                                                                                                                                                                                                                                                                                                                                                                                    |
| EPI_ISL_416997, EPI_ISL_417004 to 417006, EPI_ISL_417008 to 417009, EPI_ISL_417011 to 417023, EPI_ISL_417025, EPI_ISL_418623 to 418666, EPI_ISL_421182 to 421214, EPI_ISL_424628 to 424665, EPI_ISL_427340 to 427390, EPI_ISL_447120 to 447162, EPI_ISL_455958 to 455979, EPI_ISL_471427 to 471437, EPI_ISL_484693 to 484708, EPI_ISL_498127 to 498151, EPI_ISL_498628 to 498629, EPI_ISL_515055 to 515081, EPI_ISL_540469 to 540578, EPI_ISL_581575 to 581667, EPI_ISL_582027, EPI_ISL_1425566 to 1425567, EPI_ISL_1492720 to 1492730, EPI_ISL_1492837 to 1492841, EPI_ISL_1492904 to 1492924, EPI_ISL_1533936 |                                                                                                                                                                                         |                                                                                                                                                                                         |                                                                                                                                                                                                                                                                                                                                                                                                                                                                                                                                                                 |
| see above                                                                                                                                                                                                                                                                                                                                                                                                                                                                                                                                                                                                       | Department of Clinical Microbiology                                                                                                                                                     | GIGA Medical Genomics                                                                                                                                                                   | Artesi Maria; Axelle Chaslain; Bontems Sébastien; Boreux Raphaël; Bouchra Boujemla; Bours Vincent.; Cecile Meex; Celine Fombellida-Lopez; Cécile Meex; Céline Fombellida-Lopez; Durkin Keith; Hayette Marie-Pierre; Keith Durkin; Maria Artesi; Marie-Pierre Hayette; Meex Cécile; Melin Pierrette; Nathalie Renotte; Pierrette Melin; Raphael Boreux; Raphaël Boreux; Sebastien Bontems; Sébastien Bontems; Vincent Bours; Vincent Bours.                                                                                                                      |
| EPI_ISL_429262 to 429318, EPI_ISL_429320 to 429332, EPI_ISL_451988 to 452100                                                                                                                                                                                                                                                                                                                                                                                                                                                                                                                                    | Department of Clinical Microbiology, Copenhagen University Hospital, Hvidovre, Kettegaard Alle 30, 2650 Hvidovre.                                                                       | Albertsen lab, Department of Chemistry and Bioscience, Aalborg University, Denmark                                                                                                      | Rasmus Kirkegaard                                                                                                                                                                                                                                                                                                                                                                                                                                                                                                                                               |
| EPI_ISL_417183 to 417184, EPI_ISL_417187 to 417188, EPI_ISL_417190, EPI_ISL_417193, EPI_ISL_417195, EPI_ISL_417197, EPI_ISL_417199, EPI_ISL_418815, EPI_ISL_419213 to 419216, EPI_ISL_419218 to 419219, EPI_ISL_419224 to 419229, EPI_ISL_419232, EPI_ISL_419241, EPI_ISL_419243 to 419252, EPI_ISL_420455                                                                                                                                                                                                                                                                                                      |                                                                                                                                                                                         |                                                                                                                                                                                         |                                                                                                                                                                                                                                                                                                                                                                                                                                                                                                                                                                 |
| see above                                                                                                                                                                                                                                                                                                                                                                                                                                                                                                                                                                                                       | Department of Clinical Pathology, Pamela Youde Nethersole Eastern Hospital                                                                                                              | Department of Health Technology and Informatics, Faculty of Health and Social Science, The Hong Kong Polytechnic University                                                             | Alan Ka-Lun WU; Alex Yat-Man HO; Barry Kin-Chung WONG; Chong-Yee YAU; David Ho-Keung SHUM; Eugene Yuk-Keung TSO; Gilman Kit-Hang SIU; Hiu-Yin LAO; Kam-Tong YIP; Kam-Tong Yip; Kenneth Siu-Sing LEUNG; Kingsley King-Gee TAM; Kit-Man SIN; Kitty Sau-Chun FUNG; Kwok-Cheung LUNG; Lam-Kwong LEE; Man-Chun CHAN; Ming-Pan CHOI; Miranda Chong-Yee YAU; Raymond Wai-To LIU; Sandy Ka-Yee CHAU; Shea Ping YIP; Tak-Lun QUE; Tak-Lun Que; Timothy Ting-Leung NG; Wai-Shing LEUNG; Wing Cheong YAM; Wing-Kin TO; Yuk-Yung NG                                         |
| EPI_ISL_419242                                                                                                                                                                                                                                                                                                                                                                                                                                                                                                                                                                                                  | Department of Clinical Pathology, Tuen Mun Hospital                                                                                                                                     | Department of Health Technology and Informatics, Faculty of Health and Social Science, The Hong Kong Polytechnic University                                                             | Alan Ka-Lun WU; Alex Yat-Man HO; Barry Kin-Chung WONG; David Ho-Keung SHUM; Eugene Yuk-Keung TSO; Gilman Kit-Hang SIU; Hiu-Yin LAO; Kam-Tong YIP; Kenneth Siu-Sing LEUNG; Kingsley King-Gee TAM; Kit-Man SIN; Kitty Sau-Chun FUNG; Kwok-Cheung LUNG; Lam-Kwong LEE; Man-Chun CHAN; Ming-Pan CHOI; Miranda Chong-Yee YAU; Raymond Wai-To LIU; Sandy Ka-Yee CHAU; Shea Ping YIP; Tak-Lun QUE; Timothy Ting-Leung NG; Wai-Shing LEUNG; Wing Cheong YAM; Wing-Kin TO; Yuk-Yung NG                                                                                   |
| EPI_ISL_419231                                                                                                                                                                                                                                                                                                                                                                                                                                                                                                                                                                                                  | Department of Clinical Pathology, Tuen Mun Hospital, 23 Tsing Chung Koon Road, Tuen Mun, N.T.                                                                                           | Department of Health Technology and Informatics, Faculty of Health and Social Science, The Hong Kong Polytechnic University                                                             | Alan Ka-Lun WU; Alex Yat-Man HO; Barry Kin-Chung WONG; David Ho-Keung SHUM; Eugene Yuk-Keung TSO; Gilman Kit-Hang SIU; Hiu-Yin LAO; Kam-Tong YIP; Kenneth Siu-Sing LEUNG; Kingsley King-Gee TAM; Kit-Man SIN; Kitty Sau-Chun FUNG; Kwok-Cheung LUNG; Lam-Kwong LEE; Man-Chun CHAN; Ming-Pan CHOI; Miranda Chong-Yee YAU; Raymond Wai-To LIU; Sandy Ka-Yee CHAU; Shea Ping YIP; Tak-Lun QUE; Timothy Ting-Leung NG; Wai-Shing LEUNG; Wing Cheong YAM; Wing-Kin TO; Yuk-Yung NG                                                                                   |
| EPI_ISL_481251 to 481252, EPI_ISL_481254 to 481255, EPI_ISL_481257 to 481261, EPI_ISL_481263                                                                                                                                                                                                                                                                                                                                                                                                                                                                                                                    | Department of Emerging Infectious Diseases, Institute of Tropical Medicine, Nagasaki University                                                                                         | Department of Emerging Infectious Diseases, Institute of Tropical Medicine, Nagasaki University                                                                                         | Haruka Abe; Jiro Yasuda; Rokusuke Yoshikawa; Yuichiro Furusato                                                                                                                                                                                                                                                                                                                                                                                                                                                                                                  |
| EPI_ISL_507206 to 507215                                                                                                                                                                                                                                                                                                                                                                                                                                                                                                                                                                                        | Department of Experimental Modeling and Pathogenesis of Infectious Diseases                                                                                                             | WHO National Influenza Centre Russian Federation                                                                                                                                        | Andrey Komissarov; Anna Ivanova; Artem Fadeev; Daria Danilenko; Mariia Sergeeva                                                                                                                                                                                                                                                                                                                                                                                                                                                                                 |
| EPI_ISL_487276                                                                                                                                                                                                                                                                                                                                                                                                                                                                                                                                                                                                  | Department of Food Safety, Nutrition and Veterinary public health, Istituto Superiore di Sanita'                                                                                        | Department of Biomedical, Surgical and Dental Sciences and Department of Biomedical Sciences for Health                                                                                 | Anselmi, G.; Basilio, N.; Binda, S.; D'Alessandro, S.; Delbue, S.; Ferrante, P.; Galli, C.; Parapini, S.; Pariani, E.; Primache, V.; Signorini, L.                                                                                                                                                                                                                                                                                                                                                                                                              |
| EPI_ISL_1538415 to 1538417, EPI_ISL_1538432, EPI_ISL_1541553, EPI_ISL_1542073, EPI_ISL_1542918, EPI_ISL_1545269 to 1545270, EPI_ISL_1546389, EPI_ISL_1547360, EPI_ISL_1547365, EPI_ISL_1547371 to 1547372, EPI_ISL_1547828, EPI_ISL_1548044, EPI_ISL_1548059, EPI_ISL_1548072, EPI_ISL_1549238, EPI_ISL_1550055, EPI_ISL_1550506, EPI_ISL_1563632 to 1563634                                                                                                                                                                                                                                                    |                                                                                                                                                                                         |                                                                                                                                                                                         |                                                                                                                                                                                                                                                                                                                                                                                                                                                                                                                                                                 |
| see above                                                                                                                                                                                                                                                                                                                                                                                                                                                                                                                                                                                                       | Department of Genetic Engineering and Biotechnology, Shahjalal University of Science and Technology                                                                                     | Genomic Research Lab, BCSIR                                                                                                                                                             | Abu Sayeed Mohammad Mahmud; Ajit Ghosh; Barna Goswami; Eshrar Osman; G. M. Nurnabi Azad Jewel; G. M. Nurnabi Azad Jewel; Iffat Jahan; Md. Ahasan Habib; Md. Akkas Ali; Md. Asrafal Jahan; Md. Fahmid Hossain Bhuiyan; Md. Hamdul Hoque; Md. Kamrul Islam; Md. Murshed Hasan Sarkar; Md. Nazmul Hasan; Md. Saddam Hossain; Md. Salim Khan; Md. Shamsul Haque Prodan; Mohammad Mohi Uddin; Mohammad Samir Uzzaman; Shahina Akter; Tanjina Akhter Banu                                                                                                             |
| EPI_ISL_610163 to 610226                                                                                                                                                                                                                                                                                                                                                                                                                                                                                                                                                                                        | Department of Health Technology and Informatics, The Hong Kong Polytechnic University                                                                                                   | Department of Health Technology and Informatics, The Hong Kong Polytechnic University                                                                                                   | A.K.-L.; A.Y.-M.; B.K.-C.; C.T.-M.; Chan; Chau; D.H.-K.; Fung; G.K.-H.; H.-Y.; Ho; J.S.-L.; K.-T.; K.K.-G.; K.S.-C.; K.S.-S.; L.-K.; Lai; Lao; Lee; Leung; Luk, K.; M.C.-Y.; Ng; Que; S.K.-Y.; S.P.; Shum; Siu; T.-L.; T.T.-L.; Tam; To; W.-K.; W.C.; Wong; Wu; Y.W.-M.; Yam; Yau; Yip                                                                                                                                                                                                                                                                          |
| EPI_ISL_1472376 to 1472377                                                                                                                                                                                                                                                                                                                                                                                                                                                                                                                                                                                      | Department of Health Technology and Informatics, The Hong Kong Polytechnic University                                                                                                   | Department of Health Technology and Informatics, The Hong Kong Polytechnic University                                                                                                   | A.K.-L.; C.T.-M.; Chan; D.S.-H.; G.K.-H.; H.-Y.; J.S.-L.; K.K.-G.; K.S.-S.; L.-K.; Lao; Lee; Leung; Lo; M.C.-Y. and Lai; Ng; Siu; T.T.-L.; Tam; W.-H.; Wong; Wu; Y.W.-M.; Yau                                                                                                                                                                                                                                                                                                                                                                                   |
| EPI_ISL_417444                                                                                                                                                                                                                                                                                                                                                                                                                                                                                                                                                                                                  | Department of Healthcare Biotechnology, National University of Sciences and Technology (NUST)                                                                                           | Department of Healthcare Biotechnology, National University of Sciences and Technology (NUST)                                                                                           | Corman; Ghani, E.; H.A.; Janjua; Javed, A.; Niazi; S.K.; Saqib, M.; V.M. and Zohaib, A.                                                                                                                                                                                                                                                                                                                                                                                                                                                                         |
| EPI_ISL_1447102, EPI_ISL_1447174, EPI_ISL_1447182                                                                                                                                                                                                                                                                                                                                                                                                                                                                                                                                                               | Department of Homeless Services                                                                                                                                                         | New York City Public Health Laboratory                                                                                                                                                  | Jade Wang; et al.                                                                                                                                                                                                                                                                                                                                                                                                                                                                                                                                               |
| EPI_ISL_529151 to 529154, EPI_ISL_529162 to 529166                                                                                                                                                                                                                                                                                                                                                                                                                                                                                                                                                              | Department of Immunology, The Scripps Research Institute                                                                                                                                | Andersen lab at Scripps Research                                                                                                                                                        | Allison Smither; Antoinette Bell; Arnaud Drouin; Austin; B. with SEARCH Alliance San Diego; Basler, T.; Dahlene Fusco; Gilberto Sabino-Santos; I. with SEARCH Alliance San Diego; Kaylynn Genemaras; Lilia Melnik; Mchardy; Patricia Snarski; Quigley, M.; Robert Garry with SEARCH Alliance San Diego; Shephard, J.; Stefanski, E.                                                                                                                                                                                                                             |
| EPI_ISL_524435 to 524436                                                                                                                                                                                                                                                                                                                                                                                                                                                                                                                                                                                        | Department of Immunology, The Scripps Research Institute                                                                                                                                | Department of Immunology, The Scripps Research Institute                                                                                                                                | Bell, A.; Drouin, A.; Fusco, D.; Garry, R.; Genemaras, K.; J.H.; Melnik, L.; Pride, D.; S.D.; SEARCH Alliance; Sabino-Santos, G.; Shin; Smither, A.; Snarski, P.                                                                                                                                                                                                                                                                                                                                                                                                |
| EPI_ISL_522407 to 522409                                                                                                                                                                                                                                                                                                                                                                                                                                                                                                                                                                                        | Department of Infection Prevention and Infectious Diseases, University Hospital Regensburg                                                                                              | Department of Infection Prevention and Infectious Diseases, University Hospital Regensburg                                                                                              | Fritsch, J.; Holzmann, T.; Schneider-Brachert, W.                                                                                                                                                                                                                                                                                                                                                                                                                                                                                                               |
| EPI_ISL_513298 to 513307                                                                                                                                                                                                                                                                                                                                                                                                                                                                                                                                                                                        | Department of Infection Prevention and Infectious Diseases, University Hospital Regensburg                                                                                              | University Hospital Regensburg                                                                                                                                                          | Fritsch, J.; Holzmann, T.; Schneider-Brachert, W.                                                                                                                                                                                                                                                                                                                                                                                                                                                                                                               |
| EPI_ISL_605929 to 605930                                                                                                                                                                                                                                                                                                                                                                                                                                                                                                                                                                                        | Department of Infectious Disease Prevention and Control, Henan Provincial Center for Disease Control and Prevention                                                                     | Department of Infectious Disease Prevention and Control, Henan Provincial Center for Disease Control and Prevention                                                                     | Guo, W.; Hu, X.; Huang, X.; Li, D.; Li, X.; Lu, S.; Wu, B.; Ye, Y.                                                                                                                                                                                                                                                                                                                                                                                                                                                                                              |
| EPI_ISL_568556 to 568576, EPI_ISL_1447321 to 1447328                                                                                                                                                                                                                                                                                                                                                                                                                                                                                                                                                            | Department of Infectious Diseases and Immunology, National Hospital Organization Nagoya Medical Center                                                                                  | Clinical Research Center, National Hospital Organization Nagoya Medical Center                                                                                                          | Hirokata Ode; Kazuhiro Matsuo; Mai Kubota; Masakazu Matsuda; Mayumi Imahashi; Miho Nakasui; Mikiko Mori; Nakasui Miho; Yasumasa Iwatani; Yoshihiro Nakata; Yoshiyuki Yokomaku                                                                                                                                                                                                                                                                                                                                                                                   |
| EPI_ISL_524474, EPI_ISL_524480 to 524481                                                                                                                                                                                                                                                                                                                                                                                                                                                                                                                                                                        | Department of Infectious Diseases, Cantonal Hospital Baden                                                                                                                              | Institute of Medical Virology, University of Zurich                                                                                                                                     | Alexandra Trkola; Andrea Zbinden; Fiona Steiner; Gabriela Zillener; Jon Huder; Jürg Böni; Maryam Zaheri; Michael Huber; Patrick Redli; Riccarda Capaul; Stefan Schmutz; Verena Kufner                                                                                                                                                                                                                                                                                                                                                                           |
| EPI_ISL_457699 to 457700, EPI_ISL_457721, EPI_ISL_457724, EPI_ISL_457728, EPI_ISL_457732, EPI_ISL_457736, EPI_ISL_457749                                                                                                                                                                                                                                                                                                                                                                                                                                                                                        |                                                                                                                                                                                         |                                                                                                                                                                                         |                                                                                                                                                                                                                                                                                                                                                                                                                                                                                                                                                                 |

|                                                                                                                                                                                                                                                                                                                                                                                                                                                                                                                                                                                                                                                                                                                      |                                                                                                          |                                                                                                                                                  |                                                                                                                                                                                                                                                                                                                                                                                                                                                                                                                                                                                                                                                                                                                                                                                                                                                    |
|----------------------------------------------------------------------------------------------------------------------------------------------------------------------------------------------------------------------------------------------------------------------------------------------------------------------------------------------------------------------------------------------------------------------------------------------------------------------------------------------------------------------------------------------------------------------------------------------------------------------------------------------------------------------------------------------------------------------|----------------------------------------------------------------------------------------------------------|--------------------------------------------------------------------------------------------------------------------------------------------------|----------------------------------------------------------------------------------------------------------------------------------------------------------------------------------------------------------------------------------------------------------------------------------------------------------------------------------------------------------------------------------------------------------------------------------------------------------------------------------------------------------------------------------------------------------------------------------------------------------------------------------------------------------------------------------------------------------------------------------------------------------------------------------------------------------------------------------------------------|
| see above                                                                                                                                                                                                                                                                                                                                                                                                                                                                                                                                                                                                                                                                                                            | Department of Infectious Diseases, Istituto Superiore di Sanità, Roma , Italy                            | Army Medical and Veterinary Research Center                                                                                                      | Alessandra Lo Presti; Anna Anselmo; Antonella Fortunato; Antonella Marchi; Concetta Fabiani Silvia Fillo; Concetta Fabiani Silvia Fillo; Eleonora Benedetti; Florio Lista; Francesco Giordani; Giovanni Faggioni; Nino D'Amore; Paola Stefanelli; Riccardo De Sanctis; Stefano Fiore; Vanessa Vera Fain                                                                                                                                                                                                                                                                                                                                                                                                                                                                                                                                            |
| EPI_ISL_412973                                                                                                                                                                                                                                                                                                                                                                                                                                                                                                                                                                                                                                                                                                       | Department of Infectious Diseases, Istituto Superiore di Sanità, Roma , Italy                            | Virology Laboratory, Scientific Department, Army Medical Center                                                                                  | Andrea Ciammaraconi; Anna Anselmo; Antonella Fortunato; Antonella Marchi; Concetta Fabiani; Eleonora Benedetti; Florio Lista; Giovanni Faggioni; Paola Stefanelli; Riccardo De Santis; Silvia Fillo; Stefano Fiore; Stefano Palomba                                                                                                                                                                                                                                                                                                                                                                                                                                                                                                                                                                                                                |
| EPI_ISL_412974                                                                                                                                                                                                                                                                                                                                                                                                                                                                                                                                                                                                                                                                                                       | Department of Infectious Diseases, Istituto Superiore di Sanità, Rome, Italy                             | Virology Laboratory, Scientific Department, Army Medical Center                                                                                  | Andrea Ciammaraconi; Antonella Fortunato; Antonella Marchi; Concetta Fabiani; Eleonora Benedetti; Filippo Molinari; Florio Lista; Giancarlo Petralito; Giovanni Faggioni; Paola Stefanelli; Riccardo De Santis; Silvia Fillo; Stefano Fiore                                                                                                                                                                                                                                                                                                                                                                                                                                                                                                                                                                                                        |
| EPI_ISL_1425080 to 1425540                                                                                                                                                                                                                                                                                                                                                                                                                                                                                                                                                                                                                                                                                           | Department of Infectious Diseases, Kobe Institute of Health                                              | Department of Infectious Diseases, Kobe Institute of Health                                                                                      | Kentaro Itokawa; Makoto Kuroda; Masanori Hashino; Noriko Nakanishi; Rina Tanaka; Ryohei Nomoto; Tomotada Iwamoto; Tsuyoshi Sekizuka                                                                                                                                                                                                                                                                                                                                                                                                                                                                                                                                                                                                                                                                                                                |
| EPI_ISL_479821 to 479822, EPI_ISL_479855 to 479861, EPI_ISL_479868, EPI_ISL_479986 to 479989, EPI_ISL_480090 to 480102, EPI_ISL_480205 to 480207, EPI_ISL_480209 to 480220, EPI_ISL_1429588                                                                                                                                                                                                                                                                                                                                                                                                                                                                                                                          | Department of Infectious Diseases, Kobe Institute of Health                                              | Pathogen Genomics Center, National Institute of Infectious Diseases                                                                              | Hajime Kamiya; Kentaro Itokawa; Makoto Kuroda; Masanori Hashino; Motoi Suzuki; Rina Tanaka; Ryohei Nomoto; Tsuyoshi Sekizuka                                                                                                                                                                                                                                                                                                                                                                                                                                                                                                                                                                                                                                                                                                                       |
| see above                                                                                                                                                                                                                                                                                                                                                                                                                                                                                                                                                                                                                                                                                                            | Department of Infectious Diseases, Bichat Claude Bernard Hospital, Paris                                 | Laboratoire Virpath, CIRI U111, UCBL1, INSERM, CNRS, ENS Lyon                                                                                    | Alexandre Gaymard; Aurélien Traversier; Bruno Lina; Catherine Legras-Lachuer; Julien Fourret; Manuel Rosa-Calatrava; Olivier Terrier; Xavier Lescure; Yazdan Yazdanpanah                                                                                                                                                                                                                                                                                                                                                                                                                                                                                                                                                                                                                                                                           |
| EPI_ISL_411218 to 411220                                                                                                                                                                                                                                                                                                                                                                                                                                                                                                                                                                                                                                                                                             | Department of Infectious and Tropical Diseases, Bichat Claude Bernard Hospital, Paris                    | National Reference Center for Viruses of Respiratory Infections, Institut Pasteur, Paris                                                         | Angela Brisebarre; Flora Donati; Marion Barbet; Maud Vanpeene; Mélanie Albert; Méline Bizard; Sylvie Behillil; Sylvie van der Werf; Vincent Enouf; Xavier Lescure; Xavier Lescure.; Yazdan Yazdanpanah                                                                                                                                                                                                                                                                                                                                                                                                                                                                                                                                                                                                                                             |
| EPI_ISL_406596 to 406597, EPI_ISL_408430, EPI_ISL_410720, EPI_ISL_410984                                                                                                                                                                                                                                                                                                                                                                                                                                                                                                                                                                                                                                             | Department of Internal Medicine, College of Medicine, Chosun University                                  | Department of Internal Medicine, College of Medicine, Chosun University                                                                          | D.-M.; Kim                                                                                                                                                                                                                                                                                                                                                                                                                                                                                                                                                                                                                                                                                                                                                                                                                                         |
| EPI_ISL_485398                                                                                                                                                                                                                                                                                                                                                                                                                                                                                                                                                                                                                                                                                                       | Department of Internal Medicine, Triemli Hospital                                                        | Institute of Medical Virology, University of Zurich                                                                                              | Alexandra Trkola; Andrea Zbinden; Fiona Steiner; Gerhard Eich; Jon Huder; Jürg Böni; Maryam Zaheri; Michael Huber; Patrick Redli; Riccarda Capaul; Stefan Schmutz; Verena Kufner                                                                                                                                                                                                                                                                                                                                                                                                                                                                                                                                                                                                                                                                   |
| EPI_ISL_413019 to 413020                                                                                                                                                                                                                                                                                                                                                                                                                                                                                                                                                                                                                                                                                             | Department of Laboratory Medicine Tan Tock Seng Hospital                                                 | Department of Laboratory Medicine Tan Tock Seng Hospital                                                                                         | Barkham TMS; Chen YYC; Li C; Maurer-Stroh S; Nagarajan N; Sessions OM; Tang WY; Zair X                                                                                                                                                                                                                                                                                                                                                                                                                                                                                                                                                                                                                                                                                                                                                             |
| EPI_ISL_476805 to 476812, EPI_ISL_476815                                                                                                                                                                                                                                                                                                                                                                                                                                                                                                                                                                                                                                                                             | Department of Laboratory Medicine Tan Tock Seng Hospital                                                 | Department of Laboratory Medicine Tan Tock Seng Hospital                                                                                         | Barkham TMS; Chen YYC; Li C; Maurer-Stroh S; Nagarajan N; Sessions OM; Tang WY; Zair X                                                                                                                                                                                                                                                                                                                                                                                                                                                                                                                                                                                                                                                                                                                                                             |
| EPI_ISL_477172, EPI_ISL_477174 to 477175, EPI_ISL_477178, EPI_ISL_477180, EPI_ISL_477182, EPI_ISL_477184, EPI_ISL_477187 to 477192, EPI_ISL_479482 to 479492, EPI_ISL_492978 to 492979                                                                                                                                                                                                                                                                                                                                                                                                                                                                                                                               | Department of Laboratory Medicine Tan Tock Seng Hospital                                                 | Department of Laboratory Medicine Tan Tock Seng Hospital                                                                                         | Barkham TMS; Chen YYC; Li C; Maurer-Stroh S; Nagarajan N; Sessions OM; Tang WY; Zair X                                                                                                                                                                                                                                                                                                                                                                                                                                                                                                                                                                                                                                                                                                                                                             |
| see above                                                                                                                                                                                                                                                                                                                                                                                                                                                                                                                                                                                                                                                                                                            | Department of Laboratory Medicine, Tan Tock Seng Hospital                                                | Department of Laboratory Medicine, Tan Tock Seng Hospital                                                                                        | Barkham TMS; Chen YYC; Li C; Maurer-Stroh S; Nagarajan N; Sessions OM; Tang WY; Zair X                                                                                                                                                                                                                                                                                                                                                                                                                                                                                                                                                                                                                                                                                                                                                             |
| EPI_ISL_516801 to 516805                                                                                                                                                                                                                                                                                                                                                                                                                                                                                                                                                                                                                                                                                             | Department of Laboratory Medicine, Clinical Center, National Institutes of Health                        | Laboratory of Parasitic Diseases, Systems Genomics Section, National Institute of Allergy and Infectious Diseases, National Institutes of Health | Allison Roder; Elodie Ghedin; Heike Bailin; Jennifer Kwan; Jessica McCormick-Eli; Jung-ho Youn; Matthew Chung; Michael Bell; Rachel Mercado; Sanchita Das; Stephanie Banakis; Tara Palmore; Wei Wang                                                                                                                                                                                                                                                                                                                                                                                                                                                                                                                                                                                                                                               |
| EPI_ISL_1509003 to 1509094                                                                                                                                                                                                                                                                                                                                                                                                                                                                                                                                                                                                                                                                                           | Department of Laboratory Medicine, Division of Clinical Virology, University of Medicine, Vienna         | Bergthaler laboratory, CeMM Research Center for Molecular Medicine of the Austrian Academy of Sciences                                           | Andreas Bergthaler; Anna Schedl; Bekir Erguner; Benedikt Agerer; Christoph Bock; Fabian Amman; Jan Laine; Lukas Endler; Maelle Le Moing; Martin Senekowitsch; Michael Schuster; Petr Triska; Thomas Penz                                                                                                                                                                                                                                                                                                                                                                                                                                                                                                                                                                                                                                           |
| EPI_ISL_1495154 to 1495165, EPI_ISL_1495286 to 1495353, EPI_ISL_1495466 to 1495527, EPI_ISL_1495810 to 1495866                                                                                                                                                                                                                                                                                                                                                                                                                                                                                                                                                                                                       | Department of Laboratory Medicine, National Taiwan University Hospital                                   | Microbial Genomics Core Lab, National Taiwan University Centers of Genomic and Precision Medicine                                                | Chiao-Ling Li; Pei-Jer Chen; Shan-Chwen Chang; Shiou-Hwei Yeh; Sui-Yuan Chang; Ya-Yun Lai; You-Yu Lin                                                                                                                                                                                                                                                                                                                                                                                                                                                                                                                                                                                                                                                                                                                                              |
| EPI_ISL_408489, EPI_ISL_410218, EPI_ISL_413592, EPI_ISL_422407 to 422422, EPI_ISL_447614 to 447622, EPI_ISL_463007, EPI_ISL_534336                                                                                                                                                                                                                                                                                                                                                                                                                                                                                                                                                                                   | Department of Laboratory Medicine, Tan Tock Seng Hospital                                                | Department of Laboratory Medicine, Tan Tock Seng Hospital                                                                                        | Barkham TMS; Chen YYC; Li C; Lim JX; Makurer-Stroh S; Nagarajan N; Sessions OM; Tang WY; Zair X                                                                                                                                                                                                                                                                                                                                                                                                                                                                                                                                                                                                                                                                                                                                                    |
| see above                                                                                                                                                                                                                                                                                                                                                                                                                                                                                                                                                                                                                                                                                                            | Department of Laboratory, Medicine Tan Tock Seng Hospital                                                | Department of Laboratory, Medicine Tan Tock Seng Hospital                                                                                        | Barkham TMS; Chen YYC; Li C; Maurer-Stroh S; Nagarajan N; Sessions OM; Tang WY; Zair X                                                                                                                                                                                                                                                                                                                                                                                                                                                                                                                                                                                                                                                                                                                                                             |
| EPI_ISL_476795 to 476797, EPI_ISL_476813 to 476814, EPI_ISL_476816 to 476821, EPI_ISL_507002 to 507006, EPI_ISL_538435 to 538497                                                                                                                                                                                                                                                                                                                                                                                                                                                                                                                                                                                     | Department of Laboratory, Medicine Tan Tock Seng Hospital                                                | Department of Laboratory, Medicine Tan Tock Seng Hospital                                                                                        | Barkham TMS; Chen YYC; Li C; Maurer-Stroh S; Nagarajan N; Sessions OM; Tang WY; Zair X                                                                                                                                                                                                                                                                                                                                                                                                                                                                                                                                                                                                                                                                                                                                                             |
| EPI_ISL_477170                                                                                                                                                                                                                                                                                                                                                                                                                                                                                                                                                                                                                                                                                                       | Department of Laboratory, Medicine Tan Tock Seng Hospital                                                | Department of Laboratory, Medicine Tan Tock Seng Hospital                                                                                        | Barkham TMS; Chen YYC; Li C; Maurer-Stroh S; Nagarajan N; Sessions OM; Tang WY; Zair X                                                                                                                                                                                                                                                                                                                                                                                                                                                                                                                                                                                                                                                                                                                                                             |
| EPI_ISL_477171                                                                                                                                                                                                                                                                                                                                                                                                                                                                                                                                                                                                                                                                                                       | Department of Laboratory, Medicine Tan Tock Seng Hospital                                                | Department of Laboratory, Medicine Tan Tock Seng Hospital                                                                                        | Barkham TMS; Chen YYC; Li C; Maurer-Stroh S; Nagarajan N; Sessions OM; Tang WY; Zair X                                                                                                                                                                                                                                                                                                                                                                                                                                                                                                                                                                                                                                                                                                                                                             |
| EPI_ISL_591012, EPI_ISL_591018 to 591019, EPI_ISL_1385962, EPI_ISL_1385965, EPI_ISL_1385968, EPI_ISL_1385991, EPI_ISL_1490377, EPI_ISL_1547612, EPI_ISL_1547618, EPI_ISL_1547623, EPI_ISL_1547633                                                                                                                                                                                                                                                                                                                                                                                                                                                                                                                    | Department of Medical Microbiology - section Molde, Molde Hospital                                       | Norwegian Institute of Public Health, Department of Virology                                                                                     | Atiya R Ali; Debech Nadia; Engebretsen Serina Beate; Garcia Llorente Ignacio; Hilde Elshaug; Hilde Vollan; Jon Bråte; Kamilla Heddeland Instefjord; Karoline Bragstad; Kathrine Stene-Johansen; Marie Paulsen Madsen; Olav Hungnes; Pedersen Benedikte Nevjen; Rasmus Riis Kopperud                                                                                                                                                                                                                                                                                                                                                                                                                                                                                                                                                                |
| see above                                                                                                                                                                                                                                                                                                                                                                                                                                                                                                                                                                                                                                                                                                            | Department of Medical Microbiology, Leiden University Medical Center                                     | Department of Medical Microbiology, Leiden University Medical Center                                                                             | Dalebout; E.J.; J.C.; J.J. and Sidorov, I.; N.S.; Ogando; Snijder; T.J.; Zevenhoven; de Vries                                                                                                                                                                                                                                                                                                                                                                                                                                                                                                                                                                                                                                                                                                                                                      |
| EPI_ISL_454416                                                                                                                                                                                                                                                                                                                                                                                                                                                                                                                                                                                                                                                                                                       | Department of Medical Microbiology, St. Olavs hospital                                                   | Norwegian Institute of Public Health, Department of Virology                                                                                     | Atiya R Ali; Debech Nadia; Engebretsen Serina Beate; Garcia Llorente Ignacio; Hilde Elshaug; Hilde Vollan; Jon Bråte; Kamilla Heddeland Instefjord; Karoline Bragstad; Kathrine Stene-Johansen; Marie Paulsen Madsen; Olav Hungnes; Pedersen Benedikte Nevjen; Rasmus Riis Kopperud                                                                                                                                                                                                                                                                                                                                                                                                                                                                                                                                                                |
| EPI_ISL_591007, EPI_ISL_591014, EPI_ISL_1490457, EPI_ISL_1490461, EPI_ISL_1547563, EPI_ISL_1547567 to 1547569                                                                                                                                                                                                                                                                                                                                                                                                                                                                                                                                                                                                        | Department of Medical Microbiology, University Malaysia Medical Centre                                   | Department of Medical Microbiology                                                                                                               | Adeeba KAMARULZAMAN; Chee Kuan WONG; Cindy Shuan Ju TEH; I-Ching SAM; Sasheela PONNAMPALAVANAR; Sharifah Faridah SYED OMAR; University Malaysia Medical Centre COVID Team; Vijayan MUNUSAMY; Yoke Fun Chan; Yoong Min CHONG                                                                                                                                                                                                                                                                                                                                                                                                                                                                                                                                                                                                                        |
| EPI_ISL_417917                                                                                                                                                                                                                                                                                                                                                                                                                                                                                                                                                                                                                                                                                                       | Department of Medical Microbiology, University Malaysia Medical Centre                                   | Department of Medical Microbiology, Faculty of Medicine, University of Malaya                                                                    | Adeeba KAMARULZAMAN; Chee Kuan WONG; Cindy Shuan Ju TEH; Fadhil Hadi JAMALUDDIN; Han Ming GAN; I-Ching SAM; Jennifer Chong; Sasheela PONNAMPALAVANAR; Sharifah Faridah SYED OMAR; University Malaysia Medical Centre COVID Team; Vijayan MUNUSAMY; Yoke Fun Chan; Yoong Min CHONG                                                                                                                                                                                                                                                                                                                                                                                                                                                                                                                                                                  |
| EPI_ISL_417918 to 417920, EPI_ISL_501176 to 501228, EPI_ISL_506996 to 507000                                                                                                                                                                                                                                                                                                                                                                                                                                                                                                                                                                                                                                         | Department of Medical Microbiology, Western Sussex Hospitals NHS Foundation Trust, St Richard's Hospital | Wellcome Sanger Institute for the COVID-19 Genomics UK (COG-UK) consortium                                                                       | Cordelia Langford; David K. Jackson; Dominic Kwiatkowski; Ewan Harrison; Ian Johnston; John Sillitoe on behalf of the Wellcome Sanger Institute COVID-19 Surveillance Team ( <a href="http://www.sanger.ac.uk/covid-team">http://www.sanger.ac.uk/covid-team</a> ); Jonathan Lewis; Manasa Mutingwende; Michelle Erkiert; Olga Podplomyk; Paul Randall and Alex Alderton; Roberto Amato; Sarah Lowdon; Sonia Goncalves                                                                                                                                                                                                                                                                                                                                                                                                                             |
| EPI_ISL_488840, EPI_ISL_488845, EPI_ISL_488847, EPI_ISL_488853 to 488856, EPI_ISL_488861, EPI_ISL_488863 to 488864, EPI_ISL_488872, EPI_ISL_492836, EPI_ISL_492838 to 492839, EPI_ISL_492841 to 492842, EPI_ISL_492848 to 492849, EPI_ISL_492853 to 492855, EPI_ISL_492857 to 492861, EPI_ISL_492866 to 492867, EPI_ISL_492870 to 492871, EPI_ISL_492873, EPI_ISL_492875, EPI_ISL_492878, EPI_ISL_492881, EPI_ISL_492884, EPI_ISL_492886, EPI_ISL_492889, EPI_ISL_492891 to 492893, EPI_ISL_492895 to 492900, EPI_ISL_492903 to 492904, EPI_ISL_492907, EPI_ISL_492909 to 492910, EPI_ISL_492912 to 492913, EPI_ISL_492915, EPI_ISL_495081 to 495096, EPI_ISL_501557, EPI_ISL_501562, EPI_ISL_501602, EPI_ISL_501613 | Department of Medical Microbiology, University of Malaya                                                 | Department of Medical Microbiology                                                                                                               | Aung Kyaw Kyaw; Aung Zaw Latt; Hlaing Myat Thu; Hnin Ohnmyar Soe; Htin Lin; Kay Thi Aye; Lai Lai San; Myat Htut Nyunt; Nan Aye Thida Oo; Ni Ni Zaw; Phyu Win Ei; Su Mon Win; Theingi Win Myat; Wah Wah Aung; Yi Yi Kyaw; Zaw Than Htun                                                                                                                                                                                                                                                                                                                                                                                                                                                                                                                                                                                                             |
| see above                                                                                                                                                                                                                                                                                                                                                                                                                                                                                                                                                                                                                                                                                                            | Department of Medical, Biotechnologies University of Siena                                               | Department of Medical, Biotechnologies University of Siena                                                                                       | Anichini, G.; Cusi, G. and Santoro, F.; Gandolfo, C.; M.G.; Pinzauti, D.; Pozzi                                                                                                                                                                                                                                                                                                                                                                                                                                                                                                                                                                                                                                                                                                                                                                    |
| EPI_ISL_512844                                                                                                                                                                                                                                                                                                                                                                                                                                                                                                                                                                                                                                                                                                       | Department of Medicine, Gandhi hospital, Hyderabad                                                       | CSIR-Centre for Cellular and Molecular Biology                                                                                                   | Ajay Sarawagi; Archana Bharadwaj Siva; Dhiviya Vedagiri; Divya Gupta; Divya Tej Sowpati; G. Aditya Kumar; Gangumala Srinivas Reddy; Karthik Bharadwaj Tallapaka; Koushick Sivakumar; Krishnan Harinivas Harshan; Lamuk Zaveri; M Soujanya Reddy; Namami Gaur; Nikhil Hajirims; Onkar Kulkarni; Payel Mukherjee; Pooja Ramesh Gupta; Pratheusa Maacha; Priya Singh; Priyanka Pant; Purushothama Vodnal; Rajan Kumar Jha; Rajarao Mesipogu; Rajkanwar Nathawat; Rakesh K Mishra; Renu Sudhakar; Sakshi Shambhavi; Santosh Kumar Kuncha; Shagufta Khan; Shradha Vijay Lahoti; Sofia Banu; Somesh Gorde; Sujoy Deb; Swati Bayyana; Thrilok Chander Bingi; Tulasi Nagabandi; Umesh Kumar; Unis Ahmad Bhat; Vinayasekhar Aedula; Vishal Sah                                                                                                              |
| EPI_ISL_454733                                                                                                                                                                                                                                                                                                                                                                                                                                                                                                                                                                                                                                                                                                       | Department of Medicine, Gandhi hospital, Hyderabad                                                       | CSIR-Centre for Cellular and Molecular Biology                                                                                                   | Ajay Sarawagi; Archana Bharadwaj Siva; Dhiviya Vedagiri; Divya Gupta; Divya Tej Sowpati; G. Aditya Kumar; Gangumala Srinivas Reddy; Karthik Bharadwaj Tallapaka; Koushick Sivakumar; Krishnan Harinivas Harshan; Lamuk Zaveri; M Soujanya Reddy; Namami Gaur; Nikhil Hajirims; Onkar Kulkarni; Payel Mukherjee; Pooja Ramesh Gupta; Pratheusa Maacha; Priya Singh; Priyanka Pant; Purushothama Vodnal; Rajan Kumar Jha; Rajarao Mesipogu; Rajkanwar Nathawat; Rakesh K Mishra; Renu Sudhakar; Sakshi Shambhavi; Santosh Kumar Kuncha; Shagufta Khan; Shradha Vijay Lahoti; Sofia Banu; Somesh Gorde; Sujoy Deb; Swati Bayyana; Thrilok Chander Bingi; Tulasi Nagabandi; Umesh Kumar; Unis Ahmad Bhat; Vinayasekhar Aedula; Vishal Sah                                                                                                              |
| EPI_ISL_528809 to 528822                                                                                                                                                                                                                                                                                                                                                                                                                                                                                                                                                                                                                                                                                             | Department of Medicine, Gandhi hospital, Hyderabad                                                       | CSIR-Centre for Cellular and Molecular Biology                                                                                                   | Ajay Sarawagi; Archana Bharadwaj Siva; Dhiviya Vedagiri; Divya Gupta; Divya Tej Sowpati; G. Aditya Kumar; Gangumala Srinivas Reddy; Karthik Bharadwaj Tallapaka; Koushick Sivakumar; Krishnan Harinivas Harshan; Lamuk Zaveri; M Soujanya Reddy; Namami Gaur; Nikhil Hajirims; Onkar Kulkarni; Payel Mukherjee; Pooja Ramesh Gupta; Pratheusa Maacha; Priya Singh; Priyanka Pant; Purushothama Vodnal; Rajan Kumar Jha; Rajarao Mesipogu; Rajkanwar Nathawat; Rakesh K Mishra; Renu Sudhakar; Sakshi Shambhavi; Santosh Kumar Kuncha; Shagufta Khan; Shradha Vijay Lahoti; Sofia Banu; Somesh Gorde; Sujoy Deb; Swati Bayyana; Thrilok Chander Bingi; Tulasi Nagabandi; Umesh Kumar; Unis Ahmad Bhat; Vinayasekhar Aedula; Vishal Sah                                                                                                              |
| EPI_ISL_437438 to 437444, EPI_ISL_475030 to 475046, EPI_ISL_476869 to 476882, EPI_ISL_477183, EPI_ISL_495070 to 495080, EPI_ISL_500947 to 500950, EPI_ISL_512070 to 512071                                                                                                                                                                                                                                                                                                                                                                                                                                                                                                                                           | Department of MicroBiology, Government Medical College, Surat                                            | Gujarat Biotechnology Research Centre                                                                                                            | A M Kadri; Afzal Ansari; Akanksha Verma; Amit Kanani; Amit gamit; Anjali Rajwar; Ankit Hinsu; Apurvasinh Puvar; Armi Chaudhari; Bhavesh Modi; Bhavya Jinda; Binita Aring; Chaitanya Joshi; Dinesh Kumar; Dipa Kinariwala; Dipeshwari Shewale; Disha Patel; Fenil Patel; Gaurishankar Shrirami; Geeta Vaghela; Harsh Bakshi; Janvi Raval; Kairavi Joshi; Kamlesh J Upadhayay; Komal Patel; Lakshmi Pandya; Madhvi Khan; Maharshi Pandya; Monika Gandhi; Naresh Chauhan; Neelam Nathani; Neeta Khandelwal; Neha Rajpara; Nidhi Patel; Nidhi Sood; Nikha Trivedi; Nitin Savaliya; Pinal Trivedi; Pooja P Doshi; Pragya Sharma; Pranay Shah; Pritesh Sabara; Priti Pandita; Priyanka P Vatsa; R D Dixit; Raghavendra Kumar; Ramesh Pandit; Sharmistha Majumdar; Snehal Bagatharia; Sonia Barve; Summaiya Mullan; Tejas Shah; Zarna Patel; Zuber Saiyed |
| see above                                                                                                                                                                                                                                                                                                                                                                                                                                                                                                                                                                                                                                                                                                            | Department of MicroBiology, Government Medical College, Surat                                            | Gujarat Biotechnology Research Centre                                                                                                            | A M Kadri; Afzal Ansari; Akanksha Verma; Amit Kanani; Amit gamit; Anjali Rajwar; Ankit Hinsu; Apurvasinh Puvar; Armi Chaudhari; Bhavesh Modi; Bhavya Jinda; Binita Aring; Chaitanya Joshi; Dinesh Kumar; Dipa Kinariwala; Dipeshwari Shewale; Disha Patel; Fenil Patel; Gaurishankar Shrirami; Geeta Vaghela; Harsh Bakshi; Janvi Raval; Kairavi Joshi; Kamlesh J Upadhayay; Komal Patel; Lakshmi Pandya; Madhvi Khan; Maharshi Pandya; Monika Gandhi; Naresh Chauhan; Neelam Nathani; Neeta Khandelwal; Neha Rajpara; Nidhi Patel; Nidhi Sood; Nikha Trivedi; Nitin Savaliya; Pinal Trivedi; Pooja P Doshi; Pragya Sharma; Pranay Shah; Pritesh Sabara; Priti Pandita; Priyanka P Vatsa; R D Dixit; Raghavendra Kumar; Ramesh Pandit; Sharmistha Majumdar; Snehal Bagatharia; Sonia Barve; Summaiya Mullan; Tejas Shah; Zarna Patel; Zuber Saiyed |



|                                                                                                                                                                                                                                                                                                                                                                                                                                                                                                                                                                                                                                                                                                                                                                                                                                                                                                                                                                                                                                                                                                                                                                                                                                                                                                                                                                                                                                                                                                                                                                                                                                                                                                                                                                                                                                                                                                                                                                                                                                                                                                                                                                                                                                                                                                                                                                                                                                                                                                                                                                                                                                                                                                                                                                                                                                                                                                                                                                                                                                                                                                                                                                                                                                                                    |                                                                                                            |                                                                                                                                       |                                                                                                                                                                                                                                                                                                                                                                                                                                                                                                          |
|--------------------------------------------------------------------------------------------------------------------------------------------------------------------------------------------------------------------------------------------------------------------------------------------------------------------------------------------------------------------------------------------------------------------------------------------------------------------------------------------------------------------------------------------------------------------------------------------------------------------------------------------------------------------------------------------------------------------------------------------------------------------------------------------------------------------------------------------------------------------------------------------------------------------------------------------------------------------------------------------------------------------------------------------------------------------------------------------------------------------------------------------------------------------------------------------------------------------------------------------------------------------------------------------------------------------------------------------------------------------------------------------------------------------------------------------------------------------------------------------------------------------------------------------------------------------------------------------------------------------------------------------------------------------------------------------------------------------------------------------------------------------------------------------------------------------------------------------------------------------------------------------------------------------------------------------------------------------------------------------------------------------------------------------------------------------------------------------------------------------------------------------------------------------------------------------------------------------------------------------------------------------------------------------------------------------------------------------------------------------------------------------------------------------------------------------------------------------------------------------------------------------------------------------------------------------------------------------------------------------------------------------------------------------------------------------------------------------------------------------------------------------------------------------------------------------------------------------------------------------------------------------------------------------------------------------------------------------------------------------------------------------------------------------------------------------------------------------------------------------------------------------------------------------------------------------------------------------------------------------------------------------|------------------------------------------------------------------------------------------------------------|---------------------------------------------------------------------------------------------------------------------------------------|----------------------------------------------------------------------------------------------------------------------------------------------------------------------------------------------------------------------------------------------------------------------------------------------------------------------------------------------------------------------------------------------------------------------------------------------------------------------------------------------------------|
| EPI_ISL_431102                                                                                                                                                                                                                                                                                                                                                                                                                                                                                                                                                                                                                                                                                                                                                                                                                                                                                                                                                                                                                                                                                                                                                                                                                                                                                                                                                                                                                                                                                                                                                                                                                                                                                                                                                                                                                                                                                                                                                                                                                                                                                                                                                                                                                                                                                                                                                                                                                                                                                                                                                                                                                                                                                                                                                                                                                                                                                                                                                                                                                                                                                                                                                                                                                                                     | Department of MicroBiology, Gandhi Medical College and Hospital, Secendrabad, Hyderabad, India             | Department of Microbiology, Gandhi Medical College and Hospital, Secendrabad, Hyderabad                                               | Amit A. Upadhyay; Anand Kumar K; Kalyani Putty; Muttineni Radhakrishna; Nagamani K; Pankaj Singh D; Raja Rao M; Rama Amara; Ravikumar P; Steven E. Bosinger; Sunitha P; Thrilok Chander B                                                                                                                                                                                                                                                                                                                |
| EPI_ISL_416314 to 416315                                                                                                                                                                                                                                                                                                                                                                                                                                                                                                                                                                                                                                                                                                                                                                                                                                                                                                                                                                                                                                                                                                                                                                                                                                                                                                                                                                                                                                                                                                                                                                                                                                                                                                                                                                                                                                                                                                                                                                                                                                                                                                                                                                                                                                                                                                                                                                                                                                                                                                                                                                                                                                                                                                                                                                                                                                                                                                                                                                                                                                                                                                                                                                                                                                           | Department of Microbiology, Faculty of Medicine, The Chinese University of Hong Kong, Hong Kong SAR, China | Department of Microbiology, Faculty of Medicine, Chinese University of Hong Kong, Hong Kong SAR, China                                | Paul KS Chan; Zigui Chen                                                                                                                                                                                                                                                                                                                                                                                                                                                                                 |
| EPI_ISL_431103, EPI_ISL_431117                                                                                                                                                                                                                                                                                                                                                                                                                                                                                                                                                                                                                                                                                                                                                                                                                                                                                                                                                                                                                                                                                                                                                                                                                                                                                                                                                                                                                                                                                                                                                                                                                                                                                                                                                                                                                                                                                                                                                                                                                                                                                                                                                                                                                                                                                                                                                                                                                                                                                                                                                                                                                                                                                                                                                                                                                                                                                                                                                                                                                                                                                                                                                                                                                                     | Department of Microbiology, Gandhi Medical College and Hospital, Secendrabad, Hyderabad, India             | Department of Microbiology, Gandhi Medical College and Hospital, Secendrabad, Hyderabad, India                                        | Amit A. Upadhyay; Anand Kumar K; Kalyani Putty; Muttineni Radhakrishna; Nagamani K; Pankaj Singh D; Raja Rao M; Rama Amara; Ravikumar P; Steven E. Bosinger; Steven E. Bosinger; Sunitha P; Thrilok Chander B                                                                                                                                                                                                                                                                                            |
| EPI_ISL_483850 to 483879                                                                                                                                                                                                                                                                                                                                                                                                                                                                                                                                                                                                                                                                                                                                                                                                                                                                                                                                                                                                                                                                                                                                                                                                                                                                                                                                                                                                                                                                                                                                                                                                                                                                                                                                                                                                                                                                                                                                                                                                                                                                                                                                                                                                                                                                                                                                                                                                                                                                                                                                                                                                                                                                                                                                                                                                                                                                                                                                                                                                                                                                                                                                                                                                                                           | Department of Microbiology, Government Medical College, Surat                                              | Gujarat Biotechnology Research Centre                                                                                                 | A M Kadri; Afzal Ansari; Amit gamit; Apurvashih Puvar; Chaitanya Joshi; Dinesh Kumar; Harsh Bakshi; Janvi Ravai; Komal Patel; Labdhi Pandya; Madhvi Joshi; Maharshi Pandya; Monika Gandhi; Naresh Chauhan; Nidhi Patel; Nikha Trivedi; Nitin Savaliya; Pinal Trivedi; R D Dixit; Raghawendra Kumar; Summaiya Mullan; Zarna Patel; Zuber Saiyed                                                                                                                                                           |
| EPI_ISL_413017 to 413018, EPI_ISL_413514, EPI_ISL_413516                                                                                                                                                                                                                                                                                                                                                                                                                                                                                                                                                                                                                                                                                                                                                                                                                                                                                                                                                                                                                                                                                                                                                                                                                                                                                                                                                                                                                                                                                                                                                                                                                                                                                                                                                                                                                                                                                                                                                                                                                                                                                                                                                                                                                                                                                                                                                                                                                                                                                                                                                                                                                                                                                                                                                                                                                                                                                                                                                                                                                                                                                                                                                                                                           | Department of Microbiology, Institute for Viral Diseases, College of Medicine, Korea University            | Department of Microbiology, Institute for Viral Diseases, College of Medicine, Korea University                                       | Changmin Kang; Cui Chunguang; Dong Min Kim; Gee Eun Lee; Gee eun Lee; Hee Jin Chung; Hee Ho; Jeonghun Kim; Ji Yun Noh; Jin Gu Yoon; Jin Il Kim; Joo Young Song; Jun-Yong Bae; Jungmin Lee; Juyoung Cho; Kyeong-ryeod Shin; Man-Seong Park; Woo Joo Kim                                                                                                                                                                                                                                                   |
| EPI_ISL_420531 to 420534, EPI_ISL_420536 to 420539                                                                                                                                                                                                                                                                                                                                                                                                                                                                                                                                                                                                                                                                                                                                                                                                                                                                                                                                                                                                                                                                                                                                                                                                                                                                                                                                                                                                                                                                                                                                                                                                                                                                                                                                                                                                                                                                                                                                                                                                                                                                                                                                                                                                                                                                                                                                                                                                                                                                                                                                                                                                                                                                                                                                                                                                                                                                                                                                                                                                                                                                                                                                                                                                                 | Department of Microbiology, PathWest QEII Medical Centre                                                   | Department of Microbiology, PathWest QEII Medical Centre                                                                              | Avram Levy; Chisha Sikazwe; David Speers and David Smith; Jurissa Lang                                                                                                                                                                                                                                                                                                                                                                                                                                   |
| EPI_ISL_497768 to 497870, EPI_ISL_498269 to 498271, EPI_ISL_510538 to 510540, EPI_ISL_516798 to 516799                                                                                                                                                                                                                                                                                                                                                                                                                                                                                                                                                                                                                                                                                                                                                                                                                                                                                                                                                                                                                                                                                                                                                                                                                                                                                                                                                                                                                                                                                                                                                                                                                                                                                                                                                                                                                                                                                                                                                                                                                                                                                                                                                                                                                                                                                                                                                                                                                                                                                                                                                                                                                                                                                                                                                                                                                                                                                                                                                                                                                                                                                                                                                             | Department of Microbiology, The University of Hong Kong                                                    | Department of Microbiology, The University of Hong Kong                                                                               | Kelvin K.W. To; Kwok-Yung Yuen                                                                                                                                                                                                                                                                                                                                                                                                                                                                           |
| EPI_ISL_1540501 to 1540533, EPI_ISL_1544108                                                                                                                                                                                                                                                                                                                                                                                                                                                                                                                                                                                                                                                                                                                                                                                                                                                                                                                                                                                                                                                                                                                                                                                                                                                                                                                                                                                                                                                                                                                                                                                                                                                                                                                                                                                                                                                                                                                                                                                                                                                                                                                                                                                                                                                                                                                                                                                                                                                                                                                                                                                                                                                                                                                                                                                                                                                                                                                                                                                                                                                                                                                                                                                                                        | Department of Microbiology, University Hospital Motol                                                      | Department of Microbiology, University Hospital Motol                                                                                 | Ales Briksi; Katerina Chuda; Katerina Polackova; Klara Krivankova; Miroslav Zajac; Ondrej Cinek; Pavel Drevinek; Petr Hubacek                                                                                                                                                                                                                                                                                                                                                                            |
| EPI_ISL_1495362 to 1495383, EPI_ISL_1495602 to 1495625, EPI_ISL_1495894 to 1495919                                                                                                                                                                                                                                                                                                                                                                                                                                                                                                                                                                                                                                                                                                                                                                                                                                                                                                                                                                                                                                                                                                                                                                                                                                                                                                                                                                                                                                                                                                                                                                                                                                                                                                                                                                                                                                                                                                                                                                                                                                                                                                                                                                                                                                                                                                                                                                                                                                                                                                                                                                                                                                                                                                                                                                                                                                                                                                                                                                                                                                                                                                                                                                                 | Department of Microbiology, University Innsbruck                                                           | Berghthaler laboratory, CeMM Research Center for Molecular Medicine of the Austrian Academy of Sciences                               | Andreas Berghthaler; Anna Schedl; Bekir Erguner; Benedikt Agerer; Christoph Bock; Fabian Amman; Jan Laine; Lukas Endler; Maelle Le Moing; Martin Senekowitsch; Michael Schuster; Petr Triska; Thomas Penz                                                                                                                                                                                                                                                                                                |
| EPI_ISL_438138                                                                                                                                                                                                                                                                                                                                                                                                                                                                                                                                                                                                                                                                                                                                                                                                                                                                                                                                                                                                                                                                                                                                                                                                                                                                                                                                                                                                                                                                                                                                                                                                                                                                                                                                                                                                                                                                                                                                                                                                                                                                                                                                                                                                                                                                                                                                                                                                                                                                                                                                                                                                                                                                                                                                                                                                                                                                                                                                                                                                                                                                                                                                                                                                                                                     | Department of Microbiology, Gandhi Medical College and Hospital                                            | Department of Microbiology, Gandhi Medical College and Hospital Secendrabad, Hyderabad, India                                         | Amit A. Upadhyay; Anand Kumar K; Kalyani Putty; Muttineni Radhakrishna; Nagamani K; Pankaj Singh D; Raja Rao Mesipogu; Rama Amara; Ravikumar P; Steven Bosinger; Sunitha P; Thrilok Chander B                                                                                                                                                                                                                                                                                                            |
| EPI_ISL_437626                                                                                                                                                                                                                                                                                                                                                                                                                                                                                                                                                                                                                                                                                                                                                                                                                                                                                                                                                                                                                                                                                                                                                                                                                                                                                                                                                                                                                                                                                                                                                                                                                                                                                                                                                                                                                                                                                                                                                                                                                                                                                                                                                                                                                                                                                                                                                                                                                                                                                                                                                                                                                                                                                                                                                                                                                                                                                                                                                                                                                                                                                                                                                                                                                                                     | Department of Microbiology, Gandhi Medical College and Hospital                                            | Department of Veterinary Biotechnology, College of Veterinary Science, Rajendranagar, PV Narsimha Rao Telangana Veterinary University | Amit A. Upadhyay; Anand Kumar K; Kalyani Putty; Muttineni Radhakrishna; Nagamani K; Pankaj Singh D; Raja Rao M; Rama Amara; Ravikumar P; Steven Bosinger; Sunitha P; Thrilok Chander B                                                                                                                                                                                                                                                                                                                   |
| EPI_ISL_431101                                                                                                                                                                                                                                                                                                                                                                                                                                                                                                                                                                                                                                                                                                                                                                                                                                                                                                                                                                                                                                                                                                                                                                                                                                                                                                                                                                                                                                                                                                                                                                                                                                                                                                                                                                                                                                                                                                                                                                                                                                                                                                                                                                                                                                                                                                                                                                                                                                                                                                                                                                                                                                                                                                                                                                                                                                                                                                                                                                                                                                                                                                                                                                                                                                                     | Department of Microbiology, Gandhi Medical College and Hospital                                            | Virus Research Laboratory, Department of Zoology, Osmania University, Hyderabad, India                                                | Amit A. Upadhyay Steven E. Bosinger; Anand Kumar K; Kalyani Putty; Muttineni Radhakrishna; Nagamani K; Pankaj Singh D; Raja Rao M; Rama Amara; Ravikumar P; Sunitha P; Thrilok Chander B                                                                                                                                                                                                                                                                                                                 |
| EPI_ISL_438139                                                                                                                                                                                                                                                                                                                                                                                                                                                                                                                                                                                                                                                                                                                                                                                                                                                                                                                                                                                                                                                                                                                                                                                                                                                                                                                                                                                                                                                                                                                                                                                                                                                                                                                                                                                                                                                                                                                                                                                                                                                                                                                                                                                                                                                                                                                                                                                                                                                                                                                                                                                                                                                                                                                                                                                                                                                                                                                                                                                                                                                                                                                                                                                                                                                     | Department of Microbiology, Gandhi Medical College and Hospital, Hyderabad                                 | Virus Research Laboratory, Department of Zoology, Osmania University, Hyderabad, India                                                | Amit A. Upadhyay; Anand Kumar K; Kalyani Putty; Muttineni Radhakrishna; Nagamani K; Pankaj Singh D; Raja Rao M; Rama Amara; Ravikumar P; Steven Bosinger; Sunitha P; Thrilok Chander B                                                                                                                                                                                                                                                                                                                   |
| EPI_ISL_463741 to 463748                                                                                                                                                                                                                                                                                                                                                                                                                                                                                                                                                                                                                                                                                                                                                                                                                                                                                                                                                                                                                                                                                                                                                                                                                                                                                                                                                                                                                                                                                                                                                                                                                                                                                                                                                                                                                                                                                                                                                                                                                                                                                                                                                                                                                                                                                                                                                                                                                                                                                                                                                                                                                                                                                                                                                                                                                                                                                                                                                                                                                                                                                                                                                                                                                                           | Department of Molecular Virology, Cyprus Institute of Neurology and Genetics                               | Department of Molecular Virology, Cyprus Institute of Neurology and Genetics                                                          | Christina Christodoulou; Christina Tryfonos; Dana Koptides; George Krashias; Jan Richter; Stavros Bashiardes                                                                                                                                                                                                                                                                                                                                                                                             |
| EPI_ISL_1472367 to 1472371                                                                                                                                                                                                                                                                                                                                                                                                                                                                                                                                                                                                                                                                                                                                                                                                                                                                                                                                                                                                                                                                                                                                                                                                                                                                                                                                                                                                                                                                                                                                                                                                                                                                                                                                                                                                                                                                                                                                                                                                                                                                                                                                                                                                                                                                                                                                                                                                                                                                                                                                                                                                                                                                                                                                                                                                                                                                                                                                                                                                                                                                                                                                                                                                                                         | Department of Pathology, National Institute of Infectious Diseases                                         | Department of Pathology, National Institute of Infectious Diseases                                                                    | Harutaka Katano; Kentaro Itokawa; Makoto Kuroda; Masanori Hashino; Rina Tanaka; Tadaki Suzuki; Tsuyoshi Sekizuka                                                                                                                                                                                                                                                                                                                                                                                         |
| EPI_ISL_417176 to 417179, EPI_ISL_419217, EPI_ISL_419222 to 419223                                                                                                                                                                                                                                                                                                                                                                                                                                                                                                                                                                                                                                                                                                                                                                                                                                                                                                                                                                                                                                                                                                                                                                                                                                                                                                                                                                                                                                                                                                                                                                                                                                                                                                                                                                                                                                                                                                                                                                                                                                                                                                                                                                                                                                                                                                                                                                                                                                                                                                                                                                                                                                                                                                                                                                                                                                                                                                                                                                                                                                                                                                                                                                                                 | Department of Pathology, Princess Margaret Hospital                                                        | Department of Health Technology and Informatics, Faculty of Health and Social Science, The Hong Kong Polytechnic University           | Alan Ka-Lun WU; Alex Yat-Man HO; Barry Kin-Chung WONG; David Ho-Keung SHUM; Eugene Yuk-Keung TSO; Gilman Kit-Hang SIU; Hiu-Yin LAO; Kam-Tong YIP; Kam-Tong Yip; Kenneth Siu-Sing LEUNG; Kingsley King-Gee TAM; Kit-Man SIN; Kitty Sau-Chun FUNG; Kwok-Cheung LUNG; Lam-Kwong LEE; Man-Chun CHAN; Ming-Pan CHOI; Miranda Chong-Yee YAU; Raymond Wai-To LIU; Sandy Ka-Yee CHAU; Shea Ping YIP; Tak-Lun QUE; Tak-Lun Que; Timothy Ting-Leung NG; Wai-Shing LEUNG; Wing Cheong YAM; Wing-Kin TO; Yuk-Yung NG |
| EPI_ISL_594185 to 594188, EPI_ISL_596451 to 596452, EPI_ISL_596455                                                                                                                                                                                                                                                                                                                                                                                                                                                                                                                                                                                                                                                                                                                                                                                                                                                                                                                                                                                                                                                                                                                                                                                                                                                                                                                                                                                                                                                                                                                                                                                                                                                                                                                                                                                                                                                                                                                                                                                                                                                                                                                                                                                                                                                                                                                                                                                                                                                                                                                                                                                                                                                                                                                                                                                                                                                                                                                                                                                                                                                                                                                                                                                                 | Department of Pathology, School of Medicine, Imam Khomeini Hospital, Tehran University of Medical Sciences | Genetics Research Center, University of Social Welfare and Rehabilitation Sciences                                                    | Ali Jafarpour; Alireza Abdollahi; Azam Ghaziasad; Azar Hadadi; Hossein Najmabadi; Khadijeh Jalalvand; Kimia Kahrizi; Marzieh Mohseni; Reza Najafipour; Saber Soltani; Seyed Mohammad Jazayeri; Seyedeh elham Mortazavi; Zohreh Fattahi                                                                                                                                                                                                                                                                   |
| EPI_ISL_582033                                                                                                                                                                                                                                                                                                                                                                                                                                                                                                                                                                                                                                                                                                                                                                                                                                                                                                                                                                                                                                                                                                                                                                                                                                                                                                                                                                                                                                                                                                                                                                                                                                                                                                                                                                                                                                                                                                                                                                                                                                                                                                                                                                                                                                                                                                                                                                                                                                                                                                                                                                                                                                                                                                                                                                                                                                                                                                                                                                                                                                                                                                                                                                                                                                                     | Department of Pathology, School of Medicine, Imam Khomeini Hospital, Tehran University of Medical Sciences | Genetics Research Center, University of Social Welfare And Rehabilitation Sciences                                                    | Ali Jafarpour; Alireza Abdollahi; Azam Ghaziasad; Azar Hadadi; Hossein Najmabadi; Khadijeh Jalalvand; Kimia Kahrizi; Marzieh Mohseni; Reza Najafipour; Saber Soltani; Seyed Mohammad Jazayeri; Seyedeh elham Mortazavi; Zohreh Fattahi                                                                                                                                                                                                                                                                   |
| EPI_ISL_413459                                                                                                                                                                                                                                                                                                                                                                                                                                                                                                                                                                                                                                                                                                                                                                                                                                                                                                                                                                                                                                                                                                                                                                                                                                                                                                                                                                                                                                                                                                                                                                                                                                                                                                                                                                                                                                                                                                                                                                                                                                                                                                                                                                                                                                                                                                                                                                                                                                                                                                                                                                                                                                                                                                                                                                                                                                                                                                                                                                                                                                                                                                                                                                                                                                                     | Department of Pathology, Toshiba Hospital                                                                  | Pathogen Genomics Center, National Institute of Infectious Diseases                                                                   | Haruka Nishioka; Harutaka Katano; Ippei Miyamoto; Ja-Mun Chong; Jun Yamazaki; Kentaro Itokawa; Makoto Kuroda; Masahiro Sano; Minoru Tobiume; Noriko Nakajima; Takuya Adachi; Tsuyoshi Sekizuka; Yuko Sato                                                                                                                                                                                                                                                                                                |
| EPI_ISL_417180 to 417182, EPI_ISL_417185, EPI_ISL_419221, EPI_ISL_419253                                                                                                                                                                                                                                                                                                                                                                                                                                                                                                                                                                                                                                                                                                                                                                                                                                                                                                                                                                                                                                                                                                                                                                                                                                                                                                                                                                                                                                                                                                                                                                                                                                                                                                                                                                                                                                                                                                                                                                                                                                                                                                                                                                                                                                                                                                                                                                                                                                                                                                                                                                                                                                                                                                                                                                                                                                                                                                                                                                                                                                                                                                                                                                                           | Department of Pathology, United Christian Hospital                                                         | Department of Health Technology and Informatics, Faculty of Health and Social Science, The Hong Kong Polytechnic University           | Alan Ka-Lun WU; Alex Yat-Man HO; Barry Kin-Chung WONG; David Ho-Keung SHUM; Eugene Yuk-Keung TSO; Gilman Kit-Hang SIU; Hiu-Yin LAO; Kam-Tong YIP; Kam-Tong Yip; Kenneth Siu-Sing LEUNG; Kingsley King-Gee TAM; Kit-Man SIN; Kitty Sau-Chun FUNG; Kwok-Cheung LUNG; Lam-Kwong LEE; Man-Chun CHAN; Ming-Pan CHOI; Miranda Chong-Yee YAU; Raymond Wai-To LIU; Sandy Ka-Yee CHAU; Shea Ping YIP; Tak-Lun QUE; Tak-Lun Que; Timothy Ting-Leung NG; Wai-Shing LEUNG; Wing Cheong YAM; Wing-Kin TO; Yuk-Yung NG |
| EPI_ISL_425231 to 425257, EPI_ISL_425260, EPI_ISL_425262 to 425273, EPI_ISL_425275 to 425279, EPI_ISL_425281 to 425345, EPI_ISL_425347 to 425371, EPI_ISL_425373 to 425385, EPI_ISL_425387 to 425404, EPI_ISL_425406 to 425409, EPI_ISL_425411 to 425418, EPI_ISL_425420 to 425421, EPI_ISL_425423 to 425438, EPI_ISL_425441 to 425461, EPI_ISL_433466 to 433487, EPI_ISL_433489 to 433497, EPI_ISL_433666 to 433686, EPI_ISL_433688 to 433707, EPI_ISL_433709 to 433715, EPI_ISL_433717 to 433739, EPI_ISL_433741 to 433746, EPI_ISL_433748 to 433765, EPI_ISL_433767 to 433806, EPI_ISL_433808 to 433837, EPI_ISL_433839 to 433971, EPI_ISL_433974 to 433983, EPI_ISL_433986 to 433997, EPI_ISL_433999 to 434006, EPI_ISL_434008 to 434062, EPI_ISL_438550 to 438571, EPI_ISL_438573 to 438610, EPI_ISL_438612 to 438654, EPI_ISL_438656 to 438687, EPI_ISL_438689 to 438748, EPI_ISL_444313 to 444342, EPI_ISL_444344, EPI_ISL_444346 to 444348, EPI_ISL_444350 to 444354, EPI_ISL_444356 to 444374, EPI_ISL_444376 to 444382, EPI_ISL_444384 to 444408, EPI_ISL_444410 to 444433, EPI_ISL_444435 to 444443, EPI_ISL_444446 to 444453, EPI_ISL_4447945 to 447983, EPI_ISL_447987 to 448013, EPI_ISL_448015 to 448029, EPI_ISL_448031 to 448037, EPI_ISL_448039 to 448071, EPI_ISL_448074 to 448084, EPI_ISL_448086 to 448090, EPI_ISL_448092, EPI_ISL_448096 to 448104, EPI_ISL_448106 to 448115, EPI_ISL_452857 to 452901, EPI_ISL_452903 to 452906, EPI_ISL_452910 to 452936, EPI_ISL_452937 to 452949, EPI_ISL_452951 to 452954, EPI_ISL_452956 to 453005, EPI_ISL_456677 to 456682, EPI_ISL_456686, EPI_ISL_456688, EPI_ISL_456690, EPI_ISL_456706, EPI_ISL_456708 to 456733, EPI_ISL_456735 to 456755, EPI_ISL_461546 to 461563, EPI_ISL_461565 to 461588, EPI_ISL_473451 to 473493, EPI_ISL_473495 to 473507, EPI_ISL_477783 to 477785, EPI_ISL_477787 to 477819, EPI_ISL_483913 to 483915, EPI_ISL_490317 to 490329, EPI_ISL_499853, EPI_ISL_499855, EPI_ISL_499905, EPI_ISL_499908, EPI_ISL_499966, EPI_ISL_499968 to 499973, EPI_ISL_512330 to 512335, EPI_ISL_514443 to 514451, EPI_ISL_516990 to 517000, EPI_ISL_529224 to 529225, EPI_ISL_529236, EPI_ISL_529257, EPI_ISL_529261, EPI_ISL_529265, EPI_ISL_529269, EPI_ISL_529283, EPI_ISL_529299, EPI_ISL_529445, EPI_ISL_529454, EPI_ISL_529456 to 529660, EPI_ISL_549374, EPI_ISL_549386, EPI_ISL_549388 to 549394, EPI_ISL_572471 to 572472, EPI_ISL_572484, EPI_ISL_572519, EPI_ISL_572524, EPI_ISL_572541, EPI_ISL_572592, EPI_ISL_572616, EPI_ISL_572642, EPI_ISL_572779, EPI_ISL_572792, EPI_ISL_572851 to 572852, EPI_ISL_572862 to 572868, EPI_ISL_573138 to 573151, EPI_ISL_573153, EPI_ISL_576897 to 576902, EPI_ISL_576906 to 576919, EPI_ISL_584283, EPI_ISL_584286 to 584291, EPI_ISL_584294 to 584302, EPI_ISL_584304 to 584307, EPI_ISL_584309 to 584314, EPI_ISL_584316 to 584318, EPI_ISL_584321 to 584323, EPI_ISL_611593, EPI_ISL_611751, EPI_ISL_611938, EPI_ISL_611964 to 611967, EPI_ISL_612007, EPI_ISL_612034, EPI_ISL_612099, EPI_ISL_612106, EPI_ISL_612123, EPI_ISL_612186, EPI_ISL_612262 to 612283, EPI_ISL_1386571 to 1386575, EPI_ISL_1386581, EPI_ISL_1386583, EPI_ISL_1386586, EPI_ISL_1386588 to 1386589, EPI_ISL_1474564 to 1474573, EPI_ISL_1545847 to 1545851 |                                                                                                            |                                                                                                                                       |                                                                                                                                                                                                                                                                                                                                                                                                                                                                                                          |
| see above                                                                                                                                                                                                                                                                                                                                                                                                                                                                                                                                                                                                                                                                                                                                                                                                                                                                                                                                                                                                                                                                                                                                                                                                                                                                                                                                                                                                                                                                                                                                                                                                                                                                                                                                                                                                                                                                                                                                                                                                                                                                                                                                                                                                                                                                                                                                                                                                                                                                                                                                                                                                                                                                                                                                                                                                                                                                                                                                                                                                                                                                                                                                                                                                                                                          | Department of Pathology, University of Cambridge                                                           | COVID-19 Genomics UK (COG-UK) Consortium                                                                                              | Aminu S. Jahun; Anna Yakovleva; Charlotte J. Houldcroft; Fahad A Khokhar; Grant Hall; Ian Goodfellow; Iliana Georgana; Laura G Caller; Luke W Meredith; M. Estee Torok; M. Estée Török; M. Est.Öse Trk; Malte Pinckert; Martin D. Curran; Myra Hosmillo; Rhys Izuagbe; Sarah L. Caddy; Surendra Parmar; Theresa Felwell; William L. Hamilton; Yasmin Chaudhry                                                                                                                                            |
| EPI_ISL_458571, EPI_ISL_459173, EPI_ISL_459241, EPI_ISL_459243, EPI_ISL_459258, EPI_ISL_524590, EPI_ISL_524595                                                                                                                                                                                                                                                                                                                                                                                                                                                                                                                                                                                                                                                                                                                                                                                                                                                                                                                                                                                                                                                                                                                                                                                                                                                                                                                                                                                                                                                                                                                                                                                                                                                                                                                                                                                                                                                                                                                                                                                                                                                                                                                                                                                                                                                                                                                                                                                                                                                                                                                                                                                                                                                                                                                                                                                                                                                                                                                                                                                                                                                                                                                                                     | Department of Pathology, University of Cambridge                                                           | Wellcome Sanger Institute for the COVID-19 Genomics UK (COG-UK) Consortium                                                            | Aminu S. Jahun; Anna Yakovleva; Charlotte J. Houldcroft; Cordelia Langford; David K. Jackson; Dominic Kwiatkowski; Ewan Harrison; Fahad A Khokhar; Grant Hall; Ian Goodfellow; Ian Johnston; John Sillitoe on behalf of the Wellcome Sanger Institute COVID-19 Surveillance Team; Laura G Caller; Luke W Meredith; M. Estée Török; Martin D. Curran; Myra Hosmillo; Roberto Amato; Sarah L. Caddy; Sonia Goncalves; Theresa Felwell; William L. Hamilton; and Alex Alderton                              |
| EPI_ISL_438248 to 438545, EPI_ISL_439368 to 439664, EPI_ISL_439863 to 439952, EPI_ISL_439954 to 439956, EPI_ISL_439958, EPI_ISL_439961, EPI_ISL_439963, EPI_ISL_439968, EPI_ISL_439970, EPI_ISL_439975, EPI_ISL_439977, EPI_ISL_439980, EPI_ISL_439987, EPI_ISL_439989 to 439991, EPI_ISL_439993 to 439997, EPI_ISL_440003 to 440004, EPI_ISL_440007, EPI_ISL_440009 to 440012, EPI_ISL_440014 to 440015, EPI_ISL_440017, EPI_ISL_440019, EPI_ISL_440024 to 440025, EPI_ISL_440030, EPI_ISL_440034 to 440035, EPI_ISL_440053, EPI_ISL_440055, EPI_ISL_440057, EPI_ISL_440059 to 440062, EPI_ISL_440064, EPI_ISL_440066 to 440067, EPI_ISL_440069, EPI_ISL_440072 to 440080, EPI_ISL_440082 to 440083, EPI_ISL_440085 to 440086, EPI_ISL_440088 to 440090, EPI_ISL_440096 to 440097, EPI_ISL_440099, EPI_ISL_440104, EPI_ISL_440107 to 440112, EPI_ISL_440115, EPI_ISL_440129, EPI_ISL_440132 to 440133, EPI_ISL_440138, EPI_ISL_440143 to 440144, EPI_ISL_440146 to 440147, EPI_ISL_440150, EPI_ISL_440152, EPI_ISL_440155, EPI_ISL_440159, EPI_ISL_440161, EPI_ISL_440163 to 440164, EPI_ISL_440166, EPI_ISL_440169 to 440171, EPI_ISL_440173, EPI_ISL_440176 to 440177, EPI_ISL_440179 to 440186, EPI_ISL_440188, EPI_ISL_440193, EPI_ISL_440195, EPI_ISL_440197, EPI_ISL_440202 to 440203, EPI_ISL_440207 to 440209, EPI_ISL_440211, EPI_ISL_440213, EPI_ISL_440217, EPI_ISL_440223, EPI_ISL_440226, EPI_ISL_440230 to 440231, EPI_ISL_440234, EPI_ISL_440237, EPI_ISL_440239 to 440240, EPI_ISL_440244, EPI_ISL_440246 to 440247, EPI_ISL_440254, EPI_ISL_440257 to 440261, EPI_ISL_440263 to 440265, EPI_ISL_440267 to 440268, EPI_ISL_440270 to 440271, EPI_ISL_440278 to 440285, EPI_ISL_440287 to 440288, EPI_ISL_441680 to 441681, EPI_ISL_441684 to 441686, EPI_ISL_441688 to 441689, EPI_ISL_441692, EPI_ISL_441993, EPI_ISL_441700 to 441703, EPI_ISL_441705 to 441707, EPI_ISL_441709 to 441711, EPI_ISL_441713, EPI_ISL_441715, EPI_ISL_441718, EPI_ISL_441720 to 441729, EPI_ISL_441731 to 441732, EPI_ISL_441734 to 441736, EPI_ISL_441738 to 441750, EPI_ISL_441748 to 441750, EPI_ISL_441752, EPI_ISL_441754 to 441760, EPI_ISL_441762 to 441764, EPI_ISL_441767 to 441769, EPI_ISL_441772 to 441774, EPI_ISL_441777 to 441780, EPI_ISL_441782 to 441846, EPI_ISL_442045 to 442343, EPI_ISL_442524 to 442623, EPI_ISL_442811 to 443118, EPI_ISL_443318 to 443685, EPI_ISL_458516 to 458570, EPI_ISL_458572 to 458577, EPI_ISL_459166 to 459172, EPI_ISL_459174 to 459240, EPI_ISL_459242, EPI_ISL_459244 to 459257, EPI_ISL_459259 to 459297, EPI_ISL_459304 to 459323, EPI_ISL_459410 to 459504, EPI_ISL_469891 to 469913, EPI_ISL_470090 to 470355, EPI_ISL_470358 to 470528, EPI_ISL_470531 to                                                                                                                                                                                                                                                                                                                                                                                                                                                                                                                                                |                                                                                                            |                                                                                                                                       |                                                                                                                                                                                                                                                                                                                                                                                                                                                                                                          |

|                                                                                                                                                                                                                                                                                                                                                                                                                                                                                                                                                                                                                                                                                                                                                                                                                                                                                                                                                                                                                                                                                                                                                                                                                                                                                                |           |                                                                                                                                             |                                                                                                                                                                                                                                            |                                                                                                                                                                                                                                                                                                                                                                                                                                                                                                                                                                                                                                                                                                                                                          |
|------------------------------------------------------------------------------------------------------------------------------------------------------------------------------------------------------------------------------------------------------------------------------------------------------------------------------------------------------------------------------------------------------------------------------------------------------------------------------------------------------------------------------------------------------------------------------------------------------------------------------------------------------------------------------------------------------------------------------------------------------------------------------------------------------------------------------------------------------------------------------------------------------------------------------------------------------------------------------------------------------------------------------------------------------------------------------------------------------------------------------------------------------------------------------------------------------------------------------------------------------------------------------------------------|-----------|---------------------------------------------------------------------------------------------------------------------------------------------|--------------------------------------------------------------------------------------------------------------------------------------------------------------------------------------------------------------------------------------------|----------------------------------------------------------------------------------------------------------------------------------------------------------------------------------------------------------------------------------------------------------------------------------------------------------------------------------------------------------------------------------------------------------------------------------------------------------------------------------------------------------------------------------------------------------------------------------------------------------------------------------------------------------------------------------------------------------------------------------------------------------|
| 470533, EPI_ISL_470535 to 470538, EPI_ISL_489381 to 489390, EPI_ISL_489394 to 489395, EPI_ISL_489397 to 489400, EPI_ISL_489402 to 489406, EPI_ISL_489409 to 489412, EPI_ISL_489414 to 489417, EPI_ISL_489419 to 489428, EPI_ISL_489430 to 489441, EPI_ISL_489443 to 489448, EPI_ISL_489450 to 489454, EPI_ISL_489456 to 489469, EPI_ISL_489471 to 489479, EPI_ISL_489481 to 489488, EPI_ISL_489490 to 489522, EPI_ISL_489524 to 489529, EPI_ISL_489531 to 489535, EPI_ISL_489538 to 489542, EPI_ISL_489544 to 489546, EPI_ISL_489548 to 489566, EPI_ISL_489568 to 489577, EPI_ISL_492189 to 492194, EPI_ISL_492196, EPI_ISL_492198 to 492201, EPI_ISL_492204 to 492206, EPI_ISL_511959, EPI_ISL_511970, EPI_ISL_511982, EPI_ISL_524493, EPI_ISL_524495, EPI_ISL_524497 to 524498, EPI_ISL_524501 to 524503, EPI_ISL_524505 to 524506, EPI_ISL_524508 to 524509, EPI_ISL_524515, EPI_ISL_524521 to 524522, EPI_ISL_524525, EPI_ISL_524528 to 524531, EPI_ISL_524537 to 524538, EPI_ISL_524541, EPI_ISL_524544, EPI_ISL_524546, EPI_ISL_524548, EPI_ISL_524551, EPI_ISL_524553, EPI_ISL_524558, EPI_ISL_524560, EPI_ISL_524564, EPI_ISL_524568, EPI_ISL_524570, EPI_ISL_524573 to 524589, EPI_ISL_524591 to 524594, EPI_ISL_524596 to 524618, EPI_ISL_591076 to 591082, EPI_ISL_591091 to 591093 | see above | Department of Pathology, University of Cambridge                                                                                            | Wellcome Sanger Institute for the COVID-19 Genomics UK (COG-UK) consortium                                                                                                                                                                 | Alex Alderton; Aminu S. Jahun; Anna Yakovleva; Charlotte J. Houldcroft; Cordelia Langford; David K. Jackson; Dominic Kwiatkowski; Ewan Harrison; Fahad A. Khokhar; Grant Hall; Ian Johnston; John Goodfellow; Ian Sillitoe on behalf of the Wellcome Sanger Institute COVID-19 Surveillance Team; John Sillitoe on behalf of the Wellcome Sanger Institute COVID-19 Surveillance Team ( <a href="http://www.sanger.ac.uk/covid-team">http://www.sanger.ac.uk/covid-team</a> ); Laura G. Caller; Luke W. Meredith; M. Estée Török; Martin D. Curran; Myra Hosmillo; Roberto Amato; Sarah L. Caddy; Sonia Goncalves; Theresa Feltwell; William L. Hamilton; and Alex Alderton                                                                              |
| EPI_ISL_1435600, EPI_ISL_1435602, EPI_ISL_1435604, EPI_ISL_1435606                                                                                                                                                                                                                                                                                                                                                                                                                                                                                                                                                                                                                                                                                                                                                                                                                                                                                                                                                                                                                                                                                                                                                                                                                             |           | Department of Public Health Microbiology Ljubljana, National Laboratory for Health, Environment and Food                                    | Department of Public Health Microbiology Ljubljana, National Laboratory for Health, Environment and Food                                                                                                                                   | José Gonçalves; Katarina Proscenc; Martin Bosilj; Metka Paragi; Tom Koritnik                                                                                                                                                                                                                                                                                                                                                                                                                                                                                                                                                                                                                                                                             |
| EPI_ISL_1401986 to 1402336, EPI_ISL_1435579, EPI_ISL_1435581, EPI_ISL_1435583, EPI_ISL_1435585, EPI_ISL_1435587, EPI_ISL_1435589, EPI_ISL_1435591, EPI_ISL_1435593, EPI_ISL_1435595 to 1435596, EPI_ISL_1435598, EPI_ISL_1435608, EPI_ISL_1435610, EPI_ISL_1435612, EPI_ISL_1435614, EPI_ISL_1435616                                                                                                                                                                                                                                                                                                                                                                                                                                                                                                                                                                                                                                                                                                                                                                                                                                                                                                                                                                                           | see above | Department of Public Health Microbiology Ljubljana, National Laboratory for Health, Environment and Food                                    | Department of Public Health Microbiology Ljubljana, National Laboratory for Health, Environment and Food                                                                                                                                   | José Gonçalves; Katarina Proscenc; Martin Bosilj; Metka Paragi; Tom Koritnik                                                                                                                                                                                                                                                                                                                                                                                                                                                                                                                                                                                                                                                                             |
| EPI_ISL_576146 to 576149                                                                                                                                                                                                                                                                                                                                                                                                                                                                                                                                                                                                                                                                                                                                                                                                                                                                                                                                                                                                                                                                                                                                                                                                                                                                       |           | Department of Respiratory & Other Viral Infections of L.V. Gromashevsky Institute of Epidemiology & Infectious Diseases NAMS of Ukraine     | Department of Respiratory & Other Viral Infections of L.V. Gromashevsky Institute of Epidemiology & Infectious Diseases NAMS of Ukraine, JSC "Farmak"                                                                                      | Alla Mironenko; Andriy Goy; Ihor Kravchuk; Larysa Radchenko; Ludmyla Bolotova; Nataliia Teteriuk                                                                                                                                                                                                                                                                                                                                                                                                                                                                                                                                                                                                                                                         |
| EPI_ISL_582509                                                                                                                                                                                                                                                                                                                                                                                                                                                                                                                                                                                                                                                                                                                                                                                                                                                                                                                                                                                                                                                                                                                                                                                                                                                                                 |           | Department of Respiratory and other Viral Infections of L.V.Gromashevsky Institute of Epidemiology & Infectious Diseases NAMS of Ukraine    | Department of Respiratory and other Viral Infections of L.V.Gromashevsky Institute of Epidemiology & Infectious Diseases NAMS of Ukraine, JSC "Farmak"                                                                                     | Alla Mironenko; Andriy Goy; Ihor Kravchuk; Larysa Radchenko; Ludmyla Bolotova; Nataliia Teteriuk                                                                                                                                                                                                                                                                                                                                                                                                                                                                                                                                                                                                                                                         |
| EPI_ISL_582510                                                                                                                                                                                                                                                                                                                                                                                                                                                                                                                                                                                                                                                                                                                                                                                                                                                                                                                                                                                                                                                                                                                                                                                                                                                                                 |           | Department of Respiratory and other Viral Infections of L.V.Gromashevsky Institute of Epidemiology & Infectious Diseases NAMS of Ukraine    | Department of Respiratory and other Viral Infections of L.V.Gromashevsky Institute of Epidemiology & Infectious Diseases NAMS of Ukraine, JSC "Farmak"                                                                                     | Alla Mironenko; Andriy Goy; Ihor Kravchuk; Larysa Radchenko; Ludmyla Bolotova; Nataliia Teteriuk                                                                                                                                                                                                                                                                                                                                                                                                                                                                                                                                                                                                                                                         |
| EPI_ISL_582511 to 582513                                                                                                                                                                                                                                                                                                                                                                                                                                                                                                                                                                                                                                                                                                                                                                                                                                                                                                                                                                                                                                                                                                                                                                                                                                                                       |           | Department of Respiratory and other Viral Infections of L.V.Gromashevsky Institute of Epidemiology & Infectious Diseases NAMS of Ukraine    | Department of Respiratory and other Viral Infections of L.V.Gromashevsky Institute of Epidemiology & Infectious Diseases NAMS of Ukraine, JSC "Farmak"                                                                                     | Alla Mironenko; Andriy Goy; Ihor Kravchuk; Larysa Radchenko; Ludmyla Bolotova; Nataliia Teteriuk                                                                                                                                                                                                                                                                                                                                                                                                                                                                                                                                                                                                                                                         |
| EPI_ISL_487275                                                                                                                                                                                                                                                                                                                                                                                                                                                                                                                                                                                                                                                                                                                                                                                                                                                                                                                                                                                                                                                                                                                                                                                                                                                                                 |           | Department of Veterinary Pathology, University of Liege - FARAH                                                                             | Department of Veterinary Pathology, University of Liege - FARAH                                                                                                                                                                            | A.-S.; Clercx, C.; Desmecht, D.; Eloit, M.; Escriou, N.; Garigliany, M.; Giet, D.; Huon, C.; Vanlaere; van der Werf, S.                                                                                                                                                                                                                                                                                                                                                                                                                                                                                                                                                                                                                                  |
| EPI_ISL_450198 to 450200, EPI_ISL_450203 to 450204, EPI_ISL_450207 to 450209, EPI_ISL_1385784 to 1385786, EPI_ISL_1385789 to 1385791, EPI_ISL_1385794, EPI_ISL_1385796, EPI_ISL_1385798, EPI_ISL_1385800, EPI_ISL_1385802, EPI_ISL_1385806, EPI_ISL_1385808, EPI_ISL_1385810, EPI_ISL_1385812, EPI_ISL_1397958 to 1397960, EPI_ISL_1398039, EPI_ISL_1406391, EPI_ISL_1406393 to 1406395, EPI_ISL_1406397, EPI_ISL_1406399 to 1406401                                                                                                                                                                                                                                                                                                                                                                                                                                                                                                                                                                                                                                                                                                                                                                                                                                                           | see above | Department of Virology                                                                                                                      | Department of Virology                                                                                                                                                                                                                     | Aamer Ikram; Abdul Ahad; Ackermann, N.; Antwerpen, M.; Austin Leach; Bengs, K.; Berger, A.; Boehm, S.; Boehmer; Boender; Buchholz, U.; Cai, W.; Coman, D.V.; Dangel, A.; Drost, C.; Eberle, U.; Fingerle, V.; Grah, A.; Haas, W.; Hamouda, O.; Hoch, M.; Hoermansdorfer, S.; Ippisch, S.; Joel Montgomery; John Klens; Jones; Katz, K.; Ketan Patel; Konrad, R.; Liebl, B.; M.M.; Marosevic; Massab Umair; Melissa Moberly; Muehleemann, B.; Muhammad Salman; Muller, N.; Nazish Badar; Poartner, K.; Protzer, U.; Reich, A.; Rexroth, U.; Sana Tamim; Schneider, J.; Shannon Whitmer; Sing, A.; T.C.; T.S.; Treis, B.; V.M.; Veith, T.; Walter, M.; Wicklein, B.; Woelfel, R.; Woudenberg, T.; Zaira Rehman; Zapf, A.; Zeitlmann, N.; an der Heiden, M. |
| EPI_ISL_407084, EPI_ISL_529135                                                                                                                                                                                                                                                                                                                                                                                                                                                                                                                                                                                                                                                                                                                                                                                                                                                                                                                                                                                                                                                                                                                                                                                                                                                                 |           | Department of Virology III, National Institute of Infectious Diseases                                                                       | Pathogen Genomics Center, National Institute of Infectious Diseases                                                                                                                                                                        | Kazuya Shirato; Kentaro Itokawa; Makoto Kuroda; Makoto Takeda; Masanori Hashino; Naganori Nao; Rina Tanaka; Shinji Watanabe; Shutoku Matsuyama; Takaji Wakita; Tsuyoshi Sekizuka                                                                                                                                                                                                                                                                                                                                                                                                                                                                                                                                                                         |
| EPI_ISL_413602 to 413605, EPI_ISL_414640 to 414646, EPI_ISL_418385 to 418411, EPI_ISL_481513 to 481715, EPI_ISL_481717 to 481740, EPI_ISL_1496711 to 1497278, EPI_ISL_1497280 to 1497285, EPI_ISL_1548040 to 1548041                                                                                                                                                                                                                                                                                                                                                                                                                                                                                                                                                                                                                                                                                                                                                                                                                                                                                                                                                                                                                                                                           | see above | Department of Virology and Immunology, University of Helsinki and Helsinki University Hospital, Huslab Finland                              | Department of Virology, Faculty of Medicine, University of Helsinki, Helsinki, Finland                                                                                                                                                     | Essi Korhonen; Hanna Jarva; Hanna Liimatainen; Hannimari Kallio-Kokko; Harri Kangas; Hussein Alburkat; Jenni Virtanen; Maija Lappalainen; Maija Suvanto; Olli Vapalahti; Pekka Ellonen; Phuoc Truong; Ravi Kant; Sari Hannula; Satu Kurkela; Teemu Smura                                                                                                                                                                                                                                                                                                                                                                                                                                                                                                 |
| EPI_ISL_1558595 to 1558614                                                                                                                                                                                                                                                                                                                                                                                                                                                                                                                                                                                                                                                                                                                                                                                                                                                                                                                                                                                                                                                                                                                                                                                                                                                                     |           | Department of Virology, Istituto Zooprofilattico Sperimentale del Lazio e della Toscana (IZSLT)                                             | Department of General Diagnostics; Department of Virology; Istituto Zooprofilattico Sperimentale del Lazio e della Toscana (IZSLT)                                                                                                         | Alessia Franco; Antonella Cersini; Antonio Battisti.; Elena L. Diaconu; Fabiola Feltrin; Giuseppe Manna; Patricia Alba; Raffaella Conti; Teresa Scicluna; Virginia Carfora                                                                                                                                                                                                                                                                                                                                                                                                                                                                                                                                                                               |
| EPI_ISL_468161, EPI_ISL_468163                                                                                                                                                                                                                                                                                                                                                                                                                                                                                                                                                                                                                                                                                                                                                                                                                                                                                                                                                                                                                                                                                                                                                                                                                                                                 |           | Department of Virology, Public Health Laboratories Division, National Institute of Health                                                   | Department of Virology, Public Health Laboratories Division, National Institute of Health                                                                                                                                                  | Aamer Ikram; Adnan Khurshid; John Klens; Massab Umair; Muhammad Salman; Nazish Badar; Shannon Whitmer                                                                                                                                                                                                                                                                                                                                                                                                                                                                                                                                                                                                                                                    |
| EPI_ISL_515974                                                                                                                                                                                                                                                                                                                                                                                                                                                                                                                                                                                                                                                                                                                                                                                                                                                                                                                                                                                                                                                                                                                                                                                                                                                                                 |           | Department of Virus and Microbiological Special Diagnostics, Statens Serum Institut                                                         | Albertsen lab, Department of Chemistry and Bioscience, Aalborg University, Denmark                                                                                                                                                         | Danish Corona Danica Consortia                                                                                                                                                                                                                                                                                                                                                                                                                                                                                                                                                                                                                                                                                                                           |
| EPI_ISL_429333 to 429590, EPI_ISL_436962 to 437042, EPI_ISL_437627 to 437683, EPI_ISL_444817 to 444968, EPI_ISL_452101 to 452102                                                                                                                                                                                                                                                                                                                                                                                                                                                                                                                                                                                                                                                                                                                                                                                                                                                                                                                                                                                                                                                                                                                                                               |           | Department of Virus and Microbiological Special Diagnostics, Statens Serum Institut, Copenhagen, Denmark, Artillerivej 5, 2300 Copenhagen S | Albertsen lab, Department of Chemistry and Bioscience, Aalborg University, Denmark                                                                                                                                                         | Rasmus Kirkegaard                                                                                                                                                                                                                                                                                                                                                                                                                                                                                                                                                                                                                                                                                                                                        |
| EPI_ISL_613541 to 613544, EPI_ISL_614403 to 614762, EPI_ISL_614764 to 614888, EPI_ISL_615166 to 620405, EPI_ISL_620762 to 622714                                                                                                                                                                                                                                                                                                                                                                                                                                                                                                                                                                                                                                                                                                                                                                                                                                                                                                                                                                                                                                                                                                                                                               |           | Department of Virus and Microbiological Special Diagnostics, Statens Serum Institut, Denmark                                                | Albertsen lab, Department of Chemistry and Bioscience, Aalborg University, Denmark                                                                                                                                                         | Danish Corona Genome Consortia; Danish Covid-19 Genome Consortia                                                                                                                                                                                                                                                                                                                                                                                                                                                                                                                                                                                                                                                                                         |
| EPI_ISL_415647, EPI_ISL_416140 to 416142                                                                                                                                                                                                                                                                                                                                                                                                                                                                                                                                                                                                                                                                                                                                                                                                                                                                                                                                                                                                                                                                                                                                                                                                                                                       |           | Department of Virus and Microbiological Special diagnostics, Statens Serum Institut, Copenhagen, Denmark.                                   | Statens Serum Institute                                                                                                                                                                                                                    | Anders Fomsgaard; Maiken Worsoe Rosenstjerne; Morten Rasmussen                                                                                                                                                                                                                                                                                                                                                                                                                                                                                                                                                                                                                                                                                           |
| EPI_ISL_415646, EPI_ISL_415648, EPI_ISL_416143 to 416144, EPI_ISL_416153                                                                                                                                                                                                                                                                                                                                                                                                                                                                                                                                                                                                                                                                                                                                                                                                                                                                                                                                                                                                                                                                                                                                                                                                                       |           | Department of Virus and Microbiological Special diagnostics, Statens Serum Institut, Copenhagen, Denmark.                                   | VIFU                                                                                                                                                                                                                                       | Anders Fomsgaard; Maiken Worsoe Rosenstjerne; Morten Rasmussen                                                                                                                                                                                                                                                                                                                                                                                                                                                                                                                                                                                                                                                                                           |
| EPI_ISL_413485                                                                                                                                                                                                                                                                                                                                                                                                                                                                                                                                                                                                                                                                                                                                                                                                                                                                                                                                                                                                                                                                                                                                                                                                                                                                                 |           | Department of microbiology laboratory, Anhui Provincial Center for Disease Control and Prevention                                           | Department of microbiology laboratory, Anhui Provincial Center for Disease Control and Prevention                                                                                                                                          | Bin Su; Jun He; Junling Yu; Qingqing Chen; Weidong Li; Weiwei Li; Yinglu Ge; Yong Sun; Yonglin Shi; Yuan Yuan; Zhirong Liu; Zhuhui Zhang                                                                                                                                                                                                                                                                                                                                                                                                                                                                                                                                                                                                                 |
| EPI_ISL_496482                                                                                                                                                                                                                                                                                                                                                                                                                                                                                                                                                                                                                                                                                                                                                                                                                                                                                                                                                                                                                                                                                                                                                                                                                                                                                 |           | Dept. Infectious, Tropical Diseases & Microbiology, IRCCS Sacro Cuore Don Calabria Hospital                                                 | 1) Dept. Infectious, Tropical Diseases & Microbiology, IRCCS Sacro Cuore Don Calabria Hospital; 2) Centro Piattaforme Tecnologiche, University of Verona; 3) Dept. Neurosciences, Biomedicine and Movement Sciences, University of Verona. | 1) Antonio Mori; 2) Monica Castellucci and Francesca Griggio; 3) Giovanni Malerba; Chiara Priubelli; Elena Pomari; Michela Deiana                                                                                                                                                                                                                                                                                                                                                                                                                                                                                                                                                                                                                        |
| EPI_ISL_449789 to 449794, EPI_ISL_590877, EPI_ISL_590953 to 590977, EPI_ISL_591021, EPI_ISL_1490197 to 1490198, EPI_ISL_1547512 to 1547513, EPI_ISL_1547520, EPI_ISL_1547522                                                                                                                                                                                                                                                                                                                                                                                                                                                                                                                                                                                                                                                                                                                                                                                                                                                                                                                                                                                                                                                                                                                   | see above | Dept. of Medical Microbiology, Stavanger University Hospital, Helse Stavanger HF                                                            | Norwegian Institute of Public Health, Department of Virology                                                                                                                                                                               | Atiya R Ali; Debech Nadia; Engebretsen Serina Beate; Garcia Llorente Ignacio; Hilde Elshaug; Hilde Vollan; Iren Löhr; Jon Bråte; Kamilla Heddeland Instefjord; Karoline Bragstad; Kathrine Stene-Johansen; Marie Paulsen Madsen; Olav Hungnes; Pedersen Benedikte Nevjen; Rasmus Riis Kopperud                                                                                                                                                                                                                                                                                                                                                                                                                                                           |
| EPI_ISL_447837                                                                                                                                                                                                                                                                                                                                                                                                                                                                                                                                                                                                                                                                                                                                                                                                                                                                                                                                                                                                                                                                                                                                                                                                                                                                                 |           | Dept. of Medical Microbiology, Stavanger University Hospital, Helse Stavanger HF,                                                           | Norwegian Institute of Public Health, Department of Virology                                                                                                                                                                               | Hilde Elshaug; Kamilla Heddeland Instefjord; Karoline Bragstad; Kathrine Stene-Johansen; Olav Hungnes; Rasmus Riis Kopperud                                                                                                                                                                                                                                                                                                                                                                                                                                                                                                                                                                                                                              |
| EPI_ISL_410531 to 410532                                                                                                                                                                                                                                                                                                                                                                                                                                                                                                                                                                                                                                                                                                                                                                                                                                                                                                                                                                                                                                                                                                                                                                                                                                                                       |           | Dept. of Pathology, National Institute of Infectious Diseases                                                                               | Pathogen Genomics Center, National Institute of Infectious Diseases                                                                                                                                                                        | Harutaka Katano; Hideki Hasegawa; Kazuya Shirato; Makoto Kuroda; Makoto Takeda; Motoi Suzuki; Naganori Nao; Shutoku Matsuyama; Takaji Suzuki; Takaji Wakita; Tsuyoshi Sekizuka                                                                                                                                                                                                                                                                                                                                                                                                                                                                                                                                                                           |

|                                                                                                                                                                                                                                                                                                                                                                                                                                                                                                                                                                                                                                                                                                                                                                                                                                                              |                                                                                                                              |                                                                                                                                                                                                               |                                                                                                                                                                                                                                                                                                                                                                                  |
|--------------------------------------------------------------------------------------------------------------------------------------------------------------------------------------------------------------------------------------------------------------------------------------------------------------------------------------------------------------------------------------------------------------------------------------------------------------------------------------------------------------------------------------------------------------------------------------------------------------------------------------------------------------------------------------------------------------------------------------------------------------------------------------------------------------------------------------------------------------|------------------------------------------------------------------------------------------------------------------------------|---------------------------------------------------------------------------------------------------------------------------------------------------------------------------------------------------------------|----------------------------------------------------------------------------------------------------------------------------------------------------------------------------------------------------------------------------------------------------------------------------------------------------------------------------------------------------------------------------------|
| EPI_ISL_408665 to 408667, EPI_ISL_408669                                                                                                                                                                                                                                                                                                                                                                                                                                                                                                                                                                                                                                                                                                                                                                                                                     | Dept. of Virology III, National Institute of Infectious Diseases                                                             | Pathogen Genomics Center, National Institute of Infectious Diseases                                                                                                                                           | Kazuya Shirato; Makoto Kuroda; Makoto Takeda; Naganori Nao; Shutoku Matsuyama; Tsuyoshi Sekizuka                                                                                                                                                                                                                                                                                 |
| EPI_ISL_459911 to 459925, EPI_ISL_459931 to 459952                                                                                                                                                                                                                                                                                                                                                                                                                                                                                                                                                                                                                                                                                                                                                                                                           | Devki Devi Foundation, a unit of Max Healthcare                                                                              | CSIR-IGIB/Max                                                                                                                                                                                                 | Anurag Agrawal; Bansidhar Tarai; Bharathram Uppili; Mitali Mukerji; Mohammed Faruq; Nishu Tyagi; Pooja Sharma; Poonam Das; Rajesh Pandey#; Samreen Siddiqui; Saruchi Wadhwa; Sujeet Jha; Vinita Jha; Vivekanand A                                                                                                                                                                |
| EPI_ISL_1394222 to 1394223                                                                                                                                                                                                                                                                                                                                                                                                                                                                                                                                                                                                                                                                                                                                                                                                                                   | Di MEDICAL                                                                                                                   | 1. National Institute of Public Health - National Institute of Hygiene; 2. Eurofins Genomics Europe Sequencing GmbH                                                                                           | ECDC COVID-19 WGS support team; Eurofins Genomics Europe Sequencing Team; Gierczyki Rafa; Sadkowska-Todys Magorzata; Wokowicz Tomasz; Zacharczuk Katarzyna                                                                                                                                                                                                                       |
| EPI_ISL_1393795 to 1393797, EPI_ISL_1394210 to 1394211                                                                                                                                                                                                                                                                                                                                                                                                                                                                                                                                                                                                                                                                                                                                                                                                       | DiMedical                                                                                                                    | 1. National Institute of Public Health - National Institute of Hygiene; 2. Eurofins Genomics Europe Sequencing GmbH                                                                                           | ECDC COVID-19 WGS support team; Eurofins Genomics Europe Sequencing Team; Gierczyki Rafa; Sadkowska-Todys Magorzata; Wokowicz Tomasz; Zacharczuk Katarzyna                                                                                                                                                                                                                       |
| EPI_ISL_1559626                                                                                                                                                                                                                                                                                                                                                                                                                                                                                                                                                                                                                                                                                                                                                                                                                                              | Diagnostic Genomics Laboratory                                                                                               | Diagnostic Genomics Laboratory                                                                                                                                                                                | Carolyn Banister; Diego Altomoare; Fadi Abboodi; Helmut Albrecht; Ji (Emily) Hao; Michael Shitutum; Phillip Buckhaults                                                                                                                                                                                                                                                           |
| EPI_ISL_1447329 to 1447362, EPI_ISL_1469232 to 1469237, EPI_ISL_1533034 to 1533101                                                                                                                                                                                                                                                                                                                                                                                                                                                                                                                                                                                                                                                                                                                                                                           | Diagnostic and Research Center of Infectious Diseases, Medical Faculty, Andalas University                                   | Diagnostic and Research Center of Infectious Diseases, Medical Faculty, Andalas University                                                                                                                    | Andani Eka Putra; Ayu Novita Trisnawati; Dede Rahman Agustian; Desmawati; Dessy Arisanty; Fauzul Azhim; Gestina Aliska; Ikhwani R. Sudji; Juane Plantika Menra; Linosefa; Mutia Lailani; Nia Ayuni Putri; Nita Afriani; SM Rezvi; Sekar Asri Tresnaningtyas; Siskaili Fahma; Syafrizayanti; Syandrez Prima Putra; Yolani Syaputri                                                |
| EPI_ISL_437197 to 437203, EPI_ISL_437298 to 437303                                                                                                                                                                                                                                                                                                                                                                                                                                                                                                                                                                                                                                                                                                                                                                                                           | Diagnostic- and Research Institute of Pathology, Medical University of Graz                                                  | Diagnostic- and Research Institute of Pathology, Medical University of Graz                                                                                                                                   | Gregor Gorkiewicz; Karl Kashofer; Martin Zacharias; Peter Regitnig                                                                                                                                                                                                                                                                                                               |
| EPI_ISL_1435840, EPI_ISL_1439526 to 1439530, EPI_ISL_1439532 to 1439534, EPI_ISL_1439536 to 1439577, EPI_ISL_1439579, EPI_ISL_1439581 to 1439583, EPI_ISL_1439585 to 1439588, EPI_ISL_1439591 to 1439592, EPI_ISL_1439594 to 1439596, EPI_ISL_1439598 to 1439624, EPI_ISL_1440967 to 1440979, EPI_ISL_1440981 to 1440982, EPI_ISL_1440984 to 1440986, EPI_ISL_1440988 to 1441034, EPI_ISL_1441036 to 1441040, EPI_ISL_1441051, EPI_ISL_1441053 to 1441058, EPI_ISL_1441060, EPI_ISL_1441062 to 1441073, EPI_ISL_1441075, EPI_ISL_1441077 to 1441080, EPI_ISL_1441082 to 1441087, EPI_ISL_1441089 to 1441098, EPI_ISL_1441101 to 1441110, EPI_ISL_1441113 to 1441114, EPI_ISL_1441116 to 1441125, EPI_ISL_1441128 to 1441130, EPI_ISL_1441132, EPI_ISL_1441134 to 1441136, EPI_ISL_1441138 to 1441139, EPI_ISL_1441141 to 1441146, EPI_ISL_1441148 to 1441157 | Diagnosticum - Labor Neukirchen                                                                                              | Robert Koch Institute                                                                                                                                                                                         | ECDC COVID-19 WGS support team; Eurofins Genomics Europe Sequencing Team; Gierczyki Rafa; Sadkowska-Todys Magorzata; Wokowicz Tomasz; Zacharczuk Katarzyna                                                                                                                                                                                                                       |
| EPI_ISL_1538842 to 1538843, EPI_ISL_1539097 to 1539101                                                                                                                                                                                                                                                                                                                                                                                                                                                                                                                                                                                                                                                                                                                                                                                                       | Diagnostyka                                                                                                                  | 1. National Institute of Public Health - National Institute of Hygiene; 2. Eurofins Genomics Europe Sequencing GmbH                                                                                           | ECDC COVID-19 WGS support team; Eurofins Genomics Europe Sequencing Team; Gierczyki Rafa; Sadkowska-Todys Magorzata; Wokowicz Tomasz; Zacharczuk Katarzyna                                                                                                                                                                                                                       |
| EPI_ISL_1447200, EPI_ISL_1447206 to 1447210, EPI_ISL_1447243 to 1447249, EPI_ISL_1447278                                                                                                                                                                                                                                                                                                                                                                                                                                                                                                                                                                                                                                                                                                                                                                     | Diagnostyka Sp. z o.o.                                                                                                       | 1. National Institute of Public Health - National Institute of Hygiene; 2. Eurofins Genomics Europe Sequencing GmbH                                                                                           | ECDC COVID-19 WGS support team; Eurofins Genomics Europe Sequencing Team; Gierczyki Rafa; Sadkowska-Todys Magorzata; Wokowicz Tomasz; Zacharczuk Katarzyna                                                                                                                                                                                                                       |
| EPI_ISL_1394164 to 1394174                                                                                                                                                                                                                                                                                                                                                                                                                                                                                                                                                                                                                                                                                                                                                                                                                                   | Diagnostyka Sp. z o. o. Kraków                                                                                               | 1. National Institute of Public Health - National Institute of Hygiene; 2. Eurofins Genomics Europe Sequencing GmbH                                                                                           | ECDC COVID-19 WGS support team; Eurofins Genomics Europe Sequencing Team; Gierczyki Rafa; Sadkowska-Todys Magorzata; Wokowicz Tomasz; Zacharczuk Katarzyna                                                                                                                                                                                                                       |
| EPI_ISL_1393783 to 1393784, EPI_ISL_1393789, EPI_ISL_1394231 to 1394232                                                                                                                                                                                                                                                                                                                                                                                                                                                                                                                                                                                                                                                                                                                                                                                      | Diagnostyka Sp. z o. o. ód                                                                                                   | 1. National Institute of Public Health - National Institute of Hygiene; 2. Eurofins Genomics Europe Sequencing GmbH                                                                                           | ECDC COVID-19 WGS support team; Eurofins Genomics Europe Sequencing Team; Gierczyki Rafa; Sadkowska-Todys Magorzata; Wokowicz Tomasz; Zacharczuk Katarzyna                                                                                                                                                                                                                       |
| EPI_ISL_1538639 to 1538642, EPI_ISL_1538868, EPI_ISL_1538971 to 1538977                                                                                                                                                                                                                                                                                                                                                                                                                                                                                                                                                                                                                                                                                                                                                                                      | Diagnostyka Sp. z o.o                                                                                                        | 1. National Institute of Public Health - National Institute of Hygiene; 2. Eurofins Genomics Europe Sequencing GmbH                                                                                           | ECDC COVID-19 WGS support team; Eurofins Genomics Europe Sequencing Team; Gierczyki Rafa; Sadkowska-Todys Magorzata; Wokowicz Tomasz; Zacharczuk Katarzyna                                                                                                                                                                                                                       |
| EPI_ISL_1394114 to 1394118, EPI_ISL_1425564, EPI_ISL_1538525, EPI_ISL_1538643 to 1538644, EPI_ISL_1538978 to 1538981                                                                                                                                                                                                                                                                                                                                                                                                                                                                                                                                                                                                                                                                                                                                         | Diagnostyka Sp. z o.o.                                                                                                       | 1. National Institute of Public Health - National Institute of Hygiene; 2. Eurofins Genomics Europe Sequencing GmbH                                                                                           | ECDC COVID-19 WGS support team; Eurofins Genomics Europe Sequencing Team; Gierczyki Rafa; Sadkowska-Todys Magorzata; Wokowicz Tomasz; Zacharczuk Katarzyna                                                                                                                                                                                                                       |
| EPI_ISL_1538550 to 1538552, EPI_ISL_1538763 to 1538764, EPI_ISL_1538897 to 1538899, EPI_ISL_1539034 to 1539036, EPI_ISL_1539154, EPI_ISL_1539180                                                                                                                                                                                                                                                                                                                                                                                                                                                                                                                                                                                                                                                                                                             | Diagnostyka Sp. z o.o. Gdask                                                                                                 | 1. National Institute of Public Health - National Institute of Hygiene; 2. Eurofins Genomics Europe Sequencing GmbH                                                                                           | ECDC COVID-19 WGS support team; Eurofins Genomics Europe Sequencing Team; Gierczyki Rafa; Sadkowska-Todys Magorzata; Wokowicz Tomasz; Zacharczuk Katarzyna                                                                                                                                                                                                                       |
| EPI_ISL_1393923 to 1393932, EPI_ISL_1394247 to 1394254, EPI_ISL_1425550, EPI_ISL_1425558, EPI_ISL_1538598 to 1538599, EPI_ISL_1538938 to 1538942, EPI_ISL_1539201                                                                                                                                                                                                                                                                                                                                                                                                                                                                                                                                                                                                                                                                                            | Diagnostyka Sp.z o.o.                                                                                                        | 1. National Institute of Public Health - National Institute of Hygiene; 2. Eurofins Genomics Europe Sequencing GmbH                                                                                           | ECDC COVID-19 WGS support team; Eurofins Genomics Europe Sequencing Team; Gierczyki Rafa; Sadkowska-Todys Magorzata; Wokowicz Tomasz; Zacharczuk Katarzyna                                                                                                                                                                                                                       |
| EPI_ISL_1435285 to 1435291                                                                                                                                                                                                                                                                                                                                                                                                                                                                                                                                                                                                                                                                                                                                                                                                                                   | Dianovis GmbH Greiz                                                                                                          | Robert Koch Institute                                                                                                                                                                                         | ECDC COVID-19 WGS support team; Eurofins Genomics Europe Sequencing Team; Gierczyki Rafa; Sadkowska-Todys Magorzata; Wokowicz Tomasz; Zacharczuk Katarzyna                                                                                                                                                                                                                       |
| EPI_ISL_1393798 to 1393800, EPI_ISL_1394214 to 1394217, EPI_ISL_1425549                                                                                                                                                                                                                                                                                                                                                                                                                                                                                                                                                                                                                                                                                                                                                                                      | Dimedical                                                                                                                    | 1. National Institute of Public Health - National Institute of Hygiene; 2. Eurofins Genomics Europe Sequencing GmbH                                                                                           | ECDC COVID-19 WGS support team; Eurofins Genomics Europe Sequencing Team; Gierczyki Rafa; Sadkowska-Todys Magorzata; Wokowicz Tomasz; Zacharczuk Katarzyna                                                                                                                                                                                                                       |
| EPI_ISL_452234, EPI_ISL_475512, EPI_ISL_475562 to 475563                                                                                                                                                                                                                                                                                                                                                                                                                                                                                                                                                                                                                                                                                                                                                                                                     | Din Klinik                                                                                                                   | The Public Health Agency of Sweden                                                                                                                                                                            | Anna Risberg; Anna-Malin Linde; Helene Warnborg; Karin Tegmark-Wisell; Maria Lind Karlberg; Mathias Haukland; Mia Brytting; Olov Svartstrom; Oskar Karlsson Lindsjo; Reza Advani; Sandra Broddesson; Theresa Enkirch                                                                                                                                                             |
| EPI_ISL_1469250                                                                                                                                                                                                                                                                                                                                                                                                                                                                                                                                                                                                                                                                                                                                                                                                                                              | Dinas Kesehatan Blitar                                                                                                       | National Institute of Health Research and Development                                                                                                                                                         | Arie Ardiansyah Nugraha; Hana Apsari Pawestri; Hartanti Dian Ikawati; Kartika Dewi Puspa; Krisna Pangesti; Nelly Puspandari; Subangkit; Vivi Setiawaty                                                                                                                                                                                                                           |
| EPI_ISL_1469240, EPI_ISL_1469246, EPI_ISL_1469271 to 1469275, EPI_ISL_1469284                                                                                                                                                                                                                                                                                                                                                                                                                                                                                                                                                                                                                                                                                                                                                                                | Dinas Kesehatan Kabupaten Ponorego                                                                                           | National Institute of Health Research and Development                                                                                                                                                         | Arie Ardiansyah Nugraha; Hana Apsari Pawestri; Hartanti Dian Ikawati; Kartika Dewi Puspa; Krisna Pangesti; Nelly Puspandari; Subangkit; Vivi Setiawaty                                                                                                                                                                                                                           |
| EPI_ISL_528753                                                                                                                                                                                                                                                                                                                                                                                                                                                                                                                                                                                                                                                                                                                                                                                                                                               | Dinkes Kota Bogor                                                                                                            | School of Life Sciences and Technology & School of Pharmacy-Institut Teknologi Bandung; Molecular Genetics Laboratory-Faculty of Medicine-Universitas Padjadjaran; Laboratorium Kesehatan Provinsi Jawa Barat | Agung Eru Wibowo; Azzania Fibriani; Catur Riani; Cut Nur Cinthia Alamanda; Davin H. E. Setiawaty; Ema Rahmawati; Hammam Riza; Hesti Lina Wiraswati; Husna Nugrahapraja; Irvan Faizal; Lia Faridah; Marselina Irasonia Tan; Rifky Waluyajati Rachman; Rizki Mardiani; Ryan Bayusantika Ristandi; Savira Ekawardhani; Sony Solistia Wirawan; Tarwadi; Yulia Sribudiani             |
| EPI_ISL_528748                                                                                                                                                                                                                                                                                                                                                                                                                                                                                                                                                                                                                                                                                                                                                                                                                                               | Dinkes Provinsi Jawa Barat                                                                                                   | School of Life Sciences and Technology & School of Pharmacy-Institut Teknologi Bandung; Molecular Genetics Laboratory-Faculty of Medicine-Universitas Padjadjaran; Laboratorium Kesehatan Provinsi Jawa Barat | Adelina Kristiani Rahayu; Agung Eru Wibowo; Azzania Fibriani; Catur Riani; Cut Nur Cinthia Alamanda; Ema Rahmawati; Gusti Ayu Prani Pradani; Hammam Riza; Hesti Lina Wiraswati; Husna Nugrahapraja; Irvan Faizal; Lia Faridah; Marselina Irasonia Tan; Rifky Waluyajati Rachman; Ryan Bayusantika Ristandi; Savira Ekawardhani; Sony Solistia Wirawan; Tarwadi; Yulia Sribudiani |
| EPI_ISL_467374                                                                                                                                                                                                                                                                                                                                                                                                                                                                                                                                                                                                                                                                                                                                                                                                                                               | Dinkes Samarinda                                                                                                             | Eijkman Institute for Molecular Biology, Ministry of Research and Technology/National Agency for Research and Innovation                                                                                      | Amin Soebandrio; David H Muljono; Edison Johar; Filasita A Yudhaputri; Hidayat Trimarsanto; Khin Saw Myint; Safarina G Malik                                                                                                                                                                                                                                                     |
| EPI_ISL_591327 to 591340                                                                                                                                                                                                                                                                                                                                                                                                                                                                                                                                                                                                                                                                                                                                                                                                                                     | Dipartimento di Biotecnologie Mediche, University of Siena                                                                   | Dipartimento di Biotecnologie Mediche, University of Siena                                                                                                                                                    | Anichini, G.; COVID; Cusi; Gandolfo, C.; M.G.; Pinzauti, D.; Pozzi, G.; Santoro, F.                                                                                                                                                                                                                                                                                              |
| EPI_ISL_1509923                                                                                                                                                                                                                                                                                                                                                                                                                                                                                                                                                                                                                                                                                                                                                                                                                                              | Dipartimento di Medicina e Chirurgia Universita' degli Studi dell'Insubria Laboratorio di Microbiologia Medica Varese Italia | Laboratorio di Microbiologia e Virologia, Università Vita-Salute San Raffaele, Milano                                                                                                                         | Elena Criscuolo; Enzo Boeri; Fabrizio Maggi; Massimo Clementi; Matteo Castelli; Michela Sampaolo; Nicasio Mancini and Nicola Clementi; Roberta Antonia Diotti; Roberto Ferrarese                                                                                                                                                                                                 |
| EPI_ISL_1533724                                                                                                                                                                                                                                                                                                                                                                                                                                                                                                                                                                                                                                                                                                                                                                                                                                              | Diretoria Municipal de Saude                                                                                                 | Instituto Adolfo Lutz, Interdisciplinary Procedures Center, Strategic Laboratory                                                                                                                              | Caio Vinicius Dias Lopes; Claudia Regina Gonçalves; Claudio Tavares Sacchi; Erica Valessa Ramos Gomes; Karoline Rodrigues Campos; Leonardo Jose Tadeu de Araujo                                                                                                                                                                                                                  |
| EPI_ISL_1469553, EPI_ISL_1469560, EPI_ISL_1469592, EPI_ISL_1469598, EPI_ISL_1469605, EPI_ISL_1469609 to 1469610, EPI_ISL_1469616, EPI_ISL_1469618, EPI_ISL_1469623, EPI_ISL_1469625, EPI_ISL_1469627, EPI_ISL_1469632, EPI_ISL_1469634, EPI_ISL_1469644, EPI_ISL_1469650, EPI_ISL_1469656, EPI_ISL_1469669, EPI_ISL_1469672, EPI_ISL_1469700, EPI_ISL_1469702, EPI_ISL_1469708, EPI_ISL_1469728, EPI_ISL_1469748, EPI_ISL_1469753, EPI_ISL_1469756, EPI_ISL_1469761, EPI_ISL_1469769, EPI_ISL_1469775, EPI_ISL_1469783, EPI_ISL_1469786, EPI_ISL_1469792, EPI_ISL_1469796 to 1469797, EPI_ISL_1469802, EPI_ISL_1469808, EPI_ISL_1469816, EPI_ISL_1469819, EPI_ISL_1469823, EPI_ISL_1469829, EPI_ISL_1469832, EPI_ISL_1469835 to 1469836, EPI_ISL_1469841, EPI_ISL_1469848, EPI_ISL_1479120                                                                   | Diretoria de Vigilância em Saúde                                                                                             | Epicin                                                                                                                                                                                                        | Ana Paula Mutterle; Carolina Comerlato; Eliana Márcia Da Ros Wendland; Fernando Hayashi Sant'Anna; Janira Pritchula; Juliana Comerlato                                                                                                                                                                                                                                           |
| EPI_ISL_524428 to 524432                                                                                                                                                                                                                                                                                                                                                                                                                                                                                                                                                                                                                                                                                                                                                                                                                                     | Dirk Dittmer                                                                                                                 | Dirk Dittmer                                                                                                                                                                                                  | A.B.; A.G.; Bailey; C.P.; Caro-Vegas; Dittmer, D.; Eason; J.T.; Juarez, A.; L.J.; Landis; M.B.; McNamara; Miller; Moorad, R.; Pluta; R.P.; Seltzer; T.A.; Thompson, C.; Vahrson; W. and Villamor, F.                                                                                                                                                                             |
| EPI_ISL_504185, EPI_ISL_515466                                                                                                                                                                                                                                                                                                                                                                                                                                                                                                                                                                                                                                                                                                                                                                                                                               | Discovery DNA                                                                                                                | Discovery DNA                                                                                                                                                                                                 | Alice Li; Aneal Khan; Desmond Koo; Dustin Hittel; Leo Dimnik; Marina Kerr                                                                                                                                                                                                                                                                                                        |
| EPI_ISL_1534373                                                                                                                                                                                                                                                                                                                                                                                                                                                                                                                                                                                                                                                                                                                                                                                                                                              | District 6 CDC                                                                                                               | NHLS/UCT                                                                                                                                                                                                      | Arash Iranzadeh; Bruna Galvao; Carolyn Williamson; Deelan Doolabh; Diana Hardie; Emmanuel SJ; Innocent Mudau; Kruger Marais; Lynn Tyers; Marvin                                                                                                                                                                                                                                  |

|                                                                                                                                                                                                                                                                                                                                                                                                                                                                                                                                                                                                                                                                                                                                                                                                                                                                                             |                                                                                                                                        |                                                                                                                                                                                                                 |                                                                                                                                                                                                                                                                                                                                                                                                                                                                                                                                                                                                                                                                                                                                                                             | Hsiao; Stephen Korsman; Tegally H; de Oliveira T |
|---------------------------------------------------------------------------------------------------------------------------------------------------------------------------------------------------------------------------------------------------------------------------------------------------------------------------------------------------------------------------------------------------------------------------------------------------------------------------------------------------------------------------------------------------------------------------------------------------------------------------------------------------------------------------------------------------------------------------------------------------------------------------------------------------------------------------------------------------------------------------------------------|----------------------------------------------------------------------------------------------------------------------------------------|-----------------------------------------------------------------------------------------------------------------------------------------------------------------------------------------------------------------|-----------------------------------------------------------------------------------------------------------------------------------------------------------------------------------------------------------------------------------------------------------------------------------------------------------------------------------------------------------------------------------------------------------------------------------------------------------------------------------------------------------------------------------------------------------------------------------------------------------------------------------------------------------------------------------------------------------------------------------------------------------------------------|--------------------------------------------------|
| EPI_ISL_436137 to 436141, EPI_ISL_436156 to 436157                                                                                                                                                                                                                                                                                                                                                                                                                                                                                                                                                                                                                                                                                                                                                                                                                                          | District Surveillance Unit                                                                                                             | Department of Neurovirology, National Institute of Mental Health and Neuroscience (NIMHANS)                                                                                                                     | Anita Desai; Chitra Pattabiraman; Harsha PK; Manjunatha Venkataswamy; Ravi Vasanthapuram; Risha Rasheed; Shafeeq S Hameed; Vijayalakshmi Reddy                                                                                                                                                                                                                                                                                                                                                                                                                                                                                                                                                                                                                              |                                                  |
| EPI_ISL_428479 to 428487, EPI_ISL_486382                                                                                                                                                                                                                                                                                                                                                                                                                                                                                                                                                                                                                                                                                                                                                                                                                                                    | District Surveillance Unit                                                                                                             | Department of Neurovirology, National Institute of Mental Health and Neuroscience (NIMHANS)                                                                                                                     | Anita Desai; Chitra Pattabiraman; Harsha PK; Manjunatha Venkataswamy; Ravi Vasanthapuram; Risha Rasheed; Shafeeq S Hameed; Vijayalakshmi Reddy                                                                                                                                                                                                                                                                                                                                                                                                                                                                                                                                                                                                                              |                                                  |
| EPI_ISL_534312                                                                                                                                                                                                                                                                                                                                                                                                                                                                                                                                                                                                                                                                                                                                                                                                                                                                              | Distrito Sanitario Sul                                                                                                                 | Instituto Adolfo Lutz, Interdisciplinary Procedures Center, Strategic Laboratory                                                                                                                                | Claudia Regina Gonçalves; Claudio Tavares Sacchi; Erica Valessa Ramos Gomes                                                                                                                                                                                                                                                                                                                                                                                                                                                                                                                                                                                                                                                                                                 |                                                  |
| EPI_ISL_583499                                                                                                                                                                                                                                                                                                                                                                                                                                                                                                                                                                                                                                                                                                                                                                                                                                                                              | Distrito Sanitario Sul Campinas                                                                                                        | Instituto Adolfo Lutz, Interdisciplinary Procedures Center, Strategic Laboratory                                                                                                                                | Claudia Regina Gonçalves; Claudio Tavares Sacchi; Erica Valessa Ramos Gomes; Karoline Rodrigues Campos                                                                                                                                                                                                                                                                                                                                                                                                                                                                                                                                                                                                                                                                      |                                                  |
| EPI_ISL_1489527, EPI_ISL_1489529 to 1489656, EPI_ISL_1489942 to 1490164, EPI_ISL_1490167 to 1490184                                                                                                                                                                                                                                                                                                                                                                                                                                                                                                                                                                                                                                                                                                                                                                                         | Division of Emerging Infectious Diseases, Bureau of Infectious Diseases Diagnosis Control, Korea Disease Control and Prevention Agency | Division of Emerging Infectious Diseases, Bureau of Infectious Diseases Diagnosis Control, Korea Disease Control and Prevention Agency                                                                          | Ae Kyung Park; Chae Young Lee; Eun-Jin Kim; Heui Man Kim; Il-Hwan Kim; Jeong-Ah Kim; Jeong-Min Kim; Jin Sun No                                                                                                                                                                                                                                                                                                                                                                                                                                                                                                                                                                                                                                                              |                                                  |
| EPI_ISL_1491561 to 1491569, EPI_ISL_1491572                                                                                                                                                                                                                                                                                                                                                                                                                                                                                                                                                                                                                                                                                                                                                                                                                                                 | Division of Epidemiology                                                                                                               | COVID-19 Network Investigations (CONI) Alliance                                                                                                                                                                 | Angkana Huang; Anthony R. Jones; Araya Keskesorn; Arporn Wangwiwatsin; Arthicha Wongkumma; Atika Awae; Bhakbhoom Panthan; Chattiwutti Tanabat; Chodmanee Sukunpun; Chonticha Klungtong; Duangkamon Loesbanluechai; Ekawat Pasomsub; Elizabeth Batty; Insee Sensor; Janjira Thaipadungpanit; Juraiwan Ungsathaphornphon; Kamonchanok Chuayjan; Kawinna Kerdsalung; Khajohn Joonlasak; Kingkan Rakmanee; Krittikorn Kumpornsin; Namfon Kotanan; Pantila Taweewiyakarn; Prangsiiri Nalaem; Prapai Kreerat; Rattanapong Kompao; Rusmanira Khwankerd; Saraiya Cheta; Sawanya Chantunon; Sawwanit Lamun; Sitipatimoh Mina; Stefan Fernandez; Thanat Chookajorn; Theerarat Kochakarn; Treewat Watthanachockchai; Wachirapun Chainontee; Wasun Chantratita; Wudtichai Manasatienkij |                                                  |
| EPI_ISL_485603                                                                                                                                                                                                                                                                                                                                                                                                                                                                                                                                                                                                                                                                                                                                                                                                                                                                              | Division of Infectious Disease                                                                                                         | Steininger Lab                                                                                                                                                                                                  | Christoph Steininger; Ingeborg Klymiuk; Jakob Thannesberger; Lorenz Schubert; Nicolas Rascovan; Oliver Robak                                                                                                                                                                                                                                                                                                                                                                                                                                                                                                                                                                                                                                                                |                                                  |
| EPI_ISL_508864 to 508870, EPI_ISL_509222                                                                                                                                                                                                                                                                                                                                                                                                                                                                                                                                                                                                                                                                                                                                                                                                                                                    | Division of Infectious Diseases and Hospital Epidemiology, University Hospital Zürich                                                  | Institute of Medical Virology, University of Zurich                                                                                                                                                             | Aline Wolfensberger; Dana Weissberg; Hugo Sax; Irene A. Abela; Jürg Böni; Maryam Zaheri; Michael Huber; Peter W. Schreiber; Silvana K. Rampini; Verena Kufner                                                                                                                                                                                                                                                                                                                                                                                                                                                                                                                                                                                                               |                                                  |
| EPI_ISL_413513, EPI_ISL_413515                                                                                                                                                                                                                                                                                                                                                                                                                                                                                                                                                                                                                                                                                                                                                                                                                                                              | Division of Infectious Diseases, Department of Internal Medicine, Korea University College of Medicine                                 | Department of Microbiology, Institute for Viral Diseases, College of Medicine, Korea University                                                                                                                 | Changmin Kang; Cui Chunguang; Gee Eun Lee; Hee Jin Cheong; Heedo Park; Jeonghun Kim; Ji Yun Noh; Jin Gu Yoon; Jin Il Kim; Joon Young Song; Joon-Yong Bae; Jungmin Lee; Jouyong Cho; Kyeong-ryeol Shim; Man-Seong Park; Woo Joo Kim                                                                                                                                                                                                                                                                                                                                                                                                                                                                                                                                          |                                                  |
| EPI_ISL_413022 to 413024                                                                                                                                                                                                                                                                                                                                                                                                                                                                                                                                                                                                                                                                                                                                                                                                                                                                    | Division of Infectious Diseases, University Hospital Zurich                                                                            | Institute of Medical Virology, University of Zurich                                                                                                                                                             | Alexandra Trkola; Andrea Zbinden; Fiona Steiner; Gabriela Ziltener; Jon Huder; Jürg Böni; Maryam Zaheri; Michael Huber; Patrick Redli; Riccarda Capaul; Roberto Speck; Stefan Schmutz; Verena Kufner                                                                                                                                                                                                                                                                                                                                                                                                                                                                                                                                                                        |                                                  |
| EPI_ISL_524475, EPI_ISL_524477, EPI_ISL_524483, EPI_ISL_524485                                                                                                                                                                                                                                                                                                                                                                                                                                                                                                                                                                                                                                                                                                                                                                                                                              | Division of Infectious Diseases, University Hospital Zürich                                                                            | Institute of Medical Virology, University of Zurich                                                                                                                                                             | Alexandra Trkola; Andrea Zbinden; Fiona Steiner; Gabriela Ziltener; Jon Huder; Jürg Böni; Maryam Zaheri; Michael Huber; Patrick Redli; Riccarda Capaul; Stefan Schmutz; Verena Kufner                                                                                                                                                                                                                                                                                                                                                                                                                                                                                                                                                                                       |                                                  |
| EPI_ISL_1502129 to 1502198                                                                                                                                                                                                                                                                                                                                                                                                                                                                                                                                                                                                                                                                                                                                                                                                                                                                  | Division of Medical Virology, National Health Laboratory Service (NHLs), Tygerberg Hospital / Stellenbosch University                  | Division of Medical Virology, Stellenbosch University and NHLs Tygerberg Hospital                                                                                                                               | Bronwyn Kleinhans; Gert van Zyl; Susan Engelbrecht; Wolfgang Preiser                                                                                                                                                                                                                                                                                                                                                                                                                                                                                                                                                                                                                                                                                                        |                                                  |
| EPI_ISL_412869 to 412873, EPI_ISL_425117 to 425118, EPI_ISL_426163 to 426164, EPI_ISL_426166 to 426169, EPI_ISL_426171, EPI_ISL_426173, EPI_ISL_426180 to 426183, EPI_ISL_426187, EPI_ISL_427809 to 427813, EPI_ISL_471425 to 471426, EPI_ISL_471438 to 471455, EPI_ISL_481370 to 481379, EPI_ISL_497951, EPI_ISL_497953 to 498053, EPI_ISL_506947 to 506995, EPI_ISL_510547 to 510688, EPI_ISL_514756 to 515054, EPI_ISL_522454, EPI_ISL_522465 to 522466, EPI_ISL_522474 to 522475, EPI_ISL_522477 to 522478, EPI_ISL_522484, EPI_ISL_522486 to 522490, EPI_ISL_522498 to 522501, EPI_ISL_522503 to 522504, EPI_ISL_522506 to 522507, EPI_ISL_522509, EPI_ISL_522511 to 522514, EPI_ISL_522517, EPI_ISL_522519 to 522544, EPI_ISL_526700 to 526729, EPI_ISL_526732 to 526733                                                                                                              | Division of Viral Diseases, Center for Laboratory Control of Infectious Diseases, Korea Centers for Diseases Control and Prevention    | Division of Viral Diseases, Center for Laboratory Control of Infectious Diseases, Korea Centers for Diseases Control and Prevention                                                                             | Daesang Lee; Dong Hyun Song; Heui Man Kim; Hye-Jun Jo; Jeong-Min Kim; Jun-Sub Kim; Junhyeong Jang; Mi-Seon Kim; Myung Guk Han; Namjoo Lee; Sang Hee Woo; Sehee Park; Seong Tae Jeong; Yoon-Seok Chung                                                                                                                                                                                                                                                                                                                                                                                                                                                                                                                                                                       |                                                  |
| see above                                                                                                                                                                                                                                                                                                                                                                                                                                                                                                                                                                                                                                                                                                                                                                                                                                                                                   | Division of Viral Diseases, Center for Laboratory Control of Infectious Diseases, Korea Centers for Diseases Control and Prevention    | Division of Viral Diseases, Center for Laboratory Control of Infectious Diseases, Korea Centers for Diseases Control and Prevention                                                                             | Daesang Lee; Dong Hyun Song; Heui Man Kim; Hye-Jun Jo; Jeong-Min Kim; Jun-Sub Kim; Junhyeong Jang; Mi-Seon Kim; Myung Guk Han; Namjoo Lee; Sang Hee Woo; Sehee Park; Seong Tae Jeong; Yoon-Seok Chung                                                                                                                                                                                                                                                                                                                                                                                                                                                                                                                                                                       |                                                  |
| EPI_ISL_513357, EPI_ISL_513389                                                                                                                                                                                                                                                                                                                                                                                                                                                                                                                                                                                                                                                                                                                                                                                                                                                              | Douglas Hanly Moir                                                                                                                     | NSW Health Pathology - Institute of Clinical Pathology and Medical Research; Westmead Hospital; University of Sydney                                                                                            | CIDM-PH et al.                                                                                                                                                                                                                                                                                                                                                                                                                                                                                                                                                                                                                                                                                                                                                              |                                                  |
| EPI_ISL_451601, EPI_ISL_455051 to 455053, EPI_ISL_455065                                                                                                                                                                                                                                                                                                                                                                                                                                                                                                                                                                                                                                                                                                                                                                                                                                    | Douglas Hanly Moir Pathology                                                                                                           | NSW Health Pathology - Institute of Clinical Pathology and Medical Research; Westmead Hospital; University of Sydney                                                                                            | CIDM-PH et al.                                                                                                                                                                                                                                                                                                                                                                                                                                                                                                                                                                                                                                                                                                                                                              |                                                  |
| EPI_ISL_498773, EPI_ISL_526153, EPI_ISL_526213 to 526214, EPI_ISL_545027, EPI_ISL_593650 to 593651                                                                                                                                                                                                                                                                                                                                                                                                                                                                                                                                                                                                                                                                                                                                                                                          | Douglass Hanly Moir Pathology                                                                                                          | NSW Health Pathology - Institute of Clinical Pathology and Medical Research; Westmead Hospital; University of Sydney                                                                                            | CIDM-PH et al.                                                                                                                                                                                                                                                                                                                                                                                                                                                                                                                                                                                                                                                                                                                                                              |                                                  |
| EPI_ISL_1545263 to 1545265                                                                                                                                                                                                                                                                                                                                                                                                                                                                                                                                                                                                                                                                                                                                                                                                                                                                  | Dr. Bard                                                                                                                               | Laboratory of genomics and metagenomics                                                                                                                                                                         | Claire Bertelli; Damien Jacot; Gilbert Greub; Sébastien Aeby; Trestan Pillonel                                                                                                                                                                                                                                                                                                                                                                                                                                                                                                                                                                                                                                                                                              |                                                  |
| EPI_ISL_1545260 to 1545261                                                                                                                                                                                                                                                                                                                                                                                                                                                                                                                                                                                                                                                                                                                                                                                                                                                                  | Dr. Borel                                                                                                                              | Laboratory of genomics and metagenomics                                                                                                                                                                         | Claire Bertelli; Damien Jacot; Gilbert Greub; Sébastien Aeby; Trestan Pillonel                                                                                                                                                                                                                                                                                                                                                                                                                                                                                                                                                                                                                                                                                              |                                                  |
| EPI_ISL_1457773                                                                                                                                                                                                                                                                                                                                                                                                                                                                                                                                                                                                                                                                                                                                                                                                                                                                             | Dr. Carol Davila Central Military Emergency University Hospital                                                                        | "Stefan S. Nicolau" Institute of Virology                                                                                                                                                                       | Adriana Plesa; Alina Nastasie; Ana Iulia Neagu; Anca Botezatu; Camelia Sultana; Carmen Cristina Diaconu; Codruta-Georgiana Carp; Coralia Bleotu; Cristina Mambet; Denisa Dragu; Gabriela Anton; Ioana Pitica; Iulia Virginia Iancu; Laura Grecu; Laura Necula; Lilia Matei; Marinela Bostan; Mihaela Economescu; Mirela Mihaila; Saviana Nedeianu; Simona Ruta                                                                                                                                                                                                                                                                                                                                                                                                              |                                                  |
| EPI_ISL_418811, EPI_ISL_429806, EPI_ISL_429811, EPI_ISL_429816, EPI_ISL_479625 to 479651, EPI_ISL_481742 to 481758, EPI_ISL_482471 to 482473                                                                                                                                                                                                                                                                                                                                                                                                                                                                                                                                                                                                                                                                                                                                                | see above                                                                                                                              | Dr. Georges-L.-Dumont University Hospital Centre                                                                                                                                                                | National Microbiology Laboratory                                                                                                                                                                                                                                                                                                                                                                                                                                                                                                                                                                                                                                                                                                                                            |                                                  |
| see above                                                                                                                                                                                                                                                                                                                                                                                                                                                                                                                                                                                                                                                                                                                                                                                                                                                                                   | Dr. Georges-L.-Dumont University Hospital Centre                                                                                       | National Microbiology Laboratory                                                                                                                                                                                | Anna Majer; Elsie Grudeski; Gary Van Domselaar; Grace Seo; Guillaume Desnoyers; Jennifer Tanner; Kristyn Burak; Matthew Gilmour; Morag Graham; Natalie Knox; Nathalie Bastien; Philip Mabon; Rhiannon Huzarewich; Richard Garceau; Russel Mandes; Shari Tyson; Timothy Booth; Yan Li                                                                                                                                                                                                                                                                                                                                                                                                                                                                                        |                                                  |
| EPI_ISL_583727 to 583852                                                                                                                                                                                                                                                                                                                                                                                                                                                                                                                                                                                                                                                                                                                                                                                                                                                                    | Dr. Gernot Walder GmbH                                                                                                                 | Bergthaler laboratory, CeMM Research Center for Molecular Medicine of the Austrian Academy of Sciences                                                                                                          | Adi Steinrigl; Alexander Lercher; Alexandra Popa; Andreas Bergthaler; Benedikt Agerer; Christian Paar; Christoph Bock; Daniela Schmid; Dorothee von Laer; Elisabeth Puchhammer-Stoeckl; Franz Allerberger; Gernot Walder; Gregor Hörmann; Guenter Weiss; Gunther Vogl; Henrike Colaco; Jakob-Wendelin Genger; Jan Laine; Judith Aberle; Kinga Rigler-Hohenwarter; Lukas Endler; Manfred Nairz; Mark Smyth; Martin Senekowitsch; Michael Schuster; Peter Hufnagl; Peter Obrist; Rainer Gattringer; Sabine Sussitz-Rack; Stephan Aberle; Thomas Penz; Wegene Borena                                                                                                                                                                                                           |                                                  |
| EPI_ISL_528752                                                                                                                                                                                                                                                                                                                                                                                                                                                                                                                                                                                                                                                                                                                                                                                                                                                                              | Dr. H. A. Rotinsulu Lung Hospital                                                                                                      | School of Pharmacy & School of Life Sciences and Technology - Institut Teknologi Bandung; Molecular Genetics Laboratory-Faculty of Medicine-Universitas Padjadjaran; Laboratorium Kesehatan Provinsi Jawa Barat | Adelina Kristiani Rahayu; Agung Eru Wibowo; Azzania Fibriani; Catur Riani; Cut Nur Cynthia Alamanda; Ema Rahmawati; Gusti Ayu Prani Pradani; Hammam Riza; Hesti Lina Wiraswati; Husna Nugrahapraja; Ivran Faizal; Lia Faridah; Marselina Irasonia Tan; Rifky Waluyajati Rachman; Ryan Bayusantika Ristandi; Savira Ekawardhani; Sony Solistia Wirawan; Tarwadi; Yulia Sribudiani                                                                                                                                                                                                                                                                                                                                                                                            |                                                  |
| EPI_ISL_469043 to 469047, EPI_ISL_475056 to 475057, EPI_ISL_495067 to 495069                                                                                                                                                                                                                                                                                                                                                                                                                                                                                                                                                                                                                                                                                                                                                                                                                | Dr. N. D. Desai Medical College & Hospital                                                                                             | Gujarat Biotechnology Research Centre                                                                                                                                                                           | A M Kadri; Afzal Ansari; Akanksha Verma; Ankit Hinsu; Apurvasinh Puvar; Bhavya Jindal; Chaitanya Joshi; Dinesh Kumar; Harsh Bakshi; J G Buch; Janvi Raval; Jigar Gusani; Komal Patel; Labdhi Pandya; Madhvi Joshi; Maharshi Pandya; Monika Gandhi; Neha Rajpara; Nidhi Patel; Nikha Trivedi; Nitin Savaliya; Pinal Trivedi; Pooja P Doshi; Pritesh Sabara; Priti Pandita; Priyanka P Vatsa; R D Dixit; Raghawendra Kumar; Snehal Bagatharia; Supreet Prabhu; Tejas Shah; Zarna Patel; Zuber Saiyed                                                                                                                                                                                                                                                                          |                                                  |
| EPI_ISL_512075 to 512077, EPI_ISL_514435 to 514437, EPI_ISL_524732                                                                                                                                                                                                                                                                                                                                                                                                                                                                                                                                                                                                                                                                                                                                                                                                                          | Dr. RSS Hospital, Modasa                                                                                                               | Gujarat Biotechnology Research Centre                                                                                                                                                                           | A M Kadri; Afzal Ansari; Apurvasinh Puvar; Chaitanya Joshi; Dinesh Kumar; Harsh Bakshi; Harsh Chaudhari; Janvi Raval; Komal Patel; Labdhi Pandya; Madhvi Joshi; Maharshi Pandya; Monika Gandhi; Neena Doshi; Nidhi Patel; Nikha Trivedi; Nitin Savaliya; Pinal Trivedi; R D Dixit; Raghawendra Kumar; Varsha Godbole; Zarna Patel; Zuber Saiyed                                                                                                                                                                                                                                                                                                                                                                                                                             |                                                  |
| EPI_ISL_495012                                                                                                                                                                                                                                                                                                                                                                                                                                                                                                                                                                                                                                                                                                                                                                                                                                                                              | Dr. Tony Mazzulli Microbiologist-in-Chief                                                                                              | Dr. Jeff Wrana, Senior Investigator                                                                                                                                                                             | Bryn Hazlett; Christine Bruce; Dan Trcka; Javier Hernandez; Jeff Wrana; Jess Shen; Jessica Bourke; Kin Chan; Laurence Pelletier; Marie-Ming Aynaud; Seda Barutcu; Sue Poutanen; Tony Mazzulli                                                                                                                                                                                                                                                                                                                                                                                                                                                                                                                                                                               |                                                  |
| EPI_ISL_494970, EPI_ISL_495013                                                                                                                                                                                                                                                                                                                                                                                                                                                                                                                                                                                                                                                                                                                                                                                                                                                              | Dr. Tony Mazzulli Microbiologist-in-Chief                                                                                              | Dr. Jeff Wrana, Senior Investigator                                                                                                                                                                             | Bryn Hazlett; Christine Bruce; Dan Trcka; Javier Hernandez; Jeff Wrana; Jess Shen; Jessica Bourke; Kin Chan; Laurence Pelletier; Marie-Ming Aynaud; Seda Barutcu; Sue Poutanen; Tony Mazzulli                                                                                                                                                                                                                                                                                                                                                                                                                                                                                                                                                                               |                                                  |
| EPI_ISL_417211 to 417212                                                                                                                                                                                                                                                                                                                                                                                                                                                                                                                                                                                                                                                                                                                                                                                                                                                                    | Dunedin Hospital                                                                                                                       | University of Otago                                                                                                                                                                                             | B. Lawley; J. Grant; J. Ussher; M.E. Quiñones-Mateu; R. Harfoot                                                                                                                                                                                                                                                                                                                                                                                                                                                                                                                                                                                                                                                                                                             |                                                  |
| EPI_ISL_414423 to 414446, EPI_ISL_414448 to 414471, EPI_ISL_414529 to 414541, EPI_ISL_414544 to 414566, EPI_ISL_415460 to 415463, EPI_ISL_415465 to 415492, EPI_ISL_415495 to 415498, EPI_ISL_415500 to 415506, EPI_ISL_415508, EPI_ISL_415510 to 415516, EPI_ISL_415524 to 415535, EPI_ISL_422635, EPI_ISL_422637 to 422881, EPI_ISL_422885 to 422899, EPI_ISL_422901 to 422960, EPI_ISL_423034, EPI_ISL_455112 to 455180, EPI_ISL_455194 to 455200, EPI_ISL_455202 to 455222, EPI_ISL_455226 to 455258, EPI_ISL_455261, EPI_ISL_455263 to 455307, EPI_ISL_460636 to 460705, EPI_ISL_460714 to 460721, EPI_ISL_460723 to 460738, EPI_ISL_460753 to 460768, EPI_ISL_460770 to 460771, EPI_ISL_460773 to 460821, EPI_ISL_460823 to 460890, EPI_ISL_460892 to 461050, EPI_ISL_461061 to 461087, EPI_ISL_461101 to 461111, EPI_ISL_461113 to 461159, EPI_ISL_461161, EPI_ISL_461163 to 461167, |                                                                                                                                        |                                                                                                                                                                                                                 |                                                                                                                                                                                                                                                                                                                                                                                                                                                                                                                                                                                                                                                                                                                                                                             |                                                  |

|                                                                                                                                                                                                                                                                                                                                                                                                                                                                                                                                                                                                                                                                                                                                                                                                                                                                                                                                                                                                                                                                        |           |                                                                                                                |                                                                                                                     |                                                                                                                                                                                                                                                                                                                                                                                                                                                                                                                       |
|------------------------------------------------------------------------------------------------------------------------------------------------------------------------------------------------------------------------------------------------------------------------------------------------------------------------------------------------------------------------------------------------------------------------------------------------------------------------------------------------------------------------------------------------------------------------------------------------------------------------------------------------------------------------------------------------------------------------------------------------------------------------------------------------------------------------------------------------------------------------------------------------------------------------------------------------------------------------------------------------------------------------------------------------------------------------|-----------|----------------------------------------------------------------------------------------------------------------|---------------------------------------------------------------------------------------------------------------------|-----------------------------------------------------------------------------------------------------------------------------------------------------------------------------------------------------------------------------------------------------------------------------------------------------------------------------------------------------------------------------------------------------------------------------------------------------------------------------------------------------------------------|
| EPI_ISL_461172, EPI_ISL_461177, EPI_ISL_461179, EPI_ISL_461181 to 461189, EPI_ISL_461193 to 461199, EPI_ISL_461201 to 461202, EPI_ISL_461204 to 461232, EPI_ISL_461234 to 461373, EPI_ISL_461375 to 461381, EPI_ISL_461383 to 461391, EPI_ISL_461394, EPI_ISL_461396 to 461398, EPI_ISL_522987 to 523212, EPI_ISL_523235 to 523273, EPI_ISL_523275 to 523291, EPI_ISL_523301 to 523309, EPI_ISL_523332, EPI_ISL_523334 to 523385, EPI_ISL_523401 to 523499, EPI_ISL_523501 to 523517, EPI_ISL_523522 to 523526, EPI_ISL_523528 to 523558, EPI_ISL_523568 to 523578, EPI_ISL_523595 to 523611, EPI_ISL_523613 to 523657, EPI_ISL_523659 to 523809, EPI_ISL_574779 to 574781, EPI_ISL_574786 to 574789, EPI_ISL_577743 to 577747, EPI_ISL_577749 to 577803, EPI_ISL_577805, EPI_ISL_577807 to 577844, EPI_ISL_577847 to 577850, EPI_ISL_577852 to 577866, EPI_ISL_577872 to 577882, EPI_ISL_577886 to 577905, EPI_ISL_577908 to 577916, EPI_ISL_577926 to 577944, EPI_ISL_577948 to 577954, EPI_ISL_577964 to 578000, EPI_ISL_578004 to 578071, EPI_ISL_578073 to 578079 | see above | Dutch COVID-19 response team                                                                                   | Erasmus Medical Center                                                                                              | Anne van der Linden; Annemiek van der Eijk; Aura Timen; Bas Oude Munnink; Claudia Schapendonk; Corien Swaan; Corine GeurtsvanKessel; David Nieuwenhuijs; Emmanuelle Munger; Irina Chestakova; Jeroen van Kampen; Jolanda Voermans; Madelif Molers; Manon Haverkate; Marion Koopmans; Marjan Boter; Mark Pronk; Mart Stein; OH consortium; Pascal Lexmond; Reina Sikkema; Richard Molenkamp; Sandra Kengne Kamga Mobou; Stefan van Nieuwkoop; Theo Bestebroer; on behalf of the Dutch national COVID-19 response team. |
| EPI_ISL_1394665 to 1394737, EPI_ISL_1443441 to 1443511, EPI_ISL_1509640 to 1509696, EPI_ISL_1509702 to 1509716, EPI_ISL_1509718 to 1509719, EPI_ISL_1558521 to 1558593                                                                                                                                                                                                                                                                                                                                                                                                                                                                                                                                                                                                                                                                                                                                                                                                                                                                                                 |           | Dutch COVID-19 response team                                                                                   | Medical Microbiology, Maastricht University Medical Centre                                                          | Brian van der Veer*; Carmen Reumkens; Christian Hoebé; Erik Beuken; Jozef Dingemans*; Lieke van Alphen; Paul Savelkoul                                                                                                                                                                                                                                                                                                                                                                                                |
| EPI_ISL_454750 to 454767, EPI_ISL_454769 to 454794, EPI_ISL_547445 to 547453, EPI_ISL_547455 to 547458, EPI_ISL_547460 to 547465, EPI_ISL_547469 to 547470, EPI_ISL_547473 to 547486, EPI_ISL_547491 to 547499, EPI_ISL_547501 to 547509, EPI_ISL_547511, EPI_ISL_547513 to 547522, EPI_ISL_547524 to 547529, EPI_ISL_547531 to 547534, EPI_ISL_547536 to 547539, EPI_ISL_547541, EPI_ISL_547567 to 547560, EPI_ISL_1455675 to 1456120, EPI_ISL_1456122 to 1456449, EPI_ISL_1456451 to 1457125, EPI_ISL_1457127 to 1457195, EPI_ISL_1457197 to 1457408, EPI_ISL_1457410 to 1457756, EPI_ISL_1498153 to 1498261, EPI_ISL_1520441 to 1522236                                                                                                                                                                                                                                                                                                                                                                                                                             | see above | Dutch COVID-19 response team                                                                                   | National Institute for Public Health and the Environment (RIVM)                                                     | Adam Meijer; AnneMarie van den Brandt; Annelies Kroneman; Bas van der Veer; Chantal Reusken; Dennis Schmitz; Dirk Eggink; Eunice Then; Florian Zwagemaker; Harry Vennema; James Groot; Jeroen Cremer; Jolienke Hardeman; Karim Hajji; Kim Freniks; Linda van de Nes; Lisa Wijsman; Lynn Aarts; Melissa van Tuil; Pieter Overduin; Robert Kohl; Ryanne Jaarsma; Sanne Bos; Sharon van den Brink; Sjoerd Kuiling; on behalf of the national COVID-19 response team                                                      |
| EPI_ISL_1534299, EPI_ISL_1534387                                                                                                                                                                                                                                                                                                                                                                                                                                                                                                                                                                                                                                                                                                                                                                                                                                                                                                                                                                                                                                       |           | Dysselsdorp Clinic wc DDC                                                                                      | NHLS/UCT                                                                                                            | Arash Iranzadeh; Bruna Galvao; Carolyn Williamson; Deelan Doolabh; Diana Hardie; Emmanuel S.J; Innocent Mudau; Kruger Marais; Lynn Tyers; Marvin Hsiao; Stephen Korsman; Tegally H; de Oliveira T                                                                                                                                                                                                                                                                                                                     |
| EPI_ISL_1447201                                                                                                                                                                                                                                                                                                                                                                                                                                                                                                                                                                                                                                                                                                                                                                                                                                                                                                                                                                                                                                                        |           | Dzia Diagnostyki Laboratoryjnej Wojewódzki Szpital Specjalistyczny im.J.Gromkowskiego                          | 1. National Institute of Public Health - National Institute of Hygiene; 2. Eurofins Genomics Europe Sequencing GmbH | ECDC COVID-19 WGS support team; Eurofins Genomics Europe Sequencing Team; Gierczyki Rafa; Sadkowska-Todys Magorzata; Wokowicz Tomasz; Zacharczuk Katarzyna                                                                                                                                                                                                                                                                                                                                                            |
| EPI_ISL_1393659 to 1393664, EPI_ISL_1538474, EPI_ISL_1538885 to 1538888, EPI_ISL_1538998 to 1539001, EPI_ISL_1539174                                                                                                                                                                                                                                                                                                                                                                                                                                                                                                                                                                                                                                                                                                                                                                                                                                                                                                                                                   |           | Dzia Diagnostyki Laboratoryjnej SPZOZ                                                                          | 1. National Institute of Public Health - National Institute of Hygiene; 2. Eurofins Genomics Europe Sequencing GmbH | ECDC COVID-19 WGS support team; Eurofins Genomics Europe Sequencing Team; Gierczyki Rafa; Sadkowska-Todys Magorzata; Wokowicz Tomasz; Zacharczuk Katarzyna                                                                                                                                                                                                                                                                                                                                                            |
| EPI_ISL_1538529                                                                                                                                                                                                                                                                                                                                                                                                                                                                                                                                                                                                                                                                                                                                                                                                                                                                                                                                                                                                                                                        |           | Dzia Diagnostyki Laboratoryjnej Wojewódzki Szpital Specjalistyczny im.J.Gromkowskiego                          | 1. National Institute of Public Health - National Institute of Hygiene; 2. Eurofins Genomics Europe Sequencing GmbH | ECDC COVID-19 WGS support team; Eurofins Genomics Europe Sequencing Team; Gierczyki Rafa; Sadkowska-Todys Magorzata; Wokowicz Tomasz; Zacharczuk Katarzyna                                                                                                                                                                                                                                                                                                                                                            |
| EPI_ISL_1538927                                                                                                                                                                                                                                                                                                                                                                                                                                                                                                                                                                                                                                                                                                                                                                                                                                                                                                                                                                                                                                                        |           | Dzia Diagnostyki Laboratoryjnej Wojewódzkiego Szpitala Obserwacyjno-Zakanego w Bydgoszczy                      | 1. National Institute of Public Health - National Institute of Hygiene; 2. Eurofins Genomics Europe Sequencing GmbH | ECDC COVID-19 WGS support team; Eurofins Genomics Europe Sequencing Team; Gierczyki Rafa; Sadkowska-Todys Magorzata; Wokowicz Tomasz; Zacharczuk Katarzyna                                                                                                                                                                                                                                                                                                                                                            |
| EPI_ISL_1538837, EPI_ISL_1539094                                                                                                                                                                                                                                                                                                                                                                                                                                                                                                                                                                                                                                                                                                                                                                                                                                                                                                                                                                                                                                       |           | Dzieciacy Szpital Kliniczny im. Józefa Polikarpa Brudzkiego UCK WUM w Warszawie                                | 1. National Institute of Public Health - National Institute of Hygiene; 2. Eurofins Genomics Europe Sequencing GmbH | ECDC COVID-19 WGS support team; Eurofins Genomics Europe Sequencing Team; Gierczyki Rafa; Sadkowska-Todys Magorzata; Wokowicz Tomasz; Zacharczuk Katarzyna                                                                                                                                                                                                                                                                                                                                                            |
| EPI_ISL_421653 to 421656, EPI_ISL_426285 to 426289, EPI_ISL_450518 to 450519, EPI_ISL_492993 to 493000, EPI_ISL_501275, EPI_ISL_501284 to 501285, EPI_ISL_501823, EPI_ISL_501829, EPI_ISL_501833, EPI_ISL_501839, EPI_ISL_501849, EPI_ISL_501894, EPI_ISL_501929, EPI_ISL_501936, EPI_ISL_512313 to 512314, EPI_ISL_512645 to 512646, EPI_ISL_515187 to 515195, EPI_ISL_534199, EPI_ISL_534203, EPI_ISL_534212 to 534216, EPI_ISL_534218 to 534219, EPI_ISL_534221                                                                                                                                                                                                                                                                                                                                                                                                                                                                                                                                                                                                     | see above | E. Gulbja Laboratorija                                                                                         | Latvian Biomedical Research and Study Centre                                                                        | Dmitrijs Perminovs; Ivars Silamielis; Jnis Kloviš; Jnis Pjalkovskis; Kaspars Megnis; Mikus Gavars; Monta Ustinova; Uga Dumpis; Vita Rovte; ikita Zrelovs                                                                                                                                                                                                                                                                                                                                                              |
| EPI_ISL_486438                                                                                                                                                                                                                                                                                                                                                                                                                                                                                                                                                                                                                                                                                                                                                                                                                                                                                                                                                                                                                                                         |           | E. Gulbja laboratorija                                                                                         | Latvian Biomedical Research and Study Centre                                                                        | Dmitrijs Perminovs; Ivars Silamielis; Jnis Kloviš; Kaspars Megnis; Mikus Gavars; Monta Ustinova; Uga Dumpis; Vita Rovte; ikita Zrelovs                                                                                                                                                                                                                                                                                                                                                                                |
| EPI_ISL_434540                                                                                                                                                                                                                                                                                                                                                                                                                                                                                                                                                                                                                                                                                                                                                                                                                                                                                                                                                                                                                                                         |           | EBAIS Concepción Norte                                                                                         | Inciensa, Instituto Costarricense de Investigación y Enseñanza en Nutrición y Salud                                 | Adriana Godínez & Melany Calderon; Claudio Soto-Garita; Estela Cordero; Francisco Duarte; Hebleen Porras                                                                                                                                                                                                                                                                                                                                                                                                              |
| EPI_ISL_1545248 to 1545250, EPI_ISL_1545252 to 1545253, EPI_ISL_1545255 to 1545256                                                                                                                                                                                                                                                                                                                                                                                                                                                                                                                                                                                                                                                                                                                                                                                                                                                                                                                                                                                     |           | EHC MORGES                                                                                                     | Laboratory of genomics and metagenomics                                                                             | Claire Bertelli; Damien Jacot; Gilbert Greub; Sébastien Aebly; Trestan Pillonel                                                                                                                                                                                                                                                                                                                                                                                                                                       |
| EPI_ISL_1517303, EPI_ISL_1545185 to 1545186, EPI_ISL_1545189, EPI_ISL_1545258                                                                                                                                                                                                                                                                                                                                                                                                                                                                                                                                                                                                                                                                                                                                                                                                                                                                                                                                                                                          |           | EHNV                                                                                                           | Laboratory of genomics and metagenomics                                                                             | Claire Bertelli; Damien Jacot; Gilbert Greub; Sébastien Aebly; Sébastien Aebly; Trestan Pillonel                                                                                                                                                                                                                                                                                                                                                                                                                      |
| EPI_ISL_1406674                                                                                                                                                                                                                                                                                                                                                                                                                                                                                                                                                                                                                                                                                                                                                                                                                                                                                                                                                                                                                                                        |           | EHPAD                                                                                                          | CHU Clermont-Ferrand, service de virologie                                                                          | Bisseux Maxime; Combes Patricia; Henquell Cécile; Mirand Audrey                                                                                                                                                                                                                                                                                                                                                                                                                                                       |
| EPI_ISL_418226                                                                                                                                                                                                                                                                                                                                                                                                                                                                                                                                                                                                                                                                                                                                                                                                                                                                                                                                                                                                                                                         |           | EHPAD - Résidences les Cèdres                                                                                  | National Reference Center for Viruses of Respiratory Infections, Institut Pasteur, Paris                            | Angela Brisebarre; Etienne Simon-Lorière; Flora Donati; Marion Barbet; Maud Vanpeene; Mélanie Albert; Meline Bizard; Sylvie Behilli; Sylvie van der Werf; Vincent Enouf                                                                                                                                                                                                                                                                                                                                               |
| EPI_ISL_1433876, EPI_ISL_1433878, EPI_ISL_1434002, EPI_ISL_1434004, EPI_ISL_1434006, EPI_ISL_1434223, EPI_ISL_1434254, EPI_ISL_1457759                                                                                                                                                                                                                                                                                                                                                                                                                                                                                                                                                                                                                                                                                                                                                                                                                                                                                                                                 | see above | EPSILAB TALON VEZERONCE CURTIN                                                                                 | CNR Virus des Infections Respiratoires - France SUD                                                                 | Antonin Bal; Bruno Lina; Gregory Destras; Gwendolyne Burfin; Hadrien Regue; Laurence Josset; Martine Valette; Quentin Semanas                                                                                                                                                                                                                                                                                                                                                                                         |
| EPI_ISL_1494949                                                                                                                                                                                                                                                                                                                                                                                                                                                                                                                                                                                                                                                                                                                                                                                                                                                                                                                                                                                                                                                        |           | ESE. SAN ISIDRO DEL MUNICIPIO DE TONA                                                                          | Instituto Nacional de Salud- Dirección de Investigación en Salud Pública                                            | Carlos Franco-Muñoz; Carmen Osorio; Diana Malo; Diego A. Álvarez-Díaz; Diego Andrés Prada; Gerardo Santamaría; Hector Alejandro Ruiz-Moreno; Jhonnatan Reales-González; Juan Camilo Martínez; Julian Naizaque; Katherine Laiton-Donato; Lisseth Pardo; Magdalena Wiesner; Marcela Mercado-Reyes; María T. Herrera-Sepúlveda; Marta Lopez Blanco; Martha Lucia Ospina Martínez; Paola Rojas; Sergio Gomez; Sheryll Corchuelo; Ángela Alarcon Cruz                                                                      |
| EPI_ISL_515943 to 515944                                                                                                                                                                                                                                                                                                                                                                                                                                                                                                                                                                                                                                                                                                                                                                                                                                                                                                                                                                                                                                               |           | ESIC                                                                                                           | Department of Neurovirology, National Institute of Mental Health and Neuroscience (NIMHANS)                         | Anita Desai; Chitra Pattabiraman; Harsha PK; Manjunatha Venkataswamy; Pramada Prasad; Ravi Vasanthapuram; Risha Rasheed; Shafeeq S Hameed; Vijayalakshmi Reddy                                                                                                                                                                                                                                                                                                                                                        |
| EPI_ISL_1400801                                                                                                                                                                                                                                                                                                                                                                                                                                                                                                                                                                                                                                                                                                                                                                                                                                                                                                                                                                                                                                                        |           | ETSU Clinical Lab                                                                                              | Baylor Esoteric + Molecular Lab                                                                                     | Dawn Richards; Elizabeth Forrester                                                                                                                                                                                                                                                                                                                                                                                                                                                                                    |
| EPI_ISL_1418205, EPI_ISL_1418207                                                                                                                                                                                                                                                                                                                                                                                                                                                                                                                                                                                                                                                                                                                                                                                                                                                                                                                                                                                                                                       |           | EUROFINS CBM 69 LA SOIE                                                                                        | CNR Virus des Infections Respiratoires - France SUD                                                                 | Antonin Bal; Bruno Lina; Gregory Destras; Gwendolyne Burfin; Hadrien Regue; Laurence Josset; Martine Valette; Quentin Semanas                                                                                                                                                                                                                                                                                                                                                                                         |
| EPI_ISL_593481, EPI_ISL_593483, EPI_ISL_593486 to 593487, EPI_ISL_593489 to 593499, EPI_ISL_593501 to 593504, EPI_ISL_593506 to 593509, EPI_ISL_593511 to 593515, EPI_ISL_593517 to 593519, EPI_ISL_593523 to 593529, EPI_ISL_593531 to 593534, EPI_ISL_593536 to 593541, EPI_ISL_593543 to 593551                                                                                                                                                                                                                                                                                                                                                                                                                                                                                                                                                                                                                                                                                                                                                                     | see above | Eastern Ontario Regional Laboratory Association                                                                | McMaster University                                                                                                 | Ahmed Draia; Andrew G. McArthur; Emily Panousis; Hooman Derakhshani; Jalees Nasir; Leanne Mortimer; Robert Slinger                                                                                                                                                                                                                                                                                                                                                                                                    |
| EPI_ISL_437349                                                                                                                                                                                                                                                                                                                                                                                                                                                                                                                                                                                                                                                                                                                                                                                                                                                                                                                                                                                                                                                         |           | Ecole nationale vétérinaire d'Alfort-laboratoire de santé animale Anses UMR 1161 de virologie ENVA-Anses-INRAE | Institut Pasteur CIBU-ERI                                                                                           | Bernard Klionkowski; Corinne Sailleau; Marine Dumarest; Sophie Le Poder; Stéphan Zientara                                                                                                                                                                                                                                                                                                                                                                                                                             |
| EPI_ISL_468044 to 468062, EPI_ISL_475722 to 475724, EPI_ISL_477161, EPI_ISL_478672, EPI_ISL_479686 to 479735, EPI_ISL_524426 to 524427, EPI_ISL_529141 to 529145                                                                                                                                                                                                                                                                                                                                                                                                                                                                                                                                                                                                                                                                                                                                                                                                                                                                                                       | see above | Egyptian National Cancer Institute (ENCI)                                                                      | Egyptian National Cancer Institute (ENCI)                                                                           | A.A.; A.N.; Abdel Rahman N; Abdel Rahman N.; Abdelhamid, W.; Abouelhoda; Abouelhoda, M.; Ahmed; Ali, M.; Amer; Bahnassy; Elkhateeb; Elsisy; Ezzelarab; Gad, A.; H.K.; Hafez; Hamdy; Hassan; Hassan, W.; K.E.; Khattab; M.A.; M.H.; M.M.; M.S.; Mahmoud; Mohamed; O.S.; Raouf, A.; S.M.; Samir, M.; Soliman; W.A.; Zekri                                                                                                                                                                                               |
| EPI_ISL_469275                                                                                                                                                                                                                                                                                                                                                                                                                                                                                                                                                                                                                                                                                                                                                                                                                                                                                                                                                                                                                                                         |           | Egyptian National Cancer Institute (ENCI)                                                                      | Human Genome Center                                                                                                 | A.A.; Abdel Rahman N; Abdelhamid, W.; Abouelhoda; Ahmed; Ali, M.; Amer; Bahnassy; Elkhateeb; Elsisy; Ezzelarab; Gad, A.; H.K.; Hafez; Hamdy; Hassan, W.; K.E.; M.H.; M.M.; M.S.; Mohamed; O.S.; Raouf, A.; S.M.; Samir, M.; Soliman; Zekri                                                                                                                                                                                                                                                                            |
| EPI_ISL_434652                                                                                                                                                                                                                                                                                                                                                                                                                                                                                                                                                                                                                                                                                                                                                                                                                                                                                                                                                                                                                                                         |           | Ektorps Vardcentral                                                                                            | The Public Health Agency of Sweden                                                                                  | Anna Risberg; Anna-Malin Linde; Eva Espmark; Karin Tegmark-Wisell; Maria Lind Karlberg; Mia Brytting; Olov Svartstrom; Oskar Karlsson Lindsjo; Theresa Enkirch                                                                                                                                                                                                                                                                                                                                                        |
| EPI_ISL_1483789 to 1483794, EPI_ISL_1483800 to 1483801, EPI_ISL_1532124 to 1532126                                                                                                                                                                                                                                                                                                                                                                                                                                                                                                                                                                                                                                                                                                                                                                                                                                                                                                                                                                                     |           | El Camino Hospital                                                                                             | Santa Clara County Public Health Laboratory                                                                         | Santa Clara County Public Health Department                                                                                                                                                                                                                                                                                                                                                                                                                                                                           |
| EPI_ISL_1495719 to 1495748, EPI_ISL_1495920                                                                                                                                                                                                                                                                                                                                                                                                                                                                                                                                                                                                                                                                                                                                                                                                                                                                                                                                                                                                                            |           | Elling group, Institute of Molecular Biotechnology (IMBA)                                                      | Bergthaler laboratory, CeMM Research Center for Molecular                                                           | Andreas Bergthaler; Anna Schedl; Bekir Erguner; Benedikt Agerer; Christoph Bock; Fabian Amman; Jan Laine; Lukas Endler; Maelle Le Moing; Martin                                                                                                                                                                                                                                                                                                                                                                       |

|                                                                                                                                                                                                                                                                                                                                                                                                                                                                                                                                                                                                                                                                                                                                                                                                                                                                                                                                                                                                                                                                                                                                                                                                                                                                                                                                                 |                                                                                                                                          |                                                                                                                                                                      |                                                                                                                                                                                                                                                                                                                                                                  |
|-------------------------------------------------------------------------------------------------------------------------------------------------------------------------------------------------------------------------------------------------------------------------------------------------------------------------------------------------------------------------------------------------------------------------------------------------------------------------------------------------------------------------------------------------------------------------------------------------------------------------------------------------------------------------------------------------------------------------------------------------------------------------------------------------------------------------------------------------------------------------------------------------------------------------------------------------------------------------------------------------------------------------------------------------------------------------------------------------------------------------------------------------------------------------------------------------------------------------------------------------------------------------------------------------------------------------------------------------|------------------------------------------------------------------------------------------------------------------------------------------|----------------------------------------------------------------------------------------------------------------------------------------------------------------------|------------------------------------------------------------------------------------------------------------------------------------------------------------------------------------------------------------------------------------------------------------------------------------------------------------------------------------------------------------------|
| to 1495969                                                                                                                                                                                                                                                                                                                                                                                                                                                                                                                                                                                                                                                                                                                                                                                                                                                                                                                                                                                                                                                                                                                                                                                                                                                                                                                                      |                                                                                                                                          | Medicine of the Austrian Academy of Sciences                                                                                                                         | Senekowitsch; Michael Schuster; Petr Triska; Thomas Penz                                                                                                                                                                                                                                                                                                         |
| EPI_ISL_1398364, EPI_ISL_1398925, EPI_ISL_1398937                                                                                                                                                                                                                                                                                                                                                                                                                                                                                                                                                                                                                                                                                                                                                                                                                                                                                                                                                                                                                                                                                                                                                                                                                                                                                               | Emam Ali Hospital                                                                                                                        | Razi Vaccine and Serum Research Institute                                                                                                                            | Akbar Khorasani; Amir Kaffashi; Jiabin Huang; Mohammad Hossein Fallah Mehrabadi; Mohsen Bashashati; Mohsen Lotfi; Morteza Taghizadeh; S Reza Banihashemi; Sayed Hamidreza Mozghan; Sayed Hamidreza Mozghani                                                                                                                                                      |
| EPI_ISL_486854                                                                                                                                                                                                                                                                                                                                                                                                                                                                                                                                                                                                                                                                                                                                                                                                                                                                                                                                                                                                                                                                                                                                                                                                                                                                                                                                  | Emergency County Hospital Suceava                                                                                                        | Stefan cel Mare, University Metagenomics lab                                                                                                                         | Lobiuc Andrei et al.                                                                                                                                                                                                                                                                                                                                             |
| EPI_ISL_486855                                                                                                                                                                                                                                                                                                                                                                                                                                                                                                                                                                                                                                                                                                                                                                                                                                                                                                                                                                                                                                                                                                                                                                                                                                                                                                                                  | Emergency county Hospital Suceava                                                                                                        | "Stefan cel Mare" University Metagenomics Lab                                                                                                                        | Lobiuc Andrei et al.                                                                                                                                                                                                                                                                                                                                             |
| EPI_ISL_454690, EPI_ISL_455355 to 455361, EPI_ISL_1503955 to 1503970, EPI_ISL_1503972 to 1503978                                                                                                                                                                                                                                                                                                                                                                                                                                                                                                                                                                                                                                                                                                                                                                                                                                                                                                                                                                                                                                                                                                                                                                                                                                                | Emory Molecular Diagnostics Laboratory, Emory Healthcare                                                                                 | Piantadosi Lab, Emory Department of Pathology                                                                                                                        | Ahmed Babiker; Anne Piantadosi                                                                                                                                                                                                                                                                                                                                   |
| EPI_ISL_424350 to 424351, EPI_ISL_468718                                                                                                                                                                                                                                                                                                                                                                                                                                                                                                                                                                                                                                                                                                                                                                                                                                                                                                                                                                                                                                                                                                                                                                                                                                                                                                        | Environmental and Global Health                                                                                                          | Environmental and Global Health                                                                                                                                      | Alam, M.; C.J.; Elbadry; Gibson; J.A.; J.C.; J.G.; J.G. Jr. and Lednický; L.H.; M.A.; Merck; Morris; Stephenson; Subramaniam, K.; T.B.; Waltzek                                                                                                                                                                                                                  |
| EPI_ISL_524433 to 524434                                                                                                                                                                                                                                                                                                                                                                                                                                                                                                                                                                                                                                                                                                                                                                                                                                                                                                                                                                                                                                                                                                                                                                                                                                                                                                                        | Environmental and Global Health, University of Florida - Gainesville                                                                     | University of Florida                                                                                                                                                | Alam; C.J.; Elbadry; Gibson; J.A.; J.C.; J.G. Jr.; Lednický; M.A.; M.M.; Morris; Stephenson; Subramaniam, K.; T.B.; Waltzek                                                                                                                                                                                                                                      |
| EPI_ISL_1400985 to 1401069, EPI_ISL_1444909 to 1445019                                                                                                                                                                                                                                                                                                                                                                                                                                                                                                                                                                                                                                                                                                                                                                                                                                                                                                                                                                                                                                                                                                                                                                                                                                                                                          | Erie County Public Health (ECPHL)                                                                                                        | University at Buffalo Genomics and Bioinformatics Core                                                                                                               | Alyssa Pohlman; Amanda Boccolucci; Brandon Marzullo; Donald Yergeau; Jennifer Surtees; Jonathan Bard; Natalie Lamb; Norma Nowak                                                                                                                                                                                                                                  |
| EPI_ISL_514648                                                                                                                                                                                                                                                                                                                                                                                                                                                                                                                                                                                                                                                                                                                                                                                                                                                                                                                                                                                                                                                                                                                                                                                                                                                                                                                                  | Essentia Health-St. Joseph's Medical Center                                                                                              | Minnesota Department of Health, Public Health Laboratory                                                                                                             | Jacob Garfin; Matt Plumb; and Xiong Wang                                                                                                                                                                                                                                                                                                                         |
| EPI_ISL_514642, EPI_ISL_603004 to 603005, EPI_ISL_603012 to 603014, EPI_ISL_603016 to 603017                                                                                                                                                                                                                                                                                                                                                                                                                                                                                                                                                                                                                                                                                                                                                                                                                                                                                                                                                                                                                                                                                                                                                                                                                                                    | Essentia Health-St. Mary's Medical Center                                                                                                | Minnesota Department of Health, Public Health Laboratory                                                                                                             | Alexandra Lorentz; Jacob Garfin; Matt Plumb; and Xiong Wang                                                                                                                                                                                                                                                                                                      |
| EPI_ISL_1479139                                                                                                                                                                                                                                                                                                                                                                                                                                                                                                                                                                                                                                                                                                                                                                                                                                                                                                                                                                                                                                                                                                                                                                                                                                                                                                                                 | Essentia Health- Holy Trinity Hospital                                                                                                   | Minnesota Department of Health, Public Health Laboratory                                                                                                             | Alexandra Lorentz; Jacob Garfin; Matt Plumb; and Xiong Wang                                                                                                                                                                                                                                                                                                      |
| EPI_ISL_614265 to 614280                                                                                                                                                                                                                                                                                                                                                                                                                                                                                                                                                                                                                                                                                                                                                                                                                                                                                                                                                                                                                                                                                                                                                                                                                                                                                                                        | Eurofins                                                                                                                                 | National Reference Center for Viruses of Respiratory Infections, Institut Pasteur, Paris                                                                             | Angela Brisebarre; Camille Capel; Etienne Simon-Lorière; Marion Barbet; Maud Vanpeene; Méline Bizard; Sylvie Behillil; Sylvie van der Werf; Vincent Enouf                                                                                                                                                                                                        |
| EPI_ISL_1404923 to 1404996, EPI_ISL_1532585 to 1532651                                                                                                                                                                                                                                                                                                                                                                                                                                                                                                                                                                                                                                                                                                                                                                                                                                                                                                                                                                                                                                                                                                                                                                                                                                                                                          | Eurofins Diatherix                                                                                                                       | Hudsonalpha Genome Sequencing Center                                                                                                                                 | Ada Stewart; Jane Grimwood; Jenell Webber; Jennifer Cart; John Lovell; Joshua Stough; Leslie Malone; Lori H. Handley; Melissa Williams; Stefan Brzezinski; Teresa Jones; and Jeremy Schmutz                                                                                                                                                                      |
| EPI_ISL_1432751, EPI_ISL_1432753, EPI_ISL_1432755, EPI_ISL_1432757, EPI_ISL_1432760, EPI_ISL_1432762, EPI_ISL_1432764, EPI_ISL_1432766, EPI_ISL_1432768, EPI_ISL_1432770, EPI_ISL_1432772, EPI_ISL_1432774, EPI_ISL_1432777, EPI_ISL_1432779, EPI_ISL_1432781, EPI_ISL_1432783, EPI_ISL_1432785, EPI_ISL_1432787, EPI_ISL_1432790, EPI_ISL_1432792, EPI_ISL_1432794, EPI_ISL_1432796, EPI_ISL_1432799 to 1432800, EPI_ISL_1432803, EPI_ISL_1432805, EPI_ISL_1432807, EPI_ISL_1432809, EPI_ISL_1432814, EPI_ISL_1432816, EPI_ISL_1432818, EPI_ISL_1432820, EPI_ISL_1432822, EPI_ISL_1432824, EPI_ISL_1432827, EPI_ISL_1432829, EPI_ISL_1432831, EPI_ISL_1432833, EPI_ISL_1432836, EPI_ISL_1432838, EPI_ISL_1432840, EPI_ISL_1432843 to 1432844, EPI_ISL_1432847, EPI_ISL_1432849, EPI_ISL_1432851, EPI_ISL_1432853, EPI_ISL_1432855, EPI_ISL_1432857, EPI_ISL_1432859, EPI_ISL_1432861, EPI_ISL_1432864, EPI_ISL_1432866, EPI_ISL_1432869, EPI_ISL_1432871, EPI_ISL_1432873, EPI_ISL_1432875, EPI_ISL_1432878, EPI_ISL_1432880, EPI_ISL_1432882, EPI_ISL_1432884, EPI_ISL_1432886, EPI_ISL_1432889, EPI_ISL_1432891, EPI_ISL_1432893, EPI_ISL_1432895, EPI_ISL_1432898, EPI_ISL_1432902, EPI_ISL_1432905, EPI_ISL_1432907, EPI_ISL_1432909, EPI_ISL_1432911, EPI_ISL_1432915, EPI_ISL_1432918, EPI_ISL_1432920, EPI_ISL_1432922, EPI_ISL_1432924 | Robert Koch Institute                                                                                                                    |                                                                                                                                                                      |                                                                                                                                                                                                                                                                                                                                                                  |
| see above                                                                                                                                                                                                                                                                                                                                                                                                                                                                                                                                                                                                                                                                                                                                                                                                                                                                                                                                                                                                                                                                                                                                                                                                                                                                                                                                       | Eurofins LifeCodexx GmbH                                                                                                                 | Robert Koch Institute                                                                                                                                                |                                                                                                                                                                                                                                                                                                                                                                  |
| EPI_ISL_450873 to 450874                                                                                                                                                                                                                                                                                                                                                                                                                                                                                                                                                                                                                                                                                                                                                                                                                                                                                                                                                                                                                                                                                                                                                                                                                                                                                                                        | Evandro Chagas Institute                                                                                                                 | Evandro Chagas Institute                                                                                                                                             | A.M.; Barbagelata; E.C.; E.M.A.; Ferreira; G.M.R; J.A.; Junior; L.C.; L.S.; M.C.; Martins; P.S.; Santos; Silva; Sousa; Sousa Junior; Viana; W.D.C.; da Silva                                                                                                                                                                                                     |
| EPI_ISL_602282 to 602303                                                                                                                                                                                                                                                                                                                                                                                                                                                                                                                                                                                                                                                                                                                                                                                                                                                                                                                                                                                                                                                                                                                                                                                                                                                                                                                        | Evangelisches Klinikum Bethel, Institut für Laboratoriumsmedizin, Mikrobiologie und Hygiene                                              | Bielefeld University                                                                                                                                                 | Alexander Sczyrba; Christiane Scherer; David Brandt; Jörn Kalinowski; Levin-Joe Klages; Marina Simunovic; Markus Haak; Svenja Vinke; Tobias Busche                                                                                                                                                                                                               |
| EPI_ISL_548966 to 548971                                                                                                                                                                                                                                                                                                                                                                                                                                                                                                                                                                                                                                                                                                                                                                                                                                                                                                                                                                                                                                                                                                                                                                                                                                                                                                                        | Expo2020 Emergency Center                                                                                                                | Agiomix                                                                                                                                                              | Cengiz Yakicier; Cherif Ben Hamada; Rashid Mohammed; Tamer Degheidy; Walaa Allam; Walid Dridi                                                                                                                                                                                                                                                                    |
| EPI_ISL_1446999 to 1447001, EPI_ISL_1447047, EPI_ISL_1528314 to 1528320                                                                                                                                                                                                                                                                                                                                                                                                                                                                                                                                                                                                                                                                                                                                                                                                                                                                                                                                                                                                                                                                                                                                                                                                                                                                         | FL Bur. of Public Health Laboratories-Jacksonville                                                                                       | Centers for Disease Control and Prevention Division of Viral Diseases, Pathogen Discovery                                                                            | Alison Laufer Halpin; Ben L. Rambo-Martin; Clinton R. Paden; Dakota Howard; Darlene Wagner; Dave Wentworth; Dhvani Batra; Jasmine Padilla; Justin Lee; Katie Dillon; Krista Queen; Kristen Knipe; Kristine Lacek; Mark Burroughs; Matthew Schmerer; Mili Sheth; Peter Cook; Sam Shepard; Sarah Nobles; Shoshona Le; Suxiang Tong; Vivien Dugan; Yvette Unoarumhi |
| EPI_ISL_424856 to 424857                                                                                                                                                                                                                                                                                                                                                                                                                                                                                                                                                                                                                                                                                                                                                                                                                                                                                                                                                                                                                                                                                                                                                                                                                                                                                                                        | FL Bur. of Public Health Laboratories-Jacksonville                                                                                       | Pathogen Discovery, Respiratory Viruses Branch, Division of Viral Diseases, Centers for Disease Control and Prevention                                               | Alison S. Laufer Halpin; Anna Uehara; Christopher A. Elkins; Clinton R. Paden; Haibin Wang; Jing Zhang; Krista Queen; Mary S. Keckler; Rachel Marine; Suxiang Tong; Yan Li; Ying Tao                                                                                                                                                                             |
| EPI_ISL_420785                                                                                                                                                                                                                                                                                                                                                                                                                                                                                                                                                                                                                                                                                                                                                                                                                                                                                                                                                                                                                                                                                                                                                                                                                                                                                                                                  | FL Bureau of Health Laboratories Tampa                                                                                                   | Pathogen Discovery, Respiratory Viruses Branch, Division of Viral Diseases, Centers for Disease Control and Prevention                                               | Alison S. Laufer Halpin; Anne Uehara; Christopher A. Elkins; Clinton R. Paden; Haibin Wang; Jasmine Padilla; Jing Zhang; Justin Lee; Krista Queen; Mary S. Keckler; Rachel Marine; Suxiang Tong; Yan Li; Ying Tao                                                                                                                                                |
| EPI_ISL_452110 to 452111, EPI_ISL_452132, EPI_ISL_594461, EPI_ISL_594465                                                                                                                                                                                                                                                                                                                                                                                                                                                                                                                                                                                                                                                                                                                                                                                                                                                                                                                                                                                                                                                                                                                                                                                                                                                                        | FL Bureau of Public Health Laboratories                                                                                                  | Pathogen Discovery, Respiratory Viruses Branch, Division of Viral Diseases, Centers for Disease Control and Prevention                                               | Alison S. Laufer Halpin; Anna Montmayeur; Anna Uehara; Christopher A. Elkins; Clinton Paden; Clinton R. Paden; Haibin Wang; Jing Zhang; Julu Bhatnagar; Krista Queen; Mary S. Keckler; Rachel Marine; Suxiang Tong; Yan Li; Ying Tao; Zachary Weiner                                                                                                             |
| EPI_ISL_1447054                                                                                                                                                                                                                                                                                                                                                                                                                                                                                                                                                                                                                                                                                                                                                                                                                                                                                                                                                                                                                                                                                                                                                                                                                                                                                                                                 | FL Bureau of Public Health Laboratories-Miami                                                                                            | Centers for Disease Control and Prevention Division of Viral Diseases, Pathogen Discovery                                                                            | Alison Laufer Halpin; Ben L. Rambo-Martin; Clinton R. Paden; Dakota Howard; Darlene Wagner; Dave Wentworth; Dhvani Batra; Jasmine Padilla; Justin Lee; Katie Dillon; Krista Queen; Kristen Knipe; Kristine Lacek; Mark Burroughs; Matthew Schmerer; Mili Sheth; Peter Cook; Sam Shepard; Sarah Nobles; Shoshona Le; Suxiang Tong; Vivien Dugan; Yvette Unoarumhi |
| EPI_ISL_424853 to 424854                                                                                                                                                                                                                                                                                                                                                                                                                                                                                                                                                                                                                                                                                                                                                                                                                                                                                                                                                                                                                                                                                                                                                                                                                                                                                                                        | FL Bureau of Public Health Laboratories-Miami                                                                                            | Pathogen Discovery, Respiratory Viruses Branch, Division of Viral Diseases, Centers for Disease Control and Prevention                                               | Alison S. Laufer Halpin; Anna Uehara; Christopher A. Elkins; Clinton R. Paden; Haibin Wang; Jing Zhang; Krista Queen; Mary S. Keckler; Rachel Marine; Suxiang Tong; Yan Li; Ying Tao                                                                                                                                                                             |
| EPI_ISL_1446987 to 1446988, EPI_ISL_1528284 to 1528285                                                                                                                                                                                                                                                                                                                                                                                                                                                                                                                                                                                                                                                                                                                                                                                                                                                                                                                                                                                                                                                                                                                                                                                                                                                                                          | FL Bureau of Public Health Laboratories-Tampa                                                                                            | Centers for Disease Control and Prevention Division of Viral Diseases, Pathogen Discovery                                                                            | Alison Laufer Halpin; Ben L. Rambo-Martin; Clinton R. Paden; Dakota Howard; Darlene Wagner; Dave Wentworth; Dhvani Batra; Jasmine Padilla; Justin Lee; Katie Dillon; Krista Queen; Kristen Knipe; Kristine Lacek; Mark Burroughs; Matthew Schmerer; Mili Sheth; Peter Cook; Sam Shepard; Sarah Nobles; Shoshona Le; Suxiang Tong; Vivien Dugan; Yvette Unoarumhi |
| EPI_ISL_419559 to 419560, EPI_ISL_424855, EPI_ISL_447841                                                                                                                                                                                                                                                                                                                                                                                                                                                                                                                                                                                                                                                                                                                                                                                                                                                                                                                                                                                                                                                                                                                                                                                                                                                                                        | FL Bureau of Public Health Laboratories-Tampa                                                                                            | Pathogen Discovery, Respiratory Viruses Branch, Division of Viral Diseases, Centers for Disease Control and Prevention                                               | Alison S. Laufer Halpin; Anna Uehara; Christopher A. Elkins; Clinton R. Paden; Haibin Wang; Jasmine Padilla; Jing Zhang; Justin Lee; Krista Queen; Mary S. Keckler; Rachel Marine; Suxiang Tong; Yan Li; Ying Tao                                                                                                                                                |
| EPI_ISL_576173                                                                                                                                                                                                                                                                                                                                                                                                                                                                                                                                                                                                                                                                                                                                                                                                                                                                                                                                                                                                                                                                                                                                                                                                                                                                                                                                  | FL Department of Health-Bureau of Epidemiology                                                                                           | Pathogen Discovery, Respiratory Viruses Branch, Division of Viral Diseases, Centers for Disease Control and Prevention                                               | Anna Uehara; Brian Lynch; Clinton R. Paden; Haibin Wang; Jing Zhang; Krista Queen; Peter Cook; Suxiang Tong; Yan Li; Ying Tao                                                                                                                                                                                                                                    |
| EPI_ISL_428851 to 428852                                                                                                                                                                                                                                                                                                                                                                                                                                                                                                                                                                                                                                                                                                                                                                                                                                                                                                                                                                                                                                                                                                                                                                                                                                                                                                                        | FSBSI "Chumakov Federal Scientific Center for Research and Development of Immune-and-Biological Products of Russian Academy of Sciences" | FSBSI "Chumakov Federal Scientific Center for Research and Development of Immune-and-Biological Products of Russian Academy of Sciences" & NRC "Kurchatov institute" | Anastasia Berestovskaya; Anastasia Piniava; Anna Shishova; Aydar Ishmukhametov; Denis Protzenko; Egor Prokhorchuk; Georgy Ignatyev; Liubov Kozlovskaya; Mikhail Rychev                                                                                                                                                                                           |
| EPI_ISL_1469555, EPI_ISL_1469572, EPI_ISL_1469612, EPI_ISL_1469620, EPI_ISL_1469630, EPI_ISL_1469651, EPI_ISL_1469661, EPI_ISL_1469785                                                                                                                                                                                                                                                                                                                                                                                                                                                                                                                                                                                                                                                                                                                                                                                                                                                                                                                                                                                                                                                                                                                                                                                                          | FUNDACAO DE SAUDE PUBLICA DE NOVO HAMBURGO FSNH                                                                                          | Epicidin                                                                                                                                                             | Ana Paula Muterle; Carolina Comerlato; Eliana Márcia Da Ros Wendland; Fernando Hayashi Sant'Anna; Janira Prichula; Juliana Comerlato                                                                                                                                                                                                                             |
| EPI_ISL_1469665, EPI_ISL_1469689, EPI_ISL_1469693, EPI_ISL_1469704, EPI_ISL_1469723                                                                                                                                                                                                                                                                                                                                                                                                                                                                                                                                                                                                                                                                                                                                                                                                                                                                                                                                                                                                                                                                                                                                                                                                                                                             | FUNDACAO DE SAUDE PUBLICA SAO CAMILO DE ESTEIO                                                                                           | Epicidin                                                                                                                                                             | Ana Paula Muterle; Carolina Comerlato; Eliana Márcia Da Ros Wendland; Fernando Hayashi Sant'Anna; Janira Prichula; Juliana Comerlato                                                                                                                                                                                                                             |
| EPI_ISL_1469549                                                                                                                                                                                                                                                                                                                                                                                                                                                                                                                                                                                                                                                                                                                                                                                                                                                                                                                                                                                                                                                                                                                                                                                                                                                                                                                                 | FUNDACAO HOSPITALAR DE SAPUCAIA DO SUL                                                                                                   | Epicidin                                                                                                                                                             | Ana Paula Muterle; Carolina Comerlato; Eliana Márcia Da Ros Wendland; Fernando Hayashi Sant'Anna; Janira Prichula; Juliana Comerlato                                                                                                                                                                                                                             |
| EPI_ISL_1469586                                                                                                                                                                                                                                                                                                                                                                                                                                                                                                                                                                                                                                                                                                                                                                                                                                                                                                                                                                                                                                                                                                                                                                                                                                                                                                                                 | FUNDACAO HOSPITALAR SAO JOSE                                                                                                             | Epicidin                                                                                                                                                             | Ana Paula Muterle; Carolina Comerlato; Eliana Márcia Da Ros Wendland; Fernando Hayashi Sant'Anna; Janira Prichula; Juliana Comerlato                                                                                                                                                                                                                             |
| EPI_ISL_445277                                                                                                                                                                                                                                                                                                                                                                                                                                                                                                                                                                                                                                                                                                                                                                                                                                                                                                                                                                                                                                                                                                                                                                                                                                                                                                                                  | FUNDACION DE SALUD EL TENIENTE                                                                                                           | Instituto de Salud Publica de Chile                                                                                                                                  | Alejandra Acevedo; Andrés E Castillo; Bárbara Parra; Carolina Tambley; Gabriel Leal; Jaime Lagos; Jorge Fernandez; Loredana Arata; Patricia Bustos; Paz Tapia; Rodrigo Fasce; Winston Andrade                                                                                                                                                                    |
| EPI_ISL_417010, EPI_ISL_418252                                                                                                                                                                                                                                                                                                                                                                                                                                                                                                                                                                                                                                                                                                                                                                                                                                                                                                                                                                                                                                                                                                                                                                                                                                                                                                                  | FUNDACION JIMENEZ DIAZ                                                                                                                   | Instituto de Salud Carlos III                                                                                                                                        | A. Monzón; F. Casas; I. Fernández Roblas, R.; I. Jiménez; Iglesias-Caballero; M. Camarero; M. Cuesta; M. González-Esguevillas; M. Molinero Calamita; M. Zaballos; P. Jiménez; S. Juliá; S. Pozo; S. Varena                                                                                                                                                       |
| EPI_ISL_468747 to 468751                                                                                                                                                                                                                                                                                                                                                                                                                                                                                                                                                                                                                                                                                                                                                                                                                                                                                                                                                                                                                                                                                                                                                                                                                                                                                                                        | Facultad de Medicina UC                                                                                                                  | Center for Mathematical Modeling and Center for Genome Regulation, Santiago, Chile                                                                                   | Allende ML; Ferres M.; Gaete A; González M; Maass A; Palma R; Travisany D; Urra C; Varas M                                                                                                                                                                                                                                                                       |

|                                                                                                                                                                                                                                                                                                                                                                                                                                                                                                                                                                                                                                                                                                                                                                                                                                                                                                                                                                                                                                                                                                 |                                                                                                          |                                                                                                                       |                                                                                                                                                                                                                                                                                                                                                                                                                                                                                                                                                                                                                                                                                                                                                                                                                                            |
|-------------------------------------------------------------------------------------------------------------------------------------------------------------------------------------------------------------------------------------------------------------------------------------------------------------------------------------------------------------------------------------------------------------------------------------------------------------------------------------------------------------------------------------------------------------------------------------------------------------------------------------------------------------------------------------------------------------------------------------------------------------------------------------------------------------------------------------------------------------------------------------------------------------------------------------------------------------------------------------------------------------------------------------------------------------------------------------------------|----------------------------------------------------------------------------------------------------------|-----------------------------------------------------------------------------------------------------------------------|--------------------------------------------------------------------------------------------------------------------------------------------------------------------------------------------------------------------------------------------------------------------------------------------------------------------------------------------------------------------------------------------------------------------------------------------------------------------------------------------------------------------------------------------------------------------------------------------------------------------------------------------------------------------------------------------------------------------------------------------------------------------------------------------------------------------------------------------|
| EPI_ISL_1491576 to 1491583,<br>EPI_ISL_1538420, EPI_ISL_1538429 to<br>1538431, EPI_ISL_1545668                                                                                                                                                                                                                                                                                                                                                                                                                                                                                                                                                                                                                                                                                                                                                                                                                                                                                                                                                                                                  | Faculty of Medicine Vajira Hospital                                                                      | COVID-19 Network Investigations (CONI) Alliance                                                                       | Ampan Vimonvattana; Anan Manomaipiboon; Angkana Huang; Anthony R. Jones; Arporn Wangwiwatsin; Bhakbhoon Panthan; Chayanit Phutthanu; Chonticha Klungtong; Duangkamon Loesbanluetchai; Ekawat Pasomsub; Elizabeth Batty; Insee Semsorn; Jakravoot Maneeert; Janjira Thaipadungpanit; Khajohn Joonlasak; Kingkan Rakmanee; Krittikorn Kumpornsin; Namfon Kotanan; Stefan Fernandez; Sunisa Dongphooayao; Thanat Chookajorn; Theerarat Kochakarn; Tonsan Hansirisathit; Treewat Watthanachockchai; Uraporn Phumisantiphong; Wasun Chantratita; Wipawee Thongsopa; Wudtichai Manasatienkij                                                                                                                                                                                                                                                     |
| EPI_ISL_510533 to 510534                                                                                                                                                                                                                                                                                                                                                                                                                                                                                                                                                                                                                                                                                                                                                                                                                                                                                                                                                                                                                                                                        | Faculty of Medicine, Bursa Uludag University                                                             | Bursa Uludag University                                                                                               | Alemdar, A.; S.G.; Saglik, I.; Temel; Özemri Sa, .                                                                                                                                                                                                                                                                                                                                                                                                                                                                                                                                                                                                                                                                                                                                                                                         |
| EPI_ISL_526686 to 526688, EPI_ISL_548243 to<br>548244                                                                                                                                                                                                                                                                                                                                                                                                                                                                                                                                                                                                                                                                                                                                                                                                                                                                                                                                                                                                                                           | Faith Laboratory, Immunology Institute, Icahn School of<br>Medicine at Mount Sinai                       | van Bakel Laboratory, Genetics and Genomics Sciences,<br>Icahn School of Medicine at Mount Sinai                      | Alexandra Livanos; Alice Chen-Liaw; Ana S. Gonzalez-Reiche; Benjamin R. tenOever; Daisy Hoagland; Divya Jha; Fatima Amanat; Florian Krammer; Francesca Cossarini; Gerold Bongers; Graham J. Britton; Gustavo Martinez-Delgado; Harm Van Bakel; Ilaria Mogno; Joseph Eggers; Lauren Tal Grinspan; Marla C. Dubinsky; Matthew P. Spindler; Michael Tankelevich; Miriam Merad; Rebekah E. Dixon; Saurabh Mehandru and Jeremiah J. Faith; Sophia Sui; Tamar Plitt                                                                                                                                                                                                                                                                                                                                                                              |
| EPI_ISL_1416191                                                                                                                                                                                                                                                                                                                                                                                                                                                                                                                                                                                                                                                                                                                                                                                                                                                                                                                                                                                                                                                                                 | Fakultas Kedokteran Universitas Sumatera Utara                                                           | National Institute of Health Research and Development                                                                 | Arie Ardiansyah Nugraha; Hana Aparsi Pawestri; Hartanti Dian Ikawati; Kartika Dewi Puspa; Krisna Nur Andriana Pangesti; Nelly Puspandari; Subangkit; Vivi Setiawaty                                                                                                                                                                                                                                                                                                                                                                                                                                                                                                                                                                                                                                                                        |
| EPI_ISL_1534701 to 1534703                                                                                                                                                                                                                                                                                                                                                                                                                                                                                                                                                                                                                                                                                                                                                                                                                                                                                                                                                                                                                                                                      | Fakultas kedokteran Universitas Sumatra Utara                                                            | National Institute of Health Research and Development                                                                 | Arie Ardiansyah Nugraha; Hana Aparsi Pawestri; Hartanti Dian Ikawati; Kartika Dewi Puspa; Krisna Pangesti; Nelly Puspandari; Subangkit; Vivi Setiawaty                                                                                                                                                                                                                                                                                                                                                                                                                                                                                                                                                                                                                                                                                     |
| EPI_ISL_1534260, EPI_ISL_1534262, EPI_ISL_1534266,<br>EPI_ISL_1534278, EPI_ISL_1534307, EPI_ISL_1534331,<br>EPI_ISL_1534380, EPI_ISL_1534400, EPI_ISL_1534442, EPI_ISL_1534461                                                                                                                                                                                                                                                                                                                                                                                                                                                                                                                                                                                                                                                                                                                                                                                                                                                                                                                  | False Bay Hospital wc FBH                                                                                | NHLS/UCT                                                                                                              | Arash Iranzadeh; Bruna Galvao; Carolyn Williamson; Deelan Doolabh; Diana Hardie; Emmanuel S.J. Innocent Mudau; Kruger Marais; Lynn Tyers; Marvin Hsiao; Stephen Korsman; Tegally H; de Oliveira T                                                                                                                                                                                                                                                                                                                                                                                                                                                                                                                                                                                                                                          |
| EPI_ISL_536400                                                                                                                                                                                                                                                                                                                                                                                                                                                                                                                                                                                                                                                                                                                                                                                                                                                                                                                                                                                                                                                                                  | Fareham Creek Veterinary Surgery                                                                         | MRC-University of Glasgow Centre for Virus Research                                                                   | Ana Da Silva Filipe; Andrew Stevenson; Brian J Willitt; Bryn Tennant; Daniel G Streicker; Daniel Goldfarb; Darcy Herrity; David L Robertson and William Weir; Dawn Dunbar; Emma MacDonald; Fiona Howie; Frazer Bell; Ilaria Epifano; Lynn Stevenson; Lynn Steinhilber; Michael McDonald; Natasha Johnson; Pablo R Murcia; Richard J Orton; Ruth F Jarrett; Vanessa Herder                                                                                                                                                                                                                                                                                                                                                                                                                                                                  |
| EPI_ISL_526935 to 526948, EPI_ISL_614295 to<br>614317                                                                                                                                                                                                                                                                                                                                                                                                                                                                                                                                                                                                                                                                                                                                                                                                                                                                                                                                                                                                                                           | Faroese National Reference Laboratory for Fish and Animal<br>Diseases                                    | Faroese National Reference Laboratory for Fish and Animal<br>Diseases                                                 | Debes Hammershaibm Christiansen; Maria Marjunardóttir Dahl; Petra Elisabeth Petersen                                                                                                                                                                                                                                                                                                                                                                                                                                                                                                                                                                                                                                                                                                                                                       |
| EPI_ISL_451963 to 451970                                                                                                                                                                                                                                                                                                                                                                                                                                                                                                                                                                                                                                                                                                                                                                                                                                                                                                                                                                                                                                                                        | Federal Budget Institution of Science, State Research Center<br>for Applied Microbiology & Biotechnology | Federal Budget Institution of Science, State Research Center<br>for Applied Microbiology & Biotechnology              | Abaimova A.; Bakhteeva I.; Blagodatskikh S.; Bogun A.; Borzilov A.; Chekan L.; Chernysh S.; Denisenko E.; Dentovskaya S.; Detushev K.; Detusheva E.; Dyatlov I.; Firstova V.; Frolov V.; Fursov M.; Fursova N.; Galkina E.; Gapelchenkova T.; Goncharova J.; Gorbatov A.; Hlyntseva A.; Ivanov S.; Kalmantayev T.; Kalmantayeva O.; Kanashenko M.; Kartsev N.; Kartseva A.; Khrumov A.; Khrumov M.; Kislichkina A.; Kolchanova A.; Koroleva-Ushakova A.; Kosilova I.; Krasilnikova E.; Kuzin V.; Kuzina E.; Makarova M.; Marin M.; Novikova T.; Platonov M.; Podkopaev Y.; Ryabko A.; Shaikhutdinova R.; Shemyakin I.; Shishkina L.; Silkina M.; Sizova A.; Skryabin Y.; Slukin P.; Slukina N.; Solomentsev V.; Solovieva A.; Teymurazov M.; Timofeev V.; Titareva G.; Trunyakova A.; Tyurin E.; Vagayskaya A.; Zeninskaya N.; Zhumakaev R |
| EPI_ISL_436505 to 436563, EPI_ISL_445003 to 445050,<br>EPI_ISL_450844 to 450872, EPI_ISL_467667, EPI_ISL_480790 to 480951, EPI_ISL_489710 to 489832, EPI_ISL_495330 to 495410, EPI_ISL_508708 to 508763, EPI_ISL_508765 to 508809, EPI_ISL_508811 to 508861, EPI_ISL_509716 to 509798, EPI_ISL_512107,<br>EPI_ISL_512547 to 512596, EPI_ISL_512676 to 512677, EPI_ISL_514139 to 514225, EPI_ISL_517771 to 517957, EPI_ISL_526553 to 526685, EPI_ISL_541338, EPI_ISL_549178 to 549270, EPI_ISL_568587 to 568685, EPI_ISL_568876, EPI_ISL_594277 to 594393, EPI_ISL_594466, EPI_ISL_613712 to 613950, EPI_ISL_614247,<br>EPI_ISL_1530990 to 1531416, EPI_ISL_1559588 to 1559591                                                                                                                                                                                                                                                                                                                                                                                                                   | Florida Bureau of Public Health Laboratories                                                             | Florida Bureau of Public Health Laboratories                                                                          | Jason Blanton; S. and Blanton, J.; Sarah Schmedes; Schmedes                                                                                                                                                                                                                                                                                                                                                                                                                                                                                                                                                                                                                                                                                                                                                                                |
| EPI_ISL_541139 to 541331                                                                                                                                                                                                                                                                                                                                                                                                                                                                                                                                                                                                                                                                                                                                                                                                                                                                                                                                                                                                                                                                        | Florida Bureau of Public Health Laboratories, Florida<br>Department of Health                            | Florida Bureau of Public Health Laboratories, Florida<br>Department of Health                                         | Blanton, J.; Schmedes, S.                                                                                                                                                                                                                                                                                                                                                                                                                                                                                                                                                                                                                                                                                                                                                                                                                  |
| EPI_ISL_1497542                                                                                                                                                                                                                                                                                                                                                                                                                                                                                                                                                                                                                                                                                                                                                                                                                                                                                                                                                                                                                                                                                 | Flow Diagnostics Lab                                                                                     | Los Angeles County PHL                                                                                                | P. Hemarajata et al.                                                                                                                                                                                                                                                                                                                                                                                                                                                                                                                                                                                                                                                                                                                                                                                                                       |
| EPI_ISL_1413763, EPI_ISL_1413766,<br>EPI_ISL_1516746                                                                                                                                                                                                                                                                                                                                                                                                                                                                                                                                                                                                                                                                                                                                                                                                                                                                                                                                                                                                                                            | Flow Health                                                                                              | Infectious Disease Program, Broad Institute of Harvard and<br>MIT                                                     | Adams, G.; B.L.; B.W.; Bauer, M.; Birren; Carter, A.; Chaluvadi, S.; D.J.; DeRuff, K.; Gallagher, G.; Gladden-Young, A.; J.E.; K.J.; Lagerborg, K.; Lemieux; Loreth, C.; MacInnis; Normandin, E.; P.C.; Park; Reilly, S.; Rudy, M.; Siddle; Smole, S.; Tomkins-Tinch, C.; and Sabeti                                                                                                                                                                                                                                                                                                                                                                                                                                                                                                                                                       |
| EPI_ISL_470882, EPI_ISL_500776 to 500778, EPI_ISL_590883 to 590884, EPI_ISL_590899, EPI_ISL_590981, EPI_ISL_590985, EPI_ISL_591008, EPI_ISL_1490307, EPI_ISL_1490645, EPI_ISL_1547638 to 1547643                                                                                                                                                                                                                                                                                                                                                                                                                                                                                                                                                                                                                                                                                                                                                                                                                                                                                                | Foerde Hospital, Department of Microbiology                                                              | Norwegian Institute of Public Health, Department of Virology                                                          | Atiya R Ali; Debech Nadia; Engebretsen Serina Beate; Garcia Llorente Ignacio; Hilde Elshaug; Hilde Vollan; Jon Bråte; Kamilla Heddeland Instefjord; Karoline Bragstad; Kathrine Stene-Johansen; Marie Paulsen Madsen; Olav Hungnes; Pedersen Benedikte Nevjen; Rasmus Riis Kopperud                                                                                                                                                                                                                                                                                                                                                                                                                                                                                                                                                        |
| EPI_ISL_455903, EPI_ISL_475152,<br>EPI_ISL_476139                                                                                                                                                                                                                                                                                                                                                                                                                                                                                                                                                                                                                                                                                                                                                                                                                                                                                                                                                                                                                                               | Folkhalsomyndigheten                                                                                     | The Public Health Agency of Sweden                                                                                    | Anna Risberg; Anna-Malin Linde; Karin Tegmark-Wisell; Maria Lind Karlberg; Mattias Haukland; Olov Svartstrom; Oskar Karlsson Lindsjo; Petra Edquist; Reza Advani; Sandra Broddesson; Shamam Muradrasoli                                                                                                                                                                                                                                                                                                                                                                                                                                                                                                                                                                                                                                    |
| EPI_ISL_434650, EPI_ISL_475536,<br>EPI_ISL_475541                                                                                                                                                                                                                                                                                                                                                                                                                                                                                                                                                                                                                                                                                                                                                                                                                                                                                                                                                                                                                                               | Follinge Halsocentral                                                                                    | The Public Health Agency of Sweden                                                                                    | Anna Risberg; Anna-Malin Linde; Karin Tegmark-Wisell; Kerstin Persson Moberg; Maria Lind Karlberg; Mattias Haukland; Mia Brytting; Olov Svartstrom; Oskar Karlsson Lindsjo; Reza Advani; Sandra Broddesson; Theresa Einkirch                                                                                                                                                                                                                                                                                                                                                                                                                                                                                                                                                                                                               |
| EPI_ISL_581455, EPI_ISL_581487,<br>EPI_ISL_581489 to 581493                                                                                                                                                                                                                                                                                                                                                                                                                                                                                                                                                                                                                                                                                                                                                                                                                                                                                                                                                                                                                                     | Fondation Congolaise pour la recherche medicale (FCRM)                                                   | NGS Competence Center Tübingen, Institut für Medizinische<br>Mikrobiologie und Hygiene, Universitätsklinikum Tübingen | Angel Angelov                                                                                                                                                                                                                                                                                                                                                                                                                                                                                                                                                                                                                                                                                                                                                                                                                              |
| EPI_ISL_420145                                                                                                                                                                                                                                                                                                                                                                                                                                                                                                                                                                                                                                                                                                                                                                                                                                                                                                                                                                                                                                                                                  | Forde Hospital Department of Microbiology                                                                | Norwegian Institute of Public Health, Department of Virology                                                          | Hilde Elshaug; Kamilla Heddeland Instefjord; Karoline Bragstad; Kathrine Stene-Johansen; Olav Hungnes                                                                                                                                                                                                                                                                                                                                                                                                                                                                                                                                                                                                                                                                                                                                      |
| EPI_ISL_413565                                                                                                                                                                                                                                                                                                                                                                                                                                                                                                                                                                                                                                                                                                                                                                                                                                                                                                                                                                                                                                                                                  | Foundation Pamm                                                                                          | Erasmus Medical Center                                                                                                | Anne van der Linden; Anemiek van der Eijk; Aura Timen; Bas Oude Munnink; Claudia Schapendonk; Corien Swaan; Corine GeurtsvanKessel; David Nieuwenhuijse; Irina Chestakova; Jeroen van Kampen; Jolanda Voermans; Madelief Möllers; Manon Haverkamp; Marion Koumans; Mark Pronk; Mart Stein; Pascal Lexmond; Reina Sikkema; Richard Molenkamp; Sandra Kengne Kamga Mobou; on behalf of the Dutch national COVID-19 response team.                                                                                                                                                                                                                                                                                                                                                                                                            |
| EPI_ISL_411060, EPI_ISL_411066, EPI_ISL_431118, EPI_ISL_431180, EPI_ISL_431240, EPI_ISL_431292, EPI_ISL_431779 to 431785                                                                                                                                                                                                                                                                                                                                                                                                                                                                                                                                                                                                                                                                                                                                                                                                                                                                                                                                                                        | Fujian Center for Disease Control and Prevention                                                         | Fujian Center for Disease Control and Prevention                                                                      | Chen Wei; He Wenxiang; Huang Zhimiao; Lin Qi; Weng Yuwei; Zhang Yanhua                                                                                                                                                                                                                                                                                                                                                                                                                                                                                                                                                                                                                                                                                                                                                                     |
| EPI_ISL_479967 to 479978, EPI_ISL_480120 to<br>480168, EPI_ISL_480225                                                                                                                                                                                                                                                                                                                                                                                                                                                                                                                                                                                                                                                                                                                                                                                                                                                                                                                                                                                                                           | Fukui Prefectural Institute of Public Health and Environmental<br>Science                                | Pathogen Genomics Center, National Institute of Infectious<br>Diseases                                                | Hajime Kamiya; Kentaro Itokawa; Makoto Kuroda; Masanori Hashino; Miho Toho; Motoi Suzuki; Rina Tanaka; Tsuyoshi Sekizuka                                                                                                                                                                                                                                                                                                                                                                                                                                                                                                                                                                                                                                                                                                                   |
| EPI_ISL_1472113 to 1472273, EPI_ISL_1472338<br>to 1472339                                                                                                                                                                                                                                                                                                                                                                                                                                                                                                                                                                                                                                                                                                                                                                                                                                                                                                                                                                                                                                       | Fukuoka Institute of Health and Environmental Sciences                                                   | Fukuoka Institute of Health and Environmental Sciences                                                                | Akira Ohishi; Asako Nakamura; Chiharu Katamune; Hiroaki Shigemura; Kentaro Itokawa; Makoto Kuroda; Masanori Hashino; Mitsuhiro Hamasaki; Rina Tanaka; Saori Ueda; Takayuki Kobayashi; Tsuyoshi Sekizuka; Yoshiaki Etoh; Yuki Ashizuka                                                                                                                                                                                                                                                                                                                                                                                                                                                                                                                                                                                                      |
| EPI_ISL_1457792 to 1458819, EPI_ISL_1458844 to 1458845, EPI_ISL_1458847, EPI_ISL_1458850 to 1458859, EPI_ISL_1458900 to 1458939, EPI_ISL_1458965, EPI_ISL_1458968, EPI_ISL_1458970 to 1458979, EPI_ISL_1458979, EPI_ISL_1459012 to 1459013, EPI_ISL_1459016 to 1459029, EPI_ISL_1459070 to 1459109, EPI_ISL_1459134, EPI_ISL_1459137 to 1459149, EPI_ISL_1459190 to 1459229, EPI_ISL_1459256 to 1459269, EPI_ISL_1459292 to 1459508, EPI_ISL_1459529 to 1460729, EPI_ISL_1481549 to 1482273, EPI_ISL_1525267 to 1525903, EPI_ISL_1554950 to 1554951, EPI_ISL_1554953 to 1554954, EPI_ISL_1554956 to 1554957, EPI_ISL_1554959 to 1554960, EPI_ISL_1554962 to 1555117, EPI_ISL_1555119, EPI_ISL_1555121 to 1555289, EPI_ISL_1555291 to 1555382, EPI_ISL_1555384 to 1555625, EPI_ISL_1555628 to 1555708, EPI_ISL_1555710 to 1556023, EPI_ISL_1556025 to 1556110, EPI_ISL_1556112 to 1556400, EPI_ISL_1556402 to 1556416,<br>EPI_ISL_1556418 to 1556827, EPI_ISL_1556829 to 1556909, EPI_ISL_1556911 to 1556914, EPI_ISL_1556916 to 1557001, EPI_ISL_1557003 to 1557066, EPI_ISL_1557068 to 1557218 | Fulgent Genetics                                                                                         | Centers for Disease Control and Prevention Division of Viral<br>Diseases, Pathogen Discovery                          |                                                                                                                                                                                                                                                                                                                                                                                                                                                                                                                                                                                                                                                                                                                                                                                                                                            |
| EPI_ISL_492074                                                                                                                                                                                                                                                                                                                                                                                                                                                                                                                                                                                                                                                                                                                                                                                                                                                                                                                                                                                                                                                                                  | Functional Genomics Core University of South Carolina /<br>Prisma Health-Midlands                        | Functional Genomics Core, University of South Carolina,                                                               | Alyssa Clay-Glimour; B.Celia Cui; Diego Altomare; Hao Ji; Helmut Albrecht; Mengqian Chen; Michael Shtutman; Michael Wyatt; Phillip Buckhaults                                                                                                                                                                                                                                                                                                                                                                                                                                                                                                                                                                                                                                                                                              |
| EPI_ISL_491481                                                                                                                                                                                                                                                                                                                                                                                                                                                                                                                                                                                                                                                                                                                                                                                                                                                                                                                                                                                                                                                                                  | Functional Genomics Core University of South Carolina /<br>Prisma Health-Midlands                        | Functional Genomics Core, Center For Targeted<br>Therapeutics,                                                        | Alyssa Clay-Glimour; B.Celia Cui; Diego Altomare; Hao Ji; Helmut Albrecht; Mengqian Chen; Michael Shtutman; Michael Wyatt; Phillip Buckhaults                                                                                                                                                                                                                                                                                                                                                                                                                                                                                                                                                                                                                                                                                              |
| EPI_ISL_493209 to 493212, EPI_ISL_493427,<br>EPI_ISL_494553 to 494556, EPI_ISL_494558                                                                                                                                                                                                                                                                                                                                                                                                                                                                                                                                                                                                                                                                                                                                                                                                                                                                                                                                                                                                           | Functional Genomics Core University of South Carolina /<br>Prisma Health-Midlands                        | Functional Genomics Core, University of South Carolina                                                                | Alyssa Clay-Glimour; B.Celia Cui; Diego Altomare; Hao Ji; Helmut Albrecht; Mengqian Chen; Michael Shtutman; Michael Wyatt; Phillip Buckhaults                                                                                                                                                                                                                                                                                                                                                                                                                                                                                                                                                                                                                                                                                              |
| EPI_ISL_493129 to 493130, EPI_ISL_493426                                                                                                                                                                                                                                                                                                                                                                                                                                                                                                                                                                                                                                                                                                                                                                                                                                                                                                                                                                                                                                                        | Functional Genomics Core University of South Carolina /<br>Prisma Health-Midlands                        | Functional Genomics Core, University of South Carolina,                                                               | Alyssa Clay-Glimour; B.Celia Cui; Diego Altomare; Hao Ji; Helmut Albrecht; Mengqian Chen; Michael Shtutman; Michael Wyatt; Phillip Buckhaults                                                                                                                                                                                                                                                                                                                                                                                                                                                                                                                                                                                                                                                                                              |
| EPI_ISL_1494951                                                                                                                                                                                                                                                                                                                                                                                                                                                                                                                                                                                                                                                                                                                                                                                                                                                                                                                                                                                                                                                                                 | Fundacion Cardioinfantil                                                                                 | Instituto Nacional de Salud- Dirección de Investigación en<br>Salud Pública                                           | Carlos Franco-Muñoz; Carmen Osorio; Diana Malo; Diego A. Álvarez-Díaz; Diego Andrés Prada; Gerardo Santamaría; Hector Alejandro Ruiz-Moreno; Jhonnatan Reales-González; Juan Camilo Martínez; Julian Naizaque; Katherine Laiton-Donato; Lisseth Pardo; Magdalena Wiesner; Marcela                                                                                                                                                                                                                                                                                                                                                                                                                                                                                                                                                          |

|                                                                                                                                                                                                                                                                                                                                                                                                                                                                                                                                                                                                                                                                                                                                                                                                                                                                                                                                                                                                                                                                                                                                                                                                                                                                                                                                                                                                                                                                                                                                                                                                                                                                                                                                                                                                                                                                                                                                                                                                                                                                                                                                                |                                                                                     |                                                                                                                                                                                                                                                                                                            |                                                                                                                                                                                                                                                                                                                                                                                                                                                                                                                       |
|------------------------------------------------------------------------------------------------------------------------------------------------------------------------------------------------------------------------------------------------------------------------------------------------------------------------------------------------------------------------------------------------------------------------------------------------------------------------------------------------------------------------------------------------------------------------------------------------------------------------------------------------------------------------------------------------------------------------------------------------------------------------------------------------------------------------------------------------------------------------------------------------------------------------------------------------------------------------------------------------------------------------------------------------------------------------------------------------------------------------------------------------------------------------------------------------------------------------------------------------------------------------------------------------------------------------------------------------------------------------------------------------------------------------------------------------------------------------------------------------------------------------------------------------------------------------------------------------------------------------------------------------------------------------------------------------------------------------------------------------------------------------------------------------------------------------------------------------------------------------------------------------------------------------------------------------------------------------------------------------------------------------------------------------------------------------------------------------------------------------------------------------|-------------------------------------------------------------------------------------|------------------------------------------------------------------------------------------------------------------------------------------------------------------------------------------------------------------------------------------------------------------------------------------------------------|-----------------------------------------------------------------------------------------------------------------------------------------------------------------------------------------------------------------------------------------------------------------------------------------------------------------------------------------------------------------------------------------------------------------------------------------------------------------------------------------------------------------------|
|                                                                                                                                                                                                                                                                                                                                                                                                                                                                                                                                                                                                                                                                                                                                                                                                                                                                                                                                                                                                                                                                                                                                                                                                                                                                                                                                                                                                                                                                                                                                                                                                                                                                                                                                                                                                                                                                                                                                                                                                                                                                                                                                                |                                                                                     |                                                                                                                                                                                                                                                                                                            | Mercado-Reyes; Maria T. Herrera-Sepúlveda; Marta Lopez Blanco; Martha Lucia Ospina Martinez; Paola Rojas; Sergio Gomez; Sheryll Corchuelo; Ángela Alarcon Cruz                                                                                                                                                                                                                                                                                                                                                        |
| EPI_ISL_419235 to 419237                                                                                                                                                                                                                                                                                                                                                                                                                                                                                                                                                                                                                                                                                                                                                                                                                                                                                                                                                                                                                                                                                                                                                                                                                                                                                                                                                                                                                                                                                                                                                                                                                                                                                                                                                                                                                                                                                                                                                                                                                                                                                                                       | Fundacion Jimenez Diaz                                                              | Instituto de Salud Carlos III                                                                                                                                                                                                                                                                              | Camarero, S.; Casas, I.; Cuesta, I.; Fernández, R.; González-Esguevillas, M.; Iglesias-Caballero, M.; Jiménez, M.; Jiménez, P.; Juliá, M.; Molinero Calamita, M.; Monzón, S.; Pozo, F.; Varona, S.; Zaballos, A.                                                                                                                                                                                                                                                                                                      |
| EPI_ISL_462447 to 462449                                                                                                                                                                                                                                                                                                                                                                                                                                                                                                                                                                                                                                                                                                                                                                                                                                                                                                                                                                                                                                                                                                                                                                                                                                                                                                                                                                                                                                                                                                                                                                                                                                                                                                                                                                                                                                                                                                                                                                                                                                                                                                                       | Fundació Lluita contra la SIDA (FLSIDa)/Hospital Universitari Germans Trias i Pujol | IrsiCaixa AIDS Research Lab                                                                                                                                                                                                                                                                                | Bonaventura Clotet; Joaquim Segalés; Jorge Carrillo; Julia Blanco; Lidia Ruiz; Marc Corbacho; Marc Noguera-Julian; Maria Pilar Armengol; Maria Ubals; Mariona Parera; Nuria Izquierdo; Oriol Mitjà; Roger Paredes                                                                                                                                                                                                                                                                                                     |
| EPI_ISL_462478                                                                                                                                                                                                                                                                                                                                                                                                                                                                                                                                                                                                                                                                                                                                                                                                                                                                                                                                                                                                                                                                                                                                                                                                                                                                                                                                                                                                                                                                                                                                                                                                                                                                                                                                                                                                                                                                                                                                                                                                                                                                                                                                 | Fundación Jiménez Díaz                                                              | Instituto de Salud Carlos III                                                                                                                                                                                                                                                                              | A. Monzón; F. Casas; I. I. Jiménez; Iglesias-Caballero; M. Camarero; M. Cuesta; M. González-Esguevillas; M. Molinero Calamita; M. Zaballos; P. Jiménez; R. Fernández; S. Juliá; S. Pozo; S. Varona                                                                                                                                                                                                                                                                                                                    |
| EPI_ISL_1479122                                                                                                                                                                                                                                                                                                                                                                                                                                                                                                                                                                                                                                                                                                                                                                                                                                                                                                                                                                                                                                                                                                                                                                                                                                                                                                                                                                                                                                                                                                                                                                                                                                                                                                                                                                                                                                                                                                                                                                                                                                                                                                                                | Fundação Hospitalar São José                                                        | Epicidin                                                                                                                                                                                                                                                                                                   | Ana Paula Muterle; Carolina Comerlato; Eliana Márcia Da Ros Wendland; Fernando Hayashi Sant'Anna; Janira Prichula; Juliana Comerlato                                                                                                                                                                                                                                                                                                                                                                                  |
| EPI_ISL_1469585, EPI_ISL_1469606, EPI_ISL_1469617, EPI_ISL_1469619, EPI_ISL_1469654, EPI_ISL_1469713, EPI_ISL_1469724, EPI_ISL_1469752, EPI_ISL_1469787, EPI_ISL_1469805, EPI_ISL_1469809, EPI_ISL_1469817, EPI_ISL_1469831, EPI_ISL_1469845                                                                                                                                                                                                                                                                                                                                                                                                                                                                                                                                                                                                                                                                                                                                                                                                                                                                                                                                                                                                                                                                                                                                                                                                                                                                                                                                                                                                                                                                                                                                                                                                                                                                                                                                                                                                                                                                                                   | Fundação Hospitalar de Sapucaia do Sul                                              | Epicidin                                                                                                                                                                                                                                                                                                   | Ana Paula Muterle; Carolina Comerlato; Eliana Márcia Da Ros Wendland; Fernando Hayashi Sant'Anna; Janira Prichula; Juliana Comerlato                                                                                                                                                                                                                                                                                                                                                                                  |
| see above                                                                                                                                                                                                                                                                                                                                                                                                                                                                                                                                                                                                                                                                                                                                                                                                                                                                                                                                                                                                                                                                                                                                                                                                                                                                                                                                                                                                                                                                                                                                                                                                                                                                                                                                                                                                                                                                                                                                                                                                                                                                                                                                      | Fundação de Saúde Pública São Camilo de Esteio                                      | Epicidin                                                                                                                                                                                                                                                                                                   | Ana Paula Muterle; Carolina Comerlato; Eliana Márcia Da Ros Wendland; Fernando Hayashi Sant'Anna; Janira Prichula; Juliana Comerlato                                                                                                                                                                                                                                                                                                                                                                                  |
| EPI_ISL_1469554, EPI_ISL_1469561, EPI_ISL_1469569, EPI_ISL_1469640, EPI_ISL_1469691, EPI_ISL_1469837, EPI_ISL_1469850                                                                                                                                                                                                                                                                                                                                                                                                                                                                                                                                                                                                                                                                                                                                                                                                                                                                                                                                                                                                                                                                                                                                                                                                                                                                                                                                                                                                                                                                                                                                                                                                                                                                                                                                                                                                                                                                                                                                                                                                                          | Fundação de Saúde Pública de Novo Hamburgo                                          | Epicidin                                                                                                                                                                                                                                                                                                   | Ana Paula Muterle; Carolina Comerlato; Eliana Márcia Da Ros Wendland; Fernando Hayashi Sant'Anna; Janira Prichula; Juliana Comerlato                                                                                                                                                                                                                                                                                                                                                                                  |
| see above                                                                                                                                                                                                                                                                                                                                                                                                                                                                                                                                                                                                                                                                                                                                                                                                                                                                                                                                                                                                                                                                                                                                                                                                                                                                                                                                                                                                                                                                                                                                                                                                                                                                                                                                                                                                                                                                                                                                                                                                                                                                                                                                      | Fundação de Saúde Pública de Novo Hamburgo                                          | Epicidin                                                                                                                                                                                                                                                                                                   | Ana Paula Muterle; Carolina Comerlato; Eliana Márcia Da Ros Wendland; Fernando Hayashi Sant'Anna; Janira Prichula; Juliana Comerlato                                                                                                                                                                                                                                                                                                                                                                                  |
| EPI_ISL_420141, EPI_ISL_420146, EPI_ISL_420313, EPI_ISL_449787 to 449788, EPI_ISL_481208, EPI_ISL_493356 to 493380, EPI_ISL_500768 to 500774, EPI_ISL_500784 to 500790, EPI_ISL_549027 to 549028, EPI_ISL_549038, EPI_ISL_549048 to 549058, EPI_ISL_549060 to 549069, EPI_ISL_549071 to 549080, EPI_ISL_549082, EPI_ISL_549088, EPI_ISL_549112, EPI_ISL_549119 to 549122, EPI_ISL_549124, EPI_ISL_549132, EPI_ISL_549143, EPI_ISL_549154, EPI_ISL_549165, EPI_ISL_549168, EPI_ISL_590881, EPI_ISL_590898, EPI_ISL_590901 to 590903, EPI_ISL_590912, EPI_ISL_1385977, EPI_ISL_1385980 to 1385983, EPI_ISL_1385985, EPI_ISL_1385988, EPI_ISL_1385992, EPI_ISL_1402968, EPI_ISL_1490261 to 1490262, EPI_ISL_1490281, EPI_ISL_1490287, EPI_ISL_1490297, EPI_ISL_1490311, EPI_ISL_1490315, EPI_ISL_1490320 to 1490323, EPI_ISL_1490325, EPI_ISL_1490330 to 1490331, EPI_ISL_1490340, EPI_ISL_1490342, EPI_ISL_1490344 to 1490345, EPI_ISL_1490347, EPI_ISL_1490350 to 1490353, EPI_ISL_1490366, EPI_ISL_1490398 to 1490399, EPI_ISL_1490413, EPI_ISL_1490415, EPI_ISL_1490421 to 1490422, EPI_ISL_1490428, EPI_ISL_1490430 to 1490431, EPI_ISL_1490453, EPI_ISL_1490455, EPI_ISL_1490464, EPI_ISL_1490466, EPI_ISL_1490468 to 1490469, EPI_ISL_1490471 to 1490472, EPI_ISL_1490474, EPI_ISL_1490476 to 1490477, EPI_ISL_1490502, EPI_ISL_1490506, EPI_ISL_1490511, EPI_ISL_1490515 to 1490516, EPI_ISL_1490534 to 1490540, EPI_ISL_1490542, EPI_ISL_1490544 to 1490547, EPI_ISL_1490549 to 1490553, EPI_ISL_1490564, EPI_ISL_1490574 to 1490575, EPI_ISL_1490582, EPI_ISL_1490600, EPI_ISL_1490606, EPI_ISL_1490619 to 1490620, EPI_ISL_1490623, EPI_ISL_1490625, EPI_ISL_1490626, EPI_ISL_1490634, EPI_ISL_1547521, EPI_ISL_1547523 to 1547532, EPI_ISL_1547553 to 1547554, EPI_ISL_1547596 to 1547601, EPI_ISL_1547606 to 1547607, EPI_ISL_1547610, EPI_ISL_1547614, EPI_ISL_1547617, EPI_ISL_1547635 to 1547637, EPI_ISL_1547663 to 1547664, EPI_ISL_1547667, EPI_ISL_1547669 to 1547670, EPI_ISL_1547672, EPI_ISL_1547674, EPI_ISL_1547677 to 1547678, EPI_ISL_1547683, EPI_ISL_1547688, EPI_ISL_1547690 to 1547691, EPI_ISL_1547693 to 1547704 | Norwegian Institute of Public Health, Department of Virology                        | Atiya R Ali; Debech Nadia; Engebretsen Serina Beate; Garcia Llorente Ignacio; Hilde Elshaug; Hilde Synnøve Vollan; Hilde Vollan; Jon Bråte; Kamilla Heedeland Instefjord; Karoline Bragstad; Kathrine Stene-Johansen; Marie Paulsen Madsen; Olav Hungenes; Pedersen Benedikte Nevjen; Rasmus Riis Kopperud |                                                                                                                                                                                                                                                                                                                                                                                                                                                                                                                       |
| see above                                                                                                                                                                                                                                                                                                                                                                                                                                                                                                                                                                                                                                                                                                                                                                                                                                                                                                                                                                                                                                                                                                                                                                                                                                                                                                                                                                                                                                                                                                                                                                                                                                                                                                                                                                                                                                                                                                                                                                                                                                                                                                                                      | Furst Medical Laboratory                                                            | Norwegian Institute of Public Health, Department of Virology                                                                                                                                                                                                                                               | Atiya R Ali; Debech Nadia; Engebretsen Serina Beate; Garcia Llorente Ignacio; Hilde Elshaug; Hilde Synnøve Vollan; Hilde Vollan; Jon Bråte; Kamilla Heedeland Instefjord; Karoline Bragstad; Kathrine Stene-Johansen; Marie Paulsen Madsen; Olav Hungenes; Pedersen Benedikte Nevjen; Rasmus Riis Kopperud                                                                                                                                                                                                            |
| EPI_ISL_522549 to 522550                                                                                                                                                                                                                                                                                                                                                                                                                                                                                                                                                                                                                                                                                                                                                                                                                                                                                                                                                                                                                                                                                                                                                                                                                                                                                                                                                                                                                                                                                                                                                                                                                                                                                                                                                                                                                                                                                                                                                                                                                                                                                                                       | Félix Guyon Hospital                                                                | UMR PIMIT Université de La Réunion                                                                                                                                                                                                                                                                         | Camille Lebarbenchon; David Wilkinson; Patrick Hvingui                                                                                                                                                                                                                                                                                                                                                                                                                                                                |
| EPI_ISL_1404484                                                                                                                                                                                                                                                                                                                                                                                                                                                                                                                                                                                                                                                                                                                                                                                                                                                                                                                                                                                                                                                                                                                                                                                                                                                                                                                                                                                                                                                                                                                                                                                                                                                                                                                                                                                                                                                                                                                                                                                                                                                                                                                                | G.H.E.F.Grand Hôpital EST Francilien                                                | Department of Virology, Henri Mondor University Hospital, Assistance Publique Hôpitaux de Paris, Université Paris-Est Créteil, INSERM U955                                                                                                                                                                 | Alexandre Soulier; Christophe Rodriguez; Elisabeth Trawinski; Guillaume Gricourt; Jean-Michel Pawlotsky; Melissa N'Debi; Slim Fourati; Vanessa Demontant                                                                                                                                                                                                                                                                                                                                                              |
| EPI_ISL_1422562 to 1422563, EPI_ISL_1422565 to 1422566, EPI_ISL_1422568 to 1422569, EPI_ISL_1422571 to 1422572, EPI_ISL_1422574 to 1422575, EPI_ISL_1422577 to 1422578, EPI_ISL_1422580 to 1422581, EPI_ISL_1422583 to 1422584, EPI_ISL_1422586 to 1422587, EPI_ISL_1422589 to 1422590, EPI_ISL_1443802 to 1443818, EPI_ISL_1527444 to 1527463                                                                                                                                                                                                                                                                                                                                                                                                                                                                                                                                                                                                                                                                                                                                                                                                                                                                                                                                                                                                                                                                                                                                                                                                                                                                                                                                                                                                                                                                                                                                                                                                                                                                                                                                                                                                 | GA Department of Public Health                                                      | GA Department of Public Health                                                                                                                                                                                                                                                                             | Aliyah Fields; Cynthia Dixey; Jonathan Edwards; Stacy Reeves; Taylor Smith; Tonia Parrott                                                                                                                                                                                                                                                                                                                                                                                                                             |
| see above                                                                                                                                                                                                                                                                                                                                                                                                                                                                                                                                                                                                                                                                                                                                                                                                                                                                                                                                                                                                                                                                                                                                                                                                                                                                                                                                                                                                                                                                                                                                                                                                                                                                                                                                                                                                                                                                                                                                                                                                                                                                                                                                      | GA Department of Public Health                                                      | Pathogen Discovery, Respiratory Viruses Branch, Division of Viral Diseases, Centers for Disease Control and Prevention                                                                                                                                                                                     | Alison S. Laufer Halpin; Anne Uehara; Christopher A. Elkins; Clinton R. Paden; Haibin Wang; Jasmine Padilla; Jing Zhang; Justin Lee; Krista Queen; Mary S. Keckler; Rachel Marine; Suxiang Tong; Yan Li; Ying Tao                                                                                                                                                                                                                                                                                                     |
| EPI_ISL_1446809 to 1446824, EPI_ISL_1446864 to 1446867, EPI_ISL_1446872, EPI_ISL_1446877, EPI_ISL_1446880, EPI_ISL_1446882, EPI_ISL_1446887, EPI_ISL_1446900, EPI_ISL_1446904 to 1446905, EPI_ISL_1446910 to 1446911, EPI_ISL_1447003 to 1447011, EPI_ISL_1447055 to 1447058, EPI_ISL_1528521 to 1528530                                                                                                                                                                                                                                                                                                                                                                                                                                                                                                                                                                                                                                                                                                                                                                                                                                                                                                                                                                                                                                                                                                                                                                                                                                                                                                                                                                                                                                                                                                                                                                                                                                                                                                                                                                                                                                       | GA Department of Public Health Laboratory                                           | Centers for Disease Control and Prevention Division of Viral Diseases, Pathogen Discovery                                                                                                                                                                                                                  | Alison Laufer Halpin; Ben L. Rambo-Martin; Clinton R. Paden; Dakota Howard; Darlene Wagner; Dave Wentworth; Dhvani Batra; Jasmine Padilla; Justin Lee; Katie Dillon; Krista Queen; Kristen Knipe; Kristine Lacek; Mark Burroughs; Matthew Schmerer; Mill Sheth; Peter Cook; Sam Shepard; Sarah Nobles; Shoshona Le; Suxiang Tong; Vivien Dugan; Yvette Unoarumhi                                                                                                                                                      |
| see above                                                                                                                                                                                                                                                                                                                                                                                                                                                                                                                                                                                                                                                                                                                                                                                                                                                                                                                                                                                                                                                                                                                                                                                                                                                                                                                                                                                                                                                                                                                                                                                                                                                                                                                                                                                                                                                                                                                                                                                                                                                                                                                                      | GA Department of Public Health Laboratory                                           | Genomics and Discovery, Respiratory Viruses Branch, Division of Viral Diseases, Centers for Disease Control and Prevention                                                                                                                                                                                 | Anna Kelleher; Anna Uehara; Brian Lynch; Clinton R. Paden; Haibin Wang; Han Jia Justin Ng; Jing Zhang; Krista Queen; Peter Cook; Suxiang Tong; Yan Li; Ying Tao                                                                                                                                                                                                                                                                                                                                                       |
| EPI_ISL_1408891, EPI_ISL_1408895                                                                                                                                                                                                                                                                                                                                                                                                                                                                                                                                                                                                                                                                                                                                                                                                                                                                                                                                                                                                                                                                                                                                                                                                                                                                                                                                                                                                                                                                                                                                                                                                                                                                                                                                                                                                                                                                                                                                                                                                                                                                                                               | GA Department of Public Health Laboratory                                           | Genomics and Discovery, Respiratory Viruses Branch, Division of Viral Diseases, Centers for Disease Control and Prevention                                                                                                                                                                                 | Anna Kelleher; Anna Uehara; Brian Lynch; Clinton R. Paden; Haibin Wang; Han Jia Justin Ng; Jing Zhang; Krista Queen; Peter Cook; Suxiang Tong; Yan Li; Ying Tao                                                                                                                                                                                                                                                                                                                                                       |
| EPI_ISL_419556 to 419557, EPI_ISL_424858 to 424859, EPI_ISL_424861, EPI_ISL_424864, EPI_ISL_426417, EPI_ISL_527658 to 527665, EPI_ISL_566085 to 566107, EPI_ISL_576189 to 576195                                                                                                                                                                                                                                                                                                                                                                                                                                                                                                                                                                                                                                                                                                                                                                                                                                                                                                                                                                                                                                                                                                                                                                                                                                                                                                                                                                                                                                                                                                                                                                                                                                                                                                                                                                                                                                                                                                                                                               | GA Department of Public Health Laboratory                                           | Pathogen Discovery, Respiratory Viruses Branch, Division of Viral Diseases, Centers for Disease Control and Prevention                                                                                                                                                                                     | Alison S. Laufer Halpin; Anna Montmayeur; Anna Uehara; Brian Lynch; Christopher A. Elkins; Clinton R. Paden; Haibin Wang; Jasmine Padilla; Jing Zhang; Justin Lee; Krista Queen; Mary S. Keckler; Peter Cook; Rachel Marine; Suxiang Tong; Yan Li; Ying Tao                                                                                                                                                                                                                                                           |
| see above                                                                                                                                                                                                                                                                                                                                                                                                                                                                                                                                                                                                                                                                                                                                                                                                                                                                                                                                                                                                                                                                                                                                                                                                                                                                                                                                                                                                                                                                                                                                                                                                                                                                                                                                                                                                                                                                                                                                                                                                                                                                                                                                      | GA Department of Public Health Laboratory                                           | Pathogen Discovery, Respiratory Viruses Branch, Division of Viral Diseases, Centers for Disease Control and Prevention                                                                                                                                                                                     | Alison S. Laufer Halpin; Anna Montmayeur; Anna Uehara; Brian Lynch; Christopher A. Elkins; Clinton R. Paden; Haibin Wang; Jasmine Padilla; Jing Zhang; Justin Lee; Krista Queen; Mary S. Keckler; Peter Cook; Rachel Marine; Suxiang Tong; Yan Li; Ying Tao                                                                                                                                                                                                                                                           |
| EPI_ISL_475058 to 475059, EPI_ISL_495065 to 495066                                                                                                                                                                                                                                                                                                                                                                                                                                                                                                                                                                                                                                                                                                                                                                                                                                                                                                                                                                                                                                                                                                                                                                                                                                                                                                                                                                                                                                                                                                                                                                                                                                                                                                                                                                                                                                                                                                                                                                                                                                                                                             | GAIMS & G K General Hospital                                                        | Gujarat Biotechnology Research Centre                                                                                                                                                                                                                                                                      | ; A M Kadri; Afzal Ansari; Apurvasinh Puvar; Babulal Baboria; Chaitanya Joshi; Dinesh Kumar; Harsh Bakshi; Hitesh Assudani; Janvi Raval; Komal Patel; Labdhi Pandya; Madhvi Joshi; Maharshi Pandya; Monika Gandhi; Neha Rajpara; Nidhi Patel; Nikha Trivedi; Nitin Savaliya; Pinal Trivedi; Pragya Sharma; Pritesh Sabara; R D Dixit; Raghawendra Kumar; Snehal Bagatharia; Zarna Patel; Zuber Saiyed                                                                                                                 |
| EPI_ISL_586569 to 586570                                                                                                                                                                                                                                                                                                                                                                                                                                                                                                                                                                                                                                                                                                                                                                                                                                                                                                                                                                                                                                                                                                                                                                                                                                                                                                                                                                                                                                                                                                                                                                                                                                                                                                                                                                                                                                                                                                                                                                                                                                                                                                                       | GCRI,Ahmedabad                                                                      | Gujarat Biotechnology Research Centre                                                                                                                                                                                                                                                                      | A M Kadri; Afzal Ansari; Apurvasinh Puvar; Chaitanya Joshi; Dinesh Kumar; Harsh Bakshi; Harsha Panchal; Janvi Raval; Komal Patel; Labdhi Pandya; Madhvi Joshi; Maharshi Pandya; Monika Gandhi; Nidhi Patel; Nikha Trivedi; Nitin Savaliya; Pinal Trivedi; R D Dixit; Raghawendra Kumar; Shashank Pandya; Zarna Patel; Zuber Saiyed                                                                                                                                                                                    |
| EPI_ISL_1461246, EPI_ISL_1526567, EPI_ISL_1526585                                                                                                                                                                                                                                                                                                                                                                                                                                                                                                                                                                                                                                                                                                                                                                                                                                                                                                                                                                                                                                                                                                                                                                                                                                                                                                                                                                                                                                                                                                                                                                                                                                                                                                                                                                                                                                                                                                                                                                                                                                                                                              | GH BOURG CENTRE PRELEVEMENT                                                         | CNR Virus des Infections Respiratoires - France SUD                                                                                                                                                                                                                                                        | Antonin Bal; Bruno Lina; Gregory Destras; Gwendolynne Burfin; Hadrien Regue; Laurence Josset; Martine Valette; Quentin Semanas                                                                                                                                                                                                                                                                                                                                                                                        |
| EPI_ISL_418416, EPI_ISL_508878, EPI_ISL_509003 to 509004                                                                                                                                                                                                                                                                                                                                                                                                                                                                                                                                                                                                                                                                                                                                                                                                                                                                                                                                                                                                                                                                                                                                                                                                                                                                                                                                                                                                                                                                                                                                                                                                                                                                                                                                                                                                                                                                                                                                                                                                                                                                                       | GH Les Portes du Sud                                                                | CNR Virus des Infections Respiratoires - France SUD                                                                                                                                                                                                                                                        | Alexandre Gaynard; Antonin Bal; Bruno Lina; Carine Moustaud; Florence Morfin-Sherpa; Gregory Destras; Gwendolynne Burfin; Laurence Josset; Martine Valette; Maude Bouscambert-Duchamp; Raphaëlle Lamy; Solenne Brun                                                                                                                                                                                                                                                                                                   |
| EPI_ISL_428351 to 428352, EPI_ISL_428363                                                                                                                                                                                                                                                                                                                                                                                                                                                                                                                                                                                                                                                                                                                                                                                                                                                                                                                                                                                                                                                                                                                                                                                                                                                                                                                                                                                                                                                                                                                                                                                                                                                                                                                                                                                                                                                                                                                                                                                                                                                                                                       | GH Nord Essonne Service de Biologie clinique                                        | National Reference Center for Viruses of Respiratory Infections, Institut Pasteur, Paris                                                                                                                                                                                                                   | Angela Brisebarre; Etienne Simon-Lorière; Flora Donati; Marion Barbet; Maud Vanpeene; Mélanie Albert; Méline Bizard; Sylvie Behillil; Sylvie van der Werf; Vincent Enouf                                                                                                                                                                                                                                                                                                                                              |
| EPI_ISL_1517294 to 1517296                                                                                                                                                                                                                                                                                                                                                                                                                                                                                                                                                                                                                                                                                                                                                                                                                                                                                                                                                                                                                                                                                                                                                                                                                                                                                                                                                                                                                                                                                                                                                                                                                                                                                                                                                                                                                                                                                                                                                                                                                                                                                                                     | GHOL                                                                                | Laboratory of genomics and metagenomics                                                                                                                                                                                                                                                                    | Claire Bertelli; Damien Jacot; Gilbert Greub; SÃ©bastien Aebly; Trestan Pilonel                                                                                                                                                                                                                                                                                                                                                                                                                                       |
| EPI_ISL_1397546 to 1397549, EPI_ISL_1397962 to 1397965, EPI_ISL_1398154 to 1398155, EPI_ISL_1398270, EPI_ISL_1461293, EPI_ISL_1465617, EPI_ISL_1465853 to 1465856, EPI_ISL_1482333 to 1482335                                                                                                                                                                                                                                                                                                                                                                                                                                                                                                                                                                                                                                                                                                                                                                                                                                                                                                                                                                                                                                                                                                                                                                                                                                                                                                                                                                                                                                                                                                                                                                                                                                                                                                                                                                                                                                                                                                                                                  | GLENS FALLS HOSPITAL LABORATORY                                                     | Wadsworth Center, New York State Department of Health                                                                                                                                                                                                                                                      | Alexis Russel; Alexis Russell; Catharine Prussing; Daryl M. Lamson; Erasmus Schneider; Erica Lasek-Nesselquist; John Kelly; Jonathan Plitnick; Kirsten St. George; Matthew Shudt; Melissa A Leisner; Navjot Singh                                                                                                                                                                                                                                                                                                     |
| see above                                                                                                                                                                                                                                                                                                                                                                                                                                                                                                                                                                                                                                                                                                                                                                                                                                                                                                                                                                                                                                                                                                                                                                                                                                                                                                                                                                                                                                                                                                                                                                                                                                                                                                                                                                                                                                                                                                                                                                                                                                                                                                                                      | GLENS FALLS HOSPITAL LABORATORY                                                     | Wadsworth Center, New York State Department of Health                                                                                                                                                                                                                                                      | Alexis Russel; Alexis Russell; Catharine Prussing; Daryl M. Lamson; Erasmus Schneider; Erica Lasek-Nesselquist; John Kelly; Jonathan Plitnick; Kirsten St. George; Matthew Shudt; Melissa A Leisner; Navjot Singh                                                                                                                                                                                                                                                                                                     |
| EPI_ISL_586562 to 586566                                                                                                                                                                                                                                                                                                                                                                                                                                                                                                                                                                                                                                                                                                                                                                                                                                                                                                                                                                                                                                                                                                                                                                                                                                                                                                                                                                                                                                                                                                                                                                                                                                                                                                                                                                                                                                                                                                                                                                                                                                                                                                                       | GMERS GMERS Medical College and Hospital, Junagadh                                  | Gujarat Biotechnology Research Centre                                                                                                                                                                                                                                                                      | A M Kadri; Afzal Ansari; Apurvasinh Puvar; Bhavesh Bagda; Chaitanya Joshi; Dinesh Kumar; Harsh Bakshi; Janvi Raval; Komal Patel; Labdhi Pandya; Madhvi Joshi; Maharshi Pandya; Monika Gandhi; Nidhi Patel; Nikha Trivedi; Nitin Savaliya; Pinal Trivedi; R D Dixit; Raghawendra Kumar; Ravi Dedaniya; Zarna Patel; Zuber Saiyed                                                                                                                                                                                       |
| EPI_ISL_469037 to 469042, EPI_ISL_475047 to 475055                                                                                                                                                                                                                                                                                                                                                                                                                                                                                                                                                                                                                                                                                                                                                                                                                                                                                                                                                                                                                                                                                                                                                                                                                                                                                                                                                                                                                                                                                                                                                                                                                                                                                                                                                                                                                                                                                                                                                                                                                                                                                             | GMERS Medical College & Hospital                                                    | Gujarat Biotechnology Research Centre                                                                                                                                                                                                                                                                      | A M Kadri; Afzal Ansari; Ankit Hinsu; Apurvasinh Puvar; Armi Chaudhari; Bhavya Jindal; Chaitanya Joshi; Dinesh Kumar; Fenil Patel; Harsh Bakshi; Janvi Raval; Komal Patel; Labdhi Pandya; Madhvi Joshi; Maharshi Pandya; Meenakshi Shah; Monika Gandhi; Neelam Nathani; Neena Doshi; Neha Rajpara; Nidhi Patel; Nitin Savaliya; Pinal Trivedi; Pooja P Doshi; Pragya Sharma; Pritesh Sabara; Priyanka P Vatsa; R D Dixit; Raghawendra Kumar; Snehal Bagatharia; Tejas Shah; Varsha Godbole; Zarna Patel; Zuber Saiyed |
| EPI_ISL_476855 to 476862, EPI_ISL_495026 to 495062, EPI_ISL_500946, EPI_ISL_514610,                                                                                                                                                                                                                                                                                                                                                                                                                                                                                                                                                                                                                                                                                                                                                                                                                                                                                                                                                                                                                                                                                                                                                                                                                                                                                                                                                                                                                                                                                                                                                                                                                                                                                                                                                                                                                                                                                                                                                                                                                                                            | GMERS Medical College & Hospital, Gotri, Vadodara                                   | Gujarat Biotechnology Research Centre                                                                                                                                                                                                                                                                      | ; A M Kadri; Afzal Ansari; Apurvasinh Puvar; Chaitanya Joshi; Dinesh Kumar; Harsh Bakshi; Janvi Raval; Kamlesh J Upadhyay; Komal Patel; Labdhi Pandya; Madhvi Joshi; Maharshi Pandya; Meenakshi Shah; Monika Gandhi; Neena Doshi; Nidhi Patel; Nikha Trivedi; Nitin Savaliya; Pinal Trivedi; Pranay                                                                                                                                                                                                                   |



|                                                                                                                                                                                                                                  |                                                                                                                                                           |                                                                                                                        |                                                                                                                                                                                                                                                                                                                                                                                                                                                                                                                                                                                                                                                                                                                                                                                                                                                   |
|----------------------------------------------------------------------------------------------------------------------------------------------------------------------------------------------------------------------------------|-----------------------------------------------------------------------------------------------------------------------------------------------------------|------------------------------------------------------------------------------------------------------------------------|---------------------------------------------------------------------------------------------------------------------------------------------------------------------------------------------------------------------------------------------------------------------------------------------------------------------------------------------------------------------------------------------------------------------------------------------------------------------------------------------------------------------------------------------------------------------------------------------------------------------------------------------------------------------------------------------------------------------------------------------------------------------------------------------------------------------------------------------------|
| EPI_ISL_524730 to 524731                                                                                                                                                                                                         |                                                                                                                                                           |                                                                                                                        | Shah; R D Dixit; Raghavendra Kumar; Sanjay Kapadia; Varsha Godbole; Zarna Patel; Zuber Saiyed                                                                                                                                                                                                                                                                                                                                                                                                                                                                                                                                                                                                                                                                                                                                                     |
| EPI_ISL_495063 to 495064                                                                                                                                                                                                         | GMERS Medical College & Hospital, Himmatnagar                                                                                                             | Gujarat Biotechnology Research Centre                                                                                  | ; A M Kadri; Afzal Ansari; Apurvasinh Puvar; Chaitanya Joshi; Dinesh Kumar; Harsh Bakshi; Himanshu Khatri; Janvi Raval; Komal Patel; Labdhi Pandya; Madhvi Joshi; Maharshi Pandya; Mayur Gandhi; Monika Gandhi; Nidhi Patel; Nikha Trivedi; Nitin Savaliya; Pinal Trivedi; R D Dixit; Raghavendra Kumar; Zarna Patel; Zuber Saiyed                                                                                                                                                                                                                                                                                                                                                                                                                                                                                                                |
| EPI_ISL_483823 to 483828                                                                                                                                                                                                         | GMERS Medical College Himmatnagar                                                                                                                         | Gujarat Biotechnology Research Centre                                                                                  | A M Kadri; Afzal Ansari; Apurvasinh Puvar; Chaitanya Joshi; Dinesh Kumar; Harsh Bakshi; Himanshu Khatri; Janvi Raval; Komal Patel; Labdhi Pandya; Madhvi Joshi; Maharshi Pandya; Mayur Gandhi; Monika Gandhi; Nidhi Patel; Nikha Trivedi; Nitin Savaliya; Pinal Trivedi; R D Dixit; Raghavendra Kumar; Zarna Patel; Zuber Saiyed                                                                                                                                                                                                                                                                                                                                                                                                                                                                                                                  |
| EPI_ISL_524733 to 524734, EPI_ISL_524752 to 524766                                                                                                                                                                               | GMERS Medical College and Hospital, Dharpur, Patan                                                                                                        | Gujarat Biotechnology Research Centre                                                                                  | A M Kadri; A N Parmar; Afzal Ansari; Apurvasinh Puvar; Chaitanya Joshi; Dinesh Kumar; Harsh Bakshi; Janvi Raval; Komal Patel; Labdhi Pandya; Madhvi Joshi; Maharshi Pandya; Monika Gandhi; Nidhi Patel; Nikha Trivedi; Nitin Savaliya; Pinal Trivedi; R D Dixit; Raghavendra Kumar; Zarna Patel; Zuber Saiyed                                                                                                                                                                                                                                                                                                                                                                                                                                                                                                                                     |
| EPI_ISL_447047 to 447053, EPI_ISL_447547 to 447555, EPI_ISL_467029 to 467038, EPI_ISL_476863 to 476866, EPI_ISL_483820, EPI_ISL_514611 to 514612, EPI_ISL_524737 to 524745, EPI_ISL_525419 to 525420                             | see above                                                                                                                                                 | GMERS Medical College and Hospital, Gandhinagar                                                                        | Gujarat Biotechnology Research Centre                                                                                                                                                                                                                                                                                                                                                                                                                                                                                                                                                                                                                                                                                                                                                                                                             |
|                                                                                                                                                                                                                                  |                                                                                                                                                           |                                                                                                                        | A M Kadri; Afzal Ansari; Akanksha Verma; Amit Kanani; Anjali Rajwar; Ankit Hinsu; Apurvasinh Puvar; Armi Chaudhari; Bharti Rajani; Bhavesh Modi; Bhavya Jindal; Binita Aring; Chaitanya Joshi; Dinesh Kumar; Dipa Kinariwala; Dipeshwari Shewale; Disha Patel; Fenil Patel; Gaurishankar Shrimali; Geeta Vaghela; Harsh Bakshi; Janvi Raval; Kairavi Joshi; Kamlesh J Upadhyay; Komal Patel; Labdhi Pandya; Madhvi Joshi; Maharshi Pandya; Monika Gandhi; Neelam Nathani; Neeta Khandelwal; Neha Rajpara; Nidhi Patel; Nidhi Sood; Nikha Trivedi; Nitin Savaliya; Pinal Trivedi; Pooja P Doshi; Pragya Sharma; Pranay Shah; Pritesh Sabara; Priti Pandita; Priyanka P Vatsa; R D Dixit; Raghavendra Kumar; Ramesh Pandit; Sanjay Kapadia; Seema Bhatt; Sharmistha Majumdar; Snehal Bagatharia; Sonia Barve; Tejas Shah; Zarna Patel; Zuber Saiyed |
| EPI_ISL_1544133 to 1544134                                                                                                                                                                                                       | GMERS, Medical College, Gandhinagar                                                                                                                       | Gujarat Biotechnology Research Centre                                                                                  | Chaitanya Joshi; Dinesh Kumar; Gaurishankar Shrimali; Janvi Raval; Madhvi Joshi; Nitesh Shah; Nitin Savaliya; Ramesh Pandit; Sonal Sharma; Twinkle Soni; Umang Mishra; Zarna Patel; Zuber Saiyed                                                                                                                                                                                                                                                                                                                                                                                                                                                                                                                                                                                                                                                  |
| EPI_ISL_1465848, EPI_ISL_1465858                                                                                                                                                                                                 | GOOD SAMARITAN HOSPITAL LABORATORY                                                                                                                        | Wadsworth Center, New York State Department of Health                                                                  | Alexis Russell; Catharine Prussing; Daryl M. Lamson; Erasmus Schneider; Erica Lasek-Nessequist; John Kelly; Jonathan Plitnick; Kirsten St. George; Matthew Shudt; Melissa A Leisner; Navjot Singh                                                                                                                                                                                                                                                                                                                                                                                                                                                                                                                                                                                                                                                 |
| EPI_ISL_583426, EPI_ISL_583429, EPI_ISL_583434 to 583436, EPI_ISL_583441 to 583442, EPI_ISL_583452 to 583454, EPI_ISL_583458 to 583459, EPI_ISL_583463 to 583464, EPI_ISL_583467, EPI_ISL_583471, EPI_ISL_583473, EPI_ISL_583477 | see above                                                                                                                                                 | Garcia-Sastre Laboratory, Department of Microbiology, Icahn School of Medicine at Mount Sinai                          | van Bakel Laboratory, Genetics and Genomics Sciences, Icahn School of Medicine at Mount Sinai                                                                                                                                                                                                                                                                                                                                                                                                                                                                                                                                                                                                                                                                                                                                                     |
|                                                                                                                                                                                                                                  |                                                                                                                                                           |                                                                                                                        | Adolfo Garcia-Sastre; Adriana van de Guchte; Ajay Obla; Ana S. Gonzalez-Reiche; Genovefa Papanicolaou; Gunjan Shah; Harm van Bakel; Jayeeta Dutta; Judith Aberg; Kent Sepkowitz; Miguel-Angel Perales; Ngolela Esther Babady; Sadaf Aslam; Teresa Aydillo; Tobias Hohl; Zenab Khan; and Mini Kamboj                                                                                                                                                                                                                                                                                                                                                                                                                                                                                                                                               |
| EPI_ISL_534249 to 534251                                                                                                                                                                                                         | Gavle Sjukhus                                                                                                                                             | The Public Health Agency of Sweden                                                                                     | Anna Risberg; Anna-Malin Linde; Karin Tegmark-Wisell; Maria Lind Karlberg; Mattias Haukland; Mia Brytting; Olov Svartstrom; Oskar Karlsson Lindsjo; Petra Edquist; Reza Advani; Sandra Brodsson                                                                                                                                                                                                                                                                                                                                                                                                                                                                                                                                                                                                                                                   |
| EPI_ISL_475110, EPI_ISL_475115, EPI_ISL_582801, EPI_ISL_582809, EPI_ISL_582834, EPI_ISL_615101 to 615103                                                                                                                         | Gavle klinisk mikrobiologi                                                                                                                                | The Public Health Agency of Sweden                                                                                     | Anna Risberg; Anna-Malin Linde; Karin Tegmark-Wisell; Maria Lind Karlberg; Mattias Haukland; Mia Brytting; Olov Svartstrom; Oskar Karlsson Lindsjo; Petra Edquist; Reza Advani; Sandra Brodsson; Shamam Muradrasoli                                                                                                                                                                                                                                                                                                                                                                                                                                                                                                                                                                                                                               |
| EPI_ISL_420855, EPI_ISL_420876 to 420877, EPI_ISL_430064 to 430066                                                                                                                                                               | Geelong Centre for Emerging Infectious Diseases                                                                                                           | Geelong Centre for Emerging Infectious Diseases                                                                        | Alexandersen S.; Bhatta T.R.; Chamings A.; Chamings, A.; Raj Bhatta T.                                                                                                                                                                                                                                                                                                                                                                                                                                                                                                                                                                                                                                                                                                                                                                            |
| EPI_ISL_1393874 to 1393875, EPI_ISL_1447260, EPI_ISL_1447281, EPI_ISL_1538682                                                                                                                                                    | GenXOne SA                                                                                                                                                | 1. National Institute of Public Health - National Institute of Hygiene; 2. Eurofins Genomics Europe Sequencing GmbH    | ECDC COVID-19 WGS support team; Eurofins Genomics Europe Sequencing Team; Gierczyki Rafa; Sadkowska-Todys Magorzata; Wokowicz Tomasz; Zacharczuk Katarzyna                                                                                                                                                                                                                                                                                                                                                                                                                                                                                                                                                                                                                                                                                        |
| EPI_ISL_1538761 to 1538762, EPI_ISL_1538861                                                                                                                                                                                      | GeneMe                                                                                                                                                    | 1. National Institute of Public Health - National Institute of Hygiene; 2. Eurofins Genomics Europe Sequencing GmbH    | ECDC COVID-19 WGS support team; Eurofins Genomics Europe Sequencing Team; Gierczyki Rafa; Sadkowska-Todys Magorzata; Wokowicz Tomasz; Zacharczuk Katarzyna                                                                                                                                                                                                                                                                                                                                                                                                                                                                                                                                                                                                                                                                                        |
| EPI_ISL_467300                                                                                                                                                                                                                   | General Hospital "Abdulah Nakas"                                                                                                                          | Alea Genetic Center                                                                                                    | Damir Marjanovic; Dino Pecar; Enis Kandic; Lana Salihfendic; Nihad Fejzic; Rijad Konjhodzic; Sead Jazic; Teufik Goletic                                                                                                                                                                                                                                                                                                                                                                                                                                                                                                                                                                                                                                                                                                                           |
| EPI_ISL_516413                                                                                                                                                                                                                   | General Hospital - Kumanovo                                                                                                                               | Research Center for Genetic Engineering and Biotechnology "Georgi D. Efremov", Macedonian Academy of Sciences and Arts | RCGEB - MASA                                                                                                                                                                                                                                                                                                                                                                                                                                                                                                                                                                                                                                                                                                                                                                                                                                      |
| EPI_ISL_514354                                                                                                                                                                                                                   | General Hospital - Prilep                                                                                                                                 | Research Center for Genetic Engineering and Biotechnology "Georgi D. Efremov", Macedonian Academy of Sciences and Arts | RCGEB - MASA                                                                                                                                                                                                                                                                                                                                                                                                                                                                                                                                                                                                                                                                                                                                                                                                                                      |
| EPI_ISL_586531 to 586535                                                                                                                                                                                                         | General Hospital, Chhotaudepur                                                                                                                            | Gujarat Biotechnology Research Centre                                                                                  | A M Kadri; Afzal Ansari; Apurvasinh Puvar; Arti Thakur; Chaitanya Joshi; Dharak Pandya; Dinesh Kumar; Harsh Bakshi; Janvi Raval; Komal Patel; Labdhi Pandya; Madhvi Joshi; Maharshi Pandya; Monika Gandhi; Nidhi Patel; Nikha Trivedi; Nitin Savaliya; Pinal Trivedi; R D Dixit; Raghavendra Kumar; Yogesh Parmar; Zarna Patel; Zuber Saiyed                                                                                                                                                                                                                                                                                                                                                                                                                                                                                                      |
| EPI_ISL_586546 to 586548                                                                                                                                                                                                         | General Hospital, Godhra                                                                                                                                  | Gujarat Biotechnology Research Centre                                                                                  | A M Kadri; Afzal Ansari; Apurvasinh Puvar; Chaitanya Joshi; Dinesh Kumar; Harsh Bakshi; Janvi Raval; Komal Patel; Labdhi Pandya; Madhvi Joshi; Maharshi Pandya; Monika Gandhi; Neela Katara; Nidhi Patel; Nikha Trivedi; Nitin Savaliya; Pinal Trivedi; R D Dixit; Raghavendra Kumar; Sangeeta Kumar; Zarna Patel; Zuber Saiyed                                                                                                                                                                                                                                                                                                                                                                                                                                                                                                                   |
| EPI_ISL_430846                                                                                                                                                                                                                   | General Intensive Care Unit, Raymond Poincaré Hospital (AP-HP), Lab Inflammation & Infection, U1173 University Paris Saclay-UVSQ/INSERM, Garches, France. | Institut Pasteur, Laboratory for Urgent Response to biological Threats                                                 | Annane Djillali; Caro Valérie; Manuguerra Jean-Claude; Vanhomwegen Jessica                                                                                                                                                                                                                                                                                                                                                                                                                                                                                                                                                                                                                                                                                                                                                                        |
| EPI_ISL_614282 to 614293                                                                                                                                                                                                         | General practitioner                                                                                                                                      | National Reference Center for Viruses of Respiratory Infections, Institut Pasteur, Paris                               | Angela Brisebarre; Camille Capel; Etienne Simon-Lorière; Marion Barbet; Maud Vanpeene; Méline Bizard; Sylvie Behillil; Sylvie van der Werf; Vincent Enouf                                                                                                                                                                                                                                                                                                                                                                                                                                                                                                                                                                                                                                                                                         |
| EPI_ISL_1470415 to 1470559, EPI_ISL_1534544 to 1534609, EPI_ISL_1540996 to 1541072                                                                                                                                               | Genetica Molecular and Subdepartamento de Virologia ISP Chile                                                                                             | Instituto de Salud Publica de Chile                                                                                    | Andres Castillo; Barbara Parra; Gisselle Barra; Jaime Lagos; Javier Tognarelli; Jorge Fernandez; Karen Orostica; Loredana Arata; Patricia Bustos; Rodrigo Fasco                                                                                                                                                                                                                                                                                                                                                                                                                                                                                                                                                                                                                                                                                   |
| EPI_ISL_1530875 to 1530876                                                                                                                                                                                                       | Genome Analysis Center, Kamma Memorial Hospital                                                                                                           | Genome Analysis Center, Kamma Memorial Hospital                                                                        | Hanako Yazawa; Hiroshi Kamma; Jun Ishii; Kaori Watanabe; Michiaki Masuda; Satoko Soma; Takuya Yazawa                                                                                                                                                                                                                                                                                                                                                                                                                                                                                                                                                                                                                                                                                                                                              |
| EPI_ISL_475570 to 475571, EPI_ISL_475573, EPI_ISL_605783                                                                                                                                                                         | Genome Center                                                                                                                                             | Genome Center                                                                                                          | A. S. M. Rubayet- Ul- Alam; Ashok Kumar; Chakraborty Atonu; Habiba Ibnat; Hassan M. Al-Emran; M. Rafiul Islam; M. Shamirur Rahman; Md Nur Kabidul Azam; Md. Ali Ahasan Setu; Md. Aminul Islam; Md. Anwar Hossain; Md. Hasan al Pramanik; Md. Iqbal Kabir Jahid; Md. Iqbal Kabir Jahid Md. Anwar Hossain; Md. Muzahidul Islam; Md. Nazmul Hasan; Md. Shazid Hasan; Md. Tajjul Islam; Md. Tanvir Islam; Md. Zannat Ali; Mithun Talukder Md. Tawwabur; Najmuj Sakib; Ovinu Kibria Islam; Pravvas Chandra Roy; Prashanto Kumar Das; Provakar Mondol; Ruhul Amin; S. M. Tanjil Shah; Selina Akter; Shireen Nigar; Shohanur Rahaman; Shovon Lal Sarkar; Sourav Dutta; Tanay Chakrovarty                                                                                                                                                                 |
| EPI_ISL_427391, EPI_ISL_428346, EPI_ISL_428368, EPI_ISL_480228 to 480292                                                                                                                                                         | Genomic Laboratory (GLAB) (Conjoint lab of Health Directorate of Istanbul and Istanbul Technical University)                                              | Genomic Laboratory (GLAB), Istanbul Technical University                                                               | Arzu Iverem; Betsi Köse; Bugra Agooglu; Elinfraz Çelik; Gizem Alkurt; Gizem Dinler Doganay; Ilker Karacan; Jale Yildiz; Levent Doganay; Mehtap Aydn; Ozlem Agun Dogan; Tugba Kizilboga Akgun; Yasemin Kendir Demirkol                                                                                                                                                                                                                                                                                                                                                                                                                                                                                                                                                                                                                             |
| EPI_ISL_1492576                                                                                                                                                                                                                  | Genomic Medicine Laboratory, IRCCS Santa Lucia Foundation                                                                                                 | INMI Lazzaro Spallanzani IRCCS                                                                                         | A Di Carlo; B Bartolini; CEM Gruber; E Giardina; E Giombini; F Messina; F Santini; G Bonfigli; M Rucca; MR Capobianchi; O Butera                                                                                                                                                                                                                                                                                                                                                                                                                                                                                                                                                                                                                                                                                                                  |
| EPI_ISL_512774                                                                                                                                                                                                                   | Genomic Research Lab, BCSIR                                                                                                                               | Bangladesh Council of Scientific and Industrial Research                                                               | A. K. M. Shamsuzzaman; Abu Sayeed Mohammad Mahmud; Asish Kumar Ghosh; Barna Goswami; Eshrar Osman; Iffat Jahan; Mahmuda Yeasmin; Md. Ahasan Habib; Md. Maruf Ahmed Molla; Md. Murshed Hasan Sarkar; Md. Saddam Hossain; Md. Salim Khan; Mohammad Samir Uzzaman; Salek Ahmed Sajib; Shahina Akter; Sheikh Md. Selim Al Din; Tanjina Akhter Banu; Tasnim Nafisa; Utpal Chandra Ray                                                                                                                                                                                                                                                                                                                                                                                                                                                                  |
| EPI_ISL_483688                                                                                                                                                                                                                   | Genomic Research Lab, BCSIR                                                                                                                               | Genomic Research Lab, BCSIR                                                                                            | A. K. M. Shamsuzzaman; Abu Sayeed Mohammad Mahmud; Asish Kumar Ghosh; Barna Goswami; Eshrar Osman; Iffat Jahan; Mahmuda Yeasmin; Md. Ahasan Habib; Md. Maruf Ahmed Molla; Md. Murshed Hasan Sarkar; Md. Saddam Hossain; Md. Salim Khan; Mohammad Samir Uzzaman; Salek Ahmed Sajib; Shahina Akter; Sheikh Md. Selim Al Din; Tanjina Akhter Banu; Tasnim Nafisa; Utpal Chandra Ray                                                                                                                                                                                                                                                                                                                                                                                                                                                                  |
| EPI_ISL_1511643                                                                                                                                                                                                                  | Genomic and molecular Biology Group, A.C.Camargo Cancer                                                                                                   | Laboratory of Bioinformatics and Computational Biology,                                                                | Alexandre Defelicibus; Dirce Carraro; Giovana Torrezan; Israel Tojal                                                                                                                                                                                                                                                                                                                                                                                                                                                                                                                                                                                                                                                                                                                                                                              |

| Center                                                                                                                                                                                                                                                                                                                                                                                                                                                                                                                                                | A.C.Camargo Cancer Center                                                                                                                                |                                                                                                                                                                                                                                                                                                                                                                                                                                                                                                                                                                                                                                                                                                                                                                                          |
|-------------------------------------------------------------------------------------------------------------------------------------------------------------------------------------------------------------------------------------------------------------------------------------------------------------------------------------------------------------------------------------------------------------------------------------------------------------------------------------------------------------------------------------------------------|----------------------------------------------------------------------------------------------------------------------------------------------------------|------------------------------------------------------------------------------------------------------------------------------------------------------------------------------------------------------------------------------------------------------------------------------------------------------------------------------------------------------------------------------------------------------------------------------------------------------------------------------------------------------------------------------------------------------------------------------------------------------------------------------------------------------------------------------------------------------------------------------------------------------------------------------------------|
| EPI_ISL_436715 to 436717                                                                                                                                                                                                                                                                                                                                                                                                                                                                                                                              | Genomics and Computational Biology Lab, Scientific Research Institute of Physical-Chemical Medicine, FMBA of Russia                                      | Genomics and Computational Biology Lab, Scientific Research Institute of Physical-Chemical Medicine, FMBA of Russia<br>A. Manolov; A. Pavlenko; D. Fedorov; K. Klimina; O. Guskova; V. Govorun and E. Ilina; V. Veselovsky                                                                                                                                                                                                                                                                                                                                                                                                                                                                                                                                                               |
| EPI_ISL_1534341, EPI_ISL_1534423, EPI_ISL_1534431, EPI_ISL_1534433, EPI_ISL_1534444                                                                                                                                                                                                                                                                                                                                                                                                                                                                   | George Hospital wc GRH                                                                                                                                   | NHLS/UCT<br>Arash Iranzadeh; Bruna Galvao; Carolyn Williamson; Deelan Doolabh; Diana Hardie; Emmanuel SJ; Innocent Mudau; Kruger Marais; Lynn Tyers; Marvin Hsiao; Stephen Korsman; Tegally H; de Oliveira T                                                                                                                                                                                                                                                                                                                                                                                                                                                                                                                                                                             |
| EPI_ISL_450801, EPI_ISL_452120, EPI_ISL_452125, EPI_ISL_509662                                                                                                                                                                                                                                                                                                                                                                                                                                                                                        | Georgia Department of Health                                                                                                                             | Pathogen Discovery, Respiratory Viruses Branch, Division of Viral Diseases, Centers for Disease Control and Prevention<br>Alison S. Laufer Halpin; Anna Montmayeur; Anna Uehara; Bettina Bankamp; Christopher A. Elkins; Clinton R. Paden; Haibin Wang; Jing Zhang; Krista Queen; Mary S. Keckler; Rachel Marine; Suxiang Tong; Yan Li; Ying Tao; Zachary Weiner                                                                                                                                                                                                                                                                                                                                                                                                                         |
| EPI_ISL_594456                                                                                                                                                                                                                                                                                                                                                                                                                                                                                                                                        | Georgia Public Health Laboratory                                                                                                                         | Pathogen Discovery, Respiratory Viruses Branch, Division of Viral Diseases, Centers for Disease Control and Prevention<br>Anna Uehara; Clinton Paden; Haibin Wang; Jing Zhang; Julu Bhatnagar; Krista Queen; Suxiang Tong; Yan Li; Ying Tao                                                                                                                                                                                                                                                                                                                                                                                                                                                                                                                                              |
| EPI_ISL_539524                                                                                                                                                                                                                                                                                                                                                                                                                                                                                                                                        | Gerencia de Asistencia Sanitaria de Soria                                                                                                                | Instituto de Salud Carlos III<br>A. Monzón; C. Aldea; F. Casas; I; I. Jiménez; Iglesias-Caballero; M. Camarero; M. Cuesta; M. González-Esguevillas; M. Molinero Calamita; M. Zaballos; P. Jiménez; S. Juliá; S. Pozo; S. Varona                                                                                                                                                                                                                                                                                                                                                                                                                                                                                                                                                          |
| EPI_ISL_539557                                                                                                                                                                                                                                                                                                                                                                                                                                                                                                                                        | Gerencia del área de salud de Badajoz, Llerena y Zafra                                                                                                   | Instituto de Salud Carlos III<br>A. Monzón; C. Pazos; F. Casas; I; I. Jiménez; Iglesias-Caballero; M. Camarero; M. Cuesta; M. González-Esguevillas; M. Molinero Calamita; M. Zaballos; P. Jiménez; S. Juliá; S. Pozo; S. Varona                                                                                                                                                                                                                                                                                                                                                                                                                                                                                                                                                          |
| EPI_ISL_480083 to 480089                                                                                                                                                                                                                                                                                                                                                                                                                                                                                                                              | Gifu Prefectural Institute of Public Health and Environmental Sciences                                                                                   | Pathogen Genomics Center, National Institute of Infectious Diseases<br>Hajime Kamiya; Kentaro Itokawa; Makoto Kuroda; Masanori Hashino; Motoi Suzuki; Rina Tanaka; Tsuyoshi Sekizuka; Yoshihiko Kameyama                                                                                                                                                                                                                                                                                                                                                                                                                                                                                                                                                                                 |
| EPI_ISL_1529099, EPI_ISL_1529370, EPI_ISL_1529535, EPI_ISL_1529952                                                                                                                                                                                                                                                                                                                                                                                                                                                                                    | Global Health Research Complex (GHRC)                                                                                                                    | Texas A&M Institute for Genomic Sciences and Society (TIGSS)<br>Allison Ficht; Benjamin W. Neuman; David Threadgill; Drew Hillhouse; Kurt A. Zuelke; Melissa M. Kahl-Mcdonagh; Sankar P. Chaki; Sierra Guidry; Wesley Brashear                                                                                                                                                                                                                                                                                                                                                                                                                                                                                                                                                           |
| EPI_ISL_1528826                                                                                                                                                                                                                                                                                                                                                                                                                                                                                                                                       | Global Health Research Complex (GHRC)                                                                                                                    | TxGen<br>Allison Ficht; Benjamin W. Neuman; Charlie D. Johnson; Joshua Hill; Kurt A. Zuelke; Marcel Brun; Melissa M. Kahl-Mcdonagh; Richard Metz; Sankar P. Chaki; Sierra Guidry                                                                                                                                                                                                                                                                                                                                                                                                                                                                                                                                                                                                         |
| EPI_ISL_452218 to 452223                                                                                                                                                                                                                                                                                                                                                                                                                                                                                                                              | Goethe University Hospital Frankfurt                                                                                                                     | Institute for Medical Virology, Goethe University Hospital Frankfurt<br>Annemarie Berger; Björn Rotter; Denisa Bojkova; Jindrich Cinat; Klaus Hoffmeier; Sandra Westhaus; Sandra Ciesek; Sebastian Hoehl; Tuna Toptan; and Marek Widera                                                                                                                                                                                                                                                                                                                                                                                                                                                                                                                                                  |
| EPI_ISL_1508978 to 1508983, EPI_ISL_1508987, EPI_ISL_1532118 to 1532123                                                                                                                                                                                                                                                                                                                                                                                                                                                                               | Good Samaritan Hospital                                                                                                                                  | Santa Clara County Public Health Laboratory<br>Santa Clara County Public Health Department                                                                                                                                                                                                                                                                                                                                                                                                                                                                                                                                                                                                                                                                                               |
| EPI_ISL_1482470                                                                                                                                                                                                                                                                                                                                                                                                                                                                                                                                       | Good Samaritan Hospital Laboratory                                                                                                                       | Wadsworth Center, New York State Department of Health<br>Alexis Russell; Catharine Prussing; Daryl L. Lamson; Erasmus Schneider; Erica Lasek-Nesselquist; John Kelly; Jonathan Plitnick; Kirsten St. George; Matthew Shudt; Melissa A Leisner; Navjot Singh                                                                                                                                                                                                                                                                                                                                                                                                                                                                                                                              |
| EPI_ISL_415152                                                                                                                                                                                                                                                                                                                                                                                                                                                                                                                                        | Gorgas Memorial Institute for Health Studies                                                                                                             | Gorgas Memorial Institute for Health Studies<br>Alexander A. Martinez.; Ambar Moreno; Claudia Gonzalez; Danilo Franco; Elimelec Valdespino; Juan M. Pascale; Leyda Abrego; Oris Chavarria; Sandra Lopez-Verges; Yamilka Diaz                                                                                                                                                                                                                                                                                                                                                                                                                                                                                                                                                             |
| EPI_ISL_496603 to 496915, EPI_ISL_1502842 to 1502860, EPI_ISL_1502862 to 1502863, EPI_ISL_1502866, EPI_ISL_1502869 to 1503122, EPI_ISL_1503130 to 1503142                                                                                                                                                                                                                                                                                                                                                                                             | Gorgas Memorial Laboratory of Health Studies                                                                                                             | Gorgas Memorial Laboratory of Health Studies<br>Alexander A Martinez; Castillo Jorge; Claudia Gonzalez Sandra Lopez-Verges; Danilo Franco; Franco Danilo; Gonzalez Claudia; Jessica Gondola; Leyda Abrego; Lopez-Verges Sandra; Marlene Castillo; Martinez Alexander; Moreno Ambar; Moreno Brechla; Oris Chavarria; Ortiz Alma                                                                                                                                                                                                                                                                                                                                                                                                                                                           |
| EPI_ISL_524735 to 524736, EPI_ISL_586542 to 586545                                                                                                                                                                                                                                                                                                                                                                                                                                                                                                    | Government General Hospital, Jam Khambhaliya, Devbhoomi Dwarka                                                                                           | Gujarat Biotechnology Research Centre<br>A M Kadri; Afzal Ansari; Apurvasinh Puvar; Chaitanya Joshi; Dinesh Kumar; Harish Matani; Harsh Bakshi; Janvi Raval; Komal Patel; Labdhi Pandya; Madhvi Joshi; Maharshi Pandya; Monika Gandhi; Nidhi Patel; Nikha Trivedi; Nitin Savaliya; Pinal Trivedi; R D Dixit; Raghawendra Kumar; Zarna Patel; Zuber Saiyed                                                                                                                                                                                                                                                                                                                                                                                                                                |
| EPI_ISL_586551 to 586554, EPI_ISL_590691 to 590692                                                                                                                                                                                                                                                                                                                                                                                                                                                                                                    | Government Hospital, Veraval                                                                                                                             | Gujarat Biotechnology Research Centre<br>A M Kadri; Afzal Ansari; Apurvasinh Puvar; Chaitanya Joshi; Dinesh Kumar; Harsh Bakshi; Janvi Raval; Jignesh Parmar; Jitendra Bamrotia; Komal Patel; Labdhi Pandya; Madhvi Joshi; Maharshi Pandya; Monika Gandhi; Nidhi Patel; Nikha Trivedi; Nitin Savaliya; Pinal Trivedi; R D Dixit; Raghawendra Kumar; Zarna Patel; Zuber Saiyed                                                                                                                                                                                                                                                                                                                                                                                                            |
| EPI_ISL_508207 to 508286                                                                                                                                                                                                                                                                                                                                                                                                                                                                                                                              | Government Medical College                                                                                                                               | National Institute of Biomedical Genomics<br>Arindam Maitra; Dhaval Khatri; Jyoti Irvane; Maitrik Dave; Saumitra Das                                                                                                                                                                                                                                                                                                                                                                                                                                                                                                                                                                                                                                                                     |
| EPI_ISL_511930 to 511941                                                                                                                                                                                                                                                                                                                                                                                                                                                                                                                              | Government Medical College                                                                                                                               | National Institute of Biomedical Genomics - DBT's PAN-INDIA 1000 SARS-CoV-2 RNA Genome Sequencing Consortium<br>Arindam Maitra; Dhaval Khatri; Jyoti Irvane; Maitrik Dave; Saumitra Das                                                                                                                                                                                                                                                                                                                                                                                                                                                                                                                                                                                                  |
| EPI_ISL_1544179 to 1544195                                                                                                                                                                                                                                                                                                                                                                                                                                                                                                                            | Government Medical College (GMC), Surat                                                                                                                  | Gujarat Biotechnology Research Centre<br>Chaitanya Joshi; Dinesh Kumar; Janvi Raval; Madhvi Joshi; Neeta Khandelwal; Nitesh Shah; Nitin Savaliya; Ramesh Pandit; Sonal Sharma; Twinkle Soni; Umang Mishra; Zarna Patel; Zuber Saiyed                                                                                                                                                                                                                                                                                                                                                                                                                                                                                                                                                     |
| EPI_ISL_495020 to 495025                                                                                                                                                                                                                                                                                                                                                                                                                                                                                                                              | Government Medical College, Bhavnagar                                                                                                                    | Gujarat Biotechnology Research Centre<br>A M Kadri; Afzal Ansari; Apurvasinh Puvar; Chaitanya Joshi; Dinesh Kumar; Harsh Bakshi; Janvi Raval; Kairavi Desai; Komal Patel; Labdhi Pandya; Madhvi Joshi; Maharshi Pandya; Monika Gandhi; Nidhi Patel; Nikha Trivedi; Nitin Savaliya; Pinal Trivedi; R D Dixit; Raghawendra Kumar; Saklin Malek; Shirish Patel; Zarna Patel; Zuber Saiyed                                                                                                                                                                                                                                                                                                                                                                                                   |
| EPI_ISL_451154 to 451163, EPI_ISL_455017 to 455027, EPI_ISL_461478 to 461480, EPI_ISL_467039 to 467040, EPI_ISL_469029 to 469036, EPI_ISL_483821 to 483822                                                                                                                                                                                                                                                                                                                                                                                            | Government Medical College, Vadodara                                                                                                                     | Gujarat Biotechnology Research Centre<br>; A M Kadri; Afzal Ansari; Akanksha Verma; Amit Kanani; Ankit Hinsu; Apurvasinh Puvar; Armi Chaudhari; Bhavesh Modi; Bhavya Jindal; Camellia Chakraborty; Chaitanya Joshi; Dinesh Kumar; Fenil Patel; Gaurishankar Shrimali; Harsh Bakshi; Janvi Raval; Komal Patel; Labdhi Pandya; Madhvi Joshi; Maharshi Pandya; Manish Pattani; Meenakshi Shah; Monika Gandhi; Neelam Nathani; Neena Doshi; Nidhi Patel; Nikha Trivedi; Nitin Savaliya; Pinal Trivedi; Pooja P Doshi; Pragma Sharma; Pritesh Sabara; Priti Pandita; Prynka P Vatsa; R D Dixit; R N Daveswar; Raghawendra Kumar; Ramesh Pandit; Sharmistha Majumdar; Siddhant Kumar; Snehal Bagatharia; Tanuja Javadekar; Tejas Shah; Umang Mishra; Varsha Godbole; Zarna Patel; Zuber Saiyed |
| EPI_ISL_450781 to 450784                                                                                                                                                                                                                                                                                                                                                                                                                                                                                                                              | Government Medical College-Bhavnagar                                                                                                                     | Gujarat Biotechnology Research Centre<br>A M Kadri; Afzal Ansari; Akanksha Verma; Amit Kanani; Ankit Hinsu; Apurvasinh Puvar; Bhavesh Modi; Chaitanya Joshi; Dinesh Kumar; Gaurishankar Shrimali; Janvi Raval; Kairavi Desai; Komal Patel; Labdhi Pandya; Madhvi Joshi; Maharshi Pandya; Monika Gandhi; Neha Rajpara; Nidhi Patel; Nitin Savaliya; Pinal Trivedi; Pritesh Sabara; Priti Pandita; R D Dixit; Raghawendra Kumar; Ramesh Pandit; Saklain Malek; Shirish Patel; Snehal Bagatharia; Tejas Shah; Zarna Patel; Zuber Saiyed                                                                                                                                                                                                                                                     |
| EPI_ISL_1503921 to 1503954, EPI_ISL_1503971                                                                                                                                                                                                                                                                                                                                                                                                                                                                                                           | Grady Memorial Hospital, Clinical Microbiology Laboratory                                                                                                | Piantadosi Lab, Emory Department of Pathology<br>Anne Piantadosi; Yun F (Wayne) Wang                                                                                                                                                                                                                                                                                                                                                                                                                                                                                                                                                                                                                                                                                                     |
| EPI_ISL_1423341                                                                                                                                                                                                                                                                                                                                                                                                                                                                                                                                       | Grafton City Hospital                                                                                                                                    | WVU and Marshall University Combined Genomics Core Facilities<br>"James Denvir; Peter Perrotta; Peter Stoilov; Ryan Percifield"; Wesley Kimble                                                                                                                                                                                                                                                                                                                                                                                                                                                                                                                                                                                                                                           |
| EPI_ISL_1470375, EPI_ISL_1470395, EPI_ISL_1491342, EPI_ISL_1491367                                                                                                                                                                                                                                                                                                                                                                                                                                                                                    | Gravity Diagnostics                                                                                                                                      | Kentucky State Public Health Lab<br>Joshua Tobias; Karim George; Matthew Johnson; Rachel Zinner; Rhonda Lucas; Stephanie Lunn; Vaneet Arora; William Grooms                                                                                                                                                                                                                                                                                                                                                                                                                                                                                                                                                                                                                              |
| EPI_ISL_1534247 to 1534259, EPI_ISL_1534268, EPI_ISL_1534283, EPI_ISL_1534291, EPI_ISL_1534302, EPI_ISL_1534304, EPI_ISL_1534306, EPI_ISL_1534308 to 1534310, EPI_ISL_1534313, EPI_ISL_1534315 to 1534320, EPI_ISL_1534322 to 1534326, EPI_ISL_1534345 to 1534352, EPI_ISL_1534362, EPI_ISL_1534364, EPI_ISL_1534366, EPI_ISL_1534369, EPI_ISL_1534376 to 1534377, EPI_ISL_1534382, EPI_ISL_1534389 to 1534394, EPI_ISL_1534406 to 1534408, EPI_ISL_1534411 to 1534416, EPI_ISL_1534450 to 1534453, EPI_ISL_1534455, EPI_ISL_1534457, EPI_ISL_1534459 | see above                                                                                                                                                | Groote Schuur Hospital wc GSH<br>NHLS/UCT<br>Arash Iranzadeh; Bruna Galvao; Carolyn Williamson; Deelan Doolabh; Diana Hardie; Emmanuel SJ; Innocent Mudau; Kruger Marais; Lynn Tyers; Marvin Hsiao; Stephen Korsman; Tegally H; de Oliveira T                                                                                                                                                                                                                                                                                                                                                                                                                                                                                                                                            |
| EPI_ISL_1396813 to 1396822, EPI_ISL_1396824 to 1396828, EPI_ISL_1396834 to 1396836                                                                                                                                                                                                                                                                                                                                                                                                                                                                    | Groupe LCD                                                                                                                                               | Department of Virology, Henri Mondor University Hospital, Assistance Publique Hôpitaux de Paris, Université Paris-Est Créteil, INSERM U955<br>Alexandre Soulier; Christophe Rodriguez; Elisabeth Trawinski; Guillaume Gricourt; Jean-Michel Pawlotsky; Melissa N'Debi; Slim Fourati; Vanessa Demontant                                                                                                                                                                                                                                                                                                                                                                                                                                                                                   |
| EPI_ISL_1447673 to 1447676, EPI_ISL_1509270 to 1509271                                                                                                                                                                                                                                                                                                                                                                                                                                                                                                | Grubaug Lab - Yale School of Public Health                                                                                                               | Grubaug Lab - Yale School of Public Health<br>Anderson Brito; Annie Watkins; Chaney Kalinich; Chantal Vogels; Isabell Ott; Jessica Rothman; Joseph Fauver; Mallery Breban; Mary Petrone; Nathan Grubaug; Tara Alpert                                                                                                                                                                                                                                                                                                                                                                                                                                                                                                                                                                     |
| EPI_ISL_447734 to 447754                                                                                                                                                                                                                                                                                                                                                                                                                                                                                                                              | Grupo de Investigaciones Microbiológicas-UR (GIMUR), Departamento de Biología, Facultad de Ciencias Naturales, Universidad del Rosario, Bogotá, Colombia | Grupo de Investigaciones Microbiológicas-UR (GIMUR), Departamento de Biología, Facultad de Ciencias Naturales, Universidad del Rosario, Bogotá, Colombia Instituto Nacional<br>Adriana Castillo; Alberto Panzoni-Mondolfi; Ana S. Gonzalez-Reiche; Angelica Rico; Anibal A. Teherán; Carolina Florez; Carolina Hernandez; David Martinez; Emilia Mia Sordillo; Esther C. Barros; Harm van Bakel; Jesús E. Jaimes; Juan David Ramirez; Laura Vega; Lisseth Pardo; Marina Muñoz; Martha L. Ospina; Matthew M. Hernandez; Nathalia Ballesteros; Sergio Castañeda; Sergio Gomez; Viviana Simon                                                                                                                                                                                               |

|                                                                                                                                                                                                                                                                                                                                                                                                                                                                                                                                                                                                                                                                                                                                                                                                                                                                                                                                                                                                                                                                                                                                                                                                                                                                                                                                                                                                                                                                                                                                                                                                                                                                                                                                                                                                                                                                                                                                                                                                                                                                                                                                                                                                                                                                                                                                                                                                                                                                                                                                                                                                                                                                                                                                                                                                                                                                                                                                                                                                                                                                                                                                                                                                                                                                                                                                                                                                                                                                                                                                                                                                                                                                                                                                                                                                                                                                                                                                                                                                                                                                                                                                                                                                                                                                                                                                                                                                                                                                                                                                                                                                                                                                                                                                                                                                                                                                                                                                                                                                                                                                                                                                                                                                                                                                                                                                                                                                                                                                                                                                                                                                                                                                                                                                                                                                                                                                                                                                                                                                                                                                                                                                                                                                                                                                                                                                                                                                                                                                                                                                                                                                                                                                                                                                                                                                                                                                                                                                                                                                                                                                                                                                                                                                                                                                                                                                                                                                                                                                                                                                                                                                                                                                                                                                                                                                                                                                                                                                                                                                                                                                                                                                                                                                                                                                                                                                                                                                                                                                                                                                                                                                                                                                                                                                                                                                                                                                                                                                                                                                                                                                                                                                                                                                                                                                                                                                                                                                                                                                                                                                                                                                                                                                                                                                                                                                                                                                                                                                                                                                                                                                                                                                                                                                                                                                                                                                                                                                                                                                                                                                                                                                                                                                                                                                                                                                                                                                                                                                                                                                                                                                                                                                                                                                                                                                                                                                                                                                                                                                                                                                                                                                                                                                                                                                                                                                                                                                                                                                                                                                                                                                                                                                                                                                                                                                                                                                                                                                                                                                                                                                                                                                                                                                                                                                                                                                                                                                                                                                                                                                                                                                                                                                                                                                                                                                                                                                                                                                                                                                                                                                                                                                                                                                                    |                                                                                                                   |                                                                                                                        |                                                                                                                                                                                                                                                                                                                                                                                                                                                                                                                                                                                                                                                                                                                                                                                                                               |
|------------------------------------------------------------------------------------------------------------------------------------------------------------------------------------------------------------------------------------------------------------------------------------------------------------------------------------------------------------------------------------------------------------------------------------------------------------------------------------------------------------------------------------------------------------------------------------------------------------------------------------------------------------------------------------------------------------------------------------------------------------------------------------------------------------------------------------------------------------------------------------------------------------------------------------------------------------------------------------------------------------------------------------------------------------------------------------------------------------------------------------------------------------------------------------------------------------------------------------------------------------------------------------------------------------------------------------------------------------------------------------------------------------------------------------------------------------------------------------------------------------------------------------------------------------------------------------------------------------------------------------------------------------------------------------------------------------------------------------------------------------------------------------------------------------------------------------------------------------------------------------------------------------------------------------------------------------------------------------------------------------------------------------------------------------------------------------------------------------------------------------------------------------------------------------------------------------------------------------------------------------------------------------------------------------------------------------------------------------------------------------------------------------------------------------------------------------------------------------------------------------------------------------------------------------------------------------------------------------------------------------------------------------------------------------------------------------------------------------------------------------------------------------------------------------------------------------------------------------------------------------------------------------------------------------------------------------------------------------------------------------------------------------------------------------------------------------------------------------------------------------------------------------------------------------------------------------------------------------------------------------------------------------------------------------------------------------------------------------------------------------------------------------------------------------------------------------------------------------------------------------------------------------------------------------------------------------------------------------------------------------------------------------------------------------------------------------------------------------------------------------------------------------------------------------------------------------------------------------------------------------------------------------------------------------------------------------------------------------------------------------------------------------------------------------------------------------------------------------------------------------------------------------------------------------------------------------------------------------------------------------------------------------------------------------------------------------------------------------------------------------------------------------------------------------------------------------------------------------------------------------------------------------------------------------------------------------------------------------------------------------------------------------------------------------------------------------------------------------------------------------------------------------------------------------------------------------------------------------------------------------------------------------------------------------------------------------------------------------------------------------------------------------------------------------------------------------------------------------------------------------------------------------------------------------------------------------------------------------------------------------------------------------------------------------------------------------------------------------------------------------------------------------------------------------------------------------------------------------------------------------------------------------------------------------------------------------------------------------------------------------------------------------------------------------------------------------------------------------------------------------------------------------------------------------------------------------------------------------------------------------------------------------------------------------------------------------------------------------------------------------------------------------------------------------------------------------------------------------------------------------------------------------------------------------------------------------------------------------------------------------------------------------------------------------------------------------------------------------------------------------------------------------------------------------------------------------------------------------------------------------------------------------------------------------------------------------------------------------------------------------------------------------------------------------------------------------------------------------------------------------------------------------------------------------------------------------------------------------------------------------------------------------------------------------------------------------------------------------------------------------------------------------------------------------------------------------------------------------------------------------------------------------------------------------------------------------------------------------------------------------------------------------------------------------------------------------------------------------------------------------------------------------------------------------------------------------------------------------------------------------------------------------------------------------------------------------------------------------------------------------------------------------------------------------------------------------------------------------------------------------------------------------------------------------------------------------------------------------------------------------------------------------------------------------------------------------------------------------------------------------------------------------------------------------------------------------------------------------------------------------------------------------------------------------------------------------------------------------------------------------------------------------------------------------------------------------------------------------------------------------------------------------------------------------------------------------------------------------------------------------------------------------------------------------------------------------------------------------------------------------------------------------------------------------------------------------------------------------------------------------------------------------------------------------------------------------------------------------------------------------------------------------------------------------------------------------------------------------------------------------------------------------------------------------------------------------------------------------------------------------------------------------------------------------------------------------------------------------------------------------------------------------------------------------------------------------------------------------------------------------------------------------------------------------------------------------------------------------------------------------------------------------------------------------------------------------------------------------------------------------------------------------------------------------------------------------------------------------------------------------------------------------------------------------------------------------------------------------------------------------------------------------------------------------------------------------------------------------------------------------------------------------------------------------------------------------------------------------------------------------------------------------------------------------------------------------------------------------------------------------------------------------------------------------------------------------------------------------------------------------------------------------------------------------------------------------------------------------------------------------------------------------------------------------------------------------------------------------------------------------------------------------------------------------------------------------------------------------------------------------------------------------------------------------------------------------------------------------------------------------------------------------------------------------------------------------------------------------------------------------------------------------------------------------------------------------------------------------------------------------------------------------------------------------------------------------------------------------------------------------------------------------------------------------------------------------------------------------------------------------------------------------------------------------------------------------------------------------------------------------------------------------------------------------------------------------------------------------------------------------------------------------------------------------------------------------------------------------------------------------------------------------------------------------------------------------------------------------------------------------------------------------------------------------------------------------------------------------------------------------------------------------------------------------------------------------------------------------------------------------------------------------------------------------------------------------------------------------------------------------------------------------------------------------------------------------------------------------------------------------------------------------------------------------------------------------------------------------------------------------------------------------------------------------------------------------------------------------------------------------------------------------------------------------------------------------------------------------------------------------------------------------------------------------------------------------------------------------------------------------------------------------------------------------------------------------------------------------------------------------------------------------------------------------------------------------------------------------------------------------------------------------------------------------------------------------------------------------------------------------------------------------------------------------------------------------------------------------------------------------------------------------------------------------------------------------------------------------------------------------------------------------------------------------------------------------------------------------------------------------------------------------------------------------|-------------------------------------------------------------------------------------------------------------------|------------------------------------------------------------------------------------------------------------------------|-------------------------------------------------------------------------------------------------------------------------------------------------------------------------------------------------------------------------------------------------------------------------------------------------------------------------------------------------------------------------------------------------------------------------------------------------------------------------------------------------------------------------------------------------------------------------------------------------------------------------------------------------------------------------------------------------------------------------------------------------------------------------------------------------------------------------------|
|                                                                                                                                                                                                                                                                                                                                                                                                                                                                                                                                                                                                                                                                                                                                                                                                                                                                                                                                                                                                                                                                                                                                                                                                                                                                                                                                                                                                                                                                                                                                                                                                                                                                                                                                                                                                                                                                                                                                                                                                                                                                                                                                                                                                                                                                                                                                                                                                                                                                                                                                                                                                                                                                                                                                                                                                                                                                                                                                                                                                                                                                                                                                                                                                                                                                                                                                                                                                                                                                                                                                                                                                                                                                                                                                                                                                                                                                                                                                                                                                                                                                                                                                                                                                                                                                                                                                                                                                                                                                                                                                                                                                                                                                                                                                                                                                                                                                                                                                                                                                                                                                                                                                                                                                                                                                                                                                                                                                                                                                                                                                                                                                                                                                                                                                                                                                                                                                                                                                                                                                                                                                                                                                                                                                                                                                                                                                                                                                                                                                                                                                                                                                                                                                                                                                                                                                                                                                                                                                                                                                                                                                                                                                                                                                                                                                                                                                                                                                                                                                                                                                                                                                                                                                                                                                                                                                                                                                                                                                                                                                                                                                                                                                                                                                                                                                                                                                                                                                                                                                                                                                                                                                                                                                                                                                                                                                                                                                                                                                                                                                                                                                                                                                                                                                                                                                                                                                                                                                                                                                                                                                                                                                                                                                                                                                                                                                                                                                                                                                                                                                                                                                                                                                                                                                                                                                                                                                                                                                                                                                                                                                                                                                                                                                                                                                                                                                                                                                                                                                                                                                                                                                                                                                                                                                                                                                                                                                                                                                                                                                                                                                                                                                                                                                                                                                                                                                                                                                                                                                                                                                                                                                                                                                                                                                                                                                                                                                                                                                                                                                                                                                                                                                                                                                                                                                                                                                                                                                                                                                                                                                                                                                                                                                                                                                                                                                                                                                                                                                                                                                                                                                                                                                                                                                                    |                                                                                                                   | de Salud, Bogotá, Colombia Icahn School of Medicine at Mount Sinai, New York, USA                                      |                                                                                                                                                                                                                                                                                                                                                                                                                                                                                                                                                                                                                                                                                                                                                                                                                               |
| EPI_ISL_406531                                                                                                                                                                                                                                                                                                                                                                                                                                                                                                                                                                                                                                                                                                                                                                                                                                                                                                                                                                                                                                                                                                                                                                                                                                                                                                                                                                                                                                                                                                                                                                                                                                                                                                                                                                                                                                                                                                                                                                                                                                                                                                                                                                                                                                                                                                                                                                                                                                                                                                                                                                                                                                                                                                                                                                                                                                                                                                                                                                                                                                                                                                                                                                                                                                                                                                                                                                                                                                                                                                                                                                                                                                                                                                                                                                                                                                                                                                                                                                                                                                                                                                                                                                                                                                                                                                                                                                                                                                                                                                                                                                                                                                                                                                                                                                                                                                                                                                                                                                                                                                                                                                                                                                                                                                                                                                                                                                                                                                                                                                                                                                                                                                                                                                                                                                                                                                                                                                                                                                                                                                                                                                                                                                                                                                                                                                                                                                                                                                                                                                                                                                                                                                                                                                                                                                                                                                                                                                                                                                                                                                                                                                                                                                                                                                                                                                                                                                                                                                                                                                                                                                                                                                                                                                                                                                                                                                                                                                                                                                                                                                                                                                                                                                                                                                                                                                                                                                                                                                                                                                                                                                                                                                                                                                                                                                                                                                                                                                                                                                                                                                                                                                                                                                                                                                                                                                                                                                                                                                                                                                                                                                                                                                                                                                                                                                                                                                                                                                                                                                                                                                                                                                                                                                                                                                                                                                                                                                                                                                                                                                                                                                                                                                                                                                                                                                                                                                                                                                                                                                                                                                                                                                                                                                                                                                                                                                                                                                                                                                                                                                                                                                                                                                                                                                                                                                                                                                                                                                                                                                                                                                                                                                                                                                                                                                                                                                                                                                                                                                                                                                                                                                                                                                                                                                                                                                                                                                                                                                                                                                                                                                                                                                                                                                                                                                                                                                                                                                                                                                                                                                                                                                                                                                                                     | Guangdong Provincial Center for Diseases Control and Prevention; Guangdong Provincial Public Health               | Guangdong Provincial Center for Disease Control and Prevention                                                         | Baisheng Li; Changwen Ke; Feng Ruan; Guanhao He; Haojie Zhong; Huihong Deng; Jianfeng He; Jianpeng Xiao; Jianxiang Geng; Jianxiong Hu; Jie Wu; Jing Lu; Lifeng Lin; Lijun Liang; Lirong Zou; Min Kang; Qi Zhu; Shuijiang Mei; Songjian Xiao; Tao Liu; Tie Song; Weilin Zeng; Wenjun Ma; Xing Li; Xiujuan Tang; Xue Zhuang; Xuguang Chen; Ying Wang; Yingchao Song; Yingtao Zhang; Yuhuang Liao; Zhe Liu                                                                                                                                                                                                                                                                                                                                                                                                                       |
| EPI_ISL_406533                                                                                                                                                                                                                                                                                                                                                                                                                                                                                                                                                                                                                                                                                                                                                                                                                                                                                                                                                                                                                                                                                                                                                                                                                                                                                                                                                                                                                                                                                                                                                                                                                                                                                                                                                                                                                                                                                                                                                                                                                                                                                                                                                                                                                                                                                                                                                                                                                                                                                                                                                                                                                                                                                                                                                                                                                                                                                                                                                                                                                                                                                                                                                                                                                                                                                                                                                                                                                                                                                                                                                                                                                                                                                                                                                                                                                                                                                                                                                                                                                                                                                                                                                                                                                                                                                                                                                                                                                                                                                                                                                                                                                                                                                                                                                                                                                                                                                                                                                                                                                                                                                                                                                                                                                                                                                                                                                                                                                                                                                                                                                                                                                                                                                                                                                                                                                                                                                                                                                                                                                                                                                                                                                                                                                                                                                                                                                                                                                                                                                                                                                                                                                                                                                                                                                                                                                                                                                                                                                                                                                                                                                                                                                                                                                                                                                                                                                                                                                                                                                                                                                                                                                                                                                                                                                                                                                                                                                                                                                                                                                                                                                                                                                                                                                                                                                                                                                                                                                                                                                                                                                                                                                                                                                                                                                                                                                                                                                                                                                                                                                                                                                                                                                                                                                                                                                                                                                                                                                                                                                                                                                                                                                                                                                                                                                                                                                                                                                                                                                                                                                                                                                                                                                                                                                                                                                                                                                                                                                                                                                                                                                                                                                                                                                                                                                                                                                                                                                                                                                                                                                                                                                                                                                                                                                                                                                                                                                                                                                                                                                                                                                                                                                                                                                                                                                                                                                                                                                                                                                                                                                                                                                                                                                                                                                                                                                                                                                                                                                                                                                                                                                                                                                                                                                                                                                                                                                                                                                                                                                                                                                                                                                                                                                                                                                                                                                                                                                                                                                                                                                                                                                                                                                                                                     | Guangdong Provincial Center for Diseases Control and Prevention; Guangdong Provincial Public Health               | Guangdong Provincial Center for Diseases Control and Prevention                                                        | Baisheng Li; Changwen Ke; Feng Ruan; Guanhao He; Haojie Zhong; Huihong Deng; Jianfeng He; Jianpeng Xiao; Jianxiang Geng; Jianxiong Hu; Jie Wu; Jing Lu; Lifeng Lin; Lijun Liang; Lirong Zou; Min Kang; Qi Zhu; Shuijiang Mei; Songjian Xiao; Tao Liu; Tie Song; Weilin Zeng; Wenjun Ma; Xing Li; Xiujuan Tang; Xue Zhuang; Xuguang Chen; Ying Wang; Yingchao Song; Yingtao Zhang; Yuhuang Liao; Zhe Liu                                                                                                                                                                                                                                                                                                                                                                                                                       |
| EPI_ISL_403932 to 403937                                                                                                                                                                                                                                                                                                                                                                                                                                                                                                                                                                                                                                                                                                                                                                                                                                                                                                                                                                                                                                                                                                                                                                                                                                                                                                                                                                                                                                                                                                                                                                                                                                                                                                                                                                                                                                                                                                                                                                                                                                                                                                                                                                                                                                                                                                                                                                                                                                                                                                                                                                                                                                                                                                                                                                                                                                                                                                                                                                                                                                                                                                                                                                                                                                                                                                                                                                                                                                                                                                                                                                                                                                                                                                                                                                                                                                                                                                                                                                                                                                                                                                                                                                                                                                                                                                                                                                                                                                                                                                                                                                                                                                                                                                                                                                                                                                                                                                                                                                                                                                                                                                                                                                                                                                                                                                                                                                                                                                                                                                                                                                                                                                                                                                                                                                                                                                                                                                                                                                                                                                                                                                                                                                                                                                                                                                                                                                                                                                                                                                                                                                                                                                                                                                                                                                                                                                                                                                                                                                                                                                                                                                                                                                                                                                                                                                                                                                                                                                                                                                                                                                                                                                                                                                                                                                                                                                                                                                                                                                                                                                                                                                                                                                                                                                                                                                                                                                                                                                                                                                                                                                                                                                                                                                                                                                                                                                                                                                                                                                                                                                                                                                                                                                                                                                                                                                                                                                                                                                                                                                                                                                                                                                                                                                                                                                                                                                                                                                                                                                                                                                                                                                                                                                                                                                                                                                                                                                                                                                                                                                                                                                                                                                                                                                                                                                                                                                                                                                                                                                                                                                                                                                                                                                                                                                                                                                                                                                                                                                                                                                                                                                                                                                                                                                                                                                                                                                                                                                                                                                                                                                                                                                                                                                                                                                                                                                                                                                                                                                                                                                                                                                                                                                                                                                                                                                                                                                                                                                                                                                                                                                                                                                                                                                                                                                                                                                                                                                                                                                                                                                                                                                                                                                                           | Guangdong Provincial Center for Diseases Control and Prevention; Guangdong Provincial Public Health               | Department of Microbiology, Guangdong Provincial Center for Diseases Control and Prevention                            | Baisheng Li; Changwen Ke; Feng Ruan; Guanhao He; Haojie Zhong; Huihong Deng; Jianfeng He; Jianpeng Xiao; Jianxiang Geng; Jianxiong Hu; Jie Wu; Jing Lu; Lifeng Lin; Lijun Liang; Lirong Zou; Min Kang; Qi Zhu; Shuijiang Mei; Songjian Xiao; Tao Liu; Tie Song; Weilin Zeng; Wenjun Ma; Xing Li; Xiujuan Tang; Xue Zhuang; Xuguang Chen; Ying Wang; Yingchao Song; Yingtao Zhang; Yuhuang Liao; Zhe Liu                                                                                                                                                                                                                                                                                                                                                                                                                       |
| EPI_ISL_406534 to 406536                                                                                                                                                                                                                                                                                                                                                                                                                                                                                                                                                                                                                                                                                                                                                                                                                                                                                                                                                                                                                                                                                                                                                                                                                                                                                                                                                                                                                                                                                                                                                                                                                                                                                                                                                                                                                                                                                                                                                                                                                                                                                                                                                                                                                                                                                                                                                                                                                                                                                                                                                                                                                                                                                                                                                                                                                                                                                                                                                                                                                                                                                                                                                                                                                                                                                                                                                                                                                                                                                                                                                                                                                                                                                                                                                                                                                                                                                                                                                                                                                                                                                                                                                                                                                                                                                                                                                                                                                                                                                                                                                                                                                                                                                                                                                                                                                                                                                                                                                                                                                                                                                                                                                                                                                                                                                                                                                                                                                                                                                                                                                                                                                                                                                                                                                                                                                                                                                                                                                                                                                                                                                                                                                                                                                                                                                                                                                                                                                                                                                                                                                                                                                                                                                                                                                                                                                                                                                                                                                                                                                                                                                                                                                                                                                                                                                                                                                                                                                                                                                                                                                                                                                                                                                                                                                                                                                                                                                                                                                                                                                                                                                                                                                                                                                                                                                                                                                                                                                                                                                                                                                                                                                                                                                                                                                                                                                                                                                                                                                                                                                                                                                                                                                                                                                                                                                                                                                                                                                                                                                                                                                                                                                                                                                                                                                                                                                                                                                                                                                                                                                                                                                                                                                                                                                                                                                                                                                                                                                                                                                                                                                                                                                                                                                                                                                                                                                                                                                                                                                                                                                                                                                                                                                                                                                                                                                                                                                                                                                                                                                                                                                                                                                                                                                                                                                                                                                                                                                                                                                                                                                                                                                                                                                                                                                                                                                                                                                                                                                                                                                                                                                                                                                                                                                                                                                                                                                                                                                                                                                                                                                                                                                                                                                                                                                                                                                                                                                                                                                                                                                                                                                                                                                                                           | Guangdong Provincial Center for Diseases Control and Prevention; Guangdong Provincial Public Health               | Guangdong Provincial Center for Diseases Control and Prevention                                                        | Baisheng Li; Changwen Ke; Feng Ruan; Guanhao He; Haojie Zhong; Huihong Deng; Jianfeng He; Jianpeng Xiao; Jianxiang Geng; Jianxiong Hu; Jie Wu; Jing Lu; Lifeng Lin; Lijun Liang; Lirong Zou; Min Kang; Qi Zhu; Shuijiang Mei; Songjian Xiao; Tao Liu; Tie Song; Weilin Zeng; Wenjun Ma; Xing Li; Xiujuan Tang; Xue Zhuang; Xuguang Chen; Ying Wang; Yingchao Song; Yingtao Zhang; Yuhuang Liao; Zhe Liu                                                                                                                                                                                                                                                                                                                                                                                                                       |
| EPI_ISL_406538                                                                                                                                                                                                                                                                                                                                                                                                                                                                                                                                                                                                                                                                                                                                                                                                                                                                                                                                                                                                                                                                                                                                                                                                                                                                                                                                                                                                                                                                                                                                                                                                                                                                                                                                                                                                                                                                                                                                                                                                                                                                                                                                                                                                                                                                                                                                                                                                                                                                                                                                                                                                                                                                                                                                                                                                                                                                                                                                                                                                                                                                                                                                                                                                                                                                                                                                                                                                                                                                                                                                                                                                                                                                                                                                                                                                                                                                                                                                                                                                                                                                                                                                                                                                                                                                                                                                                                                                                                                                                                                                                                                                                                                                                                                                                                                                                                                                                                                                                                                                                                                                                                                                                                                                                                                                                                                                                                                                                                                                                                                                                                                                                                                                                                                                                                                                                                                                                                                                                                                                                                                                                                                                                                                                                                                                                                                                                                                                                                                                                                                                                                                                                                                                                                                                                                                                                                                                                                                                                                                                                                                                                                                                                                                                                                                                                                                                                                                                                                                                                                                                                                                                                                                                                                                                                                                                                                                                                                                                                                                                                                                                                                                                                                                                                                                                                                                                                                                                                                                                                                                                                                                                                                                                                                                                                                                                                                                                                                                                                                                                                                                                                                                                                                                                                                                                                                                                                                                                                                                                                                                                                                                                                                                                                                                                                                                                                                                                                                                                                                                                                                                                                                                                                                                                                                                                                                                                                                                                                                                                                                                                                                                                                                                                                                                                                                                                                                                                                                                                                                                                                                                                                                                                                                                                                                                                                                                                                                                                                                                                                                                                                                                                                                                                                                                                                                                                                                                                                                                                                                                                                                                                                                                                                                                                                                                                                                                                                                                                                                                                                                                                                                                                                                                                                                                                                                                                                                                                                                                                                                                                                                                                                                                                                                                                                                                                                                                                                                                                                                                                                                                                                                                                                                                                     | Guangdong Provincial Center for Diseases Control and Prevention; Guangdong Provincial Institute of Public Health  | Guangdong Provincial Center for Diseases Control and Prevention                                                        | Baisheng Li; Changwen Ke; Feng Ruan; Guanhao He; Haojie Zhong; Huihong Deng; Jianfeng He; Jianpeng Xiao; Jianxiang Geng; Jianxiong Hu; Jie Wu; Jing Lu; Lifeng Lin; Lijun Liang; Lirong Zou; Min Kang; Qi Zhu; Shuijiang Mei; Songjian Xiao; Tao Liu; Tie Song; Weilin Zeng; Wenjun Ma; Xing Li; Xiujuan Tang; Xue Zhuang; Xuguang Chen; Ying Wang; Yingchao Song; Yingtao Zhang; Yuhuang Liao; Zhe Liu                                                                                                                                                                                                                                                                                                                                                                                                                       |
| EPI_ISL_428440 to 428478                                                                                                                                                                                                                                                                                                                                                                                                                                                                                                                                                                                                                                                                                                                                                                                                                                                                                                                                                                                                                                                                                                                                                                                                                                                                                                                                                                                                                                                                                                                                                                                                                                                                                                                                                                                                                                                                                                                                                                                                                                                                                                                                                                                                                                                                                                                                                                                                                                                                                                                                                                                                                                                                                                                                                                                                                                                                                                                                                                                                                                                                                                                                                                                                                                                                                                                                                                                                                                                                                                                                                                                                                                                                                                                                                                                                                                                                                                                                                                                                                                                                                                                                                                                                                                                                                                                                                                                                                                                                                                                                                                                                                                                                                                                                                                                                                                                                                                                                                                                                                                                                                                                                                                                                                                                                                                                                                                                                                                                                                                                                                                                                                                                                                                                                                                                                                                                                                                                                                                                                                                                                                                                                                                                                                                                                                                                                                                                                                                                                                                                                                                                                                                                                                                                                                                                                                                                                                                                                                                                                                                                                                                                                                                                                                                                                                                                                                                                                                                                                                                                                                                                                                                                                                                                                                                                                                                                                                                                                                                                                                                                                                                                                                                                                                                                                                                                                                                                                                                                                                                                                                                                                                                                                                                                                                                                                                                                                                                                                                                                                                                                                                                                                                                                                                                                                                                                                                                                                                                                                                                                                                                                                                                                                                                                                                                                                                                                                                                                                                                                                                                                                                                                                                                                                                                                                                                                                                                                                                                                                                                                                                                                                                                                                                                                                                                                                                                                                                                                                                                                                                                                                                                                                                                                                                                                                                                                                                                                                                                                                                                                                                                                                                                                                                                                                                                                                                                                                                                                                                                                                                                                                                                                                                                                                                                                                                                                                                                                                                                                                                                                                                                                                                                                                                                                                                                                                                                                                                                                                                                                                                                                                                                                                                                                                                                                                                                                                                                                                                                                                                                                                                                                                                                                           | Guangdong Provincial Center for Diseases Control and Prevention; Guangdong Provincial Institute of Public Health  | School of Public Health, The University of Hong Kong                                                                   | Bosheng Li; Hanri Zeng; Haogao Gu; Hui-Ling Yen; Jie Wu; Leo L.M. Poon; Lijun Liang; Tie Song; Yao Hu; Yingchao Song; Zhengcui Li                                                                                                                                                                                                                                                                                                                                                                                                                                                                                                                                                                                                                                                                                             |
| EPI_ISL_413850 to 413902                                                                                                                                                                                                                                                                                                                                                                                                                                                                                                                                                                                                                                                                                                                                                                                                                                                                                                                                                                                                                                                                                                                                                                                                                                                                                                                                                                                                                                                                                                                                                                                                                                                                                                                                                                                                                                                                                                                                                                                                                                                                                                                                                                                                                                                                                                                                                                                                                                                                                                                                                                                                                                                                                                                                                                                                                                                                                                                                                                                                                                                                                                                                                                                                                                                                                                                                                                                                                                                                                                                                                                                                                                                                                                                                                                                                                                                                                                                                                                                                                                                                                                                                                                                                                                                                                                                                                                                                                                                                                                                                                                                                                                                                                                                                                                                                                                                                                                                                                                                                                                                                                                                                                                                                                                                                                                                                                                                                                                                                                                                                                                                                                                                                                                                                                                                                                                                                                                                                                                                                                                                                                                                                                                                                                                                                                                                                                                                                                                                                                                                                                                                                                                                                                                                                                                                                                                                                                                                                                                                                                                                                                                                                                                                                                                                                                                                                                                                                                                                                                                                                                                                                                                                                                                                                                                                                                                                                                                                                                                                                                                                                                                                                                                                                                                                                                                                                                                                                                                                                                                                                                                                                                                                                                                                                                                                                                                                                                                                                                                                                                                                                                                                                                                                                                                                                                                                                                                                                                                                                                                                                                                                                                                                                                                                                                                                                                                                                                                                                                                                                                                                                                                                                                                                                                                                                                                                                                                                                                                                                                                                                                                                                                                                                                                                                                                                                                                                                                                                                                                                                                                                                                                                                                                                                                                                                                                                                                                                                                                                                                                                                                                                                                                                                                                                                                                                                                                                                                                                                                                                                                                                                                                                                                                                                                                                                                                                                                                                                                                                                                                                                                                                                                                                                                                                                                                                                                                                                                                                                                                                                                                                                                                                                                                                                                                                                                                                                                                                                                                                                                                                                                                                                                                                           | Guangdong Provincial Institution of Public Health, Guangdong Provincial Center for Disease Control and Prevention | Guangdong Provincial Institution of Public Health                                                                      | Andrew Rambaut; Bo Peng; Changwen Ke; Chuming Liang; Huanying Zheng; Huifang Lin; Jing Lu; Jingju Peng; Jiufeng Sun; Josh Quick; Juan Su; Kang Min; Kuibiao Li; Lilian Zeng; Liu Zhe; Louis du Plessis; Minfeng Liang; Moritz Kraemer; Nick Loman; Nuno Faria; Oliver Pybus; Pingping Zhou; Qianlin Xiong; Ru bai; Rulin Sun; Runyu Yuan; Sarah François; Shisong Fang; Song Tie; Tao Liu; Verity Hill; Wei Li; Wenjun Ma; Wenzhe Su; Xi Tang; Jing Lu                                                                                                                                                                                                                                                                                                                                                                        |
| EPI_ISL_444969                                                                                                                                                                                                                                                                                                                                                                                                                                                                                                                                                                                                                                                                                                                                                                                                                                                                                                                                                                                                                                                                                                                                                                                                                                                                                                                                                                                                                                                                                                                                                                                                                                                                                                                                                                                                                                                                                                                                                                                                                                                                                                                                                                                                                                                                                                                                                                                                                                                                                                                                                                                                                                                                                                                                                                                                                                                                                                                                                                                                                                                                                                                                                                                                                                                                                                                                                                                                                                                                                                                                                                                                                                                                                                                                                                                                                                                                                                                                                                                                                                                                                                                                                                                                                                                                                                                                                                                                                                                                                                                                                                                                                                                                                                                                                                                                                                                                                                                                                                                                                                                                                                                                                                                                                                                                                                                                                                                                                                                                                                                                                                                                                                                                                                                                                                                                                                                                                                                                                                                                                                                                                                                                                                                                                                                                                                                                                                                                                                                                                                                                                                                                                                                                                                                                                                                                                                                                                                                                                                                                                                                                                                                                                                                                                                                                                                                                                                                                                                                                                                                                                                                                                                                                                                                                                                                                                                                                                                                                                                                                                                                                                                                                                                                                                                                                                                                                                                                                                                                                                                                                                                                                                                                                                                                                                                                                                                                                                                                                                                                                                                                                                                                                                                                                                                                                                                                                                                                                                                                                                                                                                                                                                                                                                                                                                                                                                                                                                                                                                                                                                                                                                                                                                                                                                                                                                                                                                                                                                                                                                                                                                                                                                                                                                                                                                                                                                                                                                                                                                                                                                                                                                                                                                                                                                                                                                                                                                                                                                                                                                                                                                                                                                                                                                                                                                                                                                                                                                                                                                                                                                                                                                                                                                                                                                                                                                                                                                                                                                                                                                                                                                                                                                                                                                                                                                                                                                                                                                                                                                                                                                                                                                                                                                                                                                                                                                                                                                                                                                                                                                                                                                                                                                                                                     | Guangzhou Eighth People's Hospital (Jiahe Sector)                                                                 | Institute of Human Virology, Zhongshan School of Medicine, Sun Yat-sen University                                      | Bingfeng Liu; Fang Li; Fei Yu; Feng Huang; Fengyu Hu; Hui Zhang; Huimin Fan; Jun Liu; Junsong Zhang; Kai Deng; Mang Shi; Ruosu Ying; Ting Pan; Xu Zhang; Yiwen Zhang                                                                                                                                                                                                                                                                                                                                                                                                                                                                                                                                                                                                                                                          |
| EPI_ISL_509695 to 509703, EPI_ISL_509710                                                                                                                                                                                                                                                                                                                                                                                                                                                                                                                                                                                                                                                                                                                                                                                                                                                                                                                                                                                                                                                                                                                                                                                                                                                                                                                                                                                                                                                                                                                                                                                                                                                                                                                                                                                                                                                                                                                                                                                                                                                                                                                                                                                                                                                                                                                                                                                                                                                                                                                                                                                                                                                                                                                                                                                                                                                                                                                                                                                                                                                                                                                                                                                                                                                                                                                                                                                                                                                                                                                                                                                                                                                                                                                                                                                                                                                                                                                                                                                                                                                                                                                                                                                                                                                                                                                                                                                                                                                                                                                                                                                                                                                                                                                                                                                                                                                                                                                                                                                                                                                                                                                                                                                                                                                                                                                                                                                                                                                                                                                                                                                                                                                                                                                                                                                                                                                                                                                                                                                                                                                                                                                                                                                                                                                                                                                                                                                                                                                                                                                                                                                                                                                                                                                                                                                                                                                                                                                                                                                                                                                                                                                                                                                                                                                                                                                                                                                                                                                                                                                                                                                                                                                                                                                                                                                                                                                                                                                                                                                                                                                                                                                                                                                                                                                                                                                                                                                                                                                                                                                                                                                                                                                                                                                                                                                                                                                                                                                                                                                                                                                                                                                                                                                                                                                                                                                                                                                                                                                                                                                                                                                                                                                                                                                                                                                                                                                                                                                                                                                                                                                                                                                                                                                                                                                                                                                                                                                                                                                                                                                                                                                                                                                                                                                                                                                                                                                                                                                                                                                                                                                                                                                                                                                                                                                                                                                                                                                                                                                                                                                                                                                                                                                                                                                                                                                                                                                                                                                                                                                                                                                                                                                                                                                                                                                                                                                                                                                                                                                                                                                                                                                                                                                                                                                                                                                                                                                                                                                                                                                                                                                                                                                                                                                                                                                                                                                                                                                                                                                                                                                                                                                                                                           | Guatemala Ministry of Public Health                                                                               | Pathogen Discovery, Respiratory Viruses Branch, Division of Viral Diseases, Centers for Disease Control and Prevention | Anna Uehara; Clinton Paden; Haibin Wang; Jing Zhang; Krista Queen; Suxiang Tong; Yan Li; Ying Tao                                                                                                                                                                                                                                                                                                                                                                                                                                                                                                                                                                                                                                                                                                                             |
| EPI_ISL_1534397, EPI_ISL_1534410                                                                                                                                                                                                                                                                                                                                                                                                                                                                                                                                                                                                                                                                                                                                                                                                                                                                                                                                                                                                                                                                                                                                                                                                                                                                                                                                                                                                                                                                                                                                                                                                                                                                                                                                                                                                                                                                                                                                                                                                                                                                                                                                                                                                                                                                                                                                                                                                                                                                                                                                                                                                                                                                                                                                                                                                                                                                                                                                                                                                                                                                                                                                                                                                                                                                                                                                                                                                                                                                                                                                                                                                                                                                                                                                                                                                                                                                                                                                                                                                                                                                                                                                                                                                                                                                                                                                                                                                                                                                                                                                                                                                                                                                                                                                                                                                                                                                                                                                                                                                                                                                                                                                                                                                                                                                                                                                                                                                                                                                                                                                                                                                                                                                                                                                                                                                                                                                                                                                                                                                                                                                                                                                                                                                                                                                                                                                                                                                                                                                                                                                                                                                                                                                                                                                                                                                                                                                                                                                                                                                                                                                                                                                                                                                                                                                                                                                                                                                                                                                                                                                                                                                                                                                                                                                                                                                                                                                                                                                                                                                                                                                                                                                                                                                                                                                                                                                                                                                                                                                                                                                                                                                                                                                                                                                                                                                                                                                                                                                                                                                                                                                                                                                                                                                                                                                                                                                                                                                                                                                                                                                                                                                                                                                                                                                                                                                                                                                                                                                                                                                                                                                                                                                                                                                                                                                                                                                                                                                                                                                                                                                                                                                                                                                                                                                                                                                                                                                                                                                                                                                                                                                                                                                                                                                                                                                                                                                                                                                                                                                                                                                                                                                                                                                                                                                                                                                                                                                                                                                                                                                                                                                                                                                                                                                                                                                                                                                                                                                                                                                                                                                                                                                                                                                                                                                                                                                                                                                                                                                                                                                                                                                                                                                                                                                                                                                                                                                                                                                                                                                                                                                                                                                                                                   | Guguletu CHC wc GDH                                                                                               | NHLS/UCT                                                                                                               | Arash Iranzadeh; Bruna Galvao; Carolyn Williamson; Deelan Doolabh; Diana Hardie; Emmanuel SJ; Innocent Mudau; Kruger Marais; Lynn Tyers; Marvin Hsiao; Stephen Korsman; Tegally H; de Oliveira T                                                                                                                                                                                                                                                                                                                                                                                                                                                                                                                                                                                                                              |
| EPI_ISL_435055 to 435056, EPI_ISL_444482 to 444486, EPI_ISL_447534 to 447546, EPI_ISL_458103 to 458113                                                                                                                                                                                                                                                                                                                                                                                                                                                                                                                                                                                                                                                                                                                                                                                                                                                                                                                                                                                                                                                                                                                                                                                                                                                                                                                                                                                                                                                                                                                                                                                                                                                                                                                                                                                                                                                                                                                                                                                                                                                                                                                                                                                                                                                                                                                                                                                                                                                                                                                                                                                                                                                                                                                                                                                                                                                                                                                                                                                                                                                                                                                                                                                                                                                                                                                                                                                                                                                                                                                                                                                                                                                                                                                                                                                                                                                                                                                                                                                                                                                                                                                                                                                                                                                                                                                                                                                                                                                                                                                                                                                                                                                                                                                                                                                                                                                                                                                                                                                                                                                                                                                                                                                                                                                                                                                                                                                                                                                                                                                                                                                                                                                                                                                                                                                                                                                                                                                                                                                                                                                                                                                                                                                                                                                                                                                                                                                                                                                                                                                                                                                                                                                                                                                                                                                                                                                                                                                                                                                                                                                                                                                                                                                                                                                                                                                                                                                                                                                                                                                                                                                                                                                                                                                                                                                                                                                                                                                                                                                                                                                                                                                                                                                                                                                                                                                                                                                                                                                                                                                                                                                                                                                                                                                                                                                                                                                                                                                                                                                                                                                                                                                                                                                                                                                                                                                                                                                                                                                                                                                                                                                                                                                                                                                                                                                                                                                                                                                                                                                                                                                                                                                                                                                                                                                                                                                                                                                                                                                                                                                                                                                                                                                                                                                                                                                                                                                                                                                                                                                                                                                                                                                                                                                                                                                                                                                                                                                                                                                                                                                                                                                                                                                                                                                                                                                                                                                                                                                                                                                                                                                                                                                                                                                                                                                                                                                                                                                                                                                                                                                                                                                                                                                                                                                                                                                                                                                                                                                                                                                                                                                                                                                                                                                                                                                                                                                                                                                                                                                                                                                                                                             | Gujarat Biotechnology Research Centre                                                                             | Gujarat Biotechnology Research Centre                                                                                  | ; A M Kadri; Afzal Ansari; Akanksha Verma; Amit Kanani; Anjali Rajwal; Anjali Rajwar; Ankit Hinsu; Apurvashin Puvar; Armi Chaudhari; Bhavesh Modi; Bhavya Jindal; Binita Aring; Camella Chakraborty; Chaitanya Joshi; Dinesh Kumar; Dipa Kinariwala; Dipeshwari Shewale; Disha Patel; Gaurishankar Shirmali; Geeta Vaghela; Janvi Raval; Kairavi Joshi; Kamlesh J Upadhyay; Komal Patel; Labdhi Pandya; Madhvi Joshi; Maharshi Pandya; Monika Gandhi; Neelam Nathani; Neeta Khandelwal; Neha Rajpara; Nidhi Patel; Nidhi Sood; Nitin Savaliya; Pinal Trivedi; Pooja P Doshi; Pragy Sharma; Pranay Shah; Pritesh Sabara; Priti Pandita; Priyanka P Vatsa; R D Dixit; Raghawendra Kumar; Ramesh Pandit; Sharmista Majumdar; Siddhant Kumar; Snehal Bagatharia; Sonia Barve; Tejas Shah; Umang Mishra; Zarna Patel; Zuber Saiyed |
| EPI_ISL_455573 to 455574, EPI_ISL_455580 to 455582, EPI_ISL_471157, EPI_ISL_489904, EPI_ISL_489956 to 489958, EPI_ISL_547608 to 547610, EPI_ISL_547666 to 547676, EPI_ISL_547683 to 547684, EPI_ISL_547705, EPI_ISL_547706 to 547708, EPI_ISL_547709 to 547710, EPI_ISL_547711 to 547712, EPI_ISL_547713 to 547714, EPI_ISL_547715 to 547716, EPI_ISL_547717 to 547718, EPI_ISL_547719 to 547720, EPI_ISL_547721 to 547722, EPI_ISL_547723 to 547724, EPI_ISL_547725 to 547726, EPI_ISL_547727 to 547728, EPI_ISL_547729 to 547730, EPI_ISL_547731 to 547732, EPI_ISL_547733 to 547734, EPI_ISL_547735 to 547736, EPI_ISL_547737 to 547738, EPI_ISL_547739 to 547740, EPI_ISL_547741 to 547742, EPI_ISL_547743 to 547744, EPI_ISL_547745 to 547746, EPI_ISL_547747 to 547748, EPI_ISL_547749 to 547750, EPI_ISL_547751 to 547752, EPI_ISL_547753 to 547754, EPI_ISL_547755 to 547756, EPI_ISL_547757 to 547758, EPI_ISL_547759 to 547760, EPI_ISL_547761 to 547762, EPI_ISL_547763 to 547764, EPI_ISL_547765 to 547766, EPI_ISL_547767 to 547768, EPI_ISL_547769 to 547770, EPI_ISL_547771 to 547772, EPI_ISL_547773 to 547774, EPI_ISL_547775 to 547776, EPI_ISL_547777 to 547778, EPI_ISL_547779 to 547780, EPI_ISL_547781 to 547782, EPI_ISL_547783 to 547784, EPI_ISL_547785 to 547786, EPI_ISL_547787 to 547788, EPI_ISL_547789 to 547790, EPI_ISL_547791 to 547792, EPI_ISL_547793 to 547794, EPI_ISL_547795 to 547796, EPI_ISL_547797 to 547798, EPI_ISL_547799 to 547800, EPI_ISL_547801 to 547802, EPI_ISL_547803 to 547804, EPI_ISL_547805 to 547806, EPI_ISL_547807 to 547808, EPI_ISL_547809 to 547810, EPI_ISL_547811 to 547812, EPI_ISL_547813 to 547814, EPI_ISL_547815 to 547816, EPI_ISL_547817 to 547818, EPI_ISL_547819 to 547820, EPI_ISL_547821 to 547822, EPI_ISL_547823 to 547824, EPI_ISL_547825 to 547826, EPI_ISL_547827 to 547828, EPI_ISL_547829 to 547830, EPI_ISL_547831 to 547832, EPI_ISL_547833 to 547834, EPI_ISL_547835 to 547836, EPI_ISL_547837 to 547838, EPI_ISL_547839 to 547840, EPI_ISL_547841 to 547842, EPI_ISL_547843 to 547844, EPI_ISL_547845 to 547846, EPI_ISL_547847 to 547848, EPI_ISL_547849 to 547850, EPI_ISL_547851 to 547852, EPI_ISL_547853 to 547854, EPI_ISL_547855 to 547856, EPI_ISL_547857 to 547858, EPI_ISL_547859 to 547860, EPI_ISL_547861 to 547862, EPI_ISL_547863 to 547864, EPI_ISL_547865 to 547866, EPI_ISL_547867 to 547868, EPI_ISL_547869 to 547870, EPI_ISL_547871 to 547872, EPI_ISL_547873 to 547874, EPI_ISL_547875 to 547876, EPI_ISL_547877 to 547878, EPI_ISL_547879 to 547880, EPI_ISL_547881 to 547882, EPI_ISL_547883 to 547884, EPI_ISL_547885 to 547886, EPI_ISL_547887 to 547888, EPI_ISL_547889 to 547890, EPI_ISL_547891 to 547892, EPI_ISL_547893 to 547894, EPI_ISL_547895 to 547896, EPI_ISL_547897 to 547898, EPI_ISL_547899 to 547900, EPI_ISL_547901 to 547902, EPI_ISL_547903 to 547904, EPI_ISL_547905 to 547906, EPI_ISL_547907 to 547908, EPI_ISL_547909 to 547910, EPI_ISL_547911 to 547912, EPI_ISL_547913 to 547914, EPI_ISL_547915 to 547916, EPI_ISL_547917 to 547918, EPI_ISL_547919 to 547920, EPI_ISL_547921 to 547922, EPI_ISL_547923 to 547924, EPI_ISL_547925 to 547926, EPI_ISL_547927 to 547928, EPI_ISL_547929 to 547930, EPI_ISL_547931 to 547932, EPI_ISL_547933 to 547934, EPI_ISL_547935 to 547936, EPI_ISL_547937 to 547938, EPI_ISL_547939 to 547940, EPI_ISL_547941 to 547942, EPI_ISL_547943 to 547944, EPI_ISL_547945 to 547946, EPI_ISL_547947 to 547948, EPI_ISL_547949 to 547950, EPI_ISL_547951 to 547952, EPI_ISL_547953 to 547954, EPI_ISL_547955 to 547956, EPI_ISL_547957 to 547958, EPI_ISL_547959 to 547960, EPI_ISL_547961 to 547962, EPI_ISL_547963 to 547964, EPI_ISL_547965 to 547966, EPI_ISL_547967 to 547968, EPI_ISL_547969 to 547970, EPI_ISL_547971 to 547972, EPI_ISL_547973 to 547974, EPI_ISL_547975 to 547976, EPI_ISL_547977 to 547978, EPI_ISL_547979 to 547980, EPI_ISL_547981 to 547982, EPI_ISL_547983 to 547984, EPI_ISL_547985 to 547986, EPI_ISL_547987 to 547988, EPI_ISL_547989 to 547990, EPI_ISL_547991 to 547992, EPI_ISL_547993 to 547994, EPI_ISL_547995 to 547996, EPI_ISL_547997 to 547998, EPI_ISL_547999 to 548000, EPI_ISL_548001 to 548002, EPI_ISL_548003 to 548004, EPI_ISL_548005 to 548006, EPI_ISL_548007 to 548008, EPI_ISL_548009 to 548010, EPI_ISL_548011 to 548012, EPI_ISL_548013 to 548014, EPI_ISL_548015 to 548016, EPI_ISL_548017 to 548018, EPI_ISL_548019 to 548020, EPI_ISL_548021 to 548022, EPI_ISL_548023 to 548024, EPI_ISL_548025 to 548026, EPI_ISL_548027 to 548028, EPI_ISL_548029 to 548030, EPI_ISL_548031 to 548032, EPI_ISL_548033 to 548034, EPI_ISL_548035 to 548036, EPI_ISL_548037 to 548038, EPI_ISL_548039 to 548040, EPI_ISL_548041 to 548042, EPI_ISL_548043 to 548044, EPI_ISL_548045 to 548046, EPI_ISL_548047 to 548048, EPI_ISL_548049 to 548050, EPI_ISL_548051 to 548052, EPI_ISL_548053 to 548054, EPI_ISL_548055 to 548056, EPI_ISL_548057 to 548058, EPI_ISL_548059 to 548060, EPI_ISL_548061 to 548062, EPI_ISL_548063 to 548064, EPI_ISL_548065 to 548066, EPI_ISL_548067 to 548068, EPI_ISL_548069 to 548070, EPI_ISL_548071 to 548072, EPI_ISL_548073 to 548074, EPI_ISL_548075 to 548076, EPI_ISL_548077 to 548078, EPI_ISL_548079 to 548080, EPI_ISL_548081 to 548082, EPI_ISL_548083 to 548084, EPI_ISL_548085 to 548086, EPI_ISL_548087 to 548088, EPI_ISL_548089 to 548090, EPI_ISL_548091 to 548092, EPI_ISL_548093 to 548094, EPI_ISL_548095 to 548096, EPI_ISL_548097 to 548098, EPI_ISL_548099 to 548100, EPI_ISL_548101 to 548102, EPI_ISL_548103 to 548104, EPI_ISL_548105 to 548106, EPI_ISL_548107 to 548108, EPI_ISL_548109 to 548110, EPI_ISL_548111 to 548112, EPI_ISL_548113 to 548114, EPI_ISL_548115 to 548116, EPI_ISL_548117 to 548118, EPI_ISL_548119 to 548120, EPI_ISL_548121 to 548122, EPI_ISL_548123 to 548124, EPI_ISL_548125 to 548126, EPI_ISL_548127 to 548128, EPI_ISL_548129 to 548130, EPI_ISL_548131 to 548132, EPI_ISL_548133 to 548134, EPI_ISL_548135 to 548136, EPI_ISL_548137 to 548138, EPI_ISL_548139 to 548140, EPI_ISL_548141 to 548142, EPI_ISL_548143 to 548144, EPI_ISL_548145 to 548146, EPI_ISL_548147 to 548148, EPI_ISL_548149 to 548150, EPI_ISL_548151 to 548152, EPI_ISL_548153 to 548154, EPI_ISL_548155 to 548156, EPI_ISL_548157 to 548158, EPI_ISL_548159 to 548160, EPI_ISL_548161 to 548162, EPI_ISL_548163 to 548164, EPI_ISL_548165 to 548166, EPI_ISL_548167 to 548168, EPI_ISL_548169 to 548170, EPI_ISL_548171 to 548172, EPI_ISL_548173 to 548174, EPI_ISL_548175 to 548176, EPI_ISL_548177 to 548178, EPI_ISL_548179 to 548180, EPI_ISL_548181 to 548182, EPI_ISL_548183 to 548184, EPI_ISL_548185 to 548186, EPI_ISL_548187 to 548188, EPI_ISL_548189 to 548190, EPI_ISL_548191 to 548192, EPI_ISL_548193 to 548194, EPI_ISL_548195 to 548196, EPI_ISL_548197 to 548198, EPI_ISL_548199 to 548200, EPI_ISL_548201 to 548202, EPI_ISL_548203 to 548204, EPI_ISL_548205 to 548206, EPI_ISL_548207 to 548208, EPI_ISL_548209 to 548210, EPI_ISL_548211 to 548212, EPI_ISL_548213 to 548214, EPI_ISL_548215 to 548216, EPI_ISL_548217 to 548218, EPI_ISL_548219 to 548220, EPI_ISL_548221 to 548222, EPI_ISL_548223 to 548224, EPI_ISL_548225 to 548226, EPI_ISL_548227 to 548228, EPI_ISL_548229 to 548230, EPI_ISL_548231 to 548232, EPI_ISL_548233 to 548234, EPI_ISL_548235 to 548236, EPI_ISL_548237 to 548238, EPI_ISL_548239 to 548240, EPI_ISL_548241 to 548242, EPI_ISL_548243 to 548244, EPI_ISL_548245 to 548246, EPI_ISL_548247 to 548248, EPI_ISL_548249 to 548250, EPI_ISL_548251 to 548252, EPI_ISL_548253 to 548254, EPI_ISL_548255 to 548256, EPI_ISL_548257 to 548258, EPI_ISL_548259 to 548260, EPI_ISL_548261 to 548262, EPI_ISL_548263 to 548264, EPI_ISL_548265 to 548266, EPI_ISL_548267 to 548268, EPI_ISL_548269 to 548270, EPI_ISL_548271 to 548272, EPI_ISL_548273 to 548274, EPI_ISL_548275 to 548276, EPI_ISL_548277 to 548278, EPI_ISL_548279 to 548280, EPI_ISL_548281 to 548282, EPI_ISL_548283 to 548284, EPI_ISL_548285 to 548286, EPI_ISL_548287 to 548288, EPI_ISL_548289 to 548290, EPI_ISL_548291 to 548292, EPI_ISL_548293 to 548294, EPI_ISL_548295 to 548296, EPI_ISL_548297 to 548298, EPI_ISL_548299 to 548300, EPI_ISL_548301 to 548302, EPI_ISL_548303 to 548304, EPI_ISL_548305 to 548306, EPI_ISL_548307 to 548308, EPI_ISL_548309 to 548310, EPI_ISL_548311 to 548312, EPI_ISL_548313 to 548314, EPI_ISL_548315 to 548316, EPI_ISL_548317 to 548318, EPI_ISL_548319 to 548320, EPI_ISL_548321 to 548322, EPI_ISL_548323 to 548324, EPI_ISL_548325 to 548326, EPI_ISL_548327 to 548328, EPI_ISL_548329 to 548330, EPI_ISL_548331 to 548332, EPI_ISL_548333 to 548334, EPI_ISL_548335 to 548336, EPI_ISL_548337 to 548338, EPI_ISL_548339 to 548340, EPI_ISL_548341 to 548342, EPI_ISL_548343 to 548344, EPI_ISL_548345 to 548346, EPI_ISL_548347 to 548348, EPI_ISL_548349 to 548350, EPI_ISL_548351 to 548352, EPI_ISL_548353 to 548354, EPI_ISL_548355 to 548356, EPI_ISL_548357 to 548358, EPI_ISL_548359 to 548360, EPI_ISL_548361 to 548362, EPI_ISL_548363 to 548364, EPI_ISL_548365 to 548366, EPI_ISL_548367 to 548368, EPI_ISL_548369 to 548370, EPI_ISL_548371 to 548372, EPI_ISL_548373 to 548374, EPI_ISL_548375 to 548376, EPI_ISL_548377 to 548378, EPI_ISL_548379 to 548380, EPI_ISL_548381 to 548382, EPI_ISL_548383 to 548384, EPI_ISL_548385 to 548386, EPI_ISL_548387 to 548388, EPI_ISL_548389 to 548390, EPI_ISL_548391 to 548392, EPI_ISL_548393 to 548394, EPI_ISL_548395 to 548396, EPI_ISL_548397 to 548398, EPI_ISL_548399 to 548400, EPI_ISL_548401 to 548402, EPI_ISL_548403 to 548404, EPI_ISL_548405 to 548406, EPI_ISL_548407 to 548408, EPI_ISL_548409 to 548410, EPI_ISL_548411 to 548412, EPI_ISL_548413 to 548414, EPI_ISL_548415 to 548416, EPI_ISL_548417 to 548418, EPI_ISL_548419 to 548420, EPI_ISL_548421 to 548422, EPI_ISL_548423 to 548424, EPI_ISL_548425 to 548426, EPI_ISL_548427 to 548428, EPI_ISL_548429 to 548430, EPI_ISL_548431 to 548432, EPI_ISL_548433 to 548434, EPI_ISL_548435 to 548436, EPI_ISL_548437 to 548438, EPI_ISL_548439 to 548440, EPI_ISL_548441 to 548442, EPI_ISL_548443 to 548444, EPI_ISL_548445 to 548446, EPI_ISL_548447 to 548448, EPI_ISL_548449 to 548450, EPI_ISL_548451 to 548452, EPI_ISL_548453 to 548454, EPI_ISL_548455 to 548456, EPI_ISL_548457 to 548458, EPI_ISL_548459 to 548460, EPI_ISL_548461 to 548462, EPI_ISL_548463 to 548464, EPI_ISL_548465 to 548466, EPI_ISL_548467 to 548468, EPI_ISL_548469 to 548470, EPI_ISL_548471 to 548472, EPI_ISL_548473 to 548474, EPI_ISL_548475 to 548476, EPI_ISL_548477 to 548478, EPI_ISL_548479 to 548480, EPI_ISL_548481 to 548482, EPI_ISL_548483 to 548484, EPI_ISL_548485 to 548486, EPI_ISL_548487 to 548488, EPI_ISL_548489 to 548490, EPI_ISL_548491 to 548492, EPI_ISL_548493 to 548494, EPI_ISL_548495 to 548496, EPI_ISL_548497 to 548498, EPI_ISL_548499 to 548500, EPI_ISL_548501 to 548502, EPI_ISL_548503 to 548504, EPI_ISL_548505 to 548506, EPI_ISL_548507 to 548508, EPI_ISL_548509 to 548510, EPI_ISL_548511 to 548512, EPI_ISL_548513 to 548514, EPI_ISL_548515 to 548516, EPI_ISL_548517 to 548518, EPI_ISL_548519 to 548520, EPI_ISL_548521 to 548522, EPI_ISL_548523 to 548524, EPI_ISL_548525 to 548526, EPI_ISL_548527 to 548528, EPI_ISL_548529 to 548530, EPI_ISL_548531 to 548532, EPI_ISL_548533 to 548534, EPI_ISL_548535 to 548536, EPI_ISL_548537 to 548538, EPI_ISL_548539 to 548540, EPI_ISL_548541 to 548542, EPI_ISL_548543 to 548544, EPI_ISL_548545 to 548546, EPI_ISL_548547 to 548548, EPI_ISL_548549 to 548550, EPI_ISL_548551 to 548552, EPI_ISL_548553 to 548554, EPI_ISL_548555 to 548556, EPI_ISL_548557 to 548558, EPI_ISL_548559 to 548560, EPI_ISL_548561 to 548562, EPI_ISL_548563 to 548564, EPI_ISL_548565 to 548566, EPI_ISL_548567 to 548568, EPI_ISL_548569 to 548570, EPI_ISL_548571 to 548572, EPI_ISL_548573 to 548574, EPI_ISL_548575 to 548576, EPI_ISL_548577 to 548578, EPI_ISL_548579 to 548580, EPI_ISL_548581 to 548582, EPI_ISL_548583 to 548584, EPI_ISL_548585 to 548586, EPI_ISL_548587 to 548588, EPI_ISL_548589 to 548590, EPI_ISL_548591 to 548592, EPI_ISL_548593 to 548594, EPI_ISL_548595 to 548596, EPI_ISL_548597 to 548598, EPI_ISL_548599 to 548600, EPI_ISL_548601 to 548602, EPI_ISL_548603 to 548604, EPI_ISL_548605 to 548606, EPI_ISL_548607 to 548608, EPI_ISL_548609 to 548610, EPI_ISL_548611 to 548612, EPI_ISL_548613 to 548614, EPI_ISL_548615 to 548616, EPI_ISL_548617 to 548618, EPI_ISL_548619 to 548620, EPI_ISL_548621 to 548622, EPI_ISL_548623 to 548624, EPI_ISL_548625 to 548626, EPI_ISL_548627 to 548628, EPI_ISL_548629 to 548630, EPI_ISL_548631 to 548632, EPI_ISL_548633 to 548634, EPI_ISL_548635 to 548636, EPI_ISL_548637 to 548638, EPI_ISL_548639 to 548640, EPI_ISL_548641 to 548642, EPI_ISL_548643 to 548644, EPI_ISL_548645 to 548646, EPI_ISL_548647 to 548648, EPI_ISL_548649 to 548650, EPI_ISL_548651 to 548652, EPI_ISL_548653 to 548654, EPI_ISL_548655 to 548656, EPI_ISL_548657 to 548658, EPI_ISL_548659 to 548660, EPI_ISL_548661 to 548662, EPI_ISL_548663 to 548664, EPI_ISL_548665 to 548666, EPI_ISL_548667 to 548668, EPI_ISL_548669 to 548670, EPI_ISL_548671 to 548672, EPI_ISL_548673 to 548674, EPI_ISL_548675 to 548676, EPI_ISL_548677 to 548678, EPI_ISL_548679 to 548680, EPI_ISL_548681 to 548682, EPI_ISL_548683 to 548684, EPI_ISL_548685 to 548686, EPI_ISL_548687 to 548688, EPI_ISL_548689 to 548690, EPI_ISL_548691 to 548692, EPI_ISL_548693 to 548694, EPI_ISL_548695 to 548696, EPI_ISL_548697 to 548698, EPI_ISL_548699 to 548700, EPI_ISL_5487 |                                                                                                                   |                                                                                                                        |                                                                                                                                                                                                                                                                                                                                                                                                                                                                                                                                                                                                                                                                                                                                                                                                                               |

|                                                                                                                                                                                                                                                                                                                                                                                                                                                                                                                                                                                                |                                                 |                                                                                                                        |                                                                                                                                                                                                                                                                                                                                                                                                                                                                                                                                                                                    |
|------------------------------------------------------------------------------------------------------------------------------------------------------------------------------------------------------------------------------------------------------------------------------------------------------------------------------------------------------------------------------------------------------------------------------------------------------------------------------------------------------------------------------------------------------------------------------------------------|-------------------------------------------------|------------------------------------------------------------------------------------------------------------------------|------------------------------------------------------------------------------------------------------------------------------------------------------------------------------------------------------------------------------------------------------------------------------------------------------------------------------------------------------------------------------------------------------------------------------------------------------------------------------------------------------------------------------------------------------------------------------------|
|                                                                                                                                                                                                                                                                                                                                                                                                                                                                                                                                                                                                |                                                 |                                                                                                                        | Bazykin; Ksenia Safina; Kseniya Komissarova; Maria Baturova; Maria Pisareva; Maria Timofeeva; Mikhail Bakaev; Tamila Musaeva; Veronika Eder                                                                                                                                                                                                                                                                                                                                                                                                                                        |
| EPI_ISL_426420 to 426421                                                                                                                                                                                                                                                                                                                                                                                                                                                                                                                                                                       | HI Dept. of Health, State Laboratories Division | Pathogen Discovery, Respiratory Viruses Branch, Division of Viral Diseases, Centers for Disease Control and Prevention | Alison S. Laufer Halpin; Anna Uehara; Christopher A. Elkins; Clinton R. Paden; Haibin Wang; Jing Zhang; Krista Queen; Mary S. Keckler; Rachel Marine; Suxiang Tong; Yan Li; Ying Tao                                                                                                                                                                                                                                                                                                                                                                                               |
| EPI_ISL_1406453, EPI_ISL_1406478, EPI_ISL_1406587, EPI_ISL_1406630, EPI_ISL_1406679, EPI_ISL_1483707, EPI_ISL_1483738, EPI_ISL_1490244, EPI_ISL_1547400, EPI_ISL_1547421, EPI_ISL_1547427, EPI_ISL_1547469                                                                                                                                                                                                                                                                                                                                                                                     |                                                 |                                                                                                                        |                                                                                                                                                                                                                                                                                                                                                                                                                                                                                                                                                                                    |
| see above                                                                                                                                                                                                                                                                                                                                                                                                                                                                                                                                                                                      | HOPITAL DE MONTLUCON                            | CHU Clermont-Ferrand, service de virologie                                                                             | Bisseux Maxime; Combes Patricia; Henquell Cécile; Mirand Audrey                                                                                                                                                                                                                                                                                                                                                                                                                                                                                                                    |
| EPI_ISL_1406439, EPI_ISL_1406442, EPI_ISL_1406452, EPI_ISL_1406458, EPI_ISL_1406484, EPI_ISL_1406596, EPI_ISL_1406611, EPI_ISL_1406623, EPI_ISL_1406651, EPI_ISL_1406660 to 1406662, EPI_ISL_1406665, EPI_ISL_1406667, EPI_ISL_1406671, EPI_ISL_1406673, EPI_ISL_1406676 to 1406678, EPI_ISL_1406682, EPI_ISL_1406688, EPI_ISL_1483710, EPI_ISL_1483724, EPI_ISL_1483740 to 1483741, EPI_ISL_1483760, EPI_ISL_1483769 to 1483770, EPI_ISL_1490233 to 1490234, EPI_ISL_1490245, EPI_ISL_1492561, EPI_ISL_1547447, EPI_ISL_1547459, EPI_ISL_1547462, EPI_ISL_1547465 to 1547467, EPI_ISL_1547470 |                                                 |                                                                                                                        |                                                                                                                                                                                                                                                                                                                                                                                                                                                                                                                                                                                    |
| see above                                                                                                                                                                                                                                                                                                                                                                                                                                                                                                                                                                                      | HOPITAL DE VICHY                                | CHU Clermont-Ferrand, service de virologie                                                                             | Bisseux Maxime; Combes Patricia; Henquell Cécile; Mirand Audrey                                                                                                                                                                                                                                                                                                                                                                                                                                                                                                                    |
| EPI_ISL_1406461, EPI_ISL_1406473, EPI_ISL_1406497, EPI_ISL_1406500, EPI_ISL_1406530 to 1406531, EPI_ISL_1406535, EPI_ISL_1406543, EPI_ISL_1406545, EPI_ISL_1406571, EPI_ISL_1406574, EPI_ISL_1406593, EPI_ISL_1406672, EPI_ISL_1483759, EPI_ISL_1483761, EPI_ISL_1483777 to 1483779, EPI_ISL_1490229, EPI_ISL_1547412, EPI_ISL_1547453                                                                                                                                                                                                                                                         |                                                 |                                                                                                                        |                                                                                                                                                                                                                                                                                                                                                                                                                                                                                                                                                                                    |
| see above                                                                                                                                                                                                                                                                                                                                                                                                                                                                                                                                                                                      | HOPITAL DU MONT DORE                            | CHU Clermont-Ferrand, service de virologie                                                                             | Bisseux Maxime; Combes Patricia; Henquell Cécile; Mirand Audrey                                                                                                                                                                                                                                                                                                                                                                                                                                                                                                                    |
| EPI_ISL_1526395                                                                                                                                                                                                                                                                                                                                                                                                                                                                                                                                                                                | HOPITAL INSTRUCTION DES ARMEES LAVERAN          | CNR Virus des Infections Respiratoires - France SUD                                                                    | Antonin Bal; Bruno Lina; Gregory Destras; Gwendolynne Burfin; Hadrien Regue; Laurence Josset; Martine Valette; Quentin Semanas                                                                                                                                                                                                                                                                                                                                                                                                                                                     |
| EPI_ISL_445359                                                                                                                                                                                                                                                                                                                                                                                                                                                                                                                                                                                 | HOSP. SANTIAGO ORIENTE DR. LUIS TISNE B.        | Instituto de Salud Publica de Chile                                                                                    | Alejandra Acevedo; Andrés E Castillo; Bárbara Parra; Carolina Tambley; Gabriel Leal; Jaime Lagos; Jorge Fernandez; Loredana Arata; Patricia Bustos; Paz Tapia; Rodrigo Fasce; Winston Andrade                                                                                                                                                                                                                                                                                                                                                                                      |
| EPI_ISL_445323                                                                                                                                                                                                                                                                                                                                                                                                                                                                                                                                                                                 | HOSP. ENFERMEDADES INFECCIOSAS                  | Instituto de Salud Publica de Chile                                                                                    | Alejandra Acevedo; Andrés E Castillo; Bárbara Parra; Carolina Tambley; Gabriel Leal; Jaime Lagos; Jorge Fernandez; Loredana Arata; Patricia Bustos; Paz Tapia; Rodrigo Fasce; Winston Andrade                                                                                                                                                                                                                                                                                                                                                                                      |
| EPI_ISL_1461113, EPI_ISL_1461115                                                                                                                                                                                                                                                                                                                                                                                                                                                                                                                                                               | HOSPILAB AGEN                                   | CNR Virus des Infections Respiratoires - France SUD                                                                    | Antonin Bal; Bruno Lina; Gregory Destras; Gwendolynne Burfin; Hadrien Regue; Laurence Josset; Martine Valette; Quentin Semanas                                                                                                                                                                                                                                                                                                                                                                                                                                                     |
| EPI_ISL_1469813                                                                                                                                                                                                                                                                                                                                                                                                                                                                                                                                                                                | HOSPITAL BOM JESUS                              | Epiclin                                                                                                                | Ana Paula Muterle; Carolina Comerlato; Eliana Márcia Da Ros Wendland; Fernando Hayashi Sant'Anna; Janira Pritchula; Juliana Comerlato                                                                                                                                                                                                                                                                                                                                                                                                                                              |
| EPI_ISL_1510005                                                                                                                                                                                                                                                                                                                                                                                                                                                                                                                                                                                | HOSPITAL CLINIC                                 | Instituto de Salud Carlos III                                                                                          | A. Monzón; F. Casas; I. Jiménez; I.VILA ESTAPE; JORDI; M. Sandonis; P. Zaballos; S. Cuesta; S. Iglesias-Caballero; S. Pozo; S. Varona; V. Camarero; Vázquez-Morón                                                                                                                                                                                                                                                                                                                                                                                                                  |
| EPI_ISL_445281                                                                                                                                                                                                                                                                                                                                                                                                                                                                                                                                                                                 | HOSPITAL CLINICO DEL SUR                        | Instituto de Salud Publica de Chile                                                                                    | Alejandra Acevedo; Andrés E Castillo; Bárbara Parra; Carolina Tambley; Gabriel Leal; Jaime Lagos; Jorge Fernandez; Loredana Arata; Patricia Bustos; Paz Tapia; Rodrigo Fasce; Winston Andrade                                                                                                                                                                                                                                                                                                                                                                                      |
| EPI_ISL_445275 to 445276                                                                                                                                                                                                                                                                                                                                                                                                                                                                                                                                                                       | HOSPITAL CLINICO FUSAT                          | Instituto de Salud Publica de Chile                                                                                    | Alejandra Acevedo; Andrés E Castillo; Bárbara Parra; Carolina Tambley; Gabriel Leal; Jaime Lagos; Jorge Fernandez; Loredana Arata; Patricia Bustos; Paz Tapia; Rodrigo Fasce; Winston Andrade                                                                                                                                                                                                                                                                                                                                                                                      |
| EPI_ISL_1509963 to 1509964, EPI_ISL_1509974 to 1509977, EPI_ISL_1509995, EPI_ISL_1510002 to 1510003, EPI_ISL_1510010 to 1510012, EPI_ISL_1511226 to 1511233                                                                                                                                                                                                                                                                                                                                                                                                                                    | HOSPITAL COMARCAL DE MELILLA                    | Instituto de Salud Carlos III                                                                                          | A. Monzón; F. Casas; I. Jiménez; I. ROMAN SOTO; I.ROMAN SOTO; Iglesias-Caballero; M. Camarero; M. Sandonis; P. Zaballos; S. Camarero; S. Cuesta; S. Iglesias-Caballero; S. Pozo; S. Varona; SERGIO; Sandonis; V. Camarero; V. Vázquez-Morón; Vázquez-Morón                                                                                                                                                                                                                                                                                                                         |
| EPI_ISL_445378                                                                                                                                                                                                                                                                                                                                                                                                                                                                                                                                                                                 | HOSPITAL DE BULNES                              | Instituto de Salud Publica de Chile                                                                                    | Alejandra Acevedo; Andrés E Castillo; Bárbara Parra; Carolina Tambley; Gabriel Leal; Jaime Lagos; Jorge Fernandez; Loredana Arata; Patricia Bustos; Paz Tapia; Rodrigo Fasce; Winston Andrade                                                                                                                                                                                                                                                                                                                                                                                      |
| EPI_ISL_445335                                                                                                                                                                                                                                                                                                                                                                                                                                                                                                                                                                                 | HOSPITAL DE CALBUCO                             | Instituto de Salud Publica de Chile                                                                                    | Alejandra Acevedo; Andrés E Castillo; Bárbara Parra; Carolina Tambley; Gabriel Leal; Jaime Lagos; Jorge Fernandez; Loredana Arata; Patricia Bustos; Paz Tapia; Rodrigo Fasce; Winston Andrade                                                                                                                                                                                                                                                                                                                                                                                      |
| EPI_ISL_1469705, EPI_ISL_1469839                                                                                                                                                                                                                                                                                                                                                                                                                                                                                                                                                               | HOSPITAL DE CAMPO BOM DR LAURO REUS             | Epiclin                                                                                                                | Ana Paula Muterle; Carolina Comerlato; Eliana Márcia Da Ros Wendland; Fernando Hayashi Sant'Anna; Janira Pritchula; Juliana Comerlato                                                                                                                                                                                                                                                                                                                                                                                                                                              |
| EPI_ISL_445251, EPI_ISL_445305, EPI_ISL_445354, EPI_ISL_445369 to 445370                                                                                                                                                                                                                                                                                                                                                                                                                                                                                                                       | HOSPITAL DE CARABINEROS                         | Instituto de Salud Publica de Chile                                                                                    | Alejandra Acevedo; Andrés E Castillo; Bárbara Parra; Carolina Tambley; Gabriel Leal; Jaime Lagos; Jorge Fernandez; Loredana Arata; Patricia Bustos; Paz Tapia; Rodrigo Fasce; Winston Andrade                                                                                                                                                                                                                                                                                                                                                                                      |
| EPI_ISL_419238                                                                                                                                                                                                                                                                                                                                                                                                                                                                                                                                                                                 | HOSPITAL DE CRUCES.                             | Instituto de Salud Carlos III                                                                                          | A. Monzón; F. Casas; I. Aranzamendi, M.; I. Jiménez; Iglesias-Caballero; M. Cuesta; M. González-Esguevillas; M. Molinero Calamita; M. Zaballos; P. Jiménez; S. Juliá; S. Pozo; S. Varona                                                                                                                                                                                                                                                                                                                                                                                           |
| EPI_ISL_1509996                                                                                                                                                                                                                                                                                                                                                                                                                                                                                                                                                                                | HOSPITAL DE LA VEGA LORENZO GUIRAO              | Instituto de Salud Carlos III                                                                                          | A. Monzón; F. Casas; I. Jiménez; I.ALVAREZ MELGARES DE AGUILAR; Iglesias-Caballero; JOAQUIN; M. Sandonis; P. Zaballos; S. Camarero; S. Cuesta; S. Pozo; S. Varona; V. Vázquez-Morón                                                                                                                                                                                                                                                                                                                                                                                                |
| EPI_ISL_445300                                                                                                                                                                                                                                                                                                                                                                                                                                                                                                                                                                                 | HOSPITAL DE RANCAGUA                            | Instituto de Salud Publica de Chile                                                                                    | Alejandra Acevedo; Andrés E Castillo; Bárbara Parra; Carolina Tambley; Gabriel Leal; Jaime Lagos; Jorge Fernandez; Loredana Arata; Patricia Bustos; Paz Tapia; Rodrigo Fasce; Winston Andrade                                                                                                                                                                                                                                                                                                                                                                                      |
| EPI_ISL_445298                                                                                                                                                                                                                                                                                                                                                                                                                                                                                                                                                                                 | HOSPITAL DE SAN FERNANDO                        | Instituto de Salud Publica de Chile                                                                                    | Alejandra Acevedo; Andrés E Castillo; Bárbara Parra; Carolina Tambley; Gabriel Leal; Jaime Lagos; Jorge Fernandez; Loredana Arata; Patricia Bustos; Paz Tapia; Rodrigo Fasce; Winston Andrade                                                                                                                                                                                                                                                                                                                                                                                      |
| EPI_ISL_1553814, EPI_ISL_1553820                                                                                                                                                                                                                                                                                                                                                                                                                                                                                                                                                               | HOSPITAL DE SANTA CATERINA                      | Banc de Sang i Teixits                                                                                                 | Carlos Hobeich; Francisco Vidal; Irene Corrales; Lorena Ramirez; María Glòria Soria; Natàlia Comes; Nina Borràs; Noemí Gonzalez; Silvia Saulea                                                                                                                                                                                                                                                                                                                                                                                                                                     |
| EPI_ISL_445352, EPI_ISL_445360, EPI_ISL_445368                                                                                                                                                                                                                                                                                                                                                                                                                                                                                                                                                 | HOSPITAL DEL PROFESOR                           | Instituto de Salud Publica de Chile                                                                                    | Alejandra Acevedo; Andrés E Castillo; Bárbara Parra; Carolina Tambley; Gabriel Leal; Jaime Lagos; Jorge Fernandez; Loredana Arata; Patricia Bustos; Paz Tapia; Rodrigo Fasce; Winston Andrade                                                                                                                                                                                                                                                                                                                                                                                      |
| EPI_ISL_1494944                                                                                                                                                                                                                                                                                                                                                                                                                                                                                                                                                                                | HOSPITAL DEPARTAMENTAL SAN VICENTE DE PAUL      | Instituto Nacional de Salud- Direccion de Investigación en Salud Pública                                               | Carlos Franco-Muñoz; Carmen Osorio; Diana Malo; Diego A. Álvarez-Díaz; Diego Andrés Prada; Gerardo Santamaría; Hector Alejandro Ruiz-Moreno; Jhonatan Reales-González; Juan Camilo Martínez; Julian Naizaque; Katherine Laiton-Donato; Lisseth Pardo; Magdalena Wiesner; Marcela Mercado-Reyes; María T. Herrera-Sepúlveda; Marta Lopez Blanco; Martha Lucia Ospina Martínez; Paola Rojas; Sergio Gomez; Sheryll Corchuelo; Ángela Alarcon Cruz                                                                                                                                    |
| EPI_ISL_445270, EPI_ISL_445338 to 445348, EPI_ISL_447119                                                                                                                                                                                                                                                                                                                                                                                                                                                                                                                                       | HOSPITAL DR.HERNAN HENRIQUEZ ARAVENA            | Instituto de Salud Publica de Chile                                                                                    | Alejandra Acevedo; Andrés E Castillo; Bárbara Parra; Carolina Tambley; Gabriel Leal; Jaime Lagos; Jorge Fernandez; Loredana Arata; Patricia Bustos; Paz Tapia; Rodrigo Fasce; Winston Andrade                                                                                                                                                                                                                                                                                                                                                                                      |
| EPI_ISL_445310, EPI_ISL_445325, EPI_ISL_445329, EPI_ISL_445365 to 445366, EPI_ISL_445371                                                                                                                                                                                                                                                                                                                                                                                                                                                                                                       | HOSPITAL DR.SOTERO DEL RIO                      | Instituto de Salud Publica de Chile                                                                                    | Alejandra Acevedo; Andrés E Castillo; Bárbara Parra; Carolina Tambley; Gabriel Leal; Jaime Lagos; Jorge Fernandez; Loredana Arata; Patricia Bustos; Paz Tapia; Rodrigo Fasce; Winston Andrade                                                                                                                                                                                                                                                                                                                                                                                      |
| EPI_ISL_1445200                                                                                                                                                                                                                                                                                                                                                                                                                                                                                                                                                                                | HOSPITAL E MATERNIDADE NOSSA SENHORA DA AJUDA   | Instituto Butantan / Mendelics                                                                                         | Antonio Jorge Martins; Bibiana Santos; Claudia Renata dos Santos Barros; David Schlesinger; Debora Botequiu Moretti; Dimas Tadeu Covas; Elaine Cristina Marqueze; Elaine Vieira dos Santos; Erika Freitas; Evandra Strazza Rodrigues; Flavia Aburjalie; José Salvatore Leister Patané; João Paulo Kitajima; Luiz Carlos Junior de Alcantara; Maria Carolina Elias; Marta Giovanetti; Rafael dos Santos Bezerra; Raul Machado Neto; Ricardo Haddad; Rodrigo Tocantins Calado.; Sandra Coccuzzo Sampaio; Simone Kashima; Svetoslav Navev Slavov; Vagner Fonseca; Vincent Louis Viála |
| EPI_ISL_445308, EPI_ISL_445313 to 445314, EPI_ISL_445364                                                                                                                                                                                                                                                                                                                                                                                                                                                                                                                                       | HOSPITAL EL CARMEN DR.LUIS VALENTIN F.          | Instituto de Salud Publica de Chile                                                                                    | Alejandra Acevedo; Andrés E Castillo; Bárbara Parra; Carolina Tambley; Gabriel Leal; Jaime Lagos; Jorge Fernandez; Loredana Arata; Patricia Bustos; Paz Tapia; Rodrigo Fasce; Winston Andrade                                                                                                                                                                                                                                                                                                                                                                                      |
| EPI_ISL_445319, EPI_ISL_445321                                                                                                                                                                                                                                                                                                                                                                                                                                                                                                                                                                 | HOSPITAL FELIX BULNES                           | Instituto de Salud Publica de Chile                                                                                    | Alejandra Acevedo; Andrés E Castillo; Bárbara Parra; Carolina Tambley; Gabriel Leal; Jaime Lagos; Jorge Fernandez; Loredana Arata; Patricia Bustos; Paz Tapia; Rodrigo Fasce; Winston Andrade                                                                                                                                                                                                                                                                                                                                                                                      |
| EPI_ISL_445372                                                                                                                                                                                                                                                                                                                                                                                                                                                                                                                                                                                 | HOSPITAL FF.AA. "CIRUJANO C. GUZMAN             | Instituto de Salud Publica de Chile                                                                                    | Alejandra Acevedo; Andrés E Castillo; Bárbara Parra; Carolina Tambley; Gabriel Leal; Jaime Lagos; Jorge Fernandez; Loredana Arata; Patricia Bustos; Paz Tapia; Rodrigo Fasce; Winston Andrade                                                                                                                                                                                                                                                                                                                                                                                      |
| EPI_ISL_1511216 to 1511217                                                                                                                                                                                                                                                                                                                                                                                                                                                                                                                                                                     | HOSPITAL GENERAL DE LANZAROTE                   | Instituto de Salud Carlos III                                                                                          | A. Monzón; F. Casas; I. Jiménez; I.COPADO CARRETERO; M. Sandonis; P. Zaballos; RODOLFO; S. Cuesta; S. Iglesias-Caballero; S. Pozo; S. Varona; V. Camarero; Vázquez-Morón                                                                                                                                                                                                                                                                                                                                                                                                           |
| EPI_ISL_418247                                                                                                                                                                                                                                                                                                                                                                                                                                                                                                                                                                                 | HOSPITAL GENERAL DE SEGOVIA                     | Instituto de Salud Carlos III                                                                                          | A. Monzón; F. Casas; I. Hernando-Real S.; I. Jiménez; Iglesias-Caballero; M. Camarero; M. Cuesta; M. González-Esguevillas; M. Molinero Calamita; M. Zaballos; P. Jiménez; S. Juliá; S. Pozo; S. Varona                                                                                                                                                                                                                                                                                                                                                                             |

|                                                                                                                                                                                                                                                 |                                                       |                                     |                                                                                                                                                                                                                                                                                                                                                                                                                                                                                                                                                                                    |
|-------------------------------------------------------------------------------------------------------------------------------------------------------------------------------------------------------------------------------------------------|-------------------------------------------------------|-------------------------------------|------------------------------------------------------------------------------------------------------------------------------------------------------------------------------------------------------------------------------------------------------------------------------------------------------------------------------------------------------------------------------------------------------------------------------------------------------------------------------------------------------------------------------------------------------------------------------------|
| EPI_ISL_1510004, EPI_ISL_1510687                                                                                                                                                                                                                | HOSPITAL GENERAL UNIVERSITARIO REINA SOFIA            | Instituto de Salud Carlos III       | A. Monzón; F. Casas; I. Jiménez; I. NUÑEZ TRIGUEROS; Iglesias-Caballero; M. Sandonis; M <sup>o</sup> LUZ; P. Zaballos; S. Camarero; S. Cuesta; S. Iglesias-Caballero; S. Pozo; S. Varona; V. Camarero; V. Vázquez-Morón; Vázquez-Morón                                                                                                                                                                                                                                                                                                                                             |
| EPI_ISL_445286, EPI_ISL_445337                                                                                                                                                                                                                  | HOSPITAL HANGA ROA                                    | Instituto de Salud Publica de Chile | Alejandra Acevedo; Andrés E Castillo; Bárbara Parra; Carolina Tambley; Gabriel Leal; Jaime Lagos; Jorge Fernandez; Loredana Arata; Patricia Bustos; Paz Tapia; Rodrigo Fasce; Winston Andrade                                                                                                                                                                                                                                                                                                                                                                                      |
| EPI_ISL_445331 to 445332                                                                                                                                                                                                                        | HOSPITAL HERMINDA MARTIN CHILLAN                      | Instituto de Salud Publica de Chile | Alejandra Acevedo; Andrés E Castillo; Bárbara Parra; Carolina Tambley; Gabriel Leal; Jaime Lagos; Jorge Fernandez; Loredana Arata; Patricia Bustos; Paz Tapia; Rodrigo Fasce; Winston Andrade                                                                                                                                                                                                                                                                                                                                                                                      |
| EPI_ISL_445336                                                                                                                                                                                                                                  | HOSPITAL LAS HIGUERAS DE TALCAHUANO                   | Instituto de Salud Publica de Chile | Alejandra Acevedo; Andrés E Castillo; Bárbara Parra; Carolina Tambley; Gabriel Leal; Jaime Lagos; Jorge Fernandez; Loredana Arata; Patricia Bustos; Paz Tapia; Rodrigo Fasce; Winston Andrade                                                                                                                                                                                                                                                                                                                                                                                      |
| EPI_ISL_1509961 to 1509962                                                                                                                                                                                                                      | HOSPITAL LOS ARCOS                                    | Instituto de Salud Carlos III       | A. Monzón; F. Casas; I. Jiménez; I. CAMARA SIMON; M. Sandonis; MARGARITA; P. Zaballos; S. Cuesta; S. Iglesias-Caballero; S. Pozo; S. Varona; V. Camarero; Vázquez-Morón                                                                                                                                                                                                                                                                                                                                                                                                            |
| EPI_ISL_1469746                                                                                                                                                                                                                                 | HOSPITAL MONTENEGRO                                   | Epiclin                             | Ana Paula Muterle; Carolina Comerlato; Eliana Márcia Da Ros Wendland; Fernando Hayashi Sant'Anna; Janira Pritchula; Juliana Comerlato                                                                                                                                                                                                                                                                                                                                                                                                                                              |
| EPI_ISL_1445173                                                                                                                                                                                                                                 | HOSPITAL MUNICIPAL DE IBIUNA IBIUNA SP                | Instituto Butantan / Mendelics      | Antonio Jorge Martins; Bibiana Santos; Claudia Renata dos Santos Barros; David Schlesinger; Debora Botequiu Moretti; Dimas Tadeu Covas; Elaine Cristina Marqueze; Elaine Vieira dos Santos; Erika Freitas; Evandra Strazza Rodrigues; Flavia Aburjaile; José Salvatore Leister Patané; João Paulo Kitajima; Luiz Carlos Junior de Alcantara; Maria Carolina Elias; Marta Giovanetti; Rafael dos Santos Bezerra; Raul Machado Neto; Ricardo Haddad; Rodrigo Tocantins Calado.; Sandra Coccuzzo Sampaio; Simone Kashima; Svetoslav Nanev Slavov; Vagner Fonseca; Vincent Louis Viala |
| EPI_ISL_1469624, EPI_ISL_1469631, EPI_ISL_1469699, EPI_ISL_1469759                                                                                                                                                                              | HOSPITAL MUNICIPAL GETULIO VARGAS                     | Epiclin                             | Ana Paula Muterle; Carolina Comerlato; Eliana Márcia Da Ros Wendland; Fernando Hayashi Sant'Anna; Janira Pritchula; Juliana Comerlato                                                                                                                                                                                                                                                                                                                                                                                                                                              |
| EPI_ISL_445289, EPI_ISL_445301                                                                                                                                                                                                                  | HOSPITAL NAVAL PUERTO WILLIAMS                        | Instituto de Salud Publica de Chile | Alejandra Acevedo; Andrés E Castillo; Bárbara Parra; Carolina Tambley; Gabriel Leal; Jaime Lagos; Jorge Fernandez; Loredana Arata; Patricia Bustos; Paz Tapia; Rodrigo Fasce; Winston Andrade                                                                                                                                                                                                                                                                                                                                                                                      |
| EPI_ISL_445327, EPI_ISL_445353                                                                                                                                                                                                                  | HOSPITAL PADRE HURTADO                                | Instituto de Salud Publica de Chile | Alejandra Acevedo; Andrés E Castillo; Bárbara Parra; Carolina Tambley; Gabriel Leal; Jaime Lagos; Jorge Fernandez; Loredana Arata; Patricia Bustos; Paz Tapia; Rodrigo Fasce; Winston Andrade                                                                                                                                                                                                                                                                                                                                                                                      |
| EPI_ISL_445246                                                                                                                                                                                                                                  | HOSPITAL PUERTO MONTT                                 | Instituto de Salud Publica de Chile | Alejandra Acevedo; Andrés E Castillo; Bárbara Parra; Carolina Tambley; Gabriel Leal; Jaime Lagos; Jorge Fernandez; Loredana Arata; Patricia Bustos; Paz Tapia; Rodrigo Fasce; Winston Andrade                                                                                                                                                                                                                                                                                                                                                                                      |
| EPI_ISL_1511222                                                                                                                                                                                                                                 | HOSPITAL RAFAEL MENDEZ                                | Instituto de Salud Carlos III       | A. Monzón; EVA; F. Casas; I. CASCALES ALCOLEA; I. Jiménez; M. Camarero; P. Zaballos; S. Cuesta; S. Iglesias-Caballero; S. Pozo; S. Varona; Sandonis; V. Vázquez-Morón                                                                                                                                                                                                                                                                                                                                                                                                              |
| EPI_ISL_445268 to 445269, EPI_ISL_445280, EPI_ISL_445284, EPI_ISL_445288, EPI_ISL_445293 to 445295                                                                                                                                              | HOSPITAL REG.LAUTARO NAVARRO AVARIA                   | Instituto de Salud Publica de Chile | Alejandra Acevedo; Andrés E Castillo; Bárbara Parra; Carolina Tambley; Gabriel Leal; Jaime Lagos; Jorge Fernandez; Loredana Arata; Patricia Bustos; Paz Tapia; Rodrigo Fasce; Winston Andrade                                                                                                                                                                                                                                                                                                                                                                                      |
| EPI_ISL_445296                                                                                                                                                                                                                                  | HOSPITAL REGIONAL DE COYHAIQUE                        | Instituto de Salud Publica de Chile | Alejandra Acevedo; Andrés E Castillo; Bárbara Parra; Carolina Tambley; Gabriel Leal; Jaime Lagos; Jorge Fernandez; Loredana Arata; Patricia Bustos; Paz Tapia; Rodrigo Fasce; Winston Andrade                                                                                                                                                                                                                                                                                                                                                                                      |
| EPI_ISL_1445083, EPI_ISL_1445181                                                                                                                                                                                                                | HOSPITAL REGIONAL DE ITAPETININGA                     | Instituto Butantan / Mendelics      | Antonio Jorge Martins; Bibiana Santos; Claudia Renata dos Santos Barros; David Schlesinger; Debora Botequiu Moretti; Dimas Tadeu Covas; Elaine Cristina Marqueze; Elaine Vieira dos Santos; Erika Freitas; Evandra Strazza Rodrigues; Flavia Aburjaile; José Salvatore Leister Patané; João Paulo Kitajima; Luiz Carlos Junior de Alcantara; Maria Carolina Elias; Marta Giovanetti; Rafael dos Santos Bezerra; Raul Machado Neto; Ricardo Haddad; Rodrigo Tocantins Calado.; Sandra Coccuzzo Sampaio; Simone Kashima; Svetoslav Nanev Slavov; Vagner Fonseca; Vincent Louis Viala |
| EPI_ISL_593772 to 593776                                                                                                                                                                                                                        | HOSPITAL REGIONAL LAMBAYEQUE                          | GENOMA MAYOR                        | Franklin R. Aguilar-Gamboa; Heber Silva-Díaz; Juan J. Bonifacio-Briceño; Luis M. López-Serquén; Luis Salcedo-Mejía; Marco E. Mechán-Llontop and Juan P. Cárdenas.; Percy O. Tullume-Vergara; Ramsés Salas-Asencios                                                                                                                                                                                                                                                                                                                                                                 |
| EPI_ISL_445307                                                                                                                                                                                                                                  | HOSPITAL SAN JOSE DE MAIPO                            | Instituto de Salud Publica de Chile | Alejandra Acevedo; Andrés E Castillo; Bárbara Parra; Carolina Tambley; Gabriel Leal; Jaime Lagos; Jorge Fernandez; Loredana Arata; Patricia Bustos; Paz Tapia; Rodrigo Fasce; Winston Andrade                                                                                                                                                                                                                                                                                                                                                                                      |
| EPI_ISL_445304, EPI_ISL_445349 to 445351, EPI_ISL_445373 to 445377, EPI_ISL_449800                                                                                                                                                              | HOSPITAL SAN JUAN DE DIOS                             | Instituto de Salud Publica de Chile | Alejandra Acevedo; Andrés E Castillo; Bárbara Parra; Carolina Tambley; Gabriel Leal; Jaime Lagos; Jorge Fernandez; Loredana Arata; Patricia Bustos; Paz Tapia; Rodrigo Fasce; Winston Andrade                                                                                                                                                                                                                                                                                                                                                                                      |
| EPI_ISL_1510080 to 1510081                                                                                                                                                                                                                      | HOSPITAL SAN PEDRO DE ALCANTARA - C.D. 05             | Instituto de Salud Carlos III       | A. Monzón; F. Casas; GUADALUPE; I. Jiménez; I. RODRIGUEZ RODRIGUEZ; Iglesias-Caballero; M. Sandonis; P. Zaballos; S. Camarero; S. Cuesta; S. Pozo; S. Varona; V. Vázquez-Morón                                                                                                                                                                                                                                                                                                                                                                                                     |
| EPI_ISL_417007                                                                                                                                                                                                                                  | HOSPITAL SANTA MARIA NAI                              | Instituto de Salud Carlos III       | A. Monzón; I. García Costa, J.; Iglesias-Caballero; M. Camarero S. Pozo F. Casas I. Jiménez; M. Cuesta; M. González-Esguevillas; M. Molinero Calamita; M. Zaballos; P. Jiménez; S. Juliá; S. Varona                                                                                                                                                                                                                                                                                                                                                                                |
| EPI_ISL_1469575, EPI_ISL_1469578, EPI_ISL_1469643, EPI_ISL_1469648, EPI_ISL_1469676, EPI_ISL_1469685, EPI_ISL_1469738, EPI_ISL_1469744, EPI_ISL_1469834, EPI_ISL_1479128, EPI_ISL_1479133                                                       |                                                       |                                     |                                                                                                                                                                                                                                                                                                                                                                                                                                                                                                                                                                                    |
| see above                                                                                                                                                                                                                                       | HOSPITAL SAO FRANCISCO DE ASSIS                       | Epiclin                             | Ana Paula Muterle; Carolina Comerlato; Eliana Márcia Da Ros Wendland; Fernando Hayashi Sant'Anna; Janira Pritchula; Juliana Comerlato                                                                                                                                                                                                                                                                                                                                                                                                                                              |
| EPI_ISL_1469726                                                                                                                                                                                                                                 | HOSPITAL SAPIRANGA                                    | Epiclin                             | Ana Paula Muterle; Carolina Comerlato; Eliana Márcia Da Ros Wendland; Fernando Hayashi Sant'Anna; Janira Pritchula; Juliana Comerlato                                                                                                                                                                                                                                                                                                                                                                                                                                              |
| EPI_ISL_418253, EPI_ISL_419240, EPI_ISL_419709                                                                                                                                                                                                  | HOSPITAL TXAGORRITXU                                  | Instituto de Salud Carlos III       | A. Monzón; C; F. Casas; I. Gomez-Gonzalez C.; I. Gómez; I. Gómez; C.; I. Jiménez; Iglesias-Caballero; M. Camarero; M. Camarero S. Pozo F. Casas I. Jiménez; M. Cuesta; M. González-Esguevillas; M. Molinero Calamita; M. Zaballos; P. Jiménez; S. Juliá; S. Pozo; S. Varona                                                                                                                                                                                                                                                                                                        |
| EPI_ISL_1509960, EPI_ISL_1509972, EPI_ISL_1509990 to 1509994, EPI_ISL_1510007 to 1510008, EPI_ISL_1510041 to 1510079                                                                                                                            | HOSPITAL UNIV. MIGUEL SERVET                          | Instituto de Salud Carlos III       | A. Monzón; ANA; ANA MARIA; F. Casas; I. Jiménez; I. MARTINEZ SAPIÑA; I. MILAGRO BEAMONTE; I. MILAGRO BEAMONTE; Iglesias-Caballero; M. Camarero; M. Sandonis; P. Zaballos; S. Camarero; S. Cuesta; S. Iglesias-Caballero; S. Pozo; S. Varona; Sandonis; V. Camarero; V. Vázquez-Morón; Vázquez-Morón                                                                                                                                                                                                                                                                                |
| EPI_ISL_1509999 to 1510001, EPI_ISL_1510024 to 1510031, EPI_ISL_1510719 to 1510729                                                                                                                                                              | HOSPITAL UNIVERSITARIO DE CANARIAS(GESTION ECONOMICA) | Instituto de Salud Carlos III       | A. Monzón; BEATRIZ; F. Casas; I. CASTRO HERNANDEZ; I. Jiménez; I. CASTRO HERNANDEZ; M. Camarero; M. Sandonis; P. Zaballos; S. Cuesta; S. Iglesias-Caballero; S. Pozo; S. Varona; Sandonis; V. Camarero; V. Vázquez-Morón                                                                                                                                                                                                                                                                                                                                                           |
| EPI_ISL_1511234 to 1511236                                                                                                                                                                                                                      | HOSPITAL UNIVERSITARIO DE CEUTA                       | Instituto de Salud Carlos III       | A. Monzón; F. Casas; I. Jiménez; I. HIJANO VILLEGAS; Iglesias-Caballero; M. Sandonis; P. Zaballos; S. Camarero; S. Cuesta; S. Pozo; S. Varona; SALOME; V. Vázquez-Morón                                                                                                                                                                                                                                                                                                                                                                                                            |
| EPI_ISL_1510009                                                                                                                                                                                                                                 | HOSPITAL UNIVERSITARIO DE GETAFE                      | Instituto de Salud Carlos III       | A. Monzón; F. Casas; I. Jiménez; I. GARCIA BERMEJO; ISABEL; M. Sandonis; P. Zaballos; S. Cuesta; S. Iglesias-Caballero; S. Pozo; S. Varona; V. Camarero; Vázquez-Morón                                                                                                                                                                                                                                                                                                                                                                                                             |
| EPI_ISL_1510712                                                                                                                                                                                                                                 | HOSPITAL UNIVERSITARIO DE GUADALAJARA                 | Instituto de Salud Carlos III       | A. Monzón; ALEJANDRO; F. Casas; I. GONZALEZ PRAETORIUS; I. Jiménez; M. Camarero; P. Zaballos; S. Cuesta; S. Iglesias-Caballero; S. Pozo; S. Varona; Sandonis; V. Vázquez-Morón                                                                                                                                                                                                                                                                                                                                                                                                     |
| EPI_ISL_1510688 to 1510707                                                                                                                                                                                                                      | HOSPITAL UNIVERSITARIO INSULAR DE GRAN CANARIA        | Instituto de Salud Carlos III       | A. Monzón; CRISTOBAL; F. Casas; I. Jiménez; I. DEL ROSARIO QUINTANA; M. Sandonis; P. Zaballos; S. Cuesta; S. Iglesias-Caballero; S. Pozo; S. Varona; V. Camarero; Vázquez-Morón                                                                                                                                                                                                                                                                                                                                                                                                    |
| EPI_ISL_418251                                                                                                                                                                                                                                  | HOSPITAL UNIVERSITARIO LA PAZ                         | Instituto de Salud Carlos III       | A. Monzón; F. Casas; I. Jiménez; I. Romero P.; Iglesias-Caballero; M. Camarero; M. Cuesta; M. González-Esguevillas; M. Molinero Calamita; M. Zaballos; P. Jiménez; S. Juliá; S. Pozo; S. Varona                                                                                                                                                                                                                                                                                                                                                                                    |
| EPI_ISL_1509965 to 1509966, EPI_ISL_1509968 to 1509971, EPI_ISL_1509979 to 1509987, EPI_ISL_1509989, EPI_ISL_1510013 to 1510023, EPI_ISL_1510033 to 1510039, EPI_ISL_1510736 to 1510743, EPI_ISL_1510747 to 1510757, EPI_ISL_1511209 to 1511215 |                                                       |                                     |                                                                                                                                                                                                                                                                                                                                                                                                                                                                                                                                                                                    |
| see above                                                                                                                                                                                                                                       | HOSPITAL UNIVERSITARIO VIRGEN DE LA ARRIXACA          | Instituto de Salud Carlos III       | A. Monzón; F. Casas; I. Jiménez; I. MORENO PARRADO; I. MORENO PARRADO; Iglesias-Caballero; LAURA; M. Camarero; M. Sandonis; P. Zaballos; S. Camarero; S. Cuesta; S. Iglesias-Caballero; S. Pozo; S. Varona; Sandonis; V. Camarero; V. Vázquez-Morón; Vázquez-Morón                                                                                                                                                                                                                                                                                                                 |
| EPI_ISL_418243 to 418244                                                                                                                                                                                                                        | HOSPITAL UNIVERSITARIO VIRGEN DE LAS NIEVES           | Instituto de Salud Carlos III       | A. Monzón; F. Casas; I. Jiménez; I. Sanbonmatsu S.; Iglesias-Caballero; M. Camarero; M. Cuesta; M. González-Esguevillas; M. Molinero Calamita; M. Zaballos; P. Jiménez; S. Juliá; S. Pozo; S. Varona                                                                                                                                                                                                                                                                                                                                                                               |
| EPI_ISL_1510040                                                                                                                                                                                                                                 | HOSPITAL VIRGEN DE ALTAGRACIA                         | Instituto de Salud Carlos III       | A. Monzón; ANA; F. Casas; I. Jiménez; I. SANCHEZ MAROTO LOZANO; M. Camarero; P. Zaballos; S. Cuesta; S. Iglesias-Caballero; S. Pozo; S. Varona; Sandonis; V. Vázquez-Morón                                                                                                                                                                                                                                                                                                                                                                                                         |

|                                                                                                                                                                                                                                                                                                                                                                                                                                                                                                                                                                                                                                                                                                                                                                                                                                                                                                                                                                                                                                                                                                                                                                                                                                                                                                                                                                                                                                                                                                                                                                                                                                                                                                                                                                                                                                                                                                                                                                                                                                                                                                                                                                                                                                                                                                                                                                                                                                                                                                                                                                                                                                                                                                                                                                                                                                                                                                                                                                                                                                                                                                                                                                                                                                                                                                                                                                                                                                                                                                                                                                                                                                                                                                                                                                                                                                                                                                                                                                                                                                                                                                                                                                                                                                                                                                                                                                                                                                                                                                                                                                                                                                                                                                                                                                                                                                                                                                                                                                                                                                                                                                                                                                                                                                                                                                                                                                                                                                                                                                                                                   |                                                                                                                                      |                                                                                                                                      |                                                                                                                                                                                                                                                                                                                                                                                                                                                                                                                                                                                                                                                                                                                                                                            |
|---------------------------------------------------------------------------------------------------------------------------------------------------------------------------------------------------------------------------------------------------------------------------------------------------------------------------------------------------------------------------------------------------------------------------------------------------------------------------------------------------------------------------------------------------------------------------------------------------------------------------------------------------------------------------------------------------------------------------------------------------------------------------------------------------------------------------------------------------------------------------------------------------------------------------------------------------------------------------------------------------------------------------------------------------------------------------------------------------------------------------------------------------------------------------------------------------------------------------------------------------------------------------------------------------------------------------------------------------------------------------------------------------------------------------------------------------------------------------------------------------------------------------------------------------------------------------------------------------------------------------------------------------------------------------------------------------------------------------------------------------------------------------------------------------------------------------------------------------------------------------------------------------------------------------------------------------------------------------------------------------------------------------------------------------------------------------------------------------------------------------------------------------------------------------------------------------------------------------------------------------------------------------------------------------------------------------------------------------------------------------------------------------------------------------------------------------------------------------------------------------------------------------------------------------------------------------------------------------------------------------------------------------------------------------------------------------------------------------------------------------------------------------------------------------------------------------------------------------------------------------------------------------------------------------------------------------------------------------------------------------------------------------------------------------------------------------------------------------------------------------------------------------------------------------------------------------------------------------------------------------------------------------------------------------------------------------------------------------------------------------------------------------------------------------------------------------------------------------------------------------------------------------------------------------------------------------------------------------------------------------------------------------------------------------------------------------------------------------------------------------------------------------------------------------------------------------------------------------------------------------------------------------------------------------------------------------------------------------------------------------------------------------------------------------------------------------------------------------------------------------------------------------------------------------------------------------------------------------------------------------------------------------------------------------------------------------------------------------------------------------------------------------------------------------------------------------------------------------------------------------------------------------------------------------------------------------------------------------------------------------------------------------------------------------------------------------------------------------------------------------------------------------------------------------------------------------------------------------------------------------------------------------------------------------------------------------------------------------------------------------------------------------------------------------------------------------------------------------------------------------------------------------------------------------------------------------------------------------------------------------------------------------------------------------------------------------------------------------------------------------------------------------------------------------------------------------------------------------------------------------------------------------------------------------|--------------------------------------------------------------------------------------------------------------------------------------|--------------------------------------------------------------------------------------------------------------------------------------|----------------------------------------------------------------------------------------------------------------------------------------------------------------------------------------------------------------------------------------------------------------------------------------------------------------------------------------------------------------------------------------------------------------------------------------------------------------------------------------------------------------------------------------------------------------------------------------------------------------------------------------------------------------------------------------------------------------------------------------------------------------------------|
| EPI_ISL_430847                                                                                                                                                                                                                                                                                                                                                                                                                                                                                                                                                                                                                                                                                                                                                                                                                                                                                                                                                                                                                                                                                                                                                                                                                                                                                                                                                                                                                                                                                                                                                                                                                                                                                                                                                                                                                                                                                                                                                                                                                                                                                                                                                                                                                                                                                                                                                                                                                                                                                                                                                                                                                                                                                                                                                                                                                                                                                                                                                                                                                                                                                                                                                                                                                                                                                                                                                                                                                                                                                                                                                                                                                                                                                                                                                                                                                                                                                                                                                                                                                                                                                                                                                                                                                                                                                                                                                                                                                                                                                                                                                                                                                                                                                                                                                                                                                                                                                                                                                                                                                                                                                                                                                                                                                                                                                                                                                                                                                                                                                                                                    | HS mikrobiologi virus                                                                                                                | The Public Health Agency of Sweden                                                                                                   | Anna Risberg; Anna-Malin Linde; Karin Tegmark-Wisell; Maria Lind Karlberg; Olov Svartstrom; Oskar Karlsson Lindsjo; Shaman Muradrasoli; Zhibing Yun                                                                                                                                                                                                                                                                                                                                                                                                                                                                                                                                                                                                                        |
| EPI_ISL_418009, EPI_ISL_421463, EPI_ISL_421489, EPI_ISL_421493 to 421494                                                                                                                                                                                                                                                                                                                                                                                                                                                                                                                                                                                                                                                                                                                                                                                                                                                                                                                                                                                                                                                                                                                                                                                                                                                                                                                                                                                                                                                                                                                                                                                                                                                                                                                                                                                                                                                                                                                                                                                                                                                                                                                                                                                                                                                                                                                                                                                                                                                                                                                                                                                                                                                                                                                                                                                                                                                                                                                                                                                                                                                                                                                                                                                                                                                                                                                                                                                                                                                                                                                                                                                                                                                                                                                                                                                                                                                                                                                                                                                                                                                                                                                                                                                                                                                                                                                                                                                                                                                                                                                                                                                                                                                                                                                                                                                                                                                                                                                                                                                                                                                                                                                                                                                                                                                                                                                                                                                                                                                                          | HSE Ilha Terceira - Angra do Heroismo                                                                                                | Instituto Nacional de Saude (INSA)                                                                                                   | Guimar et al                                                                                                                                                                                                                                                                                                                                                                                                                                                                                                                                                                                                                                                                                                                                                               |
| EPI_ISL_412971                                                                                                                                                                                                                                                                                                                                                                                                                                                                                                                                                                                                                                                                                                                                                                                                                                                                                                                                                                                                                                                                                                                                                                                                                                                                                                                                                                                                                                                                                                                                                                                                                                                                                                                                                                                                                                                                                                                                                                                                                                                                                                                                                                                                                                                                                                                                                                                                                                                                                                                                                                                                                                                                                                                                                                                                                                                                                                                                                                                                                                                                                                                                                                                                                                                                                                                                                                                                                                                                                                                                                                                                                                                                                                                                                                                                                                                                                                                                                                                                                                                                                                                                                                                                                                                                                                                                                                                                                                                                                                                                                                                                                                                                                                                                                                                                                                                                                                                                                                                                                                                                                                                                                                                                                                                                                                                                                                                                                                                                                                                                    | HUS Diagnostikkakeskus, Hällintö                                                                                                     | Department of Virology Faculty of Medicine, Medicum University of Helsinki                                                           | Hannimari Kallio-Kokko; Olli Vapalahti; Suvu Kuivanen; Teemu Smura                                                                                                                                                                                                                                                                                                                                                                                                                                                                                                                                                                                                                                                                                                         |
| EPI_ISL_454436 to 454446, EPI_ISL_455902, EPI_ISL_469073 to 469074, EPI_ISL_475093 to 475094, EPI_ISL_475096 to 475098, EPI_ISL_475100, EPI_ISL_475114, EPI_ISL_475116 to 475117, EPI_ISL_475120 to 475121, EPI_ISL_475123, EPI_ISL_475125, EPI_ISL_475156 to 475159, EPI_ISL_475164, EPI_ISL_475548, EPI_ISL_475563, EPI_ISL_475566 to 475567, EPI_ISL_510831, EPI_ISL_510866, EPI_ISL_548247, EPI_ISL_548249, EPI_ISL_582803 to 582805, EPI_ISL_594148, EPI_ISL_615104 to 615107                                                                                                                                                                                                                                                                                                                                                                                                                                                                                                                                                                                                                                                                                                                                                                                                                                                                                                                                                                                                                                                                                                                                                                                                                                                                                                                                                                                                                                                                                                                                                                                                                                                                                                                                                                                                                                                                                                                                                                                                                                                                                                                                                                                                                                                                                                                                                                                                                                                                                                                                                                                                                                                                                                                                                                                                                                                                                                                                                                                                                                                                                                                                                                                                                                                                                                                                                                                                                                                                                                                                                                                                                                                                                                                                                                                                                                                                                                                                                                                                                                                                                                                                                                                                                                                                                                                                                                                                                                                                                                                                                                                                                                                                                                                                                                                                                                                                                                                                                                                                                                                                | Halmstad klinisk mikrobiologi                                                                                                        | The Public Health Agency of Sweden                                                                                                   | Anna Risberg; Anna-Malin Linde; Karin Tegmark-Wisell; Maria Lind Karlberg; Mattias Haukand; Mia Brytting; Olov Svartstrom; Oskar Karlsson Lindsjo; Petra Edquist; Reza Advani; Sandra Brodsson; Shamam Muradrasoli; Shaman Muradrasoli                                                                                                                                                                                                                                                                                                                                                                                                                                                                                                                                     |
| see above                                                                                                                                                                                                                                                                                                                                                                                                                                                                                                                                                                                                                                                                                                                                                                                                                                                                                                                                                                                                                                                                                                                                                                                                                                                                                                                                                                                                                                                                                                                                                                                                                                                                                                                                                                                                                                                                                                                                                                                                                                                                                                                                                                                                                                                                                                                                                                                                                                                                                                                                                                                                                                                                                                                                                                                                                                                                                                                                                                                                                                                                                                                                                                                                                                                                                                                                                                                                                                                                                                                                                                                                                                                                                                                                                                                                                                                                                                                                                                                                                                                                                                                                                                                                                                                                                                                                                                                                                                                                                                                                                                                                                                                                                                                                                                                                                                                                                                                                                                                                                                                                                                                                                                                                                                                                                                                                                                                                                                                                                                                                         | Hangzhou Center for Disease Control and Prevention                                                                                   | Hangzhou Center for Disease Control and Prevention                                                                                   | Haoqiu Wang; Hua Yu; Jun Li; Lingfeng Mao; Qingxin Kong; Shuchang Chen; Xin Qian; Xinfen Yu; Xuchu Wang; Zhou Sun                                                                                                                                                                                                                                                                                                                                                                                                                                                                                                                                                                                                                                                          |
| EPI_ISL_407313                                                                                                                                                                                                                                                                                                                                                                                                                                                                                                                                                                                                                                                                                                                                                                                                                                                                                                                                                                                                                                                                                                                                                                                                                                                                                                                                                                                                                                                                                                                                                                                                                                                                                                                                                                                                                                                                                                                                                                                                                                                                                                                                                                                                                                                                                                                                                                                                                                                                                                                                                                                                                                                                                                                                                                                                                                                                                                                                                                                                                                                                                                                                                                                                                                                                                                                                                                                                                                                                                                                                                                                                                                                                                                                                                                                                                                                                                                                                                                                                                                                                                                                                                                                                                                                                                                                                                                                                                                                                                                                                                                                                                                                                                                                                                                                                                                                                                                                                                                                                                                                                                                                                                                                                                                                                                                                                                                                                                                                                                                                                    | Hangzhou Center for Disease Control and Prevention                                                                                   | Inspection Center of Hangzhou Center for Disease Control and Prevention                                                              | Li jun; Pan jingcao; Wang haoqiu; Yu hua; Yu xinfeng                                                                                                                                                                                                                                                                                                                                                                                                                                                                                                                                                                                                                                                                                                                       |
| EPI_ISL_418510                                                                                                                                                                                                                                                                                                                                                                                                                                                                                                                                                                                                                                                                                                                                                                                                                                                                                                                                                                                                                                                                                                                                                                                                                                                                                                                                                                                                                                                                                                                                                                                                                                                                                                                                                                                                                                                                                                                                                                                                                                                                                                                                                                                                                                                                                                                                                                                                                                                                                                                                                                                                                                                                                                                                                                                                                                                                                                                                                                                                                                                                                                                                                                                                                                                                                                                                                                                                                                                                                                                                                                                                                                                                                                                                                                                                                                                                                                                                                                                                                                                                                                                                                                                                                                                                                                                                                                                                                                                                                                                                                                                                                                                                                                                                                                                                                                                                                                                                                                                                                                                                                                                                                                                                                                                                                                                                                                                                                                                                                                                                    | Hangzhou Center for Disease Control and Prevention                                                                                   | Inspection Center of Hangzhou Center for Disease Control and Prevention                                                              | Li jun; Pan jingcao; Wang haoqiu; Yu hua; Yu xinfeng                                                                                                                                                                                                                                                                                                                                                                                                                                                                                                                                                                                                                                                                                                                       |
| EPI_ISL_418441 to 418442, EPI_ISL_418502 to 418504, EPI_ISL_418507 to 418509, EPI_ISL_418511 to 418515                                                                                                                                                                                                                                                                                                                                                                                                                                                                                                                                                                                                                                                                                                                                                                                                                                                                                                                                                                                                                                                                                                                                                                                                                                                                                                                                                                                                                                                                                                                                                                                                                                                                                                                                                                                                                                                                                                                                                                                                                                                                                                                                                                                                                                                                                                                                                                                                                                                                                                                                                                                                                                                                                                                                                                                                                                                                                                                                                                                                                                                                                                                                                                                                                                                                                                                                                                                                                                                                                                                                                                                                                                                                                                                                                                                                                                                                                                                                                                                                                                                                                                                                                                                                                                                                                                                                                                                                                                                                                                                                                                                                                                                                                                                                                                                                                                                                                                                                                                                                                                                                                                                                                                                                                                                                                                                                                                                                                                            | Hangzhou Center for Disease Control and Prevention                                                                                   | Inspection Center of Hangzhou Center for Disease Control and Prevention                                                              | Li jun; Pan jingcao; Wang haoqiu; Yu hua; Yu xinfeng                                                                                                                                                                                                                                                                                                                                                                                                                                                                                                                                                                                                                                                                                                                       |
| EPI_ISL_406970                                                                                                                                                                                                                                                                                                                                                                                                                                                                                                                                                                                                                                                                                                                                                                                                                                                                                                                                                                                                                                                                                                                                                                                                                                                                                                                                                                                                                                                                                                                                                                                                                                                                                                                                                                                                                                                                                                                                                                                                                                                                                                                                                                                                                                                                                                                                                                                                                                                                                                                                                                                                                                                                                                                                                                                                                                                                                                                                                                                                                                                                                                                                                                                                                                                                                                                                                                                                                                                                                                                                                                                                                                                                                                                                                                                                                                                                                                                                                                                                                                                                                                                                                                                                                                                                                                                                                                                                                                                                                                                                                                                                                                                                                                                                                                                                                                                                                                                                                                                                                                                                                                                                                                                                                                                                                                                                                                                                                                                                                                                                    | Hangzhou Center for Disease and Control Microbiology Lab                                                                             | Hangzhou Center for Disease and Control Microbiology Lab                                                                             | Li Jun; Wang Haoqiu; Yu Hua; Yu Xinfeng                                                                                                                                                                                                                                                                                                                                                                                                                                                                                                                                                                                                                                                                                                                                    |
| EPI_ISL_421221 to 421236, EPI_ISL_482575 to 482586                                                                                                                                                                                                                                                                                                                                                                                                                                                                                                                                                                                                                                                                                                                                                                                                                                                                                                                                                                                                                                                                                                                                                                                                                                                                                                                                                                                                                                                                                                                                                                                                                                                                                                                                                                                                                                                                                                                                                                                                                                                                                                                                                                                                                                                                                                                                                                                                                                                                                                                                                                                                                                                                                                                                                                                                                                                                                                                                                                                                                                                                                                                                                                                                                                                                                                                                                                                                                                                                                                                                                                                                                                                                                                                                                                                                                                                                                                                                                                                                                                                                                                                                                                                                                                                                                                                                                                                                                                                                                                                                                                                                                                                                                                                                                                                                                                                                                                                                                                                                                                                                                                                                                                                                                                                                                                                                                                                                                                                                                                | Hangzhou Center for Diseases Control and Prevention                                                                                  | Hangzhou Center for Diseases Control and Prevention                                                                                  | Haoqiu Wang; Hua Yu; Jun Li; Junfang Chen; Lingfeng Mao; Shuchang Chen; Xin Qian; Xinfen Yu; Xuchu Wang; Zhou Sun                                                                                                                                                                                                                                                                                                                                                                                                                                                                                                                                                                                                                                                          |
| EPI_ISL_1524889 to 1524895, EPI_ISL_1524906                                                                                                                                                                                                                                                                                                                                                                                                                                                                                                                                                                                                                                                                                                                                                                                                                                                                                                                                                                                                                                                                                                                                                                                                                                                                                                                                                                                                                                                                                                                                                                                                                                                                                                                                                                                                                                                                                                                                                                                                                                                                                                                                                                                                                                                                                                                                                                                                                                                                                                                                                                                                                                                                                                                                                                                                                                                                                                                                                                                                                                                                                                                                                                                                                                                                                                                                                                                                                                                                                                                                                                                                                                                                                                                                                                                                                                                                                                                                                                                                                                                                                                                                                                                                                                                                                                                                                                                                                                                                                                                                                                                                                                                                                                                                                                                                                                                                                                                                                                                                                                                                                                                                                                                                                                                                                                                                                                                                                                                                                                       | Hannover Medical School, Institute of Virology                                                                                       | Hannover Medical School, Institute of Virology                                                                                       | Lars Steinbrück                                                                                                                                                                                                                                                                                                                                                                                                                                                                                                                                                                                                                                                                                                                                                            |
| EPI_ISL_1534314, EPI_ISL_1534437                                                                                                                                                                                                                                                                                                                                                                                                                                                                                                                                                                                                                                                                                                                                                                                                                                                                                                                                                                                                                                                                                                                                                                                                                                                                                                                                                                                                                                                                                                                                                                                                                                                                                                                                                                                                                                                                                                                                                                                                                                                                                                                                                                                                                                                                                                                                                                                                                                                                                                                                                                                                                                                                                                                                                                                                                                                                                                                                                                                                                                                                                                                                                                                                                                                                                                                                                                                                                                                                                                                                                                                                                                                                                                                                                                                                                                                                                                                                                                                                                                                                                                                                                                                                                                                                                                                                                                                                                                                                                                                                                                                                                                                                                                                                                                                                                                                                                                                                                                                                                                                                                                                                                                                                                                                                                                                                                                                                                                                                                                                  | Hanover Park CHC wc HPH                                                                                                              | NHLS/UCT                                                                                                                             | Arash Iranzadeh; Bruna Galvao; Carolyn Williamson; Deelan Doolabh; Diana Hardie; Emmanuel S.J; Innocent Mudau; Kruger Marais; Lynn Tyers; Marvin Hsiao; Stephen Korsman; Tegally H; de Oliveira T                                                                                                                                                                                                                                                                                                                                                                                                                                                                                                                                                                          |
| EPI_ISL_413025                                                                                                                                                                                                                                                                                                                                                                                                                                                                                                                                                                                                                                                                                                                                                                                                                                                                                                                                                                                                                                                                                                                                                                                                                                                                                                                                                                                                                                                                                                                                                                                                                                                                                                                                                                                                                                                                                                                                                                                                                                                                                                                                                                                                                                                                                                                                                                                                                                                                                                                                                                                                                                                                                                                                                                                                                                                                                                                                                                                                                                                                                                                                                                                                                                                                                                                                                                                                                                                                                                                                                                                                                                                                                                                                                                                                                                                                                                                                                                                                                                                                                                                                                                                                                                                                                                                                                                                                                                                                                                                                                                                                                                                                                                                                                                                                                                                                                                                                                                                                                                                                                                                                                                                                                                                                                                                                                                                                                                                                                                                                    | Harborview Medical Center                                                                                                            | UW Virology Lab                                                                                                                      | Alexander Greninger; Arun Nalla; Hong Xie; Keith Jerome; Pavitra Roychoudhury                                                                                                                                                                                                                                                                                                                                                                                                                                                                                                                                                                                                                                                                                              |
| EPI_ISL_413487                                                                                                                                                                                                                                                                                                                                                                                                                                                                                                                                                                                                                                                                                                                                                                                                                                                                                                                                                                                                                                                                                                                                                                                                                                                                                                                                                                                                                                                                                                                                                                                                                                                                                                                                                                                                                                                                                                                                                                                                                                                                                                                                                                                                                                                                                                                                                                                                                                                                                                                                                                                                                                                                                                                                                                                                                                                                                                                                                                                                                                                                                                                                                                                                                                                                                                                                                                                                                                                                                                                                                                                                                                                                                                                                                                                                                                                                                                                                                                                                                                                                                                                                                                                                                                                                                                                                                                                                                                                                                                                                                                                                                                                                                                                                                                                                                                                                                                                                                                                                                                                                                                                                                                                                                                                                                                                                                                                                                                                                                                                                    | Harborview Medical Center                                                                                                            | University of Washington Virology Lab                                                                                                | Alexander Greninger; Arun Nalla; Hong Xie; Keith Jerome; Pavitra Roychoudhury                                                                                                                                                                                                                                                                                                                                                                                                                                                                                                                                                                                                                                                                                              |
| EPI_ISL_1490543                                                                                                                                                                                                                                                                                                                                                                                                                                                                                                                                                                                                                                                                                                                                                                                                                                                                                                                                                                                                                                                                                                                                                                                                                                                                                                                                                                                                                                                                                                                                                                                                                                                                                                                                                                                                                                                                                                                                                                                                                                                                                                                                                                                                                                                                                                                                                                                                                                                                                                                                                                                                                                                                                                                                                                                                                                                                                                                                                                                                                                                                                                                                                                                                                                                                                                                                                                                                                                                                                                                                                                                                                                                                                                                                                                                                                                                                                                                                                                                                                                                                                                                                                                                                                                                                                                                                                                                                                                                                                                                                                                                                                                                                                                                                                                                                                                                                                                                                                                                                                                                                                                                                                                                                                                                                                                                                                                                                                                                                                                                                   | Haugesund Hospital, laboratory for Medical Microbiology                                                                              | Norwegian Institute of Public Health, Department of Virology                                                                         | Atiya R Ali; Debech Nadia; Engebretsen Serina Beate; Garcia Llorente Ignacio; Hilde Elshaug; Hilde Vollan; Jon Bråte; Kamilla Heddeland Instefjord; Karoline Bragstad; Kathrine Stene-Johansen; Marie Paulsen Madsen; Olav Hungnes; Pedersen Benedikte Nevjen; Rasmus Riis Kopperud                                                                                                                                                                                                                                                                                                                                                                                                                                                                                        |
| EPI_ISL_1490268, EPI_ISL_1490271, EPI_ISL_1490524 to 1490525, EPI_ISL_1490530, EPI_ISL_1547561, EPI_ISL_1547564, EPI_ISL_1547566                                                                                                                                                                                                                                                                                                                                                                                                                                                                                                                                                                                                                                                                                                                                                                                                                                                                                                                                                                                                                                                                                                                                                                                                                                                                                                                                                                                                                                                                                                                                                                                                                                                                                                                                                                                                                                                                                                                                                                                                                                                                                                                                                                                                                                                                                                                                                                                                                                                                                                                                                                                                                                                                                                                                                                                                                                                                                                                                                                                                                                                                                                                                                                                                                                                                                                                                                                                                                                                                                                                                                                                                                                                                                                                                                                                                                                                                                                                                                                                                                                                                                                                                                                                                                                                                                                                                                                                                                                                                                                                                                                                                                                                                                                                                                                                                                                                                                                                                                                                                                                                                                                                                                                                                                                                                                                                                                                                                                  | Haukeland University Hospital, Dept. of Microbiology                                                                                 | Norwegian Institute of Public Health, Department of Virology                                                                         | Atiya R Ali; Debech Nadia; Engebretsen Serina Beate; Garcia Llorente Ignacio; Hilde Elshaug; Hilde Vollan; Jon Bråte; Kamilla Heddeland Instefjord; Karoline Bragstad; Kathrine Stene-Johansen; Marie Paulsen Madsen; Olav Hungnes; Pedersen Benedikte Nevjen; Rasmus Riis Kopperud                                                                                                                                                                                                                                                                                                                                                                                                                                                                                        |
| see above                                                                                                                                                                                                                                                                                                                                                                                                                                                                                                                                                                                                                                                                                                                                                                                                                                                                                                                                                                                                                                                                                                                                                                                                                                                                                                                                                                                                                                                                                                                                                                                                                                                                                                                                                                                                                                                                                                                                                                                                                                                                                                                                                                                                                                                                                                                                                                                                                                                                                                                                                                                                                                                                                                                                                                                                                                                                                                                                                                                                                                                                                                                                                                                                                                                                                                                                                                                                                                                                                                                                                                                                                                                                                                                                                                                                                                                                                                                                                                                                                                                                                                                                                                                                                                                                                                                                                                                                                                                                                                                                                                                                                                                                                                                                                                                                                                                                                                                                                                                                                                                                                                                                                                                                                                                                                                                                                                                                                                                                                                                                         | Health Sciences Technology Park, Avicena, 8, 18016 Granada, Spain                                                                    | Sequencing and Bioinformatics Service FISABIO-Public Health                                                                          | Almudena Rojas; Joaquin Mendoza; Pablo Mendoza                                                                                                                                                                                                                                                                                                                                                                                                                                                                                                                                                                                                                                                                                                                             |
| EPI_ISL_541942                                                                                                                                                                                                                                                                                                                                                                                                                                                                                                                                                                                                                                                                                                                                                                                                                                                                                                                                                                                                                                                                                                                                                                                                                                                                                                                                                                                                                                                                                                                                                                                                                                                                                                                                                                                                                                                                                                                                                                                                                                                                                                                                                                                                                                                                                                                                                                                                                                                                                                                                                                                                                                                                                                                                                                                                                                                                                                                                                                                                                                                                                                                                                                                                                                                                                                                                                                                                                                                                                                                                                                                                                                                                                                                                                                                                                                                                                                                                                                                                                                                                                                                                                                                                                                                                                                                                                                                                                                                                                                                                                                                                                                                                                                                                                                                                                                                                                                                                                                                                                                                                                                                                                                                                                                                                                                                                                                                                                                                                                                                                    | Health and Environmental Research Institute of Gwangju                                                                               | Health & Environment Institute of Gwangju                                                                                            | Ji-eun Lee; Min Ji Kim                                                                                                                                                                                                                                                                                                                                                                                                                                                                                                                                                                                                                                                                                                                                                     |
| EPI_ISL_540993 to 541007                                                                                                                                                                                                                                                                                                                                                                                                                                                                                                                                                                                                                                                                                                                                                                                                                                                                                                                                                                                                                                                                                                                                                                                                                                                                                                                                                                                                                                                                                                                                                                                                                                                                                                                                                                                                                                                                                                                                                                                                                                                                                                                                                                                                                                                                                                                                                                                                                                                                                                                                                                                                                                                                                                                                                                                                                                                                                                                                                                                                                                                                                                                                                                                                                                                                                                                                                                                                                                                                                                                                                                                                                                                                                                                                                                                                                                                                                                                                                                                                                                                                                                                                                                                                                                                                                                                                                                                                                                                                                                                                                                                                                                                                                                                                                                                                                                                                                                                                                                                                                                                                                                                                                                                                                                                                                                                                                                                                                                                                                                                          | Health and Environmental Research Institute of Gwangju Metropolitan city                                                             | Health and Environmental Research Institute of Gwangju Metropolitan city                                                             | Ji-eun Lee; Min Ji Kim                                                                                                                                                                                                                                                                                                                                                                                                                                                                                                                                                                                                                                                                                                                                                     |
| EPI_ISL_1478906                                                                                                                                                                                                                                                                                                                                                                                                                                                                                                                                                                                                                                                                                                                                                                                                                                                                                                                                                                                                                                                                                                                                                                                                                                                                                                                                                                                                                                                                                                                                                                                                                                                                                                                                                                                                                                                                                                                                                                                                                                                                                                                                                                                                                                                                                                                                                                                                                                                                                                                                                                                                                                                                                                                                                                                                                                                                                                                                                                                                                                                                                                                                                                                                                                                                                                                                                                                                                                                                                                                                                                                                                                                                                                                                                                                                                                                                                                                                                                                                                                                                                                                                                                                                                                                                                                                                                                                                                                                                                                                                                                                                                                                                                                                                                                                                                                                                                                                                                                                                                                                                                                                                                                                                                                                                                                                                                                                                                                                                                                                                   | Heartland Healthcare Center - Henry                                                                                                  | Illinois Department of Public Health - Springfield Lab                                                                               | Bryan Sim; Gordon McCall                                                                                                                                                                                                                                                                                                                                                                                                                                                                                                                                                                                                                                                                                                                                                   |
| EPI_ISL_1534357, EPI_ISL_1534379, EPI_ISL_1534398                                                                                                                                                                                                                                                                                                                                                                                                                                                                                                                                                                                                                                                                                                                                                                                                                                                                                                                                                                                                                                                                                                                                                                                                                                                                                                                                                                                                                                                                                                                                                                                                                                                                                                                                                                                                                                                                                                                                                                                                                                                                                                                                                                                                                                                                                                                                                                                                                                                                                                                                                                                                                                                                                                                                                                                                                                                                                                                                                                                                                                                                                                                                                                                                                                                                                                                                                                                                                                                                                                                                                                                                                                                                                                                                                                                                                                                                                                                                                                                                                                                                                                                                                                                                                                                                                                                                                                                                                                                                                                                                                                                                                                                                                                                                                                                                                                                                                                                                                                                                                                                                                                                                                                                                                                                                                                                                                                                                                                                                                                 | Heidelberg Clinic wc HBC                                                                                                             | NHLS/UCT                                                                                                                             | Arash Iranzadeh; Bruna Galvao; Carolyn Williamson; Deelan Doolabh; Diana Hardie; Emmanuel S.J; Innocent Mudau; Kruger Marais; Lynn Tyers; Marvin Hsiao; Stephen Korsman; Tegally H; de Oliveira T                                                                                                                                                                                                                                                                                                                                                                                                                                                                                                                                                                          |
| EPI_ISL_1534402                                                                                                                                                                                                                                                                                                                                                                                                                                                                                                                                                                                                                                                                                                                                                                                                                                                                                                                                                                                                                                                                                                                                                                                                                                                                                                                                                                                                                                                                                                                                                                                                                                                                                                                                                                                                                                                                                                                                                                                                                                                                                                                                                                                                                                                                                                                                                                                                                                                                                                                                                                                                                                                                                                                                                                                                                                                                                                                                                                                                                                                                                                                                                                                                                                                                                                                                                                                                                                                                                                                                                                                                                                                                                                                                                                                                                                                                                                                                                                                                                                                                                                                                                                                                                                                                                                                                                                                                                                                                                                                                                                                                                                                                                                                                                                                                                                                                                                                                                                                                                                                                                                                                                                                                                                                                                                                                                                                                                                                                                                                                   | Heideveld CDC wc HVP                                                                                                                 | NHLS/UCT                                                                                                                             | Arash Iranzadeh; Bruna Galvao; Carolyn Williamson; Deelan Doolabh; Diana Hardie; Emmanuel S.J; Innocent Mudau; Kruger Marais; Lynn Tyers; Marvin Hsiao; Stephen Korsman; Tegally H; de Oliveira T                                                                                                                                                                                                                                                                                                                                                                                                                                                                                                                                                                          |
| EPI_ISL_1534359, EPI_ISL_1534446, EPI_ISL_1534448                                                                                                                                                                                                                                                                                                                                                                                                                                                                                                                                                                                                                                                                                                                                                                                                                                                                                                                                                                                                                                                                                                                                                                                                                                                                                                                                                                                                                                                                                                                                                                                                                                                                                                                                                                                                                                                                                                                                                                                                                                                                                                                                                                                                                                                                                                                                                                                                                                                                                                                                                                                                                                                                                                                                                                                                                                                                                                                                                                                                                                                                                                                                                                                                                                                                                                                                                                                                                                                                                                                                                                                                                                                                                                                                                                                                                                                                                                                                                                                                                                                                                                                                                                                                                                                                                                                                                                                                                                                                                                                                                                                                                                                                                                                                                                                                                                                                                                                                                                                                                                                                                                                                                                                                                                                                                                                                                                                                                                                                                                 | Heideveld Emergency Centre                                                                                                           | NHLS/UCT                                                                                                                             | Arash Iranzadeh; Bruna Galvao; Carolyn Williamson; Deelan Doolabh; Diana Hardie; Emmanuel S.J; Innocent Mudau; Kruger Marais; Lynn Tyers; Marvin Hsiao; Stephen Korsman; Tegally H; de Oliveira T                                                                                                                                                                                                                                                                                                                                                                                                                                                                                                                                                                          |
| EPI_ISL_1439466                                                                                                                                                                                                                                                                                                                                                                                                                                                                                                                                                                                                                                                                                                                                                                                                                                                                                                                                                                                                                                                                                                                                                                                                                                                                                                                                                                                                                                                                                                                                                                                                                                                                                                                                                                                                                                                                                                                                                                                                                                                                                                                                                                                                                                                                                                                                                                                                                                                                                                                                                                                                                                                                                                                                                                                                                                                                                                                                                                                                                                                                                                                                                                                                                                                                                                                                                                                                                                                                                                                                                                                                                                                                                                                                                                                                                                                                                                                                                                                                                                                                                                                                                                                                                                                                                                                                                                                                                                                                                                                                                                                                                                                                                                                                                                                                                                                                                                                                                                                                                                                                                                                                                                                                                                                                                                                                                                                                                                                                                                                                   | Helios Universitätsklinikum Wuppertal: Universität Witten/Herdecke: Institut für Medizinische Labordiagnostik                        | Robert Koch Institute                                                                                                                |                                                                                                                                                                                                                                                                                                                                                                                                                                                                                                                                                                                                                                                                                                                                                                            |
| EPI_ISL_1391699 to 1391999, EPI_ISL_1420833 to 1420972, EPI_ISL_1420974, EPI_ISL_1420977, EPI_ISL_1420978, EPI_ISL_1420980, EPI_ISL_1420982, EPI_ISL_1420985, EPI_ISL_1420989, EPI_ISL_1420992, EPI_ISL_1420995, EPI_ISL_1420998, EPI_ISL_1421002, EPI_ISL_1421005, EPI_ISL_1421008, EPI_ISL_1421011, EPI_ISL_1421014, EPI_ISL_1421017, EPI_ISL_1421020, EPI_ISL_1421024, EPI_ISL_1421027, EPI_ISL_1421030, EPI_ISL_1421033, EPI_ISL_1421036, EPI_ISL_1421039, EPI_ISL_1421042, EPI_ISL_1421045, EPI_ISL_1421047, EPI_ISL_1421050, EPI_ISL_1421054, EPI_ISL_1421057, EPI_ISL_1421060, EPI_ISL_1421063, EPI_ISL_1421066, EPI_ISL_1421069, EPI_ISL_1421071, EPI_ISL_1421075, EPI_ISL_1421078, EPI_ISL_1421081, EPI_ISL_1421084, EPI_ISL_1421087, EPI_ISL_1421090, EPI_ISL_1421093, EPI_ISL_1421096, EPI_ISL_1421102, EPI_ISL_1421105, EPI_ISL_1421108, EPI_ISL_1421111, EPI_ISL_1421114, EPI_ISL_1421117, EPI_ISL_1421120, EPI_ISL_1421123, EPI_ISL_1421126, EPI_ISL_1421128, EPI_ISL_1421131, EPI_ISL_1421134, EPI_ISL_1421138, EPI_ISL_1421140, EPI_ISL_1421143, EPI_ISL_1421146, EPI_ISL_1421148, EPI_ISL_1421151, EPI_ISL_1421154, EPI_ISL_1421158, EPI_ISL_1421161, EPI_ISL_1421163, EPI_ISL_1421166, EPI_ISL_1421169, EPI_ISL_1421172, EPI_ISL_1421175, EPI_ISL_1421179, EPI_ISL_1421182, EPI_ISL_1421185, EPI_ISL_1421187, EPI_ISL_1421190, EPI_ISL_1421193, EPI_ISL_1421196, EPI_ISL_1421199, EPI_ISL_1421202, EPI_ISL_1421205, EPI_ISL_1421208, EPI_ISL_1421211, EPI_ISL_1421214, EPI_ISL_1421217, EPI_ISL_1421220, EPI_ISL_1421223, EPI_ISL_1421226, EPI_ISL_1421228 to 1421229, EPI_ISL_1421233, EPI_ISL_1421236, EPI_ISL_1421239, EPI_ISL_1421242, EPI_ISL_1421245, EPI_ISL_1421248, EPI_ISL_1421251, EPI_ISL_1421254, EPI_ISL_1421257, EPI_ISL_1421259, EPI_ISL_1421261 to 1421262, EPI_ISL_1421264, EPI_ISL_1421266, EPI_ISL_1421269, EPI_ISL_1421272, EPI_ISL_1421275, EPI_ISL_1421278, EPI_ISL_1421281, EPI_ISL_1421284, EPI_ISL_1421287, EPI_ISL_1421290, EPI_ISL_1421293, EPI_ISL_1421296, EPI_ISL_1421299 to 1421300, EPI_ISL_1421303, EPI_ISL_1421306, EPI_ISL_1421309, EPI_ISL_1421312, EPI_ISL_1421315, EPI_ISL_1421327 to 1421328, EPI_ISL_1421330, EPI_ISL_1421332, EPI_ISL_1421334 to 1421335, EPI_ISL_1421337, EPI_ISL_1421339, EPI_ISL_1421341 to 1421342, EPI_ISL_1421345, EPI_ISL_1421347, EPI_ISL_1421349 to 1421350, EPI_ISL_1421353, EPI_ISL_1421356, EPI_ISL_1421358, EPI_ISL_1421361, EPI_ISL_1421364, EPI_ISL_1421367, EPI_ISL_1421371, EPI_ISL_1421374, EPI_ISL_1421377 to 1421378, EPI_ISL_1421380 to 1421381, EPI_ISL_1421383, EPI_ISL_1421385, EPI_ISL_1421387 to 1421388, EPI_ISL_1421390, EPI_ISL_1421392, EPI_ISL_1421394, EPI_ISL_1421396, EPI_ISL_1421400, EPI_ISL_1421403, EPI_ISL_1421406, EPI_ISL_1421409, EPI_ISL_1421412, EPI_ISL_1421415, EPI_ISL_1421418, EPI_ISL_1421421, EPI_ISL_1421424, EPI_ISL_1421427, EPI_ISL_1421430, EPI_ISL_1421434, EPI_ISL_1421437, EPI_ISL_1421440, EPI_ISL_1421443, EPI_ISL_1421446, EPI_ISL_1421449, EPI_ISL_1421452, EPI_ISL_1421455, EPI_ISL_1421458, EPI_ISL_1421461, EPI_ISL_1421464, EPI_ISL_1421467, EPI_ISL_1421470, EPI_ISL_1421473 to 1421474, EPI_ISL_1421476, EPI_ISL_1421478 to 1421479, EPI_ISL_1421481, EPI_ISL_1421483, EPI_ISL_1421485, EPI_ISL_1421488, EPI_ISL_1421491, EPI_ISL_1421494, EPI_ISL_1421497, EPI_ISL_1421500, EPI_ISL_1421503, EPI_ISL_1421506, EPI_ISL_1421509, EPI_ISL_1421511, EPI_ISL_1421514, EPI_ISL_1421517, EPI_ISL_1421521, EPI_ISL_1421523, EPI_ISL_1421526, EPI_ISL_1421529, EPI_ISL_1421532, EPI_ISL_1421535, EPI_ISL_1421539, EPI_ISL_1421542, EPI_ISL_1421545, EPI_ISL_1421548, EPI_ISL_1421551, EPI_ISL_1421554 to 1421555, EPI_ISL_1421558, EPI_ISL_1421561, EPI_ISL_1421564, EPI_ISL_1421567, EPI_ISL_1421569, EPI_ISL_1421572, EPI_ISL_1421575, EPI_ISL_1421578, EPI_ISL_1421581, EPI_ISL_1421584, EPI_ISL_1421587, EPI_ISL_1421590, EPI_ISL_1421593, EPI_ISL_1421596 to 1421597, EPI_ISL_1421600, EPI_ISL_1421603, EPI_ISL_1421605, EPI_ISL_1421609, EPI_ISL_1421611 to 1421612, EPI_ISL_1421614, EPI_ISL_1421616, EPI_ISL_1421619, EPI_ISL_1421623, EPI_ISL_1421626, EPI_ISL_1421629, EPI_ISL_1421632, EPI_ISL_1421634, EPI_ISL_1421638, EPI_ISL_1421641, EPI_ISL_1421644, EPI_ISL_1421646, EPI_ISL_1421649, EPI_ISL_1421652, EPI_ISL_1421655, EPI_ISL_1421658, EPI_ISL_1421661, EPI_ISL_1421664, EPI_ISL_1421667, EPI_ISL_1421670, EPI_ISL_1421673, EPI_ISL_1421676, EPI_ISL_1421679, EPI_ISL_1421682, EPI_ISL_1421685, EPI_ISL_1421688, EPI_ISL_1421691, EPI_ISL_1421694, EPI_ISL_1421697, EPI_ISL_1421700, EPI_ISL_1421704, EPI_ISL_1421707, EPI_ISL_1421710, EPI_ISL_1421713, EPI_ISL_1421716, EPI_ISL_1421718 to 1421754, EPI_ISL_1443819 to 1443868, EPI_ISL_1443911 to 1444108, EPI_ISL_1444110, EPI_ISL_1444113, EPI_ISL_1444117, EPI_ISL_1444120, EPI_ISL_1444123, EPI_ISL_1444127, EPI_ISL_1444130, EPI_ISL_1444133, EPI_ISL_1444136, EPI_ISL_1444139, EPI_ISL_1444142, EPI_ISL_1444145, EPI_ISL_1444152, EPI_ISL_1444155, EPI_ISL_1444158, EPI_ISL_1444162, EPI_ISL_1444165, EPI_ISL_1444167 to 1444261, EPI_ISL_1460786 to 1461002, EPI_ISL_1479202 to 1479440, EPI_ISL_1480007 to 1480520, EPI_ISL_1493722 to 1493938, EPI_ISL_1511860 to 1511919, EPI_ISL_1511921 to 1512182, EPI_ISL_1512184 to 1512496, EPI_ISL_1512498 to 1512744, EPI_ISL_1553264 to 1553490, EPI_ISL_1553492 to 1553554, EPI_ISL_1553556 to 1553758, EPI_ISL_1553760 to 1553799, EPI_ISL_1553848 to 1554651, EPI_ISL_1554653 to 1554684, EPI_ISL_1554686 to 1554785, EPI_ISL_1554787 to 1554848, EPI_ISL_1554850 to 1554886 |                                                                                                                                      |                                                                                                                                      |                                                                                                                                                                                                                                                                                                                                                                                                                                                                                                                                                                                                                                                                                                                                                                            |
| see above                                                                                                                                                                                                                                                                                                                                                                                                                                                                                                                                                                                                                                                                                                                                                                                                                                                                                                                                                                                                                                                                                                                                                                                                                                                                                                                                                                                                                                                                                                                                                                                                                                                                                                                                                                                                                                                                                                                                                                                                                                                                                                                                                                                                                                                                                                                                                                                                                                                                                                                                                                                                                                                                                                                                                                                                                                                                                                                                                                                                                                                                                                                                                                                                                                                                                                                                                                                                                                                                                                                                                                                                                                                                                                                                                                                                                                                                                                                                                                                                                                                                                                                                                                                                                                                                                                                                                                                                                                                                                                                                                                                                                                                                                                                                                                                                                                                                                                                                                                                                                                                                                                                                                                                                                                                                                                                                                                                                                                                                                                                                         | Helix/Illumina                                                                                                                       | Centers for Disease Control and Prevention Division of Viral Diseases, Pathogen Discovery                                            | Adrian Paskey; Alexandre Bolze; Ary Ascencio; Ben L. Rambo-Martin; Benjamin Rambo-Martin; Brad Sicler; Charlotte Rivera-Garcia; Christine Tran; Christopher Gulvick; Clinton R. Paden; Dakota Howard; Darlene Wagner; David Becker; Dhvani Batra; Duncan MacCannell; Eren Sandovate; Eileen de Feo; Elizabeth Cirulli; Eric Allen; Geraint Lewis; James Lu; Jan Antico; Jason Caravas; Jason Nguyen; Jimmy Ramirez; Jingtao Liu; Kara Moser; Kelly Schiabor Barrett; Kim Gietzen; Magnus Isaksson; Marc Laurent; Matthew Schmerer; Matthew Tolentino; Nicole L. Washington; Peter W. Cook; Phil Febbo; Ryan Cho; Scott Sammons; Shannon Wickline; Shatavia Morrison; Sherry Wang; Simon White; Summer Galloway; Suxiang Tong; Tyler Cassens; William Lee; Yvette Unoarumhi |
| EPI_ISL_451310 to 451311, EPI_ISL_487370, EPI_ISL_487377, EPI_ISL_487379, EPI_ISL_487381, EPI_ISL_501231 to 501238, EPI_ISL_501241 to 501242, EPI_ISL_501246, EPI_ISL_501248 to 501251                                                                                                                                                                                                                                                                                                                                                                                                                                                                                                                                                                                                                                                                                                                                                                                                                                                                                                                                                                                                                                                                                                                                                                                                                                                                                                                                                                                                                                                                                                                                                                                                                                                                                                                                                                                                                                                                                                                                                                                                                                                                                                                                                                                                                                                                                                                                                                                                                                                                                                                                                                                                                                                                                                                                                                                                                                                                                                                                                                                                                                                                                                                                                                                                                                                                                                                                                                                                                                                                                                                                                                                                                                                                                                                                                                                                                                                                                                                                                                                                                                                                                                                                                                                                                                                                                                                                                                                                                                                                                                                                                                                                                                                                                                                                                                                                                                                                                                                                                                                                                                                                                                                                                                                                                                                                                                                                                            | Hellenic Pasteur Institute, National Influenza Reference laboratory of Southern Greece & Unit of Bioinformatics and Applied Genomics | Hellenic Pasteur Institute, National Influenza Reference laboratory of Southern Greece & Unit of Bioinformatics and Applied Genomics | Andreas Mentis; Androniki Voulgari-Kokota; Antonios Kalliaropoulos; Aspasia Kontou; Athanasios Kossyvakis; Evangelidou Maria; Horefti Elina; Timokratris Karamitros; Vasiliki Pogka                                                                                                                                                                                                                                                                                                                                                                                                                                                                                                                                                                                        |
| see above                                                                                                                                                                                                                                                                                                                                                                                                                                                                                                                                                                                                                                                                                                                                                                                                                                                                                                                                                                                                                                                                                                                                                                                                                                                                                                                                                                                                                                                                                                                                                                                                                                                                                                                                                                                                                                                                                                                                                                                                                                                                                                                                                                                                                                                                                                                                                                                                                                                                                                                                                                                                                                                                                                                                                                                                                                                                                                                                                                                                                                                                                                                                                                                                                                                                                                                                                                                                                                                                                                                                                                                                                                                                                                                                                                                                                                                                                                                                                                                                                                                                                                                                                                                                                                                                                                                                                                                                                                                                                                                                                                                                                                                                                                                                                                                                                                                                                                                                                                                                                                                                                                                                                                                                                                                                                                                                                                                                                                                                                                                                         | Hellenic Pasteur Institute, National Influenza Reference laboratory of Southern Greece & Unit of Bioinformatics and Applied Genomics | Hellenic Pasteur Institute, National Influenza Reference laboratory of Southern Greece & Unit of Bioinformatics and Applied Genomics | Andreas Mentis; Androniki Voulgari-Kokota; Antonios Kalliaropoulos; Aspasia Kontou; Athanasios Kossyvakis; Evangelidou Maria; Horefti Elina; Timokratris Karamitros; Vasiliki Pogka                                                                                                                                                                                                                                                                                                                                                                                                                                                                                                                                                                                        |

|                                                                                                                                                                                                                                                                                                                                                                                                                                                                                                                                                                                                                                                                                                                                                                                                                                                                                                                                                                                                                                                                                                                                                                                                                                                                                                                                                                                                                                                                                                                                                                                                                                                                                                                                                                                                                                                                                                                                                                                                                                                                                                                                                                                                                                                                                                                                                                                                                                                                                                                                                                                                                                                            |                                                                                                                   |                                                                                                                                      |                                                                                                                                                                                                                                                                                                                                                                                                                                                                                                                                                                                                                                                                                                                                                                                                                                                                                                                                                                                                                                                                                                                                                                                                                                                                                                                                                |
|------------------------------------------------------------------------------------------------------------------------------------------------------------------------------------------------------------------------------------------------------------------------------------------------------------------------------------------------------------------------------------------------------------------------------------------------------------------------------------------------------------------------------------------------------------------------------------------------------------------------------------------------------------------------------------------------------------------------------------------------------------------------------------------------------------------------------------------------------------------------------------------------------------------------------------------------------------------------------------------------------------------------------------------------------------------------------------------------------------------------------------------------------------------------------------------------------------------------------------------------------------------------------------------------------------------------------------------------------------------------------------------------------------------------------------------------------------------------------------------------------------------------------------------------------------------------------------------------------------------------------------------------------------------------------------------------------------------------------------------------------------------------------------------------------------------------------------------------------------------------------------------------------------------------------------------------------------------------------------------------------------------------------------------------------------------------------------------------------------------------------------------------------------------------------------------------------------------------------------------------------------------------------------------------------------------------------------------------------------------------------------------------------------------------------------------------------------------------------------------------------------------------------------------------------------------------------------------------------------------------------------------------------------|-------------------------------------------------------------------------------------------------------------------|--------------------------------------------------------------------------------------------------------------------------------------|------------------------------------------------------------------------------------------------------------------------------------------------------------------------------------------------------------------------------------------------------------------------------------------------------------------------------------------------------------------------------------------------------------------------------------------------------------------------------------------------------------------------------------------------------------------------------------------------------------------------------------------------------------------------------------------------------------------------------------------------------------------------------------------------------------------------------------------------------------------------------------------------------------------------------------------------------------------------------------------------------------------------------------------------------------------------------------------------------------------------------------------------------------------------------------------------------------------------------------------------------------------------------------------------------------------------------------------------|
| EPI_ISL_501230                                                                                                                                                                                                                                                                                                                                                                                                                                                                                                                                                                                                                                                                                                                                                                                                                                                                                                                                                                                                                                                                                                                                                                                                                                                                                                                                                                                                                                                                                                                                                                                                                                                                                                                                                                                                                                                                                                                                                                                                                                                                                                                                                                                                                                                                                                                                                                                                                                                                                                                                                                                                                                             | Hellenic Pasteur Institute, Public Health Laboratories                                                            | Hellenic Pasteur Institute, National Influenza Reference laboratory of Southern Greece & Unit of Bioinformatics and Applied Genomics | Andreas Mentis; Androniki Voulgari-Kokota; Antonios Kalliaropoulos; Aspasia Kontou; Athanasios Kossyvakis; Evangelidou Maria; Horefti Elina; Timokratis Karamitros; Vasiliki Pogka                                                                                                                                                                                                                                                                                                                                                                                                                                                                                                                                                                                                                                                                                                                                                                                                                                                                                                                                                                                                                                                                                                                                                             |
| EPI_ISL_430469                                                                                                                                                                                                                                                                                                                                                                                                                                                                                                                                                                                                                                                                                                                                                                                                                                                                                                                                                                                                                                                                                                                                                                                                                                                                                                                                                                                                                                                                                                                                                                                                                                                                                                                                                                                                                                                                                                                                                                                                                                                                                                                                                                                                                                                                                                                                                                                                                                                                                                                                                                                                                                             | Hellenic Pasteur Institute, Public Health Laboratories                                                            | Hellenic Pasteur Institute, Public Health Laboratories, Unit of Bioinformatics and Applied Genomics                                  | Andreas Mentis; Androniki Voulgari-Kokota; Antonios Kalliaropoulos; Aspasia Kontou; Athanasios Kossyvakis; Evangelidou Maria; Horefti Elina; Timokratis Karamitros; Vasiliki Pogka                                                                                                                                                                                                                                                                                                                                                                                                                                                                                                                                                                                                                                                                                                                                                                                                                                                                                                                                                                                                                                                                                                                                                             |
| EPI_ISL_428232 to 428236                                                                                                                                                                                                                                                                                                                                                                                                                                                                                                                                                                                                                                                                                                                                                                                                                                                                                                                                                                                                                                                                                                                                                                                                                                                                                                                                                                                                                                                                                                                                                                                                                                                                                                                                                                                                                                                                                                                                                                                                                                                                                                                                                                                                                                                                                                                                                                                                                                                                                                                                                                                                                                   | Hematology Laboratory, Section of Molecular Diagnostics, University Clinical Centre, Medical University of Gdansk | Department of Virology, Faculty of Medicine, University of Helsinki, Helsinki, Finland                                               | Aneta Szulc; Maciej Grzybek; Marlena Robakowska; Olli Vapalahti; Teemu Smura                                                                                                                                                                                                                                                                                                                                                                                                                                                                                                                                                                                                                                                                                                                                                                                                                                                                                                                                                                                                                                                                                                                                                                                                                                                                   |
| EPI_ISL_450525 to 450530, EPI_ISL_512296 to 512303                                                                                                                                                                                                                                                                                                                                                                                                                                                                                                                                                                                                                                                                                                                                                                                                                                                                                                                                                                                                                                                                                                                                                                                                                                                                                                                                                                                                                                                                                                                                                                                                                                                                                                                                                                                                                                                                                                                                                                                                                                                                                                                                                                                                                                                                                                                                                                                                                                                                                                                                                                                                         | Hematology Laboratory, Section of Molecular Diagnostics, University Clinical Centre, Medical University of Gdansk | Department of Virology, Faculty of Medicine, University of Helsinki, Helsinki, Finland                                               | Aneta Szulc; Ewa Miosz; Maciej Grzybek; Marlena Robakowska; Olli Vapalahti; Teemu Smura                                                                                                                                                                                                                                                                                                                                                                                                                                                                                                                                                                                                                                                                                                                                                                                                                                                                                                                                                                                                                                                                                                                                                                                                                                                        |
| EPI_ISL_451648 to 451654                                                                                                                                                                                                                                                                                                                                                                                                                                                                                                                                                                                                                                                                                                                                                                                                                                                                                                                                                                                                                                                                                                                                                                                                                                                                                                                                                                                                                                                                                                                                                                                                                                                                                                                                                                                                                                                                                                                                                                                                                                                                                                                                                                                                                                                                                                                                                                                                                                                                                                                                                                                                                                   | Hematology Laboratory, Section of Molecular Diagnostics, University Clinical Centre, Medical University of Gdansk | Laboratory of Recombinant Vaccines                                                                                                   | Adam Sodol; Aneta Szulc; Boguslaw Szewczyk; Ewa Miosz; Krystyna Bienkowska-Szewczyk; Krzysztof Lewandowski; Lukasz Rabalski; Marlena Robakowska                                                                                                                                                                                                                                                                                                                                                                                                                                                                                                                                                                                                                                                                                                                                                                                                                                                                                                                                                                                                                                                                                                                                                                                                |
| EPI_ISL_530169 to 530171                                                                                                                                                                                                                                                                                                                                                                                                                                                                                                                                                                                                                                                                                                                                                                                                                                                                                                                                                                                                                                                                                                                                                                                                                                                                                                                                                                                                                                                                                                                                                                                                                                                                                                                                                                                                                                                                                                                                                                                                                                                                                                                                                                                                                                                                                                                                                                                                                                                                                                                                                                                                                                   | Hennepin County Medical Center                                                                                    | Minnesota Department of Health, Public Health Laboratory                                                                             | Jacob Garfin; Matt Plumb; and Xiong Wang                                                                                                                                                                                                                                                                                                                                                                                                                                                                                                                                                                                                                                                                                                                                                                                                                                                                                                                                                                                                                                                                                                                                                                                                                                                                                                       |
| EPI_ISL_470568 to 470588, EPI_ISL_470598 to 470614, EPI_ISL_470651 to 470655                                                                                                                                                                                                                                                                                                                                                                                                                                                                                                                                                                                                                                                                                                                                                                                                                                                                                                                                                                                                                                                                                                                                                                                                                                                                                                                                                                                                                                                                                                                                                                                                                                                                                                                                                                                                                                                                                                                                                                                                                                                                                                                                                                                                                                                                                                                                                                                                                                                                                                                                                                               | Hermes Pardini                                                                                                    | Bioinformatics Laboratory / LNCC                                                                                                     | Alexandra Gerber; Amílcar Tanuri; Ana Paula Guimarães; CADDE-group; Carolina Voloch; Ester Cerdeira Sabino; Filipe Romero; Ingra Morales Claro; Jaqueline Goes de Jesus; Laboratório Hermes Pardini; Laboratório Simile; Luiz Gonzaga Paula de Almeida; Mariane Talon; Nuno Rodrigues Faria; Renato Santana Aguiar e Ana Tereza Vasconcelos; Ronaldo da Silva Francisco Junior; Terezinha Marta Pereira; working group UFMG; working group UFRJ; Átila Duque Rossi                                                                                                                                                                                                                                                                                                                                                                                                                                                                                                                                                                                                                                                                                                                                                                                                                                                                             |
| EPI_ISL_1534275, EPI_ISL_1534358                                                                                                                                                                                                                                                                                                                                                                                                                                                                                                                                                                                                                                                                                                                                                                                                                                                                                                                                                                                                                                                                                                                                                                                                                                                                                                                                                                                                                                                                                                                                                                                                                                                                                                                                                                                                                                                                                                                                                                                                                                                                                                                                                                                                                                                                                                                                                                                                                                                                                                                                                                                                                           | Hillside Clinic wc BFW                                                                                            | NHLS/UCT                                                                                                                             | Arash Iranzadeh; Bruna Galvao; Carolyn Williamson; Deelan Doolabh; Diana Hardie; Emmanuel SJ; Innocent Mudau; Kruger Marais; Lynn Tyers; Marvin Hsiao; Stephen Korsman; Tegally H; de Oliveira T                                                                                                                                                                                                                                                                                                                                                                                                                                                                                                                                                                                                                                                                                                                                                                                                                                                                                                                                                                                                                                                                                                                                               |
| EPI_ISL_479903 to 479912                                                                                                                                                                                                                                                                                                                                                                                                                                                                                                                                                                                                                                                                                                                                                                                                                                                                                                                                                                                                                                                                                                                                                                                                                                                                                                                                                                                                                                                                                                                                                                                                                                                                                                                                                                                                                                                                                                                                                                                                                                                                                                                                                                                                                                                                                                                                                                                                                                                                                                                                                                                                                                   | Himeji City Institute of Environment and Health                                                                   | Pathogen Genomics Center, National Institute of Infectious Diseases                                                                  | Hajime Kamiya; Kentaro Itokawa; Makoto Kuroda; Masanori Hashino; Motoi Suzuki; Rina Tanaka; Tsuyoshi Sekizuka                                                                                                                                                                                                                                                                                                                                                                                                                                                                                                                                                                                                                                                                                                                                                                                                                                                                                                                                                                                                                                                                                                                                                                                                                                  |
| EPI_ISL_480178 to 480179                                                                                                                                                                                                                                                                                                                                                                                                                                                                                                                                                                                                                                                                                                                                                                                                                                                                                                                                                                                                                                                                                                                                                                                                                                                                                                                                                                                                                                                                                                                                                                                                                                                                                                                                                                                                                                                                                                                                                                                                                                                                                                                                                                                                                                                                                                                                                                                                                                                                                                                                                                                                                                   | Hiroshima City Institute of Public Health                                                                         | Pathogen Genomics Center, National Institute of Infectious Diseases                                                                  | Hajime Kamiya; Kentaro Itokawa; Kota Noritune; Makoto Kuroda; Masanori Hashino; Motoi Suzuki; Rina Tanaka; Tsuyoshi Sekizuka                                                                                                                                                                                                                                                                                                                                                                                                                                                                                                                                                                                                                                                                                                                                                                                                                                                                                                                                                                                                                                                                                                                                                                                                                   |
| EPI_ISL_498774 to 498775, EPI_ISL_513318 to 513320, EPI_ISL_544960, EPI_ISL_544975, EPI_ISL_544987, EPI_ISL_545007, EPI_ISL_545034 to 545036, EPI_ISL_547600, EPI_ISL_591485 to 591486, EPI_ISL_593652                                                                                                                                                                                                                                                                                                                                                                                                                                                                                                                                                                                                                                                                                                                                                                                                                                                                                                                                                                                                                                                                                                                                                                                                                                                                                                                                                                                                                                                                                                                                                                                                                                                                                                                                                                                                                                                                                                                                                                                                                                                                                                                                                                                                                                                                                                                                                                                                                                                     | see above                                                                                                         | Histopath                                                                                                                            | NSW Health Pathology - Institute of Clinical Pathology and Medical Research; Westmead Hospital; University of Sydney                                                                                                                                                                                                                                                                                                                                                                                                                                                                                                                                                                                                                                                                                                                                                                                                                                                                                                                                                                                                                                                                                                                                                                                                                           |
| EPI_ISL_1472274 to 1472337                                                                                                                                                                                                                                                                                                                                                                                                                                                                                                                                                                                                                                                                                                                                                                                                                                                                                                                                                                                                                                                                                                                                                                                                                                                                                                                                                                                                                                                                                                                                                                                                                                                                                                                                                                                                                                                                                                                                                                                                                                                                                                                                                                                                                                                                                                                                                                                                                                                                                                                                                                                                                                 | Hokkaido Institute of Public Health                                                                               | Hokkaido Institute of Public Health                                                                                                  | Hiroki Yamaguchi; Kazuhiro Okubo; Kentaro Itokawa; Makoto Kuroda; Masanori Hashino; Rina Tanaka; Tetsuya Ikeda; Tsuyoshi Sekizuka; Yuta Ohno                                                                                                                                                                                                                                                                                                                                                                                                                                                                                                                                                                                                                                                                                                                                                                                                                                                                                                                                                                                                                                                                                                                                                                                                   |
| EPI_ISL_479812 to 479820                                                                                                                                                                                                                                                                                                                                                                                                                                                                                                                                                                                                                                                                                                                                                                                                                                                                                                                                                                                                                                                                                                                                                                                                                                                                                                                                                                                                                                                                                                                                                                                                                                                                                                                                                                                                                                                                                                                                                                                                                                                                                                                                                                                                                                                                                                                                                                                                                                                                                                                                                                                                                                   | Hokkaido Institute of Public Health                                                                               | Pathogen Genomics Center, National Institute of Infectious Diseases                                                                  | Hajime Kamiya; Kentaro Itokawa; Makoto Kuroda; Masanori Hashino; Motoi Suzuki; Rika Komagome; Rina Tanaka; Tsuyoshi Sekizuka                                                                                                                                                                                                                                                                                                                                                                                                                                                                                                                                                                                                                                                                                                                                                                                                                                                                                                                                                                                                                                                                                                                                                                                                                   |
| EPI_ISL_412028, EPI_ISL_412030                                                                                                                                                                                                                                                                                                                                                                                                                                                                                                                                                                                                                                                                                                                                                                                                                                                                                                                                                                                                                                                                                                                                                                                                                                                                                                                                                                                                                                                                                                                                                                                                                                                                                                                                                                                                                                                                                                                                                                                                                                                                                                                                                                                                                                                                                                                                                                                                                                                                                                                                                                                                                             | Hong Kong Department of Health                                                                                    | School of Public Health, The University of Hong Kong                                                                                 | Daniel K.W. Chu; Dominic N.C. Tsang; Leo L.M. Poon; Malik Peiris                                                                                                                                                                                                                                                                                                                                                                                                                                                                                                                                                                                                                                                                                                                                                                                                                                                                                                                                                                                                                                                                                                                                                                                                                                                                               |
| EPI_ISL_414517, EPI_ISL_414519, EPI_ISL_414527 to 414528, EPI_ISL_414567, EPI_ISL_414569, EPI_ISL_414571, EPI_ISL_476801 to 476804                                                                                                                                                                                                                                                                                                                                                                                                                                                                                                                                                                                                                                                                                                                                                                                                                                                                                                                                                                                                                                                                                                                                                                                                                                                                                                                                                                                                                                                                                                                                                                                                                                                                                                                                                                                                                                                                                                                                                                                                                                                                                                                                                                                                                                                                                                                                                                                                                                                                                                                         | see above                                                                                                         | Hong Kong Department of Health                                                                                                       | School of Public Health, The University of Hong Kong                                                                                                                                                                                                                                                                                                                                                                                                                                                                                                                                                                                                                                                                                                                                                                                                                                                                                                                                                                                                                                                                                                                                                                                                                                                                                           |
| EPI_ISL_412029                                                                                                                                                                                                                                                                                                                                                                                                                                                                                                                                                                                                                                                                                                                                                                                                                                                                                                                                                                                                                                                                                                                                                                                                                                                                                                                                                                                                                                                                                                                                                                                                                                                                                                                                                                                                                                                                                                                                                                                                                                                                                                                                                                                                                                                                                                                                                                                                                                                                                                                                                                                                                                             | Hong Kong Department of Health                                                                                    | The University of Hong Kong                                                                                                          | Daniel K.W. Chu; Dominic N.C. Tsang; Leo L.M. Poon; Malik Peiris                                                                                                                                                                                                                                                                                                                                                                                                                                                                                                                                                                                                                                                                                                                                                                                                                                                                                                                                                                                                                                                                                                                                                                                                                                                                               |
| EPI_ISL_1478858, EPI_ISL_1500208 to 1500210, EPI_ISL_1553185                                                                                                                                                                                                                                                                                                                                                                                                                                                                                                                                                                                                                                                                                                                                                                                                                                                                                                                                                                                                                                                                                                                                                                                                                                                                                                                                                                                                                                                                                                                                                                                                                                                                                                                                                                                                                                                                                                                                                                                                                                                                                                                                                                                                                                                                                                                                                                                                                                                                                                                                                                                               | Hopedale Medical Complex                                                                                          | Illinois Department of Public Health - Springfield Lab                                                                               | Bryan Sim; Gordon McCall                                                                                                                                                                                                                                                                                                                                                                                                                                                                                                                                                                                                                                                                                                                                                                                                                                                                                                                                                                                                                                                                                                                                                                                                                                                                                                                       |
| EPI_ISL_560581 to 560590                                                                                                                                                                                                                                                                                                                                                                                                                                                                                                                                                                                                                                                                                                                                                                                                                                                                                                                                                                                                                                                                                                                                                                                                                                                                                                                                                                                                                                                                                                                                                                                                                                                                                                                                                                                                                                                                                                                                                                                                                                                                                                                                                                                                                                                                                                                                                                                                                                                                                                                                                                                                                                   | Hopital                                                                                                           | National Reference Center for Viruses of Respiratory Infections, Institut Pasteur, Paris                                             | Etienne Simon-Lorière; Fabiana Gambaro; Maud Vanpeene; Sylvie Behillil; Sylvie van der Werf; Vincent Enouf                                                                                                                                                                                                                                                                                                                                                                                                                                                                                                                                                                                                                                                                                                                                                                                                                                                                                                                                                                                                                                                                                                                                                                                                                                     |
| EPI_ISL_418427                                                                                                                                                                                                                                                                                                                                                                                                                                                                                                                                                                                                                                                                                                                                                                                                                                                                                                                                                                                                                                                                                                                                                                                                                                                                                                                                                                                                                                                                                                                                                                                                                                                                                                                                                                                                                                                                                                                                                                                                                                                                                                                                                                                                                                                                                                                                                                                                                                                                                                                                                                                                                                             | Hopital Privé de l'Est Lyonnais                                                                                   | CNR Virus des Infections Respiratoires - France SUD                                                                                  | Alexandre Gaymard; Antonin Bal; Bruno Lina; Carine Moustaud; Florence Morfin-Sherpa; Gregory Destras; Gwendolyne Burfin; Laurence Josset; Martine Valette; Maude Bouscambert-Duchamp; Raphaëlle Lamy; Solenne Brun                                                                                                                                                                                                                                                                                                                                                                                                                                                                                                                                                                                                                                                                                                                                                                                                                                                                                                                                                                                                                                                                                                                             |
| EPI_ISL_418229                                                                                                                                                                                                                                                                                                                                                                                                                                                                                                                                                                                                                                                                                                                                                                                                                                                                                                                                                                                                                                                                                                                                                                                                                                                                                                                                                                                                                                                                                                                                                                                                                                                                                                                                                                                                                                                                                                                                                                                                                                                                                                                                                                                                                                                                                                                                                                                                                                                                                                                                                                                                                                             | Hopital franco britannique - Laboratoire                                                                          | National Reference Center for Viruses of Respiratory Infections, Institut Pasteur, Paris                                             | Angela Brisebarre; Etienne Simon-Lorière; Flora Donati; Marianne Asso Bonnet; Marion Barbet; Maud Vanpeene; Mélanie Albert; Méline Bizard; Sylvie Behillil; Sylvie van der Werf; Vincent Enouf                                                                                                                                                                                                                                                                                                                                                                                                                                                                                                                                                                                                                                                                                                                                                                                                                                                                                                                                                                                                                                                                                                                                                 |
| EPI_ISL_416501                                                                                                                                                                                                                                                                                                                                                                                                                                                                                                                                                                                                                                                                                                                                                                                                                                                                                                                                                                                                                                                                                                                                                                                                                                                                                                                                                                                                                                                                                                                                                                                                                                                                                                                                                                                                                                                                                                                                                                                                                                                                                                                                                                                                                                                                                                                                                                                                                                                                                                                                                                                                                                             | Hopital franco britannique - Service des Urgences                                                                 | National Reference Center for Viruses of Respiratory Infections, Institut Pasteur, Paris                                             | Angela Brisebarre; Etienne Simon-Lorière; Flora Donati; Marion Barbet; Maud Vanpeene; Méline Bizard; Méline Albert; Sylvie Behillil; Sylvie van der Werf; Vincent Enouf                                                                                                                                                                                                                                                                                                                                                                                                                                                                                                                                                                                                                                                                                                                                                                                                                                                                                                                                                                                                                                                                                                                                                                        |
| EPI_ISL_434666                                                                                                                                                                                                                                                                                                                                                                                                                                                                                                                                                                                                                                                                                                                                                                                                                                                                                                                                                                                                                                                                                                                                                                                                                                                                                                                                                                                                                                                                                                                                                                                                                                                                                                                                                                                                                                                                                                                                                                                                                                                                                                                                                                                                                                                                                                                                                                                                                                                                                                                                                                                                                                             | Hornefors Halsocentral                                                                                            | The Public Health Agency of Sweden                                                                                                   | Anna Risberg; Anna-Malin Linde; Camilla Eiback; Karin Tegmark-Wisell; Maria Lind Karlberg; Mia Brytting; Olov Svartstrom; Oskar Karlsson Lindsjo; Theresa Enkirch                                                                                                                                                                                                                                                                                                                                                                                                                                                                                                                                                                                                                                                                                                                                                                                                                                                                                                                                                                                                                                                                                                                                                                              |
| EPI_ISL_1533707                                                                                                                                                                                                                                                                                                                                                                                                                                                                                                                                                                                                                                                                                                                                                                                                                                                                                                                                                                                                                                                                                                                                                                                                                                                                                                                                                                                                                                                                                                                                                                                                                                                                                                                                                                                                                                                                                                                                                                                                                                                                                                                                                                                                                                                                                                                                                                                                                                                                                                                                                                                                                                            | Hosp Mun Planalto Waldomiro de Paula                                                                              | Instituto Adolfo Lutz, Interdisciplinary Procedures Center, Strategic Laboratory                                                     | Caio Vinicius Dias Lopes; Claudia Regina Gonçalves; Claudio Tavares Sacchi; Erica Valessa Ramos Gomes; Karoline Rodrigues Campos; Leonardo Jose Tadeu de Araujo                                                                                                                                                                                                                                                                                                                                                                                                                                                                                                                                                                                                                                                                                                                                                                                                                                                                                                                                                                                                                                                                                                                                                                                |
| EPI_ISL_471562, EPI_ISL_471581 to 471582, EPI_ISL_515564, EPI_ISL_523977                                                                                                                                                                                                                                                                                                                                                                                                                                                                                                                                                                                                                                                                                                                                                                                                                                                                                                                                                                                                                                                                                                                                                                                                                                                                                                                                                                                                                                                                                                                                                                                                                                                                                                                                                                                                                                                                                                                                                                                                                                                                                                                                                                                                                                                                                                                                                                                                                                                                                                                                                                                   | Hosp. Municipal Prof. Dr. Alípio Corrêa Netto                                                                     | Instituto Adolfo Lutz, Interdisciplinary Procedures Center, Strategic Laboratory                                                     | Claudia Regina Gonçalves; Claudio Tavares Sacchi; Erica Valessa Ramos Gomes                                                                                                                                                                                                                                                                                                                                                                                                                                                                                                                                                                                                                                                                                                                                                                                                                                                                                                                                                                                                                                                                                                                                                                                                                                                                    |
| EPI_ISL_560598 to 560636, EPI_ISL_560643 to 560646, EPI_ISL_1389163 to 1389164, EPI_ISL_1389182 to 1389185, EPI_ISL_1389254 to 1389256, EPI_ISL_1389267, EPI_ISL_1389287 to 1389288, EPI_ISL_1389307 to 1389310, EPI_ISL_1389319, EPI_ISL_1389344, EPI_ISL_1389353, EPI_ISL_1416811, EPI_ISL_1416823 to 1416832, EPI_ISL_1416850 to 1416858, EPI_ISL_1416907, EPI_ISL_1416909 to 1416951, EPI_ISL_1416998 to 1417014, EPI_ISL_1417024 to 1417025, EPI_ISL_1417052 to 1417066, EPI_ISL_1417095 to 1417111, EPI_ISL_1443867, EPI_ISL_1443872, EPI_ISL_1443881 to 1443889, EPI_ISL_1443895, EPI_ISL_1443897 to 1443900, EPI_ISL_1443905 to 1443907, EPI_ISL_1465535 to 1465536, EPI_ISL_1465538 to 1465540, EPI_ISL_1465610, EPI_ISL_1489729, EPI_ISL_1489737 to 1489738, EPI_ISL_1516891 to 1516897, EPI_ISL_1516899 to 1516917, EPI_ISL_1516920 to 1516922, EPI_ISL_1516941, EPI_ISL_1516958 to 1516960, EPI_ISL_1517003 to 1517005, EPI_ISL_1517007 to 1517009, EPI_ISL_1517011 to 1517012, EPI_ISL_1517014 to 1517015, EPI_ISL_1517017 to 1517019, EPI_ISL_1517021 to 1517023, EPI_ISL_1517025 to 1517027, EPI_ISL_1517032 to 1517033, EPI_ISL_1517034 to 1517035, EPI_ISL_1517054 to 1517055, EPI_ISL_1517057 to 1517059, EPI_ISL_1517061 to 1517062, EPI_ISL_1517064 to 1517065, EPI_ISL_1517067 to 1517068, EPI_ISL_1517070, EPI_ISL_1517077, EPI_ISL_1517079 to 1517080, EPI_ISL_1517082, EPI_ISL_1517084, EPI_ISL_1517095, EPI_ISL_1517099, EPI_ISL_1517101, EPI_ISL_1517121, EPI_ISL_1517123 to 1517124, EPI_ISL_1517126 to 1517127, EPI_ISL_1517129 to 1517130, EPI_ISL_1517132 to 1517133, EPI_ISL_1517135 to 1517136, EPI_ISL_1517138 to 1517140, EPI_ISL_1517142 to 1517143, EPI_ISL_1517145 to 1517146, EPI_ISL_1517148 to 1517150, EPI_ISL_1517152 to 1517154, EPI_ISL_1517156, EPI_ISL_1517158 to 1517159, EPI_ISL_1517161 to 1517163, EPI_ISL_1517165 to 1517166, EPI_ISL_1517168 to 1517170, EPI_ISL_1517172 to 1517174, EPI_ISL_1517176 to 1517178, EPI_ISL_1517472 to 1517478, EPI_ISL_1517483 to 1517488, EPI_ISL_1517493, EPI_ISL_1517495, EPI_ISL_1525261 to 1525266, EPI_ISL_1526778 to 1526783, EPI_ISL_1526785 to 1526788, EPI_ISL_1526793 to 1526794, EPI_ISL_1528181 to 1528182, EPI_ISL_1528186 to 1528192, EPI_ISL_1528194 to 1528198, EPI_ISL_1528203 to 1528210, EPI_ISL_1528214, EPI_ISL_1528219 to 1528220, EPI_ISL_1528222, EPI_ISL_1528229 to 1528230, EPI_ISL_1528232 to 1528234, EPI_ISL_1528236, EPI_ISL_1528239 to 1528241, EPI_ISL_1540445, EPI_ISL_1540447, EPI_ISL_1540449 to 1540450, EPI_ISL_1554888 to 1554903, EPI_ISL_1554905 to 1554949, EPI_ISL_1554952, EPI_ISL_1554955, EPI_ISL_1554958, EPI_ISL_1554961 | see above                                                                                                         | Hospital                                                                                                                             | National Reference Center for Viruses of Respiratory Infections, Institut Pasteur, Paris                                                                                                                                                                                                                                                                                                                                                                                                                                                                                                                                                                                                                                                                                                                                                                                                                                                                                                                                                                                                                                                                                                                                                                                                                                                       |
| EPI_ISL_434366 to 434386, EPI_ISL_450724 to 450737                                                                                                                                                                                                                                                                                                                                                                                                                                                                                                                                                                                                                                                                                                                                                                                                                                                                                                                                                                                                                                                                                                                                                                                                                                                                                                                                                                                                                                                                                                                                                                                                                                                                                                                                                                                                                                                                                                                                                                                                                                                                                                                                                                                                                                                                                                                                                                                                                                                                                                                                                                                                         | Hospital AZ Rivierenland                                                                                          | Institute of Tropical Medicine                                                                                                       | Adeline Baron; Adrien Pain; Alain Delépine; Alexandra Ducancelle; Amaury Vaysse; Angela Brisebarre; Anne Cady; Anne Holstein; Ben Hadj Yahia; Camille Capel; Catherine Coignard; Christophe Malabat; Clémentine Guillaume; Corinne Maufrais; Céline Bressollette; Céline Ramanantsoa; Damien Mornico; Dominique Descamps; Dorval I.; Ducancelle Alexandra; Eleha Guillotlet; Emmanuelle Permal; Eric Farfour; Esther Gyde; Etienne Simon-Lorière; Fabiana Gambaro; Farfour Eric; Febreau Christine; François Jouble; François Lunel Fabiani; Fréderique Canis; Frédéric Lemoine; Gaël Millot; Guillotlet Eleha; Guinard Jérôme; H Bisiau; Haciba Moudjahed; Hochart A; Ilka Engelmann; Isabelle Woerel; Jean Baptiste Bour; Jean-Baptiste Bour; Jean-François Comes; Jérôme Guinard; Lechat; Leruez-Ville Marianne; Louise Lefrançois; Léa Pilorge; Marion Barbet; Martres Pascale; Maud Vanpeene; Mj Dufour; Mj Dufour; Méline Bizard; Nabil Gastli; Odile Morvan; Odile Petsaris; Ophélie Said-Delattre; Pascale Martres; Patricia Stoussel-Thouvenin; Pierre Lechat; Pilorge Léa; Rajanarison; Ronan Pichard; S. Van Agt; Sellam; Serazin Valérie; Sophie Chalmres; Stéphanie Guymard-Rabenirina; Sylvaine Bastian; Sylvie van der Werf; Séverine Haouisse; Thibault Guinoiseau; Valérie Serazin; Victoire; Victoire Baillet; Vincent Enouf |
| EPI_ISL_1443196 to 1443198                                                                                                                                                                                                                                                                                                                                                                                                                                                                                                                                                                                                                                                                                                                                                                                                                                                                                                                                                                                                                                                                                                                                                                                                                                                                                                                                                                                                                                                                                                                                                                                                                                                                                                                                                                                                                                                                                                                                                                                                                                                                                                                                                                                                                                                                                                                                                                                                                                                                                                                                                                                                                                 | Hospital Aliança                                                                                                  | Hospital São Rafael - IDOR                                                                                                           | Aquiles Assunção Camelier; Aurea Angelica Paste; Bruno Solano de Freitas Souza; Carolina Kymie Vasques Nonaka; Elvies A.P. Maciel; Isadora Cristina de Siqueira; Karoline Almeida Félix de Sousa; Margarida Celia L. C. Neves; Tiago Graf; Victor Costa Araujo; Yasmin Santos Freitas Macêdo                                                                                                                                                                                                                                                                                                                                                                                                                                                                                                                                                                                                                                                                                                                                                                                                                                                                                                                                                                                                                                                   |
| EPI_ISL_1469707                                                                                                                                                                                                                                                                                                                                                                                                                                                                                                                                                                                                                                                                                                                                                                                                                                                                                                                                                                                                                                                                                                                                                                                                                                                                                                                                                                                                                                                                                                                                                                                                                                                                                                                                                                                                                                                                                                                                                                                                                                                                                                                                                                                                                                                                                                                                                                                                                                                                                                                                                                                                                                            | Hospital Bom Jesus                                                                                                | Epiclin                                                                                                                              | Ana Paula Muterle; Carolina Comerlati; Eliana Márcia Da Ros Wendland; Fernando Hayashi Sant'Anna; Janira Prichula; Juliana Comerlati                                                                                                                                                                                                                                                                                                                                                                                                                                                                                                                                                                                                                                                                                                                                                                                                                                                                                                                                                                                                                                                                                                                                                                                                           |
|                                                                                                                                                                                                                                                                                                                                                                                                                                                                                                                                                                                                                                                                                                                                                                                                                                                                                                                                                                                                                                                                                                                                                                                                                                                                                                                                                                                                                                                                                                                                                                                                                                                                                                                                                                                                                                                                                                                                                                                                                                                                                                                                                                                                                                                                                                                                                                                                                                                                                                                                                                                                                                                            |                                                                                                                   |                                                                                                                                      | ; Colin Anthony; Philippe Selhorst                                                                                                                                                                                                                                                                                                                                                                                                                                                                                                                                                                                                                                                                                                                                                                                                                                                                                                                                                                                                                                                                                                                                                                                                                                                                                                             |

|                                                                                                                                                                                                                                                                                                                                                                                                                                                                                                                                                                                                                                                                                                                                                                                                                                                                   |                                                                          |                                                                                                                                                                                                                                                                |                                                                                                                                                                                                                                                                                                                                                                                                                      |
|-------------------------------------------------------------------------------------------------------------------------------------------------------------------------------------------------------------------------------------------------------------------------------------------------------------------------------------------------------------------------------------------------------------------------------------------------------------------------------------------------------------------------------------------------------------------------------------------------------------------------------------------------------------------------------------------------------------------------------------------------------------------------------------------------------------------------------------------------------------------|--------------------------------------------------------------------------|----------------------------------------------------------------------------------------------------------------------------------------------------------------------------------------------------------------------------------------------------------------|----------------------------------------------------------------------------------------------------------------------------------------------------------------------------------------------------------------------------------------------------------------------------------------------------------------------------------------------------------------------------------------------------------------------|
| EPI_ISL_471554                                                                                                                                                                                                                                                                                                                                                                                                                                                                                                                                                                                                                                                                                                                                                                                                                                                    | Hospital Bosque da Saúde                                                 | Instituto Adolfo Lutz, Interdisciplinary Procedures Center, Strategic Laboratory                                                                                                                                                                               | Claudia Regina Gonçalves; Claudio Tavares Sacchi; Erica Valessa Ramos Gomes                                                                                                                                                                                                                                                                                                                                          |
| EPI_ISL_491439                                                                                                                                                                                                                                                                                                                                                                                                                                                                                                                                                                                                                                                                                                                                                                                                                                                    | Hospital Calderon Guardia                                                | Incienza, Instituto Costarricense de Investigación y Enseñanza en Nutrición y Salud                                                                                                                                                                            | Adriana Godínez & Melany Calderon; Claudio Soto-Garita; Estela Cordero; Francisco Duarte; Hebleen Brenes                                                                                                                                                                                                                                                                                                             |
| EPI_ISL_539559 to 539560                                                                                                                                                                                                                                                                                                                                                                                                                                                                                                                                                                                                                                                                                                                                                                                                                                          | Hospital Campo Arañuelo                                                  | Instituto de Salud Carlos III                                                                                                                                                                                                                                  | A. Monzón; F. Casas; G. Rodríguez; I; I. Jiménez; Iglesias-Caballero; J. López; M. Camarero; M. Cuesta; M. González-Esguevillas; M. Molinero Calamita; M. Zaballos; P. Jiménez; S. Juliá; S. Pozo; S. Varona                                                                                                                                                                                                         |
| EPI_ISL_1383812 to 1384046, EPI_ISL_1522579, EPI_ISL_1522582, EPI_ISL_1522597 to 1522598, EPI_ISL_1522607, EPI_ISL_1522623, EPI_ISL_1522631, EPI_ISL_1522634, EPI_ISL_1522642, EPI_ISL_1522660, EPI_ISL_1522672, EPI_ISL_1522677, EPI_ISL_1522688, EPI_ISL_1522700, EPI_ISL_1522711 to 1522712, EPI_ISL_1522717, EPI_ISL_1522725, EPI_ISL_1522742, EPI_ISL_1522772, EPI_ISL_1522779, EPI_ISL_1522848 to 1522849, EPI_ISL_1523061, EPI_ISL_1523127, EPI_ISL_1523131, EPI_ISL_1523144, EPI_ISL_1523147, EPI_ISL_1523151 to 1523152, EPI_ISL_1523157, EPI_ISL_1523159, EPI_ISL_1523161, EPI_ISL_1523166 to 1523167, EPI_ISL_1523170, EPI_ISL_1523176 to 1523177, EPI_ISL_1523179, EPI_ISL_1523185, EPI_ISL_1523188, EPI_ISL_1523196 to 1523198, EPI_ISL_1523202, EPI_ISL_1523206, EPI_ISL_1523219 to 1523220, EPI_ISL_1523256 to 1523275, EPI_ISL_1523347 to 1523352 | Laboratoire national de sante, Microbiology, Microbial Genomics Platform | Anke Wienecke-Baldacchino; Catherine Ragimbeau; Cynthia Oxacelay; Fatu Djabi; Jessica Tapp; Lise Pignon; Raoul Salmon; Tamir Abdelrahman                                                                                                                       |                                                                                                                                                                                                                                                                                                                                                                                                                      |
| see above                                                                                                                                                                                                                                                                                                                                                                                                                                                                                                                                                                                                                                                                                                                                                                                                                                                         | Hospital Center Emile Mayrisch                                           | Laboratoire national de sante, Microbiology, Microbial Genomics Platform                                                                                                                                                                                       | Anke Wienecke-Baldacchino; Catherine Ragimbeau; Fatu Djabi; Jean-Hugues Francois; Jessica Tapp; Lise Pignon; Michel Kohnen; Raoul Salmon; Tamir Abdelrahman                                                                                                                                                                                                                                                          |
| EPI_ISL_1384047 to 1384149, EPI_ISL_1522574, EPI_ISL_1522620, EPI_ISL_1522630, EPI_ISL_1522635, EPI_ISL_1522637, EPI_ISL_1522648, EPI_ISL_1522655, EPI_ISL_1522662, EPI_ISL_1522682, EPI_ISL_1522687, EPI_ISL_1522694, EPI_ISL_1522741, EPI_ISL_1522750, EPI_ISL_1522753, EPI_ISL_1522773, EPI_ISL_1522775, EPI_ISL_1522777, EPI_ISL_1522788, EPI_ISL_1522894 to 1522894, EPI_ISL_1523062 to 1523069, EPI_ISL_1523112, EPI_ISL_1523126, EPI_ISL_1523139, EPI_ISL_1523153, EPI_ISL_1523156, EPI_ISL_1523160, EPI_ISL_1523163 to 1523164, EPI_ISL_1523174, EPI_ISL_1523189, EPI_ISL_1523193, EPI_ISL_1523195, EPI_ISL_1523204, EPI_ISL_1523207, EPI_ISL_1523213, EPI_ISL_1523222, EPI_ISL_1523276 to 1523288                                                                                                                                                        | Hospital Center Luxembourg                                               | Laboratoire national de sante, Microbiology, Microbial Genomics Platform                                                                                                                                                                                       | Anke Wienecke-Baldacchino; Catherine Ragimbeau; Fatu Djabi; Jean-Hugues Francois; Jessica Tapp; Lise Pignon; Michel Kohnen; Raoul Salmon; Tamir Abdelrahman                                                                                                                                                                                                                                                          |
| EPI_ISL_1396364 to 1396373                                                                                                                                                                                                                                                                                                                                                                                                                                                                                                                                                                                                                                                                                                                                                                                                                                        | Hospital Central Mendoza                                                 | Nodo de Secuenciación Tierra del Fuego - Hospital Regional Ushuaia - Centro Austral De Investigaciones Cientificas - Universidad Nacional De Tierra Del Fuego on behalf of 'Proyecto Argentino Interinstitucional de genómica de SARS-CoV-2' (PAIS Consortium) | Aguirre Carolina; Alberto Carena; Alejandro Ezequiel Rojas; Andrea Falaschi; Andrea Naser; Bosio Lia; Carlos Espul; Cristina Fernanda Nardi; Fernando Gallego; Héctor Horacio Cuello; Ivan Darío Gramundi; Luciano Lima; María Belén Peralta Roca; María Liliana Videla; Pablo Rico; Patricia Robledo; Santiago Guillermo Ceballos; Valeria Fontana                                                                  |
| EPI_ISL_574580                                                                                                                                                                                                                                                                                                                                                                                                                                                                                                                                                                                                                                                                                                                                                                                                                                                    | Hospital Cidade Tiradentes Carmen Prudente                               | Instituto Adolfo Lutz, Interdisciplinary Procedures Center, Strategic Laboratory                                                                                                                                                                               | Claudia Regina Gonçalves; Claudio Tavares Sacchi; Erica Valessa Ramos Gomes; Karoline Rodrigues Campos                                                                                                                                                                                                                                                                                                               |
| EPI_ISL_527743 to 527744                                                                                                                                                                                                                                                                                                                                                                                                                                                                                                                                                                                                                                                                                                                                                                                                                                          | Hospital Cima                                                            | Incienza, Instituto Costarricense de Investigación y Enseñanza en Nutrición y Salud                                                                                                                                                                            | Adriana Godínez & Melany Calderon; Claudio Soto-Garita; Estela Cordero; Francisco Duarte; Hebleen Porras                                                                                                                                                                                                                                                                                                             |
| EPI_ISL_462479                                                                                                                                                                                                                                                                                                                                                                                                                                                                                                                                                                                                                                                                                                                                                                                                                                                    | Hospital Clinic                                                          | Instituto de Salud Carlos III                                                                                                                                                                                                                                  | A. Monzón; F. Casas; I; I. Jiménez; Iglesias-Caballero; M. Camarero; M. Cuesta; M. González-Esguevillas; M. Molinero Calamita; M. Zaballos; M.A Marcos; P. Jiménez; S. Juliá; S. Pozo; S. Varona                                                                                                                                                                                                                     |
| EPI_ISL_491441 to 491442, EPI_ISL_491455                                                                                                                                                                                                                                                                                                                                                                                                                                                                                                                                                                                                                                                                                                                                                                                                                          | Hospital Clinica Biblica                                                 | Incienza, Instituto Costarricense de Investigación y Enseñanza en Nutrición y Salud                                                                                                                                                                            | Adriana Godínez & Melany Calderon; Claudio Soto-Garita; Estela Cordero; Francisco Duarte; Hebleen Brenes                                                                                                                                                                                                                                                                                                             |
| EPI_ISL_539533 to 539556                                                                                                                                                                                                                                                                                                                                                                                                                                                                                                                                                                                                                                                                                                                                                                                                                                          | Hospital Clínic                                                          | Instituto de Salud Carlos III                                                                                                                                                                                                                                  | A. Monzón; F. Casas; I; I. Jiménez; Iglesias-Caballero; M. Camarero; M. Cuesta; M. González-Esguevillas; M. Molinero Calamita; M. Zaballos; M.A Marcos; P. Jiménez; S. Juliá; S. Pozo; S. Varona                                                                                                                                                                                                                     |
| EPI_ISL_480315 to 480320                                                                                                                                                                                                                                                                                                                                                                                                                                                                                                                                                                                                                                                                                                                                                                                                                                          | Hospital Clínica Bíblica                                                 | Charité Virology-University of Costa Rica                                                                                                                                                                                                                      | Andres Moreira-Soto; Eugenia Corrales-Aguilar; Ignacio Postigo-Hidalgo; Jan Felix Drexler; Karla Sofía Gutiérrez                                                                                                                                                                                                                                                                                                     |
| EPI_ISL_539500 to 539502, EPI_ISL_539509 to 539512, EPI_ISL_578190 to 578191                                                                                                                                                                                                                                                                                                                                                                                                                                                                                                                                                                                                                                                                                                                                                                                      | Hospital Clínico Universitario Lozano Blesa                              | Instituto de Salud Carlos III                                                                                                                                                                                                                                  | A. Monzón; F. Casas; I; I. Jiménez; Iglesias-Caballero; M. Camarero; M. Cuesta; M. González-Esguevillas; M. Molinero Calamita; M. Zaballos; P. Jiménez; R. Benito; S. Juliá; S. Pozo; S. Varona                                                                                                                                                                                                                      |
| EPI_ISL_1423919 to 1423925                                                                                                                                                                                                                                                                                                                                                                                                                                                                                                                                                                                                                                                                                                                                                                                                                                        | Hospital Clínico Universitario Virgen de la Arrixaca (Murcia)            | SeqCOVID-SPAIN consortium/IBV(CSIC)                                                                                                                                                                                                                            | Antonio Moreno Docón; Genoveva Yagüe and SeqCOVID-SPAIN consortium; Manuel Segovia Hernández                                                                                                                                                                                                                                                                                                                         |
| EPI_ISL_467262 to 467297, EPI_ISL_500162, EPI_ISL_500167, EPI_ISL_500209, EPI_ISL_500219, EPI_ISL_500221, EPI_ISL_510268 to 510304                                                                                                                                                                                                                                                                                                                                                                                                                                                                                                                                                                                                                                                                                                                                | Hospital Clínico Universitario de Santiago de Compostela                 | SeqCOVID-SPAIN consortium/IBV(CSIC)                                                                                                                                                                                                                            | Amparo Coira Nieto; Antonio Aguilera Guirao; Gema Barbeito Castiñeiras; José Javier Costa Alcalde; Mª Luisa Pérez del Molino Bernal; Rocio Trastoy Pena and SeqCOVID-SPAIN consortium                                                                                                                                                                                                                                |
| see above                                                                                                                                                                                                                                                                                                                                                                                                                                                                                                                                                                                                                                                                                                                                                                                                                                                         | Hospital Clínico Universitario de Santiago de Compostela                 | SeqCOVID-SPAIN consortium/IBV(CSIC)                                                                                                                                                                                                                            | Amparo Coira Nieto; Antonio Aguilera Guirao; Gema Barbeito Castiñeiras; José Javier Costa Alcalde; Mª Luisa Pérez del Molino Bernal; Rocio Trastoy Pena and SeqCOVID-SPAIN consortium                                                                                                                                                                                                                                |
| EPI_ISL_541037 to 541066                                                                                                                                                                                                                                                                                                                                                                                                                                                                                                                                                                                                                                                                                                                                                                                                                                          | Hospital Clínico Universitario de Santiago de Compostela                 | SeqCOVID-SPAIN consortium/Institute of Biomedicine of Valencia, IBV-CSIC                                                                                                                                                                                       | Amparo Coira Nieto; Antonio Aguilera Guirao; Gema Barbeito Castiñeiras; José Javier Costa Alcalde; Mª Luisa Pérez del Molino Bernal; Rocio Trastoy Pena and SeqCOVID-SPAIN consortium                                                                                                                                                                                                                                |
| EPI_ISL_455344 to 455349, EPI_ISL_539567 to 539568                                                                                                                                                                                                                                                                                                                                                                                                                                                                                                                                                                                                                                                                                                                                                                                                                | Hospital Comarcal de Melilla                                             | Instituto de Salud Carlos III                                                                                                                                                                                                                                  | A. Monzón; C. Ezpeleta; F. Casas; I; I. Jiménez; I. Pérez; Iglesias-Caballero; J. López; M. Camarero; M. Cuesta; M. González-Esguevillas; M. Molinero Calamita; M. Zaballos; P. Jiménez; S. Juliá; S. Pozo; S. Varona                                                                                                                                                                                                |
| EPI_ISL_462477, EPI_ISL_539499                                                                                                                                                                                                                                                                                                                                                                                                                                                                                                                                                                                                                                                                                                                                                                                                                                    | Hospital Costa del Sol                                                   | Instituto de Salud Carlos III                                                                                                                                                                                                                                  | A. Monzón; F. Casas; F. Fernández; I; I. Jiménez; Iglesias-Caballero; M. Camarero; M. Cuesta; M. González-Esguevillas; M. Molinero Calamita; M. Zaballos; P. Jiménez; S. Juliá; S. Pozo; S. Varona                                                                                                                                                                                                                   |
| EPI_ISL_512665                                                                                                                                                                                                                                                                                                                                                                                                                                                                                                                                                                                                                                                                                                                                                                                                                                                    | Hospital De Las Mujeres Dr. Adolfo Carit                                 | Incienza, Instituto Costarricense de Investigación y Enseñanza en Nutrición y Salud                                                                                                                                                                            | Adriana Godínez & Melany Calderon; Claudio Soto-Garita; Estela Cordero; Francisco Duarte; Hebleen Porras                                                                                                                                                                                                                                                                                                             |
| EPI_ISL_512655, EPI_ISL_512672 to 512675, EPI_ISL_527750                                                                                                                                                                                                                                                                                                                                                                                                                                                                                                                                                                                                                                                                                                                                                                                                          | Hospital De Niños Dr. Carlos Saenz Herrera [San Jose/San Jose]           | Incienza, Instituto Costarricense de Investigación y Enseñanza en Nutrición y Salud                                                                                                                                                                            | Adriana Godínez & Melany Calderon; Claudio Soto-Garita; Estela Cordero; Francisco Duarte; Hebleen Porras                                                                                                                                                                                                                                                                                                             |
| EPI_ISL_1469562, EPI_ISL_1469581, EPI_ISL_1469711, EPI_ISL_1469734, EPI_ISL_1469794 to 1469795                                                                                                                                                                                                                                                                                                                                                                                                                                                                                                                                                                                                                                                                                                                                                                    | Hospital Dia e Pronto Atendimento                                        | Epiclin                                                                                                                                                                                                                                                        | Ana Paula Mutterle; Carolina Comerlato; Eliana Márcia Da Ros Wendland; Fernando Hayashi Sant'Anna; Janira Pichula; Juliana Comerlato                                                                                                                                                                                                                                                                                 |
| EPI_ISL_574591 to 574592, EPI_ISL_603030                                                                                                                                                                                                                                                                                                                                                                                                                                                                                                                                                                                                                                                                                                                                                                                                                          | Hospital Domingos Leonardo Ceravolo Presidente Prudente                  | Instituto Adolfo Lutz, Interdisciplinary Procedures Center, Strategic Laboratory                                                                                                                                                                               | Claudia Regina Gonçalves; Claudio Tavares Sacchi; Erica Valessa Ramos Gomes; Karoline Rodrigues Campos                                                                                                                                                                                                                                                                                                               |
| EPI_ISL_547578                                                                                                                                                                                                                                                                                                                                                                                                                                                                                                                                                                                                                                                                                                                                                                                                                                                    | Hospital Doutor Domingos Leonardo Cerávolo                               | Instituto Adolfo Lutz, Interdisciplinary Procedures Center, Strategic Laboratory                                                                                                                                                                               | Claudia Regina Gonçalves; Claudio Tavares Sacchi; Erica Valessa Ramos Gomes; Karoline Rodrigues Campos                                                                                                                                                                                                                                                                                                               |
| EPI_ISL_527752                                                                                                                                                                                                                                                                                                                                                                                                                                                                                                                                                                                                                                                                                                                                                                                                                                                    | Hospital Dr. Rafael A. Calderon Guardia                                  | Incienza, Instituto Costarricense de Investigación y Enseñanza en Nutrición y Salud                                                                                                                                                                            | Adriana Godínez & Melany Calderon; Claudio Soto-Garita; Estela Cordero; Francisco Duarte; Hebleen Porras                                                                                                                                                                                                                                                                                                             |
| EPI_ISL_512654                                                                                                                                                                                                                                                                                                                                                                                                                                                                                                                                                                                                                                                                                                                                                                                                                                                    | Hospital Dr. Rafael A. Calderon Guardia [San Jose/San Jose]              | Incienza, Instituto Costarricense de Investigación y Enseñanza en Nutrición y Salud                                                                                                                                                                            | Adriana Godínez & Melany Calderon; Claudio Soto-Garita; Estela Cordero; Francisco Duarte; Hebleen Porras                                                                                                                                                                                                                                                                                                             |
| EPI_ISL_574594                                                                                                                                                                                                                                                                                                                                                                                                                                                                                                                                                                                                                                                                                                                                                                                                                                                    | Hospital Escola da Universidade de Taubate                               | Instituto Adolfo Lutz, Interdisciplinary Procedures Center, Strategic Laboratory                                                                                                                                                                               | Claudia Regina Gonçalves; Claudio Tavares Sacchi; Erica Valessa Ramos Gomes; Karoline Rodrigues Campos                                                                                                                                                                                                                                                                                                               |
| EPI_ISL_1396425, EPI_ISL_1396428                                                                                                                                                                                                                                                                                                                                                                                                                                                                                                                                                                                                                                                                                                                                                                                                                                  | Hospital Español de Rosario                                              | Laboratorio Mixto de Biotecnología Acuática (LMBA) on behalf of 'Proyecto Argentino Interinstitucional de genómica de SARS-CoV-2' (PAIS Consortium)                                                                                                            | Adriana Giri; Agustina Cerri; Ana Cavatorta; Ana Paletta; Diego Chouhy; Elisa Bolatti; Elizabeth Tapia (argenTAG); Federico Remes Lenicov; Flavio Spetale; Gastón Viarengo; Ignacio García Labari; Javier Murillo; Joaquín Ezpeleta; Julian Acosta; Laura Angelone; Leandro Ciappina; María Re; Pablo Casal; Pilar Bulacio; Silvana Spinelli; Silvia Arranz; Sofía Lavista Llanos; Vanina Villanova; Victoria Posner |
| EPI_ISL_574588, EPI_ISL_583490                                                                                                                                                                                                                                                                                                                                                                                                                                                                                                                                                                                                                                                                                                                                                                                                                                    | Hospital Estadual Sumare                                                 | Instituto Adolfo Lutz, Interdisciplinary Procedures Center, Strategic Laboratory                                                                                                                                                                               | Claudia Regina Gonçalves; Claudio Tavares Sacchi; Erica Valessa Ramos Gomes; Karoline Rodrigues Campos                                                                                                                                                                                                                                                                                                               |
| EPI_ISL_1533726                                                                                                                                                                                                                                                                                                                                                                                                                                                                                                                                                                                                                                                                                                                                                                                                                                                   | Hospital Estadual de Campanha Covid 19 Barradas                          | Instituto Adolfo Lutz, Interdisciplinary Procedures Center, Strategic Laboratory                                                                                                                                                                               | Caio Vinicius Dias Lopes; Claudia Regina Gonçalves; Claudio Tavares Sacchi; Erica Valessa Ramos Gomes; Karoline Rodrigues Campos; Leonardo Jose Tadeu de Araujo                                                                                                                                                                                                                                                      |
| EPI_ISL_583501                                                                                                                                                                                                                                                                                                                                                                                                                                                                                                                                                                                                                                                                                                                                                                                                                                                    | Hospital Estadual de CampanhaCOVID 19 Barradas                           | Instituto Adolfo Lutz, Interdisciplinary Procedures Center, Strategic Laboratory                                                                                                                                                                               | Claudia Regina Gonçalves; Claudio Tavares Sacchi; Erica Valessa Ramos Gomes; Karoline Rodrigues Campos                                                                                                                                                                                                                                                                                                               |
| EPI_ISL_1468412, EPI_ISL_1468443,                                                                                                                                                                                                                                                                                                                                                                                                                                                                                                                                                                                                                                                                                                                                                                                                                                 | Hospital Estadual de Mirandópolis                                        | Instituto Adolfo Lutz, Interdisciplinary Procedures Center,                                                                                                                                                                                                    | Caio Vinicius Dias Lopes; Claudia Regina Gonçalves; Claudio Tavares Sacchi; Erica Valessa Ramos Gomes; Karoline Rodrigues Campos                                                                                                                                                                                                                                                                                     |



|                                                                                                                                                                                                                                                                                                                                                                                                                                                                                                                                                                                                                                                                                                                                                                                                                                                                                                                                                                                                                                                                                                                                                                                                                        |                                                                                                           |                                                                                                                                         |                                                                                                                                                                                                                                                                                                                                                                                                                                                                                                                                                                |
|------------------------------------------------------------------------------------------------------------------------------------------------------------------------------------------------------------------------------------------------------------------------------------------------------------------------------------------------------------------------------------------------------------------------------------------------------------------------------------------------------------------------------------------------------------------------------------------------------------------------------------------------------------------------------------------------------------------------------------------------------------------------------------------------------------------------------------------------------------------------------------------------------------------------------------------------------------------------------------------------------------------------------------------------------------------------------------------------------------------------------------------------------------------------------------------------------------------------|-----------------------------------------------------------------------------------------------------------|-----------------------------------------------------------------------------------------------------------------------------------------|----------------------------------------------------------------------------------------------------------------------------------------------------------------------------------------------------------------------------------------------------------------------------------------------------------------------------------------------------------------------------------------------------------------------------------------------------------------------------------------------------------------------------------------------------------------|
| EPI_ISL_1498917                                                                                                                                                                                                                                                                                                                                                                                                                                                                                                                                                                                                                                                                                                                                                                                                                                                                                                                                                                                                                                                                                                                                                                                                        |                                                                                                           | Strategic Laboratory                                                                                                                    |                                                                                                                                                                                                                                                                                                                                                                                                                                                                                                                                                                |
| EPI_ISL_1533700                                                                                                                                                                                                                                                                                                                                                                                                                                                                                                                                                                                                                                                                                                                                                                                                                                                                                                                                                                                                                                                                                                                                                                                                        | Hospital Estadual de Sapopemba Sao Paulo                                                                  | Instituto Adolfo Lutz, Interdisciplinary Procedures Center, Strategic Laboratory                                                        | Caio Vinicius Dias Lopes; Claudia Regina Gonçalves; Claudio Tavares Sacchi; Erica Valessa Ramos Gomes; Karoline Rodrigues Campos; Leonardo Jose Tadeu de Araujo                                                                                                                                                                                                                                                                                                                                                                                                |
| EPI_ISL_1533697                                                                                                                                                                                                                                                                                                                                                                                                                                                                                                                                                                                                                                                                                                                                                                                                                                                                                                                                                                                                                                                                                                                                                                                                        | Hospital Estadual de Vila Alpina                                                                          | Instituto Adolfo Lutz, Interdisciplinary Procedures Center, Strategic Laboratory                                                        | Caio Vinicius Dias Lopes; Claudia Regina Gonçalves; Claudio Tavares Sacchi; Erica Valessa Ramos Gomes; Karoline Rodrigues Campos; Leonardo Jose Tadeu de Araujo                                                                                                                                                                                                                                                                                                                                                                                                |
| EPI_ISL_1533701, EPI_ISL_1533709 to 1533710                                                                                                                                                                                                                                                                                                                                                                                                                                                                                                                                                                                                                                                                                                                                                                                                                                                                                                                                                                                                                                                                                                                                                                            | Hospital Estadual de Vila Alpina Org Social Seconci Sao Paulo                                             | Instituto Adolfo Lutz, Interdisciplinary Procedures Center, Strategic Laboratory                                                        | Caio Vinicius Dias Lopes; Claudia Regina Gonçalves; Claudio Tavares Sacchi; Erica Valessa Ramos Gomes; Karoline Rodrigues Campos; Leonardo Jose Tadeu de Araujo                                                                                                                                                                                                                                                                                                                                                                                                |
| EPI_ISL_491443, EPI_ISL_491447                                                                                                                                                                                                                                                                                                                                                                                                                                                                                                                                                                                                                                                                                                                                                                                                                                                                                                                                                                                                                                                                                                                                                                                         | Hospital Fernando Escalante Pradilla                                                                      | Incienza, Instituto Costarricense de Investigación y Enseñanza en Nutrición y Salud                                                     | Adriana Godínez & Melany Calderon; Claudio Soto-Garita; Estela Cordero; Francisco Duarte; Hebleen Brenes                                                                                                                                                                                                                                                                                                                                                                                                                                                       |
| EPI_ISL_476496, EPI_ISL_476561                                                                                                                                                                                                                                                                                                                                                                                                                                                                                                                                                                                                                                                                                                                                                                                                                                                                                                                                                                                                                                                                                                                                                                                         | Hospital Garrahan                                                                                         | Héritas                                                                                                                                 | Andrea Mangano; Cristian Rohr; Dalmacio Pereyra; Fabian Fay; María Florencia Fernandez; Martín Vazquez; Mauricio Grisolia; Roberta Crespo                                                                                                                                                                                                                                                                                                                                                                                                                      |
| EPI_ISL_578186                                                                                                                                                                                                                                                                                                                                                                                                                                                                                                                                                                                                                                                                                                                                                                                                                                                                                                                                                                                                                                                                                                                                                                                                         | Hospital General Juan Ramón Jiménez                                                                       | Instituto de Salud Carlos III                                                                                                           | A. Monzón; F. Casas; I. J. Jiménez; Iglesias-Caballero; J. Saavedra; M. Camarero; M. Cuesta; M. González-Esguevillas; M. Molinero Calamita; M. Zaballos; P. Jiménez; S. Juliá; S. Pozo; S. Varona                                                                                                                                                                                                                                                                                                                                                              |
| EPI_ISL_424731                                                                                                                                                                                                                                                                                                                                                                                                                                                                                                                                                                                                                                                                                                                                                                                                                                                                                                                                                                                                                                                                                                                                                                                                         | Hospital General Regional No.66, Ciudad Juárez, Chihuahua.                                                | Laboratorio Central de Epidemiología-DLVIIE / Laboratorio de Secuenciación-Centro de Instrumentos. Instituto Mexicano del Seguro Social | Araiza-Rodríguez A; Arias C; Barrera-Badillo G; Becerril-Vargas E; Borja-Aburto VH.; Boukadida C; Garcés-Ayala F; García-Andrade LA; Gaytán-Cervantes FJ; González-Bonilla CR; González-Torres C; Grajales-Muñiz C; Grande R; Hernández-Rivas L; Ibarra-González V; Isa P; Ledesma-Barrientos F; López-Martínez I; Martínez-Orozco JA; Mendieta-Condado E; Muñoz-Medina JE; Mújica-Sánchez M; Pulido F. López S; Ramos-Cervantes P; Ramírez-González JE; Ruiz-Palacios GM; Sánchez A; Taboada B; Vázquez G; Vázquez-Pérez JA; de León-Garduño AP; Ávila-Ríos S |
| EPI_ISL_1401465 to 1401472, EPI_ISL_1476942 to 1476986, EPI_ISL_1477050 to 1477062, EPI_ISL_1511203 to 1511208, EPI_ISL_1524803 to 1524850, EPI_ISL_1547363, EPI_ISL_1547368 to 1547369                                                                                                                                                                                                                                                                                                                                                                                                                                                                                                                                                                                                                                                                                                                                                                                                                                                                                                                                                                                                                                |                                                                                                           |                                                                                                                                         | Cristina Rodriguez-Grande; Darío García de Viedma; Laura Pérez-Lago; Patricia Muñoz; Pedro Sola Campoy; Pilar Catalán; Sergio Buenestado Serrano                                                                                                                                                                                                                                                                                                                                                                                                               |
| see above                                                                                                                                                                                                                                                                                                                                                                                                                                                                                                                                                                                                                                                                                                                                                                                                                                                                                                                                                                                                                                                                                                                                                                                                              | Hospital General Universitario Gregorio Marañón                                                           | Hospital General Universitario Gregorio Marañón                                                                                         |                                                                                                                                                                                                                                                                                                                                                                                                                                                                                                                                                                |
| EPI_ISL_467184 to 467261, EPI_ISL_481041 to 481109, EPI_ISL_510103 to 510151, EPI_ISL_510165 to 510245, EPI_ISL_541878 to 541941, EPI_ISL_582812 to 582832, EPI_ISL_582843 to 582844                                                                                                                                                                                                                                                                                                                                                                                                                                                                                                                                                                                                                                                                                                                                                                                                                                                                                                                                                                                                                                   |                                                                                                           |                                                                                                                                         | Darío García de Viedma; Darío García de Viedma and SeqCOVID-SPAIN consortium; Jon Sicilia; Julia Suárez; Laura Pérez-Lago; Marta Herranz; Patricia Muñoz; Patricia Muñoz and SeqCOVID-SPAIN consortium; Pilar Catalán                                                                                                                                                                                                                                                                                                                                          |
| see above                                                                                                                                                                                                                                                                                                                                                                                                                                                                                                                                                                                                                                                                                                                                                                                                                                                                                                                                                                                                                                                                                                                                                                                                              | Hospital General Universitario Gregorio Marañón                                                           | SeqCOVID-SPAIN consortium/IBV(CSIC)                                                                                                     |                                                                                                                                                                                                                                                                                                                                                                                                                                                                                                                                                                |
| EPI_ISL_1441419, EPI_ISL_1441421, EPI_ISL_1441423 to 1441424, EPI_ISL_1441426, EPI_ISL_1441429, EPI_ISL_1441431, EPI_ISL_1441433, EPI_ISL_1441435 to 1441436, EPI_ISL_1441438, EPI_ISL_1441441 to 1441442, EPI_ISL_1441445, EPI_ISL_1441447, EPI_ISL_1441449 to 1441450, EPI_ISL_1441452, EPI_ISL_1441454, EPI_ISL_1441456, EPI_ISL_1441458, EPI_ISL_1441460, EPI_ISL_1441462, EPI_ISL_1441464, EPI_ISL_1441466, EPI_ISL_1441468, EPI_ISL_1441470 to 1441471, EPI_ISL_1441474 to 1441475, EPI_ISL_1441477, EPI_ISL_1441480, EPI_ISL_1441482, EPI_ISL_1441484 to 1441485, EPI_ISL_1441487, EPI_ISL_1441489, EPI_ISL_1441491, EPI_ISL_1441493, EPI_ISL_1441495, EPI_ISL_1441497, EPI_ISL_1441499, EPI_ISL_1441504, EPI_ISL_1441509, EPI_ISL_1441514, EPI_ISL_1441518, EPI_ISL_1441523, EPI_ISL_1441527, EPI_ISL_1441533, EPI_ISL_1441538 to 1441539, EPI_ISL_1441541, EPI_ISL_1441543, EPI_ISL_1441545, EPI_ISL_1441547, EPI_ISL_1441552, EPI_ISL_1441554, EPI_ISL_1441556, EPI_ISL_1441558, EPI_ISL_1441560, EPI_ISL_1441562, EPI_ISL_1441564, EPI_ISL_1441566, EPI_ISL_1441569, EPI_ISL_1441573, EPI_ISL_1441578, EPI_ISL_1441583, EPI_ISL_1441588, EPI_ISL_1441594, EPI_ISL_1441596, EPI_ISL_1441598, EPI_ISL_1441600 |                                                                                                           |                                                                                                                                         |                                                                                                                                                                                                                                                                                                                                                                                                                                                                                                                                                                |
| see above                                                                                                                                                                                                                                                                                                                                                                                                                                                                                                                                                                                                                                                                                                                                                                                                                                                                                                                                                                                                                                                                                                                                                                                                              | Hospital General Universitario de Alicante - Instituto de Investigación Sanitaria y Biomédica de Alicante | SeqCOVID-SPAIN consortium/IBV(CSIC)                                                                                                     | Carmen Molina Pardines and SeqCOVID-SPAIN consortium; Maripaz Ventero Martín                                                                                                                                                                                                                                                                                                                                                                                                                                                                                   |
| EPI_ISL_539523                                                                                                                                                                                                                                                                                                                                                                                                                                                                                                                                                                                                                                                                                                                                                                                                                                                                                                                                                                                                                                                                                                                                                                                                         | Hospital General de Segovia                                                                               | Instituto de Salud Carlos III                                                                                                           | A. Monzón; F. Casas; I. J. Jiménez; Iglesias-Caballero; M. Camarero; M. Cuesta; M. González-Esguevillas; M. Molinero Calamita; M. Zaballos; P. Jiménez; S. Hernando; S. Juliá; S. Pozo; S. Varona                                                                                                                                                                                                                                                                                                                                                              |
| EPI_ISL_418245 to 418246                                                                                                                                                                                                                                                                                                                                                                                                                                                                                                                                                                                                                                                                                                                                                                                                                                                                                                                                                                                                                                                                                                                                                                                               | Hospital General y Universitario de Guadalajara                                                           | Instituto de Salud Carlos III                                                                                                           | A. Monzón; F. Casas; I. Gonzalez-Praetorius A.; I. Jiménez; Iglesias-Caballero; M. Camarero; M. Cuesta; M. González-Esguevillas; M. Molinero Calamita; M. Zaballos; P. Jiménez; S. Juliá; S. Pozo; S. Varona                                                                                                                                                                                                                                                                                                                                                   |
| EPI_ISL_471541, EPI_ISL_523971                                                                                                                                                                                                                                                                                                                                                                                                                                                                                                                                                                                                                                                                                                                                                                                                                                                                                                                                                                                                                                                                                                                                                                                         | Hospital Geral Santa Marcelina                                                                            | Instituto Adolfo Lutz, Interdisciplinary Procedures Center, Strategic Laboratory                                                        | Claudia Regina Gonçalves; Claudio Tavares Sacchi; Erica Valessa Ramos Gomes                                                                                                                                                                                                                                                                                                                                                                                                                                                                                    |
| EPI_ISL_1533725                                                                                                                                                                                                                                                                                                                                                                                                                                                                                                                                                                                                                                                                                                                                                                                                                                                                                                                                                                                                                                                                                                                                                                                                        | Hospital Geral de Guarulhos                                                                               | Instituto Adolfo Lutz, Interdisciplinary Procedures Center, Strategic Laboratory                                                        | Caio Vinicius Dias Lopes; Claudia Regina Gonçalves; Claudio Tavares Sacchi; Erica Valessa Ramos Gomes; Karoline Rodrigues Campos; Leonardo Jose Tadeu de Araujo                                                                                                                                                                                                                                                                                                                                                                                                |
| EPI_ISL_534317                                                                                                                                                                                                                                                                                                                                                                                                                                                                                                                                                                                                                                                                                                                                                                                                                                                                                                                                                                                                                                                                                                                                                                                                         | Hospital Geral de Itapevi                                                                                 | Instituto Adolfo Lutz, Interdisciplinary Procedures Center, Strategic Laboratory                                                        | Claudia Regina Gonçalves; Claudio Tavares Sacchi; Erica Valessa Ramos Gomes                                                                                                                                                                                                                                                                                                                                                                                                                                                                                    |
| EPI_ISL_1533723                                                                                                                                                                                                                                                                                                                                                                                                                                                                                                                                                                                                                                                                                                                                                                                                                                                                                                                                                                                                                                                                                                                                                                                                        | Hospital Geral de Itaquaquecetuba                                                                         | Instituto Adolfo Lutz, Interdisciplinary Procedures Center, Strategic Laboratory                                                        | Caio Vinicius Dias Lopes; Claudia Regina Gonçalves; Claudio Tavares Sacchi; Erica Valessa Ramos Gomes; Karoline Rodrigues Campos; Leonardo Jose Tadeu de Araujo                                                                                                                                                                                                                                                                                                                                                                                                |
| EPI_ISL_603037                                                                                                                                                                                                                                                                                                                                                                                                                                                                                                                                                                                                                                                                                                                                                                                                                                                                                                                                                                                                                                                                                                                                                                                                         | Hospital Geral de Pedreira                                                                                | Instituto Adolfo Lutz, Interdisciplinary Procedures Center, Strategic Laboratory                                                        | Claudia Regina Gonçalves; Claudio Tavares Sacchi; Erica Valessa Ramos Gomes; Karoline Rodrigues Campos                                                                                                                                                                                                                                                                                                                                                                                                                                                         |
| EPI_ISL_515555                                                                                                                                                                                                                                                                                                                                                                                                                                                                                                                                                                                                                                                                                                                                                                                                                                                                                                                                                                                                                                                                                                                                                                                                         | Hospital Geral de Vila Nova Cachoeirinha                                                                  | Instituto Adolfo Lutz, Interdisciplinary Procedures Center, Strategic Laboratory                                                        | Claudia Regina Gonçalves; Claudio Tavares Sacchi; Erica Valessa Ramos Gomes                                                                                                                                                                                                                                                                                                                                                                                                                                                                                    |
| EPI_ISL_574595                                                                                                                                                                                                                                                                                                                                                                                                                                                                                                                                                                                                                                                                                                                                                                                                                                                                                                                                                                                                                                                                                                                                                                                                         | Hospital Geral de Vila Penteadó Dr. Jose Pamgella                                                         | Instituto Adolfo Lutz, Interdisciplinary Procedures Center, Strategic Laboratory                                                        | Claudia Regina Gonçalves; Claudio Tavares Sacchi; Erica Valessa Ramos Gomes; Karoline Rodrigues Campos                                                                                                                                                                                                                                                                                                                                                                                                                                                         |
| EPI_ISL_1527012, EPI_ISL_1527015, EPI_ISL_1527021                                                                                                                                                                                                                                                                                                                                                                                                                                                                                                                                                                                                                                                                                                                                                                                                                                                                                                                                                                                                                                                                                                                                                                      | Hospital Guápiles                                                                                         | Incienza, Instituto Costarricense de Investigación y Enseñanza en Nutrición y Salud                                                     | Barboza-Arguedas E & Cerdas-Quesada C; Pérez-Corrales C                                                                                                                                                                                                                                                                                                                                                                                                                                                                                                        |
| EPI_ISL_471267 to 471268, EPI_ISL_481244 to 481248, EPI_ISL_574431                                                                                                                                                                                                                                                                                                                                                                                                                                                                                                                                                                                                                                                                                                                                                                                                                                                                                                                                                                                                                                                                                                                                                     | Hospital IESS Babahoyo                                                                                    | Institute of Microbiology, Universidad San Francisco de Quito                                                                           | Belén Prado-Vivar; Bernardo Gutiérrez; Carla Torres; Fernanda Zurita; Francisco Cordova; Gabriel Trueba; Juan José Guadalupe; Killen Briones-Claudette; Killen Briones-Zamora; Michelle Grunauer; Monica Becerra-Wong; Ninfa Henriquez; Patricia Rojas-Silva; Paúl Cárdenas; Sully Márquez; Verónica Barraquán                                                                                                                                                                                                                                                 |
| EPI_ISL_412964                                                                                                                                                                                                                                                                                                                                                                                                                                                                                                                                                                                                                                                                                                                                                                                                                                                                                                                                                                                                                                                                                                                                                                                                         | Hospital Israelita Albert Einstein                                                                        | Instituto Adolfo Lutz Interdisciplinary Procedures Center Strategic Laboratory                                                          | Andrew Rambaut; Claudia Regina Gonçalves; Claudio Tavares Sacchi; Daniela Bernardes Borges da Silva; Ester Cerdeira Sabino; Flávia Cristina da Silva Sales; Ingra Morales Claro; Jaqueline Goes de Jesus; Joshua Quick; Maria do Carmo; Nicholas James Loman; Nuno Rodrigues Faria; Sampaio Tavares Timenetsky                                                                                                                                                                                                                                                 |
| EPI_ISL_414014, EPI_ISL_416033 to 416034                                                                                                                                                                                                                                                                                                                                                                                                                                                                                                                                                                                                                                                                                                                                                                                                                                                                                                                                                                                                                                                                                                                                                                               | Hospital Israelita Albert Einstein                                                                        | Instituto Adolfo Lutz, Interdisciplinary Procedures Center, Strategic Laboratory                                                        | Adriana Bugno; Adriano Abbud; Carlos Henrique Camargo; Claudia Regina Gonçalves; Claudio Tavares Sacchi; Daniela Bernardes Borges da Silva; Erica Valessa Ramos Gomes; Ester Cerdeira Sabino; Fabiana Cristina Pereira dos Santos; Katia Correia dos Santos; Maria do Carmo Sampaio Tavares Timenetsky; Maria do Carmo Sampaio Tavares Timenetsky; Simone Guadagnucci Morillo; Terezinha Maria de Paiva                                                                                                                                                        |
| EPI_ISL_413016                                                                                                                                                                                                                                                                                                                                                                                                                                                                                                                                                                                                                                                                                                                                                                                                                                                                                                                                                                                                                                                                                                                                                                                                         | Hospital Israelita Albert Einstein                                                                        | Instituto Adolfo Lutz, Interdisciplinary Procedures Center, Strategic Laboratory                                                        | Andrew Rambaut; Claudia Regina Gonçalves; Claudio Tavares Sacchi; Ester Cerdeira Sabino; Fabiana Cristina Pereira dos Santos; Flávia Cristina da Silva Sales; Ingra Morales Claro; Jaqueline Goes de Jesus; Joshua Quick; Maria do Carmo Sampaio Tavares Timenetsky; Nicholas James Loman; Nuno Rodrigues Faria                                                                                                                                                                                                                                                |
| EPI_ISL_523957                                                                                                                                                                                                                                                                                                                                                                                                                                                                                                                                                                                                                                                                                                                                                                                                                                                                                                                                                                                                                                                                                                                                                                                                         | Hospital Itamaraty                                                                                        | Instituto Adolfo Lutz, Interdisciplinary Procedures Center, Strategic Laboratory                                                        | Claudia Regina Gonçalves; Claudio Tavares Sacchi; Erica Valessa Ramos Gomes                                                                                                                                                                                                                                                                                                                                                                                                                                                                                    |
| EPI_ISL_1482628                                                                                                                                                                                                                                                                                                                                                                                                                                                                                                                                                                                                                                                                                                                                                                                                                                                                                                                                                                                                                                                                                                                                                                                                        | Hospital Margarita Maza de Juárez                                                                         | Microbial Genomics Laboratory                                                                                                           | Alejandra Garcia-Gasca; Bruno Gomez-Gil; Daniel Fregoso-Rueda; Julissa Enciso-Ibarra                                                                                                                                                                                                                                                                                                                                                                                                                                                                           |
| EPI_ISL_527741                                                                                                                                                                                                                                                                                                                                                                                                                                                                                                                                                                                                                                                                                                                                                                                                                                                                                                                                                                                                                                                                                                                                                                                                         | Hospital Metropolitano                                                                                    | Incienza, Instituto Costarricense de Investigación y Enseñanza en Nutrición y Salud                                                     | Adriana Godínez & Melany Calderon; Claudio Soto-Garita; Estela Cordero; Francisco Duarte; Hebleen Porras                                                                                                                                                                                                                                                                                                                                                                                                                                                       |
| EPI_ISL_524462                                                                                                                                                                                                                                                                                                                                                                                                                                                                                                                                                                                                                                                                                                                                                                                                                                                                                                                                                                                                                                                                                                                                                                                                         | Hospital Metropolitano                                                                                    | Instituto Adolfo Lutz, Interdisciplinary Procedures Center, Strategic Laboratory                                                        | Claudia Regina Gonçalves; Claudio Tavares Sacchi; Erica Valessa Ramos Gomes                                                                                                                                                                                                                                                                                                                                                                                                                                                                                    |
| EPI_ISL_458236, EPI_ISL_480312 to 480314                                                                                                                                                                                                                                                                                                                                                                                                                                                                                                                                                                                                                                                                                                                                                                                                                                                                                                                                                                                                                                                                                                                                                                               | Hospital Mexico                                                                                           | Charité Virology-University of Costa Rica                                                                                               | Andres Moreira-Soto; Eugenia Corrales-Aguilar; Ignacio Postigo-Hidalgo; Jan Felix Drexler; Teresita Somogyi                                                                                                                                                                                                                                                                                                                                                                                                                                                    |
| EPI_ISL_527739, EPI_ISL_527758                                                                                                                                                                                                                                                                                                                                                                                                                                                                                                                                                                                                                                                                                                                                                                                                                                                                                                                                                                                                                                                                                                                                                                                         | Hospital Mexico [San Jose/San Jose]                                                                       | Incienza, Instituto Costarricense de Investigación y Enseñanza en Nutrición y Salud                                                     | Adriana Godínez & Melany Calderon; Claudio Soto-Garita; Estela Cordero; Francisco Duarte; Hebleen Porras                                                                                                                                                                                                                                                                                                                                                                                                                                                       |

|                                                                                                                                                                          |                                                           |                                                                                                                                                                                                                                                                |                                                                                                                                                                                                                                                                                                                                              |
|--------------------------------------------------------------------------------------------------------------------------------------------------------------------------|-----------------------------------------------------------|----------------------------------------------------------------------------------------------------------------------------------------------------------------------------------------------------------------------------------------------------------------|----------------------------------------------------------------------------------------------------------------------------------------------------------------------------------------------------------------------------------------------------------------------------------------------------------------------------------------------|
| EPI_ISL_1406245, EPI_ISL_1406390                                                                                                                                         | Hospital Monte Naranco                                    | Laboratorio de Virología HUCA                                                                                                                                                                                                                                  | Abreu F; Alvarez-Arguelles ME; Boga JA; Castelló C; Costales I; Coto E; Gómez de Oña J; Martín-Rodríguez G; Melón S; Perez-Martínez Z; Rojo S; Sandoval M                                                                                                                                                                                    |
| EPI_ISL_515541, EPI_ISL_515561                                                                                                                                           | Hospital Montemagno                                       | Instituto Adolfo Lutz, Interdisciplinary Procedures Center, Strategic Laboratory                                                                                                                                                                               | Claudia Regina Gonçalves; Claudio Tavares Sacchi; Erica Valessa Ramos Gomes                                                                                                                                                                                                                                                                  |
| EPI_ISL_1469599                                                                                                                                                          | Hospital Montenegro                                       | Epiclin                                                                                                                                                                                                                                                        | Ana Paula Muterle; Carolina Comerlato; Eliana Márcia Da Ros Wendland; Fernando Hayashi Sant'Anna; Janira Prichula; Juliana Comerlato                                                                                                                                                                                                         |
| EPI_ISL_534324                                                                                                                                                           | Hospital Mun Ver Jose Storopoli                           | Instituto Adolfo Lutz, Interdisciplinary Procedures Center, Strategic Laboratory                                                                                                                                                                               | Claudia Regina Gonçalves; Claudio Tavares Sacchi; Erica Valessa Ramos Gomes                                                                                                                                                                                                                                                                  |
| EPI_ISL_534318                                                                                                                                                           | Hospital Municipal Antonio Giglio                         | Instituto Adolfo Lutz, Interdisciplinary Procedures Center, Strategic Laboratory                                                                                                                                                                               | Claudia Regina Gonçalves; Claudio Tavares Sacchi; Erica Valessa Ramos Gomes                                                                                                                                                                                                                                                                  |
| EPI_ISL_547571                                                                                                                                                           | Hospital Municipal Antônio Giglio                         | Instituto Adolfo Lutz, Interdisciplinary Procedures Center, Strategic Laboratory                                                                                                                                                                               | Claudia Regina Gonçalves; Claudio Tavares Sacchi; Erica Valessa Ramos Gomes; Karoline Rodrigues Campos                                                                                                                                                                                                                                       |
| EPI_ISL_471549, EPI_ISL_523991 to 523992, EPI_ISL_527869                                                                                                                 | Hospital Municipal Carmen Prudente                        | Instituto Adolfo Lutz, Interdisciplinary Procedures Center, Strategic Laboratory                                                                                                                                                                               | Claudia Regina Gonçalves; Claudio Tavares Sacchi; Erica Valessa Ramos Gomes                                                                                                                                                                                                                                                                  |
| EPI_ISL_515562                                                                                                                                                           | Hospital Municipal Doutor Alexandre Zaio                  | Instituto Adolfo Lutz, Interdisciplinary Procedures Center, Strategic Laboratory                                                                                                                                                                               | Claudia Regina Gonçalves; Claudio Tavares Sacchi; Erica Valessa Ramos Gomes                                                                                                                                                                                                                                                                  |
| EPI_ISL_468311 to 468312                                                                                                                                                 | Hospital Municipal Dr Ignacio Prouca de Gouvea            | Instituto Adolfo Lutz, Interdisciplinary Procedures Center, Strategic Laboratory                                                                                                                                                                               | Claudia Regina Gonçalves; Claudio Tavares Sacchi; Erica Valessa Ramos Gomes                                                                                                                                                                                                                                                                  |
| EPI_ISL_1533695                                                                                                                                                          | Hospital Municipal Dr Mario Gatti                         | Instituto Adolfo Lutz, Interdisciplinary Procedures Center, Strategic Laboratory                                                                                                                                                                               | Caio Vinicius Dias Lopes; Claudia Regina Gonçalves; Claudio Tavares Sacchi; Erica Valessa Ramos Gomes; Karoline Rodrigues Campos; Leonardo Jose Tadeu de Araujo                                                                                                                                                                              |
| EPI_ISL_1533708                                                                                                                                                          | Hospital Municipal Dr Mario Gatti Campinas                | Instituto Adolfo Lutz, Interdisciplinary Procedures Center, Strategic Laboratory                                                                                                                                                                               | Caio Vinicius Dias Lopes; Claudia Regina Gonçalves; Claudio Tavares Sacchi; Erica Valessa Ramos Gomes; Karoline Rodrigues Campos; Leonardo Jose Tadeu de Araujo                                                                                                                                                                              |
| EPI_ISL_515521                                                                                                                                                           | Hospital Municipal Dr Waldemar Tebaldi                    | Instituto Adolfo Lutz, Interdisciplinary Procedures Center, Strategic Laboratory                                                                                                                                                                               | Claudia Regina Gonçalves; Claudio Tavares Sacchi; Erica Valessa Ramos Gomes                                                                                                                                                                                                                                                                  |
| EPI_ISL_523985                                                                                                                                                           | Hospital Municipal Dr. Benedicto Montenegro               | Instituto Adolfo Lutz, Interdisciplinary Procedures Center, Strategic Laboratory                                                                                                                                                                               | Claudia Regina Gonçalves; Claudio Tavares Sacchi; Erica Valessa Ramos Gomes                                                                                                                                                                                                                                                                  |
| EPI_ISL_515553, EPI_ISL_574577, EPI_ISL_574579                                                                                                                           | Hospital Municipal Dr. Ignacio Prouca de Gouvea           | Instituto Adolfo Lutz, Interdisciplinary Procedures Center, Strategic Laboratory                                                                                                                                                                               | Claudia Regina Gonçalves; Claudio Tavares Sacchi; Erica Valessa Ramos Gomes; Karoline Rodrigues Campos                                                                                                                                                                                                                                       |
| EPI_ISL_515548, EPI_ISL_515563, EPI_ISL_574582, EPI_ISL_574589                                                                                                           | Hospital Municipal Dr. Jose Soares Hungria                | Instituto Adolfo Lutz, Interdisciplinary Procedures Center, Strategic Laboratory                                                                                                                                                                               | Claudia Regina Gonçalves; Claudio Tavares Sacchi; Erica Valessa Ramos Gomes; Karoline Rodrigues Campos                                                                                                                                                                                                                                       |
| EPI_ISL_515557, EPI_ISL_524467                                                                                                                                           | Hospital Municipal Dr. Moisés Deutsch                     | Instituto Adolfo Lutz, Interdisciplinary Procedures Center, Strategic Laboratory                                                                                                                                                                               | Claudia Regina Gonçalves; Claudio Tavares Sacchi; Erica Valessa Ramos Gomes                                                                                                                                                                                                                                                                  |
| EPI_ISL_583498                                                                                                                                                           | Hospital Municipal Dr. Waldemar Tebaldi                   | Instituto Adolfo Lutz, Interdisciplinary Procedures Center, Strategic Laboratory                                                                                                                                                                               | Claudia Regina Gonçalves; Claudio Tavares Sacchi; Erica Valessa Ramos Gomes; Karoline Rodrigues Campos                                                                                                                                                                                                                                       |
| EPI_ISL_1469754, EPI_ISL_1469778, EPI_ISL_1469811                                                                                                                        | Hospital Municipal Getúlio Vargas                         | Epiclin                                                                                                                                                                                                                                                        | Ana Paula Muterle; Carolina Comerlato; Eliana Márcia Da Ros Wendland; Fernando Hayashi Sant'Anna; Janira Prichula; Juliana Comerlato                                                                                                                                                                                                         |
| EPI_ISL_527870, EPI_ISL_574578, EPI_ISL_603029, EPI_ISL_603039                                                                                                           | Hospital Municipal Mário Gatti                            | Instituto Adolfo Lutz, Interdisciplinary Procedures Center, Strategic Laboratory                                                                                                                                                                               | Claudia Regina Gonçalves; Claudio Tavares Sacchi; Erica Valessa Ramos Gomes; Karoline Rodrigues Campos                                                                                                                                                                                                                                       |
| EPI_ISL_527856                                                                                                                                                           | Hospital Municipal Prof. Waldomiro de Paula               | Instituto Adolfo Lutz, Interdisciplinary Procedures Center, Strategic Laboratory                                                                                                                                                                               | Claudia Regina Gonçalves; Claudio Tavares Sacchi; Erica Valessa Ramos Gomes                                                                                                                                                                                                                                                                  |
| EPI_ISL_1520110 to 1520112                                                                                                                                               | Hospital Municipal Reynaldo Guerra Cajati                 | Instituto Adolfo Lutz, Interdisciplinary Procedures Center, Strategic Laboratory                                                                                                                                                                               | Caio Vinicius Dias Lopes; Claudia Regina Gonçalves; Claudio Tavares Sacchi; Erica Valessa Ramos Gomes; Karoline Rodrigues Campos                                                                                                                                                                                                             |
| EPI_ISL_603028                                                                                                                                                           | Hospital Municipal Santa Ana                              | Instituto Adolfo Lutz, Interdisciplinary Procedures Center, Strategic Laboratory                                                                                                                                                                               | Claudia Regina Gonçalves; Claudio Tavares Sacchi; Erica Valessa Ramos Gomes; Karoline Rodrigues Campos                                                                                                                                                                                                                                       |
| EPI_ISL_524468, EPI_ISL_527859                                                                                                                                           | Hospital Municipal Vereador Jose Storopoli                | Instituto Adolfo Lutz, Interdisciplinary Procedures Center, Strategic Laboratory                                                                                                                                                                               | Claudia Regina Gonçalves; Claudio Tavares Sacchi; Erica Valessa Ramos Gomes                                                                                                                                                                                                                                                                  |
| EPI_ISL_471647                                                                                                                                                           | Hospital Municipal de Barueri Dr. Francisco Moran         | Instituto Adolfo Lutz, Interdisciplinary Procedures Center, Strategic Laboratory                                                                                                                                                                               | Claudia Regina Gonçalves; Claudio Tavares Sacchi; Erica Valessa Ramos Gomes                                                                                                                                                                                                                                                                  |
| EPI_ISL_527860                                                                                                                                                           | Hospital Municipal de Parelheiros Josanias Castanha Braga | Instituto Adolfo Lutz, Interdisciplinary Procedures Center, Strategic Laboratory                                                                                                                                                                               | Claudia Regina Gonçalves; Claudio Tavares Sacchi; Erica Valessa Ramos Gomes                                                                                                                                                                                                                                                                  |
| EPI_ISL_1533696                                                                                                                                                          | Hospital Municipal de Pedreira                            | Instituto Adolfo Lutz, Interdisciplinary Procedures Center, Strategic Laboratory                                                                                                                                                                               | Caio Vinicius Dias Lopes; Claudia Regina Gonçalves; Claudio Tavares Sacchi; Erica Valessa Ramos Gomes; Karoline Rodrigues Campos; Leonardo Jose Tadeu de Araujo                                                                                                                                                                              |
| EPI_ISL_527862                                                                                                                                                           | Hospital Municipal de Urgência                            | Instituto Adolfo Lutz, Interdisciplinary Procedures Center, Strategic Laboratory                                                                                                                                                                               | Claudia Regina Gonçalves; Claudio Tavares Sacchi; Erica Valessa Ramos Gomes                                                                                                                                                                                                                                                                  |
| EPI_ISL_468308, EPI_ISL_468315, EPI_ISL_515520, EPI_ISL_515526, EPI_ISL_515546, EPI_ISL_515551 to 515552, EPI_ISL_523955, EPI_ISL_523974, EPI_ISL_523976, EPI_ISL_527863 | see above                                                 | Hospital Municipal do Tatuape Carmino Caricchio                                                                                                                                                                                                                | Instituto Adolfo Lutz, Interdisciplinary Procedures Center, Strategic Laboratory                                                                                                                                                                                                                                                             |
| EPI_ISL_491451, EPI_ISL_491453                                                                                                                                           | Hospital México                                           | Incienza, Instituto Costarricense de Investigación y Enseñanza en Nutrición y Salud                                                                                                                                                                            | Adriana Godínez & Melany Calderon; Claudio Soto-Garita; Estela Cordero; Francisco Duarte; Hebleen Brenes                                                                                                                                                                                                                                     |
| EPI_ISL_480322 to 480327                                                                                                                                                 | Hospital Nacional de Niños                                | Charité Virology-University of Costa Rica                                                                                                                                                                                                                      | Andrei Montero Bonilla; Andres Moreira-Soto; Cristian Pérez Corrales; Eugenia Corrales-Aguilar; Ignacio Postigo-Hidalgo; Jan Felix Drexler                                                                                                                                                                                                   |
| EPI_ISL_1469591, EPI_ISL_1469762, EPI_ISL_1469833, EPI_ISL_1469846, EPI_ISL_1469851                                                                                      | Hospital Nossa Senhora das Graças                         | Epiclin                                                                                                                                                                                                                                                        | Ana Paula Muterle; Carolina Comerlato; Eliana Márcia Da Ros Wendland; Fernando Hayashi Sant'Anna; Janira Prichula; Juliana Comerlato                                                                                                                                                                                                         |
| EPI_ISL_539496                                                                                                                                                           | Hospital Nostra Senyora de Meritxell                      | Instituto de Salud Carlos III                                                                                                                                                                                                                                  | A. Monzón; F. Casas; F. Fernández; I. Jiménez; Iglesias-Caballero; M. Camarero; M. Cuesta; M. González-Esguevillas; M. Molinero Calamita; M. Zaballos; P. Jiménez; S. Juliá; S. Pozo; S. Varona                                                                                                                                              |
| EPI_ISL_1396374 to 1396382                                                                                                                                               | Hospital Notti Mendoza                                    | Nodo de Secuenciación Tierra del Fuego - Hospital Regional Ushuaia - Centro Austral De Investigaciones Cientificas - Universidad Nacional De Tierra Del Fuego on behalf of 'Proyecto Argentino Interinstitucional de genómica de SARS-CoV-2' (PAIS Consortium) | Adriana Recabarren; Aguirre Carolina; Alberto Carena; Alejandro Ezequiel Rojas; Andrea Falaschi; Bosio Lia; Carlos Espul; Clara Pott Godoy; Cristina Fernanda Nardi; Daiana Lang; Fernando Gallego; Ivan Dario Gramundi; María Belen Peralta Roca; Noelia Cuglia; Patricia Robledo; Sandra Grucci; Santiago Guillermo Ceballos; Vanina Eibar |
| EPI_ISL_539525                                                                                                                                                           | Hospital Nuestra Señora de Sonsoles                       | Instituto de Salud Carlos III                                                                                                                                                                                                                                  | A. Monzón; A. San Pedro; F. Casas; I. Jiménez; Iglesias-Caballero; M. Camarero; M. Cuesta; M. González-Esguevillas; M. Molinero Calamita; M. Zaballos; P. Jiménez; S. Juliá; S. Pozo; S. Varona                                                                                                                                              |

|                                                                                                                                                                                           |                                                                                |                                                                                                                                                                                                     |                                                                                                                                                                                                                                                                                                                                                                                                                                       |
|-------------------------------------------------------------------------------------------------------------------------------------------------------------------------------------------|--------------------------------------------------------------------------------|-----------------------------------------------------------------------------------------------------------------------------------------------------------------------------------------------------|---------------------------------------------------------------------------------------------------------------------------------------------------------------------------------------------------------------------------------------------------------------------------------------------------------------------------------------------------------------------------------------------------------------------------------------|
| EPI_ISL_471269 to 471271                                                                                                                                                                  | Hospital Oncológico Solca Núcleo de Quito                                      | Institute of Microbiology, Universidad San Francisco de Quito                                                                                                                                       | Belén Prado-Vivar; Bernardo Gutiérrez; Gabriel Trueba; Grace Salazar; Juan José Guadalupe; Marcos Di Stefano; Michelle Grunauer; Patricio Rojas-Silva; Paul Cárdenas; Sully Márquez; Verónica Barragán                                                                                                                                                                                                                                |
| EPI_ISL_1395808 to 1395811                                                                                                                                                                | Hospital Pediatrico Dr Avelino Castelan, Hospital 4 de Junio Dr Ramon Carrillo | Grupo de Genómica y Bioinformática del Instituto de Investigación de la Cadena Láctea CONICET-INTA on behalf of "Proyecto Argentino Interinstitucional de genómica de SARS-CoV-2" (PAIS Consortium) | AF; Amadio; Andrea Piedra Buena; Antonieta Cayré; Eberhardt; Gabriela Jurasek; Gili Andrea; Irazoqui; Laura Lescano; Lopez María Cecilia; MF; Marino Goia; Mayra Mendoza                                                                                                                                                                                                                                                              |
| EPI_ISL_419386 to 419387                                                                                                                                                                  | Hospital Prof. Doutor Fernando Fonseca, EPE                                    | Instituto Gulbenkian de Ciência                                                                                                                                                                     | Cathy Paulino; Joao Sobral; João Costa; Ricardo Leite; Susana Ladeira                                                                                                                                                                                                                                                                                                                                                                 |
| EPI_ISL_1405917                                                                                                                                                                           | Hospital Queen Elizabeth                                                       | Institute for Medical Research, Infectious Disease Research Centre, National Institutes of Health, Ministry of Health Malaysia                                                                      | Azizan MA; Kamel K; Suppiah J; Thayan R                                                                                                                                                                                                                                                                                                                                                                                               |
| EPI_ISL_1469697, EPI_ISL_1469799, EPI_ISL_1469824, EPI_ISL_1479127                                                                                                                        | Hospital Regina                                                                | Epiclin                                                                                                                                                                                             | Ana Paula Muterle; Carolina Comerlato; Eliana Márcia Da Ros Wendland; Fernando Hayashi Sant'Anna; Janira Prichula; Juliana Comerlato                                                                                                                                                                                                                                                                                                  |
| EPI_ISL_1502818 to 1502820, EPI_ISL_1502824 to 1502825, EPI_ISL_1502835 to 1502836, EPI_ISL_1502867, EPI_ISL_1503123 to 1503129                                                           | Hospital Regional Anita Moreno Los Santos                                      | Gorgas Memorial Laboratory of Health Studies                                                                                                                                                        | Best Dayana; Castillo Jorge; Espino Juliee; Franco Danilo; Gonzalez Claudia; Jessica Gondola; Leyda Abrego; Lopez-Verges Sandra; Marlene Castillo; Martinez Alexander; Moreno Ambar; Moreno Brechla; Oris Chavarria; Ortiz Alma                                                                                                                                                                                                       |
| EPI_ISL_1502821 to 1502823, EPI_ISL_1502826 to 1502834, EPI_ISL_1502837 to 1502841, EPI_ISL_1502861, EPI_ISL_1502864 to 1502865, EPI_ISL_1502868                                          | Hospital Regional Dr. Luis "Chicho" Fábrega                                    | Gorgas Memorial Laboratory of Health Studies                                                                                                                                                        | Castillo Jorge; Franco Danilo; Gonzalez Claudia; Herrera Genarino; Herrera Melissa; Jessica Gondola; Leyda Abrego; Lopez-Verges Sandra; Marlene Castillo; Martinez Alexander; Moreno Ambar; Moreno Brechla; Oris Chavarria; Ortiz Alma                                                                                                                                                                                                |
| EPI_ISL_527857                                                                                                                                                                            | Hospital Regional Vale do Ribeira                                              | Instituto Adolfo Lutz, Interdisciplinary Procedures Center, Strategic Laboratory                                                                                                                    | Claudia Regina Gonçalves; Claudio Tavares Sacchi; Erica Valessa Ramos Gomes                                                                                                                                                                                                                                                                                                                                                           |
| EPI_ISL_523956                                                                                                                                                                            | Hospital Regional de Assis                                                     | Instituto Adolfo Lutz, Interdisciplinary Procedures Center, Strategic Laboratory                                                                                                                    | Claudia Regina Gonçalves; Claudio Tavares Sacchi; Erica Valessa Ramos Gomes                                                                                                                                                                                                                                                                                                                                                           |
| EPI_ISL_524463                                                                                                                                                                            | Hospital Regional de Cotia                                                     | Instituto Adolfo Lutz, Interdisciplinary Procedures Center, Strategic Laboratory                                                                                                                    | Claudia Regina Gonçalves; Claudio Tavares Sacchi; Erica Valessa Ramos Gomes                                                                                                                                                                                                                                                                                                                                                           |
| EPI_ISL_491450, EPI_ISL_491454, EPI_ISL_491456                                                                                                                                            | Hospital San Juan de Dios                                                      | Incienza, Instituto Costarricense de Investigación y Enseñanza en Nutrición y Salud                                                                                                                 | Adriana Godínez & Melany Calderon; Claudio Soto-Garita; Estela Cordero; Francisco Duarte; Hebleen Brenes                                                                                                                                                                                                                                                                                                                              |
| EPI_ISL_419234, EPI_ISL_455336 to 455343, EPI_ISL_578196 to 578201                                                                                                                        | Hospital San Pedro                                                             | Instituto de Salud Carlos III                                                                                                                                                                       | A. Monzón; Alonso, C.; C. Alonso; Camarero, S.; Casas, I.; Cuesta, I.; F. Casas; González-Esguevillas, M.; I; I. Jiménez; Iglesias-Caballero; Iglesias-Caballero, M.; J.M Azcona; Jiménez, M.; Jiménez, P.; Juliá, M.; M. Blasco; M. Camarero; M. Cuesta; M. González-Esguevillas; M. Molinero Calamita; M. Zaballos; Molinero Calamita, M.; Monzón, S.; P. Jiménez; Pozo, F.; S. Juliá; S. Pozo; S. Varona; Varona, S.; Zaballos, A. |
| EPI_ISL_539558, EPI_ISL_539561 to 539562                                                                                                                                                  | Hospital San Pedro de Alcántara                                                | Instituto de Salud Carlos III                                                                                                                                                                       | A. Monzón; E. Cerro; F. Casas; I; I. Jiménez; Iglesias-Caballero; J. López; M. Camarero; M. Cuesta; M. González-Esguevillas; M. Molinero Calamita; M. Zaballos; M.A Cañizares; P. Jiménez; S. Juliá; S. Pozo; S. Varona                                                                                                                                                                                                               |
| EPI_ISL_510305 to 510332, EPI_ISL_613410 to 613411, EPI_ISL_1423681 to 1423695                                                                                                            | Hospital San Pedro de Alcántara (Cáceres)                                      | SeqCOVID-SPAIN consortium/IBV(CSIC)                                                                                                                                                                 | Cristina Muñoz Cuevas; Guadalupe Rodríguez Rodríguez and SeqCOVID-SPAIN consortium; Guadalupe Rodríguez Rodríguez and SeqCOVID-SPAIN consortium                                                                                                                                                                                                                                                                                       |
| EPI_ISL_491438, EPI_ISL_491440, EPI_ISL_491448, EPI_ISL_491452                                                                                                                            | Hospital San Rafael de Alajuela                                                | Incienza, Instituto Costarricense de Investigación y Enseñanza en Nutrición y Salud                                                                                                                 | Adriana Godínez & Melany Calderon; Claudio Soto-Garita; Estela Cordero; Francisco Duarte; Hebleen Brenes                                                                                                                                                                                                                                                                                                                              |
| EPI_ISL_527753 to 527754                                                                                                                                                                  | Hospital San Vicente De Paul                                                   | Incienza, Instituto Costarricense de Investigación y Enseñanza en Nutrición y Salud                                                                                                                 | Adriana Godínez & Melany Calderon; Claudio Soto-Garita; Estela Cordero; Francisco Duarte; Hebleen Porras                                                                                                                                                                                                                                                                                                                              |
| EPI_ISL_434536                                                                                                                                                                            | Hospital San Vicente de Paul                                                   | Incienza, Instituto Costarricense de Investigación y Enseñanza en Nutrición y Salud                                                                                                                 | Adriana Godínez & Melany Calderon; Claudio Soto-Garita; Estela Cordero; Francisco Duarte; Hebleen Porras                                                                                                                                                                                                                                                                                                                              |
| EPI_ISL_471552, EPI_ISL_523967                                                                                                                                                            | Hospital Sancta Maggiore                                                       | Instituto Adolfo Lutz, Interdisciplinary Procedures Center, Strategic Laboratory                                                                                                                    | Claudia Regina Gonçalves; Claudio Tavares Sacchi; Erica Valessa Ramos Gomes                                                                                                                                                                                                                                                                                                                                                           |
| EPI_ISL_603036                                                                                                                                                                            | Hospital Santa Ana                                                             | Instituto Adolfo Lutz, Interdisciplinary Procedures Center, Strategic Laboratory                                                                                                                    | Claudia Regina Gonçalves; Claudio Tavares Sacchi; Erica Valessa Ramos Gomes; Karoline Rodrigues Campos                                                                                                                                                                                                                                                                                                                                |
| EPI_ISL_515527, EPI_ISL_1533711                                                                                                                                                           | Hospital Santa Clara                                                           | Instituto Adolfo Lutz, Interdisciplinary Procedures Center, Strategic Laboratory                                                                                                                    | Caio Vinicius Dias Lopes; Claudia Regina Gonçalves; Claudio Tavares Sacchi; Erica Valessa Ramos Gomes; Karoline Rodrigues Campos; Leonardo Jose Tadeu de Araujo                                                                                                                                                                                                                                                                       |
| EPI_ISL_1520113                                                                                                                                                                           | Hospital Santo Antonio de Juquia Juquia                                        | Instituto Adolfo Lutz, Interdisciplinary Procedures Center, Strategic Laboratory                                                                                                                    | Caio Vinicius Dias Lopes; Claudia Regina Gonçalves; Claudio Tavares Sacchi; Erica Valessa Ramos Gomes; Karoline Rodrigues Campos                                                                                                                                                                                                                                                                                                      |
| EPI_ISL_1493586, EPI_ISL_1493590                                                                                                                                                          | Hospital Sao Marcos da Samamorro Agudo                                         | Instituto Adolfo Lutz, Interdisciplinary Procedures Center, Strategic Laboratory                                                                                                                    | Caio Vinicius Dias Lopes; Claudia Regina Gonçalves; Claudio Tavares Sacchi; Erica Valessa Ramos Gomes; Karoline Rodrigues Campos                                                                                                                                                                                                                                                                                                      |
| EPI_ISL_468310                                                                                                                                                                            | Hospital Sao Paulo de Ensino da UNIFESP                                        | Instituto Adolfo Lutz, Interdisciplinary Procedures Center, Strategic Laboratory                                                                                                                    | Claudia Regina Gonçalves; Claudio Tavares Sacchi; Erica Valessa Ramos Gomes                                                                                                                                                                                                                                                                                                                                                           |
| EPI_ISL_471545, EPI_ISL_471551, EPI_ISL_515528, EPI_ISL_515545, EPI_ISL_515559 to 515560, EPI_ISL_523969, EPI_ISL_523981, EPI_ISL_523988                                                  | Hospital Sao Paulo de Ensino da Unifesp                                        | Instituto Adolfo Lutz, Interdisciplinary Procedures Center, Strategic Laboratory                                                                                                                    | Claudia Regina Gonçalves; Claudio Tavares Sacchi; Erica Valessa Ramos Gomes                                                                                                                                                                                                                                                                                                                                                           |
| see above                                                                                                                                                                                 | Hospital Sao Paulo de Ensino da Unifesp                                        | Instituto Adolfo Lutz, Interdisciplinary Procedures Center, Strategic Laboratory                                                                                                                    | Claudia Regina Gonçalves; Claudio Tavares Sacchi; Erica Valessa Ramos Gomes                                                                                                                                                                                                                                                                                                                                                           |
| EPI_ISL_1469587, EPI_ISL_1469593, EPI_ISL_1469701, EPI_ISL_1469801, EPI_ISL_1469820, EPI_ISL_1469840, EPI_ISL_1469843                                                                     | Hospital Sapiranga                                                             | Epiclin                                                                                                                                                                                             | Ana Paula Muterle; Carolina Comerlato; Eliana Márcia Da Ros Wendland; Fernando Hayashi Sant'Anna; Janira Prichula; Juliana Comerlato                                                                                                                                                                                                                                                                                                  |
| see above                                                                                                                                                                                 | Hospital Sapiranga                                                             | Epiclin                                                                                                                                                                                             | Ana Paula Muterle; Carolina Comerlato; Eliana Márcia Da Ros Wendland; Fernando Hayashi Sant'Anna; Janira Prichula; Juliana Comerlato                                                                                                                                                                                                                                                                                                  |
| EPI_ISL_524484                                                                                                                                                                            | Hospital Schwyz                                                                | Institute of Medical Virology, University of Zurich                                                                                                                                                 | Alexandra Trkola; Andrea Zbinden; Fiona Steiner; Gabriela Ziltener; Jon Huder; Jürg Böni; Maryam Zaheri; Michael Huber; Patrick Redli; Riccarda Capaut; Stefan Schmutz; Verena Kufner                                                                                                                                                                                                                                                 |
| EPI_ISL_1482627, EPI_ISL_1482629 to 1482631, EPI_ISL_1491363 to 1491365                                                                                                                   | Hospital Sharp                                                                 | Microbial Genomics Laboratory                                                                                                                                                                       | Alejandra Garcia-Gasca; Bruno Gomez-Gil; Daniel Fregoso-Rueda; Julissa Enciso-Ibarra                                                                                                                                                                                                                                                                                                                                                  |
| EPI_ISL_1469670, EPI_ISL_1469717, EPI_ISL_1469739, EPI_ISL_1469750, EPI_ISL_1469755, EPI_ISL_1469789, EPI_ISL_1469807, EPI_ISL_1469818, EPI_ISL_1469822, EPI_ISL_1469830, EPI_ISL_1469842 | Hospital São Francisco de Assis                                                | Epiclin                                                                                                                                                                                             | Ana Paula Muterle; Carolina Comerlato; Eliana Márcia Da Ros Wendland; Fernando Hayashi Sant'Anna; Janira Prichula; Juliana Comerlato                                                                                                                                                                                                                                                                                                  |
| EPI_ISL_414015 to 414017                                                                                                                                                                  | Hospital São Joaquim Beneficencia Portuguesa                                   | Instituto Adolfo Lutz, Interdisciplinary Procedures Center, Strategic Laboratory                                                                                                                    | Audrey Cilli; Carlos Henrique Camargo; Claudia Regina Gonçalves; Claudio Tavares Sacchi; Daniela Bernardes Borges da Silva; Ester Cerdeira Sabino; Fabiana Cristina Pereira dos Santos; Fabiana Cristina Pereira dos Santos Terezinha Maria de Paiva; Maria do Carmo Sampaio Tavares Timenetsky; SimoneGuadagnucci Morillo; Terezinha Maria de Paiva                                                                                  |
| EPI_ISL_455350 to 455351                                                                                                                                                                  | Hospital Txagorritxu                                                           | Instituto de Salud Carlos III                                                                                                                                                                       | A. Monzón; C. Gómez; F. Casas; I; I. Jiménez; Iglesias-Caballero; M. Camarero; M. Cuesta; M. González-Esguevillas; M. Molinero Calamita; M. Zaballos; P. Jiménez; S. Juliá; S. Pozo; S. Varona                                                                                                                                                                                                                                        |
| EPI_ISL_1469668                                                                                                                                                                           | Hospital Unimed Vale do Cai                                                    | Epiclin                                                                                                                                                                                             | Ana Paula Muterle; Carolina Comerlato; Eliana Márcia Da Ros Wendland; Fernando Hayashi Sant'Anna; Janira Prichula; Juliana Comerlato                                                                                                                                                                                                                                                                                                  |
| EPI_ISL_1394460 to 1394499                                                                                                                                                                | Hospital Universitari Arnau de Vilanova                                        | Hospital Universitari Vall d'Hebron - Vall d'Hebron Institut de                                                                                                                                     | Andrés Antón; Ariadna Rando; Carla Castillo; Cristina Andrés; Damir Garcia-Cehic; Josep F Abril; Josep Quer; Juliana Esperalba; María Carmen Martín;                                                                                                                                                                                                                                                                                  |

|                                                                                                                                                                                                                                                                                                                                                                                                                                                                                                                                                                      |                                                                                                        | Recerca                                                                          | Maria Gema Codina; María Piñana; Tomàs Pumarola                                                                                                                                                                                                                                                                                                                                                                |
|----------------------------------------------------------------------------------------------------------------------------------------------------------------------------------------------------------------------------------------------------------------------------------------------------------------------------------------------------------------------------------------------------------------------------------------------------------------------------------------------------------------------------------------------------------------------|--------------------------------------------------------------------------------------------------------|----------------------------------------------------------------------------------|----------------------------------------------------------------------------------------------------------------------------------------------------------------------------------------------------------------------------------------------------------------------------------------------------------------------------------------------------------------------------------------------------------------|
| EPI_ISL_1423903 to 1423918                                                                                                                                                                                                                                                                                                                                                                                                                                                                                                                                           | Hospital Universitari Arnau de Vilanova de Lleida                                                      | SeqCOVID-SPAIN consortium/IBV(CSIC)                                              | Alba Bellés Bellés; Albert Bernet Sánchez; Eric López González; Iván Prats Sánchez; Mercè García González and SeqCOVID-SPAIN consortium                                                                                                                                                                                                                                                                        |
| EPI_ISL_483059                                                                                                                                                                                                                                                                                                                                                                                                                                                                                                                                                       | Hospital Universitari Germans Trias i Pujol                                                            | IrsiCaixa AIDS Research Lab                                                      | A. Valencia; B. Clotet; C. Avila-Nieto; E. Vidal; G. Cantero; I. Blanco; J. Blanco; J. Carrillo; J. Rodon; J. Segalés; J. Vergara-Alert; M. Noguera-Julian; M. Parera; M. Puig; M.T. Terrón; N. Izquierdo-Useros; S. Cruz; V. Guallar                                                                                                                                                                          |
| EPI_ISL_535575, EPI_ISL_538552                                                                                                                                                                                                                                                                                                                                                                                                                                                                                                                                       | Hospital Universitari Germans Trias i Pujol(HUGTIP)/Fundació Lluita contra la SIDA (FLSida)            | IrsiCaixa AIDS Research Lab                                                      | Bonaventura Clotet; Ester Ballana; Joaquim Segalés; Jorge Carrillo; Julia Blanco; Lidia Ruiz; Marc Noguera-Julian; María Pilar Armengol; Mariona Parera; Marta Massanella; Nuria Izquierdo; Roger Paredes                                                                                                                                                                                                      |
| EPI_ISL_418268, EPI_ISL_471472, EPI_ISL_510689                                                                                                                                                                                                                                                                                                                                                                                                                                                                                                                       | Hospital Universitari Germans Trias i Pujol(HUGTIP)/Fundació Lluita contra la SIDA (FLSida)/IRTA-CReSA | IrsiCaixa AIDS Research Lab                                                      | Albert Bensaid; Bonaventura Clotet; Joaquim Segalés; Jordi Rodón; Jorge Carrillo; Julia Blanco; Julia Vergara; Lidia Ruiz; Marc Noguera-Julian; Nuria Izquierdo; Pilar Armengol; Roger Paredes                                                                                                                                                                                                                 |
| EPI_ISL_516193                                                                                                                                                                                                                                                                                                                                                                                                                                                                                                                                                       | Hospital Universitari Germans Trias i Pujol.                                                           | IrsiCaixa AIDS Research Lab                                                      | Bonaventura Clotet; Ester Ballana; Joaquim Segalés; Jorge Carrillo; Julia Blanco; Lidia Ruiz; Marc Noguera-Julian; María Pilar Armengol; Mariona Parera; Marta Massanella; Nuria Izquierdo; Roger Paredes                                                                                                                                                                                                      |
| EPI_ISL_1394500 to 1394505                                                                                                                                                                                                                                                                                                                                                                                                                                                                                                                                           | Hospital Universitari Joan XXIII de Tarragona                                                          | Hospital Universitari Vall d'Hebron - Vall d'Hebron Institut de Recerca          | Andrés Antón; Ariadna Rando; Carla Castillo; Cristina Andrés; Dami García-Cehic; Josep F Abril; Josep Quer; Juliana Esperalba; María Carmen Martín; María Gema Codina; María Piñana; Tomàs Pumarola                                                                                                                                                                                                            |
| EPI_ISL_418860 to 418861, EPI_ISL_444971 to 444990, EPI_ISL_447532 to 447533, EPI_ISL_450337, EPI_ISL_458130 to 458132, EPI_ISL_1391098 to 1391202, EPI_ISL_1394415 to 1394459                                                                                                                                                                                                                                                                                                                                                                                       | see above                                                                                              | Hospital Universitari Vall d'Hebron - Vall d'Hebron Institut de Recerca          | Andrés Antón; Ariadna Rando; Carla Castillo; Cristina Andrés; Dami García-Cehic; Dami García-Cehic; Dami García-Cehic; Josep F Abril; Josep Gregori; Josep Quer; Juliana Esperalba; María Carmen Martín; María Carmen Martín; María Gema Codina; María Piñana; Mercedes Guerrero-Murillo; Tomàs Pumarola                                                                                                       |
| EPI_ISL_538003 to 538054, EPI_ISL_539245                                                                                                                                                                                                                                                                                                                                                                                                                                                                                                                             | Hospital Universitari i Politècnic La Fe de València                                                   | SeqCOVID-SPAIN consortium/IBV(CSIC)                                              | Ana Gil Brusola; Eva González Barbera; José Luis López Hontangas and SeqCOVID-SPAIN consortium; María Dolores Gómez Ruiz; Salvador Giner Almaraz                                                                                                                                                                                                                                                               |
| EPI_ISL_421171 to 421180, EPI_ISL_428683 to 428711, EPI_ISL_430718, EPI_ISL_529972 to 530024, EPI_ISL_534327 to 534329                                                                                                                                                                                                                                                                                                                                                                                                                                               | Hospital Universitario 12 de Octubre                                                                   | Hospital Universitario 12 de Octubre                                             | Elias Dahdouh; Esther Viedma; Fernando Lázaro; Jesús Mingorance; Juan Carlos Galán; Julio García; Ma Dolores Folgueira; Mª Dolores Folgueira; Natalia Stella; Rafael Cantón; Rafael Delgado; Raúl Recio; Sara González                                                                                                                                                                                         |
| EPI_ISL_417952, EPI_ISL_417954, EPI_ISL_417956 to 417957, EPI_ISL_417961, EPI_ISL_417963, EPI_ISL_417967, EPI_ISL_418182                                                                                                                                                                                                                                                                                                                                                                                                                                             | see above                                                                                              | Hospital Universitario 12 de Octubre                                             | Elias Dahdouh; Esther Viedma; Fernando Lázaro; Jesús Mingorance; Juan Carlos Galán; Julio García; Mª Dolores Folgueira; Natalia Stella; Rafael Cantón; Rafael Delgado; Sara González                                                                                                                                                                                                                           |
| EPI_ISL_467092 to 467183, EPI_ISL_500228 to 500286, EPI_ISL_509616 to 509618, EPI_ISL_537874 to 537945, EPI_ISL_538118, EPI_ISL_538231 to 538232                                                                                                                                                                                                                                                                                                                                                                                                                     | Hospital Universitario Araba. Vitoria-Gasteiz                                                          | SeqCOVID-SPAIN consortium/IBV(CSIC)                                              | Amaia Aguirre Quiñonero; Andrés Canut Blasco and SeqCOVID-SPAIN consortium; Andrés Canut Blasco. and SeqCOVID-SPAIN consortium; Carmen Gómez González; Ma Concepción Lecaroz Agara; Ma Rosario Almela Ferrer; Marina Fernández Torres; Mª Concepción Lecaroz Agara; Mª Rosario Almela Ferrer; Silvia Hernández Crespo                                                                                          |
| EPI_ISL_452692 to 452786                                                                                                                                                                                                                                                                                                                                                                                                                                                                                                                                             | Hospital Universitario Araba. Vitoria-Gasteiz,                                                         | SeqCOVID-SPAIN consortium/IBV(CSIC)                                              | Amaia Aguirre Quiñonero; Andrés Canut Blasco and SeqCOVID-SPAIN consortium; Carmen Gómez González; María Concepción Lecaroz Agara; María Rosario Almela Ferrer; Marina Fernández Torres; Silvia Hernández Crespo                                                                                                                                                                                               |
| EPI_ISL_1538412                                                                                                                                                                                                                                                                                                                                                                                                                                                                                                                                                      | Hospital Universitario Basurto Clinical Microbiology Service                                           | Biocruces Bizkaia                                                                | Ana Belen de la Hoz; Estibalza Ugalde Zarraga; Jose Luis Díaz de Tuesta del Arco; Mikel Gallego Rodrigo; Mikel Joseba Urrutikoetxea-Gutierrez; Mª Carmen Nieto Toboso                                                                                                                                                                                                                                          |
| EPI_ISL_455326                                                                                                                                                                                                                                                                                                                                                                                                                                                                                                                                                       | Hospital Universitario Insular de Gran Canaria                                                         | Instituto de Salud Carlos III                                                    | A. Hernández; A. Monzón; F. Casas; I; I. Jiménez; Iglesias-Caballero; M. Camarero; M. Cuesta; M. González-Esguevillas; M. Molinero Calamita; M. Zaballos; P. Jiménez; S. Juliá; S. Pozo; S. Varona                                                                                                                                                                                                             |
| EPI_ISL_428674 to 428682, EPI_ISL_430719 to 430721, EPI_ISL_435144                                                                                                                                                                                                                                                                                                                                                                                                                                                                                                   | Hospital Universitario La Paz                                                                          | Hospital Universitario 12 de Octubre                                             | Elias Dahdouh; Esther Viedma; Fernando Lázaro; Jesús Mingorance; Juan Carlos Galán; Julio García; Mª Dolores Folgueira; Natalia Stella; Rafael Cantón; Rafael Delgado; Raúl Recio; Sara González                                                                                                                                                                                                               |
| EPI_ISL_417969, EPI_ISL_417972, EPI_ISL_417975, EPI_ISL_417978, EPI_ISL_530025 to 530093, EPI_ISL_534330 to 534333                                                                                                                                                                                                                                                                                                                                                                                                                                                   | Hospital Universitario La Paz                                                                          | Hospital Universitario La Paz                                                    | Elias Dahdouh; Esther Viedma; Fernando Lázaro; Jesús Mingorance; Juan Carlos Galán; Julio García; Ma Dolores Folgueira; María Rodríguez; Mª Dolores Folgueira; Natalia Stella; Rafael Cantón; Rafael Delgado; Raúl Recio; Sara González                                                                                                                                                                        |
| EPI_ISL_537809 to 537810                                                                                                                                                                                                                                                                                                                                                                                                                                                                                                                                             | Hospital Universitario Marqués de Valdecilla (Santander), Servicio de Microbiología                    | SeqCOVID-SPAIN consortium/IBV(CSIC)                                              | Daniel Pablo Marcos; Jesús Rodríguez Lozano; Jose Manuel Méndez Legaza; María Eliecer Cano García; María Siller Ruiz and SeqCOVID-SPAIN consortium; Mónica Gozalo Margüello                                                                                                                                                                                                                                    |
| EPI_ISL_538690 to 538747, EPI_ISL_582091 to 582109, EPI_ISL_1423593 to 1423632, EPI_ISL_1423816 to 1423848                                                                                                                                                                                                                                                                                                                                                                                                                                                           | Hospital Universitario Marqués de Valdecilla - IDIVAL (Santander, Cantabria)                           | SeqCOVID-SPAIN consortium/IBV(CSIC)                                              | Daniel Pablo Marcos; Jesús Rodríguez Rodríguez; Jose Manuel Méndez Legaza; María Eliecer Cano García; María Siller Ruiz and SeqCOVID-SPAIN consortium; Mónica Gozalo Margüello                                                                                                                                                                                                                                 |
| EPI_ISL_539503 to 539508, EPI_ISL_539513 to 539519, EPI_ISL_578189, EPI_ISL_578192 to 578193                                                                                                                                                                                                                                                                                                                                                                                                                                                                         | Hospital Universitario Miguel Servet                                                                   | Instituto de Salud Carlos III                                                    | A. Monzón; A. Rezusta; F. Casas; I; I. Jiménez; Iglesias-Caballero; M. Camarero; M. Cuesta; M. González-Esguevillas; M. Molinero Calamita; M. Zaballos; P. Jiménez; R. Benito; S. Juliá; S. Pozo; S. Varona                                                                                                                                                                                                    |
| EPI_ISL_452453 to 452471, EPI_ISL_467064 to 467085                                                                                                                                                                                                                                                                                                                                                                                                                                                                                                                   | Hospital Universitario Puerta del Mar de Cádiz - INIBICA                                               | SeqCOVID-SPAIN consortium/IBV(CSIC)                                              | Fátima-Galán-Sánchez; Manuel Rodríguez-Iglesias and SeqCOVID-SPAIN consortium; Manuel Rodríguez-Iglesias and SeqCOVID-SPAIN consortium; Salud Rodríguez-Pallares                                                                                                                                                                                                                                               |
| EPI_ISL_530094 to 530099                                                                                                                                                                                                                                                                                                                                                                                                                                                                                                                                             | Hospital Universitario Ramón y Cajal                                                                   | Hospital Universitario 12 de Octubre                                             | Elias Dahdouh; Esther Viedma; Fernando Lázaro; Jesús Mingorance; Juan Carlos Galán; Julio García; Mª Dolores Folgueira; Natalia Stella; Rafael Cantón; Rafael Delgado; Raúl Recio; Sara González                                                                                                                                                                                                               |
| EPI_ISL_417979 to 417981, EPI_ISL_530100 to 530119, EPI_ISL_534334                                                                                                                                                                                                                                                                                                                                                                                                                                                                                                   | Hospital Universitario Ramón y Cajal                                                                   | Hospital Universitario La Paz                                                    | Elias Dahdouh; Esther Viedma; Fernando Lázaro; Jesús Mingorance; Juan Carlos Galán; Julio García; Ma Dolores Folgueira; María Rodríguez; Mª Dolores Folgueira; Natalia Stella; Rafael Cantón; Rafael Delgado; Raúl Recio; Sara González                                                                                                                                                                        |
| EPI_ISL_419230                                                                                                                                                                                                                                                                                                                                                                                                                                                                                                                                                       | Hospital Universitario Virgen de las Nieves                                                            | Instituto de Salud Carlos III                                                    | Camarero, S.; Casas, I.; Cuesta, I.; González-Esguevillas, M.; Iglesias-Caballero, M.; Jiménez, M.; Jiménez, P.; Juliá, M.; Molinero Calamita, M.; Monzón, S.; Pozo, F.; Sanbonmatsu, S.; Varona, S.; Zaballos, A.                                                                                                                                                                                             |
| EPI_ISL_467059 to 467063, EPI_ISL_474797, EPI_ISL_474832 to 474836, EPI_ISL_474841 to 474846, EPI_ISL_474850 to 474852, EPI_ISL_474854 to 474900, EPI_ISL_474907 to 474909, EPI_ISL_474920, EPI_ISL_474922 to 474932, EPI_ISL_474934 to 474939, EPI_ISL_474942 to 474944, EPI_ISL_474948 to 474950, EPI_ISL_474957, EPI_ISL_500160 to 500161, EPI_ISL_500163 to 500165, EPI_ISL_500168 to 500206, EPI_ISL_500208, EPI_ISL_500210 to 500217, EPI_ISL_500220, EPI_ISL_500222 to 500227, EPI_ISL_510424 to 510460, EPI_ISL_538672 to 538689, EPI_ISL_1423926 to 1423933 | see above                                                                                              | SeqCOVID-SPAIN consortium/IBV(CSIC)                                              | Irene Pedrosa Corral; José M. Navarro-Marí and SeqCOVID-SPAIN consortium; Mercedes Pérez Ruiz; Sara Sanbonmatsu Gámez                                                                                                                                                                                                                                                                                          |
| EPI_ISL_468318, EPI_ISL_468321, EPI_ISL_547574                                                                                                                                                                                                                                                                                                                                                                                                                                                                                                                       | Hospital Universitario da USP                                                                          | Instituto Adolfo Lutz, Interdisciplinary Procedures Center, Strategic Laboratory | Claudia Regina Gonçalves; Claudio Tavares Sacchi; Erica Valessa Ramos Gomes; Karoline Rodrigues Campos                                                                                                                                                                                                                                                                                                         |
| EPI_ISL_471539, EPI_ISL_1533702, EPI_ISL_1533712, EPI_ISL_1533727                                                                                                                                                                                                                                                                                                                                                                                                                                                                                                    | Hospital Universitario da USP Sao Paulo                                                                | Instituto Adolfo Lutz, Interdisciplinary Procedures Center, Strategic Laboratory | Caio Vinicius Dias Lopes; Claudia Regina Gonçalves; Claudio Tavares Sacchi; Erica Valessa Ramos Gomes; Karoline Rodrigues Campos; Leonardo Jose Tadeu de Araujo                                                                                                                                                                                                                                                |
| EPI_ISL_534314                                                                                                                                                                                                                                                                                                                                                                                                                                                                                                                                                       | Hospital Universitario da USP de SP                                                                    | Instituto Adolfo Lutz, Interdisciplinary Procedures Center, Strategic Laboratory | Claudia Regina Gonçalves; Claudio Tavares Sacchi; Erica Valessa Ramos Gomes                                                                                                                                                                                                                                                                                                                                    |
| EPI_ISL_419233, EPI_ISL_455325, EPI_ISL_539532                                                                                                                                                                                                                                                                                                                                                                                                                                                                                                                       | Hospital Universitario de Canarias                                                                     | Instituto de Salud Carlos III                                                    | A. Monzón; B. Castro; Camarero, S.; Casas, I.; Castro, B.; Cuesta, I.; F. Casas; González-Esguevillas, M.; I; I. Jiménez; Iglesias-Caballero; Iglesias-Caballero, M.; Jiménez, M.; Jiménez, P.; Juliá, M.; M. Camarero; M. Cuesta; M. González-Esguevillas; M. Molinero Calamita; M. Zaballos; Molinero Calamita, M.; Monzón, S.; P. Jiménez; Pozo, F.; S. Juliá; S. Pozo; S. Varona; Varona, S.; Zaballos, A. |
| EPI_ISL_539520 to 539522                                                                                                                                                                                                                                                                                                                                                                                                                                                                                                                                             | Hospital Universitario de Ceuta                                                                        | Instituto de Salud Carlos III                                                    | A. Monzón; F. Casas; G. Sánchez; I; I. Jiménez; Iglesias-Caballero; J. López; M. Camarero; M. Cuesta; M. González-Esguevillas; M. Molinero Calamita; M. Zaballos; P. Jiménez; S. Juliá; S. Pozo; S. Varona                                                                                                                                                                                                     |
| EPI_ISL_467086 to 467091, EPI_ISL_474910 to                                                                                                                                                                                                                                                                                                                                                                                                                                                                                                                          | Hospital Universitario de Gran Canaria Dr. Negrín                                                      | SeqCOVID-SPAIN consortium/IBV(CSIC)                                              | Ana Bordes Benítez and SeqCOVID-SPAIN consortium; Francisco J. Chamizo López; M. Carmen Pérez González                                                                                                                                                                                                                                                                                                         |

|                                                                                                                                                                                                                                                                                                                                                                                                                                                                                                                                                                                           |                                                                                    |                                                                                                                                                                                                       |                                                                                                                                                                                                                                                                                                                                                                                                                                                                                 |
|-------------------------------------------------------------------------------------------------------------------------------------------------------------------------------------------------------------------------------------------------------------------------------------------------------------------------------------------------------------------------------------------------------------------------------------------------------------------------------------------------------------------------------------------------------------------------------------------|------------------------------------------------------------------------------------|-------------------------------------------------------------------------------------------------------------------------------------------------------------------------------------------------------|---------------------------------------------------------------------------------------------------------------------------------------------------------------------------------------------------------------------------------------------------------------------------------------------------------------------------------------------------------------------------------------------------------------------------------------------------------------------------------|
| 474918, EPI_ISL_537691 to 537728, EPI_ISL_537788 to 537808, EPI_ISL_561370 to 561372, EPI_ISL_1470297 to 1470374                                                                                                                                                                                                                                                                                                                                                                                                                                                                          | Hospital Universitario de La Ribera (Alzira, València)                             | SeqCOVID-SPAIN consortium/IBV(CSIC)                                                                                                                                                                   | Julia González and SeqCOVID-SPAIN consortium; Olalla Martínez Macías                                                                                                                                                                                                                                                                                                                                                                                                            |
| EPI_ISL_539246 to 539283                                                                                                                                                                                                                                                                                                                                                                                                                                                                                                                                                                  | Hospital Universitario                                                             | Epiclin                                                                                                                                                                                               | Ana Paula Muterle; Carolina Comerlato; Eliana Márcia Da Ros Wendland; Fernando Hayashi Sant'Anna; Janira Prichula; Juliana Comerlato                                                                                                                                                                                                                                                                                                                                            |
| EPI_ISL_1469570, EPI_ISL_1469773, EPI_ISL_1469815                                                                                                                                                                                                                                                                                                                                                                                                                                                                                                                                         | Hospital Universitario de Canoas                                                   | Epiclin                                                                                                                                                                                               | Ana Paula Muterle; Carolina Comerlato; Eliana Márcia Da Ros Wendland; Fernando Hayashi Sant'Anna; Janira Prichula; Juliana Comerlato                                                                                                                                                                                                                                                                                                                                            |
| EPI_ISL_1469774, EPI_ISL_1469793, EPI_ISL_1469844, EPI_ISL_1469849                                                                                                                                                                                                                                                                                                                                                                                                                                                                                                                        | Hospital Valle del Nalon                                                           | Laboratorio de Virologia HUCA                                                                                                                                                                         | Abreu F; Alvarez-Arguelles ME; Boga JA; Castelló C; Costales I; Coto E; Gómez de Oña J; Martín-Rodríguez G; Melón S; Perez-Martinez Z; Rojo S; Sandoval M                                                                                                                                                                                                                                                                                                                       |
| EPI_ISL_1399257                                                                                                                                                                                                                                                                                                                                                                                                                                                                                                                                                                           | Hospital Valle del Nalón                                                           | Laboratorio de Virologia HUCA                                                                                                                                                                         | Abreu F; Alvarez-Arguelles ME; Boga JA; Castelló C; Costales I; Coto E; Gómez de Oña J; Martín-Rodríguez G; Melón S; Perez-Martinez Z; Rojo S; Sandoval M                                                                                                                                                                                                                                                                                                                       |
| EPI_ISL_1399248, EPI_ISL_1406198, EPI_ISL_1406407                                                                                                                                                                                                                                                                                                                                                                                                                                                                                                                                         | Hospital Virgen de las Nieves                                                      | Instituto de Salud Carlos III                                                                                                                                                                         | A. Monzón; F. Casas; I; I. Jiménez; Iglesias-Caballero; J. Lepe; J.M Navarro; M. Camarero; M. Cuesta; M. González-Esguevillas; M. Molinero Calamita; M. Zaballos; P. Jiménez; S. Juliá; S. Pozo; S. Sanbonmatsu; S. Varona                                                                                                                                                                                                                                                      |
| EPI_ISL_455315 to 455322, EPI_ISL_455324, EPI_ISL_539497 to 539498, EPI_ISL_578187 to 578188                                                                                                                                                                                                                                                                                                                                                                                                                                                                                              | Hospital Virgen del Rocío                                                          | Instituto de Salud Carlos III                                                                                                                                                                         | A. Monzón; F. Casas; I; I. Jiménez; Iglesias-Caballero; J. Lepe; M. Camarero; M. Cuesta; M. González-Esguevillas; M. Molinero Calamita; M. Zaballos; P. Jiménez; S. Juliá; S. Pozo; S. Varona                                                                                                                                                                                                                                                                                   |
| EPI_ISL_455314, EPI_ISL_455323                                                                                                                                                                                                                                                                                                                                                                                                                                                                                                                                                            | Hospital da Clínicas da Faculdade de Medicina da Universidade de São Paulo         | Instituto de Medicina Tropical da Univesidade de São Paulo                                                                                                                                            | Camila Alves Maia da Silva; Carolina S. Lazar; Cecilia Salette Alencar; Darlan da Silva Candido; Erika Regina Manuli; Ester Sabino; Flavia Cristina da Silva Sales; Giula Magalhaes Ferreira; Jaqueline Goes de Jesus; Julien Theze; Mariana Severo Ramundo; Nuno Faria; Samples: Ingra Morales Claro; Sequencing: Ingra Morales Claro; Sílvia F. Costa; Thais de Moura Coletti                                                                                                 |
| EPI_ISL_534313                                                                                                                                                                                                                                                                                                                                                                                                                                                                                                                                                                            | Hospital da Sta Casa de Sto Amaro                                                  | Instituto Adolfo Lutz, Interdisciplinary Procedures Center, Strategic Laboratory                                                                                                                      | Claudia Regina Gonçalves; Claudio Tavares Sacchi; Erica Valessa Ramos Gomes                                                                                                                                                                                                                                                                                                                                                                                                     |
| EPI_ISL_1533699                                                                                                                                                                                                                                                                                                                                                                                                                                                                                                                                                                           | Hospital das Clinicas Luzia de Pinho Melo                                          | Instituto Adolfo Lutz, Interdisciplinary Procedures Center, Strategic Laboratory                                                                                                                      | Caio Vinicius Dias Lopes; Claudia Regina Gonçalves; Claudio Tavares Sacchi; Erica Valessa Ramos Gomes; Karoline Rodrigues Campos; Leonardo Jose Tadeu de Araujo                                                                                                                                                                                                                                                                                                                 |
| EPI_ISL_511577 to 511578                                                                                                                                                                                                                                                                                                                                                                                                                                                                                                                                                                  | Hospital de Braga                                                                  | Instituto Nacional de Saude (INSA)                                                                                                                                                                    | Borges et al                                                                                                                                                                                                                                                                                                                                                                                                                                                                    |
| EPI_ISL_1406278 to 1406279, EPI_ISL_1406432, EPI_ISL_1406463                                                                                                                                                                                                                                                                                                                                                                                                                                                                                                                              | Hospital de Cabueñes                                                               | Laboratorio de Virologia HUCA                                                                                                                                                                         | Abreu F; Alvarez-Arguelles ME; Boga JA; Castelló C; Costales I; Coto E; Gómez de Oña J; Martín-Rodríguez G; Melón S; Perez-Martinez Z; Rojo S; Sandoval M                                                                                                                                                                                                                                                                                                                       |
| EPI_ISL_455352 to 455354                                                                                                                                                                                                                                                                                                                                                                                                                                                                                                                                                                  | Hospital de Cruces                                                                 | Instituto de Salud Carlos III                                                                                                                                                                         | A. Monzón; F. Casas; I; I. Jiménez; Iglesias-Caballero; M. Aranzamendi; M. Camarero; M. Cuesta; M. González-Esguevillas; M. Molinero Calamita; M. Zaballos; P. Jiménez; S. Juliá; S. Pozo; S. Varona                                                                                                                                                                                                                                                                            |
| EPI_ISL_476563, EPI_ISL_476565, EPI_ISL_476567 to 476568, EPI_ISL_476571, EPI_ISL_476573, EPI_ISL_615121                                                                                                                                                                                                                                                                                                                                                                                                                                                                                  | Hospital de Pediatría "Prof. Dr. Juan P Garrahan"                                  | Héritas                                                                                                                                                                                               | Andrea Mangano; Bianca Brun; Cristian Rohr; Dalmacio Pereyra; Fabian Fay; Maria Florencia Fernandez; Martin Vazquez; Mauricio Grisolia; Priscila Aldabe; Roberta Crespo                                                                                                                                                                                                                                                                                                         |
| EPI_ISL_1469600, EPI_ISL_1469771, EPI_ISL_1469827                                                                                                                                                                                                                                                                                                                                                                                                                                                                                                                                         | Hospital de Portão                                                                 | Epiclin                                                                                                                                                                                               | Ana Paula Muterle; Carolina Comerlato; Eliana Márcia Da Ros Wendland; Fernando Hayashi Sant'Anna; Janira Prichula; Juliana Comerlato                                                                                                                                                                                                                                                                                                                                            |
| EPI_ISL_414577 to 414578                                                                                                                                                                                                                                                                                                                                                                                                                                                                                                                                                                  | Hospital de Talca, Chile                                                           | Instituto de Salud Publica de Chile                                                                                                                                                                   | Alejandra Acevedo; Andrés E. Castillo; Bárbara Parra; Carolina Tambley; Gabriel Leal; Gisselle Barra; Jaime Lagos; Javier Tognarelli; Jorge Fernández.; Loredana Arata; Patricia Bustos; Paz Tapia; Rodrigo Fasce; Soledad Ulloa; Winston Andrade                                                                                                                                                                                                                               |
| EPI_ISL_510246 to 510267                                                                                                                                                                                                                                                                                                                                                                                                                                                                                                                                                                  | Hospital de la Santa Creu i Sant Pau. Servicio de Microbiología                    | SeqCOVID-SPAIN consortium/IBV(CSIC)                                                                                                                                                                   | Elisenda Miró and SeqCOVID-SPAIN consortium; Ferran Navarro; Núria Rabella                                                                                                                                                                                                                                                                                                                                                                                                      |
| EPI_ISL_541067 to 541081                                                                                                                                                                                                                                                                                                                                                                                                                                                                                                                                                                  | Hospital de la Santa Creu i Sant Pau. Servicio de Microbiología                    | SeqCOVID-SPAIN consortium/Institute of Biomedicine of Valencia, IBV-CSIC                                                                                                                              | Elisenda Miró and SeqCOVID-SPAIN consortium; Ferran Navarro; Núria Rabella                                                                                                                                                                                                                                                                                                                                                                                                      |
| EPI_ISL_1406283 to 1406285, EPI_ISL_1406411, EPI_ISL_1406431                                                                                                                                                                                                                                                                                                                                                                                                                                                                                                                              | Hospital del Oriente de Asturias                                                   | Laboratorio de Virologia HUCA                                                                                                                                                                         | Abreu F; Alvarez-Arguelles ME; Boga JA; Castelló C; Costales I; Coto E; Gómez de Oña J; Martín-Rodríguez G; Melón S; Perez-Martinez Z; Rojo S; Sandoval M                                                                                                                                                                                                                                                                                                                       |
| EPI_ISL_1399247                                                                                                                                                                                                                                                                                                                                                                                                                                                                                                                                                                           | Hospital del Valle del Nalón                                                       | Laboratorio de Virologia HUCA                                                                                                                                                                         | Abreu F; Alvarez-Arguelles ME; Boga JA; Castelló C; Costales I; Coto E; Gómez de Oña J; Martín-Rodríguez G; Melón S; Perez-Martinez Z; Rojo S; Sandoval M                                                                                                                                                                                                                                                                                                                       |
| EPI_ISL_534319 to 534320                                                                                                                                                                                                                                                                                                                                                                                                                                                                                                                                                                  | Hospital do Serv Pub ESTAFCO Morato de Oliveira                                    | Instituto Adolfo Lutz, Interdisciplinary Procedures Center, Strategic Laboratory                                                                                                                      | Claudia Regina Gonçalves; Claudio Tavares Sacchi; Erica Valessa Ramos Gomes                                                                                                                                                                                                                                                                                                                                                                                                     |
| EPI_ISL_471548, EPI_ISL_515565, EPI_ISL_523965, EPI_ISL_523972, EPI_ISL_523978, EPI_ISL_523982, EPI_ISL_524470                                                                                                                                                                                                                                                                                                                                                                                                                                                                            | Hospital do Servidor Público Estadual Francisco Morato de Oliveira                 | Instituto Adolfo Lutz, Interdisciplinary Procedures Center, Strategic Laboratory                                                                                                                      | Claudia Regina Gonçalves; Claudio Tavares Sacchi; Erica Valessa Ramos Gomes                                                                                                                                                                                                                                                                                                                                                                                                     |
| see above                                                                                                                                                                                                                                                                                                                                                                                                                                                                                                                                                                                 | Hospital e Maternidade Celso Pierro                                                | Instituto Adolfo Lutz, Interdisciplinary Procedures Center, Strategic Laboratory                                                                                                                      | 01246-1301; 355 - Brazil; Av. Dr. Arnaldo; Cerqueira Cesar; São Paulo - SP                                                                                                                                                                                                                                                                                                                                                                                                      |
| EPI_ISL_527861                                                                                                                                                                                                                                                                                                                                                                                                                                                                                                                                                                            | Hospital e Maternidade Nossa Senhora das Graças                                    | Instituto Adolfo Lutz, Interdisciplinary Procedures Center, Strategic Laboratory                                                                                                                      | Claudia Regina Gonçalves; Claudio Tavares Sacchi; Erica Valessa Ramos Gomes; Karoline Rodrigues Campos                                                                                                                                                                                                                                                                                                                                                                          |
| EPI_ISL_547577                                                                                                                                                                                                                                                                                                                                                                                                                                                                                                                                                                            | Hospital e Maternidade São Cristóvão                                               | Instituto Adolfo Lutz, Interdisciplinary Procedures Center, Strategic Laboratory                                                                                                                      | Claudia Regina Gonçalves; Claudio Tavares Sacchi; Erica Valessa Ramos Gomes                                                                                                                                                                                                                                                                                                                                                                                                     |
| EPI_ISL_527865                                                                                                                                                                                                                                                                                                                                                                                                                                                                                                                                                                            | Hospital e Maternidade do Braz                                                     | Instituto Adolfo Lutz, Interdisciplinary Procedures Center, Strategic Laboratory                                                                                                                      | Claudia Regina Gonçalves; Claudio Tavares Sacchi; Erica Valessa Ramos Gomes                                                                                                                                                                                                                                                                                                                                                                                                     |
| EPI_ISL_527868                                                                                                                                                                                                                                                                                                                                                                                                                                                                                                                                                                            | Hospital e Pronto Socorro Comunitario Vila Yolanda                                 | Instituto Adolfo Lutz, Interdisciplinary Procedures Center, Strategic Laboratory                                                                                                                      | Claudia Regina Gonçalves; Claudio Tavares Sacchi; Erica Valessa Ramos Gomes                                                                                                                                                                                                                                                                                                                                                                                                     |
| EPI_ISL_534323                                                                                                                                                                                                                                                                                                                                                                                                                                                                                                                                                                            | Hospital e Pronto Socorro Comunitario Vila Iolanda                                 | Instituto Adolfo Lutz, Interdisciplinary Procedures Center, Strategic Laboratory                                                                                                                      | Claudia Regina Gonçalves; Claudio Tavares Sacchi; Erica Valessa Ramos Gomes                                                                                                                                                                                                                                                                                                                                                                                                     |
| EPI_ISL_527864                                                                                                                                                                                                                                                                                                                                                                                                                                                                                                                                                                            | Hospital for Infectious Diseases, Molecular Diagnostics Laboratory, Warsaw, Poland | 1. Virogenetics Laboratory of Virology, Maopolska Centre of Biotechnology, Jagiellonian University. 2. Intercollegiate Faculty of Biotechnology University of Gdansk and Medical University of Gdansk | Andrzej Horban; Aneta Kopacz; Karolina Gackowska; Krystyna Bienkowska-Szewczyk; Krzysztof Pyrc; Lukasz Rabalski; Maciej Kosinski; Natalia Mazur-Panasiuk; Piotr Zabek; Tomasz Dyd                                                                                                                                                                                                                                                                                               |
| EPI_ISL_1394290 to 1394337                                                                                                                                                                                                                                                                                                                                                                                                                                                                                                                                                                | Hospital for Tropical Diseases                                                     | COVID-19 Network Investigations (CONI) Alliance                                                                                                                                                       | Akanitt Jitmittraphap; Angkana Huang; Anthony R. Jones; Arporn Wangiwatsin; Bhakbhoon Panthan; Chonticha Klungtong; Ekawat Pasomsub; Elizabeth Batty; Insee Sarnorn; Janjira Thaipadungpanit; Khajohn Joonsalak; Kingkan Rakmanee; Krittikorn Kumpronsri; Namfon Kotanan; Nantarat Chantawat; Pornsawan Leaugwutiwong; Stefan Fernandez; Thanat Choockajorn; Theerarat Kochakarn; Treewat Watthanachockchai; Wasun Chantraittai; Weena Janwitthayanann; Wudtichai Manasatienkij |
| EPI_ISL_458023 to 458028, EPI_ISL_498255 to 498261                                                                                                                                                                                                                                                                                                                                                                                                                                                                                                                                        | Hospital for Infectious Diseases, Molecular Diagnostics Laboratory, Warsaw, Poland | COVID-19 Network Investigations (CONI) Alliance                                                                                                                                                       | Akanitt Jitmittraphap; Angkana Huang; Anthony R. Jones; Arporn Wangiwatsin; Bhakbhoon Panthan; Chonticha Klungtong; Ekawat Pasomsub; Elizabeth Batty; Insee Sarnorn; Janjira Thaipadungpanit; Khajohn Joonsalak; Kingkan Rakmanee; Krittikorn Kumpronsri; Namfon Kotanan; Nantarat Chantawat; Pornsawan Leaugwutiwong; Stefan Fernandez; Thanat Choockajorn; Theerarat Kochakarn; Treewat Watthanachockchai; Wasun Chantraittai; Weena Janwitthayanann; Wudtichai Manasatienkij |
| EPI_ISL_417486 to 417487, EPI_ISL_420147, EPI_ISL_471173, EPI_ISL_471176, EPI_ISL_481206, EPI_ISL_493384, EPI_ISL_500775, EPI_ISL_500791 to 500792, EPI_ISL_500797 to 500799, EPI_ISL_549036 to 549037, EPI_ISL_549052, EPI_ISL_549167, EPI_ISL_590904 to 590907, EPI_ISL_590915, EPI_ISL_590936 to 590937, EPI_ISL_590984, EPI_ISL_1490219, EPI_ISL_1490282, EPI_ISL_1490285, EPI_ISL_1490288 to 1490289, EPI_ISL_1490292 to 1490293, EPI_ISL_1490333, EPI_ISL_1490335, EPI_ISL_1490357, EPI_ISL_1490365, EPI_ISL_1490400 to 1490401, EPI_ISL_1490403, EPI_ISL_1490405, EPI_ISL_1490598, | Hospital for Infectious Diseases, Molecular Diagnostics Laboratory, Warsaw, Poland | COVID-19 Network Investigations (CONI) Alliance                                                                                                                                                       | Akanitt Jitmittraphap; Angkana Huang; Anthony R. Jones; Arporn Wangiwatsin; Bhakbhoon Panthan; Chonticha Klungtong; Ekawat Pasomsub; Elizabeth Batty; Insee Sarnorn; Janjira Thaipadungpanit; Khajohn Joonsalak; Kingkan Rakmanee; Krittikorn Kumpronsri; Namfon Kotanan; Nantarat Chantawat; Pornsawan Leaugwutiwong; Stefan Fernandez; Thanat Choockajorn; Theerarat Kochakarn; Treewat Watthanachockchai; Wasun Chantraittai; Weena Janwitthayanann; Wudtichai Manasatienkij |

|                                                                                                                                                                                                                                                                                                                                                                                                                                                                                                                                                                                                                                                                                                                                                                                                                                                                                                                                                                                                                                                                                                                                                                                                                                                                                                                                                                                                                                                                                                                                                                                                                                                                                                                                                                                                                                                                                                                      |           |                                                                                |                                                                                                                                            |                                                                                                                                                                                                                                                                                                                                                                                                                                                                                                               |
|----------------------------------------------------------------------------------------------------------------------------------------------------------------------------------------------------------------------------------------------------------------------------------------------------------------------------------------------------------------------------------------------------------------------------------------------------------------------------------------------------------------------------------------------------------------------------------------------------------------------------------------------------------------------------------------------------------------------------------------------------------------------------------------------------------------------------------------------------------------------------------------------------------------------------------------------------------------------------------------------------------------------------------------------------------------------------------------------------------------------------------------------------------------------------------------------------------------------------------------------------------------------------------------------------------------------------------------------------------------------------------------------------------------------------------------------------------------------------------------------------------------------------------------------------------------------------------------------------------------------------------------------------------------------------------------------------------------------------------------------------------------------------------------------------------------------------------------------------------------------------------------------------------------------|-----------|--------------------------------------------------------------------------------|--------------------------------------------------------------------------------------------------------------------------------------------|---------------------------------------------------------------------------------------------------------------------------------------------------------------------------------------------------------------------------------------------------------------------------------------------------------------------------------------------------------------------------------------------------------------------------------------------------------------------------------------------------------------|
| EPI_ISL_1490601, EPI_ISL_1490603, EPI_ISL_1490610, EPI_ISL_1490628 to 1490629, EPI_ISL_1547511, EPI_ISL_1547575 to 1547583, EPI_ISL_1547585 to 1547588                                                                                                                                                                                                                                                                                                                                                                                                                                                                                                                                                                                                                                                                                                                                                                                                                                                                                                                                                                                                                                                                                                                                                                                                                                                                                                                                                                                                                                                                                                                                                                                                                                                                                                                                                               | see above | Hospital of Southern Norway - Kristiansand, Department of Medical Microbiology | Norwegian Institute of Public Health, Department of Virology                                                                               | Atiya R Ali; Debech Nadia; Engebretsen Serina Beate; Garcia Llorente Ignacio; Hilde Elshaug; Hilde Synnøve Vollan; Hilde Vollan; Jon Bråte; Kamilla Heddeland Instefjord; Karoline Bragstad; Kathrine Stene-Johansen; Marie Paulsen Madsen; Olav Hungnes; Pedersen Enderikk; Neven; Rasmus Riis Kopperud                                                                                                                                                                                                      |
| EPI_ISL_1402977 to 1403048, EPI_ISL_1511403 to 1511602                                                                                                                                                                                                                                                                                                                                                                                                                                                                                                                                                                                                                                                                                                                                                                                                                                                                                                                                                                                                                                                                                                                                                                                                                                                                                                                                                                                                                                                                                                                                                                                                                                                                                                                                                                                                                                                               |           | Hospital of the University of Pennsylvania Molecular Pathology Lab             | Bushman Lab - University of Pennsylvania                                                                                                   | Abigail Glascock; Aoife M. Roche; Arupa Ganguly; Ayannah S. Fitzgerald; Brendan Kelly; Jevon Graham-Wooten; John Everett; Kyle Rodino; Layla A. Khatib; Mike Feldman; Pascha Hokama; Ronald G. Collman and Frederic Bushman; Samantha A. Whiteside; Scott Sherrill-Mix; Shantanu Reddy; Young Hwang                                                                                                                                                                                                           |
| EPI_ISL_593915                                                                                                                                                                                                                                                                                                                                                                                                                                                                                                                                                                                                                                                                                                                                                                                                                                                                                                                                                                                                                                                                                                                                                                                                                                                                                                                                                                                                                                                                                                                                                                                                                                                                                                                                                                                                                                                                                                       |           | Hospital, Amneville                                                            | National Reference Center for Viruses of Respiratory Infections, Institut Pasteur, Paris                                                   | Etienne Simon-Lorière; Fabiana Gambaro; Maud Vanpeene; Sylvie Behillil; Sylvie van der Werf; Vincent Enouf                                                                                                                                                                                                                                                                                                                                                                                                    |
| EPI_ISL_593903                                                                                                                                                                                                                                                                                                                                                                                                                                                                                                                                                                                                                                                                                                                                                                                                                                                                                                                                                                                                                                                                                                                                                                                                                                                                                                                                                                                                                                                                                                                                                                                                                                                                                                                                                                                                                                                                                                       |           | Hospital, Argenteuil                                                           | National Reference Center for Viruses of Respiratory Infections, Institut Pasteur, Paris                                                   | Etienne Simon-Lorière; Fabiana Gambaro; Maud Vanpeene; Sylvie Behillil; Sylvie van der Werf; Vincent Enouf                                                                                                                                                                                                                                                                                                                                                                                                    |
| EPI_ISL_593910                                                                                                                                                                                                                                                                                                                                                                                                                                                                                                                                                                                                                                                                                                                                                                                                                                                                                                                                                                                                                                                                                                                                                                                                                                                                                                                                                                                                                                                                                                                                                                                                                                                                                                                                                                                                                                                                                                       |           | Hospital, Boulogne-Billancourt                                                 | National Reference Center for Viruses of Respiratory Infections, Institut Pasteur, Paris                                                   | Etienne Simon-Lorière; Fabiana Gambaro; Maud Vanpeene; Sylvie Behillil; Sylvie van der Werf; Vincent Enouf                                                                                                                                                                                                                                                                                                                                                                                                    |
| EPI_ISL_593921                                                                                                                                                                                                                                                                                                                                                                                                                                                                                                                                                                                                                                                                                                                                                                                                                                                                                                                                                                                                                                                                                                                                                                                                                                                                                                                                                                                                                                                                                                                                                                                                                                                                                                                                                                                                                                                                                                       |           | Hospital, Fameck                                                               | National Reference Center for Viruses of Respiratory Infections, Institut Pasteur, Paris                                                   | Etienne Simon-Lorière; Fabiana Gambaro; Maud Vanpeene; Sylvie Behillil; Sylvie van der Werf; Vincent Enouf                                                                                                                                                                                                                                                                                                                                                                                                    |
| EPI_ISL_593918                                                                                                                                                                                                                                                                                                                                                                                                                                                                                                                                                                                                                                                                                                                                                                                                                                                                                                                                                                                                                                                                                                                                                                                                                                                                                                                                                                                                                                                                                                                                                                                                                                                                                                                                                                                                                                                                                                       |           | Hospital, Joeuf                                                                | National Reference Center for Viruses of Respiratory Infections, Institut Pasteur, Paris                                                   | Etienne Simon-Lorière; Fabiana Gambaro; Maud Vanpeene; Sylvie Behillil; Sylvie van der Werf; Vincent Enouf                                                                                                                                                                                                                                                                                                                                                                                                    |
| EPI_ISL_593911                                                                                                                                                                                                                                                                                                                                                                                                                                                                                                                                                                                                                                                                                                                                                                                                                                                                                                                                                                                                                                                                                                                                                                                                                                                                                                                                                                                                                                                                                                                                                                                                                                                                                                                                                                                                                                                                                                       |           | Hospital, Le Chesnay Cédex                                                     | National Reference Center for Viruses of Respiratory Infections, Institut Pasteur, Paris                                                   | Etienne Simon-Lorière; Fabiana Gambaro; Maud Vanpeene; Sylvie Behillil; Sylvie van der Werf; Vincent Enouf                                                                                                                                                                                                                                                                                                                                                                                                    |
| EPI_ISL_593922 to 593923                                                                                                                                                                                                                                                                                                                                                                                                                                                                                                                                                                                                                                                                                                                                                                                                                                                                                                                                                                                                                                                                                                                                                                                                                                                                                                                                                                                                                                                                                                                                                                                                                                                                                                                                                                                                                                                                                             |           | Hospital, Maizières les Metz                                                   | National Reference Center for Viruses of Respiratory Infections, Institut Pasteur, Paris                                                   | Etienne Simon-Lorière; Fabiana Gambaro; Maud Vanpeene; Sylvie Behillil; Sylvie van der Werf; Vincent Enouf                                                                                                                                                                                                                                                                                                                                                                                                    |
| EPI_ISL_593912                                                                                                                                                                                                                                                                                                                                                                                                                                                                                                                                                                                                                                                                                                                                                                                                                                                                                                                                                                                                                                                                                                                                                                                                                                                                                                                                                                                                                                                                                                                                                                                                                                                                                                                                                                                                                                                                                                       |           | Hospital, Marange Silvanage                                                    | National Reference Center for Viruses of Respiratory Infections, Institut Pasteur, Paris                                                   | Etienne Simon-Lorière; Fabiana Gambaro; Maud Vanpeene; Sylvie Behillil; Sylvie van der Werf; Vincent Enouf                                                                                                                                                                                                                                                                                                                                                                                                    |
| EPI_ISL_593914, EPI_ISL_593920                                                                                                                                                                                                                                                                                                                                                                                                                                                                                                                                                                                                                                                                                                                                                                                                                                                                                                                                                                                                                                                                                                                                                                                                                                                                                                                                                                                                                                                                                                                                                                                                                                                                                                                                                                                                                                                                                       |           | Hospital, Metz                                                                 | National Reference Center for Viruses of Respiratory Infections, Institut Pasteur, Paris                                                   | Etienne Simon-Lorière; Fabiana Gambaro; Maud Vanpeene; Sylvie Behillil; Sylvie van der Werf; Vincent Enouf                                                                                                                                                                                                                                                                                                                                                                                                    |
| EPI_ISL_593917                                                                                                                                                                                                                                                                                                                                                                                                                                                                                                                                                                                                                                                                                                                                                                                                                                                                                                                                                                                                                                                                                                                                                                                                                                                                                                                                                                                                                                                                                                                                                                                                                                                                                                                                                                                                                                                                                                       |           | Hospital, Montigny les Metz                                                    | National Reference Center for Viruses of Respiratory Infections, Institut Pasteur, Paris                                                   | Etienne Simon-Lorière; Fabiana Gambaro; Maud Vanpeene; Sylvie Behillil; Sylvie van der Werf; Vincent Enouf                                                                                                                                                                                                                                                                                                                                                                                                    |
| EPI_ISL_593919                                                                                                                                                                                                                                                                                                                                                                                                                                                                                                                                                                                                                                                                                                                                                                                                                                                                                                                                                                                                                                                                                                                                                                                                                                                                                                                                                                                                                                                                                                                                                                                                                                                                                                                                                                                                                                                                                                       |           | Hospital, Ottonville                                                           | National Reference Center for Viruses of Respiratory Infections, Institut Pasteur, Paris                                                   | Etienne Simon-Lorière; Fabiana Gambaro; Maud Vanpeene; Sylvie Behillil; Sylvie van der Werf; Vincent Enouf                                                                                                                                                                                                                                                                                                                                                                                                    |
| EPI_ISL_593916                                                                                                                                                                                                                                                                                                                                                                                                                                                                                                                                                                                                                                                                                                                                                                                                                                                                                                                                                                                                                                                                                                                                                                                                                                                                                                                                                                                                                                                                                                                                                                                                                                                                                                                                                                                                                                                                                                       |           | Hospital, Sarreguemines                                                        | National Reference Center for Viruses of Respiratory Infections, Institut Pasteur, Paris                                                   | Etienne Simon-Lorière; Fabiana Gambaro; Maud Vanpeene; Sylvie Behillil; Sylvie van der Werf; Vincent Enouf                                                                                                                                                                                                                                                                                                                                                                                                    |
| EPI_ISL_593913                                                                                                                                                                                                                                                                                                                                                                                                                                                                                                                                                                                                                                                                                                                                                                                                                                                                                                                                                                                                                                                                                                                                                                                                                                                                                                                                                                                                                                                                                                                                                                                                                                                                                                                                                                                                                                                                                                       |           | Hospital, Talange                                                              | National Reference Center for Viruses of Respiratory Infections, Institut Pasteur, Paris                                                   | Etienne Simon-Lorière; Fabiana Gambaro; Maud Vanpeene; Sylvie Behillil; Sylvie van der Werf; Vincent Enouf                                                                                                                                                                                                                                                                                                                                                                                                    |
| EPI_ISL_1406196                                                                                                                                                                                                                                                                                                                                                                                                                                                                                                                                                                                                                                                                                                                                                                                                                                                                                                                                                                                                                                                                                                                                                                                                                                                                                                                                                                                                                                                                                                                                                                                                                                                                                                                                                                                                                                                                                                      |           | Hospital del Oriente de Asturias                                               | Laboratorio de Virologia HUCA                                                                                                              | Abreu F; Alvarez-Arguelles ME; Boga JA; Castelló C; Costales I; Coto E; Gómez de Oña J; Martín-Rodríguez G; Melón S; Perez-Martinez Z; Rojo S; Sandoval M                                                                                                                                                                                                                                                                                                                                                     |
| EPI_ISL_1479097 to 1479118                                                                                                                                                                                                                                                                                                                                                                                                                                                                                                                                                                                                                                                                                                                                                                                                                                                                                                                                                                                                                                                                                                                                                                                                                                                                                                                                                                                                                                                                                                                                                                                                                                                                                                                                                                                                                                                                                           |           | Houston Health Dept.                                                           | Houston Health Dept.                                                                                                                       | Adolpho Lara; Pamela Brown; Ryker Penn; Yanlai Lai                                                                                                                                                                                                                                                                                                                                                                                                                                                            |
| EPI_ISL_434712 to 435031, EPI_ISL_542487 to 542934, EPI_ISL_543007 to 544954, EPI_ISL_545051 to 545574, EPI_ISL_545581 to 545953, EPI_ISL_545958 to 546435, EPI_ISL_546437 to 546934, EPI_ISL_546937 to 547432                                                                                                                                                                                                                                                                                                                                                                                                                                                                                                                                                                                                                                                                                                                                                                                                                                                                                                                                                                                                                                                                                                                                                                                                                                                                                                                                                                                                                                                                                                                                                                                                                                                                                                       | see above | Houston Methodist Hospital                                                     | Houston Methodist Hospital                                                                                                                 | Chia-Wei Chou; Concepcion C. Cantu; Daniel Boutz; David W. Bernard; Ghazaleh Eskandari; Hakon Jonsson; Heather Hendrickson; Hoang A. T. Nguyen; Hung-Che Kuo; Ilya J. Finkelstein; J. Hunter Long; James J. Davis; Jason S. McLellan; Jimmy Collihar; Jule Goike; Kamyab Javanmardi; Kari Stefansson; Layne Pruitt; Marcus Nguyen; Matthew Ojeda Saavedra; Maulik Shukla; Muthiah Kumaraswami; Paul A. Christensen; Prasanti Yerramilli; Randall J. Olsen; S. Wesley Long; Shihir Subedi; and James M. Musser |
| EPI_ISL_450819, EPI_ISL_469059, EPI_ISL_469068                                                                                                                                                                                                                                                                                                                                                                                                                                                                                                                                                                                                                                                                                                                                                                                                                                                                                                                                                                                                                                                                                                                                                                                                                                                                                                                                                                                                                                                                                                                                                                                                                                                                                                                                                                                                                                                                       |           | Hovas Askim Familjelakare och BVC                                              | The Public Health Agency of Sweden                                                                                                         | Anna Risberg; Anna Wendel; Anna-Malin Linde; Karin Tegmark-Wisell; Maria Lind Karlberg; Mattias Haukland; Mia Brytting; Olov Svartstrom; Oskar Karlsson Lindsjo; Petra Edquist; Reza Advani; Sandra Brodnesson; Shamam Muradrasoli; Theresa Enkirch                                                                                                                                                                                                                                                           |
| EPI_ISL_452237, EPI_ISL_452240, EPI_ISL_469062, EPI_ISL_469064 to 469065, EPI_ISL_475513, EPI_ISL_475522 to 475523, EPI_ISL_475525, EPI_ISL_475567                                                                                                                                                                                                                                                                                                                                                                                                                                                                                                                                                                                                                                                                                                                                                                                                                                                                                                                                                                                                                                                                                                                                                                                                                                                                                                                                                                                                                                                                                                                                                                                                                                                                                                                                                                   | see above | Huddinge VC                                                                    | The Public Health Agency of Sweden                                                                                                         | Anders Johansson; Anna Risberg; Anna-Malin Linde; Karin Tegmark-Wisell; Maria Lind Karlberg; Mattias Haukland; Mia Brytting; Olov Svartstrom; Oskar Karlsson Lindsjo; Petra Edquist; Reza Advani; Sandra Brodnesson; Shamam Muradrasoli; Theresa Enkirch                                                                                                                                                                                                                                                      |
| EPI_ISL_424349, EPI_ISL_437512, EPI_ISL_445088                                                                                                                                                                                                                                                                                                                                                                                                                                                                                                                                                                                                                                                                                                                                                                                                                                                                                                                                                                                                                                                                                                                                                                                                                                                                                                                                                                                                                                                                                                                                                                                                                                                                                                                                                                                                                                                                       |           | Human Genetic Research Center, Kawsar Biotech Company                          | Human Genetic Research Center, Kawsar Biotech Company                                                                                      | Abbasalipour Bashash, M.; Abbasalipour, M.; F. and Haghdost, Y.; Firoozi, M.; Hosseini; Jadalaha; Keshvar, Y.; Keshvar, Y.; Khateri, E.; Khosravi; M. and Yazdani, R.; M.A.; Mostafavi Jabbari, S.; Pourtavakoli, S.; R. and Hoseini, F.; Sabeghi, S.; Zeinali; Zeinali, S.                                                                                                                                                                                                                                   |
| EPI_ISL_454636 to 454641, EPI_ISL_468438 to 468461, EPI_ISL_486280 to 486286, EPI_ISL_513840 to 513855, EPI_ISL_583046 to 583170, EPI_ISL_1477169, EPI_ISL_1477172 to 1477174, EPI_ISL_1477176, EPI_ISL_1477180, EPI_ISL_1477183, EPI_ISL_1477189, EPI_ISL_1477195, EPI_ISL_1477206 to 1477208, EPI_ISL_1477218, EPI_ISL_1477220, EPI_ISL_1477224, EPI_ISL_1477226 to 1477227, EPI_ISL_1477234, EPI_ISL_1477236, EPI_ISL_1477239, EPI_ISL_1477247, EPI_ISL_1477249, EPI_ISL_1477255, EPI_ISL_1477257, EPI_ISL_1477264, EPI_ISL_1477272, EPI_ISL_1477276 to 1477277, EPI_ISL_1477280, EPI_ISL_1477282, EPI_ISL_1477284, EPI_ISL_1477290, EPI_ISL_1477294, EPI_ISL_1477296, EPI_ISL_1477299, EPI_ISL_1477306, EPI_ISL_1477312, EPI_ISL_1477325 to 1477326, EPI_ISL_1477332, EPI_ISL_1477334, EPI_ISL_1477339 to 1477341, EPI_ISL_1477346, EPI_ISL_1477348, EPI_ISL_1477354 to 1477355, EPI_ISL_1477375 to 1477376, EPI_ISL_1477379, EPI_ISL_1477381, EPI_ISL_1477389, EPI_ISL_1477394, EPI_ISL_1477396 to 1477397, EPI_ISL_1477399, EPI_ISL_1477401, EPI_ISL_1477408, EPI_ISL_1477412, EPI_ISL_1477417, EPI_ISL_1477430, EPI_ISL_1477951, EPI_ISL_1477954 to 1477955, EPI_ISL_1477970, EPI_ISL_1477973, EPI_ISL_1477975 to 1477976, EPI_ISL_1477981, EPI_ISL_1477987, EPI_ISL_1477991, EPI_ISL_1477997, EPI_ISL_1478009 to 1478010, EPI_ISL_1478015, EPI_ISL_1478026, EPI_ISL_1478041, EPI_ISL_1478054 to 1478055, EPI_ISL_1478058, EPI_ISL_1478062 to 1478063, EPI_ISL_1478065 to 1478067, EPI_ISL_1478075, EPI_ISL_1478077, EPI_ISL_1478082 to 1478083, EPI_ISL_1478093 to 1478094, EPI_ISL_1478096, EPI_ISL_1478105, EPI_ISL_1478107, EPI_ISL_1478121, EPI_ISL_1478134 to 1478135, EPI_ISL_1478138, EPI_ISL_1478140, EPI_ISL_1478143, EPI_ISL_1478150, EPI_ISL_1478156, EPI_ISL_1478159, EPI_ISL_1478163 to 1478165, EPI_ISL_1478169, EPI_ISL_1478172, EPI_ISL_1478176 to 1478177, EPI_ISL_1478186, EPI_ISL_1478190 | see above | Humboldt County Public Health Laboratory                                       | Chan-Zuckerberg Biohub                                                                                                                     | CZB Ctlahub Consortium                                                                                                                                                                                                                                                                                                                                                                                                                                                                                        |
| EPI_ISL_526215 to 526238                                                                                                                                                                                                                                                                                                                                                                                                                                                                                                                                                                                                                                                                                                                                                                                                                                                                                                                                                                                                                                                                                                                                                                                                                                                                                                                                                                                                                                                                                                                                                                                                                                                                                                                                                                                                                                                                                             |           | Hungarian Defence Forces Military Medical Centre                               | National Laboratory of Virology, Szentágotthai Research Centre                                                                             | Balázs Somogyi; Bálint Eszenyi; Endre Gábor Tóth; Ferenc Jakab; Gábor Kemeneši                                                                                                                                                                                                                                                                                                                                                                                                                                |
| EPI_ISL_1497544 to 1497547, EPI_ISL_1506116                                                                                                                                                                                                                                                                                                                                                                                                                                                                                                                                                                                                                                                                                                                                                                                                                                                                                                                                                                                                                                                                                                                                                                                                                                                                                                                                                                                                                                                                                                                                                                                                                                                                                                                                                                                                                                                                          |           | Huntington Memorial Hospital                                                   | Los Angeles County PHL                                                                                                                     | P. Hemarajata et al.                                                                                                                                                                                                                                                                                                                                                                                                                                                                                          |
| EPI_ISL_529961                                                                                                                                                                                                                                                                                                                                                                                                                                                                                                                                                                                                                                                                                                                                                                                                                                                                                                                                                                                                                                                                                                                                                                                                                                                                                                                                                                                                                                                                                                                                                                                                                                                                                                                                                                                                                                                                                                       |           | Husada Utama Hospital                                                          | Institute of Tropical Disease, Universitas Airlangga                                                                                       | Aldise M Nastri; Didi Dewanto; Gatot Soegiarto; Jezzy R Dewantari; Kazufumi Shimizu; Krisnoadi Rahardjo; Laksmi Wulandari; Maria I Lusida; Mitsuhiro Nishimura; Resti Yudhawati; Retno A Setyoningrum; Soetjipto; Yasuko Mori; Yohko K Shimizu                                                                                                                                                                                                                                                                |
| EPI_ISL_450814, EPI_ISL_452241, EPI_ISL_455103                                                                                                                                                                                                                                                                                                                                                                                                                                                                                                                                                                                                                                                                                                                                                                                                                                                                                                                                                                                                                                                                                                                                                                                                                                                                                                                                                                                                                                                                                                                                                                                                                                                                                                                                                                                                                                                                       |           | Huslakarna Varmbadhuset Varberg                                                | The Public Health Agency of Sweden                                                                                                         | Anna Risberg; Anna-Malin Linde; Johanna Hilmersson; Karin Tegmark-Wisell; Maria Lind Karlberg; Mia Brytting; Olov Svartstrom; Oskar Karlsson Lindsjo; Theresa Enkirch                                                                                                                                                                                                                                                                                                                                         |
| EPI_ISL_1396893                                                                                                                                                                                                                                                                                                                                                                                                                                                                                                                                                                                                                                                                                                                                                                                                                                                                                                                                                                                                                                                                                                                                                                                                                                                                                                                                                                                                                                                                                                                                                                                                                                                                                                                                                                                                                                                                                                      |           | HÅpital Robert Schuman-Laboratoire                                             | Department of Virology, Henri Mondor University Hospital, Assistance Publique Hôpitaux de Paris, Université Paris-Est Créteil, INSERM U955 | Alexandre Soulier; Christophe Rodriguez; Elisabeth Trawinski; Guillaume Gricourt; Jean-Michel Pawlotsky; Melissa N'Debi; Slim Fourati; Vanessa Demontant                                                                                                                                                                                                                                                                                                                                                      |
| EPI_ISL_1404482 to 1404483, EPI_ISL_1404573 to 1404575                                                                                                                                                                                                                                                                                                                                                                                                                                                                                                                                                                                                                                                                                                                                                                                                                                                                                                                                                                                                                                                                                                                                                                                                                                                                                                                                                                                                                                                                                                                                                                                                                                                                                                                                                                                                                                                               |           | Hôpital Armand-Trousseau                                                       | Department of Virology, Henri Mondor University Hospital, Assistance Publique Hôpitaux de Paris, Université Paris-Est Créteil, INSERM U955 | Alexandre Soulier; Christophe Rodriguez; Elisabeth Trawinski; Guillaume Gricourt; Jean-Michel Pawlotsky; Melissa N'Debi; Slim Fourati; Vanessa Demontant                                                                                                                                                                                                                                                                                                                                                      |
| EPI_ISL_1404511 to 1404516, EPI_ISL_1404566 to 1404572                                                                                                                                                                                                                                                                                                                                                                                                                                                                                                                                                                                                                                                                                                                                                                                                                                                                                                                                                                                                                                                                                                                                                                                                                                                                                                                                                                                                                                                                                                                                                                                                                                                                                                                                                                                                                                                               |           | Hôpital Avicenne                                                               | Department of Virology, Henri Mondor University Hospital, Assistance Publique Hôpitaux de Paris, Université Paris-Est Créteil, INSERM U955 | Alexandre Soulier; Christophe Rodriguez; Elisabeth Trawinski; Guillaume Gricourt; Jean-Michel Pawlotsky; Melissa N'Debi; Slim Fourati; Vanessa Demontant                                                                                                                                                                                                                                                                                                                                                      |

|                                                                                                                                                                                                                                                                                                                                                                                                                                                                                                                                                                                                                                                                                                                                                                                                                                                                                                                                                                                                                                                                                                                                                                                                                                                                                              |           |                                                             |                                                                                                                                            |                                                                                                                                                                                                |
|----------------------------------------------------------------------------------------------------------------------------------------------------------------------------------------------------------------------------------------------------------------------------------------------------------------------------------------------------------------------------------------------------------------------------------------------------------------------------------------------------------------------------------------------------------------------------------------------------------------------------------------------------------------------------------------------------------------------------------------------------------------------------------------------------------------------------------------------------------------------------------------------------------------------------------------------------------------------------------------------------------------------------------------------------------------------------------------------------------------------------------------------------------------------------------------------------------------------------------------------------------------------------------------------|-----------|-------------------------------------------------------------|--------------------------------------------------------------------------------------------------------------------------------------------|------------------------------------------------------------------------------------------------------------------------------------------------------------------------------------------------|
| EPI_ISL_450304 to 450305, EPI_ISL_450308, EPI_ISL_450310, EPI_ISL_450316, EPI_ISL_465681 to 465682, EPI_ISL_465694, EPI_ISL_465698 to 465699, EPI_ISL_535738, EPI_ISL_535796, EPI_ISL_535819, EPI_ISL_535848, EPI_ISL_535851, EPI_ISL_535853, EPI_ISL_535866, EPI_ISL_535869, EPI_ISL_535874, EPI_ISL_535888, EPI_ISL_535890 to 535891, EPI_ISL_535920 to 535923, EPI_ISL_535927, EPI_ISL_535944, EPI_ISL_535949 to 535950, EPI_ISL_535952 to 535953, EPI_ISL_535957, EPI_ISL_535961 to 535962, EPI_ISL_535966, EPI_ISL_535972 to 535973, EPI_ISL_535983, EPI_ISL_536017 to 536018, EPI_ISL_536020, EPI_ISL_536024 to 536025, EPI_ISL_536075, EPI_ISL_536077 to 536078, EPI_ISL_536081 to 536082, EPI_ISL_536087 to 536091, EPI_ISL_536093 to 536094, EPI_ISL_536100, EPI_ISL_536146 to 536149, EPI_ISL_536185 to 536187, EPI_ISL_536191, EPI_ISL_536194, EPI_ISL_536203, EPI_ISL_536214, EPI_ISL_536223, EPI_ISL_536225, EPI_ISL_536233, EPI_ISL_536247, EPI_ISL_536268 to 536270, EPI_ISL_536279 to 536282, EPI_ISL_536284 to 536285, EPI_ISL_536290, EPI_ISL_536292 to 536294, EPI_ISL_536296 to 536298, EPI_ISL_536313 to 536314, EPI_ISL_536316 to 536317, EPI_ISL_536326 to 536328, EPI_ISL_536331, EPI_ISL_536336, EPI_ISL_536338 to 536343, EPI_ISL_536350, EPI_ISL_536371 to 536373 | see above | Hôpital Charles-LeMoyne                                     | Laboratoire de santé publique du Québec                                                                                                    | Guillaume Bourque; Ioannis Ragoussis; Jesse Shapiro; Mark Lathrop and Michel Roger; Mark Lathrop and Michel Roger on behalf of the CoVSeQ research group; Sandrine Moreira                     |
| EPI_ISL_535839                                                                                                                                                                                                                                                                                                                                                                                                                                                                                                                                                                                                                                                                                                                                                                                                                                                                                                                                                                                                                                                                                                                                                                                                                                                                               |           | Hôpital Cité de la Santé                                    | Laboratoire de santé publique du Québec                                                                                                    | Guillaume Bourque; Ioannis Ragoussis; Jesse Shapiro; Mark Lathrop and Michel Roger; Sandrine Moreira                                                                                           |
| EPI_ISL_535792                                                                                                                                                                                                                                                                                                                                                                                                                                                                                                                                                                                                                                                                                                                                                                                                                                                                                                                                                                                                                                                                                                                                                                                                                                                                               |           | Hôpital Fleurimont                                          | Laboratoire de santé publique du Québec                                                                                                    | Guillaume Bourque; Ioannis Ragoussis; Jesse Shapiro; Mark Lathrop and Michel Roger; Sandrine Moreira                                                                                           |
| EPI_ISL_1396741 to 1396749, EPI_ISL_1396751 to 1396752, EPI_ISL_1396754 to 1396780, EPI_ISL_1396782 to 1396785, EPI_ISL_1396787 to 1396792, EPI_ISL_1396795 to 1396796, EPI_ISL_1396798 to 1396809, EPI_ISL_1404485 to 1404508, EPI_ISL_1404517 to 1404564                                                                                                                                                                                                                                                                                                                                                                                                                                                                                                                                                                                                                                                                                                                                                                                                                                                                                                                                                                                                                                   | see above | Hôpital Henri Mondor                                        | Department of Virology, Henri Mondor University Hospital, Assistance Publique Hôpitaux de Paris, Université Paris-Est Créteil, INSERM U955 | Alexandre Soulier; Christophe Rodriguez; Elisabeth Trawinski; Guillaume Gricourt; Jean-Michel Pawlowsky; Melissa N'Debi; Slim Fourati; Vanessa Demontant                                       |
| EPI_ISL_535717, EPI_ISL_535797, EPI_ISL_535912, EPI_ISL_535915, EPI_ISL_536013, EPI_ISL_536029, EPI_ISL_536055, EPI_ISL_536177, EPI_ISL_536180, EPI_ISL_536271, EPI_ISL_536330, EPI_ISL_536379                                                                                                                                                                                                                                                                                                                                                                                                                                                                                                                                                                                                                                                                                                                                                                                                                                                                                                                                                                                                                                                                                               | see above | Hôpital Honoré-Mercier                                      | Laboratoire de santé publique du Québec                                                                                                    | Guillaume Bourque; Ioannis Ragoussis; Jesse Shapiro; Mark Lathrop and Michel Roger; Mark Lathrop and Michel Roger on behalf of the CoVSeQ research group; Sandrine Moreira                     |
| EPI_ISL_415650                                                                                                                                                                                                                                                                                                                                                                                                                                                                                                                                                                                                                                                                                                                                                                                                                                                                                                                                                                                                                                                                                                                                                                                                                                                                               |           | Hôpital Instruction des Armées - BEGIN                      | National Reference Center for Viruses of Respiratory Infections, Institut Pasteur, Paris                                                   | Angela Brisebarre; Christine Bigaillon; Flora Donati Vincent Enouf; Marion Barbet; Maud Vanpeene; Méline Bizard; Méline Albert; Sylvie Behillil; Sylvie van der Werf                           |
| EPI_ISL_535745, EPI_ISL_535994                                                                                                                                                                                                                                                                                                                                                                                                                                                                                                                                                                                                                                                                                                                                                                                                                                                                                                                                                                                                                                                                                                                                                                                                                                                               |           | Hôpital Laurentien                                          | Laboratoire de santé publique du Québec                                                                                                    | Guillaume Bourque; Ioannis Ragoussis; Jesse Shapiro; Mark Lathrop and Michel Roger; Mark Lathrop and Michel Roger on behalf of the CoVSeQ research group; Sandrine Moreira                     |
| EPI_ISL_536108                                                                                                                                                                                                                                                                                                                                                                                                                                                                                                                                                                                                                                                                                                                                                                                                                                                                                                                                                                                                                                                                                                                                                                                                                                                                               |           | Hôpital Le Royer                                            | Laboratoire de santé publique du Québec                                                                                                    | Guillaume Bourque; Ioannis Ragoussis; Jesse Shapiro; Mark Lathrop and Michel Roger on behalf of the CoVSeQ research group; Sandrine Moreira                                                    |
| EPI_ISL_535755, EPI_ISL_535817, EPI_ISL_535831                                                                                                                                                                                                                                                                                                                                                                                                                                                                                                                                                                                                                                                                                                                                                                                                                                                                                                                                                                                                                                                                                                                                                                                                                                               |           | Hôpital Maisonneuve-Rosemont                                | Laboratoire de santé publique du Québec                                                                                                    | Guillaume Bourque; Ioannis Ragoussis; Jesse Shapiro; Mark Lathrop and Michel Roger; Sandrine Moreira                                                                                           |
| EPI_ISL_443295 to 443299                                                                                                                                                                                                                                                                                                                                                                                                                                                                                                                                                                                                                                                                                                                                                                                                                                                                                                                                                                                                                                                                                                                                                                                                                                                                     |           | Hôpital Necker - Enfants - Malades Laboratoire de Virologie | National Reference Center for Viruses of Respiratory Infections, Institut Pasteur, Paris                                                   | Angela Brisebarre; Etienne Simon-Lorière; Flora Donati; Marianne Leruez-Ville; Marion Barbet; Maud Vanpeene; Méline Albert; Méline Bizard; Sylvie Behillil; Sylvie van der Werf; Vincent Enouf |
| EPI_ISL_1404459 to 1404460                                                                                                                                                                                                                                                                                                                                                                                                                                                                                                                                                                                                                                                                                                                                                                                                                                                                                                                                                                                                                                                                                                                                                                                                                                                                   |           | Hôpital Necker-Enfants malades                              | Department of Virology, Henri Mondor University Hospital, Assistance Publique Hôpitaux de Paris, Université Paris-Est Créteil, INSERM U955 | Alexandre Soulier; Christophe Rodriguez; Elisabeth Trawinski; Guillaume Gricourt; Jean-Michel Pawlowsky; Melissa N'Debi; Slim Fourati; Vanessa Demontant                                       |
| EPI_ISL_535721, EPI_ISL_535795                                                                                                                                                                                                                                                                                                                                                                                                                                                                                                                                                                                                                                                                                                                                                                                                                                                                                                                                                                                                                                                                                                                                                                                                                                                               |           | Hôpital Notre-Dame                                          | Laboratoire de santé publique du Québec                                                                                                    | Guillaume Bourque; Ioannis Ragoussis; Jesse Shapiro; Mark Lathrop and Michel Roger; Mark Lathrop and Michel Roger on behalf of the CoVSeQ research group; Sandrine Moreira                     |
| EPI_ISL_450309, EPI_ISL_450314 to 450315, EPI_ISL_450317 to 450318, EPI_ISL_465695 to 465696, EPI_ISL_465700, EPI_ISL_465702 to 465703, EPI_ISL_535718, EPI_ISL_535733 to 535734, EPI_ISL_535763, EPI_ISL_535786, EPI_ISL_535818, EPI_ISL_535840, EPI_ISL_535857, EPI_ISL_535879, EPI_ISL_535908 to 535909, EPI_ISL_535948, EPI_ISL_536021, EPI_ISL_536039, EPI_ISL_536041, EPI_ISL_536092, EPI_ISL_536096, EPI_ISL_536099, EPI_ISL_536103, EPI_ISL_536173 to 536176, EPI_ISL_536178 to 536179, EPI_ISL_536188 to 536189, EPI_ISL_536195 to 536196, EPI_ISL_536229, EPI_ISL_536231, EPI_ISL_536234, EPI_ISL_536236, EPI_ISL_536245, EPI_ISL_536253, EPI_ISL_536276 to 536277, EPI_ISL_536295, EPI_ISL_536300, EPI_ISL_536303, EPI_ISL_536305 to 536309, EPI_ISL_536322 to 536324, EPI_ISL_536332 to 536335, EPI_ISL_536346 to 536347, EPI_ISL_536351 to 536352, EPI_ISL_536360, EPI_ISL_536374 to 536375, EPI_ISL_536380, EPI_ISL_536388 to 536389, EPI_ISL_536391, EPI_ISL_536395, EPI_ISL_536397                                                                                                                                                                                                                                                                                           | see above | Hôpital Pierre-Boucher                                      | Laboratoire de santé publique du Québec                                                                                                    | Guillaume Bourque; Ioannis Ragoussis; Jesse Shapiro; Mark Lathrop and Michel Roger; Mark Lathrop and Michel Roger on behalf of the CoVSeQ research group; Sandrine Moreira                     |
| EPI_ISL_535731, EPI_ISL_535752, EPI_ISL_535762, EPI_ISL_535766, EPI_ISL_535770 to 535771, EPI_ISL_535850, EPI_ISL_535861 to 535863, EPI_ISL_535881 to 535883, EPI_ISL_535892 to 535893, EPI_ISL_535936, EPI_ISL_535938, EPI_ISL_535954, EPI_ISL_535956, EPI_ISL_536061 to 536062, EPI_ISL_536064 to 536068, EPI_ISL_536070, EPI_ISL_536083 to 536086, EPI_ISL_536125, EPI_ISL_536128, EPI_ISL_536131, EPI_ISL_536137, EPI_ISL_536139 to 536140, EPI_ISL_536143 to 536144, EPI_ISL_536152, EPI_ISL_536157                                                                                                                                                                                                                                                                                                                                                                                                                                                                                                                                                                                                                                                                                                                                                                                     | see above | Hôpital Pierre-Le Gardeur                                   | Laboratoire de santé publique du Québec                                                                                                    | Guillaume Bourque; Ioannis Ragoussis; Jesse Shapiro; Mark Lathrop and Michel Roger; Mark Lathrop and Michel Roger on behalf of the CoVSeQ research group; Sandrine Moreira                     |
| EPI_ISL_414631 to 414632                                                                                                                                                                                                                                                                                                                                                                                                                                                                                                                                                                                                                                                                                                                                                                                                                                                                                                                                                                                                                                                                                                                                                                                                                                                                     |           | Hôpital Robert Debré Laboratoire de Virologie               | National Reference Center for Viruses of Respiratory Infections, Institut Pasteur, Paris                                                   | Angela Brisebarre; Flora Donati Vincent Enouf; Laurent Andreoletti; Marion Barbet; Maud Vanpeene; Méline Bizard; Méline Albert; Sylvie Behillil; Sylvie van der Werf                           |
| EPI_ISL_535810, EPI_ISL_535859 to 535860, EPI_ISL_535897 to 535901, EPI_ISL_535969, EPI_ISL_536003, EPI_ISL_536010 to 536011, EPI_ISL_536056 to 536057, EPI_ISL_536252                                                                                                                                                                                                                                                                                                                                                                                                                                                                                                                                                                                                                                                                                                                                                                                                                                                                                                                                                                                                                                                                                                                       | see above | Hôpital Sainte-Croix                                        | Laboratoire de santé publique du Québec                                                                                                    | Guillaume Bourque; Ioannis Ragoussis; Jesse Shapiro; Mark Lathrop and Michel Roger; Mark Lathrop and Michel Roger on behalf of the CoVSeQ research group; Sandrine Moreira                     |
| EPI_ISL_535963, EPI_ISL_536046                                                                                                                                                                                                                                                                                                                                                                                                                                                                                                                                                                                                                                                                                                                                                                                                                                                                                                                                                                                                                                                                                                                                                                                                                                                               |           | Hôpital d'Alma                                              | Laboratoire de santé publique du Québec                                                                                                    | Guillaume Bourque; Ioannis Ragoussis; Jesse Shapiro; Mark Lathrop and Michel Roger on behalf of the CoVSeQ research group; Sandrine Moreira                                                    |
| EPI_ISL_536265                                                                                                                                                                                                                                                                                                                                                                                                                                                                                                                                                                                                                                                                                                                                                                                                                                                                                                                                                                                                                                                                                                                                                                                                                                                                               |           | Hôpital de Chandler                                         | Laboratoire de santé publique du Québec                                                                                                    | Guillaume Bourque; Ioannis Ragoussis; Jesse Shapiro; Mark Lathrop and Michel Roger on behalf of the CoVSeQ research group; Sandrine Moreira                                                    |
| EPI_ISL_535829, EPI_ISL_535905 to 535906, EPI_ISL_535964 to 535965, EPI_ISL_536019, EPI_ISL_536107                                                                                                                                                                                                                                                                                                                                                                                                                                                                                                                                                                                                                                                                                                                                                                                                                                                                                                                                                                                                                                                                                                                                                                                           |           | Hôpital de Chicoutimi                                       | Laboratoire de santé publique du Québec                                                                                                    | Guillaume Bourque; Ioannis Ragoussis; Jesse Shapiro; Mark Lathrop and Michel Roger; Mark Lathrop and Michel Roger on behalf of the CoVSeQ research group; Sandrine Moreira                     |
| EPI_ISL_465691, EPI_ISL_535858, EPI_ISL_536266, EPI_ISL_536311, EPI_ISL_536384                                                                                                                                                                                                                                                                                                                                                                                                                                                                                                                                                                                                                                                                                                                                                                                                                                                                                                                                                                                                                                                                                                                                                                                                               |           | Hôpital de Gatineau                                         | Laboratoire de santé publique du Québec                                                                                                    | Guillaume Bourque; Ioannis Ragoussis; Jesse Shapiro; Mark Lathrop and Michel Roger on behalf of the CoVSeQ research group; Sandrine Moreira                                                    |
| EPI_ISL_465686, EPI_ISL_535794, EPI_ISL_535809, EPI_ISL_535886 to 535887, EPI_ISL_535911, EPI_ISL_535989, EPI_ISL_535993, EPI_ISL_535995, EPI_ISL_536051, EPI_ISL_536117 to 536118, EPI_ISL_536122, EPI_ISL_536124, EPI_ISL_536127, EPI_ISL_536132, EPI_ISL_536135 to 536136, EPI_ISL_536168 to 536169, EPI_ISL_536207 to 536210, EPI_ISL_536230, EPI_ISL_536238 to 536239, EPI_ISL_536242, EPI_ISL_536244, EPI_ISL_536267, EPI_ISL_536275, EPI_ISL_536291, EPI_ISL_536312, EPI_ISL_536363 to 536364, EPI_ISL_536367, EPI_ISL_536385 to 536387, EPI_ISL_536392 to 536394, EPI_ISL_536396                                                                                                                                                                                                                                                                                                                                                                                                                                                                                                                                                                                                                                                                                                     | see above | Hôpital de Hull                                             | Laboratoire de santé publique du Québec                                                                                                    | Guillaume Bourque; Ioannis Ragoussis; Jesse Shapiro; Mark Lathrop and Michel Roger; Mark Lathrop and Michel Roger on behalf of the CoVSeQ research group; Sandrine Moreira                     |
| EPI_ISL_535744                                                                                                                                                                                                                                                                                                                                                                                                                                                                                                                                                                                                                                                                                                                                                                                                                                                                                                                                                                                                                                                                                                                                                                                                                                                                               |           | Hôpital de Lasalle                                          | Laboratoire de santé publique du Québec                                                                                                    | Guillaume Bourque; Ioannis Ragoussis; Jesse Shapiro; Mark Lathrop and Michel Roger; Sandrine Moreira                                                                                           |
| EPI_ISL_465683 to 465684, EPI_ISL_535885, EPI_ISL_536111 to 536112, EPI_ISL_536262, EPI_ISL_536289                                                                                                                                                                                                                                                                                                                                                                                                                                                                                                                                                                                                                                                                                                                                                                                                                                                                                                                                                                                                                                                                                                                                                                                           |           | Hôpital de Maria                                            | Laboratoire de santé publique du Québec                                                                                                    | Guillaume Bourque; Ioannis Ragoussis; Jesse Shapiro; Mark Lathrop and Michel Roger on behalf of the CoVSeQ research group; Sandrine Moreira                                                    |
| EPI_ISL_535945                                                                                                                                                                                                                                                                                                                                                                                                                                                                                                                                                                                                                                                                                                                                                                                                                                                                                                                                                                                                                                                                                                                                                                                                                                                                               |           | Hôpital de Mont-Laurier                                     | Laboratoire de santé publique du Québec                                                                                                    | Guillaume Bourque; Ioannis Ragoussis; Jesse Shapiro; Mark Lathrop and Michel Roger; Sandrine Moreira                                                                                           |
| EPI_ISL_536171                                                                                                                                                                                                                                                                                                                                                                                                                                                                                                                                                                                                                                                                                                                                                                                                                                                                                                                                                                                                                                                                                                                                                                                                                                                                               |           | Hôpital de Papineau                                         | Laboratoire de santé publique du Québec                                                                                                    | Guillaume Bourque; Ioannis Ragoussis; Jesse Shapiro; Mark Lathrop and Michel Roger on behalf of the CoVSeQ research group; Sandrine Moreira                                                    |
| EPI_ISL_535985 to 535987                                                                                                                                                                                                                                                                                                                                                                                                                                                                                                                                                                                                                                                                                                                                                                                                                                                                                                                                                                                                                                                                                                                                                                                                                                                                     |           | Hôpital de Rouyn-Noranda                                    | Laboratoire de santé publique du Québec                                                                                                    | Guillaume Bourque; Ioannis Ragoussis; Jesse Shapiro; Mark Lathrop and Michel Roger on behalf of the CoVSeQ research group; Sandrine Moreira                                                    |
| EPI_ISL_535793, EPI_ISL_535865, EPI_ISL_535867, EPI_ISL_535878, EPI_ISL_535889, EPI_ISL_535924, EPI_ISL_535926, EPI_ISL_535929 to 535930, EPI_ISL_535941 to 535943, EPI_ISL_535947, EPI_ISL_535951, EPI_ISL_535982, EPI_ISL_536008, EPI_ISL_536049, EPI_ISL_536058, EPI_ISL_536069, EPI_ISL_536071 to 536072                                                                                                                                                                                                                                                                                                                                                                                                                                                                                                                                                                                                                                                                                                                                                                                                                                                                                                                                                                                 | see above | Hôpital de Saint-Eustache                                   | Laboratoire de santé publique du Québec                                                                                                    | Guillaume Bourque; Ioannis Ragoussis; Jesse Shapiro; Mark Lathrop and Michel Roger; Mark Lathrop and Michel Roger on behalf of the CoVSeQ research group; Sandrine Moreira                     |
| EPI_ISL_535716, EPI_ISL_535723, EPI_ISL_535728, EPI_ISL_535856                                                                                                                                                                                                                                                                                                                                                                                                                                                                                                                                                                                                                                                                                                                                                                                                                                                                                                                                                                                                                                                                                                                                                                                                                               |           | Hôpital de Verdun                                           | Laboratoire de santé publique du Québec                                                                                                    | Guillaume Bourque; Ioannis Ragoussis; Jesse Shapiro; Mark Lathrop and Michel Roger; Mark Lathrop and Michel Roger on behalf of the CoVSeQ research group; Sandrine Moreira                     |

|                                                                                                                                                                                                                                                                                                                                                                                                                                                                                                                                                                                                                                                                                                    |                                                          |                                                                                                                            |                                                                                                                                                                                                                                                                                                                                                                                                                                                                                                                                                                              |
|----------------------------------------------------------------------------------------------------------------------------------------------------------------------------------------------------------------------------------------------------------------------------------------------------------------------------------------------------------------------------------------------------------------------------------------------------------------------------------------------------------------------------------------------------------------------------------------------------------------------------------------------------------------------------------------------------|----------------------------------------------------------|----------------------------------------------------------------------------------------------------------------------------|------------------------------------------------------------------------------------------------------------------------------------------------------------------------------------------------------------------------------------------------------------------------------------------------------------------------------------------------------------------------------------------------------------------------------------------------------------------------------------------------------------------------------------------------------------------------------|
| EPI_ISL_535739                                                                                                                                                                                                                                                                                                                                                                                                                                                                                                                                                                                                                                                                                     | Hôpital de l'Enfant-Jésus                                | Laboratoire de santé publique du Québec                                                                                    | Guillaume Bourque; Ioannis Ragoussis; Jesse Shapiro; Mark Lathrop and Michel Roger; Sandrine Moreira                                                                                                                                                                                                                                                                                                                                                                                                                                                                         |
| EPI_ISL_535914, EPI_ISL_535937, EPI_ISL_535968, EPI_ISL_535971, EPI_ISL_535974 to 535975, EPI_ISL_535978, EPI_ISL_535996 to 535999, EPI_ISL_536001, EPI_ISL_536030, EPI_ISL_536032 to 536033, EPI_ISL_536037, EPI_ISL_536246, EPI_ISL_536248 to 536251                                                                                                                                                                                                                                                                                                                                                                                                                                             |                                                          |                                                                                                                            |                                                                                                                                                                                                                                                                                                                                                                                                                                                                                                                                                                              |
| see above                                                                                                                                                                                                                                                                                                                                                                                                                                                                                                                                                                                                                                                                                          | Hôpital du Centre-de-la-Mauricie                         | Laboratoire de santé publique du Québec                                                                                    | Guillaume Bourque; Ioannis Ragoussis; Jesse Shapiro; Mark Lathrop and Michel Roger; Mark Lathrop and Michel Roger on behalf of the CoVSeQ research group; Sandrine Moreira                                                                                                                                                                                                                                                                                                                                                                                                   |
| EPI_ISL_535812                                                                                                                                                                                                                                                                                                                                                                                                                                                                                                                                                                                                                                                                                     | Hôpital du Sacré-Coeur de Montréal                       | Laboratoire de santé publique du Québec                                                                                    | Guillaume Bourque; Ioannis Ragoussis; Jesse Shapiro; Mark Lathrop and Michel Roger on behalf of the CoVSeQ research group; Sandrine Moreira                                                                                                                                                                                                                                                                                                                                                                                                                                  |
| EPI_ISL_450307, EPI_ISL_450311 to 450313, EPI_ISL_465679 to 465680, EPI_ISL_465693, EPI_ISL_465701, EPI_ISL_535847, EPI_ISL_535868, EPI_ISL_535880, EPI_ISL_535913, EPI_ISL_535917 to 535919, EPI_ISL_535988, EPI_ISL_536026, EPI_ISL_536095, EPI_ISL_536097 to 536098, EPI_ISL_536102, EPI_ISL_536105, EPI_ISL_536163, EPI_ISL_536165, EPI_ISL_536167, EPI_ISL_536170, EPI_ISL_536190, EPI_ISL_536192 to 536193, EPI_ISL_536198, EPI_ISL_536200 to 536202, EPI_ISL_536226 to 536228, EPI_ISL_536254, EPI_ISL_536257, EPI_ISL_536259, EPI_ISL_536261, EPI_ISL_536273 to 536274, EPI_ISL_536287, EPI_ISL_536318 to 536320, EPI_ISL_536349, EPI_ISL_536354 to 536359, EPI_ISL_536362, EPI_ISL_536390 |                                                          |                                                                                                                            |                                                                                                                                                                                                                                                                                                                                                                                                                                                                                                                                                                              |
| see above                                                                                                                                                                                                                                                                                                                                                                                                                                                                                                                                                                                                                                                                                          | Hôpital du Suroît                                        | Laboratoire de santé publique du Québec                                                                                    | Guillaume Bourque; Ioannis Ragoussis; Jesse Shapiro; Mark Lathrop and Michel Roger; Mark Lathrop and Michel Roger on behalf of the CoVSeQ research group; Sandrine Moreira                                                                                                                                                                                                                                                                                                                                                                                                   |
| EPI_ISL_535991, EPI_ISL_536113 to 536114                                                                                                                                                                                                                                                                                                                                                                                                                                                                                                                                                                                                                                                           | Hôpital et Centre d'Hébergement de Sept-Iles             | Laboratoire de santé publique du Québec                                                                                    | Guillaume Bourque; Ioannis Ragoussis; Jesse Shapiro; Mark Lathrop and Michel Roger on behalf of the CoVSeQ research group; Sandrine Moreira                                                                                                                                                                                                                                                                                                                                                                                                                                  |
| EPI_ISL_535719 to 535720, EPI_ISL_535756 to 535757, EPI_ISL_535769                                                                                                                                                                                                                                                                                                                                                                                                                                                                                                                                                                                                                                 | Hôpital général Juif                                     | Laboratoire de santé publique du Québec                                                                                    | Guillaume Bourque; Ioannis Ragoussis; Jesse Shapiro; Mark Lathrop and Michel Roger; Mark Lathrop and Michel Roger on behalf of the CoVSeQ research group; Sandrine Moreira                                                                                                                                                                                                                                                                                                                                                                                                   |
| EPI_ISL_535852, EPI_ISL_535875                                                                                                                                                                                                                                                                                                                                                                                                                                                                                                                                                                                                                                                                     | Hôpital général du Lakeshore                             | Laboratoire de santé publique du Québec                                                                                    | Guillaume Bourque; Ioannis Ragoussis; Jesse Shapiro; Mark Lathrop and Michel Roger; Mark Lathrop and Michel Roger on behalf of the CoVSeQ research group; Sandrine Moreira                                                                                                                                                                                                                                                                                                                                                                                                   |
| EPI_ISL_536106, EPI_ISL_536205                                                                                                                                                                                                                                                                                                                                                                                                                                                                                                                                                                                                                                                                     | Hôpital régional de Rimouski                             | Laboratoire de santé publique du Québec                                                                                    | Guillaume Bourque; Ioannis Ragoussis; Jesse Shapiro; Mark Lathrop and Michel Roger on behalf of the CoVSeQ research group; Sandrine Moreira                                                                                                                                                                                                                                                                                                                                                                                                                                  |
| EPI_ISL_535791, EPI_ISL_535798, EPI_ISL_535837 to 535838, EPI_ISL_536022                                                                                                                                                                                                                                                                                                                                                                                                                                                                                                                                                                                                                           | Hôpital régional de Saint-Jérôme                         | Laboratoire de santé publique du Québec                                                                                    | Guillaume Bourque; Ioannis Ragoussis; Jesse Shapiro; Mark Lathrop and Michel Roger; Mark Lathrop and Michel Roger on behalf of the CoVSeQ research group; Sandrine Moreira                                                                                                                                                                                                                                                                                                                                                                                                   |
| EPI_ISL_536101                                                                                                                                                                                                                                                                                                                                                                                                                                                                                                                                                                                                                                                                                     | Hôpital, CLSC et Centre d'Hébergement de Roberval        | Laboratoire de santé publique du Québec                                                                                    | Guillaume Bourque; Ioannis Ragoussis; Jesse Shapiro; Mark Lathrop and Michel Roger on behalf of the CoVSeQ research group; Sandrine Moreira                                                                                                                                                                                                                                                                                                                                                                                                                                  |
| EPI_ISL_1477129 to 1477166, EPI_ISL_1522587, EPI_ISL_1522606, EPI_ISL_1522615, EPI_ISL_1522627, EPI_ISL_1522651, EPI_ISL_1522661, EPI_ISL_1522689, EPI_ISL_1522699, EPI_ISL_1522701, EPI_ISL_1522706, EPI_ISL_1522760, EPI_ISL_1522789 to 1522790, EPI_ISL_1522905 to 1522915, EPI_ISL_1523070, EPI_ISL_1523142, EPI_ISL_1523149 to 1523150, EPI_ISL_1523158, EPI_ISL_1523172, EPI_ISL_1523187, EPI_ISL_1523289, EPI_ISL_1523353 to 1523357                                                                                                                                                                                                                                                        |                                                          |                                                                                                                            |                                                                                                                                                                                                                                                                                                                                                                                                                                                                                                                                                                              |
| see above                                                                                                                                                                                                                                                                                                                                                                                                                                                                                                                                                                                                                                                                                          | Hôpitaux Robert Schuman                                  | Laboratoire national de sante, Microbiology, Microbial Genomics Platform                                                   | Alain Hakim; Anke Wienecke-Baldacchino; Catherine Ragimbeau; Fatu Djabi; Jessica Tapp; Lise Pignon; Nawfal Faik; Raoul Salmon; Tamir Abdelrahman                                                                                                                                                                                                                                                                                                                                                                                                                             |
| EPI_ISL_535725, EPI_ISL_535750 to 535751, EPI_ISL_535758 to 535759, EPI_ISL_535820 to 535821, EPI_ISL_535833 to 535836                                                                                                                                                                                                                                                                                                                                                                                                                                                                                                                                                                             | Hôtel-Dieu de Lévis                                      | Laboratoire de santé publique du Québec                                                                                    | Guillaume Bourque; Ioannis Ragoussis; Jesse Shapiro; Mark Lathrop and Michel Roger; Mark Lathrop and Michel Roger on behalf of the CoVSeQ research group; Sandrine Moreira                                                                                                                                                                                                                                                                                                                                                                                                   |
| EPI_ISL_535903 to 535904, EPI_ISL_535990, EPI_ISL_535992, EPI_ISL_536116, EPI_ISL_536121                                                                                                                                                                                                                                                                                                                                                                                                                                                                                                                                                                                                           | Hôtel-Dieu de Sorel                                      | Laboratoire de santé publique du Québec                                                                                    | Guillaume Bourque; Ioannis Ragoussis; Jesse Shapiro; Mark Lathrop and Michel Roger; Mark Lathrop and Michel Roger on behalf of the CoVSeQ research group; Sandrine Moreira                                                                                                                                                                                                                                                                                                                                                                                                   |
| EPI_ISL_1391024 to 1391028                                                                                                                                                                                                                                                                                                                                                                                                                                                                                                                                                                                                                                                                         | I.R.C.C.S. "S. De Bellis" - Ente Ospedaliero             | Istituto Zooprofilattico Sperimentale della Puglia e della Basilicata                                                      | Bianco A.; Capozzi L.; Del Sambro L.; Lippolis A.; Notarnicola M.; Parisi A.; Simone D.                                                                                                                                                                                                                                                                                                                                                                                                                                                                                      |
| EPI_ISL_1446602 to 1446606, EPI_ISL_1446728, EPI_ISL_1446941, EPI_ISL_1516424 to 1516431, EPI_ISL_1528387 to 1528396                                                                                                                                                                                                                                                                                                                                                                                                                                                                                                                                                                               | IA State Hygienic Laboratory                             | Centers for Disease Control and Prevention Division of Viral Diseases, Pathogen Discovery                                  | Alison Laufer Halpin; Ben L. Rambo-Martin; Clinton R. Paden; Dakota Howard; Darlene Wagner; Dave Wentworth; Dhvani Batra; Jasmine Padilla; Justin Lee; Katie Dillon; Krista Queen; Kristen Knipe; Kristine Lacek; Mark Burroughs; Matthew Schmeer; Mili Sheth; Peter Cook; Sam Shepard; Sarah Nobles; Shoshona Le; Suxiang Tong; Vivien Dugan; Yvette Unoarumhi                                                                                                                                                                                                              |
| EPI_ISL_424865, EPI_ISL_424895 to 424900, EPI_ISL_447842                                                                                                                                                                                                                                                                                                                                                                                                                                                                                                                                                                                                                                           | IA State Hygienic Laboratory                             | Pathogen Discovery, Respiratory Viruses Branch, Division of Viral Diseases, Centers for Disease Control and Prevention     | Alison S. Laufer Halpin; Anna Uehara; Christopher A. Elkins; Clinton R. Paden; Haibin Wang; Jasmine Padilla; Jing Zhang; Justin Lee; Krista Queen; Mary S. Keckler; Rachel Marine; Suxiang Tong; Yan Li; Ying Tao                                                                                                                                                                                                                                                                                                                                                            |
| EPI_ISL_452787 to 452795                                                                                                                                                                                                                                                                                                                                                                                                                                                                                                                                                                                                                                                                           | ICAR-National Institute of High Security Animal Diseases | ICAR-National Institute of High Security Animal Diseases                                                                   | Anamika Mishra; Ashutosh Aasdev; Ashwin Ashok Raut; Atul Kumar Pateriya; Chakradhar Tosh; Chandan Kumar Dubey; Dipesh Kumar Nayak; Fateh Singh; G Venkatesh; Harshad Murugkar; Katherukumam Rajukumar; Manoj Kumar; Meghna Tripathi; Naveen Kumar; Niranjan Mishra; Pradeep Gandhale; Pushpendra Namdeo; Pushpendra Singh; Richa Sood; Rupal Singh; Sandeep Bhatia; Sandeep Kumar Jhade; Senmannan Kalaiyarasu; Sethil Kumar D; Shanmugasundaram Nagarajan; Shashi Bhushan Sudhakar; Suman Kumari Shah; Suman Mishra; Sushil Tripathi; Vijendra Pal Singh; Vishnupriya Patil |
| EPI_ISL_1517301                                                                                                                                                                                                                                                                                                                                                                                                                                                                                                                                                                                                                                                                                    | ICH-SION                                                 | Laboratory of genomics and metagenomics                                                                                    | Claire Bertelli; Damien Jacot; Gilbert Greub; SÅ@bastien Aebly; Trestan Pillonel                                                                                                                                                                                                                                                                                                                                                                                                                                                                                             |
| EPI_ISL_430464 to 430468, EPI_ISL_437536 to 437539, EPI_ISL_455640 to 455679, EPI_ISL_508441 to 508488                                                                                                                                                                                                                                                                                                                                                                                                                                                                                                                                                                                             | ICMR-National Institute of Cholera and Enteric Diseases  | National Institute of Biomedical Genomics                                                                                  | Ananya Chatterjee; Arindam Maitra; Hasina Banu; Mamta Chawla Sarkar; Saumitra Das; Shanta Dutta; Sreedhar Chinnaswamy                                                                                                                                                                                                                                                                                                                                                                                                                                                        |
| EPI_ISL_511899                                                                                                                                                                                                                                                                                                                                                                                                                                                                                                                                                                                                                                                                                     | ICMR-National Institute of Cholera and Enteric Diseases  | National Institute of Biomedical Genomics - DBT's PAN-INDIA 1000 SARS-CoV-2 RNA Genome Sequencing Consortium               | Ananya Chatterjee; Arindam Maitra; Hasina Banu; Mamta Chawla Sarkar; Saumitra Das; Shanta Dutta; Sreedhar Chinnaswamy                                                                                                                                                                                                                                                                                                                                                                                                                                                        |
| EPI_ISL_1446977 to 1446978                                                                                                                                                                                                                                                                                                                                                                                                                                                                                                                                                                                                                                                                         | ID Bureau of Laboratories                                | Centers for Disease Control and Prevention Division of Viral Diseases, Pathogen Discovery                                  | Alison Laufer Halpin; Ben L. Rambo-Martin; Clinton R. Paden; Dakota Howard; Darlene Wagner; Dave Wentworth; Dhvani Batra; Jasmine Padilla; Justin Lee; Katie Dillon; Krista Queen; Kristen Knipe; Kristine Lacek; Mark Burroughs; Matthew Schmeer; Mili Sheth; Peter Cook; Sam Shepard; Sarah Nobles; Shoshona Le; Suxiang Tong; Vivien Dugan; Yvette Unoarumhi                                                                                                                                                                                                              |
| EPI_ISL_539491, EPI_ISL_560319                                                                                                                                                                                                                                                                                                                                                                                                                                                                                                                                                                                                                                                                     | IDSP unit, Dehradun                                      | CSIR-Institute of Microbial Technology                                                                                     | Amandeep Kaur; Anu Singh; Ashwani Kumar; Debarghya Ghose; Dipak Dutta; Harsh Goar; Kanika Bansal; Navin Baid; Poushail Chakraborty; Prabhu B. Patil; Rajesh Kumar Mishra; Sanjeet Kumar; Sanjeev Khosla                                                                                                                                                                                                                                                                                                                                                                      |
| EPI_ISL_569614                                                                                                                                                                                                                                                                                                                                                                                                                                                                                                                                                                                                                                                                                     | IHS Fort Yates Hospital                                  | South Dakota Public Health Laboratory                                                                                      | Jacob Garfin; Matt Plumb; Xiong Wang; and Chris Carlson                                                                                                                                                                                                                                                                                                                                                                                                                                                                                                                      |
| EPI_ISL_528685                                                                                                                                                                                                                                                                                                                                                                                                                                                                                                                                                                                                                                                                                     | IIP Institute of Genomics and Integrative Biology        | IIP Institute of Genomics and Integrative Biology                                                                          | Ajit Shewale; Akshay Kankan; Anurag Agrawal; Azka Khan; Bharathram Uppili; Mahesh S. Dhar; Mohammed Faruq; Partha Rakshit; Pooja Sharma; RadhaKrishnan VS; Rajesh Pandey; Robin Marwal; Sandhya Kabra; Simmi Tiwari; Sujeet Singh; Tushar Nale; Vivekanand A                                                                                                                                                                                                                                                                                                                 |
| EPI_ISL_1446979                                                                                                                                                                                                                                                                                                                                                                                                                                                                                                                                                                                                                                                                                    | IL Department of Public Health Chicago Laboratory        | Centers for Disease Control and Prevention Division of Viral Diseases, Pathogen Discovery                                  | Alison Laufer Halpin; Ben L. Rambo-Martin; Clinton R. Paden; Dakota Howard; Darlene Wagner; Dave Wentworth; Dhvani Batra; Jasmine Padilla; Justin Lee; Katie Dillon; Krista Queen; Kristen Knipe; Kristine Lacek; Mark Burroughs; Matthew Schmeer; Mili Sheth; Peter Cook; Sam Shepard; Sarah Nobles; Shoshona Le; Suxiang Tong; Vivien Dugan; Yvette Unoarumhi                                                                                                                                                                                                              |
| EPI_ISL_1509925, EPI_ISL_1509933 to 1509934, EPI_ISL_1509938, EPI_ISL_1509940, EPI_ISL_1509947 to 1509950                                                                                                                                                                                                                                                                                                                                                                                                                                                                                                                                                                                          | IL Department of Public Health Chicago Laboratory        | Genomics and Discovery, Respiratory Viruses Branch, Division of Viral Diseases, Centers for Disease Control and Prevention | Adam Retchless; Anna Kelleher; Anna Montmayeur; Anna Uehara; Brian Lynch; Clinton R. Paden; Haibin Wang; Han Jia Justin Ng; Jing Zhang; Justin Lee; Krista Queen; Mark Burroughs; Peter Cook; Rachel Marine; Suxiang Tong; Yan Li; Ying Tao                                                                                                                                                                                                                                                                                                                                  |
| EPI_ISL_404253, EPI_ISL_410045                                                                                                                                                                                                                                                                                                                                                                                                                                                                                                                                                                                                                                                                     | IL Department of Public Health Chicago Laboratory        | Pathogen Discovery, Respiratory Viruses Branch, Division of Viral Diseases, Centers for Diseases Control and Prevention    | Anna Uehara; Brett L. Whitaker; Brian Lynch; Clinton R. Paden; Janna' R. Murray; Jing Zhang; Krista Queen; Lijuan Wang; Senthil Kumar K. Sakthivel; Shifaq Kamili; Stephen Lindstrom; Susan I. Gerber; Suxiang Tong; Xiaoyan Lu; Yan Li; Ying Tao                                                                                                                                                                                                                                                                                                                            |
| EPI_ISL_424850 to 424851, EPI_ISL_452134                                                                                                                                                                                                                                                                                                                                                                                                                                                                                                                                                                                                                                                           | IL Department of Public Health Chicago Laboratory        | Pathogen Discovery, Respiratory Viruses Branch, Division of Viral Diseases, Centers for Disease Control and Prevention     | Alison S. Laufer Halpin; Anna Montmayeur; Anna Uehara; Christopher A. Elkins; Clinton R. Paden; Haibin Wang; Jing Zhang; Krista Queen; Mary S. Keckler; Rachel Marine; Suxiang Tong; Yan Li; Ying Tao; Zachary Weiner                                                                                                                                                                                                                                                                                                                                                        |
| EPI_ISL_1500236, EPI_ISL_1500238                                                                                                                                                                                                                                                                                                                                                                                                                                                                                                                                                                                                                                                                   | IL Department of Veterans Affairs                        | Illinois Department of Public Health - Springfield Lab                                                                     | Bryan Sim; Gordon McCall                                                                                                                                                                                                                                                                                                                                                                                                                                                                                                                                                     |
| EPI_ISL_1446583 to 1446590, EPI_ISL_1446744, EPI_ISL_1446928 to 1446931, EPI_ISL_1528365 to 1528373                                                                                                                                                                                                                                                                                                                                                                                                                                                                                                                                                                                                | IL Dept. of Public Health Springfield Laboratory         | Centers for Disease Control and Prevention Division of Viral Diseases, Pathogen Discovery                                  | Alison Laufer Halpin; Ben L. Rambo-Martin; Clinton R. Paden; Dakota Howard; Darlene Wagner; Dave Wentworth; Dhvani Batra; Jasmine Padilla; Justin Lee; Katie Dillon; Krista Queen; Kristen Knipe; Kristine Lacek; Mark Burroughs; Matthew Schmeer; Mili Sheth; Peter Cook; Sam Shepard; Sarah Nobles; Shoshona Le; Suxiang Tong; Vivien Dugan; Yvette Unoarumhi                                                                                                                                                                                                              |
| EPI_ISL_1408896, EPI_ISL_1448511, EPI_ISL_1448513 to 1448515, EPI_ISL_1448517, EPI_ISL_1448520 to 1448521, EPI_ISL_1448526, EPI_ISL_1509931, EPI_ISL_1509935, EPI_ISL_1509939, EPI_ISL_1509944 to 1509945                                                                                                                                                                                                                                                                                                                                                                                                                                                                                          |                                                          |                                                                                                                            |                                                                                                                                                                                                                                                                                                                                                                                                                                                                                                                                                                              |



|                                                                                                                                                                                                                                                                                                                                                                                                                                                                                                                                                                                                                                                                                                                      |                                                                                                     |                                                                                                                            |                                                                                                                                                                                                                                                                                                                                                                                                                                                                                                                                                                                                              |
|----------------------------------------------------------------------------------------------------------------------------------------------------------------------------------------------------------------------------------------------------------------------------------------------------------------------------------------------------------------------------------------------------------------------------------------------------------------------------------------------------------------------------------------------------------------------------------------------------------------------------------------------------------------------------------------------------------------------|-----------------------------------------------------------------------------------------------------|----------------------------------------------------------------------------------------------------------------------------|--------------------------------------------------------------------------------------------------------------------------------------------------------------------------------------------------------------------------------------------------------------------------------------------------------------------------------------------------------------------------------------------------------------------------------------------------------------------------------------------------------------------------------------------------------------------------------------------------------------|
| see above                                                                                                                                                                                                                                                                                                                                                                                                                                                                                                                                                                                                                                                                                                            | IL Dept. of Public Health Springfield Laboratory                                                    | Genomics and Discovery, Respiratory Viruses Branch, Division of Viral Diseases, Centers for Disease Control and Prevention | Adam Retchless; Anna Kelleher; Anna Montmayeur; Anna Uehara; Brian Lynch; Clinton R. Paden; Haibin Wang; Han Jia Justin Ng; Jing Zhang; Justin Lee; Krista Queen; Mark Burroughs; Peter Cook; Rachel Marine; Suxiang Tong; Yan Li; Ying Tao                                                                                                                                                                                                                                                                                                                                                                  |
| EPI_ISL_1495760 to 1495761                                                                                                                                                                                                                                                                                                                                                                                                                                                                                                                                                                                                                                                                                           | ILV Kärnten                                                                                         | Bergthaler laboratory, CeMM Research Center for Molecular Medicine of the Austrian Academy of Sciences                     | Andreas Bergthaler; Anna Schedl; Bekir Erguner; Benedikt Agerer; Christoph Bock; Fabian Amman; Jan Laine; Lukas Endler; Maelle Le Moing; Martin Senekowitsch; Michael Schuster; Petr Triska; Thomas Penz                                                                                                                                                                                                                                                                                                                                                                                                     |
| EPI_ISL_445379                                                                                                                                                                                                                                                                                                                                                                                                                                                                                                                                                                                                                                                                                                       | IMALAB- HOSPITAL FACH                                                                               | Instituto de Salud Publica de Chile                                                                                        | Alejandra Acevedo; Andrés E Castillo; Bárbara Parra; Carolina Tambley; Gabriel Leal; Jaime Lagos; Jorge Fernandez; Loredana Arata; Patricia Bustos; Paz Tapia; Rodrigo Fasce; Winston Andrade                                                                                                                                                                                                                                                                                                                                                                                                                |
| EPI_ISL_1435843, EPI_ISL_1435858, EPI_ISL_1435864, EPI_ISL_1435868, EPI_ISL_1435871 to 1435872, EPI_ISL_1435874, EPI_ISL_1435877, EPI_ISL_1435890, EPI_ISL_1435895, EPI_ISL_1435897, EPI_ISL_1435901, EPI_ISL_1439897                                                                                                                                                                                                                                                                                                                                                                                                                                                                                                |                                                                                                     |                                                                                                                            |                                                                                                                                                                                                                                                                                                                                                                                                                                                                                                                                                                                                              |
| see above                                                                                                                                                                                                                                                                                                                                                                                                                                                                                                                                                                                                                                                                                                            | IMD - Institut für Medizinische Diagnostik Berlin-Potsdam                                           | Robert Koch Institute                                                                                                      |                                                                                                                                                                                                                                                                                                                                                                                                                                                                                                                                                                                                              |
| EPI_ISL_1435841, EPI_ISL_1435844 to 1435845, EPI_ISL_1435847, EPI_ISL_1435849 to 1435850, EPI_ISL_1435852, EPI_ISL_1435855 to 1435857, EPI_ISL_1435859 to 1435863, EPI_ISL_1435866 to 1435867, EPI_ISL_1435870, EPI_ISL_1435875, EPI_ISL_1435880, EPI_ISL_1435882 to 1435883, EPI_ISL_1435885, EPI_ISL_1435887, EPI_ISL_1435889, EPI_ISL_1435894, EPI_ISL_1435899, EPI_ISL_1439879, EPI_ISL_1439881, EPI_ISL_1439888, EPI_ISL_1439900                                                                                                                                                                                                                                                                                |                                                                                                     |                                                                                                                            |                                                                                                                                                                                                                                                                                                                                                                                                                                                                                                                                                                                                              |
| see above                                                                                                                                                                                                                                                                                                                                                                                                                                                                                                                                                                                                                                                                                                            | IMD - Labor Oderland                                                                                | Robert Koch Institute                                                                                                      |                                                                                                                                                                                                                                                                                                                                                                                                                                                                                                                                                                                                              |
| EPI_ISL_1435854, EPI_ISL_1435873, EPI_ISL_1435876, EPI_ISL_1435891, EPI_ISL_1435893                                                                                                                                                                                                                                                                                                                                                                                                                                                                                                                                                                                                                                  | IMD - MVZ Labor Greifswald                                                                          | Robert Koch Institute                                                                                                      |                                                                                                                                                                                                                                                                                                                                                                                                                                                                                                                                                                                                              |
| EPI_ISL_1435842, EPI_ISL_1435846, EPI_ISL_1435848, EPI_ISL_1435851, EPI_ISL_1435853, EPI_ISL_1435865, EPI_ISL_1435869, EPI_ISL_1435878 to 1435879, EPI_ISL_1435881, EPI_ISL_1435884, EPI_ISL_1435886, EPI_ISL_1435892, EPI_ISL_1439870 to 1439872, EPI_ISL_1439876, EPI_ISL_1439882 to 1439885, EPI_ISL_1439889 to 1439892, EPI_ISL_1439894 to 1439895, EPI_ISL_1439898 to 1439899                                                                                                                                                                                                                                                                                                                                   |                                                                                                     |                                                                                                                            |                                                                                                                                                                                                                                                                                                                                                                                                                                                                                                                                                                                                              |
| see above                                                                                                                                                                                                                                                                                                                                                                                                                                                                                                                                                                                                                                                                                                            | IMD - MVZ Labor Martinsried                                                                         | Robert Koch Institute                                                                                                      |                                                                                                                                                                                                                                                                                                                                                                                                                                                                                                                                                                                                              |
| EPI_ISL_1439873 to 1439875, EPI_ISL_1439878, EPI_ISL_1439887, EPI_ISL_1439893                                                                                                                                                                                                                                                                                                                                                                                                                                                                                                                                                                                                                                        | IMD - Medizinisches Labor Rostock                                                                   | Robert Koch Institute                                                                                                      |                                                                                                                                                                                                                                                                                                                                                                                                                                                                                                                                                                                                              |
| EPI_ISL_1433505, EPI_ISL_1433507, EPI_ISL_1433511, EPI_ISL_1433513, EPI_ISL_1433515, EPI_ISL_1433533, EPI_ISL_1433537, EPI_ISL_1433549, EPI_ISL_1433553, EPI_ISL_1433574, EPI_ISL_1433579 to 1433580, EPI_ISL_1433582, EPI_ISL_1433586, EPI_ISL_1433590, EPI_ISL_1433592, EPI_ISL_1433688, EPI_ISL_1439370, EPI_ISL_1439372, EPI_ISL_1439374, EPI_ISL_1439376, EPI_ISL_1439378 to 1439379, EPI_ISL_1439382, EPI_ISL_1439385 to 1439386, EPI_ISL_1439391, EPI_ISL_1439393, EPI_ISL_1439396, EPI_ISL_1439402 to 1439404, EPI_ISL_1439406 to 1439407, EPI_ISL_1439409 to 1439410, EPI_ISL_1439412 to 1439415, EPI_ISL_1439417 to 1439422, EPI_ISL_1439424, EPI_ISL_1439426 to 1439431, EPI_ISL_1439434, EPI_ISL_1439436 |                                                                                                     |                                                                                                                            |                                                                                                                                                                                                                                                                                                                                                                                                                                                                                                                                                                                                              |
| see above                                                                                                                                                                                                                                                                                                                                                                                                                                                                                                                                                                                                                                                                                                            | IMD Labor Frankfurt                                                                                 | Robert Koch Institute                                                                                                      |                                                                                                                                                                                                                                                                                                                                                                                                                                                                                                                                                                                                              |
| EPI_ISL_1495581 to 1495601                                                                                                                                                                                                                                                                                                                                                                                                                                                                                                                                                                                                                                                                                           | IMP - Research Institute of Molecular Pathology                                                     | Bergthaler laboratory, CeMM Research Center for Molecular Medicine of the Austrian Academy of Sciences                     | Andreas Bergthaler; Anna Schedl; Bekir Erguner; Benedikt Agerer; Christoph Bock; Fabian Amman; Jan Laine; Lukas Endler; Maelle Le Moing; Martin Senekowitsch; Michael Schuster; Petr Triska; Thomas Penz                                                                                                                                                                                                                                                                                                                                                                                                     |
| EPI_ISL_1446516, EPI_ISL_1446519, EPI_ISL_1446522, EPI_ISL_1446524, EPI_ISL_1446527, EPI_ISL_1446530, EPI_ISL_1446533, EPI_ISL_1446535, EPI_ISL_1446538, EPI_ISL_1446846 to 1446854, EPI_ISL_1516432 to 1516444, EPI_ISL_1528424 to 1528431                                                                                                                                                                                                                                                                                                                                                                                                                                                                          |                                                                                                     |                                                                                                                            |                                                                                                                                                                                                                                                                                                                                                                                                                                                                                                                                                                                                              |
| see above                                                                                                                                                                                                                                                                                                                                                                                                                                                                                                                                                                                                                                                                                                            | IN State Department of Health Laboratory Services                                                   | Centers for Disease Control and Prevention Division of Viral Diseases, Pathogen Discovery                                  | Alison Laufer Halpin; Ben L. Rambo-Martin; Clinton R. Paden; Dakota Howard; Darlene Wagner; Dave Wentworth; Dhvani Batra; Jasmine Padilla; Justin Lee; Katie Dillon; Krista Queen; Kristen Kripe; Kristine Lasek; Mark Burroughs; Matthew Scherer; Mili Sheth; Peter Cook; Sam Shepard; Sarah Nobles; Shoshona Le; Suxiang Tong; Vivien Dugan; Yvette Unoarumhi                                                                                                                                                                                                                                              |
| EPI_ISL_1448516, EPI_ISL_1448524                                                                                                                                                                                                                                                                                                                                                                                                                                                                                                                                                                                                                                                                                     | IN State Department of Health Laboratory Services                                                   | Genomics and Discovery, Respiratory Viruses Branch, Division of Viral Diseases, Centers for Disease Control and Prevention | Anna Kelleher; Anna Uehara; Brian Lynch; Clinton R. Paden; Haibin Wang; Han Jia Justin Ng; Jing Zhang; Krista Queen; Peter Cook; Suxiang Tong; Yan Li; Ying Tao                                                                                                                                                                                                                                                                                                                                                                                                                                              |
| EPI_ISL_1394840 to 1394857, EPI_ISL_1396656 to 1396666, EPI_ISL_1400444 to 1400460, EPI_ISL_1400472 to 1400488, EPI_ISL_1403051 to 1403081, EPI_ISL_1404145 to 1404168, EPI_ISL_1404436 to 1404450, EPI_ISL_1415061 to 1415085, EPI_ISL_1416193 to 1416221, EPI_ISL_1416223 to 1416255, EPI_ISL_1490750 to 1490792, EPI_ISL_1490818 to 1490860, EPI_ISL_1527942 to 1527953, EPI_ISL_1528242 to 1528265, EPI_ISL_1563635 to 1563659, EPI_ISL_1563661 to 1563664, EPI_ISL_1563666 to 1563669, EPI_ISL_1563671 to 1563674, EPI_ISL_1563676 to 1563677                                                                                                                                                                   |                                                                                                     |                                                                                                                            |                                                                                                                                                                                                                                                                                                                                                                                                                                                                                                                                                                                                              |
| see above                                                                                                                                                                                                                                                                                                                                                                                                                                                                                                                                                                                                                                                                                                            | IN State Department of Health Laboratory Services                                                   | IN State Department of Health Laboratory Services                                                                          | Ankita Kashikar; Brian Pope; Cassandra Campion; Jamie Yeadon; Kyle Brownlee; Lixia Liu; Mark Glazier; Melissa Hindenlang                                                                                                                                                                                                                                                                                                                                                                                                                                                                                     |
| EPI_ISL_424866, EPI_ISL_426422 to 426424, EPI_ISL_452131, EPI_ISL_452135 to 452136, EPI_ISL_527666, EPI_ISL_540431                                                                                                                                                                                                                                                                                                                                                                                                                                                                                                                                                                                                   | IN State Department of Health Laboratory Services                                                   | Pathogen Discovery, Respiratory Viruses Branch, Division of Viral Diseases, Centers for Disease Control and Prevention     | Alison S. Laufer Halpin; Anna Montmayeur; Anna Uehara; Brian Lynch; Christopher A. Elkins; Clinton R. Paden; Haibin Wang; Jing Zhang; Krista Queen; Mary S. Keckler; Rachel Marine; Suxiang Tong; Yan Li; Ying Tao; Zachary Weiner                                                                                                                                                                                                                                                                                                                                                                           |
| EPI_ISL_419255, EPI_ISL_493328 to 493331, EPI_ISL_590693 to 590698, EPI_ISL_603137 to 603187, EPI_ISL_609989 to 609999, EPI_ISL_1455669, EPI_ISL_1464620, EPI_ISL_1492572, EPI_ISL_1496002, EPI_ISL_1524727 to 1524728, EPI_ISL_1524737 to 1524738, EPI_ISL_1524743 to 1524752                                                                                                                                                                                                                                                                                                                                                                                                                                       |                                                                                                     |                                                                                                                            |                                                                                                                                                                                                                                                                                                                                                                                                                                                                                                                                                                                                              |
| see above                                                                                                                                                                                                                                                                                                                                                                                                                                                                                                                                                                                                                                                                                                            | INMI Lazzaro Spallanzani IRCCS                                                                      | INMI Lazzaro Spallanzani IRCCS                                                                                             | A Di Caro; Annunziata Tamburro; Antonino Di Caro; B Bartolini; Barbara Bartolini; Beatrice Valli; C.E.M Gruber; CEM Gruber; Cesare E. M. Gruber; Cesare E.M. Gruber; Concetta Castilletti; Daniele Lapa; E Giombini; Eleonora Lalle; Emanuela Giombini; F Messina; F Santini; Fabrizio Carletti; Francesca Colavita; Francesco Messina; Francesco Vairo; Fulvia Pimpinelli; G Bonfiglio; Giuseppe Ippolito.; Giuseppina Cappiello; M Rueca; MR Capobianchi; Marcello Meledandri; Maria Letizia Schiavone; Maria R. Capobianchi; Mariaros Gaudio; Martina Rueca; O Butera; Patrizia Massarelli; Simone Lanini |
| EPI_ISL_410545 to 410546, EPI_ISL_417921 to 417923, EPI_ISL_419254, EPI_ISL_424342 to 424344                                                                                                                                                                                                                                                                                                                                                                                                                                                                                                                                                                                                                         | INMI Lazzaro Spallanzani IRCCS                                                                      | Laboratory of Virology, INMI Lazzaro Spallanzani IRCCS                                                                     | Antonino Di Caro; Barbara Bartolini; Cesare E. M. Gruber; Cesare Ernesto Maria Gruber; Concetta Castilletti; Daniele Lapa; Eleonora Lalle; Emanuela Giombini; Emanuele Nicastri; Fabrizio Carletti; Francesca Colavita; Francesco Messina; Francesco Vairo; Giulia Matusali; Giuseppe Ippolito; Giuseppe Ippolito.; Licia Bordi; Maria R. Capobianchi; Maria Rosaria Capobianchi; Martina Rueca                                                                                                                                                                                                              |
| EPI_ISL_1419053 to 1419115                                                                                                                                                                                                                                                                                                                                                                                                                                                                                                                                                                                                                                                                                           | INSACOG-Mizoram                                                                                     | National Institute of Biomedical Genomics - INSACOG                                                                        | Arindam Maitra; Gracy Laldinmawii; N Senthil Kumar; Nidhan Kumar Biswas; Saumitra Das; Sreedhar Chinnaswamy; Swagnik Roy                                                                                                                                                                                                                                                                                                                                                                                                                                                                                     |
| EPI_ISL_1419116 to 1419142                                                                                                                                                                                                                                                                                                                                                                                                                                                                                                                                                                                                                                                                                           | INSACOG-Sikkim                                                                                      | National Institute of Biomedical Genomics - INSACOG                                                                        | Arindam Maitra; Kaden Zangmu Bhutia; Nidhan Kumar Biswas; Saumitra Das; Sreedhar Chinnaswamy Tshering Ongmu Bhutia; Tara D Sharma                                                                                                                                                                                                                                                                                                                                                                                                                                                                            |
| EPI_ISL_1419048 to 1419052, EPI_ISL_1419143 to 1419336, EPI_ISL_1419338 to 1419924                                                                                                                                                                                                                                                                                                                                                                                                                                                                                                                                                                                                                                   | INSACOG-WB                                                                                          | National Institute of Biomedical Genomics - INSACOG                                                                        | Ajay Chakraborti; Arindam Maitra; Bhaswati Bandyopadhyay; Nidhan Kumar Biswas; Saumitra Das; Sreedhar Chinnaswamy; Tamal Ghosh                                                                                                                                                                                                                                                                                                                                                                                                                                                                               |
| EPI_ISL_1461179 to 1461180, EPI_ISL_1526344 to 1526345                                                                                                                                                                                                                                                                                                                                                                                                                                                                                                                                                                                                                                                               | INSTITUT BERGONIE                                                                                   | CNR Virus des Infections Respiratoires - France SUD                                                                        | Antonin Bal; Bruno Lina; Gregory Destras; Gwendolynne Burfin; Hadrien Regue; Laurence Josset; Martine Valette; Quentin Semanas                                                                                                                                                                                                                                                                                                                                                                                                                                                                               |
| EPI_ISL_445302                                                                                                                                                                                                                                                                                                                                                                                                                                                                                                                                                                                                                                                                                                       | INSTITUTO MEDICO LEGAL                                                                              | Instituto de Salud Publica de Chile                                                                                        | Alejandra Acevedo; Andrés E Castillo; Bárbara Parra; Carolina Tambley; Gabriel Leal; Jaime Lagos; Jorge Fernandez; Loredana Arata; Patricia Bustos; Paz Tapia; Rodrigo Fasce; Winston Andrade                                                                                                                                                                                                                                                                                                                                                                                                                |
| EPI_ISL_1399230, EPI_ISL_1399246, EPI_ISL_1406249, EPI_ISL_1497611 to 1497612                                                                                                                                                                                                                                                                                                                                                                                                                                                                                                                                                                                                                                        | INT Fondazione Pascale                                                                              | INT Fondazione Pascale                                                                                                     | INT Fondazione Pascale                                                                                                                                                                                                                                                                                                                                                                                                                                                                                                                                                                                       |
| EPI_ISL_445357                                                                                                                                                                                                                                                                                                                                                                                                                                                                                                                                                                                                                                                                                                       | INTEGRAMEDICA CENTROS MEDICOS S.A.                                                                  | Instituto de Salud Publica de Chile                                                                                        | Alejandra Acevedo; Andrés E Castillo; Bárbara Parra; Carolina Tambley; Gabriel Leal; Jaime Lagos; Jorge Fernandez; Loredana Arata; Patricia Bustos; Paz Tapia; Rodrigo Fasce; Winston Andrade                                                                                                                                                                                                                                                                                                                                                                                                                |
| EPI_ISL_445261                                                                                                                                                                                                                                                                                                                                                                                                                                                                                                                                                                                                                                                                                                       | INTEGRAMEDICA LAB. CLINICO LTDA.                                                                    | Instituto de Salud Publica de Chile                                                                                        | Alejandra Acevedo; Andrés E Castillo; Bárbara Parra; Carolina Tambley; Gabriel Leal; Jaime Lagos; Jorge Fernandez; Loredana Arata; Patricia Bustos; Paz Tapia; Rodrigo Fasce; Winston Andrade                                                                                                                                                                                                                                                                                                                                                                                                                |
| EPI_ISL_445324                                                                                                                                                                                                                                                                                                                                                                                                                                                                                                                                                                                                                                                                                                       | INTEGRAMEDICA S.A                                                                                   | Instituto de Salud Publica de Chile                                                                                        | Alejandra Acevedo; Andrés E Castillo; Bárbara Parra; Carolina Tambley; Gabriel Leal; Jaime Lagos; Jorge Fernandez; Loredana Arata; Patricia Bustos; Paz Tapia; Rodrigo Fasce; Winston Andrade                                                                                                                                                                                                                                                                                                                                                                                                                |
| EPI_ISL_492980 to 492987                                                                                                                                                                                                                                                                                                                                                                                                                                                                                                                                                                                                                                                                                             | IRCCS Sacro Cuore Don Calabria Hospital, Department of Infectious, Tropical Diseases & Microbiology | University of Verona, Department of Biotechnology                                                                          | Antonio Mori; Chiara Degli Esposti; Chiara Piubelli; Cristina Beltrami; Elena Pomari; Emanuela Cosentino; Giulia Lopatriello; Luca Marcolungo; Massimo Delledonne; Michela Deiana                                                                                                                                                                                                                                                                                                                                                                                                                            |
| EPI_ISL_1496000                                                                                                                                                                                                                                                                                                                                                                                                                                                                                                                                                                                                                                                                                                      | IRCCS San Raffaele                                                                                  | INMI Lazzaro Spallanzani IRCCS                                                                                             | A Di Caro; B Bartolini; CEM Gruber; D Limongi; D Russo; E Giombini; F Ciatti; F Messina; F Santini; G Bonfiglio; M Rueca; MR Capobianchi; O Butera                                                                                                                                                                                                                                                                                                                                                                                                                                                           |
| EPI_ISL_480961, EPI_ISL_480975, EPI_ISL_480981, EPI_ISL_480989, EPI_ISL_480995, EPI_ISL_481003, EPI_ISL_481017, EPI_ISL_481025, EPI_ISL_481029, EPI_ISL_481034 to 481035                                                                                                                                                                                                                                                                                                                                                                                                                                                                                                                                             |                                                                                                     |                                                                                                                            |                                                                                                                                                                                                                                                                                                                                                                                                                                                                                                                                                                                                              |
| see above                                                                                                                                                                                                                                                                                                                                                                                                                                                                                                                                                                                                                                                                                                            | ISGlobal, Institut de Salut Global de Barcelona                                                     | SeqCOVID-SPAIN consortium/IBV(CSIC)                                                                                        | Alberto L Garcia-Basteiro; Alfredo Mayor; Carlota Dobaño; Gemma Moncunill; Pau Cisteró and SeqCOVID-SPAIN consortium                                                                                                                                                                                                                                                                                                                                                                                                                                                                                         |
| EPI_ISL_1465857                                                                                                                                                                                                                                                                                                                                                                                                                                                                                                                                                                                                                                                                                                      | ITHACA COLLEGE LABORATORY HAMMOND HEALTH                                                            | Wadsworth Center, New York State Department of Health                                                                      | Alexis Russell; Catharine Prussing; Daryl M. Lamson; Erasmus Schneider; Erica Lasek-Nesselquist; John Kelly; Jonathan Plitnick; Kirsten St. George;                                                                                                                                                                                                                                                                                                                                                                                                                                                          |

|                                                                                                                                                                                                                                                                                                                                                                                                                                                                                                                                                                                                                                                                                                                                                                                                                                                                                                                                                                                                                                                                                                                                                                                                                                                                                                                                                                                                                                                                                                                                                                                                                                                                                                                                                                                                                                                                                                                                                                                                                                                                                                                                                                                                                                                                                                                                                                                                                                                                                                                                                                                                                                                                                                                                                                                                                                                                                                                                                                                                                                                                                                                                                                                                                                                                                                                                                                                                                                                                                                                                                                                                                                                                                                                                                                                                                                                                                                                                                                                                                                                                                                                                                                                                                                                                                                                                                                                                                                                                                                                                                                                                                                                                                                                                                                                                                                                                                                                                                                                                                                                                                                                                                                                                                                                                                                                                                                                                                                                                                                                                                                                                                                                                                                                                                                                                                                                                                                                                                                                                                                                                                                                                                                                                                                                                                                                                                                                                                                                                                                                                                                                                                                                                                                                                                                                                                                                                                                                                                                                                                                                                                                                                                                                                                                                                                                                                                                                                                                                                                                                                                           | CENTER                   |                                                                                     | Matthew Shudt; Melissa A Leisner; Navjot Singh                                                                                                                                                                                                                                                                                                                                                                                                                                                                                                                                                                                       |                                                                                                                                                                                                                                                                                                                                                                                                                                                                                                                                                                                                                                                                             |
|-----------------------------------------------------------------------------------------------------------------------------------------------------------------------------------------------------------------------------------------------------------------------------------------------------------------------------------------------------------------------------------------------------------------------------------------------------------------------------------------------------------------------------------------------------------------------------------------------------------------------------------------------------------------------------------------------------------------------------------------------------------------------------------------------------------------------------------------------------------------------------------------------------------------------------------------------------------------------------------------------------------------------------------------------------------------------------------------------------------------------------------------------------------------------------------------------------------------------------------------------------------------------------------------------------------------------------------------------------------------------------------------------------------------------------------------------------------------------------------------------------------------------------------------------------------------------------------------------------------------------------------------------------------------------------------------------------------------------------------------------------------------------------------------------------------------------------------------------------------------------------------------------------------------------------------------------------------------------------------------------------------------------------------------------------------------------------------------------------------------------------------------------------------------------------------------------------------------------------------------------------------------------------------------------------------------------------------------------------------------------------------------------------------------------------------------------------------------------------------------------------------------------------------------------------------------------------------------------------------------------------------------------------------------------------------------------------------------------------------------------------------------------------------------------------------------------------------------------------------------------------------------------------------------------------------------------------------------------------------------------------------------------------------------------------------------------------------------------------------------------------------------------------------------------------------------------------------------------------------------------------------------------------------------------------------------------------------------------------------------------------------------------------------------------------------------------------------------------------------------------------------------------------------------------------------------------------------------------------------------------------------------------------------------------------------------------------------------------------------------------------------------------------------------------------------------------------------------------------------------------------------------------------------------------------------------------------------------------------------------------------------------------------------------------------------------------------------------------------------------------------------------------------------------------------------------------------------------------------------------------------------------------------------------------------------------------------------------------------------------------------------------------------------------------------------------------------------------------------------------------------------------------------------------------------------------------------------------------------------------------------------------------------------------------------------------------------------------------------------------------------------------------------------------------------------------------------------------------------------------------------------------------------------------------------------------------------------------------------------------------------------------------------------------------------------------------------------------------------------------------------------------------------------------------------------------------------------------------------------------------------------------------------------------------------------------------------------------------------------------------------------------------------------------------------------------------------------------------------------------------------------------------------------------------------------------------------------------------------------------------------------------------------------------------------------------------------------------------------------------------------------------------------------------------------------------------------------------------------------------------------------------------------------------------------------------------------------------------------------------------------------------------------------------------------------------------------------------------------------------------------------------------------------------------------------------------------------------------------------------------------------------------------------------------------------------------------------------------------------------------------------------------------------------------------------------------------------------------------------------------------------------------------------------------------------------------------------------------------------------------------------------------------------------------------------------------------------------------------------------------------------------------------------------------------------------------------------------------------------------------------------------------------------------------------------------------------------------------------------------------------------------------------------------------------------------------------------------------------------------------------------------------------------------------------------------------------------------------------------------------------------------------------------------------------------------------------------------------------------------------------------------------------------------------------------------------------------------------------------------------------------------------------------------------------------|--------------------------|-------------------------------------------------------------------------------------|--------------------------------------------------------------------------------------------------------------------------------------------------------------------------------------------------------------------------------------------------------------------------------------------------------------------------------------------------------------------------------------------------------------------------------------------------------------------------------------------------------------------------------------------------------------------------------------------------------------------------------------|-----------------------------------------------------------------------------------------------------------------------------------------------------------------------------------------------------------------------------------------------------------------------------------------------------------------------------------------------------------------------------------------------------------------------------------------------------------------------------------------------------------------------------------------------------------------------------------------------------------------------------------------------------------------------------|
| EPI_ISL_572320 to 572324, EPI_ISL_584069, EPI_ISL_584071 to 584072                                                                                                                                                                                                                                                                                                                                                                                                                                                                                                                                                                                                                                                                                                                                                                                                                                                                                                                                                                                                                                                                                                                                                                                                                                                                                                                                                                                                                                                                                                                                                                                                                                                                                                                                                                                                                                                                                                                                                                                                                                                                                                                                                                                                                                                                                                                                                                                                                                                                                                                                                                                                                                                                                                                                                                                                                                                                                                                                                                                                                                                                                                                                                                                                                                                                                                                                                                                                                                                                                                                                                                                                                                                                                                                                                                                                                                                                                                                                                                                                                                                                                                                                                                                                                                                                                                                                                                                                                                                                                                                                                                                                                                                                                                                                                                                                                                                                                                                                                                                                                                                                                                                                                                                                                                                                                                                                                                                                                                                                                                                                                                                                                                                                                                                                                                                                                                                                                                                                                                                                                                                                                                                                                                                                                                                                                                                                                                                                                                                                                                                                                                                                                                                                                                                                                                                                                                                                                                                                                                                                                                                                                                                                                                                                                                                                                                                                                                                                                                                                                        | IZSM                     | IZSM                                                                                | Giovanna Fusco; Lorena Cardillo; Maurizio Viscardi                                                                                                                                                                                                                                                                                                                                                                                                                                                                                                                                                                                   |                                                                                                                                                                                                                                                                                                                                                                                                                                                                                                                                                                                                                                                                             |
| EPI_ISL_1390377 to 1390394, EPI_ISL_1390396 to 1390545, EPI_ISL_1390547 to 1390680, EPI_ISL_1390682 to 1390689, EPI_ISL_1390716 to 1390730, EPI_ISL_1396408, EPI_ISL_1447677 to 1447690, EPI_ISL_1447692 to 1447925, EPI_ISL_1509300 to 1509309, EPI_ISL_1509311 to 1509636                                                                                                                                                                                                                                                                                                                                                                                                                                                                                                                                                                                                                                                                                                                                                                                                                                                                                                                                                                                                                                                                                                                                                                                                                                                                                                                                                                                                                                                                                                                                                                                                                                                                                                                                                                                                                                                                                                                                                                                                                                                                                                                                                                                                                                                                                                                                                                                                                                                                                                                                                                                                                                                                                                                                                                                                                                                                                                                                                                                                                                                                                                                                                                                                                                                                                                                                                                                                                                                                                                                                                                                                                                                                                                                                                                                                                                                                                                                                                                                                                                                                                                                                                                                                                                                                                                                                                                                                                                                                                                                                                                                                                                                                                                                                                                                                                                                                                                                                                                                                                                                                                                                                                                                                                                                                                                                                                                                                                                                                                                                                                                                                                                                                                                                                                                                                                                                                                                                                                                                                                                                                                                                                                                                                                                                                                                                                                                                                                                                                                                                                                                                                                                                                                                                                                                                                                                                                                                                                                                                                                                                                                                                                                                                                                                                                               | see above                | IZSM                                                                                | TIGEM                                                                                                                                                                                                                                                                                                                                                                                                                                                                                                                                                                                                                                |                                                                                                                                                                                                                                                                                                                                                                                                                                                                                                                                                                                                                                                                             |
|                                                                                                                                                                                                                                                                                                                                                                                                                                                                                                                                                                                                                                                                                                                                                                                                                                                                                                                                                                                                                                                                                                                                                                                                                                                                                                                                                                                                                                                                                                                                                                                                                                                                                                                                                                                                                                                                                                                                                                                                                                                                                                                                                                                                                                                                                                                                                                                                                                                                                                                                                                                                                                                                                                                                                                                                                                                                                                                                                                                                                                                                                                                                                                                                                                                                                                                                                                                                                                                                                                                                                                                                                                                                                                                                                                                                                                                                                                                                                                                                                                                                                                                                                                                                                                                                                                                                                                                                                                                                                                                                                                                                                                                                                                                                                                                                                                                                                                                                                                                                                                                                                                                                                                                                                                                                                                                                                                                                                                                                                                                                                                                                                                                                                                                                                                                                                                                                                                                                                                                                                                                                                                                                                                                                                                                                                                                                                                                                                                                                                                                                                                                                                                                                                                                                                                                                                                                                                                                                                                                                                                                                                                                                                                                                                                                                                                                                                                                                                                                                                                                                                           |                          |                                                                                     | Andrea Ballabio; Anna Manfredi; Antonio Grimaldi; Antonio Grimaldi Patrizia Annunziata Francesco Panariello Bianca Maria Pierri Claudia Tiberio Valentina Bouche Chiara Colantuono Maria Concetta Cuomo Denise Di Concilio Lucio Di Filippo Anna Manfredi Marcello Salvi Antonio Limone Luigi Atripaldi Pellegrino Cerino Andrea Ballabio Davide Cacchiarelli; Antonio Limone Luigi Atripaldi Pellegrino Cerino; Bianca Maria Pierri Claudia Tiberio Valentina Bouche; Chiara Colantuono; Davide Cacchiarelli; Denise Di Concilio; Francesco Panariello; Lucio Di Filippo; Marcello Salvi; Maria Concetta Cuomo; Patrizia Annunziata |                                                                                                                                                                                                                                                                                                                                                                                                                                                                                                                                                                                                                                                                             |
| EPI_ISL_1434418, EPI_ISL_1434420, EPI_ISL_1434422, EPI_ISL_1434424, EPI_ISL_1434426, EPI_ISL_1434428, EPI_ISL_1434430, EPI_ISL_1434432, EPI_ISL_1434434, EPI_ISL_1434436, EPI_ISL_1434438, EPI_ISL_1434440, EPI_ISL_1434442, EPI_ISL_1434445, EPI_ISL_1434447, EPI_ISL_1434449, EPI_ISL_1434451, EPI_ISL_1434453, EPI_ISL_1434455, EPI_ISL_1434457, EPI_ISL_1434459, EPI_ISL_1434461, EPI_ISL_1434463, EPI_ISL_1434465, EPI_ISL_1434467, EPI_ISL_1434469, EPI_ISL_1434471, EPI_ISL_1434473, EPI_ISL_1434475, EPI_ISL_1434477, EPI_ISL_1434479, EPI_ISL_1434481, EPI_ISL_1434483, EPI_ISL_1434485, EPI_ISL_1434487, EPI_ISL_1434489, EPI_ISL_1434491, EPI_ISL_1434493, EPI_ISL_1434495, EPI_ISL_1434497, EPI_ISL_1434499, EPI_ISL_1434501, EPI_ISL_1434503, EPI_ISL_1434505, EPI_ISL_1434507, EPI_ISL_1434509, EPI_ISL_1434511, EPI_ISL_1434513, EPI_ISL_1434515, EPI_ISL_1434517, EPI_ISL_1434519, EPI_ISL_1434521, EPI_ISL_1434523, EPI_ISL_1434525, EPI_ISL_1434527, EPI_ISL_1434529, EPI_ISL_1434531, EPI_ISL_1434533, EPI_ISL_1434535, EPI_ISL_1434537, EPI_ISL_1434539, EPI_ISL_1434541, EPI_ISL_1434543, EPI_ISL_1434545, EPI_ISL_1434547, EPI_ISL_1434549, EPI_ISL_1434551, EPI_ISL_1434553, EPI_ISL_1434555, EPI_ISL_1434557, EPI_ISL_1434559, EPI_ISL_1434561, EPI_ISL_1434563, EPI_ISL_1434565, EPI_ISL_1434567, EPI_ISL_1434569, EPI_ISL_1434571, EPI_ISL_1434573, EPI_ISL_1434575, EPI_ISL_1434577, EPI_ISL_1434579, EPI_ISL_1434581, EPI_ISL_1434583, EPI_ISL_1434585, EPI_ISL_1434587, EPI_ISL_1434589, EPI_ISL_1434591, EPI_ISL_1434593, EPI_ISL_1434595, EPI_ISL_1434597, EPI_ISL_1434599, EPI_ISL_1434601, EPI_ISL_1434603, EPI_ISL_1434605, EPI_ISL_1434607, EPI_ISL_1434609, EPI_ISL_1434611, EPI_ISL_1434613, EPI_ISL_1434615, EPI_ISL_1434617, EPI_ISL_1434619, EPI_ISL_1434621, EPI_ISL_1434623, EPI_ISL_1434625, EPI_ISL_1434627, EPI_ISL_1434629, EPI_ISL_1434631, EPI_ISL_1434633, EPI_ISL_1434635, EPI_ISL_1434637, EPI_ISL_1434639, EPI_ISL_1434641, EPI_ISL_1434643, EPI_ISL_1434645, EPI_ISL_1434647, EPI_ISL_1434649, EPI_ISL_1434651, EPI_ISL_1434653, EPI_ISL_1434655, EPI_ISL_1434657, EPI_ISL_1434659, EPI_ISL_1434661, EPI_ISL_1434663, EPI_ISL_1434665, EPI_ISL_1434667, EPI_ISL_1434669, EPI_ISL_1434671, EPI_ISL_1434673, EPI_ISL_1434675, EPI_ISL_1434677, EPI_ISL_1434679, EPI_ISL_1434681, EPI_ISL_1434683, EPI_ISL_1434685, EPI_ISL_1434687, EPI_ISL_1434689, EPI_ISL_1434691, EPI_ISL_1434693, EPI_ISL_1434695, EPI_ISL_1434697, EPI_ISL_1434699, EPI_ISL_1434701, EPI_ISL_1434703, EPI_ISL_1434705, EPI_ISL_1434707, EPI_ISL_1434709, EPI_ISL_1434711, EPI_ISL_1434713, EPI_ISL_1434715, EPI_ISL_1434717, EPI_ISL_1434719, EPI_ISL_1434721, EPI_ISL_1434723, EPI_ISL_1434725, EPI_ISL_1434727, EPI_ISL_1434729, EPI_ISL_1434731, EPI_ISL_1434733, EPI_ISL_1434735, EPI_ISL_1434737, EPI_ISL_1434739, EPI_ISL_1434741, EPI_ISL_1434743, EPI_ISL_1434745, EPI_ISL_1434747, EPI_ISL_1434749, EPI_ISL_1434751, EPI_ISL_1434753, EPI_ISL_1434755, EPI_ISL_1434757, EPI_ISL_1434759, EPI_ISL_1434761, EPI_ISL_1434763, EPI_ISL_1434765, EPI_ISL_1434767, EPI_ISL_1434769, EPI_ISL_1434771, EPI_ISL_1434773, EPI_ISL_1434775, EPI_ISL_1434777, EPI_ISL_1434779, EPI_ISL_1434781, EPI_ISL_1434783, EPI_ISL_1434785, EPI_ISL_1434787, EPI_ISL_1434789, EPI_ISL_1434791, EPI_ISL_1434793, EPI_ISL_1434795, EPI_ISL_1434797, EPI_ISL_1434799, EPI_ISL_1434801, EPI_ISL_1434803, EPI_ISL_1434805, EPI_ISL_1434807, EPI_ISL_1434809, EPI_ISL_1434811, EPI_ISL_1434813, EPI_ISL_1434815, EPI_ISL_1434817, EPI_ISL_1434819, EPI_ISL_1434821, EPI_ISL_1434823, EPI_ISL_1434825, EPI_ISL_1434827, EPI_ISL_1434829, EPI_ISL_1434831, EPI_ISL_1434833, EPI_ISL_1434835, EPI_ISL_1434837, EPI_ISL_1434839, EPI_ISL_1434841, EPI_ISL_1434843, EPI_ISL_1434845, EPI_ISL_1434847, EPI_ISL_1434849, EPI_ISL_1434851, EPI_ISL_1434853, EPI_ISL_1434855, EPI_ISL_1434857, EPI_ISL_1434859, EPI_ISL_1434861, EPI_ISL_1434863, EPI_ISL_1434865, EPI_ISL_1434867, EPI_ISL_1434869, EPI_ISL_1434871, EPI_ISL_1434873, EPI_ISL_1434875, EPI_ISL_1434877, EPI_ISL_1434879, EPI_ISL_1434881, EPI_ISL_1434883, EPI_ISL_1434885, EPI_ISL_1434887, EPI_ISL_1434889, EPI_ISL_1434891, EPI_ISL_1434893, EPI_ISL_1434895, EPI_ISL_1434897, EPI_ISL_1434899, EPI_ISL_1434901, EPI_ISL_1434903, EPI_ISL_1434905, EPI_ISL_1434907, EPI_ISL_1434909, EPI_ISL_1434911, EPI_ISL_1434913, EPI_ISL_1434915, EPI_ISL_1434917, EPI_ISL_1434919, EPI_ISL_1434921, EPI_ISL_1434923, EPI_ISL_1434925, EPI_ISL_1434927, EPI_ISL_1434929, EPI_ISL_1434931, EPI_ISL_1434933, EPI_ISL_1434935, EPI_ISL_1434937, EPI_ISL_1434939, EPI_ISL_1434941, EPI_ISL_1434943, EPI_ISL_1434945, EPI_ISL_1434947, EPI_ISL_1434949, EPI_ISL_1434951, EPI_ISL_1434953, EPI_ISL_1434955, EPI_ISL_1434957, EPI_ISL_1434959, EPI_ISL_1434961, EPI_ISL_1434963, EPI_ISL_1434965, EPI_ISL_1434967, EPI_ISL_1434969, EPI_ISL_1434971, EPI_ISL_1434973, EPI_ISL_1434975, EPI_ISL_1434977, EPI_ISL_1434979, EPI_ISL_1434981, EPI_ISL_1434983, EPI_ISL_1434985, EPI_ISL_1434987, EPI_ISL_1434989, EPI_ISL_1434991, EPI_ISL_1434993, EPI_ISL_1434995, EPI_ISL_1434997, EPI_ISL_1434999, EPI_ISL_1435001, EPI_ISL_1435003, EPI_ISL_1435005, EPI_ISL_1435007, EPI_ISL_1435009, EPI_ISL_1435011, EPI_ISL_1435013, EPI_ISL_1435015, EPI_ISL_1435017, EPI_ISL_1435019, EPI_ISL_1435021, EPI_ISL_1435023, EPI_ISL_1435025, EPI_ISL_1435027, EPI_ISL_1435029, EPI_ISL_1435031, EPI_ISL_1435033, EPI_ISL_1435035, EPI_ISL_1435037, EPI_ISL_1435039, EPI_ISL_1435041, EPI_ISL_1435043, EPI_ISL_1435045, EPI_ISL_1435047, EPI_ISL_1435049, EPI_ISL_1435051, EPI_ISL_1435053, EPI_ISL_1435055, EPI_ISL_1435057, EPI_ISL_1435059, EPI_ISL_1435061, EPI_ISL_1435063, EPI_ISL_1435065, EPI_ISL_1435067, EPI_ISL_1435069, EPI_ISL_1435071, EPI_ISL_1435073, EPI_ISL_1435075, EPI_ISL_1435077, EPI_ISL_1435079, EPI_ISL_1435081, EPI_ISL_1435083, EPI_ISL_1435085, EPI_ISL_1435087, EPI_ISL_1435089, EPI_ISL_1435091, EPI_ISL_1435093, EPI_ISL_1435095, EPI_ISL_1435097, EPI_ISL_1435099, EPI_ISL_1435101, EPI_ISL_1435103, EPI_ISL_1435105, EPI_ISL_1435107, EPI_ISL_1435109, EPI_ISL_1435111, EPI_ISL_1435113, EPI_ISL_1435115, EPI_ISL_1435117, EPI_ISL_1435119, EPI_ISL_1435121, EPI_ISL_1435123, EPI_ISL_1435125, EPI_ISL_1435127, EPI_ISL_1435129, EPI_ISL_1435131, EPI_ISL_1435133, EPI_ISL_1435135, EPI_ISL_1435137, EPI_ISL_1435139, EPI_ISL_1435141, EPI_ISL_1435143, EPI_ISL_1435145, EPI_ISL_1435147, EPI_ISL_1435149, EPI_ISL_1435151, EPI_ISL_1435153, EPI_ISL_1435155, EPI_ISL_1435157, EPI_ISL_1435159, EPI_ISL_1435161, EPI_ISL_1435163, EPI_ISL_1435165, EPI_ISL_1435167, EPI_ISL_1435169, EPI_ISL_1435171, EPI_ISL_1435173, EPI_ISL_1435175, EPI_ISL_1435177, EPI_ISL_1435179, EPI_ISL_1435181, EPI_ISL_1435183, EPI_ISL_1435185, EPI_ISL_1435187, EPI_ISL_1435189, EPI_ISL_1435191, EPI_ISL_1435193, EPI_ISL_1435195, EPI_ISL_1435197, EPI_ISL_1435199, EPI_ISL_1435201, EPI_ISL_1435203, EPI_ISL_1435205, EPI_ISL_1435207, EPI_ISL_1435209, EPI_ISL_1435211, EPI_ISL_1435213, EPI_ISL_1435215, EPI_ISL_1435217, EPI_ISL_1435219, EPI_ISL_1435221, EPI_ISL_1435223, EPI_ISL_1435225, EPI_ISL_1435227, EPI_ISL_1435229, EPI_ISL_1435231, EPI_ISL_1435233, EPI_ISL_1435235, EPI_ISL_1435237, EPI_ISL_1435239, EPI_ISL_1435241, EPI_ISL_1435243, EPI_ISL_1435245, EPI_ISL_1435247, EPI_ISL_1435249, EPI_ISL_1435251, EPI_ISL_1435253, EPI_ISL_1435255, EPI_ISL_1435257, EPI_ISL_1435259, EPI_ISL_1435261, EPI_ISL_1435263, EPI_ISL_1435265, EPI_ISL_1435267, EPI_ISL_1435269, EPI_ISL_1435271 | see above                | Ibaraki Prefectural Institute of Public Health                                      | Ibaraki Prefectural Institute of Public Health                                                                                                                                                                                                                                                                                                                                                                                                                                                                                                                                                                                       | Keiko Goto; Kentaro Itokawa; Makoto Kuroda; Masanori Hashino; Rina Tanaka; Tsuyoshi Sekizuka                                                                                                                                                                                                                                                                                                                                                                                                                                                                                                                                                                                |
| EPI_ISL_479936 to 479943, EPI_ISL_479985, EPI_ISL_480021 to 480029, EPI_ISL_480180 to 480189, EPI_ISL_1433287, EPI_ISL_1433289, EPI_ISL_1433291, EPI_ISL_1433375, EPI_ISL_1433377, EPI_ISL_1433379, EPI_ISL_1433381, EPI_ISL_1433383, EPI_ISL_1433385, EPI_ISL_1433387, EPI_ISL_1433389, EPI_ISL_14333546, EPI_ISL_14333548, EPI_ISL_14333550, EPI_ISL_14333552, EPI_ISL_14333554, EPI_ISL_14333556, EPI_ISL_14333558, EPI_ISL_14333560, EPI_ISL_14333562, EPI_ISL_14333564, EPI_ISL_14333566, EPI_ISL_14333568, EPI_ISL_14333570, EPI_ISL_14333572, EPI_ISL_14333574, EPI_ISL_14333576, EPI_ISL_14333578, EPI_ISL_14333580, EPI_ISL_14333582, EPI_ISL_14333584, EPI_ISL_14333586, EPI_ISL_14333588, EPI_ISL_14333590, EPI_ISL_14333592, EPI_ISL_14333594, EPI_ISL_14333596, EPI_ISL_14333598, EPI_ISL_14333600, EPI_ISL_14333602, EPI_ISL_14333604, EPI_ISL_14333606, EPI_ISL_14333608, EPI_ISL_14333610, EPI_ISL_14333612, EPI_ISL_14333614, EPI_ISL_14333616, EPI_ISL_14333618, EPI_ISL_14333620, EPI_ISL_14333622, EPI_ISL_14333624, EPI_ISL_14333626, EPI_ISL_14333628, EPI_ISL_14333630, EPI_ISL_14333632, EPI_ISL_14333634, EPI_ISL_14333636, EPI_ISL_14333638, EPI_ISL_14333640, EPI_ISL_14333642, EPI_ISL_14333644, EPI_ISL_14333646, EPI_ISL_14333648, EPI_ISL_14333650, EPI_ISL_14333652, EPI_ISL_14333654, EPI_ISL_14333656, EPI_ISL_14333658, EPI_ISL_14333660, EPI_ISL_14333662, EPI_ISL_14333664, EPI_ISL_14333666, EPI_ISL_14333668, EPI_ISL_14333670                                                                                                                                                                                                                                                                                                                                                                                                                                                                                                                                                                                                                                                                                                                                                                                                                                                                                                                                                                                                                                                                                                                                                                                                                                                                                                                                                                                                                                                                                                                                                                                                                                                                                                                                                                                                                                                                                                                                                                                                                                                                                                                                                                                                                                                                                                                                                                                                                                                                                                                                                                                                                                                                                                                                                                                                                                                                                                                                                                                                                                                                                                                                                                                                                                                                                                                                                                                                                                                                                                                                                                                                                                                                                                                                                                                                                                                                                                                                                                                                                                                                                                                                                                                                                                                                                                                                                                                                                                                                                                                                                                                                                                                                                                                                                                                                                                                                                                                                                                                                                                                                                                                                                                                                                                                                                                                                                                                                                                                                                                                                                                                                                                                                                                                                                                                                                                                                                                                                                                                                                                                                                     | see above                | Ibaraki Prefectural Institute of Public Health                                      | Pathogen Genomics Center, National Institute of Infectious Diseases                                                                                                                                                                                                                                                                                                                                                                                                                                                                                                                                                                  | Hajime Kamiya; Keiko Goto; Kentaro Itokawa; Makoto Kuroda; Masanori Hashino; Motoi Suzuki; Rina Tanaka; Tsuyoshi Sekizuka                                                                                                                                                                                                                                                                                                                                                                                                                                                                                                                                                   |
| EPI_ISL_1405711 to 1405728, EPI_ISL_1492620 to 1492636, EPI_ISL_1510260 to 1510277, EPI_ISL_1532066 to 1532088                                                                                                                                                                                                                                                                                                                                                                                                                                                                                                                                                                                                                                                                                                                                                                                                                                                                                                                                                                                                                                                                                                                                                                                                                                                                                                                                                                                                                                                                                                                                                                                                                                                                                                                                                                                                                                                                                                                                                                                                                                                                                                                                                                                                                                                                                                                                                                                                                                                                                                                                                                                                                                                                                                                                                                                                                                                                                                                                                                                                                                                                                                                                                                                                                                                                                                                                                                                                                                                                                                                                                                                                                                                                                                                                                                                                                                                                                                                                                                                                                                                                                                                                                                                                                                                                                                                                                                                                                                                                                                                                                                                                                                                                                                                                                                                                                                                                                                                                                                                                                                                                                                                                                                                                                                                                                                                                                                                                                                                                                                                                                                                                                                                                                                                                                                                                                                                                                                                                                                                                                                                                                                                                                                                                                                                                                                                                                                                                                                                                                                                                                                                                                                                                                                                                                                                                                                                                                                                                                                                                                                                                                                                                                                                                                                                                                                                                                                                                                                            | EPI_ISL_1443290          | II Department of Veterans Affairs                                                   | Illinois Department of Public Health - Springfield Lab                                                                                                                                                                                                                                                                                                                                                                                                                                                                                                                                                                               | Bryan Sim; Gordon McCall                                                                                                                                                                                                                                                                                                                                                                                                                                                                                                                                                                                                                                                    |
| EPI_ISL_1418313                                                                                                                                                                                                                                                                                                                                                                                                                                                                                                                                                                                                                                                                                                                                                                                                                                                                                                                                                                                                                                                                                                                                                                                                                                                                                                                                                                                                                                                                                                                                                                                                                                                                                                                                                                                                                                                                                                                                                                                                                                                                                                                                                                                                                                                                                                                                                                                                                                                                                                                                                                                                                                                                                                                                                                                                                                                                                                                                                                                                                                                                                                                                                                                                                                                                                                                                                                                                                                                                                                                                                                                                                                                                                                                                                                                                                                                                                                                                                                                                                                                                                                                                                                                                                                                                                                                                                                                                                                                                                                                                                                                                                                                                                                                                                                                                                                                                                                                                                                                                                                                                                                                                                                                                                                                                                                                                                                                                                                                                                                                                                                                                                                                                                                                                                                                                                                                                                                                                                                                                                                                                                                                                                                                                                                                                                                                                                                                                                                                                                                                                                                                                                                                                                                                                                                                                                                                                                                                                                                                                                                                                                                                                                                                                                                                                                                                                                                                                                                                                                                                                           | EPI_ISL_1418313          | Ilfov County Emergency Clinical Hospital                                            | National Institute of Infectious Diseases-Prof. Dr. Matei Bals Molecular Diagnostics Laboratory                                                                                                                                                                                                                                                                                                                                                                                                                                                                                                                                      | Corina Casangu; Dan Otelea; Ionelia Nicolae; Leontina Banica; Marius Surlea; Ovidiu Vlaicu; Simona Paraschiv                                                                                                                                                                                                                                                                                                                                                                                                                                                                                                                                                                |
| EPI_ISL_1494032 to 1494549                                                                                                                                                                                                                                                                                                                                                                                                                                                                                                                                                                                                                                                                                                                                                                                                                                                                                                                                                                                                                                                                                                                                                                                                                                                                                                                                                                                                                                                                                                                                                                                                                                                                                                                                                                                                                                                                                                                                                                                                                                                                                                                                                                                                                                                                                                                                                                                                                                                                                                                                                                                                                                                                                                                                                                                                                                                                                                                                                                                                                                                                                                                                                                                                                                                                                                                                                                                                                                                                                                                                                                                                                                                                                                                                                                                                                                                                                                                                                                                                                                                                                                                                                                                                                                                                                                                                                                                                                                                                                                                                                                                                                                                                                                                                                                                                                                                                                                                                                                                                                                                                                                                                                                                                                                                                                                                                                                                                                                                                                                                                                                                                                                                                                                                                                                                                                                                                                                                                                                                                                                                                                                                                                                                                                                                                                                                                                                                                                                                                                                                                                                                                                                                                                                                                                                                                                                                                                                                                                                                                                                                                                                                                                                                                                                                                                                                                                                                                                                                                                                                                | EPI_ISL_420789 to 420790 | Illinois Department of Public Health                                                | Gagnon Lab, Southern Illinois University                                                                                                                                                                                                                                                                                                                                                                                                                                                                                                                                                                                             | Keith Gagnon                                                                                                                                                                                                                                                                                                                                                                                                                                                                                                                                                                                                                                                                |
| EPI_ISL_1478927                                                                                                                                                                                                                                                                                                                                                                                                                                                                                                                                                                                                                                                                                                                                                                                                                                                                                                                                                                                                                                                                                                                                                                                                                                                                                                                                                                                                                                                                                                                                                                                                                                                                                                                                                                                                                                                                                                                                                                                                                                                                                                                                                                                                                                                                                                                                                                                                                                                                                                                                                                                                                                                                                                                                                                                                                                                                                                                                                                                                                                                                                                                                                                                                                                                                                                                                                                                                                                                                                                                                                                                                                                                                                                                                                                                                                                                                                                                                                                                                                                                                                                                                                                                                                                                                                                                                                                                                                                                                                                                                                                                                                                                                                                                                                                                                                                                                                                                                                                                                                                                                                                                                                                                                                                                                                                                                                                                                                                                                                                                                                                                                                                                                                                                                                                                                                                                                                                                                                                                                                                                                                                                                                                                                                                                                                                                                                                                                                                                                                                                                                                                                                                                                                                                                                                                                                                                                                                                                                                                                                                                                                                                                                                                                                                                                                                                                                                                                                                                                                                                                           | EPI_ISL_1553244          | Illinois State University                                                           | Illinois Department of Public Health - Springfield Lab                                                                                                                                                                                                                                                                                                                                                                                                                                                                                                                                                                               | Bryan Sim; Gordon McCall                                                                                                                                                                                                                                                                                                                                                                                                                                                                                                                                                                                                                                                    |
| EPI_ISL_1464619, EPI_ISL_1525254, EPI_ISL_1525259 to 1525260                                                                                                                                                                                                                                                                                                                                                                                                                                                                                                                                                                                                                                                                                                                                                                                                                                                                                                                                                                                                                                                                                                                                                                                                                                                                                                                                                                                                                                                                                                                                                                                                                                                                                                                                                                                                                                                                                                                                                                                                                                                                                                                                                                                                                                                                                                                                                                                                                                                                                                                                                                                                                                                                                                                                                                                                                                                                                                                                                                                                                                                                                                                                                                                                                                                                                                                                                                                                                                                                                                                                                                                                                                                                                                                                                                                                                                                                                                                                                                                                                                                                                                                                                                                                                                                                                                                                                                                                                                                                                                                                                                                                                                                                                                                                                                                                                                                                                                                                                                                                                                                                                                                                                                                                                                                                                                                                                                                                                                                                                                                                                                                                                                                                                                                                                                                                                                                                                                                                                                                                                                                                                                                                                                                                                                                                                                                                                                                                                                                                                                                                                                                                                                                                                                                                                                                                                                                                                                                                                                                                                                                                                                                                                                                                                                                                                                                                                                                                                                                                                              | EPI_ISL_528746           | Illinois Valley Community Hospital                                                  | Illinois Department of Public Health - Springfield Lab                                                                                                                                                                                                                                                                                                                                                                                                                                                                                                                                                                               | Bryan Sim; Gordon McCall                                                                                                                                                                                                                                                                                                                                                                                                                                                                                                                                                                                                                                                    |
|                                                                                                                                                                                                                                                                                                                                                                                                                                                                                                                                                                                                                                                                                                                                                                                                                                                                                                                                                                                                                                                                                                                                                                                                                                                                                                                                                                                                                                                                                                                                                                                                                                                                                                                                                                                                                                                                                                                                                                                                                                                                                                                                                                                                                                                                                                                                                                                                                                                                                                                                                                                                                                                                                                                                                                                                                                                                                                                                                                                                                                                                                                                                                                                                                                                                                                                                                                                                                                                                                                                                                                                                                                                                                                                                                                                                                                                                                                                                                                                                                                                                                                                                                                                                                                                                                                                                                                                                                                                                                                                                                                                                                                                                                                                                                                                                                                                                                                                                                                                                                                                                                                                                                                                                                                                                                                                                                                                                                                                                                                                                                                                                                                                                                                                                                                                                                                                                                                                                                                                                                                                                                                                                                                                                                                                                                                                                                                                                                                                                                                                                                                                                                                                                                                                                                                                                                                                                                                                                                                                                                                                                                                                                                                                                                                                                                                                                                                                                                                                                                                                                                           |                          | Imeda Hospital                                                                      | Imelda Hospital                                                                                                                                                                                                                                                                                                                                                                                                                                                                                                                                                                                                                      | Dagmar Obbels; Hanne Valgaeren; Johan Frans                                                                                                                                                                                                                                                                                                                                                                                                                                                                                                                                                                                                                                 |
|                                                                                                                                                                                                                                                                                                                                                                                                                                                                                                                                                                                                                                                                                                                                                                                                                                                                                                                                                                                                                                                                                                                                                                                                                                                                                                                                                                                                                                                                                                                                                                                                                                                                                                                                                                                                                                                                                                                                                                                                                                                                                                                                                                                                                                                                                                                                                                                                                                                                                                                                                                                                                                                                                                                                                                                                                                                                                                                                                                                                                                                                                                                                                                                                                                                                                                                                                                                                                                                                                                                                                                                                                                                                                                                                                                                                                                                                                                                                                                                                                                                                                                                                                                                                                                                                                                                                                                                                                                                                                                                                                                                                                                                                                                                                                                                                                                                                                                                                                                                                                                                                                                                                                                                                                                                                                                                                                                                                                                                                                                                                                                                                                                                                                                                                                                                                                                                                                                                                                                                                                                                                                                                                                                                                                                                                                                                                                                                                                                                                                                                                                                                                                                                                                                                                                                                                                                                                                                                                                                                                                                                                                                                                                                                                                                                                                                                                                                                                                                                                                                                                                           |                          | Immanuel Hospital                                                                   | Molecular Genetics Laboratory-Faculty of Medicine-Universitas Padjadjaran; School of Life Sciences and Technology & School of Pharmacy-Institut Teknologi Bandung; Laboratorium Kesehatan Provinsi Jawa Barat                                                                                                                                                                                                                                                                                                                                                                                                                        | Agung Eru Wibowo; Azzania Fibrini; Catur Riani; Cut Nur Cinthia Alamanda; Erma Rahmawati; Fensi Amalia; Hammam Rizza; Hesti Lina Wirawati; Husna Nugrahapraja; Ivan Faizal; Lia Faridah; Marselina Irasonia Tan; Mas Rizky A.A. Syamsunaron; Rifky Waluyajati Rachman; Ryan Bayusantika Ristandi; Savira Ekawardhani; Sony Solistia Wirawan; Tarwadi; Tri Hanggono Achmad; Yulia Sribudiani                                                                                                                                                                                                                                                                                 |
| EPI_ISL_481110 to 481205                                                                                                                                                                                                                                                                                                                                                                                                                                                                                                                                                                                                                                                                                                                                                                                                                                                                                                                                                                                                                                                                                                                                                                                                                                                                                                                                                                                                                                                                                                                                                                                                                                                                                                                                                                                                                                                                                                                                                                                                                                                                                                                                                                                                                                                                                                                                                                                                                                                                                                                                                                                                                                                                                                                                                                                                                                                                                                                                                                                                                                                                                                                                                                                                                                                                                                                                                                                                                                                                                                                                                                                                                                                                                                                                                                                                                                                                                                                                                                                                                                                                                                                                                                                                                                                                                                                                                                                                                                                                                                                                                                                                                                                                                                                                                                                                                                                                                                                                                                                                                                                                                                                                                                                                                                                                                                                                                                                                                                                                                                                                                                                                                                                                                                                                                                                                                                                                                                                                                                                                                                                                                                                                                                                                                                                                                                                                                                                                                                                                                                                                                                                                                                                                                                                                                                                                                                                                                                                                                                                                                                                                                                                                                                                                                                                                                                                                                                                                                                                                                                                                  |                          | Immunogenomics lab, Institute of Life Sciences, Bhubaneswar                         | Immunogenomics lab, Institute of Life Sciences, Bhubaneswar                                                                                                                                                                                                                                                                                                                                                                                                                                                                                                                                                                          | Aditi Chatterjee; Ajay Parida; Ajit Singh; Amol Ratnakar Suryawanshi; Ankita Datey; Arup Ghosh; Atimukta Jha; Auromira Khuntia; Bharati Singh; DBT's PAN-INDIA 1000 SARS-CoV2 RNA genome sequencing consortium; Deepika Singh; Dileep Vasudeva; Dileep Vasudevam; Ghulam Hussain Syed; Manasi Priyadarshini; Naga Jogayya Kothakota; Neha Singh; Orissa COVID-19 Study Group; P. Sushree Shyamli; Pratul Prasad; Rahul Das; Rajeeb Swain; Rupesh Dash; Shanti Senapati; Sivaram Krishna; Sneha Dutta; Soma Chattopadhyay; Soumyajit Ghosh; Sunil Raghav; Swati Madhulika; Tsheten Sheroza; Tushar K. Beuria; Viplov K. Biswas                                               |
| EPI_ISL_475572                                                                                                                                                                                                                                                                                                                                                                                                                                                                                                                                                                                                                                                                                                                                                                                                                                                                                                                                                                                                                                                                                                                                                                                                                                                                                                                                                                                                                                                                                                                                                                                                                                                                                                                                                                                                                                                                                                                                                                                                                                                                                                                                                                                                                                                                                                                                                                                                                                                                                                                                                                                                                                                                                                                                                                                                                                                                                                                                                                                                                                                                                                                                                                                                                                                                                                                                                                                                                                                                                                                                                                                                                                                                                                                                                                                                                                                                                                                                                                                                                                                                                                                                                                                                                                                                                                                                                                                                                                                                                                                                                                                                                                                                                                                                                                                                                                                                                                                                                                                                                                                                                                                                                                                                                                                                                                                                                                                                                                                                                                                                                                                                                                                                                                                                                                                                                                                                                                                                                                                                                                                                                                                                                                                                                                                                                                                                                                                                                                                                                                                                                                                                                                                                                                                                                                                                                                                                                                                                                                                                                                                                                                                                                                                                                                                                                                                                                                                                                                                                                                                                            | EPI_ISL_1491362          | Imperial College London                                                             | Imperial College London                                                                                                                                                                                                                                                                                                                                                                                                                                                                                                                                                                                                              | Jie Zhou; Wendy Barclay                                                                                                                                                                                                                                                                                                                                                                                                                                                                                                                                                                                                                                                     |
| EPI_ISL_1517387 to 1517434                                                                                                                                                                                                                                                                                                                                                                                                                                                                                                                                                                                                                                                                                                                                                                                                                                                                                                                                                                                                                                                                                                                                                                                                                                                                                                                                                                                                                                                                                                                                                                                                                                                                                                                                                                                                                                                                                                                                                                                                                                                                                                                                                                                                                                                                                                                                                                                                                                                                                                                                                                                                                                                                                                                                                                                                                                                                                                                                                                                                                                                                                                                                                                                                                                                                                                                                                                                                                                                                                                                                                                                                                                                                                                                                                                                                                                                                                                                                                                                                                                                                                                                                                                                                                                                                                                                                                                                                                                                                                                                                                                                                                                                                                                                                                                                                                                                                                                                                                                                                                                                                                                                                                                                                                                                                                                                                                                                                                                                                                                                                                                                                                                                                                                                                                                                                                                                                                                                                                                                                                                                                                                                                                                                                                                                                                                                                                                                                                                                                                                                                                                                                                                                                                                                                                                                                                                                                                                                                                                                                                                                                                                                                                                                                                                                                                                                                                                                                                                                                                                                                |                          | Imágenes Diagnósticas de Mazatlán                                                   | Microbial Genomics Laboratory                                                                                                                                                                                                                                                                                                                                                                                                                                                                                                                                                                                                        | Alejandra Garcia-Gasca; Bruno Gomez-Gil; Daniel Fregoso-Rueda; Julissa Enciso-Ibarra                                                                                                                                                                                                                                                                                                                                                                                                                                                                                                                                                                                        |
|                                                                                                                                                                                                                                                                                                                                                                                                                                                                                                                                                                                                                                                                                                                                                                                                                                                                                                                                                                                                                                                                                                                                                                                                                                                                                                                                                                                                                                                                                                                                                                                                                                                                                                                                                                                                                                                                                                                                                                                                                                                                                                                                                                                                                                                                                                                                                                                                                                                                                                                                                                                                                                                                                                                                                                                                                                                                                                                                                                                                                                                                                                                                                                                                                                                                                                                                                                                                                                                                                                                                                                                                                                                                                                                                                                                                                                                                                                                                                                                                                                                                                                                                                                                                                                                                                                                                                                                                                                                                                                                                                                                                                                                                                                                                                                                                                                                                                                                                                                                                                                                                                                                                                                                                                                                                                                                                                                                                                                                                                                                                                                                                                                                                                                                                                                                                                                                                                                                                                                                                                                                                                                                                                                                                                                                                                                                                                                                                                                                                                                                                                                                                                                                                                                                                                                                                                                                                                                                                                                                                                                                                                                                                                                                                                                                                                                                                                                                                                                                                                                                                                           |                          | Inciensa, Instituto Costarricense de Investigación y Enseñanza en Nutrición y Salud | Inciensa, Instituto Costarricense de Investigación y Enseñanza en Nutrición y Salud                                                                                                                                                                                                                                                                                                                                                                                                                                                                                                                                                  | Barboza-Arguedas E & Blanco-Delgado C; Barboza-Arguedas E & Centeno-Miranda M; Barboza-Arguedas E & Jimenez-Mora A; Barboza-Arguedas E & Kellerman-Montero K; Cristian Pérez-Corralles; Cristian Pérez-Corralles & Barboza-Arguedas E; Cristian Pérez-Corralles & Valeria Peralta-Barquero; Valeria Peralta-Barquero & Blanco-Delgado C; Valeria Peralta-Barquero & Centeno-Miranda M.J; Valeria Peralta-Barquero & César Cerdas Quesada; Valeria Peralta-Barquero & Gallegos-Carrillo B; Valeria Peralta-Barquero & Kellerman-Montero K; Valeria Peralta-Barquero & Mauricio Bolaños; Valeria Peralta-Barquero & Patricia Salas; Valeria Peralta-Barquero & Salas-Abarca P |
| EPI_ISL_476702 to 476704                                                                                                                                                                                                                                                                                                                                                                                                                                                                                                                                                                                                                                                                                                                                                                                                                                                                                                                                                                                                                                                                                                                                                                                                                                                                                                                                                                                                                                                                                                                                                                                                                                                                                                                                                                                                                                                                                                                                                                                                                                                                                                                                                                                                                                                                                                                                                                                                                                                                                                                                                                                                                                                                                                                                                                                                                                                                                                                                                                                                                                                                                                                                                                                                                                                                                                                                                                                                                                                                                                                                                                                                                                                                                                                                                                                                                                                                                                                                                                                                                                                                                                                                                                                                                                                                                                                                                                                                                                                                                                                                                                                                                                                                                                                                                                                                                                                                                                                                                                                                                                                                                                                                                                                                                                                                                                                                                                                                                                                                                                                                                                                                                                                                                                                                                                                                                                                                                                                                                                                                                                                                                                                                                                                                                                                                                                                                                                                                                                                                                                                                                                                                                                                                                                                                                                                                                                                                                                                                                                                                                                                                                                                                                                                                                                                                                                                                                                                                                                                                                                                                  |                          | Incubadora Venezolana de Ciencia, Venezuela                                         | Incubadora Venezolana de Ciencia, Venezuela / Instituto Nacional de Salud, Bogotá, Colombia / Grupo de Investigaciones Microbiológicas-UR (GIMUR), Departamento de Biología, Facultad de Ciencias Naturales, Universidad del Rosario, Bogotá, Colombia / Icahn School of Medicine at Mount Sinai, New York, USA                                                                                                                                                                                                                                                                                                                      | Alberto Paniz-Mondolfi; Ana S. Gonzalez-Reiche; Angelica Rico; Anibal A. Teherán; Carolina Florez; Carolina Hernández; Emilia Mia Sordillo; Esther C. Barros; Harm van Bakel; Jesús E. Jaimes; Juan David Ramirez; Lisseth Pardo; Lourdes Delgado; Luis Perez-Garcia; Marina Muñoz; Matthew M. Hernandez; Sergio Gomez; Viviana Simon                                                                                                                                                                                                                                                                                                                                       |

|                                                                                                                                                                                                                                                                                     |                                                                                                                                                    |                                                                                                                                                                                                     |                                                                                                                                                                                                                                                                                                                                                                             |
|-------------------------------------------------------------------------------------------------------------------------------------------------------------------------------------------------------------------------------------------------------------------------------------|----------------------------------------------------------------------------------------------------------------------------------------------------|-----------------------------------------------------------------------------------------------------------------------------------------------------------------------------------------------------|-----------------------------------------------------------------------------------------------------------------------------------------------------------------------------------------------------------------------------------------------------------------------------------------------------------------------------------------------------------------------------|
| EPI_ISL_413522                                                                                                                                                                                                                                                                      | Indian Council of Medical Research - National Institute of Virology                                                                                | National Influenza Center, Indian Council of Medical Research - National Institute of Virology                                                                                                      | Choudhary ML; Potdar V; Shete-Aich A; Yadav PD                                                                                                                                                                                                                                                                                                                              |
| EPI_ISL_413523                                                                                                                                                                                                                                                                      | Indian Council of Medical Research-National Institute of Virology                                                                                  | National Influenza Center, Indian Council of Medical Research-National Institute of Virology                                                                                                        | Choudhary ML; Potdar V; Shete-Aich A; Yadav PD                                                                                                                                                                                                                                                                                                                              |
| EPI_ISL_508287 to 508337                                                                                                                                                                                                                                                            | Indian Institute of Science                                                                                                                        | National Institute of Biomedical Genomics                                                                                                                                                           | Amit Singh; Arindam Maitra; Bharath K Sundararaj; Deepak K Saini; Harsha Raheja; N. Srinivasan; Saumitra Das                                                                                                                                                                                                                                                                |
| EPI_ISL_511945 to 511954, EPI_ISL_518031 to 518032                                                                                                                                                                                                                                  | Indian Institute of Science                                                                                                                        | National Institute of Biomedical Genomics - DBT's PAN-INDIA 1000 SARS-CoV-2 RNA Genome Sequencing Consortium                                                                                        | Amit Singh; Arindam Maitra; Bharath K Sundararaj; Deepak K Saini; Harsha Raheja; N. Srinivasan; Saumitra Das                                                                                                                                                                                                                                                                |
| EPI_ISL_1525002 to 1525018                                                                                                                                                                                                                                                          | Indiana State Department of Health                                                                                                                 | Quantigen Biosciences                                                                                                                                                                               | Paul J Childress                                                                                                                                                                                                                                                                                                                                                            |
| EPI_ISL_1401566                                                                                                                                                                                                                                                                     | Indiana State Health Department                                                                                                                    | Quantigen Biosciences                                                                                                                                                                               | Paul J Childress                                                                                                                                                                                                                                                                                                                                                            |
| EPI_ISL_413518 to 413521                                                                                                                                                                                                                                                            | Infectious Disease Control Center, Center for Disease Control and Prevention of PLA                                                                | Infectious Disease Control Center, Center for Disease Control and Prevention of PLA                                                                                                                 | Li; Li, J.; Li, L.; Li, Z.; P. and Li, P.; Qiu, S.; Song, H.                                                                                                                                                                                                                                                                                                                |
| EPI_ISL_596454                                                                                                                                                                                                                                                                      | Infectious Disease and Tropical Medicine Research Center, Resistant Tuberculosis Institute, Zahedan University of Medical Sciences, Zahedan, Iran. | Genetics Research Center, University of Social Welfare and Rehabilitation Sciences                                                                                                                  | Ali Jafarpour; Azam Ghaziasadi; Ebrahim Kord; Hossein Najmabadi; Khadijeh Jalalvand; Kimia Kahrizi; Marzieh Mohseni; Seyed Mohammad Hashemi-Shahri; Seyed Mohammad Jazayeri; Seyedeih elham Mortazavi; Zohreh Fattahi                                                                                                                                                       |
| EPI_ISL_1502814 to 1502817, EPI_ISL_1503143                                                                                                                                                                                                                                         | Infectious Diseases Department, Instituto Nacional de Ciencias Medicas y Nutrición                                                                 | Instituto Nacional de Ciencias Medicas y Nutricion Infectious Diseases                                                                                                                              | Diana Paola Davalos Martinez; Fernando Arteaga Cabello; Fernando Ledesma Barrientos; Guillermo M. Ruiz-Palacios; Luis Alberto Garcia Andrade; Luz Elena Cervantes Villar; Miriam Arciniega Fuentes; Pilar Ramos Cervantes; Violeta Ibarra Gonzalez                                                                                                                          |
| EPI_ISL_1418316                                                                                                                                                                                                                                                                     | Infectious Diseases Hospital Galati                                                                                                                | National Institute of Infectious Diseases-Prof. Dr. Matei Bals Molecular Diagnostics Laboratory                                                                                                     | Corina Casanguiu; Dan Otelea; Ionelia Nicolae; Leontina Banica; Marius Surleac; Ovidiu Vlaicu; Simona Paraschiv                                                                                                                                                                                                                                                             |
| EPI_ISL_538514 to 538521                                                                                                                                                                                                                                                            | Infectious Diseases, North Carolina State Laboratory of Public Health COVID-19 Response Team                                                       | Infectious Diseases, North Carolina State Laboratory of Public Health COVID-19 Response Team                                                                                                        | Chase, K.                                                                                                                                                                                                                                                                                                                                                                   |
| EPI_ISL_538522 to 538523                                                                                                                                                                                                                                                            | Infectious Diseases, North Carolina State Laboratory of Public Health COVID-19 Response Team                                                       | North Carolina State Laboratory of Public Health                                                                                                                                                    | Chase, K.                                                                                                                                                                                                                                                                                                                                                                   |
| EPI_ISL_496339 to 496376                                                                                                                                                                                                                                                            | Infecolab                                                                                                                                          | Andersen lab at Scripps Research                                                                                                                                                                    | Carlos A. Cota Haros; Octavio Renteria Pacheco; SEARCH Alliance San Diego with Samuel Navarro Alvarez                                                                                                                                                                                                                                                                       |
| EPI_ISL_1512746 to 1513138                                                                                                                                                                                                                                                          | Infinity Biologix                                                                                                                                  | Centers for Disease Control and Prevention Division of Viral Diseases, Pathogen Discovery                                                                                                           | Adrian Paskey; Benjamin Rambo-Martin; Chirayu Goswami; Christian Bixby; Christopher Gulvick; Clinton R. Paden; Dakota Howard; Darlene Wagner; Dhvani Batra; Duncan MacCannell; Jason Caravas; Jonathan Schultz; Kara Moser; Matthew Schmeer; Peter W. Cook; Robin Grimwood; Russ Hager; Scott Sammons; Shatavia Morrison; Yihe Wang; Yvette Unorunmi                        |
| EPI_ISL_541970                                                                                                                                                                                                                                                                      | Influenza Centre, University of Bergen                                                                                                             | Norwegian Institute of Public Health, Department of Virology                                                                                                                                        | Bjørn Blomberg; Fan Zhou; Hilde Elshaug; Hilde Synnøve Vollan; Kamilla Heddeland Instefford; Karl A Brokstad; Karoline Bragstad; Kathrine Stene-Johansen; Olav Hungnes; Rasmus Riis Kopperud; Rebecca J Cox                                                                                                                                                                 |
| EPI_ISL_1448424                                                                                                                                                                                                                                                                     | Influenza Virus Research Center, National Institute of Infectious Diseases                                                                         | Influenza Virus Research Center, National Institute of Infectious Diseases                                                                                                                          | Hideka Miura; Kentaro Itokawa; Kiyoko Okamoto; Kumiko Araki; Makoto Kuroda; Masanori Hashino; Rina Tanaka; Seiichiro Fujisaki; Shinichiro Hirai; Tsuyoshi Sekizuka                                                                                                                                                                                                          |
| EPI_ISL_470900 to 470904                                                                                                                                                                                                                                                            | Influenza etiology and epidemiology laboratory                                                                                                     | Pathogenic Microorganisms Variability Laboratory                                                                                                                                                    | Alexander Gintsburg; Alexey Shchetinin; Andrey Botikov; Anna Ignatjeva; Daria Grousova; Denis Logunov; Elena Burtseva; Elena Shidlovskaya; Evgeniya Mukasheva; Inna Dolzhikova; Kirill Krasnoslobotsev; Ludmila Kolobukhina; Maria Nikiforova; Nadezhda Kuznetsova; Svetlana Smetanina; Svetlana Trushakova; Vladimir Gushchin                                              |
| EPI_ISL_469057                                                                                                                                                                                                                                                                      | Inger Landgren                                                                                                                                     | The Public Health Agency of Sweden                                                                                                                                                                  | Anna Risberg; Anna-Malin Linde; Karin Tegmark-Wisell; Maria Lind Karlberg; Mattias Haukland; Olov Svartstrom; Oskar Karlsson Lindsjö; Petra Edquist; Reza Advani; Sandra Broddesson; Shamam Muradrasoli                                                                                                                                                                     |
| EPI_ISL_1395812 to 1395839                                                                                                                                                                                                                                                          | Inmunología del Hospital Perrando e Instituto de Medicina Regional de la UNNE                                                                      | Grupo de Genómica y Bioinformática del Instituto de Investigación de la Cadena Láctea CONICET-INTA on behalf of 'Proyecto Argentino Interinstitucional de genómica de SARS-CoV-2' (PAIS Consortium) | AF; Amadio; Antonieta Cayré; Eberhardt; Gerardo Deluca; Gustavo Giusiano; Horacio Lucero; Irazoqui; Laura Lescano; MF; Marcelo Marin; María Delia Foussal; María Verónica Gómez; Natalia Andrea Ayala                                                                                                                                                                       |
| EPI_ISL_1490193, EPI_ISL_1490200 to 1490201, EPI_ISL_1490265, EPI_ISL_1490294, EPI_ISL_1490298, EPI_ISL_1490396, EPI_ISL_1490402, EPI_ISL_1490426, EPI_ISL_1490441, EPI_ISL_1490541, EPI_ISL_1490548, EPI_ISL_1490583, EPI_ISL_1490624, EPI_ISL_1490648, EPI_ISL_1547644 to 1547645 | see above                                                                                                                                          | Innlandet Hospital Trust, Division Lillehammer, Department for Medical Microbiology                                                                                                                 | Norwegian Institute of Public Health, Department of Virology                                                                                                                                                                                                                                                                                                                |
| EPI_ISL_467946 to 467949, EPI_ISL_495122 to 495160, EPI_ISL_511805 to 511851, EPI_ISL_511862, EPI_ISL_569887 to 569948, EPI_ISL_576518 to 576556                                                                                                                                    | Innovative Genomics Institute, UC Berkeley                                                                                                         | Innovative Genomics Institute, UC Berkeley                                                                                                                                                          | Haridha Shivram; Justin Choi; Liana Lareau; Phil Frankino; Shana McDevitt; Stacia Wyman                                                                                                                                                                                                                                                                                     |
| EPI_ISL_466648                                                                                                                                                                                                                                                                      | Innovative Genomics Institute, UCB                                                                                                                 | Innovative Genomics Institute, UCB                                                                                                                                                                  | Haridha Shivram; Justin Choi; Liana Lareau; Shana McDevitt; Stacia Wyman                                                                                                                                                                                                                                                                                                    |
| EPI_ISL_418215                                                                                                                                                                                                                                                                      | Institut Pasteur Dakar                                                                                                                             | Institut Pasteur de Dakar                                                                                                                                                                           | Amadou Alpha Sali; Ndongo Dia; Ousmane Faye                                                                                                                                                                                                                                                                                                                                 |
| EPI_ISL_1396810 to 1396811                                                                                                                                                                                                                                                          | Institut Louis Malard                                                                                                                              | Department of Virology, Henri Mondor University Hospital, Assistance Publique Hôpitaux de Paris, Université Paris-Est Créteil, INSERM U955                                                          | Alexandre Soulier; Christophe Rodriguez; Elisabeth Trawinski; Guillaume Gricourt; Jean-Michel Pawlowsky; Melissa N'Debi; Slim Fourati; Vanessa Demontant                                                                                                                                                                                                                    |
| EPI_ISL_1404475 to 1404476                                                                                                                                                                                                                                                          | Institut Louis Malardé                                                                                                                             | Department of Virology, Henri Mondor University Hospital, Assistance Publique Hôpitaux de Paris, Université Paris-Est Créteil, INSERM U955                                                          | Alexandre Soulier; Christophe Rodriguez; Elisabeth Trawinski; Guillaume Gricourt; Jean-Michel Pawlowsky; Melissa N'Debi; Slim Fourati; Vanessa Demontant                                                                                                                                                                                                                    |
| EPI_ISL_416498, EPI_ISL_428355 to 428357                                                                                                                                                                                                                                            | Institut Médico légal- Hop R. Poincaré                                                                                                             | National Reference Center for Viruses of Respiratory Infections, Institut Pasteur, Paris                                                                                                            | Angela Brisebarre; Etienne Simon-Lorière; Flora Donati; Marion Barbet; Maud Vanpeene; Mélanie Albert; Méline Bizard; Mélnie Albert; Sylvie Behillil; Sylvie van der Werf; Vincent Enouf                                                                                                                                                                                     |
| EPI_ISL_1404615, EPI_ISL_1433132, EPI_ISL_1434443, EPI_ISL_1435763, EPI_ISL_1436817, EPI_ISL_1437749, EPI_ISL_1438551, EPI_ISL_1439647, EPI_ISL_1440879                                                                                                                             | see above                                                                                                                                          | Institut National d'Hygiène                                                                                                                                                                         | Unité Mixte Internationale TransVIHMI (UMI 233 IRD - U1175 INSERM - Université de Montpellier) IRD (Institut de recherche pour le développement)                                                                                                                                                                                                                            |
| EPI_ISL_1415293, EPI_ISL_1415425, EPI_ISL_1415428, EPI_ISL_1416165, EPI_ISL_1416192, EPI_ISL_1416222, EPI_ISL_1442993, EPI_ISL_1443000 to 1443003                                                                                                                                   | see above                                                                                                                                          | Institut National d'hygiène                                                                                                                                                                         | "Unité Mixte Internationale TransVIHMI (UMI 233 IRD - U1175 INSERM - Université de Montpellier) IRD (Institut de recherche pour le développement)"                                                                                                                                                                                                                          |
| EPI_ISL_1508953, EPI_ISL_1508958, EPI_ISL_1508960, EPI_ISL_1508988, EPI_ISL_1508998, EPI_ISL_1509002, EPI_ISL_1509095, EPI_ISL_1509097, EPI_ISL_1509099, EPI_ISL_1509101                                                                                                            | see above                                                                                                                                          | Institut National d'hygiène                                                                                                                                                                         | Unité Mixte Internationale TransVIHMI (UMI 233 IRD - U1175 INSERM - Université de Montpellier) IRD (Institut de recherche pour le développement)                                                                                                                                                                                                                            |
| EPI_ISL_1406144, EPI_ISL_1406177, EPI_ISL_1445275, EPI_ISL_1500948,                                                                                                                                                                                                                 | Institut National d'Hygiène (INH)                                                                                                                  | Unité Mixte Internationale TransVIHMI (UMI 233 IRD - U1175 INSERM - Université de Montpellier)IRD (Institut de recherche                                                                            | Abla A. KONOU; Adodo SADJI; Ahidjo AYOUBA; Akoélé SILIADIN; Alassane OURO-MEDELI; Amivi EHLAN; Améyo DORKENOO; Anoumou DAGNRA; Christelle BUTEL; Déléma MABA; Eric DELAPORTE; Issaka Maman; Kokou TEGUENI; Koku AGBODEKA; Laetitia SERRANO; Martine PEETERS; Messanh DOUFFAN; Mireille PRINCE-DAVID; Mounerou SALOU; Sidonie A.M.KAGNISSODE; Sika DOSSIM; Wembo A. HALATOKO |

|                                                                                                                                                                                                                                                                                                                                                                                                                                                                                                                                                                                                                                                                                                                                                                             |                                                                                                                                |                                                                                                                                |                                                                                                                                                                                                                                                                                                                                                                                                                                                                                                                                                                     |
|-----------------------------------------------------------------------------------------------------------------------------------------------------------------------------------------------------------------------------------------------------------------------------------------------------------------------------------------------------------------------------------------------------------------------------------------------------------------------------------------------------------------------------------------------------------------------------------------------------------------------------------------------------------------------------------------------------------------------------------------------------------------------------|--------------------------------------------------------------------------------------------------------------------------------|--------------------------------------------------------------------------------------------------------------------------------|---------------------------------------------------------------------------------------------------------------------------------------------------------------------------------------------------------------------------------------------------------------------------------------------------------------------------------------------------------------------------------------------------------------------------------------------------------------------------------------------------------------------------------------------------------------------|
| EPI_ISL_1501268                                                                                                                                                                                                                                                                                                                                                                                                                                                                                                                                                                                                                                                                                                                                                             |                                                                                                                                | pour le développement)                                                                                                         | Mireille PRINCE-DAVID; Mounero SALOU; Sidonie A.M.KAGNISSODE; Sika DOSSIM; Wembo A. HALATOKO                                                                                                                                                                                                                                                                                                                                                                                                                                                                        |
| EPI_ISL_485712                                                                                                                                                                                                                                                                                                                                                                                                                                                                                                                                                                                                                                                                                                                                                              | Institut Pasteur                                                                                                               | Institut Pasteur de Dakar                                                                                                      | Amadou Alpha Sall.; Mamadou Malado Jallow; Mamadou diop; Marie Henriette Dior Ndione; Moussa Moise Diagne; Ndongo Dia; Ousmane Faye; Safietou Sanke                                                                                                                                                                                                                                                                                                                                                                                                                 |
| EPI_ISL_418206 to 418214, EPI_ISL_418216 to 418217, EPI_ISL_420069 to 420074, EPI_ISL_420076 to 420079, EPI_ISL_476148 to 476151, EPI_ISL_476491 to 476495, EPI_ISL_476497, EPI_ISL_476514 to 476516, EPI_ISL_476558, EPI_ISL_476560, EPI_ISL_476562, EPI_ISL_476564, EPI_ISL_476569 to 476570, EPI_ISL_476572, EPI_ISL_476574, EPI_ISL_477141 to 477159, EPI_ISL_480554, EPI_ISL_480556, EPI_ISL_480782 to 480783, EPI_ISL_480786 to 480789, EPI_ISL_481220, EPI_ISL_481234 to 481240, EPI_ISL_481243, EPI_ISL_482874 to 482878, EPI_ISL_485635, EPI_ISL_485708, EPI_ISL_485710 to 485711, EPI_ISL_485713, EPI_ISL_485715 to 485717, EPI_ISL_486857 to 486873                                                                                                              |                                                                                                                                |                                                                                                                                |                                                                                                                                                                                                                                                                                                                                                                                                                                                                                                                                                                     |
| see above                                                                                                                                                                                                                                                                                                                                                                                                                                                                                                                                                                                                                                                                                                                                                                   | Institut Pasteur Dakar                                                                                                         | Institut Pasteur de Dakar                                                                                                      | Amadou Alpha Sall; Amadou Alpha Sall.; Amadou Alpha sall; Amadou alpha Sall; Mamadou Diop; Mamadou Malado Jallow; Mamadou diop; Mamadou malado Jallow; Marie Henriette Dior Ndione; Moussa Moise Diagne; Ndongo Dia; Ousmane Faye; Ousmane faye; Safietou Sanke; Safietou Sankhe; mamadou Diop                                                                                                                                                                                                                                                                      |
| EPI_ISL_498229 to 498252                                                                                                                                                                                                                                                                                                                                                                                                                                                                                                                                                                                                                                                                                                                                                    | Institut Pasteur de Dakar                                                                                                      | Institut Pasteur de Dakar                                                                                                      | Amadou Alpha Sall.; Mamadou Diop; Mamadou Malado Jallow; Marie Henriette Dior Ndione; Moussa Moise Diagne; Ndongo Dia; Ousmane Faye; Safietou Sankhe Mbengue                                                                                                                                                                                                                                                                                                                                                                                                        |
| EPI_ISL_613419 to 613456                                                                                                                                                                                                                                                                                                                                                                                                                                                                                                                                                                                                                                                                                                                                                    | Institut Pasteur de la Guadeloupe                                                                                              | Institut Pasteur de la Guadeloupe                                                                                              | Angela Brisebarre; Antoine Talarmin; Camille Capel; Cherina Fleming; Etienne Simon-Lorière; Marion Barbet; Maud Vanpeene; Méline Bizard; Radjin Steingrover; Stéphanie Guymard; Sylvie Behillil; Sylvie van der Werf; Sébastien Breurec; Vincent Enouf                                                                                                                                                                                                                                                                                                              |
| EPI_ISL_459965 to 459984                                                                                                                                                                                                                                                                                                                                                                                                                                                                                                                                                                                                                                                                                                                                                    | Institut Pasteur du Maroc                                                                                                      | Institut Pasteur du Maroc                                                                                                      | Abdellah Faouzi; Anass Abbad; Anderrahmane Maaroufi; Angela Brisebarre; Camille Capel; Etienne Simon-Lorière; Jalal Nourili; Latifa Anga; Marion Barbet; Maud Vanpeene; Mjid Eloualid; Méline Bizard; Sylvie Behillil; Sylvie van der Werf; Vincent Enouf                                                                                                                                                                                                                                                                                                           |
| EPI_ISL_1403088                                                                                                                                                                                                                                                                                                                                                                                                                                                                                                                                                                                                                                                                                                                                                             | Institut de Pathologie et Genetique (IPG)                                                                                      | Institut de Pathologie et Genetique (IPG)                                                                                      | Jérémie Gras; Pascale Hilbert                                                                                                                                                                                                                                                                                                                                                                                                                                                                                                                                       |
| EPI_ISL_416747 to 416748, EPI_ISL_416750, EPI_ISL_416753 to 416754, EPI_ISL_416756, EPI_ISL_416758                                                                                                                                                                                                                                                                                                                                                                                                                                                                                                                                                                                                                                                                          | Institut des Agents Infectieux (IAI) Hospices Civils de Lyon                                                                   | CNR Virus des Infections Respiratoires - France SUD                                                                            | Alexandre; Antonin; Bal; Bouscambert-Duchamp; Brengel-Pesce; Bruno.; Cheynet; Destras; Florence; Gaymard; Gregory; Josset; Karen; Laurence; Lina; Martine; Maude; Morfin-Sherpa; Valette; Valérie                                                                                                                                                                                                                                                                                                                                                                   |
| EPI_ISL_417333 to 417337, EPI_ISL_417339, EPI_ISL_418420 to 418425, EPI_ISL_418429 to 418432, EPI_ISL_419169 to 419173, EPI_ISL_419177 to 419182, EPI_ISL_419184, EPI_ISL_420604 to 420611, EPI_ISL_420615 to 420616, EPI_ISL_420618 to 420619, EPI_ISL_420621 to 420625, EPI_ISL_508871 to 508874, EPI_ISL_508877, EPI_ISL_508882 to 508911, EPI_ISL_509007 to 509011, EPI_ISL_509013 to 509014                                                                                                                                                                                                                                                                                                                                                                            |                                                                                                                                |                                                                                                                                |                                                                                                                                                                                                                                                                                                                                                                                                                                                                                                                                                                     |
| see above                                                                                                                                                                                                                                                                                                                                                                                                                                                                                                                                                                                                                                                                                                                                                                   | Institut des Agents Infectieux (IAI), Hospices Civils de Lyon                                                                  | CNR Virus des Infections Respiratoires - France SUD                                                                            | Alexandre Gaymard; Antonin Bal; Bruno Lina; Carine Moustaud; Florence Morfin-Sherpa; Gregory Destras; Gwendolyne Burfin; Laurence Josset; Martine Valette; Maude Bouscambert-Duchamp; Raphaëlle Lamy; Solenne Brun                                                                                                                                                                                                                                                                                                                                                  |
| EPI_ISL_1439748 to 1439749                                                                                                                                                                                                                                                                                                                                                                                                                                                                                                                                                                                                                                                                                                                                                  | Institut für Medizinische Mikrobiologie - Universitätsmedizin Göttingen                                                        | Robert Koch Institute                                                                                                          |                                                                                                                                                                                                                                                                                                                                                                                                                                                                                                                                                                     |
| EPI_ISL_1489931                                                                                                                                                                                                                                                                                                                                                                                                                                                                                                                                                                                                                                                                                                                                                             | Institut für Medizinische Virologie, Universitätsklinikum Frankfurt                                                            | Charité Universitätsmedizin Berlin, Institute of Virology                                                                      | Barbara Mühlmann; Christian Drosten; Christiane Pallas; Julia Schneider; Julia Tesch; Jörn Beheim-Schwarzbach; Marek Widera; Niko Kohmer; Sandra Ciesek; Talitha Veith; Terry Jones; Tobias Bleicker; Tuna Toptan Grabmair; Victor M Corman                                                                                                                                                                                                                                                                                                                         |
| EPI_ISL_437913 to 437932, EPI_ISL_437974 to 437992, EPI_ISL_475763, EPI_ISL_475769, EPI_ISL_475813 to 475829, EPI_ISL_475916 to 475928, EPI_ISL_583572, EPI_ISL_583600 to 583616, EPI_ISL_583691                                                                                                                                                                                                                                                                                                                                                                                                                                                                                                                                                                            |                                                                                                                                |                                                                                                                                |                                                                                                                                                                                                                                                                                                                                                                                                                                                                                                                                                                     |
| see above                                                                                                                                                                                                                                                                                                                                                                                                                                                                                                                                                                                                                                                                                                                                                                   | Institut für Virologie am Department für Hygiene, Mikrobiologie und Public Health                                              | Berghthaler laboratory, CeMM Research Center for Molecular Medicine of the Austrian Academy of Sciences                        | Adi Steinrigl; Alexander Lercher; Alexandra Popa; Andreas Berghthaler; Benedikt Agerer; Christian Paar; Christoph Bock; Daniela Schmid; Dorothee von Laer; Elisabeth Puchhammer-Stoeckl; Franz Allerberger; Gernot Walder; Gregor Hörmann; Guenter Weiss; Gunther Vogl; Henrique Colaco; Jakob-Wendelin Genger; Jan Laine; Judith Aberle; Kinga Rigler-Hohenwarter; Lukas Endler; Manfred Nairz; Mark Smyth; Martin Senekowitsch; Michael Schuster; Peter Hufnagl; Peter Obrist; Rainer Gattringer; Sabine Sussitz-Rack; Stephan Aberle; Thomas Penz; Wegene Borena |
| EPI_ISL_485809 to 485813, EPI_ISL_508687 to 508704                                                                                                                                                                                                                                                                                                                                                                                                                                                                                                                                                                                                                                                                                                                          | Institut für Virologie und Epidemiologie der Viruskrankheiten, Universitätsklinikum Tübingen                                   | NGS Competence Center Tübingen, Institut für Medizinische Mikrobiologie und Hygiene, Universitätsklinikum Tübingen             | Angel Angelov; Angelov at al.; Angelov et al.                                                                                                                                                                                                                                                                                                                                                                                                                                                                                                                       |
| EPI_ISL_420075, EPI_ISL_476566                                                                                                                                                                                                                                                                                                                                                                                                                                                                                                                                                                                                                                                                                                                                              | Institut pasteur Dakar                                                                                                         | Institut Pasteur de Dakar                                                                                                      | Amadou Alpha Sall; Mamadou Diop; Moussa Moise Diagne; Ndongo Dia; Ousmane Faye                                                                                                                                                                                                                                                                                                                                                                                                                                                                                      |
| EPI_ISL_1498126 to 1498127, EPI_ISL_1498131 to 1498132, EPI_ISL_1498136 to 1498141, EPI_ISL_1498145, EPI_ISL_1498149 to 1498151                                                                                                                                                                                                                                                                                                                                                                                                                                                                                                                                                                                                                                             | Institute for Developing Science and Health Initiatives (ideSHI)                                                               | Institute for Developing Science and Health Initiatives (ideSHI)                                                               | Fidausi Qadri; Hassan Afrad; Sadia Rahman; Tahmina Shirin                                                                                                                                                                                                                                                                                                                                                                                                                                                                                                           |
| EPI_ISL_574790 to 574862                                                                                                                                                                                                                                                                                                                                                                                                                                                                                                                                                                                                                                                                                                                                                    | Institute for Infectious Diseases, University of Bern                                                                          | Institute for Infectious Diseases, University of Bern                                                                          | Alban Ramette; Christian Baumann; Cora Sägesser; Franziska Suter-Riniker; Michel C Koch; Miguel A Terrazos Miani; Peter Keller; Stephen L Leib                                                                                                                                                                                                                                                                                                                                                                                                                      |
| EPI_ISL_583853 to 583868                                                                                                                                                                                                                                                                                                                                                                                                                                                                                                                                                                                                                                                                                                                                                    | Institute for Laboratory Diagnostics and Microbiology, Klinikum Klagenfurt am Worthersee                                       | Berghthaler laboratory, CeMM Research Center for Molecular Medicine of the Austrian Academy of Sciences                        | Adi Steinrigl; Alexander Lercher; Alexandra Popa; Andreas Berghthaler; Benedikt Agerer; Christian Paar; Christoph Bock; Daniela Schmid; Dorothee von Laer; Elisabeth Puchhammer-Stoeckl; Franz Allerberger; Gernot Walder; Gregor Hörmann; Guenter Weiss; Gunther Vogl; Henrique Colaco; Jakob-Wendelin Genger; Jan Laine; Judith Aberle; Kinga Rigler-Hohenwarter; Lukas Endler; Manfred Nairz; Mark Smyth; Martin Senekowitsch; Michael Schuster; Peter Hufnagl; Peter Obrist; Rainer Gattringer; Sabine Sussitz-Rack; Stephan Aberle; Thomas Penz; Wegene Borena |
| EPI_ISL_1495274 to 1495285, EPI_ISL_1495354 to 1495361, EPI_ISL_1495543 to 1495550, EPI_ISL_1495801 to 1495809                                                                                                                                                                                                                                                                                                                                                                                                                                                                                                                                                                                                                                                              | Institute for Laboratory Diagnostics and Microbiology, Klinikum Klagenfurt am Wörthersee                                       | Berghthaler laboratory, CeMM Research Center for Molecular Medicine of the Austrian Academy of Sciences                        | Andreas Berghthaler; Anna Schedl; Bekir Erguner; Benedikt Agerer; Christoph Bock; Fabian Amman; Jan Laine; Lukas Endler; Maelle Le Moing; Martin Senekowitsch; Michael Schuster; Petr Triska; Thomas Penz                                                                                                                                                                                                                                                                                                                                                           |
| EPI_ISL_455790 to 455793                                                                                                                                                                                                                                                                                                                                                                                                                                                                                                                                                                                                                                                                                                                                                    | Institute for Medical Research, Infectious Disease Research Centre, National Institutes of Health, Ministry of Health Malaysia | Malaysia Genome Institute                                                                                                      | Azrin Ahmad; Enizza Kasim; Iri Suhayu Sapian; Jeyanthi Suppiah; Mohd Faizal Abu Bakar; Mohd Noor Mat Isa; Norazah Ahmad; Nurhezreen Md Iqbal; Ravindran Thayan; Shahrul Hisham Zainal Ariffin; Shamsidar Sopie; Siti Noraini Othman; Tahir Aris; Yusuf Muhammad Noor; Zarina Mohd Zawawi                                                                                                                                                                                                                                                                            |
| EPI_ISL_430439                                                                                                                                                                                                                                                                                                                                                                                                                                                                                                                                                                                                                                                                                                                                                              | Institute for Medical Research, Infectious Disease Research Centre, National Institutes of Health, Ministry of Health Malaysia | Institute for Medical Research Infectious Disease Research Centre, National Institutes of Health, Ministry of Health Malaysia  | Abdul-Wahid.M-Z; Ahmad.N; Azizan.M-A; Hisham.H-A; Kalyanasundram.J; Mat-Sharani.S; Mohd-Zain.R; Mohd-Zawawi.Z; Suppiah.J; Tan.L-P; Thayan.R                                                                                                                                                                                                                                                                                                                                                                                                                         |
| EPI_ISL_459957                                                                                                                                                                                                                                                                                                                                                                                                                                                                                                                                                                                                                                                                                                                                                              | Institute for Medical Research, Infectious Disease Research Centre, National Institutes of Health, Minis                       | Institute for Medical Research, Infectious Disease Research Centre, National Institutes of Health, Minis                       | Ellan K; Kalyanasundram J; Kamel KA; Mohd-Zain R; Mohd-Zawawi Z; Suppiah J; Thayan R                                                                                                                                                                                                                                                                                                                                                                                                                                                                                |
| EPI_ISL_459953                                                                                                                                                                                                                                                                                                                                                                                                                                                                                                                                                                                                                                                                                                                                                              | Institute for Medical Research, Infectious Disease Research Centre, National Institutes of Health, Ministry of Health Malaysia | Institute for Medical Research Infectious Disease Research Centre, National Institutes of Health, Ministry of Health Malaysia  | Ellan K; Kalyanasundram J; Kamel KA; Mohd-Zain R; Mohd-Zawawi Z; Suppiah J; Thayan R                                                                                                                                                                                                                                                                                                                                                                                                                                                                                |
| EPI_ISL_430440 to 430444, EPI_ISL_459954 to 459956, EPI_ISL_489992 to 489994, EPI_ISL_490014 to 490016, EPI_ISL_490047 to 490048, EPI_ISL_490089 to 490103, EPI_ISL_596449, EPI_ISL_1405966, EPI_ISL_1406078, EPI_ISL_1406146, EPI_ISL_1406148, EPI_ISL_1406153, EPI_ISL_1406178, EPI_ISL_1406185, EPI_ISL_1406187, EPI_ISL_1406192, EPI_ISL_1406194, EPI_ISL_1406197, EPI_ISL_1406199, EPI_ISL_1406201, EPI_ISL_1406204, EPI_ISL_1406242, EPI_ISL_1406244, EPI_ISL_1406247, EPI_ISL_1406250, EPI_ISL_1406274, EPI_ISL_1406277, EPI_ISL_1406281, EPI_ISL_1406286, EPI_ISL_1406292, EPI_ISL_1406294, EPI_ISL_1424064 to 1424065, EPI_ISL_1424130, EPI_ISL_1424143, EPI_ISL_1424466 to 1424468, EPI_ISL_1424470 to 1424471, EPI_ISL_1424510, EPI_ISL_1424513, EPI_ISL_1424518 |                                                                                                                                |                                                                                                                                |                                                                                                                                                                                                                                                                                                                                                                                                                                                                                                                                                                     |
| see above                                                                                                                                                                                                                                                                                                                                                                                                                                                                                                                                                                                                                                                                                                                                                                   | Institute for Medical Research, Infectious Disease Research Centre, National Institutes of Health, Ministry of Health Malaysia | Institute for Medical Research, Infectious Disease Research Centre, National Institutes of Health, Ministry of Health Malaysia | Abdul-Wahid.M-Z; Ahmad.N; Azizan.M-A; Ellan K; Hisham.H-A; Kalyanasundram J; Kalyanasundram.J; Kamel K; Kamel KA; Mat-Sharani.S; Mohd Zawawi Z; Mohd-Zain R; Mohd-Zain.R; Mohd-Zawawi Z; Ramly N; Robert F; Suppiah J; Suppiah.J; Tan.L-P; Tengku-Abd-Rashid.T-R; Tengku-Rogayah.TAR; Thayan R; Thayan.R                                                                                                                                                                                                                                                            |
| EPI_ISL_583579 to 583598                                                                                                                                                                                                                                                                                                                                                                                                                                                                                                                                                                                                                                                                                                                                                    | Institute for Medical and Chemical Laboratory Diagnostics, Kepler Universitätsklinikum                                         | Berghthaler laboratory, CeMM Research Center for Molecular Medicine of the Austrian Academy of Sciences                        | Adi Steinrigl; Alexander Lercher; Alexandra Popa; Andreas Berghthaler; Benedikt Agerer; Christian Paar; Christoph Bock; Daniela Schmid; Dorothee von Laer; Elisabeth Puchhammer-Stoeckl; Franz Allerberger; Gernot Walder; Gregor Hörmann; Guenter Weiss; Gunther Vogl; Henrique Colaco; Jakob-Wendelin Genger; Jan Laine; Judith Aberle; Kinga Rigler-Hohenwarter; Lukas Endler; Manfred Nairz; Mark Smyth; Martin Senekowitsch; Michael Schuster; Peter Hufnagl; Peter Obrist; Rainer Gattringer; Sabine Sussitz-Rack; Stephan Aberle; Thomas Penz; Wegene Borena |
| EPI_ISL_454605 to 454606, EPI_ISL_455566 to 455567, EPI_ISL_468591, EPI_ISL_468656                                                                                                                                                                                                                                                                                                                                                                                                                                                                                                                                                                                                                                                                                          | Institute for Public Health                                                                                                    | Laboratory for advanced genomics                                                                                               | Filip Roki; Igor Jurak; Lovro Trgovec-Greif; Neven Sui; Oliver Vugrek; Tomislav Rukavina                                                                                                                                                                                                                                                                                                                                                                                                                                                                            |
| EPI_ISL_492075 to 492086                                                                                                                                                                                                                                                                                                                                                                                                                                                                                                                                                                                                                                                                                                                                                    | Institute for Public Health of the Republic of North Macedonia                                                                 | Charite Universitatsmedizin Berlin, Institute of Virology                                                                      | Barbara Muhlemann; Christian Drosten; Elizabeta Jancheska; Golubinka Bosevska; Joern Beheim-Schwarzbach; Julia Schneider; Maja Kuzmanovska; Talitha Veith; Terry Jones; Victor M Corman                                                                                                                                                                                                                                                                                                                                                                             |
| EPI_ISL_477168, EPI_ISL_477205 to 477246, EPI_ISL_477248 to 477251, EPI_ISL_477255 to 477262, EPI_ISL_479736 to 479755, EPI_ISL_480293 to 480296, EPI_ISL_486673                                                                                                                                                                                                                                                                                                                                                                                                                                                                                                                                                                                                            |                                                                                                                                |                                                                                                                                |                                                                                                                                                                                                                                                                                                                                                                                                                                                                                                                                                                     |

|                                                                                                                                                                                                                                                                                                                                                                                                                                                                                                                                                                                                                                                                                                                                                                                                                          |                                                                                                                                                                                |                                                                                                                                                |                                                                                                                                                                                                                                                                                                                                                                                                                                                                                                                                                                                                                                                                                                                                                                                                                                                                                                          |
|--------------------------------------------------------------------------------------------------------------------------------------------------------------------------------------------------------------------------------------------------------------------------------------------------------------------------------------------------------------------------------------------------------------------------------------------------------------------------------------------------------------------------------------------------------------------------------------------------------------------------------------------------------------------------------------------------------------------------------------------------------------------------------------------------------------------------|--------------------------------------------------------------------------------------------------------------------------------------------------------------------------------|------------------------------------------------------------------------------------------------------------------------------------------------|----------------------------------------------------------------------------------------------------------------------------------------------------------------------------------------------------------------------------------------------------------------------------------------------------------------------------------------------------------------------------------------------------------------------------------------------------------------------------------------------------------------------------------------------------------------------------------------------------------------------------------------------------------------------------------------------------------------------------------------------------------------------------------------------------------------------------------------------------------------------------------------------------------|
| see above                                                                                                                                                                                                                                                                                                                                                                                                                                                                                                                                                                                                                                                                                                                                                                                                                | Institute for Stem Cell Science and Regenerative Medicine                                                                                                                      | National Centre for Biological Sciences                                                                                                        | Aswin Seshasayee; Awadhesh Pandit; Dasaradhi Palakodeti; Farhan Ali; Mohak Sharda; Shah-e-Jahan Gulzar; Srikar Krishna; Uma Ramakrishnan; Vanessa Molin Paynter; Varadha Sundarmurthy                                                                                                                                                                                                                                                                                                                                                                                                                                                                                                                                                                                                                                                                                                                    |
| EPI_ISL_1491531 to 1491554, EPI_ISL_1491570 to 1491571, EPI_ISL_1491574, EPI_ISL_1511124 to 1511138, EPI_ISL_1538418 to 1538419, EPI_ISL_1538421 to 1538428                                                                                                                                                                                                                                                                                                                                                                                                                                                                                                                                                                                                                                                              | Institute for Urban Disease Control and Prevention                                                                                                                             | COVID-19 Network Investigations (CONI) Alliance                                                                                                | Amornmas Kongklieng; Angkana Huang; Anthony R. Jones; Arporn Wangwiwatsin; Bhakthom Panthan; Chonticha Klungtong; Duangkamon Loesbanluechai; Ekawat Pasomsub; Elizabeth Batty; Insee Sensor; Janjira Thaipadungpanit; Kamolthip Atsawaranunt; Khajohn Joonlasak; Kingkan Rakmanee; Krittikorn Kumponsin; Namfon Kotanan; Prayuth Kaewmalang; Pukkapon Parnwijitkul; Stefan Fernandez; Thanat Chookajorn; Theerarat Kochakarn; Treewat Watthanachokchai; Vichan Pawun; Wasun Chantratia; Wuditchai Manasatienkij                                                                                                                                                                                                                                                                                                                                                                                          |
| EPI_ISL_572330 to 572331, EPI_ISL_572333, EPI_ISL_572397, EPI_ISL_573152, EPI_ISL_574259                                                                                                                                                                                                                                                                                                                                                                                                                                                                                                                                                                                                                                                                                                                                 | Institute for Virology, University Hospital Duesseldorf, Medical Faculty, Heinrich-Heine-University Duesseldorf                                                                | Institute for Virology, University Hospital Duesseldorf, Medical Faculty, Heinrich-Heine-University Duesseldorf                                | ; Alexander Killer; Andreas Walker; Annemarie Mohring; Anselm Kunststein; Ansgar Schulz; Björn Jensen; Caroline Klindt; Edwin Bölke; Gerald Antoch; Heiner Schaal; Jennifer Neubert; Johannes Bode; Johannes C. Fischer; Jörg Timm; Lisa Müller; Maximilian Damagnez; Nadine Lübke; Ortwin Adams; Philipp Albrecht; Philipp Ostermann; Saskia Elben; Tina Senif; Tom Lüdde; Torsten Feldt; Verena Keitel                                                                                                                                                                                                                                                                                                                                                                                                                                                                                                 |
| EPI_ISL_602462 to 602509, EPI_ISL_602518 to 602532                                                                                                                                                                                                                                                                                                                                                                                                                                                                                                                                                                                                                                                                                                                                                                       | Institute for Virology, University Hospital Essen                                                                                                                              | Center of Medical Microbiology, Virology, and Hospital Hygiene, University of Duesseldorf                                                      | Alexander Dilthey; Andreas Walker; Daniel Strelow; Jessica Nicolai; Jörg Timm; Klaus Pfeffer; Lisanna Hülse; Malte Kohms Vasconcelos; Maximilian Damagnez; Nadine Lübke; Olympia E. Anastasiou; Tobias Wienemann; Torsten Houwartz; Ulf Dittmer                                                                                                                                                                                                                                                                                                                                                                                                                                                                                                                                                                                                                                                          |
| EPI_ISL_1495272 to 1495273, EPI_ISL_1495384 to 1495406, EPI_ISL_1495551 to 1495573, EPI_ISL_1495867 to 1495893                                                                                                                                                                                                                                                                                                                                                                                                                                                                                                                                                                                                                                                                                                           | Institute for Water Quality and Resource Management, Technical University Vienna                                                                                               | Bergthaler laboratory, CeMM Research Center for Molecular Medicine of the Austrian Academy of Sciences                                         | Andreas Bergthaler; Anna Schedl; Bekir Erguner; Benedikt Agerer; Christoph Bock; Fabian Amman; Jan Laine; Lukas Endler; Maelle Le Moing; Martin Senekowitsch; Michael Schuster; Petr Triska; Thomas Penz                                                                                                                                                                                                                                                                                                                                                                                                                                                                                                                                                                                                                                                                                                 |
| EPI_ISL_418988                                                                                                                                                                                                                                                                                                                                                                                                                                                                                                                                                                                                                                                                                                                                                                                                           | Institute information KU Leuven, Clinical and Epidemiological Virology                                                                                                         | Institute information KU Leuven, Clinical and Epidemiological Virology                                                                         | Bert Vanmechelen; Joan Marti-Carreras; Piet Maes; Tony Wawina                                                                                                                                                                                                                                                                                                                                                                                                                                                                                                                                                                                                                                                                                                                                                                                                                                            |
| EPI_ISL_525472 to 525473                                                                                                                                                                                                                                                                                                                                                                                                                                                                                                                                                                                                                                                                                                                                                                                                 | Institute of Clinical Microbiology and Hygiene, University Hospital Regensburg                                                                                                 | Institute of Clinical Microbiology and Hygiene, University Hospital Regensburg                                                                 | Hiergeist, A.                                                                                                                                                                                                                                                                                                                                                                                                                                                                                                                                                                                                                                                                                                                                                                                                                                                                                            |
| EPI_ISL_539333 to 539339                                                                                                                                                                                                                                                                                                                                                                                                                                                                                                                                                                                                                                                                                                                                                                                                 | Institute of Disease Control and Prevention, People's Liberation Army                                                                                                          | Institute of Disease Control and Prevention, People's Liberation Army                                                                          | Li, P.; Qiu, S.                                                                                                                                                                                                                                                                                                                                                                                                                                                                                                                                                                                                                                                                                                                                                                                                                                                                                          |
| EPI_ISL_600428 to 600446, EPI_ISL_600449, EPI_ISL_600451, EPI_ISL_600454, EPI_ISL_600456, EPI_ISL_600459, EPI_ISL_600461, EPI_ISL_600463, EPI_ISL_600466, EPI_ISL_600468, EPI_ISL_600471, EPI_ISL_600473, EPI_ISL_600476, EPI_ISL_600478, EPI_ISL_600480, EPI_ISL_600484, EPI_ISL_600487, EPI_ISL_600489, EPI_ISL_600492, EPI_ISL_600495, EPI_ISL_600498, EPI_ISL_600500, EPI_ISL_600502, EPI_ISL_600505, EPI_ISL_600507, EPI_ISL_600510, EPI_ISL_600512, EPI_ISL_600515, EPI_ISL_600517, EPI_ISL_600519, EPI_ISL_600522, EPI_ISL_600524, EPI_ISL_600527, EPI_ISL_600530, EPI_ISL_600533, EPI_ISL_600535, EPI_ISL_600538, EPI_ISL_600541, EPI_ISL_600543, EPI_ISL_600546, EPI_ISL_600549, EPI_ISL_600552, EPI_ISL_600554, EPI_ISL_600557, EPI_ISL_600559, EPI_ISL_600562, EPI_ISL_600564, EPI_ISL_600567, EPI_ISL_600570 |                                                                                                                                                                                |                                                                                                                                                |                                                                                                                                                                                                                                                                                                                                                                                                                                                                                                                                                                                                                                                                                                                                                                                                                                                                                                          |
| see above                                                                                                                                                                                                                                                                                                                                                                                                                                                                                                                                                                                                                                                                                                                                                                                                                | Institute of Epidemiology Disease Control And Research                                                                                                                         | Institute for Developing Science and Health Initiatives                                                                                        | Firadausi Qadri; Lauren Cowley; Md. Mahfuz-Al-mamun; Mokibul Hassan Afrad; Sadiya Isfat Ara Rahman; Tahmina Shirin                                                                                                                                                                                                                                                                                                                                                                                                                                                                                                                                                                                                                                                                                                                                                                                       |
| EPI_ISL_1498128 to 1498130, EPI_ISL_1498133 to 1498135, EPI_ISL_1498142 to 1498144, EPI_ISL_1498146 to 1498148, EPI_ISL_1498152                                                                                                                                                                                                                                                                                                                                                                                                                                                                                                                                                                                                                                                                                          | Institute of Epidemiology, Disease Control and Research (IEDCR)                                                                                                                | Institute for Developing Science and Health Initiatives (ideSHI)                                                                               | Fidausi Qadri; Hassan Afrad; Sadiya Rahman; Tahmina Shirin                                                                                                                                                                                                                                                                                                                                                                                                                                                                                                                                                                                                                                                                                                                                                                                                                                               |
| EPI_ISL_462480, EPI_ISL_485399, EPI_ISL_582031 to 582032                                                                                                                                                                                                                                                                                                                                                                                                                                                                                                                                                                                                                                                                                                                                                                 | Institute of Human Genetics, Polish Academy of Sciences                                                                                                                        | Institute of Human Genetics, Polish Academy of Sciences                                                                                        | Adam Ustaszewski; Andrzej Pawski; Emilia Lis; Ewa Zitkiewicz; Marta Kaczmarek-Ry; Micha Witt; Szymon Hryhorowicz                                                                                                                                                                                                                                                                                                                                                                                                                                                                                                                                                                                                                                                                                                                                                                                         |
| EPI_ISL_485400                                                                                                                                                                                                                                                                                                                                                                                                                                                                                                                                                                                                                                                                                                                                                                                                           | Institute of Human Genetics, Polish Academy of Sciences                                                                                                                        | Institute of Human Genetics, Polish Academy of Sciences,                                                                                       | Adam Ustaszewski; Andrzej Pawski; Emilia Lis; Ewa Zitkiewicz; Marta Kaczmarek-Ry; Micha Witt; Szymon Hryhorowicz                                                                                                                                                                                                                                                                                                                                                                                                                                                                                                                                                                                                                                                                                                                                                                                         |
| EPI_ISL_450294                                                                                                                                                                                                                                                                                                                                                                                                                                                                                                                                                                                                                                                                                                                                                                                                           | Institute of Human Genetics, Polish Academy of Sciences Sanitary and Epidemiological Station in Pozna                                                                          | Institute of Human Genetics, Polish Academy of Sciences                                                                                        | Adam Ustaszewski; Andrzej Pawski; Emilia Lis; Marta Kaczmarek-Ry; Micha Witt; Szymon Hryhorowicz                                                                                                                                                                                                                                                                                                                                                                                                                                                                                                                                                                                                                                                                                                                                                                                                         |
| EPI_ISL_450295                                                                                                                                                                                                                                                                                                                                                                                                                                                                                                                                                                                                                                                                                                                                                                                                           | Institute of Human Genetics, Polish Academy of Sciences; Sanitary and Epidemiological Station in Pozna                                                                         | Institute of Human Genetics, Polish Academy of Sciences                                                                                        | Adam Ustaszewski; Andrzej Pawski; Emilia Lis; Marta Kaczmarek-Ry; Micha Witt; Szymon Hryhorowicz                                                                                                                                                                                                                                                                                                                                                                                                                                                                                                                                                                                                                                                                                                                                                                                                         |
| EPI_ISL_450338                                                                                                                                                                                                                                                                                                                                                                                                                                                                                                                                                                                                                                                                                                                                                                                                           | Institute of Human Genetics, Polish Academy of Sciences; Sanitary and Epidemiological Station in Pozna                                                                         | Institute of Human Genetics, Polish Academy of Sciences                                                                                        | Adam Ustaszewski; Andrzej Pawski; Emilia Lis; Marta Kaczmarek-Ry; Micha Witt; Szymon Hryhorowicz                                                                                                                                                                                                                                                                                                                                                                                                                                                                                                                                                                                                                                                                                                                                                                                                         |
| EPI_ISL_463010 to 463093                                                                                                                                                                                                                                                                                                                                                                                                                                                                                                                                                                                                                                                                                                                                                                                                 | Institute of Life Sciences, Bhubaneswar                                                                                                                                        | Immunogenomics lab, Institute of Life Sciences, Bhubaneswar                                                                                    | Ajay Parida; Aliva Minz; Arup Ghosh; Atimukta Jha; Avula Kiran; DBT's PAN-INDIA 1000 SARS-CoV2 RNA genome sequencing consortium; Debyashrita Barik; Deepak Singh; Eshna Laha; Ghulam Hussain Syed; Hiren G. Dodia; ILS COVID-19 TEAM; Jeky Chawla; Kaushik Sen; Kautilya Kumar Jena; Manasi Priyadarshini; Neha Singh; O. P. Shriwas; Orissa COVID-19 Study Group; Parej Nath; Priyanka Mohapatra; Punit Prasad; Rajeeb Swain; Rina Yadav; Rupesh Dash; Saiket De; Sanchari Chatterjee; Sandhya Suranjika; Satya Ranjan Sahu; Shamima Ansari; Shanti Senapati; Shuchi Smita; Sifu Agarwal; Soma Chattopadhyay; Sunil Raghav; Supriya Suman; Swati Madhulika; Tushar K. Beuria; Viplov K. Biswas                                                                                                                                                                                                          |
| EPI_ISL_527871                                                                                                                                                                                                                                                                                                                                                                                                                                                                                                                                                                                                                                                                                                                                                                                                           | Institute of Medical Biology, Chinese Academy of Medical Sciences and Peking Union Medical College                                                                             | Institute of Medical Biology, Chinese Academy of Medical Sciences and Peking Union Medical College                                             | Chen, H.; Fan, S.; G. and Li, Q.; Jiang, Liao, Y.; Liu, L.; Wang, L.; Xie, Z.; Xu, X.; Zheng, H.; Zhou, X.                                                                                                                                                                                                                                                                                                                                                                                                                                                                                                                                                                                                                                                                                                                                                                                               |
| EPI_ISL_590823 to 590836                                                                                                                                                                                                                                                                                                                                                                                                                                                                                                                                                                                                                                                                                                                                                                                                 | Institute of Medical Virology, University of Zurich                                                                                                                            | Institute of Medical Virology, University of Zurich                                                                                            | Alexandra Trkola; Benjamin G. Hale; Ioiaia Busnadiego; Irene Abela; Marie O. Pohl; Maryam Zaheri; Michael Huber; Silke Stertz; Stefan Schmutz; Verena Küfner                                                                                                                                                                                                                                                                                                                                                                                                                                                                                                                                                                                                                                                                                                                                             |
| EPI_ISL_422563 to 422565                                                                                                                                                                                                                                                                                                                                                                                                                                                                                                                                                                                                                                                                                                                                                                                                 | Institute of Microbiology Universidad San Francisco de Quito                                                                                                                   | Institute of Microbiology Universidad San Francisco de Quito                                                                                   | Alejandra Ramones; Belen Prado-Vivar; Bernardo Gutierrez; Edison Ligñá; Francisco Mora; Franklin Espinoza; Gabriel Trueba; Jorge Reyes; Juan Gaviria; Juan Jose Guadalupe; Michelle Grunauer; Patricio Rojas-Silva; Paul Cardenas; Sully Marquez; Veronica Barragan                                                                                                                                                                                                                                                                                                                                                                                                                                                                                                                                                                                                                                      |
| EPI_ISL_420294 to 420295, EPI_ISL_420541, EPI_ISL_1385787 to 1385788, EPI_ISL_1403338 to 1403383, EPI_ISL_1403387 to 1403421, EPI_ISL_1403427 to 1403496, EPI_ISL_1406287 to 1406290, EPI_ISL_1406434, EPI_ISL_1406436, EPI_ISL_1490187, EPI_ISL_1495062 to 1495110, EPI_ISL_1496003, EPI_ISL_1498920 to 1499019, EPI_ISL_1499021 to 1499104, EPI_ISL_1509888 to 1509922, EPI_ISL_1510936 to 1511114, EPI_ISL_1516890                                                                                                                                                                                                                                                                                                                                                                                                    | Institute of Microbiology and Immunology, Faculty of Medicine, University of Ljubljana                                                                                         | Institute of Microbiology and Immunology, Faculty of Medicine, University of Ljubljana                                                         | Alen Sulji; Andraž Celar; Dominika Šturm; Doroteja Vljaj; Lucijan Skubic; Mario Poljak; Matic Brvar; Miša Korva; Patricija Pozvek; Samo Zakotnik; Tatjana Avši - Županc; Tatjana Avši - Županc; Tomaž Mark Zorec; Špeta Pleh                                                                                                                                                                                                                                                                                                                                                                                                                                                                                                                                                                                                                                                                             |
| EPI_ISL_548942 to 548946                                                                                                                                                                                                                                                                                                                                                                                                                                                                                                                                                                                                                                                                                                                                                                                                 | Institute of Microbiology, University of Veterinary and Animal sciences                                                                                                        | Institute of Microbiology, University of Veterinary and Animal sciences                                                                        | Ali; Altaf, I.; Anwar, M.; Ashraf; Asif, A.; Attique; Awan; Aziz; Bhatti; Cheema; Fazal, S.; Hassan, S.; Khan; Khan, N.; M.A.; M.B.; M.M.; M.S.; M.T.; M.U.; M.W.; M.Z.; Mehmood, A.; Mukhtar, N.; N.A.; Nawaz, M.; Rafique, S.; Rana; Raza, S.; S. Q.; S.Z.; Sardar, N.; Sarwar, H.; Shabbir; Shah; Tahir, Z.; Yaqub, T.; Younis                                                                                                                                                                                                                                                                                                                                                                                                                                                                                                                                                                        |
| EPI_ISL_417482, EPI_ISL_477014 to 477016, EPI_ISL_486842 to 486851, EPI_ISL_491932, EPI_ISL_491936 to 491940, EPI_ISL_516648 to 516652, EPI_ISL_525430 to 525438, EPI_ISL_527809 to 527817, EPI_ISL_539785 to 539793                                                                                                                                                                                                                                                                                                                                                                                                                                                                                                                                                                                                     | Institute of Microbiology, Universidad San Francisco de Quito                                                                                                                  | Institute of Microbiology, Universidad San Francisco de Quito                                                                                  | Alejandra Ramones; Andrea Macias; Anita Garcia; Belen Prado-Vivar; Belén Prado-Vivar; Bernardo Gutierrez; Bernardo Gutiérrez; Carla Torres; Carlos Guerrero; Carlos Mena; Carlos Tobar; Carolina Pacheco; Damaris Zandoya; Damaris Sandoya; Dayron Brossard; Diego Egas; Eddy Chavez; Edison Ligñá; Edy Quizpe; Eulalia Pazmiño; Fausto Maldonado; Francisco Mora; Francisco Rodríguez; Franklin Espinoza; Gabriel Trueba; Geovanny Carzola; Jonathan Araujo; Jorge Luis Velez; Jorge Reyes; Juan Gaviria; Juan Jose Guadalupe; Juan José Guadalupe; Karina Barragan; Khurram Mahbbob; Ligia Briceño; Manuel Jibaja; Michelle Grunauer; Milton Tobar; Monica Becerra-Wong; Nabih Dahik; Patricio Rojas-Silva; Paul Cardenas; Paul Cárdenas; Prado-Vivar; Rene Bracho; Rosario Erazo; Stalin Castillo; Stephanie Arregui; Sully Marquez; Sully Márquez; Veronica Barragan; Verónica Barragán; Yomara Napa |
| EPI_ISL_1443641 to 1443665                                                                                                                                                                                                                                                                                                                                                                                                                                                                                                                                                                                                                                                                                                                                                                                               | Institute of Microbiology, Universidad San Francisco de Quito                                                                                                                  | Omics Sciences Laboratory                                                                                                                      | ; Andrea Cunguan; Belén Prado-Vivar; Bernardo Gutiérrez; Darlyn Amaya; Dayron Brossard; Derly Andrade Molina; Emeric Sulay Salto Montalvo; Fernanda Zurita; Gabriel Morey León; Gabriel Trueba; Juan Carlos Fernández Cadena; Juan José Guadalupe; Katherine Sacheri Viteri; Michelle Grunauer; Monica Becerra-Wong; Nabih Dahik; Patricio Rojas-Silva; Paula Juliana Gavilanes Jarrín; Paul Cárdenas; Rubén Armas González; Sully Márquez; Verónica Barragán                                                                                                                                                                                                                                                                                                                                                                                                                                            |
| EPI_ISL_463008                                                                                                                                                                                                                                                                                                                                                                                                                                                                                                                                                                                                                                                                                                                                                                                                           | Institute of Molecular Virology, University Münster                                                                                                                            | Institute of Molecular Virology, University Münster                                                                                            | Alexander Mellmann; Angeles Mecate Zambrano; Joachim Kühn; Linda Brunotte; Stephan Ludwig                                                                                                                                                                                                                                                                                                                                                                                                                                                                                                                                                                                                                                                                                                                                                                                                                |
| EPI_ISL_1465438 to 1465481                                                                                                                                                                                                                                                                                                                                                                                                                                                                                                                                                                                                                                                                                                                                                                                               | Institute of Molecular and Translational Medicine / Laboratory of Experimental Medicine, Faculty of Medicine and Dentistry, Palacky University and University Hospital Olomouc | Institute of Molecular and Translational Medicine / Laboratory of Experimental Medicine, Faculty of Medicine and Dentistry, Palacky University | Barbora Blumová; Hana Jaworek; Marián Hajdúch; Rastislav Slavkovský; Tomáš Pospišil; Tomáš Pospišil; Vladimíra Koudeláková                                                                                                                                                                                                                                                                                                                                                                                                                                                                                                                                                                                                                                                                                                                                                                               |
| EPI_ISL_508338 to 508414                                                                                                                                                                                                                                                                                                                                                                                                                                                                                                                                                                                                                                                                                                                                                                                                 | Institute of Post Graduate Medical Education & Research                                                                                                                        | National Institute of Biomedical Genomics                                                                                                      | Arindam Maitra; Aritra Biswas; Jayeeta Haldar; Monimoy Banerjee; Raja Ray; Saumitra Das                                                                                                                                                                                                                                                                                                                                                                                                                                                                                                                                                                                                                                                                                                                                                                                                                  |
| EPI_ISL_511900 to 511907                                                                                                                                                                                                                                                                                                                                                                                                                                                                                                                                                                                                                                                                                                                                                                                                 | Institute of Post Graduate Medical Education & Research                                                                                                                        | National Institute of Biomedical Genomics - DBT's PAN-INDIA 1000 SARS-CoV-2 RNA Genome Sequencing Consortium                                   | Arindam Maitra; Aritra Biswas; Jayeeta Haldar; Monimoy Banerjee; Raja Ray; Saumitra Das                                                                                                                                                                                                                                                                                                                                                                                                                                                                                                                                                                                                                                                                                                                                                                                                                  |

|                                                                                                                                                                                                                                                                                                                                                                                                                                                                                                                                              |                                                                                                                                                             |                                                                                                                                                                       |                                                                                                                                                                                                                                                                                                                                                                                                                                                                                                                                                                                                                                                                                                                                                                                                               |
|----------------------------------------------------------------------------------------------------------------------------------------------------------------------------------------------------------------------------------------------------------------------------------------------------------------------------------------------------------------------------------------------------------------------------------------------------------------------------------------------------------------------------------------------|-------------------------------------------------------------------------------------------------------------------------------------------------------------|-----------------------------------------------------------------------------------------------------------------------------------------------------------------------|---------------------------------------------------------------------------------------------------------------------------------------------------------------------------------------------------------------------------------------------------------------------------------------------------------------------------------------------------------------------------------------------------------------------------------------------------------------------------------------------------------------------------------------------------------------------------------------------------------------------------------------------------------------------------------------------------------------------------------------------------------------------------------------------------------------|
| EPI_ISL_1499519 to 1499543                                                                                                                                                                                                                                                                                                                                                                                                                                                                                                                   | Institute of Public Health of Dubrovnik-Neretva County                                                                                                      | Croatian Institute of Public Health                                                                                                                                   | Irena Tabain; Ivana Ferenak                                                                                                                                                                                                                                                                                                                                                                                                                                                                                                                                                                                                                                                                                                                                                                                   |
| EPI_ISL_1499544 to 1499548                                                                                                                                                                                                                                                                                                                                                                                                                                                                                                                   | Institute of Public Health of Istra County                                                                                                                  | Croatian Institute of Public Health                                                                                                                                   | Irena Tabain; Ivana Ferenak                                                                                                                                                                                                                                                                                                                                                                                                                                                                                                                                                                                                                                                                                                                                                                                   |
| EPI_ISL_1499513 to 1499518                                                                                                                                                                                                                                                                                                                                                                                                                                                                                                                   | Institute of Public Health of Karlovac County                                                                                                               | Croatian Institute of Public Health                                                                                                                                   | Irena Tabain; Ivana Ferenak                                                                                                                                                                                                                                                                                                                                                                                                                                                                                                                                                                                                                                                                                                                                                                                   |
| EPI_ISL_1499549 to 1499562                                                                                                                                                                                                                                                                                                                                                                                                                                                                                                                   | Institute of Public Health of Koprivnica-Križevci County                                                                                                    | Croatian Institute of Public Health                                                                                                                                   | Irena Tabain; Ivana Ferenak                                                                                                                                                                                                                                                                                                                                                                                                                                                                                                                                                                                                                                                                                                                                                                                   |
| EPI_ISL_1499563 to 1499568                                                                                                                                                                                                                                                                                                                                                                                                                                                                                                                   | Institute of Public Health of Krapina-Zagorje County                                                                                                        | Croatian Institute of Public Health                                                                                                                                   | Irena Tabain; Ivana Ferenak                                                                                                                                                                                                                                                                                                                                                                                                                                                                                                                                                                                                                                                                                                                                                                                   |
| EPI_ISL_1435946, EPI_ISL_1435948, EPI_ISL_1435950, EPI_ISL_1435952, EPI_ISL_1435954, EPI_ISL_1435956, EPI_ISL_1435958, EPI_ISL_1435960, EPI_ISL_1435962, EPI_ISL_1435964                                                                                                                                                                                                                                                                                                                                                                     |                                                                                                                                                             |                                                                                                                                                                       |                                                                                                                                                                                                                                                                                                                                                                                                                                                                                                                                                                                                                                                                                                                                                                                                               |
| see above                                                                                                                                                                                                                                                                                                                                                                                                                                                                                                                                    | Institute of Public Health of Lika-Senj county                                                                                                              | Croatian Institute of Public Health                                                                                                                                   | Irena Tabain; Ivana Ferenak                                                                                                                                                                                                                                                                                                                                                                                                                                                                                                                                                                                                                                                                                                                                                                                   |
| EPI_ISL_1499505 to 1499512                                                                                                                                                                                                                                                                                                                                                                                                                                                                                                                   | Institute of Public Health of Meimurje county                                                                                                               | Croatian Institute of Public Health                                                                                                                                   | Irena Tabain; Ivana Ferenak                                                                                                                                                                                                                                                                                                                                                                                                                                                                                                                                                                                                                                                                                                                                                                                   |
| EPI_ISL_1435896, EPI_ISL_1435900, EPI_ISL_1435902, EPI_ISL_1435913, EPI_ISL_1435917, EPI_ISL_1435922, EPI_ISL_1435924, EPI_ISL_1435930, EPI_ISL_1435937, EPI_ISL_1435939, EPI_ISL_1435941 to 1435942, EPI_ISL_1435944, EPI_ISL_1435995, EPI_ISL_1435997, EPI_ISL_1435999 to 1436000, EPI_ISL_1436002, EPI_ISL_1436004, EPI_ISL_1436006, EPI_ISL_1436008, EPI_ISL_1436013, EPI_ISL_1436018, EPI_ISL_1436026, EPI_ISL_1436028, EPI_ISL_1436030, EPI_ISL_1436032, EPI_ISL_1436039, EPI_ISL_1436041, EPI_ISL_1436043, EPI_ISL_1436045 to 1436046 |                                                                                                                                                             |                                                                                                                                                                       |                                                                                                                                                                                                                                                                                                                                                                                                                                                                                                                                                                                                                                                                                                                                                                                                               |
| see above                                                                                                                                                                                                                                                                                                                                                                                                                                                                                                                                    | Institute of Public Health of Varazdin county                                                                                                               | Croatian Institute of Public Health                                                                                                                                   | Irena Tabain; Ivana Ferenak                                                                                                                                                                                                                                                                                                                                                                                                                                                                                                                                                                                                                                                                                                                                                                                   |
| EPI_ISL_577734 to 577742, EPI_ISL_583481 to 583489, EPI_ISL_1492457 to 1492560, EPI_ISL_1547829 to 1547906                                                                                                                                                                                                                                                                                                                                                                                                                                   | Institute of Virology, Biomedical Research Center of the Slovak Academy of Sciences, Bratislava                                                             | Faculty of Natural Sciences, Comenius University, Bratislava                                                                                                          | Boris Klempa; Brona Brejova; Broa Brejová; Dominika Friová; Edita Staroová; Elena Tichá; Jozef Nosek; Juraj Kopacek; Juraj Kopáek; Kristina Borsova; Kristina Borsová; Lubomira Lukacikova; Martina Lickova; Martina Liková; Martina Nebohacova; Martina Nebohová; Monika Slavikova; Monika Sláviková; Sabina Fumacova Havlikova; Sabina Fumaová Havlíková; Tomas Vinar; Tomáš Vina; Viktoria Cabanova; Viktoria Hodorova; Viktória Hodorová; Viktória abanová; ubomira Lukáiková                                                                                                                                                                                                                                                                                                                             |
| EPI_ISL_417877 to 417880                                                                                                                                                                                                                                                                                                                                                                                                                                                                                                                     | Institute of Virology, Biomedical Research Center of the Slovak Academy of Sciences, Bratislava; Public Health Authority of the Slovak Republic, Bratislava | Institute of Virology, Biomedical Research Center of the Slovak Academy of Sciences, Bratislava; Comenius University Science Park, Bratislava                         | Boris Klempa; Diana Rusáková; Edita Staroová; Elena Tichá; Jaroslav Budiš; Juraj Kopáek; Juraj Koi; Martina Liková; Miroslav Böhmer; Monika Slávikova; Sabina Fumaová Havlíková; Tomáš Szemeš; Werner Krampfl                                                                                                                                                                                                                                                                                                                                                                                                                                                                                                                                                                                                 |
| EPI_ISL_455680                                                                                                                                                                                                                                                                                                                                                                                                                                                                                                                               | Institute of pathogenic microbiology, Jiangsu Provincial Center for Disease Control and Prevention                                                          | Institute of pathogenic microbiology, Jiangsu Provincial Center for Disease Control and Prevention                                                                    | Cui, L.                                                                                                                                                                                                                                                                                                                                                                                                                                                                                                                                                                                                                                                                                                                                                                                                       |
| EPI_ISL_1420635                                                                                                                                                                                                                                                                                                                                                                                                                                                                                                                              | Instituto Estadual do Cérebro Paulo Niemayer (IECPN)                                                                                                        | Laboratório de Imunofarmacologia                                                                                                                                      | Thiago Moreno Lopes Souza                                                                                                                                                                                                                                                                                                                                                                                                                                                                                                                                                                                                                                                                                                                                                                                     |
| EPI_ISL_491174 to 491297                                                                                                                                                                                                                                                                                                                                                                                                                                                                                                                     | Instituto Gulbenkian de Ciência                                                                                                                             | Instituto Gulbenkian de Ciência                                                                                                                                       | Cathy Paulino; Joao Sobral; João Costa; Ricardo Leite; Susana Ladeira                                                                                                                                                                                                                                                                                                                                                                                                                                                                                                                                                                                                                                                                                                                                         |
| EPI_ISL_426364                                                                                                                                                                                                                                                                                                                                                                                                                                                                                                                               | Instituto Nacional de Ciencias Medicas y Nutricion Salvador Zubiran                                                                                         | Instituto Nacional de Ciencias Medicas y Nutricion                                                                                                                    | Adnan Araiza Rodríguez; Alejandro Sánchez; Alfredo Ponce de León Garduño; Blanca Taboada; Carlos F. Arias; Carolina González Torres; Celia Boukadida; Cesar Raúl González Bonilla; Concepción Grajales Muñiz; Edgar Mendieta Condado; Eduardo Becerril Vargas; Fabiola Garcés Ayala; Fernando Ledesma Barrientos; Francisco Javier Gaytán Cervantes; Francisco Pulido; Gisela Barrera Badillo; Gloria Vázquez; Guillermo M. Ruiz-Palacios; Irma López Martínez; Joel Armando Vázquez Pérez; José Arturo Martínez Orozco; José Ernesto Ramírez González; José Esteban Muñoz Medina; Lucia Hernández Rivas; Luis Alberto García Andrade; Mario Mújica Sánchez; Pavel Isa; Pilar Ramos Cervantes; Ricardo Grande; Santiago Avila Ríos; Victor Hugo Borja Aburto; Violeta Ibarra Tobaalez                         |
| EPI_ISL_426361 to 426363, EPI_ISL_426365                                                                                                                                                                                                                                                                                                                                                                                                                                                                                                     | Instituto Nacional de Ciencias Medicas y Nutricion Salvador Zubiran                                                                                         | Instituto Nacional de Ciencias Medicas y Nutricion Salvador Zubiran                                                                                                   | Adnan Araiza Rodríguez; Alejandro Sánchez; Alfredo Ponce de León Garduño; Blanca Taboada; Carlos F. Arias; Carolina González Torres; Celia Boukadida; Cesar Raúl González Bonilla; Concepción Grajales Muñiz; Edgar Mendieta Condado; Eduardo Becerril Vargas; Fabiola Garcés Ayala; Fernando Ledesma Barrientos; Francisco Javier Gaytán Cervantes; Francisco Pulido; Gisela Barrera Badillo; Gloria Vázquez; Guillermo M. Ruiz-Palacios; Irma López Martínez; Joel Armando Vázquez Pérez; José Arturo Martínez Orozco; José Ernesto Ramírez González; José Esteban Muñoz Medina; Lucia Hernández Rivas; Luis Alberto García Andrade; Mario Mújica Sánchez; Pavel Isa; Pilar Ramos Cervantes; Ricardo Grande; Santiago Avila Ríos; Victor Hugo Borja Aburto; Violeta Ibarra Gonzalez                         |
| EPI_ISL_424345, EPI_ISL_424348, EPI_ISL_424625 to 424627                                                                                                                                                                                                                                                                                                                                                                                                                                                                                     | Instituto Nacional de Enfermedades Respiratorias                                                                                                            | Instituto Nacional de Enfermedades Respiratorias                                                                                                                      | Adnan Araiza Rodríguez; Alejandro Sánchez; Alfredo Ponce de León Garduño; Blanca Taboada; Carlos F. Arias.; Carolina González Torres; Celia Boukadida; Cesar Raúl González Bonilla; Concepción Grajales Muñiz; Edgar Mendieta Condado; Eduardo Becerril Vargas; Fabiola Garcés Ayala; Fernando Ledesma Barrientos; Francisco Javier Gaytán Cervantes; Francisco Pulido; Gisela Barrera Badillo; Gloria Vázquez; Guillermo M. Ruiz-Palacios; Irma López Martínez; Joel Armando Vázquez Pérez; Jorge Salas Hernández; José Arturo Martínez Orozco; José Ernesto Ramírez González; José Esteban Muñoz Medina; Lucia Hernández Rivas; Luis Alberto García Andrade; Mario Mújica Sánchez; Pavel Isa; Pilar Ramos Cervantes; Ricardo Grande; Santiago Avila Ríos; Victor Hugo Borja Aburto; Violeta Ibarra Gonzalez |
| EPI_ISL_412972                                                                                                                                                                                                                                                                                                                                                                                                                                                                                                                               | Instituto Nacional de Enfermedades Respiratorias                                                                                                            | Instituto de Diagnostico y Referencia Epidemiologicos (INDRE)                                                                                                         | Araiza-Rodriguez Adnan; Arias Carlos; Barrera-Badillo Gisela; Boukadida Celia; Garces-Ayala Fabiola; Hernandez-Rivas Lucia; Isa Pavel; Lopez Susana; Lopez-Martinez Irma; Martinez Arturo; Mendieta-Condado Edgar; Munoz-Medina Esteban; Ramirez-Gonzalez Ernesto; Rodriguez-Maldonado Abril; Sanchez Alejandro; Taboada Blanca; Vazquez-Perez Joel; Wong-Arambula Claudia                                                                                                                                                                                                                                                                                                                                                                                                                                    |
| EPI_ISL_574294                                                                                                                                                                                                                                                                                                                                                                                                                                                                                                                               | Instituto Nacional de Investigacion en Salud Pública                                                                                                        | Instituto Nacional de Investigación en Salud Pública                                                                                                                  | Alberto Orlando Narvaez; Alfredo Bruno; Andrés Carrasco; Denisse Portugal; Doménica de Mora Coloma; Leandro Patino Patino; Manuel Gonzalez; Orson Mestanza                                                                                                                                                                                                                                                                                                                                                                                                                                                                                                                                                                                                                                                    |
| EPI_ISL_574292                                                                                                                                                                                                                                                                                                                                                                                                                                                                                                                               | Instituto Nacional de Investigación en Salud Pública                                                                                                        | Instituto Nacional de Investigación en Salud Pública                                                                                                                  | Alberto Orlando Narvaez.; Alfredo Bruno Caicedo; Andrés Carrasco; Denisse Portugal; Domenica de Mora Coloma; Leandro Patino Patino; Manuel Gonzalez; Orson Mestanza                                                                                                                                                                                                                                                                                                                                                                                                                                                                                                                                                                                                                                           |
| EPI_ISL_574293                                                                                                                                                                                                                                                                                                                                                                                                                                                                                                                               | Instituto Nacional de Investigación en Salud Pública                                                                                                        | Instituto Nacional de Investigación en Salud Publica                                                                                                                  | Alberto Orlando Narvaez.; Alfredo Bruno Caicedo; Andrés Carrasco; Denisse Portugal; Doménica de Mora Coloma; Leandro Patino Patino; Manuel Gonzalez; Orson Mestanza                                                                                                                                                                                                                                                                                                                                                                                                                                                                                                                                                                                                                                           |
| EPI_ISL_491944 to 491954                                                                                                                                                                                                                                                                                                                                                                                                                                                                                                                     | Instituto Nacional de Investigación en Salud Pública - INSPI                                                                                                | INSPI - Charité                                                                                                                                                       | Alberto Orlando; Alexandra Usiña; Alfredo Bruno Caicedo; Andres Moreira-Soto; Anna-Lena Sander; Denisses Portugal; Domenica de Mora Coloma; Jan Felix Drexler; Juan Carlos Zeballos; Manuel Gonzalez; Maritza Olmedo; Nina Kufude; Silvia Salgado                                                                                                                                                                                                                                                                                                                                                                                                                                                                                                                                                             |
| EPI_ISL_1545272 to 1545389                                                                                                                                                                                                                                                                                                                                                                                                                                                                                                                   | Instituto Nacional de Investigaçao em Saúde                                                                                                                 | KRISP, KZN Research Innovation and Sequencing Platform                                                                                                                | Afonso P; David K; Emmanuel SJ; Freitas RH; Gianhari J; Inglês L; Lutucuta S; Miranda J; Morais J; Afonso M; Naidoo Y; Neto Z; Paulo A Carralero RR Paixão JP; Pereira A; Pillay S; Tegally H; Wilkinson E; de Oliveira T                                                                                                                                                                                                                                                                                                                                                                                                                                                                                                                                                                                     |
| EPI_ISL_1406722 to 1406777, EPI_ISL_1423994 to 1424001                                                                                                                                                                                                                                                                                                                                                                                                                                                                                       | Instituto Nacional de Medicina Genomica                                                                                                                     | Instituto Nacional de Enfermedades Respiratorias (INER), Centro de Investigación en Enfermedades Infecciosas (CIENI)                                                  | Arriaga-Canon C; Avila-Ríos S; Boukadida C; Cedro-Tanda A; Herrera-Montalvo LA; Hidalgo-Miranda A; Matias-Florentino M; Mendoza-Vargas A; Reyes-Grajeda JP; Reyes-Teran G                                                                                                                                                                                                                                                                                                                                                                                                                                                                                                                                                                                                                                     |
| EPI_ISL_522873 to 522878, EPI_ISL_1392922, EPI_ISL_1400795 to 1400799, EPI_ISL_1406083 to 1406142, EPI_ISL_1416873, EPI_ISL_1417442, EPI_ISL_1558802 to 1558827                                                                                                                                                                                                                                                                                                                                                                              |                                                                                                                                                             |                                                                                                                                                                       |                                                                                                                                                                                                                                                                                                                                                                                                                                                                                                                                                                                                                                                                                                                                                                                                               |
| see above                                                                                                                                                                                                                                                                                                                                                                                                                                                                                                                                    | Instituto Nacional de Medicina Genomica                                                                                                                     | Instituto Nacional de Medicina Genomica                                                                                                                               | Alcaraz N; Canseco Mendez JC; Cedro-Tanda A; Cisneros-Villanueva M; Garcia-Cardenas FJ; Garcia-Cárdenas FJ; Gonzalez-Barrera D; Gonzalez-Woge MA; González-Woge MA; Herrera-Montalvo LA; Herrera-Montalvo LA.; Hidalgo-Miranda A; Hurtado-Cordova E; Mendoza-Vargas A; Miranda-Ortiz H; Miranda-Ortiz H; Munguia-Garza; Munguia-Garza P; Peñaloza-Figueroa F; Ramirez-Vega O; Rangel-DeLeon D; Reyes-Grajeda JP; Rosas-Escobar P                                                                                                                                                                                                                                                                                                                                                                              |
| EPI_ISL_522878, EPI_ISL_522879 to 522880, EPI_ISL_522940 to 522942, EPI_ISL_522978 to 522986, EPI_ISL_523500                                                                                                                                                                                                                                                                                                                                                                                                                                 | Instituto Nacional de Medicina Genómica                                                                                                                     | Instituto Nacional de Medicina Genómica                                                                                                                               | Cedro-Tanda A; Cisneros-Villanueva M; Herrera-Montalvo LA; Hidalgo-Miranda A; Hurtado-Cordova E; Mendoza-Vargas A; Peñaloza-Figueroa F; Reyes-Grajeda JP                                                                                                                                                                                                                                                                                                                                                                                                                                                                                                                                                                                                                                                      |
| EPI_ISL_1557223                                                                                                                                                                                                                                                                                                                                                                                                                                                                                                                              | Instituto Nacional de Salud                                                                                                                                 | Corporacion Corpogen Universidad de los Andes Universidad Central                                                                                                     | Anzola; Chaib De Mares; Christian; Del Portillo; Duitama; Diaz; González; Jorge; Juan Manuel; Laura; Maryam; María Mercedes; Nelly; Patricia; Restrepo; Romero; Silvia; Zambrano                                                                                                                                                                                                                                                                                                                                                                                                                                                                                                                                                                                                                              |
| EPI_ISL_418262                                                                                                                                                                                                                                                                                                                                                                                                                                                                                                                               | Instituto Nacional de Salud                                                                                                                                 | Instituto Nacional de Salud Universidad Cooperativa de Colombia Instituto Alexander von Humboldt Imperial College-London London School of Hygiene & Tropical Medicine | Astrid C. Flórez; Carlos Franco-Muñoz; Christian Julian VillabonaArenas; Diana Marcela Walteros-Acero; Diego A. Álvarez-Díaz; Erika Ospitia; Gloria Puerto; Jose A. Usme-Ciro; Juliana Barbosa; Katherine Laiton-Donato; Liz Villabona-Arenas; Luz Dary Rodriguez; Mailyn A.Gonzalez; Marcela Mercado-Reyes; Martha Lucia Ospina Martínez; Nicolas D. Franco-Sierra; Nuno Rodrigues Faria; Sergio Gomez Rangel; Sussy Echeverria; Zulma M. Cucunubá                                                                                                                                                                                                                                                                                                                                                           |
| EPI_ISL_536477 to 536565                                                                                                                                                                                                                                                                                                                                                                                                                                                                                                                     | Instituto Nacional de Salud                                                                                                                                 | Laboratorio de Infecciones Respiratorias Agudas                                                                                                                       | David Tarazona; Dennis Carhuarica; Eduardo Juscamayta Lopez; Faviola Valdivia Guerrero; Lenin Maturrano Hernandez; Nancy Rojas Serrano; Ronnie Gavilan Chavez                                                                                                                                                                                                                                                                                                                                                                                                                                                                                                                                                                                                                                                 |
| EPI_ISL_456116 to 456156                                                                                                                                                                                                                                                                                                                                                                                                                                                                                                                     | Instituto Nacional de Salud - Unidad de Secuenciación y Análisis Genómico                                                                                   | Instituto Nacional de Salud, Universidad Cooperativa de Colombia, Instituto Alexander von Humboldt, Imperial                                                          | Astrid C. Flórez; Carlos Franco-Muñoz; Christian Julian VillabonaArenas; Diana Marcela Walteros-Acero; Diego A. Álvarez-Díaz; Erika Ospitia; Gloria Puerto; Jose A. Usme-Ciro; Juliana Barbosa; Katherine Laiton-Donato; Liz Villabona-Arenas; Luz Dary Rodriguez; Mailyn A.Gonzalez; Marcela                                                                                                                                                                                                                                                                                                                                                                                                                                                                                                                 |

|                                                                                                                                                                                                                                                                                                                                                                                                                                                                                                                                                                                                                                                                                                                                                                                                                                                                                                                                                                                                                                                                                                                                                                                                                                                                                                                                                                                                                                                                                                                                                                                                                                   |                                                                                                                                                                           |                                                                                                                                                                                                                                                               |                                                                                                                                                                                                                                                                                                                                                                                                                                                                                                                                                                                                                                                                                                                                                                                                                                                                                                                                                                                                                             |                             |
|-----------------------------------------------------------------------------------------------------------------------------------------------------------------------------------------------------------------------------------------------------------------------------------------------------------------------------------------------------------------------------------------------------------------------------------------------------------------------------------------------------------------------------------------------------------------------------------------------------------------------------------------------------------------------------------------------------------------------------------------------------------------------------------------------------------------------------------------------------------------------------------------------------------------------------------------------------------------------------------------------------------------------------------------------------------------------------------------------------------------------------------------------------------------------------------------------------------------------------------------------------------------------------------------------------------------------------------------------------------------------------------------------------------------------------------------------------------------------------------------------------------------------------------------------------------------------------------------------------------------------------------|---------------------------------------------------------------------------------------------------------------------------------------------------------------------------|---------------------------------------------------------------------------------------------------------------------------------------------------------------------------------------------------------------------------------------------------------------|-----------------------------------------------------------------------------------------------------------------------------------------------------------------------------------------------------------------------------------------------------------------------------------------------------------------------------------------------------------------------------------------------------------------------------------------------------------------------------------------------------------------------------------------------------------------------------------------------------------------------------------------------------------------------------------------------------------------------------------------------------------------------------------------------------------------------------------------------------------------------------------------------------------------------------------------------------------------------------------------------------------------------------|-----------------------------|
|                                                                                                                                                                                                                                                                                                                                                                                                                                                                                                                                                                                                                                                                                                                                                                                                                                                                                                                                                                                                                                                                                                                                                                                                                                                                                                                                                                                                                                                                                                                                                                                                                                   |                                                                                                                                                                           | College-London, London School of Hygiene & Tropical Medicine                                                                                                                                                                                                  | Mercado-Reyes.; Martha Lucia Ospina Martinez; Nicolas D. Franco-Sierra; Sergio Gomez-Rangel; Sussy Echeverria; Zulma M. Cucunubá                                                                                                                                                                                                                                                                                                                                                                                                                                                                                                                                                                                                                                                                                                                                                                                                                                                                                            |                             |
| EPI_ISL_447755 to 447769, EPI_ISL_447771 to 447772, EPI_ISL_447774 to 447787, EPI_ISL_447789 to 447817                                                                                                                                                                                                                                                                                                                                                                                                                                                                                                                                                                                                                                                                                                                                                                                                                                                                                                                                                                                                                                                                                                                                                                                                                                                                                                                                                                                                                                                                                                                            | Instituto Nacional de Salud, Bogotá, Colombia                                                                                                                             | Grupo de Investigaciones Microbiológicas-UR (GIMUR), Departamento de Biología, Facultad de Ciencias Naturales, Universidad del Rosario, Bogotá, Colombia Instituto Nacional de Salud, Bogotá, Colombia Icahn School of Medicine at Mount Sinai, New York, USA | Adriana Castillo; Alberto Paniz-Mondolfi; Ana S. Gonzalez-Reiche; Angelica Rico; Anibal A. Teherán; Carolina Florez; Carolina Hernandez; David Martinez; Emilia Mia Sordillo; Esther C. Barros; Harm van Bakel; Jesus E. Jaimes; Juan David Ramirez; Laura Vega; Lisseth Pardo; Marina Muñoz; Martha L. Ospina; Matthew M. Hernandez; Nathalia Ballesteros; Sergio Castañeda; Sergio Gomez; Viviana Simon                                                                                                                                                                                                                                                                                                                                                                                                                                                                                                                                                                                                                   |                             |
| EPI_ISL_497736, EPI_ISL_497738, EPI_ISL_497744 to 497745, EPI_ISL_498152 to 498170, EPI_ISL_526932 to 526934, EPI_ISL_526949 to 526951, EPI_ISL_526953 to 526965, EPI_ISL_526967 to 526971, EPI_ISL_526973 to 526974                                                                                                                                                                                                                                                                                                                                                                                                                                                                                                                                                                                                                                                                                                                                                                                                                                                                                                                                                                                                                                                                                                                                                                                                                                                                                                                                                                                                              | see above                                                                                                                                                                 | Instituto Nacional de Salud, Bogotá, Colombia                                                                                                                                                                                                                 | Instituto Nacional de Salud, Bogotá, Colombia                                                                                                                                                                                                                                                                                                                                                                                                                                                                                                                                                                                                                                                                                                                                                                                                                                                                                                                                                                               |                             |
|                                                                                                                                                                                                                                                                                                                                                                                                                                                                                                                                                                                                                                                                                                                                                                                                                                                                                                                                                                                                                                                                                                                                                                                                                                                                                                                                                                                                                                                                                                                                                                                                                                   |                                                                                                                                                                           |                                                                                                                                                                                                                                                               | Astrid C. Flórez; Carlos Andrés Durán; Carlos Franco-Muñoz; Carolina Ferro; Christian Julian VillabonaArenas; Diana Marcela Walteros-Acero; Diego A. Álvarez-Díaz; Diego Andrés Prada; Edmilson F. de Oliveira-Filho; Felix Betzler; Franklin Prieto; Jeadran Malagón-Rojas; Jonathan Reales; Jose A. Usme-Ciro; Katherine Laiton-Donato; Liz Villabona-Arenas; Marcela Mercado-Reyes; Martha Lucia Ospina Martinez; Mauricio Pacheco-Montealegre; Nicolas D. Franco-Sierra; Sussy Echeverria; Wendy K. Jo; Zulma M. Cucunubá                                                                                                                                                                                                                                                                                                                                                                                                                                                                                               |                             |
| EPI_ISL_1424059 to 1424063, EPI_ISL_1494947                                                                                                                                                                                                                                                                                                                                                                                                                                                                                                                                                                                                                                                                                                                                                                                                                                                                                                                                                                                                                                                                                                                                                                                                                                                                                                                                                                                                                                                                                                                                                                                       | Instituto Nacional de Salud- Dirección de Investigación en Salud Pública                                                                                                  | Instituto Nacional de Salud- Dirección de Investigación en Salud Pública                                                                                                                                                                                      | Carlos Franco-Muñoz; Carmen Osorio; Diana Malo; Diego A. Álvarez-Díaz; Diego Andrés Prada; Gerardo Santamaria; Hector Alejandro Ruiz-Moreno; Jhonnatan Reales-González; Juan Camilo Martinez; Julian Naizaque; Katherine Laiton-Donato; Lisseth Pardo; Magdalena Wiesner; Marcela Mercado-Reyes; Marcela Mercado-Reyes.; Maria T. Herrera-Sepúlveda; Marta Lopez Blanco; Martha Lucia Ospina Martinez; Martha Lucia Ospina Martínez; Mauricio Pacheco; Paola Rojas; Sergio Gomez; Sheryll Corchuelo; Ángela Alarcon Cruz                                                                                                                                                                                                                                                                                                                                                                                                                                                                                                    |                             |
| EPI_ISL_421450 to 421452, EPI_ISL_421456, EPI_ISL_421472 to 421478, EPI_ISL_421496 to 421499, EPI_ISL_510889 to 511181, EPI_ISL_511189, EPI_ISL_511316 to 511483, EPI_ISL_511509 to 511576, EPI_ISL_511579 to 511643, EPI_ISL_511645 to 511750, EPI_ISL_1399286 to 1399332, EPI_ISL_1399402, EPI_ISL_1399406 to 1399409, EPI_ISL_1399411, EPI_ISL_1399414 to 1399421, EPI_ISL_1399425 to 1399426, EPI_ISL_1399428 to 1399435, EPI_ISL_1399437, EPI_ISL_1399439 to 1399440, EPI_ISL_1399444 to 1399452, EPI_ISL_1399454 to 1399529, EPI_ISL_1399577 to 1399583, EPI_ISL_1399589 to 1399590, EPI_ISL_1399592 to 1399596, EPI_ISL_1399617 to 1399619, EPI_ISL_1399624 to 1399629, EPI_ISL_1399634 to 1399635, EPI_ISL_1399638 to 1399643, EPI_ISL_1399645 to 1399654, EPI_ISL_1399656 to 1399661, EPI_ISL_1399660 to 1399661, EPI_ISL_1399663 to 1399669, EPI_ISL_1399671 to 1399676, EPI_ISL_1399679, EPI_ISL_1399681 to 1399742, EPI_ISL_1399877 to 1399885, EPI_ISL_1399904, EPI_ISL_1399906, EPI_ISL_1399909, EPI_ISL_1399911 to 1400015, EPI_ISL_1400154 to 1400157, EPI_ISL_1400159 to 1400160, EPI_ISL_1400167 to 1400173, EPI_ISL_1400177 to 1400180, EPI_ISL_1400183, EPI_ISL_1400186 to 1400192, EPI_ISL_1400195 to 1400212, EPI_ISL_1400214 to 1400215, EPI_ISL_1400223, EPI_ISL_1400228 to 1400234, EPI_ISL_1400236 to 1400245, EPI_ISL_1400247, EPI_ISL_1400249 to 1400263, EPI_ISL_1400265, EPI_ISL_1400267 to 1400283, EPI_ISL_1400285, EPI_ISL_1400288 to 1400292, EPI_ISL_1400294 to 1400297, EPI_ISL_1413888, EPI_ISL_1413890, EPI_ISL_1413893, EPI_ISL_1413895, EPI_ISL_1413897, EPI_ISL_1414434, EPI_ISL_1414437 | see above                                                                                                                                                                 | Instituto Nacional de Saude (INSA)                                                                                                                                                                                                                            | Instituto Nacional de Saude (INSA)                                                                                                                                                                                                                                                                                                                                                                                                                                                                                                                                                                                                                                                                                                                                                                                                                                                                                                                                                                                          | Borges et al; Guiomar et al |
| EPI_ISL_511484 to 511508, EPI_ISL_511751 to 511771                                                                                                                                                                                                                                                                                                                                                                                                                                                                                                                                                                                                                                                                                                                                                                                                                                                                                                                                                                                                                                                                                                                                                                                                                                                                                                                                                                                                                                                                                                                                                                                | Instituto Nacional de Saude (INSA)                                                                                                                                        | Instituto Nacional de Saude (INSA) and Instituto Gulbenkian de Ciencia (IGC)                                                                                                                                                                                  | Borges et al                                                                                                                                                                                                                                                                                                                                                                                                                                                                                                                                                                                                                                                                                                                                                                                                                                                                                                                                                                                                                |                             |
| EPI_ISL_1399282 to 1399283, EPI_ISL_1399333 to 1399342, EPI_ISL_1399404 to 1399405, EPI_ISL_1399438, EPI_ISL_1399442 to 1399443, EPI_ISL_1399453, EPI_ISL_1399454 to 1399530, EPI_ISL_1399543 to 1399548, EPI_ISL_1399584 to 1399588, EPI_ISL_1399591, EPI_ISL_1399597 to 1399612, EPI_ISL_1399620 to 1399623, EPI_ISL_1399630, EPI_ISL_1400246, EPI_ISL_1400248, EPI_ISL_1400266, EPI_ISL_1400284, EPI_ISL_1400293                                                                                                                                                                                                                                                                                                                                                                                                                                                                                                                                                                                                                                                                                                                                                                                                                                                                                                                                                                                                                                                                                                                                                                                                               | see above                                                                                                                                                                 | Instituto Nacional de Saude (INSA) and BioSystems & Integrative Sciences Institute (BioISI) Genomics Unit, FCUL                                                                                                                                               | Instituto Nacional de Saude (INSA) and BioSystems & Integrative Sciences Institute (BioISI) Genomics Unit, FCUL                                                                                                                                                                                                                                                                                                                                                                                                                                                                                                                                                                                                                                                                                                                                                                                                                                                                                                             | Borges et al                |
| EPI_ISL_1399284 to 1399285, EPI_ISL_1399343 to 1399350, EPI_ISL_1399401, EPI_ISL_1399427, EPI_ISL_1399544 to 1399545, EPI_ISL_1399547, EPI_ISL_1399616, EPI_ISL_1399636 to 1399637, EPI_ISL_1399644, EPI_ISL_1399655, EPI_ISL_1399662, EPI_ISL_1399795 to 1399815, EPI_ISL_1399876, EPI_ISL_1399892, EPI_ISL_1400056 to 1400070, EPI_ISL_1400175 to 1400176                                                                                                                                                                                                                                                                                                                                                                                                                                                                                                                                                                                                                                                                                                                                                                                                                                                                                                                                                                                                                                                                                                                                                                                                                                                                       | see above                                                                                                                                                                 | Instituto Nacional de Saude (INSA) and Institute of Biomedicine (iBiMed), Universidade de Aveiro                                                                                                                                                              | Instituto Nacional de Saude (INSA) and Institute of Biomedicine (iBiMed), Universidade de Aveiro                                                                                                                                                                                                                                                                                                                                                                                                                                                                                                                                                                                                                                                                                                                                                                                                                                                                                                                            | Borges et al                |
| EPI_ISL_511182 to 511188, EPI_ISL_511190 to 511315, EPI_ISL_1399351 to 1399400, EPI_ISL_1399403, EPI_ISL_1399410, EPI_ISL_1399412 to 1399413, EPI_ISL_1399422 to 1399424, EPI_ISL_1399436, EPI_ISL_1399441, EPI_ISL_1399548, EPI_ISL_1399550 to 1399576, EPI_ISL_1399613 to 1399615, EPI_ISL_1399631 to 1399632, EPI_ISL_1399670, EPI_ISL_1399677 to 1399678, EPI_ISL_1399680, EPI_ISL_1399816 to 1399875, EPI_ISL_1399893 to 1399898, EPI_ISL_1399905, EPI_ISL_1399907, EPI_ISL_1400071 to 1400153, EPI_ISL_1400158, EPI_ISL_1400165 to 1400166, EPI_ISL_1400181 to 1400182, EPI_ISL_1400184 to 1400185, EPI_ISL_1400193 to 1400194, EPI_ISL_1400235, EPI_ISL_1400264, EPI_ISL_1400286 to 1400287, EPI_ISL_1413899, EPI_ISL_1413902, EPI_ISL_1413904, EPI_ISL_1413907, EPI_ISL_1413909, EPI_ISL_1413912, EPI_ISL_1413914, EPI_ISL_1413917, EPI_ISL_1413919, EPI_ISL_1413922, EPI_ISL_1413925, EPI_ISL_1413927, EPI_ISL_1413929, EPI_ISL_1413932, EPI_ISL_1413935, EPI_ISL_1413937, EPI_ISL_1413940, EPI_ISL_1413943                                                                                                                                                                                                                                                                                                                                                                                                                                                                                                                                                                                                              | see above                                                                                                                                                                 | Instituto Nacional de Saude (INSA) and Instituto Gulbenkian de Ciencia (IGC)                                                                                                                                                                                  | Instituto Nacional de Saude (INSA) and Instituto Gulbenkian de Ciencia (IGC)                                                                                                                                                                                                                                                                                                                                                                                                                                                                                                                                                                                                                                                                                                                                                                                                                                                                                                                                                | Borges et al                |
| EPI_ISL_1443030 to 1443152, EPI_ISL_1444109, EPI_ISL_1444111 to 1444112, EPI_ISL_1444114 to 1444116, EPI_ISL_1444118 to 1444119, EPI_ISL_1444121 to 1444122, EPI_ISL_1444124 to 1444126, EPI_ISL_1444128 to 1444129, EPI_ISL_1444131 to 1444132, EPI_ISL_1444134 to 1444135, EPI_ISL_1444137 to 1444138, EPI_ISL_1444140 to 1444141, EPI_ISL_1444143 to 1444144, EPI_ISL_1444146 to 1444151, EPI_ISL_1444154, EPI_ISL_1444156 to 1444157, EPI_ISL_1444159 to 1444161, EPI_ISL_1444164, EPI_ISL_1444166                                                                                                                                                                                                                                                                                                                                                                                                                                                                                                                                                                                                                                                                                                                                                                                                                                                                                                                                                                                                                                                                                                                            | see above                                                                                                                                                                 | Instituto Nacional de Saude (INSA) and i3S - Instituto de Investigação e Inovação em Saúde                                                                                                                                                                    | Instituto Nacional de Saude (INSA) and i3S - Instituto de Investigação e Inovação em Saúde                                                                                                                                                                                                                                                                                                                                                                                                                                                                                                                                                                                                                                                                                                                                                                                                                                                                                                                                  | Borges et al                |
| EPI_ISL_1550388                                                                                                                                                                                                                                                                                                                                                                                                                                                                                                                                                                                                                                                                                                                                                                                                                                                                                                                                                                                                                                                                                                                                                                                                                                                                                                                                                                                                                                                                                                                                                                                                                   | Instituto Oswaldo Cruz                                                                                                                                                    | Laboratorio de Virologia, Faculdade de Medicina, Universidade Federal de Mato Grosso, campus Cuiabá                                                                                                                                                           | Janeth Aracely Ramirez Pavon; Luciano Nakazato; María de Fátima Ferreira; Paola Cristina Resende; Renata Dezingrini Silhessarenko; Rosane Christiane Hahn; Valeria Dutra                                                                                                                                                                                                                                                                                                                                                                                                                                                                                                                                                                                                                                                                                                                                                                                                                                                    |                             |
| EPI_ISL_426580                                                                                                                                                                                                                                                                                                                                                                                                                                                                                                                                                                                                                                                                                                                                                                                                                                                                                                                                                                                                                                                                                                                                                                                                                                                                                                                                                                                                                                                                                                                                                                                                                    | Instituto Sabin                                                                                                                                                           | Laboratory of Virology                                                                                                                                                                                                                                        | Bergmann M Ribeiro; Fernando L Melo; Gustavo Barra; Ikaro A Andrade; Pedro G Mesquita; Tatsuya Nagata; Ticiane H Santa-Rita                                                                                                                                                                                                                                                                                                                                                                                                                                                                                                                                                                                                                                                                                                                                                                                                                                                                                                 |                             |
| EPI_ISL_492032 to 492048                                                                                                                                                                                                                                                                                                                                                                                                                                                                                                                                                                                                                                                                                                                                                                                                                                                                                                                                                                                                                                                                                                                                                                                                                                                                                                                                                                                                                                                                                                                                                                                                          | Instituto de Biologia do Exército                                                                                                                                         | Laboratório Metabolismo Macromolecular FirminoTorres de Castro, Instituto de Biofísica Carlos Chagas Filho, Universidade Federal do Rio de Janeiro                                                                                                            | Aline Rosa Vianna de Souza; Bianca Catarina Azevedo Cabral; Caleb GM Santos; Clarissa Damaso; Elizabeth Valentim; Marcio da Costa Cipitelli; Marcos Dornelas-Ribeiro; Nádia Vaez Gonçalves da Cruz; Rodrigo Soares de Moura Neto; Rosane Silva; Tatiana LS Nogueira; Virginia Sara Grancieri do Amaral                                                                                                                                                                                                                                                                                                                                                                                                                                                                                                                                                                                                                                                                                                                      |                             |
| EPI_ISL_424673                                                                                                                                                                                                                                                                                                                                                                                                                                                                                                                                                                                                                                                                                                                                                                                                                                                                                                                                                                                                                                                                                                                                                                                                                                                                                                                                                                                                                                                                                                                                                                                                                    | Instituto de Diagnostico y Referencia Epidemiologicos                                                                                                                     | Instituto de Diagnostico y Referencia Epidemiologicos                                                                                                                                                                                                         | Adnan Araiza Rodríguez; Alejandro Sánchez; Alfredo Ponce de León Garduño; Blanca Taboada; Carlos F. Arias; Carolina González Torres; Celia Boukadida; Cesar Raúl González Bonilla; Concepción Grajales Muñoz; Edgar Mendieta Condado; Eduardo Becerril Vargas; Fabiola Garcés Ayala; Fernando Ledesma Barrientos; Francisco Javier Gaytán Cervantes; Francisco Pulido; Gisela Barrera Badillo; Gloria Vázquez; Guillermo M. Ruiz-Palacios; Irma López Martínez; Joel Armando Vázquez Pérez; José Arturo Martínez Orozco; José Ernesto Ramirez González; José Esteban Muñoz Medina; Lucia Hernández Rivas; Luis Alberto García Andrade; Mario Mújica Sánchez; Pavel Isa; Pilar Ramos Cervantes; Ricardo Grande; Santiago Avila Ríos; Victor Hugo Borja Aburto; Violeta Ibarra Gonzalez                                                                                                                                                                                                                                       |                             |
| EPI_ISL_455432, EPI_ISL_455434 to 455439, EPI_ISL_455454 to 455456, EPI_ISL_493334 to 493349, EPI_ISL_516608 to 516625, EPI_ISL_576257 to 576279                                                                                                                                                                                                                                                                                                                                                                                                                                                                                                                                                                                                                                                                                                                                                                                                                                                                                                                                                                                                                                                                                                                                                                                                                                                                                                                                                                                                                                                                                  | Instituto de Diagnostico y Referencia Epidemiologicos (INDRE)                                                                                                             | Instituto de Diagnostico y Referencia Epidemiologicos (INDRE)                                                                                                                                                                                                 | ; Abril Rodriguez-Maldonado; Adnan Araiza-Rodriguez; Araiza-Rodriguez Adnan; Barrera-Badillo Gisela; Claudia Wong-Arambula; Dayanira Arellano-Suarez; Edgar Mendieta-Condado; Ernesto Ramirez-Gonzalez; Ernesto Ramirez-Gonzalez.; Fabiola Garcés-Ayala; Garcés-Ayala Fabiola; Garcés-Ayala Fabiola. Ramirez-Gonzalez Ernesto; Garcés-Ayala Fabiola. Taboada Ramirez Blanca. Ramirez-Gonzalez Ernesto; Garcés-Ayala Fabiola. Taboada Ramirez Blanca. Ramirez-Gonzalez Ernesto; Garcés-Ayala Fabiola. Taboada Ramirez Blanca. Ramirez-Gonzalez Ernesto; Gisela Barrera-Badillo.; Hernandez-Rivas Lucia; Irma Lopez-Martinez; Lopez-Martinez Irma; Lopez-Martinez Irma.; Lucia Hernandez-Rivas; Mendieta-Condado Edgar; Natividad Cruz-Ortiz; Ramirez-Gonzalez Ernesto; Ramirez-Gonzalez Ernesto.; Rodríguez-Maldonado Abril; Taboada Ramirez Blanca; Taboada Ramirez Blanca.; Taboada Ramirez Blanca.; Taboada Ramirez Blanca. Ramirez-Gonzalez Ernesto; Tatiana Nunez-Garcia; Wong-Arambula Claudia; Wong-Arambula Claudia. |                             |
| EPI_ISL_452139, EPI_ISL_452141                                                                                                                                                                                                                                                                                                                                                                                                                                                                                                                                                                                                                                                                                                                                                                                                                                                                                                                                                                                                                                                                                                                                                                                                                                                                                                                                                                                                                                                                                                                                                                                                    | Instituto de Diagnostico y Referencia Epidemiologicos (INDRE)                                                                                                             | Instituto de diagnóstico y Referencia Epidemiologicos (INDRE)                                                                                                                                                                                                 | Araiza-Rodriguez Adnan; Barrera-Badillo Gisela.; Garcés-Ayala Fabiola; Hernandez-Rivas Lucia; Lopez-Martinez Irma.; Lopez-Martinez Irma.; Mendieta-Condado Edgar; Ramirez-Gonzalez Ernesto; Rodriguez-Maldonado Abril; Wong-Arambula Claudia                                                                                                                                                                                                                                                                                                                                                                                                                                                                                                                                                                                                                                                                                                                                                                                |                             |
| EPI_ISL_424666                                                                                                                                                                                                                                                                                                                                                                                                                                                                                                                                                                                                                                                                                                                                                                                                                                                                                                                                                                                                                                                                                                                                                                                                                                                                                                                                                                                                                                                                                                                                                                                                                    | Instituto de Diagnóstico y Referencia Epidemiológicos                                                                                                                     | Instituto de Diagnóstico y Referencia Epidemiológicos                                                                                                                                                                                                         | Adnan Araiza Rodríguez; Alejandro Sánchez; Alfredo Ponce de León Garduño; Blanca Taboada; Carlos F. Arias.; Carolina González Torres; Celia Boukadida; Cesar Raúl González Bonilla; Concepción Grajales Muñoz; Edgar Mendieta Condado; Eduardo Becerril Vargas; Fabiola Garcés Ayala; Fernando Ledesma Barrientos; Francisco Javier Gaytán Cervantes; Francisco Pulido; Gisela Barrera Badillo; Gloria Vázquez; Guillermo M. Ruiz-Palacios; Irma López Martínez; Joel Armando Vázquez Pérez; José Arturo Martínez Orozco; José Ernesto Ramirez González; José Esteban Muñoz Medina; Lucia Hernández Rivas; Luis Alberto García Andrade; Mario Mújica Sánchez; Pavel Isa; Pilar Ramos Cervantes; Ricardo Grande; Santiago Avila Ríos; Victor Hugo Borja Aburto; Violeta Ibarra Gonzalez                                                                                                                                                                                                                                      |                             |
| EPI_ISL_510064 to 510077, EPI_ISL_510461 to 510466                                                                                                                                                                                                                                                                                                                                                                                                                                                                                                                                                                                                                                                                                                                                                                                                                                                                                                                                                                                                                                                                                                                                                                                                                                                                                                                                                                                                                                                                                                                                                                                | Instituto de Investigaciones Biomédicas de Barcelona (CSIC), Hospital Clínic i Provincial de Barcelona, Instituto de Biomedicina de Valencia (CSIC), Hospital de Sant Pau | SeqCOVID-SPAIN consortium/IBV(CSIC)                                                                                                                                                                                                                           | Alex Soriano; Andrea Vergara; Anna M. Planas; Israel Fernández Cadenas and SeqCOVID-SPAIN consortium; Jordi Pérez Tur; Miguel J. Martínez; M <sup>a</sup> Angeles Marcos                                                                                                                                                                                                                                                                                                                                                                                                                                                                                                                                                                                                                                                                                                                                                                                                                                                    |                             |

|                                                                                                                                                                                                                                                                                                                                                                                                                                                                 |                                                                                                                                                                                                                                                                                       |                                                                                                                                                                                                 |                                                                                                                                                                                                                                                                                                                                                                                                                                                                                                                                                                                                                                                   |
|-----------------------------------------------------------------------------------------------------------------------------------------------------------------------------------------------------------------------------------------------------------------------------------------------------------------------------------------------------------------------------------------------------------------------------------------------------------------|---------------------------------------------------------------------------------------------------------------------------------------------------------------------------------------------------------------------------------------------------------------------------------------|-------------------------------------------------------------------------------------------------------------------------------------------------------------------------------------------------|---------------------------------------------------------------------------------------------------------------------------------------------------------------------------------------------------------------------------------------------------------------------------------------------------------------------------------------------------------------------------------------------------------------------------------------------------------------------------------------------------------------------------------------------------------------------------------------------------------------------------------------------------|
| EPI_ISL_1395782 to 1395785, EPI_ISL_1395802 to 1395804                                                                                                                                                                                                                                                                                                                                                                                                          | Instituto de Investigaciones Biomédicas en Retrovirus y SIDA (INBIRS)                                                                                                                                                                                                                 | Área de Secuenciación del Laboratorio de Virología del Hospital de Niños Dr. Ricardo Gutiérrez on behalf of "Proyecto Argentino Interinstitucional de genómica de SARS-CoV-2" (PAIS Consortium) | Acuña; Alexay; D; Federico Remes Lenicov; Goya; Horacio Salomón; LE; Lusso; M; MI; Nabaes Jodar; Natale; S; Valinotto; Vanesa Seery; Viegas, M.                                                                                                                                                                                                                                                                                                                                                                                                                                                                                                   |
| EPI_ISL_1557222                                                                                                                                                                                                                                                                                                                                                                                                                                                 | Instituto de Medicina Tropical de Sao Paulo                                                                                                                                                                                                                                           | Instituto de Medicina Tropical de Sao Paulo                                                                                                                                                     | Camila Malta Romano; Lucy Santos Vilas Boas; Maria Cassia J Mendes-Correa                                                                                                                                                                                                                                                                                                                                                                                                                                                                                                                                                                         |
| EPI_ISL_500864                                                                                                                                                                                                                                                                                                                                                                                                                                                  | Instituto de Pesquisas Biomédicas, Hospital Naval Marçílio Dias                                                                                                                                                                                                                       | Bioinformatics Laboratory / LNCC                                                                                                                                                                | Albina Luciana da Silva Freitas; Alexandra Lehmkuhl Gerber; Amílcar Tanuri; Ana Tereza Vasconcelos; Addressa Rangel de Oliveira Lima; Carolina Moreira Voloch; Claudio Alberto Mule Monteiro; Cynthia Chester Cardoso; Fernanda Conceição Silva do Amorim; Isabel de Medeiros Magalhaes de As; Luana Ferreira Martins de Toledo; Luiz Gonzaga Paula de Almeida; Marlon Daniel Lima Tonin; Mônica Gomes Monteiro da R. Santos; Shana Priscila Coutinho Barroso; Átila Duque Rossi                                                                                                                                                                  |
| EPI_ISL_499083                                                                                                                                                                                                                                                                                                                                                                                                                                                  | Instituto de Virología "Dr. J. M. Vanella", Facultad de Ciencias Médicas, Universidad Nacional de Córdoba. Laboratorio Central de la Provincia de Córdoba, Argentina. Ministerio de Salud de la provincia de Córdoba, Argentina.                                                      | Laboratorio de Virología, Hospital de Niños Ricardo Gutiérrez, CABA, Argentina.                                                                                                                 | Adrian Diaz; Brenda Konigheim; Gabriela Barbas; Gonzalo Castro; Javier Aguilar; Lorena Spinsanti; Mariana Viegas.; Mercedes Nabaes; Monica Natale; Sandra Gallego; Sebastian Blanco; Silvina Lusso; Stephanie Goya                                                                                                                                                                                                                                                                                                                                                                                                                                |
| EPI_ISL_1394086 to 1394091, EPI_ISL_1539095 to 1539096                                                                                                                                                                                                                                                                                                                                                                                                          | Instytut "Pomnik-Centrum Zdrowia Dziecka" Zakad Mikrobiologii i Immunologii Klinicznej                                                                                                                                                                                                | 1. National Institute of Public Health - National Institute of Hygiene; 2. Eurofins Genomics Europe Sequencing GmbH                                                                             | ECDC COVID-19 WGS support team; Eurofins Genomics Europe Sequencing Team; Gierczyki Rafa; Sadkowska-Todys Magorzata; Wokowicz Tomasz; Zacharczuk Katarzyna                                                                                                                                                                                                                                                                                                                                                                                                                                                                                        |
| EPI_ISL_1494940                                                                                                                                                                                                                                                                                                                                                                                                                                                 | Investigaciones Biomédicas - Universidad de Sucre                                                                                                                                                                                                                                     | Instituto Nacional de Salud- Dirección de Investigación en Salud Pública                                                                                                                        | Carlos Franco-Muñoz; Carmen Osorio; Diana Malo; Diego A. Álvarez-Díaz; Diego Andrés Prada; Gerardo Santamaría; Hector Alejandro Ruiz-Moreno; Jhonnatan Reales-González; Juan Camilo Martínez; Julian Naizaque; Katherine Laiton-Donato; Lisseth Pardo; Magdalena Wiesner; Marcela Mercado-Reyes; Maria T. Herrera-Sepúlveda; Marta Lopez Blanco; Martha Lucia Ospina Martinez; Paola Rojas; Sergio Gomez; Sheryll Corchuelo; Ángela Alarcon Cruz                                                                                                                                                                                                  |
| EPI_ISL_1394063 to 1394065, EPI_ISL_1538758 to 1538759, EPI_ISL_1539031 to 1539032                                                                                                                                                                                                                                                                                                                                                                              | Invicta                                                                                                                                                                                                                                                                               | 1. National Institute of Public Health - National Institute of Hygiene; 2. Eurofins Genomics Europe Sequencing GmbH                                                                             | ECDC COVID-19 WGS support team; Eurofins Genomics Europe Sequencing Team; Gierczyki Rafa; Sadkowska-Todys Magorzata; Wokowicz Tomasz; Zacharczuk Katarzyna                                                                                                                                                                                                                                                                                                                                                                                                                                                                                        |
| EPI_ISL_1443284, EPI_ISL_1500195                                                                                                                                                                                                                                                                                                                                                                                                                                | Iroquois Memorial Hospital                                                                                                                                                                                                                                                            | Illinois Department of Public Health - Springfield Lab                                                                                                                                          | Bryan Sim; Gordon McCall                                                                                                                                                                                                                                                                                                                                                                                                                                                                                                                                                                                                                          |
| EPI_ISL_419299 to 419300                                                                                                                                                                                                                                                                                                                                                                                                                                        | Ishikawa Prefectural Institute of Public Health and Environmental Science                                                                                                                                                                                                             | Pathogen Genomics Center, National Institute of Infectious Diseases                                                                                                                             | Eri Nariai; Hajime Kamiya; Kentaro Itokawa; Makoto Kuroda; Masanori Hashino; Motoi Suzuki; Rina Tanaka; Sanae Kuramoto; Tsuyoshi Sekizuka                                                                                                                                                                                                                                                                                                                                                                                                                                                                                                         |
| EPI_ISL_474959 to 474994, EPI_ISL_474996 to 475025, EPI_ISL_483701, EPI_ISL_483704, EPI_ISL_483706, EPI_ISL_483708 to 483709, EPI_ISL_483711 to 483725, EPI_ISL_514267 to 514274, EPI_ISL_514276 to 514316, EPI_ISL_516884 to 516891, EPI_ISL_516893 to 516921, EPI_ISL_575332 to 575334                                                                                                                                                                        | see above                                                                                                                                                                                                                                                                             | Israel Central Virology laboratory                                                                                                                                                              | Efrat Dahan Bucris; Ella Mendelson; Michal Mandelboim; Neta Zuckerman; Oran Erster                                                                                                                                                                                                                                                                                                                                                                                                                                                                                                                                                                |
| EPI_ISL_594155 to 594162                                                                                                                                                                                                                                                                                                                                                                                                                                        | Israel Institute for Biological Research                                                                                                                                                                                                                                              | Israel Institute for Biological Research                                                                                                                                                        | Adi Beth-Din and Anat Zvi; Dana Stein; Emanuelle Mamroud; Galia Zaide; Inbar Cohen-Gihon; Libby Weiss; Ofir Israeli; Orly Laskar; Shay Weiss; Yoav Gal                                                                                                                                                                                                                                                                                                                                                                                                                                                                                            |
| EPI_ISL_474958, EPI_ISL_514275, EPI_ISL_516892                                                                                                                                                                                                                                                                                                                                                                                                                  | Israeli Central Virology laboratory                                                                                                                                                                                                                                                   | Israel Central Virology laboratory                                                                                                                                                              | Efrat Dahan Bucris; Ella Mendelson; Michal Mandelboim; Neta Zuckerman; Oran Erster                                                                                                                                                                                                                                                                                                                                                                                                                                                                                                                                                                |
| EPI_ISL_477193 to 477194, EPI_ISL_477202 to 477203                                                                                                                                                                                                                                                                                                                                                                                                              | Istituto Zooprofilattico Sperimentale Puglia e Basilicata;                                                                                                                                                                                                                            | Beaconlab (Bioinformatics, Evolution and Comparative Genomics lab), Dept of Biosciences, University on Mila                                                                                     | Chiara M.; Manzari C.; Parisi A.; Pesole G.                                                                                                                                                                                                                                                                                                                                                                                                                                                                                                                                                                                                       |
| EPI_ISL_477195 to 477201                                                                                                                                                                                                                                                                                                                                                                                                                                        | Istituto Zooprofilattico Sperimentale Puglia e Basilicata;                                                                                                                                                                                                                            | Beaconlab (Bioinformatics, Evolution and Comparative Genomics lab), Dept of Biosciences, University on Milan                                                                                    | Chiara M.; Manzari C.; Parisi A.; Pesole G.                                                                                                                                                                                                                                                                                                                                                                                                                                                                                                                                                                                                       |
| EPI_ISL_451961                                                                                                                                                                                                                                                                                                                                                                                                                                                  | Istituto Zooprofilattico Sperimentale Puglia e Basilicata; Dipartimento di Bioscienze, Biotecnologie e Biofarmaceutica dell'Università degli Studi di Bari "A.Moro"; Istituto di Biomembrane, Bioenergetica e Biotecnologie Molecolari del Consiglio Nazionale delle Ricerche di Bari | Beaconlab (Bioinformatics Evolution and Comparative Genomics lab), Dept of Biosciences, University of Milan                                                                                     | Chiara M.; Manzari C.; Parisi A.; Pesole G.                                                                                                                                                                                                                                                                                                                                                                                                                                                                                                                                                                                                       |
| EPI_ISL_451962                                                                                                                                                                                                                                                                                                                                                                                                                                                  | Istituto Zooprofilattico Sperimentale Puglia e Basilicata; Dipartimento di Bioscienze, Biotecnologie e Biofarmaceutica dell'Università degli Studi di Bari "A.Moro"; Istituto di Biomembrane, Bioenergetica e Biotecnologie Molecolari del Consiglio Nazionale delle Ricerche di Bari | Beaconlab (Bioinformatics, Evolution and Comparative Genomics lab), Dept of Biosciences, University on Milan                                                                                    | Chiara M.; Manzari C.; Parisi A.; Pesole G.                                                                                                                                                                                                                                                                                                                                                                                                                                                                                                                                                                                                       |
| EPI_ISL_468914, EPI_ISL_469016, EPI_ISL_469018 to 469023, EPI_ISL_525553 to 525574, EPI_ISL_527380                                                                                                                                                                                                                                                                                                                                                              | Istituto Zooprofilattico Sperimentale Puglia e Basilicata; Dipartimento di Bioscienze, Biotecnologie e Biofarmaceutica dell'Università degli Studi di Bari "A.Moro"; Istituto di Biomembrane, Bioenergetica e Biotecnologie Molecolari del Consiglio Nazionale delle Ricerche di Bari | Beaconlab (Bioinformatics, Evolution and Comparative Genomics lab), Dept of Biosciences, University on Milan                                                                                    | Chiara M; Chiara M.; Manzari C.; Parisi A.; Pesole G.                                                                                                                                                                                                                                                                                                                                                                                                                                                                                                                                                                                             |
| EPI_ISL_1394749 to 1394752                                                                                                                                                                                                                                                                                                                                                                                                                                      | Istituto Zooprofilattico Sperimentale Umbria e Marche "Togo Rosati"                                                                                                                                                                                                                   | Istituto Zooprofilattico Sperimentale dell'Abruzzo e Molise "G. Caporale"                                                                                                                       | Ancora M; Biagetti M; Calistri P; Cammà C; Caporale M; Curini V; Di Domenico M; Di Lollo Valeria; Di Pasquale A; Giammarioli M; Lorusso A; Mangone I; Marcacci M; Puglia I; Rinaldi A; Savini G; Scialabba S                                                                                                                                                                                                                                                                                                                                                                                                                                      |
| EPI_ISL_493332 to 493333, EPI_ISL_560407                                                                                                                                                                                                                                                                                                                                                                                                                        | Istituto Zooprofilattico Sperimentale del Mezzogiorno                                                                                                                                                                                                                                 | INMI Lazzaro Spallanzani IRCCS                                                                                                                                                                  | Antonino Di Caro; Barbara Bartolini; Cesare E.M. Gruber; Francesco Messina; Giorgia Borriello; Giovanna Fusco; Maria R. Capobianchi; Martina Rueca; Maurizio Viscardi; Sergio Brandi                                                                                                                                                                                                                                                                                                                                                                                                                                                              |
| EPI_ISL_1424144 to 1424233, EPI_ISL_1424235, EPI_ISL_1424266 to 1424396, EPI_ISL_1545630 to 1545631                                                                                                                                                                                                                                                                                                                                                             | Istituto Zooprofilattico Sperimentale del Mezzogiorno                                                                                                                                                                                                                                 | TIGEM                                                                                                                                                                                           | Andrea Ballabio; Anna Manfredi; Antonio Grimaldi; Antonio Grimaldi; Patrizia Annunziata Francesco Panariello Biancamaria Pierr Claudia Tiberio Teresa Giuliano Valentina Bouche Chiara Colantuono Maria Concetta Cuomo Denise Di Concilio Lucio Di Filippo Anna Manfredi Marcello Salvi Antonio Limone Luigi Atripaldi Pellegrino Cerino Andrea Ballabio Davide Cacchiarelli; Antonio Limone Luigi Atripaldi Pellegrino Cerino; Biancamaria Pierr Claudia Tiberio Valentina Bouche; Chiara Colantuono; Davide Cacchiarelli; Denise Di Concilio; Francesco Panariello; Lucio Di Filippo; Marcello Salvi; Maria Concetta Cuomo; Patrizia Annunziata |
| EPI_ISL_602304                                                                                                                                                                                                                                                                                                                                                                                                                                                  | Istituto Zooprofilattico Sperimentale del Mezzogiorno                                                                                                                                                                                                                                 | U.O. Diagnostica Virologica Dip. Sanità Animale IZSM                                                                                                                                            | Lorena Cardillo; Maurizio Viscardi; e Giovanna Fusco                                                                                                                                                                                                                                                                                                                                                                                                                                                                                                                                                                                              |
| EPI_ISL_1390690 to 1390715                                                                                                                                                                                                                                                                                                                                                                                                                                      | Istituto Zooprofilattico Sperimentale del Mezzogiorno - Azienda Ospedaliera "Pugliese Ciaccio" di Catanzaro                                                                                                                                                                           | TIGEM                                                                                                                                                                                           | Andrea Ballabio; Anna Manfredi; Antonio Grimaldi; Antonio Limone Luigi Atripaldi Pellegrino Cerino; Antonio Limone Pasquale Minchella Luigi Atripaldi Pellegrino Cerino; Biancamaria Pierr Claudia Tiberio Valentina Bouche; Chiara Colantuono; Davide Cacchiarelli; Denise Di Concilio; Francesco Panariello; Lucio Di Filippo; Marcello Salvi; Maria Concetta Cuomo; Patrizia Annunziata                                                                                                                                                                                                                                                        |
| EPI_ISL_1423228 to 1423245, EPI_ISL_1423257 to 1423273, EPI_ISL_1423277 to 1423325, EPI_ISL_1528617 to 1528718, EPI_ISL_1528737, EPI_ISL_1528740 to 1528742, EPI_ISL_1528744, EPI_ISL_1528760 to 1528816, EPI_ISL_1528834 to 1528870, EPI_ISL_1528878 to 1528884, EPI_ISL_1528887, EPI_ISL_1528890 to 1528891, EPI_ISL_1528904, EPI_ISL_1528906, EPI_ISL_1528910 to 1528918, EPI_ISL_1528922 to 1528923, EPI_ISL_1528925 to 1528998, EPI_ISL_1529006 to 1529028 | see above                                                                                                                                                                                                                                                                             | WVU and Marshall University Combined Genomics Core Facilities                                                                                                                                   | "James Denvir; Peter Perrotta; Peter Stoilov; Ryan Percifield"; Wesley Kimble                                                                                                                                                                                                                                                                                                                                                                                                                                                                                                                                                                     |
| EPI_ISL_422426 to 422427                                                                                                                                                                                                                                                                                                                                                                                                                                        | JABER AL AHMAD AL SABAH HOSPITAL - KUWAIT CITY                                                                                                                                                                                                                                        | Dasman Diabetes Institute                                                                                                                                                                       | Ebaa Al-Ozairi; Fahd Al-Mulla; Qais Al-Duwairi; Rasheeba Iqbal; Sumi John                                                                                                                                                                                                                                                                                                                                                                                                                                                                                                                                                                         |
| EPI_ISL_515960                                                                                                                                                                                                                                                                                                                                                                                                                                                  | JGH                                                                                                                                                                                                                                                                                   | Department of Neurovirology, National Institute of Mental Health and Neuroscience (NIMHANS)                                                                                                     | Anita Desai; Chitra Pattabiraman; Harsha PK; Manjunatha Venkataswamy; Pramada Prasad; Ravi Vasanthapuram; Risha Rasheed; Shafeeq S Hameed; Vijayalakshmi Reddy                                                                                                                                                                                                                                                                                                                                                                                                                                                                                    |
| EPI_ISL_422424                                                                                                                                                                                                                                                                                                                                                                                                                                                  | Jaber Al Ahmad Al Sabah Hospital                                                                                                                                                                                                                                                      | Dasman diabetes Institute                                                                                                                                                                       | Ebaa Al-Ozairi; Fahd Al-Mulla; Qais Al-Duwairi; Rasheeba Iqbal; Sumi John                                                                                                                                                                                                                                                                                                                                                                                                                                                                                                                                                                         |
| EPI_ISL_450792 to 450799                                                                                                                                                                                                                                                                                                                                                                                                                                        | Jamaica Ministry of Health and Wellness                                                                                                                                                                                                                                               | Pathogen Discovery, Respiratory Viruses Branch, Division of Viral Diseases, Centers for Disease Control and Prevention                                                                          | Anna Montmayeur; Anna Uehara; Bettina Bankamp; Clinton R. Paden; Haibin Wang; Jasmine Padilla; Jing Zhang; Justin Lee; Krista Queen; Rachel Marine; Suxiang Tong; Yan Li; Ying Tao; Zachary Weiner                                                                                                                                                                                                                                                                                                                                                                                                                                                |
| EPI_ISL_451958                                                                                                                                                                                                                                                                                                                                                                                                                                                  | Jamil-ur-Rahman Center for Genome Research, Dr. Panjwani                                                                                                                                                                                                                              | Jamil-ur-Rahman Center for Genome Research, Dr. Panjwani                                                                                                                                        | B.A.; I.A; Khan; Khan, S.; M.A.and Khan; Qureshi; Raza; S.A.; Shakeel, M.; Zahid, M.                                                                                                                                                                                                                                                                                                                                                                                                                                                                                                                                                              |



|                                                                                                                                                                                                                                                                                                                                                                                                                                                                                                                                                                                                                                                                                                                                                                                                                                                                                                                                                                                                                                                                                                                                                                       |                                                                                                                                   |                                                                                                                                   |                                                                                                                                                                                                                                                                                                                                                                                                                                                                                                           |
|-----------------------------------------------------------------------------------------------------------------------------------------------------------------------------------------------------------------------------------------------------------------------------------------------------------------------------------------------------------------------------------------------------------------------------------------------------------------------------------------------------------------------------------------------------------------------------------------------------------------------------------------------------------------------------------------------------------------------------------------------------------------------------------------------------------------------------------------------------------------------------------------------------------------------------------------------------------------------------------------------------------------------------------------------------------------------------------------------------------------------------------------------------------------------|-----------------------------------------------------------------------------------------------------------------------------------|-----------------------------------------------------------------------------------------------------------------------------------|-----------------------------------------------------------------------------------------------------------------------------------------------------------------------------------------------------------------------------------------------------------------------------------------------------------------------------------------------------------------------------------------------------------------------------------------------------------------------------------------------------------|
|                                                                                                                                                                                                                                                                                                                                                                                                                                                                                                                                                                                                                                                                                                                                                                                                                                                                                                                                                                                                                                                                                                                                                                       | Center for Molecular Medicine and Drug Research, International Center for Chemical and Biological Sciences, University of Karachi | Center for Molecular Medicine and Drug Research, International Center for Chemical and Biological Sciences, University of Karachi |                                                                                                                                                                                                                                                                                                                                                                                                                                                                                                           |
| EPI_ISL_416656 to 416634, EPI_ISL_454749                                                                                                                                                                                                                                                                                                                                                                                                                                                                                                                                                                                                                                                                                                                                                                                                                                                                                                                                                                                                                                                                                                                              | Japanese Quarantine Stations                                                                                                      | Pathogen Genomics Center, National Institute of Infectious Diseases                                                               | Hajime Kamiya; Hideki Hasegawa; Ikuyo Takayama; Kentaro Itokawa; Makoto Kuroda; Masanori Hashino; Motoi Suzuki; Rina Tanaka; Shinji Saito; Takaji Wakita; Takuri Takahashi; Takuya Yamagishi; Tsutomu Kageyama; Tsuyoshi Sekizuka                                                                                                                                                                                                                                                                         |
| EPI_ISL_450821 to 450822                                                                                                                                                                                                                                                                                                                                                                                                                                                                                                                                                                                                                                                                                                                                                                                                                                                                                                                                                                                                                                                                                                                                              | Jarpens HC                                                                                                                        | The Public Health Agency of Sweden                                                                                                | Anna Risberg; Anna-Malin Linde; Gunilla Johansson; Karin Tegmark-Wisell; Maria Lind Karlberg; Mia Brytting; Olov Svartstrom; Oskar Karlsson Lindsjo; Theresa Enkirch                                                                                                                                                                                                                                                                                                                                      |
| EPI_ISL_486396                                                                                                                                                                                                                                                                                                                                                                                                                                                                                                                                                                                                                                                                                                                                                                                                                                                                                                                                                                                                                                                                                                                                                        | Jayanagar General Hospital to Victoria Hospital                                                                                   | Department of Neurovirology, National Institute of Mental Health and Neuroscience (NIMHANS)                                       | Anita Desai; Chitra Pattabiraman; Harsha PK; Manjunatha Venkataswamy; Ravi Vasanthapuram; Risha Rasheed; Shafeeq S Hameed; Vijayalakshmi Reddy                                                                                                                                                                                                                                                                                                                                                            |
| EPI_ISL_1423009                                                                                                                                                                                                                                                                                                                                                                                                                                                                                                                                                                                                                                                                                                                                                                                                                                                                                                                                                                                                                                                                                                                                                       | Jefferson Medical Center                                                                                                          | WVU and Marshall University Combined Genomics Core Facilities                                                                     | "James Denvir; Peter Perrotta; Peter Stoilov; Ryan Percifield"; Wesley Kimble                                                                                                                                                                                                                                                                                                                                                                                                                             |
| EPI_ISL_1392642 to 1392646, EPI_ISL_1416683 to 1416684, EPI_ISL_1416688 to 1416725                                                                                                                                                                                                                                                                                                                                                                                                                                                                                                                                                                                                                                                                                                                                                                                                                                                                                                                                                                                                                                                                                    | Jessa                                                                                                                             | Jessa                                                                                                                             | Cruys et al. on behalf of the Jessa_cmdLab                                                                                                                                                                                                                                                                                                                                                                                                                                                                |
| EPI_ISL_421237 to 421254, EPI_ISL_421256 to 421262, EPI_ISL_455460 to 455467                                                                                                                                                                                                                                                                                                                                                                                                                                                                                                                                                                                                                                                                                                                                                                                                                                                                                                                                                                                                                                                                                          | Jiangxi Province Center for Disease Control and Prevention                                                                        | Jiangxi Province Center for Disease Control and Prevention                                                                        | DaJin Xiao; Fang Xiao; Gang Xu; JianXiong Li; Jun Zhou; ShiWen Liu; Tian Gong; XiaoQing Liu; Xin Ran; YanNi Zhang; Ying Xiong; Yong Shi                                                                                                                                                                                                                                                                                                                                                                   |
| EPI_ISL_417420                                                                                                                                                                                                                                                                                                                                                                                                                                                                                                                                                                                                                                                                                                                                                                                                                                                                                                                                                                                                                                                                                                                                                        | Jiangxi province Center for Disease Control and Prevention                                                                        | Jiangxi province Center for Disease Control and Prevention                                                                        | Li jian Xiong                                                                                                                                                                                                                                                                                                                                                                                                                                                                                             |
| EPI_ISL_434586 to 434588, EPI_ISL_434638 to 434640, EPI_ISL_434682 to 434691, EPI_ISL_438222 to 438247, EPI_ISL_457751 to 457823, EPI_ISL_511863 to 511877, EPI_ISL_1402786 to 1402931, EPI_ISL_1405466 to 1405598, EPI_ISL_1468532 to 1468655, EPI_ISL_1547907 to 1548038                                                                                                                                                                                                                                                                                                                                                                                                                                                                                                                                                                                                                                                                                                                                                                                                                                                                                            | Johns Hopkins Hospital Department of Pathology                                                                                    | Johns Hopkins Hospital Department of Pathology                                                                                    | Adannaya Amadi; Amanda Emlund; C. Paul Morris; Chun Huai Luo; Craig Howser; Heba H. Mostafa; Heba Mostafa; Kristina Zudock; Mark Hopkins; Matthew Schwartz; Melanie Kirsche; Michael C. Schatz; N. d. Trovao; Norah Sadowski; Nidia Trovao; Oluwaseun Falade-Nwulia; Oluwaseun Nwulia-Falade; Paul Morris; Peter M. Thiel; Shirlie Wohl; Srividya Ramakrishnan; Stuart C. Ray; Thomas Mehoke; Timothy Gilpatrick; Victoria Gnizdowski; Winston Timp; Yunfan Fan; _Amanda Emlund; _Oluwaseun Falade-Nwulia |
| EPI_ISL_445242                                                                                                                                                                                                                                                                                                                                                                                                                                                                                                                                                                                                                                                                                                                                                                                                                                                                                                                                                                                                                                                                                                                                                        | Jokkmokks Halsocentral                                                                                                            | The Public Health Agency of Sweden                                                                                                | Anna Risberg; Anna-Malin Linde; Karin Tegmark-Wisell; Maria Lind Karlberg; Markus Beland; Mia Brytting; Olov Svartstrom; Oskar Karlsson Lindsjo; Theresa Enkirch                                                                                                                                                                                                                                                                                                                                          |
| EPI_ISL_455101, EPI_ISL_469055 to 469056                                                                                                                                                                                                                                                                                                                                                                                                                                                                                                                                                                                                                                                                                                                                                                                                                                                                                                                                                                                                                                                                                                                              | Jourcentralen                                                                                                                     | The Public Health Agency of Sweden                                                                                                | Anna Risberg; Anna-Malin Linde; Karin Tegmark-Wisell; Maria Lind Karlberg; Mattias Haukland; Mia Brytting; Olov Svartstrom; Oskar Karlsson Lindsjo; Petra Edquist; Reza Advani; Salvatore Ascione; Sandra Brodsson; Shamam Muradrasoli; Theresa Enkirch                                                                                                                                                                                                                                                   |
| EPI_ISL_1398209 to 1398258                                                                                                                                                                                                                                                                                                                                                                                                                                                                                                                                                                                                                                                                                                                                                                                                                                                                                                                                                                                                                                                                                                                                            | KALEIDA CENTER FOR LABORATORY MEDICINE                                                                                            | Wadsworth Center, New York State Department of Health                                                                             | Alexis Russel; Daryl M. Lamson; Erasmus Schneider; Erica Lasek-Nesselquist; John Kelly; Jonathan Plitnick; Kirsten St. George; Matthew Shudt; Melissa A Leisner; Navjot Singh                                                                                                                                                                                                                                                                                                                             |
| EPI_ISL_486397                                                                                                                                                                                                                                                                                                                                                                                                                                                                                                                                                                                                                                                                                                                                                                                                                                                                                                                                                                                                                                                                                                                                                        | KC General Hospital                                                                                                               | Department of Neurovirology, National Institute of Mental Health and Neuroscience (NIMHANS)                                       | Anita Desai; Chitra Pattabiraman; Harsha PK; Manjunatha Venkataswamy; Ravi Vasanthapuram; Risha Rasheed; Shafeeq S Hameed; Vijayalakshmi Reddy                                                                                                                                                                                                                                                                                                                                                            |
| EPI_ISL_1385814 to 1385816, EPI_ISL_1385825, EPI_ISL_1385829 to 1385832, EPI_ISL_1385839 to 1385840, EPI_ISL_1396655                                                                                                                                                                                                                                                                                                                                                                                                                                                                                                                                                                                                                                                                                                                                                                                                                                                                                                                                                                                                                                                  | KEMPEGOWDA INTERNATIONAL AIRPORT                                                                                                  | INSACOG-KA, NIMHANS                                                                                                               | Anita S Desai; Anson Kunjumon George; Chitra Pattabiraman; Darshan Sreenivas; Nakka Vijay Kiran Reddy; Pramada Prasad; V Ravi                                                                                                                                                                                                                                                                                                                                                                             |
| EPI_ISL_457845 to 457931                                                                                                                                                                                                                                                                                                                                                                                                                                                                                                                                                                                                                                                                                                                                                                                                                                                                                                                                                                                                                                                                                                                                              | KEMRI-CGMR-C                                                                                                                      | KEMRI-Wellcome Trust Research Programme/KEMRI-CGMR-C Kilifi                                                                       | Githinji G. et al 2020                                                                                                                                                                                                                                                                                                                                                                                                                                                                                    |
| EPI_ISL_457932 to 457936                                                                                                                                                                                                                                                                                                                                                                                                                                                                                                                                                                                                                                                                                                                                                                                                                                                                                                                                                                                                                                                                                                                                              | KEMRI-Centre for Virus Research                                                                                                   | KEMRI-Wellcome Trust Research Programme/KEMRI-CGMR-C Kilifi                                                                       | Githinji G. et al 2020                                                                                                                                                                                                                                                                                                                                                                                                                                                                                    |
| EPI_ISL_1440075, EPI_ISL_1440078, EPI_ISL_1440081, EPI_ISL_1440084, EPI_ISL_1440087, EPI_ISL_1440090, EPI_ISL_1440128, EPI_ISL_1440131, EPI_ISL_1440134, EPI_ISL_1440136, EPI_ISL_1440139, EPI_ISL_1440142, EPI_ISL_1440145, EPI_ISL_1440148, EPI_ISL_1440151, EPI_ISL_1440154, EPI_ISL_1440157, EPI_ISL_1440164, EPI_ISL_1440171 to 1440172, EPI_ISL_1440174, EPI_ISL_1440178, EPI_ISL_1440181, EPI_ISL_1440184, EPI_ISL_1440188, EPI_ISL_1440190, EPI_ISL_1440193, EPI_ISL_1440196, EPI_ISL_1440199, EPI_ISL_1440202, EPI_ISL_1440206 to 1440212, EPI_ISL_1440214, EPI_ISL_1440216, EPI_ISL_1440220, EPI_ISL_1440223, EPI_ISL_1440226, EPI_ISL_1440229, EPI_ISL_1440236, EPI_ISL_1440240, EPI_ISL_1440243, EPI_ISL_1440245, EPI_ISL_1440252, EPI_ISL_1440254, EPI_ISL_1440257, EPI_ISL_1440261, EPI_ISL_1440264, EPI_ISL_1440266, EPI_ISL_1440269, EPI_ISL_1440272, EPI_ISL_1440275, EPI_ISL_1440278, EPI_ISL_1440281, EPI_ISL_1440284, EPI_ISL_1440287, EPI_ISL_1440289, EPI_ISL_1440292, EPI_ISL_1440295, EPI_ISL_1440298, EPI_ISL_1440301, EPI_ISL_1440304, EPI_ISL_1440307, EPI_ISL_1440310, EPI_ISL_1440314, EPI_ISL_1440316, EPI_ISL_1440319, EPI_ISL_1440322 | KEMRI-Wellcome Trust Research Programme,Kilifi                                                                                    | Githinji G.; Mburu M.W.; Mohamed K.S.; deLaurent Z.                                                                               |                                                                                                                                                                                                                                                                                                                                                                                                                                                                                                           |
| EPI_ISL_568695 to 568872                                                                                                                                                                                                                                                                                                                                                                                                                                                                                                                                                                                                                                                                                                                                                                                                                                                                                                                                                                                                                                                                                                                                              | KEMRI-Wellcome Trust Research Programme/KEMRI-CGMR-C Kilifi                                                                       | KEMRI-Wellcome Trust Research Programme/KEMRI-CGMR-C Kilifi                                                                       | Githinji et al 2020                                                                                                                                                                                                                                                                                                                                                                                                                                                                                       |
| EPI_ISL_1437281 to 1437282                                                                                                                                                                                                                                                                                                                                                                                                                                                                                                                                                                                                                                                                                                                                                                                                                                                                                                                                                                                                                                                                                                                                            | KRH Klinikum Region Hannover: Institut für Med. Mikrobiologie und Krankenhaushygiene                                              | Robert Koch Institute                                                                                                             |                                                                                                                                                                                                                                                                                                                                                                                                                                                                                                           |
| EPI_ISL_436684 to 436687, EPI_ISL_455629 to 455639                                                                                                                                                                                                                                                                                                                                                                                                                                                                                                                                                                                                                                                                                                                                                                                                                                                                                                                                                                                                                                                                                                                    | KRISP, KZN Research Innovation and Sequencing Platform                                                                            | KRISP, KZN Research Innovation and Sequencing Platform                                                                            | Chimukangara B; Deforche K; Giandhari J; Lessells R; Pillay S; Tegally H; Wilkinson E; de Oliveira T                                                                                                                                                                                                                                                                                                                                                                                                      |
| EPI_ISL_1446938 to 1446940, EPI_ISL_1446942 to 1446943, EPI_ISL_1516313 to 1516316, EPI_ISL_1528399 to 1528403                                                                                                                                                                                                                                                                                                                                                                                                                                                                                                                                                                                                                                                                                                                                                                                                                                                                                                                                                                                                                                                        | KS Health and Environmental Laboratories                                                                                          | Centers for Disease Control and Prevention Division of Viral Diseases, Pathogen Discovery                                         | Alison Laufer Halpin; Ben L. Rambo-Martin; Clinton R. Paden; Dakota Howard; Darlene Wagner; Dave Wentworth; Dhvani Batra; Jasmine Padilla; Justin Lee; Katie Dillon; Krista Queen; Kristen Knipe; Kristine Lacey; Mark Burroughs; Matthew Schmeer; Mili Sheth; Peter Cook; Sam Shepard; Sarah Nobles; Shoshona Le; Suxiang Tong; Vivien Dugan; Yvette Unoarumhi                                                                                                                                           |
| EPI_ISL_424867, EPI_ISL_452114                                                                                                                                                                                                                                                                                                                                                                                                                                                                                                                                                                                                                                                                                                                                                                                                                                                                                                                                                                                                                                                                                                                                        | KS Health and Environmental Laboratories                                                                                          | Pathogen Discovery, Respiratory Viruses Branch, Division of Viral Diseases, Centers for Disease Control and Prevention            | Alison S. Laufer Halpin; Anna Montmayeur; Anna Uehara; Christopher A. Elkins; Clinton R. Paden; Haibin Wang; Jing Zhang; Krista Queen; Mary S. Keckler; Rachel Marine; Suxiang Tong; Yan Li; Ying Tao; Zachary Weiner                                                                                                                                                                                                                                                                                     |
| EPI_ISL_1478928 to 1478932, EPI_ISL_1500152                                                                                                                                                                                                                                                                                                                                                                                                                                                                                                                                                                                                                                                                                                                                                                                                                                                                                                                                                                                                                                                                                                                           | KSB Hospital                                                                                                                      | Illinois Department of Public Health - Springfield Lab                                                                            | Bryan Sim; Gordon McCall                                                                                                                                                                                                                                                                                                                                                                                                                                                                                  |
| EPI_ISL_415154                                                                                                                                                                                                                                                                                                                                                                                                                                                                                                                                                                                                                                                                                                                                                                                                                                                                                                                                                                                                                                                                                                                                                        | KU Leuven, Clinical and Epidemiological Virology                                                                                  | KU Leuven, Clinical and Epidemiological Virology                                                                                  | Bert Vanmechelen; Joan Marti-Careras; Marc Van Ranst; Piet Maes.; Tony Wawina                                                                                                                                                                                                                                                                                                                                                                                                                             |
| EPI_ISL_407976, EPI_ISL_415153, EPI_ISL_415155 to 415159, EPI_ISL_416467 to 416472, EPI_ISL_416475 to 416476, EPI_ISL_417422, EPI_ISL_417424 to 417430, EPI_ISL_418270, EPI_ISL_418792 to 418798, EPI_ISL_418800, EPI_ISL_418805 to 418806, EPI_ISL_418863, EPI_ISL_418981 to 418987, EPI_ISL_418989, EPI_ISL_420314 to 420454                                                                                                                                                                                                                                                                                                                                                                                                                                                                                                                                                                                                                                                                                                                                                                                                                                        | KU Leuven, Clinical and Epidemiological Virology                                                                                  | KU Leuven, Clinical and Epidemiological Virology                                                                                  | Annabel Rector; Bert Vanmechelen; Elke Wollants; Els Keyaerts; Joan Marti-Careras; Joan Marti-Carreras; Lies Laenen; Marc Van Ranst; Piet Maes; Tony Wawina; and Piet Maes                                                                                                                                                                                                                                                                                                                                |
| EPI_ISL_458156 to 458235, EPI_ISL_462151 to 462275, EPI_ISL_464065 to 464090, EPI_ISL_476941 to 477007, EPI_ISL_522349 to 522350                                                                                                                                                                                                                                                                                                                                                                                                                                                                                                                                                                                                                                                                                                                                                                                                                                                                                                                                                                                                                                      | KU Leuven, Rega Institute, Clinical and Epidemiological Virology                                                                  | KU Leuven, Rega Institute, Clinical and Epidemiological Virology                                                                  | Bert Vanmechelen; Joan Marti-Careras; Piet Maes; Tony Wawina-Bokalanga                                                                                                                                                                                                                                                                                                                                                                                                                                    |
| EPI_ISL_539300 to 539325, EPI_ISL_549006 to 549023                                                                                                                                                                                                                                                                                                                                                                                                                                                                                                                                                                                                                                                                                                                                                                                                                                                                                                                                                                                                                                                                                                                    | KWR Watercycle Research Institute                                                                                                 | Erasmus Medical Center                                                                                                            | Bas B. Oude Munnink; Claudia M. E. Schapendonk; David Nieuwenhuijse; Frank M. Aarestrup; Gertjan Medema; Goffe Elsinga; Leo Heijnen; Lu Lu; Marion P.G. Koopmans; Matthijs Kon; Miranda de Graaf; Ray Izquierdo-Lara; Samantha Lyceet                                                                                                                                                                                                                                                                     |
| EPI_ISL_1446335, EPI_ISL_1446338, EPI_ISL_1446344, EPI_ISL_1446347, EPI_ISL_1446350, EPI_ISL_1446352, EPI_ISL_1446355, EPI_ISL_1446358, EPI_ISL_1446361, EPI_ISL_1446364, EPI_ISL_1516353 to 1516360                                                                                                                                                                                                                                                                                                                                                                                                                                                                                                                                                                                                                                                                                                                                                                                                                                                                                                                                                                  | KY State Public Health Lab                                                                                                        | Centers for Disease Control and Prevention Division of Viral Diseases, Pathogen Discovery                                         | Alison Laufer Halpin; Ben L. Rambo-Martin; Clinton R. Paden; Dakota Howard; Darlene Wagner; Dave Wentworth; Dhvani Batra; Jasmine Padilla; Justin Lee; Katie Dillon; Krista Queen; Kristen Knipe; Kristine Lacey; Mark Burroughs; Matthew Schmeer; Mili Sheth; Peter Cook; Sam Shepard; Sarah Nobles; Shoshona Le; Suxiang Tong; Vivien Dugan; Yvette Unoarumhi                                                                                                                                           |
| EPI_ISL_495411 to 495457                                                                                                                                                                                                                                                                                                                                                                                                                                                                                                                                                                                                                                                                                                                                                                                                                                                                                                                                                                                                                                                                                                                                              | Kafkas University, Faculty of Medicine, Department of Medical Microbiology                                                        | Kafkas University, Faculty of Medicine, Department of Medical Microbiology                                                        | Didem Ozgur; E. Ediz Tutuncu; Murat Karamese                                                                                                                                                                                                                                                                                                                                                                                                                                                              |

|                                                                                                                                                                                                                                                                                                                                                                                                                                                                                                                                                                                                                                                                                                                     |                                                                                                                                   |                                                                                                                                                                     |                                                                                                                                                                                                                                                                                                                                                                                                                                                                                                        |
|---------------------------------------------------------------------------------------------------------------------------------------------------------------------------------------------------------------------------------------------------------------------------------------------------------------------------------------------------------------------------------------------------------------------------------------------------------------------------------------------------------------------------------------------------------------------------------------------------------------------------------------------------------------------------------------------------------------------|-----------------------------------------------------------------------------------------------------------------------------------|---------------------------------------------------------------------------------------------------------------------------------------------------------------------|--------------------------------------------------------------------------------------------------------------------------------------------------------------------------------------------------------------------------------------------------------------------------------------------------------------------------------------------------------------------------------------------------------------------------------------------------------------------------------------------------------|
| EPI_ISL_1508918<br>EPI_ISL_1533431 to 1533435, EPI_ISL_1533437, EPI_ISL_1533439 to 1533440, EPI_ISL_1533445, EPI_ISL_1533448, EPI_ISL_1533451, EPI_ISL_1533531, EPI_ISL_1533533, EPI_ISL_1533535, EPI_ISL_1533564 to 1533608, EPI_ISL_1559386 to 1559387                                                                                                                                                                                                                                                                                                                                                                                                                                                            | Kaiser Permanente Downey Medical Center                                                                                           | Los Angeles County PHL                                                                                                                                              | P. Hemarajata et al.                                                                                                                                                                                                                                                                                                                                                                                                                                                                                   |
| see above                                                                                                                                                                                                                                                                                                                                                                                                                                                                                                                                                                                                                                                                                                           | Kaiser Permanente Washington Health Research Institute                                                                            | Genomics and Discovery, Respiratory Viruses Branch, Division of Viral Diseases, Centers for Disease Control and Prevention                                          | Adam Retchless; Anna Kelleher; Anna Montmayeur; Anna Uehara; Brian Lynch; Clinton R. Paden; Haibin Wang; Han Jia Justin Ng; Jing Zhang; Justin Lee; Krista Queen; Mark Burroughs; Peter Cook; Rachel Marine; Suxiang Tong; Yan Li; Ying Tao                                                                                                                                                                                                                                                            |
| EPI_ISL_1508902, EPI_ISL_1508917<br>EPI_ISL_1508984 to 1508986<br>EPI_ISL_1532141 to 1532143<br>EPI_ISL_1508966 to 1508977                                                                                                                                                                                                                                                                                                                                                                                                                                                                                                                                                                                          | Kaiser Permanente West Los Angeles Medical Center<br>Kaiser Regional<br>Kaiser San Jose<br>Kaiser Santa Clara                     | Los Angeles County PHL<br>Santa Clara County Public Health Laboratory<br>Santa Clara County Public Health Laboratory<br>Santa Clara County Public Health Laboratory | P. Hemarajata et al.<br>Santa Clara County Public Health Department<br>Santa Clara County Public Health Department<br>Santa Clara County Public Health Department                                                                                                                                                                                                                                                                                                                                      |
| EPI_ISL_475137 to 475138, EPI_ISL_510825 to 510826, EPI_ISL_510832 to 510833, EPI_ISL_510836 to 510837, EPI_ISL_510859, EPI_ISL_510864 to 510865                                                                                                                                                                                                                                                                                                                                                                                                                                                                                                                                                                    | Kalmar klinisk mikrobiologi                                                                                                       | The Public Health Agency of Sweden                                                                                                                                  | Anna Risberg; Anna-Malin Linde; Karin Tegmark-Wisell; Maria Lind Karlberg; Mattias Haukland; Mia Brytting; Olov Svartstrom; Oskar Karlsson Lindsjo; Petra Edquist; Reza Advani; Sandra Brodlesson; Shamam Muradrasoli                                                                                                                                                                                                                                                                                  |
| EPI_ISL_1400507, EPI_ISL_1400523, EPI_ISL_1400546 to 1400551, EPI_ISL_1400561                                                                                                                                                                                                                                                                                                                                                                                                                                                                                                                                                                                                                                       | Kamchatka Regional Children's Infectious Diseases Hospital                                                                        | WHO National Influenza Centre Russian Federation                                                                                                                    | Andrey Komissarov; Anna Ivanova; Artem Fadeev; Daria Danilenko; Dmitry Bazhenov; Dmitry Lioznov; Elena Nabieva; Georgii Bazykin; Ksenia Safina; Kseniya Komissarova; Maria Pisareva; Maria Timofeeva; Tamila Musaeva; Veronika Eder                                                                                                                                                                                                                                                                    |
| EPI_ISL_1427573 to 1427576, EPI_ISL_1430582 to 1430583, EPI_ISL_1430740, EPI_ISL_1430749 to 1430750, EPI_ISL_1431021 to 1431030                                                                                                                                                                                                                                                                                                                                                                                                                                                                                                                                                                                     | Kanagawa Prefectural Institute of Public Health                                                                                   | Pathogen Genomics Center, National Institute of Infectious Diseases                                                                                                 | ; Daisuke Kobayashi; Hussein H. Aly; Ken Miyazawa; Kentaro Itokawa; Kento Fukano; Makoto Kuroda; Masanori Hashino; Minoru Nagi; Nozomu Hanaoka; Rina Tanaka; Takanobu Kato; Takashi Sakudoh; Tsuguto Fujimoto; Tsuyoshi Sekizuka                                                                                                                                                                                                                                                                       |
| EPI_ISL_1392916 to 1392921, EPI_ISL_1396647 to 1396649, EPI_ISL_1401966 to 1401985, EPI_ISL_1412475, EPI_ISL_1412478, EPI_ISL_1412481, EPI_ISL_1412484, EPI_ISL_1412487, EPI_ISL_1412490, EPI_ISL_1412493, EPI_ISL_1412496, EPI_ISL_1412499, EPI_ISL_1412502, EPI_ISL_1412505, EPI_ISL_1412508, EPI_ISL_1412510, EPI_ISL_1412513, EPI_ISL_1412516, EPI_ISL_1412519, EPI_ISL_1412522, EPI_ISL_1412525, EPI_ISL_1412528, EPI_ISL_1412530, EPI_ISL_1443756 to 1443778, EPI_ISL_1447074 to 1447083, EPI_ISL_1447085 to 1447086, EPI_ISL_1461626 to 1461633, EPI_ISL_1461638, EPI_ISL_1465683 to 1465688, EPI_ISL_1494550 to 1494553, EPI_ISL_1500448 to 1500470, EPI_ISL_1502796 to 1502803, EPI_ISL_1510641 to 1510646 | Kansas Health and Environmental Lab                                                                                               | Kansas Health and Environmental Lab                                                                                                                                 | Ben Olsen; Jonathan Barnell; Mike Grose; and Phil Adam                                                                                                                                                                                                                                                                                                                                                                                                                                                 |
| see above                                                                                                                                                                                                                                                                                                                                                                                                                                                                                                                                                                                                                                                                                                           | Kansas Health and Environmental Lab                                                                                               | Kansas Health and Environmental Lab                                                                                                                                 | Ben Olsen; Jonathan Barnell; Mike Grose; and Phil Adam                                                                                                                                                                                                                                                                                                                                                                                                                                                 |
| EPI_ISL_454447 to 454493, EPI_ISL_454868 to 454902, EPI_ISL_455846 to 455901, EPI_ISL_469075, EPI_ISL_469077 to 469079, EPI_ISL_475086 to 475091, EPI_ISL_475095, EPI_ISL_475136, EPI_ISL_475141 to 475142, EPI_ISL_475149 to 475150, EPI_ISL_475544 to 475547, EPI_ISL_475551 to 475552, EPI_ISL_475558 to 475561, EPI_ISL_510834 to 510835, EPI_ISL_510838 to 510840, EPI_ISL_510852, EPI_ISL_510860 to 510863, EPI_ISL_615086 to 615089                                                                                                                                                                                                                                                                          | Karolinska Universitetslaboratoriet                                                                                               | The Public Health Agency of Sweden                                                                                                                                  | Anna Risberg; Anna-Malin Linde; Karin Tegmark-Wisell; Maria Lind Karlberg; Mattias Haukland; Mia Brytting; Olov Svartstrom; Oskar Karlsson Lindsjo; Petra Edquist; Reza Advani; Sandra Brodlesson; Shamam Muradrasoli                                                                                                                                                                                                                                                                                  |
| see above                                                                                                                                                                                                                                                                                                                                                                                                                                                                                                                                                                                                                                                                                                           | Karolinska Universitetslaboratoriet                                                                                               | The Public Health Agency of Sweden                                                                                                                                  | Anna Risberg; Anna-Malin Linde; Karin Tegmark-Wisell; Maria Lind Karlberg; Mattias Haukland; Mia Brytting; Olov Svartstrom; Oskar Karlsson Lindsjo; Petra Edquist; Reza Advani; Sandra Brodlesson                                                                                                                                                                                                                                                                                                      |
| EPI_ISL_534259, EPI_ISL_548257 to 548258, EPI_ISL_560989 to 560990                                                                                                                                                                                                                                                                                                                                                                                                                                                                                                                                                                                                                                                  | Karolinska universitetslaboratoriet                                                                                               | The Public Health Agency of Sweden                                                                                                                                  | Anna Risberg; Anna-Malin Linde; Karin Tegmark-Wisell; Maria Lind Karlberg; Mattias Haukland; Mia Brytting; Olov Svartstrom; Oskar Karlsson Lindsjo; Petra Edquist; Reza Advani; Sandra Brodlesson                                                                                                                                                                                                                                                                                                      |
| EPI_ISL_534234 to 534236, EPI_ISL_560982 to 560985                                                                                                                                                                                                                                                                                                                                                                                                                                                                                                                                                                                                                                                                  | Karolinska universitetslaboratoriet SOLNA                                                                                         | The Public Health Agency of Sweden                                                                                                                                  | Anna Risberg; Anna-Malin Linde; Karin Tegmark-Wisell; Maria Lind Karlberg; Mattias Haukland; Mia Brytting; Olov Svartstrom; Oskar Karlsson Lindsjo; Petra Edquist; Reza Advani; Sandra Brodlesson                                                                                                                                                                                                                                                                                                      |
| EPI_ISL_1398357                                                                                                                                                                                                                                                                                                                                                                                                                                                                                                                                                                                                                                                                                                     | Kasih Bunda Hospital                                                                                                              | West Java Health Laboratory; School of Life Sciences and Technology, Institut Teknologi Bandung                                                                     | Azzania Fibrani; Cut Nur Chinthia Alamanda; Ema Rahmawati; Isak Solihin; Kamila Tania; Karimatu Khoirunnisa; Miftahul Farid; Rifky Waluyajati Rachman; Rini Robiani; Ryan Bayusantika Ristandi                                                                                                                                                                                                                                                                                                         |
| EPI_ISL_1464105, EPI_ISL_1464262, EPI_ISL_1464269 to 1464270                                                                                                                                                                                                                                                                                                                                                                                                                                                                                                                                                                                                                                                        | Kath. Marienkrankenhaus                                                                                                           | Heinrich Pette Institute, Leibniz Institute for Experimental Virology                                                                                               | Adam Grundhoff; Alexis Robitaille; Johannes Knobloch; Martin Aepfelbacher; Nicole Fischer; Thomas Günther                                                                                                                                                                                                                                                                                                                                                                                              |
| EPI_ISL_1439487                                                                                                                                                                                                                                                                                                                                                                                                                                                                                                                                                                                                                                                                                                     | Kath. St.-Johannes-Gesellschaft Dortmund gGmbH                                                                                    | Robert Koch Institute                                                                                                                                               |                                                                                                                                                                                                                                                                                                                                                                                                                                                                                                        |
| EPI_ISL_1443222 to 1443225                                                                                                                                                                                                                                                                                                                                                                                                                                                                                                                                                                                                                                                                                          | Katherine Shaw Bethea Hospital                                                                                                    | Illinois Department of Public Health - Springfield Lab                                                                                                              | Bryan Sim; Gordon McCall                                                                                                                                                                                                                                                                                                                                                                                                                                                                               |
| EPI_ISL_442044                                                                                                                                                                                                                                                                                                                                                                                                                                                                                                                                                                                                                                                                                                      | Kawsar Human Genetic Research Center                                                                                              | Kawsar Human Genetic Research Center                                                                                                                                | Fatemeh Hosseini; Maryam Abbasalipour Bashash; Mohammad Ali Khosravi; Siros Zeinali; Solmaz Sabeghi; Yeganeh Haghdost; Yeganeh Keshvar                                                                                                                                                                                                                                                                                                                                                                 |
| EPI_ISL_469287 to 469296                                                                                                                                                                                                                                                                                                                                                                                                                                                                                                                                                                                                                                                                                            | Keio University Hospital                                                                                                          | Keio University Hospital                                                                                                                                            | Kenjiro Kosaki                                                                                                                                                                                                                                                                                                                                                                                                                                                                                         |
| EPI_ISL_437601, EPI_ISL_438947 to 438949, EPI_ISL_438951 to 438956, EPI_ISL_438958 to 438959, EPI_ISL_438961 to 438972                                                                                                                                                                                                                                                                                                                                                                                                                                                                                                                                                                                              | Keio University School of Medicine                                                                                                | Keio University School of Medicine                                                                                                                                  | ; Haruhiko Siomi; Kenjiro Kosaki; Toshiki Takenouchi; Yuka Iwasaki                                                                                                                                                                                                                                                                                                                                                                                                                                     |
| EPI_ISL_512811 to 512821                                                                                                                                                                                                                                                                                                                                                                                                                                                                                                                                                                                                                                                                                            | Kenema Government Hospital, Ministry of Health and Sanitation                                                                     | Kenema Government Hospital, Ministry of Health and Sanitation                                                                                                       | Andersen, K.; Garry, R.; Goba, A.; Grant, D.; Happi, C.; Jalloh, S.; Mehta, S.; Momoh, M.; Olawoye, I.; Oluniyi, P.; Park, D.; Sandi, J.; Siddle, K.; Tomkins-Tinch, C.                                                                                                                                                                                                                                                                                                                                |
| EPI_ISL_1470376 to 1470394, EPI_ISL_1470396 to 1470413, EPI_ISL_1491343 to 1491360, EPI_ISL_1491368 to 1491386                                                                                                                                                                                                                                                                                                                                                                                                                                                                                                                                                                                                      | Kentucky State Public Health Lab                                                                                                  | Kentucky State Public Health Lab                                                                                                                                    | Joshua Tobias; Karim George; Matthew Johnson; Rachel Zinner; Rhonda Lucas; Stephanie Lunn; Vaneet Arora; William Grooms                                                                                                                                                                                                                                                                                                                                                                                |
| EPI_ISL_414510                                                                                                                                                                                                                                                                                                                                                                                                                                                                                                                                                                                                                                                                                                      | Key Laboratory of Medical Molecular Virology (MOE/NHC/CAMS), School of Basic Medicine, Shanghai Medical College, Fudan University | Key Laboratory of Medical Molecular Virology (MOE/NHC/CAMS), School of Basic Medicine, Shanghai Medical College, Fudan University                                   | Cai, X.; Chen, H.; Fang, F.; Feng, F.; Fu, C.; Gu, C.; Han, W.; Li, C.; Qu, D.; Song, W.; Sun, Z.; Teng, Z.; Wang, Y.; Xie, W.; Y. and Yuan, Z.; Ye, R.; Yi, Z.; Zhang, R.; Zhang, X.; Zhou, Y.; Zhu, Y.                                                                                                                                                                                                                                                                                               |
| EPI_ISL_489996 to 490012                                                                                                                                                                                                                                                                                                                                                                                                                                                                                                                                                                                                                                                                                            | King Fahad Medical City                                                                                                           | King Fahad Medical City                                                                                                                                             | Alghoraibi, M.; Alosaimi, B.; Enani, M.; Naeem, A.                                                                                                                                                                                                                                                                                                                                                                                                                                                     |
| EPI_ISL_516940 to 516986                                                                                                                                                                                                                                                                                                                                                                                                                                                                                                                                                                                                                                                                                            | King Georges Medical University                                                                                                   | CSIR-National Botanical Research Institute                                                                                                                          | Amita Jain; Babita Singh; Danish Nasar Khan; Hricha Mishra; Kishan Sahu; MLB Bhatt; Mehar H.Asif; Om Prakash; Priti Prasad; SK Barik; Samir V. Sawant; Shantanu Prakash; Sumit Kr. Bag; Surochi Shukla                                                                                                                                                                                                                                                                                                 |
| EPI_ISL_458030 to 458044, EPI_ISL_471583 to 471584                                                                                                                                                                                                                                                                                                                                                                                                                                                                                                                                                                                                                                                                  | King Institute of Preventive Medicine & Research                                                                                  | CSIR-Centre for Cellular and Molecular Biology                                                                                                                      | Archana Bharadwaj Siva; Dhiviya Vedagiri; Divya Gupta; Divya Tej Sowpati; G. Dhinakar Raj; G. Ravikumar; K Thangaraj; K.Kaveri; Karthik Bharadwaj Tallapaka; Krishnan Harinivas Harshan; Lamuk Zaveri; M. Sekar; Namami Gaur; P. Azhahanambi; P.Padmapriya; Payel Mukherjee; Priya Singh; Purushotham Vodnala; R. P. Aravindh Babu; R.Kiruba; Rakesh K Mishra; S.Magesh; S.Sivasubramanian; S.Vennila; Sakshi Shambhavi; Santosh Kumar Kuncha; Shagufta Khan; Sofia Banu; Tulasi Nagabandi; Vishal Sah |
| EPI_ISL_483542 to 483565, EPI_ISL_483638 to 483640                                                                                                                                                                                                                                                                                                                                                                                                                                                                                                                                                                                                                                                                  | Kingdom of Bahrain Ministry of Health                                                                                             | Erasmus Medical Center                                                                                                                                              | Amjad Ghanem Mohamed; Anne van der Linden; Bas Oude Munnink; Claudia Schapendonk; David Nieuwenhuijse; Ebrahim Shehad; Fatema; Hashmeya Al Wasti; Irina Chestakova; Marion Koopmans; Mark Pronk; Pascal Lexmond; Reina Sikkema; Richard Molenkamp; Stefan van Nieuwkoop; Theo Bestebroer; on behalf of the Dutch national COVID-19 response team.                                                                                                                                                      |
| EPI_ISL_459866 to 459869, EPI_ISL_459871 to 459875, EPI_ISL_459877 to 459892, EPI_ISL_529029 to 529030                                                                                                                                                                                                                                                                                                                                                                                                                                                                                                                                                                                                              | Kingston Health Sciences Center                                                                                                   | Queen's Genomics Lab at Ongwanada (Q-GLO)                                                                                                                           | Ayub M; Colautti R; Evans GA; Guan H; Huang D; Hudson ML; Perez-Patrigeon S; Rustom N; Sheth P; Sjaarda CP; Soares CN; Wong H                                                                                                                                                                                                                                                                                                                                                                          |
| EPI_ISL_538321 to 538386                                                                                                                                                                                                                                                                                                                                                                                                                                                                                                                                                                                                                                                                                            | Kingston Health Sciences Centre / Queen's University                                                                              | Ontario Institute for Cancer Research                                                                                                                               | Bernard Lam; Calvin Sjaarda; Ilinca Lungu; Jared T. Simpson; Katya Douchant; Lawrence E Heisler; Michael Laszloffy; Paul Krzyzanowski; Prameet M. Sheth; Richard de Borja; Robert Colautti                                                                                                                                                                                                                                                                                                             |
| EPI_ISL_479990                                                                                                                                                                                                                                                                                                                                                                                                                                                                                                                                                                                                                                                                                                      | Kitakyushu City Institute of Health and Environmental Sciences                                                                    | Pathogen Genomics Center, National Institute of Infectious Diseases                                                                                                 | Asuka Kikuchi Kentaro Itokawa; Hajime Kamiya; Katsuya Obata; Makoto Kuroda; Masanori Hashino; Motoi Suzuki; Rina Tanaka; Tsuyoshi Sekizuka                                                                                                                                                                                                                                                                                                                                                             |
| EPI_ISL_1384665 to 1384691, EPI_ISL_1396391 to 1396399, EPI_ISL_1510084, EPI_ISL_1510087, EPI_ISL_1510202, EPI_ISL_1510256 to 1510259, EPI_ISL_1510480 to 1510562                                                                                                                                                                                                                                                                                                                                                                                                                                                                                                                                                   | Klaipeda University Hospital                                                                                                      | Vilnius University Hospital Santaros Klinikos, Center of Laboratory Medicine                                                                                        | Daniel Naumovas; Dovile Ezerskyte; Gytis Dudas; Ingrida Olenдраite; Laimonas Griskevicius; Ligita Raugaite; Mindaugas Stoskus; Monika Katenaite; Rimvydas Norvilas                                                                                                                                                                                                                                                                                                                                     |
| see above                                                                                                                                                                                                                                                                                                                                                                                                                                                                                                                                                                                                                                                                                                           | Klaipeda University Hospital                                                                                                      | Vilnius University Hospital Santaros Klinikos, Center of Laboratory Medicine                                                                                        | Daniel Naumovas; Dovile Ezerskyte; Gytis Dudas; Ingrida Olenдраite; Laimonas Griskevicius; Ligita Raugaite; Mindaugas Stoskus; Monika Katenaite; Rimvydas Norvilas                                                                                                                                                                                                                                                                                                                                     |

|                                                                                                                                                                                                      |                                                                                                                                       |                                                                                                                                       |                                                                                                                                                                                                                                                                                                                                                                                                                                                                                                                                           |
|------------------------------------------------------------------------------------------------------------------------------------------------------------------------------------------------------|---------------------------------------------------------------------------------------------------------------------------------------|---------------------------------------------------------------------------------------------------------------------------------------|-------------------------------------------------------------------------------------------------------------------------------------------------------------------------------------------------------------------------------------------------------------------------------------------------------------------------------------------------------------------------------------------------------------------------------------------------------------------------------------------------------------------------------------------|
| EPI_ISL_518820                                                                                                                                                                                       | Klinik Apotek Dein, Jakarta, Indonesia                                                                                                | Biosafety Level-3 Laboratory, Indonesian Institute of Sciences (LIPI)                                                                 | Ade Andriani; Ahmad Fathoni; Andri Wardiana; Anggia Prasetyoputri; Anik Budhi Dharmayanthi; Ario Betha Juanssilfero; Asep M Ridwanuloh; Isa Nuryana; Puspita Lisdianti; Rath Asmana Ningrum; Rifki Sadikin; Syam Budi Iryanto; Wien Kusharyoto                                                                                                                                                                                                                                                                                            |
| EPI_ISL_413021                                                                                                                                                                                       | Klinik Hirslanden Zurich                                                                                                              | Institute of Medical Virology, University of Zurich                                                                                   | Alexandra Trkola; Andrea Zbinden; Christian Ruef; Fiona Steiner; Gabriela Ziltener; Jon Huder; Jürg Böni; Maryam Zaheri; Michael Huber; Patrick Redli; Riccarda Capaul; Stefan Schmutz; Verena Kufner                                                                                                                                                                                                                                                                                                                                     |
| EPI_ISL_524479                                                                                                                                                                                       | Klinik Hirslanden Zürich                                                                                                              | Institute of Medical Virology, University of Zurich                                                                                   | Alexandra Trkola; Andrea Zbinden; Fiona Steiner; Gabriela Ziltener; Jon Huder; Jürg Böni; Maryam Zaheri; Michael Huber; Patrick Redli; Riccarda Capaul; Stefan Schmutz; Verena Kufner                                                                                                                                                                                                                                                                                                                                                     |
| EPI_ISL_1438660, EPI_ISL_1438666, EPI_ISL_1441213, EPI_ISL_1441225                                                                                                                                   | Klinikum Darmstadt GmbH                                                                                                               | Robert Koch Institute                                                                                                                 |                                                                                                                                                                                                                                                                                                                                                                                                                                                                                                                                           |
| EPI_ISL_1442531 to 1442535, EPI_ISL_1442537 to 1442542                                                                                                                                               | Klinikum Ernst von Bergmann gemeinnützige GmbH - stationärer Bereich                                                                  | Robert Koch Institute                                                                                                                 |                                                                                                                                                                                                                                                                                                                                                                                                                                                                                                                                           |
| EPI_ISL_1435441, EPI_ISL_1438761, EPI_ISL_1441195, EPI_ISL_1441197                                                                                                                                   | Klinikum Fulda gAG                                                                                                                    | Robert Koch Institute                                                                                                                 |                                                                                                                                                                                                                                                                                                                                                                                                                                                                                                                                           |
| EPI_ISL_475910 to 475915, EPI_ISL_1495166 to 1495178, EPI_ISL_1495267 to 1495271, EPI_ISL_1495528 to 1495542, EPI_ISL_1495762 to 1495800                                                             | Klinikum Wels-Grieskirchen                                                                                                            | Bergthaler laboratory, CeMM Research Center for Molecular Medicine of the Austrian Academy of Sciences                                | Alexander Lercher; Alexandra Popa; Andreas Bergthaler; Anna Schedl; Bekir Erguner; Benedikt Agerer; Christoph Bock; Daniela Schmid; Dorothee von Laer; Elisabeth Puchhammer-Stoeckl; Fabian Amman; Franz Allerberger; Gregor Hörmann; Guenter Weiss; Henrike Colaco; Jakob-Wendelin Genger; Jan Laine; Judith Aberle; Kinga Rigler-Hohenwarter; Lukas Endler; Maelle Le Moing; Manfred Nairz; Mark Smyth; Martin Senekowitsch; Michael Schuster; Peter Hufnagl; Petr Triska; Rainer Gatringer; Stephan Aberle; Thomas Penz; Wegene Borena |
| EPI_ISL_1404375 to 1404394                                                                                                                                                                           | Klinisch Labororium ZNA                                                                                                               | Klinisch Labororium ZNA                                                                                                               | Verstrepen et al.                                                                                                                                                                                                                                                                                                                                                                                                                                                                                                                         |
| EPI_ISL_475101 to 475104, EPI_ISL_476140 to 476142, EPI_ISL_582808, EPI_ISL_615108                                                                                                                   | Klinisk Mikrobiologi                                                                                                                  | The Public Health Agency of Sweden                                                                                                    | Anna Risberg; Anna-Malin Linde; Karin Tegmark-Wisell; Maria Lind Karlberg; Mattias Haukland; Mia Brytting; Olov Svartstrom; Oskar Karlsson Lindsjo; Petra Edquist; Reza Advani; Sandra Brodlesson; Shamam Muradrasoli                                                                                                                                                                                                                                                                                                                     |
| EPI_ISL_615097 to 615100                                                                                                                                                                             | Klinisk mikrobiologi Lanssjukhuset Ryhov, Jonkoping                                                                                   | The Public Health Agency of Sweden                                                                                                    | Anna Risberg; Anna-Malin Linde; Karin Tegmark-Wisell; Maria Lind Karlberg; Mattias Haukland; Mia Brytting; Olov Svartstrom; Oskar Karlsson Lindsjo; Petra Edquist; Reza Advani; Sandra Brodlesson                                                                                                                                                                                                                                                                                                                                         |
| EPI_ISL_510841 to 510844, EPI_ISL_510868 to 510870, EPI_ISL_548250 to 548251, EPI_ISL_548253 to 548254, EPI_ISL_560973, EPI_ISL_615090 to 615091, EPI_ISL_615109                                     |                                                                                                                                       |                                                                                                                                       |                                                                                                                                                                                                                                                                                                                                                                                                                                                                                                                                           |
| see above                                                                                                                                                                                            | Klinisk mikrobiologi NAL Trollhattan                                                                                                  | The Public Health Agency of Sweden                                                                                                    | Anna Risberg; Anna-Malin Linde; Karin Tegmark-Wisell; Maria Lind Karlberg; Mattias Haukland; Mia Brytting; Olov Svartstrom; Oskar Karlsson Lindsjo; Petra Edquist; Reza Advani; Sandra Brodlesson                                                                                                                                                                                                                                                                                                                                         |
| EPI_ISL_429136 to 429148, EPI_ISL_429150 to 429158, EPI_ISL_429160, EPI_ISL_430860 to 430861, EPI_ISL_430863                                                                                         | Klinisk mikrobiologi Orebro                                                                                                           | The Public Health Agency of Sweden                                                                                                    | Anna Risberg; Anna-Malin Linde; Karin Tegmark-Wisell; Maria Lind Karlberg; Martin Sundqvist; Olov Svartstrom; Oskar Karlsson Lindsjo; Shaman Muradrasoli                                                                                                                                                                                                                                                                                                                                                                                  |
| EPI_ISL_582806 to 582807                                                                                                                                                                             | Klinisk mikrobiologi SAS Boras                                                                                                        | The Public Health Agency of Sweden                                                                                                    | Anna Risberg; Anna-Malin Linde; Karin Tegmark-Wisell; Maria Lind Karlberg; Mattias Haukland; Mia Brytting; Olov Svartstrom; Oskar Karlsson Lindsjo; Petra Edquist; Reza Advani; Sandra Brodlesson                                                                                                                                                                                                                                                                                                                                         |
| EPI_ISL_475144 to 475148, EPI_ISL_475153 to 475155, EPI_ISL_475160 to 475163, EPI_ISL_510818 to 510819, EPI_ISL_510853 to 510858, EPI_ISL_582797 to 582798, EPI_ISL_582800, EPI_ISL_582835 to 582838 |                                                                                                                                       |                                                                                                                                       |                                                                                                                                                                                                                                                                                                                                                                                                                                                                                                                                           |
| see above                                                                                                                                                                                            | Klinisk mikrobiologi Vasternorrland                                                                                                   | The Public Health Agency of Sweden                                                                                                    | Anna Risberg; Anna-Malin Linde; Karin Tegmark-Wisell; Maria Lind Karlberg; Mattias Haukland; Mia Brytting; Olov Svartstrom; Oskar Karlsson Lindsjo; Petra Edquist; Reza Advani; Sandra Brodlesson; Shamam Muradrasoli                                                                                                                                                                                                                                                                                                                     |
| EPI_ISL_510820 to 510824, EPI_ISL_510867, EPI_ISL_548252, EPI_ISL_560975                                                                                                                             | Klinisk mikrobiologi centralsjukhuset Karlstad                                                                                        | The Public Health Agency of Sweden                                                                                                    | Anna Risberg; Anna-Malin Linde; Karin Tegmark-Wisell; Maria Lind Karlberg; Mattias Haukland; Mia Brytting; Olov Svartstrom; Oskar Karlsson Lindsjo; Petra Edquist; Reza Advani; Sandra Brodlesson                                                                                                                                                                                                                                                                                                                                         |
| EPI_ISL_429115 to 429125, EPI_ISL_430848 to 430855, EPI_ISL_450834                                                                                                                                   | Klinisk mikrobiologi och vardhygien Halmstad                                                                                          | The Public Health Agency of Sweden                                                                                                    | Anna Risberg; Anna-Malin Linde; Arne Kotz; Karin Tegmark-Wisell; Maria Lind Karlberg; Mia Brytting; Olov Svartstrom; Oskar Karlsson Lindsjo; Shaman Muradrasoli; Theresa Enkirch                                                                                                                                                                                                                                                                                                                                                          |
| EPI_ISL_534256, EPI_ISL_560988                                                                                                                                                                       | Klinisk mikrobiologi, Laboratoriemedicin Gavleborg                                                                                    | The Public Health Agency of Sweden                                                                                                    | Anna Risberg; Anna-Malin Linde; Karin Tegmark-Wisell; Maria Lind Karlberg; Mattias Haukland; Mia Brytting; Olov Svartstrom; Oskar Karlsson Lindsjo; Petra Edquist; Reza Advani; Sandra Brodlesson                                                                                                                                                                                                                                                                                                                                         |
| EPI_ISL_1469159 to 1469231                                                                                                                                                                           | Klinisk mikrobiologi, Region Västerbotten                                                                                             | CBRN Defence and Security, Swedish Defence Research Agency                                                                            | Andreas Sjödin; Anna-Lena Johansson; Annika Allard; Annika Osterman; Caroline Öhrman; David Sundell; Emelie Näslund Salomonsson; Ingrid Dacklin; Jonas Näslund; Kerstin Myrtennäs; Linda Karlsson; Malin Granberg; Mats Forsman; Stina Bäckman                                                                                                                                                                                                                                                                                            |
| EPI_ISL_424703, EPI_ISL_428148, EPI_ISL_428201, EPI_ISL_548962 to 548963, EPI_ISL_549024, EPI_ISL_549026, EPI_ISL_549176                                                                             |                                                                                                                                       |                                                                                                                                       |                                                                                                                                                                                                                                                                                                                                                                                                                                                                                                                                           |
| see above                                                                                                                                                                                            | Klinisk mikrobiologi, Region Västerbotten                                                                                             | Unit for Biological Agents, Department for CBRN Defence and Security, Swedish Defence Research Agency                                 | FOI Bioinformatics team; FOI bioinformatics team                                                                                                                                                                                                                                                                                                                                                                                                                                                                                          |
| EPI_ISL_615080 to 615085                                                                                                                                                                             | Klinisk mikrobiologi, Skanes universitetssjukhus, Lund                                                                                | The Public Health Agency of Sweden                                                                                                    | Anna Risberg; Anna-Malin Linde; Karin Tegmark-Wisell; Maria Lind Karlberg; Mattias Haukland; Mia Brytting; Olov Svartstrom; Oskar Karlsson Lindsjo; Petra Edquist; Reza Advani; Sandra Brodlesson                                                                                                                                                                                                                                                                                                                                         |
| EPI_ISL_454903, EPI_ISL_455904 to 455907                                                                                                                                                             | Klinisk mikrobiologi, UAS                                                                                                             | The Public Health Agency of Sweden                                                                                                    | Anna Risberg; Anna-Malin Linde; Karin Tegmark-Wisell; Maria Lind Karlberg; Mattias Haukland; Olov Svartstrom; Oskar Karlsson Lindsjo; Petra Edquist; Reza Advani; Shamam Muradrasoli                                                                                                                                                                                                                                                                                                                                                      |
| EPI_ISL_534245, EPI_ISL_560987                                                                                                                                                                       | Kliniskt mikrobiologiska laboratoriet                                                                                                 | The Public Health Agency of Sweden                                                                                                    | Anna Risberg; Anna-Malin Linde; Karin Tegmark-Wisell; Maria Lind Karlberg; Mattias Haukland; Mia Brytting; Olov Svartstrom; Oskar Karlsson Lindsjo; Petra Edquist; Reza Advani; Sandra Brodlesson                                                                                                                                                                                                                                                                                                                                         |
| EPI_ISL_510871 to 510877, EPI_ISL_560976, EPI_ISL_582771 to 582775, EPI_ISL_594149 to 594153, EPI_ISL_615110, EPI_ISL_615117 to 615119                                                               | Klinisk mikrobiologi Linköping                                                                                                        | The Public Health Agency of Sweden                                                                                                    | Anna Risberg; Anna-Malin Linde; Karin Tegmark-Wisell; Maria Lind Karlberg; Mattias Haukland; Mia Brytting; Olov Svartstrom; Oskar Karlsson Lindsjo; Petra Edquist; Reza Advani; Sandra Brodlesson                                                                                                                                                                                                                                                                                                                                         |
| EPI_ISL_434659, EPI_ISL_450811                                                                                                                                                                       | Knivsta VC                                                                                                                            | The Public Health Agency of Sweden                                                                                                    | Anna Risberg; Anna-Malin Linde; Johanna Carlsson; Karin Tegmark-Wisell; Maria Lind Karlberg; Mia Brytting; Olov Svartstrom; Oskar Karlsson Lindsjo; Theresa Enkirch                                                                                                                                                                                                                                                                                                                                                                       |
| EPI_ISL_1534360                                                                                                                                                                                      | Knysna CDC wc WLC                                                                                                                     | NHLS/UCT                                                                                                                              | Arash Iranzadeh; Bruna Galvao; Carolyn Williamson; Deelan Doolabh; Diana Hardie; Emmanuel SJ; Innocent Mudau; Kruger Marais; Lynn Tyers; Marvin Hsiao; Stephen Korsman; Tegally H; de Oliveira T                                                                                                                                                                                                                                                                                                                                          |
| EPI_ISL_1534385, EPI_ISL_1534388, EPI_ISL_1534403                                                                                                                                                    | Knysna Hospital wc KNY                                                                                                                | NHLS/UCT                                                                                                                              | Arash Iranzadeh; Bruna Galvao; Carolyn Williamson; Deelan Doolabh; Diana Hardie; Emmanuel SJ; Innocent Mudau; Kruger Marais; Lynn Tyers; Marvin Hsiao; Stephen Korsman; Tegally H; de Oliveira T                                                                                                                                                                                                                                                                                                                                          |
| EPI_ISL_419296, EPI_ISL_479823                                                                                                                                                                       | Kochi Prefectural Institute of Public Health                                                                                          | Pathogen Genomics Center, National Institute of Infectious Diseases                                                                   | Akihiko Tokaji; Hajime Kamiya; Kentaro Itokawa; Makoto Kuroda; Masanori Hashino; Motoi Suzuki; Rina Tanaka; Tsuyoshi Sekizuka                                                                                                                                                                                                                                                                                                                                                                                                             |
| EPI_ISL_407193                                                                                                                                                                                       | Korea Centers for Disease Control & Prevention (KCDC) Center for Laboratory Control of Infectious Diseases Division of Viral Diseases | Korea Centers for Disease Control & Prevention (KCDC) Center for Laboratory Control of Infectious Diseases Division of Viral Diseases | Heui Man Kim; Hye-Joon Jo; Jeong-Min Kim; Mi-Seon Kim; Myung Guk Han; Namjoo Lee; SangHee Woo; Sehee Park; Yoon-Seok Chung                                                                                                                                                                                                                                                                                                                                                                                                                |
| EPI_ISL_480103 to 480108, EPI_ISL_480221 to 480223                                                                                                                                                   | Koshigaya City Public Health Center                                                                                                   | Pathogen Genomics Center, National Institute of Infectious Diseases                                                                   | Aya Tamura; Hajime Kamiya; Kentaro Itokawa; Kyohei Sakata; Makoto Kuroda; Masanori Hashino; Motoi Suzuki; Rina Tanaka; Takumi Daimon; Tsuyoshi Sekizuka; Yoko Togawa; Yoshiko Hamada; Yuka Furu                                                                                                                                                                                                                                                                                                                                           |
| EPI_ISL_434657                                                                                                                                                                                       | Kristianstadkliniken                                                                                                                  | The Public Health Agency of Sweden                                                                                                    | Anna Risberg; Anna-Malin Linde; Karin Tegmark-Wisell; Maria Lind Karlberg; Mia Brytting; Mia Settergren Hammer; Olov Svartstrom; Oskar Karlsson Lindsjo; Theresa Enkirch                                                                                                                                                                                                                                                                                                                                                                  |
| EPI_ISL_434651                                                                                                                                                                                       | Krokoms Halsocentral                                                                                                                  | The Public Health Agency of Sweden                                                                                                    | Anna Risberg; Anna-Malin Linde; Karin Tegmark-Wisell; Maria Lind Karlberg; Martin Ersson; Mia Brytting; Olov Svartstrom; Oskar Karlsson Lindsjo; Theresa Enkirch                                                                                                                                                                                                                                                                                                                                                                          |
| EPI_ISL_479991 to 479996                                                                                                                                                                             | Kumamoto City Public Health Research Institute                                                                                        | Pathogen Genomics Center, National Institute of Infectious                                                                            | Hajime Kamiya; Kaori Tashiro; Kentaro Itokawa; Makoto Kuroda; Masanori Hashino; Motoi Suzuki; Rina Tanaka; Tsuyoshi Sekizuka                                                                                                                                                                                                                                                                                                                                                                                                              |

|                                                                                                                                                                                                                                                                                                                                                                                                                                      |                                                                           | Diseases                                                                                                                                   |                                                                                                                                                                                                                                                                                                                                                                                                                                                                                                                                                                                    |  |
|--------------------------------------------------------------------------------------------------------------------------------------------------------------------------------------------------------------------------------------------------------------------------------------------------------------------------------------------------------------------------------------------------------------------------------------|---------------------------------------------------------------------------|--------------------------------------------------------------------------------------------------------------------------------------------|------------------------------------------------------------------------------------------------------------------------------------------------------------------------------------------------------------------------------------------------------------------------------------------------------------------------------------------------------------------------------------------------------------------------------------------------------------------------------------------------------------------------------------------------------------------------------------|--|
| EPI_ISL_479824                                                                                                                                                                                                                                                                                                                                                                                                                       | Kumamoto Prefectural Institute of Public Health and Environmental Science | Pathogen Genomics Center, National Institute of Infectious Diseases                                                                        | Hajime Kamiya; Kentaro Itokawa; Makoto Kuroda; Masanori Hashino; Motoi Suzuki; Rina Tanaka; Shunsuke Yahiro; Tsuyoshi Sekizuka                                                                                                                                                                                                                                                                                                                                                                                                                                                     |  |
| EPI_ISL_515181 to 515184, EPI_ISL_515247 to 515249                                                                                                                                                                                                                                                                                                                                                                                   | Kumasi Centre for Collaborative Research in Tropical Medicine, Kumasi.    | Institute of Virology, Charité - Universitätsmedizin Berlin                                                                                | Augustina Sylverken; Christian Drosten; Eric Adu; Jesse Addo Asamoah; Julia Schneider; Jörn Beheim-Schwarzbach; Michael Owusu; Philip El-Duah; Richard Phillips.; Richmond Gorman; Richmond Yeboah; Sherihane Aryeetey; Victor Max Corman                                                                                                                                                                                                                                                                                                                                          |  |
| EPI_ISL_539881                                                                                                                                                                                                                                                                                                                                                                                                                       | Kungsbacka Narakut                                                        | The Public Health Agency of Sweden                                                                                                         | Anna Risberg; Anna-Malin Linde; Karin Tegmark-Wisell; Maria Lind Karlberg; Mattias Haukland; Mia Brytting; Olov Svartstrom; Oskar Karlsson Lindsjö; Reza Advani; Sandra Brodsson; Theresa Enkirch                                                                                                                                                                                                                                                                                                                                                                                  |  |
| EPI_ISL_434644, EPI_ISL_450809, EPI_ISL_469067, EPI_ISL_475542, EPI_ISL_475569                                                                                                                                                                                                                                                                                                                                                       | Kungsholmsdoktor                                                          | The Public Health Agency of Sweden                                                                                                         | Anna Risberg; Anna-Malin Linde; Karin Tegmark-Wisell; Linus Hammar; Maria Lind Karlberg; Mattias Haukland; Mia Brytting; Olov Svartstrom; Oskar Karlsson Lindsjö; Petra Edquist; Reza Advani; Sandra Brodsson; Shamam Muradrasoli; Theresa Enkirch                                                                                                                                                                                                                                                                                                                                 |  |
| EPI_ISL_434668, EPI_ISL_445232, EPI_ISL_455102, EPI_ISL_475529 to 475532, EPI_ISL_475568                                                                                                                                                                                                                                                                                                                                             | Kungsors VC                                                               | The Public Health Agency of Sweden                                                                                                         | Anna Risberg; Anna-Malin Linde; Jessica Karlsson; Karin Tegmark-Wisell; Maria Lind Karlberg; Mattias Haukland; Mia Brytting; Olov Svartstrom; Oskar Karlsson Lindsjö; Reza Advani; Sandra Brodsson; Theresa Enkirch                                                                                                                                                                                                                                                                                                                                                                |  |
| EPI_ISL_1398353, EPI_ISL_1398369                                                                                                                                                                                                                                                                                                                                                                                                     | Kuningan Public Health                                                    | West Java Health Laboratory; School of Life Sciences and Technology, Institut Teknologi Bandung                                            | Azzania Fibrani; Cut Nur Cinthia Alamanda; Ema Rahmawati; Isak Solihin; Kamila Tania; Karimatu Khoirunnisa; Miftahul Faridi; Rifky Waluyajati Rachman; Rini Robiani; Ryan Bayusantika Ristandi                                                                                                                                                                                                                                                                                                                                                                                     |  |
| EPI_ISL_539805                                                                                                                                                                                                                                                                                                                                                                                                                       | Kwong Wah Hospital                                                        | Hong Kong Department of Health                                                                                                             | Alan K.L. Tsang; Dominic N.C. Tsang; Edman T.K. Lam; Peter C.W. Yip; Rickjason C.W. Chan                                                                                                                                                                                                                                                                                                                                                                                                                                                                                           |  |
| EPI_ISL_420039 to 420040                                                                                                                                                                                                                                                                                                                                                                                                             | L'Air du Temps                                                            | National Reference Center for Viruses of Respiratory Infections, Institut Pasteur, Paris                                                   | Angela Brisebarre; Etienne Simon-Lorière; Flora Donati; Marion Barbet; Maud Vanpeene; Mélanie Albert; Méline Bizard; Sylvie Behillil; Sylvie van der Werf; Vincent Enouf                                                                                                                                                                                                                                                                                                                                                                                                           |  |
| EPI_ISL_508931                                                                                                                                                                                                                                                                                                                                                                                                                       | L'Hôpital Nord-Ouest Tarare-Grandiris                                     | CNR Virus des Infections Respiratoires - France SUD                                                                                        | Alexandre Gaymard; Antonin Bal; Bruno Lina; Carine Moustaud; Florence Morfin-Sherpa; Gregory Destras; Gwendolyne Burfin; Laurence Josset; Martine Valette; Maude Bouscambert-Duchamp; Raphaëlle Lamy; Solenne Brun                                                                                                                                                                                                                                                                                                                                                                 |  |
| EPI_ISL_1446591, EPI_ISL_1446593, EPI_ISL_1447013 to 1447017, EPI_ISL_1516401 to 1516423, EPI_ISL_1528475 to 1528477                                                                                                                                                                                                                                                                                                                 | LA Office of Public Health Laboratories                                   | Centers for Disease Control and Prevention Division of Viral Diseases, Pathogen Discovery                                                  | Alison Laufer Halpin; Ben L. Rambo-Martin; Clinton R. Paden; Dakota Howard; Darlene Wagner; Dave Wentworth; Dhvani Batra; Jasmine Padilla; Justin Lee; Katie Dillon; Krista Queen; Kristen Knipe; Kristine Lacek; Mark Burroughs; Matthew Schmeer; Mill Sheth; Peter Cook; Sam Shepard; Sarah Nobles; Shoshona Le; Suxiang Tong; Vivien Dugan; Yvette Unoarumhi                                                                                                                                                                                                                    |  |
| EPI_ISL_1448522, EPI_ISL_1509932                                                                                                                                                                                                                                                                                                                                                                                                     | LA Office of Public Health Laboratories                                   | Genomics and Discovery, Respiratory Viruses Branch, Division of Viral Diseases, Centers for Disease Control and Prevention                 | Adam Retchless; Anna Kelleher; Anna Montmayeur; Anna Uehara; Brian Lynch; Clinton R. Paden; Haibin Wang; Han Jia Justin Ng; Jing Zhang; Justin Lee; Krista Queen; Mark Burroughs; Peter Cook; Rachel Marine; Suxiang Tong; Yan Li; Ying Tao                                                                                                                                                                                                                                                                                                                                        |  |
| EPI_ISL_424868, EPI_ISL_452106 to 452107, EPI_ISL_535305 to 535358                                                                                                                                                                                                                                                                                                                                                                   | LA Office of Public Health Laboratories                                   | Pathogen Discovery, Respiratory Viruses Branch, Division of Viral Diseases, Centers for Disease Control and Prevention                     | Alison S. Laufer Halpin; Anna Montmayeur; Anna Uehara; Christopher A. Elkins; Clinton Paden; Clinton R. Paden; Haibin Wang; Jing Zhang; Krista Queen; Mary S. Keckler; Rachel Marine; Suxiang Tong; Yan Li; Ying Tao; Zachary Weiner                                                                                                                                                                                                                                                                                                                                               |  |
| EPI_ISL_1396823                                                                                                                                                                                                                                                                                                                                                                                                                      | LABM BIOLAM CLINIQUE ESTREE                                               | Department of Virology, Henri Mondor University Hospital, Assistance Publique Hôpitaux de Paris, Université Paris-Est Créteil, INSERM U955 | Alexandre Soulier; Christophe Rodriguez; Elisabeth Trawinski; Guillaume Gricourt; Jean-Michel Pawlowsky; Melissa N'Debi; Slim Fourati; Vanessa Demontant                                                                                                                                                                                                                                                                                                                                                                                                                           |  |
| EPI_ISL_416499 to 416500, EPI_ISL_418234, EPI_ISL_418240                                                                                                                                                                                                                                                                                                                                                                             | LABM GH nord Essonne                                                      | National Reference Center for Viruses of Respiratory Infections, Institut Pasteur, Paris                                                   | Angela Brisebarre; Christine Lambert; Etienne Simon-Lorière; Flora Donati; Marion Barbet; Maud Vanpeene; Mélanie Albert; Méline Bizard; Méline Albert; Sylvie Behillil; Sylvie van der Werf; Vincent Enouf                                                                                                                                                                                                                                                                                                                                                                         |  |
| EPI_ISL_428354, EPI_ISL_428361 to 428362, EPI_ISL_428365, EPI_ISL_443260, EPI_ISL_443305, EPI_ISL_443314                                                                                                                                                                                                                                                                                                                             | LABM GH nord Essonne de Longjumeau - BP 125                               | National Reference Center for Viruses of Respiratory Infections, Institut Pasteur, Paris                                                   | Angela Brisebarre; Etienne Simon-Lorière; Flora Donati; Marion Barbet; Maud Vanpeene; Mélanie Albert; Méline Bizard; Sylvie Behillil; Sylvie van der Werf; Vincent Enouf                                                                                                                                                                                                                                                                                                                                                                                                           |  |
| EPI_ISL_1418252 to 1418254                                                                                                                                                                                                                                                                                                                                                                                                           | LABORATOIRE BOUVIER                                                       | CNR Virus des Infections Respiratoires - France SUD                                                                                        | Antonin Bal; Bruno Lina; Gregory Destras; Gwendolyne Burfin; Hadrien Regue; Laurence Josset; Martine Valette; Quentin Semanas                                                                                                                                                                                                                                                                                                                                                                                                                                                      |  |
| EPI_ISL_1526389 to 1526390, EPI_ISL_1526396 to 1526400                                                                                                                                                                                                                                                                                                                                                                               | LABORATOIRE d'ANALYSES de BIOLOGIE MEDICALES                              | CNR Virus des Infections Respiratoires - France SUD                                                                                        | Antonin Bal; Bruno Lina; Gregory Destras; Gwendolyne Burfin; Hadrien Regue; Laurence Josset; Martine Valette; Quentin Semanas                                                                                                                                                                                                                                                                                                                                                                                                                                                      |  |
| EPI_ISL_1393933 to 1393941, EPI_ISL_1394255 to 1394259, EPI_ISL_1425559, EPI_ISL_1538594 to 1538597, EPI_ISL_1538828 to 1538829, EPI_ISL_1538831, EPI_ISL_1538936 to 1538937, EPI_ISL_1539078 to 1539079                                                                                                                                                                                                                             | see above                                                                 | 1. National Institute of Public Health - National Institute of Hygiene; 2. Eurofins Genomics Europe Sequencing GmbH                        | ECDC COVID-19 WGS support team; Eurofins Genomics Europe Sequencing Team; Gierczyki Rafa; Sadkowska-Todys Magorzata; Wokowicz Tomasz; Zacharczuk Katarzyna                                                                                                                                                                                                                                                                                                                                                                                                                         |  |
| EPI_ISL_445271                                                                                                                                                                                                                                                                                                                                                                                                                       | LABORATORIO CLINICA CHILLAN                                               | Instituto de Salud Publica de Chile                                                                                                        | Alejandra Acevedo; Andrés E Castillo; Bárbara Parra; Carolina Tambley; Gabriel Leal; Jaime Lagos; Jorge Fernandez; Loredana Arata; Patricia Bustos; Paz Tapia; Rodrigo Fasce; Winston Andrade                                                                                                                                                                                                                                                                                                                                                                                      |  |
| EPI_ISL_445333                                                                                                                                                                                                                                                                                                                                                                                                                       | LABORATORIO CLINICA UNIVERSITARIA DE CONCEPCION                           | Instituto de Salud Publica de Chile                                                                                                        | Alejandra Acevedo; Andrés E Castillo; Bárbara Parra; Carolina Tambley; Gabriel Leal; Jaime Lagos; Jorge Fernandez; Loredana Arata; Patricia Bustos; Paz Tapia; Rodrigo Fasce; Winston Andrade                                                                                                                                                                                                                                                                                                                                                                                      |  |
| EPI_ISL_1494945 to 1494946                                                                                                                                                                                                                                                                                                                                                                                                           | LABORATORIO CLINICO IMAT SAS                                              | Instituto Nacional de Salud- Dirección de Investigación en Salud Pública                                                                   | Carlos Franco-Muñoz; Carmen Osorio; Diana Malo; Diego A. Álvarez-Díaz; Diego Andrés Prada; Gerardo Santamaría; Hector Alejandro Ruiz-Moreno; Jhonnatan Reales-González; Juan Camilo Martínez; Julian Naizaque; Katherine Laiton-Donato; Lisseth Pardo; Magdalena Wiesner; Marcela Mercado-Reyes; Maria T. Herrera-Sepúlveda; Marta Lopez Blanco; Martha Lucia Ospina Martinez; Paola Rojas; Sergio Gomez; Sheryll Corchuelo; Ángela Alarcon Cruz                                                                                                                                   |  |
| EPI_ISL_1445155                                                                                                                                                                                                                                                                                                                                                                                                                      | LABORATORIO DE FRANCA                                                     | Instituto Butantan / Mendelics                                                                                                             | Antonio Jorge Martins; Bibiana Santos; Claudia Renata dos Santos Barros; David Schlesinger; Debora Botequiu Moretti; Dimas Tadeu Covas; Elaine Cristina Marqueze; Elaine Vieira dos Santos; Erika Freitas; Evandra Strazza Rodrigues; Flavia Aburjaile; José Salvatore Leister Patané; João Paulo Kitajima; Luiz Carlos Junior de Alcantara; Maria Carolina Elias; Marta Giovanetti; Rafael dos Santos Bezerra; Raul Machado Neto; Ricardo Haddad; Rodrigo Tocantins Calado.; Sandra Coccuzzo Sampaio; Simone Kashima; Svetoslav Nanev Stavov; Vagner Fonseca; Vincent Louis Viala |  |
| EPI_ISL_445279                                                                                                                                                                                                                                                                                                                                                                                                                       | LABORATORIO INMUNOLAB SPA                                                 | Instituto de Salud Publica de Chile                                                                                                        | Alejandra Acevedo; Andrés E Castillo; Bárbara Parra; Carolina Tambley; Gabriel Leal; Jaime Lagos; Jorge Fernandez; Loredana Arata; Patricia Bustos; Paz Tapia; Rodrigo Fasce; Winston Andrade                                                                                                                                                                                                                                                                                                                                                                                      |  |
| EPI_ISL_445273 to 445274, EPI_ISL_445278                                                                                                                                                                                                                                                                                                                                                                                             | LABORATORIO TORRE MEDICA LTDA.                                            | Instituto de Salud Publica de Chile                                                                                                        | Alejandra Acevedo; Andrés E Castillo; Bárbara Parra; Carolina Tambley; Gabriel Leal; Jaime Lagos; Jorge Fernandez; Loredana Arata; Patricia Bustos; Paz Tapia; Rodrigo Fasce; Winston Andrade                                                                                                                                                                                                                                                                                                                                                                                      |  |
| EPI_ISL_1393903 to 1393922, EPI_ISL_1393962 to 1393983, EPI_ISL_1538436, EPI_ISL_1538456, EPI_ISL_1538471, EPI_ISL_1538479, EPI_ISL_1538486, EPI_ISL_1538499, EPI_ISL_1538512, EPI_ISL_1538582 to 1538589, EPI_ISL_1538694 to 1538706, EPI_ISL_1538854, EPI_ISL_1538872, EPI_ISL_1538920 to 1538924, EPI_ISL_1539005 to 1539012, EPI_ISL_1539108 to 1539109, EPI_ISL_1539135 to 1539136, EPI_ISL_1539199, EPI_ISL_1539213 to 1539214 | see above                                                                 | 1. National Institute of Public Health - National Institute of Hygiene; 2. Eurofins Genomics Europe Sequencing GmbH                        | ECDC COVID-19 WGS support team; Eurofins Genomics Europe Sequencing Team; Gierczyki Rafa; Sadkowska-Todys Magorzata; Wokowicz Tomasz; Zacharczuk Katarzyna                                                                                                                                                                                                                                                                                                                                                                                                                         |  |
| EPI_ISL_1538473, EPI_ISL_1538788 to 1538789                                                                                                                                                                                                                                                                                                                                                                                          | LABORATORIUM BADA KLINICZNYCH WSSE w OPOLU                                | 1. National Institute of Public Health - National Institute of Hygiene; 2. Eurofins Genomics Europe Sequencing GmbH                        | ECDC COVID-19 WGS support team; Eurofins Genomics Europe Sequencing Team; Gierczyki Rafa; Sadkowska-Todys Magorzata; Wokowicz Tomasz; Zacharczuk Katarzyna                                                                                                                                                                                                                                                                                                                                                                                                                         |  |
| EPI_ISL_1468413 to 1468415, EPI_ISL_1468431, EPI_ISL_1493573 to 1493577                                                                                                                                                                                                                                                                                                                                                              | LACEN do Estado de Goias                                                  | Instituto Adolfo Lutz, Interdisciplinary Procedures Center, Strategic Laboratory                                                           | Caio Vinicius Dias Lopes; Claudia Regina Gonçalves; Claudio Tavares Sacchi; Erica Valessa Ramos Gomes; Karoline Rodrigues Campos                                                                                                                                                                                                                                                                                                                                                                                                                                                   |  |
| EPI_ISL_1493578 to 1493579, EPI_ISL_1493583 to 1493584, EPI_ISL_1493595 to 1493600, EPI_ISL_1494924, EPI_ISL_1520107 to 1520109                                                                                                                                                                                                                                                                                                      | LACEN do Estado de Rondonia                                               | Instituto Adolfo Lutz, Interdisciplinary Procedures Center, Strategic Laboratory                                                           | Caio Vinicius Dias Lopes; Claudia Regina Gonçalves; Claudio Tavares Sacchi; Erica Valessa Ramos Gomes; Karoline Rodrigues Campos                                                                                                                                                                                                                                                                                                                                                                                                                                                   |  |
| EPI_ISL_1468432 to 1468441                                                                                                                                                                                                                                                                                                                                                                                                           | LACEN do Mato Grosso do Sul                                               | Instituto Adolfo Lutz, Interdisciplinary Procedures Center, Strategic Laboratory                                                           | Caio Vinicius Dias Lopes; Claudia Regina Gonçalves; Claudio Tavares Sacchi; Erica Valessa Ramos Gomes; Karoline Rodrigues Campos                                                                                                                                                                                                                                                                                                                                                                                                                                                   |  |
| EPI_ISL_502779, EPI_ISL_502875                                                                                                                                                                                                                                                                                                                                                                                                       | LACEN/PE                                                                  | LABBE, Federal University of Pernambuco                                                                                                    | ANTONIO CARLOS DE FREITAS; BRUNO SAMPAIO; HEIDI LACERDA ALVES DA CRUZ; MAIRA GALDINO DA ROCHA PITTA; MARCOS ANTONIO                                                                                                                                                                                                                                                                                                                                                                                                                                                                |  |

|  |                                                                                                                                                                                                                                                                                                                                                                                   |                                                                               |                                                                               |                                                                                                                                                                                                                                                                                                                                                                |
|--|-----------------------------------------------------------------------------------------------------------------------------------------------------------------------------------------------------------------------------------------------------------------------------------------------------------------------------------------------------------------------------------|-------------------------------------------------------------------------------|-------------------------------------------------------------------------------|----------------------------------------------------------------------------------------------------------------------------------------------------------------------------------------------------------------------------------------------------------------------------------------------------------------------------------------------------------------|
|  | EPI_ISL_1524886                                                                                                                                                                                                                                                                                                                                                                   | LADR GmbH MVZ Dr. Kramer & Kollegen Geesthacht                                | Hannover Medical School, Institute of Virology                                | DE MORAIS JUNIOR; MARCOS DA SILVEIRA REGUEIRA NETO; MICHELLY CRISTINY PEREIRA; REGINALDO GONCALVES DE LIMA NETO; SERGIO DE SA LEITAO PAIVA JUNIOR; VALDIR DE QUEIROZ BALBINO.; WILSON JOSE DA SILVA JUNIOR; ZILDENE DE SOUSA SILVEIRA                                                                                                                          |
|  | EPI_ISL_1418192, EPI_ISL_1418194 to 1418200                                                                                                                                                                                                                                                                                                                                       | LAM AVERON LABO RODEZ                                                         | CNR Virus des Infections Respiratoires - France SUD                           | Lars Steinbrück<br>Antonin Bal; Bruno Lina; Gregory Destras; Gwendolynne Burfin; Hadrien Regue; Laurence Josset; Martine Valette; Quentin Semanas                                                                                                                                                                                                              |
|  | EPI_ISL_1461110                                                                                                                                                                                                                                                                                                                                                                   | LAM BAYARD-BIOPYRENEES                                                        | CNR Virus des Infections Respiratoires - France SUD                           | Antonin Bal; Bruno Lina; Gregory Destras; Gwendolynne Burfin; Hadrien Regue; Laurence Josset; Martine Valette; Quentin Semanas                                                                                                                                                                                                                                 |
|  | EPI_ISL_1461052                                                                                                                                                                                                                                                                                                                                                                   | LAM COLONNA DE CINARCA                                                        | CNR Virus des Infections Respiratoires - France SUD                           | Antonin Bal; Bruno Lina; Gregory Destras; Gwendolynne Burfin; Hadrien Regue; Laurence Josset; Martine Valette; Quentin Semanas                                                                                                                                                                                                                                 |
|  | EPI_ISL_1418218, EPI_ISL_1418220 to 1418228                                                                                                                                                                                                                                                                                                                                       | LAM GEN-BIO GRAVANCHES                                                        | CNR Virus des Infections Respiratoires - France SUD                           | Antonin Bal; Bruno Lina; Gregory Destras; Gwendolynne Burfin; Hadrien Regue; Laurence Josset; Martine Valette; Quentin Semanas                                                                                                                                                                                                                                 |
|  | EPI_ISL_1418255                                                                                                                                                                                                                                                                                                                                                                   | LAM VAL DE GARONNE                                                            | CNR Virus des Infections Respiratoires - France SUD                           | Antonin Bal; Bruno Lina; Gregory Destras; Gwendolynne Burfin; Hadrien Regue; Laurence Josset; Martine Valette; Quentin Semanas                                                                                                                                                                                                                                 |
|  | EPI_ISL_1446194                                                                                                                                                                                                                                                                                                                                                                   | LATE - Laboratório de Técnicas Especiais - Hospital Israelita Albert Einstein | LATE - Laboratório de Técnicas Especiais - Hospital Israelita Albert Einstein | Ana Paula Moreira Salles; Deyvid Amgarten; Fernanda de Mello Malta; João Renato Rebello Pinho; Pedro Henrique Sebe Rodrigues; Raquel Riyuzo                                                                                                                                                                                                                    |
|  | EPI_ISL_1403498                                                                                                                                                                                                                                                                                                                                                                   | LBA Casteljaloux                                                              | Cerba Lab                                                                     | Benazra M; Haim-Boukobza S; Lecorche E; Olivi M; Roquebert B; Trombert-Paolantoni S; Zimmer S                                                                                                                                                                                                                                                                  |
|  | EPI_ISL_1547827                                                                                                                                                                                                                                                                                                                                                                   | LBM ALPHABIO                                                                  | LBM ALPHABIO                                                                  | PHILIPPE HALFON; VINCENT GARCIA                                                                                                                                                                                                                                                                                                                                |
|  | EPI_ISL_1461182 to 1461187, EPI_ISL_1461189, EPI_ISL_1526264, EPI_ISL_1526268 to 1526271, EPI_ISL_1526273 to 1526276, EPI_ISL_1526278 to 1526280, EPI_ISL_1526282 to 1526286, EPI_ISL_1526288 to 1526298, EPI_ISL_1526300 to 1526312, EPI_ISL_1526314 to 1526316, EPI_ISL_1526318 to 1526326                                                                                      | see above                                                                     | LBM UNIBIO VALENTIN                                                           | CNR Virus des Infections Respiratoires - France SUD<br>Antonin Bal; Bruno Lina; Gregory Destras; Gwendolynne Burfin; Hadrien Regue; Laurence Josset; Martine Valette; Quentin Semanas                                                                                                                                                                          |
|  | EPI_ISL_1398204 to 1398208                                                                                                                                                                                                                                                                                                                                                        | LENOX HILL HOSPITAL                                                           | Wadsworth Center, New York State Department of Health                         | Alexis Russel; Daryl M. Lamson; Erasmus Schneider; Erica Lasek-Nesselquist; John Kelly; Jonathan Pitnick; Kirsten St. George; Matthew Shudt; Melissa A Leisner; Navjot Singh                                                                                                                                                                                   |
|  | EPI_ISL_1516777 to 1516786                                                                                                                                                                                                                                                                                                                                                        | LESP Aguascalientes                                                           | Instituto de Diagnostico y Referencia Epidemiologicos (INDRE)                 | Abril Rodriguez-Maldonado; Ariadna Medina-Benitez; Claudia Wong-Arambula; Ernesto Ramirez-Gonzalez.; Gisela Barrera-Badillo; Irma Lopez-Martinez; Joaquin Quiroz-Mercado; Lucia Hernandez-Rivas; Natividad Cruz-Ortiz; Sergio Rangel-Guerrero; Tatiana Nunez-Garcia; Vanessa Rivero-Arredondo                                                                  |
|  | EPI_ISL_1399280, EPI_ISL_1424050, EPI_ISL_1504108, EPI_ISL_1532264, EPI_ISL_1558798                                                                                                                                                                                                                                                                                               | LESP Baja California                                                          | Instituto de Diagnostico y Referencia Epidemiologicos (INDRE)                 | Abril Rodriguez-Maldonado; Ariadna Medina-Benitez; Claudia Wong-Arambula; Ernesto Ramirez-Gonzalez.; Gisela Barrera-Badillo; Irma Lopez-Martinez; Joaquin Quiroz-Mercado; Lucia Hernandez-Rivas; Natividad Cruz-Ortiz; Sergio Rangel-Guerrero; Tatiana Nunez-Garcia; Vanessa Rivero-Arredondo                                                                  |
|  | EPI_ISL_1504105, EPI_ISL_1532243 to 1532245, EPI_ISL_1558801                                                                                                                                                                                                                                                                                                                      | LESP Baja California Sur                                                      | Instituto de Diagnostico y Referencia Epidemiologicos (INDRE)                 | Abril Rodriguez-Maldonado; Ariadna Medina-Benitez; Claudia Wong-Arambula; Ernesto Ramirez-Gonzalez.; Gisela Barrera-Badillo; Irma Lopez-Martinez; Joaquin Quiroz-Mercado; Lucia Hernandez-Rivas; Natividad Cruz-Ortiz; Sergio Rangel-Guerrero; Tatiana Nunez-Garcia; Vanessa Rivero-Arredondo                                                                  |
|  | EPI_ISL_1400299, EPI_ISL_1424015, EPI_ISL_1483066 to 1483067                                                                                                                                                                                                                                                                                                                      | LESP Campeche                                                                 | Instituto de Diagnostico y Referencia Epidemiologicos (INDRE)                 | Abril Rodriguez-Maldonado; Ariadna Medina-Benitez; Claudia Wong-Arambula; Ernesto Ramirez-Gonzalez.; Gisela Barrera-Badillo; Irma Lopez-Martinez; Joaquin Quiroz-Mercado; Lucia Hernandez-Rivas; Natividad Cruz-Ortiz; Sergio Rangel-Guerrero; Tatiana Nunez-Garcia; Vanessa Rivero-Arredondo                                                                  |
|  | EPI_ISL_1424013, EPI_ISL_1424020, EPI_ISL_1532246 to 1532247                                                                                                                                                                                                                                                                                                                      | LESP Chiapas                                                                  | Instituto de Diagnostico y Referencia Epidemiologicos (INDRE)                 | Abril Rodriguez-Maldonado; Ariadna Medina-Benitez; Claudia Wong-Arambula; Ernesto Ramirez-Gonzalez.; Gisela Barrera-Badillo; Irma Lopez-Martinez; Joaquin Quiroz-Mercado; Lucia Hernandez-Rivas; Natividad Cruz-Ortiz; Sergio Rangel-Guerrero; Tatiana Nunez-Garcia; Vanessa Rivero-Arredondo                                                                  |
|  | EPI_ISL_1399271, EPI_ISL_1405905, EPI_ISL_1423506 to 1423509, EPI_ISL_1423512, EPI_ISL_1483074, EPI_ISL_1494626 to 1494630, EPI_ISL_1504084 to 1504088, EPI_ISL_1516766 to 1516768, EPI_ISL_1516816, EPI_ISL_1516818 to 1516823, EPI_ISL_1558791 to 1558793                                                                                                                       | see above                                                                     | LESP Chihuahua                                                                | Instituto de Diagnostico y Referencia Epidemiologicos (INDRE)<br>Abril Rodriguez-Maldonado; Ariadna Medina-Benitez; Claudia Wong-Arambula; Ernesto Ramirez-Gonzalez.; Gisela Barrera-Badillo; Irma Lopez-Martinez; Joaquin Quiroz-Mercado; Lucia Hernandez-Rivas; Natividad Cruz-Ortiz; Sergio Rangel-Guerrero; Tatiana Nunez-Garcia; Vanessa Rivero-Arredondo |
|  | EPI_ISL_1399281, EPI_ISL_1423510, EPI_ISL_1424051 to 1424053, EPI_ISL_1469941, EPI_ISL_1494636 to 1494647, EPI_ISL_1504083, EPI_ISL_1516787 to 1516788, EPI_ISL_1516817, EPI_ISL_1532265, EPI_ISL_1532279                                                                                                                                                                         | see above                                                                     | LESP Ciudad de Mexico                                                         | Instituto de Diagnostico y Referencia Epidemiologicos (INDRE)<br>Abril Rodriguez-Maldonado; Ariadna Medina-Benitez; Claudia Wong-Arambula; Ernesto Ramirez-Gonzalez.; Gisela Barrera-Badillo; Irma Lopez-Martinez; Joaquin Quiroz-Mercado; Lucia Hernandez-Rivas; Natividad Cruz-Ortiz; Sergio Rangel-Guerrero; Tatiana Nunez-Garcia; Vanessa Rivero-Arredondo |
|  | EPI_ISL_1399278, EPI_ISL_1424044 to 1424045, EPI_ISL_1516791 to 1516793, EPI_ISL_1532280                                                                                                                                                                                                                                                                                          | LESP Coahuila                                                                 | Instituto de Diagnostico y Referencia Epidemiologicos (INDRE)                 | Abril Rodriguez-Maldonado; Ariadna Medina-Benitez; Claudia Wong-Arambula; Ernesto Ramirez-Gonzalez.; Gisela Barrera-Badillo; Irma Lopez-Martinez; Joaquin Quiroz-Mercado; Lucia Hernandez-Rivas; Natividad Cruz-Ortiz; Sergio Rangel-Guerrero; Tatiana Nunez-Garcia; Vanessa Rivero-Arredondo                                                                  |
|  | EPI_ISL_1532249                                                                                                                                                                                                                                                                                                                                                                   | LESP Estado de Mexico                                                         | Instituto de Diagnostico y Referencia Epidemiologicos (INDRE)                 | Abril Rodriguez-Maldonado; Ariadna Medina-Benitez; Claudia Wong-Arambula; Ernesto Ramirez-Gonzalez.; Gisela Barrera-Badillo; Irma Lopez-Martinez; Joaquin Quiroz-Mercado; Lucia Hernandez-Rivas; Natividad Cruz-Ortiz; Sergio Rangel-Guerrero; Tatiana Nunez-Garcia; Vanessa Rivero-Arredondo                                                                  |
|  | EPI_ISL_1399260 to 1399261, EPI_ISL_1400304, EPI_ISL_1400314 to 1400349, EPI_ISL_1405900 to 1405904, EPI_ISL_1405906 to 1405907, EPI_ISL_1405909 to 1405910, EPI_ISL_1405912, EPI_ISL_1405914 to 1405915, EPI_ISL_1424010 to 1424012, EPI_ISL_1424034, EPI_ISL_1469942 to 1469944, EPI_ISL_1483048, EPI_ISL_1494657 to 1494669, EPI_ISL_1516794, EPI_ISL_1516796, EPI_ISL_1532238 | see above                                                                     | LESP Guanajuato                                                               | Instituto de Diagnostico y Referencia Epidemiologicos (INDRE)<br>Abril Rodriguez-Maldonado; Ariadna Medina-Benitez; Claudia Wong-Arambula; Ernesto Ramirez-Gonzalez.; Gisela Barrera-Badillo; Irma Lopez-Martinez; Joaquin Quiroz-Mercado; Lucia Hernandez-Rivas; Natividad Cruz-Ortiz; Sergio Rangel-Guerrero; Tatiana Nunez-Garcia; Vanessa Rivero-Arredondo |
|  | EPI_ISL_1424043, EPI_ISL_1483073, EPI_ISL_1504104, EPI_ISL_1532240 to 1532242                                                                                                                                                                                                                                                                                                     | LESP Guerrero                                                                 | Instituto de Diagnostico y Referencia Epidemiologicos (INDRE)                 | Abril Rodriguez-Maldonado; Ariadna Medina-Benitez; Claudia Wong-Arambula; Ernesto Ramirez-Gonzalez.; Gisela Barrera-Badillo; Irma Lopez-Martinez; Joaquin Quiroz-Mercado; Lucia Hernandez-Rivas; Natividad Cruz-Ortiz; Sergio Rangel-Guerrero; Tatiana Nunez-Garcia; Vanessa Rivero-Arredondo                                                                  |
|  | EPI_ISL_1424008 to 1424009, EPI_ISL_1483058, EPI_ISL_1494655 to 1494656, EPI_ISL_1516763                                                                                                                                                                                                                                                                                          | LESP Hidalgo                                                                  | Instituto de Diagnostico y Referencia Epidemiologicos (INDRE)                 | Abril Rodriguez-Maldonado; Ariadna Medina-Benitez; Claudia Wong-Arambula; Ernesto Ramirez-Gonzalez.; Gisela Barrera-Badillo; Irma Lopez-Martinez; Joaquin Quiroz-Mercado; Lucia Hernandez-Rivas; Natividad Cruz-Ortiz; Sergio Rangel-Guerrero; Tatiana Nunez-Garcia; Vanessa Rivero-Arredondo                                                                  |
|  | EPI_ISL_1399259, EPI_ISL_1399270, EPI_ISL_1400298, EPI_ISL_1405908, EPI_ISL_1405911, EPI_ISL_1405913, EPI_ISL_1469937, EPI_ISL_1483068 to 1483072, EPI_ISL_1504109, EPI_ISL_1516765, EPI_ISL_1516795, EPI_ISL_1532266 to 1532270, EPI_ISL_1558799 to 1558800                                                                                                                      | see above                                                                     | LESP Jalisco                                                                  | Instituto de Diagnostico y Referencia Epidemiologicos (INDRE)<br>Abril Rodriguez-Maldonado; Ariadna Medina-Benitez; Claudia Wong-Arambula; Ernesto Ramirez-Gonzalez.; Gisela Barrera-Badillo; Irma Lopez-Martinez; Joaquin Quiroz-Mercado; Lucia Hernandez-Rivas; Natividad Cruz-Ortiz; Sergio Rangel-Guerrero; Tatiana Nunez-Garcia; Vanessa Rivero-Arredondo |
|  | EPI_ISL_1492456                                                                                                                                                                                                                                                                                                                                                                   | LESP Jalisco                                                                  | Instituto de diagnóstico y Referencia Epidemiologicos (INDRE)                 | Abril Rodriguez-Maldonado; Ariadna Medina-Benitez; Claudia Wong-Arambula; Ernesto Ramirez-Gonzalez.; Gisela Barrera-Badillo; Irma Lopez-Martinez; Joaquin Quiroz-Mercado; Lucia Hernandez-Rivas; Natividad Cruz-Ortiz; Sergio Rangel-Guerrero; Tatiana Nunez-Garcia; Vanessa Rivero-Arredondo                                                                  |
|  | EPI_ISL_1516762, EPI_ISL_1558828 to 1558833                                                                                                                                                                                                                                                                                                                                       | LESP Jalisco/UdeG                                                             | Instituto de Diagnostico y Referencia Epidemiologicos (INDRE)                 | Abril Rodriguez-Maldonado; Ariadna Medina-Benitez; Claudia Wong-Arambula; Ernesto Ramirez-Gonzalez.; Gisela Barrera-Badillo; Irma Lopez-Martinez; Joaquin Quiroz-Mercado; Lucia Hernandez-Rivas; Natividad Cruz-Ortiz; Sergio Rangel-Guerrero; Tatiana Nunez-Garcia; Vanessa Rivero-Arredondo                                                                  |
|  | EPI_ISL_1400300 to 1400303, EPI_ISL_1400305 to 1400309, EPI_ISL_1405899, EPI_ISL_1424017, EPI_ISL_1424019, EPI_ISL_1424042, EPI_ISL_1504068 to 1504082, EPI_ISL_1516808 to 1516815                                                                                                                                                                                                | see above                                                                     | LESP Morelos                                                                  | Instituto de Diagnostico y Referencia Epidemiologicos (INDRE)<br>Abril Rodriguez-Maldonado; Ariadna Medina-Benitez; Claudia Wong-Arambula; Ernesto Ramirez-Gonzalez.; Gisela Barrera-Badillo; Irma Lopez-Martinez; Joaquin Quiroz-Mercado; Lucia Hernandez-Rivas; Natividad Cruz-Ortiz; Sergio Rangel-Guerrero; Tatiana Nunez-Garcia; Vanessa Rivero-Arredondo |
|  | EPI_ISL_1399273 to 1399274, EPI_ISL_1483040 to 1483041                                                                                                                                                                                                                                                                                                                            | LESP Nayarit                                                                  | Instituto de Diagnostico y Referencia Epidemiologicos (INDRE)                 | Abril Rodriguez-Maldonado; Ariadna Medina-Benitez; Claudia Wong-Arambula; Ernesto Ramirez-Gonzalez.; Gisela Barrera-Badillo; Irma Lopez-Martinez; Joaquin Quiroz-Mercado; Lucia Hernandez-Rivas; Natividad Cruz-Ortiz; Sergio Rangel-Guerrero; Tatiana Nunez-Garcia; Vanessa Rivero-Arredondo                                                                  |
|  | EPI_ISL_1399262 to 1399269, EPI_ISL_1469938 to 1469939, EPI_ISL_1483032 to 1483037, EPI_ISL_1494631 to 1494635, EPI_ISL_1494648 to 1494649, EPI_ISL_1494673, EPI_ISL_1504058 to 1504067, EPI_ISL_1516769 to 1516773, EPI_ISL_1516797 to 1516807, EPI_ISL_1532271                                                                                                                  | see above                                                                     | LESP Nuevo Leon                                                               | Instituto de Diagnostico y Referencia Epidemiologicos (INDRE)<br>Abril Rodriguez-Maldonado; Ariadna Medina-Benitez; Claudia Wong-Arambula; Ernesto Ramirez-Gonzalez.; Gisela Barrera-Badillo; Irma Lopez-Martinez; Joaquin Quiroz-Mercado; Lucia Hernandez-Rivas; Natividad Cruz-Ortiz; Sergio Rangel-Guerrero; Tatiana Nunez-Garcia; Vanessa Rivero-Arredondo |
|  | EPI_ISL_1400310 to 1400313, EPI_ISL_1483059 to 1483065, EPI_ISL_1516764                                                                                                                                                                                                                                                                                                           | LESP Puebla                                                                   | Instituto de Diagnostico y Referencia Epidemiologicos (INDRE)                 | Abril Rodriguez-Maldonado; Ariadna Medina-Benitez; Claudia Wong-Arambula; Ernesto Ramirez-Gonzalez.; Gisela Barrera-Badillo; Irma Lopez-Martinez; Joaquin Quiroz-Mercado; Lucia Hernandez-Rivas; Natividad Cruz-Ortiz; Sergio Rangel-Guerrero; Tatiana Nunez-Garcia; Vanessa Rivero-Arredondo                                                                  |
|  | EPI_ISL_1399272, EPI_ISL_1423513, EPI_ISL_1424016, EPI_ISL_1424021 to 1424033, EPI_ISL_1483044 to 1483047, EPI_ISL_1483049 to 1483050, EPI_ISL_1504089 to 1504103, EPI_ISL_1504110 to 1504111, EPI_ISL_1516775, EPI_ISL_1516824 to 1516826, EPI_ISL_1532236 to 1532237, EPI_ISL_1532239, EPI_ISL_1532272 to 1532278, EPI_ISL_1558794 to 1558795                                   | see above                                                                     | LESP Queretaro                                                                | Instituto de Diagnostico y Referencia Epidemiologicos (INDRE)<br>Abril Rodriguez-Maldonado; Ariadna Medina-Benitez; Claudia Wong-Arambula; Ernesto Ramirez-Gonzalez.; Gisela Barrera-Badillo; Irma Lopez-Martinez; Joaquin Quiroz-Mercado; Lucia Hernandez-Rivas; Natividad Cruz-Ortiz; Sergio Rangel-Guerrero; Tatiana Nunez-Garcia; Vanessa Rivero-Arredondo |

|                                                                                                                                                                                                                                                                                                                                                                                                                                                                                                                                                                                                                                                                                                                                                                                                                                                                                                                                                                                                                                                                                                                                                                                                                                                                                                                                                                                                                                                                                                                                                                                                                                                                                                                                                                                                                                                                                                                                                                                                       |                                                                              |                                                                                                           |                                                                                                                                                                                                                                                                                                                                                                                                                  |
|-------------------------------------------------------------------------------------------------------------------------------------------------------------------------------------------------------------------------------------------------------------------------------------------------------------------------------------------------------------------------------------------------------------------------------------------------------------------------------------------------------------------------------------------------------------------------------------------------------------------------------------------------------------------------------------------------------------------------------------------------------------------------------------------------------------------------------------------------------------------------------------------------------------------------------------------------------------------------------------------------------------------------------------------------------------------------------------------------------------------------------------------------------------------------------------------------------------------------------------------------------------------------------------------------------------------------------------------------------------------------------------------------------------------------------------------------------------------------------------------------------------------------------------------------------------------------------------------------------------------------------------------------------------------------------------------------------------------------------------------------------------------------------------------------------------------------------------------------------------------------------------------------------------------------------------------------------------------------------------------------------|------------------------------------------------------------------------------|-----------------------------------------------------------------------------------------------------------|------------------------------------------------------------------------------------------------------------------------------------------------------------------------------------------------------------------------------------------------------------------------------------------------------------------------------------------------------------------------------------------------------------------|
| EPI_ISL_1532281                                                                                                                                                                                                                                                                                                                                                                                                                                                                                                                                                                                                                                                                                                                                                                                                                                                                                                                                                                                                                                                                                                                                                                                                                                                                                                                                                                                                                                                                                                                                                                                                                                                                                                                                                                                                                                                                                                                                                                                       | LESP Quintana Roo                                                            | Instituto de Diagnostico y Referencia Epidemiologicos (INDRE)                                             | Abril Rodriguez-Maldonado; Ariadna Medina-Benitez; Claudia Wong-Arambula; Ernesto Ramirez-Gonzalez.; Gisela Barrera-Badillo; Irma Lopez-Martinez; Joaquin Quiroz-Mercado; Lucia Hernandez-Rivas; Natividad Cruz-Ortiz; Sergio Rangel-Guerrero; Tatiana Nunez-Garcia; Vanessa Rivero-Arredondo                                                                                                                    |
| EPI_ISL_1469940, EPI_ISL_1483042 to 1483043, EPI_ISL_1494670 to 1494672                                                                                                                                                                                                                                                                                                                                                                                                                                                                                                                                                                                                                                                                                                                                                                                                                                                                                                                                                                                                                                                                                                                                                                                                                                                                                                                                                                                                                                                                                                                                                                                                                                                                                                                                                                                                                                                                                                                               | LESP Sinaloa                                                                 | Instituto de Diagnostico y Referencia Epidemiologicos (INDRE)                                             | Abril Rodriguez-Maldonado; Ariadna Medina-Benitez; Claudia Wong-Arambula; Ernesto Ramirez-Gonzalez.; Gisela Barrera-Badillo; Irma Lopez-Martinez; Joaquin Quiroz-Mercado; Lucia Hernandez-Rivas; Natividad Cruz-Ortiz; Sergio Rangel-Guerrero; Tatiana Nunez-Garcia; Vanessa Rivero-Arredondo                                                                                                                    |
| EPI_ISL_1399275 to 1399277, EPI_ISL_1423511, EPI_ISL_1424039 to 1424041, EPI_ISL_1494650 to 1494654, EPI_ISL_1516776, EPI_ISL_1516789 to 1516790                                                                                                                                                                                                                                                                                                                                                                                                                                                                                                                                                                                                                                                                                                                                                                                                                                                                                                                                                                                                                                                                                                                                                                                                                                                                                                                                                                                                                                                                                                                                                                                                                                                                                                                                                                                                                                                      | LESP Tamaulipas                                                              | Instituto de Diagnostico y Referencia Epidemiologicos (INDRE)                                             | Abril Rodriguez-Maldonado; Ariadna Medina-Benitez; Claudia Wong-Arambula; Ernesto Ramirez-Gonzalez.; Gisela Barrera-Badillo; Irma Lopez-Martinez; Joaquin Quiroz-Mercado; Lucia Hernandez-Rivas; Natividad Cruz-Ortiz; Sergio Rangel-Guerrero; Tatiana Nunez-Garcia; Vanessa Rivero-Arredondo                                                                                                                    |
| EPI_ISL_1399279, EPI_ISL_1424018, EPI_ISL_1424046 to 1424049, EPI_ISL_1483055 to 1483057                                                                                                                                                                                                                                                                                                                                                                                                                                                                                                                                                                                                                                                                                                                                                                                                                                                                                                                                                                                                                                                                                                                                                                                                                                                                                                                                                                                                                                                                                                                                                                                                                                                                                                                                                                                                                                                                                                              | LESP Veracruz                                                                | Instituto de Diagnostico y Referencia Epidemiologicos (INDRE)                                             | Abril Rodriguez-Maldonado; Ariadna Medina-Benitez; Claudia Wong-Arambula; Ernesto Ramirez-Gonzalez.; Gisela Barrera-Badillo; Irma Lopez-Martinez; Joaquin Quiroz-Mercado; Lucia Hernandez-Rivas; Natividad Cruz-Ortiz; Sergio Rangel-Guerrero; Tatiana Nunez-Garcia; Vanessa Rivero-Arredondo                                                                                                                    |
| EPI_ISL_1423514, EPI_ISL_1424007, EPI_ISL_1424014, EPI_ISL_1424035 to 1424038, EPI_ISL_1483038 to 1483039, EPI_ISL_1516774, EPI_ISL_1532248                                                                                                                                                                                                                                                                                                                                                                                                                                                                                                                                                                                                                                                                                                                                                                                                                                                                                                                                                                                                                                                                                                                                                                                                                                                                                                                                                                                                                                                                                                                                                                                                                                                                                                                                                                                                                                                           | see above                                                                    | LESP Yucatan                                                                                              | Instituto de Diagnostico y Referencia Epidemiologicos (INDRE)                                                                                                                                                                                                                                                                                                                                                    |
| EPI_ISL_1504106 to 1504107, EPI_ISL_1532250 to 1532263, EPI_ISL_1558796 to 1558797                                                                                                                                                                                                                                                                                                                                                                                                                                                                                                                                                                                                                                                                                                                                                                                                                                                                                                                                                                                                                                                                                                                                                                                                                                                                                                                                                                                                                                                                                                                                                                                                                                                                                                                                                                                                                                                                                                                    | LESPZacatecas                                                                | Instituto de Diagnostico y Referencia Epidemiologicos (INDRE)                                             | Abril Rodriguez-Maldonado; Ariadna Medina-Benitez; Claudia Wong-Arambula; Ernesto Ramirez-Gonzalez.; Gisela Barrera-Badillo; Irma Lopez-Martinez; Joaquin Quiroz-Mercado; Lucia Hernandez-Rivas; Natividad Cruz-Ortiz; Sergio Rangel-Guerrero; Tatiana Nunez-Garcia; Vanessa Rivero-Arredondo                                                                                                                    |
| EPI_ISL_1524913 to 1524995                                                                                                                                                                                                                                                                                                                                                                                                                                                                                                                                                                                                                                                                                                                                                                                                                                                                                                                                                                                                                                                                                                                                                                                                                                                                                                                                                                                                                                                                                                                                                                                                                                                                                                                                                                                                                                                                                                                                                                            | LHUB-ULB                                                                     | Labo Klinische Biologie, UZA                                                                              | Basil Britto Xavier; Christine Lammens; Herman Goossens; Jasmine Coppens; Marie Le Mercier; Veerle Matheussen                                                                                                                                                                                                                                                                                                    |
| EPI_ISL_1416764, EPI_ISL_1416771, EPI_ISL_1416777 to 1416778, EPI_ISL_1416780, EPI_ISL_1416792, EPI_ISL_1416797, EPI_ISL_1416802, EPI_ISL_1455661, EPI_ISL_1455665 to 1455666, EPI_ISL_1498264, EPI_ISL_1498282 to 1498288, EPI_ISL_1498290 to 1498293, EPI_ISL_1498296, EPI_ISL_1498300                                                                                                                                                                                                                                                                                                                                                                                                                                                                                                                                                                                                                                                                                                                                                                                                                                                                                                                                                                                                                                                                                                                                                                                                                                                                                                                                                                                                                                                                                                                                                                                                                                                                                                              | see above                                                                    | LHUB-ULB                                                                                                  | UAntwerp, Laboratory of Medical Microbiology                                                                                                                                                                                                                                                                                                                                                                     |
| EPI_ISL_498226                                                                                                                                                                                                                                                                                                                                                                                                                                                                                                                                                                                                                                                                                                                                                                                                                                                                                                                                                                                                                                                                                                                                                                                                                                                                                                                                                                                                                                                                                                                                                                                                                                                                                                                                                                                                                                                                                                                                                                                        | LIC                                                                          | LIC                                                                                                       | LIC                                                                                                                                                                                                                                                                                                                                                                                                              |
| EPI_ISL_469017, EPI_ISL_469049, EPI_ISL_469051 to 469054, EPI_ISL_482732 to 482740                                                                                                                                                                                                                                                                                                                                                                                                                                                                                                                                                                                                                                                                                                                                                                                                                                                                                                                                                                                                                                                                                                                                                                                                                                                                                                                                                                                                                                                                                                                                                                                                                                                                                                                                                                                                                                                                                                                    | LNR National Reference Laboratory, Mohammed VI University of Health Sciences | Medical Biotechnology Laboratory, Rabat Medical and Pharmacy School, Mohammed The Vth University in Rabat | Chakib NEJJARI; Houda BENRAHMA; Idrissa DIAWARA; Idrissa Diawara; Imane SMYJE; Jalil EI ATAR; Jalil EI Atar; Jalila RAHOUI; Lahcen BELYAMANI and Azeddine IBRAHIMI; Laila SBABOU; Laila SBABOU; Loubna ALLAM; M.W. CHEMAO-ELFIHRI; Meriem LAAMARTI; Mohamed OUADGHIRI; Rachid EL JAUDI; Rachid MENTAG; Rokaia LAAMARTI; Rokia LAAMARTI; Saaid AMZAZI; Souad KARTTI                                               |
| EPI_ISL_1469988                                                                                                                                                                                                                                                                                                                                                                                                                                                                                                                                                                                                                                                                                                                                                                                                                                                                                                                                                                                                                                                                                                                                                                                                                                                                                                                                                                                                                                                                                                                                                                                                                                                                                                                                                                                                                                                                                                                                                                                       | LSUHS Emerging Viral Threat Laboratory                                       | LSUHS Emerging Viral Threat Laboratory                                                                    | Alexander J. Mijalis; Andrew D. Yurochko; Christopher G. Kevill; Gregory L. Ware; Jennifer L. Carroll; Jeremy P. Kamil; John A. Vanchiere; Maarten Van Diest; Rona S. Scott                                                                                                                                                                                                                                      |
| EPI_ISL_435034 to 435044, EPI_ISL_435550 to 435579, EPI_ISL_451203 to 451297, EPI_ISL_455980 to 456002, EPI_ISL_574295 to 574430, EPI_ISL_578698 to 578700, EPI_ISL_578704 to 579057                                                                                                                                                                                                                                                                                                                                                                                                                                                                                                                                                                                                                                                                                                                                                                                                                                                                                                                                                                                                                                                                                                                                                                                                                                                                                                                                                                                                                                                                                                                                                                                                                                                                                                                                                                                                                  | see above                                                                    | LSUHS Emerging Viral Threat Laboratory                                                                    | Microbial Genome Sequencing Center                                                                                                                                                                                                                                                                                                                                                                               |
| EPI_ISL_528637 to 528638                                                                                                                                                                                                                                                                                                                                                                                                                                                                                                                                                                                                                                                                                                                                                                                                                                                                                                                                                                                                                                                                                                                                                                                                                                                                                                                                                                                                                                                                                                                                                                                                                                                                                                                                                                                                                                                                                                                                                                              | LVMUFRJ                                                                      | Bioinformatics Laboratory / LNCC                                                                          | Abida Siddiqi; Adam Greer; Andrew D. Yurochko; Byeong-Jae Lee; Camille F. Abshire; Chan-ki Min; Christopher G. Kevill; Daniel J. Snyder; Edna Ondari; Jason M. Bodily; Jeremy P. Kamil; John A. Vanchiere; Katarzyna Zwolinska; Maarten Van Diest; Malgorzata Bienkowska-Haba; Martin J. Sapp; Md Maksudul Alam; Michelle M. Arnold; Monica Gestal-Carteles; Paul M. Weinberger; Rona S. Scott; Vaughn S. Cooper |
| EPI_ISL_528539                                                                                                                                                                                                                                                                                                                                                                                                                                                                                                                                                                                                                                                                                                                                                                                                                                                                                                                                                                                                                                                                                                                                                                                                                                                                                                                                                                                                                                                                                                                                                                                                                                                                                                                                                                                                                                                                                                                                                                                        | LVMUFRJ                                                                      | LNCC                                                                                                      | Amilcar Tanuri; Ana Teresa R. Vasconcelos; Bruno B. Bezerra; Diana Marianni; Elena Cobos; Fabio Limonte; Gustavo D. P. Silva; Isadora A. Correa; Luciana B. Arruda; Luciana J. Costa; Lucio A. Caldas; Luiz Almeida; Luiza Higga; M. Romário M. de Souza; Marcelo Bozza; Orlando Ferreira; Sharton V. A. Coelho; Terezinha M. Castineiras; Wanderley de Souza                                                    |
| EPI_ISL_443307                                                                                                                                                                                                                                                                                                                                                                                                                                                                                                                                                                                                                                                                                                                                                                                                                                                                                                                                                                                                                                                                                                                                                                                                                                                                                                                                                                                                                                                                                                                                                                                                                                                                                                                                                                                                                                                                                                                                                                                        | La Villa Papyri                                                              | National Reference Center for Viruses of Respiratory Infections, Institut Pasteur, Paris                  | Angela Brisebarre; Etienne Simon-Lorière; Flora Donati; Marion Barbet; Maud Vanpeene; Mélanie Albert; Méline Bizard; Sylvie Behillil; Sylvie van der Werf; Vincent Enouf                                                                                                                                                                                                                                         |
| EPI_ISL_1469249, EPI_ISL_1469251                                                                                                                                                                                                                                                                                                                                                                                                                                                                                                                                                                                                                                                                                                                                                                                                                                                                                                                                                                                                                                                                                                                                                                                                                                                                                                                                                                                                                                                                                                                                                                                                                                                                                                                                                                                                                                                                                                                                                                      | Lab Intibias Karawang                                                        | National Institute of Health Research and Development                                                     | Arie Ardiansyah Nugraha; Hana Apsari Pawestri; Hartanti Dian Ikhawati; Kartika Dewi Puspa; Krisna Pangesti; Nelly Puspandari; Subangki; Vivi Setiawaty                                                                                                                                                                                                                                                           |
| EPI_ISL_501614 to 501631                                                                                                                                                                                                                                                                                                                                                                                                                                                                                                                                                                                                                                                                                                                                                                                                                                                                                                                                                                                                                                                                                                                                                                                                                                                                                                                                                                                                                                                                                                                                                                                                                                                                                                                                                                                                                                                                                                                                                                              | Lab Microbiology, Pathology Department, William Harvey Hospital              | Wellcome Sanger Institute for the COVID-19 Genomics UK (COG-UK) consortium                                | Cordelia Langford; David K. Jackson; Dominic Kwiatkowski; Ewan Harrison; Felicity Ryan and Alex Alderton; Hannah Lowe; Ian Johnston; John Sillitoe on behalf of the Wellcome Sanger Institute COVID-19 Surveillance Team ( <a href="http://www.sanger.ac.uk/covid-team">http://www.sanger.ac.uk/covid-team</a> ); Roberto Amato; Samuel Moses; Sonia Goncalves                                                   |
| EPI_ISL_1404169 to 1404248, EPI_ISL_1443345 to 1443440, EPI_ISL_1532856 to 1532981, EPI_ISL_1532983 to 1533033                                                                                                                                                                                                                                                                                                                                                                                                                                                                                                                                                                                                                                                                                                                                                                                                                                                                                                                                                                                                                                                                                                                                                                                                                                                                                                                                                                                                                                                                                                                                                                                                                                                                                                                                                                                                                                                                                        | Lab voor klinische biologie                                                  | Lab voor klinische biologie                                                                               | Bruno Verhasselt; Hannelore Hamerlinck; Marija Janevska                                                                                                                                                                                                                                                                                                                                                          |
| EPI_ISL_419259, EPI_ISL_419264 to 419266, EPI_ISL_425048, EPI_ISL_425050 to 425064, EPI_ISL_434347 to 434365, EPI_ISL_451164 to 451182, EPI_ISL_468727 to 468746, EPI_ISL_475060 to 475082, EPI_ISL_481221 to 481233                                                                                                                                                                                                                                                                                                                                                                                                                                                                                                                                                                                                                                                                                                                                                                                                                                                                                                                                                                                                                                                                                                                                                                                                                                                                                                                                                                                                                                                                                                                                                                                                                                                                                                                                                                                  | see above                                                                    | Lab voor klinische biologie                                                                               | Onderzoeksgroep Virologie                                                                                                                                                                                                                                                                                                                                                                                        |
| EPI_ISL_1423274 to 1423276                                                                                                                                                                                                                                                                                                                                                                                                                                                                                                                                                                                                                                                                                                                                                                                                                                                                                                                                                                                                                                                                                                                                                                                                                                                                                                                                                                                                                                                                                                                                                                                                                                                                                                                                                                                                                                                                                                                                                                            | LabCorp Dublin                                                               | WVU and Marshall University Combined Genomics Core Facilities                                             | "James Denvir; Peter Perrotta; Peter Stoilov; Ryan Percifield"; Wesley Kimble                                                                                                                                                                                                                                                                                                                                    |
| EPI_ISL_1432934, EPI_ISL_1432949, EPI_ISL_1432974, EPI_ISL_1432976, EPI_ISL_1432985, EPI_ISL_1433006, EPI_ISL_1433029, EPI_ISL_1433054, EPI_ISL_1433058, EPI_ISL_1433060, EPI_ISL_1433072, EPI_ISL_1433083 to 1433085, EPI_ISL_1433095, EPI_ISL_1433098, EPI_ISL_1433100, EPI_ISL_1433107, EPI_ISL_1433111, EPI_ISL_1433120, EPI_ISL_1433124, EPI_ISL_1433135, EPI_ISL_1433147, EPI_ISL_1433153, EPI_ISL_1433159, EPI_ISL_1433166, EPI_ISL_1433170, EPI_ISL_1433176, EPI_ISL_1433195, EPI_ISL_1433207, EPI_ISL_1433214 to 1433216, EPI_ISL_1433220, EPI_ISL_1433229, EPI_ISL_1433231, EPI_ISL_1433235, EPI_ISL_1433238 to 1433239, EPI_ISL_1433252, EPI_ISL_1433257 to 1433259, EPI_ISL_1433279, EPI_ISL_1433281, EPI_ISL_1433284, EPI_ISL_1433288, EPI_ISL_1433302, EPI_ISL_1433319, EPI_ISL_1433336, EPI_ISL_1433346, EPI_ISL_1433356, EPI_ISL_1433366, EPI_ISL_1436010, EPI_ISL_1436021, EPI_ISL_1436031, EPI_ISL_1436040, EPI_ISL_1436083, EPI_ISL_1436087 to 1436089, EPI_ISL_1436095, EPI_ISL_1436105, EPI_ISL_1436111, EPI_ISL_1436120, EPI_ISL_1436124, EPI_ISL_1436131 to 1436133, EPI_ISL_1436141, EPI_ISL_1436154, EPI_ISL_1436157, EPI_ISL_1436170 to 1436172, EPI_ISL_1436177, EPI_ISL_1436187, EPI_ISL_1436191, EPI_ISL_1436194, EPI_ISL_1436196, EPI_ISL_1436205 to 1436207, EPI_ISL_1436209 to 1436210, EPI_ISL_1436218 to 1436222, EPI_ISL_1436227, EPI_ISL_1436235 to 1436236, EPI_ISL_1436238 to 1436239, EPI_ISL_1436248, EPI_ISL_1436250, EPI_ISL_1436253, EPI_ISL_1436260, EPI_ISL_1436265, EPI_ISL_1436274, EPI_ISL_1436277 to 1436278, EPI_ISL_1436290, EPI_ISL_1436295, EPI_ISL_1436306, EPI_ISL_1436310, EPI_ISL_1436312, EPI_ISL_1436318 to 1436328, EPI_ISL_1436334, EPI_ISL_1436341, EPI_ISL_1436348, EPI_ISL_1436356, EPI_ISL_1436363, EPI_ISL_1436365 to 1436366, EPI_ISL_1436369, EPI_ISL_1436374 to 1436375, EPI_ISL_1436379, EPI_ISL_1436385, EPI_ISL_1436393, EPI_ISL_1438791, EPI_ISL_1439038, EPI_ISL_1439119, EPI_ISL_1439142, EPI_ISL_1439283, EPI_ISL_1439298 | see above                                                                    | LabKom - Labor Augsburg MVZ GmbH                                                                          | Robert Koch Institute                                                                                                                                                                                                                                                                                                                                                                                            |
| EPI_ISL_1436064, EPI_ISL_1436072, EPI_ISL_1436136, EPI_ISL_1436163, EPI_ISL_1436176, EPI_ISL_1436245, EPI_ISL_1436361                                                                                                                                                                                                                                                                                                                                                                                                                                                                                                                                                                                                                                                                                                                                                                                                                                                                                                                                                                                                                                                                                                                                                                                                                                                                                                                                                                                                                                                                                                                                                                                                                                                                                                                                                                                                                                                                                 | see above                                                                    | LabKom - Labor Hamburg-Lübeck                                                                             | Robert Koch Institute                                                                                                                                                                                                                                                                                                                                                                                            |
| EPI_ISL_1436003, EPI_ISL_1436049, EPI_ISL_1436066, EPI_ISL_1436068, EPI_ISL_1436080 to 1436081, EPI_ISL_1436084 to 1436085, EPI_ISL_1436088, EPI_ISL_1436096, EPI_ISL_1436099, EPI_ISL_1436104, EPI_ISL_1436112, EPI_ISL_1436116, EPI_ISL_1436146, EPI_ISL_1436148 to 1436151, EPI_ISL_1436153, EPI_ISL_1436159, EPI_ISL_1436161, EPI_ISL_1436168, EPI_ISL_1436183, EPI_ISL_1436195, EPI_ISL_1436213, EPI_ISL_1436223 to 1436224, EPI_ISL_1436234, EPI_ISL_1436241, EPI_ISL_1436246, EPI_ISL_1436259, EPI_ISL_1436273, EPI_ISL_1436276, EPI_ISL_1436279, EPI_ISL_1436283 to 1436284, EPI_ISL_1436289, EPI_ISL_1436297, EPI_ISL_1436299, EPI_ISL_1436302, EPI_ISL_1436316 to 1436317, EPI_ISL_1436319, EPI_ISL_1436331, EPI_ISL_1436362                                                                                                                                                                                                                                                                                                                                                                                                                                                                                                                                                                                                                                                                                                                                                                                                                                                                                                                                                                                                                                                                                                                                                                                                                                                                | see above                                                                    | LabKom - Labor Hannover MVZ GmbH                                                                          | Robert Koch Institute                                                                                                                                                                                                                                                                                                                                                                                            |
| EPI_ISL_1432980, EPI_ISL_1436262, EPI_ISL_1439032, EPI_ISL_1439034, EPI_ISL_1439040, EPI_ISL_1439055, EPI_ISL_1439062 to 1439064, EPI_ISL_1439071, EPI_ISL_1439083, EPI_ISL_1439100, EPI_ISL_1439113, EPI_ISL_1439121, EPI_ISL_1439137 to 1439138, EPI_ISL_1439157, EPI_ISL_1439171, EPI_ISL_1439180, EPI_ISL_1439189, EPI_ISL_1439199 to 1439200, EPI_ISL_1439211, EPI_ISL_1439232, EPI_ISL_1439235, EPI_ISL_1439238, EPI_ISL_1439244, EPI_ISL_1439253, EPI_ISL_1439256, EPI_ISL_1439264, EPI_ISL_1439268, EPI_ISL_1439273, EPI_ISL_1439287, EPI_ISL_1439293, EPI_ISL_1439296, EPI_ISL_1439308, EPI_ISL_1439323, EPI_ISL_1439345, EPI_ISL_1439365                                                                                                                                                                                                                                                                                                                                                                                                                                                                                                                                                                                                                                                                                                                                                                                                                                                                                                                                                                                                                                                                                                                                                                                                                                                                                                                                                    | see above                                                                    | LabKom - Labor Mainz MVZ GmbH                                                                             | Robert Koch Institute                                                                                                                                                                                                                                                                                                                                                                                            |
| EPI_ISL_1436029, EPI_ISL_1436070, EPI_ISL_1436073 to 1436074, EPI_ISL_1436086, EPI_ISL_1436090, EPI_ISL_1436113, EPI_ISL_1436128, EPI_ISL_1436135, EPI_ISL_1436184, EPI_ISL_1436199 to 1436200, EPI_ISL_1436214, EPI_ISL_1436216, EPI_ISL_1436247, EPI_ISL_1436255, EPI_ISL_1436258, EPI_ISL_1436261, EPI_ISL_1436275, EPI_ISL_1436281, EPI_ISL_1436314, EPI_ISL_1436336, EPI_ISL_1436359, EPI_ISL_1436373, EPI_ISL_1436380, EPI_ISL_1436388, EPI_ISL_1438695, EPI_ISL_1438709, EPI_ISL_1438715, EPI_ISL_1438720, EPI_ISL_1438733 to 1438735, EPI_ISL_1438748, EPI_ISL_1438806,                                                                                                                                                                                                                                                                                                                                                                                                                                                                                                                                                                                                                                                                                                                                                                                                                                                                                                                                                                                                                                                                                                                                                                                                                                                                                                                                                                                                                       | see above                                                                    | LabKom - Labor Mainz MVZ GmbH                                                                             | Robert Koch Institute                                                                                                                                                                                                                                                                                                                                                                                            |

|                                                                                                                                                                                                                                                                                                                                                                                                                                                                                                                                                                                                                                                                                                                                                                                                                                                                                                                                                                                                                                                                                                                                                                                                                                                                                                                                                                                                                                                                                                                                                                                                                                                                                                                                       |                                                |                                                                                                                     |                                                                                                                                                                                                                                                                                                                                                                                                                                                                                                                                                                                                                                                                                                                                                                                                                                                                                                                                                                 |
|---------------------------------------------------------------------------------------------------------------------------------------------------------------------------------------------------------------------------------------------------------------------------------------------------------------------------------------------------------------------------------------------------------------------------------------------------------------------------------------------------------------------------------------------------------------------------------------------------------------------------------------------------------------------------------------------------------------------------------------------------------------------------------------------------------------------------------------------------------------------------------------------------------------------------------------------------------------------------------------------------------------------------------------------------------------------------------------------------------------------------------------------------------------------------------------------------------------------------------------------------------------------------------------------------------------------------------------------------------------------------------------------------------------------------------------------------------------------------------------------------------------------------------------------------------------------------------------------------------------------------------------------------------------------------------------------------------------------------------------|------------------------------------------------|---------------------------------------------------------------------------------------------------------------------|-----------------------------------------------------------------------------------------------------------------------------------------------------------------------------------------------------------------------------------------------------------------------------------------------------------------------------------------------------------------------------------------------------------------------------------------------------------------------------------------------------------------------------------------------------------------------------------------------------------------------------------------------------------------------------------------------------------------------------------------------------------------------------------------------------------------------------------------------------------------------------------------------------------------------------------------------------------------|
| EPI_ISL_1438825, EPI_ISL_1438833, EPI_ISL_1438841, EPI_ISL_1438856, EPI_ISL_1438869, EPI_ISL_1438878, EPI_ISL_1438893, EPI_ISL_1438939, EPI_ISL_1438941, EPI_ISL_1438946, EPI_ISL_1438971, EPI_ISL_1439009, EPI_ISL_1439011 to 1439012, EPI_ISL_1439022, EPI_ISL_1439041, EPI_ISL_1439049, EPI_ISL_1439068, EPI_ISL_1439096 to 1439097, EPI_ISL_1439102 to 1439103, EPI_ISL_1439110, EPI_ISL_1439120, EPI_ISL_1439130, EPI_ISL_1439148, EPI_ISL_1439154 to 1439155, EPI_ISL_1439162, EPI_ISL_1439184, EPI_ISL_1439192, EPI_ISL_1439204, EPI_ISL_1439207, EPI_ISL_1439210, EPI_ISL_1439221, EPI_ISL_1439226, EPI_ISL_1439269, EPI_ISL_1439275, EPI_ISL_1439284, EPI_ISL_1439301, EPI_ISL_1439304 to 1439305, EPI_ISL_1439312, EPI_ISL_1439313, EPI_ISL_1439316 to 1439317, EPI_ISL_1439333, EPI_ISL_1439341, EPI_ISL_1439346, EPI_ISL_1439362 to 1439363, EPI_ISL_1439366                                                                                                                                                                                                                                                                                                                                                                                                                                                                                                                                                                                                                                                                                                                                                                                                                                                              | LabKom - Labor an der Salzbrücke MVZ GmbH      | Robert Koch Institute                                                                                               |                                                                                                                                                                                                                                                                                                                                                                                                                                                                                                                                                                                                                                                                                                                                                                                                                                                                                                                                                                 |
| see above                                                                                                                                                                                                                                                                                                                                                                                                                                                                                                                                                                                                                                                                                                                                                                                                                                                                                                                                                                                                                                                                                                                                                                                                                                                                                                                                                                                                                                                                                                                                                                                                                                                                                                                             |                                                |                                                                                                                     |                                                                                                                                                                                                                                                                                                                                                                                                                                                                                                                                                                                                                                                                                                                                                                                                                                                                                                                                                                 |
| EPI_ISL_1439033, EPI_ISL_1439042, EPI_ISL_1439050, EPI_ISL_1439052, EPI_ISL_1439056, EPI_ISL_1439060 to 1439061, EPI_ISL_1439066, EPI_ISL_1439072, EPI_ISL_1439074 to 1439075, EPI_ISL_1439079, EPI_ISL_1439085, EPI_ISL_1439087, EPI_ISL_1439091, EPI_ISL_1439093, EPI_ISL_1439104, EPI_ISL_1439107, EPI_ISL_1439112, EPI_ISL_1439126, EPI_ISL_1439129, EPI_ISL_1439131, EPI_ISL_1439144, EPI_ISL_1439146, EPI_ISL_1439160, EPI_ISL_1439163, EPI_ISL_1439165, EPI_ISL_1439173, EPI_ISL_1439178, EPI_ISL_1439183, EPI_ISL_1439186, EPI_ISL_1439194 to 1439195, EPI_ISL_1439203, EPI_ISL_1439216, EPI_ISL_1439222, EPI_ISL_1439225, EPI_ISL_1439229 to 1439230, EPI_ISL_1439234, EPI_ISL_1439240, EPI_ISL_1439249 to 1439250, EPI_ISL_1439254, EPI_ISL_1439265 to 1439266, EPI_ISL_1439271, EPI_ISL_1439279, EPI_ISL_1439286, EPI_ISL_1439288, EPI_ISL_1439290, EPI_ISL_1439292, EPI_ISL_1439297, EPI_ISL_1439299, EPI_ISL_1439303, EPI_ISL_1439306 to 1439307, EPI_ISL_1439310, EPI_ISL_1439312, EPI_ISL_1439324, EPI_ISL_1439328 to 1439329, EPI_ISL_1439331, EPI_ISL_1439334, EPI_ISL_1439349, EPI_ISL_1439351, EPI_ISL_1439354, EPI_ISL_1439356                                                                                                                                                                                                                                                                                                                                                                                                                                                                                                                                                                                    | LabKom - MVZ Labor Bochum MLB GmbH             | Robert Koch Institute                                                                                               |                                                                                                                                                                                                                                                                                                                                                                                                                                                                                                                                                                                                                                                                                                                                                                                                                                                                                                                                                                 |
| see above                                                                                                                                                                                                                                                                                                                                                                                                                                                                                                                                                                                                                                                                                                                                                                                                                                                                                                                                                                                                                                                                                                                                                                                                                                                                                                                                                                                                                                                                                                                                                                                                                                                                                                                             |                                                |                                                                                                                     |                                                                                                                                                                                                                                                                                                                                                                                                                                                                                                                                                                                                                                                                                                                                                                                                                                                                                                                                                                 |
| EPI_ISL_456157, EPI_ISL_456172 to 456180, EPI_ISL_456196 to 456212, EPI_ISL_456300, EPI_ISL_456379 to 456384, EPI_ISL_456388 to 456394, EPI_ISL_534335, EPI_ISL_547969, EPI_ISL_547976, EPI_ISL_547978 to 547979, EPI_ISL_547990 to 547992, EPI_ISL_548017, EPI_ISL_548021 to 548027, EPI_ISL_548040 to 548041, EPI_ISL_548049 to 548051, EPI_ISL_548068 to 548073, EPI_ISL_548077 to 548080, EPI_ISL_548083 to 548084, EPI_ISL_548106, EPI_ISL_548108 to 548111, EPI_ISL_548119 to 548120, EPI_ISL_548122, EPI_ISL_579059 to 579098, EPI_ISL_579105 to 579117, EPI_ISL_579119 to 579120, EPI_ISL_579122 to 579123, EPI_ISL_579156, EPI_ISL_579403, EPI_ISL_579405, EPI_ISL_579425, EPI_ISL_582017, EPI_ISL_1469088, EPI_ISL_1469090 to 1469091, EPI_ISL_1469093 to 1469095, EPI_ISL_1469097 to 1469104, EPI_ISL_1469107                                                                                                                                                                                                                                                                                                                                                                                                                                                                                                                                                                                                                                                                                                                                                                                                                                                                                                              | LabPLUS                                        | Institute of Environmental Science and Research (ESR)                                                               | Anja Werno; Antje van der Linden; Arlo Upton; Chris Mansell; David Hammer; Dragana Drinkovic; Erasmus Smit; Gary McAuliffe; Hana Sofia Andersson; Hermes Perez; James Ussher; Jill Sherwood; Jing Wang; Joep de Lig; Josh Freeman; Julia Howard; Juliet Elvy; Lauren Jelly; Mary DeAlmeida; Matt Blakiston; Matt Storey; Matthew Rogers; Max Bloomfield; Michael Addide; Michelle Balm; Muhammad Faisal; Nikki Freed; Olin Silander; Olivia Stroeven; Rachel Boyle; Sally Roberts; SallyAnn Harbison; Sarah Jefferies; Sharmini Muttajah; Susan Morpeth; Susan Taylor; Timothy Blackmore; Vani Sathyendran; Veronica Playle; Virginia Hope; Xiaoyun Ren                                                                                                                                                                                                                                                                                                         |
| see above                                                                                                                                                                                                                                                                                                                                                                                                                                                                                                                                                                                                                                                                                                                                                                                                                                                                                                                                                                                                                                                                                                                                                                                                                                                                                                                                                                                                                                                                                                                                                                                                                                                                                                                             |                                                |                                                                                                                     |                                                                                                                                                                                                                                                                                                                                                                                                                                                                                                                                                                                                                                                                                                                                                                                                                                                                                                                                                                 |
| EPI_ISL_547970 to 547975, EPI_ISL_547977, EPI_ISL_547986 to 547989, EPI_ISL_547993 to 547995, EPI_ISL_548013 to 548016, EPI_ISL_548046, EPI_ISL_548104 to 548105, EPI_ISL_579058, EPI_ISL_579099, EPI_ISL_579421 to 579424                                                                                                                                                                                                                                                                                                                                                                                                                                                                                                                                                                                                                                                                                                                                                                                                                                                                                                                                                                                                                                                                                                                                                                                                                                                                                                                                                                                                                                                                                                            | LabTests                                       | Institute of Environmental Science and Research (ESR)                                                               | Anja Werno; Antje van der Linden; Arlo Upton; Chris Mansell; David Hammer; Dragana Drinkovic; Erasmus Smit; Gary McAuliffe; Hana Sofia Andersson; Hermes Perez; James Ussher; Jill Sherwood; Jing Wang; Joep de Lig; Josh Freeman; Julia Howard; Juliet Elvy; Lauren Jelly; Mary DeAlmeida; Matt Blakiston; Matt Storey; Matthew Rogers; Max Bloomfield; Michael Addide; Michelle Balm; Muhammad Faisal; Nikki Freed; Olin Silander; Sally Roberts; Sarah Jefferies; Sharmini Muttajah; Susan Morpeth; Susan Taylor; Timothy Blackmore; Vani Sathyendran; Veronica Playle; Virginia Hope; Xiaoyun Ren                                                                                                                                                                                                                                                                                                                                                           |
| EPI_ISL_1469288 to 1469289, EPI_ISL_1534708                                                                                                                                                                                                                                                                                                                                                                                                                                                                                                                                                                                                                                                                                                                                                                                                                                                                                                                                                                                                                                                                                                                                                                                                                                                                                                                                                                                                                                                                                                                                                                                                                                                                                           | Labkesda Karawang                              | National Institute of Health Research and Development                                                               | Arie Ardiansyah Nugraha; Hana Apasari Pawestri; Hartanti Dian Ikawati; Kartika Dewi Puspa; Krisna Pangesti; Nelly Puspandari; Subangkit; Vivi Setiawaty                                                                                                                                                                                                                                                                                                                                                                                                                                                                                                                                                                                                                                                                                                                                                                                                         |
| EPI_ISL_560637 to 560642, EPI_ISL_1389165 to 1389181, EPI_ISL_1389196 to 1389253, EPI_ISL_1389257 to 1389266, EPI_ISL_1389268 to 1389274, EPI_ISL_1389276 to 1389286, EPI_ISL_1389289 to 1389306, EPI_ISL_1389312 to 1389318, EPI_ISL_1389320 to 1389343, EPI_ISL_1389345 to 1389352, EPI_ISL_1416812 to 1416822, EPI_ISL_1416833 to 1416849, EPI_ISL_1416908, EPI_ISL_1416908, EPI_ISL_1416952 to 1416965, EPI_ISL_1417015 to 1417023, EPI_ISL_1417026 to 1417051, EPI_ISL_1417071 to 1417094, EPI_ISL_1417112 to 1417215, EPI_ISL_1443880, EPI_ISL_1443890, EPI_ISL_1443896, EPI_ISL_1443903 to 1443904, EPI_ISL_1443908 to 1443910, EPI_ISL_1463448 to 1463450, EPI_ISL_1465483 to 1465534, EPI_ISL_1465537, EPI_ISL_1465541 to 1465609, EPI_ISL_1489730 to 1489736, EPI_ISL_1489739, EPI_ISL_1489835 to 1489842, EPI_ISL_1516918 to 1516919, EPI_ISL_1516942 to 1516957, EPI_ISL_1516981, EPI_ISL_1516983 to 1516984, EPI_ISL_1516986 to 1516988, EPI_ISL_1516990 to 1516991, EPI_ISL_1516993 to 1516994, EPI_ISL_1516996 to 1516997, EPI_ISL_1517001, EPI_ISL_1517071, EPI_ISL_1517073 to 1517074, EPI_ISL_1517076, EPI_ISL_1517102 to 1517103, EPI_ISL_1517105 to 1517106, EPI_ISL_1517108 to 1517110, EPI_ISL_1517112, EPI_ISL_1517114 to 1517115, EPI_ISL_1517117 to 1517118, EPI_ISL_1517120, EPI_ISL_1517194 to 1517197, EPI_ISL_1517199 to 1517293, EPI_ISL_1517435 to 1517463, EPI_ISL_1517468 to 1517471, EPI_ISL_1517489, EPI_ISL_1517494, EPI_ISL_1526789 to 1526792, EPI_ISL_1528193, EPI_ISL_1528202, EPI_ISL_1528211 to 1528213, EPI_ISL_1528215 to 1528217, EPI_ISL_1528221 to 1528228, EPI_ISL_1528223, EPI_ISL_1528226 to 1528228, EPI_ISL_1528231, EPI_ISL_1528237 to 1528238, EPI_ISL_1540446, EPI_ISL_1554904 | Labo Analyses Med                              | National Reference Center for Viruses of Respiratory Infections, Institut Pasteur, Paris                            | Adrien Pain; Alain Delepine; Amaury Vayssé; Angela Brisebarre; Anne Cady; Béatrice Lesimple; Camille Capel; Catherine Coignard; Catherine Delamare; Christophe Malabat; Claire Felloni; Corinne Maufrais; CéLine Bressollette; CéLine Ramanantsoa; Damien Mornico; Dominique Descamps; Emmanuelle Permal; Etienne Simon-Lorière; Fabiana Gambaro; Fabienne Huet; Felloni Claire; Frédéric Lemoine; Giel Millot; Gentilhomme Hervé; Geoffroy Lorin De La Grandmaison; Gestin Briec; GréGoire Potiron; Hue; Ilka Engelmann; Jean-François Comes; Karine Michez; Le (V); Louise Lefrançois; M.-J. Blanc-Galiby; Marion Delbat; Maud Vanpeene; Mj Dufour; Meline Bizard; Nabil Gastli; Ophélie Said-Delattre; Pichard Ronan; Pierre Lechat; Pierre-Yves Leonard; Ronan Pichard; Sarah Schillinger; Selas Medilys; Sophie Chalmin; Stéphanie Guymard-Rabenirina; Sylvie Behillili; Sylvie van der Werf; Séverine Haouisee; Vicky Le; Victoire Baillet; Vincent Enouf |
| see above                                                                                                                                                                                                                                                                                                                                                                                                                                                                                                                                                                                                                                                                                                                                                                                                                                                                                                                                                                                                                                                                                                                                                                                                                                                                                                                                                                                                                                                                                                                                                                                                                                                                                                                             |                                                |                                                                                                                     |                                                                                                                                                                                                                                                                                                                                                                                                                                                                                                                                                                                                                                                                                                                                                                                                                                                                                                                                                                 |
| EPI_ISL_593924 to 593933                                                                                                                                                                                                                                                                                                                                                                                                                                                                                                                                                                                                                                                                                                                                                                                                                                                                                                                                                                                                                                                                                                                                                                                                                                                                                                                                                                                                                                                                                                                                                                                                                                                                                                              | Labo Analyses Med, Puteaux                     | National Reference Center for Viruses of Respiratory Infections, Institut Pasteur, Paris                            | Etienne Simon-Lorière; Fabiana Gambaro; Maud Vanpeene; Sylvie Behillili; Sylvie van der Werf; Vincent Enouf                                                                                                                                                                                                                                                                                                                                                                                                                                                                                                                                                                                                                                                                                                                                                                                                                                                     |
| EPI_ISL_593904 to 593909                                                                                                                                                                                                                                                                                                                                                                                                                                                                                                                                                                                                                                                                                                                                                                                                                                                                                                                                                                                                                                                                                                                                                                                                                                                                                                                                                                                                                                                                                                                                                                                                                                                                                                              | Labo Analyses Med, Sarcelles                   | National Reference Center for Viruses of Respiratory Infections, Institut Pasteur, Paris                            | Etienne Simon-Lorière; Fabiana Gambaro; Maud Vanpeene; Sylvie Behillili; Sylvie van der Werf; Vincent Enouf                                                                                                                                                                                                                                                                                                                                                                                                                                                                                                                                                                                                                                                                                                                                                                                                                                                     |
| EPI_ISL_420063                                                                                                                                                                                                                                                                                                                                                                                                                                                                                                                                                                                                                                                                                                                                                                                                                                                                                                                                                                                                                                                                                                                                                                                                                                                                                                                                                                                                                                                                                                                                                                                                                                                                                                                        | Labo BM - Site de Juvisy - Hôpital Général     | National Reference Center for Viruses of Respiratory Infections, Institut Pasteur, Paris                            | Angela Brisebarre; Etienne Simon-Lorière; Flora Donati; Marion Barbet; Maud Vanpeene; Mélanie Albert; Méline Bizard; Sylvie Behillili; Sylvie van der Werf; Vincent Enouf                                                                                                                                                                                                                                                                                                                                                                                                                                                                                                                                                                                                                                                                                                                                                                                       |
| EPI_ISL_1443748 to 1443755                                                                                                                                                                                                                                                                                                                                                                                                                                                                                                                                                                                                                                                                                                                                                                                                                                                                                                                                                                                                                                                                                                                                                                                                                                                                                                                                                                                                                                                                                                                                                                                                                                                                                                            | Labo Klinische Biologie, UZA                   | Labo Klinische Biologie, UZA                                                                                        | Basil Britto Xavier; Christine Lammens; Herman Goossens; Jasmine Coppens; Marie Le Mercier; Veerle Matheussen                                                                                                                                                                                                                                                                                                                                                                                                                                                                                                                                                                                                                                                                                                                                                                                                                                                   |
| EPI_ISL_1492705, EPI_ISL_1492707                                                                                                                                                                                                                                                                                                                                                                                                                                                                                                                                                                                                                                                                                                                                                                                                                                                                                                                                                                                                                                                                                                                                                                                                                                                                                                                                                                                                                                                                                                                                                                                                                                                                                                      | Labo Medicom                                   | GIGA Medical Genomics                                                                                               | Bouchra Boujemla; Cécile Meex; Keith Durkin; Maria Artesi; Marie-Pierre Hayette; Nathalie Renotte; Pierrette Melin; Raphaël Boreux; Sébastien Bontems; Vincent Bours                                                                                                                                                                                                                                                                                                                                                                                                                                                                                                                                                                                                                                                                                                                                                                                            |
| EPI_ISL_1416859 to 1416872, EPI_ISL_1416874 to 1416906, EPI_ISL_1443873 to 1443879                                                                                                                                                                                                                                                                                                                                                                                                                                                                                                                                                                                                                                                                                                                                                                                                                                                                                                                                                                                                                                                                                                                                                                                                                                                                                                                                                                                                                                                                                                                                                                                                                                                    | Labo analyses med                              | National Reference Center for Viruses of Respiratory Infections, Institut Pasteur, Paris                            | Angela Brisebarre; Anne Holstein; Camille Capel; Christophe Malabat; Corinne Maufrais; Etienne Simon-Lorière; FréDÉrique Canis; Frédéric Lemoine; GréGoire Potiron; Jérôme Guinard; Louise Lefrançois; Joep Vanpeene; Méline Bizard; Maud Vanpeene; Nathalie Coppe-Dron; Ronan Pichard; Stéphanie Guymard-Rabenirina; Sylvie Behillili; Sylvie van der Werf; Thibault Guinoiseau; Vincent Enouf                                                                                                                                                                                                                                                                                                                                                                                                                                                                                                                                                                 |
| EPI_ISL_416029                                                                                                                                                                                                                                                                                                                                                                                                                                                                                                                                                                                                                                                                                                                                                                                                                                                                                                                                                                                                                                                                                                                                                                                                                                                                                                                                                                                                                                                                                                                                                                                                                                                                                                                        | Laboatório Fleury                              | Instituto Adolfo Lutz, Interdisciplinary Procedures Center, Strategic Laboratory                                    | Adriana Bugno; Adriano Abud; Carlos Henrique Camargo; Claudia Regina Gonçalves; Claudio Tavares Sacchi; Daniela Bernardes Borges da Silva; Fabiana Cristina Pereira dos Santos; Maria do Carmo Sampaio Tavares Timenetsky; Simone Guadagnucci Morillo; Terezinha Maria de Paiva                                                                                                                                                                                                                                                                                                                                                                                                                                                                                                                                                                                                                                                                                 |
| EPI_ISL_1393675 to 1393688, EPI_ISL_1425555, EPI_ISL_1447228, EPI_ISL_1447250, EPI_ISL_1447265, EPI_ISL_1447271 to 1447272, EPI_ISL_1447279, EPI_ISL_1538514, EPI_ISL_1538540 to 1538543, EPI_ISL_1538687 to 1538691, EPI_ISL_1538860, EPI_ISL_1538879, EPI_ISL_1538889 to 1538890, EPI_ISL_1539002 to 1539003, EPI_ISL_1539169                                                                                                                                                                                                                                                                                                                                                                                                                                                                                                                                                                                                                                                                                                                                                                                                                                                                                                                                                                                                                                                                                                                                                                                                                                                                                                                                                                                                       | Labolatorium Biologi Molekularnej USK          | 1. National Institute of Public Health - National Institute of Hygiene; 2. Eurofins Genomics Europe Sequencing GmbH | ECDC COVID-19 WGS support team; Eurofins Genomics Europe Sequencing Team; Gierczyki Rafa; Sadkowska-Todys Magorzata; Wokowicz Tomasz; Zacharczuk Katarzyna                                                                                                                                                                                                                                                                                                                                                                                                                                                                                                                                                                                                                                                                                                                                                                                                      |
| see above                                                                                                                                                                                                                                                                                                                                                                                                                                                                                                                                                                                                                                                                                                                                                                                                                                                                                                                                                                                                                                                                                                                                                                                                                                                                                                                                                                                                                                                                                                                                                                                                                                                                                                                             |                                                |                                                                                                                     |                                                                                                                                                                                                                                                                                                                                                                                                                                                                                                                                                                                                                                                                                                                                                                                                                                                                                                                                                                 |
| EPI_ISL_1432926, EPI_ISL_1432930, EPI_ISL_1432965, EPI_ISL_1432987, EPI_ISL_1432989, EPI_ISL_1432993, EPI_ISL_1432998, EPI_ISL_1433013, EPI_ISL_1433021, EPI_ISL_1433033, EPI_ISL_1433068, EPI_ISL_1433075 to 1433076, EPI_ISL_1433079, EPI_ISL_1433093, EPI_ISL_1433099, EPI_ISL_1433105, EPI_ISL_1433110, EPI_ISL_1433113 to 1433114, EPI_ISL_1433122 to 1433123, EPI_ISL_1433130, EPI_ISL_1433154, EPI_ISL_1433158, EPI_ISL_1433167, EPI_ISL_1433175, EPI_ISL_1433191, EPI_ISL_1433193, EPI_ISL_1433204, EPI_ISL_1433208, EPI_ISL_1433233, EPI_ISL_1433241, EPI_ISL_1433266, EPI_ISL_1433268, EPI_ISL_1433272, EPI_ISL_1433285, EPI_ISL_1433332, EPI_ISL_1433344, EPI_ISL_1433368                                                                                                                                                                                                                                                                                                                                                                                                                                                                                                                                                                                                                                                                                                                                                                                                                                                                                                                                                                                                                                                  | Labor 28 MVZ GmbH                              | Robert Koch Institute                                                                                               |                                                                                                                                                                                                                                                                                                                                                                                                                                                                                                                                                                                                                                                                                                                                                                                                                                                                                                                                                                 |
| see above                                                                                                                                                                                                                                                                                                                                                                                                                                                                                                                                                                                                                                                                                                                                                                                                                                                                                                                                                                                                                                                                                                                                                                                                                                                                                                                                                                                                                                                                                                                                                                                                                                                                                                                             |                                                |                                                                                                                     |                                                                                                                                                                                                                                                                                                                                                                                                                                                                                                                                                                                                                                                                                                                                                                                                                                                                                                                                                                 |
| EPI_ISL_1433378, EPI_ISL_1433380, EPI_ISL_1433382, EPI_ISL_1433384, EPI_ISL_1433386, EPI_ISL_1433388, EPI_ISL_1433390, EPI_ISL_1433392, EPI_ISL_1433394, EPI_ISL_1433396, EPI_ISL_1433398, EPI_ISL_1433400, EPI_ISL_1433402, EPI_ISL_1433404, EPI_ISL_1433406, EPI_ISL_1433408, EPI_ISL_1433410, EPI_ISL_1433412, EPI_ISL_1433414, EPI_ISL_1433416, EPI_ISL_1433418, EPI_ISL_1433420, EPI_ISL_1433422, EPI_ISL_1433426, EPI_ISL_1433428, EPI_ISL_1433430, EPI_ISL_1433432, EPI_ISL_1433434 to 1433435, EPI_ISL_1433437, EPI_ISL_1433439, EPI_ISL_1433441, EPI_ISL_1433444, EPI_ISL_1433446, EPI_ISL_1433448 to 1433449, EPI_ISL_1433451, EPI_ISL_1433453, EPI_ISL_1433466, EPI_ISL_1433468, EPI_ISL_1433470, EPI_ISL_1433472, EPI_ISL_1433474, EPI_ISL_1433476, EPI_ISL_1433478                                                                                                                                                                                                                                                                                                                                                                                                                                                                                                                                                                                                                                                                                                                                                                                                                                                                                                                                                       | Labor Becker & Kollegen (Standort München)     | Robert Koch Institute                                                                                               |                                                                                                                                                                                                                                                                                                                                                                                                                                                                                                                                                                                                                                                                                                                                                                                                                                                                                                                                                                 |
| see above                                                                                                                                                                                                                                                                                                                                                                                                                                                                                                                                                                                                                                                                                                                                                                                                                                                                                                                                                                                                                                                                                                                                                                                                                                                                                                                                                                                                                                                                                                                                                                                                                                                                                                                             |                                                |                                                                                                                     |                                                                                                                                                                                                                                                                                                                                                                                                                                                                                                                                                                                                                                                                                                                                                                                                                                                                                                                                                                 |
| EPI_ISL_1464114 to 1464129, EPI_ISL_1464131 to 1464171, EPI_ISL_1464173 to 1464261, EPI_ISL_1464417 to 1464582                                                                                                                                                                                                                                                                                                                                                                                                                                                                                                                                                                                                                                                                                                                                                                                                                                                                                                                                                                                                                                                                                                                                                                                                                                                                                                                                                                                                                                                                                                                                                                                                                        | Labor Dr. Fenner und Kollegen                  | Heinrich Pette Institute, Leibniz Institute for Experimental Virology                                               | Adam Grundhoff; Alexis Robitaille; Johannes Knobloch; Martin Aepfelbacher; Nicole Fischer; Thomas Günther                                                                                                                                                                                                                                                                                                                                                                                                                                                                                                                                                                                                                                                                                                                                                                                                                                                       |
| EPI_ISL_1439798, EPI_ISL_1439804 to 1439805, EPI_ISL_1439813, EPI_ISL_1439820, EPI_ISL_1439831 to 1439832, EPI_ISL_1439845, EPI_ISL_1439856 to 1439857, EPI_ISL_1439863, EPI_ISL_1439865, EPI_ISL_1442546, EPI_ISL_1442548, EPI_ISL_1442551, EPI_ISL_1442553 to 1442557, EPI_ISL_1442559 to 1442562, EPI_ISL_1442566 to 1442571                                                                                                                                                                                                                                                                                                                                                                                                                                                                                                                                                                                                                                                                                                                                                                                                                                                                                                                                                                                                                                                                                                                                                                                                                                                                                                                                                                                                       | Labor Dr. Heidrich & Kollegen MVZ GmbH Hamburg | Robert Koch Institute                                                                                               |                                                                                                                                                                                                                                                                                                                                                                                                                                                                                                                                                                                                                                                                                                                                                                                                                                                                                                                                                                 |
| see above                                                                                                                                                                                                                                                                                                                                                                                                                                                                                                                                                                                                                                                                                                                                                                                                                                                                                                                                                                                                                                                                                                                                                                                                                                                                                                                                                                                                                                                                                                                                                                                                                                                                                                                             |                                                |                                                                                                                     |                                                                                                                                                                                                                                                                                                                                                                                                                                                                                                                                                                                                                                                                                                                                                                                                                                                                                                                                                                 |
| EPI_ISL_1432936, EPI_ISL_1432961, EPI_ISL_1432967, EPI_ISL_1433025, EPI_ISL_1433081, EPI_ISL_1433125, EPI_ISL_1433127, EPI_ISL_1433142, EPI_ISL_1433162, EPI_ISL_1433200, EPI_ISL_1433228, EPI_ISL_1433265, EPI_ISL_1433292, EPI_ISL_1433364, EPI_ISL_1433691, EPI_ISL_1438700, EPI_ISL_1438716, EPI_ISL_1438722, EPI_ISL_1438759, EPI_ISL_1438762, EPI_ISL_1438854, EPI_ISL_1438859, EPI_ISL_1438867, EPI_ISL_1438905, EPI_ISL_1438917, EPI_ISL_1438925, EPI_ISL_1438931, EPI_ISL_1438938, EPI_ISL_1438947, EPI_ISL_1438954 to 1438955, EPI_ISL_1438989, EPI_ISL_1439004, EPI_ISL_1439014, EPI_ISL_1439017                                                                                                                                                                                                                                                                                                                                                                                                                                                                                                                                                                                                                                                                                                                                                                                                                                                                                                                                                                                                                                                                                                                           | Labor Dr. Schumacher MVZ                       | Robert Koch Institute                                                                                               |                                                                                                                                                                                                                                                                                                                                                                                                                                                                                                                                                                                                                                                                                                                                                                                                                                                                                                                                                                 |
| see above                                                                                                                                                                                                                                                                                                                                                                                                                                                                                                                                                                                                                                                                                                                                                                                                                                                                                                                                                                                                                                                                                                                                                                                                                                                                                                                                                                                                                                                                                                                                                                                                                                                                                                                             |                                                |                                                                                                                     |                                                                                                                                                                                                                                                                                                                                                                                                                                                                                                                                                                                                                                                                                                                                                                                                                                                                                                                                                                 |
| EPI_ISL_1433741, EPI_ISL_1433764, EPI_ISL_1433780, EPI_ISL_1433844, EPI_ISL_1433908, EPI_ISL_1433950, EPI_ISL_1433965, EPI_ISL_1433971, EPI_ISL_1433990, EPI_ISL_1434003, EPI_ISL_1434011, EPI_ISL_1434015, EPI_ISL_1434074, EPI_ISL_1434125, EPI_ISL_1434130, EPI_ISL_1434170, EPI_ISL_1434185,                                                                                                                                                                                                                                                                                                                                                                                                                                                                                                                                                                                                                                                                                                                                                                                                                                                                                                                                                                                                                                                                                                                                                                                                                                                                                                                                                                                                                                      |                                                |                                                                                                                     |                                                                                                                                                                                                                                                                                                                                                                                                                                                                                                                                                                                                                                                                                                                                                                                                                                                                                                                                                                 |

|                                                                                                                                                                                                                                                                                                                                                                                                                                                                                                                                                                                                                                                                                                                                                                                                                                                                                                                                                                                                                                                                                                                                                                                                                                                                                        |           |                                                                                                                      |                                                                                                                                                                                                                                            |                                                                                                                                                                                                                                                                                                                                                                                                                                    |
|----------------------------------------------------------------------------------------------------------------------------------------------------------------------------------------------------------------------------------------------------------------------------------------------------------------------------------------------------------------------------------------------------------------------------------------------------------------------------------------------------------------------------------------------------------------------------------------------------------------------------------------------------------------------------------------------------------------------------------------------------------------------------------------------------------------------------------------------------------------------------------------------------------------------------------------------------------------------------------------------------------------------------------------------------------------------------------------------------------------------------------------------------------------------------------------------------------------------------------------------------------------------------------------|-----------|----------------------------------------------------------------------------------------------------------------------|--------------------------------------------------------------------------------------------------------------------------------------------------------------------------------------------------------------------------------------------|------------------------------------------------------------------------------------------------------------------------------------------------------------------------------------------------------------------------------------------------------------------------------------------------------------------------------------------------------------------------------------------------------------------------------------|
| EPI_ISL_1434214, EPI_ISL_1434295, EPI_ISL_1434309, EPI_ISL_1434325, EPI_ISL_1434351                                                                                                                                                                                                                                                                                                                                                                                                                                                                                                                                                                                                                                                                                                                                                                                                                                                                                                                                                                                                                                                                                                                                                                                                    | see above | Labor Dr. Wisplinghoff - Köln                                                                                        | Robert Koch Institute                                                                                                                                                                                                                      |                                                                                                                                                                                                                                                                                                                                                                                                                                    |
| EPI_ISL_476705, EPI_ISL_487398 to 487431                                                                                                                                                                                                                                                                                                                                                                                                                                                                                                                                                                                                                                                                                                                                                                                                                                                                                                                                                                                                                                                                                                                                                                                                                                               |           | Labor Kneißler GmbH & Co. KG                                                                                         | Heinrich Pette Institute, Leibniz Institute for Experimental Virology                                                                                                                                                                      | Adam Grundhoff; Manja Czech-Sioli; Matthias Ottinger; Melanie M. Brinkmann; Nicole Fischer; Thomas Günther                                                                                                                                                                                                                                                                                                                         |
| EPI_ISL_1435456 to 1435466, EPI_ISL_1435461 to 1435466                                                                                                                                                                                                                                                                                                                                                                                                                                                                                                                                                                                                                                                                                                                                                                                                                                                                                                                                                                                                                                                                                                                                                                                                                                 |           | Labor Kneißler GmbH & Co. KG                                                                                         | Robert Koch Institute                                                                                                                                                                                                                      |                                                                                                                                                                                                                                                                                                                                                                                                                                    |
| EPI_ISL_1435344, EPI_ISL_1435357, EPI_ISL_1435393 to 1435395, EPI_ISL_1435407, EPI_ISL_1435413, EPI_ISL_1435420, EPI_ISL_1435423, EPI_ISL_1439462, EPI_ISL_1439510, EPI_ISL_1439513                                                                                                                                                                                                                                                                                                                                                                                                                                                                                                                                                                                                                                                                                                                                                                                                                                                                                                                                                                                                                                                                                                    | see above | Labor Lübeck bzw. Laborärztliche Gemeinschaftspraxis Lübeck                                                          | Robert Koch Institute                                                                                                                                                                                                                      |                                                                                                                                                                                                                                                                                                                                                                                                                                    |
| EPI_ISL_1433599, EPI_ISL_1433603, EPI_ISL_1433610, EPI_ISL_1433619, EPI_ISL_1433621, EPI_ISL_1433627, EPI_ISL_1433629, EPI_ISL_1433631, EPI_ISL_1433633 to 1433634, EPI_ISL_1433637, EPI_ISL_1433640, EPI_ISL_1433642, EPI_ISL_1433644, EPI_ISL_1433649, EPI_ISL_1433653, EPI_ISL_1433655, EPI_ISL_1433659, EPI_ISL_1433661 to 1433662, EPI_ISL_1433668, EPI_ISL_1433670 to 1433673, EPI_ISL_1433675, EPI_ISL_1433677 to 1433678, EPI_ISL_1434439, EPI_ISL_1434446, EPI_ISL_1434465, EPI_ISL_1434467, EPI_ISL_1434489, EPI_ISL_1434494, EPI_ISL_1434496, EPI_ISL_1434510, EPI_ISL_1434514, EPI_ISL_1434518                                                                                                                                                                                                                                                                                                                                                                                                                                                                                                                                                                                                                                                                             | see above | Labor MönchengladbachMVZ Dr. Stein + Kollegen GbR                                                                    | Robert Koch Institute                                                                                                                                                                                                                      |                                                                                                                                                                                                                                                                                                                                                                                                                                    |
| EPI_ISL_1436832, EPI_ISL_1436841, EPI_ISL_1436849, EPI_ISL_1436873, EPI_ISL_1436881, EPI_ISL_1436889, EPI_ISL_1436896, EPI_ISL_1436919, EPI_ISL_1436932, EPI_ISL_1436934, EPI_ISL_1436947, EPI_ISL_1441730 to 1441731, EPI_ISL_1441762, EPI_ISL_1441764, EPI_ISL_1441779, EPI_ISL_1441781                                                                                                                                                                                                                                                                                                                                                                                                                                                                                                                                                                                                                                                                                                                                                                                                                                                                                                                                                                                              | see above | Labor ZOTZ KLIMAS; MVZ Düsseldorf-Centrum                                                                            | Robert Koch Institute                                                                                                                                                                                                                      |                                                                                                                                                                                                                                                                                                                                                                                                                                    |
| EPI_ISL_1438400, EPI_ISL_1438427, EPI_ISL_1438491, EPI_ISL_1438509                                                                                                                                                                                                                                                                                                                                                                                                                                                                                                                                                                                                                                                                                                                                                                                                                                                                                                                                                                                                                                                                                                                                                                                                                     |           | Labor für medizinische Mikrobiologie Bakteriologie Mykologie Virologie & Infektionserologie                          | Robert Koch Institute                                                                                                                                                                                                                      |                                                                                                                                                                                                                                                                                                                                                                                                                                    |
| EPI_ISL_445220                                                                                                                                                                                                                                                                                                                                                                                                                                                                                                                                                                                                                                                                                                                                                                                                                                                                                                                                                                                                                                                                                                                                                                                                                                                                         |           | Laboratory for Respiratory Viruses, "Cantacuzino" National Military-Medical Institute for Researarch and Development | Cantacuzino Institute                                                                                                                                                                                                                      | A.Cretu; L.Ustean; M.Lazar                                                                                                                                                                                                                                                                                                                                                                                                         |
| EPI_ISL_1434452, EPI_ISL_1438616, EPI_ISL_1438631, EPI_ISL_1438676, EPI_ISL_1439523, EPI_ISL_1439525                                                                                                                                                                                                                                                                                                                                                                                                                                                                                                                                                                                                                                                                                                                                                                                                                                                                                                                                                                                                                                                                                                                                                                                   |           | Laborarztpraxis Jochen Hüter                                                                                         | Robert Koch Institute                                                                                                                                                                                                                      |                                                                                                                                                                                                                                                                                                                                                                                                                                    |
| EPI_ISL_1502112, EPI_ISL_1502567, EPI_ISL_1508821, EPI_ISL_1508849, EPI_ISL_1508890, EPI_ISL_1508894, EPI_ISL_1508896 to 1508897, EPI_ISL_1508916, EPI_ISL_1508941, EPI_ISL_1508944 to 1508945, EPI_ISL_1508947, EPI_ISL_1508949, EPI_ISL_1508956 to 1508957, EPI_ISL_1508959, EPI_ISL_1508961 to 1508962, EPI_ISL_1508989 to 1508991, EPI_ISL_1509096, EPI_ISL_1509098, EPI_ISL_1509100, EPI_ISL_1509102, EPI_ISL_1509273, EPI_ISL_1509638, EPI_ISL_1524650, EPI_ISL_1524700, EPI_ISL_1524703, EPI_ISL_1524708, EPI_ISL_1524713, EPI_ISL_1524717, EPI_ISL_1524720, EPI_ISL_1524723, EPI_ISL_1548504                                                                                                                                                                                                                                                                                                                                                                                                                                                                                                                                                                                                                                                                                   | see above | Laboratoire Biolim/FSS/UL                                                                                            | Unité Mixte Internationale TransVIHMI (UMI 233 IRD - U1175 INSERM - Université de Montpellier) IRD (Institut de recherche pour le développement)                                                                                           | Abla A. KONOU; Adodo SADJI; Ahidjo AYOUBA; Akoélé SILIADIN; Alassane OURO-MEDEL; Amivi EHLAN; Améyo DORKENOO; Anoumou DAGNRA; Christelle BUTEL; Déléma MABA; Eric DELAPORTE; Issaka Maman; Kokou TEGUENI; Koku AGBODEKA; Laetitia SERRANO; Martine PEETERS; Messanh DOUFFAN; Mireille PRINCE-DAVID; Mounerou SALOU; Sidonie A.M.KAGNISSODE; Sika DOSSIM; Syntiche DEVATCHAGNI Adodo SADJI; Syntyche DEVATCHAGNI; Wembo A. HALATOKO |
| EPI_ISL_1495980                                                                                                                                                                                                                                                                                                                                                                                                                                                                                                                                                                                                                                                                                                                                                                                                                                                                                                                                                                                                                                                                                                                                                                                                                                                                        |           | Laboratoire Biorylis                                                                                                 | National Reference Center for Viruses of Respiratory Infections, Institut Pasteur, Paris                                                                                                                                                   | Angela Brisebarre; Camille Capel; Etienne Simon-Lorière; Louise Lefrançois; Marion Barbet; Maud Vanpeene; Méline Bizard; Potiron Grégoire; Sylvie Behillil; Sylvie van der Werf; Vincent Enouf                                                                                                                                                                                                                                     |
| EPI_ISL_1396891                                                                                                                                                                                                                                                                                                                                                                                                                                                                                                                                                                                                                                                                                                                                                                                                                                                                                                                                                                                                                                                                                                                                                                                                                                                                        |           | Laboratoire LENYS                                                                                                    | Department of Virology, Henri Mondor University Hospital, Assistance Publique Hôpitaux de Paris, Université Paris-Est Créteil, INSERM U955                                                                                                 | Alexandre Soulier; Christophe Rodriguez; Elisabeth Trawinski; Guillaume Gricourt; Jean-Michel Pawlotsky; Melissa N'Debi; Slim Fourati; Vanessa Demontant                                                                                                                                                                                                                                                                           |
| EPI_ISL_421734 to 421763, EPI_ISL_428939 to 428962, EPI_ISL_429706 to 429791, EPI_ISL_429793 to 429800, EPI_ISL_434487 to 434515, EPI_ISL_445053 to 445076, EPI_ISL_459893 to 459906                                                                                                                                                                                                                                                                                                                                                                                                                                                                                                                                                                                                                                                                                                                                                                                                                                                                                                                                                                                                                                                                                                   | see above | Laboratoire National de Sante, Microbiology, Virology                                                                | Laboratoire National de Sante, Microbiology, Epidemiology and Microbial Genomics                                                                                                                                                           | Anke Wienecke-Baldacchino; Ardasha Latsuzbaia; Catherine Ragimbeau; Guillaume Fournier; Jessica Tapp; Joel Mossong; Tamir Abdelrahman; Trung Nguyen Nguyen                                                                                                                                                                                                                                                                         |
| EPI_ISL_413593                                                                                                                                                                                                                                                                                                                                                                                                                                                                                                                                                                                                                                                                                                                                                                                                                                                                                                                                                                                                                                                                                                                                                                                                                                                                         |           | Laboratoire National de Santé                                                                                        | Erasmus Medical Center                                                                                                                                                                                                                     | Anne van der Linden; Annemiek van der Eijk; Bas Oude Munnink; Claudia Schapendonk; Corine GeurtsvanKessel; David Nieuwenhuijs; G. Fournier; Irina Chestakova; J. Mossong; Jeroen van Kampen; Jolanda Voermans; Marion Koopmans; Mark Pronk; Pascal Lexmond; Reina Sikkema; Richard Molenkamp; T. Abdelrahman; T. Nguyen; on behalf of the Dutch national COVID-19 response team.                                                   |
| EPI_ISL_419562 to 419607                                                                                                                                                                                                                                                                                                                                                                                                                                                                                                                                                                                                                                                                                                                                                                                                                                                                                                                                                                                                                                                                                                                                                                                                                                                               |           | Laboratoire National de Santé, Microbiology, Virology                                                                | Laboratoire National de Santé, Microbiology, Epidemiology and Microbial Genomics                                                                                                                                                           | Anke Wienecke-Baldacchino; Ardasha Latsuzbaia; Catherine Ragimbeau; Guillaume Fournier; Jessica Tapp; Joel Mossong; Tamir Abdelrahman; Trung Nguyen Nguyen                                                                                                                                                                                                                                                                         |
| EPI_ISL_417526 to 417534                                                                                                                                                                                                                                                                                                                                                                                                                                                                                                                                                                                                                                                                                                                                                                                                                                                                                                                                                                                                                                                                                                                                                                                                                                                               |           | Laboratoire Nationale de Santé, Microbiology, Virology                                                               | Laboratoire Nationale de Santé, Microbiology, Epidemiology and Microbial Genomics                                                                                                                                                          | Anke Wienecke-Baldacchino; Ardasha Latsuzbaia; Catherine Ragimbeau; Guillaume Fournier; Jessica Tapp; Joel Mossong; Tamir Abdelrahman; Trung Nguyen Nguyen                                                                                                                                                                                                                                                                         |
| EPI_ISL_443284 to 443288                                                                                                                                                                                                                                                                                                                                                                                                                                                                                                                                                                                                                                                                                                                                                                                                                                                                                                                                                                                                                                                                                                                                                                                                                                                               |           | Laboratoire de Microbiologie - Bât A - CH René Dubois                                                                | National Reference Center for Viruses of Respiratory Infections, Institut Pasteur, Paris                                                                                                                                                   | Angela Brisebarre; Etienne Simon-Lorière; Flora Donati; Marion Barbet; Maud Vanpeene; Mélanie Albert; Méline Bizard; Pascale Martres; Sylvie Behillil; Sylvie van der Werf; Vincent Enouf                                                                                                                                                                                                                                          |
| EPI_ISL_451400                                                                                                                                                                                                                                                                                                                                                                                                                                                                                                                                                                                                                                                                                                                                                                                                                                                                                                                                                                                                                                                                                                                                                                                                                                                                         |           | Laboratoire de Recherche et d'Analyse Médicale de la Gendarmerie Royale                                              | Laboratoire de Recherche et d'Analyse Médicale de la Gendarmerie Royale                                                                                                                                                                    | Amal SOUIRI; Sanaâ LEMRISS; Saâd EL KABBAJ                                                                                                                                                                                                                                                                                                                                                                                         |
| EPI_ISL_476024 to 476026                                                                                                                                                                                                                                                                                                                                                                                                                                                                                                                                                                                                                                                                                                                                                                                                                                                                                                                                                                                                                                                                                                                                                                                                                                                               |           | Laboratoire de Recherche et d'Analyses Médicales de la Gendarmerie Royale                                            | Laboratoire de Recherche et d'Analyses Médicales de la Gendarmerie Royale                                                                                                                                                                  | Amal SOUIRI; Amal Souiri; Ayoub Jibjibe; Mahmoud Yartaoui; Marouane El Rhouila; Mohamed Chahmi; Mohamed Labioui; Nabil Lemzaoui; Nabil Ouaraiba; Nadia Kandoussi; Omar Mestoui; Samiha Sellak; Sanaâ LEMRISS; Sanaâ Lemriss; Saâd EL KABBAJ; Saâd El Kabbaj                                                                                                                                                                        |
| EPI_ISL_414600, EPI_ISL_414623                                                                                                                                                                                                                                                                                                                                                                                                                                                                                                                                                                                                                                                                                                                                                                                                                                                                                                                                                                                                                                                                                                                                                                                                                                                         |           | Laboratoire de Virologie Institut de Virologie - INSERM U 1109 Hôpitaux Universitaires de Strasbourg                 | National Reference Center for Viruses of Respiratory Infections, Institut Pasteur, Paris                                                                                                                                                   | Angela Brisebarre; Flora Donati Vincent Enouf; Marion Barbet; Maud Vanpeene; Méline Bizard; Méline Albert; Samira Fafi-Kremer; Sylvie Behillil; Sylvie van der Werf                                                                                                                                                                                                                                                                |
| EPI_ISL_413996 to 413997, EPI_ISL_413999, EPI_ISL_414019 to 414023                                                                                                                                                                                                                                                                                                                                                                                                                                                                                                                                                                                                                                                                                                                                                                                                                                                                                                                                                                                                                                                                                                                                                                                                                     |           | Laboratoire de Virologie, HUG                                                                                        | Swiss National Reference Centre for Influenza                                                                                                                                                                                              | LAUBSCHER Florian et al.                                                                                                                                                                                                                                                                                                                                                                                                           |
| EPI_ISL_1392906                                                                                                                                                                                                                                                                                                                                                                                                                                                                                                                                                                                                                                                                                                                                                                                                                                                                                                                                                                                                                                                                                                                                                                                                                                                                        |           | Laboratoire de la rage et de la faune sauvage, ANSES, Malzéville.                                                    | GRAM2.0, Université de Caen Normandie / Laboratoire de Virologie, CHU de Caen / National Reference Center for Respiratory Viruses France Nord, Institut Pasteur, Paris. / Laboratoire de la rage et de la faune sauvage ANSES, Malzéville. | Angela BRISEBARRE; Astrid VABRET; Camille Capel; Elodie MONCHATRE-LEROY.; Estelle LEPERCHOIS; Etienne SIMON-LORIERE; Evelyne PICARD-MEYER; Fabiana GAMBARO; Flora DONATI; Franck BOUE; Gilles SALVAT; Januel VOUTEAU; Justine HAMEL; Marine WASNIEWSKY; Maud Vanpeene; Meriadeg AR GOUILH; Mélanie ALBERT; Méline Bizard; Nicolas NESI; Sandrine CORBET; Sophie LEVALTIER; Sylvie BEHILLIL; Sylvie VAN DER WERF; Vincent ENOUF     |
| EPI_ISL_444494 to 444516, EPI_ISL_450638 to 450653, EPI_ISL_463903 to 463969, EPI_ISL_476498 to 476513, EPI_ISL_515197 to 515246                                                                                                                                                                                                                                                                                                                                                                                                                                                                                                                                                                                                                                                                                                                                                                                                                                                                                                                                                                                                                                                                                                                                                       |           | Laboratoire de microbiologie, Hôpital de Verdun                                                                      | Smith Laboratory, Centre de Recherche CHU Sainte-Justine                                                                                                                                                                                   | Ivan Pavlov; Marieke Rozendaal; Martin Smith                                                                                                                                                                                                                                                                                                                                                                                       |
| EPI_ISL_1390770 to 1391008, EPI_ISL_1400572 to 1400794, EPI_ISL_1403093 to 1403337, EPI_ISL_1404716 to 1404877, EPI_ISL_1522382 to 1522573, EPI_ISL_1523366 to 1523524, EPI_ISL_1532652 to 1532693, EPI_ISL_1532701 to 1532730, EPI_ISL_1534160 to 1534181                                                                                                                                                                                                                                                                                                                                                                                                                                                                                                                                                                                                                                                                                                                                                                                                                                                                                                                                                                                                                             | see above | Laboratoire de santé publique du Québec                                                                              | Laboratoire de santé publique du Québec                                                                                                                                                                                                    | Guillaume Bourque; Ioannis Ragoussis; Jesse Shapiro; Mark Lathrop and Michel Roger on behalf of the CoVSeQ research group; Mark Lathrop and Michel Roger on behalf of the CoVSeQ research group ( <a href="http://covseq.ca/researchgroup">http://covseq.ca/researchgroup</a> ); Sandrine Moreira                                                                                                                                  |
| EPI_ISL_476822 to 476831, EPI_ISL_476833 to 476834                                                                                                                                                                                                                                                                                                                                                                                                                                                                                                                                                                                                                                                                                                                                                                                                                                                                                                                                                                                                                                                                                                                                                                                                                                     |           | Laboratoire des Fièvres Hémostatiques Virales du Benin                                                               | Charité-Universitätsmedizin Berlin                                                                                                                                                                                                         | Anges; Drexler; Jan Felix; Moreira-Soto Andres; Sander Anna-Lena; Yadouleton                                                                                                                                                                                                                                                                                                                                                       |
| EPI_ISL_1383642 to 1383811, EPI_ISL_1384150 to 1384159, EPI_ISL_1522576, EPI_ISL_1522580, EPI_ISL_1522584 to 1522585, EPI_ISL_1522588, EPI_ISL_1522590, EPI_ISL_1522604, EPI_ISL_1522608, EPI_ISL_1522610, EPI_ISL_1522612, EPI_ISL_1522618 to 1522619, EPI_ISL_1522643 to 1522644, EPI_ISL_1522650, EPI_ISL_1522652, EPI_ISL_1522658, EPI_ISL_1522665 to 1522666, EPI_ISL_1522668 to 1522671, EPI_ISL_1522675, EPI_ISL_1522679, EPI_ISL_1522681, EPI_ISL_1522683, EPI_ISL_1522686, EPI_ISL_1522693, EPI_ISL_1522695 to 1522698, EPI_ISL_1522707, EPI_ISL_1522710, EPI_ISL_1522713, EPI_ISL_1522719, EPI_ISL_1522729, EPI_ISL_1522731 to 1522732, EPI_ISL_1522735 to 1522736, EPI_ISL_1522746, EPI_ISL_1522751 to 1522752, EPI_ISL_1522757, EPI_ISL_1522759, EPI_ISL_1522762, EPI_ISL_1522766, EPI_ISL_1522768, EPI_ISL_1522774, EPI_ISL_1522780, EPI_ISL_1522782, EPI_ISL_1522795 to 1522800, EPI_ISL_1522970 to 1523026, EPI_ISL_1523092 to 1523111, EPI_ISL_1523114, EPI_ISL_1523118, EPI_ISL_1523120 to 1523121, EPI_ISL_1523129, EPI_ISL_1523138, EPI_ISL_1523140 to 1523141, EPI_ISL_1523165, EPI_ISL_1523168, EPI_ISL_1523184, EPI_ISL_1523191 to 1523192, EPI_ISL_1523210 to 1523211, EPI_ISL_1523214, EPI_ISL_1523223, EPI_ISL_1523309 to 1523344, EPI_ISL_1523363 to 1523365 |           |                                                                                                                      |                                                                                                                                                                                                                                            |                                                                                                                                                                                                                                                                                                                                                                                                                                    |



|                                                                                                                                                                                                                                                                                                                                                                                                                                                                                                                                                                                                                                                                                                                                                                                                                                                                                                                                                                                                                                                                                                                                                                                                                                                                                                                                                                                                     |                                                                                                                                                                                |                                                                                                                                                                                                     |                                                                                                                                                                                                                                                                                                                                                                                                                                                                                                                                                                                                                                                                                                                                                                                                                                                                                                                                                                                                                                 |
|-----------------------------------------------------------------------------------------------------------------------------------------------------------------------------------------------------------------------------------------------------------------------------------------------------------------------------------------------------------------------------------------------------------------------------------------------------------------------------------------------------------------------------------------------------------------------------------------------------------------------------------------------------------------------------------------------------------------------------------------------------------------------------------------------------------------------------------------------------------------------------------------------------------------------------------------------------------------------------------------------------------------------------------------------------------------------------------------------------------------------------------------------------------------------------------------------------------------------------------------------------------------------------------------------------------------------------------------------------------------------------------------------------|--------------------------------------------------------------------------------------------------------------------------------------------------------------------------------|-----------------------------------------------------------------------------------------------------------------------------------------------------------------------------------------------------|---------------------------------------------------------------------------------------------------------------------------------------------------------------------------------------------------------------------------------------------------------------------------------------------------------------------------------------------------------------------------------------------------------------------------------------------------------------------------------------------------------------------------------------------------------------------------------------------------------------------------------------------------------------------------------------------------------------------------------------------------------------------------------------------------------------------------------------------------------------------------------------------------------------------------------------------------------------------------------------------------------------------------------|
| see above                                                                                                                                                                                                                                                                                                                                                                                                                                                                                                                                                                                                                                                                                                                                                                                                                                                                                                                                                                                                                                                                                                                                                                                                                                                                                                                                                                                           | Laboratoire national de sante, Microbiology, Virology                                                                                                                          | Laboratoire national de sante, Microbiology, Microbial Genomics Platform                                                                                                                            | Anke Wienecke-Baldacchino; Catherine Ragimbeau; Fatu Djabi; Jessica Tapp; Lise Pignon; Raoul Salmon; Tamir Abdelrahman; Trung Nguyen Nguyen                                                                                                                                                                                                                                                                                                                                                                                                                                                                                                                                                                                                                                                                                                                                                                                                                                                                                     |
| EPI_ISL_1384555 to 1384636, EPI_ISL_1522592, EPI_ISL_1522621, EPI_ISL_1522640, EPI_ISL_1522794, EPI_ISL_1522968 to 1522969, EPI_ISL_1523145, EPI_ISL_1523155, EPI_ISL_1523171, EPI_ISL_1523308                                                                                                                                                                                                                                                                                                                                                                                                                                                                                                                                                                                                                                                                                                                                                                                                                                                                                                                                                                                                                                                                                                                                                                                                      |                                                                                                                                                                                |                                                                                                                                                                                                     |                                                                                                                                                                                                                                                                                                                                                                                                                                                                                                                                                                                                                                                                                                                                                                                                                                                                                                                                                                                                                                 |
| see above                                                                                                                                                                                                                                                                                                                                                                                                                                                                                                                                                                                                                                                                                                                                                                                                                                                                                                                                                                                                                                                                                                                                                                                                                                                                                                                                                                                           | Laboratoires Reunis                                                                                                                                                            | Laboratoire national de sante, Microbiology, Microbial Genomics Platform                                                                                                                            | Anke Wienecke-Baldacchino; Bernard Weber; Catherine Ragimbeau; Fatu Djabi; Jessica Tapp; Lise Pignon; Raoul Salmon; Tamir Abdelrahman                                                                                                                                                                                                                                                                                                                                                                                                                                                                                                                                                                                                                                                                                                                                                                                                                                                                                           |
| EPI_ISL_1384160 to 1384554, EPI_ISL_1522578, EPI_ISL_1522586, EPI_ISL_1522591, EPI_ISL_1522593, EPI_ISL_1522596, EPI_ISL_1522600 to 1522601, EPI_ISL_1522603, EPI_ISL_1522609, EPI_ISL_1522611, EPI_ISL_1522614, EPI_ISL_1522616 to 1522617, EPI_ISL_1522624, EPI_ISL_1522626, EPI_ISL_1522629, EPI_ISL_1522632, EPI_ISL_1522639, EPI_ISL_1522645 to 1522646, EPI_ISL_1522649, EPI_ISL_1522656, EPI_ISL_1522659, EPI_ISL_1522663, EPI_ISL_1522673, EPI_ISL_1522680, EPI_ISL_1522684 to 1522685, EPI_ISL_1522691, EPI_ISL_1522702, EPI_ISL_1522704, EPI_ISL_1522709, EPI_ISL_1522716, EPI_ISL_1522718, EPI_ISL_1522720 to 1522722, EPI_ISL_1522727, EPI_ISL_1522734, EPI_ISL_1522738, EPI_ISL_1522745, EPI_ISL_1522749, EPI_ISL_1522755 to 1522756, EPI_ISL_1522761, EPI_ISL_1522763 to 1522765, EPI_ISL_1522767, EPI_ISL_1522771, EPI_ISL_1522776, EPI_ISL_1522778, EPI_ISL_1522791 to 1522793, EPI_ISL_1522916 to 1522967, EPI_ISL_1523071 to 1523091, EPI_ISL_1523113, EPI_ISL_1523116 to 1523117, EPI_ISL_1523119, EPI_ISL_1523123 to 1523125, EPI_ISL_1523128, EPI_ISL_1523130, EPI_ISL_1523132, EPI_ISL_1523137, EPI_ISL_1523143, EPI_ISL_1523146, EPI_ISL_1523169, EPI_ISL_1523173, EPI_ISL_1523175, EPI_ISL_1523178, EPI_ISL_1523180 to 1523183, EPI_ISL_1523199, EPI_ISL_1523201, EPI_ISL_1523203, EPI_ISL_1523208, EPI_ISL_1523221, EPI_ISL_1523290 to 1523307, EPI_ISL_1523358 to 1523362 |                                                                                                                                                                                |                                                                                                                                                                                                     |                                                                                                                                                                                                                                                                                                                                                                                                                                                                                                                                                                                                                                                                                                                                                                                                                                                                                                                                                                                                                                 |
| see above                                                                                                                                                                                                                                                                                                                                                                                                                                                                                                                                                                                                                                                                                                                                                                                                                                                                                                                                                                                                                                                                                                                                                                                                                                                                                                                                                                                           | Laboratoires d'analyses medicales - Ketterhill                                                                                                                                 | Laboratoire national de sante, Microbiology, Microbial Genomics Platform                                                                                                                            | Anke Wienecke-Baldacchino; Caroline Scheiber; Catherine Ragimbeau; Fatu Djabi; Jessica Tapp; Lise Pignon; Raoul Salmon; Serge Vedy; Tamir Abdelrahman                                                                                                                                                                                                                                                                                                                                                                                                                                                                                                                                                                                                                                                                                                                                                                                                                                                                           |
| EPI_ISL_1423696 to 1423736                                                                                                                                                                                                                                                                                                                                                                                                                                                                                                                                                                                                                                                                                                                                                                                                                                                                                                                                                                                                                                                                                                                                                                                                                                                                                                                                                                          | Laboratori de Referència de Catalunya                                                                                                                                          | SeqCOVID-SPAIN consortium/IBV(CSIC)                                                                                                                                                                 | Aida Esperanza Ramirez Marinero; Alba Vilas Basil; Eduardo Padilla León; Mireia Canal Aranda and SeqCOVID-SPAIN consortium                                                                                                                                                                                                                                                                                                                                                                                                                                                                                                                                                                                                                                                                                                                                                                                                                                                                                                      |
| EPI_ISL_1393630 to 1393639, EPI_ISL_1425554, EPI_ISL_1538433, EPI_ISL_1538496, EPI_ISL_1538547 to 1538549, EPI_ISL_1538755 to 1538756, EPI_ISL_1538892 to 1538896, EPI_ISL_1539029, EPI_ISL_1539114 to 1539115, EPI_ISL_1539161, EPI_ISL_1539179                                                                                                                                                                                                                                                                                                                                                                                                                                                                                                                                                                                                                                                                                                                                                                                                                                                                                                                                                                                                                                                                                                                                                    |                                                                                                                                                                                |                                                                                                                                                                                                     |                                                                                                                                                                                                                                                                                                                                                                                                                                                                                                                                                                                                                                                                                                                                                                                                                                                                                                                                                                                                                                 |
| see above                                                                                                                                                                                                                                                                                                                                                                                                                                                                                                                                                                                                                                                                                                                                                                                                                                                                                                                                                                                                                                                                                                                                                                                                                                                                                                                                                                                           | Laboratoria Medyczne Bruss grupa ALAB sp. z o.o. Medyczne Laboratorium Diagnostyczne                                                                                           | 1. National Institute of Public Health - National Institute of Hygiene; 2. Eurofins Genomics Europe Sequencing GmbH                                                                                 | ECDC COVID-19 WGS support team; Eurofins Genomics Europe Sequencing Team; Gierczyki Rafa; Sadkowska-Todys Magorzata; Wokowicz Tomasz; Zacharczuk Katarzyna                                                                                                                                                                                                                                                                                                                                                                                                                                                                                                                                                                                                                                                                                                                                                                                                                                                                      |
| EPI_ISL_429128 to 429135, EPI_ISL_430856 to 430859, EPI_ISL_434641 to 434642, EPI_ISL_450836 to 450837                                                                                                                                                                                                                                                                                                                                                                                                                                                                                                                                                                                                                                                                                                                                                                                                                                                                                                                                                                                                                                                                                                                                                                                                                                                                                              | Laboratoriemedicin                                                                                                                                                             | The Public Health Agency of Sweden                                                                                                                                                                  | Anna Risberg; Anna-Malin Linde; Karin Tegmark-Wisell; Maria Lind Karlberg; Mia Brytting; Olov Svartstrom; Oskar Karlsson Lindsjo; Shaman Muradrasoli; Theresa Enkirch                                                                                                                                                                                                                                                                                                                                                                                                                                                                                                                                                                                                                                                                                                                                                                                                                                                           |
| EPI_ISL_534248, EPI_ISL_534252 to 534255, EPI_ISL_534257 to 534258                                                                                                                                                                                                                                                                                                                                                                                                                                                                                                                                                                                                                                                                                                                                                                                                                                                                                                                                                                                                                                                                                                                                                                                                                                                                                                                                  | Laboratoriemedicin Vasternorrland                                                                                                                                              | The Public Health Agency of Sweden                                                                                                                                                                  | Anna Risberg; Anna-Malin Linde; Karin Tegmark-Wisell; Maria Lind Karlberg; Mattias Haukland; Mia Brytting; Olov Svartstrom; Oskar Karlsson Lindsjo; Petra Edquist; Reza Advani; Sandra Brodsson                                                                                                                                                                                                                                                                                                                                                                                                                                                                                                                                                                                                                                                                                                                                                                                                                                 |
| EPI_ISL_1394738, EPI_ISL_1394756 to 1394757, EPI_ISL_1499645 to 1499651                                                                                                                                                                                                                                                                                                                                                                                                                                                                                                                                                                                                                                                                                                                                                                                                                                                                                                                                                                                                                                                                                                                                                                                                                                                                                                                             | Laboratorio Analisi Osp. Città di Castello - Azienda USL Umbria1                                                                                                               | Istituto Zooprofilattico Sperimentale dell'Abruzzo e Molise "G. Caporale"                                                                                                                           | Ancora M; Calistri P; Cammà C; Caporale M; Curini V; Delli Compagni E; Di Domenico M; Di Lollo Valeria; Di Pasquale A; Lorusso A; Malagigi V; Mangone I; Marcacci M; Puglia I; Rinaldi A; Savini G; Scialabba S; Tacconi P                                                                                                                                                                                                                                                                                                                                                                                                                                                                                                                                                                                                                                                                                                                                                                                                      |
| EPI_ISL_430793 to 430794                                                                                                                                                                                                                                                                                                                                                                                                                                                                                                                                                                                                                                                                                                                                                                                                                                                                                                                                                                                                                                                                                                                                                                                                                                                                                                                                                                            | Laboratorio Análisis Clínicos, Unidad de Servicios Diagnósticos, Swiss Medical Group                                                                                           | Área de Secuenciación del Laboratorio de Virología del Hospital de Niños Dr. Ricardo Gutierrez on behalf of 'Proyecto Argentino Interinstitucional de genómica de SARS-CoV-2' (PAIS Consortium)     | AS; D; Goya; Guevara; LE; Lusso; MI; MS; Mishtchenko; Nabaes Jodar; Natale; O; S; SM; Sanchez; Valinotto; Vicario; Viegas, M.                                                                                                                                                                                                                                                                                                                                                                                                                                                                                                                                                                                                                                                                                                                                                                                                                                                                                                   |
| EPI_ISL_1406296 to 1406309, EPI_ISL_1461253 to 1461277, EPI_ISL_1494675 to 1494713                                                                                                                                                                                                                                                                                                                                                                                                                                                                                                                                                                                                                                                                                                                                                                                                                                                                                                                                                                                                                                                                                                                                                                                                                                                                                                                  | Laboratorio Aziendale di Microbiologia e Virologia, Azienda Sanitaria dell'Alto Adige                                                                                          | Laboratorio Aziendale di Microbiologia e Virologia, Azienda Sanitaria dell'Alto Adige                                                                                                               | Anne Picard; Bartolomeo Mobilio Rodriguez; Chiara Cantaloni; Claudia Volpato; Elisa Masi; Elisabetta Giacobazzi; Elisabetta Pagani; Irene Bianconi; Stefanie Wieser                                                                                                                                                                                                                                                                                                                                                                                                                                                                                                                                                                                                                                                                                                                                                                                                                                                             |
| EPI_ISL_458085                                                                                                                                                                                                                                                                                                                                                                                                                                                                                                                                                                                                                                                                                                                                                                                                                                                                                                                                                                                                                                                                                                                                                                                                                                                                                                                                                                                      | Laboratorio Biologia Molecolare Sars Cov2 - UOC Laboratorio Analisi - Servizio Medicina di Laboratorio , Ospedale "San Francesco" - ATS- ASSL Nuoro                            | Laboratorio specialistico UOC Ematologia - Ospedale "San Francesco" - ATS-ASSL Nuoro                                                                                                                | Asproni Rosanna; Casu Gavino; Fancello Tatiana; Fiamma Maura; Floris Anna Rita; Lo Maglio Iana; Mamelì Giuseppe.; Monne Maria Itria; Palmas Angelo Domenico; Piras Giovanna; Sanna Filomena; Sulis Vincenzo; Toja Alessandro                                                                                                                                                                                                                                                                                                                                                                                                                                                                                                                                                                                                                                                                                                                                                                                                    |
| EPI_ISL_458084                                                                                                                                                                                                                                                                                                                                                                                                                                                                                                                                                                                                                                                                                                                                                                                                                                                                                                                                                                                                                                                                                                                                                                                                                                                                                                                                                                                      | Laboratorio Biologia Molecolare Sars Cov2 - UOC Laboratorio Analisi - Servizio Medicina di Laboratorio, Ospedale "San Francesco" - ATS-ASSL Nuoro                              | Laboratorio specialistico UOC Ematologia - Ospedale "San Francesco" - ATS-ASSL Nuoro                                                                                                                | Asproni Rosanna; Casu Gavino; Fancello Tatiana; Fiamma Maura; Floris Anna Rita; Lo Maglio Iana; Mamelì Giuseppe.; Monne Maria Itria; Palmas Angelo Domenico; Piras Giovanna; Sanna Filomena; Sulis Vincenzo; Toja Alessandro                                                                                                                                                                                                                                                                                                                                                                                                                                                                                                                                                                                                                                                                                                                                                                                                    |
| EPI_ISL_613706, EPI_ISL_613710, EPI_ISL_613953, EPI_ISL_613955, EPI_ISL_614396 to 614398, EPI_ISL_614889, EPI_ISL_1557219 to 1557221                                                                                                                                                                                                                                                                                                                                                                                                                                                                                                                                                                                                                                                                                                                                                                                                                                                                                                                                                                                                                                                                                                                                                                                                                                                                |                                                                                                                                                                                |                                                                                                                                                                                                     |                                                                                                                                                                                                                                                                                                                                                                                                                                                                                                                                                                                                                                                                                                                                                                                                                                                                                                                                                                                                                                 |
| see above                                                                                                                                                                                                                                                                                                                                                                                                                                                                                                                                                                                                                                                                                                                                                                                                                                                                                                                                                                                                                                                                                                                                                                                                                                                                                                                                                                                           | Laboratorio Biologia Molecolare Sars Cov2 - UOC Laboratorio Analisi - Servizio Medicina di Laboratorio, Ospedale "San Francesco" - ATS-ASSL Nuoro                              | Laboratorio specialistico UOC Ematologia - Ospedale "San Francesco" - ATS-ASSL Nuoro                                                                                                                | ; Asproni Rosanna; Casu Gavino; Fancello Tatiana; Fiamma Maura; Floris Anna Rita; Lo Maglio Iana; Malune Paolo; Mamelì Giuseppe; Mamelì Giuseppe.; Monne Maria Itria; Palmas Angelo Domenico; Piras Giovanna; Sanna Filomena; Sulis Vincenzo; Toja Alessandro                                                                                                                                                                                                                                                                                                                                                                                                                                                                                                                                                                                                                                                                                                                                                                   |
| EPI_ISL_613560                                                                                                                                                                                                                                                                                                                                                                                                                                                                                                                                                                                                                                                                                                                                                                                                                                                                                                                                                                                                                                                                                                                                                                                                                                                                                                                                                                                      | Laboratorio Biologia Molecolare Sars Cov2 - UOC Laboratorio Analisi - Servizio Medicina di Laboratorio, Ospedale "San Francesco" - ATS-ASSL Nuoro Via Mannironi 1, 08100 Nuoro | Laboratorio specialistico UOC Ematologia - Ospedale "San Francesco" - ATS-ASSL Nuoro Nuoro                                                                                                          | Asproni Rosanna; Casu Gavino; Fancello Tatiana; Fiamma Maura; Floris Anna Rita; Lo Maglio Iana; Mamelì Giuseppe; Monne Maria Itria; Palmas Angelo Domenico; Piras Giovanna; Sanna Filomena; Sulis Vincenzo; Toja Alessandro                                                                                                                                                                                                                                                                                                                                                                                                                                                                                                                                                                                                                                                                                                                                                                                                     |
| EPI_ISL_547965                                                                                                                                                                                                                                                                                                                                                                                                                                                                                                                                                                                                                                                                                                                                                                                                                                                                                                                                                                                                                                                                                                                                                                                                                                                                                                                                                                                      | Laboratorio Biologia Molecolare SarsCov2 UOC Laboratorio Analisi Servizio Medicina di Laboratorio Ospedale San Francesco ATS-ASSL Nuoro                                        | Laboratorio Specialistico UOC Ematologia Ospedale San Francesco - ATS ASSL NUORO                                                                                                                    | Asproni Rosanna; Casu Gavino; Fancello Tatiana; Fiamma Maura; Floris Anna Rita; Lo Maglio Iana; Mamelì Giuseppe.; Monne Maria Itria; Palmas Angelo Domenico; Piras Giovanna; Sanna Filomena; Sulis Vincenzo; Toja Alessandro                                                                                                                                                                                                                                                                                                                                                                                                                                                                                                                                                                                                                                                                                                                                                                                                    |
| EPI_ISL_1395932 to 1395935                                                                                                                                                                                                                                                                                                                                                                                                                                                                                                                                                                                                                                                                                                                                                                                                                                                                                                                                                                                                                                                                                                                                                                                                                                                                                                                                                                          | Laboratorio Central De Redes y Programas                                                                                                                                       | Grupo de Genómica y Bioinformática del Instituto de Investigación de la Cadena Láctea CONICET-INTA on behalf of 'Proyecto Argentino Interinstitucional de genómica de SARS-CoV-2' (PAIS Consortium) | AF; Amadio; Antonieta Cayré; Eberhardt; Gerardo Andino; Irazoqui; Laura Lescano; MF; Natalia Ruiz Diaz                                                                                                                                                                                                                                                                                                                                                                                                                                                                                                                                                                                                                                                                                                                                                                                                                                                                                                                          |
| EPI_ISL_1416332 to 1416682                                                                                                                                                                                                                                                                                                                                                                                                                                                                                                                                                                                                                                                                                                                                                                                                                                                                                                                                                                                                                                                                                                                                                                                                                                                                                                                                                                          | Laboratorio Central de Epidemiologia (LCE)                                                                                                                                     | Instituto de Biotecnologia de la UNAM                                                                                                                                                               | Alejandro Sanchez-Flores; Alfredo Herrera-Estrella; Alicia Ocaña-Mondragón; Angel Gustavo Salas-Lais; Bernardo Martínez-Miguel; Blanca Taboada; Brenda Irasema Maldonado-Meza; Carla Ivón Herrera-Najera; Carlos F. Arias; Celia Boukadida; Clara Esperanza Santacruz-Tinoco; Concepción Grajales-Muñiz; Consorcio Mexicano de Vigilancia Genómica (CoVigGen-Mex). Authors (in alphabetical order): Julio Elias Alvarado-Yaah; Fernando Fontove-Herrera; Francisco Pulido; Gloria Elena Espinoza-Ayala; Gloria María Molina-Salinas; Gloria Vazquez; Hector Esteban Paz-Juárez; Hector Montoya-Fuentes; Helen Haydee Fernanda Ramirez-Plascencia; Jorge Ivan Salinal-Navarez; José Antonio Enciso-Moreno; José Esteban Muñoz-Medina; José de Jesús Nuñez-Contreras; Juan Bautista Chale-Dzul; Luis Alberto Ochoa-Carrera; Margarita Matías-Florentino; Maria Guadalupe Santiago-Mauricio; María Guadalupe de Jesús Mireles-Rivera; Nelly Sélem-Mojica; Pavel Isa; Ricardo Grande; Santiago Ávila-Ríos; Victor Hugo Borja-Aburto |
| EPI_ISL_1492637 to 1492681                                                                                                                                                                                                                                                                                                                                                                                                                                                                                                                                                                                                                                                                                                                                                                                                                                                                                                                                                                                                                                                                                                                                                                                                                                                                                                                                                                          | Laboratorio Central de Salud Publica de Paraguay                                                                                                                               | Laboratorio Central de Salud Publica de Paraguay                                                                                                                                                    | Andrea Gómez de la Fuente; Cynthia Vázquez; Flavia Aburjaile; Juan Torales; Luiz Carlos Junior Alcantara; Marta Giovanetti; María José Ortega; María Liz Gamarra; Shirley Villalba; Talita Adelin; Vagner Fonseca                                                                                                                                                                                                                                                                                                                                                                                                                                                                                                                                                                                                                                                                                                                                                                                                               |
| EPI_ISL_1395936 to 1395958                                                                                                                                                                                                                                                                                                                                                                                                                                                                                                                                                                                                                                                                                                                                                                                                                                                                                                                                                                                                                                                                                                                                                                                                                                                                                                                                                                          | Laboratorio Central de Salud Pública                                                                                                                                           | Grupo de Genómica y Bioinformática del Instituto de Investigación de la Cadena Láctea CONICET-INTA on behalf of 'Proyecto Argentino Interinstitucional de genómica de SARS-CoV-2' (PAIS Consortium) | AF; Amadio; Antonieta Cayré; Eberhardt; Erica Struss; Esteban Paredes; Irazoqui; Laura Lescano; MF; Natalia Andrea Ayala y María Verónica Gómez                                                                                                                                                                                                                                                                                                                                                                                                                                                                                                                                                                                                                                                                                                                                                                                                                                                                                 |
| EPI_ISL_1395959 to 1395966                                                                                                                                                                                                                                                                                                                                                                                                                                                                                                                                                                                                                                                                                                                                                                                                                                                                                                                                                                                                                                                                                                                                                                                                                                                                                                                                                                          | Laboratorio Central de Salud Pública de la Provincia de Jujuy                                                                                                                  | Instituto de Patología Vegetal (CIAP-INTA) on behalf of 'Proyecto Argentino Interinstitucional de genómica de SARS-CoV-2' (PAIS Consortium)                                                         | A. Miguel Alejandro Charre; Amadio; Ariel David Fridman; Claudia Mamani; Debat, HJ.; FD; Fabiana Vaca.; Fernández; Irazoqui, M.; Marquez, N.                                                                                                                                                                                                                                                                                                                                                                                                                                                                                                                                                                                                                                                                                                                                                                                                                                                                                    |
| EPI_ISL_1533990, EPI_ISL_1533992 to 1533994, EPI_ISL_1533996 to 1533997, EPI_ISL_1534002 to 1534003, EPI_ISL_1534006 to 1534010                                                                                                                                                                                                                                                                                                                                                                                                                                                                                                                                                                                                                                                                                                                                                                                                                                                                                                                                                                                                                                                                                                                                                                                                                                                                     | Laboratorio Central de Saude Publica do Estado de Santa Catarina (LACEN-SC)                                                                                                    | Laboratory of Respiratory Viruses and Measles, Oswaldo Cruz Institute, FIOCRUZ                                                                                                                      | Alice Sampaio Rocha; Ana Carolina Mendonca; Anna Carolina Paixao; Darcita Buerger Rovaris; Fernando Motta; Luciana Appolinario; Marilda Siqueira on behalf of the Fiocruz COVID-19 Genomic Surveillance Network; Paola Resende; Renata Serrano Lopes; Sandra Bianchini Fernandes                                                                                                                                                                                                                                                                                                                                                                                                                                                                                                                                                                                                                                                                                                                                                |
| EPI_ISL_1534004                                                                                                                                                                                                                                                                                                                                                                                                                                                                                                                                                                                                                                                                                                                                                                                                                                                                                                                                                                                                                                                                                                                                                                                                                                                                                                                                                                                     | Laboratorio Central de Saude Publica do Estado de Sergipe (LACEN-SE)                                                                                                           | Laboratory of Respiratory Viruses and Measles, Oswaldo Cruz Institute, FIOCRUZ                                                                                                                      | Alice Sampaio Rocha; Ana Carolina Mendonca; Anna Carolina Paixao; Cliomar Alves dos Santos; Fernando Motta; Luciana Appolinario; Marilda Siqueira on behalf of the Fiocruz COVID-19 Genomic Surveillance Network; Paola Resende; Renata Serrano Lopes                                                                                                                                                                                                                                                                                                                                                                                                                                                                                                                                                                                                                                                                                                                                                                           |
| EPI_ISL_1465185 to 1465186, EPI_ISL_1465188 to 1465189, EPI_ISL_1465191 to 1465192, EPI_ISL_1465194 to 1465196, EPI_ISL_1465198 to 1465199, EPI_ISL_1465201 to 1465203, EPI_ISL_1465205 to 1465206, EPI_ISL_1465208 to 1465210, EPI_ISL_1465212 to 1465213, EPI_ISL_1465215 to 1465217, EPI_ISL_1465219 to 1465222, EPI_ISL_1465224 to 1465226, EPI_ISL_1465228 to 1465229, EPI_ISL_1465231 to 1465232, EPI_ISL_1465234 to 1465236, EPI_ISL_1465238 to 1465239, EPI_ISL_1465241 to 1465243, EPI_ISL_1465245 to 1465246, EPI_ISL_1465248 to 1465250, EPI_ISL_1465252 to 1465255, EPI_ISL_1465257 to 1465259,                                                                                                                                                                                                                                                                                                                                                                                                                                                                                                                                                                                                                                                                                                                                                                                         |                                                                                                                                                                                |                                                                                                                                                                                                     |                                                                                                                                                                                                                                                                                                                                                                                                                                                                                                                                                                                                                                                                                                                                                                                                                                                                                                                                                                                                                                 |

|                                                                                                                                                                                                                                                                                                                                                                                  |           |                                                                                                                              |                                                                                                                                                                                                                                                                |                                                                                                                                                                                                                                                                                                                                                                                                                                                                                                                                                                                                                                                                                                                                                                                       |
|----------------------------------------------------------------------------------------------------------------------------------------------------------------------------------------------------------------------------------------------------------------------------------------------------------------------------------------------------------------------------------|-----------|------------------------------------------------------------------------------------------------------------------------------|----------------------------------------------------------------------------------------------------------------------------------------------------------------------------------------------------------------------------------------------------------------|---------------------------------------------------------------------------------------------------------------------------------------------------------------------------------------------------------------------------------------------------------------------------------------------------------------------------------------------------------------------------------------------------------------------------------------------------------------------------------------------------------------------------------------------------------------------------------------------------------------------------------------------------------------------------------------------------------------------------------------------------------------------------------------|
| EPI_ISL_1465261 to 1465262, EPI_ISL_1465264 to 1465265, EPI_ISL_1465267 to 1465268, EPI_ISL_1465270 to 1465271, EPI_ISL_1465273 to 1465275, EPI_ISL_1465277 to 1465278                                                                                                                                                                                                           | see above | Laboratorio Central de Saude Publica do Estado do Maranhao (LACEN-MA)                                                        | Laboratory of Respiratory Viruses and Measles, Oswaldo Cruz Institute, FIOCRUZ                                                                                                                                                                                 | Alice Sampaio Rocha; Ana Carolina Mendonca; Ana Carolina Paixao; Fernando Motta; Lidio Gonçalves Lima Neto; Luciana Appolinario; Marilda Siqueira on behalf of the Fiocruz COVID-19 Genomic Surveillance Network; Paola Resende; Renata Serrano Lopes                                                                                                                                                                                                                                                                                                                                                                                                                                                                                                                                 |
| EPI_ISL_1533978, EPI_ISL_1533999 to 1534001                                                                                                                                                                                                                                                                                                                                      |           | Laboratorio Central de Saude Publica do Estado do Parana (LACEN-PR)                                                          | Laboratory of Respiratory Viruses and Measles, Oswaldo Cruz Institute, FIOCRUZ                                                                                                                                                                                 | Alice Sampaio Rocha; Ana Carolina Mendonca; Ana Carolina Paixao; Fernando Motta; Irina Nastassja Riediger; Luciana Appolinario; Maria do Carmo Debur; Marilda Siqueira on behalf of the Fiocruz COVID-19 Genomic Surveillance Network; Paola Resende; Renata Serrano Lopes                                                                                                                                                                                                                                                                                                                                                                                                                                                                                                            |
| EPI_ISL_1533979, EPI_ISL_1534013                                                                                                                                                                                                                                                                                                                                                 |           | Laboratorio Central de Saude Publica do Estado do Rio Grande do Sul (LACEN-RS)                                               | Laboratory of Respiratory Viruses and Measles, Oswaldo Cruz Institute, FIOCRUZ                                                                                                                                                                                 | Alice Sampaio Rocha; Ana Carolina Mendonca; Ana Carolina Paixao; Fernando Motta; Luciana Appolinario; Marilda Siqueira on behalf of the Fiocruz COVID-19 Genomic Surveillance Network; Paola Resende; Renata Serrano Lopes; Richard Salvato; Tatiana Schaffer Gregiani                                                                                                                                                                                                                                                                                                                                                                                                                                                                                                                |
| EPI_ISL_1534012                                                                                                                                                                                                                                                                                                                                                                  |           | Laboratorio Central de Saude Publica do Estado do Rio de Janeiro (LACEN-RJ)                                                  | Laboratory of Respiratory Viruses and Measles, Oswaldo Cruz Institute, FIOCRUZ                                                                                                                                                                                 | Alice Sampaio Rocha; Ana Carolina Mendonca; Andrea Cony Cavalcanti; Anna Carolina Paixao; Fernando Motta; Luciana Appolinario; Marilda Siqueira on behalf of the Fiocruz COVID-19 Genomic Surveillance Network; Paola Resende; Renata Serrano Lopes                                                                                                                                                                                                                                                                                                                                                                                                                                                                                                                                   |
| EPI_ISL_1395840 to 1395931                                                                                                                                                                                                                                                                                                                                                       |           | Laboratorio Central de la Ciudad de Santa Fe                                                                                 | Grupo de Genómica y Bioinformática del Instituto de Investigación de la Cadena Láctea CONICET-INTA on behalf of 'Proyecto Argentino Interinstitucional de genómica de SARS-CoV-2' (PAIS Consortium)                                                            | AF; Amadio; C; Eberhardt; G; Irazoqui; JM; MF; Mugna; Ojeda; Pastor; Rompató; V                                                                                                                                                                                                                                                                                                                                                                                                                                                                                                                                                                                                                                                                                                       |
| EPI_ISL_1395967 to 1396060                                                                                                                                                                                                                                                                                                                                                       |           | Laboratorio Central, Ministerio de Salud Cordoba                                                                             | Instituto de Patología Vegetal (CIAP-INTA) on behalf of 'Proyecto Argentino Interinstitucional de genómica de SARS-CoV-2' (PAIS Consortium)                                                                                                                    | Barbas, G.; Castro, G.; Debat, H.J.; FD; Fernández, M.B.; Marquez, N.; Pisano; Re, V.                                                                                                                                                                                                                                                                                                                                                                                                                                                                                                                                                                                                                                                                                                 |
| EPI_ISL_480321                                                                                                                                                                                                                                                                                                                                                                   |           | Laboratorio Clínico San José                                                                                                 | Charité Virology-University of Costa Rica                                                                                                                                                                                                                      | Andres Moreira-Soto; Eugenia Corrales-Aguilar; Hugo Núñez Navás; Ignacio Postigo-Hidalgo; Jan Felix Drexler                                                                                                                                                                                                                                                                                                                                                                                                                                                                                                                                                                                                                                                                           |
| EPI_ISL_424667                                                                                                                                                                                                                                                                                                                                                                   |           | Laboratorio Estatal de Salud Publica del Estado de México                                                                    | Instituto de Diagnóstico y Referencia Epidemiológicos                                                                                                                                                                                                          | Adnan Araiza Rodríguez; Alejandro Sánchez; Alfredo Ponce de León Garduño; Blanca Taboada; Carlos F. Arias.; Carolina González Torres; Celia Boukadida; Cesar Raúl González Bonilla; Concepción Grajales Muñiz; Edgar Mendieta Conado; Eduardo Becerril Vargas; Fabiola Garcés Ayala; Fernando Ledesma Barrientos; Francisco Javier Gaytán Cervantes; Francisco Pulido; Gisela Barrera Badillo; Gloria Vázquez; Guillermo M. Ruiz-Palacios; Irma López Martínez; Joel Armando Vázquez Pérez; José Arturo Martínez Orozco; José Ernesto Ramírez González; José Esteban Muñoz Medina; Lucía Hernández Rivas; Luis Alberto García Andrade; Mario Mújica Sánchez; Pavel Isa; Pilar Ramos Cervantes; Ricardo Grande; Santiago Avila Ríos; Victor Hugo Borja Aburto; Violeta Ibarra Gonzalez |
| EPI_ISL_424672                                                                                                                                                                                                                                                                                                                                                                   |           | Laboratorio Estatal de Salud Publica del Estado de Puebla                                                                    | Instituto de Diagnostico y Referencia Epidemiologicos                                                                                                                                                                                                          | Adnan Araiza Rodríguez; Alejandro Sánchez; Alfredo Ponce de León Garduño; Blanca Taboada; Carlos F. Arias; Carolina González Torres; Celia Boukadida; Cesar Raúl González Bonilla; Concepción Grajales Muñiz; Edgar Mendieta Conado; Eduardo Becerril Vargas; Fabiola Garcés Ayala; Fernando Ledesma Barrientos; Francisco Javier Gaytán Cervantes; Francisco Pulido; Gisela Barrera Badillo; Gloria Vázquez; Guillermo M. Ruiz-Palacios; Irma López Martínez; Joel Armando Vázquez Pérez; José Arturo Martínez Orozco; José Ernesto Ramírez González; José Esteban Muñoz Medina; Lucía Hernández Rivas; Luis Alberto García Andrade; Mario Mújica Sánchez; Pavel Isa; Pilar Ramos Cervantes; Ricardo Grande; Santiago Avila Ríos; Victor Hugo Borja Aburto; Violeta Ibarra Gonzalez  |
| EPI_ISL_424670                                                                                                                                                                                                                                                                                                                                                                   |           | Laboratorio Estatal de Salud Publica del Estado de Queretaro                                                                 | Instituto de Diagnóstico y Referencia Epidemiologicos                                                                                                                                                                                                          | Adnan Araiza Rodríguez; Alejandro Sánchez; Alfredo Ponce de León Garduño; Blanca Taboada; Carlos F. Arias; Carolina González Torres; Celia Boukadida; Cesar Raúl González Bonilla; Concepción Grajales Muñiz; Edgar Mendieta Conado; Eduardo Becerril Vargas; Fabiola Garcés Ayala; Fernando Ledesma Barrientos; Francisco Javier Gaytán Cervantes; Francisco Pulido; Gisela Barrera Badillo; Gloria Vázquez; Guillermo M. Ruiz-Palacios; Irma López Martínez; Joel Armando Vázquez Pérez; José Arturo Martínez Orozco; José Ernesto Ramírez González; José Esteban Muñoz Medina; Lucía Hernández Rivas; Luis Alberto García Andrade; Mario Mújica Sánchez; Pavel Isa; Pilar Ramos Cervantes; Ricardo Grande; Santiago Avila Ríos; Victor Hugo Borja Aburto; Violeta Ibarra Gonzalez  |
| EPI_ISL_1525249                                                                                                                                                                                                                                                                                                                                                                  |           | Laboratorio HUB -Azienda Ospedaliero Universitaria - AOU - Cagliari                                                          | Laboratorio SPOKE Biologia Molecolare -Azienda Ospedaliero Universitaria - AOU - Cagliari                                                                                                                                                                      | Alessandra Scano; Ferdinando Coghe; Germano Orrù; Riccardo Cappai; Sara Fais                                                                                                                                                                                                                                                                                                                                                                                                                                                                                                                                                                                                                                                                                                          |
| EPI_ISL_480328                                                                                                                                                                                                                                                                                                                                                                   |           | Laboratorio LABIN                                                                                                            | Charité Virology-University of Costa Rica                                                                                                                                                                                                                      | Andres Moreira-Soto; Eugenia Corrales-Aguilar; Ignacio Postigo-Hidalgo; Ignacio Soto Pacheco; Jan Felix Drexler                                                                                                                                                                                                                                                                                                                                                                                                                                                                                                                                                                                                                                                                       |
| EPI_ISL_1385805                                                                                                                                                                                                                                                                                                                                                                  |           | Laboratorio Microbiologia P.O. Cardarelli                                                                                    | Laboratorio Microbiologia P.O. Cardarelli                                                                                                                                                                                                                      | Giovanna Niro; Massimiliano Scutellà; Valentina Felice                                                                                                                                                                                                                                                                                                                                                                                                                                                                                                                                                                                                                                                                                                                                |
| EPI_ISL_1385803                                                                                                                                                                                                                                                                                                                                                                  |           | Laboratorio Microbiologia P.O.Cardarelli                                                                                     | Laboratorio Microbiologia P.O. Cardarelli                                                                                                                                                                                                                      | Giovanna Niro; Scutellà Massimiliano; Valentina Felice                                                                                                                                                                                                                                                                                                                                                                                                                                                                                                                                                                                                                                                                                                                                |
| EPI_ISL_1406778                                                                                                                                                                                                                                                                                                                                                                  |           | Laboratorio Microbiologia PO Cardarelli                                                                                      | laboratorio Microbiologia PO Cardarelli                                                                                                                                                                                                                        | Felice Valentina; Giovanna Niro; Massimiliano Scutellà                                                                                                                                                                                                                                                                                                                                                                                                                                                                                                                                                                                                                                                                                                                                |
| EPI_ISL_1533981 to 1533982, EPI_ISL_1533984 to 1533989                                                                                                                                                                                                                                                                                                                           |           | Laboratorio Nacional de Salud                                                                                                | Laboratory of Respiratory Viruses and Measles, Oswaldo Cruz Institute, FIOCRUZ                                                                                                                                                                                 | Ana Carolina Mendonca; Ana Carolina Paixao; Cesar Roberto Conde Pereira; Claudia Estrada; Fernando Motta; Luciana Appolinario; Marilda Siqueira on behalf of the Fiocruz COVID-19 Genomic Surveillance Network; Paola Resende                                                                                                                                                                                                                                                                                                                                                                                                                                                                                                                                                         |
| EPI_ISL_1396383 to 1396390                                                                                                                                                                                                                                                                                                                                                       |           | Laboratorio Salud Publica Mendoza                                                                                            | Nodo de Secuenciación Tierra del Fuego - Hospital Regional Ushuaia - Centro Austral De Investigaciones Cientificas - Universidad Nacional De Tierra Del Fuego on behalf of 'Proyecto Argentino Interinstitucional de genómica de SARS-CoV-2' (PAIS Consortium) | Aguirre Carolina; Alberto Carena; Alejandro Ezequiel Rojas; Andrea Falaschi; Belén Ortiz; Bosio Lia; Carlos Espul; Cristian Garay; Cristina Fernanda Nardi; Fernando Gallego; Fernando Giuliani; Ivan Dario Gramundí; Luciana Martinez; María Belen Peralta Roca; Patricia Robledo; Santiago Guillermo Ceballos; Silvia Zerrer; Silvina Denita                                                                                                                                                                                                                                                                                                                                                                                                                                        |
| EPI_ISL_468753 to 468759                                                                                                                                                                                                                                                                                                                                                         |           | Laboratorio de Biología Molecular, Facultad de Medicina, Universidad de Atacama                                              | Center for Mathematical Modeling and Center for Genome Regulation. Santiago, Chile                                                                                                                                                                             | Allende ML; C Echeverria; Gaete A; González M; Maass A; Palma R; Travisany D; Urra C; Varas M                                                                                                                                                                                                                                                                                                                                                                                                                                                                                                                                                                                                                                                                                         |
| EPI_ISL_457940 to 457973, EPI_ISL_480428 to 480429, EPI_ISL_480431 to 480438                                                                                                                                                                                                                                                                                                     |           | Laboratorio de Biología Molecular Asociación Española Primera en Salud                                                       | Departments of Pathology and Medicine, New York University School of Medicine                                                                                                                                                                                  | Adriana Heguy; Christian Marier; Gael Westby; Gonzalo Manrique; Maria Noel Zubillaga; Maria Victoria Elizondo; Matthew T Maurano; Paul Zappile                                                                                                                                                                                                                                                                                                                                                                                                                                                                                                                                                                                                                                        |
| EPI_ISL_417034, EPI_ISL_1533609                                                                                                                                                                                                                                                                                                                                                  |           | Laboratorio de Ecologia de Doencas Transmissíveis na Amazonia, Instituto Leonidas e Maria Deane - Fiocruz Amazonia           | Laboratorio de Ecologia de Doencas Transmissíveis na Amazonia, Instituto Leonidas e Maria Deane - Fiocruz Amazonia                                                                                                                                             | André Corado; Debora Duarte; Felipe Naveca; Felipe Naveca on behalf of the Fiocruz COVID-19 Genomic Surveillance Network; Fernanda Nascimento; George Silva; Karina Pessoa; Luciana Gonçalves; Maria Júlia Brandão; Matilde Mejía; Michele Jesus; Sérgio Luz; Valdinete Nascimento; Victor Souza; Ágatha Costa                                                                                                                                                                                                                                                                                                                                                                                                                                                                        |
| EPI_ISL_545955                                                                                                                                                                                                                                                                                                                                                                   |           | Laboratorio de Infecciones Respiratorias Agudas. Centro Nacional de Salud Publica.Instituto Nacional de Salud                | Laboratorio de Infecciones Respiratorias Agudas. Centro Nacional de Salud Publica.Instituto Nacional de Salud                                                                                                                                                  | Juscamayta, E.                                                                                                                                                                                                                                                                                                                                                                                                                                                                                                                                                                                                                                                                                                                                                                        |
| EPI_ISL_591531 to 591534                                                                                                                                                                                                                                                                                                                                                         |           | Laboratorio de Infectología y virología molecular                                                                            | Center for Mathematical Modeling and Center for Genome Regulation. Santiago, Chile                                                                                                                                                                             | Allende ML; Ferres M.; Gaete A; González M; Maass A; Palma R; Travisany D; Urra C; Valiente F; Varas M                                                                                                                                                                                                                                                                                                                                                                                                                                                                                                                                                                                                                                                                                |
| EPI_ISL_1511641, EPI_ISL_1511644                                                                                                                                                                                                                                                                                                                                                 |           | Laboratorio de Patología Clínica - UNICAMP                                                                                   | Laboratorio de Estudos de Virus Emergentes                                                                                                                                                                                                                     | Alessandro S. Farias; Aline Vieira; André S. Vieira; Angelica Schreiber; Antonio C. G. Carlos Jr; Barbara F. N. Carvalho; Camila L. Simeoni; Daniel A. Toledo-Teixeira; Emerson S.S. França; Ester C. Sabino; Fabiana Granja; Fernando R. Spilki; Gisele A. Pedroso; Ingra M. Claro; José Luiz Proenca-Modena; Julia Forato; Kamila C. S. Krywacz; Karina Bispo-dos-Santos; Luciana S. Mofatto; Luis Felipe Bachur; Luis G. O. Cardoso; Magnus N. N. Santos; Marcelo A. Mori; Maria H. P. Pavan; Maria L. Moretti; Mariene R. Amorim; Natalia S. Brunetti; Nuno R. Faria; Patricia A. F. Leme; Pierina L. Parise; Rodrigo Angerami; Tania R. Zaccariotto; William M. Souza                                                                                                            |
| EPI_ISL_1511399                                                                                                                                                                                                                                                                                                                                                                  |           | Laboratorio de Patología Clínica - UNICAMP                                                                                   | Laboratorio de Estudos de Virus Emergentes - UNICAMP                                                                                                                                                                                                           | Alessandro S. Farias; Aline Vieira; André S. Vieira; Angelica Schreiber; Antonio C. G. Carlos Jr; Barbara F. N. Carvalho; Camila L. Simeoni; Daniel A. Toledo-Teixeira; Emerson S.S. França; Ester C. Sabino; Fabiana Granja; Fernando R. Spilki; Gisele A. Pedroso; Ingra M. Claro; José Luiz Proenca-Modena; Julia Forato; Kamila C. S. Krywacz; Karina Bispo-dos-Santos; Luciana S. Mofatto; Luis Felipe Bachur; Luis G. O. Cardoso; Magnus N. N. Santos; Marcelo A. Mori; Maria H. P. Pavan; Maria L. Moretti; Mariene R. Amorim; Natalia S. Brunetti; Nuno R. Faria; Patricia A. F. Leme; Pierina L. Parise; Rodrigo Angerami; Tania R. Zaccariotto; William M. Souza                                                                                                            |
| EPI_ISL_517770, EPI_ISL_517959                                                                                                                                                                                                                                                                                                                                                   |           | Laboratorio de Referencia Nacional de Virus Respiratorio. Centro Nacional de Salud Publica. Instituto Nacional de Salud Peru | Laboratorio de Referencia Nacional de Biotecnología y Biología Molecular. Centro Nacional de Salud Publica. Instituto Nacional de Salud Peru.                                                                                                                  | Carlos Padilla Rojas; Henri Bailon Calderon; Johanna Balbuena Torres; Karolyn Vega Chozo; Marco Galarza Perez; Maribel Huaranga Nuñez; Nancy Rojas Serrano.; Omar Caceres Rey; Priscila Lope Pari                                                                                                                                                                                                                                                                                                                                                                                                                                                                                                                                                                                     |
| EPI_ISL_516626, EPI_ISL_516628, EPI_ISL_516646 to 516647, EPI_ISL_516653 to 516654, EPI_ISL_516685 to 516686, EPI_ISL_516721 to 516722, EPI_ISL_516987, EPI_ISL_517531, EPI_ISL_517686 to 517687, EPI_ISL_517713, EPI_ISL_517958, EPI_ISL_523810, EPI_ISL_523954, EPI_ISL_523979, EPI_ISL_523994, EPI_ISL_524471, EPI_ISL_524473, EPI_ISL_525206, EPI_ISL_527787, EPI_ISL_527789 |           |                                                                                                                              |                                                                                                                                                                                                                                                                |                                                                                                                                                                                                                                                                                                                                                                                                                                                                                                                                                                                                                                                                                                                                                                                       |

|                                                                                                                                                                                                                                                                                                                                                                                                                                                                                                                                       |                                                                                                                               |                                                                                                                                                                                                 |                                                                                                                                                                                                                                                                                                                                                                                                                                                                    |
|---------------------------------------------------------------------------------------------------------------------------------------------------------------------------------------------------------------------------------------------------------------------------------------------------------------------------------------------------------------------------------------------------------------------------------------------------------------------------------------------------------------------------------------|-------------------------------------------------------------------------------------------------------------------------------|-------------------------------------------------------------------------------------------------------------------------------------------------------------------------------------------------|--------------------------------------------------------------------------------------------------------------------------------------------------------------------------------------------------------------------------------------------------------------------------------------------------------------------------------------------------------------------------------------------------------------------------------------------------------------------|
| see above                                                                                                                                                                                                                                                                                                                                                                                                                                                                                                                             | Laboratorio de Referencia Nacional de Virus Respiratorio. Centro Nacional de Salud Publica. Instituto Nacional de Salud Peru. | Laboratorio de Referencia Nacional de Biotecnología y Biología Molecular. Centro Nacional de Salud Publica. Instituto Nacional de Salud Peru.                                                   | Carlos Padilla Rojas; Henri Bailon Calderon; Johanna Balbuena Torres; Karolyn Vega Chozo; Marco Galarza Perez; Maribel Huaranga Nuñez; Nancy Rojas Serrano.; Omar Caceres Rey; Priscila Lope Pari                                                                                                                                                                                                                                                                  |
| EPI_ISL_1549140                                                                                                                                                                                                                                                                                                                                                                                                                                                                                                                       | Laboratorio de Referencia Nacional de Virus Respiratorio. Instituto Nacional de Salud Peru                                    | Laboratorio de Referencia Nacional de Biotecnología y Biología Molecular. Instituto Nacional de Salud Peru                                                                                      | Carlos Padilla Rojas; Henri Bailon Calderon; Johanna Balbuena Torres; Karolyn Vega Chozo; Luis Barcena; Marco Galarza Perez; Maribel Huaranga Nuñez; Nancy Rojas Serrano; Omar Caceres Rey; Priscila Lope Pari                                                                                                                                                                                                                                                     |
| EPI_ISL_1548074                                                                                                                                                                                                                                                                                                                                                                                                                                                                                                                       | Laboratorio de Referencia Nacional de Virus Respiratorio. Instituto Nacional de Salud Peru                                    | Laboratorio de Referencia Nacional de Biotecnología y Biología Molecular. Instituto Nacional de Salud Peru                                                                                      | Carlos Padilla Rojas; Henri Bailon Calderon; Johanna Balbuena Torres; Karolyn Vega Chozo; Luis Barcena; Marco Galarza Perez; Maribel Huaranga Nuñez; Nancy Rojas Serrano; Omar Caceres Rey; Priscila Lope Pari                                                                                                                                                                                                                                                     |
| EPI_ISL_489836 to 489839, EPI_ISL_489987 to 489990, EPI_ISL_490209, EPI_ISL_490315 to 490316, EPI_ISL_490975 to 490976, EPI_ISL_491427 to 491430, EPI_ISL_491433 to 491436, EPI_ISL_491458 to 491464, EPI_ISL_514226, EPI_ISL_514317, EPI_ISL_514338 to 514342, EPI_ISL_1532145 to 1532235,                                                                                                                                                                                                                                           |                                                                                                                               |                                                                                                                                                                                                 |                                                                                                                                                                                                                                                                                                                                                                                                                                                                    |
| see above                                                                                                                                                                                                                                                                                                                                                                                                                                                                                                                             | Laboratorio de Referencia Nacional de Virus Respiratorio. Instituto Nacional de Salud Peru                                    | Laboratorio de Referencia Nacional de Biotecnología y Biología Molecular. Instituto Nacional de Salud Peru                                                                                      | Carlos Padilla Rojas; Henri Bailon Calderon; Johanna Balbuena Torres; Johanna Balbuena Torres; Karolyn Vega Chozo; Karolyn Chozo Vega; Karolyn Vega Chozo; Luis Barcena; Marco Galarza Perez; Maribel Huaranga Nuñez; Nancy Rojas Serrano.; Omar Caceres Rey; Priscila Lope Pari                                                                                                                                                                                   |
| EPI_ISL_491172                                                                                                                                                                                                                                                                                                                                                                                                                                                                                                                        | Laboratorio de Referencia Nacional de Virus Respiratorio. Instituto Nacional de Salud Peru                                    | Laboratorio de Referencia Nacional de Biotecnología y Biología Molecular. Instituto Nacional de Salud Peru.                                                                                     | Carlos Padilla Rojas; Henri Bailon Calderon; Johanna Balbuena Torres; Karolyn Chozo Vega; Marco Galarza Perez; Maribel Huaranga Nuñez; Nancy Rojas Serrano; Omar Caceres Rey; Priscila Lope Pari                                                                                                                                                                                                                                                                   |
| EPI_ISL_487269                                                                                                                                                                                                                                                                                                                                                                                                                                                                                                                        | Laboratorio de Referencia Nacional de Virus Respiratorio. Instituto Nacional de Salud.                                        | Laboratorio de Referencia Nacional de Biotecnología y Biología Molecular. Instituto Nacional de Salud.                                                                                          | Carlos Padilla Rojas; Henri Bailon Calderon; Johanna Balbuena Torres; Karolyn Chozo Vega; Marco Galarza Perez; Maribel Huaranga Nuñez; Nancy Rojas Serrano; Omar Caceres Rey; Priscila Lope Pari                                                                                                                                                                                                                                                                   |
| EPI_ISL_415787, EPI_ISL_514227                                                                                                                                                                                                                                                                                                                                                                                                                                                                                                        | Laboratorio de Referencia Nacional de Virus Respiratorio. Instituto Nacional de Salud. Peru                                   | Laboratorio de Referencia Nacional de Biotecnología y Biología Molecular. Instituto Nacional de Salud.Peru                                                                                      | Carlos Padilla Rojas; Henri Bailon Calderon; Henri Bailon Calderon; Johanna Balbuena Torres; Johanna Balbuena Torres; Karolyn Vega Chozo; Marco Galarza Perez; Maribel Huaranga Nuñez; Nancy Rojas Serrano; Omar Caceres Rey; Priscila Lope Pari                                                                                                                                                                                                                   |
| EPI_ISL_514264 to 514265                                                                                                                                                                                                                                                                                                                                                                                                                                                                                                              | Laboratorio de Referencia Nacional de Virus Respiratorio. Instituto Nacional de Salud. Perú                                   | Laboratorio de Referencia Nacional de Biotecnología y Biología Molecular. Instituto Nacional de Salud. Perú                                                                                     | Carlos Padilla Rojas; Henri Bailon Calderon; Johanna Balbuena Torres; Karolyn Vega Chozo; Marco Galarza Perez; Maribel Huaranga Nuñez; Nancy Rojas Serrano; Omar Caceres Rey; Priscila Lope Pari                                                                                                                                                                                                                                                                   |
| EPI_ISL_491431                                                                                                                                                                                                                                                                                                                                                                                                                                                                                                                        | Laboratorio de Referencia Nacional de Virus Respiratorio. Instituto Nacional de Salud. Perú                                   | Laboratorio de Referencia Nacional de Biotecnología y Biología Molecular. Instituto Nacional de Salud. Perú                                                                                     | Carlos Padilla Rojas; Henri Bailon Calderon; Johanna Balbuena Torres; Karolyn Vega Chozo; Marco Galarza Perez; Maribel Huaranga Nuñez; Nancy Rojas Serrano.; Omar Caceres Rey; Priscila Lope Pari                                                                                                                                                                                                                                                                  |
| EPI_ISL_491432                                                                                                                                                                                                                                                                                                                                                                                                                                                                                                                        | Laboratorio de Referencia Nacional de Virus Respiratorio. Instituto Nacional de Salud. Perú                                   | Laboratorio de Referencia Nacional de Biotecnología y Biología Molecular. Instituto Nacional de Salud. Perú                                                                                     | Carlos Padilla Rojas; Henri Bailon Calderon; Johanna Balbuena Torres; Karolyn Vega Chozo; Marco Galarza Perez; Maribel Huaranga Nuñez; Nancy Rojas Serrano.; Omar Caceres Rey; Priscila Lope Pari                                                                                                                                                                                                                                                                  |
| EPI_ISL_529065 to 529079, EPI_ISL_540923 to 540992, EPI_ISL_568510 to 568555                                                                                                                                                                                                                                                                                                                                                                                                                                                          | Laboratorio de Referencia Nacional de Virus Respiratorios. Instituto Nacional de Salud Peru                                   | Laboratorio de Genómica Microbiana, Universidad Peruana Cayetano Heredia                                                                                                                        | Alejandra Dávila-Barclay; Brenda Ayzanoa; Camila Castillo-Vilcahuaman; Guillermo Salvatierra; Janet Huancachoque; Luis González; Maribel Huaranga; Pablo Tsukayama; Pedro E. Romero; Pool Marcos                                                                                                                                                                                                                                                                   |
| EPI_ISL_482468                                                                                                                                                                                                                                                                                                                                                                                                                                                                                                                        | Laboratorio de Referencia Nacional de Virus Respiratorios. Instituto Nacional de Salud Peru                                   | Laboratorio de Referencia Nacional de Biotecnología y Biología Molecular. Instituto Nacional de Salud Peru                                                                                      | Carlos Padilla Rojas; Henri Bailon Calderon; Johanna Balbuena Torres; Karolyn Vega Chozo; Maribel Huaranga Nuñez; Nancy Rojas Serrano; Omar Caceres Rey; Priscila Lope Pari                                                                                                                                                                                                                                                                                        |
| EPI_ISL_1494941 to 1494943                                                                                                                                                                                                                                                                                                                                                                                                                                                                                                            | Laboratorio de Salud Publica Arauca                                                                                           | Instituto Nacional de Salud- Dirección de Investigación en Salud Pública                                                                                                                        | Carlos Franco-Muñoz; Carmen Osorio; Diana Malo; Diego A. Álvarez-Díaz; Diego Andrés Prada; Gerardo Santamaría; Hector Alejandro Ruiz-Moreno; Jhonnatan Reales-González; Juan Camilo Martínez; Julian Naizaque; Katherine Laiton-Donato; Lisseth Pardo; Magdalena Wiesner; Marcela Mercado-Reyes; María T. Herrera-Sepúlveda; Marta Lopez Blanco; Martha Lucia Ospina Martinez; Paola Rojas; Sergio Gomez; Sheryll Corchuelo; Ángela Alarcon Cruz                   |
| EPI_ISL_1494950                                                                                                                                                                                                                                                                                                                                                                                                                                                                                                                       | Laboratorio de Salud Publica de Santander                                                                                     | Instituto Nacional de Salud- Dirección de Investigación en Salud Pública                                                                                                                        | Carlos Franco-Muñoz; Carmen Osorio; Diana Malo; Diego A. Álvarez-Díaz; Diego Andrés Prada; Gerardo Santamaría; Hector Alejandro Ruiz-Moreno; Jhonnatan Reales-González; Juan Camilo Martínez; Julian Naizaque; Katherine Laiton-Donato; Lisseth Pardo; Magdalena Wiesner; Marcela Mercado-Reyes; María T. Herrera-Sepúlveda; Marta Lopez Blanco; Martha Lucia Ospina Martinez; Paola Rojas; Sergio Gomez; Sheryll Corchuelo; Ángela Alarcon Cruz                   |
| EPI_ISL_1396061 to 1396091                                                                                                                                                                                                                                                                                                                                                                                                                                                                                                            | Laboratorio de Salud Pública                                                                                                  | Instituto de Patología Vegetal (CIAP-INTA) on behalf of 'Proyecto Argentino Interinstitucional de genómica de SARS-CoV-2' (PAIS Consortium)                                                     | A. Mariana B. Salmerón; Amadio; Ana Maria Zamora; Dardo E. Costas; Debat, HJ.; FD; Fernández; Graciela Alabarse.; Gustavo Ruiz de Huidobro; Irazoqui, M.; Marquez, N.                                                                                                                                                                                                                                                                                              |
| EPI_ISL_1494959                                                                                                                                                                                                                                                                                                                                                                                                                                                                                                                       | Laboratorio de Salud Pública - Secretaría Distrital de Salud                                                                  | Instituto Nacional de Salud- Dirección de Investigación en Salud Pública                                                                                                                        | Carlos Franco-Muñoz; Carmen Osorio; Diana Malo; Diego A. Álvarez-Díaz; Diego Andrés Prada; Gerardo Santamaría; Hector Alejandro Ruiz-Moreno; Jhonnatan Reales-González; Juan Camilo Martínez; Julian Naizaque; Katherine Laiton-Donato; Lisseth Pardo; Magdalena Wiesner; Marcela Mercado-Reyes; María T. Herrera-Sepúlveda; Marta Lopez Blanco; Martha Lucia Ospina Martinez; Paola Rojas; Sergio Gomez; Sheryll Corchuelo; Ángela Alarcon Cruz                   |
| EPI_ISL_470615 to 470650                                                                                                                                                                                                                                                                                                                                                                                                                                                                                                              | Laboratorio de Virología Molecular / UFRJ                                                                                     | Bioinformatics Laboratory / LNCC                                                                                                                                                                | Alexandra Gerber; Amílcar Tanuri; Ana Paula Guimarães; CADDE-group; Carolina Voloch; Ester Cerdeira Sabino; Filipe Romero; Ingra Morales Claro; Jaqueline Goes de Jesus; Laboratorio Hermes Pardini; Laboratorio Simile; Luiz Gonzaga Paula de Almeida; Mariane Talon; Nuno Rodrigues Faria; Renato Santana Aguiar e Ana Tereza Vasconcelos; Ronaldo da Silva Francisco Junior; Terezinha Marta Pereira; working group UFMG; working group UFRJ; Átula Duque Rossi |
| EPI_ISL_1533977, EPI_ISL_1533991, EPI_ISL_1533995, EPI_ISL_1533998                                                                                                                                                                                                                                                                                                                                                                                                                                                                    | Laboratorio de Virología Molecular / UFRJ                                                                                     | Laboratory of Respiratory Viruses and Measles, Oswaldo Cruz Institute, FIOCRUZ                                                                                                                  | Alice Sampaio Rocha; Amílcar Tanuri; Ana Carolina Mendonca; Anna Carolina Paixao; Carolina M Voloch; Fernando Motta; Luciana Appolinario; Marilda Siqueira on behalf of the Fio Cruz COVID-19 Genomic Surveillance Network; Paola Resende; Renata Serrano Lopes                                                                                                                                                                                                    |
| EPI_ISL_1399180, EPI_ISL_1399228 to 1399229, EPI_ISL_1399258, EPI_ISL_1406186, EPI_ISL_1406188, EPI_ISL_1406190 to 1406191, EPI_ISL_1406193, EPI_ISL_1406200, EPI_ISL_1406203, EPI_ISL_1406240, EPI_ISL_1406248, EPI_ISL_1406272 to 1406273, EPI_ISL_1406275 to 1406276, EPI_ISL_1406280, EPI_ISL_1406282, EPI_ISL_1406291, EPI_ISL_1406293, EPI_ISL_1406387 to 1406389, EPI_ISL_1406392, EPI_ISL_1406396, EPI_ISL_1406398, EPI_ISL_1406408 to 1406410, EPI_ISL_1406417 to 1406430, EPI_ISL_1406598, EPI_ISL_1406689, EPI_ISL_1472108 |                                                                                                                               |                                                                                                                                                                                                 |                                                                                                                                                                                                                                                                                                                                                                                                                                                                    |
| see above                                                                                                                                                                                                                                                                                                                                                                                                                                                                                                                             | Laboratorio de Virología HUCA                                                                                                 | Laboratorio de Virología HUCA                                                                                                                                                                   | Abreu F; Alvarez-Arguelles ME; Boga JA; Castelló C; Costales I; Coto E; Gómez de Oña J; Martín-Rodríguez G; Melón S; Perez-Martinez Z; Rojo S; Sandoval M                                                                                                                                                                                                                                                                                                          |
| EPI_ISL_1396246 to 1396331                                                                                                                                                                                                                                                                                                                                                                                                                                                                                                            | Laboratorio de Virología del Hospital de Niños Dr. Ricardo Gutiérrez                                                          | Biocódices SA. on behalf of 'Proyecto Argentino Interinstitucional de genómica de SARS-CoV-2' (PAIS Consortium)                                                                                 | A; Acevedo; Alexay; Alvarez Lopez; Barreda Frank; Berros; C; Dopazo, H.; E; G; Grandis; J; JM; Jacques; Labarta; M; ME; Medina; Mistchenko; N; O; S; Streitenberger; Thomas; Villegas; Zubrzycki J                                                                                                                                                                                                                                                                 |
| EPI_ISL_430795, EPI_ISL_430799 to 430801, EPI_ISL_430803 to 430804, EPI_ISL_430807, EPI_ISL_430809 to 430818, EPI_ISL_1395777 to 1395781, EPI_ISL_1395786 to 1395787, EPI_ISL_1395791 to 1395797, EPI_ISL_1395805 to 1395806, EPI_ISL_1396149 to 1396245                                                                                                                                                                                                                                                                              |                                                                                                                               |                                                                                                                                                                                                 |                                                                                                                                                                                                                                                                                                                                                                                                                                                                    |
| see above                                                                                                                                                                                                                                                                                                                                                                                                                                                                                                                             | Laboratorio de Virología del Hospital de Niños Dr. Ricardo Gutiérrez                                                          | Área de Secuenciación del Laboratorio de Virología del Hospital de Niños Dr. Ricardo Gutiérrez on behalf of 'Proyecto Argentino Interinstitucional de genómica de SARS-CoV-2' (PAIS Consortium) | A; AS; Acevedo; Acuña; Alexay; Alvarez Lopez; Barreda Frank; C; D; E; Echavarría; G; Goya; Grandis; Gravis; Jacques; LE; Labarta; Lusso; M; ME; MI; MS; Medina; Mistchenko; N; Nabaes Jodar; Natale; O; S; Streitenberger; Thomas; Valinotto; Viegas, M.; Villegas                                                                                                                                                                                                 |
| EPI_ISL_1396092 to 1396123                                                                                                                                                                                                                                                                                                                                                                                                                                                                                                            | Laboratorio de Virus Respiratorios y Neurovirosis. Hospital Señor del Milagro                                                 | Instituto de Patología Vegetal (CIAP-INTA) on behalf of 'Proyecto Argentino Interinstitucional de genómica de SARS-CoV-2' (PAIS Consortium)                                                     | A. Dra. Raskovsky Viviana; Amadio; Debat, HJ.; Dr. Lavaque Esteban; Dra. Veronica Lesser. Tecnica: Pamela Cajal; FD; Fernanda Agüero.; Fernández; Irazoqui, M.; Marquez, N.                                                                                                                                                                                                                                                                                        |
| EPI_ISL_1396124 to 1396131, EPI_ISL_1396140 to 1396148                                                                                                                                                                                                                                                                                                                                                                                                                                                                                | Laboratorio de la Dirección de Epidemiología                                                                                  | Área de Secuenciación del Laboratorio de Virología del Hospital de Niños Dr. Ricardo Gutiérrez on behalf of 'Proyecto Argentino Interinstitucional de genómica de SARS-CoV-2' (PAIS Consortium) | AG; Acuña; Alexay; Bertone; C; D; Goya; JC; LE; Lusso; M; MI; Nabaes Jodar; Natale; Rechimont; S; Usero; Valinotto; Viegas, M.; Villasana                                                                                                                                                                                                                                                                                                                          |
| EPI_ISL_1395790                                                                                                                                                                                                                                                                                                                                                                                                                                                                                                                       | Laboratorio de salud pública, Facultad de Ciencias Exactas, UNLP                                                              | Área de Secuenciación del Laboratorio de Virología del Hospital de Niños Dr. Ricardo Gutiérrez on behalf of 'Proyecto Argentino Interinstitucional de genómica de SARS-CoV-2' (PAIS Consortium) | Acuña; Andrés Angelletti; Andrés Cordero; Carina Tersigni; D; Goya; LE; Laura Delaplace; Lusso; M; MI; Nabaes Jodar; Natale; Rosana Isabel Toro; S; Valinotto; Victoria Nadalich; Viegas, M.; Victoria Cabassi                                                                                                                                                                                                                                                     |
| EPI_ISL_1395789, EPI_ISL_1395798 to 1395801                                                                                                                                                                                                                                                                                                                                                                                                                                                                                           | Laboratorio del Hospital Interzonal General de Agudos "Evita"                                                                 | Área de Secuenciación del Laboratorio de Virología del Hospital de Niños Dr. Ricardo Gutiérrez on behalf of 'Proyecto                                                                           | Acuña; Alejandra Musto; Alexay; D; Erica Luczak; Goya; Isabel Desimone; LE; Lorena Serrano; Lusso; M; MI; Nabaes Jodar; Natale; Omar Grossi; Rubén Pelagamos; S; Valinotto; Viegas, M.                                                                                                                                                                                                                                                                             |

|                                                                                                                                                                                                                                                                                                                                                                                    |                                                                                                                                      |                                                                                                                                                                                                               |                                                                                                                                                                                                                                                                |                                                                                                                                                                                                                                                                                                                                                                                                                                                                                                          |
|------------------------------------------------------------------------------------------------------------------------------------------------------------------------------------------------------------------------------------------------------------------------------------------------------------------------------------------------------------------------------------|--------------------------------------------------------------------------------------------------------------------------------------|---------------------------------------------------------------------------------------------------------------------------------------------------------------------------------------------------------------|----------------------------------------------------------------------------------------------------------------------------------------------------------------------------------------------------------------------------------------------------------------|----------------------------------------------------------------------------------------------------------------------------------------------------------------------------------------------------------------------------------------------------------------------------------------------------------------------------------------------------------------------------------------------------------------------------------------------------------------------------------------------------------|
| EPI_ISL_1396332 to 1396363                                                                                                                                                                                                                                                                                                                                                         | Laboratorio del Hospital Regional Ushuaia Gdor. Ernesto Campos                                                                       | Argentino Interinstitucional de genómica de SARS-CoV-2' (PAIS Consortium)                                                                                                                                     | Nodo de Secuenciación Tierra del Fuego - Hospital Regional Ushuaia - Centro Austral De Investigaciones Científicas - Universidad Nacional De Tierra Del Fuego on behalf of 'Proyecto Argentino Interinstitucional de genómica de SARS-CoV-2' (PAIS Consortium) | Alejandro Ezequiel Rojas; Carina Andrea De Roccis; Carolina Beatriz Yulan; Cristina Fernanda Nardi; Fernando Gallego; Gabriel Alejandro Castro; Ivan Dario Gramundi; Manuel Fabian Boutoureira; Santiago Guillermo Ceballos; Silvana Beatriz Cáceres                                                                                                                                                                                                                                                     |
| EPI_ISL_1395788, EPI_ISL_1395807                                                                                                                                                                                                                                                                                                                                                   | Laboratorio del Hospital Teresa Germani                                                                                              |                                                                                                                                                                                                               | Área de Secuenciación del Laboratorio de Virología del Hospital de Niños Dr. Ricardo Gutierrez on behalf of 'Proyecto Argentino Interinstitucional de genómica de SARS-CoV-2' (PAIS Consortium)                                                                | Acuña; Alexay; Anabel Luzio; D; Gisela Saucó; Goya; LE; Lusso; M; MI; Mauricio Spacavento; Nabaes Jodar; Natale; S; Valinotto; Viegas, M.                                                                                                                                                                                                                                                                                                                                                                |
| EPI_ISL_1442994 to 1442999<br>EPI_ISL_1499593                                                                                                                                                                                                                                                                                                                                      | Laboratorio di Genetica Medica Matera, Italy<br>Laboratorio di Microbiologia e Virologia, Università Vita-Salute San Raffaele, Milan | Laboratorio di Genetica Medica Matera, Italy<br>Laboratorio di Microbiologia e Virologia, Università Vita-Salute San Raffaele, Milan                                                                          |                                                                                                                                                                                                                                                                | Angela Mitidieri; Arianna Allegretti; Domenico Dell'Edera; Simone Francesca<br>Elena Criscuolo; Massimo Clementi; Matteo Castelli; Nicasio Mancini on behalf of SARS-CoV-2 ITALIAN RESEARCH ENTERPRISE-(SCIRE) Collaborative Group; Nicola Clementi; Roberta Antonia Diotti; Roberto Ferrarese                                                                                                                                                                                                           |
| EPI_ISL_413489, EPI_ISL_1499504, EPI_ISL_1499572, EPI_ISL_1499594                                                                                                                                                                                                                                                                                                                  | Laboratorio di Microbiologia e Virologia, Università Vita-Salute San Raffaele, Milano                                                | Laboratorio di Microbiologia e Virologia, Università Vita-Salute San Raffaele, Milano                                                                                                                         |                                                                                                                                                                                                                                                                | C. Di Resta; E. Boeri; E. Criscuolo; Elena Criscuolo; G. Lo Raso; I. Negri; M. Castelli; M. Clementi; M. Sampaolo; Massimo Clementi; Matteo Castelli; N. Mancini & N. Clementi; Nicasio Mancini; Nicola Clementi; Nicola Clementi on behalf of SARS-CoV-2 ITALIAN RESEARCH ENTERPRISE-(SCIRE) Collaborative Group; R. Burioni; R. Ferrarese; R.A Diotti; Roberta Antonia Diotti; Roberto Ferrarese; V. Amato; V. Caputo; on behalf of SARS-CoV-2 ITALIAN RESEARCH ENTERPRISE-(SCIRE) Collaborative Group |
| EPI_ISL_1406780, EPI_ISL_1495144 to 1495149, EPI_ISL_1495151                                                                                                                                                                                                                                                                                                                       | Laboratorio microbiologia PO Cardarelli                                                                                              | Laboratorio microbiologia PO Cardarelli                                                                                                                                                                       |                                                                                                                                                                                                                                                                | Giovanna Niro; Giovanna niro; Massimiliano Scutella; Massimiliano Scutella; Massimiliano scutella; Valentina Felice; Valentina felice; Valentna Felice; giovanna Niro                                                                                                                                                                                                                                                                                                                                    |
| EPI_ISL_1406779, EPI_ISL_1406781                                                                                                                                                                                                                                                                                                                                                   | Laboratorio microbiologia PO Cardarelli                                                                                              | laboratorio microbiologia PO Cardarelli                                                                                                                                                                       |                                                                                                                                                                                                                                                                | Giovanna Niro; Massimiliano Scutella; Valentina Felice                                                                                                                                                                                                                                                                                                                                                                                                                                                   |
| EPI_ISL_1538461, EPI_ISL_1539088 to 1539090                                                                                                                                                                                                                                                                                                                                        | Laboratorium Analityczne Centrum                                                                                                     | 1. National Institute of Public Health - National Institute of Hygiene; 2. Eurofins Genomics Europe Sequencing GmbH                                                                                           |                                                                                                                                                                                                                                                                | ECDC COVID-19 WGS support team; Eurofins Genomics Europe Sequencing Team; Gierczyki Rafa; Sadkowska-Todys Magorzata; Wokowicz Tomasz; Zacharczuk Katarzyna                                                                                                                                                                                                                                                                                                                                               |
| EPI_ISL_1394274 to 1394280, EPI_ISL_1538513, EPI_ISL_1538604 to 1538609, EPI_ISL_1538777 to 1538779, EPI_ISL_1538950 to 1538956, EPI_ISL_1539045 to 1539046                                                                                                                                                                                                                        | Laboratorium Analiz Lekarskich Alab Rzeszów                                                                                          | 1. National Institute of Public Health - National Institute of Hygiene; 2. Eurofins Genomics Europe Sequencing GmbH                                                                                           |                                                                                                                                                                                                                                                                | ECDC COVID-19 WGS support team; Eurofins Genomics Europe Sequencing Team; Gierczyki Rafa; Sadkowska-Todys Magorzata; Wokowicz Tomasz; Zacharczuk Katarzyna                                                                                                                                                                                                                                                                                                                                               |
| EPI_ISL_1394270 to 1394273, EPI_ISL_1538611, EPI_ISL_1538780 to 1538784, EPI_ISL_1538960 to 1538961, EPI_ISL_1539047 to 1539048, EPI_ISL_1539231 to 1539232                                                                                                                                                                                                                        | Laboratorium Analiz Lekarskich Alab Tarnobrzeg                                                                                       | 1. National Institute of Public Health - National Institute of Hygiene; 2. Eurofins Genomics Europe Sequencing GmbH                                                                                           |                                                                                                                                                                                                                                                                | ECDC COVID-19 WGS support team; Eurofins Genomics Europe Sequencing Team; Gierczyki Rafa; Sadkowska-Todys Magorzata; Wokowicz Tomasz; Zacharczuk Katarzyna                                                                                                                                                                                                                                                                                                                                               |
| EPI_ISL_1393699 to 1393700, EPI_ISL_1393984 to 1393991, EPI_ISL_1538443, EPI_ISL_1538454, EPI_ISL_1538467, EPI_ISL_1538475, EPI_ISL_1538485, EPI_ISL_1538500, EPI_ISL_1538520, EPI_ISL_1538530 to 1538531, EPI_ISL_1538558 to 1538564, EPI_ISL_1538725 to 1538730, EPI_ISL_1538873, EPI_ISL_1538908, EPI_ISL_1539014 to 1539015, EPI_ISL_1539147, EPI_ISL_1539151, EPI_ISL_1539153 |                                                                                                                                      |                                                                                                                                                                                                               |                                                                                                                                                                                                                                                                |                                                                                                                                                                                                                                                                                                                                                                                                                                                                                                          |
| see above                                                                                                                                                                                                                                                                                                                                                                          | Laboratorium Badawczo-Rozwojowe Vitagenum                                                                                            | 1. National Institute of Public Health - National Institute of Hygiene; 2. Eurofins Genomics Europe Sequencing GmbH                                                                                           |                                                                                                                                                                                                                                                                | ECDC COVID-19 WGS support team; Eurofins Genomics Europe Sequencing Team; Gierczyki Rafa; Sadkowska-Todys Magorzata; Wokowicz Tomasz; Zacharczuk Katarzyna                                                                                                                                                                                                                                                                                                                                               |
| EPI_ISL_1393701 to 1393708, EPI_ISL_1393993 to 1394002, EPI_ISL_1425561, EPI_ISL_1538555 to 1538557, EPI_ISL_1538731 to 1538734, EPI_ISL_1538903 to 1538907, EPI_ISL_1539016 to 1539017, EPI_ISL_1539183 to 1539184, EPI_ISL_1539216                                                                                                                                               | Laboratorium Diagnostyczne Centrum Medycznego Luxmed                                                                                 | 1. National Institute of Public Health - National Institute of Hygiene; 2. Eurofins Genomics Europe Sequencing GmbH                                                                                           |                                                                                                                                                                                                                                                                | ECDC COVID-19 WGS support team; Eurofins Genomics Europe Sequencing Team; Gierczyki Rafa; Sadkowska-Todys Magorzata; Wokowicz Tomasz; Zacharczuk Katarzyna                                                                                                                                                                                                                                                                                                                                               |
| EPI_ISL_1538491, EPI_ISL_1538748, EPI_ISL_1539142                                                                                                                                                                                                                                                                                                                                  | Laboratorium Diagnostyczno-Analityczne                                                                                               | 1. National Institute of Public Health - National Institute of Hygiene; 2. Eurofins Genomics Europe Sequencing GmbH                                                                                           |                                                                                                                                                                                                                                                                | ECDC COVID-19 WGS support team; Eurofins Genomics Europe Sequencing Team; Gierczyki Rafa; Sadkowska-Todys Magorzata; Wokowicz Tomasz; Zacharczuk Katarzyna                                                                                                                                                                                                                                                                                                                                               |
| EPI_ISL_1393871 to 1393873, EPI_ISL_1447261                                                                                                                                                                                                                                                                                                                                        | Laboratorium Diagnostyczno-Analityczne Pozna                                                                                         | 1. National Institute of Public Health - National Institute of Hygiene; 2. Eurofins Genomics Europe Sequencing GmbH                                                                                           |                                                                                                                                                                                                                                                                | ECDC COVID-19 WGS support team; Eurofins Genomics Europe Sequencing Team; Gierczyki Rafa; Sadkowska-Todys Magorzata; Wokowicz Tomasz; Zacharczuk Katarzyna                                                                                                                                                                                                                                                                                                                                               |
| EPI_ISL_1447202 to 1447203, EPI_ISL_1447235, EPI_ISL_1447284                                                                                                                                                                                                                                                                                                                       | Laboratorium Diagnostyki COVID-19 IGC PAN                                                                                            | 1. National Institute of Public Health - National Institute of Hygiene; 2. Eurofins Genomics Europe Sequencing GmbH                                                                                           |                                                                                                                                                                                                                                                                | ECDC COVID-19 WGS support team; Eurofins Genomics Europe Sequencing Team; Gierczyki Rafa; Sadkowska-Todys Magorzata; Wokowicz Tomasz; Zacharczuk Katarzyna                                                                                                                                                                                                                                                                                                                                               |
| EPI_ISL_1538445, EPI_ISL_1538493, EPI_ISL_1538785, EPI_ISL_1539049 to 1539052                                                                                                                                                                                                                                                                                                      | Laboratorium Diagnostyki Molekularnej, Cytogenetyki i Cytometrii                                                                     | 1. National Institute of Public Health - National Institute of Hygiene; 2. Eurofins Genomics Europe Sequencing GmbH                                                                                           |                                                                                                                                                                                                                                                                | ECDC COVID-19 WGS support team; Eurofins Genomics Europe Sequencing Team; Gierczyki Rafa; Sadkowska-Todys Magorzata; Wokowicz Tomasz; Zacharczuk Katarzyna                                                                                                                                                                                                                                                                                                                                               |
| EPI_ISL_1394176 to 1394180, EPI_ISL_1425547                                                                                                                                                                                                                                                                                                                                        | Laboratorium Epidemiologii                                                                                                           | 1. National Institute of Public Health - National Institute of Hygiene; 2. Eurofins Genomics Europe Sequencing GmbH                                                                                           |                                                                                                                                                                                                                                                                | ECDC COVID-19 WGS support team; Eurofins Genomics Europe Sequencing Team; Gierczyki Rafa; Sadkowska-Todys Magorzata; Wokowicz Tomasz; Zacharczuk Katarzyna                                                                                                                                                                                                                                                                                                                                               |
| EPI_ISL_1538441, EPI_ISL_1538478, EPI_ISL_1538498, EPI_ISL_1538506, EPI_ISL_1538508, EPI_ISL_1538524, EPI_ISL_1538528, EPI_ISL_1538626 to 1538636, EPI_ISL_1538808 to 1538820, EPI_ISL_1538855, EPI_ISL_1538858, EPI_ISL_1538874, EPI_ISL_1538965 to 1538970, EPI_ISL_1539060 to 1539061,                                                                                          |                                                                                                                                      |                                                                                                                                                                                                               |                                                                                                                                                                                                                                                                |                                                                                                                                                                                                                                                                                                                                                                                                                                                                                                          |
| see above                                                                                                                                                                                                                                                                                                                                                                          | Laboratorium Epidemiologii WSSE w Szczecinie                                                                                         | 1. National Institute of Public Health - National Institute of Hygiene; 2. Eurofins Genomics Europe Sequencing GmbH                                                                                           |                                                                                                                                                                                                                                                                | ECDC COVID-19 WGS support team; Eurofins Genomics Europe Sequencing Team; Gierczyki Rafa; Sadkowska-Todys Magorzata; Wokowicz Tomasz; Zacharczuk Katarzyna                                                                                                                                                                                                                                                                                                                                               |
| EPI_ISL_1393992, EPI_ISL_1394010 to 1394013                                                                                                                                                                                                                                                                                                                                        | Laboratorium Genetyczne Alab Plus Sp. z o.o.                                                                                         | 1. National Institute of Public Health - National Institute of Hygiene; 2. Eurofins Genomics Europe Sequencing GmbH                                                                                           |                                                                                                                                                                                                                                                                | ECDC COVID-19 WGS support team; Eurofins Genomics Europe Sequencing Team; Gierczyki Rafa; Sadkowska-Todys Magorzata; Wokowicz Tomasz; Zacharczuk Katarzyna                                                                                                                                                                                                                                                                                                                                               |
| EPI_ISL_1393710 to 1393716, EPI_ISL_1394003 to 1394005, EPI_ISL_1425541, EPI_ISL_1538465, EPI_ISL_1538484, EPI_ISL_1538737                                                                                                                                                                                                                                                         | Laboratorium INNGEN                                                                                                                  | 1. National Institute of Public Health - National Institute of Hygiene; 2. Eurofins Genomics Europe Sequencing GmbH                                                                                           |                                                                                                                                                                                                                                                                | ECDC COVID-19 WGS support team; Eurofins Genomics Europe Sequencing Team; Gierczyki Rafa; Sadkowska-Todys Magorzata; Wokowicz Tomasz; Zacharczuk Katarzyna                                                                                                                                                                                                                                                                                                                                               |
| EPI_ISL_1415898                                                                                                                                                                                                                                                                                                                                                                    | Laboratorium Intibios Karawang                                                                                                       | National Institute of Health Research and Development                                                                                                                                                         |                                                                                                                                                                                                                                                                | Arie Ardiansyah Nugraha; Hana Apsari Pawestri; Hartanti Dian Ikawati; Kartika Dewi Puspa; Krisna Nur Andriana Pangesti; Nelly Puspandari; Subangkit; Vivi Setiawaty                                                                                                                                                                                                                                                                                                                                      |
| EPI_ISL_511879                                                                                                                                                                                                                                                                                                                                                                     | Laboratorium Kesehatan Provinsi Jawa Barat                                                                                           | Molecular Genetics Laboratory-Faculty of Medicine-Universitas Padjadjaran; School of Life Sciences and Technology & School of Pharmacy-Institut Teknologi Bandung; Laboratorium Kesehatan Provinsi Jawa Barat |                                                                                                                                                                                                                                                                | Agung Eru Wibowo; Azzania Fibriani; Catur Riani; Cut Nur Cinthia Alamanda; Ema Rahmawati; Hammam Riza; Hesti Lina Wiraswati; Husna Nugrahapraja; Lia Faridah; Marselina Irasonia Tan; Rifky Waluyajati Rachman; Ryan Bayusantika Ristandi; Savira Ekawardhani; Soni Solistia Wirawan; Tarwadi; Yunia Sribudani                                                                                                                                                                                           |
| EPI_ISL_528745                                                                                                                                                                                                                                                                                                                                                                     | Laboratorium Kesehatan Provinsi Jawa Barat                                                                                           | School of Life Sciences and Technology & School of Pharmacy-Institut Teknologi Bandung; Molecular Genetics Laboratory-Faculty of Medicine-Universitas Padjadjaran; Laboratorium Kesehatan Provinsi Jawa Barat |                                                                                                                                                                                                                                                                | Agung Eru Wibowo; Azzania Fibriani; Catur Riani; Cut Nur Cinthia Alamanda; Ema Rahmawati; Fensi Amalina; Hammam Riza; Hesti Lina Wiraswati; Husna Nugrahapraja; Ivan Faizal; Lia Faridah; Marselina Irasonia Tan; Mas Rizky A.A. Syamsunarno; Rifky Waluyajati Rachman; Ryan Bayusantika Ristandi; Savira Ekawardhani; Sony Solistia Wirawan; Tarwadi; Tri Hanggono Achmad; Yunia Sribudani                                                                                                              |
| EPI_ISL_1394233 to 1394246, EPI_ISL_1538600 to 1538603, EPI_ISL_1538826, EPI_ISL_1538875, EPI_ISL_1538878, EPI_ISL_1538943 to 1538948, EPI_ISL_1539070 to 1539075                                                                                                                                                                                                                  |                                                                                                                                      |                                                                                                                                                                                                               |                                                                                                                                                                                                                                                                |                                                                                                                                                                                                                                                                                                                                                                                                                                                                                                          |
| see above                                                                                                                                                                                                                                                                                                                                                                          | Laboratorium Medyczne BIOLAB                                                                                                         | 1. National Institute of Public Health - National Institute of Hygiene; 2. Eurofins Genomics Europe Sequencing GmbH                                                                                           |                                                                                                                                                                                                                                                                | ECDC COVID-19 WGS support team; Eurofins Genomics Europe Sequencing Team; Gierczyki Rafa; Sadkowska-Todys Magorzata; Wokowicz Tomasz; Zacharczuk Katarzyna                                                                                                                                                                                                                                                                                                                                               |

|                                                                                                                                                                                                                                                                                                                                                                                                                                                                                                                                                                                                                                                                                                                                                                                                                                                                                                                                                                                                                                                                                                                                                                                                                                                                                                                                                                                                                                                                                                                                                                                                                                                                                                                                                                                                                                                                               |                               |                                                                                                                                                   |                                                                                                                                                            |                                                                                                                                                                                                                                                                                                                                                                                                                                                                                                                                                                                                                                                                                                                                                                                                                                                                                                                                                                                                                                                                                   |
|-------------------------------------------------------------------------------------------------------------------------------------------------------------------------------------------------------------------------------------------------------------------------------------------------------------------------------------------------------------------------------------------------------------------------------------------------------------------------------------------------------------------------------------------------------------------------------------------------------------------------------------------------------------------------------------------------------------------------------------------------------------------------------------------------------------------------------------------------------------------------------------------------------------------------------------------------------------------------------------------------------------------------------------------------------------------------------------------------------------------------------------------------------------------------------------------------------------------------------------------------------------------------------------------------------------------------------------------------------------------------------------------------------------------------------------------------------------------------------------------------------------------------------------------------------------------------------------------------------------------------------------------------------------------------------------------------------------------------------------------------------------------------------------------------------------------------------------------------------------------------------|-------------------------------|---------------------------------------------------------------------------------------------------------------------------------------------------|------------------------------------------------------------------------------------------------------------------------------------------------------------|-----------------------------------------------------------------------------------------------------------------------------------------------------------------------------------------------------------------------------------------------------------------------------------------------------------------------------------------------------------------------------------------------------------------------------------------------------------------------------------------------------------------------------------------------------------------------------------------------------------------------------------------------------------------------------------------------------------------------------------------------------------------------------------------------------------------------------------------------------------------------------------------------------------------------------------------------------------------------------------------------------------------------------------------------------------------------------------|
| EPI_ISL_1538827, EPI_ISL_1538877, EPI_ISL_1538949, EPI_ISL_1539076 to 1539077, EPI_ISL_1539166                                                                                                                                                                                                                                                                                                                                                                                                                                                                                                                                                                                                                                                                                                                                                                                                                                                                                                                                                                                                                                                                                                                                                                                                                                                                                                                                                                                                                                                                                                                                                                                                                                                                                                                                                                                | Laboratorium Medyczne GEN LAB | 1. National Institute of Public Health - National Institute of Hygiene; 2. Eurofins Genomics Europe Sequencing GmbH                               | ECDC COVID-19 WGS support team; Eurofins Genomics Europe Sequencing Team; Gierczyki Rafa; Sadkowska-Todys Magorzata; Wokowicz Tomasz; Zacharczuk Katarzyna |                                                                                                                                                                                                                                                                                                                                                                                                                                                                                                                                                                                                                                                                                                                                                                                                                                                                                                                                                                                                                                                                                   |
| EPI_ISL_1393813 to 1393819, EPI_ISL_1393822 to 1393828, EPI_ISL_1393830, EPI_ISL_1393832 to 1393833, EPI_ISL_1394119 to 1394137, EPI_ISL_1425546, EPI_ISL_1538645 to 1538648, EPI_ISL_1538844 to 1538845, EPI_ISL_1538869, EPI_ISL_1538982, EPI_ISL_1539102 to 1539105, EPI_ISL_1539237                                                                                                                                                                                                                                                                                                                                                                                                                                                                                                                                                                                                                                                                                                                                                                                                                                                                                                                                                                                                                                                                                                                                                                                                                                                                                                                                                                                                                                                                                                                                                                                       | see above                     | Laboratorium Medyczne LAB-MED                                                                                                                     | 1. National Institute of Public Health - National Institute of Hygiene; 2. Eurofins Genomics Europe Sequencing GmbH                                        | ECDC COVID-19 WGS support team; Eurofins Genomics Europe Sequencing Team; Gierczyki Rafa; Sadkowska-Todys Magorzata; Wokowicz Tomasz; Zacharczuk Katarzyna                                                                                                                                                                                                                                                                                                                                                                                                                                                                                                                                                                                                                                                                                                                                                                                                                                                                                                                        |
| EPI_ISL_1447214, EPI_ISL_1447229, EPI_ISL_1447251, EPI_ISL_1538489, EPI_ISL_1538545 to 1538546, EPI_ISL_1538891, EPI_ISL_1539167                                                                                                                                                                                                                                                                                                                                                                                                                                                                                                                                                                                                                                                                                                                                                                                                                                                                                                                                                                                                                                                                                                                                                                                                                                                                                                                                                                                                                                                                                                                                                                                                                                                                                                                                              | see above                     | Laboratorium Mikrobiologiczne Dolnośląskie Centrum Specjalizacji Komórkowych z Krajowym Bankiem Dawców Szpiku                                     | 1. National Institute of Public Health - National Institute of Hygiene; 2. Eurofins Genomics Europe Sequencing GmbH                                        | ECDC COVID-19 WGS support team; Eurofins Genomics Europe Sequencing Team; Gierczyki Rafa; Sadkowska-Todys Magorzata; Wokowicz Tomasz; Zacharczuk Katarzyna                                                                                                                                                                                                                                                                                                                                                                                                                                                                                                                                                                                                                                                                                                                                                                                                                                                                                                                        |
| EPI_ISL_1394101 to 1394104, EPI_ISL_1538859, EPI_ISL_1538863, EPI_ISL_1538929 to 1538931, EPI_ISL_1539056 to 1539058                                                                                                                                                                                                                                                                                                                                                                                                                                                                                                                                                                                                                                                                                                                                                                                                                                                                                                                                                                                                                                                                                                                                                                                                                                                                                                                                                                                                                                                                                                                                                                                                                                                                                                                                                          |                               | Laboratorium Mikrobiologiczne RSS w Grudziądzu                                                                                                    | 1. National Institute of Public Health - National Institute of Hygiene; 2. Eurofins Genomics Europe Sequencing GmbH                                        | ECDC COVID-19 WGS support team; Eurofins Genomics Europe Sequencing Team; Gierczyki Rafa; Sadkowska-Todys Magorzata; Wokowicz Tomasz; Zacharczuk Katarzyna                                                                                                                                                                                                                                                                                                                                                                                                                                                                                                                                                                                                                                                                                                                                                                                                                                                                                                                        |
| EPI_ISL_1538457, EPI_ISL_1538463, EPI_ISL_1538566, EPI_ISL_1538912                                                                                                                                                                                                                                                                                                                                                                                                                                                                                                                                                                                                                                                                                                                                                                                                                                                                                                                                                                                                                                                                                                                                                                                                                                                                                                                                                                                                                                                                                                                                                                                                                                                                                                                                                                                                            |                               | Laboratorium Mikrobiologiczne Radomski Szpital Specjalistyczny im Dr Tytusa Chaubickiego                                                          | 1. National Institute of Public Health - National Institute of Hygiene; 2. Eurofins Genomics Europe Sequencing GmbH                                        | ECDC COVID-19 WGS support team; Eurofins Genomics Europe Sequencing Team; Gierczyki Rafa; Sadkowska-Todys Magorzata; Wokowicz Tomasz; Zacharczuk Katarzyna                                                                                                                                                                                                                                                                                                                                                                                                                                                                                                                                                                                                                                                                                                                                                                                                                                                                                                                        |
| EPI_ISL_1539126                                                                                                                                                                                                                                                                                                                                                                                                                                                                                                                                                                                                                                                                                                                                                                                                                                                                                                                                                                                                                                                                                                                                                                                                                                                                                                                                                                                                                                                                                                                                                                                                                                                                                                                                                                                                                                                               |                               | Laboratorium Mikrobiologii SZKPP Uniwersytetu Medycznego w Poznaniu                                                                               | 1. National Institute of Public Health - National Institute of Hygiene; 2. Eurofins Genomics Europe Sequencing GmbH                                        | ECDC COVID-19 WGS support team; Eurofins Genomics Europe Sequencing Team; Gierczyki Rafa; Sadkowska-Todys Magorzata; Wokowicz Tomasz; Zacharczuk Katarzyna                                                                                                                                                                                                                                                                                                                                                                                                                                                                                                                                                                                                                                                                                                                                                                                                                                                                                                                        |
| EPI_ISL_1538683                                                                                                                                                                                                                                                                                                                                                                                                                                                                                                                                                                                                                                                                                                                                                                                                                                                                                                                                                                                                                                                                                                                                                                                                                                                                                                                                                                                                                                                                                                                                                                                                                                                                                                                                                                                                                                                               |                               | Laboratorium Mikrobiologii Szpital Kliniczny Przemienienia Paskiego UM w Poznaniu                                                                 | 1. National Institute of Public Health - National Institute of Hygiene; 2. Eurofins Genomics Europe Sequencing GmbH                                        | ECDC COVID-19 WGS support team; Eurofins Genomics Europe Sequencing Team; Gierczyki Rafa; Sadkowska-Todys Magorzata; Wokowicz Tomasz; Zacharczuk Katarzyna                                                                                                                                                                                                                                                                                                                                                                                                                                                                                                                                                                                                                                                                                                                                                                                                                                                                                                                        |
| EPI_ISL_1393689 to 1393698                                                                                                                                                                                                                                                                                                                                                                                                                                                                                                                                                                                                                                                                                                                                                                                                                                                                                                                                                                                                                                                                                                                                                                                                                                                                                                                                                                                                                                                                                                                                                                                                                                                                                                                                                                                                                                                    |                               | Laboratorium badawczo-rozwojowe VITAGENUM                                                                                                         | 1. National Institute of Public Health - National Institute of Hygiene; 2. Eurofins Genomics Europe Sequencing GmbH                                        | ECDC COVID-19 WGS support team; Eurofins Genomics Europe Sequencing Team; Gierczyki Rafa; Sadkowska-Todys Magorzata; Wokowicz Tomasz; Zacharczuk Katarzyna                                                                                                                                                                                                                                                                                                                                                                                                                                                                                                                                                                                                                                                                                                                                                                                                                                                                                                                        |
| EPI_ISL_1393762 to 1393771, EPI_ISL_1393773 to 1393777, EPI_ISL_1394181 to 1394201, EPI_ISL_1425548                                                                                                                                                                                                                                                                                                                                                                                                                                                                                                                                                                                                                                                                                                                                                                                                                                                                                                                                                                                                                                                                                                                                                                                                                                                                                                                                                                                                                                                                                                                                                                                                                                                                                                                                                                           |                               | Laboratorum Epidemiologii WSSE w Szczecinie                                                                                                       | 1. National Institute of Public Health - National Institute of Hygiene; 2. Eurofins Genomics Europe Sequencing GmbH                                        | ECDC COVID-19 WGS support team; Eurofins Genomics Europe Sequencing Team; Gierczyki Rafa; Sadkowska-Todys Magorzata; Wokowicz Tomasz; Zacharczuk Katarzyna                                                                                                                                                                                                                                                                                                                                                                                                                                                                                                                                                                                                                                                                                                                                                                                                                                                                                                                        |
| EPI_ISL_1421755 to 1421778, EPI_ISL_1421780 to 1422215, EPI_ISL_1461710 to 1461815, EPI_ISL_1461817 to 1461836, EPI_ISL_1461838 to 1461994, EPI_ISL_1461996 to 1462248, EPI_ISL_1462250 to 1462499, EPI_ISL_1462501, EPI_ISL_1462504, EPI_ISL_1462507, EPI_ISL_1462511, EPI_ISL_1462514, EPI_ISL_1462517, EPI_ISL_1462520, EPI_ISL_1462522, EPI_ISL_1462529, EPI_ISL_1462532, EPI_ISL_1462535, EPI_ISL_1462538, EPI_ISL_1462541, EPI_ISL_1462544, EPI_ISL_1462547, EPI_ISL_1462550, EPI_ISL_1462554, EPI_ISL_1462557, EPI_ISL_1462560, EPI_ISL_1462562, EPI_ISL_1462565, EPI_ISL_1462568, EPI_ISL_1462571, EPI_ISL_1462574, EPI_ISL_1462577, EPI_ISL_1462580, EPI_ISL_1462583, EPI_ISL_1462586, EPI_ISL_1462590, EPI_ISL_1462592, EPI_ISL_1462599, EPI_ISL_1462595, EPI_ISL_1462598, EPI_ISL_1462602, EPI_ISL_1462605, EPI_ISL_1462608, EPI_ISL_1462611, EPI_ISL_1462614, EPI_ISL_1462616, EPI_ISL_1462619, EPI_ISL_1462622, EPI_ISL_1462625 to 1463067, EPI_ISL_1463069 to 1463150, EPI_ISL_1463152 to 1463256, EPI_ISL_1463258 to 1463444, EPI_ISL_1480977 to 1481548, EPI_ISL_1513631 to 1515761, EPI_ISL_1548117 to 1548157, EPI_ISL_1548159 to 1548426, EPI_ISL_1548428 to 1548503, EPI_ISL_1548505 to 1548644, EPI_ISL_1548646 to 1549037, EPI_ISL_1549039 to 1549133, EPI_ISL_1549141 to 1549167, EPI_ISL_1549169 to 1549237, EPI_ISL_1549215 to 1549237, EPI_ISL_1549239 to 1549477, EPI_ISL_1549479 to 1549486, EPI_ISL_1549488 to 1549569, EPI_ISL_1549571, EPI_ISL_1549574, EPI_ISL_1549577, EPI_ISL_1549580, EPI_ISL_1549583, EPI_ISL_1549585, EPI_ISL_1549589 to 1549606, EPI_ISL_1549608 to 1549715, EPI_ISL_1549717 to 1549726, EPI_ISL_1549728 to 1549755, EPI_ISL_1549757 to 1549853, EPI_ISL_1549855 to 1549902, EPI_ISL_1549905 to 1549986, EPI_ISL_1549988 to 1550054, EPI_ISL_1550056 to 1550158, EPI_ISL_1550160 to 1550273, EPI_ISL_1550275 to 1550387 | see above                     | Laboratory Corporation of America                                                                                                                 | Centers for Disease Control and Prevention Division of Viral Diseases, Pathogen Discovery                                                                  | Adrian Paskey; Amanda Douglas; Amanda Suchanek; Andrea Throop; Ayla Burns; Ben L. Rambo-Martin; Benjamin Rambo-Martin; Bobbi Croy; Brian Krueger; Brian Norvell; Christopher Gulvick; Christos Petropoulos; Clinton R. Paden; Craig Lukasik; Dakota Howard; Darlene Wagner; Debbie Boles; Dhvani Batra; Duncan MacCannell; Eyad Almasri; Goran Stevovic; Howard Engler; Hrushikesh Deshmukh; Jake Humphrey; Jana Schroth; Jason Caravas; Joe Voshell; John Pruitt; Jonathan Meltzer; Jonathan Williams; Kara Moser; Kimberly Wagner; Lax Iyer; Lyndon Tilson; Manoj Jain; Marcia Eisenberg; Mary Ann Cristobal; Mary Williamson; Matthew Schmeer; Michael Levandoski; Mike Sapeta; Mindy Nye; Minoo Agarwal; Mohan Koll; Nuthawin Charoensri; Oren Cohen; Peter W. Cook; Prashant Gupta; Qian Zeng; Rama Gharti; Scott Parker; Scott Ryan; Scott Sammons; Shatavia Morrison; Stanley Letovsky; Steven Ragan; Suresh Babu Selvaraju; Susan Countryman; Susan Hicks; Suxiang Tong; Suzanne Dale; Thomas Urban; Tim Kuphal; Tricia Zwiefelhofer; Vincent Drouillon; Yvette Unoarumhi |
| EPI_ISL_476403 to 476405                                                                                                                                                                                                                                                                                                                                                                                                                                                                                                                                                                                                                                                                                                                                                                                                                                                                                                                                                                                                                                                                                                                                                                                                                                                                                                                                                                                                                                                                                                                                                                                                                                                                                                                                                                                                                                                      |                               | Laboratory DASA                                                                                                                                   | Instituto de Medicina Tropical da Universidade de São Paulo                                                                                                | Camila Alves Maia da Silva; Darlan da Silva Candido; Erika Regina Manuli; Ester Sabino; Flavia Cristina da Silva Sales; Giula Magalhaes Ferreira; Jaqueline Goes de Jesus; Julien Theze; Mariana Severo Ramundo; Nuno Faria; Samples: José Eduardo Levi; Sequencing: Ingra Morales Claro; Thais de Moura Coletti                                                                                                                                                                                                                                                                                                                                                                                                                                                                                                                                                                                                                                                                                                                                                                  |
| EPI_ISL_514425 to 514431, EPI_ISL_541649 to 541655, EPI_ISL_541657 to 541662, EPI_ISL_582530                                                                                                                                                                                                                                                                                                                                                                                                                                                                                                                                                                                                                                                                                                                                                                                                                                                                                                                                                                                                                                                                                                                                                                                                                                                                                                                                                                                                                                                                                                                                                                                                                                                                                                                                                                                  |                               | Laboratory Diagnostic, Veterinary Specialized Institute Kraljevo                                                                                  | Laboratory Diagnostic, Veterinary Specialized Institute Kraljevo                                                                                           | Afonso, C.; Banovic Djeri, B.; Jankovic, M.; Jovanovic, T.; Knezevic, A.; Petrovic, T.; Sekler, M.; Tesovic, B.; Vidanovic, D.; Volkening, J.                                                                                                                                                                                                                                                                                                                                                                                                                                                                                                                                                                                                                                                                                                                                                                                                                                                                                                                                     |
| EPI_ISL_445086 to 445087, EPI_ISL_482744, EPI_ISL_541656                                                                                                                                                                                                                                                                                                                                                                                                                                                                                                                                                                                                                                                                                                                                                                                                                                                                                                                                                                                                                                                                                                                                                                                                                                                                                                                                                                                                                                                                                                                                                                                                                                                                                                                                                                                                                      |                               | Laboratory Diagnostic, Veterinary Specialized Institute Kraljevo                                                                                  | Laboratory Diagnostic, Veterinary Specialized Institute Kraljevo                                                                                           | Afonso, C.; Banovic Djeri, B.; C.L.; Debeljak, Z.; Dmitric, M.; J. and Alfonso, J. and Alfonso, C.; Jankovic, M.; Jovanovic, T.; Knezevic, A.; Matovic, K.; Petrovic, T.; Sekler, M.; Tesovic, B.; Vaskovic, N.; Vidanovic, D.; Volkening, J.                                                                                                                                                                                                                                                                                                                                                                                                                                                                                                                                                                                                                                                                                                                                                                                                                                     |
| EPI_ISL_476220 to 476221, EPI_ISL_476230 to 476231, EPI_ISL_476233 to 476236, EPI_ISL_476406 to 476407, EPI_ISL_476426 to 476427                                                                                                                                                                                                                                                                                                                                                                                                                                                                                                                                                                                                                                                                                                                                                                                                                                                                                                                                                                                                                                                                                                                                                                                                                                                                                                                                                                                                                                                                                                                                                                                                                                                                                                                                              |                               | Laboratory Fleury                                                                                                                                 | Instituto de Medicina Tropical da Universidade de São Paulo                                                                                                | Camila Alves Maia da Silva; Darlan da Silva Candido; Erika Regina Manuli; Ester Sabino; Flavia Cristina da Silva Sales; Giula Magalhaes Ferreira; Jaqueline Goes de Jesus; Julien Theze; Mariana Severo Ramundo; Nuno Faria; Samples: Celso Granato; Sequencing: Ingra Morales Claro; Thais de Moura Coletti                                                                                                                                                                                                                                                                                                                                                                                                                                                                                                                                                                                                                                                                                                                                                                      |
| EPI_ISL_415741 to 415743, EPI_ISL_417518 to 417525, EPI_ISL_424969 to 424975, EPI_ISL_424978, EPI_ISL_444274 to 444278, EPI_ISL_452178 to 452179, EPI_ISL_464092 to 464094                                                                                                                                                                                                                                                                                                                                                                                                                                                                                                                                                                                                                                                                                                                                                                                                                                                                                                                                                                                                                                                                                                                                                                                                                                                                                                                                                                                                                                                                                                                                                                                                                                                                                                    | see above                     | Laboratory Medicine                                                                                                                               | Department of Laboratory Medicine, Lin-Kou Chang Gung Memorial Hospital, Taoyuan, Taiwan                                                                   | Cheng-Hsun Chiu; Cheng-Ta Yang; Chi-Hsien Huang; Chung-Guei Huang; Guang-Wu Chen; Kuang-Tso Le; Kuo-Chien Tsao; Kuo-Ming Lee; Mei-Jen Hsiao; Peng-Nien Huang; Po-Wei Huang; Shin-Ru Shih; Shu-Li Yang; Shu-Min Lin; Yi-Chun Liu; Yu-Nong Gong                                                                                                                                                                                                                                                                                                                                                                                                                                                                                                                                                                                                                                                                                                                                                                                                                                     |
| EPI_ISL_411915                                                                                                                                                                                                                                                                                                                                                                                                                                                                                                                                                                                                                                                                                                                                                                                                                                                                                                                                                                                                                                                                                                                                                                                                                                                                                                                                                                                                                                                                                                                                                                                                                                                                                                                                                                                                                                                                |                               | Laboratory Medicine                                                                                                                               | Department of Laboratory Medicine, Lin-Kou Chang Gung Memorial Hospital, Taoyuan, Taiwan.                                                                  | Chung-Guei Huang; Kuo-Chien Tsao; Shin-Ru Shih; Shu-Li Yang; Yhu-Chering Huang; Yi-Chun Li; Yu-Nong Gong                                                                                                                                                                                                                                                                                                                                                                                                                                                                                                                                                                                                                                                                                                                                                                                                                                                                                                                                                                          |
| EPI_ISL_529208 to 529212                                                                                                                                                                                                                                                                                                                                                                                                                                                                                                                                                                                                                                                                                                                                                                                                                                                                                                                                                                                                                                                                                                                                                                                                                                                                                                                                                                                                                                                                                                                                                                                                                                                                                                                                                                                                                                                      |                               | Laboratory Medicine, University of Washington                                                                                                     | University of Washington, Laboratory Medicine                                                                                                              | Greninger, A.; Jerome, K.; Roychoudhury, P.                                                                                                                                                                                                                                                                                                                                                                                                                                                                                                                                                                                                                                                                                                                                                                                                                                                                                                                                                                                                                                       |
| EPI_ISL_1508895                                                                                                                                                                                                                                                                                                                                                                                                                                                                                                                                                                                                                                                                                                                                                                                                                                                                                                                                                                                                                                                                                                                                                                                                                                                                                                                                                                                                                                                                                                                                                                                                                                                                                                                                                                                                                                                               |                               | Laboratory for HIV and opportunistic infections diagnosis The Republican Research and Practical Center for Epidemiology and Microbiology (RRPCEM) | Laboratory for HIV and opportunistic infections diagnosis The Republican Research and Practical Center for Epidemiology and Microbiology (RRPCEM)          | Alena Mikhaleuka; Alexander Kilchevsky; Alina Drozd; Anatoly Krusakov; Elena Gasich; Kirill Bulda; Leonid Valentovich; Nastassia Kabankova; Vladimir Gorbunov; Yauhen Syalsiatin                                                                                                                                                                                                                                                                                                                                                                                                                                                                                                                                                                                                                                                                                                                                                                                                                                                                                                  |
| EPI_ISL_445243, EPI_ISL_455468 to 455477, EPI_ISL_455479                                                                                                                                                                                                                                                                                                                                                                                                                                                                                                                                                                                                                                                                                                                                                                                                                                                                                                                                                                                                                                                                                                                                                                                                                                                                                                                                                                                                                                                                                                                                                                                                                                                                                                                                                                                                                      |                               | Laboratory for Respiratory Viruses, Cantacuzino National Military-Medical Institute for Research and Development                                  | Cantacuzino Institute                                                                                                                                      | A.Cretu; L.Ustea; M.Lazar; T.Durfee; Tim Durfee                                                                                                                                                                                                                                                                                                                                                                                                                                                                                                                                                                                                                                                                                                                                                                                                                                                                                                                                                                                                                                   |
| EPI_ISL_471416 to 471424                                                                                                                                                                                                                                                                                                                                                                                                                                                                                                                                                                                                                                                                                                                                                                                                                                                                                                                                                                                                                                                                                                                                                                                                                                                                                                                                                                                                                                                                                                                                                                                                                                                                                                                                                                                                                                                      |                               | Laboratory for Respiratory Viruses, National Influenza Centre, Cantacuzino National Military-Medical Institute for Research and Development       | Cantacuzino Institute                                                                                                                                      | Luiza Ustea; Mihaela Lazar; Nicoleta Paraschiv; Tim Durfee                                                                                                                                                                                                                                                                                                                                                                                                                                                                                                                                                                                                                                                                                                                                                                                                                                                                                                                                                                                                                        |
| EPI_ISL_437689                                                                                                                                                                                                                                                                                                                                                                                                                                                                                                                                                                                                                                                                                                                                                                                                                                                                                                                                                                                                                                                                                                                                                                                                                                                                                                                                                                                                                                                                                                                                                                                                                                                                                                                                                                                                                                                                |                               | Laboratory for Urgent Response to Biological Threats                                                                                              | Institut Pasteur CIBU / ERI                                                                                                                                | A. Kwasiborski; C. Balière; C. Batéjat; J. Vanhomwegen; JC. Manuguerra; V. Caro; V. Hourdel                                                                                                                                                                                                                                                                                                                                                                                                                                                                                                                                                                                                                                                                                                                                                                                                                                                                                                                                                                                       |
| EPI_ISL_437690                                                                                                                                                                                                                                                                                                                                                                                                                                                                                                                                                                                                                                                                                                                                                                                                                                                                                                                                                                                                                                                                                                                                                                                                                                                                                                                                                                                                                                                                                                                                                                                                                                                                                                                                                                                                                                                                |                               | Laboratory for Urgent Response to Biological Threats                                                                                              | Institut Pasteur CIBU / ERI                                                                                                                                | A. Kwasiborski; C. Balière; C. Batéjat; H. Hourdel; J. Vanhomwegen; JC. Manuguerra; V. Caro                                                                                                                                                                                                                                                                                                                                                                                                                                                                                                                                                                                                                                                                                                                                                                                                                                                                                                                                                                                       |
| EPI_ISL_435045 to 435048                                                                                                                                                                                                                                                                                                                                                                                                                                                                                                                                                                                                                                                                                                                                                                                                                                                                                                                                                                                                                                                                                                                                                                                                                                                                                                                                                                                                                                                                                                                                                                                                                                                                                                                                                                                                                                                      |                               | Laboratory of Applied Genetics                                                                                                                    | RSE "National Center for Biotechnology"                                                                                                                    | Alexandr Shevtsov; Asylulan Amirgazin; Ilyas Akhmetolayev; Ruslan Kalendar; Viktoriya Lutsay; Yerlan Ramanculov                                                                                                                                                                                                                                                                                                                                                                                                                                                                                                                                                                                                                                                                                                                                                                                                                                                                                                                                                                   |
| EPI_ISL_572398                                                                                                                                                                                                                                                                                                                                                                                                                                                                                                                                                                                                                                                                                                                                                                                                                                                                                                                                                                                                                                                                                                                                                                                                                                                                                                                                                                                                                                                                                                                                                                                                                                                                                                                                                                                                                                                                |                               | Laboratory of Biology and Identification of Arboviruses                                                                                           | Pathogenic Microorganisms Variability Laboratory                                                                                                           | Alexander Gintsburg; Alexey Prilipov; Alexey Shchetinin; Alina Kozlova; Andrei Siniavin; Maria Nikiforova; Muhammad Saifullin; Victor Larichev; Vladimir Gushchin                                                                                                                                                                                                                                                                                                                                                                                                                                                                                                                                                                                                                                                                                                                                                                                                                                                                                                                 |
| EPI_ISL_1500433 to 1500445, EPI_ISL_1547806 to 1547826                                                                                                                                                                                                                                                                                                                                                                                                                                                                                                                                                                                                                                                                                                                                                                                                                                                                                                                                                                                                                                                                                                                                                                                                                                                                                                                                                                                                                                                                                                                                                                                                                                                                                                                                                                                                                        |                               | Laboratory of Clinical Microbiology, Virology and Bioemergencies, ASST Fatebenefratelli Sacco - Sacco                                             | Laboratory of Clinical Microbiology, Virology and Bioemergencies, ASST Fatebenefratelli Sacco - Sacco                                                      | Alberto Rizzo; Alessandro Mancon; Fiorenza Bracchitta; Luca Rizzuto; Maria Rita Gismondo; Valeria Micheli                                                                                                                                                                                                                                                                                                                                                                                                                                                                                                                                                                                                                                                                                                                                                                                                                                                                                                                                                                         |

|                                                                                                                                                                                                                                                                                                                  | Hospital                                                                                                                                                                                     | Hospital                                                                                                                        |                                                                                                                                                                                                                                                                                                                                                                                                                                                                                                                            |
|------------------------------------------------------------------------------------------------------------------------------------------------------------------------------------------------------------------------------------------------------------------------------------------------------------------|----------------------------------------------------------------------------------------------------------------------------------------------------------------------------------------------|---------------------------------------------------------------------------------------------------------------------------------|----------------------------------------------------------------------------------------------------------------------------------------------------------------------------------------------------------------------------------------------------------------------------------------------------------------------------------------------------------------------------------------------------------------------------------------------------------------------------------------------------------------------------|
| EPI_ISL_1420660                                                                                                                                                                                                                                                                                                  | Laboratory of Clinical Virology                                                                                                                                                              | Greek Genome Center, Biomedical Research Foundation of the Academy of Athens (BRFAA)                                            | Dimitrios Thanos; Emmanouil Athanasiadis; George Sourvinos; Ioannis Vatsellas; Katerina Zoi; Theodoros Loupis                                                                                                                                                                                                                                                                                                                                                                                                              |
| EPI_ISL_1469989 to 1470000, EPI_ISL_1470070 to 1470077                                                                                                                                                                                                                                                           | Laboratory of Communicable Diseases                                                                                                                                                          | 1. Laboratory of Communicable Diseases (Estonia); 2. Eurofins Genomics Europe Sequencing GmbH                                   | Lidia Dotsenko et al.                                                                                                                                                                                                                                                                                                                                                                                                                                                                                                      |
| EPI_ISL_477160, EPI_ISL_477163                                                                                                                                                                                                                                                                                   | Laboratory of Dr. John Lednický                                                                                                                                                              | University of Florida                                                                                                           | Chang-Yu Wu; John A. Lednický; John Glenn Morris, Jr.; Kutichantran Subramaniam; Maha A. Elbadry; Thomas B. Waltzek; and John Glenn Morris, Jr.                                                                                                                                                                                                                                                                                                                                                                            |
| EPI_ISL_1527390 to 1527398                                                                                                                                                                                                                                                                                       | Laboratory of Extremely Dangerous Infections of Federal Budget Health Care Institute "Center of Hygiene and Epidemiology in Sakhalin region"                                                 | Group of Genomics and Postgenomic Technologies of Central Research Institute of Epidemiology                                    | Akimkin VG; Arutiunian AE; Bulanenko VP; Byankina MA; Golubeva AG; Kapteleva VV; Kondrasheva LY; Korneenko EV; Saenko SS; Samoilov AE; Speranskaya AS; Tivanova EV; Valdokhina AV; Zagorodnov YL                                                                                                                                                                                                                                                                                                                           |
| EPI_ISL_1510606                                                                                                                                                                                                                                                                                                  | Laboratory of Extremely Dangerous Infections of Federal Budget Health Care Institute "Center of Hygiene and Epidemiology in Sverdlovsk region"                                               | Group of Genomics and Postgenomic Technologies of Central Research Institute of Epidemiology                                    | Akimkin VG; Berlina YY; Bulanenko VP; Cherkashina AS; Durasova AL; Egorova EA; Esauslkova AY; Golubeva AG; Kapteleva VV; Kondrasheva LY; Korneenko EV; Saenko SS; Samoilov AE; Shipulina OY; Snitkovskaya TE; Solovyeva ED; Speranskaya AS; Tivanova EV; Valdokhina AV; Zotova MI                                                                                                                                                                                                                                          |
| EPI_ISL_437625                                                                                                                                                                                                                                                                                                   | Laboratory of Genomics & Bioinformatics, Institute of Immunology and Experimental Therapy, Polish Academy of Sciences Oddział Mikrobiologii Wojewodzkiej Stacji Sanitarno-Epidemiologicznej. | Laboratory of Genomics & Bioinformatics, Institute of Immunology and Experimental Therapy, Polish Academy of Sciences           | Aleksandra Herud; Dariusz Martynowski; Dorota Kujawa; Grazyna Zalewska; Joanna Sikorska; Krzysztof Jakub Pawlik; Oskar Karpinski and Lukasz Laczmański; Paulina Zebrowska                                                                                                                                                                                                                                                                                                                                                  |
| EPI_ISL_1420724 to 1420732                                                                                                                                                                                                                                                                                       | Laboratory of Immunohematology, Division of Hematology                                                                                                                                       | Greek Genome Center, Biomedical Research Foundation of the Academy of Athens (BRFAA)                                            | Athanasia Mouzaki; Dimitrios Thanos; Emmanouil Athanasiadis; Ioannis Vatsellas; Katerina Zoi; Theodoros Loupis                                                                                                                                                                                                                                                                                                                                                                                                             |
| EPI_ISL_536399                                                                                                                                                                                                                                                                                                   | Laboratory of Immunovirology, Universidad de Antioquia                                                                                                                                       | Instituto Nacional de Salud - Unidad de Secuenciación y Genómica                                                                | Carlos Franco-Muñoz; Diego Álvarez-Díaz and Marcela Mercado-Reyes; Francisco J. Díaz; Katherine Laiton-Donato; Lizdany Flórez; Wbeimar Aguilar-Jimenez                                                                                                                                                                                                                                                                                                                                                                     |
| EPI_ISL_452327 to 452364                                                                                                                                                                                                                                                                                         | Laboratory of Infectious Diseases Center of Beijing Ditan Hospital                                                                                                                           | Laboratory of Infectious Diseases Center of Beijing Ditan Hospital                                                              | Chengjie Jie; Fengting Yu; Linghang Wang; Liting Yan; Siyuan Yang; Yunxia Tang                                                                                                                                                                                                                                                                                                                                                                                                                                             |
| EPI_ISL_417445 to 417447                                                                                                                                                                                                                                                                                         | Laboratory of Infectious Diseases, Department of Biomedical and Clinical Sciences L. Sacco, University of Milan                                                                              | Laboratory of Infectious Diseases, Department of Biomedical and Clinical Sciences L. Sacco, University of Milan                 | Agostino Riva; Alessia Lai; Annalisa Bergna; Arianna Gabrieli; Claudia Balotta; Dario Bernacchia; Gianguglielmo Zehender; Giuliano Rizzardini; Luca Meroni; Maciej Tarkowski; Massimo Galli; Spinello Antinori; Stefano Rusconi                                                                                                                                                                                                                                                                                            |
| EPI_ISL_418263 to 418265                                                                                                                                                                                                                                                                                         | Laboratory of Microbiology, Department of Medicine, National and Kapodistrian University of Athens, Greece                                                                                   | Laboratory of Biology, Department of Medicine, Democritus University of Thrace, Greece                                          | Elisavet Gatzidou; Ioannis Karakasiliotis; Maria Bampali; Nikolaos Dovrolis; Nikolaos Spanakis; Stavroula Veletza                                                                                                                                                                                                                                                                                                                                                                                                          |
| EPI_ISL_427043, EPI_ISL_434455 to 434486, EPI_ISL_437874 to 437911                                                                                                                                                                                                                                               | Laboratory of Microbiology, Medical School, National and Kapodistrian University of Athens                                                                                                   | Laboratory of Biology, Department of Medicine, Democritus University of Thrace                                                  | Bampali, M.; Dovrolis, N.; Froukala, E.; Gatzidou, E.; Kasselá K.; N. and Karakasiliotis, I.; Spanakis; Stavropoulou, A.; Tsakris, A.; Veletza, S.                                                                                                                                                                                                                                                                                                                                                                         |
| EPI_ISL_613563, EPI_ISL_613707 to 613708                                                                                                                                                                                                                                                                         | Laboratory of Molecular Biology, Blood Center of Ribeirão Preto                                                                                                                              | Laboratory of Molecular Biology, Blood Center of Ribeirão Preto, Faculty of Medicine of Ribeirão Preto, University of São Paulo | Aparecida Y Yamamoto; Diego Villa Clé; Dimas T Covas; Elaine V Santos; Evandra S Rodrigues; Glauco de Carvalho Pereira; Joilson Xavier; Luiz CJ Alcantara; Marta Giovanetti; Rodrigo T Calado; Simone Kashima; Svetoslav N Slavov; Talita Adelino; Wagner Fonseca                                                                                                                                                                                                                                                          |
| EPI_ISL_613709, EPI_ISL_613711, EPI_ISL_613951 to 613952, EPI_ISL_613954, EPI_ISL_613956, EPI_ISL_613961 to 613965, EPI_ISL_614011, EPI_ISL_614155 to 614156                                                                                                                                                     | Laboratory of Molecular Biology, Blood Center of Ribeirão Preto, Faculty of Medicine of Ribeirão Preto, University of São Paulo                                                              | Laboratory of Molecular Biology, Blood Center of Ribeirão Preto, Faculty of Medicine of Ribeirão Preto, University of São Paulo | Aparecida Y Yamamoto; Diego Villa Clé; Dimas T Covas; Elaine V Santos; Evandra S Rodrigues; Glauco de Carvalho Pereira; Joilson Xavier; Luiz CJ Alcantara; Marta Giovanetti; Rodrigo T Calado; Simone Kashima; Svetoslav N Slavov; Talita Adelino; Wagner Fonseca                                                                                                                                                                                                                                                          |
| see above                                                                                                                                                                                                                                                                                                        | Laboratory of Molecular Biology, Diagnostyka sp. z o.o.                                                                                                                                      | Laboratory of Recombinant Vaccines                                                                                              | Anna Piotrowska-Mietelska; Boguslaw Szewczyk; Krystyna Bienkowska-Szewczyk; Lukasz Rabalski; Maciej Kosinski                                                                                                                                                                                                                                                                                                                                                                                                               |
| EPI_ISL_428209, EPI_ISL_450746, EPI_ISL_451644 to 451647                                                                                                                                                                                                                                                         | Laboratory of Molecular Genetics, 2nd Faculty of Medicine, Charles University in Prague, Prague, Czech Republic                                                                              | Laboratory of Molecular Genetics, 2nd Faculty of Medicine, Charles University in Prague, Prague, Czech Republic                 | Katerina Polackova; Kateina Poláková; Lenka Kramna; Lenka Kramná; Ondrej Cinek; Ondej Cinek                                                                                                                                                                                                                                                                                                                                                                                                                                |
| EPI_ISL_425228 to 425229, EPI_ISL_426051, EPI_ISL_426356 to 426360                                                                                                                                                                                                                                               | Laboratory of Molecular Virology International Center for Genetic Engineering and Biotechnology (ICGEB)                                                                                      | ARGO Open Lab Platform for Genome Sequencing                                                                                    | D'Agaro P; Dal Monego S; D'Agaro P; Licastro D; Marcello A; Rajasekharan S; Segat L                                                                                                                                                                                                                                                                                                                                                                                                                                        |
| EPI_ISL_428853, EPI_ISL_498559 to 498563                                                                                                                                                                                                                                                                         | Laboratory of Molecular Virology International Center for Genetic Engineering and Biotechnology (ICGEB)                                                                                      | ARGO Open Lab Platform for Genome sequencing                                                                                    | D'Agaro P; Dal Monego S; Licastro D; Marcello A; Rajasekharan; Rajasekharan S; Segat L                                                                                                                                                                                                                                                                                                                                                                                                                                     |
| EPI_ISL_417419, EPI_ISL_417421, EPI_ISL_417423, EPI_ISL_428854                                                                                                                                                                                                                                                   | Laboratory of Molecular Virology International Center fro Genetic Engineering and Biotechnology (ICGEB)                                                                                      | ARGO Open Lab Platform for Genome sequencing                                                                                    | D'Agaro P; Dal Monego S; Licastro D; Marcello A; Rajasekharan S; Segat L                                                                                                                                                                                                                                                                                                                                                                                                                                                   |
| EPI_ISL_417418                                                                                                                                                                                                                                                                                                   | Laboratory of Molecular Virology International Center fro Genetic Engineering and Biotechnology (ICGEB)                                                                                      | ARGO Open Lab Platform for Genome Sequencing                                                                                    | Confalonieri M; Confalonieri M Marcello A; Confalonieri P; D; D'Agaro P; Dal Monego S; Licastro; Licastro D; Marcello A; Rajasekharan S; Salton F; Segat L                                                                                                                                                                                                                                                                                                                                                                 |
| EPI_ISL_479616 to 479619, EPI_ISL_479790 to 479791, EPI_ISL_525495 to 525496                                                                                                                                                                                                                                     | Laboratory of Molecular Virology, Department of Biomedical, Surgical and Dental Sciences University of Milano                                                                                | Laboratory of Molecular Virology, Department of Biomedical, Surgical and Dental Sciences University of Milano                   | Anselmi; B. and Ferrante, P.; Basilio, N.; Bianchi, M.; Binda, S.; C. and Ferrante, P.; D'Alessandro, S.; Delbue, S.; Dolci, M.; E; Fattori, M.; Ferrante, P.; G. and Pariani; Galli; Galli, C.; Incorvacia; Modenese, A.; Parapini, S.; Pariani, E.; Primache, V.; Signorini, L.; Taramelli, D.                                                                                                                                                                                                                           |
| EPI_ISL_415658, EPI_ISL_415660 to 415661                                                                                                                                                                                                                                                                         | Laboratory of Molecular Virology, Pontificia Universidad Católica de Chile                                                                                                                   | MSSH Pathogen Surveillance Program                                                                                              | Ajay Obla; Ana Silvia Gonzalez-Reiche; Eileen Serrano; Hala Alshammry; Harm van Bakel; Juan Soto; Matthew Hernandez; Melissa Smith; Mitchell Sullivan; Pablo Vial; Rafael A. Medina; Robert Sebra; Shwetha Sridhar Hara; Tamara Garcia; Viviana Simon; Ying-Chih Wang; Zenab Khan                                                                                                                                                                                                                                          |
| EPI_ISL_1406696                                                                                                                                                                                                                                                                                                  | Laboratory of Respiratory Viruses Teaching and Clinical Center of the Medical University of Lodz                                                                                             | Biobank Lab, Department of Molecular Biophysics, Faculty of Biology and Environmental Protection, University of Lodz            | Borowiec Maciej.; Dastych Jaroslaw; Dród Izabela; Dziadek Jarosaw; Paradowska Edyta; Sobalska-Kwapis Marta; Strapagiel Dominik; Traczyk-Borszyska Magdalena; Tymoniuk Bogusaw                                                                                                                                                                                                                                                                                                                                              |
| EPI_ISL_1489924 to 1489926, EPI_ISL_1495043, EPI_ISL_1495045, EPI_ISL_1495047, EPI_ISL_1495049, EPI_ISL_1495051, EPI_ISL_1495053 to 1495054                                                                                                                                                                      | Laboratory of Respiratory Viruses Teaching and Clinical Center of the Medical University of Lodz                                                                                             | Biobank Lab, Department of Molecular Biophysics, Faculty of Biology and Environmental Protection, University of Lodz            | Borowiec Maciej.; Dastych Jaroslaw; Dród Izabela; Dziadek Jarosaw; Paradowska Edyta; Sobalska-Kwapis Marta; Strapagiel Dominik; Traczyk-Borszyska Magdalena; Tymoniuk Bogusaw                                                                                                                                                                                                                                                                                                                                              |
| see above                                                                                                                                                                                                                                                                                                        | Laboratory of Respiratory Viruses Teaching and Clinical Center of the Medical University of Lodz                                                                                             | Laboratory of Respiratory Viruses Teaching and Clinical Center of the Medical University of Lodz                                | ; Borowiec Maciej.; Dastych Jaroslaw; Dród Izabela; Dziadek Jarosaw; Paradowska Edyta; Sobalska-Kwapis Marta; Strapagiel Dominik; Traczyk-Borszyska Magdalena; Tymoniuk Bogusaw                                                                                                                                                                                                                                                                                                                                            |
| EPI_ISL_1543934, EPI_ISL_1543937, EPI_ISL_1543985, EPI_ISL_1543987                                                                                                                                                                                                                                               | Laboratory of Respiratory Viruses Teaching and Clinical Center of the Medical University of Lodz                                                                                             | Laboratory of Respiratory Viruses Teaching and Clinical Center of the Medical University of Lodz                                | ; Borowiec Maciej.; Dastych Jaroslaw; Dród Izabela; Dziadek Jarosaw; Paradowska Edyta; Sobalska-Kwapis Marta; Strapagiel Dominik; Traczyk-Borszyska Magdalena; Tymoniuk Bogusaw                                                                                                                                                                                                                                                                                                                                            |
| EPI_ISL_427294 to 427304, EPI_ISL_456071 to 456075, EPI_ISL_456079 to 456081, EPI_ISL_456084 to 456087, EPI_ISL_456089 to 456106, EPI_ISL_467344 to 467371, EPI_ISL_541347 to 541369, EPI_ISL_1402429 to 1402431, EPI_ISL_1533980, EPI_ISL_1533983, EPI_ISL_1534005, EPI_ISL_1534011, EPI_ISL_1534014 to 1534016 | Laboratory of Respiratory Viruses and Measles, Oswaldo Cruz Institute, FIOCRUZ                                                                                                               | Laboratory of Respiratory Viruses and Measles, Oswaldo Cruz Institute, FIOCRUZ                                                  | Alex Pauvolid-Correa; Alice Sampaio Rocha; Aline Mattos; Ana Beatriz Machado Lima; Ana Carolina Mendonca; Ana Carolina Mendonça; Anna Carolina Paixao; Anna Carolina Paixão; Bráulio Caetano; Cinthia Avila; Cristiana Garcia; Felipe Naveca; Fernando Motta; Jonathan Lopes; Luciana Appolinario; Maria Ogrzewalska; Marilda Siqueira on behalf of the FioCruz COVID-19 Genomic Surveillance Network; Mia Ferreira Araujo; Milene Miranda; Paola Resende; Priscila Born; Renata Serrano Lopes; Roxana Loayza; Sunando Roy |
| see above                                                                                                                                                                                                                                                                                                        | Laboratory of Respiratory Viruses and Measles, Oswaldo Cruz Institute, FIOCRUZ                                                                                                               | Laboratory of Respiratory Viruses and Measles, Oswaldo Cruz Institute, FIOCRUZ                                                  | Alex Pauvolid-Correa; Alice Sampaio Rocha; Aline Mattos; Ana Beatriz Machado Lima; Ana Carolina Mendonca; Ana Carolina Mendonça; Anna Carolina Paixao; Anna Carolina Paixão; Bráulio Caetano; Cinthia Avila; Cristiana Garcia; Felipe Naveca; Fernando Motta; Jonathan Lopes; Luciana Appolinario; Maria Ogrzewalska; Marilda Siqueira on behalf of the FioCruz COVID-19 Genomic Surveillance Network; Mia Ferreira Araujo; Milene Miranda; Paola Resende; Priscila Born; Renata Serrano Lopes; Roxana Loayza; Sunando Roy |
| EPI_ISL_1527382 to 1527389                                                                                                                                                                                                                                                                                       | Laboratory of Virology of Federal Budget Health Care Institution "Center of Hygiene and Epidemiology in Arkhangelsk region"                                                                  | Group of Genomics and Postgenomic Technologies of Central Research Institute of Epidemiology                                    | Akimkin VG; Bulanenko VP; Cherkashina AS; Golubeva AG; Kapteleva VV; Kondrasheva LY; Korneenko EV; Ponomareva YA; Saenko SS; Samoilov AE; Semyina LV; Shishko LA; Speranskaya AS; Tivanova EV; Valdokhina AV                                                                                                                                                                                                                                                                                                               |
| EPI_ISL_451298 to 451305                                                                                                                                                                                                                                                                                         | Laboratory of Virology, INMI Lazzaro Spallanzani IRCCS                                                                                                                                       | Laboratory of Virology, INMI Lazzaro Spallanzani IRCCS                                                                          | Antonino Di Caro; Barbara Bartolini; Cesare E.M. Gruber; Francesco Messina; Giuseppe Ippolito; Maria R. Capobianchi; Martina Rueca                                                                                                                                                                                                                                                                                                                                                                                         |
| EPI_ISL_1489930, EPI_ISL_1489932                                                                                                                                                                                                                                                                                 | Laboratory of Virology, National center of expertise                                                                                                                                         | RSE "National Center of Expertise" and RSE "National center for Biotechnology"                                                  | Abdaliyev Askar; Amirgazin Asylulan; Balykbaev Kanat; Kamalova Dinara; Ramankulov Erlan; Sharipova Saule; Shevtsov Alexandr; Tungushbayev Talgat                                                                                                                                                                                                                                                                                                                                                                           |
| EPI_ISL_454575                                                                                                                                                                                                                                                                                                   | Laboratory of virology, National Center of Expertise                                                                                                                                         | Laboratory of molecular-genetic research, National Center for                                                                   | ; Abdaliyev Askar; Akhmetolayev Ilyas; Amirgazin Asylulan; Aushakhmetova Zabira; Kalendar Ruslan; Lutsay Viktoriya; Rakhmetova Akbota; Ramankulov                                                                                                                                                                                                                                                                                                                                                                          |

|                                                                                                                                                                                                                         |                                                                             |                                                                                                                                   |  |                                                                                                                                                                                                                                                                                                                                                                                                                                                                                                                                                                                                                                                                                                                                                                                                                                                                                                                        |
|-------------------------------------------------------------------------------------------------------------------------------------------------------------------------------------------------------------------------|-----------------------------------------------------------------------------|-----------------------------------------------------------------------------------------------------------------------------------|--|------------------------------------------------------------------------------------------------------------------------------------------------------------------------------------------------------------------------------------------------------------------------------------------------------------------------------------------------------------------------------------------------------------------------------------------------------------------------------------------------------------------------------------------------------------------------------------------------------------------------------------------------------------------------------------------------------------------------------------------------------------------------------------------------------------------------------------------------------------------------------------------------------------------------|
|                                                                                                                                                                                                                         |                                                                             | Expertise, Kazakhstan National Center for Biotechnology, Kazakhstan                                                               |  | Yerlan; Shevtsov Alexandr                                                                                                                                                                                                                                                                                                                                                                                                                                                                                                                                                                                                                                                                                                                                                                                                                                                                                              |
| EPI_ISL_454584 to 454586, EPI_ISL_454589                                                                                                                                                                                | Laboratory of virology, National Center of Expertise                        | Laboratory of molecular-genetic research, National Center for Expertise, Kazakhstan National Center for Biotechnology, Kazakhstan |  | ; Abdaliyev Askar; Akhmetolayev Ilyas; Amirgazin Asylulan; Aushakhmetova Zabira; Kalendar Ruslan; Lutsay Viktoriya; Rakhmetova Akbota; Ramankulov Yerlan; Shevtsov Alexandr                                                                                                                                                                                                                                                                                                                                                                                                                                                                                                                                                                                                                                                                                                                                            |
| EPI_ISL_454596 to 454597, EPI_ISL_454599 to 454600, EPI_ISL_454604                                                                                                                                                      | Laboratory of virology, National Center of Expertise                        | Laboratory of molecular-genetic research, National Center for Expertise, Kazakhstan National Center for Biotechnology, Kazakhstan |  | ; Abdaliyev Askar; Akhmetolayev Ilyas; Amirgazin Asylulan; Aushakhmetova Zabira; Kalendar Ruslan; Lutsay Viktoriya; Rakhmetova Akbota; Ramankulov Yerlan; Shevtsov Alexandr                                                                                                                                                                                                                                                                                                                                                                                                                                                                                                                                                                                                                                                                                                                                            |
| EPI_ISL_454576 to 454577, EPI_ISL_454579 to 454580, EPI_ISL_454582, EPI_ISL_454587, EPI_ISL_454590 to 454591, EPI_ISL_454593 to 454594, EPI_ISL_454598, EPI_ISL_454601, EPI_ISL_454603                                  | see above                                                                   | Laboratory of virology, National Center of Expertise                                                                              |  | ; Abdaliyev Askar; Akhmetolayev Ilyas; Amirgazin Asylulan; Aushakhmetova Zabira; Kalendar Ruslan; Lutsay Viktoriya; Rakhmetova Akbota; Ramankulov Yerlan; Shevtsov Alexandr                                                                                                                                                                                                                                                                                                                                                                                                                                                                                                                                                                                                                                                                                                                                            |
| EPI_ISL_1448017 to 1448018, EPI_ISL_1448020                                                                                                                                                                             | Laboratory of virology, National center of expertise                        | RSE "National Center for Biotechnology" and RSE "National Center of Expertise"                                                    |  | Abdaliyev Askar; Amirgazin Asylulan; Balykbaev Kanat; Kamalova Dinara; Ramankulov Yerlan; Sharipova Saule; Shevtsov Alexandr; Tungushbayev Talgat                                                                                                                                                                                                                                                                                                                                                                                                                                                                                                                                                                                                                                                                                                                                                                      |
| EPI_ISL_576119                                                                                                                                                                                                          | Laboratory, The Bio Arte Limited                                            | Laboratory, The Bio Arte Limited                                                                                                  |  | Biazzo, M.; Madeddu, S.; Pinzauti, D.; Santoro, F.                                                                                                                                                                                                                                                                                                                                                                                                                                                                                                                                                                                                                                                                                                                                                                                                                                                                     |
| EPI_ISL_576117 to 576118, EPI_ISL_576120 to 576126                                                                                                                                                                      | Laboratory, The Bio Arte Limited                                            | Laboratory, The Bio Arte Limited                                                                                                  |  | Biazzo, M.; Madeddu, S.; Pinzauti, D.; Santoro, F.                                                                                                                                                                                                                                                                                                                                                                                                                                                                                                                                                                                                                                                                                                                                                                                                                                                                     |
| EPI_ISL_414045, EPI_ISL_456076 to 456077, EPI_ISL_456082 to 456083, EPI_ISL_456088                                                                                                                                      | Laboratório Central de Saúde Pública Noel Nutels (LACEN-RJ)                 | Laboratory of Respiratory Viruses and Measles, Oswaldo Cruz Institute, FIOCRUZ                                                    |  | Aline Mattos; Allison Fabri; Braulia Caetano; Cristiana Garcia; Fernando Motta; Joilson Xavier; Jonathan Lopes; Luciana Appolinario; Maria Nóbrega; Maria Ogrzewalska; Marilda Siqueira on behalf of the Fiocruz COVID-19 Genomic Surveillance Network; Marilda Siqueira/Fiocruz COVID-19 Genomic Surveillance Network; Milene Miranda; Paola Resende; Sunando Roy                                                                                                                                                                                                                                                                                                                                                                                                                                                                                                                                                     |
| EPI_ISL_415105, EPI_ISL_427293                                                                                                                                                                                          | Laboratório Central de Saúde Pública Professor Gonçalves Moniz (LACEN-BA)   | Laboratory of Respiratory Viruses and Measles, Oswaldo Cruz Institute, FIOCRUZ                                                    |  | Aline Mattos; Allison Fabri; Braulia Caetano; Cristiana Garcia; Fernando Motta; Joilson Xavier; Jonathan Lopes; Luciana Appolinario; Maria Nóbrega; Maria Ogrzewalska; Marilda Siqueira Fiocruz COVID-19 Genomic Surveillance Network; Marilda Siqueira on behalf of the Fiocruz COVID-19 Genomic Surveillance Network; Milene Miranda; Paola Resende; Priscila Born; Sunando Roy                                                                                                                                                                                                                                                                                                                                                                                                                                                                                                                                      |
| EPI_ISL_427292                                                                                                                                                                                                          | Laboratório Central de Saúde Pública do Estado de Alagoas (LACEN-AL)        | Laboratory of Respiratory Viruses and Measles, Oswaldo Cruz Institute, FIOCRUZ                                                    |  | Aline Mattos; Braulia Caetano; Cristiana Garcia; Fernando Motta; Jonathan Lopes; Luciana Appolinario; Maria Ogrzewalska; Marilda Siqueira on behalf of the Fiocruz COVID-19 Genomic Surveillance Network; Milene Miranda; Paola Resende; Priscila Born; Sunando Roy                                                                                                                                                                                                                                                                                                                                                                                                                                                                                                                                                                                                                                                    |
| EPI_ISL_500460 to 500486, EPI_ISL_500865 to 500875, EPI_ISL_572334 to 572396                                                                                                                                            | Laboratório Central de Saúde Pública do Estado de Pernambuco (LACEN-PE)     | WallauLab, Aggeu Magalhães Institute                                                                                              |  | Alexandre Freitas da Silva; Antonio Mauro Rezende; Armando de Menezes Neto; Bruna Santos Lima Figueiredo de Sá; Caroline Targino Alves da Silva; Claudio Eduardo Cavalcanti; Constância Flávia Junqueira Ayres; Cássia Docena; Derciliano Lopes da Cruz; Duschinka Ribeiro Duarte Guedes; Elisama Helvecio; Filipe Zimmer Dezordi; Gabriel Luz Wallau on behalf of the Fiocruz COVID-19 Genomic Surveillance Network; Gonzalo Bello; Kamila Gaudêncio da Silva Sales; Larissa Krokovsky; Laís Ceschini Machado; Luciane Caroline Albuquerque Bezerra; Luydsom Richardson Silva Vasconcelos; Marcelo Henrique Santos Paiva; Maria Almerice Lopes da Silva; Matheus Figueira Bezerra; Michelle da Silva Barros; Paola Cristina Resende; Renata Pessôa Germano Mendes; Rodrigo Moraes Loyo Arcoverde; Severino Jefferson Ribeiro da Silva; Sival Pinto Brandão Filho; Tiago Gráf; Wheverton Ricardo Correia do Nascimento |
| EPI_ISL_427305 to 427306, EPI_ISL_541370 to 541371                                                                                                                                                                      | Laboratório Central de Saúde Pública do Estado de Santa Catarina (LACEN-SC) | Laboratory of Respiratory Viruses and Measles, Oswaldo Cruz Institute, FIOCRUZ                                                    |  | Aline Mattos; Ana Carolina Mendonça; Anna Carolina Paixão; Braulia Caetano; Cristiana Garcia; Fernando Motta; Jonathan Lopes; Luciana Appolinario; Maria Ogrzewalska; Marilda Siqueira on behalf of the Fiocruz COVID-19 Genomic Surveillance Network; Milene Miranda; Paola Resende; Priscila Born; Sandra Bianchini; Sunando Roy                                                                                                                                                                                                                                                                                                                                                                                                                                                                                                                                                                                     |
| EPI_ISL_541372 to 541396                                                                                                                                                                                                | Laboratório Central de Saúde Pública do Estado de Sergipe (LACEN-SE)        | Laboratory of Respiratory Viruses and Measles, Oswaldo Cruz Institute, FIOCRUZ                                                    |  | Ana Carolina Mendonça; Anna Carolina Paixão; Clioma Santos; Fernando Motta; Jonathan Lopes; Luciana Appolinario; Marilda Siqueira on behalf of the Fiocruz COVID-19 Genomic Surveillance Network; Paola Resende                                                                                                                                                                                                                                                                                                                                                                                                                                                                                                                                                                                                                                                                                                        |
| EPI_ISL_415128                                                                                                                                                                                                          | Laboratório Central de Saúde Pública do Estado do Espírito Santo (LACEN-ES) | Laboratory of Respiratory Viruses and Measles, Oswaldo Cruz Institute, FIOCRUZ                                                    |  | Aline Mattos; Allison Fabri; Braulia Caetano; Cristiana Garcia; Fernando Motta; Joilson Xavier; Jonathan Lopes; Luciana Appolinario; Maria Nóbrega; Maria Ogrzewalska; Marilda Siqueira on behalf of the Fiocruz COVID-19 Genomic Surveillance Network; Milene Miranda; Paola Resende; Sunando Roy                                                                                                                                                                                                                                                                                                                                                                                                                                                                                                                                                                                                                     |
| EPI_ISL_541340 to 541346                                                                                                                                                                                                | Laboratório Central de Saúde Pública do Estado do Paraná (LACEN-PR)         | Laboratory of Respiratory Viruses and Measles, Oswaldo Cruz Institute, FIOCRUZ                                                    |  | Ana Carolina Mendonça; Anna Carolina Paixão; Fernando Motta; Irina Riediger; Jonathan Lopes; Luciana Appolinario; Maria do Carmo Debur; Marilda Siqueira on behalf of the Fiocruz COVID-19 Genomic Surveillance Network; Paola Resende                                                                                                                                                                                                                                                                                                                                                                                                                                                                                                                                                                                                                                                                                 |
| EPI_ISL_417943                                                                                                                                                                                                          | Laboratório Hermes Pardini                                                  | Bioinformatics Laboratory                                                                                                         |  | Alexandra Gerber; Amilcar Tanuri; Ana Paula Guimarães; Cristiano Xavier Lima; Cássia Alves Gonçalves; Diana Mariani; Ester Cerdeira Sabino; Filipe Romero; Ingra Moraes Claro; Isabela de Carvalho Leitão; Jaqueline Goes de Jesus; Laboratório Hermes Pardini; Laboratorio Simile; Luciana Jesus Costa e André Felipe Santos; Luiz Gonzaga Paula de Almeida; Lidia Boulosa; Mariane Talon; Mauro Teixeira; Nuno Rodrigues Faria; Orlando Ferreira Jr.; Pinto Castiñeiras; Rafael de Mello Galliez; Renato Santana Aguiar e Ana Tereza Vasconcelos; Richard Araújo Maia; Rodrigo Brindeiro; Ronaldo da Silva Francisco Junior; Terezinha Marta Pereira; Érica Ramos dos Santos Nascimento                                                                                                                                                                                                                              |
| EPI_ISL_417928 to 417930, EPI_ISL_417934, EPI_ISL_417936, EPI_ISL_417940, EPI_ISL_417945, EPI_ISL_417949                                                                                                                | Laboratório Hermes Pardini                                                  | Bioinformatics Laboratory - LNCC                                                                                                  |  | Alexandra Gerber; Amilcar Tanuri; Ana Paula Guimarães; Cristiano Xavier Lima; Cássia Alves Gonçalves; Cássia Cristina Alves Gonçalves; Diana Mariani; Ester Cerdeira Sabino; Filipe Romero; Ingra Moraes Claro; Isabela de Carvalho Leitão; Jaqueline Goes de Jesus; Laboratório Hermes Pardini; Laboratorio Simile; Luciana Jesus Costa e André Felipe Santos; Luiz Gonzaga Paula de Almeida; Lidia Boulosa; Mariane Talon; Mauro Teixeira; Nuno Rodrigues Faria; Orlando Ferreira Jr.; Pinto Castiñeiras; Rafael de Mello Galliez; Renato Santana Aguiar e Ana Tereza Vasconcelos; Richard Araújo Maia; Rodrigo Brindeiro; Ronaldo da Silva Francisco Junior; Terezinha Marta Pereira; Érica Ramos dos Santos Nascimento                                                                                                                                                                                             |
| EPI_ISL_417925 to 417926                                                                                                                                                                                                | Laboratório Simili                                                          | Bioinformatics Laboratory / LNCC                                                                                                  |  | Alexandra Gerber; Amilcar Tanuri; Ana Paula Guimarães; Cristiano Xavier Lima; Cássia Cristina Alves Gonçalves; Diana Mariani; Ester Cerdeira Sabino; Filipe Romero; Francisco Junior; Ingra Moraes Claro; Isabela de Carvalho Leitão; Jaqueline Goes de Jesus; Laboratório Hermes Pardini; Laboratorio Simile; Luciana Jesus Costa e André Felipe Santos; Luiz Gonzaga Paula de Almeida; Lidia Boulosa; Mariane Talon; Mauro Teixeira; Nuno Rodrigues Faria; Orlando Ferreira Jr.; Pinto Castiñeiras; Rafael de Mello Galliez; Renato Santana Aguiar e Ana Tereza Vasconcelos; Richard Araújo Maia; Rodrigo Brindeiro; Ronaldo da Silva; Ronaldo da Silva Francisco Junior; Terezinha Marta Pereira; Érica Ramos dos Santos Nascimento                                                                                                                                                                                 |
| EPI_ISL_1494960 to 1495042, EPI_ISL_1497548 to 1497549                                                                                                                                                                  | Laboratório de Biologia Integrativa                                         | Laboratório de Biologia Integrativa                                                                                               |  | Alessandro Clayton de Souza Ferreira; Aline Brito de Lima; Carolina Moreira Voloch; Daniel Costa Queiroz; Danielle Alves Gomes Zauli; Diego Menezes Bonfim; Filipe Romero Rebelo Moreira; Frederico Scott Varella Malta; Joice do Prado Silva; Lucylene Miguita Luiz; Nuno Rodrigues Faria; Paula Luize Camargos Fonseca; Rafael Marques de Souza; Renan Pedra de Souza; Renato Santana Aguiar; Rennan Garcias Moreira; Victor Cavalcanti Pardini; Victor Emmanuel Viana Geddes                                                                                                                                                                                                                                                                                                                                                                                                                                        |
| EPI_ISL_476152 to 476170, EPI_ISL_476337 to 476349, EPI_ISL_476387 to 476402, EPI_ISL_476408 to 476425                                                                                                                  | Laboratório de Patologia Clínica - UNICAMP                                  | Laboratório de Estudos de Virus Emergentes - UNICAMP                                                                              |  | Angelica Schreiber; Camila Simeoni; Darlan da Silva Candido; Jaqueline Goes Jesus e William Marciel de Souza; José Luiz Proença-Modena; Julia Forato; Julien Theze; Luiz Gonzaga; Magnus Nueldo Nunes dos Santos; Marcilio Jorge Fumagalli; Marlene Ribeiro Amorim; Nuno Rodrigues Faria                                                                                                                                                                                                                                                                                                                                                                                                                                                                                                                                                                                                                               |
| EPI_ISL_1464626 to 1464677                                                                                                                                                                                              | Laboratório de Virologia - UNIFESP                                          | Laboratory of Respiratory Viruses and Measles, Oswaldo Cruz Institute, FIOCRUZ                                                    |  | Alice Sampaio Rocha; Ana Carolina Mendonca; Anna Carolina Paixao; Fernando Motta; Luciana Appolinario; Marilda Siqueira on behalf of the Fiocruz COVID-19 Genomic Surveillance Network; Nancy Bele; Paola Resende; Renata Serrano Lopes                                                                                                                                                                                                                                                                                                                                                                                                                                                                                                                                                                                                                                                                                |
| EPI_ISL_541397 to 541399                                                                                                                                                                                                | Laboratório de Virologia Comparada e Ambiental - LVCA - IOC                 | Laboratory of Respiratory Viruses and Measles, Oswaldo Cruz Institute, FIOCRUZ                                                    |  | Ana Carolina Mendonça; Camille Ferreira Mannarino; Fernando Motta; Luciana Appolinario; Marilda Siqueira; Marize Pereira Miagostovich on behalf of the Fiocruz COVID-19 Genomic Surveillance Network; Paola Resende; Tatiana Prado; Tulio Machado Fumian                                                                                                                                                                                                                                                                                                                                                                                                                                                                                                                                                                                                                                                               |
| EPI_ISL_1433518, EPI_ISL_1433526, EPI_ISL_1433563, EPI_ISL_1433567, EPI_ISL_1433569, EPI_ISL_1433576, EPI_ISL_1433594, EPI_ISL_1433736 to 1433737, EPI_ISL_14339380, EPI_ISL_14339398, EPI_ISL_1439416, EPI_ISL_1439432 | see above                                                                   | Labormedizin Darmstadt                                                                                                            |  | Robert Koch Institute                                                                                                                                                                                                                                                                                                                                                                                                                                                                                                                                                                                                                                                                                                                                                                                                                                                                                                  |
| EPI_ISL_1394263 to 1394269, EPI_ISL_1538481, EPI_ISL_1538502, EPI_ISL_1538610, EPI_ISL_1538957 to 1538959                                                                                                               | Labotororium Diagnostyki Molekularnej, Cytogenetyki i Cytometrii            | 1. National Institute of Public Health - National Institute of Hygiene; 2. Eurofins Genomics Europe Sequencing GmbH               |  | ECDC COVID-19 WGS support team; Eurofins Genomics Europe Sequencing Team; Gierczyki Rafa; Sadkowska-Todys Magorzata; Wokowicz Tomasz; Zacharczuk Katarzyna                                                                                                                                                                                                                                                                                                                                                                                                                                                                                                                                                                                                                                                                                                                                                             |
| EPI_ISL_1534246                                                                                                                                                                                                         | Ladismith (Nissenville) Clinic wc LAF                                       | NHLS/UCT                                                                                                                          |  | Arash Iranzadeh; Bruna Galvao; Carolyn Williamson; Deelan Doolabh; Diana Hardie; Innocent Mudau; Kruger Marais; Lynn Tyers; Marvin Hsiao; Stephen Korsman                                                                                                                                                                                                                                                                                                                                                                                                                                                                                                                                                                                                                                                                                                                                                              |

|                                                                                                                                                                                                                                                                                                                                                                                                                                                                                                                                                                                                                                                                                                                                                                                                                                                                                                                                                                                                                                                                                                                                                                                                                                                                                                                                                                                                                                                                                                                                                                                                                                                                                                                                                                                                                                                                                                                                                                                                                                                                                                                                                                                                                                                                                                                                                                                                                                                                                                                                                                                                                                                                                                                                                                                                                                                                                                                                                                                                                                                                                                                                                                                                                                                                                                                                                                                                                                                                                                                                                                                                                                                                                                                                                                                                                                                                                                                                                                                                                                                                                                                                                                                                                                                                                                                                                                                                                                                                                                                                                                                                                                                                                                                                                                                                                                                                                                                                                                                                                                                                                                                                                                                                                                                                                                                                                                                                                                                                                                                                                     |                                                                           |                                                                                                             |                                                                                                                                                                                                                    |
|-----------------------------------------------------------------------------------------------------------------------------------------------------------------------------------------------------------------------------------------------------------------------------------------------------------------------------------------------------------------------------------------------------------------------------------------------------------------------------------------------------------------------------------------------------------------------------------------------------------------------------------------------------------------------------------------------------------------------------------------------------------------------------------------------------------------------------------------------------------------------------------------------------------------------------------------------------------------------------------------------------------------------------------------------------------------------------------------------------------------------------------------------------------------------------------------------------------------------------------------------------------------------------------------------------------------------------------------------------------------------------------------------------------------------------------------------------------------------------------------------------------------------------------------------------------------------------------------------------------------------------------------------------------------------------------------------------------------------------------------------------------------------------------------------------------------------------------------------------------------------------------------------------------------------------------------------------------------------------------------------------------------------------------------------------------------------------------------------------------------------------------------------------------------------------------------------------------------------------------------------------------------------------------------------------------------------------------------------------------------------------------------------------------------------------------------------------------------------------------------------------------------------------------------------------------------------------------------------------------------------------------------------------------------------------------------------------------------------------------------------------------------------------------------------------------------------------------------------------------------------------------------------------------------------------------------------------------------------------------------------------------------------------------------------------------------------------------------------------------------------------------------------------------------------------------------------------------------------------------------------------------------------------------------------------------------------------------------------------------------------------------------------------------------------------------------------------------------------------------------------------------------------------------------------------------------------------------------------------------------------------------------------------------------------------------------------------------------------------------------------------------------------------------------------------------------------------------------------------------------------------------------------------------------------------------------------------------------------------------------------------------------------------------------------------------------------------------------------------------------------------------------------------------------------------------------------------------------------------------------------------------------------------------------------------------------------------------------------------------------------------------------------------------------------------------------------------------------------------------------------------------------------------------------------------------------------------------------------------------------------------------------------------------------------------------------------------------------------------------------------------------------------------------------------------------------------------------------------------------------------------------------------------------------------------------------------------------------------------------------------------------------------------------------------------------------------------------------------------------------------------------------------------------------------------------------------------------------------------------------------------------------------------------------------------------------------------------------------------------------------------------------------------------------------------------------------------------------------------------------------------------------------------------------------------|---------------------------------------------------------------------------|-------------------------------------------------------------------------------------------------------------|--------------------------------------------------------------------------------------------------------------------------------------------------------------------------------------------------------------------|
| EPI_ISL_1416726                                                                                                                                                                                                                                                                                                                                                                                                                                                                                                                                                                                                                                                                                                                                                                                                                                                                                                                                                                                                                                                                                                                                                                                                                                                                                                                                                                                                                                                                                                                                                                                                                                                                                                                                                                                                                                                                                                                                                                                                                                                                                                                                                                                                                                                                                                                                                                                                                                                                                                                                                                                                                                                                                                                                                                                                                                                                                                                                                                                                                                                                                                                                                                                                                                                                                                                                                                                                                                                                                                                                                                                                                                                                                                                                                                                                                                                                                                                                                                                                                                                                                                                                                                                                                                                                                                                                                                                                                                                                                                                                                                                                                                                                                                                                                                                                                                                                                                                                                                                                                                                                                                                                                                                                                                                                                                                                                                                                                                                                                                                                     | Lafene Health Center                                                      | Kansas State University Veterinary Diagnostic Laboratory                                                    | Andrea Lu; Emily Cox; Jamie Henningson; Jianfa Bai; Kasey Hogan; Lance Noll; Rachel Palinski; Tyler Doerksen                                                                                                       |
| EPI_ISL_1423977 to 1423983, EPI_ISL_1499106 to 1499111, EPI_ISL_1499595 to 1499620, EPI_ISL_1500666 to 1500667, EPI_ISL_1515790 to 1515797                                                                                                                                                                                                                                                                                                                                                                                                                                                                                                                                                                                                                                                                                                                                                                                                                                                                                                                                                                                                                                                                                                                                                                                                                                                                                                                                                                                                                                                                                                                                                                                                                                                                                                                                                                                                                                                                                                                                                                                                                                                                                                                                                                                                                                                                                                                                                                                                                                                                                                                                                                                                                                                                                                                                                                                                                                                                                                                                                                                                                                                                                                                                                                                                                                                                                                                                                                                                                                                                                                                                                                                                                                                                                                                                                                                                                                                                                                                                                                                                                                                                                                                                                                                                                                                                                                                                                                                                                                                                                                                                                                                                                                                                                                                                                                                                                                                                                                                                                                                                                                                                                                                                                                                                                                                                                                                                                                                                          | Lafene Health Center                                                      | Kansas State Veterinary Diagnostic Laboratory                                                               | Andreea Lu; Elizabeth Porter; Emily Cox; Jamie Henningson; Jianfa Bai; Kasey Hogan; Lance Noll; Rachel Palinski; Tyler Doerksen                                                                                    |
| EPI_ISL_434669, EPI_ISL_475515                                                                                                                                                                                                                                                                                                                                                                                                                                                                                                                                                                                                                                                                                                                                                                                                                                                                                                                                                                                                                                                                                                                                                                                                                                                                                                                                                                                                                                                                                                                                                                                                                                                                                                                                                                                                                                                                                                                                                                                                                                                                                                                                                                                                                                                                                                                                                                                                                                                                                                                                                                                                                                                                                                                                                                                                                                                                                                                                                                                                                                                                                                                                                                                                                                                                                                                                                                                                                                                                                                                                                                                                                                                                                                                                                                                                                                                                                                                                                                                                                                                                                                                                                                                                                                                                                                                                                                                                                                                                                                                                                                                                                                                                                                                                                                                                                                                                                                                                                                                                                                                                                                                                                                                                                                                                                                                                                                                                                                                                                                                      | Lakargruppen                                                              | The Public Health Agency of Sweden                                                                          | Anna Risberg; Anna-Malin Linde; Boris Klanger; Karin Tegmark-Wisell; Maria Lind Karlberg; Mattias Haukland; Mia Brytting; Olov Svartstrom; Oskar Karlsson Lindsjo; Reza Advani; Sandra Broddesson; Theresa Enkirch |
| EPI_ISL_1441242, EPI_ISL_1441244 to 1441245, EPI_ISL_1441250 to 1441251, EPI_ISL_1441255, EPI_ISL_1441257 to 1441258, EPI_ISL_1441260 to 1441261, EPI_ISL_1441263, EPI_ISL_1441265, EPI_ISL_1441268, EPI_ISL_1441270 to 1441275, EPI_ISL_1441278, EPI_ISL_1441281, EPI_ISL_1441284, EPI_ISL_1441287, EPI_ISL_1441292, EPI_ISL_1441294 to 1441295, EPI_ISL_1441298, EPI_ISL_1441300, EPI_ISL_1441306, EPI_ISL_1441308                                                                                                                                                                                                                                                                                                                                                                                                                                                                                                                                                                                                                                                                                                                                                                                                                                                                                                                                                                                                                                                                                                                                                                                                                                                                                                                                                                                                                                                                                                                                                                                                                                                                                                                                                                                                                                                                                                                                                                                                                                                                                                                                                                                                                                                                                                                                                                                                                                                                                                                                                                                                                                                                                                                                                                                                                                                                                                                                                                                                                                                                                                                                                                                                                                                                                                                                                                                                                                                                                                                                                                                                                                                                                                                                                                                                                                                                                                                                                                                                                                                                                                                                                                                                                                                                                                                                                                                                                                                                                                                                                                                                                                                                                                                                                                                                                                                                                                                                                                                                                                                                                                                                | see above                                                                 | Landesuntersuchungsanstalt für das Gesundheits- und Veterinärwesen (LUA) Sachsen                            | Robert Koch Institute                                                                                                                                                                                              |
| EPI_ISL_1531531 to 1531532                                                                                                                                                                                                                                                                                                                                                                                                                                                                                                                                                                                                                                                                                                                                                                                                                                                                                                                                                                                                                                                                                                                                                                                                                                                                                                                                                                                                                                                                                                                                                                                                                                                                                                                                                                                                                                                                                                                                                                                                                                                                                                                                                                                                                                                                                                                                                                                                                                                                                                                                                                                                                                                                                                                                                                                                                                                                                                                                                                                                                                                                                                                                                                                                                                                                                                                                                                                                                                                                                                                                                                                                                                                                                                                                                                                                                                                                                                                                                                                                                                                                                                                                                                                                                                                                                                                                                                                                                                                                                                                                                                                                                                                                                                                                                                                                                                                                                                                                                                                                                                                                                                                                                                                                                                                                                                                                                                                                                                                                                                                          | Landstuhl Regional Medical Center                                         | US Air Force School of Aerospace Medicine                                                                   | Amanda Javorina; Anthony Fries; Clarise Starr; Cole Anderson; Elizabeth Macias; Fritz Castillo; Jennifer Meyer; Sarah Purves; William Buggele; William Gruner                                                      |
| EPI_ISL_534237 to 534238, EPI_ISL_548255                                                                                                                                                                                                                                                                                                                                                                                                                                                                                                                                                                                                                                                                                                                                                                                                                                                                                                                                                                                                                                                                                                                                                                                                                                                                                                                                                                                                                                                                                                                                                                                                                                                                                                                                                                                                                                                                                                                                                                                                                                                                                                                                                                                                                                                                                                                                                                                                                                                                                                                                                                                                                                                                                                                                                                                                                                                                                                                                                                                                                                                                                                                                                                                                                                                                                                                                                                                                                                                                                                                                                                                                                                                                                                                                                                                                                                                                                                                                                                                                                                                                                                                                                                                                                                                                                                                                                                                                                                                                                                                                                                                                                                                                                                                                                                                                                                                                                                                                                                                                                                                                                                                                                                                                                                                                                                                                                                                                                                                                                                            | Lanssjukhuset Kalmar                                                      | The Public Health Agency of Sweden                                                                          | Anna Risberg; Anna-Malin Linde; Karin Tegmark-Wisell; Maria Lind Karlberg; Mattias Haukland; Mia Brytting; Olov Svartstrom; Oskar Karlsson Lindsjo; Petra Edquist; Reza Advani; Sandra Broddesson                  |
| EPI_ISL_407079                                                                                                                                                                                                                                                                                                                                                                                                                                                                                                                                                                                                                                                                                                                                                                                                                                                                                                                                                                                                                                                                                                                                                                                                                                                                                                                                                                                                                                                                                                                                                                                                                                                                                                                                                                                                                                                                                                                                                                                                                                                                                                                                                                                                                                                                                                                                                                                                                                                                                                                                                                                                                                                                                                                                                                                                                                                                                                                                                                                                                                                                                                                                                                                                                                                                                                                                                                                                                                                                                                                                                                                                                                                                                                                                                                                                                                                                                                                                                                                                                                                                                                                                                                                                                                                                                                                                                                                                                                                                                                                                                                                                                                                                                                                                                                                                                                                                                                                                                                                                                                                                                                                                                                                                                                                                                                                                                                                                                                                                                                                                      | Lapland Central Hospital                                                  | Department of Virology, University of Helsinki and Helsinki University Hospital, Helsinki, Finland          | Hannimari Kallio-Kokko; Olli Vapalahti; Suvi Kuivanen; Teemu Smura                                                                                                                                                 |
| EPI_ISL_437089 to 437096, EPI_ISL_486422 to 486426, EPI_ISL_486428, EPI_ISL_486430 to 486436, EPI_ISL_512647 to 512652, EPI_ISL_515185 to 515186, EPI_ISL_534204 to 534205, EPI_ISL_534209                                                                                                                                                                                                                                                                                                                                                                                                                                                                                                                                                                                                                                                                                                                                                                                                                                                                                                                                                                                                                                                                                                                                                                                                                                                                                                                                                                                                                                                                                                                                                                                                                                                                                                                                                                                                                                                                                                                                                                                                                                                                                                                                                                                                                                                                                                                                                                                                                                                                                                                                                                                                                                                                                                                                                                                                                                                                                                                                                                                                                                                                                                                                                                                                                                                                                                                                                                                                                                                                                                                                                                                                                                                                                                                                                                                                                                                                                                                                                                                                                                                                                                                                                                                                                                                                                                                                                                                                                                                                                                                                                                                                                                                                                                                                                                                                                                                                                                                                                                                                                                                                                                                                                                                                                                                                                                                                                          | see above                                                                 | Latvijas Infektoloijas centrs                                                                               | Latvian Biomedical Research and Study Centre                                                                                                                                                                       |
| EPI_ISL_451489, EPI_ISL_451545, EPI_ISL_451572, EPI_ISL_451602, EPI_ISL_451609, EPI_ISL_451611, EPI_ISL_451631, EPI_ISL_451641, EPI_ISL_455041, EPI_ISL_455048, EPI_ISL_455063, EPI_ISL_498769 to 498772, EPI_ISL_513403 to 513408, EPI_ISL_526143, EPI_ISL_526202 to 526204, EPI_ISL_544957, EPI_ISL_544962, EPI_ISL_545040, EPI_ISL_591487 to 591491, EPI_ISL_593653                                                                                                                                                                                                                                                                                                                                                                                                                                                                                                                                                                                                                                                                                                                                                                                                                                                                                                                                                                                                                                                                                                                                                                                                                                                                                                                                                                                                                                                                                                                                                                                                                                                                                                                                                                                                                                                                                                                                                                                                                                                                                                                                                                                                                                                                                                                                                                                                                                                                                                                                                                                                                                                                                                                                                                                                                                                                                                                                                                                                                                                                                                                                                                                                                                                                                                                                                                                                                                                                                                                                                                                                                                                                                                                                                                                                                                                                                                                                                                                                                                                                                                                                                                                                                                                                                                                                                                                                                                                                                                                                                                                                                                                                                                                                                                                                                                                                                                                                                                                                                                                                                                                                                                              | see above                                                                 | Laverty Pathology                                                                                           | NSW Health Pathology - Institute of Clinical Pathology and Medical Research; Westmead Hospital; University of Sydney                                                                                               |
| EPI_ISL_421507 to 421508                                                                                                                                                                                                                                                                                                                                                                                                                                                                                                                                                                                                                                                                                                                                                                                                                                                                                                                                                                                                                                                                                                                                                                                                                                                                                                                                                                                                                                                                                                                                                                                                                                                                                                                                                                                                                                                                                                                                                                                                                                                                                                                                                                                                                                                                                                                                                                                                                                                                                                                                                                                                                                                                                                                                                                                                                                                                                                                                                                                                                                                                                                                                                                                                                                                                                                                                                                                                                                                                                                                                                                                                                                                                                                                                                                                                                                                                                                                                                                                                                                                                                                                                                                                                                                                                                                                                                                                                                                                                                                                                                                                                                                                                                                                                                                                                                                                                                                                                                                                                                                                                                                                                                                                                                                                                                                                                                                                                                                                                                                                            | Le Château de Seine-Port                                                  | National Reference Center for Viruses of Respiratory Infections, Institut Pasteur, Paris                    | Angela Brisebarre; Etienne Simon-Lorière; Flora Donati; Marion Barbet; Maud Vanpeene; Mélanie Albert; Méline Bizard; Sylvie Behilli; Sylvie van der Werf; Vincent Enouf                                            |
| EPI_ISL_498551 to 498552, EPI_ISL_498554, EPI_ISL_498556                                                                                                                                                                                                                                                                                                                                                                                                                                                                                                                                                                                                                                                                                                                                                                                                                                                                                                                                                                                                                                                                                                                                                                                                                                                                                                                                                                                                                                                                                                                                                                                                                                                                                                                                                                                                                                                                                                                                                                                                                                                                                                                                                                                                                                                                                                                                                                                                                                                                                                                                                                                                                                                                                                                                                                                                                                                                                                                                                                                                                                                                                                                                                                                                                                                                                                                                                                                                                                                                                                                                                                                                                                                                                                                                                                                                                                                                                                                                                                                                                                                                                                                                                                                                                                                                                                                                                                                                                                                                                                                                                                                                                                                                                                                                                                                                                                                                                                                                                                                                                                                                                                                                                                                                                                                                                                                                                                                                                                                                                            | Lebanese American University                                              | Lebanese American University                                                                                | Abdallah, J.; Abi Habib, W.; El Shesheny, R.; Goldstein, J. and Kayali, G.; Mokhbat, J.; R.J.; Webby                                                                                                               |
| EPI_ISL_447588                                                                                                                                                                                                                                                                                                                                                                                                                                                                                                                                                                                                                                                                                                                                                                                                                                                                                                                                                                                                                                                                                                                                                                                                                                                                                                                                                                                                                                                                                                                                                                                                                                                                                                                                                                                                                                                                                                                                                                                                                                                                                                                                                                                                                                                                                                                                                                                                                                                                                                                                                                                                                                                                                                                                                                                                                                                                                                                                                                                                                                                                                                                                                                                                                                                                                                                                                                                                                                                                                                                                                                                                                                                                                                                                                                                                                                                                                                                                                                                                                                                                                                                                                                                                                                                                                                                                                                                                                                                                                                                                                                                                                                                                                                                                                                                                                                                                                                                                                                                                                                                                                                                                                                                                                                                                                                                                                                                                                                                                                                                                      | Lednický Lab                                                              | Lednický lab                                                                                                | Alam; C.J.; Elbadry; Gibson; J.A.; J.C.; J.G. Jr. and Lednický; M.A.; M.M.; Morris; Stephenson; Subramaniam, K.; T.B.; Waltzek                                                                                     |
| EPI_ISL_434677                                                                                                                                                                                                                                                                                                                                                                                                                                                                                                                                                                                                                                                                                                                                                                                                                                                                                                                                                                                                                                                                                                                                                                                                                                                                                                                                                                                                                                                                                                                                                                                                                                                                                                                                                                                                                                                                                                                                                                                                                                                                                                                                                                                                                                                                                                                                                                                                                                                                                                                                                                                                                                                                                                                                                                                                                                                                                                                                                                                                                                                                                                                                                                                                                                                                                                                                                                                                                                                                                                                                                                                                                                                                                                                                                                                                                                                                                                                                                                                                                                                                                                                                                                                                                                                                                                                                                                                                                                                                                                                                                                                                                                                                                                                                                                                                                                                                                                                                                                                                                                                                                                                                                                                                                                                                                                                                                                                                                                                                                                                                      | Lednický Laboratory at Emerging Pathogens Institute                       | Lednický Laboratory at Emerging Pathogens Institute                                                         | C.-Y.; Clugston; Elbadry; J.A.; J.G. Jr. and Lednický; J.R.; M.A.; Morris; S.N.; Shankar; Wu                                                                                                                       |
| EPI_ISL_447900                                                                                                                                                                                                                                                                                                                                                                                                                                                                                                                                                                                                                                                                                                                                                                                                                                                                                                                                                                                                                                                                                                                                                                                                                                                                                                                                                                                                                                                                                                                                                                                                                                                                                                                                                                                                                                                                                                                                                                                                                                                                                                                                                                                                                                                                                                                                                                                                                                                                                                                                                                                                                                                                                                                                                                                                                                                                                                                                                                                                                                                                                                                                                                                                                                                                                                                                                                                                                                                                                                                                                                                                                                                                                                                                                                                                                                                                                                                                                                                                                                                                                                                                                                                                                                                                                                                                                                                                                                                                                                                                                                                                                                                                                                                                                                                                                                                                                                                                                                                                                                                                                                                                                                                                                                                                                                                                                                                                                                                                                                                                      | Lednický Laboratory at Emerging Pathogens Institute                       | University of Florida                                                                                       | Alam; C.J.; Elbadry; Gibson; J.A.; J.C.; J.G.; Lednický; M.A. and Morris; M.M.; Stephenson                                                                                                                         |
| EPI_ISL_434636                                                                                                                                                                                                                                                                                                                                                                                                                                                                                                                                                                                                                                                                                                                                                                                                                                                                                                                                                                                                                                                                                                                                                                                                                                                                                                                                                                                                                                                                                                                                                                                                                                                                                                                                                                                                                                                                                                                                                                                                                                                                                                                                                                                                                                                                                                                                                                                                                                                                                                                                                                                                                                                                                                                                                                                                                                                                                                                                                                                                                                                                                                                                                                                                                                                                                                                                                                                                                                                                                                                                                                                                                                                                                                                                                                                                                                                                                                                                                                                                                                                                                                                                                                                                                                                                                                                                                                                                                                                                                                                                                                                                                                                                                                                                                                                                                                                                                                                                                                                                                                                                                                                                                                                                                                                                                                                                                                                                                                                                                                                                      | Lednický Laboratory, Emerging Pathogens Institute, University of Florida  | Lednický Laboratory at Emerging Pathogens Institute, University of Florida                                  | Alam, M.; C.J.; Elbadry; Gibson; J.A.; J.C.; J.G. Jr. and Lednický; M.A.; Morris; Stephenson; Subramaniam, K.; T.B.; Waltzek                                                                                       |
| EPI_ISL_434637                                                                                                                                                                                                                                                                                                                                                                                                                                                                                                                                                                                                                                                                                                                                                                                                                                                                                                                                                                                                                                                                                                                                                                                                                                                                                                                                                                                                                                                                                                                                                                                                                                                                                                                                                                                                                                                                                                                                                                                                                                                                                                                                                                                                                                                                                                                                                                                                                                                                                                                                                                                                                                                                                                                                                                                                                                                                                                                                                                                                                                                                                                                                                                                                                                                                                                                                                                                                                                                                                                                                                                                                                                                                                                                                                                                                                                                                                                                                                                                                                                                                                                                                                                                                                                                                                                                                                                                                                                                                                                                                                                                                                                                                                                                                                                                                                                                                                                                                                                                                                                                                                                                                                                                                                                                                                                                                                                                                                                                                                                                                      | Lednický Laboratory, Emerging Pathogens Institute, University of Florida. | Lednický Laboratory, Emerging Pathogens Institute, University of Florida.                                   | C.J.; Elbadry; Gibson; J.A.; J.C.; J.G. Jr. and Lednický; M.A.; Morris; Stephenson; Subramaniam, K.; T.B.; Waltzek                                                                                                 |
| EPI_ISL_569664 to 569688                                                                                                                                                                                                                                                                                                                                                                                                                                                                                                                                                                                                                                                                                                                                                                                                                                                                                                                                                                                                                                                                                                                                                                                                                                                                                                                                                                                                                                                                                                                                                                                                                                                                                                                                                                                                                                                                                                                                                                                                                                                                                                                                                                                                                                                                                                                                                                                                                                                                                                                                                                                                                                                                                                                                                                                                                                                                                                                                                                                                                                                                                                                                                                                                                                                                                                                                                                                                                                                                                                                                                                                                                                                                                                                                                                                                                                                                                                                                                                                                                                                                                                                                                                                                                                                                                                                                                                                                                                                                                                                                                                                                                                                                                                                                                                                                                                                                                                                                                                                                                                                                                                                                                                                                                                                                                                                                                                                                                                                                                                                            | Lee Lab                                                                   | Lee Lab                                                                                                     | Gina Faraci; Jane F. Emerson; Pamela M. Ward; Sung Yong Park; and Ha Youn Lee                                                                                                                                      |
| EPI_ISL_538811, EPI_ISL_538818, EPI_ISL_538841, EPI_ISL_538851, EPI_ISL_538863, EPI_ISL_538866, EPI_ISL_538899, EPI_ISL_538917, EPI_ISL_538945, EPI_ISL_538987, EPI_ISL_538994, EPI_ISL_539006, EPI_ISL_539030, EPI_ISL_539070, EPI_ISL_539116 to 539117, EPI_ISL_539120, EPI_ISL_539143, EPI_ISL_539150, EPI_ISL_539152, EPI_ISL_539157, EPI_ISL_539185, EPI_ISL_539197, EPI_ISL_539213                                                                                                                                                                                                                                                                                                                                                                                                                                                                                                                                                                                                                                                                                                                                                                                                                                                                                                                                                                                                                                                                                                                                                                                                                                                                                                                                                                                                                                                                                                                                                                                                                                                                                                                                                                                                                                                                                                                                                                                                                                                                                                                                                                                                                                                                                                                                                                                                                                                                                                                                                                                                                                                                                                                                                                                                                                                                                                                                                                                                                                                                                                                                                                                                                                                                                                                                                                                                                                                                                                                                                                                                                                                                                                                                                                                                                                                                                                                                                                                                                                                                                                                                                                                                                                                                                                                                                                                                                                                                                                                                                                                                                                                                                                                                                                                                                                                                                                                                                                                                                                                                                                                                                            | see above                                                                 | Leeds Teaching Hospitals NHS Trust and Public Health England, National Infection Service (Leeds Laboratory) | Wellcome Sanger Institute for the COVID-19 Genomics UK (COG-UK) Consortium                                                                                                                                         |
| EPI_ISL_538748 to 538810, EPI_ISL_538812 to 538817, EPI_ISL_538819 to 538840, EPI_ISL_538842 to 538850, EPI_ISL_538852 to 538862, EPI_ISL_538864 to 538865, EPI_ISL_538867 to 538898, EPI_ISL_538900 to 538916, EPI_ISL_538918 to 538944, EPI_ISL_538946 to 538986, EPI_ISL_538988 to 538993, EPI_ISL_538995 to 539005, EPI_ISL_539007 to 539029, EPI_ISL_539031 to 539069, EPI_ISL_539071 to 539115, EPI_ISL_539118 to 539119, EPI_ISL_539121 to 539142, EPI_ISL_539144 to 539149, EPI_ISL_539151, EPI_ISL_539153 to 539156, EPI_ISL_539158 to 539184, EPI_ISL_539186 to 539196, EPI_ISL_539198 to 539212, EPI_ISL_539214 to 539220                                                                                                                                                                                                                                                                                                                                                                                                                                                                                                                                                                                                                                                                                                                                                                                                                                                                                                                                                                                                                                                                                                                                                                                                                                                                                                                                                                                                                                                                                                                                                                                                                                                                                                                                                                                                                                                                                                                                                                                                                                                                                                                                                                                                                                                                                                                                                                                                                                                                                                                                                                                                                                                                                                                                                                                                                                                                                                                                                                                                                                                                                                                                                                                                                                                                                                                                                                                                                                                                                                                                                                                                                                                                                                                                                                                                                                                                                                                                                                                                                                                                                                                                                                                                                                                                                                                                                                                                                                                                                                                                                                                                                                                                                                                                                                                                                                                                                                                | see above                                                                 | Leeds Teaching Hospitals NHS Trust and Public Health England, National Infection Service (Leeds Laboratory) | Wellcome Sanger Institute for the COVID-19 Genomics UK (COG-UK) consortium                                                                                                                                         |
| EPI_ISL_1534272, EPI_ISL_1534370, EPI_ISL_1534441                                                                                                                                                                                                                                                                                                                                                                                                                                                                                                                                                                                                                                                                                                                                                                                                                                                                                                                                                                                                                                                                                                                                                                                                                                                                                                                                                                                                                                                                                                                                                                                                                                                                                                                                                                                                                                                                                                                                                                                                                                                                                                                                                                                                                                                                                                                                                                                                                                                                                                                                                                                                                                                                                                                                                                                                                                                                                                                                                                                                                                                                                                                                                                                                                                                                                                                                                                                                                                                                                                                                                                                                                                                                                                                                                                                                                                                                                                                                                                                                                                                                                                                                                                                                                                                                                                                                                                                                                                                                                                                                                                                                                                                                                                                                                                                                                                                                                                                                                                                                                                                                                                                                                                                                                                                                                                                                                                                                                                                                                                   | Lentegueur Hospital wc LGH                                                | NHLS/UCT                                                                                                    | Arash Iranzadeh; Bruna Galvao; Carolyn Williamson; Deelan Doolabh; Diana Hardie; Emmanuel SJ; Innocent Mudau; Kruger Marais; Lynn Tyers; Marvin Hsiao; Stephen Korsman; Tegally H; de Oliveira T                   |
| EPI_ISL_1436850 to 1436851, EPI_ISL_1436853, EPI_ISL_1436855, EPI_ISL_1436857, EPI_ISL_1436859, EPI_ISL_1436900, EPI_ISL_1436902                                                                                                                                                                                                                                                                                                                                                                                                                                                                                                                                                                                                                                                                                                                                                                                                                                                                                                                                                                                                                                                                                                                                                                                                                                                                                                                                                                                                                                                                                                                                                                                                                                                                                                                                                                                                                                                                                                                                                                                                                                                                                                                                                                                                                                                                                                                                                                                                                                                                                                                                                                                                                                                                                                                                                                                                                                                                                                                                                                                                                                                                                                                                                                                                                                                                                                                                                                                                                                                                                                                                                                                                                                                                                                                                                                                                                                                                                                                                                                                                                                                                                                                                                                                                                                                                                                                                                                                                                                                                                                                                                                                                                                                                                                                                                                                                                                                                                                                                                                                                                                                                                                                                                                                                                                                                                                                                                                                                                    | see above                                                                 | Libramont                                                                                                   | Plateforme de testing Namuroise ; Degosserie Jonathan; Denis Olivier; Mullier François; Otto Gaetan                                                                                                                |
| EPI_ISL_1384702 to 1384720, EPI_ISL_1396400, EPI_ISL_1398431 to 1398455, EPI_ISL_1510082, EPI_ISL_1510093, EPI_ISL_1510095 to 1510098, EPI_ISL_1510121 to 1510159, EPI_ISL_1510196, EPI_ISL_1510204, EPI_ISL_1510207, EPI_ISL_1510210 to 1510218                                                                                                                                                                                                                                                                                                                                                                                                                                                                                                                                                                                                                                                                                                                                                                                                                                                                                                                                                                                                                                                                                                                                                                                                                                                                                                                                                                                                                                                                                                                                                                                                                                                                                                                                                                                                                                                                                                                                                                                                                                                                                                                                                                                                                                                                                                                                                                                                                                                                                                                                                                                                                                                                                                                                                                                                                                                                                                                                                                                                                                                                                                                                                                                                                                                                                                                                                                                                                                                                                                                                                                                                                                                                                                                                                                                                                                                                                                                                                                                                                                                                                                                                                                                                                                                                                                                                                                                                                                                                                                                                                                                                                                                                                                                                                                                                                                                                                                                                                                                                                                                                                                                                                                                                                                                                                                    | see above                                                                 | Life Sciences Center, Vilnius University                                                                    | Vilnius University Hospital Santaros Klinikos, Center of Laboratory Medicine                                                                                                                                       |
| EPI_ISL_511644                                                                                                                                                                                                                                                                                                                                                                                                                                                                                                                                                                                                                                                                                                                                                                                                                                                                                                                                                                                                                                                                                                                                                                                                                                                                                                                                                                                                                                                                                                                                                                                                                                                                                                                                                                                                                                                                                                                                                                                                                                                                                                                                                                                                                                                                                                                                                                                                                                                                                                                                                                                                                                                                                                                                                                                                                                                                                                                                                                                                                                                                                                                                                                                                                                                                                                                                                                                                                                                                                                                                                                                                                                                                                                                                                                                                                                                                                                                                                                                                                                                                                                                                                                                                                                                                                                                                                                                                                                                                                                                                                                                                                                                                                                                                                                                                                                                                                                                                                                                                                                                                                                                                                                                                                                                                                                                                                                                                                                                                                                                                      | Life and Health Sciences Research Institute, University of Minho, Braga   | Instituto Nacional de Saude (INSA)                                                                          | Borges et al                                                                                                                                                                                                       |
| EPI_ISL_551294, EPI_ISL_551327, EPI_ISL_551412, EPI_ISL_551453, EPI_ISL_551484, EPI_ISL_551496, EPI_ISL_551530, EPI_ISL_552492, EPI_ISL_552818, EPI_ISL_552841, EPI_ISL_552972 to 552973, EPI_ISL_553421, EPI_ISL_553568, EPI_ISL_553778, EPI_ISL_553784, EPI_ISL_553812, EPI_ISL_553846, EPI_ISL_553866, EPI_ISL_553946, EPI_ISL_554478, EPI_ISL_554484, EPI_ISL_554497, EPI_ISL_554537, EPI_ISL_554601, EPI_ISL_554667, EPI_ISL_554709, EPI_ISL_554763, EPI_ISL_554845, EPI_ISL_554868, EPI_ISL_554929, EPI_ISL_555019, EPI_ISL_555041, EPI_ISL_555127, EPI_ISL_555129, EPI_ISL_555148, EPI_ISL_555259, EPI_ISL_555303 to 555304, EPI_ISL_555391, EPI_ISL_555398, EPI_ISL_555432 to 555433, EPI_ISL_555502, EPI_ISL_555510 to 555511, EPI_ISL_555650 to 555651, EPI_ISL_555660, EPI_ISL_555794, EPI_ISL_555807, EPI_ISL_555815, EPI_ISL_555887, EPI_ISL_555947, EPI_ISL_555986, EPI_ISL_555990, EPI_ISL_556000, EPI_ISL_556141, EPI_ISL_556348, EPI_ISL_556350, EPI_ISL_556411, EPI_ISL_556428, EPI_ISL_556433, EPI_ISL_556435, EPI_ISL_556505, EPI_ISL_556510, EPI_ISL_557002, EPI_ISL_557043, EPI_ISL_557110, EPI_ISL_557142, EPI_ISL_557625, EPI_ISL_557711, EPI_ISL_557728, EPI_ISL_557730, EPI_ISL_557739, EPI_ISL_557760, EPI_ISL_557852, EPI_ISL_557896, EPI_ISL_557999, EPI_ISL_558024, EPI_ISL_558126, EPI_ISL_558185, EPI_ISL_558222, EPI_ISL_558311, EPI_ISL_558387, EPI_ISL_558422, EPI_ISL_558432, EPI_ISL_558543, EPI_ISL_558605, EPI_ISL_558617, EPI_ISL_558796, EPI_ISL_558846, EPI_ISL_558872, EPI_ISL_558877, EPI_ISL_558950, EPI_ISL_558994, EPI_ISL_559019, EPI_ISL_559042, EPI_ISL_559046, EPI_ISL_559120, EPI_ISL_559129, EPI_ISL_559213, EPI_ISL_559275, EPI_ISL_559337, EPI_ISL_559353, EPI_ISL_559447, EPI_ISL_559576, EPI_ISL_559591, EPI_ISL_559616, EPI_ISL_559644, EPI_ISL_567803, EPI_ISL_567811, EPI_ISL_575536, EPI_ISL_579951, EPI_ISL_579971, EPI_ISL_580062, EPI_ISL_580138, EPI_ISL_580187, EPI_ISL_580210, EPI_ISL_580285, EPI_ISL_580663, EPI_ISL_580686, EPI_ISL_580708, EPI_ISL_580780, EPI_ISL_580824, EPI_ISL_581423, EPI_ISL_581612, EPI_ISL_581617, EPI_ISL_586621, EPI_ISL_586709, EPI_ISL_586711, EPI_ISL_586779, EPI_ISL_587085, EPI_ISL_587265, EPI_ISL_587797, EPI_ISL_588007, EPI_ISL_588026, EPI_ISL_589289, EPI_ISL_589302, EPI_ISL_589329, EPI_ISL_589344, EPI_ISL_589376, EPI_ISL_597633, EPI_ISL_597984, EPI_ISL_598163, EPI_ISL_606948, EPI_ISL_606960, EPI_ISL_607189, EPI_ISL_607200, EPI_ISL_607894, EPI_ISL_608147, EPI_ISL_608216, EPI_ISL_608310, EPI_ISL_609209, EPI_ISL_610332, EPI_ISL_610502 to 610503, EPI_ISL_611093, EPI_ISL_1408908, EPI_ISL_1408911, EPI_ISL_1408913, EPI_ISL_1408932, EPI_ISL_1408941, EPI_ISL_1408948, EPI_ISL_1408953, EPI_ISL_1408958 to 1408959, EPI_ISL_1408961, EPI_ISL_1408966, EPI_ISL_1408973, EPI_ISL_1408988, EPI_ISL_1408990, EPI_ISL_1409004, EPI_ISL_1409006, EPI_ISL_1409011, EPI_ISL_1409016, EPI_ISL_1409031, EPI_ISL_1409075, EPI_ISL_1409082, EPI_ISL_1409092, EPI_ISL_1409104, EPI_ISL_1409114, EPI_ISL_1409124, EPI_ISL_1409146, EPI_ISL_1409151, EPI_ISL_1409164, EPI_ISL_1409180, EPI_ISL_1409187, EPI_ISL_1409189, EPI_ISL_1409200, EPI_ISL_1409208, EPI_ISL_1409211, EPI_ISL_1409216, EPI_ISL_1409218, EPI_ISL_1409223, EPI_ISL_1409228 to 1409229, EPI_ISL_1409232, EPI_ISL_1409236, EPI_ISL_1409238 to 1409239, EPI_ISL_1409241, EPI_ISL_1409243 to 1409244, EPI_ISL_1409257, EPI_ISL_1409273, EPI_ISL_1409276, EPI_ISL_1409281, EPI_ISL_1409282, EPI_ISL_1409288, EPI_ISL_1409293, EPI_ISL_1409299 to 1409300, EPI_ISL_1409306, EPI_ISL_1409308, EPI_ISL_1409312, EPI_ISL_1409319 to 1409320, EPI_ISL_1409323, EPI_ISL_1409328 to 1409329, EPI_ISL_1409334, EPI_ISL_1409339, EPI_ISL_1409346, EPI_ISL_1409348, EPI_ISL_1409351, EPI_ISL_1409355, EPI_ISL_1409363 to 1409365, EPI_ISL_1409374, EPI_ISL_1409376, EPI_ISL_1409381 to 1409382, EPI_ISL_1409385, EPI_ISL_1409387, EPI_ISL_1409397 to 1409398, EPI_ISL_1409400, EPI_ISL_1409402, EPI_ISL_1409405, EPI_ISL_1409408, EPI_ISL_1409412, EPI_ISL_1409414, EPI_ISL_1409418 to 1409419, EPI_ISL_1409424, EPI_ISL_1409426, EPI_ISL_1409431, EPI_ISL_1409434 to 1409436, EPI_ISL_1409438, EPI_ISL_1409440, EPI_ISL_1409445, EPI_ISL_1409451, EPI_ISL_1409455, EPI_ISL_1409459, EPI_ISL_1409463 to 1409464, EPI_ISL_1409466 to 1409467, EPI_ISL_1409473, EPI_ISL_1409476, EPI_ISL_1409480, EPI_ISL_1409486 to 1409490, EPI_ISL_1409503 to 1409505, EPI_ISL_1409507, EPI_ISL_1409513, EPI_ISL_1409515, EPI_ISL_1409521, EPI_ISL_1409528, EPI_ISL_1409534, EPI_ISL_1409538, EPI_ISL_1409542, EPI_ISL_1409548, EPI_ISL_1409554, EPI_ISL_1409556, EPI_ISL_1409565, EPI_ISL_1409570, EPI_ISL_1409573, EPI_ISL_1409575, EPI_ISL_1409578, EPI_ISL_1409581, EPI_ISL_1409588, EPI_ISL_1409595, EPI_ISL_1409603, EPI_ISL_1409603 to 1409614, EPI_ISL_1409621, EPI_ISL_1409628 to 1409628, EPI_ISL_1409631, EPI_ISL_1409635 to 1409636, EPI_ISL_1409644 to 1409645, EPI_ISL_1409648, EPI_ISL_1409650, EPI_ISL_1409653, EPI_ISL_1409658, EPI_ISL_1409667, EPI_ISL_1409676, EPI_ISL_1409678, EPI_ISL_1409681, EPI_ISL_1409688, EPI_ISL_1409695, EPI_ISL_1409703 to 1409704, EPI_ISL_1409706, EPI_ISL_1409714, EPI_ISL_1409719 to 1409720, EPI_ISL_1409725 to 1409726, EPI_ISL_1409729, EPI_ISL_1409740, EPI_ISL_1409750, EPI_ISL_1409755 to 1409756, EPI_ISL_1409759, EPI_ISL_1409762, EPI_ISL_1409764 to 1409765, EPI_ISL_1409768 to 1409770, EPI_ISL_1409775 to 1409777, EPI_ISL_1409779 to 1409782, EPI_ISL_1409784 to 1409793, EPI_ISL_1409795 to 1409808, EPI_ISL_1409810 to 1409812, |                                                                           |                                                                                                             |                                                                                                                                                                                                                    |



































|                                                                                                                                                                                                                                                                                                                                                                                                                                                                                                                                                                                                                                                                                                                                                                                                                                                                                                                                                                                                                                                                                                                                                                                                                                                                                                                                                                                                                                                                                                                                                                                                                                                                                                                                                                                                                                                                                                                                                                                                                                                                                                                                                                                                                                                                                                                                                                                                                                                                    |           |                                                                                             |                                                                                                                        |                                                                                                                                                                                                                                                                                                                                                                                                                                                                                                                                                                                                                                                                                                                                                                 |
|--------------------------------------------------------------------------------------------------------------------------------------------------------------------------------------------------------------------------------------------------------------------------------------------------------------------------------------------------------------------------------------------------------------------------------------------------------------------------------------------------------------------------------------------------------------------------------------------------------------------------------------------------------------------------------------------------------------------------------------------------------------------------------------------------------------------------------------------------------------------------------------------------------------------------------------------------------------------------------------------------------------------------------------------------------------------------------------------------------------------------------------------------------------------------------------------------------------------------------------------------------------------------------------------------------------------------------------------------------------------------------------------------------------------------------------------------------------------------------------------------------------------------------------------------------------------------------------------------------------------------------------------------------------------------------------------------------------------------------------------------------------------------------------------------------------------------------------------------------------------------------------------------------------------------------------------------------------------------------------------------------------------------------------------------------------------------------------------------------------------------------------------------------------------------------------------------------------------------------------------------------------------------------------------------------------------------------------------------------------------------------------------------------------------------------------------------------------------|-----------|---------------------------------------------------------------------------------------------|------------------------------------------------------------------------------------------------------------------------|-----------------------------------------------------------------------------------------------------------------------------------------------------------------------------------------------------------------------------------------------------------------------------------------------------------------------------------------------------------------------------------------------------------------------------------------------------------------------------------------------------------------------------------------------------------------------------------------------------------------------------------------------------------------------------------------------------------------------------------------------------------------|
| 611786, EPI_ISL_611790, EPI_ISL_611796, EPI_ISL_611811, EPI_ISL_611815, EPI_ISL_611821, EPI_ISL_611827, EPI_ISL_611845, EPI_ISL_611851, EPI_ISL_611853, EPI_ISL_611857, EPI_ISL_611885, EPI_ISL_611889, EPI_ISL_611891 to 611893, EPI_ISL_611895, EPI_ISL_611897 to 611899, EPI_ISL_611908, EPI_ISL_611910 to 611911, EPI_ISL_611914 to 611915, EPI_ISL_611918, EPI_ISL_611921, EPI_ISL_611929, EPI_ISL_611974, EPI_ISL_611977 to 611978, EPI_ISL_611981, EPI_ISL_611984 to 611985, EPI_ISL_611991, EPI_ISL_611995, EPI_ISL_611999, EPI_ISL_612001, EPI_ISL_612003, EPI_ISL_612009 to 612010, EPI_ISL_612016 to 612017, EPI_ISL_612019, EPI_ISL_612021, EPI_ISL_612024, EPI_ISL_612035 to 612036, EPI_ISL_612039, EPI_ISL_612041 to 612044, EPI_ISL_612046, EPI_ISL_612051, EPI_ISL_612059 to 612061, EPI_ISL_612064 to 612066, EPI_ISL_612070 to 612072, EPI_ISL_612075, EPI_ISL_612080, EPI_ISL_612088, EPI_ISL_612101, EPI_ISL_612108, EPI_ISL_612111 to 612112, EPI_ISL_612114 to 612115, EPI_ISL_612190 to 612191, EPI_ISL_612401 to 612449, EPI_ISL_1386729, EPI_ISL_1386732 to 1386734, EPI_ISL_1386736 to 1386745, EPI_ISL_1386759 to 1386786, EPI_ISL_1386789 to 1386801, EPI_ISL_1386803 to 1386812, EPI_ISL_1474654 to 1474668, EPI_ISL_1474670 to 1474684, EPI_ISL_1474686 to 1474689, EPI_ISL_1474691 to 1474692, EPI_ISL_1474694 to 1474699, EPI_ISL_1474701 to 1474714, EPI_ISL_1474716 to 1474733, EPI_ISL_1474735 to 1474738, EPI_ISL_1474740 to 1474744, EPI_ISL_1474747 to 1474748, EPI_ISL_1474750 to 1474799, EPI_ISL_1475751 to 1475758, EPI_ISL_1545984 to 1545996, EPI_ISL_1545998 to 1546004, EPI_ISL_1546006 to 1546011, EPI_ISL_1546013 to 1546043, EPI_ISL_1546045, EPI_ISL_1546047, EPI_ISL_1546049 to 1546050, EPI_ISL_1546052, EPI_ISL_1546054, EPI_ISL_1546056, EPI_ISL_1546058 to 1546059, EPI_ISL_1546061, EPI_ISL_1546063, EPI_ISL_1546065, EPI_ISL_1546067, EPI_ISL_1546069, EPI_ISL_1546071 to 1546072, EPI_ISL_1546076, EPI_ISL_1546078, EPI_ISL_1546080 to 1546081, EPI_ISL_1546083, EPI_ISL_1546085, EPI_ISL_1546089, EPI_ISL_1546092 to 1546093, EPI_ISL_1546095, EPI_ISL_1546097, EPI_ISL_1546099, EPI_ISL_1546101, EPI_ISL_1546103, EPI_ISL_1546105, EPI_ISL_1546107 to 1546108, EPI_ISL_1546110, EPI_ISL_1546112, EPI_ISL_1546115, EPI_ISL_1546118, EPI_ISL_1546120, EPI_ISL_1546122, EPI_ISL_1546124, EPI_ISL_1546129, EPI_ISL_1546131, EPI_ISL_1546133, EPI_ISL_1546135, EPI_ISL_1546137, EPI_ISL_1546139 to 1546228 | see above | Liverpool Clinical Laboratories                                                             | COVID-19 Genomics UK (COG-UK) Consortium                                                                               | A Alrezaihi; Alessandro Gerada; Alistair Darby; Angela Cowell; Anita Lucaci; Anu Chawla; Cassie Olateju; Catherine Hartley; Charlotte Nelson; Ecaterina Vamos; Elaine O'Toole; Elaine O'ÄToole; Eleanor G Bentley; Jeanne Webster; Isabel Garcia-Dorival; Isabel Garca-Dorival; James Johnson; James P Stewart; Jenifer Manson; Joanne Watts; Jones Benjamin; Jordan J Clark; Julian Hiscov; L Luu; Lucille Rainbow; M Almsaad; Margaret Hughes; Mark Whitehead; Matthew Gemmel; Miren Iturriza-Gomara; Muhammad Alruwaili; N.P Randle; Neil Swain; Neil Swain; PKF Gilmore; Parul Sharma; Rebekah Penrice-Randal; Rebekah Penrice-Randal-†; Richard Eccles; Richard Gregory; Sam Haldenby; Steve Paterson; Stuart D Armstrong; Trevor Ian Robinson; Ximeng Han |
| EPI_ISL_1443202, EPI_ISL_1443246, EPI_ISL_1443291 to 1443292                                                                                                                                                                                                                                                                                                                                                                                                                                                                                                                                                                                                                                                                                                                                                                                                                                                                                                                                                                                                                                                                                                                                                                                                                                                                                                                                                                                                                                                                                                                                                                                                                                                                                                                                                                                                                                                                                                                                                                                                                                                                                                                                                                                                                                                                                                                                                                                                       |           | Logan County Health Department                                                              | Illinois Department of Public Health - Springfield Lab                                                                 | Bryan Sim; Gordon McCall                                                                                                                                                                                                                                                                                                                                                                                                                                                                                                                                                                                                                                                                                                                                        |
| EPI_ISL_1500206 to 1500207                                                                                                                                                                                                                                                                                                                                                                                                                                                                                                                                                                                                                                                                                                                                                                                                                                                                                                                                                                                                                                                                                                                                                                                                                                                                                                                                                                                                                                                                                                                                                                                                                                                                                                                                                                                                                                                                                                                                                                                                                                                                                                                                                                                                                                                                                                                                                                                                                                         |           | Logan County Health Dept                                                                    | Illinois Department of Public Health - Springfield Lab                                                                 | Bryan Sim; Gordon McCall                                                                                                                                                                                                                                                                                                                                                                                                                                                                                                                                                                                                                                                                                                                                        |
| EPI_ISL_1497543, EPI_ISL_1503992, EPI_ISL_1503995, EPI_ISL_1504027, EPI_ISL_1508909                                                                                                                                                                                                                                                                                                                                                                                                                                                                                                                                                                                                                                                                                                                                                                                                                                                                                                                                                                                                                                                                                                                                                                                                                                                                                                                                                                                                                                                                                                                                                                                                                                                                                                                                                                                                                                                                                                                                                                                                                                                                                                                                                                                                                                                                                                                                                                                |           | Los Angeles County PHL                                                                      | Los Angeles County PHL                                                                                                 | P. Hemarajata et al.                                                                                                                                                                                                                                                                                                                                                                                                                                                                                                                                                                                                                                                                                                                                            |
| EPI_ISL_436044                                                                                                                                                                                                                                                                                                                                                                                                                                                                                                                                                                                                                                                                                                                                                                                                                                                                                                                                                                                                                                                                                                                                                                                                                                                                                                                                                                                                                                                                                                                                                                                                                                                                                                                                                                                                                                                                                                                                                                                                                                                                                                                                                                                                                                                                                                                                                                                                                                                     |           | Louisiana Office of Public Health Laboratories                                              | Pathogen Discovery, Respiratory Viruses Branch, Division of Viral Diseases, Centers for Disease Control and Prevention | Anna Uehara; Bettina Bankamp; Clinton R. Paden; Haibin Wang; Jing Zhang; Krista Queen; Suxiang Tong; Yan Li; Ying Tao; Zachary Weiner                                                                                                                                                                                                                                                                                                                                                                                                                                                                                                                                                                                                                           |
| EPI_ISL_1495626                                                                                                                                                                                                                                                                                                                                                                                                                                                                                                                                                                                                                                                                                                                                                                                                                                                                                                                                                                                                                                                                                                                                                                                                                                                                                                                                                                                                                                                                                                                                                                                                                                                                                                                                                                                                                                                                                                                                                                                                                                                                                                                                                                                                                                                                                                                                                                                                                                                    |           | Ludwig Boltzmann Institut für Experimentelle und Klinische Traumatologie, Lorenz Böhler UKH | Berghthaler laboratory, CeMM Research Center for Molecular Medicine of the Austrian Academy of Sciences                | Andreas Berghthaler; Anna Schedl; Bekir Erguner; Benedikt Agerer; Christoph Bock; Fabian Amman; Jan Laine; Lukas Endler; Maelle Le Moing; Martin Senekowitsch; Michael Schuster; Petr Triska; Thomas Penz                                                                                                                                                                                                                                                                                                                                                                                                                                                                                                                                                       |
| EPI_ISL_434658                                                                                                                                                                                                                                                                                                                                                                                                                                                                                                                                                                                                                                                                                                                                                                                                                                                                                                                                                                                                                                                                                                                                                                                                                                                                                                                                                                                                                                                                                                                                                                                                                                                                                                                                                                                                                                                                                                                                                                                                                                                                                                                                                                                                                                                                                                                                                                                                                                                     |           | Lundens VC                                                                                  | The Public Health Agency of Sweden                                                                                     | Anna Risberg; Anna-Malin Linde; Karin Tegmark-Wisell; Maria Lind Karlberg; Marita Dagner; Mia Brytting; Olov Svartstrom; Oskar Karlsson Lindsjö; Theresa Enkirch                                                                                                                                                                                                                                                                                                                                                                                                                                                                                                                                                                                                |
| EPI_ISL_430844                                                                                                                                                                                                                                                                                                                                                                                                                                                                                                                                                                                                                                                                                                                                                                                                                                                                                                                                                                                                                                                                                                                                                                                                                                                                                                                                                                                                                                                                                                                                                                                                                                                                                                                                                                                                                                                                                                                                                                                                                                                                                                                                                                                                                                                                                                                                                                                                                                                     |           | Lung Center of the Philippines                                                              | Research Institute for Tropical Medicine                                                                               | Bautista; Brunker, K.; C.S.; C.T.; D.L.; Demetria; E.S.; F.G.M.; I.A.P.; Manalo; Medado; Mercado; O.J.T.; Onza; Polotan                                                                                                                                                                                                                                                                                                                                                                                                                                                                                                                                                                                                                                         |
| EPI_ISL_1501694 to 1501717, EPI_ISL_1501720, EPI_ISL_1501723, EPI_ISL_1501726, EPI_ISL_1501729, EPI_ISL_1501732, EPI_ISL_1501735, EPI_ISL_1501738, EPI_ISL_1501741, EPI_ISL_1501744, EPI_ISL_1501747, EPI_ISL_1501749, EPI_ISL_1501753, EPI_ISL_1501756, EPI_ISL_1501758, EPI_ISL_1501761, EPI_ISL_1501764, EPI_ISL_1501767, EPI_ISL_1501770, EPI_ISL_1501773, EPI_ISL_1501776, EPI_ISL_1501779, EPI_ISL_1501782, EPI_ISL_1501785, EPI_ISL_1501788, EPI_ISL_1501791 to 1502051                                                                                                                                                                                                                                                                                                                                                                                                                                                                                                                                                                                                                                                                                                                                                                                                                                                                                                                                                                                                                                                                                                                                                                                                                                                                                                                                                                                                                                                                                                                                                                                                                                                                                                                                                                                                                                                                                                                                                                                     |           | Lurie Children's Hospital of Chicago                                                        | Northwestern University - Ozer Lab                                                                                     | Egon A. Ozer; Judd F. Hultquist; Lacy M. Simons; Larry K. Kocielek; Michael G. Ison; Ramon Lorenzo-Redondo; Taylor J. Dean; William J. Muller; Xiaotian; Zheng                                                                                                                                                                                                                                                                                                                                                                                                                                                                                                                                                                                                  |
| see above                                                                                                                                                                                                                                                                                                                                                                                                                                                                                                                                                                                                                                                                                                                                                                                                                                                                                                                                                                                                                                                                                                                                                                                                                                                                                                                                                                                                                                                                                                                                                                                                                                                                                                                                                                                                                                                                                                                                                                                                                                                                                                                                                                                                                                                                                                                                                                                                                                                          |           | Lurie Children's Hospital of Chicago                                                        | Northwestern University - Ozer Lab                                                                                     | Egon A. Ozer; Judd F. Hultquist; Lacy M. Simons; Larry K. Kocielek; Michael G. Ison; Ramon Lorenzo-Redondo; Taylor J. Dean; William J. Muller; Xiaotian; Zheng                                                                                                                                                                                                                                                                                                                                                                                                                                                                                                                                                                                                  |
| EPI_ISL_470790 to 470800, EPI_ISL_477277 to 477290, EPI_ISL_481241, EPI_ISL_509686, EPI_ISL_514629 to 514635, EPI_ISL_515267 to 515268, EPI_ISL_530163 to 530168, EPI_ISL_534217, EPI_ISL_560798 to 560805, EPI_ISL_1396411, EPI_ISL_1402725, EPI_ISL_1402741 to 1402742, EPI_ISL_1402744 to 1402781, EPI_ISL_1403867 to 1403868, EPI_ISL_1423534 to 1423592, EPI_ISL_1445979, EPI_ISL_1445981, EPI_ISL_1445984 to 1445986, EPI_ISL_1445995, EPI_ISL_1445998, EPI_ISL_1445999, EPI_ISL_1446010, EPI_ISL_1446012, EPI_ISL_1446023 to 1446024, EPI_ISL_1446027, EPI_ISL_1446061 to 1446062, EPI_ISL_1446064 to 1446065, EPI_ISL_1446067 to 1446068, EPI_ISL_1446070, EPI_ISL_1446072 to 1446074, EPI_ISL_1446076, EPI_ISL_1446078 to 1446080, EPI_ISL_1479016 to 1479017, EPI_ISL_1479137 to 1479138, EPI_ISL_1499689 to 1499722, EPI_ISL_1527464, EPI_ISL_1527469, EPI_ISL_1527471, EPI_ISL_1527492 to 1527496, EPI_ISL_1527505, EPI_ISL_1527507, EPI_ISL_1527509, EPI_ISL_1527523 to 1527527, EPI_ISL_1531644 to 1531733                                                                                                                                                                                                                                                                                                                                                                                                                                                                                                                                                                                                                                                                                                                                                                                                                                                                                                                                                                                                                                                                                                                                                                                                                                                                                                                                                                                                                                           |           | M Health Fairview                                                                           | Minnesota Department of Health, Public Health Laboratory                                                               | Alexandra Lorentz; Jacob Garfin; Kelly Pung; Matt Plumb; and Xiong Wang                                                                                                                                                                                                                                                                                                                                                                                                                                                                                                                                                                                                                                                                                         |
| see above                                                                                                                                                                                                                                                                                                                                                                                                                                                                                                                                                                                                                                                                                                                                                                                                                                                                                                                                                                                                                                                                                                                                                                                                                                                                                                                                                                                                                                                                                                                                                                                                                                                                                                                                                                                                                                                                                                                                                                                                                                                                                                                                                                                                                                                                                                                                                                                                                                                          |           | M Health Fairview                                                                           | University of Minnesota Genomics Center                                                                                | Andrew Nelson; Benjamin Auch; Daryl M. Gohi; Jerry Daniel; John Garbe; Patrick Grady; Ray Watson; Sophia Yohe; and Kenneth B. Beckman                                                                                                                                                                                                                                                                                                                                                                                                                                                                                                                                                                                                                           |
| EPI_ISL_443183, EPI_ISL_443253 to 443257, EPI_ISL_445077                                                                                                                                                                                                                                                                                                                                                                                                                                                                                                                                                                                                                                                                                                                                                                                                                                                                                                                                                                                                                                                                                                                                                                                                                                                                                                                                                                                                                                                                                                                                                                                                                                                                                                                                                                                                                                                                                                                                                                                                                                                                                                                                                                                                                                                                                                                                                                                                           |           | M Health Fairview St. Joseph's Hospital                                                     | Minnesota Department of Health, Public Health Laboratory                                                               | Jacob Garfin; Matt Plumb; and Xiong Wang                                                                                                                                                                                                                                                                                                                                                                                                                                                                                                                                                                                                                                                                                                                        |
| EPI_ISL_514637, EPI_ISL_514643, EPI_ISL_514650, EPI_ISL_514652, EPI_ISL_514657                                                                                                                                                                                                                                                                                                                                                                                                                                                                                                                                                                                                                                                                                                                                                                                                                                                                                                                                                                                                                                                                                                                                                                                                                                                                                                                                                                                                                                                                                                                                                                                                                                                                                                                                                                                                                                                                                                                                                                                                                                                                                                                                                                                                                                                                                                                                                                                     |           | M.P Shah Government Medocal college Jamnagar                                                | Gujarat Biotechnology Research Centre                                                                                  | ; A M Kadri; Afzal Ansari; Akanksha Verma; Amit Kanani; Ankit Hinsu; Apurvashin Puvar; Bhavesh Modi; Binita Aring; Chaitanya Joshi; Dinesh Kumar; Fenil Patel; Gaurishankar Shrimali; Janavi Raval; Komal Patel; Labdhi Pandya; Madhvi Joshi; Maharsih Pandya; Monika Gandhi; Neha Rajpara; Nidhi Patel; Nitin Savaliya; Pinal Trivedi; Pragya Sharma; Pritesh Sabara; Priti Pandita; R D Dixit; Raghavendra Kumar; Ramesh Pandit; Sneha Bagatharia; Tejas Shah; Zarna Patel; Zuber Saiyed                                                                                                                                                                                                                                                                      |
| EPI_ISL_451149 to 451153, EPI_ISL_451666                                                                                                                                                                                                                                                                                                                                                                                                                                                                                                                                                                                                                                                                                                                                                                                                                                                                                                                                                                                                                                                                                                                                                                                                                                                                                                                                                                                                                                                                                                                                                                                                                                                                                                                                                                                                                                                                                                                                                                                                                                                                                                                                                                                                                                                                                                                                                                                                                           |           | MA State Public Health Laboratory                                                           | Centers for Disease Control and Prevention Division of Viral Diseases, Pathogen Discovery                              | Alison Laufer Halpin; Ben L. Rambo-Martin; Clinton R. Paden; Dakota Howard; Darlene Wagner; Dave Wentworth; Dhvani Batra; Jasmine Padilla; Justin Lee; Katie Dillon; Krista Queen; Kristen Knipe; Kristine Lacek; Mark Burroughs; Matthew Schmerer; Mili Sheth; Peter Cook; Sam Shepard; Sarah Nobles; Shoshona Le; Suxiang Tong; Vivien Dugan; Yvette Unoarumhi                                                                                                                                                                                                                                                                                                                                                                                                |
| EPI_ISL_1446992 to 1446998                                                                                                                                                                                                                                                                                                                                                                                                                                                                                                                                                                                                                                                                                                                                                                                                                                                                                                                                                                                                                                                                                                                                                                                                                                                                                                                                                                                                                                                                                                                                                                                                                                                                                                                                                                                                                                                                                                                                                                                                                                                                                                                                                                                                                                                                                                                                                                                                                                         |           | MA State Public Health Laboratory                                                           | Pathogen Discovery, Respiratory Viruses Branch, Division of Viral Diseases, Centers for Disease Control and Prevention | Alison S. Laufer Halpin; Anna Uehara; Christopher A. Elkins; Clinton R. Paden; Haibin Wang; Jing Zhang; Krista Queen; Mary S. Keckler; Rachel Marine; Suxiang Tong; Yan Li; Ying Tao                                                                                                                                                                                                                                                                                                                                                                                                                                                                                                                                                                            |
| EPI_ISL_424843 to 424847, EPI_ISL_424908 to 424920                                                                                                                                                                                                                                                                                                                                                                                                                                                                                                                                                                                                                                                                                                                                                                                                                                                                                                                                                                                                                                                                                                                                                                                                                                                                                                                                                                                                                                                                                                                                                                                                                                                                                                                                                                                                                                                                                                                                                                                                                                                                                                                                                                                                                                                                                                                                                                                                                 |           | MD DOH Laboratories Administration                                                          | Centers for Disease Control and Prevention Division of Viral Diseases, Pathogen Discovery                              | Alison Laufer Halpin; Ben L. Rambo-Martin; Clinton R. Paden; Dakota Howard; Darlene Wagner; Dave Wentworth; Dhvani Batra; Jasmine Padilla; Justin Lee; Katie Dillon; Krista Queen; Kristen Knipe; Kristine Lacek; Mark Burroughs; Matthew Schmerer; Mili Sheth; Peter Cook; Sam Shepard; Sarah Nobles; Shoshona Le; Suxiang Tong; Vivien Dugan; Yvette Unoarumhi                                                                                                                                                                                                                                                                                                                                                                                                |
| EPI_ISL_1446630 to 1446631, EPI_ISL_1446859 to 1446860, EPI_ISL_1446862, EPI_ISL_1447052, EPI_ISL_1516322 to 1516342, EPI_ISL_1528451 to 1528459                                                                                                                                                                                                                                                                                                                                                                                                                                                                                                                                                                                                                                                                                                                                                                                                                                                                                                                                                                                                                                                                                                                                                                                                                                                                                                                                                                                                                                                                                                                                                                                                                                                                                                                                                                                                                                                                                                                                                                                                                                                                                                                                                                                                                                                                                                                   |           | MD DOH Laboratories Administration                                                          | Pathogen Discovery, Respiratory Viruses Branch, Division of Viral Diseases, Centers for Disease Control and Prevention | Alison S. Laufer Halpin; Anna Uehara; Christopher A. Elkins; Clinton R. Paden; Haibin Wang; Jasmine Padilla; Jing Zhang; Justin Lee; Krista Queen; Mary S. Keckler; Rachel Marine; Suxiang Tong; Yan Li; Ying Tao                                                                                                                                                                                                                                                                                                                                                                                                                                                                                                                                               |
| EPI_ISL_424869, EPI_ISL_426425, EPI_ISL_447843                                                                                                                                                                                                                                                                                                                                                                                                                                                                                                                                                                                                                                                                                                                                                                                                                                                                                                                                                                                                                                                                                                                                                                                                                                                                                                                                                                                                                                                                                                                                                                                                                                                                                                                                                                                                                                                                                                                                                                                                                                                                                                                                                                                                                                                                                                                                                                                                                     |           | MD Laboratories                                                                             | Los Angeles County PHL                                                                                                 | P. Hemarajata et al.                                                                                                                                                                                                                                                                                                                                                                                                                                                                                                                                                                                                                                                                                                                                            |
| EPI_ISL_1502804 to 1502809, EPI_ISL_1506117 to 1506119                                                                                                                                                                                                                                                                                                                                                                                                                                                                                                                                                                                                                                                                                                                                                                                                                                                                                                                                                                                                                                                                                                                                                                                                                                                                                                                                                                                                                                                                                                                                                                                                                                                                                                                                                                                                                                                                                                                                                                                                                                                                                                                                                                                                                                                                                                                                                                                                             |           | MD PHL                                                                                      | MD PHL                                                                                                                 | Maryland Department of Health Laboratories Administration                                                                                                                                                                                                                                                                                                                                                                                                                                                                                                                                                                                                                                                                                                       |
| EPI_ISL_524873 to 524903, EPI_ISL_534699 to 534716, EPI_ISL_591022 to 591036, EPI_ISL_602258 to 602277, EPI_ISL_1493168 to 1493257, EPI_ISL_1493436 to 1493439                                                                                                                                                                                                                                                                                                                                                                                                                                                                                                                                                                                                                                                                                                                                                                                                                                                                                                                                                                                                                                                                                                                                                                                                                                                                                                                                                                                                                                                                                                                                                                                                                                                                                                                                                                                                                                                                                                                                                                                                                                                                                                                                                                                                                                                                                                     |           | MDI Limbach Berlin GmbH                                                                     | Robert Koch Institute                                                                                                  | Caly, L.; Druce, J.; M.B.; M.L.; N.L.; Sait; Sait, M.; Schultz; Seemann, T.; Sherry; Sherry, N.                                                                                                                                                                                                                                                                                                                                                                                                                                                                                                                                                                                                                                                                 |
| EPI_ISL_594134 to 594147, EPI_ISL_603040 to 603048                                                                                                                                                                                                                                                                                                                                                                                                                                                                                                                                                                                                                                                                                                                                                                                                                                                                                                                                                                                                                                                                                                                                                                                                                                                                                                                                                                                                                                                                                                                                                                                                                                                                                                                                                                                                                                                                                                                                                                                                                                                                                                                                                                                                                                                                                                                                                                                                                 |           | MDU-PHL, The Peter Doherty Institute for Infection and Immunity                             | MDU-PHL, The Peter Doherty Institute for Infection and Immunity                                                        | Caly, L.; Druce, J.; M.B.; M.L.; N.L.; Sait; Sait, M.; Schultz; Seemann, T.; Sherry; Sherry, N.                                                                                                                                                                                                                                                                                                                                                                                                                                                                                                                                                                                                                                                                 |
| EPI_ISL_1446594, EPI_ISL_1446598 to 1446600, EPI_ISL_1446803 to 1446806, EPI_ISL_1516256 to 1516261, EPI_ISL_1528363 to 1528364                                                                                                                                                                                                                                                                                                                                                                                                                                                                                                                                                                                                                                                                                                                                                                                                                                                                                                                                                                                                                                                                                                                                                                                                                                                                                                                                                                                                                                                                                                                                                                                                                                                                                                                                                                                                                                                                                                                                                                                                                                                                                                                                                                                                                                                                                                                                    |           | ME Health and Environmental Testing Laboratory                                              | Centers for Disease Control and Prevention Division of Viral Diseases, Pathogen Discovery                              | Alison Laufer Halpin; Ben L. Rambo-Martin; Clinton R. Paden; Dakota Howard; Darlene Wagner; Dave Wentworth; Dhvani Batra; Jasmine Padilla; Justin Lee; Katie Dillon; Krista Queen; Kristen Knipe; Kristine Lacek; Mark Burroughs; Matthew Schmerer; Mili Sheth; Peter Cook; Sam Shepard; Sarah Nobles; Shoshona Le; Suxiang Tong; Vivien Dugan; Yvette Unoarumhi                                                                                                                                                                                                                                                                                                                                                                                                |



|                                                                                                                                                                                                                                                                                                                                                                                                                                                                                                                                                                              |                                                                                |                                                                                                                            |                                                                                                                                                                                                                                                                                                                                                                                                                                   |
|------------------------------------------------------------------------------------------------------------------------------------------------------------------------------------------------------------------------------------------------------------------------------------------------------------------------------------------------------------------------------------------------------------------------------------------------------------------------------------------------------------------------------------------------------------------------------|--------------------------------------------------------------------------------|----------------------------------------------------------------------------------------------------------------------------|-----------------------------------------------------------------------------------------------------------------------------------------------------------------------------------------------------------------------------------------------------------------------------------------------------------------------------------------------------------------------------------------------------------------------------------|
| EPI_ISL_1408894, EPI_ISL_1509942                                                                                                                                                                                                                                                                                                                                                                                                                                                                                                                                             | ME Health and Environmental Testing Laboratory                                 | Genomics and Discovery, Respiratory Viruses Branch, Division of Viral Diseases, Centers for Disease Control and Prevention | Adam Retchless; Anna Kelleher; Anna Montmayer; Anna Uehara; Brian Lynch; Clinton R. Paden; Haibin Wang; Han Jia Justin Ng; Jing Zhang; Justin Lee; Krista Queen; Mark Burroughs; Peter Cook; Rachel Marine; Suxiang Tong; Yan Li; Ying Tao                                                                                                                                                                                        |
| EPI_ISL_1403510, EPI_ISL_1403530 to 1403531                                                                                                                                                                                                                                                                                                                                                                                                                                                                                                                                  | MEDICO COMPETENTE P.O. SULMONA - CASTEL DI SANGRO SULMONA(L'AQUILA)            | Istituto Zooprofilattico Sperimentale dell'Abruzzo e Molise "G. Caporale"                                                  | Ancora M; Calistri P; Cammà C; Curini V; Delli Compagni E; Di Domenico M; Di Pasquale A; Lorusso A; Mangone I; Marcacci M; Puglia I; Rinaldi A; Savini G; Scialabba S                                                                                                                                                                                                                                                             |
| EPI_ISL_1464106 to 1464108, EPI_ISL_1464263 to 1464268, EPI_ISL_1464586 to 1464587, EPI_ISL_1464590                                                                                                                                                                                                                                                                                                                                                                                                                                                                          | MEDILYS Laborgesellschaft mbH                                                  | Heinrich Pette Institute, Leibniz Institute for Experimental Virology                                                      | Adam Grundhoff; Alexis Robitaille; Johannes Knobloch; Martin Aepfelbacher; Nicole Fischer; Thomas Günther                                                                                                                                                                                                                                                                                                                         |
| EPI_ISL_1461077, EPI_ISL_1461079, EPI_ISL_1461081, EPI_ISL_1461083 to 1461084, EPI_ISL_1461086, EPI_ISL_1461088, EPI_ISL_1461090, EPI_ISL_1461093, EPI_ISL_1461095, EPI_ISL_1461097, EPI_ISL_1461099, EPI_ISL_1461102, EPI_ISL_1461104, EPI_ISL_1461106                                                                                                                                                                                                                                                                                                                      | see above                                                                      | MEDIPOLE CHALLES LES EAUX                                                                                                  | CNR Virus des Infections Respiratoires - France SUD                                                                                                                                                                                                                                                                                                                                                                               |
| EPI_ISL_445311, EPI_ISL_445328                                                                                                                                                                                                                                                                                                                                                                                                                                                                                                                                               | MEGASALUD S.A.                                                                 | Instituto de Salud Publica de Chile                                                                                        | Alejandra Acevedo; Andrés E Castillo; Bárbara Parra; Carolina Tambley; Gabriel Leal; Jaime Lagos; Jorge Fernandez; Loredana Arata; Patricia Bustos; Paz Tapia; Rodrigo Fasce; Winston Andrade                                                                                                                                                                                                                                     |
| EPI_ISL_445263, EPI_ISL_445358                                                                                                                                                                                                                                                                                                                                                                                                                                                                                                                                               | MEGASALUD SPA.                                                                 | Instituto de Salud Publica de Chile                                                                                        | Alejandra Acevedo; Andrés E Castillo; Bárbara Parra; Carolina Tambley; Gabriel Leal; Jaime Lagos; Jorge Fernandez; Loredana Arata; Patricia Bustos; Paz Tapia; Rodrigo Fasce; Winston Andrade                                                                                                                                                                                                                                     |
| EPI_ISL_1395710 to 1395725, EPI_ISL_1397383 to 1397388, EPI_ISL_1398040 to 1398041, EPI_ISL_1398043                                                                                                                                                                                                                                                                                                                                                                                                                                                                          | MEMORIAL SLOAN KETTERING CANCER CENTER                                         | Wadsworth Center, New York State Department of Health                                                                      | Alexis Russel; Daryl M. Lamson; Erasmus Schneider; Erica Lasek-Nesselquist; John Kelly; Jonathan Plitnick; Kirsten St. George; Matthew Shudt; Melissa A Leisner; Navjot Singh                                                                                                                                                                                                                                                     |
| EPI_ISL_568877 to 569608                                                                                                                                                                                                                                                                                                                                                                                                                                                                                                                                                     | MEPHI, Aix Marseille University                                                | MEPHI, Aix Marseille University                                                                                            | Anthony LEVASSEUR                                                                                                                                                                                                                                                                                                                                                                                                                 |
| EPI_ISL_413568                                                                                                                                                                                                                                                                                                                                                                                                                                                                                                                                                               | MHC Drente                                                                     | Erasmus Medical Center                                                                                                     | Anne van der Linden; Annemiek van der Eijk; Aura Timen; Bas Oude Munnink; Claudia Schapendonk; Corien Swaan; Corine GeurtsvanKessel; David Nieuwenhuijse; Irina Chestakova; Jeroen van Kampen; Jolanda Voermans; Madelief Mollers; Manon Haverkate; Marion Koopmans; Mark Pronk; Mart Stein; Pascal Lexmond; Reina Sikkema; Richard Molenkamp; Sandra Kengne Kamga Mobou; on behalf of the Dutch national COVID-19 response team. |
| EPI_ISL_413591                                                                                                                                                                                                                                                                                                                                                                                                                                                                                                                                                               | MHC Flevoland                                                                  | Erasmus Medical Center                                                                                                     | Anne van der Linden; Annemiek van der Eijk; Aura Timen; Bas Oude Munnink; Claudia Schapendonk; Corien Swaan; Corine GeurtsvanKessel; David Nieuwenhuijse; Irina Chestakova; Jeroen van Kampen; Jolanda Voermans; Madelief Mollers; Manon Haverkate; Marion Koopmans; Mark Pronk; Mart Stein; Pascal Lexmond; Reina Sikkema; Richard Molenkamp; Sandra Kengne Kamga Mobou; on behalf of the Dutch national COVID-19 response team. |
| EPI_ISL_413566                                                                                                                                                                                                                                                                                                                                                                                                                                                                                                                                                               | MHC Gooi & Vechtstreek                                                         | Erasmus Medical Center                                                                                                     | Anne van der Linden; Annemiek van der Eijk; Aura Timen; Bas Oude Munnink; Claudia Schapendonk; Corien Swaan; Corine GeurtsvanKessel; David Nieuwenhuijse; Irina Chestakova; Jeroen van Kampen; Jolanda Voermans; Madelief Mollers; Manon Haverkate; Marion Koopmans; Mark Pronk; Mart Stein; Pascal Lexmond; Reina Sikkema; Richard Molenkamp; Sandra Kengne Kamga Mobou; on behalf of the Dutch national COVID-19 response team. |
| EPI_ISL_413579                                                                                                                                                                                                                                                                                                                                                                                                                                                                                                                                                               | MHC Haaglanden                                                                 | Erasmus Medical Center                                                                                                     | Anne van der Linden; Annemiek van der Eijk; Aura Timen; Bas Oude Munnink; Claudia Schapendonk; Corien Swaan; Corine GeurtsvanKessel; David Nieuwenhuijse; Irina Chestakova; Jeroen van Kampen; Jolanda Voermans; Madelief Mollers; Manon Haverkate; Marion Koopmans; Mark Pronk; Mart Stein; Pascal Lexmond; Reina Sikkema; Richard Molenkamp; Sandra Kengne Kamga Mobou; on behalf of the Dutch national COVID-19 response team. |
| EPI_ISL_413590                                                                                                                                                                                                                                                                                                                                                                                                                                                                                                                                                               | MHC Utrecht                                                                    | Erasmus Medical Center                                                                                                     | Anne van der Linden; Annemiek van der Eijk; Aura Timen; Bas Oude Munnink; Claudia Schapendonk; Corien Swaan; Corine GeurtsvanKessel; David Nieuwenhuijse; Irina Chestakova; Jeroen van Kampen; Jolanda Voermans; Madelief Mollers; Manon Haverkate; Marion Koopmans; Mark Pronk; Mart Stein; Pascal Lexmond; Reina Sikkema; Richard Molenkamp; Sandra Kengne Kamga Mobou; on behalf of the Dutch national COVID-19 response team. |
| EPI_ISL_413564                                                                                                                                                                                                                                                                                                                                                                                                                                                                                                                                                               | MHC West-Brabant                                                               | Erasmus Medical Center                                                                                                     | Anne van der Linden; Annemiek van der Eijk; Aura Timen; Bas Oude Munnink; Claudia Schapendonk; Corien Swaan; Corine GeurtsvanKessel; David Nieuwenhuijse; Irina Chestakova; Jeroen van Kampen; Jolanda Voermans; Madelief Mollers; Manon Haverkate; Marion Koopmans; Mark Pronk; Mart Stein; Pascal Lexmond; Reina Sikkema; Richard Molenkamp; Sandra Kengne Kamga Mobou; on behalf of the Dutch national COVID-19 response team. |
| EPI_ISL_1446678 to 1446680, EPI_ISL_1446946 to 1446969, EPI_ISL_1447030 to 1447044, EPI_ISL_1516362 to 1516363, EPI_ISL_1528308 to 1528313                                                                                                                                                                                                                                                                                                                                                                                                                                   | MI - Michigan Department of Health and Human Services - Bureau of Laboratories | Centers for Disease Control and Prevention Division of Viral Diseases, Pathogen Discovery                                  | Alison Laufer Halpin; Ben L. Rambo-Martin; Clinton R. Paden; Dakota Howard; Darlene Wagner; Dave Wentworth; Dhvani Batra; Jasmine Padilla; Justin Lee; Katie Dillon; Krista Queen; Kristen Knipe; Kristine Lacey; Mark Burroughs; Matthew Schmeer; Mili Sheth; Peter Cook; Sam Shepard; Sarah Nobles; Shoshona Le; Suxiang Tong; Vivien Dugan; Yvette Unoarumhi                                                                   |
| EPI_ISL_486394, EPI_ISL_486398 to 486399, EPI_ISL_515968 to 515973                                                                                                                                                                                                                                                                                                                                                                                                                                                                                                           | MIMS                                                                           | Department of Neurovirology, National Institute of Mental Health and Neuroscience (NIMHANS)                                | Anita Desai; Chitra Pattabiraman; Harsha PK; Manjunatha Venkataswamy; Pramada Prasad; Ravi Vasanthapuram; Risha Rasheed; Shafeeq S Hameed; Vijayalakshmi Reddy                                                                                                                                                                                                                                                                    |
| EPI_ISL_1524887 to 1524888, EPI_ISL_1524896 to 1524905                                                                                                                                                                                                                                                                                                                                                                                                                                                                                                                       | MKK Mühlenkreiskliniken, Johannes Wesling Klinikum Minden                      | Hannover Medical School, Institute of Virology                                                                             | Lars Steinbrück                                                                                                                                                                                                                                                                                                                                                                                                                   |
| EPI_ISL_1538846 to 1538848, EPI_ISL_1538983, EPI_ISL_1539116, EPI_ISL_1539206                                                                                                                                                                                                                                                                                                                                                                                                                                                                                                | MLD Szpital w. Elbiety                                                         | 1. National Institute of Public Health - National Institute of Hygiene; 2. Eurofins Genomics Europe Sequencing GmbH        | ECDC COVID-19 WGS support team; Eurofins Genomics Europe Sequencing Team; Gierczyki Rafa; Sadkowska-Todys Magorzata; Wokowicz Tomasz; Zacharczuk Katarzyna                                                                                                                                                                                                                                                                        |
| EPI_ISL_452108, EPI_ISL_452113, EPI_ISL_452133, EPI_ISL_594463                                                                                                                                                                                                                                                                                                                                                                                                                                                                                                               | MN Department of Health                                                        | Pathogen Discovery, Respiratory Viruses Branch, Division of Viral Diseases, Centers for Disease Control and Prevention     | Alison S. Laufer Halpin; Anna Montmayer; Anna Uehara; Christopher A. Elkins; Clinton R. Paden; Clinton R. Paden; Haibin Wang; Jing Zhang; Julu Bhatnagar; Krista Queen; Mary S. Keckler; Rachel Marine; Suxiang Tong; Yan Li; Ying Tao; Zachary Weiner                                                                                                                                                                            |
| EPI_ISL_1516302 to 1516304                                                                                                                                                                                                                                                                                                                                                                                                                                                                                                                                                   | MN PHL Division, Minnesota Department of Health                                | Centers for Disease Control and Prevention Division of Viral Diseases, Pathogen Discovery                                  | Alison Laufer Halpin; Ben L. Rambo-Martin; Clinton R. Paden; Dakota Howard; Darlene Wagner; Dave Wentworth; Dhvani Batra; Jasmine Padilla; Justin Lee; Katie Dillon; Krista Queen; Kristen Knipe; Kristine Lacey; Mark Burroughs; Matthew Schmeer; Mili Sheth; Peter Cook; Sam Shepard; Sarah Nobles; Shoshona Le; Suxiang Tong; Vivien Dugan; Yvette Unoarumhi                                                                   |
| EPI_ISL_426426 to 426427, EPI_ISL_527667 to 527736                                                                                                                                                                                                                                                                                                                                                                                                                                                                                                                           | MN PHL Division, Minnesota Department of Health                                | Pathogen Discovery, Respiratory Viruses Branch, Division of Viral Diseases, Centers for Disease Control and Prevention     | Alison S. Laufer Halpin; Anna Montmayer; Anna Uehara; Brian Lynch; Christopher A. Elkins; Clinton R. Paden; Haibin Wang; Jing Zhang; Krista Queen; Mary S. Keckler; Rachel Marine; Suxiang Tong; Yan Li; Ying Tao                                                                                                                                                                                                                 |
| EPI_ISL_1446299, EPI_ISL_1446313, EPI_ISL_1446787, EPI_ISL_1446790, EPI_ISL_1446923 to 1446927, EPI_ISL_1516400, EPI_ISL_1528503 to 1528505                                                                                                                                                                                                                                                                                                                                                                                                                                  | see above                                                                      | MO State Public Health Laboratory                                                                                          | Centers for Disease Control and Prevention Division of Viral Diseases, Pathogen Discovery                                                                                                                                                                                                                                                                                                                                         |
| EPI_ISL_424870                                                                                                                                                                                                                                                                                                                                                                                                                                                                                                                                                               | MO State Public Health Laboratory                                              | Pathogen Discovery, Respiratory Viruses Branch, Division of Viral Diseases, Centers for Disease Control and Prevention     | Alison S. Laufer Halpin; Anna Uehara; Christopher A. Elkins; Clinton R. Paden; Haibin Wang; Jing Zhang; Krista Queen; Mary S. Keckler; Rachel Marine; Suxiang Tong; Yan Li; Ying Tao                                                                                                                                                                                                                                              |
| EPI_ISL_1397618 to 1397622, EPI_ISL_1397788 to 1397809, EPI_ISL_1397870 to 1397885, EPI_ISL_1398034 to 1398038, EPI_ISL_1398048 to 1398067, EPI_ISL_1398120 to 1398122, EPI_ISL_1398132 to 1398136, EPI_ISL_1398331, EPI_ISL_1398333 to 1398339, EPI_ISL_1462551, EPI_ISL_1465668 to 1465672                                                                                                                                                                                                                                                                                 | see above                                                                      | MONTEFIORE MEDICAL CENTER LABORATORIES                                                                                     | Wadsworth Center, New York State Department of Health                                                                                                                                                                                                                                                                                                                                                                             |
| EPI_ISL_1465701 to 1465713, EPI_ISL_1465794 to 1465801                                                                                                                                                                                                                                                                                                                                                                                                                                                                                                                       | see above                                                                      | MONTEFIORE NEW ROCHELLE HOSPITAL LABORATORY                                                                                | Wadsworth Center, New York State Department of Health                                                                                                                                                                                                                                                                                                                                                                             |
| EPI_ISL_1465802, EPI_ISL_1465849 to 1465852, EPI_ISL_1482336 to 1482345                                                                                                                                                                                                                                                                                                                                                                                                                                                                                                      | see above                                                                      | MRC/UVRI & LSHTM Uganda Research Unit                                                                                      | Where sequence data have been generated and submitted to GISAID                                                                                                                                                                                                                                                                                                                                                                   |
| EPI_ISL_1469313 to 1469432                                                                                                                                                                                                                                                                                                                                                                                                                                                                                                                                                   | see above                                                                      | MRCG at LSHTM Genomics Lab                                                                                                 | MRCG at LSHTM Genomics lab                                                                                                                                                                                                                                                                                                                                                                                                        |
| EPI_ISL_428856                                                                                                                                                                                                                                                                                                                                                                                                                                                                                                                                                               | see above                                                                      | MRCG at LSHTM Genomics Lab                                                                                                 | MRCG at LSHTM Genomics lab                                                                                                                                                                                                                                                                                                                                                                                                        |
| EPI_ISL_428857, EPI_ISL_471158 to 471171, EPI_ISL_560992 to 561204, EPI_ISL_561207, EPI_ISL_561209 to 561230, EPI_ISL_561234 to 561238, EPI_ISL_561240 to 561241, EPI_ISL_561249, EPI_ISL_561252 to 561253, EPI_ISL_561255 to 561256, EPI_ISL_561258 to 561269, EPI_ISL_561272, EPI_ISL_561274, EPI_ISL_561276, EPI_ISL_561281, EPI_ISL_561283, EPI_ISL_561285, EPI_ISL_561288 to 561295, EPI_ISL_561297, EPI_ISL_561302, EPI_ISL_561304, EPI_ISL_561309 to 561310, EPI_ISL_561312, EPI_ISL_561315 to 561316, EPI_ISL_561319, EPI_ISL_561322, EPI_ISL_561325, EPI_ISL_561328 | see above                                                                      | MRCG at LSHTM Genomics Lab                                                                                                 | MRCG at LSHTM Genomics lab                                                                                                                                                                                                                                                                                                                                                                                                        |
| see above                                                                                                                                                                                                                                                                                                                                                                                                                                                                                                                                                                    | see above                                                                      | see above                                                                                                                  | Abdoulie Kanthé; Abdul Karim sesay; Bakary Sanyang; Jarra Manneh; Mariama Kujabi; Sesay et al                                                                                                                                                                                                                                                                                                                                     |

|                                                                                                                                                                                                                                                                                                                                                                                                                                                                                                                                                                                                                                                                                                                                                                                                                                                                                                                                                                                                                                                                                                                                            |                                                      |                                                                                                                            |                                                                                                                                                                                                                                                                                                                                                                                                                                                                                                                                                        |                                                                                        |
|--------------------------------------------------------------------------------------------------------------------------------------------------------------------------------------------------------------------------------------------------------------------------------------------------------------------------------------------------------------------------------------------------------------------------------------------------------------------------------------------------------------------------------------------------------------------------------------------------------------------------------------------------------------------------------------------------------------------------------------------------------------------------------------------------------------------------------------------------------------------------------------------------------------------------------------------------------------------------------------------------------------------------------------------------------------------------------------------------------------------------------------------|------------------------------------------------------|----------------------------------------------------------------------------------------------------------------------------|--------------------------------------------------------------------------------------------------------------------------------------------------------------------------------------------------------------------------------------------------------------------------------------------------------------------------------------------------------------------------------------------------------------------------------------------------------------------------------------------------------------------------------------------------------|----------------------------------------------------------------------------------------|
| EPI_ISL_428855                                                                                                                                                                                                                                                                                                                                                                                                                                                                                                                                                                                                                                                                                                                                                                                                                                                                                                                                                                                                                                                                                                                             | MRCG at LSHTM Geomics lab                            | MRCG at LSHTM Geomics lab                                                                                                  | Sesay et al                                                                                                                                                                                                                                                                                                                                                                                                                                                                                                                                            |                                                                                        |
| EPI_ISL_1446290, EPI_ISL_1446293, EPI_ISL_1446296, EPI_ISL_1446302, EPI_ISL_1446304, EPI_ISL_1446307, EPI_ISL_1446310, EPI_ISL_1446315, EPI_ISL_1446318, EPI_ISL_1446321, EPI_ISL_1446766 to 1446772, EPI_ISL_1446932 to 1446936, EPI_ISL_1516368 to 1516372, EPI_ISL_1528411 to 1528413                                                                                                                                                                                                                                                                                                                                                                                                                                                                                                                                                                                                                                                                                                                                                                                                                                                   | see above                                            | Centers for Disease Control and Prevention Division of Viral Diseases, Pathogen Discovery                                  | Alison Laufer Halpin; Ben L. Rambo-Martin; Clinton R. Paden; Dakota Howard; Darlene Wagner; Dave Wentworth; Dhvani Batra; Jasmine Padilla; Justin Lee; Katie Dillon; Krista Queen; Kristen Knipe; Kristine Lacek; Mark Burroughs; Matthew Schmeer; Mili Sheth; Peter Cook; Sam Shepard; Sarah Nobles; Shoshona Le; Suxiang Tong; Vivien Dugan; Yvette Unoarumhi                                                                                                                                                                                        |                                                                                        |
| EPI_ISL_414476, EPI_ISL_415151, EPI_ISL_421348 to 421435, EPI_ISL_421593 to 421635, EPI_ISL_422488 to 422562, EPI_ISL_450004 to 450170                                                                                                                                                                                                                                                                                                                                                                                                                                                                                                                                                                                                                                                                                                                                                                                                                                                                                                                                                                                                     | MSHS Clinical Microbiology Laboratories              | MSHS Pathogen Surveillance Program                                                                                         | Adolfo Garcia-Sarstre; Adolfo Garcia-Sastre; Ajay Obla; Alberto Paniz-mondolfi; Ana S. Gonzalez-Reiche; Ana Silvia Gonzalez-Reiche; Ana Sylvia Gonzalez-Reiche; Bremy Albuquerque; Bremy Albuquerque; Emilia Sordillo; Florian Krammer; Gopi Patel; Harm van Bakel; Jayeta Dutta; Jose Polanco; Juan Soto; Judith Aberg; Lisa Miorin; Matthew Hernandez; Melissa Gitman; Melissa Smith; Mitchell Sullivan; Nancy Francoeur; Randy Albrecht; Robert Sebra; Shelcie Fabre; Shwetha Sridhar Hara; Viviana Simon; Wen-chun Liu; Ying-Chih Wang; Zenab Khan |                                                                                        |
| EPI_ISL_1446447, EPI_ISL_1446450, EPI_ISL_1446453, EPI_ISL_1446476, EPI_ISL_1446480, EPI_ISL_1446482, EPI_ISL_1446486, EPI_ISL_1446684 to 1446691, EPI_ISL_1446857, EPI_ISL_1516305 to 1516312, EPI_ISL_1528294 to 1528302                                                                                                                                                                                                                                                                                                                                                                                                                                                                                                                                                                                                                                                                                                                                                                                                                                                                                                                 | see above                                            | Centers for Disease Control and Prevention Division of Viral Diseases, Pathogen Discovery                                  | Alison Laufer Halpin; Ben L. Rambo-Martin; Clinton R. Paden; Dakota Howard; Darlene Wagner; Dave Wentworth; Dhvani Batra; Jasmine Padilla; Justin Lee; Katie Dillon; Krista Queen; Kristen Knipe; Kristine Lacek; Mark Burroughs; Matthew Schmeer; Mili Sheth; Peter Cook; Sam Shepard; Sarah Nobles; Shoshona Le; Suxiang Tong; Vivien Dugan; Yvette Unoarumhi                                                                                                                                                                                        |                                                                                        |
| EPI_ISL_1408887, EPI_ISL_1408893, EPI_ISL_1408897, EPI_ISL_1509926, EPI_ISL_1509946                                                                                                                                                                                                                                                                                                                                                                                                                                                                                                                                                                                                                                                                                                                                                                                                                                                                                                                                                                                                                                                        | MT Public Health Laboratory                          | Genomics and Discovery, Respiratory Viruses Branch, Division of Viral Diseases, Centers for Disease Control and Prevention | Adam Retchless; Anna Kelleher; Anna Montmayeur; Anna Uehara; Brian Lynch; Clinton R. Paden; Haibin Wang; Han Jia Justin Ng; Jing Zhang; Justin Lee; Krista Queen; Mark Burroughs; Peter Cook; Rachel Marine; Suxiang Tong; Yan Li; Ying Tao                                                                                                                                                                                                                                                                                                            |                                                                                        |
| EPI_ISL_1482648 to 1482973                                                                                                                                                                                                                                                                                                                                                                                                                                                                                                                                                                                                                                                                                                                                                                                                                                                                                                                                                                                                                                                                                                                 | MUSC Molecular Pathology Laboratory                  | MUSC Molecular Pathology Laboratory                                                                                        | Dariusz Pytel; Frederick S. Nolte; Jaclyn Dunne; Julie W. Hirschhorn; Kristen Maurer; W. Bailey Glen Jr                                                                                                                                                                                                                                                                                                                                                                                                                                                |                                                                                        |
| EPI_ISL_445309, EPI_ISL_445355                                                                                                                                                                                                                                                                                                                                                                                                                                                                                                                                                                                                                                                                                                                                                                                                                                                                                                                                                                                                                                                                                                             | MUTUAL DE SEGURIDAD C.H.C.                           | Instituto de Salud Publica de Chile                                                                                        | Alejandra Acevedo; Andrés E Castillo; Bárbara Parra; Carolina Tumbley; Gabriel Leal; Jaime Lagos; Jorge Fernandez; Loredana Arata; Patricia Bustos; Paz Tapia; Rodrigo Fasce; Winston Andrade                                                                                                                                                                                                                                                                                                                                                          |                                                                                        |
| EPI_ISL_1435341 to 1435343, EPI_ISL_1435346 to 1435353, EPI_ISL_1435355 to 1435356, EPI_ISL_1435358 to 1435361, EPI_ISL_1435363 to 1435378, EPI_ISL_1435380 to 1435381, EPI_ISL_1435383, EPI_ISL_1435386 to 1435387, EPI_ISL_1435389 to 1435390, EPI_ISL_1435396 to 1435399, EPI_ISL_1435401 to 1435405, EPI_ISL_1439408 to 1435412, EPI_ISL_1435414 to 1435419, EPI_ISL_1435421 to 1435422, EPI_ISL_1435424 to 1435427, EPI_ISL_1439442 to 1439443, EPI_ISL_1439447, EPI_ISL_1439450, EPI_ISL_1439456, EPI_ISL_1439469, EPI_ISL_1439474, EPI_ISL_1439478, EPI_ISL_1439480 to 1439481, EPI_ISL_1439488, EPI_ISL_1439491 to 1439495, EPI_ISL_1439497 to 1439500, EPI_ISL_1439502 to 1439503, EPI_ISL_1439505 to 1439509, EPI_ISL_1439512, EPI_ISL_1439514                                                                                                                                                                                                                                                                                                                                                                                   | see above                                            | MVZ Dr. Eberhard & Partner Dortmund                                                                                        | Robert Koch Institute                                                                                                                                                                                                                                                                                                                                                                                                                                                                                                                                  |                                                                                        |
| EPI_ISL_1434506, EPI_ISL_1435320, EPI_ISL_1435328, EPI_ISL_1441202                                                                                                                                                                                                                                                                                                                                                                                                                                                                                                                                                                                                                                                                                                                                                                                                                                                                                                                                                                                                                                                                         | see above                                            | MVZ Labor Dortmund                                                                                                         | Robert Koch Institute                                                                                                                                                                                                                                                                                                                                                                                                                                                                                                                                  |                                                                                        |
| EPI_ISL_1442509                                                                                                                                                                                                                                                                                                                                                                                                                                                                                                                                                                                                                                                                                                                                                                                                                                                                                                                                                                                                                                                                                                                            | MVZ Labor Dr. Fenner und Kollegen (Standort Hamburg) | Robert Koch Institute                                                                                                      |                                                                                                                                                                                                                                                                                                                                                                                                                                                                                                                                                        |                                                                                        |
| EPI_ISL_1433601, EPI_ISL_1433676, EPI_ISL_1434469, EPI_ISL_1438584, EPI_ISL_1438590, EPI_ISL_1438594 to 1438596, EPI_ISL_1438599 to 1438600, EPI_ISL_1438602, EPI_ISL_1438607, EPI_ISL_1438610, EPI_ISL_1438617, EPI_ISL_1438625 to 1438626, EPI_ISL_1438629 to 1438630, EPI_ISL_1438637, EPI_ISL_1438641, EPI_ISL_1438646 to 1438647, EPI_ISL_1438653, EPI_ISL_1438656, EPI_ISL_1438663, EPI_ISL_1438665, EPI_ISL_1438670, EPI_ISL_1438674 to 1438675, EPI_ISL_1438677 to 1438678, EPI_ISL_1438681 to 1438685, EPI_ISL_1441227, EPI_ISL_1441648, EPI_ISL_1441652                                                                                                                                                                                                                                                                                                                                                                                                                                                                                                                                                                          | see above                                            | MVZ Labor Dr. Limbach & Kollegen GbR                                                                                       | Robert Koch Institute                                                                                                                                                                                                                                                                                                                                                                                                                                                                                                                                  |                                                                                        |
| EPI_ISL_1433607, EPI_ISL_1433623, EPI_ISL_1433665, EPI_ISL_1433669, EPI_ISL_1441656, EPI_ISL_1441659, EPI_ISL_1441662, EPI_ISL_1441672                                                                                                                                                                                                                                                                                                                                                                                                                                                                                                                                                                                                                                                                                                                                                                                                                                                                                                                                                                                                     | see above                                            | MVZ Labor Dr. Reising-Ackermann und Kollegen                                                                               | Robert Koch Institute                                                                                                                                                                                                                                                                                                                                                                                                                                                                                                                                  |                                                                                        |
| EPI_ISL_1434520 to 1434521, EPI_ISL_1434524, EPI_ISL_1434526, EPI_ISL_1434528, EPI_ISL_1434530, EPI_ISL_1434532, EPI_ISL_1434534, EPI_ISL_1434536, EPI_ISL_1434538, EPI_ISL_1434540, EPI_ISL_1434542, EPI_ISL_1434544, EPI_ISL_1434546, EPI_ISL_1434548, EPI_ISL_1434550, EPI_ISL_1434552, EPI_ISL_1434554, EPI_ISL_1434556, EPI_ISL_1434559, EPI_ISL_1434561, EPI_ISL_1434563, EPI_ISL_1434567 to 1434568, EPI_ISL_1434570, EPI_ISL_1434572, EPI_ISL_1434574, EPI_ISL_1434576, EPI_ISL_1434578, EPI_ISL_1434581 to 1434582, EPI_ISL_1434584, EPI_ISL_1434586, EPI_ISL_1434588, EPI_ISL_1434590, EPI_ISL_1434592, EPI_ISL_1434594, EPI_ISL_1434596, EPI_ISL_1434598, EPI_ISL_1434600 to 1434601, EPI_ISL_1434603, EPI_ISL_1434605, EPI_ISL_1434607, EPI_ISL_1434609, EPI_ISL_1434611, EPI_ISL_1434613, EPI_ISL_1439438, EPI_ISL_1439625 to 1439646, EPI_ISL_1439648 to 1439670, EPI_ISL_1440873 to 1440878, EPI_ISL_1440880 to 1440884, EPI_ISL_1440886 to 1440899, EPI_ISL_1440901 to 1440909, EPI_ISL_1440911 to 1440934, EPI_ISL_1440936 to 1440950, EPI_ISL_1442896 to 1442912, EPI_ISL_1442914 to 1442925, EPI_ISL_1442927 to 1442941 | see above                                            | MVZ Labor Krone GbR                                                                                                        | Robert Koch Institute                                                                                                                                                                                                                                                                                                                                                                                                                                                                                                                                  |                                                                                        |
| EPI_ISL_1434454, EPI_ISL_1434463, EPI_ISL_1434471, EPI_ISL_1434479, EPI_ISL_1434485, EPI_ISL_1435293, EPI_ISL_1435296, EPI_ISL_1435298, EPI_ISL_1435306, EPI_ISL_1435310, EPI_ISL_1441219                                                                                                                                                                                                                                                                                                                                                                                                                                                                                                                                                                                                                                                                                                                                                                                                                                                                                                                                                  | see above                                            | MVZ Medizinisches Labor Hannover GmbH                                                                                      | Robert Koch Institute                                                                                                                                                                                                                                                                                                                                                                                                                                                                                                                                  |                                                                                        |
| EPI_ISL_1433501, EPI_ISL_1433503, EPI_ISL_1433524, EPI_ISL_1433535, EPI_ISL_1433543, EPI_ISL_1433559, EPI_ISL_1433565                                                                                                                                                                                                                                                                                                                                                                                                                                                                                                                                                                                                                                                                                                                                                                                                                                                                                                                                                                                                                      | see above                                            | MVZ für Laboratoriumsmedizin und Mikrobiologie Koblenz-Mittelrhein (Labor Koblenz)                                         | Robert Koch Institute                                                                                                                                                                                                                                                                                                                                                                                                                                                                                                                                  |                                                                                        |
| EPI_ISL_1435354, EPI_ISL_1439452                                                                                                                                                                                                                                                                                                                                                                                                                                                                                                                                                                                                                                                                                                                                                                                                                                                                                                                                                                                                                                                                                                           | see above                                            | MVZ für Laboratoriumsmedizin und Mikrobiologie Würzburg                                                                    | Robert Koch Institute                                                                                                                                                                                                                                                                                                                                                                                                                                                                                                                                  |                                                                                        |
| EPI_ISL_1443226 to 1443232, EPI_ISL_1443288, EPI_ISL_1478849, EPI_ISL_1478895 to 1478896, EPI_ISL_1478905, EPI_ISL_1478926, EPI_ISL_1553186, EPI_ISL_1553261 to 1553263                                                                                                                                                                                                                                                                                                                                                                                                                                                                                                                                                                                                                                                                                                                                                                                                                                                                                                                                                                    | see above                                            | Macon County Jail                                                                                                          | Illinois Department of Public Health - Springfield Lab                                                                                                                                                                                                                                                                                                                                                                                                                                                                                                 | Bryan Sim; Gordon McCall                                                               |
| EPI_ISL_508423 to 508440                                                                                                                                                                                                                                                                                                                                                                                                                                                                                                                                                                                                                                                                                                                                                                                                                                                                                                                                                                                                                                                                                                                   | Mahatma Gandhi Institute of Medical Sciences         | National Institute of Biomedical Genomics                                                                                  | Arindam Maitra; Deepashri Maraskolhe; Rahul Narang; Saumitra Das; Vijayshri Deotale                                                                                                                                                                                                                                                                                                                                                                                                                                                                    |                                                                                        |
| EPI_ISL_511923 to 511929, EPI_ISL_522437                                                                                                                                                                                                                                                                                                                                                                                                                                                                                                                                                                                                                                                                                                                                                                                                                                                                                                                                                                                                                                                                                                   | Mahatma Gandhi Institute of Medical Sciences         | National Institute of Biomedical Genomics - DBT's PAN-INDIA 1000 SARS-CoV-2 RNA Genome Sequencing Consortium               | Arindam Maitra; Deepashri Maraskolhe; Rahul Narang; Saumitra Das; Vijayshri Deotale                                                                                                                                                                                                                                                                                                                                                                                                                                                                    |                                                                                        |
| EPI_ISL_614294                                                                                                                                                                                                                                                                                                                                                                                                                                                                                                                                                                                                                                                                                                                                                                                                                                                                                                                                                                                                                                                                                                                             | Maimonides Medical Center                            | New York City Public Health Laboratory                                                                                     | Jade Wang; et al.                                                                                                                                                                                                                                                                                                                                                                                                                                                                                                                                      |                                                                                        |
| EPI_ISL_1502087 to 1502111                                                                                                                                                                                                                                                                                                                                                                                                                                                                                                                                                                                                                                                                                                                                                                                                                                                                                                                                                                                                                                                                                                                 | Maine HETL                                           | Health and Environmental Testing Laboratory                                                                                | Barter, M.; Dewey, H.; H. and Tewhey, R.; Lynch, R.; Martha, J.; Matluk, N.; Munger                                                                                                                                                                                                                                                                                                                                                                                                                                                                    |                                                                                        |
| EPI_ISL_513414 to 513510                                                                                                                                                                                                                                                                                                                                                                                                                                                                                                                                                                                                                                                                                                                                                                                                                                                                                                                                                                                                                                                                                                                   | Maine HETL                                           | Tewhey Lab, The Jackson Laboratory                                                                                         | Barter, M.; Dewey, H.; H. and Tewhey, R.; Lynch, R.; Matluk, N.; Munger                                                                                                                                                                                                                                                                                                                                                                                                                                                                                |                                                                                        |
| EPI_ISL_1495983                                                                                                                                                                                                                                                                                                                                                                                                                                                                                                                                                                                                                                                                                                                                                                                                                                                                                                                                                                                                                                                                                                                            | Maine Health and Environmental Testing Laboratory    | Maine Health and Environmental Testing Laboratory                                                                          | Barter, M.; Dewey, H.; H. and Tewhey, R.; Lynch, R.; Martha, J.; Matluk, N.; Munger                                                                                                                                                                                                                                                                                                                                                                                                                                                                    |                                                                                        |
| EPI_ISL_1523643 to 1523793                                                                                                                                                                                                                                                                                                                                                                                                                                                                                                                                                                                                                                                                                                                                                                                                                                                                                                                                                                                                                                                                                                                 | Maine Health and Environmental Testing Laboratory    | Tewhey Lab, The Jackson Laboratory                                                                                         | Barter, M.; Dewey, H.; H. and Tewhey, R.; Iosue, F.; Lynch, R.; Matluk, N.; Munger                                                                                                                                                                                                                                                                                                                                                                                                                                                                     |                                                                                        |
| EPI_ISL_428348                                                                                                                                                                                                                                                                                                                                                                                                                                                                                                                                                                                                                                                                                                                                                                                                                                                                                                                                                                                                                                                                                                                             | Maison de Santé du Val d'Ormois                      | National Reference Center for Viruses of Respiratory Infections, Institut Pasteur, Paris                                   | Angela Brisebarre; Etienne Simon-Lorière; Flora Donati; Marion Barbet; Maud Vanpeene; Mélanie Albert; Méline Bizard; Sylvie Behillili; Sylvie van der Werf; Vincent Enouf                                                                                                                                                                                                                                                                                                                                                                              |                                                                                        |
| EPI_ISL_430838                                                                                                                                                                                                                                                                                                                                                                                                                                                                                                                                                                                                                                                                                                                                                                                                                                                                                                                                                                                                                                                                                                                             | Makati Medical Center                                | Research Institute for Tropical Medicine                                                                                   | Bautista; Brunker, K.; C.S.; C.T.; D.L.; Demetria; E.S.; F.G.M.; I.A.P.; Manalo; Medado; Mercado; O.J.T.; Onza; Polotan                                                                                                                                                                                                                                                                                                                                                                                                                                |                                                                                        |
| EPI_ISL_528738 to 528744, EPI_ISL_568873 to 568875, EPI_ISL_582124, EPI_ISL_1435802, EPI_ISL_1435804, EPI_ISL_1435806, EPI_ISL_1435808, EPI_ISL_1435810, EPI_ISL_1435812, EPI_ISL_1435814, EPI_ISL_1435816 to 1435817, EPI_ISL_1435820                                                                                                                                                                                                                                                                                                                                                                                                                                                                                                                                                                                                                                                                                                                                                                                                                                                                                                     | see above                                            | Malaysia Genome Institute                                                                                                  | Azrin Ahmad; Enizza Kasim; Gan Han Ming; Irfi Suhayu Sapian; Mohd Faizal Abu Bakar; Mohd Noor Mat Isa; Nor Azfa Johari; Nor Azfa Johari.; Nurhezreen Md Iqbal; Shahrul Hisham Zainal Ariffin; Shamsidar Sopia; Siti Noraini Othman; Tan Ju Lin; Yusuf Muhammad Noor                                                                                                                                                                                                                                                                                    |                                                                                        |
| EPI_ISL_1385833 to 1385835                                                                                                                                                                                                                                                                                                                                                                                                                                                                                                                                                                                                                                                                                                                                                                                                                                                                                                                                                                                                                                                                                                                 | Mandya Institute of Medical Sciences                 | INSACOG-KA, NIMHANS                                                                                                        | Anita S Desai; Anson Kunjumon George; Chitra Pattabiraman; Darshan Sreenivas; Nakka Vijay Kiran Reddy; Pramada Prasad; V Ravi                                                                                                                                                                                                                                                                                                                                                                                                                          |                                                                                        |
| EPI_ISL_1478853, EPI_ISL_1553233                                                                                                                                                                                                                                                                                                                                                                                                                                                                                                                                                                                                                                                                                                                                                                                                                                                                                                                                                                                                                                                                                                           | Maple Street Clinic                                  | Illinois Department of Public Health - Springfield Lab                                                                     | Bryan Sim; Gordon McCall                                                                                                                                                                                                                                                                                                                                                                                                                                                                                                                               |                                                                                        |
| EPI_ISL_1547801                                                                                                                                                                                                                                                                                                                                                                                                                                                                                                                                                                                                                                                                                                                                                                                                                                                                                                                                                                                                                                                                                                                            | Mapmygenome                                          | CSIR-Centre for Cellular and Molecular Biology - INSACOG                                                                   | Amreshwar Vodapalli; Ara Sreenivas; B Himasri; Divya Tej Sowpati; Karthik Bharadwaj Tallapakka; Krishna Khairnar; Lamuk Zaveri; Onkar Kulkarni; Rakesh K Mishra; Sharath Chandra Thota; Shreekant Verma; Sofia Banu; Viswagithe S L                                                                                                                                                                                                                                                                                                                    |                                                                                        |
| EPI_ISL_1439433, EPI_ISL_1439435, EPI_ISL_1439437, EPI_ISL_1439439, EPI_ISL_1439441, EPI_ISL_1439444, EPI_ISL_1439446, EPI_ISL_1439448 to 1439449, EPI_ISL_1439451, EPI_ISL_1439455, EPI_ISL_1439470, EPI_ISL_1439472, EPI_ISL_1439482, EPI_ISL_1439484, EPI_ISL_1528160 to 1528169, EPI_ISL_1557224 to 1557246, EPI_ISL_1559612 to 1559614                                                                                                                                                                                                                                                                                                                                                                                                                                                                                                                                                                                                                                                                                                                                                                                                | see above                                            | Marche en Famenne                                                                                                          | Plateforme de testing Namuroise                                                                                                                                                                                                                                                                                                                                                                                                                                                                                                                        | ; Céline Maschietto; Degosserie Jonathan; Denis Olivier; Mullier François; Otto Gaetan |
| EPI_ISL_583198                                                                                                                                                                                                                                                                                                                                                                                                                                                                                                                                                                                                                                                                                                                                                                                                                                                                                                                                                                                                                                                                                                                             | Marin County Public Health Department                | Chan-Zuckerberg Biohub                                                                                                     | CZB Ciliahub Consortium                                                                                                                                                                                                                                                                                                                                                                                                                                                                                                                                |                                                                                        |

|                                                                                                                                                                                                                                                                                                                                                                                                                                                                                                                                                                                                                                                                                                                                                                                                                                                                                      |                                                                                                 |                                                                                                                            |                                                                                                                                                                                                                                                                                                                                                                                                                                                                                                                                 |
|--------------------------------------------------------------------------------------------------------------------------------------------------------------------------------------------------------------------------------------------------------------------------------------------------------------------------------------------------------------------------------------------------------------------------------------------------------------------------------------------------------------------------------------------------------------------------------------------------------------------------------------------------------------------------------------------------------------------------------------------------------------------------------------------------------------------------------------------------------------------------------------|-------------------------------------------------------------------------------------------------|----------------------------------------------------------------------------------------------------------------------------|---------------------------------------------------------------------------------------------------------------------------------------------------------------------------------------------------------------------------------------------------------------------------------------------------------------------------------------------------------------------------------------------------------------------------------------------------------------------------------------------------------------------------------|
| EPI_ISL_1455670                                                                                                                                                                                                                                                                                                                                                                                                                                                                                                                                                                                                                                                                                                                                                                                                                                                                      | Marius Nasta Institute of Pneumology                                                            | "Stefan S. Nicolau" Institute of Virology                                                                                  | Adriana Plesa; Alina Nastasie; Ana Iulia Neagu; Anca Botezatu; Carmelia Sultana; Carmen Cristina Diaconu; Coralia Bleotu; Cristina Mambet; Denisa Dragu; Gabriela Anton; Ioana Pitica; Iulia Virginia Iancu; Laura Grecu; Laura Necula; Lilia Matei; Marinela Bostan; Mihaela Economescu; Mirela Mihaila; Saviana Nedeianu; Simona Ruta; Tudor Constantinescu                                                                                                                                                                   |
| EPI_ISL_1533441 to 1533442, EPI_ISL_1533532, EPI_ISL_1533534                                                                                                                                                                                                                                                                                                                                                                                                                                                                                                                                                                                                                                                                                                                                                                                                                         | Marshfield Clinic Research Institute                                                            | Genomics and Discovery, Respiratory Viruses Branch, Division of Viral Diseases, Centers for Disease Control and Prevention | Adam Retchless; Anna Kelleher; Anna Montmayeur; Anna Uehara; Brian Lynch; Clinton R. Paden; Haibin Wang; Han Jia Justin Ng; Jing Zhang; Justin Lee; Krista Queen; Mark Burroughs; Peter Cook; Rachel Marine; Suxiang Tong; Yan Li; Ying Tao                                                                                                                                                                                                                                                                                     |
| EPI_ISL_481265 to 481282, EPI_ISL_486912 to 486917, EPI_ISL_509444 to 509491, EPI_ISL_522824 to 522854, EPI_ISL_522869 to 522871                                                                                                                                                                                                                                                                                                                                                                                                                                                                                                                                                                                                                                                                                                                                                     | Maryland Department of Health                                                                   | Maryland Department of Health                                                                                              | Keller, E.; Maryland Department of Health Laboratories Administration                                                                                                                                                                                                                                                                                                                                                                                                                                                           |
| EPI_ISL_454421 to 454435                                                                                                                                                                                                                                                                                                                                                                                                                                                                                                                                                                                                                                                                                                                                                                                                                                                             | Maryland Department of Health Laboratories Administration                                       | Maryland Department of Health Laboratories Administration                                                                  | MDH Laboratories Administration                                                                                                                                                                                                                                                                                                                                                                                                                                                                                                 |
| EPI_ISL_525118, EPI_ISL_529167 to 529168                                                                                                                                                                                                                                                                                                                                                                                                                                                                                                                                                                                                                                                                                                                                                                                                                                             | Maryland Department of Health Laboratory                                                        | Maryland Department of Health Laboratory                                                                                   | Eric Keller; Maryland Department of Health Laboratories Administration                                                                                                                                                                                                                                                                                                                                                                                                                                                          |
| EPI_ISL_1400802 to 1400941, EPI_ISL_1444777 to 1444908, EPI_ISL_1448029 to 1448042, EPI_ISL_1469292 to 1469312, EPI_ISL_1500246 to 1500425, EPI_ISL_1516754 to 1516759                                                                                                                                                                                                                                                                                                                                                                                                                                                                                                                                                                                                                                                                                                               | Maryland Genomics, Institute for Genome Sciences, University of Maryland School of Medicine     | Maryland Genomics, Institute for Genome Sciences, University of Maryland School of Medicine                                | Aditya; Claire M; Fraser; Holly; Humphrys; Jacques; Kranthi; Lisa D; Luke J; Mehta; Mike; Ott; Ravel; Roussey; Sadzewicz; Sandra; Tallon; Vavikolanu                                                                                                                                                                                                                                                                                                                                                                            |
| EPI_ISL_538265 to 538274, EPI_ISL_560806 to 560832, EPI_ISL_1482980 to 1483025                                                                                                                                                                                                                                                                                                                                                                                                                                                                                                                                                                                                                                                                                                                                                                                                       | Maryland Public Health Laboratory                                                               | Maryland Public Health Laboratory                                                                                          | Maryland Department of Health Laboratories Administration                                                                                                                                                                                                                                                                                                                                                                                                                                                                       |
| EPI_ISL_1443268, EPI_ISL_1478850 to 1478851, EPI_ISL_1478890, EPI_ISL_1478900, EPI_ISL_1478921, EPI_ISL_1500172 to 1500175, EPI_ISL_1500218, EPI_ISL_1500229 to 1500231, EPI_ISL_1500245, EPI_ISL_1553246 to 1553247                                                                                                                                                                                                                                                                                                                                                                                                                                                                                                                                                                                                                                                                 | see above                                                                                       | Mason District Hospital                                                                                                    | Illinois Department of Public Health - Springfield Lab                                                                                                                                                                                                                                                                                                                                                                                                                                                                          |
| EPI_ISL_409067                                                                                                                                                                                                                                                                                                                                                                                                                                                                                                                                                                                                                                                                                                                                                                                                                                                                       | Massachusetts Department of Public Health                                                       | Pathogen Discovery, Respiratory Viruses Branch, Division of Viral Diseases, Centers for Diseases Control and Prevention    | Anna Uehara; Brett L. Whitaker; Brian Lynch; Clinton R. Paden; Janna' R. Murray; Jing Zhang; Krista Queen; Lijuan Wang; Senthil Kumar K. Sakthivel; Shifaq Kamili; Stephen Lindstrom; Susan I. Gerber; Suxiang Tong; Xiaoyan Lu; Yan Li; Ying Tao                                                                                                                                                                                                                                                                               |
| EPI_ISL_460097 to 460472, EPI_ISL_1413133, EPI_ISL_1413136, EPI_ISL_1413139                                                                                                                                                                                                                                                                                                                                                                                                                                                                                                                                                                                                                                                                                                                                                                                                          | Massachusetts General Hospital                                                                  | Infectious Disease Program, Broad Institute of Harvard and MIT                                                             | A.E.; Adams, G.; Anahtar, M.; B.L.; B.W.; Bauer, M.; Birren; Branda, J.; Carter, A.; Cerrato, F.; Chaluviadi, S.; Chapman; Cusick, C.; D.J.; DeRuff, K.; E. and Sabeti; Flowers, K.; Gallagher, G.; Gladden-Young, A.; Gnirke, A.; Harris, J.; J.E.; K.J.; LaRocque, R.; Lagerborg, K.; Lemieux; Lin; Loreth, C.; Macinnis; Neumann, A.; Normandin, E.; P.C.; Park; Pierce, V.; Reilly, S.; Rosenberg; Rosenberg, E.; Rudy, M.; Ryan, E.; S.B.; Sabeti; Shaw, B.; Siddle; Slater, D.; Smole, S.; Tomkins-Tinch, C.; Turbett, S. |
| EPI_ISL_1404617 to 1404623, EPI_ISL_1406697 to 1406704, EPI_ISL_1503460 to 1503791, EPI_ISL_1527091 to 1527236, EPI_ISL_1528093 to 1528159                                                                                                                                                                                                                                                                                                                                                                                                                                                                                                                                                                                                                                                                                                                                           | Massachusetts State Public Health Laboratory                                                    | Massachusetts State Public Health Laboratory                                                                               | Andrew Lang; Glen Gallagher; Sandra Smole; Timelia Fink                                                                                                                                                                                                                                                                                                                                                                                                                                                                         |
| EPI_ISL_418799, EPI_ISL_418801, EPI_ISL_420878 to 420879                                                                                                                                                                                                                                                                                                                                                                                                                                                                                                                                                                                                                                                                                                                                                                                                                             | Mater Pathology                                                                                 | Public Health Virology Laboratory                                                                                          | Alyssa Pyke; Amanda De Jong; Andrew Van Den Hurk; Bixing Huang; Carmel Taylor; David Warrilow; Doris Genge; Elisabeth Gamez; Glen Hewitson; Ian Maxwell Mackay; Inga Sultana; Jamie McMahon; Jean Barcelon; Judy Northill; Mitchell Finger; Natalie Simpson; Neelima Nair; Peter Burtonclay; Peter Moore; Sarah Wheatley; Sean Moody; Sonja Hall-Mendelin; Timothy Gardam; and Frederick Moore                                                                                                                                  |
| EPI_ISL_508415 to 508422                                                                                                                                                                                                                                                                                                                                                                                                                                                                                                                                                                                                                                                                                                                                                                                                                                                             | Maulana Azad Medical College                                                                    | National Institute of Biomedical Genomics                                                                                  | Arindam Maitra; Oves Siddiqui; Saumitra Das; Sonal Saxena; Vikas Manchanda                                                                                                                                                                                                                                                                                                                                                                                                                                                      |
| EPI_ISL_420898 to 420909, EPI_ISL_420911 to 420912                                                                                                                                                                                                                                                                                                                                                                                                                                                                                                                                                                                                                                                                                                                                                                                                                                   | Max von Pettenkofer Institute, Virology, National Reference Center for Retroviruses, LMU Munich | Laboratory for Functional Genome Analysis, Dept. Genomics, Gene Center of the LMU Munich                                   | Alexander Graf; Ashok Varadarajan; Helmut Blum; Max Muenchhoff; Oliver Keppler; Stefan Krebs                                                                                                                                                                                                                                                                                                                                                                                                                                    |
| EPI_ISL_437204 to 437297, EPI_ISL_437359, EPI_ISL_451936 to 451947, EPI_ISL_452103 to 452104, EPI_ISL_466874 to 466925, EPI_ISL_548949 to 548961, EPI_ISL_549025                                                                                                                                                                                                                                                                                                                                                                                                                                                                                                                                                                                                                                                                                                                     | see above                                                                                       | Max von Pettenkofer Institute, Virology, National Reference Center for Retroviruses, LMU München                           | Laboratory for Functional Genome Analysis, Dept. Genomics, Gene Center of the LMU Munich                                                                                                                                                                                                                                                                                                                                                                                                                                        |
| EPI_ISL_477272 to 477276, EPI_ISL_477291 to 477312, EPI_ISL_481242, EPI_ISL_482967 to 482987, EPI_ISL_495597 to 495609, EPI_ISL_496918, EPI_ISL_507957 to 507961, EPI_ISL_514619 to 514628, EPI_ISL_514636, EPI_ISL_514638 to 514640, EPI_ISL_514644, EPI_ISL_514653 to 514656, EPI_ISL_515263 to 515266, EPI_ISL_518856 to 518900, EPI_ISL_521153, EPI_ISL_527630 to 527631, EPI_ISL_539842 to 539849, EPI_ISL_560792 to 560797, EPI_ISL_603010 to 603011, EPI_ISL_1396409 to 1396410, EPI_ISL_1446028, EPI_ISL_1446048 to 1446049, EPI_ISL_1446051 to 1446052, EPI_ISL_1446054 to 1446055, EPI_ISL_1479042 to 1479096, EPI_ISL_1482393, EPI_ISL_1527465, EPI_ISL_1527468, EPI_ISL_1527470, EPI_ISL_1527472, EPI_ISL_1527476 to 1527487, EPI_ISL_1527498 to 1527502, EPI_ISL_1527510 to 1527521                                                                                     | see above                                                                                       | Mayo Clinic & Mayo Clinic Laboratories                                                                                     | Minnesota Department of Health, Public Health Laboratory                                                                                                                                                                                                                                                                                                                                                                                                                                                                        |
| EPI_ISL_490978, EPI_ISL_490988, EPI_ISL_490997 to 491000, EPI_ISL_491004                                                                                                                                                                                                                                                                                                                                                                                                                                                                                                                                                                                                                                                                                                                                                                                                             | Mayo Clinic Laboratories                                                                        | Mayo Clinic Laboratories                                                                                                   | UW Virology Lab                                                                                                                                                                                                                                                                                                                                                                                                                                                                                                                 |
| EPI_ISL_500503 to 500538, EPI_ISL_501072 to 501082, EPI_ISL_501165                                                                                                                                                                                                                                                                                                                                                                                                                                                                                                                                                                                                                                                                                                                                                                                                                   | Mayo Clinic Laboratories                                                                        | Mayo Clinic Laboratories                                                                                                   | University of Washington Virology Lab                                                                                                                                                                                                                                                                                                                                                                                                                                                                                           |
| EPI_ISL_569620                                                                                                                                                                                                                                                                                                                                                                                                                                                                                                                                                                                                                                                                                                                                                                                                                                                                       | McCrossan Boys Ranch                                                                            | McCrossan Boys Ranch                                                                                                       | South Dakota Public Health Laboratory                                                                                                                                                                                                                                                                                                                                                                                                                                                                                           |
| EPI_ISL_1443237, EPI_ISL_1443269 to 1443272                                                                                                                                                                                                                                                                                                                                                                                                                                                                                                                                                                                                                                                                                                                                                                                                                                          | McDonough District Hospital                                                                     | McDonough District Hospital                                                                                                | Illinois Department of Public Health - Springfield Lab                                                                                                                                                                                                                                                                                                                                                                                                                                                                          |
| EPI_ISL_1500228                                                                                                                                                                                                                                                                                                                                                                                                                                                                                                                                                                                                                                                                                                                                                                                                                                                                      | McFarland Mental H.C.                                                                           | McFarland Mental H.C.                                                                                                      | Illinois Department of Public Health - Springfield Lab                                                                                                                                                                                                                                                                                                                                                                                                                                                                          |
| EPI_ISL_1443273                                                                                                                                                                                                                                                                                                                                                                                                                                                                                                                                                                                                                                                                                                                                                                                                                                                                      | McHenry Co Coroners Office                                                                      | McHenry Co Coroners Office                                                                                                 | Illinois Department of Public Health - Springfield Lab                                                                                                                                                                                                                                                                                                                                                                                                                                                                          |
| EPI_ISL_1478859 to 1478863, EPI_ISL_1478877 to 1478880, EPI_ISL_1478897 to 1478899, EPI_ISL_1478902, EPI_ISL_1478912, EPI_ISL_1478919 to 1478920, EPI_ISL_1500170, EPI_ISL_1500177 to 1500178, EPI_ISL_1500183 to 1500194, EPI_ISL_1500201 to 1500203, EPI_ISL_1500216, EPI_ISL_1500220 to 1500227, EPI_ISL_1500243 to 1500244, EPI_ISL_1553228 to 1553231, EPI_ISL_1553235 to 1553243, EPI_ISL_1553250                                                                                                                                                                                                                                                                                                                                                                                                                                                                              | see above                                                                                       | McDonough District Hospital                                                                                                | Illinois Department of Public Health - Springfield Lab                                                                                                                                                                                                                                                                                                                                                                                                                                                                          |
| EPI_ISL_1439758, EPI_ISL_1439763, EPI_ISL_1439769                                                                                                                                                                                                                                                                                                                                                                                                                                                                                                                                                                                                                                                                                                                                                                                                                                    | Med. Labor Prof. Schenk Dr. Ansonge & Kollegen                                                  | Med. Labor Prof. Schenk Dr. Ansonge & Kollegen                                                                             | Robert Koch Institute                                                                                                                                                                                                                                                                                                                                                                                                                                                                                                           |
| EPI_ISL_456377 to 456378                                                                                                                                                                                                                                                                                                                                                                                                                                                                                                                                                                                                                                                                                                                                                                                                                                                             | MedLab Central Ltd                                                                              | MedLab Central Ltd                                                                                                         | Institute of Environmental Science and Research (ESR)                                                                                                                                                                                                                                                                                                                                                                                                                                                                           |
| EPI_ISL_482759 to 482775, EPI_ISL_483035 to 483038                                                                                                                                                                                                                                                                                                                                                                                                                                                                                                                                                                                                                                                                                                                                                                                                                                   | Medical Ain Shams Research Institute (MASRI), Ain Shams University                              | Medical Ain Shams Research Institute (MASRI), Ain Shams University                                                         | Ahmad Moustafa; Ashraf Omar; Aya Mohamed; Ghada Ismael; Hala Hafez; Hesham Elshazaly; Hisham Elmeitini; Osama Mansour; Reham Mamdouh; Sara Elnakeep; Sara Hassan Agwa; Shaimaa Moustafa                                                                                                                                                                                                                                                                                                                                         |
| EPI_ISL_476832                                                                                                                                                                                                                                                                                                                                                                                                                                                                                                                                                                                                                                                                                                                                                                                                                                                                       | Medical Biology Department, Kocaeli University                                                  | Medical Genetics Department, Kocaeli University                                                                            | Akhan S; Akpınar G; Canturk N.Z.; Cine N; Eren-Keskin S; Ilgazlı A; Karadenizli A; Kasap M; Savlı H; Sayan M; Sunnetci-Akkyonlu D                                                                                                                                                                                                                                                                                                                                                                                               |
| EPI_ISL_495535 to 495542, EPI_ISL_515800 to 515893                                                                                                                                                                                                                                                                                                                                                                                                                                                                                                                                                                                                                                                                                                                                                                                                                                   | Medical Disagnostics Services (MDS)                                                             | Medical Disagnostics Services (MDS)                                                                                        | KRISP, KZN Research Innovation and Sequencing Platform                                                                                                                                                                                                                                                                                                                                                                                                                                                                          |
| EPI_ISL_1507483, EPI_ISL_1508711, EPI_ISL_1508825 to 1508826, EPI_ISL_1508829 to 1508832, EPI_ISL_1508835 to 1508836, EPI_ISL_1508838, EPI_ISL_1508840, EPI_ISL_1508843, EPI_ISL_1508845 to 1508848, EPI_ISL_1508850 to 1508852                                                                                                                                                                                                                                                                                                                                                                                                                                                                                                                                                                                                                                                      | see above                                                                                       | Medical Genetics Laboratory, Regional Centre of Medical Genetics, Emergency County Hospital Craiova                        | Medical Genetics Laboratory, Regional Centre of Medical Genetics, Emergency County Hospital Craiova                                                                                                                                                                                                                                                                                                                                                                                                                             |
| EPI_ISL_447838 to 447839, EPI_ISL_481216, EPI_ISL_493381 to 493383, EPI_ISL_549039 to 549041, EPI_ISL_549059, EPI_ISL_549070, EPI_ISL_549081, EPI_ISL_549085 to 549086, EPI_ISL_549164, EPI_ISL_549166, EPI_ISL_590879 to 590880, EPI_ISL_590893, EPI_ISL_590929, EPI_ISL_590932 to 590933, EPI_ISL_590945, EPI_ISL_1385964, EPI_ISL_1385967, EPI_ISL_1385970, EPI_ISL_1385973, EPI_ISL_1385978, EPI_ISL_1385986, EPI_ISL_1385989, EPI_ISL_1402951 to 1402955, EPI_ISL_1490195 to 1490196, EPI_ISL_1490199, EPI_ISL_1490204, EPI_ISL_1490220 to 1490221, EPI_ISL_1490264, EPI_ISL_1490273, EPI_ISL_1490277, EPI_ISL_1490283, EPI_ISL_1490290, EPI_ISL_1490302, EPI_ISL_1490305 to 1490306, EPI_ISL_1490308 to 1490309, EPI_ISL_1490313 to 1490314, EPI_ISL_1490324, EPI_ISL_1490327, EPI_ISL_1490329, EPI_ISL_1490355, EPI_ISL_1490358 to 1490364, EPI_ISL_1490368, EPI_ISL_1490378, | see above                                                                                       | Medical Genetics Laboratory, Regional Centre of Medical Genetics, Emergency County Hospital Craiova                        | Adina Dragos; Ana-Maria Buga; Anca-Lelia (Riza) Costache; Andrei Pirvu; Elena Plesea; Ioana Streata; Mihai Cucu; Mihai Ioana; Monica Cara; Razvan Plesea; Stefania Dorobantu                                                                                                                                                                                                                                                                                                                                                    |

|                                                                                                                                                                                                                                                                                                                                                                                                                                                                                                                                                                                                                                                                                                                                                                                                                                                                                                                                                                                                                                                               |                                                                                                             |                                                                                                                          |                                                                                                                                                                                                                                                                                                           |                                                                                                                                                                                                                                                                                                     |
|---------------------------------------------------------------------------------------------------------------------------------------------------------------------------------------------------------------------------------------------------------------------------------------------------------------------------------------------------------------------------------------------------------------------------------------------------------------------------------------------------------------------------------------------------------------------------------------------------------------------------------------------------------------------------------------------------------------------------------------------------------------------------------------------------------------------------------------------------------------------------------------------------------------------------------------------------------------------------------------------------------------------------------------------------------------|-------------------------------------------------------------------------------------------------------------|--------------------------------------------------------------------------------------------------------------------------|-----------------------------------------------------------------------------------------------------------------------------------------------------------------------------------------------------------------------------------------------------------------------------------------------------------|-----------------------------------------------------------------------------------------------------------------------------------------------------------------------------------------------------------------------------------------------------------------------------------------------------|
| EPI_ISL_1490393, EPI_ISL_1490395, EPI_ISL_1490397, EPI_ISL_1490419, EPI_ISL_1490432, EPI_ISL_1490435, EPI_ISL_1490438, EPI_ISL_1490440, EPI_ISL_1490442, EPI_ISL_1490445, EPI_ISL_1490447, EPI_ISL_1490450, EPI_ISL_1490454, EPI_ISL_1490494 to 1490497, EPI_ISL_1490499, EPI_ISL_1490520 to 1490522, EPI_ISL_1490555, EPI_ISL_1490572 to 1490573, EPI_ISL_1490604, EPI_ISL_1490609, EPI_ISL_1490611, EPI_ISL_1490613, EPI_ISL_1490615, EPI_ISL_1490617, EPI_ISL_1490621, EPI_ISL_1490630, EPI_ISL_1490636, EPI_ISL_1490638 to 1490644, EPI_ISL_1490646, EPI_ISL_1490649, EPI_ISL_1547544 to 1547545, EPI_ISL_1547548, EPI_ISL_1547551 to 1547552, EPI_ISL_1547609, EPI_ISL_1547613                                                                                                                                                                                                                                                                                                                                                                           | Medical Microbiology Unit, Department for Laboratory Medicine, Drammen Hospital, Vestre Viken Health Trust, | Norwegian Institute of Public Health, Department of Virology                                                             | Atiya R Ali; Debech Nadia; Engebretsen Serina Beate; Garcia Llorente Ignacio; Hilde Elshaug; Hilde Synnove Vollan; Hilde Vollan; Jon Bråte; Kamilla Heddeland Instefjord; Karoline Bragstad; Kathrine Stene-Johansen; Marie Paulsen Madsen; Olav Hungnes; Pedersen Benedikte Nevjen; Rasmus Riis Kopperud |                                                                                                                                                                                                                                                                                                     |
| EPI_ISL_482745 to 482746                                                                                                                                                                                                                                                                                                                                                                                                                                                                                                                                                                                                                                                                                                                                                                                                                                                                                                                                                                                                                                      | Medical Microbiology, Leiden University Medical Center                                                      | Medical Microbiology, Leiden University Medical Center                                                                   | Dalebout; E.J.; J.C.; J.C. and Sidorov, I.; J.J. and Sidorov, I.; N.S.; Ogando; Snijder; T.J.; Zevenhoven; de Vries                                                                                                                                                                                       |                                                                                                                                                                                                                                                                                                     |
| EPI_ISL_1523640 to 1523642                                                                                                                                                                                                                                                                                                                                                                                                                                                                                                                                                                                                                                                                                                                                                                                                                                                                                                                                                                                                                                    | Medical Research Center, Faculty of Medicine, Syarif Hidayatullah State Islamic University Jakarta          | Medical Research Center, Faculty of Medicine, Syarif Hidayatullah State Islamic University Jakarta                       | Chris Adhiyanto; Endah Wulandari; Erike A Suwarsono; Fika Ekayanti; Flori R Sari; Hari Hendarto; Laifa Hendarmin; Zeti Harriyati                                                                                                                                                                          |                                                                                                                                                                                                                                                                                                     |
| EPI_ISL_591522 to 591530                                                                                                                                                                                                                                                                                                                                                                                                                                                                                                                                                                                                                                                                                                                                                                                                                                                                                                                                                                                                                                      | Medicina Norte U Chile - Servicio Medico Legal                                                              | Center for Mathematical Modeling and Center for Genome Regulation, Santiago, Chile                                       | Allende ML; Ferres M.; Gaete A; Gaggero A; González M; Maass A; Palma R; Travisany D; Urra C; Valiente F; Varas M                                                                                                                                                                                         |                                                                                                                                                                                                                                                                                                     |
| EPI_ISL_1394763, EPI_ISL_1394767, EPI_ISL_1394807, EPI_ISL_1394812, EPI_ISL_1394817, EPI_ISL_1394824, EPI_ISL_1394827 to 1394828, EPI_ISL_1394831 to 1394832, EPI_ISL_1394834, EPI_ISL_1394836, EPI_ISL_1394838 to 1394839, EPI_ISL_1540556, EPI_ISL_1540558, EPI_ISL_1540576 to 1540579, EPI_ISL_1540583, EPI_ISL_1540589 to 1540611, EPI_ISL_1540706                                                                                                                                                                                                                                                                                                                                                                                                                                                                                                                                                                                                                                                                                                        | see above                                                                                                   | Lithuanian University of Health Sciences Hospital, Department of Genetics and Molecular Medicine                         | Astra Vitkauskienė; Darius Cereskevicius; Inga Nasvytiene; Mantas Sarauskas; Marius Sukys; Rasa Ugenskiene; Renaldas Jurkevicius; Rima Vainoriene; Zivile Zemeckiene                                                                                                                                      |                                                                                                                                                                                                                                                                                                     |
| EPI_ISL_1465482                                                                                                                                                                                                                                                                                                                                                                                                                                                                                                                                                                                                                                                                                                                                                                                                                                                                                                                                                                                                                                               | Medicine sentinel network Province                                                                          | National Reference Center for Viruses of Respiratory Infections, Institut Pasteur, Paris                                 | Angela Brisebarre; Camille Capel; Christophe Malabat; Corinne Maufrais; Damien Mornico; Etienne Simon-Lorière; Frédéric Lemoine; Louise Lefrançois; Marion Barbet; Maud Vanpeene; Méline Bizard; Nicolas Le Duff; Sylvie Behillil; Sylvie van der Werf; Vincent Enouf                                     |                                                                                                                                                                                                                                                                                                     |
| EPI_ISL_435281                                                                                                                                                                                                                                                                                                                                                                                                                                                                                                                                                                                                                                                                                                                                                                                                                                                                                                                                                                                                                                                | Medistra Hospital Jakarta                                                                                   | Eijkman Institute for Molecular Biology, Ministry of Research and Technology/National Agency for Research and Innovation | Amin Soebandrio; David H Muljono; Edison Johar; Filasita A Yudhaputri; Hidayat Trimarsanto; Khin Saw Myint; Safarina G Malik                                                                                                                                                                              |                                                                                                                                                                                                                                                                                                     |
| EPI_ISL_1439797, EPI_ISL_1439799 to 1439800, EPI_ISL_1439803, EPI_ISL_1439809 to 1439810, EPI_ISL_1439810, EPI_ISL_1439819, EPI_ISL_1439821 to 1439822, EPI_ISL_1439824 to 1439828, EPI_ISL_1439830, EPI_ISL_1439834 to 1439836, EPI_ISL_1439839, EPI_ISL_1439841, EPI_ISL_1439847, EPI_ISL_1439850, EPI_ISL_1439858, EPI_ISL_1439861, EPI_ISL_1439867, EPI_ISL_1439869, EPI_ISL_1442543                                                                                                                                                                                                                                                                                                                                                                                                                                                                                                                                                                                                                                                                      | see above                                                                                                   | Medizinisch-Diagnostisches Labor Kempten allgäub                                                                         | Robert Koch Institute                                                                                                                                                                                                                                                                                     |                                                                                                                                                                                                                                                                                                     |
| EPI_ISL_581452 to 581454, EPI_ISL_581456 to 581461, EPI_ISL_581463 to 581471, EPI_ISL_581473 to 581485                                                                                                                                                                                                                                                                                                                                                                                                                                                                                                                                                                                                                                                                                                                                                                                                                                                                                                                                                        | Medizinische Klinik Innere Medizin I, Universitätsklinikum Tübingen                                         | NGS Competence Center Tübingen, Institut für Medizinische Mikrobiologie und Hygiene, Universitätsklinikum Tübingen       | Angel Angelov                                                                                                                                                                                                                                                                                             |                                                                                                                                                                                                                                                                                                     |
| EPI_ISL_1436580 to 1436619                                                                                                                                                                                                                                                                                                                                                                                                                                                                                                                                                                                                                                                                                                                                                                                                                                                                                                                                                                                                                                    | Medizinische Laboratorien Düsseldorf                                                                        | Robert Koch Institute                                                                                                    |                                                                                                                                                                                                                                                                                                           |                                                                                                                                                                                                                                                                                                     |
| EPI_ISL_1434437, EPI_ISL_1434441, EPI_ISL_1434456, EPI_ISL_1434458, EPI_ISL_1434461, EPI_ISL_1434473, EPI_ISL_1434475, EPI_ISL_1434477, EPI_ISL_1434483, EPI_ISL_1434487, EPI_ISL_1434492, EPI_ISL_1434498, EPI_ISL_1434500, EPI_ISL_1434502, EPI_ISL_1434504, EPI_ISL_1434508, EPI_ISL_1434512, EPI_ISL_1438586 to 1438589, EPI_ISL_1438592 to 1438593, EPI_ISL_1438597, EPI_ISL_1438601, EPI_ISL_1438603, EPI_ISL_1438608, EPI_ISL_1438615, EPI_ISL_1438619, EPI_ISL_1438621 to 1438623, EPI_ISL_1438627 to 1438628, EPI_ISL_1438632 to 1438633, EPI_ISL_1438636, EPI_ISL_1438640, EPI_ISL_1438643, EPI_ISL_1438645, EPI_ISL_1438648, EPI_ISL_1438651, EPI_ISL_1438654, EPI_ISL_1438657, EPI_ISL_1438659, EPI_ISL_1438661, EPI_ISL_1438669, EPI_ISL_1441234, EPI_ISL_1441236, EPI_ISL_1441238, EPI_ISL_1441246, EPI_ISL_1441249, EPI_ISL_1441252 to 1441253, EPI_ISL_1441256, EPI_ISL_1441259, EPI_ISL_1441279, EPI_ISL_1441282, EPI_ISL_1441285 to 1441286, EPI_ISL_1441288 to 1441289, EPI_ISL_1441296, EPI_ISL_1441301, EPI_ISL_1441303, EPI_ISL_1441309 | see above                                                                                                   | Medizinisches Labor Ostsachsen MVZ GbR/Nebenbetriebsstätte Dresden                                                       | Robert Koch Institute                                                                                                                                                                                                                                                                                     |                                                                                                                                                                                                                                                                                                     |
| EPI_ISL_1439445, EPI_ISL_1439464, EPI_ISL_1439468, EPI_ISL_1439471, EPI_ISL_1439475, EPI_ISL_1439483, EPI_ISL_1439490, EPI_ISL_1439496, EPI_ISL_1439501, EPI_ISL_1439504, EPI_ISL_1439511, EPI_ISL_1439515 to 1439519                                                                                                                                                                                                                                                                                                                                                                                                                                                                                                                                                                                                                                                                                                                                                                                                                                         | see above                                                                                                   | Medizinisches Labor Wahl Lüdenscheid                                                                                     | Robert Koch Institute                                                                                                                                                                                                                                                                                     |                                                                                                                                                                                                                                                                                                     |
| EPI_ISL_1435384, EPI_ISL_1439440                                                                                                                                                                                                                                                                                                                                                                                                                                                                                                                                                                                                                                                                                                                                                                                                                                                                                                                                                                                                                              | Medizinisches Versorgungszentrum für Labormedizin und Mikrobiologie Ruhr GmbH - mvzlm RUHR GmbH             | Robert Koch Institute                                                                                                    |                                                                                                                                                                                                                                                                                                           |                                                                                                                                                                                                                                                                                                     |
| EPI_ISL_1434843, EPI_ISL_1434853, EPI_ISL_1434861, EPI_ISL_1435255, EPI_ISL_1435275, EPI_ISL_1435277, EPI_ISL_1438298 to 1438299, EPI_ISL_1438316, EPI_ISL_1438344, EPI_ISL_1438348, EPI_ISL_1438352, EPI_ISL_1438371, EPI_ISL_1438401, EPI_ISL_1438502, EPI_ISL_1438537, EPI_ISL_1441316, EPI_ISL_1441332, EPI_ISL_1441349, EPI_ISL_1441357, EPI_ISL_1441364 to 1441365, EPI_ISL_1441380, EPI_ISL_1441384, EPI_ISL_1441387, EPI_ISL_1441389, EPI_ISL_1441397, EPI_ISL_1441399, EPI_ISL_1441401, EPI_ISL_1441414, EPI_ISL_1441417, EPI_ISL_1441422, EPI_ISL_1441432, EPI_ISL_1441488, EPI_ISL_1441513, EPI_ISL_1441517, EPI_ISL_1441519, EPI_ISL_1441525, EPI_ISL_1441530, EPI_ISL_1441544, EPI_ISL_1441555, EPI_ISL_1441570, EPI_ISL_1441581, EPI_ISL_1441585, EPI_ISL_1441608, EPI_ISL_1441645 to 1441647                                                                                                                                                                                                                                                   | see above                                                                                                   | Medizinisches Zentrallabor Altenburg GmbH & Co.KG                                                                        | Robert Koch Institute                                                                                                                                                                                                                                                                                     |                                                                                                                                                                                                                                                                                                     |
| EPI_ISL_451534, EPI_ISL_451553 to 451555, EPI_ISL_451558, EPI_ISL_451567, EPI_ISL_451583, EPI_ISL_451597, EPI_ISL_451610, EPI_ISL_513341, EPI_ISL_526192, EPI_ISL_591492, EPI_ISL_593654                                                                                                                                                                                                                                                                                                                                                                                                                                                                                                                                                                                                                                                                                                                                                                                                                                                                      | see above                                                                                                   | Medlab Pathology                                                                                                         | NSW Health Pathology - Institute of Clinical Pathology and Medical Research; Westmead Hospital; University of Sydney                                                                                                                                                                                      | CIDM-PH et al.                                                                                                                                                                                                                                                                                      |
| EPI_ISL_536411, EPI_ISL_536793                                                                                                                                                                                                                                                                                                                                                                                                                                                                                                                                                                                                                                                                                                                                                                                                                                                                                                                                                                                                                                | Medtimes Molecular Laboratory                                                                               | Medtimes Molecular Laboratory                                                                                            | Eric Chan; Isaac Chow; Jacqueline Tam; Winsome Wong                                                                                                                                                                                                                                                       |                                                                                                                                                                                                                                                                                                     |
| EPI_ISL_1393820 to 1393821, EPI_ISL_1393829, EPI_ISL_1393831                                                                                                                                                                                                                                                                                                                                                                                                                                                                                                                                                                                                                                                                                                                                                                                                                                                                                                                                                                                                  | Medyczne Laboratorium Diagnostyczne American Heart of Poland                                                | 1. National Institute of Public Health - National Institute of Hygiene; 2. Eurofins Genomics Europe Sequencing GmbH      | ECDC COVID-19 WGS support team; Eurofins Genomics Europe Sequencing Team; Gierczyki Rafa; Sadkowska-Todys Magorzata; Wokowicz Tomasz; Zacharczuk Katarzyna                                                                                                                                                |                                                                                                                                                                                                                                                                                                     |
| EPI_ISL_1394138 to 1394140                                                                                                                                                                                                                                                                                                                                                                                                                                                                                                                                                                                                                                                                                                                                                                                                                                                                                                                                                                                                                                    | Medyczne Laboratorium Diagnostyczne, szpital w Elbiety w Katowicach                                         | 1. National Institute of Public Health - National Institute of Hygiene; 2. Eurofins Genomics Europe Sequencing GmbH      | ECDC COVID-19 WGS support team; Eurofins Genomics Europe Sequencing Team; Gierczyki Rafa; Sadkowska-Todys Magorzata; Wokowicz Tomasz; Zacharczuk Katarzyna                                                                                                                                                |                                                                                                                                                                                                                                                                                                     |
| EPI_ISL_1538468, EPI_ISL_1539093                                                                                                                                                                                                                                                                                                                                                                                                                                                                                                                                                                                                                                                                                                                                                                                                                                                                                                                                                                                                                              | Medyczne Laboratorium Diagnostyka                                                                           | 1. National Institute of Public Health - National Institute of Hygiene; 2. Eurofins Genomics Europe Sequencing GmbH      | ECDC COVID-19 WGS support team; Eurofins Genomics Europe Sequencing Team; Gierczyki Rafa; Sadkowska-Todys Magorzata; Wokowicz Tomasz; Zacharczuk Katarzyna                                                                                                                                                |                                                                                                                                                                                                                                                                                                     |
| EPI_ISL_583427 to 583428, EPI_ISL_583430 to 583433, EPI_ISL_583437 to 583440, EPI_ISL_583443 to 583451, EPI_ISL_583455 to 583457, EPI_ISL_583460 to 583462, EPI_ISL_583465 to 583466, EPI_ISL_583468 to 583470, EPI_ISL_583472, EPI_ISL_583474 to 583476, EPI_ISL_583478 to 583480                                                                                                                                                                                                                                                                                                                                                                                                                                                                                                                                                                                                                                                                                                                                                                            | see above                                                                                                   | Memorial Sloan Kettering Cancer Center                                                                                   | van Bakel Laboratory, Genetics and Genomics Sciences, Icahn School of Medicine at Mount Sinai                                                                                                                                                                                                             | Adolfo Garcia-Sastre; Adriana van de Guchte; Ajay Obla; Ana S. Gonzalez-Reiche; Genevefa Papanicolaou; Gunjan Shah; Harm van Bakel; Jayeeta Dutta; Judith Aberg; Kent Sepkowitz; Miguel-Angel Perales; Nгоlela Esther Babady; Sadaf Aslam; Teresa Aydillo; Tobias Hohl; Zenab Khan; and Mini Kamboj |
| EPI_ISL_1520158                                                                                                                                                                                                                                                                                                                                                                                                                                                                                                                                                                                                                                                                                                                                                                                                                                                                                                                                                                                                                                               | Mercy Hospital and Medical Center                                                                           | Illinois Department of Public Health - Chicago Lab                                                                       | Ira Heimler; Vineet K. Dhiman                                                                                                                                                                                                                                                                             |                                                                                                                                                                                                                                                                                                     |
| EPI_ISL_436800 to 436890, EPI_ISL_437097 to 437186, EPI_ISL_447057 to 447118, EPI_ISL_447163 to 447229, EPI_ISL_450570 to 450637, EPI_ISL_452262 to 452326, EPI_ISL_459992 to 460043, EPI_ISL_460554 to 460602, EPI_ISL_462636 to 462736, EPI_ISL_471676 to 471910, EPI_ISL_476027 to 476066, EPI_ISL_507415 to 507933, EPI_ISL_516194 to 516412, EPI_ISL_529169, EPI_ISL_529804 to 529907, EPI_ISL_565833 to 565907, EPI_ISL_565926 to 566035, EPI_ISL_576198 to 576221, EPI_ISL_577547 to 577596, EPI_ISL_583506 to 583534, EPI_ISL_594190 to 594218, EPI_ISL_614158 to 614246, EPI_ISL_1461278 to 1461289, EPI_ISL_1461322, EPI_ISL_1461378 to 1461433, EPI_ISL_1461435 to 1461625, EPI_ISL_1493062 to 1493064, EPI_ISL_1493070 to 1493102, EPI_ISL_1527661 to 1527941, EPI_ISL_1527954 to 1528092                                                                                                                                                                                                                                                         | see above                                                                                                   | Michigan Department of Health and Human Services, Bureau of Laboratories                                                 | Michigan Department of Health and Human Services, Bureau of Laboratories                                                                                                                                                                                                                                  | Blankenship; Blankenship HM; H.M.; Riner D; Riner, D.; Soehnlén MK; Soehnlén, M.                                                                                                                                                                                                                    |
| EPI_ISL_454353                                                                                                                                                                                                                                                                                                                                                                                                                                                                                                                                                                                                                                                                                                                                                                                                                                                                                                                                                                                                                                                | Microbial Genome Sequencing Center; Microbial Genomic Epidemiology Laboratory                               | Microbial Genomic Epidemiology Laboratory, University of Pittsburgh                                                      | Chinelo Ezeonwuku; Dan Snyder; Jane W. Marsh; Kady D. Waggle; Lee H. Harrison; Marissa P. Griffith; Mustapha M. Mustapha; Stephanie L. Mitchell; Vatsala R. Srinivasa; Vaughn S. Cooper                                                                                                                   |                                                                                                                                                                                                                                                                                                     |
| EPI_ISL_426583                                                                                                                                                                                                                                                                                                                                                                                                                                                                                                                                                                                                                                                                                                                                                                                                                                                                                                                                                                                                                                                | Microbial Genomics Laboratory, Institut Pasteur Montevideo                                                  | Microbial Genomics Laboratory, Institut Pasteur Montevideo, Uruguay                                                      | Cecilia Salazar; Florencia Diaz-Viraqué; Gonzalo Moratorio; Gregorio Iraola; Marianoel Pereira; Pilar Moreno                                                                                                                                                                                              |                                                                                                                                                                                                                                                                                                     |
| EPI_ISL_426479 to 426480, EPI_ISL_429257                                                                                                                                                                                                                                                                                                                                                                                                                                                                                                                                                                                                                                                                                                                                                                                                                                                                                                                                                                                                                      | Microbial Genomics Laboratory, Institut Pasteur Montevideo                                                  | Microbial Genomics Laboratory, Institut Pasteur Montevideo                                                               | Cecilia Salazar; Florencia Diaz-Viraqué; Gonzalo Moratorio; Gregorio Iraola; Marianoel Pereira; Pilar Moreno                                                                                                                                                                                              |                                                                                                                                                                                                                                                                                                     |
| EPI_ISL_426476 to 426478                                                                                                                                                                                                                                                                                                                                                                                                                                                                                                                                                                                                                                                                                                                                                                                                                                                                                                                                                                                                                                      | Microbial Genomics Laboratory, Institut Pasteur Montevideo                                                  | Microbial Genomics Laboratory, Institut Pasteur Montevideo, Uruguay                                                      | Cecilia Salazar; Florencia Diaz-Viraqué; Gonzalo Moratorio; Gregorio Iraola; Marianoel Pereira; Pilar Moreno                                                                                                                                                                                              |                                                                                                                                                                                                                                                                                                     |
| EPI_ISL_426481 to 426482                                                                                                                                                                                                                                                                                                                                                                                                                                                                                                                                                                                                                                                                                                                                                                                                                                                                                                                                                                                                                                      | Microbial Genomics Laboratory, Institut Pasteur Montevideo, Uruguay                                         | Microbial Genomics Laboratory, Institut Pasteur Montevideo                                                               | Cecilia Salazar; Florencia Diaz-Viraqué; Gonzalo Moratorio; Gregorio Iraola; Marianoel Pereira; Pilar Moreno                                                                                                                                                                                              |                                                                                                                                                                                                                                                                                                     |
| EPI_ISL_426584                                                                                                                                                                                                                                                                                                                                                                                                                                                                                                                                                                                                                                                                                                                                                                                                                                                                                                                                                                                                                                                | Microbial Genomics Laboratory, Institut Pasteur Montevideo,                                                 | Microbial Genomics Laboratory, Institut Pasteur Montevideo,                                                              | Cecilia Salazar; Florencia Diaz-Viraqué; Gonzalo Moratorio; Gregorio Iraola; Marianoel Pereira; Pilar Moreno                                                                                                                                                                                              |                                                                                                                                                                                                                                                                                                     |



|                                                                                                                                                                                                                                                                                                                                                                                                                                                                                                                                                                                                                                                                                                                                                                                                                                                                                                                                                                                                                                                                                                                                                                                                                                                                                                                                                                                                                                                                                                                                                                                                                                                                                                                                                                                                                                                                                                                                                                                                                                                                                                                                                                                                                                                                                                                                                                                                                                                                                                                  |                                                                                                            |                                                                                                                         |                                                                                                                                                                                                                                                                                                                                                                                                                                                                                                                                                                                                                                                            |
|------------------------------------------------------------------------------------------------------------------------------------------------------------------------------------------------------------------------------------------------------------------------------------------------------------------------------------------------------------------------------------------------------------------------------------------------------------------------------------------------------------------------------------------------------------------------------------------------------------------------------------------------------------------------------------------------------------------------------------------------------------------------------------------------------------------------------------------------------------------------------------------------------------------------------------------------------------------------------------------------------------------------------------------------------------------------------------------------------------------------------------------------------------------------------------------------------------------------------------------------------------------------------------------------------------------------------------------------------------------------------------------------------------------------------------------------------------------------------------------------------------------------------------------------------------------------------------------------------------------------------------------------------------------------------------------------------------------------------------------------------------------------------------------------------------------------------------------------------------------------------------------------------------------------------------------------------------------------------------------------------------------------------------------------------------------------------------------------------------------------------------------------------------------------------------------------------------------------------------------------------------------------------------------------------------------------------------------------------------------------------------------------------------------------------------------------------------------------------------------------------------------|------------------------------------------------------------------------------------------------------------|-------------------------------------------------------------------------------------------------------------------------|------------------------------------------------------------------------------------------------------------------------------------------------------------------------------------------------------------------------------------------------------------------------------------------------------------------------------------------------------------------------------------------------------------------------------------------------------------------------------------------------------------------------------------------------------------------------------------------------------------------------------------------------------------|
| see above                                                                                                                                                                                                                                                                                                                                                                                                                                                                                                                                                                                                                                                                                                                                                                                                                                                                                                                                                                                                                                                                                                                                                                                                                                                                                                                                                                                                                                                                                                                                                                                                                                                                                                                                                                                                                                                                                                                                                                                                                                                                                                                                                                                                                                                                                                                                                                                                                                                                                                        | Microbiology Department, Hereford County Hospital                                                          | Wellcome Sanger Institute for the COVID-19 Genomics UK (COG-UK) consortium                                              | Alison Johnson; Cordelia Langford; David K. Jackson; Dominic Kwiatkowski; Ewan Harrison; Fenella Halstead; Ian Johnston; Jane Thomas; John Sillitoe on behalf of the Wellcome Sanger Institute COVID-19 Surveillance Team ( <a href="http://www.sanger.ac.uk/covid-team">http://www.sanger.ac.uk/covid-team</a> ); Roberto Amato; Samantha Lamb and Alex Alderton; Sonia Goncalves; Venkat Sivaprakasam; Wendy Hogsden                                                                                                                                                                                                                                     |
| EPI_ISL_1385995 to 1386006, EPI_ISL_1386008, EPI_ISL_1386010, EPI_ISL_1386012, EPI_ISL_1386015, EPI_ISL_1386017, EPI_ISL_1386022, EPI_ISL_1386024, EPI_ISL_1386026, EPI_ISL_1386029, EPI_ISL_1386031, EPI_ISL_1386034 to 1386060, EPI_ISL_1386062 to 1386065, EPI_ISL_1386076, EPI_ISL_1386078 to 1386083, EPI_ISL_1386086 to 1386087, EPI_ISL_1386089, EPI_ISL_1386091 to 1386093, EPI_ISL_1386095, EPI_ISL_1386097 to 1386105, EPI_ISL_1405968 to 1405983, EPI_ISL_1405985 to 1406004, EPI_ISL_1406006 to 1406018, EPI_ISL_1406020 to 1406022, EPI_ISL_1406024 to 1406039, EPI_ISL_1406041 to 1406044, EPI_ISL_1406046 to 1406060, EPI_ISL_1406062 to 1406064, EPI_ISL_1486514, EPI_ISL_1486517, EPI_ISL_1486519, EPI_ISL_1486522, EPI_ISL_1486525, EPI_ISL_1486528, EPI_ISL_1486531, EPI_ISL_1486534, EPI_ISL_1486537, EPI_ISL_1486540, EPI_ISL_1486543, EPI_ISL_1486546, EPI_ISL_1486549, EPI_ISL_1486552, EPI_ISL_1486555, EPI_ISL_1486558, EPI_ISL_1486562, EPI_ISL_1486565, EPI_ISL_1486568, EPI_ISL_1486571, EPI_ISL_1486574, EPI_ISL_1486577, EPI_ISL_1486580, EPI_ISL_1486583, EPI_ISL_1486587, EPI_ISL_1486590, EPI_ISL_1486593, EPI_ISL_1486596, EPI_ISL_1486599, EPI_ISL_1486602, EPI_ISL_1486605, EPI_ISL_1486608, EPI_ISL_1486610, EPI_ISL_1486613, EPI_ISL_1486616, EPI_ISL_1486619, EPI_ISL_1486622, EPI_ISL_1486625, EPI_ISL_1486628, EPI_ISL_1486631, EPI_ISL_1486634, EPI_ISL_1486637, EPI_ISL_1486640, EPI_ISL_1486643, EPI_ISL_1486647, EPI_ISL_1486649, EPI_ISL_1486652, EPI_ISL_1486655, EPI_ISL_1486658, EPI_ISL_1486662, EPI_ISL_1486665, EPI_ISL_1486668, EPI_ISL_1486671, EPI_ISL_1486674, EPI_ISL_1486678, EPI_ISL_1486681, EPI_ISL_1486684, EPI_ISL_1486687, EPI_ISL_1486691, EPI_ISL_1486693, EPI_ISL_1486696, EPI_ISL_1486703, EPI_ISL_1486706, EPI_ISL_1486709, EPI_ISL_1486713, EPI_ISL_1486716, EPI_ISL_1486719, EPI_ISL_1486722, EPI_ISL_1486724, EPI_ISL_1486727, EPI_ISL_1486730, EPI_ISL_1486733, EPI_ISL_1486736, EPI_ISL_1486739, EPI_ISL_1486743, EPI_ISL_1486746, EPI_ISL_1486748, EPI_ISL_1486751, EPI_ISL_1486755, EPI_ISL_1486758, EPI_ISL_1486760, EPI_ISL_1486764, EPI_ISL_1486767, EPI_ISL_1486770, EPI_ISL_1486773, EPI_ISL_1486776, EPI_ISL_1486779, EPI_ISL_1486782, EPI_ISL_1486785, EPI_ISL_1486787, EPI_ISL_1486791, EPI_ISL_1486793, EPI_ISL_1503828 to 1503855, EPI_ISL_1503857, EPI_ISL_1503859 to 1503881, EPI_ISL_1503883 to 1503902, EPI_ISL_1503904 to 1503913, EPI_ISL_1503916 to 1503920, EPI_ISL_1547706 to 1547748, EPI_ISL_1547750 to 1547798 |                                                                                                            |                                                                                                                         |                                                                                                                                                                                                                                                                                                                                                                                                                                                                                                                                                                                                                                                            |
| see above                                                                                                                                                                                                                                                                                                                                                                                                                                                                                                                                                                                                                                                                                                                                                                                                                                                                                                                                                                                                                                                                                                                                                                                                                                                                                                                                                                                                                                                                                                                                                                                                                                                                                                                                                                                                                                                                                                                                                                                                                                                                                                                                                                                                                                                                                                                                                                                                                                                                                                        | Microbiology Department, Laboratori Clinic Metropolitana Nord. Hospital Universitari Germans Trias i Pujol | Can Ruti SARS-CoV-2 Sequencing Hub (HUGTIP/IRiCaixa/IGTP)                                                               | Alba Sánchez; Anna Not; Antoni E Bordoy; Bonaventura Clotet; Cristina Casañ; Cristina Esteban; Francesc Catala-Moll; Gemma Clara; Ignacio Blanco; Marc Noguera-Julian; Maria Casadella; Maria Parera; Mercedes Guerrero; Montserrat Giménez; Pere-Joan Cardona; Pilar Armengol; Roger Paredes; Verónica Saludes; and Elisa Martró on behalf of the Can Ruti SARS-CoV-2 Sequencing Hub.                                                                                                                                                                                                                                                                     |
| EPI_ISL_1495974 to 1495979, EPI_ISL_1498305 to 1498312, EPI_ISL_1502113 to 1502128, EPI_ISL_1502199 to 1502210, EPI_ISL_1509952 to 1509959                                                                                                                                                                                                                                                                                                                                                                                                                                                                                                                                                                                                                                                                                                                                                                                                                                                                                                                                                                                                                                                                                                                                                                                                                                                                                                                                                                                                                                                                                                                                                                                                                                                                                                                                                                                                                                                                                                                                                                                                                                                                                                                                                                                                                                                                                                                                                                       | Microbiology Department, University Hospital Donostia                                                      | Microbiology Department, University Hospital Donostia                                                                   | Cilla G.; Gomez M; Marimon JM; Montes M; Piñeiro L; Sorraín A                                                                                                                                                                                                                                                                                                                                                                                                                                                                                                                                                                                              |
| EPI_ISL_1478754, EPI_ISL_1478757 to 1478843, EPI_ISL_1483319 to 1483320, EPI_ISL_1532792 to 1532799                                                                                                                                                                                                                                                                                                                                                                                                                                                                                                                                                                                                                                                                                                                                                                                                                                                                                                                                                                                                                                                                                                                                                                                                                                                                                                                                                                                                                                                                                                                                                                                                                                                                                                                                                                                                                                                                                                                                                                                                                                                                                                                                                                                                                                                                                                                                                                                                              | Microbiology Department. Complejo Hospitalario Universitario de Vigo                                       | Microbiology Department. Complejo Hospitalario Universitario de Vigo                                                    | Alfaia N; Alfaya N; Alonso I; Alvarez M; Cabrera JJ; Carballo R; Cores O; Cortizo S; Martínez L; Mediero G; Perez S; Potel C; Regueiro B; Rey S; Vasallo FJ; del-Campo V                                                                                                                                                                                                                                                                                                                                                                                                                                                                                   |
| EPI_ISL_462991                                                                                                                                                                                                                                                                                                                                                                                                                                                                                                                                                                                                                                                                                                                                                                                                                                                                                                                                                                                                                                                                                                                                                                                                                                                                                                                                                                                                                                                                                                                                                                                                                                                                                                                                                                                                                                                                                                                                                                                                                                                                                                                                                                                                                                                                                                                                                                                                                                                                                                   | Microbiology Division                                                                                      | Microbiology Division                                                                                                   | Flores, H.                                                                                                                                                                                                                                                                                                                                                                                                                                                                                                                                                                                                                                                 |
| EPI_ISL_529080 to 529108                                                                                                                                                                                                                                                                                                                                                                                                                                                                                                                                                                                                                                                                                                                                                                                                                                                                                                                                                                                                                                                                                                                                                                                                                                                                                                                                                                                                                                                                                                                                                                                                                                                                                                                                                                                                                                                                                                                                                                                                                                                                                                                                                                                                                                                                                                                                                                                                                                                                                         | Microbiology Division, SC DHEC                                                                             | Microbiology Division, SC DHEC                                                                                          | Flores, H.                                                                                                                                                                                                                                                                                                                                                                                                                                                                                                                                                                                                                                                 |
| EPI_ISL_447281 to 447310                                                                                                                                                                                                                                                                                                                                                                                                                                                                                                                                                                                                                                                                                                                                                                                                                                                                                                                                                                                                                                                                                                                                                                                                                                                                                                                                                                                                                                                                                                                                                                                                                                                                                                                                                                                                                                                                                                                                                                                                                                                                                                                                                                                                                                                                                                                                                                                                                                                                                         | Microbiology Division, Barzilai University Medical Center                                                  | Stern Lab                                                                                                               | Stern Lab                                                                                                                                                                                                                                                                                                                                                                                                                                                                                                                                                                                                                                                  |
| EPI_ISL_510537                                                                                                                                                                                                                                                                                                                                                                                                                                                                                                                                                                                                                                                                                                                                                                                                                                                                                                                                                                                                                                                                                                                                                                                                                                                                                                                                                                                                                                                                                                                                                                                                                                                                                                                                                                                                                                                                                                                                                                                                                                                                                                                                                                                                                                                                                                                                                                                                                                                                                                   | Microbiology Division, SC DHEC                                                                             | Microbiology Division, SC DHEC                                                                                          | Flores, H.                                                                                                                                                                                                                                                                                                                                                                                                                                                                                                                                                                                                                                                 |
| EPI_ISL_538390 to 538434, EPI_ISL_539879, EPI_ISL_541663 to 541679, EPI_ISL_574543 to 574575                                                                                                                                                                                                                                                                                                                                                                                                                                                                                                                                                                                                                                                                                                                                                                                                                                                                                                                                                                                                                                                                                                                                                                                                                                                                                                                                                                                                                                                                                                                                                                                                                                                                                                                                                                                                                                                                                                                                                                                                                                                                                                                                                                                                                                                                                                                                                                                                                     | Microbiology Division, South Carolina Department of Health and Environmental Control                       | Microbiology Division, South Carolina Department of Health and Environmental Control                                    | Flores, H.                                                                                                                                                                                                                                                                                                                                                                                                                                                                                                                                                                                                                                                 |
| EPI_ISL_468331 to 468344                                                                                                                                                                                                                                                                                                                                                                                                                                                                                                                                                                                                                                                                                                                                                                                                                                                                                                                                                                                                                                                                                                                                                                                                                                                                                                                                                                                                                                                                                                                                                                                                                                                                                                                                                                                                                                                                                                                                                                                                                                                                                                                                                                                                                                                                                                                                                                                                                                                                                         | Microbiology Service, University Hospital of A Coruna-Biomedical Research Institute                        | Genomes & Disease, Center for Research in Molecular Medicine and Chronic Diseases, University of Santiago de Compostela | Ana Pequeno-Valtierra; Cristina Gomez; Daniel Garcia-Souto; G Bou; Javier Temes; Jorge Arca; Jorge Rodriguez-Castro; Jose M. C. Tubio; Juan A. Vallejo; Kelly Conde; M Poza; Martin Santamarina; Soraya Rumbo                                                                                                                                                                                                                                                                                                                                                                                                                                              |
| EPI_ISL_455312 to 455313                                                                                                                                                                                                                                                                                                                                                                                                                                                                                                                                                                                                                                                                                                                                                                                                                                                                                                                                                                                                                                                                                                                                                                                                                                                                                                                                                                                                                                                                                                                                                                                                                                                                                                                                                                                                                                                                                                                                                                                                                                                                                                                                                                                                                                                                                                                                                                                                                                                                                         | Microbiology Unit, Department of Pathology & Laboratory Medicine, Iium Medical Centre                      | SEA Microbiome Unit, Faculty of Industrial Sciences & Technology, Universiti Malaysia Pahang                            | Ahmad Hafiz Bin Zulkifly; Ahmad Hafiz Zulkifly; Ahmad Mahfuz Gazali; Hajar Fauzan Ahmad; Iium Medical Centre Covid19 Taskforce; Mohd Fazli Farida Asras; Mohd Nazli Bin Kamarulzaman; Muhammad Adam Lee Abdullah; Norhidayah Binti Kamarudin; Norhidayah Kamarudin; UMP Covid19 Team                                                                                                                                                                                                                                                                                                                                                                       |
| EPI_ISL_418267, EPI_ISL_418269                                                                                                                                                                                                                                                                                                                                                                                                                                                                                                                                                                                                                                                                                                                                                                                                                                                                                                                                                                                                                                                                                                                                                                                                                                                                                                                                                                                                                                                                                                                                                                                                                                                                                                                                                                                                                                                                                                                                                                                                                                                                                                                                                                                                                                                                                                                                                                                                                                                                                   | Microbiology and Immunology department, Pasteur institute in Ho Chi Minh city                              | Microbiology and Immunology department, Pasteur institute in Ho Chi Minh city                                           | A.H.; C.Q.; Cao; D.T.; Dao; H.Q.; H.T.; H.T.T.; Hoang; Huynh; K.C.; L.T.; L.T.; L.T. and Nguyen; L.T.K.; Le; Luong; M.H.; N.P.H.; N.T.; Nguyen; Pham; Phan; Phung; Q.C.; Q.D.; S.N.; T.M.; T.N.A.; T.T.; T.T.N.; T.V.; T.V. and Phan; Tran; Tran, T.; Vo; Vu                                                                                                                                                                                                                                                                                                                                                                                               |
| EPI_ISL_509424 to 509429                                                                                                                                                                                                                                                                                                                                                                                                                                                                                                                                                                                                                                                                                                                                                                                                                                                                                                                                                                                                                                                                                                                                                                                                                                                                                                                                                                                                                                                                                                                                                                                                                                                                                                                                                                                                                                                                                                                                                                                                                                                                                                                                                                                                                                                                                                                                                                                                                                                                                         | Microbiology and Immunology, University of South Alabama                                                   | Microbiology and Immunology, University of South Alabama                                                                | Borchert; Fouty, B.; G.M.; Houserova, D.; J.O.; R.A.; R.R.; Rayner; Roberts; Wood                                                                                                                                                                                                                                                                                                                                                                                                                                                                                                                                                                          |
| EPI_ISL_468067                                                                                                                                                                                                                                                                                                                                                                                                                                                                                                                                                                                                                                                                                                                                                                                                                                                                                                                                                                                                                                                                                                                                                                                                                                                                                                                                                                                                                                                                                                                                                                                                                                                                                                                                                                                                                                                                                                                                                                                                                                                                                                                                                                                                                                                                                                                                                                                                                                                                                                   | Microbiology and Immunology, The Peter Doherty Institute for Infection and Immunity                        | Microbiology and Immunology, The Peter Doherty Institute for Infection and Immunity                                     | Antonia da Costa, E.; Barreto, I.; Caly, L.; Canisla, D.; Dakh, F.; Dolores de Jesus da Costa, M.; Douglas; Druce, J.; Francis, J.; Freeman, K.; Jayanti Pereira Tilman, A.; M.B.; Marr, I.; Meumann, E.; N. and Baird, R.; Sait, M.; Salles de Sousa, A.; Schultz; Seemann, T.; Sherry, N.; Soares da Silva, E.; Wapling, J.; Ximenes, J.                                                                                                                                                                                                                                                                                                                 |
| EPI_ISL_1416330 to 1416331, EPI_ISL_1417439 to 1417441                                                                                                                                                                                                                                                                                                                                                                                                                                                                                                                                                                                                                                                                                                                                                                                                                                                                                                                                                                                                                                                                                                                                                                                                                                                                                                                                                                                                                                                                                                                                                                                                                                                                                                                                                                                                                                                                                                                                                                                                                                                                                                                                                                                                                                                                                                                                                                                                                                                           | Microbiology and Virology Laboratory, "Policlinico Riuniti, Azienda Ospedaliero Universitaria, Foggia"     | Microbiology and Virology Laboratory, "Policlinico Riuniti, Azienda Ospedaliero Universitaria, Foggia"                  | Annamaria D'Aprile; Daniela Pisanelli; Donatella Cedola; Fabio Arena; Loris Micelli; Maria Pia Patrizio; Maria Rosaria Lipsi; Maurizio Margaglione and Rosella De Nittis.; Settimia Altamura; Tiziana Rollo; Valeria Delli Carri                                                                                                                                                                                                                                                                                                                                                                                                                           |
| EPI_ISL_447258 to 447280                                                                                                                                                                                                                                                                                                                                                                                                                                                                                                                                                                                                                                                                                                                                                                                                                                                                                                                                                                                                                                                                                                                                                                                                                                                                                                                                                                                                                                                                                                                                                                                                                                                                                                                                                                                                                                                                                                                                                                                                                                                                                                                                                                                                                                                                                                                                                                                                                                                                                         | Microbiology laboratory, Assuta Ashdod University-Affiliated Hospital                                      | Stern Lab                                                                                                               | Stern Lab                                                                                                                                                                                                                                                                                                                                                                                                                                                                                                                                                                                                                                                  |
| EPI_ISL_613459 to 613462                                                                                                                                                                                                                                                                                                                                                                                                                                                                                                                                                                                                                                                                                                                                                                                                                                                                                                                                                                                                                                                                                                                                                                                                                                                                                                                                                                                                                                                                                                                                                                                                                                                                                                                                                                                                                                                                                                                                                                                                                                                                                                                                                                                                                                                                                                                                                                                                                                                                                         | Microbiology, Koc University                                                                               | Microbiology, Koc University                                                                                            | Can, F.; Dogan, O.; Kuskucu, M.A.; Nurtop, E.; Ozer, B.                                                                                                                                                                                                                                                                                                                                                                                                                                                                                                                                                                                                    |
| EPI_ISL_513585 to 513588                                                                                                                                                                                                                                                                                                                                                                                                                                                                                                                                                                                                                                                                                                                                                                                                                                                                                                                                                                                                                                                                                                                                                                                                                                                                                                                                                                                                                                                                                                                                                                                                                                                                                                                                                                                                                                                                                                                                                                                                                                                                                                                                                                                                                                                                                                                                                                                                                                                                                         | Microbiology, Pathology, Kettering General Hospital                                                        | Wellcome Sanger Institute for the COVID-19 Genomics UK (COG-UK) consortium                                              | Anita Kenyon; Cordelia Langford; David K. Jackson; Dominic Kwiatkowski; Ewan Harrison; Ian Johnston; John Sillitoe on behalf of the Wellcome Sanger Institute COVID-19 Surveillance Team ( <a href="http://www.sanger.ac.uk/covid-team">http://www.sanger.ac.uk/covid-team</a> ); Roberto Amato; Sahar El-diridi; Sonia Goncalves; Thomas Davis and Alex Alderton                                                                                                                                                                                                                                                                                          |
| EPI_ISL_434571                                                                                                                                                                                                                                                                                                                                                                                                                                                                                                                                                                                                                                                                                                                                                                                                                                                                                                                                                                                                                                                                                                                                                                                                                                                                                                                                                                                                                                                                                                                                                                                                                                                                                                                                                                                                                                                                                                                                                                                                                                                                                                                                                                                                                                                                                                                                                                                                                                                                                                   | Microbiology, The University of Hong Kong                                                                  | Microbiology, The University of Hong Kong                                                                               | Chan; J.F.W. and Yuen; K.-Y.                                                                                                                                                                                                                                                                                                                                                                                                                                                                                                                                                                                                                               |
| EPI_ISL_475717 to 475721                                                                                                                                                                                                                                                                                                                                                                                                                                                                                                                                                                                                                                                                                                                                                                                                                                                                                                                                                                                                                                                                                                                                                                                                                                                                                                                                                                                                                                                                                                                                                                                                                                                                                                                                                                                                                                                                                                                                                                                                                                                                                                                                                                                                                                                                                                                                                                                                                                                                                         | Microbiology, University Hospital Donostia                                                                 | Microbiology, University Hospital Donostia                                                                              | Cilla, G.; J.M.; Marimon; Montes, M.; Pineiro, L.                                                                                                                                                                                                                                                                                                                                                                                                                                                                                                                                                                                                          |
| EPI_ISL_429874, EPI_ISL_486646 to 486665                                                                                                                                                                                                                                                                                                                                                                                                                                                                                                                                                                                                                                                                                                                                                                                                                                                                                                                                                                                                                                                                                                                                                                                                                                                                                                                                                                                                                                                                                                                                                                                                                                                                                                                                                                                                                                                                                                                                                                                                                                                                                                                                                                                                                                                                                                                                                                                                                                                                         | Microbiology, Virology and Biemergency Laboratory-ASST FBF Sacco                                           | Microbiology, Virology and Biemergency Laboratory-ASST FBF Sacco                                                        | Comandatore F; Mancon A; Micheli V; Rimoldi SG; Romeri F; Stefani F                                                                                                                                                                                                                                                                                                                                                                                                                                                                                                                                                                                        |
| EPI_ISL_456213 to 456214, EPI_ISL_456255 to 456258, EPI_ISL_456376, EPI_ISL_456385 to 456387, EPI_ISL_456403, EPI_ISL_548001 to 548012, EPI_ISL_548031 to 548039, EPI_ISL_548052 to 548056, EPI_ISL_548074, EPI_ISL_548081 to 548082, EPI_ISL_548094 to 548097, EPI_ISL_548103, EPI_ISL_548112 to 548115, EPI_ISL_548121, EPI_ISL_548123 to 548125, EPI_ISL_548127, EPI_ISL_548130, EPI_ISL_548132 to 548133, EPI_ISL_548144 to 548146, EPI_ISL_579100 to 579104, EPI_ISL_579129 to 579132, EPI_ISL_579228 to 579232, EPI_ISL_579301 to 579314, EPI_ISL_579404, EPI_ISL_1469089, EPI_ISL_1469096, EPI_ISL_1469105                                                                                                                                                                                                                                                                                                                                                                                                                                                                                                                                                                                                                                                                                                                                                                                                                                                                                                                                                                                                                                                                                                                                                                                                                                                                                                                                                                                                                                                                                                                                                                                                                                                                                                                                                                                                                                                                                                |                                                                                                            |                                                                                                                         |                                                                                                                                                                                                                                                                                                                                                                                                                                                                                                                                                                                                                                                            |
| see above                                                                                                                                                                                                                                                                                                                                                                                                                                                                                                                                                                                                                                                                                                                                                                                                                                                                                                                                                                                                                                                                                                                                                                                                                                                                                                                                                                                                                                                                                                                                                                                                                                                                                                                                                                                                                                                                                                                                                                                                                                                                                                                                                                                                                                                                                                                                                                                                                                                                                                        | Middlemore Hospital                                                                                        | Institute of Environmental Science and Research (ESR)                                                                   | Anja Werno; Antje van der Linden; Arlo Upton; Chris Mansell; David Hammer; Dragana Drinkovic; Erasmus Smit; Gary McAulliffe; Hana Sofia Andersson; Hermes Perez; James Usher; Jill Sherwood; Jing Wang; Joep de Ligt; Josh Freeman; Julia Howard; Juliet Elvy; Lauren Jolly; Mary DeAlmeida; Matt Blakiston; Matt Storey; Matthew Rogers; Max Bloomfield; Michael Addidle; Michelle Balm; Muhammad Faisal; Nikki Freed; Olin Sidoroff; Olivia Stroeven; Rachel Boyle; Sally Roberts; SallyAnn Harbison; Sarah Jefferies; Sharmini Muttaiyah; Susan Morpeth; Susan Taylor; Timothy Blackmore; Vani Sathyendran; Veronica Playle; Virginia Hope; Xiaoyun Ren |
| EPI_ISL_417413, EPI_ISL_428712 to 428723, EPI_ISL_429861 to 429873, EPI_ISL_437304 to 437335, EPI_ISL_1386007, EPI_ISL_1386009, EPI_ISL_1386011, EPI_ISL_1386013 to 1386014, EPI_ISL_1386016, EPI_ISL_1386018, EPI_ISL_1386020 to 1386021, EPI_ISL_1386023, EPI_ISL_1386025, EPI_ISL_1386027 to 1386028, EPI_ISL_1386030, EPI_ISL_1386032 to 1386033, EPI_ISL_1403686 to 1403779, EPI_ISL_1533611 to 1533688, EPI_ISL_1534462 to 1534527                                                                                                                                                                                                                                                                                                                                                                                                                                                                                                                                                                                                                                                                                                                                                                                                                                                                                                                                                                                                                                                                                                                                                                                                                                                                                                                                                                                                                                                                                                                                                                                                                                                                                                                                                                                                                                                                                                                                                                                                                                                                         |                                                                                                            |                                                                                                                         |                                                                                                                                                                                                                                                                                                                                                                                                                                                                                                                                                                                                                                                            |
| see above                                                                                                                                                                                                                                                                                                                                                                                                                                                                                                                                                                                                                                                                                                                                                                                                                                                                                                                                                                                                                                                                                                                                                                                                                                                                                                                                                                                                                                                                                                                                                                                                                                                                                                                                                                                                                                                                                                                                                                                                                                                                                                                                                                                                                                                                                                                                                                                                                                                                                                        | Ministry of Health Turkey                                                                                  | Ministry of Health Turkey                                                                                               | Aye Baak Alta; Fatma Bayrakdar; Gulay Korukluoglu; Gülay Korukluolu; Selçuk Kılıç; Suleyman Yalcin; Süleyman Yalcin; Süleyman Yalçın; Tülin Demir; Yasemin Cosgun; Yasemin Cogan                                                                                                                                                                                                                                                                                                                                                                                                                                                                           |
| EPI_ISL_427404 to 427412, EPI_ISL_427414 to 427420                                                                                                                                                                                                                                                                                                                                                                                                                                                                                                                                                                                                                                                                                                                                                                                                                                                                                                                                                                                                                                                                                                                                                                                                                                                                                                                                                                                                                                                                                                                                                                                                                                                                                                                                                                                                                                                                                                                                                                                                                                                                                                                                                                                                                                                                                                                                                                                                                                                               | Ministry of Public Health (MoPH)                                                                           | Biomedical Research Center (BRC)                                                                                        | Abdullatif Al-Khal; Ajaeb M. M. H. Al-Nabet; Asmaa A. Al-Thani.; Einas A. E. Al-Kuwari; Fatima M. Benslimane; Hadi M. Yassine; Hamad E. Al-Romahi; Heba A. Al-Khatib; Mohamed Al-Thani; Muna A. S. Al-Maslami; Nourah B. M. Younes; Peter V. Coyle; Salih Al-Marri; Sonia Boughtahass                                                                                                                                                                                                                                                                                                                                                                      |
| EPI_ISL_414588 to 414590, EPI_ISL_417189, EPI_ISL_417191 to 417192, EPI_ISL_417194, EPI_ISL_417196, EPI_ISL_417198, EPI_ISL_417469 to 417480, EPI_ISL_417492 to 417503, EPI_ISL_419388, EPI_ISL_419390 to 419397, EPI_ISL_421683 to 421692, EPI_ISL_427273 to 427287, EPI_ISL_437360 to 437386, EPI_ISL_450748 to 450780, EPI_ISL_460045 to 460078, EPI_ISL_462845 to 462911, EPI_ISL_470747 to 470789, EPI_ISL_476706 to 476766, EPI_ISL_482946 to 482966, EPI_ISL_482988 to 483017, EPI_ISL_484692, EPI_ISL_495610 to 495628, EPI_ISL_496916 to 496917, EPI_ISL_496919 to 496930, EPI_ISL_507934 to 507956, EPI_ISL_507973 to 507983, EPI_ISL_514616 to 514618, EPI_ISL_514658 to 514672, EPI_ISL_515262, EPI_ISL_515269, EPI_ISL_518855, EPI_ISL_527573 to 527629, EPI_ISL_530172 to 530224, EPI_ISL_539824 to 539841, EPI_ISL_560743 to 560791, EPI_ISL_576228 to 576256, EPI_ISL_590753 to 590822, EPI_ISL_590837, EPI_ISL_602956 to 602999, EPI_ISL_603006 to 603009, EPI_ISL_603015, EPI_ISL_603018 to 603020, EPI_ISL_1402708 to 1402724, EPI_ISL_1402726 to 1402740, EPI_ISL_1423516 to 1423533, EPI_ISL_1445988, EPI_ISL_1445994, EPI_ISL_1445997, EPI_ISL_1446003 to 1446004, EPI_ISL_1446006, EPI_ISL_1446014, EPI_ISL_1446017, EPI_ISL_1446021, EPI_ISL_1446031, EPI_ISL_1446033 to 1446034, EPI_ISL_1446036 to 1446037, EPI_ISL_1446039 to 1446040, EPI_ISL_1446042 to 1446043, EPI_ISL_1446045 to 1446046, EPI_ISL_1479018 to 1479041, EPI_ISL_1479134 to 1479136, EPI_ISL_1479140 to 1479159, EPI_ISL_1499652 to 1499685, EPI_ISL_1531573 to 1531633                                                                                                                                                                                                                                                                                                                                                                                                                                                                                                                                                                                                                                                                                                                                                                                                                                                                                                                                             |                                                                                                            |                                                                                                                         |                                                                                                                                                                                                                                                                                                                                                                                                                                                                                                                                                                                                                                                            |
| see above                                                                                                                                                                                                                                                                                                                                                                                                                                                                                                                                                                                                                                                                                                                                                                                                                                                                                                                                                                                                                                                                                                                                                                                                                                                                                                                                                                                                                                                                                                                                                                                                                                                                                                                                                                                                                                                                                                                                                                                                                                                                                                                                                                                                                                                                                                                                                                                                                                                                                                        | Minnesota Department of Health, Public Health Laboratory                                                   | Minnesota Department of Health, Public Health Laboratory                                                                | Alexandra Lorentz; Jacob Garfin; Jacob Garfin and Xiong Wang; Jake Garfin and Xiong Wang; Matt Plumb; Xiong Wang; and Xiong Wang                                                                                                                                                                                                                                                                                                                                                                                                                                                                                                                           |

|                                                                                                                                                                                                                                                                                                                                                                                                                                                                                                                                                                   |                                                                                                                                                                                                                |                                                                                                                                                                        |                                                                                                                                                                                                                                                                                                                                                                                                           |
|-------------------------------------------------------------------------------------------------------------------------------------------------------------------------------------------------------------------------------------------------------------------------------------------------------------------------------------------------------------------------------------------------------------------------------------------------------------------------------------------------------------------------------------------------------------------|----------------------------------------------------------------------------------------------------------------------------------------------------------------------------------------------------------------|------------------------------------------------------------------------------------------------------------------------------------------------------------------------|-----------------------------------------------------------------------------------------------------------------------------------------------------------------------------------------------------------------------------------------------------------------------------------------------------------------------------------------------------------------------------------------------------------|
| EPI_ISL_1392807 to 1392888, EPI_ISL_1489843 to 1489923                                                                                                                                                                                                                                                                                                                                                                                                                                                                                                            | Missouri State Public Health Laboratory                                                                                                                                                                        | Missouri State Public Health Laboratory                                                                                                                                | Ashley New; Joshua Barry; Matthew Sinn                                                                                                                                                                                                                                                                                                                                                                    |
| EPI_ISL_1534321, EPI_ISL_1534426 to 1534427, EPI_ISL_1534435, EPI_ISL_1534447                                                                                                                                                                                                                                                                                                                                                                                                                                                                                     | Mitchells Plain Hospital wc MPH                                                                                                                                                                                | NHLS/UCT                                                                                                                                                               | Arash Iranzadeh; Bruna Galvao; Carolyn Williamson; Deelan Doolabh; Diana Hardie; Emmanuel SJ; Innocent Mudau; Kruger Marais; Lynn Tyers; Marvin Hsiao; Stephen Korsman; Tegally H; de Oliveira T                                                                                                                                                                                                          |
| EPI_ISL_458079                                                                                                                                                                                                                                                                                                                                                                                                                                                                                                                                                    | Mitra Keluarga Hospital Kenjeran                                                                                                                                                                               | Institute of Tropical Disease, Universitas Airlangga                                                                                                                   | Aldise M Nastri; Anastasia W Jefuna; Gatot Soegiarto; Jezzy R Dewantari; Kazufumi Shimizu; Krisnoadi Rahardjo; Laksmi Wulandari; Maria I Lusida; Mitsuhiro Nishimura; Resti Yudhawati; Retno A Setyoningrum; Rima R Prasetya; Soetjpto; Yasuko Mori; Yohko K Shimizu                                                                                                                                      |
| EPI_ISL_437192                                                                                                                                                                                                                                                                                                                                                                                                                                                                                                                                                    | Mitra Keluarga Kelapa Gading Hospital                                                                                                                                                                          | Eijkman Institute for Molecular Biology, Ministry of Research and Technology/National Agency for Research and Innovation                                               | Amin Soebandrio; David H Mujono; Edison Johar; Filasita A Yudhaputri; Hidayat Trimarsanto; Khin Saw Myint; Safarina G Malik                                                                                                                                                                                                                                                                               |
| EPI_ISL_435119                                                                                                                                                                                                                                                                                                                                                                                                                                                                                                                                                    | Mohammed Bin Rashid University of Medicine and Health Sciences                                                                                                                                                 | Al Jalila Children's Hospital                                                                                                                                          | Abdulmajeed Alkhaja; Abiola Catherine Senok; Ahmad Abou Tayoun; Alawi Alsheikh-Ali; Divinlal Harilal; Hamda Khansaheb; Hanan Al Suwaidi; Mohammed Uddin; Norbert Nowotny; Qutayba Hamid; Rabih Halwani; Rifat Hamoudi; Rupa Murthy Varghese; Sathishkumar Ramaswamy; Tom Loney; Zulfa Omar Deesi                                                                                                          |
| EPI_ISL_435120 to 435143, EPI_ISL_463740, EPI_ISL_469276 to 469281, EPI_ISL_520663 to 520744, EPI_ISL_523952 to 523953                                                                                                                                                                                                                                                                                                                                                                                                                                            | Mohammed Bin Rashid University of Medicine and Health Sciences                                                                                                                                                 | Al Jalila Genomics Center                                                                                                                                              | Abdulmajeed Alkhaja; Abiola Catherine Senok; Ahmad Abou Tayoun; Alawi Alsheikh-Ali; Divinlal Harilal; Hamda Khansaheb; Hanan Al Suwaidi; Mohammed Uddin; Norbert Nowotny; Qutayba Hamid; Rabih Halwani; Rifat Hamoudi; Rupa Murthy Varghese; Sathishkumar Ramaswamy; Tom Loney; Zulfa Omar Deesi                                                                                                          |
| EPI_ISL_419313                                                                                                                                                                                                                                                                                                                                                                                                                                                                                                                                                    | Molecular Biology and Biotechnology Lab II                                                                                                                                                                     | Molecular Biology and Biotechnology Lab II                                                                                                                             | Aimen Malik; Azka Noureen; Kumail Ali Rizvi; Muhammad Javaid Asad; Sana Shamshad; Tayyaba Zainab                                                                                                                                                                                                                                                                                                          |
| EPI_ISL_421573 to 421576                                                                                                                                                                                                                                                                                                                                                                                                                                                                                                                                          | Molecular Diagnostic Services                                                                                                                                                                                  | KRISP, KZN Research Innovation and Sequencing Platform                                                                                                                 | Chimukangara B; Deforche K; Giandhari J; Lessells R; Ngcapu S; Pillay S; Samsunder N; Tegally H; Wilkinson E; de Oliveira T                                                                                                                                                                                                                                                                               |
| EPI_ISL_421572                                                                                                                                                                                                                                                                                                                                                                                                                                                                                                                                                    | Molecular Diagnostic Services and Flowpath                                                                                                                                                                     | KRISP, KZN Research Innovation and Sequencing Platform                                                                                                                 | Chimukangara B; Deforche K; Giandhari J; Lessells R; Ngcapu S; Pillay S; Samsunder N; Tegally H; Wilkinson E; de Oliveira T                                                                                                                                                                                                                                                                               |
| EPI_ISL_467431, EPI_ISL_467444 to 467448, EPI_ISL_467475 to 467491, EPI_ISL_467494 to 467506, EPI_ISL_482702 to 482709, EPI_ISL_482714 to 482723, EPI_ISL_482851 to 482872, EPI_ISL_487329 to 487341                                                                                                                                                                                                                                                                                                                                                              | Molecular Diagnostics Services (MDS)                                                                                                                                                                           | KRISP, KZN Research Innovation and Sequencing Platform                                                                                                                 | Chimukangara B; Giandhari J; Khan S; Lessells R; Mdlalose K; Pillay S; Tegally H; Wilkinson E; York D; de Oliveira T                                                                                                                                                                                                                                                                                      |
| EPI_ISL_462995 to 463000                                                                                                                                                                                                                                                                                                                                                                                                                                                                                                                                          | Molecular Genetics                                                                                                                                                                                             | Molecular Genetics                                                                                                                                                     | Coto, E.; Gomez, J.                                                                                                                                                                                                                                                                                                                                                                                       |
| EPI_ISL_444455, EPI_ISL_444519                                                                                                                                                                                                                                                                                                                                                                                                                                                                                                                                    | Molecular Infectious Disease                                                                                                                                                                                   | Molecular Infectious Disease                                                                                                                                           | Anderson; B.P.; Gerasimova, A.; Kagan; R.M. and Owen, R.; Rosenthal; S.H.                                                                                                                                                                                                                                                                                                                                 |
| EPI_ISL_430018, EPI_ISL_430063, EPI_ISL_451957, EPI_ISL_498193, EPI_ISL_578701 to 578702                                                                                                                                                                                                                                                                                                                                                                                                                                                                          | Molecular Pathology Division, Department of Pathology, Hong Kong Sanatorium & Hospital                                                                                                                         | Molecular Pathology Division, Department of Pathology, Hong Kong Sanatorium & Hospital                                                                                 | Chun Hang AU; Dona N. HO; Edmond S.K. MA; Ho Yin LAM; Jonpaul S.T. ZEE; Simon Y.M. LAM; Tsun Leung CHAN; Wai Sing CHAN                                                                                                                                                                                                                                                                                    |
| EPI_ISL_451306 to 451309, EPI_ISL_460079 to 460095                                                                                                                                                                                                                                                                                                                                                                                                                                                                                                                | Molecular Virology Unit, Fondazione IRCCS Policlinico San Matteo, Pavia                                                                                                                                        | Laboratory of Virology, INMI Lazzaro Spallanzani IRCCS                                                                                                                 | Antonino Di Caro; Antonio Piralla; Barbara Bartolini; Cesare E.M. Gruber; Fausto Baldanti; Maria R. Capobianchi; Martina Rueca                                                                                                                                                                                                                                                                            |
| EPI_ISL_1403609 to 1403611                                                                                                                                                                                                                                                                                                                                                                                                                                                                                                                                        | Molecular Virology Unit, Microbiology and Virology Department, Fondazione IRCCS Policlinico San Matteo, Pavia                                                                                                  | Molecular Virology Unit, Microbiology and Virology Department, Fondazione IRCCS Policlinico San Matteo, Pavia                                                          | Antonio Piralla; Fausto Baldanti; Federica Giardina; Gherard Batisti Biffignandi; Guglielmo Ferrari; Stefania Paolucci; Stefano Gaiarsa                                                                                                                                                                                                                                                                   |
| EPI_ISL_510535                                                                                                                                                                                                                                                                                                                                                                                                                                                                                                                                                    | Molecular Virology, Instituto Carlos Chagas / Fiocruz Paraná                                                                                                                                                   | Universidade Federal do Paraná (UFPR)                                                                                                                                  | Duarte dos Santos, C.; Raboni, S.; Suzukawa, A.; Tscha, M.; Zanluca, C.                                                                                                                                                                                                                                                                                                                                   |
| EPI_ISL_460096, EPI_ISL_460604 to 460605, EPI_ISL_462149 to 462150, EPI_ISL_467774 to 467775, EPI_ISL_470539, EPI_ISL_479620 to 479624, EPI_ISL_486815 to 486829, EPI_ISL_534337 to 534349, EPI_ISL_539299, EPI_ISL_610227 to 610244, EPI_ISL_1510607 to 1510619, EPI_ISL_1527364 to 1527381                                                                                                                                                                                                                                                                      | Molecular diagnostic laboratory of Federal Budget Institution of Science "Central Research Institute of Epidemiology" of The Federal Service on Customers' Rights Protection and Human Well-being Surveillance | Group of Genomics and Postgenomic Technologies of Central Research Institute of Epidemiology                                                                           | Akimkin VG; Berlina YY; Bukharina A.Y.; Bukharina AY; Bulanenko VP; Cherkashina AS; Golubeva AG; Kaptelova VV; Kondrasheva LY; Korneenko EV; Saenko SS; Samoilov AE; Shipulina OY; Sizova TV; Solovyeva ED; Speranskaya AS; Tivanova EV; Valdokhina AV; Zotova MI                                                                                                                                         |
| EPI_ISL_614347 to 614395                                                                                                                                                                                                                                                                                                                                                                                                                                                                                                                                          | Molecular diagnostic unit for viral haemorrhagic fevers and emerging viruses, Bouaké CHU Laboratory                                                                                                            | Project group Epidemiology of Highly Pathogenic Microorganisms, Robert Koch-Institute                                                                                  | Adjaratou Traoré; Bamba Fatoumata Touré; Chantal Akoua-Koffi; Coulibaly Mbegan; Diané Bamourou; Essia Belarbi; Etilé Aho; Fabian Leendertz; Grit Schubert; Kra Ouffoué; Monemo Pacome; Safiatou Karidioula; Soundélé Maité                                                                                                                                                                                |
| EPI_ISL_1529004                                                                                                                                                                                                                                                                                                                                                                                                                                                                                                                                                   | Mon Health Medical Center                                                                                                                                                                                      | WVU and Marshall University Combined Genomics Core Facilities                                                                                                          | "James Denvir; Peter Perrotta; Peter Stoilov; Ryan Percifield"; Wesley Kimble                                                                                                                                                                                                                                                                                                                             |
| EPI_ISL_406844                                                                                                                                                                                                                                                                                                                                                                                                                                                                                                                                                    | Monash Medical Centre                                                                                                                                                                                          | Collaboration between the University of Melbourne at The Peter Doherty Institute for Infection and Immunity, and the Victorian Infectious Disease Reference Laboratory | Caly, L.; Druce; G; J. and Tairaro; Schultz, M.; Seemann, T.                                                                                                                                                                                                                                                                                                                                              |
| EPI_ISL_1416327 to 1416328, EPI_ISL_1420823 to 1420825, EPI_ISL_1420828, EPI_ISL_1490470, EPI_ISL_1490650 to 1490651, EPI_ISL_1490654, EPI_ISL_1490659, EPI_ISL_1490662 to 1490665, EPI_ISL_1490668, EPI_ISL_1490670, EPI_ISL_1490710, EPI_ISL_1490712 to 1490713, EPI_ISL_1490715, EPI_ISL_1548039, EPI_ISL_1548042 to 1548043, EPI_ISL_1548073, EPI_ISL_1548075 to 1548077, EPI_ISL_1548111 to 1548116, EPI_ISL_1549139, EPI_ISL_1549168, EPI_ISL_1549478, EPI_ISL_1549727, EPI_ISL_1549987, EPI_ISL_1550159, EPI_ISL_1551694, EPI_ISL_1551952, EPI_ISL_1552084 | Montana Public Health Laboratory                                                                                                                                                                               | Montana Public Health Laboratory                                                                                                                                       | Carrie Biskupiak; Deborah Gibson; Joy Ritter; Michelle Mozer                                                                                                                                                                                                                                                                                                                                              |
| EPI_ISL_467945                                                                                                                                                                                                                                                                                                                                                                                                                                                                                                                                                    | Montefiore Medical Center, Dept. of Pathology, Clinical Virology                                                                                                                                               | Albert Einstein College of Medicine, Dept. of Microbiology & Immunology, Chandran lab                                                                                  | Amanda Mengotto; Amy S. Fox; Ariel S. Wirchianski; Catalina Florez; D. Yitzchak Goldstein; Denise Haslwanter; Duncan Kimmel; Ethan Laudermlach; J. Maximilian Fels; Johanna P. Daily; John M. Greally; Karin A. Skalina; Kartik Chandran; Libusha Kelly; M. Eugenia Dieterle; Michael B. Prystowsky; Robert H. Bortz III; Rohit K. Jangra; Ryan Forster; Saad Khan; Shahina B. Maqbool; Wendy A. Szymczak |
| EPI_ISL_426883 to 426897, EPI_ISL_1391277 to 1391362, EPI_ISL_1391364 to 1391370                                                                                                                                                                                                                                                                                                                                                                                                                                                                                  | Motol University Hospital                                                                                                                                                                                      | Institute of Applied Biotechnologies a.s.                                                                                                                              | Adam Novotný; Jan Geryk; Kateina Kvapilová; Martin Kašný; Milan Macek; Ondej Brzo; Pavel Devínek; Petr Brož; Petr Klemp; Petr Kvapil                                                                                                                                                                                                                                                                      |
| EPI_ISL_1534245, EPI_ISL_1534267                                                                                                                                                                                                                                                                                                                                                                                                                                                                                                                                  | Mowbray Maternity Hospital wc MMH                                                                                                                                                                              | NHLS/UCT                                                                                                                                                               | Arash Iranzadeh; Bruna Galvao; Carolyn Williamson; Deelan Doolabh; Diana Hardie; Innocent Mudau; Kruger Marais; Lynn Tyers; Marvin Hsiao; Stephen Korsman                                                                                                                                                                                                                                                 |
| EPI_ISL_1509262 to 1509269                                                                                                                                                                                                                                                                                                                                                                                                                                                                                                                                        | Murphy Medical Association                                                                                                                                                                                     | Grubaugh Lab - Yale School of Public Health                                                                                                                            | Anderson Brito; Annie Watkins; Caleb Neal; Chaney Kalinich; Chantal Vogels; Eva Laszlo; Isabel Ott; Jessica Rothman; Joseph Fauver; Mallery Breban; Mary Petrone; Nathan Grubaugh; Steven Murphy; Tara Alpert                                                                                                                                                                                             |
| EPI_ISL_490205 to 490208                                                                                                                                                                                                                                                                                                                                                                                                                                                                                                                                          | München Klinik Schwabing                                                                                                                                                                                       | MGZ Medical Genetics Center                                                                                                                                            | Dieter A. Wolf; Elke Holinski-Feder                                                                                                                                                                                                                                                                                                                                                                       |
| EPI_ISL_510810 to 510816                                                                                                                                                                                                                                                                                                                                                                                                                                                                                                                                          | NA                                                                                                                                                                                                             | The Public Health Agency of Sweden                                                                                                                                     | Anna Risberg; Anna-Malin Linde; Karin Tegmark-Wisell; Maria Lind Karlberg; Mattias Haukland; Mia Brytting; Olov Svartstrom; Oskar Karlsson Lindsjö; Petra Edquist; Reza Advani; Sandra Brodsson                                                                                                                                                                                                           |
| EPI_ISL_1528919, EPI_ISL_1528924, EPI_ISL_1529000 to 1529002                                                                                                                                                                                                                                                                                                                                                                                                                                                                                                      | NA                                                                                                                                                                                                             | WVU and Marshall University Combined Genomics Core Facilities                                                                                                          | "James Denvir; Peter Perrotta; Peter Stoilov; Ryan Percifield"; Wesley Kimble                                                                                                                                                                                                                                                                                                                             |
| EPI_ISL_1446489, EPI_ISL_1446491, EPI_ISL_1446494, EPI_ISL_1446497, EPI_ISL_1446499, EPI_ISL_1446502, EPI_ISL_1446505, EPI_ISL_1446508, EPI_ISL_1446511, EPI_ISL_1446513, EPI_ISL_1446541, EPI_ISL_1446547 to 1446571, EPI_ISL_1446741 to 1446742, EPI_ISL_1446913 to 1446922, EPI_ISL_1447012, EPI_ISL_1516388 to 1516399, EPI_ISL_1528508 to 1528516                                                                                                                                                                                                            | NC State Laboratory of Public Health                                                                                                                                                                           | Centers for Disease Control and Prevention Division of Viral Diseases, Pathogen Discovery                                                                              | Alison Laufer Halpin; Ben L. Rambo-Martin; Clinton R. Paden; Dakota Howard; Darlene Wagner; Dave Wentworth; Dhvani Batra; Jasmine Padilla; Justin Lee; Katie Dillon; Krista Queen; Kristen Knipe; Kristine Lacey; Mark Burroughs; Matthew Schmerer; Mili Sheth; Peter Cook; Sam Shepard; Sarah Nobles; Shoshona Le; Suxiang Tong; Vivien Dugan; Yvette Unoarumhi                                          |
| EPI_ISL_424871 to 424873, EPI_ISL_426428, EPI_ISL_452124, EPI_ISL_452126, EPI_ISL_540441                                                                                                                                                                                                                                                                                                                                                                                                                                                                          | NC State Laboratory of Public Health                                                                                                                                                                           | Pathogen Discovery, Respiratory Viruses Branch, Division of Viral Diseases, Centers for Disease Control and Prevention                                                 | Alison S. Laufer Halpin; Anna Montmayeur; Anna Uehara; Christopher A. Elkins; Clinton R. Paden; Haibin Wang; Jing Zhang; Krista Queen; Mary S. Keckler; Rachel Marine; Suxiang Tong; Yan Li; Ying Tao; Zachary Weiner                                                                                                                                                                                     |
| EPI_ISL_528683 to 528684                                                                                                                                                                                                                                                                                                                                                                                                                                                                                                                                          | NCDC Institute of Genomics and Integrative Biology                                                                                                                                                             | NCDC Institute of Genomics and Integrative Biology                                                                                                                     | Ajit Shewale; Akshay Kanakan; Anurag Agrawal; Azka Khan; Bharathram Upplii; Mahesh S. Dhar; Mohammed Faruq; Partha Rakshit; Pooja Sharma; RadhaKrishnan VS; Rajesh Pandey; Robin Marwal; Sandhya Kabra; Simmi Tiwari; Sujeet Singh; Tushar Nale; Vivekanand A                                                                                                                                             |
| EPI_ISL_581505 to 581507, EPI_ISL_614157                                                                                                                                                                                                                                                                                                                                                                                                                                                                                                                          | NCDC/IGIB                                                                                                                                                                                                      | NCDC/IGIB                                                                                                                                                              | Ajit Shewale; Akshay Kanakan; Anurag Agrawal; Azka Khan; Bharathram Upplii; Mahesh S. Dhar; Mohammed Faruq; Nishu Tyagi; Partha Rakshit; Pooja Sharma; RadhaKrishnan VS; Rajesh Pandey; Robin Marwal; Sandhya Kabra; Simmi Tiwari; Sujeet Singh; Tushar Nale; Vivekanand A                                                                                                                                |

| EPI_ISL_1498121, EPI_ISL_1498918, EPI_ISL_1499112                                                                                                                                                                                                                                                                                                                                                                                                                                                                                                                                                                                                                                                                                                                                                                                                                                                                                                                                                                                                                                                                                                                                                                                                                                                                                                                                                                                                                                                                                                                                                                                                                                                                                                                                                                                                                                                                                                                                                                                                                                                                                                                                                                                                                                                                                                                                                                                                                                                                                                                                                                                                                                                                                                                                                                                                                                                                                                                                                                                                                                                                                                                                                                                                                                                                                                                                                                                                                                                                                                                                                                                                                                                                                                                                                                                                                                                                                                                                                                                                                                                                                                                                                                                                                                                                                                                                                                                                                                                                                                                                                                                                                                                                                                                                                                                                                                                                                                                                                                                                                                                                                                                                                                                                                                                                                                                                                                                                                                                                                                                                                                                                                                                                                                                                                                                                                                                                                                                                                                                                                                                                                                                                                                                                                                                                                                                                                                                                                                                                                                                                                                                                                                                                                                                                                                                                                                                                                                                                                                                                                                                                                                                                                                                                                                                                                                                                                                                                                                                                                                                                                                                                            | NCSLPH                                                                                                   | NCSLPH                                                                                                                     | Chase K; Glover W; Greene S; Miller MC                                                                                                                                                                                                                                                                                                                                                                                                                                                                                                                                                                                                                                |                                                                                                                                                                                                                                                                                                                                                                                                                                                                                                                                                                                                                                                                                                                                                               |
|--------------------------------------------------------------------------------------------------------------------------------------------------------------------------------------------------------------------------------------------------------------------------------------------------------------------------------------------------------------------------------------------------------------------------------------------------------------------------------------------------------------------------------------------------------------------------------------------------------------------------------------------------------------------------------------------------------------------------------------------------------------------------------------------------------------------------------------------------------------------------------------------------------------------------------------------------------------------------------------------------------------------------------------------------------------------------------------------------------------------------------------------------------------------------------------------------------------------------------------------------------------------------------------------------------------------------------------------------------------------------------------------------------------------------------------------------------------------------------------------------------------------------------------------------------------------------------------------------------------------------------------------------------------------------------------------------------------------------------------------------------------------------------------------------------------------------------------------------------------------------------------------------------------------------------------------------------------------------------------------------------------------------------------------------------------------------------------------------------------------------------------------------------------------------------------------------------------------------------------------------------------------------------------------------------------------------------------------------------------------------------------------------------------------------------------------------------------------------------------------------------------------------------------------------------------------------------------------------------------------------------------------------------------------------------------------------------------------------------------------------------------------------------------------------------------------------------------------------------------------------------------------------------------------------------------------------------------------------------------------------------------------------------------------------------------------------------------------------------------------------------------------------------------------------------------------------------------------------------------------------------------------------------------------------------------------------------------------------------------------------------------------------------------------------------------------------------------------------------------------------------------------------------------------------------------------------------------------------------------------------------------------------------------------------------------------------------------------------------------------------------------------------------------------------------------------------------------------------------------------------------------------------------------------------------------------------------------------------------------------------------------------------------------------------------------------------------------------------------------------------------------------------------------------------------------------------------------------------------------------------------------------------------------------------------------------------------------------------------------------------------------------------------------------------------------------------------------------------------------------------------------------------------------------------------------------------------------------------------------------------------------------------------------------------------------------------------------------------------------------------------------------------------------------------------------------------------------------------------------------------------------------------------------------------------------------------------------------------------------------------------------------------------------------------------------------------------------------------------------------------------------------------------------------------------------------------------------------------------------------------------------------------------------------------------------------------------------------------------------------------------------------------------------------------------------------------------------------------------------------------------------------------------------------------------------------------------------------------------------------------------------------------------------------------------------------------------------------------------------------------------------------------------------------------------------------------------------------------------------------------------------------------------------------------------------------------------------------------------------------------------------------------------------------------------------------------------------------------------------------------------------------------------------------------------------------------------------------------------------------------------------------------------------------------------------------------------------------------------------------------------------------------------------------------------------------------------------------------------------------------------------------------------------------------------------------------------------------------------------------------------------------------------------------------------------------------------------------------------------------------------------------------------------------------------------------------------------------------------------------------------------------------------------------------------------------------------------------------------------------------------------------------------------------------------------------------------------------------------------------------------------------------------------------------------------------------------------------------------------------------------------------------------------------------------------------------------------------------------------------------------------------------------------------------------------------------------------------------------------------------------------------------------------------------------------------------------------------------------------------------------------------------------------|----------------------------------------------------------------------------------------------------------|----------------------------------------------------------------------------------------------------------------------------|-----------------------------------------------------------------------------------------------------------------------------------------------------------------------------------------------------------------------------------------------------------------------------------------------------------------------------------------------------------------------------------------------------------------------------------------------------------------------------------------------------------------------------------------------------------------------------------------------------------------------------------------------------------------------|---------------------------------------------------------------------------------------------------------------------------------------------------------------------------------------------------------------------------------------------------------------------------------------------------------------------------------------------------------------------------------------------------------------------------------------------------------------------------------------------------------------------------------------------------------------------------------------------------------------------------------------------------------------------------------------------------------------------------------------------------------------|
| EPI_ISL_1446723 to 1446724, EPI_ISL_1446746 to 1446758, EPI_ISL_1446895                                                                                                                                                                                                                                                                                                                                                                                                                                                                                                                                                                                                                                                                                                                                                                                                                                                                                                                                                                                                                                                                                                                                                                                                                                                                                                                                                                                                                                                                                                                                                                                                                                                                                                                                                                                                                                                                                                                                                                                                                                                                                                                                                                                                                                                                                                                                                                                                                                                                                                                                                                                                                                                                                                                                                                                                                                                                                                                                                                                                                                                                                                                                                                                                                                                                                                                                                                                                                                                                                                                                                                                                                                                                                                                                                                                                                                                                                                                                                                                                                                                                                                                                                                                                                                                                                                                                                                                                                                                                                                                                                                                                                                                                                                                                                                                                                                                                                                                                                                                                                                                                                                                                                                                                                                                                                                                                                                                                                                                                                                                                                                                                                                                                                                                                                                                                                                                                                                                                                                                                                                                                                                                                                                                                                                                                                                                                                                                                                                                                                                                                                                                                                                                                                                                                                                                                                                                                                                                                                                                                                                                                                                                                                                                                                                                                                                                                                                                                                                                                                                                                                                                      | ND Dept. of Health Laboratory Services-Microbiology                                                      | Centers for Disease Control and Prevention Division of Viral Diseases, Pathogen Discovery                                  | Alison Laufer Halpin; Ben L. Rambo-Martin; Clinton R. Paden; Dakota Howard; Darlene Wagner; Dave Wentworth; Dhvani Batra; Jasmine Padilla; Justin Lee; Katie Dillon; Krista Queen; Kristen Knipe; Kristine Lacey; Mark Burroughs; Matthew Schmerer; Mili Sheth; Peter Cook; Sam Shepard; Sarah Nobles; Shoshona Le; Suxiang Tong; Vivien Dugan; Yvette Unoarumhi                                                                                                                                                                                                                                                                                                      |                                                                                                                                                                                                                                                                                                                                                                                                                                                                                                                                                                                                                                                                                                                                                               |
| EPI_ISL_1446825 to 1446839, EPI_ISL_1446937, EPI_ISL_1528286 to 1528290                                                                                                                                                                                                                                                                                                                                                                                                                                                                                                                                                                                                                                                                                                                                                                                                                                                                                                                                                                                                                                                                                                                                                                                                                                                                                                                                                                                                                                                                                                                                                                                                                                                                                                                                                                                                                                                                                                                                                                                                                                                                                                                                                                                                                                                                                                                                                                                                                                                                                                                                                                                                                                                                                                                                                                                                                                                                                                                                                                                                                                                                                                                                                                                                                                                                                                                                                                                                                                                                                                                                                                                                                                                                                                                                                                                                                                                                                                                                                                                                                                                                                                                                                                                                                                                                                                                                                                                                                                                                                                                                                                                                                                                                                                                                                                                                                                                                                                                                                                                                                                                                                                                                                                                                                                                                                                                                                                                                                                                                                                                                                                                                                                                                                                                                                                                                                                                                                                                                                                                                                                                                                                                                                                                                                                                                                                                                                                                                                                                                                                                                                                                                                                                                                                                                                                                                                                                                                                                                                                                                                                                                                                                                                                                                                                                                                                                                                                                                                                                                                                                                                                                      | NE Public Health Laboratory                                                                              | Centers for Disease Control and Prevention Division of Viral Diseases, Pathogen Discovery                                  | Alison Laufer Halpin; Ben L. Rambo-Martin; Clinton R. Paden; Dakota Howard; Darlene Wagner; Dave Wentworth; Dhvani Batra; Jasmine Padilla; Justin Lee; Katie Dillon; Krista Queen; Kristen Knipe; Kristine Lacey; Mark Burroughs; Matthew Schmerer; Mili Sheth; Peter Cook; Sam Shepard; Sarah Nobles; Shoshona Le; Suxiang Tong; Vivien Dugan; Yvette Unoarumhi                                                                                                                                                                                                                                                                                                      |                                                                                                                                                                                                                                                                                                                                                                                                                                                                                                                                                                                                                                                                                                                                                               |
| EPI_ISL_1448512, EPI_ISL_1448519, EPI_ISL_1478202                                                                                                                                                                                                                                                                                                                                                                                                                                                                                                                                                                                                                                                                                                                                                                                                                                                                                                                                                                                                                                                                                                                                                                                                                                                                                                                                                                                                                                                                                                                                                                                                                                                                                                                                                                                                                                                                                                                                                                                                                                                                                                                                                                                                                                                                                                                                                                                                                                                                                                                                                                                                                                                                                                                                                                                                                                                                                                                                                                                                                                                                                                                                                                                                                                                                                                                                                                                                                                                                                                                                                                                                                                                                                                                                                                                                                                                                                                                                                                                                                                                                                                                                                                                                                                                                                                                                                                                                                                                                                                                                                                                                                                                                                                                                                                                                                                                                                                                                                                                                                                                                                                                                                                                                                                                                                                                                                                                                                                                                                                                                                                                                                                                                                                                                                                                                                                                                                                                                                                                                                                                                                                                                                                                                                                                                                                                                                                                                                                                                                                                                                                                                                                                                                                                                                                                                                                                                                                                                                                                                                                                                                                                                                                                                                                                                                                                                                                                                                                                                                                                                                                                                            | NE Public Health Laboratory                                                                              | Genomics and Discovery, Respiratory Viruses Branch, Division of Viral Diseases, Centers for Disease Control and Prevention | Anna Kelleher; Anna Uehara; Brian Lynch; Clinton R. Paden; Haibin Wang; Han Jia Justin Ng; Jing Zhang; Krista Queen; Peter Cook; Suxiang Tong; Yan Li; Ying Tao                                                                                                                                                                                                                                                                                                                                                                                                                                                                                                       |                                                                                                                                                                                                                                                                                                                                                                                                                                                                                                                                                                                                                                                                                                                                                               |
| EPI_ISL_424874 to 424875                                                                                                                                                                                                                                                                                                                                                                                                                                                                                                                                                                                                                                                                                                                                                                                                                                                                                                                                                                                                                                                                                                                                                                                                                                                                                                                                                                                                                                                                                                                                                                                                                                                                                                                                                                                                                                                                                                                                                                                                                                                                                                                                                                                                                                                                                                                                                                                                                                                                                                                                                                                                                                                                                                                                                                                                                                                                                                                                                                                                                                                                                                                                                                                                                                                                                                                                                                                                                                                                                                                                                                                                                                                                                                                                                                                                                                                                                                                                                                                                                                                                                                                                                                                                                                                                                                                                                                                                                                                                                                                                                                                                                                                                                                                                                                                                                                                                                                                                                                                                                                                                                                                                                                                                                                                                                                                                                                                                                                                                                                                                                                                                                                                                                                                                                                                                                                                                                                                                                                                                                                                                                                                                                                                                                                                                                                                                                                                                                                                                                                                                                                                                                                                                                                                                                                                                                                                                                                                                                                                                                                                                                                                                                                                                                                                                                                                                                                                                                                                                                                                                                                                                                                     | NE Public Health Laboratory                                                                              | Pathogen Discovery, Respiratory Viruses Branch, Division of Viral Diseases, Centers for Disease Control and Prevention     | Alison S. Laufer Halpin; Anna Uehara; Christopher A. Elkins; Clinton R. Paden; Haibin Wang; Jing Zhang; Krista Queen; Mary S. Keckler; Rachel Marine; Suxiang Tong; Yan Li; Ying Tao                                                                                                                                                                                                                                                                                                                                                                                                                                                                                  |                                                                                                                                                                                                                                                                                                                                                                                                                                                                                                                                                                                                                                                                                                                                                               |
| EPI_ISL_605882 to 605923                                                                                                                                                                                                                                                                                                                                                                                                                                                                                                                                                                                                                                                                                                                                                                                                                                                                                                                                                                                                                                                                                                                                                                                                                                                                                                                                                                                                                                                                                                                                                                                                                                                                                                                                                                                                                                                                                                                                                                                                                                                                                                                                                                                                                                                                                                                                                                                                                                                                                                                                                                                                                                                                                                                                                                                                                                                                                                                                                                                                                                                                                                                                                                                                                                                                                                                                                                                                                                                                                                                                                                                                                                                                                                                                                                                                                                                                                                                                                                                                                                                                                                                                                                                                                                                                                                                                                                                                                                                                                                                                                                                                                                                                                                                                                                                                                                                                                                                                                                                                                                                                                                                                                                                                                                                                                                                                                                                                                                                                                                                                                                                                                                                                                                                                                                                                                                                                                                                                                                                                                                                                                                                                                                                                                                                                                                                                                                                                                                                                                                                                                                                                                                                                                                                                                                                                                                                                                                                                                                                                                                                                                                                                                                                                                                                                                                                                                                                                                                                                                                                                                                                                                                     | NGS Lab, DNA SOLUTION LTD.                                                                               | NGS Lab, DNA SOLUTION LTD.                                                                                                 | Chowdhury, M.; H.U.; Haider; Hasan; Hosen; K.N.; Khaleque, A.; Khan; Khan, M.; M.B.; M.F.A.; M.H.; M.L.; M.N.I.; Polol; Rabbi; Rahman, M.; Razu; Sufian, A.                                                                                                                                                                                                                                                                                                                                                                                                                                                                                                           |                                                                                                                                                                                                                                                                                                                                                                                                                                                                                                                                                                                                                                                                                                                                                               |
| EPI_ISL_420791 to 420792                                                                                                                                                                                                                                                                                                                                                                                                                                                                                                                                                                                                                                                                                                                                                                                                                                                                                                                                                                                                                                                                                                                                                                                                                                                                                                                                                                                                                                                                                                                                                                                                                                                                                                                                                                                                                                                                                                                                                                                                                                                                                                                                                                                                                                                                                                                                                                                                                                                                                                                                                                                                                                                                                                                                                                                                                                                                                                                                                                                                                                                                                                                                                                                                                                                                                                                                                                                                                                                                                                                                                                                                                                                                                                                                                                                                                                                                                                                                                                                                                                                                                                                                                                                                                                                                                                                                                                                                                                                                                                                                                                                                                                                                                                                                                                                                                                                                                                                                                                                                                                                                                                                                                                                                                                                                                                                                                                                                                                                                                                                                                                                                                                                                                                                                                                                                                                                                                                                                                                                                                                                                                                                                                                                                                                                                                                                                                                                                                                                                                                                                                                                                                                                                                                                                                                                                                                                                                                                                                                                                                                                                                                                                                                                                                                                                                                                                                                                                                                                                                                                                                                                                                                     | NH Department of Health and Human Services Public Health Labs                                            | Pathogen Discovery, Respiratory Viruses Branch, Division of Viral Diseases, Centers for Disease Control and Prevention     | Alison S. Laufer Halpin; Anne Uehara; Christopher A. Elkins; Clinton R. Paden; Haibin Wang; Jasmine Padilla; Jing Zhang; Justin Lee; Krista Queen; Mary S. Keckler; Rachel Marine; Suxiang Tong; Yan Li; Ying Tao                                                                                                                                                                                                                                                                                                                                                                                                                                                     |                                                                                                                                                                                                                                                                                                                                                                                                                                                                                                                                                                                                                                                                                                                                                               |
| EPI_ISL_1447059, EPI_ISL_1528493 to 1528496                                                                                                                                                                                                                                                                                                                                                                                                                                                                                                                                                                                                                                                                                                                                                                                                                                                                                                                                                                                                                                                                                                                                                                                                                                                                                                                                                                                                                                                                                                                                                                                                                                                                                                                                                                                                                                                                                                                                                                                                                                                                                                                                                                                                                                                                                                                                                                                                                                                                                                                                                                                                                                                                                                                                                                                                                                                                                                                                                                                                                                                                                                                                                                                                                                                                                                                                                                                                                                                                                                                                                                                                                                                                                                                                                                                                                                                                                                                                                                                                                                                                                                                                                                                                                                                                                                                                                                                                                                                                                                                                                                                                                                                                                                                                                                                                                                                                                                                                                                                                                                                                                                                                                                                                                                                                                                                                                                                                                                                                                                                                                                                                                                                                                                                                                                                                                                                                                                                                                                                                                                                                                                                                                                                                                                                                                                                                                                                                                                                                                                                                                                                                                                                                                                                                                                                                                                                                                                                                                                                                                                                                                                                                                                                                                                                                                                                                                                                                                                                                                                                                                                                                                  | NH Dept. of Health and Human Services Public Health Labs                                                 | Centers for Disease Control and Prevention Division of Viral Diseases, Pathogen Discovery                                  | Alison Laufer Halpin; Ben L. Rambo-Martin; Clinton R. Paden; Dakota Howard; Darlene Wagner; Dave Wentworth; Dhvani Batra; Jasmine Padilla; Justin Lee; Katie Dillon; Krista Queen; Kristen Knipe; Kristine Lacey; Mark Burroughs; Matthew Schmerer; Mili Sheth; Peter Cook; Sam Shepard; Sarah Nobles; Shoshona Le; Suxiang Tong; Vivien Dugan; Yvette Unoarumhi                                                                                                                                                                                                                                                                                                      |                                                                                                                                                                                                                                                                                                                                                                                                                                                                                                                                                                                                                                                                                                                                                               |
| EPI_ISL_1408892, EPI_ISL_1509930                                                                                                                                                                                                                                                                                                                                                                                                                                                                                                                                                                                                                                                                                                                                                                                                                                                                                                                                                                                                                                                                                                                                                                                                                                                                                                                                                                                                                                                                                                                                                                                                                                                                                                                                                                                                                                                                                                                                                                                                                                                                                                                                                                                                                                                                                                                                                                                                                                                                                                                                                                                                                                                                                                                                                                                                                                                                                                                                                                                                                                                                                                                                                                                                                                                                                                                                                                                                                                                                                                                                                                                                                                                                                                                                                                                                                                                                                                                                                                                                                                                                                                                                                                                                                                                                                                                                                                                                                                                                                                                                                                                                                                                                                                                                                                                                                                                                                                                                                                                                                                                                                                                                                                                                                                                                                                                                                                                                                                                                                                                                                                                                                                                                                                                                                                                                                                                                                                                                                                                                                                                                                                                                                                                                                                                                                                                                                                                                                                                                                                                                                                                                                                                                                                                                                                                                                                                                                                                                                                                                                                                                                                                                                                                                                                                                                                                                                                                                                                                                                                                                                                                                                             | NH Dept. of Health and Human Services Public Health Labs                                                 | Genomics and Discovery, Respiratory Viruses Branch, Division of Viral Diseases, Centers for Disease Control and Prevention | Adam Retchless; Anna Kelleher; Anna Montmayeur; Anna Uehara; Brian Lynch; Clinton R. Paden; Haibin Wang; Han Jia Justin Ng; Jing Zhang; Justin Lee; Krista Queen; Mark Burroughs; Peter Cook; Rachel Marine; Suxiang Tong; Yan Li; Ying Tao                                                                                                                                                                                                                                                                                                                                                                                                                           |                                                                                                                                                                                                                                                                                                                                                                                                                                                                                                                                                                                                                                                                                                                                                               |
| EPI_ISL_424876 to 424877                                                                                                                                                                                                                                                                                                                                                                                                                                                                                                                                                                                                                                                                                                                                                                                                                                                                                                                                                                                                                                                                                                                                                                                                                                                                                                                                                                                                                                                                                                                                                                                                                                                                                                                                                                                                                                                                                                                                                                                                                                                                                                                                                                                                                                                                                                                                                                                                                                                                                                                                                                                                                                                                                                                                                                                                                                                                                                                                                                                                                                                                                                                                                                                                                                                                                                                                                                                                                                                                                                                                                                                                                                                                                                                                                                                                                                                                                                                                                                                                                                                                                                                                                                                                                                                                                                                                                                                                                                                                                                                                                                                                                                                                                                                                                                                                                                                                                                                                                                                                                                                                                                                                                                                                                                                                                                                                                                                                                                                                                                                                                                                                                                                                                                                                                                                                                                                                                                                                                                                                                                                                                                                                                                                                                                                                                                                                                                                                                                                                                                                                                                                                                                                                                                                                                                                                                                                                                                                                                                                                                                                                                                                                                                                                                                                                                                                                                                                                                                                                                                                                                                                                                                     | NH Dept. of Health and Human Services Public Health Labs                                                 | Pathogen Discovery, Respiratory Viruses Branch, Division of Viral Diseases, Centers for Disease Control and Prevention     | Alison S. Laufer Halpin; Anna Uehara; Christopher A. Elkins; Clinton R. Paden; Haibin Wang; Jing Zhang; Krista Queen; Mary S. Keckler; Rachel Marine; Suxiang Tong; Yan Li; Ying Tao                                                                                                                                                                                                                                                                                                                                                                                                                                                                                  |                                                                                                                                                                                                                                                                                                                                                                                                                                                                                                                                                                                                                                                                                                                                                               |
| EPI_ISL_411950, EPI_ISL_411952 to 411953                                                                                                                                                                                                                                                                                                                                                                                                                                                                                                                                                                                                                                                                                                                                                                                                                                                                                                                                                                                                                                                                                                                                                                                                                                                                                                                                                                                                                                                                                                                                                                                                                                                                                                                                                                                                                                                                                                                                                                                                                                                                                                                                                                                                                                                                                                                                                                                                                                                                                                                                                                                                                                                                                                                                                                                                                                                                                                                                                                                                                                                                                                                                                                                                                                                                                                                                                                                                                                                                                                                                                                                                                                                                                                                                                                                                                                                                                                                                                                                                                                                                                                                                                                                                                                                                                                                                                                                                                                                                                                                                                                                                                                                                                                                                                                                                                                                                                                                                                                                                                                                                                                                                                                                                                                                                                                                                                                                                                                                                                                                                                                                                                                                                                                                                                                                                                                                                                                                                                                                                                                                                                                                                                                                                                                                                                                                                                                                                                                                                                                                                                                                                                                                                                                                                                                                                                                                                                                                                                                                                                                                                                                                                                                                                                                                                                                                                                                                                                                                                                                                                                                                                                     | NHC Key laboratory of Enteric Pathogenic Microbiology, Institute of Pathogenic Microbiology              | Jiangsu Provincial Center for Disease Control & Prevention                                                                 | Baoli Zhu; Bin Wu; Fengcai Zhu; Kangchen Zhao; Lunbiao Cui; Ming Wu; Tao Wu; Xiaojuan Zhu; Yin Chen; Yiyue Ge                                                                                                                                                                                                                                                                                                                                                                                                                                                                                                                                                         |                                                                                                                                                                                                                                                                                                                                                                                                                                                                                                                                                                                                                                                                                                                                                               |
| EPI_ISL_467436 to 467443, EPI_ISL_467492 to 467493, EPI_ISL_467507 to 467515, EPI_ISL_467517 to 467524, EPI_ISL_482710 to 482713, EPI_ISL_482724 to 482731, EPI_ISL_482848 to 482850, EPI_ISL_487277 to 487328, EPI_ISL_487348, EPI_ISL_495516 to 495534, EPI_ISL_495543 to 495562, EPI_ISL_498054 to 498126, EPI_ISL_509223 to 509371, EPI_ISL_515568 to 515799, EPI_ISL_518033 to 518053, EPI_ISL_529720 to 529803, EPI_ISL_535390 to 535488, EPI_ISL_535496 to 535572, EPI_ISL_602632 to 602930, EPI_ISL_605785 to 605790                                                                                                                                                                                                                                                                                                                                                                                                                                                                                                                                                                                                                                                                                                                                                                                                                                                                                                                                                                                                                                                                                                                                                                                                                                                                                                                                                                                                                                                                                                                                                                                                                                                                                                                                                                                                                                                                                                                                                                                                                                                                                                                                                                                                                                                                                                                                                                                                                                                                                                                                                                                                                                                                                                                                                                                                                                                                                                                                                                                                                                                                                                                                                                                                                                                                                                                                                                                                                                                                                                                                                                                                                                                                                                                                                                                                                                                                                                                                                                                                                                                                                                                                                                                                                                                                                                                                                                                                                                                                                                                                                                                                                                                                                                                                                                                                                                                                                                                                                                                                                                                                                                                                                                                                                                                                                                                                                                                                                                                                                                                                                                                                                                                                                                                                                                                                                                                                                                                                                                                                                                                                                                                                                                                                                                                                                                                                                                                                                                                                                                                                                                                                                                                                                                                                                                                                                                                                                                                                                                                                                                                                                                                                 | see above                                                                                                | NHLS-IALCH<br>KRISP, KZN Research Innovation and Sequencing Platform                                                       | Chimukangara B; Giandhari J; Khan S; Lessells R; Mdlalose K; Pillay S; Tegally H; Wilkinson E; York D; de Oliveira T                                                                                                                                                                                                                                                                                                                                                                                                                                                                                                                                                  |                                                                                                                                                                                                                                                                                                                                                                                                                                                                                                                                                                                                                                                                                                                                                               |
| EPI_ISL_459108, EPI_ISL_489581, EPI_ISL_534395, EPI_ISL_534634                                                                                                                                                                                                                                                                                                                                                                                                                                                                                                                                                                                                                                                                                                                                                                                                                                                                                                                                                                                                                                                                                                                                                                                                                                                                                                                                                                                                                                                                                                                                                                                                                                                                                                                                                                                                                                                                                                                                                                                                                                                                                                                                                                                                                                                                                                                                                                                                                                                                                                                                                                                                                                                                                                                                                                                                                                                                                                                                                                                                                                                                                                                                                                                                                                                                                                                                                                                                                                                                                                                                                                                                                                                                                                                                                                                                                                                                                                                                                                                                                                                                                                                                                                                                                                                                                                                                                                                                                                                                                                                                                                                                                                                                                                                                                                                                                                                                                                                                                                                                                                                                                                                                                                                                                                                                                                                                                                                                                                                                                                                                                                                                                                                                                                                                                                                                                                                                                                                                                                                                                                                                                                                                                                                                                                                                                                                                                                                                                                                                                                                                                                                                                                                                                                                                                                                                                                                                                                                                                                                                                                                                                                                                                                                                                                                                                                                                                                                                                                                                                                                                                                                               | NHSGGC West of Scotland Specialist Virology Centre / MRC-University of Glasgow Centre for Virus Research | Wellcome Sanger Institute for the COVID-19 Genomics UK (COG-UK) Consortium                                                 | Alasdair MacLean; Alice Broos; Ana da Silva Filipe; Antonia Ho; Cordelia Langford; Daniel Mair; David K. Jackson; David L Robertson; Dominic Kwiatkowski; Elihu Aranday-Cortes; Emma Thomson and Alex Alderton; Ewan Harrison; Ian Johnston; James Shepherd; Jenna Nichols; John Sillitoe on behalf of the Wellcome Sanger Institute COVID-19 Surveillance Team; Joseph Hughes; Kathy Li; Kathy Smollett; Kirstyn Brunker; Kyriaki Nomikou; Lily Tong; Marc Niebel; Natasha Jesudason; Natasha Johnson; Patawee Asamaphan; Rajiv Shah; Richard Orton; Roberto Amato; Rory Gunson; Sarah McDonald; Sonia Goncalves; Sreenu Vattipally; Stephen Carmichael; Yasmin Parr |                                                                                                                                                                                                                                                                                                                                                                                                                                                                                                                                                                                                                                                                                                                                                               |
| EPI_ISL_459095 to 459107, EPI_ISL_459109 to 459165, EPI_ISL_459505 to 459724, EPI_ISL_469930 to 470012, EPI_ISL_489380, EPI_ISL_489391 to 489393, EPI_ISL_489396, EPI_ISL_489401, EPI_ISL_489407 to 489408, EPI_ISL_489413, EPI_ISL_489429, EPI_ISL_489442, EPI_ISL_489449, EPI_ISL_489455, EPI_ISL_489470, EPI_ISL_489480, EPI_ISL_489489, EPI_ISL_489523, EPI_ISL_489530, EPI_ISL_489536 to 489537, EPI_ISL_489543, EPI_ISL_489547, EPI_ISL_489567, EPI_ISL_489578 to 489580, EPI_ISL_489582 to 489706, EPI_ISL_501633 to 501635, EPI_ISL_524494, EPI_ISL_524496, EPI_ISL_524499 to 524500, EPI_ISL_524504, EPI_ISL_524507, EPI_ISL_524510 to 524514, EPI_ISL_524516 to 524520, EPI_ISL_524523 to 524524, EPI_ISL_524526 to 524527, EPI_ISL_524532 to 524536, EPI_ISL_524539 to 524540, EPI_ISL_524543 to 524545, EPI_ISL_524545, EPI_ISL_524547, EPI_ISL_524549 to 524550, EPI_ISL_524552, EPI_ISL_524554 to 524557, EPI_ISL_524559, EPI_ISL_524561 to 524563, EPI_ISL_524565 to 524567, EPI_ISL_524569, EPI_ISL_524571 to 524572, EPI_ISL_530361, EPI_ISL_530366, EPI_ISL_530370, EPI_ISL_530377, EPI_ISL_530386, EPI_ISL_530388, EPI_ISL_530391, EPI_ISL_530398, EPI_ISL_530410, EPI_ISL_530429, EPI_ISL_530435, EPI_ISL_530440, EPI_ISL_530446, EPI_ISL_530448 to 530449, EPI_ISL_530523, EPI_ISL_530528, EPI_ISL_530533, EPI_ISL_530535, EPI_ISL_530542, EPI_ISL_530553, EPI_ISL_530562, EPI_ISL_530596, EPI_ISL_530642, EPI_ISL_530659, EPI_ISL_530673, EPI_ISL_530682, EPI_ISL_530689, EPI_ISL_530708, EPI_ISL_530722, EPI_ISL_530740, EPI_ISL_530743, EPI_ISL_530746, EPI_ISL_530754, EPI_ISL_530764, EPI_ISL_530766 to 530768, EPI_ISL_530826, EPI_ISL_530836, EPI_ISL_530845, EPI_ISL_530862, EPI_ISL_530871, EPI_ISL_530873, EPI_ISL_530904, EPI_ISL_530906, EPI_ISL_530923, EPI_ISL_530929, EPI_ISL_530953, EPI_ISL_530959, EPI_ISL_530962, EPI_ISL_530973, EPI_ISL_530976, EPI_ISL_530979, EPI_ISL_530983, EPI_ISL_530985 to 530986, EPI_ISL_530990, EPI_ISL_530996 to 530997, EPI_ISL_531002, EPI_ISL_531004, EPI_ISL_531006, EPI_ISL_531017, EPI_ISL_531020, EPI_ISL_531032 to 531033, EPI_ISL_531038, EPI_ISL_531040, EPI_ISL_531045, EPI_ISL_531048 to 531049, EPI_ISL_531052, EPI_ISL_531054, EPI_ISL_531056 to 531057, EPI_ISL_531065, EPI_ISL_531079, EPI_ISL_531083, EPI_ISL_531087, EPI_ISL_531091, EPI_ISL_531096, EPI_ISL_531099 to 531100, EPI_ISL_531103 to 531104, EPI_ISL_531114, EPI_ISL_531116, EPI_ISL_531118, EPI_ISL_531123, EPI_ISL_531126, EPI_ISL_531130 to 531131, EPI_ISL_531142, EPI_ISL_531147, EPI_ISL_531154 to 531157, EPI_ISL_531159, EPI_ISL_531166, EPI_ISL_531174 to 531175, EPI_ISL_531188 to 531189, EPI_ISL_531198, EPI_ISL_531207, EPI_ISL_531212, EPI_ISL_531214, EPI_ISL_531223, EPI_ISL_531249, EPI_ISL_531266, EPI_ISL_531321, EPI_ISL_531330, EPI_ISL_531365, EPI_ISL_531374, EPI_ISL_531382, EPI_ISL_531412, EPI_ISL_531416, EPI_ISL_531422, EPI_ISL_531432, EPI_ISL_531442, EPI_ISL_531464, EPI_ISL_531470, EPI_ISL_531473, EPI_ISL_531476 to 531477, EPI_ISL_531480, EPI_ISL_531483 to 531485, EPI_ISL_531492, EPI_ISL_531495, EPI_ISL_531500, EPI_ISL_531504, EPI_ISL_531524, EPI_ISL_531546, EPI_ISL_531548, EPI_ISL_531557, EPI_ISL_531563 to 531565, EPI_ISL_531569 to 531570, EPI_ISL_531575, EPI_ISL_531577, EPI_ISL_531583, EPI_ISL_531590, EPI_ISL_531595, EPI_ISL_531598 to 531599, EPI_ISL_531607, EPI_ISL_531609, EPI_ISL_531617 to 531618, EPI_ISL_531625, EPI_ISL_531631, EPI_ISL_531634, EPI_ISL_531638 to 531639, EPI_ISL_531649, EPI_ISL_531660, EPI_ISL_531668, EPI_ISL_531672, EPI_ISL_531677 to 531678, EPI_ISL_531687, EPI_ISL_531689 to 531691, EPI_ISL_531702 to 531703, EPI_ISL_531714, EPI_ISL_531727, EPI_ISL_531730, EPI_ISL_531732, EPI_ISL_531743, EPI_ISL_531753 to 531755, EPI_ISL_531758, EPI_ISL_531768, EPI_ISL_531779, EPI_ISL_531788, EPI_ISL_531792, EPI_ISL_531801 to 531802, EPI_ISL_531805, EPI_ISL_531814 to 531815, EPI_ISL_531821, EPI_ISL_531824, EPI_ISL_531832, EPI_ISL_531842, EPI_ISL_531851, EPI_ISL_531856 to 531858, EPI_ISL_531862 to 531863, EPI_ISL_531865, EPI_ISL_531873, EPI_ISL_531877, EPI_ISL_531880 to 531881, EPI_ISL_531884, EPI_ISL_531887, EPI_ISL_531889 to 531890, EPI_ISL_531892, EPI_ISL_531894, EPI_ISL_531905, EPI_ISL_531912 to 531913, EPI_ISL_531918 to 531919, EPI_ISL_531925, EPI_ISL_531929, EPI_ISL_531932 to 531933, EPI_ISL_531935 to 531936, EPI_ISL_531943, EPI_ISL_531945, EPI_ISL_531951, EPI_ISL_531954, EPI_ISL_531963, EPI_ISL_531973, EPI_ISL_531978 to 531979, EPI_ISL_531982, EPI_ISL_531984, EPI_ISL_531987, EPI_ISL_531990, EPI_ISL_531995, EPI_ISL_532003 to 532005, EPI_ISL_532007, EPI_ISL_532018, EPI_ISL_532024, EPI_ISL_532032, EPI_ISL_532038, EPI_ISL_532049, EPI_ISL_532053, EPI_ISL_532055, EPI_ISL_532057, EPI_ISL_532062, EPI_ISL_532070 to 532071, EPI_ISL_532076 to 532078, EPI_ISL_532080 to 532081, EPI_ISL_532085, EPI_ISL_532093 to 532094, EPI_ISL_532098, EPI_ISL_532102, EPI_ISL_532105, EPI_ISL_532118, EPI_ISL_532123, EPI_ISL_532125, EPI_ISL_532129 to 532131, EPI_ISL_532138, EPI_ISL_532153, EPI_ISL_532168, EPI_ISL_532178, EPI_ISL_532186, EPI_ISL_532192, EPI_ISL_532194 to 532197, EPI_ISL_532200, EPI_ISL_532203, EPI_ISL_532210, EPI_ISL_532214, EPI_ISL_532219, EPI_ISL_532221, EPI_ISL_532235, EPI_ISL_532241, EPI_ISL_532244, EPI_ISL_532249, EPI_ISL_532258, EPI_ISL_532263, EPI_ISL_532271 to 532272, EPI_ISL_532275 to 532276, EPI_ISL_532278, EPI_ISL_532283, EPI_ISL_532288, EPI_ISL_532293, EPI_ISL_532301, EPI_ISL_532311, EPI_ISL_532316 to 532317, EPI_ISL_532321, EPI_ISL_532328 to 532328, EPI_ISL_532334 to 532335, EPI_ISL_532338, EPI_ISL_532340, EPI_ISL_532342, EPI_ISL_532347, EPI_ISL_532349, EPI_ISL_532351, EPI_ISL_532353, EPI_ISL_532355 to 532356, EPI_ISL_532363 to 532366, EPI_ISL_532379, EPI_ISL_532384, EPI_ISL_532390, EPI_ISL_532399, EPI_ISL_532402, EPI_ISL_532404, EPI_ISL_532414, EPI_ISL_532430 to 532432, EPI_ISL_532438, EPI_ISL_532440, EPI_ISL_532444, EPI_ISL_532446, EPI_ISL_532452, EPI_ISL_532454, EPI_ISL_532456, EPI_ISL_532463 to 532464, EPI_ISL_532469, EPI_ISL_532472 to 532473, EPI_ISL_532480, EPI_ISL_532484, EPI_ISL_532490, EPI_ISL_532492 to 532493, EPI_ISL_532506, EPI_ISL_532510, EPI_ISL_532512, EPI_ISL_532514 to 532515, EPI_ISL_532518, EPI_ISL_532523, EPI_ISL_532529, EPI_ISL_532538, EPI_ISL_532587, EPI_ISL_532594, EPI_ISL_532598, EPI_ISL_532620 to 532621, EPI_ISL_532625 to 532626, EPI_ISL_532633, EPI_ISL_532639, EPI_ISL_532648, EPI_ISL_532670, EPI_ISL_532697, EPI_ISL_532715, EPI_ISL_532733, EPI_ISL_532738, EPI_ISL_532744, EPI_ISL_532746, EPI_ISL_532750, EPI_ISL_532753, EPI_ISL_532765, EPI_ISL_532767, EPI_ISL_532784, EPI_ISL_532786, EPI_ISL_532791, EPI_ISL_532811, EPI_ISL_532835, EPI_ISL_532838, EPI_ISL_532844, EPI_ISL_532858, EPI_ISL_532864 to 532865, EPI_ISL_532874 to 532876, EPI_ISL_532878, EPI_ISL_532885 to 532886, EPI_ISL_532891, EPI_ISL_532895, EPI_ISL_532896, EPI_ISL_532905 to 532906, EPI_ISL_532915, EPI_ISL_532932 to 532933, EPI_ISL_532948, EPI_ISL_532962, EPI_ISL_532988, EPI_ISL_533000, EPI_ISL_533016, EPI_ISL_533027, EPI_ISL_533072, EPI_ISL_533228, EPI_ISL_533230 to 533232, EPI_ISL_533236 to 533237, EPI_ISL_533241, EPI_ISL_533252, EPI_ISL_533256, EPI_ISL_533262, EPI_ISL_533270 to 533271, EPI_ISL_533283, EPI_ISL_533289, EPI_ISL_533311, EPI_ISL_533343, EPI_ISL_533346, EPI_ISL_533350 to 533351, EPI_ISL_533355, EPI_ISL_533358, EPI_ISL_533365, EPI_ISL_533376, EPI_ISL_533394, EPI_ISL_533396, EPI_ISL_533406, EPI_ISL_533419, EPI_ISL_533421, EPI_ISL_533435 to 533439, EPI_ISL_534396 to 534633, EPI_ISL_534635 to 534690 | see above                                                                                                | NHSGGC West of Scotland Specialist Virology Centre / MRC-University of Glasgow Centre for Virus Research                   | Wellcome Sanger Institute for the COVID-19 Genomics UK (COG-UK) consortium                                                                                                                                                                                                                                                                                                                                                                                                                                                                                                                                                                                            | Alasdair MacLean; Alice Broos; Ana da Silva Filipe; Antonia Ho; Cordelia Langford; Daniel Mair; David K. Jackson; David L Robertson; Dominic Kwiatkowski; Elihu Aranday-Cortes; Emma Thomson and Alex Alderton; Ewan Harrison; Ian Johnston; James Shepherd; Jenna Nichols; John Sillitoe on behalf of the Wellcome Sanger Institute COVID-19 Surveillance Team ( <a href="http://www.sanger.ac.uk/covid-team">http://www.sanger.ac.uk/covid-team</a> ); Joseph Hughes; Kathy Li; Kathy Smollett; Kirstyn Brunker; Kyriaki Nomikou; Lily Tong; Marc Niebel; Natasha Jesudason; Natasha Johnson; Patawee Asamaphan; Rajiv Shah; Richard Orton; Roberto Amato; Rory Gunson; Sarah McDonald; Sonia Goncalves; Sreenu Vattipally; Stephen Carmichael; Yasmin Parr |
| EPI_ISL_418241 to 418242, EPI_ISL_420037                                                                                                                                                                                                                                                                                                                                                                                                                                                                                                                                                                                                                                                                                                                                                                                                                                                                                                                                                                                                                                                                                                                                                                                                                                                                                                                                                                                                                                                                                                                                                                                                                                                                                                                                                                                                                                                                                                                                                                                                                                                                                                                                                                                                                                                                                                                                                                                                                                                                                                                                                                                                                                                                                                                                                                                                                                                                                                                                                                                                                                                                                                                                                                                                                                                                                                                                                                                                                                                                                                                                                                                                                                                                                                                                                                                                                                                                                                                                                                                                                                                                                                                                                                                                                                                                                                                                                                                                                                                                                                                                                                                                                                                                                                                                                                                                                                                                                                                                                                                                                                                                                                                                                                                                                                                                                                                                                                                                                                                                                                                                                                                                                                                                                                                                                                                                                                                                                                                                                                                                                                                                                                                                                                                                                                                                                                                                                                                                                                                                                                                                                                                                                                                                                                                                                                                                                                                                                                                                                                                                                                                                                                                                                                                                                                                                                                                                                                                                                                                                                                                                                                                                                     | NIC Viral Respiratory Unit - Institut Pasteur of Algeria                                                 | National Reference Center for Viruses of Respiratory Infections, Institut Pasteur, Paris                                   | Angela Brisebarre; Etienne Simon-Lorière; Fawzi Derrar; Flora Donati; Marion Barbet; Maud Vanpeene; Mélanie Albert; Méline Bizard; Sylvie Behillil; Sylvie van der Werf; Vincent Enouf                                                                                                                                                                                                                                                                                                                                                                                                                                                                                |                                                                                                                                                                                                                                                                                                                                                                                                                                                                                                                                                                                                                                                                                                                                                               |
| EPI_ISL_1538519, EPI_ISL_1538849 to 1538853                                                                                                                                                                                                                                                                                                                                                                                                                                                                                                                                                                                                                                                                                                                                                                                                                                                                                                                                                                                                                                                                                                                                                                                                                                                                                                                                                                                                                                                                                                                                                                                                                                                                                                                                                                                                                                                                                                                                                                                                                                                                                                                                                                                                                                                                                                                                                                                                                                                                                                                                                                                                                                                                                                                                                                                                                                                                                                                                                                                                                                                                                                                                                                                                                                                                                                                                                                                                                                                                                                                                                                                                                                                                                                                                                                                                                                                                                                                                                                                                                                                                                                                                                                                                                                                                                                                                                                                                                                                                                                                                                                                                                                                                                                                                                                                                                                                                                                                                                                                                                                                                                                                                                                                                                                                                                                                                                                                                                                                                                                                                                                                                                                                                                                                                                                                                                                                                                                                                                                                                                                                                                                                                                                                                                                                                                                                                                                                                                                                                                                                                                                                                                                                                                                                                                                                                                                                                                                                                                                                                                                                                                                                                                                                                                                                                                                                                                                                                                                                                                                                                                                                                                  | NIO, Zakad Biochemii i Analityki Klinicznej                                                              | 1. National Institute of Public Health - National Institute of Hygiene; 2. Eurofins Genomics Europe Sequencing GmbH        | ECDC COVID-19 WGS support team; Eurofins Genomics Europe Sequencing Team; Gierczyki Rafa; Sadkowska-Todys Magorzata; Wokowicz Tomasz; Zacharczuk Katarzyna                                                                                                                                                                                                                                                                                                                                                                                                                                                                                                            |                                                                                                                                                                                                                                                                                                                                                                                                                                                                                                                                                                                                                                                                                                                                                               |
| EPI_ISL_452192 to 452217, EPI_ISL_454521 to 454570, EPI_ISL_479493 to 479573, EPI_ISL_479657 to 479661, EPI_ISL_479776, EPI_ISL_577639 to 577713, EPI_ISL_577716 to 577717, EPI_ISL_577720 to 577731, EPI_ISL_582241                                                                                                                                                                                                                                                                                                                                                                                                                                                                                                                                                                                                                                                                                                                                                                                                                                                                                                                                                                                                                                                                                                                                                                                                                                                                                                                                                                                                                                                                                                                                                                                                                                                                                                                                                                                                                                                                                                                                                                                                                                                                                                                                                                                                                                                                                                                                                                                                                                                                                                                                                                                                                                                                                                                                                                                                                                                                                                                                                                                                                                                                                                                                                                                                                                                                                                                                                                                                                                                                                                                                                                                                                                                                                                                                                                                                                                                                                                                                                                                                                                                                                                                                                                                                                                                                                                                                                                                                                                                                                                                                                                                                                                                                                                                                                                                                                                                                                                                                                                                                                                                                                                                                                                                                                                                                                                                                                                                                                                                                                                                                                                                                                                                                                                                                                                                                                                                                                                                                                                                                                                                                                                                                                                                                                                                                                                                                                                                                                                                                                                                                                                                                                                                                                                                                                                                                                                                                                                                                                                                                                                                                                                                                                                                                                                                                                                                                                                                                                                         | see above                                                                                                | NIV Influenza                                                                                                              | see above                                                                                                                                                                                                                                                                                                                                                                                                                                                                                                                                                                                                                                                             |                                                                                                                                                                                                                                                                                                                                                                                                                                                                                                                                                                                                                                                                                                                                                               |
| EPI_ISL_450321 to 450325                                                                                                                                                                                                                                                                                                                                                                                                                                                                                                                                                                                                                                                                                                                                                                                                                                                                                                                                                                                                                                                                                                                                                                                                                                                                                                                                                                                                                                                                                                                                                                                                                                                                                                                                                                                                                                                                                                                                                                                                                                                                                                                                                                                                                                                                                                                                                                                                                                                                                                                                                                                                                                                                                                                                                                                                                                                                                                                                                                                                                                                                                                                                                                                                                                                                                                                                                                                                                                                                                                                                                                                                                                                                                                                                                                                                                                                                                                                                                                                                                                                                                                                                                                                                                                                                                                                                                                                                                                                                                                                                                                                                                                                                                                                                                                                                                                                                                                                                                                                                                                                                                                                                                                                                                                                                                                                                                                                                                                                                                                                                                                                                                                                                                                                                                                                                                                                                                                                                                                                                                                                                                                                                                                                                                                                                                                                                                                                                                                                                                                                                                                                                                                                                                                                                                                                                                                                                                                                                                                                                                                                                                                                                                                                                                                                                                                                                                                                                                                                                                                                                                                                                                                     | NIV Pune                                                                                                 | CSIR-Centre for Cellular and Molecular Biology                                                                             | A. Awahle; A. Gondhalikar; A. Jagtap; Archana Bharadwaj Siva; B. Minhas S. Bharadwaj; Deepak Kumar; Dewi Prasad Vijayashankara; Dhivya Vedagiri; Disha Nanda; Divya Das; Divya Gupta; Dr ML Choudhary; Dr Priya Abraham; Dr V A Potdar; G. Aditya Kumar; Gangunala Shrinivas Reddy; H Kaushal Y. Gurav; H. Kengle; Jotin Gogoi; K. Patel; Karthik Bharadwaj Tallapaka; Koushick Sivakumar; Krishnan Harinivas Harshan; Lamuk Zaveri; M. Kakade; Manish; Manish Bhattacharjee; N Srivastava; Namami Gaur; P Shinde; P. Malsane; Payel Mukherjee; Poja Ramesh Gupta; Priya Singh; Purushotham                                                                           |                                                                                                                                                                                                                                                                                                                                                                                                                                                                                                                                                                                                                                                                                                                                                               |



|                                                                                                                                                                                                                                                                                                                                                                                                                                                                                                                                                                                                                                                                                                                                                                                                                                                   |           |                                                                                                                 |                                                                                                                                                                                                                                                                                                                                                                                                                                                                                                                                                                                                                                         |
|---------------------------------------------------------------------------------------------------------------------------------------------------------------------------------------------------------------------------------------------------------------------------------------------------------------------------------------------------------------------------------------------------------------------------------------------------------------------------------------------------------------------------------------------------------------------------------------------------------------------------------------------------------------------------------------------------------------------------------------------------------------------------------------------------------------------------------------------------|-----------|-----------------------------------------------------------------------------------------------------------------|-----------------------------------------------------------------------------------------------------------------------------------------------------------------------------------------------------------------------------------------------------------------------------------------------------------------------------------------------------------------------------------------------------------------------------------------------------------------------------------------------------------------------------------------------------------------------------------------------------------------------------------------|
|                                                                                                                                                                                                                                                                                                                                                                                                                                                                                                                                                                                                                                                                                                                                                                                                                                                   |           |                                                                                                                 | Vodnala; R. Gunjkar; Rajan Kumar Jha; Rakesh K Mishra; Ravi Prasad Mukku; Renu Sudhakar; S. Bhorekar; S. Digraskar; S. Hundekar; S. Jadhav; S. Salve; S. Tomar; Sakshi Shambhavi; Santosh Kumar Kuncha; Shagufa Khan; Shradha Vijay Lahoti; Sofia Banu; Simesh Gorde; Sujoy Deb; Swati Bayyana; Tulasi Nagabandi; U. Saha; V Malik; V. Awatade; V. Vipat; Vishal Sah; Yogesh Balakartik; Zeba Rizvi                                                                                                                                                                                                                                     |
| EPI_ISL_1446412, EPI_ISL_1446415, EPI_ISL_1446436, EPI_ISL_1446444, EPI_ISL_1446712 to 1446713, EPI_ISL_1447027 to 1447028, EPI_ISL_1516172 to 1516187, EPI_ISL_1528326 to 1528338                                                                                                                                                                                                                                                                                                                                                                                                                                                                                                                                                                                                                                                                | see above | NJ Public Health and Environmental Laboratories                                                                 | Centers for Disease Control and Prevention Division of Viral Diseases, Pathogen Discovery                                                                                                                                                                                                                                                                                                                                                                                                                                                                                                                                               |
| EPI_ISL_424878, EPI_ISL_424901, EPI_ISL_452116 to 452117                                                                                                                                                                                                                                                                                                                                                                                                                                                                                                                                                                                                                                                                                                                                                                                          |           | NJ Public Health and Environmental Laboratories                                                                 | Pathogen Discovery, Respiratory Viruses Branch, Division of Viral Diseases, Centers for Disease Control and Prevention                                                                                                                                                                                                                                                                                                                                                                                                                                                                                                                  |
| EPI_ISL_1493440 to 1493493, EPI_ISL_1559333 to 1559368                                                                                                                                                                                                                                                                                                                                                                                                                                                                                                                                                                                                                                                                                                                                                                                            |           | NJDOH, Public Health and Environmental Laboratories                                                             | NJ_PHEL                                                                                                                                                                                                                                                                                                                                                                                                                                                                                                                                                                                                                                 |
| EPI_ISL_1404997 to 1405049, EPI_ISL_1489657 to 1489716                                                                                                                                                                                                                                                                                                                                                                                                                                                                                                                                                                                                                                                                                                                                                                                            |           | NJDOH, Public Health and Environmental Laboratories                                                             | New Jersey Public Health and Environmental Laboratories (NJ PHEL)                                                                                                                                                                                                                                                                                                                                                                                                                                                                                                                                                                       |
| EPI_ISL_1530877 to 1530945                                                                                                                                                                                                                                                                                                                                                                                                                                                                                                                                                                                                                                                                                                                                                                                                                        |           | NJDOH, Public Health and Environmental Laboratories                                                             | New Jersey Public Health and Environmental Laboratories (NJPHLEL)                                                                                                                                                                                                                                                                                                                                                                                                                                                                                                                                                                       |
| EPI_ISL_452109, EPI_ISL_594462                                                                                                                                                                                                                                                                                                                                                                                                                                                                                                                                                                                                                                                                                                                                                                                                                    |           | NM Department of Health                                                                                         | Pathogen Discovery, Respiratory Viruses Branch, Division of Viral Diseases, Centers for Disease Control and Prevention                                                                                                                                                                                                                                                                                                                                                                                                                                                                                                                  |
| EPI_ISL_1516236 to 1516244                                                                                                                                                                                                                                                                                                                                                                                                                                                                                                                                                                                                                                                                                                                                                                                                                        |           | NM Dept. Health, Scientific Laboratory Division                                                                 | Centers for Disease Control and Prevention Division of Viral Diseases, Pathogen Discovery                                                                                                                                                                                                                                                                                                                                                                                                                                                                                                                                               |
| EPI_ISL_422382, EPI_ISL_422384, EPI_ISL_422387, EPI_ISL_422390, EPI_ISL_422394, EPI_ISL_422397 to 422406                                                                                                                                                                                                                                                                                                                                                                                                                                                                                                                                                                                                                                                                                                                                          |           | NMIMR, Department of Virology                                                                                   | WACCBIPI, University of Ghana                                                                                                                                                                                                                                                                                                                                                                                                                                                                                                                                                                                                           |
| EPI_ISL_1540614 to 1540615, EPI_ISL_1540617 to 1540634, EPI_ISL_1540636 to 1540701, EPI_ISL_1540703 to 1540705                                                                                                                                                                                                                                                                                                                                                                                                                                                                                                                                                                                                                                                                                                                                    |           | NMVRVI                                                                                                          | Lithuanian University of Health Sciences Hospital, Department of Genetics and Molecular Medicine                                                                                                                                                                                                                                                                                                                                                                                                                                                                                                                                        |
| EPI_ISL_1395750, EPI_ISL_1395753 to 1395754, EPI_ISL_1395756 to 1395758, EPI_ISL_1395760, EPI_ISL_1395763, EPI_ISL_1397393, EPI_ISL_1397395, EPI_ISL_1397403, EPI_ISL_1397405, EPI_ISL_1397407, EPI_ISL_1397409, EPI_ISL_1397650 to 1397693, EPI_ISL_1482346 to 1482353                                                                                                                                                                                                                                                                                                                                                                                                                                                                                                                                                                           | see above | NORTH SHORE UNIVERSITY HOSPITAL                                                                                 | Wadsworth Center, New York State Department of Health                                                                                                                                                                                                                                                                                                                                                                                                                                                                                                                                                                                   |
| EPI_ISL_1395707, EPI_ISL_1397829 to 1397830, EPI_ISL_1397907 to 1397911, EPI_ISL_1398042, EPI_ISL_1399068 to 1398119, EPI_ISL_1462556, EPI_ISL_1462558 to 1462559, EPI_ISL_1462561, EPI_ISL_1462563 to 1462564, EPI_ISL_1462566 to 1462567, EPI_ISL_1462569 to 1462570, EPI_ISL_1462578 to 1462579, EPI_ISL_1462581 to 1462582, EPI_ISL_1462584 to 1462585, EPI_ISL_1462589, EPI_ISL_1462591, EPI_ISL_1462593 to 1462594, EPI_ISL_1462596 to 1462597, EPI_ISL_1462599 to 1462601, EPI_ISL_1462603 to 1462604, EPI_ISL_1462606 to 1462610, EPI_ISL_1462612 to 1462613, EPI_ISL_1462615, EPI_ISL_1462617 to 1462618, EPI_ISL_1462620 to 1462621, EPI_ISL_1462623 to 1462624, EPI_ISL_1465678 to 1465682, EPI_ISL_1465755 to 1465759, EPI_ISL_1465761 to 1465766, EPI_ISL_1465835 to 1465837, EPI_ISL_1482556 to 1482572, EPI_ISL_1482580 to 1482616 | see above | NORTHWELL HEALTH LABORATORIES                                                                                   | Wadsworth Center, New York State Department of Health                                                                                                                                                                                                                                                                                                                                                                                                                                                                                                                                                                                   |
| EPI_ISL_1434241                                                                                                                                                                                                                                                                                                                                                                                                                                                                                                                                                                                                                                                                                                                                                                                                                                   |           | NOVELAB VILLEFRANCHE                                                                                            | CNR Virus des Infections Respiratoires - France SUD                                                                                                                                                                                                                                                                                                                                                                                                                                                                                                                                                                                     |
| EPI_ISL_416742 to 416743                                                                                                                                                                                                                                                                                                                                                                                                                                                                                                                                                                                                                                                                                                                                                                                                                          |           | NRL for Influenza, Centrum Epidemiology and Microbiology of National Institute of Public Health, Czech Republic | Charite Universitaetsmedizin Berlin, Institute of Virology                                                                                                                                                                                                                                                                                                                                                                                                                                                                                                                                                                              |
| EPI_ISL_514440 to 514442, EPI_ISL_514580, EPI_ISL_514613 to 514615                                                                                                                                                                                                                                                                                                                                                                                                                                                                                                                                                                                                                                                                                                                                                                                |           | NSTU COVID-19 Diagnostic Center                                                                                 | NSU Genome Research Institute (NGRI), North South University                                                                                                                                                                                                                                                                                                                                                                                                                                                                                                                                                                            |
| EPI_ISL_514434                                                                                                                                                                                                                                                                                                                                                                                                                                                                                                                                                                                                                                                                                                                                                                                                                                    |           | NSTU COVID-19 Diagnostic Center,                                                                                | NSU Genome Research Institute (NGRI), North South University                                                                                                                                                                                                                                                                                                                                                                                                                                                                                                                                                                            |
| EPI_ISL_458712, EPI_ISL_492457, EPI_ISL_492467, EPI_ISL_492929, EPI_ISL_492931                                                                                                                                                                                                                                                                                                                                                                                                                                                                                                                                                                                                                                                                                                                                                                    |           | NU-OMICS DNA Sequencing research facility, Northumbria University                                               | Wellcome Sanger Institute for the COVID-19 Genomics UK (COG-UK) Consortium                                                                                                                                                                                                                                                                                                                                                                                                                                                                                                                                                              |
| EPI_ISL_458578 to 458711, EPI_ISL_458713 to 458718, EPI_ISL_469302 to 469344, EPI_ISL_469805, EPI_ISL_469915, EPI_ISL_488003 to 488186, EPI_ISL_488456 to 488836, EPI_ISL_489064 to 489119, EPI_ISL_489121 to 489155, EPI_ISL_492207 to 492210, EPI_ISL_492450 to 492456, EPI_ISL_492458 to 492466, EPI_ISL_492468 to 492494, EPI_ISL_492916 to 492928, EPI_ISL_492930, EPI_ISL_492932 to 492977                                                                                                                                                                                                                                                                                                                                                                                                                                                  | see above | NU-OMICS DNA Sequencing research facility, Northumbria University                                               | Wellcome Sanger Institute for the COVID-19 Genomics UK (COG-UK) consortium                                                                                                                                                                                                                                                                                                                                                                                                                                                                                                                                                              |
| EPI_ISL_1446743, EPI_ISL_1528420 to 1528423                                                                                                                                                                                                                                                                                                                                                                                                                                                                                                                                                                                                                                                                                                                                                                                                       |           | NV State Public Health Laboratory                                                                               | Centers for Disease Control and Prevention Division of Viral Diseases, Pathogen Discovery                                                                                                                                                                                                                                                                                                                                                                                                                                                                                                                                               |
| EPI_ISL_426429                                                                                                                                                                                                                                                                                                                                                                                                                                                                                                                                                                                                                                                                                                                                                                                                                                    |           | NV State Public Health Laboratory                                                                               | Pathogen Discovery, Respiratory Viruses Branch, Division of Viral Diseases, Centers for Disease Control and Prevention                                                                                                                                                                                                                                                                                                                                                                                                                                                                                                                  |
| EPI_ISL_424879                                                                                                                                                                                                                                                                                                                                                                                                                                                                                                                                                                                                                                                                                                                                                                                                                                    |           | NV-Southern Nevada Public Health Laboratory                                                                     | Pathogen Discovery, Respiratory Viruses Branch, Division of Viral Diseases, Centers for Disease Control and Prevention                                                                                                                                                                                                                                                                                                                                                                                                                                                                                                                  |
| EPI_ISL_1446974 to 1446975, EPI_ISL_1447060 to 1447062, EPI_ISL_1516205 to 1516212                                                                                                                                                                                                                                                                                                                                                                                                                                                                                                                                                                                                                                                                                                                                                                |           | NYC Department of Health and Mental Hygiene                                                                     | Centers for Disease Control and Prevention Division of Viral Diseases, Pathogen Discovery                                                                                                                                                                                                                                                                                                                                                                                                                                                                                                                                               |
| EPI_ISL_420793, EPI_ISL_424906, EPI_ISL_436047 to 436082, EPI_ISL_480784 to 480785                                                                                                                                                                                                                                                                                                                                                                                                                                                                                                                                                                                                                                                                                                                                                                |           | NYC Department of Health and Mental Hygiene                                                                     | Pathogen Discovery, Respiratory Viruses Branch, Division of Viral Diseases, Centers for Disease Control and Prevention                                                                                                                                                                                                                                                                                                                                                                                                                                                                                                                  |
| EPI_ISL_1395706, EPI_ISL_1395708 to 1395709, EPI_ISL_1397623 to 1397628, EPI_ISL_1398284 to 1398311, EPI_ISL_1398318 to 1398330, EPI_ISL_1398340 to 1398352, EPI_ISL_1461319 to 1461321, EPI_ISL_1461323 to 1461355, EPI_ISL_1465714 to 1465722, EPI_ISL_1465805 to 1465834, EPI_ISL_1482287 to 1482295                                                                                                                                                                                                                                                                                                                                                                                                                                                                                                                                           | see above | NYC Pandemic Response Lab                                                                                       | Wadsworth Center, New York State Department of Health                                                                                                                                                                                                                                                                                                                                                                                                                                                                                                                                                                                   |
| EPI_ISL_594457                                                                                                                                                                                                                                                                                                                                                                                                                                                                                                                                                                                                                                                                                                                                                                                                                                    |           | NYS Department of Health                                                                                        | Pathogen Discovery, Respiratory Viruses Branch, Division of Viral Diseases, Centers for Disease Control and Prevention                                                                                                                                                                                                                                                                                                                                                                                                                                                                                                                  |
| EPI_ISL_416830 to 416832, EPI_ISL_418190 to 418205, EPI_ISL_418254, EPI_ISL_418968 to                                                                                                                                                                                                                                                                                                                                                                                                                                                                                                                                                                                                                                                                                                                                                             |           | NYU Langone Health                                                                                              | Department of Pathology and Medicine, New York University School of Medicine                                                                                                                                                                                                                                                                                                                                                                                                                                                                                                                                                            |
|                                                                                                                                                                                                                                                                                                                                                                                                                                                                                                                                                                                                                                                                                                                                                                                                                                                   |           |                                                                                                                 | Alison Laufer Halpin; Ben L. Rambo-Martin; Clinton R. Paden; Dakota Howard; Darlene Wagner; Dave Wentworth; Dhvani Batra; Jasmine Padilla; Justin Lee; Katie Dillon; Krista Queen; Kristen Knipe; Kristine Lacek; Mark Burroughs; Matthew Schmerer; Mili Sheth; Peter Cook; Sam Shepard; Sarah Nobles; Shoshona Le; Suxiang Tong; Vivien Dugan; Yvette Unoarumhi                                                                                                                                                                                                                                                                        |
|                                                                                                                                                                                                                                                                                                                                                                                                                                                                                                                                                                                                                                                                                                                                                                                                                                                   |           |                                                                                                                 | Alison S. Laufer Halpin; Anna Montmayeur; Anna Uehara; Christopher A. Elkins; Clinton R. Paden; Haibin Wang; Jing Zhang; Krista Queen; Mary S. Keckler; Rachel Marine; Suxiang Tong; Yan Li; Ying Tao; Zachary Weiner                                                                                                                                                                                                                                                                                                                                                                                                                   |
|                                                                                                                                                                                                                                                                                                                                                                                                                                                                                                                                                                                                                                                                                                                                                                                                                                                   |           |                                                                                                                 | Byeong Jeong; Dana Woell; Jacquelyn Deverell; Lindsey Bodnar; Matthew Scarnati; Mohammad M Ali; Shiv K. Verma                                                                                                                                                                                                                                                                                                                                                                                                                                                                                                                           |
|                                                                                                                                                                                                                                                                                                                                                                                                                                                                                                                                                                                                                                                                                                                                                                                                                                                   |           |                                                                                                                 | Byeong Jeong; Dana Woell; Lindsey Bodnar; Shiv K. Verma                                                                                                                                                                                                                                                                                                                                                                                                                                                                                                                                                                                 |
|                                                                                                                                                                                                                                                                                                                                                                                                                                                                                                                                                                                                                                                                                                                                                                                                                                                   |           |                                                                                                                 | Byeong Jeong; Dana Woell; Jacquelyn Deverell; Lindsey Bodnar; Matthew Scarnati; Mohammad M Ali; Shiv K. Verma                                                                                                                                                                                                                                                                                                                                                                                                                                                                                                                           |
|                                                                                                                                                                                                                                                                                                                                                                                                                                                                                                                                                                                                                                                                                                                                                                                                                                                   |           |                                                                                                                 | Alison S. Laufer Halpin; Anna Montmayeur; Anna Uehara; Christopher A. Elkins; Clinton Paden; Clinton R. Paden; Haibin Wang; Jing Zhang; Julu Bhatnagar; Krista Queen; Mary S. Keckler; Rachel Marine; Suxiang Tong; Yan Li; Ying Tao; Zachary Weiner                                                                                                                                                                                                                                                                                                                                                                                    |
|                                                                                                                                                                                                                                                                                                                                                                                                                                                                                                                                                                                                                                                                                                                                                                                                                                                   |           |                                                                                                                 | Alison Laufer Halpin; Ben L. Rambo-Martin; Clinton R. Paden; Dakota Howard; Darlene Wagner; Dave Wentworth; Dhvani Batra; Jasmine Padilla; Justin Lee; Katie Dillon; Krista Queen; Kristen Knipe; Kristine Lacek; Mark Burroughs; Matthew Schmerer; Mili Sheth; Peter Cook; Sam Shepard; Sarah Nobles; Shoshona Le; Suxiang Tong; Vivien Dugan; Yvette Unoarumhi                                                                                                                                                                                                                                                                        |
|                                                                                                                                                                                                                                                                                                                                                                                                                                                                                                                                                                                                                                                                                                                                                                                                                                                   |           |                                                                                                                 | Abraham Kwabena Anang; Augustina Arjaquah; Augustina Arjaquah; Bright Adu; Collins M. Misita; Collins M. Morang'a; Dominic S. Y. Amuzu; Erasmus Kotey; Evelyn Bonney; Fred Tei-Maya; George B. Kyei; Gordon A. Awandare; Ivy Asante; Joyce M. Ngoi; Kofi Bonney; Linda Boatema; Miriam Eshun; Peter Quashie; Selassie Kumordjie; Vanessa Magnusson; William Ampofo                                                                                                                                                                                                                                                                      |
|                                                                                                                                                                                                                                                                                                                                                                                                                                                                                                                                                                                                                                                                                                                                                                                                                                                   |           |                                                                                                                 | Astra Vitkauskienė; Darius Cereskevicius; Inga Nasvytiene; Mantas Saraukas; Marius Sukys; Rasa Ugenskiene; Renaldas Jurkevicius; Rima Vainoriene; Zilve Zemeckiene                                                                                                                                                                                                                                                                                                                                                                                                                                                                      |
|                                                                                                                                                                                                                                                                                                                                                                                                                                                                                                                                                                                                                                                                                                                                                                                                                                                   |           |                                                                                                                 | Alexis Russel; Alexis Russell; Catharine Prussing; Daryl M. Lamson; Erasmus Schneider; Erica Lasek-Nesselquist; John Kelly; Jonathan Plitnick; Kirsten St. George; Matthew Shudt; Melissa A Leisner; Navjot Singh                                                                                                                                                                                                                                                                                                                                                                                                                       |
|                                                                                                                                                                                                                                                                                                                                                                                                                                                                                                                                                                                                                                                                                                                                                                                                                                                   |           |                                                                                                                 | Antonin Bal; Bruno Lina; Gregory Destras; Gwendolyne Burfin; Hadrien Regue; Laurence Josset; Martine Valette; Quentin Semanas                                                                                                                                                                                                                                                                                                                                                                                                                                                                                                           |
|                                                                                                                                                                                                                                                                                                                                                                                                                                                                                                                                                                                                                                                                                                                                                                                                                                                   |           |                                                                                                                 | Akexander Nagy; Barbara Muehleman; Christian Drosten; Dusan Trnka; Helena Jirincova; Jaromira Vecerova; Jorn Beheim-Schwarzbach; Julia Schneider; Ludmila Novakova; Talitha Veith; Terry Jones; Victor M Corman                                                                                                                                                                                                                                                                                                                                                                                                                         |
|                                                                                                                                                                                                                                                                                                                                                                                                                                                                                                                                                                                                                                                                                                                                                                                                                                                   |           |                                                                                                                 | Abdus Sadique; Aura Rahman; Dr. Muhammad Maqsd Hossain; Hasan Mahmud Reza; Jahidul Alam; Md Aminul Islam; Prof; Prof. Abdul Khaleque; Prof. Firoz Ahmed; Prof. Kazi Nadim Hasan; Prof. Md. Didar-Ul-Alam; Tahrima Huq; Tamanna Afroze                                                                                                                                                                                                                                                                                                                                                                                                   |
|                                                                                                                                                                                                                                                                                                                                                                                                                                                                                                                                                                                                                                                                                                                                                                                                                                                   |           |                                                                                                                 | Abdus Sadique; Aura Rahman; Dr. Muhammad Maqsd Hossain; Hasan Mahmud Reza; Jahidul Alam; Md Aminul Islam; Prof; Prof. Abdul Khaleque; Prof. Firoz Ahmed; Prof. Kazi Nadim Hasan; Prof. Md. Didar-Ul-Alam; Tahrima Huq                                                                                                                                                                                                                                                                                                                                                                                                                   |
|                                                                                                                                                                                                                                                                                                                                                                                                                                                                                                                                                                                                                                                                                                                                                                                                                                                   |           |                                                                                                                 | Andrew Nelson; Brendan Payne; Chris Duncan; Clive Graham; Cordelia Langford; Darren Smith and Alex Alderton; David K. Jackson; Debra Padgett; Dominic Kwiatkowski; Edward Barton; Emma Swindells; Ewan Harrison; Garren Scott; Gary Black; Gary Eltringham; Greg Young; Ian Johnston; Jane Greenaway; Jennifer Collins; John Allan; John Sillitoe on behalf of the Wellcome Sanger Institute COVID-19 Surveillance Team; Joshua Loh; Lynn Dover; Matthew Bashton; Paul Baker; Roberto Amato; Sarah Essex; Shea Waugh; Shirelle Burton-Fanning; Sonia Goncalves; Steve Liggett; Wen Yew; Yusri Taha                                      |
|                                                                                                                                                                                                                                                                                                                                                                                                                                                                                                                                                                                                                                                                                                                                                                                                                                                   |           |                                                                                                                 | Andrew Nelson; Brendan Payne; Chris Duncan; Clive Graham; Cordelia Langford; Darren Smith and Alex Alderton; David K. Jackson; Debra Padgett; Dominic Kwiatkowski; Edward Barton; Emma Swindells; Ewan Harrison; Garren Scott; Gary Black; Gary Eltringham; Greg Young; Ian Johnston; Jane Greenaway; Jennifer Collins; John Allan; John Sillitoe on behalf of the Wellcome Sanger Institute COVID-19 Surveillance Team (http://www.sanger.ac.uk/covid-team); Joshua Loh; Lynn Dover; Matthew Bashton; Paul Baker; Roberto Amato; Sarah Essex; Shea Waugh; Shirelle Burton-Fanning; Sonia Goncalves; Steve Liggett; Wen Yew; Yusri Taha |
|                                                                                                                                                                                                                                                                                                                                                                                                                                                                                                                                                                                                                                                                                                                                                                                                                                                   |           |                                                                                                                 | Alison Laufer Halpin; Ben L. Rambo-Martin; Clinton R. Paden; Dakota Howard; Darlene Wagner; Dave Wentworth; Dhvani Batra; Jasmine Padilla; Justin Lee; Katie Dillon; Krista Queen; Kristen Knipe; Kristine Lacek; Mark Burroughs; Matthew Schmerer; Mili Sheth; Peter Cook; Sam Shepard; Sarah Nobles; Shoshona Le; Suxiang Tong; Vivien Dugan; Yvette Unoarumhi                                                                                                                                                                                                                                                                        |
|                                                                                                                                                                                                                                                                                                                                                                                                                                                                                                                                                                                                                                                                                                                                                                                                                                                   |           |                                                                                                                 | Alison S. Laufer Halpin; Anna Uehara; Christopher A. Elkins; Clinton R. Paden; Haibin Wang; Jing Zhang; Krista Queen; Mary S. Keckler; Rachel Marine; Suxiang Tong; Yan Li; Ying Tao                                                                                                                                                                                                                                                                                                                                                                                                                                                    |
|                                                                                                                                                                                                                                                                                                                                                                                                                                                                                                                                                                                                                                                                                                                                                                                                                                                   |           |                                                                                                                 | Alison S. Laufer Halpin; Anna Uehara; Christopher A. Elkins; Clinton R. Paden; Haibin Wang; Jing Zhang; Krista Queen; Mary S. Keckler; Rachel Marine; Suxiang Tong; Yan Li; Ying Tao                                                                                                                                                                                                                                                                                                                                                                                                                                                    |
|                                                                                                                                                                                                                                                                                                                                                                                                                                                                                                                                                                                                                                                                                                                                                                                                                                                   |           |                                                                                                                 | Alison Laufer Halpin; Ben L. Rambo-Martin; Clinton R. Paden; Dakota Howard; Darlene Wagner; Dave Wentworth; Dhvani Batra; Jasmine Padilla; Justin Lee; Katie Dillon; Krista Queen; Kristen Knipe; Kristine Lacek; Mark Burroughs; Matthew Schmerer; Mili Sheth; Peter Cook; Sam Shepard; Sarah Nobles; Shoshona Le; Suxiang Tong; Vivien Dugan; Yvette Unoarumhi                                                                                                                                                                                                                                                                        |
|                                                                                                                                                                                                                                                                                                                                                                                                                                                                                                                                                                                                                                                                                                                                                                                                                                                   |           |                                                                                                                 | Alison S. Laufer Halpin; Anna Uehara; Anne Uehara; Bettina Bankamp; Christine Mahl; Christopher A. Elkins; Christy Harrison; Clinton R. Paden; Haibin Wang; Jasmine Padilla; Jennifer Rakeman; Jing Zhang; Justin Lee; Krista Queen; Mary S. Keckler; Rachel Marine; Sally Slavinski; Suxiang Tong; Yan Li; Ying Tao; Zachary Weiner                                                                                                                                                                                                                                                                                                    |
|                                                                                                                                                                                                                                                                                                                                                                                                                                                                                                                                                                                                                                                                                                                                                                                                                                                   |           |                                                                                                                 | Alexis Russel; Alexis Russell; Catharine Prussing; Daryl M. Lamson; Erasmus Schneider; Erica Lasek-Nesselquist; John Kelly; Jonathan Plitnick; Kirsten St. George; Matthew Shudt; Melissa A Leisner; Navjot Singh                                                                                                                                                                                                                                                                                                                                                                                                                       |
|                                                                                                                                                                                                                                                                                                                                                                                                                                                                                                                                                                                                                                                                                                                                                                                                                                                   |           |                                                                                                                 | Anna Uehara; Clinton Paden; Haibin Wang; Jing Zhang; Julu Bhatnagar; Krista Queen; Suxiang Tong; Yan Li; Ying Tao                                                                                                                                                                                                                                                                                                                                                                                                                                                                                                                       |
|                                                                                                                                                                                                                                                                                                                                                                                                                                                                                                                                                                                                                                                                                                                                                                                                                                                   |           |                                                                                                                 | Adriana Heguy; Amy Rapkiewicz; Antonio Serrano; Christian Marier; Dacia Dimartino; Emily Huang; Gael Westby; George Jour; Guomiao Shen; Jared Pinnell; John Cadley; John Chen; Margaret Black; Maria Agüero-Rosenfeld; Marie Samanovic-Golden; Mark J. Mulligan; Mark Mulligan; Matija Snuderl;                                                                                                                                                                                                                                                                                                                                         |

|                                                                                                                                                                                                                                                                                                                                                                                                                                                                                                                                                                                                                                                                                                                                             |                                                                                                            |                                                                                                                     |                                                                                                                                                                                                                                                                                                                                                                                                                                                                                                                                                                                                                                                                                         |
|---------------------------------------------------------------------------------------------------------------------------------------------------------------------------------------------------------------------------------------------------------------------------------------------------------------------------------------------------------------------------------------------------------------------------------------------------------------------------------------------------------------------------------------------------------------------------------------------------------------------------------------------------------------------------------------------------------------------------------------------|------------------------------------------------------------------------------------------------------------|---------------------------------------------------------------------------------------------------------------------|-----------------------------------------------------------------------------------------------------------------------------------------------------------------------------------------------------------------------------------------------------------------------------------------------------------------------------------------------------------------------------------------------------------------------------------------------------------------------------------------------------------------------------------------------------------------------------------------------------------------------------------------------------------------------------------------|
| 418980                                                                                                                                                                                                                                                                                                                                                                                                                                                                                                                                                                                                                                                                                                                                      |                                                                                                            |                                                                                                                     | Matt Mauroano; Matthew T. Maurano; Megan Hogan; Nick Vulpescu; Paolo Cotzia; Paul Zappile; Peter Meyn; Sitharam Ramaswami; Xiaojun Feng; Yutong Zhang                                                                                                                                                                                                                                                                                                                                                                                                                                                                                                                                   |
| EPI_ISL_414639, EPI_ISL_419696 to 419705, EPI_ISL_420296 to 420302, EPI_ISL_420307 to 420309, EPI_ISL_420570 to 420582, EPI_ISL_420584 to 420591, EPI_ISL_421577 to 421592, EPI_ISL_421704 to 421733, EPI_ISL_424929 to 424968, EPI_ISL_426617 to 426626, EPI_ISL_427469 to 427521, EPI_ISL_427524 to 427525, EPI_ISL_427627 to 427642, EPI_ISL_428757 to 428805, EPI_ISL_430319 to 430434, EPI_ISL_435475 to 435549, EPI_ISL_435721 to 435722, EPI_ISL_436733 to 436743, EPI_ISL_444613 to 444792, EPI_ISL_450393 to 450402, EPI_ISL_451401 to 451479, EPI_ISL_451665, EPI_ISL_456003 to 456070, EPI_ISL_456107 to 456115, EPI_ISL_458017 to 458022, EPI_ISL_460603, EPI_ISL_467377 to 467422, EPI_ISL_1423376 to 1423503, EPI_ISL_1532785 | NYU Langone Health                                                                                         | Departments of Pathology and Medicine, New York University School of Medicine                                       | Adriana Heguy; Alireza Khodadadi-Jamayran; Amy Rapkiewicz; Andre M. Ribeiro-dos-Santos; Andrew Lytle; Antonio Serrano; Brendan Belovarac; Christian Marier; Dacia Dimartino; Emily Guzman; Emily Huang; Gael Westby; George Jour; Guiqing Wang; Guomiao Shen; Iman Osman; Jared Pinnell; John Cadley; John Chen; Lawrence H. Lin; Ludovic Boytard; Margaret Black; Maria Aguiar-Rosenfeld; Marie Samanovic-Golden; Mark J. Mulligan; Matija Snuderl; Matthew T. Maurano; Megan Hogan; Nick Vulpescu; Paolo Cotzia; Paul Zappile; Peter Meyn; Raquel Ordonez Ciriza; Raven Luther; Sitharam Ramaswami; Tatyana Gindin; Theodore Vougiouklakis; Vanessa Raabe; Xiaojun Feng; Yutong Zhang |
| see above                                                                                                                                                                                                                                                                                                                                                                                                                                                                                                                                                                                                                                                                                                                                   |                                                                                                            |                                                                                                                     |                                                                                                                                                                                                                                                                                                                                                                                                                                                                                                                                                                                                                                                                                         |
| EPI_ISL_1394175, EPI_ISL_1394202, EPI_ISL_1538637 to 1538638, EPI_ISL_1538821 to 1538823, EPI_ISL_1539062 to 1539064                                                                                                                                                                                                                                                                                                                                                                                                                                                                                                                                                                                                                        | NZOZ Meditest Diagnostyka Medyczna                                                                         | 1. National Institute of Public Health - National Institute of Hygiene; 2. Eurofins Genomics Europe Sequencing GmbH | ECDC COVID-19 WGS support team; Eurofins Genomics Europe Sequencing Team; Gierczyki Rafa; Sadkowska-Todys Magorzata; Wokowicz Tomasz; Zacharczuk Katarzyna                                                                                                                                                                                                                                                                                                                                                                                                                                                                                                                              |
| EPI_ISL_1394068 to 1394075                                                                                                                                                                                                                                                                                                                                                                                                                                                                                                                                                                                                                                                                                                                  | NZOZ Medyczne Laboratorium Diagnostyczne                                                                   | 1. National Institute of Public Health - National Institute of Hygiene; 2. Eurofins Genomics Europe Sequencing GmbH | ECDC COVID-19 WGS support team; Eurofins Genomics Europe Sequencing Team; Gierczyki Rafa; Sadkowska-Todys Magorzata; Wokowicz Tomasz; Zacharczuk Katarzyna                                                                                                                                                                                                                                                                                                                                                                                                                                                                                                                              |
| EPI_ISL_1538565, EPI_ISL_1538567                                                                                                                                                                                                                                                                                                                                                                                                                                                                                                                                                                                                                                                                                                            | NZOZ Medyczne Laboratorium Diagnostyczne;                                                                  | 1. National Institute of Public Health - National Institute of Hygiene; 2. Eurofins Genomics Europe Sequencing GmbH | ECDC COVID-19 WGS support team; Eurofins Genomics Europe Sequencing Team; Gierczyki Rafa; Sadkowska-Todys Magorzata; Wokowicz Tomasz; Zacharczuk Katarzyna                                                                                                                                                                                                                                                                                                                                                                                                                                                                                                                              |
| EPI_ISL_479997 to 480001                                                                                                                                                                                                                                                                                                                                                                                                                                                                                                                                                                                                                                                                                                                    | Nagano Environmental Conservation Research Institute                                                       | Pathogen Genomics Center, National Institute of Infectious Diseases                                                 | Hajime Kamiya; Kentaro Itokawa; Makoto Kuroda; Masanori Hashino; Motoi Suzuki; Naoko Shimodaira; Rina Tanaka; Tsuyoshi Sekizuka                                                                                                                                                                                                                                                                                                                                                                                                                                                                                                                                                         |
| EPI_ISL_480002 to 480003                                                                                                                                                                                                                                                                                                                                                                                                                                                                                                                                                                                                                                                                                                                    | Nagasaki Prefectural Institute for Environmental Research and Public Health                                | Pathogen Genomics Center, National Institute of Infectious Diseases                                                 | Fumiaki Matsumoto; Hajime Kamiya; Kentaro Itokawa; Makoto Kuroda; Masanori Hashino; Motoi Suzuki; Rina Tanaka; Tsuyoshi Sekizuka                                                                                                                                                                                                                                                                                                                                                                                                                                                                                                                                                        |
| EPI_ISL_480042 to 480064                                                                                                                                                                                                                                                                                                                                                                                                                                                                                                                                                                                                                                                                                                                    | Nagoya City Public Health Research Institute                                                               | Pathogen Genomics Center, National Institute of Infectious Diseases                                                 | Hajime Kamiya; Kentaro Itokawa; Makoto Kuroda; Masanori Hashino; Motoi Suzuki; Rina Tanaka; Shinichiro Shibata; Takuya Miki; Tsuyoshi Sekizuka                                                                                                                                                                                                                                                                                                                                                                                                                                                                                                                                          |
| EPI_ISL_434660, EPI_ISL_434674, EPI_ISL_445229, EPI_ISL_445236, EPI_ISL_450817, EPI_ISL_450823, EPI_ISL_450825, EPI_ISL_452229 to 452230, EPI_ISL_452235, EPI_ISL_452239, EPI_ISL_475565                                                                                                                                                                                                                                                                                                                                                                                                                                                                                                                                                    |                                                                                                            |                                                                                                                     |                                                                                                                                                                                                                                                                                                                                                                                                                                                                                                                                                                                                                                                                                         |
| see above                                                                                                                                                                                                                                                                                                                                                                                                                                                                                                                                                                                                                                                                                                                                   | Narhalsan Backa vardcentral                                                                                | The Public Health Agency of Sweden                                                                                  | Anna Risberg; Anna-Malin Linde; Karin Tegmark-Wisell; Maria Lind Karlberg; Mats Olsson; Mattias Haukland; Mia Brytting; Olov Svartstrom; Oskar Karlsson Lindsjo; Reza Advani; Sandra Broddesson; Theresa Enkirch                                                                                                                                                                                                                                                                                                                                                                                                                                                                        |
| EPI_ISL_539885, EPI_ISL_582840                                                                                                                                                                                                                                                                                                                                                                                                                                                                                                                                                                                                                                                                                                              | Narhalsan Fjallbacka VC                                                                                    | The Public Health Agency of Sweden                                                                                  | Anna Risberg; Anna-Malin Linde; Karin Tegmark-Wisell; Maria Lind Karlberg; Mattias Haukland; Mia Brytting; Olov Svartstrom; Oskar Karlsson Lindsjo; Petra Edquist; Reza Advani; Sandra Broddesson; Theresa Enkirch                                                                                                                                                                                                                                                                                                                                                                                                                                                                      |
| EPI_ISL_455107                                                                                                                                                                                                                                                                                                                                                                                                                                                                                                                                                                                                                                                                                                                              | Narhalsan Mellerud                                                                                         | The Public Health Agency of Sweden                                                                                  | Anna Risberg; Anna-Malin Linde; Karin Tegmark-Wisell; Maria Lind Karlberg; Maria Nykvist; Mia Brytting; Olov Svartstrom; Oskar Karlsson Lindsjo; Theresa Enkirch                                                                                                                                                                                                                                                                                                                                                                                                                                                                                                                        |
| EPI_ISL_434670, EPI_ISL_445237, EPI_ISL_450815, EPI_ISL_450820                                                                                                                                                                                                                                                                                                                                                                                                                                                                                                                                                                                                                                                                              | Narhalsan Molnlycke, Barn och ungdomsmedicin                                                               | The Public Health Agency of Sweden                                                                                  | Anna Risberg; Anna-Malin Linde; Karin Tegmark-Wisell; Maria Lind Karlberg; Mats Reimer; Mia Brytting; Olov Svartstrom; Oskar Karlsson Lindsjo; Theresa Enkirch                                                                                                                                                                                                                                                                                                                                                                                                                                                                                                                          |
| EPI_ISL_475537                                                                                                                                                                                                                                                                                                                                                                                                                                                                                                                                                                                                                                                                                                                              | Narhalsan Oden VC                                                                                          | The Public Health Agency of Sweden                                                                                  | Anna Risberg; Anna-Malin Linde; Karin Tegmark-Wisell; Maria Lind Karlberg; Mattias Haukland; Mia Brytting; Olov Svartstrom; Oskar Karlsson Lindsjo; Reza Advani; Sandra Broddesson                                                                                                                                                                                                                                                                                                                                                                                                                                                                                                      |
| EPI_ISL_445224, EPI_ISL_450830, EPI_ISL_469069, EPI_ISL_539882                                                                                                                                                                                                                                                                                                                                                                                                                                                                                                                                                                                                                                                                              | Narhalsan Olskroken VC                                                                                     | The Public Health Agency of Sweden                                                                                  | Anna Risberg; Anna-Malin Linde; Karin Tegmark-Wisell; Mahin Ghoroghi; Maria Lind Karlberg; Mattias Haukland; Mia Brytting; Olov Svartstrom; Oskar Karlsson Lindsjo; Petra Edquist; Reza Advani; Sandra Broddesson; Shamam Muradrasoli; Theresa Enkirch                                                                                                                                                                                                                                                                                                                                                                                                                                  |
| EPI_ISL_434671, EPI_ISL_450829, EPI_ISL_452238, EPI_ISL_469058, EPI_ISL_469060 to 469061, EPI_ISL_475524, EPI_ISL_475539                                                                                                                                                                                                                                                                                                                                                                                                                                                                                                                                                                                                                    |                                                                                                            |                                                                                                                     |                                                                                                                                                                                                                                                                                                                                                                                                                                                                                                                                                                                                                                                                                         |
| see above                                                                                                                                                                                                                                                                                                                                                                                                                                                                                                                                                                                                                                                                                                                                   | Narhalsan Sjobo vardcentral                                                                                | The Public Health Agency of Sweden                                                                                  | Anna Risberg; Anna-Malin Linde; Karin Tegmark-Wisell; Lovisa Hjerten; Maria Lind Karlberg; Mattias Haukland; Mia Brytting; Olov Svartstrom; Oskar Karlsson Lindsjo; Petra Edquist; Reza Advani; Sandra Broddesson; Shamam Muradrasoli; Theresa Enkirch                                                                                                                                                                                                                                                                                                                                                                                                                                  |
| EPI_ISL_1393840, EPI_ISL_1394080 to 1394082                                                                                                                                                                                                                                                                                                                                                                                                                                                                                                                                                                                                                                                                                                 | Narodowy Instytut Onkologii im. Marii Sklodowskiej-Curie Pastwowy Instytut Badawczy                        | 1. National Institute of Public Health - National Institute of Hygiene; 2. Eurofins Genomics Europe Sequencing GmbH | ECDC COVID-19 WGS support team; Eurofins Genomics Europe Sequencing Team; Gierczyki Rafa; Sadkowska-Todys Magorzata; Wokowicz Tomasz; Zacharczuk Katarzyna                                                                                                                                                                                                                                                                                                                                                                                                                                                                                                                              |
| EPI_ISL_523960, EPI_ISL_523962, EPI_ISL_523964, EPI_ISL_523966, EPI_ISL_523968                                                                                                                                                                                                                                                                                                                                                                                                                                                                                                                                                                                                                                                              | National Agency for Public Health, Republic of Moldova                                                     | Charite Universitatsmedizin Berlin, Institute of Virology                                                           | Ala Halacu; Barbara Muhlemann; Barbara Muhlemann; Christian Drosten; Elizabeta Jancheska; Golubinka Bosevska; Joern Beheim-Schwarzbach; Jorn Beheim-Schwarzbach; Julia Schneider; Maja Kuzmanovska; Mariana Apostol; Talitha Veith; Terry Jones; Victor M Corman                                                                                                                                                                                                                                                                                                                                                                                                                        |
| EPI_ISL_454572                                                                                                                                                                                                                                                                                                                                                                                                                                                                                                                                                                                                                                                                                                                              | National Center of Expertise                                                                               | National Center for Expertise, Kazakhstan National Center for Biotechnology, Kazakhstan                             | ; Abdaliyev Askar; Akhmetollayev Ilyas; Amirgazin Asylulan; Aushakhmetova Zabira; Kalendar Ruslan; Lutsay Viktoriya; Rakhmetova Akbota; Ramankulov Yerlan; Shevtsov Alexandr                                                                                                                                                                                                                                                                                                                                                                                                                                                                                                            |
| EPI_ISL_454571                                                                                                                                                                                                                                                                                                                                                                                                                                                                                                                                                                                                                                                                                                                              | National Center of Expertise                                                                               | National Center for Expertise, National Center for Biotechnology, Kazakhstan                                        | ; Abdaliyev Askar; Akhmetollayev Ilyas; Amirgazin Asylulan; Aushakhmetova Zabira; Kalendar Ruslan; Lutsay Viktoriya; Rakhmetova Akbota; Ramankulov Yerlan; Shevtsov Alexandr                                                                                                                                                                                                                                                                                                                                                                                                                                                                                                            |
| EPI_ISL_1401099 to 1401464, EPI_ISL_1406690 to 1406695, EPI_ISL_1509759 to 1509887                                                                                                                                                                                                                                                                                                                                                                                                                                                                                                                                                                                                                                                          | National Center of Infectious and Parasitic Diseases                                                       | National Center of Infectious and Parasitic Diseases                                                                | Alexiev; Alexiev et al; Dimitrova; Dobrinov; Donchev; Grigorova I.; Grigorova L.; Hristova; Ivanov; Kantardjiev; Korsun; Philipova; Stoitsova; Stoykov; Trifonova                                                                                                                                                                                                                                                                                                                                                                                                                                                                                                                       |
| EPI_ISL_496524 to 496526, EPI_ISL_496531 to 496532, EPI_ISL_496535 to 496536, EPI_ISL_496555 to 496587, EPI_ISL_497873 to 497879, EPI_ISL_1384818                                                                                                                                                                                                                                                                                                                                                                                                                                                                                                                                                                                           | National Centre For Cell Science                                                                           | National Centre For Cell Science                                                                                    | Ajay Pillai; Arvind Sahu; DBT's PAN-INDIA 1000 SARS-CoV2 RNA genome sequencing consortium; Dhiraj Paul; Girdhari Lal; Janesh Kumar; Kavita Bala Anand; Kunal Jani; Maharashtra COVID-19 Study Group; Manoj Kumar Bhat; Mitali Inamdar; Mohak P Gujare; Muralidhar Tambe; Radha Chauhan; Rajesh Karyakarte; Rajiv Mohan Gupta; Santosh Karade; Shelinder Pal Singh Shergill; Shivang P. Bhanushali; Sonal Manik Chavan; Sourav Sen; Suvarna Joshi; Vasudevan Seshadri; Yogesh S Shouche; Yogesh Shouche                                                                                                                                                                                  |
| EPI_ISL_1384813 to 1384817, EPI_ISL_1384819 to 1384858, EPI_ISL_1384860 to 1384862, EPI_ISL_1384864 to 1384884, EPI_ISL_1415086 to 1415128, EPI_ISL_1415132 to 1415133, EPI_ISL_1415137 to 1415156, EPI_ISL_1415158 to 1415292, EPI_ISL_1415294 to 1415391, EPI_ISL_1511198 to 1511202, EPI_ISL_1533729 to 1533801, EPI_ISL_1540451 to 1540457, EPI_ISL_1543988 to 1544074                                                                                                                                                                                                                                                                                                                                                                  |                                                                                                            |                                                                                                                     |                                                                                                                                                                                                                                                                                                                                                                                                                                                                                                                                                                                                                                                                                         |
| see above                                                                                                                                                                                                                                                                                                                                                                                                                                                                                                                                                                                                                                                                                                                                   | National Centre For Cell Science                                                                           | National Centre For Cell Science - INSACOG                                                                          | Ajay Pillai; Dhiraj Paul; INSACOG Consortium team; Manoj Kumar Bhat; Mitali Inamdar; Mohak P Gujare; Shivang P. Bhanushali; Sonal Manik Chavan; Yogesh Shouche; Yogesh Shouche                                                                                                                                                                                                                                                                                                                                                                                                                                                                                                          |
| EPI_ISL_1384859, EPI_ISL_1384863                                                                                                                                                                                                                                                                                                                                                                                                                                                                                                                                                                                                                                                                                                            | National Centre For Cell Science                                                                           | National Institute of Virology, Pune                                                                                | Ajay Pillai; Dhiraj Paul; Manoj Kumar Bhat; Mitali Inamdar; Mohak P Gujare; Shivang P. Bhanushali; Sonal Manik Chavan; Yogesh Shouche                                                                                                                                                                                                                                                                                                                                                                                                                                                                                                                                                   |
| EPI_ISL_436413 to 436463, EPI_ISL_482491 to 482574, EPI_ISL_482587 to 482671                                                                                                                                                                                                                                                                                                                                                                                                                                                                                                                                                                                                                                                                | National Centre for Disease control (NCDC)                                                                 | NCDC/CSIR-IGIB                                                                                                      | Aarti Tewari; Anurag Agrawal; Bharathram Uppili; Bibhash Nandi; Debasis Dash; Dharendra Kumar; Hema Gogia; Hemlata Lall; Himanshu Vashisht; Mahesh S Dhar; Manju Bala; Meena Datta; Mitali Mukerji; Mohammed Faruq; Nidhi Saini; Nishu Tyagi; Partha Rakshit; Pooja Sharma; Poonam Gupta; Pramod Kumar; Prateek Singh; Preeti Madan; Priyanka Singh; Radhakrishanan VS; Rajesh Pandey; Robin Marwal; Sandhya Kabra; Saruchi Wadhwa; Satyabrata Bag; Simrita Singh; Sujeet Singh; Uma Sharma; Varun Jaiswal; Vivekanand A                                                                                                                                                                |
| EPI_ISL_435060 to 435112                                                                                                                                                                                                                                                                                                                                                                                                                                                                                                                                                                                                                                                                                                                    | National Centre for Disease control (NCDC), CSIR-Institute of Genomics and Integrative Biology (CSIR-IGIB) | NCDC/CSIR-IGIB                                                                                                      | Aarti Tewari; Anurag Agrawal; Bharathram Uppili; Bibhash Nandi; Debasis Dash; Dharendra Kumar; Hema Gogia; Hemlata Lall; Himanshu Vashisht; Mahesh Dhar; Manju Bala; Meena Datta; Mitali Mukerji; Mohammed Faruq; Nidhi Saini; Nishu Tyagi; Partha Rakshit; Pooja Sharma; Poonam Gupta; Pramod Kumar; Prateek Singh; Preeti Madan; Priyanka Singh; Rajesh Pandey; Sandhya Kabra; Saruchi Wadhwa; Satyabrata Bag; Simrita Singh; Sujeet Singh; Uma Sharma; Varun Jaiswal; Vivekanand A                                                                                                                                                                                                   |
| EPI_ISL_407988, EPI_ISL_410535, EPI_ISL_414378 to 414380, EPI_ISL_420099 to 420111                                                                                                                                                                                                                                                                                                                                                                                                                                                                                                                                                                                                                                                          | National Centre for Infectious Diseases                                                                    | Programme in Emerging Infectious Diseases, Duke-NUS Medical School                                                  | Barnaby E Young; Danielle E Anderson; David CB Lye; Gavin JD Smith; Jayanthi Jayakumar; Linfa Wang; Louisa Sun; Martin Linster; Yan Zhuang; Yee Sin Leo; Yvonne CF Su                                                                                                                                                                                                                                                                                                                                                                                                                                                                                                                   |
| EPI_ISL_1384722 to 1384773, EPI_ISL_1396401 to 1396403, EPI_ISL_1398489 to 1398523                                                                                                                                                                                                                                                                                                                                                                                                                                                                                                                                                                                                                                                          | National Food and Veterinary Risk Assessment Institute                                                     | Vilnius University Hospital Santaros Klinikos, Center of Laboratory Medicine                                        | Daniel Naumovas; Dovile Ezerskyte; Gytis Dudas; Ingrida Olendraite; Laimonas Griskevicius; Ligita Raugaite; Mindaugas Stoskus; Monika Katenaite; Rimvydas Norvilas                                                                                                                                                                                                                                                                                                                                                                                                                                                                                                                      |

|                                                                                                                                                                                                                                      |                                                                                                                                                             |                                                                                                                                                             |                                                                                                                                                                                                                                                                                                                                                                                                                                                                                                                                                                                                                                                                                                                                                                                                                                                                                                                                                                                                                                                                                                                                                                                                                                                                                                                                                                                                                                                                                                                                                                                                                                                                                                                                                                                                                                         |
|--------------------------------------------------------------------------------------------------------------------------------------------------------------------------------------------------------------------------------------|-------------------------------------------------------------------------------------------------------------------------------------------------------------|-------------------------------------------------------------------------------------------------------------------------------------------------------------|-----------------------------------------------------------------------------------------------------------------------------------------------------------------------------------------------------------------------------------------------------------------------------------------------------------------------------------------------------------------------------------------------------------------------------------------------------------------------------------------------------------------------------------------------------------------------------------------------------------------------------------------------------------------------------------------------------------------------------------------------------------------------------------------------------------------------------------------------------------------------------------------------------------------------------------------------------------------------------------------------------------------------------------------------------------------------------------------------------------------------------------------------------------------------------------------------------------------------------------------------------------------------------------------------------------------------------------------------------------------------------------------------------------------------------------------------------------------------------------------------------------------------------------------------------------------------------------------------------------------------------------------------------------------------------------------------------------------------------------------------------------------------------------------------------------------------------------------|
| EPI_ISL_466839 to 466872, EPI_ISL_528427 to 528429, EPI_ISL_528540 to 528636, EPI_ISL_528880                                                                                                                                         | National Genomics Core-Center for DNA Fingerprinting and Diagnostics                                                                                        | National Genomics Core- Center for DNA Fingerprinting and Diagnostics (NGC-CDFD)- DBT's PAN-INDIA-1000 Genome consortium                                    | ASHWIN DALAL; Abhijeeth Singh Thakur; Ajay Kumar Chaudhary; Akash Chinchole; Akruiti Shah; Amrita Bhattacharjee; Arjita Jaiswal; Arpita Singh; Ashwin Dalal; Asodu Sandeep Sarma; B. Krishna Murthy; Bala Pratyusha; Bathula Siddardha; Bharath Kumar; Bhavani Sontam; Binod Bihari Pradhan; Brahmaji Sontyana; C Bala Maddeleti; C. Arun Kumar; Ch Venkateshwar Goud; Chandra Shekhar Singh; Chandra Shekhar V; Chendra Shekar P; Chilakala Gangi Reddy; Chinthakindi KrishnaPrasad; DEBASHIS MITRA; DIVYA VASHISHT; Debashish Mitra; Debashish Mitra; Devanshi Gupta; Devinder Singh Negi; Dhanraj Adey; Divya Vashisht; Eedurugatla Dinesh; G Shashikanth; Guru Raja; Heena Shah; Hilal Ahmad Reshi; J. Mallikarjun; Jamal Md Nurul Jain; Jayashree Ladke; Jenige Aravindh Kumar; K. Viswakalyan; K. Manohar; Kaisar Ahmad Lone; Kandali Sreethi Sreenivasulu Reddy; Kausika Kumar Malik; Lavanya Banda; M Sri Lalitha; MURALI DHARAN BASHYAM; Madhumohan Rao; Mohammod Mudassar; Mugdha Singh; Murali Dharan Bashyam; Muthulakshmi; N. Sudheer; Nalini Raghunathan; Nanci Rani K; Neeraj Kumar; Nimmla Naresh; Niteen Pathak; Parveen Kumar; Pradipta Hore; R HARINARAYANAN; R Harinarayanan; R Lakshmi Vaishna; R. Angalena; R. Manorama; RASHNA BHANDARI; Rahul Baroi; Rajeshree Sanyal; Rajitha Ponnala; Raju Kumar; Rashna Bhandari; Reelina Basu; Romila Moirangthem; S Vanantha Rani; SPR Prasad; Sandip Patra; Sanjana Sarkar; Sayantan Goswami; Seyed Khajia Ali; Shaffiqu T S; Shaik Nasar Vali; Shalini Aricthota; Shivangi Wagh; Shivani Yadav; Shruti Dasgupta; Shubhra Ganguli; Sobhan Babu; Srinivas G; Suchitra Upreti; Sunke Vijayakumar; Sunu Joseph; Surya Chodisetty; Surya Vamshi; Swathi Chodisetty; T. Navaneetha; Usha Rani Dutta; V Naga Sailaja; Vani Singh; Vinay Donipadi; Vineesha Oddi; Yogesh Patidar |
| EPI_ISL_1407095 to 1407253                                                                                                                                                                                                           | National HIV Reference Laboratory, Ministry of Health, Public Health Institute of Malawi                                                                    | KRISP, KZN Research Innovation and Sequencing Platform                                                                                                      | Auld A; Chilima B; Chiwaula M; Emmanuel SJ; Giandhari J; Kaba M; Kampira E; Kasambara W; Kim L; Lessells R; Maida A; Mvula B; Mwangomba W; Naidoo Y; Panja L; Pillay S; Tegally H; Wadonda N; Wilkinson E; de Oliveira T                                                                                                                                                                                                                                                                                                                                                                                                                                                                                                                                                                                                                                                                                                                                                                                                                                                                                                                                                                                                                                                                                                                                                                                                                                                                                                                                                                                                                                                                                                                                                                                                                |
| EPI_ISL_560385, EPI_ISL_560387 to 560390                                                                                                                                                                                             | National Health Laboratory                                                                                                                                  | Botswana Institute for Technology Research and Innovation                                                                                                   | Dineo Emang Tshiamo; Dineo Emang Tshiamo. Gape Nyepetsi; Kefentse Arnold Tumedji; Madisa Mine; Maitshwarelo Ignatius Matsheka; Thongbotho Mphoyakgosi                                                                                                                                                                                                                                                                                                                                                                                                                                                                                                                                                                                                                                                                                                                                                                                                                                                                                                                                                                                                                                                                                                                                                                                                                                                                                                                                                                                                                                                                                                                                                                                                                                                                                   |
| EPI_ISL_560386                                                                                                                                                                                                                       | National Health Laboratory                                                                                                                                  | Botswana Institute for Technology Research and innovation                                                                                                   | Dineo Emang Tshiamo. Gape Nyepetsi; Kefentse Arnold Tumedji; Madisa Mine; Maitshwarelo Ignatius Matsheka; Thongbotho Mphoyakgosi                                                                                                                                                                                                                                                                                                                                                                                                                                                                                                                                                                                                                                                                                                                                                                                                                                                                                                                                                                                                                                                                                                                                                                                                                                                                                                                                                                                                                                                                                                                                                                                                                                                                                                        |
| EPI_ISL_464112 to 464133, EPI_ISL_464135 to 464158                                                                                                                                                                                   | National Health Laboratory Service (NHLS), Tygerberg                                                                                                        | Division of Medical Virology, Stellenbosch University and National Health Laboratory Service (NHLS)                                                         | Bronwyn Kleinhans; Eduan Wilkindon; Gert van Zyl; Houriyah Tegally; Kayla Delaney; Susan Engelbrecht; Tulio de Oliveira; Wolfgang Preiser                                                                                                                                                                                                                                                                                                                                                                                                                                                                                                                                                                                                                                                                                                                                                                                                                                                                                                                                                                                                                                                                                                                                                                                                                                                                                                                                                                                                                                                                                                                                                                                                                                                                                               |
| EPI_ISL_464134                                                                                                                                                                                                                       | National Health Laboratory Service (NHLS), Tygerberg                                                                                                        | Stellenbosch University and NHLS                                                                                                                            | Bronwyn Kleinhans; Eduan Wilkindon; Gert van Zyl; Houriyah Tegally; Kayla Delaney; Susan Engelbrecht; Tulio de Oliveira; Wolfgang Preiser                                                                                                                                                                                                                                                                                                                                                                                                                                                                                                                                                                                                                                                                                                                                                                                                                                                                                                                                                                                                                                                                                                                                                                                                                                                                                                                                                                                                                                                                                                                                                                                                                                                                                               |
| EPI_ISL_1550912 to 1550962                                                                                                                                                                                                           | National Health Laboratory Service, South Africa                                                                                                            | KRISP, KZN Research Innovation and Sequencing Platform                                                                                                      | Emmanuel SJ; Giandhari J; Khan S; Lessells R; Mdlalose K; Naidoo Y; Pillay S; Ramphal U; Tegally H; Wilkinson E; York D; de Oliveira T                                                                                                                                                                                                                                                                                                                                                                                                                                                                                                                                                                                                                                                                                                                                                                                                                                                                                                                                                                                                                                                                                                                                                                                                                                                                                                                                                                                                                                                                                                                                                                                                                                                                                                  |
| EPI_ISL_480601 to 480602                                                                                                                                                                                                             | National Health Laboratory, Timor-Leste                                                                                                                     | MDU-PHL                                                                                                                                                     | Antonia da Costa, E.; Baird, R.; Barreto, I.; Caly, L.; Canisia, D.; Dakh, F.; Dolores de Jesus da Costa, M.; Douglas, N.; Francis, J.; Freeman, K.; Jayanti Pereira Tilman, A.; Marr, I.; Sait, M.; Salles de Sousa, A.; Schultz, M.; Seemann, T.; Sherry, N.; Soares da Silva, E.; Wapling, J.; Ximenes, J.                                                                                                                                                                                                                                                                                                                                                                                                                                                                                                                                                                                                                                                                                                                                                                                                                                                                                                                                                                                                                                                                                                                                                                                                                                                                                                                                                                                                                                                                                                                           |
| EPI_ISL_456597 to 456612                                                                                                                                                                                                             | National Health Laboratory, Timor-Leste                                                                                                                     | Microbiological Diagnostic Unit Public Health Laboratory, The Peter Doherty Institute for Infection and Immunity                                            | Antonia da Costa, E.; Baird, R.; Barreto, I.; Caly, L.; Canisia, D.; Dakh, F.; Dolores de Jesus da Costa, M.; Douglas, N.; Francis, J.; Freeman, K.; Jayanti Pereira Tilman, A.; Marr, I.; Sait, M.; Salles de Sousa, A.; Schultz, M.; Seemann, T.; Sherry, N.; Soares da Silva, E.; Wapling, J.; Ximenes, J.                                                                                                                                                                                                                                                                                                                                                                                                                                                                                                                                                                                                                                                                                                                                                                                                                                                                                                                                                                                                                                                                                                                                                                                                                                                                                                                                                                                                                                                                                                                           |
| EPI_ISL_435303, EPI_ISL_435305, EPI_ISL_435308, EPI_ISL_435310 to 435317, EPI_ISL_455694 to 455718, EPI_ISL_511891 to 511898                                                                                                         | National Hospital of Tropical Diseases                                                                                                                      | Oxford University Clinical Research Unit, Hanoi, Vietnam                                                                                                    | H. Rogier van Doorn; H.Rogier van Doorn; Le Nguyen Minh Hoa; Nguyen Thi Hong Thuong; Nguyen Thi Ngoc Diep; Nguyen Thi Tam; Nguyen Thu Trang; Pham Ngoc Thach; Van Dinh Trang; Vu Thi Ngoc Bich; on behalf of the OUCRU COVID-19 research group                                                                                                                                                                                                                                                                                                                                                                                                                                                                                                                                                                                                                                                                                                                                                                                                                                                                                                                                                                                                                                                                                                                                                                                                                                                                                                                                                                                                                                                                                                                                                                                          |
| EPI_ISL_416028, EPI_ISL_416031 to 416032, EPI_ISL_416035 to 416036, EPI_ISL_515525                                                                                                                                                   | National Influenza Center - Instituto Adolfo Lutz                                                                                                           | Instituto Adolfo Lutz, Interdisciplinary Procedures Center, Strategic Laboratory                                                                            | Adriana Bugno; Adriano Abbud; Carlos Henrique Camargo; Claudia Regina Gonçalves; Claudio Tavares Sacchi; Daniela Bernardes Borges da Silva; Erica Valessa Ramos Gomes; Fabiana Cristina Pereira dos Santos; Maria do Carmo Sampaio Tavares Timenetsky; Simone Guadagnucci Morillo; Terezinha Maria de Paiva                                                                                                                                                                                                                                                                                                                                                                                                                                                                                                                                                                                                                                                                                                                                                                                                                                                                                                                                                                                                                                                                                                                                                                                                                                                                                                                                                                                                                                                                                                                             |
| EPI_ISL_408668                                                                                                                                                                                                                       | National Influenza Center - National Institute of Hygiene and Epidemiology (NIHE)                                                                           | National Influenza Center - National Institute of Hygiene and Epidemiology (NIHE)                                                                           | ; Hoang Vu Mai Phuong; Le Thi Quynh Mai; Le Thi Thanh; Nguyen Le Khanh Hang; Nguyen Phuong Anh; Nguyen Vu Son; Pham Thi Hien; Tran Thu Huong; Ung Thi Hong Trang; Vuong Duc Cuong                                                                                                                                                                                                                                                                                                                                                                                                                                                                                                                                                                                                                                                                                                                                                                                                                                                                                                                                                                                                                                                                                                                                                                                                                                                                                                                                                                                                                                                                                                                                                                                                                                                       |
| EPI_ISL_486887 to 486889                                                                                                                                                                                                             | National Influenza Center, Bahrain                                                                                                                          | National Influenza Center, Bahrain                                                                                                                          | AlWasti, H.; Altaif, Z.; Shehab, F.; Zaed, A.                                                                                                                                                                                                                                                                                                                                                                                                                                                                                                                                                                                                                                                                                                                                                                                                                                                                                                                                                                                                                                                                                                                                                                                                                                                                                                                                                                                                                                                                                                                                                                                                                                                                                                                                                                                           |
| EPI_ISL_420543, EPI_ISL_420545, EPI_ISL_420547, EPI_ISL_420549, EPI_ISL_420551, EPI_ISL_420553, EPI_ISL_420555, EPI_ISL_421662 to 421672, EPI_ISL_424361 to 424365, EPI_ISL_426179                                                   | National Influenza Center, Indian Council of Medical Research - National Institute of Virology                                                              | Indian Council of Medical Research-National Institute of Virology, Microbial Containment Complex                                                            | Amita Jain; Anita M. Shete; Anita Shete-Aich; Atanu Basu; Bharati Malhotra; Bharti Malhotra; Deepika Chaudhary; Dimpal A. Nyayanit; Gajanan Sapkal; Gururaj Deshpande; Hitesh Dighe; Lalit Dar; M Choudhary; Manohar. L. Chaudhary; Padinjarematathil Thankappan Ullas; Pragma D. Yadav; Pragma D. Yadav. Savita Patil; Pranita Gawande; Prasad Sarkale; Priya Abraham; Sarah Cherian; Savita Patil; Sreelekshmy Mohandas; Triparna Majumdar; Varsha Potdar                                                                                                                                                                                                                                                                                                                                                                                                                                                                                                                                                                                                                                                                                                                                                                                                                                                                                                                                                                                                                                                                                                                                                                                                                                                                                                                                                                             |
| EPI_ISL_416427 to 416431                                                                                                                                                                                                             | National Influenza Center, National Institute of Hygiene and Epidemiology (NIHE)                                                                            | National Influenza Center, National Institute of Hygiene and Epidemiology (NIHE)                                                                            | Dang Duc Anh; Futoshi Hasebe; Hoang Vu Mai Phuong; Kouichi Morita; Le Thi Thanh; Le Thi Thanh; Meng Ling Moi; Nguyen Le Khanh Hang; Nguyen Phuong Anh; Nguyen Vu Son; Pham Hong Quynh Anh; Pham Thi Hien; Taichiro Takemura; Takeshi Nabeshima; Tran Thu Huong; Ung Thi Hong Trang; Vuong Duc Cuong                                                                                                                                                                                                                                                                                                                                                                                                                                                                                                                                                                                                                                                                                                                                                                                                                                                                                                                                                                                                                                                                                                                                                                                                                                                                                                                                                                                                                                                                                                                                     |
| EPI_ISL_467778 to 467781                                                                                                                                                                                                             | National Influenza Centre Romania                                                                                                                           | Charite Universitatsmedizin Berlin, Institute of Virology                                                                                                   | Barbara Muehleemann; Christian Drosten; Jorn Beheim-Schwarzbach; Julia Schneider; L. Ustea; M. Lazar; N. Paraschiv; Talitha Veith; Terry Jones; Victor M Corman                                                                                                                                                                                                                                                                                                                                                                                                                                                                                                                                                                                                                                                                                                                                                                                                                                                                                                                                                                                                                                                                                                                                                                                                                                                                                                                                                                                                                                                                                                                                                                                                                                                                         |
| EPI_ISL_476835, EPI_ISL_476837 to 476839, EPI_ISL_476841, EPI_ISL_476843, EPI_ISL_476845, EPI_ISL_476847, EPI_ISL_476851                                                                                                             | see above                                                                                                                                                   | National Influenza Centre for Northern Greece                                                                                                               | Maria Christoforidi                                                                                                                                                                                                                                                                                                                                                                                                                                                                                                                                                                                                                                                                                                                                                                                                                                                                                                                                                                                                                                                                                                                                                                                                                                                                                                                                                                                                                                                                                                                                                                                                                                                                                                                                                                                                                     |
| EPI_ISL_476836                                                                                                                                                                                                                       | National Influenza Centre for Northern Greece                                                                                                               | National Influenza Centre for Northern Greece                                                                                                               | Maria Christoforidi                                                                                                                                                                                                                                                                                                                                                                                                                                                                                                                                                                                                                                                                                                                                                                                                                                                                                                                                                                                                                                                                                                                                                                                                                                                                                                                                                                                                                                                                                                                                                                                                                                                                                                                                                                                                                     |
| EPI_ISL_490201                                                                                                                                                                                                                       | National Influenza Centre of INSPI-Ecuador                                                                                                                  | INSPI - Charité                                                                                                                                             | Alberto Orlando; Alexandra Usiña; Alfredo Bruno Caicedo; Andres Moreira-Soto; Anna-Lena Sander; Denisses Portugal; Domenica de Mora Coloma; Jan Felix Drexler; Juan Carlos Zeballos; Manuel Gonzalez; Maritza Olmedo; Nina Krause; Silvia Salgado                                                                                                                                                                                                                                                                                                                                                                                                                                                                                                                                                                                                                                                                                                                                                                                                                                                                                                                                                                                                                                                                                                                                                                                                                                                                                                                                                                                                                                                                                                                                                                                       |
| EPI_ISL_410301                                                                                                                                                                                                                       | National Influenza Centre, National Public Health Laboratory, Kathmandu, Nepal                                                                              | The University of Hong Kong                                                                                                                                 | Alfonso J. Rodriguez-Morales; Anup Bastola; Basu Dev Pandey; Bibek Kumar Lal; Daniel Chu; Haoguo Gu; Leo Poon; Malik Peiris; Ranjit Sah; Runa Jha                                                                                                                                                                                                                                                                                                                                                                                                                                                                                                                                                                                                                                                                                                                                                                                                                                                                                                                                                                                                                                                                                                                                                                                                                                                                                                                                                                                                                                                                                                                                                                                                                                                                                       |
| EPI_ISL_450171 to 450172                                                                                                                                                                                                             | National Influenza centre, Sri Lanka                                                                                                                        | The University of Hong Kong                                                                                                                                 | Daniel KW Chu; Jude Jayamaha; Malik Peiris                                                                                                                                                                                                                                                                                                                                                                                                                                                                                                                                                                                                                                                                                                                                                                                                                                                                                                                                                                                                                                                                                                                                                                                                                                                                                                                                                                                                                                                                                                                                                                                                                                                                                                                                                                                              |
| EPI_ISL_1469238, EPI_ISL_1469241 to 1469245, EPI_ISL_1469252, EPI_ISL_1469255, EPI_ISL_1469259 to 1469270, EPI_ISL_1469276 to 1469278, EPI_ISL_1469290 to 1469291, EPI_ISL_1534706 to 1534707                                        | see above                                                                                                                                                   | National Institute Health Research and Development                                                                                                          | Agustiniingsih; Arie Ardiansyah Nugraha; Fauzul Muna; Hana Apsari Pawestri; Hartanti Dian Ikawati; Herna; Holy Arif Wibowo; Irene Lorinda Indalao; Kartika Dewi Puspa; Kindi Adam; Krisna Nur Andriana Pangesti; Krisna Pangesti; Natalie Laurencia Kipuas; Nelly Suspandari; Ni Ketut Susilarini; Nike Susanti; Nur Ika Hariastuti; Nurika Hariastuti; Reni Herman; Ririn Ramadhany; Subangkit; Tati Febriyanti; Triyani Soekarso; Ujly Alfi Nikmah; Vivi Setiawaty; Vivi Setiawaty.; Yuni Rukminiati                                                                                                                                                                                                                                                                                                                                                                                                                                                                                                                                                                                                                                                                                                                                                                                                                                                                                                                                                                                                                                                                                                                                                                                                                                                                                                                                  |
| EPI_ISL_596386                                                                                                                                                                                                                       | National Institute for Allergy and Infectious Diseases Integrated Research Facility - Frederick (NIAID IRF- Frederick), National Institutes of Health (NIH) | National Institute for Allergy and Infectious Diseases Integrated Research Facility - Frederick (NIAID IRF- Frederick), National Institutes of Health (NIH) | B. and Palacios, G.; Beitzel, J.R.; Kocher, G.; Kugelmann                                                                                                                                                                                                                                                                                                                                                                                                                                                                                                                                                                                                                                                                                                                                                                                                                                                                                                                                                                                                                                                                                                                                                                                                                                                                                                                                                                                                                                                                                                                                                                                                                                                                                                                                                                               |
| EPI_ISL_417186, EPI_ISL_430297, EPI_ISL_435058 to 435059, EPI_ISL_450296 to 450301, EPI_ISL_450495, EPI_ISL_470878 to 470880, EPI_ISL_490255 to 490314, EPI_ISL_504186 to 504244, EPI_ISL_514355 to 514424, EPI_ISL_515133 to 515180 | see above                                                                                                                                                   | National Institute for Communicable Diseases of the National Health Laboratory Service                                                                      | A; Allam M; Bhiman JN; Ismail A; Khumalo Z; Kwenda S; Mnyameni F; Mohale T; Mtshali P; Subramoney K; van Heusden P; von Gottberg                                                                                                                                                                                                                                                                                                                                                                                                                                                                                                                                                                                                                                                                                                                                                                                                                                                                                                                                                                                                                                                                                                                                                                                                                                                                                                                                                                                                                                                                                                                                                                                                                                                                                                        |
| EPI_ISL_1404878 to 1404913                                                                                                                                                                                                           | National Institute for Food and Veterinary Risk Assessment                                                                                                  | Lithuanian University of Health Sciences                                                                                                                    | Arnoldas Pautienius; Dovydas Gecys; Gediminas Alzbutas; Kamile Tamusauskaite; Lukas Zemaitis; Vaiva Lesauskaite                                                                                                                                                                                                                                                                                                                                                                                                                                                                                                                                                                                                                                                                                                                                                                                                                                                                                                                                                                                                                                                                                                                                                                                                                                                                                                                                                                                                                                                                                                                                                                                                                                                                                                                         |
| EPI_ISL_469254 to 469255                                                                                                                                                                                                             | National Institute for Viral Disease Control and Prevention, China CDC                                                                                      | Institute of Viral Disease Control and Prevention, China CDC                                                                                                | Chun Huang; Dayan Wang; George F. Gao; George Fu Gao; Guizhen Wu; Jun Han; Li Zhao; Lijuan Chen; Peihua NiuBaoying Huang; Roujian Lu; Shiwen Wang; Weifeng Shi; Wenbo Xu; Wenjie Tan; Wenling Wang; William J. Liu; Xiang ZhaoLijuan Chen; Yanhai Wang; Yao MengZhixiao ChenYuchao Wu; Yong Zhang; Yubai Bi                                                                                                                                                                                                                                                                                                                                                                                                                                                                                                                                                                                                                                                                                                                                                                                                                                                                                                                                                                                                                                                                                                                                                                                                                                                                                                                                                                                                                                                                                                                             |
| EPI_ISL_408480 to 408486, EPI_ISL_408488                                                                                                                                                                                             | National Institute for Viral Disease Control and Prevention, China CDC                                                                                      | National Institute for Viral Disease Control & Prevention, CCDC                                                                                             | Baoying Huang; Baoying HuangLi ZhaoFei YeWenbo XuGeorge F. GaoGuizhen Wu; Chongshan Li; Fei Ye; George F. Gao; Guizhen Wu; Hengqin Wang; Huiping Yang; Jianan Xu; Jianxiong Li; Kangchen Zhao; Li Zhao; Peihua Niu; Quanyi Wang; Roujian Lu; Sheng Ye; Shenjiao Wang; Ti Liu; Wenbo Xu;                                                                                                                                                                                                                                                                                                                                                                                                                                                                                                                                                                                                                                                                                                                                                                                                                                                                                                                                                                                                                                                                                                                                                                                                                                                                                                                                                                                                                                                                                                                                                 |

|                                                                                                                                                                                                                                                                                                                                                                                                                                                                                                                                                                                                                                                                                                                                                                                                                                                                                                                                                                                                                                                                                                                                                                                                                                                                                                                                                                                                                                                                                                                                                                                                                                                                                                                                                                                                                                                                                                                                                                                                                                                                                                                                                                                                                                                                                                                                                                                                                                |                                                                                                   |                                                                                                   |                                                                                                                                                                                                                                                                                                                                                                                                                                                                                                                                                                                                                                                                                                                                                                                                   |
|--------------------------------------------------------------------------------------------------------------------------------------------------------------------------------------------------------------------------------------------------------------------------------------------------------------------------------------------------------------------------------------------------------------------------------------------------------------------------------------------------------------------------------------------------------------------------------------------------------------------------------------------------------------------------------------------------------------------------------------------------------------------------------------------------------------------------------------------------------------------------------------------------------------------------------------------------------------------------------------------------------------------------------------------------------------------------------------------------------------------------------------------------------------------------------------------------------------------------------------------------------------------------------------------------------------------------------------------------------------------------------------------------------------------------------------------------------------------------------------------------------------------------------------------------------------------------------------------------------------------------------------------------------------------------------------------------------------------------------------------------------------------------------------------------------------------------------------------------------------------------------------------------------------------------------------------------------------------------------------------------------------------------------------------------------------------------------------------------------------------------------------------------------------------------------------------------------------------------------------------------------------------------------------------------------------------------------------------------------------------------------------------------------------------------------|---------------------------------------------------------------------------------------------------|---------------------------------------------------------------------------------------------------|---------------------------------------------------------------------------------------------------------------------------------------------------------------------------------------------------------------------------------------------------------------------------------------------------------------------------------------------------------------------------------------------------------------------------------------------------------------------------------------------------------------------------------------------------------------------------------------------------------------------------------------------------------------------------------------------------------------------------------------------------------------------------------------------------|
|                                                                                                                                                                                                                                                                                                                                                                                                                                                                                                                                                                                                                                                                                                                                                                                                                                                                                                                                                                                                                                                                                                                                                                                                                                                                                                                                                                                                                                                                                                                                                                                                                                                                                                                                                                                                                                                                                                                                                                                                                                                                                                                                                                                                                                                                                                                                                                                                                                |                                                                                                   |                                                                                                   | Wenjie Tan; Wenjie TanXiaoqing FuXiang ZhaoWenling Wang Peihua NiuRoujian Lu; Wenjie TanZhen Teng; Wenling Wang; Xiang Zhao; Xiang ZhaoWenling Wang Peihua NiuRoujian Lu; Yang Pan; Yanhong SunBaoying HuangLi ZhaoFei YeWenbo XuGeorge F. GaoGuizhen Wu; Yong Shi; Zhaoquo Wang                                                                                                                                                                                                                                                                                                                                                                                                                                                                                                                  |
| EPI_ISL_408487                                                                                                                                                                                                                                                                                                                                                                                                                                                                                                                                                                                                                                                                                                                                                                                                                                                                                                                                                                                                                                                                                                                                                                                                                                                                                                                                                                                                                                                                                                                                                                                                                                                                                                                                                                                                                                                                                                                                                                                                                                                                                                                                                                                                                                                                                                                                                                                                                 | National Institute for Viral Disease Control and Prevention, China CDC                            | National Institute for Viral Disease Control & Prevention, China CDC                              | Baoying Huang; Fei Ye; George F. Gao; Guizhen Wu; Jin Xu; Li Zhao; Peihua Niu; Roujian Lu; Wenbo Xu; Wenjie Tan; Wenling Wang; Xiang Zhao; Xueyong Huang                                                                                                                                                                                                                                                                                                                                                                                                                                                                                                                                                                                                                                          |
| EPI_ISL_469256, EPI_ISL_498691 to 498694, EPI_ISL_575329 to 575330, EPI_ISL_591270 to 591280                                                                                                                                                                                                                                                                                                                                                                                                                                                                                                                                                                                                                                                                                                                                                                                                                                                                                                                                                                                                                                                                                                                                                                                                                                                                                                                                                                                                                                                                                                                                                                                                                                                                                                                                                                                                                                                                                                                                                                                                                                                                                                                                                                                                                                                                                                                                   | National Institute for Viral Disease Control and Prevention, China CDC                            | National Institute for Viral Disease Control and Prevention, China CDC                            | Cao Chen; Chun Huang; Dayan Wang; Dong Xia; Geogia Fu Gao; George F. Gao; George F.Gao; Guizhen Wu; Haijun Du; Hong Wang; Huitai Ma; Ji Wang; Jingdong Song; Juan Song; Jun Han; Kang Xiao; LingLing Mao; Qinqin Song; Rongbao Gao; Ruqin Gao; Shiwen Wang; Shuai Pang; Wefeng Shi; WenQing YaoWenbo Xu; Wenbo Xu; William J. Liu; Xiang Zhao; Xiang ZhaoLijuan Chen; Xiangcheng Lu; Yang Song; Yanhai Wang; Yao Meng; Yao MengZhixiao ChenYuchao Wu; Yong Zhang; Yong ZhangBo ZhijianJianqun Zhang; Yuan He; Yuchao Wu; Zhaoquo Wang; ZhiQiang Xia; Zhixiao Chen                                                                                                                                                                                                                                 |
| EPI_ISL_458133                                                                                                                                                                                                                                                                                                                                                                                                                                                                                                                                                                                                                                                                                                                                                                                                                                                                                                                                                                                                                                                                                                                                                                                                                                                                                                                                                                                                                                                                                                                                                                                                                                                                                                                                                                                                                                                                                                                                                                                                                                                                                                                                                                                                                                                                                                                                                                                                                 | National Institute of Biotechnology                                                               | Bioinformatics Division, National Institute of Biotechnology                                      | Arittra Bhattacharjee; Asif Rashid; Chaman Ara Keya; Keshob Chandra Das; Md. Hadisur Rahman; Md. Moniruzzaman; Md. Nazrul Islam; Md. Ruhul Amin; Md. Salim Khan; Md. Salimullah; Mohammad Uzzal Hossain                                                                                                                                                                                                                                                                                                                                                                                                                                                                                                                                                                                           |
| EPI_ISL_447904                                                                                                                                                                                                                                                                                                                                                                                                                                                                                                                                                                                                                                                                                                                                                                                                                                                                                                                                                                                                                                                                                                                                                                                                                                                                                                                                                                                                                                                                                                                                                                                                                                                                                                                                                                                                                                                                                                                                                                                                                                                                                                                                                                                                                                                                                                                                                                                                                 | National Institute of Biotechnology                                                               | National Institute of Biotechnology                                                               | Arittra Bhattacharjee; Asif Rashid; Chaman Ara Keya; Irfan Ahmed; Keshob Chandra Das; Md. Hadisur Rahman; Md. Moniruzzaman; Md. Nazrul Islam; Md. Ruhul Amin; Md. Salimullah; Mohammad Uzzal Hossain; Tahia Anan Rahman                                                                                                                                                                                                                                                                                                                                                                                                                                                                                                                                                                           |
| EPI_ISL_538504 to 538505, EPI_ISL_538508 to 538509, EPI_ISL_574433, EPI_ISL_576386 to 576387, EPI_ISL_1391009 to 1391018, EPI_ISL_1411159, EPI_ISL_1413427, EPI_ISL_1415427                                                                                                                                                                                                                                                                                                                                                                                                                                                                                                                                                                                                                                                                                                                                                                                                                                                                                                                                                                                                                                                                                                                                                                                                                                                                                                                                                                                                                                                                                                                                                                                                                                                                                                                                                                                                                                                                                                                                                                                                                                                                                                                                                                                                                                                    | see above                                                                                         | National Institute of Health Research and Development                                             | National Institute of Health Research and Development                                                                                                                                                                                                                                                                                                                                                                                                                                                                                                                                                                                                                                                                                                                                             |
|                                                                                                                                                                                                                                                                                                                                                                                                                                                                                                                                                                                                                                                                                                                                                                                                                                                                                                                                                                                                                                                                                                                                                                                                                                                                                                                                                                                                                                                                                                                                                                                                                                                                                                                                                                                                                                                                                                                                                                                                                                                                                                                                                                                                                                                                                                                                                                                                                                |                                                                                                   |                                                                                                   | A; AA; Adam; Agutiningsih; Arie Ardiansyah Nugraha; F; Fauzul Muna; Febriyani; Febriyanti; HA; HD; Hana Apsari Pawestri; Hariastuti; Hartanti Dian Ikawati; Herman; Herna; Holy Arif Wibowo; I; Ikawati; Indalau; Irene Lorinda Indalao; J; K; KD; KNA; Kartika Dewi Puspa; Kindi Adnan; Kipuw; Krisna Nur Andriana Pangesti; Kurniawati; M; Muna; Mursinah; N; NI; NK; NL; Natalie Laurencia Kipuw; Nelly Puspandari; Ni Ketut Susilarini; Nike Susanti; Nikmah; Nugraha; Nurhadi; Nurika Hariastuti; Paisal; Pangesti; Pawestri; Puspa; Puspandari; Puspandary; R; Ramadhany; Reni Herman; Rinin Ramadhany; Rizki; Setiawaty; Setiawaty, V.; Soekarso; Subangkit; Susanti; Susilarini; T; Tati Febriyanti; Triyani Soekarso; UA; Uilly Alfi Nikmah; V; Vivi Setiawaty.; Wibowo; Yuni Rukminiati |
| EPI_ISL_450197, EPI_ISL_455584, EPI_ISL_455589 to 455593, EPI_ISL_455624                                                                                                                                                                                                                                                                                                                                                                                                                                                                                                                                                                                                                                                                                                                                                                                                                                                                                                                                                                                                                                                                                                                                                                                                                                                                                                                                                                                                                                                                                                                                                                                                                                                                                                                                                                                                                                                                                                                                                                                                                                                                                                                                                                                                                                                                                                                                                       | National Institute of Health, Department of medical Sciences, Ministry of Public Health, Thailand | National Institute of Health, Department of medical Sciences, Ministry of Public Health, Thailand | Chittaganpitch; Malinee; Okada; Parmmen; Phuygun; Pilailuk; Siriraporn; Sittiporn; Sunthareeya; Thanadachakul; Thanutsapa; Waicharoen; Warawan; Wongboot                                                                                                                                                                                                                                                                                                                                                                                                                                                                                                                                                                                                                                          |
| EPI_ISL_479756 to 479758                                                                                                                                                                                                                                                                                                                                                                                                                                                                                                                                                                                                                                                                                                                                                                                                                                                                                                                                                                                                                                                                                                                                                                                                                                                                                                                                                                                                                                                                                                                                                                                                                                                                                                                                                                                                                                                                                                                                                                                                                                                                                                                                                                                                                                                                                                                                                                                                       | National Institute of Hygiene and Epidemiology (NIHE)                                             | National Key Laboratory of Gene Technology, Institute of Biotechnology (IBT)                      | Chu Hoang Ha; Dang Duc Anh; Futoshi Hasebe; Ho Thi Thuong; Hoang Ha; Hoang Vu Mai Phuong; Le Quynh Mai; Le Thi Thanh; Le Tung Lam; Nguyen Hong Trang; Nguyen Le Khanh Hang; Nguyen Phuong Anh; Nguyen Vu Son; Pham Thi Hien; Taichiro Takemura; Tran Huyen Linh; Tran Thu Huong; Truong Nam Hai; Ung Thi Hong Trang; Vuong Duc Cuong                                                                                                                                                                                                                                                                                                                                                                                                                                                              |
| EPI_ISL_1447363 to 1447487                                                                                                                                                                                                                                                                                                                                                                                                                                                                                                                                                                                                                                                                                                                                                                                                                                                                                                                                                                                                                                                                                                                                                                                                                                                                                                                                                                                                                                                                                                                                                                                                                                                                                                                                                                                                                                                                                                                                                                                                                                                                                                                                                                                                                                                                                                                                                                                                     | National Institute of Infectious Diseases (NIID)                                                  | National Institute of Infectious Diseases (NIID)                                                  | Hideka Miura; Kentaro Itokawa; Kiyoko Okamoto; Kumiko Araki; Makoto Kuroda; Masanori Hashino; Rina Tanaka; Seiichiro Fujisaki; Shinichiro Hirai; Tsuyoshi Sekizuka                                                                                                                                                                                                                                                                                                                                                                                                                                                                                                                                                                                                                                |
| EPI_ISL_1418308 to 1418309, EPI_ISL_1418314 to 1418315, EPI_ISL_1418317 to 1418322, EPI_ISL_1418325 to 1418330                                                                                                                                                                                                                                                                                                                                                                                                                                                                                                                                                                                                                                                                                                                                                                                                                                                                                                                                                                                                                                                                                                                                                                                                                                                                                                                                                                                                                                                                                                                                                                                                                                                                                                                                                                                                                                                                                                                                                                                                                                                                                                                                                                                                                                                                                                                 | National Institute of Infectious Diseases-Prof. Dr. Matei Bals Molecular Diagnostics Laboratory   | National Institute of Infectious Diseases-Prof. Dr. Matei Bals Molecular Diagnostics Laboratory   | Corina Casanguiu; Dan Otelea; Ionelia Nicolae; Leontina Banica; Marius Surleac; Ovidiu Vlaicu; Simona Paraschiv                                                                                                                                                                                                                                                                                                                                                                                                                                                                                                                                                                                                                                                                                   |
| EPI_ISL_480414 to 480421, EPI_ISL_480424 to 480427, EPI_ISL_480439 to 480444, EPI_ISL_1492682, EPI_ISL_1493059, EPI_ISL_1493066, EPI_ISL_1493069, EPI_ISL_1493103, EPI_ISL_1493106, EPI_ISL_1493108                                                                                                                                                                                                                                                                                                                                                                                                                                                                                                                                                                                                                                                                                                                                                                                                                                                                                                                                                                                                                                                                                                                                                                                                                                                                                                                                                                                                                                                                                                                                                                                                                                                                                                                                                                                                                                                                                                                                                                                                                                                                                                                                                                                                                            | see above                                                                                         | National Institute of Laboratory Medicine and Referral Center                                     | Bangladesh Council of Scientific and Industrial Research                                                                                                                                                                                                                                                                                                                                                                                                                                                                                                                                                                                                                                                                                                                                          |
|                                                                                                                                                                                                                                                                                                                                                                                                                                                                                                                                                                                                                                                                                                                                                                                                                                                                                                                                                                                                                                                                                                                                                                                                                                                                                                                                                                                                                                                                                                                                                                                                                                                                                                                                                                                                                                                                                                                                                                                                                                                                                                                                                                                                                                                                                                                                                                                                                                |                                                                                                   |                                                                                                   | A. K. M. Shamsuzzaman; Abu Sayeed Mohammad Mahmud; Asish Kumar Ghosh; Barna Goswami; Eshrar Osman; Iffat Jahan; Mahmuda Yeasmin; Md. Ahasan Habib; Md. Maruf Ahmed Molla; Md. Murshed Hasan Sarkar; Md. Saddam Hossain; Md. Salim Khan; Mohammad Samir Uzzaman; Salek Ahmed Sajib; Shahina Akter; Shahjahan Siddike; Sheikh Md. Selim Al Din; Tanjina Akhter Banu; Tanjina Akhter Banu; Tasnim Nafisa; Utpal Chandra Ray                                                                                                                                                                                                                                                                                                                                                                          |
| EPI_ISL_1538405                                                                                                                                                                                                                                                                                                                                                                                                                                                                                                                                                                                                                                                                                                                                                                                                                                                                                                                                                                                                                                                                                                                                                                                                                                                                                                                                                                                                                                                                                                                                                                                                                                                                                                                                                                                                                                                                                                                                                                                                                                                                                                                                                                                                                                                                                                                                                                                                                | National Institute of Laboratory Medicine and Referral Center                                     | Dr. Qudrat-I-Khuda Road, Dhaka-1205, Bangladesh                                                   | A. K. M. Shamsuzzaman; Abu Sayeed Mohammad Mahmud; Arifa Akram; Asish Kumar Ghosh; Barna Goswami; Eshrar Osman; Iffat Jahan; Mahmuda Yeasmin; Md. Ahasan Habib; Md. Maruf Ahmed Molla; Md. Murshed Hasan Sarkar; Md. Saddam Hossain; Md. Salim Khan; Mohammad Mohi Uddin; Mohammad Samir Uzzaman; Shahina Akter; Tanjina Akhter Banu; Tasnim Nafisa                                                                                                                                                                                                                                                                                                                                                                                                                                               |
| EPI_ISL_455420, EPI_ISL_455458 to 455459, EPI_ISL_462090 to 462098, EPI_ISL_464159 to 464166, EPI_ISL_465163 to 465164, EPI_ISL_466626 to 466630, EPI_ISL_466636 to 466639, EPI_ISL_466644 to 466645, EPI_ISL_466649 to 466650, EPI_ISL_466654 to 466664, EPI_ISL_466684 to 466686, EPI_ISL_469286 to 469288, EPI_ISL_469297 to 469300, EPI_ISL_475083 to 475084, EPI_ISL_475165 to 475173, EPI_ISL_475238, EPI_ISL_475754 to 475761, EPI_ISL_480445 to 480450, EPI_ISL_482485 to 482489, EPI_ISL_482700 to 482701, EPI_ISL_483622 to 483624, EPI_ISL_483626 to 483636, EPI_ISL_483641 to 483647, EPI_ISL_483686 to 483687, EPI_ISL_483689 to 483695, EPI_ISL_483699 to 483700, EPI_ISL_483703, EPI_ISL_483705, EPI_ISL_483707, EPI_ISL_483710, EPI_ISL_487362 to 487364, EPI_ISL_487366 to 487368, EPI_ISL_487371 to 487373, EPI_ISL_487375 to 487376, EPI_ISL_487378, EPI_ISL_487380, EPI_ISL_487382 to 487386, EPI_ISL_487392 to 487396, EPI_ISL_490109 to 490111, EPI_ISL_490113 to 490114, EPI_ISL_490144, EPI_ISL_490164 to 490165, EPI_ISL_490167 to 490168, EPI_ISL_498227 to 498228, EPI_ISL_498253 to 498254, EPI_ISL_498267 to 498268, EPI_ISL_498272 to 498274, EPI_ISL_498417 to 498419, EPI_ISL_498466 to 498467, EPI_ISL_498549 to 498550, EPI_ISL_498783 to 498797, EPI_ISL_498800 to 498806, EPI_ISL_498808 to 498809, EPI_ISL_498811, EPI_ISL_498814 to 498818, EPI_ISL_498830, EPI_ISL_498892, EPI_ISL_498932 to 498933, EPI_ISL_503958, EPI_ISL_504040, EPI_ISL_504137, EPI_ISL_504176 to 504184, EPI_ISL_514129 to 514130, EPI_ISL_514228 to 514252, EPI_ISL_603221 to 603225, EPI_ISL_603238 to 603247, EPI_ISL_603249 to 603250, EPI_ISL_1508828, EPI_ISL_1508833, EPI_ISL_1508841, EPI_ISL_1508940, EPI_ISL_1508942 to 1508943, EPI_ISL_1508946, EPI_ISL_1508950, EPI_ISL_1508952, EPI_ISL_1508954 to 1508955, EPI_ISL_1508999 to 1509001, EPI_ISL_1509272, EPI_ISL_1509298 to 1509299, EPI_ISL_1509637, EPI_ISL_1509924, EPI_ISL_1520103, EPI_ISL_1520105, EPI_ISL_1524771, EPI_ISL_1524775 to 1524776, EPI_ISL_1524802, EPI_ISL_1524872, EPI_ISL_1531533 to 1531534, EPI_ISL_1531553 to 1531574, EPI_ISL_1531735, EPI_ISL_1531743 to 1531744, EPI_ISL_1531776, EPI_ISL_1532065, EPI_ISL_1532855, EPI_ISL_1532982, EPI_ISL_1533423, EPI_ISL_1533426 to 1533427, EPI_ISL_1533429 to 1533430, EPI_ISL_1533728, EPI_ISL_1533802, EPI_ISL_1533852, EPI_ISL_1534610 to 1534621, EPI_ISL_1538406 to 1538411 |                                                                                                   |                                                                                                   |                                                                                                                                                                                                                                                                                                                                                                                                                                                                                                                                                                                                                                                                                                                                                                                                   |
| see above                                                                                                                                                                                                                                                                                                                                                                                                                                                                                                                                                                                                                                                                                                                                                                                                                                                                                                                                                                                                                                                                                                                                                                                                                                                                                                                                                                                                                                                                                                                                                                                                                                                                                                                                                                                                                                                                                                                                                                                                                                                                                                                                                                                                                                                                                                                                                                                                                      | National Institute of Laboratory Medicine and Referral Center                                     | Genomic Research Lab, BCSIR                                                                       | ; A. K. M. Shamsuzzaman; Abu Sayeed Mohammad Mahmud; Arifa Akram; Asish Kumar Ghos; Asish Kumar Ghosh; Barna Goswami; Bayzid Bin Monir; Eshrar Osman; Iffat Jahan; Mahmuda Yeasmin; Md. Ahasan Habib; Md. Ahasan Habib; Md. Ahasan Habib; Md. Maruf Ahmed Molla; Md. Maruf Ahmed Molla; Md. Masum Hossain Arif; Md. Murshed Hasan Sarkar; Md. Murshed Hasan Sarkar; Md. Saddam Hossain; Md. Salim Khan; Mohammad Mohi Uddin; Mohammad Samir Uzzaman; Monira Parveen; Salek Ahmed Sajib; Shahina Akhter; Shahjahan Siddike; Sheikh Md. Selim Al Din; Tanjina Akhter Banu; Tanjina Akhter Banu; Tarannum Taznin; Tasnim Nafisa; Utpal Chandra Ray; Uzzaman                                                                                                                                          |
| EPI_ISL_1508891 to 1508893, EPI_ISL_1508915                                                                                                                                                                                                                                                                                                                                                                                                                                                                                                                                                                                                                                                                                                                                                                                                                                                                                                                                                                                                                                                                                                                                                                                                                                                                                                                                                                                                                                                                                                                                                                                                                                                                                                                                                                                                                                                                                                                                                                                                                                                                                                                                                                                                                                                                                                                                                                                    | National Institute of Laboratory Medicine and Referral Center                                     | Genomic Research Lab. BCSIR                                                                       | A. K. M. Shamsuzzaman; Abu Sayeed Mohammad Mahmud; Arifa Akram; Asish Kumar Ghosh; Barna Goswami; Eshrar Osman; Iffat Jahan; Mahmuda Yeasmin; Md. Ahasan Habib; Md. Maruf Ahmed Molla; Md. Murshed Hasan Sarkar; Md. Saddam Hossain; Md. Salim Khan; Mohammad Samir Uzzaman; Shahina Akter; Tanjina Akhter Banu; Tasnim Nafisa                                                                                                                                                                                                                                                                                                                                                                                                                                                                    |
| EPI_ISL_1492070 to 1492071, EPI_ISL_1492073 to 1492074, EPI_ISL_1492076 to 1492077, EPI_ISL_1492079, EPI_ISL_1492081 to 1492082, EPI_ISL_1492084 to 1492085, EPI_ISL_1492087, EPI_ISL_1492089 to 1492090, EPI_ISL_1492092 to 1492093, EPI_ISL_1492095, EPI_ISL_1492097, EPI_ISL_1492099 to 1492100, EPI_ISL_1492102 to 1492103, EPI_ISL_1492105, EPI_ISL_1492107 to 1492108, EPI_ISL_1492110 to 1492111, EPI_ISL_1492113 to 1492114, EPI_ISL_1492116 to 1492117, EPI_ISL_1492119, EPI_ISL_1492121, EPI_ISL_1492123 to 1492124, EPI_ISL_1492126 to 1492127, EPI_ISL_1492129 to 1492130, EPI_ISL_1492132 to 1492133, EPI_ISL_1492135, EPI_ISL_1492137 to 1492138, EPI_ISL_1492140 to 1492141, EPI_ISL_1492143 to 1492144, EPI_ISL_1492146 to 1492443, EPI_ISL_1498826 to 1498915                                                                                                                                                                                                                                                                                                                                                                                                                                                                                                                                                                                                                                                                                                                                                                                                                                                                                                                                                                                                                                                                                                                                                                                                                                                                                                                                                                                                                                                                                                                                                                                                                                                 | see above                                                                                         | National Institute of Public Health                                                               |                                                                                                                                                                                                                                                                                                                                                                                                                                                                                                                                                                                                                                                                                                                                                                                                   |
|                                                                                                                                                                                                                                                                                                                                                                                                                                                                                                                                                                                                                                                                                                                                                                                                                                                                                                                                                                                                                                                                                                                                                                                                                                                                                                                                                                                                                                                                                                                                                                                                                                                                                                                                                                                                                                                                                                                                                                                                                                                                                                                                                                                                                                                                                                                                                                                                                                |                                                                                                   |                                                                                                   | Alexander Nagy; Dusan Trnka; Helena Jirincova; Jaromira Vecerova; Timotej Suri                                                                                                                                                                                                                                                                                                                                                                                                                                                                                                                                                                                                                                                                                                                    |
| EPI_ISL_1510278 to 1510419                                                                                                                                                                                                                                                                                                                                                                                                                                                                                                                                                                                                                                                                                                                                                                                                                                                                                                                                                                                                                                                                                                                                                                                                                                                                                                                                                                                                                                                                                                                                                                                                                                                                                                                                                                                                                                                                                                                                                                                                                                                                                                                                                                                                                                                                                                                                                                                                     | National Institute of Public Health                                                               | State Veterinary Institute Prague                                                                 | A; D; H; J; Jirincova; Nagy; Suri; T; Trnka; Vecerova                                                                                                                                                                                                                                                                                                                                                                                                                                                                                                                                                                                                                                                                                                                                             |
| EPI_ISL_539776, EPI_ISL_539778 to 539782                                                                                                                                                                                                                                                                                                                                                                                                                                                                                                                                                                                                                                                                                                                                                                                                                                                                                                                                                                                                                                                                                                                                                                                                                                                                                                                                                                                                                                                                                                                                                                                                                                                                                                                                                                                                                                                                                                                                                                                                                                                                                                                                                                                                                                                                                                                                                                                       | National Institute of Public Health (Czech Republic)                                              | State Veterinary Institute Prague                                                                 | A; D; H; Jirincova; L; Nagy; Novakova; Trnka; Vecerova, J.                                                                                                                                                                                                                                                                                                                                                                                                                                                                                                                                                                                                                                                                                                                                        |
| EPI_ISL_1447198 to 1447199, EPI_ISL_1447215 to 1447227, EPI_ISL_1447230 to 1447234, EPI_ISL_1447236, EPI_ISL_1447254 to 1447256, EPI_ISL_1447258 to 1447259, EPI_ISL_1447269 to 1447270, EPI_ISL_1447282 to 1447283, EPI_ISL_1538664                                                                                                                                                                                                                                                                                                                                                                                                                                                                                                                                                                                                                                                                                                                                                                                                                                                                                                                                                                                                                                                                                                                                                                                                                                                                                                                                                                                                                                                                                                                                                                                                                                                                                                                                                                                                                                                                                                                                                                                                                                                                                                                                                                                           | see above                                                                                         | National Institute of Public Health - National Institute of Hygiene                               | 1. National Institute of Public Health - National Institute of Hygiene; 2. Eurofins Genomics Europe Sequencing GmbH                                                                                                                                                                                                                                                                                                                                                                                                                                                                                                                                                                                                                                                                               |
|                                                                                                                                                                                                                                                                                                                                                                                                                                                                                                                                                                                                                                                                                                                                                                                                                                                                                                                                                                                                                                                                                                                                                                                                                                                                                                                                                                                                                                                                                                                                                                                                                                                                                                                                                                                                                                                                                                                                                                                                                                                                                                                                                                                                                                                                                                                                                                                                                                |                                                                                                   |                                                                                                   | ECDC COVID-19 WGS support team; Eurofins Genomics Europe Sequencing Team; Gierczyki Rafa; Sadkowska-Todys Magorzata; Wokowicz Tomasz; Zacharczuk Katarzyna                                                                                                                                                                                                                                                                                                                                                                                                                                                                                                                                                                                                                                        |
| EPI_ISL_541681 to 541751                                                                                                                                                                                                                                                                                                                                                                                                                                                                                                                                                                                                                                                                                                                                                                                                                                                                                                                                                                                                                                                                                                                                                                                                                                                                                                                                                                                                                                                                                                                                                                                                                                                                                                                                                                                                                                                                                                                                                                                                                                                                                                                                                                                                                                                                                                                                                                                                       | National Institute of Virology, NIV Influenza                                                     | National Institute of Virology, NIV Influenza                                                     | Potdar V                                                                                                                                                                                                                                                                                                                                                                                                                                                                                                                                                                                                                                                                                                                                                                                          |
| EPI_ISL_434554 to 434558                                                                                                                                                                                                                                                                                                                                                                                                                                                                                                                                                                                                                                                                                                                                                                                                                                                                                                                                                                                                                                                                                                                                                                                                                                                                                                                                                                                                                                                                                                                                                                                                                                                                                                                                                                                                                                                                                                                                                                                                                                                                                                                                                                                                                                                                                                                                                                                                       | National Institutes of Health, University of the Philippines Manila                               | Philippine Genome Center                                                                          | Alessandra C. Sanchez; Benedict A. Maralit; Bernard Demot; Carlo M. Lapid; Christina Tan; El King D. Morado; Eva Maria Cutiongco-de la Paz; Francis A. Tablizo; Haifa L.Gaza; Jan Michael C. Yap; Jarvin E. Nipales; Jo-Hannah S. Llamas; John Mark Velasco; Joshua Gregor A. Dizon; Joy Ann Petronio-Santos; Julius Aaron Mejia; Kris P. Punayag; Kristianne Arielle D. Gabriel; Maribell Dollete; Marissa M. Alejandria; Raul V. Destura; Shana F. Genavia; Shebna Rose D. Fabilloren; Shiela Mae M. Araiza; Sonia Salamat; and Cynthia P. Saloma                                                                                                                                                                                                                                               |
| EPI_ISL_431833                                                                                                                                                                                                                                                                                                                                                                                                                                                                                                                                                                                                                                                                                                                                                                                                                                                                                                                                                                                                                                                                                                                                                                                                                                                                                                                                                                                                                                                                                                                                                                                                                                                                                                                                                                                                                                                                                                                                                                                                                                                                                                                                                                                                                                                                                                                                                                                                                 | National Institutes of Health, University of the Philippines Manila                               | Philippine Genome Center, University of the Philippines System                                    | Alessandra C. Sanchez; Benedict A. Maralit; Bernard Demot; Carlo M. Lapid; Christina Tan; El King D. Morado; Eva Maria Cutiongco-de la Paz; Francis A. Tablizo; Haifa L.Gaza; Jan Michael C. Yap; Jarvin E. Nipales; Jo-Hannah S. Llamas; John Mark Velasco; Joshua Gregor A. Dizon; Joy Ann Petronio-Santos; Julius Aaron Mejia; Kris P. Punayag; Kristianne Arielle D. Gabriel; Maribell Dollete; Marissa M. Alejandria; Raul V. Destura; Shana F. Genavia; Shebna Rose D. Fabilloren; Shiela Mae M. Araiza; Sonia Salamat; and Cynthia P. Saloma                                                                                                                                                                                                                                               |
| EPI_ISL_449799                                                                                                                                                                                                                                                                                                                                                                                                                                                                                                                                                                                                                                                                                                                                                                                                                                                                                                                                                                                                                                                                                                                                                                                                                                                                                                                                                                                                                                                                                                                                                                                                                                                                                                                                                                                                                                                                                                                                                                                                                                                                                                                                                                                                                                                                                                                                                                                                                 | National Laboratory for Health, Environment and Food                                              | National Laboratory for Health, Environment and Food                                              | Blazun Vosner H.; Duh D.; Hedzet S.; Janezic S.; Mahnic A.; Rupnik M.; Završnik J.                                                                                                                                                                                                                                                                                                                                                                                                                                                                                                                                                                                                                                                                                                                |
| EPI_ISL_1490940, EPI_ISL_1491000, EPI_ISL_1491005 to 1491019, EPI_ISL_1491021 to 1491023, EPI_ISL_1491027, EPI_ISL_1491138 to 1491177, EPI_ISL_1491188 to 1491189, EPI_ISL_1491196 to 1491197, EPI_ISL_1491264, EPI_ISL_1491279 to 1491286, EPI_ISL_1491288, EPI_ISL_1491291 to 1491301, EPI_ISL_1491329, EPI_ISL_1491341                                                                                                                                                                                                                                                                                                                                                                                                                                                                                                                                                                                                                                                                                                                                                                                                                                                                                                                                                                                                                                                                                                                                                                                                                                                                                                                                                                                                                                                                                                                                                                                                                                                                                                                                                                                                                                                                                                                                                                                                                                                                                                      |                                                                                                   |                                                                                                   |                                                                                                                                                                                                                                                                                                                                                                                                                                                                                                                                                                                                                                                                                                                                                                                                   |

|                                                                                                                                                                                                                                                                                                                                                                                                                                                                                                                                                                                                                                                                                                                                                                                                                                                                                                                                                                                                                                                                                                                                                                                                                                                                                                                                                                                                                                                                                                                                                                                                                                                                                                                                                                                                                                                                                                                                                                                                                                                                                                                                                                                                                                                                                                                                                                                                                                                                                                                                                                                                                                                                                                                                                                                                                                                                                                                                                                                                                                                                                                                                                                                                                                                                                                                                                                                                                                                                                                                                                                                                                                                                                                                                                                                                                                                                                                                                                                                                                                                                                                                                                                                                                                                                      |                                                                                                                                                                      |                                                                                                                                                                      |                                                                                                                                                                                                                                                                                                                                                                          |
|----------------------------------------------------------------------------------------------------------------------------------------------------------------------------------------------------------------------------------------------------------------------------------------------------------------------------------------------------------------------------------------------------------------------------------------------------------------------------------------------------------------------------------------------------------------------------------------------------------------------------------------------------------------------------------------------------------------------------------------------------------------------------------------------------------------------------------------------------------------------------------------------------------------------------------------------------------------------------------------------------------------------------------------------------------------------------------------------------------------------------------------------------------------------------------------------------------------------------------------------------------------------------------------------------------------------------------------------------------------------------------------------------------------------------------------------------------------------------------------------------------------------------------------------------------------------------------------------------------------------------------------------------------------------------------------------------------------------------------------------------------------------------------------------------------------------------------------------------------------------------------------------------------------------------------------------------------------------------------------------------------------------------------------------------------------------------------------------------------------------------------------------------------------------------------------------------------------------------------------------------------------------------------------------------------------------------------------------------------------------------------------------------------------------------------------------------------------------------------------------------------------------------------------------------------------------------------------------------------------------------------------------------------------------------------------------------------------------------------------------------------------------------------------------------------------------------------------------------------------------------------------------------------------------------------------------------------------------------------------------------------------------------------------------------------------------------------------------------------------------------------------------------------------------------------------------------------------------------------------------------------------------------------------------------------------------------------------------------------------------------------------------------------------------------------------------------------------------------------------------------------------------------------------------------------------------------------------------------------------------------------------------------------------------------------------------------------------------------------------------------------------------------------------------------------------------------------------------------------------------------------------------------------------------------------------------------------------------------------------------------------------------------------------------------------------------------------------------------------------------------------------------------------------------------------------------------------------------------------------------------------------------|----------------------------------------------------------------------------------------------------------------------------------------------------------------------|----------------------------------------------------------------------------------------------------------------------------------------------------------------------|--------------------------------------------------------------------------------------------------------------------------------------------------------------------------------------------------------------------------------------------------------------------------------------------------------------------------------------------------------------------------|
| see above                                                                                                                                                                                                                                                                                                                                                                                                                                                                                                                                                                                                                                                                                                                                                                                                                                                                                                                                                                                                                                                                                                                                                                                                                                                                                                                                                                                                                                                                                                                                                                                                                                                                                                                                                                                                                                                                                                                                                                                                                                                                                                                                                                                                                                                                                                                                                                                                                                                                                                                                                                                                                                                                                                                                                                                                                                                                                                                                                                                                                                                                                                                                                                                                                                                                                                                                                                                                                                                                                                                                                                                                                                                                                                                                                                                                                                                                                                                                                                                                                                                                                                                                                                                                                                                            | National Laboratory for Health, Environment and Food, OMM, Celje                                                                                                     | CISLD (Clinical Institute of Special Laboratory Diagnostics), University Children's Hospital, University Medical Center Ljubljana                                    | Ana Grom; Barbara Jenko Bizjan; Jernej Kova; Katarina Kozmos; Marko Pokorn; Maruša Debeljak; Robert Šket; Tadej Battelino; Tine Tesovnik                                                                                                                                                                                                                                 |
| EPI_ISL_1490923, EPI_ISL_1490936 to 1490938, EPI_ISL_1490941, EPI_ISL_1490951, EPI_ISL_1490964 to 1490977, EPI_ISL_1491003 to 1491004, EPI_ISL_1491020, EPI_ISL_1491024, EPI_ISL_1491038 to 1491039, EPI_ISL_1491099 to 1491105, EPI_ISL_1491136, EPI_ISL_1491185 to 1491187, EPI_ISL_1491192 to 1491195, EPI_ISL_1491200, EPI_ISL_1491208 to 1491262, EPI_ISL_1491278, EPI_ISL_1491287, EPI_ISL_1491290, EPI_ISL_1491303 to 1491308, EPI_ISL_1491310 to 1491312                                                                                                                                                                                                                                                                                                                                                                                                                                                                                                                                                                                                                                                                                                                                                                                                                                                                                                                                                                                                                                                                                                                                                                                                                                                                                                                                                                                                                                                                                                                                                                                                                                                                                                                                                                                                                                                                                                                                                                                                                                                                                                                                                                                                                                                                                                                                                                                                                                                                                                                                                                                                                                                                                                                                                                                                                                                                                                                                                                                                                                                                                                                                                                                                                                                                                                                                                                                                                                                                                                                                                                                                                                                                                                                                                                                                     |                                                                                                                                                                      |                                                                                                                                                                      |                                                                                                                                                                                                                                                                                                                                                                          |
| see above                                                                                                                                                                                                                                                                                                                                                                                                                                                                                                                                                                                                                                                                                                                                                                                                                                                                                                                                                                                                                                                                                                                                                                                                                                                                                                                                                                                                                                                                                                                                                                                                                                                                                                                                                                                                                                                                                                                                                                                                                                                                                                                                                                                                                                                                                                                                                                                                                                                                                                                                                                                                                                                                                                                                                                                                                                                                                                                                                                                                                                                                                                                                                                                                                                                                                                                                                                                                                                                                                                                                                                                                                                                                                                                                                                                                                                                                                                                                                                                                                                                                                                                                                                                                                                                            | National Laboratory for Health, Environment and Food, OMM, Koper                                                                                                     | CISLD (Clinical Institute of Special Laboratory Diagnostics), University Children's Hospital, University Medical Center Ljubljana                                    | Ana Grom; Barbara Jenko Bizjan; Jernej Kova; Katarina Kozmos; Marko Pokorn; Maruša Debeljak; Robert Šket; Tadej Battelino; Tine Tesovnik                                                                                                                                                                                                                                 |
| EPI_ISL_1490944 to 1490950, EPI_ISL_1490952, EPI_ISL_1491033 to 1491035, EPI_ISL_1491040 to 1491048, EPI_ISL_1491106, EPI_ISL_1491183 to 1491184, EPI_ISL_1491190, EPI_ISL_1491201 to 1491206, EPI_ISL_1491263, EPI_ISL_1491302, EPI_ISL_1491315 to 1491316, EPI_ISL_1491319, EPI_ISL_1491328                                                                                                                                                                                                                                                                                                                                                                                                                                                                                                                                                                                                                                                                                                                                                                                                                                                                                                                                                                                                                                                                                                                                                                                                                                                                                                                                                                                                                                                                                                                                                                                                                                                                                                                                                                                                                                                                                                                                                                                                                                                                                                                                                                                                                                                                                                                                                                                                                                                                                                                                                                                                                                                                                                                                                                                                                                                                                                                                                                                                                                                                                                                                                                                                                                                                                                                                                                                                                                                                                                                                                                                                                                                                                                                                                                                                                                                                                                                                                                        |                                                                                                                                                                      |                                                                                                                                                                      |                                                                                                                                                                                                                                                                                                                                                                          |
| see above                                                                                                                                                                                                                                                                                                                                                                                                                                                                                                                                                                                                                                                                                                                                                                                                                                                                                                                                                                                                                                                                                                                                                                                                                                                                                                                                                                                                                                                                                                                                                                                                                                                                                                                                                                                                                                                                                                                                                                                                                                                                                                                                                                                                                                                                                                                                                                                                                                                                                                                                                                                                                                                                                                                                                                                                                                                                                                                                                                                                                                                                                                                                                                                                                                                                                                                                                                                                                                                                                                                                                                                                                                                                                                                                                                                                                                                                                                                                                                                                                                                                                                                                                                                                                                                            | National Laboratory for Health, Environment and Food, OMM, Kranj                                                                                                     | CISLD (Clinical Institute of Special Laboratory Diagnostics), University Children's Hospital, University Medical Center Ljubljana                                    | Ana Grom; Barbara Jenko Bizjan; Jernej Kova; Katarina Kozmos; Marko Pokorn; Maruša Debeljak; Robert Šket; Tadej Battelino; Tine Tesovnik                                                                                                                                                                                                                                 |
| EPI_ISL_1490920 to 1490922, EPI_ISL_1490924 to 1490935, EPI_ISL_1490939, EPI_ISL_1490943, EPI_ISL_1490978 to 1490999, EPI_ISL_1491025 to 1491026, EPI_ISL_1491028 to 1491032, EPI_ISL_1491037, EPI_ISL_1491081 to 1491098, EPI_ISL_1491107 to 1491133, EPI_ISL_1491137, EPI_ISL_1491178 to 1491182, EPI_ISL_1491191, EPI_ISL_1491198 to 1491199, EPI_ISL_1491265 to 1491274, EPI_ISL_1491309, EPI_ISL_1491313, EPI_ISL_1491317 to 1491318, EPI_ISL_1491320 to 1491327, EPI_ISL_1491330 to 1491334, EPI_ISL_1491336 to 1491339                                                                                                                                                                                                                                                                                                                                                                                                                                                                                                                                                                                                                                                                                                                                                                                                                                                                                                                                                                                                                                                                                                                                                                                                                                                                                                                                                                                                                                                                                                                                                                                                                                                                                                                                                                                                                                                                                                                                                                                                                                                                                                                                                                                                                                                                                                                                                                                                                                                                                                                                                                                                                                                                                                                                                                                                                                                                                                                                                                                                                                                                                                                                                                                                                                                                                                                                                                                                                                                                                                                                                                                                                                                                                                                                        |                                                                                                                                                                      |                                                                                                                                                                      |                                                                                                                                                                                                                                                                                                                                                                          |
| see above                                                                                                                                                                                                                                                                                                                                                                                                                                                                                                                                                                                                                                                                                                                                                                                                                                                                                                                                                                                                                                                                                                                                                                                                                                                                                                                                                                                                                                                                                                                                                                                                                                                                                                                                                                                                                                                                                                                                                                                                                                                                                                                                                                                                                                                                                                                                                                                                                                                                                                                                                                                                                                                                                                                                                                                                                                                                                                                                                                                                                                                                                                                                                                                                                                                                                                                                                                                                                                                                                                                                                                                                                                                                                                                                                                                                                                                                                                                                                                                                                                                                                                                                                                                                                                                            | National Laboratory for Health, Environment and Food, OMM, Maribor                                                                                                   | CISLD (Clinical Institute of Special Laboratory Diagnostics), University Children's Hospital, University Medical Center Ljubljana                                    | Ana Grom; Barbara Jenko Bizjan; Jernej Kova; Katarina Kozmos; Marko Pokorn; Maruša Debeljak; Robert Šket; Tadej Battelino; Tine Tesovnik                                                                                                                                                                                                                                 |
| EPI_ISL_1490919, EPI_ISL_1490942, EPI_ISL_1490953 to 1490963, EPI_ISL_1491001 to 1491002, EPI_ISL_1491036, EPI_ISL_1491049 to 1491053, EPI_ISL_1491055 to 1491080, EPI_ISL_1491134 to 1491135, EPI_ISL_1491207, EPI_ISL_1491275, EPI_ISL_1491289, EPI_ISL_1491314, EPI_ISL_1491335, EPI_ISL_1491340                                                                                                                                                                                                                                                                                                                                                                                                                                                                                                                                                                                                                                                                                                                                                                                                                                                                                                                                                                                                                                                                                                                                                                                                                                                                                                                                                                                                                                                                                                                                                                                                                                                                                                                                                                                                                                                                                                                                                                                                                                                                                                                                                                                                                                                                                                                                                                                                                                                                                                                                                                                                                                                                                                                                                                                                                                                                                                                                                                                                                                                                                                                                                                                                                                                                                                                                                                                                                                                                                                                                                                                                                                                                                                                                                                                                                                                                                                                                                                  |                                                                                                                                                                      |                                                                                                                                                                      |                                                                                                                                                                                                                                                                                                                                                                          |
| see above                                                                                                                                                                                                                                                                                                                                                                                                                                                                                                                                                                                                                                                                                                                                                                                                                                                                                                                                                                                                                                                                                                                                                                                                                                                                                                                                                                                                                                                                                                                                                                                                                                                                                                                                                                                                                                                                                                                                                                                                                                                                                                                                                                                                                                                                                                                                                                                                                                                                                                                                                                                                                                                                                                                                                                                                                                                                                                                                                                                                                                                                                                                                                                                                                                                                                                                                                                                                                                                                                                                                                                                                                                                                                                                                                                                                                                                                                                                                                                                                                                                                                                                                                                                                                                                            | National Laboratory for Health, Environment and Food, OMM, Novo mesto                                                                                                | CISLD (Clinical Institute of Special Laboratory Diagnostics), University Children's Hospital, University Medical Center Ljubljana                                    | Ana Grom; Barbara Jenko Bizjan; Jernej Kova; Katarina Kozmos; Marko Pokorn; Maruša Debeljak; Robert Šket; Tadej Battelino; Tine Tesovnik                                                                                                                                                                                                                                 |
| EPI_ISL_512597 to 512637, EPI_ISL_512639 to 512644, EPI_ISL_512810                                                                                                                                                                                                                                                                                                                                                                                                                                                                                                                                                                                                                                                                                                                                                                                                                                                                                                                                                                                                                                                                                                                                                                                                                                                                                                                                                                                                                                                                                                                                                                                                                                                                                                                                                                                                                                                                                                                                                                                                                                                                                                                                                                                                                                                                                                                                                                                                                                                                                                                                                                                                                                                                                                                                                                                                                                                                                                                                                                                                                                                                                                                                                                                                                                                                                                                                                                                                                                                                                                                                                                                                                                                                                                                                                                                                                                                                                                                                                                                                                                                                                                                                                                                                   | National Laboratory for Influenza/Virology reference laboratory, Public Health Center of the Ministry of Health of Ukraine                                           | Respiratory Virus Unit, Microbiology Services Colindale, Public Health England                                                                                       | Dr. Iryna Demchyshyna; PHE Covid Sequencing Team                                                                                                                                                                                                                                                                                                                         |
| EPI_ISL_483637                                                                                                                                                                                                                                                                                                                                                                                                                                                                                                                                                                                                                                                                                                                                                                                                                                                                                                                                                                                                                                                                                                                                                                                                                                                                                                                                                                                                                                                                                                                                                                                                                                                                                                                                                                                                                                                                                                                                                                                                                                                                                                                                                                                                                                                                                                                                                                                                                                                                                                                                                                                                                                                                                                                                                                                                                                                                                                                                                                                                                                                                                                                                                                                                                                                                                                                                                                                                                                                                                                                                                                                                                                                                                                                                                                                                                                                                                                                                                                                                                                                                                                                                                                                                                                                       | National Laboratory of Virology, Szentágotthai Research Centre                                                                                                       | National Laboratory of Virology, Szentágotthai Research Centre                                                                                                       | Balázs Somogyi; Endre Gábor Tóth; Ferenc Jakab; Gábor Kemenesi                                                                                                                                                                                                                                                                                                           |
| EPI_ISL_1392640 to 1392641                                                                                                                                                                                                                                                                                                                                                                                                                                                                                                                                                                                                                                                                                                                                                                                                                                                                                                                                                                                                                                                                                                                                                                                                                                                                                                                                                                                                                                                                                                                                                                                                                                                                                                                                                                                                                                                                                                                                                                                                                                                                                                                                                                                                                                                                                                                                                                                                                                                                                                                                                                                                                                                                                                                                                                                                                                                                                                                                                                                                                                                                                                                                                                                                                                                                                                                                                                                                                                                                                                                                                                                                                                                                                                                                                                                                                                                                                                                                                                                                                                                                                                                                                                                                                                           | National Medical Research Center for Obstetrics, Gynecology and Perinatology named after Academician V.I.Kulakov of the Ministry of Healthcare of Russian Federation | National Medical Research Center for Obstetrics, Gynecology and Perinatology named after Academician V.I.Kulakov of the Ministry of Healthcare of Russian Federation | Andrey Donnikov; Andrey Goltsov; Denis Rebrikov; Dmitry Abramov; Dmitry Korostin; Dmitry Trofimov; Gennadiy Sukhikh; Jekaterina Shubina; Tatiana Priputnevich; Yegor Botsmanov                                                                                                                                                                                           |
| EPI_ISL_1386250 to 1386252, EPI_ISL_1386441, EPI_ISL_1386701, EPI_ISL_1386926, EPI_ISL_1387178, EPI_ISL_1387353, EPI_ISL_1387637, EPI_ISL_1387988, EPI_ISL_1388503, EPI_ISL_1388979, EPI_ISL_1389156 to 1389159, EPI_ISL_1524382, EPI_ISL_1524384, EPI_ISL_1524647, EPI_ISL_1524698 to 1524699, EPI_ISL_1524701 to 1524702, EPI_ISL_1524704 to 1524707, EPI_ISL_1524711 to 1524712, EPI_ISL_1524714 to 1524716, EPI_ISL_1524718 to 1524719, EPI_ISL_1524721 to 1524722, EPI_ISL_1524724 to 1524726, EPI_ISL_1524753 to 1524756, EPI_ISL_1524772 to 1524774                                                                                                                                                                                                                                                                                                                                                                                                                                                                                                                                                                                                                                                                                                                                                                                                                                                                                                                                                                                                                                                                                                                                                                                                                                                                                                                                                                                                                                                                                                                                                                                                                                                                                                                                                                                                                                                                                                                                                                                                                                                                                                                                                                                                                                                                                                                                                                                                                                                                                                                                                                                                                                                                                                                                                                                                                                                                                                                                                                                                                                                                                                                                                                                                                                                                                                                                                                                                                                                                                                                                                                                                                                                                                                           |                                                                                                                                                                      |                                                                                                                                                                      |                                                                                                                                                                                                                                                                                                                                                                          |
| see above                                                                                                                                                                                                                                                                                                                                                                                                                                                                                                                                                                                                                                                                                                                                                                                                                                                                                                                                                                                                                                                                                                                                                                                                                                                                                                                                                                                                                                                                                                                                                                                                                                                                                                                                                                                                                                                                                                                                                                                                                                                                                                                                                                                                                                                                                                                                                                                                                                                                                                                                                                                                                                                                                                                                                                                                                                                                                                                                                                                                                                                                                                                                                                                                                                                                                                                                                                                                                                                                                                                                                                                                                                                                                                                                                                                                                                                                                                                                                                                                                                                                                                                                                                                                                                                            | National Platform bis UMONS/Jolimont                                                                                                                                 | National Platform bis UMONS/Jolimont                                                                                                                                 | François DufRASne; Gautier Detry; Guillaume Bayon-Vicente; Ruddy Wattiez                                                                                                                                                                                                                                                                                                 |
| EPI_ISL_1447292 to 1447320                                                                                                                                                                                                                                                                                                                                                                                                                                                                                                                                                                                                                                                                                                                                                                                                                                                                                                                                                                                                                                                                                                                                                                                                                                                                                                                                                                                                                                                                                                                                                                                                                                                                                                                                                                                                                                                                                                                                                                                                                                                                                                                                                                                                                                                                                                                                                                                                                                                                                                                                                                                                                                                                                                                                                                                                                                                                                                                                                                                                                                                                                                                                                                                                                                                                                                                                                                                                                                                                                                                                                                                                                                                                                                                                                                                                                                                                                                                                                                                                                                                                                                                                                                                                                                           | National Public Health Center, COVID Laboratory                                                                                                                      | National Public Health Center, National Biosafety Laboratory                                                                                                         | Bernadett Pályi; Dániel Déri; Judit Henczkó; Norbert Solymosi; Nóra Magyar; Zoltán Kis                                                                                                                                                                                                                                                                                   |
| EPI_ISL_457833 to 457838, EPI_ISL_457842 to 457844                                                                                                                                                                                                                                                                                                                                                                                                                                                                                                                                                                                                                                                                                                                                                                                                                                                                                                                                                                                                                                                                                                                                                                                                                                                                                                                                                                                                                                                                                                                                                                                                                                                                                                                                                                                                                                                                                                                                                                                                                                                                                                                                                                                                                                                                                                                                                                                                                                                                                                                                                                                                                                                                                                                                                                                                                                                                                                                                                                                                                                                                                                                                                                                                                                                                                                                                                                                                                                                                                                                                                                                                                                                                                                                                                                                                                                                                                                                                                                                                                                                                                                                                                                                                                   | National Public Health Laboratory                                                                                                                                    | KEMRI-Wellcome Trust Research Programme/KEMRI-CGMR-C Kilifi                                                                                                          | Githinji G. et al 2020                                                                                                                                                                                                                                                                                                                                                   |
| EPI_ISL_416829, EPI_ISL_416866, EPI_ISL_416884 to 416886, EPI_ISL_416907                                                                                                                                                                                                                                                                                                                                                                                                                                                                                                                                                                                                                                                                                                                                                                                                                                                                                                                                                                                                                                                                                                                                                                                                                                                                                                                                                                                                                                                                                                                                                                                                                                                                                                                                                                                                                                                                                                                                                                                                                                                                                                                                                                                                                                                                                                                                                                                                                                                                                                                                                                                                                                                                                                                                                                                                                                                                                                                                                                                                                                                                                                                                                                                                                                                                                                                                                                                                                                                                                                                                                                                                                                                                                                                                                                                                                                                                                                                                                                                                                                                                                                                                                                                             | National Public Health Laboratory                                                                                                                                    | Malaysia Genome Institute                                                                                                                                            | Azrin Ahmad; Enizza Kasim; Hani Mat Hussin; Irni Suhayu Sapian; Mohd Faizal Abu Bakar; Mohd Noor Mat Isa; Noorliza Mohamad Noordin; Nor Azfa Johari; Norazimah Tajudin; Nurhazreen Md Iqbal; Rehan Shuhada Abu Bakar; Selvanesan Sengol; Shahruil Hisham Zainal Ariffin; Shamsidar Sopie; Siti Noraini Othman; W Afiza W Mohd Ariffin; Yu Kie Chern; Yusuf Muhammad Noor |
| EPI_ISL_410719                                                                                                                                                                                                                                                                                                                                                                                                                                                                                                                                                                                                                                                                                                                                                                                                                                                                                                                                                                                                                                                                                                                                                                                                                                                                                                                                                                                                                                                                                                                                                                                                                                                                                                                                                                                                                                                                                                                                                                                                                                                                                                                                                                                                                                                                                                                                                                                                                                                                                                                                                                                                                                                                                                                                                                                                                                                                                                                                                                                                                                                                                                                                                                                                                                                                                                                                                                                                                                                                                                                                                                                                                                                                                                                                                                                                                                                                                                                                                                                                                                                                                                                                                                                                                                                       | National Public Health Laboratory                                                                                                                                    | National Public Health Laboratory                                                                                                                                    | Cui L; Lin RTP; Mak TM; Octavia S                                                                                                                                                                                                                                                                                                                                        |
| EPI_ISL_410716                                                                                                                                                                                                                                                                                                                                                                                                                                                                                                                                                                                                                                                                                                                                                                                                                                                                                                                                                                                                                                                                                                                                                                                                                                                                                                                                                                                                                                                                                                                                                                                                                                                                                                                                                                                                                                                                                                                                                                                                                                                                                                                                                                                                                                                                                                                                                                                                                                                                                                                                                                                                                                                                                                                                                                                                                                                                                                                                                                                                                                                                                                                                                                                                                                                                                                                                                                                                                                                                                                                                                                                                                                                                                                                                                                                                                                                                                                                                                                                                                                                                                                                                                                                                                                                       | National Public Health Laboratory, National Centre for Infectious Diseases                                                                                           | National Centre for Infectious Diseases, National Centre for Infectious Diseases                                                                                     | Cui L; Lin RTP; Mak TM; Octavia S                                                                                                                                                                                                                                                                                                                                        |
| EPI_ISL_410713 to 410715, EPI_ISL_418992 to 419001, EPI_ISL_422428 to 422435, EPI_ISL_428822 to 428850, EPI_ISL_435678 to 435700, EPI_ISL_443188 to 443249, EPI_ISL_462276 to 462433, EPI_ISL_469080 to 469115, EPI_ISL_469117 to 469155, EPI_ISL_469274, EPI_ISL_475837 to 475999, EPI_ISL_479574 to 479603, EPI_ISL_483576 to 483621, EPI_ISL_490049 to 490079, EPI_ISL_493390 to 493425, EPI_ISL_498564 to 498618, EPI_ISL_512822 to 512842, EPI_ISL_516807 to 516828, EPI_ISL_527359 to 527379, EPI_ISL_536412 to 536454, EPI_ISL_548972 to 549005, EPI_ISL_574493 to 574542, EPI_ISL_596456 to 596497, EPI_ISL_605817 to 605824, EPI_ISL_1442942 to 1442955, EPI_ISL_1476987 to 1477042, EPI_ISL_1489717 to 1489728, EPI_ISL_1519355 to 1519358, EPI_ISL_1519360 to 1519366, EPI_ISL_1519368 to 1519375, EPI_ISL_1519377 to 1519384, EPI_ISL_1519386, EPI_ISL_1519388, EPI_ISL_1519391, EPI_ISL_1519393, EPI_ISL_1519396, EPI_ISL_1519398, EPI_ISL_1519401, EPI_ISL_1519405, EPI_ISL_1519407, EPI_ISL_1519410, EPI_ISL_1519413, EPI_ISL_1519416, EPI_ISL_1519419, EPI_ISL_1524777 to 1524801, EPI_ISL_1543939 to 1543982, EPI_ISL_1545779                                                                                                                                                                                                                                                                                                                                                                                                                                                                                                                                                                                                                                                                                                                                                                                                                                                                                                                                                                                                                                                                                                                                                                                                                                                                                                                                                                                                                                                                                                                                                                                                                                                                                                                                                                                                                                                                                                                                                                                                                                                                                                                                                                                                                                                                                                                                                                                                                                                                                                                                                                                                                                                                                                                                                                                                                                                                                                                                                                                                                                                                                                                       |                                                                                                                                                                      |                                                                                                                                                                      |                                                                                                                                                                                                                                                                                                                                                                          |
| see above                                                                                                                                                                                                                                                                                                                                                                                                                                                                                                                                                                                                                                                                                                                                                                                                                                                                                                                                                                                                                                                                                                                                                                                                                                                                                                                                                                                                                                                                                                                                                                                                                                                                                                                                                                                                                                                                                                                                                                                                                                                                                                                                                                                                                                                                                                                                                                                                                                                                                                                                                                                                                                                                                                                                                                                                                                                                                                                                                                                                                                                                                                                                                                                                                                                                                                                                                                                                                                                                                                                                                                                                                                                                                                                                                                                                                                                                                                                                                                                                                                                                                                                                                                                                                                                            | National Public Health Laboratory, National Centre for Infectious Diseases                                                                                           | National Public Health Laboratory, National Centre for Infectious Diseases                                                                                           | Chavatte JM; Chavatte Jean-Marc; Cui L; Cui Lin; Grace Jie Yin Ngan; Lin Cui; Lin RTP; Lin Raymond Tzer Pin; Mak TM; Mak Tze Minn; Octavia S; Octavia Sophie; Raymond Tzer Pin Lin; Royce Ang; Sophie Octavia; Tze Minn Mak; Zhenyang Zhou; Zhou Z                                                                                                                       |
| EPI_ISL_1497286 to 1497524, EPI_ISL_1503144 to 1503230                                                                                                                                                                                                                                                                                                                                                                                                                                                                                                                                                                                                                                                                                                                                                                                                                                                                                                                                                                                                                                                                                                                                                                                                                                                                                                                                                                                                                                                                                                                                                                                                                                                                                                                                                                                                                                                                                                                                                                                                                                                                                                                                                                                                                                                                                                                                                                                                                                                                                                                                                                                                                                                                                                                                                                                                                                                                                                                                                                                                                                                                                                                                                                                                                                                                                                                                                                                                                                                                                                                                                                                                                                                                                                                                                                                                                                                                                                                                                                                                                                                                                                                                                                                                               | National Public Health Organization                                                                                                                                  | National Public Health Organization                                                                                                                                  | Kyriaki Tryfinopoulou et al                                                                                                                                                                                                                                                                                                                                              |
| EPI_ISL_1498123 to 1498125                                                                                                                                                                                                                                                                                                                                                                                                                                                                                                                                                                                                                                                                                                                                                                                                                                                                                                                                                                                                                                                                                                                                                                                                                                                                                                                                                                                                                                                                                                                                                                                                                                                                                                                                                                                                                                                                                                                                                                                                                                                                                                                                                                                                                                                                                                                                                                                                                                                                                                                                                                                                                                                                                                                                                                                                                                                                                                                                                                                                                                                                                                                                                                                                                                                                                                                                                                                                                                                                                                                                                                                                                                                                                                                                                                                                                                                                                                                                                                                                                                                                                                                                                                                                                                           | National Reference Laboratory                                                                                                                                        | National Reference Laboratory                                                                                                                                        | Enatha Mukantwari; Jeanne d'Arc Umuringa; Umuringa Jeanne d'Arc; Yvan Butera                                                                                                                                                                                                                                                                                             |
| EPI_ISL_480224, EPI_ISL_480297 to 480310                                                                                                                                                                                                                                                                                                                                                                                                                                                                                                                                                                                                                                                                                                                                                                                                                                                                                                                                                                                                                                                                                                                                                                                                                                                                                                                                                                                                                                                                                                                                                                                                                                                                                                                                                                                                                                                                                                                                                                                                                                                                                                                                                                                                                                                                                                                                                                                                                                                                                                                                                                                                                                                                                                                                                                                                                                                                                                                                                                                                                                                                                                                                                                                                                                                                                                                                                                                                                                                                                                                                                                                                                                                                                                                                                                                                                                                                                                                                                                                                                                                                                                                                                                                                                             | National Reference Laboratory "Influenza and acute respiratory diseases"                                                                                             | NRL-HIV                                                                                                                                                              | Ivailo Alexiev; Ivan Ivanov; Ivva Philipova                                                                                                                                                                                                                                                                                                                              |
| EPI_ISL_507008                                                                                                                                                                                                                                                                                                                                                                                                                                                                                                                                                                                                                                                                                                                                                                                                                                                                                                                                                                                                                                                                                                                                                                                                                                                                                                                                                                                                                                                                                                                                                                                                                                                                                                                                                                                                                                                                                                                                                                                                                                                                                                                                                                                                                                                                                                                                                                                                                                                                                                                                                                                                                                                                                                                                                                                                                                                                                                                                                                                                                                                                                                                                                                                                                                                                                                                                                                                                                                                                                                                                                                                                                                                                                                                                                                                                                                                                                                                                                                                                                                                                                                                                                                                                                                                       | National Veterinary Institute                                                                                                                                        | National Veterinary Institute                                                                                                                                        | Siamak Zohari                                                                                                                                                                                                                                                                                                                                                            |
| EPI_ISL_435674 to 435677, EPI_ISL_443187                                                                                                                                                                                                                                                                                                                                                                                                                                                                                                                                                                                                                                                                                                                                                                                                                                                                                                                                                                                                                                                                                                                                                                                                                                                                                                                                                                                                                                                                                                                                                                                                                                                                                                                                                                                                                                                                                                                                                                                                                                                                                                                                                                                                                                                                                                                                                                                                                                                                                                                                                                                                                                                                                                                                                                                                                                                                                                                                                                                                                                                                                                                                                                                                                                                                                                                                                                                                                                                                                                                                                                                                                                                                                                                                                                                                                                                                                                                                                                                                                                                                                                                                                                                                                             | National Virology Reference Laboratory                                                                                                                               | National Public Health Laboratory, National Centre for Infectious Diseases                                                                                           | Chavatte Jean-Marc; Cui Lin; Lin Raymond Tzer Pin; Mak Tze Minn; Octavia Sophie; Taib Surita; Zaini Zainun                                                                                                                                                                                                                                                               |
| EPI_ISL_605058 to 605080                                                                                                                                                                                                                                                                                                                                                                                                                                                                                                                                                                                                                                                                                                                                                                                                                                                                                                                                                                                                                                                                                                                                                                                                                                                                                                                                                                                                                                                                                                                                                                                                                                                                                                                                                                                                                                                                                                                                                                                                                                                                                                                                                                                                                                                                                                                                                                                                                                                                                                                                                                                                                                                                                                                                                                                                                                                                                                                                                                                                                                                                                                                                                                                                                                                                                                                                                                                                                                                                                                                                                                                                                                                                                                                                                                                                                                                                                                                                                                                                                                                                                                                                                                                                                                             | National Virus Reference Laboratory                                                                                                                                  | Irish Coronavirus Sequencing Consortium - Helixworks                                                                                                                 | Conor Crosbie; Nimesh Pinnamaneni; Sachin Chalapati                                                                                                                                                                                                                                                                                                                      |
| EPI_ISL_500573 to 500595, EPI_ISL_501252 to 501274, EPI_ISL_512087 to 512106, EPI_ISL_525352 to 525418, EPI_ISL_528440 to 528484, EPI_ISL_578202 to 578253, EPI_ISL_578256 to 578334, EPI_ISL_596889 to 596927, EPI_ISL_1396894 to 1397382, EPI_ISL_1398569 to 1398923, EPI_ISL_1398985 to 1399160, EPI_ISL_1402432 to 1402434, EPI_ISL_1402782 to 1402785, EPI_ISL_1416727 to 1416760, EPI_ISL_1483429 to 1483572, EPI_ISL_1491525 to 1491530, EPI_ISL_1499723 to 1499726, EPI_ISL_1499728 to 1500085, EPI_ISL_1501269 to 1501307, EPI_ISL_1502211 to 1502434, EPI_ISL_1502211 to 1502434, EPI_ISL_1510758 to 1510935, EPI_ISL_1511121 to 1511123, EPI_ISL_1511272 to 1511398, EPI_ISL_1552243 to 1552244, EPI_ISL_1552246 to 1552248, EPI_ISL_1552250 to 1552251, EPI_ISL_1552253, EPI_ISL_1552256, EPI_ISL_1552258, EPI_ISL_1552261, EPI_ISL_1552263, EPI_ISL_1552266, EPI_ISL_1552268, EPI_ISL_1552271, EPI_ISL_1552272 to 1552279, EPI_ISL_1552281, EPI_ISL_1552284, EPI_ISL_1552287, EPI_ISL_1552289, EPI_ISL_1552292, EPI_ISL_1552294, EPI_ISL_1552300, EPI_ISL_1552303, EPI_ISL_1552306, EPI_ISL_1552309, EPI_ISL_1552312, EPI_ISL_1552312, EPI_ISL_1552315 to 1552320, EPI_ISL_1552322 to 1552323, EPI_ISL_1552325 to 1552326, EPI_ISL_1552328 to 1552329, EPI_ISL_1552331 to 1552332, EPI_ISL_1552335, EPI_ISL_1552338, EPI_ISL_1552340, EPI_ISL_1552343, EPI_ISL_1552345, EPI_ISL_1552348, EPI_ISL_1552352, EPI_ISL_1552354, EPI_ISL_1552357, EPI_ISL_1552360, EPI_ISL_1552363, EPI_ISL_1552366, EPI_ISL_1552369, EPI_ISL_1552372, EPI_ISL_1552374, EPI_ISL_1552377, EPI_ISL_1552380 to 1552381, EPI_ISL_1552383 to 1552384, EPI_ISL_1552386 to 1552387, EPI_ISL_1552389, EPI_ISL_1552391, EPI_ISL_1552391, EPI_ISL_1552393, EPI_ISL_1552396, EPI_ISL_1552401, EPI_ISL_1552404, EPI_ISL_1552407, EPI_ISL_1552410, EPI_ISL_1552413, EPI_ISL_1552416, EPI_ISL_1552419, EPI_ISL_1552422, EPI_ISL_1552425, EPI_ISL_1552427, EPI_ISL_1552430, EPI_ISL_1552433, EPI_ISL_1552435, EPI_ISL_1552438, EPI_ISL_1552441, EPI_ISL_1552444, EPI_ISL_1552447 to 1552448, EPI_ISL_1552450 to 1552451, EPI_ISL_1552453 to 1552454, EPI_ISL_1552459, EPI_ISL_1552457, EPI_ISL_1552461 to 1552462, EPI_ISL_1552465, EPI_ISL_1552467 to 1552468, EPI_ISL_1552470 to 1552472, EPI_ISL_1552474 to 1552475, EPI_ISL_1552477 to 1552478, EPI_ISL_1552480 to 1552481, EPI_ISL_1552483, EPI_ISL_1552485 to 1552486, EPI_ISL_1552488 to 1552489, EPI_ISL_1552491 to 1552492, EPI_ISL_1552494 to 1552495, EPI_ISL_1552497 to 1552498, EPI_ISL_1552500 to 1552501, EPI_ISL_1552503 to 1552504, EPI_ISL_1552506 to 1552507, EPI_ISL_1552509 to 1552510, EPI_ISL_1552512 to 1552513, EPI_ISL_1552515 to 1552516, EPI_ISL_1552518 to 1552519, EPI_ISL_1552521 to 1552522, EPI_ISL_1552524 to 1552525, EPI_ISL_1552527 to 1552528, EPI_ISL_1552530 to 1552531, EPI_ISL_1552533 to 1552534, EPI_ISL_1552536 to 1552538, EPI_ISL_1552540 to 1552541, EPI_ISL_1552543, EPI_ISL_1552546 to 1552548, EPI_ISL_1552549, EPI_ISL_1552551 to 1552552, EPI_ISL_1552554 to 1552555, EPI_ISL_1552557 to 1552558, EPI_ISL_1552560 to 1552561, EPI_ISL_1552563 to 1552564, EPI_ISL_1552566 to 1552567, EPI_ISL_1552569 to 1552570, EPI_ISL_1552572 to 1552573, EPI_ISL_1552575 to 1552576, EPI_ISL_1552578 to 1552579, EPI_ISL_1552581 to 1552582, EPI_ISL_1552584 to 1552585, EPI_ISL_1552587 to 1552588, EPI_ISL_1552590 to 1552591, EPI_ISL_1552593, EPI_ISL_1552595 to 1552596, EPI_ISL_1552598 to 1552599, EPI_ISL_1552601, EPI_ISL_1552603 to 1552604, EPI_ISL_1552606 to 1552607, EPI_ISL_1552609 to 1552610, EPI_ISL_1552612 to 1552613, EPI_ISL_1552615 to 1552616, EPI_ISL_1552618 to 1552619, EPI_ISL_1552621 to 1552622, EPI_ISL_1552624 to 1552625, EPI_ISL_1552627 to 1552628, EPI_ISL_1552630 to 1552631, EPI_ISL_1552633 to 1552634, EPI_ISL_1552636 to 1552638, EPI_ISL_1552640 to 1552641, EPI_ISL_1552643 to 1552644, EPI_ISL_1552646 to 1552647, EPI_ISL_1552649 to 1552650, EPI_ISL_1552652 to 1552653, EPI_ISL_1552655 to 1552656, EPI_ISL_1552658 to 1552659, EPI_ISL_1552661 to 1552662, EPI_ISL_1552664 to 1552667, EPI_ISL_1552669 to 1552670, EPI_ISL_1552672 to 1552673, EPI_ISL_1552675 to 1552676, EPI_ISL_1552678 to 1552679, EPI_ISL_1552681 to 1552682, EPI_ISL_1552684 |                                                                                                                                                                      |                                                                                                                                                                      |                                                                                                                                                                                                                                                                                                                                                                          |
| see above                                                                                                                                                                                                                                                                                                                                                                                                                                                                                                                                                                                                                                                                                                                                                                                                                                                                                                                                                                                                                                                                                                                                                                                                                                                                                                                                                                                                                                                                                                                                                                                                                                                                                                                                                                                                                                                                                                                                                                                                                                                                                                                                                                                                                                                                                                                                                                                                                                                                                                                                                                                                                                                                                                                                                                                                                                                                                                                                                                                                                                                                                                                                                                                                                                                                                                                                                                                                                                                                                                                                                                                                                                                                                                                                                                                                                                                                                                                                                                                                                                                                                                                                                                                                                                                            | National Virus Reference Laboratory                                                                                                                                  | National Virus Reference Laboratory                                                                                                                                  | Aditi Chaturvedi; Calum Walsh; Charlene Bennet; Charlene Bennett; Cillian F De Gascun; Daniel Hare; Fiona Crispie; Gabriel Gonzalez; Guerrino Macori; Jonathan Dean; Matthew McCabe; Michael Carr; Paul Cotter; Seamus Fanning; Suzie Coughlan; Zoe Yandle                                                                                                               |
| EPI_ISL_493149 to 493190                                                                                                                                                                                                                                                                                                                                                                                                                                                                                                                                                                                                                                                                                                                                                                                                                                                                                                                                                                                                                                                                                                                                                                                                                                                                                                                                                                                                                                                                                                                                                                                                                                                                                                                                                                                                                                                                                                                                                                                                                                                                                                                                                                                                                                                                                                                                                                                                                                                                                                                                                                                                                                                                                                                                                                                                                                                                                                                                                                                                                                                                                                                                                                                                                                                                                                                                                                                                                                                                                                                                                                                                                                                                                                                                                                                                                                                                                                                                                                                                                                                                                                                                                                                                                                             | National Virus Resource Center, Chinese Academy of                                                                                                                   | Computational Virology Group, Center for Bacteria and                                                                                                                | Di Liu; Hongping Wei; Jianjun Chen; Jin Xiong; Yi Huang; Yi Yan                                                                                                                                                                                                                                                                                                          |

|                                                                                                                                                                                                                                                                                                                                                                                                                                                                                                                                                               |                                                                         |                                                                                                                            |                                                                                                                                                                                                                                                                                                                                                                                                                                                                                                                                                                                                         |
|---------------------------------------------------------------------------------------------------------------------------------------------------------------------------------------------------------------------------------------------------------------------------------------------------------------------------------------------------------------------------------------------------------------------------------------------------------------------------------------------------------------------------------------------------------------|-------------------------------------------------------------------------|----------------------------------------------------------------------------------------------------------------------------|---------------------------------------------------------------------------------------------------------------------------------------------------------------------------------------------------------------------------------------------------------------------------------------------------------------------------------------------------------------------------------------------------------------------------------------------------------------------------------------------------------------------------------------------------------------------------------------------------------|
|                                                                                                                                                                                                                                                                                                                                                                                                                                                                                                                                                               | Sciences, Wuhan 430071, China                                           | Viruses Resources and Bioinformation, Wuhan Institute of Virology, Chinese Academy of SciencesWuhan 430071, China          |                                                                                                                                                                                                                                                                                                                                                                                                                                                                                                                                                                                                         |
| EPI_ISL_444994 to 445000                                                                                                                                                                                                                                                                                                                                                                                                                                                                                                                                      | Naval Health Research Center                                            | Naval Medical Research Center Biological Defense Research Directorate                                                      | Adrian Paskey; Chris Myers; Dessiree Pena-Gomez; Ewell Hollis; Kimberly Bishop-Lilly; Kyle Long; Logan Voegtly; Melinda Balansay-Ames; Nathaniel Christy; Regina Cer; Roger Pan                                                                                                                                                                                                                                                                                                                                                                                                                         |
| EPI_ISL_491907 to 491931, EPI_ISL_491942 to 491943                                                                                                                                                                                                                                                                                                                                                                                                                                                                                                            | Naval Infectious Diseases Diagnostic Laboratory                         | Naval Medical Research Center Biological Defense Research Directorate                                                      | Adrian Paskey; Dessiree Pena-Gomez; Francisco Malgon Bautista; Hua Wei Chen; Kimberly Bishop-Lilly; Kyle Long; Lindsay Glang; Logan Voegtly; Mark Simons; Megan Schilling; Regina Cer; Victor Sugiharto                                                                                                                                                                                                                                                                                                                                                                                                 |
| EPI_ISL_514128                                                                                                                                                                                                                                                                                                                                                                                                                                                                                                                                                | Navy and Marine Corps Public Health Center                              | Centers for Disease Control and Prevention                                                                                 | Anna Montmayeur; Anna Uehara; Clinton R. Paden; Haibin Wang; Jing Zhang; Krista Queen; Rachel Marine; Suxiang Tong; Yan Li; Ying Tao                                                                                                                                                                                                                                                                                                                                                                                                                                                                    |
| EPI_ISL_514062 to 514092                                                                                                                                                                                                                                                                                                                                                                                                                                                                                                                                      | Navy and Marine Corps Public Health Center                              | Pathogen Discovery, Respiratory Viruses Branch, Division of Viral Diseases, Centers for Disease Control and Prevention     | Anna Montmayeur; Anna Uehara; Clinton R. Paden; Haibin Wang; Jing Zhang; Krista Queen; Rachel Marine; Suxiang Tong; Yan Li; Ying Tao                                                                                                                                                                                                                                                                                                                                                                                                                                                                    |
| EPI_ISL_1400461 to 1400471, EPI_ISL_1444673 to 1444674, EPI_ISL_1444676 to 1444677, EPI_ISL_1444679 to 1444680, EPI_ISL_1444682 to 1444683, EPI_ISL_1444685 to 1444686, EPI_ISL_1444688, EPI_ISL_1503792 to 1503802                                                                                                                                                                                                                                                                                                                                           | see above                                                               | Nebraska Public Health Laboratory                                                                                          | NPHL COVID-19 Response Team                                                                                                                                                                                                                                                                                                                                                                                                                                                                                                                                                                             |
| EPI_ISL_428202 to 428206, EPI_ISL_466652 to 466683, EPI_ISL_467298, EPI_ISL_475174 to 475237                                                                                                                                                                                                                                                                                                                                                                                                                                                                  | Nebraska Public Health Laboratory                                       | UNMC COVID-19 Response Team                                                                                                | UNMC COVID-19 Response Team                                                                                                                                                                                                                                                                                                                                                                                                                                                                                                                                                                             |
| EPI_ISL_514673 to 514674, EPI_ISL_515293 to 515462, EPI_ISL_1399162 to 1399179, EPI_ISL_1404589 to 1404613, EPI_ISL_1422992 to 1423007, EPI_ISL_1469493 to 1469548, EPI_ISL_1483242 to 1483278, EPI_ISL_1493146 to 1493164, EPI_ISL_1501675 to 1501683, EPI_ISL_1511631 to 1511639                                                                                                                                                                                                                                                                            | see above                                                               | Nevada State Public Health Laboratory                                                                                      | Nevada State Public Health Laboratory                                                                                                                                                                                                                                                                                                                                                                                                                                                                                                                                                                   |
| EPI_ISL_1534438                                                                                                                                                                                                                                                                                                                                                                                                                                                                                                                                               | New Horizon Clinic wc NZC                                               | NHLS/UCT                                                                                                                   | Andrew Gorzalski; Chris Laverdure; Cyprian Rossetto; Cyprian Rossetto; David Jackson; Heather Kerwin; Joel R. Sevinsky; Mark Pandori; Natalie Crawford; Paul Hartley; Richard Tillet; Richard Tillet; Stephanie Van Hooser; Subhash C. Verma; and Mark Pandori                                                                                                                                                                                                                                                                                                                                          |
| EPI_ISL_510878 to 510888, EPI_ISL_535263 to 535303, EPI_ISL_542012 to 542097, EPI_ISL_569625 to 569663, EPI_ISL_574260 to 574291, EPI_ISL_602162 to 602207, EPI_ISL_1400942 to 1400963, EPI_ISL_1400967 to 1400981, EPI_ISL_1400984, EPI_ISL_1493389 to 1493435, EPI_ISL_1530948 to 1530989                                                                                                                                                                                                                                                                   | see above                                                               | New Mexico Department of Health Scientific Laboratory                                                                      | Anastacia Griego-Fisher; D'Eldra Malone; D'Eldra Malone; Jennifer Benoit                                                                                                                                                                                                                                                                                                                                                                                                                                                                                                                                |
| EPI_ISL_467525 to 467664, EPI_ISL_485872, EPI_ISL_507984 to 508121, EPI_ISL_610250, EPI_ISL_610253, EPI_ISL_610268 to 610281                                                                                                                                                                                                                                                                                                                                                                                                                                  | New Mexico Department of Health Scientific Laboratory Division          | Center for Global Health, University of New Mexico Health Sciences Center                                                  | Darrell Dinwiddie; Daryl Domman; Joseph Hicks; Kurt Schwalm; Michael Edwards; Twila Kunde                                                                                                                                                                                                                                                                                                                                                                                                                                                                                                               |
| EPI_ISL_596447 to 596448, EPI_ISL_602208 to 602209, EPI_ISL_602278 to 602281                                                                                                                                                                                                                                                                                                                                                                                                                                                                                  | New Mexico Department of Health Scientific Laboratory Division          | Los Alamos National Laboratory Bioscience Division                                                                         | Alina Deshpande; Cheryl Gleasner; Chien-Chi Lo; Joseph Hicks; Kim McMurry; Michael Edwards; Migun Shakya; Patrick Chain; Twila Kunde                                                                                                                                                                                                                                                                                                                                                                                                                                                                    |
| EPI_ISL_1397953 to 1397957                                                                                                                                                                                                                                                                                                                                                                                                                                                                                                                                    | New South Wales Health Pathology Royal Prince Alfred Hospital           | Microbiology RPAH                                                                                                          | Au, J.; Bull, R.; Deveson, I.; Foster, C.; Rawlinson, W.; Ruiz Silva, M.; Van Hal, S.                                                                                                                                                                                                                                                                                                                                                                                                                                                                                                                   |
| EPI_ISL_1394642, EPI_ISL_1394644 to 1394664, EPI_ISL_1397460 to 1397541                                                                                                                                                                                                                                                                                                                                                                                                                                                                                       | New York Presbyterian Hospital                                          | Wadsworth Center, New York State Department of Health                                                                      | Alexis Russel; Daryl M. Lamson; Erasmus Schneider; Erica Lasek-Nesselquist; John Kelly; Jonathan Plitnick; Kirsten St. George; Matthew Shudt; Melissa A Leisner; Navjot Singh                                                                                                                                                                                                                                                                                                                                                                                                                           |
| EPI_ISL_427526 to 427618                                                                                                                                                                                                                                                                                                                                                                                                                                                                                                                                      | NewYork-Presbyterian & Mason Lab                                        | Mason Lab                                                                                                                  | Alon Shaiber; Arryn Craney; Benjamin Young; Cem Meydan; Chandrima Bhattacharya; Christopher E. Mason; Christopher Mozsary; Craig D. Westover; Daniel J. Butler; David Danko; Dmitry Meleshko; Dong Xu; Ebrahim Afshinnekoo; Fritz J. Sedlazeck; Hanna Rennett; Iman Hajirasouliha; Jenny Xiang; Joel Rosiene; John Spley; Jonathan Foox; Justyna Gawrys; Krista Ryon; Lars F. Westblade; Lin Cong; Marcin Imielinski; Maria Sierra; Massimo Loda; Matthew MacKay; Melissa Cushing; Mirella Salvatore; Nikolay A. Ivanov; Phyllis Ruggiero; Priya Velu; Shawn Levy                                       |
| EPI_ISL_516934 to 516936, EPI_ISL_516938                                                                                                                                                                                                                                                                                                                                                                                                                                                                                                                      | Nicolae Testemitanu State University of Medicine and Pharmacy           | International Centre for Genetic Engineering and Biotechnology (ICGEB) and ARGO Open Lab Platform for Genome Sequencing    | Dal Monego S; Licastro D; Marcello A; Rajasekharan S; Uliniuc M                                                                                                                                                                                                                                                                                                                                                                                                                                                                                                                                         |
| EPI_ISL_1436808 to 1436816, EPI_ISL_1436818 to 1436828                                                                                                                                                                                                                                                                                                                                                                                                                                                                                                        | Niedersächsisches Landesgesundheitsamt (NLGA)                           | Robert Koch Institute                                                                                                      |                                                                                                                                                                                                                                                                                                                                                                                                                                                                                                                                                                                                         |
| EPI_ISL_455422, EPI_ISL_455426                                                                                                                                                                                                                                                                                                                                                                                                                                                                                                                                | Nigeria Centre for Disease Control                                      | African Centre of Excellence for Genomics of Infectious Diseases (ACEGID), Redeemer's University, Ede, Osun State, Nigeria | Ajogbasile F.V.; Folarin O.A.; Happi C.T.; Ihekweazu C.; Kayode A.; Oguzie J.; Olawoye I.; Olumade T.; Oluniyi P.E.; Uwanibe J.                                                                                                                                                                                                                                                                                                                                                                                                                                                                         |
| EPI_ISL_455362, EPI_ISL_455412 to 455415, EPI_ISL_455418 to 455419, EPI_ISL_455423 to 455425, EPI_ISL_455427, EPI_ISL_455429 to 455431, EPI_ISL_487087, EPI_ISL_487089 to 487092, EPI_ISL_487095 to 487096, EPI_ISL_487098 to 487099, EPI_ISL_487101 to 487112, EPI_ISL_527872 to 527915                                                                                                                                                                                                                                                                      | see above                                                               | Nigeria Centre for Disease Control (NCDC)                                                                                  | Ajogbasile F.V.; Folarin O.A.; Happi C.T.; Ihekweazu C.; Kayode A.; Oguzie J.; Olawoye I.; Olumade T.; Oluniyi P.E.; Oluniyi P.E. et al; Uwanibe J.                                                                                                                                                                                                                                                                                                                                                                                                                                                     |
| EPI_ISL_487113                                                                                                                                                                                                                                                                                                                                                                                                                                                                                                                                                | Nigeria Centre for Disease Control (NCDC)                               | Redeemer's University, ACEGID                                                                                              | Ajogbasile F.V.; Folarin O.A.; Happi C.T.; Ihekweazu C.; Kayode A.; Oguzie J.; Olawoye I.; Olumade T.; Oluniyi P.E.; Uwanibe J.                                                                                                                                                                                                                                                                                                                                                                                                                                                                         |
| EPI_ISL_479913 to 479924                                                                                                                                                                                                                                                                                                                                                                                                                                                                                                                                      | Niiigata City Public Health Research Institute                          | Pathogen Genomics Center, National Institute of Infectious Diseases                                                        | Hajime Kamiya; Kentaro Itokawa; Makoto Kuroda; Masanori Hashino; Motoi Suzuki; Rina Tanaka; Tsuyoshi Sekizuka; Yurie Takahashi                                                                                                                                                                                                                                                                                                                                                                                                                                                                          |
| EPI_ISL_479869, EPI_ISL_479902, EPI_ISL_480226, EPI_ISL_1426573 to 1426574, EPI_ISL_1427585 to 1427586, EPI_ISL_1428574 to 1428587, EPI_ISL_1428594 to 1428599, EPI_ISL_1428604 to 1428609, EPI_ISL_1429633, EPI_ISL_1429716 to 1429721, EPI_ISL_1430685, EPI_ISL_1430705 to 1430714, EPI_ISL_1430849 to 1430854, EPI_ISL_1431521 to 1431523, EPI_ISL_1431724, EPI_ISL_1431730                                                                                                                                                                                | see above                                                               | Niigata Prefectural Institute of Public Health and Environmental Sciences                                                  | ; Chang-Kweng Lim; Chikako Shimokawa; Daisuke Kobayashi; Eri Nakayama; Eunsil Park; Hajime Kamiya; Hussein H. Aly; Ken Miyazawa; Kentaro Itokawa; Kento Fukano; Makoto Kuroda; Masanori Hashino; Minoru Nagi; Motohiko Ogawa; Motoi Suzuki; Nozomu Hanaoka; Reiko Arai; Rina Tanaka; Shigeru Tanjima; Takahiro Maeki; Takanobu Kato; Takashi Sakudoh; Tsuguto Fujimoto; Tsuyoshi Sekizuka; Yasutaka Hoshino; Yoshihiro Kaku                                                                                                                                                                             |
| EPI_ISL_420151                                                                                                                                                                                                                                                                                                                                                                                                                                                                                                                                                | Nordland Hospital - Bodo, Laboratory Department, Molecular Biology Unit | Norwegian Institute of Public Health, Department of Virology                                                               | Hilde Elishaug; Kamilla Heddeland Instefjord; Karoline Bragstad; Kathrine Stene-Johansen; Olav Hungnes                                                                                                                                                                                                                                                                                                                                                                                                                                                                                                  |
| EPI_ISL_1490276, EPI_ISL_1490304, EPI_ISL_1490312, EPI_ISL_1490316, EPI_ISL_1490326, EPI_ISL_1490356, EPI_ISL_1490367, EPI_ISL_1490369, EPI_ISL_1490372, EPI_ISL_1490391, EPI_ISL_1490409, EPI_ISL_1490412, EPI_ISL_1490433, EPI_ISL_1490436, EPI_ISL_1490444, EPI_ISL_1490449, EPI_ISL_1490452, EPI_ISL_1490458, EPI_ISL_1490462 to 1490463, EPI_ISL_1490581, EPI_ISL_1490584 to 1490585, EPI_ISL_1490589, EPI_ISL_1490618, EPI_ISL_1490635, EPI_ISL_1490647, EPI_ISL_1547603, EPI_ISL_1547605, EPI_ISL_1547615, EPI_ISL_1547619 to 1547620, EPI_ISL_1547622 | see above                                                               | Nordland Hospital - Bodo, Laboratory Department, Molecular Biology Unit                                                    | Atiya R Ali; Debech Nadia; Engebretsen Serina Beate; Garcia Liorente Ignacio; Hilde Elishaug; Hilde Vollan; Jon Bråte; Kamilla Heddeland Instefjord; Karoline Bragstad; Kathrine Stene-Johansen; Marie Paulsen Madsen; Olav Hungnes; Pedersen Benedikte Nevjen; Rasmus Riis Kopperud                                                                                                                                                                                                                                                                                                                    |
| EPI_ISL_534239 to 534243                                                                                                                                                                                                                                                                                                                                                                                                                                                                                                                                      | Norra Älvsborgs länssjukhus                                             | The Public Health Agency of Sweden                                                                                         | Anna Risberg; Anna-Malin Linde; Karin Tegmark-Wisell; Maria Lind Karlberg; Mattias Haukland; Mia Brytting; Olov Svartstrom; Oskar Karlsson Lindsjö; Petra Edquist; Reza Advani; Sandra Broddesson                                                                                                                                                                                                                                                                                                                                                                                                       |
| EPI_ISL_1470059 to 1470069, EPI_ISL_1470122 to 1470136                                                                                                                                                                                                                                                                                                                                                                                                                                                                                                        | North Estonia Medical Centre laboratory                                 | 1. Laboratory of Communicable Diseases (Estonia); 2. Eurofins Genomics Europe Sequencing GmbH                              | Lidia Dotsenko et al.                                                                                                                                                                                                                                                                                                                                                                                                                                                                                                                                                                                   |
| EPI_ISL_456294, EPI_ISL_456323, EPI_ISL_456395 to 456397, EPI_ISL_548018 to 548020, EPI_ISL_548028 to 548030, EPI_ISL_548042 to 548044, EPI_ISL_548047 to 548048, EPI_ISL_548057 to 548063, EPI_ISL_548065 to 548067, EPI_ISL_548075 to 548076, EPI_ISL_579093 to 579096, EPI_ISL_579406 to 579407                                                                                                                                                                                                                                                            | see above                                                               | North Shore Hospital                                                                                                       | Institute of Environmental Science and Research (ESR)                                                                                                                                                                                                                                                                                                                                                                                                                                                                                                                                                   |
| EPI_ISL_482138                                                                                                                                                                                                                                                                                                                                                                                                                                                                                                                                                | North West London Pathology, Imperial College Healthcare NHS Trust      | Wellcome Sanger Institute for the COVID-19 Genomics UK (COG-UK) Consortium                                                 | Anja Werno; Antje van der Linden; Arlo Upton; Chris Mansell; David Hammer; Dragana Drinkovic; Erasmus Smit; Gary McAuliffe; Hana Sofia Andersson; Hermes Perez; James Ussher; Jill Sherwood; Jing Wang; Joep de Lig; Josh Freeman; Julia Howard; Juliet Elvy; Lauren Jelly; Mary DeAlmeida; Matt Blakiston; Matt Storey; Matthew Rogers; Max Bloomfield; Michael Addidle; Michelle Balm; Muhammad Faisal; Nikki Freed; Olin Silander; Sally Roberts; Sarah Jefferies; Sharmini Muttaiyah; Susan Morpeth; Susan Taylor; Timothy Blackmore; Vani Sathyendran; Veronica Playle; Virginia Hope; Xiaoyun Ren |
|                                                                                                                                                                                                                                                                                                                                                                                                                                                                                                                                                               |                                                                         |                                                                                                                            | Aileen Rowan; Alison Holmes; Anja Badhan; Carolina Herrera and Alex Alderton; Cordelia Langford; David K. Jackson; David Muir; Dominic Kwiatkowski; Ewan Harrison; Frankie Bolt; Graham Taylor; Ian Johnston; James Price; John Sillitoe on behalf of the Wellcome Sanger Institute COVID-19 Surveillance                                                                                                                                                                                                                                                                                               |

| Team; Ling Li; Paul Randell; Roberto Amato; Sonia Goncalves                                                                                                                                                                                                                                                                                                                                                                                                                                                                                                                                                                                                                                                                                                                                                                                                                                                                                                                                                                                                                                                                                                                                                                                                                                                                                                                                                                                                                                                                                                                                                                                                                                                                                                                                                                                                                                                                                                                                                                                                                                                                                                                                                                                                                                                                                                                                                                                                                                                                                                                                                                                                                                                                                                                                                                                                                                                                                                |                                                                                                                                                                                                                     |                                                                                                                        |                                                                                                                                                                                                                                                                                                                                                                 |                                                                                                                                                                                                                                                                                                                                                         |
|------------------------------------------------------------------------------------------------------------------------------------------------------------------------------------------------------------------------------------------------------------------------------------------------------------------------------------------------------------------------------------------------------------------------------------------------------------------------------------------------------------------------------------------------------------------------------------------------------------------------------------------------------------------------------------------------------------------------------------------------------------------------------------------------------------------------------------------------------------------------------------------------------------------------------------------------------------------------------------------------------------------------------------------------------------------------------------------------------------------------------------------------------------------------------------------------------------------------------------------------------------------------------------------------------------------------------------------------------------------------------------------------------------------------------------------------------------------------------------------------------------------------------------------------------------------------------------------------------------------------------------------------------------------------------------------------------------------------------------------------------------------------------------------------------------------------------------------------------------------------------------------------------------------------------------------------------------------------------------------------------------------------------------------------------------------------------------------------------------------------------------------------------------------------------------------------------------------------------------------------------------------------------------------------------------------------------------------------------------------------------------------------------------------------------------------------------------------------------------------------------------------------------------------------------------------------------------------------------------------------------------------------------------------------------------------------------------------------------------------------------------------------------------------------------------------------------------------------------------------------------------------------------------------------------------------------------------|---------------------------------------------------------------------------------------------------------------------------------------------------------------------------------------------------------------------|------------------------------------------------------------------------------------------------------------------------|-----------------------------------------------------------------------------------------------------------------------------------------------------------------------------------------------------------------------------------------------------------------------------------------------------------------------------------------------------------------|---------------------------------------------------------------------------------------------------------------------------------------------------------------------------------------------------------------------------------------------------------------------------------------------------------------------------------------------------------|
| EPI_ISL_482124, EPI_ISL_482131, EPI_ISL_516831 to 516883, EPI_ISL_524619 to 524712                                                                                                                                                                                                                                                                                                                                                                                                                                                                                                                                                                                                                                                                                                                                                                                                                                                                                                                                                                                                                                                                                                                                                                                                                                                                                                                                                                                                                                                                                                                                                                                                                                                                                                                                                                                                                                                                                                                                                                                                                                                                                                                                                                                                                                                                                                                                                                                                                                                                                                                                                                                                                                                                                                                                                                                                                                                                         | North West London Pathology, Imperial College Healthcare NHS Trust                                                                                                                                                  | Wellcome Sanger Institute for the COVID-19 Genomics UK (COG-UK) consortium                                             | Aileen Rowan; Alison Holmes; Anjna Badhan; Ewan Harrison; Frankie Bolt; Graham Taylor; Ian Johnston; James Price; John Sillitoe on behalf of the Wellcome Sanger Institute COVID-19 Surveillance Team (http://www.sanger.ac.uk/covid-team); Ling Li; Paul Randell; Roberto Amato; Sonia Goncalves                                                               | Carolina Herrera and Alex Alderton; Cordelia Langford; David K. Jackson; David Muir; Dominic Kwiatkowski; John Sillitoe on behalf of the Wellcome Sanger Institute COVID-19 Surveillance Team (http://www.sanger.ac.uk/covid-team); Ling Li; Paul Randell; Roberto Amato; Sonia Goncalves                                                               |
| EPI_ISL_453486 to 453542, EPI_ISL_453544, EPI_ISL_457303 to 457325, EPI_ISL_461791 to 461804, EPI_ISL_472155 to 472160, EPI_ISL_472162 to 472238, EPI_ISL_472240 to 472290, EPI_ISL_478473 to 478498, EPI_ISL_478510, EPI_ISL_478513, EPI_ISL_478516 to 478518, EPI_ISL_478520 to 478622, EPI_ISL_478624 to 478668, EPI_ISL_484264 to 484327, EPI_ISL_490440 to 490495, EPI_ISL_493452 to 493540, EPI_ISL_499472, EPI_ISL_499474, EPI_ISL_499478, EPI_ISL_499482, EPI_ISL_499485, EPI_ISL_499493 to 499494, EPI_ISL_499502 to 499508, EPI_ISL_499510, EPI_ISL_499515, EPI_ISL_499546 to 499556, EPI_ISL_499558 to 499561, EPI_ISL_499563, EPI_ISL_499568, EPI_ISL_499572, EPI_ISL_499587, EPI_ISL_499595 to 499598, EPI_ISL_499602, EPI_ISL_499606, EPI_ISL_499609 to 499610, EPI_ISL_499626, EPI_ISL_499777 to 499807, EPI_ISL_507110 to 507129, EPI_ISL_512348 to 512365, EPI_ISL_572409 to 572410, EPI_ISL_572412, EPI_ISL_572424, EPI_ISL_572438 to 572439, EPI_ISL_572450, EPI_ISL_572452, EPI_ISL_572464, EPI_ISL_572480, EPI_ISL_572488 to 572489, EPI_ISL_572491, EPI_ISL_572513, EPI_ISL_572515, EPI_ISL_572517, EPI_ISL_572525, EPI_ISL_572530, EPI_ISL_572532, EPI_ISL_572568, EPI_ISL_572570 to 572572, EPI_ISL_572579, EPI_ISL_572581, EPI_ISL_572594 to 572597, EPI_ISL_572644, EPI_ISL_572648, EPI_ISL_572663 to 572664, EPI_ISL_572700 to 572704, EPI_ISL_572712 to 572713, EPI_ISL_572729, EPI_ISL_572744, EPI_ISL_572747, EPI_ISL_572751, EPI_ISL_572753, EPI_ISL_572783, EPI_ISL_572795, EPI_ISL_572798, EPI_ISL_572802, EPI_ISL_572840, EPI_ISL_572845, EPI_ISL_572909 to 572911, EPI_ISL_572942, EPI_ISL_572950, EPI_ISL_573266 to 573413, EPI_ISL_573760 to 573761, EPI_ISL_573799, EPI_ISL_573871 to 573872, EPI_ISL_573877 to 573939, EPI_ISL_576986 to 577039, EPI_ISL_584681 to 584715, EPI_ISL_584847 to 584882, EPI_ISL_585504 to 585532, EPI_ISL_594987 to 595045, EPI_ISL_611524, EPI_ISL_611572, EPI_ISL_611574, EPI_ISL_611576 to 611577, EPI_ISL_611591, EPI_ISL_611643 to 611649, EPI_ISL_611657, EPI_ISL_611668, EPI_ISL_611746 to 611747, EPI_ISL_611752, EPI_ISL_611756 to 611760, EPI_ISL_611766 to 611770, EPI_ISL_611839, EPI_ISL_611846, EPI_ISL_611864, EPI_ISL_611868, EPI_ISL_611917, EPI_ISL_611930, EPI_ISL_611941 to 611953, EPI_ISL_612008, EPI_ISL_612030, EPI_ISL_612054, EPI_ISL_612085, EPI_ISL_612090, EPI_ISL_612097, EPI_ISL_612100, EPI_ISL_612104, EPI_ISL_612110, EPI_ISL_612134, EPI_ISL_612523 to 612545, EPI_ISL_612549 to 612570, EPI_ISL_1387050 to 1387052, EPI_ISL_1387054, EPI_ISL_1387062 to 1387075, EPI_ISL_1387077 to 1387085, EPI_ISL_1387088, EPI_ISL_1387090 to 1387091, EPI_ISL_1387094 to 1387100, EPI_ISL_1387108, EPI_ISL_1387113 to 1387132, EPI_ISL_1475189, EPI_ISL_1475191 to 1475193, EPI_ISL_1475196, EPI_ISL_1475204, EPI_ISL_1475206 to 1475224, EPI_ISL_1475232 to 1475233, EPI_ISL_1475239, EPI_ISL_1475259, EPI_ISL_1475306 to 1475386, EPI_ISL_1475388 to 1475485 | Northumbria University / South Tees Hospitals NHS Foundation Trust / North Cumbria Integrated Care NHS Foundation Trust / North Tees and Hartlepool NHS Foundation Trust / Newcastle Hospitals NHS Foundation Trust | COVID-19 Genomics UK (COG-UK) Consortium                                                                               | Andrew Nelson; Brendan Payne; Clive Graham; Darren L Smith; Debra Padgett; Edward Barton; Emma Swindells; Garren Scott; Gary Black; Gary Eltringham; Giles S Holt; Greg R Young; Jane Greenaway; Jennifer Collins; John Allan; Joshua Loh; Lynn Dover; Matthew Bashton; Mohammad A Tariq; Paul Baker; Sarah Essex; Steve Liggett; Wen C Yew; Yusri Taha         |                                                                                                                                                                                                                                                                                                                                                         |
| EPI_ISL_453543                                                                                                                                                                                                                                                                                                                                                                                                                                                                                                                                                                                                                                                                                                                                                                                                                                                                                                                                                                                                                                                                                                                                                                                                                                                                                                                                                                                                                                                                                                                                                                                                                                                                                                                                                                                                                                                                                                                                                                                                                                                                                                                                                                                                                                                                                                                                                                                                                                                                                                                                                                                                                                                                                                                                                                                                                                                                                                                                             | Northumbria University / South Tees Hospitals NHS Foundation Trust / North Cumbria Integrated Care NHS Foundation Trust / Newcastle Hospitals NHS Foundation Trust                                                  | Northumbria University                                                                                                 | Andrew Nelson; Brendan Payne; Clive Graham; Darren L Smith; Debra Padgett; Edward Barton; Emma Swindells; Garren Scott; Gary Black; Gary Eltringham; Giles S Holt; Greg R Young; Jane Greenaway; Jennifer Collins; John Allan; Joshua Loh; Lynn Dover; Matthew Bashton; Mohammad A Tariq; Paul Baker; Sarah Essex; Steve Liggett; Wen C Yew; Yusri Taha         | Andrew Nelson; Brendan Payne; Clive Graham; Darren L Smith; Debra Padgett; Edward Barton; Emma Swindells; Garren Scott; Gary Black; Gary Eltringham; Giles S Holt; Greg R Young; Jane Greenaway; Jennifer Collins; John Allan; Joshua Loh; Lynn Dover; Matthew Bashton; Mohammad A Tariq; Paul Baker; Sarah Essex; Steve Liggett; Wen C Yew; Yusri Taha |
| EPI_ISL_1520167                                                                                                                                                                                                                                                                                                                                                                                                                                                                                                                                                                                                                                                                                                                                                                                                                                                                                                                                                                                                                                                                                                                                                                                                                                                                                                                                                                                                                                                                                                                                                                                                                                                                                                                                                                                                                                                                                                                                                                                                                                                                                                                                                                                                                                                                                                                                                                                                                                                                                                                                                                                                                                                                                                                                                                                                                                                                                                                                            | Northwest Community Hospital                                                                                                                                                                                        | Illinois Department of Public Health - Chicago Lab                                                                     |                                                                                                                                                                                                                                                                                                                                                                 | Ira Heimler; Vineet K. Dhiman                                                                                                                                                                                                                                                                                                                           |
| EPI_ISL_1520143, EPI_ISL_1520165                                                                                                                                                                                                                                                                                                                                                                                                                                                                                                                                                                                                                                                                                                                                                                                                                                                                                                                                                                                                                                                                                                                                                                                                                                                                                                                                                                                                                                                                                                                                                                                                                                                                                                                                                                                                                                                                                                                                                                                                                                                                                                                                                                                                                                                                                                                                                                                                                                                                                                                                                                                                                                                                                                                                                                                                                                                                                                                           | Northwestern Medicine                                                                                                                                                                                               | Illinois Department of Public Health - Chicago Lab                                                                     |                                                                                                                                                                                                                                                                                                                                                                 | Ira Heimler; Vineet K. Dhiman                                                                                                                                                                                                                                                                                                                           |
| EPI_ISL_1501684 to 1501693, EPI_ISL_1502052 to 1502074                                                                                                                                                                                                                                                                                                                                                                                                                                                                                                                                                                                                                                                                                                                                                                                                                                                                                                                                                                                                                                                                                                                                                                                                                                                                                                                                                                                                                                                                                                                                                                                                                                                                                                                                                                                                                                                                                                                                                                                                                                                                                                                                                                                                                                                                                                                                                                                                                                                                                                                                                                                                                                                                                                                                                                                                                                                                                                     | Northwestern Memorial Hospital                                                                                                                                                                                      | Northwestern University - Ozer Lab                                                                                     | Chad J. Achenbach; Chao Qi; Egon A. Ozer; Judd F. Hultquist; Lacy M. Simons; Lawrence J. Jennings; Michael G. Ison; Ramon Lorenzo-Redondo; Taylor J. Dean                                                                                                                                                                                                       |                                                                                                                                                                                                                                                                                                                                                         |
| EPI_ISL_444520 to 444609                                                                                                                                                                                                                                                                                                                                                                                                                                                                                                                                                                                                                                                                                                                                                                                                                                                                                                                                                                                                                                                                                                                                                                                                                                                                                                                                                                                                                                                                                                                                                                                                                                                                                                                                                                                                                                                                                                                                                                                                                                                                                                                                                                                                                                                                                                                                                                                                                                                                                                                                                                                                                                                                                                                                                                                                                                                                                                                                   | Northwestern Memorial Hospital                                                                                                                                                                                      | Ozer Lab                                                                                                               | Alan R. Hauser; Chad J. Achenbach; Chao Qi; Egon A. Ozer; Hannah H. Nam; Judd F. Hultquist; Lacy M. Simons; Lawrence J. Jennings; Michael G. Ison; Ramon Lorenzo-Redondo; Scott C. Roberts                                                                                                                                                                      |                                                                                                                                                                                                                                                                                                                                                         |
| EPI_ISL_1490255, EPI_ISL_1490259, EPI_ISL_1490269 to 1490270, EPI_ISL_1490275, EPI_ISL_1490279 to 1490280, EPI_ISL_1490286, EPI_ISL_1490310, EPI_ISL_1490317 to 1490319, EPI_ISL_1490328, EPI_ISL_1490371, EPI_ISL_1490375, EPI_ISL_1490434, EPI_ISL_1490437, EPI_ISL_1490439, EPI_ISL_1490451, EPI_ISL_1490478 to 1490479, EPI_ISL_1490576 to 1490579, EPI_ISL_1490637, EPI_ISL_1547549 to 1547550, EPI_ISL_1547652, EPI_ISL_1547655 to 1547656                                                                                                                                                                                                                                                                                                                                                                                                                                                                                                                                                                                                                                                                                                                                                                                                                                                                                                                                                                                                                                                                                                                                                                                                                                                                                                                                                                                                                                                                                                                                                                                                                                                                                                                                                                                                                                                                                                                                                                                                                                                                                                                                                                                                                                                                                                                                                                                                                                                                                                           | Norwegian Institute of Public Health, Department of Virology                                                                                                                                                        | Norwegian Institute of Public Health, Department of Virology                                                           | Atiya R Ali; Debech Nadia; Engebretsen Serina Beate; Garcia Llorente Ignacio; Hilde Elshaug; Hilde Vollan; Jon Bråte; Kamilla Heddeland Instefjord; Karoline Bragstad; Kathrine Stene-Johansen; Marie Paulsen Madsen; Olav Hungnes; Pedersen Benedikte Nevjen; Rasmus Riis Kopperud                                                                             |                                                                                                                                                                                                                                                                                                                                                         |
| see above                                                                                                                                                                                                                                                                                                                                                                                                                                                                                                                                                                                                                                                                                                                                                                                                                                                                                                                                                                                                                                                                                                                                                                                                                                                                                                                                                                                                                                                                                                                                                                                                                                                                                                                                                                                                                                                                                                                                                                                                                                                                                                                                                                                                                                                                                                                                                                                                                                                                                                                                                                                                                                                                                                                                                                                                                                                                                                                                                  |                                                                                                                                                                                                                     |                                                                                                                        |                                                                                                                                                                                                                                                                                                                                                                 |                                                                                                                                                                                                                                                                                                                                                         |
| EPI_ISL_534326                                                                                                                                                                                                                                                                                                                                                                                                                                                                                                                                                                                                                                                                                                                                                                                                                                                                                                                                                                                                                                                                                                                                                                                                                                                                                                                                                                                                                                                                                                                                                                                                                                                                                                                                                                                                                                                                                                                                                                                                                                                                                                                                                                                                                                                                                                                                                                                                                                                                                                                                                                                                                                                                                                                                                                                                                                                                                                                                             | Notre Dame Intermedica Saude AS                                                                                                                                                                                     | Instituto Adolfo Lutz, Interdisciplinary Procedures Center, Strategic Laboratory                                       |                                                                                                                                                                                                                                                                                                                                                                 | Claudia Regina Gonçalves; Claudio Tavares Sacchi; Erica Valessa Ramos Gomes                                                                                                                                                                                                                                                                             |
| EPI_ISL_512846                                                                                                                                                                                                                                                                                                                                                                                                                                                                                                                                                                                                                                                                                                                                                                                                                                                                                                                                                                                                                                                                                                                                                                                                                                                                                                                                                                                                                                                                                                                                                                                                                                                                                                                                                                                                                                                                                                                                                                                                                                                                                                                                                                                                                                                                                                                                                                                                                                                                                                                                                                                                                                                                                                                                                                                                                                                                                                                                             | O.I.J. MORGUE JUDICIAL                                                                                                                                                                                              | Incienza, Instituto Costarricense de Investigación y Enseñanza en Nutrición y Salud                                    | Adriana Godínez & Melany Calderon; Claudio Soto-Garita; Estela Cordero; Francisco Duarte; Hebleen Porras                                                                                                                                                                                                                                                        |                                                                                                                                                                                                                                                                                                                                                         |
| EPI_ISL_1447091, EPI_ISL_1447100, EPI_ISL_1447104, EPI_ISL_1447111, EPI_ISL_1447114, EPI_ISL_1447119, EPI_ISL_1447138, EPI_ISL_1447177 to 1447178, EPI_ISL_1447183                                                                                                                                                                                                                                                                                                                                                                                                                                                                                                                                                                                                                                                                                                                                                                                                                                                                                                                                                                                                                                                                                                                                                                                                                                                                                                                                                                                                                                                                                                                                                                                                                                                                                                                                                                                                                                                                                                                                                                                                                                                                                                                                                                                                                                                                                                                                                                                                                                                                                                                                                                                                                                                                                                                                                                                         | OCME Office Of Chief Medical Examiner                                                                                                                                                                               | New York City Public Health Laboratory                                                                                 |                                                                                                                                                                                                                                                                                                                                                                 | Jade Wang; et al.                                                                                                                                                                                                                                                                                                                                       |
| see above                                                                                                                                                                                                                                                                                                                                                                                                                                                                                                                                                                                                                                                                                                                                                                                                                                                                                                                                                                                                                                                                                                                                                                                                                                                                                                                                                                                                                                                                                                                                                                                                                                                                                                                                                                                                                                                                                                                                                                                                                                                                                                                                                                                                                                                                                                                                                                                                                                                                                                                                                                                                                                                                                                                                                                                                                                                                                                                                                  |                                                                                                                                                                                                                     |                                                                                                                        |                                                                                                                                                                                                                                                                                                                                                                 |                                                                                                                                                                                                                                                                                                                                                         |
| EPI_ISL_1446621 to 1446629, EPI_ISL_1446858, EPI_ISL_1516373 to 1516376, EPI_ISL_1528497 to 1528502                                                                                                                                                                                                                                                                                                                                                                                                                                                                                                                                                                                                                                                                                                                                                                                                                                                                                                                                                                                                                                                                                                                                                                                                                                                                                                                                                                                                                                                                                                                                                                                                                                                                                                                                                                                                                                                                                                                                                                                                                                                                                                                                                                                                                                                                                                                                                                                                                                                                                                                                                                                                                                                                                                                                                                                                                                                        | OH Department of Health Laboratory                                                                                                                                                                                  | Centers for Disease Control and Prevention Division of Viral Diseases, Pathogen Discovery                              | Alison Laufer Halpin; Ben L. Rambo-Martin; Clinton R. Paden; Dakota Howard; Darlene Wagner; Dave Wentworth; Dhvani Batra; Jasmine Padilla; Justin Lee; Katie Dillon; Krista Queen; Kristen Knipe; Kristine Lacey; Mark Burroughs; Matthew Schmeer; Mili Sheth; Peter Cook; Sam Shepard; Sarah Nobles; Shoshona Le; Suxiang Tong; Vivien Dugan; Yvette Unoarumhi |                                                                                                                                                                                                                                                                                                                                                         |
| EPI_ISL_424880, EPI_ISL_426430 to 426431                                                                                                                                                                                                                                                                                                                                                                                                                                                                                                                                                                                                                                                                                                                                                                                                                                                                                                                                                                                                                                                                                                                                                                                                                                                                                                                                                                                                                                                                                                                                                                                                                                                                                                                                                                                                                                                                                                                                                                                                                                                                                                                                                                                                                                                                                                                                                                                                                                                                                                                                                                                                                                                                                                                                                                                                                                                                                                                   | OH Department of Health Laboratory                                                                                                                                                                                  | Pathogen Discovery, Respiratory Viruses Branch, Division of Viral Diseases, Centers for Disease Control and Prevention | Alison S. Laufer Halpin; Anna Uehara; Christopher A. Elkins; Clinton R. Paden; Haibin Wang; Jing Zhang; Krista Queen; Mary S. Keckler; Rachel Marine; Suxiang Tong; Yan Li; Ying Tao                                                                                                                                                                            |                                                                                                                                                                                                                                                                                                                                                         |
| EPI_ISL_525803, EPI_ISL_525808 to 525824, EPI_ISL_525826, EPI_ISL_525828 to 525832, EPI_ISL_525834 to 525840, EPI_ISL_525842 to 525846, EPI_ISL_525848, EPI_ISL_525850, EPI_ISL_525852 to 525855, EPI_ISL_525859, EPI_ISL_525861, EPI_ISL_525863 to 525864, EPI_ISL_525866 to 525867, EPI_ISL_525869, EPI_ISL_525871 to 525873, EPI_ISL_525875, EPI_ISL_525877, EPI_ISL_525879, EPI_ISL_525882, EPI_ISL_525884, EPI_ISL_525886 to 525890, EPI_ISL_526087 to 526090, EPI_ISL_526092 to 526093, EPI_ISL_526097                                                                                                                                                                                                                                                                                                                                                                                                                                                                                                                                                                                                                                                                                                                                                                                                                                                                                                                                                                                                                                                                                                                                                                                                                                                                                                                                                                                                                                                                                                                                                                                                                                                                                                                                                                                                                                                                                                                                                                                                                                                                                                                                                                                                                                                                                                                                                                                                                                               | OHSU Lab Services Molecular Microbiology Lab                                                                                                                                                                        | Ginkgo Bioworks Clinical Laboratory                                                                                    | Alec J. Hirsch; Alex Plocik; Andrew C. Adey; Becky Schilling; Benjamin N. Bimber; Birgitte Simen; Brendan L. O'Connell; Brian J. O'Roak; Daniel N. Streblov; Guang Fan; James McGann; Jim Griffin; Keith Robison; Malaika McKenzie-Bennett; Michelle Spencer; Rebecca Littlefield; Ruth V. Nichols; William B. Messer                                           |                                                                                                                                                                                                                                                                                                                                                         |
| see above                                                                                                                                                                                                                                                                                                                                                                                                                                                                                                                                                                                                                                                                                                                                                                                                                                                                                                                                                                                                                                                                                                                                                                                                                                                                                                                                                                                                                                                                                                                                                                                                                                                                                                                                                                                                                                                                                                                                                                                                                                                                                                                                                                                                                                                                                                                                                                                                                                                                                                                                                                                                                                                                                                                                                                                                                                                                                                                                                  |                                                                                                                                                                                                                     |                                                                                                                        |                                                                                                                                                                                                                                                                                                                                                                 |                                                                                                                                                                                                                                                                                                                                                         |
| EPI_ISL_437520 to 437535, EPI_ISL_468080 to 468129, EPI_ISL_509059 to 509214, EPI_ISL_525802, EPI_ISL_525804 to 525807, EPI_ISL_525825, EPI_ISL_525827, EPI_ISL_525833, EPI_ISL_525841, EPI_ISL_525847, EPI_ISL_525849, EPI_ISL_525851, EPI_ISL_525856 to 525858, EPI_ISL_525860, EPI_ISL_525862, EPI_ISL_525865, EPI_ISL_525868, EPI_ISL_525870, EPI_ISL_525874, EPI_ISL_525876, EPI_ISL_525878, EPI_ISL_525880 to 525881, EPI_ISL_525883, EPI_ISL_525885, EPI_ISL_525891 to 526086, EPI_ISL_526091, EPI_ISL_526094 to 526096, EPI_ISL_526098 to 526114, EPI_ISL_526551 to 526552, EPI_ISL_1541210 to 1541552, EPI_ISL_1541554 to 1542072                                                                                                                                                                                                                                                                                                                                                                                                                                                                                                                                                                                                                                                                                                                                                                                                                                                                                                                                                                                                                                                                                                                                                                                                                                                                                                                                                                                                                                                                                                                                                                                                                                                                                                                                                                                                                                                                                                                                                                                                                                                                                                                                                                                                                                                                                                                 | OHSU Lab Services Molecular Microbiology Lab                                                                                                                                                                        | Oregon SARS-CoV-2 Genome Sequencing Center                                                                             | Alec J. Hirsch; Andrew C. Adey; Benjamin N. Bimber; Brendan L. O'Connell; Brian J. O'Roak; Daniel N. Streblov; Donna Hansel; Guang Fan; Kayla Carter; Ruth V. Nichols; Sally B. Grindstaff; Sally Onia Acharya; William B. Messer; Xuan Qin                                                                                                                     |                                                                                                                                                                                                                                                                                                                                                         |
| EPI_ISL_1516296 to 1516301                                                                                                                                                                                                                                                                                                                                                                                                                                                                                                                                                                                                                                                                                                                                                                                                                                                                                                                                                                                                                                                                                                                                                                                                                                                                                                                                                                                                                                                                                                                                                                                                                                                                                                                                                                                                                                                                                                                                                                                                                                                                                                                                                                                                                                                                                                                                                                                                                                                                                                                                                                                                                                                                                                                                                                                                                                                                                                                                 | OK Public Health Laboratory, Oklahoma State DOH                                                                                                                                                                     | Centers for Disease Control and Prevention Division of Viral Diseases, Pathogen Discovery                              | Alison Laufer Halpin; Ben L. Rambo-Martin; Clinton R. Paden; Dakota Howard; Darlene Wagner; Dave Wentworth; Dhvani Batra; Jasmine Padilla; Justin Lee; Katie Dillon; Krista Queen; Kristen Knipe; Kristine Lacey; Mark Burroughs; Matthew Schmeer; Mili Sheth; Peter Cook; Sam Shepard; Sarah Nobles; Shoshona Le; Suxiang Tong; Vivien Dugan; Yvette Unoarumhi |                                                                                                                                                                                                                                                                                                                                                         |
| EPI_ISL_1424057 to 1424058                                                                                                                                                                                                                                                                                                                                                                                                                                                                                                                                                                                                                                                                                                                                                                                                                                                                                                                                                                                                                                                                                                                                                                                                                                                                                                                                                                                                                                                                                                                                                                                                                                                                                                                                                                                                                                                                                                                                                                                                                                                                                                                                                                                                                                                                                                                                                                                                                                                                                                                                                                                                                                                                                                                                                                                                                                                                                                                                 | OLIMPUS MAGDALENA                                                                                                                                                                                                   | Instituto Nacional de Salud- Dirección de Investigación en Salud Pública                                               | Carlos Franco-Muñoz; Diego A. Álvarez-Díaz; Diego Andrés Prada; Gerardo Santamaría; Hector Alejandro Ruiz-Moreno; Jhonnatan Reales-González; Julian Naizaque; Katherine Laiton-Donato; Magdalena Wiesner; Marcela Mercado-Reyes.; María T. Herrera-Sepúlveda; Martha Lucia Ospina Martínez; Sheryll Corchuelo                                                   |                                                                                                                                                                                                                                                                                                                                                         |
| EPI_ISL_1396406, EPI_ISL_1549134 to 1549138                                                                                                                                                                                                                                                                                                                                                                                                                                                                                                                                                                                                                                                                                                                                                                                                                                                                                                                                                                                                                                                                                                                                                                                                                                                                                                                                                                                                                                                                                                                                                                                                                                                                                                                                                                                                                                                                                                                                                                                                                                                                                                                                                                                                                                                                                                                                                                                                                                                                                                                                                                                                                                                                                                                                                                                                                                                                                                                | OLVZ Aalst                                                                                                                                                                                                          | OLVZ Aalst                                                                                                             |                                                                                                                                                                                                                                                                                                                                                                 | Astrid Holderbeke                                                                                                                                                                                                                                                                                                                                       |
| EPI_ISL_457705                                                                                                                                                                                                                                                                                                                                                                                                                                                                                                                                                                                                                                                                                                                                                                                                                                                                                                                                                                                                                                                                                                                                                                                                                                                                                                                                                                                                                                                                                                                                                                                                                                                                                                                                                                                                                                                                                                                                                                                                                                                                                                                                                                                                                                                                                                                                                                                                                                                                                                                                                                                                                                                                                                                                                                                                                                                                                                                                             | OMAN-NIC                                                                                                                                                                                                            | Department of Microbiology and Immunology- SQUH                                                                        | Abdulla Balkhair; Ahlam Al-Amri; Aisha Al-Amri; Aisha Al-Busaidi; Amina Al Jardani; Fahad Zadjali; Fatma BaAlawi; Hamida AL Barwani; Hanan Al-kind; Intisar Al-Shukri; Khulood Al-Mammary; Mohammed Al-Tobi; Samiha Al Kharusi; Samira Al-Maruqi; Zeyana AL-Dahmani                                                                                             |                                                                                                                                                                                                                                                                                                                                                         |
| EPI_ISL_1446324, EPI_ISL_1446327, EPI_ISL_1446330, EPI_ISL_1446332, EPI_ISL_1446341, EPI_ISL_1446759 to 1446765, EPI_ISL_1447029, EPI_ISL_1516198 to 1516204, EPI_ISL_1528321 to 1528325                                                                                                                                                                                                                                                                                                                                                                                                                                                                                                                                                                                                                                                                                                                                                                                                                                                                                                                                                                                                                                                                                                                                                                                                                                                                                                                                                                                                                                                                                                                                                                                                                                                                                                                                                                                                                                                                                                                                                                                                                                                                                                                                                                                                                                                                                                                                                                                                                                                                                                                                                                                                                                                                                                                                                                   | OR State PHL-Virology/Immunology Section                                                                                                                                                                            | Centers for Disease Control and Prevention Division of Viral Diseases, Pathogen Discovery                              | Alison Laufer Halpin; Ben L. Rambo-Martin; Clinton R. Paden; Dakota Howard; Darlene Wagner; Dave Wentworth; Dhvani Batra; Jasmine Padilla; Justin Lee; Katie Dillon; Krista Queen; Kristen Knipe; Kristine Lacey; Mark Burroughs; Matthew Schmeer; Mili Sheth; Peter Cook; Sam Shepard; Sarah Nobles; Shoshona Le; Suxiang Tong; Vivien Dugan; Yvette Unoarumhi |                                                                                                                                                                                                                                                                                                                                                         |
| see above                                                                                                                                                                                                                                                                                                                                                                                                                                                                                                                                                                                                                                                                                                                                                                                                                                                                                                                                                                                                                                                                                                                                                                                                                                                                                                                                                                                                                                                                                                                                                                                                                                                                                                                                                                                                                                                                                                                                                                                                                                                                                                                                                                                                                                                                                                                                                                                                                                                                                                                                                                                                                                                                                                                                                                                                                                                                                                                                                  |                                                                                                                                                                                                                     |                                                                                                                        |                                                                                                                                                                                                                                                                                                                                                                 |                                                                                                                                                                                                                                                                                                                                                         |
| EPI_ISL_419558                                                                                                                                                                                                                                                                                                                                                                                                                                                                                                                                                                                                                                                                                                                                                                                                                                                                                                                                                                                                                                                                                                                                                                                                                                                                                                                                                                                                                                                                                                                                                                                                                                                                                                                                                                                                                                                                                                                                                                                                                                                                                                                                                                                                                                                                                                                                                                                                                                                                                                                                                                                                                                                                                                                                                                                                                                                                                                                                             | OR State PHL-Virology/Immunology Section                                                                                                                                                                            | Pathogen Discovery, Respiratory Viruses Branch, Division of Viral Diseases, Centers for Disease Control and Prevention | Anna Uehara; Clinton R. Paden; Haibin Wang; Jasmine Padilla; Jing Zhang; Justin Lee; Krista Queen; Suxiang Tong; Yan Li; Ying Tao                                                                                                                                                                                                                               |                                                                                                                                                                                                                                                                                                                                                         |
| EPI_ISL_534316                                                                                                                                                                                                                                                                                                                                                                                                                                                                                                                                                                                                                                                                                                                                                                                                                                                                                                                                                                                                                                                                                                                                                                                                                                                                                                                                                                                                                                                                                                                                                                                                                                                                                                                                                                                                                                                                                                                                                                                                                                                                                                                                                                                                                                                                                                                                                                                                                                                                                                                                                                                                                                                                                                                                                                                                                                                                                                                                             | OS Mun Santana Lauro Ribas Braga                                                                                                                                                                                    | Instituto Adolfo Lutz, Interdisciplinary Procedures Center, Strategic Laboratory                                       |                                                                                                                                                                                                                                                                                                                                                                 | Claudia Regina Gonçalves; Claudio Tavares Sacchi; Erica Valessa Ramos Gomes                                                                                                                                                                                                                                                                             |
| EPI_ISL_1443199 to 1443201, EPI_ISL_1443203 to 1443206, EPI_ISL_1443208 to 1443213                                                                                                                                                                                                                                                                                                                                                                                                                                                                                                                                                                                                                                                                                                                                                                                                                                                                                                                                                                                                                                                                                                                                                                                                                                                                                                                                                                                                                                                                                                                                                                                                                                                                                                                                                                                                                                                                                                                                                                                                                                                                                                                                                                                                                                                                                                                                                                                                                                                                                                                                                                                                                                                                                                                                                                                                                                                                         | OSF St Francis Medical Center                                                                                                                                                                                       | Illinois Department of Public Health - Springfield Lab                                                                 |                                                                                                                                                                                                                                                                                                                                                                 | Bryan Sim; Gordon McCall                                                                                                                                                                                                                                                                                                                                |
| EPI_ISL_1553188 to 1553212, EPI_ISL_1553214                                                                                                                                                                                                                                                                                                                                                                                                                                                                                                                                                                                                                                                                                                                                                                                                                                                                                                                                                                                                                                                                                                                                                                                                                                                                                                                                                                                                                                                                                                                                                                                                                                                                                                                                                                                                                                                                                                                                                                                                                                                                                                                                                                                                                                                                                                                                                                                                                                                                                                                                                                                                                                                                                                                                                                                                                                                                                                                | OSF St. Francis Medical Center                                                                                                                                                                                      | Illinois Department of Public Health - Springfield Lab                                                                 |                                                                                                                                                                                                                                                                                                                                                                 | Bryan Sim; Gordon McCall                                                                                                                                                                                                                                                                                                                                |

|                                                                                                                                                                                                                                                                                               |                                                                                               |                                                                                                                     |                                                                                                                                                                                                                                                                                                                                                                                                                                                                                                                                                                                                                                                             |                                                                                                                                                                                                                                                                                                                                                                                                                                                              |                          |
|-----------------------------------------------------------------------------------------------------------------------------------------------------------------------------------------------------------------------------------------------------------------------------------------------|-----------------------------------------------------------------------------------------------|---------------------------------------------------------------------------------------------------------------------|-------------------------------------------------------------------------------------------------------------------------------------------------------------------------------------------------------------------------------------------------------------------------------------------------------------------------------------------------------------------------------------------------------------------------------------------------------------------------------------------------------------------------------------------------------------------------------------------------------------------------------------------------------------|--------------------------------------------------------------------------------------------------------------------------------------------------------------------------------------------------------------------------------------------------------------------------------------------------------------------------------------------------------------------------------------------------------------------------------------------------------------|--------------------------|
| to 1553216, EPI_ISL_1553251                                                                                                                                                                                                                                                                   |                                                                                               |                                                                                                                     |                                                                                                                                                                                                                                                                                                                                                                                                                                                                                                                                                                                                                                                             |                                                                                                                                                                                                                                                                                                                                                                                                                                                              | Bryan Sim; Gordon McCall |
| EPI_ISL_1500153 to 1500169, EPI_ISL_1500171                                                                                                                                                                                                                                                   | OSF St. Francis Medical Center - OSF System Laboratory                                        | Illinois Department of Public Health - Springfield Lab                                                              |                                                                                                                                                                                                                                                                                                                                                                                                                                                                                                                                                                                                                                                             |                                                                                                                                                                                                                                                                                                                                                                                                                                                              |                          |
| EPI_ISL_1502472, EPI_ISL_1502522, EPI_ISL_1502524 to 1502525                                                                                                                                                                                                                                  | OSPEDALE "F. RENZETTI" LANCIANO - MEDICINA INTERNA LANCIANO(CHIETI)                           | Istituto Zooprofilattico Sperimentale dell'Abruzzo e Molise "G. Caporale"                                           | Ancora M; Calistri P; Cammà C; Caporale M; Curini V; Delli Compagni E; Di Domenico M; Di Lollo Valeria; Di Pasquale A; Lorusso A; Mangone I; Marcacci M; Puglia I; Rinaldi A; Savini G; Scialabba S                                                                                                                                                                                                                                                                                                                                                                                                                                                         |                                                                                                                                                                                                                                                                                                                                                                                                                                                              |                          |
| EPI_ISL_1403552                                                                                                                                                                                                                                                                               | OSPEDALE CIVILE GIULIANOVA - MEDICINA INTERNA GIULIANOVA(TERAMO)                              | Istituto Zooprofilattico Sperimentale dell'Abruzzo e Molise "G. Caporale"                                           | Ancora M; Calistri P; Cammà C; Curini V; Delli Compagni E; Di Domenico M; Di Pasquale A; Lorusso A; Mangone I; Marcacci M; Puglia I; Rinaldi A; Savini G; Scialabba S                                                                                                                                                                                                                                                                                                                                                                                                                                                                                       |                                                                                                                                                                                                                                                                                                                                                                                                                                                              |                          |
| EPI_ISL_1392650 to 1392651, EPI_ISL_1403508, EPI_ISL_1502449, EPI_ISL_1502517                                                                                                                                                                                                                 | OSPEDALE CIVILE GIULIANOVA - PRONTO SOCCORSO GIULIANOVA(TERAMO)                               | Istituto Zooprofilattico Sperimentale dell'Abruzzo e Molise "G. Caporale"                                           | Ancora M; Calistri P; Cammà C; Caporale M; Curini V; Delli Compagni E; Di Domenico M; Di Lollo Valeria; Di Pasquale A; Lorusso A; Mangone I; Marcacci M; Puglia I; Rinaldi A; Savini G; Scialabba S                                                                                                                                                                                                                                                                                                                                                                                                                                                         |                                                                                                                                                                                                                                                                                                                                                                                                                                                              |                          |
| EPI_ISL_1403548, EPI_ISL_1403555, EPI_ISL_1415421                                                                                                                                                                                                                                             | OSPEDALE CIVILE SANT'OMERO - PRONTO SOCCORSO SANT'OMERO(TERAMO)                               | Istituto Zooprofilattico Sperimentale dell'Abruzzo e Molise "G. Caporale"                                           | Ancora M; Calistri P; Cammà C; Caporale M; Curini V; Delli Compagni E; Di Domenico M; Di Lollo Valeria; Di Pasquale A; Lorusso A; Mangone I; Marcacci M; Puglia I; Rinaldi A; Savini G; Scialabba S                                                                                                                                                                                                                                                                                                                                                                                                                                                         |                                                                                                                                                                                                                                                                                                                                                                                                                                                              |                          |
| EPI_ISL_1391395                                                                                                                                                                                                                                                                               | OSPEDALE S.S. ANNUNZIATA CHIETI                                                               | Istituto Zooprofilattico Sperimentale dell'Abruzzo e Molise "G. Caporale"                                           | Ancora M; Calistri P; Cammà C; Caporale M; Curini V; Di Domenico M; Di Lollo Valeria; Di Pasquale A; Lorusso A; Mangone I; Marcacci M; Puglia I; Rinaldi A; Savini G; Scialabba S                                                                                                                                                                                                                                                                                                                                                                                                                                                                           |                                                                                                                                                                                                                                                                                                                                                                                                                                                              |                          |
| EPI_ISL_1502540 to 1502566                                                                                                                                                                                                                                                                    | OSPEDALE SAN SALVATORE - MEDICINA DI LABORATORIO L'AQUILA(L'AQUILA)                           | Istituto Zooprofilattico Sperimentale dell'Abruzzo e Molise "G. Caporale"                                           | Ancora M; Calistri P; Cammà C; Caporale M; Curini V; Delli Compagni E; Di Domenico M; Di Lollo Valeria; Di Pasquale A; Lorusso A; Mangone I; Marcacci M; Puglia I; Rinaldi A; Savini G; Scialabba S                                                                                                                                                                                                                                                                                                                                                                                                                                                         |                                                                                                                                                                                                                                                                                                                                                                                                                                                              |                          |
| EPI_ISL_430010                                                                                                                                                                                                                                                                                | OSU Wexner Medical Center                                                                     | James Molecular Lab - OSUWMC                                                                                        |                                                                                                                                                                                                                                                                                                                                                                                                                                                                                                                                                                                                                                                             | Dan Jones; Erica Vincent; Huolin Tu; Matt Avenarius; Matt Hunt; Preeti Pancholi                                                                                                                                                                                                                                                                                                                                                                              |                          |
| EPI_ISL_498171 to 498192                                                                                                                                                                                                                                                                      | OUCRU                                                                                         | OUCRU                                                                                                               |                                                                                                                                                                                                                                                                                                                                                                                                                                                                                                                                                                                                                                                             | Dinh Nguyen Huy Man; Guy Thwaites; Lam Anh Nguyen; Lam Minh Yen; Le Manh Hung; Le Nguyen Truc Nhu; Nghiem My Ngoc; Ngo Ngoc Quang Minh; Nguyen Tan Binh; Nguyen Thanh Dung; Nguyen Thanh Phong; Nguyen Thanh Truong; Nguyen Thi Han Ny; Nguyen Thi Thu Hong; Nguyen Tri Dung; Nguyen Van Vinh Chau; Tang Chi Thuong; Tran Chanh Xuan; Tran Nguyen Hoang Tu; Tran Tan Thanh; Tran Tinh Hien; Vo Thanh Lam; and Le Van Tan; for OUCRU COVID-19 research group* |                          |
| EPI_ISL_450738 to 450745                                                                                                                                                                                                                                                                      | OUCRU/HTD                                                                                     | OUCRU/HTD                                                                                                           |                                                                                                                                                                                                                                                                                                                                                                                                                                                                                                                                                                                                                                                             | Dinh Nguyen Huy Man; Guy Thwaites; Lam Anh Nguyen; Lam Minh Yen; Le Manh Hung; Le Nguyen Truc Nhu; Nghiem My Ngoc; Ngo Ngoc Quang Minh; Nguyen Tan Binh; Nguyen Thanh Dung; Nguyen Thanh Phong; Nguyen Thanh Truong; Nguyen Thi Han Ny; Nguyen Thi Thu Hong; Nguyen Tri Dung; Nguyen Van Vinh Chau; Tang Chi Thuong; Tran Chanh Xuan; Tran Nguyen Hoang Tu; Tran Tan Thanh; Tran Tinh Hien; Vo Thanh Lam; and Le Van Tan; for OUCRU COVID-19 research group* |                          |
| EPI_ISL_1441264, EPI_ISL_1441266, EPI_ISL_1441277                                                                                                                                                                                                                                             | Oberlausitz Kliniken gGmbH                                                                    | Robert Koch Institute                                                                                               |                                                                                                                                                                                                                                                                                                                                                                                                                                                                                                                                                                                                                                                             |                                                                                                                                                                                                                                                                                                                                                                                                                                                              |                          |
| EPI_ISL_1534271, EPI_ISL_1534279                                                                                                                                                                                                                                                              | Ocean View CDC wc OCE                                                                         | NHLS/UCT                                                                                                            | Arash Iranzadeh; Bruna Galvao; Carolyn Williamson; Deelan Doolabh; Diana Hardie; Innocent Mudau; Kruger Marais; Lynn Tyers; Marvin Hsiao; Stephen Korsman                                                                                                                                                                                                                                                                                                                                                                                                                                                                                                   |                                                                                                                                                                                                                                                                                                                                                                                                                                                              |                          |
| EPI_ISL_426627 to 426628                                                                                                                                                                                                                                                                      | Ochsner Health                                                                                | BioInfoExperts, LLC                                                                                                 | Amy Feehan; David Moraga Amador; David Nolan; Julia-Garcia-Diaz; Luke Caruso; Lydia Von Borstel; Rebecca Rose; Sissy Cross; Susanna Lamers; Tong Yang; Wayra Navia; Xiao Hui Zhou                                                                                                                                                                                                                                                                                                                                                                                                                                                                           |                                                                                                                                                                                                                                                                                                                                                                                                                                                              |                          |
| EPI_ISL_436939 to 436961, EPI_ISL_455609 to 455623, EPI_ISL_463277 to 463300, EPI_ISL_468701 to 468717                                                                                                                                                                                        | Ochsner Health                                                                                | Bioinfoexperts, LLC                                                                                                 | Amy Feehan; David J. Nolan; David Moraga Amador; Julia-Garcia-Diaz; Luke Caruso; Lydia Von Borstel; Rebecca Rose; Sissy Cross; Susanna L. Lamers; Tong Yang; Wayra Navia; Xiao Hui Zhou                                                                                                                                                                                                                                                                                                                                                                                                                                                                     |                                                                                                                                                                                                                                                                                                                                                                                                                                                              |                          |
| EPI_ISL_1447195, EPI_ISL_1447253, EPI_ISL_1447257                                                                                                                                                                                                                                             | Odzia Mikrobiologii WSSE Wroclaw                                                              | 1. National Institute of Public Health - National Institute of Hygiene; 2. Eurofins Genomics Europe Sequencing GmbH | ECDC COVID-19 WGS support team; Eurofins Genomics Europe Sequencing Team; Gierczyki Rafa; Sadkowska-Todys Magorzata; Wokowicz Tomasz; Zacharczuk Katarzyna                                                                                                                                                                                                                                                                                                                                                                                                                                                                                                  |                                                                                                                                                                                                                                                                                                                                                                                                                                                              |                          |
| EPI_ISL_1491575                                                                                                                                                                                                                                                                               | Office of Diseases Prevention and Control Region 4 Saraburi                                   | COVID-19 Network Investigations (CONI) Alliance                                                                     | Anek Mungaomklang; Angkana Huang; Anthony R. Jones; Arporn Wangwivatsin; Bhakbhoom Panthan; Chonticha Klungtong; Duangkamon Loesbanleuchai; Ekawat Pasomsub; Elizabeth Batty; Insee Sensors; Janjira Thaipadungpanit; Jutikul Kaewmalakul; Khajohn Joonlasak; Kingkan Rakmanee; Krittikorn Kumponsin; Namfon Kotanan; Nathamon Runnachot; Pakjira Rimdusi; Payon Pengyo; Praima Moonmuang; Sataporn Hatsadichart; Sirinapa Singthong; Siriporn Lakesukthom; Sirivan Yaemnimnual; Stefan Fernandez; Suttiruk Changchawai; Thanat Chookajorn; Theerarat Kochakarn; Treewat Watthanachockchai; Wasun Chantratita; Wonvimol Lemprasert; Wudtichai Manasatienkij |                                                                                                                                                                                                                                                                                                                                                                                                                                                              |                          |
| EPI_ISL_1553183                                                                                                                                                                                                                                                                               | Ogle County Correctional Center                                                               | Illinois Department of Public Health - Springfield Lab                                                              |                                                                                                                                                                                                                                                                                                                                                                                                                                                                                                                                                                                                                                                             | Bryan Sim; Gordon McCall                                                                                                                                                                                                                                                                                                                                                                                                                                     |                          |
| EPI_ISL_1386661, EPI_ISL_1389160 to 1389162, EPI_ISL_1389275, EPI_ISL_1389397, EPI_ISL_1389399, EPI_ISL_1390768, EPI_ISL_1463151, EPI_ISL_1463445 to 1463447, EPI_ISL_1463541 to 1463543, EPI_ISL_1468405 to 1468410, EPI_ISL_1533424 to 1533425, EPI_ISL_1533428, EPI_ISL_1545442 to 1545444 | Ohio Department of Health Laboratory                                                          | Ohio Department of Health Laboratory                                                                                | Allison Black; Brent Lee; Caitlin McDonnell; Eric Brandt; Erica Leasure; Glen McGillivray; Heather Blankenship; Holmes; Jade Mowery; Jennifer; Kelsey Florek; Keoni Omura; Kirtana Ramadugu; Quanta Brown; Stephanie Mccracken; Tyler Payne; and Tammy Bannerman                                                                                                                                                                                                                                                                                                                                                                                            |                                                                                                                                                                                                                                                                                                                                                                                                                                                              |                          |
| see above                                                                                                                                                                                                                                                                                     | Ohio Department of Health Laboratory                                                          | Ohio Department of Health Laboratory                                                                                |                                                                                                                                                                                                                                                                                                                                                                                                                                                                                                                                                                                                                                                             | Chappell D; Jones D; Leber A; Snyder P; Tu H; Wang H                                                                                                                                                                                                                                                                                                                                                                                                         |                          |
| EPI_ISL_1391363                                                                                                                                                                                                                                                                               | Ohio State University Wexner Medical Center                                                   | Polaris Molecular Laboratory                                                                                        |                                                                                                                                                                                                                                                                                                                                                                                                                                                                                                                                                                                                                                                             | Hajime Kamiya; Kentaro Itokawa; Makoto Kuroda; Mari Sasaki; Masanori Hashino; Motoi Suzuki; Rina Tanaka; Tsuyoshi Sekizuka                                                                                                                                                                                                                                                                                                                                   |                          |
| EPI_ISL_479979 to 479984, EPI_ISL_480109 to 480119                                                                                                                                                                                                                                            | Oita Prefectural Institute of Public Health and Environmental Science                         | Pathogen Genomics Center, National Institute of Infectious Diseases                                                 |                                                                                                                                                                                                                                                                                                                                                                                                                                                                                                                                                                                                                                                             |                                                                                                                                                                                                                                                                                                                                                                                                                                                              |                          |
| EPI_ISL_535361 to 535364                                                                                                                                                                                                                                                                      | Oklahoma Animal Disease Diagnostic Laboratory                                                 | Oklahoma Animal Disease Diagnostic Laboratory                                                                       | Akhilesh Ramachandran; Anil Kaul; Girish Patil; Jeremiah Saliki; Jerry Malayer; John C Ritchey; Sai Narayanan; Sunil More; Teluguakula Narasaraju                                                                                                                                                                                                                                                                                                                                                                                                                                                                                                           |                                                                                                                                                                                                                                                                                                                                                                                                                                                              |                          |
| EPI_ISL_576127                                                                                                                                                                                                                                                                                | Oklahoma Animal Disease Diagnostic Laboratory, Oklahoma State University                      | Oklahoma Animal Disease Diagnostic Laboratory, Oklahoma State University                                            | J.C.; J.R.; J.T.; Kaul, A.; Malayer; More, S.; Narasaraju, T.; Narayanan, S.; Patil, G.; Ramachandran, A.; Ritchey; Saliki                                                                                                                                                                                                                                                                                                                                                                                                                                                                                                                                  |                                                                                                                                                                                                                                                                                                                                                                                                                                                              |                          |
| EPI_ISL_487231                                                                                                                                                                                                                                                                                | Oklahoma State University Diagnostic Laboratory-Oklahoma Animal Disease Diagnostic Laboratory | Oklahoma Animal Disease Diagnostic Laboratory                                                                       | Akhilesh Ramachandran; Anil Kaul; Girish Patil; Jerry Saliki; John Ritchey; Sai Narayanan; Sunil More; Teluguakula Narasaraju                                                                                                                                                                                                                                                                                                                                                                                                                                                                                                                               |                                                                                                                                                                                                                                                                                                                                                                                                                                                              |                          |
| EPI_ISL_455111                                                                                                                                                                                                                                                                                | Olof Norrby                                                                                   | The Public Health Agency of Sweden                                                                                  | Anna Risberg; Anna-Malin Linde; Bia Kustens halsocentral; Karin Tegmark-Wisell; Maria Lind Karlberg; Mia Brytting; Olov Svartstrom; Oskar Karlsson Lindsjo; Theresa Enkirch                                                                                                                                                                                                                                                                                                                                                                                                                                                                                 |                                                                                                                                                                                                                                                                                                                                                                                                                                                              |                          |
| EPI_ISL_458137                                                                                                                                                                                                                                                                                | Oman National Influenza Centre                                                                | Department of Microbiology and Immunology                                                                           | Abdulla Balkhair; Ahlam Al-Amri; Aisha Al-Amri; Aisha Al-Busaidi; Amina Al Jardani; Fahad Zadjali; Fatma BaAlawi; Hamida AL Barwani; Hanan Al-kind; Intisar Al-Shukri; Khulood Al-Mammary; Mohammed Al-Tobi; Samiha Al Kharusi; Samira Al-Marui; Zeyana AL-Dahmani                                                                                                                                                                                                                                                                                                                                                                                          |                                                                                                                                                                                                                                                                                                                                                                                                                                                              |                          |
| EPI_ISL_458116 to 458128                                                                                                                                                                                                                                                                      | Oman National Influenza Centre                                                                | Department of Microbiology and Immunology-SQUH                                                                      | Abdulla Balkhair; Ahlam Al-Amri; Aisha Al-Amri; Aisha Al-Busaidi; Amina Al Jardani; Fahad Zadjali; Fatma BaAlawi; Hamida AL Barwani; Hanan Al-kind; Intisar Al-Shukri; Khulood Al-Mammary; Mohammed Al-Tobi; Samiha Al Kharusi; Samira Al-Marui; Zeyana AL-Dahmani                                                                                                                                                                                                                                                                                                                                                                                          |                                                                                                                                                                                                                                                                                                                                                                                                                                                              |                          |
| EPI_ISL_457703, EPI_ISL_457707                                                                                                                                                                                                                                                                | Oman-NIC                                                                                      | Department of Microbiology and Immunology- SQUH                                                                     | Abdulla Balkhair; Ahlam Al-Amri; Aisha Al-Amri; Aisha Al-Busaidi; Amina Al Jardani; Fahad Zadjali; Fatma BaAlawi; Hamida AL Barwani; Hanan Al-kind; Intisar Al-Shukri; Khulood Al-Mammary; Mohammed Al-Tobi; Samiha Al Kharusi; Samira Al-Marui; Zeyana AL-Dahmani                                                                                                                                                                                                                                                                                                                                                                                          |                                                                                                                                                                                                                                                                                                                                                                                                                                                              |                          |
| EPI_ISL_457981 to 457984, EPI_ISL_491968 to 492026                                                                                                                                                                                                                                            | Oman-NIC                                                                                      | Department of Microbiology and Immunology-SQUH                                                                      | Abdulla Balkhair; Ahlam Al-Amri; Aisha Al-Amri; Aisha Al-Busaidi; Amina Al Jardani; Fahad Zadjali; Fatma BaAlawi; Hamida AL Barwani; Hanan Al-kind; Intisar Al-Shukri; Khulood Al-Mammary; Mohammed Al-Tobi; Samiha Al Kharusi; Samira Al-Marui; Zeyana AL-Dahmani                                                                                                                                                                                                                                                                                                                                                                                          |                                                                                                                                                                                                                                                                                                                                                                                                                                                              |                          |
| EPI_ISL_457702                                                                                                                                                                                                                                                                                | Oman-NIC                                                                                      | Microbiology laboratory- Sultan Qaboos University Hospital                                                          | Abdulla Balkhair; Ahlam Al-Amri; Aisha Al-Amri; Aisha Al-Busaidi; Amina Al Jardani; Fahad Zadjali; Fatma BaAlawi; Hamida AL Barwani; Hanan Al-kind; Intisar Al-Shukri; Khulood Al-Mammary; Mohammed Al-Tobi; Samiha Al Kharusi; Samira Al-Marui; Zeyana AL-Dahmani                                                                                                                                                                                                                                                                                                                                                                                          |                                                                                                                                                                                                                                                                                                                                                                                                                                                              |                          |
| EPI_ISL_457701, EPI_ISL_457704, EPI_ISL_457706, EPI_ISL_457937 to 457939, EPI_ISL_457974 to 457980, EPI_ISL_457985 to 457998                                                                                                                                                                  | Oman-NIC                                                                                      | Oman-NIC                                                                                                            | Abdulla Balkhair; Ahlam Al-Amri; Aisha Al-Amri; Aisha Al-Busaidi; Amina Al Jardani; Fahad Zadjali; Fatma BaAlawi; Hamida AL Barwani; Hanan Al-kind; Intisar Al-Shukri; Khulood Al-Mammary; Mohammed Al-Tobi; Samiha Al Kharusi; Samira Al-Marui; Zeyana AL-Dahmani                                                                                                                                                                                                                                                                                                                                                                                          |                                                                                                                                                                                                                                                                                                                                                                                                                                                              |                          |
| EPI_ISL_491116, EPI_ISL_491121 to 491171, EPI_ISL_525423 to 525429, EPI_ISL_525466, EPI_ISL_1517192, EPI_ISL_1532282 to 1532305                                                                                                                                                               | Oman-National Influenza Center                                                                | Biotechnology & OMICs Laboratory                                                                                    | Abdul Latif Khan; Adil Al-Wahaibi; Adil Khan; Ahlam Al-Amri; Ahmed Al Harrasi; Ahmed Al Harrasi.; Ahmed Al-Harrasi; Ahmed Al-Rawahi; Ahmed N Al-Rawahi; Aisha Al-Amri; Aisha Al-Busaidi; Amal Al-Maani; Amina Al-Jardani; Amina Al-Jardani.; Bilal Hussain; Fahad Al-Balushi; Hanan Al-Kindi; Intisar Al-Shukri; Laila Al-Balushi; Sajjad Asaf; Samiha Al-Kharusi; Samira Al-Mahruqi; Samiya Al-Zadjali; Saqib Bilal; Seif Al-Abri; Seif Al-Abri.                                                                                                                                                                                                           |                                                                                                                                                                                                                                                                                                                                                                                                                                                              |                          |



|                                                                                                                                                                                                                                                                                                                                                                                                                                                                                                                                                                                                                                                                                                                                                                                                                                                                                                                                                                                                                                                                                                                                                                                                                                                                                                                                                                                                                                                                                                                                                                                                                                                                                                                                                                                                                                                                                                                                                                                                                                                                                                                                                                                                                                                                                                                                                                                                                                                                                                                                                                                                                                                                                                                                                                                                                                                                                                                                                                                                                                                                                                                                                                                                                                                                                                                                                                                                                                                                                                                                                                                                                                                                                                                                                                                                                                                                                                                                                                                                                                                                                                                                                                                                                                                                                                                                                                                                                                                                                                                                                                                                                                                                                                                                                                                                                                                                                                                                                                                                                                                                                                                                                                                                                                                                                                                                                                                                                                                                                                                                                                                                                                                                                                                                                                                                                                                                                                                                                                                                                                                                                                                                                                                                                                                                                                                                                                                                                                                                                                                                                                                                                                                                                                                                                                                                                                                                                                                                                                                                                                                                                                                                                                                                                                                                                                                                                                                                                                                                                                                                                                                                                                                                                                                                                                                                                                                                                                                                                                                                                                                                                                                                                                                                                                                                                                                                                                                                                                                                                                                                                                                                                                                                                                                                                                                                    |                                                     |                                                                                                                                                         |                                                                                                                                                                                                                                                                     |
|----------------------------------------------------------------------------------------------------------------------------------------------------------------------------------------------------------------------------------------------------------------------------------------------------------------------------------------------------------------------------------------------------------------------------------------------------------------------------------------------------------------------------------------------------------------------------------------------------------------------------------------------------------------------------------------------------------------------------------------------------------------------------------------------------------------------------------------------------------------------------------------------------------------------------------------------------------------------------------------------------------------------------------------------------------------------------------------------------------------------------------------------------------------------------------------------------------------------------------------------------------------------------------------------------------------------------------------------------------------------------------------------------------------------------------------------------------------------------------------------------------------------------------------------------------------------------------------------------------------------------------------------------------------------------------------------------------------------------------------------------------------------------------------------------------------------------------------------------------------------------------------------------------------------------------------------------------------------------------------------------------------------------------------------------------------------------------------------------------------------------------------------------------------------------------------------------------------------------------------------------------------------------------------------------------------------------------------------------------------------------------------------------------------------------------------------------------------------------------------------------------------------------------------------------------------------------------------------------------------------------------------------------------------------------------------------------------------------------------------------------------------------------------------------------------------------------------------------------------------------------------------------------------------------------------------------------------------------------------------------------------------------------------------------------------------------------------------------------------------------------------------------------------------------------------------------------------------------------------------------------------------------------------------------------------------------------------------------------------------------------------------------------------------------------------------------------------------------------------------------------------------------------------------------------------------------------------------------------------------------------------------------------------------------------------------------------------------------------------------------------------------------------------------------------------------------------------------------------------------------------------------------------------------------------------------------------------------------------------------------------------------------------------------------------------------------------------------------------------------------------------------------------------------------------------------------------------------------------------------------------------------------------------------------------------------------------------------------------------------------------------------------------------------------------------------------------------------------------------------------------------------------------------------------------------------------------------------------------------------------------------------------------------------------------------------------------------------------------------------------------------------------------------------------------------------------------------------------------------------------------------------------------------------------------------------------------------------------------------------------------------------------------------------------------------------------------------------------------------------------------------------------------------------------------------------------------------------------------------------------------------------------------------------------------------------------------------------------------------------------------------------------------------------------------------------------------------------------------------------------------------------------------------------------------------------------------------------------------------------------------------------------------------------------------------------------------------------------------------------------------------------------------------------------------------------------------------------------------------------------------------------------------------------------------------------------------------------------------------------------------------------------------------------------------------------------------------------------------------------------------------------------------------------------------------------------------------------------------------------------------------------------------------------------------------------------------------------------------------------------------------------------------------------------------------------------------------------------------------------------------------------------------------------------------------------------------------------------------------------------------------------------------------------------------------------------------------------------------------------------------------------------------------------------------------------------------------------------------------------------------------------------------------------------------------------------------------------------------------------------------------------------------------------------------------------------------------------------------------------------------------------------------------------------------------------------------------------------------------------------------------------------------------------------------------------------------------------------------------------------------------------------------------------------------------------------------------------------------------------------------------------------------------------------------------------------------------------------------------------------------------------------------------------------------------------------------------------------------------------------------------------------------------------------------------------------------------------------------------------------------------------------------------------------------------------------------------------------------------------------------------------------------------------------------------------------------------------------------------------------------------------------------------------------------------------------------------------------------------------------------------------------------------------------------------------------------------------------------------------------------------------------------------------------------------------------------------------------------------------------------------------------------------------------------------------------------------------------------------------------------------------------------------------------------------------------------------------------------------------------------------------------------------------------------|-----------------------------------------------------|---------------------------------------------------------------------------------------------------------------------------------------------------------|---------------------------------------------------------------------------------------------------------------------------------------------------------------------------------------------------------------------------------------------------------------------|
| EPI_ISL_518821 to 518854                                                                                                                                                                                                                                                                                                                                                                                                                                                                                                                                                                                                                                                                                                                                                                                                                                                                                                                                                                                                                                                                                                                                                                                                                                                                                                                                                                                                                                                                                                                                                                                                                                                                                                                                                                                                                                                                                                                                                                                                                                                                                                                                                                                                                                                                                                                                                                                                                                                                                                                                                                                                                                                                                                                                                                                                                                                                                                                                                                                                                                                                                                                                                                                                                                                                                                                                                                                                                                                                                                                                                                                                                                                                                                                                                                                                                                                                                                                                                                                                                                                                                                                                                                                                                                                                                                                                                                                                                                                                                                                                                                                                                                                                                                                                                                                                                                                                                                                                                                                                                                                                                                                                                                                                                                                                                                                                                                                                                                                                                                                                                                                                                                                                                                                                                                                                                                                                                                                                                                                                                                                                                                                                                                                                                                                                                                                                                                                                                                                                                                                                                                                                                                                                                                                                                                                                                                                                                                                                                                                                                                                                                                                                                                                                                                                                                                                                                                                                                                                                                                                                                                                                                                                                                                                                                                                                                                                                                                                                                                                                                                                                                                                                                                                                                                                                                                                                                                                                                                                                                                                                                                                                                                                                                                                                                                           | Oman-National Influenza Center                      | Biotechnology & OMICs Laboratory, Natural & Medical Sciences Research Center, University of Nizwa                                                       | Abdul Latif Khan; Adil Al-Wahaibi; Adil Khan; Ahlam Al-Amri; Ahmed Al-Harasi; Ahmed Al-Rawahi; Aisha Al-Amri; Aisha Al-Busaidi; Amina Al-Jardani; Hanan Al-Kindi; Intisar Al-Shukri; Sajjad Asaf; Samiha Al-Kharusi; Samira Al-Mahruqi; Seif Al-Abri; Seif Al-Abri. |
| EPI_ISL_492065                                                                                                                                                                                                                                                                                                                                                                                                                                                                                                                                                                                                                                                                                                                                                                                                                                                                                                                                                                                                                                                                                                                                                                                                                                                                                                                                                                                                                                                                                                                                                                                                                                                                                                                                                                                                                                                                                                                                                                                                                                                                                                                                                                                                                                                                                                                                                                                                                                                                                                                                                                                                                                                                                                                                                                                                                                                                                                                                                                                                                                                                                                                                                                                                                                                                                                                                                                                                                                                                                                                                                                                                                                                                                                                                                                                                                                                                                                                                                                                                                                                                                                                                                                                                                                                                                                                                                                                                                                                                                                                                                                                                                                                                                                                                                                                                                                                                                                                                                                                                                                                                                                                                                                                                                                                                                                                                                                                                                                                                                                                                                                                                                                                                                                                                                                                                                                                                                                                                                                                                                                                                                                                                                                                                                                                                                                                                                                                                                                                                                                                                                                                                                                                                                                                                                                                                                                                                                                                                                                                                                                                                                                                                                                                                                                                                                                                                                                                                                                                                                                                                                                                                                                                                                                                                                                                                                                                                                                                                                                                                                                                                                                                                                                                                                                                                                                                                                                                                                                                                                                                                                                                                                                                                                                                                                                                     | Oman-National Influenza Center                      | Department of Microbiology and Immunology-SQUH<br>Department of Microbiology and Immunology, Sultan Qaboos University Hospital, P.O 35, Postal code 123 | Abdulla Balkhair; Amina Al Jardani; Aziz Al-Rashdi; Fahad Zadiqal; Fatma BaAlawi; Hamida Al. Barwani; Hanan Al-Kindi; Intisar Al-Shukri; Khulood Al-Mammary; Samiha Al Kharusi; Samira Al-Maruqi; Zeyana AL-Dahmani                                                 |
| EPI_ISL_1443666 to 1443682                                                                                                                                                                                                                                                                                                                                                                                                                                                                                                                                                                                                                                                                                                                                                                                                                                                                                                                                                                                                                                                                                                                                                                                                                                                                                                                                                                                                                                                                                                                                                                                                                                                                                                                                                                                                                                                                                                                                                                                                                                                                                                                                                                                                                                                                                                                                                                                                                                                                                                                                                                                                                                                                                                                                                                                                                                                                                                                                                                                                                                                                                                                                                                                                                                                                                                                                                                                                                                                                                                                                                                                                                                                                                                                                                                                                                                                                                                                                                                                                                                                                                                                                                                                                                                                                                                                                                                                                                                                                                                                                                                                                                                                                                                                                                                                                                                                                                                                                                                                                                                                                                                                                                                                                                                                                                                                                                                                                                                                                                                                                                                                                                                                                                                                                                                                                                                                                                                                                                                                                                                                                                                                                                                                                                                                                                                                                                                                                                                                                                                                                                                                                                                                                                                                                                                                                                                                                                                                                                                                                                                                                                                                                                                                                                                                                                                                                                                                                                                                                                                                                                                                                                                                                                                                                                                                                                                                                                                                                                                                                                                                                                                                                                                                                                                                                                                                                                                                                                                                                                                                                                                                                                                                                                                                                                                         | Omics Sciences Laboratory                           | Omics Sciences Laboratory                                                                                                                               | Daryln Amaya; Derly Andrade Molina; Emily Sulay Saltos Montalvo; Gabriel Morey León; Juan Carlos Fernández Cadena; Kathryn Sacheri Viteri; Paula Juliana Gavilanes Jarrin; Rubén Armas González                                                                     |
| EPI_ISL_569735 to 569857                                                                                                                                                                                                                                                                                                                                                                                                                                                                                                                                                                                                                                                                                                                                                                                                                                                                                                                                                                                                                                                                                                                                                                                                                                                                                                                                                                                                                                                                                                                                                                                                                                                                                                                                                                                                                                                                                                                                                                                                                                                                                                                                                                                                                                                                                                                                                                                                                                                                                                                                                                                                                                                                                                                                                                                                                                                                                                                                                                                                                                                                                                                                                                                                                                                                                                                                                                                                                                                                                                                                                                                                                                                                                                                                                                                                                                                                                                                                                                                                                                                                                                                                                                                                                                                                                                                                                                                                                                                                                                                                                                                                                                                                                                                                                                                                                                                                                                                                                                                                                                                                                                                                                                                                                                                                                                                                                                                                                                                                                                                                                                                                                                                                                                                                                                                                                                                                                                                                                                                                                                                                                                                                                                                                                                                                                                                                                                                                                                                                                                                                                                                                                                                                                                                                                                                                                                                                                                                                                                                                                                                                                                                                                                                                                                                                                                                                                                                                                                                                                                                                                                                                                                                                                                                                                                                                                                                                                                                                                                                                                                                                                                                                                                                                                                                                                                                                                                                                                                                                                                                                                                                                                                                                                                                                                                           | Omsk Research Institute of Natural Focal Infections | WHO National Influenza Centre Russian Federation                                                                                                        | Aleksei Vasilenko; Andrey Komissarov; Artem Fadeev; Daria Nashatyreva; Ekaterina Gradoboeva; Ekaterina Savkina; Elena Poleshchuk; Valery Yakimenko                                                                                                                  |
| EPI_ISL_434661 to 434662, EPI_ISL_434664, EPI_ISL_434673, EPI_ISL_475528, EPI_ISL_475533 to 475535, EPI_ISL_475538, EPI_ISL_539883 to 539884                                                                                                                                                                                                                                                                                                                                                                                                                                                                                                                                                                                                                                                                                                                                                                                                                                                                                                                                                                                                                                                                                                                                                                                                                                                                                                                                                                                                                                                                                                                                                                                                                                                                                                                                                                                                                                                                                                                                                                                                                                                                                                                                                                                                                                                                                                                                                                                                                                                                                                                                                                                                                                                                                                                                                                                                                                                                                                                                                                                                                                                                                                                                                                                                                                                                                                                                                                                                                                                                                                                                                                                                                                                                                                                                                                                                                                                                                                                                                                                                                                                                                                                                                                                                                                                                                                                                                                                                                                                                                                                                                                                                                                                                                                                                                                                                                                                                                                                                                                                                                                                                                                                                                                                                                                                                                                                                                                                                                                                                                                                                                                                                                                                                                                                                                                                                                                                                                                                                                                                                                                                                                                                                                                                                                                                                                                                                                                                                                                                                                                                                                                                                                                                                                                                                                                                                                                                                                                                                                                                                                                                                                                                                                                                                                                                                                                                                                                                                                                                                                                                                                                                                                                                                                                                                                                                                                                                                                                                                                                                                                                                                                                                                                                                                                                                                                                                                                                                                                                                                                                                                                                                                                                                       | see above                                           | Omtanken Grimmered<br>The Public Health Agency of Sweden                                                                                                | Anna Risberg; Anna-Malin Linde; Bernd Sengpiel; Karin Tegmark-Wisell; Maria Lind Karlberg; Mattias Haukland; Mia Brytting; Olov Svartstrom; Oskar Karlsson Lindsjö; Reza Advani; Sandra Broddesson; Theresa Enkirch                                                 |
| EPI_ISL_468592 to 468614, EPI_ISL_513707 to 513772, EPI_ISL_582975 to 583045, EPI_ISL_1477443, EPI_ISL_1477495, EPI_ISL_1477498, EPI_ISL_147752, EPI_ISL_1477582, EPI_ISL_1477611, EPI_ISL_1477663, EPI_ISL_1477986, EPI_ISL_1478024, EPI_ISL_1478030, EPI_ISL_1478106, EPI_ISL_1478110, EPI_ISL_1478175, EPI_ISL_1529158, EPI_ISL_1529336                                                                                                                                                                                                                                                                                                                                                                                                                                                                                                                                                                                                                                                                                                                                                                                                                                                                                                                                                                                                                                                                                                                                                                                                                                                                                                                                                                                                                                                                                                                                                                                                                                                                                                                                                                                                                                                                                                                                                                                                                                                                                                                                                                                                                                                                                                                                                                                                                                                                                                                                                                                                                                                                                                                                                                                                                                                                                                                                                                                                                                                                                                                                                                                                                                                                                                                                                                                                                                                                                                                                                                                                                                                                                                                                                                                                                                                                                                                                                                                                                                                                                                                                                                                                                                                                                                                                                                                                                                                                                                                                                                                                                                                                                                                                                                                                                                                                                                                                                                                                                                                                                                                                                                                                                                                                                                                                                                                                                                                                                                                                                                                                                                                                                                                                                                                                                                                                                                                                                                                                                                                                                                                                                                                                                                                                                                                                                                                                                                                                                                                                                                                                                                                                                                                                                                                                                                                                                                                                                                                                                                                                                                                                                                                                                                                                                                                                                                                                                                                                                                                                                                                                                                                                                                                                                                                                                                                                                                                                                                                                                                                                                                                                                                                                                                                                                                                                                                                                                                                         | see above                                           | Orange County Public Health Lab<br>Chan-Zuckerberg Biohub                                                                                               | CZB Cllahub Consortium                                                                                                                                                                                                                                              |
| EPI_ISL_486120 to 486279, EPI_ISL_513789 to 513839, EPI_ISL_548270 to 548276, EPI_ISL_548278, EPI_ISL_548283, EPI_ISL_548285, EPI_ISL_548287, EPI_ISL_548289, EPI_ISL_548291, EPI_ISL_548293, EPI_ISL_548296 to 548298, EPI_ISL_548300 to 548301, EPI_ISL_548305 to 548306, EPI_ISL_548308 to 548309, EPI_ISL_548312 to 548313, EPI_ISL_548315, EPI_ISL_548317 to 548318, EPI_ISL_548323, EPI_ISL_548326, EPI_ISL_548328, EPI_ISL_548329, EPI_ISL_548332, EPI_ISL_548334, EPI_ISL_548373, EPI_ISL_548375, EPI_ISL_548377 to 548378, EPI_ISL_548381, EPI_ISL_548383, EPI_ISL_548386 to 548387, EPI_ISL_548389, EPI_ISL_548393, EPI_ISL_548400, EPI_ISL_548404 to 548405, EPI_ISL_548408, EPI_ISL_548411 to 548413, EPI_ISL_548416, EPI_ISL_548418, EPI_ISL_548424, EPI_ISL_548431, EPI_ISL_548438 to 548441, EPI_ISL_548444 to 548445, EPI_ISL_548449, EPI_ISL_548454, EPI_ISL_548456, EPI_ISL_548460, EPI_ISL_548462 to 548465, EPI_ISL_548467, EPI_ISL_548469, EPI_ISL_548484 to 548485, EPI_ISL_548488, EPI_ISL_548500 to 548501, EPI_ISL_548504 to 548505, EPI_ISL_548509, EPI_ISL_548511, EPI_ISL_548513 to 548515, EPI_ISL_548620, EPI_ISL_548623, EPI_ISL_548625, EPI_ISL_548627 to 548628, EPI_ISL_548634 to 548635, EPI_ISL_548637 to 548638, EPI_ISL_548640 to 548641, EPI_ISL_548646, EPI_ISL_548648, EPI_ISL_548651, EPI_ISL_548653 to 548654, EPI_ISL_548660, EPI_ISL_548662, EPI_ISL_548665 to 548668, EPI_ISL_548674 to 548675, EPI_ISL_548677                                                                                                                                                                                                                                                                                                                                                                                                                                                                                                                                                                                                                                                                                                                                                                                                                                                                                                                                                                                                                                                                                                                                                                                                                                                                                                                                                                                                                                                                                                                                                                                                                                                                                                                                                                                                                                                                                                                                                                                                                                                                                                                                                                                                                                                                                                                                                                                                                                                                                                                                                                                                                                                                                                                                                                                                                                                                                                                                                                                                                                                                                                                                                                                                                                                                                                                                                                                                                                                                                                                                                                                                                                                                                                                                                                                                                                                                                                                                                                                                                                                                                                                                                                                                                                                                                                                                                                                                                                                                                                                                                                                                                                                                                                                                                                                                                                                                                                                                                                                                                                                                                                                                                                                                                                                                                                                                                                                                                                                                                                                                                                                                                                                                                                                                                                                                                                                                                                                                                                                                                                                                                                                                                                                                                                                                                                                                                                                                                                                                                                                                                                                                                                                                                                                                                                                                                                                                                                                                                                                                                                                                                                                                                                                                                                                                                                                                       | see above                                           | Orange County Public Health Laboratory<br>Chan-Zuckerberg Biohub                                                                                        | CZB Cllahub Consortium                                                                                                                                                                                                                                              |
| EPI_ISL_1492583 to 1492619, EPI_ISL_1497618 to 1497678, EPI_ISL_1547502 to 1547505                                                                                                                                                                                                                                                                                                                                                                                                                                                                                                                                                                                                                                                                                                                                                                                                                                                                                                                                                                                                                                                                                                                                                                                                                                                                                                                                                                                                                                                                                                                                                                                                                                                                                                                                                                                                                                                                                                                                                                                                                                                                                                                                                                                                                                                                                                                                                                                                                                                                                                                                                                                                                                                                                                                                                                                                                                                                                                                                                                                                                                                                                                                                                                                                                                                                                                                                                                                                                                                                                                                                                                                                                                                                                                                                                                                                                                                                                                                                                                                                                                                                                                                                                                                                                                                                                                                                                                                                                                                                                                                                                                                                                                                                                                                                                                                                                                                                                                                                                                                                                                                                                                                                                                                                                                                                                                                                                                                                                                                                                                                                                                                                                                                                                                                                                                                                                                                                                                                                                                                                                                                                                                                                                                                                                                                                                                                                                                                                                                                                                                                                                                                                                                                                                                                                                                                                                                                                                                                                                                                                                                                                                                                                                                                                                                                                                                                                                                                                                                                                                                                                                                                                                                                                                                                                                                                                                                                                                                                                                                                                                                                                                                                                                                                                                                                                                                                                                                                                                                                                                                                                                                                                                                                                                                                 | see above                                           | Orebro University Hospital<br>Orebro University Hospital                                                                                                | Sundqvist M et al                                                                                                                                                                                                                                                   |
| EPI_ISL_455840 to 455841, EPI_ISL_475128 to 475135, EPI_ISL_475139, EPI_ISL_510817, EPI_ISL_560972, EPI_ISL_582785 to 582789, EPI_ISL_582791 to 582793, EPI_ISL_582841, EPI_ISL_615079, EPI_ISL_615111 to 615114, EPI_ISL_615120                                                                                                                                                                                                                                                                                                                                                                                                                                                                                                                                                                                                                                                                                                                                                                                                                                                                                                                                                                                                                                                                                                                                                                                                                                                                                                                                                                                                                                                                                                                                                                                                                                                                                                                                                                                                                                                                                                                                                                                                                                                                                                                                                                                                                                                                                                                                                                                                                                                                                                                                                                                                                                                                                                                                                                                                                                                                                                                                                                                                                                                                                                                                                                                                                                                                                                                                                                                                                                                                                                                                                                                                                                                                                                                                                                                                                                                                                                                                                                                                                                                                                                                                                                                                                                                                                                                                                                                                                                                                                                                                                                                                                                                                                                                                                                                                                                                                                                                                                                                                                                                                                                                                                                                                                                                                                                                                                                                                                                                                                                                                                                                                                                                                                                                                                                                                                                                                                                                                                                                                                                                                                                                                                                                                                                                                                                                                                                                                                                                                                                                                                                                                                                                                                                                                                                                                                                                                                                                                                                                                                                                                                                                                                                                                                                                                                                                                                                                                                                                                                                                                                                                                                                                                                                                                                                                                                                                                                                                                                                                                                                                                                                                                                                                                                                                                                                                                                                                                                                                                                                                                                                   | see above                                           | Orebro klinisk mikrobiologi<br>The Public Health Agency of Sweden                                                                                       | Anna Risberg; Anna-Malin Linde; Karin Tegmark-Wisell; Maria Lind Karlberg; Mattias Haukland; Mia Brytting; Olov Svartstrom; Oskar Karlsson Lindsjö; Petra Edquist; Reza Advani; Sandra Broddesson; Shamam Murtadrasol                                               |
| EPI_ISL_1527630 to 1527633                                                                                                                                                                                                                                                                                                                                                                                                                                                                                                                                                                                                                                                                                                                                                                                                                                                                                                                                                                                                                                                                                                                                                                                                                                                                                                                                                                                                                                                                                                                                                                                                                                                                                                                                                                                                                                                                                                                                                                                                                                                                                                                                                                                                                                                                                                                                                                                                                                                                                                                                                                                                                                                                                                                                                                                                                                                                                                                                                                                                                                                                                                                                                                                                                                                                                                                                                                                                                                                                                                                                                                                                                                                                                                                                                                                                                                                                                                                                                                                                                                                                                                                                                                                                                                                                                                                                                                                                                                                                                                                                                                                                                                                                                                                                                                                                                                                                                                                                                                                                                                                                                                                                                                                                                                                                                                                                                                                                                                                                                                                                                                                                                                                                                                                                                                                                                                                                                                                                                                                                                                                                                                                                                                                                                                                                                                                                                                                                                                                                                                                                                                                                                                                                                                                                                                                                                                                                                                                                                                                                                                                                                                                                                                                                                                                                                                                                                                                                                                                                                                                                                                                                                                                                                                                                                                                                                                                                                                                                                                                                                                                                                                                                                                                                                                                                                                                                                                                                                                                                                                                                                                                                                                                                                                                                                                         | Oregon Department of Agriculture                    | Diagnostic Virology Laboratory, National Veterinary Services Laboratories, USDA1920 Dayton Avenue, Ames, IA 50010, USA                                  | Emily R. Love; Kerrie M. Franzen; Mary L. Killian; Mia Torchetti; Sulee Robbe-Austerman; Tod P. Stuber                                                                                                                                                              |
| EPI_ISL_1393629, EPI_ISL_1394338, EPI_ISL_1402541, EPI_ISL_1402707, EPI_ISL_1403049 to 1403050, EPI_ISL_1403386, EPI_ISL_1403666, EPI_ISL_1403669, EPI_ISL_1403781 to 1403783, EPI_ISL_1403809, EPI_ISL_1403827, EPI_ISL_1404130, EPI_ISL_1404143, EPI_ISL_1424131 to 1424142, EPI_ISL_1482647, EPI_ISL_1482974 to 1482978, EPI_ISL_1493060 to 1493061, EPI_ISL_1493067 to 1493068, EPI_ISL_1493124, EPI_ISL_1493145, EPI_ISL_1493165 to 1493167, EPI_ISL_1493258 to 1493268, EPI_ISL_1493363 to 1493365, EPI_ISL_1511640, EPI_ISL_1511642, EPI_ISL_1511645, EPI_ISL_1511697, EPI_ISL_1511920, EPI_ISL_1512183, EPI_ISL_1512497, EPI_ISL_1512745, EPI_ISL_1523525 to 1523543, EPI_ISL_1531535 to 1531552                                                                                                                                                                                                                                                                                                                                                                                                                                                                                                                                                                                                                                                                                                                                                                                                                                                                                                                                                                                                                                                                                                                                                                                                                                                                                                                                                                                                                                                                                                                                                                                                                                                                                                                                                                                                                                                                                                                                                                                                                                                                                                                                                                                                                                                                                                                                                                                                                                                                                                                                                                                                                                                                                                                                                                                                                                                                                                                                                                                                                                                                                                                                                                                                                                                                                                                                                                                                                                                                                                                                                                                                                                                                                                                                                                                                                                                                                                                                                                                                                                                                                                                                                                                                                                                                                                                                                                                                                                                                                                                                                                                                                                                                                                                                                                                                                                                                                                                                                                                                                                                                                                                                                                                                                                                                                                                                                                                                                                                                                                                                                                                                                                                                                                                                                                                                                                                                                                                                                                                                                                                                                                                                                                                                                                                                                                                                                                                                                                                                                                                                                                                                                                                                                                                                                                                                                                                                                                                                                                                                                                                                                                                                                                                                                                                                                                                                                                                                                                                                                                                                                                                                                                                                                                                                                                                                                                                                                                                                                                                                                                                                                           | see above                                           | Oregon State Public Health Laboratory<br>Oregon State Public Health Laboratory                                                                          | Eugene Yeboah; G. Libuit; Joel R. Sevinsky; John Fontana; John Fontana and Shane Sevey; Karim Morey; Kevin; LaDonna Grenz; Laura Tsaknadidis; Laura Tsaknadidis; Reza Advani; Rafia Razzaque; Shane Sevey; Vanda Makris                                             |
| EPI_ISL_420794                                                                                                                                                                                                                                                                                                                                                                                                                                                                                                                                                                                                                                                                                                                                                                                                                                                                                                                                                                                                                                                                                                                                                                                                                                                                                                                                                                                                                                                                                                                                                                                                                                                                                                                                                                                                                                                                                                                                                                                                                                                                                                                                                                                                                                                                                                                                                                                                                                                                                                                                                                                                                                                                                                                                                                                                                                                                                                                                                                                                                                                                                                                                                                                                                                                                                                                                                                                                                                                                                                                                                                                                                                                                                                                                                                                                                                                                                                                                                                                                                                                                                                                                                                                                                                                                                                                                                                                                                                                                                                                                                                                                                                                                                                                                                                                                                                                                                                                                                                                                                                                                                                                                                                                                                                                                                                                                                                                                                                                                                                                                                                                                                                                                                                                                                                                                                                                                                                                                                                                                                                                                                                                                                                                                                                                                                                                                                                                                                                                                                                                                                                                                                                                                                                                                                                                                                                                                                                                                                                                                                                                                                                                                                                                                                                                                                                                                                                                                                                                                                                                                                                                                                                                                                                                                                                                                                                                                                                                                                                                                                                                                                                                                                                                                                                                                                                                                                                                                                                                                                                                                                                                                                                                                                                                                                                                     | Oregon State Public Health- Virology section        | Pathogen Discovery, Respiratory Viruses Branch, Division of Viral Diseases, Centers for Disease Control and Prevention                                  | Alison S. Laufer Halpin; Anne Uehara; Christopher A. Elkins; Clinton R. Paden; Haibin Wang; Jasmine Padilla; Jing Zhang; Justin Lee; Krista Queen; Mary S. Keckler; Rachel Marine; Suxiang Tong; Yan Li; Ying Tao                                                   |
| EPI_ISL_1394858 to 1394869, EPI_ISL_1404650 to 1404679, EPI_ISL_1405940 to 1405945, EPI_ISL_1416256 to 1416311, EPI_ISL_1423984 to 1423993, EPI_ISL_1494925 to 1494939, EPI_ISL_1501718 to 1501719, EPI_ISL_1501721 to 1501722, EPI_ISL_1501724 to 1501725, EPI_ISL_1501727 to 1501728, EPI_ISL_1501730 to 1501731, EPI_ISL_1501733 to 1501734, EPI_ISL_1501736 to 1501737, EPI_ISL_1501739 to 1501740, EPI_ISL_1501742 to 1501743, EPI_ISL_1501745 to 1501746, EPI_ISL_1501748, EPI_ISL_1501750 to 1501752, EPI_ISL_1501754 to 1501755, EPI_ISL_1501757, EPI_ISL_1501759 to 1501760, EPI_ISL_1501762 to 1501763, EPI_ISL_1501765 to 1501766, EPI_ISL_1501768 to 1501769, EPI_ISL_1501771 to 1501772, EPI_ISL_1501774 to 1501775, EPI_ISL_1501777 to 1501778, EPI_ISL_1501780 to 1501781, EPI_ISL_1501783 to 1501784, EPI_ISL_1501786 to 1501787, EPI_ISL_1501789 to 1501790, EPI_ISL_1504042 to 1504057                                                                                                                                                                                                                                                                                                                                                                                                                                                                                                                                                                                                                                                                                                                                                                                                                                                                                                                                                                                                                                                                                                                                                                                                                                                                                                                                                                                                                                                                                                                                                                                                                                                                                                                                                                                                                                                                                                                                                                                                                                                                                                                                                                                                                                                                                                                                                                                                                                                                                                                                                                                                                                                                                                                                                                                                                                                                                                                                                                                                                                                                                                                                                                                                                                                                                                                                                                                                                                                                                                                                                                                                                                                                                                                                                                                                                                                                                                                                                                                                                                                                                                                                                                                                                                                                                                                                                                                                                                                                                                                                                                                                                                                                                                                                                                                                                                                                                                                                                                                                                                                                                                                                                                                                                                                                                                                                                                                                                                                                                                                                                                                                                                                                                                                                                                                                                                                                                                                                                                                                                                                                                                                                                                                                                                                                                                                                                                                                                                                                                                                                                                                                                                                                                                                                                                                                                                                                                                                                                                                                                                                                                                                                                                                                                                                                                                                                                                                                                                                                                                                                                                                                                                                                                                                                                                                                                                                                                           | see above                                           | Oregon State University TRACE Project<br>OSU Center for Genome Research and Biocomputing<br>Oregon State University TRACE Project                       |                                                                                                                                                                                                                                                                     |
| EPI_ISL_475511                                                                                                                                                                                                                                                                                                                                                                                                                                                                                                                                                                                                                                                                                                                                                                                                                                                                                                                                                                                                                                                                                                                                                                                                                                                                                                                                                                                                                                                                                                                                                                                                                                                                                                                                                                                                                                                                                                                                                                                                                                                                                                                                                                                                                                                                                                                                                                                                                                                                                                                                                                                                                                                                                                                                                                                                                                                                                                                                                                                                                                                                                                                                                                                                                                                                                                                                                                                                                                                                                                                                                                                                                                                                                                                                                                                                                                                                                                                                                                                                                                                                                                                                                                                                                                                                                                                                                                                                                                                                                                                                                                                                                                                                                                                                                                                                                                                                                                                                                                                                                                                                                                                                                                                                                                                                                                                                                                                                                                                                                                                                                                                                                                                                                                                                                                                                                                                                                                                                                                                                                                                                                                                                                                                                                                                                                                                                                                                                                                                                                                                                                                                                                                                                                                                                                                                                                                                                                                                                                                                                                                                                                                                                                                                                                                                                                                                                                                                                                                                                                                                                                                                                                                                                                                                                                                                                                                                                                                                                                                                                                                                                                                                                                                                                                                                                                                                                                                                                                                                                                                                                                                                                                                                                                                                                                                                     | Orestadsklinikens VC                                | The Public Health Agency of Sweden                                                                                                                      | Anna Risberg; Anna-Malin Linde; Karin Tegmark-Wisell; Maria Lind Karlberg; Mattias Haukland; Mia Brytting; Olov Svartstrom; Oskar Karlsson Lindsjö; Reza Advani; Sandra Broddesson                                                                                  |
| EPI_ISL_1387237 to 1387241, EPI_ISL_1387243 to 1387259, EPI_ISL_1387261 to 1387275, EPI_ISL_1387277, EPI_ISL_1387279 to 1387282, EPI_ISL_1387284 to 1387296, EPI_ISL_1387298 to 1387299, EPI_ISL_1387301 to 1387304, EPI_ISL_1387306 to 1387311, EPI_ISL_1387313 to 1387314, EPI_ISL_1387316 to 1387318, EPI_ISL_1387320, EPI_ISL_1387322 to 1387325, EPI_ISL_1387327 to 1387329, EPI_ISL_1387332 to 1387340, EPI_ISL_1387342 to 1387349, EPI_ISL_1387351 to 1387352, EPI_ISL_1387354 to 1387361, EPI_ISL_1387363 to 1387364, EPI_ISL_1387367 to 1387370, EPI_ISL_1387373 to 1387376, EPI_ISL_1387378 to 1387383, EPI_ISL_1387385 to 1387386, EPI_ISL_1387388, EPI_ISL_1387390, EPI_ISL_1387393 to 1387398, EPI_ISL_1387401 to 1387402, EPI_ISL_1387405 to 1387407, EPI_ISL_1387409, EPI_ISL_1387411, EPI_ISL_1387413 to 1387414, EPI_ISL_1387416, EPI_ISL_1387418 to 1387422, EPI_ISL_1387425, EPI_ISL_1387427 to 1387429, EPI_ISL_1387432, EPI_ISL_1387436 to 1387437, EPI_ISL_1387439 to 1387440, EPI_ISL_1387443 to 1387446, EPI_ISL_1387448 to 1387449, EPI_ISL_1387452 to 1387455, EPI_ISL_1387461, EPI_ISL_1387463 to 1387468, EPI_ISL_1387470 to 1387472, EPI_ISL_1387475 to 1387476, EPI_ISL_1387478 to 1387482, EPI_ISL_1387484 to 1387487, EPI_ISL_1387489, EPI_ISL_1387491, EPI_ISL_1387494 to 1387495, EPI_ISL_1387497 to 1387510, EPI_ISL_1387512 to 1387513, EPI_ISL_1387515 to 1387523, EPI_ISL_1387525 to 1387537, EPI_ISL_1387539 to 1387541, EPI_ISL_1387543 to 1387545, EPI_ISL_1387548 to 1387551, EPI_ISL_1387553, EPI_ISL_1387555 to 1387580, EPI_ISL_1387582 to 1387586, EPI_ISL_1387588 to 1387598, EPI_ISL_1387600 to 1387603, EPI_ISL_1387605 to 1387611, EPI_ISL_1387613 to 1387617, EPI_ISL_1387619 to 1387626, EPI_ISL_1387628 to 1387630, EPI_ISL_1387632 to 1387634, EPI_ISL_1387640 to 1387644, EPI_ISL_1387646 to 1387648, EPI_ISL_1387650 to 1387654, EPI_ISL_1387657 to 1387658, EPI_ISL_1387660 to 1387669, EPI_ISL_1387671, EPI_ISL_1387673 to 1387674, EPI_ISL_1387676, EPI_ISL_1387678 to 1387683, EPI_ISL_1387686 to 1387688, EPI_ISL_1387690 to 1387693, EPI_ISL_1387695 to 1387705, EPI_ISL_1387707 to 1387708, EPI_ISL_1387710 to 1387715, EPI_ISL_1387721, EPI_ISL_1387723, EPI_ISL_1387725, EPI_ISL_1387732, EPI_ISL_1387730 to 1387732, EPI_ISL_1387735 to 1387736, EPI_ISL_1387739, EPI_ISL_1387743, EPI_ISL_1387745 to 1387751, EPI_ISL_1387754 to 1387758, EPI_ISL_1387760 to 1387762, EPI_ISL_1387765 to 1387770, EPI_ISL_1387772 to 1387773, EPI_ISL_1387780, EPI_ISL_1387782 to 1387785, EPI_ISL_1387788, EPI_ISL_1387791 to 1387792, EPI_ISL_1387795 to 1387799, EPI_ISL_1387801, EPI_ISL_1387804 to 1387822, EPI_ISL_1387824, EPI_ISL_1387826 to 1387836, EPI_ISL_1387838 to 1387839, EPI_ISL_1387841, EPI_ISL_1387843, EPI_ISL_1387845 to 1387847, EPI_ISL_1387849 to 1387853, EPI_ISL_1387855, EPI_ISL_1387857 to 1387863, EPI_ISL_1387866, EPI_ISL_1387872 to 1387877, EPI_ISL_1387881 to 1387883, EPI_ISL_1387889, EPI_ISL_1387893, EPI_ISL_1387895, EPI_ISL_1387905, EPI_ISL_1387907 to 1387908, EPI_ISL_1387914, EPI_ISL_1387916 to 1387919, EPI_ISL_1387921, EPI_ISL_1387923, EPI_ISL_1387926 to 1387931, EPI_ISL_1387934, EPI_ISL_1387938, EPI_ISL_1387942, EPI_ISL_1387945, EPI_ISL_1387947, EPI_ISL_1387950, EPI_ISL_1387954 to 1387965, EPI_ISL_1387967, EPI_ISL_1387970 to 1387975, EPI_ISL_1387979, EPI_ISL_1387984, EPI_ISL_1387989, EPI_ISL_1387991 to 1388003, EPI_ISL_1388005 to 1388011, EPI_ISL_1388013 to 1388015, EPI_ISL_1388017 to 1388020, EPI_ISL_1388023 to 1388024, EPI_ISL_1388029 to 1388031, EPI_ISL_1388033 to 1388037, EPI_ISL_1388040 to 1388042, EPI_ISL_1388044 to 1388049, EPI_ISL_1388052 to 1388053, EPI_ISL_1388056, EPI_ISL_1388059 to 1388062, EPI_ISL_1388064 to 1388065, EPI_ISL_1388068, EPI_ISL_1388071 to 1388072, EPI_ISL_1388074, EPI_ISL_1388076 to 1388082, EPI_ISL_1388084 to 1388086, EPI_ISL_1388089 to 1388090, EPI_ISL_1388092 to 1388093, EPI_ISL_1388095 to 1388104, EPI_ISL_1388111, EPI_ISL_1388113, EPI_ISL_1388115, EPI_ISL_1388120, EPI_ISL_1388123, EPI_ISL_1388125, EPI_ISL_1388127, EPI_ISL_1388129, EPI_ISL_1388135, EPI_ISL_1388138, EPI_ISL_1388140, EPI_ISL_1388142, EPI_ISL_1388148, EPI_ISL_1388151, EPI_ISL_1388153, EPI_ISL_1388155, EPI_ISL_1388157, EPI_ISL_1388159, EPI_ISL_1388161, EPI_ISL_1388163, EPI_ISL_1388165, EPI_ISL_1388169, EPI_ISL_1388172 to 1388173, EPI_ISL_1388176, EPI_ISL_1388178, EPI_ISL_1388180, EPI_ISL_1388186, EPI_ISL_1388190, EPI_ISL_1388192, EPI_ISL_1388196, EPI_ISL_1388205, EPI_ISL_1388207, EPI_ISL_1388209, EPI_ISL_1388211, EPI_ISL_1388213, EPI_ISL_1388215, EPI_ISL_1388219, EPI_ISL_1388221, EPI_ISL_1388225, EPI_ISL_1388231, EPI_ISL_1388236 to 1388237, EPI_ISL_1388241, EPI_ISL_1388243, EPI_ISL_1388246, EPI_ISL_1388248, EPI_ISL_1388250, EPI_ISL_1388254, EPI_ISL_1388256, EPI_ISL_1388260, EPI_ISL_1388266, EPI_ISL_1388268, EPI_ISL_1388274, EPI_ISL_1388282, EPI_ISL_1388284, EPI_ISL_1388286, EPI_ISL_1388288, EPI_ISL_1388294, EPI_ISL_1388296, EPI_ISL_1388298, EPI_ISL_1388302 to 1388303, EPI_ISL_1388307, EPI_ISL_1388309, EPI_ISL_1388311, EPI_ISL_1388313, EPI_ISL_1388315, EPI_ISL_1388317, EPI_ISL_1388327, EPI_ISL_1388331, EPI_ISL_1388335, EPI_ISL_1388337, EPI_ISL_1388343, EPI_ISL_1388345, EPI_ISL_1388347, EPI_ISL_1388353, EPI_ISL_1388357, EPI_ISL_1388359, EPI_ISL_1388361, EPI_ISL_1388363, EPI_ISL_1388369, EPI_ISL_1388371, EPI_ISL_1388374, EPI_ISL_1388378, EPI_ISL_1388381, EPI_ISL_1388383, EPI_ISL_1388387, EPI_ISL_1388391, EPI_ISL_1388393, EPI_ISL_1388395, EPI_ISL_1388399, EPI_ISL_1388411, EPI_ISL_1388415, EPI_ISL_1388418, EPI_ISL_1388420, EPI_ISL_1388424, EPI_ISL_1388430 to 1388431, EPI_ISL_1388433, EPI_ISL_1388435, EPI_ISL_1388439, EPI_ISL_1388441, EPI_ISL_1388443, EPI_ISL_1388445 to 1388446, EPI_ISL_1388448, EPI_ISL_1388450, EPI_ISL_1388452, EPI_ISL_1388454, EPI_ISL_1388456, EPI_ISL_1388458 to 1388459, EPI_ISL_1388461, EPI_ISL_1388463, EPI_ISL_1388465, EPI_ISL_1388467 to 1388468, EPI_ISL_1388470, EPI_ISL_1388475, EPI_ISL_1388479, EPI_ISL_1388485, EPI_ISL_1388487, EPI_ISL_1388489, EPI_ISL_1388491, EPI_ISL_1388493, EPI_ISL_1388495 to 1388496, EPI_ISL_1388498, EPI_ISL_1388500, EPI_ISL_1388505 to 1388506, EPI_ISL_1388508, EPI_ISL_1388510, EPI_ISL_1388513, EPI_ISL_1388515, EPI_ISL_1388519, EPI_ISL_1388521, EPI_ISL_1388523, EPI_ISL_1388525, EPI_ISL_1388527, EPI_ISL_1388531, EPI_ISL_1388533, EPI_ISL_1388535, EPI_ISL_1388537, EPI_ISL_1388539, EPI_ISL_1388541, EPI_ISL_1388545, EPI_ISL_1388549, EPI_ISL_1388551, EPI_ISL_1388553, EPI_ISL_1388555, EPI_ISL_1388557, EPI_ISL_1388559, EPI_ISL_1388563, EPI_ISL_1388565, EPI_ISL_1388567, EPI_ISL_1388569, EPI_ISL_1388573, EPI_ISL_1388575, EPI_ISL_1388581, EPI_ISL_1388583, EPI_ISL_1388585, EPI_ISL_1388591, EPI_ISL_1388593, EPI_ISL_1388594, EPI_ISL_1388596, EPI_ISL_1388598, EPI_ISL_1388601 to 1388602, EPI_ISL_1388605, EPI_ISL_1388607, EPI_ISL_1388609, EPI_ISL_1388611, EPI_ISL_1388613, EPI_ISL_1388615, EPI_ISL_1388617, EPI_ISL_1388619, EPI_ISL_1388621, EPI_ISL_1388623 to 1388624, EPI_ISL_1388627 to 1388628, EPI_ISL_1388630, EPI_ISL_1388632, EPI_ISL_1388634, EPI_ISL_1388636, EPI_ISL_1388638, EPI_ISL_1388640, EPI_ISL_1388642, EPI_ISL_1388644, EPI_ISL_1388646, EPI_ISL_1388648, EPI_ISL_1388650, EPI_ISL_1388652, EPI_ISL_1388654, EPI_ISL_1388656, EPI_ISL_1388658, EPI_ISL_1388660, EPI_ISL_1388662, EPI_ISL_1388664, EPI_ISL_1388666, EPI_ISL_1388668, EPI_ISL_1388670, EPI_ISL_1388672 to 1476074, EPI_ISL_1476076 to 1476078, EPI_ISL_1476081 to 1476085, EPI_ISL_1476095, EPI_ISL_1476099, EPI_ISL_1476101 to 1476106, EPI_ISL_1476108 to 1476109, EPI_ISL_1476111 to 1476114, EPI_ISL_1476116 to 1476131, EPI_ISL_1476133 to 1476135, EPI_ISL_1476137 to 1476138, EPI_ISL_1476140 to 1476143, EPI_ISL_1476149, EPI_ISL_1476151 to 1476157, EPI_ISL_1476160, EPI_ISL_1476165 to 1476166, EPI_ISL_1476168, EPI_ISL_1476171, EPI_ISL_1476173 to 1476174, EPI_ISL_1476176 to 1476179, EPI_ISL_1476182, EPI_ISL_1476184 to 1476185, EPI_ISL_1476189 to 1476190, EPI_ISL_1476192 to 1476193, EPI_ISL_1476195 to 1476197, EPI_ISL_1476199, EPI_ISL_1476201, EPI_ISL_1476204, EPI_ISL_1476206 to 1476208, EPI_ISL_1476215, EPI_ISL_1476219, EPI_ISL_1476222 to 1476225, EPI_ISL_1476227 to 1476228, EPI_ISL_1476231 to 1476233, EPI_ISL_1476235 to 1476282, EPI_ISL_1476284 to 1476290, EPI_ISL_1476292 to 1476295, EPI_ISL_1476299 to 1476302, EPI_ISL_1476304 to 1476308, EPI_ISL_1476311 to 1476314, EPI_ISL_1476316, EPI_ISL_1476319, EPI_ISL_1476323 to 1476325, EPI_ISL_1476327 to 1476330, EPI_ISL_1476332 to 1476337, EPI_ISL_1476340 to 1476342, EPI_ISL_1476344 to 1476363, EPI_ISL_1476365 to 1476366, EPI_ISL_1476370, EPI_ISL_1476372 to |                                                     |                                                                                                                                                         |                                                                                                                                                                                                                                                                     |

|                                                                                                                                                                                                                                                                                                                                                                                                                                                                                                                                                                                                                                                                                                                                                                                                                                                                                                                                                                                                                                                                                                                                                                                                                                                                                                                                                                                                                                                                                                                                                                                                                                                                                                                                                                                                                                                                                                                                                                                                                                                                                                                                                                                                                                                                                                                                                                                                                                                                                                                                                                                                                                                                                                                                                                                                                                                                                                                                                                                                                                                                                                                        |                                                              |                                                                                          |                                                                                                                                                                                                                                                                                                                                                                                                                                        |                                                                                                                                                                                                                                                                                                                                                                          |
|------------------------------------------------------------------------------------------------------------------------------------------------------------------------------------------------------------------------------------------------------------------------------------------------------------------------------------------------------------------------------------------------------------------------------------------------------------------------------------------------------------------------------------------------------------------------------------------------------------------------------------------------------------------------------------------------------------------------------------------------------------------------------------------------------------------------------------------------------------------------------------------------------------------------------------------------------------------------------------------------------------------------------------------------------------------------------------------------------------------------------------------------------------------------------------------------------------------------------------------------------------------------------------------------------------------------------------------------------------------------------------------------------------------------------------------------------------------------------------------------------------------------------------------------------------------------------------------------------------------------------------------------------------------------------------------------------------------------------------------------------------------------------------------------------------------------------------------------------------------------------------------------------------------------------------------------------------------------------------------------------------------------------------------------------------------------------------------------------------------------------------------------------------------------------------------------------------------------------------------------------------------------------------------------------------------------------------------------------------------------------------------------------------------------------------------------------------------------------------------------------------------------------------------------------------------------------------------------------------------------------------------------------------------------------------------------------------------------------------------------------------------------------------------------------------------------------------------------------------------------------------------------------------------------------------------------------------------------------------------------------------------------------------------------------------------------------------------------------------------------|--------------------------------------------------------------|------------------------------------------------------------------------------------------|----------------------------------------------------------------------------------------------------------------------------------------------------------------------------------------------------------------------------------------------------------------------------------------------------------------------------------------------------------------------------------------------------------------------------------------|--------------------------------------------------------------------------------------------------------------------------------------------------------------------------------------------------------------------------------------------------------------------------------------------------------------------------------------------------------------------------|
| 1476373, EPI_ISL_1476375 to 1476376, EPI_ISL_1476378 to 1476379, EPI_ISL_1476381 to 1476389, EPI_ISL_1476391 to 1476392, EPI_ISL_1476395, EPI_ISL_1476397 to 1476398, EPI_ISL_1476400 to 1476407, EPI_ISL_1476411, EPI_ISL_1476414 to 1476416, EPI_ISL_1476418 to 1476419, EPI_ISL_1476421 to 1476422, EPI_ISL_1476424, EPI_ISL_1476426, EPI_ISL_1476430 to 1476432, EPI_ISL_1476435 to 1476436, EPI_ISL_1476438 to 1476441, EPI_ISL_1476443, EPI_ISL_1476446, EPI_ISL_1476451 to 1476458, EPI_ISL_1476460 to 1476461, EPI_ISL_1476464 to 1476467, EPI_ISL_1476469, EPI_ISL_1476471 to 1476472, EPI_ISL_1476474, EPI_ISL_1476476 to 1476477, EPI_ISL_1476480 to 1476488, EPI_ISL_1476490 to 1476494, EPI_ISL_1476496, EPI_ISL_1476498 to 1476516, EPI_ISL_1476518 to 1476527, EPI_ISL_1476529 to 1476548, EPI_ISL_1546251, EPI_ISL_1546253 to 1546255, EPI_ISL_1546257 to 1546268, EPI_ISL_1546270, EPI_ISL_1546273 to 1546277, EPI_ISL_1546279 to 1546286, EPI_ISL_1546289 to 1546291, EPI_ISL_1546293, EPI_ISL_1546295 to 1546329, EPI_ISL_1546331 to 1546336, EPI_ISL_1546339 to 1546342, EPI_ISL_1546344 to 1546345, EPI_ISL_1546347 to 1546356, EPI_ISL_1546358 to 1546365, EPI_ISL_1546370 to 1546371, EPI_ISL_1546373 to 1546385, EPI_ISL_1546387 to 1546388, EPI_ISL_1546390, EPI_ISL_1546392, EPI_ISL_1546394 to 1546396, EPI_ISL_1546398 to 1546403, EPI_ISL_1546405, EPI_ISL_1546407 to 1546415, EPI_ISL_1546417, EPI_ISL_1546419, EPI_ISL_1546421 to 1546423, EPI_ISL_1546426, EPI_ISL_1546428, EPI_ISL_1546430 to 1546461, EPI_ISL_1546463 to 1546470, EPI_ISL_1546472 to 1546478, EPI_ISL_1546480, EPI_ISL_1546482 to 1546484, EPI_ISL_1546486 to 1546489, EPI_ISL_1546491 to 1546499, EPI_ISL_1546501 to 1546503, EPI_ISL_1546505, EPI_ISL_1546507 to 1546508, EPI_ISL_1546511 to 1546512, EPI_ISL_1546514 to 1546518, EPI_ISL_1546520, EPI_ISL_1546523 to 1546527, EPI_ISL_1546530, EPI_ISL_1546533 to 1546539, EPI_ISL_1546541, EPI_ISL_1546544 to 1546547, EPI_ISL_1546549, EPI_ISL_1546553, EPI_ISL_1546557 to 1546562, EPI_ISL_1546564 to 1546574 to 1546583, EPI_ISL_1546585, EPI_ISL_1546587 to 1546591, EPI_ISL_1546593 to 1546623, EPI_ISL_1546625 to 1546629, EPI_ISL_1546631 to 1546633, EPI_ISL_1546635, EPI_ISL_1546637 to 1546642, EPI_ISL_1546644 to 1546645, EPI_ISL_1546648 to 1546649, EPI_ISL_1546651 to 1546657, EPI_ISL_1546660 to 1546661, EPI_ISL_1546663 to 1546666, EPI_ISL_1546668 to 1546672, EPI_ISL_1546674 to 1546681, EPI_ISL_1546683 to 1546684, EPI_ISL_1546686 to 1546693, EPI_ISL_1546695 to 1546713, EPI_ISL_1546715 to 1546728, EPI_ISL_1546730 to 1546742, EPI_ISL_1546744 to 1546745, EPI_ISL_1546748 to 1546749, EPI_ISL_1546751 to 1546755, EPI_ISL_1546758, EPI_ISL_1546760, EPI_ISL_1546762 to 1546764, EPI_ISL_1546768 to 1546773, EPI_ISL_1546775 to 1546780, EPI_ISL_1546782 to 1546791, EPI_ISL_1546793 to 1546805, EPI_ISL_1546808 to 1546814, EPI_ISL_1546816 to 1546818, EPI_ISL_1546820 to 1546825, EPI_ISL_1546828 to 1546829, EPI_ISL_1546834, EPI_ISL_1546840, EPI_ISL_1546842 to 1546844, EPI_ISL_1546846 to 1546861, EPI_ISL_1546864 to 1546884 | see above                                                    | Originating lab: Wales Specialist Virology Centre Sequencing lab: Pathogen Genomics Unit | Public Health Wales Microbiology Cardiff Wales Specialist Virology Centre                                                                                                                                                                                                                                                                                                                                                              | Alec Birchley; Alexander Adams; Amy Gaskin; Angela Marchbank; Bree Gatica-Wilcox; Catherine Moore; Jason Coombes; Joanne Watkins; Joel Southgate; Johnathan Evans; Laura Gifford; Lauren Gilbert; Lee Graham; Malorie Perry; Matthew Bull; Nicole Paanchibini; Sally Corden; Sara Kunziene-Summerhayes; Sara Rey; Sarah Taylor; Simon Cottrell; Sophie Jones; Tom Connor |
| EPI_ISL_455100, EPI_ISL_475519                                                                                                                                                                                                                                                                                                                                                                                                                                                                                                                                                                                                                                                                                                                                                                                                                                                                                                                                                                                                                                                                                                                                                                                                                                                                                                                                                                                                                                                                                                                                                                                                                                                                                                                                                                                                                                                                                                                                                                                                                                                                                                                                                                                                                                                                                                                                                                                                                                                                                                                                                                                                                                                                                                                                                                                                                                                                                                                                                                                                                                                                                         | Orsa VC                                                      | The Public Health Agency of Sweden                                                       | Anna Risberg; Anna-Karin Lundqvist; Anna-Malin Linde; Karin Tegmark-Wisell; Maria Lind Karlberg; Mattias Haukland; Mia Brytting; Olov Svartstrom; Oskar Karlsson Lindsjo; Reza Advani; Sandra Broddesson; Theresa Enkirc                                                                                                                                                                                                               |                                                                                                                                                                                                                                                                                                                                                                          |
| EPI_ISL_1427154 to 1427165, EPI_ISL_1427607 to 1427609, EPI_ISL_1427729 to 1427732, EPI_ISL_1427784 to 1427799, EPI_ISL_1428610, EPI_ISL_1429579 to 1429582, EPI_ISL_1429584 to 1429587, EPI_ISL_1430552 to 1430554, EPI_ISL_1430570 to 1430571, EPI_ISL_1430579, EPI_ISL_1430581, EPI_ISL_1430585 to 1430624, EPI_ISL_1430626, EPI_ISL_1430635 to 1430638, EPI_ISL_1430653 to 1430655, EPI_ISL_1430668 to 1430671, EPI_ISL_1430681, EPI_ISL_1430700, EPI_ISL_1430721, EPI_ISL_1430734, EPI_ISL_1430824, EPI_ISL_1431390 to 1431443, EPI_ISL_1431577, EPI_ISL_1431719, EPI_ISL_1432329, EPI_ISL_1432331, EPI_ISL_1432333, EPI_ISL_1432335, EPI_ISL_1432337, EPI_ISL_1432339 to 1432340                                                                                                                                                                                                                                                                                                                                                                                                                                                                                                                                                                                                                                                                                                                                                                                                                                                                                                                                                                                                                                                                                                                                                                                                                                                                                                                                                                                                                                                                                                                                                                                                                                                                                                                                                                                                                                                                                                                                                                                                                                                                                                                                                                                                                                                                                                                                                                                                                                 | see above                                                    | Osaka Institute of Public Health, Morinomiya Center                                      | Pathogen Genomics Center, National Institute of Infectious Diseases                                                                                                                                                                                                                                                                                                                                                                    | ; Chang-Kweng Lim; Chikako Shimokawa; Daisuke Kobayashi; Eri Nakayama; Eunsil Park; Hussein H. Aly; Ken Miyazawa; Kentaro Itokawa; Kousho Wakae; Makoto Kuroda; Masanori Hashino; Minoru Nagi; Motohiko Ogawara; Rina Tanaka; Shigeru Tanjima; Takahiro Maeki; Takanobu Kato; Takashi Sakudoh; Tsuguto Fujimoto; Tsuyoshi Sekizuka; Yasutaka Hoshino; Yoshihiro Kaku     |
| EPI_ISL_417483                                                                                                                                                                                                                                                                                                                                                                                                                                                                                                                                                                                                                                                                                                                                                                                                                                                                                                                                                                                                                                                                                                                                                                                                                                                                                                                                                                                                                                                                                                                                                                                                                                                                                                                                                                                                                                                                                                                                                                                                                                                                                                                                                                                                                                                                                                                                                                                                                                                                                                                                                                                                                                                                                                                                                                                                                                                                                                                                                                                                                                                                                                         | Oslo University Hospital, Department of Medical Microbiology | Norwegian Institute of Public Health                                                     | Hilde Elshaug; Kamilla Heddeland Insteffjord; Karoline Bragstad; Kathrine Stene-Johansen; Olav Hungnes                                                                                                                                                                                                                                                                                                                                 |                                                                                                                                                                                                                                                                                                                                                                          |
| EPI_ISL_417484, EPI_ISL_417488 to 417490, EPI_ISL_420135, EPI_ISL_420150, EPI_ISL_471175, EPI_ISL_471177, EPI_ISL_481214 to 481215, EPI_ISL_481217 to 481218, EPI_ISL_493351 to 493355, EPI_ISL_493385 to 493389, EPI_ISL_500800, EPI_ISL_549029 to 549035, EPI_ISL_590878, EPI_ISL_590900, EPI_ISL_590910, EPI_ISL_590913 to 590914, EPI_ISL_590916, EPI_ISL_590918, EPI_ISL_590923, EPI_ISL_590927 to 590928, EPI_ISL_590930, EPI_ISL_590934 to 590935, EPI_ISL_590978 to 590980, EPI_ISL_591011, EPI_ISL_591020, EPI_ISL_1490260, EPI_ISL_1547627 to 1547632                                                                                                                                                                                                                                                                                                                                                                                                                                                                                                                                                                                                                                                                                                                                                                                                                                                                                                                                                                                                                                                                                                                                                                                                                                                                                                                                                                                                                                                                                                                                                                                                                                                                                                                                                                                                                                                                                                                                                                                                                                                                                                                                                                                                                                                                                                                                                                                                                                                                                                                                                        | see above                                                    | Oslo University Hospital, Department of Medical Microbiology                             | Norwegian Institute of Public Health, Department of Virology                                                                                                                                                                                                                                                                                                                                                                           | Atiya R Ali; Debech Nadia; Engebretsen Serina Beate; Garcia Llorente Ignacio; Hilde Elshaug; Hilde Synnove Vollan; Hilde Vollan; Jon Bråte; Kamilla Heddeland Insteffjord; Karoline Bragstad; Kathrine Stene-Johansen; Marie Paulsen Madsen; Olav Hungnes; Pedersen Benedikte Nevjen; Rasmus Riis Kopperud                                                               |
| EPI_ISL_458066 to 458069, EPI_ISL_495274 to 495297                                                                                                                                                                                                                                                                                                                                                                                                                                                                                                                                                                                                                                                                                                                                                                                                                                                                                                                                                                                                                                                                                                                                                                                                                                                                                                                                                                                                                                                                                                                                                                                                                                                                                                                                                                                                                                                                                                                                                                                                                                                                                                                                                                                                                                                                                                                                                                                                                                                                                                                                                                                                                                                                                                                                                                                                                                                                                                                                                                                                                                                                     | Osmania Medical College                                      | CSIR-Centre for Cellular and Molecular Biology                                           | Archana Bharadwaj Siva; Dhiviya Vedagiri; Divya Gupta; Divya Tej Sowpati; Karthik Bharadwaj Tallapaka; Krishnan Harinivas Harshan; Lamuk Zaveri; M Soujanya Reddy; Mahboob Khan; Namami Gaur; Nikhil Hajirnis; Onkar Kulkarni; Payal Mukherjee; Pratheusa Maccha; Priya Singh; Purushotham Vodnal; Rakesh K Mishra; Sakshi Shambhavi; Santosh Kumar Kuncha; Shagufata Khan; Shashikala Reddy; Sofia Banu; Tulasi Nagabandi; Vishal Sah |                                                                                                                                                                                                                                                                                                                                                                          |
| EPI_ISL_447902                                                                                                                                                                                                                                                                                                                                                                                                                                                                                                                                                                                                                                                                                                                                                                                                                                                                                                                                                                                                                                                                                                                                                                                                                                                                                                                                                                                                                                                                                                                                                                                                                                                                                                                                                                                                                                                                                                                                                                                                                                                                                                                                                                                                                                                                                                                                                                                                                                                                                                                                                                                                                                                                                                                                                                                                                                                                                                                                                                                                                                                                                                         | Osmania University                                           | Osmania University                                                                       | Amit; An and Kumar, K.; Bosinger; Kalyani, P.; Nagamani, K.; Pankaj Singh, D.; Radhakrishna, M.; Raja Rao, M.; Ravikumar, P.; S.E. and Rama, A.; Sunitha, P.; Thriok Chander, B.; U.A.                                                                                                                                                                                                                                                 |                                                                                                                                                                                                                                                                                                                                                                          |
| EPI_ISL_528922, EPI_ISL_528924, EPI_ISL_528926 to 528928, EPI_ISL_529018, EPI_ISL_529026                                                                                                                                                                                                                                                                                                                                                                                                                                                                                                                                                                                                                                                                                                                                                                                                                                                                                                                                                                                                                                                                                                                                                                                                                                                                                                                                                                                                                                                                                                                                                                                                                                                                                                                                                                                                                                                                                                                                                                                                                                                                                                                                                                                                                                                                                                                                                                                                                                                                                                                                                                                                                                                                                                                                                                                                                                                                                                                                                                                                                               | Ospedale "Giuseppe Mazzini"-Teramo                           | Istituto Zooprofilattico Sperimentale dell'Abruzzo e Molise "G.Caporale"                 | Ancora M; Cammà C; Curini V; Di Domenico M; Di Pasquale A; Lorusso A; Mangone I; Marcacci M; Puglia I; Rinaldi A; Savini G.                                                                                                                                                                                                                                                                                                            |                                                                                                                                                                                                                                                                                                                                                                          |
| EPI_ISL_529014 to 529015, EPI_ISL_529022                                                                                                                                                                                                                                                                                                                                                                                                                                                                                                                                                                                                                                                                                                                                                                                                                                                                                                                                                                                                                                                                                                                                                                                                                                                                                                                                                                                                                                                                                                                                                                                                                                                                                                                                                                                                                                                                                                                                                                                                                                                                                                                                                                                                                                                                                                                                                                                                                                                                                                                                                                                                                                                                                                                                                                                                                                                                                                                                                                                                                                                                               | Ospedale "Ss. Annunziata"                                    | Istituto Zooprofilattico Sperimentale dell'Abruzzo e Molise "G.Caporale"                 | Ancora M; Cammà C; Curini V; Di Domenico M; Di Pasquale A; Lorusso A; Mangone I; Marcacci M; Puglia I; Rinaldi A; Savini G.                                                                                                                                                                                                                                                                                                            |                                                                                                                                                                                                                                                                                                                                                                          |
| EPI_ISL_1391073 to 1391076                                                                                                                                                                                                                                                                                                                                                                                                                                                                                                                                                                                                                                                                                                                                                                                                                                                                                                                                                                                                                                                                                                                                                                                                                                                                                                                                                                                                                                                                                                                                                                                                                                                                                                                                                                                                                                                                                                                                                                                                                                                                                                                                                                                                                                                                                                                                                                                                                                                                                                                                                                                                                                                                                                                                                                                                                                                                                                                                                                                                                                                                                             | Ospedale Casa Sollievo della Sofferenza                      | Istituto Zooprofilattico Sperimentale della Puglia e della Basilicata                    | Bianco A.; Capozzi L.; Del Sambro L.; Difato L.; Giannico A.; Labonia M.; Parisi A.; Ridolfi D.; Simone D.                                                                                                                                                                                                                                                                                                                             |                                                                                                                                                                                                                                                                                                                                                                          |
| EPI_ISL_420564                                                                                                                                                                                                                                                                                                                                                                                                                                                                                                                                                                                                                                                                                                                                                                                                                                                                                                                                                                                                                                                                                                                                                                                                                                                                                                                                                                                                                                                                                                                                                                                                                                                                                                                                                                                                                                                                                                                                                                                                                                                                                                                                                                                                                                                                                                                                                                                                                                                                                                                                                                                                                                                                                                                                                                                                                                                                                                                                                                                                                                                                                                         | Ospedale Civile Castel Di Sangro                             | Istituto Zooprofilattico Sperimentale dell'Abruzzo e Molise "G.Caporale"                 | Ancora M; Cammà C; Curini V; Di Domenico M; Di Pasquale A; Lorusso A; Mangone I; Marcacci M; Puglia I; Rinaldi A; Savini G                                                                                                                                                                                                                                                                                                             |                                                                                                                                                                                                                                                                                                                                                                          |
| EPI_ISL_418260 to 418261, EPI_ISL_420563, EPI_ISL_429228, EPI_ISL_429230 to 429235                                                                                                                                                                                                                                                                                                                                                                                                                                                                                                                                                                                                                                                                                                                                                                                                                                                                                                                                                                                                                                                                                                                                                                                                                                                                                                                                                                                                                                                                                                                                                                                                                                                                                                                                                                                                                                                                                                                                                                                                                                                                                                                                                                                                                                                                                                                                                                                                                                                                                                                                                                                                                                                                                                                                                                                                                                                                                                                                                                                                                                     | Ospedale Civile Giuseppe Mazzini                             | Istituto Zooprofilattico Sperimentale dell'Abruzzo e Molise "G.Caporale"                 | Ancora M; Cammà C; Curini V; Di Domenico M; Di Pasquale A; Lorusso A; Mangone I; Marcacci M; Puglia I; Rinaldi A; Savini G; Savini G.                                                                                                                                                                                                                                                                                                  |                                                                                                                                                                                                                                                                                                                                                                          |
| EPI_ISL_420565, EPI_ISL_420568 to 420569, EPI_ISL_420583, EPI_ISL_420592, EPI_ISL_435145, EPI_ISL_436723                                                                                                                                                                                                                                                                                                                                                                                                                                                                                                                                                                                                                                                                                                                                                                                                                                                                                                                                                                                                                                                                                                                                                                                                                                                                                                                                                                                                                                                                                                                                                                                                                                                                                                                                                                                                                                                                                                                                                                                                                                                                                                                                                                                                                                                                                                                                                                                                                                                                                                                                                                                                                                                                                                                                                                                                                                                                                                                                                                                                               | Ospedale Civile Giuseppe Mazzini                             | Istituto Zooprofilattico Sperimentale dell'Abruzzo e Molise "G.Caporale"                 | Ancora M; Cammà C; Curini V; Di Domenico M; Di Pasquale A; Lorusso A; Mangone I; Marcacci M; Puglia I; Rinaldi A; Savini G                                                                                                                                                                                                                                                                                                             |                                                                                                                                                                                                                                                                                                                                                                          |
| EPI_ISL_418257                                                                                                                                                                                                                                                                                                                                                                                                                                                                                                                                                                                                                                                                                                                                                                                                                                                                                                                                                                                                                                                                                                                                                                                                                                                                                                                                                                                                                                                                                                                                                                                                                                                                                                                                                                                                                                                                                                                                                                                                                                                                                                                                                                                                                                                                                                                                                                                                                                                                                                                                                                                                                                                                                                                                                                                                                                                                                                                                                                                                                                                                                                         | Ospedale Civile Giuseppe Mazzini, Teramo                     | Istituto Zooprofilattico Sperimentale dell'Abruzzo e Molise "G.Caporale"                 | Ancora M; Cammà C; Curini V; Di Domenico M; Di Pasquale A; Lorusso A; Mangone I; Marcacci M; Puglia I; Rinaldi A; Savini G.                                                                                                                                                                                                                                                                                                            |                                                                                                                                                                                                                                                                                                                                                                          |
| EPI_ISL_528990                                                                                                                                                                                                                                                                                                                                                                                                                                                                                                                                                                                                                                                                                                                                                                                                                                                                                                                                                                                                                                                                                                                                                                                                                                                                                                                                                                                                                                                                                                                                                                                                                                                                                                                                                                                                                                                                                                                                                                                                                                                                                                                                                                                                                                                                                                                                                                                                                                                                                                                                                                                                                                                                                                                                                                                                                                                                                                                                                                                                                                                                                                         | Ospedale Civile Maria SS. dello Splendore                    | Istituto Zooprofilattico Sperimentale dell'Abruzzo e Molise "G.Caporale"                 | Ancora M; Cammà C; Curini V; Di Domenico M; Di Pasquale A; Lorusso A; Mangone I; Marcacci M; Puglia I; Rinaldi A; Savini G.                                                                                                                                                                                                                                                                                                            |                                                                                                                                                                                                                                                                                                                                                                          |
| EPI_ISL_429236                                                                                                                                                                                                                                                                                                                                                                                                                                                                                                                                                                                                                                                                                                                                                                                                                                                                                                                                                                                                                                                                                                                                                                                                                                                                                                                                                                                                                                                                                                                                                                                                                                                                                                                                                                                                                                                                                                                                                                                                                                                                                                                                                                                                                                                                                                                                                                                                                                                                                                                                                                                                                                                                                                                                                                                                                                                                                                                                                                                                                                                                                                         | Ospedale Civile S. Liberatore di Atri                        | Istituto Zooprofilattico Sperimentale dell'Abruzzo e Molise "G.Caporale"                 | Ancora M; Cammà C; Curini V; Di Domenico M; Di Pasquale A; Lorusso A; Mangone I; Marcacci M; Puglia I; Rinaldi A; Savini G                                                                                                                                                                                                                                                                                                             |                                                                                                                                                                                                                                                                                                                                                                          |
| EPI_ISL_436719 to 436722, EPI_ISL_436724, EPI_ISL_436731 to 436732                                                                                                                                                                                                                                                                                                                                                                                                                                                                                                                                                                                                                                                                                                                                                                                                                                                                                                                                                                                                                                                                                                                                                                                                                                                                                                                                                                                                                                                                                                                                                                                                                                                                                                                                                                                                                                                                                                                                                                                                                                                                                                                                                                                                                                                                                                                                                                                                                                                                                                                                                                                                                                                                                                                                                                                                                                                                                                                                                                                                                                                     | Ospedale Civile S. Liberatore di Atri                        | Istituto Zooprofilattico Sperimentale dell'Abruzzo e Molise "G.Caporale"                 | Ancora M; Cammà C; Curini V; Di Domenico M; Di Pasquale A; Lorusso A; Mangone I; Marcacci M; Puglia I; Rinaldi A; Savini G                                                                                                                                                                                                                                                                                                             |                                                                                                                                                                                                                                                                                                                                                                          |
| EPI_ISL_528919, EPI_ISL_528923, EPI_ISL_528929, EPI_ISL_528993, EPI_ISL_529007, EPI_ISL_529009, EPI_ISL_529020 to 529021                                                                                                                                                                                                                                                                                                                                                                                                                                                                                                                                                                                                                                                                                                                                                                                                                                                                                                                                                                                                                                                                                                                                                                                                                                                                                                                                                                                                                                                                                                                                                                                                                                                                                                                                                                                                                                                                                                                                                                                                                                                                                                                                                                                                                                                                                                                                                                                                                                                                                                                                                                                                                                                                                                                                                                                                                                                                                                                                                                                               | see above                                                    | Ospedale Civile S. Liberatore-Atri                                                       | Istituto Zooprofilattico Sperimentale dell'Abruzzo e Molise "G.Caporale"                                                                                                                                                                                                                                                                                                                                                               | Ancora M; Cammà C; Curini V; Di Domenico M; Di Pasquale A; Lorusso A; Mangone I; Marcacci M; Puglia I; Rinaldi A; Savini G.                                                                                                                                                                                                                                              |
| EPI_ISL_1464621, EPI_ISL_1492581                                                                                                                                                                                                                                                                                                                                                                                                                                                                                                                                                                                                                                                                                                                                                                                                                                                                                                                                                                                                                                                                                                                                                                                                                                                                                                                                                                                                                                                                                                                                                                                                                                                                                                                                                                                                                                                                                                                                                                                                                                                                                                                                                                                                                                                                                                                                                                                                                                                                                                                                                                                                                                                                                                                                                                                                                                                                                                                                                                                                                                                                                       | Ospedale Cristo Re                                           | INMI Lazzaro Spallanzani IRCCS                                                           | A Di Caro; B Bartolini; CEM Gruber; E Giombini; F Messina; F Santini; G Bonfiglio; M Rueca; MR Capobianchi; O Butera                                                                                                                                                                                                                                                                                                                   |                                                                                                                                                                                                                                                                                                                                                                          |
| EPI_ISL_1492564                                                                                                                                                                                                                                                                                                                                                                                                                                                                                                                                                                                                                                                                                                                                                                                                                                                                                                                                                                                                                                                                                                                                                                                                                                                                                                                                                                                                                                                                                                                                                                                                                                                                                                                                                                                                                                                                                                                                                                                                                                                                                                                                                                                                                                                                                                                                                                                                                                                                                                                                                                                                                                                                                                                                                                                                                                                                                                                                                                                                                                                                                                        | Ospedale F.Spaziani                                          | INMI Lazzaro Spallanzani IRCCS                                                           | A Di Caro; B Bartolini; C Gargiulo; CEM Gruber; E Giombini; F Messina; F Santini; G Bonfiglio; G Brocco; M Rueca; MR Capobianchi; O Butera; R Pulselli                                                                                                                                                                                                                                                                                 |                                                                                                                                                                                                                                                                                                                                                                          |
| EPI_ISL_1391020 to 1391023, EPI_ISL_1391029 to 1391037                                                                                                                                                                                                                                                                                                                                                                                                                                                                                                                                                                                                                                                                                                                                                                                                                                                                                                                                                                                                                                                                                                                                                                                                                                                                                                                                                                                                                                                                                                                                                                                                                                                                                                                                                                                                                                                                                                                                                                                                                                                                                                                                                                                                                                                                                                                                                                                                                                                                                                                                                                                                                                                                                                                                                                                                                                                                                                                                                                                                                                                                 | Ospedale Generale Regionale F. Miulli                        | Istituto Zooprofilattico Sperimentale della Puglia e della Basilicata                    | Bianco A.; Capozzi L.; Ceci E.; Del Sambro L.; Parisi A.; Simone D.                                                                                                                                                                                                                                                                                                                                                                    |                                                                                                                                                                                                                                                                                                                                                                          |
| EPI_ISL_1524409 to 1524411, EPI_ISL_1524620 to 1524623                                                                                                                                                                                                                                                                                                                                                                                                                                                                                                                                                                                                                                                                                                                                                                                                                                                                                                                                                                                                                                                                                                                                                                                                                                                                                                                                                                                                                                                                                                                                                                                                                                                                                                                                                                                                                                                                                                                                                                                                                                                                                                                                                                                                                                                                                                                                                                                                                                                                                                                                                                                                                                                                                                                                                                                                                                                                                                                                                                                                                                                                 | Ospedale Magalini                                            | Istituto Zooprofilattico Sperimentale delle Venezie                                      | Adelaide Milani; Alessia Schivo; Alice Fusaro; Ambra Pastori; Annalisa Salvato; Antonia Ricci; Calogero Terregino; Edoardo Giussani; Elisa Palumbo; Erika Giorgia Quaranta; Isabella Monne; Luca Tassoni                                                                                                                                                                                                                               |                                                                                                                                                                                                                                                                                                                                                                          |
| EPI_ISL_1524466, EPI_ISL_1524539 to 1524547                                                                                                                                                                                                                                                                                                                                                                                                                                                                                                                                                                                                                                                                                                                                                                                                                                                                                                                                                                                                                                                                                                                                                                                                                                                                                                                                                                                                                                                                                                                                                                                                                                                                                                                                                                                                                                                                                                                                                                                                                                                                                                                                                                                                                                                                                                                                                                                                                                                                                                                                                                                                                                                                                                                                                                                                                                                                                                                                                                                                                                                                            | Ospedale Magalini                                            | Istituto di Genomica Applicata; Istituto Zooprofilattico Sperimentale delle Venezie      | Alessia Schivo; Alice Fusaro; Ambra Pastori; Annalisa Salvato; Antonia Ricci; Calogero Terregino; Davide Scaglione; Edoardo Giussani; Eleonora Paparelli; Erika Giorgia Quaranta; Francesca Bruno; Gabriele Magris; Irena Jurman; Isabella Monne; Luca Tassoni; Maria Varotto; Michele Morgante; Silvia Ormelli; Valeria D'Amico; Vera Vendramin                                                                                       |                                                                                                                                                                                                                                                                                                                                                                          |
| EPI_ISL_1524625 to 1524630                                                                                                                                                                                                                                                                                                                                                                                                                                                                                                                                                                                                                                                                                                                                                                                                                                                                                                                                                                                                                                                                                                                                                                                                                                                                                                                                                                                                                                                                                                                                                                                                                                                                                                                                                                                                                                                                                                                                                                                                                                                                                                                                                                                                                                                                                                                                                                                                                                                                                                                                                                                                                                                                                                                                                                                                                                                                                                                                                                                                                                                                                             | Ospedale Mater Salutis                                       | Istituto Zooprofilattico Sperimentale delle Venezie                                      | Adelaide Milani; Alessia Schivo; Alice Fusaro; Ambra Pastori; Annalisa Salvato; Antonia Ricci; Calogero Terregino; Edoardo Giussani; Elisa Palumbo; Erika Giorgia Quaranta; Isabella Monne; Luca Tassoni                                                                                                                                                                                                                               |                                                                                                                                                                                                                                                                                                                                                                          |
| EPI_ISL_1524467 to 1524468, EPI_ISL_1524561 to 1524568                                                                                                                                                                                                                                                                                                                                                                                                                                                                                                                                                                                                                                                                                                                                                                                                                                                                                                                                                                                                                                                                                                                                                                                                                                                                                                                                                                                                                                                                                                                                                                                                                                                                                                                                                                                                                                                                                                                                                                                                                                                                                                                                                                                                                                                                                                                                                                                                                                                                                                                                                                                                                                                                                                                                                                                                                                                                                                                                                                                                                                                                 | Ospedale Mater Salutis                                       | Istituto di Genomica Applicata; Istituto Zooprofilattico Sperimentale delle Venezie      | Alessia Schivo; Alice Fusaro; Ambra Pastori; Annalisa Salvato; Antonia Ricci; Calogero Terregino; Davide Scaglione; Edoardo Giussani; Eleonora Paparelli; Erika Giorgia Quaranta; Francesca Bruno; Gabriele Magris; Irena Jurman; Isabella Monne; Luca Tassoni; Maria Varotto; Michele Morgante; Silvia Ormelli; Valeria D'Amico; Vera Vendramin                                                                                       |                                                                                                                                                                                                                                                                                                                                                                          |
| EPI_ISL_429229                                                                                                                                                                                                                                                                                                                                                                                                                                                                                                                                                                                                                                                                                                                                                                                                                                                                                                                                                                                                                                                                                                                                                                                                                                                                                                                                                                                                                                                                                                                                                                                                                                                                                                                                                                                                                                                                                                                                                                                                                                                                                                                                                                                                                                                                                                                                                                                                                                                                                                                                                                                                                                                                                                                                                                                                                                                                                                                                                                                                                                                                                                         | Ospedale Regionale San Salvatore                             | Istituto Zooprofilattico Sperimentale dell'Abruzzo e Molise "G.                          | Ancora M; Cammà C; Curini V; Di Domenico M; Di Pasquale A; Lorusso A; Mangone I; Marcacci M; Puglia I; Rinaldi A; Savini G                                                                                                                                                                                                                                                                                                             |                                                                                                                                                                                                                                                                                                                                                                          |

| Caporale*                                                                                                                                                                                                                                                                                                                                                                                                                                                                                                                                                                                                                                                                                                                                                                                                                                                                                                                                                                                                                                                                                                                                                                                                                                                                                                                                                                                                                                                                                                                                                                                                                                                                                                                                                                                                                                                                                                                                                                                                                                                                                                                                                                                                                                                                                                                                                                                                                                                                                                                                                                                                                                                                                                                                                                                                                                                                                                                                                                                                                                                                                                                                                                                                                                                                                                                                                                                                                                                                                                                                                                                                                                                                                                                                                                                                                                                                                                                                                                                                                                                                                                                                                                                                                                                                                                                                                                              |                                                                                                                     |                                                                                                                                                                                                                                                                                                           |                                                                                                                                                                                                                                                                                                                                                                       |
|----------------------------------------------------------------------------------------------------------------------------------------------------------------------------------------------------------------------------------------------------------------------------------------------------------------------------------------------------------------------------------------------------------------------------------------------------------------------------------------------------------------------------------------------------------------------------------------------------------------------------------------------------------------------------------------------------------------------------------------------------------------------------------------------------------------------------------------------------------------------------------------------------------------------------------------------------------------------------------------------------------------------------------------------------------------------------------------------------------------------------------------------------------------------------------------------------------------------------------------------------------------------------------------------------------------------------------------------------------------------------------------------------------------------------------------------------------------------------------------------------------------------------------------------------------------------------------------------------------------------------------------------------------------------------------------------------------------------------------------------------------------------------------------------------------------------------------------------------------------------------------------------------------------------------------------------------------------------------------------------------------------------------------------------------------------------------------------------------------------------------------------------------------------------------------------------------------------------------------------------------------------------------------------------------------------------------------------------------------------------------------------------------------------------------------------------------------------------------------------------------------------------------------------------------------------------------------------------------------------------------------------------------------------------------------------------------------------------------------------------------------------------------------------------------------------------------------------------------------------------------------------------------------------------------------------------------------------------------------------------------------------------------------------------------------------------------------------------------------------------------------------------------------------------------------------------------------------------------------------------------------------------------------------------------------------------------------------------------------------------------------------------------------------------------------------------------------------------------------------------------------------------------------------------------------------------------------------------------------------------------------------------------------------------------------------------------------------------------------------------------------------------------------------------------------------------------------------------------------------------------------------------------------------------------------------------------------------------------------------------------------------------------------------------------------------------------------------------------------------------------------------------------------------------------------------------------------------------------------------------------------------------------------------------------------------------------------------------------------------------------------------|---------------------------------------------------------------------------------------------------------------------|-----------------------------------------------------------------------------------------------------------------------------------------------------------------------------------------------------------------------------------------------------------------------------------------------------------|-----------------------------------------------------------------------------------------------------------------------------------------------------------------------------------------------------------------------------------------------------------------------------------------------------------------------------------------------------------------------|
| EPI_ISL_420566 to 420567, EPI_ISL_436718                                                                                                                                                                                                                                                                                                                                                                                                                                                                                                                                                                                                                                                                                                                                                                                                                                                                                                                                                                                                                                                                                                                                                                                                                                                                                                                                                                                                                                                                                                                                                                                                                                                                                                                                                                                                                                                                                                                                                                                                                                                                                                                                                                                                                                                                                                                                                                                                                                                                                                                                                                                                                                                                                                                                                                                                                                                                                                                                                                                                                                                                                                                                                                                                                                                                                                                                                                                                                                                                                                                                                                                                                                                                                                                                                                                                                                                                                                                                                                                                                                                                                                                                                                                                                                                                                                                                               | Ospedale Regionale San Salvatore                                                                                    | Istituto Zooprofilattico Sperimentale dell'Abruzzo e Molise "G.Caporale"                                                                                                                                                                                                                                  | Ancora M; Cammà C; Curini V; Di Domenico M; Di Pasquale A; Lorusso A; Mangone I; Marcacci M; Puglia I; Rinaldi A; Savini G                                                                                                                                                                                                                                            |
| EPI_ISL_528925                                                                                                                                                                                                                                                                                                                                                                                                                                                                                                                                                                                                                                                                                                                                                                                                                                                                                                                                                                                                                                                                                                                                                                                                                                                                                                                                                                                                                                                                                                                                                                                                                                                                                                                                                                                                                                                                                                                                                                                                                                                                                                                                                                                                                                                                                                                                                                                                                                                                                                                                                                                                                                                                                                                                                                                                                                                                                                                                                                                                                                                                                                                                                                                                                                                                                                                                                                                                                                                                                                                                                                                                                                                                                                                                                                                                                                                                                                                                                                                                                                                                                                                                                                                                                                                                                                                                                                         | Ospedale Regionale San Salvatore-L'Aquila                                                                           | Istituto Zooprofilattico Sperimentale dell'Abruzzo e Molise "G.Caporale"                                                                                                                                                                                                                                  | Ancora M; Cammà C; Curini V; Di Domenico M; Di Pasquale A; Lorusso A; Mangone I; Marcacci M; Puglia I; Rinaldi A; Savini G.                                                                                                                                                                                                                                           |
| EPI_ISL_1464622, EPI_ISL_1492579 to 1492580, EPI_ISL_1495999                                                                                                                                                                                                                                                                                                                                                                                                                                                                                                                                                                                                                                                                                                                                                                                                                                                                                                                                                                                                                                                                                                                                                                                                                                                                                                                                                                                                                                                                                                                                                                                                                                                                                                                                                                                                                                                                                                                                                                                                                                                                                                                                                                                                                                                                                                                                                                                                                                                                                                                                                                                                                                                                                                                                                                                                                                                                                                                                                                                                                                                                                                                                                                                                                                                                                                                                                                                                                                                                                                                                                                                                                                                                                                                                                                                                                                                                                                                                                                                                                                                                                                                                                                                                                                                                                                                           | Ospedale S.M. Goretti                                                                                               | INMI Lazzaro Spallanzani IRCCS                                                                                                                                                                                                                                                                            | A Di Caro; A Lucci; B Bartolini; CEM Gruber; E Giombini; F Messina; F Santini; G Bonfiglio; L Corso; L Di Biase; M Rucca; MR Capobianchi; O Butera; S Pignatola                                                                                                                                                                                                       |
| EPI_ISL_435148, EPI_ISL_435150 to 435151                                                                                                                                                                                                                                                                                                                                                                                                                                                                                                                                                                                                                                                                                                                                                                                                                                                                                                                                                                                                                                                                                                                                                                                                                                                                                                                                                                                                                                                                                                                                                                                                                                                                                                                                                                                                                                                                                                                                                                                                                                                                                                                                                                                                                                                                                                                                                                                                                                                                                                                                                                                                                                                                                                                                                                                                                                                                                                                                                                                                                                                                                                                                                                                                                                                                                                                                                                                                                                                                                                                                                                                                                                                                                                                                                                                                                                                                                                                                                                                                                                                                                                                                                                                                                                                                                                                                               | Ospedale SS Annunziata                                                                                              | Istituto Zooprofilattico Sperimentale dell'Abruzzo e Molise "G.Caporale"                                                                                                                                                                                                                                  | Ancora M; Cammà C; Curini V; Di Domenico M; Di Pasquale A; Lorusso A; Mangone I; Marcacci M; Puglia I; Rinaldi A; Savini G                                                                                                                                                                                                                                            |
| EPI_ISL_528991 to 528992, EPI_ISL_529016                                                                                                                                                                                                                                                                                                                                                                                                                                                                                                                                                                                                                                                                                                                                                                                                                                                                                                                                                                                                                                                                                                                                                                                                                                                                                                                                                                                                                                                                                                                                                                                                                                                                                                                                                                                                                                                                                                                                                                                                                                                                                                                                                                                                                                                                                                                                                                                                                                                                                                                                                                                                                                                                                                                                                                                                                                                                                                                                                                                                                                                                                                                                                                                                                                                                                                                                                                                                                                                                                                                                                                                                                                                                                                                                                                                                                                                                                                                                                                                                                                                                                                                                                                                                                                                                                                                                               | Ospedale SS Annunziata-Sulmona                                                                                      | Istituto Zooprofilattico Sperimentale dell'Abruzzo e Molise "G.Caporale"                                                                                                                                                                                                                                  | Ancora M; Cammà C; Curini V; Di Domenico M; Di Pasquale A; Lorusso A; Mangone I; Marcacci M; Puglia I; Rinaldi A; Savini G.                                                                                                                                                                                                                                           |
| EPI_ISL_1524406 to 1524408, EPI_ISL_1524624                                                                                                                                                                                                                                                                                                                                                                                                                                                                                                                                                                                                                                                                                                                                                                                                                                                                                                                                                                                                                                                                                                                                                                                                                                                                                                                                                                                                                                                                                                                                                                                                                                                                                                                                                                                                                                                                                                                                                                                                                                                                                                                                                                                                                                                                                                                                                                                                                                                                                                                                                                                                                                                                                                                                                                                                                                                                                                                                                                                                                                                                                                                                                                                                                                                                                                                                                                                                                                                                                                                                                                                                                                                                                                                                                                                                                                                                                                                                                                                                                                                                                                                                                                                                                                                                                                                                            | Ospedale San Bonifacio                                                                                              | Istituto Zooprofilattico Sperimentale delle Venezie                                                                                                                                                                                                                                                       | Adelaide Milani; Alessia Schivo; Alice Fusaro; Ambra Pastori; Annalisa Salvato; Antonia Ricci; Calogero Terregino; Edoardo Giussani; Elisa Palumbo; Erika Giorgia Quaranta; Isabella Monne; Luca Tassoni                                                                                                                                                              |
| EPI_ISL_1464623                                                                                                                                                                                                                                                                                                                                                                                                                                                                                                                                                                                                                                                                                                                                                                                                                                                                                                                                                                                                                                                                                                                                                                                                                                                                                                                                                                                                                                                                                                                                                                                                                                                                                                                                                                                                                                                                                                                                                                                                                                                                                                                                                                                                                                                                                                                                                                                                                                                                                                                                                                                                                                                                                                                                                                                                                                                                                                                                                                                                                                                                                                                                                                                                                                                                                                                                                                                                                                                                                                                                                                                                                                                                                                                                                                                                                                                                                                                                                                                                                                                                                                                                                                                                                                                                                                                                                                        | Ospedale San Camillo De Lellis                                                                                      | INMI Lazzaro Spallanzani IRCCS                                                                                                                                                                                                                                                                            | A De Luca; A Di Caro; B Bartolini; CEM Gruber; E Giombini; F Messina; G Bonfiglio; L Casertano; M Rucca; MR Capobianchi; O Butera; S Venarubea                                                                                                                                                                                                                        |
| EPI_ISL_1524734                                                                                                                                                                                                                                                                                                                                                                                                                                                                                                                                                                                                                                                                                                                                                                                                                                                                                                                                                                                                                                                                                                                                                                                                                                                                                                                                                                                                                                                                                                                                                                                                                                                                                                                                                                                                                                                                                                                                                                                                                                                                                                                                                                                                                                                                                                                                                                                                                                                                                                                                                                                                                                                                                                                                                                                                                                                                                                                                                                                                                                                                                                                                                                                                                                                                                                                                                                                                                                                                                                                                                                                                                                                                                                                                                                                                                                                                                                                                                                                                                                                                                                                                                                                                                                                                                                                                                                        | Ospedale San Camillo De Lellis di Rieti                                                                             | INMI Lazzaro Spallanzani IRCCS                                                                                                                                                                                                                                                                            | A De Luca; A Di Caro; B Bartolini; CEM Gruber; E Giombini; F Messina; F Santini; G Bonfiglio; L Casertano; M Rucca; MR Capobianchi; O Butera; S Venarubea                                                                                                                                                                                                             |
| EPI_ISL_1492567, EPI_ISL_1492571, EPI_ISL_1492582, EPI_ISL_1524742                                                                                                                                                                                                                                                                                                                                                                                                                                                                                                                                                                                                                                                                                                                                                                                                                                                                                                                                                                                                                                                                                                                                                                                                                                                                                                                                                                                                                                                                                                                                                                                                                                                                                                                                                                                                                                                                                                                                                                                                                                                                                                                                                                                                                                                                                                                                                                                                                                                                                                                                                                                                                                                                                                                                                                                                                                                                                                                                                                                                                                                                                                                                                                                                                                                                                                                                                                                                                                                                                                                                                                                                                                                                                                                                                                                                                                                                                                                                                                                                                                                                                                                                                                                                                                                                                                                     | Ospedale San Filippo Neri                                                                                           | INMI Lazzaro Spallanzani IRCCS                                                                                                                                                                                                                                                                            | A Di Caro; A Tamburro; B Bartolini; CEM Gruber; E Giombini; F Messina; F Santini; G Bonfiglio; M Meledandri; M Rucca; ML Schiavone; MR Capobianchi; O Butera                                                                                                                                                                                                          |
| EPI_ISL_1492577, EPI_ISL_1524735 to 1524736, EPI_ISL_1524740 to 1524741                                                                                                                                                                                                                                                                                                                                                                                                                                                                                                                                                                                                                                                                                                                                                                                                                                                                                                                                                                                                                                                                                                                                                                                                                                                                                                                                                                                                                                                                                                                                                                                                                                                                                                                                                                                                                                                                                                                                                                                                                                                                                                                                                                                                                                                                                                                                                                                                                                                                                                                                                                                                                                                                                                                                                                                                                                                                                                                                                                                                                                                                                                                                                                                                                                                                                                                                                                                                                                                                                                                                                                                                                                                                                                                                                                                                                                                                                                                                                                                                                                                                                                                                                                                                                                                                                                                | Ospedale San Giovanni Evangelista                                                                                   | INMI Lazzaro Spallanzani IRCCS                                                                                                                                                                                                                                                                            | A Di Caro; B Bartolini; CEM Gruber; D Cerini; D Di Fusco; E Giombini; F Messina; F Santini; G Bonfiglio; M Rucca; MR Capobianchi; O Butera                                                                                                                                                                                                                            |
| EPI_ISL_1391065 to 1391072                                                                                                                                                                                                                                                                                                                                                                                                                                                                                                                                                                                                                                                                                                                                                                                                                                                                                                                                                                                                                                                                                                                                                                                                                                                                                                                                                                                                                                                                                                                                                                                                                                                                                                                                                                                                                                                                                                                                                                                                                                                                                                                                                                                                                                                                                                                                                                                                                                                                                                                                                                                                                                                                                                                                                                                                                                                                                                                                                                                                                                                                                                                                                                                                                                                                                                                                                                                                                                                                                                                                                                                                                                                                                                                                                                                                                                                                                                                                                                                                                                                                                                                                                                                                                                                                                                                                                             | Ospedale Santa Caterina Novella                                                                                     | Istituto Zooprofilattico Sperimentale della Puglia e della Basilicata                                                                                                                                                                                                                                     | Bianco A.; Bruno A. R.; Capozzi L.; Del Sambro L.; Difato L.; Parisi A.; Simone D.                                                                                                                                                                                                                                                                                    |
| EPI_ISL_1391077 to 1391097                                                                                                                                                                                                                                                                                                                                                                                                                                                                                                                                                                                                                                                                                                                                                                                                                                                                                                                                                                                                                                                                                                                                                                                                                                                                                                                                                                                                                                                                                                                                                                                                                                                                                                                                                                                                                                                                                                                                                                                                                                                                                                                                                                                                                                                                                                                                                                                                                                                                                                                                                                                                                                                                                                                                                                                                                                                                                                                                                                                                                                                                                                                                                                                                                                                                                                                                                                                                                                                                                                                                                                                                                                                                                                                                                                                                                                                                                                                                                                                                                                                                                                                                                                                                                                                                                                                                                             | Ospedale Santissima Annunziata                                                                                      | Istituto Zooprofilattico Sperimentale della Puglia e della Basilicata                                                                                                                                                                                                                                     | Bianco A.; Capozzi L.; Del Sambro L.; Difato L.; Giannico A.; Parisi A.; Ridolfi D.; Simone D.; Tampola M.                                                                                                                                                                                                                                                            |
| EPI_ISL_1391058 to 1391064                                                                                                                                                                                                                                                                                                                                                                                                                                                                                                                                                                                                                                                                                                                                                                                                                                                                                                                                                                                                                                                                                                                                                                                                                                                                                                                                                                                                                                                                                                                                                                                                                                                                                                                                                                                                                                                                                                                                                                                                                                                                                                                                                                                                                                                                                                                                                                                                                                                                                                                                                                                                                                                                                                                                                                                                                                                                                                                                                                                                                                                                                                                                                                                                                                                                                                                                                                                                                                                                                                                                                                                                                                                                                                                                                                                                                                                                                                                                                                                                                                                                                                                                                                                                                                                                                                                                                             | Ospedale Vito Fazzi                                                                                                 | Istituto Zooprofilattico Sperimentale della Puglia e della Basilicata                                                                                                                                                                                                                                     | Bianco A.; Capozzi L.; Del Sambro L.; Difato L.; Lobreglio G.; Parisi A.; Simone D.                                                                                                                                                                                                                                                                                   |
| EPI_ISL_1492569                                                                                                                                                                                                                                                                                                                                                                                                                                                                                                                                                                                                                                                                                                                                                                                                                                                                                                                                                                                                                                                                                                                                                                                                                                                                                                                                                                                                                                                                                                                                                                                                                                                                                                                                                                                                                                                                                                                                                                                                                                                                                                                                                                                                                                                                                                                                                                                                                                                                                                                                                                                                                                                                                                                                                                                                                                                                                                                                                                                                                                                                                                                                                                                                                                                                                                                                                                                                                                                                                                                                                                                                                                                                                                                                                                                                                                                                                                                                                                                                                                                                                                                                                                                                                                                                                                                                                                        | Ospedale dei Castelli                                                                                               | INMI Lazzaro Spallanzani IRCCS                                                                                                                                                                                                                                                                            | A Di Caro; B Bartolini; CEM Gruber; E Giombini; F Messina; F Santini; G Bonfiglio; M Rucca; MR Capobianchi; O Butera                                                                                                                                                                                                                                                  |
| EPI_ISL_1464624 to 1464625, EPI_ISL_1492565, EPI_ISL_1524729 to 1524733                                                                                                                                                                                                                                                                                                                                                                                                                                                                                                                                                                                                                                                                                                                                                                                                                                                                                                                                                                                                                                                                                                                                                                                                                                                                                                                                                                                                                                                                                                                                                                                                                                                                                                                                                                                                                                                                                                                                                                                                                                                                                                                                                                                                                                                                                                                                                                                                                                                                                                                                                                                                                                                                                                                                                                                                                                                                                                                                                                                                                                                                                                                                                                                                                                                                                                                                                                                                                                                                                                                                                                                                                                                                                                                                                                                                                                                                                                                                                                                                                                                                                                                                                                                                                                                                                                                | Ospedale di Genzano - ASL RM 6                                                                                      | INMI Lazzaro Spallanzani IRCCS                                                                                                                                                                                                                                                                            | A Di Caro; B Bartolini; CEM Gruber; E Conti; E Giombini; F Messina; F Santini; G Bonfiglio; G Tramini; M Rucca; MR Capobianchi; O Butera                                                                                                                                                                                                                              |
| EPI_ISL_1391038 to 1391052, EPI_ISL_1497610                                                                                                                                                                                                                                                                                                                                                                                                                                                                                                                                                                                                                                                                                                                                                                                                                                                                                                                                                                                                                                                                                                                                                                                                                                                                                                                                                                                                                                                                                                                                                                                                                                                                                                                                                                                                                                                                                                                                                                                                                                                                                                                                                                                                                                                                                                                                                                                                                                                                                                                                                                                                                                                                                                                                                                                                                                                                                                                                                                                                                                                                                                                                                                                                                                                                                                                                                                                                                                                                                                                                                                                                                                                                                                                                                                                                                                                                                                                                                                                                                                                                                                                                                                                                                                                                                                                                            | Ospedale di Venere                                                                                                  | Istituto Zooprofilattico Sperimentale della Puglia e della Basilicata                                                                                                                                                                                                                                     | Bianco A.; Capozzi L.; Del Sambro L.; Giannico A.; Iacobellis M.; Parisi A.; Ridolfi D.; Simone D.                                                                                                                                                                                                                                                                    |
| EPI_ISL_418256                                                                                                                                                                                                                                                                                                                                                                                                                                                                                                                                                                                                                                                                                                                                                                                                                                                                                                                                                                                                                                                                                                                                                                                                                                                                                                                                                                                                                                                                                                                                                                                                                                                                                                                                                                                                                                                                                                                                                                                                                                                                                                                                                                                                                                                                                                                                                                                                                                                                                                                                                                                                                                                                                                                                                                                                                                                                                                                                                                                                                                                                                                                                                                                                                                                                                                                                                                                                                                                                                                                                                                                                                                                                                                                                                                                                                                                                                                                                                                                                                                                                                                                                                                                                                                                                                                                                                                         | Ospedale "San Liberatore" di Atri                                                                                   | Istituto Zooprofilattico Sperimentale dell'Abruzzo e Molise "G. Caporale"                                                                                                                                                                                                                                 | Ancora M; Cammà C; Curini V; Di Domenico M; Di Pasquale A; Lorusso A; Mangone I; Marcacci M; Puglia I; Rinaldi A; Savini G.                                                                                                                                                                                                                                           |
| EPI_ISL_475124, EPI_ISL_476145 to 476147, EPI_ISL_548248                                                                                                                                                                                                                                                                                                                                                                                                                                                                                                                                                                                                                                                                                                                                                                                                                                                                                                                                                                                                                                                                                                                                                                                                                                                                                                                                                                                                                                                                                                                                                                                                                                                                                                                                                                                                                                                                                                                                                                                                                                                                                                                                                                                                                                                                                                                                                                                                                                                                                                                                                                                                                                                                                                                                                                                                                                                                                                                                                                                                                                                                                                                                                                                                                                                                                                                                                                                                                                                                                                                                                                                                                                                                                                                                                                                                                                                                                                                                                                                                                                                                                                                                                                                                                                                                                                                               | Ostersund klinisk mikrobiologi                                                                                      | The Public Health Agency of Sweden                                                                                                                                                                                                                                                                        | Anna Risberg; Anna-Malin Linde; Karin Tegmark-Wisell; Maria Lind Karlberg; Mattias Haukland; Mia Brytting; Olov Svartstrom; Oskar Karlsson Lindsjo; Petra Edquist; Reza Advani; Sandra Brodressedon; Shamam Muradrasoli                                                                                                                                               |
| EPI_ISL_448786, EPI_ISL_471174, EPI_ISL_481207, EPI_ISL_481209 to 481213, EPI_ISL_493350, EPI_ISL_549042 to 549047, EPI_ISL_549092 to 549111, EPI_ISL_549113 to 549118, EPI_ISL_549126 to 549131, EPI_ISL_549133 to 549142, EPI_ISL_549144 to 549153, EPI_ISL_549155 to 549163, EPI_ISL_590894 to 590897, EPI_ISL_590921 to 590922, EPI_ISL_590931, EPI_ISL_590948, EPI_ISL_590986 to 591006, EPI_ISL_591009, EPI_ISL_591015 to 591017, EPI_ISL_1402932 to 1402936, EPI_ISL_1402938 to 1402940, EPI_ISL_1402942, EPI_ISL_1402944, EPI_ISL_1402947, EPI_ISL_1402949 to 1402950, EPI_ISL_1402956 to 1402967, EPI_ISL_1402969 to 1402970, EPI_ISL_1402972 to 1402973, EPI_ISL_1402976, EPI_ISL_1490192, EPI_ISL_1490194, EPI_ISL_1490266 to 1490267, EPI_ISL_1490381, EPI_ISL_1490383 to 1490384, EPI_ISL_1490390, EPI_ISL_1490408, EPI_ISL_1490410 to 1490411, EPI_ISL_1490414, EPI_ISL_1490416 to 1490418, EPI_ISL_1490492 to 1490493, EPI_ISL_1490498, EPI_ISL_1490500 to 1490501, EPI_ISL_1490517 to 1490519, EPI_ISL_1490523, EPI_ISL_1490556, EPI_ISL_1490570 to 1490571, EPI_ISL_1490580, EPI_ISL_1490587, EPI_ISL_1490595, EPI_ISL_1490612, EPI_ISL_1490614, EPI_ISL_1547555 to 1547560, EPI_ISL_1547562, EPI_ISL_1547565, EPI_ISL_1547570, EPI_ISL_1547573, EPI_ISL_1547593 to 1547595, EPI_ISL_1547634, EPI_ISL_1547646 to 1547648, EPI_ISL_1547665 to 1547666, EPI_ISL_1547668, EPI_ISL_1547671, EPI_ISL_1547673, EPI_ISL_1547675 to 1547676, EPI_ISL_1547682, EPI_ISL_1547684 to 1547687, EPI_ISL_1547689, EPI_ISL_1547692, EPI_ISL_1547705                                                                                                                                                                                                                                                                                                                                                                                                                                                                                                                                                                                                                                                                                                                                                                                                                                                                                                                                                                                                                                                                                                                                                                                                                                                                                                                                                                                                                                                                                                                                                                                                                                                                                                                                                                                                                                                                                                                                                                                                                                                                                                                                                                                                                                                                                                                                                                                                                                                                                                                                                                                                                                                                                                                                                                                                                                   | Norwegian Institute of Public Health, Department of Virology                                                        | Atiya R Ali; Debech Nadia; Engebretsen Serina Beate; Garcia Llorente Ignacio; Hilde Elshaug; Hilde Synnøve Vollan; Hilde Vollan; Jon Bråte; Kamilla Heddeland Instefjord; Karoline Bragstad; Kathrine Stene-Johansen; Marie Paulsen Madsen; Olav Hungnes; Pedersen Benedikte Nevjen; Rasmus Riis Kopperud |                                                                                                                                                                                                                                                                                                                                                                       |
| see above                                                                                                                                                                                                                                                                                                                                                                                                                                                                                                                                                                                                                                                                                                                                                                                                                                                                                                                                                                                                                                                                                                                                                                                                                                                                                                                                                                                                                                                                                                                                                                                                                                                                                                                                                                                                                                                                                                                                                                                                                                                                                                                                                                                                                                                                                                                                                                                                                                                                                                                                                                                                                                                                                                                                                                                                                                                                                                                                                                                                                                                                                                                                                                                                                                                                                                                                                                                                                                                                                                                                                                                                                                                                                                                                                                                                                                                                                                                                                                                                                                                                                                                                                                                                                                                                                                                                                                              | Ostfold Hospital Trust - Kalnes, Centre for Laboratory Medicine, Section for gene technology and infection serology | Norwegian Institute of Public Health, Department of Virology                                                                                                                                                                                                                                              | Hilde Elshaug; Kamilla Heddeland Instefjord; Karoline Bragstad; Kathrine Stene-Johansen; Olav Hungnes                                                                                                                                                                                                                                                                 |
| EPI_ISL_420148                                                                                                                                                                                                                                                                                                                                                                                                                                                                                                                                                                                                                                                                                                                                                                                                                                                                                                                                                                                                                                                                                                                                                                                                                                                                                                                                                                                                                                                                                                                                                                                                                                                                                                                                                                                                                                                                                                                                                                                                                                                                                                                                                                                                                                                                                                                                                                                                                                                                                                                                                                                                                                                                                                                                                                                                                                                                                                                                                                                                                                                                                                                                                                                                                                                                                                                                                                                                                                                                                                                                                                                                                                                                                                                                                                                                                                                                                                                                                                                                                                                                                                                                                                                                                                                                                                                                                                         | Ostfold Hospital Trust -Kalnes Centre for Laboratory Medicine Section for gene technology and infection serology    | Norwegian Institute of Public Health, Department of Virology                                                                                                                                                                                                                                              | Hilde Elshaug; Kamilla Heddeland Instefjord; Karoline Bragstad; Kathrine Stene-Johansen; Olav Hungnes                                                                                                                                                                                                                                                                 |
| EPI_ISL_1534277, EPI_ISL_1534293, EPI_ISL_1534344, EPI_ISL_1534378, EPI_ISL_1534456                                                                                                                                                                                                                                                                                                                                                                                                                                                                                                                                                                                                                                                                                                                                                                                                                                                                                                                                                                                                                                                                                                                                                                                                                                                                                                                                                                                                                                                                                                                                                                                                                                                                                                                                                                                                                                                                                                                                                                                                                                                                                                                                                                                                                                                                                                                                                                                                                                                                                                                                                                                                                                                                                                                                                                                                                                                                                                                                                                                                                                                                                                                                                                                                                                                                                                                                                                                                                                                                                                                                                                                                                                                                                                                                                                                                                                                                                                                                                                                                                                                                                                                                                                                                                                                                                                    | Oudtshoorn Hospital wc OUD                                                                                          | NHLS/UCT                                                                                                                                                                                                                                                                                                  | Arash Iranzadeh; Bruna Galvao; Carolyn Williamson; Deelan Doolabh; Diana Hardie; Emmanuel SJ; Innocent Mudau; Kruger Marais; Lynn Tyers; Marvin Hsiao; Stephen Korsman; Tegally H; de Oliveira T                                                                                                                                                                      |
| EPI_ISL_1416966 to 1416991, EPI_ISL_1443891 to 1443894                                                                                                                                                                                                                                                                                                                                                                                                                                                                                                                                                                                                                                                                                                                                                                                                                                                                                                                                                                                                                                                                                                                                                                                                                                                                                                                                                                                                                                                                                                                                                                                                                                                                                                                                                                                                                                                                                                                                                                                                                                                                                                                                                                                                                                                                                                                                                                                                                                                                                                                                                                                                                                                                                                                                                                                                                                                                                                                                                                                                                                                                                                                                                                                                                                                                                                                                                                                                                                                                                                                                                                                                                                                                                                                                                                                                                                                                                                                                                                                                                                                                                                                                                                                                                                                                                                                                 | Outre mer                                                                                                           | National Reference Center for Viruses of Respiratory Infections, Institut Pasteur, Paris                                                                                                                                                                                                                  | Angela Brisebarre; Anne Holstein; Camille Capel; Christophe Malabat; Claire Felloni; Corinne Maufrais; CéLine Ramanantsoa; Esther Gyde; Etienne Simon-Lorière; Frédéric Lemoine; GréGoire Potiron; Jérôme Guinard; Louise Lefrançois; Marion Barbet; Maud Vanpeene; Méline Bizard; Stéphanie Guymard-Rabenirina; Sylvie Behillili; Sylvie van der Werf; Vincent Enouf |
| EPI_ISL_448449 to 448547, EPI_ISL_448549, EPI_ISL_448551, EPI_ISL_448553, EPI_ISL_448555, EPI_ISL_448557, EPI_ISL_448559, EPI_ISL_448561, EPI_ISL_448564 to 448565, EPI_ISL_448574 to 448575, EPI_ISL_478751 to 478754, EPI_ISL_478756 to 478759, EPI_ISL_478761, EPI_ISL_478763 to 478764, EPI_ISL_478766 to 478777, EPI_ISL_478779 to 478780, EPI_ISL_478782 to 478787, EPI_ISL_478789 to 478792, EPI_ISL_478794 to 478795, EPI_ISL_478797 to 478799, EPI_ISL_478801 to 478803, EPI_ISL_478806 to 478816, EPI_ISL_478819 to 478820, EPI_ISL_478822 to 478824, EPI_ISL_478826 to 478830, EPI_ISL_478832, EPI_ISL_478834 to 478845, EPI_ISL_478847 to 478848, EPI_ISL_478850 to 478852, EPI_ISL_478854 to 478861, EPI_ISL_478863 to 478882, EPI_ISL_478884, EPI_ISL_478886 to 478891, EPI_ISL_478893 to 478895, EPI_ISL_478897 to 478898, EPI_ISL_478900 to 478901, EPI_ISL_478903 to 478909, EPI_ISL_478911 to 478912, EPI_ISL_478914 to 478920, EPI_ISL_478922 to 478924, EPI_ISL_478926 to 478933, EPI_ISL_478935 to 478940, EPI_ISL_478942 to 478943, EPI_ISL_478945 to 478946, EPI_ISL_478948 to 478954, EPI_ISL_478956 to 478957, EPI_ISL_478959 to 478960, EPI_ISL_478962 to 478964, EPI_ISL_478966 to 478969, EPI_ISL_478971 to 478972, EPI_ISL_478974 to 478977, EPI_ISL_478979 to 478980, EPI_ISL_478982 to 478984, EPI_ISL_478986 to 478987, EPI_ISL_478989, EPI_ISL_478991 to 478992, EPI_ISL_478994 to 478995, EPI_ISL_478997 to 478999, EPI_ISL_479001, EPI_ISL_479003 to 479004, EPI_ISL_479006, EPI_ISL_479008, EPI_ISL_479010, EPI_ISL_479012, EPI_ISL_479014, EPI_ISL_479017, EPI_ISL_479020, EPI_ISL_479022, EPI_ISL_479026 to 479031, EPI_ISL_479033 to 479038, EPI_ISL_479041 to 479054, EPI_ISL_479056 to 479062, EPI_ISL_479064, EPI_ISL_479066 to 479069, EPI_ISL_479071 to 479076, EPI_ISL_479078 to 479080, EPI_ISL_479082 to 479087, EPI_ISL_479089 to 479091, EPI_ISL_479093, EPI_ISL_479095 to 479097, EPI_ISL_479099 to 479104, EPI_ISL_479108 to 479114, EPI_ISL_479116 to 479154, EPI_ISL_479156 to 479167, EPI_ISL_479169 to 479174, EPI_ISL_534763 to 535023, EPI_ISL_549329 to 549333, EPI_ISL_549335, EPI_ISL_549337 to 549340, EPI_ISL_549342, EPI_ISL_549345 to 549348, EPI_ISL_549396 to 549459, EPI_ISL_549523 to 549546, EPI_ISL_559753 to 559897, EPI_ISL_559984 to 560053, EPI_ISL_560069 to 560082, EPI_ISL_560305 to 560306, EPI_ISL_572714, EPI_ISL_572723 to 572724, EPI_ISL_572726 to 572728, EPI_ISL_572846, EPI_ISL_572849 to 572850, EPI_ISL_572857 to 572861, EPI_ISL_572869 to 572870, EPI_ISL_572873, EPI_ISL_572891 to 572897, EPI_ISL_572902 to 572903, EPI_ISL_572917 to 572926, EPI_ISL_572933 to 572937, EPI_ISL_572937, EPI_ISL_572952 to 572953, EPI_ISL_572958, EPI_ISL_572960, EPI_ISL_572962 to 573084, EPI_ISL_573154 to 573235, EPI_ISL_573566 to 573651, EPI_ISL_573759, EPI_ISL_573811 to 573855, EPI_ISL_573866 to 573869, EPI_ISL_574257, EPI_ISL_576569 to 576876, EPI_ISL_576920 to 576960, EPI_ISL_577068 to 577095, EPI_ISL_577383 to 577384, EPI_ISL_577401 to 577416, EPI_ISL_584680, EPI_ISL_594467 to 594483, EPI_ISL_594617 to 594644, EPI_ISL_594889 to 594922, EPI_ISL_595326 to 595328, EPI_ISL_595617 to 595798, EPI_ISL_1387213, EPI_ISL_1387216 to 1387219, EPI_ISL_1387221, EPI_ISL_1387225 to 1387227, EPI_ISL_1387229, EPI_ISL_1475543, EPI_ISL_1475547 to 1475550, EPI_ISL_1475552, EPI_ISL_1475555, EPI_ISL_1475557 to 1475560, EPI_ISL_1475562 to 1475563, EPI_ISL_1475567 to 1475568, EPI_ISL_1475572, EPI_ISL_1475574, EPI_ISL_1475576 to 1475577, EPI_ISL_1475580 to 1475581, EPI_ISL_1475583 to 1475587, EPI_ISL_1475589 to 1475591, EPI_ISL_1475593 to 1475595, EPI_ISL_1475601 to 1475607, EPI_ISL_1475609, EPI_ISL_1475611 to 1475613, EPI_ISL_1475615 to 1475621, EPI_ISL_1475623 to 1475633, EPI_ISL_1475635, EPI_ISL_1475638 to 1475642, EPI_ISL_1475644, EPI_ISL_1475647 to 1475649, EPI_ISL_1475658, EPI_ISL_1475661 to 1475662, EPI_ISL_1475664 to 1475679, EPI_ISL_1475683 to 1475684, EPI_ISL_1475686, EPI_ISL_1475689, EPI_ISL_1475692 to 1475694, EPI_ISL_1475697 to 1475701, EPI_ISL_1475703 to 1475704, EPI_ISL_1475706, EPI_ISL_1475708 to 1475712, EPI_ISL_1475716, EPI_ISL_1475718 to 1475721, EPI_ISL_1475723 to 1475731, EPI_ISL_1475733 to 1475734, EPI_ISL_1475737 to 1475738, EPI_ISL_1475740 to 1475744, EPI_ISL_1475746 to 1475747, EPI_ISL_1475749 to 1475750 | COVID-19 Genomics UK (COG-UK) Consortium                                                                            | Alex Mobbs; Amy Trebes; Anita Justice; Catrin Moore; Christophe Fraser; David Bonsall; David Buck; Emma Wise; George Macintyre; Jessica Lynch; John Todd; Mariateresa de Cesare; Matilde Mori; Monique Andersson; Nathan Moore; Nick Cortes; Robert Shaw; Stephen Kidd; Tanya Golubchik; Timothy Peto     |                                                                                                                                                                                                                                                                                                                                                                       |
| see above                                                                                                                                                                                                                                                                                                                                                                                                                                                                                                                                                                                                                                                                                                                                                                                                                                                                                                                                                                                                                                                                                                                                                                                                                                                                                                                                                                                                                                                                                                                                                                                                                                                                                                                                                                                                                                                                                                                                                                                                                                                                                                                                                                                                                                                                                                                                                                                                                                                                                                                                                                                                                                                                                                                                                                                                                                                                                                                                                                                                                                                                                                                                                                                                                                                                                                                                                                                                                                                                                                                                                                                                                                                                                                                                                                                                                                                                                                                                                                                                                                                                                                                                                                                                                                                                                                                                                                              | Oxford Viromics, NDM, University of Oxford; Oxford University Hospitals; Basingstoke and North Hampshire Hospital   | COVID-19 Genomics UK (COG-UK) Consortium                                                                                                                                                                                                                                                                  | Alex Mobbs; Amy Trebes; Anita Justice; Catrin Moore; Christophe Fraser; David Bonsall; David Buck; Emma Wise; George Macintyre; Jessica Lynch; John Todd; Mariateresa de Cesare; Matilde Mori; Monique Andersson; Nathan Moore; Nick Cortes; Robert Shaw; Stephen Kidd; Tanya Golubchik; Timothy Peto                                                                 |
| EPI_ISL_528425 to 528426                                                                                                                                                                                                                                                                                                                                                                                                                                                                                                                                                                                                                                                                                                                                                                                                                                                                                                                                                                                                                                                                                                                                                                                                                                                                                                                                                                                                                                                                                                                                                                                                                                                                                                                                                                                                                                                                                                                                                                                                                                                                                                                                                                                                                                                                                                                                                                                                                                                                                                                                                                                                                                                                                                                                                                                                                                                                                                                                                                                                                                                                                                                                                                                                                                                                                                                                                                                                                                                                                                                                                                                                                                                                                                                                                                                                                                                                                                                                                                                                                                                                                                                                                                                                                                                                                                                                                               | P. D. Hinduja Hospital and Medical Research Centre                                                                  | Institute of Genomics and Integrative Biology - Council of Scientific and Industrial Research                                                                                                                                                                                                             | Akshay Kanakan; Amol Borse; Janani Srinivasa Vasudevan; Jasmina Savak; Jayanthi Shastri; Mahesh Sangar; Manish Pathak; Mayuresh Vishwanathan; Nirjhar Chatterjee; Rajesh Pandey; Ranjeet Maurya; Sachee Agrawal; Shruthi Sachidanandan; Shrutika Pophale; Shweta Kawankar; Subrat Thanapati;                                                                          |

| Suresh Poojari; Swapneil Parikh; Utkarsha Yelve; Vasil Nachan; Vivekanand A                                                                                                                                                                                                                                                                                                                                                                                                                                                                                                                                                                                                                                                                                                                                                                                                                                                                                                                                                                                                                                                                                                                                                                                                                                                                                                                                                                                                                                                                                                                                                                                                                                                                                                                                                                                                                                                                                                                                                                                                                                                                                                                                                                                                                                                                                                                                                                                                                                                                                                                                                                                                                                                                                                                                                                                                                                                                                                                                                                                                                                                                                                                                                                                                                                                                                                                                                                                                                                                                                                                                                                                                                                                |                                                                                                |                                                                                                                        |                                                                                                                                                                                                                                                                                                                                                                                                                                                                                                                                                                                    |                                                                                                                                                                                                                                                                                                                                                                                                                                                     |
|----------------------------------------------------------------------------------------------------------------------------------------------------------------------------------------------------------------------------------------------------------------------------------------------------------------------------------------------------------------------------------------------------------------------------------------------------------------------------------------------------------------------------------------------------------------------------------------------------------------------------------------------------------------------------------------------------------------------------------------------------------------------------------------------------------------------------------------------------------------------------------------------------------------------------------------------------------------------------------------------------------------------------------------------------------------------------------------------------------------------------------------------------------------------------------------------------------------------------------------------------------------------------------------------------------------------------------------------------------------------------------------------------------------------------------------------------------------------------------------------------------------------------------------------------------------------------------------------------------------------------------------------------------------------------------------------------------------------------------------------------------------------------------------------------------------------------------------------------------------------------------------------------------------------------------------------------------------------------------------------------------------------------------------------------------------------------------------------------------------------------------------------------------------------------------------------------------------------------------------------------------------------------------------------------------------------------------------------------------------------------------------------------------------------------------------------------------------------------------------------------------------------------------------------------------------------------------------------------------------------------------------------------------------------------------------------------------------------------------------------------------------------------------------------------------------------------------------------------------------------------------------------------------------------------------------------------------------------------------------------------------------------------------------------------------------------------------------------------------------------------------------------------------------------------------------------------------------------------------------------------------------------------------------------------------------------------------------------------------------------------------------------------------------------------------------------------------------------------------------------------------------------------------------------------------------------------------------------------------------------------------------------------------------------------------------------------------------------------|------------------------------------------------------------------------------------------------|------------------------------------------------------------------------------------------------------------------------|------------------------------------------------------------------------------------------------------------------------------------------------------------------------------------------------------------------------------------------------------------------------------------------------------------------------------------------------------------------------------------------------------------------------------------------------------------------------------------------------------------------------------------------------------------------------------------|-----------------------------------------------------------------------------------------------------------------------------------------------------------------------------------------------------------------------------------------------------------------------------------------------------------------------------------------------------------------------------------------------------------------------------------------------------|
| EPI_ISL_1516276 to 1516295                                                                                                                                                                                                                                                                                                                                                                                                                                                                                                                                                                                                                                                                                                                                                                                                                                                                                                                                                                                                                                                                                                                                                                                                                                                                                                                                                                                                                                                                                                                                                                                                                                                                                                                                                                                                                                                                                                                                                                                                                                                                                                                                                                                                                                                                                                                                                                                                                                                                                                                                                                                                                                                                                                                                                                                                                                                                                                                                                                                                                                                                                                                                                                                                                                                                                                                                                                                                                                                                                                                                                                                                                                                                                                 | PA Department of Health, Bureau of Laboratories                                                | Centers for Disease Control and Prevention Division of Viral Diseases, Pathogen Discovery                              | Alison Laufer Halpin; Ben L. Rambo-Martin; Clinton R. Paden; Dakota Howard; Darlene Wagner; Dave Wentworth; Dhvani Batra; Jasmine Padilla; Justin Lee; Katie Dillon; Krista Queen; Kristen Knipe; Kristine Lacek; Mark Burroughs; Matthew Schmerer; Mili Sheth; Peter Cook; Sam Shepard; Sarah Nobles; Shoshona Le; Suxiang Tong; Vivien Dugan; Yvette Unoarumhi                                                                                                                                                                                                                   |                                                                                                                                                                                                                                                                                                                                                                                                                                                     |
| EPI_ISL_424881 to 424886, EPI_ISL_426432 to 426434, EPI_ISL_447844, EPI_ISL_450802 to 450803, EPI_ISL_576170 to 576171                                                                                                                                                                                                                                                                                                                                                                                                                                                                                                                                                                                                                                                                                                                                                                                                                                                                                                                                                                                                                                                                                                                                                                                                                                                                                                                                                                                                                                                                                                                                                                                                                                                                                                                                                                                                                                                                                                                                                                                                                                                                                                                                                                                                                                                                                                                                                                                                                                                                                                                                                                                                                                                                                                                                                                                                                                                                                                                                                                                                                                                                                                                                                                                                                                                                                                                                                                                                                                                                                                                                                                                                     | PA Department of Health, Bureau of Laboratories                                                | Pathogen Discovery, Respiratory Viruses Branch, Division of Viral Diseases, Centers for Disease Control and Prevention | Alison S. Laufer Halpin; Anna Montmayre; Anna Uehara; Bettina Bankamp; Brian Lynch; Christopher A. Elkins; Clinton R. Paden; Haibin Wang; Jasmine Padilla; Jing Zhang; Justin Lee; Krista Queen; Mary S. Keckler; Peter Cook; Rachel Marine; Suxiang Tong; Yan Li; Ying Tao; Zachary Weiner                                                                                                                                                                                                                                                                                        |                                                                                                                                                                                                                                                                                                                                                                                                                                                     |
| EPI_ISL_458491, EPI_ISL_458786, EPI_ISL_458800, EPI_ISL_458872, EPI_ISL_459039, EPI_ISL_482028, EPI_ISL_487569, EPI_ISL_487593, EPI_ISL_487609, EPI_ISL_488342, EPI_ISL_488409, EPI_ISL_488411, EPI_ISL_492514, EPI_ISL_492594, EPI_ISL_492596, EPI_ISL_539895                                                                                                                                                                                                                                                                                                                                                                                                                                                                                                                                                                                                                                                                                                                                                                                                                                                                                                                                                                                                                                                                                                                                                                                                                                                                                                                                                                                                                                                                                                                                                                                                                                                                                                                                                                                                                                                                                                                                                                                                                                                                                                                                                                                                                                                                                                                                                                                                                                                                                                                                                                                                                                                                                                                                                                                                                                                                                                                                                                                                                                                                                                                                                                                                                                                                                                                                                                                                                                                             | see above                                                                                      | PHE South West Regional Laboratory, National Infection Service                                                         | Wellcome Sanger Institute for the COVID-19 Genomics UK (COG-UK) Consortium                                                                                                                                                                                                                                                                                                                                                                                                                                                                                                         | Barry Vipond; Cordelia Langford; David K. Jackson; Dominic Kwiatkowski; Dr Peter Muir; Ewan Harrison; Hannah Pymont; Ian Johnston; John Sillitoe on behalf of the Wellcome Sanger Institute COVID-19 Surveillance Team; Rich Hopes; Roberto Amato; Sonia Goncalves; Stephanie Hutchings; and Alex Alderton                                                                                                                                          |
| EPI_ISL_439953, EPI_ISL_439957, EPI_ISL_439959 to 439960, EPI_ISL_439962, EPI_ISL_439964 to 439967, EPI_ISL_439969, EPI_ISL_439971 to 439974, EPI_ISL_439976, EPI_ISL_439978 to 439979, EPI_ISL_439981 to 439986, EPI_ISL_439988, EPI_ISL_439992, EPI_ISL_439998, EPI_ISL_440000 to 440002, EPI_ISL_440005 to 440006, EPI_ISL_440008, EPI_ISL_440013, EPI_ISL_440016, EPI_ISL_440018, EPI_ISL_440020 to 440023, EPI_ISL_440026 to 440029, EPI_ISL_440031 to 440033, EPI_ISL_440035 to 440039, EPI_ISL_440042 to 440043, EPI_ISL_440050 to 440052, EPI_ISL_440054, EPI_ISL_440056, EPI_ISL_440058, EPI_ISL_440063, EPI_ISL_440065, EPI_ISL_440068, EPI_ISL_440070 to 440071, EPI_ISL_440081, EPI_ISL_440084, EPI_ISL_440087, EPI_ISL_440091 to 440095, EPI_ISL_440098, EPI_ISL_440100 to 440103, EPI_ISL_440105 to 440106, EPI_ISL_440113 to 440116, EPI_ISL_440118 to 440119, EPI_ISL_440123 to 440124, EPI_ISL_440126 to 440128, EPI_ISL_440130 to 440131, EPI_ISL_440134 to 440137, EPI_ISL_440139 to 440142, EPI_ISL_440145, EPI_ISL_440148 to 440149, EPI_ISL_440151, EPI_ISL_440153 to 440154, EPI_ISL_440156 to 440158, EPI_ISL_440160, EPI_ISL_440162, EPI_ISL_440165, EPI_ISL_440167 to 440168, EPI_ISL_440172, EPI_ISL_440174 to 440175, EPI_ISL_440178, EPI_ISL_440187, EPI_ISL_440189 to 440192, EPI_ISL_440194, EPI_ISL_440196, EPI_ISL_440198 to 440201, EPI_ISL_440204 to 440206, EPI_ISL_440210, EPI_ISL_440212, EPI_ISL_440214 to 440216, EPI_ISL_440218 to 440222, EPI_ISL_440224 to 440225, EPI_ISL_440227 to 440229, EPI_ISL_440232 to 440233, EPI_ISL_440235 to 440236, EPI_ISL_440238, EPI_ISL_440241 to 440243, EPI_ISL_440245, EPI_ISL_440248 to 440253, EPI_ISL_440255 to 440256, EPI_ISL_440262, EPI_ISL_440266, EPI_ISL_440269, EPI_ISL_440272 to 440277, EPI_ISL_440281 to 440292, EPI_ISL_440294, EPI_ISL_440298 to 440299, EPI_ISL_440623 to 440809, EPI_ISL_442624 to 442810, EPI_ISL_443686 to 444021, EPI_ISL_458299 to 458490, EPI_ISL_458492 to 458515, EPI_ISL_458719 to 458785, EPI_ISL_458787 to 458799, EPI_ISL_458801 to 458871, EPI_ISL_458873 to 459038, EPI_ISL_459040 to 459094, EPI_ISL_459725 to 459727, EPI_ISL_467693 to 467719, EPI_ISL_469345 to 469804, EPI_ISL_469806 to 469843, EPI_ISL_469914, EPI_ISL_469916 to 469917, EPI_ISL_470356 to 470357, EPI_ISL_470529 to 470530, EPI_ISL_481763 to 482027, EPI_ISL_482029 to 482831, EPI_ISL_487524, EPI_ISL_487526 to 487528, EPI_ISL_487530 to 487533, EPI_ISL_487535 to 487536, EPI_ISL_487538 to 487539, EPI_ISL_487541 to 487545, EPI_ISL_487547 to 487549, EPI_ISL_487551 to 487555, EPI_ISL_487560 to 487561, EPI_ISL_487563, EPI_ISL_487565 to 487567, EPI_ISL_487570 to 487571, EPI_ISL_487573 to 487577, EPI_ISL_487579 to 487580, EPI_ISL_487583, EPI_ISL_487586 to 487588, EPI_ISL_487590 to 487592, EPI_ISL_487594, EPI_ISL_487596, EPI_ISL_487598 to 487599, EPI_ISL_487601 to 487605, EPI_ISL_487608, EPI_ISL_487610 to 487613, EPI_ISL_487617 to 487620, EPI_ISL_487622 to 487624, EPI_ISL_487629, EPI_ISL_487634, EPI_ISL_488187 to 488341, EPI_ISL_488343 to 488408, EPI_ISL_488410, EPI_ISL_488412 to 488455, EPI_ISL_488877 to 488878, EPI_ISL_489120, EPI_ISL_492185 to 492188, EPI_ISL_492195, EPI_ISL_492197, EPI_ISL_492202 to 492203, EPI_ISL_492211 to 492249, EPI_ISL_492505 to 492513, EPI_ISL_492515 to 492593, EPI_ISL_492595, EPI_ISL_492597 to 492745, EPI_ISL_492764 to 492835, EPI_ISL_495097 to 495121, EPI_ISL_501555 to 501556, EPI_ISL_501558 to 501561, EPI_ISL_501563 to 501599, EPI_ISL_501601, EPI_ISL_501603 to 501612, EPI_ISL_511955 to 511958, EPI_ISL_511960 to 511969, EPI_ISL_511971 to 511981, EPI_ISL_513584, EPI_ISL_524486 to 524492, EPI_ISL_539894, EPI_ISL_539896 | see above                                                                                      | PHE South West Regional Laboratory, National Infection Service                                                         | Wellcome Sanger Institute for the COVID-19 Genomics UK (COG-UK) consortium                                                                                                                                                                                                                                                                                                                                                                                                                                                                                                         | Alex Alderton; Barry Vipond; Cordelia Langford; David K. Jackson; Dominic Kwiatkowski; Dr Peter Muir; Ewan Harrison; Hannah Pymont; Ian Johnston; John Sillitoe on behalf of the Wellcome Sanger Institute COVID-19 Surveillance Team; John Sillitoe on behalf of the Wellcome Sanger Institute COVID-19 Surveillance Team (http://www.sanger.ac.uk/covid-team); Rich Hopes; Roberto Amato; Sonia Goncalves; Stephanie Hutchings; and Alex Alderton |
| EPI_ISL_1396519 to 1396521, EPI_ISL_1396524 to 1396527, EPI_ISL_1396530, EPI_ISL_1404914, EPI_ISL_1404920, EPI_ISL_1424004 to 1424006, EPI_ISL_1465879 to 1465886, EPI_ISL_1465889 to 1465891, EPI_ISL_1465893 to 1465896, EPI_ISL_1516885 to 1516887                                                                                                                                                                                                                                                                                                                                                                                                                                                                                                                                                                                                                                                                                                                                                                                                                                                                                                                                                                                                                                                                                                                                                                                                                                                                                                                                                                                                                                                                                                                                                                                                                                                                                                                                                                                                                                                                                                                                                                                                                                                                                                                                                                                                                                                                                                                                                                                                                                                                                                                                                                                                                                                                                                                                                                                                                                                                                                                                                                                                                                                                                                                                                                                                                                                                                                                                                                                                                                                                      | see above                                                                                      | PHV-FSS                                                                                                                | PHV-FSS                                                                                                                                                                                                                                                                                                                                                                                                                                                                                                                                                                            | Son Nguyen                                                                                                                                                                                                                                                                                                                                                                                                                                          |
| EPI_ISL_1469258                                                                                                                                                                                                                                                                                                                                                                                                                                                                                                                                                                                                                                                                                                                                                                                                                                                                                                                                                                                                                                                                                                                                                                                                                                                                                                                                                                                                                                                                                                                                                                                                                                                                                                                                                                                                                                                                                                                                                                                                                                                                                                                                                                                                                                                                                                                                                                                                                                                                                                                                                                                                                                                                                                                                                                                                                                                                                                                                                                                                                                                                                                                                                                                                                                                                                                                                                                                                                                                                                                                                                                                                                                                                                                            | PKM TEMPURAN KARAWANG                                                                          | National Institute of Health Research and Development                                                                  | Agustiniingsih; Arie Ardiansyah Nugraha; Fauzul Muna; Hana Aparsi Pawestri; Hartanti Dian Ikawati; Herna; Holy Arif Wibowo; Irene Lorinda Indalao; Kartika Dewi Puspa; Kindi Adam; Krisna Nur Andriana Pangesti; Natalie Laurencia Kipuu; Nelly Puspandari; Ni Ketut Susilari; Niko Susanti; Nurika Hariastuti; Reni Herman; Rinin Ramadhany; Subangkit; Tati Febriyanti; Triyani Soekarso; Uily Alfi Nikmah; Vivi Setiawaty.; Yuni Rukmiati                                                                                                                                       |                                                                                                                                                                                                                                                                                                                                                                                                                                                     |
| EPI_ISL_1445090                                                                                                                                                                                                                                                                                                                                                                                                                                                                                                                                                                                                                                                                                                                                                                                                                                                                                                                                                                                                                                                                                                                                                                                                                                                                                                                                                                                                                                                                                                                                                                                                                                                                                                                                                                                                                                                                                                                                                                                                                                                                                                                                                                                                                                                                                                                                                                                                                                                                                                                                                                                                                                                                                                                                                                                                                                                                                                                                                                                                                                                                                                                                                                                                                                                                                                                                                                                                                                                                                                                                                                                                                                                                                                            | POLICLINICA COVID 19 ITAPETININGA                                                              | Instituto Butantan / Mendelics                                                                                         | Antonio Jorge Martins; Bibiana Santos; Claudia Renata dos Santos Barros; David Schlesinger; Debora Botequiu Moretti; Dimas Tadeu Covas; Elaine Cristina Marqueze; Elaine Vieira dos Santos; Erika Freitas; Evandra Strazza Rodrigues; Flavia Aburjalje; José Salvatore Leister Patané; João Paulo Kitajima; Luiz Carlos Junior de Alcantara; Maria Carolina Elias; Marta Giovanetti; Rafael dos Santos Bezerra; Raul Machado Neto; Ricardo Haddad; Rodrigo Tocantins Calado.; Sandra Coccuzzo Sampaio; Simone Kashima; Svetoslav Nanev Slavov; Vagner Fonseca; Vincent Louis Viala |                                                                                                                                                                                                                                                                                                                                                                                                                                                     |
| EPI_ISL_445252                                                                                                                                                                                                                                                                                                                                                                                                                                                                                                                                                                                                                                                                                                                                                                                                                                                                                                                                                                                                                                                                                                                                                                                                                                                                                                                                                                                                                                                                                                                                                                                                                                                                                                                                                                                                                                                                                                                                                                                                                                                                                                                                                                                                                                                                                                                                                                                                                                                                                                                                                                                                                                                                                                                                                                                                                                                                                                                                                                                                                                                                                                                                                                                                                                                                                                                                                                                                                                                                                                                                                                                                                                                                                                             | PONTIFICIA U. CATOLICA FAC. MEDICINA                                                           | Instituto de Salud Publica de Chile                                                                                    | Alejandra Acevedo; Andrés E Castillo; Bárbara Parra; Carolina Tambley; Gabriel Leal; Jaime Lagos; Jorge Fernandez; Loredana Arata; Patricia Bustos; Paz Tapia; Rodrigo Fasce; Winston Andrade                                                                                                                                                                                                                                                                                                                                                                                      |                                                                                                                                                                                                                                                                                                                                                                                                                                                     |
| EPI_ISL_445356                                                                                                                                                                                                                                                                                                                                                                                                                                                                                                                                                                                                                                                                                                                                                                                                                                                                                                                                                                                                                                                                                                                                                                                                                                                                                                                                                                                                                                                                                                                                                                                                                                                                                                                                                                                                                                                                                                                                                                                                                                                                                                                                                                                                                                                                                                                                                                                                                                                                                                                                                                                                                                                                                                                                                                                                                                                                                                                                                                                                                                                                                                                                                                                                                                                                                                                                                                                                                                                                                                                                                                                                                                                                                                             | PONTIFICIA U. CATOLICA SERV. LABORATORIO                                                       | Instituto de Salud Publica de Chile                                                                                    | Alejandra Acevedo; Andrés E Castillo; Bárbara Parra; Carolina Tambley; Gabriel Leal; Jaime Lagos; Jorge Fernandez; Loredana Arata; Patricia Bustos; Paz Tapia; Rodrigo Fasce; Winston Andrade                                                                                                                                                                                                                                                                                                                                                                                      |                                                                                                                                                                                                                                                                                                                                                                                                                                                     |
| EPI_ISL_445265                                                                                                                                                                                                                                                                                                                                                                                                                                                                                                                                                                                                                                                                                                                                                                                                                                                                                                                                                                                                                                                                                                                                                                                                                                                                                                                                                                                                                                                                                                                                                                                                                                                                                                                                                                                                                                                                                                                                                                                                                                                                                                                                                                                                                                                                                                                                                                                                                                                                                                                                                                                                                                                                                                                                                                                                                                                                                                                                                                                                                                                                                                                                                                                                                                                                                                                                                                                                                                                                                                                                                                                                                                                                                                             | PONTIFICIA UNIVERSIDAD CATOLICA DE CHILE                                                       | Instituto de Salud Publica de Chile                                                                                    | Alejandra Acevedo; Andrés E Castillo; Bárbara Parra; Carolina Tambley; Gabriel Leal; Jaime Lagos; Jorge Fernandez; Loredana Arata; Patricia Bustos; Paz Tapia; Rodrigo Fasce; Winston Andrade                                                                                                                                                                                                                                                                                                                                                                                      |                                                                                                                                                                                                                                                                                                                                                                                                                                                     |
| EPI_ISL_1445224                                                                                                                                                                                                                                                                                                                                                                                                                                                                                                                                                                                                                                                                                                                                                                                                                                                                                                                                                                                                                                                                                                                                                                                                                                                                                                                                                                                                                                                                                                                                                                                                                                                                                                                                                                                                                                                                                                                                                                                                                                                                                                                                                                                                                                                                                                                                                                                                                                                                                                                                                                                                                                                                                                                                                                                                                                                                                                                                                                                                                                                                                                                                                                                                                                                                                                                                                                                                                                                                                                                                                                                                                                                                                                            | PPA FENELON GUEDES PEREIRA                                                                     | Instituto Butantan / Mendelics                                                                                         | Antonio Jorge Martins; Bibiana Santos; Claudia Renata dos Santos Barros; David Schlesinger; Debora Botequiu Moretti; Dimas Tadeu Covas; Elaine Cristina Marqueze; Elaine Vieira dos Santos; Erika Freitas; Evandra Strazza Rodrigues; Flavia Aburjalje; José Salvatore Leister Patané; João Paulo Kitajima; Luiz Carlos Junior de Alcantara; Maria Carolina Elias; Marta Giovanetti; Rafael dos Santos Bezerra; Raul Machado Neto; Ricardo Haddad; Rodrigo Tocantins Calado.; Sandra Coccuzzo Sampaio; Simone Kashima; Svetoslav Nanev Slavov; Vagner Fonseca; Vincent Louis Viala |                                                                                                                                                                                                                                                                                                                                                                                                                                                     |
| EPI_ISL_1445207                                                                                                                                                                                                                                                                                                                                                                                                                                                                                                                                                                                                                                                                                                                                                                                                                                                                                                                                                                                                                                                                                                                                                                                                                                                                                                                                                                                                                                                                                                                                                                                                                                                                                                                                                                                                                                                                                                                                                                                                                                                                                                                                                                                                                                                                                                                                                                                                                                                                                                                                                                                                                                                                                                                                                                                                                                                                                                                                                                                                                                                                                                                                                                                                                                                                                                                                                                                                                                                                                                                                                                                                                                                                                                            | PPA MARCIO VALDEVINO BATISTA                                                                   | Instituto Butantan / Mendelics                                                                                         | Antonio Jorge Martins; Bibiana Santos; Claudia Renata dos Santos Barros; David Schlesinger; Debora Botequiu Moretti; Dimas Tadeu Covas; Elaine Cristina Marqueze; Elaine Vieira dos Santos; Erika Freitas; Evandra Strazza Rodrigues; Flavia Aburjalje; José Salvatore Leister Patané; João Paulo Kitajima; Luiz Carlos Junior de Alcantara; Maria Carolina Elias; Marta Giovanetti; Rafael dos Santos Bezerra; Raul Machado Neto; Ricardo Haddad; Rodrigo Tocantins Calado.; Sandra Coccuzzo Sampaio; Simone Kashima; Svetoslav Nanev Slavov; Vagner Fonseca; Vincent Louis Viala |                                                                                                                                                                                                                                                                                                                                                                                                                                                     |
| EPI_ISL_447845                                                                                                                                                                                                                                                                                                                                                                                                                                                                                                                                                                                                                                                                                                                                                                                                                                                                                                                                                                                                                                                                                                                                                                                                                                                                                                                                                                                                                                                                                                                                                                                                                                                                                                                                                                                                                                                                                                                                                                                                                                                                                                                                                                                                                                                                                                                                                                                                                                                                                                                                                                                                                                                                                                                                                                                                                                                                                                                                                                                                                                                                                                                                                                                                                                                                                                                                                                                                                                                                                                                                                                                                                                                                                                             | PR - Biological and Chemical Emergencies Lab Office of Public Health Preparedness and Response | Pathogen Discovery, Respiratory Viruses Branch, Division of Viral Diseases, Centers for Disease Control and Prevention | Alison S. Laufer Halpin; Anna Uehara; Christopher A. Elkins; Clinton R. Paden; Haibin Wang; Jasmine Padilla; Jing Zhang; Justin Lee; Krista Queen; Mary S. Keckler; Suxiang Tong; Yan Li; Ying Tao                                                                                                                                                                                                                                                                                                                                                                                 |                                                                                                                                                                                                                                                                                                                                                                                                                                                     |
| EPI_ISL_1516262 to 1516263, EPI_ISL_1528460 to 1528461                                                                                                                                                                                                                                                                                                                                                                                                                                                                                                                                                                                                                                                                                                                                                                                                                                                                                                                                                                                                                                                                                                                                                                                                                                                                                                                                                                                                                                                                                                                                                                                                                                                                                                                                                                                                                                                                                                                                                                                                                                                                                                                                                                                                                                                                                                                                                                                                                                                                                                                                                                                                                                                                                                                                                                                                                                                                                                                                                                                                                                                                                                                                                                                                                                                                                                                                                                                                                                                                                                                                                                                                                                                                     | PR Public Health Lab                                                                           | Centers for Disease Control and Prevention Division of Viral Diseases, Pathogen Discovery                              | Alison Laufer Halpin; Ben L. Rambo-Martin; Clinton R. Paden; Dakota Howard; Darlene Wagner; Dave Wentworth; Dhvani Batra; Jasmine Padilla; Justin Lee; Katie Dillon; Krista Queen; Kristen Knipe; Kristine Lacek; Mark Burroughs; Matthew Schmerer; Mili Sheth; Peter Cook; Sam Shepard; Sarah Nobles; Shoshona Le; Suxiang Tong; Vivien Dugan; Yvette Unoarumhi                                                                                                                                                                                                                   |                                                                                                                                                                                                                                                                                                                                                                                                                                                     |
| EPI_ISL_1483748                                                                                                                                                                                                                                                                                                                                                                                                                                                                                                                                                                                                                                                                                                                                                                                                                                                                                                                                                                                                                                                                                                                                                                                                                                                                                                                                                                                                                                                                                                                                                                                                                                                                                                                                                                                                                                                                                                                                                                                                                                                                                                                                                                                                                                                                                                                                                                                                                                                                                                                                                                                                                                                                                                                                                                                                                                                                                                                                                                                                                                                                                                                                                                                                                                                                                                                                                                                                                                                                                                                                                                                                                                                                                                            | PRESCRIPTIONS EXTERIEURES                                                                      | CHU Clermont-Ferrand, service de virologie                                                                             | Bisieux Maxime; Combes Patricia; Henquell Cécile; Mirand Audrey                                                                                                                                                                                                                                                                                                                                                                                                                                                                                                                    |                                                                                                                                                                                                                                                                                                                                                                                                                                                     |
| EPI_ISL_1403500 to 1403501, EPI_ISL_1403585 to 1403591, EPI_ISL_1403593 to 1403600, EPI_ISL_1420831, EPI_ISL_1502523, EPI_ISL_1502526 to 1502527                                                                                                                                                                                                                                                                                                                                                                                                                                                                                                                                                                                                                                                                                                                                                                                                                                                                                                                                                                                                                                                                                                                                                                                                                                                                                                                                                                                                                                                                                                                                                                                                                                                                                                                                                                                                                                                                                                                                                                                                                                                                                                                                                                                                                                                                                                                                                                                                                                                                                                                                                                                                                                                                                                                                                                                                                                                                                                                                                                                                                                                                                                                                                                                                                                                                                                                                                                                                                                                                                                                                                                           | PRESIDIO TERRITORIALE CASOLI CASOLI(CHIETI)                                                    | Istituto Zooprofilattico Sperimentale dell'Abruzzo e Molise "G. Caporale"                                              | Ancora M; Calistri P; Cammà C; Caporale M; Curini V; Delli Compagni E; Di Domenico M; Di Lollo Valeria; Di Pasquale A; Lorusso A; Mangone I; Marccoli M; Puglia I; Rinaldi A; Savini G; Scialabba S                                                                                                                                                                                                                                                                                                                                                                                |                                                                                                                                                                                                                                                                                                                                                                                                                                                     |
| EPI_ISL_1445130 to 1445132                                                                                                                                                                                                                                                                                                                                                                                                                                                                                                                                                                                                                                                                                                                                                                                                                                                                                                                                                                                                                                                                                                                                                                                                                                                                                                                                                                                                                                                                                                                                                                                                                                                                                                                                                                                                                                                                                                                                                                                                                                                                                                                                                                                                                                                                                                                                                                                                                                                                                                                                                                                                                                                                                                                                                                                                                                                                                                                                                                                                                                                                                                                                                                                                                                                                                                                                                                                                                                                                                                                                                                                                                                                                                                 | PRONTO ATENDIMENTO DA PONTE DE SAO JOAO                                                        | Instituto Butantan / Mendelics                                                                                         | Antonio Jorge Martins; Bibiana Santos; Claudia Renata dos Santos Barros; David Schlesinger; Debora Botequiu Moretti; Dimas Tadeu Covas; Elaine Cristina Marqueze; Elaine Vieira dos Santos; Erika Freitas; Evandra Strazza Rodrigues; Flavia Aburjalje; José Salvatore Leister Patané; João Paulo Kitajima; Luiz Carlos Junior de Alcantara; Maria Carolina Elias; Marta Giovanetti; Rafael dos Santos Bezerra; Raul Machado Neto; Ricardo Haddad; Rodrigo Tocantins Calado.; Sandra Coccuzzo Sampaio; Simone Kashima; Svetoslav Nanev Slavov; Vagner Fonseca; Vincent Louis Viala |                                                                                                                                                                                                                                                                                                                                                                                                                                                     |
| EPI_ISL_1445185, EPI_ISL_1445187, EPI_ISL_1445193 to 1445194                                                                                                                                                                                                                                                                                                                                                                                                                                                                                                                                                                                                                                                                                                                                                                                                                                                                                                                                                                                                                                                                                                                                                                                                                                                                                                                                                                                                                                                                                                                                                                                                                                                                                                                                                                                                                                                                                                                                                                                                                                                                                                                                                                                                                                                                                                                                                                                                                                                                                                                                                                                                                                                                                                                                                                                                                                                                                                                                                                                                                                                                                                                                                                                                                                                                                                                                                                                                                                                                                                                                                                                                                                                               | PRONTO ATENDIMENTO SAO JOSE                                                                    | Instituto Butantan / Mendelics                                                                                         | Antonio Jorge Martins; Bibiana Santos; Claudia Renata dos Santos Barros; David Schlesinger; Debora Botequiu Moretti; Dimas Tadeu Covas; Elaine Cristina Marqueze; Elaine Vieira dos Santos; Erika Freitas; Evandra Strazza Rodrigues; Flavia Aburjalje; José Salvatore Leister Patané; João Paulo Kitajima; Luiz Carlos Junior de Alcantara; Maria Carolina Elias; Marta Giovanetti; Rafael dos Santos Bezerra; Raul Machado Neto; Ricardo Haddad; Rodrigo Tocantins Calado.; Sandra Coccuzzo Sampaio; Simone Kashima; Svetoslav Nanev Slavov; Vagner Fonseca; Vincent Louis Viala |                                                                                                                                                                                                                                                                                                                                                                                                                                                     |
| EPI_ISL_1445096 to 1445100, EPI_ISL_1445102 to 1445108, EPI_ISL_1445111 to 1445112, EPI_ISL_1445186, EPI_ISL_1445188 to 1445192                                                                                                                                                                                                                                                                                                                                                                                                                                                                                                                                                                                                                                                                                                                                                                                                                                                                                                                                                                                                                                                                                                                                                                                                                                                                                                                                                                                                                                                                                                                                                                                                                                                                                                                                                                                                                                                                                                                                                                                                                                                                                                                                                                                                                                                                                                                                                                                                                                                                                                                                                                                                                                                                                                                                                                                                                                                                                                                                                                                                                                                                                                                                                                                                                                                                                                                                                                                                                                                                                                                                                                                            | PRONTO ATENDIMENTO VILA PADRE ANCHIETA                                                         | Instituto Butantan / Mendelics                                                                                         | Antonio Jorge Martins; Bibiana Santos; Claudia Renata dos Santos Barros; David Schlesinger; Debora Botequiu Moretti; Dimas Tadeu Covas; Elaine Cristina Marqueze; Elaine Vieira dos Santos; Erika Freitas; Evandra Strazza Rodrigues; Flavia Aburjalje; José Salvatore Leister Patané; João Paulo Kitajima; Luiz Carlos Junior de Alcantara; Maria Carolina Elias; Marta Giovanetti; Rafael dos Santos Bezerra; Raul Machado Neto; Ricardo Haddad; Rodrigo Tocantins Calado.; Sandra Coccuzzo Sampaio; Simone Kashima; Svetoslav Nanev Slavov; Vagner Fonseca; Vincent Louis Viala |                                                                                                                                                                                                                                                                                                                                                                                                                                                     |
| EPI_ISL_1445225                                                                                                                                                                                                                                                                                                                                                                                                                                                                                                                                                                                                                                                                                                                                                                                                                                                                                                                                                                                                                                                                                                                                                                                                                                                                                                                                                                                                                                                                                                                                                                                                                                                                                                                                                                                                                                                                                                                                                                                                                                                                                                                                                                                                                                                                                                                                                                                                                                                                                                                                                                                                                                                                                                                                                                                                                                                                                                                                                                                                                                                                                                                                                                                                                                                                                                                                                                                                                                                                                                                                                                                                                                                                                                            | PRONTO SOCORRO DR ANTONIO FLAVIO FRANCA                                                        | Instituto Butantan / Mendelics                                                                                         | Antonio Jorge Martins; Bibiana Santos; Claudia Renata dos Santos Barros; David Schlesinger; Debora Botequiu Moretti; Dimas Tadeu Covas; Elaine Cristina Marqueze; Elaine Vieira dos Santos; Erika Freitas; Evandra Strazza Rodrigues; Flavia Aburjalje; José Salvatore Leister Patané; João Paulo Kitajima; Luiz Carlos Junior de Alcantara; Maria Carolina Elias; Marta Giovanetti; Rafael dos Santos Bezerra; Raul Machado Neto; Ricardo Haddad; Rodrigo Tocantins Calado.; Sandra Coccuzzo Sampaio; Simone Kashima; Svetoslav Nanev Slavov; Vagner Fonseca; Vincent Louis Viala |                                                                                                                                                                                                                                                                                                                                                                                                                                                     |

|                                                                                                                                                                                                                                                                                                                                                                                                                                                                                                                                                                                                                                                                                                                                                                                                                                                                                                                                                                                                                                                                                                                                                                                                                                                                                                                                                                                                                                                                                                                                                                                                                                                                                                                                                                                                                                                                                           |                                                                                                                        |                                                                                                                        |                                                                                                                                                                                                                                                                                                                                                                                                                                                                                                                                                                                                                                                                                                                                                                                                                                                                                                                                             |
|-------------------------------------------------------------------------------------------------------------------------------------------------------------------------------------------------------------------------------------------------------------------------------------------------------------------------------------------------------------------------------------------------------------------------------------------------------------------------------------------------------------------------------------------------------------------------------------------------------------------------------------------------------------------------------------------------------------------------------------------------------------------------------------------------------------------------------------------------------------------------------------------------------------------------------------------------------------------------------------------------------------------------------------------------------------------------------------------------------------------------------------------------------------------------------------------------------------------------------------------------------------------------------------------------------------------------------------------------------------------------------------------------------------------------------------------------------------------------------------------------------------------------------------------------------------------------------------------------------------------------------------------------------------------------------------------------------------------------------------------------------------------------------------------------------------------------------------------------------------------------------------------|------------------------------------------------------------------------------------------------------------------------|------------------------------------------------------------------------------------------------------------------------|---------------------------------------------------------------------------------------------------------------------------------------------------------------------------------------------------------------------------------------------------------------------------------------------------------------------------------------------------------------------------------------------------------------------------------------------------------------------------------------------------------------------------------------------------------------------------------------------------------------------------------------------------------------------------------------------------------------------------------------------------------------------------------------------------------------------------------------------------------------------------------------------------------------------------------------------|
| EPI_ISL_1445174                                                                                                                                                                                                                                                                                                                                                                                                                                                                                                                                                                                                                                                                                                                                                                                                                                                                                                                                                                                                                                                                                                                                                                                                                                                                                                                                                                                                                                                                                                                                                                                                                                                                                                                                                                                                                                                                           | PRONTO SOCORRO MUNICIPAL DE TATUI                                                                                      | Instituto Butantan / Mendelics                                                                                         | Antonio Jorge Martins; Bibiana Santos; Claudia Renata dos Santos Barros; David Schlesinger; Debora Botequiu Moretti; Dimas Tadeu Covas; Elaine Cristina Marqueeze; Elaine Vieira dos Santos; Erika Freitas; Evandra Strazza Rodrigues; Flavia Aburjaile; José Salvatore Leister Patané; João Paulo Kitajima; Luiz Carlos Junior de Alcantara; Maria Carolina Elias; Marta Giovanetti; Rafael dos Santos Bezerra; Raul Machado Neto; Ricardo Haddad; Rodrigo Tocantins Calado.; Sandra Coccuzzo Sampaio; Simone Kashima; Svetoslav Nanev Slavov; Vagner Fonseca; Vincent Louis Viala                                                                                                                                                                                                                                                                                                                                                         |
| EPI_ISL_534322                                                                                                                                                                                                                                                                                                                                                                                                                                                                                                                                                                                                                                                                                                                                                                                                                                                                                                                                                                                                                                                                                                                                                                                                                                                                                                                                                                                                                                                                                                                                                                                                                                                                                                                                                                                                                                                                            | PS Mun Julio Tupy                                                                                                      | Instituto Adolfo Lutz, Interdisciplinary Procedures Center, Strategic Laboratory                                       | Claudia Regina Gonçalves; Claudio Tavares Sacchi; Erica Valessa Ramos Gomes                                                                                                                                                                                                                                                                                                                                                                                                                                                                                                                                                                                                                                                                                                                                                                                                                                                                 |
| EPI_ISL_1533706                                                                                                                                                                                                                                                                                                                                                                                                                                                                                                                                                                                                                                                                                                                                                                                                                                                                                                                                                                                                                                                                                                                                                                                                                                                                                                                                                                                                                                                                                                                                                                                                                                                                                                                                                                                                                                                                           | PS Mun Santana Lauro Ribas Braga                                                                                       | Instituto Adolfo Lutz, Interdisciplinary Procedures Center, Strategic Laboratory                                       | Caio Vinicius Dias Lopes; Claudia Regina Gonçalves; Claudio Tavares Sacchi; Erica Valessa Ramos Gomes; Karoline Rodrigues Campos; Leonardo Jose Tadeu de Araujo                                                                                                                                                                                                                                                                                                                                                                                                                                                                                                                                                                                                                                                                                                                                                                             |
| EPI_ISL_523973                                                                                                                                                                                                                                                                                                                                                                                                                                                                                                                                                                                                                                                                                                                                                                                                                                                                                                                                                                                                                                                                                                                                                                                                                                                                                                                                                                                                                                                                                                                                                                                                                                                                                                                                                                                                                                                                            | PS Municipal Dona Maria Antonieta Ferreira de Barros                                                                   | Instituto Adolfo Lutz, Interdisciplinary Procedures Center, Strategic Laboratory                                       | Claudia Regina Gonçalves; Claudio Tavares Sacchi; Erica Valessa Ramos Gomes                                                                                                                                                                                                                                                                                                                                                                                                                                                                                                                                                                                                                                                                                                                                                                                                                                                                 |
| EPI_ISL_547570                                                                                                                                                                                                                                                                                                                                                                                                                                                                                                                                                                                                                                                                                                                                                                                                                                                                                                                                                                                                                                                                                                                                                                                                                                                                                                                                                                                                                                                                                                                                                                                                                                                                                                                                                                                                                                                                            | PS Municipal Dr Augusto Gomes de Mattos                                                                                | Instituto Adolfo Lutz, Interdisciplinary Procedures Center, Strategic Laboratory                                       | Claudia Regina Gonçalves; Claudio Tavares Sacchi; Erica Valessa Ramos Gomes; Karoline Rodrigues Campos                                                                                                                                                                                                                                                                                                                                                                                                                                                                                                                                                                                                                                                                                                                                                                                                                                      |
| EPI_ISL_515523 to 515524, EPI_ISL_515566, EPI_ISL_524466, EPI_ISL_527866                                                                                                                                                                                                                                                                                                                                                                                                                                                                                                                                                                                                                                                                                                                                                                                                                                                                                                                                                                                                                                                                                                                                                                                                                                                                                                                                                                                                                                                                                                                                                                                                                                                                                                                                                                                                                  | PS Municipal Dr Lauro Ribas Braga                                                                                      | Instituto Adolfo Lutz, Interdisciplinary Procedures Center, Strategic Laboratory                                       | 01246-1301; 355 - Brazil; Av. Dr. Arnaldo; Cerqueira Cesar; Claudia Regina Gonçalves; Claudio Tavares Sacchi; Erica Valessa Ramos Gomes; São Paulo - SP                                                                                                                                                                                                                                                                                                                                                                                                                                                                                                                                                                                                                                                                                                                                                                                     |
| EPI_ISL_524465                                                                                                                                                                                                                                                                                                                                                                                                                                                                                                                                                                                                                                                                                                                                                                                                                                                                                                                                                                                                                                                                                                                                                                                                                                                                                                                                                                                                                                                                                                                                                                                                                                                                                                                                                                                                                                                                            | PS Municipal Dr. Caetano Virgilio Neto                                                                                 | Instituto Adolfo Lutz, Interdisciplinary Procedures Center, Strategic Laboratory                                       | Claudia Regina Gonçalves; Claudio Tavares Sacchi; Erica Valessa Ramos Gomes                                                                                                                                                                                                                                                                                                                                                                                                                                                                                                                                                                                                                                                                                                                                                                                                                                                                 |
| EPI_ISL_534321                                                                                                                                                                                                                                                                                                                                                                                                                                                                                                                                                                                                                                                                                                                                                                                                                                                                                                                                                                                                                                                                                                                                                                                                                                                                                                                                                                                                                                                                                                                                                                                                                                                                                                                                                                                                                                                                            | PS e Maternidade Nair Fonseca Leitao Arantes                                                                           | Instituto Adolfo Lutz, Interdisciplinary Procedures Center, Strategic Laboratory                                       | Claudia Regina Gonçalves; Claudio Tavares Sacchi; Erica Valessa Ramos Gomes                                                                                                                                                                                                                                                                                                                                                                                                                                                                                                                                                                                                                                                                                                                                                                                                                                                                 |
| EPI_ISL_1534367, EPI_ISL_1534425, EPI_ISL_1534432, EPI_ISL_1534434, EPI_ISL_1534445, EPI_ISL_1534458                                                                                                                                                                                                                                                                                                                                                                                                                                                                                                                                                                                                                                                                                                                                                                                                                                                                                                                                                                                                                                                                                                                                                                                                                                                                                                                                                                                                                                                                                                                                                                                                                                                                                                                                                                                      | Pacaltsdorp Clinic wc PAC                                                                                              | NHLS/UCT                                                                                                               | Arash Iranzadeh; Bruna Galvao; Carolyn Williamson; Deelan Doolabh; Diana Hardie; Emmanuel SJ; Innocent Mudau; Kruger Marais; Lynn Tyers; Marvin Hsiao; Stephen Korsman; Tegally H; de Oliveira T                                                                                                                                                                                                                                                                                                                                                                                                                                                                                                                                                                                                                                                                                                                                            |
| EPI_ISL_596500 to 596538, EPI_ISL_596542 to 596565, EPI_ISL_596567 to 596568                                                                                                                                                                                                                                                                                                                                                                                                                                                                                                                                                                                                                                                                                                                                                                                                                                                                                                                                                                                                                                                                                                                                                                                                                                                                                                                                                                                                                                                                                                                                                                                                                                                                                                                                                                                                              | Palestinian Ministry of Health                                                                                         | Molecular Genetics Lab                                                                                                 | Damien Richard; Dana Najjar; Francois Balloux; Hisham Darwish; Husam Sallam; Issa Shtayah; Lucy van Dorp; Mahmoud Ruzayqat; Nouar Qutob; Osama Najjar; Zaidoun Salah                                                                                                                                                                                                                                                                                                                                                                                                                                                                                                                                                                                                                                                                                                                                                                        |
| EPI_ISL_1443215, EPI_ISL_1500211, EPI_ISL_1553248                                                                                                                                                                                                                                                                                                                                                                                                                                                                                                                                                                                                                                                                                                                                                                                                                                                                                                                                                                                                                                                                                                                                                                                                                                                                                                                                                                                                                                                                                                                                                                                                                                                                                                                                                                                                                                         | Pana Community Hospital                                                                                                | Illinois Department of Public Health - Springfield Lab                                                                 | Bryan Sim; Gordon McCall                                                                                                                                                                                                                                                                                                                                                                                                                                                                                                                                                                                                                                                                                                                                                                                                                                                                                                                    |
| EPI_ISL_1384885 to 1385783, EPI_ISL_1470741 to 1472076, EPI_ISL_1542074 to 1542917, EPI_ISL_1542919 to 1543920                                                                                                                                                                                                                                                                                                                                                                                                                                                                                                                                                                                                                                                                                                                                                                                                                                                                                                                                                                                                                                                                                                                                                                                                                                                                                                                                                                                                                                                                                                                                                                                                                                                                                                                                                                            | Pandemic Response Lab - NYC                                                                                            | Pandemic Response Lab, R&D                                                                                             | Cybill del Castillo; Dylan Law; Haiping Hao; Henry Lee; Jon Laurent; Katharine Nelson; Melissa Hopkins; Michael Hammerling; Pradeep Bugga; Shinyoung Clair Kang; Sol Rey; William Ward                                                                                                                                                                                                                                                                                                                                                                                                                                                                                                                                                                                                                                                                                                                                                      |
| EPI_ISL_450785 to 450791, EPI_ISL_455015 to 455016, EPI_ISL_461481 to 461482, EPI_ISL_483829 to 483849                                                                                                                                                                                                                                                                                                                                                                                                                                                                                                                                                                                                                                                                                                                                                                                                                                                                                                                                                                                                                                                                                                                                                                                                                                                                                                                                                                                                                                                                                                                                                                                                                                                                                                                                                                                    | Pandit Deendayal Upadhyay Government Medical College, Rajkot                                                           | Gujarat Biotechnology Research Centre                                                                                  | A M Kadri; Afzal Ansari; Amit Kanani; Anjali Rajwar; Ankit Hinsu; Apurvashin Puvar; Armi Chaudhari; Arti Trivedi; Bhavesh Modi; Bhavya Jindal; Camellia Chakraborty; Chaitanya Joshi; Dinesh Kumar; Gauravi Dhruv; Gaurishankar Shrimali; Harsh Bakshi; Janvi Raval; Komal Patel; Labdhi Pandya; Madhvi Joshi; Maharshi Pandya; Manish Pattani; Monika Gandhi; Neelam Nathani; Neha Rajpara; Nidhi Patel; Nikha Trivedi; Nitin Savaliya; Pinal Trivedi; Pooja P Doshi; Prakash Modi; Pritesh Sabara; R D Dixit; Raghawendra Kumar; Ramesh Pandit; Sejal Antala; Sharmistha Majumdar; Siddhant Kumar; Snehal Bagatharia; Tejas Shah; Umang Mishra; Zarna Patel; Zuber Saiyed                                                                                                                                                                                                                                                                 |
| EPI_ISL_455605                                                                                                                                                                                                                                                                                                                                                                                                                                                                                                                                                                                                                                                                                                                                                                                                                                                                                                                                                                                                                                                                                                                                                                                                                                                                                                                                                                                                                                                                                                                                                                                                                                                                                                                                                                                                                                                                            | Panyananthaphikkhu Chonprathan Medical Center                                                                          | National Institute of Health, Department of medical Sciences, Ministry of Public Health, Thailand                      | Chittaganpitch; Malinee; Okada; Parmen; Phuygun; Paila; Siripaporn; Sittiporn; Sunthareeya; Thanadachakul; Thanutsapa; Waicharoen; Warawan; Wongboot                                                                                                                                                                                                                                                                                                                                                                                                                                                                                                                                                                                                                                                                                                                                                                                        |
| EPI_ISL_434701                                                                                                                                                                                                                                                                                                                                                                                                                                                                                                                                                                                                                                                                                                                                                                                                                                                                                                                                                                                                                                                                                                                                                                                                                                                                                                                                                                                                                                                                                                                                                                                                                                                                                                                                                                                                                                                                            | Panyanunthaphikkhu Chonprathan Medical Center (PCMC)                                                                   | National Institute of Health, Department of medical Sciences, Ministry of Public Health, Thailand                      | Chittaganpitch; Malinee; Okada; Parmen; Phuygun; Paila; Siripaporn; Sittiporn; Sunthareeya; Thanadachakul; Thanutsapa; Waicharoen; Warawan; Wongboot                                                                                                                                                                                                                                                                                                                                                                                                                                                                                                                                                                                                                                                                                                                                                                                        |
| EPI_ISL_421502 to 421503                                                                                                                                                                                                                                                                                                                                                                                                                                                                                                                                                                                                                                                                                                                                                                                                                                                                                                                                                                                                                                                                                                                                                                                                                                                                                                                                                                                                                                                                                                                                                                                                                                                                                                                                                                                                                                                                  | Parc des Dames                                                                                                         | National Reference Center for Viruses of Respiratory Infections, Institut Pasteur, Paris                               | Angela Brisebarre; Etienne Simon-Lorière; Flora Donati; Marion Barbet; Maud Vanpeene; Mélanie Albert; Méline Bizard; Sylvie Behillili; Sylvie van der Werf; Vincent Enouf                                                                                                                                                                                                                                                                                                                                                                                                                                                                                                                                                                                                                                                                                                                                                                   |
| EPI_ISL_430845                                                                                                                                                                                                                                                                                                                                                                                                                                                                                                                                                                                                                                                                                                                                                                                                                                                                                                                                                                                                                                                                                                                                                                                                                                                                                                                                                                                                                                                                                                                                                                                                                                                                                                                                                                                                                                                                            | Passig City General Hospital                                                                                           | Research Institute for Tropical Medicine                                                                               | Bautista; Bruner, K.; C.S.; C.T.; D.L.; Demetria; E.S.; F.G.M.; I.A.P.; Manalo; Medado; Mercado; O.J.T.; Onza; Polotan                                                                                                                                                                                                                                                                                                                                                                                                                                                                                                                                                                                                                                                                                                                                                                                                                      |
| EPI_ISL_1478907, EPI_ISL_1500217                                                                                                                                                                                                                                                                                                                                                                                                                                                                                                                                                                                                                                                                                                                                                                                                                                                                                                                                                                                                                                                                                                                                                                                                                                                                                                                                                                                                                                                                                                                                                                                                                                                                                                                                                                                                                                                          | Passavant Area Hospital                                                                                                | Illinois Department of Public Health - Springfield Lab                                                                 | Bryan Sim; Gordon McCall                                                                                                                                                                                                                                                                                                                                                                                                                                                                                                                                                                                                                                                                                                                                                                                                                                                                                                                    |
| EPI_ISL_448222                                                                                                                                                                                                                                                                                                                                                                                                                                                                                                                                                                                                                                                                                                                                                                                                                                                                                                                                                                                                                                                                                                                                                                                                                                                                                                                                                                                                                                                                                                                                                                                                                                                                                                                                                                                                                                                                            | Pasteur Insitute Ho Chi Minh City                                                                                      | National Key Laboratory of Gene Technology, Institute of Biotechnology, Vietnam Academy of Science and Technology      | Cao Minh Thang; Chu Hoang Ha; Ho Thi Thuong; Hoang Ha; Huynh Thi Kim Loan; Le Tung Lam; Luong Chan Quang; Luu Thuy Tien; Nguyen Hong Trang; Nguyen Thi Ngoc Thao; Nguyen Trung Hieu; Nguyen Vu Thuong; Pham Duy Quang; Phan Trong Lan; Tran Huyen Linh; Truong Nam Hai                                                                                                                                                                                                                                                                                                                                                                                                                                                                                                                                                                                                                                                                      |
| EPI_ISL_442523                                                                                                                                                                                                                                                                                                                                                                                                                                                                                                                                                                                                                                                                                                                                                                                                                                                                                                                                                                                                                                                                                                                                                                                                                                                                                                                                                                                                                                                                                                                                                                                                                                                                                                                                                                                                                                                                            | Pasteur Institute of Iran                                                                                              | Kawsar Human Genetic Research Company                                                                                  | Elmira Khateri; Maraym Firoozi; Maryam Abbasalipour Bashash; Mohammad Ali Khosravi; Razieh Zeinali and Fahimeh Hoseini; Sanaz Mostafavi Jabbari; Sirous Zeinali; Sormeh Pourtavakoli                                                                                                                                                                                                                                                                                                                                                                                                                                                                                                                                                                                                                                                                                                                                                        |
| EPI_ISL_463749                                                                                                                                                                                                                                                                                                                                                                                                                                                                                                                                                                                                                                                                                                                                                                                                                                                                                                                                                                                                                                                                                                                                                                                                                                                                                                                                                                                                                                                                                                                                                                                                                                                                                                                                                                                                                                                                            | Pasteur Institute of Iran                                                                                              | Rapid Response Team                                                                                                    | Afsaneh Zokaee; Ahmad Ghasemi; Ahmad Mahmoudi; Akram Abouie Mehrizi; Ali Maleki; Ali Torabi; Amir Hesam Nemati; Arash Arashkia; Azam Amirian; Azita Eshratkhal mohammadnejad; Elmira Vadaye kheiri; Farideh niknam oskouei; Fatemeh Fotouhi-Chahooki; Hadiseh Shokouhi Targhi; Hajarossadat Ghaderi; Hesam Karimi; Kayhan Azadmanesh; Kazem Baesi; Mahboobeh Rafiq; Mahmood Barati; Mahsa Ghalejoogh; Mahsa Tavakolirad; Mehdi Fazlalipour; Mehdi Rohani; Mehri Habibi; Mina Agharezaei; Mohamad Mahdi Mortazavipour; Mohammad Hassan Pouriayevali; Mohammad Reza Asadi Karam; Mohammad Sadegh Shams Nosrati; Mostafa Salehi-Vaziri; Neda Afzali; Parastoo Yekta Sanati; Saber Esmaili; Sahar Khakifirooz; Sanam Azad-Mazjiri; Seyed Dawood Mousavi Nasab; Seyedeh Atefe Hosseini; Seyedeh Sahar Bathaieian; Seyedeh Zahra Moraveji; Tahereh Mohammadi; Tahmineh Jalali; Zabihollah Shoja; Zahra Ahmadi; Zahra Fereydouni; Zahra Nejatipour |
| EPI_ISL_456163, EPI_ISL_456171, EPI_ISL_456194 to 456195, EPI_ISL_456215, EPI_ISL_456221 to 456224, EPI_ISL_456301, EPI_ISL_582018 to 582021                                                                                                                                                                                                                                                                                                                                                                                                                                                                                                                                                                                                                                                                                                                                                                                                                                                                                                                                                                                                                                                                                                                                                                                                                                                                                                                                                                                                                                                                                                                                                                                                                                                                                                                                              | see above                                                                                                              | PathLab Bay of Plenty                                                                                                  | Institute of Environmental Science and Research (ESR)                                                                                                                                                                                                                                                                                                                                                                                                                                                                                                                                                                                                                                                                                                                                                                                                                                                                                       |
| EPI_ISL_420456, EPI_ISL_470830 to 470875                                                                                                                                                                                                                                                                                                                                                                                                                                                                                                                                                                                                                                                                                                                                                                                                                                                                                                                                                                                                                                                                                                                                                                                                                                                                                                                                                                                                                                                                                                                                                                                                                                                                                                                                                                                                                                                  | PathWest Laboratory Medicine WA                                                                                        | PathWest Laboratory Medicine WA                                                                                        | Avram Levy; Chisha Sikazwe; David Smith and David Speers; Jurissa Lang                                                                                                                                                                                                                                                                                                                                                                                                                                                                                                                                                                                                                                                                                                                                                                                                                                                                      |
| EPI_ISL_512712 to 512765, EPI_ISL_594166 to 594179, EPI_ISL_596677 to 596888, EPI_ISL_605825 to 605877, EPI_ISL_605879 to 605881, EPI_ISL_1384811 to 1384812, EPI_ISL_1416321 to 1416326, EPI_ISL_1448426 to 1448430, EPI_ISL_1508992 to 1508997                                                                                                                                                                                                                                                                                                                                                                                                                                                                                                                                                                                                                                                                                                                                                                                                                                                                                                                                                                                                                                                                                                                                                                                                                                                                                                                                                                                                                                                                                                                                                                                                                                          | see above                                                                                                              | PathWest Laboratory Medicine WA                                                                                        | PathWest Laboratory Medicine WA Microbial Surveillance Unit                                                                                                                                                                                                                                                                                                                                                                                                                                                                                                                                                                                                                                                                                                                                                                                                                                                                                 |
| EPI_ISL_582022 to 582023                                                                                                                                                                                                                                                                                                                                                                                                                                                                                                                                                                                                                                                                                                                                                                                                                                                                                                                                                                                                                                                                                                                                                                                                                                                                                                                                                                                                                                                                                                                                                                                                                                                                                                                                                                                                                                                                  | Pathlab Lakes                                                                                                          | Institute of Environmental Science and Research (ESR)                                                                  | Anja Werno; Antje van der Linden; Arlo Upton; Chris Mansell; David Hammer; Dragana Drinkovic; Erasmus Smit; Gary McAuliffe; Hana Sofia Andersson; Hermes Perez; James Ussher; Jill Sherwood; Jing Wang; Joep de Ligt; Josh Freeman; Julia Howard; Juliet Elvy; Lauren Jelly; Mary DeAlmeida; Matt Blakiston; Matt Storey; Matthew Rogers; Max Bloomfield; Michael Addide; Michelle Balm; Muhammad Faisal; Nikki Freed; Olin Silander; Sally Roberts; Sarah Jefferies; Sharmini Muttaiyah; Susan Morpeth; Susan Taylor; Timothy Blackmore; Vani Sathyendran; Veronica Playle; Virginia Hope; Xiaoyun Ren                                                                                                                                                                                                                                                                                                                                     |
| EPI_ISL_1520168                                                                                                                                                                                                                                                                                                                                                                                                                                                                                                                                                                                                                                                                                                                                                                                                                                                                                                                                                                                                                                                                                                                                                                                                                                                                                                                                                                                                                                                                                                                                                                                                                                                                                                                                                                                                                                                                           | Pathnostics Laboratory                                                                                                 | Illinois Department of Public Health - Chicago Lab                                                                     | Ira Heimler; Vineet K. Dhiman                                                                                                                                                                                                                                                                                                                                                                                                                                                                                                                                                                                                                                                                                                                                                                                                                                                                                                               |
| EPI_ISL_1483210, EPI_ISL_1483213, EPI_ISL_1483221, EPI_ISL_1483230                                                                                                                                                                                                                                                                                                                                                                                                                                                                                                                                                                                                                                                                                                                                                                                                                                                                                                                                                                                                                                                                                                                                                                                                                                                                                                                                                                                                                                                                                                                                                                                                                                                                                                                                                                                                                        | Pathogen Discovery, Respiratory Viruses Branch, Division of Viral Diseases, Centers for Disease Control and Prevention | Pathogen Discovery, Respiratory Viruses Branch, Division of Viral Diseases, Centers for Disease Control and Prevention | Anna Kelleher; Anna Uehara; Brian Lynch; Clinton R. Paden; Haibin Wang; Han Jia Justin Ng; Jing Zhang; Krista Queen; Peter Cook; Suxiang Tong; Yan Li; Ying Tao                                                                                                                                                                                                                                                                                                                                                                                                                                                                                                                                                                                                                                                                                                                                                                             |
| EPI_ISL_480208, EPI_ISL_591347 to 591470, EPI_ISL_591535 to 591539, EPI_ISL_1425572, EPI_ISL_1425601 to 1425604, EPI_ISL_1425614, EPI_ISL_1425616, EPI_ISL_1425620 to 1425695, EPI_ISL_1425697 to 1425698, EPI_ISL_1425700, EPI_ISL_1425703, EPI_ISL_1425706 to 1425711, EPI_ISL_1425713, EPI_ISL_1425717 to 1425718, EPI_ISL_1425721 to 1425724, EPI_ISL_1425740 to 1425747, EPI_ISL_1425777 to 1425858, EPI_ISL_1425861 to 1425878, EPI_ISL_1425882 to 1425918, EPI_ISL_1425938 to 1425962, EPI_ISL_1425964, EPI_ISL_1425968, EPI_ISL_1425974, EPI_ISL_1425977, EPI_ISL_1426045, EPI_ISL_1426048 to 1426141, EPI_ISL_1426158 to 1426265, EPI_ISL_1426371 to 1426567, EPI_ISL_1426589, EPI_ISL_1426594 to 1426631, EPI_ISL_1426633 to 1426635, EPI_ISL_1426638 to 1426642, EPI_ISL_1426645 to 1426647, EPI_ISL_1426659 to 1426660, EPI_ISL_1426662 to 1426691, EPI_ISL_1426662 to 1426991, EPI_ISL_1427105 to 1427153, EPI_ISL_1427166 to 1427339, EPI_ISL_1427506 to 1427533, EPI_ISL_1427553 to 1427567, EPI_ISL_1427587 to 1427601, EPI_ISL_1427611 to 1427653, EPI_ISL_1427656 to 1427671, EPI_ISL_1427673 to 1427682, EPI_ISL_1427687 to 1427688, EPI_ISL_1427694 to 1427715, EPI_ISL_1427733 to 1427783, EPI_ISL_1427830 to 1428173, EPI_ISL_1428175, EPI_ISL_1428177 to 1428182, EPI_ISL_1428184 to 1428187, EPI_ISL_1428189 to 1428233, EPI_ISL_1428236 to 1428250, EPI_ISL_1428260 to 1428287, EPI_ISL_1428314 to 1428568, EPI_ISL_1428570, EPI_ISL_1428611 to 1428631, EPI_ISL_1428636 to 1428639, EPI_ISL_1428641 to 1428643, EPI_ISL_1428645 to 1429340, EPI_ISL_1429342 to 1429555, EPI_ISL_1429557 to 1429571, EPI_ISL_1429574 to 1429578, EPI_ISL_1429590 to 1429591, EPI_ISL_1429593 to 1429632, EPI_ISL_1429634 to 1429638, EPI_ISL_1429640 to 1429715, EPI_ISL_1429722 to 1429757, EPI_ISL_1429759 to 1429763, EPI_ISL_1429765 to 1429788, EPI_ISL_1429790 to 1429915, |                                                                                                                        |                                                                                                                        |                                                                                                                                                                                                                                                                                                                                                                                                                                                                                                                                                                                                                                                                                                                                                                                                                                                                                                                                             |



|                                                                                                                                                                                                                                                                                                                                                                                                                                                                                                                                                                                                                                                                                                                                                                                                                                                                                                                                                                                                                                                                                                                                                                                                                                                                                                                                                                                                                                                                                                                          |                                                                                                            |                                                                                                                      |                                                                                                                                                                                                  |
|--------------------------------------------------------------------------------------------------------------------------------------------------------------------------------------------------------------------------------------------------------------------------------------------------------------------------------------------------------------------------------------------------------------------------------------------------------------------------------------------------------------------------------------------------------------------------------------------------------------------------------------------------------------------------------------------------------------------------------------------------------------------------------------------------------------------------------------------------------------------------------------------------------------------------------------------------------------------------------------------------------------------------------------------------------------------------------------------------------------------------------------------------------------------------------------------------------------------------------------------------------------------------------------------------------------------------------------------------------------------------------------------------------------------------------------------------------------------------------------------------------------------------|------------------------------------------------------------------------------------------------------------|----------------------------------------------------------------------------------------------------------------------|--------------------------------------------------------------------------------------------------------------------------------------------------------------------------------------------------|
| EPI_ISL_451490 to 451516, EPI_ISL_451522 to 451529, EPI_ISL_451532, EPI_ISL_451535, EPI_ISL_451537 to 451539, EPI_ISL_451541, EPI_ISL_451546 to 451547, EPI_ISL_451550 to 451551, EPI_ISL_451556 to 451557, EPI_ISL_451566, EPI_ISL_451568 to 451571, EPI_ISL_451573, EPI_ISL_451575 to 451577, EPI_ISL_451579 to 451580, EPI_ISL_451582, EPI_ISL_451584 to 451586, EPI_ISL_451606 to 451607, EPI_ISL_451613 to 451630, EPI_ISL_451637 to 451640, EPI_ISL_455028 to 455035, EPI_ISL_455038 to 455040, EPI_ISL_455044 to 455047, EPI_ISL_455049, EPI_ISL_455055 to 455062, EPI_ISL_455064, EPI_ISL_455066 to 455067, EPI_ISL_455069 to 455070, EPI_ISL_455095, EPI_ISL_490036, EPI_ISL_490038 to 490039, EPI_ISL_490044, EPI_ISL_490046, EPI_ISL_498748 to 498750, EPI_ISL_498761 to 498762, EPI_ISL_498766 to 498767, EPI_ISL_498776 to 498777, EPI_ISL_498779 to 498780, EPI_ISL_513321 to 513322, EPI_ISL_513324 to 513326, EPI_ISL_513332, EPI_ISL_513338 to 513339, EPI_ISL_513342, EPI_ISL_513345 to 513346, EPI_ISL_513350 to 513351, EPI_ISL_513358 to 513359, EPI_ISL_513369 to 513371, EPI_ISL_513378, EPI_ISL_513380, EPI_ISL_513390 to 513395, EPI_ISL_526115 to 526118, EPI_ISL_526138 to 526141, EPI_ISL_526150 to 526151, EPI_ISL_526156, EPI_ISL_526161 to 526165, EPI_ISL_526689, EPI_ISL_544955, EPI_ISL_544986, EPI_ISL_545006, EPI_ISL_545029, EPI_ISL_545032 to 545033, EPI_ISL_545038, EPI_ISL_545046 to 545047, EPI_ISL_545050, EPI_ISL_591494 to 591501, EPI_ISL_593660 to 593682, EPI_ISL_593770 | Pathology West - NSW Health Pathology                                                                      | NSW Health Pathology - Institute of Clinical Pathology and Medical Research; Westmead Hospital; University of Sydney | CIDM-PH et al.                                                                                                                                                                                   |
| EPI_ISL_1468422 to 1468423                                                                                                                                                                                                                                                                                                                                                                                                                                                                                                                                                                                                                                                                                                                                                                                                                                                                                                                                                                                                                                                                                                                                                                                                                                                                                                                                                                                                                                                                                               | Penitenciaría Compacta de Avandhandava                                                                     | Instituto Adolfo Lutz, Interdisciplinary Procedures Center, Strategic Laboratory                                     | Caio Vinicius Dias Lopes; Claudia Regina Gonçalves; Claudio Tavares Sacchi; Erica Valessa Ramos Gomes; Karoline Rodrigues Campos                                                                 |
| EPI_ISL_1500196                                                                                                                                                                                                                                                                                                                                                                                                                                                                                                                                                                                                                                                                                                                                                                                                                                                                                                                                                                                                                                                                                                                                                                                                                                                                                                                                                                                                                                                                                                          | Peoria County Jail                                                                                         | Illinois Department of Public Health - Springfield Lab                                                               | Bryan Sim; Gordon McCall                                                                                                                                                                         |
| EPI_ISL_455585, EPI_ISL_455608                                                                                                                                                                                                                                                                                                                                                                                                                                                                                                                                                                                                                                                                                                                                                                                                                                                                                                                                                                                                                                                                                                                                                                                                                                                                                                                                                                                                                                                                                           | Phramongkutkiao Hospital                                                                                   | National Institute of Health. Department of medical Sciences, Ministry of Public Health, Thailand                    | Chittaganpitch; Malinee; Okada; Parmmen; Phuygun; Pilailuk; Siripaporn; Sittiporn; Sunthareeya; Thanadachakul; Thanutsapa; Waicharoen; Warawan; Wongboot                                         |
| EPI_ISL_468066                                                                                                                                                                                                                                                                                                                                                                                                                                                                                                                                                                                                                                                                                                                                                                                                                                                                                                                                                                                                                                                                                                                                                                                                                                                                                                                                                                                                                                                                                                           | Physiology, Istanbul Medeniyet University                                                                  | Physiology, Istanbul Medeniyet University                                                                            | B. and Kara, A.; Caykara, B.; Cevher Keskin; H.H.; Pence; Pence, S.; Tekin, S.; Yiyit, N.                                                                                                        |
| EPI_ISL_514750                                                                                                                                                                                                                                                                                                                                                                                                                                                                                                                                                                                                                                                                                                                                                                                                                                                                                                                                                                                                                                                                                                                                                                                                                                                                                                                                                                                                                                                                                                           | Pirogov Russian National Research Medical University                                                       | Pirogov Russian National Research Medical University, Research and Development                                       | Blagodatskikh; K.A.                                                                                                                                                                              |
| EPI_ISL_443308                                                                                                                                                                                                                                                                                                                                                                                                                                                                                                                                                                                                                                                                                                                                                                                                                                                                                                                                                                                                                                                                                                                                                                                                                                                                                                                                                                                                                                                                                                           | Plaisance                                                                                                  | National Reference Center for Viruses of Respiratory Infections, Institut Pasteur, Paris                             | Angela Brisebarre; Etienne Simon-Lorière; Flora Donati; Marion Barbet; Maud Vanpeene; Mélanie Albert; Méline Bizard; Sylvie Behillil; Sylvie van der Werf; Vincent Enouf                         |
| EPI_ISL_1437047, EPI_ISL_1437053, EPI_ISL_1437057, EPI_ISL_1437059, EPI_ISL_1437061, EPI_ISL_1437063, EPI_ISL_1437065, EPI_ISL_1437070, EPI_ISL_1437075, EPI_ISL_1437077, EPI_ISL_1437079, EPI_ISL_1437082, EPI_ISL_1437084, EPI_ISL_1437686, EPI_ISL_1437688, EPI_ISL_1437701, EPI_ISL_1437703 to 1437704, EPI_ISL_1437707, EPI_ISL_1437709, EPI_ISL_1437711, EPI_ISL_1437722, EPI_ISL_1437725, EPI_ISL_1437727, EPI_ISL_1437737, EPI_ISL_1438443, EPI_ISL_1438445, EPI_ISL_1438449, EPI_ISL_1438454, EPI_ISL_1438456, EPI_ISL_1438458, EPI_ISL_1438460, EPI_ISL_1438462, EPI_ISL_1438464, EPI_ISL_1438466, EPI_ISL_1439453, EPI_ISL_1439457, EPI_ISL_1439461, EPI_ISL_1439463, EPI_ISL_1439465, EPI_ISL_1439467, EPI_ISL_1439473, EPI_ISL_1439476 to 1439477, EPI_ISL_1439479, EPI_ISL_1439486, EPI_ISL_1527634 to 1527660, EPI_ISL_1528170 to 1528180, EPI_ISL_1548078 to 1548110, EPI_ISL_1557247 to 1557253, EPI_ISL_1559615 to 1559625                                                                                                                                                                                                                                                                                                                                                                                                                                                                                                                                                                             | Plateforme de testing Namuroise                                                                            | Plateforme de testing Namuroise                                                                                      | ; Céline Maschietto; Degosserie Jonathan; Denis Olivier; Mullier François; Otto Gaetan                                                                                                           |
| EPI_ISL_1443699 to 1443747, EPI_ISL_1498313 to 1498342, EPI_ISL_1498346 to 1498372, EPI_ISL_1498374 to 1498377, EPI_ISL_1549570, EPI_ISL_1549572 to 1549573, EPI_ISL_1549575 to 1549576, EPI_ISL_1549578 to 1549579, EPI_ISL_1549581 to 1549582, EPI_ISL_1549584, EPI_ISL_1549586 to 1549588                                                                                                                                                                                                                                                                                                                                                                                                                                                                                                                                                                                                                                                                                                                                                                                                                                                                                                                                                                                                                                                                                                                                                                                                                             | Platforme de testing Namuroise                                                                             | Plateforme de testing Namuroise                                                                                      | ; Céline Maschietto; Degosserie Jonathan; Denis Olivier; Mullier François; Otto Gaetan                                                                                                           |
| EPI_ISL_1416761, EPI_ISL_1416765 to 1416768, EPI_ISL_1416772 to 1416775, EPI_ISL_1416779, EPI_ISL_1416782 to 1416791, EPI_ISL_1416793 to 1416794, EPI_ISL_1416798 to 1416799, EPI_ISL_1416801, EPI_ISL_1416803, EPI_ISL_1416805 to 1416810, EPI_ISL_1455659, EPI_ISL_1455662, EPI_ISL_1455664, EPI_ISL_1455667 to 1455668, EPI_ISL_1498122, EPI_ISL_1498265 to 1498269, EPI_ISL_1498271 to 1498281, EPI_ISL_1498289, EPI_ISL_1498291, EPI_ISL_1498299, EPI_ISL_1498303, EPI_ISL_1558615 to 1558714                                                                                                                                                                                                                                                                                                                                                                                                                                                                                                                                                                                                                                                                                                                                                                                                                                                                                                                                                                                                                       | Platform BIS UZA/UAntwerpen                                                                                | Labo Klinische Biologie, UZA                                                                                         | Basil Britto Xavier; Christine Lammens; Herman Goossens; Jasmine Coppens; Marie Le Mercier; Veerle Matheeusens                                                                                   |
| EPI_ISL_1469433 to 1469436, EPI_ISL_1469438 to 1469449                                                                                                                                                                                                                                                                                                                                                                                                                                                                                                                                                                                                                                                                                                                                                                                                                                                                                                                                                                                                                                                                                                                                                                                                                                                                                                                                                                                                                                                                   | Platform BIS UZA/UAntwerpen                                                                                | UAntwerp, Laboratory of Medical Microbiology                                                                         | Basil Britto Xavier; Christine Lammens; Herman Goossens; Jasmine Coppens; Marie Le Mercier; Veerle Matheeusens                                                                                   |
| EPI_ISL_522547 to 522548                                                                                                                                                                                                                                                                                                                                                                                                                                                                                                                                                                                                                                                                                                                                                                                                                                                                                                                                                                                                                                                                                                                                                                                                                                                                                                                                                                                                                                                                                                 | Platforme CYROI                                                                                            | UMR PIMIT Université de La Réunion                                                                                   | Camille Lebarbenchon; David Wilkinson; Patrick Mavingui                                                                                                                                          |
| EPI_ISL_1534424                                                                                                                                                                                                                                                                                                                                                                                                                                                                                                                                                                                                                                                                                                                                                                                                                                                                                                                                                                                                                                                                                                                                                                                                                                                                                                                                                                                                                                                                                                          | Plettenberg Bay Clinic wc PLC                                                                              | NHLS/UCT                                                                                                             | Arash Iranzadeh; Bruna Galvao; Carolyn Williamson; Deelan Doolabh; Diana Hardie; Emmanuel SJ; Innocent Mudau; Kruger Marais; Lynn Tyers; Marvin Hsiao; Stephen Korsman; Tegally H; de Oliveira T |
| EPI_ISL_1393717 to 1393719, EPI_ISL_1394281 to 1394282                                                                                                                                                                                                                                                                                                                                                                                                                                                                                                                                                                                                                                                                                                                                                                                                                                                                                                                                                                                                                                                                                                                                                                                                                                                                                                                                                                                                                                                                   | Podkarpackie Centrum Genetyczne OncoGenLab Pracownia Diagnostyki Molekularnej                              | 1. National Institute of Public Health - National Institute of Hygiene; 2. Eurofins Genomics Europe Sequencing GmbH  | ECDC COVID-19 WGS support team; Eurofins Genomics Europe Sequencing Team; Gierczyki Rafa; Sadkowska-Todys Magorzata; Wokowicz Tomasz; Zacharczuk Katarzyna                                       |
| EPI_ISL_536263 to 536264                                                                                                                                                                                                                                                                                                                                                                                                                                                                                                                                                                                                                                                                                                                                                                                                                                                                                                                                                                                                                                                                                                                                                                                                                                                                                                                                                                                                                                                                                                 | Point de Service de Témiscaming-et-Kipawa                                                                  | Laboratoire de santé publique du Québec                                                                              | Guillaume Bourque; Ioannis Ragoussis; Jesse Shapiro; Mark Lathrop and Michel Roger on behalf of the CoVSeQ research group; Sandrine Moreira                                                      |
| EPI_ISL_539850 to 539851                                                                                                                                                                                                                                                                                                                                                                                                                                                                                                                                                                                                                                                                                                                                                                                                                                                                                                                                                                                                                                                                                                                                                                                                                                                                                                                                                                                                                                                                                                 | Pok Oi Hospital                                                                                            | Hong Kong Department of Health                                                                                       | Alan K.L. Tsang; Dominic N.C. Tsang; Edman T.K. Lam; Peter C.W. Yip; Rickjason C.W. Chan                                                                                                         |
| EPI_ISL_1533719                                                                                                                                                                                                                                                                                                                                                                                                                                                                                                                                                                                                                                                                                                                                                                                                                                                                                                                                                                                                                                                                                                                                                                                                                                                                                                                                                                                                                                                                                                          | Policlinica Munic da Est Turística de Holambra                                                             | Instituto Adolfo Lutz, Interdisciplinary Procedures Center, Strategic Laboratory                                     | Caio Vinicius Dias Lopes; Claudia Regina Gonçalves; Claudio Tavares Sacchi; Erica Valessa Ramos Gomes; Karoline Rodrigues Campos; Leonardo Jose Tadeu de Araujo                                  |
| EPI_ISL_1492568                                                                                                                                                                                                                                                                                                                                                                                                                                                                                                                                                                                                                                                                                                                                                                                                                                                                                                                                                                                                                                                                                                                                                                                                                                                                                                                                                                                                                                                                                                          | Policlinico Casilino                                                                                       | INMI Lazzaro Spallanzani IRCCS                                                                                       | A Di Caro; B Bartolini; CEM Gruber; E Giombini; F Messina; F Santini; G Bonfiglio; M Rueca; MR Capobianchi; O Butera                                                                             |
| EPI_ISL_1492575                                                                                                                                                                                                                                                                                                                                                                                                                                                                                                                                                                                                                                                                                                                                                                                                                                                                                                                                                                                                                                                                                                                                                                                                                                                                                                                                                                                                                                                                                                          | Polo Sanitario San Feliciano                                                                               | INMI Lazzaro Spallanzani IRCCS                                                                                       | A Di Caro; B Bartolini; CEM Gruber; E Giombini; F Messina; F Santini; G Bonfiglio; M Rueca; MR Capobianchi; O Butera                                                                             |
| EPI_ISL_1497525, EPI_ISL_1506115, EPI_ISL_1508898 to 1508901                                                                                                                                                                                                                                                                                                                                                                                                                                                                                                                                                                                                                                                                                                                                                                                                                                                                                                                                                                                                                                                                                                                                                                                                                                                                                                                                                                                                                                                             | Pomona Valley Hospital Medical Center                                                                      | Los Angeles County PHL                                                                                               | P. Hemarajata et al.                                                                                                                                                                             |
| EPI_ISL_1469812                                                                                                                                                                                                                                                                                                                                                                                                                                                                                                                                                                                                                                                                                                                                                                                                                                                                                                                                                                                                                                                                                                                                                                                                                                                                                                                                                                                                                                                                                                          | Posto de Saúde Combará do Sul                                                                              | Epiclin                                                                                                              | Ana Paula Muterle; Carolina Comerlato; Eliana Márcia Da Ros Wendland; Fernando Hayashi Sant'Anna; Janira Prichula; Juliana Comerlato                                                             |
| EPI_ISL_1394078 to 1394079, EPI_ISL_1394083 to 1394085, EPI_ISL_1538497, EPI_ISL_1538509, EPI_ISL_1538568 to 1538574, EPI_ISL_1538839, EPI_ISL_1538913 to 1538914, EPI_ISL_1539092, EPI_ISL_1539137                                                                                                                                                                                                                                                                                                                                                                                                                                                                                                                                                                                                                                                                                                                                                                                                                                                                                                                                                                                                                                                                                                                                                                                                                                                                                                                      | Powiatowa Stacja Sanitarno-Epidemiologiczna w Radomiu                                                      | 1. National Institute of Public Health - National Institute of Hygiene; 2. Eurofins Genomics Europe Sequencing GmbH  | ECDC COVID-19 WGS support team; Eurofins Genomics Europe Sequencing Team; Gierczyki Rafa; Sadkowska-Todys Magorzata; Wokowicz Tomasz; Zacharczuk Katarzyna                                       |
| EPI_ISL_1538749 to 1538750, EPI_ISL_1539150                                                                                                                                                                                                                                                                                                                                                                                                                                                                                                                                                                                                                                                                                                                                                                                                                                                                                                                                                                                                                                                                                                                                                                                                                                                                                                                                                                                                                                                                              | Pracownia Biologii Molekularnej Laboratorium Centralne SPZOZ w Krotoszynie                                 | 1. National Institute of Public Health - National Institute of Hygiene; 2. Eurofins Genomics Europe Sequencing GmbH  | ECDC COVID-19 WGS support team; Eurofins Genomics Europe Sequencing Team; Gierczyki Rafa; Sadkowska-Todys Magorzata; Wokowicz Tomasz; Zacharczuk Katarzyna                                       |
| EPI_ISL_1447237, EPI_ISL_1447268                                                                                                                                                                                                                                                                                                                                                                                                                                                                                                                                                                                                                                                                                                                                                                                                                                                                                                                                                                                                                                                                                                                                                                                                                                                                                                                                                                                                                                                                                         | Pracownia Diagnostyki Molekularnej WSSK                                                                    | 1. National Institute of Public Health - National Institute of Hygiene; 2. Eurofins Genomics Europe Sequencing GmbH  | ECDC COVID-19 WGS support team; Eurofins Genomics Europe Sequencing Team; Gierczyki Rafa; Sadkowska-Todys Magorzata; Wokowicz Tomasz; Zacharczuk Katarzyna                                       |
| EPI_ISL_1394105, EPI_ISL_1538865, EPI_ISL_1538926, EPI_ISL_1539200                                                                                                                                                                                                                                                                                                                                                                                                                                                                                                                                                                                                                                                                                                                                                                                                                                                                                                                                                                                                                                                                                                                                                                                                                                                                                                                                                                                                                                                       | Pracownia Genetyki Klinicznej i Patologii Molekularnej 10 WSK                                              | 1. National Institute of Public Health - National Institute of Hygiene; 2. Eurofins Genomics Europe Sequencing GmbH  | ECDC COVID-19 WGS support team; Eurofins Genomics Europe Sequencing Team; Gierczyki Rafa; Sadkowska-Todys Magorzata; Wokowicz Tomasz; Zacharczuk Katarzyna                                       |
| EPI_ISL_1393669 to 1393672, EPI_ISL_1538435, EPI_ISL_1538534, EPI_ISL_1538686, EPI_ISL_1538880 to 1538881, EPI_ISL_1538995 to 1538997, EPI_ISL_1539178                                                                                                                                                                                                                                                                                                                                                                                                                                                                                                                                                                                                                                                                                                                                                                                                                                                                                                                                                                                                                                                                                                                                                                                                                                                                                                                                                                   | Pracownia Mikrobiologiczna Wojewódzki Szpital Specjalistyczny                                              | 1. National Institute of Public Health - National Institute of Hygiene; 2. Eurofins Genomics Europe Sequencing GmbH  | ECDC COVID-19 WGS support team; Eurofins Genomics Europe Sequencing Team; Gierczyki Rafa; Sadkowska-Todys Magorzata; Wokowicz Tomasz; Zacharczuk Katarzyna                                       |
| EPI_ISL_430841, EPI_ISL_434698 to 434699, EPI_ISL_434702 to 434706, EPI_ISL_455606 to 455607                                                                                                                                                                                                                                                                                                                                                                                                                                                                                                                                                                                                                                                                                                                                                                                                                                                                                                                                                                                                                                                                                                                                                                                                                                                                                                                                                                                                                             | Praram 9 Hospital                                                                                          | National Institute of Health. Department of medical Sciences, Ministry of Public Health, Thailand                    | Chittaganpitch; Malinee; Okada; Parmmen; Phuygun; Pilailuk; Siripaporn; Sittiporn; Sunthareeya; Thanadachakul; Thanutsapa; Waicharoen; Warawan; Wongboot                                         |
| EPI_ISL_1436971, EPI_ISL_1436993, EPI_ISL_1437017, EPI_ISL_1437089, EPI_ISL_1437279, EPI_ISL_1438311, EPI_ISL_1441366, EPI_ISL_1442846                                                                                                                                                                                                                                                                                                                                                                                                                                                                                                                                                                                                                                                                                                                                                                                                                                                                                                                                                                                                                                                                                                                                                                                                                                                                                                                                                                                   | Praxisgemeinschaft für Laboratoriumsmedizin Labor Blumenstraße; Praxis Dr. E. Wietschel & Dr. F. Wietschel | Robert Koch Institute                                                                                                |                                                                                                                                                                                                  |
| EPI_ISL_1436976, EPI_ISL_1436987, EPI_ISL_1436989, EPI_ISL_1438479, EPI_ISL_1438546, EPI_ISL_1441486, EPI_ISL_1441631, EPI_ISL_1441636, EPI_ISL_1442831, EPI_ISL_1442833                                                                                                                                                                                                                                                                                                                                                                                                                                                                                                                                                                                                                                                                                                                                                                                                                                                                                                                                                                                                                                                                                                                                                                                                                                                                                                                                                 | Praxisgemeinschaft für Laboratoriumsmedizin Labor Blumenstraße; Praxis Dr. Sel und Dr. Späte               | Robert Koch Institute                                                                                                |                                                                                                                                                                                                  |
| EPI_ISL_418255                                                                                                                                                                                                                                                                                                                                                                                                                                                                                                                                                                                                                                                                                                                                                                                                                                                                                                                                                                                                                                                                                                                                                                                                                                                                                                                                                                                                                                                                                                           | Presidio Ospedaliero "S. Spirito" - PESCARA                                                                | Istituto Zooprofilattico Sperimentale dell'Abruzzo e Molise "G. Caporale"                                            | Cammà C; Di Pasquale A; Lorusso A; Mangone I; Marcacci M; Monaco F; Puglia I; Rinaldi A; Savini G                                                                                                |
| EPI_ISL_529013                                                                                                                                                                                                                                                                                                                                                                                                                                                                                                                                                                                                                                                                                                                                                                                                                                                                                                                                                                                                                                                                                                                                                                                                                                                                                                                                                                                                                                                                                                           | Presidio Ospedaliero "S.Filippo e Nicola"-Avezzano                                                         | Istituto Zooprofilattico Sperimentale dell'Abruzzo e Molise                                                          | Ancora M; Cammà C; Curini V; Di Domenico M; Di Pasquale A; Lorusso A; Mangone I; Marcacci M; Puglia I; Rinaldi A; Savini G.                                                                      |

|                                                                                                                                                                                                    |                                                                    |                                                                                          |                                                                                                                                                                                                                                                                                                                                                                                                                                                                                                                                                                                                                                                                                                                                                                                                                                                                                                                                                                                                                                                                                                                                                                                                                                                                                                                                                                                         |
|----------------------------------------------------------------------------------------------------------------------------------------------------------------------------------------------------|--------------------------------------------------------------------|------------------------------------------------------------------------------------------|-----------------------------------------------------------------------------------------------------------------------------------------------------------------------------------------------------------------------------------------------------------------------------------------------------------------------------------------------------------------------------------------------------------------------------------------------------------------------------------------------------------------------------------------------------------------------------------------------------------------------------------------------------------------------------------------------------------------------------------------------------------------------------------------------------------------------------------------------------------------------------------------------------------------------------------------------------------------------------------------------------------------------------------------------------------------------------------------------------------------------------------------------------------------------------------------------------------------------------------------------------------------------------------------------------------------------------------------------------------------------------------------|
| EPI_ISL_528920 to 528921                                                                                                                                                                           | Presidio Ospedaliero "Santo Spirito"-Pescara                       | "G.Caporale"<br>Istituto Zooprofilattico Sperimentale dell'Abruzzo e Molise "G.Caporale" | Ancora M; Cammà C; Curini V; Di Domenico M; Di Pasquale A; Lorusso A; Mangone I; Marcacci M; Puglia I; Rinaldi A; Savini G.                                                                                                                                                                                                                                                                                                                                                                                                                                                                                                                                                                                                                                                                                                                                                                                                                                                                                                                                                                                                                                                                                                                                                                                                                                                             |
| EPI_ISL_429226 to 429227                                                                                                                                                                           | Presidio Ospedaliero Santo Spirito                                 | Istituto Zooprofilattico Sperimentale dell'Abruzzo e Molise "G.Caporale"                 | Ancora M; Cammà C; Curini V; Di Domenico M; Di Pasquale A; Lorusso A; Mangone I; Marcacci M; Puglia I; Rinaldi A; Savini G                                                                                                                                                                                                                                                                                                                                                                                                                                                                                                                                                                                                                                                                                                                                                                                                                                                                                                                                                                                                                                                                                                                                                                                                                                                              |
| EPI_ISL_1391053 to 1391057                                                                                                                                                                         | Presidio di Brindisi Di Summa - Perrino                            | Istituto Zooprofilattico Sperimentale della Puglia e della Basilicata                    | Bianco A.; Capozzi L.; Del Sambro L.; Difato L.; Giannico A.; Parisi A.; Ridolfi D.; Santoro A.; Simone D.                                                                                                                                                                                                                                                                                                                                                                                                                                                                                                                                                                                                                                                                                                                                                                                                                                                                                                                                                                                                                                                                                                                                                                                                                                                                              |
| EPI_ISL_418258 to 418259                                                                                                                                                                           | Presidio ospedaliero "Santo Spirito"                               | Istituto Zooprofilattico Sperimentale dell'Abruzzo e Molise "G.Caporale"                 | Ancora M; Cammà C; Curini V; Di Domenico M; Di Pasquale A; Lorusso A; Mangone I; Marcacci M; Puglia I; Rinaldi A; Savini G.                                                                                                                                                                                                                                                                                                                                                                                                                                                                                                                                                                                                                                                                                                                                                                                                                                                                                                                                                                                                                                                                                                                                                                                                                                                             |
| EPI_ISL_1528999                                                                                                                                                                                    | Preston Taylor Community Health Center                             | WVU and Marshall University Combined Genomics Core Facilities                            | "James Denvir; Peter Perrotta; Peter Stoilov; Ryan Percifield"; Wesley Kimble                                                                                                                                                                                                                                                                                                                                                                                                                                                                                                                                                                                                                                                                                                                                                                                                                                                                                                                                                                                                                                                                                                                                                                                                                                                                                                           |
| EPI_ISL_436097                                                                                                                                                                                     | Prince Charles Hospital                                            | Public Health Virology Laboratory, Forensics and Scientific Services, Queensland Health  | Alyssa Pyke; Amanda De Jong; Andrew Van Den Hurk; Bixing Huang; Carmel Taylor; David Warrilow; Doris Genge; Elisabeth Gamez; Glen Hewitson; Ian Maxwell Mackay; Inga Sultana and Frederick Moore; Jamie McMahon; Jean Barcelon; Judy Northill; Lisa Leckie; Mitchell Finger; Natalie Simpson; Neelima Nair; Peter Burtonclay; Peter Moore; Sarah Wheatley; Sean Moody; Sonja Hall-Mendelin                                                                                                                                                                                                                                                                                                                                                                                                                                                                                                                                                                                                                                                                                                                                                                                                                                                                                                                                                                                              |
| EPI_ISL_417064, EPI_ISL_539813                                                                                                                                                                     | Prince of Wales Hospital                                           | Hong Kong Department of Health                                                           | Alan K.L. Tsang; Dominic N.C. Tsang; Edman T.K. Lam; Peter C.W. Yip; Rickjason C.W. Chan                                                                                                                                                                                                                                                                                                                                                                                                                                                                                                                                                                                                                                                                                                                                                                                                                                                                                                                                                                                                                                                                                                                                                                                                                                                                                                |
| EPI_ISL_539806 to 539808                                                                                                                                                                           | Princess Margaret Hospital                                         | Hong Kong Department of Health                                                           | Alan K.L. Tsang; Dominic N.C. Tsang; Edman T.K. Lam; Peter C.W. Yip; Rickjason C.W. Chan                                                                                                                                                                                                                                                                                                                                                                                                                                                                                                                                                                                                                                                                                                                                                                                                                                                                                                                                                                                                                                                                                                                                                                                                                                                                                                |
| EPI_ISL_1402423 to 1402428, EPI_ISL_1439578, EPI_ISL_1439580, EPI_ISL_1439584, EPI_ISL_1439589, EPI_ISL_1439593, EPI_ISL_1477044 to 1477046                                                        | Private clinic of Biogen Med, Tashkent, Uzbekistan                 | Center of Genomics and bioinformatics, Bioinformatics laboratory                         | Abdurakhmon N Yusupov; Ibrokhim Y Abdurakhmonov.; Mirzakamol S Ayubov; Mukhammadjon H Mirzakhmedov; Shukhrat E Shermatov; Zabardast T Buriev                                                                                                                                                                                                                                                                                                                                                                                                                                                                                                                                                                                                                                                                                                                                                                                                                                                                                                                                                                                                                                                                                                                                                                                                                                            |
| EPI_ISL_1435362, EPI_ISL_1435379, EPI_ISL_1435382, EPI_ISL_1435388, EPI_ISL_1435400, EPI_ISL_1439454, EPI_ISL_1439458, EPI_ISL_1439460, EPI_ISL_1439485, EPI_ISL_1439489                           | see above                                                          | Procomcure Biotech Germany GmbH                                                          | Robert Koch Institute                                                                                                                                                                                                                                                                                                                                                                                                                                                                                                                                                                                                                                                                                                                                                                                                                                                                                                                                                                                                                                                                                                                                                                                                                                                                                                                                                                   |
| EPI_ISL_477204, EPI_ISL_514432                                                                                                                                                                     | Prof. Massimo Zollo CEINGE TASK-FORCE COVID19 - Regione Campania   | Prof. Massimo Zollo CEINGE TASK-FORCE COVID19 - Regione Campania                         | ; 2; 2* 1 CEINGE Biotechnologie Avanzate; 8* and Massimo Zollo1; Angelo Boccia; Angelo Boccia2; Azienda Sanitaria Ospedali dei Colli; Claudia Tiberio; Claudia Tiberio4; Dae young Kong; Dae young Kong8; Fatemeh asadzadeh; Fatemeh asadzadeh1; Giorgia Borriello; Giorgia Borriello3; Giovanna Fusco; Giovanna Fusco3; Giovanni Paoletta; Giovanni Paoletta1; Giuseppe Castaldo; Giuseppe Castaldo1; Hong Yeoul Kim 7; Hong Yeoul Kim and Massimo Zollo; Indust; Italia 2 Dipartimento di Medicina Molecolare e Biotechnologie Mediche DMMBM University of Naples Federico II; Italia 3 Istituto Zooprofilattico Sperimentale del Mezzogiorno; Italia 4 -U.O.C. di Patologia Clinica Ospedale D. Cotugno; Italia 6 Department of Microbiology; Italy, 5 Università La Sapienza di Roma; Jae Ho Jung; Jae Ho Jung6; Jae Myun Lee; Jae Myun Lee5; Korea 8 Haim bio co.; Korea 7 Department of Surgery; Kyong Seop Yun; Kyong Seop Yun7; Laura Marrone; Laura Marrone1; Lorenzo Chiariotti; Lorenzo Chiariotti1; Ltd; Luigi Atripaldi4; Marika Comegna; Marika Comegna1; Martina Bianchi; Martina Bianchi4; Maurizio Viscardi; Maurizio Viscardi3; Naples; Rino Cerino; Rino Cerino3; Roberto Siciliano; Roberto Siciliano1; Seoul; Sergio Brandi; Sergio Brandi3; Stefano Pascarella; Stefano Pascarella4; Veronica Ferrucci; Veronica Ferrucci1; Yonsei University College of Medicine |
| EPI_ISL_513513 to 513583                                                                                                                                                                           | Programa de Oncovirologia, Instituto Nacional de Câncer            | Programa de Oncovirologia, Instituto Nacional de Câncer                                  | Andrea C. de Melo; Brunna M. Alves; Claudia Cicala; James Arthos; João P.B. Viola; Juliana D. Siqueira; Livia R. Goes; Marcelo A. Soares                                                                                                                                                                                                                                                                                                                                                                                                                                                                                                                                                                                                                                                                                                                                                                                                                                                                                                                                                                                                                                                                                                                                                                                                                                                |
| EPI_ISL_591519 to 591521                                                                                                                                                                           | Programa de Virologia, Facultad de Medicina UC                     | Center for Mathematical Modeling and Center for Genome Regulation, Santiago, Chile       | Allende ML; Ferres M.; Gaete A; Gaggero A; González M; Maass A; Palma R; Travisany D; Urra C; Valiente F; Varas M                                                                                                                                                                                                                                                                                                                                                                                                                                                                                                                                                                                                                                                                                                                                                                                                                                                                                                                                                                                                                                                                                                                                                                                                                                                                       |
| EPI_ISL_574479 to 574492                                                                                                                                                                           | Programme in Emerging Infectious Diseases, Duke-NUS Medical School | National Public Health Laboratory, National Centre for Infectious Diseases               | Adrian Eng Zheng Kang; Danielle E Anderson; Lin Cui; Raymond Tzer Pin Lin; Sophie Octavia; Tze Minn Mak; Zhenyang Zhou                                                                                                                                                                                                                                                                                                                                                                                                                                                                                                                                                                                                                                                                                                                                                                                                                                                                                                                                                                                                                                                                                                                                                                                                                                                                  |
| EPI_ISL_1469564, EPI_ISL_1469602, EPI_ISL_1469615, EPI_ISL_1469621, EPI_ISL_1469657, EPI_ISL_1469712, EPI_ISL_1469825, EPI_ISL_1479129                                                             | see above                                                          | Pronto Atendimento Campo Bom                                                             | Epiclin                                                                                                                                                                                                                                                                                                                                                                                                                                                                                                                                                                                                                                                                                                                                                                                                                                                                                                                                                                                                                                                                                                                                                                                                                                                                                                                                                                                 |
| EPI_ISL_1469721                                                                                                                                                                                    | Pronto Atendimento Cruzeiro do Sul                                 | Epiclin                                                                                  | Ana Paula Muterle; Carolina Comerlato; Eliana Márcia Da Ros Wendland; Fernando Hayashi Sant'Anna; Janira Prichula; Juliana Comerlato                                                                                                                                                                                                                                                                                                                                                                                                                                                                                                                                                                                                                                                                                                                                                                                                                                                                                                                                                                                                                                                                                                                                                                                                                                                    |
| EPI_ISL_527858                                                                                                                                                                                     | Pronto Atendimento Sancta Maggiore Jardim Paulista                 | Instituto Adolfo Lutz, Interdisciplinary Procedures Center, Strategic Laboratory         | Ana Paula Muterle; Carolina Comerlato; Eliana Márcia Da Ros Wendland; Fernando Hayashi Sant'Anna; Janira Prichula; Juliana Comerlato                                                                                                                                                                                                                                                                                                                                                                                                                                                                                                                                                                                                                                                                                                                                                                                                                                                                                                                                                                                                                                                                                                                                                                                                                                                    |
| EPI_ISL_1533703                                                                                                                                                                                    | Pronto Atendimento Sao Jose                                        | Instituto Adolfo Lutz, Interdisciplinary Procedures Center, Strategic Laboratory         | Claudia Regina Gonçalves; Claudio Tavares Sacchi; Erica Valessa Ramos Gomes                                                                                                                                                                                                                                                                                                                                                                                                                                                                                                                                                                                                                                                                                                                                                                                                                                                                                                                                                                                                                                                                                                                                                                                                                                                                                                             |
| EPI_ISL_1533714                                                                                                                                                                                    | Pronto Socorro Dr Osmar Mesquita                                   | Instituto Adolfo Lutz, Interdisciplinary Procedures Center, Strategic Laboratory         | Caio Vinicius Dias Lopes; Claudia Regina Gonçalves; Claudio Tavares Sacchi; Erica Valessa Ramos Gomes; Karoline Rodrigues Campos; Leonardo Jose Tadeu de Araujo                                                                                                                                                                                                                                                                                                                                                                                                                                                                                                                                                                                                                                                                                                                                                                                                                                                                                                                                                                                                                                                                                                                                                                                                                         |
| EPI_ISL_603021                                                                                                                                                                                     | Pronto Socorro Dr. Conrado Cesarino Nuvolini                       | Instituto Adolfo Lutz, Interdisciplinary Procedures Center, Strategic Laboratory         | Caio Vinicius Dias Lopes; Claudia Regina Gonçalves; Claudio Tavares Sacchi; Erica Valessa Ramos Gomes; Karoline Rodrigues Campos; Leonardo Jose Tadeu de Araujo                                                                                                                                                                                                                                                                                                                                                                                                                                                                                                                                                                                                                                                                                                                                                                                                                                                                                                                                                                                                                                                                                                                                                                                                                         |
| EPI_ISL_471556                                                                                                                                                                                     | Pronto Socorro Jose Ibrahim                                        | Instituto Adolfo Lutz, Interdisciplinary Procedures Center, Strategic Laboratory         | Claudia Regina Gonçalves; Claudio Tavares Sacchi; Erica Valessa Ramos Gomes                                                                                                                                                                                                                                                                                                                                                                                                                                                                                                                                                                                                                                                                                                                                                                                                                                                                                                                                                                                                                                                                                                                                                                                                                                                                                                             |
| EPI_ISL_527867                                                                                                                                                                                     | Pronto Socorro Municipal - Balneario São José                      | Instituto Adolfo Lutz, Interdisciplinary Procedures Center, Strategic Laboratory         | Claudia Regina Gonçalves; Claudio Tavares Sacchi; Erica Valessa Ramos Gomes                                                                                                                                                                                                                                                                                                                                                                                                                                                                                                                                                                                                                                                                                                                                                                                                                                                                                                                                                                                                                                                                                                                                                                                                                                                                                                             |
| EPI_ISL_523961                                                                                                                                                                                     | Pronto Socorro Municipal 21 de Junho                               | Instituto Adolfo Lutz, Interdisciplinary Procedures Center, Strategic Laboratory         | Claudia Regina Gonçalves; Claudio Tavares Sacchi; Erica Valessa Ramos Gomes                                                                                                                                                                                                                                                                                                                                                                                                                                                                                                                                                                                                                                                                                                                                                                                                                                                                                                                                                                                                                                                                                                                                                                                                                                                                                                             |
| EPI_ISL_515529                                                                                                                                                                                     | Pronto Socorro Municipal Julio Tupy                                | Instituto Adolfo Lutz, Interdisciplinary Procedures Center, Strategic Laboratory         | Claudia Regina Gonçalves; Claudio Tavares Sacchi; Erica Valessa Ramos Gomes                                                                                                                                                                                                                                                                                                                                                                                                                                                                                                                                                                                                                                                                                                                                                                                                                                                                                                                                                                                                                                                                                                                                                                                                                                                                                                             |
| EPI_ISL_515554, EPI_ISL_523958 to 523959                                                                                                                                                           | Pronto Socorro Municipal de Perus                                  | Instituto Adolfo Lutz, Interdisciplinary Procedures Center, Strategic Laboratory         | Claudia Regina Gonçalves; Claudio Tavares Sacchi; Erica Valessa Ramos Gomes                                                                                                                                                                                                                                                                                                                                                                                                                                                                                                                                                                                                                                                                                                                                                                                                                                                                                                                                                                                                                                                                                                                                                                                                                                                                                                             |
| EPI_ISL_491475                                                                                                                                                                                     | Protacio Hospital                                                  | Research Institute for Tropical Medicine                                                 | Catalino Demetria; Criselda Bautista; Daria Manalo; Edelwisa Mercado; Francisco Gerardo Polotan; Inez Andrea Medado; Kirstyn Brunker; Ma. Angelica Tujan; Othoniel Jan Onza                                                                                                                                                                                                                                                                                                                                                                                                                                                                                                                                                                                                                                                                                                                                                                                                                                                                                                                                                                                                                                                                                                                                                                                                             |
| EPI_ISL_582134                                                                                                                                                                                     | Protzer Lab                                                        | Protzer Lab                                                                              | Alexander Karollus; Andrea Theumer; Dieter Hoffmann; Eva Schulte; Julien Gagneur; Max von Kleist; Oliver Drechsel; Ulrike Protzer                                                                                                                                                                                                                                                                                                                                                                                                                                                                                                                                                                                                                                                                                                                                                                                                                                                                                                                                                                                                                                                                                                                                                                                                                                                       |
| EPI_ISL_404895                                                                                                                                                                                     | Providence Regional Medical Center                                 | Division of Viral Diseases, Centers for Disease Control and Prevention                   | C.R.; Gerber; Li, Y.; Lindstrom, S.; Lu, X.; Paden; Queen, K.; S.I.; Tao, Y.; Tong, S.; Zhang, J.                                                                                                                                                                                                                                                                                                                                                                                                                                                                                                                                                                                                                                                                                                                                                                                                                                                                                                                                                                                                                                                                                                                                                                                                                                                                                       |
| EPI_ISL_482292 to 482467, EPI_ISL_486830 to 486831                                                                                                                                                 | Providence St. Joseph Health Molecular Genomics Laboratory         | Providence St. Joseph Health Molecular Genomics Laboratory                               | Alexa K Dowdell; Brian D Piening; Carlo B Bifulco; Fred L Robinson; Mary Campbell                                                                                                                                                                                                                                                                                                                                                                                                                                                                                                                                                                                                                                                                                                                                                                                                                                                                                                                                                                                                                                                                                                                                                                                                                                                                                                       |
| EPI_ISL_538513                                                                                                                                                                                     | Provincial Health Laboratory Bekasi West Java                      | National Institute of Health Research and Development                                    | AA; HA; HD; Ikawati; KD; KNA; Nugraha; Paisal; Pangesti; Pawestri; Puspa; Setiawaty, V.; Soekarso; Subangkit; T                                                                                                                                                                                                                                                                                                                                                                                                                                                                                                                                                                                                                                                                                                                                                                                                                                                                                                                                                                                                                                                                                                                                                                                                                                                                         |
| EPI_ISL_1401567 to 1401722, EPI_ISL_1520181 to 1520329, EPI_ISL_1520331 to 1520365, EPI_ISL_1524015 to 1524329, EPI_ISL_1525000 to 1525001, EPI_ISL_1526607 to 1526777, EPI_ISL_1543921 to 1543923 | see above                                                          | Public Health Authority of the Slovak Republic                                           | Anna Giová; Diana Rusáková; Jaroslav Budiš; Miroslav Böhmer; Tatiana Sedláková; Tomáš Szemes                                                                                                                                                                                                                                                                                                                                                                                                                                                                                                                                                                                                                                                                                                                                                                                                                                                                                                                                                                                                                                                                                                                                                                                                                                                                                            |
| EPI_ISL_572329                                                                                                                                                                                     | Public Health Authority of the Slovak Republic, Bratislava         | Faculty of Natural Sciences, Comenius University in Bratislava                           | Boris Klempa; Broa Brejová; Dominika Friová; Edita Starová; Elena Tichá; Jozef Nosek; Juraj Kopáek; Kristína Boršová; Martina Liková; Martina Neboháová; Monika Sláviková; Sabina Fumaová Havlíková; Tomáš Vlna; Viktória Hodorová; Viktória abanová; ubomira Lukáiková                                                                                                                                                                                                                                                                                                                                                                                                                                                                                                                                                                                                                                                                                                                                                                                                                                                                                                                                                                                                                                                                                                                 |



|                                                                                                                                                                                                                                                                                                                                                                                                                                                                                                                                                                                                                                                                                                                                                                                                                                                                                                                                                                                                                                                                                                                                                                                                                                                                                                                                                                                                                                                                                                                                                                                                                                                                                                                                                                                                                                                                                                                                                                                                                                                                                                                                                                                                                                                                                                                                                                                                                                                                                                                                                                                                                                                                                                                                                                                                                                                                                                                                                                                                                                                                                                                                                                                                                                                                                                                                                                                                                                                                                                                                                                                                                                                                                                                                                                                                        |                                                                                                                                  |                                                                                                                                                                                                                                                                                                                                                                                                                                                                                                                                                          |                                                                                                                                                                                                                                                                                                                                                                                                                                    |
|--------------------------------------------------------------------------------------------------------------------------------------------------------------------------------------------------------------------------------------------------------------------------------------------------------------------------------------------------------------------------------------------------------------------------------------------------------------------------------------------------------------------------------------------------------------------------------------------------------------------------------------------------------------------------------------------------------------------------------------------------------------------------------------------------------------------------------------------------------------------------------------------------------------------------------------------------------------------------------------------------------------------------------------------------------------------------------------------------------------------------------------------------------------------------------------------------------------------------------------------------------------------------------------------------------------------------------------------------------------------------------------------------------------------------------------------------------------------------------------------------------------------------------------------------------------------------------------------------------------------------------------------------------------------------------------------------------------------------------------------------------------------------------------------------------------------------------------------------------------------------------------------------------------------------------------------------------------------------------------------------------------------------------------------------------------------------------------------------------------------------------------------------------------------------------------------------------------------------------------------------------------------------------------------------------------------------------------------------------------------------------------------------------------------------------------------------------------------------------------------------------------------------------------------------------------------------------------------------------------------------------------------------------------------------------------------------------------------------------------------------------------------------------------------------------------------------------------------------------------------------------------------------------------------------------------------------------------------------------------------------------------------------------------------------------------------------------------------------------------------------------------------------------------------------------------------------------------------------------------------------------------------------------------------------------------------------------------------------------------------------------------------------------------------------------------------------------------------------------------------------------------------------------------------------------------------------------------------------------------------------------------------------------------------------------------------------------------------------------------------------------------------------------------------------------|----------------------------------------------------------------------------------------------------------------------------------|----------------------------------------------------------------------------------------------------------------------------------------------------------------------------------------------------------------------------------------------------------------------------------------------------------------------------------------------------------------------------------------------------------------------------------------------------------------------------------------------------------------------------------------------------------|------------------------------------------------------------------------------------------------------------------------------------------------------------------------------------------------------------------------------------------------------------------------------------------------------------------------------------------------------------------------------------------------------------------------------------|
| EPI_ISL_429815, EPI_ISL_469224 to 469240, EPI_ISL_482479                                                                                                                                                                                                                                                                                                                                                                                                                                                                                                                                                                                                                                                                                                                                                                                                                                                                                                                                                                                                                                                                                                                                                                                                                                                                                                                                                                                                                                                                                                                                                                                                                                                                                                                                                                                                                                                                                                                                                                                                                                                                                                                                                                                                                                                                                                                                                                                                                                                                                                                                                                                                                                                                                                                                                                                                                                                                                                                                                                                                                                                                                                                                                                                                                                                                                                                                                                                                                                                                                                                                                                                                                                                                                                                                               | Public Health Laboratory                                                                                                         | National Microbiology Laboratory                                                                                                                                                                                                                                                                                                                                                                                                                                                                                                                         | Adel Malek; Anna Majer; Elsie Grudeski; Gary Van Domselaar; George Zahariadis; Grace Seo; Jennifer Tanner; Krystyn Burak; Laura Gilbert; Matthew Gilmour; Morag Graham; Natalie Knox; Nathalie Bastien; Philip Mabon; Rhiannon Huzarewicz; Robert Needle; Russell Mandes; Shari Tyson; Timothy Booth; Yan Li; Yang Yu                                                                                                              |
| EPI_ISL_416521                                                                                                                                                                                                                                                                                                                                                                                                                                                                                                                                                                                                                                                                                                                                                                                                                                                                                                                                                                                                                                                                                                                                                                                                                                                                                                                                                                                                                                                                                                                                                                                                                                                                                                                                                                                                                                                                                                                                                                                                                                                                                                                                                                                                                                                                                                                                                                                                                                                                                                                                                                                                                                                                                                                                                                                                                                                                                                                                                                                                                                                                                                                                                                                                                                                                                                                                                                                                                                                                                                                                                                                                                                                                                                                                                                                         | Public Health Laboratory                                                                                                         | Public Health Laboratory, Saudi CDC                                                                                                                                                                                                                                                                                                                                                                                                                                                                                                                      | A; Albarrag                                                                                                                                                                                                                                                                                                                                                                                                                        |
| EPI_ISL_613463 to 613540                                                                                                                                                                                                                                                                                                                                                                                                                                                                                                                                                                                                                                                                                                                                                                                                                                                                                                                                                                                                                                                                                                                                                                                                                                                                                                                                                                                                                                                                                                                                                                                                                                                                                                                                                                                                                                                                                                                                                                                                                                                                                                                                                                                                                                                                                                                                                                                                                                                                                                                                                                                                                                                                                                                                                                                                                                                                                                                                                                                                                                                                                                                                                                                                                                                                                                                                                                                                                                                                                                                                                                                                                                                                                                                                                                               | Public Health Laboratory - Infectious Disease Lab, Minnesota Department of Health Infectious Disease Laboratory Submission Group | Minnesota Department of Health, Public Health Laboratory                                                                                                                                                                                                                                                                                                                                                                                                                                                                                                 | Garfin, J.; Lorentz, A.; Plumb, M.; Wang, X.                                                                                                                                                                                                                                                                                                                                                                                       |
| EPI_ISL_1483026                                                                                                                                                                                                                                                                                                                                                                                                                                                                                                                                                                                                                                                                                                                                                                                                                                                                                                                                                                                                                                                                                                                                                                                                                                                                                                                                                                                                                                                                                                                                                                                                                                                                                                                                                                                                                                                                                                                                                                                                                                                                                                                                                                                                                                                                                                                                                                                                                                                                                                                                                                                                                                                                                                                                                                                                                                                                                                                                                                                                                                                                                                                                                                                                                                                                                                                                                                                                                                                                                                                                                                                                                                                                                                                                                                                        | Public Health Laboratory - Infectious Disease Lab, Minnesota Department of Health Infectious Disease Laboratory Submission Group | Public Health Laboratory - Infectious Disease Lab, Minnesota Department of Health Infectious Disease Laboratory Submission Group                                                                                                                                                                                                                                                                                                                                                                                                                         | Garfin, J.; Lorentz, A.; M. and Wang, X.; Plumb                                                                                                                                                                                                                                                                                                                                                                                    |
| EPI_ISL_416522                                                                                                                                                                                                                                                                                                                                                                                                                                                                                                                                                                                                                                                                                                                                                                                                                                                                                                                                                                                                                                                                                                                                                                                                                                                                                                                                                                                                                                                                                                                                                                                                                                                                                                                                                                                                                                                                                                                                                                                                                                                                                                                                                                                                                                                                                                                                                                                                                                                                                                                                                                                                                                                                                                                                                                                                                                                                                                                                                                                                                                                                                                                                                                                                                                                                                                                                                                                                                                                                                                                                                                                                                                                                                                                                                                                         | Public Health Laboratory, Saudi CDC                                                                                              | Public Health Laboratory, Saudi CDC                                                                                                                                                                                                                                                                                                                                                                                                                                                                                                                      | A; Albarrag                                                                                                                                                                                                                                                                                                                                                                                                                        |
| EPI_ISL_425177                                                                                                                                                                                                                                                                                                                                                                                                                                                                                                                                                                                                                                                                                                                                                                                                                                                                                                                                                                                                                                                                                                                                                                                                                                                                                                                                                                                                                                                                                                                                                                                                                                                                                                                                                                                                                                                                                                                                                                                                                                                                                                                                                                                                                                                                                                                                                                                                                                                                                                                                                                                                                                                                                                                                                                                                                                                                                                                                                                                                                                                                                                                                                                                                                                                                                                                                                                                                                                                                                                                                                                                                                                                                                                                                                                                         | Public Health Ontario                                                                                                            | Public Health Agency of Canada - National Microbiology Laboratory                                                                                                                                                                                                                                                                                                                                                                                                                                                                                        | Amrit S. Boese; Anders Leung; Darwyn Kobasa; Jonathan Audet; Joshua Quick; Morag Graham; Natalie Knox; Nikesh Tailor; Shari Tyson                                                                                                                                                                                                                                                                                                  |
| EPI_ISL_413015                                                                                                                                                                                                                                                                                                                                                                                                                                                                                                                                                                                                                                                                                                                                                                                                                                                                                                                                                                                                                                                                                                                                                                                                                                                                                                                                                                                                                                                                                                                                                                                                                                                                                                                                                                                                                                                                                                                                                                                                                                                                                                                                                                                                                                                                                                                                                                                                                                                                                                                                                                                                                                                                                                                                                                                                                                                                                                                                                                                                                                                                                                                                                                                                                                                                                                                                                                                                                                                                                                                                                                                                                                                                                                                                                                                         | Public Health Ontario Laboratory                                                                                                 | National Microbiology Laboratory                                                                                                                                                                                                                                                                                                                                                                                                                                                                                                                         | Adrian Zetner; Anna Majer; Darryl Falzarano; Erika Landry; Gerds Volker; Grace Seo; Guillaume Poliquin; Jocelyne Lew; Jonathan Gubbay; Matthew Gilmour; Morag Graham; Natalie Knox; Nathalie Bastien; Philip Mabon; Rob Kozak; Samira Mubareka; Shari Tyson; Stephanie Booth; Timothy Booth; Tom Graefenhan; Yan Li                                                                                                                |
| EPI_ISL_576131 to 576144, EPI_ISL_593597 to 593645                                                                                                                                                                                                                                                                                                                                                                                                                                                                                                                                                                                                                                                                                                                                                                                                                                                                                                                                                                                                                                                                                                                                                                                                                                                                                                                                                                                                                                                                                                                                                                                                                                                                                                                                                                                                                                                                                                                                                                                                                                                                                                                                                                                                                                                                                                                                                                                                                                                                                                                                                                                                                                                                                                                                                                                                                                                                                                                                                                                                                                                                                                                                                                                                                                                                                                                                                                                                                                                                                                                                                                                                                                                                                                                                                     | Public Health Virology Laboratory, Forensic and Scientific Services (PHV-FSS)                                                    | Public Health Virology Laboratory, Forensic and Scientific Services (PHV-FSS)                                                                                                                                                                                                                                                                                                                                                                                                                                                                            | Son Nguyen et al                                                                                                                                                                                                                                                                                                                                                                                                                   |
| EPI_ISL_1396522 to 1396523, EPI_ISL_1396528 to see above                                                                                                                                                                                                                                                                                                                                                                                                                                                                                                                                                                                                                                                                                                                                                                                                                                                                                                                                                                                                                                                                                                                                                                                                                                                                                                                                                                                                                                                                                                                                                                                                                                                                                                                                                                                                                                                                                                                                                                                                                                                                                                                                                                                                                                                                                                                                                                                                                                                                                                                                                                                                                                                                                                                                                                                                                                                                                                                                                                                                                                                                                                                                                                                                                                                                                                                                                                                                                                                                                                                                                                                                                                                                                                                                               | Public Health Virology-Forensic and Scientific Services (PHV-FSS)                                                                | Public Health Virology-Forensic and Scientific Services (PHV-FSS)                                                                                                                                                                                                                                                                                                                                                                                                                                                                                        | Son Nguyen                                                                                                                                                                                                                                                                                                                                                                                                                         |
| EPI_ISL_512785 to 512809, EPI_ISL_513310                                                                                                                                                                                                                                                                                                                                                                                                                                                                                                                                                                                                                                                                                                                                                                                                                                                                                                                                                                                                                                                                                                                                                                                                                                                                                                                                                                                                                                                                                                                                                                                                                                                                                                                                                                                                                                                                                                                                                                                                                                                                                                                                                                                                                                                                                                                                                                                                                                                                                                                                                                                                                                                                                                                                                                                                                                                                                                                                                                                                                                                                                                                                                                                                                                                                                                                                                                                                                                                                                                                                                                                                                                                                                                                                                               | Public Health, United States Air Force School of Aerospace Medicine                                                              | Public Health, United States Air Force School of Aerospace Medicine                                                                                                                                                                                                                                                                                                                                                                                                                                                                                      | A.C.; A.K.; A.W.; B.C.; C.R.; Chapleau; Connors; E.A.; Fries; J.R.; Javorina; Lambert; Macias; Meyer; Purves; R.R.; R.R. and Starr; S.M.; Starr                                                                                                                                                                                                                                                                                    |
| EPI_ISL_513311 to 513313                                                                                                                                                                                                                                                                                                                                                                                                                                                                                                                                                                                                                                                                                                                                                                                                                                                                                                                                                                                                                                                                                                                                                                                                                                                                                                                                                                                                                                                                                                                                                                                                                                                                                                                                                                                                                                                                                                                                                                                                                                                                                                                                                                                                                                                                                                                                                                                                                                                                                                                                                                                                                                                                                                                                                                                                                                                                                                                                                                                                                                                                                                                                                                                                                                                                                                                                                                                                                                                                                                                                                                                                                                                                                                                                                                               | Public Health, United States Air Force School of Aerospace Medicine                                                              | Public Health, United States Air Force School of Aerospace Medicine                                                                                                                                                                                                                                                                                                                                                                                                                                                                                      | A.C.; A.K.; A.W.; B.C.; C.R.; Chapleau; Connors; E.A.; Fries; J.R.; Javorina; Lambert; Macias; Meyer; Purves; R.R. and Starr; S.M.                                                                                                                                                                                                                                                                                                 |
| EPI_ISL_1495179 to 1495266                                                                                                                                                                                                                                                                                                                                                                                                                                                                                                                                                                                                                                                                                                                                                                                                                                                                                                                                                                                                                                                                                                                                                                                                                                                                                                                                                                                                                                                                                                                                                                                                                                                                                                                                                                                                                                                                                                                                                                                                                                                                                                                                                                                                                                                                                                                                                                                                                                                                                                                                                                                                                                                                                                                                                                                                                                                                                                                                                                                                                                                                                                                                                                                                                                                                                                                                                                                                                                                                                                                                                                                                                                                                                                                                                                             | Public Health Authority of the Slovak Republic                                                                                   | Bergthaler laboratory, CeMM Research Center for Molecular Medicine of the Austrian Academy of Sciences                                                                                                                                                                                                                                                                                                                                                                                                                                                   | Andreas Bergthaler; Anna Schedl; Bekir Erguner; Benedikt Agerer; Christoph Bock; Fabian Amman; Jan Laine; Lukas Endler; Maelle Le Moing; Martin Senekowitsch; Michael Schuster; Petr Triska; Thomas Penz                                                                                                                                                                                                                           |
| EPI_ISL_434541 to 434553                                                                                                                                                                                                                                                                                                                                                                                                                                                                                                                                                                                                                                                                                                                                                                                                                                                                                                                                                                                                                                                                                                                                                                                                                                                                                                                                                                                                                                                                                                                                                                                                                                                                                                                                                                                                                                                                                                                                                                                                                                                                                                                                                                                                                                                                                                                                                                                                                                                                                                                                                                                                                                                                                                                                                                                                                                                                                                                                                                                                                                                                                                                                                                                                                                                                                                                                                                                                                                                                                                                                                                                                                                                                                                                                                                               | Puerto Rico Department of Health                                                                                                 | Centers for Disease Control and Prevention, Dengue Branch                                                                                                                                                                                                                                                                                                                                                                                                                                                                                                | Betzabel Flores; Chaney Kalinich; Fabiola Cruz; Gilberto A. Santiago; Glenda Gonzalez; Jessica I. Falcon; Jorge L. Munoz-Jordan; Joseph Fauver; Keyla Charriez; Nathan Grubaugh                                                                                                                                                                                                                                                    |
| EPI_ISL_1398936                                                                                                                                                                                                                                                                                                                                                                                                                                                                                                                                                                                                                                                                                                                                                                                                                                                                                                                                                                                                                                                                                                                                                                                                                                                                                                                                                                                                                                                                                                                                                                                                                                                                                                                                                                                                                                                                                                                                                                                                                                                                                                                                                                                                                                                                                                                                                                                                                                                                                                                                                                                                                                                                                                                                                                                                                                                                                                                                                                                                                                                                                                                                                                                                                                                                                                                                                                                                                                                                                                                                                                                                                                                                                                                                                                                        | Purwakarta Public Health                                                                                                         | West Java Health Laboratory                                                                                                                                                                                                                                                                                                                                                                                                                                                                                                                              | Azzania Fibriani; Cut Nur Cinthia Alamanda; Ema Rahmawati; Isak Solihin; Kamila Tania; Karimatu Khoirunnisa; Miftahul Farid; Rifky Waluyajati Rachman; Rini Robiani; Ryan Bayusantika Ristandi                                                                                                                                                                                                                                     |
| EPI_ISL_437189                                                                                                                                                                                                                                                                                                                                                                                                                                                                                                                                                                                                                                                                                                                                                                                                                                                                                                                                                                                                                                                                                                                                                                                                                                                                                                                                                                                                                                                                                                                                                                                                                                                                                                                                                                                                                                                                                                                                                                                                                                                                                                                                                                                                                                                                                                                                                                                                                                                                                                                                                                                                                                                                                                                                                                                                                                                                                                                                                                                                                                                                                                                                                                                                                                                                                                                                                                                                                                                                                                                                                                                                                                                                                                                                                                                         | Pusat Pertamina Hospital                                                                                                         | Eijkman Institute for Molecular Biology, Ministry of Research and Technology/National Agency for Research and Innovation                                                                                                                                                                                                                                                                                                                                                                                                                                 | Amin Soebandrio; David H Muljono; Edison Johar; Filasita A Yudhaputri; Hidayat Trimarsanto; Khin Saw Myint; Safarina G Malik                                                                                                                                                                                                                                                                                                       |
| EPI_ISL_610155                                                                                                                                                                                                                                                                                                                                                                                                                                                                                                                                                                                                                                                                                                                                                                                                                                                                                                                                                                                                                                                                                                                                                                                                                                                                                                                                                                                                                                                                                                                                                                                                                                                                                                                                                                                                                                                                                                                                                                                                                                                                                                                                                                                                                                                                                                                                                                                                                                                                                                                                                                                                                                                                                                                                                                                                                                                                                                                                                                                                                                                                                                                                                                                                                                                                                                                                                                                                                                                                                                                                                                                                                                                                                                                                                                                         | Puskesmas Cangkrep                                                                                                               | Genetics Working Group (Pokja Genetik) Faculty of Medicine, Public Health and Nursing Universitas Gadjah Mada (FK-KMK UGM); Disease Investigation Center Wates Ministry of Agriculture Indonesia; Department of Microbiology FK-KMK UGM; Laboratorium Diagnostik Yayasan Tahija World Mosquito Program (WMP) Yogyakarta Center for Tropical Medicine FK-KMK UGM; Integrated Research Center FK-KMK UGM; Department of Computer Science and Electronics FMIPA UGM; Balai Besar Teknik Kesehatan Lingkungan dan Pengendalian Penyakit (BBTKLPP) Yogyakarta | Afiahayati; Dwi AA Nugrahaningsih; Edwin W. Daniwijaya; Eggi Arguni; Endah Supriyati; Fadil Fahri; Gunadi; Havid Setyawan; Hendra Wibawa; Indaryati; Irene; Kristy Iskandar; Ludhang P. Rizki; Marcellus; Mohamad S. Hakim; Nawang Sukestiningih; Nungki Anggorowati; Ririn Enggy Yuliyanti; Siswanto; Titik Nuryastuti; Tri Wibawa                                                                                                |
| EPI_ISL_574610                                                                                                                                                                                                                                                                                                                                                                                                                                                                                                                                                                                                                                                                                                                                                                                                                                                                                                                                                                                                                                                                                                                                                                                                                                                                                                                                                                                                                                                                                                                                                                                                                                                                                                                                                                                                                                                                                                                                                                                                                                                                                                                                                                                                                                                                                                                                                                                                                                                                                                                                                                                                                                                                                                                                                                                                                                                                                                                                                                                                                                                                                                                                                                                                                                                                                                                                                                                                                                                                                                                                                                                                                                                                                                                                                                                         | Puskesmas Tambora                                                                                                                | Eijkman Institute for Molecular Biology, Ministry of Research and Technology/National Agency for Research and Innovation                                                                                                                                                                                                                                                                                                                                                                                                                                 | Amin Soebandrio; David H Muljono; Edison Johar; Filasita A Yudhaputri; Herawati Sudoyo; Hidayat Trimarsanto; Iskandar A Adnan; Khin Saw Myint; Safarina G Malik; Willy Agustine                                                                                                                                                                                                                                                    |
| EPI_ISL_579515 to 579758                                                                                                                                                                                                                                                                                                                                                                                                                                                                                                                                                                                                                                                                                                                                                                                                                                                                                                                                                                                                                                                                                                                                                                                                                                                                                                                                                                                                                                                                                                                                                                                                                                                                                                                                                                                                                                                                                                                                                                                                                                                                                                                                                                                                                                                                                                                                                                                                                                                                                                                                                                                                                                                                                                                                                                                                                                                                                                                                                                                                                                                                                                                                                                                                                                                                                                                                                                                                                                                                                                                                                                                                                                                                                                                                                                               | QEII Health Sciences Centre                                                                                                      | National Microbiology Laboratory (NML)                                                                                                                                                                                                                                                                                                                                                                                                                                                                                                                   | Anna Majer; Anneliese Landgraff; CanCOGeN's metadata curation team; Darian Hole; Elsie Grudeski; Gary Van Domselaar; Grace Seo; Jason LeBlanc; Jennifer Tanner; Morag Graham; Natalie Knox; Nathalie Bastien; Philip Mabon; Public Health Agency of Canada's CanCOGeN team; Rhiannon Huzarewicz; Russell Mandes; Shari Tyson; Timothy Booth; Todd Hatchette; Yan Li                                                                |
| EPI_ISL_1423015 to 1423020, EPI_ISL_1423126, EPI_ISL_1423128 to 1423130, EPI_ISL_1423211 to 1423212, EPI_ISL_1528719 to 1528736, EPI_ISL_1528738 to 1528739, EPI_ISL_1528743, EPI_ISL_1528756 to 1528759                                                                                                                                                                                                                                                                                                                                                                                                                                                                                                                                                                                                                                                                                                                                                                                                                                                                                                                                                                                                                                                                                                                                                                                                                                                                                                                                                                                                                                                                                                                                                                                                                                                                                                                                                                                                                                                                                                                                                                                                                                                                                                                                                                                                                                                                                                                                                                                                                                                                                                                                                                                                                                                                                                                                                                                                                                                                                                                                                                                                                                                                                                                                                                                                                                                                                                                                                                                                                                                                                                                                                                                               | see above                                                                                                                        | QLabs                                                                                                                                                                                                                                                                                                                                                                                                                                                                                                                                                    | WVU and Marshall University Combined Genomics Core Facilities                                                                                                                                                                                                                                                                                                                                                                      |
| EPI_ISL_444612                                                                                                                                                                                                                                                                                                                                                                                                                                                                                                                                                                                                                                                                                                                                                                                                                                                                                                                                                                                                                                                                                                                                                                                                                                                                                                                                                                                                                                                                                                                                                                                                                                                                                                                                                                                                                                                                                                                                                                                                                                                                                                                                                                                                                                                                                                                                                                                                                                                                                                                                                                                                                                                                                                                                                                                                                                                                                                                                                                                                                                                                                                                                                                                                                                                                                                                                                                                                                                                                                                                                                                                                                                                                                                                                                                                         | QML Pathology                                                                                                                    | Public Health Virology Laboratory                                                                                                                                                                                                                                                                                                                                                                                                                                                                                                                        | Alyssa Pyke; Amanda De Jong; Andrew Van Den Hurk; Bixing Huang; Carmel Taylor; David Warrilow; Doris Genge; Elisabeth Gamez; Glen Hewitson; Ian Maxwell Mackay; Inga Sultana; Jamie McMahon; Jean Barcelon; Judy Northill; Mitchell Finger; Natalie Simpson; Neelima Nair; Peter Burtonclay; Peter Moore; Sarah Wheatley; Sarah Moody; Sonja Hall-Mendelin; Timothy Gardam; and Frederick Moore                                    |
| EPI_ISL_613457                                                                                                                                                                                                                                                                                                                                                                                                                                                                                                                                                                                                                                                                                                                                                                                                                                                                                                                                                                                                                                                                                                                                                                                                                                                                                                                                                                                                                                                                                                                                                                                                                                                                                                                                                                                                                                                                                                                                                                                                                                                                                                                                                                                                                                                                                                                                                                                                                                                                                                                                                                                                                                                                                                                                                                                                                                                                                                                                                                                                                                                                                                                                                                                                                                                                                                                                                                                                                                                                                                                                                                                                                                                                                                                                                                                         | QUARANTINE CAMP                                                                                                                  | Hong Kong Department of Health                                                                                                                                                                                                                                                                                                                                                                                                                                                                                                                           | Alan K.L. Tsang; Dominic N.C. Tsang; Edman T.K. Lam; Peter C.W. Yip; Rickjason C.W. Chan                                                                                                                                                                                                                                                                                                                                           |
| EPI_ISL_518819                                                                                                                                                                                                                                                                                                                                                                                                                                                                                                                                                                                                                                                                                                                                                                                                                                                                                                                                                                                                                                                                                                                                                                                                                                                                                                                                                                                                                                                                                                                                                                                                                                                                                                                                                                                                                                                                                                                                                                                                                                                                                                                                                                                                                                                                                                                                                                                                                                                                                                                                                                                                                                                                                                                                                                                                                                                                                                                                                                                                                                                                                                                                                                                                                                                                                                                                                                                                                                                                                                                                                                                                                                                                                                                                                                                         | Qadr Hospital, Tangerang, Banten                                                                                                 | Biosafety Level-3 Laboratory, Indonesian Institute of Sciences (LIPI)                                                                                                                                                                                                                                                                                                                                                                                                                                                                                    | Ade Andriani; Ahmad Fathoni; Andri Wardiana; Anggia Prasetyoputri; Anik Budhi Dharmayanthi; Ario Betha Juansilfero; Asep M Ridwanuloh; Isa Nuryana; Puspita Lisdiyanti; Rath Asmana Ningrum; Rifki Sadikin; Syam Budi Iryanto; Wien Kusharyoto                                                                                                                                                                                     |
| EPI_ISL_448223 to 448240, EPI_ISL_448242 to 448256, EPI_ISL_448258 to 448307, EPI_ISL_448309 to 448388, EPI_ISL_448978 to 449136, EPI_ISL_449138 to 449175, EPI_ISL_453545 to 453613, EPI_ISL_457326 to 457572, EPI_ISL_461805 to 461893, EPI_ISL_472291 to 472369, EPI_ISL_472371 to 472383, EPI_ISL_478719 to 478720, EPI_ISL_480329 to 480330, EPI_ISL_484328 to 484338, EPI_ISL_490496 to 490559, EPI_ISL_493541 to 493546, EPI_ISL_499479, EPI_ISL_499490, EPI_ISL_499495, EPI_ISL_499562, EPI_ISL_499588, EPI_ISL_499591 to 499592, EPI_ISL_499599, EPI_ISL_499601, EPI_ISL_499603, EPI_ISL_499623, EPI_ISL_499631, EPI_ISL_507130, EPI_ISL_512366 to 512371, EPI_ISL_512373 to 512378, EPI_ISL_529238, EPI_ISL_529240 to 529250, EPI_ISL_529267, EPI_ISL_529273, EPI_ISL_529281 to 529282, EPI_ISL_529286, EPI_ISL_529290, EPI_ISL_529292, EPI_ISL_529294, EPI_ISL_529378 to 529381, EPI_ISL_529388 to 529389, EPI_ISL_529413, EPI_ISL_529415 to 529417, EPI_ISL_529422, EPI_ISL_529437, EPI_ISL_529451 to 529452, EPI_ISL_529457 to 529460, EPI_ISL_529469, EPI_ISL_529476 to 529477, EPI_ISL_529487 to 529489, EPI_ISL_529492, EPI_ISL_529496 to 529497, EPI_ISL_529506 to 529507, EPI_ISL_529523, EPI_ISL_529526, EPI_ISL_529557 to 529559, EPI_ISL_540691 to 540698, EPI_ISL_549336, EPI_ISL_549344, EPI_ISL_549349 to 549351, EPI_ISL_549353, EPI_ISL_549355, EPI_ISL_549359, EPI_ISL_549373, EPI_ISL_549377 to 549379, EPI_ISL_549382 to 549384, EPI_ISL_549477 to 549490, EPI_ISL_572399 to 572401, EPI_ISL_572403, EPI_ISL_572406, EPI_ISL_572419, EPI_ISL_572423, EPI_ISL_572430, EPI_ISL_572437, EPI_ISL_572440 to 572441, EPI_ISL_572447 to 572449, EPI_ISL_572453 to 572454, EPI_ISL_572456, EPI_ISL_572459, EPI_ISL_572462 to 572463, EPI_ISL_572485 to 572486, EPI_ISL_572492 to 572493, EPI_ISL_572495, EPI_ISL_572497 to 572499, EPI_ISL_572503 to 572505, EPI_ISL_572520, EPI_ISL_572526, EPI_ISL_572533, EPI_ISL_572546, EPI_ISL_572548 to 572551, EPI_ISL_572553, EPI_ISL_572556, EPI_ISL_572569, EPI_ISL_572583, EPI_ISL_572591, EPI_ISL_572600, EPI_ISL_572602, EPI_ISL_572607, EPI_ISL_572615, EPI_ISL_572646, EPI_ISL_572649, EPI_ISL_572651, EPI_ISL_572653, EPI_ISL_572655 to 572656, EPI_ISL_572658, EPI_ISL_572660, EPI_ISL_572665 to 572666, EPI_ISL_572670 to 572671, EPI_ISL_572673, EPI_ISL_572711, EPI_ISL_572717 to 572720, EPI_ISL_572730, EPI_ISL_572732, EPI_ISL_572735, EPI_ISL_572742, EPI_ISL_572745, EPI_ISL_572749, EPI_ISL_572755, EPI_ISL_572758 to 572759, EPI_ISL_572764, EPI_ISL_572768, EPI_ISL_572775, EPI_ISL_572780 to 572787, EPI_ISL_572789, EPI_ISL_572791, EPI_ISL_572793, EPI_ISL_572797, EPI_ISL_572804, EPI_ISL_572806, EPI_ISL_572811 to 572812, EPI_ISL_572814, EPI_ISL_572819, EPI_ISL_572823, EPI_ISL_572825 to 572826, EPI_ISL_572831, EPI_ISL_572835, EPI_ISL_572842, EPI_ISL_572844, EPI_ISL_572847, EPI_ISL_572888 to 572901, EPI_ISL_572939 to 572941, EPI_ISL_572954, EPI_ISL_573085 to 573131, EPI_ISL_573414 to 573417, EPI_ISL_577096 to 577109, EPI_ISL_584165 to 584166, EPI_ISL_584716 to 584749, EPI_ISL_584906 to 585008, EPI_ISL_585260, EPI_ISL_585583 to 585619, EPI_ISL_586240 to 586242, EPI_ISL_595115 to 595208, EPI_ISL_595210 to 595231, EPI_ISL_595837 to 596190, EPI_ISL_1386253 to 1386408, EPI_ISL_1386410 to 1386411, EPI_ISL_1386413, EPI_ISL_1386416 to 1386419, EPI_ISL_1386424, EPI_ISL_1386426 to 1386427, EPI_ISL_1386433 to 1386434, EPI_ISL_1386439 to 1386440, EPI_ISL_1386450 to 1386451, EPI_ISL_1386453, EPI_ISL_1386455 to 1386456, EPI_ISL_1386458, EPI_ISL_1386460 to 1386461, EPI_ISL_1386464, EPI_ISL_1386468, EPI_ISL_1386472 to 1386473, EPI_ISL_1386934 to 1387049, EPI_ISL_1387133 to 1387156, EPI_ISL_1474166 to 1474379, EPI_ISL_1474893 to 1474957, EPI_ISL_1476686 to 1476690 |                                                                                                                                  |                                                                                                                                                                                                                                                                                                                                                                                                                                                                                                                                                          |                                                                                                                                                                                                                                                                                                                                                                                                                                    |
| see above                                                                                                                                                                                                                                                                                                                                                                                                                                                                                                                                                                                                                                                                                                                                                                                                                                                                                                                                                                                                                                                                                                                                                                                                                                                                                                                                                                                                                                                                                                                                                                                                                                                                                                                                                                                                                                                                                                                                                                                                                                                                                                                                                                                                                                                                                                                                                                                                                                                                                                                                                                                                                                                                                                                                                                                                                                                                                                                                                                                                                                                                                                                                                                                                                                                                                                                                                                                                                                                                                                                                                                                                                                                                                                                                                                                              | Quadram Institute Bioscience                                                                                                     | COVID-19 Genomics UK (COG-UK) Consortium                                                                                                                                                                                                                                                                                                                                                                                                                                                                                                                 | Alexander J Trotter; Alison E. Gray; Alp Aydin; Ana P. Tedim; Anastasia Kolyva; Andrew Bell; Andrew J. Page; Claire Stuart; Dave J. Baker; Gemma L. Kay; John Wain; Justin O'Matheny; Leonardo de Oliveira Martins; Lizzy Meadows; Maria Diaz; Mark Webber; Muhammed Ahmad; Ngozi Elumogo; Nicholas M. Thomson; Rachael Stanley; Rachel Gilroy; Reenesh Prakash; Samir Dervisevic; Samuel Bloomfield; Steven Rudder; Thanh Le-Viet |
| EPI_ISL_487432 to 487436                                                                                                                                                                                                                                                                                                                                                                                                                                                                                                                                                                                                                                                                                                                                                                                                                                                                                                                                                                                                                                                                                                                                                                                                                                                                                                                                                                                                                                                                                                                                                                                                                                                                                                                                                                                                                                                                                                                                                                                                                                                                                                                                                                                                                                                                                                                                                                                                                                                                                                                                                                                                                                                                                                                                                                                                                                                                                                                                                                                                                                                                                                                                                                                                                                                                                                                                                                                                                                                                                                                                                                                                                                                                                                                                                                               | Queen Astrid Military Hospital                                                                                                   | Institute of Tropical Medicine                                                                                                                                                                                                                                                                                                                                                                                                                                                                                                                           | Colin Anthony; Philippe Selhorst                                                                                                                                                                                                                                                                                                                                                                                                   |

|                                                                                                                                                                                                                                                                                                                                                                                                                                                                                                                                                                                                                                                                                                                                                                                                                                                                                                                                                                                                                                                                                                                                                                                                                                                                                                                                                                                                                                                                                                                                                                                                                                                                                                                                                                                                                                                                                                                                                                                                                                                                                                                                                                                                                                                                                                                                                                                                                                                                                                                                                                                                                                                                                                                                                                                                                                                                                                                                                                                                                                                                                                                                                                                                                                                                                                                                                                                                                                                                                                                                                                                                                                                                                                                                                                                                                                                                                                                                                                                                                                                                                                                                                                                                                                                                                                                                                                                                                                                                                                                                                                                                                                                                                                                                                                                                                                                                                                                                                                                                                                                                                                                                                                                                                                                                                                                                                                                                                                                                                                                                                                                                                                                                                                                                                                                                                                                                                                                                                                                                                                                                                                                                                                                                                                                                                                                                                                                                                                                                                                                                                                                                                                                                                |                                                                                                                         |                                                                                                                                 |                                                                                                                                                                                                                                                                                                                                                                                                                                                                                                                                                             |
|--------------------------------------------------------------------------------------------------------------------------------------------------------------------------------------------------------------------------------------------------------------------------------------------------------------------------------------------------------------------------------------------------------------------------------------------------------------------------------------------------------------------------------------------------------------------------------------------------------------------------------------------------------------------------------------------------------------------------------------------------------------------------------------------------------------------------------------------------------------------------------------------------------------------------------------------------------------------------------------------------------------------------------------------------------------------------------------------------------------------------------------------------------------------------------------------------------------------------------------------------------------------------------------------------------------------------------------------------------------------------------------------------------------------------------------------------------------------------------------------------------------------------------------------------------------------------------------------------------------------------------------------------------------------------------------------------------------------------------------------------------------------------------------------------------------------------------------------------------------------------------------------------------------------------------------------------------------------------------------------------------------------------------------------------------------------------------------------------------------------------------------------------------------------------------------------------------------------------------------------------------------------------------------------------------------------------------------------------------------------------------------------------------------------------------------------------------------------------------------------------------------------------------------------------------------------------------------------------------------------------------------------------------------------------------------------------------------------------------------------------------------------------------------------------------------------------------------------------------------------------------------------------------------------------------------------------------------------------------------------------------------------------------------------------------------------------------------------------------------------------------------------------------------------------------------------------------------------------------------------------------------------------------------------------------------------------------------------------------------------------------------------------------------------------------------------------------------------------------------------------------------------------------------------------------------------------------------------------------------------------------------------------------------------------------------------------------------------------------------------------------------------------------------------------------------------------------------------------------------------------------------------------------------------------------------------------------------------------------------------------------------------------------------------------------------------------------------------------------------------------------------------------------------------------------------------------------------------------------------------------------------------------------------------------------------------------------------------------------------------------------------------------------------------------------------------------------------------------------------------------------------------------------------------------------------------------------------------------------------------------------------------------------------------------------------------------------------------------------------------------------------------------------------------------------------------------------------------------------------------------------------------------------------------------------------------------------------------------------------------------------------------------------------------------------------------------------------------------------------------------------------------------------------------------------------------------------------------------------------------------------------------------------------------------------------------------------------------------------------------------------------------------------------------------------------------------------------------------------------------------------------------------------------------------------------------------------------------------------------------------------------------------------------------------------------------------------------------------------------------------------------------------------------------------------------------------------------------------------------------------------------------------------------------------------------------------------------------------------------------------------------------------------------------------------------------------------------------------------------------------------------------------------------------------------------------------------------------------------------------------------------------------------------------------------------------------------------------------------------------------------------------------------------------------------------------------------------------------------------------------------------------------------------------------------------------------------------------------------------------------------------------------------------------------------|-------------------------------------------------------------------------------------------------------------------------|---------------------------------------------------------------------------------------------------------------------------------|-------------------------------------------------------------------------------------------------------------------------------------------------------------------------------------------------------------------------------------------------------------------------------------------------------------------------------------------------------------------------------------------------------------------------------------------------------------------------------------------------------------------------------------------------------------|
| EPI_ISL_539815                                                                                                                                                                                                                                                                                                                                                                                                                                                                                                                                                                                                                                                                                                                                                                                                                                                                                                                                                                                                                                                                                                                                                                                                                                                                                                                                                                                                                                                                                                                                                                                                                                                                                                                                                                                                                                                                                                                                                                                                                                                                                                                                                                                                                                                                                                                                                                                                                                                                                                                                                                                                                                                                                                                                                                                                                                                                                                                                                                                                                                                                                                                                                                                                                                                                                                                                                                                                                                                                                                                                                                                                                                                                                                                                                                                                                                                                                                                                                                                                                                                                                                                                                                                                                                                                                                                                                                                                                                                                                                                                                                                                                                                                                                                                                                                                                                                                                                                                                                                                                                                                                                                                                                                                                                                                                                                                                                                                                                                                                                                                                                                                                                                                                                                                                                                                                                                                                                                                                                                                                                                                                                                                                                                                                                                                                                                                                                                                                                                                                                                                                                                                                                                                 | Queen Elizabeth Hospital                                                                                                | Hong Kong Department of Health                                                                                                  | Alan K.L. Tsang; Dominic N.C. Tsang; Edman T.K. Lam; Peter C.W. Yip; Rickjason C.W. Chan                                                                                                                                                                                                                                                                                                                                                                                                                                                                    |
| EPI_ISL_418814, EPI_ISL_429812 to 429814, EPI_ISL_482469 to 482470, EPI_ISL_482476 to 482477                                                                                                                                                                                                                                                                                                                                                                                                                                                                                                                                                                                                                                                                                                                                                                                                                                                                                                                                                                                                                                                                                                                                                                                                                                                                                                                                                                                                                                                                                                                                                                                                                                                                                                                                                                                                                                                                                                                                                                                                                                                                                                                                                                                                                                                                                                                                                                                                                                                                                                                                                                                                                                                                                                                                                                                                                                                                                                                                                                                                                                                                                                                                                                                                                                                                                                                                                                                                                                                                                                                                                                                                                                                                                                                                                                                                                                                                                                                                                                                                                                                                                                                                                                                                                                                                                                                                                                                                                                                                                                                                                                                                                                                                                                                                                                                                                                                                                                                                                                                                                                                                                                                                                                                                                                                                                                                                                                                                                                                                                                                                                                                                                                                                                                                                                                                                                                                                                                                                                                                                                                                                                                                                                                                                                                                                                                                                                                                                                                                                                                                                                                                   | Queen Elizabeth II Health Science Centre                                                                                | National Microbiology Laboratory                                                                                                | Anna Majer; Elsie Grudeski; Gary Van Domselaar; Grace Seo; Jason LeBlanc; Jennifer Tanner; Kristyn Burak; Matthew Gilmour; Morag Graham; Natalie Knox; Nathalie Bastien; Philip Mabon; Rhiannon Huzarewich; Russell Mandes; Shari Tyson; Timothy Booth; Todd Hatchette; Yan Li                                                                                                                                                                                                                                                                              |
| EPI_ISL_539803, EPI_ISL_539816 to 539817, EPI_ISL_539820                                                                                                                                                                                                                                                                                                                                                                                                                                                                                                                                                                                                                                                                                                                                                                                                                                                                                                                                                                                                                                                                                                                                                                                                                                                                                                                                                                                                                                                                                                                                                                                                                                                                                                                                                                                                                                                                                                                                                                                                                                                                                                                                                                                                                                                                                                                                                                                                                                                                                                                                                                                                                                                                                                                                                                                                                                                                                                                                                                                                                                                                                                                                                                                                                                                                                                                                                                                                                                                                                                                                                                                                                                                                                                                                                                                                                                                                                                                                                                                                                                                                                                                                                                                                                                                                                                                                                                                                                                                                                                                                                                                                                                                                                                                                                                                                                                                                                                                                                                                                                                                                                                                                                                                                                                                                                                                                                                                                                                                                                                                                                                                                                                                                                                                                                                                                                                                                                                                                                                                                                                                                                                                                                                                                                                                                                                                                                                                                                                                                                                                                                                                                                       | Queen Mary Hospital                                                                                                     | Hong Kong Department of Health                                                                                                  | Alan K.L. Tsang; Dominic N.C. Tsang; Edman T.K. Lam; Peter C.W. Yip; Rickjason C.W. Chan                                                                                                                                                                                                                                                                                                                                                                                                                                                                    |
| EPI_ISL_425462 to 425549, EPI_ISL_425570 to 425577, EPI_ISL_425579 to 425646, EPI_ISL_432668 to 432709, EPI_ISL_432900 to 433067, EPI_ISL_441437 to 441546, EPI_ISL_441847 to 441897, EPI_ISL_448389 to 448448, EPI_ISL_453614 to 453664, EPI_ISL_457573 to 457580, EPI_ISL_461894 to 461969, EPI_ISL_472384 to 472431, EPI_ISL_484339 to 484353, EPI_ISL_484374 to 484375, EPI_ISL_484390 to 484391, EPI_ISL_490560 to 490562, EPI_ISL_493547 to 493548, EPI_ISL_493601 to 493602, EPI_ISL_493606 to 493609, EPI_ISL_499266 to 499269, EPI_ISL_499808 to 499809, EPI_ISL_512379 to 512383, EPI_ISL_514452 to 514454, EPI_ISL_526337 to 526366, EPI_ISL_526395 to 526430, EPI_ISL_529264, EPI_ISL_529266, EPI_ISL_529276, EPI_ISL_529279, EPI_ISL_529288, EPI_ISL_529306 to 529311, EPI_ISL_529383, EPI_ISL_529385, EPI_ISL_529387, EPI_ISL_529410 to 529412, EPI_ISL_529414, EPI_ISL_529423, EPI_ISL_529436, EPI_ISL_529450, EPI_ISL_529454 to 529456, EPI_ISL_529463 to 529464, EPI_ISL_529467, EPI_ISL_529479, EPI_ISL_529483, EPI_ISL_529486, EPI_ISL_529504, EPI_ISL_529519, EPI_ISL_529528 to 529556, EPI_ISL_529667, EPI_ISL_534756 to 534762, EPI_ISL_535183, EPI_ISL_540640 to 540690, EPI_ISL_540699 to 540718, EPI_ISL_540894 to 540896, EPI_ISL_549334, EPI_ISL_549357, EPI_ISL_549361, EPI_ISL_549376, EPI_ISL_549380, EPI_ISL_549385, EPI_ISL_549491 to 549416, EPI_ISL_572444, EPI_ISL_572460, EPI_ISL_572475 to 572476, EPI_ISL_572509, EPI_ISL_572582, EPI_ISL_572598, EPI_ISL_572603, EPI_ISL_572706, EPI_ISL_572799, EPI_ISL_572833, EPI_ISL_572872, EPI_ISL_573418 to 573436, EPI_ISL_573450 to 573477, EPI_ISL_577110 to 577192, EPI_ISL_584381 to 584439, EPI_ISL_584750 to 584808, EPI_ISL_585627 to 585629, EPI_ISL_594923 to 594986, EPI_ISL_595046 to 595099, EPI_ISL_595232 to 595325, EPI_ISL_611546, EPI_ISL_611582, EPI_ISL_611604, EPI_ISL_611659, EPI_ISL_611662, EPI_ISL_611670, EPI_ISL_611676 to 611677, EPI_ISL_611680, EPI_ISL_611753, EPI_ISL_611791, EPI_ISL_611810, EPI_ISL_611812 to 611813, EPI_ISL_611833, EPI_ISL_611840, EPI_ISL_611919, EPI_ISL_611954 to 611956, EPI_ISL_611963, EPI_ISL_612032, EPI_ISL_612077, EPI_ISL_612107, EPI_ISL_612158 to 612159, EPI_ISL_612181 to 612183, EPI_ISL_612192, EPI_ISL_612197, EPI_ISL_612571 to 612606, EPI_ISL_613307 to 613355, EPI_ISL_1386933, EPI_ISL_1387157 to 1387177, EPI_ISL_1387179 to 1387195, EPI_ISL_1475486 to 1475494, EPI_ISL_1546239 to 1546250                                                                                                                                                                                                                                                                                                                                                                                                                                                                                                                                                                                                                                                                                                                                                                                                                                                                                                                                                                                                                                                                                                                                                                                                                                                                                                                                                                                                                                                                                                                                                                                                                                                                                                                                                                                                                                                                                                                                                                                                                                                                                                                                                                                                                                                                                                                                                                                                                                                                                                                                                                                                                                                                                                                                                                                                                                                                                                                                                                                                                                                                                                                                                                                                                                                                                                                                                                                                                                                                                                                                                                                                                                                                                                                                                                                                                                                                                                                                                                                                                                                                                                                                                                                                                        | Queens Medical Centre, Clinical Microbiology Department / DeepSeq Nottingham                                            | COVID-19 Genomics UK (COG-UK) Consortium                                                                                        | Christopher Moore; Emily Park; Fei Sang; Gemma Clark; Hannah Howson-Wells; Jack Hill; Jayasree Dey; Joeseoph Chappell; Johnny Debebe; Jonathan Bail; Joseph Chappell; Manjinder Khakh; Matthew Carlisle; Matthew Loose; Michelle M Lister; Nadine Holmes; Nichola Duckworth; Patrick McClure; Sarah Walsh; Theocharis Tsoieridis; Tim Sloan; Timothy Byaruhanga; Vicki M Fleming; Victoria Wright; Wendy Smith                                                                                                                                              |
| EPI_ISL_530225 to 530283                                                                                                                                                                                                                                                                                                                                                                                                                                                                                                                                                                                                                                                                                                                                                                                                                                                                                                                                                                                                                                                                                                                                                                                                                                                                                                                                                                                                                                                                                                                                                                                                                                                                                                                                                                                                                                                                                                                                                                                                                                                                                                                                                                                                                                                                                                                                                                                                                                                                                                                                                                                                                                                                                                                                                                                                                                                                                                                                                                                                                                                                                                                                                                                                                                                                                                                                                                                                                                                                                                                                                                                                                                                                                                                                                                                                                                                                                                                                                                                                                                                                                                                                                                                                                                                                                                                                                                                                                                                                                                                                                                                                                                                                                                                                                                                                                                                                                                                                                                                                                                                                                                                                                                                                                                                                                                                                                                                                                                                                                                                                                                                                                                                                                                                                                                                                                                                                                                                                                                                                                                                                                                                                                                                                                                                                                                                                                                                                                                                                                                                                                                                                                                                       | Queensland Health Forensic and Scientific Services, Public Health Virology                                              | Public Health Virology Laboratory, Forensic and Scientific Services, Queensland Health                                          | Son Nguyen et al                                                                                                                                                                                                                                                                                                                                                                                                                                                                                                                                            |
| EPI_ISL_1424680, EPI_ISL_1424758, EPI_ISL_1424782, EPI_ISL_1424786, EPI_ISL_1424816, EPI_ISL_1424835 to 1424844                                                                                                                                                                                                                                                                                                                                                                                                                                                                                                                                                                                                                                                                                                                                                                                                                                                                                                                                                                                                                                                                                                                                                                                                                                                                                                                                                                                                                                                                                                                                                                                                                                                                                                                                                                                                                                                                                                                                                                                                                                                                                                                                                                                                                                                                                                                                                                                                                                                                                                                                                                                                                                                                                                                                                                                                                                                                                                                                                                                                                                                                                                                                                                                                                                                                                                                                                                                                                                                                                                                                                                                                                                                                                                                                                                                                                                                                                                                                                                                                                                                                                                                                                                                                                                                                                                                                                                                                                                                                                                                                                                                                                                                                                                                                                                                                                                                                                                                                                                                                                                                                                                                                                                                                                                                                                                                                                                                                                                                                                                                                                                                                                                                                                                                                                                                                                                                                                                                                                                                                                                                                                                                                                                                                                                                                                                                                                                                                                                                                                                                                                                | Queensland Medical Laboratories                                                                                         | Melbourne Diagnostic Unit Public Health Laboratory (MDU-PHL)                                                                    | N.L.; Palou, T.; Seemann, T.; Sherry; Vaccher, S.                                                                                                                                                                                                                                                                                                                                                                                                                                                                                                           |
| EPI_ISL_1424519 to 1424635                                                                                                                                                                                                                                                                                                                                                                                                                                                                                                                                                                                                                                                                                                                                                                                                                                                                                                                                                                                                                                                                                                                                                                                                                                                                                                                                                                                                                                                                                                                                                                                                                                                                                                                                                                                                                                                                                                                                                                                                                                                                                                                                                                                                                                                                                                                                                                                                                                                                                                                                                                                                                                                                                                                                                                                                                                                                                                                                                                                                                                                                                                                                                                                                                                                                                                                                                                                                                                                                                                                                                                                                                                                                                                                                                                                                                                                                                                                                                                                                                                                                                                                                                                                                                                                                                                                                                                                                                                                                                                                                                                                                                                                                                                                                                                                                                                                                                                                                                                                                                                                                                                                                                                                                                                                                                                                                                                                                                                                                                                                                                                                                                                                                                                                                                                                                                                                                                                                                                                                                                                                                                                                                                                                                                                                                                                                                                                                                                                                                                                                                                                                                                                                     | Queensland Medical Laboratories                                                                                         | Victorian Infectious Diseases Reference Laboratory (VIDRL) and the Melbourne Diagnostic Unit Public Health Laboratory (MDU-PHL) | N.L.; Palou, T.; Seemann, T.; Sherry; Vaccher, S.                                                                                                                                                                                                                                                                                                                                                                                                                                                                                                           |
| EPI_ISL_1520144 to 1520145                                                                                                                                                                                                                                                                                                                                                                                                                                                                                                                                                                                                                                                                                                                                                                                                                                                                                                                                                                                                                                                                                                                                                                                                                                                                                                                                                                                                                                                                                                                                                                                                                                                                                                                                                                                                                                                                                                                                                                                                                                                                                                                                                                                                                                                                                                                                                                                                                                                                                                                                                                                                                                                                                                                                                                                                                                                                                                                                                                                                                                                                                                                                                                                                                                                                                                                                                                                                                                                                                                                                                                                                                                                                                                                                                                                                                                                                                                                                                                                                                                                                                                                                                                                                                                                                                                                                                                                                                                                                                                                                                                                                                                                                                                                                                                                                                                                                                                                                                                                                                                                                                                                                                                                                                                                                                                                                                                                                                                                                                                                                                                                                                                                                                                                                                                                                                                                                                                                                                                                                                                                                                                                                                                                                                                                                                                                                                                                                                                                                                                                                                                                                                                                     | Quest Diagnostics                                                                                                       | Illinois Department of Public Health - Chicago Lab                                                                              | Ira Heimler; Vineet K. Dhiman                                                                                                                                                                                                                                                                                                                                                                                                                                                                                                                               |
| EPI_ISL_490210 to 490223                                                                                                                                                                                                                                                                                                                                                                                                                                                                                                                                                                                                                                                                                                                                                                                                                                                                                                                                                                                                                                                                                                                                                                                                                                                                                                                                                                                                                                                                                                                                                                                                                                                                                                                                                                                                                                                                                                                                                                                                                                                                                                                                                                                                                                                                                                                                                                                                                                                                                                                                                                                                                                                                                                                                                                                                                                                                                                                                                                                                                                                                                                                                                                                                                                                                                                                                                                                                                                                                                                                                                                                                                                                                                                                                                                                                                                                                                                                                                                                                                                                                                                                                                                                                                                                                                                                                                                                                                                                                                                                                                                                                                                                                                                                                                                                                                                                                                                                                                                                                                                                                                                                                                                                                                                                                                                                                                                                                                                                                                                                                                                                                                                                                                                                                                                                                                                                                                                                                                                                                                                                                                                                                                                                                                                                                                                                                                                                                                                                                                                                                                                                                                                                       | Quest Diagnostics                                                                                                       | Q Squared Solutions - QRTP facility                                                                                             | Victor J Weigman                                                                                                                                                                                                                                                                                                                                                                                                                                                                                                                                            |
| EPI_ISL_454691 to 454693, EPI_ISL_467811 to 467927, EPI_ISL_468560 to 468590, EPI_ISL_494504 to 494552, EPI_ISL_498695 to 498747, EPI_ISL_500459, EPI_ISL_571016 to 572185, EPI_ISL_603759 to 605057                                                                                                                                                                                                                                                                                                                                                                                                                                                                                                                                                                                                                                                                                                                                                                                                                                                                                                                                                                                                                                                                                                                                                                                                                                                                                                                                                                                                                                                                                                                                                                                                                                                                                                                                                                                                                                                                                                                                                                                                                                                                                                                                                                                                                                                                                                                                                                                                                                                                                                                                                                                                                                                                                                                                                                                                                                                                                                                                                                                                                                                                                                                                                                                                                                                                                                                                                                                                                                                                                                                                                                                                                                                                                                                                                                                                                                                                                                                                                                                                                                                                                                                                                                                                                                                                                                                                                                                                                                                                                                                                                                                                                                                                                                                                                                                                                                                                                                                                                                                                                                                                                                                                                                                                                                                                                                                                                                                                                                                                                                                                                                                                                                                                                                                                                                                                                                                                                                                                                                                                                                                                                                                                                                                                                                                                                                                                                                                                                                                                           | Quest Diagnostics                                                                                                       | Quest Diagnostics                                                                                                               | Anderson; Anderson, B.; B.P.; D.F.; Gerasimova, A.; Grover, D.; Hua, M.; K.E.; Kagan; Lacbawan, F.; Liu Y.; Livingston; Owen; Owen, R.; R. AND Lacbawan, F.; R.M.; R.M. and Owen, R.; Rosenthal; S.H.; Shalhout                                                                                                                                                                                                                                                                                                                                             |
| EPI_ISL_1391417 to 1391420, EPI_ISL_1391422 to 1391620, EPI_ISL_1391622 to 1391698, EPI_ISL_1392237, EPI_ISL_1392239 to 1392240, EPI_ISL_1392242, EPI_ISL_1392244, EPI_ISL_1392246, EPI_ISL_1392248, EPI_ISL_1392250, EPI_ISL_1392252, EPI_ISL_1392254 to 1392255, EPI_ISL_1392258, EPI_ISL_1392260, EPI_ISL_1392262, EPI_ISL_1392264, EPI_ISL_1392266, EPI_ISL_1392268, EPI_ISL_1392270, EPI_ISL_1392272, EPI_ISL_1392274, EPI_ISL_1392276, EPI_ISL_1392278, EPI_ISL_1392280, EPI_ISL_1392282, EPI_ISL_1392284, EPI_ISL_1392286, EPI_ISL_1392288, EPI_ISL_1392290, EPI_ISL_1392292, EPI_ISL_1392294, EPI_ISL_1392296, EPI_ISL_1392298, EPI_ISL_1392300, EPI_ISL_1392302, EPI_ISL_1392304 to 1392305, EPI_ISL_1392307, EPI_ISL_1392309, EPI_ISL_1392311, EPI_ISL_1392313, EPI_ISL_1392315, EPI_ISL_1392317, EPI_ISL_1392319, EPI_ISL_1392321, EPI_ISL_1392323, EPI_ISL_1392325, EPI_ISL_1392327, EPI_ISL_1392329, EPI_ISL_1392331, EPI_ISL_1392333, EPI_ISL_1392335 to 1392336, EPI_ISL_1392338, EPI_ISL_1392340, EPI_ISL_1392343, EPI_ISL_1392345, EPI_ISL_1392347, EPI_ISL_1392349, EPI_ISL_1392351, EPI_ISL_1392353, EPI_ISL_1392355, EPI_ISL_1392357, EPI_ISL_1392359, EPI_ISL_1392361, EPI_ISL_1392363, EPI_ISL_1392365, EPI_ISL_1392367 to 1392368, EPI_ISL_1392370, EPI_ISL_1392372, EPI_ISL_1392374, EPI_ISL_1392376, EPI_ISL_1392378, EPI_ISL_1392380, EPI_ISL_1392382, EPI_ISL_1392384, EPI_ISL_1392386, EPI_ISL_1392388, EPI_ISL_1392390, EPI_ISL_1392392, EPI_ISL_1392394, EPI_ISL_1392396, EPI_ISL_1392398, EPI_ISL_1392400, EPI_ISL_1392402, EPI_ISL_1392404, EPI_ISL_1392406, EPI_ISL_1392408 to 1392409, EPI_ISL_1392412, EPI_ISL_1392414, EPI_ISL_1392416 to 1392417, EPI_ISL_1392420, EPI_ISL_1392422, EPI_ISL_1392424, EPI_ISL_1392426, EPI_ISL_1392428, EPI_ISL_1392430 to 1392431, EPI_ISL_1392434, EPI_ISL_1392436, EPI_ISL_1422327 to 1422561, EPI_ISL_1422564, EPI_ISL_1422567, EPI_ISL_1422570, EPI_ISL_1422573, EPI_ISL_1422576, EPI_ISL_1422579, EPI_ISL_1422582, EPI_ISL_1422585, EPI_ISL_1422588, EPI_ISL_1422591 to 1422991, EPI_ISL_1444347 to 1444672, EPI_ISL_1444675, EPI_ISL_1444678, EPI_ISL_1444681, EPI_ISL_1444684, EPI_ISL_1444687, EPI_ISL_1444689 to 1444731, EPI_ISL_1460730 to 1460785, EPI_ISL_1479683 to 1479801, EPI_ISL_1479870 to 1480006, EPI_ISL_1480521 to 1480976, EPI_ISL_1491950 to 1492069, EPI_ISL_1492072, EPI_ISL_1492075, EPI_ISL_1492078, EPI_ISL_1492080, EPI_ISL_1492083, EPI_ISL_1492086, EPI_ISL_1492088, EPI_ISL_1492091, EPI_ISL_1492094, EPI_ISL_1492096, EPI_ISL_1492098, EPI_ISL_1492101, EPI_ISL_1492104, EPI_ISL_1492106, EPI_ISL_1492109, EPI_ISL_1492112, EPI_ISL_1492115, EPI_ISL_1492118, EPI_ISL_1492120, EPI_ISL_1492122, EPI_ISL_1492125, EPI_ISL_1492128, EPI_ISL_1492131, EPI_ISL_1492134, EPI_ISL_1492136, EPI_ISL_1492139, EPI_ISL_1492142, EPI_ISL_1492145, EPI_ISL_1493601 to 1493721, EPI_ISL_1511646 to 1511696, EPI_ISL_1511698 to 1511859, EPI_ISL_1525904 to 1526070, EPI_ISL_1551643 to 1551693, EPI_ISL_1551695 to 1551915, EPI_ISL_1551917 to 1551951, EPI_ISL_1551953 to 1552083, EPI_ISL_1552085 to 1552242, EPI_ISL_1552245, EPI_ISL_1552249, EPI_ISL_1552252, EPI_ISL_1552254 to 1552255, EPI_ISL_1552257, EPI_ISL_1552259 to 1552260, EPI_ISL_1552262, EPI_ISL_1552264 to 1552265, EPI_ISL_1552267, EPI_ISL_1552269, EPI_ISL_1552273, EPI_ISL_1552275, EPI_ISL_1552277, EPI_ISL_1552280, EPI_ISL_1552282 to 1552283, EPI_ISL_1552286, EPI_ISL_1552288, EPI_ISL_1552290 to 1552291, EPI_ISL_1552293, EPI_ISL_1552295 to 1552296, EPI_ISL_1552298 to 1552299, EPI_ISL_1552301, EPI_ISL_1552304 to 1552305, EPI_ISL_1552307 to 1552308, EPI_ISL_1552310 to 1552311, EPI_ISL_1552313 to 1552314, EPI_ISL_1552316, EPI_ISL_1552321, EPI_ISL_1552324, EPI_ISL_1552327, EPI_ISL_1552330, EPI_ISL_1552333 to 1552334, EPI_ISL_1552336 to 1552337, EPI_ISL_1552339, EPI_ISL_1552341 to 1552342, EPI_ISL_1552344, EPI_ISL_1552346 to 1552347, EPI_ISL_1552349 to 1552351, EPI_ISL_1552353, EPI_ISL_1552355, EPI_ISL_1552357, EPI_ISL_1552359, EPI_ISL_1552361 to 1552362, EPI_ISL_1552364 to 1552365, EPI_ISL_1552367 to 1552368, EPI_ISL_1552370 to 1552371, EPI_ISL_1552373, EPI_ISL_1552375 to 1552376, EPI_ISL_1552378 to 1552379, EPI_ISL_1552382, EPI_ISL_1552384, EPI_ISL_1552386, EPI_ISL_1552388, EPI_ISL_1552390, EPI_ISL_1552392, EPI_ISL_1552394 to 1552395, EPI_ISL_1552397 to 1552398, EPI_ISL_1552400, EPI_ISL_1552402 to 1552403, EPI_ISL_1552405 to 1552406, EPI_ISL_1552408 to 1552409, EPI_ISL_1552411 to 1552412, EPI_ISL_1552414 to 1552415, EPI_ISL_1552417 to 1552418, EPI_ISL_1552420 to 1552421, EPI_ISL_1552424, EPI_ISL_1552426, EPI_ISL_1552428, EPI_ISL_1552429 to 1552429, EPI_ISL_1552431 to 1552432, EPI_ISL_1552434, EPI_ISL_1552436 to 1552437, EPI_ISL_1552439 to 1552440, EPI_ISL_1552442 to 1552443, EPI_ISL_1552445 to 1552446, EPI_ISL_1552449, EPI_ISL_1552452, EPI_ISL_1552455, EPI_ISL_1552458, EPI_ISL_1552460, EPI_ISL_1552463, EPI_ISL_1552466, EPI_ISL_1552469, EPI_ISL_1552473, EPI_ISL_1552476, EPI_ISL_1552479, EPI_ISL_1552482, EPI_ISL_1552484, EPI_ISL_1552487, EPI_ISL_1552490, EPI_ISL_1552493, EPI_ISL_1552496, EPI_ISL_1552499, EPI_ISL_1552502, EPI_ISL_1552505, EPI_ISL_1552508, EPI_ISL_1552511, EPI_ISL_1552514, EPI_ISL_1552517, EPI_ISL_1552523, EPI_ISL_1552526, EPI_ISL_1552529, EPI_ISL_1552532, EPI_ISL_1552535, EPI_ISL_1552539, EPI_ISL_1552542, EPI_ISL_1552544, EPI_ISL_1552547, EPI_ISL_1552550, EPI_ISL_1552553, EPI_ISL_1552556, EPI_ISL_1552559, EPI_ISL_1552562, EPI_ISL_1552565, EPI_ISL_1552568, EPI_ISL_1552571, EPI_ISL_1552574, EPI_ISL_1552577, EPI_ISL_1552580, EPI_ISL_1552583, EPI_ISL_1552586, EPI_ISL_1552589, EPI_ISL_1552592, EPI_ISL_1552594, EPI_ISL_1552597, EPI_ISL_1552600, EPI_ISL_1552602, EPI_ISL_1552605, EPI_ISL_1552608, EPI_ISL_1552611, EPI_ISL_1552614, EPI_ISL_1552617, EPI_ISL_1552620, EPI_ISL_1552623, EPI_ISL_1552626, EPI_ISL_1552629, EPI_ISL_1552632, EPI_ISL_1552635, EPI_ISL_1552639, EPI_ISL_1552642, EPI_ISL_1552645, EPI_ISL_1552648, EPI_ISL_1552651, EPI_ISL_1552654, EPI_ISL_1552657, EPI_ISL_1552660, EPI_ISL_1552663, EPI_ISL_1552665, EPI_ISL_1552668, EPI_ISL_1552674, EPI_ISL_1552677, EPI_ISL_1552680, EPI_ISL_1552683, EPI_ISL_1552685 to 1552812, EPI_ISL_1552814 to 1552923, EPI_ISL_1552925 to 1553037, EPI_ISL_1553039 to 1553052, EPI_ISL_1553054 to 1553172, EPI_ISL_1559412 to 1559434, EPI_ISL_1559436 to 1559451, EPI_ISL_1559453 to 1559516, EPI_ISL_1559518 to 1559529, EPI_ISL_1559531 to 1559540, EPI_ISL_1559542 to 1559543, EPI_ISL_1559545 to 1559548, EPI_ISL_1559550 to 1559551, EPI_ISL_1559553 to 1559556, EPI_ISL_1559558 to 1559587 | Quest Diagnostics Incorporated                                                                                          | Centers for Disease Control and Prevention Division of Viral Diseases, Pathogen Discovery                                       | A. Gerasimova; A. Perez; Adrian Paskey; B. Anderson; Ben L. Rambo-Martin; Benjamin Rambo-Martin; Christopher Gulvick; Clinton R. Paden; Dakota Howard; Darlene Wagner; Dhvani Batra; Duncan MacCannell; F. Lacbawan; I. A. Shlyakhter; Jason Caravas; K.E. Livingston; Kara Moser; L.E. Bernstein; M. Hua; Matthew Schmerer; P. Tanpaiboon; Peter W. Cook; R. M. Kagan; R. Owen; R. V. Rolando; S. H. Rosenthal; Scott Sammons; Shatavisa Morrison; Suxiang Tong; Y. Liu; Yvette Unoarumhi                                                                  |
| EPI_ISL_569615                                                                                                                                                                                                                                                                                                                                                                                                                                                                                                                                                                                                                                                                                                                                                                                                                                                                                                                                                                                                                                                                                                                                                                                                                                                                                                                                                                                                                                                                                                                                                                                                                                                                                                                                                                                                                                                                                                                                                                                                                                                                                                                                                                                                                                                                                                                                                                                                                                                                                                                                                                                                                                                                                                                                                                                                                                                                                                                                                                                                                                                                                                                                                                                                                                                                                                                                                                                                                                                                                                                                                                                                                                                                                                                                                                                                                                                                                                                                                                                                                                                                                                                                                                                                                                                                                                                                                                                                                                                                                                                                                                                                                                                                                                                                                                                                                                                                                                                                                                                                                                                                                                                                                                                                                                                                                                                                                                                                                                                                                                                                                                                                                                                                                                                                                                                                                                                                                                                                                                                                                                                                                                                                                                                                                                                                                                                                                                                                                                                                                                                                                                                                                                                                 | Quick Care Huron                                                                                                        | South Dakota Public Health Laboratory                                                                                           | Jacob Garfin; Matt Plumb; Xiong Wang; and Chris Carlson                                                                                                                                                                                                                                                                                                                                                                                                                                                                                                     |
| EPI_ISL_569621, EPI_ISL_569623                                                                                                                                                                                                                                                                                                                                                                                                                                                                                                                                                                                                                                                                                                                                                                                                                                                                                                                                                                                                                                                                                                                                                                                                                                                                                                                                                                                                                                                                                                                                                                                                                                                                                                                                                                                                                                                                                                                                                                                                                                                                                                                                                                                                                                                                                                                                                                                                                                                                                                                                                                                                                                                                                                                                                                                                                                                                                                                                                                                                                                                                                                                                                                                                                                                                                                                                                                                                                                                                                                                                                                                                                                                                                                                                                                                                                                                                                                                                                                                                                                                                                                                                                                                                                                                                                                                                                                                                                                                                                                                                                                                                                                                                                                                                                                                                                                                                                                                                                                                                                                                                                                                                                                                                                                                                                                                                                                                                                                                                                                                                                                                                                                                                                                                                                                                                                                                                                                                                                                                                                                                                                                                                                                                                                                                                                                                                                                                                                                                                                                                                                                                                                                                 | Quick Care Watertown                                                                                                    | South Dakota Public Health Laboratory                                                                                           | Jacob Garfin; Matt Plumb; Xiong Wang; and Chris Carlson                                                                                                                                                                                                                                                                                                                                                                                                                                                                                                     |
| EPI_ISL_415641 to 415644, EPI_ISL_416477 to 416482                                                                                                                                                                                                                                                                                                                                                                                                                                                                                                                                                                                                                                                                                                                                                                                                                                                                                                                                                                                                                                                                                                                                                                                                                                                                                                                                                                                                                                                                                                                                                                                                                                                                                                                                                                                                                                                                                                                                                                                                                                                                                                                                                                                                                                                                                                                                                                                                                                                                                                                                                                                                                                                                                                                                                                                                                                                                                                                                                                                                                                                                                                                                                                                                                                                                                                                                                                                                                                                                                                                                                                                                                                                                                                                                                                                                                                                                                                                                                                                                                                                                                                                                                                                                                                                                                                                                                                                                                                                                                                                                                                                                                                                                                                                                                                                                                                                                                                                                                                                                                                                                                                                                                                                                                                                                                                                                                                                                                                                                                                                                                                                                                                                                                                                                                                                                                                                                                                                                                                                                                                                                                                                                                                                                                                                                                                                                                                                                                                                                                                                                                                                                                             | R. G. Lugar Center for Public Health Research, National Center for Disease Control and Public Health (NCDC) of Georgia. | R. G. Lugar Center for Public Health Research, National Center for Disease Control and Public Health (NCDC) of Georgia.         | Adam Kotorashvili; Amiran Gamkrelidze.; Ana Pakpaki; Ann Machabishvili; Anna Kasradze; Davit Tsaguria; Ekaterine Khmaladze; Ekaterine Zangaladze; Ekaterine Zhgenti; Giorgi Tomashvili; Gvantsa Brachveli; Gvantsa Chanturia; Irma Burjanadze; Ketevan Sidamondze; Khatusa Zakhshvili; Lela Sabadze; Lela Urushadze; Magda Dgebudze; Maia Alkhaszashvili; Mari Gavashelidze; Marjan Zakalashvili; Marine Murtonikvhaladze; Meri Pantsulia; Nato Kotaria; Nino Berishvili; Paata Imnadze; Roena Sukhishvili; Tamar Jashishvili; Tata Imnadze; Tea Tevdoradze |
| EPI_ISL_1393640 to 1393642, EPI_ISL_1538757, EPI_ISL_1539030                                                                                                                                                                                                                                                                                                                                                                                                                                                                                                                                                                                                                                                                                                                                                                                                                                                                                                                                                                                                                                                                                                                                                                                                                                                                                                                                                                                                                                                                                                                                                                                                                                                                                                                                                                                                                                                                                                                                                                                                                                                                                                                                                                                                                                                                                                                                                                                                                                                                                                                                                                                                                                                                                                                                                                                                                                                                                                                                                                                                                                                                                                                                                                                                                                                                                                                                                                                                                                                                                                                                                                                                                                                                                                                                                                                                                                                                                                                                                                                                                                                                                                                                                                                                                                                                                                                                                                                                                                                                                                                                                                                                                                                                                                                                                                                                                                                                                                                                                                                                                                                                                                                                                                                                                                                                                                                                                                                                                                                                                                                                                                                                                                                                                                                                                                                                                                                                                                                                                                                                                                                                                                                                                                                                                                                                                                                                                                                                                                                                                                                                                                                                                   | RCKIK                                                                                                                   | 1. National Institute of Public Health - National Institute of Hygiene; 2. Eurofins Genomics Europe Sequencing GmbH             | ECDC COVID-19 WGS support team; Eurofins Genomics Europe Sequencing Team; Gierczyki Rafa; Sadkowska-Todys Magorzata; Wokowicz Tomasz; Zacharczuk Katarzyna                                                                                                                                                                                                                                                                                                                                                                                                  |
| EPI_ISL_455308 to 455311, EPI_ISL_455478                                                                                                                                                                                                                                                                                                                                                                                                                                                                                                                                                                                                                                                                                                                                                                                                                                                                                                                                                                                                                                                                                                                                                                                                                                                                                                                                                                                                                                                                                                                                                                                                                                                                                                                                                                                                                                                                                                                                                                                                                                                                                                                                                                                                                                                                                                                                                                                                                                                                                                                                                                                                                                                                                                                                                                                                                                                                                                                                                                                                                                                                                                                                                                                                                                                                                                                                                                                                                                                                                                                                                                                                                                                                                                                                                                                                                                                                                                                                                                                                                                                                                                                                                                                                                                                                                                                                                                                                                                                                                                                                                                                                                                                                                                                                                                                                                                                                                                                                                                                                                                                                                                                                                                                                                                                                                                                                                                                                                                                                                                                                                                                                                                                                                                                                                                                                                                                                                                                                                                                                                                                                                                                                                                                                                                                                                                                                                                                                                                                                                                                                                                                                                                       | REGIONAL VRDL,ICMR-RRMC BBSR                                                                                            | Immunogenomics group, Institute of Life Sciences, Bhubaneswar                                                                   | Ajay Parida; Arup Ghosh; Atimukta Jha; COVID-19 team of ILS & RRMC; DBT's PAN-INDIA 1000 SARS-CoV2 RNA genome sequencing consortium; Debdutta Bhattacharya; Ghulam Hussain Syed; Jaya Singh Khastri; Jyotirmayee Turuk; Manasi Priyadarshini; Orissa COVID-19 study group; Punit Prasad; Rajeeb Swain; Rupesh Dash; Sanghamitra Pati; Shanti Senapati; Shuchi Smita; Soma Chattopadhyay; Sunil Raghav; Swati Madhulika; Tushar K. Beuria; Viplov K. Biswas                                                                                                  |
| EPI_ISL_455749 to 455788                                                                                                                                                                                                                                                                                                                                                                                                                                                                                                                                                                                                                                                                                                                                                                                                                                                                                                                                                                                                                                                                                                                                                                                                                                                                                                                                                                                                                                                                                                                                                                                                                                                                                                                                                                                                                                                                                                                                                                                                                                                                                                                                                                                                                                                                                                                                                                                                                                                                                                                                                                                                                                                                                                                                                                                                                                                                                                                                                                                                                                                                                                                                                                                                                                                                                                                                                                                                                                                                                                                                                                                                                                                                                                                                                                                                                                                                                                                                                                                                                                                                                                                                                                                                                                                                                                                                                                                                                                                                                                                                                                                                                                                                                                                                                                                                                                                                                                                                                                                                                                                                                                                                                                                                                                                                                                                                                                                                                                                                                                                                                                                                                                                                                                                                                                                                                                                                                                                                                                                                                                                                                                                                                                                                                                                                                                                                                                                                                                                                                                                                                                                                                                                       | REGIONAL VRDL,ICMR-RRMC BBSR                                                                                            | Immunogenomics lab, Institute of Life Sciences, Bhubaneswar                                                                     | Ajay Parida; Arup Ghosh; Atimukta Jha; COVID-19 team of ILS & RRMC; DBT's PAN-INDIA 1000 SARS-CoV2 RNA genome sequencing consortium; Debdutta Bhattacharya; Ghulam Hussain Syed; Jaya Singh Khastri; Jyotirmayee Turuk; Manasi Priyadarshini; Orissa COVID-19 study group; Punit Prasad; Rajeeb Swain; Rupesh Dash; Sanghamitra Pati; Shanti Senapati; Shuchi Smita; Soma Chattopadhyay; Sunil Raghav; Swati Madhulika; Tushar K. Beuria; Viplov K. Biswas                                                                                                  |
| EPI_ISL_1446572 to 1446575, EPI_ISL_1516377 to 1516387, EPI_ISL_1528462 to 1528474                                                                                                                                                                                                                                                                                                                                                                                                                                                                                                                                                                                                                                                                                                                                                                                                                                                                                                                                                                                                                                                                                                                                                                                                                                                                                                                                                                                                                                                                                                                                                                                                                                                                                                                                                                                                                                                                                                                                                                                                                                                                                                                                                                                                                                                                                                                                                                                                                                                                                                                                                                                                                                                                                                                                                                                                                                                                                                                                                                                                                                                                                                                                                                                                                                                                                                                                                                                                                                                                                                                                                                                                                                                                                                                                                                                                                                                                                                                                                                                                                                                                                                                                                                                                                                                                                                                                                                                                                                                                                                                                                                                                                                                                                                                                                                                                                                                                                                                                                                                                                                                                                                                                                                                                                                                                                                                                                                                                                                                                                                                                                                                                                                                                                                                                                                                                                                                                                                                                                                                                                                                                                                                                                                                                                                                                                                                                                                                                                                                                                                                                                                                             | RI State Health Laboratories                                                                                            | Centers for Disease Control and Prevention Division of Viral Diseases, Pathogen Discovery                                       | Alison Lauffer Halpin; Ben L. Rambo-Martin; Clinton R. Paden; Dakota Howard; Darlene Wagner; Dave Wentworth; Dhvani Batra; Jasmine Padilla; Justin Lee; Katie Dillon; Krista Queen; Kristen Kripe; Kristine Lacey; Mark Burroughs; Matthew Schmerer; Mill Sheth; Peter Cook; Sam Shepard; Sarah Nobles; Shoshona Le; Suxiang Tong; Vivien Dugan; Yvette Unoarumhi                                                                                                                                                                                           |

|                                                                          |                                                |                                                                                                                                                                                                                                                                                                                                                                                                                                                                  |                                                                                                                                                                                                                                                                                                                                                                                                                                   |
|--------------------------------------------------------------------------|------------------------------------------------|------------------------------------------------------------------------------------------------------------------------------------------------------------------------------------------------------------------------------------------------------------------------------------------------------------------------------------------------------------------------------------------------------------------------------------------------------------------|-----------------------------------------------------------------------------------------------------------------------------------------------------------------------------------------------------------------------------------------------------------------------------------------------------------------------------------------------------------------------------------------------------------------------------------|
| EPI_ISL_419553, EPI_ISL_424887, EPI_ISL_426435, EPI_ISL_535359 to 535360 | RI State Health Laboratories                   | Pathogen Discovery, Respiratory Viruses Branch, Division of Viral Diseases, Centers for Disease Control and Prevention                                                                                                                                                                                                                                                                                                                                           | Alison S. Laufer Halpin; Anna Uehara; Christopher A. Elkins; Clinton Paden; Clinton R. Paden; Haibin Wang; Jasmine Padilla; Jing Zhang; Justin Lee; Krista Queen; Mary S. Keckler; Rachel Marine; Suxiang Tong; Yan Li; Ying Tao                                                                                                                                                                                                  |
| EPI_ISL_420795                                                           | RI State Health Laboratory                     | Pathogen Discovery, Respiratory Viruses Branch, Division of Viral Diseases, Centers for Disease Control and Prevention                                                                                                                                                                                                                                                                                                                                           | Alison S. Laufer Halpin; Anne Uehara; Christopher A. Elkins; Clinton R. Paden; Haibin Wang; Jasmine Padilla; Jing Zhang; Justin Lee; Krista Queen; Mary S. Keckler; Rachel Marine; Suxiang Tong; Yan Li; Ying Tao                                                                                                                                                                                                                 |
| EPI_ISL_413569                                                           | RIVM                                           | Erasmus Medical Center                                                                                                                                                                                                                                                                                                                                                                                                                                           | Anne van der Linden; Annemiek van der Eijk; Aura Timen; Bas Oude Munnink; Claudia Schapendonk; Corien Swaan; Corine GeurtsvanKessel; David Nieuwenhuijse; Irina Chestakova; Jeroen van Kampen; Jolanda Voermans; Madelief Mollers; Manon Haverkate; Marion Koopmans; Mark Pronk; Mart Stein; Pascal Lexmond; Reina Sikkema; Richard Molenkamp; Sandra Kengne Kamga Mobou; on behalf of the Dutch national COVID-19 response team. |
| EPI_ISL_568693, EPI_ISL_574603                                           | RS Freeport Tembagapura                        | Eijkman Institute for Molecular Biology, Ministry of Research and Technology/National Agency for Research and Innovation                                                                                                                                                                                                                                                                                                                                         | Amin Soebandrio; David H Muljono; Edison Johar; Frilasita A Yudhaputri; Herawati Sudoyo; Hidayat Trimarsanto; Iskandar A Adnan; Khin Saw Myint; Safarina G Malik; Willy Agustine                                                                                                                                                                                                                                                  |
| EPI_ISL_574613, EPI_ISL_574615                                           | RS Harapan Bunda                               | Eijkman Institute for Molecular Biology, Ministry of Research and Technology/National Agency for Research and Innovation                                                                                                                                                                                                                                                                                                                                         | Amin Soebandrio; David H Muljono; Edison Johar; Frilasita A Yudhaputri; Herawati Sudoyo; Hidayat Trimarsanto; Iskandar A Adnan; Khin Saw Myint; Safarina G Malik; Willy Agustine                                                                                                                                                                                                                                                  |
| EPI_ISL_574612                                                           | RS Hermina Meksari                             | Eijkman Institute for Molecular Biology, Ministry of Research and Technology/National Agency for Research and Innovation                                                                                                                                                                                                                                                                                                                                         | Amin Soebandrio; David H Muljono; Edison Johar; Frilasita A Yudhaputri; Herawati Sudoyo; Hidayat Trimarsanto; Iskandar A Adnan; Khin Saw Myint; Safarina G Malik; Willy Agustine                                                                                                                                                                                                                                                  |
| EPI_ISL_574607                                                           | RS Husada                                      | Eijkman Institute for Molecular Biology, Ministry of Research and Technology/National Agency for Research and Innovation                                                                                                                                                                                                                                                                                                                                         | Amin Soebandrio; David H Muljono; Edison Johar; Frilasita A Yudhaputri; Herawati Sudoyo; Hidayat Trimarsanto; Iskandar A Adnan; Khin Saw Myint; Safarina G Malik; Willy Agustine                                                                                                                                                                                                                                                  |
| EPI_ISL_1469247, EPI_ISL_1469256 to 1469257, EPI_ISL_1469285 to 1469286  | RS Khusus Paru Karawang                        | National Institute of Health Research and Development                                                                                                                                                                                                                                                                                                                                                                                                            | Arie Ardiansyah Nugraha; Hana Apsari Pawestri; Hartanti Dian Ikawati; Kartika Dewi Puspa; Krisna Pangesti; Nelly Puspandari; Subangkit; Vivi Setiawaty                                                                                                                                                                                                                                                                            |
| EPI_ISL_568692, EPI_ISL_574614, EPI_ISL_574616 to 574618                 | RS Kramat 128                                  | Eijkman Institute for Molecular Biology, Ministry of Research and Technology/National Agency for Research and Innovation                                                                                                                                                                                                                                                                                                                                         | Amin Soebandrio; David H Muljono; Edison Johar; Frilasita A Yudhaputri; Herawati Sudoyo; Hidayat Trimarsanto; Iskandar A Adnan; Khin Saw Myint; Safarina G Malik; Willy Agustine                                                                                                                                                                                                                                                  |
| EPI_ISL_538499                                                           | RS Lavallete Malang East Java                  | National Institute of Health Research and Development                                                                                                                                                                                                                                                                                                                                                                                                            | AA; HA; HD; Ikawati; KD; KNA; Nugraha; Paisal; Pangesti; Pawestri; Puspa; Setiawaty, V.; Soekarso; Subangkit; T                                                                                                                                                                                                                                                                                                                   |
| EPI_ISL_1469254                                                          | RS Lira Medika Karawang                        | National Institute of Health Research and Development                                                                                                                                                                                                                                                                                                                                                                                                            | Arie Ardiansyah Nugraha; Hana Apsari Pawestri; Hartanti Dian Ikawati; Kartika Dewi Puspa; Krisna Pangesti; Nelly Puspandari; Subangkit; Vivi Setiawaty                                                                                                                                                                                                                                                                            |
| EPI_ISL_1469248, EPI_ISL_1469253, EPI_ISL_1469287                        | RS Mandaya Karawang                            | National Institute of Health Research and Development                                                                                                                                                                                                                                                                                                                                                                                                            | Arie Ardiansyah Nugraha; Hana Apsari Pawestri; Hartanti Dian Ikawati; Kartika Dewi Puspa; Krisna Pangesti; Nelly Puspandari; Subangkit; Vivi Setiawaty                                                                                                                                                                                                                                                                            |
| EPI_ISL_574608                                                           | RS Mitra Keluarga Kelapa Gading                | Eijkman Institute for Molecular Biology, Ministry of Research and Technology/National Agency for Research and Innovation                                                                                                                                                                                                                                                                                                                                         | Amin Soebandrio; David H Muljono; Edison Johar; Frilasita A Yudhaputri; Herawati Sudoyo; Hidayat Trimarsanto; Iskandar A Adnan; Khin Saw Myint; Safarina G Malik; Willy Agustine                                                                                                                                                                                                                                                  |
| EPI_ISL_610158                                                           | RS Pantii Rini                                 | Genetics Working Group (Pokja Genetik) Faculty of Medicine, Public Health and Nursing Universitas Gadjah Mada (FK-KMK UGM); Disease Investigation Center Wates Ministry of Agriculture Indonesia; Department of Microbiology FK-KMK UGM; Laboratorium Diagnostik Yayasan Tahija World Mosquito Program (WMP) Yogyakarta Center for Tropical Medicine FK-KMK UGM; Integrated Research Center FK-KMK UGM; Department of Computer Science and Electronics FMIPA UGM | Afiahayati; Dwi AA Nugrahaningsih; Dwiki Afandy; Dyah Ayu Puspitarani; Edwin W. Daniwijaya; Eggi Arguni; Endah Supriyati; Gunadi; Hendra Wibawa; Kristy Iskandar; Ludhang P. Rizki; Marcellus; Mohamad S. Hakim; Nungki Anggorowati; Siswanto; Titik Nuryastuti; Tri Wibawa; V. Noegroho Isti Donodjati; Wawan Triharjanto                                                                                                        |
| EPI_ISL_568688                                                           | RS Pelni                                       | Eijkman Institute for Molecular Biology, Ministry of Research and Technology/National Agency for Research and Innovation                                                                                                                                                                                                                                                                                                                                         | Amin Soebandrio; David H Muljono; Edison Johar; Frilasita A Yudhaputri; Herawati Sudoyo; Hidayat Trimarsanto; Iskandar A Adnan; Khin Saw Myint; Safarina G Malik; Willy Agustine                                                                                                                                                                                                                                                  |
| EPI_ISL_435282 to 435283, EPI_ISL_437190 to 437191                       | RS Pondok Indah Hospital - Pondok Indah 437191 | Eijkman Institute for Molecular Biology, Ministry of Research and Technology/National Agency for Research and Innovation                                                                                                                                                                                                                                                                                                                                         | Amin Soebandrio; David H Muljono; Edison Johar; Frilasita A Yudhaputri; Hidayat Trimarsanto; Khin Saw Myint; Safarina G Malik                                                                                                                                                                                                                                                                                                     |
| EPI_ISL_568689                                                           | RS Pondok Indah Puri Indah                     | Eijkman Institute for Molecular Biology, Ministry of Research and Technology/National Agency for Research and Innovation                                                                                                                                                                                                                                                                                                                                         | Amin Soebandrio; David H Muljono; Edison Johar; Frilasita A Yudhaputri; Herawati Sudoyo; Hidayat Trimarsanto; Iskandar A Adnan; Khin Saw Myint; Safarina G Malik; Willy Agustine                                                                                                                                                                                                                                                  |
| EPI_ISL_574611                                                           | RS Premier Bintaro                             | Eijkman Institute for Molecular Biology, Ministry of Research and Technology/National Agency for Research and Innovation                                                                                                                                                                                                                                                                                                                                         | Amin Soebandrio; David H Muljono; Edison Johar; Frilasita A Yudhaputri; Herawati Sudoyo; Hidayat Trimarsanto; Iskandar A Adnan; Khin Saw Myint; Safarina G Malik; Willy Agustine                                                                                                                                                                                                                                                  |
| EPI_ISL_538500 to 538501                                                 | RS Prima Husada Cipta Medan North Sumatra      | National Institute of Health Research and Development                                                                                                                                                                                                                                                                                                                                                                                                            | AA; HA; HD; Ikawati; KD; KNA; Nugraha; Paisal; Pangesti; Pawestri; Puspa; Setiawaty, V.; Soekarso; Subangkit; T                                                                                                                                                                                                                                                                                                                   |
| EPI_ISL_574606                                                           | RS Siloam Purwakarta                           | Eijkman Institute for Molecular Biology, Ministry of Research and Technology/National Agency for Research and Innovation                                                                                                                                                                                                                                                                                                                                         | Amin Soebandrio; David H Muljono; Edison Johar; Frilasita A Yudhaputri; Herawati Sudoyo; Hidayat Trimarsanto; Iskandar A Adnan; Khin Saw Myint; Safarina G Malik; Willy Agustine                                                                                                                                                                                                                                                  |
| EPI_ISL_1392663 to 1392665, EPI_ISL_1502460, EPI_ISL_1502498             | RSA GIULIANA GIULIANA(TERAMO)                  | Istituto Zooprofilattico Sperimentale dell'Abruzzo e Molise "G. Caporale"                                                                                                                                                                                                                                                                                                                                                                                        | Ancora M; Calistri P; Cammà C; Caporale M; Curini V; Delli Compagni E; Di Domenico M; Di Lollo Valeria; Di Pasquale A; Lorusso A; Mangone I; Marcacci M; Puglia I; Rinaldi A; Savini G; Scialabba S                                                                                                                                                                                                                               |
| EPI_ISL_529017                                                           | RSA San Raffaele Sulmona                       | Istituto Zooprofilattico Sperimentale dell'Abruzzo e Molise "G. Caporale"                                                                                                                                                                                                                                                                                                                                                                                        | Ancora M; Cammà C; Curini V; Di Domenico M; Di Pasquale A; Lorusso A; Mangone I; Marcacci M; Puglia I; Rinaldi A; Savini G.                                                                                                                                                                                                                                                                                                       |
| EPI_ISL_576145                                                           | RSA Universitas Gadjah Mada                    | Genetics Working Group (Pokja Genetik) Faculty of Medicine, Public Health and Nursing Universitas Gadjah Mada (FK-KMK UGM); Disease Investigation Center Wates Ministry of Agriculture Indonesia; Department of Microbiology FK-KMK UGM; Laboratorium Diagnostik Yayasan Tahija World Mosquito Program (WMP) Yogyakarta Center for Tropical Medicine FK-KMK UGM; Integrated Research Center FK-KMK UGM; Department of Computer Science and Electronics FMIPA UGM | Afiahayati; Dwi AA Nugrahaningsih; Edwin W. Daniwijaya; Eggi Arguni; Endah Supriyati; Fadil Fahri; Gunadi; Hendra Wibawa; Kristy Iskandar; Ludhang P. Rizki; Marcellus; Mohamad S. Hakim; Nungki Anggorowati; Siswanto; Titik Nuryastuti; Tri Wibawa; William Widitjjarso                                                                                                                                                         |
| EPI_ISL_529019                                                           | RSA/RP Villa San Giovanni - Gruppo Edos        | Istituto Zooprofilattico Sperimentale dell'Abruzzo e Molise "G. Caporale"                                                                                                                                                                                                                                                                                                                                                                                        | Ancora M; Cammà C; Curini V; Di Domenico M; Di Pasquale A; Lorusso A; Mangone I; Marcacci M; Puglia I; Rinaldi A; Savini G.                                                                                                                                                                                                                                                                                                       |
| EPI_ISL_436725                                                           | RSA/RP Villa San Giovanni - Gruppo Edos        | Istituto Zooprofilattico Sperimentale dell'Abruzzo e Molise "G. Caporale"                                                                                                                                                                                                                                                                                                                                                                                        | Ancora M; Cammà C; Curini V; Di Domenico M; Di Pasquale A; Lorusso A; Mangone I; Marcacci M; Puglia I; Rinaldi A; Savini G                                                                                                                                                                                                                                                                                                        |
| EPI_ISL_529138                                                           | RSAL Dr. Ramealan Surabaya                     | Institute of Tropical Disease, Universitas Airlangga                                                                                                                                                                                                                                                                                                                                                                                                             | Aldise M Nastri; Gatot Soegiarto; Jezzy R Dewantari; Kazufumi Shimizu; Krisnoadi Rahardjo; Laksmi Wulandari; Maria I Lusida; Mitsuhiko Nishimura; Radito Soesanto; Resti Yudhawati; Retno A Setyoningrum; Rima R Prasetya; Soetjipto; Yasuko Mori; Yokho K Shimizu                                                                                                                                                                |
| EPI_ISL_454497 to 454520                                                 | RSE "National Center for Biotechnology"        | RSE "National Center for Biotechnology"                                                                                                                                                                                                                                                                                                                                                                                                                          | Akbota Rakhmetova; Alexandr Shevtsov; Askar Abdaliyev; Asylulan Amirgazin; Ilyas Akhmetollayev; Ruslan Kalender; Viktoriya Lutsay; Yerlan Ramankulov; Zabria Aushakmetova                                                                                                                                                                                                                                                         |
| EPI_ISL_574609                                                           | RSJPD Harapan Kita                             | Eijkman Institute for Molecular Biology, Ministry of Research and Technology/National Agency for Research and Innovation                                                                                                                                                                                                                                                                                                                                         | Amin Soebandrio; David H Muljono; Edison Johar; Frilasita A Yudhaputri; Herawati Sudoyo; Hidayat Trimarsanto; Iskandar A Adnan; Khin Saw Myint; Safarina G Malik; Willy Agustine                                                                                                                                                                                                                                                  |
| EPI_ISL_458081, EPI_ISL_529964                                           | RSUD Bangil Pasuruan                           | Institute of Tropical Disease, Universitas Airlangga                                                                                                                                                                                                                                                                                                                                                                                                             | Aldise M Nastri; Arma Roosalina; Gatot Soegiarto; Jezzy R Dewantari; Kazufumi Shimizu; Krisnoadi Rahardjo; Laksmi Wulandari; Maria I Lusida; Mitsuhiko Nishimura; Resti Yudhawati; Retno A Setyoningrum; Rima R Prasetya; Soetjipto; Yasuko Mori; Yokho K Shimizu                                                                                                                                                                 |
| EPI_ISL_576383                                                           | RSUD Budi Rahayu Kota Magelang                 | Genetics Working Group (Pokja Genetik) Faculty of Medicine, Public Health and Nursing Universitas Gadjah Mada (FK-KMK UGM); Disease Investigation Center Wates Ministry of                                                                                                                                                                                                                                                                                       | Aditya Ritqi Fauzi; Afiahayati; Ari Meliyanti; Audric Kenny Tedja; Dwi AA Nugrahaningsih; Edwin W. Daniwijaya; Eggi Arguni; Endah Supriyati; Gunadi; Havid Setyawan; Hendra Wibawa; Indaryati; Irene; Kristy Iskandar; Ludhang P. Rizki; Marcellus; Merliana Sari Situmeang; Mohamad S. Hakim; Nungki Anggorowati; Siswanto; Titik Nuryastuti; Tri Wibawa                                                                         |

|                                                                          |                                                      |                                                                                                                                                                                                                                                                                                                                                                                                                                                                                                                                                          |                                                                                                                                                                                                                                                                                                                                                                                                                                                                                                                                                                                                                                                                                                                                                                                                                                                                                          |
|--------------------------------------------------------------------------|------------------------------------------------------|----------------------------------------------------------------------------------------------------------------------------------------------------------------------------------------------------------------------------------------------------------------------------------------------------------------------------------------------------------------------------------------------------------------------------------------------------------------------------------------------------------------------------------------------------------|------------------------------------------------------------------------------------------------------------------------------------------------------------------------------------------------------------------------------------------------------------------------------------------------------------------------------------------------------------------------------------------------------------------------------------------------------------------------------------------------------------------------------------------------------------------------------------------------------------------------------------------------------------------------------------------------------------------------------------------------------------------------------------------------------------------------------------------------------------------------------------------|
|                                                                          |                                                      | Agriculture Indonesia; Department of Microbiology FK-KMK UGM; Laboratorium Diagnostik Yayasan Tahjia World Mosquito Program (WMP) Yogyakarta Center for Tropical Medicine FK-KMK UGM; Integrated Research Center FK-KMK UGM; Department of Computer Science and Electronics FMIPA UGM; Balai Besar Teknik Kesehatan Lingkungan dan Pengendalian Penyakit (BBTKLPP) Yogyakarta                                                                                                                                                                            |                                                                                                                                                                                                                                                                                                                                                                                                                                                                                                                                                                                                                                                                                                                                                                                                                                                                                          |
| EPI_ISL_437188, EPI_ISL_529965, EPI_ISL_560991                           | RSUD Dr. Soetomo                                     | Institute of Tropical Disease, Universitas Airlangga                                                                                                                                                                                                                                                                                                                                                                                                                                                                                                     | Aldise M Nastri; Gatot Soegiarto; Jezy R Dewantari; Joni Wahyuhadi; Kazufumi Shimizu; Krisnoadi Rahardjo; Laksmi Wulandari; Maria I Lusida; Mitsuhiro Nishimura; Resti Y Meliana; Resti Yudhawati; Retno A Setyoningrum; Rima R Prasetya; Soetijpto; Yasuko Mori; Yohko K Shimizu                                                                                                                                                                                                                                                                                                                                                                                                                                                                                                                                                                                                        |
| EPI_ISL_610161 to 610162                                                 | RSUD Dr. Tjitrowardjo                                | Genetics Working Group (Pokja Genetik) Faculty of Medicine, Public Health and Nursing Universitas Gadjah Mada (FK-KMK UGM); Disease Investigation Center Wates Ministry of Agriculture Indonesia; Department of Microbiology FK-KMK UGM; Laboratorium Diagnostik Yayasan Tahjia World Mosquito Program (WMP) Yogyakarta Center for Tropical Medicine FK-KMK UGM; Integrated Research Center FK-KMK UGM; Department of Computer Science and Electronics FMIPA UGM; Balai Besar Teknik Kesehatan Lingkungan dan Pengendalian Penyakit (BBTKLPP) Yogyakarta | Afiahayati; Alvin Santoso Kalim; Desyifa Mursalin; Dwi AA Nugrahaningsih; Edwin W. Daniwijaya; Eggi Arguni; Endah Supriyati; Gunadi; Havid Setyawan; Hendra Wibawa; Indaryati; Irene; Kerala Athollah; Kristy Iskandar; Ludhang P. Rizki; Marcellus; Mohamad S. Hakim; Nungki Anggorowati; Siswanto; Susan Simanjaya; Titik Nuryastuti; Tri Wibawa; Wuryanto                                                                                                                                                                                                                                                                                                                                                                                                                                                                                                                             |
| EPI_ISL_516829                                                           | RSUD Nyi Ageng Serang                                | Genetics Working Group (Pokja Genetik) Faculty of Medicine, Public Health and Nursing Universitas Gadjah Mada (FK-KMK UGM); Disease Investigation Center Wates Ministry of Agriculture Indonesia; Department of Microbiology FK-KMK UGM; Laboratorium Diagnostik Yayasan Tahjia World Mosquito Program (WMP) Yogyakarta Center for Tropical Medicine FK-KMK UGM; Integrated Research Center FK-KMK UGM; Department of Computer Science and Electronics FMIPA UGM                                                                                         | Marcellus; . Siswanto; Afiahayati; Beby Dewi Sartika; Dwi AA Nugrahaningsih; Dyah Ayu Puspitarani; Edwin W. Daniwijaya; Eggi Arguni; Endah Supriyati; Gunadi; Hendra Wibawa; Ludhang P. Rizki; Mohamad S. Hakim; Titik Nuryastuti; Tri Wibawa                                                                                                                                                                                                                                                                                                                                                                                                                                                                                                                                                                                                                                            |
| EPI_ISL_568686                                                           | RSUD Prof. DR. Margono Soekarjo                      | Eijkman Institute for Molecular Biology, Ministry of Research and Technology/National Agency for Research and Innovation                                                                                                                                                                                                                                                                                                                                                                                                                                 | Amin Soebandrio; David H Muljono; Edison Johar; Frilasita A Yudhaputri; Herawati Sudoyo; Hidayat Trimarsanto; Iskandar A Adnan; Khin Saw Myint; Safarina G Malik; Willy Agustine                                                                                                                                                                                                                                                                                                                                                                                                                                                                                                                                                                                                                                                                                                         |
| EPI_ISL_529966 to 529967                                                 | RSUD Sidoarjo                                        | Institute of Tropical Disease, Universitas Airlangga                                                                                                                                                                                                                                                                                                                                                                                                                                                                                                     | Aldise M Nastri; Atok Irawan; Gatot Soegiarto; Jezy R Dewantari; Kazufumi Shimizu; Krisnoadi Rahardjo; Laksmi Wulandari; Maria I Lusida; Mitsuhiro Nishimura; Resti Yudhawati; Retno A Setyoningrum; Rima R Prasetya; Soetijpto; Yasuko Mori; Yohko K Shimizu                                                                                                                                                                                                                                                                                                                                                                                                                                                                                                                                                                                                                            |
| EPI_ISL_538498                                                           | RSUD Soediono Madiun East Java                       | National Institute of Health Research and Development                                                                                                                                                                                                                                                                                                                                                                                                                                                                                                    | AA; HA; HD; Ikawati; KD; KNA; Nugraha; Paisal; Pangesti; Pawestri; Puspa; Setiawaty, V.; Soekarso; Subangkit; T                                                                                                                                                                                                                                                                                                                                                                                                                                                                                                                                                                                                                                                                                                                                                                          |
| EPI_ISL_538502                                                           | RSUD Sultan Imanudin Pangkalan Bun Center Kalimantan | National Institute of Health Research and Development                                                                                                                                                                                                                                                                                                                                                                                                                                                                                                    | AA; HA; HD; Ikawati; KD; KNA; Nugraha; Paisal; Pangesti; Pawestri; Puspa; Setiawaty, V.; Soekarso; Subangkit; T                                                                                                                                                                                                                                                                                                                                                                                                                                                                                                                                                                                                                                                                                                                                                                          |
| EPI_ISL_1469279 to 1469283                                               | RSUD Surakarta                                       | National Institute of Health Research and Development                                                                                                                                                                                                                                                                                                                                                                                                                                                                                                    | Arie Ardiansyah Nugraha; Hana Apsari Pawestri; Hartanti Dian Ikawati; Kartika Dewi Puspa; Krisna Pangesti; Nelly Puspandari; Subangkit; Vivi Setiawaty                                                                                                                                                                                                                                                                                                                                                                                                                                                                                                                                                                                                                                                                                                                                   |
| EPI_ISL_538510                                                           | RSUD Ulin Banjarmasin South Kalimantan               | National Institute of Health Research and Development                                                                                                                                                                                                                                                                                                                                                                                                                                                                                                    | AA; HA; HD; Ikawati; KD; KNA; M; Nugraha; Paisal; Pangesti; Pasaribu; Pawestri; Puspa; Setiawaty, V.; Soekarso; Subangkit; T                                                                                                                                                                                                                                                                                                                                                                                                                                                                                                                                                                                                                                                                                                                                                             |
| EPI_ISL_538511                                                           | RSUD Wahidin Sudirohusodo Mojokerto East Java        | National Institute of Health Research and Development                                                                                                                                                                                                                                                                                                                                                                                                                                                                                                    | AA; HA; HD; Ikawati; KD; KNA; Nugraha; Paisal; Pangesti; Pawestri; Puspa; Setiawaty, V.; Soekarso; Subangkit; T                                                                                                                                                                                                                                                                                                                                                                                                                                                                                                                                                                                                                                                                                                                                                                          |
| EPI_ISL_575331                                                           | RSUD Wates                                           | Genetics Working Group (Pokja Genetik) Faculty of Medicine, Public Health and Nursing Universitas Gadjah Mada (FK-KMK UGM); Disease Investigation Center Wates Ministry of Agriculture Indonesia; Department of Microbiology FK-KMK UGM; Laboratorium Diagnostik Yayasan Tahjia World Mosquito Program (WMP) Yogyakarta Center for Tropical Medicine FK-KMK UGM; Integrated Research Center FK-KMK UGM; Department of Computer Science and Electronics FMIPA UGM                                                                                         | Marcellus; Afiahayati; Alvin S. Kalim; Bastianto Kusumajaya; Dwi AA Nugrahaningsih; Edwin W. Daniwijaya; Eggi Arguni; Endah Supriyati; Gunadi; Hendra Wibawa; Kristy Iskandar; Ludhang P. Rizki; Mohamad S. Hakim; Nungki Anggorowati; Siswanto; Susan Simanjaya; Titik Nuryastuti; Tri Wibawa; Zumrati Ahmad                                                                                                                                                                                                                                                                                                                                                                                                                                                                                                                                                                            |
| EPI_ISL_576115                                                           | RSUP Dr Sardjito                                     | Genetics Working Group (Pokja Genetik) Faculty of Medicine, Public Health and Nursing Universitas Gadjah Mada (FK-KMK UGM); Disease Investigation Center Wates Ministry of Agriculture Indonesia; Department of Microbiology FK-KMK UGM; Laboratorium Diagnostik Yayasan Tahjia World Mosquito Program (WMP) Yogyakarta Center for Tropical Medicine FK-KMK UGM; Integrated Research Center FK-KMK UGM; Department of Computer Science and Electronics FMIPA UGM                                                                                         | Marcellus; Afiahayati; Dwi AA Nugrahaningsih; Edwin W. Daniwijaya; Eggi Arguni; Endah Supriyati; Gunadi; Hendra Wibawa; Ika Trisnawati; Ira Puspitawati; Kristy Iskandar; Ludhang P. Rizki; Maria Patricia Inggriani; Mohamad S. Hakim; Nungki Anggorowati; Nur Imma Fatimah Harahap; Osman Sianipar; Riat El Khair; Siswanto; Titik Nuryastuti; Tri Wibawa; Umi Solekha Intansari; Untung Wirawan; Yunika Puspawati; Elizabeth Henny Herringtiyas                                                                                                                                                                                                                                                                                                                                                                                                                                       |
| EPI_ISL_576113 to 576114, EPI_ISL_576116, EPI_ISL_576128, EPI_ISL_576130 | RSUP Dr. Sardjito                                    | Genetics Working Group (Pokja Genetik) Faculty of Medicine, Public Health and Nursing Universitas Gadjah Mada (FK-KMK UGM); Disease Investigation Center Wates Ministry of Agriculture Indonesia; Department of Microbiology FK-KMK UGM; Laboratorium Diagnostik Yayasan Tahjia World Mosquito Program (WMP) Yogyakarta Center for Tropical Medicine FK-KMK UGM; Integrated Research Center FK-KMK UGM; Department of Computer Science and Electronics FMIPA UGM                                                                                         | Marcellus; Aditya Rifqi Fauzi; Afiahayati; Alvin S. Kalim; Alvin Santoso Kalim; Amalia Setyati; Audric Kenny Tedja; Bambang Sigit Riyanto; Cahya Dewi Satria; Desyifa Mursalin; Dwi AA Nugrahaningsih; Dwikisworo Setyowireni; Dyah Ayu Puspitarani; Edwin W. Daniwijaya; Eggi Arguni; Eko Budiono; Elisabeth Siti Herini; Endah Supriyati; Fadil Fahri; Gunadi; Hendra Wibawa; Heni Retnowulan; Ida Safitri Laksanawati; Ika Trisnawati; Ira Puspitawati; Kerala Athollah; Kristy Iskandar; Ludhang P. Rizki; Marcellus; Mohamad S. Hakim; Munawar Gani; Nungki Anggorowati; Nur Imma Fatimah Harahap; Nur Rahmi Ananda; Osman Sianipar; Riat El Khair; Rina Triasih; Rinin Enggy Yuliyanti; Satria Maulana; Siswanto; Sumard; Susan Simanjaya; Titik Nuryastuti; Titis Widowati; Tri Wibawa; Umi Solekha Intansari; William Widiatjaro; Yunika Puspawati; Elizabeth Henny Herringtiyas |
| EPI_ISL_467376, EPI_ISL_568687, EPI_ISL_568690 to 568691                 | RSUP Fatmawati                                       | Eijkman Institute for Molecular Biology, Ministry of Research and Technology/National Agency for Research and Innovation                                                                                                                                                                                                                                                                                                                                                                                                                                 | Amin Soebandrio; David H Muljono; Edison Johar; Frilasita A Yudhaputri; Herawati Sudoyo; Hidayat Trimarsanto; Iskandar A Adnan; Khin Saw Myint; Safarina G Malik; Willy Agustine                                                                                                                                                                                                                                                                                                                                                                                                                                                                                                                                                                                                                                                                                                         |
| EPI_ISL_467375, EPI_ISL_568694, EPI_ISL_574604                           | RSUP Prof. Dr. R. Kandou Manado                      | Eijkman Institute for Molecular Biology, Ministry of Research and Technology/National Agency for Research and Innovation                                                                                                                                                                                                                                                                                                                                                                                                                                 | Amin Soebandrio; David H Muljono; Edison Johar; Frilasita A Yudhaputri; Herawati Sudoyo; Hidayat Trimarsanto; Iskandar A Adnan; Khin Saw Myint; Safarina G Malik; Willy Agustine                                                                                                                                                                                                                                                                                                                                                                                                                                                                                                                                                                                                                                                                                                         |
| EPI_ISL_525492                                                           | RSUP dr. SOERADJI TIRTONEGORO                        | Genetics Working Group (Pokja Genetik) Faculty of Medicine, Public Health and Nursing Universitas Gadjah Mada (FK-KMK UGM); Disease Investigation Center Wates Ministry of Agriculture Indonesia; Department of Microbiology FK-KMK UGM; Laboratorium Diagnostik Yayasan Tahjia World Mosquito Program (WMP) Yogyakarta Center for Tropical Medicine FK-KMK UGM; Integrated Research Center FK-KMK UGM; Department of Computer Science and Electronics FMIPA UGM                                                                                         | Marcellus; . Siswanto; Afiahayati; Alvin S. Kalim; Dwi AA Nugrahaningsih; Dwiki Afandy; Edwin W. Daniwijaya; Eggi Arguni; Endah Supriyati; Gunadi; Hendra Wibawa; Indah Juliana; Kurniyanto; Ludhang P. Rizki; Mohamad S. Hakim; Titik Nuryastuti; Tri Wibawa                                                                                                                                                                                                                                                                                                                                                                                                                                                                                                                                                                                                                            |
| EPI_ISL_574605                                                           | RSUP dr. Sardjito                                    | Eijkman Institute for Molecular Biology, Ministry of Research and Technology/National Agency for Research and Innovation                                                                                                                                                                                                                                                                                                                                                                                                                                 | Amin Soebandrio; David H Muljono; Edison Johar; Frilasita A Yudhaputri; Herawati Sudoyo; Hidayat Trimarsanto; Iskandar A Adnan; Khin Saw Myint; Safarina G Malik; Willy Agustine                                                                                                                                                                                                                                                                                                                                                                                                                                                                                                                                                                                                                                                                                                         |



|                                                                                                                                                                                                                                                                                                                                                                                                                                                                                                                                                                                                                                                                                                                                                                                                                                                                                                                                                                                                                                                                                                                                                                                                                                                                                                                                                                                                                                                                                                                                                                                                                                                                                                                                                                                                                                                                                                                                                                                                                                                                                                                                                                                                                                                                                                                                                                                                                                                                                                                                                                                                                                                                                                                                                                                                                                                                                                                                                                                                                                                                                                                                                                                                                                                                                                                                                                                                                                                                                                                                                                                                                                                                                                                                                                                                                                                                                                                                                                                                                                                                                                                                                                                                                                                                                                                                                                                                                                                                                                                                                                                                                                                                                                                                                                                                                                                                                                                                                                                                                                                                                                                                                                                                                                                                                                                                                                                                                                                                                                                                                                                                                                                                                                                                                                                                                                                                                                                                                                                                                                                                                                                                                                                                                                                                                                                                                                                                                                                                                                                                                                                                                                                                                                                                                                                                                                                                                                                                                                                                                                                                                                                                                                                                                                                                                                                                                                                                                                                                                                                                                                                                                                                                                                                                                                                                                                                                                                                                                                                                                                                                                                                                                                                                                                                                                                                                                                                                                                                                                                                                                                                                                                                                                                                                                                                                                                                                                                                                                                                                                                                                                                                                                                                                                                                                                                                                                                                                                                                                                                                                                                                                                                                                                                                                                                                                                                                                                                                                                                                                                                                                                                                       |                                                                 |                                                                                |                                                                                                                                                                                                                                                                                                                                                                                 |                                                                                                                                                                                                                                                                    |
|-----------------------------------------------------------------------------------------------------------------------------------------------------------------------------------------------------------------------------------------------------------------------------------------------------------------------------------------------------------------------------------------------------------------------------------------------------------------------------------------------------------------------------------------------------------------------------------------------------------------------------------------------------------------------------------------------------------------------------------------------------------------------------------------------------------------------------------------------------------------------------------------------------------------------------------------------------------------------------------------------------------------------------------------------------------------------------------------------------------------------------------------------------------------------------------------------------------------------------------------------------------------------------------------------------------------------------------------------------------------------------------------------------------------------------------------------------------------------------------------------------------------------------------------------------------------------------------------------------------------------------------------------------------------------------------------------------------------------------------------------------------------------------------------------------------------------------------------------------------------------------------------------------------------------------------------------------------------------------------------------------------------------------------------------------------------------------------------------------------------------------------------------------------------------------------------------------------------------------------------------------------------------------------------------------------------------------------------------------------------------------------------------------------------------------------------------------------------------------------------------------------------------------------------------------------------------------------------------------------------------------------------------------------------------------------------------------------------------------------------------------------------------------------------------------------------------------------------------------------------------------------------------------------------------------------------------------------------------------------------------------------------------------------------------------------------------------------------------------------------------------------------------------------------------------------------------------------------------------------------------------------------------------------------------------------------------------------------------------------------------------------------------------------------------------------------------------------------------------------------------------------------------------------------------------------------------------------------------------------------------------------------------------------------------------------------------------------------------------------------------------------------------------------------------------------------------------------------------------------------------------------------------------------------------------------------------------------------------------------------------------------------------------------------------------------------------------------------------------------------------------------------------------------------------------------------------------------------------------------------------------------------------------------------------------------------------------------------------------------------------------------------------------------------------------------------------------------------------------------------------------------------------------------------------------------------------------------------------------------------------------------------------------------------------------------------------------------------------------------------------------------------------------------------------------------------------------------------------------------------------------------------------------------------------------------------------------------------------------------------------------------------------------------------------------------------------------------------------------------------------------------------------------------------------------------------------------------------------------------------------------------------------------------------------------------------------------------------------------------------------------------------------------------------------------------------------------------------------------------------------------------------------------------------------------------------------------------------------------------------------------------------------------------------------------------------------------------------------------------------------------------------------------------------------------------------------------------------------------------------------------------------------------------------------------------------------------------------------------------------------------------------------------------------------------------------------------------------------------------------------------------------------------------------------------------------------------------------------------------------------------------------------------------------------------------------------------------------------------------------------------------------------------------------------------------------------------------------------------------------------------------------------------------------------------------------------------------------------------------------------------------------------------------------------------------------------------------------------------------------------------------------------------------------------------------------------------------------------------------------------------------------------------------------------------------------------------------------------------------------------------------------------------------------------------------------------------------------------------------------------------------------------------------------------------------------------------------------------------------------------------------------------------------------------------------------------------------------------------------------------------------------------------------------------------------------------------------------------------------------------------------------------------------------------------------------------------------------------------------------------------------------------------------------------------------------------------------------------------------------------------------------------------------------------------------------------------------------------------------------------------------------------------------------------------------------------------------------------------------------------------------------------------------------------------------------------------------------------------------------------------------------------------------------------------------------------------------------------------------------------------------------------------------------------------------------------------------------------------------------------------------------------------------------------------------------------------------------------------------------------------------------------------------------------------------------------------------------------------------------------------------------------------------------------------------------------------------------------------------------------------------------------------------------------------------------------------------------------------------------------------------------------------------------------------------------------------------------------------------------------------------------------------------------------------------------------------------------------------------------------------------------------------------------------------------------------------------------------------------------------------------------------------------------------------------------------------------------------------------------------------------------------------------------------------------------------------------------------------------------------------------------------------------------------------------------------------------------------------------------------------------------------------------------------------------------------------------------------------------------------------------------------------------------------------------------------------------------------------------------------------------------------------------------------------------------------------------------------------------------------------------------------------------------------------------------------------------------------------------------------|-----------------------------------------------------------------|--------------------------------------------------------------------------------|---------------------------------------------------------------------------------------------------------------------------------------------------------------------------------------------------------------------------------------------------------------------------------------------------------------------------------------------------------------------------------|--------------------------------------------------------------------------------------------------------------------------------------------------------------------------------------------------------------------------------------------------------------------|
| EPI_ISL_1505712, EPI_ISL_1505716, EPI_ISL_1505718, EPI_ISL_1505723, EPI_ISL_1505727 to 1505728, EPI_ISL_1505735, EPI_ISL_1505739, EPI_ISL_1505742 to 1505743, EPI_ISL_1505750, EPI_ISL_1505756, EPI_ISL_1505767 to 1505768, EPI_ISL_1505770 to 1505771, EPI_ISL_1505786, EPI_ISL_1505788, EPI_ISL_1505793 to 1505794, EPI_ISL_1505808, EPI_ISL_1505811 to 1505812, EPI_ISL_1505814, EPI_ISL_1505827, EPI_ISL_1505845, EPI_ISL_1505856, EPI_ISL_1505858 to 1505859, EPI_ISL_1505862, EPI_ISL_1505866, EPI_ISL_1505873, EPI_ISL_1505889, EPI_ISL_1505899, EPI_ISL_1505907, EPI_ISL_1505940, EPI_ISL_1505944, EPI_ISL_1505950, EPI_ISL_1505960 to 1505961, EPI_ISL_1505963, EPI_ISL_1505973, EPI_ISL_1505977, EPI_ISL_1505995, EPI_ISL_1506002 to 1506003, EPI_ISL_1506006, EPI_ISL_1506015, EPI_ISL_1506026, EPI_ISL_1506039, EPI_ISL_1506041, EPI_ISL_1506045 to 1506046, EPI_ISL_1506050, EPI_ISL_1506060, EPI_ISL_1506065 to 1506066, EPI_ISL_1506070, EPI_ISL_1506078, EPI_ISL_1506085, EPI_ISL_1506089, EPI_ISL_1506092, EPI_ISL_1506094, EPI_ISL_1506104, EPI_ISL_1506425, EPI_ISL_1518073, EPI_ISL_1518078, EPI_ISL_1518082, EPI_ISL_1518092, EPI_ISL_1518097, EPI_ISL_1518112, EPI_ISL_1518114, EPI_ISL_1518130, EPI_ISL_1518152, EPI_ISL_1518183, EPI_ISL_1518195 to 1518196, EPI_ISL_1518196, EPI_ISL_1518209, EPI_ISL_1518217, EPI_ISL_1518217, EPI_ISL_1518232, EPI_ISL_1518239, EPI_ISL_1518241, EPI_ISL_1518246, EPI_ISL_1518256, EPI_ISL_1518280, EPI_ISL_1518288, EPI_ISL_1518319, EPI_ISL_1518331, EPI_ISL_1518342, EPI_ISL_1518348, EPI_ISL_1518350, EPI_ISL_1518373, EPI_ISL_1518679, EPI_ISL_1518681 to 1518682, EPI_ISL_1519270, EPI_ISL_1519272 to 1519273, EPI_ISL_1519275, EPI_ISL_1519279, EPI_ISL_1519281 to 1519282, EPI_ISL_1519284, EPI_ISL_1519286 to 1519287, EPI_ISL_1519302, EPI_ISL_1519910 to 1519917, EPI_ISL_1519920, EPI_ISL_1519926 to 1519928, EPI_ISL_1519932 to 1519967, EPI_ISL_1519969 to 1520097, EPI_ISL_1535612, EPI_ISL_1535627 to 1535628, EPI_ISL_1535632 to 1535633, EPI_ISL_1535642, EPI_ISL_1535664, EPI_ISL_1535666, EPI_ISL_1535684, EPI_ISL_1535701, EPI_ISL_1535707, EPI_ISL_1535710, EPI_ISL_1535720, EPI_ISL_1535724, EPI_ISL_1535739, EPI_ISL_1535753, EPI_ISL_1535758 to 1535759, EPI_ISL_1535761, EPI_ISL_1535769, EPI_ISL_1535772, EPI_ISL_1535788 to 1535789, EPI_ISL_1535792, EPI_ISL_1535804, EPI_ISL_1535806, EPI_ISL_1535820 to 1535821, EPI_ISL_1535825 to 1535826, EPI_ISL_1535856, EPI_ISL_1535862, EPI_ISL_1535868, EPI_ISL_1535872, EPI_ISL_1535878, EPI_ISL_1535881, EPI_ISL_1535888, EPI_ISL_1536194, EPI_ISL_1536217, EPI_ISL_1536237, EPI_ISL_1536287, EPI_ISL_1536322, EPI_ISL_1536351, EPI_ISL_1536362, EPI_ISL_1536370, EPI_ISL_1536373, EPI_ISL_1536395, EPI_ISL_1536421 to 1536422, EPI_ISL_1536433, EPI_ISL_1536458, EPI_ISL_1536486, EPI_ISL_1536520, EPI_ISL_1536525, EPI_ISL_1536533, EPI_ISL_1536537, EPI_ISL_1536682 to 1536683, EPI_ISL_1536904, EPI_ISL_1536920, EPI_ISL_1536934, EPI_ISL_1536996 to 1536997, EPI_ISL_1537005, EPI_ISL_1537025, EPI_ISL_1537031, EPI_ISL_1537049, EPI_ISL_1537071, EPI_ISL_1537091 to 1537092, EPI_ISL_1537101, EPI_ISL_1537106, EPI_ISL_1537122, EPI_ISL_1537126, EPI_ISL_1537131, EPI_ISL_1537134 to 1537136, EPI_ISL_1537138 to 1537140, EPI_ISL_1538049, EPI_ISL_1538404, EPI_ISL_1544203, EPI_ISL_1544210, EPI_ISL_1544218, EPI_ISL_1544222 to 1544224, EPI_ISL_1544227, EPI_ISL_1544229, EPI_ISL_1544239 to 1544240, EPI_ISL_1544248, EPI_ISL_1544259 to 1544261, EPI_ISL_1544264, EPI_ISL_1544267, EPI_ISL_1544274, EPI_ISL_1544281, EPI_ISL_1544288, EPI_ISL_1544293 to 1544296, EPI_ISL_1544299, EPI_ISL_1544308 to 1544309, EPI_ISL_1544314, EPI_ISL_1544317, EPI_ISL_1544319, EPI_ISL_1544331, EPI_ISL_1544339, EPI_ISL_1544349, EPI_ISL_1544354, EPI_ISL_1544362, EPI_ISL_1544382, EPI_ISL_1544385, EPI_ISL_1544388, EPI_ISL_1544390, EPI_ISL_1544396 to 1544397, EPI_ISL_1544407, EPI_ISL_1544409, EPI_ISL_1544414 to 1544416, EPI_ISL_1544419, EPI_ISL_1544424 to 1544426, EPI_ISL_1544432 to 1544433, EPI_ISL_1544437, EPI_ISL_1544442, EPI_ISL_1544464 to 1544466, EPI_ISL_1544473 to 1544474, EPI_ISL_1544476, EPI_ISL_1544480, EPI_ISL_1544485, EPI_ISL_1544487, EPI_ISL_1544490, EPI_ISL_1544493                                                                                                                                                                                                                                                                                                                                                                                                                                                                                                                                                                                                                                                                                                                                                                                                                                                                                                                                                                                                                                                                                                                                                                                                                                                                                                                                                                                                                                                                                                                                                                                                                                                                                                                                                                                                                                                                                                                                                                                                                                                                                                                                                                                                                                                                                                                                                                                                                                                                                                                                                                                                                                                                                                                                                                                                                                                                                                                                                                                                                                                                                                                                                                                                                                                                                                                                                                                                                                                                                                                                                                                                                                                                                                                                                                                                                                                                                                                                                                                                                                                                                                                                                                                                                                                                                                                                                                                                                                                                                                                                                                                                                                                                                                                                                                                                                                                                                                                                                                                                                                                                                                                                                                                                                                                                                                                                                                                                                                                                                                                                                                                                                                                                                                                                                                                                                                                                           | see above                                                       | Randex Laboratories                                                            | Wellcome Sanger Institute for the COVID-19 Genomics UK (COG-UK) Consortium                                                                                                                                                                                                                                                                                                      | Cordelia Langford; David K. Jackson; Dominic Kwiatkowski; Ewan Harrison; Ian Johnston; Jeffrey Barrett; John Sillitoe on behalf of the Wellcome Sanger Institute COVID-19 Surveillance Team; Randox Laboratories and Alex Alderton; Roberto Amato; Sonia Goncalves |
| EPI_ISL_1534342 to 1534343, EPI_ISL_1534443                                                                                                                                                                                                                                                                                                                                                                                                                                                                                                                                                                                                                                                                                                                                                                                                                                                                                                                                                                                                                                                                                                                                                                                                                                                                                                                                                                                                                                                                                                                                                                                                                                                                                                                                                                                                                                                                                                                                                                                                                                                                                                                                                                                                                                                                                                                                                                                                                                                                                                                                                                                                                                                                                                                                                                                                                                                                                                                                                                                                                                                                                                                                                                                                                                                                                                                                                                                                                                                                                                                                                                                                                                                                                                                                                                                                                                                                                                                                                                                                                                                                                                                                                                                                                                                                                                                                                                                                                                                                                                                                                                                                                                                                                                                                                                                                                                                                                                                                                                                                                                                                                                                                                                                                                                                                                                                                                                                                                                                                                                                                                                                                                                                                                                                                                                                                                                                                                                                                                                                                                                                                                                                                                                                                                                                                                                                                                                                                                                                                                                                                                                                                                                                                                                                                                                                                                                                                                                                                                                                                                                                                                                                                                                                                                                                                                                                                                                                                                                                                                                                                                                                                                                                                                                                                                                                                                                                                                                                                                                                                                                                                                                                                                                                                                                                                                                                                                                                                                                                                                                                                                                                                                                                                                                                                                                                                                                                                                                                                                                                                                                                                                                                                                                                                                                                                                                                                                                                                                                                                                                                                                                                                                                                                                                                                                                                                                                                                                                                                                                                                                                                                           | Red Cross Children's Hospital wc RXH                            | NHLS/UCT                                                                       | Arash Iranzadeh; Bruna Galvao; Carolyn Williamson; Deelan Doolabh; Diana Hardie; Emmanuel SJ; Innocent Mudau; Kruger Marais; Lynn Tyers; Marvin Hsiao; Stephen Korsman; Tegally H; de Oliveira T                                                                                                                                                                                |                                                                                                                                                                                                                                                                    |
| EPI_ISL_1478885, EPI_ISL_1500179, EPI_ISL_1553173 to 1553182                                                                                                                                                                                                                                                                                                                                                                                                                                                                                                                                                                                                                                                                                                                                                                                                                                                                                                                                                                                                                                                                                                                                                                                                                                                                                                                                                                                                                                                                                                                                                                                                                                                                                                                                                                                                                                                                                                                                                                                                                                                                                                                                                                                                                                                                                                                                                                                                                                                                                                                                                                                                                                                                                                                                                                                                                                                                                                                                                                                                                                                                                                                                                                                                                                                                                                                                                                                                                                                                                                                                                                                                                                                                                                                                                                                                                                                                                                                                                                                                                                                                                                                                                                                                                                                                                                                                                                                                                                                                                                                                                                                                                                                                                                                                                                                                                                                                                                                                                                                                                                                                                                                                                                                                                                                                                                                                                                                                                                                                                                                                                                                                                                                                                                                                                                                                                                                                                                                                                                                                                                                                                                                                                                                                                                                                                                                                                                                                                                                                                                                                                                                                                                                                                                                                                                                                                                                                                                                                                                                                                                                                                                                                                                                                                                                                                                                                                                                                                                                                                                                                                                                                                                                                                                                                                                                                                                                                                                                                                                                                                                                                                                                                                                                                                                                                                                                                                                                                                                                                                                                                                                                                                                                                                                                                                                                                                                                                                                                                                                                                                                                                                                                                                                                                                                                                                                                                                                                                                                                                                                                                                                                                                                                                                                                                                                                                                                                                                                                                                                                                                                                          | Reditus Labs                                                    | Illinois Department of Public Health - Springfield Lab                         | Bryan Sim; Gordon McCall                                                                                                                                                                                                                                                                                                                                                        |                                                                                                                                                                                                                                                                    |
| EPI_ISL_1415392 to 1415419                                                                                                                                                                                                                                                                                                                                                                                                                                                                                                                                                                                                                                                                                                                                                                                                                                                                                                                                                                                                                                                                                                                                                                                                                                                                                                                                                                                                                                                                                                                                                                                                                                                                                                                                                                                                                                                                                                                                                                                                                                                                                                                                                                                                                                                                                                                                                                                                                                                                                                                                                                                                                                                                                                                                                                                                                                                                                                                                                                                                                                                                                                                                                                                                                                                                                                                                                                                                                                                                                                                                                                                                                                                                                                                                                                                                                                                                                                                                                                                                                                                                                                                                                                                                                                                                                                                                                                                                                                                                                                                                                                                                                                                                                                                                                                                                                                                                                                                                                                                                                                                                                                                                                                                                                                                                                                                                                                                                                                                                                                                                                                                                                                                                                                                                                                                                                                                                                                                                                                                                                                                                                                                                                                                                                                                                                                                                                                                                                                                                                                                                                                                                                                                                                                                                                                                                                                                                                                                                                                                                                                                                                                                                                                                                                                                                                                                                                                                                                                                                                                                                                                                                                                                                                                                                                                                                                                                                                                                                                                                                                                                                                                                                                                                                                                                                                                                                                                                                                                                                                                                                                                                                                                                                                                                                                                                                                                                                                                                                                                                                                                                                                                                                                                                                                                                                                                                                                                                                                                                                                                                                                                                                                                                                                                                                                                                                                                                                                                                                                                                                                                                                                            | Reference Laboratory of the Ministry of Health                  | Laboratory of Respiratory Viruses and Measles, Oswaldo Cruz Institute, FIOCRUZ | Alice Sampaio Rocha; Ana Carolina Mendonca; Anna Carolina Paixao; Fernanda Motta; Indira Martins; Jessica Edwards; Luciana Appolinario; Marilda Siqueira on behalf of the Fiocruz COVID-19 Genomic Surveillance Network; Paola Resende; Renata Serrano Lopes                                                                                                                    |                                                                                                                                                                                                                                                                    |
| EPI_ISL_414949                                                                                                                                                                                                                                                                                                                                                                                                                                                                                                                                                                                                                                                                                                                                                                                                                                                                                                                                                                                                                                                                                                                                                                                                                                                                                                                                                                                                                                                                                                                                                                                                                                                                                                                                                                                                                                                                                                                                                                                                                                                                                                                                                                                                                                                                                                                                                                                                                                                                                                                                                                                                                                                                                                                                                                                                                                                                                                                                                                                                                                                                                                                                                                                                                                                                                                                                                                                                                                                                                                                                                                                                                                                                                                                                                                                                                                                                                                                                                                                                                                                                                                                                                                                                                                                                                                                                                                                                                                                                                                                                                                                                                                                                                                                                                                                                                                                                                                                                                                                                                                                                                                                                                                                                                                                                                                                                                                                                                                                                                                                                                                                                                                                                                                                                                                                                                                                                                                                                                                                                                                                                                                                                                                                                                                                                                                                                                                                                                                                                                                                                                                                                                                                                                                                                                                                                                                                                                                                                                                                                                                                                                                                                                                                                                                                                                                                                                                                                                                                                                                                                                                                                                                                                                                                                                                                                                                                                                                                                                                                                                                                                                                                                                                                                                                                                                                                                                                                                                                                                                                                                                                                                                                                                                                                                                                                                                                                                                                                                                                                                                                                                                                                                                                                                                                                                                                                                                                                                                                                                                                                                                                                                                                                                                                                                                                                                                                                                                                                                                                                                                                                                                                        | Regional Virus Laboratory, Belfast                              | Public Health Wales Microbiology Cardiff                                       | Catherine Moore; Conall McCaughey; Joanne Watkins; Sally Corden; Tanya Curran; Tom Connor                                                                                                                                                                                                                                                                                       |                                                                                                                                                                                                                                                                    |
| EPI_ISL_441355 to 441436, EPI_ISL_448918 to 448977, EPI_ISL_453465 to 453485, EPI_ISL_461773 to 461790, EPI_ISL_472136 to 472154, EPI_ISL_585092 to 585259, EPI_ISL_611531, EPI_ISL_611628, EPI_ISL_611807 to 611808, EPI_ISL_612546 to 612548, EPI_ISL_1474958 to 1474982, EPI_ISL_1474984 to 1474998, EPI_ISL_1475000 to 1475006, EPI_ISL_1475010 to 1475018, EPI_ISL_1475021 to 1475033, EPI_ISL_1475035 to 1475040, EPI_ISL_1475042 to 1475046, EPI_ISL_1475048 to 1475052, EPI_ISL_1475054 to 1475079, EPI_ISL_1475081 to 1475084, EPI_ISL_1475086 to 1475090, EPI_ISL_1475101, EPI_ISL_1475103 to 1475105, EPI_ISL_1475107 to 1475112, EPI_ISL_1475115 to 1475117, EPI_ISL_1475119 to 1475120, EPI_ISL_1475122 to 1475125, EPI_ISL_1475127 to 1475132, EPI_ISL_1475134 to 1475135, EPI_ISL_1475137 to 1475138, EPI_ISL_1475140 to 1475142, EPI_ISL_1475145 to 1475149, EPI_ISL_1475151, EPI_ISL_1475153 to 1475159, EPI_ISL_1475162, EPI_ISL_1475164 to 1475166, EPI_ISL_1475169, EPI_ISL_1475171 to 1475172, EPI_ISL_1475174, EPI_ISL_1475176 to 1475177, EPI_ISL_1475179 to 1475181, EPI_ISL_1475183 to 1475188                                                                                                                                                                                                                                                                                                                                                                                                                                                                                                                                                                                                                                                                                                                                                                                                                                                                                                                                                                                                                                                                                                                                                                                                                                                                                                                                                                                                                                                                                                                                                                                                                                                                                                                                                                                                                                                                                                                                                                                                                                                                                                                                                                                                                                                                                                                                                                                                                                                                                                                                                                                                                                                                                                                                                                                                                                                                                                                                                                                                                                                                                                                                                                                                                                                                                                                                                                                                                                                                                                                                                                                                                                                                                                                                                                                                                                                                                                                                                                                                                                                                                                                                                                                                                                                                                                                                                                                                                                                                                                                                                                                                                                                                                                                                                                                                                                                                                                                                                                                                                                                                                                                                                                                                                                                                                                                                                                                                                                                                                                                                                                                                                                                                                                                                                                                                                                                                                                                                                                                                                                                                                                                                                                                                                                                                                                                                                                                                                                                                                                                                                                                                                                                                                                                                                                                                                                                                                                                                                                                                                                                                                                                                                                                                                                                                                                                                                                                                                                                                                                                                                                                                                                                                                                                                                                                                                                                                                                                                                                                                                                                                                                                                                                                                                                                                                                                                                                                                                                                                                                                                                                                                                                                                                                                                                                                                                                                                                                                                                                                               | see above                                                       | Regional Virus Laboratory, Belfast Health and Social Care Trust                | COVID-19 Genomics UK (COG-UK) Consortium                                                                                                                                                                                                                                                                                                                                        | Alison Watt; Ciara Cox; Conall McCaughey; David Simpson; Derek Fairley; James McKenna; Mairead Connor; Susan Feeney; Tanya Curran; Zoltan Molnar                                                                                                                   |
| EPI_ISL_459358, EPI_ISL_459372, EPI_ISL_489213, EPI_ISL_489358                                                                                                                                                                                                                                                                                                                                                                                                                                                                                                                                                                                                                                                                                                                                                                                                                                                                                                                                                                                                                                                                                                                                                                                                                                                                                                                                                                                                                                                                                                                                                                                                                                                                                                                                                                                                                                                                                                                                                                                                                                                                                                                                                                                                                                                                                                                                                                                                                                                                                                                                                                                                                                                                                                                                                                                                                                                                                                                                                                                                                                                                                                                                                                                                                                                                                                                                                                                                                                                                                                                                                                                                                                                                                                                                                                                                                                                                                                                                                                                                                                                                                                                                                                                                                                                                                                                                                                                                                                                                                                                                                                                                                                                                                                                                                                                                                                                                                                                                                                                                                                                                                                                                                                                                                                                                                                                                                                                                                                                                                                                                                                                                                                                                                                                                                                                                                                                                                                                                                                                                                                                                                                                                                                                                                                                                                                                                                                                                                                                                                                                                                                                                                                                                                                                                                                                                                                                                                                                                                                                                                                                                                                                                                                                                                                                                                                                                                                                                                                                                                                                                                                                                                                                                                                                                                                                                                                                                                                                                                                                                                                                                                                                                                                                                                                                                                                                                                                                                                                                                                                                                                                                                                                                                                                                                                                                                                                                                                                                                                                                                                                                                                                                                                                                                                                                                                                                                                                                                                                                                                                                                                                                                                                                                                                                                                                                                                                                                                                                                                                                                                                                        | Regional Virus Laboratory, Belfast Health and Social Care Trust | Wellcome Sanger Institute for the COVID-19 Genomics UK (COG-UK) Consortium     | Alison Watt; Ciara Cox; Conall McCaughey; Cordelia Langford; David K. Jackson; David Simpson; Derek Fairley; Dominic Kwiatkowski; Ewan Harrison; Ian Johnston; James McKenna; John Sillitoe on behalf of the Wellcome Sanger Institute COVID-19 Surveillance Team; Mairead Connor; Roberto Amato; Sonia Goncalves; Susan Feeney; Tanya Curran; Zoltan Molnar; and Alex Alderton |                                                                                                                                                                                                                                                                    |
| EPI_ISL_441659, EPI_ISL_441662 to 441663, EPI_ISL_441670, EPI_ISL_441675 to 441676, EPI_ISL_441685, EPI_ISL_441690 to 441691, EPI_ISL_441693 to 441694, EPI_ISL_441696 to 441699, EPI_ISL_441704, EPI_ISL_441708, EPI_ISL_441712, EPI_ISL_441714, EPI_ISL_441716 to 441717, EPI_ISL_441719, EPI_ISL_441730, EPI_ISL_441733, EPI_ISL_441737, EPI_ISL_441747, EPI_ISL_441751, EPI_ISL_441753, EPI_ISL_441761, EPI_ISL_441765 to 441766, EPI_ISL_441770 to 441771, EPI_ISL_441775 to 441778, EPI_ISL_441781, EPI_ISL_441784, EPI_ISL_441786, EPI_ISL_441788, EPI_ISL_441790 to 441791, EPI_ISL_441792 to 441793, EPI_ISL_441795 to 441796, EPI_ISL_441798 to 441799, EPI_ISL_441800, EPI_ISL_441802 to 441803, EPI_ISL_441805 to 441806, EPI_ISL_441808 to 441809, EPI_ISL_441811 to 441812, EPI_ISL_441814 to 441815, EPI_ISL_441817 to 441818, EPI_ISL_441820 to 441821, EPI_ISL_441823 to 441824, EPI_ISL_441826 to 441827, EPI_ISL_441829 to 441830, EPI_ISL_441832 to 441833, EPI_ISL_441835 to 441836, EPI_ISL_441838 to 441839, EPI_ISL_441841 to 441842, EPI_ISL_441844 to 441845, EPI_ISL_441847 to 441848, EPI_ISL_441850 to 441851, EPI_ISL_441853 to 441854, EPI_ISL_441856 to 441857, EPI_ISL_441859 to 441860, EPI_ISL_441862 to 441863, EPI_ISL_441865 to 441866, EPI_ISL_441868 to 441869, EPI_ISL_441871 to 441872, EPI_ISL_441874 to 441875, EPI_ISL_441877 to 441878, EPI_ISL_441880 to 441881, EPI_ISL_441883 to 441884, EPI_ISL_441886 to 441887, EPI_ISL_441889 to 441890, EPI_ISL_441892 to 441893, EPI_ISL_441895 to 441896, EPI_ISL_441898 to 441899, EPI_ISL_441901 to 441902, EPI_ISL_441904 to 441905, EPI_ISL_441907 to 441908, EPI_ISL_441910 to 441911, EPI_ISL_441913 to 441914, EPI_ISL_441916 to 441917, EPI_ISL_441919 to 441920, EPI_ISL_441922 to 441923, EPI_ISL_441925 to 441926, EPI_ISL_441928 to 441929, EPI_ISL_441931 to 441932, EPI_ISL_441934 to 441935, EPI_ISL_441937 to 441938, EPI_ISL_441940 to 441941, EPI_ISL_441943 to 441944, EPI_ISL_441946 to 441947, EPI_ISL_441949 to 441950, EPI_ISL_441952 to 441953, EPI_ISL_441955 to 441956, EPI_ISL_441958 to 441959, EPI_ISL_441961 to 441962, EPI_ISL_441964 to 441965, EPI_ISL_441967 to 441968, EPI_ISL_441970 to 441971, EPI_ISL_441973 to 441974, EPI_ISL_441976 to 441977, EPI_ISL_441979 to 441980, EPI_ISL_441982 to 441983, EPI_ISL_441985 to 441986, EPI_ISL_441988 to 441989, EPI_ISL_441991 to 441992, EPI_ISL_441994 to 441995, EPI_ISL_441997 to 441998, EPI_ISL_441999 to 442000, EPI_ISL_442002 to 442003, EPI_ISL_442005 to 442006, EPI_ISL_442008 to 442009, EPI_ISL_442011 to 442012, EPI_ISL_442014 to 442015, EPI_ISL_442017 to 442018, EPI_ISL_442020 to 442021, EPI_ISL_442023 to 442024, EPI_ISL_442026 to 442027, EPI_ISL_442029 to 442030, EPI_ISL_442032 to 442033, EPI_ISL_442035 to 442036, EPI_ISL_442038 to 442039, EPI_ISL_442041 to 442042, EPI_ISL_442044 to 442045, EPI_ISL_442047 to 442048, EPI_ISL_442050 to 442051, EPI_ISL_442053 to 442054, EPI_ISL_442056 to 442057, EPI_ISL_442059 to 442060, EPI_ISL_442062 to 442063, EPI_ISL_442065 to 442066, EPI_ISL_442068 to 442069, EPI_ISL_442071 to 442072, EPI_ISL_442074 to 442075, EPI_ISL_442077 to 442078, EPI_ISL_442080 to 442081, EPI_ISL_442083 to 442084, EPI_ISL_442086 to 442087, EPI_ISL_442089 to 442090, EPI_ISL_442092 to 442093, EPI_ISL_442095 to 442096, EPI_ISL_442098 to 442099, EPI_ISL_442101 to 442102, EPI_ISL_442104 to 442105, EPI_ISL_442107 to 442108, EPI_ISL_442110 to 442111, EPI_ISL_442113 to 442114, EPI_ISL_442116 to 442117, EPI_ISL_442119 to 442120, EPI_ISL_442122 to 442123, EPI_ISL_442125 to 442126, EPI_ISL_442128 to 442129, EPI_ISL_442131 to 442132, EPI_ISL_442134 to 442135, EPI_ISL_442137 to 442138, EPI_ISL_442140 to 442141, EPI_ISL_442143 to 442144, EPI_ISL_442146 to 442147, EPI_ISL_442149 to 442150, EPI_ISL_442152 to 442153, EPI_ISL_442155 to 442156, EPI_ISL_442158 to 442159, EPI_ISL_442161 to 442162, EPI_ISL_442164 to 442165, EPI_ISL_442167 to 442168, EPI_ISL_442170 to 442171, EPI_ISL_442173 to 442174, EPI_ISL_442176 to 442177, EPI_ISL_442179 to 442180, EPI_ISL_442182 to 442183, EPI_ISL_442185 to 442186, EPI_ISL_442188 to 442189, EPI_ISL_442191 to 442192, EPI_ISL_442194 to 442195, EPI_ISL_442197 to 442198, EPI_ISL_442199 to 442200, EPI_ISL_442202 to 442203, EPI_ISL_442205 to 442206, EPI_ISL_442208 to 442209, EPI_ISL_442211 to 442212, EPI_ISL_442214 to 442215, EPI_ISL_442217 to 442218, EPI_ISL_442220 to 442221, EPI_ISL_442223 to 442224, EPI_ISL_442226 to 442227, EPI_ISL_442229 to 442230, EPI_ISL_442232 to 442233, EPI_ISL_442235 to 442236, EPI_ISL_442238 to 442239, EPI_ISL_442241 to 442242, EPI_ISL_442244 to 442245, EPI_ISL_442247 to 442248, EPI_ISL_442250 to 442251, EPI_ISL_442253 to 442254, EPI_ISL_442256 to 442257, EPI_ISL_442259 to 442260, EPI_ISL_442262 to 442263, EPI_ISL_442265 to 442266, EPI_ISL_442268 to 442269, EPI_ISL_442271 to 442272, EPI_ISL_442274 to 442275, EPI_ISL_442277 to 442278, EPI_ISL_442280 to 442281, EPI_ISL_442283 to 442284, EPI_ISL_442286 to 442287, EPI_ISL_442289 to 442290, EPI_ISL_442292 to 442293, EPI_ISL_442295 to 442296, EPI_ISL_442298 to 442299, EPI_ISL_442301 to 442302, EPI_ISL_442304 to 442305, EPI_ISL_442307 to 442308, EPI_ISL_442310 to 442311, EPI_ISL_442313 to 442314, EPI_ISL_442316 to 442317, EPI_ISL_442319 to 442320, EPI_ISL_442322 to 442323, EPI_ISL_442325 to 442326, EPI_ISL_442328 to 442329, EPI_ISL_442331 to 442332, EPI_ISL_442334 to 442335, EPI_ISL_442337 to 442338, EPI_ISL_442340 to 442341, EPI_ISL_442343 to 442344, EPI_ISL_442346 to 442347, EPI_ISL_442349 to 442350, EPI_ISL_442352 to 442353, EPI_ISL_442355 to 442356, EPI_ISL_442358 to 442359, EPI_ISL_442361 to 442362, EPI_ISL_442364 to 442365, EPI_ISL_442367 to 442368, EPI_ISL_442370 to 442371, EPI_ISL_442373 to 442374, EPI_ISL_442376 to 442377, EPI_ISL_442379 to 442380, EPI_ISL_442382 to 442383, EPI_ISL_442385 to 442386, EPI_ISL_442388 to 442389, EPI_ISL_442391 to 442392, EPI_ISL_442394 to 442395, EPI_ISL_442397 to 442398, EPI_ISL_442400 to 442401, EPI_ISL_442403 to 442404, EPI_ISL_442406 to 442407, EPI_ISL_442409 to 442410, EPI_ISL_442412 to 442413, EPI_ISL_442415 to 442416, EPI_ISL_442418 to 442419, EPI_ISL_442421 to 442422, EPI_ISL_442424 to 442425, EPI_ISL_442427 to 442428, EPI_ISL_442430 to 442431, EPI_ISL_442433 to 442434, EPI_ISL_442436 to 442437, EPI_ISL_442439 to 442440, EPI_ISL_442442 to 442443, EPI_ISL_442445 to 442446, EPI_ISL_442448 to 442449, EPI_ISL_442451 to 442452, EPI_ISL_442454 to 442455, EPI_ISL_442457 to 442458, EPI_ISL_442460 to 442461, EPI_ISL_442462 to 442463, EPI_ISL_442465 to 442466, EPI_ISL_442468 to 442469, EPI_ISL_442471 to 442472, EPI_ISL_442474 to 442475, EPI_ISL_442477 to 442478, EPI_ISL_442480 to 442481, EPI_ISL_442483 to 442484, EPI_ISL_442486 to 442487, EPI_ISL_442489 to 442490, EPI_ISL_442492 to 442493, EPI_ISL_442495 to 442496, EPI_ISL_442498 to 442499, EPI_ISL_442501 to 442502, EPI_ISL_442504 to 442505, EPI_ISL_442507 to 442508, EPI_ISL_442510 to 442511, EPI_ISL_442513 to 442514, EPI_ISL_442516 to 442517, EPI_ISL_442519 to 442520, EPI_ISL_442522 to 442523, EPI_ISL_442525 to 442526, EPI_ISL_442528 to 442529, EPI_ISL_442531 to 442532, EPI_ISL_442534 to 442535, EPI_ISL_442537 to 442538, EPI_ISL_442540 to 442541, EPI_ISL_442543 to 442544, EPI_ISL_442546 to 442547, EPI_ISL_442549 to 442550, EPI_ISL_442552 to 442553, EPI_ISL_442555 to 442556, EPI_ISL_442558 to 442559, EPI_ISL_442561 to 442562, EPI_ISL_442564 to 442565, EPI_ISL_442567 to 442568, EPI_ISL_442570 to 442571, EPI_ISL_442573 to 442574, EPI_ISL_442576 to 442577, EPI_ISL_442579 to 442580, EPI_ISL_442582 to 442583, EPI_ISL_442585 to 442586, EPI_ISL_442588 to 442589, EPI_ISL_442591 to 442592, EPI_ISL_442594 to 442595, EPI_ISL_442597 to 442598, EPI_ISL_442600 to 442601, EPI_ISL_442603 to 442604, EPI_ISL_442606 to 442607, EPI_ISL_442609 to 442610, EPI_ISL_442612 to 442613, EPI_ISL_442615 to 442616, EPI_ISL_442618 to 442619, EPI_ISL_442621 to 442622, EPI_ISL_442624 to 442625, EPI_ISL_442627 to 442628, EPI_ISL_442630 to 442631, EPI_ISL_442633 to 442634, EPI_ISL_442636 to 442637, EPI_ISL_442639 to 442640, EPI_ISL_442642 to 442643, EPI_ISL_442645 to 442646, EPI_ISL_442648 to 442649, EPI_ISL_442651 to 442652, EPI_ISL_442654 to 442655, EPI_ISL_442657 to 442658, EPI_ISL_442660 to 442661, EPI_ISL_442663 to 442664, EPI_ISL_442666 to 442667, EPI_ISL_442669 to 442670, EPI_ISL_442672 to 442673, EPI_ISL_442675 to 442676, EPI_ISL_442678 to 442679, EPI_ISL_442681 to 442682, EPI_ISL_442684 to 442685, EPI_ISL_442687 to 442688, EPI_ISL_442690 to 442691, EPI_ISL_442693 to 442694, EPI_ISL_442696 to 442697, EPI_ISL_442699 to 442700, EPI_ISL_442702 to 442703, EPI_ISL_442705 to 442706, EPI_ISL_442708 to 442709, EPI_ISL_442711 to 442712, EPI_ISL_442714 to 442715, EPI_ISL_442717 to 442718, EPI_ISL_442720 to 442721, EPI_ISL_442723 to 442724, EPI_ISL_442726 to 442727, EPI_ISL_442729 to 442730, EPI_ISL_442732 to 442733, EPI_ISL_442735 to 442736, EPI_ISL_442738 to 442739, EPI_ISL_442741 to 442742, EPI_ISL_442744 to 442745, EPI_ISL_442747 to 442748, EPI_ISL_442750 to 442751, EPI_ISL_442753 to 442754, EPI_ISL_442756 to 442757, EPI_ISL_442759 to 442760, EPI_ISL_442762 to 442763, EPI_ISL_442765 to 442766, EPI_ISL_442768 to 442769, EPI_ISL_442771 to 442772, EPI_ISL_442774 to 442775, EPI_ISL_442777 to 442778, EPI_ISL_442780 to 442781, EPI_ISL_442783 to 442784, EPI_ISL_442786 to 442787, EPI_ISL_442789 to 442790, EPI_ISL_442792 to 442793, EPI_ISL_442795 to 442796, EPI_ISL_442798 to 442799, EPI_ISL_442801 to 442802, EPI_ISL_442804 to 442805, EPI_ISL_442807 to 442808, EPI_ISL_442810 to 442811, EPI_ISL_442813 to 442814, EPI_ISL_442816 to 442817, EPI_ISL_442819 to 442820, EPI_ISL_442822 to 442823, EPI_ISL_442825 to 442826, EPI_ISL_442828 to 442829, EPI_ISL_442831 to 442832, EPI_ISL_442834 to 442835, EPI_ISL_442837 to 442838, EPI_ISL_442840 to 442841, EPI_ISL_442 |                                                                 |                                                                                |                                                                                                                                                                                                                                                                                                                                                                                 |                                                                                                                                                                                                                                                                    |

|                                                                                                                                                                                                                                                                                                                                                                                                                                                                                                                                                                                                                                                                                                                                                                                                                                                                                                                                                                                                                                                                                                                                                                                                                                                                                                                                                                                                                                                                                                                                                                                                                                                                                                     |           |                                                                                                                      |                                                                                                                                                                                                                                                                                                                                                                                                                                                                  |                                                                                                                                                                                                                                                                                                                                                                                                                                                                                                                                                                                                                                                                                       |
|-----------------------------------------------------------------------------------------------------------------------------------------------------------------------------------------------------------------------------------------------------------------------------------------------------------------------------------------------------------------------------------------------------------------------------------------------------------------------------------------------------------------------------------------------------------------------------------------------------------------------------------------------------------------------------------------------------------------------------------------------------------------------------------------------------------------------------------------------------------------------------------------------------------------------------------------------------------------------------------------------------------------------------------------------------------------------------------------------------------------------------------------------------------------------------------------------------------------------------------------------------------------------------------------------------------------------------------------------------------------------------------------------------------------------------------------------------------------------------------------------------------------------------------------------------------------------------------------------------------------------------------------------------------------------------------------------------|-----------|----------------------------------------------------------------------------------------------------------------------|------------------------------------------------------------------------------------------------------------------------------------------------------------------------------------------------------------------------------------------------------------------------------------------------------------------------------------------------------------------------------------------------------------------------------------------------------------------|---------------------------------------------------------------------------------------------------------------------------------------------------------------------------------------------------------------------------------------------------------------------------------------------------------------------------------------------------------------------------------------------------------------------------------------------------------------------------------------------------------------------------------------------------------------------------------------------------------------------------------------------------------------------------------------|
| EPI_ISL_1407334 to 1407457, EPI_ISL_1413514, EPI_ISL_1413516, EPI_ISL_1413519, EPI_ISL_1413522, EPI_ISL_1413525, EPI_ISL_1413528, EPI_ISL_1413530, EPI_ISL_1413533, EPI_ISL_1413536, EPI_ISL_1413538, EPI_ISL_1413542, EPI_ISL_1413544, EPI_ISL_1413547, EPI_ISL_1413549, EPI_ISL_1413554, EPI_ISL_1413556, EPI_ISL_1413559, EPI_ISL_1413561, EPI_ISL_1413563, EPI_ISL_1413566, EPI_ISL_1413568, EPI_ISL_1413571, EPI_ISL_1413574, EPI_ISL_1413576, EPI_ISL_1413579, EPI_ISL_1413582, EPI_ISL_1413585, EPI_ISL_1413587, EPI_ISL_1413589, EPI_ISL_1413592, EPI_ISL_1413594, EPI_ISL_1413597, EPI_ISL_1413600, EPI_ISL_1413602, EPI_ISL_1413605, EPI_ISL_1413607, EPI_ISL_1413610, EPI_ISL_1413613, EPI_ISL_1413615, EPI_ISL_1413618, EPI_ISL_1413621, EPI_ISL_1413623, EPI_ISL_1413626, EPI_ISL_1413628, EPI_ISL_1413631, EPI_ISL_1413634, EPI_ISL_1413637, EPI_ISL_1413639, EPI_ISL_1413642, EPI_ISL_1413645, EPI_ISL_1413647, EPI_ISL_1413651, EPI_ISL_1413653, EPI_ISL_1413656, EPI_ISL_1413658, EPI_ISL_1413661, EPI_ISL_1413664, EPI_ISL_1413667, EPI_ISL_1413669, EPI_ISL_1413672, EPI_ISL_1413675, EPI_ISL_1413678, EPI_ISL_1413680, EPI_ISL_1413682, EPI_ISL_1413685, EPI_ISL_1413687, EPI_ISL_1413690, EPI_ISL_1413693, EPI_ISL_1413696, EPI_ISL_1413699, EPI_ISL_1413702, EPI_ISL_1413704, EPI_ISL_1413707, EPI_ISL_1413710, EPI_ISL_1413712, EPI_ISL_1413715, EPI_ISL_1413718, EPI_ISL_1413720, EPI_ISL_1413723, EPI_ISL_1413726, EPI_ISL_1413728, EPI_ISL_1413731, EPI_ISL_1413733, EPI_ISL_1413736, EPI_ISL_1413739, EPI_ISL_1413742, EPI_ISL_1413745, EPI_ISL_1413748, EPI_ISL_1413750, EPI_ISL_1413753, EPI_ISL_1413755, EPI_ISL_1413758, EPI_ISL_1413761, EPI_ISL_1516598 to 1516664 | see above | Rhode Island Department of Health                                                                                    | Infectious Disease Program, Broad Institute of Harvard and MIT                                                                                                                                                                                                                                                                                                                                                                                                   | Adams, G.; Azevedo, K.; B.L.; B.W.; Bauer, M.; Birren; Carter, A.; Chaluvadi, S.; D.J.; DeRuff, K.; Gladden-Young, A.; Huard, R.; J.E.; K.J.; King, E.; Lagerborg, K.; Lemieux; Loreth, C.; Miller, A.; Normandin, E.; P.C.; Park; Pearlman, L.; Reilly, S.; Rudy, M.; Sabeti; Siddle; Tomkins-Tinch, C.; and MacInnis                                                                                                                                                                                                                                                                                                                                                                |
| EPI_ISL_485003 to 485387, EPI_ISL_485873 to 485906                                                                                                                                                                                                                                                                                                                                                                                                                                                                                                                                                                                                                                                                                                                                                                                                                                                                                                                                                                                                                                                                                                                                                                                                                                                                                                                                                                                                                                                                                                                                                                                                                                                  |           | River Road Testing Lab                                                                                               | Ginkgo Bioworks Clinical Laboratory                                                                                                                                                                                                                                                                                                                                                                                                                              | Alex Plocik; Becky Schilling; Birgitte Simen; E. Handly Mayton; Hollis R. O'Neil; James McGann; Jim Griffin; Keith Robison; Luan V. Dinh; Malaika Mckenzie-Bennett; Michelle Spencer; Rebecca C. Christofferson; Rebecca Littlefield; Stephanie A. Cormier; Thaya Stoufflet                                                                                                                                                                                                                                                                                                                                                                                                           |
| EPI_ISL_1534332 to 1534333, EPI_ISL_1534422                                                                                                                                                                                                                                                                                                                                                                                                                                                                                                                                                                                                                                                                                                                                                                                                                                                                                                                                                                                                                                                                                                                                                                                                                                                                                                                                                                                                                                                                                                                                                                                                                                                         |           | Riversdale Clinic wc RAV                                                                                             | NHLs/UCT                                                                                                                                                                                                                                                                                                                                                                                                                                                         | Arash Iranzadeh; Bruna Galvao; Carolyn Williamson; Dealan Doolabh; Diana Hardie; Emmanuel SJ; Innocent Mudau; Kruger Marais; Lynn Tyers; Marvin Hsiao; Stephen Korsman; Tegally H; de Oliveira T                                                                                                                                                                                                                                                                                                                                                                                                                                                                                      |
| EPI_ISL_1520146 to 1520154                                                                                                                                                                                                                                                                                                                                                                                                                                                                                                                                                                                                                                                                                                                                                                                                                                                                                                                                                                                                                                                                                                                                                                                                                                                                                                                                                                                                                                                                                                                                                                                                                                                                          |           | Riverside Medical Center                                                                                             | Illinois Department of Public Health - Chicago Lab                                                                                                                                                                                                                                                                                                                                                                                                               | Ira Heimler; Vineet K. Dhiman                                                                                                                                                                                                                                                                                                                                                                                                                                                                                                                                                                                                                                                         |
| EPI_ISL_430456                                                                                                                                                                                                                                                                                                                                                                                                                                                                                                                                                                                                                                                                                                                                                                                                                                                                                                                                                                                                                                                                                                                                                                                                                                                                                                                                                                                                                                                                                                                                                                                                                                                                                      |           | Rizal Medical Center                                                                                                 | Research Institute for Tropical Medicine                                                                                                                                                                                                                                                                                                                                                                                                                         | Bautista; Brunker, K.; C.S.; C.T.; D.L.; Demetria; E.S.; F.G.M.; I.A.P.; Manalo; Medado; Mercado; O.J.T.; Onza; Polotan                                                                                                                                                                                                                                                                                                                                                                                                                                                                                                                                                               |
| EPI_ISL_434517 to 434532, EPI_ISL_435445 to 435472, EPI_ISL_437540 to 437548, EPI_ISL_445119 to 445163, EPI_ISL_450173 to 450185, EPI_ISL_450231                                                                                                                                                                                                                                                                                                                                                                                                                                                                                                                                                                                                                                                                                                                                                                                                                                                                                                                                                                                                                                                                                                                                                                                                                                                                                                                                                                                                                                                                                                                                                    |           | Robert Garry lab                                                                                                     | Andersen lab at Scripps Research                                                                                                                                                                                                                                                                                                                                                                                                                                 | Allison Smither; Antoinette Bell; Arnaud Drouin; Dahlene Fusco; Gilberto Sabino-Santos; Kaylynn Genemaras; Lilia Melnik; Patricia Snarski; Robert Garry with SEARCH Alliance San Diego                                                                                                                                                                                                                                                                                                                                                                                                                                                                                                |
| EPI_ISL_481253, EPI_ISL_481256, EPI_ISL_481262, EPI_ISL_481264                                                                                                                                                                                                                                                                                                                                                                                                                                                                                                                                                                                                                                                                                                                                                                                                                                                                                                                                                                                                                                                                                                                                                                                                                                                                                                                                                                                                                                                                                                                                                                                                                                      |           | Robert Koch Institute, National Reference center for Influenza, Berlin, Germany                                      | Robert Koch Institute, Bioinformatics MF1, Berlin, Germany                                                                                                                                                                                                                                                                                                                                                                                                       | Andrea Thuermer; Marianne Wedde; Max v. Kleist; Oliver Drechsel; Ralf Duerwald; Rene Kmiecinski; Stephan Fuchs; Thorsten Wolff                                                                                                                                                                                                                                                                                                                                                                                                                                                                                                                                                        |
| EPI_ISL_483139 to 483157                                                                                                                                                                                                                                                                                                                                                                                                                                                                                                                                                                                                                                                                                                                                                                                                                                                                                                                                                                                                                                                                                                                                                                                                                                                                                                                                                                                                                                                                                                                                                                                                                                                                            |           | Robert Koch Institute, ZBS1 Highly Pathogenic Viruses, Berlin, Germany                                               | Robert Koch Institute, Bioinformatics MF1, Berlin, Germany                                                                                                                                                                                                                                                                                                                                                                                                       | Andrea Thuermer; Andreas Nitsche; Janine Michel; Max v. Kleist; Oliver Drechsel; Rene Kmiecinski; Stephan Fuchs                                                                                                                                                                                                                                                                                                                                                                                                                                                                                                                                                                       |
| EPI_ISL_1439128                                                                                                                                                                                                                                                                                                                                                                                                                                                                                                                                                                                                                                                                                                                                                                                                                                                                                                                                                                                                                                                                                                                                                                                                                                                                                                                                                                                                                                                                                                                                                                                                                                                                                     |           | Robert-Bosch-Krankenhaus                                                                                             | Robert Koch Institute                                                                                                                                                                                                                                                                                                                                                                                                                                            |                                                                                                                                                                                                                                                                                                                                                                                                                                                                                                                                                                                                                                                                                       |
| EPI_ISL_1447143                                                                                                                                                                                                                                                                                                                                                                                                                                                                                                                                                                                                                                                                                                                                                                                                                                                                                                                                                                                                                                                                                                                                                                                                                                                                                                                                                                                                                                                                                                                                                                                                                                                                                     |           | Rockefeller University Hospital                                                                                      | New York City Public Health Laboratory                                                                                                                                                                                                                                                                                                                                                                                                                           | Jade Wang; et al.                                                                                                                                                                                                                                                                                                                                                                                                                                                                                                                                                                                                                                                                     |
| EPI_ISL_417032                                                                                                                                                                                                                                                                                                                                                                                                                                                                                                                                                                                                                                                                                                                                                                                                                                                                                                                                                                                                                                                                                                                                                                                                                                                                                                                                                                                                                                                                                                                                                                                                                                                                                      |           | Rockhampton Base Hospital                                                                                            | Public Health Virology Laboratory                                                                                                                                                                                                                                                                                                                                                                                                                                | Alyssa Pyke; Amanda De Jong; Andrew Van Den Hurk; Bixing Huang; Carmel Taylor; David Warrilow; Doris Genge; Elisabeth Gamez; Glen Hewitson; Ian Maxwell Mackay; Inga Sultana; Jamie McMahon; Jean Barcelon; Judy Northill; Mitchell Finger; Natalie Simpson; Neelima Nair; Peter Burtonclay; Peter Moore; Sarah Wheatley; Sean Moody; Sonja Hall-Mendelin; Timothy Gardam; and Frederick Moore                                                                                                                                                                                                                                                                                        |
| EPI_ISL_514131 to 514138                                                                                                                                                                                                                                                                                                                                                                                                                                                                                                                                                                                                                                                                                                                                                                                                                                                                                                                                                                                                                                                                                                                                                                                                                                                                                                                                                                                                                                                                                                                                                                                                                                                                            |           | Rondônia Central Public Health Laboratory (LACEN/RO), vinctulated to State Health Secretariat of Rondônia (SESAU/RO) | Molecular Virology Laboratory of Oswaldo Cruz Foundation of Rondônia                                                                                                                                                                                                                                                                                                                                                                                             | Adriana Cristina Salvador Maia; Alcione de Oliveira dos Santos; Alice Paula Di Sabatino Guimarães; Aline Linhares Ferreira de Melo Mendonça; Caio Henrique Nemeth Santos; Camila Flávia Gomes Azzi; Celina Aparecida Bertoni Lugtenburg; Cicileia Correia da Silva; Felipe Gomes Naveca; Felipe Souza Nogueira-Lima; Fernando Rodrigues Máximo; Jansen Fernandes de Medeiros; Juan Miguel Villalobos-Salcedo and Deusiene Souza Vieira; Juan Miguel Villalobos-Salcedo and Deusiene Souza Vieira; Juan Miguel Villalobos-Salcedo and Deusiene Souza Vieira; Juliana Loca Furtado; Luan Felipo Botelho-Souza; Suelen Cavalcante; Tércio Peixoto Roca; Rita de Cássia Pontello Rampazzo |
| EPI_ISL_1388132, EPI_ISL_1388170 to 1388171, EPI_ISL_1388174 to 1388175, EPI_ISL_1388181, EPI_ISL_1388183, EPI_ISL_1388187, EPI_ISL_1388259, EPI_ISL_1388263, EPI_ISL_1388289, EPI_ISL_1388291, EPI_ISL_1388291, EPI_ISL_1388308, EPI_ISL_1388336, EPI_ISL_1388338, EPI_ISL_1388346, EPI_ISL_1388351, EPI_ISL_1388358, EPI_ISL_1388360, EPI_ISL_1388366, EPI_ISL_1388375, EPI_ISL_1388377, EPI_ISL_1388380, EPI_ISL_1388382, EPI_ISL_1388460, EPI_ISL_1388471, EPI_ISL_1388474, EPI_ISL_1388474, EPI_ISL_1388492, EPI_ISL_1388532, EPI_ISL_1388552, EPI_ISL_1388562, EPI_ISL_1388564, EPI_ISL_1388576, EPI_ISL_1388633, EPI_ISL_1388645, EPI_ISL_1388716, EPI_ISL_1388740, EPI_ISL_1388815, EPI_ISL_1388817, EPI_ISL_1389019 to 1389023, EPI_ISL_1389031 to 1389036, EPI_ISL_1389049, EPI_ISL_1389061, EPI_ISL_1389063, EPI_ISL_1389078, EPI_ISL_1389136                                                                                                                                                                                                                                                                                                                                                                                                                                                                                                                                                                                                                                                                                                                                                                                                                                            | see above | Rothen Medizinische Laboratorien AG                                                                                  | University Hospital Basel, Clinical Bacteriology                                                                                                                                                                                                                                                                                                                                                                                                                 | Adrian Egli; Alfredo Mari; Hans Hirsch; Helena MB Seth-Smith; Ingrid Steffen; Julia Bielički; Karoline Leuzinger; Madlen Stange; Manuel Battegay; Tim Roloff                                                                                                                                                                                                                                                                                                                                                                                                                                                                                                                          |
| EPI_ISL_436098                                                                                                                                                                                                                                                                                                                                                                                                                                                                                                                                                                                                                                                                                                                                                                                                                                                                                                                                                                                                                                                                                                                                                                                                                                                                                                                                                                                                                                                                                                                                                                                                                                                                                      |           | Royal Brisbane and Women's Hospital                                                                                  | Public Health Virology Laboratory, Forensic and Scientific Services, Queensland Health                                                                                                                                                                                                                                                                                                                                                                           | Alyssa Pyke; Amanda De Jong; Andrew Van Den Hurk; Bixing Huang; Carmel Taylor; David Warrilow; Doris Genge; Elisabeth Gamez; Glen Hewitson; Ian Maxwell Mackay; Inga Sultana and Frederick Moore; Jamie McMahon; Jean Barcelon; Judy Northill; Lisa Leckie; Mitchell Finger; Natalie Simpson; Neelima Nair; Peter Burtonclay; Peter Moore; Sarah Wheatley; Sean Moody; Sonja Hall-Mendelin                                                                                                                                                                                                                                                                                            |
| EPI_ISL_521860 to 521862                                                                                                                                                                                                                                                                                                                                                                                                                                                                                                                                                                                                                                                                                                                                                                                                                                                                                                                                                                                                                                                                                                                                                                                                                                                                                                                                                                                                                                                                                                                                                                                                                                                                            |           | Royal Darwin Hospital Pathology                                                                                      | MDU-PHL                                                                                                                                                                                                                                                                                                                                                                                                                                                          | Caly L.; Druce J.; Meumann, E.; Sait, M.; Schultz M.; Seemann T.; Sherry, N.                                                                                                                                                                                                                                                                                                                                                                                                                                                                                                                                                                                                          |
| EPI_ISL_492862                                                                                                                                                                                                                                                                                                                                                                                                                                                                                                                                                                                                                                                                                                                                                                                                                                                                                                                                                                                                                                                                                                                                                                                                                                                                                                                                                                                                                                                                                                                                                                                                                                                                                      |           | Royal Free Hospital / Health Services Laboratories                                                                   | Wellcome Sanger Institute for the COVID-19 Genomics UK (COG-UK) Consortium                                                                                                                                                                                                                                                                                                                                                                                       | Cate Goodlad; Cordelia Langford; David K. Jackson; Dianne Irish; Dominic Kwiatkowski; Ewan Harrison; Ian Johnston; Jenny Cross; John Sillitoe on behalf of the Wellcome Sanger Institute COVID-19 Surveillance Team; Judith Heaney and Alex Alderton; Roberto Amato; Sonia Goncalves; Tabitha Mahungu; Tanzina Haque                                                                                                                                                                                                                                                                                                                                                                  |
| EPI_ISL_492837, EPI_ISL_492840, EPI_ISL_492843 to 492847, EPI_ISL_492850 to 492852, EPI_ISL_492856, EPI_ISL_492863 to 492865, EPI_ISL_492868 to 492869, EPI_ISL_492872, EPI_ISL_492874, EPI_ISL_492876 to 492877, EPI_ISL_492879 to 492880, EPI_ISL_492882 to 492883, EPI_ISL_492885, EPI_ISL_492887 to 492888, EPI_ISL_492890, EPI_ISL_492894, EPI_ISL_492901 to 492902, EPI_ISL_492905 to 492906, EPI_ISL_492908, EPI_ISL_492911, EPI_ISL_492914                                                                                                                                                                                                                                                                                                                                                                                                                                                                                                                                                                                                                                                                                                                                                                                                                                                                                                                                                                                                                                                                                                                                                                                                                                                  | see above | Royal Free Hospital / Health Services Laboratories                                                                   | Wellcome Sanger Institute for the COVID-19 Genomics UK (COG-UK) consortium                                                                                                                                                                                                                                                                                                                                                                                       | Cate Goodlad; Cordelia Langford; David K. Jackson; Dianne Irish; Dominic Kwiatkowski; Ewan Harrison; Ian Johnston; Jenny Cross; John Sillitoe on behalf of the Wellcome Sanger Institute COVID-19 Surveillance Team ( <a href="http://www.sanger.ac.uk/covid-team">http://www.sanger.ac.uk/covid-team</a> ); Judith Heaney and Alex Alderton; Roberto Amato; Sonia Goncalves; Tabitha Mahungu; Tanzina Haque                                                                                                                                                                                                                                                                          |
| EPI_ISL_577607                                                                                                                                                                                                                                                                                                                                                                                                                                                                                                                                                                                                                                                                                                                                                                                                                                                                                                                                                                                                                                                                                                                                                                                                                                                                                                                                                                                                                                                                                                                                                                                                                                                                                      |           | Royal Hobart Hospital                                                                                                | Royal Hobart Hospital                                                                                                                                                                                                                                                                                                                                                                                                                                            | Coolley L.; van Haeften R.                                                                                                                                                                                                                                                                                                                                                                                                                                                                                                                                                                                                                                                            |
| EPI_ISL_522556 to 522646, EPI_ISL_522648 to 522684, EPI_ISL_522686 to 522727, EPI_ISL_522729 to 522769                                                                                                                                                                                                                                                                                                                                                                                                                                                                                                                                                                                                                                                                                                                                                                                                                                                                                                                                                                                                                                                                                                                                                                                                                                                                                                                                                                                                                                                                                                                                                                                              |           | Royal Hobart Hospital Microbiology Department                                                                        | MDU-PHL                                                                                                                                                                                                                                                                                                                                                                                                                                                          | Coolley L.; M.B.; Sait M.; Schultz; Seemann T.; Sherry N.; van Haeften R.                                                                                                                                                                                                                                                                                                                                                                                                                                                                                                                                                                                                             |
| EPI_ISL_516800                                                                                                                                                                                                                                                                                                                                                                                                                                                                                                                                                                                                                                                                                                                                                                                                                                                                                                                                                                                                                                                                                                                                                                                                                                                                                                                                                                                                                                                                                                                                                                                                                                                                                      |           | Rumah Sakit Akademik Universitas Gadjah Mada                                                                         | Genetics Working Group (Pokja Genetik) Faculty of Medicine, Public Health and Nursing Universitas Gadjah Mada (FK-KMK UGM); Disease Investigation Center Wates Ministry of Agriculture Indonesia; Department of Microbiology FK-KMK UGM; Laboratorium Diagnostik Yayasan Tahjia World Mosquito Program (WMP) Yogyakarta Center for Tropical Medicine FK-KMK UGM; Integrated Research center FK-KMK UGM; Department of Computer Science and Electronics FMIPA UGM | . Marcellus; Afiahayati; Alvin S. Kalim; Desyifa Mursalin; Dwi AA Nugrahaningsih; Edwin W. Daniwijaya; Eggi Arguni; Endah Supriyati; Gunadi; Hendra Wibawa; Ludhang P. Rizki; Mohamad S. Hakim; Siswanto; Titik Nuryastuti; Tri Wibawa                                                                                                                                                                                                                                                                                                                                                                                                                                                |
| EPI_ISL_516806                                                                                                                                                                                                                                                                                                                                                                                                                                                                                                                                                                                                                                                                                                                                                                                                                                                                                                                                                                                                                                                                                                                                                                                                                                                                                                                                                                                                                                                                                                                                                                                                                                                                                      |           | Rumah Sakit PKU Gamping                                                                                              | Genetics Working Group (Pokja Genetik) Faculty of Medicine, Public Health and Nursing Universitas Gadjah Mada (FK-KMK UGM); Disease Investigation Center Wates Ministry of Agriculture Indonesia; Department of Microbiology FK-KMK UGM; Laboratorium Diagnostik Yayasan Tahjia World Mosquito Program (WMP) Yogyakarta Center for Tropical Medicine FK-KMK UGM; Integrated Research center FK-KMK UGM; Department of Computer Science and Electronics FMIPA UGM | . Afiahayati; . Marcellus; . Siswanto; Ardorisye Saptaty Fornia; Dwi AA Nugrahaningsih; Edwin W. Daniwijaya; Eggi Arguni; Endah Supriyati; Gunadi; Hendra Wibawa; Kemal Athollah; Ludhang P. Rizki; Mohamad S. Hakim; Titik Nuryastuti; Tri Wibawa                                                                                                                                                                                                                                                                                                                                                                                                                                    |
| EPI_ISL_491298                                                                                                                                                                                                                                                                                                                                                                                                                                                                                                                                                                                                                                                                                                                                                                                                                                                                                                                                                                                                                                                                                                                                                                                                                                                                                                                                                                                                                                                                                                                                                                                                                                                                                      |           | Rural Health Unit - Calauan, Laguna                                                                                  | Research Institute for Tropical Medicine                                                                                                                                                                                                                                                                                                                                                                                                                         | Bautista; Brunker, K.; C.S.; C.T.; D.L.; Demetria; E.S.; F.G.M.; I.A.P.; M.A.A.; Manalo; Medado; Mercado; O.J.T.; Onza; Polotan; Tujan                                                                                                                                                                                                                                                                                                                                                                                                                                                                                                                                                |
| EPI_ISL_421275, EPI_ISL_454732, EPI_ISL_470896                                                                                                                                                                                                                                                                                                                                                                                                                                                                                                                                                                                                                                                                                                                                                                                                                                                                                                                                                                                                                                                                                                                                                                                                                                                                                                                                                                                                                                                                                                                                                                                                                                                      |           | Russian State Collection of Viruses                                                                                  | Pathogenic Microorganisms Variability Laboratory                                                                                                                                                                                                                                                                                                                                                                                                                 | Alexander Gintsburg; Alexey Mazus; Alexey Shchetinin; Andrey Botikov; Daria Grousova; Denis Logunov; Denis Protsenko; Ekaterina Aksenova; Elena Shidlovskaya; Inna Dolzhikova; Maria Nikiforova; Marina Kunda; Nadezhda Kuznetsova; Natalia Ryzhova; Olga Voronina; Vladimir Gushchin                                                                                                                                                                                                                                                                                                                                                                                                 |

|                                                                                                                                                                                                                                                                                                                                                                                                                                                                                                                                                                                                                                                                                                                                                                                                                                                                                                                                                                                                                                                                                                                                                                                                                                                                                                                                                                                                                |                                                                                                                               |                                                                                                                                                                                                                                                                                                                                                                                                                                                                                                                                                                                                                                                                                           |                                                                                                                                                                                                                                                                                                                                                                                                                                                                                                                                                                                                                                                                                           |
|----------------------------------------------------------------------------------------------------------------------------------------------------------------------------------------------------------------------------------------------------------------------------------------------------------------------------------------------------------------------------------------------------------------------------------------------------------------------------------------------------------------------------------------------------------------------------------------------------------------------------------------------------------------------------------------------------------------------------------------------------------------------------------------------------------------------------------------------------------------------------------------------------------------------------------------------------------------------------------------------------------------------------------------------------------------------------------------------------------------------------------------------------------------------------------------------------------------------------------------------------------------------------------------------------------------------------------------------------------------------------------------------------------------|-------------------------------------------------------------------------------------------------------------------------------|-------------------------------------------------------------------------------------------------------------------------------------------------------------------------------------------------------------------------------------------------------------------------------------------------------------------------------------------------------------------------------------------------------------------------------------------------------------------------------------------------------------------------------------------------------------------------------------------------------------------------------------------------------------------------------------------|-------------------------------------------------------------------------------------------------------------------------------------------------------------------------------------------------------------------------------------------------------------------------------------------------------------------------------------------------------------------------------------------------------------------------------------------------------------------------------------------------------------------------------------------------------------------------------------------------------------------------------------------------------------------------------------------|
| EPI_ISL_420051                                                                                                                                                                                                                                                                                                                                                                                                                                                                                                                                                                                                                                                                                                                                                                                                                                                                                                                                                                                                                                                                                                                                                                                                                                                                                                                                                                                                 | Résidence Eleusis                                                                                                             | National Reference Center for Viruses of Respiratory Infections, Institut Pasteur, Paris                                                                                                                                                                                                                                                                                                                                                                                                                                                                                                                                                                                                  | Angela Brisebarre; Etienne Simon-Lorière; Flora Donati; Marion Barbet; Maud Vanpeene; Mélanie Albert; Méline Bizard; Sylvie Behillil; Sylvie van der Werf; Vincent Enouf                                                                                                                                                                                                                                                                                                                                                                                                                                                                                                                  |
| EPI_ISL_443304                                                                                                                                                                                                                                                                                                                                                                                                                                                                                                                                                                                                                                                                                                                                                                                                                                                                                                                                                                                                                                                                                                                                                                                                                                                                                                                                                                                                 | Résidence Esterel                                                                                                             | National Reference Center for Viruses of Respiratory Infections, Institut Pasteur, Paris                                                                                                                                                                                                                                                                                                                                                                                                                                                                                                                                                                                                  | Angela Brisebarre; Etienne Simon-Lorière; Flora Donati; Marion Barbet; Maud Vanpeene; Mélanie Albert; Méline Bizard; Sylvie Behillil; Sylvie van der Werf; Vincent Enouf                                                                                                                                                                                                                                                                                                                                                                                                                                                                                                                  |
| EPI_ISL_443303                                                                                                                                                                                                                                                                                                                                                                                                                                                                                                                                                                                                                                                                                                                                                                                                                                                                                                                                                                                                                                                                                                                                                                                                                                                                                                                                                                                                 | Résidence Les Marines                                                                                                         | National Reference Center for Viruses of Respiratory Infections, Institut Pasteur, Paris                                                                                                                                                                                                                                                                                                                                                                                                                                                                                                                                                                                                  | Angela Brisebarre; Etienne Simon-Lorière; Flora Donati; Marion Barbet; Maud Vanpeene; Mélanie Albert; Méline Bizard; Sylvie Behillil; Sylvie van der Werf; Vincent Enouf                                                                                                                                                                                                                                                                                                                                                                                                                                                                                                                  |
| EPI_ISL_443258 to 443259                                                                                                                                                                                                                                                                                                                                                                                                                                                                                                                                                                                                                                                                                                                                                                                                                                                                                                                                                                                                                                                                                                                                                                                                                                                                                                                                                                                       | Résidence Ornano                                                                                                              | National Reference Center for Viruses of Respiratory Infections, Institut Pasteur, Paris                                                                                                                                                                                                                                                                                                                                                                                                                                                                                                                                                                                                  | Angela Brisebarre; Etienne Simon-Lorière; Flora Donati; Marion Barbet; Maud Vanpeene; Mélanie Albert; Méline Bizard; Sylvie Behillil; Sylvie van der Werf; Vincent Enouf                                                                                                                                                                                                                                                                                                                                                                                                                                                                                                                  |
| EPI_ISL_420046 to 420047                                                                                                                                                                                                                                                                                                                                                                                                                                                                                                                                                                                                                                                                                                                                                                                                                                                                                                                                                                                                                                                                                                                                                                                                                                                                                                                                                                                       | Résidence Villa Caroline                                                                                                      | National Reference Center for Viruses of Respiratory Infections, Institut Pasteur, Paris                                                                                                                                                                                                                                                                                                                                                                                                                                                                                                                                                                                                  | Angela Brisebarre; Etienne Simon-Lorière; Flora Donati; Marion Barbet; Maud Vanpeene; Mélanie Albert; Méline Bizard; Sylvie Behillil; Sylvie van der Werf; Vincent Enouf                                                                                                                                                                                                                                                                                                                                                                                                                                                                                                                  |
| EPI_ISL_420054                                                                                                                                                                                                                                                                                                                                                                                                                                                                                                                                                                                                                                                                                                                                                                                                                                                                                                                                                                                                                                                                                                                                                                                                                                                                                                                                                                                                 | Résidence de maintenon                                                                                                        | National Reference Center for Viruses of Respiratory Infections, Institut Pasteur, Paris                                                                                                                                                                                                                                                                                                                                                                                                                                                                                                                                                                                                  | Angela Brisebarre; Etienne Simon-Lorière; Flora Donati; Marion Barbet; Maud Vanpeene; Mélanie Albert; Méline Bizard; Sylvie Behillil; Sylvie van der Werf; Vincent Enouf                                                                                                                                                                                                                                                                                                                                                                                                                                                                                                                  |
| EPI_ISL_420052                                                                                                                                                                                                                                                                                                                                                                                                                                                                                                                                                                                                                                                                                                                                                                                                                                                                                                                                                                                                                                                                                                                                                                                                                                                                                                                                                                                                 | Résidence les Marines                                                                                                         | National Reference Center for Viruses of Respiratory Infections, Institut Pasteur, Paris                                                                                                                                                                                                                                                                                                                                                                                                                                                                                                                                                                                                  | Angela Brisebarre; Etienne Simon-Lorière; Flora Donati; Marion Barbet; Maud Vanpeene; Mélanie Albert; Méline Bizard; Sylvie Behillil; Sylvie van der Werf; Vincent Enouf                                                                                                                                                                                                                                                                                                                                                                                                                                                                                                                  |
| EPI_ISL_450193 to 450195, EPI_ISL_451077 to 451148, EPI_ISL_467985 to 468043, EPI_ISL_483066 to 483138, EPI_ISL_492109 to 492180, EPI_ISL_508122 to 508145, EPI_ISL_508605 to 508608, EPI_ISL_510542 to 510544, EPI_ISL_513911 to 513913, EPI_ISL_516550 to 516551, EPI_ISL_602577 to 602581, EPI_ISL_603123 to 603128                                                                                                                                                                                                                                                                                                                                                                                                                                                                                                                                                                                                                                                                                                                                                                                                                                                                                                                                                                                                                                                                                         | see above                                                                                                                     | SA Pathology                                                                                                                                                                                                                                                                                                                                                                                                                                                                                                                                                                                                                                                                              | Bastian; CK; Chuan Kok Lim; G; Geoff Higgins; Higgins; I; Ivan Bastian; Julien Soubrier; Karin Kassah; LEX; Leong; Lex Leong; Lim; Luke Walters; M; Mark Turra; Song Gao; Turra                                                                                                                                                                                                                                                                                                                                                                                                                                                                                                           |
| EPI_ISL_455595 to 455603                                                                                                                                                                                                                                                                                                                                                                                                                                                                                                                                                                                                                                                                                                                                                                                                                                                                                                                                                                                                                                                                                                                                                                                                                                                                                                                                                                                       | SAE SERVICIO DE ATENDIMENTO ESPECIALIZADO                                                                                     | SA Pathology                                                                                                                                                                                                                                                                                                                                                                                                                                                                                                                                                                                                                                                                              | Beard, MR.; C.K.; Coldbeck-Shackley, R.; Kirby, E.; L.E.X.; Leong; Lim; Llamas, B.; Merrett, J.; Shue, B.; Van Der Hoek, K.                                                                                                                                                                                                                                                                                                                                                                                                                                                                                                                                                               |
| EPI_ISL_1445153 to 1445154, EPI_ISL_1445156                                                                                                                                                                                                                                                                                                                                                                                                                                                                                                                                                                                                                                                                                                                                                                                                                                                                                                                                                                                                                                                                                                                                                                                                                                                                                                                                                                    | SAE SERVICIO DE ATENDIMENTO ESPECIALIZADO                                                                                     | SA Pathology                                                                                                                                                                                                                                                                                                                                                                                                                                                                                                                                                                                                                                                                              | Beard, MR.; C.K.; Coldbeck-Shackley, R.; Kirby, E.; L.E.X.; Leong; Lim; Llamas, B.; Merrett, J.; Shue, B.; Van Der Hoek, K.                                                                                                                                                                                                                                                                                                                                                                                                                                                                                                                                                               |
| EPI_ISL_1468428                                                                                                                                                                                                                                                                                                                                                                                                                                                                                                                                                                                                                                                                                                                                                                                                                                                                                                                                                                                                                                                                                                                                                                                                                                                                                                                                                                                                | SAE Servicio de Atendimento Especializado                                                                                     | Instituto Adolfo Lutz, Interdisciplinary Procedures Center, Strategic Laboratory                                                                                                                                                                                                                                                                                                                                                                                                                                                                                                                                                                                                          | Antonio Jorge Martins; Bibiana Santos; Claudia Renata dos Santos Barros; David Schlesinger; Debora Botequiao Moretti; Dimas Tadeu Covas; Elaine Cristina Marqueze; Elaine Vieira dos Santos; Erika Freitas; Evandra Strazza Rodrigues; Flavia Aburjaille; José Salvatore Leister Patané; João Paulo Kitajima; Luiz Carlos Junior de Alcantara; Maria Carolina Elias; Marta Giovanetti; Rafael dos Santos Bezerra; Raul Machado Neto; Ricardo Haddad; Rodrigo Tocantins Calado.; Sandra Coccuzzo Sampaio; Simone Kashima; Svetoslav Nanev Slavov; Vagner Fonseca; Vincent Louis Viala                                                                                                      |
| EPI_ISL_1393790 to 1393792                                                                                                                                                                                                                                                                                                                                                                                                                                                                                                                                                                                                                                                                                                                                                                                                                                                                                                                                                                                                                                                                                                                                                                                                                                                                                                                                                                                     | SALVE MEDICA                                                                                                                  | 1. National Institute of Public Health - National Institute of Hygiene; 2. Eurofins Genomics Europe Sequencing GmbH                                                                                                                                                                                                                                                                                                                                                                                                                                                                                                                                                                       | ECDC COVID-19 WGS support team; Eurofins Genomics Europe Sequencing Team; Gierczyki Rafa; Sadkowska-Todys Magorzata; Wokowicz Tomasz; Zacharczuk Katarzyna                                                                                                                                                                                                                                                                                                                                                                                                                                                                                                                                |
| EPI_ISL_1398269                                                                                                                                                                                                                                                                                                                                                                                                                                                                                                                                                                                                                                                                                                                                                                                                                                                                                                                                                                                                                                                                                                                                                                                                                                                                                                                                                                                                | SARATOGA HOSPITAL LABORATORY                                                                                                  | Wadsworth Center, New York State Department of Health                                                                                                                                                                                                                                                                                                                                                                                                                                                                                                                                                                                                                                     | Alexis Russel; Daryl M. Lamson; Erasmus Schneider; Erica Lasek-Nesselquist; John Kelly; Jonathan Plitnick; Kirsten St. George; Matthew Shudt; Melissa A Leisner; Navjot Singh                                                                                                                                                                                                                                                                                                                                                                                                                                                                                                             |
| EPI_ISL_1425573 to 1425578, EPI_ISL_1425586, EPI_ISL_1425588 to 1425600, EPI_ISL_1425605 to 1425613, EPI_ISL_1425615, EPI_ISL_1425617 to 1425619, EPI_ISL_1425699, EPI_ISL_1425704 to 1425705, EPI_ISL_1425712, EPI_ISL_1425714 to 1425716, EPI_ISL_1425719 to 1425720, EPI_ISL_1425725 to 1425734, EPI_ISL_1425749 to 1425776, EPI_ISL_1426046 to 1426047, EPI_ISL_1426266 to 1426291, EPI_ISL_1426570 to 1426572, EPI_ISL_1426575 to 1426579, EPI_ISL_1426587 to 1426588, EPI_ISL_1426590, EPI_ISL_1426648 to 1426649, EPI_ISL_1426992 to 1426995, EPI_ISL_1427570 to 1427572, EPI_ISL_1427577 to 1427584, EPI_ISL_1427602 to 1427606, EPI_ISL_1427610, EPI_ISL_1427654, EPI_ISL_1427683 to 1427686, EPI_ISL_1427693, EPI_ISL_1427800 to 1427829, EPI_ISL_1428571 to 1428573, EPI_ISL_1428588 to 1428589, EPI_ISL_1428591 to 1428593, EPI_ISL_1428600, EPI_ISL_1428602 to 1428603, EPI_ISL_1428632 to 1428635, EPI_ISL_1428640, EPI_ISL_1429583, EPI_ISL_1429589, EPI_ISL_1429592, EPI_ISL_1430578, EPI_ISL_1430580, EPI_ISL_1430584, EPI_ISL_1430625, EPI_ISL_1430627 to 1430634, EPI_ISL_1430639 to 1430652, EPI_ISL_1430656 to 1430667, EPI_ISL_1430697, EPI_ISL_1430736 to 1430737, EPI_ISL_1430755 to 1430762, EPI_ISL_1430825 to 1430828, EPI_ISL_1430868 to 1430874, EPI_ISL_1431129 to 1431135, EPI_ISL_1431479, EPI_ISL_1431578, EPI_ISL_1433299, EPI_ISL_1433301, EPI_ISL_1433303, EPI_ISL_1433306 | Pathogen Genomics Center, National Institute of Infectious Diseases                                                           | ; Chang-Kweng Lim; Chikako Shimokawa; Daisuke Kobayashi; Eri Nakayama; Eunsil Park; Hazuka Yoshida; Hidemasa Izumiya; Hideyuki Takahashi; Hiromizu Takahashi; Hiroshi Ishii; Hussein H. Aly; Ken Miyazawa; Kentaro Itokawa; Kento Fukano; Koichi Ishikawa; Kousho Wakae; Lucky Ronald Runtuwene; Makoto Kuroda; Masanori Hashino; Masatomo Morita; Midori Nakamura-Hoshi; Minoru Nagi; Motochiko Ogawa; Naomi Nojiri; Nobuo Koizumi; Nozomu Hanaoka; Rina Tanaka; Sayuri Seki; Shigeru Kusagawa; Shigeru Tanjima; Sunao Iyoda; Tadashi Kikuchi; Takahiro Maeki; Takanobu Kato; Takashi Sakudoh; Tsuguto Fujimoto; Tsuyoshi Sekizuka; Yasutaka Hoshino; Yasuyuki Morishima; Yoshihiro Kaku |                                                                                                                                                                                                                                                                                                                                                                                                                                                                                                                                                                                                                                                                                           |
| see above                                                                                                                                                                                                                                                                                                                                                                                                                                                                                                                                                                                                                                                                                                                                                                                                                                                                                                                                                                                                                                                                                                                                                                                                                                                                                                                                                                                                      | SARS-CoV-2 testing team, National Institute of Infectious Diseases                                                            | Pathogen Genomics Center, National Institute of Infectious Diseases                                                                                                                                                                                                                                                                                                                                                                                                                                                                                                                                                                                                                       | ; Chang-Kweng Lim; Chikako Shimokawa; Daisuke Kobayashi; Eri Nakayama; Eunsil Park; Hazuka Yoshida; Hidemasa Izumiya; Hideyuki Takahashi; Hiromizu Takahashi; Hiroshi Ishii; Hussein H. Aly; Ken Miyazawa; Kentaro Itokawa; Kento Fukano; Koichi Ishikawa; Kousho Wakae; Lucky Ronald Runtuwene; Makoto Kuroda; Masanori Hashino; Masatomo Morita; Midori Nakamura-Hoshi; Minoru Nagi; Motochiko Ogawa; Naomi Nojiri; Nobuo Koizumi; Nozomu Hanaoka; Rina Tanaka; Sayuri Seki; Shigeru Kusagawa; Shigeru Tanjima; Sunao Iyoda; Tadashi Kikuchi; Takahiro Maeki; Takanobu Kato; Takashi Sakudoh; Tsuguto Fujimoto; Tsuyoshi Sekizuka; Yasutaka Hoshino; Yasuyuki Morishima; Yoshihiro Kaku |
| EPI_ISL_1445080, EPI_ISL_1445085, EPI_ISL_1445177                                                                                                                                                                                                                                                                                                                                                                                                                                                                                                                                                                                                                                                                                                                                                                                                                                                                                                                                                                                                                                                                                                                                                                                                                                                                                                                                                              | SAUDE COLETIVA CAPAO BONITO                                                                                                   | Instituto Butantan / Mendelics                                                                                                                                                                                                                                                                                                                                                                                                                                                                                                                                                                                                                                                            | Antonio Jorge Martins; Bibiana Santos; Claudia Renata dos Santos Barros; David Schlesinger; Debora Botequiao Moretti; Dimas Tadeu Covas; Elaine Cristina Marqueze; Elaine Vieira dos Santos; Erika Freitas; Evandra Strazza Rodrigues; Flavia Aburjaille; José Salvatore Leister Patané; João Paulo Kitajima; Luiz Carlos Junior de Alcantara; Maria Carolina Elias; Marta Giovanetti; Rafael dos Santos Bezerra; Raul Machado Neto; Ricardo Haddad; Rodrigo Tocantins Calado.; Sandra Coccuzzo Sampaio; Simone Kashima; Svetoslav Nanev Slavov; Vagner Fonseca; Vincent Louis Viala                                                                                                      |
| EPI_ISL_1509732 to 1509736, EPI_ISL_1509742 to 1509745, EPI_ISL_1509751, EPI_ISL_1510420 to 1510479                                                                                                                                                                                                                                                                                                                                                                                                                                                                                                                                                                                                                                                                                                                                                                                                                                                                                                                                                                                                                                                                                                                                                                                                                                                                                                            | SC (UCO) Igiene e Sanità Pubblica (funzione integrata con SC Microbiologia e Virologia)                                       | ARGO Laboratorio Genomica ed Epigenomica                                                                                                                                                                                                                                                                                                                                                                                                                                                                                                                                                                                                                                                  | D'Agaro P; Dal Monego S; De Rosa R; Degasperri M; Licastro D; Lombardo F; Marcello A; Pipan C; Piscianz E; Segat L                                                                                                                                                                                                                                                                                                                                                                                                                                                                                                                                                                        |
| EPI_ISL_1509721 to 1509731, EPI_ISL_1509746, EPI_ISL_1509748 to 1509750, EPI_ISL_1509752 to 1509753, EPI_ISL_1509755 to 1509758                                                                                                                                                                                                                                                                                                                                                                                                                                                                                                                                                                                                                                                                                                                                                                                                                                                                                                                                                                                                                                                                                                                                                                                                                                                                                | SC (UCO) Igiene e Sanità Pubblica (funzione integrata con SC Microbiologia e Virologia) e Az. Ospedaliero-Universitaria Udine | ARGO Laboratorio Genomica ed Epigenomica                                                                                                                                                                                                                                                                                                                                                                                                                                                                                                                                                                                                                                                  | D'Agaro P; Dal Monego S; De Rosa R; Degasperri M; Licastro D; Marcello A; Piscianz E; Segat L                                                                                                                                                                                                                                                                                                                                                                                                                                                                                                                                                                                             |
| EPI_ISL_1509737 to 1509741, EPI_ISL_1509747, EPI_ISL_1509754                                                                                                                                                                                                                                                                                                                                                                                                                                                                                                                                                                                                                                                                                                                                                                                                                                                                                                                                                                                                                                                                                                                                                                                                                                                                                                                                                   | SC (UCO) Igiene e Sanità Pubblica (funzione integrata con SC Microbiologia e Virologia) e Azienda Ospedaliera Pordenone       | ARGO Laboratorio Genomica ed Epigenomica                                                                                                                                                                                                                                                                                                                                                                                                                                                                                                                                                                                                                                                  | D'Agaro P; Dal Monego S; Degasperri M; Licastro D; Marcello A; Piscianz E; Segat L                                                                                                                                                                                                                                                                                                                                                                                                                                                                                                                                                                                                        |
| EPI_ISL_491097 to 491110                                                                                                                                                                                                                                                                                                                                                                                                                                                                                                                                                                                                                                                                                                                                                                                                                                                                                                                                                                                                                                                                                                                                                                                                                                                                                                                                                                                       | SC Department of Health and Environmental Control                                                                             | SC Department of Health and Environmental Control                                                                                                                                                                                                                                                                                                                                                                                                                                                                                                                                                                                                                                         | Flores, H.                                                                                                                                                                                                                                                                                                                                                                                                                                                                                                                                                                                                                                                                                |
| EPI_ISL_1446706 to 1446711, EPI_ISL_1446735 to 1446737, EPI_ISL_1446976, EPI_ISL_1516269 to 1516275, EPI_ISL_1528270 to 1528271                                                                                                                                                                                                                                                                                                                                                                                                                                                                                                                                                                                                                                                                                                                                                                                                                                                                                                                                                                                                                                                                                                                                                                                                                                                                                | SC Dept of Health and Env. Control-Bureau of Laboratories                                                                     | Centers for Disease Control and Prevention Division of Viral Diseases, Pathogen Discovery                                                                                                                                                                                                                                                                                                                                                                                                                                                                                                                                                                                                 | Alison Laufer Halpin; Ben L. Rambo-Martin; Clinton R. Paden; Dakota Howard; Darlene Wagner; Dave Wentworth; Dhvani Batra; Jasmine Padilla; Justin Lee; Katie Dillon; Krista Queen; Kristen Knipe; Kristine Lacey; Mark Burroughs; Matthew Schmeer; Mili Sheth; Peter Cook; Sam Shepard; Sarah Nobles; Shoshona Le; Suxiang Tong; Vivien Dugan; Yvette Unoarumhi                                                                                                                                                                                                                                                                                                                           |
| EPI_ISL_424841 to 424842, EPI_ISL_424888, EPI_ISL_424902 to 424905                                                                                                                                                                                                                                                                                                                                                                                                                                                                                                                                                                                                                                                                                                                                                                                                                                                                                                                                                                                                                                                                                                                                                                                                                                                                                                                                             | SC Dept of Health and Env. Control-Bureau of Laboratories                                                                     | Pathogen Discovery, Respiratory Viruses Branch, Division of Viral Diseases, Centers for Disease Control and Prevention                                                                                                                                                                                                                                                                                                                                                                                                                                                                                                                                                                    | Alison S. Laufer Halpin; Anna Uehara; Christopher A. Elkins; Clinton R. Paden; Haibin Wang; Jing Zhang; Krista Queen; Mary S. Keckler; Rachel Marine; Suxiang Tong; Yan Li; Ying Tao                                                                                                                                                                                                                                                                                                                                                                                                                                                                                                      |
| EPI_ISL_1446702 to 1446705, EPI_ISL_1446989 to 1446991, EPI_ISL_1516169 to 1516171, EPI_ISL_1528266 to 1528269                                                                                                                                                                                                                                                                                                                                                                                                                                                                                                                                                                                                                                                                                                                                                                                                                                                                                                                                                                                                                                                                                                                                                                                                                                                                                                 | SD Public Health Laboratory                                                                                                   | Centers for Disease Control and Prevention Division of Viral Diseases, Pathogen Discovery                                                                                                                                                                                                                                                                                                                                                                                                                                                                                                                                                                                                 | Alison Laufer Halpin; Ben L. Rambo-Martin; Clinton R. Paden; Dakota Howard; Darlene Wagner; Dave Wentworth; Dhvani Batra; Jasmine Padilla; Justin Lee; Katie Dillon; Krista Queen; Kristen Knipe; Kristine Lacey; Mark Burroughs; Matthew Schmeer; Mili Sheth; Peter Cook; Sam Shepard; Sarah Nobles; Shoshona Le; Suxiang Tong; Vivien Dugan; Yvette Unoarumhi                                                                                                                                                                                                                                                                                                                           |
| EPI_ISL_569617                                                                                                                                                                                                                                                                                                                                                                                                                                                                                                                                                                                                                                                                                                                                                                                                                                                                                                                                                                                                                                                                                                                                                                                                                                                                                                                                                                                                 | SD Urban Indian Health Pierre                                                                                                 | South Dakota Public Health Laboratory                                                                                                                                                                                                                                                                                                                                                                                                                                                                                                                                                                                                                                                     | Jacob Garfin; Matt Plumb; Xiong Wang; and Chris Carlson                                                                                                                                                                                                                                                                                                                                                                                                                                                                                                                                                                                                                                   |
| EPI_ISL_1445157 to 1445161, EPI_ISL_1445168 to 1445170, EPI_ISL_1445238 to 1445248, EPI_ISL_1445252 to 1445253, EPI_ISL_1445262                                                                                                                                                                                                                                                                                                                                                                                                                                                                                                                                                                                                                                                                                                                                                                                                                                                                                                                                                                                                                                                                                                                                                                                                                                                                                | SECAO CENTRO DE DIAGNOSTICO SECEDI                                                                                            | Instituto Butantan / Mendelics                                                                                                                                                                                                                                                                                                                                                                                                                                                                                                                                                                                                                                                            | Antonio Jorge Martins; Bibiana Santos; Claudia Renata dos Santos Barros; David Schlesinger; Debora Botequiao Moretti; Dimas Tadeu Covas; Elaine Cristina Marqueze; Elaine Vieira dos Santos; Erika Freitas; Evandra Strazza Rodrigues; Flavia Aburjaille; José Salvatore Leister Patané; João Paulo Kitajima; Luiz Carlos Junior de Alcantara; Maria Carolina Elias; Marta Giovanetti; Rafael dos Santos Bezerra; Raul Machado Neto; Ricardo Haddad; Rodrigo Tocantins Calado.; Sandra Coccuzzo Sampaio; Simone Kashima; Svetoslav Nanev Slavov; Vagner Fonseca; Vincent Louis Viala                                                                                                      |
| EPI_ISL_1445066                                                                                                                                                                                                                                                                                                                                                                                                                                                                                                                                                                                                                                                                                                                                                                                                                                                                                                                                                                                                                                                                                                                                                                                                                                                                                                                                                                                                | SECRETARIA MUNICIPAL DA SAUDE DE GUARIBA                                                                                      | Instituto Butantan / Mendelics                                                                                                                                                                                                                                                                                                                                                                                                                                                                                                                                                                                                                                                            | Antonio Jorge Martins; Bibiana Santos; Claudia Renata dos Santos Barros; David Schlesinger; Debora Botequiao Moretti; Dimas Tadeu Covas; Elaine Cristina Marqueze; Elaine Vieira dos Santos; Erika Freitas; Evandra Strazza Rodrigues; Flavia Aburjaille; José Salvatore Leister Patané; João Paulo Kitajima; Luiz Carlos Junior de Alcantara; Maria Carolina Elias; Marta Giovanetti; Rafael dos Santos Bezerra; Raul Machado Neto; Ricardo Haddad; Rodrigo Tocantins Calado.; Sandra Coccuzzo Sampaio; Simone Kashima; Svetoslav Nanev Slavov; Vagner Fonseca; Vincent Louis Viala                                                                                                      |
| EPI_ISL_1445091 to 1445095, EPI_ISL_1445101                                                                                                                                                                                                                                                                                                                                                                                                                                                                                                                                                                                                                                                                                                                                                                                                                                                                                                                                                                                                                                                                                                                                                                                                                                                                                                                                                                    | SECRETARIA MUNICIPAL DE SAUDE DE PIRACAIA                                                                                     | Instituto Butantan / Mendelics                                                                                                                                                                                                                                                                                                                                                                                                                                                                                                                                                                                                                                                            | Antonio Jorge Martins; Bibiana Santos; Claudia Renata dos Santos Barros; David Schlesinger; Debora Botequiao Moretti; Dimas Tadeu Covas; Elaine Cristina Marqueze; Elaine Vieira dos Santos; Erika Freitas; Evandra Strazza Rodrigues; Flavia Aburjaille; José Salvatore Leister Patané; João Paulo Kitajima; Luiz Carlos Junior de Alcantara; Maria Carolina Elias; Marta Giovanetti; Rafael dos Santos Bezerra; Raul Machado Neto; Ricardo Haddad; Rodrigo Tocantins Calado.; Sandra Coccuzzo Sampaio; Simone Kashima; Svetoslav Nanev Slavov; Vagner Fonseca; Vincent Louis Viala                                                                                                      |



|                                                                                                                                                                                                                                                                                                                                                                                                                                                                                                                                                                                                                                                                                                                                                                                                                                                                                                  |                                                            |                                                                                             |                                                                                                                                                                                                                                                                                                                                                                                                                                                                                                                                                                                    |
|--------------------------------------------------------------------------------------------------------------------------------------------------------------------------------------------------------------------------------------------------------------------------------------------------------------------------------------------------------------------------------------------------------------------------------------------------------------------------------------------------------------------------------------------------------------------------------------------------------------------------------------------------------------------------------------------------------------------------------------------------------------------------------------------------------------------------------------------------------------------------------------------------|------------------------------------------------------------|---------------------------------------------------------------------------------------------|------------------------------------------------------------------------------------------------------------------------------------------------------------------------------------------------------------------------------------------------------------------------------------------------------------------------------------------------------------------------------------------------------------------------------------------------------------------------------------------------------------------------------------------------------------------------------------|
| EPI_ISL_1469568, EPI_ISL_1469639, EPI_ISL_1469690, EPI_ISL_1469736, EPI_ISL_1469788, EPI_ISL_1469814                                                                                                                                                                                                                                                                                                                                                                                                                                                                                                                                                                                                                                                                                                                                                                                             | SECRETARIA MUNICIPAL DE SAUDE DE SAO LEOPOLDO              | Epiclin                                                                                     | Rodrigo Tocantins Calado.; Sandra Coccuzzo Sampaio; Simone Kashima; Svetoslav Nanev Slavov; Vagner Fonseca; Vincent Louis Viala                                                                                                                                                                                                                                                                                                                                                                                                                                                    |
| EPI_ISL_1469601, EPI_ISL_1469683, EPI_ISL_1469687, EPI_ISL_1469709, EPI_ISL_1479130                                                                                                                                                                                                                                                                                                                                                                                                                                                                                                                                                                                                                                                                                                                                                                                                              | SECRETARIA MUNICIPAL DE SAUDE DE TAQUARA                   | Epiclin                                                                                     | Ana Paula Muterle; Carolina Comerlato; Eliana Márcia Da Ros Wendland; Fernando Hayashi Sant'Anna; Janira Prichula; Juliana Comerlato                                                                                                                                                                                                                                                                                                                                                                                                                                               |
| EPI_ISL_1469645, EPI_ISL_1469678, EPI_ISL_1469740                                                                                                                                                                                                                                                                                                                                                                                                                                                                                                                                                                                                                                                                                                                                                                                                                                                | SECRETARIA MUNICIPAL DE SAUDE DE TRES COROAS               | Epiclin                                                                                     | Ana Paula Muterle; Carolina Comerlato; Eliana Márcia Da Ros Wendland; Fernando Hayashi Sant'Anna; Janira Prichula; Juliana Comerlato                                                                                                                                                                                                                                                                                                                                                                                                                                               |
| EPI_ISL_1445082, EPI_ISL_1445087 to 1445088, EPI_ISL_1445133 to 1445135, EPI_ISL_1445137 to 1445139, EPI_ISL_1445171, EPI_ISL_1445176, EPI_ISL_1445178 to 1445180, EPI_ISL_1445182                                                                                                                                                                                                                                                                                                                                                                                                                                                                                                                                                                                                                                                                                                               | see above                                                  | SECRETARIA MUNICIPAL DE SAUDE SOROCABA                                                      | Instituto Butantan / Mendelics                                                                                                                                                                                                                                                                                                                                                                                                                                                                                                                                                     |
|                                                                                                                                                                                                                                                                                                                                                                                                                                                                                                                                                                                                                                                                                                                                                                                                                                                                                                  |                                                            |                                                                                             | Antonio Jorge Martins; Bibiana Santos; Claudia Renata dos Santos Barros; David Schlesinger; Debora Botequio Moretti; Dimas Tadeu Covas; Elaine Cristina Marqueze; Elaine Vieira dos Santos; Erika Freitas; Evandra Strazza Rodrigues; Flavia Aburjaile; José Salvatore Leister Patané; João Paulo Kitajima; Luiz Carlos Junior de Alcantara; Maria Carolina Elias; Marta Giovanetti; Rafael dos Santos Bezerra; Raul Machado Neto; Ricardo Haddad; Rodrigo Tocantins Calado.; Sandra Coccuzzo Sampaio; Simone Kashima; Svetoslav Nanev Slavov; Vagner Fonseca; Vincent Louis Viala |
| EPI_ISL_1433784, EPI_ISL_1433801, EPI_ISL_1433818, EPI_ISL_1433888, EPI_ISL_1433890, EPI_ISL_1433898, EPI_ISL_1433902, EPI_ISL_1433904, EPI_ISL_1433914, EPI_ISL_1433919, EPI_ISL_1433921, EPI_ISL_1433923, EPI_ISL_1434061, EPI_ISL_1434205, EPI_ISL_1434207, EPI_ISL_1434209, EPI_ISL_1434211, EPI_ISL_1434213, EPI_ISL_1434215, EPI_ISL_1434225 to 1434226, EPI_ISL_1434228, EPI_ISL_1434231, EPI_ISL_1434233, EPI_ISL_1434259, EPI_ISL_1434262, EPI_ISL_1457762, EPI_ISL_1457764, EPI_ISL_1457766 to 1457767                                                                                                                                                                                                                                                                                                                                                                                 | see above                                                  | SELARL MIRIALIS CLUSES                                                                      | CNR Virus des Infections Respiratoires - France SUD                                                                                                                                                                                                                                                                                                                                                                                                                                                                                                                                |
|                                                                                                                                                                                                                                                                                                                                                                                                                                                                                                                                                                                                                                                                                                                                                                                                                                                                                                  |                                                            |                                                                                             | Antonin Bal; Bruno Lina; Gregory Destras; Gwendolyme Burfin; Hadrien Regue; Laurence Josset; Martine Valette; Quentin Semanas                                                                                                                                                                                                                                                                                                                                                                                                                                                      |
| EPI_ISL_1445162 to 1445167, EPI_ISL_1445269, EPI_ISL_1445272                                                                                                                                                                                                                                                                                                                                                                                                                                                                                                                                                                                                                                                                                                                                                                                                                                     | SERV DE VIG SANITARIA EPIDEMIO E CTRL DE ZOONOSZES GUARUJA | Instituto Butantan / Mendelics                                                              | Antonio Jorge Martins; Bibiana Santos; Claudia Renata dos Santos Barros; David Schlesinger; Debora Botequio Moretti; Dimas Tadeu Covas; Elaine Cristina Marqueze; Elaine Vieira dos Santos; Erika Freitas; Evandra Strazza Rodrigues; Flavia Aburjaile; José Salvatore Leister Patané; João Paulo Kitajima; Luiz Carlos Junior de Alcantara; Maria Carolina Elias; Marta Giovanetti; Rafael dos Santos Bezerra; Raul Machado Neto; Ricardo Haddad; Rodrigo Tocantins Calado.; Sandra Coccuzzo Sampaio; Simone Kashima; Svetoslav Nanev Slavov; Vagner Fonseca; Vincent Louis Viala |
| EPI_ISL_435149, EPI_ISL_435153 to 435155, EPI_ISL_436726 to 436729                                                                                                                                                                                                                                                                                                                                                                                                                                                                                                                                                                                                                                                                                                                                                                                                                               | SERVIZIO DI IGIENE E SANITÀ PUBBLICA ASL Teramo            | Istituto Zooprofilattico Sperimentale dell'Abruzzo e Molise "G.Caporale"                    | Ancora M; Cammà C; Curini V; Di Domenico M; Di Pasquale A; Lorusso A; Mangone I; Marcacci M; Puglia I; Rinaldi A; Savini G                                                                                                                                                                                                                                                                                                                                                                                                                                                         |
| EPI_ISL_515956                                                                                                                                                                                                                                                                                                                                                                                                                                                                                                                                                                                                                                                                                                                                                                                                                                                                                   | SHEKAR HOSPITAL                                            | Department of Neurovirology, National Institute of Mental Health and Neuroscience (NIMHANS) | Anita Desai; Chitra Pattabiraman; Harsha PK; Manjunatha Venkataswamy; Pramada Prasad; Ravi Vasanthapuram; Risha Rasheed; Shafeeq S Hameed; Vijayalakshmi Reddy                                                                                                                                                                                                                                                                                                                                                                                                                     |
| EPI_ISL_1403534, EPI_ISL_1502441                                                                                                                                                                                                                                                                                                                                                                                                                                                                                                                                                                                                                                                                                                                                                                                                                                                                 | SIESP CHIETI - DRIVE IN ATESSA ATESSA(CHIETI)              | Istituto Zooprofilattico Sperimentale dell'Abruzzo e Molise "G. Caporale"                   | Ancora M; Calistri P; Cammà C; Caporale M; Curini V; Delli Compagni E; Di Domenico M; Di Lollo Valeria; Di Pasquale A; Lorusso A; Mangone I; Marcacci M; Puglia I; Rinaldi A; Savini G; Scialabba S                                                                                                                                                                                                                                                                                                                                                                                |
| EPI_ISL_1391396, EPI_ISL_1391405                                                                                                                                                                                                                                                                                                                                                                                                                                                                                                                                                                                                                                                                                                                                                                                                                                                                 | SIESP CHIETI - DRIVE IN CHIETI                             | Istituto Zooprofilattico Sperimentale dell'Abruzzo e Molise "G. Caporale"                   | Ancora M; Calistri P; Cammà C; Caporale M; Curini V; Di Domenico M; Di Lollo Valeria; Di Pasquale A; Lorusso A; Mangone I; Marcacci M; Puglia I; Rinaldi A; Savini G; Scialabba S                                                                                                                                                                                                                                                                                                                                                                                                  |
| EPI_ISL_1391266 to 1391270, EPI_ISL_1392680, EPI_ISL_1392698 to 1392701, EPI_ISL_1392710, EPI_ISL_1403519, EPI_ISL_1403525, EPI_ISL_1403528, EPI_ISL_1403566, EPI_ISL_1412935, EPI_ISL_1502466, EPI_ISL_1502489 to 1502490, EPI_ISL_1502506, EPI_ISL_1502539, EPI_ISL_1524857, EPI_ISL_1524860                                                                                                                                                                                                                                                                                                                                                                                                                                                                                                                                                                                                   | see above                                                  | SIESP CHIETI - DRIVE IN CHIETI CHIETI(CHIETI)                                               | Istituto Zooprofilattico Sperimentale dell'Abruzzo e Molise "G. Caporale"                                                                                                                                                                                                                                                                                                                                                                                                                                                                                                          |
|                                                                                                                                                                                                                                                                                                                                                                                                                                                                                                                                                                                                                                                                                                                                                                                                                                                                                                  |                                                            |                                                                                             | Ancora M; Calistri P; Cammà C; Caporale M; Curini V; Delli Compagni E; Di Domenico M; Di Lollo Valeria; Di Pasquale A; Lorusso A; Mangone I; Marcacci M; Puglia I; Rinaldi A; Savini G; Scialabba S                                                                                                                                                                                                                                                                                                                                                                                |
| EPI_ISL_1391275, EPI_ISL_1392691 to 1392693, EPI_ISL_1403503, EPI_ISL_1403505 to 1403507, EPI_ISL_1502450 to 1502451, EPI_ISL_1502487 to 1502488, EPI_ISL_1502531, EPI_ISL_1524859                                                                                                                                                                                                                                                                                                                                                                                                                                                                                                                                                                                                                                                                                                               | see above                                                  | SIESP CHIETI - DRIVE IN GISSI GISSI(CHIETI)                                                 | Istituto Zooprofilattico Sperimentale dell'Abruzzo e Molise "G. Caporale"                                                                                                                                                                                                                                                                                                                                                                                                                                                                                                          |
|                                                                                                                                                                                                                                                                                                                                                                                                                                                                                                                                                                                                                                                                                                                                                                                                                                                                                                  |                                                            |                                                                                             | Ancora M; Calistri P; Cammà C; Caporale M; Curini V; Delli Compagni E; Di Domenico M; Di Lollo Valeria; Di Pasquale A; Lorusso A; Mangone I; Marcacci M; Puglia I; Rinaldi A; Savini G; Scialabba S                                                                                                                                                                                                                                                                                                                                                                                |
| EPI_ISL_1415426                                                                                                                                                                                                                                                                                                                                                                                                                                                                                                                                                                                                                                                                                                                                                                                                                                                                                  | SIESP CHIETI - DRIVE IN LANCIANO                           | Istituto Zooprofilattico Sperimentale dell'Abruzzo e Molise "G. Caporale"                   | Ancora M; Calistri P; Cammà C; Caporale M; Curini V; Delli Compagni E; Di Domenico M; Di Lollo Valeria; Di Pasquale A; Lorusso A; Mangone I; Marcacci M; Puglia I; Rinaldi A; Savini G; Scialabba S                                                                                                                                                                                                                                                                                                                                                                                |
| EPI_ISL_1391230 to 1391233, EPI_ISL_1391252, EPI_ISL_1391260 to 1391262, EPI_ISL_1391265, EPI_ISL_1392681, EPI_ISL_1392695 to 1392697, EPI_ISL_1403532, EPI_ISL_1403560, EPI_ISL_1403604, EPI_ISL_1403606, EPI_ISL_1412932, EPI_ISL_1502440, EPI_ISL_1502442 to 1502444, EPI_ISL_1502473, EPI_ISL_1502482 to 1502483, EPI_ISL_1524863 to 1524864, EPI_ISL_1524867                                                                                                                                                                                                                                                                                                                                                                                                                                                                                                                                | see above                                                  | SIESP CHIETI - DRIVE IN LANCIANO LANCIANO(CHIETI)                                           | Istituto Zooprofilattico Sperimentale dell'Abruzzo e Molise "G. Caporale"                                                                                                                                                                                                                                                                                                                                                                                                                                                                                                          |
|                                                                                                                                                                                                                                                                                                                                                                                                                                                                                                                                                                                                                                                                                                                                                                                                                                                                                                  |                                                            |                                                                                             | Ancora M; Calistri P; Cammà C; Caporale M; Curini V; Delli Compagni E; Di Domenico M; Di Lollo Valeria; Di Pasquale A; Lorusso A; Mangone I; Marcacci M; Puglia I; Rinaldi A; Savini G; Scialabba S                                                                                                                                                                                                                                                                                                                                                                                |
| EPI_ISL_1391397, EPI_ISL_1391399 to 1391400, EPI_ISL_1391408, EPI_ISL_1396650                                                                                                                                                                                                                                                                                                                                                                                                                                                                                                                                                                                                                                                                                                                                                                                                                    | SIESP CHIETI - DRIVE IN ORTONA                             | Istituto Zooprofilattico Sperimentale dell'Abruzzo e Molise "G. Caporale"                   | Ancora M; Calistri P; Cammà C; Caporale M; Curini V; Di Domenico M; Di Lollo Valeria; Di Pasquale A; Lorusso A; Mangone I; Marcacci M; Puglia I; Rinaldi A; Savini G; Scialabba S                                                                                                                                                                                                                                                                                                                                                                                                  |
| EPI_ISL_1391271 to 1391273, EPI_ISL_1392702, EPI_ISL_1403509, EPI_ISL_1403521, EPI_ISL_1403543, EPI_ISL_1403568, EPI_ISL_1403581, EPI_ISL_1412929, EPI_ISL_1415423, EPI_ISL_1420829 to 1420830, EPI_ISL_1502447 to 1502448, EPI_ISL_1502471, EPI_ISL_1502485 to 1502486, EPI_ISL_1502507, EPI_ISL_1502538                                                                                                                                                                                                                                                                                                                                                                                                                                                                                                                                                                                        | see above                                                  | SIESP CHIETI - DRIVE IN ORTONA ORTONA(CHIETI)                                               | Istituto Zooprofilattico Sperimentale dell'Abruzzo e Molise "G. Caporale"                                                                                                                                                                                                                                                                                                                                                                                                                                                                                                          |
|                                                                                                                                                                                                                                                                                                                                                                                                                                                                                                                                                                                                                                                                                                                                                                                                                                                                                                  |                                                            |                                                                                             | Ancora M; Calistri P; Cammà C; Caporale M; Curini V; Delli Compagni E; Di Domenico M; Di Lollo Valeria; Di Pasquale A; Lorusso A; Mangone I; Marcacci M; Puglia I; Rinaldi A; Savini G; Scialabba S                                                                                                                                                                                                                                                                                                                                                                                |
| EPI_ISL_1392688 to 1392689, EPI_ISL_1392694, EPI_ISL_1403535, EPI_ISL_1403559, EPI_ISL_1502445 to 1502446, EPI_ISL_1502484, EPI_ISL_1524858                                                                                                                                                                                                                                                                                                                                                                                                                                                                                                                                                                                                                                                                                                                                                      | see above                                                  | SIESP CHIETI - DRIVE IN VASTO VASTO(CHIETI)                                                 | Istituto Zooprofilattico Sperimentale dell'Abruzzo e Molise "G. Caporale"                                                                                                                                                                                                                                                                                                                                                                                                                                                                                                          |
|                                                                                                                                                                                                                                                                                                                                                                                                                                                                                                                                                                                                                                                                                                                                                                                                                                                                                                  |                                                            |                                                                                             | Ancora M; Calistri P; Cammà C; Caporale M; Curini V; Delli Compagni E; Di Domenico M; Di Lollo Valeria; Di Pasquale A; Lorusso A; Mangone I; Marcacci M; Puglia I; Rinaldi A; Savini G; Scialabba S                                                                                                                                                                                                                                                                                                                                                                                |
| EPI_ISL_1391393, EPI_ISL_1391404, EPI_ISL_1396653                                                                                                                                                                                                                                                                                                                                                                                                                                                                                                                                                                                                                                                                                                                                                                                                                                                | SIESP DIPARTIMENTO DI PREVENZIONE CHIETI                   | Istituto Zooprofilattico Sperimentale dell'Abruzzo e Molise "G. Caporale"                   | Ancora M; Calistri P; Cammà C; Caporale M; Curini V; Di Domenico M; Di Lollo Valeria; Di Pasquale A; Lorusso A; Mangone I; Marcacci M; Puglia I; Rinaldi A; Savini G; Scialabba S                                                                                                                                                                                                                                                                                                                                                                                                  |
| EPI_ISL_1391249 to 1391251, EPI_ISL_1391253 to 1391259, EPI_ISL_1391263 to 1391264, EPI_ISL_1392666, EPI_ISL_1392690, EPI_ISL_1403533, EPI_ISL_1403577, EPI_ISL_1502439, EPI_ISL_1502491, EPI_ISL_1502500 to 1502502, EPI_ISL_1502530                                                                                                                                                                                                                                                                                                                                                                                                                                                                                                                                                                                                                                                            | see above                                                  | SIESP DIPARTIMENTO DI PREVENZIONE CHIETI CHIETI(CHIETI)                                     | Istituto Zooprofilattico Sperimentale dell'Abruzzo e Molise "G. Caporale"                                                                                                                                                                                                                                                                                                                                                                                                                                                                                                          |
|                                                                                                                                                                                                                                                                                                                                                                                                                                                                                                                                                                                                                                                                                                                                                                                                                                                                                                  |                                                            |                                                                                             | Ancora M; Calistri P; Cammà C; Caporale M; Curini V; Delli Compagni E; Di Domenico M; Di Lollo Valeria; Di Pasquale A; Lorusso A; Mangone I; Marcacci M; Puglia I; Rinaldi A; Savini G; Scialabba S                                                                                                                                                                                                                                                                                                                                                                                |
| EPI_ISL_1391394, EPI_ISL_1391401 to 1391402, EPI_ISL_1391407, EPI_ISL_1396651 to 1396652                                                                                                                                                                                                                                                                                                                                                                                                                                                                                                                                                                                                                                                                                                                                                                                                         | SIESP DIPARTIMENTO DI PREVENZIONE TERAMO                   | Istituto Zooprofilattico Sperimentale dell'Abruzzo e Molise "G. Caporale"                   | Ancora M; Calistri P; Cammà C; Caporale M; Curini V; Di Domenico M; Di Lollo Valeria; Di Pasquale A; Lorusso A; Mangone I; Marcacci M; Puglia I; Rinaldi A; Savini G; Scialabba S                                                                                                                                                                                                                                                                                                                                                                                                  |
| EPI_ISL_1391204 to 1391229, EPI_ISL_1391274, EPI_ISL_1392652 to 1392662, EPI_ISL_1392682, EPI_ISL_1392703 to 1392709, EPI_ISL_1392713, EPI_ISL_1403502, EPI_ISL_1403518, EPI_ISL_1403520, EPI_ISL_1403522, EPI_ISL_1403540, EPI_ISL_1403549 to 1403551, EPI_ISL_1403553 to 1403554, EPI_ISL_1403556 to 1403558, EPI_ISL_1403561 to 1403565, EPI_ISL_1403567, EPI_ISL_1403569 to 1403575, EPI_ISL_1403578 to 1403580, EPI_ISL_1403582 to 1403583, EPI_ISL_1403592, EPI_ISL_1403602 to 1403603, EPI_ISL_1403605, EPI_ISL_1415420, EPI_ISL_1415424, EPI_ISL_1502435 to 1502438, EPI_ISL_1502452 to 1502459, EPI_ISL_1502461 to 1502465, EPI_ISL_1502467 to 1502470, EPI_ISL_1502480, EPI_ISL_1502492 to 1502497, EPI_ISL_1502499, EPI_ISL_1502503 to 1502505, EPI_ISL_1502518, EPI_ISL_1502532 to 1502533, EPI_ISL_1524852, EPI_ISL_1524856, EPI_ISL_1524861 to 1524862, EPI_ISL_1524869 to 1524870 | see above                                                  | SIESP DIPARTIMENTO DI PREVENZIONE TERAMO TERAMO(TERAMO)                                     | Istituto Zooprofilattico Sperimentale dell'Abruzzo e Molise "G. Caporale"                                                                                                                                                                                                                                                                                                                                                                                                                                                                                                          |
|                                                                                                                                                                                                                                                                                                                                                                                                                                                                                                                                                                                                                                                                                                                                                                                                                                                                                                  |                                                            |                                                                                             | Ancora M; Calistri P; Cammà C; Caporale M; Curini V; Delli Compagni E; Di Domenico M; Di Lollo Valeria; Di Pasquale A; Lorusso A; Mangone I; Marcacci M; Puglia I; Rinaldi A; Savini G; Scialabba S                                                                                                                                                                                                                                                                                                                                                                                |
| EPI_ISL_1391398, EPI_ISL_1391406                                                                                                                                                                                                                                                                                                                                                                                                                                                                                                                                                                                                                                                                                                                                                                                                                                                                 | SIESP SULMONA                                              | Istituto Zooprofilattico Sperimentale dell'Abruzzo e Molise "G. Caporale"                   | Ancora M; Calistri P; Cammà C; Caporale M; Curini V; Di Domenico M; Di Lollo Valeria; Di Pasquale A; Lorusso A; Mangone I; Marcacci M; Puglia I; Rinaldi A; Savini G; Scialabba S                                                                                                                                                                                                                                                                                                                                                                                                  |
| EPI_ISL_1391234 to 1391237, EPI_ISL_1391239 to 1391240, EPI_ISL_1391248, EPI_ISL_1392670 to 1392671, EPI_ISL_1392674, EPI_ISL_1403511, EPI_ISL_1403514, EPI_ISL_1403523 to 1403524, EPI_ISL_1403527, EPI_ISL_1403536, EPI_ISL_1403538 to 1403539, EPI_ISL_1403576, EPI_ISL_1502474, EPI_ISL_1502508 to 1502511, EPI_ISL_1502513, EPI_ISL_1524865 to 1524866, EPI_ISL_1524871                                                                                                                                                                                                                                                                                                                                                                                                                                                                                                                     | see above                                                  | SIESP SULMONA SULMONA(L'AQUILA)                                                             | Istituto Zooprofilattico Sperimentale dell'Abruzzo e Molise "G. Caporale"                                                                                                                                                                                                                                                                                                                                                                                                                                                                                                          |
|                                                                                                                                                                                                                                                                                                                                                                                                                                                                                                                                                                                                                                                                                                                                                                                                                                                                                                  |                                                            |                                                                                             | Ancora M; Calistri P; Cammà C; Caporale M; Curini V; Delli Compagni E; Di Domenico M; Di Lollo Valeria; Di Pasquale A; Lorusso A; Mangone I; Marcacci M; Puglia I; Rinaldi A; Savini G; Scialabba S                                                                                                                                                                                                                                                                                                                                                                                |
| EPI_ISL_1478852, EPI_ISL_1478881                                                                                                                                                                                                                                                                                                                                                                                                                                                                                                                                                                                                                                                                                                                                                                                                                                                                 | SIU Center for Family Medicine - Springfield Main          | Illinois Department of Public Health - Springfield Lab                                      | Bryan Sim; Gordon McCall                                                                                                                                                                                                                                                                                                                                                                                                                                                                                                                                                           |

|                                                                                                                                                                                                                                                                                                                                                                                                                                                                                                                                                                                                                                                                                                                                                                                                                                                                                                                                                                                                                                                                                                                                                                                                                                                                                                                                                                                                                                                                                                                                                                                                                                                                                                                                                                                                                                                                                                                                                                                                                                                                                                                                                                                                                                                                                                                                                                                                                                                                                                                                                                                                                                                                                                                                                                                                                                                                                                                                                                                                                                                                                                                                                                                                                                                                                                                                                                                                                                                                                                                                                                                                                                                                                                                                                                                                                                                                                                                                                                                                                                                                                                                                                                                                                                                                                                                                                                                                                                                                                                                                                                                                                                                                                                                                                                                                                                                                                                                                                                                                                                                                                                                                                                                                                                                                                                                                                                                                                                                                                                                                                                                                                                                                                                                                                                                                                                                                                                                                                                                                                                                                                                                                                                                                                                                                                                                                                                                                                                                                                                                                                                                                                                                                                                                                                                                                                                                                                                                                                                                                                                                                                                                              |                                                                                                        |                                                                                                                     |                                                                                                                                                                                                                                                                                                                                                                                                                                                                                                                                                                                    |
|------------------------------------------------------------------------------------------------------------------------------------------------------------------------------------------------------------------------------------------------------------------------------------------------------------------------------------------------------------------------------------------------------------------------------------------------------------------------------------------------------------------------------------------------------------------------------------------------------------------------------------------------------------------------------------------------------------------------------------------------------------------------------------------------------------------------------------------------------------------------------------------------------------------------------------------------------------------------------------------------------------------------------------------------------------------------------------------------------------------------------------------------------------------------------------------------------------------------------------------------------------------------------------------------------------------------------------------------------------------------------------------------------------------------------------------------------------------------------------------------------------------------------------------------------------------------------------------------------------------------------------------------------------------------------------------------------------------------------------------------------------------------------------------------------------------------------------------------------------------------------------------------------------------------------------------------------------------------------------------------------------------------------------------------------------------------------------------------------------------------------------------------------------------------------------------------------------------------------------------------------------------------------------------------------------------------------------------------------------------------------------------------------------------------------------------------------------------------------------------------------------------------------------------------------------------------------------------------------------------------------------------------------------------------------------------------------------------------------------------------------------------------------------------------------------------------------------------------------------------------------------------------------------------------------------------------------------------------------------------------------------------------------------------------------------------------------------------------------------------------------------------------------------------------------------------------------------------------------------------------------------------------------------------------------------------------------------------------------------------------------------------------------------------------------------------------------------------------------------------------------------------------------------------------------------------------------------------------------------------------------------------------------------------------------------------------------------------------------------------------------------------------------------------------------------------------------------------------------------------------------------------------------------------------------------------------------------------------------------------------------------------------------------------------------------------------------------------------------------------------------------------------------------------------------------------------------------------------------------------------------------------------------------------------------------------------------------------------------------------------------------------------------------------------------------------------------------------------------------------------------------------------------------------------------------------------------------------------------------------------------------------------------------------------------------------------------------------------------------------------------------------------------------------------------------------------------------------------------------------------------------------------------------------------------------------------------------------------------------------------------------------------------------------------------------------------------------------------------------------------------------------------------------------------------------------------------------------------------------------------------------------------------------------------------------------------------------------------------------------------------------------------------------------------------------------------------------------------------------------------------------------------------------------------------------------------------------------------------------------------------------------------------------------------------------------------------------------------------------------------------------------------------------------------------------------------------------------------------------------------------------------------------------------------------------------------------------------------------------------------------------------------------------------------------------------------------------------------------------------------------------------------------------------------------------------------------------------------------------------------------------------------------------------------------------------------------------------------------------------------------------------------------------------------------------------------------------------------------------------------------------------------------------------------------------------------------------------------------------------------------------------------------------------------------------------------------------------------------------------------------------------------------------------------------------------------------------------------------------------------------------------------------------------------------------------------------------------------------------------------------------------------------------------------------------------------------------------------------------------------------|--------------------------------------------------------------------------------------------------------|---------------------------------------------------------------------------------------------------------------------|------------------------------------------------------------------------------------------------------------------------------------------------------------------------------------------------------------------------------------------------------------------------------------------------------------------------------------------------------------------------------------------------------------------------------------------------------------------------------------------------------------------------------------------------------------------------------------|
| EPI_ISL_1478888 to 1478894, EPI_ISL_1478901, EPI_ISL_1478903 to 1478904                                                                                                                                                                                                                                                                                                                                                                                                                                                                                                                                                                                                                                                                                                                                                                                                                                                                                                                                                                                                                                                                                                                                                                                                                                                                                                                                                                                                                                                                                                                                                                                                                                                                                                                                                                                                                                                                                                                                                                                                                                                                                                                                                                                                                                                                                                                                                                                                                                                                                                                                                                                                                                                                                                                                                                                                                                                                                                                                                                                                                                                                                                                                                                                                                                                                                                                                                                                                                                                                                                                                                                                                                                                                                                                                                                                                                                                                                                                                                                                                                                                                                                                                                                                                                                                                                                                                                                                                                                                                                                                                                                                                                                                                                                                                                                                                                                                                                                                                                                                                                                                                                                                                                                                                                                                                                                                                                                                                                                                                                                                                                                                                                                                                                                                                                                                                                                                                                                                                                                                                                                                                                                                                                                                                                                                                                                                                                                                                                                                                                                                                                                                                                                                                                                                                                                                                                                                                                                                                                                                                                                                      | SIU Center for Family Medicine - Springfield SCDPH                                                     | Illinois Department of Public Health - Springfield Lab                                                              | Bryan Sim; Gordon McCall                                                                                                                                                                                                                                                                                                                                                                                                                                                                                                                                                           |
| EPI_ISL_1478925                                                                                                                                                                                                                                                                                                                                                                                                                                                                                                                                                                                                                                                                                                                                                                                                                                                                                                                                                                                                                                                                                                                                                                                                                                                                                                                                                                                                                                                                                                                                                                                                                                                                                                                                                                                                                                                                                                                                                                                                                                                                                                                                                                                                                                                                                                                                                                                                                                                                                                                                                                                                                                                                                                                                                                                                                                                                                                                                                                                                                                                                                                                                                                                                                                                                                                                                                                                                                                                                                                                                                                                                                                                                                                                                                                                                                                                                                                                                                                                                                                                                                                                                                                                                                                                                                                                                                                                                                                                                                                                                                                                                                                                                                                                                                                                                                                                                                                                                                                                                                                                                                                                                                                                                                                                                                                                                                                                                                                                                                                                                                                                                                                                                                                                                                                                                                                                                                                                                                                                                                                                                                                                                                                                                                                                                                                                                                                                                                                                                                                                                                                                                                                                                                                                                                                                                                                                                                                                                                                                                                                                                                                              | SIU Center for Family Medicine- SPFLD Main                                                             | Illinois Department of Public Health - Springfield Lab                                                              | Bryan Sim; Gordon McCall                                                                                                                                                                                                                                                                                                                                                                                                                                                                                                                                                           |
| EPI_ISL_1500180 to 1500200, EPI_ISL_1500197 to 1500215                                                                                                                                                                                                                                                                                                                                                                                                                                                                                                                                                                                                                                                                                                                                                                                                                                                                                                                                                                                                                                                                                                                                                                                                                                                                                                                                                                                                                                                                                                                                                                                                                                                                                                                                                                                                                                                                                                                                                                                                                                                                                                                                                                                                                                                                                                                                                                                                                                                                                                                                                                                                                                                                                                                                                                                                                                                                                                                                                                                                                                                                                                                                                                                                                                                                                                                                                                                                                                                                                                                                                                                                                                                                                                                                                                                                                                                                                                                                                                                                                                                                                                                                                                                                                                                                                                                                                                                                                                                                                                                                                                                                                                                                                                                                                                                                                                                                                                                                                                                                                                                                                                                                                                                                                                                                                                                                                                                                                                                                                                                                                                                                                                                                                                                                                                                                                                                                                                                                                                                                                                                                                                                                                                                                                                                                                                                                                                                                                                                                                                                                                                                                                                                                                                                                                                                                                                                                                                                                                                                                                                                                       | SIU Center for Family Medicine- SPFLD SCDPH                                                            | Illinois Department of Public Health - Springfield Lab                                                              | Bryan Sim; Gordon McCall                                                                                                                                                                                                                                                                                                                                                                                                                                                                                                                                                           |
| EPI_ISL_486393                                                                                                                                                                                                                                                                                                                                                                                                                                                                                                                                                                                                                                                                                                                                                                                                                                                                                                                                                                                                                                                                                                                                                                                                                                                                                                                                                                                                                                                                                                                                                                                                                                                                                                                                                                                                                                                                                                                                                                                                                                                                                                                                                                                                                                                                                                                                                                                                                                                                                                                                                                                                                                                                                                                                                                                                                                                                                                                                                                                                                                                                                                                                                                                                                                                                                                                                                                                                                                                                                                                                                                                                                                                                                                                                                                                                                                                                                                                                                                                                                                                                                                                                                                                                                                                                                                                                                                                                                                                                                                                                                                                                                                                                                                                                                                                                                                                                                                                                                                                                                                                                                                                                                                                                                                                                                                                                                                                                                                                                                                                                                                                                                                                                                                                                                                                                                                                                                                                                                                                                                                                                                                                                                                                                                                                                                                                                                                                                                                                                                                                                                                                                                                                                                                                                                                                                                                                                                                                                                                                                                                                                                                               | SJMCH                                                                                                  | Department of Neurology, National Institute of Mental Health and Neuroscience (NIMHANS)                             | Anita Desai; Chitra Pattabiraman; Harsha PK; Manjunatha Venkataswamy; Ravi Vasanthapuram; Risha Rasheed; Shafeeq S Hameed; Vijayalakshmi Reddy                                                                                                                                                                                                                                                                                                                                                                                                                                     |
| EPI_ISL_1438583, EPI_ISL_1438642, EPI_ISL_1438655                                                                                                                                                                                                                                                                                                                                                                                                                                                                                                                                                                                                                                                                                                                                                                                                                                                                                                                                                                                                                                                                                                                                                                                                                                                                                                                                                                                                                                                                                                                                                                                                                                                                                                                                                                                                                                                                                                                                                                                                                                                                                                                                                                                                                                                                                                                                                                                                                                                                                                                                                                                                                                                                                                                                                                                                                                                                                                                                                                                                                                                                                                                                                                                                                                                                                                                                                                                                                                                                                                                                                                                                                                                                                                                                                                                                                                                                                                                                                                                                                                                                                                                                                                                                                                                                                                                                                                                                                                                                                                                                                                                                                                                                                                                                                                                                                                                                                                                                                                                                                                                                                                                                                                                                                                                                                                                                                                                                                                                                                                                                                                                                                                                                                                                                                                                                                                                                                                                                                                                                                                                                                                                                                                                                                                                                                                                                                                                                                                                                                                                                                                                                                                                                                                                                                                                                                                                                                                                                                                                                                                                                            | SLK-Kliniken Heilbronn GmbH - Institut für Laboratoriumsmedizin                                        | Robert Koch Institute                                                                                               |                                                                                                                                                                                                                                                                                                                                                                                                                                                                                                                                                                                    |
| EPI_ISL_1445136                                                                                                                                                                                                                                                                                                                                                                                                                                                                                                                                                                                                                                                                                                                                                                                                                                                                                                                                                                                                                                                                                                                                                                                                                                                                                                                                                                                                                                                                                                                                                                                                                                                                                                                                                                                                                                                                                                                                                                                                                                                                                                                                                                                                                                                                                                                                                                                                                                                                                                                                                                                                                                                                                                                                                                                                                                                                                                                                                                                                                                                                                                                                                                                                                                                                                                                                                                                                                                                                                                                                                                                                                                                                                                                                                                                                                                                                                                                                                                                                                                                                                                                                                                                                                                                                                                                                                                                                                                                                                                                                                                                                                                                                                                                                                                                                                                                                                                                                                                                                                                                                                                                                                                                                                                                                                                                                                                                                                                                                                                                                                                                                                                                                                                                                                                                                                                                                                                                                                                                                                                                                                                                                                                                                                                                                                                                                                                                                                                                                                                                                                                                                                                                                                                                                                                                                                                                                                                                                                                                                                                                                                                              | SMS IPERO                                                                                              | Instituto Butantan / Mendelics                                                                                      | Antonio Jorge Martins; Bibiana Santos; Claudia Renata dos Santos Barros; David Schlesinger; Debora Botequiu Moretti; Dimas Tadeu Covas; Elaine Cristina Marqueze; Elaine Vieira dos Santos; Erika Freitas; Evandra Strazza Rodrigues; Flavia Aburjaile; José Salvatore Leister Patané; João Paulo Kitajima; Luiz Carlos Junior de Alcantara; Maria Carolina Elias; Marta Giovanetti; Rafael dos Santos Bezerra; Raul Machado Neto; Ricardo Haddad; Rodrigo Tocantins Calado.; Sandra Coccuzzo Sampaio; Simone Kashima; Svetoslav Nanev Slavov; Vagner Fonseca; Vincent Louis Viala |
| EPI_ISL_454830 to 454833                                                                                                                                                                                                                                                                                                                                                                                                                                                                                                                                                                                                                                                                                                                                                                                                                                                                                                                                                                                                                                                                                                                                                                                                                                                                                                                                                                                                                                                                                                                                                                                                                                                                                                                                                                                                                                                                                                                                                                                                                                                                                                                                                                                                                                                                                                                                                                                                                                                                                                                                                                                                                                                                                                                                                                                                                                                                                                                                                                                                                                                                                                                                                                                                                                                                                                                                                                                                                                                                                                                                                                                                                                                                                                                                                                                                                                                                                                                                                                                                                                                                                                                                                                                                                                                                                                                                                                                                                                                                                                                                                                                                                                                                                                                                                                                                                                                                                                                                                                                                                                                                                                                                                                                                                                                                                                                                                                                                                                                                                                                                                                                                                                                                                                                                                                                                                                                                                                                                                                                                                                                                                                                                                                                                                                                                                                                                                                                                                                                                                                                                                                                                                                                                                                                                                                                                                                                                                                                                                                                                                                                                                                     | SMS Medical College, Jaipur                                                                            | CSIR Institute of Genomics and Integrative Biology                                                                  | Abhinav Jain; Anshul Kumar; Bani Jolly; Disha Sharma; Gyan Ranjan; Mohammed Imran; Mohit Divakar; Paras Sehgal; Rahul Bhoyar; Rahul Sahlot; Sandeep K Mathur; Sridhar Sivasubbu; Sudhir Bhandari; Vinod Scaria                                                                                                                                                                                                                                                                                                                                                                     |
| EPI_ISL_1445084                                                                                                                                                                                                                                                                                                                                                                                                                                                                                                                                                                                                                                                                                                                                                                                                                                                                                                                                                                                                                                                                                                                                                                                                                                                                                                                                                                                                                                                                                                                                                                                                                                                                                                                                                                                                                                                                                                                                                                                                                                                                                                                                                                                                                                                                                                                                                                                                                                                                                                                                                                                                                                                                                                                                                                                                                                                                                                                                                                                                                                                                                                                                                                                                                                                                                                                                                                                                                                                                                                                                                                                                                                                                                                                                                                                                                                                                                                                                                                                                                                                                                                                                                                                                                                                                                                                                                                                                                                                                                                                                                                                                                                                                                                                                                                                                                                                                                                                                                                                                                                                                                                                                                                                                                                                                                                                                                                                                                                                                                                                                                                                                                                                                                                                                                                                                                                                                                                                                                                                                                                                                                                                                                                                                                                                                                                                                                                                                                                                                                                                                                                                                                                                                                                                                                                                                                                                                                                                                                                                                                                                                                                              | SMS SECRETARIA MUNICIPAL DE SAUDE DE BOITUVA                                                           | Instituto Butantan / Mendelics                                                                                      | Antonio Jorge Martins; Bibiana Santos; Claudia Renata dos Santos Barros; David Schlesinger; Debora Botequiu Moretti; Dimas Tadeu Covas; Elaine Cristina Marqueze; Elaine Vieira dos Santos; Erika Freitas; Evandra Strazza Rodrigues; Flavia Aburjaile; José Salvatore Leister Patané; João Paulo Kitajima; Luiz Carlos Junior de Alcantara; Maria Carolina Elias; Marta Giovanetti; Rafael dos Santos Bezerra; Raul Machado Neto; Ricardo Haddad; Rodrigo Tocantins Calado.; Sandra Coccuzzo Sampaio; Simone Kashima; Svetoslav Nanev Slavov; Vagner Fonseca; Vincent Louis Viala |
| EPI_ISL_1544075 to 1544107                                                                                                                                                                                                                                                                                                                                                                                                                                                                                                                                                                                                                                                                                                                                                                                                                                                                                                                                                                                                                                                                                                                                                                                                                                                                                                                                                                                                                                                                                                                                                                                                                                                                                                                                                                                                                                                                                                                                                                                                                                                                                                                                                                                                                                                                                                                                                                                                                                                                                                                                                                                                                                                                                                                                                                                                                                                                                                                                                                                                                                                                                                                                                                                                                                                                                                                                                                                                                                                                                                                                                                                                                                                                                                                                                                                                                                                                                                                                                                                                                                                                                                                                                                                                                                                                                                                                                                                                                                                                                                                                                                                                                                                                                                                                                                                                                                                                                                                                                                                                                                                                                                                                                                                                                                                                                                                                                                                                                                                                                                                                                                                                                                                                                                                                                                                                                                                                                                                                                                                                                                                                                                                                                                                                                                                                                                                                                                                                                                                                                                                                                                                                                                                                                                                                                                                                                                                                                                                                                                                                                                                                                                   | SOC Igiene ed Epidemiologia Clinica, ASUFC, Udine and SC (UCO) Igiene e Sanità Publica, ASUGI, Trieste | Istituto di Genomica Applicata                                                                                      | Corrado Pipan; Davide Scaglione; Eleonora Paparelli; Gabriele Magris; Irena Jurman; Michele Morgante; Pierlanfranco D'Agaro; Vera Vendramin                                                                                                                                                                                                                                                                                                                                                                                                                                        |
| EPI_ISL_1393780 to 1393782, EPI_ISL_1393801, EPI_ISL_1538796, EPI_ISL_1539054, EPI_ISL_1539133                                                                                                                                                                                                                                                                                                                                                                                                                                                                                                                                                                                                                                                                                                                                                                                                                                                                                                                                                                                                                                                                                                                                                                                                                                                                                                                                                                                                                                                                                                                                                                                                                                                                                                                                                                                                                                                                                                                                                                                                                                                                                                                                                                                                                                                                                                                                                                                                                                                                                                                                                                                                                                                                                                                                                                                                                                                                                                                                                                                                                                                                                                                                                                                                                                                                                                                                                                                                                                                                                                                                                                                                                                                                                                                                                                                                                                                                                                                                                                                                                                                                                                                                                                                                                                                                                                                                                                                                                                                                                                                                                                                                                                                                                                                                                                                                                                                                                                                                                                                                                                                                                                                                                                                                                                                                                                                                                                                                                                                                                                                                                                                                                                                                                                                                                                                                                                                                                                                                                                                                                                                                                                                                                                                                                                                                                                                                                                                                                                                                                                                                                                                                                                                                                                                                                                                                                                                                                                                                                                                                                               | SP ZOZ Centralny Szpital Kliniczny UM w odzi Pracownia Diagnostyki Wirusów Oddechowych                 | 1. National Institute of Public Health - National Institute of Hygiene; 2. Eurofins Genomics Europe Sequencing GmbH | ECDC COVID-19 WGS support team; Eurofins Genomics Europe Sequencing Team; Gierczyki Rafa; Sadkowska-Todys Magorzata; Wokowicz Tomasz; Zacharczuk Katarzyna                                                                                                                                                                                                                                                                                                                                                                                                                         |
| EPI_ISL_1538790 to 1538793                                                                                                                                                                                                                                                                                                                                                                                                                                                                                                                                                                                                                                                                                                                                                                                                                                                                                                                                                                                                                                                                                                                                                                                                                                                                                                                                                                                                                                                                                                                                                                                                                                                                                                                                                                                                                                                                                                                                                                                                                                                                                                                                                                                                                                                                                                                                                                                                                                                                                                                                                                                                                                                                                                                                                                                                                                                                                                                                                                                                                                                                                                                                                                                                                                                                                                                                                                                                                                                                                                                                                                                                                                                                                                                                                                                                                                                                                                                                                                                                                                                                                                                                                                                                                                                                                                                                                                                                                                                                                                                                                                                                                                                                                                                                                                                                                                                                                                                                                                                                                                                                                                                                                                                                                                                                                                                                                                                                                                                                                                                                                                                                                                                                                                                                                                                                                                                                                                                                                                                                                                                                                                                                                                                                                                                                                                                                                                                                                                                                                                                                                                                                                                                                                                                                                                                                                                                                                                                                                                                                                                                                                                   | SP ZOZ USK nr 1 Zakad Diagnostyki Laboratoryjnej                                                       | 1. National Institute of Public Health - National Institute of Hygiene; 2. Eurofins Genomics Europe Sequencing GmbH | ECDC COVID-19 WGS support team; Eurofins Genomics Europe Sequencing Team; Gierczyki Rafa; Sadkowska-Todys Magorzata; Wokowicz Tomasz; Zacharczuk Katarzyna                                                                                                                                                                                                                                                                                                                                                                                                                         |
| EPI_ISL_1393785 to 1393788                                                                                                                                                                                                                                                                                                                                                                                                                                                                                                                                                                                                                                                                                                                                                                                                                                                                                                                                                                                                                                                                                                                                                                                                                                                                                                                                                                                                                                                                                                                                                                                                                                                                                                                                                                                                                                                                                                                                                                                                                                                                                                                                                                                                                                                                                                                                                                                                                                                                                                                                                                                                                                                                                                                                                                                                                                                                                                                                                                                                                                                                                                                                                                                                                                                                                                                                                                                                                                                                                                                                                                                                                                                                                                                                                                                                                                                                                                                                                                                                                                                                                                                                                                                                                                                                                                                                                                                                                                                                                                                                                                                                                                                                                                                                                                                                                                                                                                                                                                                                                                                                                                                                                                                                                                                                                                                                                                                                                                                                                                                                                                                                                                                                                                                                                                                                                                                                                                                                                                                                                                                                                                                                                                                                                                                                                                                                                                                                                                                                                                                                                                                                                                                                                                                                                                                                                                                                                                                                                                                                                                                                                                   | SP ZOZ Uniwersytecki Szpital Kliniczny nr 1 im. Norberta Barlickiego                                   | 1. National Institute of Public Health - National Institute of Hygiene; 2. Eurofins Genomics Europe Sequencing GmbH | ECDC COVID-19 WGS support team; Eurofins Genomics Europe Sequencing Team; Gierczyki Rafa; Sadkowska-Todys Magorzata; Wokowicz Tomasz; Zacharczuk Katarzyna                                                                                                                                                                                                                                                                                                                                                                                                                         |
| EPI_ISL_1393794                                                                                                                                                                                                                                                                                                                                                                                                                                                                                                                                                                                                                                                                                                                                                                                                                                                                                                                                                                                                                                                                                                                                                                                                                                                                                                                                                                                                                                                                                                                                                                                                                                                                                                                                                                                                                                                                                                                                                                                                                                                                                                                                                                                                                                                                                                                                                                                                                                                                                                                                                                                                                                                                                                                                                                                                                                                                                                                                                                                                                                                                                                                                                                                                                                                                                                                                                                                                                                                                                                                                                                                                                                                                                                                                                                                                                                                                                                                                                                                                                                                                                                                                                                                                                                                                                                                                                                                                                                                                                                                                                                                                                                                                                                                                                                                                                                                                                                                                                                                                                                                                                                                                                                                                                                                                                                                                                                                                                                                                                                                                                                                                                                                                                                                                                                                                                                                                                                                                                                                                                                                                                                                                                                                                                                                                                                                                                                                                                                                                                                                                                                                                                                                                                                                                                                                                                                                                                                                                                                                                                                                                                                              | SP ZOZ Uniwersytecki Szpital Kliniczny nr 1 im. Norberta Barlickiego Uniwersytetu Medycznego w odzi    | 1. National Institute of Public Health - National Institute of Hygiene; 2. Eurofins Genomics Europe Sequencing GmbH | ECDC COVID-19 WGS support team; Eurofins Genomics Europe Sequencing Team; Gierczyki Rafa; Sadkowska-Todys Magorzata; Wokowicz Tomasz; Zacharczuk Katarzyna                                                                                                                                                                                                                                                                                                                                                                                                                         |
| EPI_ISL_1544142 to 1544165, EPI_ISL_1544170 to 1544178                                                                                                                                                                                                                                                                                                                                                                                                                                                                                                                                                                                                                                                                                                                                                                                                                                                                                                                                                                                                                                                                                                                                                                                                                                                                                                                                                                                                                                                                                                                                                                                                                                                                                                                                                                                                                                                                                                                                                                                                                                                                                                                                                                                                                                                                                                                                                                                                                                                                                                                                                                                                                                                                                                                                                                                                                                                                                                                                                                                                                                                                                                                                                                                                                                                                                                                                                                                                                                                                                                                                                                                                                                                                                                                                                                                                                                                                                                                                                                                                                                                                                                                                                                                                                                                                                                                                                                                                                                                                                                                                                                                                                                                                                                                                                                                                                                                                                                                                                                                                                                                                                                                                                                                                                                                                                                                                                                                                                                                                                                                                                                                                                                                                                                                                                                                                                                                                                                                                                                                                                                                                                                                                                                                                                                                                                                                                                                                                                                                                                                                                                                                                                                                                                                                                                                                                                                                                                                                                                                                                                                                                       | SSG Medical College, Baroda                                                                            | Gujarat Biotechnology Research Centre                                                                               | Chaitanya Joshi; Dinesh Kumar; Janvi Raval; Madhvi Joshi; Nitesh Shah; Nitin Savaliya; Ramesh Pandit; Sonal Sharma; Tanuja B. Javadekar; Twinkle Soni; Umang Mishra; Zarna Patel; Zuber Saiyed                                                                                                                                                                                                                                                                                                                                                                                     |
| EPI_ISL_1482454                                                                                                                                                                                                                                                                                                                                                                                                                                                                                                                                                                                                                                                                                                                                                                                                                                                                                                                                                                                                                                                                                                                                                                                                                                                                                                                                                                                                                                                                                                                                                                                                                                                                                                                                                                                                                                                                                                                                                                                                                                                                                                                                                                                                                                                                                                                                                                                                                                                                                                                                                                                                                                                                                                                                                                                                                                                                                                                                                                                                                                                                                                                                                                                                                                                                                                                                                                                                                                                                                                                                                                                                                                                                                                                                                                                                                                                                                                                                                                                                                                                                                                                                                                                                                                                                                                                                                                                                                                                                                                                                                                                                                                                                                                                                                                                                                                                                                                                                                                                                                                                                                                                                                                                                                                                                                                                                                                                                                                                                                                                                                                                                                                                                                                                                                                                                                                                                                                                                                                                                                                                                                                                                                                                                                                                                                                                                                                                                                                                                                                                                                                                                                                                                                                                                                                                                                                                                                                                                                                                                                                                                                                              | ST. FRANCIS HOSPITAL LABORATORY                                                                        | Wadsworth Center, New York State Department of Health                                                               | Alexis Russell; Catharine Prussing; Daryl M. Lamson; Erasmus Schneider; Erica Lasek-Nesselquist; John Kelly; Jonathan Plitnick; Kirsten St. George; Matthew Shudt; Melissa A Leisner; Navjot Singh                                                                                                                                                                                                                                                                                                                                                                                 |
| EPI_ISL_1469437                                                                                                                                                                                                                                                                                                                                                                                                                                                                                                                                                                                                                                                                                                                                                                                                                                                                                                                                                                                                                                                                                                                                                                                                                                                                                                                                                                                                                                                                                                                                                                                                                                                                                                                                                                                                                                                                                                                                                                                                                                                                                                                                                                                                                                                                                                                                                                                                                                                                                                                                                                                                                                                                                                                                                                                                                                                                                                                                                                                                                                                                                                                                                                                                                                                                                                                                                                                                                                                                                                                                                                                                                                                                                                                                                                                                                                                                                                                                                                                                                                                                                                                                                                                                                                                                                                                                                                                                                                                                                                                                                                                                                                                                                                                                                                                                                                                                                                                                                                                                                                                                                                                                                                                                                                                                                                                                                                                                                                                                                                                                                                                                                                                                                                                                                                                                                                                                                                                                                                                                                                                                                                                                                                                                                                                                                                                                                                                                                                                                                                                                                                                                                                                                                                                                                                                                                                                                                                                                                                                                                                                                                                              | ST. JOZEFKLINIEK-Campus Willebroek                                                                     | UZA, Clinical Biology                                                                                               | Basil Britto Xavier; Christine Lammens; Herman Goossens; Jasmine Coppens; Marie Le Mercier; Veerle Matheussen                                                                                                                                                                                                                                                                                                                                                                                                                                                                      |
| EPI_ISL_1397831 to 1397832, EPI_ISL_1465838 to 1465847                                                                                                                                                                                                                                                                                                                                                                                                                                                                                                                                                                                                                                                                                                                                                                                                                                                                                                                                                                                                                                                                                                                                                                                                                                                                                                                                                                                                                                                                                                                                                                                                                                                                                                                                                                                                                                                                                                                                                                                                                                                                                                                                                                                                                                                                                                                                                                                                                                                                                                                                                                                                                                                                                                                                                                                                                                                                                                                                                                                                                                                                                                                                                                                                                                                                                                                                                                                                                                                                                                                                                                                                                                                                                                                                                                                                                                                                                                                                                                                                                                                                                                                                                                                                                                                                                                                                                                                                                                                                                                                                                                                                                                                                                                                                                                                                                                                                                                                                                                                                                                                                                                                                                                                                                                                                                                                                                                                                                                                                                                                                                                                                                                                                                                                                                                                                                                                                                                                                                                                                                                                                                                                                                                                                                                                                                                                                                                                                                                                                                                                                                                                                                                                                                                                                                                                                                                                                                                                                                                                                                                                                       | STONY BROOK UNIVERSITY HOSPITAL                                                                        | Wadsworth Center, New York State Department of Health                                                               | Alexis Russel; Alexis Russell; Catharine Prussing; Daryl M. Lamson; Erasmus Schneider; Erica Lasek-Nesselquist; John Kelly; Jonathan Plitnick; Kirsten St. George; Matthew Shudt; Melissa A Leisner; Navjot Singh                                                                                                                                                                                                                                                                                                                                                                  |
| EPI_ISL_1416685 to 1416687                                                                                                                                                                                                                                                                                                                                                                                                                                                                                                                                                                                                                                                                                                                                                                                                                                                                                                                                                                                                                                                                                                                                                                                                                                                                                                                                                                                                                                                                                                                                                                                                                                                                                                                                                                                                                                                                                                                                                                                                                                                                                                                                                                                                                                                                                                                                                                                                                                                                                                                                                                                                                                                                                                                                                                                                                                                                                                                                                                                                                                                                                                                                                                                                                                                                                                                                                                                                                                                                                                                                                                                                                                                                                                                                                                                                                                                                                                                                                                                                                                                                                                                                                                                                                                                                                                                                                                                                                                                                                                                                                                                                                                                                                                                                                                                                                                                                                                                                                                                                                                                                                                                                                                                                                                                                                                                                                                                                                                                                                                                                                                                                                                                                                                                                                                                                                                                                                                                                                                                                                                                                                                                                                                                                                                                                                                                                                                                                                                                                                                                                                                                                                                                                                                                                                                                                                                                                                                                                                                                                                                                                                                   | STZ                                                                                                    | Jessa                                                                                                               | Cruys et al. on behalf of the Jessa_cmdLab                                                                                                                                                                                                                                                                                                                                                                                                                                                                                                                                         |
| EPI_ISL_1395751 to 1395752, EPI_ISL_1395755, EPI_ISL_1395759, EPI_ISL_1395761 to 1395762, EPI_ISL_1395764 to 1395765, EPI_ISL_1395767, EPI_ISL_1395770, EPI_ISL_1395772, EPI_ISL_1395774 to 1395776, EPI_ISL_1397389 to 1397392, EPI_ISL_1397394, EPI_ISL_1397396 to 1397402, EPI_ISL_1397404, EPI_ISL_1397406, EPI_ISL_1397408, EPI_ISL_1397410 to 1397423, EPI_ISL_1397459, EPI_ISL_1397592 to 1397611, EPI_ISL_1397629, EPI_ISL_1397706, EPI_ISL_1397784 to 1397787, EPI_ISL_1397968 to 1397970, EPI_ISL_1397983, EPI_ISL_1398002 to 1398004, EPI_ISL_1398156 to 1398162, EPI_ISL_1461294, EPI_ISL_1461310 to 1461317, EPI_ISL_1462500, EPI_ISL_1462503, EPI_ISL_1462505, EPI_ISL_1462536 to 1462537, EPI_ISL_1462539 to 1462540, EPI_ISL_1462542 to 1462543, EPI_ISL_1462545 to 1462546, EPI_ISL_1462548 to 1462549, EPI_ISL_1465638, EPI_ISL_1465665 to 1465666, EPI_ISL_1465689 to 1465692, EPI_ISL_1465697 to 1465700, EPI_ISL_1482274 to 1482276, EPI_ISL_1482206 to 1482407, EPI_ISL_1499437 to 1499456                                                                                                                                                                                                                                                                                                                                                                                                                                                                                                                                                                                                                                                                                                                                                                                                                                                                                                                                                                                                                                                                                                                                                                                                                                                                                                                                                                                                                                                                                                                                                                                                                                                                                                                                                                                                                                                                                                                                                                                                                                                                                                                                                                                                                                                                                                                                                                                                                                                                                                                                                                                                                                                                                                                                                                                                                                                                                                                                                                                                                                                                                                                                                                                                                                                                                                                                                                                                                                                                                                                                                                                                                                                                                                                                                                                                                                                                                                                                                                                                                                                                                                                                                                                                                                                                                                                                                                                                                                                                                                                                                                                                                                                                                                                                                                                                                                                                                                                                                                                                                                                                                                                                                                                                                                                                                                                                                                                                                                                                                                                                                                                                                                                                                                                                                                                                                                                                                                                                                                                                                                                                                                             |                                                                                                        |                                                                                                                     |                                                                                                                                                                                                                                                                                                                                                                                                                                                                                                                                                                                    |
| see above                                                                                                                                                                                                                                                                                                                                                                                                                                                                                                                                                                                                                                                                                                                                                                                                                                                                                                                                                                                                                                                                                                                                                                                                                                                                                                                                                                                                                                                                                                                                                                                                                                                                                                                                                                                                                                                                                                                                                                                                                                                                                                                                                                                                                                                                                                                                                                                                                                                                                                                                                                                                                                                                                                                                                                                                                                                                                                                                                                                                                                                                                                                                                                                                                                                                                                                                                                                                                                                                                                                                                                                                                                                                                                                                                                                                                                                                                                                                                                                                                                                                                                                                                                                                                                                                                                                                                                                                                                                                                                                                                                                                                                                                                                                                                                                                                                                                                                                                                                                                                                                                                                                                                                                                                                                                                                                                                                                                                                                                                                                                                                                                                                                                                                                                                                                                                                                                                                                                                                                                                                                                                                                                                                                                                                                                                                                                                                                                                                                                                                                                                                                                                                                                                                                                                                                                                                                                                                                                                                                                                                                                                                                    | SUNY UPSTATE MEDICAL UNIVERSITY                                                                        | Wadsworth Center, New York State Department of Health                                                               | Alexis Russel; Alexis Russell; Catharine Prussing; Daryl M. Lamson; Erasmus Schneider; Erica Lasek-Nesselquist; John Kelly; Jonathan Plitnick; Kirsten St. George; Matthew Shudt; Melissa A Leisner; Navjot Singh                                                                                                                                                                                                                                                                                                                                                                  |
| EPI_ISL_547575                                                                                                                                                                                                                                                                                                                                                                                                                                                                                                                                                                                                                                                                                                                                                                                                                                                                                                                                                                                                                                                                                                                                                                                                                                                                                                                                                                                                                                                                                                                                                                                                                                                                                                                                                                                                                                                                                                                                                                                                                                                                                                                                                                                                                                                                                                                                                                                                                                                                                                                                                                                                                                                                                                                                                                                                                                                                                                                                                                                                                                                                                                                                                                                                                                                                                                                                                                                                                                                                                                                                                                                                                                                                                                                                                                                                                                                                                                                                                                                                                                                                                                                                                                                                                                                                                                                                                                                                                                                                                                                                                                                                                                                                                                                                                                                                                                                                                                                                                                                                                                                                                                                                                                                                                                                                                                                                                                                                                                                                                                                                                                                                                                                                                                                                                                                                                                                                                                                                                                                                                                                                                                                                                                                                                                                                                                                                                                                                                                                                                                                                                                                                                                                                                                                                                                                                                                                                                                                                                                                                                                                                                                               | SVO Jundiá                                                                                             | Instituto Adolfo Lutz, Interdisciplinary Procedures Center, Strategic Laboratory                                    | Claudia Regina Gonçalves; Claudio Tavares Sacchi; Erica Valessa Ramos Gomes; Karoline Rodrigues Campos                                                                                                                                                                                                                                                                                                                                                                                                                                                                             |
| EPI_ISL_1492683 to 1492704, EPI_ISL_1492706, EPI_ISL_1492708 to 1492719, EPI_ISL_1492731, EPI_ISL_1492733 to 1492767, EPI_ISL_1492769 to 1492778, EPI_ISL_1492806 to 1492836, EPI_ISL_1492842 to 1492903, EPI_ISL_1492925 to 1492972, EPI_ISL_1493012 to 1493015, EPI_ISL_1493018 to 1493022, EPI_ISL_1493024 to 1493039, EPI_ISL_1533853 to 1533881, EPI_ISL_1533883 to 1533935                                                                                                                                                                                                                                                                                                                                                                                                                                                                                                                                                                                                                                                                                                                                                                                                                                                                                                                                                                                                                                                                                                                                                                                                                                                                                                                                                                                                                                                                                                                                                                                                                                                                                                                                                                                                                                                                                                                                                                                                                                                                                                                                                                                                                                                                                                                                                                                                                                                                                                                                                                                                                                                                                                                                                                                                                                                                                                                                                                                                                                                                                                                                                                                                                                                                                                                                                                                                                                                                                                                                                                                                                                                                                                                                                                                                                                                                                                                                                                                                                                                                                                                                                                                                                                                                                                                                                                                                                                                                                                                                                                                                                                                                                                                                                                                                                                                                                                                                                                                                                                                                                                                                                                                                                                                                                                                                                                                                                                                                                                                                                                                                                                                                                                                                                                                                                                                                                                                                                                                                                                                                                                                                                                                                                                                                                                                                                                                                                                                                                                                                                                                                                                                                                                                                             |                                                                                                        |                                                                                                                     |                                                                                                                                                                                                                                                                                                                                                                                                                                                                                                                                                                                    |
| see above                                                                                                                                                                                                                                                                                                                                                                                                                                                                                                                                                                                                                                                                                                                                                                                                                                                                                                                                                                                                                                                                                                                                                                                                                                                                                                                                                                                                                                                                                                                                                                                                                                                                                                                                                                                                                                                                                                                                                                                                                                                                                                                                                                                                                                                                                                                                                                                                                                                                                                                                                                                                                                                                                                                                                                                                                                                                                                                                                                                                                                                                                                                                                                                                                                                                                                                                                                                                                                                                                                                                                                                                                                                                                                                                                                                                                                                                                                                                                                                                                                                                                                                                                                                                                                                                                                                                                                                                                                                                                                                                                                                                                                                                                                                                                                                                                                                                                                                                                                                                                                                                                                                                                                                                                                                                                                                                                                                                                                                                                                                                                                                                                                                                                                                                                                                                                                                                                                                                                                                                                                                                                                                                                                                                                                                                                                                                                                                                                                                                                                                                                                                                                                                                                                                                                                                                                                                                                                                                                                                                                                                                                                                    | SYNLAB                                                                                                 | GIGA Medical Genomics                                                                                               | Bouchra Boujemla; Cécile Meex; Keith Durkin; Maria Artesi; Marie-Pierre Hayette; Nathalie Renotte; Pierrette Melin; Raphaël Boreux; Sébastien Bontems; Vincent Bours                                                                                                                                                                                                                                                                                                                                                                                                               |
| EPI_ISL_1434617, EPI_ISL_1434619, EPI_ISL_1434626, EPI_ISL_1434637, EPI_ISL_1434639, EPI_ISL_1434645, EPI_ISL_1434647, EPI_ISL_1434649, EPI_ISL_1434655, EPI_ISL_1434659, EPI_ISL_1434661, EPI_ISL_1434664, EPI_ISL_1434668, EPI_ISL_1434672, EPI_ISL_1434674, EPI_ISL_1434678, EPI_ISL_1434685 to 1434686, EPI_ISL_1434692, EPI_ISL_1434694, EPI_ISL_1434698, EPI_ISL_1434706, EPI_ISL_1434712, EPI_ISL_1434716, EPI_ISL_1434720 to 1434721, EPI_ISL_1434723, EPI_ISL_1434725, EPI_ISL_1434729, EPI_ISL_1434742, EPI_ISL_1434756, EPI_ISL_1434752, EPI_ISL_1434755, EPI_ISL_1434757, EPI_ISL_1434761, EPI_ISL_1434771, EPI_ISL_1434775, EPI_ISL_1434778, EPI_ISL_1434780, EPI_ISL_1434785, EPI_ISL_1434787, EPI_ISL_1434789, EPI_ISL_1434791, EPI_ISL_1434795 to 1434796, EPI_ISL_1434800, EPI_ISL_1434802, EPI_ISL_1434805, EPI_ISL_1434810, EPI_ISL_1434814, EPI_ISL_1434820, EPI_ISL_1434822, EPI_ISL_1434824, EPI_ISL_1434826, EPI_ISL_1434828 to 1434829, EPI_ISL_1434831, EPI_ISL_1434835, EPI_ISL_1434837, EPI_ISL_1434847, EPI_ISL_1434851, EPI_ISL_1434856 to 1434857, EPI_ISL_1434859, EPI_ISL_1434863, EPI_ISL_1434865, EPI_ISL_1434867, EPI_ISL_1434874, EPI_ISL_1434877, EPI_ISL_1434886, EPI_ISL_1434890, EPI_ISL_1434896, EPI_ISL_1434900, EPI_ISL_1434904, EPI_ISL_1434906, EPI_ISL_1434911, EPI_ISL_1434913, EPI_ISL_1434915, EPI_ISL_1434919, EPI_ISL_1434923, EPI_ISL_1434925, EPI_ISL_1434927, EPI_ISL_1434931, EPI_ISL_1434933, EPI_ISL_1434935, EPI_ISL_1434937, EPI_ISL_1434941, EPI_ISL_1434943, EPI_ISL_1434945, EPI_ISL_1434947, EPI_ISL_1434951, EPI_ISL_1434953, EPI_ISL_1434955, EPI_ISL_1434957 to 1434958, EPI_ISL_1434960, EPI_ISL_1434962, EPI_ISL_1434964, EPI_ISL_1434966, EPI_ISL_1434972, EPI_ISL_1434974, EPI_ISL_1434976, EPI_ISL_1434978, EPI_ISL_1434984, EPI_ISL_1434988, EPI_ISL_1434999, EPI_ISL_1435003, EPI_ISL_1435005, EPI_ISL_1435009, EPI_ISL_1435011, EPI_ISL_1435014, EPI_ISL_1435016, EPI_ISL_1435018, EPI_ISL_1435020, EPI_ISL_1435022, EPI_ISL_1435024, EPI_ISL_1435044, EPI_ISL_1435049 to 1435050, EPI_ISL_1435052, EPI_ISL_1435054 to 1435055, EPI_ISL_1435059, EPI_ISL_1435061, EPI_ISL_1435063, EPI_ISL_1435072, EPI_ISL_1435074, EPI_ISL_1435076, EPI_ISL_1435080, EPI_ISL_1435086 to 1435087, EPI_ISL_1435089, EPI_ISL_1435091, EPI_ISL_1435093, EPI_ISL_1435095, EPI_ISL_1435099, EPI_ISL_1435101, EPI_ISL_1435107, EPI_ISL_1435109, EPI_ISL_1435109, EPI_ISL_1435111, EPI_ISL_1435117, EPI_ISL_1435120, EPI_ISL_1435124, EPI_ISL_1435126, EPI_ISL_1435128, EPI_ISL_1435136, EPI_ISL_1435140, EPI_ISL_1435146, EPI_ISL_1435148, EPI_ISL_1435154, EPI_ISL_1435157, EPI_ISL_1435164, EPI_ISL_1435166, EPI_ISL_1435168, EPI_ISL_1435180, EPI_ISL_1435184, EPI_ISL_1435186, EPI_ISL_1435188, EPI_ISL_1435192, EPI_ISL_1435203, EPI_ISL_1435205, EPI_ISL_1435209, EPI_ISL_1435211, EPI_ISL_1435215 to 1435216, EPI_ISL_1435221 to 1435222, EPI_ISL_1435225 to 1435226, EPI_ISL_1435230, EPI_ISL_1435234, EPI_ISL_1435240, EPI_ISL_1435248, EPI_ISL_1435250, EPI_ISL_1435252, EPI_ISL_1435257, EPI_ISL_1435261, EPI_ISL_1435263, EPI_ISL_1435265, EPI_ISL_1435267, EPI_ISL_1435272, EPI_ISL_1435274, EPI_ISL_1435276, EPI_ISL_1435278 to 1435284, EPI_ISL_1436952, EPI_ISL_1436959 to 1436961, EPI_ISL_1436963, EPI_ISL_1436966, EPI_ISL_1436978, EPI_ISL_1436982, EPI_ISL_1436983, EPI_ISL_1436986, EPI_ISL_1437000, EPI_ISL_1437002, EPI_ISL_1437004 to 1437005, EPI_ISL_1437012 to 1437020, EPI_ISL_1437028, EPI_ISL_1437048, EPI_ISL_1437056, EPI_ISL_1437062, EPI_ISL_1437073, EPI_ISL_1437076, EPI_ISL_1437085, EPI_ISL_1437093, EPI_ISL_1437097, EPI_ISL_1437099, EPI_ISL_1437102 to 1437103, EPI_ISL_1437109, EPI_ISL_1437118, EPI_ISL_1437121, EPI_ISL_1437126, EPI_ISL_1437134, EPI_ISL_1437137 to 1437138, EPI_ISL_1437140 to 1437141, EPI_ISL_1437160, EPI_ISL_1437165, EPI_ISL_1437172, EPI_ISL_1437180, EPI_ISL_1437185, EPI_ISL_1437187 to 1437188, EPI_ISL_1437192, EPI_ISL_1437198, EPI_ISL_1437198, EPI_ISL_1437200, EPI_ISL_1437213, EPI_ISL_1437215, EPI_ISL_1437221, EPI_ISL_1437223, EPI_ISL_1437225, EPI_ISL_1437260, EPI_ISL_1437263, EPI_ISL_1437268, EPI_ISL_1438308, EPI_ISL_1438310, EPI_ISL_1438315, EPI_ISL_1438319 to 1438322, EPI_ISL_1438325 to 1438329, EPI_ISL_1438333 to 1438334, EPI_ISL_1438336 to 1438337, EPI_ISL_1438339 to 1438340, EPI_ISL_1438346 to 1438347, EPI_ISL_1438349, EPI_ISL_1438351, EPI_ISL_1438358, EPI_ISL_1438362, EPI_ISL_1438369 to 1438370, EPI_ISL_1438375, EPI_ISL_1438378 to 1438380, EPI_ISL_1438384 to 1438385, EPI_ISL_1438391, EPI_ISL_1438399, EPI_ISL_1438406 to 1438408, EPI_ISL_1438415, EPI_ISL_1438418, EPI_ISL_1438426, EPI_ISL_1438431 to 1438433, EPI_ISL_1438438, EPI_ISL_1438440, EPI_ISL_1438446, EPI_ISL_1438450, EPI_ISL_1438453, EPI_ISL_1438459, EPI_ISL_1438465, EPI_ISL_1438469, EPI_ISL_1438475, EPI_ISL_1438477, EPI_ISL_1438481, EPI_ISL_1438484, EPI_ISL_1438487, EPI_ISL_1438490, EPI_ISL_1438494 to 1438495, EPI_ISL_1438497, EPI_ISL_1438500, EPI_ISL_1438505, EPI_ISL_1438514, EPI_ISL_1438518 to 1438519, EPI_ISL_1438519, EPI_ISL_1438530, EPI_ISL_1438535 to 1438536, EPI_ISL_1438540, EPI_ISL_1438544, EPI_ISL_1438549, EPI_ISL_1438553, EPI_ISL_1438557, EPI_ISL_1438561, EPI_ISL_1438566, EPI_ISL_1438572, EPI_ISL_1438575, EPI_ISL_1438578, EPI_ISL_1441310, EPI_ISL_1441313, EPI_ISL_1441318, EPI_ISL_1441321, EPI_ISL_1441323, EPI_ISL_1441325 to 1441326, EPI_ISL_1441328, EPI_ISL_1441330, EPI_ISL_1441334, EPI_ISL_1441336 to 1441339, EPI_ISL_1441341, EPI_ISL_1441343, EPI_ISL_1441348, EPI_ISL_1441352, EPI_ISL_1441356, EPI_ISL_1441359, EPI_ISL_1441362, EPI_ISL_1441374, EPI_ISL_1441376, EPI_ISL_1441379, EPI_ISL_1441383, EPI_ISL_1441391, EPI_ISL_1441409, EPI_ISL_1441412, EPI_ISL_1441414, EPI_ISL_1441416, EPI_ISL_1441418, EPI_ISL_1441427 to 1441428, EPI_ISL_1441430, EPI_ISL_1441434, EPI_ISL_1441437, EPI_ISL_1441440, EPI_ISL_1441455, EPI_ISL_1441459, EPI_ISL_1441472 to 1441473, EPI_ISL_1441496, EPI_ISL_1441500, EPI_ISL_1441502, EPI_ISL_1441510, EPI_ISL_1441521, EPI_ISL_1441524, EPI_ISL_1441526, EPI_ISL_1441528, EPI_ISL_1441531, EPI_ISL_1441535, EPI_ISL_1441537, EPI_ISL_1441542, EPI_ISL_1441551, EPI_ISL_1441559, EPI_ISL_1441561, EPI_ISL_1441565, EPI_ISL_1441567 to 1441568, EPI_ISL_1441582, EPI_ISL_1441586, EPI_ISL_1441589, EPI_ISL_1441591 to 1441592, EPI_ISL_1441604, EPI_ISL_1441610, EPI_ISL_1441615, EPI_ISL_1441622, EPI_ISL_1441624, EPI_ISL_1441626, EPI_ISL_1441635, EPI_ISL_1441638, EPI_ISL_1441641 to 1441644, EPI_ISL_1442766, EPI_ISL_1442768 to 1442769, EPI_ISL_1442771, EPI_ISL_1442773, EPI_ISL_1442776, EPI_ISL_1442785 to 1442786, EPI_ISL_1442791, EPI_ISL_1442797 to 1442798, EPI_ISL_1442801, EPI_ISL_1442805, EPI_ISL_1442812, EPI_ISL_1442815, EPI_ISL_1442818 to 1442819, EPI_ISL_1442826 to 1442828, EPI_ISL_1442834, EPI_ISL_1442836, EPI_ISL_1442840, EPI_ISL_1442842, EPI_ISL_1442845, EPI_ISL_1442849, EPI_ISL_1442854 to 1442855, EPI_ISL_1442866, EPI_ISL_1442871, EPI_ISL_1442873 to 1442874, EPI_ISL_1442877, EPI_ISL_1442879, EPI_ISL_1442884 to 1442885, EPI_ISL_1442887 |                                                                                                        |                                                                                                                     |                                                                                                                                                                                                                                                                                                                                                                                                                                                                                                                                                                                    |



EPI\_ISL\_1432599, EPI\_ISL\_1432603, EPI\_ISL\_1432607, EPI\_ISL\_1432616, EPI\_ISL\_1432618, EPI\_ISL\_1432624, EPI\_ISL\_1432628, EPI\_ISL\_1432643, EPI\_ISL\_1432650, EPI\_ISL\_1432658, EPI\_ISL\_1432665, EPI\_ISL\_1432672, EPI\_ISL\_1432674, EPI\_ISL\_1432679, EPI\_ISL\_1432682, EPI\_ISL\_1432684, EPI\_ISL\_1432696, EPI\_ISL\_1432700, EPI\_ISL\_1432708, EPI\_ISL\_1432737, EPI\_ISL\_1432783 to 1432785, EPI\_ISL\_1432787 to 1432793, EPI\_ISL\_1437295, EPI\_ISL\_1437297 to 1437301, EPI\_ISL\_1437303 to 1437306, EPI\_ISL\_1437308 to 1437310, EPI\_ISL\_1437312 to 1437313, EPI\_ISL\_1437315, EPI\_ISL\_1437317 to 1437321, EPI\_ISL\_1437323 to 1437328, EPI\_ISL\_1437332 to 1437335, EPI\_ISL\_1437338 to 1437340, EPI\_ISL\_1437342 to 1437346, EPI\_ISL\_1437348 to 1437361, EPI\_ISL\_1437363 to 1437364, EPI\_ISL\_1437367, EPI\_ISL\_1437369 to 1437370, EPI\_ISL\_1437372 to 1437378, EPI\_ISL\_1437380 to 1437383, EPI\_ISL\_1437385 to 1437386, EPI\_ISL\_1437388 to 1437396, EPI\_ISL\_1437399 to 1437405, EPI\_ISL\_1437407 to 1437408, EPI\_ISL\_1437410 to 1437416, EPI\_ISL\_1437418 to 1437425, EPI\_ISL\_1437427, EPI\_ISL\_1437430, EPI\_ISL\_1437432 to 1437433, EPI\_ISL\_1437436, EPI\_ISL\_1437441 to 1437442, EPI\_ISL\_1437445 to 1437447, EPI\_ISL\_1437448 to 1437454, EPI\_ISL\_1437462, EPI\_ISL\_1437464 to 1437466, EPI\_ISL\_1437469 to 1437470, EPI\_ISL\_1437472 to 1437477, EPI\_ISL\_1437479 to 1437481, EPI\_ISL\_1437484 to 1437485, EPI\_ISL\_1437489, EPI\_ISL\_1437491, EPI\_ISL\_1437494, EPI\_ISL\_1437497 to 1437499, EPI\_ISL\_1437502 to 1437503, EPI\_ISL\_1437505, EPI\_ISL\_1437509, EPI\_ISL\_1437513, EPI\_ISL\_1437515, EPI\_ISL\_1437519, EPI\_ISL\_1437528, EPI\_ISL\_1437537, EPI\_ISL\_1437544, EPI\_ISL\_1437554, EPI\_ISL\_1437558, EPI\_ISL\_1437565, EPI\_ISL\_1437574, EPI\_ISL\_1437578 to 1437579, EPI\_ISL\_1437581, EPI\_ISL\_1437584 to 1437586, EPI\_ISL\_1437588 to 1437589, EPI\_ISL\_1437591 to 1437594, EPI\_ISL\_1437596 to 1437597, EPI\_ISL\_1437599, EPI\_ISL\_1437602 to 1437603, EPI\_ISL\_1437606, EPI\_ISL\_1437608, EPI\_ISL\_1437610 to 1437611, EPI\_ISL\_1439901, EPI\_ISL\_1439903 to 1439908, EPI\_ISL\_1439910, EPI\_ISL\_1439912, EPI\_ISL\_1439914, EPI\_ISL\_1439916 to 1439917, EPI\_ISL\_1439921, EPI\_ISL\_1439923, EPI\_ISL\_1439925 to 1439926, EPI\_ISL\_1439930, EPI\_ISL\_1439932, EPI\_ISL\_1439937 to 1439939, EPI\_ISL\_1439941 to 1439943, EPI\_ISL\_1439945, EPI\_ISL\_1439947, EPI\_ISL\_1439949 to 1439950, EPI\_ISL\_1439952 to 1439956, EPI\_ISL\_1439958 to 1439960, EPI\_ISL\_1439963 to 1439965, EPI\_ISL\_1439967 to 1439968, EPI\_ISL\_1439970, EPI\_ISL\_1439973 to 1439974, EPI\_ISL\_1439977 to 1439979, EPI\_ISL\_1439982 to 1439983, EPI\_ISL\_1439984 to 1439985, EPI\_ISL\_1439989, EPI\_ISL\_1439991, EPI\_ISL\_1439995 to 1439996, EPI\_ISL\_1440001 to 1440004, EPI\_ISL\_1440007, EPI\_ISL\_1440009 to 1440011, EPI\_ISL\_1440013, EPI\_ISL\_1440016 to 1440017, EPI\_ISL\_1440019, EPI\_ISL\_1440021, EPI\_ISL\_1440023 to 1440025, EPI\_ISL\_1440027, EPI\_ISL\_1440029 to 1440033, EPI\_ISL\_1440035 to 1440036, EPI\_ISL\_1440039, EPI\_ISL\_1440041, EPI\_ISL\_1440043, EPI\_ISL\_1440045 to 1440046, EPI\_ISL\_1440048, EPI\_ISL\_1440050 to 1440053, EPI\_ISL\_1440055 to 1440058, EPI\_ISL\_1440060, EPI\_ISL\_1440062, EPI\_ISL\_1440064 to 1440066, EPI\_ISL\_1440068 to 1440069, EPI\_ISL\_1440071, EPI\_ISL\_1440073, EPI\_ISL\_1440076 to 1440077, EPI\_ISL\_1440080, EPI\_ISL\_1440082, EPI\_ISL\_1440086, EPI\_ISL\_1440088 to 1440089, EPI\_ISL\_1440092, EPI\_ISL\_1440094 to 1440095, EPI\_ISL\_1440098, EPI\_ISL\_1440100, EPI\_ISL\_1440103 to 1440105, EPI\_ISL\_1440108, EPI\_ISL\_1440110, EPI\_ISL\_1440113 to 1440114, EPI\_ISL\_1440120, EPI\_ISL\_1440126 to 1440127, EPI\_ISL\_1440132 to 1440133, EPI\_ISL\_1440135, EPI\_ISL\_1440137, EPI\_ISL\_1440141, EPI\_ISL\_1440143 to 1440144, EPI\_ISL\_1440147, EPI\_ISL\_1440149 to 1440150, EPI\_ISL\_1440152 to 1440153, EPI\_ISL\_1440155 to 1440156, EPI\_ISL\_1440158, EPI\_ISL\_1440161 to 1440162, EPI\_ISL\_1440165, EPI\_ISL\_1440168, EPI\_ISL\_1440170, EPI\_ISL\_1440176 to 1440177, EPI\_ISL\_1440180, EPI\_ISL\_1440182 to 1440183, EPI\_ISL\_1440186, EPI\_ISL\_1440191 to 1440192, EPI\_ISL\_1440197, EPI\_ISL\_1440203, EPI\_ISL\_1440205, EPI\_ISL\_1440216, EPI\_ISL\_1440219, EPI\_ISL\_1440221 to 1440222, EPI\_ISL\_1440227 to 1440228, EPI\_ISL\_1440230, EPI\_ISL\_1440233 to 1440234, EPI\_ISL\_1440239, EPI\_ISL\_1440241, EPI\_ISL\_1440244, EPI\_ISL\_1440246, EPI\_ISL\_1440248, EPI\_ISL\_1440251, EPI\_ISL\_1440256, EPI\_ISL\_1440260, EPI\_ISL\_1440274, EPI\_ISL\_1440278, EPI\_ISL\_1440578, EPI\_ISL\_1440580 to 1440581, EPI\_ISL\_1440583 to 1440584, EPI\_ISL\_1440586, EPI\_ISL\_1440588, EPI\_ISL\_1440590 to 1440591, EPI\_ISL\_1440593 to 1440595, EPI\_ISL\_1440597 to 1440600, EPI\_ISL\_1440602 to 1440607, EPI\_ISL\_1440611 to 1440615, EPI\_ISL\_1440617, EPI\_ISL\_1440622, EPI\_ISL\_1440625 to 1440627, EPI\_ISL\_1440629 to 1440632, EPI\_ISL\_1440634 to 1440638, EPI\_ISL\_1440641 to 1440642, EPI\_ISL\_1440645, EPI\_ISL\_1440648, EPI\_ISL\_1440650 to 1440651, EPI\_ISL\_1440653 to 1440654, EPI\_ISL\_1440658 to 1440659, EPI\_ISL\_1440661 to 1440665, EPI\_ISL\_1440667 to 1440668, EPI\_ISL\_1440670 to 1440674, EPI\_ISL\_1440676, EPI\_ISL\_1440678 to 1440680, EPI\_ISL\_1440682 to 1440684, EPI\_ISL\_1440686 to 1440689, EPI\_ISL\_1440692, EPI\_ISL\_1440694, EPI\_ISL\_1440697, EPI\_ISL\_1440701 to 1440708, EPI\_ISL\_1440710 to 1440712, EPI\_ISL\_1440715 to 1440727, EPI\_ISL\_1440719 to 1440731, EPI\_ISL\_1440729 to 1440731, EPI\_ISL\_1441934 to 1441990, EPI\_ISL\_1442369 to 1442370, EPI\_ISL\_1442372 to 1442373, EPI\_ISL\_1442375, EPI\_ISL\_1442384, EPI\_ISL\_1442387 to 1442388, EPI\_ISL\_1442388, EPI\_ISL\_1442393, EPI\_ISL\_1442397, EPI\_ISL\_1442402 to 1442403, EPI\_ISL\_1442405 to 1442406, EPI\_ISL\_1442411, EPI\_ISL\_1442413, EPI\_ISL\_1442416 to 1442417, EPI\_ISL\_1442421 to 1442422, EPI\_ISL\_1442427, EPI\_ISL\_1442429, EPI\_ISL\_1442434, EPI\_ISL\_1442436, EPI\_ISL\_1442439, EPI\_ISL\_1442441, EPI\_ISL\_1442444, EPI\_ISL\_1442446, EPI\_ISL\_1442465, EPI\_ISL\_1442474, EPI\_ISL\_1442478, EPI\_ISL\_1442480, EPI\_ISL\_1442482, EPI\_ISL\_1442484

see above SYNLAB MVZ Leverkusen Robert Koch Institute  
EPI\_ISL\_1432078, EPI\_ISL\_1432104, EPI\_ISL\_1432113, EPI\_ISL\_1432116, EPI\_ISL\_1432199, EPI\_ISL\_1432263, EPI\_ISL\_1432288, EPI\_ISL\_1432639, EPI\_ISL\_1432656, EPI\_ISL\_1440129, EPI\_ISL\_1440215, EPI\_ISL\_1440592, EPI\_ISL\_1440596, EPI\_ISL\_1440628, EPI\_ISL\_1440649, EPI\_ISL\_1440655, EPI\_ISL\_1440669, EPI\_ISL\_1440675, EPI\_ISL\_1440693, EPI\_ISL\_1440713

see above SYNLAB MVZ Neustadt a. d. Weinstraße Robert Koch Institute  
EPI\_ISL\_1437614 to 1437617, EPI\_ISL\_1437619, EPI\_ISL\_1437622 to 1437633, EPI\_ISL\_1437635 to 1437641, EPI\_ISL\_1437643 to 1437644, EPI\_ISL\_1437646, EPI\_ISL\_1437648, EPI\_ISL\_1437651 to 1437652, EPI\_ISL\_1437654 to 1437662, EPI\_ISL\_1437665 to 1437666, EPI\_ISL\_1437669 to 1437680, EPI\_ISL\_1437682 to 1437685, EPI\_ISL\_1437687, EPI\_ISL\_1437689, EPI\_ISL\_1437691, EPI\_ISL\_1437693, EPI\_ISL\_1437695, EPI\_ISL\_1437697, EPI\_ISL\_1437700, EPI\_ISL\_1437702, EPI\_ISL\_1437705, EPI\_ISL\_1437708, EPI\_ISL\_1437710, EPI\_ISL\_1437712, EPI\_ISL\_1437714, EPI\_ISL\_1437716, EPI\_ISL\_1437721, EPI\_ISL\_1437724, EPI\_ISL\_1437726, EPI\_ISL\_1437731 to 1437733, EPI\_ISL\_1437735, EPI\_ISL\_1437738 to 1437741, EPI\_ISL\_1437743 to 1437745, EPI\_ISL\_1437747, EPI\_ISL\_1437752 to 1437753, EPI\_ISL\_1437756, EPI\_ISL\_1437758 to 1437761, EPI\_ISL\_1437763, EPI\_ISL\_1437766, EPI\_ISL\_1437771 to 1437773, EPI\_ISL\_1437775, EPI\_ISL\_1437778 to 1437779, EPI\_ISL\_1437782 to 1437785, EPI\_ISL\_1437787, EPI\_ISL\_1437789 to 1437791, EPI\_ISL\_1437811 to 1437813, EPI\_ISL\_1437817 to 1437818, EPI\_ISL\_1437820 to 1437838, EPI\_ISL\_1437842, EPI\_ISL\_1437844, EPI\_ISL\_1437849 to 1437858, EPI\_ISL\_1437860, EPI\_ISL\_1437862, EPI\_ISL\_1437864 to 1437868, EPI\_ISL\_1437870 to 1437889, EPI\_ISL\_1437891, EPI\_ISL\_1437894 to 1437900, EPI\_ISL\_1437902 to 1437903, EPI\_ISL\_1437906 to 1437908, EPI\_ISL\_1437910, EPI\_ISL\_1437912, EPI\_ISL\_1437914, EPI\_ISL\_1437916 to 1437922, EPI\_ISL\_1437924, EPI\_ISL\_1437926, EPI\_ISL\_1437928 to 1437931, EPI\_ISL\_1440280, EPI\_ISL\_1440288, EPI\_ISL\_1440293, EPI\_ISL\_1440303, EPI\_ISL\_1440306, EPI\_ISL\_1440311, EPI\_ISL\_1440315, EPI\_ISL\_1440321, EPI\_ISL\_1440328 to 1440331, EPI\_ISL\_1440333 to 1440334, EPI\_ISL\_1440342 to 1440344, EPI\_ISL\_1440347 to 1440348, EPI\_ISL\_1440353, EPI\_ISL\_1440362, EPI\_ISL\_1440365, EPI\_ISL\_1440368, EPI\_ISL\_1440372, EPI\_ISL\_1440374, EPI\_ISL\_1440378, EPI\_ISL\_1440380 to 1440381, EPI\_ISL\_1440383, EPI\_ISL\_1440385 to 1440388, EPI\_ISL\_1440390 to 1440391, EPI\_ISL\_1440395, EPI\_ISL\_1440397 to 1440398, EPI\_ISL\_1440405, EPI\_ISL\_1440407 to 1440408, EPI\_ISL\_1440410, EPI\_ISL\_1440415, EPI\_ISL\_1440419 to 1440420, EPI\_ISL\_1440430 to 1440431, EPI\_ISL\_1440433, EPI\_ISL\_1440435, EPI\_ISL\_1440445, EPI\_ISL\_1440447 to 1440448, EPI\_ISL\_1440450, EPI\_ISL\_1440453, EPI\_ISL\_1440455 to 1440456, EPI\_ISL\_1440461, EPI\_ISL\_1440466, EPI\_ISL\_1440473, EPI\_ISL\_1440476, EPI\_ISL\_1440482, EPI\_ISL\_1440484, EPI\_ISL\_1440491, EPI\_ISL\_1440495, EPI\_ISL\_1440497, EPI\_ISL\_1440499, EPI\_ISL\_1440501 to 1440506, EPI\_ISL\_1440508, EPI\_ISL\_1440510 to 1440514, EPI\_ISL\_1440517, EPI\_ISL\_1440519, EPI\_ISL\_1440522, EPI\_ISL\_1440526, EPI\_ISL\_1440528, EPI\_ISL\_1440539, EPI\_ISL\_1440541, EPI\_ISL\_1440543, EPI\_ISL\_1440547, EPI\_ISL\_1440549, EPI\_ISL\_1440552 to 1440553, EPI\_ISL\_1440555, EPI\_ISL\_1440564 to 1440565, EPI\_ISL\_1440575, EPI\_ISL\_1442586 to 1442592, EPI\_ISL\_1442594 to 1442597, EPI\_ISL\_1442599, EPI\_ISL\_1442601 to 1442603, EPI\_ISL\_1442605, EPI\_ISL\_1442607, EPI\_ISL\_1442610, EPI\_ISL\_1442615, EPI\_ISL\_1442618 to 1442621, EPI\_ISL\_1442623 to 1442625, EPI\_ISL\_1442629 to 1442630, EPI\_ISL\_1442632, EPI\_ISL\_1442635, EPI\_ISL\_1442637 to 1442638, EPI\_ISL\_1442640, EPI\_ISL\_1442642 to 1442643, EPI\_ISL\_1442645, EPI\_ISL\_1442648, EPI\_ISL\_1442651 to 1442653, EPI\_ISL\_1442655, EPI\_ISL\_1442657, EPI\_ISL\_1442659, EPI\_ISL\_1442665, EPI\_ISL\_1442668 to 1442670, EPI\_ISL\_1442672 to 1442675, EPI\_ISL\_1442677, EPI\_ISL\_1442679, EPI\_ISL\_1442681, EPI\_ISL\_1442683 to 1442696, EPI\_ISL\_1442698 to 1442706, EPI\_ISL\_1442710, EPI\_ISL\_1442713, EPI\_ISL\_1442716 to 1442724, EPI\_ISL\_1442726, EPI\_ISL\_1442730, EPI\_ISL\_1442733 to 1442743, EPI\_ISL\_1442745 to 1442750

see above SYNLAB MVZ Trier Robert Koch Institute  
EPI\_ISL\_1437645, EPI\_ISL\_1437650, EPI\_ISL\_1437664, EPI\_ISL\_1437681, EPI\_ISL\_1437719, EPI\_ISL\_1437777, EPI\_ISL\_1437780, EPI\_ISL\_1437786, EPI\_ISL\_1437816, EPI\_ISL\_1437843, EPI\_ISL\_1437881 to 1437882, EPI\_ISL\_1437904, EPI\_ISL\_1440277, EPI\_ISL\_1440285 to 1440286, EPI\_ISL\_1440291, EPI\_ISL\_1440317 to 1440318, EPI\_ISL\_1440318 to 1440326, EPI\_ISL\_1440326 to 1440341, EPI\_ISL\_1440360, EPI\_ISL\_1440363, EPI\_ISL\_1440375 to 1440377, EPI\_ISL\_1440392, EPI\_ISL\_1440417, EPI\_ISL\_1440423 to 1440424, EPI\_ISL\_1440436 to 1440437, EPI\_ISL\_1440441, EPI\_ISL\_1440449, EPI\_ISL\_1440457, EPI\_ISL\_1440467, EPI\_ISL\_1440469, EPI\_ISL\_1440472, EPI\_ISL\_1440481, EPI\_ISL\_1440483, EPI\_ISL\_1440489, EPI\_ISL\_1440493, EPI\_ISL\_1440550, EPI\_ISL\_1440556, EPI\_ISL\_1440570, EPI\_ISL\_1440576, EPI\_ISL\_1442604, EPI\_ISL\_1442609, EPI\_ISL\_1442613 to 1442614, EPI\_ISL\_1442633, EPI\_ISL\_1442663, EPI\_ISL\_1442711, EPI\_ISL\_1442732, EPI\_ISL\_1442744

see above SYNLAB MVZ Weiden Robert Koch Institute  
EPI\_ISL\_1468464 to 1468465, Sae servico de Atendimento Especializado Instituto Adolfo Lutz, Interdisciplinary Procedures Center, Caio Vinicius Dias Lopes; Claudia Regina Gonçalves; Claudio Tavares Sacchi; Erica Valessa Ramos Gomes; Karoline Rodrigues Campos  
EPI\_ISL\_1468474, EPI\_ISL\_1493581 Strategic Laboratory  
EPI\_ISL\_479797 to 479798, EPI\_ISL\_479802 to 479804, EPI\_ISL\_479870 to 479871 Sagamihara City Public Health Research Institute Pathogen Genomics Center, National Institute of Infectious Diseases Hajime Kamiya; Hiroshi Nakamura; Kentaro Itokawa; Makoto Kuroda; Masanori Hashino; Motoi Suzuki; Rina Tanaka; Tsuyoshi Sekizuka  
EPI\_ISL\_512072 to 512074 Saikrishna Hospital, Mehsana Gujarat Biotechnology Research Centre A M Kadri; Afzal Ansari; Apurvashin Puvar; Chaitanya Joshi; Dinesh Kumar; Harsh Bakshi; Harshadhbhai Parmar; Janvi Raval; Komal Patel; Labdhi Pandya; Madhvi Joshi; Maharshi Pandya; Monika Gandhi; Nidhi Patel; Nikha Trivedi; Nitin Savaliya; Pinal Trivedi; R D Dixit; Raghavendra Kumar; Zarna Patel; Zuber Saiyed  
EPI\_ISL\_586567 to 586568 Saikrishna Hospital, Mehsana Gujarat Biotechnology Research Centre A M Kadri; Afzal Ansari; Apurvashin Puvar; Chaitanya Joshi; Dinesh Kumar; Harsh Bakshi; Harshadhbhai Parmar; Janvi Raval; Komal Patel; Labdhi Pandya; Madhvi Joshi; Maharshi Pandya; Monika Gandhi; Nidhi Patel; Nikha Trivedi; Nitin Savaliya; Pinal Trivedi; R D Dixit; Raghavendra Kumar; Zarna Patel; Zuber Saiyed  
EPI\_ISL\_416525 Saitama Medical University Saitama Medical University Kazuo Imai  
EPI\_ISL\_416524 Saitama Medical University Hospital Saitama Medical University Kazuo Imai  
EPI\_ISL\_419301 to 419308, EPI\_ISL\_479805 to 479808, EPI\_ISL\_479928 to 479935, EPI\_ISL\_1425569 to 1425571, EPI\_ISL\_1425579 to 1425585, EPI\_ISL\_1425587, EPI\_ISL\_1425696, EPI\_ISL\_1425735 to 1425739, EPI\_ISL\_1425748, EPI\_ISL\_1426292 to 1426370, EPI\_ISL\_1426569, EPI\_ISL\_1426582 to 1426586, EPI\_ISL\_1426591, EPI\_ISL\_1426632, EPI\_ISL\_1426636 to 1426637, EPI\_ISL\_1426643 to 1426644, EPI\_ISL\_1426650 to 1426652, EPI\_ISL\_1426661, EPI\_ISL\_1426696 to 1427051, EPI\_ISL\_1427340 to 1427505, EPI\_ISL\_1427534 to 1427552, EPI\_ISL\_1428590, EPI\_ISL\_1430687 to 1430690, EPI\_ISL\_1430695 to 1430696, EPI\_ISL\_1430698, EPI\_ISL\_1430763 to 1430772, EPI\_ISL\_1431136 to 1431170, EPI\_ISL\_1431739 to 1431740, EPI\_ISL\_1431745 to 1431748, EPI\_ISL\_1431748  
see above Saitama Prefectural Institute of Public Health Pathogen Genomics Center, National Institute of Infectious Diseases ; Chang-Kweng Lim; Daisuke Kobayashi; Eri Nakayama; Hajime Kamiya; Hayato Ehara; Hussein H. Aly; Ken Miyazawa; Kentaro Itokawa; Kento Fukano; Kousho Wakae; Makoto Kuroda; Masanori Hashino; Michioy Shinohara; Minoru Nagi; Motohiko Ogawa; Motoi Suzuki; Nozomu Hanaoka; Rina Tanaka; Shigeru Tanijima; Takahiro Maeki; Takanobu Kato; Takashi Sakudoh; Tsuguto Fujimoto; Tsuyoshi Kishimoto; Tsuyoshi Sekizuka

EPI\_ISL\_479925 to 479927, EPI\_ISL\_480065 to 480072, EPI\_ISL\_1426568, EPI\_ISL\_1426592 to 1426593, EPI\_ISL\_1427052 to 1427070, EPI\_ISL\_1427655, EPI\_ISL\_1427716, EPI\_ISL\_1428251 to 1428259  
see above Sakai City Institute of Public Health Pathogen Genomics Center, National Institute of Infectious Diseases Hajime Kamiya; Kentaro Itokawa; Makoto Kuroda; Masanori Hashino; Motoi Suzuki; Rina Tanaka; Tatsuya Miyoshi; Tsuyoshi Sekizuka

EPI\_ISL\_1538799 to 1538802, EPI\_ISL\_1539134 Salve Medica Sp. z o. o. sp. K. 1. National Institute of Public Health - National Institute of Hygiene; 2. Eurofins Genomics Europe Sequencing GmbH ECDC COVID-19 WGS support team; Eurofins Genomics Europe Sequencing Team; Gierczycki Rafa; Sadkowska-Todys Magorzata; Wokowicz Tomasz; Zacharczuk Katarzyna  
EPI\_ISL\_583173 to 583189 San Bernardino County Public Health Lab Chan-Zuckerberg Biohub CZB Ctlahub Consortium  
EPI\_ISL\_467950 to 467966, EPI\_ISL\_467968 to 467971, EPI\_ISL\_467973 to 467975, EPI\_ISL\_467977 to 467980, EPI\_ISL\_467982 to 467983, EPI\_ISL\_483158 to 483164, EPI\_ISL\_483531 to 483541, EPI\_ISL\_494372 to 494503, EPI\_ISL\_494568 to 494569, EPI\_ISL\_494571 to 494595, EPI\_ISL\_494620 to 494634, EPI\_ISL\_494714 to 494746, EPI\_ISL\_512158 to 512273, EPI\_ISL\_1468832, EPI\_ISL\_1468837, EPI\_ISL\_1468839, EPI\_ISL\_1468841, EPI\_ISL\_1468843 to 1468844, EPI\_ISL\_1468847, EPI\_ISL\_1468854, EPI\_ISL\_1468854, EPI\_ISL\_1468874 to 1468881, EPI\_ISL\_1468906 to 1468909, EPI\_ISL\_1468914 to 1468916, EPI\_ISL\_1468922 to 1468946, EPI\_ISL\_1468948 to 1468951, EPI\_ISL\_1468953, EPI\_ISL\_1468959, EPI\_ISL\_1468979 to 1469042, EPI\_ISL\_1531942 to 1532064

see above San Diego County Public Health Laboratory Andersen lab at Scripps Research Brett Austin; Ellen Stefanski; Ian Mchardy; Jovan Shephard; SEARCH Alliance San Diego with Michael Quigley; SEARCH Alliance San Diego with Tracy Basler  
EPI\_ISL\_513856 to 513882, EPI\_ISL\_583190 to 583197 San Francisco Public Health Laboratory Chan-Zuckerberg Biohub CZB Ctlahub Consortium

EPI\_ISL\_1492566, EPI\_ISL\_1492570, San Gallicano Dermatological Institute I.F.O. INMI Lazzaro Spallanzani IRCCS A Di Caro; A Mastrofrancesco; B Bartolini; CEM Gruber; E Giombini; EG Di Domenico; F Ensoli; F Messina; F Pimpinelli; F Santini; G Bonfiglio; G EPI\_ISL\_1492574 Prignano; M Rueca; MR Capobianchi; O Butera

|                                                                                                                                                                                                                                                                                                                                                                                                                                                                                                                                                                                                                                                                                                                                                                                                                                                                                                                                                                                                                                                                                                                                                                                                                                                                                                                                                                                                                                                                                                                                                                                                                                                                                                                                                                                                                                                                                                                                                                                                                                                                                                                                                                                                                                                                                                                                                                                                                                                                                                                                                                                                                                                                                                                                                                                                                                                                                                                                                                                                |                                                                                      |                                                                                                                                                                                                               |                                                                                                                                                                                                                                                                                                                                                                                  |
|------------------------------------------------------------------------------------------------------------------------------------------------------------------------------------------------------------------------------------------------------------------------------------------------------------------------------------------------------------------------------------------------------------------------------------------------------------------------------------------------------------------------------------------------------------------------------------------------------------------------------------------------------------------------------------------------------------------------------------------------------------------------------------------------------------------------------------------------------------------------------------------------------------------------------------------------------------------------------------------------------------------------------------------------------------------------------------------------------------------------------------------------------------------------------------------------------------------------------------------------------------------------------------------------------------------------------------------------------------------------------------------------------------------------------------------------------------------------------------------------------------------------------------------------------------------------------------------------------------------------------------------------------------------------------------------------------------------------------------------------------------------------------------------------------------------------------------------------------------------------------------------------------------------------------------------------------------------------------------------------------------------------------------------------------------------------------------------------------------------------------------------------------------------------------------------------------------------------------------------------------------------------------------------------------------------------------------------------------------------------------------------------------------------------------------------------------------------------------------------------------------------------------------------------------------------------------------------------------------------------------------------------------------------------------------------------------------------------------------------------------------------------------------------------------------------------------------------------------------------------------------------------------------------------------------------------------------------------------------------------|--------------------------------------------------------------------------------------|---------------------------------------------------------------------------------------------------------------------------------------------------------------------------------------------------------------|----------------------------------------------------------------------------------------------------------------------------------------------------------------------------------------------------------------------------------------------------------------------------------------------------------------------------------------------------------------------------------|
| EPI_ISL_468506 to 468559, EPI_ISL_486287 to 486338                                                                                                                                                                                                                                                                                                                                                                                                                                                                                                                                                                                                                                                                                                                                                                                                                                                                                                                                                                                                                                                                                                                                                                                                                                                                                                                                                                                                                                                                                                                                                                                                                                                                                                                                                                                                                                                                                                                                                                                                                                                                                                                                                                                                                                                                                                                                                                                                                                                                                                                                                                                                                                                                                                                                                                                                                                                                                                                                             | San Joaquin County Public Health Lab                                                 | Chan-Zuckerberg Biohub                                                                                                                                                                                        | CZB Ctlahub Consortium                                                                                                                                                                                                                                                                                                                                                           |
| EPI_ISL_1400982 to 1400983                                                                                                                                                                                                                                                                                                                                                                                                                                                                                                                                                                                                                                                                                                                                                                                                                                                                                                                                                                                                                                                                                                                                                                                                                                                                                                                                                                                                                                                                                                                                                                                                                                                                                                                                                                                                                                                                                                                                                                                                                                                                                                                                                                                                                                                                                                                                                                                                                                                                                                                                                                                                                                                                                                                                                                                                                                                                                                                                                                     | San Juan Regional Medical Center                                                     | New Mexico Department of Health Scientific Laboratory                                                                                                                                                         | Anastacia Griego-Fisher; D'eldra Malone; Ellie Johnson; Jennifer Benoit                                                                                                                                                                                                                                                                                                          |
| EPI_ISL_491465 to 491466, EPI_ISL_491471                                                                                                                                                                                                                                                                                                                                                                                                                                                                                                                                                                                                                                                                                                                                                                                                                                                                                                                                                                                                                                                                                                                                                                                                                                                                                                                                                                                                                                                                                                                                                                                                                                                                                                                                                                                                                                                                                                                                                                                                                                                                                                                                                                                                                                                                                                                                                                                                                                                                                                                                                                                                                                                                                                                                                                                                                                                                                                                                                       | San Lazaro Hospital                                                                  | Research Institute for Tropical Medicine                                                                                                                                                                      | Catalino Demetria; Criselda Bautista; Daria Manalo; Edelwisa Mercado; Francisco Gerardo Polotan; Inez Andrea Medado; Kirstyn Brunker; Ma. Angelica Tujan; Othoniel Jan Onza                                                                                                                                                                                                      |
| EPI_ISL_582959 to 582974                                                                                                                                                                                                                                                                                                                                                                                                                                                                                                                                                                                                                                                                                                                                                                                                                                                                                                                                                                                                                                                                                                                                                                                                                                                                                                                                                                                                                                                                                                                                                                                                                                                                                                                                                                                                                                                                                                                                                                                                                                                                                                                                                                                                                                                                                                                                                                                                                                                                                                                                                                                                                                                                                                                                                                                                                                                                                                                                                                       | San Luis Obispo Public Health Department                                             | Chan-Zuckerberg Biohub                                                                                                                                                                                        | CZB Ctlahub Consortium                                                                                                                                                                                                                                                                                                                                                           |
| EPI_ISL_542278 to 542399                                                                                                                                                                                                                                                                                                                                                                                                                                                                                                                                                                                                                                                                                                                                                                                                                                                                                                                                                                                                                                                                                                                                                                                                                                                                                                                                                                                                                                                                                                                                                                                                                                                                                                                                                                                                                                                                                                                                                                                                                                                                                                                                                                                                                                                                                                                                                                                                                                                                                                                                                                                                                                                                                                                                                                                                                                                                                                                                                                       | San Matteo Hospital Pavia                                                            | Dep. Of Oncology and Hemato-Oncology University of Milan                                                                                                                                                      | Antonio Piralla; Carlo Federico Perno; Chiara Vismara; Claudia Alteri; Elisa Matarazzo; Fausto Baldanti; Federica Giardina; Federica Novazzi; Luna Colagrossi; Maria Antonello; Massimo Puoti; Monica Tallarita; Oscar Massimiliano Epis; Roberto Fumagalli; Silvia Renica; Stefano Gaiarsa; Valentino Costabile; Valeria Cento                                                  |
| EPI_ISL_603000 to 603003                                                                                                                                                                                                                                                                                                                                                                                                                                                                                                                                                                                                                                                                                                                                                                                                                                                                                                                                                                                                                                                                                                                                                                                                                                                                                                                                                                                                                                                                                                                                                                                                                                                                                                                                                                                                                                                                                                                                                                                                                                                                                                                                                                                                                                                                                                                                                                                                                                                                                                                                                                                                                                                                                                                                                                                                                                                                                                                                                                       | Sanford South University Medical Center                                              | Minnesota Department of Health, Public Health Laboratory                                                                                                                                                      | Alexandra Lorentz; Jacob Garfin; Matt Plumb; and Xiong Wang                                                                                                                                                                                                                                                                                                                      |
| EPI_ISL_1439597, EPI_ISL_1477047 to 1477049                                                                                                                                                                                                                                                                                                                                                                                                                                                                                                                                                                                                                                                                                                                                                                                                                                                                                                                                                                                                                                                                                                                                                                                                                                                                                                                                                                                                                                                                                                                                                                                                                                                                                                                                                                                                                                                                                                                                                                                                                                                                                                                                                                                                                                                                                                                                                                                                                                                                                                                                                                                                                                                                                                                                                                                                                                                                                                                                                    | Sanitary-Epidemiological And Public Health Department Of Tashkent Region, Uzbekistan | Center of Genomics and bioinformatics, Bioinformatics laboratory                                                                                                                                              | Abdurakhmon N Yusupov; Ibrokhim Y Abdurakhmonov.; Mirzakamol S Ayubov; Mukhammadjon H Mirzakhmedov; Shukhrat E Shermatov; Zabardast T Buriev                                                                                                                                                                                                                                     |
| EPI_ISL_583492                                                                                                                                                                                                                                                                                                                                                                                                                                                                                                                                                                                                                                                                                                                                                                                                                                                                                                                                                                                                                                                                                                                                                                                                                                                                                                                                                                                                                                                                                                                                                                                                                                                                                                                                                                                                                                                                                                                                                                                                                                                                                                                                                                                                                                                                                                                                                                                                                                                                                                                                                                                                                                                                                                                                                                                                                                                                                                                                                                                 | Santa Casa Anna Cintra                                                               | Instituto Adolfo Lutz, Interdisciplinary Procedures Center, Strategic Laboratory                                                                                                                              | Claudia Regina Gonçalves; Claudio Tavares Sacchi; Erica Valessa Ramos Gomes; Karoline Rodrigues Campos                                                                                                                                                                                                                                                                           |
| EPI_ISL_547580, EPI_ISL_603026, EPI_ISL_603032                                                                                                                                                                                                                                                                                                                                                                                                                                                                                                                                                                                                                                                                                                                                                                                                                                                                                                                                                                                                                                                                                                                                                                                                                                                                                                                                                                                                                                                                                                                                                                                                                                                                                                                                                                                                                                                                                                                                                                                                                                                                                                                                                                                                                                                                                                                                                                                                                                                                                                                                                                                                                                                                                                                                                                                                                                                                                                                                                 | Santa Casa da Misericórdia de Presidente Prudente                                    | Instituto Adolfo Lutz, Interdisciplinary Procedures Center, Strategic Laboratory                                                                                                                              | Claudia Regina Gonçalves; Claudio Tavares Sacchi; Erica Valessa Ramos Gomes; Karoline Rodrigues Campos                                                                                                                                                                                                                                                                           |
| EPI_ISL_1468454                                                                                                                                                                                                                                                                                                                                                                                                                                                                                                                                                                                                                                                                                                                                                                                                                                                                                                                                                                                                                                                                                                                                                                                                                                                                                                                                                                                                                                                                                                                                                                                                                                                                                                                                                                                                                                                                                                                                                                                                                                                                                                                                                                                                                                                                                                                                                                                                                                                                                                                                                                                                                                                                                                                                                                                                                                                                                                                                                                                | Santa Casa de Andradina                                                              | Instituto Adolfo Lutz, Interdisciplinary Procedures Center, Strategic Laboratory                                                                                                                              | Caio Vinicius Dias Lopes; Claudia Regina Gonçalves; Claudio Tavares Sacchi; Erica Valessa Ramos Gomes; Karoline Rodrigues Campos                                                                                                                                                                                                                                                 |
| EPI_ISL_1533721                                                                                                                                                                                                                                                                                                                                                                                                                                                                                                                                                                                                                                                                                                                                                                                                                                                                                                                                                                                                                                                                                                                                                                                                                                                                                                                                                                                                                                                                                                                                                                                                                                                                                                                                                                                                                                                                                                                                                                                                                                                                                                                                                                                                                                                                                                                                                                                                                                                                                                                                                                                                                                                                                                                                                                                                                                                                                                                                                                                | Santa Casa de Aracatuba Hospital Sagrado Coracao De Jesus                            | Instituto Adolfo Lutz, Interdisciplinary Procedures Center, Strategic Laboratory                                                                                                                              | Caio Vinicius Dias Lopes; Claudia Regina Gonçalves; Claudio Tavares Sacchi; Erica Valessa Ramos Gomes; Karoline Rodrigues Campos; Leonardo Jose Tadeu de Araujo                                                                                                                                                                                                                  |
| EPI_ISL_1468417, EPI_ISL_1468419, EPI_ISL_1468424, EPI_ISL_1468449 to 1468450, EPI_ISL_1468461, EPI_ISL_1533715                                                                                                                                                                                                                                                                                                                                                                                                                                                                                                                                                                                                                                                                                                                                                                                                                                                                                                                                                                                                                                                                                                                                                                                                                                                                                                                                                                                                                                                                                                                                                                                                                                                                                                                                                                                                                                                                                                                                                                                                                                                                                                                                                                                                                                                                                                                                                                                                                                                                                                                                                                                                                                                                                                                                                                                                                                                                                | Santa Casa de Aracatuba Hospital Sagrado Coracao de Jesus                            | Instituto Adolfo Lutz, Interdisciplinary Procedures Center, Strategic Laboratory                                                                                                                              | Caio Vinicius Dias Lopes; Claudia Regina Gonçalves; Claudio Tavares Sacchi; Erica Valessa Ramos Gomes; Karoline Rodrigues Campos; Leonardo Jose Tadeu de Araujo                                                                                                                                                                                                                  |
| EPI_ISL_1533704                                                                                                                                                                                                                                                                                                                                                                                                                                                                                                                                                                                                                                                                                                                                                                                                                                                                                                                                                                                                                                                                                                                                                                                                                                                                                                                                                                                                                                                                                                                                                                                                                                                                                                                                                                                                                                                                                                                                                                                                                                                                                                                                                                                                                                                                                                                                                                                                                                                                                                                                                                                                                                                                                                                                                                                                                                                                                                                                                                                | Santa Casa de Atibaia Pro Saude                                                      | Instituto Adolfo Lutz, Interdisciplinary Procedures Center, Strategic Laboratory                                                                                                                              | Caio Vinicius Dias Lopes; Claudia Regina Gonçalves; Claudio Tavares Sacchi; Erica Valessa Ramos Gomes; Karoline Rodrigues Campos; Leonardo Jose Tadeu de Araujo                                                                                                                                                                                                                  |
| EPI_ISL_1468420 to 1468421, EPI_ISL_1468425, EPI_ISL_1468442, EPI_ISL_1468448, EPI_ISL_1468460, EPI_ISL_1533694                                                                                                                                                                                                                                                                                                                                                                                                                                                                                                                                                                                                                                                                                                                                                                                                                                                                                                                                                                                                                                                                                                                                                                                                                                                                                                                                                                                                                                                                                                                                                                                                                                                                                                                                                                                                                                                                                                                                                                                                                                                                                                                                                                                                                                                                                                                                                                                                                                                                                                                                                                                                                                                                                                                                                                                                                                                                                | Santa Casa de Birigui                                                                | Instituto Adolfo Lutz, Interdisciplinary Procedures Center, Strategic Laboratory                                                                                                                              | Caio Vinicius Dias Lopes; Claudia Regina Gonçalves; Claudio Tavares Sacchi; Erica Valessa Ramos Gomes; Karoline Rodrigues Campos; Leonardo Jose Tadeu de Araujo                                                                                                                                                                                                                  |
| EPI_ISL_1493592                                                                                                                                                                                                                                                                                                                                                                                                                                                                                                                                                                                                                                                                                                                                                                                                                                                                                                                                                                                                                                                                                                                                                                                                                                                                                                                                                                                                                                                                                                                                                                                                                                                                                                                                                                                                                                                                                                                                                                                                                                                                                                                                                                                                                                                                                                                                                                                                                                                                                                                                                                                                                                                                                                                                                                                                                                                                                                                                                                                | Santa Casa de Guaira                                                                 | Instituto Adolfo Lutz, Interdisciplinary Procedures Center, Strategic Laboratory                                                                                                                              | Caio Vinicius Dias Lopes; Claudia Regina Gonçalves; Claudio Tavares Sacchi; Erica Valessa Ramos Gomes; Karoline Rodrigues Campos                                                                                                                                                                                                                                                 |
| EPI_ISL_603024, EPI_ISL_603027, EPI_ISL_603038                                                                                                                                                                                                                                                                                                                                                                                                                                                                                                                                                                                                                                                                                                                                                                                                                                                                                                                                                                                                                                                                                                                                                                                                                                                                                                                                                                                                                                                                                                                                                                                                                                                                                                                                                                                                                                                                                                                                                                                                                                                                                                                                                                                                                                                                                                                                                                                                                                                                                                                                                                                                                                                                                                                                                                                                                                                                                                                                                 | Santa Casa de Misericórdia de Araçatuba                                              | Instituto Adolfo Lutz, Interdisciplinary Procedures Center, Strategic Laboratory                                                                                                                              | Claudia Regina Gonçalves; Claudio Tavares Sacchi; Erica Valessa Ramos Gomes; Karoline Rodrigues Campos                                                                                                                                                                                                                                                                           |
| EPI_ISL_1468445, EPI_ISL_1468453                                                                                                                                                                                                                                                                                                                                                                                                                                                                                                                                                                                                                                                                                                                                                                                                                                                                                                                                                                                                                                                                                                                                                                                                                                                                                                                                                                                                                                                                                                                                                                                                                                                                                                                                                                                                                                                                                                                                                                                                                                                                                                                                                                                                                                                                                                                                                                                                                                                                                                                                                                                                                                                                                                                                                                                                                                                                                                                                                               | Santa Casa de Misericórdia de Pereira Barreto                                        | Instituto Adolfo Lutz, Interdisciplinary Procedures Center, Strategic Laboratory                                                                                                                              | Caio Vinicius Dias Lopes; Claudia Regina Gonçalves; Claudio Tavares Sacchi; Erica Valessa Ramos Gomes; Karoline Rodrigues Campos                                                                                                                                                                                                                                                 |
| EPI_ISL_524469                                                                                                                                                                                                                                                                                                                                                                                                                                                                                                                                                                                                                                                                                                                                                                                                                                                                                                                                                                                                                                                                                                                                                                                                                                                                                                                                                                                                                                                                                                                                                                                                                                                                                                                                                                                                                                                                                                                                                                                                                                                                                                                                                                                                                                                                                                                                                                                                                                                                                                                                                                                                                                                                                                                                                                                                                                                                                                                                                                                 | Santa Casa de Misericórdia de Sao Paulo                                              | Instituto Adolfo Lutz, Interdisciplinary Procedures Center, Strategic Laboratory                                                                                                                              | Claudia Regina Gonçalves; Claudio Tavares Sacchi; Erica Valessa Ramos Gomes                                                                                                                                                                                                                                                                                                      |
| EPI_ISL_547579                                                                                                                                                                                                                                                                                                                                                                                                                                                                                                                                                                                                                                                                                                                                                                                                                                                                                                                                                                                                                                                                                                                                                                                                                                                                                                                                                                                                                                                                                                                                                                                                                                                                                                                                                                                                                                                                                                                                                                                                                                                                                                                                                                                                                                                                                                                                                                                                                                                                                                                                                                                                                                                                                                                                                                                                                                                                                                                                                                                 | Santa Casa de Misericórdia de Araçatuba                                              | Instituto Adolfo Lutz, Interdisciplinary Procedures Center, Strategic Laboratory                                                                                                                              | Claudia Regina Gonçalves; Claudio Tavares Sacchi; Erica Valessa Ramos Gomes; Karoline Rodrigues Campos                                                                                                                                                                                                                                                                           |
| EPI_ISL_1533720                                                                                                                                                                                                                                                                                                                                                                                                                                                                                                                                                                                                                                                                                                                                                                                                                                                                                                                                                                                                                                                                                                                                                                                                                                                                                                                                                                                                                                                                                                                                                                                                                                                                                                                                                                                                                                                                                                                                                                                                                                                                                                                                                                                                                                                                                                                                                                                                                                                                                                                                                                                                                                                                                                                                                                                                                                                                                                                                                                                | Santa Casa de Penapolis                                                              | Instituto Adolfo Lutz, Interdisciplinary Procedures Center, Strategic Laboratory                                                                                                                              | Caio Vinicius Dias Lopes; Claudia Regina Gonçalves; Claudio Tavares Sacchi; Erica Valessa Ramos Gomes; Karoline Rodrigues Campos; Leonardo Jose Tadeu de Araujo                                                                                                                                                                                                                  |
| EPI_ISL_603031                                                                                                                                                                                                                                                                                                                                                                                                                                                                                                                                                                                                                                                                                                                                                                                                                                                                                                                                                                                                                                                                                                                                                                                                                                                                                                                                                                                                                                                                                                                                                                                                                                                                                                                                                                                                                                                                                                                                                                                                                                                                                                                                                                                                                                                                                                                                                                                                                                                                                                                                                                                                                                                                                                                                                                                                                                                                                                                                                                                 | Santa Casa de Presidente Epitácio                                                    | Instituto Adolfo Lutz, Interdisciplinary Procedures Center, Strategic Laboratory                                                                                                                              | Claudia Regina Gonçalves; Claudio Tavares Sacchi; Erica Valessa Ramos Gomes; Karoline Rodrigues Campos                                                                                                                                                                                                                                                                           |
| EPI_ISL_524464                                                                                                                                                                                                                                                                                                                                                                                                                                                                                                                                                                                                                                                                                                                                                                                                                                                                                                                                                                                                                                                                                                                                                                                                                                                                                                                                                                                                                                                                                                                                                                                                                                                                                                                                                                                                                                                                                                                                                                                                                                                                                                                                                                                                                                                                                                                                                                                                                                                                                                                                                                                                                                                                                                                                                                                                                                                                                                                                                                                 | Santa Casa de Santa Isabel                                                           | Instituto Adolfo Lutz, Interdisciplinary Procedures Center, Strategic Laboratory                                                                                                                              | Claudia Regina Gonçalves; Claudio Tavares Sacchi; Erica Valessa Ramos Gomes                                                                                                                                                                                                                                                                                                      |
| EPI_ISL_1468466                                                                                                                                                                                                                                                                                                                                                                                                                                                                                                                                                                                                                                                                                                                                                                                                                                                                                                                                                                                                                                                                                                                                                                                                                                                                                                                                                                                                                                                                                                                                                                                                                                                                                                                                                                                                                                                                                                                                                                                                                                                                                                                                                                                                                                                                                                                                                                                                                                                                                                                                                                                                                                                                                                                                                                                                                                                                                                                                                                                | Santa Casa de Sao Carlos                                                             | Instituto Adolfo Lutz, Interdisciplinary Procedures Center, Strategic Laboratory                                                                                                                              | Caio Vinicius Dias Lopes; Claudia Regina Gonçalves; Claudio Tavares Sacchi; Erica Valessa Ramos Gomes; Karoline Rodrigues Campos                                                                                                                                                                                                                                                 |
| EPI_ISL_1533692                                                                                                                                                                                                                                                                                                                                                                                                                                                                                                                                                                                                                                                                                                                                                                                                                                                                                                                                                                                                                                                                                                                                                                                                                                                                                                                                                                                                                                                                                                                                                                                                                                                                                                                                                                                                                                                                                                                                                                                                                                                                                                                                                                                                                                                                                                                                                                                                                                                                                                                                                                                                                                                                                                                                                                                                                                                                                                                                                                                | Santa Casa de Sao Paulo                                                              | Instituto Adolfo Lutz, Interdisciplinary Procedures Center, Strategic Laboratory                                                                                                                              | Caio Vinicius Dias Lopes; Claudia Regina Gonçalves; Claudio Tavares Sacchi; Erica Valessa Ramos Gomes; Karoline Rodrigues Campos; Leonardo Jose Tadeu de Araujo                                                                                                                                                                                                                  |
| EPI_ISL_417317 to 417321, EPI_ISL_429879 to 429880, EPI_ISL_435580 to 435673                                                                                                                                                                                                                                                                                                                                                                                                                                                                                                                                                                                                                                                                                                                                                                                                                                                                                                                                                                                                                                                                                                                                                                                                                                                                                                                                                                                                                                                                                                                                                                                                                                                                                                                                                                                                                                                                                                                                                                                                                                                                                                                                                                                                                                                                                                                                                                                                                                                                                                                                                                                                                                                                                                                                                                                                                                                                                                                   | Santa Clara County Public Health Department                                          | Chiu Laboratory, University of California, San Francisco                                                                                                                                                      | Brandon Bonin; Debra A. Wadford; Elsa Villarino; Scot Federman; Wei Gu; Xianding Deng; and Charles Y. Chiu                                                                                                                                                                                                                                                                       |
| EPI_ISL_1477441, EPI_ISL_1477445, EPI_ISL_1477455, EPI_ISL_1477461, EPI_ISL_1477484, EPI_ISL_1477486, EPI_ISL_1477494, EPI_ISL_1477496, EPI_ISL_1477501, EPI_ISL_1477507, EPI_ISL_1477510, EPI_ISL_1477518 to 1477519, EPI_ISL_1477529, EPI_ISL_1477534 to 1477535, EPI_ISL_1477540 to 1477541, EPI_ISL_1477552, EPI_ISL_1477558, EPI_ISL_1477566, EPI_ISL_1477575, EPI_ISL_1477578, EPI_ISL_1477581, EPI_ISL_1477590, EPI_ISL_1477598, EPI_ISL_1477603, EPI_ISL_1477622, EPI_ISL_1477637, EPI_ISL_1477644, EPI_ISL_1477655, EPI_ISL_1477664, EPI_ISL_1477670, EPI_ISL_1477677, EPI_ISL_1477682, EPI_ISL_1477690, EPI_ISL_1477695, EPI_ISL_1477699, EPI_ISL_1477706, EPI_ISL_1477722, EPI_ISL_1477726 to 1477727, EPI_ISL_1477731, EPI_ISL_1477734, EPI_ISL_1477745, EPI_ISL_1477749 to 1477750, EPI_ISL_1477752, EPI_ISL_1477755, EPI_ISL_1477762, EPI_ISL_1477767 to 1477768, EPI_ISL_1477776, EPI_ISL_1477780, EPI_ISL_1477790, EPI_ISL_1477793, EPI_ISL_1477797, EPI_ISL_1477799 to 1477800, EPI_ISL_1477814, EPI_ISL_1477817 to 1477818, EPI_ISL_1477822, EPI_ISL_1477836, EPI_ISL_1477839, EPI_ISL_1477842, EPI_ISL_1477845 to 1477846, EPI_ISL_1477850, EPI_ISL_1477854, EPI_ISL_1477856, EPI_ISL_1477859 to 1477860, EPI_ISL_1477863, EPI_ISL_1477871, EPI_ISL_1477874, EPI_ISL_1477878 to 1477879, EPI_ISL_1477881 to 1477882, EPI_ISL_1477885, EPI_ISL_1477888, EPI_ISL_1477892 to 1477893, EPI_ISL_1477895, EPI_ISL_1477902, EPI_ISL_1477907, EPI_ISL_1477909, EPI_ISL_1477912, EPI_ISL_1477923, EPI_ISL_1477925 to 1477926, EPI_ISL_1477935, EPI_ISL_1477937, EPI_ISL_1477943, EPI_ISL_1477958, EPI_ISL_1477961, EPI_ISL_1477963, EPI_ISL_1477967, EPI_ISL_1477974, EPI_ISL_1477979, EPI_ISL_1477982 to 1477983, EPI_ISL_1478012 to 1478013, EPI_ISL_1478019, EPI_ISL_1478028, EPI_ISL_1478031, EPI_ISL_1478038, EPI_ISL_1478046, EPI_ISL_1478048, EPI_ISL_1478050, EPI_ISL_1478059, EPI_ISL_1478081, EPI_ISL_1478084, EPI_ISL_1478087, EPI_ISL_1478089, EPI_ISL_1478092, EPI_ISL_1478095, EPI_ISL_1478097, EPI_ISL_1478102 to 1478103, EPI_ISL_1478123 to 1478124, EPI_ISL_1478129, EPI_ISL_1478149, EPI_ISL_1478152 to 1478153, EPI_ISL_1478161, EPI_ISL_1478170 to 1478171, EPI_ISL_1478192, EPI_ISL_1478200, EPI_ISL_1529101 to 1529102, EPI_ISL_1529106 to 1529110, EPI_ISL_1529113, EPI_ISL_1529119, EPI_ISL_1529121, EPI_ISL_1529137 to 1529138, EPI_ISL_1529148, EPI_ISL_1529151 to 1529152, EPI_ISL_1529154, EPI_ISL_1529162, EPI_ISL_1529173, EPI_ISL_1529183, EPI_ISL_1529191, EPI_ISL_1529193, EPI_ISL_1529205 to 1529207, EPI_ISL_1529218, EPI_ISL_1529221, EPI_ISL_1529224, EPI_ISL_1529226, EPI_ISL_1529234, EPI_ISL_1529238, EPI_ISL_1529240 to 1529241, EPI_ISL_1529245, EPI_ISL_1529252, EPI_ISL_1529258 to 1529259, EPI_ISL_1529262 to 1529263, EPI_ISL_1529267, EPI_ISL_1529273, EPI_ISL_1529283 to 1529284, EPI_ISL_1529287, EPI_ISL_1529295, EPI_ISL_1529309, EPI_ISL_1529316 to 1529317, EPI_ISL_1529344, EPI_ISL_1529347, EPI_ISL_1529349, EPI_ISL_1529351 |                                                                                      |                                                                                                                                                                                                               |                                                                                                                                                                                                                                                                                                                                                                                  |
| see above                                                                                                                                                                                                                                                                                                                                                                                                                                                                                                                                                                                                                                                                                                                                                                                                                                                                                                                                                                                                                                                                                                                                                                                                                                                                                                                                                                                                                                                                                                                                                                                                                                                                                                                                                                                                                                                                                                                                                                                                                                                                                                                                                                                                                                                                                                                                                                                                                                                                                                                                                                                                                                                                                                                                                                                                                                                                                                                                                                                      | Santa Clara County Public Health Laboratory                                          | Chan-Zuckerberg Biohub                                                                                                                                                                                        | CZB Ctlahub Consortium                                                                                                                                                                                                                                                                                                                                                           |
| EPI_ISL_1406155 to 1406176, EPI_ISL_1483802, EPI_ISL_1508964 to 1508965, EPI_ISL_1532139 to 1532140, EPI_ISL_1532144                                                                                                                                                                                                                                                                                                                                                                                                                                                                                                                                                                                                                                                                                                                                                                                                                                                                                                                                                                                                                                                                                                                                                                                                                                                                                                                                                                                                                                                                                                                                                                                                                                                                                                                                                                                                                                                                                                                                                                                                                                                                                                                                                                                                                                                                                                                                                                                                                                                                                                                                                                                                                                                                                                                                                                                                                                                                           | Santa Clara County Public Health Laboratory                                          | Santa Clara County Public Health Laboratory                                                                                                                                                                   | Santa Clara County Public Health Department                                                                                                                                                                                                                                                                                                                                      |
| EPI_ISL_1483799, EPI_ISL_1532127 to 1532138                                                                                                                                                                                                                                                                                                                                                                                                                                                                                                                                                                                                                                                                                                                                                                                                                                                                                                                                                                                                                                                                                                                                                                                                                                                                                                                                                                                                                                                                                                                                                                                                                                                                                                                                                                                                                                                                                                                                                                                                                                                                                                                                                                                                                                                                                                                                                                                                                                                                                                                                                                                                                                                                                                                                                                                                                                                                                                                                                    | Santa Clara Valley Medical Center                                                    | Santa Clara County Public Health Laboratory                                                                                                                                                                   | Santa Clara County Public Health Department                                                                                                                                                                                                                                                                                                                                      |
| EPI_ISL_529718                                                                                                                                                                                                                                                                                                                                                                                                                                                                                                                                                                                                                                                                                                                                                                                                                                                                                                                                                                                                                                                                                                                                                                                                                                                                                                                                                                                                                                                                                                                                                                                                                                                                                                                                                                                                                                                                                                                                                                                                                                                                                                                                                                                                                                                                                                                                                                                                                                                                                                                                                                                                                                                                                                                                                                                                                                                                                                                                                                                 | Santo Borromeus Hospital                                                             | Laboratorium Kesehatan Provinsi Jawa Barat; School of Life Sciences and Technology & School of Pharmacy-Institut Teknologi Bandung; Molecular Genetics Laboratory-Faculty of Medicine-Universitas Padjadjaran | Adelina Kristiani Rahayu; Agung Eru Wibowo; Azzania Fibriani; Catur Riani; Cut Nur Cinthia Alamanda; Ema Rahmawati; Gusti Ayu Prani Pradani; Hammam Riza; Hesti Lina Wiraswati; Husna Nugrahapraja; Ivan Faizal; Lia Faridah; Marselina Irawanisa Tan; Rifky Waluyajati Rachman; Ryan Bayusantika Ristandi; Savira Ekawardhani; Sony Solistia Wirawan; Tarwadi; Yunia Sribudiani |

|                                                                                                                                                                                                                                                                                                                                   |                                                                   |                                                                                                                                                                                                                 |                                                                                                                                                                                                                                                                                                                                                                                                                                                                                                                                                                   |
|-----------------------------------------------------------------------------------------------------------------------------------------------------------------------------------------------------------------------------------------------------------------------------------------------------------------------------------|-------------------------------------------------------------------|-----------------------------------------------------------------------------------------------------------------------------------------------------------------------------------------------------------------|-------------------------------------------------------------------------------------------------------------------------------------------------------------------------------------------------------------------------------------------------------------------------------------------------------------------------------------------------------------------------------------------------------------------------------------------------------------------------------------------------------------------------------------------------------------------|
| EPI_ISL_528751                                                                                                                                                                                                                                                                                                                    | Santo Borromeus Hospital                                          | Molecular Genetics Laboratory-Faculty of Medicine-Universitas Padjadjaran; School of Life Sciences and Technology & School of Pharmacy-Institut Teknologi Bandung; Laboratorium Kesehatan Provinsi Jawa Barat   | Agung Eru Wibowo; Azzania Fibriani; Catur Riani; Cut Nur Cinthia Alamanda; Ema Rahmawati; Fensi Amalina; Hammam Riza; Hesti Lina Wiraswati; Husna Nugrahapraja; Irvan Faizal; Lia Faridah; Marselina Irasonia Tan; Mas Rizky A.A. Syamsunarno; Rifky Waluyajati Rachman; Ryan Bayusantika Ristandi; Savira Ekawardhani; Sony Solistia Wirawan; Tarwadi; Tri Hanggono Achmad; Yunia Sribudiani                                                                                                                                                                     |
| EPI_ISL_528750, EPI_ISL_528759                                                                                                                                                                                                                                                                                                    | Santo Borromeus Hospital                                          | School of Life Sciences and Technology & School of Pharmacy-Institut Teknologi Bandung; Molecular Genetics Laboratory-Faculty of Medicine-Universitas Padjadjaran; Laboratorium Kesehatan Provinsi Jawa Barat   | Agung Eru Wibowo; Azzania Fibriani; Catur Riani; Cut Nur Cinthia Alamanda; Ema Rahmawati; Fensi Amalina; Hammam Riza; Hesti Lina Wiraswati; Husna Nugrahapraja; Irvan Faizal; Karimatu Khoirunnisa; Lia Faridah; Marselina Irasonia Tan; Mas Rizky A.A. Syamsunarno; Miftahul Faridi; Rifky Waluyajati Rachman; Ryan Bayusantika Ristandi; Savira Ekawardhani; Sony Solistia Wirawan; Tarwadi; Tri Hanggono Achmad; Yunia Sribudiani                                                                                                                              |
| EPI_ISL_528747                                                                                                                                                                                                                                                                                                                    | Santo Borromeus Hospital                                          | School of Pharmacy & School of Life Sciences and Technology - Institut Teknologi Bandung; Molecular Genetics Laboratory-Faculty of Medicine-Universitas Padjadjaran; Laboratorium Kesehatan Provinsi Jawa Barat | Agung Eru Wibowo; Azzania Fibriani; Catur Riani; Cut Nur Cinthia Alamanda; Ema Rahmawati; Hammam Riza; Hesti Lina Wiraswati; Husna Nugrahapraja; Irvan Faizal; Karimatu Khoirunnisa; Lia Faridah; Marselina Irasonia Tan; Miftahul Faridi; Rifky Waluyajati Rachman; Ryan Bayusantika Ristandi; Savira Ekawardhani; Sony Solistia Wirawan; Tarwadi; Yunia Sribudiani                                                                                                                                                                                              |
| EPI_ISL_528749                                                                                                                                                                                                                                                                                                                    | Santosa Hospital Bandung Central                                  | School of Life Sciences and Technology & School of Pharmacy-Institut Teknologi Bandung; Molecular Genetics Laboratory-Faculty of Medicine-Universitas Padjadjaran; Laboratorium Kesehatan Provinsi Jawa Barat   | Agung Eru Wibowo; Azzania Fibriani; Catur Riani; Cut Nur Cinthia Alamanda; Davin H. E. Setiarmarga; Ema Rahmawati; Hammam Riza; Hesti Lina Wiraswati; Husna Nugrahapraja; Irvan Faizal; Lia Faridah; Marselina Irasonia Tan; Rifky Waluyajati Rachman; Rizki Mardian; Ryan Bayusantika Ristandi; Savira Ekawardhani; Sony Solistia Wirawan; Tarwadi; Yunia Sribudiani                                                                                                                                                                                             |
| EPI_ISL_511878                                                                                                                                                                                                                                                                                                                    | Santosa Hospital Bandung Kopo                                     | Laboratorium Kesehatan Provinsi Jawa Barat; Molecular Genetics Laboratory-Faculty of Medicine-Universitas Padjadjaran; School of Life Sciences and Technology & School of Pharmacy-Institut Teknologi Bandung   | Agung Eru Wibowo; Azzania Fibriani; Catur Riani; Cut Nur Cinthia Alamanda; Ema Rahmawati; Hammam Riza; Hesti Lina Wiraswati; Husna Nugrahapraja; Lia Faridah; Marselina Irasonia Tan; Rifky Waluyajati Rachman; Ryan Bayusantika Ristandi; Savira Ekawardhani; Soni Solistia Wirawan; Tarwadi; Yunia Sribudiani                                                                                                                                                                                                                                                   |
| EPI_ISL_479799 to 479800, EPI_ISL_479826 to 479849, EPI_ISL_479872 to 479885                                                                                                                                                                                                                                                      | Sapporo City Institute of Public Health                           | Pathogen Genomics Center, National Institute of Infectious Diseases                                                                                                                                             | Asami Ohnishi; Hajime Kamiya; Kentaro Itokawa; Makoto Kuroda; Masanori Hashino; Motoi Suzuki; Rina Tanaka; Tsuyoshi Sekizuka                                                                                                                                                                                                                                                                                                                                                                                                                                      |
| EPI_ISL_1448409 to 1448423                                                                                                                                                                                                                                                                                                        | Sapporo City Institute of Public Health                           | Sapporo City Institute of Public Health                                                                                                                                                                         | Asami Ohnishi; Kentaro Itokawa; Makoto Kuroda; Masanori Hashino; Masayuki Kikuchi; Rie Shimazaki; Rina Tanaka; Tsuyoshi Sekizuka; Yusuke Oguchi                                                                                                                                                                                                                                                                                                                                                                                                                   |
| EPI_ISL_1443214, EPI_ISL_1443216 to 1443219, EPI_ISL_1443277 to 1443283                                                                                                                                                                                                                                                           | Sarah Busch Lincoln Health Center                                 | Illinois Department of Public Health - Springfield Lab                                                                                                                                                          | Bryan Sim; Gordon McCall                                                                                                                                                                                                                                                                                                                                                                                                                                                                                                                                          |
| EPI_ISL_512066 to 512069                                                                                                                                                                                                                                                                                                          | Sardar Vallabhbhai Patel Institute of Medical Sciences & Research | Gujarat Biotechnology Research Centre                                                                                                                                                                           | A M Kadri; Afzal Ansari; Apurvashin Puvar; Chaitanya Joshi; Dinesh Kumar; Harsh Bakshi; Janvi Raval; Kamlesh J Upadhyay; Komal Patel; Labdhi Pandya; Madhvi Joshi; Maharshi Pandya; Monika Gandhi; Nidhi Patel; Nikha Trivedi; Nitin Savaliya; Pinal Trivedi; Pranay Shah; R D Dixit; Raghavendra Kumar; Sanjay Kapadia; Zarna Patel; Zuber Saiyed                                                                                                                                                                                                                |
| EPI_ISL_434654, EPI_ISL_445222, EPI_ISL_445226, EPI_ISL_450808, EPI_ISL_450810, EPI_ISL_452231 to 452232                                                                                                                                                                                                                          | Saroledens Familjelakare                                          | The Public Health Agency of Sweden                                                                                                                                                                              | Anna Risberg; Anna-Malin Linde; Karin Tegmark-Wisell; Katarina Jarbur; Maria Lind Karlberg; Mia Brytting; Olov Svartstrom; Oskar Karlsson Lindsjo; Theresa Enkirch                                                                                                                                                                                                                                                                                                                                                                                                |
| EPI_ISL_455110                                                                                                                                                                                                                                                                                                                    | Scania Halsocenter, B288                                          | The Public Health Agency of Sweden                                                                                                                                                                              | Anna Risberg; Anna-Malin Linde; Christina Lergin; Karin Tegmark-Wisell; Maria Lind Karlberg; Mia Brytting; Olov Svartstrom; Oskar Karlsson Lindsjo; Theresa Enkirch                                                                                                                                                                                                                                                                                                                                                                                               |
| EPI_ISL_1527360 to 1527363, EPI_ISL_1527530 to 1527537, EPI_ISL_1531734, EPI_ISL_1531736 to 1531742                                                                                                                                                                                                                               | School of Pharmacy, Shenandoah University                         | School of Pharmacy, Shenandoah University                                                                                                                                                                       | A.F.; Adams; G.W.; Harralson; Kidd; R.S.; S.M.; Sawyer                                                                                                                                                                                                                                                                                                                                                                                                                                                                                                            |
| EPI_ISL_450403                                                                                                                                                                                                                                                                                                                    | School of Public Health, The University of Hong Kong              | School of Public Health, The University of Hong Kong                                                                                                                                                            | Brackman; C.J.; Chu; D.K.W.; D.N.C.; L.D.; L.L.M. and Peiris, M.; Perera; Poon; R.A.P.M.; Sims; Sit; T.H.S.; Tsang                                                                                                                                                                                                                                                                                                                                                                                                                                                |
| EPI_ISL_510529                                                                                                                                                                                                                                                                                                                    | School of Veterinary Medicine, Disease Control                    | School of Veterinary Medicine, Disease Control                                                                                                                                                                  | A.L.; A.N.; Bates, M.; C. and Zumla, A.; Chambaro, H.; Chanda, D.; Changula, K.; Chilufya; Chipimo; Chitanga, S.; Fwoloshi, S.; K.S.; Kapata; Kapata, N.; Kapaya, F.; Kapin'a, M.; Kayeyi, N.; Liwewe, M.M.; Malama, K.; Masahiro, K.; Monze, B.; Morales; Mubemba, B.; Mukonka, V.; Mulenga, L.; Muleya, W.; Mupeta, F.; Musonda, K.; Nalubamba; Ngosa, W.; P.C.; P.J.; Saasa, N.; Sawa, H.; Shibemba; Simulundu, E.; Sinyange, N.; Takada, A.; Tembo, J.; Zulu, P.                                                                                              |
| EPI_ISL_437549 to 437600, EPI_ISL_445164 to 445168, EPI_ISL_450191 to 450192, EPI_ISL_458237 to 458284, EPI_ISL_467967, EPI_ISL_467972, EPI_ISL_494596 to 494619, EPI_ISL_494635 to 494713, EPI_ISL_1468842, EPI_ISL_1468849, EPI_ISL_1468882 to 1468888, EPI_ISL_1468947, EPI_ISL_1468955 to 1468956, EPI_ISL_1469043 to 1469060 | Scripps Medical Laboratory                                        | Andersen lab at Scripps Research                                                                                                                                                                                | Brett Austin; Ellen Stefanski; Ian Mchardy; Jovan Shephard; SEARCH Alliance San Diego with Michael Quigley; SEARCH Alliance San Diego with Tracy Basler                                                                                                                                                                                                                                                                                                                                                                                                           |
| see above                                                                                                                                                                                                                                                                                                                         | Seattle Flu Study                                                 | Seattle Flu Study                                                                                                                                                                                               | Amanda Adler; Barry R. Lutz; Benjamin Pelle; Brian Hiatt; Caitlin R. Wolf; Chris D. Frazer; Chu et al; Chu et al; Deborah A. Nickerson; Elisabeth Brandstetter; Erica Ryke; Geoff Melly; Helen Y. Chu; Janet A. Englund; Jay Shendure; Jeff Duchin; Jover Lee; Kairsten Fay; Karen Cowgill; Kirsten Lacombe; Lea M. Starita; Mark J. Rieder; Matthew Richardson; Matthew Thompson; Melissa Truong; Michael Boeckh; Michael Famulare; Misja Ilcin; Peter D. Han; Philip Dykema; Romesh Gautam; Scott Lindquist; Stephanie Schrag; Thomas R. Sibley; Trevor Bedford |
| EPI_ISL_413456                                                                                                                                                                                                                                                                                                                    | Seattle Flu Study, University of Washington Medical Center        | Seattle Flu Study, University of Washington Medical Center                                                                                                                                                      | Chu et al                                                                                                                                                                                                                                                                                                                                                                                                                                                                                                                                                         |
| EPI_ISL_412026                                                                                                                                                                                                                                                                                                                    | Second Hospital of Anhui Medical University                       | Second Hospital of Anhui Medical University                                                                                                                                                                     | Changtai Wang; Mengji Lu; Mengyuan Xua; Tengfei He; Xin Huang; Zhenhua Zhang; Zhongping Liua; Zixiang Chen                                                                                                                                                                                                                                                                                                                                                                                                                                                        |
| EPI_ISL_469253                                                                                                                                                                                                                                                                                                                    | Second Military Medical University, Department of Microbiology    | Second Military Medical University, Department of Microbiology                                                                                                                                                  | Jiang, L.; Peng, H.; Qi; Tang, H.; Z. and Zhao, P.                                                                                                                                                                                                                                                                                                                                                                                                                                                                                                                |
| EPI_ISL_1533722                                                                                                                                                                                                                                                                                                                   | Secretaria Municipal de Saude De Piracica                         | Instituto Adolfo Lutz, Interdisciplinary Procedures Center, Strategic Laboratory                                                                                                                                | Caio Vinicius Dias Lopes; Claudia Regina Gonçalves; Claudio Tavares Sacchi; Erica Valessa Ramos Gomes; Karoline Rodrigues Campos; Leonardo Jose Tadeu de Araujo                                                                                                                                                                                                                                                                                                                                                                                                   |
| EPI_ISL_1468467, EPI_ISL_1468470 to 1468471                                                                                                                                                                                                                                                                                       | Secretaria Municipal de Saude Descalvado                          | Instituto Adolfo Lutz, Interdisciplinary Procedures Center, Strategic Laboratory                                                                                                                                | Caio Vinicius Dias Lopes; Claudia Regina Gonçalves; Claudio Tavares Sacchi; Erica Valessa Ramos Gomes; Karoline Rodrigues Campos                                                                                                                                                                                                                                                                                                                                                                                                                                  |
| EPI_ISL_1468469                                                                                                                                                                                                                                                                                                                   | Secretaria Municipal de Saude Porto Ferreira                      | Instituto Adolfo Lutz, Interdisciplinary Procedures Center, Strategic Laboratory                                                                                                                                | Caio Vinicius Dias Lopes; Claudia Regina Gonçalves; Claudio Tavares Sacchi; Erica Valessa Ramos Gomes; Karoline Rodrigues Campos                                                                                                                                                                                                                                                                                                                                                                                                                                  |
| EPI_ISL_1468416, EPI_ISL_1468447                                                                                                                                                                                                                                                                                                  | Secretaria Municipal de Saude de Andradina                        | Instituto Adolfo Lutz, Interdisciplinary Procedures Center, Strategic Laboratory                                                                                                                                | Caio Vinicius Dias Lopes; Claudia Regina Gonçalves; Claudio Tavares Sacchi; Erica Valessa Ramos Gomes; Karoline Rodrigues Campos                                                                                                                                                                                                                                                                                                                                                                                                                                  |
| EPI_ISL_1468418, EPI_ISL_1468444, EPI_ISL_1468446, EPI_ISL_1533698                                                                                                                                                                                                                                                                | Secretaria Municipal de Saude de Birigui                          | Instituto Adolfo Lutz, Interdisciplinary Procedures Center, Strategic Laboratory                                                                                                                                | Caio Vinicius Dias Lopes; Claudia Regina Gonçalves; Claudio Tavares Sacchi; Erica Valessa Ramos Gomes; Karoline Rodrigues Campos; Leonardo Jose Tadeu de Araujo                                                                                                                                                                                                                                                                                                                                                                                                   |
| EPI_ISL_468320                                                                                                                                                                                                                                                                                                                    | Secretaria Municipal de Saude de Hortolandia                      | Instituto Adolfo Lutz, Interdisciplinary Procedures Center, Strategic Laboratory                                                                                                                                | Claudia Regina Gonçalves; Claudio Tavares Sacchi; Erica Valessa Ramos Gomes                                                                                                                                                                                                                                                                                                                                                                                                                                                                                       |
| EPI_ISL_574583                                                                                                                                                                                                                                                                                                                    | Secretaria Municipal de Saude de Jandira                          | Instituto Adolfo Lutz, Interdisciplinary Procedures Center, Strategic Laboratory                                                                                                                                | Claudia Regina Gonçalves; Claudio Tavares Sacchi; Erica Valessa Ramos Gomes; Karoline Rodrigues Campos                                                                                                                                                                                                                                                                                                                                                                                                                                                            |
| EPI_ISL_574597                                                                                                                                                                                                                                                                                                                    | Secretaria Municipal de Saude de Jarinu                           | Instituto Adolfo Lutz, Interdisciplinary Procedures Center, Strategic Laboratory                                                                                                                                | Claudia Regina Gonçalves; Claudio Tavares Sacchi; Erica Valessa Ramos Gomes; Karoline Rodrigues Campos                                                                                                                                                                                                                                                                                                                                                                                                                                                            |

|                                                                                                                                                                                      |                                                                                 |                                                                                                                                                                                           |                                                                                                                                                                                                                                                                                                                                                                                                                                       |
|--------------------------------------------------------------------------------------------------------------------------------------------------------------------------------------|---------------------------------------------------------------------------------|-------------------------------------------------------------------------------------------------------------------------------------------------------------------------------------------|---------------------------------------------------------------------------------------------------------------------------------------------------------------------------------------------------------------------------------------------------------------------------------------------------------------------------------------------------------------------------------------------------------------------------------------|
| EPI_ISL_1533693                                                                                                                                                                      | Secretaria Municipal de Saude de Ubatuba                                        | Instituto Adolfo Lutz, Interdisciplinary Procedures Center, Strategic Laboratory                                                                                                          | Caio Vinicius Dias Lopes; Claudia Regina Gonçalves; Claudio Tavares Sacchi; Erica Valessa Ramos Gomes; Karoline Rodrigues Campos; Leonardo Jose Tadeu de Araujo                                                                                                                                                                                                                                                                       |
| EPI_ISL_1468458 to 1468459                                                                                                                                                           | Secretaria Municipal de Saude de Valparaiso SP                                  | Instituto Adolfo Lutz, Interdisciplinary Procedures Center, Strategic Laboratory                                                                                                          | Caio Vinicius Dias Lopes; Claudia Regina Gonçalves; Claudio Tavares Sacchi; Erica Valessa Ramos Gomes; Karoline Rodrigues Campos                                                                                                                                                                                                                                                                                                      |
| EPI_ISL_547576, EPI_ISL_603035                                                                                                                                                       | Secretaria Municipal de Saúde                                                   | Instituto Adolfo Lutz, Interdisciplinary Procedures Center, Strategic Laboratory                                                                                                          | Claudia Regina Gonçalves; Claudio Tavares Sacchi; Erica Valessa Ramos Gomes; Karoline Rodrigues Campos                                                                                                                                                                                                                                                                                                                                |
| EPI_ISL_1469666                                                                                                                                                                      | Secretaria Municipal de Saúde de Montenegro                                     | Epiclin                                                                                                                                                                                   | Ana Paula Muterle; Carolina Comerlato; Eliana Márcia Da Ros Wendland; Fernando Hayashi Sant'Anna; Janira Prichula; Juliana Comerlato                                                                                                                                                                                                                                                                                                  |
| EPI_ISL_1469551, EPI_ISL_1469556, EPI_ISL_1469727, EPI_ISL_1469757                                                                                                                   | Secretaria Municipal de Saúde de São Leopoldo                                   | Epiclin                                                                                                                                                                                   | Ana Paula Muterle; Carolina Comerlato; Eliana Márcia Da Ros Wendland; Fernando Hayashi Sant'Anna; Janira Prichula; Juliana Comerlato                                                                                                                                                                                                                                                                                                  |
| EPI_ISL_1469588, EPI_ISL_1469647, EPI_ISL_1469780                                                                                                                                    | Secretaria Municipal de Saúde de Taquara                                        | Epiclin                                                                                                                                                                                   | Ana Paula Muterle; Carolina Comerlato; Eliana Márcia Da Ros Wendland; Fernando Hayashi Sant'Anna; Janira Prichula; Juliana Comerlato                                                                                                                                                                                                                                                                                                  |
| EPI_ISL_1469559, EPI_ISL_1469607, EPI_ISL_1469758, EPI_ISL_1469803, EPI_ISL_1469838, EPI_ISL_1469847                                                                                 | Secretaria Municipal de Saúde de Três Coroas                                    | Epiclin                                                                                                                                                                                   | Ana Paula Muterle; Carolina Comerlato; Eliana Márcia Da Ros Wendland; Fernando Hayashi Sant'Anna; Janira Prichula; Juliana Comerlato                                                                                                                                                                                                                                                                                                  |
| EPI_ISL_471542                                                                                                                                                                       | Secretaria de Saude de Mogi das Cruzes                                          | Instituto Adolfo Lutz, Interdisciplinary Procedures Center, Strategic Laboratory                                                                                                          | Claudia Regina Gonçalves; Claudio Tavares Sacchi; Erica Valessa Ramos Gomes                                                                                                                                                                                                                                                                                                                                                           |
| EPI_ISL_1468468                                                                                                                                                                      | Secretaria municipal de saude de Itapolis                                       | Instituto Adolfo Lutz, Interdisciplinary Procedures Center, Strategic Laboratory                                                                                                          | Caio Vinicius Dias Lopes; Claudia Regina Gonçalves; Claudio Tavares Sacchi; Erica Valessa Ramos Gomes; Karoline Rodrigues Campos                                                                                                                                                                                                                                                                                                      |
| EPI_ISL_417924                                                                                                                                                                       | Secretaria de Salud Medellín                                                    | Instituto Nacional de Salud, Universidad Cooperativa de Colombia, Instituto Alexander von Humboldt, Imperial College-London, London School of Hygiene & Tropical Medicine                 | Astrid C. Flórez; Carlos Franco-Muñoz; Christian Julian VillabonaArenas; Diana Marcela Walteros-Acero; Diego A. Álvarez-Díaz; Erika Ospitia; Gloria Puerto; Jose A. Usme-Ciro; Juliana Barbosa; Katherine Laiton-Donato; Liz Villabona-Arenas; Luz Dary Rodriguez; Maily A. Gonzalez; Marcela Mercado-Reyes; Martha Lucia Ospina Martinez; Nicolás D. Franco-Sierra; Sergio Gomez Rangel; Sussy Echeverría-Londoño; Zulma M. Cucunubá |
| EPI_ISL_1534339, EPI_ISL_1534356                                                                                                                                                     | Sedgefield Clinic wc SGE                                                        | NHLS/UCT                                                                                                                                                                                  | Arash Iranzadeh; Bruna Galvao; Carolyn Williamson; Deelan Doolabh; Diana Hardie; Emmanuel SJ; Innocent Mudau; Kruger Marais; Lynn Tyers; Marvin Hsiao; Stephen Korsman; Tegally H; de Oliveira T                                                                                                                                                                                                                                      |
| EPI_ISL_1554887                                                                                                                                                                      | Sentinelles Idf                                                                 | National Reference Center for Viruses of Respiratory Infections, Institut Pasteur, Paris                                                                                                  | Angela Brisebarre; Askin Dilek; Camille Capel; Christophe Malabat; Corinne Maufrais; Damien Mornico; Etienne Simon-Lorière; Frédéric Lemoine; Louise Lefrançois; Marion Barbet; Maud Vanpeene; Méline Bizard; Sylvie Behillil; Sylvie van der Werf; Vincent Enouf                                                                                                                                                                     |
| EPI_ISL_420038, EPI_ISL_420045, EPI_ISL_420055, EPI_ISL_421514                                                                                                                       | Sentinelles network                                                             | National Reference Center for Viruses of Respiratory Infections, Institut Pasteur, Paris                                                                                                  | Angela Brisebarre; Etienne Simon-Lorière; Flora Donati; Marion Barbet; Maud Vanpeene; Mélanie Albert; Meline Bizard; Sylvie Behillil; Sylvie van der Werf; Vincent Enouf                                                                                                                                                                                                                                                              |
| EPI_ISL_593934                                                                                                                                                                       | Sentinelles, Chanteloup-En-Brie                                                 | National Reference Center for Viruses of Respiratory Infections, Institut Pasteur, Paris                                                                                                  | Etienne Simon-Lorière; Fabiana Gambaro; Maud Vanpeene; Sylvie Behillil; Sylvie van der Werf; Vincent Enouf                                                                                                                                                                                                                                                                                                                            |
| EPI_ISL_593936                                                                                                                                                                       | Sentinelles, Fondettes                                                          | National Reference Center for Viruses of Respiratory Infections, Institut Pasteur, Paris                                                                                                  | Etienne Simon-Lorière; Fabiana Gambaro; Maud Vanpeene; Sylvie Behillil; Sylvie van der Werf; Vincent Enouf                                                                                                                                                                                                                                                                                                                            |
| EPI_ISL_593902                                                                                                                                                                       | Sentinelles, Limay                                                              | National Reference Center for Viruses of Respiratory Infections, Institut Pasteur, Paris                                                                                                  | Etienne Simon-Lorière; Fabiana Gambaro; Maud Vanpeene; Sylvie Behillil; Sylvie van der Werf; Vincent Enouf                                                                                                                                                                                                                                                                                                                            |
| EPI_ISL_593935                                                                                                                                                                       | Sentinelles, Plessis-Trevisie                                                   | National Reference Center for Viruses of Respiratory Infections, Institut Pasteur, Paris                                                                                                  | Etienne Simon-Lorière; Fabiana Gambaro; Maud Vanpeene; Sylvie Behillil; Sylvie van der Werf; Vincent Enouf                                                                                                                                                                                                                                                                                                                            |
| EPI_ISL_408977                                                                                                                                                                       | Serology, Virology and OTDS Laboratories (SAVID), NSW Health Pathology Randwick | NSW Health Pathology - Institute of Clinical Pathology and Medical Research; Centre for Infectious Diseases and Microbiology Laboratory Services, Westmead Hospital; University of Sydney | Carter I; Chen SC; Eden J-S; Holmes EC; Kok J and Dwyer DE for the 2019-nCoV Study Group*; Maddocks S; O'Sullivan MV; Rahman H; Rawlinson W; Rockett R; Sintchenko V                                                                                                                                                                                                                                                                  |
| EPI_ISL_583502                                                                                                                                                                       | Serv de Vig Sanitaria Epidemio e CTRL de Zoonoses Guaruja                       | Instituto Adolfo Lutz, Interdisciplinary Procedures Center, Strategic Laboratory                                                                                                          | Claudia Regina Gonçalves; Claudio Tavares Sacchi; Erica Valessa Ramos Gomes; Karoline Rodrigues Campos                                                                                                                                                                                                                                                                                                                                |
| EPI_ISL_420048, EPI_ISL_420058 to 420060, EPI_ISL_420062, EPI_ISL_420064, EPI_ISL_421501, EPI_ISL_421504 to 421506, EPI_ISL_421512, EPI_ISL_428347, EPI_ISL_428349                   | see above                                                                       | Service de Biologie Médicale - BP 125                                                                                                                                                     | Angela Brisebarre; Christine Lambert; Etienne Simon-Lorière; Flora Donati; Marion Barbet; Maud Vanpeene; Mélanie Albert; Meline Bizard; Sylvie Behillil; Sylvie van der Werf; Vincent Enouf                                                                                                                                                                                                                                           |
| EPI_ISL_420042, EPI_ISL_421513                                                                                                                                                       | Service de Biologie clinique                                                    | National Reference Center for Viruses of Respiratory Infections, Institut Pasteur, Paris                                                                                                  | Angela Brisebarre; Christine Lambert; Etienne Simon-Lorière; Flora Donati; Marion Barbet; Maud Vanpeene; Mélanie Albert; Meline Bizard; Sylvie Behillil; Sylvie van der Werf; Vincent Enouf                                                                                                                                                                                                                                           |
| EPI_ISL_469283 to 469284                                                                                                                                                             | Service de Virologie Hôpital Saint-Louis                                        | Laboratory Cell Biology of Viral Infection-INSERM unit 944                                                                                                                                | Ali Amara; Constance Delaugerre; Laurent Meertens; Lucie Bonnet-Madin; Maud SALMONA; Séverine Mercier-Delarue                                                                                                                                                                                                                                                                                                                         |
| EPI_ISL_469282                                                                                                                                                                       | Service de Virologie Hôpital Saint-Louis                                        | Laboratory of Cell Biology of viral infection, Unit INSERM-U944                                                                                                                           | Ali Amara; Constance Delaugerre; Laurent Meertens; Lucie Bonnet-Madin                                                                                                                                                                                                                                                                                                                                                                 |
| EPI_ISL_418232 to 418233                                                                                                                                                             | Service des Urgences                                                            | National Reference Center for Viruses of Respiratory Infections, Institut Pasteur, Paris                                                                                                  | Angela Brisebarre; Boubekeur; Etienne Simon-Lorière; Flora Donati; Marion Barbet; Maud Vanpeene; Mélanie Albert; Meline Bizard; Sylvie Behillil; Sylvie van der Werf; Vincent Enouf                                                                                                                                                                                                                                                   |
| EPI_ISL_414598                                                                                                                                                                       | Servicio Microbiologia, Hospital Clínico Universitario, Valencia                | Sequencing and Bioinformatics Service and Molecular Epidemiology Research Group. FISABIO-Public Health                                                                                    | David Navarro; Fernando Gonzalez-Candelas; Giuseppe D'Auria; Griselda De Marco; Maria Alma Bracho; Neris Garcia-Gonzalez                                                                                                                                                                                                                                                                                                              |
| EPI_ISL_414496                                                                                                                                                                       | Servicio Microbiologia. Hospital Clínico Universitario. Valencia.               | Sequencing and Bioinformatics Service. Molecular Epidemiology Laboratory. FISABIO-Public Health                                                                                           | David Navarro; Fernando Gonzalez-Candelas; Giuseppe D'Auria; Griselda De Marco; Maria Alma Bracho; Neris Garcia-Gonzalez                                                                                                                                                                                                                                                                                                              |
| EPI_ISL_414495                                                                                                                                                                       | Servicio Microbiología. Hospital Clínico Universitario. Valencia.               | Sequencing and Bioinformatics Service. Molecular Epidemiology Laboratory. FISABIO-Public Health                                                                                           | David Navarro; Fernando Gonzalez-Candelas; Giuseppe D'Auria; Griselda De Marco; Maria Alma Bracho; Neris Garcia-Gonzalez                                                                                                                                                                                                                                                                                                              |
| EPI_ISL_420598 to 420600                                                                                                                                                             | Servicio Virosis Respiratorias-Departamento Virología-INEI                      | Instituto Nacional Enfermedades Infecciosas C.G.Malbran                                                                                                                                   | Avaro M.; Baumeister E.; Benedetti E.; Campos J.; Cisterna D.; Dattero ME; Lorenzo F.; Molina V.; Perandones C.; Poklepovich T.; Pontoriero A.; Russo M.; Tuduri E.                                                                                                                                                                                                                                                                   |
| EPI_ISL_416485, EPI_ISL_417206                                                                                                                                                       | Servicio de Microbiologia. Consorcio Hospital General Universitario de Valencia | Sequencing and Bioinformatics Service and Molecular Epidemiology Research Group. FISABIO-Public Health                                                                                    | Concepcion Gimeno; Fernando Gonzalez-Candelas; Giuseppe D'Auria; Griselda De Marco; Maria Alma Bracho; Maria Dolores Ocete; Neris Garcia-Gonzalez                                                                                                                                                                                                                                                                                     |
| EPI_ISL_537996 to 538002                                                                                                                                                             | Servicio de Microbiologia. Hospital Arnau de Vilanova                           | SeqCOVID-SPAIN consortium/IBV(CSIC)                                                                                                                                                       | Fernando Gonzalez-Candelas and SeqCOVID-SPAIN consortium; Giuseppe D'Auria; Griselda De Marco; Inma Galán Vendrell; Ivan Ansari; Lidia Ruiz Roldan; Lúcia Martínez-Priego; Loreto Ferrús Abad; Maria Alma Bracho; Mariana Reyes-Prieto; Paula Ruiz-Hueso; Sandra Carbo; Vicente Soriano Chirona; Victoria Dominguez                                                                                                                   |
| EPI_ISL_539221 to 539233, EPI_ISL_539235 to 539239, EPI_ISL_539243 to 539244, EPI_ISL_539288                                                                                         | Servicio de Microbiologia. Hospital Clínico Universitario de Valencia           | SeqCOVID-SPAIN consortium/IBV(CSIC)                                                                                                                                                       | Beatriz Beamud; Concepcion Gimeno; Fernando Gonzalez-Candelas and SeqCOVID-SPAIN consortium; Giuseppe D'Auria; Griselda De Marco; Inma Galán Vendrell; Lidia Ruiz Roldan; Lúcia Martínez-Priego; Loreto Ferrús Abad; Maria Alma Bracho; Mariana Reyes-Prieto; Marta Pla Diaz; Neris Garcia-Gonzalez; Paula Ruiz-Hueso; Vicente Soriano Chirona                                                                                        |
| EPI_ISL_420125 to 420132, EPI_ISL_421515 to 421520, EPI_ISL_425199 to 425211, EPI_ISL_436278 to 436360, EPI_ISL_436362 to 436371, EPI_ISL_436396 to 436411, EPI_ISL_447470 to 447531 | see above                                                                       | Servicio de Microbiologia. Hospital Clínico Universitario de Valencia                                                                                                                     | Sequencing and Bioinformatics Service and Molecular Epidemiology Research Group. FISABIO-Public Health                                                                                                                                                                                                                                                                                                                                |
|                                                                                                                                                                                      |                                                                                 |                                                                                                                                                                                           | Beatriz Beamud; Concepcion Gimeno; David Navarro; Eliseo Albert; Fernando Gonzalez-Candelas; Giuseppe 'Auria; Giuseppe D'Auria; Griselda De Marco; Inma Galán Vendrell; Ivan Ansari; Lidia Ruiz Roldan; Lúcia Martínez-Priego; Loreto Ferrús Abad; Maria Alma Bracho; Maria Dolores Ocete;                                                                                                                                            |

|                                                                                                                                                                                                                                                                                                                                                                                                                                                                                                                                                                          |                                                                                                                                                                                                                                 |                                                                                                                                                                                                                                |                                                                                                                                                                                                                                                                                                                                                                                                                                                    |
|--------------------------------------------------------------------------------------------------------------------------------------------------------------------------------------------------------------------------------------------------------------------------------------------------------------------------------------------------------------------------------------------------------------------------------------------------------------------------------------------------------------------------------------------------------------------------|---------------------------------------------------------------------------------------------------------------------------------------------------------------------------------------------------------------------------------|--------------------------------------------------------------------------------------------------------------------------------------------------------------------------------------------------------------------------------|----------------------------------------------------------------------------------------------------------------------------------------------------------------------------------------------------------------------------------------------------------------------------------------------------------------------------------------------------------------------------------------------------------------------------------------------------|
|                                                                                                                                                                                                                                                                                                                                                                                                                                                                                                                                                                          |                                                                                                                                                                                                                                 |                                                                                                                                                                                                                                | Mariana Reyes-Prieto; Marta Pla Diaz; Neris Garcia-Gonzalez; Paula Ruiz-Hueso; Sandra Carbo; Vicente Soriano Chirona                                                                                                                                                                                                                                                                                                                               |
| EPI_ISL_455721 to 455734, EPI_ISL_455737 to 455744                                                                                                                                                                                                                                                                                                                                                                                                                                                                                                                       | Servicio de Microbiología. Hospital Clínico Universitario de Valencia                                                                                                                                                           | Sequencing and Bioinformatics Service and Molecular Epidemiology Research Group. FISABIO-Public Health, and SeqCOVID-Spain Consortium                                                                                          | David Navarro; Eliseo Albert; Fernando Gonzalez-Candelas; Giuseppe 'Auria; Griselda De Marco; Inma Galán Vendrell; Ivan Ansari; Lidia Ruiz Roldan; Lúcia Martínez-Priego; Loreto Ferrús Abad; Maria Alma Bracho; Mariana Reyes-Prieto; Neris Garcia-Gonzalez; Paula Ruiz-Hueso; Sandra Carbo; Vicente Soriano Chirona                                                                                                                              |
| EPI_ISL_436235 to 436270, EPI_ISL_436372 to 436381                                                                                                                                                                                                                                                                                                                                                                                                                                                                                                                       | Servicio de Microbiología. Hospital Universitario Doctor Peset                                                                                                                                                                  | Sequencing and Bioinformatics Service and Molecular Epidemiology Research Group. FISABIO-Public Health                                                                                                                         | Beatriz Beamud; Fernando Gonzalez-Candelas; Giuseppe D'Auria; Griselda De Marco; Inma Galán Vendrell; Ivan Ansari; Jose Miguel Nogueira Coito; Juan Alberola Enguadanos; Juan Jose Camarena Miñana; Lidia Ruiz Roldan; Lúcia Martínez-Priego; Loreto Ferrús Abad; Maria Alma Bracho; Mariana Reyes-Prieto; Marta Pla Diaz; Neris Garcia-Gonzalez; Paula Ruiz-Hueso; Rosa González Pellicer; Sandra Carbo; Vicente Soriano Chirona                  |
| EPI_ISL_455735 to 455736                                                                                                                                                                                                                                                                                                                                                                                                                                                                                                                                                 | Servicio de Microbiología. Hospital_Arnau_de_Vilanova                                                                                                                                                                           | Sequencing and Bioinformatics Service and Molecular Epidemiology Research Group. FISABIO-Public Health, and SeqCOVID-Spain Consortium                                                                                          | Fernando Gonzalez-Candelas; Giuseppe 'Auria; Griselda De Marco; Inma Galán Vendrell; Ivan Ansari; Lidia Ruiz Roldan; Lúcia Martínez-Priego; Loreto Ferrús Abad; Maria Alma Bracho; Mariana Reyes-Prieto; Neris Garcia-Gonzalez; Paula Ruiz-Hueso; Sandra Carbo; Vicente Soriano Chirona; Victoria Dominguez                                                                                                                                        |
| EPI_ISL_1392944 to 1393628                                                                                                                                                                                                                                                                                                                                                                                                                                                                                                                                               | Servicio de Microbiología Clínica (Complejo Hospitalario de Navarra, Pamplona)                                                                                                                                                  | Centro de Secuenciación NASERTIC                                                                                                                                                                                               | Ana Miqueleiz; Ana Navascués; Carmen Ezpeleta Baquedano                                                                                                                                                                                                                                                                                                                                                                                            |
| EPI_ISL_1423633 to 1423680                                                                                                                                                                                                                                                                                                                                                                                                                                                                                                                                               | Servicio de Microbiología Clínica (Complejo Hospitalario de Navarra, Pamplona), Instituto de Investigación Sanitaria de Navarra (IdiSNA)                                                                                        | SeqCOVID-SPAIN consortium/IBV(CSIC)                                                                                                                                                                                            | Ana Miqueleiz and SeqCOVID-SPAIN consortium; Ana Navascués; Carmen Ezpeleta Baquedano                                                                                                                                                                                                                                                                                                                                                              |
| EPI_ISL_538055 to 538061, EPI_ISL_538119 to 538230, EPI_ISL_538568 to 538607                                                                                                                                                                                                                                                                                                                                                                                                                                                                                             | Servicio de Microbiología y Parasitología clínica. UCEIMP. Hospital Universitario Virgen del Rocío/IBIS/CSIC/US                                                                                                                 | SeqCOVID-SPAIN consortium/IBV(CSIC)                                                                                                                                                                                            | Guillermo Martín Gutiérrez; Javier Aznar Martín and SeqCOVID-SPAIN consortium; Lidia Gálvez Benitez; Verónica González Galán; Ángel Rodríguez Villodres                                                                                                                                                                                                                                                                                            |
| EPI_ISL_452544 to 452616                                                                                                                                                                                                                                                                                                                                                                                                                                                                                                                                                 | Servicio de Microbiología y Parasitología clínica. UCEIMP. Hospital Universitario Virgen del Rocío/IBIS/CSIC/US.                                                                                                                | SeqCOVID-SPAIN consortium/IBV(CSIC)                                                                                                                                                                                            | Guillermo Martí-n Gutiérrez; Javier Aznar Martí-n and SeqCOVID-SPAIN consortium; Lidia Gálvez Benitez; Verónica González Galán; Ángel Rodríguez Villodres                                                                                                                                                                                                                                                                                          |
| EPI_ISL_468765 to 468859, EPI_ISL_500287 to 500288, EPI_ISL_500290 to 500291, EPI_ISL_500336 to 500341, EPI_ISL_500343 to 500347, EPI_ISL_500349 to 500357, EPI_ISL_500359 to 500368, EPI_ISL_510333 to 510390, EPI_ISL_537729 to 537787                                                                                                                                                                                                                                                                                                                                 | see above                                                                                                                                                                                                                       | Servicio de Microbiología, Hospital Miguel Servet, Zaragoza                                                                                                                                                                    | Alexander Tristancho Baró; Ana Milagro; Antonio Rezusta López; Nieves Martínez Cameo and SeqCOVID-SPAIN consortium; Yolanda Gracia Grataloup                                                                                                                                                                                                                                                                                                       |
| EPI_ISL_541008 to 541036                                                                                                                                                                                                                                                                                                                                                                                                                                                                                                                                                 | Servicio de Microbiología, Hospital Miguel Servet, Zaragoza                                                                                                                                                                     | SeqCOVID-SPAIN consortium/Institute of Biomedicine of Valencia, IBV-CSIC                                                                                                                                                       | Alexander Tristancho Baró; Ana Milagro; Antonio Rezusta López; Nieves Martínez Cameo and SeqCOVID-SPAIN consortium; Yolanda Gracia Grataloup                                                                                                                                                                                                                                                                                                       |
| EPI_ISL_582695 to 582766                                                                                                                                                                                                                                                                                                                                                                                                                                                                                                                                                 | Servicio de Microbiología, Hospital Universitario Cruces, Bilbao                                                                                                                                                                | SeqCOVID-SPAIN consortium/IBV(CSIC)                                                                                                                                                                                            | Maitane Aranzamendi Zaldumbide and SeqCOVID-SPAIN consortium                                                                                                                                                                                                                                                                                                                                                                                       |
| EPI_ISL_467055 to 467058, EPI_ISL_468952 to 469015, EPI_ISL_541949 to 541969                                                                                                                                                                                                                                                                                                                                                                                                                                                                                             | Servicio de Microbiología, Hospital Universitario San Espases                                                                                                                                                                   | SeqCOVID-SPAIN consortium/IBV(CSIC)                                                                                                                                                                                            | Antonio Oliver and SeqCOVID-SPAIN consortium; Carla López-Causapé; Jordi Reina; Jordi Reina y Antonio Oliver and SeqCOVID-SPAIN consortium                                                                                                                                                                                                                                                                                                         |
| EPI_ISL_510510 to 510523                                                                                                                                                                                                                                                                                                                                                                                                                                                                                                                                                 | Servicio de Microbiología, Laboratori Clínic Metropolitana Nord, Hospital Universitari Germans Trias i Pujol, Institut d'Investigació en Ciències de la Salut Germans Trias i Pujol (IGTP)                                      | SeqCOVID-SPAIN consortium/IBV(CSIC)                                                                                                                                                                                            | Adrián Antuori; Anabel Fernández; Anna Not; Antoni E. Bordoy; Elisa Martró; Nona Romani and SeqCOVID-SPAIN consortium                                                                                                                                                                                                                                                                                                                              |
| EPI_ISL_537608, EPI_ISL_539234, EPI_ISL_539240 to 539242, EPI_ISL_539289 to 539298                                                                                                                                                                                                                                                                                                                                                                                                                                                                                       | Servicio de Microbiología. Consorcio Hospital General Universitario de Valencia                                                                                                                                                 | SeqCOVID-SPAIN consortium/IBV(CSIC)                                                                                                                                                                                            | Beatriz Beamud; David Navarro; Fernando Gonzalez-Candelas and SeqCOVID-SPAIN consortium; Giuseppe D'Auria; Griselda De Marco; Inma Galán Vendrell; Ivan Ansari; Lidia Ruiz Roldan; Lúcia Martínez-Priego; Loreto Ferrús Abad; Maria Alma Bracho; Mariana Reyes-Prieto; Marta Pla Diaz; Neris Garcia-Gonzalez; Paula Ruiz-Hueso; Sandra Carbo; Vicente Soriano Chirona                                                                              |
| EPI_ISL_416483 to 416484, EPI_ISL_416486 to 416487, EPI_ISL_417205, EPI_ISL_419675 to 419690, EPI_ISL_420112 to 420124, EPI_ISL_425178 to 425198, EPI_ISL_425212 to 425223, EPI_ISL_436195 to 436234, EPI_ISL_436271 to 436277, EPI_ISL_436361, EPI_ISL_436382 to 436395                                                                                                                                                                                                                                                                                                 | see above                                                                                                                                                                                                                       | Servicio de Microbiología. Consorcio Hospital General Universitario de Valencia                                                                                                                                                | ; Beatriz Beamud; Concepcion Gimeno; David Navarro; Fernando Gonzalez-Candelas; Giuseppe D'Auria; Griselda De Marco; Inma Galán Vendrell; Ivan Ansari; Lidia Ruiz Roldan; Lúcia Martínez-Priego; Lidia Martínez-Priego; Lidia Martínez-Priego; Griselda De Marco; Loreto Ferrús Abad; Maria Alma Bracho; Maria Dolores Ocete; Mariana Reyes-Prieto; Marta Pla Diaz; Neris Garcia-Gonzalez; Paula Ruiz-Hueso; Sandra Carbo; Vicente Soriano Chirona |
| EPI_ISL_452365 to 452452, EPI_ISL_509602 to 509609, EPI_ISL_509611, EPI_ISL_509619 to 509632, EPI_ISL_510044 to 510063, EPI_ISL_565908 to 565919                                                                                                                                                                                                                                                                                                                                                                                                                         | Servicio de Microbiología. HRU de Málaga. Servicio Andaluz de Salud                                                                                                                                                             | SeqCOVID-SPAIN consortium/IBV(CSIC)                                                                                                                                                                                            | Begoña Palop Borrás and SeqCOVID-SPAIN consortium; Inmaculada de Toro Peinado; Inmaculada de Toro Peinado. M <sup>o</sup> Concepción Mediavilla Gradolph. Begoña Palop Borrás and SeqCOVID-SPAIN consortium; Ma Concepción Mediavilla Gradolph; María Concepción Mediavilla Gradolph                                                                                                                                                               |
| EPI_ISL_583917                                                                                                                                                                                                                                                                                                                                                                                                                                                                                                                                                           | Servicio de Microbiología. Hospital General Universitario de Castellón                                                                                                                                                          | SeqCOVID-SPAIN consortium/IBV (CSIC)                                                                                                                                                                                           | María Dolores Tirado and SeqCOVID-SPAIN consortium; Rosario Moreno                                                                                                                                                                                                                                                                                                                                                                                 |
| EPI_ISL_537946 to 537995, EPI_ISL_538613 to 538671, EPI_ISL_539284 to 539287, EPI_ISL_583918 to 583952                                                                                                                                                                                                                                                                                                                                                                                                                                                                   | Servicio de Microbiología. Hospital General Universitario de Castellón                                                                                                                                                          | SeqCOVID-SPAIN consortium/IBV(CSIC)                                                                                                                                                                                            | María Dolores Tirado and SeqCOVID-SPAIN consortium; Rosario Moreno                                                                                                                                                                                                                                                                                                                                                                                 |
| EPI_ISL_1423737 to 1423761, EPI_ISL_1423793 to 1423815                                                                                                                                                                                                                                                                                                                                                                                                                                                                                                                   | Servicio de Microbiología. Hospital Ramón y Cajal. (CIBERESP)                                                                                                                                                                   | SeqCOVID-SPAIN consortium/IBV(CSIC)                                                                                                                                                                                            | Jose M <sup>o</sup> González-Alba; Juan C Galán and SeqCOVID-SPAIN consortium; L. Olavarrieta; Val Fernández                                                                                                                                                                                                                                                                                                                                       |
| EPI_ISL_480952 to 480960, EPI_ISL_480962 to 480974, EPI_ISL_480976 to 480980, EPI_ISL_480982 to 480988, EPI_ISL_480990 to 480994, EPI_ISL_480996 to 481002, EPI_ISL_481004 to 481016, EPI_ISL_481018 to 481024, EPI_ISL_481026 to 481028, EPI_ISL_481030 to 481033, EPI_ISL_481036 to 481040, EPI_ISL_500292 to 500335, EPI_ISL_509601, EPI_ISL_509610, EPI_ISL_509612 to 509615, EPI_ISL_509633 to 509654, EPI_ISL_510391 to 510423, EPI_ISL_510467 to 510509, EPI_ISL_538062 to 538081, EPI_ISL_565920 to 565925, EPI_ISL_582034 to 582090, EPI_ISL_1423858 to 1423902 | see above                                                                                                                                                                                                                       | Servicio de Microbiología. Hospital Universitario Donostia. OSI Donostialdea. Área de Enfermedades Infecciosas, Grupo de Infección Respiratoria y Resistencia Antimicrobiana. Instituto de Investigación Sanitaria Biodonostia |                                                                                                                                                                                                                                                                                                                                                                                                                                                    |
| EPI_ISL_541083 to 541137                                                                                                                                                                                                                                                                                                                                                                                                                                                                                                                                                 | Servicio de Microbiología. Hospital Universitario Donostia. OSI Donostialdea. Área de Enfermedades Infecciosas, Grupo de Infección Respiratoria y Resistencia Antimicrobiana. Instituto de Investigación Sanitaria Biodonostia  | SeqCOVID-SPAIN consortium/Institute of Biomedicine of Valencia, IBV-CSIC                                                                                                                                                       | Gustavo Cilla; Jose Maria Marimón and SeqCOVID-SPAIN consortium; Luis Piñeiro; Milagrosa Montes                                                                                                                                                                                                                                                                                                                                                    |
| EPI_ISL_452617 to 452691, EPI_ISL_468860 to 468913, EPI_ISL_468915 to 468951                                                                                                                                                                                                                                                                                                                                                                                                                                                                                             | Servicio de Microbiología. Hospital Universitario Donostia. OSI Donostialdea. Área de Enfermedades Infecciosas, Grupo de Infección Respiratoria y Resistencia Antimicrobiana. Instituto de Investigación Sanitaria Biodonostia. | SeqCOVID-SPAIN consortium/IBV(CSIC)                                                                                                                                                                                            | Gustavo Cilla; Jose Maria Marimón and SeqCOVID-SPAIN consortium; Luis Piñeiro; Milagrosa Montes                                                                                                                                                                                                                                                                                                                                                    |
| EPI_ISL_1468462                                                                                                                                                                                                                                                                                                                                                                                                                                                                                                                                                          | Servicio Especial de Saude de Araraquara Sesa Araraquara                                                                                                                                                                        | Instituto Adolfo Lutz, Interdisciplinary Procedures Center, Strategic Laboratory                                                                                                                                               | Caio Vinicius Dias Lopes; Claudia Regina Gonçalves; Claudio Tavares Sacchi; Erica Valessa Ramos Gomes; Karoline Rodrigues Campos                                                                                                                                                                                                                                                                                                                   |
| EPI_ISL_574598                                                                                                                                                                                                                                                                                                                                                                                                                                                                                                                                                           | Servicio de Verificacao de Obito SVO                                                                                                                                                                                            | Instituto Adolfo Lutz, Interdisciplinary Procedures Center, Strategic Laboratory                                                                                                                                               | Claudia Regina Gonçalves; Claudio Tavares Sacchi; Erica Valessa Ramos Gomes; Karoline Rodrigues Campos                                                                                                                                                                                                                                                                                                                                             |
| EPI_ISL_1533718                                                                                                                                                                                                                                                                                                                                                                                                                                                                                                                                                          | Servicio de Verificacao de Obitos Svo Guarulhos                                                                                                                                                                                 | Instituto Adolfo Lutz, Interdisciplinary Procedures Center, Strategic Laboratory                                                                                                                                               | Caio Vinicius Dias Lopes; Claudia Regina Gonçalves; Claudio Tavares Sacchi; Erica Valessa Ramos Gomes; Karoline Rodrigues Campos; Leonardo Jose Tadeu de Araujo                                                                                                                                                                                                                                                                                    |
| EPI_ISL_529010 to 529012                                                                                                                                                                                                                                                                                                                                                                                                                                                                                                                                                 | Servizio Igiene Epidemiologia e Sanità Pubblica (SIESP)-L'Aquila                                                                                                                                                                | Istituto Zooprofilattico Sperimentale dell'Abruzzo e Molise "G. Caporale"                                                                                                                                                      | Ancora M; Cammà C; Curini V; Di Domenico M; Di Pasquale A; Lorusso A; Mangone I; Marcacci M; Puglia I; Rinaldi A; Savini G.                                                                                                                                                                                                                                                                                                                        |
| EPI_ISL_435152                                                                                                                                                                                                                                                                                                                                                                                                                                                                                                                                                           | Servizio di Igiene, Epidemiologia e Sanità Pubblica (SIESP) Avezzano                                                                                                                                                            | Istituto Zooprofilattico Sperimentale dell'Abruzzo e Molise "G. Caporale"                                                                                                                                                      | Ancora M; Cammà C; Curini V; Di Domenico M; Di Pasquale A; Lorusso A; Mangone I; Marcacci M; Puglia I; Rinaldi A; Savini G                                                                                                                                                                                                                                                                                                                         |
| EPI_ISL_529006, EPI_ISL_529008                                                                                                                                                                                                                                                                                                                                                                                                                                                                                                                                           | Servizio di igiene e sanità pubblica (SIESP)-Teramo                                                                                                                                                                             | Istituto Zooprofilattico Sperimentale dell'Abruzzo e Molise                                                                                                                                                                    | Ancora M; Cammà C; Curini V; Di Domenico M; Di Pasquale A; Lorusso A; Mangone I; Marcacci M; Puglia I; Rinaldi A; Savini G.                                                                                                                                                                                                                                                                                                                        |



|                                                                                                                                                                                                                                                                                                                                                                                                                                     |                                                                                                                                              |                                                                                                                                                                                         |                                                                                                                                                                                                                                                                                                                                                                                                                                                                    |
|-------------------------------------------------------------------------------------------------------------------------------------------------------------------------------------------------------------------------------------------------------------------------------------------------------------------------------------------------------------------------------------------------------------------------------------|----------------------------------------------------------------------------------------------------------------------------------------------|-----------------------------------------------------------------------------------------------------------------------------------------------------------------------------------------|--------------------------------------------------------------------------------------------------------------------------------------------------------------------------------------------------------------------------------------------------------------------------------------------------------------------------------------------------------------------------------------------------------------------------------------------------------------------|
| EPI_ISL_528994 to 529005, EPI_ISL_529023 to 529025                                                                                                                                                                                                                                                                                                                                                                                  | Servizio di igiene epidemiologia e sanità pubblica (SIESP)-Chieti                                                                            | Istituto Zooprofilattico Sperimentale dell'Abruzzo e Molise "G. Caporale"                                                                                                               | Ancora M; Cammà C; Curini V; Di Domenico M; Di Pasquale A; Lorusso A; Mangone I; Marcacci M; Puglia I; Rinaldi A; Savini G.                                                                                                                                                                                                                                                                                                                                        |
| EPI_ISL_436730                                                                                                                                                                                                                                                                                                                                                                                                                      | Servizio di igiene epidemiologia e sanità pubblica (Siesp) Chieti                                                                            | Istituto Zooprofilattico Sperimentale dell'Abruzzo e Molise "G. Caporale"                                                                                                               | Ancora M; Cammà C; Curini V; Di Domenico M; Di Pasquale A; Lorusso A; Mangone I; Marcacci M; Puglia I; Rinaldi A; Savini G                                                                                                                                                                                                                                                                                                                                         |
| EPI_ISL_1543930                                                                                                                                                                                                                                                                                                                                                                                                                     | Servizo de Microbioloxía, Complexo Hospitalario de Santiago de Compostela                                                                    | Servizo de Microbioloxía, Complexo Hospitalario de Santiago de Compostela21                                                                                                             | Amparo Coira; Antonio Aguilera; Carlos García_Riestra; Daniel Navarro; Gema Barbeito; Iria Roca; José Llovo; Laura Millán; Manuela Hernández; María Luisa Pérez_del_Molino; Mercedes Treviño; Rocío Trastoy; Xosé Costa                                                                                                                                                                                                                                            |
| EPI_ISL_534315, EPI_ISL_583495                                                                                                                                                                                                                                                                                                                                                                                                      | Serviço de Verificação de Óbitos SVO Guarulhos                                                                                               | Instituto Adolfo Lutz, Interdisciplinary Procedures Center, Strategic Laboratory                                                                                                        | Claudia Regina Gonçalves; Claudio Tavares Sacchi; Erica Valessa Ramos Gomes; Karoline Rodrigues Campos                                                                                                                                                                                                                                                                                                                                                             |
| EPI_ISL_515543                                                                                                                                                                                                                                                                                                                                                                                                                      | Serviço de Vigilância Sanitária e Epidemiológica                                                                                             | Instituto Adolfo Lutz, Interdisciplinary Procedures Center, Strategic Laboratory                                                                                                        | Claudia Regina Gonçalves; Claudio Tavares Sacchi; Erica Valessa Ramos Gomes                                                                                                                                                                                                                                                                                                                                                                                        |
| EPI_ISL_414934 to 414941                                                                                                                                                                                                                                                                                                                                                                                                            | Shandong Provincial Center for Disease Control and Prevention                                                                                | Beijing Institute of Microbiology and Epidemiology                                                                                                                                      | Bo Pang; Can-Fang Lin; Cun-Bao Li; Dian-Ming Kang; Feng Gao; Guo-Lin Wang; Jie Lei; Li-Jun Duan; Lin Yao; Mai-Juan Ma; Ming-Xiao Yao; Sheng-Xiang Ji; Wen-Kui Sun; Xiang-Na Zhao; Xiao Wei; Xiao-Li Zhang; Xiao-Lin Jiang; Yang Hang; Zeng-Qiang Kou                                                                                                                                                                                                               |
| EPI_ISL_416316 to 416409                                                                                                                                                                                                                                                                                                                                                                                                            | Shanghai Public Health Clinical Center, Shanghai Medical College, Fudan University                                                           | National Research Center for Translational Medicine (Shanghai), Ruijin Hospital affiliated to Shanghai Jiao Tong University School of Medicine & Shanghai Public Health Clinical Center | Gang Lu; Hongzhou Lu; Saijuan Chen; Shengyue Wang; Xiaonan Zhang; Yun Ling; Yun Tan                                                                                                                                                                                                                                                                                                                                                                                |
| EPI_ISL_497950                                                                                                                                                                                                                                                                                                                                                                                                                      | Shaoxing CDC                                                                                                                                 | Zhejiang Provincial Center for Disease Control and Prevention                                                                                                                           | Haiyan Mao; Hao Yan; Junhang Pan; Wen Shi; Xiuyu Lou; Yanjun Zhang; Yi Sun; Yin Chen; Zhen Li                                                                                                                                                                                                                                                                                                                                                                      |
| EPI_ISL_463889, EPI_ISL_463894 to 463902                                                                                                                                                                                                                                                                                                                                                                                            | Shaoxing Center for Disease Control and Prevention                                                                                           | Department of Pathology and Laboratory Medicine, University of California Los Angeles                                                                                                   | Evann E. Hilt; Fan Li; Huan Wu; JiLing Wang; Jialiang Tang; Jinkun Chen; QinChao Zhang; Shangxin Yang; Yifang Wang; Zhuojing Jiang; Ziqin Li                                                                                                                                                                                                                                                                                                                       |
| EPI_ISL_1478854, EPI_ISL_1478856, EPI_ISL_1478886, EPI_ISL_1500235                                                                                                                                                                                                                                                                                                                                                                  | Shapiro Center                                                                                                                               | Illinois Department of Public Health - Springfield Lab                                                                                                                                  | Bryan Sim; Gordon McCall                                                                                                                                                                                                                                                                                                                                                                                                                                           |
| EPI_ISL_1468829 to 1468831, EPI_ISL_1468833 to 1468836, EPI_ISL_1468838, EPI_ISL_1468840, EPI_ISL_1468845 to 1468846, EPI_ISL_1468848, EPI_ISL_1468850 to 1468853, EPI_ISL_1468855 to 1468873, EPI_ISL_1468889 to 1468905, EPI_ISL_1468910 to 1468913, EPI_ISL_1468917 to 1468921, EPI_ISL_1468952, EPI_ISL_1468954, EPI_ISL_1468957 to 1468958, EPI_ISL_1468960 to 1468978, EPI_ISL_1469061 to 1469087, EPI_ISL_1531777 to 1531806 | see above                                                                                                                                    | Sharp HealthCare Laboratory                                                                                                                                                             | Andersen lab at Scripps Research                                                                                                                                                                                                                                                                                                                                                                                                                                   |
| EPI_ISL_582125 to 582126                                                                                                                                                                                                                                                                                                                                                                                                            | Sheikh Khalifa Medical City                                                                                                                  | Molecular Surveillance lab Sheikh Khalifa Medical City                                                                                                                                  | Art Mendoza; Cathy Woerle; Jacquelyn Berumen; Liam McGinnis; Omid Bakhtar; SEARCH Alliance San Diego with Aaron Harding                                                                                                                                                                                                                                                                                                                                            |
| EPI_ISL_582608 to 582691                                                                                                                                                                                                                                                                                                                                                                                                            | Sheikh Khalifa Medical City                                                                                                                  | Molecular/Surveillance lab Sheikh Khalifa Medical City                                                                                                                                  | Amirtharaj Francis; Hala Imambaccus; Hiba Saud; Sahar Almarzooqi; Sajeed Abdul; Stefan Weber                                                                                                                                                                                                                                                                                                                                                                       |
| EPI_ISL_406593 to 406595                                                                                                                                                                                                                                                                                                                                                                                                            | Shenzhen Key Laboratory of Pathogen and Immunity, National Clinical Research Center for Infectious Disease, Shenzhen Third People's Hospital | Shenzhen Key Laboratory of Pathogen and Immunity, National Clinical Research Center for Infectious Disease, Shenzhen Third People's Hospital                                            | Chenguang Shen; Haixia Zheng; Li Xing; Yang Yang; Yingxia Liu; Zhixiang Xu                                                                                                                                                                                                                                                                                                                                                                                         |
| EPI_ISL_406592                                                                                                                                                                                                                                                                                                                                                                                                                      | Shenzhen Third People's Hospital                                                                                                             | Shenzhen Key Laboratory of Pathogen and Immunity, National Clinical Research Center for Infectious Disease, Shenzhen Third People's Hospital                                            | Chenguang Shen; Haixia Zheng; Li Xing; Yang Yang; Yingxia Liu; Zhixiang Xu                                                                                                                                                                                                                                                                                                                                                                                         |
| EPI_ISL_1469987                                                                                                                                                                                                                                                                                                                                                                                                                     | Shimantik Pathology and Diagnostic Center                                                                                                    | Child Health Research Foundation                                                                                                                                                        | CHRF Bangladesh Genomics Team; Md. Mobarok Karim; Md. Parvej Alam                                                                                                                                                                                                                                                                                                                                                                                                  |
| EPI_ISL_1533610                                                                                                                                                                                                                                                                                                                                                                                                                     | Shiraz University                                                                                                                            | Shiraz University                                                                                                                                                                       | Abozar Ghorbani; Ebrahim Eftekhari; Hakimeh Ahmadi; Hamed Gouklani                                                                                                                                                                                                                                                                                                                                                                                                 |
| EPI_ISL_480074 to 480082                                                                                                                                                                                                                                                                                                                                                                                                            | Shizuoka City Institute of Environmental Sciences and Public Health                                                                          | Pathogen Genomics Center, National Institute of Infectious Diseases                                                                                                                     | Hajime Kamiya; Kenji Yagi; Kentaro Itokawa; Makoto Kuroda; Masanori Hashino; Motoi Suzuki; Rina Tanaka; Sou Okamura; Takaharu Maehata; Tsuyoshi Sekizuka; Yuji Kanazawa                                                                                                                                                                                                                                                                                            |
| EPI_ISL_437187                                                                                                                                                                                                                                                                                                                                                                                                                      | Siloam Hospitals                                                                                                                             | Institute of Tropical Disease, Universitas Airlangga                                                                                                                                    | Aldise M Nastri; Gatot Soegiarto; Jezzy R Dewantari; Kazufumi Shimizu; Krisnoadi Rahardjo; Laksmi Wulandari; Maria I Lusida; Maria M Padmidevi; Mitsuhiro Nishimura; Resti Y Meliana; Retno A Setyoningrum; Rima R Prasetya; Soetjipto; Yasuko Mori; Yohko K Shimizu                                                                                                                                                                                               |
| EPI_ISL_470589 to 470597                                                                                                                                                                                                                                                                                                                                                                                                            | Simile                                                                                                                                       | Bioinformatics Laboratory / LNCC                                                                                                                                                        | Alexandra Gerber; Amílcar Tanuri; Ana Paula Guimarães; CADDE-group; Carolina Voloch; Ester Cerdeira Sabino; Filipe Romero; Ingra Morales Claro; Jaqueline Goes de Jesus; Laboratório Hermes Pardini; Laboratório Simile; Luiz Gonzaga Paula de Almeida; Mariane Talon; Nuno Rodrigues Faria; Renato Santana Aguiar e Ana Tereza Vasconcelos; Ronaldo da Silva Francisco Junior; Terezinha Marta Pereira; working group UFMG; working group UFRJ; Átala Duque Rossi |
| EPI_ISL_462085 to 462089, EPI_ISL_482672 to 482699, EPI_ISL_500539 to 500572, EPI_ISL_509372 to 509395, EPI_ISL_517996 to 518017, EPI_ISL_524445 to 524449, EPI_ISL_583893 to 583900, EPI_ISL_610152 to 610154                                                                                                                                                                                                                      | see above                                                                                                                                    | Singapore General Hospital                                                                                                                                                              | Department of Microbiology                                                                                                                                                                                                                                                                                                                                                                                                                                         |
| EPI_ISL_406973                                                                                                                                                                                                                                                                                                                                                                                                                      | Singapore General Hospital                                                                                                                   | National Public Health Laboratory                                                                                                                                                       | Chenhao Li; Chenhao Li; Karrie Ko; Karrie Ko; Kenneth Xin Long Chan; Kern Rei Chng; Kern Rei Chng; Kian Sing Chan; Kian Sing Chan; Kun Lee Lim; Kun Lee Lim; Lynette Oon; Lynette Oon; Niranjan Nagarajan; Niranjan Nagarajan; Nurdyana Abdul Rahman; Nurdyana Abdul Rahman; Sul Sin Goh                                                                                                                                                                           |
| EPI_ISL_407987                                                                                                                                                                                                                                                                                                                                                                                                                      | Singapore General Hospital                                                                                                                   | Programme in Emerging Infectious Diseases, Duke-NUS Medical School                                                                                                                      | Chavatte JM; Cui; L; Lin; Mak; Octavia S; RTP; TM; ZY; Zhou                                                                                                                                                                                                                                                                                                                                                                                                        |
| EPI_ISL_410536 to 410537                                                                                                                                                                                                                                                                                                                                                                                                            | Singapore General Hospital, Molecular Laboratory, Division of Pathology                                                                      | Programme in Emerging Infectious Diseases, Duke-NUS Medical School                                                                                                                      | Danielle E Anderson; Gavin JD Smith; Jayanthi Jayakumar; Jenny GH Low; Kian Sing Chan; Linfa Wang; Lynette LE Oon; Martin Linster; Yan Zhuang; Yvonne CF Su                                                                                                                                                                                                                                                                                                        |
| EPI_ISL_569611                                                                                                                                                                                                                                                                                                                                                                                                                      | Sioux Falls Urgent Care                                                                                                                      | South Dakota Public Health Laboratory                                                                                                                                                   | Danielle E Anderson; Gavin JD Smith; Jayanthi Jayakumar; Jenny GH Low; Kian Sing Chan; Lynette LE Oon; Martin Linster; Shirin Kalimuddin; Yan Zhuang; Yvonne CF Su                                                                                                                                                                                                                                                                                                 |
| EPI_ISL_426414                                                                                                                                                                                                                                                                                                                                                                                                                      | Sir M P Shah Government Medical College                                                                                                      | Gujarat Biotechnology Research Centre                                                                                                                                                   | Jacob Garfin; Matt Plumb; Xiong Wang; and Chris Carlson                                                                                                                                                                                                                                                                                                                                                                                                            |
| EPI_ISL_524746 to 524751                                                                                                                                                                                                                                                                                                                                                                                                            | Sir M P Shah Government Medical College, Jamnagar                                                                                            | Gujarat Biotechnology Research Centre                                                                                                                                                   | Akanksha Verma; Amit Kanani; Ankit Hinsu; Apurvasinh Puvar; Bhavesh Modi; Binita Aring; Chaitanya Joshi; Dinesh Kumar; Dipa Kinariwala; Disha Patel; Geeta Vaghela; Janvi Raval; Kairavi Joshi; Madhvi Joshi; Maharshi Pandya; Monika Gandhi; Nidhi Sood; Nitin Savaliya; Pinal Trivedi; Pranay Shah; Pritesh Sabara; R D Dixit; Raghavendra Kumar; Ramesh Pandit; Snehal Bagatharia; Sonia Barve; Tejas Shah; Zubair Saiyed                                       |
| EPI_ISL_426415                                                                                                                                                                                                                                                                                                                                                                                                                      | Sir M P Shah Government Medical College, Jamnagar                                                                                            | Gujarat Biotechnology Research Centre, Gandhinagar                                                                                                                                      | A M Kadri; Afzal Ansari; Apurvasinh Puvar; Binita Aring; Chaitanya Joshi; Dinesh Kumar; Harsh Bakshi; Janvi Raval; Komal Patel; Labdhi Pandya; Madhvi Joshi; Maharshi Pandya; Monika Gandhi; Nidhi Patel; Nikha Trivedi; Nitin Savaliya; Pinal Trivedi; R D Dixit; Raghavendra Kumar; Zarna Patel; Zuber Saiyed                                                                                                                                                    |
| EPI_ISL_455586                                                                                                                                                                                                                                                                                                                                                                                                                      | Siriraj hospital                                                                                                                             | National Institute of Health, Department of medical Sciences, Ministry of Public Health, Thailand                                                                                       | Akanksha Verma; Amit Kanani; Ankit Hinsu; Apurvasinh Puvar; Bhavesh Modi; Binita Aring; Chaitanya Joshi; Dinesh Kumar; Dipa Kinariwala; Disha Patel; Geeta Vaghela; Janvi Raval; Kairavi Joshi; Madhvi Joshi; Maharshi Pandya; Monika Gandhi; Nidhi Sood; Nitin Savaliya; Pinal Trivedi; Pranay Shah; Pritesh Sabara; R D Dixit; Raghvendra Kumar; Ramesh Pandit; Snehal Bagatharia; Sonia Barve; Tejas Shah; Zuber Saiyed                                         |
| EPI_ISL_534225 to 534229, EPI_ISL_560980                                                                                                                                                                                                                                                                                                                                                                                            | Skanes universitetstsjukhus Lund                                                                                                             | The Public Health Agency of Sweden                                                                                                                                                      | Chittaganpitch; Malinee; Okada; Parmmen; Phuygun; Pilailuk; Siripaporn; Sittiporn; Sunthareeya; Thanadachakul; Thanutsapa; Waicharoen; Warawan; Wongboot                                                                                                                                                                                                                                                                                                           |
| EPI_ISL_454494 to 454496, EPI_ISL_455842 to 455845, EPI_ISL_475085, EPI_ISL_475092, EPI_ISL_475099, EPI_ISL_475105 to 475109, EPI_ISL_475111 to 475113, EPI_ISL_475140, EPI_ISL_475549 to 475550, EPI_ISL_475554 to 475555, EPI_ISL_476143 to 476144, EPI_ISL_510845 to 510851, EPI_ISL_548245 to 548246, EPI_ISL_615115 to 615116                                                                                                  | see above                                                                                                                                    | The Public Health Agency of Sweden                                                                                                                                                      | Anna Risberg; Anna-Malin Linde; Karin Tegmark-Wisell; Maria Lind Karlberg; Mattias Haukland; Mia Brytting; Olov Svartstrom; Oskar Karlsson Lindsjo; Petra Edquist; Reza Advani; Sandra Brodsson                                                                                                                                                                                                                                                                    |
| EPI_ISL_455108                                                                                                                                                                                                                                                                                                                                                                                                                      | Smedby HC                                                                                                                                    | The Public Health Agency of Sweden                                                                                                                                                      | Anna Risberg; Anna-Malin Linde; Karin Tegmark-Wisell; Maria Lind Karlberg; Mia Brytting; Olov Svartstrom; Oskar Karlsson Lindsjo; Susanne Brunby;                                                                                                                                                                                                                                                                                                                  |



|                                                                                                                                                                                                                                                                                                                                                                                                                                                                                                                  |                                                                                                                                                                                                                                |                                                                                                                                                                                                                                |                                                                                                                                                                                                                                                                                                                                                                                                                                                                                                                                                                                                          |
|------------------------------------------------------------------------------------------------------------------------------------------------------------------------------------------------------------------------------------------------------------------------------------------------------------------------------------------------------------------------------------------------------------------------------------------------------------------------------------------------------------------|--------------------------------------------------------------------------------------------------------------------------------------------------------------------------------------------------------------------------------|--------------------------------------------------------------------------------------------------------------------------------------------------------------------------------------------------------------------------------|----------------------------------------------------------------------------------------------------------------------------------------------------------------------------------------------------------------------------------------------------------------------------------------------------------------------------------------------------------------------------------------------------------------------------------------------------------------------------------------------------------------------------------------------------------------------------------------------------------|
| see above                                                                                                                                                                                                                                                                                                                                                                                                                                                                                                        | South Eastern Area Laboratory Services (SEALS)                                                                                                                                                                                 | NSW Health Pathology - Institute of Clinical Pathology and Medical Research; Westmead Hospital; University of Sydney                                                                                                           | CIDM-PH et al.                                                                                                                                                                                                                                                                                                                                                                                                                                                                                                                                                                                           |
| EPI_ISL_1443287                                                                                                                                                                                                                                                                                                                                                                                                                                                                                                  | South Six Express Care Respiratory Clinic                                                                                                                                                                                      | Illinois Department of Public Health - Springfield Lab                                                                                                                                                                         | Bryan Sim; Gordon McCall                                                                                                                                                                                                                                                                                                                                                                                                                                                                                                                                                                                 |
| EPI_ISL_1478847, EPI_ISL_1500239 to 1500240                                                                                                                                                                                                                                                                                                                                                                                                                                                                      | South Sixth Express Care Respiratory Clinic                                                                                                                                                                                    | Illinois Department of Public Health - Springfield Lab                                                                                                                                                                         | Bryan Sim; Gordon McCall                                                                                                                                                                                                                                                                                                                                                                                                                                                                                                                                                                                 |
| EPI_ISL_456158 to 456159, EPI_ISL_456162, EPI_ISL_456167, EPI_ISL_456181, EPI_ISL_456216 to 456220, EPI_ISL_456225 to 456240, EPI_ISL_456242 to 456254, EPI_ISL_456261 to 456293, EPI_ISL_456295 to 456299, EPI_ISL_456302 to 456318, EPI_ISL_456344 to 456347, EPI_ISL_536788 to 536789, EPI_ISL_579124 to 579128, EPI_ISL_579133 to 579155, EPI_ISL_579157 to 579189, EPI_ISL_579219                                                                                                                           |                                                                                                                                                                                                                                |                                                                                                                                                                                                                                |                                                                                                                                                                                                                                                                                                                                                                                                                                                                                                                                                                                                          |
| see above                                                                                                                                                                                                                                                                                                                                                                                                                                                                                                        | Southern Community Labs Dunedin                                                                                                                                                                                                | Institute of Environmental Science and Research (ESR)                                                                                                                                                                          | Anja Werno; Antje van der Linden; Arlo Upton; Chris Mansell; David Hammer; Dragana Drinkovic; Erasmus Smit; Gary McAuliffe; Hana Sofia Andersson; Hermes Perez; James Ussher; Jill Sherwood; Jing Wang; Joep de Ligt; Josh Freeman; Julia Howard; Juliet Elvy; Lauren Jelly; Mary DeAlmeida; Matt Blakiston; Matt Storey; Matthew Rogers; Max Bloomfield; Michael Addidle; Michelle Balm; Muhammad Faisal; Nikki Freed; Olin Silander; Sally Roberts; Sarah Jefferies; Sharmini Muttaiyah; Susan Morpeth; Susan Taylor; Timothy Blackmore; Vani Sathyendran; Veronica Playle; Virginia Hope; Xiaoyun Ren |
| EPI_ISL_469241 to 469252                                                                                                                                                                                                                                                                                                                                                                                                                                                                                         | Special Infectious Agents Unit                                                                                                                                                                                                 | Special Infectious Agents Unit                                                                                                                                                                                                 | A.M.; Al-Sobahy; Azhar; E.I.; El-Kafrawy; Farraj; Hassan; N.A.; S.A.; T.L.; Tolah; Uthman                                                                                                                                                                                                                                                                                                                                                                                                                                                                                                                |
| EPI_ISL_1553217 to 1553226                                                                                                                                                                                                                                                                                                                                                                                                                                                                                       | Springfield Clinic                                                                                                                                                                                                             | Illinois Department of Public Health - Springfield Lab                                                                                                                                                                         | Bryan Sim; Gordon McCall                                                                                                                                                                                                                                                                                                                                                                                                                                                                                                                                                                                 |
| EPI_ISL_1443220 to 1443221, EPI_ISL_1443233, EPI_ISL_1443275 to 1443276, EPI_ISL_1443285 to 1443286, EPI_ISL_1478844 to 1478846, EPI_ISL_1478884, EPI_ISL_1478922 to 1478924, EPI_ISL_1500219                                                                                                                                                                                                                                                                                                                    |                                                                                                                                                                                                                                |                                                                                                                                                                                                                                |                                                                                                                                                                                                                                                                                                                                                                                                                                                                                                                                                                                                          |
| see above                                                                                                                                                                                                                                                                                                                                                                                                                                                                                                        | Springfield Clinic Laboratory                                                                                                                                                                                                  | Illinois Department of Public Health - Springfield Lab                                                                                                                                                                         | Bryan Sim; Gordon McCall                                                                                                                                                                                                                                                                                                                                                                                                                                                                                                                                                                                 |
| EPI_ISL_1483207 to 1483209, EPI_ISL_1483232 to 1483234                                                                                                                                                                                                                                                                                                                                                                                                                                                           | Springfield-Greene Co. Health Dept.                                                                                                                                                                                            | Pathogen Discovery, Respiratory Viruses Branch, Division of Viral Diseases, Centers for Disease Control and Prevention                                                                                                         | Anna Kelleher; Anna Uehara; Brian Lynch; Clinton R. Paden; Haibin Wang; Han Jia Justin Ng; Jing Zhang; Krista Queen; Peter Cook; Suxiang Tong; Yan Li; Ying Tao                                                                                                                                                                                                                                                                                                                                                                                                                                          |
| EPI_ISL_1500241 to 1500242                                                                                                                                                                                                                                                                                                                                                                                                                                                                                       | St Margrets Hospital                                                                                                                                                                                                           | Illinois Department of Public Health - Springfield Lab                                                                                                                                                                         | Bryan Sim; Gordon McCall                                                                                                                                                                                                                                                                                                                                                                                                                                                                                                                                                                                 |
| EPI_ISL_513330, EPI_ISL_513347, EPI_ISL_513353 to 513356, EPI_ISL_513361 to 513365, EPI_ISL_513372, EPI_ISL_513379, EPI_ISL_513384 to 513385, EPI_ISL_513396 to 513399, EPI_ISL_526121 to 526123, EPI_ISL_526171, EPI_ISL_526177 to 526185, EPI_ISL_526187 to 526190, EPI_ISL_526194 to 526195, EPI_ISL_526200, EPI_ISL_544961, EPI_ISL_544968, EPI_ISL_544971 to 544973, EPI_ISL_544977 to 544981, EPI_ISL_544992 to 545001, EPI_ISL_545026, EPI_ISL_545030, EPI_ISL_547595 to 547596, EPI_ISL_591505 to 591506 |                                                                                                                                                                                                                                |                                                                                                                                                                                                                                |                                                                                                                                                                                                                                                                                                                                                                                                                                                                                                                                                                                                          |
| see above                                                                                                                                                                                                                                                                                                                                                                                                                                                                                                        | St Vincent's Pathology (SydPath)                                                                                                                                                                                               | NSW Health Pathology - Institute of Clinical Pathology and Medical Research; Westmead Hospital; University of Sydney                                                                                                           | CIDM-PH et al.                                                                                                                                                                                                                                                                                                                                                                                                                                                                                                                                                                                           |
| EPI_ISL_1553213                                                                                                                                                                                                                                                                                                                                                                                                                                                                                                  | St. Clair County Health Department                                                                                                                                                                                             | Illinois Department of Public Health - Springfield Lab                                                                                                                                                                         | Bryan Sim; Gordon McCall                                                                                                                                                                                                                                                                                                                                                                                                                                                                                                                                                                                 |
| EPI_ISL_514641, EPI_ISL_514646                                                                                                                                                                                                                                                                                                                                                                                                                                                                                   | St. Luke's Hospital                                                                                                                                                                                                            | Minnesota Department of Health, Public Health Laboratory                                                                                                                                                                       | Jacob Garfin; Matt Plumb; and Xiong Wang                                                                                                                                                                                                                                                                                                                                                                                                                                                                                                                                                                 |
| EPI_ISL_1443207, EPI_ISL_1478848, EPI_ISL_1478882, EPI_ISL_1553227                                                                                                                                                                                                                                                                                                                                                                                                                                               | St. Margaret's Hospital                                                                                                                                                                                                        | Illinois Department of Public Health - Springfield Lab                                                                                                                                                                         | Bryan Sim; Gordon McCall                                                                                                                                                                                                                                                                                                                                                                                                                                                                                                                                                                                 |
| EPI_ISL_1553245, EPI_ISL_1553249                                                                                                                                                                                                                                                                                                                                                                                                                                                                                 | St. Margarets Hospital                                                                                                                                                                                                         | Illinois Department of Public Health - Springfield Lab                                                                                                                                                                         | Bryan Sim; Gordon McCall                                                                                                                                                                                                                                                                                                                                                                                                                                                                                                                                                                                 |
| EPI_ISL_1492768, EPI_ISL_1493016 to 1493017, EPI_ISL_1493023, EPI_ISL_1493104, EPI_ISL_1533882                                                                                                                                                                                                                                                                                                                                                                                                                   | St. Nikolaus-Hospital Eupen                                                                                                                                                                                                    | GIGA Medical Genomics                                                                                                                                                                                                          | Bouchra Boujemla; Cécile Meex; Keith Durkin; Maria Artesi; Marie-Pierre Hayette; Nathalie Renotte; Pierrette Melin; Raphaël Boreux; Sébastien Bontems; Vincent Bours                                                                                                                                                                                                                                                                                                                                                                                                                                     |
| EPI_ISL_591540                                                                                                                                                                                                                                                                                                                                                                                                                                                                                                   | St.Johns Hospital                                                                                                                                                                                                              | Department of Neurovirology, National Institute of Mental Health and Neuroscience (NIMHANS)                                                                                                                                    | Anita Desai; Chitra Pattabiraman; Harsha PK; Manjunatha Venkataswamy; Pramada Prasad; Ravi Vasanthapuram; Risha Rasheed; Shafeeq S Hameed; Vijayalakshmi Reddy                                                                                                                                                                                                                                                                                                                                                                                                                                           |
| EPI_ISL_450346 to 450352                                                                                                                                                                                                                                                                                                                                                                                                                                                                                         | St.Olavs hospital/NTNU                                                                                                                                                                                                         | Institute of Genomics Core Facility, University of Tartu                                                                                                                                                                       | Aleksandr Ianevski; Denis Kainov; Janne-Fossum Malmring; Svein Arne Nordbo; Tuuli Reisberg                                                                                                                                                                                                                                                                                                                                                                                                                                                                                                               |
| EPI_ISL_596627 to 596676                                                                                                                                                                                                                                                                                                                                                                                                                                                                                         | St.Vincent's University Hospital                                                                                                                                                                                               | St.Vincent's University Hospital                                                                                                                                                                                               | Aisling Purcell; Gabriel Gonzalez; Guerrino Macori; Kirsten Schaffer; Lynda Fenelon; Mary Lucey; Niamh Mullane; Suzie Coughlan; Séamus Fanning; Una Sutton-Fitzpatrick                                                                                                                                                                                                                                                                                                                                                                                                                                   |
| EPI_ISL_1483795 to 1483798, EPI_ISL_1508963                                                                                                                                                                                                                                                                                                                                                                                                                                                                      | Stanford Clinical Virology Laboratory                                                                                                                                                                                          | Santa Clara County Public Health Laboratory                                                                                                                                                                                    | Santa Clara County Public Health Department                                                                                                                                                                                                                                                                                                                                                                                                                                                                                                                                                              |
| EPI_ISL_1424066 to 1424129                                                                                                                                                                                                                                                                                                                                                                                                                                                                                       | Stanford Health Care                                                                                                                                                                                                           | Stanford University School of Medicine, Clinical Virology Laboratory                                                                                                                                                           | Becky Jiang; ChunHong Huang; Daniel Solis; Fumiko Yamamoto; James Zehnder; Malaya K. Sahoo; Mamdouh Sibai; Michelle Verghese; and Benjamin A. Pinsky                                                                                                                                                                                                                                                                                                                                                                                                                                                     |
| EPI_ISL_450445 to 450481, EPI_ISL_476767 to 476794                                                                                                                                                                                                                                                                                                                                                                                                                                                               | Stanford clinical virology lab                                                                                                                                                                                                 | Chan-Zuckerberg Biohub                                                                                                                                                                                                         | Benjamin Pinsky; Carlos Bustamante; Euan Ashley; Hannah N. DeJong; Jason Andrews; John Gorzynski; Katharine Walter; Manuel Rivas; Matthew T. Wheeler; Victoria N. Parikh; with CZB Cliahub Consortium                                                                                                                                                                                                                                                                                                                                                                                                    |
| EPI_ISL_412912                                                                                                                                                                                                                                                                                                                                                                                                                                                                                                   | State Health Office Baden-Württemberg                                                                                                                                                                                          | Charite Universitätsmedizin Berlin, Institute of Virology                                                                                                                                                                      | Barbara Muhlemann; Christian Drosten; Julia Schneider; Jörn Beheim-Schwarzbach; Rainer Oehme; Silke Fischer; Talitha Veith; Terry Jones; Victor M Corman                                                                                                                                                                                                                                                                                                                                                                                                                                                 |
| EPI_ISL_1495111 to 1495143                                                                                                                                                                                                                                                                                                                                                                                                                                                                                       | State Institution «Public Health Center of Ministry of Health of Ukraine»                                                                                                                                                      | Robert Koch Institute, ZBS1 Highly Pathogenic Viruses, Berlin, Germany                                                                                                                                                         | Andreas Nitsche; Annika Brinkmann; Iryna Dermchyshyna; Janine Michel; Liudmyla Chernenko; Roman Rodyna; Steven Uddin                                                                                                                                                                                                                                                                                                                                                                                                                                                                                     |
| EPI_ISL_416044, EPI_ISL_416046 to 416047, EPI_ISL_416425, EPI_ISL_416473 to 416474, EPI_ISL_418990 to 418991                                                                                                                                                                                                                                                                                                                                                                                                     | State Key Laboratory for Diagnosis and Treatment of Infectious Diseases, National Clinical Research Center for Infectious Diseases, First Affiliated Hospital, Zhejiang University School of Medicine, Hangzhou, China 310003  | State Key Laboratory for Diagnosis and Treatment of Infectious Diseases, National Clinical Research Center for Infectious Diseases, First Affiliated Hospital, Zhejiang University School of Medicine, Hangzhou, China 310003  | Changzhong Jin; Chao Jiang; Fumin Liu; Haibo Wu; Hangping Yao; Lanjuan Li; Linfang Cheng; Min Zheng; Nanping Wu; Xiangyun Lu; Zhigang Wu                                                                                                                                                                                                                                                                                                                                                                                                                                                                 |
| EPI_ISL_415709, EPI_ISL_415711, EPI_ISL_416042                                                                                                                                                                                                                                                                                                                                                                                                                                                                   | State Key Laboratory for Diagnosis and Treatment of Infectious Diseases, National Clinical Research Center for Infectious Diseases, First Affiliated Hospital, Zhejiang University School of Medicine, Hangzhou, China. 310003 | State Key Laboratory for Diagnosis and Treatment of Infectious Diseases, National Clinical Research Center for Infectious Diseases, First Affiliated Hospital, Zhejiang University School of Medicine, Hangzhou, China. 310003 | Changzhong Jin; Chao Jiang; Fumin Liu; Haibo Wu; Hangping Yao; Lanjuan Li; Linfang Cheng; Min Zheng; Nanping Wu; Xiangyun Lu; Zhigang Wu                                                                                                                                                                                                                                                                                                                                                                                                                                                                 |
| EPI_ISL_417443                                                                                                                                                                                                                                                                                                                                                                                                                                                                                                   | State Key Laboratory for Emerging Infectious Diseases Department of Microbiology Li Ka Shing Faculty of Medicine The University of Hong Kong                                                                                   | State Key Laboratory for Emerging Infectious Diseases Department of Microbiology Li Ka Shing Faculty of Medicine The University of Hong Kong                                                                                   | Bobo Wing-Yee Mok; Honglin Chen; Kwok-Yung Yuen; Pui Wang; Shaofeng Deng; Siu-Ying Lau; Wenjun Song                                                                                                                                                                                                                                                                                                                                                                                                                                                                                                      |
| EPI_ISL_444273                                                                                                                                                                                                                                                                                                                                                                                                                                                                                                   | State Key Laboratory of Respiratory Disease, National Clinical Research Center for Respiratory Disease, Guangzhou Institute of Respiratory Health, the First Affiliated Hospital of Guangzhou Medical University               | State Key Laboratory of Respiratory Disease, National Clinical Research Center for Respiratory Disease, Guangzhou Institute of Respiratory Health, the First Affiliated Hospital of Guangzhou Medical University               | Huang; J. and Zhao, J.; Shi, Y.; Sun, J.; Zheng, K.                                                                                                                                                                                                                                                                                                                                                                                                                                                                                                                                                      |
| EPI_ISL_414663, EPI_ISL_414686, EPI_ISL_414688 to 414692                                                                                                                                                                                                                                                                                                                                                                                                                                                         | State Key Laboratory of Respiratory Disease, National Clinical Research Center for Respiratory Disease, Guangzhou Institute of Respiratory Health, the First Affiliated Hospital of Guangzhou Medical University               | The First Affiliated Hospital of Guangzhou Medical University & BGI-Shenzhen                                                                                                                                                   | Zhao et al                                                                                                                                                                                                                                                                                                                                                                                                                                                                                                                                                                                               |
| EPI_ISL_414687                                                                                                                                                                                                                                                                                                                                                                                                                                                                                                   | State Key Laboratory of Respiratory Disease, National Clinical Research Center for Respiratory Disease, Guangzhou Institute of Respiratory Health, the First Affiliated Hospital of Guangzhou Medical University               | the First Affiliated Hospital of Guangzhou Medical University & BGI-Shenzhen                                                                                                                                                   | Zhao et al                                                                                                                                                                                                                                                                                                                                                                                                                                                                                                                                                                                               |
| EPI_ISL_1515801 to 1515821, EPI_ISL_1515823 to 1515835, EPI_ISL_1515837 to 1515839, EPI_ISL_1515842 to 1515994, EPI_ISL_1515996 to 1515997, EPI_ISL_1515999 to 1516006                                                                                                                                                                                                                                                                                                                                           | State Laboratories Division, Hawaii State Department of Health                                                                                                                                                                 | State Laboratories Division, Hawaii State Department of Health                                                                                                                                                                 | Ayana Garnet; Drew Kuwazaki; Edward Desmond; Pamela O'Brien; Razvan Sultana                                                                                                                                                                                                                                                                                                                                                                                                                                                                                                                              |
| EPI_ISL_428860 to 428924                                                                                                                                                                                                                                                                                                                                                                                                                                                                                         | State Research Center of Virology and Biotechnology                                                                                                                                                                            | State Research Center of Virology and Biotechnology                                                                                                                                                                            | Alexander N. Shvalov; Anastasiya A. Nazarenko; Anastasiya M. Smirnova; Elena V. Gavrilova; Oleg V. Pyankov; Rinat A. Maksyutov; Sergey A. Bodnev;                                                                                                                                                                                                                                                                                                                                                                                                                                                        |

|                                                                                                                                                                                                                                                                                                                                                                                                                                                                                                                                                                                                                                                                                                                                                                                                                                                                                                                                                                                                                                                                                                                                                                 |                                                                                                            |                                                                                                                                                                                                               |                                                                                                                                                                                                                                                                                                                                                                                                                                                                                            |
|-----------------------------------------------------------------------------------------------------------------------------------------------------------------------------------------------------------------------------------------------------------------------------------------------------------------------------------------------------------------------------------------------------------------------------------------------------------------------------------------------------------------------------------------------------------------------------------------------------------------------------------------------------------------------------------------------------------------------------------------------------------------------------------------------------------------------------------------------------------------------------------------------------------------------------------------------------------------------------------------------------------------------------------------------------------------------------------------------------------------------------------------------------------------|------------------------------------------------------------------------------------------------------------|---------------------------------------------------------------------------------------------------------------------------------------------------------------------------------------------------------------|--------------------------------------------------------------------------------------------------------------------------------------------------------------------------------------------------------------------------------------------------------------------------------------------------------------------------------------------------------------------------------------------------------------------------------------------------------------------------------------------|
|                                                                                                                                                                                                                                                                                                                                                                                                                                                                                                                                                                                                                                                                                                                                                                                                                                                                                                                                                                                                                                                                                                                                                                 | VECTOR, Department of Collection of Microorganisms<br>State Sanitary Inspectorate                          | VECTOR, Department of Collection of Microorganisms<br>Laboratory of Recombinant Vaccines                                                                                                                      | Tatyana V. Tregubchak                                                                                                                                                                                                                                                                                                                                                                                                                                                                      |
| EPI_ISL_451655 to 451664                                                                                                                                                                                                                                                                                                                                                                                                                                                                                                                                                                                                                                                                                                                                                                                                                                                                                                                                                                                                                                                                                                                                        | State Veterinary Institute Prague                                                                          | State Veterinary Institute Prague                                                                                                                                                                             | Boguslaw Szewczyk; Jaroslaw Pinkas; Krystyna Bienkowska-Szewczyk; Lukasz Rabalski                                                                                                                                                                                                                                                                                                                                                                                                          |
| EPI_ISL_1497613 to 1497617                                                                                                                                                                                                                                                                                                                                                                                                                                                                                                                                                                                                                                                                                                                                                                                                                                                                                                                                                                                                                                                                                                                                      | Stavanger University Hospital, Department of Medical Microbiology                                          | Norwegian Institute of Public Health, Department of Virology                                                                                                                                                  | A; Cernikova; L; M; Nagy; Stara                                                                                                                                                                                                                                                                                                                                                                                                                                                            |
| EPI_ISL_420149                                                                                                                                                                                                                                                                                                                                                                                                                                                                                                                                                                                                                                                                                                                                                                                                                                                                                                                                                                                                                                                                                                                                                  | Stiftung Krankenhaus Bethanien für die Grafschaft Moers                                                    | Robert Koch Institute                                                                                                                                                                                         | Hilde Elshaug; Kamilla Heddeland Instefjord; Karoline Bragstad; Kathrine Stene-Johansen; Olav Hungnes                                                                                                                                                                                                                                                                                                                                                                                      |
| EPI_ISL_1435385, EPI_ISL_1435391 to 1435392, EPI_ISL_1435406                                                                                                                                                                                                                                                                                                                                                                                                                                                                                                                                                                                                                                                                                                                                                                                                                                                                                                                                                                                                                                                                                                    |                                                                                                            |                                                                                                                                                                                                               |                                                                                                                                                                                                                                                                                                                                                                                                                                                                                            |
| EPI_ISL_1534280, EPI_ISL_1534301, EPI_ISL_1534311, EPI_ISL_1534335, EPI_ISL_1534368, EPI_ISL_1534417, EPI_ISL_1534428                                                                                                                                                                                                                                                                                                                                                                                                                                                                                                                                                                                                                                                                                                                                                                                                                                                                                                                                                                                                                                           |                                                                                                            |                                                                                                                                                                                                               |                                                                                                                                                                                                                                                                                                                                                                                                                                                                                            |
| see above                                                                                                                                                                                                                                                                                                                                                                                                                                                                                                                                                                                                                                                                                                                                                                                                                                                                                                                                                                                                                                                                                                                                                       | Still Bay Sat Clinic w/c SFV                                                                               | NHLS/UCT                                                                                                                                                                                                      | Arash Iranzadeh; Bruna Galvao; Carolyn Williamson; Deelan Doolabh; Diana Hardie; Emmanuel SJ; Innocent Mudau; Kruger Marais; Lynn Tyers; Marvin Hsiao; Stephen Korsman; Tegally H; de Oliveira T                                                                                                                                                                                                                                                                                           |
| EPI_ISL_582799, EPI_ISL_582839                                                                                                                                                                                                                                                                                                                                                                                                                                                                                                                                                                                                                                                                                                                                                                                                                                                                                                                                                                                                                                                                                                                                  | Stockholm_KUL Solna                                                                                        | The Public Health Agency of Sweden                                                                                                                                                                            | Anna Risberg; Anna-Malin Linde; Karin Tegmark-Wisell; Maria Lind Karlberg; Mattias Haukland; Mia Brytting; Olov Svartstrom; Oskar Karlsson Lindsjo; Petra Edquist; Reza Advani; Sandra Brodsson                                                                                                                                                                                                                                                                                            |
| EPI_ISL_1441247, EPI_ISL_1441254, EPI_ISL_1441290, EPI_ISL_1441305                                                                                                                                                                                                                                                                                                                                                                                                                                                                                                                                                                                                                                                                                                                                                                                                                                                                                                                                                                                                                                                                                              | Städtisches Klinikum Dresden                                                                               | Robert Koch Institute                                                                                                                                                                                         |                                                                                                                                                                                                                                                                                                                                                                                                                                                                                            |
| EPI_ISL_1398267, EPI_ISL_1398355, EPI_ISL_1398359, EPI_ISL_1398375, EPI_ISL_1398561, EPI_ISL_1398924, EPI_ISL_1398927, EPI_ISL_1398930, EPI_ISL_1398981                                                                                                                                                                                                                                                                                                                                                                                                                                                                                                                                                                                                                                                                                                                                                                                                                                                                                                                                                                                                         |                                                                                                            |                                                                                                                                                                                                               |                                                                                                                                                                                                                                                                                                                                                                                                                                                                                            |
| see above                                                                                                                                                                                                                                                                                                                                                                                                                                                                                                                                                                                                                                                                                                                                                                                                                                                                                                                                                                                                                                                                                                                                                       | Subang Public Health                                                                                       | West Java Health Laboratory; School of Life Sciences and Technology, Institut Teknologi Bandung                                                                                                               | Azzania Fibrani; Cut Nur Cinthia Alamanda; Ema Rahmawati; Isak Solihin; Kamila Tania; Karimatu Khoirunnisa; Miftahul Faridi; Rifky Waluyajati Rachman; Rini Robiani; Ryan Bayusantika Ristandi                                                                                                                                                                                                                                                                                             |
| EPI_ISL_491036 to 491091                                                                                                                                                                                                                                                                                                                                                                                                                                                                                                                                                                                                                                                                                                                                                                                                                                                                                                                                                                                                                                                                                                                                        | Suceava County Emergency Hospital                                                                          | "Stefan cel Mare" University Metagenomics Lab                                                                                                                                                                 | Antoniadis Panagiotis et al.; Lobiuc Andrei; Lobiuc Andrei et al.                                                                                                                                                                                                                                                                                                                                                                                                                          |
| EPI_ISL_486834                                                                                                                                                                                                                                                                                                                                                                                                                                                                                                                                                                                                                                                                                                                                                                                                                                                                                                                                                                                                                                                                                                                                                  | Suceava County Emergency Hospital "Sf. Ioan cel Nou"                                                       | SMU Metagenomics lab                                                                                                                                                                                          | Antoniadis Panagiotis; Lobiuc Andrei                                                                                                                                                                                                                                                                                                                                                                                                                                                       |
| EPI_ISL_1398374                                                                                                                                                                                                                                                                                                                                                                                                                                                                                                                                                                                                                                                                                                                                                                                                                                                                                                                                                                                                                                                                                                                                                 | Sukabumi Public Health                                                                                     | West Java Health Laboratory; School of Life Sciences and Technology, Institut Teknologi Bandung                                                                                                               | Azzania Fibrani; Cut Nur Cinthia Alamanda; Ema Rahmawati; Isak Solihin; Kamila Tania; Karimatu Khoirunnisa; Miftahul Faridi; Rifky Waluyajati Rachman; Rini Robiani; Ryan Bayusantika Ristandi                                                                                                                                                                                                                                                                                             |
| EPI_ISL_455072 to 455073                                                                                                                                                                                                                                                                                                                                                                                                                                                                                                                                                                                                                                                                                                                                                                                                                                                                                                                                                                                                                                                                                                                                        | Sullivan Nicolaidis Pathology                                                                              | NSW Health Pathology - Institute of Clinical Pathology and Medical Research; Westmead Hospital; University of Sydney                                                                                          | CIDM-PH et al.                                                                                                                                                                                                                                                                                                                                                                                                                                                                             |
| EPI_ISL_417033                                                                                                                                                                                                                                                                                                                                                                                                                                                                                                                                                                                                                                                                                                                                                                                                                                                                                                                                                                                                                                                                                                                                                  | Sullivan Nicolaidis Pathology                                                                              | Public Health Virology Laboratory                                                                                                                                                                             | Alyssa Pyke; Amanda De Jong; Andrew Van Den Hurk; Bixing Huang; Carmel Taylor; David Warrilow; Doris Genge; Elisabeth Gamez; Glen Hewitson; Ian Maxwell Mackay; Inga Sultana; Jamie McMahon; Jean Barcelon; Judy Northill; Mitchell Finger; Natalie Simpson; Neelima Nair; Peter Burtonclay; Peter Moore; Sarah Wheatley; Sean Moody; Sonja Hall-Mendelin; Timothy Gardam; and Frederick Moore                                                                                             |
| EPI_ISL_1398365, EPI_ISL_1398980                                                                                                                                                                                                                                                                                                                                                                                                                                                                                                                                                                                                                                                                                                                                                                                                                                                                                                                                                                                                                                                                                                                                | Sumedang Public Health                                                                                     | West Java Health Laboratory; School of Life Sciences and Technology, Institut Teknologi Bandung                                                                                                               | Azzania Fibrani; Cut Nur Cinthia Alamanda; Ema Rahmawati; Isak Solihin; Kamila Tania; Karimatu Khoirunnisa; Miftahul Faridi; Rifky Waluyajati Rachman; Rini Robiani; Ryan Bayusantika Ristandi                                                                                                                                                                                                                                                                                             |
| EPI_ISL_529719                                                                                                                                                                                                                                                                                                                                                                                                                                                                                                                                                                                                                                                                                                                                                                                                                                                                                                                                                                                                                                                                                                                                                  | Sumedang Regional General Hospital                                                                         | Laboratorium Kesehatan Provinsi Jawa Barat; School of Life Sciences and Technology & School of Pharmacy-Institut Teknologi Bandung; Molecular Genetics Laboratory-Faculty of Medicine-Universitas Padjadjaran | Adelina Kristiani Rahayu; Agung Eru Wibowo; Azzania Fibrani; Catur Riani; Cut Nur Cinthia Alamanda; Ema Rahmawati; Gusti Ayu Prani Pradani; Hammam Riza; Hesti Lina Wiraswati; Husna Nugrahapraja; Ivan Faizal; Lia Faridah; Marselina Irasonia Tan; Rifky Waluyajati Rachman; Ryan Bayusantika Ristandi; Savira Ekawardhani; Sony Solistia Wirawan; Tarwadi; Yulia Sribudiani                                                                                                             |
| EPI_ISL_534244, EPI_ISL_560986                                                                                                                                                                                                                                                                                                                                                                                                                                                                                                                                                                                                                                                                                                                                                                                                                                                                                                                                                                                                                                                                                                                                  | Sundsvalls sjukhus                                                                                         | The Public Health Agency of Sweden                                                                                                                                                                            | Anna Risberg; Anna-Malin Linde; Karin Tegmark-Wisell; Maria Lind Karlberg; Mattias Haukland; Mia Brytting; Olov Svartstrom; Oskar Karlsson Lindsjo; Petra Edquist; Reza Advani; Sandra Brodsson                                                                                                                                                                                                                                                                                            |
| EPI_ISL_450747                                                                                                                                                                                                                                                                                                                                                                                                                                                                                                                                                                                                                                                                                                                                                                                                                                                                                                                                                                                                                                                                                                                                                  | Sunnybrook Health Sciences Centre                                                                          | Department of Laboratory Medicine and Molecular Diagnostics, Sunnybrook Health Sciences Centre                                                                                                                | Amogelang R. Raphenya; Andrew G. McArthur; Arinjay Banerjee; Bo Wang; Brian P. Alcock; Finlay Maguire; Hamza Mbareche; Hassaan Maan; Jalees A. Nasir; Julian A. Hiscox; Karen Mossman; Kendrick M. Smith; Muhammad Alruwaili; Natalie C. Knox; Patryk Aftanas; Robert A. Kozak; Samira Mubareka Chaitanya Joshi; Dinesh Kumar; Janvi Raval; Madhvi Joshi; Mahendra Parikh; Nitesh Shah; Nitin Savaliya; Ramesh Pandit; Sonal Sharma; Twinkle Soni; Umang Mishra; Zarna Patel; Zuber Saiyed |
| EPI_ISL_1544118 to 1544132, EPI_ISL_1544135 to 1544141, EPI_ISL_1544166 to 1544169                                                                                                                                                                                                                                                                                                                                                                                                                                                                                                                                                                                                                                                                                                                                                                                                                                                                                                                                                                                                                                                                              | Supratech Micropath Laboratory Research Institute Pvt Ltd, Ahmedabad                                       | Gujarat Biotechnology Research Centre                                                                                                                                                                         |                                                                                                                                                                                                                                                                                                                                                                                                                                                                                            |
| EPI_ISL_434663, EPI_ISL_434672, EPI_ISL_434675 to 434676, EPI_ISL_445225, EPI_ISL_455106, EPI_ISL_469066, EPI_ISL_469070, EPI_ISL_475543, EPI_ISL_475564, EPI_ISL_476136                                                                                                                                                                                                                                                                                                                                                                                                                                                                                                                                                                                                                                                                                                                                                                                                                                                                                                                                                                                        |                                                                                                            |                                                                                                                                                                                                               |                                                                                                                                                                                                                                                                                                                                                                                                                                                                                            |
| see above                                                                                                                                                                                                                                                                                                                                                                                                                                                                                                                                                                                                                                                                                                                                                                                                                                                                                                                                                                                                                                                                                                                                                       | Surbrunns VC                                                                                               | The Public Health Agency of Sweden                                                                                                                                                                            | Anna Risberg; Anna-Malin Linde; Erik Embring; Karin Tegmark-Wisell; Maria Lind Karlberg; Mattias Haukland; Mia Brytting; Olov Svartstrom; Oskar Karlsson Lindsjo; Petra Edquist; Reza Advani; Sandra Brodsson; Shamam Muradrasoli; Theresa Enkirch                                                                                                                                                                                                                                         |
| EPI_ISL_434645, EPI_ISL_434649                                                                                                                                                                                                                                                                                                                                                                                                                                                                                                                                                                                                                                                                                                                                                                                                                                                                                                                                                                                                                                                                                                                                  | Svardsjo VC                                                                                                | The Public Health Agency of Sweden                                                                                                                                                                            | Anna Risberg; Anna-Malin Linde; Karin Tegmark-Wisell; Maria Lind Karlberg; Mia Brytting; Olov Svartstrom; Oskar Karlsson Lindsjo; Theresa Enkirch; Tommy Janers                                                                                                                                                                                                                                                                                                                            |
| EPI_ISL_1417216 to 1417438, EPI_ISL_1417443 to 1418186, EPI_ISL_1418331 to 1419047, EPI_ISL_1419925 to 1420634                                                                                                                                                                                                                                                                                                                                                                                                                                                                                                                                                                                                                                                                                                                                                                                                                                                                                                                                                                                                                                                  | Swedish national genomic surveillance program of SARS-CoV-2                                                | The Public Health Agency of Sweden                                                                                                                                                                            | Swedish national genomic surveillance program of SARS-CoV-2                                                                                                                                                                                                                                                                                                                                                                                                                                |
| EPI_ISL_478717 to 478718, EPI_ISL_498765, EPI_ISL_526125, EPI_ISL_544956, EPI_ISL_545037, EPI_ISL_545044, EPI_ISL_545049, EPI_ISL_547598, EPI_ISL_591507                                                                                                                                                                                                                                                                                                                                                                                                                                                                                                                                                                                                                                                                                                                                                                                                                                                                                                                                                                                                        |                                                                                                            |                                                                                                                                                                                                               |                                                                                                                                                                                                                                                                                                                                                                                                                                                                                            |
| see above                                                                                                                                                                                                                                                                                                                                                                                                                                                                                                                                                                                                                                                                                                                                                                                                                                                                                                                                                                                                                                                                                                                                                       | Sydney South West Pathology Service (SSWPS) - Concord Repatriation General Hospital - NSW Health Pathology | NSW Health Pathology - Institute of Clinical Pathology and Medical Research; Westmead Hospital; University of Sydney                                                                                          | CIDM-PH et al.                                                                                                                                                                                                                                                                                                                                                                                                                                                                             |
| EPI_ISL_478675 to 478682, EPI_ISL_478706 to 478707, EPI_ISL_478712 to 478716, EPI_ISL_490020, EPI_ISL_490037, EPI_ISL_498763 to 498764, EPI_ISL_498778, EPI_ISL_498781 to 498782, EPI_ISL_513323, EPI_ISL_513327 to 513329, EPI_ISL_513333 to 513334, EPI_ISL_513336 to 513337, EPI_ISL_513366 to 513367, EPI_ISL_513373 to 513374, EPI_ISL_513381 to 513383, EPI_ISL_513401, EPI_ISL_513409 to 513412, EPI_ISL_526119 to 526120, EPI_ISL_526124, EPI_ISL_526126 to 526127, EPI_ISL_526131, EPI_ISL_526157 to 526160, EPI_ISL_526172 to 526176, EPI_ISL_526193, EPI_ISL_526197 to 526198, EPI_ISL_526206, EPI_ISL_526210 to 526211, EPI_ISL_544958 to 544959, EPI_ISL_544964 to 544965, EPI_ISL_544965, EPI_ISL_544965, EPI_ISL_545003, EPI_ISL_545025, EPI_ISL_545042, EPI_ISL_547594, EPI_ISL_591508 to 591516, EPI_ISL_593755 to 593765                                                                                                                                                                                                                                                                                                                      |                                                                                                            |                                                                                                                                                                                                               |                                                                                                                                                                                                                                                                                                                                                                                                                                                                                            |
| see above                                                                                                                                                                                                                                                                                                                                                                                                                                                                                                                                                                                                                                                                                                                                                                                                                                                                                                                                                                                                                                                                                                                                                       | Sydney South West Pathology Service (SSWPS) - Liverpool Hospital - NSW Health Pathology                    | NSW Health Pathology - Institute of Clinical Pathology and Medical Research; Westmead Hospital; University of Sydney                                                                                          | CIDM-PH et al.                                                                                                                                                                                                                                                                                                                                                                                                                                                                             |
| EPI_ISL_513400, EPI_ISL_526134 to 526137, EPI_ISL_526196, EPI_ISL_526201, EPI_ISL_526207 to 526209, EPI_ISL_544974, EPI_ISL_545004 to 545005, EPI_ISL_545017 to 545023, EPI_ISL_545028, EPI_ISL_545039, EPI_ISL_545041, EPI_ISL_545043, EPI_ISL_545045, EPI_ISL_547599, EPI_ISL_591517, EPI_ISL_593766 to 593768                                                                                                                                                                                                                                                                                                                                                                                                                                                                                                                                                                                                                                                                                                                                                                                                                                                |                                                                                                            |                                                                                                                                                                                                               |                                                                                                                                                                                                                                                                                                                                                                                                                                                                                            |
| see above                                                                                                                                                                                                                                                                                                                                                                                                                                                                                                                                                                                                                                                                                                                                                                                                                                                                                                                                                                                                                                                                                                                                                       | Sydney South West Pathology Service (SSWPS) - Royal Prince Alfred Hospital - NSW Health Pathology          | NSW Health Pathology - Institute of Clinical Pathology and Medical Research; Westmead Hospital; University of Sydney                                                                                          | CIDM-PH et al.                                                                                                                                                                                                                                                                                                                                                                                                                                                                             |
| EPI_ISL_1385836                                                                                                                                                                                                                                                                                                                                                                                                                                                                                                                                                                                                                                                                                                                                                                                                                                                                                                                                                                                                                                                                                                                                                 | Syngene                                                                                                    | INSACOG-KA, NIMHANS                                                                                                                                                                                           | Anita S Desai; Anson Kunjumon George; Chitra Pattabiraman; Darshan Sreenivas; Nakka Vijay Kiran Reddy; Pramada Prasad; V Ravi                                                                                                                                                                                                                                                                                                                                                              |
| EPI_ISL_1470001 to 1470058, EPI_ISL_1470078 to 1470121, EPI_ISL_1470137 to 1470296                                                                                                                                                                                                                                                                                                                                                                                                                                                                                                                                                                                                                                                                                                                                                                                                                                                                                                                                                                                                                                                                              | Synlab Eesti OÜ                                                                                            | 1. Laboratory of Communicable Diseases (Estonia); 2. Eurofins Genomics Europe Sequencing GmbH                                                                                                                 | Lidia Dotsenko et al.                                                                                                                                                                                                                                                                                                                                                                                                                                                                      |
| EPI_ISL_1437612, EPI_ISL_1437621, EPI_ISL_1437653, EPI_ISL_1437667 to 1437668, EPI_ISL_1437699, EPI_ISL_1437715, EPI_ISL_1437728, EPI_ISL_1437742, EPI_ISL_1437746, EPI_ISL_1437748, EPI_ISL_1437750, EPI_ISL_1437757, EPI_ISL_1437762, EPI_ISL_1437764, EPI_ISL_1437767, EPI_ISL_1437772, EPI_ISL_1437776, EPI_ISL_1437810, EPI_ISL_1437815, EPI_ISL_1437819, EPI_ISL_1437845, EPI_ISL_1437859, EPI_ISL_1437861, EPI_ISL_1437863, EPI_ISL_1437892, EPI_ISL_1437901, EPI_ISL_1437905, EPI_ISL_1437913, EPI_ISL_1437915, EPI_ISL_1437927, EPI_ISL_1440305, EPI_ISL_1440312, EPI_ISL_1440338, EPI_ISL_1440345 to 1440346, EPI_ISL_1440350, EPI_ISL_1440352, EPI_ISL_1440355, EPI_ISL_1440359, EPI_ISL_1440394, EPI_ISL_1440416, EPI_ISL_1440421, EPI_ISL_1440429, EPI_ISL_1440446, EPI_ISL_1440452, EPI_ISL_1440460, EPI_ISL_1440462, EPI_ISL_1440462, EPI_ISL_1440475, EPI_ISL_1440492, EPI_ISL_1440518, EPI_ISL_1440524, EPI_ISL_1440527, EPI_ISL_1440531, EPI_ISL_1440551, EPI_ISL_1440568, EPI_ISL_1442588, EPI_ISL_1442598, EPI_ISL_1442608, EPI_ISL_1442616, EPI_ISL_1442697, EPI_ISL_1442707, EPI_ISL_1442709, EPI_ISL_1442714 to 1442715, EPI_ISL_1442728 |                                                                                                            |                                                                                                                                                                                                               |                                                                                                                                                                                                                                                                                                                                                                                                                                                                                            |
| see above                                                                                                                                                                                                                                                                                                                                                                                                                                                                                                                                                                                                                                                                                                                                                                                                                                                                                                                                                                                                                                                                                                                                                       | Synlab MVZ Augsburg                                                                                        | Robert Koch Institute                                                                                                                                                                                         |                                                                                                                                                                                                                                                                                                                                                                                                                                                                                            |
| EPI_ISL_1538444, EPI_ISL_1538480, EPI_ISL_1538665 to 1538667, EPI_ISL_1538707 to 1538718, EPI_ISL_1538862, EPI_ISL_1538988 to 1538989, EPI_ISL_1539013                                                                                                                                                                                                                                                                                                                                                                                                                                                                                                                                                                                                                                                                                                                                                                                                                                                                                                                                                                                                          |                                                                                                            |                                                                                                                                                                                                               |                                                                                                                                                                                                                                                                                                                                                                                                                                                                                            |
| see above                                                                                                                                                                                                                                                                                                                                                                                                                                                                                                                                                                                                                                                                                                                                                                                                                                                                                                                                                                                                                                                                                                                                                       | Szpital Uniwersytecki im. Karola Marcinkowskiego                                                           | 1. National Institute of Public Health - National Institute of Hygiene; 2. Eurofins Genomics Europe Sequencing GmbH                                                                                           | ECDC COVID-19 WGS support team; Eurofins Genomics Europe Sequencing Team; Gierczyki Rafa; Sadkowska-Todys Magorzata; Wokowicz Tomasz; Zacharczuk Katarzyna                                                                                                                                                                                                                                                                                                                                 |

|                                                                                                                                                                                                                                                                                                                                                                                                                                                                                                                                                                                                                                                                                                                                                                                                                                                                                                                                                                                                                                                                                                                                                                                                                                                                                                                                                                                                                                                                                                                                                                                                                                                                                                                                                                                                                                                                                                                                                                                                                                                                                                                                                                                                                                                                                                                                                                                                                                                                                                                                                                                                                                                                                                                                                                                                                                                                                                                                                                                                                                                                             |                                                                              |                                                                                    |                                                                                                                                      |                                                                                                                                                                                                                                                                                                                                                                                                                                                                |
|-----------------------------------------------------------------------------------------------------------------------------------------------------------------------------------------------------------------------------------------------------------------------------------------------------------------------------------------------------------------------------------------------------------------------------------------------------------------------------------------------------------------------------------------------------------------------------------------------------------------------------------------------------------------------------------------------------------------------------------------------------------------------------------------------------------------------------------------------------------------------------------------------------------------------------------------------------------------------------------------------------------------------------------------------------------------------------------------------------------------------------------------------------------------------------------------------------------------------------------------------------------------------------------------------------------------------------------------------------------------------------------------------------------------------------------------------------------------------------------------------------------------------------------------------------------------------------------------------------------------------------------------------------------------------------------------------------------------------------------------------------------------------------------------------------------------------------------------------------------------------------------------------------------------------------------------------------------------------------------------------------------------------------------------------------------------------------------------------------------------------------------------------------------------------------------------------------------------------------------------------------------------------------------------------------------------------------------------------------------------------------------------------------------------------------------------------------------------------------------------------------------------------------------------------------------------------------------------------------------------------------------------------------------------------------------------------------------------------------------------------------------------------------------------------------------------------------------------------------------------------------------------------------------------------------------------------------------------------------------------------------------------------------------------------------------------------------|------------------------------------------------------------------------------|------------------------------------------------------------------------------------|--------------------------------------------------------------------------------------------------------------------------------------|----------------------------------------------------------------------------------------------------------------------------------------------------------------------------------------------------------------------------------------------------------------------------------------------------------------------------------------------------------------------------------------------------------------------------------------------------------------|
| EPI_ISL_455719                                                                                                                                                                                                                                                                                                                                                                                                                                                                                                                                                                                                                                                                                                                                                                                                                                                                                                                                                                                                                                                                                                                                                                                                                                                                                                                                                                                                                                                                                                                                                                                                                                                                                                                                                                                                                                                                                                                                                                                                                                                                                                                                                                                                                                                                                                                                                                                                                                                                                                                                                                                                                                                                                                                                                                                                                                                                                                                                                                                                                                                              | T.C. Salk Bakanl Adyaman I Salk Müdürlüü Adyaman Eitim Ve Aratırma Hastanesi | VETAL Animal Health Products Company, BSL3+ Production Laboratory /Turkey          | Abidin Ercan Yonucu; Fatma Nilay Tutak; Fethiye Sevimli; Haluk Uluca; Mehmet Turgut; Muhittin Önderci; Murat Dönen; O. Ugur Sezerman |                                                                                                                                                                                                                                                                                                                                                                                                                                                                |
| EPI_ISL_435057                                                                                                                                                                                                                                                                                                                                                                                                                                                                                                                                                                                                                                                                                                                                                                                                                                                                                                                                                                                                                                                                                                                                                                                                                                                                                                                                                                                                                                                                                                                                                                                                                                                                                                                                                                                                                                                                                                                                                                                                                                                                                                                                                                                                                                                                                                                                                                                                                                                                                                                                                                                                                                                                                                                                                                                                                                                                                                                                                                                                                                                              | T.C. Salk Bakanl Adyaman I Salk Müdürlüü Adyaman Eitim Ve Aratırma Hastanesi | VETAL Animal Health Products Company, BSL3+ Production Laboratory, Turkey          | Abidin Ercan Yonucu; Fatma Nilay Tutak; Fethiye Sevimli; Haluk Uluca; Mehmet Turgut; Muhittin Önderci; Murat Dönen; O. Ugur Sezerman |                                                                                                                                                                                                                                                                                                                                                                                                                                                                |
| EPI_ISL_1397553 to 1397554, EPI_ISL_1397581 to 1397591, EPI_ISL_1397700 to 1397705, EPI_ISL_1397836, EPI_ISL_1397838 to 1397842, EPI_ISL_1397844 to 1397852, EPI_ISL_1397857, EPI_ISL_1397859 to 1397860, EPI_ISL_1397862 to 1397865, EPI_ISL_1461356 to 1461377, EPI_ISL_1462552, EPI_ISL_1465859 to 1465878                                                                                                                                                                                                                                                                                                                                                                                                                                                                                                                                                                                                                                                                                                                                                                                                                                                                                                                                                                                                                                                                                                                                                                                                                                                                                                                                                                                                                                                                                                                                                                                                                                                                                                                                                                                                                                                                                                                                                                                                                                                                                                                                                                                                                                                                                                                                                                                                                                                                                                                                                                                                                                                                                                                                                               | see above                                                                    | TEMPUS LABS INC                                                                    | Wadsworth Center, New York State Department of Health                                                                                | Alexis Russel; Alexis Russell; Catharine Prussing; Daryl M. Lamson; Erasmus Schneider; Erica Lasek-Nesselquist; John Kelly; Jonathan Plitnick; Kirsten St. George; Matthew Shudt; Melissa A Leisner; Navjot Singh                                                                                                                                                                                                                                              |
| EPI_ISL_426499 to 426507, EPI_ISL_426509 to 426511, EPI_ISL_426520 to 426526, EPI_ISL_426532 to 426536, EPI_ISL_426556 to 426557, EPI_ISL_1392000, EPI_ISL_1392019, EPI_ISL_1392021, EPI_ISL_1392036, EPI_ISL_1392055, EPI_ISL_1392080, EPI_ISL_1392104, EPI_ISL_1392124, EPI_ISL_1392140, EPI_ISL_1392156, EPI_ISL_1392164, EPI_ISL_1392173, EPI_ISL_1392177, EPI_ISL_1392183, EPI_ISL_1392199, EPI_ISL_1392277, EPI_ISL_1392316, EPI_ISL_1392447, EPI_ISL_1392464, EPI_ISL_1392499, EPI_ISL_1392518, EPI_ISL_1392534, EPI_ISL_1392541, EPI_ISL_1392573, EPI_ISL_1392633, EPI_ISL_1464693, EPI_ISL_1464695, EPI_ISL_1464719, EPI_ISL_1464745, EPI_ISL_1464814, EPI_ISL_1464874, EPI_ISL_1464904, EPI_ISL_1464969, EPI_ISL_1465157, EPI_ISL_1465324, EPI_ISL_1465360, EPI_ISL_1465417, EPI_ISL_1465423, EPI_ISL_1500642, EPI_ISL_1500644 to 1500645, EPI_ISL_1500647, EPI_ISL_1500671, EPI_ISL_1500676, EPI_ISL_1500678 to 1500681, EPI_ISL_1500686, EPI_ISL_1500695, EPI_ISL_1500698, EPI_ISL_1500703, EPI_ISL_1500705, EPI_ISL_1500711, EPI_ISL_1500714, EPI_ISL_1500717, EPI_ISL_1500722, EPI_ISL_1500728, EPI_ISL_1500732, EPI_ISL_1500734, EPI_ISL_1500752 to 1500754, EPI_ISL_1500767, EPI_ISL_1500772 to 1500773, EPI_ISL_1500777 to 1500778, EPI_ISL_1500780, EPI_ISL_1500786 to 1500787, EPI_ISL_1500789, EPI_ISL_1500793, EPI_ISL_1500797, EPI_ISL_1500801, EPI_ISL_1500805, EPI_ISL_1500812 to 1500813, EPI_ISL_1500823, EPI_ISL_1500827, EPI_ISL_1500834, EPI_ISL_1500852, EPI_ISL_1500878, EPI_ISL_1500896, EPI_ISL_1500905 to 1500906, EPI_ISL_1500910, EPI_ISL_1500912, EPI_ISL_1500915, EPI_ISL_1500918, EPI_ISL_1500919, EPI_ISL_1500921, EPI_ISL_1500933, EPI_ISL_1500938 to 1500939, EPI_ISL_1500945, EPI_ISL_1530563, EPI_ISL_1530567, EPI_ISL_1530570, EPI_ISL_1530574, EPI_ISL_1530579, EPI_ISL_1530590, EPI_ISL_1530595, EPI_ISL_1530597, EPI_ISL_1530599 to 1530602, EPI_ISL_1530604, EPI_ISL_1530607, EPI_ISL_1530613, EPI_ISL_1530619, EPI_ISL_1530624, EPI_ISL_1530628, EPI_ISL_1530630, EPI_ISL_1530634, EPI_ISL_1530640, EPI_ISL_1530642, EPI_ISL_1530647, EPI_ISL_1530657, EPI_ISL_1530663, EPI_ISL_1530666, EPI_ISL_1530668, EPI_ISL_1530671, EPI_ISL_1530676, EPI_ISL_1530682, EPI_ISL_1530686, EPI_ISL_1530688 to 1530689, EPI_ISL_1530691, EPI_ISL_1530697, EPI_ISL_1530699, EPI_ISL_1530704, EPI_ISL_1530708, EPI_ISL_1530716, EPI_ISL_1530719, EPI_ISL_1530721, EPI_ISL_1530723 to 1530724, EPI_ISL_1530729, EPI_ISL_1530730, EPI_ISL_1530732, EPI_ISL_1530734, EPI_ISL_1530736, EPI_ISL_1530741, EPI_ISL_1530743 to 1530744, EPI_ISL_1530754 to 1530755, EPI_ISL_1530760, EPI_ISL_1530763, EPI_ISL_1530768, EPI_ISL_1530783, EPI_ISL_1530785, EPI_ISL_1530788, EPI_ISL_1530791 to 1530792, EPI_ISL_1530794, EPI_ISL_1530802, EPI_ISL_1530805 to 1530810, EPI_ISL_1530813, EPI_ISL_1530821, EPI_ISL_1530823 to 1530825, EPI_ISL_1530831, EPI_ISL_1530833, EPI_ISL_1530846, EPI_ISL_1530853, EPI_ISL_1530855, EPI_ISL_1530858, EPI_ISL_1530865 to 1530867, EPI_ISL_1530869 to 1530872, EPI_ISL_1550882, EPI_ISL_1550899, EPI_ISL_1550901 | see above                                                                    | TGen North                                                                         | TGen North                                                                                                                           | *Jolene Bowers; Ashlyn Pfeiffer; Chris French; Darrin Lemmer; Dave Engelthaler; Hayley Yaglom; Heather Centner; Jolene Bowers; Megan Folkerts; The Arizona COVID Genomics Union (ACGU); The Arizona COVID Genomics Union (ACGU)                                                                                                                                                                                                                                |
| EPI_ISL_1395766, EPI_ISL_1395768 to 1395769, EPI_ISL_1395771, EPI_ISL_1395773, EPI_ISL_1397612 to 1397617, EPI_ISL_1397783, EPI_ISL_1397966 to 1397967, EPI_ISL_1397988, EPI_ISL_1398259 to 1398263, EPI_ISL_1462572 to 1462573, EPI_ISL_1462575, EPI_ISL_1465673 to 1465677, EPI_ISL_1465760                                                                                                                                                                                                                                                                                                                                                                                                                                                                                                                                                                                                                                                                                                                                                                                                                                                                                                                                                                                                                                                                                                                                                                                                                                                                                                                                                                                                                                                                                                                                                                                                                                                                                                                                                                                                                                                                                                                                                                                                                                                                                                                                                                                                                                                                                                                                                                                                                                                                                                                                                                                                                                                                                                                                                                               | see above                                                                    | THE MARY IMOGENE BASSETT HOSPITAL                                                  | Wadsworth Center, New York State Department of Health                                                                                | Alexis Russel; Alexis Russell; Catharine Prussing; Daryl M. Lamson; Erasmus Schneider; Erica Lasek-Nesselquist; John Kelly; Jonathan Plitnick; Kirsten St. George; Matthew Shudt; Melissa A Leisner; Navjot Singh                                                                                                                                                                                                                                              |
| EPI_ISL_1446284, EPI_ISL_1446287, EPI_ISL_1446582, EPI_ISL_1446592, EPI_ISL_1446740, EPI_ISL_1446945, EPI_ISL_1516197, EPI_ISL_1528404 to 1528405                                                                                                                                                                                                                                                                                                                                                                                                                                                                                                                                                                                                                                                                                                                                                                                                                                                                                                                                                                                                                                                                                                                                                                                                                                                                                                                                                                                                                                                                                                                                                                                                                                                                                                                                                                                                                                                                                                                                                                                                                                                                                                                                                                                                                                                                                                                                                                                                                                                                                                                                                                                                                                                                                                                                                                                                                                                                                                                           | see above                                                                    | TN Division of Laboratory Services                                                 | Centers for Disease Control and Prevention Division of Viral Diseases, Pathogen Discovery                                            | Alison Laufer Halpin; Ben L. Rambo-Martin; Clinton R. Paden; Dakota Howard; Darlene Wagner; Dave Wentworth; Dhvani Batra; Jasmine Padilla; Justin Lee; Katie Dillon; Krista Queen; Kristen Knipe; Kristine Lacey; Mark Burroughs; Matthew Schmerer; Mili Sheth; Peter Cook; Sam Shepard; Sarah Nobles; Shoshona Le; Suxiang Tong; Vivien Dugan; Yvette Unoarumhi                                                                                               |
| EPI_ISL_1408888 to 1408889, EPI_ISL_1408898, EPI_ISL_1448518, EPI_ISL_1448523, EPI_ISL_1509951                                                                                                                                                                                                                                                                                                                                                                                                                                                                                                                                                                                                                                                                                                                                                                                                                                                                                                                                                                                                                                                                                                                                                                                                                                                                                                                                                                                                                                                                                                                                                                                                                                                                                                                                                                                                                                                                                                                                                                                                                                                                                                                                                                                                                                                                                                                                                                                                                                                                                                                                                                                                                                                                                                                                                                                                                                                                                                                                                                              |                                                                              | TN Division of Laboratory Services                                                 | Genomics and Discovery, Respiratory Viruses Branch, Division of Viral Diseases, Centers for Disease Control and Prevention           | Adam Retchless; Anna Kelleher; Anna Montmayeur; Anna Uehara; Brian Lynch; Clinton R. Paden; Haibin Wang; Han Jia Justin Ng; Jing Zhang; Justin Lee; Krista Queen; Mark Burroughs; Peter Cook; Rachel Marine; Suxiang Tong; Yan Li; Ying Tao                                                                                                                                                                                                                    |
| EPI_ISL_540432 to 540434, EPI_ISL_576172, EPI_ISL_576175 to 576176                                                                                                                                                                                                                                                                                                                                                                                                                                                                                                                                                                                                                                                                                                                                                                                                                                                                                                                                                                                                                                                                                                                                                                                                                                                                                                                                                                                                                                                                                                                                                                                                                                                                                                                                                                                                                                                                                                                                                                                                                                                                                                                                                                                                                                                                                                                                                                                                                                                                                                                                                                                                                                                                                                                                                                                                                                                                                                                                                                                                          |                                                                              | TN Division of Laboratory Services                                                 | Pathogen Discovery, Respiratory Viruses Branch, Division of Viral Diseases, Centers for Disease Control and Prevention               | Anna Montmayeur; Anna Uehara; Brian Lynch; Clinton R. Paden; Haibin Wang; Jing Zhang; Krista Queen; Peter Cook; Rachel Marine; Suxiang Tong; Yan Li; Ying Tao                                                                                                                                                                                                                                                                                                  |
| EPI_ISL_528419 to 528424                                                                                                                                                                                                                                                                                                                                                                                                                                                                                                                                                                                                                                                                                                                                                                                                                                                                                                                                                                                                                                                                                                                                                                                                                                                                                                                                                                                                                                                                                                                                                                                                                                                                                                                                                                                                                                                                                                                                                                                                                                                                                                                                                                                                                                                                                                                                                                                                                                                                                                                                                                                                                                                                                                                                                                                                                                                                                                                                                                                                                                                    |                                                                              | TNMC & BYL NAIR CH. HOSPITAL                                                       | Institute of Genomics and Integrative Biology - Council of Scientific and Industrial Research                                        | Akshay Kanakar; Amol Borse; Janani Srinivasa Vasudevan; Jasmina Savak; Jayanthi Shastri; Mahesh Sangar; Manish Pathak; Mayuresh Vishwanathan; Nirihar Chatterjee; Ranjeet Maurya; Sachee Agrawal; Shruthi Sachidanandan; Shrutika Pophale; Shweta Kawankar; Subrat Thanapati; Suresh Poojari; Swapnell Parikh; Utkarsha Yelwe; Vasil Nachan; Vivekanand A                                                                                                      |
| EPI_ISL_426629 to 426632, EPI_ISL_427392 to 427398, EPI_ISL_428229 to 428231, EPI_ISL_436099 to 436108, EPI_ISL_447252 to 447257, EPI_ISL_447591 to 447593, EPI_ISL_457726, EPI_ISL_457730, EPI_ISL_457733, EPI_ISL_458029                                                                                                                                                                                                                                                                                                                                                                                                                                                                                                                                                                                                                                                                                                                                                                                                                                                                                                                                                                                                                                                                                                                                                                                                                                                                                                                                                                                                                                                                                                                                                                                                                                                                                                                                                                                                                                                                                                                                                                                                                                                                                                                                                                                                                                                                                                                                                                                                                                                                                                                                                                                                                                                                                                                                                                                                                                                  | see above                                                                    | TSGH-CP molecular lab                                                              | TSGH-CP molecular lab                                                                                                                | Cheng-Lih Perng; Chien-Wen Chen; Chih-Kai Chang; Feng-Yee Chang; Hsing-Yi Chung; Hung-Sheng Shang; Jung-Chung Lin; Kuo-Ming Yeh; Kuo-Sheng Hung; Ming-Jr JIAN; Ming-Jr Jian; Sheng-Kang Chiu; Shih-Hung Tsai; Tien-Yao Chang                                                                                                                                                                                                                                   |
| EPI_ISL_437336                                                                                                                                                                                                                                                                                                                                                                                                                                                                                                                                                                                                                                                                                                                                                                                                                                                                                                                                                                                                                                                                                                                                                                                                                                                                                                                                                                                                                                                                                                                                                                                                                                                                                                                                                                                                                                                                                                                                                                                                                                                                                                                                                                                                                                                                                                                                                                                                                                                                                                                                                                                                                                                                                                                                                                                                                                                                                                                                                                                                                                                              |                                                                              | TSGH-CP molecular lab, Division of Clinical Pathology, Department of Pathology     | TSGH-CP molecular lab, Division of Clinical Pathology, Department of Pathology                                                       | Cheng-Lih Perng; Chien-Wen Chen; Chih-Kai Chang; Feng-Yee Chang; Hsing-Yi Chung; Hung-Sheng Shang; Jung-Chung Lin; Kuo-Ming Yeh; Kuo-Sheng Hung; Ming-Jr JIAN; Sheng-Kang Chiu; Shih-Hung Tsai; Tien-Yao Chang                                                                                                                                                                                                                                                 |
| EPI_ISL_1446980 to 1446984, EPI_ISL_1447046                                                                                                                                                                                                                                                                                                                                                                                                                                                                                                                                                                                                                                                                                                                                                                                                                                                                                                                                                                                                                                                                                                                                                                                                                                                                                                                                                                                                                                                                                                                                                                                                                                                                                                                                                                                                                                                                                                                                                                                                                                                                                                                                                                                                                                                                                                                                                                                                                                                                                                                                                                                                                                                                                                                                                                                                                                                                                                                                                                                                                                 |                                                                              | TX-Houston Health Department Laboratory                                            | Centers for Disease Control and Prevention Division of Viral Diseases, Pathogen Discovery                                            | Alison Laufer Halpin; Ben L. Rambo-Martin; Clinton R. Paden; Dakota Howard; Darlene Wagner; Dave Wentworth; Dhvani Batra; Jasmine Padilla; Justin Lee; Katie Dillon; Krista Queen; Kristen Knipe; Kristine Lacey; Mark Burroughs; Matthew Schmerer; Mili Sheth; Peter Cook; Sam Shepard; Sarah Nobles; Shoshona Le; Suxiang Tong; Vivien Dugan; Yvette Unoarumhi                                                                                               |
| EPI_ISL_1392714 to 1392799, EPI_ISL_1422238 to 1422326, EPI_ISL_1444262 to 1444346, EPI_ISL_1478933 to 1479015, EPI_ISL_1527538 to 1527629                                                                                                                                                                                                                                                                                                                                                                                                                                                                                                                                                                                                                                                                                                                                                                                                                                                                                                                                                                                                                                                                                                                                                                                                                                                                                                                                                                                                                                                                                                                                                                                                                                                                                                                                                                                                                                                                                                                                                                                                                                                                                                                                                                                                                                                                                                                                                                                                                                                                                                                                                                                                                                                                                                                                                                                                                                                                                                                                  |                                                                              | TXDSHS                                                                             | TXDSHS                                                                                                                               | Anita Pokharel; Bonnie Oh; Chun Wang; Grace Kubin; Jenny Zhang; Lorraine Rodriguez; Maliha Rahman; Mayela Pedrueza; Myong Koag; Rachel Lee; Rashmi Tuladhar                                                                                                                                                                                                                                                                                                    |
| EPI_ISL_1443153 to 1443156                                                                                                                                                                                                                                                                                                                                                                                                                                                                                                                                                                                                                                                                                                                                                                                                                                                                                                                                                                                                                                                                                                                                                                                                                                                                                                                                                                                                                                                                                                                                                                                                                                                                                                                                                                                                                                                                                                                                                                                                                                                                                                                                                                                                                                                                                                                                                                                                                                                                                                                                                                                                                                                                                                                                                                                                                                                                                                                                                                                                                                                  |                                                                              | TYKS, Klininen mikrobiologia                                                       | Expert Microbiology, National Institute for Health and Welfare                                                                       | Carita Savolainen-Kopra; Haider al-Hello; Jani Halkilahti; Kirsi Liitsola; Niina Ikonen; Pekka Ellonen; Päivi Laurila; Sari Hannula; Soile Blomqvist; Teemu Smura                                                                                                                                                                                                                                                                                              |
| EPI_ISL_414518                                                                                                                                                                                                                                                                                                                                                                                                                                                                                                                                                                                                                                                                                                                                                                                                                                                                                                                                                                                                                                                                                                                                                                                                                                                                                                                                                                                                                                                                                                                                                                                                                                                                                                                                                                                                                                                                                                                                                                                                                                                                                                                                                                                                                                                                                                                                                                                                                                                                                                                                                                                                                                                                                                                                                                                                                                                                                                                                                                                                                                                              |                                                                              | Tai Lung Veterinary Laboratory, Agriculture, Fisheries and Conservation Department | School of Public Health, The University of Hong Kong                                                                                 | Christopher J Brackman; Daniel K.W. Chu; Leo L.M. Poon; Malik Peiris; Thomas S.H. Chung                                                                                                                                                                                                                                                                                                                                                                        |
| EPI_ISL_411926 to 411927                                                                                                                                                                                                                                                                                                                                                                                                                                                                                                                                                                                                                                                                                                                                                                                                                                                                                                                                                                                                                                                                                                                                                                                                                                                                                                                                                                                                                                                                                                                                                                                                                                                                                                                                                                                                                                                                                                                                                                                                                                                                                                                                                                                                                                                                                                                                                                                                                                                                                                                                                                                                                                                                                                                                                                                                                                                                                                                                                                                                                                                    |                                                                              | Taiwan Centers for Disease Control                                                 | Taiwan Centers for Disease Control                                                                                                   | Ji-Rong Yang; Jung-Jung Mu; Ming-Tsan-Liu; Yu-Chi-Lin                                                                                                                                                                                                                                                                                                                                                                                                          |
| EPI_ISL_412968 to 412969, EPI_ISL_420889 to 420890, EPI_ISL_445183                                                                                                                                                                                                                                                                                                                                                                                                                                                                                                                                                                                                                                                                                                                                                                                                                                                                                                                                                                                                                                                                                                                                                                                                                                                                                                                                                                                                                                                                                                                                                                                                                                                                                                                                                                                                                                                                                                                                                                                                                                                                                                                                                                                                                                                                                                                                                                                                                                                                                                                                                                                                                                                                                                                                                                                                                                                                                                                                                                                                          |                                                                              | Takayuki Hishiki Kanagawa Prefectural Institute of Public Health                   | Takayuki Hishiki Kanagawa Prefectural Institute of Public Health                                                                     | An, T.; Hayashizaki; Hishiki, T.; Kawai, J.; Kogo, Y.; Matsuki, Y.; Sakuragi, J.; Suzuki, R.; Tanaka, Y.; Usui, K.; Y. and Takasaki, T.                                                                                                                                                                                                                                                                                                                        |
| EPI_ISL_447584 to 447587                                                                                                                                                                                                                                                                                                                                                                                                                                                                                                                                                                                                                                                                                                                                                                                                                                                                                                                                                                                                                                                                                                                                                                                                                                                                                                                                                                                                                                                                                                                                                                                                                                                                                                                                                                                                                                                                                                                                                                                                                                                                                                                                                                                                                                                                                                                                                                                                                                                                                                                                                                                                                                                                                                                                                                                                                                                                                                                                                                                                                                                    |                                                                              | Tamil Nadu Veterinary and Animal Sciences University                               | CSIR-Centre for Cellular and Molecular Biology                                                                                       | Archana Bharadwaj Siva; Dhivya Vedagiri; Divya Gupta; Divya Tej Sowpati; G Dhinakar Raj; G Ravi Kumar; K Kaveri; Karthik Bharadwaj Tallapaka; Krishnan Harinivas Harshan; Kumarasamy Thangaraj; Lamuk Zaveri; Namami Gaur; P Padmapriya; Payel Mukherjee; Priya Singh; Purushotham Vodnala; R Kiruba; Rakesh K Mishra; S Magesh; S Sivasubramanian; S Vennila; Sakshi Shambhavi; Santosh Kumar Kuncha; Shagufta Khan; Sofia Banu; Tulasi Nagabandi; Vishal Sah |
| EPI_ISL_1483279 to 1483318, EPI_ISL_1492444 to 1492455                                                                                                                                                                                                                                                                                                                                                                                                                                                                                                                                                                                                                                                                                                                                                                                                                                                                                                                                                                                                                                                                                                                                                                                                                                                                                                                                                                                                                                                                                                                                                                                                                                                                                                                                                                                                                                                                                                                                                                                                                                                                                                                                                                                                                                                                                                                                                                                                                                                                                                                                                                                                                                                                                                                                                                                                                                                                                                                                                                                                                      |                                                                              | Tampa General Hospital Esoteric Lab                                                | Tampa General Hospital Esoteric Research & Development Lab                                                                           | Amorce Lima; Deanna Becker; Dominic Uy; Grant Vestal; Suzanne Silbert; Vicki Healer                                                                                                                                                                                                                                                                                                                                                                            |
| EPI_ISL_1455673                                                                                                                                                                                                                                                                                                                                                                                                                                                                                                                                                                                                                                                                                                                                                                                                                                                                                                                                                                                                                                                                                                                                                                                                                                                                                                                                                                                                                                                                                                                                                                                                                                                                                                                                                                                                                                                                                                                                                                                                                                                                                                                                                                                                                                                                                                                                                                                                                                                                                                                                                                                                                                                                                                                                                                                                                                                                                                                                                                                                                                                             |                                                                              | TaskForce Covid19-Ceinge Regione Campania                                          | TaskForce Covid19-Ceinge Regione Campania                                                                                            | Massimo Zollo (1) Ettore Capoluongo (1) Veronica Ferrucci (1) Rossella Tufano (1) Angelo Boccia (1) Giovanni Paoletta (1) 1) TaskForce Covid19-Ceinge Regione Campania                                                                                                                                                                                                                                                                                         |
| EPI_ISL_1443539 to 1443600                                                                                                                                                                                                                                                                                                                                                                                                                                                                                                                                                                                                                                                                                                                                                                                                                                                                                                                                                                                                                                                                                                                                                                                                                                                                                                                                                                                                                                                                                                                                                                                                                                                                                                                                                                                                                                                                                                                                                                                                                                                                                                                                                                                                                                                                                                                                                                                                                                                                                                                                                                                                                                                                                                                                                                                                                                                                                                                                                                                                                                                  |                                                                              | Teaching Institute for Public Health of Split-Dalmatia County                      | Croatian Institute of Public Health                                                                                                  | Irena Tabain; Ivana Ferenak                                                                                                                                                                                                                                                                                                                                                                                                                                    |
| EPI_ISL_1388124, EPI_ISL_1388568, EPI_ISL_1389060                                                                                                                                                                                                                                                                                                                                                                                                                                                                                                                                                                                                                                                                                                                                                                                                                                                                                                                                                                                                                                                                                                                                                                                                                                                                                                                                                                                                                                                                                                                                                                                                                                                                                                                                                                                                                                                                                                                                                                                                                                                                                                                                                                                                                                                                                                                                                                                                                                                                                                                                                                                                                                                                                                                                                                                                                                                                                                                                                                                                                           |                                                                              | Team W                                                                             | University Hospital Basel, Clinical Bacteriology                                                                                     | Adrian Egli; Alfredo Mari; Hans Hirsch; Helena MB Seth-Smith; Julia Bielicki; Karoline Leuzinger; Madlen Stange; Manuel Battegay; Simon Fuchs; Tim Roloff                                                                                                                                                                                                                                                                                                      |
| EPI_ISL_529149 to 529150                                                                                                                                                                                                                                                                                                                                                                                                                                                                                                                                                                                                                                                                                                                                                                                                                                                                                                                                                                                                                                                                                                                                                                                                                                                                                                                                                                                                                                                                                                                                                                                                                                                                                                                                                                                                                                                                                                                                                                                                                                                                                                                                                                                                                                                                                                                                                                                                                                                                                                                                                                                                                                                                                                                                                                                                                                                                                                                                                                                                                                                    |                                                                              | Technology Centre, Guangzhou Customs                                               | Technology Centre, Guangzhou Customs                                                                                                 | Dai, J.; Huang, J.; Huang, S.; Li, X.; Shi, Y.; Sun, F.; Sun, J.; Wang, Y.; Zhang, Z.; Zheng, K.; Zhu, .; Zhuang, Z.                                                                                                                                                                                                                                                                                                                                           |
| EPI_ISL_412966 to 412967                                                                                                                                                                                                                                                                                                                                                                                                                                                                                                                                                                                                                                                                                                                                                                                                                                                                                                                                                                                                                                                                                                                                                                                                                                                                                                                                                                                                                                                                                                                                                                                                                                                                                                                                                                                                                                                                                                                                                                                                                                                                                                                                                                                                                                                                                                                                                                                                                                                                                                                                                                                                                                                                                                                                                                                                                                                                                                                                                                                                                                                    |                                                                              | Technology Centre, Guangzhou Customs                                               | Technology Centre, Guangzhou Customs                                                                                                 | Chen, Z.; Dai, J.; Huang; Huang, J.; J. and Zhao, J.; Li, Shi, Y.; Sun, F.; Sun, J.; X. and Wang, Y.; Zhang, Z.; Zheng, K.; Zhu, A.; Zhuang, Z.                                                                                                                                                                                                                                                                                                                |
| EPI_ISL_514438 to 514439                                                                                                                                                                                                                                                                                                                                                                                                                                                                                                                                                                                                                                                                                                                                                                                                                                                                                                                                                                                                                                                                                                                                                                                                                                                                                                                                                                                                                                                                                                                                                                                                                                                                                                                                                                                                                                                                                                                                                                                                                                                                                                                                                                                                                                                                                                                                                                                                                                                                                                                                                                                                                                                                                                                                                                                                                                                                                                                                                                                                                                                    |                                                                              | Tewhey Lab, The Jackson Laboratory                                                 | Tewhey Lab, The Jackson Laboratory                                                                                                   | Barter, M.; Dewey, H.; Lynch, R.; Matluk, N.; Munger, H.; Tewhey, R.                                                                                                                                                                                                                                                                                                                                                                                           |
| EPI_ISL_1446195 to 1446283, EPI_ISL_1446288 to 1446289, EPI_ISL_1446291 to 1446292, EPI_ISL_1446294 to 1446295, EPI_ISL_1446297 to 1446298, EPI_ISL_1446300 to 1446301, EPI_ISL_1446303, EPI_ISL_1446305 to 1446306, EPI_ISL_1446309, EPI_ISL_1446311 to 1446312, EPI_ISL_1446314, EPI_ISL_1446316 to 1446317, EPI_ISL_1446319 to 1446320, EPI_ISL_1446322 to 1446323, EPI_ISL_1446325 to 1446326, EPI_ISL_1446328 to 1446329, EPI_ISL_1446331, EPI_ISL_1446333 to 1446334, EPI_ISL_1446336 to 1446337, EPI_ISL_1446339 to 1446340, EPI_ISL_1446342 to 1446343, EPI_ISL_1446345 to 1446346, EPI_ISL_1446348 to 1446349, EPI_ISL_1446351, EPI_ISL_1446353 to 1446354, EPI_ISL_1446356 to 1446357, EPI_ISL_1446359 to 1446360, EPI_ISL_1446362 to 1446363, EPI_ISL_1446365 to 1446366, EPI_ISL_1446368 to 1446369, EPI_ISL_1446372 to 1446373, EPI_ISL_1446375 to 1446376, EPI_ISL_1446378 to 1446379, EPI_ISL_1446381 to 1446382, EPI_ISL_1446384 to 1446385, EPI_ISL_1446387 to 1446388, EPI_ISL_1446390 to 1446391, EPI_ISL_1446393 to 1446394, EPI_ISL_1446396 to 1446397, EPI_ISL_1446399 to 1446400, EPI_ISL_1446402 to 1446403, EPI_ISL_1446405, EPI_ISL_1446407 to 1446408, EPI_ISL_1446410 to 1446411, EPI_ISL_1446413 to 1446414, EPI_ISL_1446416 to 1446417, EPI_ISL_1446419,                                                                                                                                                                                                                                                                                                                                                                                                                                                                                                                                                                                                                                                                                                                                                                                                                                                                                                                                                                                                                                                                                                                                                                                                                                                                                                                                                                                                                                                                                                                                                                                                                                                                                                                                                                                      |                                                                              |                                                                                    |                                                                                                                                      |                                                                                                                                                                                                                                                                                                                                                                                                                                                                |

|                                                                                                                                                                                                                                                                                                                                                                                                                                                                                                                                                                                                                                                                                                                                                                                                                                                                                                                                                                                                                                                                                                                                                                                         |           |                                                                                                                         |                                                                                                                         |                                                                                                                                                                                                                                                                                                                                                                                                                                                                                                                                                                                                                                                                                                                                                                                      |
|-----------------------------------------------------------------------------------------------------------------------------------------------------------------------------------------------------------------------------------------------------------------------------------------------------------------------------------------------------------------------------------------------------------------------------------------------------------------------------------------------------------------------------------------------------------------------------------------------------------------------------------------------------------------------------------------------------------------------------------------------------------------------------------------------------------------------------------------------------------------------------------------------------------------------------------------------------------------------------------------------------------------------------------------------------------------------------------------------------------------------------------------------------------------------------------------|-----------|-------------------------------------------------------------------------------------------------------------------------|-------------------------------------------------------------------------------------------------------------------------|--------------------------------------------------------------------------------------------------------------------------------------------------------------------------------------------------------------------------------------------------------------------------------------------------------------------------------------------------------------------------------------------------------------------------------------------------------------------------------------------------------------------------------------------------------------------------------------------------------------------------------------------------------------------------------------------------------------------------------------------------------------------------------------|
| EPI_ISL_1446421 to 1446422, EPI_ISL_1446424, EPI_ISL_1446426, EPI_ISL_1446428 to 1446429, EPI_ISL_1446431 to 1446432, EPI_ISL_1446434 to 1446435, EPI_ISL_1446437 to 1446438, EPI_ISL_1446440, EPI_ISL_1446442 to 1446443, EPI_ISL_1446445 to 1446446, EPI_ISL_1446448 to 1446449, EPI_ISL_1446451 to 1446452, EPI_ISL_1446454 to 1446455, EPI_ISL_1446457 to 1446458, EPI_ISL_1446460 to 1446461, EPI_ISL_1446463 to 1446464, EPI_ISL_1446466 to 1446467, EPI_ISL_1446469 to 1446470, EPI_ISL_1446472, EPI_ISL_1446474 to 1446475, EPI_ISL_1446477 to 1446479, EPI_ISL_1446481, EPI_ISL_1446483 to 1446485, EPI_ISL_1446487 to 1446488, EPI_ISL_1446490, EPI_ISL_1446492 to 1446493, EPI_ISL_1446495 to 1446496, EPI_ISL_1446498, EPI_ISL_1446500, EPI_ISL_1446501, EPI_ISL_1446503 to 1446504, EPI_ISL_1446506 to 1446507, EPI_ISL_1446509 to 1446510, EPI_ISL_1446512, EPI_ISL_1446514 to 1446515, EPI_ISL_1446517 to 1446518, EPI_ISL_1446520 to 1446521, EPI_ISL_1446523, EPI_ISL_1446525 to 1446526, EPI_ISL_1446528 to 1446529, EPI_ISL_1446531 to 1446532, EPI_ISL_1446534, EPI_ISL_1446536 to 1446537, EPI_ISL_1446539 to 1446540, EPI_ISL_1446542, EPI_ISL_1482537 to 1482538 | see above | Texas Children's Hospital                                                                                               | Texas Children's Microbiome Center                                                                                      | Ila Singh; James Dunn; James Versalovic; Jennifer K. Spinler; Judith R. Campbell; Lea Fasciano; Lisa Tocco; Lucia Marquez; Ruth Ann Luna; Tjin Koy                                                                                                                                                                                                                                                                                                                                                                                                                                                                                                                                                                                                                                   |
| EPI_ISL_420796 to 420798, EPI_ISL_452105, EPI_ISL_452112, EPI_ISL_452115                                                                                                                                                                                                                                                                                                                                                                                                                                                                                                                                                                                                                                                                                                                                                                                                                                                                                                                                                                                                                                                                                                                |           | Texas DSHS Lab Services                                                                                                 | Pathogen Discovery, Respiratory Viruses Branch, Division of Viral Diseases, Centers for Disease Control and Prevention  | Alison S. Laufer Halpin; Anna Montmayeur; Anna Uehara; Anne Uehara; Christopher A. Elkins; Clinton R. Paden; Haibin Wang; Jasmine Padilla; Jing Zhang; Justin Lee; Krista Queen; Mary S. Keckler; Rachel Marine; Suxiang Tong; Yan Li; Ying Tao; Zachary Weiner                                                                                                                                                                                                                                                                                                                                                                                                                                                                                                                      |
| EPI_ISL_411956                                                                                                                                                                                                                                                                                                                                                                                                                                                                                                                                                                                                                                                                                                                                                                                                                                                                                                                                                                                                                                                                                                                                                                          |           | Texas Department of State Health Services                                                                               | Pathogen Discovery, Respiratory Viruses Branch, Division of Viral Diseases, Centers for Diseases Control and Prevention | Anna Uehara; Brett L. Whitaker; Brian Lynch; Clinton R. Paden; Haibin Wang; Janna R. Murray; Jing Zhang; Krista Queen; Lijuan Wang; Senthil Kumar K. Sakthivel; Shifaq Kamili; Stephen Lindstrom; Susan I. Gerber; Suxiang Tong; Xiaoyan Lu; Yan Li; Ying Tao                                                                                                                                                                                                                                                                                                                                                                                                                                                                                                                        |
| EPI_ISL_515250 to 515261, EPI_ISL_517960 to 517995, EPI_ISL_522351 to 522395, EPI_ISL_522943 to 522977, EPI_ISL_524053 to 524073, EPI_ISL_525763 to 525789, EPI_ISL_527820 to 527855, EPI_ISL_534260 to 534302, EPI_ISL_538275 to 538320, EPI_ISL_541971 to 542011, EPI_ISL_542444 to 542485, EPI_ISL_560926 to 560970, EPI_ISL_569689 to 569734, EPI_ISL_574434 to 574478, EPI_ISL_576281 to 576362, EPI_ISL_576568, EPI_ISL_584123 to 584164, EPI_ISL_590838 to 590876, EPI_ISL_593559 to 593595, EPI_ISL_602210 to 602255, EPI_ISL_610000 to 610047, EPI_ISL_613966 to 614010, EPI_ISL_615122 to 615165                                                                                                                                                                                                                                                                                                                                                                                                                                                                                                                                                                              | see above | Texas Department of State Health Services                                                                               | Texas Department of State Health Services                                                                               | Anita Pokharel; Bonnie Oh; Cara Akrouf; Chun Wang; Chung Wang; Grace Kubin; Jenny Zhang; Maliha Rahman; Mayela Pedrueza; Myong Koag; Rachel Lee; Rashmi Tuladhar                                                                                                                                                                                                                                                                                                                                                                                                                                                                                                                                                                                                                     |
| EPI_ISL_1405729 to 1405813, EPI_ISL_1503309 to 1503394                                                                                                                                                                                                                                                                                                                                                                                                                                                                                                                                                                                                                                                                                                                                                                                                                                                                                                                                                                                                                                                                                                                                  |           | Texas Department of State Health Services (TXDSHS)                                                                      | Texas Department of State Health Services (TXDSHS)                                                                      | Anita Pokharel; Bonnie Oh; Chun Wang; Grace Kubin; Jenny Zhang; Lorraine Rodriguez; Maliha Rahman; Mayela Pedrueza; Myong Koag; Rachel Lee; Rashmi Tuladhar                                                                                                                                                                                                                                                                                                                                                                                                                                                                                                                                                                                                                          |
| EPI_ISL_594455, EPI_ISL_594464                                                                                                                                                                                                                                                                                                                                                                                                                                                                                                                                                                                                                                                                                                                                                                                                                                                                                                                                                                                                                                                                                                                                                          |           | Texas Department of State Health Services Public Health Laboratory                                                      | Pathogen Discovery, Respiratory Viruses Branch, Division of Viral Diseases, Centers for Disease Control and Prevention  | Anna Uehara; Clinton Paden; Haibin Wang; Jing Zhang; Julu Bhatnagar; Krista Queen; Suxiang Tong; Yan Li; Ying Tao                                                                                                                                                                                                                                                                                                                                                                                                                                                                                                                                                                                                                                                                    |
| EPI_ISL_434707                                                                                                                                                                                                                                                                                                                                                                                                                                                                                                                                                                                                                                                                                                                                                                                                                                                                                                                                                                                                                                                                                                                                                                          |           | Thammasat University Hospital                                                                                           | National Institute of Health, Department of medical Sciences, Ministry of Public Health, Thailand                       | Chittaganpitch; Malinee; Okada; Parmmen; Phuygun; Pilailuk; Siripaporn; Sittiporn; Sunthareeya; Thanadachakul; Thanutsapa; Waicharoen; Warawan; Wongboot                                                                                                                                                                                                                                                                                                                                                                                                                                                                                                                                                                                                                             |
| EPI_ISL_1490223, EPI_ISL_1490225 to 1490226, EPI_ISL_1490228, EPI_ISL_1490246 to 1490250, EPI_ISL_1490252, EPI_ISL_1490254, EPI_ISL_1490653, EPI_ISL_1490661, EPI_ISL_1490666, EPI_ISL_1490714, EPI_ISL_1498095, EPI_ISL_1498262, EPI_ISL_1498379                                                                                                                                                                                                                                                                                                                                                                                                                                                                                                                                                                                                                                                                                                                                                                                                                                                                                                                                       | see above | The Caribbean Public Health Agency                                                                                      | Carrington Lab, Department of PreClinical Sciences, Faculty of Medical Sciences, The University of the West Indies      | Adesh Ramsubhag; Arianne Brown-Jordan; Avery Hinds; Chinna Chinnadurai; Christine V. F. Carrington; Christopher Oura; Gabriel Escobar; Jaya Jayaraman; Jerome Foster; Karla Georges; Marsha Ivey; Naresh Nandram; Nikita S. D. Sahadeo; Nuno Faria; Oliver Pybus; Rahul Naidu; Rajini Haraksingh; Risha Singh; Roshan Parasram; Sarah Hill; Stanley Giddings; SueMin Nathaniel; Vernie Ramkissoon                                                                                                                                                                                                                                                                                                                                                                                    |
| EPI_ISL_412978                                                                                                                                                                                                                                                                                                                                                                                                                                                                                                                                                                                                                                                                                                                                                                                                                                                                                                                                                                                                                                                                                                                                                                          |           | The Central Hospital Of Wuhan                                                                                           | Hubei Provincial Center for Disease Control and Prevention                                                              | Bin Fang; Bo Yang; Bo Yu; Faxian Zhan; Guojun Ye; Jing Li; Junqiang Xu; Kun Cai; Linlin Liu; Xiang Li; Xiao Yu; Xixiang Huo; Yongzhong Jiang.                                                                                                                                                                                                                                                                                                                                                                                                                                                                                                                                                                                                                                        |
| EPI_ISL_419210                                                                                                                                                                                                                                                                                                                                                                                                                                                                                                                                                                                                                                                                                                                                                                                                                                                                                                                                                                                                                                                                                                                                                                          |           | The Chaim Sheba Medical Center                                                                                          | Israel Institute for Biological Research                                                                                | Adi Beth-Din; Anat Zvi; Boaz Politi; Dana Stein; Einat Vitner; Gadi Segal; Gil Regev-Yochay; Hadas Tamir; Hagit Achdot; Inbar Cohen-Gihon; Ilach Cherry; Michal Mandelboim; Nir Paran; Ofir Israeli; Ohad Shifman; Oran Erster; Orly Laskar; Sharon Melamed; Shay Weiss; Shmuel C. Shapira; Shmuel Yitzhaki; Tomer Israely; Yifat Yahalom Ronen                                                                                                                                                                                                                                                                                                                                                                                                                                      |
| EPI_ISL_526129, EPI_ISL_526205, EPI_ISL_544963, EPI_ISL_545002, EPI_ISL_591518, EPI_ISL_593769                                                                                                                                                                                                                                                                                                                                                                                                                                                                                                                                                                                                                                                                                                                                                                                                                                                                                                                                                                                                                                                                                          |           | The Children's Hospital at Westmead                                                                                     | NSW Health Pathology - Institute of Clinical Pathology and Medical Research; Westmead Hospital; University of Sydney    | CIDM-PH et al.                                                                                                                                                                                                                                                                                                                                                                                                                                                                                                                                                                                                                                                                                                                                                                       |
| EPI_ISL_450442                                                                                                                                                                                                                                                                                                                                                                                                                                                                                                                                                                                                                                                                                                                                                                                                                                                                                                                                                                                                                                                                                                                                                                          |           | The Department of Infectious Disease Prevention and Control, Henan Provincial Center for Disease Control and Prevention | The Department of Infectious Disease Prevention and Control, Henan Provincial Center for Disease Control and Prevention | Hu, X.; Huang; Li, D.; Li, X.; Lu, S.; Wu, B.; X. and Guo, W.                                                                                                                                                                                                                                                                                                                                                                                                                                                                                                                                                                                                                                                                                                                        |
| EPI_ISL_482057 to 482068, EPI_ISL_482120 to 482123, EPI_ISL_482125 to 482130                                                                                                                                                                                                                                                                                                                                                                                                                                                                                                                                                                                                                                                                                                                                                                                                                                                                                                                                                                                                                                                                                                            |           | The Department of Microbiology, Torbay and South Devon NHS Foundation Trust                                             | Wellcome Sanger Institute for the COVID-19 Genomics UK (COG-UK) consortium                                              | Amy Hurd; Anthony Mogridge; Cheryl Bailiss; Cordelia Langford; David K. Jackson; Dominic Kwiatkowski; Ewan Harrison; Gary Booth; Helen Brown; Ian Johnston; Jack Howe; John Sillitoe on behalf of the Wellcome Sanger Institute COVID-19 Surveillance Team ( <a href="http://www.sanger.ac.uk/covid-team">http://www.sanger.ac.uk/covid-team</a> ); Mel Brown; Michelle Harrison and Alex Alderton; Roberto Amato; Sonia Goncalves; Sophie Lloyd                                                                                                                                                                                                                                                                                                                                     |
| EPI_ISL_429074 to 429086, EPI_ISL_429088 to 429105                                                                                                                                                                                                                                                                                                                                                                                                                                                                                                                                                                                                                                                                                                                                                                                                                                                                                                                                                                                                                                                                                                                                      |           | The First Affiliated Hospital of Guangzhou Medical University                                                           | BGI-shenzhen & The First Affiliated Hospital of Guangzhou Medical University                                            | ; Daxi Wang; Lu Zhang; Wanying Sun; Yanqun Wang; Zhaoyong Zhang et al.                                                                                                                                                                                                                                                                                                                                                                                                                                                                                                                                                                                                                                                                                                               |
| EPI_ISL_457687 to 457698                                                                                                                                                                                                                                                                                                                                                                                                                                                                                                                                                                                                                                                                                                                                                                                                                                                                                                                                                                                                                                                                                                                                                                |           | The First Affiliated Hospital of Guangzhou Medical University, Guangzhou, China                                         | BGI-shenzhen & The First Affiliated Hospital of Guangzhou Medical University                                            | Daxi Wang; Lu Zhang; Wanying Sun; Yanqun Wang; Zhaoyong Zhang et al.                                                                                                                                                                                                                                                                                                                                                                                                                                                                                                                                                                                                                                                                                                                 |
| EPI_ISL_1401473 to 1401565, EPI_ISL_1470560 to 1470740, EPI_ISL_1540714 to 1540852                                                                                                                                                                                                                                                                                                                                                                                                                                                                                                                                                                                                                                                                                                                                                                                                                                                                                                                                                                                                                                                                                                      |           | The Jackson Laboratory                                                                                                  | The Jackson Laboratory                                                                                                  | Adams M; Bergeron D; Kelly K; Li L; Long J; Omerza G; Renzette N; Uvalic J                                                                                                                                                                                                                                                                                                                                                                                                                                                                                                                                                                                                                                                                                                           |
| EPI_ISL_491473                                                                                                                                                                                                                                                                                                                                                                                                                                                                                                                                                                                                                                                                                                                                                                                                                                                                                                                                                                                                                                                                                                                                                                          |           | The Medical City                                                                                                        | Research Institute for Tropical Medicine                                                                                | Catalino Demetria; Criselda Bautista; Daria Manalo; Edelwisa Mercado; Francisco Gerardo Polotan; Inez Andrea Medado; Kirstyn Brunker; Ma. Angelica Tujan; Othoniel Jan Onza                                                                                                                                                                                                                                                                                                                                                                                                                                                                                                                                                                                                          |
| EPI_ISL_491092, EPI_ISL_530347 to 530350, EPI_ISL_539493 to 539494, EPI_ISL_539777, EPI_ISL_541082, EPI_ISL_541138, EPI_ISL_541332 to 541334, EPI_ISL_541336 to 541337, EPI_ISL_545580, EPI_ISL_545954, EPI_ISL_545956 to 545957, EPI_ISL_546436, EPI_ISL_546935 to 546936, EPI_ISL_547966 to 547968, EPI_ISL_560408 to 560412, EPI_ISL_568577, EPI_ISL_577623 to 577638, EPI_ISL_584073 to 584082                                                                                                                                                                                                                                                                                                                                                                                                                                                                                                                                                                                                                                                                                                                                                                                      | see above | The National Institute of Public Health                                                                                 | State Veterinary Institute Prague                                                                                       | A; D; H; J; Jirincova; L; Nagy; Novakova; Trnka; Vecerova                                                                                                                                                                                                                                                                                                                                                                                                                                                                                                                                                                                                                                                                                                                            |
| EPI_ISL_471528, EPI_ISL_471530, EPI_ISL_471540, EPI_ISL_471544, EPI_ISL_471547, EPI_ISL_471550, EPI_ISL_471553, EPI_ISL_471555, EPI_ISL_476067                                                                                                                                                                                                                                                                                                                                                                                                                                                                                                                                                                                                                                                                                                                                                                                                                                                                                                                                                                                                                                          | see above | The National Institute of Public Health                                                                                 | State Veterinary Institute Prague and The National Institute of Public Health                                           | A; D; H; J; Jirincova; L; Nagy; Novakova; Trnka; Vecerova                                                                                                                                                                                                                                                                                                                                                                                                                                                                                                                                                                                                                                                                                                                            |
| EPI_ISL_541335                                                                                                                                                                                                                                                                                                                                                                                                                                                                                                                                                                                                                                                                                                                                                                                                                                                                                                                                                                                                                                                                                                                                                                          |           | The National Institute of Public Health                                                                                 | Sidlištní 136/24 165 03, Prague Czech Republic                                                                          | A; D; H; J; Jirincova; L; Nagy; Novakova; Trnka; Vecerova                                                                                                                                                                                                                                                                                                                                                                                                                                                                                                                                                                                                                                                                                                                            |
| EPI_ISL_489708 to 489709, EPI_ISL_490112, EPI_ISL_491093 to 491095, EPI_ISL_491117 to 491119, EPI_ISL_513314, EPI_ISL_513511 to 513512                                                                                                                                                                                                                                                                                                                                                                                                                                                                                                                                                                                                                                                                                                                                                                                                                                                                                                                                                                                                                                                  |           | The National Institute of Public Health                                                                                 | The National Institute of Public Health and State Veterinary Institute Prague                                           | A; D; H; J; Jirincova; L; Nagy; Novakova; Trnka; Vecerova                                                                                                                                                                                                                                                                                                                                                                                                                                                                                                                                                                                                                                                                                                                            |
| EPI_ISL_414477, EPI_ISL_422636                                                                                                                                                                                                                                                                                                                                                                                                                                                                                                                                                                                                                                                                                                                                                                                                                                                                                                                                                                                                                                                                                                                                                          |           | The National Institute of Public Health Center for Epidemiology and Microbiology                                        | State Veterinary Institute Prague                                                                                       | Alexander Nagy; Dusan Trnka; Helena Jirincova; Jaromira Vecerova; Klara Labska; Ludmila Novakova; Oldrich Bartos; Olga Storkanova                                                                                                                                                                                                                                                                                                                                                                                                                                                                                                                                                                                                                                                    |
| EPI_ISL_434572, EPI_ISL_437519                                                                                                                                                                                                                                                                                                                                                                                                                                                                                                                                                                                                                                                                                                                                                                                                                                                                                                                                                                                                                                                                                                                                                          |           | The National Institute of Public Health Center for Epidemiology and Microbiology                                        | The National Institute of Public Health Center for Epidemiology and Microbiology                                        | Alexander Nagy; Dusan Trnka; Helena Jirincova; Jaromira Vecerova; Ludmila Novakova                                                                                                                                                                                                                                                                                                                                                                                                                                                                                                                                                                                                                                                                                                   |
| EPI_ISL_426379                                                                                                                                                                                                                                                                                                                                                                                                                                                                                                                                                                                                                                                                                                                                                                                                                                                                                                                                                                                                                                                                                                                                                                          |           | The National Laboratory of Health, Environment and Food, Maribor, Slovenia                                              | The National Laboratory of Health, Environment and Food, Maribor, Slovenia                                              | Blazun Vosner H.; Duh D.; Hedzet S.; Janezic S.; Mahnic A.; Rupnik M.; Završnik J.                                                                                                                                                                                                                                                                                                                                                                                                                                                                                                                                                                                                                                                                                                   |
| EPI_ISL_1384692 to 1384701                                                                                                                                                                                                                                                                                                                                                                                                                                                                                                                                                                                                                                                                                                                                                                                                                                                                                                                                                                                                                                                                                                                                                              |           | The National Public Health Laboratory                                                                                   | Vilnius University Hospital Santaros Klinikos, Center of Laboratory Medicine                                            | Daniel Naumovas; Dovile Ezerskyte; Gytis Dudas; Ingrida Olen draite; Laimonas Griskevicius; Ligita Raugaite; Mindaugas Stoskus; Monika Katenaite; Rimvydas Norvilas                                                                                                                                                                                                                                                                                                                                                                                                                                                                                                                                                                                                                  |
| EPI_ISL_417550 to 417551, EPI_ISL_417553 to 417589, EPI_ISL_417591 to 417617, EPI_ISL_417619 to 417654, EPI_ISL_417673 to 417675, EPI_ISL_417677 to 417876, EPI_ISL_424379 to 424532, EPI_ISL_424552, EPI_ISL_424554 to 424559, EPI_ISL_424563 to 424564, EPI_ISL_424571 to 424593, EPI_ISL_424595 to 424607, EPI_ISL_424610 to 424624                                                                                                                                                                                                                                                                                                                                                                                                                                                                                                                                                                                                                                                                                                                                                                                                                                                  | see above | The National University Hospital of Iceland                                                                             | deCODE genetics                                                                                                         | Agnar Helgason; Alma Moller; Arna B Agustsdottir; Arnaldur Gylfason; Asgeir Sigurdsson; Aslaug Jonasdottir; Berglind Eiriksdottir; Bjarni Thorbjornsson; Brynjar O Jenson; Daniel F Gudbjartsson; Droplaug N Magnusdottir; Elisabet E Gardarsdottir; Emil A Thorarensen; Gardar Sveinbjornsson; Gisli Masson; Gudmundur Georgsson; Gudmundur L Norddahl; Gudrun Sigmundsdottir; Hakon Jonsson; Hilma Holm; Ingileif Jonsdottir; Jona Saemundsdottir; Kamilla S Jofsdottir; Kari Stefansson; Karl G Kristinnson; Kjartan R Gudmundsson; Kjaire S Sveinsdottir; Louise le Roux; Maney Sveinsdottir; Olafia S Gretarsdottir; Olafur T Magnusson; Pall Melsted; Patrick Sulem; Run Fridrikdottir; Thora R Gunnarsdottir; Thorur Kristjansson; Thorolfur Gudnason; Unnur Thorsteinsdottir |
| EPI_ISL_421660, EPI_ISL_427288 to 427291                                                                                                                                                                                                                                                                                                                                                                                                                                                                                                                                                                                                                                                                                                                                                                                                                                                                                                                                                                                                                                                                                                                                                |           | The Ohio State University                                                                                               | The Ohio State University-James Molecular Lab at Polar                                                                  | Dan Jones; Erica Vincent; Huolin Tu; Jason Garee; Joan-Miquel Balada-Llasat; Matt Hunt; Matthew Avenarius; Matthew Hunt; Preeti Pancholi; Preeti                                                                                                                                                                                                                                                                                                                                                                                                                                                                                                                                                                                                                                     |

|                                                                                                                                                                                                                                                                                                                                                                                                                                                                                                                                                                                                          |                                                                                                     |                                                                                                                                                                                     |                                                                                                                                                                                                                                                                                                                                                                                                                                                                                                                                                                                     |
|----------------------------------------------------------------------------------------------------------------------------------------------------------------------------------------------------------------------------------------------------------------------------------------------------------------------------------------------------------------------------------------------------------------------------------------------------------------------------------------------------------------------------------------------------------------------------------------------------------|-----------------------------------------------------------------------------------------------------|-------------------------------------------------------------------------------------------------------------------------------------------------------------------------------------|-------------------------------------------------------------------------------------------------------------------------------------------------------------------------------------------------------------------------------------------------------------------------------------------------------------------------------------------------------------------------------------------------------------------------------------------------------------------------------------------------------------------------------------------------------------------------------------|
|                                                                                                                                                                                                                                                                                                                                                                                                                                                                                                                                                                                                          |                                                                                                     |                                                                                                                                                                                     | Pancholi; Rongjin Ren; Sean Caruthers; Weiqiang Zhao; Xiaokang Pan; Xiaokang Zhao                                                                                                                                                                                                                                                                                                                                                                                                                                                                                                   |
| EPI_ISL_421675                                                                                                                                                                                                                                                                                                                                                                                                                                                                                                                                                                                           | The Ohio State University Wexner Medical Center                                                     | The Ohio State University James Molecular lab                                                                                                                                       | Dan Jones; Huolin Tu; Jason Garee; Joan-Miquel Balada-Llasat; Matthew Avenarius; Matthew Hunt; Pam Snyder; Preeti Pancholi; Sean Caruthers; Xiaokang Pan                                                                                                                                                                                                                                                                                                                                                                                                                            |
| EPI_ISL_509436 to 509443                                                                                                                                                                                                                                                                                                                                                                                                                                                                                                                                                                                 | The Princess Alexandra Hospital                                                                     | Wellcome Sanger Institute for the COVID-19 Genomics UK (COG-UK) consortium                                                                                                          | Claudia McCrea and Alex Alderton; Cordelia Langford; David K. Jackson; Dominic Kwiatkowski; Ewan Harrison; Ian Johnston; Jessica Scott; John Sillitoe on behalf of the Wellcome Sanger Institute COVID-19 Surveillance Team ( <a href="http://www.sanger.ac.uk/covid-team">http://www.sanger.ac.uk/covid-team</a> ); Louise Lopez; Lynn Monaghan; Nick Levene; Roberto Amato; Sonia Goncalves                                                                                                                                                                                       |
| EPI_ISL_429161 to 429163, EPI_ISL_430862, EPI_ISL_430864                                                                                                                                                                                                                                                                                                                                                                                                                                                                                                                                                 | The Public Health Agency of Sweden                                                                  | The Public Health Agency of Sweden                                                                                                                                                  | Anna Risberg; Anna-Malin Linde; Karin Tegmark-Wisell; Maria Lind Karlberg; Olov Svartstrom; Oskar Karlsson Lindsjo; Shaman Muradrasoli                                                                                                                                                                                                                                                                                                                                                                                                                                              |
| EPI_ISL_1520159 to 1520164                                                                                                                                                                                                                                                                                                                                                                                                                                                                                                                                                                               | The University of Chicago Medical Center                                                            | Illinois Department of Public Health - Chicago Lab                                                                                                                                  | Ira Heimler; Vineet K. Dhiman                                                                                                                                                                                                                                                                                                                                                                                                                                                                                                                                                       |
| EPI_ISL_405839, EPI_ISL_406030                                                                                                                                                                                                                                                                                                                                                                                                                                                                                                                                                                           | The University of Hong Kong - Shenzhen Hospital                                                     | Li Ka Shing Faculty of Medicine, The University of Hong Kong                                                                                                                        | C.C.-Y.; C.K.-M. and Yuen; Cai; Chan; Chen, H.; Cheng; Chu, H.; H.W.; Hui; Ip; J.D.; J.F.-W.; J.P.; K.H.; K.K.-W.; K.Y.; Kok; Liu, J.; Lo; Poon; R.W.-S.; S.K.-F.; To; Tsai; V.C.-C.; V.K.-M.; W.M.; Xing, F.; Yang, J.; Yip; Yuan, S.                                                                                                                                                                                                                                                                                                                                              |
| EPI_ISL_1497597                                                                                                                                                                                                                                                                                                                                                                                                                                                                                                                                                                                          | The office of Disease Prevention and Control 6, Chonburi                                            | National Institute of Health, Department of Medical Sciences, Ministry of Public Health, Thailand                                                                                   | Hathaikan Tanchai; Natchaya Khiahsang; Nuttida Thongpramul; Pakorn Piromtong; Pilailuk Okada; Ratana Tacharoenmuang; Siripaporn Phuygun; Sittiporn Parmmen; Sunthareeya Waicharoen.; Thanutsapa Thanadachakull                                                                                                                                                                                                                                                                                                                                                                      |
| EPI_ISL_412983                                                                                                                                                                                                                                                                                                                                                                                                                                                                                                                                                                                           | Tianmen Center for Disease Control and Prevention                                                   | Hubei Provincial Center for Disease Control and Prevention                                                                                                                          | Bin Fang; Bo Yang; Bo Yu; Faxian Zhan; Guojun Ye; Jing Li; Junqiang Xu; Kun Cai; Linlin Liu; Xiang Li; Xiao Yu; Xierong Li; Xixiang Huo; Yangyang Tao; Yifa Zhu; Yongzhong Jiang.                                                                                                                                                                                                                                                                                                                                                                                                   |
| EPI_ISL_576385                                                                                                                                                                                                                                                                                                                                                                                                                                                                                                                                                                                           | Tirta Medical Center Angsana, Banjarmasin Kalsel                                                    | National Institute of Health Research and Development                                                                                                                               | AA; HA; HD; Ikawati; KD; KNA; Nugraha; Paisal; Pangesti; Pawestri; Puspa; Setiawaty; Soekarso; Subangkit; T; V                                                                                                                                                                                                                                                                                                                                                                                                                                                                      |
| EPI_ISL_480030 to 480041, EPI_ISL_480073                                                                                                                                                                                                                                                                                                                                                                                                                                                                                                                                                                 | Tochigi Prefectural Institute of Public Health and Environmental Science                            | Pathogen Genomics Center, National Institute of Infectious Diseases                                                                                                                 | Ako Nakajima; Hajime Kamiya; Kentaro Itokawa; Makoto Kuroda; Masanori Hashino; Motoi Suzuki; Rina Tanaka; Tsuyoshi Sekizuka                                                                                                                                                                                                                                                                                                                                                                                                                                                         |
| EPI_ISL_479886 to 479895, EPI_ISL_479959 to 479965, EPI_ISL_480227, EPI_ISL_1430682                                                                                                                                                                                                                                                                                                                                                                                                                                                                                                                      | Tokyo Metropolitan Institute of Public Health                                                       | Pathogen Genomics Center, National Institute of Infectious Diseases                                                                                                                 | Chikako Shimokawa; Eunsil Park; Hajime Kamiya; Kenji Sadamasu; Kentaro Itokawa; Makoto Kuroda; Mami Nagashima; Masanori Hashino; Motoi Suzuki; Rina Tanaka; Takashi Chiba; Tsuguto Fujimoto; Tsuyoshi Sekizuka; Yasutaka Hoshino; Yoshihiro Kaku                                                                                                                                                                                                                                                                                                                                    |
| EPI_ISL_463970 to 463994, EPI_ISL_586267 to 586428, EPI_ISL_586430 to 586438, EPI_ISL_586440 to 586449, EPI_ISL_586452 to 586453, EPI_ISL_586455 to 586456, EPI_ISL_586458 to 586461, EPI_ISL_586463, EPI_ISL_586466 to 586508, EPI_ISL_591100 to 591141, EPI_ISL_591143, EPI_ISL_591148, EPI_ISL_591150, EPI_ISL_591152, EPI_ISL_591154 to 591160, EPI_ISL_591164 to 591166, EPI_ISL_591168 to 591170, EPI_ISL_591175 to 591212, EPI_ISL_591216, EPI_ISL_591220, EPI_ISL_591222 to 591225, EPI_ISL_591237 to 591238, EPI_ISL_591240, EPI_ISL_591245 to 591247, EPI_ISL_591249, EPI_ISL_591253 to 591269 | McMaster University                                                                                 | Ahmed Draia; Allison McGeer; Andrew G. McArthur; Angel Li; Emily Panousis; Hooman Derakhshani; Jalees Nasir; Kuganya Nirmalarajah; Michael Surette; Patryk Aftanas; Samira Mubareka |                                                                                                                                                                                                                                                                                                                                                                                                                                                                                                                                                                                     |
| EPI_ISL_480196 to 480203, EPI_ISL_1429639, EPI_ISL_1430561 to 1430569, EPI_ISL_1431611, EPI_ISL_1431805, EPI_ISL_1432005, EPI_ISL_1432931, EPI_ISL_1432933, EPI_ISL_1432935, EPI_ISL_1432937 to 1432938, EPI_ISL_1432940, EPI_ISL_1432942                                                                                                                                                                                                                                                                                                                                                                | see above                                                                                           | Toyama Institute of Health                                                                                                                                                          | Hajime Kamiya; Kazunori Oishi; Kentaro Itokawa; Makoto Kuroda; Masae Itamochi; Masanori Hashino; Motoi Suzuki; Rina Tanaka; Tsuyoshi Sekizuka                                                                                                                                                                                                                                                                                                                                                                                                                                       |
| EPI_ISL_455588                                                                                                                                                                                                                                                                                                                                                                                                                                                                                                                                                                                           | Trang Hospital                                                                                      | National Institute of Health, Department of medical Sciences, Ministry of Public Health, Thailand                                                                                   | Chittaganpitch; Malinee; Okada; Parmmen; Phuygun; Pilailuk; Siripaporn; Sittiporn; Sunthareeya; Thanadachakul; Thanutsapa; Waicharoen; Warawan; Wongboot                                                                                                                                                                                                                                                                                                                                                                                                                            |
| EPI_ISL_508489 to 508509                                                                                                                                                                                                                                                                                                                                                                                                                                                                                                                                                                                 | Translational Health Science and Technology Institute                                               | National Institute of Biomedical Genomics                                                                                                                                           | Anbalagan Ananthraj; Arindam Maitra; Gagandeep Kang; Guruprasad Medigeshi; Imran Khan; Madhu Pareek; Saumitra Das; Sharanabasava Patil                                                                                                                                                                                                                                                                                                                                                                                                                                              |
| EPI_ISL_511942 to 511944                                                                                                                                                                                                                                                                                                                                                                                                                                                                                                                                                                                 | Translational Health Science and Technology Institute                                               | National Institute of Biomedical Genomics - DBT's PAN-INDIA 1000 SARS-CoV-2 RNA Genome Sequencing Consortium                                                                        | Anbalagan Ananthraj; Arindam Maitra; Gagandeep Kang; Guruprasad Medigeshi; Imran Khan; Madhu Pareek; Saumitra Das; Sharanabasava Patil                                                                                                                                                                                                                                                                                                                                                                                                                                              |
| EPI_ISL_454858 to 454867, EPI_ISL_528382 to 528385, EPI_ISL_1532786 to 1532791                                                                                                                                                                                                                                                                                                                                                                                                                                                                                                                           | Translational Health Science and Technology Institute -ESIC medical college and hospital, Faridabad | THSTI Bioassay laboratory                                                                                                                                                           | Akshay Kanakan; Anil Kumar Pandey; Anil Pandey; Asim Das; Guruprasad R Medigeshi; Guruprasad R. Medigeshi; Janani Srinivasa Vasudevan; Jigme Wangchuk; Naseem Ahmed Khan; Neha Jha; Priyanka Mehta; Rajesh Pandey; Ranjeet Maurya; Saurabh Kumar                                                                                                                                                                                                                                                                                                                                    |
| EPI_ISL_538233 to 538264, EPI_ISL_542935 to 543006, EPI_ISL_560325 to 560362, EPI_ISL_582148 to 582203, EPI_ISL_582205 to 582219, EPI_ISL_610251 to 610252, EPI_ISL_610254 to 610267, EPI_ISL_610282                                                                                                                                                                                                                                                                                                                                                                                                     | see above                                                                                           | TriCore Reference Laboratories                                                                                                                                                      | Darrell Dinwiddie; Daryl Domman; Joseph Hicks; Kurt Schwalm; Michael Edwards; Twila Kunde                                                                                                                                                                                                                                                                                                                                                                                                                                                                                           |
| EPI_ISL_1530946 to 1530947                                                                                                                                                                                                                                                                                                                                                                                                                                                                                                                                                                               | TriCore Reference Laboratories                                                                      | New Mexico Department of Health Scientific Laboratory                                                                                                                               | Anastacia Griego-Fisher; D'eldra Malone; Ellie Johnson; Jennifer Benoit                                                                                                                                                                                                                                                                                                                                                                                                                                                                                                             |
| EPI_ISL_1400964 to 1400966                                                                                                                                                                                                                                                                                                                                                                                                                                                                                                                                                                               | TriCore Reference Laboratory Inc.                                                                   | New Mexico Department of Health Scientific Laboratory                                                                                                                               | Anastacia Griego-Fisher; D'eldra Malone; Ellie Johnson; Jennifer Benoit                                                                                                                                                                                                                                                                                                                                                                                                                                                                                                             |
| EPI_ISL_1499113, EPI_ISL_1499115                                                                                                                                                                                                                                                                                                                                                                                                                                                                                                                                                                         | Trinidad Public Health Laboratory                                                                   | Carrington Lab, Department of PreClinical Sciences, Faculty of Medical Sciences, The University of the West Indies                                                                  | Adesh Ramsubhag; Arianne Brown-Jordan; Avery Hinds; Chinna Chinnadurai; Christine V. F. Carrington; Christopher Oura; Gabriel Escobar; Jaya Jayaraman; Jerome Foster; Karla Georges; Marsha Ivey; Naresh Nandram; Nikita S. D. Sahadeo; Nuno Faria; Oliver Pybus; Rahul Naidu; Rajini Haraksingh; Risha Singh; Roshan Parasram; Sarah Hill; Stanley Giddings; SueMin Nathaniel; Vernie Ramkissoon                                                                                                                                                                                   |
| EPI_ISL_434653, EPI_ISL_434656, EPI_ISL_475518                                                                                                                                                                                                                                                                                                                                                                                                                                                                                                                                                           | Trollbackens VC                                                                                     | The Public Health Agency of Sweden                                                                                                                                                  | Amelie Holmqvist; Anna Risberg; Anna-Malin Linde; Karin Tegmark-Wisell; Maria Lind Karlberg; Mattias Haukland; Mia Brytting; Olov Svartstrom; Oskar Karlsson Lindsjo; Reza Advani; Sandra Broddesson; Theresa Enkirch                                                                                                                                                                                                                                                                                                                                                               |
| EPI_ISL_539814, EPI_ISL_539818 to 539819                                                                                                                                                                                                                                                                                                                                                                                                                                                                                                                                                                 | Tuen Mun Hospital                                                                                   | Hong Kong Department of Health                                                                                                                                                      | Alan K.L. Tsang; Dominic N.C. Tsang; Edman T.K. Lam; Peter C.W. Yip; Rickjason C.W. Chan                                                                                                                                                                                                                                                                                                                                                                                                                                                                                            |
| EPI_ISL_583171 to 583172                                                                                                                                                                                                                                                                                                                                                                                                                                                                                                                                                                                 | Tulare County Public Health Lab                                                                     | Chan-Zuckerberg Biohub                                                                                                                                                              | CZB Ciliahub Consortium                                                                                                                                                                                                                                                                                                                                                                                                                                                                                                                                                             |
| EPI_ISL_548363, EPI_ISL_548599, EPI_ISL_548626                                                                                                                                                                                                                                                                                                                                                                                                                                                                                                                                                           | Tuolumne County Public Health                                                                       | Chan-Zuckerberg Biohub                                                                                                                                                              | CZB Ciliahub Consortium                                                                                                                                                                                                                                                                                                                                                                                                                                                                                                                                                             |
| EPI_ISL_1448024, EPI_ISL_1448510, EPI_ISL_1470414                                                                                                                                                                                                                                                                                                                                                                                                                                                                                                                                                        | U.O. Microbiologia, Laboratorio Unico Centro Servizi - AUSL della Romagna                           | U.O. Microbiologia, Laboratorio Unico Centro Servizi - AUSL della Romagna                                                                                                           | Giorgio Dirani; Silvia Zanolli; Vittorio Sambrì                                                                                                                                                                                                                                                                                                                                                                                                                                                                                                                                     |
| EPI_ISL_444610                                                                                                                                                                                                                                                                                                                                                                                                                                                                                                                                                                                           | U.S. Naval Medical Research Center Biological Defense Research Directorate                          | U.S. Naval Medical Research Center Biological Defense Research Directorate                                                                                                          | A.C.; Balansy-Ames; C.A.; Cer; Christy; E.M.; Hollis; K.A.; L.J.; Long; M.S.; Myers; N.C. and Bishop-Lilly; Pan; Paskey; Pena-Gomez, D.; R.W.; R.Z.; Voegtly                                                                                                                                                                                                                                                                                                                                                                                                                        |
| EPI_ISL_1498097 to 1498120                                                                                                                                                                                                                                                                                                                                                                                                                                                                                                                                                                               | UAB "Baltic Medics"                                                                                 | Institute of Biotechnology, Life Sciences Center, Vilnius University                                                                                                                | Albertas Timinskas; Alma Gedvilaitė; Danguole Ziogiene; Emilija Vasilūnaite; Milda Norkiene                                                                                                                                                                                                                                                                                                                                                                                                                                                                                         |
| EPI_ISL_1384641 to 1384664, EPI_ISL_1398395 to 1398430, EPI_ISL_1510088, EPI_ISL_1510092, EPI_ISL_1510101 to 1510110, EPI_ISL_1510193                                                                                                                                                                                                                                                                                                                                                                                                                                                                    | UAB InMedica                                                                                        | Vilnius University Hospital Santaros Klinikos, Center of Laboratory Medicine                                                                                                        | Daniel Naumovas; Dovile Ezerskyte; Gytis Dudas; Ingrida Olen draite; Laimonas Griskevicius; Ligita Raugaite; Mindaugas Stoskus; Monika Katenaite; Rimvydas Norvilas                                                                                                                                                                                                                                                                                                                                                                                                                 |
| EPI_ISL_1482354 to 1482392                                                                                                                                                                                                                                                                                                                                                                                                                                                                                                                                                                               | UAB Medicina practica laboratorija                                                                  | Lithuanian University of Health Sciences                                                                                                                                            | Arnoldas Pautienius; Dovydas Gecys; Gediminas Alzbutas; Kamile Tamauskaite; Lukas Zemaitis; Vaiva Lesauskaite                                                                                                                                                                                                                                                                                                                                                                                                                                                                       |
| EPI_ISL_1510094, EPI_ISL_1510119 to 1510120                                                                                                                                                                                                                                                                                                                                                                                                                                                                                                                                                              | UAB SK Impeks Medicinos diagnostikos centras                                                        | Vilnius University Hospital Santaros Klinikos, Center of Laboratory Medicine                                                                                                        | Daniel Naumovas; Dovile Ezerskyte; Gytis Dudas; Ingrida Olen draite; Laimonas Griskevicius; Ligita Raugaite; Mindaugas Stoskus; Monika Katenaite; Rimvydas Norvilas                                                                                                                                                                                                                                                                                                                                                                                                                 |
| EPI_ISL_1468455                                                                                                                                                                                                                                                                                                                                                                                                                                                                                                                                                                                          | UBS 02 Jardim Toselar Birigui                                                                       | Instituto Adolfo Lutz, Interdisciplinary Procedures Center, Strategic Laboratory                                                                                                    | Caio Vinicius Dias Lopes; Claudia Regina Gonçalves; Claudio Tavares Sacchi; Erica Valessa Ramos Gomes; Karoline Rodrigues Campos                                                                                                                                                                                                                                                                                                                                                                                                                                                    |
| EPI_ISL_1445206, EPI_ISL_1445208                                                                                                                                                                                                                                                                                                                                                                                                                                                                                                                                                                         | UBS DARCY ALVES E ROBALINHO                                                                         | Instituto Butantan / Mendelics                                                                                                                                                      | Antonio Jorge Martins; Bibiana Santos; Claudia Renata dos Santos Barros; David Schlesinger; Debora Botequiu Moretti; Dimas Tadeu Covas; Elaine Cristina Marqueeze; Elaine Vieira dos Santos; Erika Freitas; Evandra Strazza Rodrigues; Flavia Aburjaile; José Salvatore Leister Patané; João Paulo Kitajima; Luiz Carlos Junior de Alcantara; Maria Carolina Elias; Marta Giovanetti; Rafael dos Santos Bezerra; Raul Machado Neto; Ricardo Haddad; Rodrigo Tocantins Calado.; Sandra Coccuzzo Sampaio; Simone Kashima; Svetoslav Navev Slavov; Vagner Fonseca; Vincent Louis Viala |
| EPI_ISL_1468456 to 1468457                                                                                                                                                                                                                                                                                                                                                                                                                                                                                                                                                                               | UBS Dr Alfredo Dantas de Souza Umurama                                                              | Instituto Adolfo Lutz, Interdisciplinary Procedures Center, Strategic Laboratory                                                                                                    | Caio Vinicius Dias Lopes; Claudia Regina Gonçalves; Claudio Tavares Sacchi; Erica Valessa Ramos Gomes; Karoline Rodrigues Campos                                                                                                                                                                                                                                                                                                                                                                                                                                                    |

|                                                                                                                                                                                                                                                                                                                                                                              |                                                      |                                                                                                                     |                                                                                                                                                                                                                                                                                                                                                                                                                                                                                                                                                                                    |
|------------------------------------------------------------------------------------------------------------------------------------------------------------------------------------------------------------------------------------------------------------------------------------------------------------------------------------------------------------------------------|------------------------------------------------------|---------------------------------------------------------------------------------------------------------------------|------------------------------------------------------------------------------------------------------------------------------------------------------------------------------------------------------------------------------------------------------------------------------------------------------------------------------------------------------------------------------------------------------------------------------------------------------------------------------------------------------------------------------------------------------------------------------------|
| EPI_ISL_1445217, EPI_ISL_1445219 to 1445220, EPI_ISL_1445227                                                                                                                                                                                                                                                                                                                 | UBS EMILIA COSME CERQUEIRA                           | Instituto Butantan / Mendelics                                                                                      | Antonio Jorge Martins; Bibiana Santos; Claudia Renata dos Santos Barros; David Schlesinger; Debora Botequiu Moretti; Dimas Tadeu Covas; Elaine Cristina Marqueze; Elaine Vieira dos Santos; Erika Freitas; Evandra Strazza Rodrigues; Flavia Aburjaile; José Salvatore Leister Patané; João Paulo Kitajima; Luiz Carlos Junior de Alcantara; Maria Carolina Elias; Marta Giovanetti; Rafael dos Santos Bezerra; Raul Machado Neto; Ricardo Haddad; Rodrigo Tocantins Calado.; Sandra Coccuzzo Sampaio; Simone Kashima; Svetoslav Nanev Slavov; Vagner Fonseca; Vincent Louis Viala |
| EPI_ISL_1445205                                                                                                                                                                                                                                                                                                                                                              | UBS FRANCISCA LIMA DE LIRA                           | Instituto Butantan / Mendelics                                                                                      | Antonio Jorge Martins; Bibiana Santos; Claudia Renata dos Santos Barros; David Schlesinger; Debora Botequiu Moretti; Dimas Tadeu Covas; Elaine Cristina Marqueze; Elaine Vieira dos Santos; Erika Freitas; Evandra Strazza Rodrigues; Flavia Aburjaile; José Salvatore Leister Patané; João Paulo Kitajima; Luiz Carlos Junior de Alcantara; Maria Carolina Elias; Marta Giovanetti; Rafael dos Santos Bezerra; Raul Machado Neto; Ricardo Haddad; Rodrigo Tocantins Calado.; Sandra Coccuzzo Sampaio; Simone Kashima; Svetoslav Nanev Slavov; Vagner Fonseca; Vincent Louis Viala |
| EPI_ISL_1445215 to 1445216, EPI_ISL_1445221 to 1445223                                                                                                                                                                                                                                                                                                                       | UBS HELENA MARREY                                    | Instituto Butantan / Mendelics                                                                                      | Antonio Jorge Martins; Bibiana Santos; Claudia Renata dos Santos Barros; David Schlesinger; Debora Botequiu Moretti; Dimas Tadeu Covas; Elaine Cristina Marqueze; Elaine Vieira dos Santos; Erika Freitas; Evandra Strazza Rodrigues; Flavia Aburjaile; José Salvatore Leister Patané; João Paulo Kitajima; Luiz Carlos Junior de Alcantara; Maria Carolina Elias; Marta Giovanetti; Rafael dos Santos Bezerra; Raul Machado Neto; Ricardo Haddad; Rodrigo Tocantins Calado.; Sandra Coccuzzo Sampaio; Simone Kashima; Svetoslav Nanev Slavov; Vagner Fonseca; Vincent Louis Viala |
| EPI_ISL_1520114                                                                                                                                                                                                                                                                                                                                                              | UBS III de Pariquera Acu Pariquera Acu               | Instituto Adolfo Lutz, Interdisciplinary Procedures Center, Strategic Laboratory                                    | Caio Vinicius Dias Lopes; Claudia Regina Gonçalves; Claudio Tavares Sacchi; Erica Valessa Ramos Gomes; Karoline Rodrigues Campos                                                                                                                                                                                                                                                                                                                                                                                                                                                   |
| EPI_ISL_1445212, EPI_ISL_1445228                                                                                                                                                                                                                                                                                                                                             | UBS IRMA AGUEDA MARIA JAIME                          | Instituto Butantan / Mendelics                                                                                      | Antonio Jorge Martins; Bibiana Santos; Claudia Renata dos Santos Barros; David Schlesinger; Debora Botequiu Moretti; Dimas Tadeu Covas; Elaine Cristina Marqueze; Elaine Vieira dos Santos; Erika Freitas; Evandra Strazza Rodrigues; Flavia Aburjaile; José Salvatore Leister Patané; João Paulo Kitajima; Luiz Carlos Junior de Alcantara; Maria Carolina Elias; Marta Giovanetti; Rafael dos Santos Bezerra; Raul Machado Neto; Ricardo Haddad; Rodrigo Tocantins Calado.; Sandra Coccuzzo Sampaio; Simone Kashima; Svetoslav Nanev Slavov; Vagner Fonseca; Vincent Louis Viala |
| EPI_ISL_1468451                                                                                                                                                                                                                                                                                                                                                              | UBS IV Guararapes                                    | Instituto Adolfo Lutz, Interdisciplinary Procedures Center, Strategic Laboratory                                    | Caio Vinicius Dias Lopes; Claudia Regina Gonçalves; Claudio Tavares Sacchi; Erica Valessa Ramos Gomes; Karoline Rodrigues Campos                                                                                                                                                                                                                                                                                                                                                                                                                                                   |
| EPI_ISL_1445214                                                                                                                                                                                                                                                                                                                                                              | UBS JOSE HILARIO DOS SANTOS                          | Instituto Butantan / Mendelics                                                                                      | Antonio Jorge Martins; Bibiana Santos; Claudia Renata dos Santos Barros; David Schlesinger; Debora Botequiu Moretti; Dimas Tadeu Covas; Elaine Cristina Marqueze; Elaine Vieira dos Santos; Erika Freitas; Evandra Strazza Rodrigues; Flavia Aburjaile; José Salvatore Leister Patané; João Paulo Kitajima; Luiz Carlos Junior de Alcantara; Maria Carolina Elias; Marta Giovanetti; Rafael dos Santos Bezerra; Raul Machado Neto; Ricardo Haddad; Rodrigo Tocantins Calado.; Sandra Coccuzzo Sampaio; Simone Kashima; Svetoslav Nanev Slavov; Vagner Fonseca; Vincent Louis Viala |
| EPI_ISL_1445210 to 1445211                                                                                                                                                                                                                                                                                                                                                   | UBS JOSE SABINO FERREIRA                             | Instituto Butantan / Mendelics                                                                                      | Antonio Jorge Martins; Bibiana Santos; Claudia Renata dos Santos Barros; David Schlesinger; Debora Botequiu Moretti; Dimas Tadeu Covas; Elaine Cristina Marqueze; Elaine Vieira dos Santos; Erika Freitas; Evandra Strazza Rodrigues; Flavia Aburjaile; José Salvatore Leister Patané; João Paulo Kitajima; Luiz Carlos Junior de Alcantara; Maria Carolina Elias; Marta Giovanetti; Rafael dos Santos Bezerra; Raul Machado Neto; Ricardo Haddad; Rodrigo Tocantins Calado.; Sandra Coccuzzo Sampaio; Simone Kashima; Svetoslav Nanev Slavov; Vagner Fonseca; Vincent Louis Viala |
| EPI_ISL_1445209, EPI_ISL_1445213                                                                                                                                                                                                                                                                                                                                             | UBS OTACILIO FIRMINO LOPES                           | Instituto Butantan / Mendelics                                                                                      | Antonio Jorge Martins; Bibiana Santos; Claudia Renata dos Santos Barros; David Schlesinger; Debora Botequiu Moretti; Dimas Tadeu Covas; Elaine Cristina Marqueze; Elaine Vieira dos Santos; Erika Freitas; Evandra Strazza Rodrigues; Flavia Aburjaile; José Salvatore Leister Patané; João Paulo Kitajima; Luiz Carlos Junior de Alcantara; Maria Carolina Elias; Marta Giovanetti; Rafael dos Santos Bezerra; Raul Machado Neto; Ricardo Haddad; Rodrigo Tocantins Calado.; Sandra Coccuzzo Sampaio; Simone Kashima; Svetoslav Nanev Slavov; Vagner Fonseca; Vincent Louis Viala |
| EPI_ISL_1445141                                                                                                                                                                                                                                                                                                                                                              | UBS SALTO DE SAO JOSE                                | Instituto Butantan / Mendelics                                                                                      | Antonio Jorge Martins; Bibiana Santos; Claudia Renata dos Santos Barros; David Schlesinger; Debora Botequiu Moretti; Dimas Tadeu Covas; Elaine Cristina Marqueze; Elaine Vieira dos Santos; Erika Freitas; Evandra Strazza Rodrigues; Flavia Aburjaile; José Salvatore Leister Patané; João Paulo Kitajima; Luiz Carlos Junior de Alcantara; Maria Carolina Elias; Marta Giovanetti; Rafael dos Santos Bezerra; Raul Machado Neto; Ricardo Haddad; Rodrigo Tocantins Calado.; Sandra Coccuzzo Sampaio; Simone Kashima; Svetoslav Nanev Slavov; Vagner Fonseca; Vincent Louis Viala |
| EPI_ISL_1445196                                                                                                                                                                                                                                                                                                                                                              | UBS SAO JUDAS                                        | Instituto Butantan / Mendelics                                                                                      | Antonio Jorge Martins; Bibiana Santos; Claudia Renata dos Santos Barros; David Schlesinger; Debora Botequiu Moretti; Dimas Tadeu Covas; Elaine Cristina Marqueze; Elaine Vieira dos Santos; Erika Freitas; Evandra Strazza Rodrigues; Flavia Aburjaile; José Salvatore Leister Patané; João Paulo Kitajima; Luiz Carlos Junior de Alcantara; Maria Carolina Elias; Marta Giovanetti; Rafael dos Santos Bezerra; Raul Machado Neto; Ricardo Haddad; Rodrigo Tocantins Calado.; Sandra Coccuzzo Sampaio; Simone Kashima; Svetoslav Nanev Slavov; Vagner Fonseca; Vincent Louis Viala |
| EPI_ISL_1445218, EPI_ISL_1445226                                                                                                                                                                                                                                                                                                                                             | UBS SYLVIO JOAO L DE LUCIA                           | Instituto Butantan / Mendelics                                                                                      | Antonio Jorge Martins; Bibiana Santos; Claudia Renata dos Santos Barros; David Schlesinger; Debora Botequiu Moretti; Dimas Tadeu Covas; Elaine Cristina Marqueze; Elaine Vieira dos Santos; Erika Freitas; Evandra Strazza Rodrigues; Flavia Aburjaile; José Salvatore Leister Patané; João Paulo Kitajima; Luiz Carlos Junior de Alcantara; Maria Carolina Elias; Marta Giovanetti; Rafael dos Santos Bezerra; Raul Machado Neto; Ricardo Haddad; Rodrigo Tocantins Calado.; Sandra Coccuzzo Sampaio; Simone Kashima; Svetoslav Nanev Slavov; Vagner Fonseca; Vincent Louis Viala |
| EPI_ISL_523963                                                                                                                                                                                                                                                                                                                                                               | UBS Vila Silvia                                      | Instituto Adolfo Lutz, Interdisciplinary Procedures Center, Strategic Laboratory                                    | Claudia Regina Gonçalves; Claudio Tavares Sacchi; Erica Valessa Ramos Gomes                                                                                                                                                                                                                                                                                                                                                                                                                                                                                                        |
| EPI_ISL_1509639, EPI_ISL_1509720                                                                                                                                                                                                                                                                                                                                             | UBS de Auriflama                                     | Instituto Adolfo Lutz, Interdisciplinary Procedures Center, Strategic Laboratory                                    | Caio Vinicius Dias Lopes; Claudia Regina Gonçalves; Claudio Tavares Sacchi; Erica Valessa Ramos Gomes; Karoline Rodrigues Campos; Leonardo Jose Tadeu de Araujo                                                                                                                                                                                                                                                                                                                                                                                                                    |
| EPI_ISL_471648                                                                                                                                                                                                                                                                                                                                                               | UBS e Pronto Socorro Jd. Jacira                      | Instituto Adolfo Lutz, Interdisciplinary Procedures Center, Strategic Laboratory                                    | Claudia Regina Gonçalves; Claudio Tavares Sacchi; Erica Valessa Ramos Gomes                                                                                                                                                                                                                                                                                                                                                                                                                                                                                                        |
| EPI_ISL_445094 to 445117, EPI_ISL_483165 to 483530                                                                                                                                                                                                                                                                                                                           | UC San Diego Center for Advanced Laboratory Medicine | Andersen lab at Scripps Research                                                                                    | Allison Smither; Antoinette Bell; Arnaud Drouin; Dahlene Fusco; Gilberto Sabino-Santos; Ji H Shin; Kaylynn Genemaras; Lilia Melnik; Patricia Snarski; Robert Garry with SEARCH Alliance San Diego; SEARCH Alliance San Diego with David Pride                                                                                                                                                                                                                                                                                                                                      |
| EPI_ISL_417432                                                                                                                                                                                                                                                                                                                                                               | UCD National Virus Reference Laboratory              | Public Health Wales Microbiology Cardiff                                                                            | ; Catherine Dempsey; Cillian F De Gascun; Michael Prentice; Olive Murphy                                                                                                                                                                                                                                                                                                                                                                                                                                                                                                           |
| EPI_ISL_414487, EPI_ISL_414584 to 414587, EPI_ISL_418516, EPI_ISL_418548, EPI_ISL_418580 to 418584                                                                                                                                                                                                                                                                           | UCD National Virus Reference Laboratory              | UCD National Virus Reference Laboratory                                                                             | Alison Murphy; Brendan Loftus; Cillian F De Gascun; Gabriel Gonzalez; Jeff Connell; Jonathan Dean; Ken Wolfe; Kevin Byrne; Michael Carr; Suzie Coughlan                                                                                                                                                                                                                                                                                                                                                                                                                            |
| EPI_ISL_1393643 to 1393650, EPI_ISL_1538532, EPI_ISL_1539037                                                                                                                                                                                                                                                                                                                 | UCK                                                  | 1. National Institute of Public Health - National Institute of Hygiene; 2. Eurofins Genomics Europe Sequencing GmbH | ECDC COVID-19 WGS support team; Eurofins Genomics Europe Sequencing Team; Gierczyki Rafa; Sadkowska-Todys Magorzata; Wokowicz Tomasz; Zacharczuk Katarzyna                                                                                                                                                                                                                                                                                                                                                                                                                         |
| EPI_ISL_1497541, EPI_ISL_1506114                                                                                                                                                                                                                                                                                                                                             | UCLA Clinical Micro Lab                              | Los Angeles County PHL                                                                                              | P. Hemarajata et al.                                                                                                                                                                                                                                                                                                                                                                                                                                                                                                                                                               |
| EPI_ISL_537467 to 537607                                                                                                                                                                                                                                                                                                                                                     | UCLA Pathology Clinical Microbiology Lab             | Kruglyak Lab                                                                                                        | Guo et al.                                                                                                                                                                                                                                                                                                                                                                                                                                                                                                                                                                         |
| EPI_ISL_1402586 to 1402654, EPI_ISL_1405050 to 1405060, EPI_ISL_1405599 to 1405679, EPI_ISL_1405814 to 1405897, EPI_ISL_1469120 to 1469121, EPI_ISL_1469852 to 1469936                                                                                                                                                                                                       | UCSC Genomics Institute                              | UCSC Genomics Institute                                                                                             | A. Marm Kilpatrick; Angie Hinrichs; Beth Shapiro; Bryan Thornlow; David Haussler; Eric Beraut; Hugh Olsen; Ikenna Anigbogu; Isabel Bjork; Jakob McBroome; Jeremy Sanford; Joshua Kapp; Mark Akeson; Maximilian Haeussler; Michael Stone; Miten Jain; Molly Cassatt-Johnstone; Namrita Dhillon; Russell Corbett-Detig; Terren Chang; Yatish Turakhia                                                                                                                                                                                                                                |
| EPI_ISL_417931 to 417933, EPI_ISL_417935, EPI_ISL_417937 to 417939, EPI_ISL_428990 to 429073, EPI_ISL_430791 to 430792, EPI_ISL_444051 to 444078, EPI_ISL_445169 to 445182, EPI_ISL_454614 to 454634, EPI_ISL_486339 to 486365, EPI_ISL_513883 to 513910, EPI_ISL_516723 to 516747, EPI_ISL_548505, EPI_ISL_548513, EPI_ISL_548522, EPI_ISL_548571, EPI_ISL_583199 to 583231 | UCSF Clinical Microbiology Laboratory                | Chan-Zuckerberg Biohub                                                                                              | Amy Kistler; Angela Detweiler; Angela Pisco; CZB Cllahub Consortium; Chaz Langelier; Chunyu Zhao; David Dynerman; G. Renuka Kumar; Gloria Castaneda; Jack Kamm; Josh Batson; Lucy Li; Lusajo Mwakibete; Maira Phelps; Michelle Tan; Norma Neff; Olga Botvinnik; Samantha Hao; Shaun Arevalo; Steve Miller                                                                                                                                                                                                                                                                          |
| see above                                                                                                                                                                                                                                                                                                                                                                    | UCSF Clinical Microbiology Laboratory                | Chan-Zuckerberg Biohub                                                                                              | Scott Federman; Wei Gu; Xianding Deng; and Charles Y. Chiu                                                                                                                                                                                                                                                                                                                                                                                                                                                                                                                         |
| EPI_ISL_450232 to 450240                                                                                                                                                                                                                                                                                                                                                     | UCSF Clinical Microbiology Laboratory                | Chiu Laboratory, University of California, San Francisco                                                            | "James Denvir; Peter Perrotta; Peter Stoilov; Ryan Percifield"; Wesley Kimble                                                                                                                                                                                                                                                                                                                                                                                                                                                                                                      |
| EPI_ISL_1528885                                                                                                                                                                                                                                                                                                                                                              | UHC                                                  | WVU and Marshall University Combined Genomics Core Facilities                                                       |                                                                                                                                                                                                                                                                                                                                                                                                                                                                                                                                                                                    |
| EPI_ISL_584440 to 584590                                                                                                                                                                                                                                                                                                                                                     | UHCW / University of Warwick                         | COVID-19 Genomics UK (COG-UK) Consortium                                                                            | Chrystala Constantinidou; Dimitris Grammatopoulos; Grace Taylor-Joyce; Hannah Elizabeth Bridgewater; Jeff Cheng; Laura Baxter; Lucy Frost; Meera Unnikrishnan; Paul Brown; Richard Stark; Sarojini Pandey; Sascha Ott; Tauqeer Alam                                                                                                                                                                                                                                                                                                                                                |



|                                                                                                                                                             |                                                                                               |                                                                                               |                                                                                                                                                                                                                                                                                                                                                                                                                                                                                                                                                                                      |
|-------------------------------------------------------------------------------------------------------------------------------------------------------------|-----------------------------------------------------------------------------------------------|-----------------------------------------------------------------------------------------------|--------------------------------------------------------------------------------------------------------------------------------------------------------------------------------------------------------------------------------------------------------------------------------------------------------------------------------------------------------------------------------------------------------------------------------------------------------------------------------------------------------------------------------------------------------------------------------------|
| EPI_ISL_460635                                                                                                                                              | UHCW Pathology / University of Warwick                                                        | University of Warwick, for the COVID-19 Genomics (COG) UK Consortium                          | Chrystala Constantinidou; Dimitris Grammatopoulos; Grace Taylor-Joyce; Hannah Elizabeth Bridgewater; Jeff Cheng; Laura Baxter; Lucy Frost; Meera Unnikrishnan; Paul Brown; Richard Stark; Sarojini Pandey; Sascha Ott; Tauqeer Alam                                                                                                                                                                                                                                                                                                                                                  |
| EPI_ISL_1524386 to 1524387, EPI_ISL_1524430 to 1524432, EPI_ISL_1524452, EPI_ISL_1524648 to 1524649, EPI_ISL_1524651 to 1524653                             | ULSS 1 Dolomiti                                                                               | Istituto Zooprofilattico Sperimentale delle Venezie                                           | Adelaide Milani; Alessia Schivo; Alice Fusaro; Ambra Pastori; Annalisa Salviato; Antonia Ricci; Calogero Terregino; Edoardo Giussani; Elisa Palumbo; Erika Giorgia Quaranta; Isabella Monne; Luca Tassoni                                                                                                                                                                                                                                                                                                                                                                            |
| EPI_ISL_1524470 to 1524483                                                                                                                                  | ULSS 1 Dolomiti                                                                               | Istituto di Genomica Applicata; Istituto Zooprofilattico Sperimentale delle Venezie           | Alessia Schivo; Alice Fusaro; Ambra Pastori; Annalisa Salviato; Antonia Ricci; Calogero Terregino; Davide Scaglione; Edoardo Giussani; Eleonora Paparelli; Erika Giorgia Quaranta; Francesca Bruno; Gabriele Magris; Irena Jurman; Isabella Monne; Luca Tassoni; Maria Varotto; Michele Morgante; Silvia Ormelli; Valeria D'Amico; Vera Vendramin                                                                                                                                                                                                                                    |
| EPI_ISL_1524696 to 1524697                                                                                                                                  | ULSS 2 Marca Trevigiana                                                                       | Istituto Zooprofilattico Sperimentale delle Venezie                                           | Adelaide Milani; Alessia Schivo; Alice Fusaro; Ambra Pastori; Annalisa Salviato; Antonia Ricci; Calogero Terregino; Edoardo Giussani; Elisa Palumbo; Erika Giorgia Quaranta; Isabella Monne; Luca Tassoni                                                                                                                                                                                                                                                                                                                                                                            |
| EPI_ISL_1524583 to 1524600                                                                                                                                  | ULSS 2 Marca Trevigiana                                                                       | Istituto di Genomica Applicata; Istituto Zooprofilattico Sperimentale delle Venezie           | Alessia Schivo; Alice Fusaro; Ambra Pastori; Annalisa Salviato; Antonia Ricci; Calogero Terregino; Davide Scaglione; Edoardo Giussani; Eleonora Paparelli; Erika Giorgia Quaranta; Francesca Bruno; Gabriele Magris; Irena Jurman; Isabella Monne; Luca Tassoni; Maria Varotto; Michele Morgante; Silvia Ormelli; Valeria D'Amico; Vera Vendramin                                                                                                                                                                                                                                    |
| EPI_ISL_1524437 to 1524445, EPI_ISL_1524451, EPI_ISL_1524457 to 1524461, EPI_ISL_1524676 to 1524678                                                         | ULSS 3 Venezia                                                                                | Istituto Zooprofilattico Sperimentale delle Venezie                                           | Adelaide Milani; Alessia Schivo; Alice Fusaro; Ambra Pastori; Annalisa Salviato; Antonia Ricci; Calogero Terregino; Edoardo Giussani; Elisa Palumbo; Erika Giorgia Quaranta; Isabella Monne; Luca Tassoni                                                                                                                                                                                                                                                                                                                                                                            |
| EPI_ISL_1524601 to 1524619                                                                                                                                  | ULSS 3 Venezia                                                                                | Istituto di Genomica Applicata; Istituto Zooprofilattico Sperimentale delle Venezie           | Alessia Schivo; Alice Fusaro; Ambra Pastori; Annalisa Salviato; Antonia Ricci; Calogero Terregino; Davide Scaglione; Edoardo Giussani; Eleonora Paparelli; Erika Giorgia Quaranta; Francesca Bruno; Gabriele Magris; Irena Jurman; Isabella Monne; Luca Tassoni; Maria Varotto; Michele Morgante; Silvia Ormelli; Valeria D'Amico; Vera Vendramin                                                                                                                                                                                                                                    |
| EPI_ISL_1524453, EPI_ISL_1524664 to 1524669                                                                                                                 | ULSS 4 Veneto Orientale                                                                       | Istituto Zooprofilattico Sperimentale delle Venezie                                           | Adelaide Milani; Alessia Schivo; Alice Fusaro; Ambra Pastori; Annalisa Salviato; Antonia Ricci; Calogero Terregino; Edoardo Giussani; Elisa Palumbo; Erika Giorgia Quaranta; Isabella Monne; Luca Tassoni                                                                                                                                                                                                                                                                                                                                                                            |
| EPI_ISL_1524464, EPI_ISL_1524507 to 1524513                                                                                                                 | ULSS 4 Veneto Orientale                                                                       | Istituto di Genomica Applicata; Istituto Zooprofilattico Sperimentale delle Venezie           | Alessia Schivo; Alice Fusaro; Ambra Pastori; Annalisa Salviato; Antonia Ricci; Calogero Terregino; Davide Scaglione; Edoardo Giussani; Eleonora Paparelli; Erika Giorgia Quaranta; Francesca Bruno; Gabriele Magris; Irena Jurman; Isabella Monne; Luca Tassoni; Maria Varotto; Michele Morgante; Silvia Ormelli; Valeria D'Amico; Vera Vendramin                                                                                                                                                                                                                                    |
| EPI_ISL_1524404 to 1524405, EPI_ISL_1524436, EPI_ISL_1524454, EPI_ISL_1524654 to 1524659                                                                    | ULSS 5 Polesana                                                                               | Istituto Zooprofilattico Sperimentale delle Venezie                                           | Adelaide Milani; Alessia Schivo; Alice Fusaro; Ambra Pastori; Annalisa Salviato; Antonia Ricci; Calogero Terregino; Edoardo Giussani; Elisa Palumbo; Erika Giorgia Quaranta; Isabella Monne; Luca Tassoni                                                                                                                                                                                                                                                                                                                                                                            |
| EPI_ISL_1524484 to 1524497                                                                                                                                  | ULSS 5 Polesana                                                                               | Istituto di Genomica Applicata; Istituto Zooprofilattico Sperimentale delle Venezie           | Alessia Schivo; Alice Fusaro; Ambra Pastori; Annalisa Salviato; Antonia Ricci; Calogero Terregino; Davide Scaglione; Edoardo Giussani; Eleonora Paparelli; Erika Giorgia Quaranta; Francesca Bruno; Gabriele Magris; Irena Jurman; Isabella Monne; Luca Tassoni; Maria Varotto; Michele Morgante; Silvia Ormelli; Valeria D'Amico; Vera Vendramin                                                                                                                                                                                                                                    |
| EPI_ISL_1524385, EPI_ISL_1524388 to 1524392, EPI_ISL_1524412 to 1524418, EPI_ISL_1524424 to 1524429, EPI_ISL_1524446 to 1524447, EPI_ISL_1524631 to 1524646 | ULSS 6 Euganea                                                                                | Istituto Zooprofilattico Sperimentale delle Venezie                                           | Adelaide Milani; Alessia Schivo; Alice Fusaro; Ambra Pastori; Annalisa Salviato; Antonia Ricci; Calogero Terregino; Edoardo Giussani; Elisa Palumbo; Erika Giorgia Quaranta; Isabella Monne; Luca Tassoni                                                                                                                                                                                                                                                                                                                                                                            |
| EPI_ISL_1524548 to 1524560                                                                                                                                  | ULSS 6 Euganea                                                                                | Istituto di Genomica Applicata; Istituto Zooprofilattico Sperimentale delle Venezie           | Alessia Schivo; Alice Fusaro; Ambra Pastori; Annalisa Salviato; Antonia Ricci; Calogero Terregino; Davide Scaglione; Edoardo Giussani; Eleonora Paparelli; Erika Giorgia Quaranta; Francesca Bruno; Gabriele Magris; Irena Jurman; Isabella Monne; Luca Tassoni; Maria Varotto; Michele Morgante; Silvia Ormelli; Valeria D'Amico; Vera Vendramin                                                                                                                                                                                                                                    |
| EPI_ISL_1524448 to 1524449, EPI_ISL_1524462 to 1524463, EPI_ISL_1524670 to 1524672                                                                          | ULSS 7 Pedemontana - Distretto 1                                                              | Istituto Zooprofilattico Sperimentale delle Venezie                                           | Adelaide Milani; Alessia Schivo; Alice Fusaro; Ambra Pastori; Annalisa Salviato; Antonia Ricci; Calogero Terregino; Edoardo Giussani; Elisa Palumbo; Erika Giorgia Quaranta; Isabella Monne; Luca Tassoni                                                                                                                                                                                                                                                                                                                                                                            |
| EPI_ISL_1524514 to 1524519                                                                                                                                  | ULSS 7 Pedemontana - Distretto 1                                                              | Istituto di Genomica Applicata; Istituto Zooprofilattico Sperimentale delle Venezie           | Alessia Schivo; Alice Fusaro; Ambra Pastori; Annalisa Salviato; Antonia Ricci; Calogero Terregino; Davide Scaglione; Edoardo Giussani; Eleonora Paparelli; Erika Giorgia Quaranta; Francesca Bruno; Gabriele Magris; Irena Jurman; Isabella Monne; Luca Tassoni; Maria Varotto; Michele Morgante; Silvia Ormelli; Valeria D'Amico; Vera Vendramin                                                                                                                                                                                                                                    |
| EPI_ISL_1524419 to 1524423, EPI_ISL_1524673 to 1524675                                                                                                      | ULSS 7 Pedemontana - Distretto 2                                                              | Istituto Zooprofilattico Sperimentale delle Venezie                                           | Adelaide Milani; Alessia Schivo; Alice Fusaro; Ambra Pastori; Annalisa Salviato; Antonia Ricci; Calogero Terregino; Edoardo Giussani; Elisa Palumbo; Erika Giorgia Quaranta; Isabella Monne; Luca Tassoni                                                                                                                                                                                                                                                                                                                                                                            |
| EPI_ISL_1524465, EPI_ISL_1524520 to 1524524                                                                                                                 | ULSS 7 Pedemontana - Distretto 2                                                              | Istituto di Genomica Applicata; Istituto Zooprofilattico Sperimentale delle Venezie           | Alessia Schivo; Alice Fusaro; Ambra Pastori; Annalisa Salviato; Antonia Ricci; Calogero Terregino; Davide Scaglione; Edoardo Giussani; Eleonora Paparelli; Erika Giorgia Quaranta; Francesca Bruno; Gabriele Magris; Irena Jurman; Isabella Monne; Luca Tassoni; Maria Varotto; Michele Morgante; Silvia Ormelli; Valeria D'Amico; Vera Vendramin                                                                                                                                                                                                                                    |
| EPI_ISL_1524401 to 1524403, EPI_ISL_1524433 to 1524435, EPI_ISL_1524450, EPI_ISL_1524692 to 1524695                                                         | ULSS 8 Berica                                                                                 | Istituto Zooprofilattico Sperimentale delle Venezie                                           | Adelaide Milani; Alessia Schivo; Alice Fusaro; Ambra Pastori; Annalisa Salviato; Antonia Ricci; Calogero Terregino; Edoardo Giussani; Elisa Palumbo; Erika Giorgia Quaranta; Isabella Monne; Luca Tassoni                                                                                                                                                                                                                                                                                                                                                                            |
| EPI_ISL_1524525 to 1524538                                                                                                                                  | ULSS 8 Berica                                                                                 | Istituto di Genomica Applicata; Istituto Zooprofilattico Sperimentale delle Venezie           | Alessia Schivo; Alice Fusaro; Ambra Pastori; Annalisa Salviato; Antonia Ricci; Calogero Terregino; Davide Scaglione; Edoardo Giussani; Eleonora Paparelli; Erika Giorgia Quaranta; Francesca Bruno; Gabriele Magris; Irena Jurman; Isabella Monne; Luca Tassoni; Maria Varotto; Michele Morgante; Silvia Ormelli; Valeria D'Amico; Vera Vendramin                                                                                                                                                                                                                                    |
| EPI_ISL_422437 to 422438, EPI_ISL_452181 to 452189, EPI_ISL_522855, EPI_ISL_522860 to 522868                                                                | ULSS9 Distretto di Bussolengo                                                                 | Istituto Zooprofilattico Sperimentale delle Venezie                                           | Adelaide Milani; Alessia Schivo; Alice Fusaro; Ambra Pastori; Annalisa Salviato; Antonia Ricci; Bianca Zecchin; Calogero Terregino; Erika Giorgia Quaranta; Isabella Monne                                                                                                                                                                                                                                                                                                                                                                                                           |
| EPI_ISL_452190 to 452191, EPI_ISL_522856, EPI_ISL_522858                                                                                                    | ULSS9 Distretto di San Bonifacio                                                              | Istituto Zooprofilattico Sperimentale delle Venezie                                           | Adelaide Milani; Alessia Schivo; Alice Fusaro; Ambra Pastori; Annalisa Salviato; Antonia Ricci; Bianca Zecchin; Calogero Terregino; Erika Giorgia Quaranta; Isabella Monne                                                                                                                                                                                                                                                                                                                                                                                                           |
| EPI_ISL_522857, EPI_ISL_522859                                                                                                                              | ULSS9 Scaligera                                                                               | Istituto Zooprofilattico Sperimentale delle Venezie                                           | Adelaide Milani; Alessia Schivo; Alice Fusaro; Ambra Pastori; Annalisa Salviato; Antonia Ricci; Bianca Zecchin; Calogero Terregino; Erika Giorgia Quaranta; Isabella Monne                                                                                                                                                                                                                                                                                                                                                                                                           |
| EPI_ISL_1402542 to 1402585, EPI_ISL_1511604 to 1511630, EPI_ISL_1559369 to 1559384                                                                          | UMC Groningen, Clinical Virology, Department of Medical Microbiology and Infection Prevention | UMC Groningen, Clinical Virology, Department of Medical Microbiology and Infection Prevention | Alexander Friedrich; Coretta Van Leer-Buter; Erley Lizarazo-Forero; Hubert Niesters; Lilli Gard; Marjolein Knoester; Monika Fliss; Monika Flissikowska; Sigrid Rosema; Xuewei Zhou                                                                                                                                                                                                                                                                                                                                                                                                   |
| EPI_ISL_560308 to 560317                                                                                                                                    | UMMC-Health                                                                                   | WHO National Influenza Centre Russian Federation                                              | Andrey Komissarov; Anna Ivanova; Artem Fadeev; Daria Danilenko; Tatiana Platonova                                                                                                                                                                                                                                                                                                                                                                                                                                                                                                    |
| EPI_ISL_1445183 to 1445184                                                                                                                                  | UNIDADE BASICA DE SAUDE DA FAMILIA BILAC                                                      | Instituto Butantan / Mendelics                                                                | Antonio Jorge Martins; Bibiana Santos; Claudia Renata dos Santos Barros; David Schlessinger; Debora Botequiao Moretti; Dimas Tadeu Covas; Elaine Cristina Marqueze; Elaine Vieira dos Santos; Erika Freitas; Evandra Strazza Rodrigues; Flavia Aburjaile; José Salvatore Leister Patané; João Paulo Kitajima; Luiz Carlos Junior de Alcantara; Maria Carolina Elias; Marta Giovanetti; Rafael dos Santos Bezerra; Raul Machado Neto; Ricardo Haddad; Rodrigo Tocantins Calado.; Sandra Coccuzzo Sampaio; Simone Kashima; Svetoslav Nanev Slavov; Vagner Fonseca; Vincent Louis Viala |
| EPI_ISL_1469660, EPI_ISL_1469751                                                                                                                            | UNIDADE BASICA DE SAUDE DE RIOZINHO                                                           | Epiclin                                                                                       | Ana Paula Muterle; Carolina Comerlato; Eliana Márcia Da Ros Wendland; Fernando Hayashi Sant'Anna; Janira Prichula; Juliana Comerlato                                                                                                                                                                                                                                                                                                                                                                                                                                                 |
| EPI_ISL_1469694                                                                                                                                             | UNIDADE BASICA DE SAUDE PARECI NOVO                                                           | Epiclin                                                                                       | Ana Paula Muterle; Carolina Comerlato; Eliana Márcia Da Ros Wendland; Fernando Hayashi Sant'Anna; Janira Prichula; Juliana Comerlato                                                                                                                                                                                                                                                                                                                                                                                                                                                 |
| EPI_ISL_1469680, EPI_ISL_1479126                                                                                                                            | UNIDADE DE ATENDIMENTO DST AIDS TB E HAN                                                      | Epiclin                                                                                       | Ana Paula Muterle; Carolina Comerlato; Eliana Márcia Da Ros Wendland; Fernando Hayashi Sant'Anna; Janira Prichula; Juliana Comerlato                                                                                                                                                                                                                                                                                                                                                                                                                                                 |
| EPI_ISL_1469589, EPI_ISL_1469646, EPI_ISL_1469719, EPI_ISL_1469733, EPI_ISL_1469745, EPI_ISL_1469768, EPI_ISL_1469804                                       |                                                                                               |                                                                                               |                                                                                                                                                                                                                                                                                                                                                                                                                                                                                                                                                                                      |
| see above                                                                                                                                                   | UNIDADE DE PRONTO ATENDIMENTO DE SAPUCAIA DO                                                  | Epiclin                                                                                       | Ana Paula Muterle; Carolina Comerlato; Eliana Márcia Da Ros Wendland; Fernando Hayashi Sant'Anna; Janira Prichula; Juliana Comerlato                                                                                                                                                                                                                                                                                                                                                                                                                                                 |

| SUL UPA                                                                                                                                                                                                                                                                                                                                                                                                                                                                                                                                                                                                                                                                                                                                                                                                                                                                                                                                                                      |                                                                                       |                                                                                                                            |                                                                                                                                                                                                                                                                                                                                                                                                                                                                                                                                                                                     |  |
|------------------------------------------------------------------------------------------------------------------------------------------------------------------------------------------------------------------------------------------------------------------------------------------------------------------------------------------------------------------------------------------------------------------------------------------------------------------------------------------------------------------------------------------------------------------------------------------------------------------------------------------------------------------------------------------------------------------------------------------------------------------------------------------------------------------------------------------------------------------------------------------------------------------------------------------------------------------------------|---------------------------------------------------------------------------------------|----------------------------------------------------------------------------------------------------------------------------|-------------------------------------------------------------------------------------------------------------------------------------------------------------------------------------------------------------------------------------------------------------------------------------------------------------------------------------------------------------------------------------------------------------------------------------------------------------------------------------------------------------------------------------------------------------------------------------|--|
| EPI_ISL_1445120 to 1445126                                                                                                                                                                                                                                                                                                                                                                                                                                                                                                                                                                                                                                                                                                                                                                                                                                                                                                                                                   | UNIDADE DE PRONTO ATENDIMENTO UPA DRA ANA OLIVIA BENTIVOGLIO                          | Instituto Butantan / Mendelics                                                                                             | Antonio Jorge Martins; Bibiana Santos; Claudia Renata dos Santos Barros; David Schlesinger; Debora Botequiao Moretti; Dimas Tadeu Covas; Elaine Cristina Marqueze; Elaine Vieira dos Santos; Erika Freitas; Evandra Strazza Rodrigues; Flavia Aburjaile; José Salvatore Leister Patané; João Paulo Kitajima; Luiz Carlos Junior de Alcantara; Maria Carolina Elias; Marta Giovanetti; Rafael dos Santos Bezerra; Raul Machado Neto; Ricardo Haddad; Rodrigo Tocantins Calado.; Sandra Coccuzzo Sampaio; Simone Kashima; Svetoslav Nanev Slavov; Vagner Fonseca; Vincent Louis Viala |  |
| EPI_ISL_1479124                                                                                                                                                                                                                                                                                                                                                                                                                                                                                                                                                                                                                                                                                                                                                                                                                                                                                                                                                              | UNIDADE DE SAUDE NOVA HARTZ                                                           | Epiclin                                                                                                                    | Ana Paula Muterle; Carolina Comerlato; Eliana Márcia Da Ros Wendland; Fernando Hayashi Sant'Anna; Janira Pritchula; Juliana Comerlato                                                                                                                                                                                                                                                                                                                                                                                                                                               |  |
| EPI_ISL_1445172                                                                                                                                                                                                                                                                                                                                                                                                                                                                                                                                                                                                                                                                                                                                                                                                                                                                                                                                                              | UNIDADE MISTA ARACOIBA DA SERRA                                                       | Instituto Butantan / Mendelics                                                                                             | Antonio Jorge Martins; Bibiana Santos; Claudia Renata dos Santos Barros; David Schlesinger; Debora Botequiao Moretti; Dimas Tadeu Covas; Elaine Cristina Marqueze; Elaine Vieira dos Santos; Erika Freitas; Evandra Strazza Rodrigues; Flavia Aburjaile; José Salvatore Leister Patané; João Paulo Kitajima; Luiz Carlos Junior de Alcantara; Maria Carolina Elias; Marta Giovanetti; Rafael dos Santos Bezerra; Raul Machado Neto; Ricardo Haddad; Rodrigo Tocantins Calado.; Sandra Coccuzzo Sampaio; Simone Kashima; Svetoslav Nanev Slavov; Vagner Fonseca; Vincent Louis Viala |  |
| EPI_ISL_1445140                                                                                                                                                                                                                                                                                                                                                                                                                                                                                                                                                                                                                                                                                                                                                                                                                                                                                                                                                              | UNIDADE MISTA DE SAUDE CAPELA DO ALTO                                                 | Instituto Butantan / Mendelics                                                                                             | Antonio Jorge Martins; Bibiana Santos; Claudia Renata dos Santos Barros; David Schlesinger; Debora Botequiao Moretti; Dimas Tadeu Covas; Elaine Cristina Marqueze; Elaine Vieira dos Santos; Erika Freitas; Evandra Strazza Rodrigues; Flavia Aburjaile; José Salvatore Leister Patané; João Paulo Kitajima; Luiz Carlos Junior de Alcantara; Maria Carolina Elias; Marta Giovanetti; Rafael dos Santos Bezerra; Raul Machado Neto; Ricardo Haddad; Rodrigo Tocantins Calado.; Sandra Coccuzzo Sampaio; Simone Kashima; Svetoslav Nanev Slavov; Vagner Fonseca; Vincent Louis Viala |  |
| EPI_ISL_1445065, EPI_ISL_1445198                                                                                                                                                                                                                                                                                                                                                                                                                                                                                                                                                                                                                                                                                                                                                                                                                                                                                                                                             | UNIDADE MISTA DE TAIACU                                                               | Instituto Butantan / Mendelics                                                                                             | Antonio Jorge Martins; Bibiana Santos; Claudia Renata dos Santos Barros; David Schlesinger; Debora Botequiao Moretti; Dimas Tadeu Covas; Elaine Cristina Marqueze; Elaine Vieira dos Santos; Erika Freitas; Evandra Strazza Rodrigues; Flavia Aburjaile; José Salvatore Leister Patané; João Paulo Kitajima; Luiz Carlos Junior de Alcantara; Maria Carolina Elias; Marta Giovanetti; Rafael dos Santos Bezerra; Raul Machado Neto; Ricardo Haddad; Rodrigo Tocantins Calado.; Sandra Coccuzzo Sampaio; Simone Kashima; Svetoslav Nanev Slavov; Vagner Fonseca; Vincent Louis Viala |  |
| EPI_ISL_1445113, EPI_ISL_1445119, EPI_ISL_1445127 to 1445129                                                                                                                                                                                                                                                                                                                                                                                                                                                                                                                                                                                                                                                                                                                                                                                                                                                                                                                 | UNIDADE RESPIRATORIA NOVA HORTOLANDIA                                                 | Instituto Butantan / Mendelics                                                                                             | Antonio Jorge Martins; Bibiana Santos; Claudia Renata dos Santos Barros; David Schlesinger; Debora Botequiao Moretti; Dimas Tadeu Covas; Elaine Cristina Marqueze; Elaine Vieira dos Santos; Erika Freitas; Evandra Strazza Rodrigues; Flavia Aburjaile; José Salvatore Leister Patané; João Paulo Kitajima; Luiz Carlos Junior de Alcantara; Maria Carolina Elias; Marta Giovanetti; Rafael dos Santos Bezerra; Raul Machado Neto; Ricardo Haddad; Rodrigo Tocantins Calado.; Sandra Coccuzzo Sampaio; Simone Kashima; Svetoslav Nanev Slavov; Vagner Fonseca; Vincent Louis Viala |  |
| EPI_ISL_1469583, EPI_ISL_1469720, EPI_ISL_1469722, EPI_ISL_1469765                                                                                                                                                                                                                                                                                                                                                                                                                                                                                                                                                                                                                                                                                                                                                                                                                                                                                                           | UNIDADE SANITARIA DE IGREJINHA                                                        | Epiclin                                                                                                                    | Ana Paula Muterle; Carolina Comerlato; Eliana Márcia Da Ros Wendland; Fernando Hayashi Sant'Anna; Janira Pritchula; Juliana Comerlato                                                                                                                                                                                                                                                                                                                                                                                                                                               |  |
| EPI_ISL_1433812, EPI_ISL_1433958, EPI_ISL_1433960, EPI_ISL_1433962, EPI_ISL_1433964, EPI_ISL_1433966 to 1433967, EPI_ISL_1433969, EPI_ISL_1433972, EPI_ISL_1433974, EPI_ISL_1433976 to 1433977, EPI_ISL_1433979, EPI_ISL_1434144, EPI_ISL_1434146 to 1434147, EPI_ISL_1434150, EPI_ISL_1434152, EPI_ISL_1434154, EPI_ISL_1434156, EPI_ISL_1434158, EPI_ISL_1434160, EPI_ISL_1434163, EPI_ISL_1434165, EPI_ISL_1434167, EPI_ISL_1434169, EPI_ISL_1434171 to 1434172, EPI_ISL_1434174, EPI_ISL_1434176, EPI_ISL_1434178, EPI_ISL_1434180, EPI_ISL_1434182, EPI_ISL_1434184, EPI_ISL_1434270, EPI_ISL_1434272, EPI_ISL_1457770                                                                                                                                                                                                                                                                                                                                                  |                                                                                       |                                                                                                                            |                                                                                                                                                                                                                                                                                                                                                                                                                                                                                                                                                                                     |  |
| see above                                                                                                                                                                                                                                                                                                                                                                                                                                                                                                                                                                                                                                                                                                                                                                                                                                                                                                                                                                    | UNILIANS DECINES                                                                      | CNR Virus des Infections Respiratoires - France SUD                                                                        | Antonin Bal; Bruno Lina; Gregory Destras; Gwendolyne Burfin; Hadrien Regue; Laurence Josset; Martine Valette; Quentin Semanas                                                                                                                                                                                                                                                                                                                                                                                                                                                       |  |
| EPI_ISL_1517302                                                                                                                                                                                                                                                                                                                                                                                                                                                                                                                                                                                                                                                                                                                                                                                                                                                                                                                                                              | UNISANTE                                                                              | Laboratory of genomics and metagenomics                                                                                    | Claire Bertelli; Damien Jacot; Gilbert Greub; SÅ@bastien Aeb; Trestan Pilonel                                                                                                                                                                                                                                                                                                                                                                                                                                                                                                       |  |
| EPI_ISL_445317, EPI_ISL_445322                                                                                                                                                                                                                                                                                                                                                                                                                                                                                                                                                                                                                                                                                                                                                                                                                                                                                                                                               | UNIV.DE CHILE HOSP.CLINICO                                                            | Instituto de Salud Publica de Chile                                                                                        | Alejandra Acevedo; Andrés E Castillo; Bárbara Parra; Carolina Tambley; Gabriel Leal; Jaime Lagos; Jorge Fernandez; Loredana Arata; Patricia Bustos; Paz Tapia; Rodrigo Fasce; Winston Andrade                                                                                                                                                                                                                                                                                                                                                                                       |  |
| EPI_ISL_445247                                                                                                                                                                                                                                                                                                                                                                                                                                                                                                                                                                                                                                                                                                                                                                                                                                                                                                                                                               | UNIVERSIDAD DE LOS ANDES                                                              | Instituto de Salud Publica de Chile                                                                                        | Alejandra Acevedo; Andrés E Castillo; Bárbara Parra; Carolina Tambley; Gabriel Leal; Jaime Lagos; Jorge Fernandez; Loredana Arata; Patricia Bustos; Paz Tapia; Rodrigo Fasce; Winston Andrade                                                                                                                                                                                                                                                                                                                                                                                       |  |
| EPI_ISL_582123, EPI_ISL_583954 to 583967, EPI_ISL_1408885 to 1408886, EPI_ISL_1416312 to 1416320, EPI_ISL_1500426 to 1500432                                                                                                                                                                                                                                                                                                                                                                                                                                                                                                                                                                                                                                                                                                                                                                                                                                                 | UOC Microbiologia e Virologia, Azienda Ospedaliera Universitaria Senese, Siena, Italy | Dipartimento di Biotechnologie Mediche                                                                                     | Claudia Gandolfo; David Pinzauti; Francesco Santoro; Gabriele Anichini; Gianni Gori Savellini; Gianni Pozzi; Maria Grazia Cusi                                                                                                                                                                                                                                                                                                                                                                                                                                                      |  |
| EPI_ISL_515522                                                                                                                                                                                                                                                                                                                                                                                                                                                                                                                                                                                                                                                                                                                                                                                                                                                                                                                                                               | UPA 24HS de Itatiba                                                                   | Instituto Adolfo Lutz, Interdisciplinary Procedures Center, Strategic Laboratory                                           | Claudia Regina Gonçalves; Claudio Tavares Sacchi; Erica Valessa Ramos Gomes                                                                                                                                                                                                                                                                                                                                                                                                                                                                                                         |  |
| EPI_ISL_523983, EPI_ISL_523993                                                                                                                                                                                                                                                                                                                                                                                                                                                                                                                                                                                                                                                                                                                                                                                                                                                                                                                                               | UPA Campo Limpo                                                                       | Instituto Adolfo Lutz, Interdisciplinary Procedures Center, Strategic Laboratory                                           | Claudia Regina Gonçalves; Claudio Tavares Sacchi; Erica Valessa Ramos Gomes                                                                                                                                                                                                                                                                                                                                                                                                                                                                                                         |  |
| EPI_ISL_603025                                                                                                                                                                                                                                                                                                                                                                                                                                                                                                                                                                                                                                                                                                                                                                                                                                                                                                                                                               | UPA Central de Caraguatatuba                                                          | Instituto Adolfo Lutz, Interdisciplinary Procedures Center, Strategic Laboratory                                           | Claudia Regina Gonçalves; Claudio Tavares Sacchi; Erica Valessa Ramos Gomes; Karoline Rodrigues Campos                                                                                                                                                                                                                                                                                                                                                                                                                                                                              |  |
| EPI_ISL_534311                                                                                                                                                                                                                                                                                                                                                                                                                                                                                                                                                                                                                                                                                                                                                                                                                                                                                                                                                               | UPA III 26 de Agosto                                                                  | Instituto Adolfo Lutz, Interdisciplinary Procedures Center, Strategic Laboratory                                           | Claudia Regina Gonçalves; Claudio Tavares Sacchi; Erica Valessa Ramos Gomes                                                                                                                                                                                                                                                                                                                                                                                                                                                                                                         |  |
| EPI_ISL_583496                                                                                                                                                                                                                                                                                                                                                                                                                                                                                                                                                                                                                                                                                                                                                                                                                                                                                                                                                               | UPA Jandira                                                                           | Instituto Adolfo Lutz, Interdisciplinary Procedures Center, Strategic Laboratory                                           | Claudia Regina Gonçalves; Claudio Tavares Sacchi; Erica Valessa Ramos Gomes; Karoline Rodrigues Campos                                                                                                                                                                                                                                                                                                                                                                                                                                                                              |  |
| EPI_ISL_523975, EPI_ISL_523980                                                                                                                                                                                                                                                                                                                                                                                                                                                                                                                                                                                                                                                                                                                                                                                                                                                                                                                                               | UPA Tito Lopes                                                                        | Instituto Adolfo Lutz, Interdisciplinary Procedures Center, Strategic Laboratory                                           | Claudia Regina Gonçalves; Claudio Tavares Sacchi; Erica Valessa Ramos Gomes                                                                                                                                                                                                                                                                                                                                                                                                                                                                                                         |  |
| EPI_ISL_468316                                                                                                                                                                                                                                                                                                                                                                                                                                                                                                                                                                                                                                                                                                                                                                                                                                                                                                                                                               | UPA Vila Assis                                                                        | Instituto Adolfo Lutz, Interdisciplinary Procedures Center, Strategic Laboratory                                           | Claudia Regina Gonçalves; Claudio Tavares Sacchi; Erica Valessa Ramos Gomes                                                                                                                                                                                                                                                                                                                                                                                                                                                                                                         |  |
| EPI_ISL_515550                                                                                                                                                                                                                                                                                                                                                                                                                                                                                                                                                                                                                                                                                                                                                                                                                                                                                                                                                               | UPA Vila Santa Catarina                                                               | Instituto Adolfo Lutz, Interdisciplinary Procedures Center, Strategic Laboratory                                           | Claudia Regina Gonçalves; Claudio Tavares Sacchi; Erica Valessa Ramos Gomes                                                                                                                                                                                                                                                                                                                                                                                                                                                                                                         |  |
| EPI_ISL_1491515, EPI_ISL_1491518 to 1491519, EPI_ISL_1491521                                                                                                                                                                                                                                                                                                                                                                                                                                                                                                                                                                                                                                                                                                                                                                                                                                                                                                                 | UPMC Children's Hospital of Pittsburgh                                                | Genomics and Discovery, Respiratory Viruses Branch, Division of Viral Diseases, Centers for Disease Control and Prevention | Anna Kelleher; Anna Uehara; Brian Lynch; Clinton R. Paden; Haibin Wang; Han Jia Justin Ng; Jing Zhang; Krista Queen; Peter Cook; Suxiang Tong; Yan Li; Ying Tao                                                                                                                                                                                                                                                                                                                                                                                                                     |  |
| EPI_ISL_436466 to 436503                                                                                                                                                                                                                                                                                                                                                                                                                                                                                                                                                                                                                                                                                                                                                                                                                                                                                                                                                     | UPMC Clinical Laboratory                                                              | Microbial Genome Sequencing Center, Microbial Genomic Epidemiological Laboratory                                           | Chinelo Ezeonwuku; Dan Snyder; Jane W. Marsh; Kady D Waggle; Lee H. Harrison; Marissa P Griffith; Mustapha M Mustapha; Stephanie L Mitchell; Vatsala R Srinivasa; Vaughn S. Cooper                                                                                                                                                                                                                                                                                                                                                                                                  |  |
| EPI_ISL_454355 to 454368, EPI_ISL_454370 to 454376, EPI_ISL_454378 to 454384, EPI_ISL_454387, EPI_ISL_454399, EPI_ISL_454401 to 454404, EPI_ISL_454406 to 454411                                                                                                                                                                                                                                                                                                                                                                                                                                                                                                                                                                                                                                                                                                                                                                                                             | UPMC Clinical Microbiology Laboratory                                                 | Microbial Genome Sequencing Center, Microbial Genomic Epidemiological Laboratory                                           | Chinelo Ezeonwuku; Dan Snyder; Jane W. Marsh; Kady D. Waggle; Lee H. Harrison; Marissa P. Griffith; Mustapha M. Mustapha; Stephanie L. Mitchell; Vatsala R. Srinivasa; Vaughn S. Cooper                                                                                                                                                                                                                                                                                                                                                                                             |  |
| see above                                                                                                                                                                                                                                                                                                                                                                                                                                                                                                                                                                                                                                                                                                                                                                                                                                                                                                                                                                    | UPMC Clinical Microbiology Laboratory                                                 | Microbial Genome Sequencing Center; Microbial Genomic Epidemiology Laboratory, University of Pittsburgh                    | Chinelo Ezeonwuku; Dan Snyder; Jane W. Marsh; Kady D. Waggle; Lee H. Harrison; Marissa P. Griffith; Mustapha M. Mustapha; Stephanie L. Mitchell; Vatsala R. Srinivasa; Vaughn S. Cooper                                                                                                                                                                                                                                                                                                                                                                                             |  |
| EPI_ISL_1394629 to 1394641, EPI_ISL_1394643, EPI_ISL_1397552, EPI_ISL_1397555 to 1397580, EPI_ISL_1397630 to 1397635, EPI_ISL_1397810 to 1397823, EPI_ISL_1397971 to 1397982, EPI_ISL_1397984 to 1397987, EPI_ISL_1397989 to 1398001, EPI_ISL_1398005 to 1398020, EPI_ISL_1398123 to 1398131, EPI_ISL_1398137 to 1398143, EPI_ISL_1398271 to 1398273, EPI_ISL_1398312 to 1398317, EPI_ISL_1461290 to 1461292, EPI_ISL_1461300 to 1461309, EPI_ISL_1461318, EPI_ISL_1462509 to 1462510, EPI_ISL_1462512 to 1462513, EPI_ISL_1462515 to 1462516, EPI_ISL_1462518 to 1462519, EPI_ISL_1462521, EPI_ISL_1462523 to 1462525, EPI_ISL_1462527 to 1462528, EPI_ISL_1462530 to 1462531, EPI_ISL_1462533 to 1462534, EPI_ISL_1465618 to 1465621, EPI_ISL_1465623 to 1465632, EPI_ISL_1465640 to 1465664, EPI_ISL_1465667, EPI_ISL_1465696, EPI_ISL_1465723 to 1465754, EPI_ISL_1482278 to 1482286, EPI_ISL_1482296 to 1482332, EPI_ISL_1482625 to 1482626, EPI_ISL_1499395 to 1499436 |                                                                                       |                                                                                                                            |                                                                                                                                                                                                                                                                                                                                                                                                                                                                                                                                                                                     |  |
| see above                                                                                                                                                                                                                                                                                                                                                                                                                                                                                                                                                                                                                                                                                                                                                                                                                                                                                                                                                                    | URMC LABS                                                                             | Wadsworth Center, New York State Department of Health                                                                      | Alexis Russel; Alexis Russell; Catharine Prussing; Daryl M. Lamson; Erasmus Schneider; Erica Lasek-Nesselquist; John Kelly; Jonathan Pitnick; Kirsten St. George; Matthew Shudt; Melissa A Leisner; Navjot Singh                                                                                                                                                                                                                                                                                                                                                                    |  |
| EPI_ISL_1531431 to 1531530                                                                                                                                                                                                                                                                                                                                                                                                                                                                                                                                                                                                                                                                                                                                                                                                                                                                                                                                                   | US Air Force School of Aerospace Medicine                                             | US Air Force School of Aerospace Medicine                                                                                  | Amanda Javorina; Anthony Fries; Clarise Starr; Elizabeth Macias; Jennifer Meyer; Sarah Purves; William Buggele; William Gruner                                                                                                                                                                                                                                                                                                                                                                                                                                                      |  |
| EPI_ISL_436045 to 436046                                                                                                                                                                                                                                                                                                                                                                                                                                                                                                                                                                                                                                                                                                                                                                                                                                                                                                                                                     | US VI Department of Health                                                            | Pathogen Discovery, Respiratory Viruses Branch, Division of Viral Diseases, Centers for Disease Control and Prevention     | Anna Uehara; Bettina Bankamp; Clinton R. Paden; Haibin Wang; Jing Zhang; Krista Queen; Suxiang Tong; Yan Li; Ying Tao; Zachary Weiner                                                                                                                                                                                                                                                                                                                                                                                                                                               |  |
| EPI_ISL_1549214                                                                                                                                                                                                                                                                                                                                                                                                                                                                                                                                                                                                                                                                                                                                                                                                                                                                                                                                                              | USA Health Care Authority                                                             | Synergy Laboratories                                                                                                       | Megan Cornwell                                                                                                                                                                                                                                                                                                                                                                                                                                                                                                                                                                      |  |

|                                                                                                                                                                                                                                                                                                                                                                                                                                                                                                                                                                                                                                                                                                                                                                                                                                                                                                                                                                                                                                                                                                                                                                                                                                                                                                                                                                                                                                                                                                                                                                                                                                                                                                                                                                |                                                  |                                                                                                                        |                                                                                                                                                                                                                                                                                                                                                                                                                                                                                                                                                                                    |
|----------------------------------------------------------------------------------------------------------------------------------------------------------------------------------------------------------------------------------------------------------------------------------------------------------------------------------------------------------------------------------------------------------------------------------------------------------------------------------------------------------------------------------------------------------------------------------------------------------------------------------------------------------------------------------------------------------------------------------------------------------------------------------------------------------------------------------------------------------------------------------------------------------------------------------------------------------------------------------------------------------------------------------------------------------------------------------------------------------------------------------------------------------------------------------------------------------------------------------------------------------------------------------------------------------------------------------------------------------------------------------------------------------------------------------------------------------------------------------------------------------------------------------------------------------------------------------------------------------------------------------------------------------------------------------------------------------------------------------------------------------------|--------------------------------------------------|------------------------------------------------------------------------------------------------------------------------|------------------------------------------------------------------------------------------------------------------------------------------------------------------------------------------------------------------------------------------------------------------------------------------------------------------------------------------------------------------------------------------------------------------------------------------------------------------------------------------------------------------------------------------------------------------------------------|
| EPI_ISL_1445203                                                                                                                                                                                                                                                                                                                                                                                                                                                                                                                                                                                                                                                                                                                                                                                                                                                                                                                                                                                                                                                                                                                                                                                                                                                                                                                                                                                                                                                                                                                                                                                                                                                                                                                                                | USAFA GUILHERMINA                                | Instituto Butantan / Mendelics                                                                                         | Antonio Jorge Martins; Bibiana Santos; Claudia Renata dos Santos Barros; David Schlesinger; Debora Botequiu Moretti; Dimas Tadeu Covas; Elaine Cristina Marqueze; Elaine Vieira dos Santos; Erika Freitas; Evandra Strazza Rodrigues; Flavia Aburjaile; José Salvatore Leister Patané; João Paulo Kitajima; Luiz Carlos Junior de Alcantara; Maria Carolina Elias; Marta Giovanetti; Rafael dos Santos Bezerra; Raul Machado Neto; Ricardo Haddad; Rodrigo Tocantins Calado.; Sandra Coccuzzo Sampaio; Simone Kashima; Svetoslav Nanev Slavov; Vagner Fonseca; Vincent Louis Viala |
| EPI_ISL_1445202, EPI_ISL_1445204                                                                                                                                                                                                                                                                                                                                                                                                                                                                                                                                                                                                                                                                                                                                                                                                                                                                                                                                                                                                                                                                                                                                                                                                                                                                                                                                                                                                                                                                                                                                                                                                                                                                                                                               | USAFA MARACANA                                   | Instituto Butantan / Mendelics                                                                                         | Antonio Jorge Martins; Bibiana Santos; Claudia Renata dos Santos Barros; David Schlesinger; Debora Botequiu Moretti; Dimas Tadeu Covas; Elaine Cristina Marqueze; Elaine Vieira dos Santos; Erika Freitas; Evandra Strazza Rodrigues; Flavia Aburjaile; José Salvatore Leister Patané; João Paulo Kitajima; Luiz Carlos Junior de Alcantara; Maria Carolina Elias; Marta Giovanetti; Rafael dos Santos Bezerra; Raul Machado Neto; Ricardo Haddad; Rodrigo Tocantins Calado.; Sandra Coccuzzo Sampaio; Simone Kashima; Svetoslav Nanev Slavov; Vagner Fonseca; Vincent Louis Viala |
| EPI_ISL_1445201                                                                                                                                                                                                                                                                                                                                                                                                                                                                                                                                                                                                                                                                                                                                                                                                                                                                                                                                                                                                                                                                                                                                                                                                                                                                                                                                                                                                                                                                                                                                                                                                                                                                                                                                                | USAFA TUDE BASTOS                                | Instituto Butantan / Mendelics                                                                                         | Antonio Jorge Martins; Bibiana Santos; Claudia Renata dos Santos Barros; David Schlesinger; Debora Botequiu Moretti; Dimas Tadeu Covas; Elaine Cristina Marqueze; Elaine Vieira dos Santos; Erika Freitas; Evandra Strazza Rodrigues; Flavia Aburjaile; José Salvatore Leister Patané; João Paulo Kitajima; Luiz Carlos Junior de Alcantara; Maria Carolina Elias; Marta Giovanetti; Rafael dos Santos Bezerra; Raul Machado Neto; Ricardo Haddad; Rodrigo Tocantins Calado.; Sandra Coccuzzo Sampaio; Simone Kashima; Svetoslav Nanev Slavov; Vagner Fonseca; Vincent Louis Viala |
| EPI_ISL_1497526 to 1497540, EPI_ISL_1502810 to 1502812, EPI_ISL_1503989 to 1503990, EPI_ISL_1503993 to 1503994, EPI_ISL_1503996 to 1503997, EPI_ISL_1504025, EPI_ISL_1504028 to 1504041, EPI_ISL_1506120 to 1506126, EPI_ISL_1508903 to 1508908, EPI_ISL_1508910 to 1508914, EPI_ISL_1508919 to 1508939, EPI_ISL_1509274 to 1509297, EPI_ISL_1515800                                                                                                                                                                                                                                                                                                                                                                                                                                                                                                                                                                                                                                                                                                                                                                                                                                                                                                                                                                                                                                                                                                                                                                                                                                                                                                                                                                                                           |                                                  |                                                                                                                        |                                                                                                                                                                                                                                                                                                                                                                                                                                                                                                                                                                                    |
| see above                                                                                                                                                                                                                                                                                                                                                                                                                                                                                                                                                                                                                                                                                                                                                                                                                                                                                                                                                                                                                                                                                                                                                                                                                                                                                                                                                                                                                                                                                                                                                                                                                                                                                                                                                      | USC Clinical Lab                                 | Los Angeles County PHL                                                                                                 | P. Hemarajata et al.                                                                                                                                                                                                                                                                                                                                                                                                                                                                                                                                                               |
| EPI_ISL_1415422, EPI_ISL_1524851                                                                                                                                                                                                                                                                                                                                                                                                                                                                                                                                                                                                                                                                                                                                                                                                                                                                                                                                                                                                                                                                                                                                                                                                                                                                                                                                                                                                                                                                                                                                                                                                                                                                                                                               | USCA Avezzano AVEZZANO(L'AQUILA)                 | Istituto Zooprofilattico Sperimentale dell'Abruzzo e Molise "G. Caporale"                                              | Ancora M; Calistri P; Cammà C; Caporale M; Curini V; Delli Compagni E; Di Domenico M; Di Lollo Valeria; Di Pasquale A; Lorusso A; Mangone I; Marcacci M; Puglia I; Rinaldi A; Savini G; Scialabba S                                                                                                                                                                                                                                                                                                                                                                                |
| EPI_ISL_1403515 to 1403517                                                                                                                                                                                                                                                                                                                                                                                                                                                                                                                                                                                                                                                                                                                                                                                                                                                                                                                                                                                                                                                                                                                                                                                                                                                                                                                                                                                                                                                                                                                                                                                                                                                                                                                                     | USCA Castel di Sangro CASTEL DI SANGRO(L'AQUILA) | Istituto Zooprofilattico Sperimentale dell'Abruzzo e Molise "G. Caporale"                                              | Ancora M; Calistri P; Cammà C; Curini V; Delli Compagni E; Di Domenico M; Di Pasquale A; Lorusso A; Mangone I; Marcacci M; Puglia I; Rinaldi A; Savini G; Scialabba S                                                                                                                                                                                                                                                                                                                                                                                                              |
| EPI_ISL_1392685 to 1392687, EPI_ISL_1403526, EPI_ISL_1403542, EPI_ISL_1403545, EPI_ISL_1403547, EPI_ISL_1502528 to 1502529                                                                                                                                                                                                                                                                                                                                                                                                                                                                                                                                                                                                                                                                                                                                                                                                                                                                                                                                                                                                                                                                                                                                                                                                                                                                                                                                                                                                                                                                                                                                                                                                                                     | USCA Pescina PESCINA(L'AQUILA)                   | Istituto Zooprofilattico Sperimentale dell'Abruzzo e Molise "G. Caporale"                                              | Ancora M; Calistri P; Cammà C; Caporale M; Curini V; Delli Compagni E; Di Domenico M; Di Lollo Valeria; Di Pasquale A; Lorusso A; Mangone I; Marcacci M; Puglia I; Rinaldi A; Savini G; Scialabba S                                                                                                                                                                                                                                                                                                                                                                                |
| EPI_ISL_1403529, EPI_ISL_1403537                                                                                                                                                                                                                                                                                                                                                                                                                                                                                                                                                                                                                                                                                                                                                                                                                                                                                                                                                                                                                                                                                                                                                                                                                                                                                                                                                                                                                                                                                                                                                                                                                                                                                                                               | USCA Sulmona SULMONA(L'AQUILA)                   | Istituto Zooprofilattico Sperimentale dell'Abruzzo e Molise "G. Caporale"                                              | Ancora M; Calistri P; Cammà C; Curini V; Delli Compagni E; Di Domenico M; Di Pasquale A; Lorusso A; Mangone I; Marcacci M; Puglia I; Rinaldi A; Savini G; Scialabba S                                                                                                                                                                                                                                                                                                                                                                                                              |
| EPI_ISL_1392683 to 1392684, EPI_ISL_1403504, EPI_ISL_1420832                                                                                                                                                                                                                                                                                                                                                                                                                                                                                                                                                                                                                                                                                                                                                                                                                                                                                                                                                                                                                                                                                                                                                                                                                                                                                                                                                                                                                                                                                                                                                                                                                                                                                                   | USCA Tagliacozzo TAGLIACOZZO(L'AQUILA)           | Istituto Zooprofilattico Sperimentale dell'Abruzzo e Molise "G. Caporale"                                              | Ancora M; Calistri P; Cammà C; Caporale M; Curini V; Delli Compagni E; Di Domenico M; Di Lollo Valeria; Di Pasquale A; Lorusso A; Mangone I; Marcacci M; Puglia I; Rinaldi A; Savini G; Scialabba S                                                                                                                                                                                                                                                                                                                                                                                |
| EPI_ISL_1445070                                                                                                                                                                                                                                                                                                                                                                                                                                                                                                                                                                                                                                                                                                                                                                                                                                                                                                                                                                                                                                                                                                                                                                                                                                                                                                                                                                                                                                                                                                                                                                                                                                                                                                                                                | USF ARCADAS                                      | Instituto Butantan / Mendelics                                                                                         | Antonio Jorge Martins; Bibiana Santos; Claudia Renata dos Santos Barros; David Schlesinger; Debora Botequiu Moretti; Dimas Tadeu Covas; Elaine Cristina Marqueze; Elaine Vieira dos Santos; Erika Freitas; Evandra Strazza Rodrigues; Flavia Aburjaile; José Salvatore Leister Patané; João Paulo Kitajima; Luiz Carlos Junior de Alcantara; Maria Carolina Elias; Marta Giovanetti; Rafael dos Santos Bezerra; Raul Machado Neto; Ricardo Haddad; Rodrigo Tocantins Calado.; Sandra Coccuzzo Sampaio; Simone Kashima; Svetoslav Nanev Slavov; Vagner Fonseca; Vincent Louis Viala |
| EPI_ISL_1445068                                                                                                                                                                                                                                                                                                                                                                                                                                                                                                                                                                                                                                                                                                                                                                                                                                                                                                                                                                                                                                                                                                                                                                                                                                                                                                                                                                                                                                                                                                                                                                                                                                                                                                                                                | USF JARDIM DAS AVES MOREIRINHA                   | Instituto Butantan / Mendelics                                                                                         | Antonio Jorge Martins; Bibiana Santos; Claudia Renata dos Santos Barros; David Schlesinger; Debora Botequiu Moretti; Dimas Tadeu Covas; Elaine Cristina Marqueze; Elaine Vieira dos Santos; Erika Freitas; Evandra Strazza Rodrigues; Flavia Aburjaile; José Salvatore Leister Patané; João Paulo Kitajima; Luiz Carlos Junior de Alcantara; Maria Carolina Elias; Marta Giovanetti; Rafael dos Santos Bezerra; Raul Machado Neto; Ricardo Haddad; Rodrigo Tocantins Calado.; Sandra Coccuzzo Sampaio; Simone Kashima; Svetoslav Nanev Slavov; Vagner Fonseca; Vincent Louis Viala |
| EPI_ISL_1445069, EPI_ISL_1445072                                                                                                                                                                                                                                                                                                                                                                                                                                                                                                                                                                                                                                                                                                                                                                                                                                                                                                                                                                                                                                                                                                                                                                                                                                                                                                                                                                                                                                                                                                                                                                                                                                                                                                                               | USF JARDIM SAO DIMAS                             | Instituto Butantan / Mendelics                                                                                         | Antonio Jorge Martins; Bibiana Santos; Claudia Renata dos Santos Barros; David Schlesinger; Debora Botequiu Moretti; Dimas Tadeu Covas; Elaine Cristina Marqueze; Elaine Vieira dos Santos; Erika Freitas; Evandra Strazza Rodrigues; Flavia Aburjaile; José Salvatore Leister Patané; João Paulo Kitajima; Luiz Carlos Junior de Alcantara; Maria Carolina Elias; Marta Giovanetti; Rafael dos Santos Bezerra; Raul Machado Neto; Ricardo Haddad; Rodrigo Tocantins Calado.; Sandra Coccuzzo Sampaio; Simone Kashima; Svetoslav Nanev Slavov; Vagner Fonseca; Vincent Louis Viala |
| EPI_ISL_1445073                                                                                                                                                                                                                                                                                                                                                                                                                                                                                                                                                                                                                                                                                                                                                                                                                                                                                                                                                                                                                                                                                                                                                                                                                                                                                                                                                                                                                                                                                                                                                                                                                                                                                                                                                | USF SANTA MARIA DO AMPARO                        | Instituto Butantan / Mendelics                                                                                         | Antonio Jorge Martins; Bibiana Santos; Claudia Renata dos Santos Barros; David Schlesinger; Debora Botequiu Moretti; Dimas Tadeu Covas; Elaine Cristina Marqueze; Elaine Vieira dos Santos; Erika Freitas; Evandra Strazza Rodrigues; Flavia Aburjaile; José Salvatore Leister Patané; João Paulo Kitajima; Luiz Carlos Junior de Alcantara; Maria Carolina Elias; Marta Giovanetti; Rafael dos Santos Bezerra; Raul Machado Neto; Ricardo Haddad; Rodrigo Tocantins Calado.; Sandra Coccuzzo Sampaio; Simone Kashima; Svetoslav Nanev Slavov; Vagner Fonseca; Vincent Louis Viala |
| EPI_ISL_1445067, EPI_ISL_1445071, EPI_ISL_1445074                                                                                                                                                                                                                                                                                                                                                                                                                                                                                                                                                                                                                                                                                                                                                                                                                                                                                                                                                                                                                                                                                                                                                                                                                                                                                                                                                                                                                                                                                                                                                                                                                                                                                                              | USF TRES PONTES                                  | Instituto Butantan / Mendelics                                                                                         | Antonio Jorge Martins; Bibiana Santos; Claudia Renata dos Santos Barros; David Schlesinger; Debora Botequiu Moretti; Dimas Tadeu Covas; Elaine Cristina Marqueze; Elaine Vieira dos Santos; Erika Freitas; Evandra Strazza Rodrigues; Flavia Aburjaile; José Salvatore Leister Patané; João Paulo Kitajima; Luiz Carlos Junior de Alcantara; Maria Carolina Elias; Marta Giovanetti; Rafael dos Santos Bezerra; Raul Machado Neto; Ricardo Haddad; Rodrigo Tocantins Calado.; Sandra Coccuzzo Sampaio; Simone Kashima; Svetoslav Nanev Slavov; Vagner Fonseca; Vincent Louis Viala |
| EPI_ISL_1446433, EPI_ISL_1446439, EPI_ISL_1446441, EPI_ISL_1446576 to 1446581, EPI_ISL_1446634, EPI_ISL_1446725 to 1446727, EPI_ISL_1516343 to 1516352, EPI_ISL_1528432 to 1528441                                                                                                                                                                                                                                                                                                                                                                                                                                                                                                                                                                                                                                                                                                                                                                                                                                                                                                                                                                                                                                                                                                                                                                                                                                                                                                                                                                                                                                                                                                                                                                             |                                                  |                                                                                                                        |                                                                                                                                                                                                                                                                                                                                                                                                                                                                                                                                                                                    |
| see above                                                                                                                                                                                                                                                                                                                                                                                                                                                                                                                                                                                                                                                                                                                                                                                                                                                                                                                                                                                                                                                                                                                                                                                                                                                                                                                                                                                                                                                                                                                                                                                                                                                                                                                                                      | UT-Unified State Labs: Public Health Utah DOH    | Centers for Disease Control and Prevention Division of Viral Diseases, Pathogen Discovery                              | Alison Laufer Halpin; Ben L. Rambo-Martin; Clinton R. Paden; Dakota Howard; Darlene Wagner; Dave Wentworth; Dhvani Batra; Jasmine Padilla; Justin Lee; Katie Dillon; Krista Queen; Kristen Knipe; Kristine Lacey; Mark Burroughs; Matthew Schmeer; Mili Sheth; Peter Cook; Sam Shepard; Sarah Nobles; Shoshona Le; Suxiang Tong; Vivien Dugan; Yvette Unoarumhi                                                                                                                                                                                                                    |
| EPI_ISL_424889 to 424890                                                                                                                                                                                                                                                                                                                                                                                                                                                                                                                                                                                                                                                                                                                                                                                                                                                                                                                                                                                                                                                                                                                                                                                                                                                                                                                                                                                                                                                                                                                                                                                                                                                                                                                                       | UT-Unified State Labs: Public Health Utah DOH    | Pathogen Discovery, Respiratory Viruses Branch, Division of Viral Diseases, Centers for Disease Control and Prevention | Alison S. Laufer Halpin; Anna Uehara; Christopher A. Elkins; Clinton R. Paden; Haibin Wang; Jing Zhang; Krista Queen; Mary S. Keckler; Rachel Marine; Suxiang Tong; Yan Li; Ying Tao                                                                                                                                                                                                                                                                                                                                                                                               |
| EPI_ISL_413562 to 413563, EPI_ISL_413649 to 413653, EPI_ISL_414363 to 414369, EPI_ISL_414591 to 414597, EPI_ISL_414616 to 414622, EPI_ISL_415591 to 415627, EPI_ISL_416433 to 416456, EPI_ISL_416635 to 416729, EPI_ISL_417341 to 417382, EPI_ISL_417448 to 417456, EPI_ISL_418028 to 418082, EPI_ISL_418866 to 418924, EPI_ISL_418926 to 418940, EPI_ISL_418942 to 418955, EPI_ISL_422961 to 422967, EPI_ISL_422969 to 423022, EPI_ISL_423024 to 423033, EPI_ISL_424166 to 424188, EPI_ISL_424190 to 424219, EPI_ISL_424239 to 424247, EPI_ISL_424249 to 424341, EPI_ISL_426052 to 426137, EPI_ISL_427161 to 427270, EPI_ISL_429597 to 429656, EPI_ISL_430867 to 430980, EPI_ISL_437803 to 437872, EPI_ISL_443184 to 443186, EPI_ISL_460621 to 460634, EPI_ISL_461399 to 461477, EPI_ISL_476900 to 476940, EPI_ISL_477673 to 477724, EPI_ISL_485917 to 485942, EPI_ISL_485944 to 485961, EPI_ISL_485963 to 485964, EPI_ISL_485967 to 485969, EPI_ISL_485971 to 486030, EPI_ISL_486032 to 486090, EPI_ISL_486093 to 486095, EPI_ISL_486097 to 486099, EPI_ISL_486102 to 486103, EPI_ISL_486105 to 486106, EPI_ISL_486108 to 486110, EPI_ISL_486112 to 486114, EPI_ISL_490979 to 490980, EPI_ISL_490982 to 490987, EPI_ISL_490989 to 490996, EPI_ISL_491001 to 491003, EPI_ISL_491005 to 491007, EPI_ISL_491009 to 491034, EPI_ISL_497872, EPI_ISL_511852 to 511861, EPI_ISL_570027 to 571015, EPI_ISL_576399 to 576405, EPI_ISL_576407 to 576517, EPI_ISL_576557 to 576564, EPI_ISL_603251 to 603265, EPI_ISL_610283 to 610285, EPI_ISL_1400350 to 1400443, EPI_ISL_1405061 to 1405403, EPI_ISL_1448051 to 1448397, EPI_ISL_1490861 to 1490896, EPI_ISL_1497767 to 1498093, EPI_ISL_1523794 to 1524014, EPI_ISL_1526795 to 1526835, EPI_ISL_1526910 to 1526989 |                                                  |                                                                                                                        |                                                                                                                                                                                                                                                                                                                                                                                                                                                                                                                                                                                    |
| see above                                                                                                                                                                                                                                                                                                                                                                                                                                                                                                                                                                                                                                                                                                                                                                                                                                                                                                                                                                                                                                                                                                                                                                                                                                                                                                                                                                                                                                                                                                                                                                                                                                                                                                                                                      | UW Virology Lab                                  | UW Virology Lab                                                                                                        | Alexander Greninger; Amin Addetta; Hong Xie; Keith Jerome; Keith R Jerome; Lasata Shrestha; Margaret Mills; Meei-Li Huang; Michelle Lin; Noah Baker; Noah R. Baker; Pavitra Roychowdhury; Saraswathi Sathees; Sean Ellis; Shah Mohamed Bakhsh; Truong Nguyen; Victoria M Racheff                                                                                                                                                                                                                                                                                                   |
| EPI_ISL_512086                                                                                                                                                                                                                                                                                                                                                                                                                                                                                                                                                                                                                                                                                                                                                                                                                                                                                                                                                                                                                                                                                                                                                                                                                                                                                                                                                                                                                                                                                                                                                                                                                                                                                                                                                 | UW Virology lab                                  | UW Virology lab                                                                                                        | Alexander Greninger; Amin Addetta; Hong Xie; Keith Jerome; Lasata Shrestha; Meei-Li Huang; Pavitra Roychowdhury; Truong Nguyen                                                                                                                                                                                                                                                                                                                                                                                                                                                     |
| EPI_ISL_451183 to 451202                                                                                                                                                                                                                                                                                                                                                                                                                                                                                                                                                                                                                                                                                                                                                                                                                                                                                                                                                                                                                                                                                                                                                                                                                                                                                                                                                                                                                                                                                                                                                                                                                                                                                                                                       | Uganda Virus Research Institute                  | MRC/UVRI & LSHTM Uganda Research Unit                                                                                  | Beatrice Dhaala; Dan Lule Bugembe; Deogratius Ssemwanga; Henry Kyobe; Henry Mwebesa; Jane Aceng; John Kiyiwa; Jonas Lexow; Julius Lutwama; Matthew Cotten; My V.T Phan; Phionah Tushabe; Pontiano Kaleebu; Stephen Balinandi                                                                                                                                                                                                                                                                                                                                                       |
| EPI_ISL_434646, EPI_ISL_434667, EPI_ISL_445228, EPI_ISL_445240, EPI_ISL_450824, EPI_ISL_455104, EPI_ISL_455109, EPI_ISL_469063, EPI_ISL_469072, EPI_ISL_475521, EPI_ISL_476138                                                                                                                                                                                                                                                                                                                                                                                                                                                                                                                                                                                                                                                                                                                                                                                                                                                                                                                                                                                                                                                                                                                                                                                                                                                                                                                                                                                                                                                                                                                                                                                 |                                                  |                                                                                                                        |                                                                                                                                                                                                                                                                                                                                                                                                                                                                                                                                                                                    |
| see above                                                                                                                                                                                                                                                                                                                                                                                                                                                                                                                                                                                                                                                                                                                                                                                                                                                                                                                                                                                                                                                                                                                                                                                                                                                                                                                                                                                                                                                                                                                                                                                                                                                                                                                                                      | Ulltuna Vardcentral                              | The Public Health Agency of Sweden                                                                                     | Anna Risberg; Anna-Malin Linde; Heidi Lindback; Karin Tegmark-Wisell; Maria Lind Karlberg; Mattias Haukland; Mia Bryting; Olov Svartstrom; Oskar Karlsson Lindsjo; Petra Edquist; Reza Advani; Sandra Brodressedon; Shamam Muradrasol; Theresa Enkirch                                                                                                                                                                                                                                                                                                                             |
| EPI_ISL_475122, EPI_ISL_475126 to 475127, EPI_ISL_475143, EPI_ISL_615092 to 615096                                                                                                                                                                                                                                                                                                                                                                                                                                                                                                                                                                                                                                                                                                                                                                                                                                                                                                                                                                                                                                                                                                                                                                                                                                                                                                                                                                                                                                                                                                                                                                                                                                                                             | Umea klinisk mikrobiologi                        | The Public Health Agency of Sweden                                                                                     | Anna Risberg; Anna-Malin Linde; Karin Tegmark-Wisell; Maria Lind Karlberg; Mattias Haukland; Mia Bryting; Olov Svartstrom; Oskar Karlsson Lindsjo; Petra Edquist; Reza Advani; Sandra Brodressedon; Shamam Muradrasol                                                                                                                                                                                                                                                                                                                                                              |
| EPI_ISL_1423505                                                                                                                                                                                                                                                                                                                                                                                                                                                                                                                                                                                                                                                                                                                                                                                                                                                                                                                                                                                                                                                                                                                                                                                                                                                                                                                                                                                                                                                                                                                                                                                                                                                                                                                                                | Unidad de Patologia Clinica                      | Instituto de Diagnostico y Referencia Epidemiologicos (INDRE)                                                          | Abril Rodriguez-Maldonado; Ariadna Medina-Benitez; Claudia Wong-Arambula; Ernesto Ramirez-Gonzalez.; Gisela Barrera-Badillo; Irma Lopez-Martinez; Joaquin Quiroz-Mercado; Lucia Hernandez-Rivas; Natividad Cruz-Ortiz; Sergio Rangel-Guerrero; Tatiana Nunez-Garcia; Vanessa Rivero-Arredondo                                                                                                                                                                                                                                                                                      |
| EPI_ISL_1469563, EPI_ISL_1469763                                                                                                                                                                                                                                                                                                                                                                                                                                                                                                                                                                                                                                                                                                                                                                                                                                                                                                                                                                                                                                                                                                                                                                                                                                                                                                                                                                                                                                                                                                                                                                                                                                                                                                                               | Unidade Básica de Saúde de Riozinho              | Epiclin                                                                                                                | Ana Paula Muterle; Carolina Comerlato; Eliana Márcia Da Ros Wendland; Fernando Hayashi Sant'Anna; Janira Prichula; Juliana Comerlato                                                                                                                                                                                                                                                                                                                                                                                                                                               |
| EPI_ISL_1469552, EPI_ISL_1469567, EPI_ISL_1469576, EPI_ISL_1469614,                                                                                                                                                                                                                                                                                                                                                                                                                                                                                                                                                                                                                                                                                                                                                                                                                                                                                                                                                                                                                                                                                                                                                                                                                                                                                                                                                                                                                                                                                                                                                                                                                                                                                            | Unidade Sanitária de Igrejinha                   | Epiclin                                                                                                                | Ana Paula Muterle; Carolina Comerlato; Eliana Márcia Da Ros Wendland; Fernando Hayashi Sant'Anna; Janira Prichula; Juliana Comerlato                                                                                                                                                                                                                                                                                                                                                                                                                                               |

|                                                                                                                                                                                                                                                                               |                                                                                         |                                                                                                                     |                                                                                                                                                                                                                                                                                                                                                                                                                                                                                                                                                                                                                                                                                                      |
|-------------------------------------------------------------------------------------------------------------------------------------------------------------------------------------------------------------------------------------------------------------------------------|-----------------------------------------------------------------------------------------|---------------------------------------------------------------------------------------------------------------------|------------------------------------------------------------------------------------------------------------------------------------------------------------------------------------------------------------------------------------------------------------------------------------------------------------------------------------------------------------------------------------------------------------------------------------------------------------------------------------------------------------------------------------------------------------------------------------------------------------------------------------------------------------------------------------------------------|
| EPI_ISL_1469716                                                                                                                                                                                                                                                               |                                                                                         |                                                                                                                     |                                                                                                                                                                                                                                                                                                                                                                                                                                                                                                                                                                                                                                                                                                      |
| EPI_ISL_1469649, EPI_ISL_1469664, EPI_ISL_1469714                                                                                                                                                                                                                             | Unidade de Atendimento DST AIDS TB e Han                                                | Epiclin                                                                                                             | Ana Paula Muterle; Carolina Comerlato; Eliana Márcia Da Ros Wendland; Fernando Hayashi Sant'Anna; Janira Prichula; Juliana Comerlato                                                                                                                                                                                                                                                                                                                                                                                                                                                                                                                                                                 |
| EPI_ISL_574590                                                                                                                                                                                                                                                                | Unidade de Pronto Atendimento UPA I Santa Isabel                                        | Instituto Adolfo Lutz, Interdisciplinary Procedures Center, Strategic Laboratory                                    | Claudia Regina Gonçalves; Claudio Tavares Sacchi; Erica Valessa Ramos Gomes; Karoline Rodrigues Campos                                                                                                                                                                                                                                                                                                                                                                                                                                                                                                                                                                                               |
| EPI_ISL_1533713, EPI_ISL_1533717                                                                                                                                                                                                                                              | Unidade de Pronto Atendimento Jd Amanda                                                 | Instituto Adolfo Lutz, Interdisciplinary Procedures Center, Strategic Laboratory                                    | Caio Vinicius Dias Lopes; Claudia Regina Gonçalves; Claudio Tavares Sacchi; Erica Valessa Ramos Gomes; Karoline Rodrigues Campos; Leonardo Jose Tadeu de Araujo                                                                                                                                                                                                                                                                                                                                                                                                                                                                                                                                      |
| EPI_ISL_1520115 to 1520116                                                                                                                                                                                                                                                    | Unidade de Pronto Atendimento UPA                                                       | Instituto Adolfo Lutz, Interdisciplinary Procedures Center, Strategic Laboratory                                    | Caio Vinicius Dias Lopes; Claudia Regina Gonçalves; Claudio Tavares Sacchi; Erica Valessa Ramos Gomes; Karoline Rodrigues Campos                                                                                                                                                                                                                                                                                                                                                                                                                                                                                                                                                                     |
| EPI_ISL_1469565, EPI_ISL_1469571, EPI_ISL_1469577, EPI_ISL_1469580, EPI_ISL_1469582, EPI_ISL_1469695, EPI_ISL_1469703, EPI_ISL_1469718, EPI_ISL_1469747, EPI_ISL_1469790, EPI_ISL_1469810                                                                                     |                                                                                         |                                                                                                                     |                                                                                                                                                                                                                                                                                                                                                                                                                                                                                                                                                                                                                                                                                                      |
| see above                                                                                                                                                                                                                                                                     | Unidade de Pronto Atendimento de Sapucaia do Sul                                        | Epiclin                                                                                                             | Ana Paula Muterle; Carolina Comerlato; Eliana Márcia Da Ros Wendland; Fernando Hayashi Sant'Anna; Janira Prichula; Juliana Comerlato                                                                                                                                                                                                                                                                                                                                                                                                                                                                                                                                                                 |
| EPI_ISL_1493585, EPI_ISL_1493594                                                                                                                                                                                                                                              | Unidade de Saude Dr Phebo de Oliveira Roge Ferreira                                     | Instituto Adolfo Lutz, Interdisciplinary Procedures Center, Strategic Laboratory                                    | Caio Vinicius Dias Lopes; Claudia Regina Gonçalves; Claudio Tavares Sacchi; Erica Valessa Ramos Gomes; Karoline Rodrigues Campos                                                                                                                                                                                                                                                                                                                                                                                                                                                                                                                                                                     |
| EPI_ISL_534325                                                                                                                                                                                                                                                                | Unidade de Vigilancia em Saude de Guarulhos                                             | Instituto Adolfo Lutz, Interdisciplinary Procedures Center, Strategic Laboratory                                    | Claudia Regina Gonçalves; Claudio Tavares Sacchi; Erica Valessa Ramos Gomes                                                                                                                                                                                                                                                                                                                                                                                                                                                                                                                                                                                                                          |
| EPI_ISL_1441231, EPI_ISL_1441233, EPI_ISL_1441235, EPI_ISL_1441237, EPI_ISL_1441239, EPI_ISL_1441241, EPI_ISL_1441248, EPI_ISL_1441299                                                                                                                                        |                                                                                         |                                                                                                                     |                                                                                                                                                                                                                                                                                                                                                                                                                                                                                                                                                                                                                                                                                                      |
| see above                                                                                                                                                                                                                                                                     | Uniklinikum Carl Gustav Carus an der TU Dresden; Institut für Virologie                 | Robert Koch Institute                                                                                               |                                                                                                                                                                                                                                                                                                                                                                                                                                                                                                                                                                                                                                                                                                      |
| EPI_ISL_510827 to 510830, EPI_ISL_582794 to 582796, EPI_ISL_594154                                                                                                                                                                                                            | Unilabs Eskilstuna                                                                      | The Public Health Agency of Sweden                                                                                  | Anna Risberg; Anna-Malin Linde; Karin Tegmark-Wisell; Maria Lind Karlberg; Mattias Haukland; Mia Brytting; Olov Svartstrom; Oskar Karlsson Lindsjo; Petra Edquist; Reza Advani; Sandra Brodsson                                                                                                                                                                                                                                                                                                                                                                                                                                                                                                      |
| EPI_ISL_420143, EPI_ISL_471172, EPI_ISL_549050, EPI_ISL_549123, EPI_ISL_549125, EPI_ISL_549172, EPI_ISL_549175, EPI_ISL_590882, EPI_ISL_590911, EPI_ISL_590917, EPI_ISL_591010, EPI_ISL_591013, EPI_ISL_1490256 to 1490257, EPI_ISL_1490272, EPI_ISL_1490334, EPI_ISL_1490459 |                                                                                         |                                                                                                                     |                                                                                                                                                                                                                                                                                                                                                                                                                                                                                                                                                                                                                                                                                                      |
| see above                                                                                                                                                                                                                                                                     | Unilabs Laboratory Medicine                                                             | Norwegian Institute of Public Health, Department of Virology                                                        | Atiya R Ali; Debech Nadia; Engebretsen Serina Beate; Garcia Llorente Ignacio; Hilde Elshaug; Hilde Synnøve Vollan; Hilde Vollan; Jon Bråte; Kamilla Heddeland Instefjord; Karoline Bragstad; Kathrine Stene-Johansen; Marie Paulsen Madsen; Olav Hungnes; Pedersen Benedikte Nevjen; Rasmus Riis Kopperud                                                                                                                                                                                                                                                                                                                                                                                            |
| EPI_ISL_429126 to 429127, EPI_ISL_450835                                                                                                                                                                                                                                      | Unilabs Skovde                                                                          | The Public Health Agency of Sweden                                                                                  | Anna Risberg; Anna-Malin Linde; Helena Enroth; Karin Tegmark-Wisell; Maria Lind Karlberg; Mia Brytting; Olov Svartstrom; Oskar Karlsson Lindsjo; Shaman Muradrasoli; Theresa Enkirch; Tobias Kollberg                                                                                                                                                                                                                                                                                                                                                                                                                                                                                                |
| EPI_ISL_412979 to 412980                                                                                                                                                                                                                                                      | Union Hospital of Tongji Medical College, Huazhong University of Science and Technology | Hubei Provincial Center for Disease Control and Prevention                                                          | Bin Fang; Bo Yang; Bo Yu; Faxian Zhan; Guojun Ye; Jing Li; Junqiang Xu; Kun Cai; Linlin Liu; Xiang Li; Xiao Yu; Xixiang Huo; Yongzhong Jiang.                                                                                                                                                                                                                                                                                                                                                                                                                                                                                                                                                        |
| EPI_ISL_1534269, EPI_ISL_1534372                                                                                                                                                                                                                                              | Uniondale Hospital wc UDH                                                               | NHLS/UCT                                                                                                            | Arash Iranzadeh; Bruna Galvao; Carolyn Williamson; Deelan Doolabh; Diana Hardie; Emmanuel SJ; Innocent Mudau; Kruger Marais; Lynn Tyers; Marvin Hsiao; Stephen Korsman; Tegally H; de Oliveira T                                                                                                                                                                                                                                                                                                                                                                                                                                                                                                     |
| EPI_ISL_411951                                                                                                                                                                                                                                                                | Unit for Laboratory Development and Technology Transfer, Public Health Agency of Sweden | Unit for Laboratory Development and Technology Transfer, Public Health Agency of Sweden                             | Appelberg, S.; Bengner, M.; Brave, A.; Lind Karlberg, M.; Lindsjo, O.; Montell, V.; Muradrasoli; Palmerus, M.; S. and Tegmark-Wisell, K.                                                                                                                                                                                                                                                                                                                                                                                                                                                                                                                                                             |
| EPI_ISL_510527                                                                                                                                                                                                                                                                | Unite des virus emergents, UMR190                                                       | Unite des virus emergents, UMR190                                                                                   | Baronti, C.; Charrel; Coutard, B.; Piorkowski, G.; R. and de Lamballerie, X.                                                                                                                                                                                                                                                                                                                                                                                                                                                                                                                                                                                                                         |
| EPI_ISL_463995 to 464064, EPI_ISL_526253 to 526286, EPI_ISL_569949 to 570026, EPI_ISL_609801 to 609826, EPI_ISL_1490672 to 1490709, EPI_ISL_1490717 to 1490747                                                                                                                | Unity Health Toronto                                                                    | Ontario Institute for Cancer Research                                                                               | Annette Gower; Bernard Lam; Felicia Vincelli; Ilina Lungu; Jared Simpson; Jared T. Simpson; Jeremy Johns; Karel Boissinot; Larissa M. Matukas; Le Lu; Mark Downing; Paul Krzyzanowski; Philip Zuzarte; Ramzi Fattouh; Richard de Borja; Samira Mubareka; TIBDN; Trina Otterman; Wai Sum Siu; Yan Chen; Zhi Cui                                                                                                                                                                                                                                                                                                                                                                                       |
| EPI_ISL_1443234 to 1443236, EPI_ISL_1443238 to 1443245, EPI_ISL_1443247 to 1443267, EPI_ISL_1478864, EPI_ISL_1478866 to 1478876, EPI_ISL_1478883                                                                                                                              | Unity Point Methodist Hospital                                                          | Illinois Department of Public Health - Springfield Lab                                                              | Bryan Sim; Gordon McCall                                                                                                                                                                                                                                                                                                                                                                                                                                                                                                                                                                                                                                                                             |
| EPI_ISL_1478865                                                                                                                                                                                                                                                               | Unity Point Proctor Hospital                                                            | Illinois Department of Public Health - Springfield Lab                                                              | Bryan Sim; Gordon McCall                                                                                                                                                                                                                                                                                                                                                                                                                                                                                                                                                                                                                                                                             |
| EPI_ISL_525467 to 525471                                                                                                                                                                                                                                                      | Universidad Iberoamericana                                                              | International Centre for Genetic Engineering and Biotechnology (ICGEB) and ARGO Open Lab Platform                   | Alejandro Vallejo Degaudenzi; Danilo Licastro; Eileen Riego; Leandro Tapia; Patricia Leon; Robert Paulino-Ramirez; Simeone Dal Monego; Sreejith Rajasekharan and Alessandro Marcello.; Victor Virgilio Calderon                                                                                                                                                                                                                                                                                                                                                                                                                                                                                      |
| EPI_ISL_522406                                                                                                                                                                                                                                                                | Universidad Iberoamericana (UNIBE)                                                      | International Centre for Genetic Engineering and Biotechnology (ICGEB) and ARGO Open Lab Platform                   | Alejandro Vallejo; Danilo Licastro; Eileen Riego; Leandro Tapia; Robert Paulino-Ramirez; Simeone Dal Monego; Sreejith Rajasekharan; Victor Calderon; and Alessandro Marcello.                                                                                                                                                                                                                                                                                                                                                                                                                                                                                                                        |
| EPI_ISL_523811 to 523812                                                                                                                                                                                                                                                      | Universidad Iberoamericana, Instituto de Medicina Tropical & Salud Global               | International Centre for Genetic Engineering and Biotechnology (ICGEB) and ARGO Open Lab Platform                   | Alejandro Vallejo Degaudenzi; Danilo Licastro; Eileen Riego; Leandro Tapia; Robert Paulino-Ramirez; Simeone Dal Monego; Sreejith Rajasekharan and Alessandro Marcello.; Victor Virgilio Calderon                                                                                                                                                                                                                                                                                                                                                                                                                                                                                                     |
| EPI_ISL_539783 to 539784                                                                                                                                                                                                                                                      | Universidad Regional Amazonica IKIAM                                                    | Institute of Microbiology, Universidad San Francisco de Quito                                                       | Andrea Carrera; Belén Prado-Vivar; Bernardo Gutiérrez; Carolina Proaño-Bolaños; Fabian Aguilar; Gabriel Trueba; Giovanna Moran; Juan José Guadalupe; Katherine Apunte; Marcelo Ortiz; Michelle Grunauer; Monica Becerra-Wong; Nina Espinoza de los Monteros; Patricio Rojas-Silva; Paul Cárdenas; Sonia Sislema; Sully Márquez; Verónica Barragán; Yeymi Rojas                                                                                                                                                                                                                                                                                                                                       |
| EPI_ISL_1540707                                                                                                                                                                                                                                                               | Universidad Tecnica Particular de Loja                                                  | Institute of Microbiology, Universidad San Francisco de Quito                                                       | Belén Prado-Vivar; Bernardo Gutiérrez; Fernando Serrano; David Zuñiga; Fernando Serrano; Juan José Guadalupe; Katherine Ojeda; Luis Flores; Melissa Ortega; Michelle Grunauer; Monica Becerra-Wong; Paola Dalgo; Patricio Rojas-Silva; Paul Cárdenas; Raiza Briceño; Sully Márquez; Verónica Barragán                                                                                                                                                                                                                                                                                                                                                                                                |
| EPI_ISL_537288 to 537379, EPI_ISL_537609 to 537690                                                                                                                                                                                                                            | Universidad de León                                                                     | SeqCOVID-SPAIN consortium/IBV(CSIC)                                                                                 | Ana Carvajal; Antonio J. Molina and SeqCOVID-SPAIN consortium; Héctor Argüello; Juan M. Fregeneda; Tania Fernández-Villa; Vicente Martín                                                                                                                                                                                                                                                                                                                                                                                                                                                                                                                                                             |
| EPI_ISL_1424054 to 1424056                                                                                                                                                                                                                                                    | Universidad del Magdalena                                                               | Instituto Nacional de Salud- Dirección de Investigación en Salud Pública                                            | Carlos Franco-Muñoz; Diego A. Álvarez-Díaz; Diego Andrés Prada; Gerardo Santamaría; Hector Alejandro Ruiz-Moreno; Jhonnatan Reales-González; Julian Naizaque; Katherine Laiton-Donato; Magdalena Wiesner; Marcela Mercado-Reyes.; María T. Herrera-Sepúlveda; Martha Lucia Ospina Martínez; Sheryll Corchuelo                                                                                                                                                                                                                                                                                                                                                                                        |
| EPI_ISL_445219                                                                                                                                                                                                                                                                | Universidad del Valle, Laboratorio de Microbiología, VIREM                              | Universidad del Valle, Universidad Nacional de Colombia-Sede Palmira, International Center for Tropical Agriculture | Beatriz Parra; Diana López-Alvarez; Wilmer J. Cuellar                                                                                                                                                                                                                                                                                                                                                                                                                                                                                                                                                                                                                                                |
| EPI_ISL_417951, EPI_ISL_417953, EPI_ISL_417982 to 417985                                                                                                                                                                                                                      | Universidade Federal do Rio de Janeiro                                                  | Bioinformatics Laboratory - LNCC                                                                                    | Alexandra Gerber; Amílcar Tanuri; Ana Paula Guimarães; Cristiano Xavier Lima; Cássia Alves Gonçalves; Diana Mariani; Ester Cerdeira Sabino; Filipe Romero; Ingra Morales Claro; Isabela de Carvalho Leitão; Jaqueline Goes de Jesus; Laboratorio Hermes Pardini; Laboratorio Simile; Luciana Jesus Costa e André Felipe Santos; Luiz Gonzaga Paula de Almeida; Lidia Boulosa; Mariane Talon; Mauro Teixeira; Nuno Rodrigues Faria; Orlando Ferreira Jr.; Pinto Castifeiras; Rafael de Mello Galliez; Renato Santana Aguiar e Ana Tereza Vasconcelos; Richard Araujo Maia; Rodrigo Brindeiro; Ronaldo da Silva Francisco Junior; Terezinha Marta Pereira; Erica Ramos dos Santos Nascimento           |
| EPI_ISL_418959                                                                                                                                                                                                                                                                | Universidade Federal do Rio de Janeiro - UFRJ                                           | Bioinformatics Laboratory - LNCC                                                                                    | Alexandra Gerber; Amílcar Tanuri; Ana Paula Guimarães; Cristiano Xavier Lima; Cássia Cristina Alves Gonçalves; Diana Mariani; Ester Cerdeira Sabino; Filipe Romero; Ingra Morales Claro; Isabela de Carvalho Leitão; Jaqueline Goes de Jesus; Laboratorio Hermes Pardini; Laboratorio Simile; Luciana Jesus Costa e André Felipe Santos; Luiz Gonzaga Paula de Almeida; Lidia Boulosa; Mariane Talon; Mauro Teixeira; Nuno Rodrigues Faria; Orlando Ferreira Jr.; Pinto Castifeiras; Rafael de Mello Galliez; Renato Santana Aguiar; Richard Araujo Maia; Rodrigo Brindeiro; Ronaldo da Silva Francisco Junior; Terezinha Marta Pereira; e Ana Tereza Vasconcelos; Erica Ramos dos Santos Nascimento |
| EPI_ISL_437933 to 437973, EPI_ISL_475764 to                                                                                                                                                                                                                                   | Universitaetsklinik für Innere Medizin II Innsbruck                                     | Berghthaler laboratory, CeMM Research Center for Molecular                                                          | Adi Steinrigl; Alexander Lercher; Alexandra Popa; Andreas Berghthaler; Benedikt Agerer; Christian Paar; Christoph Bock; Daniela Schmid; Dorothee von                                                                                                                                                                                                                                                                                                                                                                                                                                                                                                                                                 |

|                                                                                                                                                                                                                                                                                                                                                                                                                                                                                                                                                                                                                                                                                                                                                                                                                                                                                                                                                                                                                                                                                                                                                                                                                                                                                                                                                                                                                                                                                                                                                                                                                                                                                                                                                                                                                                                                                                                                                                                                                                                                                                                                                                                                                                                                                                                                                                                                                                                                                                                                                                                                                                                                                                                                                                                                                                                                                                                                                                                                                                                                                                                                                                                                                                                                                                                                                                                                                                                                                                                                                                                                                                                                                                                                                                                                                                                                                                                                                                                                                                                                                                                                                                                                                                                                                                                                                                                                                                                                                                                                                                                                                                                                                                                                                                                                                                                                                                                                                                                                                                                                                                                                                                                                                                                                                                                                                                                                                                                                                                                                                                                                                                                                                                                                                                                                                                                                                                                                                                                                                                                        |                                                                                                                                  |                                                                                                                                                                                                                                                                                                                                           |                                                                                                                                                                                                                                                                                                                                                                                                                                                                                                                                                                                                |
|--------------------------------------------------------------------------------------------------------------------------------------------------------------------------------------------------------------------------------------------------------------------------------------------------------------------------------------------------------------------------------------------------------------------------------------------------------------------------------------------------------------------------------------------------------------------------------------------------------------------------------------------------------------------------------------------------------------------------------------------------------------------------------------------------------------------------------------------------------------------------------------------------------------------------------------------------------------------------------------------------------------------------------------------------------------------------------------------------------------------------------------------------------------------------------------------------------------------------------------------------------------------------------------------------------------------------------------------------------------------------------------------------------------------------------------------------------------------------------------------------------------------------------------------------------------------------------------------------------------------------------------------------------------------------------------------------------------------------------------------------------------------------------------------------------------------------------------------------------------------------------------------------------------------------------------------------------------------------------------------------------------------------------------------------------------------------------------------------------------------------------------------------------------------------------------------------------------------------------------------------------------------------------------------------------------------------------------------------------------------------------------------------------------------------------------------------------------------------------------------------------------------------------------------------------------------------------------------------------------------------------------------------------------------------------------------------------------------------------------------------------------------------------------------------------------------------------------------------------------------------------------------------------------------------------------------------------------------------------------------------------------------------------------------------------------------------------------------------------------------------------------------------------------------------------------------------------------------------------------------------------------------------------------------------------------------------------------------------------------------------------------------------------------------------------------------------------------------------------------------------------------------------------------------------------------------------------------------------------------------------------------------------------------------------------------------------------------------------------------------------------------------------------------------------------------------------------------------------------------------------------------------------------------------------------------------------------------------------------------------------------------------------------------------------------------------------------------------------------------------------------------------------------------------------------------------------------------------------------------------------------------------------------------------------------------------------------------------------------------------------------------------------------------------------------------------------------------------------------------------------------------------------------------------------------------------------------------------------------------------------------------------------------------------------------------------------------------------------------------------------------------------------------------------------------------------------------------------------------------------------------------------------------------------------------------------------------------------------------------------------------------------------------------------------------------------------------------------------------------------------------------------------------------------------------------------------------------------------------------------------------------------------------------------------------------------------------------------------------------------------------------------------------------------------------------------------------------------------------------------------------------------------------------------------------------------------------------------------------------------------------------------------------------------------------------------------------------------------------------------------------------------------------------------------------------------------------------------------------------------------------------------------------------------------------------------------------------------------------------------------------------------------------------------------------|----------------------------------------------------------------------------------------------------------------------------------|-------------------------------------------------------------------------------------------------------------------------------------------------------------------------------------------------------------------------------------------------------------------------------------------------------------------------------------------|------------------------------------------------------------------------------------------------------------------------------------------------------------------------------------------------------------------------------------------------------------------------------------------------------------------------------------------------------------------------------------------------------------------------------------------------------------------------------------------------------------------------------------------------------------------------------------------------|
| 475768, EPI_ISL_475929 to 475936,<br>EPI_ISL_583557 to 583562, EPI_ISL_583617 to<br>583618                                                                                                                                                                                                                                                                                                                                                                                                                                                                                                                                                                                                                                                                                                                                                                                                                                                                                                                                                                                                                                                                                                                                                                                                                                                                                                                                                                                                                                                                                                                                                                                                                                                                                                                                                                                                                                                                                                                                                                                                                                                                                                                                                                                                                                                                                                                                                                                                                                                                                                                                                                                                                                                                                                                                                                                                                                                                                                                                                                                                                                                                                                                                                                                                                                                                                                                                                                                                                                                                                                                                                                                                                                                                                                                                                                                                                                                                                                                                                                                                                                                                                                                                                                                                                                                                                                                                                                                                                                                                                                                                                                                                                                                                                                                                                                                                                                                                                                                                                                                                                                                                                                                                                                                                                                                                                                                                                                                                                                                                                                                                                                                                                                                                                                                                                                                                                                                                                                                                                             |                                                                                                                                  | Medicine of the Austrian Academy of Sciences                                                                                                                                                                                                                                                                                              | Laer; Elisabeth Puchhammer-Stoekli; Franz Allerberger; Gernot Walder; Gregor Hörmann; Guenter Weiss; Gunther Vogl; Henrique Colaco; Jakob-Wendelin Genger; Jan Laine; Judith Aberle; Kinga Rigler-Hohenwarter; Lukas Endler; Manfred Nairez; Mark Smyth; Martin Senekowitsch; Michael Schuster; Peter Hufnagl; Peter Obrist; Rainer Gattringer; Sabine Sussitz-Rack; Stephan Aberle; Thomas Penz; Wengel Borena                                                                                                                                                                                |
| EPI_ISL_458082, EPI_ISL_529962 to 529963                                                                                                                                                                                                                                                                                                                                                                                                                                                                                                                                                                                                                                                                                                                                                                                                                                                                                                                                                                                                                                                                                                                                                                                                                                                                                                                                                                                                                                                                                                                                                                                                                                                                                                                                                                                                                                                                                                                                                                                                                                                                                                                                                                                                                                                                                                                                                                                                                                                                                                                                                                                                                                                                                                                                                                                                                                                                                                                                                                                                                                                                                                                                                                                                                                                                                                                                                                                                                                                                                                                                                                                                                                                                                                                                                                                                                                                                                                                                                                                                                                                                                                                                                                                                                                                                                                                                                                                                                                                                                                                                                                                                                                                                                                                                                                                                                                                                                                                                                                                                                                                                                                                                                                                                                                                                                                                                                                                                                                                                                                                                                                                                                                                                                                                                                                                                                                                                                                                                                                                                               | Universitas Airlangga Hospital                                                                                                   | Institute of Tropical Disease, Universitas Airlangga                                                                                                                                                                                                                                                                                      | Alidse M Nastri; Gatot Soegiarto; Jezy R Dewantari; Kazufumi Shimizu; Krisnoadi Rahardjo; Laksmi Wulandari; Makhia I Lusida; Mitsuhiro Nishimura; Nasronudin; Resty Yudhawati; Retno A Setyoningrum; Rima R Prasetya; Soejipto; Yasuko Mori; Yoriko K Shimizu                                                                                                                                                                                                                                                                                                                                  |
| EPI_ISL_534224, EPI_ISL_534246 to 534247,<br>EPI_ISL_560977 to 560979                                                                                                                                                                                                                                                                                                                                                                                                                                                                                                                                                                                                                                                                                                                                                                                                                                                                                                                                                                                                                                                                                                                                                                                                                                                                                                                                                                                                                                                                                                                                                                                                                                                                                                                                                                                                                                                                                                                                                                                                                                                                                                                                                                                                                                                                                                                                                                                                                                                                                                                                                                                                                                                                                                                                                                                                                                                                                                                                                                                                                                                                                                                                                                                                                                                                                                                                                                                                                                                                                                                                                                                                                                                                                                                                                                                                                                                                                                                                                                                                                                                                                                                                                                                                                                                                                                                                                                                                                                                                                                                                                                                                                                                                                                                                                                                                                                                                                                                                                                                                                                                                                                                                                                                                                                                                                                                                                                                                                                                                                                                                                                                                                                                                                                                                                                                                                                                                                                                                                                                  | Universitetssjukhuset i Linköping                                                                                                | The Public Health Agency of Sweden                                                                                                                                                                                                                                                                                                        | Anna Risberg; Anna-Malin Linde; Karin Tegmark-Wisell; Maria Lind Karlberg; Mattias Haukland; Mia Brytting; Olov Svartstrom; Oskar Karlsson Lindsjo; Petra Edquist; Reza Advani; Sandra Brodsson                                                                                                                                                                                                                                                                                                                                                                                                |
| EPI_ISL_463893                                                                                                                                                                                                                                                                                                                                                                                                                                                                                                                                                                                                                                                                                                                                                                                                                                                                                                                                                                                                                                                                                                                                                                                                                                                                                                                                                                                                                                                                                                                                                                                                                                                                                                                                                                                                                                                                                                                                                                                                                                                                                                                                                                                                                                                                                                                                                                                                                                                                                                                                                                                                                                                                                                                                                                                                                                                                                                                                                                                                                                                                                                                                                                                                                                                                                                                                                                                                                                                                                                                                                                                                                                                                                                                                                                                                                                                                                                                                                                                                                                                                                                                                                                                                                                                                                                                                                                                                                                                                                                                                                                                                                                                                                                                                                                                                                                                                                                                                                                                                                                                                                                                                                                                                                                                                                                                                                                                                                                                                                                                                                                                                                                                                                                                                                                                                                                                                                                                                                                                                                                         | University Clinical Center Tuzla                                                                                                 | Allea Genetiki Centar                                                                                                                                                                                                                                                                                                                     | D; Goleti; Huki, M.; Konjodžić; L; Marjanović; N; Pear; R; Salihfeđić; T; Tihi                                                                                                                                                                                                                                                                                                                                                                                                                                                                                                                 |
| EPI_ISL_462990                                                                                                                                                                                                                                                                                                                                                                                                                                                                                                                                                                                                                                                                                                                                                                                                                                                                                                                                                                                                                                                                                                                                                                                                                                                                                                                                                                                                                                                                                                                                                                                                                                                                                                                                                                                                                                                                                                                                                                                                                                                                                                                                                                                                                                                                                                                                                                                                                                                                                                                                                                                                                                                                                                                                                                                                                                                                                                                                                                                                                                                                                                                                                                                                                                                                                                                                                                                                                                                                                                                                                                                                                                                                                                                                                                                                                                                                                                                                                                                                                                                                                                                                                                                                                                                                                                                                                                                                                                                                                                                                                                                                                                                                                                                                                                                                                                                                                                                                                                                                                                                                                                                                                                                                                                                                                                                                                                                                                                                                                                                                                                                                                                                                                                                                                                                                                                                                                                                                                                                                                                         | University Clinical Centre of the Republic of Srpska                                                                             | University of Sarajevo, Veterinary Faculty                                                                                                                                                                                                                                                                                                | Aida, K.; Alma; Maja, T.; Mirsada, H.; Teufik, G.; Toni, E.; Š.A.; Šejla, G.                                                                                                                                                                                                                                                                                                                                                                                                                                                                                                                   |
| EPI_ISL_462753                                                                                                                                                                                                                                                                                                                                                                                                                                                                                                                                                                                                                                                                                                                                                                                                                                                                                                                                                                                                                                                                                                                                                                                                                                                                                                                                                                                                                                                                                                                                                                                                                                                                                                                                                                                                                                                                                                                                                                                                                                                                                                                                                                                                                                                                                                                                                                                                                                                                                                                                                                                                                                                                                                                                                                                                                                                                                                                                                                                                                                                                                                                                                                                                                                                                                                                                                                                                                                                                                                                                                                                                                                                                                                                                                                                                                                                                                                                                                                                                                                                                                                                                                                                                                                                                                                                                                                                                                                                                                                                                                                                                                                                                                                                                                                                                                                                                                                                                                                                                                                                                                                                                                                                                                                                                                                                                                                                                                                                                                                                                                                                                                                                                                                                                                                                                                                                                                                                                                                                                                                         | University Clinical Hospital of Mostar                                                                                           | University of Sarajevo Veterinary Faculty                                                                                                                                                                                                                                                                                                 | Eterovic, T.; Goletic, S.; Goletic, T.; Hukic, M.; Ostojic, M.; Seho-Alic, A.; Softic, A.                                                                                                                                                                                                                                                                                                                                                                                                                                                                                                      |
| EPI_ISL_507040 to 507109                                                                                                                                                                                                                                                                                                                                                                                                                                                                                                                                                                                                                                                                                                                                                                                                                                                                                                                                                                                                                                                                                                                                                                                                                                                                                                                                                                                                                                                                                                                                                                                                                                                                                                                                                                                                                                                                                                                                                                                                                                                                                                                                                                                                                                                                                                                                                                                                                                                                                                                                                                                                                                                                                                                                                                                                                                                                                                                                                                                                                                                                                                                                                                                                                                                                                                                                                                                                                                                                                                                                                                                                                                                                                                                                                                                                                                                                                                                                                                                                                                                                                                                                                                                                                                                                                                                                                                                                                                                                                                                                                                                                                                                                                                                                                                                                                                                                                                                                                                                                                                                                                                                                                                                                                                                                                                                                                                                                                                                                                                                                                                                                                                                                                                                                                                                                                                                                                                                                                                                                                               | University College London Hospital                                                                                               | COVID-19 Genomics UK (COG-UK) Consortium                                                                                                                                                                                                                                                                                                  | Catherine Houlihan; Dan Frampton; Judith Heaney; Matthew Byott; Moira Spyer and Eleni Nastouli; Stuart Kirk                                                                                                                                                                                                                                                                                                                                                                                                                                                                                    |
| EPI_ISL_440951 to 441051, EPI_ISL_441350 to 441354, EPI_ISL_444079 to 444272, EPI_ISL_449626 to 449729, EPI_ISL_453460 to 453464, EPI_ISL_457270 to 457302, EPI_ISL_461763 to 461772, EPI_ISL_478404 to 478472, EPI_ISL_572684 to 572685, EPI_ISL_572709, EPI_ISL_572725, EPI_ISL_572770, EPI_ISL_572800,<br>EPI_ISL_572807 to 572809, EPI_ISL_572828 to 572829, EPI_ISL_572838, EPI_ISL_572838, EPI_ISL_572957, EPI_ISL_573478 to 573525, EPI_ISL_573652 to 573685, EPI_ISL_573764, EPI_ISL_573800 to 573805, EPI_ISL_573856 to 573865, EPI_ISL_574258, EPI_ISL_576984 to 576985, EPI_ISL_584670 to 584679, EPI_ISL_584811<br>to 584846, EPI_ISL_585502 to 585503, EPI_ISL_594861 to 594888, EPI_ISL_611523, EPI_ISL_611527, EPI_ISL_611558 to 611559, EPI_ISL_611595 to 611597, EPI_ISL_611622 to 611623, EPI_ISL_611665, EPI_ISL_611822 to 611823, EPI_ISL_611996, EPI_ISL_612000, EPI_ISL_612014, EPI_ISL_612078 to 612079,<br>EPI_ISL_612103, EPI_ISL_612105, EPI_ISL_612131, EPI_ISL_612198, EPI_ISL_612450 to 612457, EPI_ISL_1386813 to 1386925, EPI_ISL_1386927 to 1386931, EPI_ISL_1474800, EPI_ISL_1474829 to 1474892, EPI_ISL_1546229 to 1546238                                                                                                                                                                                                                                                                                                                                                                                                                                                                                                                                                                                                                                                                                                                                                                                                                                                                                                                                                                                                                                                                                                                                                                                                                                                                                                                                                                                                                                                                                                                                                                                                                                                                                                                                                                                                                                                                                                                                                                                                                                                                                                                                                                                                                                                                                                                                                                                                                                                                                                                                                                                                                                                                                                                                                                                                                                                                                                                                                                                                                                                                                                                                                                                                                                                                                                                                                                                                                                                                                                                                                                                                                                                                                                                                                                                                                                                                                                                                                                                                                                                                                                                                                                                                                                                                                                                                                                                                                                                                                                                                                                                                                                                                                                                                                                                                                                                                                           | COVID-19 Genomics UK (COG-UK) Consortium                                                                                         | Alison Holmes; Charlotte Williams; Helena Tutill; Jacqueline Findlay; James Price; Judith Breuer; Julianne Brown; Kathryn Harris; Leysa Forrest; Mark Kristiansen; Paola Niola; Paola Resende Silva; Patricia Dyal; Paul Randell; Rachel Williams; Sam Weeks; Samuel Weeks; Sergi Castellano; Sunando Roy; Tony Brooks; Yasmin Panchbhaya |                                                                                                                                                                                                                                                                                                                                                                                                                                                                                                                                                                                                |
| see above                                                                                                                                                                                                                                                                                                                                                                                                                                                                                                                                                                                                                                                                                                                                                                                                                                                                                                                                                                                                                                                                                                                                                                                                                                                                                                                                                                                                                                                                                                                                                                                                                                                                                                                                                                                                                                                                                                                                                                                                                                                                                                                                                                                                                                                                                                                                                                                                                                                                                                                                                                                                                                                                                                                                                                                                                                                                                                                                                                                                                                                                                                                                                                                                                                                                                                                                                                                                                                                                                                                                                                                                                                                                                                                                                                                                                                                                                                                                                                                                                                                                                                                                                                                                                                                                                                                                                                                                                                                                                                                                                                                                                                                                                                                                                                                                                                                                                                                                                                                                                                                                                                                                                                                                                                                                                                                                                                                                                                                                                                                                                                                                                                                                                                                                                                                                                                                                                                                                                                                                                                              | University College London, Great Ormond Street Hospital for Children NHS Foundation Trust, Imperial College Healthcare NHS Trust | COVID-19 Genomics UK (COG-UK) Consortium                                                                                                                                                                                                                                                                                                  | Alison Holmes; Charlotte Williams; Helena Tutill; Jacqueline Findlay; James Price; Judith Breuer; Julianne Brown; Kathryn Harris; Leysa Forrest; Mark Kristiansen; Paola Niola; Paola Resende Silva; Patricia Dyal; Paul Randell; Rachel Williams; Roberto Amato; Sam Weeks; Sergi Castellano; Sonia Goncalves; Sunando Roy; Tony Brooks; Yasmin Panchbhaya                                                                                                                                                                                                                                    |
| EPI_ISL_492495, EPI_ISL_492497,<br>EPI_ISL_492746, EPI_ISL_492748,<br>EPI_ISL_492750, EPI_ISL_492758                                                                                                                                                                                                                                                                                                                                                                                                                                                                                                                                                                                                                                                                                                                                                                                                                                                                                                                                                                                                                                                                                                                                                                                                                                                                                                                                                                                                                                                                                                                                                                                                                                                                                                                                                                                                                                                                                                                                                                                                                                                                                                                                                                                                                                                                                                                                                                                                                                                                                                                                                                                                                                                                                                                                                                                                                                                                                                                                                                                                                                                                                                                                                                                                                                                                                                                                                                                                                                                                                                                                                                                                                                                                                                                                                                                                                                                                                                                                                                                                                                                                                                                                                                                                                                                                                                                                                                                                                                                                                                                                                                                                                                                                                                                                                                                                                                                                                                                                                                                                                                                                                                                                                                                                                                                                                                                                                                                                                                                                                                                                                                                                                                                                                                                                                                                                                                                                                                                                                   | University College London, Great Ormond Street Hospital for Children NHS Foundation Trust, Imperial College Healthcare NHS Trust | Wellcome Sanger Institute for the COVID-19 Genomics UK (COG-UK) Consortium                                                                                                                                                                                                                                                                | Alison Holmes; Charlotte Williams; Cordelia Langford; David K. Jackson; Dominic Kwiatkowski; Ewan Harrison; Helena Tutill; Ian Johnston; Jacqueline Findlay; James Price; John Sillitoe on behalf of the Wellcome Sanger Institute COVID-19 Surveillance Team; Judith Breuer and Alex Alderton; Julianne Brown; Kathryn Harris; Leysa Forrest; Mark Kristiansen; Paola Niola; Paola Resende Silva; Patricia Dyal; Paul Randell; Rachel Williams; Roberto Amato; Sam Weeks; Sergi Castellano; Sonia Goncalves; Sunando Roy; Tony Brooks; Yasmin Panchbhaya                                      |
| EPI_ISL_482160 to 482218, EPI_ISL_487525, EPI_ISL_487529, EPI_ISL_487534, EPI_ISL_487537, EPI_ISL_487540, EPI_ISL_487546, EPI_ISL_487550, EPI_ISL_487556 to 487559, EPI_ISL_487562, EPI_ISL_487564, EPI_ISL_487568, EPI_ISL_487572, EPI_ISL_487578, EPI_ISL_487581 to 487582, EPI_ISL_487584 to 487585, EPI_ISL_487589, EPI_ISL_487595, EPI_ISL_487597, EPI_ISL_487600, EPI_ISL_487606 to 487607, EPI_ISL_487610 to 487616, EPI_ISL_487621, EPI_ISL_487628, EPI_ISL_487630 to 487633, EPI_ISL_487635 to 487646, EPI_ISL_492498 to 492504, EPI_ISL_492496, EPI_ISL_492747, EPI_ISL_492749,<br>EPI_ISL_492751 to 492757, EPI_ISL_492759 to 492763                                                                                                                                                                                                                                                                                                                                                                                                                                                                                                                                                                                                                                                                                                                                                                                                                                                                                                                                                                                                                                                                                                                                                                                                                                                                                                                                                                                                                                                                                                                                                                                                                                                                                                                                                                                                                                                                                                                                                                                                                                                                                                                                                                                                                                                                                                                                                                                                                                                                                                                                                                                                                                                                                                                                                                                                                                                                                                                                                                                                                                                                                                                                                                                                                                                                                                                                                                                                                                                                                                                                                                                                                                                                                                                                                                                                                                                                                                                                                                                                                                                                                                                                                                                                                                                                                                                                                                                                                                                                                                                                                                                                                                                                                                                                                                                                                                                                                                                                                                                                                                                                                                                                                                                                                                                                                                                                                                                                        | University College London, Great Ormond Street Hospital for Children NHS Foundation Trust, Imperial College Healthcare NHS Trust | Wellcome Sanger Institute for the COVID-19 Genomics UK (COG-UK) consortium                                                                                                                                                                                                                                                                | Alison Holmes; Charlotte Williams; Cordelia Langford; David K. Jackson; Dominic Kwiatkowski; Ewan Harrison; Helena Tutill; Ian Johnston; Jacqueline Findlay; James Price; John Sillitoe on behalf of the Wellcome Sanger Institute COVID-19 Surveillance Team (http://www.sanger.ac.uk/covid-team); Judith Breuer and Alex Alderton; Julianne Brown; Kathryn Harris; Leysa Forrest; Mark Kristiansen; Paola Niola; Paola Resende Silva; Patricia Dyal; Paul Randell; Rachel Williams; Roberto Amato; Sam Weeks; Sergi Castellano; Sonia Goncalves; Sunando Roy; Tony Brooks; Yasmin Panchbhaya |
| see above                                                                                                                                                                                                                                                                                                                                                                                                                                                                                                                                                                                                                                                                                                                                                                                                                                                                                                                                                                                                                                                                                                                                                                                                                                                                                                                                                                                                                                                                                                                                                                                                                                                                                                                                                                                                                                                                                                                                                                                                                                                                                                                                                                                                                                                                                                                                                                                                                                                                                                                                                                                                                                                                                                                                                                                                                                                                                                                                                                                                                                                                                                                                                                                                                                                                                                                                                                                                                                                                                                                                                                                                                                                                                                                                                                                                                                                                                                                                                                                                                                                                                                                                                                                                                                                                                                                                                                                                                                                                                                                                                                                                                                                                                                                                                                                                                                                                                                                                                                                                                                                                                                                                                                                                                                                                                                                                                                                                                                                                                                                                                                                                                                                                                                                                                                                                                                                                                                                                                                                                                                              | University College London, Great Ormond Street Hospital for Children NHS Foundation Trust, Imperial College Healthcare NHS Trust | Wellcome Sanger Institute for the COVID-19 Genomics UK (COG-UK) consortium                                                                                                                                                                                                                                                                | Alison Holmes; Charlotte Williams; Cordelia Langford; David K. Jackson; Dominic Kwiatkowski; Ewan Harrison; Helena Tutill; Ian Johnston; Jacqueline Findlay; James Price; John Sillitoe on behalf of the Wellcome Sanger Institute COVID-19 Surveillance Team (http://www.sanger.ac.uk/covid-team); Judith Breuer and Alex Alderton; Julianne Brown; Kathryn Harris; Leysa Forrest; Mark Kristiansen; Paola Niola; Paola Resende Silva; Patricia Dyal; Paul Randell; Rachel Williams; Roberto Amato; Sam Weeks; Sergi Castellano; Sonia Goncalves; Sunando Roy; Tony Brooks; Yasmin Panchbhaya |
| EPI_ISL_1498343 to 1498345, EPI_ISL_1498373                                                                                                                                                                                                                                                                                                                                                                                                                                                                                                                                                                                                                                                                                                                                                                                                                                                                                                                                                                                                                                                                                                                                                                                                                                                                                                                                                                                                                                                                                                                                                                                                                                                                                                                                                                                                                                                                                                                                                                                                                                                                                                                                                                                                                                                                                                                                                                                                                                                                                                                                                                                                                                                                                                                                                                                                                                                                                                                                                                                                                                                                                                                                                                                                                                                                                                                                                                                                                                                                                                                                                                                                                                                                                                                                                                                                                                                                                                                                                                                                                                                                                                                                                                                                                                                                                                                                                                                                                                                                                                                                                                                                                                                                                                                                                                                                                                                                                                                                                                                                                                                                                                                                                                                                                                                                                                                                                                                                                                                                                                                                                                                                                                                                                                                                                                                                                                                                                                                                                                                                            | University Hospital Antwerp (UZA), Drie Eikenstraat 655, 2650 Edegem, Belgium                                                    | Labo Klinische Biologie, UZA                                                                                                                                                                                                                                                                                                              | Basil Britto Xavier; Christine Lammens; Herman Goossens; Jasmine Coppens; Marie Le Mercier; Veerle Matheussen                                                                                                                                                                                                                                                                                                                                                                                                                                                                                  |
| EPI_ISL_418274 to 418275, EPI_ISL_418277 to 418285, EPI_ISL_418433 to 418435, EPI_ISL_418437 to 418440, EPI_ISL_527916 to 528381, EPI_ISL_530122 to 530123, EPI_ISL_581668 to 582002, EPI_ISL_1388110, EPI_ISL_1388114, EPI_ISL_1388116, EPI_ISL_1388118 to 1388119, EPI_ISL_1388126, EPI_ISL_1388128,<br>EPI_ISL_1388130, EPI_ISL_1388134, EPI_ISL_1388136 to 1388137, EPI_ISL_1388139, EPI_ISL_1388141, EPI_ISL_1388143, EPI_ISL_1388145, EPI_ISL_1388147, EPI_ISL_1388149, EPI_ISL_1388152, EPI_ISL_1388154, EPI_ISL_1388156, EPI_ISL_1388158, EPI_ISL_1388160, EPI_ISL_1388162, EPI_ISL_1388177,<br>EPI_ISL_1388179, EPI_ISL_1388185, EPI_ISL_1388188, EPI_ISL_1388191, EPI_ISL_1388195, EPI_ISL_1388199, EPI_ISL_1388201, EPI_ISL_1388204, EPI_ISL_1388206, EPI_ISL_1388208, EPI_ISL_1388210, EPI_ISL_1388212, EPI_ISL_1388214, EPI_ISL_1388216, EPI_ISL_1388218, EPI_ISL_1388220, EPI_ISL_1388222,<br>EPI_ISL_1388224, EPI_ISL_1388226, EPI_ISL_1388232, EPI_ISL_1388234 to 1388235, EPI_ISL_1388242, EPI_ISL_1388244, EPI_ISL_1388247, EPI_ISL_1388253, EPI_ISL_1388257, EPI_ISL_1388261, EPI_ISL_1388265, EPI_ISL_1388267, EPI_ISL_1388269, EPI_ISL_1388275, EPI_ISL_1388277,<br>EPI_ISL_1388279, EPI_ISL_1388281, EPI_ISL_1388283, EPI_ISL_1388285, EPI_ISL_1388287, EPI_ISL_1388293, EPI_ISL_1388295, EPI_ISL_1388297, EPI_ISL_1388299, EPI_ISL_1388300 to 1388301, EPI_ISL_1388304, EPI_ISL_1388306, EPI_ISL_1388310, EPI_ISL_1388312, EPI_ISL_1388314, EPI_ISL_1388316, EPI_ISL_1388318,<br>EPI_ISL_1388320, EPI_ISL_1388322, EPI_ISL_1388328, EPI_ISL_1388330, EPI_ISL_1388332, EPI_ISL_1388334, EPI_ISL_1388340, EPI_ISL_1388342, EPI_ISL_1388344, EPI_ISL_1388352, EPI_ISL_1388354, EPI_ISL_1388362, EPI_ISL_1388364, EPI_ISL_1388370, EPI_ISL_1388386,<br>EPI_ISL_1388388, EPI_ISL_1388390, EPI_ISL_1388392, EPI_ISL_1388394, EPI_ISL_1388396 to 1388397, EPI_ISL_1388400, EPI_ISL_1388402, EPI_ISL_1388404, EPI_ISL_1388406, EPI_ISL_1388408, EPI_ISL_1388410, EPI_ISL_1388412, EPI_ISL_1388414, EPI_ISL_1388444, EPI_ISL_1388447, EPI_ISL_1388449,<br>EPI_ISL_1388451, EPI_ISL_1388455, EPI_ISL_1388458, EPI_ISL_1388462, EPI_ISL_1388464, EPI_ISL_1388466, EPI_ISL_1388469, EPI_ISL_1388476, EPI_ISL_1388478, EPI_ISL_1388480, EPI_ISL_1388482, EPI_ISL_1388484, EPI_ISL_1388486, EPI_ISL_1388488, EPI_ISL_1388490, EPI_ISL_1388494, EPI_ISL_1388497, EPI_ISL_1388501, EPI_ISL_1388503, EPI_ISL_1388507, EPI_ISL_1388509, EPI_ISL_1388511, EPI_ISL_1388514, EPI_ISL_1388516, EPI_ISL_1388518, EPI_ISL_1388520, EPI_ISL_1388522, EPI_ISL_1388524, EPI_ISL_1388526, EPI_ISL_1388528, EPI_ISL_1388530, EPI_ISL_1388534, EPI_ISL_1388550,<br>EPI_ISL_1388570, EPI_ISL_1388572, EPI_ISL_1388574, EPI_ISL_1388579 to 1388580, EPI_ISL_1388583, EPI_ISL_1388585, EPI_ISL_1388600, EPI_ISL_1388602 to 1388604, EPI_ISL_1388629, EPI_ISL_1388631, EPI_ISL_1388635, EPI_ISL_1388637, EPI_ISL_1388639, EPI_ISL_1388642, EPI_ISL_1388644,<br>EPI_ISL_1388648, EPI_ISL_1388650, EPI_ISL_1388652 to 1388653, EPI_ISL_1388655, EPI_ISL_1388659, EPI_ISL_1388662, EPI_ISL_1388666, EPI_ISL_1388668 to 1388669, EPI_ISL_1388671, EPI_ISL_1388673, EPI_ISL_1388675, EPI_ISL_1388677, EPI_ISL_1388679 to 1388681, EPI_ISL_1388683, EPI_ISL_1388685, EPI_ISL_1388687,<br>EPI_ISL_1388689, EPI_ISL_1388691, EPI_ISL_1388693, EPI_ISL_1388711, EPI_ISL_1388713, EPI_ISL_1388718, EPI_ISL_1388720, EPI_ISL_1388722 to 1388723, EPI_ISL_1388726 to 1388727, EPI_ISL_1388729, EPI_ISL_1388731, EPI_ISL_1388733, EPI_ISL_1388737, EPI_ISL_1388742, EPI_ISL_1388744,<br>EPI_ISL_1388746, EPI_ISL_1388748, EPI_ISL_1388750 to 1388751, EPI_ISL_1388753, EPI_ISL_1388755, EPI_ISL_1388757, EPI_ISL_1388759, EPI_ISL_1388761, EPI_ISL_1388763, EPI_ISL_1388765, EPI_ISL_1388767, EPI_ISL_1388769, EPI_ISL_1388771, EPI_ISL_1388773 to 1388774, EPI_ISL_1388776,<br>EPI_ISL_1388778, EPI_ISL_1388780 to 1388781, EPI_ISL_1388783, EPI_ISL_1388785, EPI_ISL_1388787, EPI_ISL_1388789, EPI_ISL_1388791, EPI_ISL_1388793, EPI_ISL_1388795, EPI_ISL_1388797, EPI_ISL_1388799, EPI_ISL_1388801, EPI_ISL_1388803, EPI_ISL_1388805, EPI_ISL_1388807, EPI_ISL_1388811, EPI_ISL_1388813, EPI_ISL_1388821,<br>EPI_ISL_1388823, EPI_ISL_1388825, EPI_ISL_1388827, EPI_ISL_1388829 to 1388830, EPI_ISL_1388833 to 1388834, EPI_ISL_1388836, EPI_ISL_1388838, EPI_ISL_1388840, EPI_ISL_1388844 to 1388845, EPI_ISL_1388848, EPI_ISL_1388852, EPI_ISL_1388854, EPI_ISL_1388856, EPI_ISL_1388858, EPI_ISL_1388860, EPI_ISL_1388862, EPI_ISL_1388864,<br>EPI_ISL_1388866, EPI_ISL_1388868 to 1388869, EPI_ISL_1388900, EPI_ISL_1388922, EPI_ISL_1388924, EPI_ISL_1388926, EPI_ISL_1388928, EPI_ISL_1388930, EPI_ISL_1388932 to 1388944, EPI_ISL_1388946, EPI_ISL_1388948, EPI_ISL_1388950, EPI_ISL_1388952, EPI_ISL_1388954, EPI_ISL_1388956, EPI_ISL_1388958, EPI_ISL_1388960, EPI_ISL_1388962, EPI_ISL_1388964, EPI_ISL_1388966, EPI_ISL_1388968, EPI_ISL_1388970, EPI_ISL_1388972, EPI_ISL_1388974, EPI_ISL_1388976, EPI_ISL_1388978, EPI_ISL_1388980,<br>EPI_ISL_1388982, EPI_ISL_1388984, EPI_ISL_1388986, EPI_ISL_1388988, EPI_ISL_1388990, EPI_ISL_1388992, EPI_ISL_1388994, EPI_ISL_1388996, EPI_ISL_1388998, EPI_ISL_1389000, EPI_ISL_1389002, EPI_ISL_1389004, EPI_ISL_1389006, EPI_ISL_1389008, EPI_ISL_1389010, EPI_ISL_1389012, EPI_ISL_1389014, EPI_ISL_1389016, EPI_ISL_1389018, EPI_ISL_1389020, EPI_ISL_1389022, EPI_ISL_1389024, EPI_ISL_1389026, EPI_ISL_1389028, EPI_ISL_1389030, EPI_ISL_1389032, EPI_ISL_1389034, EPI_ISL_1389036, EPI_ISL_1389038, EPI_ISL_1389040, EPI_ISL_1389042, EPI_ISL_1389044, EPI_ISL_1389046, EPI_ISL_1389048, EPI_ISL_1389050, EPI_ISL_1389052, EPI_ISL_1389054, EPI_ISL_1389056, EPI_ISL_1389058, EPI_ISL_1389060, EPI_ISL_1389062, EPI_ISL_1389064, EPI_ISL_1389066, EPI_ISL_1389068, EPI_ISL_1389070, EPI_ISL_1389072, EPI_ISL_1389074, EPI_ISL_1389076, EPI_ISL_1389078, EPI_ISL_1389080,<br>EPI_ISL_1389121, EPI_ISL_1389123 to 1389124, EPI_ISL_1389127, EPI_ISL_1389129, EPI_ISL_1389131, EPI_ISL_1389133, EPI_ISL_1389135 | University Hospital Antwerp (UZA), Drie Eikenstraat 655, 2650 Edegem, Belgium                                                    | Labo Klinische Biologie, UZA                                                                                                                                                                                                                                                                                                              | Basil Britto Xavier; Christine Lammens; Herman Goossens; Jasmine Coppens; Marie Le Mercier; Veerle Matheussen                                                                                                                                                                                                                                                                                                                                                                                                                                                                                  |
| EPI_ISL_418436                                                                                                                                                                                                                                                                                                                                                                                                                                                                                                                                                                                                                                                                                                                                                                                                                                                                                                                                                                                                                                                                                                                                                                                                                                                                                                                                                                                                                                                                                                                                                                                                                                                                                                                                                                                                                                                                                                                                                                                                                                                                                                                                                                                                                                                                                                                                                                                                                                                                                                                                                                                                                                                                                                                                                                                                                                                                                                                                                                                                                                                                                                                                                                                                                                                                                                                                                                                                                                                                                                                                                                                                                                                                                                                                                                                                                                                                                                                                                                                                                                                                                                                                                                                                                                                                                                                                                                                                                                                                                                                                                                                                                                                                                                                                                                                                                                                                                                                                                                                                                                                                                                                                                                                                                                                                                                                                                                                                                                                                                                                                                                                                                                                                                                                                                                                                                                                                                                                                                                                                                                         | University Hospital Basel, Clinical Virology                                                                                     | University Hospital Basel, Clinical Bacteriology                                                                                                                                                                                                                                                                                          | A. University Hospital Basel; Adrian Egli; Alexander Gensch; Alfredo Mari; Christian Nickel; Clinical Bacteriology; Egli; Egli, A.; Hans Hirsch; Hans Pargger; Helena MB Seth-Smith; Hirsch, H.; Julia Bielicki; Karoline Leuzinger; Kirstine K. Soegaard; Leuzinger, K.; Madlen Stange; Manuel Battegay; Mari, A.; Martin Siegemund; Michael Osthoff; Michael Schweitzer; Myrta Brunner; Rita Schneider-Sliwa; Roland Bingsser; Roloff, T.; Sarah Tschudin-Sutter; Seth-Smith, H.; Simon Fuchs; Stefano Bassetti; Tim Roloff                                                                  |
| EPI_ISL_418271, EPI_ISL_418273                                                                                                                                                                                                                                                                                                                                                                                                                                                                                                                                                                                                                                                                                                                                                                                                                                                                                                                                                                                                                                                                                                                                                                                                                                                                                                                                                                                                                                                                                                                                                                                                                                                                                                                                                                                                                                                                                                                                                                                                                                                                                                                                                                                                                                                                                                                                                                                                                                                                                                                                                                                                                                                                                                                                                                                                                                                                                                                                                                                                                                                                                                                                                                                                                                                                                                                                                                                                                                                                                                                                                                                                                                                                                                                                                                                                                                                                                                                                                                                                                                                                                                                                                                                                                                                                                                                                                                                                                                                                                                                                                                                                                                                                                                                                                                                                                                                                                                                                                                                                                                                                                                                                                                                                                                                                                                                                                                                                                                                                                                                                                                                                                                                                                                                                                                                                                                                                                                                                                                                                                         | University Hospital Basel, Clinical Virology                                                                                     | University Hospital Basel, Labormedizin                                                                                                                                                                                                                                                                                                   | Egli, A.; Hirsch, H.; Leuzinger, K.; Mari, A.; Roloff, T.; Seth-Smith, H.                                                                                                                                                                                                                                                                                                                                                                                                                                                                                                                      |
| EPI_ISL_1435908 to 1435909, EPI_ISL_1435919 to 1435920, EPI_ISL_1435933, EPI_ISL_1435966, EPI_ISL_1435968, EPI_ISL_1435970, EPI_ISL_1435972, EPI_ISL_1436022, EPI_ISL_1436024, EPI_ISL_1436033                                                                                                                                                                                                                                                                                                                                                                                                                                                                                                                                                                                                                                                                                                                                                                                                                                                                                                                                                                                                                                                                                                                                                                                                                                                                                                                                                                                                                                                                                                                                                                                                                                                                                                                                                                                                                                                                                                                                                                                                                                                                                                                                                                                                                                                                                                                                                                                                                                                                                                                                                                                                                                                                                                                                                                                                                                                                                                                                                                                                                                                                                                                                                                                                                                                                                                                                                                                                                                                                                                                                                                                                                                                                                                                                                                                                                                                                                                                                                                                                                                                                                                                                                                                                                                                                                                                                                                                                                                                                                                                                                                                                                                                                                                                                                                                                                                                                                                                                                                                                                                                                                                                                                                                                                                                                                                                                                                                                                                                                                                                                                                                                                                                                                                                                                                                                                                                         | University Hospital Centre Split                                                                                                 | Croatian Institute of Public Health                                                                                                                                                                                                                                                                                                       | Irena Tabain; Ivana Ferenak                                                                                                                                                                                                                                                                                                                                                                                                                                                                                                                                                                    |
| see above                                                                                                                                                                                                                                                                                                                                                                                                                                                                                                                                                                                                                                                                                                                                                                                                                                                                                                                                                                                                                                                                                                                                                                                                                                                                                                                                                                                                                                                                                                                                                                                                                                                                                                                                                                                                                                                                                                                                                                                                                                                                                                                                                                                                                                                                                                                                                                                                                                                                                                                                                                                                                                                                                                                                                                                                                                                                                                                                                                                                                                                                                                                                                                                                                                                                                                                                                                                                                                                                                                                                                                                                                                                                                                                                                                                                                                                                                                                                                                                                                                                                                                                                                                                                                                                                                                                                                                                                                                                                                                                                                                                                                                                                                                                                                                                                                                                                                                                                                                                                                                                                                                                                                                                                                                                                                                                                                                                                                                                                                                                                                                                                                                                                                                                                                                                                                                                                                                                                                                                                                                              | University Hospital Zurich                                                                                                       | Department of Biosystems Science and Engineering, ETH Zurich                                                                                                                                                                                                                                                                              | Christian Beisel; Elodie Burcklen; Ina Nissen; Ivan Topolsky; Julia Martinez-Gomez; Mitch Levesque; Natascha Santacroce; Niko Beerenwinkel; Pedro Ferreira; Phil Cheng; Philipp Bosshart; Philipp Jablonski; Sarah Nadeau; Susana Posada-Céspedes; Tanja Stadler; Tobias Schär                                                                                                                                                                                                                                                                                                                 |
| EPI_ISL_524482, EPI_ISL_524782                                                                                                                                                                                                                                                                                                                                                                                                                                                                                                                                                                                                                                                                                                                                                                                                                                                                                                                                                                                                                                                                                                                                                                                                                                                                                                                                                                                                                                                                                                                                                                                                                                                                                                                                                                                                                                                                                                                                                                                                                                                                                                                                                                                                                                                                                                                                                                                                                                                                                                                                                                                                                                                                                                                                                                                                                                                                                                                                                                                                                                                                                                                                                                                                                                                                                                                                                                                                                                                                                                                                                                                                                                                                                                                                                                                                                                                                                                                                                                                                                                                                                                                                                                                                                                                                                                                                                                                                                                                                                                                                                                                                                                                                                                                                                                                                                                                                                                                                                                                                                                                                                                                                                                                                                                                                                                                                                                                                                                                                                                                                                                                                                                                                                                                                                                                                                                                                                                                                                                                                                         | University Hospital Zürich                                                                                                       | Institute of Medical Virology, University of Zurich                                                                                                                                                                                                                                                                                       | Alexandra Trkola; Andrea Zbinden; Fiona Steiner; Gabriela Ziltener; Jon Huder; Jürgen Böni; Maryam Zaheri; Michael Huber; Patrick Redli; Riccarda Capaul; Stefan Schmutz; Verena Kufner                                                                                                                                                                                                                                                                                                                                                                                                        |
| EPI_ISL_454578, EPI_ISL_454581,<br>EPI_ISL_454583, EPI_ISL_454588,<br>EPI_ISL_454592, EPI_ISL_454595                                                                                                                                                                                                                                                                                                                                                                                                                                                                                                                                                                                                                                                                                                                                                                                                                                                                                                                                                                                                                                                                                                                                                                                                                                                                                                                                                                                                                                                                                                                                                                                                                                                                                                                                                                                                                                                                                                                                                                                                                                                                                                                                                                                                                                                                                                                                                                                                                                                                                                                                                                                                                                                                                                                                                                                                                                                                                                                                                                                                                                                                                                                                                                                                                                                                                                                                                                                                                                                                                                                                                                                                                                                                                                                                                                                                                                                                                                                                                                                                                                                                                                                                                                                                                                                                                                                                                                                                                                                                                                                                                                                                                                                                                                                                                                                                                                                                                                                                                                                                                                                                                                                                                                                                                                                                                                                                                                                                                                                                                                                                                                                                                                                                                                                                                                                                                                                                                                                                                   | University Hospital for Infectious Diseases "Dr. Fran Mihajlevi",<br>Research Unit                                               | University of Zagreb, Centre for research and knowledge transfer in biotechnology                                                                                                                                                                                                                                                         | Anamarija Slovic; Ivan-Christian Kurolic; Jelena Ivancic Jelecki                                                                                                                                                                                                                                                                                                                                                                                                                                                                                                                               |
| EPI_ISL_417485, EPI_ISL_420138, EPI_ISL_420152 to 420153, EPI_ISL_420310, EPI_ISL_590924 to 590926, EPI_ISL_590938 to 590944, EPI_ISL_590946 to 590947, EPI_ISL_590949 to 590950, EPI_ISL_1490215, EPI_ISL_1490258, EPI_ISL_1490263, EPI_ISL_1490301, EPI_ISL_1490380, EPI_ISL_1490406,<br>EPI_ISL_1490424, EPI_ISL_1490429, EPI_ISL_1490443, EPI_ISL_1490446, EPI_ISL_1490448, EPI_ISL_1490456, EPI_ISL_1490554, EPI_ISL_1490605, EPI_ISL_1490607, EPI_ISL_1490622, EPI_ISL_1490627, EPI_ISL_1490632 to 1490633, EPI_ISL_1547571 to 1547572, EPI_ISL_1547574                                                                                                                                                                                                                                                                                                                                                                                                                                                                                                                                                                                                                                                                                                                                                                                                                                                                                                                                                                                                                                                                                                                                                                                                                                                                                                                                                                                                                                                                                                                                                                                                                                                                                                                                                                                                                                                                                                                                                                                                                                                                                                                                                                                                                                                                                                                                                                                                                                                                                                                                                                                                                                                                                                                                                                                                                                                                                                                                                                                                                                                                                                                                                                                                                                                                                                                                                                                                                                                                                                                                                                                                                                                                                                                                                                                                                                                                                                                                                                                                                                                                                                                                                                                                                                                                                                                                                                                                                                                                                                                                                                                                                                                                                                                                                                                                                                                                                                                                                                                                                                                                                                                                                                                                                                                                                                                                                                                                                                                                                          | University Hospital of Northern Norway, Department for Microbiology and Infectious Disease Control                               | Norwegian Institute of Public Health, Department of Virology                                                                                                                                                                                                                                                                              | Atiya R Ali; Debech Nadia; Engbreitسن Serina Beate; Garcia Llorente Ignacio; Hilde Elshaug; Hilde Vollan; Jon Bråte; Kamilla Heddeland Instefjord; Karoline Bragstad; Kathrine Stene-Johansen; Marie Paulsen Madsen; Olav Hungenes; Pedersen Benedikte Nevjen; Rasmus Riis Kopperud                                                                                                                                                                                                                                                                                                            |
| EPI_ISL_478289 to 478371, EPI_ISL_484221 to 484253, EPI_ISL_484376 to 484389, EPI_ISL_499810, EPI_ISL_499828 to 499829, EPI_ISL_499858, EPI_ISL_499861, EPI_ISL_499869, EPI_ISL_499894 to 499895, EPI_ISL_499897, EPI_ISL_499910, EPI_ISL_499912 to 499913, EPI_ISL_499933, EPI_ISL_499950,<br>EPI_ISL_499974 to 499983, EPI_ISL_1474645 to 1474653, EPI_ISL_1545973 to 1545983                                                                                                                                                                                                                                                                                                                                                                                                                                                                                                                                                                                                                                                                                                                                                                                                                                                                                                                                                                                                                                                                                                                                                                                                                                                                                                                                                                                                                                                                                                                                                                                                                                                                                                                                                                                                                                                                                                                                                                                                                                                                                                                                                                                                                                                                                                                                                                                                                                                                                                                                                                                                                                                                                                                                                                                                                                                                                                                                                                                                                                                                                                                                                                                                                                                                                                                                                                                                                                                                                                                                                                                                                                                                                                                                                                                                                                                                                                                                                                                                                                                                                                                                                                                                                                                                                                                                                                                                                                                                                                                                                                                                                                                                                                                                                                                                                                                                                                                                                                                                                                                                                                                                                                                                                                                                                                                                                                                                                                                                                                                                                                                                                                                                        | University Hospitals Of Leicester NHS Trust and DeepSeq Nottingham                                                               | COVID-19 Genomics UK (COG-UK) Consortium                                                                                                                                                                                                                                                                                                  | Christopher Holmes; Christopher Moore; Fei Sang; Joseph Chappell; Johnny Debebe; Jonathan Ball; Julian Tang; Karlie Fallon; Matthew Carlisle; Matthew Loose; Nadine Holmes; Patrick McClure; Paul Bird; Thomas Helmer; Victoria Wright                                                                                                                                                                                                                                                                                                                                                         |
| see above                                                                                                                                                                                                                                                                                                                                                                                                                                                                                                                                                                                                                                                                                                                                                                                                                                                                                                                                                                                                                                                                                                                                                                                                                                                                                                                                                                                                                                                                                                                                                                                                                                                                                                                                                                                                                                                                                                                                                                                                                                                                                                                                                                                                                                                                                                                                                                                                                                                                                                                                                                                                                                                                                                                                                                                                                                                                                                                                                                                                                                                                                                                                                                                                                                                                                                                                                                                                                                                                                                                                                                                                                                                                                                                                                                                                                                                                                                                                                                                                                                                                                                                                                                                                                                                                                                                                                                                                                                                                                                                                                                                                                                                                                                                                                                                                                                                                                                                                                                                                                                                                                                                                                                                                                                                                                                                                                                                                                                                                                                                                                                                                                                                                                                                                                                                                                                                                                                                                                                                                                                              | University Hospitals Of Leicester NHS Trust and DeepSeq Nottingham                                                               | COVID-19 Genomics UK (COG-UK) Consortium                                                                                                                                                                                                                                                                                                  | Christopher Holmes; Christopher Moore; Fei Sang; Joseph Chappell; Johnny Debebe; Jonathan Ball; Julian Tang; Karlie Fallon; Matthew Carlisle; Matthew Loose; Nadine Holmes; Patrick McClure; Paul Bird; Thomas Helmer; Victoria Wright                                                                                                                                                                                                                                                                                                                                                         |
| EPI_ISL_1472386 to 1472407                                                                                                                                                                                                                                                                                                                                                                                                                                                                                                                                                                                                                                                                                                                                                                                                                                                                                                                                                                                                                                                                                                                                                                                                                                                                                                                                                                                                                                                                                                                                                                                                                                                                                                                                                                                                                                                                                                                                                                                                                                                                                                                                                                                                                                                                                                                                                                                                                                                                                                                                                                                                                                                                                                                                                                                                                                                                                                                                                                                                                                                                                                                                                                                                                                                                                                                                                                                                                                                                                                                                                                                                                                                                                                                                                                                                                                                                                                                                                                                                                                                                                                                                                                                                                                                                                                                                                                                                                                                                                                                                                                                                                                                                                                                                                                                                                                                                                                                                                                                                                                                                                                                                                                                                                                                                                                                                                                                                                                                                                                                                                                                                                                                                                                                                                                                                                                                                                                                                                                                                                             | University Hospitals Translational Laboratory (UHTL)                                                                             | University Hospitals Translational Laboratory (UHTL)                                                                                                                                                                                                                                                                                      | Alouani, D.; Sadri, N.; Song, X.                                                                                                                                                                                                                                                                                                                                                                                                                                                                                                                                                               |

|                                                                                                                                                                                                                                                                                                                                                                                                                                                                                                                                                                                                                                                                                                                                                                                                                                                                                                                                                                                                                                                                                                                                                                                                                                                                                                                                                                                                                                                                                                                                                                                                                                                                                                                                                                                                                                                                                                                                                                                                                                                                |                                                                   |                                                                                          |                                                                                                                                                                                                                                                                                                                                                                                                                                                                                                                                                                                                                                                                                                                   |
|----------------------------------------------------------------------------------------------------------------------------------------------------------------------------------------------------------------------------------------------------------------------------------------------------------------------------------------------------------------------------------------------------------------------------------------------------------------------------------------------------------------------------------------------------------------------------------------------------------------------------------------------------------------------------------------------------------------------------------------------------------------------------------------------------------------------------------------------------------------------------------------------------------------------------------------------------------------------------------------------------------------------------------------------------------------------------------------------------------------------------------------------------------------------------------------------------------------------------------------------------------------------------------------------------------------------------------------------------------------------------------------------------------------------------------------------------------------------------------------------------------------------------------------------------------------------------------------------------------------------------------------------------------------------------------------------------------------------------------------------------------------------------------------------------------------------------------------------------------------------------------------------------------------------------------------------------------------------------------------------------------------------------------------------------------------|-------------------------------------------------------------------|------------------------------------------------------------------------------------------|-------------------------------------------------------------------------------------------------------------------------------------------------------------------------------------------------------------------------------------------------------------------------------------------------------------------------------------------------------------------------------------------------------------------------------------------------------------------------------------------------------------------------------------------------------------------------------------------------------------------------------------------------------------------------------------------------------------------|
| EPI_ISL_415454 to 415459, EPI_ISL_415698 to 415708, EPI_ISL_429196 to 429197, EPI_ISL_429199 to 429201, EPI_ISL_429203 to 429204, EPI_ISL_429206 to 429215, EPI_ISL_429217 to 429223                                                                                                                                                                                                                                                                                                                                                                                                                                                                                                                                                                                                                                                                                                                                                                                                                                                                                                                                                                                                                                                                                                                                                                                                                                                                                                                                                                                                                                                                                                                                                                                                                                                                                                                                                                                                                                                                           | University Hospitals                                              | University Hospitals                                                                     |                                                                                                                                                                                                                                                                                                                                                                                                                                                                                                                                                                                                                                                                                                                   |
| see above                                                                                                                                                                                                                                                                                                                                                                                                                                                                                                                                                                                                                                                                                                                                                                                                                                                                                                                                                                                                                                                                                                                                                                                                                                                                                                                                                                                                                                                                                                                                                                                                                                                                                                                                                                                                                                                                                                                                                                                                                                                      | University Hospitals of Geneva Laboratory of Virology             | University Hospitals of Geneva Laboratory of Virology                                    | Laubscher F.                                                                                                                                                                                                                                                                                                                                                                                                                                                                                                                                                                                                                                                                                                      |
| EPI_ISL_1448529 to 1448787, EPI_ISL_1533102 to 1533422, EPI_ISL_1547472 to 1547501                                                                                                                                                                                                                                                                                                                                                                                                                                                                                                                                                                                                                                                                                                                                                                                                                                                                                                                                                                                                                                                                                                                                                                                                                                                                                                                                                                                                                                                                                                                                                                                                                                                                                                                                                                                                                                                                                                                                                                             | University Hospitals of Geneva, Laboratory of Virology            | HUG, Laboratory of Virology and the Health2030 Genome Center                             | Ana Rita Goncalves; Deborah Penet; Emmanouil Dermitzakis; Henri Pegeot; Ioannis Xenarios; Keith Harshman; Laurent Kaiser; Lorenzo Cerutti; Melyssa Elies; Samuel Cordey                                                                                                                                                                                                                                                                                                                                                                                                                                                                                                                                           |
| EPI_ISL_1464109 to 1464113, EPI_ISL_1464588 to 1464589, EPI_ISL_1464591 to 1464600                                                                                                                                                                                                                                                                                                                                                                                                                                                                                                                                                                                                                                                                                                                                                                                                                                                                                                                                                                                                                                                                                                                                                                                                                                                                                                                                                                                                                                                                                                                                                                                                                                                                                                                                                                                                                                                                                                                                                                             | University Medical Center Hamburg Eppendorf                       | Heinrich Pette Institute, Leibniz Institute for Experimental Virology                    | Adam Grundhoff; Alexis Robitaille; Johannes Knobloch; Martin Aepfelbacher; Nicole Fischer; Thomas Günther                                                                                                                                                                                                                                                                                                                                                                                                                                                                                                                                                                                                         |
| EPI_ISL_492181 to 492182                                                                                                                                                                                                                                                                                                                                                                                                                                                                                                                                                                                                                                                                                                                                                                                                                                                                                                                                                                                                                                                                                                                                                                                                                                                                                                                                                                                                                                                                                                                                                                                                                                                                                                                                                                                                                                                                                                                                                                                                                                       | University of Arkansas for Medical Sciences (UAMS)                | Department of Biomedical Informatics, University of Arkansas for Medical Sciences (UAMS) | David W Usseery; Piroon Jenjaroenpun; Thidathip Wongsurawat                                                                                                                                                                                                                                                                                                                                                                                                                                                                                                                                                                                                                                                       |
| EPI_ISL_1469945 to 1469957, EPI_ISL_1469960, EPI_ISL_1469962 to 1469963, EPI_ISL_1520140, EPI_ISL_1520169, EPI_ISL_1520172, EPI_ISL_1520174, EPI_ISL_1520177, EPI_ISL_1520180, EPI_ISL_1520366, EPI_ISL_1520368, EPI_ISL_1520370 to 1520371, EPI_ISL_1520373, EPI_ISL_1520375, EPI_ISL_1520377 to 1520380                                                                                                                                                                                                                                                                                                                                                                                                                                                                                                                                                                                                                                                                                                                                                                                                                                                                                                                                                                                                                                                                                                                                                                                                                                                                                                                                                                                                                                                                                                                                                                                                                                                                                                                                                      | University of Bari Biomedical Sciences and Human Oncology         | University of Bari Biomedical Sciences and Human Oncology                                | Accogli M.; Chironna M.; Loconsole D.; Sallustio A.; sallustio A.                                                                                                                                                                                                                                                                                                                                                                                                                                                                                                                                                                                                                                                 |
| EPI_ISL_444279 to 444312, EPI_ISL_447922 to 447944, EPI_ISL_456666 to 456676, EPI_ISL_473306 to 473450, EPI_ISL_477727 to 477782, EPI_ISL_483880 to 483912, EPI_ISL_484218 to 484220, EPI_ISL_493441 to 493451, EPI_ISL_526287 to 526336, EPI_ISL_529218 to 529223, EPI_ISL_529234 to 529235, EPI_ISL_529237, EPI_ISL_529239, EPI_ISL_529251 to 529252, EPI_ISL_529255 to 529256, EPI_ISL_529262, EPI_ISL_529268, EPI_ISL_529275, EPI_ISL_529277 to 529278, EPI_ISL_529289, EPI_ISL_529291, EPI_ISL_529298, EPI_ISL_529300, EPI_ISL_529312 to 529314, EPI_ISL_529320 to 529340, EPI_ISL_529357 to 529372, EPI_ISL_529384, EPI_ISL_529386, EPI_ISL_529390 to 529406, EPI_ISL_529408, EPI_ISL_529420 to 529421, EPI_ISL_529424 to 529430, EPI_ISL_529434 to 529435, EPI_ISL_529438 to 529444, EPI_ISL_529448, EPI_ISL_529453, EPI_ISL_529461 to 529462, EPI_ISL_529468, EPI_ISL_529470 to 529475, EPI_ISL_529480, EPI_ISL_529482, EPI_ISL_529485, EPI_ISL_529493 to 529497, EPI_ISL_529499, EPI_ISL_529508, EPI_ISL_529512, EPI_ISL_529514 to 529515, EPI_ISL_529517 to 529518, EPI_ISL_529520, EPI_ISL_529522, EPI_ISL_529590 to 529655, EPI_ISL_529661 to 529666, EPI_ISL_529677 to 529686, EPI_ISL_594484 to 594616, EPI_ISL_611550, EPI_ISL_611554, EPI_ISL_611556, EPI_ISL_611608, EPI_ISL_611612, EPI_ISL_611692, EPI_ISL_611696, EPI_ISL_611700, EPI_ISL_611705, EPI_ISL_611776, EPI_ISL_611814, EPI_ISL_611825, EPI_ISL_611847, EPI_ISL_611855 to 611856, EPI_ISL_611858 to 611860, EPI_ISL_612011, EPI_ISL_612015, EPI_ISL_612047, EPI_ISL_612073, EPI_ISL_612207 to 612260, EPI_ISL_1386476 to 1386522, EPI_ISL_1386524 to 1386528, EPI_ISL_1386530 to 1386533, EPI_ISL_1386540 to 1386570, EPI_ISL_1474382 to 1474383, EPI_ISL_1474385 to 1474395, EPI_ISL_1474399 to 1474402, EPI_ISL_1474404, EPI_ISL_1474406, EPI_ISL_1474411 to 1474430, EPI_ISL_1474432 to 1474440, EPI_ISL_1474442, EPI_ISL_1474444, EPI_ISL_1474446 to 1474453, EPI_ISL_1474466 to 1474467, EPI_ISL_1474468 to 1474488, EPI_ISL_1474490 to 1474491, EPI_ISL_1474493 to 1474529 | University of Birmingham                                          | COVID-19 Genomics UK (COG-UK) Consortium                                                 | Alex Richter; Andrew Bosworth; Andrew Bosworth. Queen Elizabeth Hospital: Anna Casey; Andrew D Beggs; Andrew D Beggs // PHE Heartlands Lab; Husam Osman; Andrew D Beggs PHE Heartlands Lab; Husam Osman; Celina M Whalley; Charlotte Poax; Claire McMurray; Husam Osman; Institute of Microbiology; Joanne Stockton; Josh Quick; Kasun Wanigasooriya; Loman Lab; Claire McMurray; Mike Kidd; Nicholas Loman; Nicholas Loman // UHB Lab; Celina M Whalley; Nicholas Loman. University of Birmingham Testing Laboratory; Celina M Whalley; Oliver Pickles; Radoslaw Poplawski; Samuel Nicholls; University of Birmingham Testing Laboratory; Celina M Whalley; University of Birmingham; Claire McMurray; Will Rowe |
| EPI_ISL_447887 to 447896, EPI_ISL_548374, EPI_ISL_548380, EPI_ISL_548382, EPI_ISL_548397, EPI_ISL_548414, EPI_ISL_548435, EPI_ISL_548447, EPI_ISL_548452, EPI_ISL_548458, EPI_ISL_548474, EPI_ISL_548477, EPI_ISL_548479, EPI_ISL_548486, EPI_ISL_548490                                                                                                                                                                                                                                                                                                                                                                                                                                                                                                                                                                                                                                                                                                                                                                                                                                                                                                                                                                                                                                                                                                                                                                                                                                                                                                                                                                                                                                                                                                                                                                                                                                                                                                                                                                                                       | University of California, Davis                                   | Chan-Zuckerberg Biohub                                                                   | CZB Ciliahub Consortium                                                                                                                                                                                                                                                                                                                                                                                                                                                                                                                                                                                                                                                                                           |
| EPI_ISL_476068 to 476077, EPI_ISL_477008 to 477013                                                                                                                                                                                                                                                                                                                                                                                                                                                                                                                                                                                                                                                                                                                                                                                                                                                                                                                                                                                                                                                                                                                                                                                                                                                                                                                                                                                                                                                                                                                                                                                                                                                                                                                                                                                                                                                                                                                                                                                                             | University of Debrecen, Department of Medical Microbiology        | National Laboratory of Virology, Szentágotthai Research Centre                           | Balázs Somogyi; Brigitta Zana; Endre Gábor Tóth; Eszter Csoma; Ferenc Jakab; Gábor Kemenesi                                                                                                                                                                                                                                                                                                                                                                                                                                                                                                                                                                                                                       |
| EPI_ISL_457028 to 457029, EPI_ISL_457031 to 457136, EPI_ISL_457138 to 457147, EPI_ISL_457149 to 457151, EPI_ISL_457153 to 457258, EPI_ISL_471911 to 471992, EPI_ISL_478274 to 478279, EPI_ISL_478281 to 478288, EPI_ISL_512336 to 512341, EPI_ISL_540579, EPI_ISL_540582 to 540583, EPI_ISL_577220 to 577298, EPI_ISL_577346, EPI_ISL_577359 to 577380, EPI_ISL_577544, EPI_ISL_584883 to 584905, EPI_ISL_585533 to 585582, EPI_ISL_611539 to 611540, EPI_ISL_611551 to 611552, EPI_ISL_611599, EPI_ISL_611607, EPI_ISL_611615 to 611620, EPI_ISL_611701 to 611703, EPI_ISL_611836 to 611838, EPI_ISL_611843 to 611844, EPI_ISL_611939 to 611940, EPI_ISL_611976, EPI_ISL_611987, EPI_ISL_612056 to 612057, EPI_ISL_612095 to 612096, EPI_ISL_612118, EPI_ISL_612130, EPI_ISL_612375 to 612393, EPI_ISL_612395 to 612400, EPI_ISL_1474530 to 1474536, EPI_ISL_1474538 to 1474541, EPI_ISL_1474543 to 1474552, EPI_ISL_1474554 to 1474563, EPI_ISL_1474603 to 1474643, EPI_ISL_1545766 to 1545767, EPI_ISL_1545770 to 1545773, EPI_ISL_1545775, EPI_ISL_1545777 to 1545778, EPI_ISL_1545780 to 1545781, EPI_ISL_1545783 to 1545793, EPI_ISL_1545795 to 1545820, EPI_ISL_1545822 to 1545841, EPI_ISL_1545844 to 1545845, EPI_ISL_1545944, EPI_ISL_1545946 to 1545959, EPI_ISL_1545959                                                                                                                                                                                                                                                                                                                                                                                                                                                                                                                                                                                                                                                                                                                                                                            | University of Exeter                                              | COVID-19 Genomics UK (COG-UK) Consortium                                                 | Aaron Jeffries; Audrey Farbos; Ben Temperton; Jane Masoli; Joanna Warwick-Dugdale; Michelle Michelsen; Robyn Manley; Stephen Michell                                                                                                                                                                                                                                                                                                                                                                                                                                                                                                                                                                              |
| EPI_ISL_447903, EPI_ISL_447905, EPI_ISL_455682, EPI_ISL_468719 to 468723                                                                                                                                                                                                                                                                                                                                                                                                                                                                                                                                                                                                                                                                                                                                                                                                                                                                                                                                                                                                                                                                                                                                                                                                                                                                                                                                                                                                                                                                                                                                                                                                                                                                                                                                                                                                                                                                                                                                                                                       | University of Florida                                             | University of Florida                                                                    | Alam; C.-Y.; C.J.; Elbadry; Gibson; J.A.; J.C.; J.G.; J.G. Jr. and Lednický; Lauzardo; Lauzardo; M.; Lednický; M. and Morris; M.A.; M.M.; Morris; Stephenson; Subramaniam, K.; T.B.; Waltzek; Wu                                                                                                                                                                                                                                                                                                                                                                                                                                                                                                                  |
| EPI_ISL_447589                                                                                                                                                                                                                                                                                                                                                                                                                                                                                                                                                                                                                                                                                                                                                                                                                                                                                                                                                                                                                                                                                                                                                                                                                                                                                                                                                                                                                                                                                                                                                                                                                                                                                                                                                                                                                                                                                                                                                                                                                                                 | University of Florida, Lednický Lab                               | University of Florida, Lednický Lab                                                      | Alam; C.J.; Elbadry; Gibson; J.A.; J.C.; J.G. Jr. and Lednický; M.A.; M.M.; Morris; Stephenson; Subramaniam, K.; T.B.; Waltzek                                                                                                                                                                                                                                                                                                                                                                                                                                                                                                                                                                                    |
| EPI_ISL_540442 to 540468, EPI_ISL_1492779 to 1492805, EPI_ISL_1492973 to 1493011, EPI_ISL_1533937 to 1533976                                                                                                                                                                                                                                                                                                                                                                                                                                                                                                                                                                                                                                                                                                                                                                                                                                                                                                                                                                                                                                                                                                                                                                                                                                                                                                                                                                                                                                                                                                                                                                                                                                                                                                                                                                                                                                                                                                                                                   | University of Liège COVID-19 testing center                       | GIGA Medical Genomics                                                                    | Bouchra Boujelma; Cécile Meex; Emmanuel Adré; Francis Bureau; Keith Durkin; Laurent Gillet; Marc Van Ranst; Maria Artes; Marie-Pierre Hayette; Nathalie Renotte; Pierrette Melin; Raphaël Boreux; Sébastien Bontemps; Vincent Bouas; Wouter Coppeters                                                                                                                                                                                                                                                                                                                                                                                                                                                             |
| EPI_ISL_1490186                                                                                                                                                                                                                                                                                                                                                                                                                                                                                                                                                                                                                                                                                                                                                                                                                                                                                                                                                                                                                                                                                                                                                                                                                                                                                                                                                                                                                                                                                                                                                                                                                                                                                                                                                                                                                                                                                                                                                                                                                                                | University of Ljubljana, Faculty of Veterinary Medicine           | Institute of Microbiology and Immunology, Faculty of Medicine, University of Ljubljana   | Ana Koevar; Brigita Slavec; Jožko Ranik; Mario Poljak; Matic Brvar; Milan Matko; Miša Korva; Olga Zorman Rojs; Samo Zakotnik; Tatjana Avši - Županc; Tomaž Mark Zorec                                                                                                                                                                                                                                                                                                                                                                                                                                                                                                                                             |
| EPI_ISL_479759 to 479775, EPI_ISL_513265 to 513293, EPI_ISL_527381 to 527399, EPI_ISL_534693 to 534698, EPI_ISL_602306 to 602328, EPI_ISL_605147                                                                                                                                                                                                                                                                                                                                                                                                                                                                                                                                                                                                                                                                                                                                                                                                                                                                                                                                                                                                                                                                                                                                                                                                                                                                                                                                                                                                                                                                                                                                                                                                                                                                                                                                                                                                                                                                                                               | University of Miami Immunology and Histocompatibility Laboratory  | University of Miami Immunology and Histocompatibility Laboratory                         | Emilio Margolles-Clark; MD; PhD; PhD and Phillip Ruiz                                                                                                                                                                                                                                                                                                                                                                                                                                                                                                                                                                                                                                                             |
| EPI_ISL_484709 to 484806, EPI_ISL_487229 to 487230, EPI_ISL_495563 to 495596, EPI_ISL_578082 to 578167, EPI_ISL_578169 to 578174, EPI_ISL_578185, EPI_ISL_583249 to 583425, EPI_ISL_584095 to 584097, EPI_ISL_590699 to 590752, EPI_ISL_596569 to 596626, EPI_ISL_610048 to 610117, EPI_ISL_610246 to 610248, EPI_ISL_1404249 to 1404373, EPI_ISL_1406251 to 1406271, EPI_ISL_1491390 to 1491514, EPI_ISL_1493040 to 1493058                                                                                                                                                                                                                                                                                                                                                                                                                                                                                                                                                                                                                                                                                                                                                                                                                                                                                                                                                                                                                                                                                                                                                                                                                                                                                                                                                                                                                                                                                                                                                                                                                                   | University of Michigan Clinical Microbiology Laboratory           | Lauring Lab, University of Michigan, Department of Microbiology and Immunology           | Valesano; Valesano et al.                                                                                                                                                                                                                                                                                                                                                                                                                                                                                                                                                                                                                                                                                         |
| EPI_ISL_1527029 to 1527090, EPI_ISL_1527237 to 1527264, EPI_ISL_1527399 to 1527443                                                                                                                                                                                                                                                                                                                                                                                                                                                                                                                                                                                                                                                                                                                                                                                                                                                                                                                                                                                                                                                                                                                                                                                                                                                                                                                                                                                                                                                                                                                                                                                                                                                                                                                                                                                                                                                                                                                                                                             | University of Mississippi Medical Center, Department of Pathology | University of Mississippi Medical Center, Molecular and Genomics Core Facility           | Ashley C. Johnson; D. Ashley Robinson; Ithiel J. Frame; Krishna K. Ayyalomasayajula; Michael R. Garrett                                                                                                                                                                                                                                                                                                                                                                                                                                                                                                                                                                                                           |
| EPI_ISL_1508853 to 1508889, EPI_ISL_1531745 to 1531775                                                                                                                                                                                                                                                                                                                                                                                                                                                                                                                                                                                                                                                                                                                                                                                                                                                                                                                                                                                                                                                                                                                                                                                                                                                                                                                                                                                                                                                                                                                                                                                                                                                                                                                                                                                                                                                                                                                                                                                                         | University of Oregon COVID-19 MAP Laboratory                      | University of Oregon Genomics and Cell Characterization Core Facility (GC3F)             | Ariana White; Douglas Turnbull; Jason Carriere; Jeff Bishop                                                                                                                                                                                                                                                                                                                                                                                                                                                                                                                                                                                                                                                       |
| EPI_ISL_476897                                                                                                                                                                                                                                                                                                                                                                                                                                                                                                                                                                                                                                                                                                                                                                                                                                                                                                                                                                                                                                                                                                                                                                                                                                                                                                                                                                                                                                                                                                                                                                                                                                                                                                                                                                                                                                                                                                                                                                                                                                                 | University of South Carolina Functional Genomics Core             | University of South Carolina Functional Genomics Core                                    | Michael Shtutman                                                                                                                                                                                                                                                                                                                                                                                                                                                                                                                                                                                                                                                                                                  |
| EPI_ISL_476078, EPI_ISL_477615 to 477625                                                                                                                                                                                                                                                                                                                                                                                                                                                                                                                                                                                                                                                                                                                                                                                                                                                                                                                                                                                                                                                                                                                                                                                                                                                                                                                                                                                                                                                                                                                                                                                                                                                                                                                                                                                                                                                                                                                                                                                                                       | University of Szeged, Institute of Clinical Microbiology          | National Laboratory of Virology, Szentágotthai Research Centre                           | Balázs Somogyi; Brigitta Zana; Endre Gábor Tóth; Ferenc Jakab; Gábor Kemenesi; Terhes Gabriella                                                                                                                                                                                                                                                                                                                                                                                                                                                                                                                                                                                                                   |
| EPI_ISL_485001 to 485002, EPI_ISL_485388 to 485396                                                                                                                                                                                                                                                                                                                                                                                                                                                                                                                                                                                                                                                                                                                                                                                                                                                                                                                                                                                                                                                                                                                                                                                                                                                                                                                                                                                                                                                                                                                                                                                                                                                                                                                                                                                                                                                                                                                                                                                                             | University of Ulsan College of Medicine and Asan Medical Center   | University of Ulsan College of Medicine and Asan Medical Center                          | Heungsup Sung; Jaewoong Lee; Jina Lee; Jiwon Jung; Jongsik Chun; Kihyun Lee; Kuenyool Park; Kyu-Hwa Hur; Mauricio Chaita; Mi-Na Kim; Seok-Hwan Yoon; Sung-Han Kim; and Hae Kyung Lee                                                                                                                                                                                                                                                                                                                                                                                                                                                                                                                              |
| EPI_ISL_524444                                                                                                                                                                                                                                                                                                                                                                                                                                                                                                                                                                                                                                                                                                                                                                                                                                                                                                                                                                                                                                                                                                                                                                                                                                                                                                                                                                                                                                                                                                                                                                                                                                                                                                                                                                                                                                                                                                                                                                                                                                                 | University of Washington Virology Lab                             | Fred Hutchinson Cancer Research Center                                                   | Greninger, A.; Jerome, K.; Roychoudhury, P.                                                                                                                                                                                                                                                                                                                                                                                                                                                                                                                                                                                                                                                                       |
| EPI_ISL_524437 to 524443                                                                                                                                                                                                                                                                                                                                                                                                                                                                                                                                                                                                                                                                                                                                                                                                                                                                                                                                                                                                                                                                                                                                                                                                                                                                                                                                                                                                                                                                                                                                                                                                                                                                                                                                                                                                                                                                                                                                                                                                                                       | University of Washington Virology Lab                             | Laboratory Medicine, University of Washington                                            | Greninger, A.; Jerome, K.; Roychoudhury, P.                                                                                                                                                                                                                                                                                                                                                                                                                                                                                                                                                                                                                                                                       |
| EPI_ISL_500500 to 500502, EPI_ISL_501083 to 501164, EPI_ISL_513632 to 513638, EPI_ISL_515270 to 515286                                                                                                                                                                                                                                                                                                                                                                                                                                                                                                                                                                                                                                                                                                                                                                                                                                                                                                                                                                                                                                                                                                                                                                                                                                                                                                                                                                                                                                                                                                                                                                                                                                                                                                                                                                                                                                                                                                                                                         | University of Washington Virology Lab                             | University of Washington Virology Lab                                                    | Alexander Greninger; Amin Addetia; Hong Xie; Keith R Jerome; Lasata Shrestha; Meei-Li Huang; Pavitra Roychoudhury; Trung Nguyen; Victoria M Rachleff                                                                                                                                                                                                                                                                                                                                                                                                                                                                                                                                                              |
| EPI_ISL_529155 to 529161, EPI_ISL_529170, EPI_ISL_529200                                                                                                                                                                                                                                                                                                                                                                                                                                                                                                                                                                                                                                                                                                                                                                                                                                                                                                                                                                                                                                                                                                                                                                                                                                                                                                                                                                                                                                                                                                                                                                                                                                                                                                                                                                                                                                                                                                                                                                                                       | University of Washington, Laboratory Medicine                     | University of Washington, Laboratory Medicine                                            | Greninger, A.; Jerome, K.; Roychoudhury, P.                                                                                                                                                                                                                                                                                                                                                                                                                                                                                                                                                                                                                                                                       |
| EPI_ISL_418809                                                                                                                                                                                                                                                                                                                                                                                                                                                                                                                                                                                                                                                                                                                                                                                                                                                                                                                                                                                                                                                                                                                                                                                                                                                                                                                                                                                                                                                                                                                                                                                                                                                                                                                                                                                                                                                                                                                                                                                                                                                 | University of Wisconsin - Madison: Influenza Research Institute   | University of Wisconsin Madison, AIDS Vaccine Research Laboratories                      | Gage Moreno; Katarina Braun; Peter Halfmann; et al.                                                                                                                                                                                                                                                                                                                                                                                                                                                                                                                                                                                                                                                               |
| EPI_ISL_416489, EPI_ISL_416491 to 416492, EPI_ISL_416523, EPI_ISL_417200 to 417204, EPI_ISL_417504 to 417510, EPI_ISL_417512 to 417517, EPI_ISL_421283 to 421336, EPI_ISL_421338 to 421343, EPI_ISL_425142 to 425176, EPI_ISL_427427 to 427462, EPI_ISL_428252 to 428345, EPI_ISL_428724 to 428732, EPI_ISL_428935 to 428936, EPI_ISL_434607 to 434615, EPI_ISL_436564 to 436640, EPI_ISL_450700 to 450722, EPI_ISL_480351 to 480413, EPI_ISL_484807 to 485000, EPI_ISL_491299 to 491426, EPI_ISL_495460 to 495509, EPI_ISL_509799 to 509998, EPI_ISL_510524 to 510525, EPI_ISL_516432 to 516549, EPI_ISL_522881 to 522939, EPI_ISL_527794 to 527808, EPI_ISL_536572 to 536655, EPI_ISL_536658 to 536784, EPI_ISL_536786 to 536787, EPI_ISL_541540 to 541550, EPI_ISL_541566 to 541567, EPI_ISL_541569 to 541648, EPI_ISL_547581 to 547583, EPI_ISL_605405 to 605501, EPI_ISL_605504 to 605779,                                                                                                                                                                                                                                                                                                                                                                                                                                                                                                                                                                                                                                                                                                                                                                                                                                                                                                                                                                                                                                                                                                                                                                |                                                                   |                                                                                          |                                                                                                                                                                                                                                                                                                                                                                                                                                                                                                                                                                                                                                                                                                                   |

|                                                                                                                                                                                                                                                                                                                                                                                                                                                                                                                                                                                                                                                                                                                                                                                                                                                                                                                                                                                                                                                                                                                                                                                                                                                                                                                                                                                                                                                  |                                                                                                                                                                                                                                                                                                                                                                                                                                                                                                                                                                                                                                                                                                                                                                                |                                                                                                                                       |                                                                                                                                                                                                          |                                                                                                                                                                                                                                                                                                                                                                 |
|--------------------------------------------------------------------------------------------------------------------------------------------------------------------------------------------------------------------------------------------------------------------------------------------------------------------------------------------------------------------------------------------------------------------------------------------------------------------------------------------------------------------------------------------------------------------------------------------------------------------------------------------------------------------------------------------------------------------------------------------------------------------------------------------------------------------------------------------------------------------------------------------------------------------------------------------------------------------------------------------------------------------------------------------------------------------------------------------------------------------------------------------------------------------------------------------------------------------------------------------------------------------------------------------------------------------------------------------------------------------------------------------------------------------------------------------------|--------------------------------------------------------------------------------------------------------------------------------------------------------------------------------------------------------------------------------------------------------------------------------------------------------------------------------------------------------------------------------------------------------------------------------------------------------------------------------------------------------------------------------------------------------------------------------------------------------------------------------------------------------------------------------------------------------------------------------------------------------------------------------|---------------------------------------------------------------------------------------------------------------------------------------|----------------------------------------------------------------------------------------------------------------------------------------------------------------------------------------------------------|-----------------------------------------------------------------------------------------------------------------------------------------------------------------------------------------------------------------------------------------------------------------------------------------------------------------------------------------------------------------|
| EPI_ISL_1403624 to 1403642, EPI_ISL_1403646 to 1403664, EPI_ISL_1403810 to 1403826, EPI_ISL_1404106 to 1404129, EPI_ISL_1422216 to 1422236, EPI_ISL_1493065, EPI_ISL_1493110 to 1493122, EPI_ISL_1493125 to 1493144                                                                                                                                                                                                                                                                                                                                                                                                                                                                                                                                                                                                                                                                                                                                                                                                                                                                                                                                                                                                                                                                                                                                                                                                                              | see above                                                                                                                                                                                                                                                                                                                                                                                                                                                                                                                                                                                                                                                                                                                                                                      | University of Wisconsin-Madison AIDS Vaccine Research Laboratories                                                                    | University of Wisconsin-Madison AIDS Vaccine Research Laboratories                                                                                                                                       | Gage Moreno; Katarina Braun; et al. AIDS Vaccine Research Laboratories                                                                                                                                                                                                                                                                                          |
| EPI_ISL_536656 to 536657, EPI_ISL_536785, EPI_ISL_541551 to 541565, EPI_ISL_541568                                                                                                                                                                                                                                                                                                                                                                                                                                                                                                                                                                                                                                                                                                                                                                                                                                                                                                                                                                                                                                                                                                                                                                                                                                                                                                                                                               | EPI_ISL_1424397 to 1424465                                                                                                                                                                                                                                                                                                                                                                                                                                                                                                                                                                                                                                                                                                                                                     | University of Wisconsin-Madison Campus AIDS Vaccine Research Laboratories                                                             | University of Wisconsin-Madison AIDS Vaccine Research Laboratories                                                                                                                                       | Gage Moreno; Katarina Braun; et al. AIDS Vaccine Research Laboratories                                                                                                                                                                                                                                                                                          |
| EPI_ISL_1394753 to 1394755, EPI_ISL_1394758, EPI_ISL_1499628 to 1499644, EPI_ISL_1520098                                                                                                                                                                                                                                                                                                                                                                                                                                                                                                                                                                                                                                                                                                                                                                                                                                                                                                                                                                                                                                                                                                                                                                                                                                                                                                                                                         | EPI_ISL_1404435, EPI_ISL_1436355, EPI_ISL_1436357 to 1436358, EPI_ISL_1436360, EPI_ISL_1510565 to 1510582                                                                                                                                                                                                                                                                                                                                                                                                                                                                                                                                                                                                                                                                      | Università Federico II - Dipartimento di scienze mediche traslazionali - Napoli                                                       | TIGEM                                                                                                                                                                                                    | Antonio Girmaldi Patrizia Annunziata Francesco Panariello Michele Cennamo Valentina Bouche Chiara Colantuono Lucio Di Filippo Mariano Fiorenza Anna Manfredi Marcello Salvi Giuseppe Portella Andrea Ballabio Davide Cacchiarelli                                                                                                                               |
| EPI_ISL_1439369, EPI_ISL_1439371, EPI_ISL_1439377, EPI_ISL_1439381, EPI_ISL_1439383 to 1439384, EPI_ISL_1439400                                                                                                                                                                                                                                                                                                                                                                                                                                                                                                                                                                                                                                                                                                                                                                                                                                                                                                                                                                                                                                                                                                                                                                                                                                                                                                                                  | EPI_ISL_1434366 to 1434369, EPI_ISL_1434371 to 1434400, EPI_ISL_1434402 to 1434404, EPI_ISL_1434406, EPI_ISL_1434408 to 1434417, EPI_ISL_1434419, EPI_ISL_1434423, EPI_ISL_1434429, EPI_ISL_1434431, EPI_ISL_1434433, EPI_ISL_1434435, EPI_ISL_1439708 to 1439725, EPI_ISL_1439727 to 1439731, EPI_ISL_1439735 to 1439736, EPI_ISL_1439738 to 1439740, EPI_ISL_1439742 to 1439743, EPI_ISL_1439745 to 1439746, EPI_ISL_1440732 to 1440739, EPI_ISL_1440741 to 1440756, EPI_ISL_1440758 to 1440770, EPI_ISL_1440772 to 1440773, EPI_ISL_1440775 to 1440777, EPI_ISL_1440779 to 1440780, EPI_ISL_1440782 to 1440790, EPI_ISL_1440792 to 1440805, EPI_ISL_1440807 to 1440809, EPI_ISL_1440811 to 1440845, EPI_ISL_1440847 to 1440852, EPI_ISL_1440854, EPI_ISL_1440856 to 1440871 | Università degli Studi di Perugia                                                                                                     | Istituto Zooprofilattico Sperimentale dell'Abruzzo e Molise "G. Caporale"                                                                                                                                | Ancora M; Calistri P; Camilioni B; Cammà C; Caporale M; Curini V; Delli Compagni E; Di Domenico M; Di Lollo Valeria; Di Pasquale A; Lorusso A; Mangone I; Marcacci M; Mencacci A; Puglia I; Rinaldi A; Savini G; Scialabba S                                                                                                                                    |
| see above                                                                                                                                                                                                                                                                                                                                                                                                                                                                                                                                                                                                                                                                                                                                                                                                                                                                                                                                                                                                                                                                                                                                                                                                                                                                                                                                                                                                                                        | see above                                                                                                                                                                                                                                                                                                                                                                                                                                                                                                                                                                                                                                                                                                                                                                      | Università di Parma, Laboratorio di Igiene e Sanità Pubblica                                                                          | Istituto Zooprofilattico Sperimentale della Lombardia e dell'Emilia Romagna (IZSLER), Risk Analysis and Genomic Epidemiology Unit                                                                        | Erika Scaltriti; Iliaria Mengoni; Licia Veronesi; Maria Eugenia Colucci; Marina Morganti; Paola Affanni; Stefano Pongolini                                                                                                                                                                                                                                      |
| see above                                                                                                                                                                                                                                                                                                                                                                                                                                                                                                                                                                                                                                                                                                                                                                                                                                                                                                                                                                                                                                                                                                                                                                                                                                                                                                                                                                                                                                        | see above                                                                                                                                                                                                                                                                                                                                                                                                                                                                                                                                                                                                                                                                                                                                                                      | Universitätsklinikum Bonn - Institut für Medizinische Mikrobiologie Immunologie und Parasitologie + Institut für Virologie            | Robert Koch Institute                                                                                                                                                                                    |                                                                                                                                                                                                                                                                                                                                                                 |
| EPI_ISL_1435905, EPI_ISL_1435907, EPI_ISL_1435910, EPI_ISL_1435912, EPI_ISL_1435914, EPI_ISL_1435916, EPI_ISL_1435918, EPI_ISL_1435921, EPI_ISL_1435923, EPI_ISL_1435925, EPI_ISL_1435927, EPI_ISL_1435929, EPI_ISL_1435932, EPI_ISL_1435934, EPI_ISL_1435936, EPI_ISL_1435938, EPI_ISL_1435940, EPI_ISL_1435943, EPI_ISL_1435945, EPI_ISL_1435947, EPI_ISL_1435949, EPI_ISL_1435951, EPI_ISL_1435953, EPI_ISL_1435955, EPI_ISL_1435957, EPI_ISL_1435959, EPI_ISL_1435961                                                                                                                                                                                                                                                                                                                                                                                                                                                                                                                                                                                                                                                                                                                                                                                                                                                                                                                                                                        | see above                                                                                                                                                                                                                                                                                                                                                                                                                                                                                                                                                                                                                                                                                                                                                                      | Universitätsklinikum Münster Institut für Virologie                                                                                   | Robert Koch Institute                                                                                                                                                                                    |                                                                                                                                                                                                                                                                                                                                                                 |
| see above                                                                                                                                                                                                                                                                                                                                                                                                                                                                                                                                                                                                                                                                                                                                                                                                                                                                                                                                                                                                                                                                                                                                                                                                                                                                                                                                                                                                                                        | see above                                                                                                                                                                                                                                                                                                                                                                                                                                                                                                                                                                                                                                                                                                                                                                      | Universitätsklinikum Schleswig-Holstein (standortübergreifend inkl. Kiel) - Institut für Klinische Chemie und Laboratoriumsdiagnostik | Robert Koch Institute                                                                                                                                                                                    |                                                                                                                                                                                                                                                                                                                                                                 |
| EPI_ISL_1439387 to 1439388, EPI_ISL_1439390, EPI_ISL_1439395, EPI_ISL_1439397, EPI_ISL_1439399, EPI_ISL_1439401, EPI_ISL_1439405, EPI_ISL_1439408, EPI_ISL_1439423, EPI_ISL_1439425                                                                                                                                                                                                                                                                                                                                                                                                                                                                                                                                                                                                                                                                                                                                                                                                                                                                                                                                                                                                                                                                                                                                                                                                                                                              | see above                                                                                                                                                                                                                                                                                                                                                                                                                                                                                                                                                                                                                                                                                                                                                                      | Universitätsklinikum des Saarlandes - Institut für Virologie                                                                          | Robert Koch Institute                                                                                                                                                                                    |                                                                                                                                                                                                                                                                                                                                                                 |
| EPI_ISL_1538625, EPI_ISL_1539122                                                                                                                                                                                                                                                                                                                                                                                                                                                                                                                                                                                                                                                                                                                                                                                                                                                                                                                                                                                                                                                                                                                                                                                                                                                                                                                                                                                                                 | EPI_ISL_1393888 to 1393896                                                                                                                                                                                                                                                                                                                                                                                                                                                                                                                                                                                                                                                                                                                                                     | Uniwersytecki Szpital Kliniczny im. N.Barlickiego w odzi                                                                              | 1. National Institute of Public Health - National Institute of Hygiene; 2. Eurofins Genomics Europe Sequencing GmbH                                                                                      | ECDC COVID-19 WGS support team; Eurofins Genomics Europe Sequencing Team; Gierczyki Rafa; Sadkowska-Todys Magorzata; Wokowicz Tomasz; Zacharczuk Katarzyna                                                                                                                                                                                                      |
| EPI_ISL_434643, EPI_ISL_434655, EPI_ISL_434665, EPI_ISL_445227, EPI_ISL_445230 to 445231, EPI_ISL_445239, EPI_ISL_450812, EPI_ISL_450826 to 450828, EPI_ISL_475514, EPI_ISL_475516 to 475517, EPI_ISL_475526 to 475527                                                                                                                                                                                                                                                                                                                                                                                                                                                                                                                                                                                                                                                                                                                                                                                                                                                                                                                                                                                                                                                                                                                                                                                                                           | see above                                                                                                                                                                                                                                                                                                                                                                                                                                                                                                                                                                                                                                                                                                                                                                      | Universytet Medyczny im. Karola Marcinkowskiego w Poznaniu; Laboratorium UCA_Covid-19                                                 | 1. National Institute of Public Health - National Institute of Hygiene; 2. Eurofins Genomics Europe Sequencing GmbH                                                                                      | ECDC COVID-19 WGS support team; Eurofins Genomics Europe Sequencing Team; Gierczyki Rafa; Sadkowska-Todys Magorzata; Wokowicz Tomasz; Zacharczuk Katarzyna                                                                                                                                                                                                      |
| see above                                                                                                                                                                                                                                                                                                                                                                                                                                                                                                                                                                                                                                                                                                                                                                                                                                                                                                                                                                                                                                                                                                                                                                                                                                                                                                                                                                                                                                        | see above                                                                                                                                                                                                                                                                                                                                                                                                                                                                                                                                                                                                                                                                                                                                                                      | Uppsala Narakut Aleris                                                                                                                | The Public Health Agency of Sweden                                                                                                                                                                       | Anna Risberg; Anna-Malin Linde; Annika Nilsson; Karin Tegmark-Wisell; Maria Lind Karlberg; Mattias Haukland; Mia Brytting; Olov Svartstrom; Oskar Karlsson Lindsjo; Reza Advani; Sandra Broddegsson; Theresa Enkirch                                                                                                                                            |
| EPI_ISL_469076, EPI_ISL_475118 to 475119, EPI_ISL_475151, EPI_ISL_582776 to 582784, EPI_ISL_615076 to 615078                                                                                                                                                                                                                                                                                                                                                                                                                                                                                                                                                                                                                                                                                                                                                                                                                                                                                                                                                                                                                                                                                                                                                                                                                                                                                                                                     | see above                                                                                                                                                                                                                                                                                                                                                                                                                                                                                                                                                                                                                                                                                                                                                                      | Uppsala klinisk mikrobiologi                                                                                                          | The Public Health Agency of Sweden                                                                                                                                                                       | Anna Risberg; Anna-Malin Linde; Karin Tegmark-Wisell; Maria Lind Karlberg; Mattias Haukland; Mia Brytting; Olov Svartstrom; Oskar Karlsson Lindsjo; Petra Edquist; Reza Advani; Sandra Broddegsson; Shamam Muradrasoli                                                                                                                                          |
| EPI_ISL_509689 to 509694, EPI_ISL_509707 to 509709, EPI_ISL_510160                                                                                                                                                                                                                                                                                                                                                                                                                                                                                                                                                                                                                                                                                                                                                                                                                                                                                                                                                                                                                                                                                                                                                                                                                                                                                                                                                                               | see above                                                                                                                                                                                                                                                                                                                                                                                                                                                                                                                                                                                                                                                                                                                                                                      | Utah Public Health Laboratory                                                                                                         | Pathogen Discovery, Respiratory Viruses Branch, Division of Viral Diseases, Centers for Disease Control and Prevention                                                                                   | Anna Uehara; Clinton Paden; Clinton R. Paden; Haibin Wang; Jing Zhang; Kerrie Franzen; Krista Queen; Mary L. Killian; Suxiang Tong; Yan Li; Ying Tao                                                                                                                                                                                                            |
| EPI_ISL_415539, EPI_ISL_415541 to 415544, EPI_ISL_417026 to 417028, EPI_ISL_417958 to 417960, EPI_ISL_417964, EPI_ISL_417966, EPI_ISL_417970 to 417971, EPI_ISL_417973 to 417974, EPI_ISL_417976 to 417977, EPI_ISL_418961 to 418967, EPI_ISL_420803 to 420825, EPI_ISL_421560 to 421563, EPI_ISL_430019 to 430062, EPI_ISL_435348 to 435393, EPI_ISL_436901 to 436925, EPI_ISL_436927 to 436938, EPI_ISL_449801 to 449838, EPI_ISL_450538 to 450557, EPI_ISL_450559 to 450568, EPI_ISL_450838, EPI_ISL_452153 to 452177, EPI_ISL_454707 to 454731, EPI_ISL_470541 to 470567, EPI_ISL_470656 to 470746, EPI_ISL_475725 to 475744, EPI_ISL_483018 to 483033, EPI_ISL_487193 to 487228, EPI_ISL_487244 to 487268, EPI_ISL_493004 to 493052, EPI_ISL_493054 to 493060, EPI_ISL_493087 to 493124, EPI_ISL_498630 to 498635, EPI_ISL_498637 to 498690, EPI_ISL_509527 to 509563, EPI_ISL_509567 to 509600, EPI_ISL_513640 to 513706, EPI_ISL_522254 to 522348, EPI_ISL_524074 to 524425, EPI_ISL_524767 to 524781, EPI_ISL_524802 to 524872, EPI_ISL_524904 to 525117, EPI_ISL_525119 to 525188, EPI_ISL_525207 to 525351, EPI_ISL_529201 to 529207, EPI_ISL_560833 to 560925, EPI_ISL_575034 to 575288, EPI_ISL_591281 to 591315, EPI_ISL_593999 to 594117, EPI_ISL_594248 to 594276, EPI_ISL_594394 to 594446, EPI_ISL_602931 to 602955, EPI_ISL_605148 to 605404, EPI_ISL_611485 to 611513, EPI_ISL_1403828 to 1404105, EPI_ISL_1483075 to 1483206 | see above                                                                                                                                                                                                                                                                                                                                                                                                                                                                                                                                                                                                                                                                                                                                                                      | Utah Public Health Laboratory                                                                                                         | David R. Hillyard; E. Susan Slechta; Erin L. Young; Erin Young; Heidi Butz; Jeffrey B. Stevenson; Kelly F. Oakeson; Kelly Oakeson; Melanie A. Mallory; Michael T. Pyne; Salika M. Shakir; Tara Gallagher |                                                                                                                                                                                                                                                                                                                                                                 |
| EPI_ISL_577598, EPI_ISL_577600                                                                                                                                                                                                                                                                                                                                                                                                                                                                                                                                                                                                                                                                                                                                                                                                                                                                                                                                                                                                                                                                                                                                                                                                                                                                                                                                                                                                                   | see above                                                                                                                                                                                                                                                                                                                                                                                                                                                                                                                                                                                                                                                                                                                                                                      | Utah Public Health Laboratory, Utah Public Health Laboratory Infectious Disease submission group                                      | Utah Public Health Laboratory                                                                                                                                                                            | Butz, H.; E.L.; Hirschi, B.; Oakeson, K.; Sangster, A.; Young                                                                                                                                                                                                                                                                                                   |
| EPI_ISL_512775 to 512784, EPI_ISL_576363 to 576370, EPI_ISL_577599, EPI_ISL_577601 to 577603, EPI_ISL_602554 to 602558, EPI_ISL_603049 to 603081, EPI_ISL_620407 to 620410                                                                                                                                                                                                                                                                                                                                                                                                                                                                                                                                                                                                                                                                                                                                                                                                                                                                                                                                                                                                                                                                                                                                                                                                                                                                       | see above                                                                                                                                                                                                                                                                                                                                                                                                                                                                                                                                                                                                                                                                                                                                                                      | Utah Public Health Laboratory, Utah Public Health Laboratory Infectious Disease submission group                                      | Utah Public Health Laboratory, Utah Public Health Laboratory Infectious Disease submission group                                                                                                         | Butz; Butz, H.; E.L.; H.A.; Hirschi, B.; K.F.; Oakeson; Oakeson, K.; Sangster, A.; Young                                                                                                                                                                                                                                                                        |
| EPI_ISL_513941 to 513942, EPI_ISL_605931                                                                                                                                                                                                                                                                                                                                                                                                                                                                                                                                                                                                                                                                                                                                                                                                                                                                                                                                                                                                                                                                                                                                                                                                                                                                                                                                                                                                         | see above                                                                                                                                                                                                                                                                                                                                                                                                                                                                                                                                                                                                                                                                                                                                                                      | Utah Public Health Laboratory, Utah Public Health Laboratory Infectious Disease submission group                                      | Utah Public Health Laboratory, Utah Public Health Laboratory Infectious Disease submission group                                                                                                         | Butz; E.L. and Oakeson, K.; H.A.; Young                                                                                                                                                                                                                                                                                                                         |
| EPI_ISL_1504026, EPI_ISL_1506127                                                                                                                                                                                                                                                                                                                                                                                                                                                                                                                                                                                                                                                                                                                                                                                                                                                                                                                                                                                                                                                                                                                                                                                                                                                                                                                                                                                                                 | see above                                                                                                                                                                                                                                                                                                                                                                                                                                                                                                                                                                                                                                                                                                                                                                      | VA Medical Center                                                                                                                     | Los Angeles County PHL                                                                                                                                                                                   | P. Hemarajata et al.                                                                                                                                                                                                                                                                                                                                            |
| EPI_ISL_1446729 to 1446730, EPI_ISL_1446732, EPI_ISL_1447045, EPI_ISL_1528275 to 1528283                                                                                                                                                                                                                                                                                                                                                                                                                                                                                                                                                                                                                                                                                                                                                                                                                                                                                                                                                                                                                                                                                                                                                                                                                                                                                                                                                         | see above                                                                                                                                                                                                                                                                                                                                                                                                                                                                                                                                                                                                                                                                                                                                                                      | VA-Division of Consolidated Laboratory Services                                                                                       | Centers for Disease Control and Prevention Division of Viral Diseases, Pathogen Discovery                                                                                                                | Alison Laufer Halpin; Ben L. Rambo-Martin; Clinton R. Paden; Dakota Howard; Darlene Wagner; Dave Wentworth; Dhvani Batra; Jasmine Padilla; Justin Lee; Katie Dillon; Krista Queen; Kristen Knipe; Kristine Lacek; Mark Burroughs; Matthew Scherer; Mili Sheth; Peter Cook; Sam Shepard; Sarah Nobles; Shoshona Le; Suxiang Tong; Vivien Dugan; Yvette Unoarumhi |
| EPI_ISL_424891 to 424894, EPI_ISL_424907, EPI_ISL_540435, EPI_ISL_576174                                                                                                                                                                                                                                                                                                                                                                                                                                                                                                                                                                                                                                                                                                                                                                                                                                                                                                                                                                                                                                                                                                                                                                                                                                                                                                                                                                         | see above                                                                                                                                                                                                                                                                                                                                                                                                                                                                                                                                                                                                                                                                                                                                                                      | VA-Division of Consolidated Laboratory Services                                                                                       | Pathogen Discovery, Respiratory Viruses Branch, Division of Viral Diseases, Centers for Disease Control and Prevention                                                                                   | Alison S. Laufer Halpin; Anna Montmayeur; Anna Uehara; Brian Lynch; Christopher A. Elkins; Clinton R. Paden; Haibin Wang; Jing Zhang; Krista Queen; Mary S. Keckler; Peter Cook; Rachel Marine; Suxiang Tong; Yan Li; Ying Tao                                                                                                                                  |
| EPI_ISL_452236                                                                                                                                                                                                                                                                                                                                                                                                                                                                                                                                                                                                                                                                                                                                                                                                                                                                                                                                                                                                                                                                                                                                                                                                                                                                                                                                                                                                                                   | see above                                                                                                                                                                                                                                                                                                                                                                                                                                                                                                                                                                                                                                                                                                                                                                      | VC Sorgenfrimottagningen                                                                                                              | The Public Health Agency of Sweden                                                                                                                                                                       | Anna Risberg; Anna-Malin Linde; Karin Tegmark-Wisell; Lisa Esbjornsson Klemendz; Maria Lind Karlberg; Mia Brytting; Olov Svartstrom; Oskar Karlsson Lindsjo; Theresa Enkirch                                                                                                                                                                                    |
| EPI_ISL_451960                                                                                                                                                                                                                                                                                                                                                                                                                                                                                                                                                                                                                                                                                                                                                                                                                                                                                                                                                                                                                                                                                                                                                                                                                                                                                                                                                                                                                                   | see above                                                                                                                                                                                                                                                                                                                                                                                                                                                                                                                                                                                                                                                                                                                                                                      | VI-US Virgin Islands Department of Health                                                                                             | Centers for Disease Control and Prevention                                                                                                                                                               | B. and Tong, S.; Bankamp; C.R.; Lee, J.; Li, Y.; Marine, R.; Montmayeur, A.; Paden; Padilla, J.; Queen, K.; Tao, Y.; Uehara, A.; Wang, H.; Weiner, Z.; Zhang, J.                                                                                                                                                                                                |
| EPI_ISL_1528517 to 1528520                                                                                                                                                                                                                                                                                                                                                                                                                                                                                                                                                                                                                                                                                                                                                                                                                                                                                                                                                                                                                                                                                                                                                                                                                                                                                                                                                                                                                       | see above                                                                                                                                                                                                                                                                                                                                                                                                                                                                                                                                                                                                                                                                                                                                                                      | VI-US Virgin Islands Department of Health                                                                                             | Centers for Disease Control and Prevention Division of Viral Diseases, Pathogen Discovery                                                                                                                | Alison Laufer Halpin; Ben L. Rambo-Martin; Clinton R. Paden; Dakota Howard; Darlene Wagner; Dave Wentworth; Dhvani Batra; Jasmine Padilla; Justin Lee; Katie Dillon; Krista Queen; Kristen Knipe; Kristine Lacek; Mark Burroughs; Matthew Scherer; Mili Sheth; Peter Cook; Sam Shepard; Sarah Nobles; Shoshona Le; Suxiang Tong; Vivien Dugan; Yvette Unoarumhi |
| EPI_ISL_450804 to 450806, EPI_ISL_452119, EPI_ISL_452121 to 452123, EPI_ISL_452137 to 452138, EPI_ISL_454643 to 454644, EPI_ISL_454647 to 454652, EPI_ISL_464167                                                                                                                                                                                                                                                                                                                                                                                                                                                                                                                                                                                                                                                                                                                                                                                                                                                                                                                                                                                                                                                                                                                                                                                                                                                                                 | see above                                                                                                                                                                                                                                                                                                                                                                                                                                                                                                                                                                                                                                                                                                                                                                      | VI-US Virgin Islands Department of Health                                                                                             | Pathogen Discovery, Respiratory Viruses Branch, Division of Viral Diseases, Centers for Disease Control and Prevention                                                                                   | Alison S. Laufer Halpin; Anna Montmayeur; Anna Uehara; Bettina Bankamp; Christopher A. Elkins; Clinton R. Paden; Haibin Wang; Jasmine Padilla; Jing Zhang; Justin Lee; Krista Queen; Mary S. Keckler; Rachel Marine; Suxiang Tong; Yan Li; Ying Tao; Zachary Weiner                                                                                             |

|                                                                                                                                                                                                                                                                                                                                                                                                                                                                                                                                                                |                                                                          |                                                                                                                            |                                                                                                                                                                                                                                                                                                                                                                                                                                                                                                                                                                                   |
|----------------------------------------------------------------------------------------------------------------------------------------------------------------------------------------------------------------------------------------------------------------------------------------------------------------------------------------------------------------------------------------------------------------------------------------------------------------------------------------------------------------------------------------------------------------|--------------------------------------------------------------------------|----------------------------------------------------------------------------------------------------------------------------|-----------------------------------------------------------------------------------------------------------------------------------------------------------------------------------------------------------------------------------------------------------------------------------------------------------------------------------------------------------------------------------------------------------------------------------------------------------------------------------------------------------------------------------------------------------------------------------|
| EPI_ISL_515950 to 515953, EPI_ISL_515963 to 515964, EPI_ISL_515966 to 515967, EPI_ISL_516076 to 516078                                                                                                                                                                                                                                                                                                                                                                                                                                                         | VICTORIA HOSPITAL                                                        | Department of Neurovirology, National Institute of Mental Health and Neuroscience (NIMHANS)                                | Anita Desai; Chitra Pattabiraman; Harsha PK; Manjunatha Venkataswamy; Pramada Prasad; Ravi Vasanthapuram; Risha Rasheed; Shafeeq S Hameed; Vijayalakshmi Reddy                                                                                                                                                                                                                                                                                                                                                                                                                    |
| EPI_ISL_1469573                                                                                                                                                                                                                                                                                                                                                                                                                                                                                                                                                | VIGILANCIA EM SAUDE NH                                                   | Epiclin                                                                                                                    | Ana Paula Muterle; Carolina Comerlato; Eliana Mária Da Ros Wendland; Fernando Hayashi Sant'Anna; Janira Prichula; Juliana Comerlato                                                                                                                                                                                                                                                                                                                                                                                                                                               |
| EPI_ISL_1445229 to 1445237, EPI_ISL_1445249 to 1445251, EPI_ISL_1445254 to 1445261, EPI_ISL_1445263, EPI_ISL_1445265, EPI_ISL_1445268, EPI_ISL_1445270 to 1445271                                                                                                                                                                                                                                                                                                                                                                                              | VIGILANCIA EPIDEMIOLOGICA                                                | Instituto Butantan / Mendelics                                                                                             | Antonio Jorge Martins; Bibiana Santos; Claudia Renata dos Santos Barros; David Schlesinger; Debora Botequiu Moretti; Dimas Tadeu Covas; Elaine Cristina Marqueze; Elaine Vieira dos Santos; Erika Freitas; Evandra Strazza Rodrigues; Flavia Aburjaile; José Salvatore Leister Patané; João Paulo Kitajima; Luiz Carlos Junior de Alcantara; Maria Carolina Elias; Marta Giovanetti; Rafael dos Santos Bezerra; Raul Machado Neto; Ricardo Haddad; Rodrigo Tocantins Calado.; Sandra Coccuzo Sampaio; Simone Kashima; Svetoslav Nanev Slavor; Vagner Fonseca; Vincent Louis Viala |
| EPI_ISL_1502534 to 1502537                                                                                                                                                                                                                                                                                                                                                                                                                                                                                                                                     | VILLA NOVECENTO S.R.L LANCIANO(CHIETI)                                   | Istituto Zooprofilattico Sperimentale dell'Abruzzo e Molise "G. Caporale"                                                  | Ancora M.; Calistri P.; Cammà C.; Caporale M.; Curini V.; Delli Compagni E.; Di Domenico M.; Di Lollo Valeria; Di Pasquale A.; Lorusso A.; Mangone I.; Marcacci M.; Puglia I.; Rinaldi A.; Savini G.; Scialabba S                                                                                                                                                                                                                                                                                                                                                                 |
| EPI_ISL_1424469, EPI_ISL_1443337 to 1443343                                                                                                                                                                                                                                                                                                                                                                                                                                                                                                                    | VIROLOGY LABORATORY-CHU NICE                                             | VIROLOGY LABORATORY-CHU NICE                                                                                               | Geraldine Gonfrier; Sebastien Vitale; Sebastien Vitale-Virginie Flahou-Geraldine Gonfrier-Valerie Giordanengo; Valerie Giordanengo                                                                                                                                                                                                                                                                                                                                                                                                                                                |
| EPI_ISL_1446667 to 1446670, EPI_ISL_1446672 to 1446675, EPI_ISL_1446716 to 1446717, EPI_ISL_1446733, EPI_ISL_1528386                                                                                                                                                                                                                                                                                                                                                                                                                                           | VT Dept. of Health Laboratory                                            | Centers for Disease Control and Prevention Division of Viral Diseases, Pathogen Discovery                                  | Alison Laufer Halpin; Ben L. Rambo-Martin; Clinton R. Paden; Dakota Howard; Darlene Wagner; Dave Wentworth; Dhvani Batra; Jasmine Padilla; Justin Lee; Katie Dillon; Krista Queen; Kristen Knipe; Kristine Lacek; Mark Burroughs; Matthew Schmeer; Mili Sheth; Peter Cook; Sam Shepard; Sarah Nobles; Shoshona Le; Suxiang Tong; Vivien Dugan; Yvette Unoarumhi                                                                                                                                                                                                                   |
| EPI_ISL_447846                                                                                                                                                                                                                                                                                                                                                                                                                                                                                                                                                 | VT Dept. of Health Laboratory                                            | Pathogen Discovery, Respiratory Viruses Branch, Division of Viral Diseases, Centers for Disease Control and Prevention     | Alison S. Laufer Halpin; Anna Uehara; Christopher A. Elkins; Clinton R. Paden; Haibin Wang; Jasmine Padilla; Jing Zhang; Justin Lee; Krista Queen; Mary S. Keckler; Suxiang Tong; Yan Li; Ying Tao                                                                                                                                                                                                                                                                                                                                                                                |
| EPI_ISL_424366                                                                                                                                                                                                                                                                                                                                                                                                                                                                                                                                                 | Vaccine Research, Development and Application Center, Erciyes University | Gen Era Diagnostics Inc.                                                                                                   | Alper Iseri; Aykut Ozdarendeli; Can Holyavkin; Günsu Aydın; Hazel Yetiskin; Muhammet Ali Uygut; Shaikh Terkis Islam Pavel; Zehra B Dursun; Ihami Celik                                                                                                                                                                                                                                                                                                                                                                                                                            |
| EPI_ISL_1534381                                                                                                                                                                                                                                                                                                                                                                                                                                                                                                                                                | Valkenberg Hospital wc VBH                                               | NHLS/UCT                                                                                                                   | Arash Iranzadeh; Bruna Galvao; Carolyn Williamson; Deelan Doolabh; Diana Hardie; Emmanuel S.J; Innocent Mudau; Kruger Marais; Lynn Tyers; Marvin Hsiao; Stephen Korsman; Tegally H; de Oliveira T                                                                                                                                                                                                                                                                                                                                                                                 |
| EPI_ISL_413486                                                                                                                                                                                                                                                                                                                                                                                                                                                                                                                                                 | Valley Medical Center                                                    | University of Washington Virology Lab                                                                                      | Alexander Greninger; Arun Nalla; Hong Xie; Keith Jerome; Pavitra Roychoudhury                                                                                                                                                                                                                                                                                                                                                                                                                                                                                                     |
| EPI_ISL_1534361                                                                                                                                                                                                                                                                                                                                                                                                                                                                                                                                                | Van Wyksdorp Sat Clinic wc VWS                                           | NHLS/UCT                                                                                                                   | Arash Iranzadeh; Bruna Galvao; Carolyn Williamson; Deelan Doolabh; Diana Hardie; Emmanuel S.J; Innocent Mudau; Kruger Marais; Lynn Tyers; Marvin Hsiao; Stephen Korsman; Tegally H; de Oliveira T                                                                                                                                                                                                                                                                                                                                                                                 |
| EPI_ISL_1483211 to 1483212, EPI_ISL_1483214 to 1483220, EPI_ISL_1483222 to 1483229, EPI_ISL_1483235                                                                                                                                                                                                                                                                                                                                                                                                                                                            | Vanderbilt University                                                    | Pathogen Discovery, Respiratory Viruses Branch, Division of Viral Diseases, Centers for Disease Control and Prevention     | Anna Kelleher; Anna Uehara; Brian Lynch; Clinton R. Paden; Haibin Wang; Han Jia Justin Ng; Jing Zhang; Krista Queen; Peter Cook; Suxiang Tong; Yan Li; Ying Tao                                                                                                                                                                                                                                                                                                                                                                                                                   |
| EPI_ISL_1533438, EPI_ISL_1533536 to 1533538                                                                                                                                                                                                                                                                                                                                                                                                                                                                                                                    | Vanderbilt University Medical Center                                     | Genomics and Discovery, Respiratory Viruses Branch, Division of Viral Diseases, Centers for Disease Control and Prevention | Adam Retchless; Anna Kelleher; Anna Montmayeur; Anna Uehara; Brian Lynch; Clinton R. Paden; Haibin Wang; Han Jia Justin Ng; Jing Zhang; Justin Lee; Krista Queen; Mark Burroughs; Peter Cook; Rachel Marine; Suxiang Tong; Yan Li; Ying Tao                                                                                                                                                                                                                                                                                                                                       |
| EPI_ISL_1483236 to 1483238                                                                                                                                                                                                                                                                                                                                                                                                                                                                                                                                     | Vanderbilt University Medical Center                                     | Pathogen Discovery, Respiratory Viruses Branch, Division of Viral Diseases, Centers for Disease Control and Prevention     | Anna Kelleher; Anna Uehara; Brian Lynch; Clinton R. Paden; Haibin Wang; Han Jia Justin Ng; Jing Zhang; Krista Queen; Peter Cook; Suxiang Tong; Yan Li; Ying Tao                                                                                                                                                                                                                                                                                                                                                                                                                   |
| EPI_ISL_1534354, EPI_ISL_1534409                                                                                                                                                                                                                                                                                                                                                                                                                                                                                                                               | Vanguard CHC wc VGC                                                      | NHLS/UCT                                                                                                                   | Arash Iranzadeh; Bruna Galvao; Carolyn Williamson; Deelan Doolabh; Diana Hardie; Emmanuel S.J; Innocent Mudau; Kruger Marais; Lynn Tyers; Marvin Hsiao; Stephen Korsman; Tegally H; de Oliveira T                                                                                                                                                                                                                                                                                                                                                                                 |
| EPI_ISL_445233, EPI_ISL_475520, EPI_ISL_475566                                                                                                                                                                                                                                                                                                                                                                                                                                                                                                                 | Vardcentralen Brinken                                                    | The Public Health Agency of Sweden                                                                                         | Agnes Wigh; Anna Risberg; Anna-Malin Linde; Karin Tegmark-Wisell; Maria Lind Karlberg; Mattias Haukland; Mia Brytting; Olov Svartstrom; Oskar Karlsson Lindsjo; Reza Advani; Sandra Broddesson; Theresa Enkirch                                                                                                                                                                                                                                                                                                                                                                   |
| EPI_ISL_1402743, EPI_ISL_1445978, EPI_ISL_1445982, EPI_ISL_1445989, EPI_ISL_1445992, EPI_ISL_1446000 to 1446001, EPI_ISL_1446007, EPI_ISL_1446015, EPI_ISL_1446018, EPI_ISL_1446026, EPI_ISL_1446056, EPI_ISL_1446058 to 1446059, EPI_ISL_1499686 to 1499688, EPI_ISL_1527466, EPI_ISL_1527473, EPI_ISL_1527475, EPI_ISL_1527488 to 1527491, EPI_ISL_1527497, EPI_ISL_1527503 to 1527504, EPI_ISL_1527506, EPI_ISL_1527508, EPI_ISL_1527522, EPI_ISL_1527528 to 1527529, EPI_ISL_1531634 to 1531643                                                            | Vault Health                                                             | Minnesota Department of Health, Public Health Laboratory                                                                   | Alexandra Lorentz; Jacob Garfin; Matt Plumb; and Xiong Wang                                                                                                                                                                                                                                                                                                                                                                                                                                                                                                                       |
| EPI_ISL_468462 to 468505, EPI_ISL_548346, EPI_ISL_548348 to 548349, EPI_ISL_548352 to 548356, EPI_ISL_548358, EPI_ISL_548362, EPI_ISL_548364, EPI_ISL_548367 to 548368, EPI_ISL_548372, EPI_ISL_548376, EPI_ISL_548390, EPI_ISL_548398, EPI_ISL_548402, EPI_ISL_548406, EPI_ISL_548409 to 548410, EPI_ISL_548427, EPI_ISL_548430, EPI_ISL_548442 to 548443, EPI_ISL_548450, EPI_ISL_548455, EPI_ISL_548459, EPI_ISL_548461, EPI_ISL_548471, EPI_ISL_548473, EPI_ISL_548475 to 548476, EPI_ISL_548480 to 548481, EPI_ISL_548483, EPI_ISL_548487, EPI_ISL_548489 | Ventura County Public Health Lab                                         | Chan-Zuckerberg Biohub                                                                                                     | CZB Clahub Consortium                                                                                                                                                                                                                                                                                                                                                                                                                                                                                                                                                             |
| EPI_ISL_549051, EPI_ISL_549087, EPI_ISL_549173 to 549174, EPI_ISL_590885 to 590888, EPI_ISL_590919 to 590920, EPI_ISL_590982 to 590983, EPI_ISL_1402937, EPI_ISL_1402945 to 1402946, EPI_ISL_1402948, EPI_ISL_1402971, EPI_ISL_1402974                                                                                                                                                                                                                                                                                                                         | Vestfold Hospital, Toensberg Department of Microbiology                  | Norwegian Institute of Public Health, Department of Virology                                                               | Atiya R Ali; Debech Nadia; Engebretsen Serina Beate; Garcia Llorente Ignacio; Hilde Elshaug; Hilde Synnøve Vollan; Hilde Vollan; Jon Bråte; Kamilla Heddeland Instefjord; Karoline Bragstad; Kathrine Stene-Johansen; Marie Paulsen Madsen; Olav Hungnes; Pedersen Benedikte Nevjen; Rasmus Riis Kopperud                                                                                                                                                                                                                                                                         |
| EPI_ISL_1490274, EPI_ISL_1490332, EPI_ISL_1490336 to 1490337, EPI_ISL_1490339, EPI_ISL_1490341, EPI_ISL_1490343, EPI_ISL_1490346, EPI_ISL_1490348 to 1490349, EPI_ISL_1490354, EPI_ISL_1490370, EPI_ISL_1490373 to 1490374, EPI_ISL_1490376, EPI_ISL_1490379, EPI_ISL_1490404, EPI_ISL_1490407, EPI_ISL_1490465, EPI_ISL_1490473, EPI_ISL_1490475, EPI_ISL_1490512, EPI_ISL_1490566, EPI_ISL_1490569, EPI_ISL_1490586, EPI_ISL_1490599, EPI_ISL_1490616, EPI_ISL_1547515 to 1547516, EPI_ISL_1547518 to 1547519                                                | Vestfold Hospital, Toensberg Department of Microbiology                  | Norwegian Institute of Public Health, Department of Virology                                                               | Atiya R Ali; Debech Nadia; Engebretsen Serina Beate; Garcia Llorente Ignacio; Hilde Elshaug; Hilde Vollan; Jon Bråte; Kamilla Heddeland Instefjord; Karoline Bragstad; Kathrine Stene-Johansen; Marie Paulsen Madsen; Olav Hungnes; Pedersen Benedikte Nevjen; Rasmus Riis Kopperud                                                                                                                                                                                                                                                                                               |
| EPI_ISL_420137                                                                                                                                                                                                                                                                                                                                                                                                                                                                                                                                                 | Vestfold Hospital, Tonsberg Department of Microbiology                   | Norwegian Institute of Public Health, Department of Virology                                                               | Hilde Elshaug; Kamilla Heddeland Instefjord; Karoline Bragstad; Kathrine Stene-Johansen; Olav Hungnes                                                                                                                                                                                                                                                                                                                                                                                                                                                                             |
| EPI_ISL_430840                                                                                                                                                                                                                                                                                                                                                                                                                                                                                                                                                 | Veterans Memorial Medical Center                                         | Research Institute for Tropical Medicine                                                                                   | Bautista; Brunker, K.; C.S.; C.T.; D.L.; Demetria; E.S.; F.G.M.; I.A.P.; Manalo; Medado; Mercado; O.J.T.; Onza; Polotan                                                                                                                                                                                                                                                                                                                                                                                                                                                           |
| EPI_ISL_437435 to 437436                                                                                                                                                                                                                                                                                                                                                                                                                                                                                                                                       | Veterinary Specialized Institue Kraljevo                                 | Veterinary Specialized Institue Kraljevo                                                                                   | Claudio L Alfonso; Dejan Vidanovic. Bojana Tesovic; Jeremy Volkening; Kazimir Matovic; Marko Dmitric; Milanko Sekler; Nikola Vaskovic; Tamas Petrovic; Zoran Debeljak                                                                                                                                                                                                                                                                                                                                                                                                             |
| EPI_ISL_582524 to 582529, EPI_ISL_582531 to 582534                                                                                                                                                                                                                                                                                                                                                                                                                                                                                                             | Veterinary Specialized Institute "Kraljevo", Serbia                      | Veterinary Specialized Institute "Kraljevo", Serbia                                                                        | Afonso, C.; Banovic Djeri, B.; Jankovic, M.; Jovanovic, T.; Knezevic, A.; Petrovic, T.; Sekler, M.; Tesovic, B.; Vidanovic, D.; Volkening, J.                                                                                                                                                                                                                                                                                                                                                                                                                                     |
| EPI_ISL_454795, EPI_ISL_455480                                                                                                                                                                                                                                                                                                                                                                                                                                                                                                                                 | Veterinary Specialized Institute Kraljevo                                | Veterinary Specialized Institute Kraljevo                                                                                  | Banovic Djeri, B.; C.L.; Debeljak, Z.; Dmitric, M.; J. and Alfonso; Matovic, K.; Petrovic, T.; Sekler, M.; Tesovic, B.; Vaskovic, N.; Vidanovic, D.; Volkening                                                                                                                                                                                                                                                                                                                                                                                                                    |
| EPI_ISL_486385 to 486386, EPI_ISL_486392, EPI_ISL_486400, EPI_ISL_486404, EPI_ISL_583915                                                                                                                                                                                                                                                                                                                                                                                                                                                                       | Victoria Hospital                                                        | Department of Neurovirology, National Institute of Mental Health and Neuroscience (NIMHANS)                                | Anita Desai; Chitra Pattabiraman; Harsha PK; Manjunatha Venkataswamy; Pramada Prasad; Ravi Vasanthapuram; Risha Rasheed; Shafeeq S Hameed; Vijayalakshmi Reddy                                                                                                                                                                                                                                                                                                                                                                                                                    |
| EPI_ISL_1534261, EPI_ISL_1534263, EPI_ISL_1534265, EPI_ISL_1534282, EPI_ISL_1534287, EPI_ISL_1534289, EPI_ISL_1534292, EPI_ISL_1534295, EPI_ISL_1534300, EPI_ISL_1534303, EPI_ISL_1534305, EPI_ISL_1534312, EPI_ISL_1534337, EPI_ISL_1534353, EPI_ISL_1534386, EPI_ISL_1534420, EPI_ISL_1534430                                                                                                                                                                                                                                                                | Victoria Hospital wc VHW                                                 | NHLS/UCT                                                                                                                   | Arash Iranzadeh; Bruna Galvao; Carolyn Williamson; Deelan Doolabh; Diana Hardie; Emmanuel S.J; Innocent Mudau; Kruger Marais; Lynn Tyers; Marvin Hsiao; Stephen Korsman; Tegally H; de Oliveira T                                                                                                                                                                                                                                                                                                                                                                                 |
| EPI_ISL_434647 to 434648, EPI_ISL_445223, EPI_ISL_450807, EPI_ISL_452233                                                                                                                                                                                                                                                                                                                                                                                                                                                                                       | Victoria Vard och Hals                                                   | The Public Health Agency of Sweden                                                                                         | Anna Risberg; Anna-Malin Linde; Karin Tegmark-Wisell; Maria Lind Karlberg; Mia Brytting; Olov Svartstrom; Oskar Karlsson Lindsjo; Sarah Henriksson; Theresa Enkirch                                                                                                                                                                                                                                                                                                                                                                                                               |
| EPI_ISL_471471                                                                                                                                                                                                                                                                                                                                                                                                                                                                                                                                                 | Victorian Infectious Diseases Reference Laboratory                       | Victorian Infectious Diseases Reference Laboratory                                                                         | Antonia da Costa, E.; Barreto, I.; Cally, L.; Canisia, D.; Dakh, F.; Dolores de Jesus da Costa, M.; Douglas; Druce, J.; Francis, J.; Freeman, K.; Jayanti Pereira Tilman, A.; M.B.; Marr, I.; N. Meumann, E.; N. and Baird, R.; Sait, M.; Salles de Sousa, A.; Schultz; Seemann, T.; Sherry; Soares da Silva, E.; Wapling, J.; Ximenes, J.                                                                                                                                                                                                                                        |
| EPI_ISL_426637 to 426687, EPI_ISL_426869 to 426882, EPI_ISL_426923 to 427042, EPI_ISL_427044 to 427053, EPI_ISL_427079 to 427132, EPI_ISL_427134 to 427147, EPI_ISL_427150 to 427160, EPI_ISL_436111 to 436132, EPI_ISL_456410 to 456477, EPI_ISL_456480 to 456492, EPI_ISL_456499 to 456500, EPI_ISL_456502 to 456505, EPI_ISL_456508 to 456517, EPI_ISL_456519 to 456593, EPI_ISL_456613 to 456622, EPI_ISL_456625 to 456655                                                                                                                                 |                                                                          |                                                                                                                            |                                                                                                                                                                                                                                                                                                                                                                                                                                                                                                                                                                                   |



|                                                                                                                                                                                                                                                                                                                                                                                                                                                                                                                                                                                                                                                                                                                                                                                                                                                                                                                                                                                                                                                                                                                                                                                                                                                                                                                                                                                                                                                                                                                                                                                                                                                                                                                                                                                                                                                                                                                                                                                                                                                                                                                                                                                                                                                                                                                                                                                                                                                                                                                                                                                                                                                                                                                                                                                                                                                                                                                                                                                                                                                                                                                                                                                                                                                                                                                                                                                                                                                                                                                                                                                                                                                                                                                                                                                                                                                                                                                                                                                                                                                                                                                                                                                                                                                                                                                                                                                                                                                                                                                                                                                                                                                                                                                                                                                                                                                                                                                                                                                                                                                                                                                                                                                                                                                                                                                                                                                                                                                                                                                                                                                                                                                                                                                                                                                                                                                                                                                                                                                                                                                                                                                                                                                                                                                                                                                                                                                                                                                                                                                                                                                                                                                                                                                                                                                                                                                                                                                                                                                                                                                                                                                                                                                                                                                                                                                                                                                                                                                                                                                                                                                                                                                                                                                                                                                                                                                                                                                                                                                                                                                                                                                                                                                                                                                                                                                                                                                                                                                                                                                                                                                                                                                                                                                                                                                                                                                                                                                                                                                                                                                                                                          |                                                                   |                                                                                                                                                                                                                                                                                            |                                                                                                                                                                                                          |
|----------------------------------------------------------------------------------------------------------------------------------------------------------------------------------------------------------------------------------------------------------------------------------------------------------------------------------------------------------------------------------------------------------------------------------------------------------------------------------------------------------------------------------------------------------------------------------------------------------------------------------------------------------------------------------------------------------------------------------------------------------------------------------------------------------------------------------------------------------------------------------------------------------------------------------------------------------------------------------------------------------------------------------------------------------------------------------------------------------------------------------------------------------------------------------------------------------------------------------------------------------------------------------------------------------------------------------------------------------------------------------------------------------------------------------------------------------------------------------------------------------------------------------------------------------------------------------------------------------------------------------------------------------------------------------------------------------------------------------------------------------------------------------------------------------------------------------------------------------------------------------------------------------------------------------------------------------------------------------------------------------------------------------------------------------------------------------------------------------------------------------------------------------------------------------------------------------------------------------------------------------------------------------------------------------------------------------------------------------------------------------------------------------------------------------------------------------------------------------------------------------------------------------------------------------------------------------------------------------------------------------------------------------------------------------------------------------------------------------------------------------------------------------------------------------------------------------------------------------------------------------------------------------------------------------------------------------------------------------------------------------------------------------------------------------------------------------------------------------------------------------------------------------------------------------------------------------------------------------------------------------------------------------------------------------------------------------------------------------------------------------------------------------------------------------------------------------------------------------------------------------------------------------------------------------------------------------------------------------------------------------------------------------------------------------------------------------------------------------------------------------------------------------------------------------------------------------------------------------------------------------------------------------------------------------------------------------------------------------------------------------------------------------------------------------------------------------------------------------------------------------------------------------------------------------------------------------------------------------------------------------------------------------------------------------------------------------------------------------------------------------------------------------------------------------------------------------------------------------------------------------------------------------------------------------------------------------------------------------------------------------------------------------------------------------------------------------------------------------------------------------------------------------------------------------------------------------------------------------------------------------------------------------------------------------------------------------------------------------------------------------------------------------------------------------------------------------------------------------------------------------------------------------------------------------------------------------------------------------------------------------------------------------------------------------------------------------------------------------------------------------------------------------------------------------------------------------------------------------------------------------------------------------------------------------------------------------------------------------------------------------------------------------------------------------------------------------------------------------------------------------------------------------------------------------------------------------------------------------------------------------------------------------------------------------------------------------------------------------------------------------------------------------------------------------------------------------------------------------------------------------------------------------------------------------------------------------------------------------------------------------------------------------------------------------------------------------------------------------------------------------------------------------------------------------------------------------------------------------------------------------------------------------------------------------------------------------------------------------------------------------------------------------------------------------------------------------------------------------------------------------------------------------------------------------------------------------------------------------------------------------------------------------------------------------------------------------------------------------------------------------------------------------------------------------------------------------------------------------------------------------------------------------------------------------------------------------------------------------------------------------------------------------------------------------------------------------------------------------------------------------------------------------------------------------------------------------------------------------------------------------------------------------------------------------------------------------------------------------------------------------------------------------------------------------------------------------------------------------------------------------------------------------------------------------------------------------------------------------------------------------------------------------------------------------------------------------------------------------------------------------------------------------------------------------------------------------------------------------------------------------------------------------------------------------------------------------------------------------------------------------------------------------------------------------------------------------------------------------------------------------------------------------------------------------------------------------------------------------------------------------------------------------------------------------------------------------------------------------------------------------------------------------------------------------------------------------------------------------------------------------------------------------------------------------------------------------------------------------------------------------------------------------------------------------------------------------------------------------------------------------------------------------------------------------------------------------------------------------|-------------------------------------------------------------------|--------------------------------------------------------------------------------------------------------------------------------------------------------------------------------------------------------------------------------------------------------------------------------------------|----------------------------------------------------------------------------------------------------------------------------------------------------------------------------------------------------------|
| see above                                                                                                                                                                                                                                                                                                                                                                                                                                                                                                                                                                                                                                                                                                                                                                                                                                                                                                                                                                                                                                                                                                                                                                                                                                                                                                                                                                                                                                                                                                                                                                                                                                                                                                                                                                                                                                                                                                                                                                                                                                                                                                                                                                                                                                                                                                                                                                                                                                                                                                                                                                                                                                                                                                                                                                                                                                                                                                                                                                                                                                                                                                                                                                                                                                                                                                                                                                                                                                                                                                                                                                                                                                                                                                                                                                                                                                                                                                                                                                                                                                                                                                                                                                                                                                                                                                                                                                                                                                                                                                                                                                                                                                                                                                                                                                                                                                                                                                                                                                                                                                                                                                                                                                                                                                                                                                                                                                                                                                                                                                                                                                                                                                                                                                                                                                                                                                                                                                                                                                                                                                                                                                                                                                                                                                                                                                                                                                                                                                                                                                                                                                                                                                                                                                                                                                                                                                                                                                                                                                                                                                                                                                                                                                                                                                                                                                                                                                                                                                                                                                                                                                                                                                                                                                                                                                                                                                                                                                                                                                                                                                                                                                                                                                                                                                                                                                                                                                                                                                                                                                                                                                                                                                                                                                                                                                                                                                                                                                                                                                                                                                                                                                | Victorian Infectious Diseases Reference Laboratory (VIDRL)        | Microbiological Diagnostic Unit Public Health Laboratory and Victorian Infectious Diseases Reference Laboratory, Doherty Institute                                                                                                                                                         | Caly L.; Druce J.; Sait, M.; Schultz M.; Seemann T.; Sherry, N.                                                                                                                                          |
| EPI_ISL_436688 to 436689                                                                                                                                                                                                                                                                                                                                                                                                                                                                                                                                                                                                                                                                                                                                                                                                                                                                                                                                                                                                                                                                                                                                                                                                                                                                                                                                                                                                                                                                                                                                                                                                                                                                                                                                                                                                                                                                                                                                                                                                                                                                                                                                                                                                                                                                                                                                                                                                                                                                                                                                                                                                                                                                                                                                                                                                                                                                                                                                                                                                                                                                                                                                                                                                                                                                                                                                                                                                                                                                                                                                                                                                                                                                                                                                                                                                                                                                                                                                                                                                                                                                                                                                                                                                                                                                                                                                                                                                                                                                                                                                                                                                                                                                                                                                                                                                                                                                                                                                                                                                                                                                                                                                                                                                                                                                                                                                                                                                                                                                                                                                                                                                                                                                                                                                                                                                                                                                                                                                                                                                                                                                                                                                                                                                                                                                                                                                                                                                                                                                                                                                                                                                                                                                                                                                                                                                                                                                                                                                                                                                                                                                                                                                                                                                                                                                                                                                                                                                                                                                                                                                                                                                                                                                                                                                                                                                                                                                                                                                                                                                                                                                                                                                                                                                                                                                                                                                                                                                                                                                                                                                                                                                                                                                                                                                                                                                                                                                                                                                                                                                                                                                                 | Victorian Infectious Diseases Reference Laboratory (VIDRL)        | Microbiological Diagnostic Unit Public Health Laboratory and Victorian Infectious Diseases Reference Laboratory, The Peter Doherty Institute for Infection & Immunity                                                                                                                      | Caly L.; Druce J.; Sait, M.; Schultz M.; Seemann T.; Sherry, N.                                                                                                                                          |
| EPI_ISL_430473 to 430493, EPI_ISL_430498 to 430630, EPI_ISL_430637 to 430638, EPI_ISL_430688 to 430714                                                                                                                                                                                                                                                                                                                                                                                                                                                                                                                                                                                                                                                                                                                                                                                                                                                                                                                                                                                                                                                                                                                                                                                                                                                                                                                                                                                                                                                                                                                                                                                                                                                                                                                                                                                                                                                                                                                                                                                                                                                                                                                                                                                                                                                                                                                                                                                                                                                                                                                                                                                                                                                                                                                                                                                                                                                                                                                                                                                                                                                                                                                                                                                                                                                                                                                                                                                                                                                                                                                                                                                                                                                                                                                                                                                                                                                                                                                                                                                                                                                                                                                                                                                                                                                                                                                                                                                                                                                                                                                                                                                                                                                                                                                                                                                                                                                                                                                                                                                                                                                                                                                                                                                                                                                                                                                                                                                                                                                                                                                                                                                                                                                                                                                                                                                                                                                                                                                                                                                                                                                                                                                                                                                                                                                                                                                                                                                                                                                                                                                                                                                                                                                                                                                                                                                                                                                                                                                                                                                                                                                                                                                                                                                                                                                                                                                                                                                                                                                                                                                                                                                                                                                                                                                                                                                                                                                                                                                                                                                                                                                                                                                                                                                                                                                                                                                                                                                                                                                                                                                                                                                                                                                                                                                                                                                                                                                                                                                                                                                                   | Victorian Infectious Diseases Reference Laboratory (VIDRL)        | Microbiological Diagnostic Unit Public Health Laboratory and Victorian Infectious Diseases Reference Laboratory, The Peter Doherty Institute for Infection and Immunity                                                                                                                    | Caly L.; Druce J.; Sait, M.; Schultz M.; Seemann T.; Sherry, N.                                                                                                                                          |
| <p>EPI_ISL_480557, EPI_ISL_480563 to 480572, EPI_ISL_480574, EPI_ISL_480576 to 480577, EPI_ISL_480579, EPI_ISL_480581 to 480586, EPI_ISL_480588 to 480595, EPI_ISL_480597 to 480599, EPI_ISL_480604 to 480611, EPI_ISL_480621 to 480622, EPI_ISL_480624 to 480686, EPI_ISL_480688 to 480690, EPI_ISL_480698 to 480744, EPI_ISL_480764 to 480766, EPI_ISL_480778 to 480781, EPI_ISL_518081 to 518092, EPI_ISL_518098 to 518117, EPI_ISL_518119 to 518230, EPI_ISL_518239 to 518240, EPI_ISL_518244 to 518249, EPI_ISL_518388 to 518401, EPI_ISL_518424 to 518471, EPI_ISL_518723, EPI_ISL_518976, EPI_ISL_518981 to 519023, EPI_ISL_519025 to 519046, EPI_ISL_519048 to 519051, EPI_ISL_519256 to 519326, EPI_ISL_519385, EPI_ISL_519519 to 519521, EPI_ISL_519948 to 519950, EPI_ISL_520181 to 520200, EPI_ISL_520202 to 520214, EPI_ISL_520249 to 520307, EPI_ISL_520315 to 520329, EPI_ISL_520331 to 520391, EPI_ISL_520745 to 520764, EPI_ISL_520791 to 520838, EPI_ISL_520840 to 520843, EPI_ISL_520864 to 520928, EPI_ISL_521102 to 521152, EPI_ISL_521270 to 521277, EPI_ISL_521315 to 521408, EPI_ISL_521410 to 521449, EPI_ISL_521463 to 521561, EPI_ISL_521840 to 521859, EPI_ISL_521864 to 521868, EPI_ISL_521870 to 521886, EPI_ISL_521889 to 521905, EPI_ISL_521912 to 521922, EPI_ISL_521924 to 521925, EPI_ISL_521945 to 521978, EPI_ISL_521980 to 521988, EPI_ISL_522055 to 522089, EPI_ISL_522091 to 522095, EPI_ISL_522097 to 522110, EPI_ISL_522119 to 522187, EPI_ISL_522233 to 522242, EPI_ISL_561380, EPI_ISL_561388, EPI_ISL_561392, EPI_ISL_561397, EPI_ISL_561403 to 561404, EPI_ISL_561407, EPI_ISL_561409, EPI_ISL_561414, EPI_ISL_561416, EPI_ISL_561420 to 561421, EPI_ISL_561425 to 561426, EPI_ISL_561428, EPI_ISL_561433 to 561434, EPI_ISL_561440, EPI_ISL_561450, EPI_ISL_561453, EPI_ISL_561458, EPI_ISL_561462, EPI_ISL_561465, EPI_ISL_561468, EPI_ISL_561470, EPI_ISL_561491, EPI_ISL_561498, EPI_ISL_561508, EPI_ISL_561514 to 561515, EPI_ISL_561517, EPI_ISL_561519, EPI_ISL_561523, EPI_ISL_561532 to 561533, EPI_ISL_561535, EPI_ISL_561541, EPI_ISL_561544, EPI_ISL_561559, EPI_ISL_561565, EPI_ISL_561578, EPI_ISL_561582, EPI_ISL_561584, EPI_ISL_561586, EPI_ISL_561590 to 561591, EPI_ISL_561612 to 561614, EPI_ISL_561621 to 561622, EPI_ISL_561629, EPI_ISL_561651, EPI_ISL_561653, EPI_ISL_561655 to 561657, EPI_ISL_561661, EPI_ISL_561673 to 561674, EPI_ISL_561679, EPI_ISL_561682, EPI_ISL_561686, EPI_ISL_561690, EPI_ISL_561697, EPI_ISL_561707, EPI_ISL_561711, EPI_ISL_561715, EPI_ISL_561721, EPI_ISL_561728, EPI_ISL_561741, EPI_ISL_561750, EPI_ISL_561752, EPI_ISL_561764 to 561766, EPI_ISL_561777 to 561778, EPI_ISL_561787 to 561788, EPI_ISL_561791, EPI_ISL_561793, EPI_ISL_561799, EPI_ISL_561803, EPI_ISL_561808, EPI_ISL_561816, EPI_ISL_561825, EPI_ISL_561840, EPI_ISL_561843 to 561844, EPI_ISL_561852, EPI_ISL_561856, EPI_ISL_561858, EPI_ISL_561863, EPI_ISL_561866, EPI_ISL_561879, EPI_ISL_561893 to 561894, EPI_ISL_561935 to 561936, EPI_ISL_561946, EPI_ISL_561957, EPI_ISL_561975, EPI_ISL_561986 to 561988, EPI_ISL_561991, EPI_ISL_561994, EPI_ISL_562011 to 562012, EPI_ISL_562016, EPI_ISL_562021, EPI_ISL_562023, EPI_ISL_562033, EPI_ISL_562048, EPI_ISL_562055 to 562057, EPI_ISL_562066 to 562067, EPI_ISL_562069, EPI_ISL_562072, EPI_ISL_562076, EPI_ISL_562080 to 562081, EPI_ISL_562085, EPI_ISL_562100 to 562106, EPI_ISL_562109 to 562110, EPI_ISL_562115, EPI_ISL_562123, EPI_ISL_562136, EPI_ISL_562138, EPI_ISL_562152, EPI_ISL_562155, EPI_ISL_562163 to 562164, EPI_ISL_562166, EPI_ISL_562175, EPI_ISL_562179, EPI_ISL_562189, EPI_ISL_562194, EPI_ISL_562197, EPI_ISL_562200, EPI_ISL_562202, EPI_ISL_562207 to 562209, EPI_ISL_562211, EPI_ISL_562213, EPI_ISL_562216 to 562217, EPI_ISL_562224 to 562225, EPI_ISL_562228 to 562229, EPI_ISL_562231, EPI_ISL_562237, EPI_ISL_562239, EPI_ISL_562242, EPI_ISL_562244 to 562245, EPI_ISL_562250, EPI_ISL_562258 to 562259, EPI_ISL_562261, EPI_ISL_562264, EPI_ISL_562267, EPI_ISL_562269, EPI_ISL_562272 to 562275, EPI_ISL_562280, EPI_ISL_562282, EPI_ISL_562286, EPI_ISL_562288 to 562290, EPI_ISL_562294, EPI_ISL_562296 to 562297, EPI_ISL_562304, EPI_ISL_562308, EPI_ISL_562317, EPI_ISL_562322, EPI_ISL_562326, EPI_ISL_562328, EPI_ISL_562331, EPI_ISL_562333, EPI_ISL_562335, EPI_ISL_562342, EPI_ISL_562348, EPI_ISL_562351, EPI_ISL_562354, EPI_ISL_562356 to 562357, EPI_ISL_562363, EPI_ISL_562366, EPI_ISL_562375 to 562376, EPI_ISL_562379, EPI_ISL_562381, EPI_ISL_562385, EPI_ISL_562389 to 562390, EPI_ISL_562393, EPI_ISL_562396, EPI_ISL_562406, EPI_ISL_562410, EPI_ISL_562412, EPI_ISL_562414 to 562415, EPI_ISL_562430 to 562431, EPI_ISL_562435, EPI_ISL_562437, EPI_ISL_562440 to 562442, EPI_ISL_562445, EPI_ISL_562447, EPI_ISL_562460, EPI_ISL_562463, EPI_ISL_562474, EPI_ISL_562482 to 562484, EPI_ISL_562488, EPI_ISL_562498, EPI_ISL_562502 to 562503, EPI_ISL_562505, EPI_ISL_562509, EPI_ISL_562510, EPI_ISL_562514 to 562515, EPI_ISL_562517 to 562518, EPI_ISL_562524, EPI_ISL_562526 to 562527, EPI_ISL_562531, EPI_ISL_562535 to 562536, EPI_ISL_562538 to 562540, EPI_ISL_562542, EPI_ISL_562545 to 562546, EPI_ISL_562548, EPI_ISL_562552, EPI_ISL_562557 to 562559, EPI_ISL_562563, EPI_ISL_562583, EPI_ISL_562585 to 562589, EPI_ISL_562593, EPI_ISL_562595, EPI_ISL_562628, EPI_ISL_562640, EPI_ISL_562645 to 562646, EPI_ISL_562658 to 562659, EPI_ISL_562669, EPI_ISL_562671, EPI_ISL_562696 to 562697, EPI_ISL_562700, EPI_ISL_562705, EPI_ISL_562754, EPI_ISL_562791 to 562792, EPI_ISL_562803 to 562809, EPI_ISL_562838 to 562845, EPI_ISL_562910 to 562913, EPI_ISL_562924, EPI_ISL_562929, EPI_ISL_562936, EPI_ISL_562946, EPI_ISL_562951, EPI_ISL_562961, EPI_ISL_563000, EPI_ISL_563131 to 563133, EPI_ISL_563136 to 563144, EPI_ISL_563407 to 563423, EPI_ISL_563497 to 563499, EPI_ISL_563551, EPI_ISL_563609, EPI_ISL_563721 to 563723, EPI_ISL_563790, EPI_ISL_563792, EPI_ISL_563808, EPI_ISL_563811, EPI_ISL_563820, EPI_ISL_563832, EPI_ISL_563840, EPI_ISL_563866, EPI_ISL_563880, EPI_ISL_563925, EPI_ISL_563938, EPI_ISL_563973 to 563975, EPI_ISL_563977 to 563978, EPI_ISL_563987 to 564013, EPI_ISL_564015 to 564049, EPI_ISL_564055 to 564074, EPI_ISL_564076 to 564110, EPI_ISL_564180 to 564254, EPI_ISL_564270, EPI_ISL_564318 to 564350, EPI_ISL_564352 to 564397, EPI_ISL_564404, EPI_ISL_564544, EPI_ISL_564546 to 564564, EPI_ISL_565136 to 565222, EPI_ISL_565382, EPI_ISL_565385, EPI_ISL_565394 to 565396, EPI_ISL_565399, EPI_ISL_565401 to 565404, EPI_ISL_565409, EPI_ISL_565415, EPI_ISL_565459, EPI_ISL_565461, EPI_ISL_565463 to 565467, EPI_ISL_565469, EPI_ISL_565509, EPI_ISL_565730 to 565742, EPI_ISL_591558, EPI_ISL_591561 to 591562, EPI_ISL_591565, EPI_ISL_591571 to 591574, EPI_ISL_591578, EPI_ISL_591580, EPI_ISL_591584 to 591585, EPI_ISL_591587, EPI_ISL_591590 to 591592, EPI_ISL_591595, EPI_ISL_591603, EPI_ISL_591609, EPI_ISL_591613, EPI_ISL_591615, EPI_ISL_591619, EPI_ISL_591621, EPI_ISL_591623, EPI_ISL_591626, EPI_ISL_591638, EPI_ISL_591640, EPI_ISL_591643, EPI_ISL_591645, EPI_ISL_591652 to 591654, EPI_ISL_591656 to 591657, EPI_ISL_591659, EPI_ISL_591666 to 591667, EPI_ISL_591669 to 59170, EPI_ISL_591672, EPI_ISL_591679, EPI_ISL_591681, EPI_ISL_591684, EPI_ISL_591688, EPI_ISL_591700, EPI_ISL_591703 to 591704, EPI_ISL_591706 to 591708, EPI_ISL_591715, EPI_ISL_591721, EPI_ISL_591723, EPI_ISL_591725 to 591726, EPI_ISL_591729, EPI_ISL_591734, EPI_ISL_591737, EPI_ISL_591740, EPI_ISL_591744, EPI_ISL_591746, EPI_ISL_591754 to 591755, EPI_ISL_591758, EPI_ISL_591760 to 591761, EPI_ISL_591763, EPI_ISL_591767, EPI_ISL_591769, EPI_ISL_591771 to 591773, EPI_ISL_591775, EPI_ISL_591778 to 591779, EPI_ISL_591783, EPI_ISL_591786, EPI_ISL_591791 to 591792, EPI_ISL_591799 to 591800, EPI_ISL_591807, EPI_ISL_591822, EPI_ISL_591824 to 591825, EPI_ISL_591849 to 591852, EPI_ISL_591854 to 591854, EPI_ISL_591854 to 591904, EPI_ISL_591907 to 591909, EPI_ISL_591912, EPI_ISL_591917, EPI_ISL_591919, EPI_ISL_591925, EPI_ISL_591928, EPI_ISL_591932, EPI_ISL_591936, EPI_ISL_591940 to 591960, EPI_ISL_592136 to 592195, EPI_ISL_592485 to 592486, EPI_ISL_592488 to 592507, EPI_ISL_592509, EPI_ISL_592511 to 592516, EPI_ISL_592537, EPI_ISL_592548, EPI_ISL_592564, EPI_ISL_592568, EPI_ISL_592577, EPI_ISL_592590, EPI_ISL_592597, EPI_ISL_592600, EPI_ISL_592616, EPI_ISL_592660 to 592661, EPI_ISL_592668, EPI_ISL_592716, EPI_ISL_592720, EPI_ISL_592730, EPI_ISL_592770 to 592771, EPI_ISL_592781 to 592783, EPI_ISL_592790, EPI_ISL_592795, EPI_ISL_592804, EPI_ISL_592814, EPI_ISL_592820 to 592821, EPI_ISL_592824, EPI_ISL_592828, EPI_ISL_592836 to 592837, EPI_ISL_592858 to 592860, EPI_ISL_592862 to 592865, EPI_ISL_592878 to 592881, EPI_ISL_592958, EPI_ISL_592969 to 592985, EPI_ISL_593003 to 593007, EPI_ISL_593033, EPI_ISL_593035, EPI_ISL_593048, EPI_ISL_593125 to 593126, EPI_ISL_593215 to 593216, EPI_ISL_593256, EPI_ISL_593411 to 593412, EPI_ISL_593476 to 593477</p> |                                                                   |                                                                                                                                                                                                                                                                                            |                                                                                                                                                                                                          |
| see above                                                                                                                                                                                                                                                                                                                                                                                                                                                                                                                                                                                                                                                                                                                                                                                                                                                                                                                                                                                                                                                                                                                                                                                                                                                                                                                                                                                                                                                                                                                                                                                                                                                                                                                                                                                                                                                                                                                                                                                                                                                                                                                                                                                                                                                                                                                                                                                                                                                                                                                                                                                                                                                                                                                                                                                                                                                                                                                                                                                                                                                                                                                                                                                                                                                                                                                                                                                                                                                                                                                                                                                                                                                                                                                                                                                                                                                                                                                                                                                                                                                                                                                                                                                                                                                                                                                                                                                                                                                                                                                                                                                                                                                                                                                                                                                                                                                                                                                                                                                                                                                                                                                                                                                                                                                                                                                                                                                                                                                                                                                                                                                                                                                                                                                                                                                                                                                                                                                                                                                                                                                                                                                                                                                                                                                                                                                                                                                                                                                                                                                                                                                                                                                                                                                                                                                                                                                                                                                                                                                                                                                                                                                                                                                                                                                                                                                                                                                                                                                                                                                                                                                                                                                                                                                                                                                                                                                                                                                                                                                                                                                                                                                                                                                                                                                                                                                                                                                                                                                                                                                                                                                                                                                                                                                                                                                                                                                                                                                                                                                                                                                                                                | Victorian Infectious Diseases Reference Laboratory (VIDRL)        | VIDRL and MDU-PHL                                                                                                                                                                                                                                                                          | Caly L.; Caly, L.; Druce J.; M. B.; Sait, M.; Schultz; Schultz M.; Seemann T.; Seemann, T.; Sherry, N.                                                                                                   |
| EPI_ISL_416410 to 416415, EPI_ISL_416514 to 416518, EPI_ISL_419733 to 419822, EPI_ISL_419826, EPI_ISL_419834, EPI_ISL_419836 to 419979, EPI_ISL_419982 to 419998, EPI_ISL_420004 to 420005, EPI_ISL_420036                                                                                                                                                                                                                                                                                                                                                                                                                                                                                                                                                                                                                                                                                                                                                                                                                                                                                                                                                                                                                                                                                                                                                                                                                                                                                                                                                                                                                                                                                                                                                                                                                                                                                                                                                                                                                                                                                                                                                                                                                                                                                                                                                                                                                                                                                                                                                                                                                                                                                                                                                                                                                                                                                                                                                                                                                                                                                                                                                                                                                                                                                                                                                                                                                                                                                                                                                                                                                                                                                                                                                                                                                                                                                                                                                                                                                                                                                                                                                                                                                                                                                                                                                                                                                                                                                                                                                                                                                                                                                                                                                                                                                                                                                                                                                                                                                                                                                                                                                                                                                                                                                                                                                                                                                                                                                                                                                                                                                                                                                                                                                                                                                                                                                                                                                                                                                                                                                                                                                                                                                                                                                                                                                                                                                                                                                                                                                                                                                                                                                                                                                                                                                                                                                                                                                                                                                                                                                                                                                                                                                                                                                                                                                                                                                                                                                                                                                                                                                                                                                                                                                                                                                                                                                                                                                                                                                                                                                                                                                                                                                                                                                                                                                                                                                                                                                                                                                                                                                                                                                                                                                                                                                                                                                                                                                                                                                                                                                               | Victorian Infectious Diseases Reference Laboratory (VIDRL)        | Victorian Infectious Diseases Reference Laboratory and Microbiological Diagnostic Unit Public Health Laboratory, Doherty Institute                                                                                                                                                         | Caly L.; Druce J.; Sait, M.; Schultz M.; Seemann T.; Sherry, N.; Taiaroa, G.                                                                                                                             |
| see above                                                                                                                                                                                                                                                                                                                                                                                                                                                                                                                                                                                                                                                                                                                                                                                                                                                                                                                                                                                                                                                                                                                                                                                                                                                                                                                                                                                                                                                                                                                                                                                                                                                                                                                                                                                                                                                                                                                                                                                                                                                                                                                                                                                                                                                                                                                                                                                                                                                                                                                                                                                                                                                                                                                                                                                                                                                                                                                                                                                                                                                                                                                                                                                                                                                                                                                                                                                                                                                                                                                                                                                                                                                                                                                                                                                                                                                                                                                                                                                                                                                                                                                                                                                                                                                                                                                                                                                                                                                                                                                                                                                                                                                                                                                                                                                                                                                                                                                                                                                                                                                                                                                                                                                                                                                                                                                                                                                                                                                                                                                                                                                                                                                                                                                                                                                                                                                                                                                                                                                                                                                                                                                                                                                                                                                                                                                                                                                                                                                                                                                                                                                                                                                                                                                                                                                                                                                                                                                                                                                                                                                                                                                                                                                                                                                                                                                                                                                                                                                                                                                                                                                                                                                                                                                                                                                                                                                                                                                                                                                                                                                                                                                                                                                                                                                                                                                                                                                                                                                                                                                                                                                                                                                                                                                                                                                                                                                                                                                                                                                                                                                                                                | Vienna COVID-19 Detection Initiative (VCDI)                       | Bergthaler laboratory, CeMM Research Center for Molecular Medicine of the Austrian Academy of Sciences                                                                                                                                                                                     | Andreas Bergthaler; Anna Schedl; Bekir Erguner; Benedikt Agerer; Christoph Bock; Fabian Amman; Jan Laine; Lukas Endler; Maelle Le Moing; Martin Senekowitsch; Michael Schuster; Petr Triska; Thomas Penz |
| EPI_ISL_1495574 to 1495580                                                                                                                                                                                                                                                                                                                                                                                                                                                                                                                                                                                                                                                                                                                                                                                                                                                                                                                                                                                                                                                                                                                                                                                                                                                                                                                                                                                                                                                                                                                                                                                                                                                                                                                                                                                                                                                                                                                                                                                                                                                                                                                                                                                                                                                                                                                                                                                                                                                                                                                                                                                                                                                                                                                                                                                                                                                                                                                                                                                                                                                                                                                                                                                                                                                                                                                                                                                                                                                                                                                                                                                                                                                                                                                                                                                                                                                                                                                                                                                                                                                                                                                                                                                                                                                                                                                                                                                                                                                                                                                                                                                                                                                                                                                                                                                                                                                                                                                                                                                                                                                                                                                                                                                                                                                                                                                                                                                                                                                                                                                                                                                                                                                                                                                                                                                                                                                                                                                                                                                                                                                                                                                                                                                                                                                                                                                                                                                                                                                                                                                                                                                                                                                                                                                                                                                                                                                                                                                                                                                                                                                                                                                                                                                                                                                                                                                                                                                                                                                                                                                                                                                                                                                                                                                                                                                                                                                                                                                                                                                                                                                                                                                                                                                                                                                                                                                                                                                                                                                                                                                                                                                                                                                                                                                                                                                                                                                                                                                                                                                                                                                                               | Vienna COVID-19 Detection Initiative (VCDI)                       | Bergthaler laboratory, CeMM Research Center for Molecular Medicine of the Austrian Academy of Sciences                                                                                                                                                                                     | Andreas Bergthaler; Anna Schedl; Bekir Erguner; Benedikt Agerer; Christoph Bock; Fabian Amman; Jan Laine; Lukas Endler; Maelle Le Moing; Martin Senekowitsch; Michael Schuster; Petr Triska; Thomas Penz |
| EPI_ISL_1540538 to 1540539, EPI_ISL_1540542, EPI_ISL_1540546, EPI_ISL_1540550, EPI_ISL_1540555, EPI_ISL_1540557, EPI_ISL_1540559, EPI_ISL_1540565, EPI_ISL_1540568, EPI_ISL_1540587                                                                                                                                                                                                                                                                                                                                                                                                                                                                                                                                                                                                                                                                                                                                                                                                                                                                                                                                                                                                                                                                                                                                                                                                                                                                                                                                                                                                                                                                                                                                                                                                                                                                                                                                                                                                                                                                                                                                                                                                                                                                                                                                                                                                                                                                                                                                                                                                                                                                                                                                                                                                                                                                                                                                                                                                                                                                                                                                                                                                                                                                                                                                                                                                                                                                                                                                                                                                                                                                                                                                                                                                                                                                                                                                                                                                                                                                                                                                                                                                                                                                                                                                                                                                                                                                                                                                                                                                                                                                                                                                                                                                                                                                                                                                                                                                                                                                                                                                                                                                                                                                                                                                                                                                                                                                                                                                                                                                                                                                                                                                                                                                                                                                                                                                                                                                                                                                                                                                                                                                                                                                                                                                                                                                                                                                                                                                                                                                                                                                                                                                                                                                                                                                                                                                                                                                                                                                                                                                                                                                                                                                                                                                                                                                                                                                                                                                                                                                                                                                                                                                                                                                                                                                                                                                                                                                                                                                                                                                                                                                                                                                                                                                                                                                                                                                                                                                                                                                                                                                                                                                                                                                                                                                                                                                                                                                                                                                                                                      | Višoši taiga Respublikin Panevėžiu ligonin                        | Lithuanian University of Health Sciences Hospital, Department of Genetics and Molecular Medicine                                                                                                                                                                                           | Astra Vitkauskienė; Darius Cereskevicius; Inga Nasvytienė; Mantas Saraukas; Marius Sukys; Rasa Ugenskiene; Renaldas Jurkevicius; Rima Vainoriene; Zilvė Zemeckienė                                       |
| see above                                                                                                                                                                                                                                                                                                                                                                                                                                                                                                                                                                                                                                                                                                                                                                                                                                                                                                                                                                                                                                                                                                                                                                                                                                                                                                                                                                                                                                                                                                                                                                                                                                                                                                                                                                                                                                                                                                                                                                                                                                                                                                                                                                                                                                                                                                                                                                                                                                                                                                                                                                                                                                                                                                                                                                                                                                                                                                                                                                                                                                                                                                                                                                                                                                                                                                                                                                                                                                                                                                                                                                                                                                                                                                                                                                                                                                                                                                                                                                                                                                                                                                                                                                                                                                                                                                                                                                                                                                                                                                                                                                                                                                                                                                                                                                                                                                                                                                                                                                                                                                                                                                                                                                                                                                                                                                                                                                                                                                                                                                                                                                                                                                                                                                                                                                                                                                                                                                                                                                                                                                                                                                                                                                                                                                                                                                                                                                                                                                                                                                                                                                                                                                                                                                                                                                                                                                                                                                                                                                                                                                                                                                                                                                                                                                                                                                                                                                                                                                                                                                                                                                                                                                                                                                                                                                                                                                                                                                                                                                                                                                                                                                                                                                                                                                                                                                                                                                                                                                                                                                                                                                                                                                                                                                                                                                                                                                                                                                                                                                                                                                                                                                | Vigilância Em Saude                                               | Instituto Adolfo Lutz, Interdisciplinary Procedures Center, Strategic Laboratory                                                                                                                                                                                                           | Caio Vinicius Dias Lopes; Claudia Regina Gonçalves; Claudio Tavares Sacchi; Erica Valessa Ramos Gomes; Karoline Rodrigues Campos; Leonardo Jose Tadeu de Araujo                                          |
| EPI_ISL_1533716                                                                                                                                                                                                                                                                                                                                                                                                                                                                                                                                                                                                                                                                                                                                                                                                                                                                                                                                                                                                                                                                                                                                                                                                                                                                                                                                                                                                                                                                                                                                                                                                                                                                                                                                                                                                                                                                                                                                                                                                                                                                                                                                                                                                                                                                                                                                                                                                                                                                                                                                                                                                                                                                                                                                                                                                                                                                                                                                                                                                                                                                                                                                                                                                                                                                                                                                                                                                                                                                                                                                                                                                                                                                                                                                                                                                                                                                                                                                                                                                                                                                                                                                                                                                                                                                                                                                                                                                                                                                                                                                                                                                                                                                                                                                                                                                                                                                                                                                                                                                                                                                                                                                                                                                                                                                                                                                                                                                                                                                                                                                                                                                                                                                                                                                                                                                                                                                                                                                                                                                                                                                                                                                                                                                                                                                                                                                                                                                                                                                                                                                                                                                                                                                                                                                                                                                                                                                                                                                                                                                                                                                                                                                                                                                                                                                                                                                                                                                                                                                                                                                                                                                                                                                                                                                                                                                                                                                                                                                                                                                                                                                                                                                                                                                                                                                                                                                                                                                                                                                                                                                                                                                                                                                                                                                                                                                                                                                                                                                                                                                                                                                                          | Vigilância Epidemiológica de São Bernardo do Campo                | Instituto Adolfo Lutz, Interdisciplinary Procedures Center, Strategic Laboratory                                                                                                                                                                                                           | Claudia Regina Gonçalves; Claudio Tavares Sacchi; Erica Valessa Ramos Gomes; Karoline Rodrigues Campos                                                                                                   |
| EPI_ISL_468313, EPI_ISL_468319, EPI_ISL_603033                                                                                                                                                                                                                                                                                                                                                                                                                                                                                                                                                                                                                                                                                                                                                                                                                                                                                                                                                                                                                                                                                                                                                                                                                                                                                                                                                                                                                                                                                                                                                                                                                                                                                                                                                                                                                                                                                                                                                                                                                                                                                                                                                                                                                                                                                                                                                                                                                                                                                                                                                                                                                                                                                                                                                                                                                                                                                                                                                                                                                                                                                                                                                                                                                                                                                                                                                                                                                                                                                                                                                                                                                                                                                                                                                                                                                                                                                                                                                                                                                                                                                                                                                                                                                                                                                                                                                                                                                                                                                                                                                                                                                                                                                                                                                                                                                                                                                                                                                                                                                                                                                                                                                                                                                                                                                                                                                                                                                                                                                                                                                                                                                                                                                                                                                                                                                                                                                                                                                                                                                                                                                                                                                                                                                                                                                                                                                                                                                                                                                                                                                                                                                                                                                                                                                                                                                                                                                                                                                                                                                                                                                                                                                                                                                                                                                                                                                                                                                                                                                                                                                                                                                                                                                                                                                                                                                                                                                                                                                                                                                                                                                                                                                                                                                                                                                                                                                                                                                                                                                                                                                                                                                                                                                                                                                                                                                                                                                                                                                                                                                                                           | Vigilância em Saude                                               | Instituto Adolfo Lutz, Interdisciplinary Procedures Center, Strategic Laboratory                                                                                                                                                                                                           | Caio Vinicius Dias Lopes; Claudia Regina Gonçalves; Claudio Tavares Sacchi; Erica Valessa Ramos Gomes; Karoline Rodrigues Campos; Leonardo Jose Tadeu de Araujo                                          |
| EPI_ISL_1533705                                                                                                                                                                                                                                                                                                                                                                                                                                                                                                                                                                                                                                                                                                                                                                                                                                                                                                                                                                                                                                                                                                                                                                                                                                                                                                                                                                                                                                                                                                                                                                                                                                                                                                                                                                                                                                                                                                                                                                                                                                                                                                                                                                                                                                                                                                                                                                                                                                                                                                                                                                                                                                                                                                                                                                                                                                                                                                                                                                                                                                                                                                                                                                                                                                                                                                                                                                                                                                                                                                                                                                                                                                                                                                                                                                                                                                                                                                                                                                                                                                                                                                                                                                                                                                                                                                                                                                                                                                                                                                                                                                                                                                                                                                                                                                                                                                                                                                                                                                                                                                                                                                                                                                                                                                                                                                                                                                                                                                                                                                                                                                                                                                                                                                                                                                                                                                                                                                                                                                                                                                                                                                                                                                                                                                                                                                                                                                                                                                                                                                                                                                                                                                                                                                                                                                                                                                                                                                                                                                                                                                                                                                                                                                                                                                                                                                                                                                                                                                                                                                                                                                                                                                                                                                                                                                                                                                                                                                                                                                                                                                                                                                                                                                                                                                                                                                                                                                                                                                                                                                                                                                                                                                                                                                                                                                                                                                                                                                                                                                                                                                                                                          | Vigilância Epidemiológica de Leme                                 | Instituto Adolfo Lutz, Interdisciplinary Procedures Center, Strategic Laboratory                                                                                                                                                                                                           | Claudia Regina Gonçalves; Claudio Tavares Sacchi; Erica Valessa Ramos Gomes                                                                                                                              |
| EPI_ISL_515542                                                                                                                                                                                                                                                                                                                                                                                                                                                                                                                                                                                                                                                                                                                                                                                                                                                                                                                                                                                                                                                                                                                                                                                                                                                                                                                                                                                                                                                                                                                                                                                                                                                                                                                                                                                                                                                                                                                                                                                                                                                                                                                                                                                                                                                                                                                                                                                                                                                                                                                                                                                                                                                                                                                                                                                                                                                                                                                                                                                                                                                                                                                                                                                                                                                                                                                                                                                                                                                                                                                                                                                                                                                                                                                                                                                                                                                                                                                                                                                                                                                                                                                                                                                                                                                                                                                                                                                                                                                                                                                                                                                                                                                                                                                                                                                                                                                                                                                                                                                                                                                                                                                                                                                                                                                                                                                                                                                                                                                                                                                                                                                                                                                                                                                                                                                                                                                                                                                                                                                                                                                                                                                                                                                                                                                                                                                                                                                                                                                                                                                                                                                                                                                                                                                                                                                                                                                                                                                                                                                                                                                                                                                                                                                                                                                                                                                                                                                                                                                                                                                                                                                                                                                                                                                                                                                                                                                                                                                                                                                                                                                                                                                                                                                                                                                                                                                                                                                                                                                                                                                                                                                                                                                                                                                                                                                                                                                                                                                                                                                                                                                                                           | Vigilância em Saúde Visa Sul                                      | Instituto Adolfo Lutz, Interdisciplinary Procedures Center, Strategic Laboratory                                                                                                                                                                                                           | Claudia Regina Gonçalves; Claudio Tavares Sacchi; Erica Valessa Ramos Gomes; Karoline Rodrigues Campos                                                                                                   |
| EPI_ISL_603023                                                                                                                                                                                                                                                                                                                                                                                                                                                                                                                                                                                                                                                                                                                                                                                                                                                                                                                                                                                                                                                                                                                                                                                                                                                                                                                                                                                                                                                                                                                                                                                                                                                                                                                                                                                                                                                                                                                                                                                                                                                                                                                                                                                                                                                                                                                                                                                                                                                                                                                                                                                                                                                                                                                                                                                                                                                                                                                                                                                                                                                                                                                                                                                                                                                                                                                                                                                                                                                                                                                                                                                                                                                                                                                                                                                                                                                                                                                                                                                                                                                                                                                                                                                                                                                                                                                                                                                                                                                                                                                                                                                                                                                                                                                                                                                                                                                                                                                                                                                                                                                                                                                                                                                                                                                                                                                                                                                                                                                                                                                                                                                                                                                                                                                                                                                                                                                                                                                                                                                                                                                                                                                                                                                                                                                                                                                                                                                                                                                                                                                                                                                                                                                                                                                                                                                                                                                                                                                                                                                                                                                                                                                                                                                                                                                                                                                                                                                                                                                                                                                                                                                                                                                                                                                                                                                                                                                                                                                                                                                                                                                                                                                                                                                                                                                                                                                                                                                                                                                                                                                                                                                                                                                                                                                                                                                                                                                                                                                                                                                                                                                                                           | Vigilância em Saúde de Cajamar                                    | Instituto Adolfo Lutz, Interdisciplinary Procedures Center, Strategic Laboratory                                                                                                                                                                                                           | Claudia Regina Gonçalves; Claudio Tavares Sacchi; Erica Valessa Ramos Gomes; Karoline Rodrigues Campos                                                                                                   |
| EPI_ISL_547573, EPI_ISL_583493                                                                                                                                                                                                                                                                                                                                                                                                                                                                                                                                                                                                                                                                                                                                                                                                                                                                                                                                                                                                                                                                                                                                                                                                                                                                                                                                                                                                                                                                                                                                                                                                                                                                                                                                                                                                                                                                                                                                                                                                                                                                                                                                                                                                                                                                                                                                                                                                                                                                                                                                                                                                                                                                                                                                                                                                                                                                                                                                                                                                                                                                                                                                                                                                                                                                                                                                                                                                                                                                                                                                                                                                                                                                                                                                                                                                                                                                                                                                                                                                                                                                                                                                                                                                                                                                                                                                                                                                                                                                                                                                                                                                                                                                                                                                                                                                                                                                                                                                                                                                                                                                                                                                                                                                                                                                                                                                                                                                                                                                                                                                                                                                                                                                                                                                                                                                                                                                                                                                                                                                                                                                                                                                                                                                                                                                                                                                                                                                                                                                                                                                                                                                                                                                                                                                                                                                                                                                                                                                                                                                                                                                                                                                                                                                                                                                                                                                                                                                                                                                                                                                                                                                                                                                                                                                                                                                                                                                                                                                                                                                                                                                                                                                                                                                                                                                                                                                                                                                                                                                                                                                                                                                                                                                                                                                                                                                                                                                                                                                                                                                                                                                           | Vigilância em Saúde de Sapucaia do Sul                            | Epiclin                                                                                                                                                                                                                                                                                    | Ana Paula Mutterle; Carolina Comerlato; Eliana Márcia Da Ros Wendland; Fernando Hayashi Sant'Anna; Janira Prichula; Juliana Comerlato                                                                    |
| EPI_ISL_1469550, EPI_ISL_1469671, EPI_ISL_1469696                                                                                                                                                                                                                                                                                                                                                                                                                                                                                                                                                                                                                                                                                                                                                                                                                                                                                                                                                                                                                                                                                                                                                                                                                                                                                                                                                                                                                                                                                                                                                                                                                                                                                                                                                                                                                                                                                                                                                                                                                                                                                                                                                                                                                                                                                                                                                                                                                                                                                                                                                                                                                                                                                                                                                                                                                                                                                                                                                                                                                                                                                                                                                                                                                                                                                                                                                                                                                                                                                                                                                                                                                                                                                                                                                                                                                                                                                                                                                                                                                                                                                                                                                                                                                                                                                                                                                                                                                                                                                                                                                                                                                                                                                                                                                                                                                                                                                                                                                                                                                                                                                                                                                                                                                                                                                                                                                                                                                                                                                                                                                                                                                                                                                                                                                                                                                                                                                                                                                                                                                                                                                                                                                                                                                                                                                                                                                                                                                                                                                                                                                                                                                                                                                                                                                                                                                                                                                                                                                                                                                                                                                                                                                                                                                                                                                                                                                                                                                                                                                                                                                                                                                                                                                                                                                                                                                                                                                                                                                                                                                                                                                                                                                                                                                                                                                                                                                                                                                                                                                                                                                                                                                                                                                                                                                                                                                                                                                                                                                                                                                                                        | Villa Serena del Dr. Leonardo Petruzzi                            | Istituto Zooprofilattico Sperimentale dell'Abruzzo e Molise "G. Caporale"                                                                                                                                                                                                                  | Ancora M; Cammà C; Curini V; Di Domenico M; Di Pasquale A; Lorusso A; Mangone I; Marcacci M; Puglia I; Rinaldi A; Savini G                                                                               |
| EPI_ISL_435146 to 435147                                                                                                                                                                                                                                                                                                                                                                                                                                                                                                                                                                                                                                                                                                                                                                                                                                                                                                                                                                                                                                                                                                                                                                                                                                                                                                                                                                                                                                                                                                                                                                                                                                                                                                                                                                                                                                                                                                                                                                                                                                                                                                                                                                                                                                                                                                                                                                                                                                                                                                                                                                                                                                                                                                                                                                                                                                                                                                                                                                                                                                                                                                                                                                                                                                                                                                                                                                                                                                                                                                                                                                                                                                                                                                                                                                                                                                                                                                                                                                                                                                                                                                                                                                                                                                                                                                                                                                                                                                                                                                                                                                                                                                                                                                                                                                                                                                                                                                                                                                                                                                                                                                                                                                                                                                                                                                                                                                                                                                                                                                                                                                                                                                                                                                                                                                                                                                                                                                                                                                                                                                                                                                                                                                                                                                                                                                                                                                                                                                                                                                                                                                                                                                                                                                                                                                                                                                                                                                                                                                                                                                                                                                                                                                                                                                                                                                                                                                                                                                                                                                                                                                                                                                                                                                                                                                                                                                                                                                                                                                                                                                                                                                                                                                                                                                                                                                                                                                                                                                                                                                                                                                                                                                                                                                                                                                                                                                                                                                                                                                                                                                                                                 | Vilnius University Hospital Santaros Klinikos                     | Vilnius University Hospital Santaros Klinikos, Center of Laboratory Medicine                                                                                                                                                                                                               | Daniel Naumovas; Dovile Ezerskyte; Gytis Dudas; Ingrida Olendraite; Laimonas Griskevicius; Ligita Raugaite; Mindaugas Stoskus; Monika Katenaite; Rimvydas Norvilas                                       |
| EPI_ISL_1384721, EPI_ISL_1396405, EPI_ISL_1398376 to 1398394, EPI_ISL_1398456 to 1398488, EPI_ISL_1398532 to 1398560, EPI_ISL_1510090                                                                                                                                                                                                                                                                                                                                                                                                                                                                                                                                                                                                                                                                                                                                                                                                                                                                                                                                                                                                                                                                                                                                                                                                                                                                                                                                                                                                                                                                                                                                                                                                                                                                                                                                                                                                                                                                                                                                                                                                                                                                                                                                                                                                                                                                                                                                                                                                                                                                                                                                                                                                                                                                                                                                                                                                                                                                                                                                                                                                                                                                                                                                                                                                                                                                                                                                                                                                                                                                                                                                                                                                                                                                                                                                                                                                                                                                                                                                                                                                                                                                                                                                                                                                                                                                                                                                                                                                                                                                                                                                                                                                                                                                                                                                                                                                                                                                                                                                                                                                                                                                                                                                                                                                                                                                                                                                                                                                                                                                                                                                                                                                                                                                                                                                                                                                                                                                                                                                                                                                                                                                                                                                                                                                                                                                                                                                                                                                                                                                                                                                                                                                                                                                                                                                                                                                                                                                                                                                                                                                                                                                                                                                                                                                                                                                                                                                                                                                                                                                                                                                                                                                                                                                                                                                                                                                                                                                                                                                                                                                                                                                                                                                                                                                                                                                                                                                                                                                                                                                                                                                                                                                                                                                                                                                                                                                                                                                                                                                                                    | Vilnius University Hospital Santaros Klinikos, Vilnius University | Institute of Biotechnology, Life Sciences Center, Vilnius University and Thermo Fisher Scientific                                                                                                                                                                                          | Albertas Timinskas; Alma Gedvilaite; Aurelija Zvirbilene; Daniel Naumovas; Justinas Slikas; Laimonas Griskevicius; Ligita Jancioriene; Mindaugas Paulauskas                                              |
| EPI_ISL_451668 to 451916, EPI_ISL_466927 to 467016, EPI_ISL_468202 to 468207, EPI_ISL_468209 to 468222, EPI_ISL_468224 to 468236, EPI_ISL_468298 to 468304, EPI_ISL_476079 to 476110, EPI_ISL_476112 to 476134, EPI_ISL_483648 to 483667, EPI_ISL_486442 to 486538, EPI_ISL_489959 to 489986, EPI_ISL_498619 to 498627, EPI_ISL_500877 to 500945, EPI_ISL_510690 to 510809, EPI_ISL_511984 to 512054, EPI_ISL_516552 to 516607, EPI_ISL_523856 to 523926, EPI_ISL_535585 to 535649, EPI_ISL_539341 to 539482, EPI_ISL_541401 to 541539, EPI_ISL_560416 to 560553, EPI_ISL_574876 to 575019, EPI_ISL_603267 to 603758, EPI_ISL_614893 to 614979, EPI_ISL_1406782 to 1407094, EPI_ISL_1407458 to 1408439, EPI_ISL_1408441, EPI_ISL_1408443, EPI_ISL_1408445, EPI_ISL_1408447 to 1408884, EPI_ISL_1496004 to 1496710                                                                                                                                                                                                                                                                                                                                                                                                                                                                                                                                                                                                                                                                                                                                                                                                                                                                                                                                                                                                                                                                                                                                                                                                                                                                                                                                                                                                                                                                                                                                                                                                                                                                                                                                                                                                                                                                                                                                                                                                                                                                                                                                                                                                                                                                                                                                                                                                                                                                                                                                                                                                                                                                                                                                                                                                                                                                                                                                                                                                                                                                                                                                                                                                                                                                                                                                                                                                                                                                                                                                                                                                                                                                                                                                                                                                                                                                                                                                                                                                                                                                                                                                                                                                                                                                                                                                                                                                                                                                                                                                                                                                                                                                                                                                                                                                                                                                                                                                                                                                                                                                                                                                                                                                                                                                                                                                                                                                                                                                                                                                                                                                                                                                                                                                                                                                                                                                                                                                                                                                                                                                                                                                                                                                                                                                                                                                                                                                                                                                                                                                                                                                                                                                                                                                                                                                                                                                                                                                                                                                                                                                                                                                                                                                                                                                                                                                                                                                                                                                                                                                                                                                                                                                                                                                                                                                                                                                                                                                                                                                                                                                                                                                                                                                                                                                                        | Department of Biosystems Science and Engineering, ETH Zürich      | Andrea Patrignani; Andrea Cabral de Gouvea; Catharine Aquino; Chaoran Chen; Christian Beisel; Christiane Beckmann; Christoph Noppen; David Dreifuss; Deborah Pemet; Doris Popovic; Elodie Burcklen; Emmanouil Dermatzakis; Griffin White; Henri Pegeot; Ina Nissen; Ioannis Xenarios; Ivan |                                                                                                                                                                                                          |
| see above                                                                                                                                                                                                                                                                                                                                                                                                                                                                                                                                                                                                                                                                                                                                                                                                                                                                                                                                                                                                                                                                                                                                                                                                                                                                                                                                                                                                                                                                                                                                                                                                                                                                                                                                                                                                                                                                                                                                                                                                                                                                                                                                                                                                                                                                                                                                                                                                                                                                                                                                                                                                                                                                                                                                                                                                                                                                                                                                                                                                                                                                                                                                                                                                                                                                                                                                                                                                                                                                                                                                                                                                                                                                                                                                                                                                                                                                                                                                                                                                                                                                                                                                                                                                                                                                                                                                                                                                                                                                                                                                                                                                                                                                                                                                                                                                                                                                                                                                                                                                                                                                                                                                                                                                                                                                                                                                                                                                                                                                                                                                                                                                                                                                                                                                                                                                                                                                                                                                                                                                                                                                                                                                                                                                                                                                                                                                                                                                                                                                                                                                                                                                                                                                                                                                                                                                                                                                                                                                                                                                                                                                                                                                                                                                                                                                                                                                                                                                                                                                                                                                                                                                                                                                                                                                                                                                                                                                                                                                                                                                                                                                                                                                                                                                                                                                                                                                                                                                                                                                                                                                                                                                                                                                                                                                                                                                                                                                                                                                                                                                                                                                                                | Vilnius University Hospital Santaros Klinikos, Vilnius University | Institute of Biotechnology, Life Sciences Center, Vilnius University and Thermo Fisher Scientific                                                                                                                                                                                          | Albertas Timinskas; Alma Gedvilaite; Aurelija Zvirbilene; Daniel Naumovas; Justinas Slikas; Laimonas Griskevicius; Ligita Jancioriene; Mindaugas Paulauskas                                              |
| EPI_ISL_451668 to 451916, EPI_ISL_466927 to 467016, EPI_ISL_468202 to 468207, EPI_ISL_468209 to 468222, EPI_ISL_468224 to 468236, EPI_ISL_468298 to 468304, EPI_ISL_476079 to 476110, EPI_ISL_476112 to 476134, EPI_ISL_483648 to 483667, EPI_ISL_486442 to 486538, EPI_ISL_489959 to 489986, EPI_ISL_498619 to 498627, EPI_ISL_500877 to 500945, EPI_ISL_510690 to 510809, EPI_ISL_511984 to 512054, EPI_ISL_516552 to 516607, EPI_ISL_523856 to 523926, EPI_ISL_535585 to 535649, EPI_ISL_539341 to 539482, EPI_ISL_541401 to 541539, EPI_ISL_560416 to 560553, EPI_ISL_574876 to 575019, EPI_ISL_603267 to 603758, EPI_ISL_614893 to 614979, EPI_ISL_1406782 to 1407094, EPI_ISL_1407458 to 1408439, EPI_ISL_1408441, EPI_ISL_1408443, EPI_ISL_1408445, EPI_ISL_1408447 to 1408884, EPI_ISL_1496004 to 1496710                                                                                                                                                                                                                                                                                                                                                                                                                                                                                                                                                                                                                                                                                                                                                                                                                                                                                                                                                                                                                                                                                                                                                                                                                                                                                                                                                                                                                                                                                                                                                                                                                                                                                                                                                                                                                                                                                                                                                                                                                                                                                                                                                                                                                                                                                                                                                                                                                                                                                                                                                                                                                                                                                                                                                                                                                                                                                                                                                                                                                                                                                                                                                                                                                                                                                                                                                                                                                                                                                                                                                                                                                                                                                                                                                                                                                                                                                                                                                                                                                                                                                                                                                                                                                                                                                                                                                                                                                                                                                                                                                                                                                                                                                                                                                                                                                                                                                                                                                                                                                                                                                                                                                                                                                                                                                                                                                                                                                                                                                                                                                                                                                                                                                                                                                                                                                                                                                                                                                                                                                                                                                                                                                                                                                                                                                                                                                                                                                                                                                                                                                                                                                                                                                                                                                                                                                                                                                                                                                                                                                                                                                                                                                                                                                                                                                                                                                                                                                                                                                                                                                                                                                                                                                                                                                                                                                                                                                                                                                                                                                                                                                                                                                                                                                                                                                        | Department of Biosystems Science and Engineering, ETH Zürich      | Andrea Patrignani; Andrea Cabral de Gouvea; Catharine Aquino; Chaoran Chen; Christian Beisel; Christiane Beckmann; Christoph Noppen; David Dreifuss; Deborah Pemet; Doris Popovic; Elodie Burcklen; Emmanouil Dermatzakis; Griffin White; Henri Pegeot; Ina Nissen; Ioannis Xenarios; Ivan |                                                                                                                                                                                                          |

Topolsky; Jay Tracy; Katharina Jahn; Keith Harshman; Lara Fuhrmann; Laura Neff; Lennart Opitz; Lorenzo Cerutti; Maria Domenica Moccia; Maurice Redondo; Mirjam Feldkamp; Natascha Santacroce; Niko Beerenwinkel; Noemie Santamaria de Souza; Olivier Kobel; Pedro Ferreira; Philipp Jablonski; Ralph Schlapbach; Rebecca Denes; Sarah Nadeau; Simon Grüter; Sophie Seidel; Susana Posada-Céspedes; Tanja Stadler; Timothy Sykes; Tobias Schär

|                                                                                                                                                                                                                                                                                                                                                                                                                                                                                                                                                                                                                                                                                                                                                                                                                                                                                                                                                                                                                                                                                                                                                                                                                                                                                                                                                                                                                                                                                                                                                                                                                                                                                                                                                                                                                                                                |           |                                                                                                                                                                                                 |                                                                                                                                                               |                                                                                                                                                                                                                                                                                                                                                                                                                                                                             |
|----------------------------------------------------------------------------------------------------------------------------------------------------------------------------------------------------------------------------------------------------------------------------------------------------------------------------------------------------------------------------------------------------------------------------------------------------------------------------------------------------------------------------------------------------------------------------------------------------------------------------------------------------------------------------------------------------------------------------------------------------------------------------------------------------------------------------------------------------------------------------------------------------------------------------------------------------------------------------------------------------------------------------------------------------------------------------------------------------------------------------------------------------------------------------------------------------------------------------------------------------------------------------------------------------------------------------------------------------------------------------------------------------------------------------------------------------------------------------------------------------------------------------------------------------------------------------------------------------------------------------------------------------------------------------------------------------------------------------------------------------------------------------------------------------------------------------------------------------------------|-----------|-------------------------------------------------------------------------------------------------------------------------------------------------------------------------------------------------|---------------------------------------------------------------------------------------------------------------------------------------------------------------|-----------------------------------------------------------------------------------------------------------------------------------------------------------------------------------------------------------------------------------------------------------------------------------------------------------------------------------------------------------------------------------------------------------------------------------------------------------------------------|
| EPI_ISL_1388122, EPI_ISL_1388150, EPI_ISL_1388164, EPI_ISL_1388166, EPI_ISL_1388168, EPI_ISL_1388193, EPI_ISL_1388197, EPI_ISL_1388202, EPI_ISL_1388228, EPI_ISL_1388238, EPI_ISL_1388240, EPI_ISL_1388251, EPI_ISL_1388271, EPI_ISL_1388273, EPI_ISL_1388348, EPI_ISL_1388368, EPI_ISL_1388372, EPI_ISL_1388373, EPI_ISL_1388417, EPI_ISL_1388419, EPI_ISL_1388421, EPI_ISL_1388423, EPI_ISL_1388425, EPI_ISL_1388427, EPI_ISL_1388429, EPI_ISL_1388432, EPI_ISL_1388434, EPI_ISL_1388436, EPI_ISL_1388438, EPI_ISL_1388440, EPI_ISL_1388442, EPI_ISL_1388538, EPI_ISL_1388540, EPI_ISL_1388554, EPI_ISL_1388556, EPI_ISL_1388558, EPI_ISL_1388560, EPI_ISL_1388587, EPI_ISL_1388588, EPI_ISL_1388590, EPI_ISL_1388592, EPI_ISL_1388595, EPI_ISL_1388597, EPI_ISL_1388598, EPI_ISL_1388618, EPI_ISL_1388620, EPI_ISL_1388622, EPI_ISL_1388624, EPI_ISL_1388626, EPI_ISL_1388663, EPI_ISL_1388673, EPI_ISL_1388693, EPI_ISL_1388707, EPI_ISL_1388709, EPI_ISL_1388735, EPI_ISL_1388854, EPI_ISL_1388856, EPI_ISL_1388858, EPI_ISL_1388871, EPI_ISL_1388873, EPI_ISL_1388875, EPI_ISL_1388877, EPI_ISL_1388879, EPI_ISL_1388881, EPI_ISL_1388883, EPI_ISL_1388885, EPI_ISL_1388887, EPI_ISL_1388889, EPI_ISL_1388892, EPI_ISL_1388894, EPI_ISL_1388895, EPI_ISL_1388898, EPI_ISL_1388902, EPI_ISL_1388903, EPI_ISL_1388905, EPI_ISL_1388907, EPI_ISL_1388909, EPI_ISL_1388911, EPI_ISL_1388913, EPI_ISL_1388916, EPI_ISL_1389119                                                                                                                                                                                                                                                                                                                                                                                                                                | see above | Viollier AG                                                                                                                                                                                     | University Hospital Basel, Clinical Bacteriology                                                                                                              | Adrian Egli; Alfredo Mari; Christiane Beckmann; Hans Hirsch; Helena MB Seth-Smith; Julia Bielicki; Karoline Leuzinger; Lukas Fenner; Madlen Stange; Manuel Battegay; Tim Roloff                                                                                                                                                                                                                                                                                             |
| EPI_ISL_1495046, EPI_ISL_1495050, EPI_ISL_1545764, EPI_ISL_1545997, EPI_ISL_1547310, EPI_ISL_1547359, EPI_ISL_1547364, EPI_ISL_1547366                                                                                                                                                                                                                                                                                                                                                                                                                                                                                                                                                                                                                                                                                                                                                                                                                                                                                                                                                                                                                                                                                                                                                                                                                                                                                                                                                                                                                                                                                                                                                                                                                                                                                                                         | see above | Viollier AG                                                                                                                                                                                     | Viollier AG                                                                                                                                                   | Andrea Patrizia Salzmann; Christiane Beckmann; Christoph Noppen; Henriette Kurth; Maurice Redondo; Olivier Kobel                                                                                                                                                                                                                                                                                                                                                            |
| EPI_ISL_414647, EPI_ISL_417433, EPI_ISL_417442, EPI_ISL_417941, EPI_ISL_417942, EPI_ISL_417944, EPI_ISL_417946, EPI_ISL_417948, EPI_ISL_417950, EPI_ISL_417955, EPI_ISL_420030, EPI_ISL_420035, EPI_ISL_420838, EPI_ISL_420841, EPI_ISL_420845, EPI_ISL_420847, EPI_ISL_420849, EPI_ISL_420851, EPI_ISL_420854, EPI_ISL_429254, EPI_ISL_429258, EPI_ISL_429259, EPI_ISL_431011, EPI_ISL_431012, EPI_ISL_434678, EPI_ISL_434681, EPI_ISL_434710, EPI_ISL_434711, EPI_ISL_435032, EPI_ISL_435033, EPI_ISL_435113, EPI_ISL_435114, EPI_ISL_435116, EPI_ISL_435118, EPI_ISL_435156, EPI_ISL_435168, EPI_ISL_436194, EPI_ISL_436412, EPI_ISL_437193, EPI_ISL_437196, EPI_ISL_437337, EPI_ISL_437348, EPI_ISL_437350, EPI_ISL_437358, EPI_ISL_447230, EPI_ISL_447249, EPI_ISL_447596, EPI_ISL_447607, EPI_ISL_471396, EPI_ISL_471415, EPI_ISL_487365, EPI_ISL_487369, EPI_ISL_495629, EPI_ISL_495641, EPI_ISL_496491, EPI_ISL_496517, EPI_ISL_513589, EPI_ISL_513631, EPI_ISL_514103, EPI_ISL_514125, EPI_ISL_527489, EPI_ISL_527572, EPI_ISL_591083, EPI_ISL_591089                                                                                                                                                                                                                                                                                                                                                                                                                                                                                                                                                                                                                                                                                                                                                                                                 | see above | Viral Respiratory Lab, National Institute for Biomedical Research (INRB)                                                                                                                        | Pathogen Sequencing Lab, National Institute for Biomedical Research (INRB)                                                                                    | Adrienne Amuri Aziza; Allison Black; Amuri Aziza; Andrew Rambaut; Andrew Rambaut; Catherine Pratt; Eddy Kinganda-Lusamaki; Edith Nkwembe; Emmanuel Lokilo Lofiko; Emmanuel Lokilo-Lofiko; Francisca Muyembe-Mawete; Francisca Muyembe-Mawete; Ian Goodfellow; James Hadfield; Jean Claude Makangara; Jean-Jacques Muyembe Tamfum; Josh Quick; Kristian Andersen; Matthias Pauthner; Michael Wiley; Nick Loman; Placide Mbala-Kingebeni; Steve Ahuka-Mundeke; Trevor Bedford |
| EPI_ISL_487192                                                                                                                                                                                                                                                                                                                                                                                                                                                                                                                                                                                                                                                                                                                                                                                                                                                                                                                                                                                                                                                                                                                                                                                                                                                                                                                                                                                                                                                                                                                                                                                                                                                                                                                                                                                                                                                 |           | Viral Respiratory Lab, National Institute for Biomedical Research (INRB)                                                                                                                        | Pathogen Sequencing Lab, National Institute for Biomedical Research (INRB)                                                                                    | Allison Black; Amuri Aziza; Andrew Rambaut; Catherine Pratt; Eddy Kinganda-Lusamaki; Edith Nkwembe; Emmanuel Lokilo-Lofiko; Francisca Muyembe-Mawete; Ian Goodfellow; James Hadfield; Jean-Jacques Muyembe Tamfum; Josh Quick; Kristian Andersen; Matthias Pauthner; Michael Wiley; Nick Loman; Placide Mbala-Kingebeni; Steve Ahuka-Mundeke; Trevor Bedford                                                                                                                |
| EPI_ISL_528386                                                                                                                                                                                                                                                                                                                                                                                                                                                                                                                                                                                                                                                                                                                                                                                                                                                                                                                                                                                                                                                                                                                                                                                                                                                                                                                                                                                                                                                                                                                                                                                                                                                                                                                                                                                                                                                 |           | Viral vaccines, VSVRI- Veterinary serum and vaccine research institute                                                                                                                          | Viral vaccines, VSVRI- Veterinary serum and vaccine research institute                                                                                        | A.A.; M.A.; Saad; Saleh                                                                                                                                                                                                                                                                                                                                                                                                                                                     |
| EPI_ISL_418864, EPI_ISL_418956, EPI_ISL_418958, EPI_ISL_419256, EPI_ISL_419258, EPI_ISL_419260, EPI_ISL_419263, EPI_ISL_419706, EPI_ISL_419708, EPI_ISL_419710, EPI_ISL_419713, EPI_ISL_420018, EPI_ISL_420029, EPI_ISL_420628, EPI_ISL_420630, EPI_ISL_426454, EPI_ISL_426475, EPI_ISL_429969, EPI_ISL_429989, EPI_ISL_434590, EPI_ISL_434606, EPI_ISL_437387, EPI_ISL_437432, EPI_ISL_437763, EPI_ISL_437802, EPI_ISL_452796, EPI_ISL_452856, EPI_ISL_463094, EPI_ISL_463137, EPI_ISL_467782, EPI_ISL_467808, EPI_ISL_467928, EPI_ISL_467944, EPI_ISL_477631, EPI_ISL_477632, EPI_ISL_485814, EPI_ISL_485871, EPI_ISL_495298, EPI_ISL_495329, EPI_ISL_500831, EPI_ISL_516655, EPI_ISL_516684, EPI_ISL_516687, EPI_ISL_516720, EPI_ISL_522777, EPI_ISL_522823, EPI_ISL_525189, EPI_ISL_525205, EPI_ISL_526775, EPI_ISL_526931, EPI_ISL_528639, EPI_ISL_528662, EPI_ISL_529937, EPI_ISL_529960, EPI_ISL_572195, EPI_ISL_572318, EPI_ISL_581508, EPI_ISL_581518, EPI_ISL_581520, EPI_ISL_581522, EPI_ISL_581574, EPI_ISL_609971, EPI_ISL_609988, EPI_ISL_610118, EPI_ISL_610151, EPI_ISL_614012, EPI_ISL_614094, EPI_ISL_614096, EPI_ISL_614154                                                                                                                                                                                                                                                                                                                                                                                                                                                                                                                                                                                                                                                                                                                 | see above | Virginia DCLS                                                                                                                                                                                   | Virginia DCLS                                                                                                                                                 | Virginia DCLS                                                                                                                                                                                                                                                                                                                                                                                                                                                               |
| EPI_ISL_529908, EPI_ISL_529936, EPI_ISL_1445020, EPI_ISL_1445064, EPI_ISL_1461649, EPI_ISL_1461709, EPI_ISL_1494557, EPI_ISL_1494625, EPI_ISL_1526836, EPI_ISL_1526909, EPI_ISL_1540458, EPI_ISL_1540500                                                                                                                                                                                                                                                                                                                                                                                                                                                                                                                                                                                                                                                                                                                                                                                                                                                                                                                                                                                                                                                                                                                                                                                                                                                                                                                                                                                                                                                                                                                                                                                                                                                       |           | Virginia Division of Consolidated Laboratory Services                                                                                                                                           | Virginia Division of Consolidated Laboratory Services                                                                                                         | Virginia DCLS                                                                                                                                                                                                                                                                                                                                                                                                                                                               |
| EPI_ISL_528663, EPI_ISL_528682                                                                                                                                                                                                                                                                                                                                                                                                                                                                                                                                                                                                                                                                                                                                                                                                                                                                                                                                                                                                                                                                                                                                                                                                                                                                                                                                                                                                                                                                                                                                                                                                                                                                                                                                                                                                                                 |           | Virginia Division of Consolidated Laboratory Services (DCLS)                                                                                                                                    | Virginia Division of Consolidated Laboratory Services (DCLS)                                                                                                  | Virginia DCLS                                                                                                                                                                                                                                                                                                                                                                                                                                                               |
| EPI_ISL_416488                                                                                                                                                                                                                                                                                                                                                                                                                                                                                                                                                                                                                                                                                                                                                                                                                                                                                                                                                                                                                                                                                                                                                                                                                                                                                                                                                                                                                                                                                                                                                                                                                                                                                                                                                                                                                                                 |           | ViroGenetics - BSL3 Laboratory of Virology; Human Genome Variation Research Group & Genomics Centre MCB; Bioinformatics Research Group Department of Virology                                   | ViroGenetics - BSL3 Laboratory of Virology; Human Genome Variation Research Group & Genomics Centre MCB; Bioinformatics Research Group Department of Virology | Adrianna Klajmon; Agata Jarosz; Agnieszka Koakowska-Kulesza; Aleksandra Milewska; Ewelina Hallman-Szeliska; Ewelina Popiech; Kamila Marszaek; Katarzyna Pancer; Katarzyna Zacharczuk; Krzysztof Pyg; Magdalena Rzecczkowska; Natalia Wolaniuk; Pawe P abaj; Tomasz Wokowicz; Wojciech Branicki                                                                                                                                                                              |
| EPI_ISL_428925, EPI_ISL_428932                                                                                                                                                                                                                                                                                                                                                                                                                                                                                                                                                                                                                                                                                                                                                                                                                                                                                                                                                                                                                                                                                                                                                                                                                                                                                                                                                                                                                                                                                                                                                                                                                                                                                                                                                                                                                                 |           | ViroGenetics - BSL3 Laboratory of Virology; Human Genome Variation Research Group & Genomics Centre MCB; Bioinformatics Research Group; Wojewódzka Stacja Sanitarno-Epidemiologiczna w Krakowie | ViroGenetics - BSL3 Laboratory of Virology; Human Genome Variation Research Group & Genomics Centre MCB; Bioinformatics Research Group                        | Adrianna Klajmon; Agnieszka Starowicz; Aleksandra Pisarek; Aleksandra Synowicz; Danuta Piniewska-Róg; Ewelina Popiech; Inga Drebot; Jarosaw Foremy; Kamila Marszaek; Katarzyna Dudek; Katarzyna Gua; Katarzyna Kopera; Krzysztof Pyg; Magda Pachota; Marek Sanak; Micha Kowalski; Pawe P abaj; Tomasz Gromowski; Wojciech Branicki                                                                                                                                          |
| EPI_ISL_416744, EPI_ISL_418183, EPI_ISL_435403, EPI_ISL_435431                                                                                                                                                                                                                                                                                                                                                                                                                                                                                                                                                                                                                                                                                                                                                                                                                                                                                                                                                                                                                                                                                                                                                                                                                                                                                                                                                                                                                                                                                                                                                                                                                                                                                                                                                                                                 |           | Virological Research Group, Szentágotthai Research Centre                                                                                                                                       | Bioinformatics Research Group, Szentágotthai Research Centre                                                                                                  | Attila Gyenesei; Endre Gábor Tóth; Ferenc Jakab; Gábor Kemenesi; Péter Urbán; Róbert Herczeg                                                                                                                                                                                                                                                                                                                                                                                |
| EPI_ISL_416426                                                                                                                                                                                                                                                                                                                                                                                                                                                                                                                                                                                                                                                                                                                                                                                                                                                                                                                                                                                                                                                                                                                                                                                                                                                                                                                                                                                                                                                                                                                                                                                                                                                                                                                                                                                                                                                 |           | Virological Research Group, Szentágotthai Research Centre, University of Pécs                                                                                                                   | Bioinformatics Research Group, Szentágotthai Research Centre, University of Pécs                                                                              | Attila Gyenesei; Endre Gábor Tóth; Ferenc Jakab; Gábor Kemenesi; Péter Urbán; Róbert Herczeg                                                                                                                                                                                                                                                                                                                                                                                |
| EPI_ISL_470801                                                                                                                                                                                                                                                                                                                                                                                                                                                                                                                                                                                                                                                                                                                                                                                                                                                                                                                                                                                                                                                                                                                                                                                                                                                                                                                                                                                                                                                                                                                                                                                                                                                                                                                                                                                                                                                 |           | Virology                                                                                                                                                                                        | Virology                                                                                                                                                      | Ahmed, T.; Alam; Clemens; Hasan; Hasan, R.; Hossain, J.D.; M.E.; M.K.; M.M.; M.S.; M.Z. and Rahhan, M.; Miah, M.; Rahman; Sumaiya                                                                                                                                                                                                                                                                                                                                           |
| EPI_ISL_415629, EPI_ISL_415632, EPI_ISL_415640                                                                                                                                                                                                                                                                                                                                                                                                                                                                                                                                                                                                                                                                                                                                                                                                                                                                                                                                                                                                                                                                                                                                                                                                                                                                                                                                                                                                                                                                                                                                                                                                                                                                                                                                                                                                                 |           | Virology Department, Royal Infirmary of Edinburgh, NHS Lothian                                                                                                                                  | Virology Department, Royal Infirmary of Edinburgh, NHS Lothian                                                                                                | Dewar R; McHugh M; O'Toole Á; Rambaut A; Templeton K; Williams TC                                                                                                                                                                                                                                                                                                                                                                                                           |
| EPI_ISL_1386647, EPI_ISL_1386660, EPI_ISL_1386662, EPI_ISL_1386700, EPI_ISL_1386702, EPI_ISL_1386706, EPI_ISL_1474574, EPI_ISL_1474602, EPI_ISL_1545900, EPI_ISL_1545913, EPI_ISL_1545915, EPI_ISL_1545942                                                                                                                                                                                                                                                                                                                                                                                                                                                                                                                                                                                                                                                                                                                                                                                                                                                                                                                                                                                                                                                                                                                                                                                                                                                                                                                                                                                                                                                                                                                                                                                                                                                     |           | Virology Department, Royal Infirmary of Edinburgh, NHS Lothian / School of Biological Sciences, University of Edinburgh                                                                         | COVID-19 Genomics UK (COG-UK) Consortium                                                                                                                      | Colquhoun R; Cotton S; Dewar R; Hill V; Jackson B; McCrone JT; McHugh M; O'Toole Á; Rambaut A; Rooke S; Scher E; Templeton K; Yu X                                                                                                                                                                                                                                                                                                                                          |
| EPI_ISL_487767, EPI_ISL_489043, EPI_ISL_491572, EPI_ISL_491608, EPI_ISL_491611, EPI_ISL_491616, EPI_ISL_491655                                                                                                                                                                                                                                                                                                                                                                                                                                                                                                                                                                                                                                                                                                                                                                                                                                                                                                                                                                                                                                                                                                                                                                                                                                                                                                                                                                                                                                                                                                                                                                                                                                                                                                                                                 | see above | Virology Department, Royal Infirmary of Edinburgh, NHS Lothian / School of Biological Sciences, University of Edinburgh                                                                         | Wellcome Sanger Institute for the COVID-19 Genomics UK (COG-UK) Consortium                                                                                    | Colquhoun R; Cordelia Langford; David K. Jackson; Dewar R; Dominic Kwiatkowski; Ewan Harrison; Hill V; Ian Johnston; Jackson B; John Sillitoe on behalf of the Wellcome Sanger Institute COVID-19 Surveillance Team; McCrone JT; McHugh M; O'Toole Á; Rambaut A; Roberto Amato; Rooke S; Scher E; Sonia Goncalves; Templeton K and Alex Alderton; Yu X                                                                                                                      |
| EPI_ISL_487647, EPI_ISL_487766, EPI_ISL_487768, EPI_ISL_488002, EPI_ISL_488879, EPI_ISL_489042, EPI_ISL_489044, EPI_ISL_489063, EPI_ISL_491494, EPI_ISL_491571, EPI_ISL_491573, EPI_ISL_491607, EPI_ISL_491609, EPI_ISL_491610, EPI_ISL_491612, EPI_ISL_491615, EPI_ISL_491617, EPI_ISL_491654, EPI_ISL_491656, EPI_ISL_491700, EPI_ISL_501632, EPI_ISL_532659, EPI_ISL_532683, EPI_ISL_532689, EPI_ISL_532705, EPI_ISL_532926, EPI_ISL_532978, EPI_ISL_532983, EPI_ISL_532990, EPI_ISL_532992, EPI_ISL_532994                                                                                                                                                                                                                                                                                                                                                                                                                                                                                                                                                                                                                                                                                                                                                                                                                                                                                                                                                                                                                                                                                                                                                                                                                                                                                                                                                 | see above | Virology Department, Royal Infirmary of Edinburgh, NHS Lothian / School of Biological Sciences, University of Edinburgh                                                                         | Wellcome Sanger Institute for the COVID-19 Genomics UK (COG-UK) consortium                                                                                    | Colquhoun R; Cordelia Langford; David K. Jackson; Dewar R; Dominic Kwiatkowski; Ewan Harrison; Hill V; Ian Johnston; Jackson B; John Sillitoe on behalf of the Wellcome Sanger Institute COVID-19 Surveillance Team ( <a href="http://www.sanger.ac.uk/covid-team">http://www.sanger.ac.uk/covid-team</a> ); McCrone JT; McHugh M; O'Toole Á; Rambaut A; Roberto Amato; Rooke S; Scher E; Sonia Goncalves; Templeton K and Alex Alderton; Yu X                              |
| EPI_ISL_425819, EPI_ISL_426024, EPI_ISL_432868, EPI_ISL_432899, EPI_ISL_433068, EPI_ISL_433267, EPI_ISL_433374, EPI_ISL_433465, EPI_ISL_439144, EPI_ISL_439367, EPI_ISL_439665, EPI_ISL_439671, EPI_ISL_449259, EPI_ISL_449329, EPI_ISL_453099, EPI_ISL_453194, EPI_ISL_456890, EPI_ISL_457023, EPI_ISL_461706, EPI_ISL_461762, EPI_ISL_473783, EPI_ISL_473955, EPI_ISL_478163, EPI_ISL_478273, EPI_ISL_484680, EPI_ISL_484684, EPI_ISL_493898, EPI_ISL_493974, EPI_ISL_507180, EPI_ISL_507201, EPI_ISL_514516, EPI_ISL_514562, EPI_ISL_517583, EPI_ISL_517589, EPI_ISL_526459, EPI_ISL_526536, EPI_ISL_529285, EPI_ISL_529317, EPI_ISL_529318, EPI_ISL_529478, EPI_ISL_529689, EPI_ISL_529696, EPI_ISL_540871, EPI_ISL_540893, EPI_ISL_559971, EPI_ISL_559982, EPI_ISL_572411, EPI_ISL_572414, EPI_ISL_572416, EPI_ISL_572421, EPI_ISL_572425, EPI_ISL_572427, EPI_ISL_572435, EPI_ISL_572442, EPI_ISL_572448, EPI_ISL_572490, EPI_ISL_572514, EPI_ISL_572515, EPI_ISL_572535, EPI_ISL_572539, EPI_ISL_572544, EPI_ISL_572573, EPI_ISL_572590, EPI_ISL_572593, EPI_ISL_572599, EPI_ISL_572608, EPI_ISL_572610, EPI_ISL_572617, EPI_ISL_572689, EPI_ISL_572692, EPI_ISL_572707, EPI_ISL_572756, EPI_ISL_572760, EPI_ISL_572762, EPI_ISL_572774, EPI_ISL_572776, EPI_ISL_572777, EPI_ISL_572801, EPI_ISL_572803, EPI_ISL_572821, EPI_ISL_572834, EPI_ISL_572839, EPI_ISL_572871, EPI_ISL_572874, EPI_ISL_572955, EPI_ISL_573247, EPI_ISL_573252, EPI_ISL_573794, EPI_ISL_573798, EPI_ISL_577347, EPI_ISL_577358, EPI_ISL_585426, EPI_ISL_585501, EPI_ISL_594816, EPI_ISL_594848, EPI_ISL_611544, EPI_ISL_611549, EPI_ISL_611685, EPI_ISL_611707, EPI_ISL_611842, EPI_ISL_611850, EPI_ISL_611894, EPI_ISL_611924, EPI_ISL_611989, EPI_ISL_612037, EPI_ISL_612074, EPI_ISL_612126, EPI_ISL_612129, EPI_ISL_612187, EPI_ISL_612189, EPI_ISL_612314, EPI_ISL_612374 | see above | Virology Department, Royal Infirmary of Edinburgh, NHS Lothian / School of Biological Sciences, University of Edinburgh / Institute of Genetics and Molecular Medicine, University of Edinburgh | COVID-19 Genomics UK (COG-UK) Consortium                                                                                                                      | Balcaza C; Colquhoun R; Dewar R; Gallagher M; Hill V; Jackson B; McCrone JT; McHugh M; O'Toole A; O'Toole Á; O'Átoole Á; Rambaut A; Rooke S; Scher E; Templeton K; Williams TC; Yu X                                                                                                                                                                                                                                                                                        |
| EPI_ISL_414500, EPI_ISL_414501                                                                                                                                                                                                                                                                                                                                                                                                                                                                                                                                                                                                                                                                                                                                                                                                                                                                                                                                                                                                                                                                                                                                                                                                                                                                                                                                                                                                                                                                                                                                                                                                                                                                                                                                                                                                                                 |           | Virology Department, Sheffield Teaching Hospitals NHS Foundation Trust                                                                                                                          | Department of Infection, Immunity and Cardiovascular Disease, The Florey Institute, The Medical School, University                                            | Cariad Evans; Matthew Parker; Matthew Wyles; Mehmet Yavuz; Mohammad Raza; Thushan de Silva                                                                                                                                                                                                                                                                                                                                                                                  |

| of Sheffield                                                                                                                                                                                                                                                                                                                                                                                                                                                                                                                                                                                                                                                                                                                                                                                                                                                                                                                                                                                                                                                                                                                                                                                                                                                                                                                                                                                                                                                                                                                                                                                                                                                                                                                                                                                                                                                                                                                                                                                                                                                                                                                                                                                                                                                                                                                                                                                                                                                                                                                                                                                                                                                                                                                                                                                                                                                                                                                                                                                                                                                                                                                                                                                                                                                                                                                                                                                                                                                                                                                                                                                                                                                                                                                                                                                                                                                                 |                                                                                                                                                                                    |                                                                                                                                                                                                                                                           |                                                                                                                                                                                                                                                                                                                                                                                                                                                                                                    |                                                                                                                                                                                                                                                                              |
|------------------------------------------------------------------------------------------------------------------------------------------------------------------------------------------------------------------------------------------------------------------------------------------------------------------------------------------------------------------------------------------------------------------------------------------------------------------------------------------------------------------------------------------------------------------------------------------------------------------------------------------------------------------------------------------------------------------------------------------------------------------------------------------------------------------------------------------------------------------------------------------------------------------------------------------------------------------------------------------------------------------------------------------------------------------------------------------------------------------------------------------------------------------------------------------------------------------------------------------------------------------------------------------------------------------------------------------------------------------------------------------------------------------------------------------------------------------------------------------------------------------------------------------------------------------------------------------------------------------------------------------------------------------------------------------------------------------------------------------------------------------------------------------------------------------------------------------------------------------------------------------------------------------------------------------------------------------------------------------------------------------------------------------------------------------------------------------------------------------------------------------------------------------------------------------------------------------------------------------------------------------------------------------------------------------------------------------------------------------------------------------------------------------------------------------------------------------------------------------------------------------------------------------------------------------------------------------------------------------------------------------------------------------------------------------------------------------------------------------------------------------------------------------------------------------------------------------------------------------------------------------------------------------------------------------------------------------------------------------------------------------------------------------------------------------------------------------------------------------------------------------------------------------------------------------------------------------------------------------------------------------------------------------------------------------------------------------------------------------------------------------------------------------------------------------------------------------------------------------------------------------------------------------------------------------------------------------------------------------------------------------------------------------------------------------------------------------------------------------------------------------------------------------------------------------------------------------------------------------------------|------------------------------------------------------------------------------------------------------------------------------------------------------------------------------------|-----------------------------------------------------------------------------------------------------------------------------------------------------------------------------------------------------------------------------------------------------------|----------------------------------------------------------------------------------------------------------------------------------------------------------------------------------------------------------------------------------------------------------------------------------------------------------------------------------------------------------------------------------------------------------------------------------------------------------------------------------------------------|------------------------------------------------------------------------------------------------------------------------------------------------------------------------------------------------------------------------------------------------------------------------------|
| EPI_ISL_416730 to 416740, EPI_ISL_418286 to 418321, EPI_ISL_420154 to 420292                                                                                                                                                                                                                                                                                                                                                                                                                                                                                                                                                                                                                                                                                                                                                                                                                                                                                                                                                                                                                                                                                                                                                                                                                                                                                                                                                                                                                                                                                                                                                                                                                                                                                                                                                                                                                                                                                                                                                                                                                                                                                                                                                                                                                                                                                                                                                                                                                                                                                                                                                                                                                                                                                                                                                                                                                                                                                                                                                                                                                                                                                                                                                                                                                                                                                                                                                                                                                                                                                                                                                                                                                                                                                                                                                                                                 | Virology Department, Sheffield Teaching Hospitals NHS Foundation Trust                                                                                                             | Department of Infection, Immunity and Cardiovascular Disease, The Florey Institute, The Medical School, University of Sheffield                                                                                                                           | Adri Angyal; Alex Keeley; Benjamin Lindsey; Cariad Evans; Danielle Groves; Dave Partridge; Luke Green; Matthew Parker; Matthew Wyles; Mehmet Yavuz; Mohammad Raza; Paul Parsons; Rachel Tucker; Rebecca Brown; Thushan de Silva                                                                                                                                                                                                                                                                    |                                                                                                                                                                                                                                                                              |
| EPI_ISL_537213, EPI_ISL_537254, EPI_ISL_537279, EPI_ISL_537285                                                                                                                                                                                                                                                                                                                                                                                                                                                                                                                                                                                                                                                                                                                                                                                                                                                                                                                                                                                                                                                                                                                                                                                                                                                                                                                                                                                                                                                                                                                                                                                                                                                                                                                                                                                                                                                                                                                                                                                                                                                                                                                                                                                                                                                                                                                                                                                                                                                                                                                                                                                                                                                                                                                                                                                                                                                                                                                                                                                                                                                                                                                                                                                                                                                                                                                                                                                                                                                                                                                                                                                                                                                                                                                                                                                                               | Virology Department, Sheffield Teaching Hospitals NHS Foundation Trust / Department of Infection, Immunity and Cardiovascular Disease, The Medical School, University of Sheffield | Wellcome Sanger Institute for the COVID-19 Genomics UK (COG-UK) Consortium                                                                                                                                                                                | Adri Angyal; Alex Keeley; Benjamin Lindsey; Cariad Evans and Alex Alderton; Cordelia Langford; Danielle Groves; Dave Partridge; David K. Jackson; Dominic Kwiatkowski; Ewan Harrison; Ian Johnston; John Sillitoe on behalf of the Wellcome Sanger Institute COVID-19 Surveillance Team; Luke Green; Matthew Parker; Matthew Wyles; Mehmet Yavuz; Mohammad Raza; Paul Parsons; Rachel Tucker; Rebecca Brown; Roberto Amato; Sonia Goncalves; Thushan de Silva                                      |                                                                                                                                                                                                                                                                              |
| EPI_ISL_469918 to 469929, EPI_ISL_537206 to 537212, EPI_ISL_537214 to 537253, EPI_ISL_537255 to 537278, EPI_ISL_537280 to 537284                                                                                                                                                                                                                                                                                                                                                                                                                                                                                                                                                                                                                                                                                                                                                                                                                                                                                                                                                                                                                                                                                                                                                                                                                                                                                                                                                                                                                                                                                                                                                                                                                                                                                                                                                                                                                                                                                                                                                                                                                                                                                                                                                                                                                                                                                                                                                                                                                                                                                                                                                                                                                                                                                                                                                                                                                                                                                                                                                                                                                                                                                                                                                                                                                                                                                                                                                                                                                                                                                                                                                                                                                                                                                                                                             | Virology Department, Sheffield Teaching Hospitals NHS Foundation Trust / Department of Infection, Immunity and Cardiovascular Disease, The Medical School, University of Sheffield | Wellcome Sanger Institute for the COVID-19 Genomics UK (COG-UK) consortium                                                                                                                                                                                | Adri Angyal; Alex Keeley; Benjamin Lindsey; Cariad Evans and Alex Alderton; Cordelia Langford; Danielle Groves; Dave Partridge; David K. Jackson; Dominic Kwiatkowski; Ewan Harrison; Ian Johnston; John Sillitoe on behalf of the Wellcome Sanger Institute COVID-19 Surveillance Team (http://www.sanger.ac.uk/covid-team); Luke Green; Matthew Parker; Matthew Wyles; Mehmet Yavuz; Mohammad Raza; Paul Parsons; Rachel Tucker; Rebecca Brown; Roberto Amato; Sonia Goncalves; Thushan de Silva |                                                                                                                                                                                                                                                                              |
| EPI_ISL_432451 to 432667, EPI_ISL_432710 to 432867                                                                                                                                                                                                                                                                                                                                                                                                                                                                                                                                                                                                                                                                                                                                                                                                                                                                                                                                                                                                                                                                                                                                                                                                                                                                                                                                                                                                                                                                                                                                                                                                                                                                                                                                                                                                                                                                                                                                                                                                                                                                                                                                                                                                                                                                                                                                                                                                                                                                                                                                                                                                                                                                                                                                                                                                                                                                                                                                                                                                                                                                                                                                                                                                                                                                                                                                                                                                                                                                                                                                                                                                                                                                                                                                                                                                                           | Virology Department, Sheffield Teaching Hospitals NHS Foundation Trust / Virology Department, Sheffield Teaching Hospitals NHS Foundation Trust                                    | COVID-19 Genomics UK (COG-UK) Consortium                                                                                                                                                                                                                  | Adri Angyal; Alex Keeley; Benjamin Lindsey; Cariad Evans; Danielle Groves; Dave Partridge; Luke Green; Matthew Parker; Matthew Wyles; Mehmet Yavuz; Mohammad Raza; Paul Parsons; Rachel Tucker; Rebecca Brown; Thushan de Silva                                                                                                                                                                                                                                                                    |                                                                                                                                                                                                                                                                              |
| EPI_ISL_441898 to 442043, EPI_ISL_442344 to 442522, EPI_ISL_448826 to 448843, EPI_ISL_448845 to 448849, EPI_ISL_448851 to 448863, EPI_ISL_448865, EPI_ISL_448867 to 448893, EPI_ISL_448895, EPI_ISL_448897 to 448901, EPI_ISL_448903 to 448905, EPI_ISL_448907 to 448917, EPI_ISL_453696 to 453778, EPI_ISL_457581 to 457686, EPI_ISL_461999 to 462084, EPI_ISL_475342 to 475510, EPI_ISL_479195 to 479283, EPI_ISL_484433 to 484518, EPI_ISL_490581 to 490645, EPI_ISL_493666 to 493740, EPI_ISL_499330 to 499351, EPI_ISL_507160 to 507179, EPI_ISL_517543 to 517579, EPI_ISL_526437 to 526450, EPI_ISL_529301, EPI_ISL_529353 to 529356, EPI_ISL_529382, EPI_ISL_529407, EPI_ISL_529419, EPI_ISL_529433, EPI_ISL_529446, EPI_ISL_529449, EPI_ISL_529500 to 529503, EPI_ISL_529521, EPI_ISL_529675 to 529683, EPI_ISL_535043 to 535101, EPI_ISL_540719 to 540774, EPI_ISL_559898 to 559946, EPI_ISL_560054 to 560068, EPI_ISL_572417 to 572418, EPI_ISL_572420, EPI_ISL_572422, EPI_ISL_572428, EPI_ISL_572432 to 572433, EPI_ISL_572453, EPI_ISL_572458, EPI_ISL_572467, EPI_ISL_572481 to 572482, EPI_ISL_572516, EPI_ISL_572522, EPI_ISL_572529, EPI_ISL_572567, EPI_ISL_572589, EPI_ISL_572609, EPI_ISL_572613, EPI_ISL_572618 to 572619, EPI_ISL_572678, EPI_ISL_572722, EPI_ISL_572743, EPI_ISL_572752, EPI_ISL_572757, EPI_ISL_572767, EPI_ISL_572796, EPI_ISL_572820, EPI_ISL_572841, EPI_ISL_572848, EPI_ISL_572912 to 572916, EPI_ISL_572927 to 572930, EPI_ISL_572945 to 572946, EPI_ISL_572948 to 572949, EPI_ISL_572956, EPI_ISL_572959, EPI_ISL_572961, EPI_ISL_573526 to 573565, EPI_ISL_573686 to 573758, EPI_ISL_573762 to 573763, EPI_ISL_573806 to 573810, EPI_ISL_584167, EPI_ISL_584188 to 584192, EPI_ISL_584196 to 584199, EPI_ISL_584207 to 584211, EPI_ISL_584217 to 584282, EPI_ISL_584324 to 584380, EPI_ISL_585009 to 585091, EPI_ISL_585620 to 585626, EPI_ISL_595802 to 595821, EPI_ISL_595823 to 595836, EPI_ISL_596191 to 596227, EPI_ISL_611520, EPI_ISL_611525, EPI_ISL_611528, EPI_ISL_611536, EPI_ISL_611541, EPI_ISL_611545, EPI_ISL_611553, EPI_ISL_611583 to 611584, EPI_ISL_611587, EPI_ISL_611594, EPI_ISL_611598, EPI_ISL_611602, EPI_ISL_611606, EPI_ISL_611650 to 611651, EPI_ISL_611655 to 611656, EPI_ISL_611661, EPI_ISL_611669, EPI_ISL_611678 to 611679, EPI_ISL_611682, EPI_ISL_611688, EPI_ISL_611690, EPI_ISL_611698 to 611699, EPI_ISL_611733, EPI_ISL_611744 to 611745, EPI_ISL_611774 to 611775, EPI_ISL_611777 to 611783, EPI_ISL_611787 to 611789, EPI_ISL_611793 to 611795, EPI_ISL_611797 to 611806, EPI_ISL_611816 to 611817, EPI_ISL_611829 to 611830, EPI_ISL_611861 to 611862, EPI_ISL_611869, EPI_ISL_611920, EPI_ISL_611936, EPI_ISL_611979, EPI_ISL_611988, EPI_ISL_611997, EPI_ISL_612005, EPI_ISL_612020, EPI_ISL_612022 to 612023, EPI_ISL_612033, EPI_ISL_612050, EPI_ISL_612055, EPI_ISL_612058, EPI_ISL_612062, EPI_ISL_612067, EPI_ISL_612084, EPI_ISL_612102, EPI_ISL_612196, EPI_ISL_613356 to 613409, EPI_ISL_1389038, EPI_ISL_1389040, EPI_ISL_1389044, EPI_ISL_1389046, EPI_ISL_1389048, EPI_ISL_1389050, EPI_ISL_1389052, EPI_ISL_1389056, EPI_ISL_1389058 to 1389059, EPI_ISL_1389062, EPI_ISL_1389064, EPI_ISL_1389066, EPI_ISL_1389068 to 1389069, EPI_ISL_1389071, EPI_ISL_1389073, EPI_ISL_1389075, EPI_ISL_1389077, EPI_ISL_1389079 to 1389080, EPI_ISL_1389082, EPI_ISL_1389084, EPI_ISL_1389086, EPI_ISL_1389088, EPI_ISL_1389090, EPI_ISL_1389094, EPI_ISL_1389096, EPI_ISL_1389098, EPI_ISL_1389100, EPI_ISL_1389102, EPI_ISL_1389104, EPI_ISL_1389110, EPI_ISL_1389112, EPI_ISL_1389115, EPI_ISL_1389117 to 1389118, EPI_ISL_1389122, EPI_ISL_1389125 to 1389126, EPI_ISL_1389130, EPI_ISL_1389132, EPI_ISL_1389134 to 1389135, EPI_ISL_1389138, EPI_ISL_1476691 to 1476708, EPI_ISL_1476710 to 1476740, EPI_ISL_1547311 to 1547313, EPI_ISL_1547315, EPI_ISL_1547317 to 1547358 | Virology Department, Sheffield Teaching Hospitals NHS Foundation Trust/Department of Infection, Immunity and Cardiovascular Disease, The Medical School, University of Sheffield   | COVID-19 Genomics UK (COG-UK) Consortium                                                                                                                                                                                                                  | Adri Angyal; Alex Keeley; Benjamin Lindsey; Cariad Evans; Danielle Groves; Dave Partridge; Katie Johnson; Laura Carrilero; Luke Green; Matthew Parker; Matthew Wyles; Mehmet Yavuz; Mohammad Raza; Nikki Smith; Paul Parsons; Rachel Tucker; Rebecca Brown; Thushan de Silva                                                                                                                                                                                                                       |                                                                                                                                                                                                                                                                              |
| EPI_ISL_493198 to 493208, EPI_ISL_494747                                                                                                                                                                                                                                                                                                                                                                                                                                                                                                                                                                                                                                                                                                                                                                                                                                                                                                                                                                                                                                                                                                                                                                                                                                                                                                                                                                                                                                                                                                                                                                                                                                                                                                                                                                                                                                                                                                                                                                                                                                                                                                                                                                                                                                                                                                                                                                                                                                                                                                                                                                                                                                                                                                                                                                                                                                                                                                                                                                                                                                                                                                                                                                                                                                                                                                                                                                                                                                                                                                                                                                                                                                                                                                                                                                                                                                     | Virology Lab, Department of Pathology, National Cheng Kung University Hospital                                                                                                     | Virology Lab, Department of Pathology, National Cheng Kung University Hospital                                                                                                                                                                            | Huey-Pin Tsai; Huey-Pin Tsai et al; et al                                                                                                                                                                                                                                                                                                                                                                                                                                                          |                                                                                                                                                                                                                                                                              |
| EPI_ISL_448844, EPI_ISL_448850, EPI_ISL_448864, EPI_ISL_448866, EPI_ISL_448894, EPI_ISL_448896, EPI_ISL_448902, EPI_ISL_448906                                                                                                                                                                                                                                                                                                                                                                                                                                                                                                                                                                                                                                                                                                                                                                                                                                                                                                                                                                                                                                                                                                                                                                                                                                                                                                                                                                                                                                                                                                                                                                                                                                                                                                                                                                                                                                                                                                                                                                                                                                                                                                                                                                                                                                                                                                                                                                                                                                                                                                                                                                                                                                                                                                                                                                                                                                                                                                                                                                                                                                                                                                                                                                                                                                                                                                                                                                                                                                                                                                                                                                                                                                                                                                                                               | see above                                                                                                                                                                          | Virology Laboratory, Castle Hill Hospital, Hull University Teaching Hospitals NHS Trust/Department of Infection, Immunity and Cardiovascular Disease, The Medical School, University of Sheffield                                                         | COVID-19 Genomics UK (COG-UK) Consortium                                                                                                                                                                                                                                                                                                                                                                                                                                                           | Adri Angyal; Alex Keeley; Benjamin Lindsey; Cariad Evans; Danielle Groves; Dave Partridge; Katie Johnson; Laura Carrilero; Luke Green; Matthew Parker; Matthew Wyles; Mehmet Yavuz; Mohammad Raza; Nikki Smith; Paul Parsons; Rachel Tucker; Rebecca Brown; Thushan de Silva |
| EPI_ISL_417491                                                                                                                                                                                                                                                                                                                                                                                                                                                                                                                                                                                                                                                                                                                                                                                                                                                                                                                                                                                                                                                                                                                                                                                                                                                                                                                                                                                                                                                                                                                                                                                                                                                                                                                                                                                                                                                                                                                                                                                                                                                                                                                                                                                                                                                                                                                                                                                                                                                                                                                                                                                                                                                                                                                                                                                                                                                                                                                                                                                                                                                                                                                                                                                                                                                                                                                                                                                                                                                                                                                                                                                                                                                                                                                                                                                                                                                               | Virology Laboratory, Department of Biomedical Sciences and Public Health, University Politecnica delle Marche                                                                      | Virology and Legal Medicine Laboratories, Department of Biomedical Sciences and Public Health, University Politecnica delle Marche                                                                                                                        | Alessandrini, F.; Bagnarelli, P.; Caucci, S.; Di Sante, L.; Menzo, S.; Onofri, V.; Tagliabracchi, A.; Turchi, C.                                                                                                                                                                                                                                                                                                                                                                                   |                                                                                                                                                                                                                                                                              |
| EPI_ISL_445085                                                                                                                                                                                                                                                                                                                                                                                                                                                                                                                                                                                                                                                                                                                                                                                                                                                                                                                                                                                                                                                                                                                                                                                                                                                                                                                                                                                                                                                                                                                                                                                                                                                                                                                                                                                                                                                                                                                                                                                                                                                                                                                                                                                                                                                                                                                                                                                                                                                                                                                                                                                                                                                                                                                                                                                                                                                                                                                                                                                                                                                                                                                                                                                                                                                                                                                                                                                                                                                                                                                                                                                                                                                                                                                                                                                                                                                               | Virology Unit, Agrobiodiversity and Biotechnology Project, CIAT - International Center for Tropical Agriculture                                                                    | Virology Unit, Agrobiodiversity and Biotechnology Project, CIAT - International Center for Tropical Agriculture                                                                                                                                           | B. and Cuellar; Lopez, D.; Parra; W.J.                                                                                                                                                                                                                                                                                                                                                                                                                                                             |                                                                                                                                                                                                                                                                              |
| EPI_ISL_508862 to 508863                                                                                                                                                                                                                                                                                                                                                                                                                                                                                                                                                                                                                                                                                                                                                                                                                                                                                                                                                                                                                                                                                                                                                                                                                                                                                                                                                                                                                                                                                                                                                                                                                                                                                                                                                                                                                                                                                                                                                                                                                                                                                                                                                                                                                                                                                                                                                                                                                                                                                                                                                                                                                                                                                                                                                                                                                                                                                                                                                                                                                                                                                                                                                                                                                                                                                                                                                                                                                                                                                                                                                                                                                                                                                                                                                                                                                                                     | Virology Unit, Institut Pasteur de Madagascar                                                                                                                                      | Virology Unit, Institut Pasteur de Madagascar                                                                                                                                                                                                             | Cara Brook; Christian Ranaivosoa; Cristina M. Tato; Helisoa Razafimanjato; Jean-Michel Heraud; Joseph L. DeRisi; Michelle Tan; Norosoa Razanajatovo; Soa Fy Andriamandimby; Tsiry Randriambolamanantsoa; Vida Ahyong; Vololoniaina Raharinosy                                                                                                                                                                                                                                                      |                                                                                                                                                                                                                                                                              |
| EPI_ISL_1532801 to 1532802, EPI_ISL_1532804 to 1532811, EPI_ISL_1532813 to 1532815, EPI_ISL_1534528 to 1534543                                                                                                                                                                                                                                                                                                                                                                                                                                                                                                                                                                                                                                                                                                                                                                                                                                                                                                                                                                                                                                                                                                                                                                                                                                                                                                                                                                                                                                                                                                                                                                                                                                                                                                                                                                                                                                                                                                                                                                                                                                                                                                                                                                                                                                                                                                                                                                                                                                                                                                                                                                                                                                                                                                                                                                                                                                                                                                                                                                                                                                                                                                                                                                                                                                                                                                                                                                                                                                                                                                                                                                                                                                                                                                                                                               | Virology Unit, Institut Pasteur du Cambodge                                                                                                                                        | Virology Unit, Institut Pasteur du Cambodge                                                                                                                                                                                                               | Chau Darapeak; Chin Savuth; Erik A Karlsson; Kraing Sidonn; Leakhena Pum; Ly Sovann; Sokhoun Yann; Teypoutta Ou; Veasna Duong; Yi Sengdoeurn                                                                                                                                                                                                                                                                                                                                                       |                                                                                                                                                                                                                                                                              |
| EPI_ISL_411902                                                                                                                                                                                                                                                                                                                                                                                                                                                                                                                                                                                                                                                                                                                                                                                                                                                                                                                                                                                                                                                                                                                                                                                                                                                                                                                                                                                                                                                                                                                                                                                                                                                                                                                                                                                                                                                                                                                                                                                                                                                                                                                                                                                                                                                                                                                                                                                                                                                                                                                                                                                                                                                                                                                                                                                                                                                                                                                                                                                                                                                                                                                                                                                                                                                                                                                                                                                                                                                                                                                                                                                                                                                                                                                                                                                                                                                               | Virology Unit, Institut Pasteur du Cambodge.                                                                                                                                       | Virology Unit, Institut Pasteur du Cambodge (Sequencing done by: Jessica E Manning/Jennifer A Bohl at Malaria and Vector Research Research Laboratory, National Institute of Allergy and Infectious Diseases and Vida Ahyong from Chan-Zuckerberg Biohub) | Erik A Karlsson; Jennifer A Bohl; Jessica E Manning.; Philippe Dussart; Veasna Duong; Vida Ahyong                                                                                                                                                                                                                                                                                                                                                                                                  |                                                                                                                                                                                                                                                                              |
| EPI_ISL_467666                                                                                                                                                                                                                                                                                                                                                                                                                                                                                                                                                                                                                                                                                                                                                                                                                                                                                                                                                                                                                                                                                                                                                                                                                                                                                                                                                                                                                                                                                                                                                                                                                                                                                                                                                                                                                                                                                                                                                                                                                                                                                                                                                                                                                                                                                                                                                                                                                                                                                                                                                                                                                                                                                                                                                                                                                                                                                                                                                                                                                                                                                                                                                                                                                                                                                                                                                                                                                                                                                                                                                                                                                                                                                                                                                                                                                                                               | Virology lab, NIC, NCCD, Ulaanbaatar, Mongolia                                                                                                                                     | National Centre for Communicable Diseases (NCCD)                                                                                                                                                                                                          | Ankhubay S; Bayasgalan N; Darmaa B; Erdene-Ochir Ts; Naranzul Ts; Nymadawa P; Tsogtbaatar B                                                                                                                                                                                                                                                                                                                                                                                                        |                                                                                                                                                                                                                                                                              |
| EPI_ISL_416458                                                                                                                                                                                                                                                                                                                                                                                                                                                                                                                                                                                                                                                                                                                                                                                                                                                                                                                                                                                                                                                                                                                                                                                                                                                                                                                                                                                                                                                                                                                                                                                                                                                                                                                                                                                                                                                                                                                                                                                                                                                                                                                                                                                                                                                                                                                                                                                                                                                                                                                                                                                                                                                                                                                                                                                                                                                                                                                                                                                                                                                                                                                                                                                                                                                                                                                                                                                                                                                                                                                                                                                                                                                                                                                                                                                                                                                               | Virology laboratory Ministry of Health Kuwait sequenced at Dasman Diabetes Institute                                                                                               | Dasman Diabetes Institute                                                                                                                                                                                                                                 | Ebaa alOzairi; Fahd Al-Mulla; Motasem Melhem; Qais Al-Duwairi; Rasheeba iqbal; Sara Alqabandi; Sumi John                                                                                                                                                                                                                                                                                                                                                                                           |                                                                                                                                                                                                                                                                              |
| EPI_ISL_610245                                                                                                                                                                                                                                                                                                                                                                                                                                                                                                                                                                                                                                                                                                                                                                                                                                                                                                                                                                                                                                                                                                                                                                                                                                                                                                                                                                                                                                                                                                                                                                                                                                                                                                                                                                                                                                                                                                                                                                                                                                                                                                                                                                                                                                                                                                                                                                                                                                                                                                                                                                                                                                                                                                                                                                                                                                                                                                                                                                                                                                                                                                                                                                                                                                                                                                                                                                                                                                                                                                                                                                                                                                                                                                                                                                                                                                                               | Virology, National Institute for Biological Standards and Control                                                                                                                  | Virology, National Institute for Biological Standards and Control                                                                                                                                                                                         | Bentley, E.; E.T.; Fritzsche; M. and Mattiuzzo, G.; Mate, R.; Mee; Routley, S.                                                                                                                                                                                                                                                                                                                                                                                                                     |                                                                                                                                                                                                                                                                              |
| EPI_ISL_1394506 to 1394592                                                                                                                                                                                                                                                                                                                                                                                                                                                                                                                                                                                                                                                                                                                                                                                                                                                                                                                                                                                                                                                                                                                                                                                                                                                                                                                                                                                                                                                                                                                                                                                                                                                                                                                                                                                                                                                                                                                                                                                                                                                                                                                                                                                                                                                                                                                                                                                                                                                                                                                                                                                                                                                                                                                                                                                                                                                                                                                                                                                                                                                                                                                                                                                                                                                                                                                                                                                                                                                                                                                                                                                                                                                                                                                                                                                                                                                   | Virology, Universitätsklinikum des Saarlandes                                                                                                                                      | Epigenetics, Saarland University                                                                                                                                                                                                                          | Jörn Walter; Kathrin Kattler; Markus Vogelgesang; Sascha Tierling; Sigrun Smola; Stefan Lohse; Thorsten Pfuhl                                                                                                                                                                                                                                                                                                                                                                                      |                                                                                                                                                                                                                                                                              |
| EPI_ISL_431778, EPI_ISL_447623 to 447634                                                                                                                                                                                                                                                                                                                                                                                                                                                                                                                                                                                                                                                                                                                                                                                                                                                                                                                                                                                                                                                                                                                                                                                                                                                                                                                                                                                                                                                                                                                                                                                                                                                                                                                                                                                                                                                                                                                                                                                                                                                                                                                                                                                                                                                                                                                                                                                                                                                                                                                                                                                                                                                                                                                                                                                                                                                                                                                                                                                                                                                                                                                                                                                                                                                                                                                                                                                                                                                                                                                                                                                                                                                                                                                                                                                                                                     | Virology, Wageningen Bioveterinary Research                                                                                                                                        | Virology, Wageningen Bioveterinary Research                                                                                                                                                                                                               | A. and van der Poel; Bouwstra, R.; Engelsma; Gerhards, N.; Hakke van der Honing; Harders, F.; Hissink, H.; M.Y.; Molenaar; Oreshkova, N.; R.J.; R.W.; Smit, L.; Stegeman; Stegeman, A.; Tacken, M.; Vreman, S.; W.H.M.; Weesendorp, E.; van der Poel; van der Poel, W.                                                                                                                                                                                                                             |                                                                                                                                                                                                                                                                              |
| EPI_ISL_591054 to 591056                                                                                                                                                                                                                                                                                                                                                                                                                                                                                                                                                                                                                                                                                                                                                                                                                                                                                                                                                                                                                                                                                                                                                                                                                                                                                                                                                                                                                                                                                                                                                                                                                                                                                                                                                                                                                                                                                                                                                                                                                                                                                                                                                                                                                                                                                                                                                                                                                                                                                                                                                                                                                                                                                                                                                                                                                                                                                                                                                                                                                                                                                                                                                                                                                                                                                                                                                                                                                                                                                                                                                                                                                                                                                                                                                                                                                                                     | Virus Ecology, Rocky Mountain Laboratories, National Institutes of Health                                                                                                          | Virus Ecology, Rocky Mountain Laboratories, National Institutes of Health                                                                                                                                                                                 | Barbian; Bushmaker, C.; Bushmaker, T.; C.A.; Holbrook; K.D.; M.G.; Martens; Munster; V.J.; Van Doremalen, N.                                                                                                                                                                                                                                                                                                                                                                                       |                                                                                                                                                                                                                                                                              |
| EPI_ISL_568579                                                                                                                                                                                                                                                                                                                                                                                                                                                                                                                                                                                                                                                                                                                                                                                                                                                                                                                                                                                                                                                                                                                                                                                                                                                                                                                                                                                                                                                                                                                                                                                                                                                                                                                                                                                                                                                                                                                                                                                                                                                                                                                                                                                                                                                                                                                                                                                                                                                                                                                                                                                                                                                                                                                                                                                                                                                                                                                                                                                                                                                                                                                                                                                                                                                                                                                                                                                                                                                                                                                                                                                                                                                                                                                                                                                                                                                               | Virus Molecular Laboratory of the Microbiology and Virology Department                                                                                                             | INMI Lazzaro Spallanzani IRCCS                                                                                                                                                                                                                            | Antonino Di Caro; Barbara Bartolini; Cesare E.M. Gruber; Concetta Castilletti; Edoardo Vecchio Nepita; Elena Percivalle; Fausto Baldanti; Francesca Colavita; Francesco Messina; Irene Cassaniti; Maria R. Capobianchi; Martina Rueca; Silvia Meschi                                                                                                                                                                                                                                               |                                                                                                                                                                                                                                                                              |
| EPI_ISL_1538447, EPI_ISL_1538459, EPI_ISL_1538469, EPI_ISL_1538516, EPI_ISL_1538590, EPI_ISL_1538593, EPI_ISL_1538805 to 1538806, EPI_ISL_1538856, EPI_ISL_1539059, EPI_ISL_1539144, EPI_ISL_1539155                                                                                                                                                                                                                                                                                                                                                                                                                                                                                                                                                                                                                                                                                                                                                                                                                                                                                                                                                                                                                                                                                                                                                                                                                                                                                                                                                                                                                                                                                                                                                                                                                                                                                                                                                                                                                                                                                                                                                                                                                                                                                                                                                                                                                                                                                                                                                                                                                                                                                                                                                                                                                                                                                                                                                                                                                                                                                                                                                                                                                                                                                                                                                                                                                                                                                                                                                                                                                                                                                                                                                                                                                                                                         | see above                                                                                                                                                                          | Vitalabo Bydgoszcz                                                                                                                                                                                                                                        | 1. National Institute of Public Health - National Institute of Hygiene; 2. Eurofins Genomics Europe Sequencing GmbH                                                                                                                                                                                                                                                                                                                                                                                |                                                                                                                                                                                                                                                                              |
| EPI_ISL_1402354 to 1402375                                                                                                                                                                                                                                                                                                                                                                                                                                                                                                                                                                                                                                                                                                                                                                                                                                                                                                                                                                                                                                                                                                                                                                                                                                                                                                                                                                                                                                                                                                                                                                                                                                                                                                                                                                                                                                                                                                                                                                                                                                                                                                                                                                                                                                                                                                                                                                                                                                                                                                                                                                                                                                                                                                                                                                                                                                                                                                                                                                                                                                                                                                                                                                                                                                                                                                                                                                                                                                                                                                                                                                                                                                                                                                                                                                                                                                                   | Vyskov hospital                                                                                                                                                                    | CMBG FN Brno                                                                                                                                                                                                                                              | Bezdicke M.; Hanslianova M.; Lengerova M.; Svaton J.                                                                                                                                                                                                                                                                                                                                                                                                                                               |                                                                                                                                                                                                                                                                              |
| EPI_ISL_1446681 to 1446683, EPI_ISL_1446692 to 1446700, EPI_ISL_1446720, EPI_ISL_1446739, EPI_ISL_1516213 to 1516214, EPI_ISL_1528374 to 1528377                                                                                                                                                                                                                                                                                                                                                                                                                                                                                                                                                                                                                                                                                                                                                                                                                                                                                                                                                                                                                                                                                                                                                                                                                                                                                                                                                                                                                                                                                                                                                                                                                                                                                                                                                                                                                                                                                                                                                                                                                                                                                                                                                                                                                                                                                                                                                                                                                                                                                                                                                                                                                                                                                                                                                                                                                                                                                                                                                                                                                                                                                                                                                                                                                                                                                                                                                                                                                                                                                                                                                                                                                                                                                                                             | WA State Department of Health                                                                                                                                                      | Centers for Disease Control and Prevention Division of Viral Diseases, Pathogen Discovery                                                                                                                                                                 | Alison Laufer Halpin; Ben L. Rambo-Martin; Clinton R. Paden; Dakota Howard; Darlene Wagner; Dave Wentworth; Dhvani Batra; Jasmine Padilla; Justin Lee; Katie Dillon; Krista Queen; Kristen Knipe; Kristine Lacey; Mark Burroughs; Matthew Scherer; Mili Sheth; Peter Cook; Sam Shepard; Sarah Nobles; Shoshona Le; Suxiang Tong; Vivien Dugan; Yvette Unoarumhi                                                                                                                                    |                                                                                                                                                                                                                                                                              |

|                                                                                                                                                                                                                                                                                                                                                                                                                                                                                                    |                                                                   |                                                                                                                        |                                                                                                                                                                                                                                                                                                                                                                                                                                                                                                 |
|----------------------------------------------------------------------------------------------------------------------------------------------------------------------------------------------------------------------------------------------------------------------------------------------------------------------------------------------------------------------------------------------------------------------------------------------------------------------------------------------------|-------------------------------------------------------------------|------------------------------------------------------------------------------------------------------------------------|-------------------------------------------------------------------------------------------------------------------------------------------------------------------------------------------------------------------------------------------------------------------------------------------------------------------------------------------------------------------------------------------------------------------------------------------------------------------------------------------------|
| EPI_ISL_418771 to 418791, EPI_ISL_419555, EPI_ISL_426436 to 426453                                                                                                                                                                                                                                                                                                                                                                                                                                 | WA State Department of Health                                     | Pathogen Discovery, Respiratory Viruses Branch, Division of Viral Diseases, Centers for Disease Control and Prevention | Anna Uehara; Brian Hiatt; Clinton R. Paden; Denny Russell; Haibin Wang; Jasmine Padilla; Jessica Jacobs; Jessica Gant; Jing Zhang; Justin Lee; Krista Queen; Suxiang Tong; Yan Li; Ying Tao                                                                                                                                                                                                                                                                                                     |
| EPI_ISL_1468717, EPI_ISL_1468725, EPI_ISL_1468736, EPI_ISL_1468744 to 1468746, EPI_ISL_1468754 to 1468757, EPI_ISL_1468761, EPI_ISL_1468768, EPI_ISL_1468782, EPI_ISL_1468791, EPI_ISL_1468793 to 1468794, EPI_ISL_1468803                                                                                                                                                                                                                                                                         | WA State PHL                                                      | Seattle Flu Study                                                                                                      | Amanda Adler; Barry R. Lutz; Benjamin Pelle; Brian Hiatt; Caitlin R. Wolf; Chris D. Frazer; Deborah A. Nickerson; Elisabeth Brandstetter; Erica Ryke; Geoff Melly; Helen Y. Chu; Janet A. Englund; Jay Shendure; Jover Lee; Kairsten Fay; Kirsten Lacombe; Lea M. Starita; Mark J. Rieder; Matthew Richardson; Matthew Thompson; Melissa Truong; Michael Boeckh; Michael Famulare; Misja Ilcinis; Peter D. Han; Philip Dykema; Romesh Gautam; Scott Lindquist; Thomas R. Sibley; Trevor Bedford |
| see above                                                                                                                                                                                                                                                                                                                                                                                                                                                                                          | WESTCHESTER MEDICAL CENTER                                        | Wadsworth Center, New York State Department of Health                                                                  | Alexis Russel; Alexis Russell; Catharine Prussing; Daryl M. Lamson; Erasmus Schneider; Erica Lasek-Nesselquist; John Kelly; Jonathan Plitnick; Kirsten St. George; Matthew Shudt; Melissa A Leisner; Navjot Singh                                                                                                                                                                                                                                                                               |
| EPI_ISL_1394593 to 1394628, EPI_ISL_1397444 to 1397458, EPI_ISL_1397550, EPI_ISL_1397768 to 1397782, EPI_ISL_1397914 to 1397952, EPI_ISL_1398028 to 1398033, EPI_ISL_1462553, EPI_ISL_1462555, EPI_ISL_1465622, EPI_ISL_1465637, EPI_ISL_1482394 to 1482405, EPI_ISL_1482411 to 1482445, EPI_ISL_1482539 to 1482555, EPI_ISL_1482617 to 1482624                                                                                                                                                    | WHITE PLAINS HOSPITAL CENTER LABORATORY                           | Wadsworth Center, New York State Department of Health                                                                  | Alexis Russel; Alexis Russell; Catharine Prussing; Daryl M. Lamson; Erasmus Schneider; Erica Lasek-Nesselquist; John Kelly; Jonathan Plitnick; Kirsten St. George; Matthew Shudt; Melissa A Leisner; Navjot Singh                                                                                                                                                                                                                                                                               |
| see above                                                                                                                                                                                                                                                                                                                                                                                                                                                                                          | WHO National Influenza Centre Russian Federation                  | WHO National Influenza Centre Russian Federation                                                                       | Andrey Komissarov; Anna Ivanova; Artem Fadeev; Daria Danilenko; Dmitry Bazhenov; Dmitry Lioznov; Elena Nabieva; Georgii Bazykin; Ksenia Komissarova; Ksenia Safina; Kseniya Komissarova; Maria Pisareva; Maria Pisareva; Maria Timofeeva; Maria Timofeeva; Mariia Sergeeva; Mariia Timofeeva; Mikhail Bakaev; Tamila Musaeva; Veronica Eder; Veronika Eder                                                                                                                                      |
| EPI_ISL_1446367, EPI_ISL_1446383, EPI_ISL_1446861, EPI_ISL_1446863, EPI_ISL_1516245 to 1516255, EPI_ISL_1528406 to 1528410                                                                                                                                                                                                                                                                                                                                                                         | WI State Laboratory of Hygiene                                    | Centers for Disease Control and Prevention Division of Viral Diseases, Pathogen Discovery                              | Alison Laufer Halpin; Ben L. Rambo-Martin; Clinton R. Paden; Dakota Howard; Darlene Wagner; Dave Wentworth; Dhvani Batra; Jasmine Padilla; Justin Lee; Katie Dillon; Krista Queen; Kristen Knipe; Kristine Lacey; Mark Burroughs; Matthew Schmerer; Mili Sheth; Peter Cook; Sam Shepard; Sarah Nobles; Shoshona Le; Suxiang Tong; Vivien Dugan; Yvette Unoarumhi                                                                                                                                |
| EPI_ISL_527737, EPI_ISL_540436 to 540438, EPI_ISL_576179 to 576188                                                                                                                                                                                                                                                                                                                                                                                                                                 | WI State Laboratory of Hygiene                                    | Pathogen Discovery, Respiratory Viruses Branch, Division of Viral Diseases, Centers for Disease Control and Prevention | Anna Montmayeur; Anna Uehara; Brian Lynch; Clinton Paden; Clinton R. Paden; Haibin Wang; Jing Zhang; Krista Queen; Peter Cook; Rachel Marine; Suxiang Tong; Yan Li; Ying Tao                                                                                                                                                                                                                                                                                                                    |
| EPI_ISL_1538832 to 1538833, EPI_ISL_1539080 to 1539083                                                                                                                                                                                                                                                                                                                                                                                                                                             | WSSD Olsztyn                                                      | 1. National Institute of Public Health - National Institute of Hygiene; 2. Eurofins Genomics Europe Sequencing GmbH    | ECDC COVID-19 WGS support team; Eurofins Genomics Europe Sequencing Team; Gierczyki Rafa; Sadkowska-Todys Magorzata; Wokowicz Tomasz; Zacharczuk Katarzyna                                                                                                                                                                                                                                                                                                                                      |
| EPI_ISL_1393760 to 1393761, EPI_ISL_1394041, EPI_ISL_1425543, EPI_ISL_1538442, EPI_ISL_1538462, EPI_ISL_1538511, EPI_ISL_1538580, EPI_ISL_1539163                                                                                                                                                                                                                                                                                                                                                  | see above                                                         | WSSE Biaystok                                                                                                          | 1. National Institute of Public Health - National Institute of Hygiene; 2. Eurofins Genomics Europe Sequencing GmbH                                                                                                                                                                                                                                                                                                                                                                             |
| EPI_ISL_1538470, EPI_ISL_1538724                                                                                                                                                                                                                                                                                                                                                                                                                                                                   | WSSE Gorzów Wlkp.                                                 | 1. National Institute of Public Health - National Institute of Hygiene; 2. Eurofins Genomics Europe Sequencing GmbH    | ECDC COVID-19 WGS support team; Eurofins Genomics Europe Sequencing Team; Gierczyki Rafa; Sadkowska-Todys Magorzata; Wokowicz Tomasz; Zacharczuk Katarzyna                                                                                                                                                                                                                                                                                                                                      |
| EPI_ISL_1393810 to 1393812, EPI_ISL_1394141, EPI_ISL_1538649, EPI_ISL_1539106                                                                                                                                                                                                                                                                                                                                                                                                                      | WSSE Katowice                                                     | 1. National Institute of Public Health - National Institute of Hygiene; 2. Eurofins Genomics Europe Sequencing GmbH    | ECDC COVID-19 WGS support team; Eurofins Genomics Europe Sequencing Team; Gierczyki Rafa; Sadkowska-Todys Magorzata; Wokowicz Tomasz; Zacharczuk Katarzyna                                                                                                                                                                                                                                                                                                                                      |
| EPI_ISL_1538460, EPI_ISL_1538504, EPI_ISL_1538526, EPI_ISL_1538676, EPI_ISL_1538990, EPI_ISL_1539143                                                                                                                                                                                                                                                                                                                                                                                               | WSSE Kielce                                                       | 1. National Institute of Public Health - National Institute of Hygiene; 2. Eurofins Genomics Europe Sequencing GmbH    | ECDC COVID-19 WGS support team; Eurofins Genomics Europe Sequencing Team; Gierczyki Rafa; Sadkowska-Todys Magorzata; Wokowicz Tomasz; Zacharczuk Katarzyna                                                                                                                                                                                                                                                                                                                                      |
| EPI_ISL_1393878 to 1393887, EPI_ISL_1447194, EPI_ISL_1447196, EPI_ISL_1447204, EPI_ISL_1447211 to 1447212, EPI_ISL_1447241, EPI_ISL_1447252, EPI_ISL_1447262 to 1447264, EPI_ISL_1447266 to 1447267, EPI_ISL_1447274 to 1447276, EPI_ISL_1448398, EPI_ISL_1448407, EPI_ISL_1538448 to 1538449, EPI_ISL_1538472, EPI_ISL_1538487, EPI_ISL_1538510, EPI_ISL_1538677 to 1538681, EPI_ISL_1538991 to 1538993, EPI_ISL_1539124 to 1539125, EPI_ISL_1539146, EPI_ISL_1539156, EPI_ISL_1539210            | see above                                                         | WSSE Laboratorium Mikrobiologii i Parazytologii                                                                        | 1. National Institute of Public Health - National Institute of Hygiene; 2. Eurofins Genomics Europe Sequencing GmbH                                                                                                                                                                                                                                                                                                                                                                             |
| EPI_ISL_1393720 to 1393726                                                                                                                                                                                                                                                                                                                                                                                                                                                                         | WSSE Rzeszów LDM                                                  | 1. National Institute of Public Health - National Institute of Hygiene; 2. Eurofins Genomics Europe Sequencing GmbH    | ECDC COVID-19 WGS support team; Eurofins Genomics Europe Sequencing Team; Gierczyki Rafa; Sadkowska-Todys Magorzata; Wokowicz Tomasz; Zacharczuk Katarzyna                                                                                                                                                                                                                                                                                                                                      |
| EPI_ISL_1538797 to 1538798                                                                                                                                                                                                                                                                                                                                                                                                                                                                         | WSSE W odzi - laboratorium                                        | 1. National Institute of Public Health - National Institute of Hygiene; 2. Eurofins Genomics Europe Sequencing GmbH    | ECDC COVID-19 WGS support team; Eurofins Genomics Europe Sequencing Team; Gierczyki Rafa; Sadkowska-Todys Magorzata; Wokowicz Tomasz; Zacharczuk Katarzyna                                                                                                                                                                                                                                                                                                                                      |
| EPI_ISL_1393863 to 1393867, EPI_ISL_1394092 to 1394095, EPI_ISL_1538452, EPI_ISL_1538803, EPI_ISL_1538925, EPI_ISL_1539138                                                                                                                                                                                                                                                                                                                                                                         | WSSE w Bydgoszczy-laboratorium                                    | 1. National Institute of Public Health - National Institute of Hygiene; 2. Eurofins Genomics Europe Sequencing GmbH    | ECDC COVID-19 WGS support team; Eurofins Genomics Europe Sequencing Team; Gierczyki Rafa; Sadkowska-Todys Magorzata; Wokowicz Tomasz; Zacharczuk Katarzyna                                                                                                                                                                                                                                                                                                                                      |
| EPI_ISL_1393651 to 1393657, EPI_ISL_1394066 to 1394067, EPI_ISL_1538870, EPI_ISL_1538902, EPI_ISL_1539128                                                                                                                                                                                                                                                                                                                                                                                          | WSSE w Gdasku                                                     | 1. National Institute of Public Health - National Institute of Hygiene; 2. Eurofins Genomics Europe Sequencing GmbH    | ECDC COVID-19 WGS support team; Eurofins Genomics Europe Sequencing Team; Gierczyki Rafa; Sadkowska-Todys Magorzata; Wokowicz Tomasz; Zacharczuk Katarzyna                                                                                                                                                                                                                                                                                                                                      |
| EPI_ISL_1393709, EPI_ISL_1393945 to 1393953, EPI_ISL_1394143 to 1394163, EPI_ISL_1425560, EPI_ISL_1538434, EPI_ISL_1538437, EPI_ISL_1538446, EPI_ISL_1538450, EPI_ISL_1538455, EPI_ISL_1538483, EPI_ISL_1538490, EPI_ISL_1538494 to 1538495, EPI_ISL_1538501, EPI_ISL_1538517, EPI_ISL_1538537 to 1538538, EPI_ISL_1538650 to 1538663, EPI_ISL_1538765 to 1538776, EPI_ISL_1538984 to 1538987, EPI_ISL_1539038 to 1539044, EPI_ISL_1539129, EPI_ISL_1539140 to 1539141, EPI_ISL_1539207 to 1539208 | see above                                                         | WSSE w Krakowie                                                                                                        | 1. National Institute of Public Health - National Institute of Hygiene; 2. Eurofins Genomics Europe Sequencing GmbH                                                                                                                                                                                                                                                                                                                                                                             |
| EPI_ISL_1393943 to 1393944, EPI_ISL_1394260 to 1394262, EPI_ISL_1425551, EPI_ISL_1538824 to 1538825, EPI_ISL_1538932 to 1538935, EPI_ISL_1539065 to 1539069                                                                                                                                                                                                                                                                                                                                        | WSSE w Olsztynie                                                  | 1. National Institute of Public Health - National Institute of Hygiene; 2. Eurofins Genomics Europe Sequencing GmbH    | ECDC COVID-19 WGS support team; Eurofins Genomics Europe Sequencing Team; Gierczyki Rafa; Sadkowska-Todys Magorzata; Wokowicz Tomasz; Zacharczuk Katarzyna                                                                                                                                                                                                                                                                                                                                      |
| EPI_ISL_1394076, EPI_ISL_1538523, EPI_ISL_1538834 to 1538835, EPI_ISL_1538838, EPI_ISL_1539084 to 1539086, EPI_ISL_1539236                                                                                                                                                                                                                                                                                                                                                                         | WSSE w Warszawie                                                  | 1. National Institute of Public Health - National Institute of Hygiene; 2. Eurofins Genomics Europe Sequencing GmbH    | ECDC COVID-19 WGS support team; Eurofins Genomics Europe Sequencing Team; Gierczyki Rafa; Sadkowska-Todys Magorzata; Wokowicz Tomasz; Zacharczuk Katarzyna                                                                                                                                                                                                                                                                                                                                      |
| EPI_ISL_1539110 to 1539112, EPI_ISL_1539211                                                                                                                                                                                                                                                                                                                                                                                                                                                        | WSZ im dr R.Ostrzyckiego w Koninie Zakad Mikrobiologii Klinicznej | 1. National Institute of Public Health - National Institute of Hygiene; 2. Eurofins Genomics Europe Sequencing GmbH    | ECDC COVID-19 WGS support team; Eurofins Genomics Europe Sequencing Team; Gierczyki Rafa; Sadkowska-Todys Magorzata; Wokowicz Tomasz; Zacharczuk Katarzyna                                                                                                                                                                                                                                                                                                                                      |
| EPI_ISL_1446718 to 1446719, EPI_ISL_1446731, EPI_ISL_1446734, EPI_ISL_1516264 to 1516268, EPI_ISL_1528444 to 1528450                                                                                                                                                                                                                                                                                                                                                                               | WVDHHR - Office of Laboratory Services                            | Centers for Disease Control and Prevention Division of Viral Diseases, Pathogen Discovery                              | Alison Laufer Halpin; Ben L. Rambo-Martin; Clinton R. Paden; Dakota Howard; Darlene Wagner; Dave Wentworth; Dhvani Batra; Jasmine Padilla; Justin Lee; Katie Dillon; Krista Queen; Kristen Knipe; Kristine Lacey; Mark Burroughs; Matthew Schmerer; Mili Sheth; Peter Cook; Sam Shepard; Sarah Nobles; Shoshona Le; Suxiang Tong; Vivien Dugan; Yvette Unoarumhi                                                                                                                                |
| EPI_ISL_1509927, EPI_ISL_1509936, EPI_ISL_1509941                                                                                                                                                                                                                                                                                                                                                                                                                                                  | WVDHHR - Office of Laboratory Services                            | Genomics and Discovery, Respiratory Viruses Branch, Division of Viral Diseases, Centers for Disease Control and        | Adam Retchless; Anna Kelleher; Anna Montmayeur; Anna Uehara; Brian Lynch; Clinton R. Paden; Haibin Wang; Han Jia Justin Ng; Jing Zhang; Justin Lee; Krista Queen; Mark Burroughs; Peter Cook; Rachel Marine; Suxiang Tong; Yan Li; Ying Tao                                                                                                                                                                                                                                                     |

| Prevention                                                                                                                                                                                                                                                                                                                                                                                                                                                                                                                                                                                                                                                                                                                                                                                                                                                                                                                                                                                                                                                                                                                                                                                                                                                                                                                                                                                                                                                                                                                                                                                                                                                                                                                                                                                                                                                                                                                                                                                                                                                                                                                                                                                                                                                                                                                                                                                                                                                                                                                                                                                                                                                                                                                                                                                                                                                                                                                                                                                                                                                                                                                                                                                                                                                                                                                                                                                                                                                                                                                                                                                                                                                                                       |                                                                         |                                                                                                                                                |                                                                                                                                                                                                                                                                                                                                                                                                                                                                                                                                                                                                                          |
|--------------------------------------------------------------------------------------------------------------------------------------------------------------------------------------------------------------------------------------------------------------------------------------------------------------------------------------------------------------------------------------------------------------------------------------------------------------------------------------------------------------------------------------------------------------------------------------------------------------------------------------------------------------------------------------------------------------------------------------------------------------------------------------------------------------------------------------------------------------------------------------------------------------------------------------------------------------------------------------------------------------------------------------------------------------------------------------------------------------------------------------------------------------------------------------------------------------------------------------------------------------------------------------------------------------------------------------------------------------------------------------------------------------------------------------------------------------------------------------------------------------------------------------------------------------------------------------------------------------------------------------------------------------------------------------------------------------------------------------------------------------------------------------------------------------------------------------------------------------------------------------------------------------------------------------------------------------------------------------------------------------------------------------------------------------------------------------------------------------------------------------------------------------------------------------------------------------------------------------------------------------------------------------------------------------------------------------------------------------------------------------------------------------------------------------------------------------------------------------------------------------------------------------------------------------------------------------------------------------------------------------------------------------------------------------------------------------------------------------------------------------------------------------------------------------------------------------------------------------------------------------------------------------------------------------------------------------------------------------------------------------------------------------------------------------------------------------------------------------------------------------------------------------------------------------------------------------------------------------------------------------------------------------------------------------------------------------------------------------------------------------------------------------------------------------------------------------------------------------------------------------------------------------------------------------------------------------------------------------------------------------------------------------------------------------------------|-------------------------------------------------------------------------|------------------------------------------------------------------------------------------------------------------------------------------------|--------------------------------------------------------------------------------------------------------------------------------------------------------------------------------------------------------------------------------------------------------------------------------------------------------------------------------------------------------------------------------------------------------------------------------------------------------------------------------------------------------------------------------------------------------------------------------------------------------------------------|
| EPI_ISL_540439                                                                                                                                                                                                                                                                                                                                                                                                                                                                                                                                                                                                                                                                                                                                                                                                                                                                                                                                                                                                                                                                                                                                                                                                                                                                                                                                                                                                                                                                                                                                                                                                                                                                                                                                                                                                                                                                                                                                                                                                                                                                                                                                                                                                                                                                                                                                                                                                                                                                                                                                                                                                                                                                                                                                                                                                                                                                                                                                                                                                                                                                                                                                                                                                                                                                                                                                                                                                                                                                                                                                                                                                                                                                                   | WVDHHR - Office of Laboratory Services                                  | Pathogen Discovery, Respiratory Viruses Branch, Division of Viral Diseases, Centers for Disease Control and Prevention                         | Anna Uehara; Clinton R. Paden; Haibin Wang; Jing Zhang; Krista Queen; Suxiang Tong; Yan Li; Ying Tao                                                                                                                                                                                                                                                                                                                                                                                                                                                                                                                     |
| EPI_ISL_1528531 to 1528578, EPI_ISL_1528827 to 1528833                                                                                                                                                                                                                                                                                                                                                                                                                                                                                                                                                                                                                                                                                                                                                                                                                                                                                                                                                                                                                                                                                                                                                                                                                                                                                                                                                                                                                                                                                                                                                                                                                                                                                                                                                                                                                                                                                                                                                                                                                                                                                                                                                                                                                                                                                                                                                                                                                                                                                                                                                                                                                                                                                                                                                                                                                                                                                                                                                                                                                                                                                                                                                                                                                                                                                                                                                                                                                                                                                                                                                                                                                                           | WVU Rapid Development Lab                                               | WVU and Marshall University Combined Genomics Core Facilities                                                                                  | *James Denvir; Peter Perrotta; Peter Stoilov; Ryan Percifield*; Wesley Kimble                                                                                                                                                                                                                                                                                                                                                                                                                                                                                                                                            |
| EPI_ISL_1423021 to 1423111, EPI_ISL_1423131 to 1423202                                                                                                                                                                                                                                                                                                                                                                                                                                                                                                                                                                                                                                                                                                                                                                                                                                                                                                                                                                                                                                                                                                                                                                                                                                                                                                                                                                                                                                                                                                                                                                                                                                                                                                                                                                                                                                                                                                                                                                                                                                                                                                                                                                                                                                                                                                                                                                                                                                                                                                                                                                                                                                                                                                                                                                                                                                                                                                                                                                                                                                                                                                                                                                                                                                                                                                                                                                                                                                                                                                                                                                                                                                           | WVU Rapid Development Laboratory                                        | WVU and Marshall University Combined Genomics Core Facilities                                                                                  | *James Denvir; Peter Perrotta; Peter Stoilov; Ryan Percifield*; Wesley Kimble                                                                                                                                                                                                                                                                                                                                                                                                                                                                                                                                            |
| EPI_ISL_1446418, EPI_ISL_1446420, EPI_ISL_1446423, EPI_ISL_1446425, EPI_ISL_1446427, EPI_ISL_1446430, EPI_ISL_1516215 to 1516235, EPI_ISL_1528414 to 1528418                                                                                                                                                                                                                                                                                                                                                                                                                                                                                                                                                                                                                                                                                                                                                                                                                                                                                                                                                                                                                                                                                                                                                                                                                                                                                                                                                                                                                                                                                                                                                                                                                                                                                                                                                                                                                                                                                                                                                                                                                                                                                                                                                                                                                                                                                                                                                                                                                                                                                                                                                                                                                                                                                                                                                                                                                                                                                                                                                                                                                                                                                                                                                                                                                                                                                                                                                                                                                                                                                                                                     | see above                                                               | WY Public Health Laboratory                                                                                                                    | Centers for Disease Control and Prevention Division of Viral Diseases, Pathogen Discovery                                                                                                                                                                                                                                                                                                                                                                                                                                                                                                                                |
| EPI_ISL_425224, EPI_ISL_525575 to 525686, EPI_ISL_529033 to 529036, EPI_ISL_534731, EPI_ISL_1397833                                                                                                                                                                                                                                                                                                                                                                                                                                                                                                                                                                                                                                                                                                                                                                                                                                                                                                                                                                                                                                                                                                                                                                                                                                                                                                                                                                                                                                                                                                                                                                                                                                                                                                                                                                                                                                                                                                                                                                                                                                                                                                                                                                                                                                                                                                                                                                                                                                                                                                                                                                                                                                                                                                                                                                                                                                                                                                                                                                                                                                                                                                                                                                                                                                                                                                                                                                                                                                                                                                                                                                                              | Wadsworth Center, New York State Department of Health                   | Wadsworth Center, New York State Department of Health                                                                                          | Alexis Russel; Daryl M. Lamson; Erasmus Schneider; Erica Lasek-Nesselquist; John Kelly; Jonathan Plitnick; Kirsten St. George; Matthew D. Shudt; Matthew Shudt; Melissa A Leisner; Navjot Singh; Sara Griesemer                                                                                                                                                                                                                                                                                                                                                                                                          |
| EPI_ISL_426290                                                                                                                                                                                                                                                                                                                                                                                                                                                                                                                                                                                                                                                                                                                                                                                                                                                                                                                                                                                                                                                                                                                                                                                                                                                                                                                                                                                                                                                                                                                                                                                                                                                                                                                                                                                                                                                                                                                                                                                                                                                                                                                                                                                                                                                                                                                                                                                                                                                                                                                                                                                                                                                                                                                                                                                                                                                                                                                                                                                                                                                                                                                                                                                                                                                                                                                                                                                                                                                                                                                                                                                                                                                                                   | Wadsworth Center, New York State Department of Health                   | Wadsworth Center, New York State Department of Health                                                                                          | Daryl M. Lamson; Erica Lasek-Nesselquist; Jonathan Plitnick; Kirsten St. George; Matthew D. Shudt; Navjot Singh; Sara Griesemer                                                                                                                                                                                                                                                                                                                                                                                                                                                                                          |
| EPI_ISL_426025 to 426050, EPI_ISL_426291 to 426328                                                                                                                                                                                                                                                                                                                                                                                                                                                                                                                                                                                                                                                                                                                                                                                                                                                                                                                                                                                                                                                                                                                                                                                                                                                                                                                                                                                                                                                                                                                                                                                                                                                                                                                                                                                                                                                                                                                                                                                                                                                                                                                                                                                                                                                                                                                                                                                                                                                                                                                                                                                                                                                                                                                                                                                                                                                                                                                                                                                                                                                                                                                                                                                                                                                                                                                                                                                                                                                                                                                                                                                                                                               | Wadsworth Center, New York State Department of Health                   | Wadsworth Center, New York State Department of Health                                                                                          | Daryl M. Lamson; Erica Lasek-Nesselquist; Jonathan Plitnick; Kirsten St. George; Matthew D. Shudt; Navjot Singh; Sara Griesemer                                                                                                                                                                                                                                                                                                                                                                                                                                                                                          |
| EPI_ISL_456160, EPI_ISL_456168, EPI_ISL_456189 to 456193, EPI_ISL_456241, EPI_ISL_456259 to 456260, EPI_ISL_536790 to 536791, EPI_ISL_548064, EPI_ISL_548101 to 548102, EPI_ISL_579118, EPI_ISL_579121                                                                                                                                                                                                                                                                                                                                                                                                                                                                                                                                                                                                                                                                                                                                                                                                                                                                                                                                                                                                                                                                                                                                                                                                                                                                                                                                                                                                                                                                                                                                                                                                                                                                                                                                                                                                                                                                                                                                                                                                                                                                                                                                                                                                                                                                                                                                                                                                                                                                                                                                                                                                                                                                                                                                                                                                                                                                                                                                                                                                                                                                                                                                                                                                                                                                                                                                                                                                                                                                                           | see above                                                               | Waikato Hospital                                                                                                                               | Institute of Environmental Science and Research (ESR)                                                                                                                                                                                                                                                                                                                                                                                                                                                                                                                                                                    |
| see above                                                                                                                                                                                                                                                                                                                                                                                                                                                                                                                                                                                                                                                                                                                                                                                                                                                                                                                                                                                                                                                                                                                                                                                                                                                                                                                                                                                                                                                                                                                                                                                                                                                                                                                                                                                                                                                                                                                                                                                                                                                                                                                                                                                                                                                                                                                                                                                                                                                                                                                                                                                                                                                                                                                                                                                                                                                                                                                                                                                                                                                                                                                                                                                                                                                                                                                                                                                                                                                                                                                                                                                                                                                                                        | Wales Specialist Virology Centre                                        | Public Health Wales Microbiology Cardiff                                                                                                       | Alec Birchley; Alexander Adams; Amy Gaskin; Bree Gatica-Wilcox; Catherine Moore; Cen Sabu; Jason Coombes; Joanne Watkins; Joanne watkins; Johnathan Evans; Laura Gifford; Lauren Gilbert; Lee Graham; Malorie Perry; Matt Bull; Matthew Bull; Nicole Pacchiarini; Sally Corden; Sara Kumziene-Summerhayes; Sara Rey; Sarah Taylor; Simon Cottrell; Simon Cottrell Sara Rey; Sophie Jones; Tim Jones; Tom Connor                                                                                                                                                                                                          |
| EPI_ISL_413555 to 413556, EPI_ISL_414486, EPI_ISL_414488, EPI_ISL_415041, EPI_ISL_415435, EPI_ISL_415453, EPI_ISL_415536 to 415538, EPI_ISL_415655 to 415657, EPI_ISL_415659, EPI_ISL_415916, EPI_ISL_415918 to 415920, EPI_ISL_415977 to 415978, EPI_ISL_415991, EPI_ISL_416024, EPI_ISL_416026 to 416027, EPI_ISL_418083 to 418165, EPI_ISL_419398 to 419511, EPI_ISL_420913 to 421011, EPI_ISL_422016 to 422100, EPI_ISL_422102 to 422366, EPI_ISL_422368 to 422377, EPI_ISL_431901 to 431914, EPI_ISL_431916 to 431968, EPI_ISL_431971 to 431978, EPI_ISL_431980 to 431992, EPI_ISL_431994 to 432019, EPI_ISL_432021 to 432059, EPI_ISL_432062, EPI_ISL_432065 to 432075, EPI_ISL_432077 to 432086, EPI_ISL_432088 to 432100, EPI_ISL_432103, EPI_ISL_432105 to 432113, EPI_ISL_432115 to 432148, EPI_ISL_432150 to 432163, EPI_ISL_432165 to 432307, EPI_ISL_432309 to 432310, EPI_ISL_432312 to 432325, EPI_ISL_432327 to 432335, EPI_ISL_432337 to 432374, EPI_ISL_432377 to 432404, EPI_ISL_432407 to 432414, EPI_ISL_432416 to 432450, EPI_ISL_445381 to 445747, EPI_ISL_445749 to 445781, EPI_ISL_445783 to 446995                                                                                                                                                                                                                                                                                                                                                                                                                                                                                                                                                                                                                                                                                                                                                                                                                                                                                                                                                                                                                                                                                                                                                                                                                                                                                                                                                                                                                                                                                                                                                                                                                                                                                                                                                                                                                                                                                                                                                                                                                                                                                                                                                                                                                                                                                                                                                                                                                                                                                                                                                                     | see above                                                               | Fumio Terasoma; Hajime Kamiya; Kentaro Itokawa; Makoto Kuroda; Masanori Hashino; Motoi Suzuki; Rina Tanaka; Tsuyoshi Sekizuka; Yosuke Hamajima |                                                                                                                                                                                                                                                                                                                                                                                                                                                                                                                                                                                                                          |
| see above                                                                                                                                                                                                                                                                                                                                                                                                                                                                                                                                                                                                                                                                                                                                                                                                                                                                                                                                                                                                                                                                                                                                                                                                                                                                                                                                                                                                                                                                                                                                                                                                                                                                                                                                                                                                                                                                                                                                                                                                                                                                                                                                                                                                                                                                                                                                                                                                                                                                                                                                                                                                                                                                                                                                                                                                                                                                                                                                                                                                                                                                                                                                                                                                                                                                                                                                                                                                                                                                                                                                                                                                                                                                                        | Wales Specialist Virology Centre                                        | Public Health Wales Microbiology Cardiff                                                                                                       | Alec Birchley; Alexander Adams; Amy Gaskin; Bree Gatica-Wilcox; Catherine Moore; Cen Sabu; Jason Coombes; Joanne Watkins; Joanne watkins; Johnathan Evans; Laura Gifford; Lauren Gilbert; Lee Graham; Malorie Perry; Matt Bull; Matthew Bull; Nicole Pacchiarini; Sally Corden; Sara Kumziene-Summerhayes; Sara Rey; Sarah Taylor; Simon Cottrell; Simon Cottrell Sara Rey; Sophie Jones; Tim Jones; Tom Connor                                                                                                                                                                                                          |
| EPI_ISL_472432 to 473305, EPI_ISL_473956 to 474796, EPI_ISL_479284 to 479481, EPI_ISL_484685 to 484691, EPI_ISL_490710 to 490867, EPI_ISL_493975 to 494371, EPI_ISL_499355 to 499459, EPI_ISL_512481 to 512546, EPI_ISL_514563 to 514579, EPI_ISL_517590 to 517610, EPI_ISL_529226 to 529233, EPI_ISL_529253, EPI_ISL_529297, EPI_ISL_529418, EPI_ISL_529447, EPI_ISL_529505, EPI_ISL_529527, EPI_ISL_529697 to 529717, EPI_ISL_535184 to 535262, EPI_ISL_540897 to 540920, EPI_ISL_560083 to 560304, EPI_ISL_572405, EPI_ISL_572407 to 572408, EPI_ISL_572434, EPI_ISL_572446, EPI_ISL_572455, EPI_ISL_572461, EPI_ISL_572465, EPI_ISL_572468 to 572469, EPI_ISL_572474, EPI_ISL_572477, EPI_ISL_572487, EPI_ISL_572494, EPI_ISL_572496, EPI_ISL_572501, EPI_ISL_572512, EPI_ISL_572531, EPI_ISL_572540, EPI_ISL_572545, EPI_ISL_572547, EPI_ISL_572555, EPI_ISL_572558 to 572561, EPI_ISL_572564 to 572566, EPI_ISL_572574 to 572577, EPI_ISL_572580, EPI_ISL_572586, EPI_ISL_572605 to 572606, EPI_ISL_572611 to 572612, EPI_ISL_572614, EPI_ISL_572643, EPI_ISL_572645, EPI_ISL_572647, EPI_ISL_572652, EPI_ISL_572654, EPI_ISL_572657, EPI_ISL_572659, EPI_ISL_572661 to 572662, EPI_ISL_572667 to 572668, EPI_ISL_572672, EPI_ISL_572674 to 572676, EPI_ISL_572680 to 572681, EPI_ISL_572683, EPI_ISL_572690, EPI_ISL_572693 to 572694, EPI_ISL_572697 to 572698, EPI_ISL_572708, EPI_ISL_572731, EPI_ISL_572754, EPI_ISL_572766, EPI_ISL_572772, EPI_ISL_572778, EPI_ISL_572781 to 572782, EPI_ISL_572784, EPI_ISL_572790, EPI_ISL_572805, EPI_ISL_572810, EPI_ISL_572816, EPI_ISL_572818, EPI_ISL_572830, EPI_ISL_572836, EPI_ISL_572853 to 572856, EPI_ISL_572875 to 572890, EPI_ISL_572931 to 572932, EPI_ISL_572951, EPI_ISL_573873 to 574256, EPI_ISL_577417 to 577543, EPI_ISL_585630 to 586239, EPI_ISL_595329 to 595616, EPI_ISL_611518 to 611519, EPI_ISL_611529 to 611530, EPI_ISL_611534, EPI_ISL_611560 to 611564, EPI_ISL_611566, EPI_ISL_611573, EPI_ISL_611578, EPI_ISL_611586, EPI_ISL_611601, EPI_ISL_611605, EPI_ISL_611609, EPI_ISL_611624 to 611626, EPI_ISL_611631, EPI_ISL_611633, EPI_ISL_611636 to 611637, EPI_ISL_611640, EPI_ISL_611652, EPI_ISL_611663, EPI_ISL_611666, EPI_ISL_611673 to 611674, EPI_ISL_611683 to 611684, EPI_ISL_611686 to 611688, EPI_ISL_611691, EPI_ISL_611697, EPI_ISL_611704, EPI_ISL_611706, EPI_ISL_611711, EPI_ISL_611722, EPI_ISL_611725 to 611726, EPI_ISL_611732, EPI_ISL_611735, EPI_ISL_611738, EPI_ISL_611740, EPI_ISL_611742, EPI_ISL_611748 to 611749, EPI_ISL_611792, EPI_ISL_611809, EPI_ISL_611819, EPI_ISL_611824, EPI_ISL_611828, EPI_ISL_611832, EPI_ISL_611834 to 611835, EPI_ISL_611849, EPI_ISL_611854, EPI_ISL_611863, EPI_ISL_611865, EPI_ISL_611886 to 611888, EPI_ISL_611896, EPI_ISL_611900 to 611907, EPI_ISL_611909, EPI_ISL_611912 to 611913, EPI_ISL_611922 to 611923, EPI_ISL_611926, EPI_ISL_611931 to 611932, EPI_ISL_611968 to 611970, EPI_ISL_611972 to 611973, EPI_ISL_611975, EPI_ISL_611982, EPI_ISL_611986, EPI_ISL_611992 to 611994, EPI_ISL_612002, EPI_ISL_612006, EPI_ISL_612012 to 612013, EPI_ISL_612018, EPI_ISL_612025, EPI_ISL_612029, EPI_ISL_612031, EPI_ISL_612038, EPI_ISL_612040, EPI_ISL_612045, EPI_ISL_612048 to 612049, EPI_ISL_612052 to 612053, EPI_ISL_612076, EPI_ISL_612081, EPI_ISL_612083, EPI_ISL_612087, EPI_ISL_612091, EPI_ISL_612093, EPI_ISL_612098, EPI_ISL_612109, EPI_ISL_612116 to 612117, EPI_ISL_612119 to 612122, EPI_ISL_612132 to 612133, EPI_ISL_612135 to 612157, EPI_ISL_612160 to 612180, EPI_ISL_612184 to 612185, EPI_ISL_612193 to 612195, EPI_ISL_612199 to 612206, EPI_ISL_612458 to 612522, EPI_ISL_612607 to 612721, EPI_ISL_612723 to 613281 | see above                                                               | COVID-19 Genomics UK (COG-UK) Consortium                                                                                                       |                                                                                                                                                                                                                                                                                                                                                                                                                                                                                                                                                                                                                          |
| see above                                                                                                                                                                                                                                                                                                                                                                                                                                                                                                                                                                                                                                                                                                                                                                                                                                                                                                                                                                                                                                                                                                                                                                                                                                                                                                                                                                                                                                                                                                                                                                                                                                                                                                                                                                                                                                                                                                                                                                                                                                                                                                                                                                                                                                                                                                                                                                                                                                                                                                                                                                                                                                                                                                                                                                                                                                                                                                                                                                                                                                                                                                                                                                                                                                                                                                                                                                                                                                                                                                                                                                                                                                                                                        | Wales Specialist Virology Centre Sequencing lab: Pathogen Genomics Unit | COVID-19 Genomics UK (COG-UK) Consortium                                                                                                       | Alec Birchley; Alexander Adams; Amy Gaskin; Angela Marchbank; Bree Gatica-Wilcox; Catherine Moore; Jason Coombes; Joanne Watkins; Joel Southgate; Johnathan Evans; Laura Gifford; Lauren Gilbert; Lee Graham; Malorie Perry; Matthew Bull; Nicole Pacchiarini; Sally Corden; Sara Kumziene-Summerhayes; Sara Rey; Sarah Taylor; Simon Cottrell; Sophie Jones; Tom Connor                                                                                                                                                                                                                                                 |
| EPI_ISL_542486                                                                                                                                                                                                                                                                                                                                                                                                                                                                                                                                                                                                                                                                                                                                                                                                                                                                                                                                                                                                                                                                                                                                                                                                                                                                                                                                                                                                                                                                                                                                                                                                                                                                                                                                                                                                                                                                                                                                                                                                                                                                                                                                                                                                                                                                                                                                                                                                                                                                                                                                                                                                                                                                                                                                                                                                                                                                                                                                                                                                                                                                                                                                                                                                                                                                                                                                                                                                                                                                                                                                                                                                                                                                                   | Walter Reed National Military Medical Center                            | Naval Medical Research Center Biological Defense Research Directorate                                                                          | Derek Larson; Francisco J. Malagon; Kimberly A Bishop-Lilly; Kyle A. Long; Lindsay A. Glang; Logan J. Voegtly; Regina Z. Cer; Sterling L. Brodnick                                                                                                                                                                                                                                                                                                                                                                                                                                                                       |
| EPI_ISL_1413769, EPI_ISL_1413771, EPI_ISL_1413774, EPI_ISL_1413776, EPI_ISL_1413779, EPI_ISL_1413781, EPI_ISL_1413784, EPI_ISL_1413787                                                                                                                                                                                                                                                                                                                                                                                                                                                                                                                                                                                                                                                                                                                                                                                                                                                                                                                                                                                                                                                                                                                                                                                                                                                                                                                                                                                                                                                                                                                                                                                                                                                                                                                                                                                                                                                                                                                                                                                                                                                                                                                                                                                                                                                                                                                                                                                                                                                                                                                                                                                                                                                                                                                                                                                                                                                                                                                                                                                                                                                                                                                                                                                                                                                                                                                                                                                                                                                                                                                                                           | see above                                                               | Warrior Diagnostics Laboratory                                                                                                                 | Infectious Disease Program, Broad Institute of Harvard and MIT                                                                                                                                                                                                                                                                                                                                                                                                                                                                                                                                                           |
| see above                                                                                                                                                                                                                                                                                                                                                                                                                                                                                                                                                                                                                                                                                                                                                                                                                                                                                                                                                                                                                                                                                                                                                                                                                                                                                                                                                                                                                                                                                                                                                                                                                                                                                                                                                                                                                                                                                                                                                                                                                                                                                                                                                                                                                                                                                                                                                                                                                                                                                                                                                                                                                                                                                                                                                                                                                                                                                                                                                                                                                                                                                                                                                                                                                                                                                                                                                                                                                                                                                                                                                                                                                                                                                        | Washington State Department of Health                                   | Pathogen Discovery, Respiratory Viruses Branch, Division of Viral Diseases, Centers for Diseases Control and Prevention                        | Anna Uehara; Azaibi Tamin; Clinton R. Paden; Haibin Wang; Janna' R. Murray; Jennifer Harcourt; Jing Zhang; Krista Queen; Natalie Thornburg; Rashi Gautam; Shifaq Kamili; Stephen Lindstrom; Susan I. Gerber; Suxiang Tong; Xiaoyan Lu; Yan Li; Ying Tao                                                                                                                                                                                                                                                                                                                                                                  |
| EPI_ISL_412970, EPI_ISL_417065 to 417162, EPI_ISL_417166 to 417175, EPI_ISL_430160 to 430194, EPI_ISL_430196 to 430199, EPI_ISL_430203 to 430296, EPI_ISL_434063 to 434066, EPI_ISL_434068 to 434124, EPI_ISL_434128 to 434194, EPI_ISL_434196 to 434202, EPI_ISL_434204 to 434260, EPI_ISL_434262 to 434266, EPI_ISL_434268 to 434277, EPI_ISL_434279 to 434291, EPI_ISL_434294, EPI_ISL_434296, EPI_ISL_434298 to 434303, EPI_ISL_434305 to 434311, EPI_ISL_434313 to 434317, EPI_ISL_434319 to 434325, EPI_ISL_434327 to 434339, EPI_ISL_434341 to 434346, EPI_ISL_438176 to 438221, EPI_ISL_449893 to 449923, EPI_ISL_449925 to 449960, EPI_ISL_449962 to 449992, EPI_ISL_449994 to 450003, EPI_ISL_463324 to 463371, EPI_ISL_463375, EPI_ISL_463378 to 463446, EPI_ISL_463449 to 463467, EPI_ISL_463472, EPI_ISL_463478 to 463705, EPI_ISL_495642 to 495653, EPI_ISL_495656 to 495871, EPI_ISL_495874 to 495884, EPI_ISL_495888 to 496338, EPI_ISL_496931 to 497000, EPI_ISL_497002 to 497726                                                                                                                                                                                                                                                                                                                                                                                                                                                                                                                                                                                                                                                                                                                                                                                                                                                                                                                                                                                                                                                                                                                                                                                                                                                                                                                                                                                                                                                                                                                                                                                                                                                                                                                                                                                                                                                                                                                                                                                                                                                                                                                                                                                                                                                                                                                                                                                                                                                                                                                                                                                                                                                                                               | see above                                                               | Seattle Flu Study                                                                                                                              | Amanda Adler; Barry Lutz; Barry R. Lutz; Benjamin Pelle; Brian Hiatt; Caitlin R. Wolf; Chris D. Frazer; Chu et al; Chu et al; Deborah A. Nickerson; Deborah Nickerson; Elisabeth Brandstetter; Geoff; Geoff Melly; Helen Chu; Helen Y. Chu; Janet A. Englund; Janet Englund; Jay Shendure; Jover Lee; Kairsten Fay; Kirsten Lacombe; Lea M. Starita; Lea M. Starita; Mark J. Rieder; Mark Rieder; Matthew Richardson; Matthew Thompson; Melissa Truong; Michael Boeckh; Michael Famulare; Misja Ilcin; Peter D. Han; Philip Dykema; Romesh Gautam; Scott Lindquist; Thomas R. Sibley; Trevor Bedford; and Trevor Bedford |
| see above                                                                                                                                                                                                                                                                                                                                                                                                                                                                                                                                                                                                                                                                                                                                                                                                                                                                                                                                                                                                                                                                                                                                                                                                                                                                                                                                                                                                                                                                                                                                                                                                                                                                                                                                                                                                                                                                                                                                                                                                                                                                                                                                                                                                                                                                                                                                                                                                                                                                                                                                                                                                                                                                                                                                                                                                                                                                                                                                                                                                                                                                                                                                                                                                                                                                                                                                                                                                                                                                                                                                                                                                                                                                                        | Washington State Department of Health                                   | Washington State Department of Health Public Health Laboratories                                                                               | Avi Singh; Darren Lucas; Denny Russell; Drew MacKellar; Geoff Melly; Hannah Gray; Joenice Gonzalez; JohnAric Peterson; Philip Dykema; Rebecca Cao; Vanessa De Los Santos                                                                                                                                                                                                                                                                                                                                                                                                                                                 |
| EPI_ISL_1399249 to 1399256, EPI_ISL_1447488 to 1447509, EPI_ISL_1526990 to 1527010, EPI_ISL_1527265 to 1527359, EPI_ISL_1559388 to 1559410                                                                                                                                                                                                                                                                                                                                                                                                                                                                                                                                                                                                                                                                                                                                                                                                                                                                                                                                                                                                                                                                                                                                                                                                                                                                                                                                                                                                                                                                                                                                                                                                                                                                                                                                                                                                                                                                                                                                                                                                                                                                                                                                                                                                                                                                                                                                                                                                                                                                                                                                                                                                                                                                                                                                                                                                                                                                                                                                                                                                                                                                                                                                                                                                                                                                                                                                                                                                                                                                                                                                                       | Washington State Public Health Lab                                      | UW Virology Lab                                                                                                                                | Alexander Greninger; Arun Nalla; Hong Xie; Keith Jerome; Pavitra Roychoudhury                                                                                                                                                                                                                                                                                                                                                                                                                                                                                                                                            |
| EPI_ISL_413455                                                                                                                                                                                                                                                                                                                                                                                                                                                                                                                                                                                                                                                                                                                                                                                                                                                                                                                                                                                                                                                                                                                                                                                                                                                                                                                                                                                                                                                                                                                                                                                                                                                                                                                                                                                                                                                                                                                                                                                                                                                                                                                                                                                                                                                                                                                                                                                                                                                                                                                                                                                                                                                                                                                                                                                                                                                                                                                                                                                                                                                                                                                                                                                                                                                                                                                                                                                                                                                                                                                                                                                                                                                                                   | Washington State Public Health Lab                                      | University of Washington Virology Lab                                                                                                          | Alexander Greninger; Arun Nalla; Hong Xie; Keith Jerome; Pavitra Roychoudhury                                                                                                                                                                                                                                                                                                                                                                                                                                                                                                                                            |
| EPI_ISL_594447 to 594454, EPI_ISL_594459                                                                                                                                                                                                                                                                                                                                                                                                                                                                                                                                                                                                                                                                                                                                                                                                                                                                                                                                                                                                                                                                                                                                                                                                                                                                                                                                                                                                                                                                                                                                                                                                                                                                                                                                                                                                                                                                                                                                                                                                                                                                                                                                                                                                                                                                                                                                                                                                                                                                                                                                                                                                                                                                                                                                                                                                                                                                                                                                                                                                                                                                                                                                                                                                                                                                                                                                                                                                                                                                                                                                                                                                                                                         | Washington State Public Health Laboratories                             | Pathogen Discovery, Respiratory Viruses Branch, Division of Viral Diseases, Centers for Disease Control and Prevention                         | Anna Uehara; Clinton Paden; Haibin Wang; Jing Zhang; Julu Bhatnagar; Krista Queen; Suxiang Tong; Yan Li; Ying Tao                                                                                                                                                                                                                                                                                                                                                                                                                                                                                                        |
| EPI_ISL_1491520                                                                                                                                                                                                                                                                                                                                                                                                                                                                                                                                                                                                                                                                                                                                                                                                                                                                                                                                                                                                                                                                                                                                                                                                                                                                                                                                                                                                                                                                                                                                                                                                                                                                                                                                                                                                                                                                                                                                                                                                                                                                                                                                                                                                                                                                                                                                                                                                                                                                                                                                                                                                                                                                                                                                                                                                                                                                                                                                                                                                                                                                                                                                                                                                                                                                                                                                                                                                                                                                                                                                                                                                                                                                                  | Washington University School of Medicine                                | Genomics and Discovery, Respiratory Viruses Branch, Division of Viral Diseases, Centers for Disease Control and                                | Anna Kelleher; Anna Uehara; Brian Lynch; Clinton R. Paden; Haibin Wang; Han Jia Justin Ng; Jing Zhang; Krista Queen; Peter Cook; Suxiang Tong; Yan Li; Ying Tao                                                                                                                                                                                                                                                                                                                                                                                                                                                          |

| Prevention                                                                                                                                                                                                                                                                                                                                                                                                                                                                                                                                                                                                                                                                                                                                                                                                                                                                                                                                                                                                                                                                                                                                                                                                                                                                                                                                                                                                                                                                                                                                                                                         |                                                                                      |                                                                                                                                                                                     |                                                                                                                                                                                                                                                                                                                                                                                                                                                                                                                                                                                 |                                                                                                                                                                                                                                                                                                                                                                                                                                                                                                                                   |
|----------------------------------------------------------------------------------------------------------------------------------------------------------------------------------------------------------------------------------------------------------------------------------------------------------------------------------------------------------------------------------------------------------------------------------------------------------------------------------------------------------------------------------------------------------------------------------------------------------------------------------------------------------------------------------------------------------------------------------------------------------------------------------------------------------------------------------------------------------------------------------------------------------------------------------------------------------------------------------------------------------------------------------------------------------------------------------------------------------------------------------------------------------------------------------------------------------------------------------------------------------------------------------------------------------------------------------------------------------------------------------------------------------------------------------------------------------------------------------------------------------------------------------------------------------------------------------------------------|--------------------------------------------------------------------------------------|-------------------------------------------------------------------------------------------------------------------------------------------------------------------------------------|---------------------------------------------------------------------------------------------------------------------------------------------------------------------------------------------------------------------------------------------------------------------------------------------------------------------------------------------------------------------------------------------------------------------------------------------------------------------------------------------------------------------------------------------------------------------------------|-----------------------------------------------------------------------------------------------------------------------------------------------------------------------------------------------------------------------------------------------------------------------------------------------------------------------------------------------------------------------------------------------------------------------------------------------------------------------------------------------------------------------------------|
| EPI_ISL_467301 to 467302, EPI_ISL_467304, EPI_ISL_476018 to 476021, EPI_ISL_493069 to 493086, EPI_ISL_610157, EPI_ISL_610159 to 610160                                                                                                                                                                                                                                                                                                                                                                                                                                                                                                                                                                                                                                                                                                                                                                                                                                                                                                                                                                                                                                                                                                                                                                                                                                                                                                                                                                                                                                                             | Washington University in St. Louis                                                   | Washington University in St. Louis                                                                                                                                                  | Bijal Parikh; Carey-Ann Burnham; David Wang; Lindsay Droit; Scott Handley; Stephen Tahan                                                                                                                                                                                                                                                                                                                                                                                                                                                                                        |                                                                                                                                                                                                                                                                                                                                                                                                                                                                                                                                   |
| EPI_ISL_445221, EPI_ISL_445234 to 445235, EPI_ISL_469071, EPI_ISL_476137                                                                                                                                                                                                                                                                                                                                                                                                                                                                                                                                                                                                                                                                                                                                                                                                                                                                                                                                                                                                                                                                                                                                                                                                                                                                                                                                                                                                                                                                                                                           | Wasterlakarna                                                                        | The Public Health Agency of Sweden                                                                                                                                                  | Anna Risberg; Anna-Malin Linde; Frida Ahlfors; Karin Tegmark-Wisell; Maria Lind Karlberg; Mattias Haukland; Mia Brytting; Olov Svartstrom; Oskar Karlsson Lindsjo; Petra Edquist; Reza Advani; Sandra Brodsson; Shamam Muraladrosi; Theresa Enkirch                                                                                                                                                                                                                                                                                                                             |                                                                                                                                                                                                                                                                                                                                                                                                                                                                                                                                   |
| EPI_ISL_416538 to 416539                                                                                                                                                                                                                                                                                                                                                                                                                                                                                                                                                                                                                                                                                                                                                                                                                                                                                                                                                                                                                                                                                                                                                                                                                                                                                                                                                                                                                                                                                                                                                                           | Wellington Hospital                                                                  | Institute of Environmental Science and Research (ESR)                                                                                                                               | Craig Thornley; Erasmus Smit; Joep de Lig; Lauren Jelly; Matt Storey; Maxim Bloomfield; New Zealand; Newtown; Riddiford Street; Wellington 6021; Wellington Hospital; Wellington SCL; Xiaoyun Ren                                                                                                                                                                                                                                                                                                                                                                               |                                                                                                                                                                                                                                                                                                                                                                                                                                                                                                                                   |
| EPI_ISL_456161, EPI_ISL_456164 to 456166, EPI_ISL_456169 to 456170, EPI_ISL_456182 to 456188, EPI_ISL_456319 to 456320, EPI_ISL_456324 to 456343, EPI_ISL_456398 to 456402                                                                                                                                                                                                                                                                                                                                                                                                                                                                                                                                                                                                                                                                                                                                                                                                                                                                                                                                                                                                                                                                                                                                                                                                                                                                                                                                                                                                                         | see above                                                                            | Wellington SCL                                                                                                                                                                      | Institute of Environmental Science and Research (ESR)                                                                                                                                                                                                                                                                                                                                                                                                                                                                                                                           |                                                                                                                                                                                                                                                                                                                                                                                                                                                                                                                                   |
| EPI_ISL_579418, EPI_ISL_579420                                                                                                                                                                                                                                                                                                                                                                                                                                                                                                                                                                                                                                                                                                                                                                                                                                                                                                                                                                                                                                                                                                                                                                                                                                                                                                                                                                                                                                                                                                                                                                     | Wellington SCL (WN)                                                                  | Institute of Environmental Science and Research (ESR)                                                                                                                               | Anja Werno; Antje van der Linden; Arlo Upton; Chris Mansell; David Hammer; Dragana Drinkovic; Erasmus Smit; Gary McAuliffe; Hana Sofia Andersson; James Ussher; Jill Sherwood; Joep de Lig; Josh Freeman; Julia Howard; Juliet Elvy; Lauren Jelly; Mary DeAlmeida; Matt Blakiston; Matt Storey; Matthew Rogers; Max Bloomfield; Michael Addidle; Michelle Balm; Muhammad Faisal; Nikki Freedy; Olin Silander; Sally Roberts; Sarah Jefferies; Sharmini Muttaiyah; Susan Morpeth; Susan Taylor; Timothy Blackmore; Vani Sathyendran; Veronica Playle; Virginia Hope; Xiaoyun Ren |                                                                                                                                                                                                                                                                                                                                                                                                                                                                                                                                   |
| EPI_ISL_452242                                                                                                                                                                                                                                                                                                                                                                                                                                                                                                                                                                                                                                                                                                                                                                                                                                                                                                                                                                                                                                                                                                                                                                                                                                                                                                                                                                                                                                                                                                                                                                                     | Wernstedt Medical AB                                                                 | The Public Health Agency of Sweden                                                                                                                                                  | Anna Risberg; Anna-Malin Linde; Eva Sandberg; Karin Tegmark-Wisell; Maria Lind Karlberg; Mia Brytting; Olov Svartstrom; Oskar Karlsson Lindsjo; Theresa Enkirch                                                                                                                                                                                                                                                                                                                                                                                                                 |                                                                                                                                                                                                                                                                                                                                                                                                                                                                                                                                   |
| EPI_ISL_1398934                                                                                                                                                                                                                                                                                                                                                                                                                                                                                                                                                                                                                                                                                                                                                                                                                                                                                                                                                                                                                                                                                                                                                                                                                                                                                                                                                                                                                                                                                                                                                                                    | West Bandung Public Health                                                           | West Java Health Laboratory                                                                                                                                                         | Azzania Fibrani; Cut Nur Cinthia Alamanda; Ema Rahmawati; Isak Solihin; Kamila Tania; Karimatu Khoirunnisa; Miftahul Farid; Rifky Waluyajati Rachman; Rini Robiani; Ryan Bayusantika Ristandi                                                                                                                                                                                                                                                                                                                                                                                   |                                                                                                                                                                                                                                                                                                                                                                                                                                                                                                                                   |
| EPI_ISL_1398361, EPI_ISL_1398563, EPI_ISL_1398568, EPI_ISL_1398929, EPI_ISL_1398984                                                                                                                                                                                                                                                                                                                                                                                                                                                                                                                                                                                                                                                                                                                                                                                                                                                                                                                                                                                                                                                                                                                                                                                                                                                                                                                                                                                                                                                                                                                | West Bandung Public Health                                                           | West Java Health Laboratory; School of Life Sciences and Technology, Institut Teknologi Bandung                                                                                     | Azzania Fibrani; Cut Nur Cinthia Alamanda; Ema Rahmawati; Isak Solihin; Kamila Tania; Karimatu Khoirunnisa; Miftahul Farid; Rifky Waluyajati Rachman; Rini Robiani; Ryan Bayusantika Ristandi                                                                                                                                                                                                                                                                                                                                                                                   |                                                                                                                                                                                                                                                                                                                                                                                                                                                                                                                                   |
| EPI_ISL_451076, EPI_ISL_451312 to 451399                                                                                                                                                                                                                                                                                                                                                                                                                                                                                                                                                                                                                                                                                                                                                                                                                                                                                                                                                                                                                                                                                                                                                                                                                                                                                                                                                                                                                                                                                                                                                           | West China Hospital of Sichuan University                                            | State Key Laboratory of Biotherapy of Sichuan University                                                                                                                            | Baowen Du; Binwu Ying; Chao Tang; Chao Tanga; Chuan Chen; Chuan Chena; Han-Cheng Wei; Hancheng Wei; Jia Geng; Jing-wen Lin; Lu Chen; Mingxia Yu; Minjin Wang; Weimin Li; Yongzhao Zhou                                                                                                                                                                                                                                                                                                                                                                                          |                                                                                                                                                                                                                                                                                                                                                                                                                                                                                                                                   |
| EPI_ISL_1398363, EPI_ISL_1398371, EPI_ISL_1398562, EPI_ISL_1398567                                                                                                                                                                                                                                                                                                                                                                                                                                                                                                                                                                                                                                                                                                                                                                                                                                                                                                                                                                                                                                                                                                                                                                                                                                                                                                                                                                                                                                                                                                                                 | West Java Health Laboratory                                                          | West Java Health Laboratory; School of Life Sciences and Technology, Institut Teknologi Bandung                                                                                     | Azzania Fibrani; Cut Nur Cinthia Alamanda; Ema Rahmawati; Isak Solihin; Kamila Tania; Karimatu Khoirunnisa; Miftahul Farid; Rifky Waluyajati Rachman; Rini Robiani; Ryan Bayusantika Ristandi                                                                                                                                                                                                                                                                                                                                                                                   |                                                                                                                                                                                                                                                                                                                                                                                                                                                                                                                                   |
| EPI_ISL_413221, EPI_ISL_414024 to 414027, EPI_ISL_415628, EPI_ISL_415630 to 415631                                                                                                                                                                                                                                                                                                                                                                                                                                                                                                                                                                                                                                                                                                                                                                                                                                                                                                                                                                                                                                                                                                                                                                                                                                                                                                                                                                                                                                                                                                                 | West of Scotland Specialist Virology Centre, NHSGCC                                  | MRC-University of Glasgow Centre for Virus Research                                                                                                                                 | Alasdair MacLean; Ana da Silva Filipe; Andrew Rambaut; Antonia Ho; Daniel Mair; David L Robertson; Emma Thomson; Emma Thomson.; James Shephard; Josh Singer; Kathy Li; Kathy Smollett; Natasha Jesudason; Richard Orton; Rory Gunson; Rory Gunson.; Shirin Ashraf; Stephen Carmichael                                                                                                                                                                                                                                                                                           |                                                                                                                                                                                                                                                                                                                                                                                                                                                                                                                                   |
| EPI_ISL_425647 to 425818, EPI_ISL_433268 to 433373, EPI_ISL_433498 to 433665, EPI_ISL_438749 to 438946, EPI_ISL_438973 to 439143, EPI_ISL_448116 to 448221, EPI_ISL_449176 to 449258, EPI_ISL_453006 to 453098, EPI_ISL_456756 to 456889, EPI_ISL_461589 to 461705, EPI_ISL_473508 to 473782, EPI_ISL_477820 to 478162, EPI_ISL_484519 to 484679, EPI_ISL_490330, EPI_ISL_490646 to 490709, EPI_ISL_493741 to 493897, EPI_ISL_499352 to 499354, EPI_ISL_512436 to 512480, EPI_ISL_514514 to 514515, EPI_ISL_517580 to 517582, EPI_ISL_526451 to 526458, EPI_ISL_529315 to 529316, EPI_ISL_529319, EPI_ISL_529409, EPI_ISL_529684 to 529688, EPI_ISL_535102 to 535182, EPI_ISL_540775 to 540822, EPI_ISL_572415, EPI_ISL_572470, EPI_ISL_572518, EPI_ISL_572523, EPI_ISL_572528, EPI_ISL_572534, EPI_ISL_572585, EPI_ISL_572620 to 572641, EPI_ISL_572686, EPI_ISL_572741, EPI_ISL_572746, EPI_ISL_572763, EPI_ISL_572765, EPI_ISL_572788, EPI_ISL_572794, EPI_ISL_572832, EPI_ISL_573765 to 573768, EPI_ISL_573770 to 573793, EPI_ISL_585261 to 585296, EPI_ISL_585422 to 585425, EPI_ISL_594645 to 594815, EPI_ISL_611533, EPI_ISL_611547 to 611548, EPI_ISL_611610 to 611611, EPI_ISL_611614, EPI_ISL_611660, EPI_ISL_611693, EPI_ISL_611708 to 611710, EPI_ISL_611712 to 611720, EPI_ISL_611818, EPI_ISL_611820, EPI_ISL_611826, EPI_ISL_611848, EPI_ISL_611852, EPI_ISL_611866 to 611867, EPI_ISL_611870 to 611884, EPI_ISL_611890, EPI_ISL_611990, EPI_ISL_612063, EPI_ISL_612113, EPI_ISL_612124 to 612125, EPI_ISL_612284 to 612313, EPI_ISL_1386590 to 1386646, EPI_ISL_1545852 to 1545899 | see above                                                                            | West of Scotland Specialist Virology Centre, NHSGCC / MRC-University of Glasgow Centre for Virus Research                                                                           | COVID-19 Genomics UK (COG-UK) Consortium                                                                                                                                                                                                                                                                                                                                                                                                                                                                                                                                        | Alasdair MacLean; Alice Broos; Ana da Silva Filipe; Antonia Ho; Daniel Mair; David L Robertson; Elihu Aranday-Cortes; Emma Thomson; Guy Mollet; Igor Starinskij; James Shephard; Jenna Nichols; Joseph Hughes; Kathy Li; Kathy Smollett; Kirstyn Brunker; Kyriaki Nomikou; Lily Tong; Marc Niebel; Matthew Holden; Natasha Jesudason; Natasha Johnson; Patawee Asamaphan; Rachel Blacow; Rajiv Shah; Richard Orton; Rory Gunson; Rory Gunson.; Sarah McDonald; Sharif Shaaban; Sreenu Vattipally; Stephen Carmichael; Yasmin Parr |
| EPI_ISL_1500176, EPI_ISL_1500212, EPI_ISL_1553232                                                                                                                                                                                                                                                                                                                                                                                                                                                                                                                                                                                                                                                                                                                                                                                                                                                                                                                                                                                                                                                                                                                                                                                                                                                                                                                                                                                                                                                                                                                                                  | Western Illinois University                                                          | Illinois Department of Public Health - Springfield Lab                                                                                                                              | Bryan Sim; Gordon McCall                                                                                                                                                                                                                                                                                                                                                                                                                                                                                                                                                        |                                                                                                                                                                                                                                                                                                                                                                                                                                                                                                                                   |
| EPI_ISL_450831, EPI_ISL_450833, EPI_ISL_455105                                                                                                                                                                                                                                                                                                                                                                                                                                                                                                                                                                                                                                                                                                                                                                                                                                                                                                                                                                                                                                                                                                                                                                                                                                                                                                                                                                                                                                                                                                                                                     | Wetterhalsan                                                                         | The Public Health Agency of Sweden                                                                                                                                                  | Anders Tengblad; Anna Risberg; Anna-Malin Linde; Karin Tegmark-Wisell; Maria Lind Karlberg; Mia Brytting; Olov Svartstrom; Oskar Karlsson Lindsjo; Theresa Enkirch                                                                                                                                                                                                                                                                                                                                                                                                              |                                                                                                                                                                                                                                                                                                                                                                                                                                                                                                                                   |
| EPI_ISL_1528601 to 1528616, EPI_ISL_1528817 to 1528825                                                                                                                                                                                                                                                                                                                                                                                                                                                                                                                                                                                                                                                                                                                                                                                                                                                                                                                                                                                                                                                                                                                                                                                                                                                                                                                                                                                                                                                                                                                                             | Wheeling Hospital                                                                    | WVU and Marshall University Combined Genomics Core Facilities                                                                                                                       | "James Denvir; Peter Perrotta; Peter Stoilov; Ryan Percifield"; Wesley Kimble                                                                                                                                                                                                                                                                                                                                                                                                                                                                                                   |                                                                                                                                                                                                                                                                                                                                                                                                                                                                                                                                   |
| EPI_ISL_1503232 to 1503246                                                                                                                                                                                                                                                                                                                                                                                                                                                                                                                                                                                                                                                                                                                                                                                                                                                                                                                                                                                                                                                                                                                                                                                                                                                                                                                                                                                                                                                                                                                                                                         | Wichita State University - Molecular Diagnostics Lab                                 | Kansas Health and Environmental Lab                                                                                                                                                 | Ben Olsen; Jonathan Barnell; Mike Grose; and Phil Adam                                                                                                                                                                                                                                                                                                                                                                                                                                                                                                                          |                                                                                                                                                                                                                                                                                                                                                                                                                                                                                                                                   |
| EPI_ISL_1538751 to 1538753, EPI_ISL_1539127, EPI_ISL_1539227 to 1539228                                                                                                                                                                                                                                                                                                                                                                                                                                                                                                                                                                                                                                                                                                                                                                                                                                                                                                                                                                                                                                                                                                                                                                                                                                                                                                                                                                                                                                                                                                                            | Wielkopolskie Centrum Onkologii im. M. Sklodowskiej-Curie w Poznaniu                 | 1. National Institute of Public Health - National Institute of Hygiene; 2. Eurofins Genomics Europe Sequencing GmbH                                                                 | ECDC COVID-19 WGS support team; Eurofins Genomics Europe Sequencing Team; Gierczyki Rafa; Sadkowska-Todys Magorzata; Wokowicz Tomasz; Zacharczuk Katarzyna                                                                                                                                                                                                                                                                                                                                                                                                                      |                                                                                                                                                                                                                                                                                                                                                                                                                                                                                                                                   |
| EPI_ISL_1393876                                                                                                                                                                                                                                                                                                                                                                                                                                                                                                                                                                                                                                                                                                                                                                                                                                                                                                                                                                                                                                                                                                                                                                                                                                                                                                                                                                                                                                                                                                                                                                                    | Wielkopolskie Centrum Pulmonologii i Torakochirurgii im. Eugenii i Janusza Zeylandów | 1. National Institute of Public Health - National Institute of Hygiene; 2. Eurofins Genomics Europe Sequencing GmbH                                                                 | ECDC COVID-19 WGS support team; Eurofins Genomics Europe Sequencing Team; Gierczyki Rafa; Sadkowska-Todys Magorzata; Wokowicz Tomasz; Zacharczuk Katarzyna                                                                                                                                                                                                                                                                                                                                                                                                                      |                                                                                                                                                                                                                                                                                                                                                                                                                                                                                                                                   |
| EPI_ISL_1538453, EPI_ISL_1538668 to 1538675, EPI_ISL_1538719 to 1538723, EPI_ISL_1539165, EPI_ISL_1539209, EPI_ISL_1539215                                                                                                                                                                                                                                                                                                                                                                                                                                                                                                                                                                                                                                                                                                                                                                                                                                                                                                                                                                                                                                                                                                                                                                                                                                                                                                                                                                                                                                                                         | Wielospecjalistyczny Szpital Wojewódzki                                              | 1. National Institute of Public Health - National Institute of Hygiene; 2. Eurofins Genomics Europe Sequencing GmbH                                                                 | ECDC COVID-19 WGS support team; Eurofins Genomics Europe Sequencing Team; Gierczyki Rafa; Sadkowska-Todys Magorzata; Wokowicz Tomasz; Zacharczuk Katarzyna                                                                                                                                                                                                                                                                                                                                                                                                                      |                                                                                                                                                                                                                                                                                                                                                                                                                                                                                                                                   |
| EPI_ISL_420293                                                                                                                                                                                                                                                                                                                                                                                                                                                                                                                                                                                                                                                                                                                                                                                                                                                                                                                                                                                                                                                                                                                                                                                                                                                                                                                                                                                                                                                                                                                                                                                     | Wildlife Conservation Society, Bronx Zoo                                             | Diagnostic Virology Laboratory, United States Department of Agriculture, National Veterinary Services Laboratories                                                                  | Brittany Chilson; D. G. Diel; F. Yuan; Ivan Kuzmin; Kerrie Franzen; L. Wang; Laura B. Goodman; Mary Lea Killian; Melinda Jenkins-Moore; Nichole Hines Bergeson; Patrick K. Mitchell; Renee R. Anderson; Roopa Venugopalan; Tod P. Stuber; Y. Fang                                                                                                                                                                                                                                                                                                                               |                                                                                                                                                                                                                                                                                                                                                                                                                                                                                                                                   |
| EPI_ISL_566036 to 566044                                                                                                                                                                                                                                                                                                                                                                                                                                                                                                                                                                                                                                                                                                                                                                                                                                                                                                                                                                                                                                                                                                                                                                                                                                                                                                                                                                                                                                                                                                                                                                           | Wildlife Conservation Society, Bronx Zoo                                             | Diagnostic Virology Laboratory, United States Department of Agriculture, National Veterinary Services Laboratories, Population Medicine and Diagnostic Sciences, Cornell University | B.D.; Bartlett; Calle; Cardia Caserta, L.; Caserta; Cronk; D.C.; D.G.; Delaney; Diel; Elvinger, F.; Fang, Y.; Farnzen, K.; Frederikson, R.; Goodman, L.; Goodrich, E.; Hines Bergeson, N.; Ingerman, C.; Ivancic, M.; J.M.; Jenkins-Moore, M.; Killian; Kuzmin, L.; L.C.; Laverack, M.; M.A.; M.K.; M.L.; M.R.; Mauldin; Mauldin, M.; McAloose, D.; McCann, C.; Mitchell; Mazingo, K.; Olmstead, C.; P.K.; P.P.; Queen, K.; S.L.; Slavinski, S.; Smith; Stokol, T.; Sykes; Terio, K.; Thomas, P.; Tong, S.; Torchetti; Wang, H.; Wang, L.; Yuan, F.; Zec, S.                    |                                                                                                                                                                                                                                                                                                                                                                                                                                                                                                                                   |
| EPI_ISL_1493366                                                                                                                                                                                                                                                                                                                                                                                                                                                                                                                                                                                                                                                                                                                                                                                                                                                                                                                                                                                                                                                                                                                                                                                                                                                                                                                                                                                                                                                                                                                                                                                    | Willamette Valley Toxicology                                                         | Oregon State Public Health Laboratory                                                                                                                                               | Eugene Yeboah; John Fontana and Shane Sevey; Laura Tsaknariadis; Rafia Razaque; Vanda Makris                                                                                                                                                                                                                                                                                                                                                                                                                                                                                    |                                                                                                                                                                                                                                                                                                                                                                                                                                                                                                                                   |
| EPI_ISL_408670                                                                                                                                                                                                                                                                                                                                                                                                                                                                                                                                                                                                                                                                                                                                                                                                                                                                                                                                                                                                                                                                                                                                                                                                                                                                                                                                                                                                                                                                                                                                                                                     | Wisconsin Department of Health Services                                              | Pathogen Discovery, Respiratory Viruses Branch, Division of Viral Diseases, Centers for Diseases Control and Prevention                                                             | Anna Uehara; Brett L. Whitaker; Brian Lynch; Clinton R. Paden; Janna' R. Murray; Jing Zhang; Krista Queen; Lijuan Wang; Senthil Kumar K. Sakthivel; Shifaq Kamili; Stephen Lindstrom; Susan I. Gerber; Suxiang Tong; Xiaoyan Lu; Yan Li; Ying Tao                                                                                                                                                                                                                                                                                                                               |                                                                                                                                                                                                                                                                                                                                                                                                                                                                                                                                   |
| EPI_ISL_509704 to 509706, EPI_ISL_509715                                                                                                                                                                                                                                                                                                                                                                                                                                                                                                                                                                                                                                                                                                                                                                                                                                                                                                                                                                                                                                                                                                                                                                                                                                                                                                                                                                                                                                                                                                                                                           | Wisconsin Department of Health Services                                              | Pathogen Discovery, Respiratory Viruses Branch, Division of Viral Diseases, Centers for Disease Control and Prevention                                                              | Anna Uehara; Clinton Paden; Haibin Wang; Jing Zhang; Krista Queen; Suxiang Tong; Yan Li; Ying Tao                                                                                                                                                                                                                                                                                                                                                                                                                                                                               |                                                                                                                                                                                                                                                                                                                                                                                                                                                                                                                                   |
| EPI_ISL_470540                                                                                                                                                                                                                                                                                                                                                                                                                                                                                                                                                                                                                                                                                                                                                                                                                                                                                                                                                                                                                                                                                                                                                                                                                                                                                                                                                                                                                                                                                                                                                                                     | Wisconsin State Laboratory of Hygiene Communicable Disease Division                  | Wisconsin State Laboratory of Hygiene Communicable Disease Division                                                                                                                 | Kelsey R Florek                                                                                                                                                                                                                                                                                                                                                                                                                                                                                                                                                                 |                                                                                                                                                                                                                                                                                                                                                                                                                                                                                                                                   |
| EPI_ISL_1423343 to 1423360, EPI_ISL_1423362 to 1423365, EPI_ISL_1423367 to 1423373                                                                                                                                                                                                                                                                                                                                                                                                                                                                                                                                                                                                                                                                                                                                                                                                                                                                                                                                                                                                                                                                                                                                                                                                                                                                                                                                                                                                                                                                                                                 | Wisconsin State Laboratory of Hygiene Communicable Disease Division                  | Ginkgo Bioworks Clinical Laboratory                                                                                                                                                 | Abigail C. Shockey; Alex Plocik; Amanda Riccardi; Becky Schilling; Brigitte Simen; James McGann; Jim Griffin; Keith Robison; Kelsey R. Florek; Malaika Mckenzie-Bennett; Martha Pierson; Michelle Spencer; Rebecca Littlefield                                                                                                                                                                                                                                                                                                                                                  |                                                                                                                                                                                                                                                                                                                                                                                                                                                                                                                                   |
| EPI_ISL_471178 to 471266, EPI_ISL_578335 to 578695, EPI_ISL_1420973, EPI_ISL_1420975 to 1420976, EPI_ISL_1420978 to 1420979, EPI_ISL_1420981, EPI_ISL_1420983 to 1420984, EPI_ISL_1420986 to 1420988, EPI_ISL_1420990 to 1420991, EPI_ISL_1420993 to 1420994, EPI_ISL_1420996 to 1420997, EPI_ISL_1420999 to 1421001, EPI_ISL_1421003 to 1421004, EPI_ISL_1421006 to 1421007, EPI_ISL_1421009 to 1421010, EPI_ISL_1421012 to 1421013, EPI_ISL_1421015 to 1421016, EPI_ISL_1421018 to 1421019, EPI_ISL_1421021 to 1421023, EPI_ISL_1421025 to 1421026, EPI_ISL_1421028 to 1421029, EPI_ISL_1421031                                                                                                                                                                                                                                                                                                                                                                                                                                                                                                                                                                                                                                                                                                                                                                                                                                                                                                                                                                                                  |                                                                                      |                                                                                                                                                                                     |                                                                                                                                                                                                                                                                                                                                                                                                                                                                                                                                                                                 |                                                                                                                                                                                                                                                                                                                                                                                                                                                                                                                                   |

|                                                                                                                                                                                                                                                                                                                                                                                                                                                                                                                                                                                                                                                                                                                                                                                                                                                                                                                                                                                                                                                                                                                                                                                                                                                                                                                                                                                                                                                                                                                                                                                                                                                                                                                                                                                                                                                                                                                                                                                                                                                                                                                                                                                                                                                                                                                                                                                                                                                                                                                                                                                                                                                                                                                                                                                                                                                                                                                                                                                                                                                                                                                                                                                                                                                                                                                                                                                                                                                                                                                                                                                                                                                                                                                                                                                                                                                                                                                                                                                                                                                                                                                                                                                                                                                                                                                                                                                                                                                                                                                                                                                                                                                                                                                                                                                                                                                                                                                                                                                                                                                                                                                                                                                                                                                                                                                                                                                                                                                                                                                                                                                                                                                                                                                                                                                                                                                                                                                                                                                                                                                                                                                                                                                                     |                                                                                                           |                                                                                                                     |                                                                                                                                                                                                                     |                                                                                                                                                                                                                                                                                                                                                                                                                                                                         |
|-----------------------------------------------------------------------------------------------------------------------------------------------------------------------------------------------------------------------------------------------------------------------------------------------------------------------------------------------------------------------------------------------------------------------------------------------------------------------------------------------------------------------------------------------------------------------------------------------------------------------------------------------------------------------------------------------------------------------------------------------------------------------------------------------------------------------------------------------------------------------------------------------------------------------------------------------------------------------------------------------------------------------------------------------------------------------------------------------------------------------------------------------------------------------------------------------------------------------------------------------------------------------------------------------------------------------------------------------------------------------------------------------------------------------------------------------------------------------------------------------------------------------------------------------------------------------------------------------------------------------------------------------------------------------------------------------------------------------------------------------------------------------------------------------------------------------------------------------------------------------------------------------------------------------------------------------------------------------------------------------------------------------------------------------------------------------------------------------------------------------------------------------------------------------------------------------------------------------------------------------------------------------------------------------------------------------------------------------------------------------------------------------------------------------------------------------------------------------------------------------------------------------------------------------------------------------------------------------------------------------------------------------------------------------------------------------------------------------------------------------------------------------------------------------------------------------------------------------------------------------------------------------------------------------------------------------------------------------------------------------------------------------------------------------------------------------------------------------------------------------------------------------------------------------------------------------------------------------------------------------------------------------------------------------------------------------------------------------------------------------------------------------------------------------------------------------------------------------------------------------------------------------------------------------------------------------------------------------------------------------------------------------------------------------------------------------------------------------------------------------------------------------------------------------------------------------------------------------------------------------------------------------------------------------------------------------------------------------------------------------------------------------------------------------------------------------------------------------------------------------------------------------------------------------------------------------------------------------------------------------------------------------------------------------------------------------------------------------------------------------------------------------------------------------------------------------------------------------------------------------------------------------------------------------------------------------------------------------------------------------------------------------------------------------------------------------------------------------------------------------------------------------------------------------------------------------------------------------------------------------------------------------------------------------------------------------------------------------------------------------------------------------------------------------------------------------------------------------------------------------------------------------------------------------------------------------------------------------------------------------------------------------------------------------------------------------------------------------------------------------------------------------------------------------------------------------------------------------------------------------------------------------------------------------------------------------------------------------------------------------------------------------------------------------------------------------------------------------------------------------------------------------------------------------------------------------------------------------------------------------------------------------------------------------------------------------------------------------------------------------------------------------------------------------------------------------------------------------------------------------------------------------------------------------------------------------------|-----------------------------------------------------------------------------------------------------------|---------------------------------------------------------------------------------------------------------------------|---------------------------------------------------------------------------------------------------------------------------------------------------------------------------------------------------------------------|-------------------------------------------------------------------------------------------------------------------------------------------------------------------------------------------------------------------------------------------------------------------------------------------------------------------------------------------------------------------------------------------------------------------------------------------------------------------------|
| to 1421032, EPI_ISL_1421034 to 1421035, EPI_ISL_1421037 to 1421038, EPI_ISL_1421040 to 1421041, EPI_ISL_1421043 to 1421044, EPI_ISL_1421046, EPI_ISL_1421048 to 1421049, EPI_ISL_1421051 to 1421053, EPI_ISL_1421055 to 1421056, EPI_ISL_1421058 to 1421059, EPI_ISL_1421061 to 1421062, EPI_ISL_1421064 to 1421065, EPI_ISL_1421067 to 1421068, EPI_ISL_1421070, EPI_ISL_1421072 to 1421074, EPI_ISL_1421076 to 1421077, EPI_ISL_1421079 to 1421080, EPI_ISL_1421082 to 1421083, EPI_ISL_1421085 to 1421086, EPI_ISL_1421088 to 1421089, EPI_ISL_1421091 to 1421092, EPI_ISL_1421094 to 1421095, EPI_ISL_1421097 to 1421098, EPI_ISL_1421100 to 1421101, EPI_ISL_1421103 to 1421104, EPI_ISL_1421106 to 1421107, EPI_ISL_1421109 to 1421110, EPI_ISL_1421112 to 1421113, EPI_ISL_1421115 to 1421116, EPI_ISL_1421118 to 1421119, EPI_ISL_1421121 to 1421122, EPI_ISL_1421124 to 1421125, EPI_ISL_1421127, EPI_ISL_1421129 to 1421130, EPI_ISL_1421132 to 1421133, EPI_ISL_1421135 to 1421137, EPI_ISL_1421139, EPI_ISL_1421141 to 1421142, EPI_ISL_1421144 to 1421145, EPI_ISL_1421147, EPI_ISL_1421149 to 1421150, EPI_ISL_1421152 to 1421153, EPI_ISL_1421155 to 1421157, EPI_ISL_1421159 to 1421160, EPI_ISL_1421162, EPI_ISL_1421164 to 1421165, EPI_ISL_1421167 to 1421168, EPI_ISL_1421170 to 1421171, EPI_ISL_1421173 to 1421174, EPI_ISL_1421176 to 1421178, EPI_ISL_1421181, EPI_ISL_1421183 to 1421184, EPI_ISL_1421186, EPI_ISL_1421188 to 1421189, EPI_ISL_1421191 to 1421192, EPI_ISL_1421194 to 1421195, EPI_ISL_1421197 to 1421198, EPI_ISL_1421200 to 1421201, EPI_ISL_1421203 to 1421204, EPI_ISL_1421206 to 1421207, EPI_ISL_1421209 to 1421210, EPI_ISL_1421212 to 1421213, EPI_ISL_1421215 to 1421216, EPI_ISL_1421218 to 1421219, EPI_ISL_1421221 to 1421222, EPI_ISL_1421224 to 1421225, EPI_ISL_1421227, EPI_ISL_1421230 to 1421232, EPI_ISL_1421235, EPI_ISL_1421237 to 1421238, EPI_ISL_1421240 to 1421241, EPI_ISL_1421243 to 1421244, EPI_ISL_1421246 to 1421247, EPI_ISL_1421249 to 1421250, EPI_ISL_1421252 to 1421253, EPI_ISL_1421255 to 1421256, EPI_ISL_1421258, EPI_ISL_1421260, EPI_ISL_1421263, EPI_ISL_1421265, EPI_ISL_1421267 to 1421268, EPI_ISL_1421270 to 1421271, EPI_ISL_1421273 to 1421274, EPI_ISL_1421276 to 1421277, EPI_ISL_1421279 to 1421280, EPI_ISL_1421282 to 1421283, EPI_ISL_1421285 to 1421286, EPI_ISL_1421288 to 1421289, EPI_ISL_1421291 to 1421292, EPI_ISL_1421294 to 1421295, EPI_ISL_1421297 to 1421298, EPI_ISL_1421301 to 1421302, EPI_ISL_1421304 to 1421305, EPI_ISL_1421307 to 1421308, EPI_ISL_1421310 to 1421311, EPI_ISL_1421313 to 1421314, EPI_ISL_1421316 to 1421326, EPI_ISL_1421329, EPI_ISL_1421331, EPI_ISL_1421333, EPI_ISL_1421336, EPI_ISL_1421338, EPI_ISL_1421340, EPI_ISL_1421343 to 1421344, EPI_ISL_1421346, EPI_ISL_1421348, EPI_ISL_1421351 to 1421352, EPI_ISL_1421354 to 1421355, EPI_ISL_1421357, EPI_ISL_1421359 to 1421360, EPI_ISL_1421362 to 1421363, EPI_ISL_1421365 to 1421366, EPI_ISL_1421368 to 1421370, EPI_ISL_1421372 to 1421373, EPI_ISL_1421375 to 1421376, EPI_ISL_1421379, EPI_ISL_1421382, EPI_ISL_1421384, EPI_ISL_1421386, EPI_ISL_1421389, EPI_ISL_1421391, EPI_ISL_1421393, EPI_ISL_1421395, EPI_ISL_1421397 to 1421399, EPI_ISL_1421401 to 1421402, EPI_ISL_1421404 to 1421405, EPI_ISL_1421407 to 1421408, EPI_ISL_1421410 to 1421411, EPI_ISL_1421413 to 1421414, EPI_ISL_1421416 to 1421417, EPI_ISL_1421419 to 1421420, EPI_ISL_1421422 to 1421423, EPI_ISL_1421425 to 1421426, EPI_ISL_1421428 to 1421429, EPI_ISL_1421431 to 1421433, EPI_ISL_1421435 to 1421436, EPI_ISL_1421438 to 1421439, EPI_ISL_1421441 to 1421442, EPI_ISL_1421444 to 1421445, EPI_ISL_1421447 to 1421448, EPI_ISL_1421450 to 1421451, EPI_ISL_1421453 to 1421454, EPI_ISL_1421456 to 1421457, EPI_ISL_1421459 to 1421460, EPI_ISL_1421462 to 1421463, EPI_ISL_1421465 to 1421466, EPI_ISL_1421468 to 1421469, EPI_ISL_1421471 to 1421472, EPI_ISL_1421475, EPI_ISL_1421477, EPI_ISL_1421480, EPI_ISL_1421482, EPI_ISL_1421484, EPI_ISL_1421486 to 1421487, EPI_ISL_1421489 to 1421490, EPI_ISL_1421492 to 1421493, EPI_ISL_1421495 to 1421496, EPI_ISL_1421498 to 1421499, EPI_ISL_1421501 to 1421502, EPI_ISL_1421504 to 1421505, EPI_ISL_1421507 to 1421508, EPI_ISL_1421510, EPI_ISL_1421512 to 1421513, EPI_ISL_1421515 to 1421516, EPI_ISL_1421518 to 1421520, EPI_ISL_1421522, EPI_ISL_1421524 to 1421525, EPI_ISL_1421527 to 1421528, EPI_ISL_1421530 to 1421531, EPI_ISL_1421533 to 1421534, EPI_ISL_1421536 to 1421538, EPI_ISL_1421540 to 1421541, EPI_ISL_1421543 to 1421544, EPI_ISL_1421546 to 1421547, EPI_ISL_1421549 to 1421550, EPI_ISL_1421552 to 1421553, EPI_ISL_1421556 to 1421557, EPI_ISL_1421559 to 1421560, EPI_ISL_1421562 to 1421563, EPI_ISL_1421565 to 1421566, EPI_ISL_1421568 to 1421569, EPI_ISL_1421571 to 1421572, EPI_ISL_1421573 to 1421574, EPI_ISL_1421576 to 1421577, EPI_ISL_1421579 to 1421580, EPI_ISL_1421582 to 1421583, EPI_ISL_1421585 to 1421586, EPI_ISL_1421588 to 1421589, EPI_ISL_1421591 to 1421592, EPI_ISL_1421594 to 1421595, EPI_ISL_1421598 to 1421599, EPI_ISL_1421601 to 1421602, EPI_ISL_1421604, EPI_ISL_1421606 to 1421608, EPI_ISL_1421610, EPI_ISL_1421613, EPI_ISL_1421615, EPI_ISL_1421617 to 1421618, EPI_ISL_1421620 to 1421622, EPI_ISL_1421624 to 1421625, EPI_ISL_1421627 to 1421628, EPI_ISL_1421630 to 1421631, EPI_ISL_1421633, EPI_ISL_1421635 to 1421637, EPI_ISL_1421639 to 1421640, EPI_ISL_1421642 to 1421643, EPI_ISL_1421645, EPI_ISL_1421647 to 1421648, EPI_ISL_1421650 to 1421651, EPI_ISL_1421653 to 1421654, EPI_ISL_1421656 to 1421657, EPI_ISL_1421659 to 1421660, EPI_ISL_1421662 to 1421663, EPI_ISL_1421665 to 1421666, EPI_ISL_1421668 to 1421669, EPI_ISL_1421671 to 1421672, EPI_ISL_1421674 to 1421675, EPI_ISL_1421677 to 1421678, EPI_ISL_1421680 to 1421681, EPI_ISL_1421683 to 1421684, EPI_ISL_1421686 to 1421687, EPI_ISL_1421689 to 1421690, EPI_ISL_1421692 to 1421693, EPI_ISL_1421695 to 1421696, EPI_ISL_1421698 to 1421699, EPI_ISL_1421701 to 1421703, EPI_ISL_1421705 to 1421706, EPI_ISL_1421708 to 1421709, EPI_ISL_1421711 to 1421712, EPI_ISL_1421714 to 1421715, EPI_ISL_1421717 | see above                                                                                                 | Wisconsin State Laboratory of Hygiene Communicable Disease Division                                                 | Wisconsin State Laboratory of Hygiene Communicable Disease Division                                                                                                                                                 | Abigail C. Shockey; Kelsey R. Florek                                                                                                                                                                                                                                                                                                                                                                                                                                    |
| EPI_ISL_1386179 to 1386223, EPI_ISL_1493316 to 1493362                                                                                                                                                                                                                                                                                                                                                                                                                                                                                                                                                                                                                                                                                                                                                                                                                                                                                                                                                                                                                                                                                                                                                                                                                                                                                                                                                                                                                                                                                                                                                                                                                                                                                                                                                                                                                                                                                                                                                                                                                                                                                                                                                                                                                                                                                                                                                                                                                                                                                                                                                                                                                                                                                                                                                                                                                                                                                                                                                                                                                                                                                                                                                                                                                                                                                                                                                                                                                                                                                                                                                                                                                                                                                                                                                                                                                                                                                                                                                                                                                                                                                                                                                                                                                                                                                                                                                                                                                                                                                                                                                                                                                                                                                                                                                                                                                                                                                                                                                                                                                                                                                                                                                                                                                                                                                                                                                                                                                                                                                                                                                                                                                                                                                                                                                                                                                                                                                                                                                                                                                                                                                                                                              | Wojewodzka Stacja Sanitarno-Epidemiologiczna w Olsztynie, Laboratorium Badań Epidemiologiczno-Klinicznych | Wojewodzka Stacja Sanitarno-Epidemiologiczna w Olsztynie, Laboratorium Badań Epidemiologiczno-Klinicznych           | Aleksandra Kobiatko; Barbara Dolinska; Emilia Tarabas; Ewa Liszewska; Marta Lukian; Monika Czerminska; Patryk Bielecki; Paulina Rozycka; Sylwia Krzetowska; Tomasz Jakubczak                                        |                                                                                                                                                                                                                                                                                                                                                                                                                                                                         |
| EPI_ISL_1393808 to 1393809                                                                                                                                                                                                                                                                                                                                                                                                                                                                                                                                                                                                                                                                                                                                                                                                                                                                                                                                                                                                                                                                                                                                                                                                                                                                                                                                                                                                                                                                                                                                                                                                                                                                                                                                                                                                                                                                                                                                                                                                                                                                                                                                                                                                                                                                                                                                                                                                                                                                                                                                                                                                                                                                                                                                                                                                                                                                                                                                                                                                                                                                                                                                                                                                                                                                                                                                                                                                                                                                                                                                                                                                                                                                                                                                                                                                                                                                                                                                                                                                                                                                                                                                                                                                                                                                                                                                                                                                                                                                                                                                                                                                                                                                                                                                                                                                                                                                                                                                                                                                                                                                                                                                                                                                                                                                                                                                                                                                                                                                                                                                                                                                                                                                                                                                                                                                                                                                                                                                                                                                                                                                                                                                                                          | Wojewódzki Specjalistyczny Szpital im. Wł. Biegaskiego                                                    | 1. National Institute of Public Health - National Institute of Hygiene; 2. Eurofins Genomics Europe Sequencing GmbH | ECDC COVID-19 WGS support team; Eurofins Genomics Europe Sequencing Team; Gierczyki Rafa; Sadkowska-Todys Magorzata; Wokowicz Tomasz; Zacharczuk Katarzyna                                                          |                                                                                                                                                                                                                                                                                                                                                                                                                                                                         |
| EPI_ISL_1539121, EPI_ISL_1539160                                                                                                                                                                                                                                                                                                                                                                                                                                                                                                                                                                                                                                                                                                                                                                                                                                                                                                                                                                                                                                                                                                                                                                                                                                                                                                                                                                                                                                                                                                                                                                                                                                                                                                                                                                                                                                                                                                                                                                                                                                                                                                                                                                                                                                                                                                                                                                                                                                                                                                                                                                                                                                                                                                                                                                                                                                                                                                                                                                                                                                                                                                                                                                                                                                                                                                                                                                                                                                                                                                                                                                                                                                                                                                                                                                                                                                                                                                                                                                                                                                                                                                                                                                                                                                                                                                                                                                                                                                                                                                                                                                                                                                                                                                                                                                                                                                                                                                                                                                                                                                                                                                                                                                                                                                                                                                                                                                                                                                                                                                                                                                                                                                                                                                                                                                                                                                                                                                                                                                                                                                                                                                                                                                    | Wojewódzki Specjalistyczny Szpitali m. Dr Wadysawa Biegaskiego                                            | 1. National Institute of Public Health - National Institute of Hygiene; 2. Eurofins Genomics Europe Sequencing GmbH | ECDC COVID-19 WGS support team; Eurofins Genomics Europe Sequencing Team; Gierczyki Rafa; Sadkowska-Todys Magorzata; Wokowicz Tomasz; Zacharczuk Katarzyna                                                          |                                                                                                                                                                                                                                                                                                                                                                                                                                                                         |
| EPI_ISL_1394077, EPI_ISL_1425563                                                                                                                                                                                                                                                                                                                                                                                                                                                                                                                                                                                                                                                                                                                                                                                                                                                                                                                                                                                                                                                                                                                                                                                                                                                                                                                                                                                                                                                                                                                                                                                                                                                                                                                                                                                                                                                                                                                                                                                                                                                                                                                                                                                                                                                                                                                                                                                                                                                                                                                                                                                                                                                                                                                                                                                                                                                                                                                                                                                                                                                                                                                                                                                                                                                                                                                                                                                                                                                                                                                                                                                                                                                                                                                                                                                                                                                                                                                                                                                                                                                                                                                                                                                                                                                                                                                                                                                                                                                                                                                                                                                                                                                                                                                                                                                                                                                                                                                                                                                                                                                                                                                                                                                                                                                                                                                                                                                                                                                                                                                                                                                                                                                                                                                                                                                                                                                                                                                                                                                                                                                                                                                                                                    | Wojskowy Instytut Medyczny                                                                                | 1. National Institute of Public Health - National Institute of Hygiene; 2. Eurofins Genomics Europe Sequencing GmbH | ECDC COVID-19 WGS support team; Eurofins Genomics Europe Sequencing Team; Gierczyki Rafa; Sadkowska-Todys Magorzata; Wokowicz Tomasz; Zacharczuk Katarzyna                                                          |                                                                                                                                                                                                                                                                                                                                                                                                                                                                         |
| EPI_ISL_1538522                                                                                                                                                                                                                                                                                                                                                                                                                                                                                                                                                                                                                                                                                                                                                                                                                                                                                                                                                                                                                                                                                                                                                                                                                                                                                                                                                                                                                                                                                                                                                                                                                                                                                                                                                                                                                                                                                                                                                                                                                                                                                                                                                                                                                                                                                                                                                                                                                                                                                                                                                                                                                                                                                                                                                                                                                                                                                                                                                                                                                                                                                                                                                                                                                                                                                                                                                                                                                                                                                                                                                                                                                                                                                                                                                                                                                                                                                                                                                                                                                                                                                                                                                                                                                                                                                                                                                                                                                                                                                                                                                                                                                                                                                                                                                                                                                                                                                                                                                                                                                                                                                                                                                                                                                                                                                                                                                                                                                                                                                                                                                                                                                                                                                                                                                                                                                                                                                                                                                                                                                                                                                                                                                                                     | Wojwózdki Specjalistyczny Szpital im. W. Biegaskiego w odzi                                               | 1. National Institute of Public Health - National Institute of Hygiene; 2. Eurofins Genomics Europe Sequencing GmbH | ECDC COVID-19 WGS support team; Eurofins Genomics Europe Sequencing Team; Gierczyki Rafa; Sadkowska-Todys Magorzata; Wokowicz Tomasz; Zacharczuk Katarzyna                                                          |                                                                                                                                                                                                                                                                                                                                                                                                                                                                         |
| EPI_ISL_569622                                                                                                                                                                                                                                                                                                                                                                                                                                                                                                                                                                                                                                                                                                                                                                                                                                                                                                                                                                                                                                                                                                                                                                                                                                                                                                                                                                                                                                                                                                                                                                                                                                                                                                                                                                                                                                                                                                                                                                                                                                                                                                                                                                                                                                                                                                                                                                                                                                                                                                                                                                                                                                                                                                                                                                                                                                                                                                                                                                                                                                                                                                                                                                                                                                                                                                                                                                                                                                                                                                                                                                                                                                                                                                                                                                                                                                                                                                                                                                                                                                                                                                                                                                                                                                                                                                                                                                                                                                                                                                                                                                                                                                                                                                                                                                                                                                                                                                                                                                                                                                                                                                                                                                                                                                                                                                                                                                                                                                                                                                                                                                                                                                                                                                                                                                                                                                                                                                                                                                                                                                                                                                                                                                                      | Woodrow Wilson Keeble Memorial Healthcare                                                                 | South Dakota Public Health Laboratory                                                                               | Jacob Garfin; Matt Plumb; Xiong Wang; and Chris Carlson                                                                                                                                                             |                                                                                                                                                                                                                                                                                                                                                                                                                                                                         |
| EPI_ISL_1538451, EPI_ISL_1538521, EPI_ISL_1539026 to 1539028, EPI_ISL_1539113, EPI_ISL_1539230                                                                                                                                                                                                                                                                                                                                                                                                                                                                                                                                                                                                                                                                                                                                                                                                                                                                                                                                                                                                                                                                                                                                                                                                                                                                                                                                                                                                                                                                                                                                                                                                                                                                                                                                                                                                                                                                                                                                                                                                                                                                                                                                                                                                                                                                                                                                                                                                                                                                                                                                                                                                                                                                                                                                                                                                                                                                                                                                                                                                                                                                                                                                                                                                                                                                                                                                                                                                                                                                                                                                                                                                                                                                                                                                                                                                                                                                                                                                                                                                                                                                                                                                                                                                                                                                                                                                                                                                                                                                                                                                                                                                                                                                                                                                                                                                                                                                                                                                                                                                                                                                                                                                                                                                                                                                                                                                                                                                                                                                                                                                                                                                                                                                                                                                                                                                                                                                                                                                                                                                                                                                                                      | Wsse Laboratorium Mikrobiologii i Parazytologii                                                           | 1. National Institute of Public Health - National Institute of Hygiene; 2. Eurofins Genomics Europe Sequencing GmbH | ECDC COVID-19 WGS support team; Eurofins Genomics Europe Sequencing Team; Gierczyki Rafa; Sadkowska-Todys Magorzata; Wokowicz Tomasz; Zacharczuk Katarzyna                                                          |                                                                                                                                                                                                                                                                                                                                                                                                                                                                         |
| EPI_ISL_454904 to 455014, EPI_ISL_455363 to 455411                                                                                                                                                                                                                                                                                                                                                                                                                                                                                                                                                                                                                                                                                                                                                                                                                                                                                                                                                                                                                                                                                                                                                                                                                                                                                                                                                                                                                                                                                                                                                                                                                                                                                                                                                                                                                                                                                                                                                                                                                                                                                                                                                                                                                                                                                                                                                                                                                                                                                                                                                                                                                                                                                                                                                                                                                                                                                                                                                                                                                                                                                                                                                                                                                                                                                                                                                                                                                                                                                                                                                                                                                                                                                                                                                                                                                                                                                                                                                                                                                                                                                                                                                                                                                                                                                                                                                                                                                                                                                                                                                                                                                                                                                                                                                                                                                                                                                                                                                                                                                                                                                                                                                                                                                                                                                                                                                                                                                                                                                                                                                                                                                                                                                                                                                                                                                                                                                                                                                                                                                                                                                                                                                  | Wuhan Chain Medical Labs (CMLabs)                                                                         | State Key Laboratory of Biotherapy of Sichuan University                                                            | Baowen Du; Binwu Ying; Chao Tang; Chuan Chen; Hancheng Wei; Jia Geng; Jing-wen Lin; Lu Chen; Mingxia Yu; Minjin Wang; Weimin Li; Yongzhao Zhou                                                                      |                                                                                                                                                                                                                                                                                                                                                                                                                                                                         |
| EPI_ISL_408978                                                                                                                                                                                                                                                                                                                                                                                                                                                                                                                                                                                                                                                                                                                                                                                                                                                                                                                                                                                                                                                                                                                                                                                                                                                                                                                                                                                                                                                                                                                                                                                                                                                                                                                                                                                                                                                                                                                                                                                                                                                                                                                                                                                                                                                                                                                                                                                                                                                                                                                                                                                                                                                                                                                                                                                                                                                                                                                                                                                                                                                                                                                                                                                                                                                                                                                                                                                                                                                                                                                                                                                                                                                                                                                                                                                                                                                                                                                                                                                                                                                                                                                                                                                                                                                                                                                                                                                                                                                                                                                                                                                                                                                                                                                                                                                                                                                                                                                                                                                                                                                                                                                                                                                                                                                                                                                                                                                                                                                                                                                                                                                                                                                                                                                                                                                                                                                                                                                                                                                                                                                                                                                                                                                      | Wuhan Fourth Hospital                                                                                     | Beijing Genomics Institute (BGI)                                                                                    | Weijun Chen                                                                                                                                                                                                         |                                                                                                                                                                                                                                                                                                                                                                                                                                                                         |
| EPI_ISL_450489                                                                                                                                                                                                                                                                                                                                                                                                                                                                                                                                                                                                                                                                                                                                                                                                                                                                                                                                                                                                                                                                                                                                                                                                                                                                                                                                                                                                                                                                                                                                                                                                                                                                                                                                                                                                                                                                                                                                                                                                                                                                                                                                                                                                                                                                                                                                                                                                                                                                                                                                                                                                                                                                                                                                                                                                                                                                                                                                                                                                                                                                                                                                                                                                                                                                                                                                                                                                                                                                                                                                                                                                                                                                                                                                                                                                                                                                                                                                                                                                                                                                                                                                                                                                                                                                                                                                                                                                                                                                                                                                                                                                                                                                                                                                                                                                                                                                                                                                                                                                                                                                                                                                                                                                                                                                                                                                                                                                                                                                                                                                                                                                                                                                                                                                                                                                                                                                                                                                                                                                                                                                                                                                                                                      | Wuhan Institute of Virology, Chinese Academy of Sciences                                                  | Wuhan Institute of Virology, Chinese Academy of Sciences                                                            | Lin, H.; Shi, Si, H.; Xie, S.; Z. and Zhou, P.; Zhu, Y.                                                                                                                                                             |                                                                                                                                                                                                                                                                                                                                                                                                                                                                         |
| EPI_ISL_412982                                                                                                                                                                                                                                                                                                                                                                                                                                                                                                                                                                                                                                                                                                                                                                                                                                                                                                                                                                                                                                                                                                                                                                                                                                                                                                                                                                                                                                                                                                                                                                                                                                                                                                                                                                                                                                                                                                                                                                                                                                                                                                                                                                                                                                                                                                                                                                                                                                                                                                                                                                                                                                                                                                                                                                                                                                                                                                                                                                                                                                                                                                                                                                                                                                                                                                                                                                                                                                                                                                                                                                                                                                                                                                                                                                                                                                                                                                                                                                                                                                                                                                                                                                                                                                                                                                                                                                                                                                                                                                                                                                                                                                                                                                                                                                                                                                                                                                                                                                                                                                                                                                                                                                                                                                                                                                                                                                                                                                                                                                                                                                                                                                                                                                                                                                                                                                                                                                                                                                                                                                                                                                                                                                                      | Wuhan Lung Hospital                                                                                       | Hubei Provincial Center for Disease Control and Prevention                                                          | Bin Fang; Bo Yang; Bo Yu; Faxian Zhan; Guojun Ye; Jing Li; Junqiang Xu; Kun Cai; Linlin Liu; Xiang Li; Xiao Yu; Xixiang Huo; Yongzhong Jiang.                                                                       |                                                                                                                                                                                                                                                                                                                                                                                                                                                                         |
| EPI_ISL_421272, EPI_ISL_421345 to 421347, EPI_ISL_421543 to 421554, EPI_ISL_462912 to 462989, EPI_ISL_582220 to 582240, EPI_ISL_614248 to 614264                                                                                                                                                                                                                                                                                                                                                                                                                                                                                                                                                                                                                                                                                                                                                                                                                                                                                                                                                                                                                                                                                                                                                                                                                                                                                                                                                                                                                                                                                                                                                                                                                                                                                                                                                                                                                                                                                                                                                                                                                                                                                                                                                                                                                                                                                                                                                                                                                                                                                                                                                                                                                                                                                                                                                                                                                                                                                                                                                                                                                                                                                                                                                                                                                                                                                                                                                                                                                                                                                                                                                                                                                                                                                                                                                                                                                                                                                                                                                                                                                                                                                                                                                                                                                                                                                                                                                                                                                                                                                                                                                                                                                                                                                                                                                                                                                                                                                                                                                                                                                                                                                                                                                                                                                                                                                                                                                                                                                                                                                                                                                                                                                                                                                                                                                                                                                                                                                                                                                                                                                                                    | Wyoming Public Health Laboratory                                                                          | Center for Global Health, University of New Mexico Health Sciences Center                                           | Cari Sloma; Darrell Dinwiddie; Daryl Domman; Kurt Schwalim; Noah Hull; Rob Christensen; Wanda Manley                                                                                                                |                                                                                                                                                                                                                                                                                                                                                                                                                                                                         |
| EPI_ISL_493001, EPI_ISL_493061 to 493064, EPI_ISL_493125 to 493128, EPI_ISL_539794 to 539802, EPI_ISL_540421 to 540422, EPI_ISL_540921, EPI_ISL_1398956 to 1398979, EPI_ISL_1399181 to 1399227, EPI_ISL_1403670 to 1403685, EPI_ISL_1403784 to 1403808, EPI_ISL_1406205 to 1406238, EPI_ISL_1406705 to 1406721, EPI_ISL_1420789 to 1420814, EPI_ISL_1443602 to 1443640, EPI_ISL_1468656 to 1468666, EPI_ISL_1482471 to 1482536, EPI_ISL_1483321 to 1483362, EPI_ISL_1484314, EPI_ISL_1484316, EPI_ISL_1484319, EPI_ISL_1484322, EPI_ISL_1484324, EPI_ISL_1484327, EPI_ISL_1484330, EPI_ISL_1484333, EPI_ISL_1484336, EPI_ISL_1484339, EPI_ISL_1484342, EPI_ISL_1484345, EPI_ISL_1484347, EPI_ISL_1484350, EPI_ISL_1484353, EPI_ISL_1484357, EPI_ISL_1484360, EPI_ISL_1484362, EPI_ISL_1484365, EPI_ISL_1484368, EPI_ISL_1484371, EPI_ISL_1484374, EPI_ISL_1484378, EPI_ISL_1484381, EPI_ISL_1484384, EPI_ISL_1484387, EPI_ISL_1484389, EPI_ISL_1484392, EPI_ISL_1484395, EPI_ISL_1484398, EPI_ISL_1484401, EPI_ISL_1484403, EPI_ISL_1484406, EPI_ISL_1484409, EPI_ISL_1484412, EPI_ISL_1484415, EPI_ISL_1484421, EPI_ISL_1484424, EPI_ISL_1484427, EPI_ISL_1484430, EPI_ISL_1484433, EPI_ISL_1484435, EPI_ISL_1484438, EPI_ISL_1484441, EPI_ISL_1484444, EPI_ISL_1484447, EPI_ISL_1484450, EPI_ISL_1490898 to 1490918, EPI_ISL_1494915 to 1494922, EPI_ISL_1499364 to 1499394, EPI_ISL_1503247 to 1503298, EPI_ISL_1503999 to 1504021, EPI_ISL_1511238 to 1511267, EPI_ISL_1515763 to 1515789, EPI_ISL_1531417 to 1531430, EPI_ISL_1532089 to 1532117, EPI_ISL_1532694 to 1532700, EPI_ISL_1540048 to 1540448                                                                                                                                                                                                                                                                                                                                                                                                                                                                                                                                                                                                                                                                                                                                                                                                                                                                                                                                                                                                                                                                                                                                                                                                                                                                                                                                                                                                                                                                                                                                                                                                                                                                                                                                                                                                                                                                                                                                                                                                                                                                                                                                                                                                                                                                                                                                                                                                                                                                                                                                                                                                                                                                                                                                                                                                                                                                                                                                                                                                                                                                                                                                                                                                                                                                                                                                                                                                                                                                                                                                                                                                                                                                                                                                                                                                                                                                                                                                                                                                                                                                                                                                                                                                                                                                                                                                                                                                                                                                                                                                                                                       | see above                                                                                                 | Wyoming Public Health Laboratory                                                                                    | Wyoming Public Health Laboratory                                                                                                                                                                                    | Ashley Norberg; Brian Dominguez; Cari Sloma; Channing Weber; Chayse Rowley; Elliot Thomasson; Jim Mildeberger; Joel Sevinsky; Lynette Gumbleton; Marley Goetz; Noah Hull; Rob Christensen; Taylor Fearing; Wanda Manley; and Rob Christensen; and Wanda Manley                                                                                                                                                                                                          |
| EPI_ISL_1510006                                                                                                                                                                                                                                                                                                                                                                                                                                                                                                                                                                                                                                                                                                                                                                                                                                                                                                                                                                                                                                                                                                                                                                                                                                                                                                                                                                                                                                                                                                                                                                                                                                                                                                                                                                                                                                                                                                                                                                                                                                                                                                                                                                                                                                                                                                                                                                                                                                                                                                                                                                                                                                                                                                                                                                                                                                                                                                                                                                                                                                                                                                                                                                                                                                                                                                                                                                                                                                                                                                                                                                                                                                                                                                                                                                                                                                                                                                                                                                                                                                                                                                                                                                                                                                                                                                                                                                                                                                                                                                                                                                                                                                                                                                                                                                                                                                                                                                                                                                                                                                                                                                                                                                                                                                                                                                                                                                                                                                                                                                                                                                                                                                                                                                                                                                                                                                                                                                                                                                                                                                                                                                                                                                                     | XERENCIA DE XESTIÓN INTEGRADA DE PONTEVEDRA E O SALNÉS                                                    | Instituto de Salud Carlos III                                                                                       | A. Monzón; F. Casas; I. Jiménez; I. TRIGO DAPORTA; M. Sandonís; MATILDE; P. Zaballos; S. Cuesta; S. Iglesias-Caballero; S. Pozo; S. Varona; V. Camarero; Vázquez-Morón                                              |                                                                                                                                                                                                                                                                                                                                                                                                                                                                         |
| EPI_ISL_455332, EPI_ISL_539565 to 539566                                                                                                                                                                                                                                                                                                                                                                                                                                                                                                                                                                                                                                                                                                                                                                                                                                                                                                                                                                                                                                                                                                                                                                                                                                                                                                                                                                                                                                                                                                                                                                                                                                                                                                                                                                                                                                                                                                                                                                                                                                                                                                                                                                                                                                                                                                                                                                                                                                                                                                                                                                                                                                                                                                                                                                                                                                                                                                                                                                                                                                                                                                                                                                                                                                                                                                                                                                                                                                                                                                                                                                                                                                                                                                                                                                                                                                                                                                                                                                                                                                                                                                                                                                                                                                                                                                                                                                                                                                                                                                                                                                                                                                                                                                                                                                                                                                                                                                                                                                                                                                                                                                                                                                                                                                                                                                                                                                                                                                                                                                                                                                                                                                                                                                                                                                                                                                                                                                                                                                                                                                                                                                                                                            | Xerencia de Xestión Integrada de Pontevedra e o Salnés                                                    | Instituto de Salud Carlos III                                                                                       | A. Monzón; F. Casas; I. I. Jiménez; I. Pérez; Iglesias-Caballero; J. López; M. Camarero; M. Cuesta; M. Garcia; M. González-Esguevillas; M. Molinero Calamita; M. Zaballos; P. Jiménez; S. Juliá; S. Pozo; S. Varona |                                                                                                                                                                                                                                                                                                                                                                                                                                                                         |
| EPI_ISL_514753                                                                                                                                                                                                                                                                                                                                                                                                                                                                                                                                                                                                                                                                                                                                                                                                                                                                                                                                                                                                                                                                                                                                                                                                                                                                                                                                                                                                                                                                                                                                                                                                                                                                                                                                                                                                                                                                                                                                                                                                                                                                                                                                                                                                                                                                                                                                                                                                                                                                                                                                                                                                                                                                                                                                                                                                                                                                                                                                                                                                                                                                                                                                                                                                                                                                                                                                                                                                                                                                                                                                                                                                                                                                                                                                                                                                                                                                                                                                                                                                                                                                                                                                                                                                                                                                                                                                                                                                                                                                                                                                                                                                                                                                                                                                                                                                                                                                                                                                                                                                                                                                                                                                                                                                                                                                                                                                                                                                                                                                                                                                                                                                                                                                                                                                                                                                                                                                                                                                                                                                                                                                                                                                                                                      | Yaftabad Hospital, COVID Lab Center                                                                       | University of Tabriz                                                                                                | Hashemian; Hosseinzadeh Gharajeh, N.; S.M. and Barati, O.; Shahabzadeh, Z.                                                                                                                                          |                                                                                                                                                                                                                                                                                                                                                                                                                                                                         |
| EPI_ISL_507007                                                                                                                                                                                                                                                                                                                                                                                                                                                                                                                                                                                                                                                                                                                                                                                                                                                                                                                                                                                                                                                                                                                                                                                                                                                                                                                                                                                                                                                                                                                                                                                                                                                                                                                                                                                                                                                                                                                                                                                                                                                                                                                                                                                                                                                                                                                                                                                                                                                                                                                                                                                                                                                                                                                                                                                                                                                                                                                                                                                                                                                                                                                                                                                                                                                                                                                                                                                                                                                                                                                                                                                                                                                                                                                                                                                                                                                                                                                                                                                                                                                                                                                                                                                                                                                                                                                                                                                                                                                                                                                                                                                                                                                                                                                                                                                                                                                                                                                                                                                                                                                                                                                                                                                                                                                                                                                                                                                                                                                                                                                                                                                                                                                                                                                                                                                                                                                                                                                                                                                                                                                                                                                                                                                      | Yaftabad Hospital, Covid Lab Center                                                                       | Tehran University of Medical Sciences                                                                               | Hashemian; Hosseinzadeh Gharajeh, N.; S.M. and Barati, O.; Shahabzadeh, Z.                                                                                                                                          |                                                                                                                                                                                                                                                                                                                                                                                                                                                                         |
| EPI_ISL_419512 to 419516, EPI_ISL_428373 to 428380, EPI_ISL_428384 to 428405, EPI_ISL_428745 to 428752, EPI_ISL_431080 to 431096, EPI_ISL_435702 to 435709, EPI_ISL_452143 to 452147, EPI_ISL_594119 to 594133                                                                                                                                                                                                                                                                                                                                                                                                                                                                                                                                                                                                                                                                                                                                                                                                                                                                                                                                                                                                                                                                                                                                                                                                                                                                                                                                                                                                                                                                                                                                                                                                                                                                                                                                                                                                                                                                                                                                                                                                                                                                                                                                                                                                                                                                                                                                                                                                                                                                                                                                                                                                                                                                                                                                                                                                                                                                                                                                                                                                                                                                                                                                                                                                                                                                                                                                                                                                                                                                                                                                                                                                                                                                                                                                                                                                                                                                                                                                                                                                                                                                                                                                                                                                                                                                                                                                                                                                                                                                                                                                                                                                                                                                                                                                                                                                                                                                                                                                                                                                                                                                                                                                                                                                                                                                                                                                                                                                                                                                                                                                                                                                                                                                                                                                                                                                                                                                                                                                                                                      | see above                                                                                                 | Yale COVID-19 Biorepository                                                                                         | Grubaugh Lab - Yale School of Public Health                                                                                                                                                                         | Adam Moore; Akiko Iwasaki; Albert Ko; Alice Lu; Allison Nelson; Anderson Brito; Anne Wyllie; Arnu Casanovas; Catherine Muenker; Chaney Kalinich; Chantal Vogels; Charlese Dela Cruz; Cole Jensen; Isabel Ott; Joseph Fauver; Maria Tokuyama; Mary Petrone; Nathan Grubaugh; Patrick Wong; Peiwen Lu; Richard Martinello; Saad Omer; Shelli Farhadian; Tara Alpert                                                                                                       |
| EPI_ISL_1447510 to 1447670, EPI_ISL_1509103 to 1509261                                                                                                                                                                                                                                                                                                                                                                                                                                                                                                                                                                                                                                                                                                                                                                                                                                                                                                                                                                                                                                                                                                                                                                                                                                                                                                                                                                                                                                                                                                                                                                                                                                                                                                                                                                                                                                                                                                                                                                                                                                                                                                                                                                                                                                                                                                                                                                                                                                                                                                                                                                                                                                                                                                                                                                                                                                                                                                                                                                                                                                                                                                                                                                                                                                                                                                                                                                                                                                                                                                                                                                                                                                                                                                                                                                                                                                                                                                                                                                                                                                                                                                                                                                                                                                                                                                                                                                                                                                                                                                                                                                                                                                                                                                                                                                                                                                                                                                                                                                                                                                                                                                                                                                                                                                                                                                                                                                                                                                                                                                                                                                                                                                                                                                                                                                                                                                                                                                                                                                                                                                                                                                                                              | Yale Clinical Virology Lab                                                                                | Grubaugh Lab - Yale School of Public Health                                                                         | Anderson Brito; Annie Watkins; Chaney Kalinich; Chantal Vogels; Isabel Ott; Isabell Ott; Jessica Rothman; Joseph Fauver; Mallery Breban; Marie L. Landry; Mary Petrone; Nathan Grubaugh; Tara Alpert                |                                                                                                                                                                                                                                                                                                                                                                                                                                                                         |
| EPI_ISL_416420 to 416424, EPI_ISL_419517 to 419528, EPI_ISL_420086 to 420098, EPI_ISL_428250, EPI_ISL_428369 to 428372, EPI_ISL_428381 to 428382, EPI_ISL_428740, EPI_ISL_435720, EPI_ISL_463138 to 463174, EPI_ISL_469171 to 469280, EPI_ISL_476517 to 476557                                                                                                                                                                                                                                                                                                                                                                                                                                                                                                                                                                                                                                                                                                                                                                                                                                                                                                                                                                                                                                                                                                                                                                                                                                                                                                                                                                                                                                                                                                                                                                                                                                                                                                                                                                                                                                                                                                                                                                                                                                                                                                                                                                                                                                                                                                                                                                                                                                                                                                                                                                                                                                                                                                                                                                                                                                                                                                                                                                                                                                                                                                                                                                                                                                                                                                                                                                                                                                                                                                                                                                                                                                                                                                                                                                                                                                                                                                                                                                                                                                                                                                                                                                                                                                                                                                                                                                                                                                                                                                                                                                                                                                                                                                                                                                                                                                                                                                                                                                                                                                                                                                                                                                                                                                                                                                                                                                                                                                                                                                                                                                                                                                                                                                                                                                                                                                                                                                                                      | see above                                                                                                 | Yale Clinical Virology Laboratory                                                                                   | Grubaugh Lab - Yale School of Public Health                                                                                                                                                                         | Adam Moore; Akiko Iwasaki; Albert Ko; Alice Lu; Allison Nelson; Anderson Brito; Anne Wyllie; Anthony Muymombwe; Arnu Casanovas; Catherine Muenker; Chaney Kalinich; Chantal Vogels; Charlese Dela Cruz; Cole Jensen; Ellen Foxman; Isabel Ott; Jafar Razeg; Joseph Fauver; Maria Tokuyama; Marie Landry; Marie-Louise Landry; Mary Petrone; Nagarjuna Cheemarla; Nathan Grubaugh; Patrick Wong; Peiwen Lu; Richard Martinello; Saad Omer; Shelli Farhadian; Tara Alpert |
| EPI_ISL_1447671                                                                                                                                                                                                                                                                                                                                                                                                                                                                                                                                                                                                                                                                                                                                                                                                                                                                                                                                                                                                                                                                                                                                                                                                                                                                                                                                                                                                                                                                                                                                                                                                                                                                                                                                                                                                                                                                                                                                                                                                                                                                                                                                                                                                                                                                                                                                                                                                                                                                                                                                                                                                                                                                                                                                                                                                                                                                                                                                                                                                                                                                                                                                                                                                                                                                                                                                                                                                                                                                                                                                                                                                                                                                                                                                                                                                                                                                                                                                                                                                                                                                                                                                                                                                                                                                                                                                                                                                                                                                                                                                                                                                                                                                                                                                                                                                                                                                                                                                                                                                                                                                                                                                                                                                                                                                                                                                                                                                                                                                                                                                                                                                                                                                                                                                                                                                                                                                                                                                                                                                                                                                                                                                                                                     | Yale Pathology Lab                                                                                        | Grubaugh Lab - Yale School of Public Health                                                                         | Anderson Brito; Annie Watkins; Chaney Kalinich; Chantal Vogels; Chen Liu; Isabel Ott; Jessica Rothman; Jianhui Wang; Joseph Fauver; Mallery Breban; Mary Petrone; Nathan Grubaugh; Pei Hui; Tara Alpert             |                                                                                                                                                                                                                                                                                                                                                                                                                                                                         |
| EPI_ISL_539804                                                                                                                                                                                                                                                                                                                                                                                                                                                                                                                                                                                                                                                                                                                                                                                                                                                                                                                                                                                                                                                                                                                                                                                                                                                                                                                                                                                                                                                                                                                                                                                                                                                                                                                                                                                                                                                                                                                                                                                                                                                                                                                                                                                                                                                                                                                                                                                                                                                                                                                                                                                                                                                                                                                                                                                                                                                                                                                                                                                                                                                                                                                                                                                                                                                                                                                                                                                                                                                                                                                                                                                                                                                                                                                                                                                                                                                                                                                                                                                                                                                                                                                                                                                                                                                                                                                                                                                                                                                                                                                                                                                                                                                                                                                                                                                                                                                                                                                                                                                                                                                                                                                                                                                                                                                                                                                                                                                                                                                                                                                                                                                                                                                                                                                                                                                                                                                                                                                                                                                                                                                                                                                                                                                      | Yan Chai Hospital                                                                                         | Hong Kong Department of Health                                                                                      | Alan K.L. Tsang; Dominic N.C. Tsang; Edman T.K. Lam; Peter C.W. Yip; Rickjason C.W. Chan                                                                                                                            |                                                                                                                                                                                                                                                                                                                                                                                                                                                                         |

|                                                                                                                                                                                                                                                                                                                                                                    |                                                                                                |                                                                                                                     |                                                                                                                                                                                                                                                                                                                                                                                                                                                                                                                                                                   |
|--------------------------------------------------------------------------------------------------------------------------------------------------------------------------------------------------------------------------------------------------------------------------------------------------------------------------------------------------------------------|------------------------------------------------------------------------------------------------|---------------------------------------------------------------------------------------------------------------------|-------------------------------------------------------------------------------------------------------------------------------------------------------------------------------------------------------------------------------------------------------------------------------------------------------------------------------------------------------------------------------------------------------------------------------------------------------------------------------------------------------------------------------------------------------------------|
| EPI_ISL_408478                                                                                                                                                                                                                                                                                                                                                     | Yongchuan District Center for Disease Control and Prevention                                   | Chongqing Municipal Center for Disease Control and Prevention                                                       | Chen Shuang; Li Qing; Ling Hua; Rong Rong; Su Kun; Tan ZhangPing; Tang Wenge; Tang Yun; Ye Sheng; Yu zhen                                                                                                                                                                                                                                                                                                                                                                                                                                                         |
| EPI_ISL_1393897 to 1393899, EPI_ISL_1393954 to 1393956, EPI_ISL_1538581                                                                                                                                                                                                                                                                                            | ZDL ZOZ Nysa                                                                                   | 1. National Institute of Public Health - National Institute of Hygiene; 2. Eurofins Genomics Europe Sequencing GmbH | ECDC COVID-19 WGS support team; Eurofins Genomics Europe Sequencing Team; Gierczyki Rafa; Sadkowska-Todys Magorzata; Wokowicz Tomasz; Zacharczuk Katarzyna                                                                                                                                                                                                                                                                                                                                                                                                        |
| EPI_ISL_539577 to 539615                                                                                                                                                                                                                                                                                                                                           | ZOTZ KLIMAS MVZ Düsseldorf-Centrum GbR ÜBAG für Labormedizin, Genetik, Zytologie, Pathologie   | Center of Medical Microbiology, Virology, and Hospital Hygiene, University of Duesseldorf                           | Alexander Dilthey; Andreas Walker; Ashley-Jane Duplessis; Daniel Strelow; Jessica Nicolai; Jörg Timm; Katrin Hoffmann; Klaus Pfeffer; Malte Kohns Vasconcelos; Marek Korenca; Maximilian Damagnez; Nadine Lübke; Patrick Finzer; Rainer Zotz; Tobias Wienemann; Torsten Houwaart                                                                                                                                                                                                                                                                                  |
| EPI_ISL_1539149                                                                                                                                                                                                                                                                                                                                                    | Zakad Bakteriologii Szpital Matki Boej Nieuwstałej Pomocy                                      | 1. National Institute of Public Health - National Institute of Hygiene; 2. Eurofins Genomics Europe Sequencing GmbH | ECDC COVID-19 WGS support team; Eurofins Genomics Europe Sequencing Team; Gierczyki Rafa; Sadkowska-Todys Magorzata; Wokowicz Tomasz; Zacharczuk Katarzyna                                                                                                                                                                                                                                                                                                                                                                                                        |
| EPI_ISL_1538476, EPI_ISL_1539091                                                                                                                                                                                                                                                                                                                                   | Zakad Bakteriologii Wojewódzki Szpital Zespolony w Pocku                                       | 1. National Institute of Public Health - National Institute of Hygiene; 2. Eurofins Genomics Europe Sequencing GmbH | ECDC COVID-19 WGS support team; Eurofins Genomics Europe Sequencing Team; Gierczyki Rafa; Sadkowska-Todys Magorzata; Wokowicz Tomasz; Zacharczuk Katarzyna                                                                                                                                                                                                                                                                                                                                                                                                        |
| EPI_ISL_1394142                                                                                                                                                                                                                                                                                                                                                    | Zakad Biochemii i Analityki Klinicznej Narodowy Instytut Onkologii                             | 1. National Institute of Public Health - National Institute of Hygiene; 2. Eurofins Genomics Europe Sequencing GmbH | ECDC COVID-19 WGS support team; Eurofins Genomics Europe Sequencing Team; Gierczyki Rafa; Sadkowska-Todys Magorzata; Wokowicz Tomasz; Zacharczuk Katarzyna                                                                                                                                                                                                                                                                                                                                                                                                        |
| EPI_ISL_1538909 to 1538910, EPI_ISL_1539087, EPI_ISL_1539158                                                                                                                                                                                                                                                                                                       | Zakad Diagnostyki Laboratoryjnej Mazowieckiego Szpitala Bródnowskiego w Warszawie Sp. z o.o.   | 1. National Institute of Public Health - National Institute of Hygiene; 2. Eurofins Genomics Europe Sequencing GmbH | ECDC COVID-19 WGS support team; Eurofins Genomics Europe Sequencing Team; Gierczyki Rafa; Sadkowska-Todys Magorzata; Wokowicz Tomasz; Zacharczuk Katarzyna                                                                                                                                                                                                                                                                                                                                                                                                        |
| EPI_ISL_1538466, EPI_ISL_1538515, EPI_ISL_1538533, EPI_ISL_1538836, EPI_ISL_1538911                                                                                                                                                                                                                                                                                | Zakad Diagnostyki Laboratoryjnej Midzyleskiego Szpitala Specjalistycznego                      | 1. National Institute of Public Health - National Institute of Hygiene; 2. Eurofins Genomics Europe Sequencing GmbH | ECDC COVID-19 WGS support team; Eurofins Genomics Europe Sequencing Team; Gierczyki Rafa; Sadkowska-Todys Magorzata; Wokowicz Tomasz; Zacharczuk Katarzyna                                                                                                                                                                                                                                                                                                                                                                                                        |
| EPI_ISL_1393772                                                                                                                                                                                                                                                                                                                                                    | Zakad Diagnostyki Laboratoryjnej SPWSZ                                                         | 1. National Institute of Public Health - National Institute of Hygiene; 2. Eurofins Genomics Europe Sequencing GmbH | ECDC COVID-19 WGS support team; Eurofins Genomics Europe Sequencing Team; Gierczyki Rafa; Sadkowska-Todys Magorzata; Wokowicz Tomasz; Zacharczuk Katarzyna                                                                                                                                                                                                                                                                                                                                                                                                        |
| EPI_ISL_1393665 to 1393668, EPI_ISL_1447213, EPI_ISL_1447280, EPI_ISL_1447285, EPI_ISL_1538539, EPI_ISL_1538882 to 1538884, EPI_ISL_1539107, EPI_ISL_1539212                                                                                                                                                                                                       | see above                                                                                      | 1. National Institute of Public Health - National Institute of Hygiene; 2. Eurofins Genomics Europe Sequencing GmbH | ECDC COVID-19 WGS support team; Eurofins Genomics Europe Sequencing Team; Gierczyki Rafa; Sadkowska-Todys Magorzata; Wokowicz Tomasz; Zacharczuk Katarzyna                                                                                                                                                                                                                                                                                                                                                                                                        |
| EPI_ISL_1538754, EPI_ISL_1539025, EPI_ISL_1539229                                                                                                                                                                                                                                                                                                                  | Zakad Diagnostyki Laboratoryjnej WSM im. J. Strusia W Poznaniu                                 | 1. National Institute of Public Health - National Institute of Hygiene; 2. Eurofins Genomics Europe Sequencing GmbH | ECDC COVID-19 WGS support team; Eurofins Genomics Europe Sequencing Team; Gierczyki Rafa; Sadkowska-Todys Magorzata; Wokowicz Tomasz; Zacharczuk Katarzyna                                                                                                                                                                                                                                                                                                                                                                                                        |
| EPI_ISL_1393877, EPI_ISL_1447197, EPI_ISL_1447238, EPI_ISL_1538864 to 1538865, EPI_ISL_1538994                                                                                                                                                                                                                                                                     | Zakad Diagnostyki Laboratoryjnej WSM im. J. Strusia w Poznaniu                                 | 1. National Institute of Public Health - National Institute of Hygiene; 2. Eurofins Genomics Europe Sequencing GmbH | ECDC COVID-19 WGS support team; Eurofins Genomics Europe Sequencing Team; Gierczyki Rafa; Sadkowska-Todys Magorzata; Wokowicz Tomasz; Zacharczuk Katarzyna                                                                                                                                                                                                                                                                                                                                                                                                        |
| EPI_ISL_1538482                                                                                                                                                                                                                                                                                                                                                    | Zakad Diagnostyki Mikrobiol. WSS we Wocawku                                                    | 1. National Institute of Public Health - National Institute of Hygiene; 2. Eurofins Genomics Europe Sequencing GmbH | ECDC COVID-19 WGS support team; Eurofins Genomics Europe Sequencing Team; Gierczyki Rafa; Sadkowska-Todys Magorzata; Wokowicz Tomasz; Zacharczuk Katarzyna                                                                                                                                                                                                                                                                                                                                                                                                        |
| EPI_ISL_1394106                                                                                                                                                                                                                                                                                                                                                    | Zakad Diagnostyki Mikrobiologicznej, Kujawsko-Pomorskie Centrum Pulmonologii                   | 1. National Institute of Public Health - National Institute of Hygiene; 2. Eurofins Genomics Europe Sequencing GmbH | ECDC COVID-19 WGS support team; Eurofins Genomics Europe Sequencing Team; Gierczyki Rafa; Sadkowska-Todys Magorzata; Wokowicz Tomasz; Zacharczuk Katarzyna                                                                                                                                                                                                                                                                                                                                                                                                        |
| EPI_ISL_1393673 to 1393674, EPI_ISL_1447273, EPI_ISL_1538544, EPI_ISL_1538692 to 1538693, EPI_ISL_1539004, EPI_ISL_1539162                                                                                                                                                                                                                                         | Zakad Diagnostyki Molekularnej Nowotworów Dolnolskie Centrum Onkologii                         | 1. National Institute of Public Health - National Institute of Hygiene; 2. Eurofins Genomics Europe Sequencing GmbH | ECDC COVID-19 WGS support team; Eurofins Genomics Europe Sequencing Team; Gierczyki Rafa; Sadkowska-Todys Magorzata; Wokowicz Tomasz; Zacharczuk Katarzyna                                                                                                                                                                                                                                                                                                                                                                                                        |
| EPI_ISL_1538591                                                                                                                                                                                                                                                                                                                                                    | Zakad Mikrobiologii Centrum Onkologii w Bydgoszczy                                             | 1. National Institute of Public Health - National Institute of Hygiene; 2. Eurofins Genomics Europe Sequencing GmbH | ECDC COVID-19 WGS support team; Eurofins Genomics Europe Sequencing Team; Gierczyki Rafa; Sadkowska-Todys Magorzata; Wokowicz Tomasz; Zacharczuk Katarzyna                                                                                                                                                                                                                                                                                                                                                                                                        |
| EPI_ISL_1393900 to 1393902, EPI_ISL_1393957 to 1393961, EPI_ISL_1538492, EPI_ISL_1538503, EPI_ISL_1538919, EPI_ISL_1539164, EPI_ISL_1539172 to 1539173, EPI_ISL_1539198                                                                                                                                                                                            | see above                                                                                      | 1. National Institute of Public Health - National Institute of Hygiene; 2. Eurofins Genomics Europe Sequencing GmbH | ECDC COVID-19 WGS support team; Eurofins Genomics Europe Sequencing Team; Gierczyki Rafa; Sadkowska-Todys Magorzata; Wokowicz Tomasz; Zacharczuk Katarzyna                                                                                                                                                                                                                                                                                                                                                                                                        |
| EPI_ISL_1393868 to 1393870, EPI_ISL_1394107 to 1394113, EPI_ISL_1425545, EPI_ISL_1538477, EPI_ISL_1538488, EPI_ISL_1538804, EPI_ISL_1538807, EPI_ISL_1538866 to 1538867, EPI_ISL_1539055                                                                                                                                                                           | see above                                                                                      | 1. National Institute of Public Health - National Institute of Hygiene; 2. Eurofins Genomics Europe Sequencing GmbH | ECDC COVID-19 WGS support team; Eurofins Genomics Europe Sequencing Team; Gierczyki Rafa; Sadkowska-Todys Magorzata; Wokowicz Tomasz; Zacharczuk Katarzyna                                                                                                                                                                                                                                                                                                                                                                                                        |
| EPI_ISL_475887 to 475909, EPI_ISL_583599                                                                                                                                                                                                                                                                                                                           | Zentralinstitut für medizinische und chemische Labordiagnostik, Universitätskliniken Innsbruck | Berghaler laboratory, CeMM Research Center for Molecular Medicine of the Austrian Academy of Sciences               | Adi Steinrigl; Alexander Lercher; Alexandra Popa; Andreas Berghaler; Benedikt Agerer; Christian Paar; Christoph Bock; Daniela Schmid; Dorothee von Laer; Elisabeth Puchhammer-Stoeckl; Franz Allerberger; Gernot Walder; Gregor Hörmann; Guenter Weiss; Gunther Vogl; Henrique Colaco; Jakob-Wendelin Genger; Jan Laine; Judith Aberle; Kinga Rigler-Hohenwarter; Lukas Endler; Manfred Nairz; Mark Smyth; Martin Senekowitsch; Michael Schuster; Peter Hufnagl; Peter Obrist; Rainer Gattringer; Sabine Sussitz-Rack; Stephan Aberle; Thomas Penz; Wegene Borena |
| EPI_ISL_404227 to 404228                                                                                                                                                                                                                                                                                                                                           | Zhejiang Provincial Center for Disease Control and Prevention                                  | Department of Microbiology, Zhejiang Provincial Center for Disease Control and Prevention                           | Chen Chen; Chonggao Hu; Enfu Chen; Fang Xu; Haiyan Mao; Hanping Zhu; Hao Yan; Jian Gao; Jianmin Jiang; Junhang Pan; Juying Yan; Liming Gong; Qiong Ge; Wen Shi; Wenwu Yao; Xinying Wang; Xiuyu Lou; Yan Feng; Yanjun Zhang; Yi Sun; Yin Chen; Yisheng Sun; Yiyu Lu; Zhangnv Yang; Zhen Li; Zhen Wang; Zhiping Chen                                                                                                                                                                                                                                                |
| EPI_ISL_422425                                                                                                                                                                                                                                                                                                                                                     | Zhejiang Provincial Center for Disease Control and Prevention                                  | Zhejiang Provincial Center for Disease Control and Prevention                                                       | Yanjun Zhang; Yi Sun                                                                                                                                                                                                                                                                                                                                                                                                                                                                                                                                              |
| EPI_ISL_408479                                                                                                                                                                                                                                                                                                                                                     | Zhongxian Center for Disease Control and Prevention                                            | Chongqing Municipal Center for Disease Control and Prevention                                                       | Chen Shuang; Li Qin; Ling Hua; Rong Rong; Su Kun; Tan ZhangPing; Tang Wenge; Tang Yun; Ye Sheng; Yu zhen; Zhang Hong                                                                                                                                                                                                                                                                                                                                                                                                                                              |
| EPI_ISL_1443170 to 1443186                                                                                                                                                                                                                                                                                                                                         | Zoo Barcelona   IRTA-CReSA                                                                     | IrsiCaixa                                                                                                           | B. Clotet; F. Català-Moll; H. Fernández-Bellón; J. Vergara-Alert; J.Rodon; L. Fernández-Bastit; M. Casadellà; M. Noguera-Julian; M. Parera; R. Paredes                                                                                                                                                                                                                                                                                                                                                                                                            |
| EPI_ISL_467430                                                                                                                                                                                                                                                                                                                                                     | Zoonotic and Exotic infection Diseases Division                                                | Zoonotic and Exotic infection Diseases Division                                                                     | Jinlang Wang; Zhigao Bu                                                                                                                                                                                                                                                                                                                                                                                                                                                                                                                                           |
| EPI_ISL_459909                                                                                                                                                                                                                                                                                                                                                     | Zoonotic and Exotic infection Diseases Division, Harbin Veterinary Research Institute, CAAS    | Zoonotic and Exotic infection Diseases Division, Harbin Veterinary Research Institute, CAAS                         | Jinliang Wang; Zhigao Bu                                                                                                                                                                                                                                                                                                                                                                                                                                                                                                                                          |
| EPI_ISL_459910                                                                                                                                                                                                                                                                                                                                                     | Zoonotic and Exotic infection Diseases Division, Harbin Veterinary Research Institute, CAAS    | Zoonotic and Exotic infection Diseases Division, Harbin Veterinary Resrarch Institute, CAAS                         | Chong Wang; Dan Shan; Gongxun Zhong; Jinliang Wang; Jinying Ge; Lei Shuai; Renqiang Liu; Xianfeng Zhang; Xijun He; Xijun Wang; Zhigao Bu; Zhiyuan Wen; Ziruo Sun                                                                                                                                                                                                                                                                                                                                                                                                  |
| EPI_ISL_586536 to 586541                                                                                                                                                                                                                                                                                                                                           | Zydus Medical Hospital, Dahod                                                                  | Gujarat Biotechnology Research Centre                                                                               | A M Kadri; Afzal Ansari; Apurvasinh Puvar; Chaitanya Joshi; Dinesh Kumar; Harsh Bakshi; Janvi Raval; Kalpesh Labana; Komal Patel; Labdhi Pandya; Madhvi Joshi; Maharshi Pandya; Mohit Desai; Monika Gandhi; Nidhi Patel; Nikha Trivedi; Nitin Savaliya; Pinal Trivedi; R D Dixit; Raghawendra Kumar; Zarna Patel; Zuber Saiyed                                                                                                                                                                                                                                    |
| EPI_ISL_468134 to 468158                                                                                                                                                                                                                                                                                                                                           | [Romania, Bucharest] National Institute for Infectious Diseases "Prof. Dr. Matei Bal"          | [Romania, Bucharest] National Institute for Infectious Diseases "Prof. Dr. Matei Bal"                               | Corina Casangiu; Leontina Banica; Marius Cotic; Marius Surleac; Simona Paraschiv                                                                                                                                                                                                                                                                                                                                                                                                                                                                                  |
| EPI_ISL_1435963, EPI_ISL_1435965, EPI_ISL_1435967, EPI_ISL_1435969, EPI_ISL_1435974, EPI_ISL_1435976, EPI_ISL_1442577, EPI_ISL_1442579 to 1442582, EPI_ISL_1442584 to 1442585                                                                                                                                                                                      | see above                                                                                      | alphaomega Labor GbR (Medizinische KooperationsgemeinschaftDres. Ackermann/Tennert/Zaiß)                            | Robert Koch Institute                                                                                                                                                                                                                                                                                                                                                                                                                                                                                                                                             |
| EPI_ISL_1436640, EPI_ISL_1436694, EPI_ISL_1436703 to 1436704, EPI_ISL_1436708, EPI_ISL_1436711, EPI_ISL_1436718, EPI_ISL_1436726, EPI_ISL_1436729, EPI_ISL_1436731, EPI_ISL_1436736, EPI_ISL_1436738, EPI_ISL_1436740, EPI_ISL_1436747, EPI_ISL_1436750 to 1436751, EPI_ISL_1436756, EPI_ISL_1436760, EPI_ISL_1436763, EPI_ISL_1436772 to 1436773, EPI_ISL_1436775 | see above                                                                                      | amedes Göttingen                                                                                                    | Robert Koch Institute                                                                                                                                                                                                                                                                                                                                                                                                                                                                                                                                             |



|                                                                                                                                                                                                                                                                                                                                                                                                                                                         |           |                                                                  |                                                                                                    |                                                                                                                                                                                                                                                                                                                                                                                                                                                                                                                                                                                                                                                                                                                                                                                             |
|---------------------------------------------------------------------------------------------------------------------------------------------------------------------------------------------------------------------------------------------------------------------------------------------------------------------------------------------------------------------------------------------------------------------------------------------------------|-----------|------------------------------------------------------------------|----------------------------------------------------------------------------------------------------|---------------------------------------------------------------------------------------------------------------------------------------------------------------------------------------------------------------------------------------------------------------------------------------------------------------------------------------------------------------------------------------------------------------------------------------------------------------------------------------------------------------------------------------------------------------------------------------------------------------------------------------------------------------------------------------------------------------------------------------------------------------------------------------------|
| EPI_ISL_1436696, EPI_ISL_1436700, EPI_ISL_1436710, EPI_ISL_1436716, EPI_ISL_1436719, EPI_ISL_1436724, EPI_ISL_1436735, EPI_ISL_1436741, EPI_ISL_1436743, EPI_ISL_1436748, EPI_ISL_1436753, EPI_ISL_1436758, EPI_ISL_1436765, EPI_ISL_1436770, EPI_ISL_1436774, EPI_ISL_1436786, EPI_ISL_1436796, EPI_ISL_1436803, EPI_ISL_1436805                                                                                                                       | see above | amedes MVZ DIAMEDIS Sennestadt                                   | Robert Koch Institute                                                                              |                                                                                                                                                                                                                                                                                                                                                                                                                                                                                                                                                                                                                                                                                                                                                                                             |
| EPI_ISL_1436620, EPI_ISL_1436625, EPI_ISL_1436636, EPI_ISL_1436659, EPI_ISL_1436663, EPI_ISL_1436677, EPI_ISL_1436686 to 1436688, EPI_ISL_1436693, EPI_ISL_1436698, EPI_ISL_1436702, EPI_ISL_1436705 to 1436706, EPI_ISL_1436709, EPI_ISL_1436713 to 1436714, EPI_ISL_1436721, EPI_ISL_1436725, EPI_ISL_1436727, EPI_ISL_1436734, EPI_ISL_1436739, EPI_ISL_1436742, EPI_ISL_1436745, EPI_ISL_1436754, EPI_ISL_1436788, EPI_ISL_1436793, EPI_ISL_1436800 | see above | amedes MVZ Halle/Leipzig                                         | Robert Koch Institute                                                                              |                                                                                                                                                                                                                                                                                                                                                                                                                                                                                                                                                                                                                                                                                                                                                                                             |
| EPI_ISL_1436621, EPI_ISL_1436623, EPI_ISL_1436627, EPI_ISL_1436632, EPI_ISL_1436644, EPI_ISL_1436650, EPI_ISL_1436657, EPI_ISL_1436672, EPI_ISL_1436679, EPI_ISL_1436681, EPI_ISL_1436689, EPI_ISL_1436692, EPI_ISL_1436697, EPI_ISL_1436717, EPI_ISL_1436723, EPI_ISL_1436757, EPI_ISL_1436768, EPI_ISL_1436779, EPI_ISL_1436784                                                                                                                       | see above | amedes MVZ Hannover                                              | Robert Koch Institute                                                                              |                                                                                                                                                                                                                                                                                                                                                                                                                                                                                                                                                                                                                                                                                                                                                                                             |
| EPI_ISL_1436630, EPI_ISL_1436634, EPI_ISL_1436685, EPI_ISL_1436690, EPI_ISL_1436707, EPI_ISL_1436715, EPI_ISL_1436730, EPI_ISL_1436746, EPI_ISL_1436755, EPI_ISL_1436762, EPI_ISL_1436771, EPI_ISL_1436780, EPI_ISL_1436783, EPI_ISL_1436787, EPI_ISL_1436802                                                                                                                                                                                           | see above | amedes MVZ Jena                                                  | Robert Koch Institute                                                                              |                                                                                                                                                                                                                                                                                                                                                                                                                                                                                                                                                                                                                                                                                                                                                                                             |
| EPI_ISL_1436654, EPI_ISL_1436669, EPI_ISL_1436776                                                                                                                                                                                                                                                                                                                                                                                                       |           | amedes MVZ Zentrum für Pathologie und Zytodiagnostik GmbH (Köln) | Robert Koch Institute                                                                              |                                                                                                                                                                                                                                                                                                                                                                                                                                                                                                                                                                                                                                                                                                                                                                                             |
| EPI_ISL_1436638, EPI_ISL_1436642, EPI_ISL_1436646, EPI_ISL_1436652, EPI_ISL_1436655, EPI_ISL_1436665, EPI_ISL_1436722, EPI_ISL_1436728, EPI_ISL_1436737, EPI_ISL_1436744, EPI_ISL_1436749, EPI_ISL_1436752, EPI_ISL_1436781, EPI_ISL_1436785, EPI_ISL_1436789, EPI_ISL_1436792, EPI_ISL_1436794 to 1436795, EPI_ISL_1436799                                                                                                                             | see above | amedes MVZ für Laboratoriumsdiagnostik Raubling GmbH             | Robert Koch Institute                                                                              |                                                                                                                                                                                                                                                                                                                                                                                                                                                                                                                                                                                                                                                                                                                                                                                             |
| EPI_ISL_1436648, EPI_ISL_1436674, EPI_ISL_1436684, EPI_ISL_1436691, EPI_ISL_1436777, EPI_ISL_1436797 to 1436798, EPI_ISL_1436806                                                                                                                                                                                                                                                                                                                        | see above | amedes MVZ für Laboratoriumsmedizin Fürstenfeldbruck             | Robert Koch Institute                                                                              |                                                                                                                                                                                                                                                                                                                                                                                                                                                                                                                                                                                                                                                                                                                                                                                             |
| EPI_ISL_1436782                                                                                                                                                                                                                                                                                                                                                                                                                                         |           | amedes MVZ für Laboratoriumsmedizin München                      | Robert Koch Institute                                                                              |                                                                                                                                                                                                                                                                                                                                                                                                                                                                                                                                                                                                                                                                                                                                                                                             |
| EPI_ISL_1436732, EPI_ISL_1436759, EPI_ISL_1436778, EPI_ISL_1436791                                                                                                                                                                                                                                                                                                                                                                                      |           | amedes MVZ für Laboratoriumsmedizin Rhein/Ruhr                   | Robert Koch Institute                                                                              |                                                                                                                                                                                                                                                                                                                                                                                                                                                                                                                                                                                                                                                                                                                                                                                             |
| EPI_ISL_1436661, EPI_ISL_1436667, EPI_ISL_1436676, EPI_ISL_1436678, EPI_ISL_1436680, EPI_ISL_1436682 to 1436683, EPI_ISL_1436769, EPI_ISL_1436790, EPI_ISL_1436801, EPI_ISL_1436807                                                                                                                                                                                                                                                                     | see above | amedes MVZ für Labordiagnostik Rhein-Main                        | Robert Koch Institute                                                                              |                                                                                                                                                                                                                                                                                                                                                                                                                                                                                                                                                                                                                                                                                                                                                                                             |
| EPI_ISL_1436712                                                                                                                                                                                                                                                                                                                                                                                                                                         |           | amedes Medizinisches Labor Mülhausen                             | Robert Koch Institute                                                                              |                                                                                                                                                                                                                                                                                                                                                                                                                                                                                                                                                                                                                                                                                                                                                                                             |
| EPI_ISL_1436701, EPI_ISL_1436733, EPI_ISL_1436767                                                                                                                                                                                                                                                                                                                                                                                                       |           | amedes Medlab Arnold Analytik MVZ GmbH                           | Robert Koch Institute                                                                              |                                                                                                                                                                                                                                                                                                                                                                                                                                                                                                                                                                                                                                                                                                                                                                                             |
| EPI_ISL_450196                                                                                                                                                                                                                                                                                                                                                                                                                                          |           | bumrungrad international hospital                                | National Institute of Health, Department of medical Sciences, Ministry of Public Health, Thailand  | Chittaganpitch; Malinee; Okada; Parnmen; Phuygun; Pilailuk; Siripaporn; Sittiporn; Sunthareeya; Thanadachakul; Thanutsapa; Waicharoen; Warawan; Wongboot                                                                                                                                                                                                                                                                                                                                                                                                                                                                                                                                                                                                                                    |
| EPI_ISL_1406446, EPI_ISL_1490231                                                                                                                                                                                                                                                                                                                                                                                                                        |           | center de prélèvement COVID ISSOIRE                              | CHU Clermont-Ferrand, service de virologie                                                         | Bisseux Maxime; Combes Patricia; Henquell Cécile; Mirand Audrey                                                                                                                                                                                                                                                                                                                                                                                                                                                                                                                                                                                                                                                                                                                             |
| EPI_ISL_417481, EPI_ISL_417535 to 417549, EPI_ISL_417552, EPI_ISL_417590, EPI_ISL_417618, EPI_ISL_417655 to 417672, EPI_ISL_417676, EPI_ISL_417676, EPI_ISL_424377 to 424378, EPI_ISL_424533, EPI_ISL_424535 to 424536, EPI_ISL_424538 to 424539, EPI_ISL_424543 to 424546, EPI_ISL_424551, EPI_ISL_424553, EPI_ISL_424560 to 424562, EPI_ISL_424565 to 424570, EPI_ISL_424608 to 424609                                                                | see above | deCODE genetics                                                  | deCODE genetics                                                                                    | Agnar Helgason; Alma Moller; Arna B Agustsdottir; Arnaldur Gylfason; Asgeir Sigurdsson; Aslaug Jonasdottir; Berglind Eiriksdottir; Bjarni Thorbjornsson; Brynjar O Jenson; Daniel F Gudbjartsson; Droplaug N Magnusdottir; Elisabet E Gardarsdottir; Emil A Thorarensen; Gardar Sveinbjornsson; Gisli Masson; Gudmundur Georgsson; Gudmundur L Norddahl; Gudrun Sigmundsdottir; Hakon Jonsson; Hilma Holm; Ingileif Jonsdottir; Jona Saemundsdottir; Kamilla S Jofsefsdottir; Kari Stefansson; Karl G Kristinnsson; Kjartan R Gudmundsson; Kristin E Sveinsdottir; Louise le Roux; Maney Sveinsdottir; Olafia S Gretarsdottir; Olafur T Magnusson; Pall Melsted; Patrick Sulem; Run Fridriksdottir; Thora R Gunnarsdottir; Thordur Kristjansson; Thorolfur Gudnason; Unnur Thorsteinsdottir |
| EPI_ISL_560591 to 560597, EPI_ISL_594163 to 594165                                                                                                                                                                                                                                                                                                                                                                                                      |           | hopital                                                          | National Reference Center for Viruses of Respiratory Infections, Institut Pasteur, Paris           | Etienne Simon-Lorière; Fabiana Garbaro; Maud Vanpeene; Sylvie Behillil; Sylvie van der Werf; Vincent Enouf                                                                                                                                                                                                                                                                                                                                                                                                                                                                                                                                                                                                                                                                                  |
| EPI_ISL_560568 to 560580                                                                                                                                                                                                                                                                                                                                                                                                                                |           | hôpital                                                          | National Reference Center for Viruses of Respiratory Infections, Institut Pasteur, Paris           | Etienne Simon-Lorière; Fabiana Garbaro; Maud Vanpeene; Sylvie Behillil; Sylvie van der Werf; Vincent Enouf                                                                                                                                                                                                                                                                                                                                                                                                                                                                                                                                                                                                                                                                                  |
| EPI_ISL_1439675, EPI_ISL_1439683                                                                                                                                                                                                                                                                                                                                                                                                                        |           | labopart - Medizinische Laboratorien Dresden                     | Robert Koch Institute                                                                              |                                                                                                                                                                                                                                                                                                                                                                                                                                                                                                                                                                                                                                                                                                                                                                                             |
| EPI_ISL_1483703 to 1483704                                                                                                                                                                                                                                                                                                                                                                                                                              |           | laboratorio microbiologia PO Cardarelli                          | laboratorio microbiologia PO Cardarelli                                                            | Giovanna Niro; Massimiliano Scutella; Valentina Felice                                                                                                                                                                                                                                                                                                                                                                                                                                                                                                                                                                                                                                                                                                                                      |
| EPI_ISL_1483701 to 1483702, EPI_ISL_1483705 to 1483706, EPI_ISL_1483788, EPI_ISL_1495972                                                                                                                                                                                                                                                                                                                                                                |           | laboratorio microbiologia PO Cardarelli                          | laboratorio microbiologia PO Cardarelli                                                            | Giovanna Niro; Massimiliano Scutella; Massimiliano Scutella. Giovanna Niro; Valentina Felice                                                                                                                                                                                                                                                                                                                                                                                                                                                                                                                                                                                                                                                                                                |
| EPI_ISL_447909 to 447921                                                                                                                                                                                                                                                                                                                                                                                                                                |           | n/a                                                              | National Institute of Health, Department of medical Sciences, Ministry of Public Health, Thailand  | Chittaganpitch; Malinee; Okada; Parnmen; Phuygun; Pilailuk; Siripaporn; Sittiporn; Sunthareeya; Thanadachakul; Thanutsapa; Waicharoen; Warawan; Wongboot                                                                                                                                                                                                                                                                                                                                                                                                                                                                                                                                                                                                                                    |
| EPI_ISL_430837                                                                                                                                                                                                                                                                                                                                                                                                                                          |           | n/a                                                              | Thai National Influenza Center, Department of medical Science, Ministry of Public Health, Thailand | Chittaganpitch; Malinee; Okada; Parnmen; Phuygun; Pilailuk; Siripaporn; Sittiporn; Sunthareeya; Thanadachakul; Thanutsapa; Waicharoen; Warawan; Wongboot                                                                                                                                                                                                                                                                                                                                                                                                                                                                                                                                                                                                                                    |
| EPI_ISL_426484                                                                                                                                                                                                                                                                                                                                                                                                                                          |           | n/a                                                              | Worobey Lab on behalf of the Arizona COVID-19 Genomics Union                                       | Ashlyn Pfeiffer; Brendan B. Larsen; Crystal Hepp; Danielle Yasquez; Darrin Lemmer; David M. Engelthaler; Evan Bolyen; Hayley Yaglom; J. Gregory Caporaso; Jason Ladner; Jason W. Sahl; Jolene Bowers; Krystal Sheridan; Megan Folkerts; Michael Worobey; Nicholas A. Bokulich; Paul Keim                                                                                                                                                                                                                                                                                                                                                                                                                                                                                                    |
| EPI_ISL_1436695, EPI_ISL_1436761, EPI_ISL_1436764, EPI_ISL_1436804                                                                                                                                                                                                                                                                                                                                                                                      |           | nordlab - Partnerschaftspraxis fu?r Laboratoriumsmedizin         | Robert Koch Institute                                                                              |                                                                                                                                                                                                                                                                                                                                                                                                                                                                                                                                                                                                                                                                                                                                                                                             |
| EPI_ISL_454574                                                                                                                                                                                                                                                                                                                                                                                                                                          |           | nstitute for Public Health                                       | Laboratory for advanced genomics                                                                   | Filip Roki; Igor Jurak; Lovro Trgovec-Greif; Neven Sui; Oliver Vugrek; Tomislav Rukavina                                                                                                                                                                                                                                                                                                                                                                                                                                                                                                                                                                                                                                                                                                    |
| EPI_ISL_450816                                                                                                                                                                                                                                                                                                                                                                                                                                          |           | orestadsklinikens VC                                             | The Public Health Agency of Sweden                                                                 | Anna Risberg; Anna-Malin Linde; Karin Tegmark-Wisell; Lisa Kjellberg / Laura Plavitu; Maria Lind Karlberg; Mia Brytting; Olov Svartstrom; Oskar Karlsson Lindsjo; Theresa Enkirch                                                                                                                                                                                                                                                                                                                                                                                                                                                                                                                                                                                                           |
| EPI_ISL_1404616                                                                                                                                                                                                                                                                                                                                                                                                                                         |           | siParadigm LLC                                                   | siParadigm LLC                                                                                     | Kamfai Chan                                                                                                                                                                                                                                                                                                                                                                                                                                                                                                                                                                                                                                                                                                                                                                                 |
| EPI_ISL_458285 to 458286                                                                                                                                                                                                                                                                                                                                                                                                                                |           | unknown                                                          | Bundeswehr Institute of Microbiology                                                               | Antwerpen; Bestehorn-Willmann; Eckstein, S.; Handrick, S.; M.C.; M.H.; M.S.; Naija, H.; R. and Ben Moussa, M.; Rehn, A.; Stoecker, K.; Walter; Woelfel                                                                                                                                                                                                                                                                                                                                                                                                                                                                                                                                                                                                                                      |
| EPI_ISL_450500 to 450504                                                                                                                                                                                                                                                                                                                                                                                                                                |           | unknown                                                          | CAS Key Laboratory of Special Pathogens and Biosafety and Center for Emerging Infectious Diseases  | Lin, H.; Shi, Z.; Si, H.; Xie, S.; Zhou, P.; Zhu, Y.                                                                                                                                                                                                                                                                                                                                                                                                                                                                                                                                                                                                                                                                                                                                        |
| EPI_ISL_486427, EPI_ISL_486429                                                                                                                                                                                                                                                                                                                                                                                                                          |           | unknown                                                          | Clinical Laboratory, Hospital Israelita Albert Einstein                                            | Amgartebe, D.; Amgarten, D.; C.L. and Pinho; F.G.; Guedes; J.R.; Malta, F.; Manguiera; R.A.; R.L.; Santana; de Menezes                                                                                                                                                                                                                                                                                                                                                                                                                                                                                                                                                                                                                                                                      |
| EPI_ISL_463001 to 463006                                                                                                                                                                                                                                                                                                                                                                                                                                |           | unknown                                                          | Clinical virology                                                                                  | Fares, W.; Triki, H.                                                                                                                                                                                                                                                                                                                                                                                                                                                                                                                                                                                                                                                                                                                                                                        |
| EPI_ISL_487270, EPI_ISL_487272 to 487274                                                                                                                                                                                                                                                                                                                                                                                                                |           | unknown                                                          | Communicable Disease Laboratory, Public Health Directorate                                         | AITaif, Z.; AlWasti, H.; Altaif, Z.; Altaif, z.; Shehab, F.; Zaed, A.                                                                                                                                                                                                                                                                                                                                                                                                                                                                                                                                                                                                                                                                                                                       |
| EPI_ISL_468063 to 468065                                                                                                                                                                                                                                                                                                                                                                                                                                |           | unknown                                                          | Computer Science and Engineering                                                                   | A.B.; Adcock; Alejandro, B.; Arnold; Carrico, R.; Chariker; Chung, D.; E.C.; F.W.; Hwang; J.H.; J.W.; J.Y.; K.E.; L.A.; Lasnik; Palmer; Park; R.S.; Ramirez, J.; Rouchka; Waigel, S.; Wolf; Zacharias, W.; Zhang, M.                                                                                                                                                                                                                                                                                                                                                                                                                                                                                                                                                                        |
| EPI_ISL_450484 to 450487                                                                                                                                                                                                                                                                                                                                                                                                                                |           | unknown                                                          | Data Science                                                                                       | C.J.; Carroll; Cohen; Miller; N.K.; S.H.; T.D.; Tran                                                                                                                                                                                                                                                                                                                                                                                                                                                                                                                                                                                                                                                                                                                                        |

|                                                                                                                                                                                                                                                                                                                                                                                                                                                                                          |                                                                                               |                                                                                                                                           |                                                                                                                                                                                                                                                                                                                                                                                                                                                                                                                                                                                                                                                                 |
|------------------------------------------------------------------------------------------------------------------------------------------------------------------------------------------------------------------------------------------------------------------------------------------------------------------------------------------------------------------------------------------------------------------------------------------------------------------------------------------|-----------------------------------------------------------------------------------------------|-------------------------------------------------------------------------------------------------------------------------------------------|-----------------------------------------------------------------------------------------------------------------------------------------------------------------------------------------------------------------------------------------------------------------------------------------------------------------------------------------------------------------------------------------------------------------------------------------------------------------------------------------------------------------------------------------------------------------------------------------------------------------------------------------------------------------|
| EPI_ISL_447635 to 447653, EPI_ISL_447832 to 447836                                                                                                                                                                                                                                                                                                                                                                                                                                       | unknown                                                                                       | Department of Medicine                                                                                                                    | Bampali, M.; Dovroli, N.; Froukala, E.; Gatzidou, E.; Kassela, K.; N. and Karakasilioti, I.; Spanakis; Stavropoulou, A.; Tsakris, A.; Veletza, S.                                                                                                                                                                                                                                                                                                                                                                                                                                                                                                               |
| EPI_ISL_455683 to 455693, EPI_ISL_468726                                                                                                                                                                                                                                                                                                                                                                                                                                                 | unknown                                                                                       | Department of Microbiology                                                                                                                | Bao, L.; Cai, F.; Deng, W.; Gao, H.; Gao, Q.; Ge, X.; Gong, X.; Hu, Y.; Jiang, D.; Jiang, L.; Kan, B.; Li, C.; Li, J.; Li, Y.; Liu, J.; Lou, X.; Lu, J.; Lv, Z.; Mao, H.; Peng, H.; Qi, Z.; Qin, C.; Shi, W.; Sun, Y.; Tang, H.; Wang, L.; Wang, N.; Wang, X.; Wu, D.; Xu, K.; Yang, M.; Yin, W.; Yin, Y.; Zhang, H.; Zhang, Y.; Zhao, P.; Zhu, L.                                                                                                                                                                                                                                                                                                              |
| EPI_ISL_449476 to 449487                                                                                                                                                                                                                                                                                                                                                                                                                                                                 | unknown                                                                                       | Department of Respiratory and Critical Care                                                                                               | Bai, X.; Chang, Y.; Deng, T.; Gao, Y.; He, Y.; Jiang, N.; Liang, L.; Liu, L.; Liu, W.; Ma, Ma, L.; Ma, X.; Pan, T.; Shi, H.; W.L. and Gao, Z.; Wang, G.; Wang, X.; Wei, X.; Xu, Y.; Yang, B.; Yang, D.; Zhai, B.; Zhang, J.; Zhang, Z.; Zheng, Y.; Zhou, Q.                                                                                                                                                                                                                                                                                                                                                                                                     |
| EPI_ISL_468159 to 468160, EPI_ISL_468162                                                                                                                                                                                                                                                                                                                                                                                                                                                 | unknown                                                                                       | Department of Virology, Public Health Laboratories Division, National Institute of Health                                                 | Aamer Ikram; Adnan Khurshid; John Klena; Massab Umair; Muhammad Salman; Nazish Badar; Shannon Whitmer                                                                                                                                                                                                                                                                                                                                                                                                                                                                                                                                                           |
| EPI_ISL_437602 to 437622, EPI_ISL_437624                                                                                                                                                                                                                                                                                                                                                                                                                                                 | unknown                                                                                       | Faculty of Medicine                                                                                                                       | Buathong, R.; Bunprakob, S.; Ghai, S.; Jojjinda, Y.; Mungaomklang, A.; Petcharat, S.; Pilpat; Prasithsirikul, W.; Rodpan, A.; Sirichan, N.; T. and Hemachudha, T.; Wacharapluesadee, S.                                                                                                                                                                                                                                                                                                                                                                                                                                                                         |
| EPI_ISL_1527011, EPI_ISL_1527017 to 1527020, EPI_ISL_1527023, EPI_ISL_1527025 to 1527028                                                                                                                                                                                                                                                                                                                                                                                                 | unknown                                                                                       | Incienza, Instituto Costarricense de Investigación y Enseñanza en Nutrición y Salud                                                       | Barboza-Arguedas E & Aguilar-Monge R; Barboza-Arguedas E & Blanco-Delgado C; Barboza-Arguedas E & Cerdas-Quesada C; Barboza-Arguedas E & Murillo-Bustos H; Barboza-Arguedas E & Ramirez-Pacheco J; Pérez-Corrales C; Pérez-Corrales C & Barboza-Arguedas E                                                                                                                                                                                                                                                                                                                                                                                                      |
| EPI_ISL_507010 to 507038                                                                                                                                                                                                                                                                                                                                                                                                                                                                 | unknown                                                                                       | Infectious Diseases Research, King Abdullah International Medical Research Center (KAIMRC)                                                | Alghoribi, M.F.                                                                                                                                                                                                                                                                                                                                                                                                                                                                                                                                                                                                                                                 |
| EPI_ISL_453813 to 454352, EPI_ISL_455625 to 455627, EPI_ISL_582516 to 582521, EPI_ISL_1499575 to 1499592, EPI_ISL_1547376 to 1547387                                                                                                                                                                                                                                                                                                                                                     | unknown                                                                                       | Instituto Nacional de Saude (INSA)                                                                                                        | Borges et al                                                                                                                                                                                                                                                                                                                                                                                                                                                                                                                                                                                                                                                    |
| EPI_ISL_1490656 to 1490658                                                                                                                                                                                                                                                                                                                                                                                                                                                               | unknown                                                                                       | Instituto Nacional de Saude (INSA) and BioSystems & Integrative Sciences Institute (BioSI) Genomics Unit, FCUL                            | Borges et al                                                                                                                                                                                                                                                                                                                                                                                                                                                                                                                                                                                                                                                    |
| EPI_ISL_582514 to 582515, EPI_ISL_582522 to 582523                                                                                                                                                                                                                                                                                                                                                                                                                                       | unknown                                                                                       | Instituto Nacional de Saude (INSA) and Instituto Gulbenkian de Ciencia (IGC)                                                              | Borges et al                                                                                                                                                                                                                                                                                                                                                                                                                                                                                                                                                                                                                                                    |
| EPI_ISL_476559                                                                                                                                                                                                                                                                                                                                                                                                                                                                           | unknown                                                                                       | Laboratoire Sciences et Technologies de la Santé (STS) Institut Supérieur des Sciences de la Santé Université Hassan 1er, Settat, Morocco | Abderraouf Hilali; Amal Souiri; Hajar Lemriss; Jawad Bouzid; Mustapha Mouallif; Narjis Amar; Sanaâ Lemriss; Saâd EL Kabbaj; Touria Essayagh                                                                                                                                                                                                                                                                                                                                                                                                                                                                                                                     |
| EPI_ISL_462434 to 462438                                                                                                                                                                                                                                                                                                                                                                                                                                                                 | unknown                                                                                       | Laboratory Diagnostic                                                                                                                     | Afonso; Banovic Djeri, B.; C.L.; Dmitric, M.; Jankovic, M.; Knezevic, A.; Petrovic, T.; Sekler, M.; Tesovic, B.; Vidanovic, D.; Volkening, J.                                                                                                                                                                                                                                                                                                                                                                                                                                                                                                                   |
| EPI_ISL_487271                                                                                                                                                                                                                                                                                                                                                                                                                                                                           | unknown                                                                                       | MDU-PHL, The Peter Doherty Institute for Infection and Immunity                                                                           | Antonia da Costa, E.; Baird, R.; Baretto, I.; Bastian, I.; C.K.; Caly, L.; Canisia, D.; Dakh, F.; Dolores de Jesus da Costa, M.; Douglas, N.; Francis, J.; Freeman, K.; Higgins, G.; Jayanti Pereira Tilman, A.; Leong, L.; Lim, M.B.; Marr, I.; Meumann, E.; Sait, M.; Salles de Sousa, A.; Schultz; Seemann, T.; Sherry, N.; Soares da Silva, E.; Turra, M.; Wapling, J.; Ximenes, J.                                                                                                                                                                                                                                                                         |
| EPI_ISL_450212 to 450216                                                                                                                                                                                                                                                                                                                                                                                                                                                                 | unknown                                                                                       | Microbiological Diagnostic Unit Public Health Laboratory (MDU-PHL) and Victorian Infectious Disease Reference Laboratory (VIDRL)          | Alpren, C.; B.P.; Ballard; C.R.; Caly, L.; Catton, M.; D.A.; Dougal, S.; Druce, J.; Duchene, S.; Easton, M.; Goncalves da Silva, A.; Hoang, T.; Horan, K.; Howden; Lane, M.B.; N.L.; S.A.; Sait, M.; Schultz; Seemann, T.; Sherry; Stinear; Sutton, B.; T.P.; Williamson; van Diemen, A.                                                                                                                                                                                                                                                                                                                                                                        |
| EPI_ISL_434570, EPI_ISL_450408 to 450412                                                                                                                                                                                                                                                                                                                                                                                                                                                 | unknown                                                                                       | Microbiology                                                                                                                              | K.-Y.; K.K.W.; K.K.W. and Yuen; To; Yuen                                                                                                                                                                                                                                                                                                                                                                                                                                                                                                                                                                                                                        |
| EPI_ISL_483060                                                                                                                                                                                                                                                                                                                                                                                                                                                                           | unknown                                                                                       | Microbiology, Canterbury Health Laboratories                                                                                              | Anderson, T.; Dilcher, M.                                                                                                                                                                                                                                                                                                                                                                                                                                                                                                                                                                                                                                       |
| EPI_ISL_478669 to 478670                                                                                                                                                                                                                                                                                                                                                                                                                                                                 | unknown                                                                                       | Microbiology, Koc University                                                                                                              | Can, F.; Dogan, O.; Nurtop, E.; Ozer, B.                                                                                                                                                                                                                                                                                                                                                                                                                                                                                                                                                                                                                        |
| EPI_ISL_434563 to 434569                                                                                                                                                                                                                                                                                                                                                                                                                                                                 | unknown                                                                                       | Microbiology, The University of Hong Kong                                                                                                 | K.-Y.; K.K.W. and Yuen; To                                                                                                                                                                                                                                                                                                                                                                                                                                                                                                                                                                                                                                      |
| EPI_ISL_444518                                                                                                                                                                                                                                                                                                                                                                                                                                                                           | unknown                                                                                       | Molecular Infectious Disease                                                                                                              | Anderson; B.P.; Gerasimova, A.; Kagan; R.M. and Owen, R.; Rosenthal; S.H.                                                                                                                                                                                                                                                                                                                                                                                                                                                                                                                                                                                       |
| EPI_ISL_434695, EPI_ISL_434697, EPI_ISL_434708                                                                                                                                                                                                                                                                                                                                                                                                                                           | unknown                                                                                       | National Institute of Health, Department of medical Sciences, Ministry of Public Health, Thailand                                         | Chittaganpitch; Malinee; Okada; Pannmen; Phuygun; Pilailuk; Siripaporn; Sittiporn; Sunthareeya; Thanadachakul; Thanutsapa; Waicharoen; Warawan; Wongboot                                                                                                                                                                                                                                                                                                                                                                                                                                                                                                        |
| EPI_ISL_414626, EPI_ISL_415649, EPI_ISL_415651 to 415652                                                                                                                                                                                                                                                                                                                                                                                                                                 | unknown                                                                                       | National Reference Center for Viruses of Respiratory Infections, Institut Pasteur, Paris                                                  | Angela Brisebarre; Flora Donati Vincent Enouf; Marion Barbet; Maud Vanpeene; Méline Bizard; Méline Albert; Sylvie Behillil; Sylvie van der Werf                                                                                                                                                                                                                                                                                                                                                                                                                                                                                                                 |
| EPI_ISL_447886                                                                                                                                                                                                                                                                                                                                                                                                                                                                           | unknown                                                                                       | Pathogen Discovery                                                                                                                        | Anna Uehara; Clinton R. Paden; Haibin Wang; Jing Zhang; Julu Bhatnagar; Krista Queen; Suxiang Tong; Yan Li; Ying Tao                                                                                                                                                                                                                                                                                                                                                                                                                                                                                                                                            |
| EPI_ISL_413606 to 413623                                                                                                                                                                                                                                                                                                                                                                                                                                                                 | unknown                                                                                       | Pathogen Discovery, Respiratory Viruses Branch, Division of Viral Diseases, Centers for Diseases Control and Prevention                   | Alison S Laufer Halpin; Anna Uehara; Brett L. Whitaker; Brian Lynch; Christopher A. Elkins; Clinton R. Paden; Haibin Wang; Janna' R. Murray; Jasmine Padilla; Jing Zhang; Justin Lee; Krista Queen; Lijuan Wang; Mary S. Keckler; Senthil Kumar K. Saktihivel; Shifaq Kamili; Stephen Lindstrom; Susan I. Gerber; Suxiang Tong; Xiaoyan Lu; Yan Li; Ying Tao                                                                                                                                                                                                                                                                                                    |
| EPI_ISL_414479 to 414485                                                                                                                                                                                                                                                                                                                                                                                                                                                                 | unknown                                                                                       | Pathogen Discovery, Respiratory Viruses Branch, Division of Viral Diseases, Centers for Disease Control and Prevention                    | Alison S. Laufer Halpin; Anna Uehara; Brett L. Whitaker; Brian Lynch; Christopher A. Elkins; Clinton R. Paden; Haibin Wang; Janna' R. Murray; Jasmine Padilla; Jing Zhang; Justin Lee; Krista Queen; Lijuan Wang; Mary S. Keckler; Senthil Kumar K. Saktihivel; Shifaq Kamili; Stephen Lindstrom; Susan I. Gerber; Suxiang Tong; Xiaoyan Lu; Yan Li; Ying Tao                                                                                                                                                                                                                                                                                                   |
| EPI_ISL_460617 to 460619                                                                                                                                                                                                                                                                                                                                                                                                                                                                 | unknown                                                                                       | Physiology                                                                                                                                | Caykara, B.; Cevher Keskin, B.; H.H.; Kara, A.; Pence; Pence, S.; Tekin, S.; Yiyit, N.                                                                                                                                                                                                                                                                                                                                                                                                                                                                                                                                                                          |
| EPI_ISL_450404 to 450405                                                                                                                                                                                                                                                                                                                                                                                                                                                                 | unknown                                                                                       | School of Public Health, The University of Hong Kong                                                                                      | Brackman; C.J.; Chu; D.K.W.; D.N.C.; L.D.; L.L.M. and Peiris, M.; Perera; Poon; R.A.P.M.; Sims; Sit; T.H.S.; Tsang                                                                                                                                                                                                                                                                                                                                                                                                                                                                                                                                              |
| EPI_ISL_483063 to 483064                                                                                                                                                                                                                                                                                                                                                                                                                                                                 | unknown                                                                                       | Virology, Ecole Nationale Veterinaire de Toulouse                                                                                         | Bessiere, P.; Cadiergues; Croville, G.; Dubois, M.; Guerin; Izopet, J.; J.-L.; M.-C.; Walch, M.                                                                                                                                                                                                                                                                                                                                                                                                                                                                                                                                                                 |
| EPI_ISL_516748 to 516782                                                                                                                                                                                                                                                                                                                                                                                                                                                                 | van Bakel Laboratory, Genetics and Genomics Sciences, Icahn School of Medicine at Mount Sinai | van Bakel Laboratory, Genetics and Genomics Sciences, Icahn School of Medicine at Mount Sinai                                             | Adriana van de Guchte; Ajay Obla; Alessandra Soares-Schanoski; Ana S. Gonzalez-Reiche; Andrew G. Letizia; Aspasia Kalomoiri; Brian Pike; Carl Gorforth; Carlos Williams; Darnell Graham; Dawn Weir; Edgar Nunez; Ernesto Santa Ana; Ethan Ellis; Eugene V. Millar; Franca Jones; German Nudelman; Harm van Bakel; Irene Ramos; James Regimbald; Jan Marayag; Jayeeta Dutta; Luis Estrella; Marcos M. Bamman; Mark Simons; Mary-Catherine George; Michael Termini; Nada Marjanovic; Rachel S. Gelernter Sealfon; Ramiro Gutierrez; Rhonda Lizewski; Robert Sebra; Sindhu Vangeti; Stas Rirak; Stephen Lizewski; Stuart C. Sealfon; Venugopalan Nair; Yongchao Ge |
| EPI_ISL_436926                                                                                                                                                                                                                                                                                                                                                                                                                                                                           | x <sup>2</sup>                                                                                | Utah Public Health Laboratory                                                                                                             | Erin Young; Kelly Oakeson                                                                                                                                                                                                                                                                                                                                                                                                                                                                                                                                                                                                                                       |
| EPI_ISL_445241                                                                                                                                                                                                                                                                                                                                                                                                                                                                           | Å-restadsklinikens VC                                                                         | The Public Health Agency of Sweden                                                                                                        | Anna Risberg; Anna-Malin Linde; Karin Tegmark-Wisell; Lisa Kjellberg / Laura Plavitu; Maria Lind Karlberg; Mia Brytting; Olov Svartstrom; Oskar Karlsson Lindsjo; Theresa Enkirch                                                                                                                                                                                                                                                                                                                                                                                                                                                                               |
| EPI_ISL_445238                                                                                                                                                                                                                                                                                                                                                                                                                                                                           | Å-resundslakarna                                                                              | The Public Health Agency of Sweden                                                                                                        | Anna Risberg; Anna-Malin Linde; Del Akrawi; Karin Tegmark-Wisell; Maria Lind Karlberg; Mia Brytting; Olov Svartstrom; Oskar Karlsson Lindsjo; Theresa Enkirch                                                                                                                                                                                                                                                                                                                                                                                                                                                                                                   |
| EPI_ISL_1418310                                                                                                                                                                                                                                                                                                                                                                                                                                                                          | "St. Parascheva" Infectious Diseases Clinical Hospital                                        | National Institute of Infectious Diseases-Prof. Dr. Matei Bals Molecular Diagnostics Laboratory                                           | Corina Casanguiu; Dan Otelea; Ionelia Nicolae; Leontina Banica; Marius Surleac; Ovidiu Vlaicu; Simona Paraschiv                                                                                                                                                                                                                                                                                                                                                                                                                                                                                                                                                 |
| EPI_ISL_1393942                                                                                                                                                                                                                                                                                                                                                                                                                                                                          | "Pro-Medica" w Kku Sp. z o.o., Medyczne Laboratorium Mikrobiologiczne, Pracownia COVID-19     | 1. National Institute of Public Health - National Institute of Hygiene; 2. Eurofins Genomics Europe Sequencing GmbH                       | ECDC COVID-19 WGS support team; Eurofins Genomics Europe Sequencing Team; Gierczyki Rafa; Sadkowska-Todys Magorzata; Wokowicz Tomasz; Zacharczuk Katarzyna                                                                                                                                                                                                                                                                                                                                                                                                                                                                                                      |
| EPI_ISL_1394771, EPI_ISL_1394775, EPI_ISL_1394788 to 1394789, EPI_ISL_1394793, EPI_ISL_1394800, EPI_ISL_1394803, EPI_ISL_1394806, EPI_ISL_1394814, EPI_ISL_1394818, EPI_ISL_1394820 to 1394821, EPI_ISL_1394826, EPI_ISL_1394829, EPI_ISL_1394837, EPI_ISL_1540537, EPI_ISL_1540541, EPI_ISL_1540544 to 1540545, EPI_ISL_1540549, EPI_ISL_1540564, EPI_ISL_1540566 to 1540567, EPI_ISL_1540569, EPI_ISL_1540575, EPI_ISL_1540580 to 1540581, EPI_ISL_1540584 to 1540586, EPI_ISL_1540588 | see above                                                                                     | "Rezus.lt"                                                                                                                                | Lithuanian University of Health Sciences Hospital, Department of Genetics and Molecular Medicine                                                                                                                                                                                                                                                                                                                                                                                                                                                                                                                                                                |
|                                                                                                                                                                                                                                                                                                                                                                                                                                                                                          |                                                                                               |                                                                                                                                           | Astra Vitkauskiene; Darius Cereskevicius; Inga Nasvytiene; Mantas Sarauskas; Marius Sukys; Rasa Ugenskiene; Renaldas Jurkevicius; Rima Vainoriene; Zivile Zemeckiene                                                                                                                                                                                                                                                                                                                                                                                                                                                                                            |

EPI\_ISL\_458138 to 458149, EPI\_ISL\_524783 to  
524801

Evandro Chagas Institute

Evandro Chagas Institute

A.M.; Barbagelata; E.C.; E.M.A.; Ferreira; G.M.R; H.R; J.A.; Junior; L.C.; L.S.; M.C.; Martins; P.S.; Resque; Santos; Silva; Sousa; Sousa Junior; Viana;  
W.D.C.; da Silva

We gratefully acknowledge the following Authors from the Originating laboratories responsible for obtaining the specimens, as well as the Submitting laboratories where the genome data were generated and shared via GISAID, on which this research is based.

All Submitters of data may be contacted directly via [www.gisaid.org](http://www.gisaid.org)

Authors are sorted alphabetically.

| Accession ID                                                                                                                                                                                                                                                                                                                                                                                                                                                                                                                                                                                                                                                                                                                                                                                                                                                                                                                                 | Originating Laboratory                                                                                                                                                                                                                                                                                                                                                                                                                                                                          | Submitting Laboratory                                                                                                                                                                                                                                                                                                                                                    | Authors                                                                                                                                                                                                                                                                                                                                                                                                                                                                                                                                                                                                                                                                                                                                                                                                                                                                                                                                                                                                                                                                                                                      |
|----------------------------------------------------------------------------------------------------------------------------------------------------------------------------------------------------------------------------------------------------------------------------------------------------------------------------------------------------------------------------------------------------------------------------------------------------------------------------------------------------------------------------------------------------------------------------------------------------------------------------------------------------------------------------------------------------------------------------------------------------------------------------------------------------------------------------------------------------------------------------------------------------------------------------------------------|-------------------------------------------------------------------------------------------------------------------------------------------------------------------------------------------------------------------------------------------------------------------------------------------------------------------------------------------------------------------------------------------------------------------------------------------------------------------------------------------------|--------------------------------------------------------------------------------------------------------------------------------------------------------------------------------------------------------------------------------------------------------------------------------------------------------------------------------------------------------------------------|------------------------------------------------------------------------------------------------------------------------------------------------------------------------------------------------------------------------------------------------------------------------------------------------------------------------------------------------------------------------------------------------------------------------------------------------------------------------------------------------------------------------------------------------------------------------------------------------------------------------------------------------------------------------------------------------------------------------------------------------------------------------------------------------------------------------------------------------------------------------------------------------------------------------------------------------------------------------------------------------------------------------------------------------------------------------------------------------------------------------------|
| EPI_ISL_875674                                                                                                                                                                                                                                                                                                                                                                                                                                                                                                                                                                                                                                                                                                                                                                                                                                                                                                                               | "1.AO Universitaria 'S. Giovanni di Dio e Ruggi D'Aragona, Scuola Medica Salernitana' Hospital / 2.UOC di Virologia e Microbiologia, Università della Campania 'L. Vanvitelli' / 3.AO Universitaria 'Federico II' Napoli Hospital / 4.AORN 'San Giuseppe Moscati' Avellino Hospital / 5.AO 'San Pio - presidio G. Rummo' Benevento Hospital / 6.AO 'Sant'Anna e San Sebastiano' Caserta Hospital / 7.PO 'Maria Santissima Addolorata' Eboli Hospital / 8.Biogen Istituto di Ricerche Genetiche" | "1. Genome Research Center for Health (CRGS) / 2. Laboratory of Molecular Medicine and Genomics(LMMGe) / 3. Center for Research in Pure and Applied Mathematics (CRMPA)"                                                                                                                                                                                                 | "Giorgio Giurato (Corresponding Author); Alessandro Weisz (Corresponding Author); Alessia Cossu; Aniello Gentile; Annamaria Salvati; Antonello Saccomanno; Arnolfo Petruzzello; Assunta Sellitto; Carlo Ferravante; Domenico Memoli; Domenico Palumbo; Elena Alexandrova; Emilia Vaccaro; Francesca Marciano; Francesca Rizzo (Corresponding Author); Gianluigi Franci; Giovanni Nassa; Giovanni Pecoraro; Giuseppe Fenza; Giuseppe Portella; Gregorio Goffredi; Ilaria Terenzi; Jessica Lamberti; Maddalena Schioppa; Maria Grazia Foti; Maria Landi; Marianna Scrima"; Mariarosaria Ingino; Massimiliano Galdiero; Maurizio Fumi; Michele Caraglia; Michele Cennamo; Oriana Strianese; Pasquale Pagliano; Rita Greco; Roberta Tarallo; Sonia Amabile; Teresa Rocco; Valeria Mirici Cappa; Vincenzo Rocco; Viola Melone; Vittoria Letizia; Ylenia D'Agostino                                                                                                                                                                                                                                                                |
| EPI_ISL_985399 to 985400, EPI_ISL_985402, EPI_ISL_985405 to 985407, EPI_ISL_985410, EPI_ISL_985433, EPI_ISL_988352, EPI_ISL_989241, EPI_ISL_990198, EPI_ISL_991178, EPI_ISL_993056, EPI_ISL_993930, EPI_ISL_994654 to 994667, EPI_ISL_994739 to 994740, EPI_ISL_996002, EPI_ISL_996004, EPI_ISL_996028                                                                                                                                                                                                                                                                                                                                                                                                                                                                                                                                                                                                                                       |                                                                                                                                                                                                                                                                                                                                                                                                                                                                                                 |                                                                                                                                                                                                                                                                                                                                                                          |                                                                                                                                                                                                                                                                                                                                                                                                                                                                                                                                                                                                                                                                                                                                                                                                                                                                                                                                                                                                                                                                                                                              |
| see above                                                                                                                                                                                                                                                                                                                                                                                                                                                                                                                                                                                                                                                                                                                                                                                                                                                                                                                                    | "Dr. Andrija Stampar" Teaching Institute of Public Health, Department of Clinical Microbiology                                                                                                                                                                                                                                                                                                                                                                                                  | Institute of Applied Genomics                                                                                                                                                                                                                                                                                                                                            | Federica Cattonaro; Jasmina Vranes; Michele MORGante; Michele Morgante                                                                                                                                                                                                                                                                                                                                                                                                                                                                                                                                                                                                                                                                                                                                                                                                                                                                                                                                                                                                                                                       |
| EPI_ISL_833052 to 833054                                                                                                                                                                                                                                                                                                                                                                                                                                                                                                                                                                                                                                                                                                                                                                                                                                                                                                                     | "Presidio Ospedaliero "San Liberatore" Atri                                                                                                                                                                                                                                                                                                                                                                                                                                                     | Istituto Zooprofilattico Sperimentale dell'Abruzzo e Molise "G. Caporale"                                                                                                                                                                                                                                                                                                | Ancora M; Calistri P; Cammà C; Curini V; Delli Compagni E; Di Domenico M; Di Pasquale A; Lorusso A; Mangone I; Marcacci M; Puglia I; Rinaldi A; Savini G                                                                                                                                                                                                                                                                                                                                                                                                                                                                                                                                                                                                                                                                                                                                                                                                                                                                                                                                                                     |
| EPI_ISL_833055 to 833056                                                                                                                                                                                                                                                                                                                                                                                                                                                                                                                                                                                                                                                                                                                                                                                                                                                                                                                     | "SIESP DIPARTIMENTO DI PREVENZIONE CHIETI                                                                                                                                                                                                                                                                                                                                                                                                                                                       | Istituto Zooprofilattico Sperimentale dell'Abruzzo e Molise "G. Caporale"                                                                                                                                                                                                                                                                                                | Ancora M; Calistri P; Cammà C; Curini V; Delli Compagni E; Di Domenico M; Di Pasquale A; Lorusso A; Mangone I; Marcacci M; Puglia I; Rinaldi A; Savini G                                                                                                                                                                                                                                                                                                                                                                                                                                                                                                                                                                                                                                                                                                                                                                                                                                                                                                                                                                     |
| EPI_ISL_632310                                                                                                                                                                                                                                                                                                                                                                                                                                                                                                                                                                                                                                                                                                                                                                                                                                                                                                                               | 1-Laboratory of Microbiology, National Reference Lab, Charles Nicolle Hospital; 2-University of Tunis ElManar, Faculty of Medicine of Tunis, LR99ES09, Tunis, Tunisia                                                                                                                                                                                                                                                                                                                           | 1-Clinical and Experimental Pharmacology Lab, LR16SP02, National Center of Pharmacovigilance, University of Tunis El Manar, Tunis, Tunisia. 2-Neurodegenerative diseases and psychiatric troubles, LR18SP03, Razi Hospital, University of Tunis El Manar, Tunis, Tunisia. 3- Ministry of Health, National Observatory of New and Emerging Diseases, 1006, Tunis, Tunisia | Alia Ben Kahla; Gaies Emna; Ilhem Boutiba-Ben Boubaker; Imen Kacem; Imen Mkada; Jalila Ben Khellil; Maher Kharrat; Mouna Ben Sassi; Mouna Safer; Nissaf Ben Alaya; Riadh Daghfous; Riadh Gouider.; Salma Abid; Sameh Trabelsi; Sana Ferjani; Soumaya Rammeh                                                                                                                                                                                                                                                                                                                                                                                                                                                                                                                                                                                                                                                                                                                                                                                                                                                                  |
| EPI_ISL_634977, EPI_ISL_635059 to 635062, EPI_ISL_683329, EPI_ISL_699655 to 699657, EPI_ISL_707697 to 707700, EPI_ISL_707791 to 707793, EPI_ISL_733499 to 733500, EPI_ISL_763065, EPI_ISL_763067, EPI_ISL_794735 to 794738                                                                                                                                                                                                                                                                                                                                                                                                                                                                                                                                                                                                                                                                                                                   |                                                                                                                                                                                                                                                                                                                                                                                                                                                                                                 |                                                                                                                                                                                                                                                                                                                                                                          |                                                                                                                                                                                                                                                                                                                                                                                                                                                                                                                                                                                                                                                                                                                                                                                                                                                                                                                                                                                                                                                                                                                              |
| see above                                                                                                                                                                                                                                                                                                                                                                                                                                                                                                                                                                                                                                                                                                                                                                                                                                                                                                                                    | 1-Laboratory of Microbiology, National Reference Lab, Charles Nicolle Hospital; 2-University of Tunis ElManar, Faculty of Medicine of Tunis, LR99ES09, Tunis, Tunisia                                                                                                                                                                                                                                                                                                                           | 1-Clinical and Experimental Pharmacology Lab, LR16SP02, National Center of Pharmacovigilance, University of Tunis El Manar, Tunis, Tunisia. 2-Neurodegenerative diseases and psychiatric troubles, LR18SP03, Razi Hospital, University of Tunis El Manar, Tunis, Tunisia. 3- Ministry of Health, National Observatory of New and Emerging Diseases, 1006, Tunis, Tunisia | Alia Ben Kahla; Alia BenKahla; Asma Ferjani; Awatef El MOussi; Awatef El Moussi; Gaies Emna; Guedi Ali Barreh; Guedi Berrabeh; Habiba Ben Romdhane; Hanen El Jebari; Hanen ElJebari; Ilhem Boutiba-Ben Boubaker; Imen Kacem; Imen Mkada; Ines Mdiri; Jalila Ben Khellil; Maher Kharrat; Mouna Ben Sassi; Mouna Safer; Nissaf Ben Alaya; Riadh Daghfous; Riadh Gouider.; Rouaa Ben Othman; Salma Abid; Salwa Mrabet; Sameh Trabelsi; Sana Ferjani; Sarra Chamman; Souissi Amira; Soumaya Rammeh; Zaineb Hamzaoui                                                                                                                                                                                                                                                                                                                                                                                                                                                                                                                                                                                                              |
| EPI_ISL_876042 to 876043, EPI_ISL_876969 to 877034, EPI_ISL_877036, EPI_ISL_882674 to 882768, EPI_ISL_883499 to 883500, EPI_ISL_887506 to 887507, EPI_ISL_888679 to 888682, EPI_ISL_894218, EPI_ISL_918128, EPI_ISL_918412 to 918422, EPI_ISL_918457 to 918460, EPI_ISL_918462 to 918482, EPI_ISL_925093 to 925136, EPI_ISL_925497 to 925501, EPI_ISL_934419 to 934423, EPI_ISL_935103 to 935154, EPI_ISL_954183 to 954225                                                                                                                                                                                                                                                                                                                                                                                                                                                                                                                   |                                                                                                                                                                                                                                                                                                                                                                                                                                                                                                 |                                                                                                                                                                                                                                                                                                                                                                          |                                                                                                                                                                                                                                                                                                                                                                                                                                                                                                                                                                                                                                                                                                                                                                                                                                                                                                                                                                                                                                                                                                                              |
| see above                                                                                                                                                                                                                                                                                                                                                                                                                                                                                                                                                                                                                                                                                                                                                                                                                                                                                                                                    | 1.AO Universitaria 'S. Giovanni di Dio e Ruggi D'Aragona, Scuola Medica Salernitana' Hospital / 2.UOC di Virologia e Microbiologia, Università della Campania 'L. Vanvitelli' / 3.AO Universitaria 'Federico II' Napoli Hospital / 4.AORN 'San Giuseppe Moscati' Avellino Hospital / 5.AO 'San Pio - presidio G. Rummo' Benevento Hospital / 6.AO 'Sant'Anna e San Sebastiano' Caserta Hospital / 7.PO 'Maria Santissima Addolorata' Eboli Hospital / 8.Biogen Istituto di Ricerche Genetiche   | 1. Genome Research Center for Health (CRGS) / 2. Laboratory of Molecular Medicine and Genomics(LMMGe) / 3. Center for Research in Pure and Applied Mathematics (CRMPA)                                                                                                                                                                                                   | Alessandro Weisz; Alessandro Weisz (Corresponding Author); Alessia Cossu; Andreina Baj; Aniello Gentile; Annamaria Salvati; Antonello Saccomanno; Arnolfo Petruzzello; Assunta Sellitto; Carlo Ferravante; Domenico Memoli; Domenico Palumbo; Edmondo Adoriso; Elena Alexandrova; Emilia Vaccaro; Fausto Sessa.; Francesca Marciano; Francesca Rizzo; Francesca Rizzo (Corresponding Author); Francesco Curcio; Gianluigi Franci; Giorgio Dirani; Giorgio Giurato; Giorgio Giurato (Corresponding Author); Giovanni Nassa; Giovanni Pecoraro; Giuseppe Fenza; Giuseppe Portella; Gregorio Goffredi; Ilaria Terenzi; Jessica Lamberti; Maddalena Schioppa; Maria Grazia Foti; Maria Landi; Marianna Scrima; Mariarosaria Ingino; Massimiliano Galdiero; Maurizio Fumi; Michela Iacobellis; Michele Caraglia; Michele Cennamo; Morena D'Avenia; Oriana Strianese; Pasquale Pagliano; Rita Greco; Roberta Tarallo; Rosanna Piluscio; Silvia Zanolì; Simona Semprini; Sonia Amabile; Stefania Marzinotto; Teresa Rocco; Valeria Mirici Cappa; Vincenzo Rocco; Viola Melone; Vittoria Letizia; Vittorio Sambri; Ylenia D'Agostino |
| EPI_ISL_640056, EPI_ISL_640078, EPI_ISL_640089, EPI_ISL_640107, EPI_ISL_640115, EPI_ISL_640127, EPI_ISL_700446, EPI_ISL_700555                                                                                                                                                                                                                                                                                                                                                                                                                                                                                                                                                                                                                                                                                                                                                                                                               |                                                                                                                                                                                                                                                                                                                                                                                                                                                                                                 |                                                                                                                                                                                                                                                                                                                                                                          |                                                                                                                                                                                                                                                                                                                                                                                                                                                                                                                                                                                                                                                                                                                                                                                                                                                                                                                                                                                                                                                                                                                              |
| see above                                                                                                                                                                                                                                                                                                                                                                                                                                                                                                                                                                                                                                                                                                                                                                                                                                                                                                                                    | 2 Military Hospital wc MAA                                                                                                                                                                                                                                                                                                                                                                                                                                                                      | NHLS/UCT                                                                                                                                                                                                                                                                                                                                                                 | Arash Iranzadeh; Bruna Galvao; Carolyn Williamson; Deelan Doolabh; Diana Hardie; Innocent Mudau; Kruger Marais; Lynn Tyers; Marvin Hsiao; Stephen Korsman                                                                                                                                                                                                                                                                                                                                                                                                                                                                                                                                                                                                                                                                                                                                                                                                                                                                                                                                                                    |
| EPI_ISL_960130, EPI_ISL_960151                                                                                                                                                                                                                                                                                                                                                                                                                                                                                                                                                                                                                                                                                                                                                                                                                                                                                                               | 2 Military Hospital wc MAA                                                                                                                                                                                                                                                                                                                                                                                                                                                                      | National Health Laboratory Service/UCT                                                                                                                                                                                                                                                                                                                                   | Arash Iranzadeh; Bruna Galvao; Carolyn Williamson; Deelan Doolabh; Diana Hardie; Innocent Mudau; Kruger Marais; Lynn Tyers; Marvin Hsiao; Stephen Korsman                                                                                                                                                                                                                                                                                                                                                                                                                                                                                                                                                                                                                                                                                                                                                                                                                                                                                                                                                                    |
| EPI_ISL_767931, EPI_ISL_806723, EPI_ISL_806726 to 806727                                                                                                                                                                                                                                                                                                                                                                                                                                                                                                                                                                                                                                                                                                                                                                                                                                                                                     | 4Cyte Pathology                                                                                                                                                                                                                                                                                                                                                                                                                                                                                 | NSW Health Pathology - Institute of Clinical Pathology and Medical Research; Westmead Hospital; University of Sydney                                                                                                                                                                                                                                                     | CIDM-PH et al.                                                                                                                                                                                                                                                                                                                                                                                                                                                                                                                                                                                                                                                                                                                                                                                                                                                                                                                                                                                                                                                                                                               |
| EPI_ISL_729337 to 729345, EPI_ISL_729347, EPI_ISL_729349 to 729352, EPI_ISL_729354, EPI_ISL_729358 to 729359, EPI_ISL_729361 to 729364, EPI_ISL_729367 to 729369, EPI_ISL_729371 to 729376, EPI_ISL_729379 to 729381, EPI_ISL_729383 to 729386, EPI_ISL_729389 to 729392, EPI_ISL_729394 to 729397, EPI_ISL_729399, EPI_ISL_729401, EPI_ISL_729403, EPI_ISL_729407, EPI_ISL_729411, EPI_ISL_729414, EPI_ISL_729416 to 729467, EPI_ISL_729469 to 729472, EPI_ISL_729498, EPI_ISL_729500 to 729513, EPI_ISL_729515 to 729528, EPI_ISL_729535 to 729547, EPI_ISL_729552, EPI_ISL_729562 to 729595, EPI_ISL_729608 to 729682, EPI_ISL_729684 to 729717, EPI_ISL_729719 to 729734, EPI_ISL_824742 to 824786, EPI_ISL_824864, EPI_ISL_849794 to 849866, EPI_ISL_869082, EPI_ISL_869084, EPI_ISL_869086 to 869117, EPI_ISL_869120 to 869123, EPI_ISL_869137 to 869142, EPI_ISL_909745 to 909746, EPI_ISL_909748 to 909749, EPI_ISL_909964 to 910010 |                                                                                                                                                                                                                                                                                                                                                                                                                                                                                                 |                                                                                                                                                                                                                                                                                                                                                                          |                                                                                                                                                                                                                                                                                                                                                                                                                                                                                                                                                                                                                                                                                                                                                                                                                                                                                                                                                                                                                                                                                                                              |
| see above                                                                                                                                                                                                                                                                                                                                                                                                                                                                                                                                                                                                                                                                                                                                                                                                                                                                                                                                    | A. Krumbholz, Labor Dr. Krause und Kollegen MVZ GmbH, Kiel                                                                                                                                                                                                                                                                                                                                                                                                                                      | Charité Universitätsmedizin Berlin, Institut für Virologie                                                                                                                                                                                                                                                                                                               | Barbara Mühlemann; Christian Drosten; Cornelia Schlee; Julia Schneider; Julia Tesch; Jörn Beheim-Schwarzbach; Talitha Veith; Terry Jones; Tobias Bleicker; Tomasz Zemojtel; Victor M Corman                                                                                                                                                                                                                                                                                                                                                                                                                                                                                                                                                                                                                                                                                                                                                                                                                                                                                                                                  |
| EPI_ISL_766695, EPI_ISL_766698 to 766699, EPI_ISL_766708 to 766709, EPI_ISL_766715 to 766723                                                                                                                                                                                                                                                                                                                                                                                                                                                                                                                                                                                                                                                                                                                                                                                                                                                 | A05 Biomedicum                                                                                                                                                                                                                                                                                                                                                                                                                                                                                  | The Public Health Agency of Sweden                                                                                                                                                                                                                                                                                                                                       | Department of Microbiology; The Public Health Agency of Sweden                                                                                                                                                                                                                                                                                                                                                                                                                                                                                                                                                                                                                                                                                                                                                                                                                                                                                                                                                                                                                                                               |
| EPI_ISL_775533 to 775541, EPI_ISL_775550 to 775571, EPI_ISL_775575 to 775582, EPI_ISL_788991 to 788998, EPI_ISL_789000 to 789011, EPI_ISL_789014 to 789016, EPI_ISL_789018 to 789028, EPI_ISL_831944, EPI_ISL_831947 to 831952, EPI_ISL_831959, EPI_ISL_831982 to 831985                                                                                                                                                                                                                                                                                                                                                                                                                                                                                                                                                                                                                                                                     |                                                                                                                                                                                                                                                                                                                                                                                                                                                                                                 |                                                                                                                                                                                                                                                                                                                                                                          |                                                                                                                                                                                                                                                                                                                                                                                                                                                                                                                                                                                                                                                                                                                                                                                                                                                                                                                                                                                                                                                                                                                              |
| see above                                                                                                                                                                                                                                                                                                                                                                                                                                                                                                                                                                                                                                                                                                                                                                                                                                                                                                                                    | ABC                                                                                                                                                                                                                                                                                                                                                                                                                                                                                             | The Public Health Agency of Sweden                                                                                                                                                                                                                                                                                                                                       | Department of Microbiology; The Public Health Agency of Sweden                                                                                                                                                                                                                                                                                                                                                                                                                                                                                                                                                                                                                                                                                                                                                                                                                                                                                                                                                                                                                                                               |
| EPI_ISL_913282, EPI_ISL_913287 to 913293, EPI_ISL_913316, EPI_ISL_913486                                                                                                                                                                                                                                                                                                                                                                                                                                                                                                                                                                                                                                                                                                                                                                                                                                                                     | ABC Labs                                                                                                                                                                                                                                                                                                                                                                                                                                                                                        | The Public Health Agency of Sweden                                                                                                                                                                                                                                                                                                                                       | Anna Risberg; Anna-Malin Linde; Carlo Berg; Karin Tegmark-Wisell; Maria Lind Karlberg; Mattias Haukland; Mia Brytting; Noura Walai; Oskar Karlsson Lindsjö; Petra Edquist; Petra Holmstrom; Reza Advani; Sofia Stamouli                                                                                                                                                                                                                                                                                                                                                                                                                                                                                                                                                                                                                                                                                                                                                                                                                                                                                                      |
| EPI_ISL_735503                                                                                                                                                                                                                                                                                                                                                                                                                                                                                                                                                                                                                                                                                                                                                                                                                                                                                                                               | ACT Pathology                                                                                                                                                                                                                                                                                                                                                                                                                                                                                   | Schwessinger Lab                                                                                                                                                                                                                                                                                                                                                         | Ashley Jones; Benjamin Schwessinger; Craig Kennedy; Karina Kennedy; Kevin Murray; Megan McDonald; Ming-Dao Chia; Robert Lanfear; Robyn N Hall                                                                                                                                                                                                                                                                                                                                                                                                                                                                                                                                                                                                                                                                                                                                                                                                                                                                                                                                                                                |
| EPI_ISL_830724 to 830725, EPI_ISL_853676 to                                                                                                                                                                                                                                                                                                                                                                                                                                                                                                                                                                                                                                                                                                                                                                                                                                                                                                  | ACUTIS DIAGNOSTICS                                                                                                                                                                                                                                                                                                                                                                                                                                                                              | Wadsworth Center, New York State Department of Health                                                                                                                                                                                                                                                                                                                    | Alexis Russel; Daryl M. Lamson; Erasmus Schneider; Erica Lasek-Nesselquist; John Kelly; Jonathan Plitnick; Kirsten St. George; Matthew Shudt; Melissa                                                                                                                                                                                                                                                                                                                                                                                                                                                                                                                                                                                                                                                                                                                                                                                                                                                                                                                                                                        |

|                                                                                                                                                                                                                                                                    |                                                              |                                                                                                                            |                                                                                                                                                                                                                                                                          |
|--------------------------------------------------------------------------------------------------------------------------------------------------------------------------------------------------------------------------------------------------------------------|--------------------------------------------------------------|----------------------------------------------------------------------------------------------------------------------------|--------------------------------------------------------------------------------------------------------------------------------------------------------------------------------------------------------------------------------------------------------------------------|
| 853682                                                                                                                                                                                                                                                             |                                                              |                                                                                                                            | A Leisner; Navjot Singh                                                                                                                                                                                                                                                  |
| EPI_ISL_861135 to 861143, EPI_ISL_883436 to 883444, EPI_ISL_883473, EPI_ISL_936046 to 936059, EPI_ISL_982499 to 982504                                                                                                                                             | ADIRONDACK MEDICAL CENTER                                    | Wadsworth Center, New York State Department of Health                                                                      | Alexis Russel; Daryl M. Lamson; Erasmus Schneider; Erica Lasek-Nesselquist; John Kelly; Jonathan Plitnick; Kirsten St. George; Matthew Shudt; Melissa A Leisner; Navjot Singh                                                                                            |
| EPI_ISL_934405, EPI_ISL_934978 to 935011                                                                                                                                                                                                                           | ADMED Microbiologie                                          | Genomics and Transcriptomics, Philip Morris International                                                                  | David Bornand; Emmanuel Guedj; Manuel Peitsch; Marie-Lise Tritten; Maxime Berthouzoz; Mehdi Auberson; Nicolas Siervo; Nikolai Ivanov; Reto Lienhard; Rémi Dulize                                                                                                         |
| EPI_ISL_763362 to 763364, EPI_ISL_768752 to 768797, EPI_ISL_768833                                                                                                                                                                                                 | AIID                                                         | Irish Coronavirus Sequencing Consortium - National Virus Reference Laboratory                                              | Alejandro Abner Garcia Leon; Gabriel Gonzalez; Michael Carr; Patrick Mallon                                                                                                                                                                                              |
| EPI_ISL_778819 to 778841, EPI_ISL_871793 to 871814, EPI_ISL_918434 to 918456, EPI_ISL_960986 to 961008                                                                                                                                                             | AIID                                                         | Irish Coronavirus Sequencing Consortium-Teagasc Grange                                                                     | Aljandro Abner Garcia Leon; Calum Walsh; Fiona Crispie; Gabriel Gonzalez; John Kenny; Matthew McCabe; Michael Carr; Patrick Mallon; Paul Cotter                                                                                                                          |
| EPI_ISL_751592 to 751593, EPI_ISL_751597 to 751598, EPI_ISL_751694, EPI_ISL_751793                                                                                                                                                                                 | AK State Public Health Lab, State Health Department          | Genomics and Discovery, Respiratory Viruses Branch, Division of Viral Diseases, Centers for Disease Control and Prevention | Anna Montmayeur; Anna Uehara; Clinton R. Paden; Haibin Wang; Jing Zhang; Justin Lee; Krista Queen; Mili Sheth; Peter W. Cook; Rachel Marine; Suxiang Tong; Yan Li; Ying Tao                                                                                              |
| EPI_ISL_751647, EPI_ISL_751668, EPI_ISL_751753, EPI_ISL_751755 to 751756, EPI_ISL_751791 to 751792, EPI_ISL_903899                                                                                                                                                 | AL Dept. of Public Health Bureau of Clinical Laboratories    | Genomics and Discovery, Respiratory Viruses Branch, Division of Viral Diseases, Centers for Disease Control and Prevention | Anna Montmayeur; Anna Uehara; Ben L. Rambo-Martin; Clinton R. Paden; Dhvani Batra; Haibin Wang; Jasmine Padilla; Jing Zhang; Justin Lee; Krista Queen; Lori Rowe; Mark Burroughs; Mili Sheth; Peter W. Cook; Rachel Marine; Sarah Nobles; Suxiang Tong; Yan Li; Ying Tao |
| see above                                                                                                                                                                                                                                                          |                                                              |                                                                                                                            |                                                                                                                                                                                                                                                                          |
| EPI_ISL_936180 to 936181                                                                                                                                                                                                                                           | ALBANY MEDICAL CENTER                                        | Wadsworth Center, New York State Department of Health                                                                      | Alexis Russel; Daryl M. Lamson; Erasmus Schneider; Erica Lasek-Nesselquist; John Kelly; Jonathan Plitnick; Kirsten St. George; Matthew Shudt; Melissa A Leisner; Navjot Singh                                                                                            |
| EPI_ISL_830683 to 830719, EPI_ISL_853684 to 853687, EPI_ISL_853690 to 853704, EPI_ISL_853709 to 853711, EPI_ISL_884008 to 884012, EPI_ISL_884017 to 884031, EPI_ISL_884042 to 884046, EPI_ISL_884048 to 884053, EPI_ISL_884059 to 884079, EPI_ISL_884081 to 884085 | ALBANY MEDICAL CENTER HOSPITAL CLINICAL LABORATORIES         | Wadsworth Center, New York State Department of Health                                                                      | Alexis Russel; Daryl M. Lamson; Erasmus Schneider; Erica Lasek-Nesselquist; John Kelly; Jonathan Plitnick; Kirsten St. George; Matthew Shudt; Melissa A Leisner; Navjot Singh                                                                                            |
| see above                                                                                                                                                                                                                                                          |                                                              |                                                                                                                            |                                                                                                                                                                                                                                                                          |
| EPI_ISL_918407                                                                                                                                                                                                                                                     | ALEA Dr Kandic                                               | Alea Genetic Centre                                                                                                        | Dino Pecar; Lana Salihefendic; Rijad Konjhodzic                                                                                                                                                                                                                          |
| EPI_ISL_910329, EPI_ISL_910334                                                                                                                                                                                                                                     | ALEA dr Kandic                                               | Alea Genetic Centre                                                                                                        | Dino Pecar; Lana Salihefendic; Rijad Konjhodzic                                                                                                                                                                                                                          |
| EPI_ISL_861651                                                                                                                                                                                                                                                     | AMA Jardim Brasil                                            | Instituto Adolfo Lutz, Interdisciplinary Procedures Center, Strategic Laboratory                                           | Claudia Regina Gonçalves; Claudio Tavares Sacchi; Erica Valessa Ramos Gomes; Karoline Rodrigues Campos                                                                                                                                                                   |
| EPI_ISL_861652                                                                                                                                                                                                                                                     | AMA Wamberto Dias da Costa                                   | Instituto Adolfo Lutz, Interdisciplinary Procedures Center, Strategic Laboratory                                           | Claudia Regina Gonçalves; Claudio Tavares Sacchi; Erica Valessa Ramos Gomes; Karoline Rodrigues Campos                                                                                                                                                                   |
| EPI_ISL_955272, EPI_ISL_955313, EPI_ISL_955315, EPI_ISL_955331 to 955333                                                                                                                                                                                           | AR Dept. of Health-PHL, Molecular Diagnostics                | Pathogen Discovery, Respiratory Viruses Branch, Division of Viral Diseases, Centers for Disease Control and Prevention     | Anna Uehara; Clinton R. Paden; Haibin Wang; Jing Zhang; Krista Queen; Peter Cook; Suxiang Tong; Yan Li; Ying Tao                                                                                                                                                         |
| EPI_ISL_751574, EPI_ISL_751652, EPI_ISL_751697 to 751699, EPI_ISL_751723, EPI_ISL_751731, EPI_ISL_751760, EPI_ISL_751764 to 751765, EPI_ISL_903565, EPI_ISL_903593, EPI_ISL_903639 to 903640, EPI_ISL_903679, EPI_ISL_903697                                       | AR Dept. of Health-Public Health Lab                         | Genomics and Discovery, Respiratory Viruses Branch, Division of Viral Diseases, Centers for Disease Control and Prevention | Anna Montmayeur; Anna Uehara; Ben L. Rambo-Martin; Clinton R. Paden; Dhvani Batra; Haibin Wang; Jasmine Padilla; Jing Zhang; Justin Lee; Krista Queen; Lori Rowe; Mark Burroughs; Mili Sheth; Peter W. Cook; Rachel Marine; Sarah Nobles; Suxiang Tong; Yan Li; Ying Tao |
| see above                                                                                                                                                                                                                                                          |                                                              |                                                                                                                            |                                                                                                                                                                                                                                                                          |
| EPI_ISL_682235, EPI_ISL_682258 to 682259                                                                                                                                                                                                                           | AREA DE SALUD ALAJUELA NORTE - CLINICA DR. MARCIAL RODRIGUEZ | Incienza, Instituto Costarricense de Investigación y Enseñanza en Nutrición y Salud                                        | Adriana Godínez; Adriana Godínez & Melany Calderon; Claudio Soto-Garita; Estela Cordero; Francisco Duarte; Hebleen Porras; Melany Calderon & Mariel López                                                                                                                |
| EPI_ISL_914828                                                                                                                                                                                                                                                     | AREA DE SALUD ALAJUELA SUR                                   | Incienza, Instituto Costarricense de Investigación y Enseñanza en Nutrición y Salud                                        | Adriana Godínez; Claudio Soto-Garita; Estela Cordero; Francisco Duarte; Hebleen Porras; Melany Calderón & Mariel López                                                                                                                                                   |
| EPI_ISL_914794                                                                                                                                                                                                                                                     | AREA DE SALUD BUENOS AIRES                                   | Incienza, Instituto Costarricense de Investigación y Enseñanza en Nutrición y Salud                                        | Adriana Godínez; Claudio Soto-Garita; Estela Cordero; Francisco Duarte; Hebleen Porras; Melany Calderón & Mariel López                                                                                                                                                   |
| EPI_ISL_914830 to 914831                                                                                                                                                                                                                                           | AREA DE SALUD CARRILLO                                       | Incienza, Instituto Costarricense de Investigación y Enseñanza en Nutrición y Salud                                        | Adriana Godínez; Claudio Soto-Garita; Estela Cordero; Francisco Duarte; Hebleen Porras; Melany Calderón & Adriana Bermúdez-Espinoza                                                                                                                                      |
| EPI_ISL_914798, EPI_ISL_914805                                                                                                                                                                                                                                     | AREA DE SALUD CARTAGO                                        | Incienza, Instituto Costarricense de Investigación y Enseñanza en Nutrición y Salud                                        | Adriana Godínez; Claudio Soto-Garita; Estela Cordero; Francisco Duarte; Hebleen Porras; Melany Calderón & Mariel López; Melany Calderón & Mónica Charpentier-Artavia                                                                                                     |
| EPI_ISL_682260, EPI_ISL_914802                                                                                                                                                                                                                                     | AREA DE SALUD CATEDRAL NORESTE                               | Incienza, Instituto Costarricense de Investigación y Enseñanza en Nutrición y Salud                                        | Adriana Godínez; Adriana Godínez; Claudio Soto-Garita; Estela Cordero; Francisco Duarte; Hebleen Porras; Melany Calderon & Mariel López; Melany Calderón & Mariel López                                                                                                  |
| EPI_ISL_682247 to 682248                                                                                                                                                                                                                                           | AREA DE SALUD CIUDAD QUESADA                                 | Incienza, Instituto Costarricense de Investigación y Enseñanza en Nutrición y Salud                                        | Adriana Godínez; Adriana Godínez & Melany Calderon; Claudio Soto-Garita; Estela Cordero; Francisco Duarte; Hebleen Porras; Melany Calderon & Mariel López                                                                                                                |
| EPI_ISL_914806                                                                                                                                                                                                                                                     | AREA DE SALUD CORONADO                                       | Incienza, Instituto Costarricense de Investigación y Enseñanza en Nutrición y Salud                                        | Adriana Godínez & Melany Calderón; Claudio Soto-Garita; Estela Cordero; Francisco Duarte; Hebleen Porras                                                                                                                                                                 |
| EPI_ISL_682237, EPI_ISL_682256                                                                                                                                                                                                                                     | AREA DE SALUD CORREDORES                                     | Incienza, Instituto Costarricense de Investigación y Enseñanza en Nutrición y Salud                                        | Adriana Godínez; Adriana Godínez & Melany Calderon; Claudio Soto-Garita; Estela Cordero; Francisco Duarte; Hebleen Porras; Melany Calderon & Mariel López                                                                                                                |
| EPI_ISL_682250 to 682252                                                                                                                                                                                                                                           | AREA DE SALUD ESCAZU (COOPESANA)                             | Incienza, Instituto Costarricense de Investigación y Enseñanza en Nutrición y Salud                                        | Adriana Godínez & Melany Calderon; Claudio Soto-Garita; Estela Cordero; Francisco Duarte; Hebleen Porras                                                                                                                                                                 |
| EPI_ISL_682240                                                                                                                                                                                                                                                     | AREA DE SALUD GOICOCHEA 1                                    | Incienza, Instituto Costarricense de Investigación y Enseñanza en Nutrición y Salud                                        | Adriana Godínez & Melany Calderon; Claudio Soto-Garita; Estela Cordero; Francisco Duarte; Hebleen Porras                                                                                                                                                                 |
| EPI_ISL_914811 to 914812                                                                                                                                                                                                                                           | AREA DE SALUD GOICOECHEA 2 - CLINICA DR. JIMENEZ NUÑEZ       | Incienza, Instituto Costarricense de Investigación y Enseñanza en Nutrición y Salud                                        | Adriana Godínez; Claudio Soto-Garita; Estela Cordero; Francisco Duarte; Hebleen Porras; Melany Calderón & Mariel López                                                                                                                                                   |
| EPI_ISL_682238, EPI_ISL_682244                                                                                                                                                                                                                                     | AREA DE SALUD LA CRUZ                                        | Incienza, Instituto Costarricense de Investigación y Enseñanza en Nutrición y Salud                                        | Adriana Godínez; Adriana Godínez & Melany Calderon; Claudio Soto-Garita; Estela Cordero; Francisco Duarte; Hebleen Porras; Melany Calderon & Mariel López                                                                                                                |
| EPI_ISL_682249, EPI_ISL_914803                                                                                                                                                                                                                                     | AREA DE SALUD LA UNION                                       | Incienza, Instituto Costarricense de Investigación y Enseñanza en Nutrición y Salud                                        | Adriana Godínez; Adriana Godínez; Claudio Soto-Garita; Estela Cordero; Francisco Duarte; Hebleen Porras; Melany Calderon & Mariel López; Melany Calderón & Mónica Charpentier-Artavia                                                                                    |
| EPI_ISL_682236                                                                                                                                                                                                                                                     | AREA DE SALUD LOS CHILES                                     | Incienza, Instituto Costarricense de Investigación y Enseñanza en Nutrición y Salud                                        | Adriana Godínez; Claudio Soto-Garita; Estela Cordero; Francisco Duarte; Hebleen Porras; Melany Calderon & Mariel López                                                                                                                                                   |
| EPI_ISL_914825                                                                                                                                                                                                                                                     | AREA DE SALUD MORAVIA                                        | Incienza, Instituto Costarricense de Investigación y Enseñanza en Nutrición y Salud                                        | Adriana Godínez; Claudio Soto-Garita; Estela Cordero; Francisco Duarte; Hebleen Porras; Melany Calderón & Mariel López                                                                                                                                                   |
| EPI_ISL_914809                                                                                                                                                                                                                                                     | AREA DE SALUD OREAMUNO-PACAYAS-TIERRA BLANCA                 | Incienza, Instituto Costarricense de Investigación y Enseñanza en Nutrición y Salud                                        | Adriana Godínez; Claudio Soto-Garita; Estela Cordero; Francisco Duarte; Hebleen Porras; Melany Calderón & Mariel López                                                                                                                                                   |
| EPI_ISL_914835                                                                                                                                                                                                                                                     | AREA DE SALUD PARAISO-CERVANTES                              | Incienza, Instituto Costarricense de Investigación y                                                                       | Adriana Godínez; Claudio Soto-Garita; Estela Cordero; Francisco Duarte; Hebleen Porras; Melany Calderón & Mariel López                                                                                                                                                   |

|                                                                                                                                                                                                                                                                                                                                                                                                                                                                                                                                                                                                                                                                                                                                                                                                                                                                  |                                                                     |                                                                                                                                                                                                                                                                                                                                                                                                                                                                  |                                                                                                                                                                                                                                                                                                                                                                                                                                                     |
|------------------------------------------------------------------------------------------------------------------------------------------------------------------------------------------------------------------------------------------------------------------------------------------------------------------------------------------------------------------------------------------------------------------------------------------------------------------------------------------------------------------------------------------------------------------------------------------------------------------------------------------------------------------------------------------------------------------------------------------------------------------------------------------------------------------------------------------------------------------|---------------------------------------------------------------------|------------------------------------------------------------------------------------------------------------------------------------------------------------------------------------------------------------------------------------------------------------------------------------------------------------------------------------------------------------------------------------------------------------------------------------------------------------------|-----------------------------------------------------------------------------------------------------------------------------------------------------------------------------------------------------------------------------------------------------------------------------------------------------------------------------------------------------------------------------------------------------------------------------------------------------|
| EPI_ISL_914799 to 914800                                                                                                                                                                                                                                                                                                                                                                                                                                                                                                                                                                                                                                                                                                                                                                                                                                         | AREA DE SALUD SAN FRANCISCO-SAN ANTONIO (COOPESANA)                 | Enseñanza en Nutrición y Salud<br>Inciensa, Instituto Costarricense de Investigación y Enseñanza en Nutrición y Salud                                                                                                                                                                                                                                                                                                                                            | Adriana Godínez; Claudio Soto-Garita; Estela Cordero; Francisco Duarte; Hebleen Porras; Melany Calderón & Mariel López                                                                                                                                                                                                                                                                                                                              |
| EPI_ISL_914810, EPI_ISL_914820                                                                                                                                                                                                                                                                                                                                                                                                                                                                                                                                                                                                                                                                                                                                                                                                                                   | AREA DE SALUD SAN JUAN-SAN DIEGO-CONCEPCION 2                       | Inciensa, Instituto Costarricense de Investigación y Enseñanza en Nutrición y Salud                                                                                                                                                                                                                                                                                                                                                                              | Adriana Godínez; Claudio Soto-Garita; Estela Cordero; Francisco Duarte; Hebleen Porras; Melany Calderón & Mariel López                                                                                                                                                                                                                                                                                                                              |
| EPI_ISL_914804                                                                                                                                                                                                                                                                                                                                                                                                                                                                                                                                                                                                                                                                                                                                                                                                                                                   | AREA DE SALUD TURRIALBA-JIMENEZ                                     | Inciensa, Instituto Costarricense de Investigación y Enseñanza en Nutrición y Salud                                                                                                                                                                                                                                                                                                                                                                              | Adriana Godínez; Claudio Soto-Garita; Estela Cordero; Francisco Duarte; Hebleen Porras; Melany Calderón & Mónica Charpentier-Artavia                                                                                                                                                                                                                                                                                                                |
| EPI_ISL_911548                                                                                                                                                                                                                                                                                                                                                                                                                                                                                                                                                                                                                                                                                                                                                                                                                                                   | ARUP laboratories                                                   | ARUP Laboratories                                                                                                                                                                                                                                                                                                                                                                                                                                                | Barker AP; Hillyard DR; Hymas W; Mallory MA; Pyne MT; Shakir SM; Simmon KE; Slechta ES                                                                                                                                                                                                                                                                                                                                                              |
| EPI_ISL_983322                                                                                                                                                                                                                                                                                                                                                                                                                                                                                                                                                                                                                                                                                                                                                                                                                                                   | ASL LATINA PRESIDIO OSPEDALIERO NORD                                | INMI Lazzaro Spallanzani IRCCS                                                                                                                                                                                                                                                                                                                                                                                                                                   | A Di Caro; A Lucci; B Bartolini; C.E.M Gruber; E Giombini; F Messina; M. Ruca; MR Capobianchi; O Butera; S Pignalosa                                                                                                                                                                                                                                                                                                                                |
| EPI_ISL_900506                                                                                                                                                                                                                                                                                                                                                                                                                                                                                                                                                                                                                                                                                                                                                                                                                                                   | AX BIO OCEAN                                                        | CNR Virus des Infections Respiratoires - France SUD                                                                                                                                                                                                                                                                                                                                                                                                              | Antonin Bal; Bruno Lina; Gregory Destras; Gwendolynne Burfin; Hadrien Règue; Laurence Josset; Martine Valette; Quentin Semanas                                                                                                                                                                                                                                                                                                                      |
| EPI_ISL_891249 to 891250, EPI_ISL_909953 to 909954, EPI_ISL_909963, EPI_ISL_910011 to 910013, EPI_ISL_910015                                                                                                                                                                                                                                                                                                                                                                                                                                                                                                                                                                                                                                                                                                                                                     | AZ Delta                                                            | AZ Delta                                                                                                                                                                                                                                                                                                                                                                                                                                                         | Brigitte Maes; Dieter De Smet; Geert Marten; Geert Martens                                                                                                                                                                                                                                                                                                                                                                                          |
| EPI_ISL_981006, EPI_ISL_981370 to 981371, EPI_ISL_981373, EPI_ISL_981376, EPI_ISL_981378 to 981379                                                                                                                                                                                                                                                                                                                                                                                                                                                                                                                                                                                                                                                                                                                                                               | AZ Klina                                                            | AZ Klina                                                                                                                                                                                                                                                                                                                                                                                                                                                         | Dr. C. Vael                                                                                                                                                                                                                                                                                                                                                                                                                                         |
| EPI_ISL_903580, EPI_ISL_903600, EPI_ISL_903620, EPI_ISL_903634, EPI_ISL_903750, EPI_ISL_903794, EPI_ISL_903808, EPI_ISL_903827, EPI_ISL_903838, EPI_ISL_903842, EPI_ISL_903855, EPI_ISL_903873, EPI_ISL_903902, EPI_ISL_903918 to 903919, EPI_ISL_903932, EPI_ISL_903935, EPI_ISL_903957                                                                                                                                                                                                                                                                                                                                                                                                                                                                                                                                                                         | see above                                                           | AZ SPHL, Arizona Department of Health Services                                                                                                                                                                                                                                                                                                                                                                                                                   | Genomics and Discovery, Respiratory Viruses Branch, Division of Viral Diseases, Centers for Disease Control and Prevention                                                                                                                                                                                                                                                                                                                          |
| EPI_ISL_694049, EPI_ISL_694053 to 694138, EPI_ISL_694148 to 694218, EPI_ISL_694248 to 694315, EPI_ISL_694405 to 694427, EPI_ISL_694458 to 694600, EPI_ISL_694724 to 694796, EPI_ISL_694799 to 694844, EPI_ISL_694885 to 694950, EPI_ISL_695103 to 695228, EPI_ISL_695316 to 695371, EPI_ISL_695393 to 695520, EPI_ISL_695563 to 695613, EPI_ISL_695642 to 695655, EPI_ISL_695665 to 695701, EPI_ISL_695712 to 695752, EPI_ISL_695830 to 695839                                                                                                                                                                                                                                                                                                                                                                                                                   | see above                                                           | AZ SPHL, Arizona Department of Health Services                                                                                                                                                                                                                                                                                                                                                                                                                   | TGen North                                                                                                                                                                                                                                                                                                                                                                                                                                          |
| EPI_ISL_872065 to 872068                                                                                                                                                                                                                                                                                                                                                                                                                                                                                                                                                                                                                                                                                                                                                                                                                                         | AZ Vesale (Tongres)                                                 | GIGA Medical Genomics                                                                                                                                                                                                                                                                                                                                                                                                                                            | Ashlyn Pfeiffer; Chris French; Darrin Lemmer; Dave Engelthaler; Hayley Yaglom; Jolene Bowers; Megan Folkerts; The Arizona COVID Genomics Union (ACGU)                                                                                                                                                                                                                                                                                               |
| EPI_ISL_911386 to 911401, EPI_ISL_911430 to 911442, EPI_ISL_913496 to 913513, EPI_ISL_913594 to 913605, EPI_ISL_954755 to 954775, EPI_ISL_954777 to 954779, EPI_ISL_954814 to 954817, EPI_ISL_961181 to 961203, EPI_ISL_978788 to 978810, EPI_ISL_978812 to 978866, EPI_ISL_978868 to 978879                                                                                                                                                                                                                                                                                                                                                                                                                                                                                                                                                                     | see above                                                           | AZDelta                                                                                                                                                                                                                                                                                                                                                                                                                                                          | Dieter De Smet; Geert Martens                                                                                                                                                                                                                                                                                                                                                                                                                       |
| EPI_ISL_940573 to 940575, EPI_ISL_949079 to 949081                                                                                                                                                                                                                                                                                                                                                                                                                                                                                                                                                                                                                                                                                                                                                                                                               | AZT                                                                 | Jessa                                                                                                                                                                                                                                                                                                                                                                                                                                                            | Jessa_cmdLab                                                                                                                                                                                                                                                                                                                                                                                                                                        |
| EPI_ISL_949091                                                                                                                                                                                                                                                                                                                                                                                                                                                                                                                                                                                                                                                                                                                                                                                                                                                   | AZV                                                                 | Jessa                                                                                                                                                                                                                                                                                                                                                                                                                                                            | Jessa_cmdLab                                                                                                                                                                                                                                                                                                                                                                                                                                        |
| EPI_ISL_735501 to 735502                                                                                                                                                                                                                                                                                                                                                                                                                                                                                                                                                                                                                                                                                                                                                                                                                                         | Abdul Malek Ukil Medical College, Noakhali                          | Central Biological Research Laboratory and Department of Biochemistry and Molecular Biology                                                                                                                                                                                                                                                                                                                                                                      | H. M. Abdullah Al Masud; Imam Hossen; Md. Arif Hossain; Md. Imranul Hoq; Md. Khondakar Razaur Rahman; Md. Omer Faruq; Mohammad Omar Faruque; Robiul Hasan Bhuiyan; Sajib Rudra; Shanta Paul                                                                                                                                                                                                                                                         |
| EPI_ISL_896109                                                                                                                                                                                                                                                                                                                                                                                                                                                                                                                                                                                                                                                                                                                                                                                                                                                   | Abklärungs- und _Teststation BL                                     | University Hospital Basel, Clinical Bacteriology                                                                                                                                                                                                                                                                                                                                                                                                                 | Adrian Egli; Alfredo Mari; Hans Hirsch; Helena MB Seth-Smith; Juerg Sommer; Julia Bielikow; Karoline Leuzinger; Madlen Stange; Manuel Bategay; Samuel Erny; Thomas Goetz; Tim Roloff                                                                                                                                                                                                                                                                |
| EPI_ISL_890185 to 890187, EPI_ISL_891151, EPI_ISL_905731, EPI_ISL_911707, EPI_ISL_911709                                                                                                                                                                                                                                                                                                                                                                                                                                                                                                                                                                                                                                                                                                                                                                         | Academic Hospital of Gadjah Mada University (RSA UGM)               | Genetics Working Group (Pokja Genetik) Faculty of Medicine, Public Health and Nursing Universitas Gadjah Mada (FK-KMK UGM); Disease Investigation Center Wates Ministry of Agriculture Indonesia; Department of Microbiology FK-KMK UGM; Laboratorium Diagnostik Yayasan Tahija World Mosquito Program (WMP) Yogyakarta Center for Tropical Medicine FK-KMK UGM; Integrated Research center FK-KMK UGM; Department of Computer Science and Electronics FMIPA UGM | Aditya Rifq Fauzi; Afiahayati; Alvin Santoso Kalim; Audric Kenny Tedja; Dwi AA Nugrahaningsih; Dwiki afandy; Dyah Ayu Puspitarani; Edwin W. Daniwijaya; Eggi Arguni; Endah Supriyati; Fadi Fahri; Gunadi; Hendra Wibawa; Kemala Athollah; Kristy Iskandar; Ludhang P. Rizki; Marcellus; Maria Patricia Inggriani; Mohamad S. Hakim; Nungki Anggorowati; Siswanto; Susan Simanjaya; Titik Nuryastuti; Tri Wibawa; Untung Riawan; William Widitjarsjo |
| EPI_ISL_877129                                                                                                                                                                                                                                                                                                                                                                                                                                                                                                                                                                                                                                                                                                                                                                                                                                                   | Academic Hospital of Gadjah Mada University (RSA UGM)               | Genetics Working Group (Pokja Genetik) Faculty of Medicine, Public Health and Nursing Universitas Gadjah Mada (FK-KMK UGM); Disease Investigation Center Wates Ministry of Agriculture Indonesia; Department of Microbiology FK-KMK UGM; Laboratorium Diagnostik Yayasan Tahija World Mosquito Program (WMP) Yogyakarta Center for Tropical Medicine FK-KMK UGM; Integrated Research Center FK-KMK UGM; Department of Computer Science and Electronics FMIPA UGM | Afiahayati; Dwi AA Nugrahaningsih; Dwiki afandy; Dyah Ayu Puspitarani; Edwin W. Daniwijaya; Eggi Arguni; Endah Supriyati; Gunadi; Hendra Wibawa; Kristy Iskandar; Ludhang P. Rizki; Marcellus; Mohamad S. Hakim; Nungki Anggorowati; Siswanto; Titik Nuryastuti; Tri Wibawa                                                                                                                                                                         |
| EPI_ISL_877126 to 877128, EPI_ISL_877130 to 877131                                                                                                                                                                                                                                                                                                                                                                                                                                                                                                                                                                                                                                                                                                                                                                                                               | Academic Hospital of Gadjah Mada University (RSA UGM)               | Genetics Working Group (Pokja Genetik) Faculty of Medicine, Public Health and Nursing Universitas Gadjah Mada (FK-KMK UGM); Disease Investigation Center Wates Ministry of Agriculture Indonesia; Department of Microbiology FK-KMK UGM; Laboratorium Diagnostik Yayasan Tahija World Mosquito Program (WMP) Yogyakarta Center for Tropical Medicine FK-KMK UGM; Integrated Research center FK-KMK UGM; Department of Computer Science and Electronics FMIPA UGM | Aditya Rifq Fauzi; Afiahayati; Alvin Santoso Kalim; Audric Kenny Tedja; Desyifa Mursalin; Dwi AA Nugrahaningsih; Edwin W. Daniwijaya; Eggi Arguni; Endah Supriyati; Fadi Fahri; Gunadi; Hendra Wibawa; Kemala Athollah; Kristy Iskandar; Ludhang P. Rizki; Marcellus; Maria Patricia Inggriani; Mohamad S. Hakim; Nungki Anggorowati; Siswanto; Susan Simanjaya; Titik Nuryastuti; Tri Wibawa; Untung Riawan; William Widitjarsjo                   |
| EPI_ISL_956271                                                                                                                                                                                                                                                                                                                                                                                                                                                                                                                                                                                                                                                                                                                                                                                                                                                   | Adi Husada Undaan Hospital                                          | Institute of Tropical Disease, Universitas Airlangga                                                                                                                                                                                                                                                                                                                                                                                                             | Aldise M Nastri; Gatot Soegiarto; Irawati Marga; Jezzy R Dewantari; Kazufumi Shimizu; Krisnoadi Rahardjo; Laksmi Wulandari; Maria I Lusida; Mitsuhiro Nishimura; Resti Yudhawati; Retno A Setyoningrum; Rima R Prasetya; Soetjpto; Yasuko Mori; Yohko K Shimizu                                                                                                                                                                                     |
| EPI_ISL_635102, EPI_ISL_635194, EPI_ISL_668391, EPI_ISL_668393, EPI_ISL_775269 to 775270, EPI_ISL_775275, EPI_ISL_775344, EPI_ISL_775387 to 775390, EPI_ISL_775479, EPI_ISL_775528 to 775530, EPI_ISL_796649, EPI_ISL_796665 to 796666, EPI_ISL_796699, EPI_ISL_796712 to 796713, EPI_ISL_813975, EPI_ISL_860210, EPI_ISL_860212, EPI_ISL_860219, EPI_ISL_860223, EPI_ISL_860232, EPI_ISL_860259 to 860260, EPI_ISL_860269, EPI_ISL_860277, EPI_ISL_906817 to 906820, EPI_ISL_906826 to 906829, EPI_ISL_962895, EPI_ISL_962897, EPI_ISL_962911 to 962913, EPI_ISL_964254, EPI_ISL_964257, EPI_ISL_964259, EPI_ISL_964284, EPI_ISL_964287, EPI_ISL_964289, EPI_ISL_964297, EPI_ISL_964300, EPI_ISL_964303, EPI_ISL_964305, EPI_ISL_964308, EPI_ISL_964953 to 964954, EPI_ISL_964958, EPI_ISL_964963 to 964965, EPI_ISL_964975 to 964976, EPI_ISL_964992 to 964994 | see above                                                           | Akershus University Hospital, Department for Microbiology and Infectious Disease Control                                                                                                                                                                                                                                                                                                                                                                         |                                                                                                                                                                                                                                                                                                                                                                                                                                                     |
| EPI_ISL_747240                                                                                                                                                                                                                                                                                                                                                                                                                                                                                                                                                                                                                                                                                                                                                                                                                                                   | Al Islam Hospital                                                   | Norwegian Institute of Public Health, Department of Virology                                                                                                                                                                                                                                                                                                                                                                                                     | Atiya R Ali; Hilde Elshaug; Hilde Vollen; Ignacio Garcia Lorente; Kamilla Heddeland Instefjord; Karoline Bragstad; Kathrine Stene-Johansen; Marie Paulsen Madsen; Olav Hungnes; Rasmus Riis Kopperud; Serina B Engebretsen                                                                                                                                                                                                                          |
| EPI_ISL_739659 to 739661                                                                                                                                                                                                                                                                                                                                                                                                                                                                                                                                                                                                                                                                                                                                                                                                                                         | Al-Quds Nutrition and Health Research Institute, Al-Quds University | West Java Health Laboratory; School of Life Sciences and Technology, Institut Teknologi Bandung                                                                                                                                                                                                                                                                                                                                                                  | Azzania Fibrani; Cut Nur Cinthia Alamanda; Ema Rahmawati; Isak Solihin; Karimatu Khoirunnisa; Miftahul Farid; Rifky Waluyajati Rachman; Rini Robiani; Ryan Bayusantika Ristandi                                                                                                                                                                                                                                                                     |
| EPI_ISL_649153, EPI_ISL_661272                                                                                                                                                                                                                                                                                                                                                                                                                                                                                                                                                                                                                                                                                                                                                                                                                                   | Al-Quds Nutrition and Health Research Institute, Al-Quds            | Al-Quds Nutrition and Health Research Institute, Al-Quds                                                                                                                                                                                                                                                                                                                                                                                                         | Al-Jawabreh, A.; Ereqat, S.; Nasereddin, A.; Rishmawi, C.<br>A. and Al-Jawabreh, A.; Ereqat, S.; Nasereddin; Nasereddin, A.; S. and Al-Jawabreh, A.                                                                                                                                                                                                                                                                                                 |



|                                                                                                                                                                                                                                                                                                                                                                                                                                                                                                                                                                                                                                                                                                                                                                                                                                                                                                                                                                                                                                                                                                                                                                                                                                                                                                                                                                                                                                                                                                                                                                                                                                                                                                                                                                                                                                                                                                                                                                                                                                                                                                                                                                                                                                                                                                                                                                                           |                                                                                                     |                                                                                                                                   |                                                                                                                                                                                                                                                                                                                                                  |
|-------------------------------------------------------------------------------------------------------------------------------------------------------------------------------------------------------------------------------------------------------------------------------------------------------------------------------------------------------------------------------------------------------------------------------------------------------------------------------------------------------------------------------------------------------------------------------------------------------------------------------------------------------------------------------------------------------------------------------------------------------------------------------------------------------------------------------------------------------------------------------------------------------------------------------------------------------------------------------------------------------------------------------------------------------------------------------------------------------------------------------------------------------------------------------------------------------------------------------------------------------------------------------------------------------------------------------------------------------------------------------------------------------------------------------------------------------------------------------------------------------------------------------------------------------------------------------------------------------------------------------------------------------------------------------------------------------------------------------------------------------------------------------------------------------------------------------------------------------------------------------------------------------------------------------------------------------------------------------------------------------------------------------------------------------------------------------------------------------------------------------------------------------------------------------------------------------------------------------------------------------------------------------------------------------------------------------------------------------------------------------------------|-----------------------------------------------------------------------------------------------------|-----------------------------------------------------------------------------------------------------------------------------------|--------------------------------------------------------------------------------------------------------------------------------------------------------------------------------------------------------------------------------------------------------------------------------------------------------------------------------------------------|
| EPI_ISL_770005                                                                                                                                                                                                                                                                                                                                                                                                                                                                                                                                                                                                                                                                                                                                                                                                                                                                                                                                                                                                                                                                                                                                                                                                                                                                                                                                                                                                                                                                                                                                                                                                                                                                                                                                                                                                                                                                                                                                                                                                                                                                                                                                                                                                                                                                                                                                                                            | Area De Salud Moravia                                                                               | Incienza, Instituto Costarricense de Investigación y Enseñanza en Nutrición y Salud                                               | Adriana Godínez; Claudio Soto-Garita; Estela Cordero; Francisco Duarte; Hebleen Porras; Melany Calderón & Mariel López                                                                                                                                                                                                                           |
| EPI_ISL_769999                                                                                                                                                                                                                                                                                                                                                                                                                                                                                                                                                                                                                                                                                                                                                                                                                                                                                                                                                                                                                                                                                                                                                                                                                                                                                                                                                                                                                                                                                                                                                                                                                                                                                                                                                                                                                                                                                                                                                                                                                                                                                                                                                                                                                                                                                                                                                                            | Area De Salud Paraiso-Cervantes                                                                     | Incienza, Instituto Costarricense de Investigación y Enseñanza en Nutrición y Salud                                               | Adriana Godínez; Claudio Soto-Garita; Estela Cordero; Francisco Duarte; Hebleen Porras; Melany Calderón & Mariel López                                                                                                                                                                                                                           |
| EPI_ISL_770017, EPI_ISL_770022                                                                                                                                                                                                                                                                                                                                                                                                                                                                                                                                                                                                                                                                                                                                                                                                                                                                                                                                                                                                                                                                                                                                                                                                                                                                                                                                                                                                                                                                                                                                                                                                                                                                                                                                                                                                                                                                                                                                                                                                                                                                                                                                                                                                                                                                                                                                                            | Area De Salud Perez Zeledon                                                                         | Incienza, Instituto Costarricense de Investigación y Enseñanza en Nutrición y Salud                                               | Adriana Godínez; Claudio Soto-Garita; Estela Cordero; Francisco Duarte; Hebleen Porras; Melany Calderón & Mariel López                                                                                                                                                                                                                           |
| EPI_ISL_769988 to 769989, EPI_ISL_770015, EPI_ISL_770023                                                                                                                                                                                                                                                                                                                                                                                                                                                                                                                                                                                                                                                                                                                                                                                                                                                                                                                                                                                                                                                                                                                                                                                                                                                                                                                                                                                                                                                                                                                                                                                                                                                                                                                                                                                                                                                                                                                                                                                                                                                                                                                                                                                                                                                                                                                                  | Area De Salud San Francisco-San Antonio (Coopesana)                                                 | Incienza, Instituto Costarricense de Investigación y Enseñanza en Nutrición y Salud                                               | Adriana Godínez; Claudio Soto-Garita; Estela Cordero; Francisco Duarte; Hebleen Porras; Melany Calderón & Mariel López                                                                                                                                                                                                                           |
| EPI_ISL_769996, EPI_ISL_770025                                                                                                                                                                                                                                                                                                                                                                                                                                                                                                                                                                                                                                                                                                                                                                                                                                                                                                                                                                                                                                                                                                                                                                                                                                                                                                                                                                                                                                                                                                                                                                                                                                                                                                                                                                                                                                                                                                                                                                                                                                                                                                                                                                                                                                                                                                                                                            | Area De Salud San Juan-San Diego-Concepcion 2                                                       | Incienza, Instituto Costarricense de Investigación y Enseñanza en Nutrición y Salud                                               | Adriana Godínez; Claudio Soto-Garita; Estela Cordero; Francisco Duarte; Hebleen Porras; Melany Calderón & Mariel López                                                                                                                                                                                                                           |
| EPI_ISL_770007                                                                                                                                                                                                                                                                                                                                                                                                                                                                                                                                                                                                                                                                                                                                                                                                                                                                                                                                                                                                                                                                                                                                                                                                                                                                                                                                                                                                                                                                                                                                                                                                                                                                                                                                                                                                                                                                                                                                                                                                                                                                                                                                                                                                                                                                                                                                                                            | Area De Salud San Rafael                                                                            | Incienza, Instituto Costarricense de Investigación y Enseñanza en Nutrición y Salud                                               | Adriana Godínez; Claudio Soto-Garita; Estela Cordero; Francisco Duarte; Hebleen Porras; Melany Calderón & Mariel López                                                                                                                                                                                                                           |
| EPI_ISL_710513, EPI_ISL_738137, EPI_ISL_745029 to 745031, EPI_ISL_775242, EPI_ISL_775245, EPI_ISL_794671                                                                                                                                                                                                                                                                                                                                                                                                                                                                                                                                                                                                                                                                                                                                                                                                                                                                                                                                                                                                                                                                                                                                                                                                                                                                                                                                                                                                                                                                                                                                                                                                                                                                                                                                                                                                                                                                                                                                                                                                                                                                                                                                                                                                                                                                                  | Area of Virology, Serology and Virology Division (SAVID), New South Wales Health Pathology Randwick | Area of Virology, Serology and Virology Division (SAVID), New South Wales Health Pathology Randwick                               | Bull, R.; Deveson, I.; Foster, C.; Rawlinson, W.; Van Hal, S.                                                                                                                                                                                                                                                                                    |
| EPI_ISL_678292 to 678293, EPI_ISL_678295 to 678386, EPI_ISL_707891 to 707902, EPI_ISL_717701 to 717713, EPI_ISL_812347, EPI_ISL_812359                                                                                                                                                                                                                                                                                                                                                                                                                                                                                                                                                                                                                                                                                                                                                                                                                                                                                                                                                                                                                                                                                                                                                                                                                                                                                                                                                                                                                                                                                                                                                                                                                                                                                                                                                                                                                                                                                                                                                                                                                                                                                                                                                                                                                                                    | Area of Virology, Serology and Virology Division (SAVID), New South Wales Health Pathology Randwick | Virology Research Laboratory; Area of Virology, Serology and Virology Division (SAVID), New South Wales Health Pathology Randwick | Au, J.; Bull, R.; Deveson, I.; Foster, C.; Rawlinson, W.; Ruiz Silva, M.; Van Hal, S.                                                                                                                                                                                                                                                            |
| EPI_ISL_824787 to 824789, EPI_ISL_824922 to 824941, EPI_ISL_824987 to 825012, EPI_ISL_925509 to 925523, EPI_ISL_925525 to 925534, EPI_ISL_925824 to 925845, EPI_ISL_930635 to 930664, EPI_ISL_933540 to 933563, EPI_ISL_933580 to 933601, EPI_ISL_967882 to 967884, EPI_ISL_968189 to 968211, EPI_ISL_978353 to 978395, EPI_ISL_978397 to 978487                                                                                                                                                                                                                                                                                                                                                                                                                                                                                                                                                                                                                                                                                                                                                                                                                                                                                                                                                                                                                                                                                                                                                                                                                                                                                                                                                                                                                                                                                                                                                                                                                                                                                                                                                                                                                                                                                                                                                                                                                                          |                                                                                                     |                                                                                                                                   |                                                                                                                                                                                                                                                                                                                                                  |
| see above                                                                                                                                                                                                                                                                                                                                                                                                                                                                                                                                                                                                                                                                                                                                                                                                                                                                                                                                                                                                                                                                                                                                                                                                                                                                                                                                                                                                                                                                                                                                                                                                                                                                                                                                                                                                                                                                                                                                                                                                                                                                                                                                                                                                                                                                                                                                                                                 | Arizona State Public Health Laboratory                                                              | Arizona State Public Health Laboratory                                                                                            | Jessica Escobar; Katherine Fullerton; Linda Getsinger; Nobuko Fukushima; Stacy White; Trung Huynh; Victor Waddell                                                                                                                                                                                                                                |
| EPI_ISL_812114, EPI_ISL_903361 to 903363, EPI_ISL_943569                                                                                                                                                                                                                                                                                                                                                                                                                                                                                                                                                                                                                                                                                                                                                                                                                                                                                                                                                                                                                                                                                                                                                                                                                                                                                                                                                                                                                                                                                                                                                                                                                                                                                                                                                                                                                                                                                                                                                                                                                                                                                                                                                                                                                                                                                                                                  | Arizona State University                                                                            | Arizona State University                                                                                                          | Efrem S. Lim; Emily A. Kaelin; Joshua LaBaer; Joy M. Blain; Kristina Buss; LaRinda A. Holland; Nicholas J. Mellor; Peter T. Skidmore; Valerie Harris; Vel Murugan                                                                                                                                                                                |
| EPI_ISL_721629 to 721645, EPI_ISL_722187 to 722200                                                                                                                                                                                                                                                                                                                                                                                                                                                                                                                                                                                                                                                                                                                                                                                                                                                                                                                                                                                                                                                                                                                                                                                                                                                                                                                                                                                                                                                                                                                                                                                                                                                                                                                                                                                                                                                                                                                                                                                                                                                                                                                                                                                                                                                                                                                                        | Armed Forces Medical College                                                                        | National Centre For Cell Science                                                                                                  | Arvind Sahu; Dhiraj Paul; Girdhari Lal; Janesh Kumar; Kavita Bala Anand; Kunal Jani; Manoj Kumar Bhat; Murlidhar Tambe; Radha Chauhan; Rajesh Karyakarte; Rajiv Mohan Gupta; Santosh Karade; Sheldiner Pal Singh Shergill; Sourav Sen; Suvarna Joshi; Vasudevan Seshadri; Yogesh S Shouche                                                       |
| EPI_ISL_717978                                                                                                                                                                                                                                                                                                                                                                                                                                                                                                                                                                                                                                                                                                                                                                                                                                                                                                                                                                                                                                                                                                                                                                                                                                                                                                                                                                                                                                                                                                                                                                                                                                                                                                                                                                                                                                                                                                                                                                                                                                                                                                                                                                                                                                                                                                                                                                            | Army Medical Center, Scientific Department, Virology Laboratory                                     | Army Medical Center, Scientific Department, Virology Laboratory                                                                   | Alessandra Amoroso; Andrea Ciammarrucio; Anella Monte; Anna Anselmo; Annalisa Pelo; Antonella Fortunato; Federica Galeano; Florigio Lista.; Francesco Giordani; Giovanni Faggioni; Giulia Campoli; Margherita De Santis; Marzia Cavalli; Nino D'Amore; Riccardo De Santis; Roberta Sorrentino; Rossella Tirelli; Silvia Fillo; Vanessa Vera Fain |
| EPI_ISL_900525                                                                                                                                                                                                                                                                                                                                                                                                                                                                                                                                                                                                                                                                                                                                                                                                                                                                                                                                                                                                                                                                                                                                                                                                                                                                                                                                                                                                                                                                                                                                                                                                                                                                                                                                                                                                                                                                                                                                                                                                                                                                                                                                                                                                                                                                                                                                                                            | Astralab                                                                                            | CNR Virus des Infections Respiratoires - France SUD                                                                               | Antonin Bal; Bruno Lina; Gregory Destras; Gwendolyne Burfin; Hadrien Règue; Laurence Josset; Martine Valette; Quentin Semanas                                                                                                                                                                                                                    |
| EPI_ISL_902969                                                                                                                                                                                                                                                                                                                                                                                                                                                                                                                                                                                                                                                                                                                                                                                                                                                                                                                                                                                                                                                                                                                                                                                                                                                                                                                                                                                                                                                                                                                                                                                                                                                                                                                                                                                                                                                                                                                                                                                                                                                                                                                                                                                                                                                                                                                                                                            | Atlas Genomics - UW Virology Lab                                                                    | UW Virology Lab                                                                                                                   | Alexander Greninger; Hong Xie; Keith R Jerome; Lasata Shrestha; Meei-Li Huang; Michelle Lin; Pavitra Roychoudhury                                                                                                                                                                                                                                |
| EPI_ISL_977660, EPI_ISL_977665                                                                                                                                                                                                                                                                                                                                                                                                                                                                                                                                                                                                                                                                                                                                                                                                                                                                                                                                                                                                                                                                                                                                                                                                                                                                                                                                                                                                                                                                                                                                                                                                                                                                                                                                                                                                                                                                                                                                                                                                                                                                                                                                                                                                                                                                                                                                                            | Auburn Sports Medicine                                                                              | Synergy Laboratories                                                                                                              | Megan Cornwell                                                                                                                                                                                                                                                                                                                                   |
| EPI_ISL_745091 to 745092                                                                                                                                                                                                                                                                                                                                                                                                                                                                                                                                                                                                                                                                                                                                                                                                                                                                                                                                                                                                                                                                                                                                                                                                                                                                                                                                                                                                                                                                                                                                                                                                                                                                                                                                                                                                                                                                                                                                                                                                                                                                                                                                                                                                                                                                                                                                                                  | Australian Clinical Labs                                                                            | CIDM-PH, Westmead Hospital                                                                                                        | CIDM-PH et al.                                                                                                                                                                                                                                                                                                                                   |
| EPI_ISL_767896, EPI_ISL_767902, EPI_ISL_767916 to 767918, EPI_ISL_872585                                                                                                                                                                                                                                                                                                                                                                                                                                                                                                                                                                                                                                                                                                                                                                                                                                                                                                                                                                                                                                                                                                                                                                                                                                                                                                                                                                                                                                                                                                                                                                                                                                                                                                                                                                                                                                                                                                                                                                                                                                                                                                                                                                                                                                                                                                                  | Australian Clinical Labs                                                                            | NSW Health Pathology - Institute of Clinical Pathology and Medical Research; Westmead Hospital; University of Sydney              | CIDM-PH et al.                                                                                                                                                                                                                                                                                                                                   |
| EPI_ISL_767884                                                                                                                                                                                                                                                                                                                                                                                                                                                                                                                                                                                                                                                                                                                                                                                                                                                                                                                                                                                                                                                                                                                                                                                                                                                                                                                                                                                                                                                                                                                                                                                                                                                                                                                                                                                                                                                                                                                                                                                                                                                                                                                                                                                                                                                                                                                                                                            | Australian Clinical Labs (formerly Healthscope Pathology)                                           | NSW Health Pathology - Institute of Clinical Pathology and Medical Research; Westmead Hospital; University of Sydney              | CIDM-PH et al.                                                                                                                                                                                                                                                                                                                                   |
| EPI_ISL_853721, EPI_ISL_853733, EPI_ISL_853738, EPI_ISL_853741, EPI_ISL_853746, EPI_ISL_853749, EPI_ISL_853757 to 853758, EPI_ISL_853766, EPI_ISL_853779 to 853782, EPI_ISL_853790 to 853791, EPI_ISL_853793 to 853794, EPI_ISL_853797, EPI_ISL_853800 to 853801, EPI_ISL_853803 to 853804, EPI_ISL_853807 to 853813, EPI_ISL_853815, EPI_ISL_853818, EPI_ISL_853965 to 853972, EPI_ISL_853975 to 854040, EPI_ISL_854113 to 854178, EPI_ISL_854180 to 854183, EPI_ISL_854187 to 854209, EPI_ISL_854213, EPI_ISL_854215 to 854216, EPI_ISL_854228, EPI_ISL_854231, EPI_ISL_854235, EPI_ISL_854243 to 854252, EPI_ISL_854254, EPI_ISL_854262 to 854281, EPI_ISL_854285 to 854294, EPI_ISL_854297, EPI_ISL_854301, EPI_ISL_854304, EPI_ISL_934434 to 934539, EPI_ISL_934593 to 934632                                                                                                                                                                                                                                                                                                                                                                                                                                                                                                                                                                                                                                                                                                                                                                                                                                                                                                                                                                                                                                                                                                                                                                                                                                                                                                                                                                                                                                                                                                                                                                                                        |                                                                                                     |                                                                                                                                   |                                                                                                                                                                                                                                                                                                                                                  |
| see above                                                                                                                                                                                                                                                                                                                                                                                                                                                                                                                                                                                                                                                                                                                                                                                                                                                                                                                                                                                                                                                                                                                                                                                                                                                                                                                                                                                                                                                                                                                                                                                                                                                                                                                                                                                                                                                                                                                                                                                                                                                                                                                                                                                                                                                                                                                                                                                 | Austrian Agency for Health and Food Safety (AGES)                                                   | Berghaler laboratory, CeMM Research Center for Molecular Medicine of the Austrian Academy of Sciences                             | Alexander Lercher; Alexandra Popa; Andreas Berghaler; Anna Schedi; Bekir Erguner; Benedikt Agerer; Christoph Bock; Christoph Bock; Jakob-Wendelin Genger; Jan Laine; Lukas Endler; Maelle Le Moing; Martin Senekowitsch; Martin Senekowitsch; Michael Schuster; Michael Schuster; Thomas Penz                                                    |
| EPI_ISL_845618 to 845619                                                                                                                                                                                                                                                                                                                                                                                                                                                                                                                                                                                                                                                                                                                                                                                                                                                                                                                                                                                                                                                                                                                                                                                                                                                                                                                                                                                                                                                                                                                                                                                                                                                                                                                                                                                                                                                                                                                                                                                                                                                                                                                                                                                                                                                                                                                                                                  | Ayudas diagnósticas SURA                                                                            | Instituto Nacional de Salud - Dirección de Investigación en Salud Pública                                                         | Carlos Franco-Muñoz; Diego A. Álvarez-Díaz; Diego Andrés Prada; Gerardo Santamaría; Jonathan Reales; Jonathan Naizaque; Katherine Laiton-Donato; Magdalena Wiesner; Marcela Mercado-Reyes; María T. Herrera-Sepúlveda; Martha Lucia Ospina Martínez; Mauricio Pacheco-Montealegre; Paola Muñoz-Laiton; Sheryll Corchuelo                         |
| EPI_ISL_882637 to 882644                                                                                                                                                                                                                                                                                                                                                                                                                                                                                                                                                                                                                                                                                                                                                                                                                                                                                                                                                                                                                                                                                                                                                                                                                                                                                                                                                                                                                                                                                                                                                                                                                                                                                                                                                                                                                                                                                                                                                                                                                                                                                                                                                                                                                                                                                                                                                                  | Azerbaijan National Hematology Center Division of Medical Genetics                                  | Azerbaijan National Hematology Center Division of Medical Genetics                                                                | Aghayev Agha Rza; Bayraml Ramin                                                                                                                                                                                                                                                                                                                  |
| EPI_ISL_902753, EPI_ISL_965133, EPI_ISL_983328                                                                                                                                                                                                                                                                                                                                                                                                                                                                                                                                                                                                                                                                                                                                                                                                                                                                                                                                                                                                                                                                                                                                                                                                                                                                                                                                                                                                                                                                                                                                                                                                                                                                                                                                                                                                                                                                                                                                                                                                                                                                                                                                                                                                                                                                                                                                            | Azienda Ospedaliera San Camillo Forlanini                                                           | INMI Lazzaro Spallanzani IRCCS                                                                                                    | A D'Agostino; A Di Caro; B Bartolini; C.E.M Gruber; D.Gallone; E Giombini; F Basile; F Messina; G Parisi; M Rucca; M. Rucca; ML Guarino; MR Capobianchi; O Butera                                                                                                                                                                                |
| EPI_ISL_882937 to 882939, EPI_ISL_965131 to 965132                                                                                                                                                                                                                                                                                                                                                                                                                                                                                                                                                                                                                                                                                                                                                                                                                                                                                                                                                                                                                                                                                                                                                                                                                                                                                                                                                                                                                                                                                                                                                                                                                                                                                                                                                                                                                                                                                                                                                                                                                                                                                                                                                                                                                                                                                                                                        | Azienda Ospedaliera San Giovanni Addolorata                                                         | INMI Lazzaro Spallanzani IRCCS                                                                                                    | A Di Caro; B Bartolini; C.E.M Gruber; CEM Gruber; E Giombini; F Messina; M Gaudio; M Rucca; MR Capobianchi; O Butera; PM Picanica                                                                                                                                                                                                                |
| EPI_ISL_965136                                                                                                                                                                                                                                                                                                                                                                                                                                                                                                                                                                                                                                                                                                                                                                                                                                                                                                                                                                                                                                                                                                                                                                                                                                                                                                                                                                                                                                                                                                                                                                                                                                                                                                                                                                                                                                                                                                                                                                                                                                                                                                                                                                                                                                                                                                                                                                            | Azienda Sanitaria Locale Roma 5                                                                     | INMI Lazzaro Spallanzani IRCCS                                                                                                    | A Di Caro; B Bartolini; CEM Gruber; D Cerini; D Di Fusco; E Giombini; F Messina; M Rucca; MR Capobianchi; O Butera                                                                                                                                                                                                                               |
| EPI_ISL_728254 to 728271, EPI_ISL_728325 to 728330                                                                                                                                                                                                                                                                                                                                                                                                                                                                                                                                                                                                                                                                                                                                                                                                                                                                                                                                                                                                                                                                                                                                                                                                                                                                                                                                                                                                                                                                                                                                                                                                                                                                                                                                                                                                                                                                                                                                                                                                                                                                                                                                                                                                                                                                                                                                        | B.J. Govt. Medical College                                                                          | National Centre For Cell Science                                                                                                  | Arvind Sahu; Dhiraj Paul; Girdhari Lal; Janesh Kumar; Kavita Bala Anand; Kunal Jani; Manoj Kumar Bhat; Murlidhar Tambe; Radha Chauhan; Rajesh Karyakarte; Rajiv Mohan Gupta; Santosh Karade; Sheldiner Pal Singh Shergill; Sourav Sen; Suvarna Joshi; Vasudevan Seshadri; Yogesh S Shouche                                                       |
| EPI_ISL_825034 to 825042                                                                                                                                                                                                                                                                                                                                                                                                                                                                                                                                                                                                                                                                                                                                                                                                                                                                                                                                                                                                                                                                                                                                                                                                                                                                                                                                                                                                                                                                                                                                                                                                                                                                                                                                                                                                                                                                                                                                                                                                                                                                                                                                                                                                                                                                                                                                                                  | B.J. Medical College and Civil hospital, Ahmedabad                                                  | Gujarat Biotechnology Research Centre                                                                                             | Afzal Ansari; Apurvashin Puvar; Chaitanya Joshi; Dinesh Kumar; Dipa Kinariwala; Janvi Raval; Kamlesh J Upadhyay; Labdhi Pandya; Madhvi Joshi; Nikha Trivedi; Nilima Shah; Nitin Savaliya; Pranay Shah; Ramesh Pandit; Sanjay Kapadia; Zarna Patel; Zuber Saiyed                                                                                  |
| EPI_ISL_995696, EPI_ISL_995708 to 995712, EPI_ISL_995724, EPI_ISL_995748, EPI_ISL_995763                                                                                                                                                                                                                                                                                                                                                                                                                                                                                                                                                                                                                                                                                                                                                                                                                                                                                                                                                                                                                                                                                                                                                                                                                                                                                                                                                                                                                                                                                                                                                                                                                                                                                                                                                                                                                                                                                                                                                                                                                                                                                                                                                                                                                                                                                                  | BANGALORE MEDICAL COLLEGE AND RESEARCH INSTITUTE                                                    | Department of Neurovirology, National Institute of Mental Health and Neurosciences (NIMHANS)                                      | Anita S Desai; Anson Kunjumon George; Chitra Pattabiraman; Darshan Sreenivas; Harsha.P.K; Nakka Vijay Kiran Reddy; Pramada Prasad; Risha Rasheed; V Ravi                                                                                                                                                                                         |
| EPI_ISL_747244, EPI_ISL_803901 to 803902, EPI_ISL_803904, EPI_ISL_803908, EPI_ISL_803911 to 803912, EPI_ISL_807158, EPI_ISL_825141 to 825143, EPI_ISL_825148, EPI_ISL_845874 to 845876, EPI_ISL_845878 to 845880, EPI_ISL_845883 to 845884, EPI_ISL_845887 to 845890, EPI_ISL_860189, EPI_ISL_860194 to 860195, EPI_ISL_860197, EPI_ISL_860199 to 860201, EPI_ISL_995173 to 995184, EPI_ISL_995704 to 995705, EPI_ISL_995715 to 995719, EPI_ISL_995725, EPI_ISL_995728 to 995729, EPI_ISL_995732, EPI_ISL_995735 to 995736, EPI_ISL_995739 to 995741, EPI_ISL_995746, EPI_ISL_995750 to 995752, EPI_ISL_995754 to 995757                                                                                                                                                                                                                                                                                                                                                                                                                                                                                                                                                                                                                                                                                                                                                                                                                                                                                                                                                                                                                                                                                                                                                                                                                                                                                                                                                                                                                                                                                                                                                                                                                                                                                                                                                                  |                                                                                                     |                                                                                                                                   |                                                                                                                                                                                                                                                                                                                                                  |
| see above                                                                                                                                                                                                                                                                                                                                                                                                                                                                                                                                                                                                                                                                                                                                                                                                                                                                                                                                                                                                                                                                                                                                                                                                                                                                                                                                                                                                                                                                                                                                                                                                                                                                                                                                                                                                                                                                                                                                                                                                                                                                                                                                                                                                                                                                                                                                                                                 | BBMP Urban PHC                                                                                      | Department of Neurovirology, National Institute of Mental Health and Neurosciences (NIMHANS)                                      | Anita S Desai; Anson Kunjumon George; Chitra Pattabiraman; Darshan Sreenivas; Harsha.P.K; Nakka Vijay Kiran Reddy; Pramada Prasad; Risha Rasheed; V Ravi                                                                                                                                                                                         |
| EPI_ISL_968250 to 968251, EPI_ISL_968253 to 968663, EPI_ISL_968665, EPI_ISL_968667, EPI_ISL_968669, EPI_ISL_968671 to 968725, EPI_ISL_968727 to 968771, EPI_ISL_968774 to 968806, EPI_ISL_968809, EPI_ISL_968811 to 968812, EPI_ISL_968814, EPI_ISL_968818, EPI_ISL_968823 to 968824, EPI_ISL_968830, EPI_ISL_968833, EPI_ISL_968836, EPI_ISL_968840, EPI_ISL_968845, EPI_ISL_968848, EPI_ISL_968852, EPI_ISL_968859, EPI_ISL_968862, EPI_ISL_968866, EPI_ISL_968870, EPI_ISL_968872, EPI_ISL_968875 to 968876, EPI_ISL_968880, EPI_ISL_968886, EPI_ISL_968888, EPI_ISL_968893, EPI_ISL_968895, EPI_ISL_968900, EPI_ISL_968906, EPI_ISL_968912, EPI_ISL_968915, EPI_ISL_968918, EPI_ISL_968921, EPI_ISL_968923, EPI_ISL_968928, EPI_ISL_968931 to 968940, EPI_ISL_968944 to 968954, EPI_ISL_968960, EPI_ISL_968962 to 968971, EPI_ISL_968973 to 968983, EPI_ISL_968991, EPI_ISL_969000, EPI_ISL_969006, EPI_ISL_969015, EPI_ISL_969022, EPI_ISL_969032 to 969033, EPI_ISL_969035 to 969040, EPI_ISL_969045, EPI_ISL_969055, EPI_ISL_969062, EPI_ISL_969070, EPI_ISL_969075 to 969130, EPI_ISL_969132 to 969217, EPI_ISL_969219 to 969226, EPI_ISL_969228 to 969244, EPI_ISL_969246 to 969257, EPI_ISL_969259 to 969289, EPI_ISL_969291 to 969296, EPI_ISL_969298 to 969331, EPI_ISL_969333 to 969364, EPI_ISL_969366 to 969396, EPI_ISL_969398 to 969453, EPI_ISL_969470, EPI_ISL_969499, EPI_ISL_969547, EPI_ISL_969590, EPI_ISL_969601, EPI_ISL_969604, EPI_ISL_969648, EPI_ISL_969676, EPI_ISL_969678, EPI_ISL_969680 to 969681, EPI_ISL_969684, EPI_ISL_969686 to 969687, EPI_ISL_969689, EPI_ISL_969692, EPI_ISL_969694, EPI_ISL_969696, EPI_ISL_969698, EPI_ISL_969700, EPI_ISL_969703, EPI_ISL_969705, EPI_ISL_969707, EPI_ISL_969709, EPI_ISL_969711, EPI_ISL_969713, EPI_ISL_969715, EPI_ISL_969717, EPI_ISL_969719, EPI_ISL_969721, EPI_ISL_969723, EPI_ISL_969725, EPI_ISL_969727, EPI_ISL_969729, EPI_ISL_969731, EPI_ISL_969733, EPI_ISL_969735, EPI_ISL_969737 to 969738, EPI_ISL_969743, EPI_ISL_969745, EPI_ISL_969747, EPI_ISL_969749, EPI_ISL_969751, EPI_ISL_969753, EPI_ISL_969755, EPI_ISL_969757 to 969758, EPI_ISL_969761, EPI_ISL_969763, EPI_ISL_969765, EPI_ISL_969767, EPI_ISL_969770, EPI_ISL_969772 to 969773, EPI_ISL_969775, EPI_ISL_969777 to 969778, EPI_ISL_969781, EPI_ISL_969783 to 969784, EPI_ISL_969787 to 969788, EPI_ISL_969790, EPI_ISL_969792, |                                                                                                     |                                                                                                                                   |                                                                                                                                                                                                                                                                                                                                                  |



EPI\_ISL\_969794, EPI\_ISL\_969796, EPI\_ISL\_969798, EPI\_ISL\_969800, EPI\_ISL\_969803, EPI\_ISL\_969805, EPI\_ISL\_969807, EPI\_ISL\_969810, EPI\_ISL\_969811, EPI\_ISL\_969814, EPI\_ISL\_969816, EPI\_ISL\_969818, EPI\_ISL\_969820, EPI\_ISL\_969822, EPI\_ISL\_969825, EPI\_ISL\_969827, EPI\_ISL\_969829, EPI\_ISL\_969830, EPI\_ISL\_969832, EPI\_ISL\_969835, EPI\_ISL\_969837, EPI\_ISL\_969839, EPI\_ISL\_969842, EPI\_ISL\_969844, EPI\_ISL\_969845, EPI\_ISL\_969847, EPI\_ISL\_969850, EPI\_ISL\_969851, EPI\_ISL\_969854, EPI\_ISL\_969855, EPI\_ISL\_969857, EPI\_ISL\_969860, EPI\_ISL\_969862, EPI\_ISL\_969864, EPI\_ISL\_969866, EPI\_ISL\_969870, EPI\_ISL\_969872, EPI\_ISL\_969874, EPI\_ISL\_969876, EPI\_ISL\_969878, EPI\_ISL\_969880, EPI\_ISL\_969882, EPI\_ISL\_969884, EPI\_ISL\_969885, EPI\_ISL\_969888, EPI\_ISL\_969890, EPI\_ISL\_969892, EPI\_ISL\_969894, EPI\_ISL\_969896, EPI\_ISL\_969898, EPI\_ISL\_969900, EPI\_ISL\_969902, EPI\_ISL\_969904, EPI\_ISL\_969905, EPI\_ISL\_969908, EPI\_ISL\_969910, EPI\_ISL\_969912, EPI\_ISL\_969913, EPI\_ISL\_969915, EPI\_ISL\_969918, EPI\_ISL\_969920, EPI\_ISL\_969922, EPI\_ISL\_969924, EPI\_ISL\_969927, EPI\_ISL\_969929, EPI\_ISL\_969931, EPI\_ISL\_969933, EPI\_ISL\_969935, EPI\_ISL\_969938, EPI\_ISL\_969941, EPI\_ISL\_969942, EPI\_ISL\_969944, EPI\_ISL\_969946, EPI\_ISL\_969949, EPI\_ISL\_969950, EPI\_ISL\_969953, EPI\_ISL\_969954, EPI\_ISL\_969957, EPI\_ISL\_969959, EPI\_ISL\_969960, EPI\_ISL\_969962, EPI\_ISL\_969964, EPI\_ISL\_969966, EPI\_ISL\_969968, EPI\_ISL\_969970, EPI\_ISL\_969972, EPI\_ISL\_969974, EPI\_ISL\_969976, EPI\_ISL\_969978, EPI\_ISL\_969980, EPI\_ISL\_969981, EPI\_ISL\_969982, EPI\_ISL\_969984, EPI\_ISL\_969986, EPI\_ISL\_969987, EPI\_ISL\_969988, EPI\_ISL\_969991, EPI\_ISL\_969993, EPI\_ISL\_969995, EPI\_ISL\_969997, EPI\_ISL\_969999, EPI\_ISL\_970001, EPI\_ISL\_970003, EPI\_ISL\_970006, EPI\_ISL\_970008, EPI\_ISL\_970010, EPI\_ISL\_970012, EPI\_ISL\_970014, EPI\_ISL\_970016, EPI\_ISL\_970018, EPI\_ISL\_970020, EPI\_ISL\_970021, EPI\_ISL\_970023, EPI\_ISL\_970025, EPI\_ISL\_970027, EPI\_ISL\_970029, EPI\_ISL\_970031, EPI\_ISL\_970034, EPI\_ISL\_970036, EPI\_ISL\_970038, EPI\_ISL\_970040, EPI\_ISL\_970042, EPI\_ISL\_970044, EPI\_ISL\_970046, EPI\_ISL\_970048, EPI\_ISL\_970051, EPI\_ISL\_970053, EPI\_ISL\_970054, EPI\_ISL\_970056, EPI\_ISL\_970058, EPI\_ISL\_970060, EPI\_ISL\_970062, EPI\_ISL\_970065, EPI\_ISL\_970067, EPI\_ISL\_970069, EPI\_ISL\_970071, EPI\_ISL\_970072, EPI\_ISL\_970074, EPI\_ISL\_970077, EPI\_ISL\_970078, EPI\_ISL\_970081, EPI\_ISL\_970083, EPI\_ISL\_970085, EPI\_ISL\_970088, EPI\_ISL\_970090, EPI\_ISL\_970093, EPI\_ISL\_970095, EPI\_ISL\_970097, EPI\_ISL\_970100, EPI\_ISL\_970102, EPI\_ISL\_970104, EPI\_ISL\_970106, EPI\_ISL\_970108, EPI\_ISL\_970110, EPI\_ISL\_970112, EPI\_ISL\_970114, EPI\_ISL\_970116, EPI\_ISL\_970118, EPI\_ISL\_970121, EPI\_ISL\_970123, EPI\_ISL\_970125, EPI\_ISL\_970127, EPI\_ISL\_970129, EPI\_ISL\_970131, EPI\_ISL\_970133, EPI\_ISL\_970135, EPI\_ISL\_970137, EPI\_ISL\_970139, EPI\_ISL\_970141, EPI\_ISL\_970143, EPI\_ISL\_970144, EPI\_ISL\_970146, EPI\_ISL\_970149, EPI\_ISL\_970151, EPI\_ISL\_970154, EPI\_ISL\_970156, EPI\_ISL\_970158, EPI\_ISL\_970159, EPI\_ISL\_970162, EPI\_ISL\_970164, EPI\_ISL\_970167, EPI\_ISL\_970169, EPI\_ISL\_970171, EPI\_ISL\_970174, EPI\_ISL\_970176, EPI\_ISL\_970178, EPI\_ISL\_970180, EPI\_ISL\_970182, EPI\_ISL\_970185, EPI\_ISL\_970187, EPI\_ISL\_970189, EPI\_ISL\_970191, EPI\_ISL\_970193, EPI\_ISL\_970194, EPI\_ISL\_970196, EPI\_ISL\_970199, EPI\_ISL\_970201, EPI\_ISL\_970203, EPI\_ISL\_970204, EPI\_ISL\_970207, EPI\_ISL\_970208, EPI\_ISL\_970210, EPI\_ISL\_970212, EPI\_ISL\_970214, EPI\_ISL\_970216, EPI\_ISL\_970218, EPI\_ISL\_970220, EPI\_ISL\_970222, EPI\_ISL\_970223, EPI\_ISL\_970226, EPI\_ISL\_970228, EPI\_ISL\_970230, EPI\_ISL\_970232, EPI\_ISL\_970234, EPI\_ISL\_970236, EPI\_ISL\_970238, EPI\_ISL\_970240, EPI\_ISL\_970241, EPI\_ISL\_970243, EPI\_ISL\_970246, EPI\_ISL\_970248, EPI\_ISL\_970250, EPI\_ISL\_970253, EPI\_ISL\_970255, EPI\_ISL\_970257, EPI\_ISL\_970259, EPI\_ISL\_970261, EPI\_ISL\_970263, EPI\_ISL\_970265, EPI\_ISL\_970267, EPI\_ISL\_970269, EPI\_ISL\_970271, EPI\_ISL\_970273, EPI\_ISL\_970276, EPI\_ISL\_970280, EPI\_ISL\_970282, EPI\_ISL\_970284, EPI\_ISL\_970286, EPI\_ISL\_970289, EPI\_ISL\_970290, EPI\_ISL\_970293, EPI\_ISL\_970294, EPI\_ISL\_970296, EPI\_ISL\_970298, EPI\_ISL\_970300, EPI\_ISL\_970302, EPI\_ISL\_970304, EPI\_ISL\_970306, EPI\_ISL\_970308, EPI\_ISL\_970310, EPI\_ISL\_970311, EPI\_ISL\_970313, EPI\_ISL\_970315, EPI\_ISL\_970317, EPI\_ISL\_970319, EPI\_ISL\_970321, EPI\_ISL\_970323, EPI\_ISL\_970325, EPI\_ISL\_970327, EPI\_ISL\_970329, EPI\_ISL\_970331, EPI\_ISL\_970333, EPI\_ISL\_970335, EPI\_ISL\_970336, EPI\_ISL\_970339, EPI\_ISL\_970341, EPI\_ISL\_970343, EPI\_ISL\_970345, EPI\_ISL\_970347, EPI\_ISL\_970349, EPI\_ISL\_970351, EPI\_ISL\_970353, EPI\_ISL\_970355, EPI\_ISL\_970357, EPI\_ISL\_970359, EPI\_ISL\_970361, EPI\_ISL\_970363, EPI\_ISL\_970365, EPI\_ISL\_970367, EPI\_ISL\_970369, EPI\_ISL\_970371, EPI\_ISL\_970373, EPI\_ISL\_970375, EPI\_ISL\_970377, EPI\_ISL\_970379, EPI\_ISL\_970381, EPI\_ISL\_970383, EPI\_ISL\_970385, EPI\_ISL\_970387, EPI\_ISL\_970389, EPI\_ISL\_970391, EPI\_ISL\_970393, EPI\_ISL\_970395, EPI\_ISL\_970397, EPI\_ISL\_970399, EPI\_ISL\_970401, EPI\_ISL\_970403, EPI\_ISL\_970405, EPI\_ISL\_970407, EPI\_ISL\_970408, EPI\_ISL\_970410, EPI\_ISL\_970413, EPI\_ISL\_970414, EPI\_ISL\_970417, EPI\_ISL\_970418, EPI\_ISL\_970420, EPI\_ISL\_970423, EPI\_ISL\_970425, EPI\_ISL\_970427, EPI\_ISL\_970429, EPI\_ISL\_970431, EPI\_ISL\_970433, EPI\_ISL\_970434, EPI\_ISL\_970437, EPI\_ISL\_970438, EPI\_ISL\_970440, EPI\_ISL\_970442, EPI\_ISL\_970445, EPI\_ISL\_970447, EPI\_ISL\_970449, EPI\_ISL\_970451, EPI\_ISL\_970453, EPI\_ISL\_970455, EPI\_ISL\_970456, EPI\_ISL\_970458, EPI\_ISL\_970459, EPI\_ISL\_970461, EPI\_ISL\_970463, EPI\_ISL\_970465, EPI\_ISL\_970467, EPI\_ISL\_970469, EPI\_ISL\_970471, EPI\_ISL\_970473, EPI\_ISL\_970475, EPI\_ISL\_970477, EPI\_ISL\_970479, EPI\_ISL\_970481, EPI\_ISL\_970482, EPI\_ISL\_970484, EPI\_ISL\_970485, EPI\_ISL\_970487, EPI\_ISL\_970489, EPI\_ISL\_970491, EPI\_ISL\_970494, EPI\_ISL\_970496, EPI\_ISL\_970498, EPI\_ISL\_970501, EPI\_ISL\_970503, EPI\_ISL\_970505, EPI\_ISL\_970507, EPI\_ISL\_970509, EPI\_ISL\_970511, EPI\_ISL\_970514, EPI\_ISL\_970516, EPI\_ISL\_970518, EPI\_ISL\_970520, EPI\_ISL\_970522, EPI\_ISL\_970524, EPI\_ISL\_970526, EPI\_ISL\_970528, EPI\_ISL\_970531, EPI\_ISL\_970534, EPI\_ISL\_970536, EPI\_ISL\_970538, EPI\_ISL\_970539, EPI\_ISL\_970542, EPI\_ISL\_970544, EPI\_ISL\_970545, EPI\_ISL\_970547, EPI\_ISL\_970549, EPI\_ISL\_970550, EPI\_ISL\_970552, EPI\_ISL\_970554, EPI\_ISL\_970556, EPI\_ISL\_970557, EPI\_ISL\_970559, EPI\_ISL\_970561, EPI\_ISL\_970563, EPI\_ISL\_970565, EPI\_ISL\_970567, EPI\_ISL\_970570, EPI\_ISL\_970572, EPI\_ISL\_970574, EPI\_ISL\_970576, EPI\_ISL\_970578, EPI\_ISL\_970580, EPI\_ISL\_970582, EPI\_ISL\_970584, EPI\_ISL\_970586, EPI\_ISL\_970588, EPI\_ISL\_970590, EPI\_ISL\_970592, EPI\_ISL\_970594, EPI\_ISL\_970596, EPI\_ISL\_970598, EPI\_ISL\_970600, EPI\_ISL\_970603, EPI\_ISL\_970604, EPI\_ISL\_970606, EPI\_ISL\_970608, EPI\_ISL\_970610, EPI\_ISL\_970611, EPI\_ISL\_970613, EPI\_ISL\_970615, EPI\_ISL\_970617, EPI\_ISL\_970620, EPI\_ISL\_970622, EPI\_ISL\_970624, EPI\_ISL\_970626, EPI\_ISL\_970627, EPI\_ISL\_970629, EPI\_ISL\_970631, EPI\_ISL\_970634, EPI\_ISL\_970636, EPI\_ISL\_970638, EPI\_ISL\_970640, EPI\_ISL\_970642, EPI\_ISL\_970644, EPI\_ISL\_970646, EPI\_ISL\_970649, EPI\_ISL\_970651, EPI\_ISL\_970653, EPI\_ISL\_970655, EPI\_ISL\_970657, EPI\_ISL\_970659, EPI\_ISL\_970662, EPI\_ISL\_970663, EPI\_ISL\_970665, EPI\_ISL\_970667, EPI\_ISL\_970669, EPI\_ISL\_970671, EPI\_ISL\_970672, EPI\_ISL\_970674, EPI\_ISL\_970676, EPI\_ISL\_970678, EPI\_ISL\_970682, EPI\_ISL\_970684, EPI\_ISL\_970686, EPI\_ISL\_970688, EPI\_ISL\_970691, EPI\_ISL\_970693, EPI\_ISL\_970695, EPI\_ISL\_970696, EPI\_ISL\_970698, EPI\_ISL\_970700, EPI\_ISL\_970702, EPI\_ISL\_970705, EPI\_ISL\_970707, EPI\_ISL\_970710, EPI\_ISL\_970712, EPI\_ISL\_970714, EPI\_ISL\_970716, EPI\_ISL\_970718, EPI\_ISL\_970721, EPI\_ISL\_970723, EPI\_ISL\_970725, EPI\_ISL\_970728, EPI\_ISL\_970730, EPI\_ISL\_970731, EPI\_ISL\_970733, EPI\_ISL\_970735, EPI\_ISL\_970737, EPI\_ISL\_970740, EPI\_ISL\_970742, EPI\_ISL\_970743, EPI\_ISL\_970745, EPI\_ISL\_970748, EPI\_ISL\_970750, EPI\_ISL\_970752, EPI\_ISL\_970754, EPI\_ISL\_970756, EPI\_ISL\_970759, EPI\_ISL\_970761, EPI\_ISL\_970763, EPI\_ISL\_970765, EPI\_ISL\_970767, EPI\_ISL\_970769, EPI\_ISL\_970771, EPI\_ISL\_970773, EPI\_ISL\_970775, EPI\_ISL\_970777, EPI\_ISL\_970778, EPI\_ISL\_970780, EPI\_ISL\_970783, EPI\_ISL\_970785, EPI\_ISL\_970787, EPI\_ISL\_970789, EPI\_ISL\_970791, EPI\_ISL\_970793, EPI\_ISL\_970795, EPI\_ISL\_970798, EPI\_ISL\_970799, EPI\_ISL\_970801, EPI\_ISL\_970804, EPI\_ISL\_970806, EPI\_ISL\_970809, EPI\_ISL\_970818, EPI\_ISL\_970840, EPI\_ISL\_970856, EPI\_ISL\_970878, EPI\_ISL\_970902, EPI\_ISL\_970931, EPI\_ISL\_970947, EPI\_ISL\_970965, EPI\_ISL\_970995, EPI\_ISL\_971012, EPI\_ISL\_971036, EPI\_ISL\_971046, EPI\_ISL\_971049, EPI\_ISL\_971101, EPI\_ISL\_971104, EPI\_ISL\_971105, EPI\_ISL\_971107, EPI\_ISL\_971154, EPI\_ISL\_971161, EPI\_ISL\_971166, EPI\_ISL\_971171, EPI\_ISL\_971176, EPI\_ISL\_971182, EPI\_ISL\_971187, EPI\_ISL\_971189, EPI\_ISL\_971192, EPI\_ISL\_971196, EPI\_ISL\_971199, EPI\_ISL\_971202, EPI\_ISL\_971205, EPI\_ISL\_971208, EPI\_ISL\_971212, EPI\_ISL\_971216, EPI\_ISL\_971219, EPI\_ISL\_971221, EPI\_ISL\_971223, EPI\_ISL\_971225, EPI\_ISL\_971227, EPI\_ISL\_971230, EPI\_ISL\_971233, EPI\_ISL\_971238, EPI\_ISL\_971240, EPI\_ISL\_971243, EPI\_ISL\_971245, EPI\_ISL\_971249, EPI\_ISL\_971253, EPI\_ISL\_971256, EPI\_ISL\_971259, EPI\_ISL\_971262, EPI\_ISL\_971265, EPI\_ISL\_971268, EPI\_ISL\_971271, EPI\_ISL\_971274, EPI\_ISL\_971276, EPI\_ISL\_971278, EPI\_ISL\_971282, EPI\_ISL\_971285, EPI\_ISL\_971291, EPI\_ISL\_971294, EPI\_ISL\_971298, EPI\_ISL\_971300, EPI\_ISL\_971303, EPI\_ISL\_971305, EPI\_ISL\_971308, EPI\_ISL\_971311, EPI\_ISL\_971314, EPI\_ISL\_971317, EPI\_ISL\_971321, EPI\_ISL\_971325, EPI\_ISL\_971328, EPI\_ISL\_971331, EPI\_ISL\_971334, EPI\_ISL\_971337, EPI\_ISL\_971340, EPI\_ISL\_971342, EPI\_ISL\_971344, EPI\_ISL\_971348, EPI\_ISL\_971351, EPI\_ISL\_971354, EPI\_ISL\_971356, EPI\_ISL\_971359, EPI\_ISL\_971362, EPI\_ISL\_971367, EPI\_ISL\_971369, EPI\_ISL\_971372, EPI\_ISL\_971374, EPI\_ISL\_971377, EPI\_ISL\_971380, EPI\_ISL\_971383, EPI\_ISL\_971386, EPI\_ISL\_971390, EPI\_ISL\_971393, EPI\_ISL\_971396, EPI\_ISL\_971399, EPI\_ISL\_971403, EPI\_ISL\_971406, EPI\_ISL\_971409, EPI\_ISL\_971412, EPI\_ISL\_971414, EPI\_ISL\_971416, EPI\_ISL\_971421, EPI\_ISL\_971424, EPI\_ISL\_971427, EPI\_ISL\_971430, EPI\_ISL\_971432, EPI\_ISL\_971433, EPI\_ISL\_971435, EPI\_ISL\_971438, EPI\_ISL\_971440, EPI\_ISL\_971442, EPI\_ISL\_971444, EPI\_ISL\_971446, EPI\_ISL\_971448, EPI\_ISL\_971449, EPI\_ISL\_971453, EPI\_ISL\_971454, EPI\_ISL\_971457, EPI\_ISL\_971459, EPI\_ISL\_973477, EPI\_ISL\_973479, EPI\_ISL\_973481, EPI\_ISL\_973483, EPI\_ISL\_973485, EPI\_ISL\_973488, EPI\_ISL\_973490, EPI\_ISL\_973491, EPI\_ISL\_973494, EPI\_ISL\_973496, EPI\_ISL\_973498, EPI\_ISL\_973500, EPI\_ISL\_973502, EPI\_ISL\_973504, EPI\_ISL\_973506, EPI\_ISL\_973507, EPI\_ISL\_973509, EPI\_ISL\_973511, EPI\_ISL\_973513, EPI\_ISL\_973515, EPI\_ISL\_973517, EPI\_ISL\_973520, EPI\_ISL\_973522, EPI\_ISL\_973525, EPI\_ISL\_973528, EPI\_ISL\_973530, EPI\_ISL\_973531, EPI\_ISL\_973534, EPI\_ISL\_973536, EPI\_ISL\_973537, EPI\_ISL\_973541, EPI\_ISL\_973543, EPI\_ISL\_973545, EPI\_ISL\_973547, EPI\_ISL\_973549, EPI\_ISL\_973552, EPI\_ISL\_973554, EPI\_ISL\_973556, EPI\_ISL\_973558, EPI\_ISL\_973560, EPI\_ISL\_973562, EPI\_ISL\_973564, EPI\_ISL\_973565, EPI\_ISL\_973567, EPI\_ISL\_973569, EPI\_ISL\_973571, EPI\_ISL\_973573, EPI\_ISL\_973575, EPI\_ISL\_973577, EPI\_ISL\_973579, EPI\_ISL\_973581, EPI\_ISL\_973583, EPI\_ISL\_973585, EPI\_ISL\_973587, EPI\_ISL\_973588, EPI\_ISL\_973590, EPI\_ISL\_973592, EPI\_ISL\_973594, EPI\_ISL\_973596, EPI\_ISL\_973598, EPI\_ISL\_973600, EPI\_ISL\_973602, EPI\_ISL\_973604, EPI\_ISL\_973606, EPI\_ISL\_973608, EPI\_ISL\_973610, EPI\_ISL\_973612, EPI\_ISL\_973613, EPI\_ISL\_973617, EPI\_ISL\_973619, EPI\_ISL\_973620, EPI\_ISL\_973623, EPI\_ISL\_973625, EPI\_ISL\_973627, EPI\_ISL\_973630, EPI\_ISL\_973632, EPI\_ISL\_973634, EPI\_ISL\_973637, EPI\_ISL\_973639, EPI\_ISL\_973642, EPI\_ISL\_973643, EPI\_ISL\_973646, EPI\_ISL\_973649, EPI\_ISL\_973650, EPI\_ISL\_973653, EPI\_ISL\_973655, EPI\_ISL\_973657, EPI\_ISL\_973659, EPI\_ISL\_973661, EPI\_ISL\_973663, EPI\_ISL\_973665, EPI\_ISL\_973667, EPI\_ISL\_973669, EPI\_ISL\_973671, EPI\_ISL\_973673, EPI\_ISL\_973675, EPI\_ISL\_973678, EPI\_ISL\_973679, EPI\_ISL\_973681, EPI\_ISL\_973683, EPI\_ISL\_973685, EPI\_ISL\_973687, EPI\_ISL\_973689, EPI\_ISL\_973690, EPI\_ISL\_973692, EPI\_ISL\_973695, EPI\_ISL\_973697, EPI\_ISL\_973700, EPI\_ISL\_973702, EPI\_ISL\_973705, EPI\_ISL\_973707, EPI\_ISL\_973709, EPI\_ISL\_973712, EPI\_ISL\_973714, EPI\_ISL\_973716, EPI\_ISL\_973718, EPI\_ISL\_973719, EPI\_ISL\_973721, EPI\_ISL\_973725, EPI\_ISL\_973727, EPI\_ISL\_973729, EPI\_ISL\_973731, EPI\_ISL\_973733, EPI\_ISL\_973736, EPI\_ISL\_973737, EPI\_ISL\_973740, EPI\_ISL\_973742, EPI\_ISL\_973745, EPI\_ISL\_973747, EPI\_ISL\_973749, EPI\_ISL\_973751, EPI\_ISL\_973753, EPI\_ISL\_973755, EPI\_ISL\_973758, EPI\_ISL\_973760, EPI\_ISL\_973764, EPI\_ISL\_973767, EPI\_ISL\_973769, EPI\_ISL\_973771, EPI\_ISL\_973775, EPI\_ISL\_973776, EPI\_ISL\_973779, EPI\_ISL\_973781, EPI\_ISL\_973783, EPI\_ISL\_973785, EPI\_ISL\_973787, EPI\_ISL\_973789, EPI\_ISL\_973791, EPI\_ISL\_973793, EPI\_ISL\_973795, EPI\_ISL\_973797, EPI\_ISL\_973800, EPI\_ISL\_973802, EPI\_ISL\_973805, EPI\_ISL\_973807, EPI\_ISL\_973810, EPI\_ISL\_973813, EPI\_ISL\_973815, EPI\_ISL\_973818, EPI\_ISL\_973821, EPI\_ISL\_973823, EPI\_ISL\_973826, EPI\_ISL\_973828, EPI\_ISL\_973830, EPI\_ISL\_973832, EPI\_ISL\_973834, EPI\_ISL\_973837, EPI\_ISL\_974149, EPI\_ISL\_974151, EPI\_ISL\_974154, EPI\_ISL\_974446, EPI\_ISL\_974852, EPI\_ISL\_974854, EPI\_ISL\_975774, EPI\_ISL\_975776, EPI\_ISL\_976304, EPI\_ISL\_976306, EPI\_ISL\_976815, EPI\_ISL\_976817, EPI\_ISL\_976892, EPI\_ISL\_982299

|                                                                                                                                                                                                                                  |                                                       |                                                                                              |                                                                                                                                                                                                                   |
|----------------------------------------------------------------------------------------------------------------------------------------------------------------------------------------------------------------------------------|-------------------------------------------------------|----------------------------------------------------------------------------------------------|-------------------------------------------------------------------------------------------------------------------------------------------------------------------------------------------------------------------|
| see above                                                                                                                                                                                                                        | BCCDC Public Health Laboratory                        | BCCDC Public Health Laboratory                                                               | Ana Pacagnella; Corrine Ng; Dan Fornika; John Tyson; Kim Macdonald; Kimia Kamelian; Linda Hoang; Loretta Janz; Mel Kraiden; Prystajczyk Natalie; Robert Azana; Robert Azana Terry Snutch; Shannon Russell         |
| EPI_ISL_955248                                                                                                                                                                                                                   | BCO SANGRE CM LA RAZA                                 | BIOBANCO / COCTI                                                                             | Arias C; Borja-Aburto VH; Grajales-Muñiz C; Grande R; Isa P; López S; Muñoz-Medina JE; Ochoa Carrera LA; Rojas-Mendoza T; Santacruz Tinoco CE; Sánchez A; Taboada B                                               |
| EPI_ISL_850945                                                                                                                                                                                                                   | BCSIR                                                 | Genomic Research Lab, BCSIR                                                                  | Abu Sayeed Mohammad Mahmud; Barna Goswami; Eshrah Osman; Iffat Jahan; Md. Ashahan Habib; Md. Mukhtar Hasan Sarkar; Md. Saddam Hossain; Md. Salim Khan.; Mahammad Samir Uzzaman; Shahina Akter; Tanjina Akbar Hanu |
| EPI_ISL_804981 to 804984, EPI_ISL_830720 to 830723, EPI_ISL_854350 to 854367, EPI_ISL_854369, EPI_ISL_854372, EPI_ISL_861175 to 861182, EPI_ISL_861185, EPI_ISL_861187, EPI_ISL_861210 to 861232, EPI_ISL_896297, EPI_ISL_896300 | BIO-REFERENCE LABORATORIES                            | Wadsworth Center, New York State Department of Health                                        | Alexis Russel; Daryl M. Lamson; Erasmus Schneider; Erica Lasek-Nesselquist; John Kelly; Jonathan Plitnick; Kirsten St. George; Matthew Shudt; Melissa A Leisner; Navjot Singh                                     |
| EPI_ISL_767648, EPI_ISL_767650 to 767653, EPI_ISL_767665 to 767680, EPI_ISL_802430, EPI_ISL_802445 to 802447, EPI_ISL_802790 to 802793, EPI_ISL_804946                                                                           | BIO-REFERENCE LABORATORIES                            | Wadsworth Center, New York State Department of Health                                        | Alexis Russel; Daryl M. Lamson; Erasmus Schneider; Erica Lasek-Nesselquist; John Kelly; Jonathan Plitnick; Kirsten St. George; Matthew Shudt; Melissa A Leisner; Navjot Singh; Sara Griesemer                     |
| EPI_ISL_830214, EPI_ISL_854446, EPI_ISL_883425, EPI_ISL_883429 to 883430                                                                                                                                                         | BOSTON HEART DIAGNOSTICS CORP                         | Wadsworth Center, New York State Department of Health                                        | Alexis Russel; Daryl M. Lamson; Erasmus Schneider; Erica Lasek-Nesselquist; John Kelly; Jonathan Plitnick; Kirsten St. George; Matthew Shudt; Melissa A Leisner; Navjot Singh                                     |
| EPI_ISL_918496                                                                                                                                                                                                                   | BSWMC-Marble Falls                                    | BSWMC-Temple Molecular                                                                       | Ari Rao; Kimberly Walker; Linden Morales; Shelby Hendrickson                                                                                                                                                      |
| EPI_ISL_859561 to 860091                                                                                                                                                                                                         | BTC, Khalifa University                               | BTC, Khalifa University                                                                      | Al Safar et al                                                                                                                                                                                                    |
| EPI_ISL_884857 to 884863                                                                                                                                                                                                         | Bacteriology, Georgia Public Health Laboratory (GPHL) | Bacteriology, Georgia Public Health Laboratory (GPHL)                                        | Dixey, C.; Edwards, J.; Parrott, T.; Reeves, S.                                                                                                                                                                   |
| EPI_ISL_791988                                                                                                                                                                                                                   | Balai Besar POM Semarang                              | National Institute of Health Research and Development                                        | AA; Aryanti; HA; HD; Ikawati; KD; KNA; N; Nugraha; Pangesti; Pawestri; Puspa; Puspandari; Setiawaty; Soekarso; Subangkit; T; V                                                                                    |
| EPI_ISL_775599                                                                                                                                                                                                                   | Balai Besar Veteriner Maros                           | National Institute of Health Research and Development                                        | AA; HA; HD; Ikawati; KD; KNA; Mangidi; Muflihanah; N; Nugraha; Pangesti; Pawestri; Puspa; Puspandari; R; Setiawaty; Soekarso; Subangkit; T; V                                                                     |
| EPI_ISL_753698                                                                                                                                                                                                                   | Balai Besar Veteriner Maros, Sulawesi Selatan         | National Institute of Health Research and Development                                        | AA; HA; HD; Ikawati; KD; KNA; Mangidi; Muflihanah; N; Nugraha; Pangesti; Pawestri; Puspa; Puspandari; R; Setiawaty; Soekarso; Subangkit; T; V                                                                     |
| EPI_ISL_791978                                                                                                                                                                                                                   | Balai Labkes Lampung                                  | National Institute of Health Research and Development                                        | AA; HA; HD; Ikawati; KD; KNA; L; N; Nugraha; Pangesti; Pawestri; Puspa; Puspandari; Setiawaty; Soekarso; Subangkit; T; V; Yurina                                                                                  |
| EPI_ISL_791981                                                                                                                                                                                                                   | Balai Litbang Aceh                                    | National Institute of Health Research and Development                                        | AA; E; F; Fitriah; HA; HD; Ichwansyah; Ikawati; KD; KNA; N; Nugraha; Pangesti; Pawestri; Puspa; Puspandari; Setiawaty; Soekarso; Subangkit; T; V                                                                  |
| EPI_ISL_775594                                                                                                                                                                                                                   | Balitwet Lampung                                      | National Institute of Health Research and Development                                        | AA; E; EA; HA; HD; Ikawati; KD; KNA; N; Nugraha; Pangesti; Pawestri; Puspa; Puspandari; Saswiyanti; Setiawaty; Soekarso; Srihanto; Subangkit; T; V                                                                |
| EPI_ISL_825144, EPI_ISL_860182 to 860186                                                                                                                                                                                         | Bangalore Medical College and Research Institute      | Department of Neurovirology, National Institute of Mental Health and Neurosciences (NIMHANS) | Anita S Desai; Anson Kunjumon George; Chitra Pattabiraman; Darshan Sreenivas; Nakka Vijay Kiran Reddy; Pramada Prasad; Risha Rasheed; V Ravi                                                                      |
| EPI_ISL_912162                                                                                                                                                                                                                   | Baptist Medical Center                                | Grubaugh Lab - Yale School of Public Health                                                  | Anderson Brito; Anne Wylie; Annie Watkins; Chaney Kalnich; Chantal Vogels; Isabel Ott; Joseph Fauver; Mallery Breban; Mary Petrone; Nathan Grubaugh; Tara Alpert                                                  |
| EPI_ISL_710613, EPI_ISL_732657, EPI_ISL_766645                                                                                                                                                                                   | Barnakuten                                            | The Public Health Agency of Sweden                                                           | Department of Microbiology; The Public Health Agency of Sweden                                                                                                                                                    |
| EPI_ISL_855549                                                                                                                                                                                                                   | Barts Health NHS Trust                                | Barts Health NHS Trust                                                                       | BROAD; Beatrix; CUTINO-MOGUEL; Claire; David; Dola; HARRINGTON; KELE; KULASEGARAN-SHYLINI; Maria-Teresa; OWOYEMI; Raghavendran                                                                                    |
| EPI_ISL_842793 to 843150, EPI_ISL_865488 to                                                                                                                                                                                      | Barts Health NHS Trust                                | COVID-19 Genomics UK (COG-UK) Consortium                                                     | BROAD; Beatrix; CUTINO-MOGUEL; Claire; David; Dola; HARRINGTON; KELE; KULASEGARAN-SHYLINI; Maria-Teresa; OWOYEMI; Raghavendran;                                                                                   |

|                                                                                                                                                                                                                                                                                                                                                                                                                                                                                                                                                                                                                                                                                                                                                                                                                                                                                                                                                                                                                                                                                                                                                                                                                                                                                                                                                                                                                                                                                                                                                                                                                                      |                                                                    |                                                                                                                        |                                                                                                                                                                                                |         |
|--------------------------------------------------------------------------------------------------------------------------------------------------------------------------------------------------------------------------------------------------------------------------------------------------------------------------------------------------------------------------------------------------------------------------------------------------------------------------------------------------------------------------------------------------------------------------------------------------------------------------------------------------------------------------------------------------------------------------------------------------------------------------------------------------------------------------------------------------------------------------------------------------------------------------------------------------------------------------------------------------------------------------------------------------------------------------------------------------------------------------------------------------------------------------------------------------------------------------------------------------------------------------------------------------------------------------------------------------------------------------------------------------------------------------------------------------------------------------------------------------------------------------------------------------------------------------------------------------------------------------------------|--------------------------------------------------------------------|------------------------------------------------------------------------------------------------------------------------|------------------------------------------------------------------------------------------------------------------------------------------------------------------------------------------------|---------|
| 865583, EPI_ISL_919779 to 919855,<br>EPI_ISL_949748 to 949784, EPI_ISL_997615 to<br>997676                                                                                                                                                                                                                                                                                                                                                                                                                                                                                                                                                                                                                                                                                                                                                                                                                                                                                                                                                                                                                                                                                                                                                                                                                                                                                                                                                                                                                                                                                                                                           |                                                                    |                                                                                                                        |                                                                                                                                                                                                | SHYLINI |
| EPI_ISL_833333 to 833334, EPI_ISL_833340 to<br>833341                                                                                                                                                                                                                                                                                                                                                                                                                                                                                                                                                                                                                                                                                                                                                                                                                                                                                                                                                                                                                                                                                                                                                                                                                                                                                                                                                                                                                                                                                                                                                                                | Batangas City Health Office                                        | Research Institute for Tropical Medicine                                                                               | Catalino Demetria; Daria Manalo; Edelwisa Mercado; Francisco Gerardo Polotan; Hannah Leah Morito; Inez Andrea Medado; John Leonard Chan; Kirstyn Brunker; Ma Angelica Tujan; Othoniel Jan Onza |         |
| EPI_ISL_966285                                                                                                                                                                                                                                                                                                                                                                                                                                                                                                                                                                                                                                                                                                                                                                                                                                                                                                                                                                                                                                                                                                                                                                                                                                                                                                                                                                                                                                                                                                                                                                                                                       | Baylor Scott & White - Irving                                      | Baylor Scott & White - Temple                                                                                          | Ari Rao; Kimberly Walker; Linden Morales; Marcus Volz; Shelby Hendrickson                                                                                                                      |         |
| EPI_ISL_966310, EPI_ISL_966313                                                                                                                                                                                                                                                                                                                                                                                                                                                                                                                                                                                                                                                                                                                                                                                                                                                                                                                                                                                                                                                                                                                                                                                                                                                                                                                                                                                                                                                                                                                                                                                                       | Baylor Scott & White - Temple                                      | Baylor Scott & White - Temple                                                                                          | Ari Rao; Kimberly Walker; Linden Morales; Marcus Volz; Shelby Hendrickson                                                                                                                      |         |
| EPI_ISL_925208, EPI_ISL_943550                                                                                                                                                                                                                                                                                                                                                                                                                                                                                                                                                                                                                                                                                                                                                                                                                                                                                                                                                                                                                                                                                                                                                                                                                                                                                                                                                                                                                                                                                                                                                                                                       | Baylor Scott & White-Temple                                        | Baylor Scott & White-Temple                                                                                            | Ari Rao; Kimberly Walker; Linden Morales; Marcus Volz; Shelby Hendrickson                                                                                                                      |         |
| EPI_ISL_700553                                                                                                                                                                                                                                                                                                                                                                                                                                                                                                                                                                                                                                                                                                                                                                                                                                                                                                                                                                                                                                                                                                                                                                                                                                                                                                                                                                                                                                                                                                                                                                                                                       | Beaufort West CDC wc BWC                                           | NHLS/UCT                                                                                                               | Arash Iranzadeh; Bruna Galvao; Carolyn Williamson; Deelan Doolabh; Diana Hardie; Innocent Mudau; Kruger Marais; Lynn Tyers; Marvin Hsiao; Stephen Korsman                                      |         |
| EPI_ISL_640031, EPI_ISL_640047,<br>EPI_ISL_700453                                                                                                                                                                                                                                                                                                                                                                                                                                                                                                                                                                                                                                                                                                                                                                                                                                                                                                                                                                                                                                                                                                                                                                                                                                                                                                                                                                                                                                                                                                                                                                                    | Beaufort West Hospital wc BWH                                      | NHLS/UCT                                                                                                               | Arash Iranzadeh; Bruna Galvao; Carolyn Williamson; Deelan Doolabh; Diana Hardie; Innocent Mudau; Kruger Marais; Lynn Tyers; Marvin Hsiao; Stephen Korsman                                      |         |
| EPI_ISL_960141                                                                                                                                                                                                                                                                                                                                                                                                                                                                                                                                                                                                                                                                                                                                                                                                                                                                                                                                                                                                                                                                                                                                                                                                                                                                                                                                                                                                                                                                                                                                                                                                                       | Beaufort West Hospital wc BWH                                      | National Health Laboratory Service/UCT                                                                                 | Arash Iranzadeh; Bruna Galvao; Carolyn Williamson; Deelan Doolabh; Diana Hardie; Innocent Mudau; Kruger Marais; Lynn Tyers; Marvin Hsiao; Stephen Korsman                                      |         |
| EPI_ISL_631580, EPI_ISL_631765, EPI_ISL_631804, EPI_ISL_631838, EPI_ISL_632068 to 632069, EPI_ISL_632098, EPI_ISL_632121, EPI_ISL_632136                                                                                                                                                                                                                                                                                                                                                                                                                                                                                                                                                                                                                                                                                                                                                                                                                                                                                                                                                                                                                                                                                                                                                                                                                                                                                                                                                                                                                                                                                             |                                                                    |                                                                                                                        |                                                                                                                                                                                                |         |
| see above                                                                                                                                                                                                                                                                                                                                                                                                                                                                                                                                                                                                                                                                                                                                                                                                                                                                                                                                                                                                                                                                                                                                                                                                                                                                                                                                                                                                                                                                                                                                                                                                                            | Bellevue Hospital Center                                           | New York City Public Health Laboratory                                                                                 | Jade Wang; et al.                                                                                                                                                                              |         |
| EPI_ISL_845891 to 845892                                                                                                                                                                                                                                                                                                                                                                                                                                                                                                                                                                                                                                                                                                                                                                                                                                                                                                                                                                                                                                                                                                                                                                                                                                                                                                                                                                                                                                                                                                                                                                                                             | Benaroya Research Institute                                        | UW Virology Lab                                                                                                        | Alexander Greninger; Hong Xie; Keith R Jerome; Lasata Shrestha; Meei-Li Huang; Michelle Lin; Pavitra Roychoudhury                                                                              |         |
| EPI_ISL_780382 to 780410, EPI_ISL_783850                                                                                                                                                                                                                                                                                                                                                                                                                                                                                                                                                                                                                                                                                                                                                                                                                                                                                                                                                                                                                                                                                                                                                                                                                                                                                                                                                                                                                                                                                                                                                                                             | Bermuda Government Molecular Diagnostics Laboratory (MDL)          | Respiratory Virus Unit, National Infection Service, Public Health England                                              | Dr Ayoola Oyinloye (Bermuda); Dr Carika Weldon (Bermuda); PHE Covid Sequencing Team                                                                                                            |         |
| EPI_ISL_833405 to 833412                                                                                                                                                                                                                                                                                                                                                                                                                                                                                                                                                                                                                                                                                                                                                                                                                                                                                                                                                                                                                                                                                                                                                                                                                                                                                                                                                                                                                                                                                                                                                                                                             | Beverly Hospital                                                   | Los Angeles County PHL                                                                                                 | P. Hemarajata et al.                                                                                                                                                                           |         |
| EPI_ISL_735495                                                                                                                                                                                                                                                                                                                                                                                                                                                                                                                                                                                                                                                                                                                                                                                                                                                                                                                                                                                                                                                                                                                                                                                                                                                                                                                                                                                                                                                                                                                                                                                                                       | Bhashabir M A Wadud RT-PCR Lab, Chandpur                           | Central Biological Research Laboratory and Department of Biochemistry and Molecular Biology                            | H. M. Abdullah Al Masud; Imam Hossen; Md. Arif Hossain; Md. Imranul Hoq; Md. Khondakar Raziur Rahman; Md. Omer Faruq; Mohammad Omar Faruque; Robiul Hasan Bhuiyan; Sajib Rudra; Shanta Paul    |         |
| EPI_ISL_955231 to 955232, EPI_ISL_955258 to<br>955260                                                                                                                                                                                                                                                                                                                                                                                                                                                                                                                                                                                                                                                                                                                                                                                                                                                                                                                                                                                                                                                                                                                                                                                                                                                                                                                                                                                                                                                                                                                                                                                | BioReference Lab                                                   | NJ Public Health and Environmental Laboratories                                                                        | Byeong Jeong; Dana Woell; Lindsey Bodnar; Shiv Verma                                                                                                                                           |         |
| EPI_ISL_861865 to 861866, EPI_ISL_896095                                                                                                                                                                                                                                                                                                                                                                                                                                                                                                                                                                                                                                                                                                                                                                                                                                                                                                                                                                                                                                                                                                                                                                                                                                                                                                                                                                                                                                                                                                                                                                                             | Bioanalytika AG                                                    | University Hospital Basel, Clinical Bacteriology                                                                       | Adrian Egli; Adrian Hürri; Alfredo Mari; Hans Hirsch; Helena MB Seth-Smith; Julia Bielicki; Karoline Leuzinger; Madlen Stange; Manuel Battegay; Tim Roloff                                     |         |
| EPI_ISL_900515 to 900520, EPI_ISL_900529                                                                                                                                                                                                                                                                                                                                                                                                                                                                                                                                                                                                                                                                                                                                                                                                                                                                                                                                                                                                                                                                                                                                                                                                                                                                                                                                                                                                                                                                                                                                                                                             | Bioesterel                                                         | CNR Virus des Infections Respiratoires - France SUD                                                                    | Antonin Bal; Bruno Lina; Gregory Destras; Gwendolynne Burfin; Géraldine Gonfrier; Hadrien Règue; Laurence Josset; Martine Valette; Quentin Semanas; Sylvie Larrat; Valérie Giordanengo         |         |
| EPI_ISL_814287 to 814290, EPI_ISL_814292, EPI_ISL_814351, EPI_ISL_814357 to 814361, EPI_ISL_814417 to 814421, EPI_ISL_814424 to 814438, EPI_ISL_814517 to 814522, EPI_ISL_814524 to 814525, EPI_ISL_814530, EPI_ISL_814532, EPI_ISL_814538 to 814539, EPI_ISL_814543 to 814544, EPI_ISL_814548, EPI_ISL_814610 to 814619, EPI_ISL_816686 to 817122, EPI_ISL_842355 to 842445, EPI_ISL_842447 to 842470, EPI_ISL_842472 to 842494, EPI_ISL_842496 to 842511, EPI_ISL_842513 to 842596, EPI_ISL_842598 to 842608, EPI_ISL_868716 to 868769, EPI_ISL_868771 to 868785, EPI_ISL_868787 to 868808, EPI_ISL_868810 to 868817, EPI_ISL_868819 to 868830, EPI_ISL_868832 to 868888, EPI_ISL_868890 to 868948, EPI_ISL_868950 to 869025, EPI_ISL_869027 to 869078, EPI_ISL_924430 to 924441, EPI_ISL_924495, EPI_ISL_924497 to 924498, EPI_ISL_924500 to 924535, EPI_ISL_924537 to 924540, EPI_ISL_924542, EPI_ISL_924544 to 924545, EPI_ISL_924547 to 924623, EPI_ISL_924625 to 924642, EPI_ISL_924644 to 924670, EPI_ISL_924672 to 924673, EPI_ISL_924676 to 924750, EPI_ISL_924752 to 924766, EPI_ISL_924768 to 924786, EPI_ISL_924788 to 924798, EPI_ISL_924800 to 924852, EPI_ISL_924854 to 924875, EPI_ISL_924877 to 924897, EPI_ISL_924899 to 924902, EPI_ISL_924904 to 924919, EPI_ISL_924921 to 924931, EPI_ISL_924933, EPI_ISL_924935 to 924950, EPI_ISL_924952 to 924954, EPI_ISL_924956 to 924986, EPI_ISL_924988 to 925030, EPI_ISL_953024 to 953083, EPI_ISL_953085 to 953109, EPI_ISL_953111, EPI_ISL_953113 to 953133, EPI_ISL_953135 to 953140, EPI_ISL_953142 to 953154, EPI_ISL_953156 to 953167, EPI_ISL_953169 to 953375 |                                                                    |                                                                                                                        |                                                                                                                                                                                                |         |
| see above                                                                                                                                                                                                                                                                                                                                                                                                                                                                                                                                                                                                                                                                                                                                                                                                                                                                                                                                                                                                                                                                                                                                                                                                                                                                                                                                                                                                                                                                                                                                                                                                                            | Bioinformatics and Biostatistics Lab, Advanced Sequencing Facility | COVID-19 Genomics UK (COG-UK) Consortium                                                                               | Aengus Stewart; Chelsea Sawyer; Harshil Patel; Jerome Nicod; Laura Cubitt; Margaret Crawford                                                                                                   |         |
| EPI_ISL_635777 to 635782, EPI_ISL_636267 to 636458, EPI_ISL_730229 to 730290, EPI_ISL_730372 to 730563, EPI_ISL_755118, EPI_ISL_755120 to 755129, EPI_ISL_755131, EPI_ISL_755141 to 755145, EPI_ISL_755210 to 755214, EPI_ISL_755232 to 755268, EPI_ISL_878440, EPI_ISL_878443, EPI_ISL_878445, EPI_ISL_878448, EPI_ISL_878450, EPI_ISL_878452, EPI_ISL_878455, EPI_ISL_878457, EPI_ISL_878460, EPI_ISL_878463, EPI_ISL_878465, EPI_ISL_878468, EPI_ISL_878470, EPI_ISL_878472, EPI_ISL_878474, EPI_ISL_878477, EPI_ISL_878480, EPI_ISL_878483, EPI_ISL_878485, EPI_ISL_878488, EPI_ISL_878491 to 878492, EPI_ISL_878495, EPI_ISL_878498, EPI_ISL_878500, EPI_ISL_878503, EPI_ISL_878506, EPI_ISL_878509, EPI_ISL_878511, EPI_ISL_878514, EPI_ISL_878516, EPI_ISL_878519, EPI_ISL_878522, EPI_ISL_878524, EPI_ISL_878526, EPI_ISL_878571, EPI_ISL_878574, EPI_ISL_878576, EPI_ISL_878579, EPI_ISL_878581                                                                                                                                                                                                                                                                                                                                                                                                                                                                                                                                                                                                                                                                                                                             |                                                                    |                                                                                                                        |                                                                                                                                                                                                |         |
| see above                                                                                                                                                                                                                                                                                                                                                                                                                                                                                                                                                                                                                                                                                                                                                                                                                                                                                                                                                                                                                                                                                                                                                                                                                                                                                                                                                                                                                                                                                                                                                                                                                            | Biobank Diagnostic Laboratories                                    | Andersen lab at Scripps Research                                                                                       | Ahmad Tibi; Amid Abdelnour with SEARCH Alliance San Diego; Issa Abu-Dayyeh; Lama Hussein; Lina Mohammad; Zein Naber                                                                            |         |
| EPI_ISL_977537, EPI_ISL_977600,<br>EPI_ISL_977602                                                                                                                                                                                                                                                                                                                                                                                                                                                                                                                                                                                                                                                                                                                                                                                                                                                                                                                                                                                                                                                                                                                                                                                                                                                                                                                                                                                                                                                                                                                                                                                    | Biobank Diagnostic Laboratories                                    | Biobank Diagnostic Laboratories                                                                                        | Ahmad Tibi; Amid Abdelnour; Badia Sadeddin; Issa Abu-Dayyeh; Lama Hussein; Shayma Ali                                                                                                          |         |
| EPI_ISL_935026, EPI_ISL_935038 to 935039,<br>EPI_ISL_935041                                                                                                                                                                                                                                                                                                                                                                                                                                                                                                                                                                                                                                                                                                                                                                                                                                                                                                                                                                                                                                                                                                                                                                                                                                                                                                                                                                                                                                                                                                                                                                          | Biobank Diagnostic Laboratories                                    | Princess Haya Biotechnology Center, Jordan University of Science and Technology                                        | Amid Abdelnour; Areej Alquran; Hazem Haddad; Issa Abu-Dayyeh; Maha Karam; Moh'D Al-Zghoul; Mohammad Alboom; Mustafa Ababneh; Saied Jaradat; Shereen Issa; Suha Hasan                           |         |
| EPI_ISL_935043, EPI_ISL_935046                                                                                                                                                                                                                                                                                                                                                                                                                                                                                                                                                                                                                                                                                                                                                                                                                                                                                                                                                                                                                                                                                                                                                                                                                                                                                                                                                                                                                                                                                                                                                                                                       | Biobank Diagnostic Laboratories                                    | Princess Haya Biotechnology Center/ Jordan University of Science & Technology                                          | Amid Abdelnour; Areej Alquran; Hazem Haddad; Issa Abu-Dayyeh; Maha Karam; Moh'D Al-Zghoul; Mohammad Alboom; Mustafa Ababneh; Saied Jaradat; Shereen Issa; Suha Hasan                           |         |
| EPI_ISL_900514                                                                                                                                                                                                                                                                                                                                                                                                                                                                                                                                                                                                                                                                                                                                                                                                                                                                                                                                                                                                                                                                                                                                                                                                                                                                                                                                                                                                                                                                                                                                                                                                                       | Biobank Diagnostic Laboratories                                    | CNR Virus des Infections Respiratoires - France SUD                                                                    | Antonin Bal; Bruno Lina; Gregory Destras; Gwendolynne Burfin; Hadrien Règue; Laurence Josset; Martine Valette; Quentin Semanas                                                                 |         |
| EPI_ISL_907076 to 907085                                                                                                                                                                                                                                                                                                                                                                                                                                                                                                                                                                                                                                                                                                                                                                                                                                                                                                                                                                                                                                                                                                                                                                                                                                                                                                                                                                                                                                                                                                                                                                                                             | Biology, MCL                                                       | Biology, MCL                                                                                                           | A.F.; A.N.; Elhoseiny; Gad; M.D.; M.F.; M.G.; Seadawy; Shamel; Zekri                                                                                                                           |         |
| EPI_ISL_794634                                                                                                                                                                                                                                                                                                                                                                                                                                                                                                                                                                                                                                                                                                                                                                                                                                                                                                                                                                                                                                                                                                                                                                                                                                                                                                                                                                                                                                                                                                                                                                                                                       | Biology, MCL                                                       | Biology, MCL                                                                                                           | A.F.; A.S.; B.S. and EL-Safty; EL-harty; EL-hosieny; Gad; M.D.; M.F.; M.G.; Seadawy; Shamel                                                                                                    |         |
| EPI_ISL_985058 to 985129, EPI_ISL_985237 to<br>985238                                                                                                                                                                                                                                                                                                                                                                                                                                                                                                                                                                                                                                                                                                                                                                                                                                                                                                                                                                                                                                                                                                                                                                                                                                                                                                                                                                                                                                                                                                                                                                                | Biorepository and Clinical Virology Laboratory                     | Ozer Lab                                                                                                               | Adeola A. Fowotade; Babafemi O. Taiwo; Egon A. Ozer; Ewan C. Omoruyi; Johnson A. Adeniji; Judd F. Hultquist; Lacy M. Simons; Olubusuyi M. Adewumi; Ramon Lorenzo-Redondo                       |         |
| EPI_ISL_745118, EPI_ISL_745134,<br>EPI_ISL_745158 to 745159, EPI_ISL_745168 to<br>745169                                                                                                                                                                                                                                                                                                                                                                                                                                                                                                                                                                                                                                                                                                                                                                                                                                                                                                                                                                                                                                                                                                                                                                                                                                                                                                                                                                                                                                                                                                                                             | Bishop Lavis CDC wc BLP                                            | National Health Laboratory Service (NHLS), Tygerberg                                                                   | Bronwyn Kleinhans; Eduan Wilkindon; Gert van Zyl; Hourriyah Tegally; Kayla Delaney; Susan Engelbrecht; Tulio de Oliveira; Wolfgang Preiser                                                     |         |
| EPI_ISL_876588 to 876589                                                                                                                                                                                                                                                                                                                                                                                                                                                                                                                                                                                                                                                                                                                                                                                                                                                                                                                                                                                                                                                                                                                                                                                                                                                                                                                                                                                                                                                                                                                                                                                                             | Blackhawk Genomics                                                 | Pathogen Discovery, Respiratory Viruses Branch, Division of Viral Diseases, Centers for Disease Control and Prevention | Anna Uehara; Clinton R. Paden; Haibin Wang; Jing Zhang; Krista Queen; Peter Cook; Suxiang Tong; Yan Li; Ying Tao                                                                               |         |
| EPI_ISL_747238                                                                                                                                                                                                                                                                                                                                                                                                                                                                                                                                                                                                                                                                                                                                                                                                                                                                                                                                                                                                                                                                                                                                                                                                                                                                                                                                                                                                                                                                                                                                                                                                                       | Bogor Public Health                                                | West Java Health Laboratory; School of Life Sciences and Technology, Institut Teknologi Bandung                        | Azzania Fibrani; Cut Nur Cinthia Alamanda; Ema Rahmawati; Isak Solihin; Karimatu Khoirunnisa; Miftahul Farid; Rifky Waluyajati Rachman; Rini Robiani; Ryan Bayusantika Ristandi                |         |
| EPI_ISL_700589                                                                                                                                                                                                                                                                                                                                                                                                                                                                                                                                                                                                                                                                                                                                                                                                                                                                                                                                                                                                                                                                                                                                                                                                                                                                                                                                                                                                                                                                                                                                                                                                                       | Bongoletu Clinic wc BLC                                            | NHLS/UCT                                                                                                               | Arash Iranzadeh; Bruna Galvao; Carolyn Williamson; Deelan Doolabh; Diana Hardie; Hourriyah Tegally; Innocent Mudau; Kruger Marais; Lynn Tyers; Marvin Hsiao; Stephen Korsman                   |         |
| EPI_ISL_718167, EPI_ISL_718174, EPI_ISL_718176, EPI_ISL_718178, EPI_ISL_718182, EPI_ISL_718185, EPI_ISL_718191 to 718192, EPI_ISL_718197 to 718198, EPI_ISL_718203 to 718205, EPI_ISL_718216, EPI_ISL_718218, EPI_ISL_718222                                                                                                                                                                                                                                                                                                                                                                                                                                                                                                                                                                                                                                                                                                                                                                                                                                                                                                                                                                                                                                                                                                                                                                                                                                                                                                                                                                                                         |                                                                    |                                                                                                                        |                                                                                                                                                                                                |         |
| see above                                                                                                                                                                                                                                                                                                                                                                                                                                                                                                                                                                                                                                                                                                                                                                                                                                                                                                                                                                                                                                                                                                                                                                                                                                                                                                                                                                                                                                                                                                                                                                                                                            | Borneo Medical Centre                                              | Institute of Health and Community Medicine                                                                             | Chan Chia Jui; Chua Hock Hin; David Perera; Ooi Mong How; Tonnie Sia Loong Loong; Wong Jyn Shan; Wong Kiing Aik                                                                                |         |
| EPI_ISL_640075                                                                                                                                                                                                                                                                                                                                                                                                                                                                                                                                                                                                                                                                                                                                                                                                                                                                                                                                                                                                                                                                                                                                                                                                                                                                                                                                                                                                                                                                                                                                                                                                                       | Bothasig CDC wc BLD                                                | NHLS/UCT                                                                                                               | Arash Iranzadeh; Bruna Galvao; Carolyn Williamson; Deelan Doolabh; Diana Hardie; Innocent Mudau; Kruger Marais; Lynn Tyers; Marvin Hsiao; Stephen Korsman                                      |         |
| EPI_ISL_965182                                                                                                                                                                                                                                                                                                                                                                                                                                                                                                                                                                                                                                                                                                                                                                                                                                                                                                                                                                                                                                                                                                                                                                                                                                                                                                                                                                                                                                                                                                                                                                                                                       | Botswana Harvard AIDS Institute Partnership                        | Botswana Harvard AIDS Institute Partnership                                                                            | Boitumelo Zuze; Botshelo Radibe; David Lawrence; Dorcas Maruapula; Joseph Makhema; Mosepele Mosepele; Roger Shapiro; Shahin Lockman; Sikhulle Moyo; Simani Gaseitsiwe; Wonderful T. Choga      |         |
| EPI_ISL_965178                                                                                                                                                                                                                                                                                                                                                                                                                                                                                                                                                                                                                                                                                                                                                                                                                                                                                                                                                                                                                                                                                                                                                                                                                                                                                                                                                                                                                                                                                                                                                                                                                       | Botswana Harvard HIV Reference Laboratory                          | Botswana Harvard AIDS Institute Partnership                                                                            | Boitumelo Zuze; Botshelo Radibe; David Lawrence; Dorcas Maruapula; Joseph Makhema; Mosepele Mosepele; Roger Shapiro; Shahin Lockman; Sikhulle Moyo; Simani Gaseitsiwe; Wonderful T. Choga      |         |

|                                                                                                                                                                                                                                                                                                                                                                                                                                                                                                                                                                                                                                                                    |                                                                                  |                                                                                                                            |                                                                                                                                                                                                                                                                                                                                                                                                                                                                                                                                                                                                                                                      |  |
|--------------------------------------------------------------------------------------------------------------------------------------------------------------------------------------------------------------------------------------------------------------------------------------------------------------------------------------------------------------------------------------------------------------------------------------------------------------------------------------------------------------------------------------------------------------------------------------------------------------------------------------------------------------------|----------------------------------------------------------------------------------|----------------------------------------------------------------------------------------------------------------------------|------------------------------------------------------------------------------------------------------------------------------------------------------------------------------------------------------------------------------------------------------------------------------------------------------------------------------------------------------------------------------------------------------------------------------------------------------------------------------------------------------------------------------------------------------------------------------------------------------------------------------------------------------|--|
| EPI_ISL_871872, EPI_ISL_933724, EPI_ISL_935040, EPI_ISL_935042, EPI_ISL_935045, EPI_ISL_940762, EPI_ISL_940765, EPI_ISL_940768, EPI_ISL_940776, EPI_ISL_940844, EPI_ISL_943992, EPI_ISL_944590, EPI_ISL_944756 to 944757, EPI_ISL_944760 to 944761, EPI_ISL_944767, EPI_ISL_944782, EPI_ISL_944790, EPI_ISL_949068, EPI_ISL_955102, EPI_ISL_960226, EPI_ISL_960303, EPI_ISL_960312, EPI_ISL_962880, EPI_ISL_962882, EPI_ISL_962886, EPI_ISL_965181, EPI_ISL_965264, EPI_ISL_965277, EPI_ISL_965909, EPI_ISL_968214, EPI_ISL_968234, EPI_ISL_968252, EPI_ISL_968857, EPI_ISL_969034, EPI_ISL_977499, EPI_ISL_981384, EPI_ISL_981386, EPI_ISL_981548, EPI_ISL_982860 |                                                                                  |                                                                                                                            |                                                                                                                                                                                                                                                                                                                                                                                                                                                                                                                                                                                                                                                      |  |
| see above                                                                                                                                                                                                                                                                                                                                                                                                                                                                                                                                                                                                                                                          | Botswana Harvard HIV Reference Laboratory                                        | Botswana Harvard HIV Reference Laboratory                                                                                  | Boitumelo Zuze; Botshelo Radibe; David Lawrence; Dorcas Maruapula; Joseph; Joseph Makhema; Legodile T. Koepiele David Lawrence; Makhema; Mosepele Mosepele; Roger L. Shapiro; Roger Lawrence; Rohan Shapiro; Shahn Lockman; Sikhulile Moyo; Sikhamani Gaseitsiwe; Wonderful Choga; Wonderful T. Choga                                                                                                                                                                                                                                                                                                                                                |  |
| EPI_ISL_900691 to 900741                                                                                                                                                                                                                                                                                                                                                                                                                                                                                                                                                                                                                                           | Bozeman Health Deaconess Hospital                                                | Wiedenheft lab, Montana State University                                                                                   | Anna Nemudraia; Artem Nemudryi; Calvin Cicha; Deann T. Snyder; Diane Bimczok; Helen Lee; Jodi F. Hedges; Joseph Nichols; Karl K. Vanderwood; Mark A. Jutila and Blake Wiedenheft; Tanner Wiegand                                                                                                                                                                                                                                                                                                                                                                                                                                                     |  |
| EPI_ISL_903339 to 903346                                                                                                                                                                                                                                                                                                                                                                                                                                                                                                                                                                                                                                           | Bozeman Health Deaconess Hospital                                                | Wiedenheft lab, Montana State University                                                                                   | Anna Nemudraia; Artem Nemudryi; Calvin Cicha; Deann T. Snyder; Diane Bimczok; Helen Lee; Jodi F. Hedges; Joseph Nichols; Karl K. Vanderwood; Mark A. Jutila and Blake Wiedenheft; Tanner Wiegand                                                                                                                                                                                                                                                                                                                                                                                                                                                     |  |
| EPI_ISL_745170, EPI_ISL_745190                                                                                                                                                                                                                                                                                                                                                                                                                                                                                                                                                                                                                                     | Brackengate Field Hospital COVID-19 wc BRG                                       | National Health Laboratory Service (NHLS), Tygerberg                                                                       | Bronwyn Kleinhans; Eduan Wilkindon; Gert van Zyl; Houriyah Tegally; Kayla Delaney; Susan Engelbrecht; Tulio de Oliveira; Wolfgang Preiser                                                                                                                                                                                                                                                                                                                                                                                                                                                                                                            |  |
| EPI_ISL_640036                                                                                                                                                                                                                                                                                                                                                                                                                                                                                                                                                                                                                                                     | Bridgeton CDC wc BTC                                                             | NHLS/UCT                                                                                                                   | Arash Iranzadeh; Bruna Galvao; Carolyn Williamson; Deelan Doolabh; Diana Hardie; Innocent Mudau; Kruger Marais; Lynn Tyers; Marvin Hsiao; Stephen Korsman                                                                                                                                                                                                                                                                                                                                                                                                                                                                                            |  |
| EPI_ISL_648265 to 648270                                                                                                                                                                                                                                                                                                                                                                                                                                                                                                                                                                                                                                           | Brigham and Women's Hospital                                                     | Jonathan Li laboratory                                                                                                     | Douglas S Kwon; George Eng; Jonathan Z. Li; Manish C. Choudhary; Upasana D. Adhikari                                                                                                                                                                                                                                                                                                                                                                                                                                                                                                                                                                 |  |
| EPI_ISL_765583 to 765612                                                                                                                                                                                                                                                                                                                                                                                                                                                                                                                                                                                                                                           | Brigham and Womens Hospital                                                      | Infectious Disease Program, Broad Institute of Harvard and MIT                                                             | A.E.; Adams, G.; Anahtar, M.; B.L.; B.W.; Bauer, M.; Birren; Branda, J.; Carter, A.; Cerrato, F.; Chaluvaadi, S.; Chapman; Cusick, C.; D.J.; DeRuff, K.; E. and Sabeti; Flowers, K.; Gallagher, G.; Gladden-Young, A.; Gnirke, A.; Harris, J.; J.E.; K.J.; LaRoque, R.; Lagerborg, K.; Lemieux; Lin; Loreth, C.; MacInnis; Neumann, A.; Normandin, E.; P.C.; Park; Pierce, V.; Reilly, S.; Rosenberg; Rudy, M.; Ryan, E.; S.B.; Shaw, B.; Siddle; Slater, D.; Smole, S.; Tomkins-Tinch, C.; Turbett, S.                                                                                                                                              |  |
| EPI_ISL_976941 to 976980, EPI_ISL_976982 to 977023                                                                                                                                                                                                                                                                                                                                                                                                                                                                                                                                                                                                                 | Broad Institute Clinical Research Sequencing Platform                            | Infectious Disease Program, Broad Institute of Harvard and MIT                                                             | Adams, G.; B.L.; B.W.; Bauer, M.; Birren; Carter, A.; Chaluvaadi, S.; D.J.; DeRuff, K.; Gallagher, G.; Gladden-Young, A.; J.E.; K.J.; Lagerborg, K.; Lemieux; Loreth, C.; MacInnis; Normandin, E.; P.C.; Park; Reilly, S.; Rudy, M.; Siddle; Smole, S.; Tomkins-Tinch, C.; and Sabeti                                                                                                                                                                                                                                                                                                                                                                |  |
| EPI_ISL_631552 to 631553, EPI_ISL_631562, EPI_ISL_631565, EPI_ISL_631573, EPI_ISL_631800, EPI_ISL_631803, EPI_ISL_631805 to 631807, EPI_ISL_631819, EPI_ISL_631829, EPI_ISL_631864, EPI_ISL_631884, EPI_ISL_631976, EPI_ISL_631978, EPI_ISL_631981, EPI_ISL_631984, EPI_ISL_632077 to 632078, EPI_ISL_632089, EPI_ISL_632100, EPI_ISL_632114, EPI_ISL_632123, EPI_ISL_632142, EPI_ISL_632155 to 632156                                                                                                                                                                                                                                                             |                                                                                  |                                                                                                                            |                                                                                                                                                                                                                                                                                                                                                                                                                                                                                                                                                                                                                                                      |  |
| see above                                                                                                                                                                                                                                                                                                                                                                                                                                                                                                                                                                                                                                                          | Brookdale University Hospital Medical Center                                     | New York City Public Health Laboratory                                                                                     | Jade Wang; et al.                                                                                                                                                                                                                                                                                                                                                                                                                                                                                                                                                                                                                                    |  |
| EPI_ISL_631508                                                                                                                                                                                                                                                                                                                                                                                                                                                                                                                                                                                                                                                     | Brooklyn Hospital Center                                                         | New York City Public Health Laboratory                                                                                     | Jade Wang; et al.                                                                                                                                                                                                                                                                                                                                                                                                                                                                                                                                                                                                                                    |  |
| EPI_ISL_833343                                                                                                                                                                                                                                                                                                                                                                                                                                                                                                                                                                                                                                                     | Buenavista Rural Health Unit                                                     | Research Institute for Tropical Medicine                                                                                   | Catalino Demetria; Daria Manalo; Edelwisa Mercado; Francisco Gerardo Polotan; Hannah Leah Morito; Inez Andrea Medado; John Leonard Chan; Kirstyn Brunker; Ma Angelica Tujan; Othoniel Jan Onza                                                                                                                                                                                                                                                                                                                                                                                                                                                       |  |
| EPI_ISL_732524 to 732564, EPI_ISL_732658, EPI_ISL_755639, EPI_ISL_915422, EPI_ISL_915424 to 915427, EPI_ISL_915429                                                                                                                                                                                                                                                                                                                                                                                                                                                                                                                                                 | Bundeswehr Institute of Microbiology                                             | Bundeswehr Institute of Microbiology                                                                                       | Alexandra Rehn; Christina Bugert; Elham Khatamzas; Enrico Georgi; Joachim Bugert; Malena Bestehorn-Willmann; Markus Antwerpen; Mathias Walter; Michael von Bergwelt-Baldon; Roman Wölfel; Sabine Zange                                                                                                                                                                                                                                                                                                                                                                                                                                               |  |
| EPI_ISL_918431 to 918433, EPI_ISL_996415                                                                                                                                                                                                                                                                                                                                                                                                                                                                                                                                                                                                                           | Bundeswehrkrankenhaus Berlin                                                     | Bundeswehr Institute of Microbiology                                                                                       | Alexandra Rehn; Enrico Georgi; Malena Bestehorn-Willmann; Markus Antwerpen; Martin Müller; Mathias Walter; Mike Pillukat; Roman Wölfel; Sabine Zange                                                                                                                                                                                                                                                                                                                                                                                                                                                                                                 |  |
| EPI_ISL_996417, EPI_ISL_996419                                                                                                                                                                                                                                                                                                                                                                                                                                                                                                                                                                                                                                     | Bundeswehrkrankenhaus Hamburg                                                    | Bundeswehr Institute of Microbiology                                                                                       | Alexandra Rehn; Enrico Georgi; Malena Bestehorn-Willmann; Markus Antwerpen; Mathias Walter; Mike Pillukat; Roman Wölfel; Sabine Zange                                                                                                                                                                                                                                                                                                                                                                                                                                                                                                                |  |
| EPI_ISL_915430 to 915433, EPI_ISL_918430                                                                                                                                                                                                                                                                                                                                                                                                                                                                                                                                                                                                                           | Bundeswehrkrankenhaus Westerstede                                                | Bundeswehr Institute of Microbiology                                                                                       | Alexandra Rehn; Enrico Georgi; Klaus Peter Ebert; Malena Bestehorn-Willmann; Markus Antwerpen; Mathias Walter; Roman Wölfel; Sabine Zange                                                                                                                                                                                                                                                                                                                                                                                                                                                                                                            |  |
| EPI_ISL_918424 to 918425                                                                                                                                                                                                                                                                                                                                                                                                                                                                                                                                                                                                                                           | Bundeswehrzentralrankenhaus Koblenz                                              | Bundeswehr Institute of Microbiology                                                                                       | Alexandra Rehn; Enrico Georgi; Ingo Fengler; Malena Bestehorn-Willmann; Markus Antwerpen; Mathias Walter; Ralf Hagen; Roman Wölfel; Sabine Zange                                                                                                                                                                                                                                                                                                                                                                                                                                                                                                     |  |
| EPI_ISL_906884 to 906919                                                                                                                                                                                                                                                                                                                                                                                                                                                                                                                                                                                                                                           | Bureau of Public Health Laboratories, Florida Department of Health (BPHL, FLDOH) | Bureau of Public Health Laboratories, Florida Department of Health (BPHL, FLDOH)                                           | Blanton, J.; Schmedes, S.                                                                                                                                                                                                                                                                                                                                                                                                                                                                                                                                                                                                                            |  |
| EPI_ISL_833336                                                                                                                                                                                                                                                                                                                                                                                                                                                                                                                                                                                                                                                     | Bureau of Quarantine                                                             | Research Institute for Tropical Medicine                                                                                   | Catalino Demetria; Daria Manalo; Edelwisa Mercado; Francisco Gerardo Polotan; Hannah Leah Morito; Inez Andrea Medado; John Leonard Chan; Kirstyn Brunker; Ma Angelica Tujan; Othoniel Jan Onza                                                                                                                                                                                                                                                                                                                                                                                                                                                       |  |
| EPI_ISL_912554 to 912556, EPI_ISL_912573                                                                                                                                                                                                                                                                                                                                                                                                                                                                                                                                                                                                                           | C.H.R. d'Orléans - Hôpital de la Source                                          | National Reference Center for Viruses of Respiratory Infections, Institut Pasteur, Paris                                   | Angela Brisebarre; Camille Capel; Etienne Simon-Lorière; Guinard Jérôme; Marion Barbet; Maud Vanpeene; Méline Bizard; Sylvie Behillil; Sylvie van der Werf; Vincent Enouf                                                                                                                                                                                                                                                                                                                                                                                                                                                                            |  |
| EPI_ISL_884866 to 884870                                                                                                                                                                                                                                                                                                                                                                                                                                                                                                                                                                                                                                           | CA DPH Viral and Rickettsial Disease Laboratory                                  | Chan-Zuckerberg Biohub                                                                                                     | CZB Cihub Consortium                                                                                                                                                                                                                                                                                                                                                                                                                                                                                                                                                                                                                                 |  |
| EPI_ISL_903591, EPI_ISL_903761, EPI_ISL_903810, EPI_ISL_903833, EPI_ISL_903844, EPI_ISL_903856, EPI_ISL_903892, EPI_ISL_903913, EPI_ISL_903915, EPI_ISL_903941                                                                                                                                                                                                                                                                                                                                                                                                                                                                                                     |                                                                                  |                                                                                                                            |                                                                                                                                                                                                                                                                                                                                                                                                                                                                                                                                                                                                                                                      |  |
| see above                                                                                                                                                                                                                                                                                                                                                                                                                                                                                                                                                                                                                                                          | CDPH, Viral and Rickettsial Disease Laboratory                                   | Genomics and Discovery, Respiratory Viruses Branch, Division of Viral Diseases, Centers for Disease Control and Prevention | Anna Montmayer; Anna Uehara; Ben L. Rambo-Martin; Clinton R. Paden; Dhvani Batra; Haibin Wang; Jasmine Padilla; Jing Zhang; Justin Lee; Krista Queen; Lori Rowe; Mark Burroughs; Mili Sheth; Peter W. Cook; Rachel Marine; Sarah Nobles; Suxiang Tong; Yan Li; Ying Tao                                                                                                                                                                                                                                                                                                                                                                              |  |
| EPI_ISL_912614                                                                                                                                                                                                                                                                                                                                                                                                                                                                                                                                                                                                                                                     | CENTRE HOSPITALIER JACQUES LACARIN LABORATOIRE                                   | National Reference Center for Viruses of Respiratory Infections, Institut Pasteur, Paris                                   | Angela Brisebarre; Camille Capel; Etienne Simon-Lorière; Marion Barbet; Maud Vanpeene; Méline Bizard; Sylvie Behillil; Sylvie van der Werf; Vincent Enouf                                                                                                                                                                                                                                                                                                                                                                                                                                                                                            |  |
| EPI_ISL_912539, EPI_ISL_912580 to 912583                                                                                                                                                                                                                                                                                                                                                                                                                                                                                                                                                                                                                           | CENTRE HOSPITALIER LEON BINET                                                    | National Reference Center for Viruses of Respiratory Infections, Institut Pasteur, Paris                                   | Angela Brisebarre; Camille Capel; Etienne Simon-Lorière; Marion Barbet; Maud Vanpeene; Meziane Ilham; Méline Bizard; Sylvie Behillil; Sylvie van der Werf; Vincent Enouf                                                                                                                                                                                                                                                                                                                                                                                                                                                                             |  |
| EPI_ISL_750175                                                                                                                                                                                                                                                                                                                                                                                                                                                                                                                                                                                                                                                     | CENUR Este-Sede Rocha-UdelaR                                                     | Institut Pasteur de Montevideo                                                                                             | Ana Carolina Mendonça; Andres Lizasoain; Camila Simoes; Cecilia Alonso; Cecilia Salazar; Daijana Mir; Fernando Lopez-Tort; Fernando Motta; Gonzalo Bello; Ighor Arantes; Ignacio Ferrés; Jose Sotelo; Leticia Maya; Leticia Garay Martins; Luciana Appolinario; Lucia Spangenberg; Mailen Arleo; Mariana Brandes; Marilda Mendonça Siqueira; Marilda Tereza Mar da Rosa; Maria Jose Benitez-Galeano; Martín Graña; Matias Castells; Matias Victoria; Matias Salvo; Natalia Rego; Natalia Reyes; Pablo Smircich; Paola Cristina Resende; Rodney Colina; Tamara Fernandez-Calero; Tania Possi; Tatiana Schäffer Gregianini; Veronica Noya; Yasser Vega |  |
| EPI_ISL_751184 to 751190                                                                                                                                                                                                                                                                                                                                                                                                                                                                                                                                                                                                                                           | CENUR Litoral Norte - UdelaR, Salto, Uruguay                                     | Institut Pasteur de Montevideo                                                                                             | Ana Carolina Mendonça; Andres Lizasoain; Camila Simoes; Cecilia Alonso; Cecilia Salazar; Daijana Mir; Fernando Lopez-Tort; Fernando Motta; Gonzalo Bello; Ighor Arantes; Ignacio Ferrés; Jose Sotelo; Leticia Maya; Leticia Garay Martins; Luciana Appolinario; Lucia Spangenberg; Mailen Arleo; Mariana Brandes; Marilda Mendonça Siqueira; Marilda Tereza Mar da Rosa; Maria Jose Benitez-Galeano; Martín Graña; Matias Castells; Matias Victoria; Matias Salvo; Natalia Rego; Natalia Reyes; Pablo Smircich; Paola Cristina Resende; Rodney Colina; Tamara Fernandez-Calero; Tania Possi; Tatiana Schäffer Gregianini; Veronica Noya; Yasser Vega |  |
| EPI_ISL_750165                                                                                                                                                                                                                                                                                                                                                                                                                                                                                                                                                                                                                                                     | CENUR Litoral Norte - UdelaR, Salto, Uruguay.                                    | Institut Pasteur de Montevideo                                                                                             | Ana Carolina Mendonça; Andres Lizasoain; Camila Simoes; Cecilia Alonso; Cecilia Salazar; Daijana Mir; Fernando Lopez-Tort; Fernando Motta; Gonzalo Bello; Ighor Arantes; Ignacio Ferrés; Jose Sotelo; Leticia Maya; Leticia Garay Martins; Luciana Appolinario; Lucia Spangenberg; Mailen Arleo; Mariana Brandes; Marilda Mendonça Siqueira; Marilda Tereza Mar da Rosa; Maria Jose Benitez-Galeano; Martín Graña; Matias Castells; Matias Victoria; Matias Salvo; Natalia Rego; Natalia Reyes; Pablo Smircich; Paola Cristina Resende; Rodney Colina; Tamara Fernandez-Calero; Tania Possi; Tatiana Schäffer Gregianini; Veronica Noya; Yasser Vega |  |
| EPI_ISL_644229 to 644230, EPI_ISL_644250 to 644254, EPI_ISL_644256, EPI_ISL_644258                                                                                                                                                                                                                                                                                                                                                                                                                                                                                                                                                                                 | CEPHR / Mater Hospital                                                           | Irish Coronavirus Sequencing Consortium - National Virus Reference Laboratory                                              | Alejandro Abner Garcia Leon; Gabriel Gonzalez; Michael Carr; Patrick Mallon                                                                                                                                                                                                                                                                                                                                                                                                                                                                                                                                                                          |  |
| EPI_ISL_644209 to 644228, EPI_ISL_644231 to 644249, EPI_ISL_644255, EPI_ISL_644257, EPI_ISL_644259 to 644345                                                                                                                                                                                                                                                                                                                                                                                                                                                                                                                                                       | CEPHR / Vincent's Hospital                                                       | Irish Coronavirus Sequencing Consortium - National Virus Reference Laboratory                                              | Alejandro Abner Garcia Leon; Gabriel Gonzalez; Michael Carr; Patrick Mallon                                                                                                                                                                                                                                                                                                                                                                                                                                                                                                                                                                          |  |
| EPI_ISL_861715 to 861716, EPI_ISL_861727 to 861728, EPI_ISL_862042 to 862045                                                                                                                                                                                                                                                                                                                                                                                                                                                                                                                                                                                       | CERBA                                                                            | CERBA LAB                                                                                                                  | Costa JM; Haim-Boukobza S.; Hedbaut E; Lecorche E; Malek Ramdane; Olivi M; Roquebert B; Trombert S; Verdurme L                                                                                                                                                                                                                                                                                                                                                                                                                                                                                                                                       |  |
| EPI_ISL_780418                                                                                                                                                                                                                                                                                                                                                                                                                                                                                                                                                                                                                                                     | CERBA LAB                                                                        | CERBA LAB                                                                                                                  | Costa JM; Haim-Boukobza S.; Hedbaut E; Lecorche E; Malek Ramdane; Olivi M; Roquebert B; Trombert S; Verdurme L                                                                                                                                                                                                                                                                                                                                                                                                                                                                                                                                       |  |

|                                                                                                                                                                                                                                                                                                                                                                                                                                                                    |                                                   |                                                                                                                                            |                                                                                                                                                                                                                                                                                            |
|--------------------------------------------------------------------------------------------------------------------------------------------------------------------------------------------------------------------------------------------------------------------------------------------------------------------------------------------------------------------------------------------------------------------------------------------------------------------|---------------------------------------------------|--------------------------------------------------------------------------------------------------------------------------------------------|--------------------------------------------------------------------------------------------------------------------------------------------------------------------------------------------------------------------------------------------------------------------------------------------|
| EPI_ISL_860848                                                                                                                                                                                                                                                                                                                                                                                                                                                     | CH Dunkerque Laboratoire de Biologie              | National Reference Center for Viruses of Respiratory Infections, Institut Pasteur, Paris                                                   | Angela Brisebarre; Camille Capel; Etienne Simon-Lorière; Joly Isabelle; Marion Barbet; Maud Vanpeene; Méline Bizard; Sylvie Behillili; Sylvie van der Werf; Vincent Enouf                                                                                                                  |
| EPI_ISL_900534                                                                                                                                                                                                                                                                                                                                                                                                                                                     | CH VILLEFRANCHE                                   | CNR Virus des Infections Respiratoires - France SUD                                                                                        | Antonin Bal; Bruno Lina; Gregory Destras; Gwendolyne Burfin; Hadrien Règue; Laurence Josset; Martine Valette; Quentin Semanas                                                                                                                                                              |
| EPI_ISL_792008 to 792015                                                                                                                                                                                                                                                                                                                                                                                                                                           | CH de Bethune - Laboratoire de Biologie Médicale  | National Reference Center for Viruses of Respiratory Infections, Institut Pasteur, Paris                                                   | Angela Brisebarre; Camille Capel; Etienne Simon-Lorière; Léa Pilorgé; Marion Barbet; Maud Vanpeene; Méline Bizard; Sylvie Behillili; Sylvie van der Werf; Vincent Enouf                                                                                                                    |
| EPI_ISL_860900 to 860904, EPI_ISL_860910                                                                                                                                                                                                                                                                                                                                                                                                                           | CH du MANS - Lab. Bio. Moléculaire                | National Reference Center for Viruses of Respiratory Infections, Institut Pasteur, Paris                                                   | Angela Brisebarre; Camille Capel; Etienne Simon-Lorière; Marion Barbet; Maud Vanpeene; Méline Bizard; Ramanantsoa CéLine; Sylvie Behillili; Sylvie van der Werf; Vincent Enouf                                                                                                             |
| EPI_ISL_912681, EPI_ISL_912687, EPI_ISL_912781 to 912785, EPI_ISL_912891, EPI_ISL_912907, EPI_ISL_912961, EPI_ISL_981390 to 981392, EPI_ISL_981394, EPI_ISL_981396 to 981400, EPI_ISL_981406 to 981408, EPI_ISL_981452 to 981453, EPI_ISL_981462 to 981465, EPI_ISL_981486, EPI_ISL_981488, EPI_ISL_981538 to 981546, EPI_ISL_982118, EPI_ISL_982147, EPI_ISL_982181, EPI_ISL_982226 to 982227, EPI_ISL_982303, EPI_ISL_982305 to 982306, EPI_ISL_982312 to 982320 | CH.INTERCOMMUNAL DE CRETEIL                       | Department of Virology, Henri Mondor University Hospital, Assistance Publique Hôpitaux de Paris, Université Paris-Est Créteil, INSERM U955 | Alexandre Soulier; Christophe Rodriguez; Elisabeth Trawinski; Guillaume Gricourt; Jean-Michel Pawlowsky; Melissa N'Debi; Slim Fourati; Vanessa Demontant                                                                                                                                   |
| see above                                                                                                                                                                                                                                                                                                                                                                                                                                                          | CHAI WAN FAMILIES CLINIC                          | Hong Kong Department of Health                                                                                                             | Alan K.L. Tsang; Dominic N.C. Tsang; Edman T.K. Lam; Peter C.W. Yip; Rickjason C.W. Chan                                                                                                                                                                                                   |
| EPI_ISL_733569                                                                                                                                                                                                                                                                                                                                                                                                                                                     | CHC                                               | GIGA Medical Genomics                                                                                                                      | Bouchra Boujemla; Cécile Meex; Keith Durkin; Maria Artesi; Marie-Pierre Hayette; Pierrette Melin; Raphaël Boreux; Sébastien Bontems; Vincent Bours                                                                                                                                         |
| EPI_ISL_872051, EPI_ISL_872110 to 872111, EPI_ISL_872146 to 872147, EPI_ISL_930580 to 930584, EPI_ISL_930604, EPI_ISL_930623                                                                                                                                                                                                                                                                                                                                       | CHC Liège                                         | GIGA Medical Genomics                                                                                                                      | Bouchra Boujemla; Cécile Meex; Keith Durkin; Maria Artesi; Marie-Pierre Hayette; Pierrette Melin; Raphaël Boreux; Sébastien Bontems; Vincent Bours                                                                                                                                         |
| EPI_ISL_959551 to 959552                                                                                                                                                                                                                                                                                                                                                                                                                                           | CHI VILLENEUVE ST GEORGES                         | Department of Virology, Henri Mondor University Hospital, Assistance Publique Hôpitaux de Paris, Université Paris-Est Créteil, INSERM U955 | Alexandre Soulier; Christophe Rodriguez; Elisabeth Trawinski; Guillaume Gricourt; Jean-Michel Pawlowsky; Melissa N'Debi; Slim Fourati; Vanessa Demontant                                                                                                                                   |
| EPI_ISL_981454 to 981457, EPI_ISL_981459 to 981461, EPI_ISL_981466 to 981481, EPI_ISL_981483, EPI_ISL_982158, EPI_ISL_982179                                                                                                                                                                                                                                                                                                                                       | CHR Citadelle                                     | GIGA Medical Genomics                                                                                                                      | Bouchra Boujemla; Cécile Meex; Keith Durkin; Maria Artesi; Marie-Pierre Hayette; Pierrette Melin; Raphaël Boreux; Sébastien Bontems; Vincent Bours                                                                                                                                         |
| EPI_ISL_872052 to 872056, EPI_ISL_872117 to 872121, EPI_ISL_872123 to 872126, EPI_ISL_872134, EPI_ISL_872150 to 872152                                                                                                                                                                                                                                                                                                                                             | CHR Namur                                         | GIGA Medical Genomics                                                                                                                      | Bouchra Boujemla; Cécile Meex; Keith Durkin; Maria Artesi; Marie-Pierre Hayette; Pierrette Melin; Raphaël Boreux; Sébastien Bontems; Vincent Bours                                                                                                                                         |
| EPI_ISL_959553                                                                                                                                                                                                                                                                                                                                                                                                                                                     | CHR de la Citadelle                               | GIGA Medical Genomics                                                                                                                      | Bouchra Boujemla; Cécile Meex; Keith Durkin; Maria Artesi; Marie-Pierre Hayette; Pierrette Melin; Raphaël Boreux; Sébastien Bontems; Vincent Bours                                                                                                                                         |
| EPI_ISL_935674 to 935695, EPI_ISL_959600 to 959602, EPI_ISL_965414 to 965415, EPI_ISL_965421 to 965430, EPI_ISL_965432, EPI_ISL_965437 to 965450                                                                                                                                                                                                                                                                                                                   | CHRU Pontchailou - Laboratoire de Virologie       | National Reference Center for Viruses of Respiratory Infections, Institut Pasteur, Paris                                                   | Angela Brisebarre; Camille Capel; Etienne Simon-Lorière; Gisèle Lagathu; Marion Barbet; Maud Vanpeene; Méline Bizard; Sylvie Behillili; Sylvie van der Werf; Vincent Enouf                                                                                                                 |
| EPI_ISL_734168 to 734169                                                                                                                                                                                                                                                                                                                                                                                                                                           | CHU - Hôpital Cavale Blanche                      | National Reference Center for Viruses of Respiratory Infections, Institut Pasteur, Paris                                                   | Angela Brisebarre; Camille Capel; Etienne Simon-Lorière; Léa Pilorgé; Marion Barbet; Maud Vanpeene; Méline Bizard; Sylvie Behillili; Sylvie van der Werf; Vincent Enouf                                                                                                                    |
| EPI_ISL_791991 to 791999                                                                                                                                                                                                                                                                                                                                                                                                                                           | CHU - Hôpital Cavale Blanche - Labo. de Virologie | National Reference Center for Viruses of Respiratory Infections, Institut Pasteur, Paris                                                   | Angela Brisebarre; Camille Capel; Etienne Simon-Lorière; Marion Barbet; Maud Vanpeene; Méline Bizard; Pilorge léa; Sylvie Behillili; Sylvie van der Werf; Vincent Enouf                                                                                                                    |
| EPI_ISL_754853 to 754856                                                                                                                                                                                                                                                                                                                                                                                                                                           | CHU Amiens - Labo virologie                       | National Reference Center for Viruses of Respiratory Infections, Institut Pasteur, Paris                                                   | Angela Brisebarre; Camille Capel; Castelain Sandrine; Etienne Simon-Lorière; François Catherine; Marion Barbet; Maud Vanpeene; Méline Bizard; Sylvie Behillili; Sylvie van der Werf; Vincent Enouf                                                                                         |
| EPI_ISL_754842                                                                                                                                                                                                                                                                                                                                                                                                                                                     | CHU Angers - Dpt des Agents Infectieux            | National Reference Center for Viruses of Respiratory Infections, Institut Pasteur, Paris                                                   | Angela Brisebarre; Camille Capel; Ducancelle Alexandra; Etienne Simon-Lorière; Marion Barbet; Maud Vanpeene; Méline Bizard; Sylvie Behillili; Sylvie van der Werf; Vincent Enouf                                                                                                           |
| EPI_ISL_860905 to 860906, EPI_ISL_860911 to 860912, EPI_ISL_861236                                                                                                                                                                                                                                                                                                                                                                                                 | see above                                         | CNR Virus des Infections Respiratoires - France SUD                                                                                        | Antonin Bal; Bruno Lina; Camille Ciccone; Gregory Destras; Gwendolyne Burfin; Hadrien Règue; Isabelle Garrigue; Laurence Josset; Marie-Edith Lafon; Martine Valette; Pambxika Bellecave; Pascale Trimoulet; Quentin Semanas                                                                |
| EPI_ISL_645169 to 645172, EPI_ISL_649954 to 649971, EPI_ISL_660372, EPI_ISL_700326, EPI_ISL_768823, EPI_ISL_779786, EPI_ISL_779837 to 779844                                                                                                                                                                                                                                                                                                                       | CHU Clermont-Ferrand                              | CNR Virus des Infections Respiratoires - France SUD                                                                                        | Amélie Brebion; Antonin Bal; Audrey Mirand; Bruno Lina; Christel Regagnon; Christine Archimbaud; Cécile Henquell; Gregory Destras; Gwendolyne Burfin; Hadrien Règue; Hélène Chabrolles; Laurence Josset; Martine Chambon; Martine Valette; Maxime Bissex; Patricia Combes; Quentin Semanas |
| see above                                                                                                                                                                                                                                                                                                                                                                                                                                                          | CHU Montpellier                                   | CNR Virus des Infections Respiratoires - France SUD                                                                                        | Antonin Bal; Bruno Lina; Gregory Destras; Gwendolyne Burfin; Hadrien Règue; Laurence Josset; Martine Valette; Michel Segondy; Quentin Semanas; Vincent Foulongne                                                                                                                           |
| EPI_ISL_641546 to 641550, EPI_ISL_645188 to 645196, EPI_ISL_660353 to 660371, EPI_ISL_745312 to 745315, EPI_ISL_745335 to 745336, EPI_ISL_900528                                                                                                                                                                                                                                                                                                                   | CHU Nantes                                        | CNR Virus des Infections Respiratoires - France SUD                                                                                        | Antonin Bal; Bruno Lina; Celine Bressollette; Gregory Destras; Gwendolyne Burfin; Hadrien Règue; Laurence Josset; Louise Castain; Martine Valette; Quentin Semanas; Virginie Ferré                                                                                                         |
| EPI_ISL_641556, EPI_ISL_644681 to 644696, EPI_ISL_660672 to 660709                                                                                                                                                                                                                                                                                                                                                                                                 | CHU Nîmes                                         | CNR Virus des Infections Respiratoires - France SUD                                                                                        | Antonin Bal; Bruno Lina; Gregory Destras; Gwendolyne Burfin; Hadrien Règue; Jean-Philippe Lavigne; Laurence Josset; Marie-Josée Carles; Martine Valette; Maxence Lotellier; Quentin Semanas; Stephan Robin                                                                                 |
| EPI_ISL_645217 to 645218, EPI_ISL_649173 to 649187, EPI_ISL_663249 to 663284, EPI_ISL_666721 to 666724, EPI_ISL_700371                                                                                                                                                                                                                                                                                                                                             | CHU Poitiers                                      | CNR Virus des Infections Respiratoires - France SUD                                                                                        | Agnès Beby-Defaux; Antonin Bal; Bruno Lina; Clément Jousselin; Gregory Destras; Gwendolyne Burfin; Hadrien Règue; Laurence Josset; Magali Garcia; Martine Valette; Nicolas Lévêque; Quentin Semanas                                                                                        |
| EPI_ISL_644697 to 644702, EPI_ISL_645197 to 645209, EPI_ISL_645215, EPI_ISL_660710 to 660731, EPI_ISL_663243 to 663248                                                                                                                                                                                                                                                                                                                                             | see above                                         | CHU Purpan - Laboratoire de Virologie - Institut Fédératif de Biologie                                                                     | Boyer P.; Carcenac R.; Dubois M.; Harter A.; Izopet J.; Latour J.; Ranger N.; Tremeaux P.                                                                                                                                                                                                  |
| EPI_ISL_645216, EPI_ISL_663227 to 663242, EPI_ISL_707781 to 707782, EPI_ISL_768822, EPI_ISL_779785, EPI_ISL_900531                                                                                                                                                                                                                                                                                                                                                 | CHU SUD AMIENS                                    | Department of Virology, Henri Mondor University Hospital, Assistance Publique Hôpitaux de Paris, Université Paris-Est Créteil, INSERM U955 | Alexandre Soulier; Christophe Rodriguez; Elisabeth Trawinski; Guillaume Gricourt; Jean-Michel Pawlowsky; Melissa N'Debi; Slim Fourati; Vanessa Demontant                                                                                                                                   |
| EPI_ISL_671941 to 671972, EPI_ISL_671975 to 671977, EPI_ISL_751448 to 751499, EPI_ISL_754136 to 754139, EPI_ISL_804370 to 804373, EPI_ISL_804375 to 804378, EPI_ISL_833457 to 833480, EPI_ISL_848063 to 848068, EPI_ISL_852814 to 852818, EPI_ISL_864581 to 864593, EPI_ISL_875666 to 875673, EPI_ISL_913102 to 913115, EPI_ISL_913592 to 913593                                                                                                                   | CHU Toulouse                                      | CNR Virus des Infections Respiratoires - France SUD                                                                                        | Antonin Bal; Bruno Lina; Gregory Destras; Gwendolyne Burfin; Hadrien Règue; Jean Michel Mansuy; Laurence Josset; Martine Valette; Quentin Semanas                                                                                                                                          |
| see above                                                                                                                                                                                                                                                                                                                                                                                                                                                          | CHU Tours                                         | CNR Virus des Infections Respiratoires - France SUD                                                                                        | Antonin Bal; Bruno Lina; Catherine Gaudy-Graffin; Claudia Gonzalez; Florence Morfin; Gregory Destras; Gwendolyne Burfin; Hadrien Regue; Julien Marlet; Karl Stefic; Laurence Josset; Martine Valette; Maude Bouscambert; Quentin Semanas; Thibault Guinoiseau; Yahia Mekki                 |
| EPI_ISL_982128, EPI_ISL_982142 to 982144, EPI_ISL_982146, EPI_ISL_982154, EPI_ISL_982165, EPI_ISL_982174 to 982176                                                                                                                                                                                                                                                                                                                                                 | CHU Tours - Virologie                             | National Reference Center for Viruses of Respiratory Infections, Institut Pasteur, Paris                                                   | Angela Brisebarre; Camille Capel; Etienne Simon-Lorière; Gaudy Graffin Catherine; Marion Barbet; Maud Vanpeene; Méline Bizard; Sylvie Behillili; Sylvie van der Werf; Vincent Enouf                                                                                                        |
| EPI_ISL_641551 to 641555, EPI_ISL_660373 to 660377, EPI_ISL_660665 to 660671                                                                                                                                                                                                                                                                                                                                                                                       | CHU de Limoges                                    | CNR Virus des Infections Respiratoires - France SUD                                                                                        | Antonin Bal; Bruno Lina; Gregory Destras; Gwendolyne Burfin; Hadrien Règue; Laurence Josset; Martine Valette; Quentin Semanas; Sylvie Rogez                                                                                                                                                |
| EPI_ISL_735391                                                                                                                                                                                                                                                                                                                                                                                                                                                     |                                                   |                                                                                                                                            |                                                                                                                                                                                                                                                                                            |
| EPI_ISL_860820, EPI_ISL_860822 to 860823, EPI_ISL_860825, EPI_ISL_860827, EPI_ISL_860832, EPI_ISL_860867, EPI_ISL_860891 to 860897, EPI_ISL_860907 to 860909, EPI_ISL_861235, EPI_ISL_861238                                                                                                                                                                                                                                                                       |                                                   |                                                                                                                                            |                                                                                                                                                                                                                                                                                            |
| see above                                                                                                                                                                                                                                                                                                                                                                                                                                                          |                                                   |                                                                                                                                            |                                                                                                                                                                                                                                                                                            |
| EPI_ISL_644673 to 644680, EPI_ISL_645174 to                                                                                                                                                                                                                                                                                                                                                                                                                        |                                                   |                                                                                                                                            |                                                                                                                                                                                                                                                                                            |

|                                                                                                                                                                                                                                                                                                                                                                                                                                                                                                                                                                                                                                                                                                                                                                                                                    |                                                       |                                                                                                                                                                                                                                                        |                                                                                                                                                                                                                                                                                                                                                                                                                                                                          |                                                                                                                                                                                                                                                                          |
|--------------------------------------------------------------------------------------------------------------------------------------------------------------------------------------------------------------------------------------------------------------------------------------------------------------------------------------------------------------------------------------------------------------------------------------------------------------------------------------------------------------------------------------------------------------------------------------------------------------------------------------------------------------------------------------------------------------------------------------------------------------------------------------------------------------------|-------------------------------------------------------|--------------------------------------------------------------------------------------------------------------------------------------------------------------------------------------------------------------------------------------------------------|--------------------------------------------------------------------------------------------------------------------------------------------------------------------------------------------------------------------------------------------------------------------------------------------------------------------------------------------------------------------------------------------------------------------------------------------------------------------------|--------------------------------------------------------------------------------------------------------------------------------------------------------------------------------------------------------------------------------------------------------------------------|
| 645183, EPI_ISL_663206 to 663226,<br>EPI_ISL_666711 to 666720                                                                                                                                                                                                                                                                                                                                                                                                                                                                                                                                                                                                                                                                                                                                                      |                                                       |                                                                                                                                                                                                                                                        |                                                                                                                                                                                                                                                                                                                                                                                                                                                                          |                                                                                                                                                                                                                                                                          |
| EPI_ISL_860821, EPI_ISL_860828, EPI_ISL_860863, EPI_ISL_860865, EPI_ISL_860868, EPI_ISL_860890, EPI_ISL_860913 to 860930                                                                                                                                                                                                                                                                                                                                                                                                                                                                                                                                                                                                                                                                                           |                                                       |                                                                                                                                                                                                                                                        |                                                                                                                                                                                                                                                                                                                                                                                                                                                                          |                                                                                                                                                                                                                                                                          |
| see above                                                                                                                                                                                                                                                                                                                                                                                                                                                                                                                                                                                                                                                                                                                                                                                                          | CHU de Nantes - Hôtel Dieu - Labo. Virologie          | National Reference Center for Viruses of Respiratory Infections, Institut Pasteur, Paris                                                                                                                                                               | Andre-Garnier Elisabeth; Angela Brisebarre; Camille Capel; Etienne Simon-Lorière; Marion Barbet; Maud Vanpeene; Méline Bizard; Sylvie Behillil; Sylvie van der Werf; Vincent Enouf                                                                                                                                                                                                                                                                                       |                                                                                                                                                                                                                                                                          |
| EPI_ISL_909702                                                                                                                                                                                                                                                                                                                                                                                                                                                                                                                                                                                                                                                                                                                                                                                                     | CHU de Nantes - Hôtel Dieu. Laboratoire de Virologie  | National Reference Center for Viruses of Respiratory Infections, Institut Pasteur, Paris                                                                                                                                                               | Angela Brisebarre; Bressollette CéLine; Camille Capel; Etienne Simon-Lorière; Marion Barbet; Maud Vanpeene; Méline Bizard; Sylvie Behillil; Sylvie van der Werf; Vincent Enouf                                                                                                                                                                                                                                                                                           |                                                                                                                                                                                                                                                                          |
| EPI_ISL_645173                                                                                                                                                                                                                                                                                                                                                                                                                                                                                                                                                                                                                                                                                                                                                                                                     | CHU de Nice                                           | CNR Virus des Infections Respiratoires - France SUD                                                                                                                                                                                                    | Antonin Bal; Bruno Lina; Gregory Destras; Gwendolynne Burfin; Géraldine Gonfrier; Hadrien Règue; Laurence Josset; Martine Valette; Quentin Semanas; Valérie Giordanengo                                                                                                                                                                                                                                                                                                  |                                                                                                                                                                                                                                                                          |
| EPI_ISL_641528                                                                                                                                                                                                                                                                                                                                                                                                                                                                                                                                                                                                                                                                                                                                                                                                     | CHU de Nice - Hôpital Archet 10                       | CNR Virus des Infections Respiratoires - France SUD                                                                                                                                                                                                    | Antonin Bal; Bruno Lina; Gregory Destras; Gwendolynne Burfin; Géraldine Gonfrier; Hadrien Règue; Laurence Josset; Martine Valette; Quentin Semanas; Valérie Giordanengo                                                                                                                                                                                                                                                                                                  |                                                                                                                                                                                                                                                                          |
| EPI_ISL_641529                                                                                                                                                                                                                                                                                                                                                                                                                                                                                                                                                                                                                                                                                                                                                                                                     | CHU de Nice - Hôpital Archet 11                       | CNR Virus des Infections Respiratoires - France SUD                                                                                                                                                                                                    | Antonin Bal; Bruno Lina; Gregory Destras; Gwendolynne Burfin; Géraldine Gonfrier; Hadrien Règue; Laurence Josset; Martine Valette; Quentin Semanas; Valérie Giordanengo                                                                                                                                                                                                                                                                                                  |                                                                                                                                                                                                                                                                          |
| EPI_ISL_641530                                                                                                                                                                                                                                                                                                                                                                                                                                                                                                                                                                                                                                                                                                                                                                                                     | CHU de Nice - Hôpital Archet 12                       | CNR Virus des Infections Respiratoires - France SUD                                                                                                                                                                                                    | Antonin Bal; Bruno Lina; Gregory Destras; Gwendolynne Burfin; Géraldine Gonfrier; Hadrien Règue; Laurence Josset; Martine Valette; Quentin Semanas; Valérie Giordanengo                                                                                                                                                                                                                                                                                                  |                                                                                                                                                                                                                                                                          |
| EPI_ISL_641531                                                                                                                                                                                                                                                                                                                                                                                                                                                                                                                                                                                                                                                                                                                                                                                                     | CHU de Nice - Hôpital Archet 13                       | CNR Virus des Infections Respiratoires - France SUD                                                                                                                                                                                                    | Antonin Bal; Bruno Lina; Gregory Destras; Gwendolynne Burfin; Géraldine Gonfrier; Hadrien Règue; Laurence Josset; Martine Valette; Quentin Semanas; Valérie Giordanengo                                                                                                                                                                                                                                                                                                  |                                                                                                                                                                                                                                                                          |
| EPI_ISL_641532                                                                                                                                                                                                                                                                                                                                                                                                                                                                                                                                                                                                                                                                                                                                                                                                     | CHU de Nice - Hôpital Archet 14                       | CNR Virus des Infections Respiratoires - France SUD                                                                                                                                                                                                    | Antonin Bal; Bruno Lina; Gregory Destras; Gwendolynne Burfin; Géraldine Gonfrier; Hadrien Règue; Laurence Josset; Martine Valette; Quentin Semanas; Valérie Giordanengo                                                                                                                                                                                                                                                                                                  |                                                                                                                                                                                                                                                                          |
| EPI_ISL_641533                                                                                                                                                                                                                                                                                                                                                                                                                                                                                                                                                                                                                                                                                                                                                                                                     | CHU de Nice - Hôpital Archet 15                       | CNR Virus des Infections Respiratoires - France SUD                                                                                                                                                                                                    | Antonin Bal; Bruno Lina; Gregory Destras; Gwendolynne Burfin; Géraldine Gonfrier; Hadrien Règue; Laurence Josset; Martine Valette; Quentin Semanas; Valérie Giordanengo                                                                                                                                                                                                                                                                                                  |                                                                                                                                                                                                                                                                          |
| EPI_ISL_641534                                                                                                                                                                                                                                                                                                                                                                                                                                                                                                                                                                                                                                                                                                                                                                                                     | CHU de Nice - Hôpital Archet 16                       | CNR Virus des Infections Respiratoires - France SUD                                                                                                                                                                                                    | Antonin Bal; Bruno Lina; Gregory Destras; Gwendolynne Burfin; Géraldine Gonfrier; Hadrien Règue; Laurence Josset; Martine Valette; Quentin Semanas; Valérie Giordanengo                                                                                                                                                                                                                                                                                                  |                                                                                                                                                                                                                                                                          |
| EPI_ISL_641520, EPI_ISL_693387 to 693390,<br>EPI_ISL_779846                                                                                                                                                                                                                                                                                                                                                                                                                                                                                                                                                                                                                                                                                                                                                        | CHU de Nice - Hôpital Archet 2                        | CNR Virus des Infections Respiratoires - France SUD                                                                                                                                                                                                    | Antonin Bal; Bruno Lina; Gregory Destras; Gwendolynne Burfin; Géraldine Gonfrier; Hadrien Règue; Laurence Josset; Martine Valette; Quentin Semanas; Valérie Giordanengo                                                                                                                                                                                                                                                                                                  |                                                                                                                                                                                                                                                                          |
| EPI_ISL_641522                                                                                                                                                                                                                                                                                                                                                                                                                                                                                                                                                                                                                                                                                                                                                                                                     | CHU de Nice - Hôpital Archet 3                        | CNR Virus des Infections Respiratoires - France SUD                                                                                                                                                                                                    | Antonin Bal; Bruno Lina; Gregory Destras; Gwendolynne Burfin; Géraldine Gonfrier; Hadrien Règue; Laurence Josset; Martine Valette; Quentin Semanas; Valérie Giordanengo                                                                                                                                                                                                                                                                                                  |                                                                                                                                                                                                                                                                          |
| EPI_ISL_641523                                                                                                                                                                                                                                                                                                                                                                                                                                                                                                                                                                                                                                                                                                                                                                                                     | CHU de Nice - Hôpital Archet 4                        | CNR Virus des Infections Respiratoires - France SUD                                                                                                                                                                                                    | Antonin Bal; Bruno Lina; Gregory Destras; Gwendolynne Burfin; Géraldine Gonfrier; Hadrien Règue; Laurence Josset; Martine Valette; Quentin Semanas; Valérie Giordanengo                                                                                                                                                                                                                                                                                                  |                                                                                                                                                                                                                                                                          |
| EPI_ISL_641524                                                                                                                                                                                                                                                                                                                                                                                                                                                                                                                                                                                                                                                                                                                                                                                                     | CHU de Nice - Hôpital Archet 5                        | CNR Virus des Infections Respiratoires - France SUD                                                                                                                                                                                                    | Antonin Bal; Bruno Lina; Gregory Destras; Gwendolynne Burfin; Géraldine Gonfrier; Hadrien Règue; Laurence Josset; Martine Valette; Quentin Semanas; Valérie Giordanengo                                                                                                                                                                                                                                                                                                  |                                                                                                                                                                                                                                                                          |
| EPI_ISL_641525                                                                                                                                                                                                                                                                                                                                                                                                                                                                                                                                                                                                                                                                                                                                                                                                     | CHU de Nice - Hôpital Archet 6                        | CNR Virus des Infections Respiratoires - France SUD                                                                                                                                                                                                    | Antonin Bal; Bruno Lina; Gregory Destras; Gwendolynne Burfin; Géraldine Gonfrier; Hadrien Règue; Laurence Josset; Martine Valette; Quentin Semanas; Valérie Giordanengo                                                                                                                                                                                                                                                                                                  |                                                                                                                                                                                                                                                                          |
| EPI_ISL_641526                                                                                                                                                                                                                                                                                                                                                                                                                                                                                                                                                                                                                                                                                                                                                                                                     | CHU de Nice - Hôpital Archet 7                        | CNR Virus des Infections Respiratoires - France SUD                                                                                                                                                                                                    | Antonin Bal; Bruno Lina; Gregory Destras; Gwendolynne Burfin; Géraldine Gonfrier; Hadrien Règue; Laurence Josset; Martine Valette; Quentin Semanas; Valérie Giordanengo                                                                                                                                                                                                                                                                                                  |                                                                                                                                                                                                                                                                          |
| EPI_ISL_641521                                                                                                                                                                                                                                                                                                                                                                                                                                                                                                                                                                                                                                                                                                                                                                                                     | CHU de Nice - Hôpital Archet 8                        | CNR Virus des Infections Respiratoires - France SUD                                                                                                                                                                                                    | Antonin Bal; Bruno Lina; Gregory Destras; Gwendolynne Burfin; Géraldine Gonfrier; Hadrien Règue; Laurence Josset; Martine Valette; Quentin Semanas; Valérie Giordanengo                                                                                                                                                                                                                                                                                                  |                                                                                                                                                                                                                                                                          |
| EPI_ISL_641527                                                                                                                                                                                                                                                                                                                                                                                                                                                                                                                                                                                                                                                                                                                                                                                                     | CHU de Nice - Hôpital Archet 9                        | CNR Virus des Infections Respiratoires - France SUD                                                                                                                                                                                                    | Antonin Bal; Bruno Lina; Gregory Destras; Gwendolynne Burfin; Géraldine Gonfrier; Hadrien Règue; Laurence Josset; Martine Valette; Quentin Semanas; Valérie Giordanengo                                                                                                                                                                                                                                                                                                  |                                                                                                                                                                                                                                                                          |
| EPI_ISL_641519, EPI_ISL_641535 to 641545,<br>EPI_ISL_645184 to 645187, EPI_ISL_649942 to<br>649953, EPI_ISL_660326 to 660352,<br>EPI_ISL_660432                                                                                                                                                                                                                                                                                                                                                                                                                                                                                                                                                                                                                                                                    | CHU de Saint-Étienne Hôpital Nord                     | CNR Virus des Infections Respiratoires - France SUD                                                                                                                                                                                                    | Antonin Bal; Bruno Lina; Bruno Pozzetto; Gregory Destras; Gwendolynne Burfin; Hadrien Règue; Issam Bechri; Laurence Josset; Manon Vogrig; Marine Delorme; Martine Valette; Quentin Semanas; Sylvie Gonzalo; Sylvie Pilllet; Thomas Bourlet                                                                                                                                                                                                                               |                                                                                                                                                                                                                                                                          |
| EPI_ISL_745260                                                                                                                                                                                                                                                                                                                                                                                                                                                                                                                                                                                                                                                                                                                                                                                                     | CHUM-Site Glen-LAB Microbiologie                      | Laboratoire de santé publique du Québec                                                                                                                                                                                                                | Guillaume Bourque; Ioannis Ragoussis; Jesse Shapiro; Mark Lathrop and Michel Roger on behalf of the CoVSeQ research group ( <a href="http://covseq.ca/researchgroup">http://covseq.ca/researchgroup</a> ); Sandrine Moreira                                                                                                                                                                                                                                              |                                                                                                                                                                                                                                                                          |
| EPI_ISL_683835                                                                                                                                                                                                                                                                                                                                                                                                                                                                                                                                                                                                                                                                                                                                                                                                     | CICM                                                  | Malaria Research and Training Center (MRTC-Parasito)                                                                                                                                                                                                   | Abdoulaye Djimde; Antoine Dara                                                                                                                                                                                                                                                                                                                                                                                                                                           |                                                                                                                                                                                                                                                                          |
| EPI_ISL_906540, EPI_ISL_906544                                                                                                                                                                                                                                                                                                                                                                                                                                                                                                                                                                                                                                                                                                                                                                                     | CLINICA DE OCCIDENTE                                  | Instituto Nacional de Salud- Dirección de Investigación en Salud Pública, Universidad de los Andes- Applied genomics research group, Vicerrectoría de Investigación y Creación, Universidad de los Andes- Systems and Computing Engineering Department | Carlos Franco-Muñoz; Diego A. Álvarez-Díaz; Diego Andrés Prada; Gerardo Santamaría Jorge Duitama; Héctor Alejandro Ruiz-Moreno; Jhonnatan Reales-González; Jorge Ivan Díaz; Julian Naizaque; Katherine Laiton-Donato; Laura Natalia Gonzalez; Magdalena Wiesner; Marcela Mercado-Reyes; María T. Herrera-Sepúlveda; Martha Lucia Ospina Martínez; Mauricio Pacheco-Montealegre; Sheryll Corchuelo; Silvia Restrepo-Restrepo                                              |                                                                                                                                                                                                                                                                          |
| EPI_ISL_906536                                                                                                                                                                                                                                                                                                                                                                                                                                                                                                                                                                                                                                                                                                                                                                                                     | CLINICA OCCIDENTE                                     | Instituto Nacional de Salud- Dirección de Investigación en Salud Pública, Universidad de los Andes- Applied genomics research group, Vicerrectoría de Investigación y Creación, Universidad de los Andes- Systems and Computing Engineering Department | Carlos Franco-Muñoz; Diego A. Álvarez-Díaz; Diego Andrés Prada; Gerardo Santamaría Jorge Duitama; Héctor Alejandro Ruiz-Moreno; Jhonnatan Reales-González; Jorge Ivan Díaz; Julian Naizaque; Katherine Laiton-Donato; Laura Natalia Gonzalez; Magdalena Wiesner; Marcela Mercado-Reyes; María T. Herrera-Sepúlveda; Martha Lucia Ospina Martínez; Mauricio Pacheco-Montealegre; Sheryll Corchuelo; Silvia Restrepo-Restrepo                                              |                                                                                                                                                                                                                                                                          |
| EPI_ISL_623098 to 623102, EPI_ISL_636476 to 636477, EPI_ISL_636479, EPI_ISL_636484 to 636485, EPI_ISL_636487, EPI_ISL_636489 to 636490, EPI_ISL_639974 to 639977, EPI_ISL_639979 to 639983, EPI_ISL_639985 to 640014, EPI_ISL_676542 to 676573, EPI_ISL_678494 to 678508, EPI_ISL_678534 to 678547, EPI_ISL_681261 to 681263, EPI_ISL_683334 to 683402, EPI_ISL_684107, EPI_ISL_692733 to 692768, EPI_ISL_693488 to 693514, EPI_ISL_700327, EPI_ISL_728304 to 728320, EPI_ISL_728516 to 728551, EPI_ISL_730640 to 730651, EPI_ISL_732677 to 732703, EPI_ISL_745307 to 745311, EPI_ISL_745316 to 745334, EPI_ISL_745337 to 745397, EPI_ISL_768827 to 768828, EPI_ISL_779780, EPI_ISL_779783 to 779784, EPI_ISL_779787 to 779813, EPI_ISL_779845, EPI_ISL_900526, EPI_ISL_900532 to 900533, EPI_ISL_900544 to 900567 | see above                                             | CNR Virus des Infections Respiratoires - France SUD                                                                                                                                                                                                    | CNR Virus des Infections Respiratoires - France SUD                                                                                                                                                                                                                                                                                                                                                                                                                      | Alexandre Gaymard; Antonin Bal; Bruno Lina; Claudia Gonzalez; Florence Morfin-Sherpa; Gregory Destras; Gwendolynne Burfin; Hadrien Règue; Laurence Josset; Martine Valette; Maude Bouscambert-Duchamp; Quentin Semanas; Solenne Brun                                     |
| EPI_ISL_751575, EPI_ISL_751630, EPI_ISL_751701, EPI_ISL_751704 to 751705, EPI_ISL_751728, EPI_ISL_751763, EPI_ISL_751766, EPI_ISL_903581, EPI_ISL_903606, EPI_ISL_903648, EPI_ISL_903780 to 903781, EPI_ISL_903798 to 903799, EPI_ISL_903818, EPI_ISL_903861, EPI_ISL_903936                                                                                                                                                                                                                                                                                                                                                                                                                                                                                                                                       | see above                                             | CO Dept. of Public Health and Environment, Lab Services Division                                                                                                                                                                                       | Genomics and Discovery, Respiratory Viruses Branch, Division of Viral Diseases, Centers for Disease Control and Prevention                                                                                                                                                                                                                                                                                                                                               | Anna Montmayeur; Anna Uehara; Ben L. Rambo-Martin; Clinton R. Paden; Dhvani Batra; Haibin Wang; Jasmine Padilla; Jing Zhang; Justin Lee; Krista Queen; Lori Rowe; Mark Burroughs; Mili Sheth; Peter W. Cook; Rachel Marine; Sarah Nobles; Suxiang Tong; Yan Li; Ying Tao |
| EPI_ISL_954780                                                                                                                                                                                                                                                                                                                                                                                                                                                                                                                                                                                                                                                                                                                                                                                                     | COMPLEJO HOSPITALARIO XERAL-CALDE                     | Instituto de Salud Carlos III                                                                                                                                                                                                                          | A. Monzón; F. Casas; I. Alonso, P.; I. Jiménez; Iglesias-Caballero; M. Camarero; P. Zaballos; S. Cuesta; S. Pozo; S. Sandonis; S. Varona; V. Vázquez                                                                                                                                                                                                                                                                                                                     |                                                                                                                                                                                                                                                                          |
| EPI_ISL_735408                                                                                                                                                                                                                                                                                                                                                                                                                                                                                                                                                                                                                                                                                                                                                                                                     | COVID 19 Centro de Combate ao Coronavirus CCC Jandira | Instituto Adolfo Lutz, Interdisciplinary Procedures Center, Strategic Laboratory                                                                                                                                                                       | Claudia Regina Gonçalves; Claudio Tavares Sacchi; Erica Valessa Ramos Gomes; Karoline Rodrigues Campos                                                                                                                                                                                                                                                                                                                                                                   |                                                                                                                                                                                                                                                                          |
| EPI_ISL_847826 to 847827                                                                                                                                                                                                                                                                                                                                                                                                                                                                                                                                                                                                                                                                                                                                                                                           | COVID-19 National Reference Laboratory                | COVID-19 National Reference Laboratory                                                                                                                                                                                                                 | Ahmad Ghasemi; Amitis Ramezani; Farideh Niknam; Hessam Nemati; Kayhan Azadmanesh; Mahsa Tavakoli; Maryam Rostamtabar; Marzieh Sadjadi; Mohamad Sadeq Shams Nosrati; Mohammad Hassan Pouriayevali; Mohammad Mehdi Mortazavipour; Mostafa Salehi-Vaziri; Parastoo Yekta; Sahar Khakifrouz; Sana Eybpoosh; Sanam Azad-Manjiri; Sepideh Gerdooei; Setareh Kashanian; Tahereh Mohammadi; Tahmineh Jalali; Zabihollah Shoja; Zahra Ahmadi; Zahra Fereydouni; Zeynab Veisizadeh |                                                                                                                                                                                                                                                                          |

|                                                                                                                                                                                                                                                                                                                                                                                                                                                                                                                                                                                                                                                                                                                                |                                                      |                                                                                                                        |                                                                                                                                                                                                                                                                                                                                                                                                                                                                                                                                                                                                            |
|--------------------------------------------------------------------------------------------------------------------------------------------------------------------------------------------------------------------------------------------------------------------------------------------------------------------------------------------------------------------------------------------------------------------------------------------------------------------------------------------------------------------------------------------------------------------------------------------------------------------------------------------------------------------------------------------------------------------------------|------------------------------------------------------|------------------------------------------------------------------------------------------------------------------------|------------------------------------------------------------------------------------------------------------------------------------------------------------------------------------------------------------------------------------------------------------------------------------------------------------------------------------------------------------------------------------------------------------------------------------------------------------------------------------------------------------------------------------------------------------------------------------------------------------|
| EPI_ISL_861662                                                                                                                                                                                                                                                                                                                                                                                                                                                                                                                                                                                                                                                                                                                 | CS I Tacito Leite de Carvalho e Silva                | Instituto Adolfo Lutz, Interdisciplinary Procedures Center, Strategic Laboratory                                       | Claudia Regina Gonçalves; Claudio Tavares Sacchi; Erica Valessa Ramos Gomes; Karoline Rodrigues Campos                                                                                                                                                                                                                                                                                                                                                                                                                                                                                                     |
| EPI_ISL_636980                                                                                                                                                                                                                                                                                                                                                                                                                                                                                                                                                                                                                                                                                                                 | CS Xai Xai                                           | KRISP, KZN Research Innovation and Sequencing Platform                                                                 | Glandhari J; Ismael N; Nadia Siteo; Nedio Mabunda; Paulo Arnaldo; Pillay S; Tegally H; Wilkinson E; de Oliveira T                                                                                                                                                                                                                                                                                                                                                                                                                                                                                          |
| EPI_ISL_910031 to 910221, EPI_ISL_910223 to 910323                                                                                                                                                                                                                                                                                                                                                                                                                                                                                                                                                                                                                                                                             | CSIR-Centre for Cellular and Molecular Biology       | CSIR-Centre for Cellular and Molecular Biology                                                                         | Archana Bharadwaj Siva; B Himasi; Blessy B John; Divya Tej Sowpati; Karthik Bharadwaj Tallapaka; Lamuk Zaveri; Namami Gaur; Payel Mukherjee; Pratheusa Maccha; Priya Singh; Purushotham Vodna; Rakesh K Mishra; Sofia Banu; Tulasi Nagabandi; Viswagithe S L                                                                                                                                                                                                                                                                                                                                               |
| EPI_ISL_661304 to 661311, EPI_ISL_944762 to 944763, EPI_ISL_944765, EPI_ISL_944768 to 944769, EPI_ISL_944771 to 944773, EPI_ISL_944775 to 944776, EPI_ISL_944781, EPI_ISL_944783 to 944784, EPI_ISL_944788 to 944789, EPI_ISL_944791                                                                                                                                                                                                                                                                                                                                                                                                                                                                                           | see above                                            | CSIR-Indian Institute of Chemical Biology, MEDICA Superspecialty Hospital Kolkata                                      | Abhishake Lahiri; Debaleena Bhowmik; Dr. Arpita Ghosh Mitra; Dr. Aviral Roy; Dr. Partha Chakrabarti; Dr. Rajesh Pandey; Dr. Saikat Chakrabarti; Dr. Sandip Paul; Dr. Soumen Saha; Priyanka Mallick; Sujay Krishna Maity                                                                                                                                                                                                                                                                                                                                                                                    |
| EPI_ISL_751554, EPI_ISL_751624, EPI_ISL_751649 to 751650, EPI_ISL_751706, EPI_ISL_751729, EPI_ISL_751759, EPI_ISL_751762, EPI_ISL_903851, EPI_ISL_903921                                                                                                                                                                                                                                                                                                                                                                                                                                                                                                                                                                       | see above                                            | CT-Dr. Katherine A. Kelley State Public Health Lab                                                                     | Genomics and Discovery, Respiratory Viruses Branch, Division of Viral Diseases, Centers for Disease Control and Prevention                                                                                                                                                                                                                                                                                                                                                                                                                                                                                 |
| EPI_ISL_812141, EPI_ISL_914036 to 914038                                                                                                                                                                                                                                                                                                                                                                                                                                                                                                                                                                                                                                                                                       | CT-Dr. Katherine A. Kelley State Public Health Lab   | Pathogen Discovery, Respiratory Viruses Branch, Division of Viral Diseases, Centers for Disease Control and Prevention | Anna Montmayeur; Anna Uehara; Ben L. Rambo-Martin; Clinton R. Paden; Dhvani Batra; Haibin Wang; Jasmine Padilla; Jing Zhang; Justin Lee; Krista Queen; Lori Rowe; Mark Burroughs; Mili Sheth; Peter W. Cook; Rachel Marine; Sarah Nobles; Suxiang Tong; Yan Li; Ying Tao                                                                                                                                                                                                                                                                                                                                   |
| EPI_ISL_756369 to 756374                                                                                                                                                                                                                                                                                                                                                                                                                                                                                                                                                                                                                                                                                                       | CUMC - CHI Bergan Mercy                              | Creighton University School of Medicine, Departments of Medical Microbiology and Pharmacology and Neuroscience         | Anne V. Cheng; Christopher J. Destache; Holly A. Stessman; Jacob A. Siedlik; Michael Belshan; Morgan A. Raine; Richard V. Goering                                                                                                                                                                                                                                                                                                                                                                                                                                                                          |
| EPI_ISL_909946 to 909952, EPI_ISL_918489 to 918490                                                                                                                                                                                                                                                                                                                                                                                                                                                                                                                                                                                                                                                                             | CUSL/UCLouvain COVID testing federal platform        | UCLouvain/IREC/MBLG                                                                                                    | Benoit Kabamba Mukadi; Jean Ruelle; Lysa Pinsmaye                                                                                                                                                                                                                                                                                                                                                                                                                                                                                                                                                          |
| EPI_ISL_632909 to 632933                                                                                                                                                                                                                                                                                                                                                                                                                                                                                                                                                                                                                                                                                                       | Cadham Provincial laboratory                         | Cadham Provincial laboratory                                                                                           | Anna Majer; Anneliese Landgraff; CanCOGeN's metadata curation team; Darian Hole; David Alexander; Elsie Grudeski; Gary Van Domselaar; Grace Seo; Jared Bullard; Jennifer Tanner; Kerry Dust; Madison Chapel; Morag Graham; Natalie Knox; Nathalie Bastien; Paul Van Caesele; Philip Mabon; Public Health Agency of Canada CanCOGeN team; Rhiannon Huzarewich; Russell Mandes; Shari Tyson; Timothy Booth; Yan Li                                                                                                                                                                                           |
| EPI_ISL_935753 to 935970, EPI_ISL_937514, EPI_ISL_979271 to 979326                                                                                                                                                                                                                                                                                                                                                                                                                                                                                                                                                                                                                                                             | Cadham Provincial laboratory                         | National Microbiology Laboratory (NML)                                                                                 | Anna Majer; Anneliese Landgraff; CanCOGeN's metadata curation team; Darian Hole; David Alexander; Elsie Grudeski; Gary Van Domselaar; Grace Seo; Jared Bullard; Jennifer Tanner; Kerry Dust; Kirsten Biggar; Madison Chapel; Morag Graham; Natalie Knox; Nathalie Bastien; Paul Van Caesele; Philip Mabon; Public Health Agency of Canada CanCOGeN team; Rhiannon Huzarewich; Russell Mandes; Shari Tyson; Timothy Booth; Yan Li                                                                                                                                                                           |
| EPI_ISL_754914 to 755114, EPI_ISL_824390 to 824406                                                                                                                                                                                                                                                                                                                                                                                                                                                                                                                                                                                                                                                                             | California Department of Public Health               | California Department of Public Health                                                                                 | CDPH IDLB COVIDNet                                                                                                                                                                                                                                                                                                                                                                                                                                                                                                                                                                                         |
| EPI_ISL_755940 to 755942, EPI_ISL_847516, EPI_ISL_847518 to 847535, EPI_ISL_847537 to 847539, EPI_ISL_847541 to 847544, EPI_ISL_847547 to 847552, EPI_ISL_847554 to 847562, EPI_ISL_847564 to 847578, EPI_ISL_847580 to 847618, EPI_ISL_847623 to 847639, EPI_ISL_847645 to 847715, EPI_ISL_847717 to 847719, EPI_ISL_847721 to 847729, EPI_ISL_847732 to 847735, EPI_ISL_847737, EPI_ISL_847739 to 847740, EPI_ISL_847745, EPI_ISL_847748 to 847781, EPI_ISL_847783 to 847818, EPI_ISL_855389 to 855398, EPI_ISL_977721 to 977742, EPI_ISL_977745 to 977755, EPI_ISL_977757 to 977851, EPI_ISL_977864 to 977867, EPI_ISL_977869, EPI_ISL_977878, EPI_ISL_978976 to 978983, EPI_ISL_984318 to 984362, EPI_ISL_984364 to 984613 | see above                                            | California Department of Public Health                                                                                 | Chiu Laboratory, University of California, San Francisco                                                                                                                                                                                                                                                                                                                                                                                                                                                                                                                                                   |
| EPI_ISL_885128 to 885138, EPI_ISL_912187 to 912194                                                                                                                                                                                                                                                                                                                                                                                                                                                                                                                                                                                                                                                                             | California Institute of Technology                   | Chan-Zuckerberg Biohub                                                                                                 | Brian Bushnell; Candace Wang; Charles Chiu; Debra Wadford; Jill Hacker; Scot Federman; Venice Servellita; Xianding (Wayne) Deng                                                                                                                                                                                                                                                                                                                                                                                                                                                                            |
| EPI_ISL_745121                                                                                                                                                                                                                                                                                                                                                                                                                                                                                                                                                                                                                                                                                                                 | Calvinia Hospital                                    | National Health Laboratory Service (NHLS), Tygerberg                                                                   | Bronwyn Kleinhans; Eduan Wilkindon; Gert van Zyl; Houriyah Tegally; Kayla Delaney; Susan Engelbrecht; Tulio de Oliveira; Wolfgang Preiser                                                                                                                                                                                                                                                                                                                                                                                                                                                                  |
| EPI_ISL_857315 to 857347, EPI_ISL_862783 to 862813, EPI_ISL_890195 to 890231, EPI_ISL_907086 to 907118                                                                                                                                                                                                                                                                                                                                                                                                                                                                                                                                                                                                                         | Cancer Biology Department, National Cancer Institute | Cancer Biology Department, National Cancer Institute                                                                   | A.A.; A.E.; A.N.; Abouelhoda, M.; Ahmed; Bahnassy; Elhosieni; F.W.; Gad; H.K.; Hafez; Hamdy; M.G.; M.M.; M.S.; O.S.; Sedawy; Soliman; Soliman, L.; Zekri                                                                                                                                                                                                                                                                                                                                                                                                                                                   |
| EPI_ISL_622768 to 622771, EPI_ISL_622775, EPI_ISL_622780 to 622782, EPI_ISL_622784, EPI_ISL_622786, EPI_ISL_622788 to 622791, EPI_ISL_622794 to 622801, EPI_ISL_622808 to 622813, EPI_ISL_622824 to 622830, EPI_ISL_661260, EPI_ISL_682283 to 682286, EPI_ISL_682295 to 682296, EPI_ISL_732963, EPI_ISL_755619 to 755623, EPI_ISL_755638, EPI_ISL_794627, EPI_ISL_843194 to 843195, EPI_ISL_843197 to 843200, EPI_ISL_877219 to 877220                                                                                                                                                                                                                                                                                         | see above                                            | Canterbury Health Laboratories                                                                                         | Institute of Environmental Science and Research (ESR)                                                                                                                                                                                                                                                                                                                                                                                                                                                                                                                                                      |
| EPI_ISL_812249                                                                                                                                                                                                                                                                                                                                                                                                                                                                                                                                                                                                                                                                                                                 | Cantonal Hospital Baden                              | Institute of Medical Virology, University of Zurich                                                                    | Anja Werner; Antje van der Linden; Arlo Upton; Chris Mansell; David Hammer; Dragana Drinkovic; Erasmus Smit; Gary McAuliffe; Hana Sofia Andersson; Hermes Perez; James Ussher; Jill Sherwood; Jing Wang; Joep de Gigt; Josh Freeman; Julia Howard; Juliet Elvy; Lauren Jelly; Mary DeAlmeida; Matt Blakiston; Matt Storey; Matthew Rogers; Max Bloomfield; Michael Addidle; Michelle Balm; Muhammad Faisal; Nikki Freed; Olin Silander; Sally Roberts; Sarah Jefferies; Sharmini Muttaiyah; Susan Morpeth; Susan Taylor; Timothy Blackmore; Yarni Sathyendran; Veronica Playle; Virginia Hope; Xiaoyun Ren |
| EPI_ISL_730623                                                                                                                                                                                                                                                                                                                                                                                                                                                                                                                                                                                                                                                                                                                 | Cantonal Hospital Frauenfeld                         | Institute of Medical Virology, University of Zurich                                                                    | Alexandra Trkola; Annette Audigé; Cyril Shah; Guido Bloemberg; Jon Huder; Jürg Böni; Kevin Steiner; Maria Grünberg; Maryam Zaheri; Michael Huber; Riccarda Capaul; Stefan Schmutz; Verena Kufner                                                                                                                                                                                                                                                                                                                                                                                                           |
| EPI_ISL_811127                                                                                                                                                                                                                                                                                                                                                                                                                                                                                                                                                                                                                                                                                                                 | Cantonal Hospital Winterthur                         | Institute of Medical Virology, University of Zurich                                                                    | Alexandra Trkola; Gabriela Ziltener; Jürg Böni; Maryam Zaheri; Michael Huber; Stefan Schmutz; Verena Kufner                                                                                                                                                                                                                                                                                                                                                                                                                                                                                                |
| EPI_ISL_710612                                                                                                                                                                                                                                                                                                                                                                                                                                                                                                                                                                                                                                                                                                                 | Capio Bro VC                                         | The Public Health Agency of Sweden                                                                                     | Alexander Wepf; Alexandra Trkola; Annette Audigé; Cyril Shah; Guido Bloemberg; Jon Huder; Jürg Böni; Kevin Steiner; Maria Grünberg; Maryam Zaheri; Michael Huber; Riccarda Capaul; Stefan Schmutz; Urs Karrer; Verena Kufner                                                                                                                                                                                                                                                                                                                                                                               |
| EPI_ISL_977538 to 977539, EPI_ISL_977581, EPI_ISL_977583 to 977584, EPI_ISL_977594                                                                                                                                                                                                                                                                                                                                                                                                                                                                                                                                                                                                                                             | Caribbean Public Health Agency                       | Carrington Lab, Department of PreClinical Sciences                                                                     | Department of Microbiology; The Public Health Agency of Sweden                                                                                                                                                                                                                                                                                                                                                                                                                                                                                                                                             |
| EPI_ISL_977655 to 977659, EPI_ISL_978931, EPI_ISL_978933, EPI_ISL_978935 to 978936, EPI_ISL_978938, EPI_ISL_978944, EPI_ISL_978947, EPI_ISL_978949                                                                                                                                                                                                                                                                                                                                                                                                                                                                                                                                                                             | see above                                            | Caribbean Public Health Agency                                                                                         | Carrington Lab, Department of PreClinical Sciences, Building 36, First Floor Biochemistry Unit, Faculty of Medical Sciences, The University of the West Indies                                                                                                                                                                                                                                                                                                                                                                                                                                             |
| EPI_ISL_857348, EPI_ISL_872194 to 872196                                                                                                                                                                                                                                                                                                                                                                                                                                                                                                                                                                                                                                                                                       | Caribbean Public Health Agency                       | Caribbean Public Health Agency                                                                                         | Adesh Ramsubhag; Arianne Brown-Jordan; Avery Hinds; Chinna Chinnadurai; Christine V. F. Carrington; Christopher Oura; Gabriel Escobar; Irad Potter; Jaya Jayaraman; Jerome Foster; John Lee; Karla Georges; Kenneth George; Marsha Ivey; Naresh Nandram; Nikita S. D. Sahadeo; Nuno Faria; Oliver Pybus; Rahul Naidu; Rajini Haraksingh; Risha Singh; Sarah Hill; Stanley Giddings; SueMin Nathaniel; Vernie Ramkissoon                                                                                                                                                                                    |
| EPI_ISL_872193                                                                                                                                                                                                                                                                                                                                                                                                                                                                                                                                                                                                                                                                                                                 | Caribbean Public Health Agency                       | Caribbean Public Health Agency                                                                                         | Adesh Ramsubhag; Arianne Brown-Jordan; Avery Hinds; Chinna Chinnadurai; Christine V. F. Carrington; Christopher Oura; Gabriel Escobar; Jaya Jayaraman; Jerome Foster; Karla Georges; Marsha Ivey; Naresh Nandram; Nikita S. D. Sahadeo; Nuno Faria; Oliver Pybus; Rahul Naidu; Rajini Haraksingh; Risha Singh; Roshan Parasram; Sarah Hill; Stanley Giddings; SueMin Nathaniel; Vernie Ramkissoon                                                                                                                                                                                                          |
| EPI_ISL_756360                                                                                                                                                                                                                                                                                                                                                                                                                                                                                                                                                                                                                                                                                                                 | Caribbean Regional Public Health Authority           | Caribbean Regional Public Health Authority                                                                             | Adesh Ramsubhag; Arianne Brown-Jordan; Avery Hinds; Chinna Chinnadurai; Christine V. F. Carrington; Christopher Oura; Gabriel Escobar; Jaya Jayaraman; Jerome Foster; Karla Georges; Marsha Ivey; Naresh Nandram; Nikita S. D. Sahadeo; Nuno Faria; Oliver Pybus; Rahul Naidu; Rajini Haraksingh; Risha Singh; Sarah Hill; Simone Keizer-Beache; Stanley Giddings; SueMin Nathaniel; Vernie Ramkissoon                                                                                                                                                                                                     |
| EPI_ISL_794663                                                                                                                                                                                                                                                                                                                                                                                                                                                                                                                                                                                                                                                                                                                 | Carvajal Laboratorios                                | Instituto Nacional de Salud - Dirección de Investigación en Salud Pública                                              | ; Adesh Ramsubhag; Arianne Brown-Jordan; Avery Hinds; Chinna Chinnadurai; Christine V. F. Carrington; Christopher Oura; Gabriel Escobar; Jaya Jayaraman; Jerome Foster; Karla Georges; Marsha Ivey; Naresh Nandram; Nikita S. D. Sahadeo; Nuno Faria; Oliver Pybus; Rahul Naidu; Rajini Haraksingh; Risha Singh; Sarah Hill; Stanley Giddings; SueMin Nathaniel; Vernie Ramkissoon                                                                                                                                                                                                                         |
| EPI_ISL_806783                                                                                                                                                                                                                                                                                                                                                                                                                                                                                                                                                                                                                                                                                                                 | Casa di cura Di Lorenzo- Avezzano                    | Istituto Zooprofilattico Sperimentale dell'Abruzzo e Molise "G. Caporale"                                              | Carlos Franco-Muñoz; Diego A. Álvarez-Díaz; Diego Andrés Prada; Gerardo Santamaría; Jonathan Reales; Julian Naizaque; Katherine Laiton-Donato; Magdalena Wiesner; Marcela Mercado-Reyes; María T. Herrera; Martha Lucia Ospina Martinez; Mauricio Pacheco-Montealegre; Paola Muñoz-Laiton; Sheryl Corchuelo                                                                                                                                                                                                                                                                                                |
| EPI_ISL_693235                                                                                                                                                                                                                                                                                                                                                                                                                                                                                                                                                                                                                                                                                                                 | Casmi Centro Atendimento Saude da Mulher e Infancia  | Instituto Adolfo Lutz, Interdisciplinary Procedures Center, Strategic Laboratory                                       | Ancora M; Calistri P; Cammá C; Curini V; Di Domenico M; Di Pasquale A; Lorusso A; Mangone I; Marcacci M; Puglia I; Rinaldi A; Savini G                                                                                                                                                                                                                                                                                                                                                                                                                                                                     |
|                                                                                                                                                                                                                                                                                                                                                                                                                                                                                                                                                                                                                                                                                                                                |                                                      |                                                                                                                        | Claudia Regina Gonçalves; Claudio Tavares Sacchi; Erica Valessa Ramos Gomes; Karoline Rodrigues Campos                                                                                                                                                                                                                                                                                                                                                                                                                                                                                                     |

|                                                                                                                                                                                                                        |                                                                                                            |                                                                                                                               |                                                                                                                                                                                                                                                                                                                                                                                                    |
|------------------------------------------------------------------------------------------------------------------------------------------------------------------------------------------------------------------------|------------------------------------------------------------------------------------------------------------|-------------------------------------------------------------------------------------------------------------------------------|----------------------------------------------------------------------------------------------------------------------------------------------------------------------------------------------------------------------------------------------------------------------------------------------------------------------------------------------------------------------------------------------------|
| EPI_ISL_824555 to 824616, EPI_ISL_824618 to 824656, EPI_ISL_824658 to 824741                                                                                                                                           | Cedars-Sinai Medical Center, Department of Pathology & Laboratory Medicine, Molecular Pathology Laboratory | Cedars-Sinai Medical Center, Molecular Pathology Laboratory of Department of Pathology & Laboratory Medicine and Genomic Core | Brian Davis; Eric Vail; Jasmine T Plummer; Jorge Mario Sincuir Martinez; Stephanie Chen; Wenjuan Zhang                                                                                                                                                                                                                                                                                             |
| EPI_ISL_971451                                                                                                                                                                                                         | Cell culture Unit at CV-MIT belonging to HIMMV                                                             | Functional Genomic Platform UATRS-biology, CNRST                                                                              | Abderrazzak Rfak; Amine Idriss Lahlou; Elmoustafa EL FAHIME; Hicham Elannaz; Khalid ENNIBI; Marouane MELLOUL; Mly Abdelaziz ELALAOUI; Mostafa ELOUENNASS; Mouhssine Hemlali; Nadia Touil; Sanaa ALAOUI-Amine                                                                                                                                                                                       |
| EPI_ISL_756293 to 756294                                                                                                                                                                                               | Center for Biotechnology and Cell Therapy, São Rafael Hospital, Salvador, Brazil                           | Center for Biotechnology and Cell Therapy, São Rafael Hospital, Salvador, Brazil                                              | Ana Verena Almeida Mendes; Bruno Solano de Freitas Souza; Carolina Kymie Vasques Nonaka; Marta Giovanetti; Marília Miranda Franco; Renato Santana de Aguiar; Tiago Gräf                                                                                                                                                                                                                            |
| EPI_ISL_906780 to 906781, EPI_ISL_906790, EPI_ISL_906792                                                                                                                                                               | Center for Genome Research and Biocomputing                                                                | Center for Genome Research and Biocomputing                                                                                   | Oregon State University TRACE Project                                                                                                                                                                                                                                                                                                                                                              |
| EPI_ISL_825033, EPI_ISL_890236                                                                                                                                                                                         | Center for Genome Sciences, US Army Medical Research Institute of Infectious Disease (USAMRIID)            | Center for Genome Sciences, US Army Medical Research Institute of Infectious Disease (USAMRIID)                               | Bateman; Di Paola, N.; Gibson, W.; J. and Beitzel, B.; Kugelman; Kugelman, J.; Richardson, J.; S. and Jerke, K.                                                                                                                                                                                                                                                                                    |
| EPI_ISL_940771                                                                                                                                                                                                         | Center for Laboratory Medicine St. Gallen                                                                  | Center for Laboratory Medicine St. Gallen                                                                                     | Yannick Gerth                                                                                                                                                                                                                                                                                                                                                                                      |
| EPI_ISL_913064 to 913091, EPI_ISL_913093 to 913098                                                                                                                                                                     | Center for Virology                                                                                        | Center for Virology                                                                                                           | Irene Goerzer; Jeremy V. Camp; Monika Redlberger-Fritz; Stephan W. Aberle                                                                                                                                                                                                                                                                                                                          |
| EPI_ISL_853751, EPI_ISL_853759, EPI_ISL_853822 to 853853, EPI_ISL_853877 to 853913, EPI_ISL_853957 to 853961, EPI_ISL_854218 to 854219, EPI_ISL_854241, EPI_ISL_854253, EPI_ISL_854258, EPI_ISL_854295, EPI_ISL_854299 | Center for Virology, Medical University of Vienna                                                          | Bergthaler Laboratory, CeMM Research Center for Molecular Medicine of the Austrian Academy of Sciences                        | Alexander Lercher; Alexandra Popa; Andreas Bergthaler; Anna Schedl; Benedikt Agerer; Christoph Bock; Jakob-Wendelin Genger; Jan Laine; Lukas Endler; Martin Senekowitsch; Michael Schuster; Thomas Penz                                                                                                                                                                                            |
| EPI_ISL_677700 to 677702, EPI_ISL_677706, EPI_ISL_677708, EPI_ISL_678248 to 678249                                                                                                                                     | Center for public health - Skopje                                                                          | Research Center for Genetic Engineering and Biotechnology "Georgi D. Efreinov", Macedonian Academy of Sciences and Arts       | RCGEB - MASA                                                                                                                                                                                                                                                                                                                                                                                       |
| EPI_ISL_755572 to 755574                                                                                                                                                                                               | Center of Advanced Studies and Technology, CAST                                                            | Center of Advanced Studies and Technology, CAST                                                                               | De Fabritiis, S.; Ferrante, R.; Mandatori, D.                                                                                                                                                                                                                                                                                                                                                      |
| EPI_ISL_888674 to 888676                                                                                                                                                                                               | Center of Advanced Studies and Technology, Molecular Genetics Laboratory                                   | Center of Advanced Studies and Technology, Molecular Genetics Laboratory                                                      | De Fabritiis Simone; Ferrante Rossella; Mandatori Domitilla                                                                                                                                                                                                                                                                                                                                        |
| EPI_ISL_717976, EPI_ISL_779922 to 779953, EPI_ISL_832364 to 832374                                                                                                                                                     | Center of Medical Microbiology, Virology, and Hospital Hygiene, University of Duesseldorf                  | Center of Medical Microbiology, Virology, and Hospital Hygiene, University of Duesseldorf                                     | Alexander Dilthey; Andreas Walker; Ashley-Jane Duplessis; Daniel Strelow; Hendrik Streeck; Jessica Nicolai; Jörg Timm; Klaus Pfeffer; Lisanna Hülse; Maite Kohns Vasconcelos; Marek Korencaj; Maximilian Damagnez; Nadine Lübke; Teresa Tamayo; Tobias Wienemann; Torsten Houwaart                                                                                                                 |
| EPI_ISL_940756, EPI_ISL_940895 to 940994, EPI_ISL_942007 to 942012                                                                                                                                                     | Centers for Disease Control and Prevention, Dengue Branch                                                  | Centers for Disease Control and Prevention, Dengue Branch                                                                     | Betzabel Flores; Gabriela Paz-Bailey; Gilberto A. Santiago; Glenda Gonzalez; Jorge L. Munoz-Jordan; Keyla Charriez                                                                                                                                                                                                                                                                                 |
| EPI_ISL_857314                                                                                                                                                                                                         | Centers for Disease Control, R.O.C. (Taiwan)                                                               | Centers for Disease Control, R.O.C. (Taiwan)                                                                                  | Ji-Rong Yang; Jung-Jung-Mu; Ming-Tsan Liu; Yu-Chi Lin                                                                                                                                                                                                                                                                                                                                              |
| EPI_ISL_815255 to 815399                                                                                                                                                                                               | Centogene                                                                                                  | Centogene                                                                                                                     | Krishna Kumar Kandaswamy; Peter Bauer; Vivi Hue-Trang Lieu                                                                                                                                                                                                                                                                                                                                         |
| EPI_ISL_794593 to 794604                                                                                                                                                                                               | Central Laboratories, Egyptian Ministry of Health and Population                                           | Central Laboratories, Egyptian Ministry of Health and Population                                                              | A.E.; Ali; El Guindy; El Sayes; El Taweel, A.; El-Shesheny, R.; Gomaa, M.; Kamel; Kandeil, A.; Kayali, G.; Kayed; Khalifa; Kutkat, O.; M.A.; M.K.; M.N.; Mahmoud; Mahrous, N.; Moatasim, Y.; Mostafa, A.; N.M.; Naguib, A.; Roshdy; S.H.; Saleh, M.; Shawky, S.; Shehata, M.; W.H.                                                                                                                 |
| EPI_ISL_930854 to 930858, EPI_ISL_942374 to 942375, EPI_ISL_942407, EPI_ISL_942896 to 942899, EPI_ISL_942930 to 942931, EPI_ISL_943574 to 943613, EPI_ISL_983863 to 983869, EPI_ISL_984619 to 984621                   | Central Laboratory of Public Health of Rio Grande do Sul (Lacen-RS)                                        | State Center for Health Surveillance of the Health Department of the State of Rio Grande do Sul (CEVS/SES-RS)                 | ; Aline Campos; Amanda da Silva; Anelise Schaurich; Barcellos R; Campos A; Claudia Dornelles; Crescente L; Cynthia Molina; Da Silva A; Dornelles C; Fernanda Godinho; Fonseca V; Garay L; Godinho F; Gonzalez A; Gregianini T; Lara Crescente; Leticia Garay; Ludmila Fiorenzano Baethgen; Molina C; Regina Barcellos; Richard Salvato; Salvato R; Schaurich A; Tatiana Gregianini; Wagner Fonseca |
| EPI_ISL_794605 to 794608                                                                                                                                                                                               | Central Public Health Laboratories, Egyptian Ministry of Health and Population                             | Central Public Health Laboratories, Egyptian Ministry of Health and Population                                                | A.E.; Ali; El Guindy; El Sayes; El Taweel, A.; El-Shesheny, R.; Gomaa, M.; Kamel; Kandeil, A.; Kayali, G.; Kayed; Khalifa; Kutkat, O.; M.A.; M.K.; M.N.; Mahmoud; Mahrous, N.; Moatasim, Y.; Mostafa, A.; N.M.; Naguib, A.; Roshdy; S.H.; Saleh, M.; Shawky, S.; Shehata, M.; W.H.                                                                                                                 |
| EPI_ISL_693471 to 693483                                                                                                                                                                                               | Central Public Health Laboratory                                                                           | National Public Health Laboratory, National Centre for Infectious Diseases                                                    | Esorom Daoni; Lin Cui; Raymond Tzer Pin Lin; Sophie Octavia; Theresa Palou; Tze Minn Mak; Zhenyang Zhou                                                                                                                                                                                                                                                                                            |
| EPI_ISL_978495 to 978533                                                                                                                                                                                               | Central Public Health Laboratory - LACEN -Bahia, Salvador, Brazil                                          | Central Public Health Laboratory - LACEN -Bahia, Salvador, Brazil                                                             | Arabela Leal; Breno Dominguez; Felicidade Pereira; Jaqueline Gomes; Luciana Oliveira; Luiz Alcantara; Marcela Gómez; Marta Giovanetti; Patrícia Cajado; Stephane Tosta; Wagner Fonseca; Vanessa Nardy                                                                                                                                                                                              |
| EPI_ISL_733498, EPI_ISL_737202 to 737204                                                                                                                                                                               | Central Virology Laboratory, Israel Ministry of Health                                                     | Central Virology Laboratory, Israel Ministry of Health                                                                        | Efrat Dahan Bucris; Ella Mendelson; Michal Mandelboim; Neta S. Zuckerman; Oran Erster; Orna Mor                                                                                                                                                                                                                                                                                                    |
| EPI_ISL_693197                                                                                                                                                                                                         | Central de Rede de Frio Municipal                                                                          | Instituto Adolfo Lutz, Interdisciplinary Procedures Center, Strategic Laboratory                                              | Claudia Regina Gonçalves; Claudio Tavares Sacchi; Erica Valessa Ramos Gomes; Karoline Rodrigues Campos                                                                                                                                                                                                                                                                                             |
| EPI_ISL_885143                                                                                                                                                                                                         | Central public health laboratory                                                                           | Molecular Diagnostics Department, Central public health laboratory                                                            | Dalia, F.; Dler, H.; Dlshad, H.; F.-A.; Fahmi, A.; Furat, S.; Hemdad, A.; Hemn, M. and Idrees, H.; Mohsen, A.; Sharmeen                                                                                                                                                                                                                                                                            |
| EPI_ISL_961805, EPI_ISL_961809 to 961830, EPI_ISL_961833 to 961851                                                                                                                                                     | Centrāla laboratorija                                                                                      | Latvian Biomedical Research and Study Centre                                                                                  | Daivids Fridmanis; Ivars Silāmekiēls; Jana Osīte; Janis Pjalkovskis; Janis Klovs; Juris Perevoscikovs; Kaspars Megnis; Laila Silāmekiēle; Lauma Freimane; Laura Anšone; Liga Birzniece; Marta Priedīte; Monta Ustinova; Nikita Zrelōvs; Uga Dumpis; Vita Rovīte                                                                                                                                    |
| EPI_ISL_860847, EPI_ISL_860898                                                                                                                                                                                         | Centre Hospitalier Compiègne-Noyon - Laboratoire                                                           | National Reference Center for Viruses of Respiratory Infections, Institut Pasteur, Paris                                      | Angela Brisebarre; Camille Capel; Emond Jean-Philippe; Etienne Simon-Lorière; Foissaud Vincent; Marion Barbet; Maud Vanpeene; Méline Bizard; Sylvie Behillili; Sylvie van der Werf; Vincent Enouf                                                                                                                                                                                                  |
| EPI_ISL_636478, EPI_ISL_636480, EPI_ISL_636482 to 636483, EPI_ISL_636486                                                                                                                                               | Centre Hospitalier Pierre Oudot                                                                            | CNR Virus des Infections Respiratoires - France SUD                                                                           | Alexandre Gaymard; Antonin Bal; Bruno Lina; Florence Morfin-Sherpa; Gregory Destras; Gwendolyne Burfin; Hadrien Règue; Laurence Josset; Martine Valette; Maude Bouscambert-Duchamp                                                                                                                                                                                                                 |
| EPI_ISL_639978                                                                                                                                                                                                         | Centre Hospitalier Saint Joseph Saint Luc                                                                  | CNR Virus des Infections Respiratoires - France SUD                                                                           | Alexandre Gaymard; Antonin Bal; Bruno Lina; Florence Morfin-Sherpa; Gregory Destras; Gwendolyne Burfin; Hadrien Règue; Laurence Josset; Martine Valette; Maude Bouscambert-Duchamp                                                                                                                                                                                                                 |
| EPI_ISL_636481, EPI_ISL_639984                                                                                                                                                                                         | Centre Hospitalier de Bourg en Bresse                                                                      | CNR Virus des Infections Respiratoires - France SUD                                                                           | Alexandre Gaymard; Antonin Bal; Bruno Lina; Florence Morfin-Sherpa; Gregory Destras; Gwendolyne Burfin; Hadrien Règue; Laurence Josset; Martine Valette; Maude Bouscambert-Duchamp                                                                                                                                                                                                                 |
| EPI_ISL_912612 to 912613                                                                                                                                                                                               | Centre Hospitalier de Compiègne Laboratoire Compiègne                                                      | National Reference Center for Viruses of Respiratory Infections, Institut Pasteur, Paris                                      | Angela Brisebarre; Camille Capel; Etienne Simon-Lorière; Marion Barbet; Maud Vanpeene; Méline Bizard; Romand Sylvie; Sylvie Behillili; Sylvie van der Werf; Vincent Enouf                                                                                                                                                                                                                          |
| EPI_ISL_912557 to 912558                                                                                                                                                                                               | Centre Hospitalier de Gisors Route de Rouen                                                                | National Reference Center for Viruses of Respiratory Infections, Institut Pasteur, Paris                                      | Angela Brisebarre; Camille Capel; Etienne Simon-Lorière; Marion Barbet; Maud Vanpeene; Méline Bizard; Sylvie Behillili; Sylvie van der Werf; Vincent Enouf                                                                                                                                                                                                                                         |
| EPI_ISL_900530, EPI_ISL_900573                                                                                                                                                                                         | Centre Hospitalier de Guéret                                                                               | CNR Virus des Infections Respiratoires - France SUD                                                                           | Antonin Bal; Bruno Lina; Gregory Destras; Gwendolyne Burfin; Hadrien Règue; Laurence Josset; Martine Valette; Quentin Semanas; Sylvie Larrat                                                                                                                                                                                                                                                       |
| EPI_ISL_779847                                                                                                                                                                                                         | Centre Hospitalier Cannes                                                                                  | CNR Virus des Infections Respiratoires - France SUD                                                                           | Antonin Bal; Bruno Lina; Gregory Destras; Gwendolyne Burfin; Hadrien Règue; Laurence Josset; Martine Valette; Quentin Semanas                                                                                                                                                                                                                                                                      |
| EPI_ISL_660442                                                                                                                                                                                                         | Centre Muraz                                                                                               | Project group Epidemiology of Highly Pathogenic Microorganisms, Robert Koch Institut                                          | Abdoul-Salam Ouedraogo; Arsène Zongo; Essia Belarbi; Fabian Leendertz; Grit Schubert; Soumeiya Ouangraoua; Yacouba Sawadogo                                                                                                                                                                                                                                                                        |
| EPI_ISL_788933 to 788938                                                                                                                                                                                               | Centre de Recherche et de Formation en Infectiologie Guinée                                                | TransVIHMI, IRD/INSERM/Monpellier University                                                                                  | Abdoul Karim SOUMAH; Abdoulaye TOURE; Ahidjo AYOUBA; Aimou CAMARA; Alpha Kabinet KEITA; Bouna; Bouna Yatassaye; Christelle BUTEL; Eric DELAPORTE; Jean-louis MONEMOU; Joel KOIVOGUI; Kaba KOUROUMA; Laetitia SERRANO; Mamadou Bhoeye KEITA; Mamadou Saliou BAH; Mamadou Saliou SOW; Mandiou DIAKITE; Martine PEETERS; Moriba POVOGUI; Penda Malhado DIALLO; Sakoba KEITA                           |
| EPI_ISL_978534 to 978552                                                                                                                                                                                               | Centre de Virologie des Maladies infectueuses Tropicales                                                   | Functional Genomic Platform UATRS-biology, CNRST                                                                              | ; Abdelliah LARAQUI; Abderrazzak Rfak; Elmoustafa BENAISSA; Elmoustafa EL FAHIME; Elmoustafa EL FAHIME.; Farida HILAL; Hemlali Mouhssine; Khalid ENNIBI; Khalid ENNIBI; Marouane MELLOUL; Mly Abdelaziz ELALAOUI; Mostafa ELOUENNASS; Nadia Touil; Safaa GHOULAM; Safaa Ghoulam; Sanaa ALAOUI-Amine; Taha Chouati; Tahar BAJJOU; Yassine SEKHSOK; Yassine SEKHSOKH                                 |

|                                                                                                                                                                                                                                                                                                                                                                                                                                                                                                                                                                                                                                                                                                                                                                                                                                                                                                                                                                                                                                                                                                                                                                                                                                                                                                                                                                                                                                                                                                                                                                                                                                                                                                                                                                                                                                                                                                                                                                                                                                                                                                                                                                                                                                                                                                                                                                                                                                                                                                                                                                                                                                                                                                                                                                                                                                                                                                                                                                                                                                                                                                                                                                                                                                                                                                                                                                                                                                                                                                                                                                                                                                                                                                                                                                                                                                                                                                                                                                                                                                                                                                                                                                                                                                                                                                                                                                                                                                                                                                                                                                                                                                                                                                                                                                                                                                                                                                                                                                                                                                                                                                                                                                                                                                                                                                                                                                                              |                                                                                                                                                    |                                                                                                                                                                                                                                                         |                                                                                                                                                                                                                                                                                                                                                                                                                                                   |
|----------------------------------------------------------------------------------------------------------------------------------------------------------------------------------------------------------------------------------------------------------------------------------------------------------------------------------------------------------------------------------------------------------------------------------------------------------------------------------------------------------------------------------------------------------------------------------------------------------------------------------------------------------------------------------------------------------------------------------------------------------------------------------------------------------------------------------------------------------------------------------------------------------------------------------------------------------------------------------------------------------------------------------------------------------------------------------------------------------------------------------------------------------------------------------------------------------------------------------------------------------------------------------------------------------------------------------------------------------------------------------------------------------------------------------------------------------------------------------------------------------------------------------------------------------------------------------------------------------------------------------------------------------------------------------------------------------------------------------------------------------------------------------------------------------------------------------------------------------------------------------------------------------------------------------------------------------------------------------------------------------------------------------------------------------------------------------------------------------------------------------------------------------------------------------------------------------------------------------------------------------------------------------------------------------------------------------------------------------------------------------------------------------------------------------------------------------------------------------------------------------------------------------------------------------------------------------------------------------------------------------------------------------------------------------------------------------------------------------------------------------------------------------------------------------------------------------------------------------------------------------------------------------------------------------------------------------------------------------------------------------------------------------------------------------------------------------------------------------------------------------------------------------------------------------------------------------------------------------------------------------------------------------------------------------------------------------------------------------------------------------------------------------------------------------------------------------------------------------------------------------------------------------------------------------------------------------------------------------------------------------------------------------------------------------------------------------------------------------------------------------------------------------------------------------------------------------------------------------------------------------------------------------------------------------------------------------------------------------------------------------------------------------------------------------------------------------------------------------------------------------------------------------------------------------------------------------------------------------------------------------------------------------------------------------------------------------------------------------------------------------------------------------------------------------------------------------------------------------------------------------------------------------------------------------------------------------------------------------------------------------------------------------------------------------------------------------------------------------------------------------------------------------------------------------------------------------------------------------------------------------------------------------------------------------------------------------------------------------------------------------------------------------------------------------------------------------------------------------------------------------------------------------------------------------------------------------------------------------------------------------------------------------------------------------------------------------------------------------------------------------------------|----------------------------------------------------------------------------------------------------------------------------------------------------|---------------------------------------------------------------------------------------------------------------------------------------------------------------------------------------------------------------------------------------------------------|---------------------------------------------------------------------------------------------------------------------------------------------------------------------------------------------------------------------------------------------------------------------------------------------------------------------------------------------------------------------------------------------------------------------------------------------------|
| EPI_ISL_792547 to 792556, EPI_ISL_862716 to 862721, EPI_ISL_862724 to 862727, EPI_ISL_872394, EPI_ISL_872478, EPI_ISL_872567 to 872568, EPI_ISL_978811, EPI_ISL_978867, EPI_ISL_978880 to 978889, EPI_ISL_978918 to 978924, EPI_ISL_978926 to 978928, EPI_ISL_978930, EPI_ISL_978932, EPI_ISL_978934, EPI_ISL_978937, EPI_ISL_978941 to 978942, EPI_ISL_978945 to 978946, EPI_ISL_978948, EPI_ISL_978950, EPI_ISL_978952 to 978954, EPI_ISL_978984 to 978988, EPI_ISL_996029 to 996065                                                                                                                                                                                                                                                                                                                                                                                                                                                                                                                                                                                                                                                                                                                                                                                                                                                                                                                                                                                                                                                                                                                                                                                                                                                                                                                                                                                                                                                                                                                                                                                                                                                                                                                                                                                                                                                                                                                                                                                                                                                                                                                                                                                                                                                                                                                                                                                                                                                                                                                                                                                                                                                                                                                                                                                                                                                                                                                                                                                                                                                                                                                                                                                                                                                                                                                                                                                                                                                                                                                                                                                                                                                                                                                                                                                                                                                                                                                                                                                                                                                                                                                                                                                                                                                                                                                                                                                                                                                                                                                                                                                                                                                                                                                                                                                                                                                                                                       |                                                                                                                                                    |                                                                                                                                                                                                                                                         |                                                                                                                                                                                                                                                                                                                                                                                                                                                   |
| see above                                                                                                                                                                                                                                                                                                                                                                                                                                                                                                                                                                                                                                                                                                                                                                                                                                                                                                                                                                                                                                                                                                                                                                                                                                                                                                                                                                                                                                                                                                                                                                                                                                                                                                                                                                                                                                                                                                                                                                                                                                                                                                                                                                                                                                                                                                                                                                                                                                                                                                                                                                                                                                                                                                                                                                                                                                                                                                                                                                                                                                                                                                                                                                                                                                                                                                                                                                                                                                                                                                                                                                                                                                                                                                                                                                                                                                                                                                                                                                                                                                                                                                                                                                                                                                                                                                                                                                                                                                                                                                                                                                                                                                                                                                                                                                                                                                                                                                                                                                                                                                                                                                                                                                                                                                                                                                                                                                                    | Centre for Dengue Research and AICBU, Department of Immunology and Molecular Medicine                                                              | Centre for Dengue Research and AICBU, Department of Immunology and Molecular Medicine                                                                                                                                                                   | Chandima Jeewandara; Deshni Jayathilaka; Dinuka Ariyaratne; Diyanath Ranasinghe; Gathsaurie Neelika Malavige; Laksiri Gomes; Tibutius Thanesh Pramanayagam                                                                                                                                                                                                                                                                                        |
| EPI_ISL_978951                                                                                                                                                                                                                                                                                                                                                                                                                                                                                                                                                                                                                                                                                                                                                                                                                                                                                                                                                                                                                                                                                                                                                                                                                                                                                                                                                                                                                                                                                                                                                                                                                                                                                                                                                                                                                                                                                                                                                                                                                                                                                                                                                                                                                                                                                                                                                                                                                                                                                                                                                                                                                                                                                                                                                                                                                                                                                                                                                                                                                                                                                                                                                                                                                                                                                                                                                                                                                                                                                                                                                                                                                                                                                                                                                                                                                                                                                                                                                                                                                                                                                                                                                                                                                                                                                                                                                                                                                                                                                                                                                                                                                                                                                                                                                                                                                                                                                                                                                                                                                                                                                                                                                                                                                                                                                                                                                                               | Centre for Dengue Research and AICBU, Department of Immunology and Molecular Medicine                                                              | Centre for Dengue Research and AICBU, Department of Immunology and Molecular Medicine, University of Sri Jayewardenepura, Sri Lanka                                                                                                                     | Chandima Jeewandara; Deshni Jayathilaka; Dinuka Ariyaratne; Diyanath Ranasinghe; Gathsaurie Neelika Malavige; Laksiri Gomes; Tibutius Thanesh Pramanayagam                                                                                                                                                                                                                                                                                        |
| EPI_ISL_668447 to 668455                                                                                                                                                                                                                                                                                                                                                                                                                                                                                                                                                                                                                                                                                                                                                                                                                                                                                                                                                                                                                                                                                                                                                                                                                                                                                                                                                                                                                                                                                                                                                                                                                                                                                                                                                                                                                                                                                                                                                                                                                                                                                                                                                                                                                                                                                                                                                                                                                                                                                                                                                                                                                                                                                                                                                                                                                                                                                                                                                                                                                                                                                                                                                                                                                                                                                                                                                                                                                                                                                                                                                                                                                                                                                                                                                                                                                                                                                                                                                                                                                                                                                                                                                                                                                                                                                                                                                                                                                                                                                                                                                                                                                                                                                                                                                                                                                                                                                                                                                                                                                                                                                                                                                                                                                                                                                                                                                                     | Centre for Dengue Research, Department of Immunology and Molecular Medicine                                                                        | Centre for Dengue Research, Department of Immunology and Molecular Medicine                                                                                                                                                                             | Chandima Jeewandara; Deshni Jayathilaka; Dinuka Ariyaratne; Diyanath Ranasinghe; Gathsaurie Neelika Malavige; Laksiri Gomes                                                                                                                                                                                                                                                                                                                       |
| EPI_ISL_626677 to 626678, EPI_ISL_626684, EPI_ISL_626689 to 626690, EPI_ISL_626738, EPI_ISL_626778, EPI_ISL_626792, EPI_ISL_626878 to 626880, EPI_ISL_626895, EPI_ISL_626936, EPI_ISL_627056 to 627057, EPI_ISL_627116, EPI_ISL_627128, EPI_ISL_627144, EPI_ISL_627150, EPI_ISL_628312 to 628333, EPI_ISL_637278 to 637279, EPI_ISL_637305, EPI_ISL_637369 to 637372, EPI_ISL_637387, EPI_ISL_637402, EPI_ISL_637411, EPI_ISL_637432, EPI_ISL_637453, EPI_ISL_637459, EPI_ISL_637466 to 637467, EPI_ISL_637491 to 637499, EPI_ISL_637502, EPI_ISL_637528, EPI_ISL_637610, EPI_ISL_637659, EPI_ISL_637674, EPI_ISL_637714 to 637715, EPI_ISL_637717 to 637720, EPI_ISL_637783, EPI_ISL_637853, EPI_ISL_637889, EPI_ISL_637892, EPI_ISL_637920 to 637921, EPI_ISL_637931 to 637932, EPI_ISL_637949, EPI_ISL_637951, EPI_ISL_637986, EPI_ISL_638002, EPI_ISL_638006, EPI_ISL_638026, EPI_ISL_638050, EPI_ISL_638065, EPI_ISL_638134 to 638137, EPI_ISL_638249 to 638257, EPI_ISL_638265 to 638292, EPI_ISL_638454 to 638458, EPI_ISL_638911 to 638913, EPI_ISL_639006 to 639007, EPI_ISL_650168 to 650169, EPI_ISL_650221, EPI_ISL_650248 to 650249, EPI_ISL_650379, EPI_ISL_650388, EPI_ISL_650401, EPI_ISL_650566 to 650571, EPI_ISL_650575 to 650578, EPI_ISL_650581, EPI_ISL_650584 to 650585, EPI_ISL_650600 to 650605, EPI_ISL_650608, EPI_ISL_650711, EPI_ISL_650941, EPI_ISL_650947, EPI_ISL_650949, EPI_ISL_650956 to 650957, EPI_ISL_650964 to 650966, EPI_ISL_650982 to 650983, EPI_ISL_651066 to 651069, EPI_ISL_651099, EPI_ISL_651187, EPI_ISL_651277, EPI_ISL_652103 to 652110, EPI_ISL_652620 to 652626, EPI_ISL_664137, EPI_ISL_664191, EPI_ISL_664302, EPI_ISL_664374 to 664377, EPI_ISL_664492, EPI_ISL_664526, EPI_ISL_664556 to 664559, EPI_ISL_664679, EPI_ISL_664690, EPI_ISL_664746, EPI_ISL_664763, EPI_ISL_664767, EPI_ISL_664840 to 664855, EPI_ISL_665338, EPI_ISL_665347 to 665348, EPI_ISL_665391, EPI_ISL_665487 to 665488, EPI_ISL_665616, EPI_ISL_665625, EPI_ISL_665652, EPI_ISL_665723, EPI_ISL_665726, EPI_ISL_665849, EPI_ISL_666107 to 666109, EPI_ISL_678831, EPI_ISL_679971, EPI_ISL_680016 to 680036, EPI_ISL_680562 to 680570, EPI_ISL_680578, EPI_ISL_702870, EPI_ISL_723521 to 723557, EPI_ISL_727697 to 727723, EPI_ISL_727734 to 727750, EPI_ISL_727774 to 727806, EPI_ISL_741348, EPI_ISL_741357 to 741358, EPI_ISL_741658, EPI_ISL_741675, EPI_ISL_741693, EPI_ISL_741697, EPI_ISL_741716 to 741759, EPI_ISL_741772, EPI_ISL_742260, EPI_ISL_763396, EPI_ISL_763407, EPI_ISL_763425, EPI_ISL_763451, EPI_ISL_763465, EPI_ISL_763471, EPI_ISL_763476, EPI_ISL_763495, EPI_ISL_763505, EPI_ISL_763512, EPI_ISL_763516, EPI_ISL_763521, EPI_ISL_763541, EPI_ISL_763550, EPI_ISL_763595, EPI_ISL_763612, EPI_ISL_763617, EPI_ISL_763617, EPI_ISL_763624, EPI_ISL_763659 to 763661, EPI_ISL_763672, EPI_ISL_763676, EPI_ISL_763685, EPI_ISL_763690, EPI_ISL_763693, EPI_ISL_763734, EPI_ISL_763755, EPI_ISL_763791, EPI_ISL_763798 to 763800, EPI_ISL_763804 to 763806, EPI_ISL_763823 to 763825, EPI_ISL_763827 to 763836, EPI_ISL_763865, EPI_ISL_764007 to 764030, EPI_ISL_764036, EPI_ISL_764081, EPI_ISL_764094 to 764096, EPI_ISL_764101 to 764102, EPI_ISL_764118 to 764125, EPI_ISL_764136, EPI_ISL_764169, EPI_ISL_764172, EPI_ISL_764193, EPI_ISL_765112 to 765116, EPI_ISL_765119 to 765142, EPI_ISL_765144 to 765148, EPI_ISL_816172, EPI_ISL_816174, EPI_ISL_816194 to 816225, EPI_ISL_841755 to 841759, EPI_ISL_841767, EPI_ISL_841769 to 841775, EPI_ISL_841777 to 841778, EPI_ISL_841780 to 841806, EPI_ISL_841808 to 841819, EPI_ISL_841821 to 841848, EPI_ISL_841850, EPI_ISL_841852 to 841864, EPI_ISL_841866 to 841870, EPI_ISL_841921 to 841922, EPI_ISL_841927, EPI_ISL_841945, EPI_ISL_841978, EPI_ISL_842004, EPI_ISL_842008, EPI_ISL_842010 to 842015, EPI_ISL_867930 to 867945, EPI_ISL_867948 to 867967, EPI_ISL_867969 to 867981, EPI_ISL_867990, EPI_ISL_867993, EPI_ISL_868001, EPI_ISL_868008, EPI_ISL_868023, EPI_ISL_868102, EPI_ISL_868141 to 868148, EPI_ISL_868150, EPI_ISL_868203 to 868210, EPI_ISL_868212 to 868222, EPI_ISL_868224 to 868226, EPI_ISL_868228 to 868238, EPI_ISL_868240 to 868250, EPI_ISL_868252 to 868257, EPI_ISL_868309 to 868356, EPI_ISL_923212 to 923222, EPI_ISL_923224, EPI_ISL_923226 to 923235, EPI_ISL_923237 to 923240, EPI_ISL_923242 to 923251, EPI_ISL_923256 to 923271, EPI_ISL_923273 to 923294, EPI_ISL_923296 to 923333, EPI_ISL_923335 to 923357, EPI_ISL_923359 to 923388, EPI_ISL_923390, EPI_ISL_923392 to 923399, EPI_ISL_923401 to 923424, EPI_ISL_923430, EPI_ISL_923436, EPI_ISL_923438, EPI_ISL_923443, EPI_ISL_923539, EPI_ISL_923577, EPI_ISL_923580, EPI_ISL_923589 to 923598, EPI_ISL_923605, EPI_ISL_923611, EPI_ISL_923613, EPI_ISL_923628, EPI_ISL_923660, EPI_ISL_923663 to 923683, EPI_ISL_952377 to 952448, EPI_ISL_952450 to 952458, EPI_ISL_952460 to 952490, EPI_ISL_952492 to 952499, EPI_ISL_952521 to 952526, EPI_ISL_952528 to 952532, EPI_ISL_952534 to 952547, EPI_ISL_952550, EPI_ISL_952553 to 952559, EPI_ISL_952561, EPI_ISL_952565 to 952576, EPI_ISL_952578, EPI_ISL_952580 to 952592, EPI_ISL_952594 to 952595, EPI_ISL_952597 to 952602, EPI_ISL_952624, EPI_ISL_952673, EPI_ISL_952675, EPI_ISL_952677, EPI_ISL_952680, EPI_ISL_952689, EPI_ISL_952777 to 952815, EPI_ISL_952817 to 952842, EPI_ISL_952844 to 952855, EPI_ISL_952857 |                                                                                                                                                    |                                                                                                                                                                                                                                                         |                                                                                                                                                                                                                                                                                                                                                                                                                                                   |
| see above                                                                                                                                                                                                                                                                                                                                                                                                                                                                                                                                                                                                                                                                                                                                                                                                                                                                                                                                                                                                                                                                                                                                                                                                                                                                                                                                                                                                                                                                                                                                                                                                                                                                                                                                                                                                                                                                                                                                                                                                                                                                                                                                                                                                                                                                                                                                                                                                                                                                                                                                                                                                                                                                                                                                                                                                                                                                                                                                                                                                                                                                                                                                                                                                                                                                                                                                                                                                                                                                                                                                                                                                                                                                                                                                                                                                                                                                                                                                                                                                                                                                                                                                                                                                                                                                                                                                                                                                                                                                                                                                                                                                                                                                                                                                                                                                                                                                                                                                                                                                                                                                                                                                                                                                                                                                                                                                                                                    | Centre for Enzyme Innovation, University of Portsmouth / Translational Research Laboratory, Portsmouth Hospitals NHS Trust                         | COVID-19 Genomics UK (COG-UK) Consortium                                                                                                                                                                                                                | Allyson Lloyd; Angela Beckett; Anoop Chauhan; Christopher Fearn; Ethan Butcher; Garry Sharlet; Kate Cook; Katie Loveson; Kelly Bicknell; Robert Impey; Salman Goudarzi; Samuel Robson; Sarah Wyllie; Scott Elliott; Sharon Glaysher; Yann Bourgeois                                                                                                                                                                                               |
| EPI_ISL_733568                                                                                                                                                                                                                                                                                                                                                                                                                                                                                                                                                                                                                                                                                                                                                                                                                                                                                                                                                                                                                                                                                                                                                                                                                                                                                                                                                                                                                                                                                                                                                                                                                                                                                                                                                                                                                                                                                                                                                                                                                                                                                                                                                                                                                                                                                                                                                                                                                                                                                                                                                                                                                                                                                                                                                                                                                                                                                                                                                                                                                                                                                                                                                                                                                                                                                                                                                                                                                                                                                                                                                                                                                                                                                                                                                                                                                                                                                                                                                                                                                                                                                                                                                                                                                                                                                                                                                                                                                                                                                                                                                                                                                                                                                                                                                                                                                                                                                                                                                                                                                                                                                                                                                                                                                                                                                                                                                                               | Centre for Health Protection                                                                                                                       | Hong Kong Department of Health                                                                                                                                                                                                                          | Alan K.L. Tsang; Dominic N.C. Tsang; Edman T.K. Lam; Peter C.W. Yip; Rickjason C.W. Chan                                                                                                                                                                                                                                                                                                                                                          |
| EPI_ISL_654794                                                                                                                                                                                                                                                                                                                                                                                                                                                                                                                                                                                                                                                                                                                                                                                                                                                                                                                                                                                                                                                                                                                                                                                                                                                                                                                                                                                                                                                                                                                                                                                                                                                                                                                                                                                                                                                                                                                                                                                                                                                                                                                                                                                                                                                                                                                                                                                                                                                                                                                                                                                                                                                                                                                                                                                                                                                                                                                                                                                                                                                                                                                                                                                                                                                                                                                                                                                                                                                                                                                                                                                                                                                                                                                                                                                                                                                                                                                                                                                                                                                                                                                                                                                                                                                                                                                                                                                                                                                                                                                                                                                                                                                                                                                                                                                                                                                                                                                                                                                                                                                                                                                                                                                                                                                                                                                                                                               | Centre for Human Virology & Genomics, Nigerian Institute of Medical Research                                                                       | Centre for Human Virology & Genomics, Nigerian Institute of Medical Research                                                                                                                                                                            | Shaibu, J.                                                                                                                                                                                                                                                                                                                                                                                                                                        |
| EPI_ISL_900512, EPI_ISL_900543                                                                                                                                                                                                                                                                                                                                                                                                                                                                                                                                                                                                                                                                                                                                                                                                                                                                                                                                                                                                                                                                                                                                                                                                                                                                                                                                                                                                                                                                                                                                                                                                                                                                                                                                                                                                                                                                                                                                                                                                                                                                                                                                                                                                                                                                                                                                                                                                                                                                                                                                                                                                                                                                                                                                                                                                                                                                                                                                                                                                                                                                                                                                                                                                                                                                                                                                                                                                                                                                                                                                                                                                                                                                                                                                                                                                                                                                                                                                                                                                                                                                                                                                                                                                                                                                                                                                                                                                                                                                                                                                                                                                                                                                                                                                                                                                                                                                                                                                                                                                                                                                                                                                                                                                                                                                                                                                                               | Centre hospitalier Emile Roux                                                                                                                      | CNR Virus des Infections Respiratoires - France SUD                                                                                                                                                                                                     | Antonin Bal; Bruno Lina; Gregory Destras; Gwendolyne Burfin; Hadrien Règue; Laurence Josset; Martine Valette; Quentin Semanas                                                                                                                                                                                                                                                                                                                     |
| EPI_ISL_666682 to 666686, EPI_ISL_693391, EPI_ISL_700372 to 700410                                                                                                                                                                                                                                                                                                                                                                                                                                                                                                                                                                                                                                                                                                                                                                                                                                                                                                                                                                                                                                                                                                                                                                                                                                                                                                                                                                                                                                                                                                                                                                                                                                                                                                                                                                                                                                                                                                                                                                                                                                                                                                                                                                                                                                                                                                                                                                                                                                                                                                                                                                                                                                                                                                                                                                                                                                                                                                                                                                                                                                                                                                                                                                                                                                                                                                                                                                                                                                                                                                                                                                                                                                                                                                                                                                                                                                                                                                                                                                                                                                                                                                                                                                                                                                                                                                                                                                                                                                                                                                                                                                                                                                                                                                                                                                                                                                                                                                                                                                                                                                                                                                                                                                                                                                                                                                                           | Centre hospitalier Métropole Savoie                                                                                                                | CNR Virus des Infections Respiratoires - France SUD                                                                                                                                                                                                     | Antonin Bal; Bruno Lina; Carine Dumollard; Gregory Destras; Gwendolyne Burfin; Hadrien Règue; Jérôme Grosjean; Laurence Josset; Martine Valette; Quentin Semanas                                                                                                                                                                                                                                                                                  |
| EPI_ISL_639739                                                                                                                                                                                                                                                                                                                                                                                                                                                                                                                                                                                                                                                                                                                                                                                                                                                                                                                                                                                                                                                                                                                                                                                                                                                                                                                                                                                                                                                                                                                                                                                                                                                                                                                                                                                                                                                                                                                                                                                                                                                                                                                                                                                                                                                                                                                                                                                                                                                                                                                                                                                                                                                                                                                                                                                                                                                                                                                                                                                                                                                                                                                                                                                                                                                                                                                                                                                                                                                                                                                                                                                                                                                                                                                                                                                                                                                                                                                                                                                                                                                                                                                                                                                                                                                                                                                                                                                                                                                                                                                                                                                                                                                                                                                                                                                                                                                                                                                                                                                                                                                                                                                                                                                                                                                                                                                                                                               | Centre of Nanotechnologies, INCD IMT-Bucuresti (National Institute for Research and Development in Microtechnologies - Bucharest)                  | Centre of Nanotechnologies, INCD IMT-Bucuresti (National Institute for Research and Development in Microtechnologies - Bucharest)                                                                                                                       | Gogianu, L. and Baisan, M.; Salceanu, A.                                                                                                                                                                                                                                                                                                                                                                                                          |
| EPI_ISL_693248                                                                                                                                                                                                                                                                                                                                                                                                                                                                                                                                                                                                                                                                                                                                                                                                                                                                                                                                                                                                                                                                                                                                                                                                                                                                                                                                                                                                                                                                                                                                                                                                                                                                                                                                                                                                                                                                                                                                                                                                                                                                                                                                                                                                                                                                                                                                                                                                                                                                                                                                                                                                                                                                                                                                                                                                                                                                                                                                                                                                                                                                                                                                                                                                                                                                                                                                                                                                                                                                                                                                                                                                                                                                                                                                                                                                                                                                                                                                                                                                                                                                                                                                                                                                                                                                                                                                                                                                                                                                                                                                                                                                                                                                                                                                                                                                                                                                                                                                                                                                                                                                                                                                                                                                                                                                                                                                                                               | Centro Municipal de Epidemiologia e Imunizações                                                                                                    | Instituto Adolfo Lutz, Interdisciplinary Procedures Center, Strategic Laboratory                                                                                                                                                                        | Claudia Regina Gonçalves; Claudio Tavares Sacchi; Erica Valessa Ramos Gomes; Karoline Rodrigues Campos                                                                                                                                                                                                                                                                                                                                            |
| EPI_ISL_693244                                                                                                                                                                                                                                                                                                                                                                                                                                                                                                                                                                                                                                                                                                                                                                                                                                                                                                                                                                                                                                                                                                                                                                                                                                                                                                                                                                                                                                                                                                                                                                                                                                                                                                                                                                                                                                                                                                                                                                                                                                                                                                                                                                                                                                                                                                                                                                                                                                                                                                                                                                                                                                                                                                                                                                                                                                                                                                                                                                                                                                                                                                                                                                                                                                                                                                                                                                                                                                                                                                                                                                                                                                                                                                                                                                                                                                                                                                                                                                                                                                                                                                                                                                                                                                                                                                                                                                                                                                                                                                                                                                                                                                                                                                                                                                                                                                                                                                                                                                                                                                                                                                                                                                                                                                                                                                                                                                               | Centro Médico da Polícia Militar do Estado de Sao Paulo                                                                                            | Instituto Adolfo Lutz, Interdisciplinary Procedures Center, Strategic Laboratory                                                                                                                                                                        | Claudia Regina Gonçalves; Claudio Tavares Sacchi; Erica Valessa Ramos Gomes; Karoline Rodrigues Campos                                                                                                                                                                                                                                                                                                                                            |
| EPI_ISL_837550, EPI_ISL_837553 to 837578                                                                                                                                                                                                                                                                                                                                                                                                                                                                                                                                                                                                                                                                                                                                                                                                                                                                                                                                                                                                                                                                                                                                                                                                                                                                                                                                                                                                                                                                                                                                                                                                                                                                                                                                                                                                                                                                                                                                                                                                                                                                                                                                                                                                                                                                                                                                                                                                                                                                                                                                                                                                                                                                                                                                                                                                                                                                                                                                                                                                                                                                                                                                                                                                                                                                                                                                                                                                                                                                                                                                                                                                                                                                                                                                                                                                                                                                                                                                                                                                                                                                                                                                                                                                                                                                                                                                                                                                                                                                                                                                                                                                                                                                                                                                                                                                                                                                                                                                                                                                                                                                                                                                                                                                                                                                                                                                                     | Centro Nacional de Enfermedades Tropicales (CENETROP)                                                                                              | Laboratory of Respiratory Viruses and Measles, Oswaldo Cruz Institute, FIOCRUZ                                                                                                                                                                          | Ana Carolina Mendonca; Anna Carolina Paixao; Cynthia Avila; Fernando Motta; Luciana Appolinario; Marilda Siqueira on behalf of the Fiocruz COVID-19 Genomic Surveillance Network; Paola Resende; Roxana Loayza                                                                                                                                                                                                                                    |
| EPI_ISL_629011 to 629028                                                                                                                                                                                                                                                                                                                                                                                                                                                                                                                                                                                                                                                                                                                                                                                                                                                                                                                                                                                                                                                                                                                                                                                                                                                                                                                                                                                                                                                                                                                                                                                                                                                                                                                                                                                                                                                                                                                                                                                                                                                                                                                                                                                                                                                                                                                                                                                                                                                                                                                                                                                                                                                                                                                                                                                                                                                                                                                                                                                                                                                                                                                                                                                                                                                                                                                                                                                                                                                                                                                                                                                                                                                                                                                                                                                                                                                                                                                                                                                                                                                                                                                                                                                                                                                                                                                                                                                                                                                                                                                                                                                                                                                                                                                                                                                                                                                                                                                                                                                                                                                                                                                                                                                                                                                                                                                                                                     | Centro de Biotecnología Vegetal, Universidad Andrés Bello, Center for Genome Regulation                                                            | Center for Mathematical Modeling and Center for Genome Regulation, Santiago, Chile                                                                                                                                                                      | Allende ML; Arriagada G; Bastias M; Bustos F; Castro E; González M; M; Maass A; Meneses C.; Montecino; Orellana A; Sanhueza D; Travisany D                                                                                                                                                                                                                                                                                                        |
| EPI_ISL_635479 to 635576                                                                                                                                                                                                                                                                                                                                                                                                                                                                                                                                                                                                                                                                                                                                                                                                                                                                                                                                                                                                                                                                                                                                                                                                                                                                                                                                                                                                                                                                                                                                                                                                                                                                                                                                                                                                                                                                                                                                                                                                                                                                                                                                                                                                                                                                                                                                                                                                                                                                                                                                                                                                                                                                                                                                                                                                                                                                                                                                                                                                                                                                                                                                                                                                                                                                                                                                                                                                                                                                                                                                                                                                                                                                                                                                                                                                                                                                                                                                                                                                                                                                                                                                                                                                                                                                                                                                                                                                                                                                                                                                                                                                                                                                                                                                                                                                                                                                                                                                                                                                                                                                                                                                                                                                                                                                                                                                                                     | Centro de Diagnostico COVID-19 UABC Tijuana                                                                                                        | Andersen lab at Scripps Research                                                                                                                                                                                                                        | Germán Ibarra; Jonathan Vincent Baena; Jorge Luis Jiménez Niebla; Manuel Sánchez Alavez; Oscar Efrén Zazueta Fierro; SEARCH Alliance San Diego with Idanya Rubi Serafin Higuera                                                                                                                                                                                                                                                                   |
| EPI_ISL_941104 to 941162                                                                                                                                                                                                                                                                                                                                                                                                                                                                                                                                                                                                                                                                                                                                                                                                                                                                                                                                                                                                                                                                                                                                                                                                                                                                                                                                                                                                                                                                                                                                                                                                                                                                                                                                                                                                                                                                                                                                                                                                                                                                                                                                                                                                                                                                                                                                                                                                                                                                                                                                                                                                                                                                                                                                                                                                                                                                                                                                                                                                                                                                                                                                                                                                                                                                                                                                                                                                                                                                                                                                                                                                                                                                                                                                                                                                                                                                                                                                                                                                                                                                                                                                                                                                                                                                                                                                                                                                                                                                                                                                                                                                                                                                                                                                                                                                                                                                                                                                                                                                                                                                                                                                                                                                                                                                                                                                                                     | Centro de Investigaciones en Microbiología y Biotecnología-UR (CIMBIUR), Facultad de Ciencias Naturales, Universidad del Rosario, Bogotá, Colombia | Centro de Investigaciones en Microbiología y Biotecnología-UR (CIMBIUR), Facultad de Ciencias Naturales, Universidad del Rosario, Bogotá, Colombia Icahn School of Medicine at Mount Sinai, New York, USA                                               | Adriana van de Guchte; Alberto Paniz-Mondolfi; Alejandro Fedeg-Rivadeneira; Ana S. Gonzalez-Reiche; Andrés Angel; Carolina Flórez; Carolina Hernández; Emilia Mia Sordillo; Felipe González-Casabianca; Hala Alejel Alshammary; Harm van Bakel; Jayeeta Dutta; Juan David Ramirez; Luz Helena Patiño; Marina Muñoz; Matthew M. Hernandez; Mauricio Santos-Vega; Mónica Palma-Cuero; Nathalia Ballesteros; Sergio Gomez; Viviana Simon; Zenab Khan |
| EPI_ISL_941941, EPI_ISL_941944 to 941948, EPI_ISL_941950, EPI_ISL_941952, EPI_ISL_941954, EPI_ISL_941959, EPI_ISL_941961 to 941962, EPI_ISL_941964 to 941983, EPI_ISL_941995 to 942002, EPI_ISL_942004 to 942005, EPI_ISL_944634 to 944638                                                                                                                                                                                                                                                                                                                                                                                                                                                                                                                                                                                                                                                                                                                                                                                                                                                                                                                                                                                                                                                                                                                                                                                                                                                                                                                                                                                                                                                                                                                                                                                                                                                                                                                                                                                                                                                                                                                                                                                                                                                                                                                                                                                                                                                                                                                                                                                                                                                                                                                                                                                                                                                                                                                                                                                                                                                                                                                                                                                                                                                                                                                                                                                                                                                                                                                                                                                                                                                                                                                                                                                                                                                                                                                                                                                                                                                                                                                                                                                                                                                                                                                                                                                                                                                                                                                                                                                                                                                                                                                                                                                                                                                                                                                                                                                                                                                                                                                                                                                                                                                                                                                                                   |                                                                                                                                                    |                                                                                                                                                                                                                                                         | Adriana van de Guchte; Alberto Paniz-Mondolfi; Ana S. Gonzalez-Reiche; Carolina Flórez; Carolina Hernández; Emilia Mia Sordillo; Hala Alejel Alshammary; Harm van Bakel; Jayeeta Dutta; Juan David Ramirez; Luz Helena Patiño; Marina Muñoz; Matthew M. Hernandez; Mauricio Santos-Vega; Mónica Palma-Cuero; Nathalia Ballesteros; Sergio Gomez; Viviana Simon; Zenab Khan                                                                        |
| see above                                                                                                                                                                                                                                                                                                                                                                                                                                                                                                                                                                                                                                                                                                                                                                                                                                                                                                                                                                                                                                                                                                                                                                                                                                                                                                                                                                                                                                                                                                                                                                                                                                                                                                                                                                                                                                                                                                                                                                                                                                                                                                                                                                                                                                                                                                                                                                                                                                                                                                                                                                                                                                                                                                                                                                                                                                                                                                                                                                                                                                                                                                                                                                                                                                                                                                                                                                                                                                                                                                                                                                                                                                                                                                                                                                                                                                                                                                                                                                                                                                                                                                                                                                                                                                                                                                                                                                                                                                                                                                                                                                                                                                                                                                                                                                                                                                                                                                                                                                                                                                                                                                                                                                                                                                                                                                                                                                                    | Centro de Investigaciones en Microbiología y Biotecnología-UR (CIMBIUR), Facultad de Ciencias Naturales, Universidad del Rosario, Bogotá, Colombia | Centro de Investigaciones en Microbiología y Biotecnología-UR (CIMBIUR), Facultad de Ciencias Naturales, Universidad del Rosario, Bogotá, Colombia Instituto Nacional de Salud, Bogotá, Colombia Icahn School of Medicine at Mount Sinai, New York, USA | Adriana van de Guchte; Alberto Paniz-Mondolfi; Ana S. Gonzalez-Reiche; Carolina Flórez; Carolina Hernández; Emilia Mia Sordillo; Hala Alejel Alshammary; Harm van Bakel; Jayeeta Dutta; Juan David Ramirez; Luz Helena Patiño; Marina Muñoz; Matthew M. Hernandez; Mauricio Santos-Vega; Mónica Palma-Cuero; Nathalia Ballesteros; Sergio Gomez; Viviana Simon; Zenab Khan                                                                        |
| EPI_ISL_697797                                                                                                                                                                                                                                                                                                                                                                                                                                                                                                                                                                                                                                                                                                                                                                                                                                                                                                                                                                                                                                                                                                                                                                                                                                                                                                                                                                                                                                                                                                                                                                                                                                                                                                                                                                                                                                                                                                                                                                                                                                                                                                                                                                                                                                                                                                                                                                                                                                                                                                                                                                                                                                                                                                                                                                                                                                                                                                                                                                                                                                                                                                                                                                                                                                                                                                                                                                                                                                                                                                                                                                                                                                                                                                                                                                                                                                                                                                                                                                                                                                                                                                                                                                                                                                                                                                                                                                                                                                                                                                                                                                                                                                                                                                                                                                                                                                                                                                                                                                                                                                                                                                                                                                                                                                                                                                                                                                               | Centro de Investigaciones, Universidad de Especialidades Espíritu Santo                                                                            | Institute of Microbiology, Universidad San Francisco de Quito                                                                                                                                                                                           | Belén Prado-Vivar; Bernardo Gutiérrez; Derly Andrade; Edith Lopez; Fernando Espinoza; Gabriel Morey; Gabriel Trueba; Jose Pedro Barberan; Juan Carlos Fernandez; Juan José Guadalupe; Michelle Grunauer; Monica Becerra-Wong; Patricio Rojas-Silva; Paul Cárdenas; Ruben Armas; Sully Márquez; Verónica Barragán                                                                                                                                  |
| EPI_ISL_732748 to 732819                                                                                                                                                                                                                                                                                                                                                                                                                                                                                                                                                                                                                                                                                                                                                                                                                                                                                                                                                                                                                                                                                                                                                                                                                                                                                                                                                                                                                                                                                                                                                                                                                                                                                                                                                                                                                                                                                                                                                                                                                                                                                                                                                                                                                                                                                                                                                                                                                                                                                                                                                                                                                                                                                                                                                                                                                                                                                                                                                                                                                                                                                                                                                                                                                                                                                                                                                                                                                                                                                                                                                                                                                                                                                                                                                                                                                                                                                                                                                                                                                                                                                                                                                                                                                                                                                                                                                                                                                                                                                                                                                                                                                                                                                                                                                                                                                                                                                                                                                                                                                                                                                                                                                                                                                                                                                                                                                                     | Centro de Investigación Biomédica de La Rioja - Hospital San Pedro Logroño                                                                         | SeqCOVID-SPAIN consortium/IBV(CSIC)                                                                                                                                                                                                                     | José Manuel Azcona Gutiérrez; María Pilar Bea Escudero; María de Toro; Miriam Blasco Alberdi and SeqCOVID-SPAIN consortium                                                                                                                                                                                                                                                                                                                        |
| EPI_ISL_735416                                                                                                                                                                                                                                                                                                                                                                                                                                                                                                                                                                                                                                                                                                                                                                                                                                                                                                                                                                                                                                                                                                                                                                                                                                                                                                                                                                                                                                                                                                                                                                                                                                                                                                                                                                                                                                                                                                                                                                                                                                                                                                                                                                                                                                                                                                                                                                                                                                                                                                                                                                                                                                                                                                                                                                                                                                                                                                                                                                                                                                                                                                                                                                                                                                                                                                                                                                                                                                                                                                                                                                                                                                                                                                                                                                                                                                                                                                                                                                                                                                                                                                                                                                                                                                                                                                                                                                                                                                                                                                                                                                                                                                                                                                                                                                                                                                                                                                                                                                                                                                                                                                                                                                                                                                                                                                                                                                               | Centro de Saude II Dr Jose Paione Mococa                                                                                                           | Instituto Adolfo Lutz, Interdisciplinary Procedures Center, Strategic Laboratory                                                                                                                                                                        | Claudia Regina Gonçalves; Claudio Tavares Sacchi; Erica Valessa Ramos Gomes; Karoline Rodrigues Campos                                                                                                                                                                                                                                                                                                                                            |
| EPI_ISL_861668, EPI_ISL_882659                                                                                                                                                                                                                                                                                                                                                                                                                                                                                                                                                                                                                                                                                                                                                                                                                                                                                                                                                                                                                                                                                                                                                                                                                                                                                                                                                                                                                                                                                                                                                                                                                                                                                                                                                                                                                                                                                                                                                                                                                                                                                                                                                                                                                                                                                                                                                                                                                                                                                                                                                                                                                                                                                                                                                                                                                                                                                                                                                                                                                                                                                                                                                                                                                                                                                                                                                                                                                                                                                                                                                                                                                                                                                                                                                                                                                                                                                                                                                                                                                                                                                                                                                                                                                                                                                                                                                                                                                                                                                                                                                                                                                                                                                                                                                                                                                                                                                                                                                                                                                                                                                                                                                                                                                                                                                                                                                               | Centro de Triagem Covid19                                                                                                                          | Instituto Adolfo Lutz, Interdisciplinary Procedures Center, Strategic Laboratory                                                                                                                                                                        | Claudia Regina Gonçalves; Claudio Tavares Sacchi; Erica Valessa Ramos Gomes; Karoline Rodrigues Campos                                                                                                                                                                                                                                                                                                                                            |
| EPI_ISL_735411, EPI_ISL_735423 to 735424, EPI_ISL_735426                                                                                                                                                                                                                                                                                                                                                                                                                                                                                                                                                                                                                                                                                                                                                                                                                                                                                                                                                                                                                                                                                                                                                                                                                                                                                                                                                                                                                                                                                                                                                                                                                                                                                                                                                                                                                                                                                                                                                                                                                                                                                                                                                                                                                                                                                                                                                                                                                                                                                                                                                                                                                                                                                                                                                                                                                                                                                                                                                                                                                                                                                                                                                                                                                                                                                                                                                                                                                                                                                                                                                                                                                                                                                                                                                                                                                                                                                                                                                                                                                                                                                                                                                                                                                                                                                                                                                                                                                                                                                                                                                                                                                                                                                                                                                                                                                                                                                                                                                                                                                                                                                                                                                                                                                                                                                                                                     | Centro de Vigilancia a Saude de Diadema                                                                                                            | Instituto Adolfo Lutz, Interdisciplinary Procedures Center, Strategic Laboratory                                                                                                                                                                        | Claudia Regina Gonçalves; Claudio Tavares Sacchi; Erica Valessa Ramos Gomes; Karoline Rodrigues Campos                                                                                                                                                                                                                                                                                                                                            |
| EPI_ISL_693240, EPI_ISL_693242                                                                                                                                                                                                                                                                                                                                                                                                                                                                                                                                                                                                                                                                                                                                                                                                                                                                                                                                                                                                                                                                                                                                                                                                                                                                                                                                                                                                                                                                                                                                                                                                                                                                                                                                                                                                                                                                                                                                                                                                                                                                                                                                                                                                                                                                                                                                                                                                                                                                                                                                                                                                                                                                                                                                                                                                                                                                                                                                                                                                                                                                                                                                                                                                                                                                                                                                                                                                                                                                                                                                                                                                                                                                                                                                                                                                                                                                                                                                                                                                                                                                                                                                                                                                                                                                                                                                                                                                                                                                                                                                                                                                                                                                                                                                                                                                                                                                                                                                                                                                                                                                                                                                                                                                                                                                                                                                                               | Centro de Vigiliãncia a Saude de Diadema                                                                                                           | Instituto Adolfo Lutz, Interdisciplinary Procedures Center, Strategic Laboratory                                                                                                                                                                        | Claudia Regina Gonçalves; Claudio Tavares Sacchi; Erica Valessa Ramos Gomes; Karoline Rodrigues Campos                                                                                                                                                                                                                                                                                                                                            |
| EPI_ISL_961286 to 961287, EPI_ISL_961322, EPI_ISL_961352 to 961355, EPI_ISL_961463                                                                                                                                                                                                                                                                                                                                                                                                                                                                                                                                                                                                                                                                                                                                                                                                                                                                                                                                                                                                                                                                                                                                                                                                                                                                                                                                                                                                                                                                                                                                                                                                                                                                                                                                                                                                                                                                                                                                                                                                                                                                                                                                                                                                                                                                                                                                                                                                                                                                                                                                                                                                                                                                                                                                                                                                                                                                                                                                                                                                                                                                                                                                                                                                                                                                                                                                                                                                                                                                                                                                                                                                                                                                                                                                                                                                                                                                                                                                                                                                                                                                                                                                                                                                                                                                                                                                                                                                                                                                                                                                                                                                                                                                                                                                                                                                                                                                                                                                                                                                                                                                                                                                                                                                                                                                                                           | Centrum voor Medische Analyse                                                                                                                      | UAntwerp, Laboratory of Medical Microbiology                                                                                                                                                                                                            | Basil Britto Xavier; Christine Lammens; Herman Goossens; Jasmine Coppens; Marie Le Mercier; Veerle Matheussen                                                                                                                                                                                                                                                                                                                                     |



|                                                                                                                                                                                                                                                                                                                                                                                                                                                                                                                                                                                                                                                                                                                                                                                                                    |           |                                                                                                             |                                                                                                                        |                                                                                                                                                                                                                                                                                                                                                                                                                                                                                                                                            |
|--------------------------------------------------------------------------------------------------------------------------------------------------------------------------------------------------------------------------------------------------------------------------------------------------------------------------------------------------------------------------------------------------------------------------------------------------------------------------------------------------------------------------------------------------------------------------------------------------------------------------------------------------------------------------------------------------------------------------------------------------------------------------------------------------------------------|-----------|-------------------------------------------------------------------------------------------------------------|------------------------------------------------------------------------------------------------------------------------|--------------------------------------------------------------------------------------------------------------------------------------------------------------------------------------------------------------------------------------------------------------------------------------------------------------------------------------------------------------------------------------------------------------------------------------------------------------------------------------------------------------------------------------------|
| EPI_ISL_639632 to 639633, EPI_ISL_639636, EPI_ISL_639640, EPI_ISL_639642, EPI_ISL_639648, EPI_ISL_639650 to 639651, EPI_ISL_639654 to 639657, EPI_ISL_639663, EPI_ISL_639672, EPI_ISL_639676 to 639680, EPI_ISL_639683, EPI_ISL_770038 to 770039, EPI_ISL_770042, EPI_ISL_770045, EPI_ISL_770048 to 770049, EPI_ISL_770052, EPI_ISL_770054, EPI_ISL_770056, EPI_ISL_770058 to 770059, EPI_ISL_770061                                                                                                                                                                                                                                                                                                                                                                                                               | see above | Centrl Laboratorija                                                                                         | Latvian Biomedical Research and Study Centre                                                                           | Ivars Silamielis; Jana Oste; Jnis Klovis; Jnis Pjalkovskis; Kaspars Megnis; Marta Priedte; Monta Ustinova; Stella Lapia; Uga Dumpis; Vita Rovte; ikitā Zrelavs                                                                                                                                                                                                                                                                                                                                                                             |
| EPI_ISL_861714                                                                                                                                                                                                                                                                                                                                                                                                                                                                                                                                                                                                                                                                                                                                                                                                     |           | Cerba                                                                                                       | CERBA LAB                                                                                                              | Costa JM; Haïm-Boukobza S.; Hedbaut E; Lecorche E; Malek Ramdane; Olivi M; Roquebert B; Trombert S; Verdurme L                                                                                                                                                                                                                                                                                                                                                                                                                             |
| EPI_ISL_900527, EPI_ISL_913666                                                                                                                                                                                                                                                                                                                                                                                                                                                                                                                                                                                                                                                                                                                                                                                     |           | Cerballiance                                                                                                | CNR Virus des Infections Respiratoires - France SUD                                                                    | Antonin Bal; Bruno Lina; Gregory Destras; Gwendolynne Burfin; Hadrien Régue; Laurence Josset; Martine Valette; Quentin Semanas                                                                                                                                                                                                                                                                                                                                                                                                             |
| EPI_ISL_861503                                                                                                                                                                                                                                                                                                                                                                                                                                                                                                                                                                                                                                                                                                                                                                                                     |           | Cerballiance Alpes Durance                                                                                  | CERBA LAB                                                                                                              | Dyen P; Prots L.                                                                                                                                                                                                                                                                                                                                                                                                                                                                                                                           |
| EPI_ISL_861497, EPI_ISL_861500 to 861502                                                                                                                                                                                                                                                                                                                                                                                                                                                                                                                                                                                                                                                                                                                                                                           |           | Cerballiance Centre Est                                                                                     | CERBA LAB                                                                                                              | Chanard C; Chanard E; Gazzano V; Munier C; Prots L.                                                                                                                                                                                                                                                                                                                                                                                                                                                                                        |
| EPI_ISL_860716, EPI_ISL_861488 to 861496, EPI_ISL_871876                                                                                                                                                                                                                                                                                                                                                                                                                                                                                                                                                                                                                                                                                                                                                           |           | Cerballiance Côte d'Azur                                                                                    | CERBA LAB                                                                                                              | ; Aankour N; Adjtoutah Z; Adoul O; Barrieu-Moussat S; Barrieu-Moussat S; Barsanti M; Bausset O; Boudjahem Z; Chaudet L; Chobert F; Costa JM; De La Chapelle A; Francois J; Gandillet A; Gastaud S; Haïm-Boukobza S.; Hedbaut E; Jaugin P; Juvet O; Lecorche E; Malek Ramdane; Maltese S; Mangiarotti T; Marcadal M; Marius M; Martin L; Morello V; Olivi M; Pichon R; Pichon R; Quintle S; Prots L; Prots L; Prots L; Raimondi V.; Prots.L; Roman E; Roquebert B; Sanza O; Sinsouliou T; Trombert S; Van Der Rhyn I; Verdurme L; Viltard B |
| EPI_ISL_861508                                                                                                                                                                                                                                                                                                                                                                                                                                                                                                                                                                                                                                                                                                                                                                                                     |           | Cerballiance Haut de France                                                                                 | CERBA LAB                                                                                                              | Felloni C; Lahmidi S.; Mainardi A                                                                                                                                                                                                                                                                                                                                                                                                                                                                                                          |
| EPI_ISL_871789, EPI_ISL_871792                                                                                                                                                                                                                                                                                                                                                                                                                                                                                                                                                                                                                                                                                                                                                                                     |           | Cerballiance Normandie                                                                                      | CERBA LAB                                                                                                              | BRIAND G; COUDRAY J; COULON C; HAMEL A.; LAFOREST D; LEPIGEON; MARTINS-AMARAL F; THOMAS Johan; VITEL R; technicien V                                                                                                                                                                                                                                                                                                                                                                                                                       |
| EPI_ISL_861504 to 861507                                                                                                                                                                                                                                                                                                                                                                                                                                                                                                                                                                                                                                                                                                                                                                                           |           | Cerballiance Provence                                                                                       | CERBA LAB                                                                                                              | Delaunay E; Prots L.; Roig JC                                                                                                                                                                                                                                                                                                                                                                                                                                                                                                              |
| EPI_ISL_862046 to 862047                                                                                                                                                                                                                                                                                                                                                                                                                                                                                                                                                                                                                                                                                                                                                                                           |           | Cerballiance Val de Loire                                                                                   | CERBA LAB                                                                                                              | Abs G.                                                                                                                                                                                                                                                                                                                                                                                                                                                                                                                                     |
| EPI_ISL_855551                                                                                                                                                                                                                                                                                                                                                                                                                                                                                                                                                                                                                                                                                                                                                                                                     |           | Cerballiance Wilson                                                                                         | CERBA LAB                                                                                                              | Costa JM; Haïm-Boukobza S; Herhira S; Lecorche E; Malek R; Merah K; Olivi M; Roquebert B; Trombert S; Verdurme L; Zimmer S                                                                                                                                                                                                                                                                                                                                                                                                                 |
| EPI_ISL_802994 to 802995                                                                                                                                                                                                                                                                                                                                                                                                                                                                                                                                                                                                                                                                                                                                                                                           |           | Charite Universitätsmedizin Berlin, Institut für Virologie, Charitéplatz 1, 10117 Berlin, Germany           | Charite Universitätsmedizin Berlin, Institut für Virologie, Charitéplatz 1, 10117 Berlin, Germany                      | Barbara Mühlemann; Christian Drosten; Julia Schneider; Julia Tesch; Jörn Beheim-Schwarzbach; Talitha Veith; Terry Jones; Tobias Bleicker; Victor M Corman                                                                                                                                                                                                                                                                                                                                                                                  |
| EPI_ISL_862124 to 862132, EPI_ISL_862134 to 862159, EPI_ISL_862163 to 862187, EPI_ISL_862659 to 862664                                                                                                                                                                                                                                                                                                                                                                                                                                                                                                                                                                                                                                                                                                             |           | Charité Universitätsmedizin Berlin, Institut für Virologie/Labor Berlin                                     | Charité Universitätsmedizin Berlin, Institut für Virologie Berlin                                                      | Barbara Mühlemann; Christian Drosten; Julia Schneider; Julia Tesch; Jörn Beheim-Schwarzbach; Talitha Veith; Terry Jones; Tobias Bleicker; Victor M Corman                                                                                                                                                                                                                                                                                                                                                                                  |
| EPI_ISL_754174 to 754175                                                                                                                                                                                                                                                                                                                                                                                                                                                                                                                                                                                                                                                                                                                                                                                           |           | Charité Universitätsmedizin Berlin, Institut für Virologie                                                  | Charité Universitätsmedizin Berlin, Institut für Virologie                                                             | Barbara Mühlemann; Christian Drosten; Julia Schneider; Jörn Beheim-Schwarzbach; Talitha Veith; Terry Jones; Victor M Corman                                                                                                                                                                                                                                                                                                                                                                                                                |
| EPI_ISL_729346, EPI_ISL_729348, EPI_ISL_729355 to 729357, EPI_ISL_729360, EPI_ISL_729365 to 729366, EPI_ISL_729370, EPI_ISL_729377, EPI_ISL_729382, EPI_ISL_729387 to 729388, EPI_ISL_729398, EPI_ISL_729400, EPI_ISL_729404, EPI_ISL_729406, EPI_ISL_729408 to 729410, EPI_ISL_729413, EPI_ISL_729473 to 729497, EPI_ISL_729499, EPI_ISL_729514, EPI_ISL_729529 to 729531, EPI_ISL_729534, EPI_ISL_729548, EPI_ISL_729555 to 729557, EPI_ISL_729598 to 729607, EPI_ISL_753702 to 754058, EPI_ISL_754184 to 754194, EPI_ISL_806526 to 806531, EPI_ISL_806533 to 806537, EPI_ISL_806539 to 806542, EPI_ISL_853394 to 853404, EPI_ISL_869083, EPI_ISL_869085, EPI_ISL_869118 to 869119, EPI_ISL_869124 to 869136, EPI_ISL_869143, EPI_ISL_909747, EPI_ISL_909750 to 909760, EPI_ISL_909771, EPI_ISL_912227 to 912267 | see above | Charité Universitätsmedizin Berlin, Institut für Virologie/Labor Berlin                                     | Charité Universitätsmedizin Berlin, Institut für Virologie                                                             | Barbara Mühlemann; Christian Drosten; Cornelia Schlee; Julia Schneider; Julia Tesch; Jörn Beheim-Schwarzbach; Talitha Veith; Terry Jones; Tobias Bleicker; Tomasz Zemojtel; Victor M Corman                                                                                                                                                                                                                                                                                                                                                |
| EPI_ISL_818342                                                                                                                                                                                                                                                                                                                                                                                                                                                                                                                                                                                                                                                                                                                                                                                                     |           | Charité Universitätsmedizin Berlin, Institute of Virology                                                   | Charité Universitätsmedizin Berlin, Institute of Virology                                                              | Barbara Mühlemann; Christian Drosten; Julia Schneider; Jörn Beheim-Schwarzbach; Talitha Veith; Terry Jones; Victor M Corman                                                                                                                                                                                                                                                                                                                                                                                                                |
| EPI_ISL_824920 to 824921, EPI_ISL_824942 to 824944, EPI_ISL_824985 to 824986, EPI_ISL_848200 to 848202, EPI_ISL_856678, EPI_ISL_856680 to 856681, EPI_ISL_856683, EPI_ISL_860784 to 860790, EPI_ISL_868949, EPI_ISL_875344                                                                                                                                                                                                                                                                                                                                                                                                                                                                                                                                                                                         | see above | Charité Universitätsmedizin Berlin, Institute of Virology, Charitéplatz 1, 10117 Berlin, Germany            | Charité Universitätsmedizin Berlin, Institute of Virology, Charitéplatz 1, 10117 Berlin, Germany                       | Barbara Mühlemann; Christian Drosten; Julia Schneider; Julia Tesch; Jörn Beheim-Schwarzbach; Talitha Veith; Terry Jones; Tobias Bleicker; Victor M Corman                                                                                                                                                                                                                                                                                                                                                                                  |
| EPI_ISL_940075 to 940104, EPI_ISL_940106 to 940107, EPI_ISL_940109 to 940124, EPI_ISL_940126 to 940137                                                                                                                                                                                                                                                                                                                                                                                                                                                                                                                                                                                                                                                                                                             |           | Charlotte Maxeke Johannesburg Academic Hospital, National Health Laboratory Services, Gauteng, South Africa | National Institute for Communicable Diseases of the National Health Laboratory Service                                 | Allam M; Amoako DG; Bhiman JN; Ismail A; Mahlangu B; Mohale T; Ntuli N                                                                                                                                                                                                                                                                                                                                                                                                                                                                     |
| EPI_ISL_735496 to 735497                                                                                                                                                                                                                                                                                                                                                                                                                                                                                                                                                                                                                                                                                                                                                                                           |           | Chattogram Veterinary and Animal Sciences University                                                        | Central Biological Research Laboratory and Department of Biochemistry and Molecular Biology                            | H. M. Abdullah Al Masud; Imam Hossen; Md. Arif Hossain; Md. Imranul Hoq; Md. Khondakar Raziur Rahman; Md. Omer Faruq; Mohammad Omar Faruque; Robiul Hasan Bhuiyan; Sajib Rudra; Shanta Paul                                                                                                                                                                                                                                                                                                                                                |
| EPI_ISL_684159 to 684161, EPI_ISL_686659 to 686844, EPI_ISL_691284 to 691288, EPI_ISL_901717 to 901721                                                                                                                                                                                                                                                                                                                                                                                                                                                                                                                                                                                                                                                                                                             |           | Chiba Prefectural Institute of Public Health                                                                | Pathogen Genomics Center, National Institute of Infectious Diseases                                                    | Kentaro Itokawa; Makoto Kuroda; Masanori Hashino; Rina Tanaka; Tsuyoshi Sekizuka                                                                                                                                                                                                                                                                                                                                                                                                                                                           |
| EPI_ISL_625457 to 625477, EPI_ISL_700328 to 700347, EPI_ISL_768728 to 768742, EPI_ISL_906082 to 906090, EPI_ISL_906092 to 906097, EPI_ISL_906099 to 906116                                                                                                                                                                                                                                                                                                                                                                                                                                                                                                                                                                                                                                                         |           | Child Health Research Foundation                                                                            | Child Health Research Foundation                                                                                       | Afroza Akter Tanni; Arif Mohammad Tanmoy; Md Hafizur Rahman; Md Saiful Islam Sajib; Nikkon Sarkar; Roly Malaker; Samir K Saha; Senjuti Saha; Sharmistha Goswami; Syed Mukhtadir Al Sium                                                                                                                                                                                                                                                                                                                                                    |
| EPI_ISL_847515, EPI_ISL_847517, EPI_ISL_847536, EPI_ISL_847540, EPI_ISL_847545 to 847546, EPI_ISL_847553, EPI_ISL_847563, EPI_ISL_847579, EPI_ISL_847619 to 847622, EPI_ISL_847640 to 847644, EPI_ISL_847716, EPI_ISL_847720, EPI_ISL_847730 to 847731, EPI_ISL_847736, EPI_ISL_847738, EPI_ISL_847741 to 847744, EPI_ISL_847746 to 847747, EPI_ISL_847782, EPI_ISL_855399 to 855401, EPI_ISL_977885 to 977983, EPI_ISL_977985 to 978168, EPI_ISL_978955 to 978973                                                                                                                                                                                                                                                                                                                                                 | see above | Chiu Laboratory, University of California, San Francisco                                                    | Chiu Laboratory, University of California, San Francisco                                                               | Brian Bushnell; Candace Wang; Charles Chiu; Debra Wadford; Jill Hacker; Scot Federman; Venice Servellita; Xiandong (Wayne) Deng                                                                                                                                                                                                                                                                                                                                                                                                            |
| EPI_ISL_833337                                                                                                                                                                                                                                                                                                                                                                                                                                                                                                                                                                                                                                                                                                                                                                                                     |           | Christ the Saviour General Hospital - Batangas                                                              | Research Institute for Tropical Medicine                                                                               | Catalino Demetria; Daria Manalo; Edelwisa Mercado; Francisco Gerardo Polotan; Hannah Leah Morito; Inez Andrea Medado; John Leonard Chan; Kirstyn Brunker; Ma Angelica Tujan; Othoniel Jan Onza                                                                                                                                                                                                                                                                                                                                             |
| EPI_ISL_872100 to 872104                                                                                                                                                                                                                                                                                                                                                                                                                                                                                                                                                                                                                                                                                                                                                                                           |           | Chu Tivoli                                                                                                  | GIGA Medical Genomics                                                                                                  | Bouchra Boujemla; Cécile Meex; Keith Durkin; Maria Artesi; Marie-Pierre Hayette; Pierrette Melin; Raphaël Boreux; Sébastien Bontems; Vincent Bours                                                                                                                                                                                                                                                                                                                                                                                         |
| EPI_ISL_877422                                                                                                                                                                                                                                                                                                                                                                                                                                                                                                                                                                                                                                                                                                                                                                                                     |           | Citra Medika Hospital                                                                                       | Institute of Tropical Disease, Universitas Airlangga                                                                   | Aldise M Nastro; Gatot Soegiarto; Jezzy R Dewantari; Kazufumi Shimizu; Krisnadi Rahardjo; Laksmi Wulandari; Maria I Lusida; Resti Yudhawati; Rima R Prasetya; Soetjpto; Wahidah Rachmaniyah; Yasuko Mori                                                                                                                                                                                                                                                                                                                                   |
| EPI_ISL_636981                                                                                                                                                                                                                                                                                                                                                                                                                                                                                                                                                                                                                                                                                                                                                                                                     |           | City of Chimoio                                                                                             | KRISP, KZN Research Innovation and Sequencing Platform                                                                 | Gianthari J; Ismael N; Nadia Siteo; Nedio Mabunda; Paulo Arnaldo; Pillay S; Tegally H; Wilkinson E; de Oliveira T                                                                                                                                                                                                                                                                                                                                                                                                                          |
| EPI_ISL_833413                                                                                                                                                                                                                                                                                                                                                                                                                                                                                                                                                                                                                                                                                                                                                                                                     |           | City of Hope Comprehensive Cancer Center                                                                    | Los Angeles County PHL                                                                                                 | P. Hemarajata et al.                                                                                                                                                                                                                                                                                                                                                                                                                                                                                                                       |
| EPI_ISL_931472 to 931485, EPI_ISL_940715 to 940730, EPI_ISL_940732 to 940734, EPI_ISL_940784 to 940791, EPI_ISL_954753 to 954754                                                                                                                                                                                                                                                                                                                                                                                                                                                                                                                                                                                                                                                                                   |           | City of Milwaukee Health Department Laboratory                                                              | City of Milwaukee Health Department Laboratory                                                                         | Sanjib Bhattacharyya                                                                                                                                                                                                                                                                                                                                                                                                                                                                                                                       |
| EPI_ISL_640068, EPI_ISL_700432, EPI_ISL_700519                                                                                                                                                                                                                                                                                                                                                                                                                                                                                                                                                                                                                                                                                                                                                                     |           | Clinic-in-Asla                                                                                              | NHLS/UCT                                                                                                               | Arash Iranzadeh; Bruna Galvao; Carolyn Williamson; Deelan Doolabh; Diana Hardie; Houriyah Tegally; Innocent Mudau; Kruger Marais; Lynn Tyers; Marvin Hsiao; Stephen Korsman                                                                                                                                                                                                                                                                                                                                                                |
| EPI_ISL_770004                                                                                                                                                                                                                                                                                                                                                                                                                                                                                                                                                                                                                                                                                                                                                                                                     |           | Clinica Bíblica                                                                                             | Incienza, Instituto Costarricense de Investigación y Enseñanza en Nutrición y Salud                                    | Adriana Godínez; Claudio Soto-Garita; Estela Cordero; Francisco Duarte; Hebleen Porras; Melany Calderón & Karla Gutiérrez-González                                                                                                                                                                                                                                                                                                                                                                                                         |
| EPI_ISL_902954 to 902968, EPI_ISL_902970 to 902995, EPI_ISL_903218 to 903228, EPI_ISL_911353 to 911371, EPI_ISL_911402 to 911429, EPI_ISL_911443 to 911470, EPI_ISL_911549 to 911579, EPI_ISL_911604 to 911632, EPI_ISL_911710 to 911731, EPI_ISL_911733 to 911745, EPI_ISL_911751 to 911754, EPI_ISL_911924 to 911928                                                                                                                                                                                                                                                                                                                                                                                                                                                                                             | see above | Clinical Diagnostics Laboratory, Diagnostic & Experimental Pathology, Lilly Research Laboratories           | Clinical Diagnostics Laboratory, Diagnostic & Experimental Pathology, Lilly Research Laboratories                      | Andrew Schade; Angie Fulford; Erin Wray; Jeff Fill; Joe Oakley; John Calley; John McElwee; Leslie O'Neill Reising; Mayuri Vaidya; Pat Finnegan; Phil Ebert; Rachael Redmond; Sam McNeely; Tim Holzer                                                                                                                                                                                                                                                                                                                                       |
| EPI_ISL_677715, EPI_ISL_677718                                                                                                                                                                                                                                                                                                                                                                                                                                                                                                                                                                                                                                                                                                                                                                                     |           | Clinical Hospital - Bitola                                                                                  | Research Center for Genetic Engineering and Biotechnology "Georgi D. Efremov", Macedonian Academy of Sciences and Arts | RCGEB - MASA                                                                                                                                                                                                                                                                                                                                                                                                                                                                                                                               |

|                                                                                                                                                                                                                                                                                                                                                                                                      |                                                                                 |                                                                                                                        |                                                                                                                                                                                                                                                                                                                                                                                                                                                                                                                                                             |
|------------------------------------------------------------------------------------------------------------------------------------------------------------------------------------------------------------------------------------------------------------------------------------------------------------------------------------------------------------------------------------------------------|---------------------------------------------------------------------------------|------------------------------------------------------------------------------------------------------------------------|-------------------------------------------------------------------------------------------------------------------------------------------------------------------------------------------------------------------------------------------------------------------------------------------------------------------------------------------------------------------------------------------------------------------------------------------------------------------------------------------------------------------------------------------------------------|
| EPI_ISL_677676 to 677677, EPI_ISL_677716 to 677717, EPI_ISL_677720 to 677721, EPI_ISL_677724, EPI_ISL_678250, EPI_ISL_678259                                                                                                                                                                                                                                                                         | Clinical Hospital - Shtip                                                       | Research Center for Genetic Engineering and Biotechnology "Georgi D. Efremov", Macedonian Academy of Sciences and Arts | RCGEB - MASA                                                                                                                                                                                                                                                                                                                                                                                                                                                                                                                                                |
| EPI_ISL_747194                                                                                                                                                                                                                                                                                                                                                                                       | Clinical Microbiology Laboratory, Faculty of Medicine, Universitas Indonesia    | Clinical Microbiology Laboratory, Faculty of Medicine, Universitas Indonesia                                           | Andi Yasmon; Anis Karuniawati; Augustine Natasha; Fera Ibrahim; Fithriyah; Pratiwi Sudarmono; Yulia Rosa Saharman                                                                                                                                                                                                                                                                                                                                                                                                                                           |
| EPI_ISL_877585 to 877763, EPI_ISL_884291 to 884293, EPI_ISL_968140 to 968188                                                                                                                                                                                                                                                                                                                         | Clinical Molecular Microbiology Laboratory, UNC Hospital                        | Dirk Dittmer                                                                                                           | Angelica Juarez; Blossom Damania.; Brent A. Eason; Cameroon Grant; Carolina Caro-Vegas; Cecilia Thompson; Dirk Dittmer; Evelyn Hoffman; Jason Wong; Justin T. Landis; Linda Pluta; Melissa B. Miller; Patricia Cano; Razia Moorad; Ryan McNamara; Shawn Hawken                                                                                                                                                                                                                                                                                              |
| EPI_ISL_831361 to 831369, EPI_ISL_832121 to 832126, EPI_ISL_861443 to 861455, EPI_ISL_911580 to 911603, EPI_ISL_911674, EPI_ISL_965157 to 965177, EPI_ISL_965906 to 965908                                                                                                                                                                                                                           | see above                                                                       | Clinical Molecular Microbiology Laboratory, UNC Hospitals                                                              | Jeremy Wang                                                                                                                                                                                                                                                                                                                                                                                                                                                                                                                                                 |
| EPI_ISL_914003 to 914009, EPI_ISL_955264, EPI_ISL_955266 to 955268, EPI_ISL_955270, EPI_ISL_955276, EPI_ISL_955278 to 955282, EPI_ISL_955286 to 955287, EPI_ISL_955289, EPI_ISL_955294 to 955297, EPI_ISL_955301, EPI_ISL_955304 to 955306, EPI_ISL_955312, EPI_ISL_955317 to 955318, EPI_ISL_955321                                                                                                 | see above                                                                       | Clinical Pathology Lab                                                                                                 | Pathogen Discovery, Respiratory Viruses Branch, Division of Viral Diseases, Centers for Disease Control and Prevention                                                                                                                                                                                                                                                                                                                                                                                                                                      |
| EPI_ISL_778842, EPI_ISL_778865 to 778866                                                                                                                                                                                                                                                                                                                                                             | Clinical Pathology Labs                                                         | Centers for Disease Control and Prevention Division of Viral Diseases, Pathogen Discovery                              | Ying Tao Yan Li Jing Zhang Krista Queen Anna Uehara Peter Cook Clinton R. Paden Haibin Wang Suxiang Tong                                                                                                                                                                                                                                                                                                                                                                                                                                                    |
| EPI_ISL_735511                                                                                                                                                                                                                                                                                                                                                                                       | Clinical Pathology and Microbiology, San Gallicano Dermatologic Institute IRCCS | National Institute for Infectious Diseases, INMI, "L. Spallanzani" IRCCS                                               | A. Di Caro; B. Bartolini; C.E.M Gruber; E. Giombini; F. Carletti; F. Ensolì; F. Messina; F. Pimpinelli; M. Rueca; M.R. Capobianchi                                                                                                                                                                                                                                                                                                                                                                                                                          |
| EPI_ISL_753262 to 753692                                                                                                                                                                                                                                                                                                                                                                             | Clinical virology Laboratory, Children's Hospital Los Angeles                   | Center for Personalized Medicine, Children's Hospital Los Angeles                                                      | Gai et al                                                                                                                                                                                                                                                                                                                                                                                                                                                                                                                                                   |
| EPI_ISL_965393 to 965397, EPI_ISL_965402, EPI_ISL_965451                                                                                                                                                                                                                                                                                                                                             | Clinique N.D de Grâce Gosselies                                                 | GIGA Medical Genomics                                                                                                  | Bouchra Boujemla; Cécile Meex; Keith Durkin; Maria Artesi; Marie-Pierre Hayette; Pierrette Melin; Raphaël Boreux; Sébastien Bontems; Vincent Bours                                                                                                                                                                                                                                                                                                                                                                                                          |
| EPI_ISL_949248                                                                                                                                                                                                                                                                                                                                                                                       | Cliniques Saint-Pierre Ottignies                                                | UCLouvain/IREC/MBLG                                                                                                    | Benoit Kabamba Mukadi; Jean Ruelle; Lysa Pinsmaye                                                                                                                                                                                                                                                                                                                                                                                                                                                                                                           |
| EPI_ISL_949244 to 949247, EPI_ISL_949249 to 949253                                                                                                                                                                                                                                                                                                                                                   | Cliniques universitaires Saint-Luc                                              | UCLouvain/IREC/MBLG                                                                                                    | Benoit Kabamba Mukadi; Jean Ruelle; Lysa Pinsmaye                                                                                                                                                                                                                                                                                                                                                                                                                                                                                                           |
| EPI_ISL_862652 to 862653                                                                                                                                                                                                                                                                                                                                                                             | Clinica Universidad de Navarra                                                  | Instituto de Salud Carlos III                                                                                          | A. Monzón; F. Casas; I. Fernández, M.; I. Jiménez; Iglesias-Caballero; M. Pozo; M. Cuesta; M. González-Esguevillas; M. Zaballos; M.Camarero; P. Jiménez; S. Juliá; S. Molinero Calamita; S. Varona                                                                                                                                                                                                                                                                                                                                                          |
| EPI_ISL_745128, EPI_ISL_745153                                                                                                                                                                                                                                                                                                                                                                       | CoVid EC Nelson Mandela Bay Metro                                               | National Health Laboratory Service (NHLS), Tygerberg                                                                   | Bronwyn Kleinhans; Eduan Wilkindon; Gert van Zyl; Houriiyah Tegally; Kayla Delaney; Susan Engelbrecht; Tulio de Oliveira; Wolfgang Preiser                                                                                                                                                                                                                                                                                                                                                                                                                  |
| EPI_ISL_640062 to 640063                                                                                                                                                                                                                                                                                                                                                                             | CoVid WC Cape Town Metro                                                        | NHLS/UCT                                                                                                               | Arash Irzadeh; Bruna Galvao; Carolyn Williamson; Deelan Doolabh; Diana Hardie; Innocent Mudau; Kruger Marais; Lynn Tyers; Marvin Hsiao; Stephen Korsman                                                                                                                                                                                                                                                                                                                                                                                                     |
| EPI_ISL_677241, EPI_ISL_751800                                                                                                                                                                                                                                                                                                                                                                       | Colorado Department of Public Health and Environment                            | Colorado Department of Public Health & Environment                                                                     | Diana Ir; Emily A. Travanty; Laura Bankers; Molly C. Hetherington-Rauth; Molly Hetherington-Rauth; Sarah Elizabeth Totten; Shannon Ely; Shannon R. Matzinger                                                                                                                                                                                                                                                                                                                                                                                                |
| EPI_ISL_677242 to 677319, EPI_ISL_677637 to 677657, EPI_ISL_710130 to 710270, EPI_ISL_710272 to 710373, EPI_ISL_771152 to 771187, EPI_ISL_771189 to 771193, EPI_ISL_771195 to 771204, EPI_ISL_771206 to 771223, EPI_ISL_771225 to 771233, EPI_ISL_771245 to 771360, EPI_ISL_857043 to 857050, EPI_ISL_954818 to 954942, EPI_ISL_954944 to 955060, EPI_ISL_955131 to 955135, EPI_ISL_983705 to 983862 | see above                                                                       | Colorado Department of Public Health and Environment                                                                   | Diana Ir; Emily A. Travanty; Laura Bankers; Molly C. Hetherington-Rauth; Molly Hetherington-Rauth; Sarah Elizabeth Totten; Shannon Ely; Shannon R. Matzinger                                                                                                                                                                                                                                                                                                                                                                                                |
| EPI_ISL_765574 to 765582, EPI_ISL_872745 to 872777                                                                                                                                                                                                                                                                                                                                                   | Colorado Mesa University                                                        | Infectious Disease Program, Broad Institute of Harvard and MIT                                                         | A.E.; Adams, G.; Anahtar, M.; B.L.; B.W.; Bauer, M.; Birren; Branda, J.; Bronson, A.; Carter, A.; Cerrato, F.; Chaluvadi, S.; Chapman; Cusick, C.; D.J.; DeRuff, K.; E. and Sabeti; Flowers, K.; Gallagher, G.; Gladden-Young, A.; Gnirke, A.; Harris, J.; J.E.; K.J.; LaRocque, R.; Lagerberg, K.; Lemieux; Lin; Loreth, C.; MacInnis; Marshall, J.; Neumann, A.; Normandin, E.; O'Neill, M.; P.C.; Park; Pierce, V.; Reilly, S.; Rosenberg, Rudy, M.; Ryan, E.; S.B.; Shaw, B.; Siddle; Slater, D.; Smole, S.; Tomkins-Tinch, C.; Turbett, S.; and Sabeti |
| EPI_ISL_804980, EPI_ISL_896216 to 896217, EPI_ISL_896227, EPI_ISL_896231 to 896234, EPI_ISL_896236 to 896246, EPI_ISL_896382 to 896384, EPI_ISL_896386, EPI_ISL_896389, EPI_ISL_896391 to 896395, EPI_ISL_896422 to 896446, EPI_ISL_936036 to 936045, EPI_ISL_936063 to 936066, EPI_ISL_936069, EPI_ISL_936082, EPI_ISL_936086, EPI_ISL_936089, EPI_ISL_936092 to 936093                             | see above                                                                       | Columbia University Irving Medical Center                                                                              | Wadsworth Center, New York State Department of Health                                                                                                                                                                                                                                                                                                                                                                                                                                                                                                       |
| EPI_ISL_794283 to 794307, EPI_ISL_802777 to 802789                                                                                                                                                                                                                                                                                                                                                   | Columbia University Irving Medical Center                                       | Wadsworth Center, New York State Department of Health                                                                  | Alexis Russel; Daryl M. Lamson; Erasmus Schneider; Erica Lasek-Nesselquist; John Kelly; Jonathan Plitnick; Kirsten St. George; Matthew Shudt; Melissa A Leisner; Navjot Singh                                                                                                                                                                                                                                                                                                                                                                               |
| EPI_ISL_632250 to 632285, EPI_ISL_632899 to 632907, EPI_ISL_678261 to 678272, EPI_ISL_681298 to 681319, EPI_ISL_682299 to 682322, EPI_ISL_684028 to 684036                                                                                                                                                                                                                                           | Communicable Disease Laboratory, Public Health Directorate                      | Communicable Disease Laboratory, Public Health Directorate                                                             | AlAbbas, Z.; AlHujairi, Z.; AlTaif, Z.; AlWasti, H.; Alhujairi, Z.; Altaif, Z.; Alwasti, H.                                                                                                                                                                                                                                                                                                                                                                                                                                                                 |
| EPI_ISL_862544, EPI_ISL_862553 to 862555                                                                                                                                                                                                                                                                                                                                                             | Complejo Hospitalario Xeral-Calde                                               | Instituto de Salud Carlos III                                                                                          | A. Monzón; F. Casas; I. Alonso, P.; I. Jiménez; Iglesias-Caballero; M. Pozo; M. Cuesta; M. González-Esguevillas; M. Zaballos; M.Camarero; P. Jiménez; S. Juliá; S. Molinero Calamita; S. Varona                                                                                                                                                                                                                                                                                                                                                             |
| EPI_ISL_913038                                                                                                                                                                                                                                                                                                                                                                                       | Complejo Asistencial Universitario de Burgos                                    | Instituto de Salud Carlos III                                                                                          | A. Monzón; F. Casas; I. Jiménez; I. Megías, G.; Iglesias-Caballero; M. Camarero; P. Zaballos; S. Cuesta; S. Pozo; S. Sandonis; S. Varona; V. Vázquez                                                                                                                                                                                                                                                                                                                                                                                                        |
| EPI_ISL_913052 to 913053, EPI_ISL_954785                                                                                                                                                                                                                                                                                                                                                             | Complejo Asistencial Universitario de Salamanca                                 | Instituto de Salud Carlos III                                                                                          | A. Monzón; F. Casas; I. Jiménez; I. Ávila, A.; Iglesias-Caballero; M. Camarero; P. Zaballos; S. Cuesta; S. Pozo; S. Sandonis; S. Varona; V. Vázquez                                                                                                                                                                                                                                                                                                                                                                                                         |
| EPI_ISL_954789, EPI_ISL_954794, EPI_ISL_954800, EPI_ISL_954807 to 954808                                                                                                                                                                                                                                                                                                                             | Complejo Hospitalario Universitario La Coruña                                   | Instituto de Salud Carlos III                                                                                          | A. Monzón; F. Casas; I. Jiménez; I. Peña, F.; Iglesias-Caballero; M. Camarero; P. Zaballos; S. Cuesta; S. Pozo; S. Sandonis; S. Varona; V. Vázquez                                                                                                                                                                                                                                                                                                                                                                                                          |
| EPI_ISL_691684                                                                                                                                                                                                                                                                                                                                                                                       | Complejo Hospitalario Universitario de Albacete                                 | Instituto de Salud Carlos III                                                                                          | A. Monzón; F. Casas; I. Jiménez; I. Martínez, E.; Iglesias-Caballero; M. Camarero; M. Cuesta; M. González-Esguevillas; M. Pozo; M. Zaballos; P. Jiménez; S. Juliá; S. Molinero Calamita; S. Varona                                                                                                                                                                                                                                                                                                                                                          |
| EPI_ISL_913024, EPI_ISL_913495                                                                                                                                                                                                                                                                                                                                                                       | Complejo Hospitalario Universitario de Santiago                                 | Instituto de Salud Carlos III                                                                                          | A. Monzón; F. Casas; I. Jiménez; I. Peña, F.; Iglesias-Caballero; M. Camarero; P. Zaballos; S. Cuesta; S. Pozo; S. Sandonis; S. Varona; V. Vázquez                                                                                                                                                                                                                                                                                                                                                                                                          |
| EPI_ISL_913039                                                                                                                                                                                                                                                                                                                                                                                       | Complejo Hospitalario Xeral-Calde                                               | Instituto de Salud Carlos III                                                                                          | A. Monzón; F. Casas; I. Alonso, P.; I. Jiménez; Iglesias-Caballero; M. Camarero; P. Zaballos; S. Cuesta; S. Pozo; S. Sandonis; S. Varona; V. Vázquez                                                                                                                                                                                                                                                                                                                                                                                                        |
| EPI_ISL_862550, EPI_ISL_862552, EPI_ISL_862570 to 862572, EPI_ISL_862645 to 862651, EPI_ISL_954784, EPI_ISL_954786, EPI_ISL_954791, EPI_ISL_954802, EPI_ISL_954804, EPI_ISL_965933, EPI_ISL_965937, EPI_ISL_965942 to 965944, EPI_ISL_965950, EPI_ISL_965956                                                                                                                                         | see above                                                                       | Complejo Hospitalario de Navarra                                                                                       | Instituto de Salud Carlos III                                                                                                                                                                                                                                                                                                                                                                                                                                                                                                                               |
| EPI_ISL_861683                                                                                                                                                                                                                                                                                                                                                                                       | Complexo Hospitalar Padre Bento de Guarulhos                                    | Instituto Adolfo Lutz, Interdisciplinary Procedures Center, Strategic Laboratory                                       | Claudia Regina Gonçalves; Claudio Tavares Sacchi; Erica Valessa Ramos Gomes; Karoline Rodrigues Campos                                                                                                                                                                                                                                                                                                                                                                                                                                                      |
| EPI_ISL_872191 to 872192                                                                                                                                                                                                                                                                                                                                                                             | Conjunto Hospitalar do Mandaqui de Sao Paulo                                    | Instituto Adolfo Lutz, Interdisciplinary Procedures Center, Strategic Laboratory                                       | Ana Lucia de Carvalho Avelino; Claudia Regina Gonçalves; Claudio Tavares Sacchi; Erica Valessa Ramos Gomes; Fabiana Cristina Pereira dos Santos; Karoline Rodrigues Campos; Katia Correa de Oliveira Santos                                                                                                                                                                                                                                                                                                                                                 |
| EPI_ISL_729735 to 729736, EPI_ISL_729741, EPI_ISL_729743 to 729750, EPI_ISL_729752 to 729756, EPI_ISL_729758 to 729760, EPI_ISL_729765, EPI_ISL_729772 to 729773, EPI_ISL_729778 to 729780, EPI_ISL_729786, EPI_ISL_729789, EPI_ISL_729792, EPI_ISL_730053 to 730061, EPI_ISL_802502 to 802505, EPI_ISL_847834, EPI_ISL_847838, EPI_ISL_912163 to 912165, EPI_ISL_912185                             | see above                                                                       | Connecticut Department of Health                                                                                       | Grubaguh Lab - Yale School of Public Health                                                                                                                                                                                                                                                                                                                                                                                                                                                                                                                 |
|                                                                                                                                                                                                                                                                                                                                                                                                      |                                                                                 |                                                                                                                        | Adam Moore; Akiko Iwasaki; Albert Ko; Alice Lu; Allison Nelson; Anderson Brito; Anne Wylie; Annie Watkins; Arnau Casanovas; Catherine Muenker;                                                                                                                                                                                                                                                                                                                                                                                                              |

|                                                                                                                                                                                                                                                                                                                                                    |                                                                                       |                                                                                                                            |                                                                                                                                                                                                                                                                                                                                                                                                                                                                                                                                                                                                           |
|----------------------------------------------------------------------------------------------------------------------------------------------------------------------------------------------------------------------------------------------------------------------------------------------------------------------------------------------------|---------------------------------------------------------------------------------------|----------------------------------------------------------------------------------------------------------------------------|-----------------------------------------------------------------------------------------------------------------------------------------------------------------------------------------------------------------------------------------------------------------------------------------------------------------------------------------------------------------------------------------------------------------------------------------------------------------------------------------------------------------------------------------------------------------------------------------------------------|
|                                                                                                                                                                                                                                                                                                                                                    |                                                                                       |                                                                                                                            | Chaney Kalinich; Chantal Vogels; Charlese Dela Cruz; Isabel Ott; Joseph Fauver; Mallery Breban; Maria Tokuyama; Mary Petrone; Nathan Grubaugh; Patrick Wong; Peiwen Lu; Richard Martinello; Saad Omer; Shelli Farhadian; Tara Alpert                                                                                                                                                                                                                                                                                                                                                                      |
| EPI_ISL_792557                                                                                                                                                                                                                                                                                                                                     | Connecticut State Department of Public Health                                         | Grubaugh Lab - Yale School of Public Health                                                                                | Anderson Brito; Anthony Muyombwe; Chantal Vogels; Ellen Foxman; Jafar Razeq; Joseph Fauver; Nagarjuna Cheemarla; Nathan Grubaugh; Tara Alpert                                                                                                                                                                                                                                                                                                                                                                                                                                                             |
| EPI_ISL_738244 to 738289, EPI_ISL_738298 to 738312                                                                                                                                                                                                                                                                                                 | Connecticut Veterans' Affairs Hospital                                                | Grubaugh Lab - Yale School of Public Health                                                                                | Chantal Vogels; Danielle Plank; Ellen Foxman; Isabel Ott; Joseph Fauver; Mary Petrone; Nathan Grubaugh; Shaili Gupta; Tara Alpert                                                                                                                                                                                                                                                                                                                                                                                                                                                                         |
| EPI_ISL_691681                                                                                                                                                                                                                                                                                                                                     | Consejería de Sanidad y Asuntos Sociales                                              | Instituto de Salud Carlos III                                                                                              | A. Monzón; F. Casas; I. Gutiérrez, G.; I. Jiménez; Iglesias-Caballero; M. Camarero; M. Cuesta; M. González-Esguevillas; M. Pozo; M. Zaballos; P. Jiménez; S. Juliá; S. Molinero Calamita; S. Varona                                                                                                                                                                                                                                                                                                                                                                                                       |
| EPI_ISL_862546 to 862547, EPI_ISL_862557 to 862563, EPI_ISL_862566, EPI_ISL_862641 to 862644, EPI_ISL_913041, EPI_ISL_913059                                                                                                                                                                                                                       | Consejería de Sanidad y Asuntos Sociales                                              | Instituto de Salud Carlos III                                                                                              | A. Monzón; F. Casas; I. Gutiérrez, G.; I. Jiménez; Iglesias-Caballero; M. Camarero; M. Cuesta; M. González-Esguevillas; M. Pozo; M. Zaballos; P. Jiménez; P. Zaballos; S. Cuesta; S. Juliá; S. Molinero Calamita; S. Pozo; S. Sandonis; S. Varona; V. Vázquez                                                                                                                                                                                                                                                                                                                                             |
| EPI_ISL_965921, EPI_ISL_965938, EPI_ISL_965952, EPI_ISL_965957                                                                                                                                                                                                                                                                                     | Consejería de Sanidad y Asuntos Sociales de Castilla La Mancha                        | Instituto de Salud Carlos III                                                                                              | A. Monzón; F. Casas; I. Gutiérrez, G.; I. Jiménez; Iglesias-Caballero; M. Camarero; M. Sandonis; P. Zaballos; S. Camarero; S. Cuesta; S. Iglesias-Caballero; S. Pozo; S. Varona; Sandonis; V. Camarero; V. Vázquez; Vázquez                                                                                                                                                                                                                                                                                                                                                                               |
| EPI_ISL_672488 to 672489                                                                                                                                                                                                                                                                                                                           | Contra Costa County Public Health Lab                                                 | Chan-Zuckerberg Biohub                                                                                                     | CZB Ctlahub Consortium                                                                                                                                                                                                                                                                                                                                                                                                                                                                                                                                                                                    |
| EPI_ISL_640015, EPI_ISL_640118, EPI_ISL_700414, EPI_ISL_700441, EPI_ISL_700467, EPI_ISL_700488, EPI_ISL_700492, EPI_ISL_700496, EPI_ISL_700504, EPI_ISL_700506, EPI_ISL_700533, EPI_ISL_700536, EPI_ISL_700538 to 700539, EPI_ISL_700554, EPI_ISL_700556 to 700557, EPI_ISL_700563, EPI_ISL_700581, EPI_ISL_700587, EPI_ISL_700590, EPI_ISL_700599 |                                                                                       |                                                                                                                            |                                                                                                                                                                                                                                                                                                                                                                                                                                                                                                                                                                                                           |
| see above                                                                                                                                                                                                                                                                                                                                          | Conville CDC wc CVC                                                                   | NHLS/UCT                                                                                                                   | Arash Iranzadeh; Bruna Galvao; Carolyn Williamson; Deelan Doolabh; Diana Hardie; Houriyah Tegally; Innocent Mudau; Kruger Marais; Lynn Tyers; Marvin Hsiao; Stephen Korsman                                                                                                                                                                                                                                                                                                                                                                                                                               |
| EPI_ISL_960119, EPI_ISL_960122, EPI_ISL_960127, EPI_ISL_960134                                                                                                                                                                                                                                                                                     | Conville CDC wc CVC                                                                   | National Health Laboratory Service/UCT                                                                                     | Arash Iranzadeh; Bruna Galvao; Carolyn Williamson; Deelan Doolabh; Diana Hardie; Innocent Mudau; Kruger Marais; Lynn Tyers; Marvin Hsiao; Stephen Korsman                                                                                                                                                                                                                                                                                                                                                                                                                                                 |
| EPI_ISL_696472, EPI_ISL_696492, EPI_ISL_696508 to 696509, EPI_ISL_696512                                                                                                                                                                                                                                                                           | Conville CDC wc CVC & NHLS/UCT                                                        | KRISP, KZN Research Innovation and Sequencing Platform                                                                     | Arash Iranzadeh; Bruna Galvao; Carolyn Williamson; Deelan Doolabh; Diana Hardie; Emanuel James San; Houriyah Tegally; Innocent Mudau; Jennifer Giandhari; Kruger Marais; Lynn Tyers; Marvin Hsiao; Stephen Korsman; Sureshnee Pillay; Tulio de Oliveira                                                                                                                                                                                                                                                                                                                                                   |
| EPI_ISL_625547 to 625549, EPI_ISL_625623 to 625626, EPI_ISL_672028, EPI_ISL_672068, EPI_ISL_672087, EPI_ISL_672354 to 672359, EPI_ISL_738890, EPI_ISL_738890, EPI_ISL_739017, EPI_ISL_739038, EPI_ISL_739095, EPI_ISL_739102, EPI_ISL_739363, EPI_ISL_739399, EPI_ISL_739480, EPI_ISL_739492, EPI_ISL_739588, EPI_ISL_979159 to 979161             |                                                                                       |                                                                                                                            |                                                                                                                                                                                                                                                                                                                                                                                                                                                                                                                                                                                                           |
| see above                                                                                                                                                                                                                                                                                                                                          | County of San Luis Obispo Public Health Laboratory                                    | Chan-Zuckerberg Biohub                                                                                                     | CZB Ctlahub Consortium                                                                                                                                                                                                                                                                                                                                                                                                                                                                                                                                                                                    |
| EPI_ISL_735494                                                                                                                                                                                                                                                                                                                                     | Cox's Bazar Medical College                                                           | Central Biological Research Laboratory and Department of Biochemistry and Molecular Biology                                | H. M. Abdullah Al Masud; Imam Hossen; Md. Arif Hossain; Md. Imranul Hoq; Md. Khondakar Raziur Rahman; Md. Omer Faruq; Mohammad Omar Faruque; Robiul Hasan Bhuiyan; Sajib Rudra; Shanta Paul                                                                                                                                                                                                                                                                                                                                                                                                               |
| EPI_ISL_735493                                                                                                                                                                                                                                                                                                                                     | Cox's Bazar Medicila College                                                          | Central Biological Research Laboratory and Department of Biochemistry and Molecular Biology                                | H. M. Abdullah Al Masud; Imam Hossen; Md. Arif Hossain; Md. Imranul Hoq; Md. Khondakar Raziur Rahman; Md. Omer Faruq; Mohammad Omar Faruque; Robiul Hasan Bhuiyan; Sajib Rudra; Shanta Paul                                                                                                                                                                                                                                                                                                                                                                                                               |
| EPI_ISL_700443                                                                                                                                                                                                                                                                                                                                     | Crags Clinic wc CRG                                                                   | NHLS/UCT                                                                                                                   | Arash Iranzadeh; Bruna Galvao; Carolyn Williamson; Deelan Doolabh; Diana Hardie; Houriyah Tegally; Innocent Mudau; Kruger Marais; Lynn Tyers; Marvin Hsiao; Stephen Korsman                                                                                                                                                                                                                                                                                                                                                                                                                               |
| EPI_ISL_696480                                                                                                                                                                                                                                                                                                                                     | Crags Clinic wc CRG & NHLS/UCT                                                        | KRISP, KZN Research Innovation and Sequencing Platform                                                                     | Arash Iranzadeh; Bruna Galvao; Carolyn Williamson; Deelan Doolabh; Diana Hardie; Emanuel James San; Houriyah Tegally; Innocent Mudau; Jennifer Giandhari; Kruger Marais; Lynn Tyers; Marvin Hsiao; Stephen Korsman; Sureshnee Pillay; Tulio de Oliveira                                                                                                                                                                                                                                                                                                                                                   |
| EPI_ISL_693207                                                                                                                                                                                                                                                                                                                                     | Cs II Doutor Antonio Vicoso Moreira de Rezende                                        | Instituto Adolfo Lutz, Interdisciplinary Procedures Center, Strategic Laboratory                                           | Claudia Regina Gonçalves; Claudio Tavares Sacchi; Erica Valessa Ramos Gomes; Karoline Rodrigues Campos                                                                                                                                                                                                                                                                                                                                                                                                                                                                                                    |
| EPI_ISL_935155                                                                                                                                                                                                                                                                                                                                     | Cytocheck Laboratory                                                                  | Kansas Health and Environmental Lab                                                                                        | Ben Olsen; Carissa Robertson; Mike Grose; Paige Drury; and Phil Adam                                                                                                                                                                                                                                                                                                                                                                                                                                                                                                                                      |
| EPI_ISL_640029, EPI_ISL_640048, EPI_ISL_700420, EPI_ISL_700427, EPI_ISL_700448, EPI_ISL_700470, EPI_ISL_700564, EPI_ISL_700569                                                                                                                                                                                                                     |                                                                                       |                                                                                                                            |                                                                                                                                                                                                                                                                                                                                                                                                                                                                                                                                                                                                           |
| see above                                                                                                                                                                                                                                                                                                                                          | D'Almeida Clinic wc DAL                                                               | NHLS/UCT                                                                                                                   | Arash Iranzadeh; Bruna Galvao; Carolyn Williamson; Deelan Doolabh; Diana Hardie; Houriyah Tegally; Innocent Mudau; Kruger Marais; Lynn Tyers; Marvin Hsiao; Stephen Korsman                                                                                                                                                                                                                                                                                                                                                                                                                               |
| EPI_ISL_833167 to 833176                                                                                                                                                                                                                                                                                                                           | DB Diagnosticos do Brasil                                                             | Instituto Adolfo Lutz, Interdisciplinary Procedures Center, Strategic Laboratory                                           | Claudia Regina Gonçalves; Claudio Tavares Sacchi; Erica Valessa Ramos Gomes; Karoline Rodrigues Campos                                                                                                                                                                                                                                                                                                                                                                                                                                                                                                    |
| EPI_ISL_672664 to 672668, EPI_ISL_672670 to 672686, EPI_ISL_722134 to 722169, EPI_ISL_804814 to 804844, EPI_ISL_904018 to 904034                                                                                                                                                                                                                   | DB Diagnosticos do Brasil                                                             | Laboratório de Parasitologia Médica - Instituto de Medicina Tropical - Universidade de São Paulo                           | Andrew Rambaut; Brazil-UK Centre for Arbovirus Discovery Diagnosis Genomics and Epidemiology (CADDE) Genomic Network - Instituto de Medicina Tropical; CADDE Genomic Network; CDL; Camila A. Maia da Silva; Cecilia da Cunha Camilo; DB; Darlan Candido; Erika Regina Manuli; Ester C. Sabino; Flavia Cristina Sales; HEMOAM; Ingra Morales Claro; Lucas A. Moyses Franco; Maria do Perpétuo Socorro Sampaio Carvalho; Myuki Alfaia Esashika Crispim; Nelson Abraham Fraiji; Nelson Gaburu; Nick Loman; Nuno Faria; Oliver G. Pybus; Pamela dos Santos Andrade; Renato A. Santana; Thais de Moura Coletti |
| EPI_ISL_804845 to 804880, EPI_ISL_804882 to 804944, EPI_ISL_913740 to 913747                                                                                                                                                                                                                                                                       | DC Public Health Lab/ Dept. of Forensic Sciences                                      | DC Public Health Lab/ Dept. of Forensic Sciences                                                                           | Brittany Hamilton; Connie Maza; David Payne; Elizabeth Zelaya; Jocelyn Hauser; Monica Mann; Scott Nguyen                                                                                                                                                                                                                                                                                                                                                                                                                                                                                                  |
| EPI_ISL_903743, EPI_ISL_903793, EPI_ISL_903864, EPI_ISL_903922, EPI_ISL_903959, EPI_ISL_903964, EPI_ISL_903969, EPI_ISL_903973, EPI_ISL_903976                                                                                                                                                                                                     |                                                                                       |                                                                                                                            |                                                                                                                                                                                                                                                                                                                                                                                                                                                                                                                                                                                                           |
| see above                                                                                                                                                                                                                                                                                                                                          | DC Public Health Lab/ Dept. of Forensic Sciences                                      | Genomics and Discovery, Respiratory Viruses Branch, Division of Viral Diseases, Centers for Disease Control and Prevention | Anna Montmayeur; Anna Uehara; Ben L. Rambo-Martin; Clinton R. Paden; Dhvani Batra; Haibin Wang; Jasmine Padilla; Jing Zhang; Justin Lee; Krista Queen; Lori Rowe; Mark Burroughs; Mili Sheth; Peter W. Cook; Rachel Marine; Sarah Nobles; Suxiang Tong; Yan Li; Ying Tao                                                                                                                                                                                                                                                                                                                                  |
| EPI_ISL_751543, EPI_ISL_751547, EPI_ISL_751602, EPI_ISL_751605, EPI_ISL_751621, EPI_ISL_751623, EPI_ISL_751627, EPI_ISL_751631, EPI_ISL_751726                                                                                                                                                                                                     |                                                                                       |                                                                                                                            |                                                                                                                                                                                                                                                                                                                                                                                                                                                                                                                                                                                                           |
| see above                                                                                                                                                                                                                                                                                                                                          | DE Public Health Laboratory                                                           | Genomics and Discovery, Respiratory Viruses Branch, Division of Viral Diseases, Centers for Disease Control and Prevention | Anna Montmayeur; Anna Uehara; Clinton R. Paden; Haibin Wang; Jing Zhang; Justin Lee; Krista Queen; Mili Sheth; Peter W. Cook; Rachel Marine; Suxiang Tong; Yan Li; Ying Tao                                                                                                                                                                                                                                                                                                                                                                                                                               |
| EPI_ISL_833050 to 833051, EPI_ISL_833057 to 833067, EPI_ISL_961078 to 961080, EPI_ISL_961083, EPI_ISL_961094 to 961095                                                                                                                                                                                                                             | DIP. PREV. AVEZZANO SERVIZIO DI IGIENE EPIDEMIOLOGIAE SANITA' PUBBLICA                | Istituto Zooprofilattico Sperimentale dell'Abruzzo e Molise *G. Caporale*                                                  | Ancora M; Calistri P; Cammà C; Curini V; Delli Compagni E; Di Domenico M; Di Pasquale A; Lorusso A; Mangone I; Marcacci M; Puglia I; Rinaldi A; Savini G; Scialabba S                                                                                                                                                                                                                                                                                                                                                                                                                                     |
| EPI_ISL_849635 to 849636                                                                                                                                                                                                                                                                                                                           | DIPARTIMENTO PREVENZIONE AVEZZANO-SERVIZIO DI IGIENE EPIDEMIOLOGIA E SANITA' PUBBLICA | Istituto Zooprofilattico Sperimentale dell'Abruzzo e Molise *G. Caporale*                                                  | Ancora M; Cammà C; Curini V; Di Domenico M; Di Pasquale A; Lorusso A; Mangone I; Marcacci M; Puglia I; Rinaldi A; Savini G.                                                                                                                                                                                                                                                                                                                                                                                                                                                                               |
| EPI_ISL_806758 to 806761, EPI_ISL_806763 to 806765, EPI_ISL_806781 to 806782, EPI_ISL_833283, EPI_ISL_833301                                                                                                                                                                                                                                       | DIPARTIMENTO PREVENZIONE AVEZZANO-SERVIZIO DI IGIENE EPIDEMIOLOGIA E SANITA' PUBBLICA | Istituto Zooprofilattico Sperimentale dell'Abruzzo e Molise *G. Caporale*                                                  | Ancora M; Calistri P; Cammà C; Curini V; Di Domenico M; Di Pasquale A; Lorusso A; Mangone I; Marcacci M; Puglia I; Rinaldi A; Savini G                                                                                                                                                                                                                                                                                                                                                                                                                                                                    |
| EPI_ISL_794658                                                                                                                                                                                                                                                                                                                                     | DIRECCION DE SANIDAD POLICIA NACIONAL                                                 | Instituto Nacional de Salud - Dirección de Investigación en Salud Pública                                                  | Carlos Franco-Muñoz; Diego A. Álvarez-Díaz; Diego Andrés Prada; Gerardo Santamaría; Jonathan Reales; Julian Naizaque; Katherine Laiton-Donato; Magdalena Wiesner; Marcela Mercado-Reyes; Maria T. Herrera; Martha Lucia Ospina Martinez; Mauricio Pacheco-Montealegre; Paola Muñoz-Laiton; Sheryll Corchuelo                                                                                                                                                                                                                                                                                              |
| EPI_ISL_906550 to 906551                                                                                                                                                                                                                                                                                                                           | DIRECCION DEPARTAMENTAL DE SALUD DE AMAZONAS                                          | Instituto Nacional de Salud- Dirección de Investigación en Salud Pública, Universidad de los Andes- Applied genomics       | Carlos Franco-Muñoz; Diego A. Álvarez-Díaz; Diego Andrés Prada; Gerardo Santamaría Jorge Duitama; Héctor Alejandro Ruiz-Moreno; Jhonattan Reales-González; Jorge Ivan Diaz; Julian Naizaque; Katherine Laiton-Donato; Laura Natalia Gonzalez; Magdalena Wiesner; Marcela Mercado-Reyes; Maria T. Herrera-Sepúlveda; Martha Lucia Ospina Martinez; Mauricio Pacheco-Montealegre; Sheryll Corchuelo; Silvia Restrepo-Restrepo                                                                                                                                                                               |

research group, Vicerrectoria de Investigación y Creación,  
Universidad de los Andes- Systems and Computing  
Engineering Department

| EPI_ISL                          | Organization                                | Research Group / Department                                                                                                                                                                                                                            | PIs                                                                                                                                                                                                                                                                                                                                                                                                                        |
|----------------------------------|---------------------------------------------|--------------------------------------------------------------------------------------------------------------------------------------------------------------------------------------------------------------------------------------------------------|----------------------------------------------------------------------------------------------------------------------------------------------------------------------------------------------------------------------------------------------------------------------------------------------------------------------------------------------------------------------------------------------------------------------------|
| EPI_ISL_906556                   | DIRECCION DEPARTAMENTAL DE SALUD DE GUAJIRA | Instituto Nacional de Salud- Dirección de Investigación en Salud Pública, Universidad de los Andes- Applied genomics research group, Vicerrectoria de Investigación y Creación, Universidad de los Andes- Systems and Computing Engineering Department | Carlos Franco-Muñoz; Diego A. Álvarez-Díaz; Diego Andrés Prada; Gerardo Santamaria Jorge Duitama; Héctor Alejandro Ruiz-Moreno; Jhonattan Reales-González; Jorge Ivan Díaz; Julian Naizaga; Katherine Laiton-Donato; Laura Natalia Gonzalez; Magdalena Wiesner; Marcela Mercado-Reyes; Maria T. Herrera-Sepúlveda; Martha Lucia Ospina Martínez; Mauricio Pacheco-Montealegre; Sheryll Corchuelo; Silvia Restrepo-Restrepo |
| EPI_ISL_747283                   | DNA SOLUTION LTD.                           | DNA SOLUTION LTD.                                                                                                                                                                                                                                      | Abdul Khaleque; Abu Sufian; Firoz Kabir; Jannatun Naima; Kazi Nadim Hasan; Md. Imran Khan; Mizanur Rahman; Mohammad Fazle Alam Rabbi; Sharif Akhteruzzaman                                                                                                                                                                                                                                                                 |
| EPI_ISL_633009 to EPI_ISL_966413 | DOHMH Central Harlem                        | New York City Public Health Laboratory                                                                                                                                                                                                                 | Jade Wang; et al.                                                                                                                                                                                                                                                                                                                                                                                                          |
| EPI_ISL_633014 to EPI_ISL_966416 | DOHMH Chelsea                               | New York City Public Health Laboratory                                                                                                                                                                                                                 | Jade Wang; et al.                                                                                                                                                                                                                                                                                                                                                                                                          |
| EPI_ISL_632980 to EPI_ISL_966491 | DOHMH Corona                                | New York City Public Health Laboratory                                                                                                                                                                                                                 | Jade Wang; et al.                                                                                                                                                                                                                                                                                                                                                                                                          |
| EPI_ISL_632984 to EPI_ISL_966484 | DOHMH Crown Heights                         | New York City Public Health Laboratory                                                                                                                                                                                                                 | Jade Wang; et al.                                                                                                                                                                                                                                                                                                                                                                                                          |
| EPI_ISL_633073 to EPI_ISL_966443 | DOHMH Fort Greene                           | New York City Public Health Laboratory                                                                                                                                                                                                                 | Jade Wang; et al.                                                                                                                                                                                                                                                                                                                                                                                                          |
| EPI_ISL_632999 to EPI_ISL_966481 | DOHMH Jamaica                               | New York City Public Health Laboratory                                                                                                                                                                                                                 | Jade Wang; et al.                                                                                                                                                                                                                                                                                                                                                                                                          |
| EPI_ISL_633015 to EPI_ISL_966420 | DOHMH Morrisania                            | New York City Public Health Laboratory                                                                                                                                                                                                                 | Jade Wang; et al.                                                                                                                                                                                                                                                                                                                                                                                                          |
| EPI_ISL_633011 to EPI_ISL_937156 | DOHMH PHL                                   | New York City Public Health Laboratory                                                                                                                                                                                                                 | Jade Wang; et al.                                                                                                                                                                                                                                                                                                                                                                                                          |

|                                                                                                                                                                                                                                                                                                                                                                                                                                                                                                                                                                                                                                                                                                                                                                                                                                                                                            |                                                                                                                                                                                         |                                                                                                                                                                                                 |                                                                                                                                                                                                                                                                                                                                                                                                                                                                                                                                                               |
|--------------------------------------------------------------------------------------------------------------------------------------------------------------------------------------------------------------------------------------------------------------------------------------------------------------------------------------------------------------------------------------------------------------------------------------------------------------------------------------------------------------------------------------------------------------------------------------------------------------------------------------------------------------------------------------------------------------------------------------------------------------------------------------------------------------------------------------------------------------------------------------------|-----------------------------------------------------------------------------------------------------------------------------------------------------------------------------------------|-------------------------------------------------------------------------------------------------------------------------------------------------------------------------------------------------|---------------------------------------------------------------------------------------------------------------------------------------------------------------------------------------------------------------------------------------------------------------------------------------------------------------------------------------------------------------------------------------------------------------------------------------------------------------------------------------------------------------------------------------------------------------|
| see above                                                                                                                                                                                                                                                                                                                                                                                                                                                                                                                                                                                                                                                                                                                                                                                                                                                                                  | DOHMH Riverside                                                                                                                                                                         | New York City Public Health Laboratory                                                                                                                                                          | Jade Wang; et al.                                                                                                                                                                                                                                                                                                                                                                                                                                                                                                                                             |
| EPI_ISL_891153 to 891206, EPI_ISL_936464 to 936485                                                                                                                                                                                                                                                                                                                                                                                                                                                                                                                                                                                                                                                                                                                                                                                                                                         | DPH, Massachusetts State Public Health Lab                                                                                                                                              | DPH, Massachusetts State Public Health Lab                                                                                                                                                      | A.S.; Fink, T.; G.R.; Gallagher; Lang; S.C.; Smole                                                                                                                                                                                                                                                                                                                                                                                                                                                                                                            |
| EPI_ISL_933735 to 933739, EPI_ISL_933741 to 933765                                                                                                                                                                                                                                                                                                                                                                                                                                                                                                                                                                                                                                                                                                                                                                                                                                         | DPHL                                                                                                                                                                                    | Delaware Public Health Lab                                                                                                                                                                      | Gregory Hovan                                                                                                                                                                                                                                                                                                                                                                                                                                                                                                                                                 |
| EPI_ISL_794661                                                                                                                                                                                                                                                                                                                                                                                                                                                                                                                                                                                                                                                                                                                                                                                                                                                                             | DRECCION DE SANIDAD POLICIA NACIONAL                                                                                                                                                    | Instituto Nacional de Salud - Dirección de Investigación en Salud Pública                                                                                                                       | Carlos Franco-Muñoz; Diego A. Álvarez-Díaz; Diego Andrés Prada; Gerardo Santamaría; Jonathan Reales; Julian Naizaque; Katherine Laiton-Donato; Magdalena Wiesner; Marcela Mercado-Reyes; María T. Herrera; Martha Lucia Ospina Martinez; Mauricio Pacheco-Montealegre; Paola Muñoz-Laiton; Sheryl Corchuelo                                                                                                                                                                                                                                                   |
| EPI_ISL_877459                                                                                                                                                                                                                                                                                                                                                                                                                                                                                                                                                                                                                                                                                                                                                                                                                                                                             | Darmo Hospital                                                                                                                                                                          | Institute of Tropical Disease, Universitas Airlangga                                                                                                                                            | Aldise M Nastri; Gatot Soegiarto; Jezzy R Dewantari; Kazufumi Shimizu; Krisnoadi Rahardjo; Laksmi Wulandari; Maria I Lusida; Resti Yudhawati; Rima R Prasetya; Soetjipto; Sulung Budianto; Yasuko Mori                                                                                                                                                                                                                                                                                                                                                        |
| EPI_ISL_877420, EPI_ISL_882770                                                                                                                                                                                                                                                                                                                                                                                                                                                                                                                                                                                                                                                                                                                                                                                                                                                             | Darus Syifa' Islamic Hospital                                                                                                                                                           | Institute of Tropical Disease, Universitas Airlangga                                                                                                                                            | Aldise M Nastri; Gatot Soegiarto; HM Faiz; Jezzy R Dewantari; Kazufumi Shimizu; Krisnoadi Rahardjo; Laksmi Wulandari; Maria I Lusida; Resti Yudhawati; Rima R Prasetya; Soetjipto; Yasuko Mori                                                                                                                                                                                                                                                                                                                                                                |
| EPI_ISL_861672, EPI_ISL_906065                                                                                                                                                                                                                                                                                                                                                                                                                                                                                                                                                                                                                                                                                                                                                                                                                                                             | Day Hospital de Ermelino Matarazzo                                                                                                                                                      | Instituto Adolfo Lutz, Interdisciplinary Procedures Center, Strategic Laboratory                                                                                                                | Claudia Regina Gonçalves; Claudio Tavares Sacchi; Erica Valessa Ramos Gomes; Karoline Rodrigues Campos                                                                                                                                                                                                                                                                                                                                                                                                                                                        |
| EPI_ISL_833041                                                                                                                                                                                                                                                                                                                                                                                                                                                                                                                                                                                                                                                                                                                                                                                                                                                                             | Defence Services Medical Research Center, Biological Research Laboratory                                                                                                                | Defence Services Medical Research Center, Biological Research Laboratory                                                                                                                        | Khine Zaw Oo; Ko Ko Lwin; Ko Ko Win; Kyaw Wanna; Kyeem Myint; Nay Myo Aung; Phyo Kyaw Aung; Sat Paing Htoo; Thein Zaw; Zaw Win Htun                                                                                                                                                                                                                                                                                                                                                                                                                           |
| EPI_ISL_708382 to 708452, EPI_ISL_812286 to 812307, EPI_ISL_849322 to 849349                                                                                                                                                                                                                                                                                                                                                                                                                                                                                                                                                                                                                                                                                                                                                                                                               | Delaware Public Health Lab                                                                                                                                                              | Delaware Public Health Lab                                                                                                                                                                      | Gregory Hovan                                                                                                                                                                                                                                                                                                                                                                                                                                                                                                                                                 |
| EPI_ISL_961105 to 961131                                                                                                                                                                                                                                                                                                                                                                                                                                                                                                                                                                                                                                                                                                                                                                                                                                                                   | Delaware Public Health Laboratory                                                                                                                                                       | Delaware Public Health Lab                                                                                                                                                                      | Gregory Hovan                                                                                                                                                                                                                                                                                                                                                                                                                                                                                                                                                 |
| EPI_ISL_693688 to 693757, EPI_ISL_766971 to 767012                                                                                                                                                                                                                                                                                                                                                                                                                                                                                                                                                                                                                                                                                                                                                                                                                                         | Delaware Public Health Laboratory                                                                                                                                                       | Delaware Public Health Laboratory                                                                                                                                                               | Gregory Hovan                                                                                                                                                                                                                                                                                                                                                                                                                                                                                                                                                 |
| EPI_ISL_985239 to 985302                                                                                                                                                                                                                                                                                                                                                                                                                                                                                                                                                                                                                                                                                                                                                                                                                                                                   | Delaware Public Health Laboratory (DPHL)                                                                                                                                                | Delaware Public Health Lab                                                                                                                                                                      | Gregory Hovan                                                                                                                                                                                                                                                                                                                                                                                                                                                                                                                                                 |
| EPI_ISL_745171 to 745172                                                                                                                                                                                                                                                                                                                                                                                                                                                                                                                                                                                                                                                                                                                                                                                                                                                                   | Delft CHC wc DFP                                                                                                                                                                        | National Health Laboratory Service (NHLS), Tygerberg                                                                                                                                            | Bronwyn Kleinhans; Eduan Wilkindon; Gert van Zyl; Houriyah Tegally; Kayla Delaney; Susan Engelbrecht; Tulio de Oliveira; Wolfgang Preiser                                                                                                                                                                                                                                                                                                                                                                                                                     |
| EPI_ISL_792301                                                                                                                                                                                                                                                                                                                                                                                                                                                                                                                                                                                                                                                                                                                                                                                                                                                                             | Departamento de Biología y genética molecular, IACA Laboratorios.                                                                                                                       | Área de Secuenciación del Laboratorio de Virología del Hospital de Niños Dr. Ricardo Gutierrez on behalf of 'Proyecto Argentino Interinstitucional de genómica de SARS-CoV-2' (PAIS Consortium) | A; AS; E; Goya; LE; Lusso; MI; MS; Masciovecchio MV; Mistchenko; Nabaes Jodar; Natale; S; Streitenberger ER; Suárez; Tittarelli; Valinotto; Viegas, M.                                                                                                                                                                                                                                                                                                                                                                                                        |
| EPI_ISL_949193 to 949243                                                                                                                                                                                                                                                                                                                                                                                                                                                                                                                                                                                                                                                                                                                                                                                                                                                                   | Departamento de Microbiología, CDB, Hospital Clínic, Barcelona                                                                                                                          | SeqCOVID-SPAIN consortium/IBV(CSIC)                                                                                                                                                             | Aida Peiró and SeqCOVID-SPAIN consortium; Andrea Vergara; Elisa Rubio; Jéssica Navero; Mikel Martínez                                                                                                                                                                                                                                                                                                                                                                                                                                                         |
| EPI_ISL_754180 to 754181, EPI_ISL_754195, EPI_ISL_763062                                                                                                                                                                                                                                                                                                                                                                                                                                                                                                                                                                                                                                                                                                                                                                                                                                   | Department for Virology, Molecular Biology and Genome Research, R. G. Lugar Center for Public Health Research, National Center for Disease Control and Public Health (NCDC) of Georgia. | Department for Virology, Molecular Biology and Genome Research, R. G. Lugar Center for Public Health Research, National Center for Disease Control and Public Health (NCDC) of Georgia.         | Adam Kotorashvili; Amiran Gamkrelidze.; Ana Papkiuri; Ann Machabishvili; Anna Kasradze; Davit Tsaguria; Ekaterine Khmaladze; Ekaterine Zangaladze; Ekaterine Zhgenti; Giorgi Tomashvili; Gvantsa Brachveli; Gvantsa Chanturia; Irma Burjanadze; Ketevan Sidamonidze; Khatuna Zakhashvili; Lela Sabadze; Lela Urushadze; Magda Dgebusadze; Maia Alkhazashvili; Mariam Zakatashvili; Marine Murtskhaladze; Meri Pantsulaia; Nato Kotaria; Nino Berishvili; Paata Imnadze; Roena Sukhiasvili; Salome Javashvili; Tamar Jashiasvili; Tata Imnadze; Tea Tvedoradze |
| EPI_ISL_632935                                                                                                                                                                                                                                                                                                                                                                                                                                                                                                                                                                                                                                                                                                                                                                                                                                                                             | Department of Acute Infectious Diseases Control and Prevention, Yunnan Provincial Center for Disease Control and Prevention                                                             | Department of Acute Infectious Diseases Control and Prevention, Yunnan Provincial Center for Disease Control and Prevention                                                                     | Jienan Zhou; Meiling Zhang; Senquan Jia; Xiaonan Zhao; Xiaoqing Fu                                                                                                                                                                                                                                                                                                                                                                                                                                                                                            |
| EPI_ISL_632934                                                                                                                                                                                                                                                                                                                                                                                                                                                                                                                                                                                                                                                                                                                                                                                                                                                                             | Department of Acute Infectious Diseases Control and Prevention, Yunnan Provincial Center for Disease Control and Prevention                                                             | Department of Acute Infectious Diseases Control and Prevention, Yunnan Provincial Center for Disease Control and Prevention                                                                     | Jienan Zhou; Meiling Zhang; Senquan Jia; Xiaonan Zhao; Xiaoqing Fu                                                                                                                                                                                                                                                                                                                                                                                                                                                                                            |
| EPI_ISL_884826 to 884856, EPI_ISL_944646 to 944735                                                                                                                                                                                                                                                                                                                                                                                                                                                                                                                                                                                                                                                                                                                                                                                                                                         | Department of Biochemistry, Cell and Molecular Biology, West African Centre for Cell Biology of Infectious Pathogens (WACCBIP), University of Ghana                                     | Department of Biochemistry, Cell and Molecular Biology, West African Centre for Cell Biology of Infectious Pathogens (WACCBIP), University of Ghana                                             | A.-K.; A.B.; Abass; Adusei-Poku, M.; Akoriye; Amenga-Etego; Amoako, E.; Ampofo; Amuzu; Asante, I.; Awandare; Bediako, Y.; Boakyie; Bonney; Bonney, E.; C.M.; D.S.; Diallo; E.B.; G.A.; J.H.; J.K.; J.M.; Kibinge, N.; Kumi-Ansah, F.; L.N.; Magnusson, V.; Mohammed, A.; Morang'a; N.T.; Ndam; Ngoi; O.D.; Odoom; Odoom, T.; Ofori-Boadu, L.; Quansah; Quashie, P.; S.K.; Said, S.; Tapela, K.; Tei-Maya, F.; W.K.                                                                                                                                            |
| EPI_ISL_907075, EPI_ISL_956332                                                                                                                                                                                                                                                                                                                                                                                                                                                                                                                                                                                                                                                                                                                                                                                                                                                             | Department of Biology, University of Basrah                                                                                                                                             | Department of Biology, University of Basrah                                                                                                                                                     | A.I.; Abu-Alli; H.F. and Al-Badran; H.M. and Al-Badran; I.F.                                                                                                                                                                                                                                                                                                                                                                                                                                                                                                  |
| EPI_ISL_626231 to 626339, EPI_ISL_636605 to 636685, EPI_ISL_641557 to 641606, EPI_ISL_644611 to 644626, EPI_ISL_661201 to 661251, EPI_ISL_666871 to 666889, EPI_ISL_678399 to 678485, EPI_ISL_681264 to 681270, EPI_ISL_707714 to 707770, EPI_ISL_708453 to 708459, EPI_ISL_722926 to 722966, EPI_ISL_737310 to 737394, EPI_ISL_812122, EPI_ISL_824790 to 824863, EPI_ISL_832207 to 832242, EPI_ISL_833185 to 833190, EPI_ISL_856722 to 856754, EPI_ISL_872038 to 872050, EPI_ISL_872057 to 872064, EPI_ISL_872069 to 872087, EPI_ISL_872105 to 872109, EPI_ISL_872112 to 872116, EPI_ISL_872122, EPI_ISL_872127 to 872133, EPI_ISL_872135 to 872145, EPI_ISL_872148 to 872149, EPI_ISL_872153 to 872155, EPI_ISL_925362 to 925496, EPI_ISL_930569 to 930571, EPI_ISL_930575, EPI_ISL_930603, EPI_ISL_930609 to 930610, EPI_ISL_930615 to 930620, EPI_ISL_935654 to 935673, EPI_ISL_984622 |                                                                                                                                                                                         |                                                                                                                                                                                                 |                                                                                                                                                                                                                                                                                                                                                                                                                                                                                                                                                               |
| see above                                                                                                                                                                                                                                                                                                                                                                                                                                                                                                                                                                                                                                                                                                                                                                                                                                                                                  | Department of Clinical Microbiology                                                                                                                                                     | GIGA Medical Genomics                                                                                                                                                                           | Bouchra Boujemla; Cécile Meex; Gilles Darcis; Justine Defêche; Keith Durkin; Maria Artesi; Marie-Pierre Hayette; Michel Moutschen; Pierrette Melin; Raphaël Boreux; Sébastien Bontems; Vincent Bours                                                                                                                                                                                                                                                                                                                                                          |
| EPI_ISL_855345 to 855352                                                                                                                                                                                                                                                                                                                                                                                                                                                                                                                                                                                                                                                                                                                                                                                                                                                                   | Department of Epidemiology, Infectious Disease Control and Prevention, Hiroshima University, Japan                                                                                      | Department of Epidemiology, Infectious Disease Control and Prevention, Hiroshima University, Japan                                                                                              | Eisaku Kishita; Junko Tanaka; Kazuaki Takahashi; Ko Ko; Masao Kuwabara; Shintaro Nagashima                                                                                                                                                                                                                                                                                                                                                                                                                                                                    |
| EPI_ISL_738084                                                                                                                                                                                                                                                                                                                                                                                                                                                                                                                                                                                                                                                                                                                                                                                                                                                                             | Department of Health Technology and Informatics, Hong Kong Polytechnic University of Hong Kong                                                                                          | Department of Health Technology and Informatics, Hong Kong Polytechnic University of Hong Kong                                                                                                  | A.-K.-L.; A.Y.-M.; B.K.-C.; Chan; Chau; Choi; D.H.-K.; E.Y.-K.; Fung; G.K.-H.; H.-Y.; Ho; K.-C.; K.-T.; K.K.-G.; K.S.-C.; K.S.-S.; L.-K.; Lao; Lee; Leung; Liu; Lung; M.-C.; M.-P.; M.C.-Y.; Ng; Que; R.W.-T.; S.-P.; S.K.-Y.; Shum; T.-L.Q.; T.T.-L.; Tam; To; Tso; W.-K.; W.-S.; W.C. and Siu; Wong; Wu; Yam; Yau; Yip                                                                                                                                                                                                                                      |
| EPI_ISL_632964, EPI_ISL_823970, EPI_ISL_823973, EPI_ISL_823975, EPI_ISL_857188, EPI_ISL_857198, EPI_ISL_857287 to 857288, EPI_ISL_857290, EPI_ISL_857293, EPI_ISL_857298, EPI_ISL_857301, EPI_ISL_857306, EPI_ISL_883326, EPI_ISL_883332, EPI_ISL_883395 to 883396, EPI_ISL_883403, EPI_ISL_937191 to 937192, EPI_ISL_937248 to 937250, EPI_ISL_966385, EPI_ISL_966401, EPI_ISL_966469                                                                                                                                                                                                                                                                                                                                                                                                                                                                                                     |                                                                                                                                                                                         |                                                                                                                                                                                                 |                                                                                                                                                                                                                                                                                                                                                                                                                                                                                                                                                               |
| see above                                                                                                                                                                                                                                                                                                                                                                                                                                                                                                                                                                                                                                                                                                                                                                                                                                                                                  | Department of Homeless Services                                                                                                                                                         | New York City Public Health Laboratory                                                                                                                                                          | Jade Wang; et al.                                                                                                                                                                                                                                                                                                                                                                                                                                                                                                                                             |
| EPI_ISL_636989 to 637021, EPI_ISL_637075, EPI_ISL_918167 to 918176                                                                                                                                                                                                                                                                                                                                                                                                                                                                                                                                                                                                                                                                                                                                                                                                                         | Department of Infectious Diseases and Immunology, National Hospital Organization Nagoya Medical Center                                                                                  | Clinical Research Center, National Hospital Organization Nagoya Medical Center                                                                                                                  | Hirotaoka Ode; Kazuhiro Matsuoka; Mai Kubota; Masakazu Matsuda; Mayumi Imahashi; Miho Nakasugi; Mikiko Mori; Yasumasa Iwatani; Yoshihiro Nakata; Yoshiyuki Yokomaku                                                                                                                                                                                                                                                                                                                                                                                           |
| EPI_ISL_856889, EPI_ISL_856904                                                                                                                                                                                                                                                                                                                                                                                                                                                                                                                                                                                                                                                                                                                                                                                                                                                             | Department of Infectious Diseases, Istituto Superiore di Sanità, Roma, Italy                                                                                                            | Virology Laboratory, Scientific Department, Army Medical Center                                                                                                                                 | Alessandra Lo Presti; Angela Di Martino; Anna Anselmo; Antonella Fortunato; Florigio Lista; Francesco Giordani; Giovanni Faggioni; Nino D'Amore; Paola Stefanelli; Riccardo De Sanctis; Silvia Fillo; Stefano Fiore; Vanessa Vera Fain                                                                                                                                                                                                                                                                                                                        |
| EPI_ISL_856888                                                                                                                                                                                                                                                                                                                                                                                                                                                                                                                                                                                                                                                                                                                                                                                                                                                                             | Department of Infectious Diseases, Istituto Superiore di Sanità, Roma, Italy; A.O.R. San Carlo di Potenza, Laboratorio Microbiologia e Virologia, Potenza, Italy                        | Virology Laboratory, Scientific Department, Army Medical Center                                                                                                                                 | Alessandra Lo Presti; Angela Di Martino; Anna Anselmo; Antonella Fortunato; Antonio Picerno; Florigio Lista; Francesco Giordani; Giovanni Faggioni; Nino D'Amore; Paola Stefanelli; Riccardo De Sanctis; Silvia Fillo; Stefano Fiore; Vanessa Vera Fain                                                                                                                                                                                                                                                                                                       |
| EPI_ISL_856890                                                                                                                                                                                                                                                                                                                                                                                                                                                                                                                                                                                                                                                                                                                                                                                                                                                                             | Department of Infectious Diseases, Istituto Superiore di Sanità, Roma, Italy; AO Annunziata, UOC Microbiologia e Virologia, Cosenza, Italy                                              | Virology Laboratory, Scientific Department, Army Medical Center                                                                                                                                 | Alessandra Lo Presti; Angela Di Martino; Anna Anselmo; Antonella Fortunato; Cristina Giraldo; Florigio Lista; Francesco Giordani; Giovanni Faggioni; Nino D'Amore; Paola Stefanelli; Riccardo De Sanctis; Silvia Fillo; Stefano Fiore; Vanessa Vera Fain                                                                                                                                                                                                                                                                                                      |
| EPI_ISL_856905 to 856906                                                                                                                                                                                                                                                                                                                                                                                                                                                                                                                                                                                                                                                                                                                                                                                                                                                                   | Department of Infectious Diseases, Istituto Superiore di Sanità, Roma, Italy; AO S.M. della Misericordia, S.C. Microbiologia, Perugia, Italy                                            | Virology Laboratory, Scientific Department, Army Medical Center                                                                                                                                 | Alessandra Lo Presti; Angela Di Martino; Anna Anselmo; Antonella Fortunato; Barbara Camilloni; Florigio Lista; Francesco Giordani; Giovanni Faggioni; Nino D'Amore; Paola Stefanelli; Riccardo De Sanctis; Silvia Fillo; Stefano Fiore; Vanessa Vera Fain                                                                                                                                                                                                                                                                                                     |
| EPI_ISL_856871, EPI_ISL_856891 to 856892                                                                                                                                                                                                                                                                                                                                                                                                                                                                                                                                                                                                                                                                                                                                                                                                                                                   | Department of Infectious Diseases, Istituto Superiore di Sanità, Roma, Italy; AORN dei Colli, UOC Microbiologia Virologia, Napoli, Italy                                                | Virology Laboratory, Scientific Department, Army Medical Center                                                                                                                                 | Alessandra Lo Presti; Angela Di Martino; Anna Anselmo; Antonella Fortunato; Florigio Lista; Francesco Giordani; Giovanni Faggioni; Luigi Atripaldi; Nino D'Amore; Paola Stefanelli; Riccardo De Sanctis; Silvia Fillo; Stefano Fiore; Vanessa Vera Fain                                                                                                                                                                                                                                                                                                       |
| EPI_ISL_856900 to 856901                                                                                                                                                                                                                                                                                                                                                                                                                                                                                                                                                                                                                                                                                                                                                                                                                                                                   | Department of Infectious Diseases, Istituto Superiore di Sanità,                                                                                                                        | Virology Laboratory, Scientific Department, Army Medical                                                                                                                                        | Alessandra Lo Presti; Angela Di Martino; Anna Anselmo; Antonella Fortunato; Florigio Lista; Francesco Giordani; Giovanni Faggioni; Guido Scalia; Nino                                                                                                                                                                                                                                                                                                                                                                                                         |

|                                                                                                                                                                                                                                                                                                         |                                                                                                                                                                                                                                                                                      |                                                                                                                 |                                                                                                                                                                                                                                                                                                |
|---------------------------------------------------------------------------------------------------------------------------------------------------------------------------------------------------------------------------------------------------------------------------------------------------------|--------------------------------------------------------------------------------------------------------------------------------------------------------------------------------------------------------------------------------------------------------------------------------------|-----------------------------------------------------------------------------------------------------------------|------------------------------------------------------------------------------------------------------------------------------------------------------------------------------------------------------------------------------------------------------------------------------------------------|
|                                                                                                                                                                                                                                                                                                         | Roma, Italy; AOUP V. Emanuele di Catania, P.O. Gaspare Rodolico, Catania, Italy                                                                                                                                                                                                      | Center                                                                                                          | D'Amore; Paola Stefanelli; Riccardo De Sanctis; Silvia Fillo; Stefano Fiore; Vanessa Vera Fain                                                                                                                                                                                                 |
| EPI_ISL_856902                                                                                                                                                                                                                                                                                          | Department of Infectious Diseases, Istituto Superiore di Sanità, Roma, Italy; AS Alto Adige, Microbiologia e Virologia, Bolzano, Italy                                                                                                                                               | Virology Laboratory, Scientific Department, Army Medical Center                                                 | Alessandra Lo Presti; Angela Di Martino; Anna Anselmo; Antonella Fortunato; Elisabetta Pagani; Florigio Lista; Francesco Giordani; Giovanni Faggioni; Nino D'Amore; Paola Stefanelli; Riccardo De Sanctis; Silvia Fillo; Stefano Fiore; Vanessa Vera Fain                                      |
| EPI_ISL_856898 to 856899                                                                                                                                                                                                                                                                                | Department of Infectious Diseases, Istituto Superiore di Sanità, Roma, Italy; ASL Città di Torino, S.C. Microbiologia e Virologia, Torino, Italy                                                                                                                                     | Virology Laboratory, Scientific Department, Army Medical Center                                                 | Alessandra Lo Presti; Angela Di Martino; Anna Anselmo; Antonella Fortunato; Florigio Lista; Francesco Giordani; Giovanni Faggioni; Nino D'Amore; Paola Stefanelli; Riccardo De Sanctis; Silvia Fillo; Stefano Fiore; Valeria Ghisetti; Vanessa Vera Fain                                       |
| EPI_ISL_856893 to 856894                                                                                                                                                                                                                                                                                | Department of Infectious Diseases, Istituto Superiore di Sanità, Roma, Italy; ASUITS - Ospedale Maggiore, S.C. UOC Igiene e Sanità Pubblica, Trieste, Italy                                                                                                                          | Virology Laboratory, Scientific Department, Army Medical Center                                                 | Alessandra Lo Presti; Angela Di Martino; Anna Anselmo; Antonella Fortunato; Florigio Lista; Francesco Giordani; Giovanni Faggioni; Nino D'Amore; Paola Stefanelli; Pierlanfranco D'Agaro; Riccardo De Sanctis; Silvia Fillo; Stefano Fiore; Vanessa Vera Fain                                  |
| EPI_ISL_856887                                                                                                                                                                                                                                                                                          | Department of Infectious Diseases, Istituto Superiore di Sanità, Roma, Italy; AUOC Policlinico Bari, UOC Igiene, Bari, Italy                                                                                                                                                         | Virology Laboratory, Scientific Department, Army Medical Center                                                 | Alessandra Lo Presti; Angela Di Martino; Anna Anselmo; Antonella Fortunato; Florigio Lista; Francesco Giordani; Giovanni Faggioni; Maria Chironna; Nino D'Amore; Paola Stefanelli; Riccardo De Sanctis; Silvia Fillo; Stefano Fiore; Vanessa Vera Fain                                         |
| EPI_ISL_856907                                                                                                                                                                                                                                                                                          | Department of Infectious Diseases, Istituto Superiore di Sanità, Roma, Italy; AUSL Valle d'Aosta, Aosta, Italy                                                                                                                                                                       | Virology Laboratory, Scientific Department, Army Medical Center                                                 | Alessandra Lo Presti; Angela Di Martino; Anna Anselmo; Antonella Fortunato; Florigio Lista; Francesco Giordani; Giovanni Faggioni; Massimo Di Benedetto; Nino D'Amore; Paola Stefanelli; Riccardo De Sanctis; Silvia Fillo; Stefano Fiore; Vanessa Vera Fain                                   |
| EPI_ISL_856880, EPI_ISL_856895 to 856896                                                                                                                                                                                                                                                                | Department of Infectious Diseases, Istituto Superiore di Sanità, Roma, Italy; Ospedali Riuniti, Laboratorio Virologia, Ancona, Italy                                                                                                                                                 | Virology Laboratory, Scientific Department, Army Medical Center                                                 | Alessandra Lo Presti; Angela Di Martino; Anna Anselmo; Antonella Fortunato; Florigio Lista; Francesco Giordani; Giovanni Faggioni; Nino D'Amore; Paola Stefanelli; Patrizia Bagnarelli; Riccardo De Sanctis; Silvia Fillo; Stefano Fiore; Vanessa Vera Fain                                    |
| EPI_ISL_856881, EPI_ISL_856897                                                                                                                                                                                                                                                                          | Department of Infectious Diseases, Istituto Superiore di Sanità, Roma, Italy; PO Cardarelli, Laboratorio Analisi Microbiologia e Virologia, Campobasso, Italy                                                                                                                        | Virology Laboratory, Scientific Department, Army Medical Center                                                 | Alessandra Lo Presti; Angela Di Martino; Anna Anselmo; Antonella Fortunato; Florigio Lista; Francesco Giordani; Giovanni Faggioni; Massimiliano Scutellà; Nino D'Amore; Paola Stefanelli; Riccardo De Sanctis; Silvia Fillo; Stefano Fiore; Vanessa Vera Fain                                  |
| EPI_ISL_856908                                                                                                                                                                                                                                                                                          | Department of Infectious Diseases, Istituto Superiore di Sanità, Roma, Italy; PO Madre Teresa di Calcutta, UOC. Laboratorio Analisi ULSS 6 Euganea, Padova, Italy                                                                                                                    | Virology Laboratory, Scientific Department, Army Medical Center                                                 | Alessandra Lo Presti; Angela Di Martino; Anna Anselmo; Antonella Fortunato; Florigio Lista; Francesco Giordani; Giacomo Mezzapelle; Giovanni Faggioni; Nino D'Amore; Paola Stefanelli; Riccardo De Sanctis; Silvia Fillo; Stefano Fiore; Vanessa Vera Fain                                     |
| EPI_ISL_856884, EPI_ISL_856903                                                                                                                                                                                                                                                                          | Department of Infectious Diseases, Istituto Superiore di Sanità, Roma, Italy; PO Santa Chiara, Microbiologia e Virologia, Trento, Italy                                                                                                                                              | Virology Laboratory, Scientific Department, Army Medical Center                                                 | Alessandra Lo Presti; Angela Di Martino; Anna Anselmo; Antonella Fortunato; Florigio Lista; Francesco Giordani; Giovanni Faggioni; Nino D'Amore; Paola Stefanelli; Paolo Lanzafame; Riccardo De Sanctis; Silvia Fillo; Stefano Fiore; Vanessa Vera Fain                                        |
| EPI_ISL_856886                                                                                                                                                                                                                                                                                          | Department of Infectious Diseases, Istituto Superiore di Sanità, Roma, Italy; PO Spirito Santo, UOC Microbiologia e Virologia Clinica, Pescara, Italy                                                                                                                                | Virology Laboratory, Scientific Department, Army Medical Center                                                 | Alessandra Lo Presti; Angela Di Martino; Anna Anselmo; Antonella Fortunato; Florigio Lista; Francesco Giordani; Giovanni Faggioni; Nino D'Amore; Paola Stefanelli; Paolo Fazio; Riccardo De Sanctis; Silvia Fillo; Stefano Fiore; Vanessa Vera Fain                                            |
| EPI_ISL_856909                                                                                                                                                                                                                                                                                          | Department of Infectious Diseases, Istituto Superiore di Sanità, Roma, Italy; ULSS 8 Berica Vicenza, UOC Microbiologia, Vicenza, Italy                                                                                                                                               | Virology Laboratory, Scientific Department, Army Medical Center                                                 | Alessandra Lo Presti; Angela Di Martino; Anna Anselmo; Antonella Fortunato; Florigio Lista; Francesco Giordani; Giovanni Faggioni; Mario Rassu; Nino D'Amore; Paola Stefanelli; Riccardo De Sanctis; Silvia Fillo; Stefano Fiore; Vanessa Vera Fain                                            |
| EPI_ISL_855550, EPI_ISL_855553                                                                                                                                                                                                                                                                          | Department of Infectious Diseases, Istituto Superiore di Sanità, Rome, Italy                                                                                                                                                                                                         | Istituto Superiore di Sanità (ISS)                                                                              | Alessandra Lo Presti; Angela Di Martino; Gabriele Vaccari; Giovanni Ianiro; Ilaria Di Bartolo; Luca De Sabato; Manuela Marra; Marco Crescenzi; Maria Carollo; Paola Stefanelli; Stefano Fiore                                                                                                  |
| EPI_ISL_910331 to 910332                                                                                                                                                                                                                                                                                | Department of Infectious Diseases, Istituto Superiore di Sanità, Rome, Italy; AOUP Paolo Giaccone, Palermo, Italy                                                                                                                                                                    | Istituto Superiore di Sanità (ISS)                                                                              | Alessandra Lo Presti; Angela Di Martino; Carmelo Maida; Daniela Di Naro; Fabio Tramuto; Francesco Vitale; Giulia Randazzo; Manuela Marra; Marco Crescenzi; Maria Carollo; Paola Stefanelli; Stefano Fiore                                                                                      |
| EPI_ISL_855554 to 855555                                                                                                                                                                                                                                                                                | Department of Infectious Diseases, Istituto Superiore di Sanità, Rome, Italy; ASST G.O.M. Niguarda, Sezione Microbiologia e Virologia, Milano, Italy                                                                                                                                 | Istituto Superiore di Sanità (ISS)                                                                              | Alessandra Lo Presti; Angela Di Martino; Carlo Federico Perno; Gabriele Vaccari; Giovanni Ianiro; Ilaria Di Bartolo; Luca De Sabato; Manuela Marra; Marco Crescenzi; Maria Carollo; Paola Stefanelli; Stefano Fiore                                                                            |
| EPI_ISL_855552                                                                                                                                                                                                                                                                                          | Department of Infectious Diseases, Istituto Superiore di Sanità, Rome, Italy; Ospedali Riuniti, Laboratorio Virologia, Ancona, Italy                                                                                                                                                 | Istituto Superiore di Sanità (ISS)                                                                              | Alessandra Lo Presti; Angela Di Martino; Gabriele Vaccari; Giovanni Ianiro; Ilaria Di Bartolo; Luca De Sabato; Manuela Marra; Marco Crescenzi; Maria Carollo; Paola Stefanelli; Patrizia Bagnarelli; Stefano Fiore                                                                             |
| EPI_ISL_875687                                                                                                                                                                                                                                                                                          | Department of Infectious Diseases, Istituto Superiore di Sanità, Rome, Italy; UCO Igiene e Sanità Pubblica, ASUGI, Trieste, Italy; Laboratorio di Genomica ed Epigenomica sistema Argo, Area SciencePark, Trieste, Italy; Laboratorio di Virologia Molecolare, ICGEB, Trieste, Italy | Istituto Superiore di Sanità (ISS)                                                                              | Alessandra Lo Presti; Alessandro Marcello; Angela Di Martino; Danilo Licastro; Ludovica Segat; Manuela Marra; Marco Crescenzi; Maria Carollo; Paola Stefanelli; Pierlanfranco D'Agaro; Stefano Fiore                                                                                           |
| EPI_ISL_644945 to 644999                                                                                                                                                                                                                                                                                | Department of Infectious Diseases, Keio University School of Medicine, Tokyo, Japan                                                                                                                                                                                                  | Center for Medical Genetics, Keio University School of Medicine, Tokyo, Japan                                   | Haruhiko Siomi; Hirotugu Ishizu; Kenjiro Kosaki; Kodai Abe; Yuka Iwasaki                                                                                                                                                                                                                       |
| EPI_ISL_893368 to 893719, EPI_ISL_939642                                                                                                                                                                                                                                                                | Department of Infectious Diseases, Kobe Institute of Health                                                                                                                                                                                                                          | Department of Infectious Diseases, Kobe Institute of Health                                                     | Kentaro Itokawa; Makoto Kuroda; Masanori Hashino; Rina Tanaka; Ryohei Nomoto; Tomotada Iwamoto; Tsuyoshi Sekizuka                                                                                                                                                                              |
| EPI_ISL_892726 to 892807, EPI_ISL_894354 to 894363, EPI_ISL_895014 to 895094, EPI_ISL_896795 to 896854, see above                                                                                                                                                                                       | Department of Infectious Diseases, Kobe Institute of Health                                                                                                                                                                                                                          | Pathogen Genomics Center, National Institute of Infectious Diseases                                             | Kentaro Itokawa; Makoto Kuroda; Masanori Hashino; Rina Tanaka; Tsuyoshi Sekizuka                                                                                                                                                                                                               |
| EPI_ISL_985394                                                                                                                                                                                                                                                                                          | Department of Internal Medicine, College of Medicine, Chosun University                                                                                                                                                                                                              | Department of Internal Medicine, College of Medicine, Chosun University                                         | Dong-Min Kim                                                                                                                                                                                                                                                                                   |
| EPI_ISL_934548 to 934588, EPI_ISL_934655 to 934695                                                                                                                                                                                                                                                      | Department of Laboratory Medicine, Division of Clinical Virology, University of Medicine, Vienna                                                                                                                                                                                     | Bergthaler laboratory, CeMM Research Center for Molecular Medicine of the Austrian Academy of Sciences          | Andreas Bergthaler; Anna Schedl; Bekir Erguner; Benedikt Agerer; Christoph Bock; Jan Laine; Lukas Endler; Maelle Le Moing; Martin Senekowitsch; Michael Schuster; Thomas Penz                                                                                                                  |
| EPI_ISL_693302 to 693306, EPI_ISL_738064 to 738065, EPI_ISL_740547, EPI_ISL_872591 to 872599                                                                                                                                                                                                            | Department of Laboratory Medicine, National Taiwan University Hospital                                                                                                                                                                                                               | Microbial Genomics Core Lab, National Taiwan University Centers of Genomic and Precision Medicine               | Chiao-Ling Li; Pei-Jer Chen; Shan-Chwen Chang; Shiou-Hwei Yeh; Sui-Yuan Chang; Ya-Yun Lai; You-Yu Lin                                                                                                                                                                                          |
| EPI_ISL_648043 to 648121, EPI_ISL_648610 to 648676, EPI_ISL_648678 to 648820                                                                                                                                                                                                                            | Department of Laboratory Medicine, Tan Tock Seng Hospital                                                                                                                                                                                                                            | Department of Laboratory Medicine, Tan Tock Seng Hospital                                                       | Barkham TMS; Chen YYC; Li C; Lim JX; Maurer-Stroh S; Nagarajan N; Sessions OM; Tang WY; Zair X                                                                                                                                                                                                 |
| EPI_ISL_803880 to 803888, EPI_ISL_803891 to 803893, EPI_ISL_803895                                                                                                                                                                                                                                      | Department of Medical Biotechnologies, University of Siena                                                                                                                                                                                                                           | Laboratory of Infectious Diseases, Department of Biomedical and Clinical Sciences L. Sacco, University of Milan | Alessia Lai; Annalisa Bergna; Carla Della Ventura; Claudia Balotta; Filippo Dragoni; Gianguglielmo Zehender on behalf of SARS-CoV-2 ITALIAN RESEARCH ENTERPRISE-(SCIRE) Collaborative Group; Ilaria Vicenti; Maria Grazia Cusi; Massimo Galli; Maurizio Zazzi                                  |
| EPI_ISL_710483 to 710484                                                                                                                                                                                                                                                                                | Department of Medical Laboratory Sciences, Arab American University                                                                                                                                                                                                                  | Department of Medical Laboratory Sciences, Arab American University                                             | Al-Jawabreh, A.; Al-Jawabreh, H.; Dumaidi, K.; Ereqat, S.; Nasereddin, A.                                                                                                                                                                                                                      |
| EPI_ISL_775428 to 775437, EPI_ISL_775467, EPI_ISL_775523, EPI_ISL_796653, EPI_ISL_796681 to 796683, EPI_ISL_860262, EPI_ISL_906822 to 906825, EPI_ISL_964981 to 964983, see above                                                                                                                       | Department of Medical Microbiology - section Molde, Molde Hospital                                                                                                                                                                                                                   | Norwegian Institute of Public Health, Department of Virology                                                    | Atiya R Ali; Hilde Elshaug; Hilde Vollan; Ignacio Garcia Lorente; Kamilla Heddeland Instefjord; Karoline Bragstad; Kathrine Stene-Johansen; Marie Paulsen Madsen; Olav Hungnes; Rasmus Riis Kopperud; Serina B Engebretsen                                                                     |
| EPI_ISL_861717 to 861726, EPI_ISL_861729, EPI_ISL_977585 to 977590                                                                                                                                                                                                                                      | Department of Medical Microbiology, Hospital Pengajar Universiti Putra Malaysia                                                                                                                                                                                                      | Malaysia Genome Institute                                                                                       | Avisha Richards; Azrin Ahmad; Enizza Kasim; Hui-Yee Chee; Irni Suhayu Sapian; Mohd Faizal Abu Bakar; Mohd Noor Mat Isa; Muhammad Mi; Narcisse Joseph; Nor Azfa Johari; Nor Zahrin Hasran; Nurhezreen Md Iqbal; Shamsidar Sopia; Siti Noraini Othman; Syafinaz Amin-Nordin; Yusuf Muhammad Noor |
| EPI_ISL_635096, EPI_ISL_635100, EPI_ISL_635110 to 635111, EPI_ISL_635126, EPI_ISL_635135 to 635136, EPI_ISL_635165, EPI_ISL_668404, EPI_ISL_668417 to 668418, EPI_ISL_668420 to 668421, EPI_ISL_668441, EPI_ISL_708042 to 708043, EPI_ISL_708106 to 708109, EPI_ISL_708142 to 708146, EPI_ISL_759969 to |                                                                                                                                                                                                                                                                                      |                                                                                                                 |                                                                                                                                                                                                                                                                                                |







|                                                                                                                                                                                                                                                                                                                                                                                                                                                                                                                                                                                                                                                                                                                                                                                                                                                                                                                                                                                                                                                                                                                                                                                                                                                                                                                                                                                                                                                                                        |                                                                                                                                        |                                                                                                                                                                                                                                                        |                                                                                                                                                                                                                                                                                                                                                                                                                                                                                                                         |
|----------------------------------------------------------------------------------------------------------------------------------------------------------------------------------------------------------------------------------------------------------------------------------------------------------------------------------------------------------------------------------------------------------------------------------------------------------------------------------------------------------------------------------------------------------------------------------------------------------------------------------------------------------------------------------------------------------------------------------------------------------------------------------------------------------------------------------------------------------------------------------------------------------------------------------------------------------------------------------------------------------------------------------------------------------------------------------------------------------------------------------------------------------------------------------------------------------------------------------------------------------------------------------------------------------------------------------------------------------------------------------------------------------------------------------------------------------------------------------------|----------------------------------------------------------------------------------------------------------------------------------------|--------------------------------------------------------------------------------------------------------------------------------------------------------------------------------------------------------------------------------------------------------|-------------------------------------------------------------------------------------------------------------------------------------------------------------------------------------------------------------------------------------------------------------------------------------------------------------------------------------------------------------------------------------------------------------------------------------------------------------------------------------------------------------------------|
| EPI_ISL_961730, EPI_ISL_961734, EPI_ISL_961747                                                                                                                                                                                                                                                                                                                                                                                                                                                                                                                                                                                                                                                                                                                                                                                                                                                                                                                                                                                                                                                                                                                                                                                                                                                                                                                                                                                                                                         | Dipartimento Prevenzione Avezzano-Servizio Igiene epidemiologia Sanità Pubblica                                                        | Istituto Zooprofilattico Sperimentale dell'Abruzzo e Molise "G. Caporale"                                                                                                                                                                              | Ancora M; Calistri P; Cammà C; Curini V; Di Domenico M; Di Pasquale A; Lorusso A; Mangone I; Marccaci M; Puglia I; Rinaldi A; Savini G; Scialabba S                                                                                                                                                                                                                                                                                                                                                                     |
| EPI_ISL_983327                                                                                                                                                                                                                                                                                                                                                                                                                                                                                                                                                                                                                                                                                                                                                                                                                                                                                                                                                                                                                                                                                                                                                                                                                                                                                                                                                                                                                                                                         | Dipartimento di Prevenzione ASL Roma 4                                                                                                 | INMI Lazzaro Spallanzani IRCCS                                                                                                                                                                                                                         | A Di Caro; B Bartolini; CEM Gruber; E Giombini; F Messina; M Rueca; MR Capobianchi; O Butera; S Ursino                                                                                                                                                                                                                                                                                                                                                                                                                  |
| EPI_ISL_722855 to 722858, EPI_ISL_722872, EPI_ISL_722896 to 722897                                                                                                                                                                                                                                                                                                                                                                                                                                                                                                                                                                                                                                                                                                                                                                                                                                                                                                                                                                                                                                                                                                                                                                                                                                                                                                                                                                                                                     | Dipartimento di Scienze Biomediche e Oncologia Umana - Azienda Ospedaliero Universitaria Consorziata Policlinico                       | Istituto Zooprofilattico Sperimentale della Puglia e della Basilicata                                                                                                                                                                                  | Bianco A.; Capozzi L.; Chironna M.; Del Sambro L.; Loconsole D.; Parisi A.                                                                                                                                                                                                                                                                                                                                                                                                                                              |
| EPI_ISL_906529                                                                                                                                                                                                                                                                                                                                                                                                                                                                                                                                                                                                                                                                                                                                                                                                                                                                                                                                                                                                                                                                                                                                                                                                                                                                                                                                                                                                                                                                         | Dirección de parntamental de salud del Amazonas                                                                                        | Instituto Nacional de Salud- Dirección de Investigación en Salud Pública, Universidad de los Andes- Applied genomics research group, Vicerrectoría de Investigación y Creación, Universidad de los Andes- Systems and Computing Engineering Department | Carlos Franco-Muñoz; Diego A. Álvarez-Díaz; Diego Andrés Prada; Gerardo Santamaría Jorge Duitama; Héctor Alejandro Ruiz-Moreno; Jhonntan Reales-González; Jorge Ivan Diaz; Julian Naizaque; Katherine Laiton-Donato; Laura Natalia Gonzalez; Magdalena Wiesner; Marcela Mercado-Reyes; Maria T. Herrera-Sepúlveda; Martha Lucia Ospina Martinez; Mauricio Pacheco-Montealegre; Sheryll Corchuelo; Silvia Restrepo-Restrepo                                                                                              |
| EPI_ISL_902736                                                                                                                                                                                                                                                                                                                                                                                                                                                                                                                                                                                                                                                                                                                                                                                                                                                                                                                                                                                                                                                                                                                                                                                                                                                                                                                                                                                                                                                                         | Dirección Departamental de Salud de Pública Leticia                                                                                    | Instituto Nacional de Salud- Dirección de Investigación en Salud Pública, Universidad de los Andes- Applied genomics research group, Vicerrectoría de Investigación y Creación, Universidad de los Andes- Systems and Computing Engineering Department | Carlos Franco-Muñoz; Diego A. Álvarez-Díaz; Diego Andrés Prada; Jorge Duitama; Jorge Ivan Diaz; Katherine Laiton-Donato; Laura Natalia Gonzalez; Magdalena Wiesner; Marcela Mercado-Reyes; Maria T. Herrera-Sepúlveda; Martha Lucia Ospina Martinez; Mauricio Pacheco-Montealegre; Silvia Restrepo-Restrepo                                                                                                                                                                                                             |
| EPI_ISL_845621 to 845625                                                                                                                                                                                                                                                                                                                                                                                                                                                                                                                                                                                                                                                                                                                                                                                                                                                                                                                                                                                                                                                                                                                                                                                                                                                                                                                                                                                                                                                               | Dirección de Sanidad Ejército                                                                                                          | Instituto Nacional de Salud - Dirección de Investigación en Salud Pública                                                                                                                                                                              | Carlos Franco-Muñoz; Diego A. Álvarez-Díaz; Diego Andrés Prada; Gerardo Santamaría; Jonathan Reales; Julian Naizaque; Katherine Laiton-Donato; Magdalena Wiesner; Marcela Mercado-Reyes; Maria T. Herrera-Sepúlveda; Martha Lucia Ospina Martinez; Mauricio Pacheco-Montealegre; Paola Muñoz-Laiton; Sheryll Corchuelo                                                                                                                                                                                                  |
| EPI_ISL_640044                                                                                                                                                                                                                                                                                                                                                                                                                                                                                                                                                                                                                                                                                                                                                                                                                                                                                                                                                                                                                                                                                                                                                                                                                                                                                                                                                                                                                                                                         | District 6 CDC wc DSI                                                                                                                  | NHLS/UCT                                                                                                                                                                                                                                               | Arash Irazadeh; Bruna Galvao; Carolyn Williamson; Deelan Doolabh; Diana Hardie; Innocent Mudau; Kruger Marais; Lynn Tyers; Marvin Hsiao; Stephen Korsman                                                                                                                                                                                                                                                                                                                                                                |
| EPI_ISL_738139, EPI_ISL_738141 to 738142, EPI_ISL_747245 to 747281, EPI_ISL_747284 to 747421, EPI_ISL_747425 to 747458, EPI_ISL_759991 to 760030, EPI_ISL_760060 to 760245, EPI_ISL_762992, EPI_ISL_833249, EPI_ISL_850181 to 850505, EPI_ISL_850653 to 850662, EPI_ISL_955939 to 955981, EPI_ISL_959476 to 959537, EPI_ISL_994668 to 994738, EPI_ISL_994741 to 994801, EPI_ISL_995192 to 995293, EPI_ISL_995308 to 995330, EPI_ISL_995765 to 995838                                                                                                                                                                                                                                                                                                                                                                                                                                                                                                                                                                                                                                                                                                                                                                                                                                                                                                                                                                                                                                   | Division of Emerging Infectious Diseases, Bureau of Infectious Diseases Diagnosis Control, Korea Disease Control and Prevention Agency | Division of Emerging Infectious Diseases, Bureau of Infectious Diseases Diagnosis Control, Korea Disease Control and Prevention Agency                                                                                                                 | Ae Kyung Park; Chae Young Lee; Chaeyoung Lee; Eun-Jin Kim; Heui Man Kim; Il-Hwan Kim; Jeong-Min Kim; Namjoo Lee; Sang Hee Woo                                                                                                                                                                                                                                                                                                                                                                                           |
| see above                                                                                                                                                                                                                                                                                                                                                                                                                                                                                                                                                                                                                                                                                                                                                                                                                                                                                                                                                                                                                                                                                                                                                                                                                                                                                                                                                                                                                                                                              | Division of Infectious Diseases, Department of Internal Medicine, Yonsei University College of Medicine                                | Department of biotechnology, Yonsei University                                                                                                                                                                                                         | Jae sun Yoon; Jin Young Ahn; Jun Yong Choi*; Jung Ho Kim; Minwoo Kim; Youn-Jung Lee; and Jong-Won Oh*                                                                                                                                                                                                                                                                                                                                                                                                                   |
| EPI_ISL_660109 to 660110                                                                                                                                                                                                                                                                                                                                                                                                                                                                                                                                                                                                                                                                                                                                                                                                                                                                                                                                                                                                                                                                                                                                                                                                                                                                                                                                                                                                                                                               | Division of Infectious Diseases, University Hospital Zürich                                                                            | Institute of Medical Virology, University of Zurich                                                                                                                                                                                                    | Alexandra Trkola; Annette Audigé; Cyril Shah; Guido Bloemberg; Jon Huder; Jürg Böni; Kevin Steiner; Maria Grünberg; Maryam Zaheri; Michael Huber; Riccarda Capaul; Stefan Schmutz; Verena Kufner                                                                                                                                                                                                                                                                                                                        |
| EPI_ISL_939660 to 939672                                                                                                                                                                                                                                                                                                                                                                                                                                                                                                                                                                                                                                                                                                                                                                                                                                                                                                                                                                                                                                                                                                                                                                                                                                                                                                                                                                                                                                                               | Division of Pathogen Resource Management, Korea National Institute of Health, Korea Disease Control and Prevention Agency              | Division of Pathogen Resource Management, Korea National Institute of Health, Korea Disease Control and Prevention Agency                                                                                                                              | Choi; Choi, C.; E.-J.; J.-M.; Kim; M.-r.; S.T.; S.Y.; Y.S.; Yun                                                                                                                                                                                                                                                                                                                                                                                                                                                         |
| EPI_ISL_812956 to 812965                                                                                                                                                                                                                                                                                                                                                                                                                                                                                                                                                                                                                                                                                                                                                                                                                                                                                                                                                                                                                                                                                                                                                                                                                                                                                                                                                                                                                                                               | Dom Zdravija Sarajevo                                                                                                                  | Alea Genetic Center                                                                                                                                                                                                                                    | Konjhodzic R.; Pecar D.; Salihefendic L.                                                                                                                                                                                                                                                                                                                                                                                                                                                                                |
| EPI_ISL_722209                                                                                                                                                                                                                                                                                                                                                                                                                                                                                                                                                                                                                                                                                                                                                                                                                                                                                                                                                                                                                                                                                                                                                                                                                                                                                                                                                                                                                                                                         | Douglas Hanly Moir                                                                                                                     | NSW Health Pathology - Institute of Clinical Pathology and Medical Research; Westmead Hospital; University of Sydney                                                                                                                                   | CIDM-PH et al.                                                                                                                                                                                                                                                                                                                                                                                                                                                                                                          |
| EPI_ISL_699650                                                                                                                                                                                                                                                                                                                                                                                                                                                                                                                                                                                                                                                                                                                                                                                                                                                                                                                                                                                                                                                                                                                                                                                                                                                                                                                                                                                                                                                                         | Dougllass Hanly Moir Pathology                                                                                                         | NSW Health Pathology - Institute of Clinical Pathology and Medical Research; Westmead Hospital; University of Sydney                                                                                                                                   | CIDM-PH et al.                                                                                                                                                                                                                                                                                                                                                                                                                                                                                                          |
| EPI_ISL_740881 to 740882, EPI_ISL_779398, EPI_ISL_792026, EPI_ISL_792034                                                                                                                                                                                                                                                                                                                                                                                                                                                                                                                                                                                                                                                                                                                                                                                                                                                                                                                                                                                                                                                                                                                                                                                                                                                                                                                                                                                                               | Dr Abdurahman CDC wc DAC                                                                                                               | NHLS/UCT                                                                                                                                                                                                                                               | Arash Irazadeh; Bruna Galvao; Carolyn Williamson; Deelan Doolabh; Diana Hardie; Innocent Mudau; Kruger Marais; Lynn Tyers; Marvin Hsiao; Stephen Korsman                                                                                                                                                                                                                                                                                                                                                                |
| EPI_ISL_640100, EPI_ISL_700513, EPI_ISL_700517, EPI_ISL_700525, EPI_ISL_700547, EPI_ISL_700552, EPI_ISL_700567 to 700568, EPI_ISL_700570, EPI_ISL_700582, EPI_ISL_700591 to 700592                                                                                                                                                                                                                                                                                                                                                                                                                                                                                                                                                                                                                                                                                                                                                                                                                                                                                                                                                                                                                                                                                                                                                                                                                                                                                                     | Dr Abdurahman CDC wc DAC                                                                                                               | National Health Laboratory Service/UCT                                                                                                                                                                                                                 | Arash Irazadeh; Bruna Galvao; Carolyn Williamson; Deelan Doolabh; Diana Hardie; Innocent Mudau; Kruger Marais; Lynn Tyers; Marvin Hsiao; Stephen Korsman                                                                                                                                                                                                                                                                                                                                                                |
| see above                                                                                                                                                                                                                                                                                                                                                                                                                                                                                                                                                                                                                                                                                                                                                                                                                                                                                                                                                                                                                                                                                                                                                                                                                                                                                                                                                                                                                                                                              | Dr Ivan Toms Clinic wc IVT                                                                                                             | National Health Laboratory Service (NHLS), Tygerberg                                                                                                                                                                                                   | Bronwyn Kleinhans; Eduan Wilkindon; Gert van Zyl; Houriyah Tegally; Kayla Delaney; Susan Engelbrecht; Tulio de Oliveira; Wolfgang Preiser                                                                                                                                                                                                                                                                                                                                                                               |
| EPI_ISL_960160 to 960161, EPI_ISL_960171 to 960172                                                                                                                                                                                                                                                                                                                                                                                                                                                                                                                                                                                                                                                                                                                                                                                                                                                                                                                                                                                                                                                                                                                                                                                                                                                                                                                                                                                                                                     | Dr Van Niekerk Hospital                                                                                                                | National Health Laboratory Service (NHLS), Tygerberg                                                                                                                                                                                                   | Bronwyn Kleinhans; Eduan Wilkindon; Gert van Zyl; Houriyah Tegally; Kayla Delaney; Susan Engelbrecht; Tulio de Oliveira; Wolfgang Preiser                                                                                                                                                                                                                                                                                                                                                                               |
| EPI_ISL_745113, EPI_ISL_745132, EPI_ISL_745154                                                                                                                                                                                                                                                                                                                                                                                                                                                                                                                                                                                                                                                                                                                                                                                                                                                                                                                                                                                                                                                                                                                                                                                                                                                                                                                                                                                                                                         | Dr. Boubaker Karim laboratory                                                                                                          | Institute of Medical Virology, University of Zurich                                                                                                                                                                                                    | Alexandra Trkola; Annette Audigé; Cyril Shah; Jon Huder; Jürg Böni; Kevin Steiner; Maria Grünberg; Maryam Zaheri; Michael Huber; Riccarda Capaul; Stefan Schmutz; Verena Kufner                                                                                                                                                                                                                                                                                                                                         |
| EPI_ISL_745112, EPI_ISL_745138 to 745139                                                                                                                                                                                                                                                                                                                                                                                                                                                                                                                                                                                                                                                                                                                                                                                                                                                                                                                                                                                                                                                                                                                                                                                                                                                                                                                                                                                                                                               | Dr. Leonard A. Miller Centre for Health Services                                                                                       | National Microbiology Laboratory (NML)                                                                                                                                                                                                                 | Adel Malek; Anna Majer; Anneliese Landgraf; CanCOGeN's metadata curation team; Darian Hole; Elsie Grudeski; Gary Van Domselaar; George Zahariadis; Grace Seo; Jennifer Tanner; Kerri Smith; Laura Gilbert; Madison Chapel; Morag Graham; Natalie Knox; Nathalie Bastien; Philip Mabon; Public Health Agency of Canada CanCOGeN team; Rhiannon Huzarewich; Robert Needle; Russell Mandes; Shari Tyson; Timothy Booth; Yan Li; Yang Yu                                                                                    |
| EPI_ISL_766589 to 766590                                                                                                                                                                                                                                                                                                                                                                                                                                                                                                                                                                                                                                                                                                                                                                                                                                                                                                                                                                                                                                                                                                                                                                                                                                                                                                                                                                                                                                                               | Du Noon CDC wc DNC                                                                                                                     | NHLS/UCT                                                                                                                                                                                                                                               | Arash Irazadeh; Bruna Galvao; Carolyn Williamson; Deelan Doolabh; Diana Hardie; Innocent Mudau; Kruger Marais; Lynn Tyers; Marvin Hsiao; Stephen Korsman                                                                                                                                                                                                                                                                                                                                                                |
| EPI_ISL_906760 to 906776                                                                                                                                                                                                                                                                                                                                                                                                                                                                                                                                                                                                                                                                                                                                                                                                                                                                                                                                                                                                                                                                                                                                                                                                                                                                                                                                                                                                                                                               | Dutch COVID-19 response team                                                                                                           | Erasmus Medical Center                                                                                                                                                                                                                                 | Anne van der Linden; Annemiek van der Eijk; Aura Timen; Bas Oude Munnink; Claudia Schapendonk; Corien Swaan; Corine GeurtsvanKessel; David Nieuwenhuijse; Emmanuelle Munger; Iera Chestakova; Jeroen van Kampen; Jolanda Voermans; Madelief Mollers; Manon Haverkate; Marion Koopmans; Marjan Boter; Mark Pronk; Mart Stein; OH consortium; Pascal Lexmond; Reina Sikkema; Richard Molenkamp; Sandra Kengne Kamga Mobou; Stefan van Nieuwkoop; Theo Bestebroer; on behalf of the Dutch national COVID-19 response team. |
| EPI_ISL_640057, EPI_ISL_640059, EPI_ISL_640091, EPI_ISL_640094 to 640095                                                                                                                                                                                                                                                                                                                                                                                                                                                                                                                                                                                                                                                                                                                                                                                                                                                                                                                                                                                                                                                                                                                                                                                                                                                                                                                                                                                                               | Dutch COVID-19 response team                                                                                                           | Medical Microbiology, Maastricht University Medical Centre                                                                                                                                                                                             | Brian van der Veer*; Carmen Reumkens; Christian Hoebe; Erik Beuken; Jozef Dingemans*; Lieke van Alphen; Paul Savelkoul                                                                                                                                                                                                                                                                                                                                                                                                  |
| EPI_ISL_632321 to 632350, EPI_ISL_632352 to 632356, EPI_ISL_632359 to 632364, EPI_ISL_632366 to 632381, EPI_ISL_632383 to 632395, EPI_ISL_632397 to 632430, EPI_ISL_632434 to 632461, EPI_ISL_632480 to 632795, EPI_ISL_722273 to 722300, EPI_ISL_722302 to 722312, EPI_ISL_722314 to 722324, EPI_ISL_722326 to 722357, EPI_ISL_722359 to 722376, EPI_ISL_722378 to 722465, EPI_ISL_722492 to 722850, EPI_ISL_734166, EPI_ISL_763099 to 763103, EPI_ISL_763109 to 763127, EPI_ISL_763130 to 763137, EPI_ISL_763139 to 763172, EPI_ISL_763174 to 763181, EPI_ISL_763188 to 763189, EPI_ISL_763191 to 763280, EPI_ISL_763284 to 763292, EPI_ISL_763294 to 763314, EPI_ISL_763348 to 763349, EPI_ISL_763353 to 763359, EPI_ISL_801404 to 801409, EPI_ISL_801411 to 801420, EPI_ISL_801422, EPI_ISL_801424 to 801513, EPI_ISL_801515, EPI_ISL_802506 to 802514, EPI_ISL_802516 to 802533, EPI_ISL_802536 to 802544, EPI_ISL_904135 to 904145, EPI_ISL_904148 to 904149, EPI_ISL_904151 to 904154, EPI_ISL_904156 to 904157, EPI_ISL_904159 to 904161, EPI_ISL_904163 to 904165, EPI_ISL_904167 to 904168, EPI_ISL_904170 to 904171, EPI_ISL_904173 to 904174, EPI_ISL_904176 to 904180, EPI_ISL_904182, EPI_ISL_904184, EPI_ISL_904186 to 904192, EPI_ISL_904196 to 904220, EPI_ISL_904222 to 904225, EPI_ISL_904228 to 904237, EPI_ISL_904239 to 904255, EPI_ISL_904262 to 904315, EPI_ISL_904318 to 904319, EPI_ISL_904361 to 904370, EPI_ISL_904372 to 904381, EPI_ISL_904419 to 904624 | Dutch COVID-19 response team                                                                                                           | Adam Meijer; AnneMarie van den Brandt; Bas van der Veer; Chantal Reusken; Dennis Schmitz; Dirk Eggink; Florian Zwagemaker; Harry Vennema; Jeroen Cremer; Matthijs Welkers; Sharon van den Brink; on behalf of the national COVID-19 response team      |                                                                                                                                                                                                                                                                                                                                                                                                                                                                                                                         |
| EPI_ISL_965529 to 965769, EPI_ISL_965771 to 965800, EPI_ISL_965802 to 965811                                                                                                                                                                                                                                                                                                                                                                                                                                                                                                                                                                                                                                                                                                                                                                                                                                                                                                                                                                                                                                                                                                                                                                                                                                                                                                                                                                                                           | Dutch COVID-19 response team                                                                                                           | National Institute for Public Health and the Environment (RIVM)                                                                                                                                                                                        | Adam Meijer; AnneMarie van den Brandt; Bas van der Veer; Chantal Reusken; Dennis Schmitz; Dirk Eggink; Florian Zwagemaker; Harry Vennema; Jeroen Cremer; Matthijs Welkers; Sharon van den Brink; on behalf of the national COVID-19 response team                                                                                                                                                                                                                                                                       |
| EPI_ISL_636491 to 636504, EPI_ISL_636506 to 636507, EPI_ISL_636511, EPI_ISL_636513 to 636521, EPI_ISL_636525 to 636526, EPI_ISL_636528 to 636544, EPI_ISL_636546 to 636561, EPI_ISL_636564 to 636585, EPI_ISL_636587 to 636591, EPI_ISL_636593, EPI_ISL_636598, EPI_ISL_636600 to 636603, EPI_ISL_723155 to 723467, EPI_ISL_728564 to 728763, EPI_ISL_747521 to 747525, EPI_ISL_790570 to 791083, EPI_ISL_804379 to 804462, EPI_ISL_823976 to 824283, EPI_ISL_826523 to 826536, EPI_ISL_904658 to 904934, EPI_ISL_904958 to 905730, EPI_ISL_942977 to 943547                                                                                                                                                                                                                                                                                                                                                                                                                                                                                                                                                                                                                                                                                                                                                                                                                                                                                                                           | Dutch COVID-19 response team                                                                                                           | National Institute for Public Health and the Environment (RIVM)                                                                                                                                                                                        | Adam Meijer; AnneMarie van den Brandt; Bas van der Veer; Chantal Reusken; Dennis Schmitz; Dirk Eggink; Florian Zwagemaker; Harry Vennema; Jeroen Cremer; Matthijs Welkers; Sharon van den Brink; on behalf of the national COVID-19 response team                                                                                                                                                                                                                                                                       |
| see above                                                                                                                                                                                                                                                                                                                                                                                                                                                                                                                                                                                                                                                                                                                                                                                                                                                                                                                                                                                                                                                                                                                                                                                                                                                                                                                                                                                                                                                                              | Dynamic Code AB                                                                                                                        | The Public Health Agency of Sweden                                                                                                                                                                                                                     | Anna Risberg; Anna-Malin Linde; Carlo Berg; Karin Tegmark-Wisell; Maria Lind Karlberg; Mattias Haukland; Mia Brytting; Noura Walai; Oskar Karlsson Lindsjö; Petra Adavani; Petra Holmstrom; Reza Advani; Sofia Stamouli                                                                                                                                                                                                                                                                                                 |
| EPI_ISL_913275, EPI_ISL_913277, EPI_ISL_913281, EPI_ISL_913309, EPI_ISL_913378 to 913392, EPI_ISL_913454, EPI_ISL_913459, EPI_ISL_934377                                                                                                                                                                                                                                                                                                                                                                                                                                                                                                                                                                                                                                                                                                                                                                                                                                                                                                                                                                                                                                                                                                                                                                                                                                                                                                                                               | Dysselsdorp Clinic wc DDC                                                                                                              | NHLS/UCT                                                                                                                                                                                                                                               | Arash Irazadeh; Bruna Galvao; Carolyn Williamson; Deelan Doolabh; Diana Hardie; Houriyah Tegally; Innocent Mudau; Kruger Marais; Lynn Tyers; Marvin Hsiao; Stephen Korsman                                                                                                                                                                                                                                                                                                                                              |
| see above                                                                                                                                                                                                                                                                                                                                                                                                                                                                                                                                                                                                                                                                                                                                                                                                                                                                                                                                                                                                                                                                                                                                                                                                                                                                                                                                                                                                                                                                              |                                                                                                                                        |                                                                                                                                                                                                                                                        |                                                                                                                                                                                                                                                                                                                                                                                                                                                                                                                         |

|                                                                                                                                                                                                                                                                                                                                                                                                                                                                        |                                                                                                                          |                                                                                                                                                                                                                                                        |                                                                                                                                                                                                                                                                                                                                                                                                                                                                                                 |                                                                                                                                                                                                             |
|------------------------------------------------------------------------------------------------------------------------------------------------------------------------------------------------------------------------------------------------------------------------------------------------------------------------------------------------------------------------------------------------------------------------------------------------------------------------|--------------------------------------------------------------------------------------------------------------------------|--------------------------------------------------------------------------------------------------------------------------------------------------------------------------------------------------------------------------------------------------------|-------------------------------------------------------------------------------------------------------------------------------------------------------------------------------------------------------------------------------------------------------------------------------------------------------------------------------------------------------------------------------------------------------------------------------------------------------------------------------------------------|-------------------------------------------------------------------------------------------------------------------------------------------------------------------------------------------------------------|
| EPI_ISL_960096                                                                                                                                                                                                                                                                                                                                                                                                                                                         | Dysseldorp Clinic wc DDC                                                                                                 | National Health Laboratory Service/UCT                                                                                                                                                                                                                 | Arash Iranzadeh; Bruna Galvao; Carolyn Williamson; Deelan Doolabh; Diana Hardie; Innocent Mudau; Kruger Marais; Lynn Tyers; Marvin Hsiao; Stephen Korsman                                                                                                                                                                                                                                                                                                                                       |                                                                                                                                                                                                             |
| EPI_ISL_639631, EPI_ISL_639635, EPI_ISL_639637 to 639638, EPI_ISL_639641, EPI_ISL_639643 to 639647, EPI_ISL_639649, EPI_ISL_639652 to 639653, EPI_ISL_639658 to 639662, EPI_ISL_639664 to 639671, EPI_ISL_639673 to 639675, EPI_ISL_639681 to 639682, EPI_ISL_639684 to 639694, EPI_ISL_770033 to 770037, EPI_ISL_770040 to 770041, EPI_ISL_770043 to 770044, EPI_ISL_770046, EPI_ISL_770050 to 770051, EPI_ISL_770053, EPI_ISL_770055, EPI_ISL_770057, EPI_ISL_770062 | see above                                                                                                                | E. Gulbja Laboratorija                                                                                                                                                                                                                                 | Latvian Biomedical Research and Study Centre                                                                                                                                                                                                                                                                                                                                                                                                                                                    | Dmitrijs Perminovs; Ivars Silamielis; Jnis Kloviš; Jnis Pjalkovskis; Kaspars Megnis; Mikus Gavars; Monta Ustinova; Uga Dumpis; Vita Rovte; ikita Zrelavs                                                    |
| EPI_ISL_961801 to 961804, EPI_ISL_961807 to 961808, EPI_ISL_961832, EPI_ISL_961853 to 961861, EPI_ISL_961864 to 961865, EPI_ISL_961867 to 961868, EPI_ISL_961871                                                                                                                                                                                                                                                                                                       | see above                                                                                                                | E. Gulbja laboratorija                                                                                                                                                                                                                                 | Latvian Biomedical Research and Study Centre                                                                                                                                                                                                                                                                                                                                                                                                                                                    | to 961875, EPI_ISL_961877 to 961882                                                                                                                                                                         |
| EPI_ISL_906545                                                                                                                                                                                                                                                                                                                                                                                                                                                         | E.S.E. HOSPITAL SAN JOSE DE MAICAO                                                                                       | Instituto Nacional de Salud- Dirección de Investigación en Salud Pública, Universidad de los Andes- Applied genomics research group, Vicerrectoría de Investigación y Creación, Universidad de los Andes- Systems and Computing Engineering Department | Carlos Franco-Muñoz; Diego A. Álvarez-Díaz; Diego Andrés Prada; Gerardo Santamaría Jorge Duitama; Héctor Alejandro Ruiz-Moreno; Jhonnatan Reales-González; Jorge Ivan Diaz; Julian Naizaque; Katherine Laiton-Donato; Laura Natalia Gonzalez; Magdalena Wiesner; Marcela Mercado-Reyes; Maria T. Herrera-Sepúlveda; Martha Lucia Ospina Martinez; Mauricio Pacheco-Montealegre; Sheryll Corchuelo; Silvia Restrepo-Restrepo                                                                     |                                                                                                                                                                                                             |
| EPI_ISL_982123                                                                                                                                                                                                                                                                                                                                                                                                                                                         | EFS ILE DE FRANCE BANQUE DE TISSUS                                                                                       | Department of Virology, Henri Mondor University Hospital, Assistance Publique Hôpitaux de Paris, Université Paris-Est Créteil, INSERM U955                                                                                                             | Alexandre Soulier; Christophe Rodriguez; Elisabeth Trawinski; Guillaume Gricourt; Jean-Michel Pawlowsky; Melissa N'Debi; Slim Fourati; Vanessa Demontant                                                                                                                                                                                                                                                                                                                                        |                                                                                                                                                                                                             |
| EPI_ISL_970469                                                                                                                                                                                                                                                                                                                                                                                                                                                         | EHN                                                                                                                      | Laboratory of genomics and metagenomics, Institute of Microbiology, University Hospital Centre and University of Lausanne, Switzerland                                                                                                                 | Claire Bertelli; Damien Jacot; Gilbert Greub; Sébastien Aebly; Trestan Pilonel                                                                                                                                                                                                                                                                                                                                                                                                                  |                                                                                                                                                                                                             |
| EPI_ISL_765478                                                                                                                                                                                                                                                                                                                                                                                                                                                         | EHPAD                                                                                                                    | National Reference Center for Viruses of Respiratory Infections, Institut Pasteur, Paris                                                                                                                                                               | Angela Brisebarre; Camille Capel; Etienne Simon-Lorière; Marion Barbet; Maud Vanpeene; Méline Bizard; Sylvie Behillil; Sylvie van der Werf; Vincent Enouf                                                                                                                                                                                                                                                                                                                                       |                                                                                                                                                                                                             |
| EPI_ISL_956304 to 956305                                                                                                                                                                                                                                                                                                                                                                                                                                               | ESE INSTITUTO NACIONAL DE CANCEROLOGIA                                                                                   | Instituto Nacional de Salud- Dirección de Investigación en Salud Pública                                                                                                                                                                               | Carlos Franco-Muñoz; Diego A. Álvarez-Díaz; Diego Andrés Prada; Gerardo Santamaría; Hector Alejandro Ruiz-Moreno; Jhonnatan Reales-González; Julian Naizaque; Katherine Laiton-Donato; Magdalena Wiesner; Marcela Mercado-Reyes; Maria T. Herrera-Sepúlveda; Martha Lucia Ospina Martinez; Mauricio Pacheco-Montealegre; Sheryll Corchuelo                                                                                                                                                      |                                                                                                                                                                                                             |
| EPI_ISL_745198                                                                                                                                                                                                                                                                                                                                                                                                                                                         | ESI Hospital                                                                                                             | CSIR-Centre for Cellular and Molecular Biology                                                                                                                                                                                                         | Archana Bharadwaj Siva; B Himasri; Blessy B John; Divya Tej Sowpati; Dr.P.Shashikala Reddy; Dr.S.Pavani; Dr.Satyaprasad; Dr.V.Sudha Rani; Karthik Bharadwaj Tallapaka; Lamuk Zaveri; M Soujanya Reddy; Namami Gaur; Nikhil Hajirnis; Onkar Kulkarni; Payel Mukherjee; Pratheusa Maccha; Priya Singh; Purushotham Vodnala; Rakesh K Mishra; Sakshi Shambhavi; Shagufta Khan; Sofia Banu; Tulasi Nagabandi; Viswagithe S L                                                                        |                                                                                                                                                                                                             |
| EPI_ISL_854305                                                                                                                                                                                                                                                                                                                                                                                                                                                         | ESOTERIX GENETIC LABORATORIES LLC                                                                                        | Wadsworth Center, New York State Department of Health                                                                                                                                                                                                  | Alexis Russel; Daryl M. Lamson; Erasmus Schneider; Erica Lasek-Nesselquist; John Kelly; Jonathan Pitnick; Kirsten St. George; Matthew Shudt; Melissa A Leisner; Navjot Singh                                                                                                                                                                                                                                                                                                                    |                                                                                                                                                                                                             |
| EPI_ISL_912169                                                                                                                                                                                                                                                                                                                                                                                                                                                         | East Gene                                                                                                                | Grubaugh Lab - Yale School of Public Health                                                                                                                                                                                                            | Anderson Brito; Anne Wyllie; Annie Watkins; Chaney Kalinich; Chantal Vogels; Isabel Ott; Joseph Fauver; Mallery Breban; Mary Petrone; Nathan Grubaugh; Tara Alpert                                                                                                                                                                                                                                                                                                                              |                                                                                                                                                                                                             |
| EPI_ISL_712077 to 712078, EPI_ISL_712092                                                                                                                                                                                                                                                                                                                                                                                                                               | East London NHLs Laboratory, Eastern Cape, South Africa                                                                  | National Institute for Communicable Diseases of the National Health Laboratory Service                                                                                                                                                                 | Allam M; Bhiman JN; Ismail A; Mahlangu B; Mohale T; Ntuli N                                                                                                                                                                                                                                                                                                                                                                                                                                     |                                                                                                                                                                                                             |
| EPI_ISL_770822 to 770827                                                                                                                                                                                                                                                                                                                                                                                                                                               | Eastern Ontario Regional Laboratory Association                                                                          | McMaster University                                                                                                                                                                                                                                    | Ahmed Draia; Andrew G. McArthur; Emily Panousis; Hooman Derakhshani; Jalees Nasir; Leanne Mortimer; Robert Slinger                                                                                                                                                                                                                                                                                                                                                                              |                                                                                                                                                                                                             |
| EPI_ISL_745137, EPI_ISL_745151                                                                                                                                                                                                                                                                                                                                                                                                                                         | Edameni Clinic                                                                                                           | National Health Laboratory Service (NHLs), Tygerberg                                                                                                                                                                                                   | Bronwyn Kleinhans; Eduan Wilkindon; Gert van Zyl; Houriyah Tegally; Kayla Delaney; Susan Engelbrecht; Tulio de Oliveira; Wolfgang Preiser                                                                                                                                                                                                                                                                                                                                                       |                                                                                                                                                                                                             |
| EPI_ISL_745119, EPI_ISL_745173 to 745178                                                                                                                                                                                                                                                                                                                                                                                                                               | Eerste River Hospital wc ERH                                                                                             | National Health Laboratory Service (NHLs), Tygerberg                                                                                                                                                                                                   | Bronwyn Kleinhans; Eduan Wilkindon; Gert van Zyl; Houriyah Tegally; Kayla Delaney; Susan Engelbrecht; Tulio de Oliveira; Wolfgang Preiser                                                                                                                                                                                                                                                                                                                                                       |                                                                                                                                                                                                             |
| EPI_ISL_862849 to 862851, EPI_ISL_862879                                                                                                                                                                                                                                                                                                                                                                                                                               | Ehime Prefectural Central Hospital                                                                                       | Fujita health University, School of Medicine, Department of Microbiology                                                                                                                                                                               | Masahiro suzuki; Yohei Doi                                                                                                                                                                                                                                                                                                                                                                                                                                                                      |                                                                                                                                                                                                             |
| EPI_ISL_889005, EPI_ISL_947293                                                                                                                                                                                                                                                                                                                                                                                                                                         | Eijkman Institute for Molecular Biology, Ministry of Research and Technology/National Agency for Research and Innovation | Eijkman Institute for Molecular Biology, Ministry of Research and Technology/National Agency for Research and Innovation                                                                                                                               | Amin Soebandrio; Edison Johar; Frilisa A Yudhaputri; Hidayat Trimarsanto; Iskandar Adnan; Khin Saw Myint; Lydia V. Panggalo; Safarina G Malik; Sukma Oktavianthi; Willy Agustine                                                                                                                                                                                                                                                                                                                |                                                                                                                                                                                                             |
| EPI_ISL_710610 to 710611                                                                                                                                                                                                                                                                                                                                                                                                                                               | Ektorps Vardcentral                                                                                                      | The Public Health Agency of Sweden                                                                                                                                                                                                                     | Department of Microbiology; The Public Health Agency of Sweden                                                                                                                                                                                                                                                                                                                                                                                                                                  |                                                                                                                                                                                                             |
| EPI_ISL_745110, EPI_ISL_745125, EPI_ISL_745162                                                                                                                                                                                                                                                                                                                                                                                                                         | Elsies River CHC wc ERP                                                                                                  | National Health Laboratory Service (NHLs), Tygerberg                                                                                                                                                                                                   | Bronwyn Kleinhans; Eduan Wilkindon; Gert van Zyl; Houriyah Tegally; Kayla Delaney; Susan Engelbrecht; Tulio de Oliveira; Wolfgang Preiser                                                                                                                                                                                                                                                                                                                                                       |                                                                                                                                                                                                             |
| EPI_ISL_708822, EPI_ISL_768612 to 768613                                                                                                                                                                                                                                                                                                                                                                                                                               | Emergency Operation Center, (EOC)                                                                                        | National Institute of Health, Department of Medical Sciences, Ministry of Public Health, Thailand                                                                                                                                                      | ; Malinee Chittaganpitch; Natchaya Khiahsang; Pakorn Piromtong; Pilailuk Okada; Ratana Tacharoenmuang; Siripaporn Phuygun; Sittiporn Parmmen; Sunthareeya Waicharoen; Thanutsapa Thanadachakul; Warawan Wongboot; sirikanda wimol                                                                                                                                                                                                                                                               |                                                                                                                                                                                                             |
| EPI_ISL_754746 to 754778, EPI_ISL_845754 to 845782                                                                                                                                                                                                                                                                                                                                                                                                                     | Emory Molecular Diagnostics Laboratory, Emory Healthcare                                                                 | Piantadosi Lab, Emory Department of Pathology                                                                                                                                                                                                          | Ahmed Babiker; Anne Piantadosi                                                                                                                                                                                                                                                                                                                                                                                                                                                                  |                                                                                                                                                                                                             |
| EPI_ISL_632976 to 632979                                                                                                                                                                                                                                                                                                                                                                                                                                               | Empire City Laboratories                                                                                                 | New York City Public Health Laboratory                                                                                                                                                                                                                 | Jade Wang; et al.                                                                                                                                                                                                                                                                                                                                                                                                                                                                               |                                                                                                                                                                                                             |
| EPI_ISL_641318 to 641319, EPI_ISL_666617 to 666622                                                                                                                                                                                                                                                                                                                                                                                                                     | Environmental and Global Health, University of Florida                                                                   | Environmental and Global Health, University of Florida                                                                                                                                                                                                 | Alam; C.-Y.; C.J.; C.T.; Elbadry; Fan; J.A.; J.C.; J.G.; L.O.; Lauzardo, M.; Lednicky; Loeb; M.A.; M.M.; Morris; Nannu-Shankar, S.; Silva; Stephenson; Subramaniam, K.; T.B.; Waltzek; Witanachchi; Wu; Z.H.                                                                                                                                                                                                                                                                                    |                                                                                                                                                                                                             |
| EPI_ISL_632287, EPI_ISL_681322, EPI_ISL_873277                                                                                                                                                                                                                                                                                                                                                                                                                         | Environmental and Global Health, University of Florida                                                                   | Environmental and Global Health, University of Florida                                                                                                                                                                                                 | Alam; C.J.; Elbadry; Gibson; Iovine; J.A.; J.C.; J.G. and Lednicky; Lauzardo, M.; Lessard, K.; Loeb; M.A.; M.M.; Merck, L.; Morris; N.M.; Reeves, M.; Stephenson; Subramaniam, K.; T.B.; Waltzek; Wilkerson, G.                                                                                                                                                                                                                                                                                 |                                                                                                                                                                                                             |
| EPI_ISL_648166 to 648168                                                                                                                                                                                                                                                                                                                                                                                                                                               | Eskilstuna                                                                                                               | The Public Health Agency of Sweden                                                                                                                                                                                                                     | Anna Risberg; Anna-Malin Linde; Karin Tegmark-Wisell; Maria Lind Karlberg; Mattias Haukland; Mia Brytting; Olov Svartstrom; Oskar Karlsson Lindsjö; Petra Edquist; Reza Advani; Sandra Brodsson                                                                                                                                                                                                                                                                                                 |                                                                                                                                                                                                             |
| EPI_ISL_644933 to 644935, EPI_ISL_644943, EPI_ISL_654696 to 654697, EPI_ISL_654699, EPI_ISL_683690 to 683694, EPI_ISL_683696 to 683713, EPI_ISL_708484, EPI_ISL_770808 to 770813, EPI_ISL_802567 to 802571, EPI_ISL_983699 to 983704                                                                                                                                                                                                                                   | see above                                                                                                                | Essentia Health-St. Mary's Medical Center                                                                                                                                                                                                              | Minnesota Department of Health, Public Health Laboratory                                                                                                                                                                                                                                                                                                                                                                                                                                        | Alexandra Lorentz; Jacob Garfin; Matt Plumb; and Xiong Wang                                                                                                                                                 |
| EPI_ISL_640064                                                                                                                                                                                                                                                                                                                                                                                                                                                         | Ethembeni Clinic [Prieska]                                                                                               | NHLs/UCT                                                                                                                                                                                                                                               | Arash Iranzadeh; Bruna Galvao; Carolyn Williamson; Deelan Doolabh; Diana Hardie; Innocent Mudau; Kruger Marais; Lynn Tyers; Marvin Hsiao; Stephen Korsman                                                                                                                                                                                                                                                                                                                                       |                                                                                                                                                                                                             |
| EPI_ISL_871817, EPI_ISL_872395 to 872477, EPI_ISL_875570 to 875659, EPI_ISL_875874 to 875958, EPI_ISL_876331 to 876425, EPI_ISL_876428 to 876517, EPI_ISL_877237 to 877328, EPI_ISL_877331 to 877418, EPI_ISL_877461 to 877537, EPI_ISL_877539 to 877550, EPI_ISL_883066 to 883154, EPI_ISL_883195 to 883284, EPI_ISL_883501 to 883861, EPI_ISL_883867 to 883956, EPI_ISL_884089 to 884181, EPI_ISL_979459 to 979543                                                   | see above                                                                                                                | Eurofins Diatherix                                                                                                                                                                                                                                     | Hudsonalpha Genome Sequencing Center                                                                                                                                                                                                                                                                                                                                                                                                                                                            | Ada Stewart; Jane Grimwood; Jenell Webber; Jennifer Cart; John Lovell; John T. Lovell; Joshua Stough; Leslie Malone; Lori H. Handley; Melissa Williams; Stefan Brzezinski; Teresa Jones; and Jeremy Schmutz |
| EPI_ISL_983321                                                                                                                                                                                                                                                                                                                                                                                                                                                         | Eurofins Genoma Group s.r.l.                                                                                             | INMI Lazzaro Spallanzani IRCCS                                                                                                                                                                                                                         | A Di Caro; B Bartolini; CEM Gruber; E Giombini; F Fiorentino; F Messina; F Spinella; M Rueca; MR Capobianchi; O Butera                                                                                                                                                                                                                                                                                                                                                                          |                                                                                                                                                                                                             |
| EPI_ISL_962442                                                                                                                                                                                                                                                                                                                                                                                                                                                         | Evergreen Healthcare                                                                                                     | Seattle Flu Study                                                                                                                                                                                                                                      | Amanda Adler; Barry R. Lutz; Benjamin Pelle; Brian Hiatt; Caitlin R. Wolf; Chris D. Frazar; Deborah A. Nickerson; Elisabeth Brandstetter; Erica Ryke; Geoff Melly; Helen Y. Chu; Janet A. Englund; Jay Shendure; Jover Lee; Kairsten Fay; Kirsten Lacombe; Lea M. Starita; Mark J. Rieder; Matthew Richardson; Matthew Thompson; Melissa Truong; Michael Boeckh; Michael Famulare; Misja Ilcinis; Peter D. Han; Philip Dykema; Romesh Gautam; Scott Lindquist; Thomas R. Sibley; Trevor Bedford |                                                                                                                                                                                                             |
| EPI_ISL_812138, EPI_ISL_812142                                                                                                                                                                                                                                                                                                                                                                                                                                         | FL Bureau of Public Health Laboratories-Tampa                                                                            | Pathogen Discovery, Respiratory Viruses Branch, Division of Viral Diseases, Centers for Disease Control and Prevention                                                                                                                                 | Anna Montmayer; Anna Uehara; Brian Lynch; Clinton R. Paden; Haibin Wang; Jing Zhang; Krista Queen; Peter Cook; Rachel Marine; Suxiang Tong; Yan Li; Ying Tao                                                                                                                                                                                                                                                                                                                                    |                                                                                                                                                                                                             |
| EPI_ISL_833046, EPI_ISL_833068 to 833075                                                                                                                                                                                                                                                                                                                                                                                                                               | FPAM                                                                                                                     | Istituto Zooprofilattico Sperimentale dell'Abruzzo e Molise *G.                                                                                                                                                                                        | Ancora M; Calistri P; Cammà C; Curini V; Delli Compagni E; Di Domenico M; Di Pasquale A; Lorusso A; Mangone I; Marcacci M; Puglia I; Rinaldi A; Savini                                                                                                                                                                                                                                                                                                                                          |                                                                                                                                                                                                             |

| Caporale*                                                                                                                                                                                                                                                                                                                                                                                                                                                                                                                                                                                                                                                                                                                                                                                                                                                                                                                                                                                                                                                                                                                                                                                                                                                                                                                                                                                                                                                                                                            |                                                                         |                                                                                                                                                                                                                                                        | G                                                                                                                                                                                                                                                                                                                                                                                                                                                                                              |
|----------------------------------------------------------------------------------------------------------------------------------------------------------------------------------------------------------------------------------------------------------------------------------------------------------------------------------------------------------------------------------------------------------------------------------------------------------------------------------------------------------------------------------------------------------------------------------------------------------------------------------------------------------------------------------------------------------------------------------------------------------------------------------------------------------------------------------------------------------------------------------------------------------------------------------------------------------------------------------------------------------------------------------------------------------------------------------------------------------------------------------------------------------------------------------------------------------------------------------------------------------------------------------------------------------------------------------------------------------------------------------------------------------------------------------------------------------------------------------------------------------------------|-------------------------------------------------------------------------|--------------------------------------------------------------------------------------------------------------------------------------------------------------------------------------------------------------------------------------------------------|------------------------------------------------------------------------------------------------------------------------------------------------------------------------------------------------------------------------------------------------------------------------------------------------------------------------------------------------------------------------------------------------------------------------------------------------------------------------------------------------|
| EPI_ISL_845626                                                                                                                                                                                                                                                                                                                                                                                                                                                                                                                                                                                                                                                                                                                                                                                                                                                                                                                                                                                                                                                                                                                                                                                                                                                                                                                                                                                                                                                                                                       | FUNDACION CARDIOINFANTIL                                                | Instituto Nacional de Salud - Dirección de Investigación en Salud Pública                                                                                                                                                                              | Carlos Franco-Muñoz; Diego A. Álvarez-Díaz; Diego Andrés Prada; Gerardo Santamaría; Jonathan Reales; Julian Naizaque; Katherine Laiton-Donato; Magdalena Wiesner; Marcela Mercado-Reyes; María T. Herrera-Sepúlveda; Martha Lucia Ospina Martínez; Mauricio Pacheco-Montealegre; Paola Muñoz-Laiton; Sheryll Corchuelo                                                                                                                                                                         |
| EPI_ISL_906543                                                                                                                                                                                                                                                                                                                                                                                                                                                                                                                                                                                                                                                                                                                                                                                                                                                                                                                                                                                                                                                                                                                                                                                                                                                                                                                                                                                                                                                                                                       | FUNDACION HOSPITAL SAN PEDRO                                            | Instituto Nacional de Salud- Dirección de Investigación en Salud Pública, Universidad de los Andes- Applied genomics research group, Vicerrectoría de Investigación y Creación, Universidad de los Andes- Systems and Computing Engineering Department | Carlos Franco-Muñoz; Diego A. Álvarez-Díaz; Diego Andrés Prada; Gerardo Santamaría Jorge Duitama; Héctor Alejandro Ruiz-Moreno; Jhonatan Reales-González; Jorge Ivan Díaz; Julian Naizaque; Katherine Laiton-Donato; Laura Natalia Gonzalez; Magdalena Wiesner; Marcela Mercado-Reyes; María T. Herrera-Sepúlveda; Martha Lucia Ospina Martínez; Mauricio Pacheco-Montealegre; Sheryll Corchuelo; Silvia Restrepo-Restrepo                                                                     |
| EPI_ISL_804016 to 804017                                                                                                                                                                                                                                                                                                                                                                                                                                                                                                                                                                                                                                                                                                                                                                                                                                                                                                                                                                                                                                                                                                                                                                                                                                                                                                                                                                                                                                                                                             | Facultad de Medicina, Universidad de Atacama                            | Facultad de Ciencias de la Vida, UNAB                                                                                                                                                                                                                  | Claudio Meneses; César Echeverría; Dayán Sanhueza; Eduardo Castro; Jorge Olivares; Macarena Bastías; Sebastián Wolter; Waldo Díaz                                                                                                                                                                                                                                                                                                                                                              |
| EPI_ISL_752605                                                                                                                                                                                                                                                                                                                                                                                                                                                                                                                                                                                                                                                                                                                                                                                                                                                                                                                                                                                                                                                                                                                                                                                                                                                                                                                                                                                                                                                                                                       | Faculty of Medicine, Al-Quds University                                 | Faculty of Medicine, Al-Quds University                                                                                                                                                                                                                | A. and Al-Jawabreh, A.; Ereqat, S.; Nasereddin                                                                                                                                                                                                                                                                                                                                                                                                                                                 |
| EPI_ISL_640033, EPI_ISL_640050, EPI_ISL_640088, EPI_ISL_640090, EPI_ISL_640116, EPI_ISL_640121, EPI_ISL_640123 to 640125                                                                                                                                                                                                                                                                                                                                                                                                                                                                                                                                                                                                                                                                                                                                                                                                                                                                                                                                                                                                                                                                                                                                                                                                                                                                                                                                                                                             | False Bay Hospital wc FBH                                               | NHLS/UCT                                                                                                                                                                                                                                               | Arash Iranzadeh; Bruna Galvao; Carolyn Williamson; Deelan Doolabh; Diana Hardie; Innocent Mudau; Kruger Marais; Lynn Tyers; Marvin Hsiao; Stephen Korsman                                                                                                                                                                                                                                                                                                                                      |
| see above                                                                                                                                                                                                                                                                                                                                                                                                                                                                                                                                                                                                                                                                                                                                                                                                                                                                                                                                                                                                                                                                                                                                                                                                                                                                                                                                                                                                                                                                                                            | False Bay Hospital wc FBH                                               | National Health Laboratory Service/UCT                                                                                                                                                                                                                 | Arash Iranzadeh; Bruna Galvao; Carolyn Williamson; Deelan Doolabh; Diana Hardie; Innocent Mudau; Kruger Marais; Lynn Tyers; Marvin Hsiao; Stephen Korsman                                                                                                                                                                                                                                                                                                                                      |
| EPI_ISL_960105, EPI_ISL_960110, EPI_ISL_960112                                                                                                                                                                                                                                                                                                                                                                                                                                                                                                                                                                                                                                                                                                                                                                                                                                                                                                                                                                                                                                                                                                                                                                                                                                                                                                                                                                                                                                                                       | False Bay Hospital wc FBH                                               | National Health Laboratory Service/UCT                                                                                                                                                                                                                 | Arash Iranzadeh; Bruna Galvao; Carolyn Williamson; Deelan Doolabh; Diana Hardie; Innocent Mudau; Kruger Marais; Lynn Tyers; Marvin Hsiao; Stephen Korsman                                                                                                                                                                                                                                                                                                                                      |
| EPI_ISL_854594                                                                                                                                                                                                                                                                                                                                                                                                                                                                                                                                                                                                                                                                                                                                                                                                                                                                                                                                                                                                                                                                                                                                                                                                                                                                                                                                                                                                                                                                                                       | Faroese National Reference Laboratory for Fish and Animal Diseases      | Faroese National Reference Laboratory for Fish and Animal Diseases                                                                                                                                                                                     | Arnfinnur Kallsberg Junior; Debes Hammershaimb Christiansen; Maria Marjunardóttir Dahl; Petra Elisabeth Petersen                                                                                                                                                                                                                                                                                                                                                                               |
| EPI_ISL_891059, EPI_ISL_960223                                                                                                                                                                                                                                                                                                                                                                                                                                                                                                                                                                                                                                                                                                                                                                                                                                                                                                                                                                                                                                                                                                                                                                                                                                                                                                                                                                                                                                                                                       | FidaLab                                                                 | Seattle Flu Study                                                                                                                                                                                                                                      | Amanda Adler; Barry R. Lutz; Benjamin Pelle; Brian Hiatt; Caitlin R. Wolf; Chris D. Frazar; Deborah A. Nickerson; Elisabeth Brandstetter; Erica Ryke; Geoff Melly; Helen Y. Chu; Janet A. Englund; Jay Shendure; Jover Lee; Kirsten Fay; Kirsten Lacombe; Lea M. Starita; Mark J. Rieder; Matthew Richardson; Matthew Thompson; Melissa Truong; Michael Boeckh; Michael Famulare; Misja Ilcisin; Peter D. Han; Philip Dykema; Romesh Gautam; Scott Lindquist; Thomas R. Sibley; Trevor Bedford |
| EPI_ISL_653098 to 653344, EPI_ISL_666814 to 666869, EPI_ISL_763331 to 763347, EPI_ISL_767416, EPI_ISL_790567 to 790569, EPI_ISL_802724 to 802725, EPI_ISL_848643 to 849147, EPI_ISL_852858 to 852861, EPI_ISL_876520 to 876587, EPI_ISL_876737, EPI_ISL_911518 to 911523, EPI_ISL_918493, EPI_ISL_918495, EPI_ISL_935359 to 935519, EPI_ISL_941927 to 941940, EPI_ISL_965016 to 965024                                                                                                                                                                                                                                                                                                                                                                                                                                                                                                                                                                                                                                                                                                                                                                                                                                                                                                                                                                                                                                                                                                                               | Florida Bureau of Public Health Laboratories                            | Florida Bureau of Public Health Laboratories                                                                                                                                                                                                           | Jason Blanton; Sarah Schmedes                                                                                                                                                                                                                                                                                                                                                                                                                                                                  |
| see above                                                                                                                                                                                                                                                                                                                                                                                                                                                                                                                                                                                                                                                                                                                                                                                                                                                                                                                                                                                                                                                                                                                                                                                                                                                                                                                                                                                                                                                                                                            | Florida Department of Public Health                                     | Pathogen Discovery, Respiratory Viruses Branch, Division of Viral Diseases, Centers for Disease Control and Prevention                                                                                                                                 | Anna Montmayeur; Anna Uehara; Brian Lynch; Clinton R. Paden; Haibin Wang; Jing Zhang; Krista Queen; Peter Cook; Rachel Marine; Suxiang Tong; Yan Li; Ying Tao                                                                                                                                                                                                                                                                                                                                  |
| EPI_ISL_893739                                                                                                                                                                                                                                                                                                                                                                                                                                                                                                                                                                                                                                                                                                                                                                                                                                                                                                                                                                                                                                                                                                                                                                                                                                                                                                                                                                                                                                                                                                       | Florida Department of Public Health                                     | Pathogen Discovery, Respiratory Viruses Branch, Division of Viral Diseases, Centers for Disease Control and Prevention                                                                                                                                 | Anna Montmayeur; Anna Uehara; Brian Lynch; Clinton R. Paden; Haibin Wang; Jing Zhang; Krista Queen; Peter Cook; Rachel Marine; Suxiang Tong; Yan Li; Ying Tao                                                                                                                                                                                                                                                                                                                                  |
| EPI_ISL_917943                                                                                                                                                                                                                                                                                                                                                                                                                                                                                                                                                                                                                                                                                                                                                                                                                                                                                                                                                                                                                                                                                                                                                                                                                                                                                                                                                                                                                                                                                                       | Flow Diagnostics Lab                                                    | Los Angeles County PHL                                                                                                                                                                                                                                 | P. Hemarajata et al.                                                                                                                                                                                                                                                                                                                                                                                                                                                                           |
| EPI_ISL_977120 to 977144                                                                                                                                                                                                                                                                                                                                                                                                                                                                                                                                                                                                                                                                                                                                                                                                                                                                                                                                                                                                                                                                                                                                                                                                                                                                                                                                                                                                                                                                                             | Flow Health                                                             | Infectious Disease Program, Broad Institute of Harvard and MIT                                                                                                                                                                                         | Adams, G.; B.L.; B.W.; Bauer, M.; Birren; Carter, A.; Chaluvadi, S.; D.J.; DeRuff, K.; Gallagher, G.; Gladden-Young, A.; J.E.; K.J.; Lagerborg, K.; Lemieux; Loreth, C.; MacInnis; Normandin, E.; P.C.; Park; Reilly, S.; Rudy, M.; Siddle; Smole, S.; Tomkins-Tinch, C.; and Sabeti                                                                                                                                                                                                           |
| EPI_ISL_631563, EPI_ISL_631579, EPI_ISL_631586, EPI_ISL_631589, EPI_ISL_631602, EPI_ISL_631606, EPI_ISL_631614, EPI_ISL_631616, EPI_ISL_631620, EPI_ISL_631638, EPI_ISL_631692, EPI_ISL_631696, EPI_ISL_631699 to 631701, EPI_ISL_631707 to 631708, EPI_ISL_631710, EPI_ISL_631714 to 631715, EPI_ISL_631724 to 631725, EPI_ISL_631727, EPI_ISL_631732, EPI_ISL_631756, EPI_ISL_631766, EPI_ISL_631769 to 631771, EPI_ISL_631773 to 631774, EPI_ISL_631787, EPI_ISL_631826, EPI_ISL_631848, EPI_ISL_631851, EPI_ISL_631855, EPI_ISL_631885, EPI_ISL_631891, EPI_ISL_631893 to 631894, EPI_ISL_631906 to 631908, EPI_ISL_631916, EPI_ISL_631918, EPI_ISL_631923, EPI_ISL_631929, EPI_ISL_631931, EPI_ISL_631955, EPI_ISL_631959 to 631961, EPI_ISL_631964, EPI_ISL_631968, EPI_ISL_631986, EPI_ISL_631989, EPI_ISL_631991, EPI_ISL_632003 to 632004, EPI_ISL_632010, EPI_ISL_632018 to 632020, EPI_ISL_632022, EPI_ISL_632024, EPI_ISL_632027, EPI_ISL_632034, EPI_ISL_632087, EPI_ISL_632097, EPI_ISL_632103 to 632105, EPI_ISL_632119 to 632120, EPI_ISL_632122, EPI_ISL_632124 to 632127, EPI_ISL_632132 to 632134, EPI_ISL_632137 to 632140, EPI_ISL_632144, EPI_ISL_632174, EPI_ISL_632181, EPI_ISL_632185, EPI_ISL_632190, EPI_ISL_632194, EPI_ISL_632196 to 632197, EPI_ISL_632211 to 632213, EPI_ISL_632220, EPI_ISL_632222 to 632226, EPI_ISL_632236 to 632237, EPI_ISL_632947, EPI_ISL_632951 to 632952, EPI_ISL_632954 to 632956, EPI_ISL_632960, EPI_ISL_632966 to 632968, EPI_ISL_632973, EPI_ISL_633070 | New York City Public Health Laboratory                                  | Jade Wang; et al.                                                                                                                                                                                                                                      |                                                                                                                                                                                                                                                                                                                                                                                                                                                                                                |
| see above                                                                                                                                                                                                                                                                                                                                                                                                                                                                                                                                                                                                                                                                                                                                                                                                                                                                                                                                                                                                                                                                                                                                                                                                                                                                                                                                                                                                                                                                                                            | Flushing Hospital Medical Center                                        | New York City Public Health Laboratory                                                                                                                                                                                                                 | Jade Wang; et al.                                                                                                                                                                                                                                                                                                                                                                                                                                                                              |
| EPI_ISL_635063 to 635065, EPI_ISL_635098, EPI_ISL_635127, EPI_ISL_635167, EPI_ISL_635170, EPI_ISL_635173, EPI_ISL_635176 to 635177, EPI_ISL_708073 to 708078, EPI_ISL_708176 to 708179, EPI_ISL_738313, EPI_ISL_775323 to 775326, EPI_ISL_775333, EPI_ISL_775362 to 775370, EPI_ISL_860274 to 860276, EPI_ISL_964959, EPI_ISL_964995                                                                                                                                                                                                                                                                                                                                                                                                                                                                                                                                                                                                                                                                                                                                                                                                                                                                                                                                                                                                                                                                                                                                                                                 | Foerde Hospital, Department of Microbiology                             | Norwegian Institute of Public Health, Department of Virology                                                                                                                                                                                           | Atiya R Ali; Hilde Elshaug; Hilde Vollan; Ignacio Garcia Llorente; Kamilla Heddeland Instefjord; Karoline Bragstad; Kathrine Stene-Johansen; Marie Paulsen Madsen; Olav Hungnes; Rasmus Riis Kopperud; Serina B Engebretsen                                                                                                                                                                                                                                                                    |
| see above                                                                                                                                                                                                                                                                                                                                                                                                                                                                                                                                                                                                                                                                                                                                                                                                                                                                                                                                                                                                                                                                                                                                                                                                                                                                                                                                                                                                                                                                                                            | Fondation Congolaise pour la recherche medicale (FCRM), Francine Ntoumi | NGS Competence Center Tuebingen, Institut für Medizinische Mikrobiologie und Hygiene, Universitaetsklinikum Tübingen                                                                                                                                   | Angel Angelov                                                                                                                                                                                                                                                                                                                                                                                                                                                                                  |
| EPI_ISL_902756, EPI_ISL_965137, EPI_ISL_965139                                                                                                                                                                                                                                                                                                                                                                                                                                                                                                                                                                                                                                                                                                                                                                                                                                                                                                                                                                                                                                                                                                                                                                                                                                                                                                                                                                                                                                                                       | Fondazione Policlinico Universitario "A. Gemelli" IRCCS                 | INMI Lazzaro Spallanzani IRCCS                                                                                                                                                                                                                         | A Di Caro; B Bartolini; C.E.M Gruber; E Giombini; F Messina; M Rueca; M Sanguinetti; M. Rueca; MR Capobianchi; O Butera; P Cattani                                                                                                                                                                                                                                                                                                                                                             |
| EPI_ISL_672423 to 672425                                                                                                                                                                                                                                                                                                                                                                                                                                                                                                                                                                                                                                                                                                                                                                                                                                                                                                                                                                                                                                                                                                                                                                                                                                                                                                                                                                                                                                                                                             | Fresno County Public Health Laboratory                                  | Chan-Zuckerberg Biohub                                                                                                                                                                                                                                 | CZB Ctiabhub Consortium                                                                                                                                                                                                                                                                                                                                                                                                                                                                        |
| EPI_ISL_862839, EPI_ISL_862857, EPI_ISL_862868                                                                                                                                                                                                                                                                                                                                                                                                                                                                                                                                                                                                                                                                                                                                                                                                                                                                                                                                                                                                                                                                                                                                                                                                                                                                                                                                                                                                                                                                       | Fujita Health University Bantane Hospital                               | Fujita health University, School of Medicine, Department of Microbiology                                                                                                                                                                               | Masahiro suzuki; Yohei Doi                                                                                                                                                                                                                                                                                                                                                                                                                                                                     |
| EPI_ISL_707928                                                                                                                                                                                                                                                                                                                                                                                                                                                                                                                                                                                                                                                                                                                                                                                                                                                                                                                                                                                                                                                                                                                                                                                                                                                                                                                                                                                                                                                                                                       | Fujita Health University Hospital                                       | Fujita Health University School of Medicine, Department of Microbiology                                                                                                                                                                                | Aki Sakurai; Masahiro Suzuki; Yohei Doi                                                                                                                                                                                                                                                                                                                                                                                                                                                        |
| EPI_ISL_862837 to 862838, EPI_ISL_862840 to 862842                                                                                                                                                                                                                                                                                                                                                                                                                                                                                                                                                                                                                                                                                                                                                                                                                                                                                                                                                                                                                                                                                                                                                                                                                                                                                                                                                                                                                                                                   | Fujita Health University Hospital                                       | Fujita health University, School of Medicine, Department of Microbiology                                                                                                                                                                               | Masahiro suzuki; Yohei Doi                                                                                                                                                                                                                                                                                                                                                                                                                                                                     |
| EPI_ISL_728000                                                                                                                                                                                                                                                                                                                                                                                                                                                                                                                                                                                                                                                                                                                                                                                                                                                                                                                                                                                                                                                                                                                                                                                                                                                                                                                                                                                                                                                                                                       | Fujita Health University Okazaki Medical Center                         | Department of Virology and Parasitology, Fujita Health University School of Medicine                                                                                                                                                                   | Aki Sakurai; Masahiro suzuki; Satoshi Komoto; Takayuki Murata; Takuma Ishihara; Tomihiko Ide; Yohei Doi                                                                                                                                                                                                                                                                                                                                                                                        |
| EPI_ISL_718273, EPI_ISL_727998 to 727999, EPI_ISL_728153 to 728156, EPI_ISL_728159                                                                                                                                                                                                                                                                                                                                                                                                                                                                                                                                                                                                                                                                                                                                                                                                                                                                                                                                                                                                                                                                                                                                                                                                                                                                                                                                                                                                                                   | Fujita Health University Okazaki Medical Center                         | Department of Virology and Parasitology, Fujita Health University School of Medicine                                                                                                                                                                   | Aki Sakurai; Masahiro suzuki; Satoshi Komoto; Takayuki Murata; Takuma Ishihara; Tomihiko Ide; Yohei Doi                                                                                                                                                                                                                                                                                                                                                                                        |
| EPI_ISL_728206 to 728208                                                                                                                                                                                                                                                                                                                                                                                                                                                                                                                                                                                                                                                                                                                                                                                                                                                                                                                                                                                                                                                                                                                                                                                                                                                                                                                                                                                                                                                                                             | Fujita Health University Okazaki Medical Center                         | Fujita health University, Department of Microbiology                                                                                                                                                                                                   | Aki Sakurai; Masahiro suzuki; Satoshi Komoto; Takayuki Murata; Takuma Ishihara; Tomihiko Ide; Yohei Doi                                                                                                                                                                                                                                                                                                                                                                                        |
| EPI_ISL_684408 to 684470, EPI_ISL_684634 to 684692, EPI_ISL_684723 to 684727, EPI_ISL_685918 to 685924, EPI_ISL_687533 to 687560, EPI_ISL_688612, EPI_ISL_688619 to 688623, EPI_ISL_688634, EPI_ISL_688897 to 688968, EPI_ISL_689460 to 689496, EPI_ISL_689646, EPI_ISL_689692 to 689697, EPI_ISL_689759 to 689825, EPI_ISL_690432 to 690526, EPI_ISL_690982 to 690986, EPI_ISL_691550 to 691551, EPI_ISL_691735, EPI_ISL_691756, EPI_ISL_691764 to 691765, EPI_ISL_692048 to 692050, EPI_ISL_692219 to 692229, EPI_ISL_692442 to 692497, EPI_ISL_894278 to 894279, EPI_ISL_894287, EPI_ISL_894301, EPI_ISL_894672 to 894680, EPI_ISL_894688 to 894791, EPI_ISL_894816, EPI_ISL_902208                                                                                                                                                                                                                                                                                                                                                                                                                                                                                                                                                                                                                                                                                                                                                                                                                               | Fukuoka Institute of Health and Environmental Sciences                  | Pathogen Genomics Center, National Institute of Infectious Diseases                                                                                                                                                                                    | Kentaro Itokawa; Makoto Kuroda; Masanori Hashino; Rina Tanaka; Tsuyoshi Sekizuka                                                                                                                                                                                                                                                                                                                                                                                                               |
| see above                                                                                                                                                                                                                                                                                                                                                                                                                                                                                                                                                                                                                                                                                                                                                                                                                                                                                                                                                                                                                                                                                                                                                                                                                                                                                                                                                                                                                                                                                                            | Fukuoka Institute of Health and Environmental Sciences                  | Pathogen Genomics Center, National Institute of Infectious Diseases                                                                                                                                                                                    | Kentaro Itokawa; Makoto Kuroda; Masanori Hashino; Rina Tanaka; Tsuyoshi Sekizuka                                                                                                                                                                                                                                                                                                                                                                                                               |
| EPI_ISL_955261, EPI_ISL_955263, EPI_ISL_984753 to 984754, EPI_ISL_984948                                                                                                                                                                                                                                                                                                                                                                                                                                                                                                                                                                                                                                                                                                                                                                                                                                                                                                                                                                                                                                                                                                                                                                                                                                                                                                                                                                                                                                             | Fulgent Genetics                                                        | Fulgent Genetics                                                                                                                                                                                                                                       | Becky Tsai; Benafsh Sapra; Doreen Ng; Harry Gao; James Xie; John Gao; Joseph Fierro; Mickey Li; Yan Meng                                                                                                                                                                                                                                                                                                                                                                                       |
| EPI_ISL_794649 to 794651, EPI_ISL_794662                                                                                                                                                                                                                                                                                                                                                                                                                                                                                                                                                                                                                                                                                                                                                                                                                                                                                                                                                                                                                                                                                                                                                                                                                                                                                                                                                                                                                                                                             | Fundación Cardio Infantil                                               | Instituto Nacional de Salud - Dirección de Investigación en Salud Pública                                                                                                                                                                              | Carlos Franco-Muñoz; Diego A. Álvarez-Díaz; Diego Andrés Prada; Gerardo Santamaría; Jonathan Reales; Julian Naizaque; Katherine Laiton-Donato; Magdalena Wiesner; Marcela Mercado-Reyes; María T. Herrera; Martha Lucia Ospina Martínez; Mauricio Pacheco-Montealegre; Paola Muñoz-Laiton; Sheryll Corchuelo                                                                                                                                                                                   |
| EPI_ISL_794654 to 794655, EPI_ISL_794664 to 794665                                                                                                                                                                                                                                                                                                                                                                                                                                                                                                                                                                                                                                                                                                                                                                                                                                                                                                                                                                                                                                                                                                                                                                                                                                                                                                                                                                                                                                                                   | Fundación Valle del Lili                                                | Instituto Nacional de Salud - Dirección de Investigación en Salud Pública                                                                                                                                                                              | Carlos Franco-Muñoz; Diego A. Álvarez-Díaz; Diego Andrés Prada; Gerardo Santamaría; Jonathan Reales; Julian Naizaque; Katherine Laiton-Donato; Magdalena Wiesner; Marcela Mercado-Reyes; María T. Herrera; Martha Lucia Ospina Martínez; Mauricio Pacheco-Montealegre; Paola Muñoz-Laiton; Sheryll Corchuelo                                                                                                                                                                                   |
| EPI_ISL_635086 to 635087, EPI_ISL_668396 to 668397, EPI_ISL_668403, EPI_ISL_708035, EPI_ISL_708057 to 708059, EPI_ISL_708126 to 708130, EPI_ISL_759973 to 759974, EPI_ISL_759984 to 759985, EPI_ISL_775271, EPI_ISL_775273 to 775274, EPI_ISL_775279, EPI_ISL_775294, EPI_ISL_775299 to 775300,                                                                                                                                                                                                                                                                                                                                                                                                                                                                                                                                                                                                                                                                                                                                                                                                                                                                                                                                                                                                                                                                                                                                                                                                                      |                                                                         |                                                                                                                                                                                                                                                        |                                                                                                                                                                                                                                                                                                                                                                                                                                                                                                |

|                                                                                                                                                                                                                                                                                                                                                                                          |                                                                  |                                                                                                                                            |                                                                                                                                                                                                                                                                                                                    |  |
|------------------------------------------------------------------------------------------------------------------------------------------------------------------------------------------------------------------------------------------------------------------------------------------------------------------------------------------------------------------------------------------|------------------------------------------------------------------|--------------------------------------------------------------------------------------------------------------------------------------------|--------------------------------------------------------------------------------------------------------------------------------------------------------------------------------------------------------------------------------------------------------------------------------------------------------------------|--|
| EPI_ISL_775303 to 775304, EPI_ISL_775427, EPI_ISL_775484, EPI_ISL_775488 to 775490, EPI_ISL_775496 to 775497, EPI_ISL_775524 to 775527, EPI_ISL_796671, EPI_ISL_796722 to 796724, EPI_ISL_796732, EPI_ISL_796730 to 796732, EPI_ISL_842644, EPI_ISL_860213, EPI_ISL_860281, EPI_ISL_906830, EPI_ISL_962901 to 962903, EPI_ISL_964979, EPI_ISL_964988 to 964989, EPI_ISL_965001 to 965004 |                                                                  |                                                                                                                                            |                                                                                                                                                                                                                                                                                                                    |  |
| see above                                                                                                                                                                                                                                                                                                                                                                                | Furst Medical Laboratory                                         | Norwegian Institute of Public Health, Department of Virology                                                                               | Atiya R Ali; Hilde Elshaug; Hilde Vollan; Ignacio Garcia Lorente; Kamilla Heddeland Instefjord; Karoline Bragstad; Kathrine Stene-Johansen; Marie Paulsen Madsen; Olav Hungnes; Rasmus Riis Kopperud; Serina B Engebretsen                                                                                         |  |
| EPI_ISL_912674 to 912676, EPI_ISL_981547, EPI_ISL_982162, EPI_ISL_982301, EPI_ISL_982307 to 982310                                                                                                                                                                                                                                                                                       | G.H.E.F.Grand Hôpital EST Francilien                             | Department of Virology, Henri Mondor University Hospital, Assistance Publique Hôpitaux de Paris, Université Paris-Est Créteil, INSERM U955 | Alexandre Soulier; Christophe Rodriguez; Elisabeth Trawinski; Guillaume Gricourt; Jean-Michel Pawlotosky; Melissa N'Debi; Slim Fourati; Vanessa Demontant                                                                                                                                                          |  |
| EPI_ISL_965840 to 965854                                                                                                                                                                                                                                                                                                                                                                 | GA Department of Public Health                                   | GA Department of Public Health                                                                                                             | Cynthia Dixey; Jonathan Edwards; Stacy Reeves; Tonia Parrott                                                                                                                                                                                                                                                       |  |
| EPI_ISL_903670, EPI_ISL_903685                                                                                                                                                                                                                                                                                                                                                           | GA Department of Public Health Laboratory                        | Genomics and Discovery, Respiratory Viruses Branch, Division of Viral Diseases, Centers for Disease Control and Prevention                 | Anna Montmayeur; Anna Uehara; Ben L. Rambo-Martin; Clinton R. Paden; Dhvani Batra; Haibin Wang; Jasmine Padilla; Jing Zhang; Justin Lee; Krista Queen; Lori Rowe; Mark Burroughs; Mili Sheth; Peter W. Cook; Rachel Marine; Sarah Nobles; Suxiang Tong; Yan Li; Ying Tao                                           |  |
| EPI_ISL_647987 to 647989, EPI_ISL_648002 to 648003, EPI_ISL_648123, EPI_ISL_681776 to 681828, EPI_ISL_812131, EPI_ISL_812133, EPI_ISL_812136 to 812137, EPI_ISL_812140, EPI_ISL_812143 to 812197, EPI_ISL_955277, EPI_ISL_955288, EPI_ISL_955302 to 955303, EPI_ISL_955316, EPI_ISL_955319 to 955320, EPI_ISL_955329 to 955330, EPI_ISL_955334 to 955336                                 |                                                                  |                                                                                                                                            |                                                                                                                                                                                                                                                                                                                    |  |
| see above                                                                                                                                                                                                                                                                                                                                                                                | GA Department of Public Health Laboratory                        | Pathogen Discovery, Respiratory Viruses Branch, Division of Viral Diseases, Centers for Disease Control and Prevention                     | Anna Montmayeur; Anna Uehara; Brian Lynch; Clinton R. Paden; Haibin Wang; Jing Zhang; Krista Queen; Peter Cook; Rachel Marine; Suxiang Tong; Yan Li; Ying Tao                                                                                                                                                      |  |
| EPI_ISL_909686                                                                                                                                                                                                                                                                                                                                                                           | GH Cochin-Broca Hôtel Dieu/Lab Virologie                         | National Reference Center for Viruses of Respiratory Infections, Institut Pasteur, Paris                                                   | Angela Brisebarre; Camille Capel; Etienne Simon-Lorière; L'Honneur Anne-Sophie; Marion Barbet; Maud Vanpeene; Méline Bizard; Sylvie Behillil; Sylvie van der Werf; Vincent Enouf                                                                                                                                   |  |
| EPI_ISL_935973 to 935992                                                                                                                                                                                                                                                                                                                                                                 | GLENS FALLS HOSPITAL LABORATORY                                  | Wadsworth Center, New York State Department of Health                                                                                      | Alexis Russel; Daryl M. Lamson; Erasmus Schneider; Erica Lasek-Nesselquist; John Kelly; Jonathan Plitnick; Kirsten St. George; Matthew Shudt; Melissa A Leisner; Navjot Singh                                                                                                                                      |  |
| EPI_ISL_794107 to 794118                                                                                                                                                                                                                                                                                                                                                                 | GLENS FALLS HOSPITAL LABORATORY                                  | Wadsworth Center, New York State Department of Health                                                                                      | Alexis Russel; Daryl M. Lamson; Erasmus Schneider; Erica Lasek-Nesselquist; John Kelly; Jonathan Plitnick; Kirsten St. George; Matthew Shudt; Melissa A Leisner; Navjot Singh; Sara Griesemer                                                                                                                      |  |
| EPI_ISL_825048 to 825049, EPI_ISL_825054 to 825058, EPI_ISL_825061 to 825062                                                                                                                                                                                                                                                                                                             | GMERS Medical College and Hospital, Gotri, Vadodara              | Gujarat Biotechnology Research Centre                                                                                                      | Afzal Ansari; Apurvasinh Puvar; Bithika Duttaroy; Chaitanya Joshi; Dinesh Kumar; Janvi Raval; Kalpesh Mistry; Labdhi Pandya; Madhvi Joshi; Mitesh Karnothi; Nikha Trivedi; Nitin Savaliya; Ramesh Pandit; Zarna Patel; Zuber Saiyed                                                                                |  |
| EPI_ISL_888821                                                                                                                                                                                                                                                                                                                                                                           | GZA Hospital Sint-Augustinus                                     | UAntwerp, Laboratory of Medical Microbiology, Campus Drie Eiken S6.26, Universiteitsplein 1, 2610, Wilrijk, Antwerp, Belgium               | Basil Britto Xavier; Christine Lammens; Herman Goossens; Jasmine Coppens; Veerle Matheussens                                                                                                                                                                                                                       |  |
| EPI_ISL_888822 to 888825, EPI_ISL_939654                                                                                                                                                                                                                                                                                                                                                 | GZA Sint-Augustinus Hospital                                     | UAntwerp, Laboratory of Medical Microbiology, Campus Drie Eiken S6.26, Universiteitsplein 1, 2610, Wilrijk, Antwerp, Belgium               | Basil Britto Xavier; Christine Lammens; Herman Goossens; Jasmine Coppens; Marie Le Mercier; Veerle Matheussens                                                                                                                                                                                                     |  |
| EPI_ISL_940757                                                                                                                                                                                                                                                                                                                                                                           | GZA Sint-Augustinus Hospital                                     | UAntwerp, Laboratory of Medical Microbiology, Campus Drie Eiken S6.26, Universiteitsplein 1, 2610, Wilrijk, Belgium                        | Basil Britto Xavier; Christine Lammens; Herman Goossens; Jasmine Coppens; Marie Le Mercier; Veerle Matheussens                                                                                                                                                                                                     |  |
| EPI_ISL_851048 to 851051                                                                                                                                                                                                                                                                                                                                                                 | Gandhi Medical College and Hospital                              | CSIR-Centre for Cellular and Molecular Biology                                                                                             | Amrithesh Kumar; Archana GJ; Divya Tej Sowpati; Madhavi Latha Manolla; Manisha Rani; Nagamani Kammili; Raja Rao Mesepogu; Shailaja VV; Sofia Banu; Sudhamadhuri Devara; Sunitha Pakalapati; Sushma Rajyalakshmi Gudiseva; Thirlok Chander Bingi; Vanisree Rajoli; Vinay Shekar Reddy; Winnie Thomas                |  |
| EPI_ISL_850510, EPI_ISL_850514                                                                                                                                                                                                                                                                                                                                                           | Gandhi Medical College and Hospital                              | MDRU-DHR,Gandhi Medical College                                                                                                            | Amrithesh Kumar; Archana GJ; Divya Tej Sowpati; Madhavi Latha Manolla; Manisha Rani; Nagamani Kammili; Raja Rao Mesepogu; Shailaja VV; Sofia Banu; Sudhamadhuri Devara; Sunitha Pakalapati; Sushma Rajyalakshmi Gudiseva; Thirlok Chander Bingi; Vanisree Rajoli; Vinay Shekar Reddy; Winnie Thomas                |  |
| EPI_ISL_850507, EPI_ISL_850509                                                                                                                                                                                                                                                                                                                                                           | Gandhi Medical College and Hospital                              | VRDL-Gandhi Medical College                                                                                                                | Amrithesh Kumar; Archana GJ; Divya Tej Sowpati; Madhavi Latha Manolla; Manisha Rani; Nagamani Kammili; Raja Rao Mesepogu; Rajeshwar Rao; Shailaja VV; Sofia Banu; Sudhamadhuri Devara; Sunitha Pakalapati; Sushma Rajyalakshmi Gudiseva; Thirlok Chander Bingi; Vanisree Rajoli; Vinay Shekar Reddy; Winnie Thomas |  |
| EPI_ISL_623095, EPI_ISL_648140 to 648142, EPI_ISL_648144, EPI_ISL_648163, EPI_ISL_661283, EPI_ISL_661287, EPI_ISL_710608 to 710609, EPI_ISL_831977 to 831978                                                                                                                                                                                                                             |                                                                  |                                                                                                                                            |                                                                                                                                                                                                                                                                                                                    |  |
| see above                                                                                                                                                                                                                                                                                                                                                                                | Gavle klinisk mikrobiologi                                       | The Public Health Agency of Sweden                                                                                                         | Anna Risberg; Anna-Malin Linde; Department of Microbiology; Karin Tegmark-Wisell; Maria Lind Karlberg; Mattias Haukland; Mia Brytting; Olov Svartstrom; Oskar Karlsson Lindsjö; Petra Edquist; Reza Advani; Sandra Brodsson; The Public Health Agency of Sweden                                                    |  |
| EPI_ISL_676514                                                                                                                                                                                                                                                                                                                                                                           | Gavleborg                                                        | The Public Health Agency of Sweden                                                                                                         | Department of Microbiology; The Public Health Agency of Sweden                                                                                                                                                                                                                                                     |  |
| EPI_ISL_730567 to 730577, EPI_ISL_730620, EPI_ISL_984736 to 984752, EPI_ISL_984980 to 984994                                                                                                                                                                                                                                                                                             | Gazi University Faculty of Medicine, Medical Virology Laboratory | Gazi University Faculty of Medicine, Medical Virology Laboratory                                                                           | Erdem ahin; Güldam Bozday; Hager Muftah; Il Fidan; Kayhan Çalar; Murat Dizbay; Selin Yiit; Shaknoza Sarzhanova; Özlem Güzel Tunçcan                                                                                                                                                                                |  |
| EPI_ISL_900502, EPI_ISL_900536 to 900542                                                                                                                                                                                                                                                                                                                                                 | Gen-Bio                                                          | CNR Virus des Infections Respiratoires - France SUD                                                                                        | Antonin Bai; Bruno Lina; Gregory Destras; Gwendolyne Burfin; Hadrien Règue; Laurence Josset; Martine Valette; Quentin Semanas; Sylvie Larrat                                                                                                                                                                       |  |
| EPI_ISL_959650, EPI_ISL_964882                                                                                                                                                                                                                                                                                                                                                           | General Hospital "Abdulah Nakas" Sarajevo                        | Alea Genetic Centre                                                                                                                        | Adis Kandic; Dino Pecar; Lana Salihefendic; Rijad Konjodzic; Sead Jazic                                                                                                                                                                                                                                            |  |
| EPI_ISL_922076                                                                                                                                                                                                                                                                                                                                                                           | General Hospital #Abdulah Nakas" Sarajevo                        | Alea Genetic Centre                                                                                                                        | Dino Pecar; Lana Salihefendic; Rijad Konjodzic; Sead Jazic                                                                                                                                                                                                                                                         |  |
| EPI_ISL_909738                                                                                                                                                                                                                                                                                                                                                                           | General Hospital - Bitola                                        | Research Center for Genetic Engineering and Biotechnology "Georgi D. Efremov" , Macedonian Academ                                          | RCGEB - MASA                                                                                                                                                                                                                                                                                                       |  |
| EPI_ISL_933566, EPI_ISL_933772, EPI_ISL_933786, EPI_ISL_934314, EPI_ISL_934418, EPI_ISL_942961, EPI_ISL_942963, EPI_ISL_942970, EPI_ISL_957423, EPI_ISL_958751                                                                                                                                                                                                                           |                                                                  |                                                                                                                                            |                                                                                                                                                                                                                                                                                                                    |  |
| see above                                                                                                                                                                                                                                                                                                                                                                                | General Hospital - Bitola                                        | Research Center for Genetic Engineering and Biotechnology "Georgi D. Efremov" , Macedonian Academy of Sciences and Arts                    | Aleksandar J. Dimovski; Aleksandar J.Dimovski; Dijana Plasheska-Karanfiliska; Gjorgji Bozinovski; Milena Jakimovska; Predrag Noveski; RCGEB - MASA                                                                                                                                                                 |  |
| EPI_ISL_677705, EPI_ISL_677707, EPI_ISL_678252, EPI_ISL_910327, EPI_ISL_918492, EPI_ISL_933573, EPI_ISL_933776, EPI_ISL_934092, EPI_ISL_942962, EPI_ISL_942964, EPI_ISL_942966 to 942968, EPI_ISL_956421, EPI_ISL_956668                                                                                                                                                                 |                                                                  |                                                                                                                                            |                                                                                                                                                                                                                                                                                                                    |  |
| see above                                                                                                                                                                                                                                                                                                                                                                                | General Hospital - Kumanovo                                      | Research Center for Genetic Engineering and Biotechnology "Georgi D. Efremov" , Macedonian Academy of Sciences and Arts                    | Aleksandar J. Dimovski; Aleksandar J.Dimovski; Dijana Plasheska-Karanfiliska; Gjorgji Bozinovski; Milen; Milena Jakimovska; Predrag Noveski; RCGEB - MASA                                                                                                                                                          |  |
| EPI_ISL_910333                                                                                                                                                                                                                                                                                                                                                                           | General Hospital - Ohrid                                         | Research Center for Genetic Engineering and Biotechnology "Georgi D. Efremov" , Macedoni                                                   | RCGEB - MASA                                                                                                                                                                                                                                                                                                       |  |
| EPI_ISL_677704, EPI_ISL_677709, EPI_ISL_677711, EPI_ISL_677722, EPI_ISL_677725 to 677726, EPI_ISL_678255 to 678256, EPI_ISL_909740, EPI_ISL_933775, EPI_ISL_933803, EPI_ISL_954745 to 954746, EPI_ISL_956402, EPI_ISL_959289, EPI_ISL_959291                                                                                                                                             |                                                                  |                                                                                                                                            |                                                                                                                                                                                                                                                                                                                    |  |
| see above                                                                                                                                                                                                                                                                                                                                                                                | General Hospital - Ohrid                                         | Research Center for Genetic Engineering and Biotechnology "Georgi D. Efremov" , Macedonian Academy of Sciences and Arts                    | Aleksandar J. Dimovski; Dijana Plasheska-Karanfiliska; Gjorgji Bozinovski; Milena Jakimovska; Predrag Noveski; RCGEB - MASA                                                                                                                                                                                        |  |
| EPI_ISL_677674, EPI_ISL_677703, EPI_ISL_677712 to 677714, EPI_ISL_678258, EPI_ISL_909739, EPI_ISL_918497, EPI_ISL_933713, EPI_ISL_933766, EPI_ISL_944786, EPI_ISL_954265, EPI_ISL_956367, EPI_ISL_956382 to 956383, EPI_ISL_956419, EPI_ISL_959285                                                                                                                                       |                                                                  |                                                                                                                                            |                                                                                                                                                                                                                                                                                                                    |  |
| see above                                                                                                                                                                                                                                                                                                                                                                                | General Hospital - Prilep                                        | Research Center for Genetic Engineering and Biotechnology "Georgi D. Efremov" , Macedonian Academy of Sciences and Arts                    | Aleksandar J. Dimovski; Dijana Plasheska-Karanfiliska; Gjorgji Bozinovski; Milena Jakimovska; Predrag Noveski; RCGEB - MASA                                                                                                                                                                                        |  |
| EPI_ISL_933571                                                                                                                                                                                                                                                                                                                                                                           | General Hospital - Ship                                          | Research Center for Genetic Engineering and Biotechnology                                                                                  | RCGEB - MASA                                                                                                                                                                                                                                                                                                       |  |

|                                                                                                                                                                                |                                                                                                              |                                                                                                                                                                               |                                                                                                                                                                                                                                                                                                                                 |
|--------------------------------------------------------------------------------------------------------------------------------------------------------------------------------|--------------------------------------------------------------------------------------------------------------|-------------------------------------------------------------------------------------------------------------------------------------------------------------------------------|---------------------------------------------------------------------------------------------------------------------------------------------------------------------------------------------------------------------------------------------------------------------------------------------------------------------------------|
|                                                                                                                                                                                |                                                                                                              | "Georgi D. Efr                                                                                                                                                                |                                                                                                                                                                                                                                                                                                                                 |
| EPI_ISL_909742, EPI_ISL_933602, EPI_ISL_933797, EPI_ISL_934413, EPI_ISL_959288                                                                                                 | General Hospital - Shtip                                                                                     | Research Center for Genetic Engineering and Biotechnology "Georgi D. EfreMOV", Macedonian Academy of Sciences and Arts                                                        | Aleksandar J. Dimovski; Dijana Plasheska-Karanfiliska; Gjorgji Bozinovski; Milena Jakimovska; Predrag Noveski; RCGEB - MASA                                                                                                                                                                                                     |
| EPI_ISL_677719, EPI_ISL_678260, EPI_ISL_909736, EPI_ISL_918486, EPI_ISL_944108 to 944109, EPI_ISL_954611                                                                       | General Hospital - Struga                                                                                    | Research Center for Genetic Engineering and Biotechnology "Georgi D. EfreMOV", Macedonian Academy of Sciences and Arts                                                        | Aleksandar J. Dimovski; Dijana Plasheska-Karanfiliska; Gjorgji Bozinovski; Milena Jakimovska; Predrag Noveski; RCGEB - MASA                                                                                                                                                                                                     |
| EPI_ISL_943993                                                                                                                                                                 | General Hospital - Strumica                                                                                  | Research Center for Genetic Engineering and Biotechnology "Georgi D. EfreMOV", Macedon                                                                                        | Aleksandar J. Dimovski; Dijana Plasheska-Karanfiliska; Gjorgji Bozinovski; Predrag Noveski                                                                                                                                                                                                                                      |
| EPI_ISL_910326                                                                                                                                                                 | General Hospital - Strumica                                                                                  | Research Center for Genetic Engineering and Biotechnology "Georgi D. EfreMOV", Macedonian Academ                                                                              | RCGEB - MASA                                                                                                                                                                                                                                                                                                                    |
| EPI_ISL_678254, EPI_ISL_918488, EPI_ISL_933579, EPI_ISL_933717, EPI_ISL_933726, EPI_ISL_943994, EPI_ISL_943998, EPI_ISL_944105 to 944106, EPI_ISL_956404, EPI_ISL_959286       | see above                                                                                                    | Research Center for Genetic Engineering and Biotechnology "Georgi D. EfreMOV", Macedonian Academy of Sciences and Arts                                                        | Aleksandar J. Dimovski; Dijana Plasheska-Karanfiliska; Gjorgji Bozinovski; Mi; Milena Jakimovska; Predrag Noveski; RCGEB - MASA                                                                                                                                                                                                 |
| EPI_ISL_909654, EPI_ISL_910328, EPI_ISL_933574, EPI_ISL_933720, EPI_ISL_943996 to 943997, EPI_ISL_944107, EPI_ISL_944779, EPI_ISL_947678, EPI_ISL_957966, EPI_ISL_959274       | see above                                                                                                    | Research Center for Genetic Engineering and Biotechnology "Georgi D. EfreMOV", Macedonian Academy of Sciences and Arts                                                        | Aleksandar J. Dimovski; Dijana Plasheska-Karanfiliska; Gjorgji Bozinovski; Milena Jakimovska; Predrag Noveski; RCGEB - MASA                                                                                                                                                                                                     |
| EPI_ISL_677675, EPI_ISL_677710, EPI_ISL_910330, EPI_ISL_933578, EPI_ISL_933660, EPI_ISL_934415, EPI_ISL_942965, EPI_ISL_942969, EPI_ISL_943995, EPI_ISL_953939, EPI_ISL_956405 | see above                                                                                                    | Research Center for Genetic Engineering and Biotechnology "Georgi D. EfreMOV", Macedonian Academy of Sciences and Arts                                                        | Aleksandar J. Dimovski; Aleksandar J. Dimovski; Dijana Plasheska-Karanfiliska; Gjorgji Bozinovski; Milena Jakimovska; Predrag Noveski; RCGEB - MASA                                                                                                                                                                             |
| EPI_ISL_747243                                                                                                                                                                 | General Hospital Laboratory                                                                                  | Pathogen Laboratory (BSL3), Biomedical Innovation Department, Experimental and Applied Biology Division, Scientific Research Center and High Education from Ensenada (CICESE) | Cervantes-Luevano K.; Galindo C. and Licea-Navarro A.; Martinez M.A.; Saavedra-Flores A.                                                                                                                                                                                                                                        |
| EPI_ISL_623096 to 623097, EPI_ISL_623103, EPI_ISL_660324 to 660325, EPI_ISL_693766 to 693774, EPI_ISL_792042, EPI_ISL_792045 to 792048, EPI_ISL_792050, EPI_ISL_792053         | see above                                                                                                    | General practitioner                                                                                                                                                          | National Reference Center for Viruses of Respiratory Infections, Institut Pasteur, Paris ; Angela Brisebarre; Briec Lefaire; Camille Capel; Etienne Simon-Lorière; Marion Barbet; Maud Vanpeene; Méline Bizard; Sylvie Behillil; Sylvie van der Werf; Vincent Enouf                                                             |
| EPI_ISL_888827 to 888829                                                                                                                                                       | General practitioner office                                                                                  | National Reference Center for Viruses of Respiratory Infections, Institut Pasteur, Paris                                                                                      | Angela Brisebarre; Camille Capel; Etienne Simon-Lorière; Marion Barbet; Maud Vanpeene; Méline Bizard; Sylvie Behillil; Sylvie van der Werf; Vincent Enouf                                                                                                                                                                       |
| EPI_ISL_746478 to 746825, EPI_ISL_754391 to 754393                                                                                                                             | Genetica Molecular and Subdepartamento de Virologia ISP Chile                                                | Instituto de Salud Publica de Chile                                                                                                                                           | Andres Castillo; Barbara Parra; Gisselle Barra; Jaime Lagos; Javier Tognarelli; Jorge Fernandez; Loredana Arata; Patricia Bustos; Rodrigo Fasce                                                                                                                                                                                 |
| EPI_ISL_936380 to 936386                                                                                                                                                       | Genetica y Virologia, Facultad de Ciencias                                                                   | Genetica y Virologia, Facultad de Ciencias                                                                                                                                    | Arbiza, J.; Calleros, L.; Chiparelli, H.; Coppola, L.; Delfraro, A.; Frabasil, S.; Fuques, E.; Goni, N.; Grecco, S.; Marandino, A.; Mogdasy, C.; Panzera, Y.; Perez, R.; Ramos, V.; Ramos, N.; Sorhouet, C.; Techera, C.; Tomas, G.                                                                                             |
| EPI_ISL_978917                                                                                                                                                                 | Genome Analysis Center, Yamanashi Central Hospital                                                           | Genome Analysis Center, Yamanashi Central Hospital                                                                                                                            | Yosuke Hirotsu                                                                                                                                                                                                                                                                                                                  |
| EPI_ISL_746318 to 746319, EPI_ISL_746323 to 746324                                                                                                                             | Genome Center                                                                                                | Genome Center                                                                                                                                                                 | A. S. M. Rubayet- Ul- Alam; Hassan M. Al-Emran; Md. Anwar Hossain; Md. Iqbal Kabir Jahid; Md. Shazid Hasan; Md. Tanvir Islam; Najmuj Sakib; Nigar Sultana Meghla; Ovinu Kibria Islam; Pravas Chandra Roy; S. M. Tanjil Shah; Selina Akter; Shireen Nigar; Shovon Lal Sarkar                                                     |
| EPI_ISL_735259 to 735373, EPI_ISL_735434 to 735435, EPI_ISL_833141 to 833148, EPI_ISL_885146, EPI_ISL_955153 to 955154                                                         | Genomic Laboratory (GLAB) (Conjoint lab of Health Directorate of Istanbul and Istanbul Technical University) | Genomic Laboratory (GLAB), Istanbul Technical University                                                                                                                      | Arzu Irvem; Ayse Serra Ozel; Betsi Kose; Gizem Alkurt; Gizem Dinler Doganay; Ilker Karacan; Jale Yildiz; Levent Doganay; Mehtap Aydin; Nihat Bugra Agaoglu; Nilgun Altunali; Nisan Denizce Can; Ozlem Akgun Dogan; Parl Sharifli; Payam Zolfagharian; Tugba Kizilboga Akgun; Yasemin Kendir Demirkol                            |
| EPI_ISL_882921                                                                                                                                                                 | Genomic Medicine Laboratory, IRCCS Santa Lucia Foundation                                                    | INMI Lazzaro Spallanzani IRCCS                                                                                                                                                | A Di Caro; B Bartolini; C.E.M Gruber; E Giardina; E Giombini; F Messina; M Rueca; MR Capobianchi; O Butera                                                                                                                                                                                                                      |
| EPI_ISL_803899                                                                                                                                                                 | Genomic Medicine Laboratory, IRCCS Santa Lucia Foundation                                                    | National Institute for Infectious Diseases, INMI, "L. Spallanzani" IRCCS                                                                                                      | A Di Caro; B Bartolini; C.E.M Gruber; E Giardina; E Giombini; F Messina; M. Rueca; MR Capobianchi; O Butera                                                                                                                                                                                                                     |
| EPI_ISL_632908                                                                                                                                                                 | Genomic Sciences, Rehman Medical Institute                                                                   | Genomic Sciences, Rehman Medical Institute                                                                                                                                    | Afridi; Ali, J.; H. and Jehanzeb, V.; Haider; Jan; S.A.; Sabiha, B.; U.K.                                                                                                                                                                                                                                                       |
| EPI_ISL_730197 to 730228                                                                                                                                                       | Genomica Lab Molecular, MEXICO                                                                               | Andersen lab at Scripps Research                                                                                                                                              | Jose Horacio Reyna Verdugo; Jose Roman Chavez Mendez; Luis Alberto Rangel Gonzalez; Martin Gonzalez Ibarra; SEARCH Alliance San Diego with Jonathan Gonzalez Garcia                                                                                                                                                             |
| EPI_ISL_812783 to 812872                                                                                                                                                       | Genomics Program, Children Cancer Hospital                                                                   | Genomics Program, Children Cancer Hospital                                                                                                                                    | Abdo, I.; Abouelnaga, S.; Amer, K.; Bakry, U.; Diab, A.; El-Shaqnery, H.; El-Zayat, M.; Farawyla, H.; Gomaa, C.; Hadad, A.; Halafawy, A.; Hammad, M.; Hassan, R.; Hassan, W.; Hatem, A.; Hussein, S.; Jalal, D.; Magdeldin, S.; Mansour, T.; Monuir, G.; Salah, H.; Samir, O.; Sayed, A.; Soliman, M.; Soliman, S.; shalaby, L. |
| EPI_ISL_861889, EPI_ISL_861911, EPI_ISL_861914                                                                                                                                 | Genomika Einstein                                                                                            | LATE - Laboratório de Técnicas Especiais - Hospital Israelita Albert Einstein                                                                                                 | Ana Paula Moreira Salles; Deyvid Argarten; Fernanda de Mello Malta; João Bosco Oliveira Filho; João Renato Rebelo Pinho; Pedro Henrique Sebe Rodrigues; Raquel Rlyuzo                                                                                                                                                           |
| EPI_ISL_640016, EPI_ISL_640027, EPI_ISL_700497                                                                                                                                 | George Hospital wc GRH                                                                                       | NHLs/UCT                                                                                                                                                                      | Arash Iranzadeh; Bruna Galvao; Carolyn Williamson; Deelan Doolabh; Diana Hardie; Innocent Mudau; Kruger Marais; Lynn Tyers; Marvin Hsiao; Stephen Korsman                                                                                                                                                                       |
| EPI_ISL_960118                                                                                                                                                                 | George Hospital wc GRH                                                                                       | National Health Laboratory Service/UCT                                                                                                                                        | Arash Iranzadeh; Bruna Galvao; Carolyn Williamson; Deelan Doolabh; Diana Hardie; Innocent Mudau; Kruger Marais; Lynn Tyers; Marvin Hsiao; Stephen Korsman                                                                                                                                                                       |
| EPI_ISL_696458, EPI_ISL_696471, EPI_ISL_696473, EPI_ISL_696481, EPI_ISL_696503                                                                                                 | George Hospital wc GRH & NHLs/UCT                                                                            | KRISP, KZN Research Innovation and Sequencing Platform                                                                                                                        | Arash Iranzadeh; Bruna Galvao; Carolyn Williamson; Deelan Doolabh; Diana Hardie; Emanuel James San; Houriyah Tegally; Innocent Mudau; Jennifer Giandhari; Kruger Marais; Lynn Tyers; Marvin Hsiao; Stephen Korsman; Sureshnee Pillay; Tulio de Oliveira                                                                         |
| EPI_ISL_640049                                                                                                                                                                 | George Road Sat Clinic wc GWM                                                                                | NHLs/UCT                                                                                                                                                                      | Arash Iranzadeh; Bruna Galvao; Carolyn Williamson; Deelan Doolabh; Diana Hardie; Innocent Mudau; Kruger Marais; Lynn Tyers; Marvin Hsiao; Stephen Korsman                                                                                                                                                                       |
| EPI_ISL_862556, EPI_ISL_862564 to 862565, EPI_ISL_862567, EPI_ISL_862640, EPI_ISL_954806                                                                                       | Gerencia de Asistencia Sanitaria de Soria                                                                    | Instituto de Salud Carlos III                                                                                                                                                 | A. Monzón; C. Aldea; F. Casas; I. I. Aldea, C.; I. Jiménez; Iglesias-Caballero; M. Pozo; M. Camarero; M. Cuesta; M. González-Esguevillas; M. Molinero Calamita; M. Zaballos; M. Camarero; P. Jiménez; P. Zaballos; S. Cuesta; S. Juliá; S. Molinero Calamita; S. Pozo; S. Sandonis; S. Varona; V. Vázquez                       |
| EPI_ISL_960664 to 960713, EPI_ISL_960715 to 960830                                                                                                                             | Germano de sousa                                                                                             | Instituto Gulbenkian de Ciencia                                                                                                                                               | Cathy Paulino; João Costa; João Sobral; Maria Costa; Ricardo Leite; Susana Ladeiro                                                                                                                                                                                                                                              |
| EPI_ISL_918484, EPI_ISL_933722, EPI_ISL_933769, EPI_ISL_944777, EPI_ISL_954139, EPI_ISL_954141                                                                                 | Gerontology Institute - Skopje                                                                               | Research Center for Genetic Engineering and Biotechnology "Georgi D. EfreMOV", Macedonian Academy of Sciences and Arts                                                        | Aleksandar J. Dimovski; Dijana Plasheska-Karanfiliska; Gjorgji Bozinovski; Milena Jakimovska; Predrag Noveski; RCGEB - MASA                                                                                                                                                                                                     |
| EPI_ISL_745471 to 746317                                                                                                                                                       | Ginkgo Bioworks Clinical Laboratory                                                                          | Utah Public Health Laboratory                                                                                                                                                 | Alex Plocik; Becky Schilling; Birgitte Simen; David R. Hillyard; E. Susan Slechta; Erin L. Young; James McGann; Jeffrey B. Stevenson; Jim Griffin; Keith                                                                                                                                                                        |

|                                                                                                                                                                                                                                                                                                                                                                        |                                                                                                            |                                                                                                                                            |                                                                                                                                                                                                                                                                                                                                                                                                                                                                   |
|------------------------------------------------------------------------------------------------------------------------------------------------------------------------------------------------------------------------------------------------------------------------------------------------------------------------------------------------------------------------|------------------------------------------------------------------------------------------------------------|--------------------------------------------------------------------------------------------------------------------------------------------|-------------------------------------------------------------------------------------------------------------------------------------------------------------------------------------------------------------------------------------------------------------------------------------------------------------------------------------------------------------------------------------------------------------------------------------------------------------------|
|                                                                                                                                                                                                                                                                                                                                                                        |                                                                                                            |                                                                                                                                            | Robison; Kelly Oakeson; Malaika McKenzie-Bennett; Martha Pierson; Melanie A. Mallory; Michael T. Pyne; Michelle Spencer; Rebecca Littlefield; Salika M. Shakir; Tara Gallagher                                                                                                                                                                                                                                                                                    |
| EPI_ISL_833260 to 833261                                                                                                                                                                                                                                                                                                                                               | Giulianova                                                                                                 | Istituto Zooprofilattico Sperimentale dell'Abruzzo e Molise "G. Caporale"                                                                  | Ancora M; Calistri P; Cammà C; Curini V; Di Domenico M; Di Pasquale A; Lorusso A; Mangone I; Marcacci M; Puglia I; Rinaldi A; Savini G                                                                                                                                                                                                                                                                                                                            |
| EPI_ISL_890188 to 890194                                                                                                                                                                                                                                                                                                                                               | Gonoshasthaya-RNA Research Center, Gonoshasthaya-RNA Molecular Diagnostics and Research Center             | Gonoshasthaya-RNA Research Center, Gonoshasthaya-RNA Molecular Diagnostics and Research Center                                             | Adnan, N.; Ahmed; Akter, S.; Ali, T.; Azmuda, N.; Chaity, M.; Haq; Jahan, N.; Jamiruddin; Jamiruddin, M.; Khandker; Khondoker; Liza; M.A.; M.F.; M.R.; M.U.; Marzan, M.; Mou; Nahar, S.; Oishee, M.; S.M.; S.S.; Sharif, N.; Sharmin, S.; T.J.                                                                                                                                                                                                                    |
| EPI_ISL_774976                                                                                                                                                                                                                                                                                                                                                         | Gonoshasthaya-RNA Molecular Diagnostic and Research Center                                                 | Gonoshasthaya-RNA Molecular Diagnostic and Research Center                                                                                 | Firoz Ahmed; Maha Jamiruddin; Mahfuza Marzan; Md. Ahsanul Haq; Mohd. Raaed Jamiruddin; Mohib Ullah Khondoker; Mousumi Chaity; Mumtaz Jannat Oishee; Nafisa Azmuda; Nihad Adnan; Nowshin Jahan; Salma Akter; Sayeda Moriam Liza; Shahad Saif Khandker; Shahana Sharmin; Tamanna Ali; Taslin Jahan Mou                                                                                                                                                              |
| EPI_ISL_775019 to 775020, EPI_ISL_775213 to 775218                                                                                                                                                                                                                                                                                                                     | Gonoshasthaya-RNA Molecular Research Center                                                                | Gonoshasthaya-RNA Molecular Research Center                                                                                                | Firoz Ahmed; Maha Jamiruddin; Mahfuza Marzan; Md. Ahsanul Haq; Mohd. Raaed Jamiruddin; Mohib Ullah Khondoker; Mousumi Chaity; Mumtaz Jannat Oishee; Nafisa Azmuda; Nihad Adnan; Nowshin Jahan; Salma Akter; Sayeda Moriam Liza; Shahad Saif Khandker; Shahana Sharmin; Tamanna Ali; Taslin Jahan Mou                                                                                                                                                              |
| EPI_ISL_906306                                                                                                                                                                                                                                                                                                                                                         | Gorgas memorial Institute For Health Studies                                                               | Gorgas memorial Institute For Health Studies                                                                                               | Abrego L; Castillo M; Chavarria O; Diaz Y; Franco D; Gondola Y; Lopez-Verguez S; Martinez Alexander A.; Moreno A; Moreno B; Pitti Y; Saenz L                                                                                                                                                                                                                                                                                                                      |
| EPI_ISL_982857 to 982859, EPI_ISL_983063 to 983072, EPI_ISL_983075 to 983081, EPI_ISL_983083 to 983084, EPI_ISL_983086 to 983091                                                                                                                                                                                                                                       | Gravity Diagnostics                                                                                        | Kentucky State Public Health Lab                                                                                                           | Joshua Tobias; Karim George; Matthew Johnson; Rachel Zinner; Rhonda Lucas; Stephanie Lunn; Vaneet Arora; William Grooms                                                                                                                                                                                                                                                                                                                                           |
| EPI_ISL_700543, EPI_ISL_700550                                                                                                                                                                                                                                                                                                                                         | Great Brak River Clinic wc GBC                                                                             | NHLS/UCT                                                                                                                                   | Arash Iranzadeh; Bruna Galvao; Carolyn Williamson; Deelan Doolabh; Diana Hardie; Houriyah Tegally; Innocent Mudau; Kruger Marais; Lynn Tyers; Marvin Hsiao; Stephen Korsman                                                                                                                                                                                                                                                                                       |
| EPI_ISL_960149                                                                                                                                                                                                                                                                                                                                                         | Great Brak River Clinic wc GBC                                                                             | National Health Laboratory Service/UCT                                                                                                     | Arash Iranzadeh; Bruna Galvao; Carolyn Williamson; Deelan Doolabh; Diana Hardie; Innocent Mudau; Kruger Marais; Lynn Tyers; Marvin Hsiao; Stephen Korsman                                                                                                                                                                                                                                                                                                         |
| EPI_ISL_696466, EPI_ISL_696497, EPI_ISL_696501, EPI_ISL_696507                                                                                                                                                                                                                                                                                                         | Great Brak River Clinic wc GBC & NHLS/UCT                                                                  | KRISP, KZN Research Innovation and Sequencing Platform                                                                                     | Arash Iranzadeh; Bruna Galvao; Carolyn Williamson; Deelan Doolabh; Diana Hardie; Emanuel James San; Houriyah Tegally; Innocent Mudau; Jennifer Giandhari; Kruger Marais; Lynn Tyers; Marvin Hsiao; Stephen Korsman; Sureshnee Pillay; Tulio de Oliveira                                                                                                                                                                                                           |
| EPI_ISL_794818 to 794820, EPI_ISL_794822 to 794824                                                                                                                                                                                                                                                                                                                     | Greek Genome Center, Biomedical Research Foundation of the Academy of Athens (BRFAA)                       | Greek Genome Center, Biomedical Research Foundation of the Academy of Athens (BRFAA)                                                       | Christina Maria Kravvari; Dimitrios Thanos; Emmanouil Athanasiadis; Ioannis Vatsellas; Katerina Zoi; Thodoris Loupis                                                                                                                                                                                                                                                                                                                                              |
| EPI_ISL_640041                                                                                                                                                                                                                                                                                                                                                         | Green Point CDC wc GPH                                                                                     | NHLS/UCT                                                                                                                                   | Arash Iranzadeh; Bruna Galvao; Carolyn Williamson; Deelan Doolabh; Diana Hardie; Innocent Mudau; Kruger Marais; Lynn Tyers; Marvin Hsiao; Stephen Korsman                                                                                                                                                                                                                                                                                                         |
| EPI_ISL_640040, EPI_ISL_640043, EPI_ISL_640045, EPI_ISL_640051 to 640055, EPI_ISL_640058, EPI_ISL_640060 to 640061, EPI_ISL_640066 to 640067, EPI_ISL_640084, EPI_ISL_700507, EPI_ISL_700534, EPI_ISL_700577                                                                                                                                                           |                                                                                                            |                                                                                                                                            | EPI_ISL_640111 to 640112, EPI_ISL_640119 to 640120, EPI_ISL_640122, EPI_ISL_640128 to 640135, EPI_ISL_640137 to 640140, EPI_ISL_700493, EPI_ISL_700507, EPI_ISL_700534, EPI_ISL_700577                                                                                                                                                                                                                                                                            |
| see above                                                                                                                                                                                                                                                                                                                                                              | Groote Schuur Hospital wc GSH                                                                              | NHLS/UCT                                                                                                                                   | Arash Iranzadeh; Bruna Galvao; Carolyn Williamson; Deelan Doolabh; Diana Hardie; Innocent Mudau; Kruger Marais; Lynn Tyers; Marvin Hsiao; Stephen Korsman                                                                                                                                                                                                                                                                                                         |
| EPI_ISL_960102 to 960103, EPI_ISL_960107, EPI_ISL_960109, EPI_ISL_960117, EPI_ISL_960126, EPI_ISL_960132 to 960133, EPI_ISL_960135 to 960136, EPI_ISL_960140, EPI_ISL_960142 to 960143, EPI_ISL_960145                                                                                                                                                                 |                                                                                                            |                                                                                                                                            | Arash Iranzadeh; Bruna Galvao; Carolyn Williamson; Deelan Doolabh; Diana Hardie; Innocent Mudau; Kruger Marais; Lynn Tyers; Marvin Hsiao; Stephen Korsman                                                                                                                                                                                                                                                                                                         |
| see above                                                                                                                                                                                                                                                                                                                                                              | Groote Schuur Hospital wc GSH                                                                              | National Health Laboratory Service/UCT                                                                                                     | Arash Iranzadeh; Bruna Galvao; Carolyn Williamson; Deelan Doolabh; Diana Hardie; Innocent Mudau; Kruger Marais; Lynn Tyers; Marvin Hsiao; Stephen Korsman                                                                                                                                                                                                                                                                                                         |
| EPI_ISL_696464                                                                                                                                                                                                                                                                                                                                                         | Groote Schuur Hospital wc GSH & NHLS/UCT                                                                   | KRISP, KZN Research Innovation and Sequencing Platform                                                                                     | Arash Iranzadeh; Bruna Galvao; Carolyn Williamson; Deelan Doolabh; Diana Hardie; Emanuel James San; Houriyah Tegally; Innocent Mudau; Jennifer Giandhari; Kruger Marais; Lynn Tyers; Marvin Hsiao; Stephen Korsman; Sureshnee Pillay; Tulio de Oliveira                                                                                                                                                                                                           |
| EPI_ISL_698105 to 698169, EPI_ISL_698172 to 699161, EPI_ISL_708827 to 708838                                                                                                                                                                                                                                                                                           | Group 42 (G42) Healthcare, Abu Dhabi, United Arab Emirates; Department of Health, The United Arab Emirates | G42 Healthcare                                                                                                                             | Ashish Koshy; Budoor Alqarni; Denghui Liu; Fang Chen; Hanif Khalak; Huanming Yang; Javier Quiroz; Jian Wang; Junhua Li; Ke Liang; Long Lin; Mohammed Saifuddin Fashuddin; Nan Qiao; Nawal Ahmed Mohamed Al Kaabi; Pauline Ogrodzki; Pei Wu; Peng Xiao; Pengxian Liu; Rong Liu; Sally Mahmoud; Siyang Liu; Stephen S. Francis; Tao Ma; Vinay Kusuma; Walid Abbas Zaher; Weibin Liu; Wenjun He; Xavier Anton; Xin Jin; Xin Meng; Xinyu Huang; Xun Xu; Zhaorong Yuan |
| EPI_ISL_981401 to 981405, EPI_ISL_981409 to 981424, EPI_ISL_981426 to 981451, EPI_ISL_981489 to 981491, EPI_ISL_981493 to 981496, EPI_ISL_981498 to 981531, EPI_ISL_982145                                                                                                                                                                                             |                                                                                                            |                                                                                                                                            | EPI_ISL_981401 to 981405, EPI_ISL_981409 to 981424, EPI_ISL_981426 to 981451, EPI_ISL_981489 to 981491, EPI_ISL_981493 to 981496, EPI_ISL_981498 to 981531, EPI_ISL_982145                                                                                                                                                                                                                                                                                        |
| see above                                                                                                                                                                                                                                                                                                                                                              | Groupe LCD                                                                                                 | Department of Virology, Henri Mondor University Hospital, Assistance Publique Hôpitaux de Paris, Université Paris-Est Créteil, INSERM U955 | Alexandre Soulier; Christophe Rodriguez; Elisabeth Trawinski; Guillaume Gricourt; Jean-Michel Pawlotsky; Melissa N'Debi; Slim Fourati; Vanessa Demontant                                                                                                                                                                                                                                                                                                          |
| EPI_ISL_729737, EPI_ISL_729739 to 729740, EPI_ISL_729771, EPI_ISL_729774 to 729776, EPI_ISL_729781 to 729785, EPI_ISL_729787 to 729788, EPI_ISL_729790 to 729791, EPI_ISL_729793, EPI_ISL_792558 to 792559                                                                                                                                                             |                                                                                                            |                                                                                                                                            | EPI_ISL_729737, EPI_ISL_729739 to 729740, EPI_ISL_729771, EPI_ISL_729774 to 729776, EPI_ISL_729781 to 729785, EPI_ISL_729787 to 729788, EPI_ISL_729790 to 729791, EPI_ISL_729793, EPI_ISL_792558 to 792559                                                                                                                                                                                                                                                        |
| see above                                                                                                                                                                                                                                                                                                                                                              | Grubaugh Lab - Yale School of Public Health                                                                | Grubaugh Lab - Yale School of Public Health                                                                                                | Adam Moore; Akiko Iwasaki; Albert Ko; Alice Lu; Allison Nelson; Anderson Brito; Anne Wylie; Annie Watkins; Arnau Casanovas; Catherine Muenker; Chaney Kalinich; Chantal Vogels; Charlese Dela Cruz; Isabel Ott; Joseph Fauver; Maria Tokuyama; Mary Petrone; Nathan Grubaugh; Patrick Wong; Peiwen Lu; Richard Martinello; Saad Omer; Shelli Farhadian; Tara Alpert                                                                                               |
| EPI_ISL_804009 to 804015                                                                                                                                                                                                                                                                                                                                               | Grupo de Resistencia Antimicrobiana en bacterias patógenas y ambientales GRABPA                            | Facultad de Ciencias de la Vida, UNAB                                                                                                      | Claudio Meneses; César Echeverría; Dayán Sanhueza; Eduardo Castro; Jorge Olivares; Macarena Bastías; Sebastián Wolter; Waldo Díaz                                                                                                                                                                                                                                                                                                                                 |
| EPI_ISL_640069 to 640071, EPI_ISL_640104, EPI_ISL_700415, EPI_ISL_700455, EPI_ISL_700481, EPI_ISL_700491, EPI_ISL_700503, EPI_ISL_700512, EPI_ISL_700514, EPI_ISL_700530, EPI_ISL_700576, EPI_ISL_700578                                                                                                                                                               |                                                                                                            |                                                                                                                                            | EPI_ISL_640069 to 640071, EPI_ISL_640104, EPI_ISL_700415, EPI_ISL_700455, EPI_ISL_700481, EPI_ISL_700491, EPI_ISL_700503, EPI_ISL_700512, EPI_ISL_700514, EPI_ISL_700530, EPI_ISL_700576, EPI_ISL_700578                                                                                                                                                                                                                                                          |
| see above                                                                                                                                                                                                                                                                                                                                                              | Guguletu CHC wc GDH                                                                                        | NHLS/UCT                                                                                                                                   | Arash Iranzadeh; Bruna Galvao; Carolyn Williamson; Deelan Doolabh; Diana Hardie; Innocent Mudau; Kruger Marais; Lynn Tyers; Marvin Hsiao; Stephen Korsman                                                                                                                                                                                                                                                                                                         |
| EPI_ISL_960154 to 960158, EPI_ISL_960163, EPI_ISL_960167, EPI_ISL_960174                                                                                                                                                                                                                                                                                               | Guguletu CHC wc GDH                                                                                        | National Health Laboratory Service/UCT                                                                                                     | Arash Iranzadeh; Bruna Galvao; Carolyn Williamson; Deelan Doolabh; Diana Hardie; Innocent Mudau; Kruger Marais; Lynn Tyers; Marvin Hsiao; Stephen Korsman                                                                                                                                                                                                                                                                                                         |
| EPI_ISL_660802 to 660805, EPI_ISL_660869 to 660881, EPI_ISL_660892 to 660893, EPI_ISL_942415 to 942418, EPI_ISL_942482 to 942494, EPI_ISL_942505 to 942506, EPI_ISL_942941                                                                                                                                                                                             |                                                                                                            |                                                                                                                                            | EPI_ISL_660802 to 660805, EPI_ISL_660869 to 660881, EPI_ISL_660892 to 660893, EPI_ISL_942415 to 942418, EPI_ISL_942482 to 942494, EPI_ISL_942505 to 942506, EPI_ISL_942941                                                                                                                                                                                                                                                                                        |
| see above                                                                                                                                                                                                                                                                                                                                                              | Gundersen Clinical Microbiology Laboratory                                                                 | Kabara Cancer Research Institute                                                                                                           | Craig S. Richmond; Parica A. Kenny                                                                                                                                                                                                                                                                                                                                                                                                                                |
| EPI_ISL_660795 to 660801, EPI_ISL_660806 to 660868, EPI_ISL_660882 to 660891, EPI_ISL_660894 to 661173, EPI_ISL_806807 to 806808, EPI_ISL_830649, EPI_ISL_861472 to 861475, EPI_ISL_906146, EPI_ISL_942408 to 942414, EPI_ISL_942419 to 942481, EPI_ISL_942495 to 942504, EPI_ISL_942507 to 942514, EPI_ISL_942516 to 942894, EPI_ISL_942940, EPI_ISL_942942 to 942950 |                                                                                                            |                                                                                                                                            | EPI_ISL_660795 to 660801, EPI_ISL_660806 to 660868, EPI_ISL_660882 to 660891, EPI_ISL_660894 to 661173, EPI_ISL_806807 to 806808, EPI_ISL_830649, EPI_ISL_861472 to 861475, EPI_ISL_906146, EPI_ISL_942408 to 942414, EPI_ISL_942419 to 942481, EPI_ISL_942495 to 942504, EPI_ISL_942507 to 942514, EPI_ISL_942516 to 942894, EPI_ISL_942940, EPI_ISL_942942 to 942950                                                                                            |
| see above                                                                                                                                                                                                                                                                                                                                                              | Gundersen Molecular Diagnostics Laboratory                                                                 | Kabara Cancer Research Institute                                                                                                           | Craig S. Richmond; Parica A. Kenny                                                                                                                                                                                                                                                                                                                                                                                                                                |
| EPI_ISL_684127, EPI_ISL_684220 to 684288, EPI_ISL_684325 to 684338, EPI_ISL_685279 to 685281, EPI_ISL_689612, EPI_ISL_689617, EPI_ISL_690210 to 690253, EPI_ISL_692047, EPI_ISL_692316 to 692327, EPI_ISL_896764 to 896794, EPI_ISL_901458 to 901490, EPI_ISL_901966 to 902018                                                                                         |                                                                                                            |                                                                                                                                            | EPI_ISL_684127, EPI_ISL_684220 to 684288, EPI_ISL_684325 to 684338, EPI_ISL_685279 to 685281, EPI_ISL_689612, EPI_ISL_689617, EPI_ISL_690210 to 690253, EPI_ISL_692047, EPI_ISL_692316 to 692327, EPI_ISL_896764 to 896794, EPI_ISL_901458 to 901490, EPI_ISL_901966 to 902018                                                                                                                                                                                    |
| see above                                                                                                                                                                                                                                                                                                                                                              | Gunma Prefectural Institute of Public Health and Environmental Sciences                                    | Pathogen Genomics Center, National Institute of Infectious Diseases                                                                        | Kentaro Itokawa; Makoto Kuroda; Masanori Hashino; Rina Tanaka; Tsuyoshi Sekizuka                                                                                                                                                                                                                                                                                                                                                                                  |
| EPI_ISL_745201                                                                                                                                                                                                                                                                                                                                                         | Guntur General Hospital                                                                                    | CSIR-Centre for Cellular and Molecular Biology                                                                                             | Archana Bharadwaj Siva; B Himasri; Blessy B John; Divya Tej Sowpati; Dr.P.Shashikala Reddy; Dr.S.Pavani; Dr.Satyaprasad; Dr.V.Sudha Rani; Karthik Bharadwaj Tallapaka; Lamuk Zaveri; M Soujanya Reddy; Namami Gaur; Nikhil Hajiris; Onkar Kulkarni; Payel Mukherjee; Pratheusa Maccha; Priya Singh; Purushotham Vodnala; Rakesh K Mishra; Sakshi Shambhavi; Shagufta Khan; Sofia Banu; Tulasi Nagabandi; Viswagithe S L                                           |
| EPI_ISL_955234, EPI_ISL_955239                                                                                                                                                                                                                                                                                                                                         | HE CMN LA RAZA                                                                                             | BIOBANCO / COCTI                                                                                                                           | Arias C; Borja-Aburto VH; Grajales-Muñiz C; Grande R; Isa P; López S; Muñoz-Medina JE; Ochoa Carrera LA; Rojas-Mendoza T; Santacruz Tinoco CE; Sánchez A; Taboada B                                                                                                                                                                                                                                                                                               |
| EPI_ISL_639948 to 639973, EPI_ISL_733023 to 733153, EPI_ISL_733301 to 733391, EPI_ISL_733393, EPI_ISL_733396 to 733401, EPI_ISL_733417 to 733458, EPI_ISL_872972 to 873039                                                                                                                                                                                             |                                                                                                            |                                                                                                                                            | EPI_ISL_639948 to 639973, EPI_ISL_733023 to 733153, EPI_ISL_733301 to 733391, EPI_ISL_733393, EPI_ISL_733396 to 733401, EPI_ISL_733417 to 733458, EPI_ISL_872972 to 873039                                                                                                                                                                                                                                                                                        |
| see above                                                                                                                                                                                                                                                                                                                                                              | HELIX LLC                                                                                                  | WHO National Influenza Centre Russian Federation                                                                                           | Andrey Komissarov; Anna Ivanova; Artem Fadeev; Daria Danilenko; Dmitry Bazhenov; Dmitry Lioznov; Elena Nabieva; Georgii Bazykin; Ksenia Safina;                                                                                                                                                                                                                                                                                                                   |

|                                                                                                                                                                          |                                                                                 |                                                                                                                                                                                                                                                        |                                                                                                                                                                                                                                                                                                                                                                                                                             |
|--------------------------------------------------------------------------------------------------------------------------------------------------------------------------|---------------------------------------------------------------------------------|--------------------------------------------------------------------------------------------------------------------------------------------------------------------------------------------------------------------------------------------------------|-----------------------------------------------------------------------------------------------------------------------------------------------------------------------------------------------------------------------------------------------------------------------------------------------------------------------------------------------------------------------------------------------------------------------------|
|                                                                                                                                                                          |                                                                                 |                                                                                                                                                                                                                                                        | Kseniya Komissarova; Mikhail Bakaev                                                                                                                                                                                                                                                                                                                                                                                         |
| EPI_ISL_955246                                                                                                                                                           | HGOMF 60 TLANEPANTLA                                                            | BIOBANCO / COCTI                                                                                                                                                                                                                                       | Arias C; Borja-Aburto VH; Grajales-Muñiz C; Grande R; Isa P; López S; Muñoz-Medina JE; Ochoa Carrera LA; Rojas-Mendoza T; Santacruz Tinoco CE; Sánchez A; Taboada B                                                                                                                                                                                                                                                         |
| EPI_ISL_955236, EPI_ISL_955245                                                                                                                                           | HGR 1 VICENTE GUERRERO                                                          | BIOBANCO / COCTI                                                                                                                                                                                                                                       | Arias C; Borja-Aburto VH; Grajales-Muñiz C; Grande R; Isa P; López S; Muñoz-Medina JE; Ochoa Carrera LA; Rojas-Mendoza T; Santacruz Tinoco CE; Sánchez A; Taboada B                                                                                                                                                                                                                                                         |
| EPI_ISL_955247                                                                                                                                                           | HGR 200 TECAMAC                                                                 | BIOBANCO / COCTI                                                                                                                                                                                                                                       | Arias C; Borja-Aburto VH; Grajales-Muñiz C; Grande R; Isa P; López S; Muñoz-Medina JE; Ochoa Carrera LA; Rojas-Mendoza T; Santacruz Tinoco CE; Sánchez A; Taboada B                                                                                                                                                                                                                                                         |
| EPI_ISL_955242 to 955243, EPI_ISL_955250 to 955253, EPI_ISL_955255                                                                                                       | HGSMF 26 CABO SAN LUCAS                                                         | BIOBANCO / COCTI                                                                                                                                                                                                                                       | Arias C; Borja-Aburto VH; Grajales-Muñiz C; Grande R; Isa P; López S; Muñoz-Medina JE; Ochoa Carrera LA; Rojas-Mendoza T; Santacruz Tinoco CE; Sánchez A; Taboada B                                                                                                                                                                                                                                                         |
| EPI_ISL_955256                                                                                                                                                           | HGZ 1 CARLOS MC GREGOR                                                          | BIOBANCO / COCTI                                                                                                                                                                                                                                       | Arias C; Borja-Aburto VH; Grajales-Muñiz C; Grande R; Isa P; López S; Muñoz-Medina JE; Ochoa Carrera LA; Rojas-Mendoza T; Santacruz Tinoco CE; Sánchez A; Taboada B                                                                                                                                                                                                                                                         |
| EPI_ISL_955249                                                                                                                                                           | HGZ 2A PASO-TRONCOSO                                                            | BIOBANCO / COCTI                                                                                                                                                                                                                                       | Arias C; Borja-Aburto VH; Grajales-Muñiz C; Grande R; Isa P; López S; Muñoz-Medina JE; Ochoa Carrera LA; Rojas-Mendoza T; Santacruz Tinoco CE; Sánchez A; Taboada B                                                                                                                                                                                                                                                         |
| EPI_ISL_955240 to 955241                                                                                                                                                 | HGZ 30 MEXICALI                                                                 | BIOBANCO / COCTI                                                                                                                                                                                                                                       | Arias C; Borja-Aburto VH; Grajales-Muñiz C; Grande R; Isa P; López S; Muñoz-Medina JE; Ochoa Carrera LA; Rojas-Mendoza T; Santacruz Tinoco CE; Sánchez A; Taboada B                                                                                                                                                                                                                                                         |
| EPI_ISL_955257                                                                                                                                                           | HGZ 32 VILLA COAPA                                                              | BIOBANCO / COCTI                                                                                                                                                                                                                                       | Arias C; Borja-Aburto VH; Grajales-Muñiz C; Grande R; Isa P; López S; Muñoz-Medina JE; Ochoa Carrera LA; Rojas-Mendoza T; Santacruz Tinoco CE; Sánchez A; Taboada B                                                                                                                                                                                                                                                         |
| EPI_ISL_955233                                                                                                                                                           | HGZMF 1 LA PAZ                                                                  | BIOBANCO / COCTI                                                                                                                                                                                                                                       | Arias C; Borja-Aburto VH; Grajales-Muñiz C; Grande R; Isa P; López S; Muñoz-Medina JE; Ochoa Carrera LA; Rojas-Mendoza T; Santacruz Tinoco CE; Sánchez A; Taboada B                                                                                                                                                                                                                                                         |
| EPI_ISL_955238                                                                                                                                                           | HI CMN LA RAZA                                                                  | BIOBANCO / COCTI                                                                                                                                                                                                                                       | Arias C; Borja-Aburto VH; Grajales-Muñiz C; Grande R; Isa P; López S; Muñoz-Medina JE; Ochoa Carrera LA; Rojas-Mendoza T; Santacruz Tinoco CE; Sánchez A; Taboada B                                                                                                                                                                                                                                                         |
| EPI_ISL_751578, EPI_ISL_751603, EPI_ISL_751651, EPI_ISL_751673 to 751675, EPI_ISL_751758, EPI_ISL_751761, EPI_ISL_751767, EPI_ISL_751772, EPI_ISL_903574, EPI_ISL_903583 |                                                                                 |                                                                                                                                                                                                                                                        |                                                                                                                                                                                                                                                                                                                                                                                                                             |
| see above                                                                                                                                                                | HI Dept. of Health, State Laboratories Division                                 | Genomics and Discovery, Respiratory Viruses Branch, Division of Viral Diseases, Centers for Disease Control and Prevention                                                                                                                             | Anna Montmayeur; Anna Uehara; Ben L. Rambo-Martin; Clinton R. Paden; Dhvani Batra; Haibin Wang; Jasmine Padilla; Jing Zhang; Justin Lee; Krista Queen; Lori Rowe; Mark Burroughs; Mili Sheth; Peter W. Cook; Rachel Marine; Sarah Nobles; Suxiang Tong; Yan Li; Ying Tao                                                                                                                                                    |
| EPI_ISL_860849                                                                                                                                                           | HIA BÉGIN Service de Biologie                                                   | National Reference Center for Viruses of Respiratory Infections, Institut Pasteur, Paris                                                                                                                                                               | Angela Brisebarre; Camille Capel; Etienne Simon-Lorière; Marion Barbet; Maud Vanpeene; Merens Audrey; Méline Bizard; Sylvie Behillili; Sylvie van der Werf; Vincent Enouf                                                                                                                                                                                                                                                   |
| EPI_ISL_941270                                                                                                                                                           | HIA PERCY - lab biologie                                                        | National Reference Center for Viruses of Respiratory Infections, Institut Pasteur, Paris                                                                                                                                                               | Angela Brisebarre; Camille Capel; Etienne Simon-Lorière; Marion Barbet; Maud Vanpeene; Méline Bizard; Sylvie Behillili; Sylvie van der Werf; Vincent Enouf; Vincent Foissaud                                                                                                                                                                                                                                                |
| EPI_ISL_860850 to 860851                                                                                                                                                 | HIA PERCY, Biologie médicale                                                    | National Reference Center for Viruses of Respiratory Infections, Institut Pasteur, Paris                                                                                                                                                               | Angela Brisebarre; Camille Capel; Etienne Simon-Lorière; Foissaud Vincent; Marion Barbet; Maud Vanpeene; Méline Bizard; Sylvie Behillili; Sylvie van der Werf; Vincent Enouf                                                                                                                                                                                                                                                |
| EPI_ISL_914808                                                                                                                                                           | HLE - ASOCIACION HOGAR PARA ANCIANOS PRESBITERO JAFET JIMENEZ MORALES DE GRECIA | Incienza, Instituto Costarricense de Investigación y Enseñanza en Nutrición y Salud                                                                                                                                                                    | Adriana Godínez; Claudio Soto-Garita; Estela Cordero; Francisco Duarte; Hebleen Porras; Melany Calderón & Mariel López                                                                                                                                                                                                                                                                                                      |
| EPI_ISL_914827                                                                                                                                                           | HLE - ASOCIACION DE ALBERGUE PARA ANCIANOS DE GOLFITO                           | Incienza, Instituto Costarricense de Investigación y Enseñanza en Nutrición y Salud                                                                                                                                                                    | Adriana Godínez; Claudio Soto-Garita; Estela Cordero; Francisco Duarte; Hebleen Porras; Melany Calderón & Mariel López                                                                                                                                                                                                                                                                                                      |
| EPI_ISL_914807                                                                                                                                                           | HLE - ASOCIACION HOGAR DE ANCIANOS SANTIAGO CRESPO CALVO                        | Incienza, Instituto Costarricense de Investigación y Enseñanza en Nutrición y Salud                                                                                                                                                                    | Adriana Godínez; Claudio Soto-Garita; Estela Cordero; Francisco Duarte; Hebleen Porras; Melany Calderón & Mariel López                                                                                                                                                                                                                                                                                                      |
| EPI_ISL_914826                                                                                                                                                           | HLE - MANOS ABIERTAS                                                            | Incienza, Instituto Costarricense de Investigación y Enseñanza en Nutrición y Salud                                                                                                                                                                    | Adriana Godínez; Claudio Soto-Garita; Estela Cordero; Francisco Duarte; Hebleen Porras; Melany Calderón & Mariel López                                                                                                                                                                                                                                                                                                      |
| EPI_ISL_860899                                                                                                                                                           | HOPITAL PAUL BROUSSE - Service Microbiologie                                    | National Reference Center for Viruses of Respiratory Infections, Institut Pasteur, Paris                                                                                                                                                               | Angela Brisebarre; Camille Capel; Etienne Simon-Lorière; Marion Barbet; Maud Vanpeene; Méline Bizard; Roque-Afonso Anne-Marie; Sylvie Behillili; Sylvie van der Werf; Vincent Enouf                                                                                                                                                                                                                                         |
| EPI_ISL_912560 to 912562, EPI_ISL_912599                                                                                                                                 | HOPITAL SIMONE VEIL                                                             | National Reference Center for Viruses of Respiratory Infections, Institut Pasteur, Paris                                                                                                                                                               | Angela Brisebarre; Camille Capel; Etienne Simon-Lorière; Marion Barbet; Maud Vanpeene; Moreau Farida; Méline Bizard; Sylvie Behillili; Sylvie van der Werf; Vincent Enouf                                                                                                                                                                                                                                                   |
| EPI_ISL_912621                                                                                                                                                           | HOPITAL YVES LE FOLL Laboratoire de Biologie Médicale                           | National Reference Center for Viruses of Respiratory Infections, Institut Pasteur, Paris                                                                                                                                                               | Angela Brisebarre; Camille Capel; Chrevet Laurent; Etienne Simon-Lorière; Marion Barbet; Maud Vanpeene; Méline Bizard; Sylvie Behillili; Sylvie van der Werf; Vincent Enouf                                                                                                                                                                                                                                                 |
| EPI_ISL_682239                                                                                                                                                           | HOSPITAL CIUDAD NEILY                                                           | Incienza, Instituto Costarricense de Investigación y Enseñanza en Nutrición y Salud                                                                                                                                                                    | Adriana Godínez & Melany Calderon; Claudio Soto-Garita; Estela Cordero; Francisco Duarte; Hebleen Porras                                                                                                                                                                                                                                                                                                                    |
| EPI_ISL_954792, EPI_ISL_954796                                                                                                                                           | HOSPITAL COMARCAL DE MELILLA                                                    | Instituto de Salud Carlos III                                                                                                                                                                                                                          | A. Monzón; F. Casas; I. Illescas, S.; I. Jiménez; I. Roman, S.; Iglesias-Caballero; M. Camarero; P. Zaballos; S. Cuesta; S. Pozo; S. Sandonís; S. Varona; V. Vázquez                                                                                                                                                                                                                                                        |
| EPI_ISL_914815 to 914819                                                                                                                                                 | HOSPITAL DE NIÑOS DR. CARLOS SAENZ HERRERA                                      | Incienza, Instituto Costarricense de Investigación y Enseñanza en Nutrición y Salud                                                                                                                                                                    | Adriana Godínez; Claudio Soto-Garita; Estela Cordero; Francisco Duarte; Hebleen Porras; Melany Calderón & Cristian Pérez-Corrales                                                                                                                                                                                                                                                                                           |
| EPI_ISL_906539                                                                                                                                                           | HOSPITAL DEPARTAMENTAL DE VILLAVICENCIO                                         | Instituto Nacional de Salud- Dirección de Investigación en Salud Pública, Universidad de los Andes- Applied genomics research group, Vicerrectoría de Investigación y Creación, Universidad de los Andes- Systems and Computing Engineering Department | Carlos Franco-Muñoz; Diego A. Álvarez-Díaz; Diego Andrés Prada; Gerardo Santamaría Jorge Duitama; Héctor Alejandro Ruiz-Moreno; Jhonnatan Reales-González; Jorge Ivan Diaz; Julian Naizaque; Katherine Laiton-Donato; Laura Natalia Gonzalez; Magdalena Wiesner; Marcela Mercado-Reyes; María T. Herrera-Sepúlveda; Martha Lucía Ospina Martínez; Mauricio Pacheco-Montealegre; Sheryll Corchuelo; Silvia Restrepo-Restrepo |
| EPI_ISL_906535, EPI_ISL_906537, EPI_ISL_906547                                                                                                                           | HOSPITAL DEPARTAMENTAL DE VILLAVICENCIO E.S.E.                                  | Instituto Nacional de Salud- Dirección de Investigación en Salud Pública, Universidad de los Andes- Applied genomics research group, Vicerrectoría de Investigación y Creación, Universidad de los Andes- Systems and Computing Engineering Department | Carlos Franco-Muñoz; Diego A. Álvarez-Díaz; Diego Andrés Prada; Gerardo Santamaría Jorge Duitama; Héctor Alejandro Ruiz-Moreno; Jhonnatan Reales-González; Jorge Ivan Diaz; Julian Naizaque; Katherine Laiton-Donato; Laura Natalia Gonzalez; Magdalena Wiesner; Marcela Mercado-Reyes; María T. Herrera-Sepúlveda; Martha Lucía Ospina Martínez; Mauricio Pacheco-Montealegre; Sheryll Corchuelo; Silvia Restrepo-Restrepo |
| EPI_ISL_914821 to 914823                                                                                                                                                 | HOSPITAL DR. ENRIQUE BALTODANO BRICEÑO                                          | Incienza, Instituto Costarricense de Investigación y Enseñanza en Nutrición y Salud                                                                                                                                                                    | Adriana Godínez; Claudio Soto-Garita; Estela Cordero; Francisco Duarte; Hebleen Porras; Melany Calderón & Mariel López                                                                                                                                                                                                                                                                                                      |
| EPI_ISL_914795                                                                                                                                                           | HOSPITAL DR. FERNANDO ESCALANTE PRADILLA                                        | Incienza, Instituto Costarricense de Investigación y Enseñanza en Nutrición y Salud                                                                                                                                                                    | Adriana Godínez; Claudio Soto-Garita; Estela Cordero; Francisco Duarte; Hebleen Porras; Melany Calderón & Mariel López                                                                                                                                                                                                                                                                                                      |
| EPI_ISL_914840                                                                                                                                                           | HOSPITAL DR. RAUL BLANCO CERVANTES                                              | Incienza, Instituto Costarricense de Investigación y Enseñanza en Nutrición y Salud                                                                                                                                                                    | Adriana Godínez; Claudio Soto-Garita; Estela Cordero; Francisco Duarte; Hebleen Porras; Melany Calderón & Rebeca Ruiz-Sánchez                                                                                                                                                                                                                                                                                               |
| EPI_ISL_914801                                                                                                                                                           | HOSPITAL DR. TOMAS CASAS CASAJUS                                                | Incienza, Instituto Costarricense de Investigación y Enseñanza en Nutrición y Salud                                                                                                                                                                    | Adriana Godínez; Claudio Soto-Garita; Estela Cordero; Francisco Duarte; Hebleen Porras; Melany Calderón & Mariel López                                                                                                                                                                                                                                                                                                      |
| EPI_ISL_954795                                                                                                                                                           | HOSPITAL GENERAL RIO CARRION                                                    | Instituto de Salud Carlos III                                                                                                                                                                                                                          | A. Monzón; F. Casas; I. García, A.; I. Jiménez; Iglesias-Caballero; M. Camarero; P. Zaballos; S. Cuesta; S. Pozo; S. Sandonís; S. Varona; V. Vázquez                                                                                                                                                                                                                                                                        |
| EPI_ISL_914814, EPI_ISL_914834                                                                                                                                           | HOSPITAL METROPOLITANO                                                          | Incienza, Instituto Costarricense de Investigación y                                                                                                                                                                                                   | Adriana Godínez; Claudio Soto-Garita; Estela Cordero; Francisco Duarte; Hebleen Porras; Melany Calderón & Margarita Lee-Lui                                                                                                                                                                                                                                                                                                 |

|                                                                                                                                                                                                                                                                                                                                                                                                                                                                                                                                                                                                                                                                                                                                                                                                                                                                                                                |                                                                                                                                                                  |                                                                                                                                                                                                                                                        |                                                                                                                                                                                                                                                                                                                                                                                                                                                                                                                                                                                                                        |                                                                                                                                                                                                                            |
|----------------------------------------------------------------------------------------------------------------------------------------------------------------------------------------------------------------------------------------------------------------------------------------------------------------------------------------------------------------------------------------------------------------------------------------------------------------------------------------------------------------------------------------------------------------------------------------------------------------------------------------------------------------------------------------------------------------------------------------------------------------------------------------------------------------------------------------------------------------------------------------------------------------|------------------------------------------------------------------------------------------------------------------------------------------------------------------|--------------------------------------------------------------------------------------------------------------------------------------------------------------------------------------------------------------------------------------------------------|------------------------------------------------------------------------------------------------------------------------------------------------------------------------------------------------------------------------------------------------------------------------------------------------------------------------------------------------------------------------------------------------------------------------------------------------------------------------------------------------------------------------------------------------------------------------------------------------------------------------|----------------------------------------------------------------------------------------------------------------------------------------------------------------------------------------------------------------------------|
| EPI_ISL_914836 to 914839                                                                                                                                                                                                                                                                                                                                                                                                                                                                                                                                                                                                                                                                                                                                                                                                                                                                                       | HOSPITAL MEXICO                                                                                                                                                  | Enseñanza en Nutrición y Salud<br>Inciensa, Instituto Costarricense de Investigación y Enseñanza en Nutrición y Salud                                                                                                                                  | Adriana Godínez; Claudio Soto-Garita; Estela Cordero; Francisco Duarte; Hebleen Porras; Melany Calderón & Mariel López; Melany Calderón & Teresita Somogyi                                                                                                                                                                                                                                                                                                                                                                                                                                                             |                                                                                                                                                                                                                            |
| EPI_ISL_906541                                                                                                                                                                                                                                                                                                                                                                                                                                                                                                                                                                                                                                                                                                                                                                                                                                                                                                 | HOSPITAL SAN JOSE DE MAICAO                                                                                                                                      | Instituto Nacional de Salud- Dirección de Investigación en Salud Pública, Universidad de los Andes- Applied genomics research group, Vicerrectoría de Investigación y Creación, Universidad de los Andes- Systems and Computing Engineering Department | Carlos Franco-Muñoz; Diego A. Álvarez-Díaz; Diego Andrés Prada; Gerardo Santamaría Jorge Duitama; Héctor Alejandro Ruiz-Moreno; Jhonnatan Reales-González; Jorge Ivan Díaz; Julian Naizaque; Katherine Laiton-Donato; Laura Natalia Gonzalez; Magdalena Wiesner; Marcela Mercado-Reyes; Maria T. Herrera-Sepúlveda; Martha Lucia Ospina Martínez; Mauricio Pacheco-Montealegre; Sheryll Corchuelo; Silvia Restrepo-Restrepo                                                                                                                                                                                            |                                                                                                                                                                                                                            |
| EPI_ISL_682241, EPI_ISL_682243, EPI_ISL_682245 to 682246, EPI_ISL_682253 to 682254, EPI_ISL_682257, EPI_ISL_682262 to 682264, EPI_ISL_682266 to 682274                                                                                                                                                                                                                                                                                                                                                                                                                                                                                                                                                                                                                                                                                                                                                         | see above                                                                                                                                                        | HOSPITAL SAN JUAN DE DIOS                                                                                                                                                                                                                              | Inciensa, Instituto Costarricense de Investigación y Enseñanza en Nutrición y Salud                                                                                                                                                                                                                                                                                                                                                                                                                                                                                                                                    | Adriana Godínez & Melany Calderon; Claudio Soto-Garita; Estela Cordero; Francisco Duarte; Hebleen Porras                                                                                                                   |
| EPI_ISL_682242, EPI_ISL_682255                                                                                                                                                                                                                                                                                                                                                                                                                                                                                                                                                                                                                                                                                                                                                                                                                                                                                 | HOSPITAL SAN VICENTE DE PAUL                                                                                                                                     | Inciensa, Instituto Costarricense de Investigación y Enseñanza en Nutrición y Salud                                                                                                                                                                    | Adriana Godínez; Adriana Godínez & Melany Calderon; Claudio Soto-Garita; Estela Cordero; Francisco Duarte; Hebleen Porras; Melany Calderon & Mariel López                                                                                                                                                                                                                                                                                                                                                                                                                                                              |                                                                                                                                                                                                                            |
| EPI_ISL_954811, EPI_ISL_954813                                                                                                                                                                                                                                                                                                                                                                                                                                                                                                                                                                                                                                                                                                                                                                                                                                                                                 | HOSPITAL UNIVERSITARIO DE GUADALAJARA                                                                                                                            | Instituto de Salud Carlos III                                                                                                                                                                                                                          | A. Monzón; F. Casas; I. González, A.; I. Jiménez; Iglesias-Caballero; M. Camarero; P. Zaballos; S. Cuesta; S. Pozo; S. Sandonis; S. Varona; V. Vázquez                                                                                                                                                                                                                                                                                                                                                                                                                                                                 |                                                                                                                                                                                                                            |
| EPI_ISL_794659 to 794660                                                                                                                                                                                                                                                                                                                                                                                                                                                                                                                                                                                                                                                                                                                                                                                                                                                                                       | HOSPITAL UNIVERSITARIO SAN IGNACIO                                                                                                                               | Instituto Nacional de Salud - Dirección de Investigación en Salud Pública                                                                                                                                                                              | Carlos Franco-Muñoz; Diego A. Álvarez-Díaz; Diego Andrés Prada; Gerardo Santamaría; Jonathan Reales; Julian Naizaque; Katherine Laiton-Donato; Magdalena Wiesner; Marcela Mercado-Reyes; Maria T. Herrera; Martha Lucia Ospina Martínez; Mauricio Pacheco-Montealegre; Paola Muñoz-Laiton; Sheryl Corchuelo                                                                                                                                                                                                                                                                                                            |                                                                                                                                                                                                                            |
| EPI_ISL_682265                                                                                                                                                                                                                                                                                                                                                                                                                                                                                                                                                                                                                                                                                                                                                                                                                                                                                                 | HOSPITAL UPALA                                                                                                                                                   | Inciensa, Instituto Costarricense de Investigación y Enseñanza en Nutrición y Salud                                                                                                                                                                    | Adriana Godínez & Melany Calderon; Claudio Soto-Garita; Estela Cordero; Francisco Duarte; Hebleen Porras                                                                                                                                                                                                                                                                                                                                                                                                                                                                                                               |                                                                                                                                                                                                                            |
| EPI_ISL_636975 to 636979                                                                                                                                                                                                                                                                                                                                                                                                                                                                                                                                                                                                                                                                                                                                                                                                                                                                                       | HP Pemba                                                                                                                                                         | KRISP, KZN Research Innovation and Sequencing Platform                                                                                                                                                                                                 | Giandhari J; Ismael N; Nadia Siteo; Nedio Mabunda; Paulo Arnaldo; Pillay S; Tegally H; Wilkinson E; de Oliveira T                                                                                                                                                                                                                                                                                                                                                                                                                                                                                                      |                                                                                                                                                                                                                            |
| EPI_ISL_648151                                                                                                                                                                                                                                                                                                                                                                                                                                                                                                                                                                                                                                                                                                                                                                                                                                                                                                 | Halmstad                                                                                                                                                         | The Public Health Agency of Sweden                                                                                                                                                                                                                     | Anna Risberg; Anna-Malin Linde; Karin Tegmark-Wisell; Maria Lind Karlberg; Mattias Haukland; Mia Brytting; Olov Svartstrom; Oskar Karlsson Lindsjo; Petra Edquist; Reza Advani; Sandra Brodsson                                                                                                                                                                                                                                                                                                                                                                                                                        |                                                                                                                                                                                                                            |
| EPI_ISL_623086, EPI_ISL_648148                                                                                                                                                                                                                                                                                                                                                                                                                                                                                                                                                                                                                                                                                                                                                                                                                                                                                 | Halmstad klinisk mikrobiologi                                                                                                                                    | The Public Health Agency of Sweden                                                                                                                                                                                                                     | Anna Risberg; Anna-Malin Linde; Karin Tegmark-Wisell; Maria Lind Karlberg; Mattias Haukland; Mia Brytting; Olov Svartstrom; Oskar Karlsson Lindsjo; Petra Edquist; Reza Advani; Sandra Brodsson                                                                                                                                                                                                                                                                                                                                                                                                                        |                                                                                                                                                                                                                            |
| EPI_ISL_710606 to 710607, EPI_ISL_766591                                                                                                                                                                                                                                                                                                                                                                                                                                                                                                                                                                                                                                                                                                                                                                                                                                                                       | Halsomedicinskt Center                                                                                                                                           | The Public Health Agency of Sweden                                                                                                                                                                                                                     | Department of Microbiology; The Public Health Agency of Sweden                                                                                                                                                                                                                                                                                                                                                                                                                                                                                                                                                         |                                                                                                                                                                                                                            |
| EPI_ISL_660137 to 660139, EPI_ISL_660141 to 660142                                                                                                                                                                                                                                                                                                                                                                                                                                                                                                                                                                                                                                                                                                                                                                                                                                                             | Hamadi                                                                                                                                                           | National Health Laboratory Service (NHLS), Tygerberg                                                                                                                                                                                                   | Bronwyn Kleinhans; Davis M-A; Draper C; Eduan Wilkinkond; Gert van Zyl; Houriiyah Tegally; Hsiao M; Kayla Delaney; Siegfried N; Susan Engelbrecht; Tulio de Oliveira; Williamson C; Wolfgang Preiser                                                                                                                                                                                                                                                                                                                                                                                                                   |                                                                                                                                                                                                                            |
| EPI_ISL_766028, EPI_ISL_883158 to 883171                                                                                                                                                                                                                                                                                                                                                                                                                                                                                                                                                                                                                                                                                                                                                                                                                                                                       | Hannover Medical School, Institute of Virology                                                                                                                   | Hannover Medical School, Institute of Virology                                                                                                                                                                                                         | Jasper Götting; Lars Steinbrück                                                                                                                                                                                                                                                                                                                                                                                                                                                                                                                                                                                        |                                                                                                                                                                                                                            |
| EPI_ISL_700411, EPI_ISL_700418, EPI_ISL_700457, EPI_ISL_700463, EPI_ISL_700477, EPI_ISL_700480, EPI_ISL_700494, EPI_ISL_700515 to 700516, EPI_ISL_700561 to 700562, EPI_ISL_700566, EPI_ISL_700573, EPI_ISL_700585, EPI_ISL_700593                                                                                                                                                                                                                                                                                                                                                                                                                                                                                                                                                                                                                                                                             | see above                                                                                                                                                        | Hannover Park CHC wc HPH                                                                                                                                                                                                                               | NHLS/UCT                                                                                                                                                                                                                                                                                                                                                                                                                                                                                                                                                                                                               | Arash Iranzadeh; Bruna Galvao; Carolyn Williamson; Deelan Doolabh; Diana Hardie; Innocent Mudau; Kruger Marais; Lynn Tyers; Marvin Hsiao; Stephen Korsman                                                                  |
| EPI_ISL_960165                                                                                                                                                                                                                                                                                                                                                                                                                                                                                                                                                                                                                                                                                                                                                                                                                                                                                                 | Hannover Park CHC wc HPH                                                                                                                                         | National Health Laboratory Service/UCT                                                                                                                                                                                                                 | Arash Iranzadeh; Bruna Galvao; Carolyn Williamson; Deelan Doolabh; Diana Hardie; Innocent Mudau; Kruger Marais; Lynn Tyers; Marvin Hsiao; Stephen Korsman                                                                                                                                                                                                                                                                                                                                                                                                                                                              |                                                                                                                                                                                                                            |
| EPI_ISL_635080 to 635084, EPI_ISL_635089 to 635091, EPI_ISL_635133, EPI_ISL_635184                                                                                                                                                                                                                                                                                                                                                                                                                                                                                                                                                                                                                                                                                                                                                                                                                             | Haukeland University Hospital, Department of Medical Microbiology                                                                                                | Norwegian Institute of Public Health, Department of Virology                                                                                                                                                                                           | Hilde Elshaug; Hilde Vollan; Kamilla Heddeland Instefjord; Karoline Bragstad; Kathrine Stene-Johansen; Marie Paulsen Madsen; Olav Hungnes; Rasmus Riis Kopperud                                                                                                                                                                                                                                                                                                                                                                                                                                                        |                                                                                                                                                                                                                            |
| EPI_ISL_635128, EPI_ISL_668392, EPI_ISL_668405, EPI_ISL_759975, EPI_ISL_775276, EPI_ISL_775335 to 775336, EPI_ISL_775357, EPI_ISL_775407 to 775409, EPI_ISL_796652, EPI_ISL_860208, EPI_ISL_860211, EPI_ISL_860278, EPI_ISL_964951                                                                                                                                                                                                                                                                                                                                                                                                                                                                                                                                                                                                                                                                             | see above                                                                                                                                                        | Haukeland University Hospital, Dept. of Microbiology                                                                                                                                                                                                   | Norwegian Institute of Public Health, Department of Virology                                                                                                                                                                                                                                                                                                                                                                                                                                                                                                                                                           | Atiya R Ali; Hilde Elshaug; Hilde Vollan; Ignacio Garcia Lorente; Kamilla Heddeland Instefjord; Karoline Bragstad; Kathrine Stene-Johansen; Marie Paulsen Madsen; Olav Hungnes; Rasmus Riis Kopperud; Serina B Engebretsen |
| EPI_ISL_634864 to 634865                                                                                                                                                                                                                                                                                                                                                                                                                                                                                                                                                                                                                                                                                                                                                                                                                                                                                       | HealthPartners Central Lab                                                                                                                                       | Minnesota Department of Health, Public Health Laboratory                                                                                                                                                                                               | Alexandra Lorentz; Jacob Garfin; Matt Plumb; and Xiong Wang                                                                                                                                                                                                                                                                                                                                                                                                                                                                                                                                                            |                                                                                                                                                                                                                            |
| EPI_ISL_796012 to 796026                                                                                                                                                                                                                                                                                                                                                                                                                                                                                                                                                                                                                                                                                                                                                                                                                                                                                       | Hebei Provincial Center for Disease Control and Prevention, Shijiazhuang, Hebei Province; National Institute for Viral Disease Control and Prevention, China CDC | Hebei Provincial Center for Disease Control and Prevention, Shijiazhuang, Hebei Province; National Institute for Viral Disease Control and Prevention, China CDC                                                                                       | George F. Gao; Nankun Liu; Qi Li; Shunxiang Qi; Wenbo Xu; Xiang Zhao; Yang Song                                                                                                                                                                                                                                                                                                                                                                                                                                                                                                                                        |                                                                                                                                                                                                                            |
| EPI_ISL_640018                                                                                                                                                                                                                                                                                                                                                                                                                                                                                                                                                                                                                                                                                                                                                                                                                                                                                                 | Heidelberg Clinic wc HBC                                                                                                                                         | NHLS/UCT                                                                                                                                                                                                                                               | Arash Iranzadeh; Bruna Galvao; Carolyn Williamson; Deelan Doolabh; Diana Hardie; Innocent Mudau; Kruger Marais; Lynn Tyers; Marvin Hsiao; Stephen Korsman                                                                                                                                                                                                                                                                                                                                                                                                                                                              |                                                                                                                                                                                                                            |
| EPI_ISL_640101, EPI_ISL_640103, EPI_ISL_640106, EPI_ISL_700412, EPI_ISL_700454, EPI_ISL_700459, EPI_ISL_700473, EPI_ISL_700499, EPI_ISL_700508, EPI_ISL_700522, EPI_ISL_700549                                                                                                                                                                                                                                                                                                                                                                                                                                                                                                                                                                                                                                                                                                                                 | see above                                                                                                                                                        | Heideveld CDC wc HVP                                                                                                                                                                                                                                   | NHLS/UCT                                                                                                                                                                                                                                                                                                                                                                                                                                                                                                                                                                                                               | Arash Iranzadeh; Bruna Galvao; Carolyn Williamson; Deelan Doolabh; Diana Hardie; Innocent Mudau; Kruger Marais; Lynn Tyers; Marvin Hsiao; Stephen Korsman                                                                  |
| EPI_ISL_960164, EPI_ISL_960168 to 960170, EPI_ISL_960173                                                                                                                                                                                                                                                                                                                                                                                                                                                                                                                                                                                                                                                                                                                                                                                                                                                       | Heideveld CDC wc HVP                                                                                                                                             | National Health Laboratory Service/UCT                                                                                                                                                                                                                 | Arash Iranzadeh; Bruna Galvao; Carolyn Williamson; Deelan Doolabh; Diana Hardie; Innocent Mudau; Kruger Marais; Lynn Tyers; Marvin Hsiao; Stephen Korsman                                                                                                                                                                                                                                                                                                                                                                                                                                                              |                                                                                                                                                                                                                            |
| EPI_ISL_640082, EPI_ISL_700445, EPI_ISL_700545, EPI_ISL_700559, EPI_ISL_700574, EPI_ISL_700584, EPI_ISL_700595, EPI_ISL_700598                                                                                                                                                                                                                                                                                                                                                                                                                                                                                                                                                                                                                                                                                                                                                                                 | see above                                                                                                                                                        | Heideveld Emergency Centre                                                                                                                                                                                                                             | NHLS/UCT                                                                                                                                                                                                                                                                                                                                                                                                                                                                                                                                                                                                               | Arash Iranzadeh; Bruna Galvao; Carolyn Williamson; Deelan Doolabh; Diana Hardie; Houriiyah Tegally; Innocent Mudau; Kruger Marais; Lynn Tyers; Marvin Hsiao; Stephen Korsman                                               |
| EPI_ISL_960124, EPI_ISL_960153, EPI_ISL_960162, EPI_ISL_960166                                                                                                                                                                                                                                                                                                                                                                                                                                                                                                                                                                                                                                                                                                                                                                                                                                                 | Heideveld Emergency Centre                                                                                                                                       | National Health Laboratory Service/UCT                                                                                                                                                                                                                 | Arash Iranzadeh; Bruna Galvao; Carolyn Williamson; Deelan Doolabh; Diana Hardie; Innocent Mudau; Kruger Marais; Lynn Tyers; Marvin Hsiao; Stephen Korsman                                                                                                                                                                                                                                                                                                                                                                                                                                                              |                                                                                                                                                                                                                            |
| EPI_ISL_940767                                                                                                                                                                                                                                                                                                                                                                                                                                                                                                                                                                                                                                                                                                                                                                                                                                                                                                 | Heilig Hart Lier                                                                                                                                                 | UAntwerp, Laboratory of Medical Microbiology, Campus Drie Eiken S6.26, Universiteitsplein 1, 2610, Wilrijk, Belgium                                                                                                                                    | Basil Britto Xavier; Christine Lammens; Herman Goossens; Jasmine Coppens; Marie Le Mercier; Veerle Matheussen                                                                                                                                                                                                                                                                                                                                                                                                                                                                                                          |                                                                                                                                                                                                                            |
| EPI_ISL_961104                                                                                                                                                                                                                                                                                                                                                                                                                                                                                                                                                                                                                                                                                                                                                                                                                                                                                                 | Heilig Hart Mol                                                                                                                                                  | UAntwerp, Laboratory of Medical Microbiology                                                                                                                                                                                                           | Basil Britto Xavier; Christine Lammens; Herman Goossens; Jasmine Coppens; Marie Le Mercier; Veerle Matheussen                                                                                                                                                                                                                                                                                                                                                                                                                                                                                                          |                                                                                                                                                                                                                            |
| EPI_ISL_850689 to 850944                                                                                                                                                                                                                                                                                                                                                                                                                                                                                                                                                                                                                                                                                                                                                                                                                                                                                       | Helix / Illumina                                                                                                                                                 | Genomics and Discovery, Respiratory Viruses Branch, Division of Viral Diseases, Centers for Disease Control and Prevention                                                                                                                             | Alexandre Bolze; Ary Ascencio; Ben L. Rambo-Martin Eileen de Feo; Brad Sickler; Charlotte Rivera-Garcia; Christine Tran; Clinton R. Paden; David Becker; Dhvani Batra; Duncan MacCannell; Eftren Sandoval; Elizabeth Cirulli; Eric Allen; Geraint Levan; James Lu; Jan Antico; Jason Nguyen; Jimmy Ramirez; Jingtao Liu; Kelly Schiabor Barrett; Kim Gietzen; Magnus Isaksson; Marc Laurent; Matthew Tolentino; Nicole L. Washington; Peter W. Cook; Phil Febbo; Ryan Cho; Shannon Wickline; Sherry Wang; Simon White; Summer Galloway; Suxiang Tong; Tyler Cassens; William Lee                                       |                                                                                                                                                                                                                            |
| EPI_ISL_755590 to 755618, EPI_ISL_802599 to 802723, EPI_ISL_850517 to 850651, EPI_ISL_850952 to 851040, EPI_ISL_876625 to 876736                                                                                                                                                                                                                                                                                                                                                                                                                                                                                                                                                                                                                                                                                                                                                                               | Helix/Illumina                                                                                                                                                   | Genomics and Discovery, Respiratory Viruses Branch, Division of Viral Diseases, Centers for Disease Control and Prevention                                                                                                                             | ; Alexandre Bolze; Ary Ascencio; Ben L. Rambo-Martin; Ben L. Rambo-Martin Eileen de Feo; Brad Sickler; Charlotte Rivera-Garcia; Christine Tran; Clinton R. Paden; David Becker; Dhvani Batra; Duncan MacCannell; Eftren Sandoval; Eileen de Feo; Elizabeth Cirulli; Eric Allen; Geraint Levan; James Lu; Jan Antico; Jason Nguyen; Jimmy Ramirez; Jingtao Liu; Kelly Schiabor Barrett; Kim Gietzen; Magnus Isaksson; Marc Laurent; Matthew Tolentino; Nicole L. Washington; Peter W. Cook; Phil Febbo; Ryan Cho; Shannon Wickline; Sherry Wang; Simon White; Summer Galloway; Suxiang Tong; Tyler Cassens; William Lee |                                                                                                                                                                                                                            |
| EPI_ISL_966497 to 966512, EPI_ISL_966514 to 966532, EPI_ISL_966534 to 966548, EPI_ISL_966553 to 966564, EPI_ISL_966566 to 966590, EPI_ISL_966592 to 966604, EPI_ISL_966606 to 966622, EPI_ISL_966624 to 966645, EPI_ISL_966647 to 966662, EPI_ISL_966664 to 966681, EPI_ISL_966683 to 966706, EPI_ISL_966708 to 966755, EPI_ISL_966852 to 966939, EPI_ISL_966941 to 967522, EPI_ISL_967524, EPI_ISL_967531, EPI_ISL_967537, EPI_ISL_967547, EPI_ISL_967554, EPI_ISL_967567, EPI_ISL_967576, EPI_ISL_967583, EPI_ISL_967590, EPI_ISL_967599, EPI_ISL_967609, EPI_ISL_967617, EPI_ISL_967629, EPI_ISL_967642, EPI_ISL_967655, EPI_ISL_967662, EPI_ISL_967671, EPI_ISL_967678, EPI_ISL_967684, EPI_ISL_967693, EPI_ISL_967700, EPI_ISL_967710, EPI_ISL_967719, EPI_ISL_967726, EPI_ISL_967736, EPI_ISL_967748, EPI_ISL_967753, EPI_ISL_967761, EPI_ISL_967767, EPI_ISL_967772 to 967881, EPI_ISL_978555 to 978787 |                                                                                                                                                                  |                                                                                                                                                                                                                                                        |                                                                                                                                                                                                                                                                                                                                                                                                                                                                                                                                                                                                                        |                                                                                                                                                                                                                            |



|                                                                                                                                                                                                                                                                                                                                                                                                                                                                                                                                                                                                                                                                                                                                                                                                                                                                                                                                                                                                                                                                                                                                                                                                                                                                                                                                                                                                                                                                                                                                                                                                                                                            |                |                                                                                                                   |                                                                                                                                                                                                                                                                                                                                                                                                                                                                                                                                                                                                                                                                                                                                                                                                                                                                                                                                                                                                                        |
|------------------------------------------------------------------------------------------------------------------------------------------------------------------------------------------------------------------------------------------------------------------------------------------------------------------------------------------------------------------------------------------------------------------------------------------------------------------------------------------------------------------------------------------------------------------------------------------------------------------------------------------------------------------------------------------------------------------------------------------------------------------------------------------------------------------------------------------------------------------------------------------------------------------------------------------------------------------------------------------------------------------------------------------------------------------------------------------------------------------------------------------------------------------------------------------------------------------------------------------------------------------------------------------------------------------------------------------------------------------------------------------------------------------------------------------------------------------------------------------------------------------------------------------------------------------------------------------------------------------------------------------------------------|----------------|-------------------------------------------------------------------------------------------------------------------|------------------------------------------------------------------------------------------------------------------------------------------------------------------------------------------------------------------------------------------------------------------------------------------------------------------------------------------------------------------------------------------------------------------------------------------------------------------------------------------------------------------------------------------------------------------------------------------------------------------------------------------------------------------------------------------------------------------------------------------------------------------------------------------------------------------------------------------------------------------------------------------------------------------------------------------------------------------------------------------------------------------------|
| see above                                                                                                                                                                                                                                                                                                                                                                                                                                                                                                                                                                                                                                                                                                                                                                                                                                                                                                                                                                                                                                                                                                                                                                                                                                                                                                                                                                                                                                                                                                                                                                                                                                                  | Helix/Illumina | Respiratory Viruses Branch, Division of Viral Diseases, Centers for Disease Control and Prevention                | ; Alexandre Bolze; Ary Ascencio; Ben L. Rambo-Martin; Brad Sickler; Charlotte Rivera-Garcia; Christine Tran; Clinton R. Paden; Dakota Howard; David Becker; Dhvani Batra; Duncan MacCannell; Efren Sandoval; Eileen de Feo; Elizabeth Cirulli; Eric Allen; Geraint Levan; James Lu; Jan Antico; Jason Nguyen; Jimmy Ramirez; Jingtao Liu; Kelly Schiabor Barrett; Kim Gietzen; Magnus Isaksson; Marc Laurent; Matthew Tolentino; Nicole L. Washington; Peter W. Cook; Phil Febbo; Ryan Cho; Shannon Wickline; Sherry Wang; Simon White; Summer Galloway; Suxiang Tong; Tyler Cassens; William Lee                                                                                                                                                                                                                                                                                                                                                                                                                      |
| EPI_ISL_906711 to 906712, EPI_ISL_906714 to 906719, EPI_ISL_906721 to 906726, EPI_ISL_906728 to 906729, EPI_ISL_906731 to 906735, EPI_ISL_906737 to 906739, EPI_ISL_906741 to 906742, EPI_ISL_906744 to 906754, EPI_ISL_906756, EPI_ISL_930784                                                                                                                                                                                                                                                                                                                                                                                                                                                                                                                                                                                                                                                                                                                                                                                                                                                                                                                                                                                                                                                                                                                                                                                                                                                                                                                                                                                                             | see above      | Hematology Laboratory, Section of Molecular Diagnostics, University Clinical Centre, Medical University of Gdansk | Laboratory of Recombinant Vaccines<br>Adam Sodal; Aneta Szulc; Anna Piotrowska-Mietelska; Boguslaw Szewczyk; Ewa Milosz; Izabela Szczygielska; Krystyna Bienkowska-Szewczyk; Krzysztof Lewandowski; Lukasz Rabalski; Maciej Grzybek; Maciej Kosinski; Marlena Robakowska                                                                                                                                                                                                                                                                                                                                                                                                                                                                                                                                                                                                                                                                                                                                               |
| EPI_ISL_699658 to 700325, EPI_ISL_723045 to 723076                                                                                                                                                                                                                                                                                                                                                                                                                                                                                                                                                                                                                                                                                                                                                                                                                                                                                                                                                                                                                                                                                                                                                                                                                                                                                                                                                                                                                                                                                                                                                                                                         |                | Hematopathology Laboratory, ACTREC, TMC                                                                           | ACTREC; Hematopathology Laboratory                                                                                                                                                                                                                                                                                                                                                                                                                                                                                                                                                                                                                                                                                                                                                                                                                                                                                                                                                                                     |
| EPI_ISL_644942, EPI_ISL_683689, EPI_ISL_770793 to 770794, EPI_ISL_770797, EPI_ISL_873276                                                                                                                                                                                                                                                                                                                                                                                                                                                                                                                                                                                                                                                                                                                                                                                                                                                                                                                                                                                                                                                                                                                                                                                                                                                                                                                                                                                                                                                                                                                                                                   |                | Hennepin County Medical Center                                                                                    | Minnesota Department of Health, Public Health Laboratory<br>Alexandra Lorentz; Jacob Garfin; Matt Plumb; and Xiong Wang                                                                                                                                                                                                                                                                                                                                                                                                                                                                                                                                                                                                                                                                                                                                                                                                                                                                                                |
| EPI_ISL_700565, EPI_ISL_700571                                                                                                                                                                                                                                                                                                                                                                                                                                                                                                                                                                                                                                                                                                                                                                                                                                                                                                                                                                                                                                                                                                                                                                                                                                                                                                                                                                                                                                                                                                                                                                                                                             |                | Herbertsdale Sat Clinic wc HBD                                                                                    | NHLS/UCT<br>Arash Iranzadeh; Bruna Galvao; Carolyn Williamson; Deelan Doolabh; Diana Hardie; Innocent Mudau; Kruger Marais; Lynn Tyers; Marvin Hsiao; Stephen Korsman                                                                                                                                                                                                                                                                                                                                                                                                                                                                                                                                                                                                                                                                                                                                                                                                                                                  |
| EPI_ISL_745093 to 745094                                                                                                                                                                                                                                                                                                                                                                                                                                                                                                                                                                                                                                                                                                                                                                                                                                                                                                                                                                                                                                                                                                                                                                                                                                                                                                                                                                                                                                                                                                                                                                                                                                   |                | Histopath                                                                                                         | CIDM-PH, Westmead Hospital<br>CIDM-PH et al.                                                                                                                                                                                                                                                                                                                                                                                                                                                                                                                                                                                                                                                                                                                                                                                                                                                                                                                                                                           |
| EPI_ISL_672574, EPI_ISL_740879 to 740880, EPI_ISL_740896, EPI_ISL_767872 to 767875, EPI_ISL_767925 to 767926, EPI_ISL_792031, EPI_ISL_806721, EPI_ISL_845796, EPI_ISL_872580                                                                                                                                                                                                                                                                                                                                                                                                                                                                                                                                                                                                                                                                                                                                                                                                                                                                                                                                                                                                                                                                                                                                                                                                                                                                                                                                                                                                                                                                               | see above      | Histopath                                                                                                         | NSW Health Pathology - Institute of Clinical Pathology and Medical Research; Westmead Hospital; University of Sydney<br>CIDM-PH et al.                                                                                                                                                                                                                                                                                                                                                                                                                                                                                                                                                                                                                                                                                                                                                                                                                                                                                 |
| EPI_ISL_770013                                                                                                                                                                                                                                                                                                                                                                                                                                                                                                                                                                                                                                                                                                                                                                                                                                                                                                                                                                                                                                                                                                                                                                                                                                                                                                                                                                                                                                                                                                                                                                                                                                             |                | Hle - Asilos De Ancianos                                                                                          | Adriana Godínez; Claudio Soto-Garita; Estela Cordero; Francisco Duarte; Hebleen Porras; Melany Calderón & Mariel López                                                                                                                                                                                                                                                                                                                                                                                                                                                                                                                                                                                                                                                                                                                                                                                                                                                                                                 |
| EPI_ISL_770006                                                                                                                                                                                                                                                                                                                                                                                                                                                                                                                                                                                                                                                                                                                                                                                                                                                                                                                                                                                                                                                                                                                                                                                                                                                                                                                                                                                                                                                                                                                                                                                                                                             |                | Hle - Asociacion Hogar De Ancianos De Palmar Sur De Osa                                                           | Adriana Godínez; Claudio Soto-Garita; Estela Cordero; Francisco Duarte; Hebleen Porras; Melany Calderón & Mariel López                                                                                                                                                                                                                                                                                                                                                                                                                                                                                                                                                                                                                                                                                                                                                                                                                                                                                                 |
| EPI_ISL_770024                                                                                                                                                                                                                                                                                                                                                                                                                                                                                                                                                                                                                                                                                                                                                                                                                                                                                                                                                                                                                                                                                                                                                                                                                                                                                                                                                                                                                                                                                                                                                                                                                                             |                | Hle - Asociacion Hogar De Ancianos Santiago Crespo Calvo                                                          | Adriana Godínez; Claudio Soto-Garita; Estela Cordero; Francisco Duarte; Hebleen Porras; Melany Calderón & Mariel López                                                                                                                                                                                                                                                                                                                                                                                                                                                                                                                                                                                                                                                                                                                                                                                                                                                                                                 |
| EPI_ISL_770031 to 770032                                                                                                                                                                                                                                                                                                                                                                                                                                                                                                                                                                                                                                                                                                                                                                                                                                                                                                                                                                                                                                                                                                                                                                                                                                                                                                                                                                                                                                                                                                                                                                                                                                   |                | Hle-Asociacion De Atencion Integral Del Anciano San Cayetano                                                      | Adriana Godínez; Claudio Soto-Garita; Estela Cordero; Francisco Duarte; Hebleen Porras; Melany Calderón & Mariel López                                                                                                                                                                                                                                                                                                                                                                                                                                                                                                                                                                                                                                                                                                                                                                                                                                                                                                 |
| EPI_ISL_760031 to 760042, EPI_ISL_760045 to 760047, EPI_ISL_760049 to 760058                                                                                                                                                                                                                                                                                                                                                                                                                                                                                                                                                                                                                                                                                                                                                                                                                                                                                                                                                                                                                                                                                                                                                                                                                                                                                                                                                                                                                                                                                                                                                                               |                | Hong Kong Department of Health                                                                                    | School of Public Health, The University of Hong Kong<br>Carrie Wan; Daisy Ng; Daniel Chu; Gigi Liu; Haogao Gu; Leo Poon; Malik Peiris; Pavithra Krishnan                                                                                                                                                                                                                                                                                                                                                                                                                                                                                                                                                                                                                                                                                                                                                                                                                                                               |
| EPI_ISL_792056, EPI_ISL_846631 to 846636, EPI_ISL_846644, EPI_ISL_846649 to 846650, EPI_ISL_872198 to 872199, EPI_ISL_872206, EPI_ISL_872210 to 872211, EPI_ISL_872213 to 872220, EPI_ISL_872221 to 872222, EPI_ISL_872231, EPI_ISL_872233, EPI_ISL_872236 to 872237, EPI_ISL_872249 to 872253, EPI_ISL_872255, EPI_ISL_872261 to 872263, EPI_ISL_872266 to 872270, EPI_ISL_872274 to 872278, EPI_ISL_872291 to 872305, EPI_ISL_872307 to 872308, EPI_ISL_872315 to 872319, EPI_ISL_872325, EPI_ISL_872339 to 872348, EPI_ISL_883972 to 883989, EPI_ISL_894219, EPI_ISL_912566, EPI_ISL_935551 to 935559, EPI_ISL_935561 to 935562, EPI_ISL_935565 to 935575, EPI_ISL_935577 to 935586, EPI_ISL_935639, EPI_ISL_940095, EPI_ISL_941000 to 941003, EPI_ISL_941016, EPI_ISL_941019, EPI_ISL_941021 to 941022, EPI_ISL_941027, EPI_ISL_953940 to 953951, EPI_ISL_953953, EPI_ISL_953955, EPI_ISL_953957 to 953962, EPI_ISL_953964 to 953967, EPI_ISL_953969 to 953985, EPI_ISL_953987, EPI_ISL_953989 to 953993, EPI_ISL_953995 to 953997, EPI_ISL_954009 to 954012, EPI_ISL_954014 to 954020, EPI_ISL_954032 to 954033, EPI_ISL_954047 to 954048, EPI_ISL_954071 to 954072, EPI_ISL_954076 to 954077, EPI_ISL_954081, EPI_ISL_954103 to 954104, EPI_ISL_954106 to 954107, EPI_ISL_954112 to 954113, EPI_ISL_954115, EPI_ISL_954120, EPI_ISL_954122, EPI_ISL_954126, EPI_ISL_955061, EPI_ISL_955064 to 955065, EPI_ISL_955074 to 955075, EPI_ISL_955077 to 955078, EPI_ISL_955081, EPI_ISL_955083 to 955085, EPI_ISL_955095 to 955100, EPI_ISL_955174 to 955177, EPI_ISL_964916, EPI_ISL_995449 to 995467, EPI_ISL_995471 to 995472, EPI_ISL_995474 to 995490 | see above      | Hopital                                                                                                           | National Reference Center for Viruses of Respiratory Infections, Institut Pasteur, Paris<br>Angela Brisebarre; Bigaillon Christine; Blazejewski C.; Bour Jean Baptiste; Bret Laurent; Breuil J.; Brichler Ségolène; Brichler Ségolène; Cady Anne; Camille Capel; Castelain Sandrine; Centre Hospitalier De Manosque; Cron Sophie; Delamare Catherine; Ducancelle Alexandra; Eloy Clarence; Etienne Simon-Lorière; Farfour Eric; Fiette; Florin Cécile; Foissaud Vincent; Fourgeaud Jacques; Gaschet Anne; Goudeau Alain; Goudeau Alain; Griscelli Franck; Guigon Aurélie; Guinard Jérôme; Guinoiseau Thibault; Irimia Alix; Joly Isabelle; Lagathu Gisèle; Larrece, Lesimple Béatrice; Louvet; Maneglie Benjamin; Marion Barbet; Marque Juliette Stéphanie; Martres Pascale; Maud Vanpeene; Merens Audrey; Morvan Odile; Méline Bizard; Patricia Stoessel; Philippi Jean-François; Ramanantsoa Cécile; Ramirez José-Manuel; Raulin Olivia; Smati-Lafarge Mounira; Sylvie Behillili; Sylvie van der Werf; Vincent Enouf |
| EPI_ISL_912559, EPI_ISL_912598, EPI_ISL_913607                                                                                                                                                                                                                                                                                                                                                                                                                                                                                                                                                                                                                                                                                                                                                                                                                                                                                                                                                                                                                                                                                                                                                                                                                                                                                                                                                                                                                                                                                                                                                                                                             |                | Hopital Avicenne Laboratoire central de bactériologie virologie hygiène                                           | National Reference Center for Viruses of Respiratory Infections, Institut Pasteur, Paris<br>Angela Brisebarre; Brichler Ségolène; Camille Capel; Etienne Simon-Lorière; Marion Barbet; Maud Vanpeene; Méline Bizard; Sylvie Behillili; Sylvie van der Werf; Vincent Enouf                                                                                                                                                                                                                                                                                                                                                                                                                                                                                                                                                                                                                                                                                                                                              |
| EPI_ISL_909666, EPI_ISL_909682 to 909683                                                                                                                                                                                                                                                                                                                                                                                                                                                                                                                                                                                                                                                                                                                                                                                                                                                                                                                                                                                                                                                                                                                                                                                                                                                                                                                                                                                                                                                                                                                                                                                                                   |                | Hopital Avicenne. Laboratoire central de bactériologie virologie hygiène                                          | National Reference Center for Viruses of Respiratory Infections, Institut Pasteur, Paris<br>Angela Brisebarre; Brichler Ségolène; Camille Capel; Etienne Simon-Lorière; Marion Barbet; Maud Vanpeene; Méline Bizard; Sylvie Behillili; Sylvie van der Werf; Vincent Enouf                                                                                                                                                                                                                                                                                                                                                                                                                                                                                                                                                                                                                                                                                                                                              |
| EPI_ISL_700458, EPI_ISL_700524, EPI_ISL_700558                                                                                                                                                                                                                                                                                                                                                                                                                                                                                                                                                                                                                                                                                                                                                                                                                                                                                                                                                                                                                                                                                                                                                                                                                                                                                                                                                                                                                                                                                                                                                                                                             |                | Hornlee Clinic wc HLC                                                                                             | NHLS/UCT<br>Arash Iranzadeh; Bruna Galvao; Carolyn Williamson; Deelan Doolabh; Diana Hardie; Hourihay Tegally; Innocent Mudau; Kruger Marais; Lynn Tyers; Marvin Hsiao; Stephen Korsman                                                                                                                                                                                                                                                                                                                                                                                                                                                                                                                                                                                                                                                                                                                                                                                                                                |
| EPI_ISL_696457, EPI_ISL_696479, EPI_ISL_696483, EPI_ISL_696486, EPI_ISL_696502                                                                                                                                                                                                                                                                                                                                                                                                                                                                                                                                                                                                                                                                                                                                                                                                                                                                                                                                                                                                                                                                                                                                                                                                                                                                                                                                                                                                                                                                                                                                                                             |                | Hornlee Clinic wc HLC & NHLS/UCT                                                                                  | KRISP, KZN Research Innovation and Sequencing Platform<br>Arash Iranzadeh; Bruna Galvao; Carolyn Williamson; Deelan Doolabh; Diana Hardie; Emanual James San; Hourihay Tegally; Innocent Mudau; Jennifer Giandhari; Kruger Marais; Lynn Tyers; Marvin Hsiao; Stephen Korsman; Sureshnee Pillay; Tullio de Oliveira                                                                                                                                                                                                                                                                                                                                                                                                                                                                                                                                                                                                                                                                                                     |
| EPI_ISL_660323, EPI_ISL_693758 to 693764, EPI_ISL_718226 to 718249, EPI_ISL_832130 to 832166, EPI_ISL_832169 to 832177, EPI_ISL_832179 to 832180, EPI_ISL_832197, EPI_ISL_832201, EPI_ISL_855353 to 855356, EPI_ISL_855358 to 855359, EPI_ISL_855382 to 855386, EPI_ISL_855388, EPI_ISL_888826, EPI_ISL_890359, EPI_ISL_890889 to 890894                                                                                                                                                                                                                                                                                                                                                                                                                                                                                                                                                                                                                                                                                                                                                                                                                                                                                                                                                                                                                                                                                                                                                                                                                                                                                                                   | see above      | Hospital                                                                                                          | National Reference Center for Viruses of Respiratory Infections, Institut Pasteur, Paris<br>Alexandra Ducancelle; Angela Brisebarre; Aurélie Guigon; Camille Capel; Clémence Guillaume; Ducancelle Alexandra; Esther Gyde; Etienne Simon-Lorière; Fourgeaud Jacques; Gisèle Lagathu; Griscelli Franck; Guigon Aurélie; Laurent Andreoletti; Laurent Roudiere; Léa Pilorge; Marion Barbet; Maud Vanpeene; Méline Bizard; Patricia Stoessel-Thouvenin; Pilorge Léa; Sylvie Behillili; Sylvie van der Werf; Vincent Enouf                                                                                                                                                                                                                                                                                                                                                                                                                                                                                                 |
| EPI_ISL_693229                                                                                                                                                                                                                                                                                                                                                                                                                                                                                                                                                                                                                                                                                                                                                                                                                                                                                                                                                                                                                                                                                                                                                                                                                                                                                                                                                                                                                                                                                                                                                                                                                                             |                | Hospital 8 de Maio                                                                                                | Instituto Adolfo Lutz, Interdisciplinary Procedures Center, Strategic Laboratory<br>Claudia Regina Gonçalves; Claudio Tavares Sacchi; Erica Valessa Ramos Gomes; Karoline Rodrigues Campos                                                                                                                                                                                                                                                                                                                                                                                                                                                                                                                                                                                                                                                                                                                                                                                                                             |
| EPI_ISL_906080 to 906081                                                                                                                                                                                                                                                                                                                                                                                                                                                                                                                                                                                                                                                                                                                                                                                                                                                                                                                                                                                                                                                                                                                                                                                                                                                                                                                                                                                                                                                                                                                                                                                                                                   |                | Hospital Beneficiencia Portuguesa                                                                                 | Instituto Adolfo Lutz, Interdisciplinary Procedures Center, Strategic Laboratory<br>Claudia Regina Gonçalves; Claudio Tavares Sacchi; Erica Valessa Ramos Gomes; Karoline Rodrigues Campos                                                                                                                                                                                                                                                                                                                                                                                                                                                                                                                                                                                                                                                                                                                                                                                                                             |
| EPI_ISL_906078                                                                                                                                                                                                                                                                                                                                                                                                                                                                                                                                                                                                                                                                                                                                                                                                                                                                                                                                                                                                                                                                                                                                                                                                                                                                                                                                                                                                                                                                                                                                                                                                                                             |                | Hospital Carlos Chagas                                                                                            | Instituto Adolfo Lutz, Interdisciplinary Procedures Center, Strategic Laboratory<br>Claudia Regina Gonçalves; Claudio Tavares Sacchi; Erica Valessa Ramos Gomes; Karoline Rodrigues Campos                                                                                                                                                                                                                                                                                                                                                                                                                                                                                                                                                                                                                                                                                                                                                                                                                             |
| EPI_ISL_940626 to 940627                                                                                                                                                                                                                                                                                                                                                                                                                                                                                                                                                                                                                                                                                                                                                                                                                                                                                                                                                                                                                                                                                                                                                                                                                                                                                                                                                                                                                                                                                                                                                                                                                                   |                | Hospital Central Sao Caetano do Sul                                                                               | Instituto Adolfo Lutz, Interdisciplinary Procedures Center, Strategic Laboratory<br>Claudia Regina Gonçalves; Claudio Tavares Sacchi; Erica Valessa Ramos Gomes; Karoline Rodrigues Campos                                                                                                                                                                                                                                                                                                                                                                                                                                                                                                                                                                                                                                                                                                                                                                                                                             |
| EPI_ISL_862573 to 862588, EPI_ISL_862627 to 862636                                                                                                                                                                                                                                                                                                                                                                                                                                                                                                                                                                                                                                                                                                                                                                                                                                                                                                                                                                                                                                                                                                                                                                                                                                                                                                                                                                                                                                                                                                                                                                                                         |                | Hospital Clínic                                                                                                   | Instituto de Salud Carlos III<br>A. Monzón; F. Casas; I. Jiménez; I. Marcos; Iglesias-Caballero; M. Pozo; M. Cuesta; M. González-Esguevillas; M. Zaballos; M.A.; M. Camarero; P. Jiménez; S. Juliá; S. Molinero Calamita; S. Varona                                                                                                                                                                                                                                                                                                                                                                                                                                                                                                                                                                                                                                                                                                                                                                                    |
| EPI_ISL_802726 to 802749                                                                                                                                                                                                                                                                                                                                                                                                                                                                                                                                                                                                                                                                                                                                                                                                                                                                                                                                                                                                                                                                                                                                                                                                                                                                                                                                                                                                                                                                                                                                                                                                                                   |                | Hospital Clínic de Barcelona                                                                                      | Instituto de Salud Carlos III<br>A. Monzón; F. Casas; I. Jiménez; Iglesias-Caballero; M. Camarero; M. Cuesta; M. González-Esguevillas; M. Molinero Calamita; M. Zaballos; M.A. Marcos.; P. Jiménez; S. Juliá; S. Pozo; S. Varona                                                                                                                                                                                                                                                                                                                                                                                                                                                                                                                                                                                                                                                                                                                                                                                       |
| EPI_ISL_691700 to 691728, EPI_ISL_862548, EPI_ISL_862569, EPI_ISL_871985 to 871990, EPI_ISL_871992 to 871993                                                                                                                                                                                                                                                                                                                                                                                                                                                                                                                                                                                                                                                                                                                                                                                                                                                                                                                                                                                                                                                                                                                                                                                                                                                                                                                                                                                                                                                                                                                                               |                | Hospital Clínico San Carlos                                                                                       | Instituto de Salud Carlos III<br>A. Monzón; F. Casas; I. Jiménez; I. Rodríguez, I.; Iglesias-Caballero; M. Camarero; M. Cuesta; M. González-Esguevillas; M. Pozo; M. Zaballos; P. Jiménez; S. Juliá; S. Molinero Calamita; S. Varona                                                                                                                                                                                                                                                                                                                                                                                                                                                                                                                                                                                                                                                                                                                                                                                   |
| EPI_ISL_671794 to 671804, EPI_ISL_683595 to 683597                                                                                                                                                                                                                                                                                                                                                                                                                                                                                                                                                                                                                                                                                                                                                                                                                                                                                                                                                                                                                                                                                                                                                                                                                                                                                                                                                                                                                                                                                                                                                                                                         |                | Hospital Clínico Universitario Lozano Blesa de Zaragoza (España)                                                  | SeqCOVID-SPAIN consortium/IBV(CSIC)<br>Jessica Bueno and SeqCOVID-SPAIN consortium; Rafael Benito; Sonia Algarate                                                                                                                                                                                                                                                                                                                                                                                                                                                                                                                                                                                                                                                                                                                                                                                                                                                                                                      |
| EPI_ISL_913042 to 913051                                                                                                                                                                                                                                                                                                                                                                                                                                                                                                                                                                                                                                                                                                                                                                                                                                                                                                                                                                                                                                                                                                                                                                                                                                                                                                                                                                                                                                                                                                                                                                                                                                   |                | Hospital Comarcal Sierrallana                                                                                     | Instituto de Salud Carlos III<br>A. Monzón; F. Casas; I. De Benito, I.; I. Jiménez; Iglesias-Caballero; M. Camarero; P. Zaballos; S. Cuesta; S. Pozo; S. Sandoñis; S. Varona; V. Vázquez                                                                                                                                                                                                                                                                                                                                                                                                                                                                                                                                                                                                                                                                                                                                                                                                                               |

|                                                                                                                                                                                                                                                                                                                  |                                                                                                           |                                                                                                                                |                                                                                                                                                                                                                                                                                                                                                                                                                  |
|------------------------------------------------------------------------------------------------------------------------------------------------------------------------------------------------------------------------------------------------------------------------------------------------------------------|-----------------------------------------------------------------------------------------------------------|--------------------------------------------------------------------------------------------------------------------------------|------------------------------------------------------------------------------------------------------------------------------------------------------------------------------------------------------------------------------------------------------------------------------------------------------------------------------------------------------------------------------------------------------------------|
| EPI_ISL_804949 to 804979, EPI_ISL_862589 to 862626, EPI_ISL_954798, EPI_ISL_965930, EPI_ISL_965936, EPI_ISL_965949                                                                                                                                                                                               | Hospital Comarcal de Melilla                                                                              | Instituto de Salud Carlos III                                                                                                  | A. Monzón; F. Casas; I. Jiménez; I. López, J.; I. Roman, S.; I. Román, S.; Iglesias-Caballero; J. López; M. Camarero; M. Cuesta; M. González-Esguevillas; M. Molinero Calamita; M. Pozo; M. Sandonis; M. Zaballos; P. Jiménez; P. Zaballos; S. Camarero; S. Cuesta; S. Iglesias-Caballero; S. Juliá; S. Molinero Calamita; S. Pozo; S. Sandonis; S. Varona; Sandonis; V. Vázquez                                 |
| EPI_ISL_693218                                                                                                                                                                                                                                                                                                   | Hospital Domingos Leonardo Ceravolo Presidente Prudente                                                   | Instituto Adolfo Lutz, Interdisciplinary Procedures Center, Strategic Laboratory                                               | Claudia Regina Gonçalves; Claudio Tavares Sacchi; Erica Valessa Ramos Gomes; Karoline Rodrigues Campos                                                                                                                                                                                                                                                                                                           |
| EPI_ISL_769990                                                                                                                                                                                                                                                                                                   | Hospital Dr. Rafael A. Calderon Guardia                                                                   | Incienza, Instituto Costarricense de Investigación y Enseñanza en Nutrición y Salud                                            | Adriana Godínez; Claudio Soto-Garita; Estela Cordero; Francisco Duarte; Hebleen Porras; Melany Calderón & Mariel López                                                                                                                                                                                                                                                                                           |
| EPI_ISL_770028                                                                                                                                                                                                                                                                                                   | Hospital Dr. Raul Blanco Cervantes                                                                        | Incienza, Instituto Costarricense de Investigación y Enseñanza en Nutrición y Salud                                            | Adriana Godínez; Claudio Soto-Garita; Estela Cordero; Francisco Duarte; Hebleen Porras; Melany Calderón & Mariel López                                                                                                                                                                                                                                                                                           |
| EPI_ISL_693213                                                                                                                                                                                                                                                                                                   | Hospital E Maternidade Municipal Governador Mario Covas                                                   | Instituto Adolfo Lutz, Interdisciplinary Procedures Center, Strategic Laboratory                                               | Claudia Regina Gonçalves; Claudio Tavares Sacchi; Erica Valessa Ramos Gomes; Karoline Rodrigues Campos                                                                                                                                                                                                                                                                                                           |
| EPI_ISL_936494                                                                                                                                                                                                                                                                                                   | Hospital Enche Besar Hajjah Khalsom Kluang                                                                | Institute for Medical Research, Infectious Disease Research Centre, National Institutes of Health, Ministry of Health Malaysia | Azizan MA; Kamel K; Suppiah J; Thayan R                                                                                                                                                                                                                                                                                                                                                                          |
| EPI_ISL_756271, EPI_ISL_756273 to 756274, EPI_ISL_776770, EPI_ISL_776772, EPI_ISL_776870 to 776871, EPI_ISL_776875, EPI_ISL_776877, EPI_ISL_777490, EPI_ISL_777902, EPI_ISL_778445, EPI_ISL_778644 to 778645, EPI_ISL_803854 to 803864, EPI_ISL_885150, EPI_ISL_985401, EPI_ISL_985404, EPI_ISL_985408 to 985409 |                                                                                                           |                                                                                                                                |                                                                                                                                                                                                                                                                                                                                                                                                                  |
| see above                                                                                                                                                                                                                                                                                                        | Hospital General Universitario Gregorio Marañón                                                           | Hospital General Universitario Gregorio Marañón                                                                                | Cristina Rodríguez-Grande; Darío García de Viedma; Darío García de Viedma.; Laura Perez-Lago; Laura Pérez-Lago; Patricia Muñoz; Pedro Sola Campoy; Pilar Catalán; Sergio Buenestado Serrano                                                                                                                                                                                                                      |
| EPI_ISL_912268 to 912352                                                                                                                                                                                                                                                                                         | Hospital General Universitario Gregorio Marañón                                                           | SeqCOVID-SPAIN consortium / IBV (CSIC)                                                                                         | Andrés Von Wernitz; Arturo fraile Torres; Carmen del Arco; Darío García de Viedma; Darío García de Viedma and SeqCOVID-SPAIN consortium; Julia Suárez; Laura Cardeñoso; Laura Pérez-Lago; Marta Herranz; Patricia Muñoz; Patricia Muñoz and SeqCOVID-SPAIN consortium; Pedro J Sola-Campoy; Pedro J. Sola Campoy; Pilar Catalán; Sergio Buenestado Serrano; Sergio Buenestado-Serrano; Victor Manuel de la Cueva |
| EPI_ISL_654021 to 654400, EPI_ISL_779955 to 780095, EPI_ISL_780414 to 780415, EPI_ISL_813980 to 814061, EPI_ISL_852947 to 853032, EPI_ISL_861773 to 861855                                                                                                                                                       | Hospital General Universitario Gregorio Marañón                                                           | SeqCOVID-SPAIN consortium/IBV(CSIC)                                                                                            | Darío García de Viedma; Jon Sicilia; Julia Suárez; Laura Pérez-Lago; Marta Herranz; Patricia Muñoz and SeqCOVID-SPAIN consortium; Pedro J Sola-Campoy; Pilar Catalán; Sergio Buenestado-Serrano; Victor Manuel de la Cueva                                                                                                                                                                                       |
| EPI_ISL_756272                                                                                                                                                                                                                                                                                                   | Hospital General Universitario La Princesa                                                                | Hospital General Universitario Gregorio Marañón                                                                                | Andrés Von Wernitz; Arturo fraile Torres; Carmen del Arco; Darío García de Viedma.; Laura Cardeñoso; Patricia Muñoz; Pedro Sola Campoy; Pilar Catalán; Sergio Buenestado Serrano                                                                                                                                                                                                                                 |
| EPI_ISL_961204 to 961285                                                                                                                                                                                                                                                                                         | Hospital General Universitario de Alicante - Instituto de Investigación Sanitaria y Biomédica de Alicante | SeqCOVID-SPAIN consortium/IBV(CSIC)                                                                                            | Carmen Molina Pardines and SeqCOVID-SPAIN consortium; Maripaz Ventero Martín                                                                                                                                                                                                                                                                                                                                     |
| EPI_ISL_691682 to 691683, EPI_ISL_954781, EPI_ISL_954805, EPI_ISL_954810, EPI_ISL_965914 to 965915, EPI_ISL_965926, EPI_ISL_965934, EPI_ISL_965940, EPI_ISL_965946, EPI_ISL_965959                                                                                                                               |                                                                                                           |                                                                                                                                |                                                                                                                                                                                                                                                                                                                                                                                                                  |
| see above                                                                                                                                                                                                                                                                                                        | Hospital General Universitario de Ciudad Real                                                             | Instituto de Salud Carlos III                                                                                                  | A. Monzón; F. Casas; I. Illescas, S.; I. Jarilla, M.; I. Jiménez; I. Madrigal, M.; Iglesias-Caballero; M. Camarero; M. Cuesta; M. González-Esguevillas; M. Pozo; M. Sandonis; M. Zaballos; P. Jiménez; P. Zaballos; S. Camarero; S. Cuesta; S. Iglesias-Caballero; S. Juliá; S. Molinero Calamita; S. Pozo; S. Sandonis; S. Varona; Sandonis; V. Camarero; V. Vázquez; Vázquez                                   |
| EPI_ISL_954809                                                                                                                                                                                                                                                                                                   | Hospital General de Lanzarote                                                                             | Instituto de Salud Carlos III                                                                                                  | A. Monzón; F. Casas; I. Copado, R.; I. Jiménez; Iglesias-Caballero; M. Camarero; P. Zaballos; S. Cuesta; S. Pozo; S. Sandonis; S. Varona; V. Vázquez                                                                                                                                                                                                                                                             |
| EPI_ISL_861636                                                                                                                                                                                                                                                                                                   | Hospital Geral de Sao Mateus São Paulo                                                                    | Instituto Adolfo Lutz, Interdisciplinary Procedures Center, Strategic Laboratory                                               | Claudia Regina Gonçalves; Claudio Tavares Sacchi; Erica Valessa Ramos Gomes; Karoline Rodrigues Campos                                                                                                                                                                                                                                                                                                           |
| EPI_ISL_940630, EPI_ISL_943967 to 943972                                                                                                                                                                                                                                                                         | Hospital Geral de Sao Paulo                                                                               | Instituto Adolfo Lutz, Interdisciplinary Procedures Center, Strategic Laboratory                                               | Claudia Regina Gonçalves; Claudio Tavares Sacchi; Erica Valessa Ramos Gomes; Karoline Rodrigues Campos                                                                                                                                                                                                                                                                                                           |
| EPI_ISL_906075                                                                                                                                                                                                                                                                                                   | Hospital Geral de Vila Penteadro Dr Jose Pangella Sao Paulo                                               | Instituto Adolfo Lutz, Interdisciplinary Procedures Center, Strategic Laboratory                                               | Claudia Regina Gonçalves; Claudio Tavares Sacchi; Erica Valessa Ramos Gomes; Karoline Rodrigues Campos                                                                                                                                                                                                                                                                                                           |
| EPI_ISL_871974 to 871975, EPI_ISL_871979                                                                                                                                                                                                                                                                         | Hospital Infanta Cristina                                                                                 | Instituto de Salud Carlos III                                                                                                  | A. Monzón; F. Casas; I. García, P.; I. Jiménez; Iglesias-Caballero; M. Camarero; M. Cuesta; M. González-Esguevillas; M. Pozo; M. Zaballos; P. Jiménez; S. Juliá; S. Molinero Calamita; S. Varona                                                                                                                                                                                                                 |
| EPI_ISL_862551, EPI_ISL_954787, EPI_ISL_954790                                                                                                                                                                                                                                                                   | Hospital J.M. Morales Meseguer                                                                            | Instituto de Salud Carlos III                                                                                                  | A. Monzón; F. Casas; I. Guerrero, C.; I. Jiménez; I. Navarro, D.; Iglesias-Caballero; M. . Pozo; M. Camarero; M. Cuesta; M. González-Esguevillas; M. Zaballos; P. Jiménez; P. Zaballos; S. Cuesta; S. Juliá; S. Molinero Calamita; S. Pozo; S. Sandonis; S. Varona; V. Vázquez                                                                                                                                   |
| EPI_ISL_954797, EPI_ISL_954801, EPI_ISL_954803                                                                                                                                                                                                                                                                   | Hospital Los Arcos                                                                                        | Instituto de Salud Carlos III                                                                                                  | A. Monzón; F. Casas; I. Camara, M.; I. Jiménez; Iglesias-Caballero; M. Camarero; P. Zaballos; S. Cuesta; S. Pozo; S. Sandonis; S. Varona; V. Vázquez                                                                                                                                                                                                                                                             |
| EPI_ISL_965911, EPI_ISL_965913, EPI_ISL_965917 to 965919, EPI_ISL_965923, EPI_ISL_965928 to 965929, EPI_ISL_965932, EPI_ISL_965935, EPI_ISL_965939, EPI_ISL_965941, EPI_ISL_965945, EPI_ISL_965947, EPI_ISL_965951, EPI_ISL_965955, EPI_ISL_965958                                                               |                                                                                                           |                                                                                                                                |                                                                                                                                                                                                                                                                                                                                                                                                                  |
| see above                                                                                                                                                                                                                                                                                                        | Hospital Los Arcos del Mar Menor                                                                          | Instituto de Salud Carlos III                                                                                                  | A. Monzón; F. Casas; I. Cámara, M.; I. Jiménez; Iglesias-Caballero; M. Camarero; M. Sandonis; P. Zaballos; S. Camarero; S. Cuesta; S. Iglesias-Caballero; S. Pozo; S. Varona; Sandonis; V. Camarero; V. Vázquez; Vázquez                                                                                                                                                                                         |
| EPI_ISL_769992, EPI_ISL_769995                                                                                                                                                                                                                                                                                   | Hospital Metropolitano                                                                                    | Incienza, Instituto Costarricense de Investigación y Enseñanza en Nutrición y Salud                                            | Adriana Godínez; Claudio Soto-Garita; Estela Cordero; Francisco Duarte; Hebleen Porras; Melany Calderón & Margarita Lee Lui                                                                                                                                                                                                                                                                                      |
| EPI_ISL_693208 to 693209                                                                                                                                                                                                                                                                                         | Hospital Municipal Antonio Giglio                                                                         | Instituto Adolfo Lutz, Interdisciplinary Procedures Center, Strategic Laboratory                                               | Claudia Regina Gonçalves; Claudio Tavares Sacchi; Erica Valessa Ramos Gomes; Karoline Rodrigues Campos                                                                                                                                                                                                                                                                                                           |
| EPI_ISL_861658                                                                                                                                                                                                                                                                                                   | Hospital Municipal Ant3nio Giglio                                                                         | Instituto Adolfo Lutz, Interdisciplinary Procedures Center, Strategic Laboratory                                               | Claudia Regina Gonçalves; Claudio Tavares Sacchi; Erica Valessa Ramos Gomes; Karoline Rodrigues Campos                                                                                                                                                                                                                                                                                                           |
| EPI_ISL_693203                                                                                                                                                                                                                                                                                                   | Hospital Municipal Doutor Arthur Ribeiro de Saboya                                                        | Instituto Adolfo Lutz, Interdisciplinary Procedures Center, Strategic Laboratory                                               | Claudia Regina Gonçalves; Claudio Tavares Sacchi; Erica Valessa Ramos Gomes; Karoline Rodrigues Campos                                                                                                                                                                                                                                                                                                           |
| EPI_ISL_882671 to 882673                                                                                                                                                                                                                                                                                         | Hospital Municipal Dr. Guido Guida                                                                        | Instituto Adolfo Lutz, Interdisciplinary Procedures Center, Strategic Laboratory                                               | Claudia Regina Gonçalves; Claudio Tavares Sacchi; Erica Valessa Ramos Gomes; Karoline Rodrigues Campos                                                                                                                                                                                                                                                                                                           |
| EPI_ISL_861638, EPI_ISL_861640 to 861641                                                                                                                                                                                                                                                                         | Hospital Municipal Dr. Moyses Deutsch                                                                     | Instituto Adolfo Lutz, Interdisciplinary Procedures Center, Strategic Laboratory                                               | Claudia Regina Gonçalves; Claudio Tavares Sacchi; Erica Valessa Ramos Gomes; Karoline Rodrigues Campos                                                                                                                                                                                                                                                                                                           |
| EPI_ISL_861681                                                                                                                                                                                                                                                                                                   | Hospital Municipal Dr. Waldemar Tebaldi                                                                   | Instituto Adolfo Lutz, Interdisciplinary Procedures Center, Strategic Laboratory                                               | Claudia Regina Gonçalves; Claudio Tavares Sacchi; Erica Valessa Ramos Gomes; Karoline Rodrigues Campos                                                                                                                                                                                                                                                                                                           |
| EPI_ISL_977490                                                                                                                                                                                                                                                                                                   | Hospital Municipal Guido Guida                                                                            | Instituto Adolfo Lutz, Interdisciplinary Procedures Center, Strategic Laboratory                                               | Claudia Regina Gonçalves; Claudio Tavares Sacchi; Erica Valessa Ramos Gomes; Karoline Rodrigues Campos                                                                                                                                                                                                                                                                                                           |
| EPI_ISL_940629                                                                                                                                                                                                                                                                                                   | Hospital Municipal Josnias Castanha Braga                                                                 | Instituto Adolfo Lutz, Interdisciplinary Procedures Center, Strategic Laboratory                                               | Claudia Regina Gonçalves; Claudio Tavares Sacchi; Erica Valessa Ramos Gomes; Karoline Rodrigues Campos                                                                                                                                                                                                                                                                                                           |
| EPI_ISL_693206                                                                                                                                                                                                                                                                                                   | Hospital Municipal Mario Gatti                                                                            | Instituto Adolfo Lutz, Interdisciplinary Procedures Center, Strategic Laboratory                                               | Claudia Regina Gonçalves; Claudio Tavares Sacchi; Erica Valessa Ramos Gomes; Karoline Rodrigues Campos                                                                                                                                                                                                                                                                                                           |
| EPI_ISL_861671, EPI_ISL_882660                                                                                                                                                                                                                                                                                   | Hospital Municipal Prefeito Waldemar Costa Filho                                                          | Instituto Adolfo Lutz, Interdisciplinary Procedures Center, Strategic Laboratory                                               | Claudia Regina Gonçalves; Claudio Tavares Sacchi; Erica Valessa Ramos Gomes; Karoline Rodrigues Campos                                                                                                                                                                                                                                                                                                           |

|                                                                                                                                                                                                                                                                                                    |                                                                                                |                                                                                                                                                                                                                                                        |                                                                                                                                                                                                                                                                                                                                                                                                                             |
|----------------------------------------------------------------------------------------------------------------------------------------------------------------------------------------------------------------------------------------------------------------------------------------------------|------------------------------------------------------------------------------------------------|--------------------------------------------------------------------------------------------------------------------------------------------------------------------------------------------------------------------------------------------------------|-----------------------------------------------------------------------------------------------------------------------------------------------------------------------------------------------------------------------------------------------------------------------------------------------------------------------------------------------------------------------------------------------------------------------------|
| EPI_ISL_735399                                                                                                                                                                                                                                                                                     | Hospital Municipal Dr Ignacio de gouvea                                                        | Instituto Adolfo Lutz, Interdisciplinary Procedures Center, Strategic Laboratory                                                                                                                                                                       | Claudia Regina Gonçalves; Claudio Tavares Sacchi; Erica Valessa Ramos Gomes; Karoline Rodrigues Campos                                                                                                                                                                                                                                                                                                                      |
| EPI_ISL_836977                                                                                                                                                                                                                                                                                     | Hospital Municipal Dr. Jose de Carvalho Florence                                               | Instituto Adolfo Lutz, Interdisciplinary Procedures Center, Strategic Laboratory                                                                                                                                                                       | Claudia Regina Gonçalves; Claudio Tavares Sacchi; Erica Valessa Ramos Gomes; Karoline Rodrigues Campos                                                                                                                                                                                                                                                                                                                      |
| EPI_ISL_735428 to 735429, EPI_ISL_735431 to 735432, EPI_ISL_861637, EPI_ISL_906066                                                                                                                                                                                                                 | Hospital Nipo Brasileiro                                                                       | Instituto Adolfo Lutz, Interdisciplinary Procedures Center, Strategic Laboratory                                                                                                                                                                       | Claudia Regina Gonçalves; Claudio Tavares Sacchi; Erica Valessa Ramos Gomes; Karoline Rodrigues Campos                                                                                                                                                                                                                                                                                                                      |
| EPI_ISL_862637 to 862639, EPI_ISL_913061 to 913062                                                                                                                                                                                                                                                 | Hospital Nuestra Señora de Sonsoles                                                            | Instituto de Salud Carlos III                                                                                                                                                                                                                          | A. Monzón; A. San Pedro; F. Casas; I. Jiménez; I. Sánchez, R.; Iglesias-Caballero; M. Camarero; M. Cuesta; M. González-Esguevillas; M. Molinero Calamita; M. Zaballos; P. Jiménez; P. Zaballos; S. Cuesta; S. Juliá; S. Pozo; S. Sandonis; S. Varona; V. Vázquez                                                                                                                                                            |
| EPI_ISL_977502                                                                                                                                                                                                                                                                                     | Hospital Oriente de Asturias                                                                   | Laboratorio de Virología HUCA                                                                                                                                                                                                                          | Abreu F; Alvarez-Arguelles ME; Boga JA; Castelló C; Costales I; Coto E; Gómez de Oña J; Martín-Rodríguez G; Melón S; Perez-Martínez Z; Rojo S; Sandoval M                                                                                                                                                                                                                                                                   |
| EPI_ISL_906079, EPI_ISL_940610 to 940611                                                                                                                                                                                                                                                           | Hospital Paulistano Paulista                                                                   | Instituto Adolfo Lutz, Interdisciplinary Procedures Center, Strategic Laboratory                                                                                                                                                                       | Claudia Regina Gonçalves; Claudio Tavares Sacchi; Erica Valessa Ramos Gomes; Karoline Rodrigues Campos                                                                                                                                                                                                                                                                                                                      |
| EPI_ISL_861684 to 861685                                                                                                                                                                                                                                                                           | Hospital Pronto Socorro Itaquera                                                               | Instituto Adolfo Lutz, Interdisciplinary Procedures Center, Strategic Laboratory                                                                                                                                                                       | Claudia Regina Gonçalves; Claudio Tavares Sacchi; Erica Valessa Ramos Gomes; Karoline Rodrigues Campos                                                                                                                                                                                                                                                                                                                      |
| EPI_ISL_936488                                                                                                                                                                                                                                                                                     | Hospital Queen Elizabeth                                                                       | Institute for Medical Research, Infectious Disease Research Centre, National Institutes of Health, Ministry of Health Malaysia                                                                                                                         | Azizan MA; Kamel K; Suppiah J; Thayan R                                                                                                                                                                                                                                                                                                                                                                                     |
| EPI_ISL_936489                                                                                                                                                                                                                                                                                     | Hospital Raja Perempuan Zainab II                                                              | Institute for Medical Research, Infectious Disease Research Centre, National Institutes of Health, Ministry of Health Malaysia                                                                                                                         | Azizan MA; Kamel K; Suppiah J; Thayan R                                                                                                                                                                                                                                                                                                                                                                                     |
| EPI_ISL_882612 to 882613, EPI_ISL_882615 to 882618, EPI_ISL_882620 to 882621, EPI_ISL_882623 to 882625, EPI_ISL_882627 to 882629, EPI_ISL_882631 to 882632                                                                                                                                         | Hospital Ramón y Cajal                                                                         | Hospital Ramón y Cajal                                                                                                                                                                                                                                 | Concepción Rodríguez; JC Galán; José M Gonzalez-Alba; Laura Martínez; Luz Leticia Olavarrieta; Melanie Abreu; Rafael Cantón; Val F Lanza                                                                                                                                                                                                                                                                                    |
| EPI_ISL_735418                                                                                                                                                                                                                                                                                     | Hospital Regional do Vale do Paraíba                                                           | Instituto Adolfo Lutz, Interdisciplinary Procedures Center, Strategic Laboratory                                                                                                                                                                       | Claudia Regina Gonçalves; Claudio Tavares Sacchi; Erica Valessa Ramos Gomes; Karoline Rodrigues Campos                                                                                                                                                                                                                                                                                                                      |
| EPI_ISL_861649                                                                                                                                                                                                                                                                                     | Hospital Renascença Campinas                                                                   | Instituto Adolfo Lutz, Interdisciplinary Procedures Center, Strategic Laboratory                                                                                                                                                                       | Claudia Regina Gonçalves; Claudio Tavares Sacchi; Erica Valessa Ramos Gomes; Karoline Rodrigues Campos                                                                                                                                                                                                                                                                                                                      |
| EPI_ISL_833165 to 833166                                                                                                                                                                                                                                                                           | Hospital Samaritano                                                                            | Instituto Adolfo Lutz, Interdisciplinary Procedures Center, Strategic Laboratory                                                                                                                                                                       | Claudia Regina Gonçalves; Claudio Tavares Sacchi; Erica Valessa Ramos Gomes; Karoline Rodrigues Campos                                                                                                                                                                                                                                                                                                                      |
| EPI_ISL_882670                                                                                                                                                                                                                                                                                     | Hospital Samaritano Paulista                                                                   | Instituto Adolfo Lutz, Interdisciplinary Procedures Center, Strategic Laboratory                                                                                                                                                                       | Claudia Regina Gonçalves; Claudio Tavares Sacchi; Erica Valessa Ramos Gomes; Karoline Rodrigues Campos                                                                                                                                                                                                                                                                                                                      |
| EPI_ISL_970179                                                                                                                                                                                                                                                                                     | Hospital San Agustín, Avilés                                                                   | Laboratorio de Virología HUCA                                                                                                                                                                                                                          | Abreu F; Alvarez-Arguelles ME; Boga JA; Castelló C; Costales I; Coto E; Gómez de Oña J; Martín-Rodríguez G; Melón S; Perez-Martínez Z; Rojo S; Sandoval M                                                                                                                                                                                                                                                                   |
| EPI_ISL_993630                                                                                                                                                                                                                                                                                     | Hospital San Agustín                                                                           | Laboratorio de Virología Hospital Universitario Central de Asturias (HUCA)                                                                                                                                                                             | Abreu F; Alvarez-Arguelles ME; Boga JA; Castelló C; Costales I; Coto E; Gómez de Oña J; Martín-Rodríguez G; Melón S; Perez-Martínez Z; Rojo S; Sandoval M                                                                                                                                                                                                                                                                   |
| EPI_ISL_906532                                                                                                                                                                                                                                                                                     | Hospital San Jose de Maicao                                                                    | Instituto Nacional de Salud- Dirección de Investigación en Salud Pública, Universidad de los Andes- Applied genomics research group, Vicerrectoría de Investigación y Creación, Universidad de los Andes- Systems and Computing Engineering Department | Carlos Franco-Muñoz; Diego A. Álvarez-Díaz; Diego Andrés Prada; Gerardo Santamaría Jorge Duitama; Héctor Alejandro Ruiz-Moreno; Jhonattan Reales-González; Jorge Ivan Díaz; Julian Naizaque; Katherine Laiton-Donato; Laura Natalia Gonzalez; Magdalena Wiesner; Marcela Mercado-Reyes; María T. Herrera-Sepúlveda; Martha Lucia Ospina Martínez; Mauricio Pacheco-Montealegre; Sheryll Corchuelo; Silvia Restrepo-Restrepo |
| EPI_ISL_862654, EPI_ISL_913021 to 913023, EPI_ISL_913032 to 913035, EPI_ISL_913057                                                                                                                                                                                                                 | Hospital San Pedro de Alcántara                                                                | Instituto de Salud Carlos III                                                                                                                                                                                                                          | A. Monzón; F. Casas; I. Jiménez; I. Rodríguez, G.; Iglesias-Caballero; M. Pozo; M. Camarero; M. Cuesta; M. González-Esguevillas; M. Zaballos; M.Camarero; P. Jiménez; P. Zaballos; S. Cuesta; S. Juliá; S. Molinero Calamita; S. Pozo; S. Sandonis; S. Varona; V. Vázquez                                                                                                                                                   |
| EPI_ISL_693196                                                                                                                                                                                                                                                                                     | Hospital Santa Clara                                                                           | Instituto Adolfo Lutz, Interdisciplinary Procedures Center, Strategic Laboratory                                                                                                                                                                       | Claudia Regina Gonçalves; Claudio Tavares Sacchi; Erica Valessa Ramos Gomes; Karoline Rodrigues Campos                                                                                                                                                                                                                                                                                                                      |
| EPI_ISL_693233                                                                                                                                                                                                                                                                                     | Hospital Santa Cruz                                                                            | Instituto Adolfo Lutz, Interdisciplinary Procedures Center, Strategic Laboratory                                                                                                                                                                       | Claudia Regina Gonçalves; Claudio Tavares Sacchi; Erica Valessa Ramos Gomes; Karoline Rodrigues Campos                                                                                                                                                                                                                                                                                                                      |
| EPI_ISL_693236, EPI_ISL_861646 to 861647, EPI_ISL_861650, EPI_ISL_861654 to 861655                                                                                                                                                                                                                 | Hospital Santa Marcelina Sao Paulo                                                             | Instituto Adolfo Lutz, Interdisciplinary Procedures Center, Strategic Laboratory                                                                                                                                                                       | Claudia Regina Gonçalves; Claudio Tavares Sacchi; Erica Valessa Ramos Gomes; Karoline Rodrigues Campos                                                                                                                                                                                                                                                                                                                      |
| EPI_ISL_802750 to 802776                                                                                                                                                                                                                                                                           | Hospital Santa María Nai                                                                       | Instituto de Salud Carlos III                                                                                                                                                                                                                          | A. Monzón; F. Casas; I. Jiménez; Iglesias-Caballero; J. García.; M. Camarero; M. Cuesta; M. González-Esguevillas; M. Molinero Calamita; M. Zaballos; P. Jiménez; S. Juliá; S. Pozo; S. Varona                                                                                                                                                                                                                               |
| EPI_ISL_861644                                                                                                                                                                                                                                                                                     | Hospital Santa Virginia                                                                        | Instituto Adolfo Lutz, Interdisciplinary Procedures Center, Strategic Laboratory                                                                                                                                                                       | Claudia Regina Gonçalves; Claudio Tavares Sacchi; Erica Valessa Ramos Gomes; Karoline Rodrigues Campos                                                                                                                                                                                                                                                                                                                      |
| EPI_ISL_861653                                                                                                                                                                                                                                                                                     | Hospital Santa Virginia                                                                        | Instituto Adolfo Lutz, Interdisciplinary Procedures Center, Strategic Laboratory                                                                                                                                                                       | Claudia Regina Gonçalves; Claudio Tavares Sacchi; Erica Valessa Ramos Gomes; Karoline Rodrigues Campos                                                                                                                                                                                                                                                                                                                      |
| EPI_ISL_940619 to 940625                                                                                                                                                                                                                                                                           | Hospital Sao Joaquim - Beneficencia Portuguesa                                                 | Instituto Adolfo Lutz, Interdisciplinary Procedures Center, Strategic Laboratory                                                                                                                                                                       | Claudia Regina Gonçalves; Claudio Tavares Sacchi; Erica Valessa Ramos Gomes; Karoline Rodrigues Campos                                                                                                                                                                                                                                                                                                                      |
| EPI_ISL_906076 to 906077                                                                                                                                                                                                                                                                           | Hospital Sao Luiz Sao Caetano                                                                  | Instituto Adolfo Lutz, Interdisciplinary Procedures Center, Strategic Laboratory                                                                                                                                                                       | Claudia Regina Gonçalves; Claudio Tavares Sacchi; Erica Valessa Ramos Gomes; Karoline Rodrigues Campos                                                                                                                                                                                                                                                                                                                      |
| EPI_ISL_693201, EPI_ISL_861639                                                                                                                                                                                                                                                                     | Hospital Sao Paulo de Ensino da Unifesp                                                        | Instituto Adolfo Lutz, Interdisciplinary Procedures Center, Strategic Laboratory                                                                                                                                                                       | Claudia Regina Gonçalves; Claudio Tavares Sacchi; Erica Valessa Ramos Gomes; Karoline Rodrigues Campos                                                                                                                                                                                                                                                                                                                      |
| EPI_ISL_902738 to 902748                                                                                                                                                                                                                                                                           | Hospital Universitari Germans Trias i Pujol (HUGTIP) / Fundació Lluita contra la SIDA (FLSida) | IrsiCaixa - Can Ruti CovidSeq                                                                                                                                                                                                                          | 2a planta; Badalona Marta Massanella; Bonaventura Clotet; Ester Ballana; Fundació irsiCaixa, Hospital Universitari Germans Trias i Pujol(HUGTIP); Joaquim Segalés; Jorge Carrillo; Julia Blanco; Lidia Ruiz; Nuria Izquierdo; Roger Paredes; maternal Ctra Canyet s/n                                                                                                                                                       |
| EPI_ISL_832101 to 832104                                                                                                                                                                                                                                                                           | Hospital Universitari Germans Trias i Pujol(HUGTIP)/Fundació Lluita contra la SIDA (FLSida)    | IrsiCaixa AIDS Research Lab                                                                                                                                                                                                                            | Bonaventura Clotet; Ester Ballana; Joaquim Segalés; Jorge Carrillo; Julia Blanco; Lidia Ruiz; Marc Noguera-Julian; Maria Pilar Armengol; Mariona Parera; Marta Massanella; Nuria Izquierdo; Roger Paredes                                                                                                                                                                                                                   |
| EPI_ISL_728361 to 728362, EPI_ISL_728364 to 728365, EPI_ISL_819293 to 819363, EPI_ISL_824409 to 824512, EPI_ISL_825326 to 825384, EPI_ISL_825618 to 825631, EPI_ISL_850516, EPI_ISL_918273 to 918338, EPI_ISL_954142 to 954182, EPI_ISL_954747, EPI_ISL_981297 to 981304, EPI_ISL_981308 to 981367 | see above                                                                                      | Hospital Universitari Vall d'Hebron - Vall d'Hebron Institut de Recerca                                                                                                                                                                                | Andrés Antón; Ariadna Rando; Aroa Silgado; Carla Castillo; Cristina Andrés; Damir Garcia-Cehic; Elena Sulleiro; Josep F Abril; Josep Quer; Juliana Esperalba; Maria Carmen Martin; Maria Carmen Martin; Maria Gema Codina; Maria Piñana; Tomás Pumarola                                                                                                                                                                     |
| EPI_ISL_850511 to 850513, EPI_ISL_850515, EPI_ISL_981270 to 981296                                                                                                                                                                                                                                 | Hospital Universitari de Bellvitge                                                             | Hospital Universitari Vall d'Hebron - Vall d'Hebron Institut de Recerca                                                                                                                                                                                | Andrés Antón; Ariadna Rando; Carla Castillo; Cristina Andrés; Damir Garcia-Cehic; Josep F Abril; Josep Quer; Juliana Esperalba; Maria Carmen Martin; Maria Gema Codina; Maria Piñana; Tomás Pumarola                                                                                                                                                                                                                        |
| EPI_ISL_941165 to 941173                                                                                                                                                                                                                                                                           | Hospital Universitari i Politècnic La Fe de València                                           | SeqCOVID-SPAIN consortium/IBV(CSIC)                                                                                                                                                                                                                    | Ana Gil Brusola; Eva González Barberá; José Luis López Hontangas and SeqCOVID-SPAIN consortium; María Dolores Gómez Ruiz; Salvador Giner                                                                                                                                                                                                                                                                                    |

|                                                                                                                                          |                                                                                        |                                                                                                  |                                                                                                                                                                                                                                                                                                    | Almaraz |
|------------------------------------------------------------------------------------------------------------------------------------------|----------------------------------------------------------------------------------------|--------------------------------------------------------------------------------------------------|----------------------------------------------------------------------------------------------------------------------------------------------------------------------------------------------------------------------------------------------------------------------------------------------------|---------|
| EPI_ISL_671863                                                                                                                           | Hospital Universitari i Politècnic la Fe, València, Spain                              | SeqCOVID-SPAIN consortium/IBV(CSIC)                                                              | Manuel Guerreiro; Marta Montero-Alonso; María Dolores Gómez and SeqCOVID-SPAIN consortium                                                                                                                                                                                                          |         |
| EPI_ISL_737930                                                                                                                           | Hospital Universitario 12 de Octubre                                                   | Hospital Universitario 12 de Octubre                                                             | Esther Viedma; Irene Muñoz-Gallego; M <sup>a</sup> Dolores Folgueira; Rafael Delgado; Raul Recio; Sara González                                                                                                                                                                                    |         |
| EPI_ISL_831021 to 831288                                                                                                                 | Hospital Universitario La Paz (Madrid)                                                 | SeqCOVID-SPAIN consortium/IBV(CSIC)                                                              | Elias Dahdouh; Fernando Lázaro-Perona; Jesús Mingorance and SeqCOVID-SPAIN consortium; María Rodríguez-Tejedor                                                                                                                                                                                     |         |
| EPI_ISL_871976 to 871977                                                                                                                 | Hospital Universitario Lozano Bielsa                                                   | Instituto de Salud Carlos III                                                                    | A. Monzón; F. Casas; I. Benito, R.; I. Jiménez; Iglesias-Caballero; M. Camarero; M. Cuesta; M. González-Esguevillas; M. Pozo; M. Zaballos; P. Jiménez; S. Juliá; S. Molinero Calamita; S. Varona                                                                                                   |         |
| EPI_ISL_871879 to 871890, EPI_ISL_871892 to 871907, EPI_ISL_871911                                                                       | Hospital Universitario Marqués de Valdecilla - IDIVAL (Santander, Cantabria)           | SeqCOVID-SPAIN consortium/IBV(CSIC)                                                              | Daniel Pablo Marcos; Jesús Rodríguez Rodríguez; Jose Manuel Méndez Legaza; María Eleicer Cano García; María Siller Ruiz and SeqCOVID-SPAIN consortium; Mónica Gozalo Margüello                                                                                                                     |         |
| EPI_ISL_871978, EPI_ISL_871980 to 871983                                                                                                 | Hospital Universitario Miguel Servet                                                   | Instituto de Salud Carlos III                                                                    | A. Monzón; F. Casas; I. Jiménez; I. Rezusta, A.; Iglesias-Caballero; M. Camarero; M. Cuesta; M. González-Esguevillas; M. Pozo; M. Zaballos; P. Jiménez; S. Juliá; S. Molinero Calamita; S. Varona                                                                                                  |         |
| EPI_ISL_691731                                                                                                                           | Hospital Universitario Puerta de Hierro                                                | Instituto de Salud Carlos III                                                                    | A. Monzón; F. Casas; I. Jiménez; I. Velasco, A.; Iglesias-Caballero; M. Camarero; M. Cuesta; M. González-Esguevillas; M. Pozo; M. Zaballos; P. Jiménez; S. Juliá; S. Molinero Calamita; S. Varona                                                                                                  |         |
| EPI_ISL_691729 to 691730, EPI_ISL_871973, EPI_ISL_871984, EPI_ISL_871991                                                                 | Hospital Universitario Severo Ochoa                                                    | Instituto de Salud Carlos III                                                                    | A. Monzón; F. Casas; I. García; I. García, M.; I. Jiménez; Iglesias-Caballero; M. Camarero; M. Cuesta; M. González-Esguevillas; M. Pozo; M. Zaballos; M.L.; P. Jiménez; S. Juliá; S. Molinero Calamita; S. Varona                                                                                  |         |
| EPI_ISL_862545, EPI_ISL_862549, EPI_ISL_862568, EPI_ISL_913060, EPI_ISL_954782 to 954783, EPI_ISL_954793, EPI_ISL_954799, EPI_ISL_954812 | Hospital Universitario Virgen de la Arrixaca                                           | Instituto de Salud Carlos III                                                                    | A. Monzón; F. Casas; I. Jiménez; I. Moreno, A.; I. Moreno, L.; Iglesias-Caballero; M. Camarero; M. Camarero; M. Cuesta; M. González-Esguevillas; M. Pozo; M. Zaballos; Moreno, A.; P. Jiménez; P. Zaballos; S. Cuesta; S. Juliá; S. Molinero Calamita; S. Pozo; S. Sandonis; S. Varona; V. Vázquez |         |
| see above                                                                                                                                | Hospital Universitario Virgen de las Nieves de Granada-SAS                             | SeqCOVID-SPAIN consortium/IBV(CSIC)                                                              | Irene Pedrosa Corral; José M. Navarro-Marí and SeqCOVID-SPAIN consortium; Mercedes Pérez Ruiz; Sara Sanbonmatsu Gámez                                                                                                                                                                              |         |
| EPI_ISL_654626                                                                                                                           | Hospital Universitario de Ceuta                                                        | Instituto de Salud Carlos III                                                                    | A. Monzón; F. Casas; I. Hijano, S.; I. Jiménez; I. López, J.; Iglesias-Caballero; M. Camarero; M. Cuesta; M. González-Esguevillas; M. Pozo; M. Zaballos; P. Jiménez; P. Zaballos; S. Cuesta; S. Juliá; S. Molinero Calamita; S. Pozo; S. Sandonis; S. Varona; V. Vázquez                           |         |
| EPI_ISL_691686 to 691699, EPI_ISL_862655 to 862658, EPI_ISL_871995, EPI_ISL_913020, EPI_ISL_913054 to 913056, EPI_ISL_913058             | Hospital Universitario de Gran Canaria Dr. Negrín                                      | SeqCOVID-SPAIN consortium/IBV(CSIC)                                                              | Ana Bordes Benítez and SeqCOVID-SPAIN consortium; Francisco J. Chamizo López; M. Carmen Pérez González                                                                                                                                                                                             |         |
| EPI_ISL_660600, EPI_ISL_962929 to 962974                                                                                                 | Hospital Universitario de Guadalajara                                                  | Instituto de Salud Carlos III                                                                    | A. Monzón; F. Casas; I. González, A.; I. Jiménez; Iglesias-Caballero; M. Camarero; P. Zaballos; S. Cuesta; S. Pozo; S. Sandonis; S. Varona; V. Vázquez                                                                                                                                             |         |
| EPI_ISL_913040                                                                                                                           | Hospital Universitario de La Ribera (Alzira, València)                                 | SeqCOVID-SPAIN consortium/IBV(CSIC)                                                              | Julia González Cantó and SeqCOVID-SPAIN consortium; Olalla Martínez Macías                                                                                                                                                                                                                         |         |
| EPI_ISL_941233 to 941239                                                                                                                 | Hospital Universitario de La Ribera (Alzira, València)                                 | SeqCOVID-SPAIN consortium/IBV(CSIC)                                                              | Abreu F; Alvarez-Arguelles ME; Boga JA; Castelló C; Costales I; Coto E; Gómez de Oña J; Martín-Rodríguez G; Melón S; Perez-Martinez Z; Rojo S; Sandoval M                                                                                                                                          |         |
| EPI_ISL_977507                                                                                                                           | Hospital Valle del Nalon                                                               | Laboratorio de Virología HUCA                                                                    | Abreu F; Alvarez-Arguelles ME; Boga JA; Castelló C; Costales I; Coto E; Gómez de Oña J; Martín-Rodríguez G; Melón S; Perez-Martinez Z; Rojo S; Sandoval M                                                                                                                                          |         |
| EPI_ISL_977509                                                                                                                           | Hospital Valle del Nalón                                                               | Laboratorio de Virología HUCA                                                                    | Abreu F; Alvarez-Arguelles ME; Boga JA; Castelló C; Costales I; Coto E; Gómez de Oña J; Martín-Rodríguez G; Melón S; Perez-Martinez Z; Rojo S; Sandoval M                                                                                                                                          |         |
| EPI_ISL_693516, EPI_ISL_693518 to 693520, EPI_ISL_693523 to 693524, EPI_ISL_693534 to 693537, EPI_ISL_693539, EPI_ISL_693630 to 693657   | Hospital Vila Franca de Xira                                                           | Instituto Nacional de Saude (INSA)                                                               | Borges et al                                                                                                                                                                                                                                                                                       |         |
| EPI_ISL_906073                                                                                                                           | Hospital Vila Lobos                                                                    | Instituto Adolfo Lutz, Interdisciplinary Procedures Center, Strategic Laboratory                 | Claudia Regina Gonçalves; Claudio Tavares Sacchi; Erica Valessa Ramos Gomes; Karoline Rodrigues Campos                                                                                                                                                                                             |         |
| EPI_ISL_721987 to 722129                                                                                                                 | Hospital das Clinicas Universidade de São Paulo Medical School                         | Laboratório de Parasitologia Médica - Instituto de Medicina Tropical - Universidade de São Paulo | Brazil-UK Centre for Arbovirus Discovery Diagnosis Genomics and Epidemiology (CADDE) Genomic Network - Instituto de Medicina Tropical                                                                                                                                                              |         |
| EPI_ISL_672669, EPI_ISL_672687 to 672700, EPI_ISL_672722 to 672745                                                                       | Hospital das Clínicas da Faculdade de Medicina da Universidade de São Paulo (HC-FMUSP) | Laboratório de Parasitologia Médica - Instituto de Medicina Tropical - Universidade de São Paulo | Brazil-UK Centre for Arbovirus Discovery Diagnosis Genomics and Epidemiology (CADDE) Genomic Network - Instituto de Medicina Tropical                                                                                                                                                              |         |
| EPI_ISL_660443 to 660444                                                                                                                 | Hospital de Braga                                                                      | Instituto Nacional de Saude (INSA)                                                               | Borges et al                                                                                                                                                                                                                                                                                       |         |
| EPI_ISL_977417                                                                                                                           | Hospital de Cabueñes                                                                   | Laboratorio de Virología / Hospital Universitario Central de Asturias (HUCA)                     | Abreu F; Alvarez-Arguelles ME; Boga JA; Castelló C; Costales I; Coto E; Gómez de Oña J; Martín-Rodríguez G; Melón S; Perez-Martinez Z; Rojo S; Sandoval M                                                                                                                                          |         |
| EPI_ISL_977501                                                                                                                           | Hospital de Cabueñes                                                                   | Laboratorio de Virología HUCA                                                                    | Abreu F; Alvarez-Arguelles ME; Boga JA; Castelló C; Costales I; Coto E; Gómez de Oña J; Martín-Rodríguez G; Melón S; Perez-Martinez Z; Rojo S; Sandoval M                                                                                                                                          |         |
| EPI_ISL_836143                                                                                                                           | Hospital de Campanha COVID-19 de Mairipora                                             | Instituto Adolfo Lutz, Interdisciplinary Procedures Center, Strategic Laboratory                 | Claudia Regina Gonçalves; Claudio Tavares Sacchi; Erica Valessa Ramos Gomes; Karoline Rodrigues Campos                                                                                                                                                                                             |         |
| EPI_ISL_693205                                                                                                                           | Hospital de Campanha Covid-19 Assis                                                    | Instituto Adolfo Lutz, Interdisciplinary Procedures Center, Strategic Laboratory                 | Claudia Regina Gonçalves; Claudio Tavares Sacchi; Erica Valessa Ramos Gomes; Karoline Rodrigues Campos                                                                                                                                                                                             |         |
| EPI_ISL_940612                                                                                                                           | Hospital de Campanha para Enfrentamento do Coronavirus - Goiania                       | Instituto Adolfo Lutz, Interdisciplinary Procedures Center, Strategic Laboratory                 | Claudia Regina Gonçalves; Claudio Tavares Sacchi; Erica Valessa Ramos Gomes; Karoline Rodrigues Campos                                                                                                                                                                                             |         |
| EPI_ISL_735396                                                                                                                           | Hospital de Camplanha COVID 19 SER                                                     | Instituto Adolfo Lutz, Interdisciplinary Procedures Center, Strategic Laboratory                 | Claudia Regina Gonçalves; Claudio Tavares Sacchi; Erica Valessa Ramos Gomes; Karoline Rodrigues Campos                                                                                                                                                                                             |         |
| EPI_ISL_882667                                                                                                                           | Hospital de Clinicas Caieiras                                                          | Instituto Adolfo Lutz, Interdisciplinary Procedures Center, Strategic Laboratory                 | Claudia Regina Gonçalves; Claudio Tavares Sacchi; Erica Valessa Ramos Gomes; Karoline Rodrigues Campos                                                                                                                                                                                             |         |
| EPI_ISL_691685                                                                                                                           | Hospital de Leon                                                                       | Instituto de Salud Carlos III                                                                    | A. Monzón; F. Casas; I. Jiménez; I. Vidan, J.; Iglesias-Caballero; M. Camarero; M. Cuesta; M. González-Esguevillas; M. Pozo; M. Zaballos; P. Jiménez; S. Juliá; S. Molinero Calamita; S. Varona                                                                                                    |         |
| EPI_ISL_691732, EPI_ISL_871994                                                                                                           | Hospital de Madrid                                                                     | Instituto de Salud Carlos III                                                                    | A. Monzón; F. Casas; I. Alhambra, A.; I. Jiménez; Iglesias-Caballero; M. Camarero; M. Cuesta; M. González-Esguevillas; M. Pozo; M. Zaballos; P. Jiménez; S. Juliá; S. Molinero Calamita; S. Varona                                                                                                 |         |
| EPI_ISL_882661 to 882662                                                                                                                 | Hospital de Santa Barbara de Goias                                                     | Instituto Adolfo Lutz, Interdisciplinary Procedures Center, Strategic Laboratory                 | Claudia Regina Gonçalves; Claudio Tavares Sacchi; Erica Valessa Ramos Gomes; Karoline Rodrigues Campos                                                                                                                                                                                             |         |
| EPI_ISL_850508                                                                                                                           | Hospital de Tortosa Verge de la Cinta                                                  | Hospital Universitari Vall d'Hebron - Vall d'Hebron Institut de Recerca                          | Andrés Antón; Ariadna Rando; Carla Castillo; Cristina Andrés; Damir Garcia-Cehic; Josep F Abril; Josep Quer; Juliana Esperalba; Maria Carmen Martín; Maria Gema Codina; Maria Piñana; Tomàs Pumarola                                                                                               |         |
| EPI_ISL_671805 to 671833                                                                                                                 | Hospital de la Santa Creu i Sant Pau. Servicio de Microbiología                        | SeqCOVID-SPAIN consortium/IBV(CSIC)                                                              | Elisenda Miró and SeqCOVID-SPAIN consortium; Ferran Navarro; Núria Rabella                                                                                                                                                                                                                         |         |
| EPI_ISL_875689                                                                                                                           | Hospital do Servidor Publico                                                           | Instituto Adolfo Lutz, Interdisciplinary Procedures Center, Strategic Laboratory                 | Claudia Regina Gonçalves; Claudio Tavares Sacchi; Erica Valessa Ramos Gomes; Karoline Rodrigues Campos                                                                                                                                                                                             |         |
| EPI_ISL_693199                                                                                                                           | Hospital do Servidor Publico Estadual Francisco Morato de Oliveira                     | Instituto Adolfo Lutz, Interdisciplinary Procedures Center, Strategic Laboratory                 | Claudia Regina Gonçalves; Claudio Tavares Sacchi; Erica Valessa Ramos Gomes; Karoline Rodrigues Campos                                                                                                                                                                                             |         |
| EPI_ISL_940609                                                                                                                           | Hospital e Maternidade Celso Piirro                                                    | Instituto Adolfo Lutz, Interdisciplinary Procedures Center, Strategic Laboratory                 | Claudia Regina Gonçalves; Claudio Tavares Sacchi; Erica Valessa Ramos Gomes; Karoline Rodrigues Campos                                                                                                                                                                                             |         |

|                                                                                                                                                                                                                                                                                                                                                                                                                                                                                                                                                                                                                                                                                                                                                                                                                                                                                                                                                                                                                                                                                                                                                                                                                                                                                                                                                                                                                                                                                                                                                                                                                                                                                                                                                                                                                                                                                                                                                                                                                                                                      |                                                                                |                                                                                                                                            |                                                                                                                                                                                                                                                                                                                                                                                                                                                                                               |
|----------------------------------------------------------------------------------------------------------------------------------------------------------------------------------------------------------------------------------------------------------------------------------------------------------------------------------------------------------------------------------------------------------------------------------------------------------------------------------------------------------------------------------------------------------------------------------------------------------------------------------------------------------------------------------------------------------------------------------------------------------------------------------------------------------------------------------------------------------------------------------------------------------------------------------------------------------------------------------------------------------------------------------------------------------------------------------------------------------------------------------------------------------------------------------------------------------------------------------------------------------------------------------------------------------------------------------------------------------------------------------------------------------------------------------------------------------------------------------------------------------------------------------------------------------------------------------------------------------------------------------------------------------------------------------------------------------------------------------------------------------------------------------------------------------------------------------------------------------------------------------------------------------------------------------------------------------------------------------------------------------------------------------------------------------------------|--------------------------------------------------------------------------------|--------------------------------------------------------------------------------------------------------------------------------------------|-----------------------------------------------------------------------------------------------------------------------------------------------------------------------------------------------------------------------------------------------------------------------------------------------------------------------------------------------------------------------------------------------------------------------------------------------------------------------------------------------|
| EPI_ISL_861635                                                                                                                                                                                                                                                                                                                                                                                                                                                                                                                                                                                                                                                                                                                                                                                                                                                                                                                                                                                                                                                                                                                                                                                                                                                                                                                                                                                                                                                                                                                                                                                                                                                                                                                                                                                                                                                                                                                                                                                                                                                       | Hospital e Maternidade Madre Theodora                                          | Instituto Adolfo Lutz, Interdisciplinary Procedures Center, Strategic Laboratory                                                           | Claudia Regina Gonçalves; Claudio Tavares Sacchi; Erica Valessa Ramos Gomes; Karoline Rodrigues Campos                                                                                                                                                                                                                                                                                                                                                                                        |
| EPI_ISL_693200                                                                                                                                                                                                                                                                                                                                                                                                                                                                                                                                                                                                                                                                                                                                                                                                                                                                                                                                                                                                                                                                                                                                                                                                                                                                                                                                                                                                                                                                                                                                                                                                                                                                                                                                                                                                                                                                                                                                                                                                                                                       | Hospital e Maternidade Mairipora                                               | Instituto Adolfo Lutz, Interdisciplinary Procedures Center, Strategic Laboratory                                                           | Claudia Regina Gonçalves; Claudio Tavares Sacchi; Erica Valessa Ramos Gomes; Karoline Rodrigues Campos                                                                                                                                                                                                                                                                                                                                                                                        |
| EPI_ISL_693241, EPI_ISL_735425                                                                                                                                                                                                                                                                                                                                                                                                                                                                                                                                                                                                                                                                                                                                                                                                                                                                                                                                                                                                                                                                                                                                                                                                                                                                                                                                                                                                                                                                                                                                                                                                                                                                                                                                                                                                                                                                                                                                                                                                                                       | Hospital e Maternidade Sao Lucas                                               | Instituto Adolfo Lutz, Interdisciplinary Procedures Center, Strategic Laboratory                                                           | Claudia Regina Gonçalves; Claudio Tavares Sacchi; Erica Valessa Ramos Gomes; Karoline Rodrigues Campos                                                                                                                                                                                                                                                                                                                                                                                        |
| EPI_ISL_861657                                                                                                                                                                                                                                                                                                                                                                                                                                                                                                                                                                                                                                                                                                                                                                                                                                                                                                                                                                                                                                                                                                                                                                                                                                                                                                                                                                                                                                                                                                                                                                                                                                                                                                                                                                                                                                                                                                                                                                                                                                                       | Hospital e Maternidade Sino Brasileiro                                         | Instituto Adolfo Lutz, Interdisciplinary Procedures Center, Strategic Laboratory                                                           | Claudia Regina Gonçalves; Claudio Tavares Sacchi; Erica Valessa Ramos Gomes; Karoline Rodrigues Campos                                                                                                                                                                                                                                                                                                                                                                                        |
| EPI_ISL_861645                                                                                                                                                                                                                                                                                                                                                                                                                                                                                                                                                                                                                                                                                                                                                                                                                                                                                                                                                                                                                                                                                                                                                                                                                                                                                                                                                                                                                                                                                                                                                                                                                                                                                                                                                                                                                                                                                                                                                                                                                                                       | Hospital e Pronto Socorro Comunitario Vila Iolanda                             | Instituto Adolfo Lutz, Interdisciplinary Procedures Center, Strategic Laboratory                                                           | Claudia Regina Gonçalves; Claudio Tavares Sacchi; Erica Valessa Ramos Gomes; Karoline Rodrigues Campos                                                                                                                                                                                                                                                                                                                                                                                        |
| EPI_ISL_693195, EPI_ISL_693230, EPI_ISL_693232, EPI_ISL_735412, EPI_ISL_861648, EPI_ISL_861680                                                                                                                                                                                                                                                                                                                                                                                                                                                                                                                                                                                                                                                                                                                                                                                                                                                                                                                                                                                                                                                                                                                                                                                                                                                                                                                                                                                                                                                                                                                                                                                                                                                                                                                                                                                                                                                                                                                                                                       | Hospital e Pronto Socorro Portinari                                            | Instituto Adolfo Lutz, Interdisciplinary Procedures Center, Strategic Laboratory                                                           | Claudia Regina Gonçalves; Claudio Tavares Sacchi; Erica Valessa Ramos Gomes; Karoline Rodrigues Campos                                                                                                                                                                                                                                                                                                                                                                                        |
| EPI_ISL_707709 to 707710                                                                                                                                                                                                                                                                                                                                                                                                                                                                                                                                                                                                                                                                                                                                                                                                                                                                                                                                                                                                                                                                                                                                                                                                                                                                                                                                                                                                                                                                                                                                                                                                                                                                                                                                                                                                                                                                                                                                                                                                                                             | Hospital for Tropical Diseases                                                 | COVID-19 Network Investigations (CONI) Alliance                                                                                            | Akanitt Jitmittraphang; Angkana Huang; Anthony R. Jones; Arporn Wangwiwatsin; Bhakbhoon Panthan; Chonticha Klungtong; Ekawat Pasomsub; Elizabeth Batty; Insee Sensors; Janjira Thaipadungpanit; Khajohn Joonsalak; Kingkan Rakmanee; Krittikorn Kumpornsri; Namfon Kotanan; Nantarat Chantawat; Pornsawan Leangwiwong; Stefan Fernandez; Thanat Chookajorn; Theearat Kochakarn; Treewat Watthanachockchai; Viravorn Luvira; Wasun Chantrattita; Weena Janwitthayanon; Wudtichai Manasatienkij |
| EPI_ISL_913025 to 913031, EPI_ISL_913036 to 913037                                                                                                                                                                                                                                                                                                                                                                                                                                                                                                                                                                                                                                                                                                                                                                                                                                                                                                                                                                                                                                                                                                                                                                                                                                                                                                                                                                                                                                                                                                                                                                                                                                                                                                                                                                                                                                                                                                                                                                                                                   | Hospital los Arcos                                                             | Instituto de Salud Carlos III                                                                                                              | A. Monzón; F. Casas; I. Cámara, M.; I. Jiménez; Iglesias-Caballero; M. Camarero; P. Zaballos; S. Cuesta; S. Pozo; S. Sandonis; S. Varona; V. Vázquez                                                                                                                                                                                                                                                                                                                                          |
| EPI_ISL_635097, EPI_ISL_635121 to 635123, EPI_ISL_635138, EPI_ISL_635143, EPI_ISL_635161, EPI_ISL_635189, EPI_ISL_668394 to 668395, EPI_ISL_668427 to 668428, EPI_ISL_708055 to 708056, EPI_ISL_708122 to 708125, EPI_ISL_759976, EPI_ISL_775285, EPI_ISL_775371, EPI_ISL_775518 to 775522, EPI_ISL_796664, EPI_ISL_796688, EPI_ISL_796714 to 796716, EPI_ISL_796729, EPI_ISL_813977, EPI_ISL_842645, EPI_ISL_860214, EPI_ISL_860222, EPI_ISL_860236, EPI_ISL_860295, EPI_ISL_906831, EPI_ISL_964984 to 964986                                                                                                                                                                                                                                                                                                                                                                                                                                                                                                                                                                                                                                                                                                                                                                                                                                                                                                                                                                                                                                                                                                                                                                                                                                                                                                                                                                                                                                                                                                                                                       | Hospital of Southern Norway - Kristiansand, Department of Medical Microbiology | Norwegian Institute of Public Health, Department of Virology                                                                               | Atiya R Ali; Hilde Elshaug; Hilde Vollaen; Ignacio Garcia Llorente; Kamilla Heddeland Instefjord; Karoline Bragstad; Kathrine Stene-Johansen; Marie Paulsen Madsen; Olav Hungnes; Rasmus Riis Kopperud; Serina B Engebretsen                                                                                                                                                                                                                                                                  |
| EPI_ISL_956340 to 956366, EPI_ISL_968082 to 968088, EPI_ISL_968090 to 968139                                                                                                                                                                                                                                                                                                                                                                                                                                                                                                                                                                                                                                                                                                                                                                                                                                                                                                                                                                                                                                                                                                                                                                                                                                                                                                                                                                                                                                                                                                                                                                                                                                                                                                                                                                                                                                                                                                                                                                                         | Houston Health Department, Disease Prevention and Control                      | Houston Health Department, Disease Prevention and Control                                                                                  | Brown, P.; Lara, A.; Penn, R.                                                                                                                                                                                                                                                                                                                                                                                                                                                                 |
| EPI_ISL_900054, EPI_ISL_911471 to 911493, EPI_ISL_935696 to 935752, EPI_ISL_936182 to 936211, EPI_ISL_940793 to 940820, EPI_ISL_942900 to 942926, EPI_ISL_979379 to 979409                                                                                                                                                                                                                                                                                                                                                                                                                                                                                                                                                                                                                                                                                                                                                                                                                                                                                                                                                                                                                                                                                                                                                                                                                                                                                                                                                                                                                                                                                                                                                                                                                                                                                                                                                                                                                                                                                           | Houston Health Dept.                                                           | Houston Health Dept.                                                                                                                       | Adolpho Lara; Pamela Brown; Ryker Penn                                                                                                                                                                                                                                                                                                                                                                                                                                                        |
| EPI_ISL_780097 to 780374, EPI_ISL_780427 to 780669, EPI_ISL_780671 to 781112, EPI_ISL_781114 to 781177, EPI_ISL_783536 to 783849, EPI_ISL_783851 to 788897, EPI_ISL_789105 to 790566                                                                                                                                                                                                                                                                                                                                                                                                                                                                                                                                                                                                                                                                                                                                                                                                                                                                                                                                                                                                                                                                                                                                                                                                                                                                                                                                                                                                                                                                                                                                                                                                                                                                                                                                                                                                                                                                                 | Houston Methodist Hospital                                                     | Houston Methodist Hospital                                                                                                                 | David W. Bernard; Heather Hendrickson; James J. Davis; Layne Pruitt; Marcus Nguyen; Matthew Ojeda Saavedra; Maulik Shukla; Paul A. Christensen; Prasanti Yerramilli; Randall J. Olsen; S. Wesley Long; Sishir Subedi; and James M. Musser                                                                                                                                                                                                                                                     |
| EPI_ISL_645000 to 645109                                                                                                                                                                                                                                                                                                                                                                                                                                                                                                                                                                                                                                                                                                                                                                                                                                                                                                                                                                                                                                                                                                                                                                                                                                                                                                                                                                                                                                                                                                                                                                                                                                                                                                                                                                                                                                                                                                                                                                                                                                             | Human Genome Variation Research Group, Malopolska Centre of Biotechnology      | Human Genome Variation Research Group, Malopolska Centre of Biotechnology                                                                  | Botwina, P.; Branicki, W.; Dabrowska, A.; Foremny, J.; Gromowski, T.; Klajmon, A.; Kopera, K.; Kowalski, M.; Labaj; Marszalek, K.; Owczarek, K.; P.P.; Pisarek, A.; Pospiech, E.; Pyrc, K.; Sanak, M.; Swadzba, J.; Szczepanski, A.                                                                                                                                                                                                                                                           |
| EPI_ISL_738504 to 738505, EPI_ISL_738530, EPI_ISL_738539, EPI_ISL_738563, EPI_ISL_738600, EPI_ISL_738647, EPI_ISL_738649, EPI_ISL_738651, EPI_ISL_738742, EPI_ISL_738756, EPI_ISL_738759, EPI_ISL_738778 to 738779, EPI_ISL_738785 to 738786, EPI_ISL_738795, EPI_ISL_738801, EPI_ISL_738806 to 738807, EPI_ISL_738809 to 738810, EPI_ISL_738827, EPI_ISL_738832, EPI_ISL_738844, EPI_ISL_738849, EPI_ISL_738852, EPI_ISL_738854, EPI_ISL_738865, EPI_ISL_738875, EPI_ISL_738879, EPI_ISL_738902, EPI_ISL_738912 to 738913, EPI_ISL_738917 to 738918, EPI_ISL_738923, EPI_ISL_738929, EPI_ISL_738938, EPI_ISL_738947, EPI_ISL_738951, EPI_ISL_738953, EPI_ISL_738958, EPI_ISL_738961, EPI_ISL_738969, EPI_ISL_738980, EPI_ISL_738985, EPI_ISL_738988, EPI_ISL_738999 to 739001, EPI_ISL_739007, EPI_ISL_739011, EPI_ISL_739032, EPI_ISL_739043, EPI_ISL_739052, EPI_ISL_739079, EPI_ISL_739086, EPI_ISL_739106, EPI_ISL_739112, EPI_ISL_739114, EPI_ISL_739123, EPI_ISL_739126, EPI_ISL_739131, EPI_ISL_739148, EPI_ISL_739155, EPI_ISL_739159, EPI_ISL_739165, EPI_ISL_739170, EPI_ISL_739177, EPI_ISL_739183, EPI_ISL_739194, EPI_ISL_739198, EPI_ISL_739210, EPI_ISL_739212, EPI_ISL_739235, EPI_ISL_739240, EPI_ISL_739242, EPI_ISL_739250, EPI_ISL_739264, EPI_ISL_739269, EPI_ISL_739272, EPI_ISL_739274, EPI_ISL_739278, EPI_ISL_739292, EPI_ISL_739299, EPI_ISL_739311, EPI_ISL_739313, EPI_ISL_739318, EPI_ISL_739330, EPI_ISL_739366 to 739367, EPI_ISL_739389, EPI_ISL_739403, EPI_ISL_739405, EPI_ISL_739411, EPI_ISL_739417 to 739418, EPI_ISL_739425, EPI_ISL_739430, EPI_ISL_739433, EPI_ISL_739436, EPI_ISL_739442, EPI_ISL_739447, EPI_ISL_739452, EPI_ISL_739461, EPI_ISL_739475, EPI_ISL_739489, EPI_ISL_739499, EPI_ISL_739525, EPI_ISL_739527, EPI_ISL_739530 to 739531, EPI_ISL_739533, EPI_ISL_739542, EPI_ISL_739553, EPI_ISL_739558, EPI_ISL_739571, EPI_ISL_739585, EPI_ISL_739608, EPI_ISL_739611, EPI_ISL_739621, EPI_ISL_739651, EPI_ISL_955496 to 955560, EPI_ISL_955693 to 955777, EPI_ISL_979162 to 979245, EPI_ISL_979710 to 979797 | Humboldt County Public Health Laboratory                                       | Chan-Zuckerberg Biohub                                                                                                                     | CZB Ciliahub Consortium                                                                                                                                                                                                                                                                                                                                                                                                                                                                       |
| EPI_ISL_759956                                                                                                                                                                                                                                                                                                                                                                                                                                                                                                                                                                                                                                                                                                                                                                                                                                                                                                                                                                                                                                                                                                                                                                                                                                                                                                                                                                                                                                                                                                                                                                                                                                                                                                                                                                                                                                                                                                                                                                                                                                                       | Husada Utama Hospital                                                          | Institute of Tropical Disease, Universitas Airlangga                                                                                       | Aldise M Nastri; Didi Dewanto; Gatot Soegiarto; Jezzy R Dewantari; Kazufumi Shimizu; Krisnoadi Rahardjo; Laksmi Wulandari; Maria I Lusida; Resti Yudhawati; Rima R Prasetya; Soetjipto; Yasuko Mori                                                                                                                                                                                                                                                                                           |
| EPI_ISL_981533 to 981534                                                                                                                                                                                                                                                                                                                                                                                                                                                                                                                                                                                                                                                                                                                                                                                                                                                                                                                                                                                                                                                                                                                                                                                                                                                                                                                                                                                                                                                                                                                                                                                                                                                                                                                                                                                                                                                                                                                                                                                                                                             | Hôpital Avicenne                                                               | Department of Virology, Henri Mondor University Hospital, Assistance Publique Hôpitaux de Paris, Université Paris-Est Créteil, INSERM U955 | Alexandre Soulier; Christophe Rodriguez; Elisabeth Trawinski; Guillaume Gricourt; Jean-Michel Pawlotsky; Melissa N'Debi; Slim Fourati; Vanessa Demontant                                                                                                                                                                                                                                                                                                                                      |
| EPI_ISL_833191 to 833200, EPI_ISL_940159 to 940552                                                                                                                                                                                                                                                                                                                                                                                                                                                                                                                                                                                                                                                                                                                                                                                                                                                                                                                                                                                                                                                                                                                                                                                                                                                                                                                                                                                                                                                                                                                                                                                                                                                                                                                                                                                                                                                                                                                                                                                                                   | Hôpital Bichat Claude Bernard, Laboratoire de Virologie                        | IAME UMR1137 Inserm, Université de Paris, Hôpital Bichat                                                                                   | Alexandre Storto; Amélie Reccing; Antoine Bridier; Antoine Bridier-Nahmias; Benoit Visseaux; Charlotte Charpentier; Diane Descamps; Gilles Collin; Lena Daniel; Mélanie Bertine; Nadhira Houhou-Fidouh; Quentin Le Hingrat; Siham Hamri                                                                                                                                                                                                                                                       |
| EPI_ISL_710532, EPI_ISL_710534, EPI_ISL_710537, EPI_ISL_710540 to 710541, EPI_ISL_710575, EPI_ISL_711057, EPI_ISL_712060                                                                                                                                                                                                                                                                                                                                                                                                                                                                                                                                                                                                                                                                                                                                                                                                                                                                                                                                                                                                                                                                                                                                                                                                                                                                                                                                                                                                                                                                                                                                                                                                                                                                                                                                                                                                                                                                                                                                             | Hôpital Fattouma-Bourguiba de Monastir                                         | Laboratoire des Procédés de Criblage Moléculaire et Cellulaire-Centre de Biotechnologie de Sfax                                            | A. and Masmoudi, S.; Abdelmoulah, F.; Abid, N.; Ajili, F.; Aouni, M.; Ben Ayed, I.; Bensaïd, M.; Chtourou, A.; Elargoubi, A.; Fki-berrajah, L.; Gaaloul, I.; Gargouri, S.; Hammami, A.; Kamoun, S.; Karray Hakim, H.; Kharat, N.; Mastouri, M.; Mhalla, S.; Nabli, A.; Rebai; Smeti, I.; Souissi, A.; Stambouli, N.; Turki, M.                                                                                                                                                                |
| EPI_ISL_961555 to 961672                                                                                                                                                                                                                                                                                                                                                                                                                                                                                                                                                                                                                                                                                                                                                                                                                                                                                                                                                                                                                                                                                                                                                                                                                                                                                                                                                                                                                                                                                                                                                                                                                                                                                                                                                                                                                                                                                                                                                                                                                                             | Hôpital Georges L. Dumont                                                      | National Microbiology Laboratory (NML)                                                                                                     | Anna Majer; Anneliese Landgraff; CanCOGeN's metadata curation team; Darian Hole; Elsie Grudeski; Gary Van Dornseelaar; Grace Seo; Guillaume Desnoyers; Jennifer Tanner; Kirsten Biggar; Madison Chapel; Morag Graham; Natalie Knox; Nathalie Bastien; Philip Mabon; Public Health Agency of Canada CanCOGeN team; Rhiannon Huzarewich; Richard Garceau; Russell Mandes; Shari Tyson; Timothy Booth; Yan Li                                                                                    |
| EPI_ISL_912635 to 912636, EPI_ISL_912638 to 912642, EPI_ISL_912645 to 912648, EPI_ISL_912650 to 912654, EPI_ISL_912656 to 912659, EPI_ISL_912661, EPI_ISL_912663 to 912666, EPI_ISL_912668 to 912673, EPI_ISL_912677 to 912680, EPI_ISL_912682 to 912686, EPI_ISL_912688 to 912718, EPI_ISL_912720 to 912780, EPI_ISL_912795 to 912890, EPI_ISL_912892 to 912906, EPI_ISL_912908, EPI_ISL_912921 to 912922, EPI_ISL_912927 to 912932, EPI_ISL_912935, EPI_ISL_912937 to 912939, EPI_ISL_912941 to 912960, EPI_ISL_912962 to 913019, EPI_ISL_982116 to 982117, EPI_ISL_982119 to 982122, EPI_ISL_982124 to 982127, EPI_ISL_982129 to 982141, EPI_ISL_982148 to 982153, EPI_ISL_982155, EPI_ISL_982157, EPI_ISL_982160 to 982161, EPI_ISL_982163 to 982164, EPI_ISL_982166 to 982173, EPI_ISL_982177 to 982178, EPI_ISL_982180, EPI_ISL_982182 to 982225, EPI_ISL_982300, EPI_ISL_982302, EPI_ISL_982304, EPI_ISL_982311, EPI_ISL_982321 to 982343                                                                                                                                                                                                                                                                                                                                                                                                                                                                                                                                                                                                                                                                                                                                                                                                                                                                                                                                                                                                                                                                                                                     | Hôpital Henri Mondor                                                           | Department of Virology, Henri Mondor University Hospital, Assistance Publique Hôpitaux de Paris, Université Paris-Est Créteil, INSERM U955 | Alexandre Soulier; Christophe Rodriguez; Elisabeth Trawinski; Guillaume Gricourt; Jean-Michel Pawlotsky; Melissa N'Debi; Slim Fourati; Vanessa Demontant                                                                                                                                                                                                                                                                                                                                      |
| EPI_ISL_982159                                                                                                                                                                                                                                                                                                                                                                                                                                                                                                                                                                                                                                                                                                                                                                                                                                                                                                                                                                                                                                                                                                                                                                                                                                                                                                                                                                                                                                                                                                                                                                                                                                                                                                                                                                                                                                                                                                                                                                                                                                                       | Hôpital Necker-Enfants malades                                                 | Department of Virology, Henri Mondor University Hospital, Assistance Publique Hôpitaux de Paris, Université Paris-Est Créteil, INSERM U955 | Alexandre Soulier; Christophe Rodriguez; Elisabeth Trawinski; Guillaume Gricourt; Jean-Michel Pawlotsky; Melissa N'Debi; Slim Fourati; Vanessa Demontant                                                                                                                                                                                                                                                                                                                                      |
| EPI_ISL_900503, EPI_ISL_900535, EPI_ISL_900569 to 900572                                                                                                                                                                                                                                                                                                                                                                                                                                                                                                                                                                                                                                                                                                                                                                                                                                                                                                                                                                                                                                                                                                                                                                                                                                                                                                                                                                                                                                                                                                                                                                                                                                                                                                                                                                                                                                                                                                                                                                                                             | Hôpital Paris Saint-Joseph                                                     | CNR Virus des Infections Respiratoires - France SUD                                                                                        | Antonin Bal; Bruno Lina; Camille Ciccone; Gregory Destras; Gwendolyne Burfin; Hadrien Règue; Isabelle Garrigue; Laurence Josset; Marie-Edith Lafon; Martine Valette; Pantxika Bellecave; Pascale Trimoulet; Quentin Semanas; Sylvie Larrat                                                                                                                                                                                                                                                    |
| EPI_ISL_912637, EPI_ISL_912643 to 912644, EPI_ISL_912649, EPI_ISL_912655, EPI_ISL_912660, EPI_ISL_912662, EPI_ISL_912667, EPI_ISL_912719, EPI_ISL_912786 to 912794, EPI_ISL_912909 to 912920, EPI_ISL_912923 to 912926, EPI_ISL_912933 to 912934, EPI_ISL_912936, EPI_ISL_912940, EPI_ISL_981532, EPI_ISL_981535 to 981537, EPI_ISL_982156                                                                                                                                                                                                                                                                                                                                                                                                                                                                                                                                                                                                                                                                                                                                                                                                                                                                                                                                                                                                                                                                                                                                                                                                                                                                                                                                                                                                                                                                                                                                                                                                                                                                                                                           | Hôpital Pitié-Salpêtrière                                                      | Department of Virology, Henri Mondor University Hospital, Assistance Publique Hôpitaux de Paris, Université Paris-Est Créteil, INSERM U955 | Alexandre Soulier; Christophe Rodriguez; Elisabeth Trawinski; Guillaume Gricourt; Jean-Michel Pawlotsky; Melissa N'Debi; Slim Fourati; Vanessa Demontant                                                                                                                                                                                                                                                                                                                                      |
| EPI_ISL_768829                                                                                                                                                                                                                                                                                                                                                                                                                                                                                                                                                                                                                                                                                                                                                                                                                                                                                                                                                                                                                                                                                                                                                                                                                                                                                                                                                                                                                                                                                                                                                                                                                                                                                                                                                                                                                                                                                                                                                                                                                                                       | Hôpital d'Instruction des Armées Sainte-Anne                                   | CNR Virus des Infections Respiratoires - France SUD                                                                                        | Antonin Bal; Bruno Lina; Gregory Destras; Gwendolyne Burfin; Hadrien Règue; Laurence Josset; Martine Valette; Quentin Semanas                                                                                                                                                                                                                                                                                                                                                                 |

|                                                                                                                                                                                                                                                                                                                                                        |           |                                                                                                     |                                                                                                                                            |                                                                                                                                                                                                                                                                                                                                                                                                                                   |
|--------------------------------------------------------------------------------------------------------------------------------------------------------------------------------------------------------------------------------------------------------------------------------------------------------------------------------------------------------|-----------|-----------------------------------------------------------------------------------------------------|--------------------------------------------------------------------------------------------------------------------------------------------|-----------------------------------------------------------------------------------------------------------------------------------------------------------------------------------------------------------------------------------------------------------------------------------------------------------------------------------------------------------------------------------------------------------------------------------|
| EPI_ISL_649785, EPI_ISL_649938 to 649939, EPI_ISL_653763 to 653783, EPI_ISL_653787 to 653812, EPI_ISL_653814 to 653823, EPI_ISL_722851 to 722854, EPI_ISL_722859 to 722871, EPI_ISL_722895, EPI_ISL_722898, EPI_ISL_722900                                                                                                                             | see above | I.R.C.C.S. "S. De Bellis" - Ente Ospedaliero                                                        | Istituto Zooprofilattico Sperimentale della Puglia e della Basilicata                                                                      | Bianco A.; Capozzi L.; Cipolletta D.; Del Sambro L.; Galante D.; Lippolis A.; Manzulli V.; Notarnicola M.; Pace L.; Parisi A.; Rondinone V.                                                                                                                                                                                                                                                                                       |
| EPI_ISL_751553, EPI_ISL_751565, EPI_ISL_751666, EPI_ISL_751687, EPI_ISL_751692, EPI_ISL_751721, EPI_ISL_751742, EPI_ISL_751779, EPI_ISL_751783, EPI_ISL_903621, EPI_ISL_903629, EPI_ISL_903669, EPI_ISL_903772, EPI_ISL_903815, EPI_ISL_903840, EPI_ISL_903900, EPI_ISL_903920, EPI_ISL_903927                                                         | see above | IA State Hygienic Laboratory                                                                        | Genomics and Discovery, Respiratory Viruses Branch, Division of Viral Diseases, Centers for Disease Control and Prevention                 | Anna Montmayer; Anna Uehara; Ben L. Rambo-Martin; Clinton R. Paden; Dhvani Batra; Haibin Wang; Jasmine Padilla; Jing Zhang; Justin Lee; Krista Queen; Lori Rowe; Mark Burroughs; Mili Sheth; Peter W. Cook; Rachel Marine; Sarah Nobles; Suxiang Tong; Yan Li; Ying Tao                                                                                                                                                           |
| EPI_ISL_647990 to 648001                                                                                                                                                                                                                                                                                                                               |           | IA State Hygienic Laboratory                                                                        | Pathogen Discovery, Respiratory Viruses Branch, Division of Viral Diseases, Centers for Disease Control and Prevention                     | Anna Uehara; Brian Lynch; Clinton R. Paden; Haibin Wang; Jing Zhang; Krista Queen; Suxiang Tong; Yan Li; Ying Tao                                                                                                                                                                                                                                                                                                                 |
| EPI_ISL_981383, EPI_ISL_981385, EPI_ISL_981387, EPI_ISL_984263                                                                                                                                                                                                                                                                                         |           | IAL Regional de Bauru                                                                               | Instituto Adolfo Lutz, Interdisciplinary Procedures Center, Strategic Laboratory                                                           | Claudia Regina Gonçalves; Claudio Tavares Sacchi; Erica Valessa Ramos Gomes; Karoline Rodrigues Campos                                                                                                                                                                                                                                                                                                                            |
| EPI_ISL_984247 to 984262                                                                                                                                                                                                                                                                                                                               |           | IAL Regional de Marilia                                                                             | Instituto Adolfo Lutz, Interdisciplinary Procedures Center, Strategic Laboratory                                                           | Claudia Regina Gonçalves; Claudio Tavares Sacchi; Erica Valessa Ramos Gomes; Karoline Rodrigues Campos                                                                                                                                                                                                                                                                                                                            |
| EPI_ISL_751567, EPI_ISL_751590, EPI_ISL_751612, EPI_ISL_751614, EPI_ISL_751618, EPI_ISL_751719, EPI_ISL_751748, EPI_ISL_751750, EPI_ISL_751780, EPI_ISL_751782, EPI_ISL_751789, EPI_ISL_903571, EPI_ISL_903603, EPI_ISL_903619, EPI_ISL_903624, EPI_ISL_903753, EPI_ISL_903887, EPI_ISL_903908, EPI_ISL_903923                                         | see above | ID Bureau of Laboratories                                                                           | Genomics and Discovery, Respiratory Viruses Branch, Division of Viral Diseases, Centers for Disease Control and Prevention                 | Anna Montmayer; Anna Uehara; Ben L. Rambo-Martin; Clinton R. Paden; Dhvani Batra; Haibin Wang; Jasmine Padilla; Jing Zhang; Justin Lee; Krista Queen; Lori Rowe; Mark Burroughs; Mili Sheth; Peter W. Cook; Rachel Marine; Sarah Nobles; Suxiang Tong; Yan Li; Ying Tao                                                                                                                                                           |
| EPI_ISL_845630 to 845633                                                                                                                                                                                                                                                                                                                               |           | IDIME S.A                                                                                           | Instituto Nacional de Salud - Direccion de Investigación en Salud Pública                                                                  | Carlos Franco-Muñoz; Diego A. Álvarez-Díaz; Diego Andrés Prada; Gerardo Santamaría; Jonathan Reales; Julian Naizaque; Katherine Laiton-Donato; Magdalena Wiesner; Marcela Mercado-Reyes; Maria T. Herrera-Sepúlveda; Martha Lucia Ospina Martinez; Mauricio Pacheco-Montealegre; Paola Muñoz-Laiton; Sheryll Corchuelo                                                                                                            |
| EPI_ISL_891255                                                                                                                                                                                                                                                                                                                                         |           | IHU Méditerranée Infection                                                                          | 19-21, boulevard Jean Moulin, 13005 Marseille                                                                                              | Philippe Colson et al.                                                                                                                                                                                                                                                                                                                                                                                                            |
| EPI_ISL_891254                                                                                                                                                                                                                                                                                                                                         |           | IHU Méditerranée Infection                                                                          | IHU Méditerranée Infection                                                                                                                 | Philippe Colson et al.                                                                                                                                                                                                                                                                                                                                                                                                            |
| EPI_ISL_913990, EPI_ISL_914013 to 914029                                                                                                                                                                                                                                                                                                               |           | IL Department of Public Health Chicago Laboratory                                                   | Pathogen Discovery, Respiratory Viruses Branch, Division of Viral Diseases, Centers for Disease Control and Prevention                     | Anna Uehara; Clinton R. Paden; Haibin Wang; Jing Zhang; Krista Queen; Peter Cook; Suxiang Tong; Yan Li; Ying Tao                                                                                                                                                                                                                                                                                                                  |
| EPI_ISL_911923                                                                                                                                                                                                                                                                                                                                         |           | IL Department of Public Health Chicago Laboratory/Tempus Labs                                       | Pathogen Discovery, Respiratory Viruses Branch, Division of Viral Diseases, Centers for Disease Control and Prevention                     | Anna Uehara; Clinton R. Paden; Haibin Wang; Jing Zhang; Krista Queen; Peter Cook; Suxiang Tong; Yan Li; Ying Tao                                                                                                                                                                                                                                                                                                                  |
| EPI_ISL_914030 to 914034                                                                                                                                                                                                                                                                                                                               |           | IL Department of Public Health Springfield Laboratory                                               | Pathogen Discovery, Respiratory Viruses Branch, Division of Viral Diseases, Centers for Disease Control and Prevention                     | Anna Uehara; Clinton R. Paden; Haibin Wang; Jing Zhang; Krista Queen; Peter Cook; Suxiang Tong; Yan Li; Ying Tao                                                                                                                                                                                                                                                                                                                  |
| EPI_ISL_903586 to 903588, EPI_ISL_903607, EPI_ISL_903663, EPI_ISL_903682, EPI_ISL_903742, EPI_ISL_903779, EPI_ISL_903789, EPI_ISL_903807, EPI_ISL_903812, EPI_ISL_903828, EPI_ISL_903847, EPI_ISL_903878, EPI_ISL_903896, EPI_ISL_903911, EPI_ISL_903928                                                                                               | see above | IL Dept. of Public Health Springfield Laboratory                                                    | Genomics and Discovery, Respiratory Viruses Branch, Division of Viral Diseases, Centers for Disease Control and Prevention                 | Anna Montmayer; Anna Uehara; Ben L. Rambo-Martin; Clinton R. Paden; Dhvani Batra; Haibin Wang; Jasmine Padilla; Jing Zhang; Justin Lee; Krista Queen; Lori Rowe; Mark Burroughs; Mili Sheth; Peter W. Cook; Rachel Marine; Sarah Nobles; Suxiang Tong; Yan Li; Ying Tao                                                                                                                                                           |
| EPI_ISL_913991, EPI_ISL_913995 to 913996, EPI_ISL_955291, EPI_ISL_955309, EPI_ISL_955328                                                                                                                                                                                                                                                               |           | IL Dept. of Public Health Springfield Laboratory                                                    | Pathogen Discovery, Respiratory Viruses Branch, Division of Viral Diseases, Centers for Disease Control and Prevention                     | Anna Uehara; Clinton R. Paden; Haibin Wang; Jing Zhang; Krista Queen; Peter Cook; Suxiang Tong; Yan Li; Ying Tao                                                                                                                                                                                                                                                                                                                  |
| EPI_ISL_853854 to 853855, EPI_ISL_853914, EPI_ISL_853924 to 853928, EPI_ISL_934425 to 934433                                                                                                                                                                                                                                                           |           | ILV Kärnten                                                                                         | Bergthaler laboratory, CeMM Research Center for Molecular Medicine of the Austrian Academy of Sciences                                     | Alexander Lercher; Alexandra Popa; Andreas Bergthaler; Anna Schedl; Bekir Erguner; Benedikt Agerer; Christoph Bock; Christoph Bock; Jakob-Wendelin Genger; Jan Laine; Lukas Ender; Maelle Le Moing; Martin Senekowitsch; Martin Senekowitsch; Michael Schuster; Michael Schuster; Thomas Penz                                                                                                                                     |
| EPI_ISL_914035                                                                                                                                                                                                                                                                                                                                         |           | IN State Department of Health Laboratory Service                                                    | Pathogen Discovery, Respiratory Viruses Branch, Division of Viral Diseases, Centers for Disease Control and Prevention                     | Anna Uehara; Clinton R. Paden; Haibin Wang; Jing Zhang; Krista Queen; Peter Cook; Suxiang Tong; Yan Li; Ying Tao                                                                                                                                                                                                                                                                                                                  |
| EPI_ISL_751579, EPI_ISL_751599 to 751600, EPI_ISL_751626, EPI_ISL_751632, EPI_ISL_751672, EPI_ISL_751676, EPI_ISL_751727, EPI_ISL_751768, EPI_ISL_751770, EPI_ISL_903616, EPI_ISL_903754, EPI_ISL_903773, EPI_ISL_903875, EPI_ISL_903883, EPI_ISL_903886, EPI_ISL_903904                                                                               | see above | IN State Department of Health Laboratory Services                                                   | Genomics and Discovery, Respiratory Viruses Branch, Division of Viral Diseases, Centers for Disease Control and Prevention                 | Anna Montmayer; Anna Uehara; Ben L. Rambo-Martin; Clinton R. Paden; Dhvani Batra; Haibin Wang; Jasmine Padilla; Jing Zhang; Justin Lee; Krista Queen; Lori Rowe; Mark Burroughs; Mili Sheth; Peter W. Cook; Rachel Marine; Sarah Nobles; Suxiang Tong; Yan Li; Ying Tao                                                                                                                                                           |
| EPI_ISL_648209 to 648216, EPI_ISL_648218, EPI_ISL_648677                                                                                                                                                                                                                                                                                               |           | INBIRS-UBA                                                                                          | Laboratorio Mixto de Biotecnología Acuática (LMBA)                                                                                         | Adriana Giri; Agustina Cerri; Ana Cavatorta; Ana Paletta; Diego Chouhy; Elisa Bolatti; Elizabeth Tapia; Federico Remes Lenicov; Flavio Spetale; Gastón Viarengo; Ignacio Garcia Labari; Javier Munillo; Joaquín Ezpeleta; Julian Acosta; Laura Angelone; Leandro Ciappina; Maria Re; Pablo Casal; Pilar Bulacio; Silvana Spinelli; Silvia Arranz; Sofia Lavista Llanos; Vanina Villanova; Victoria Posner                         |
| EPI_ISL_882918 to 882920, EPI_ISL_882924 to 882932, EPI_ISL_913448, EPI_ISL_941338, EPI_ISL_965127 to 965128, EPI_ISL_983323 to 983325                                                                                                                                                                                                                 |           | INMI Lazzaro Spallanzani IRCCS                                                                      | INMI Lazzaro Spallanzani IRCCS                                                                                                             | A Di Caro; Antonino Di Caro; B Bartolini; Barbara Bartolini; C.E.M Gruber; CEM Gruber; Cesare E.M. Gruber; Cesare EM Gruber; Concetta Castilletti; Daniele Castiglia; E Giombini; Emanuela Giombini; F Messina; Francesca Colavita; Francesco Messina; Giandomenico Russo; M Rueca; M. Rueca; MR Capobianchi; Maria R Capobianchi; Maria R. Capobianchi; Martina Rueca; O Butera; Ornella Butera; Silvia Meschi; Stefania Madonna |
| EPI_ISL_806544                                                                                                                                                                                                                                                                                                                                         |           | INSPI Instituto Nacional de Investigación en Salud Pública                                          | Av. Julián Coronel 905 entre Esmeraldas y José Mascote Av. Juan Tanca Marengo No. 100 y Av. de las Américas                                | Alberto Orlando.; Alfredo Bruno; Andrés Carrazzo; Doménica de Mora; Leandro Patiño; Manuel González; Maritza Olmedo; Mary Regato; Melissa Zambrano; Orson Mestanza                                                                                                                                                                                                                                                                |
| EPI_ISL_826798, EPI_ISL_826800, EPI_ISL_826802, EPI_ISL_826804 to 826805, EPI_ISL_826807, EPI_ISL_826809, EPI_ISL_826811 to 826812, EPI_ISL_826814, EPI_ISL_826816, EPI_ISL_826818, EPI_ISL_826820, EPI_ISL_826822 to 826823, EPI_ISL_826825, EPI_ISL_826827, EPI_ISL_826829 to 826830, EPI_ISL_826832, EPI_ISL_826834, EPI_ISL_826836, EPI_ISL_831020 | see above | INSPI-CRN DE INFLUENZA Y OTROS VIRUS RESPIRATORIOS                                                  | Instituto de Salud Publica de Chile                                                                                                        | Alfredo Bruno; Andres Castillo; Barbara Parra; Domenica de Mora; Gisselle Barra; Jaime Lagos; Javier Tognarelli; Jimmy Garcez; Jorge Fernandez; Loredana Arata; Manuel Gonzalez; Maritza Olmedo; Michelle Paez; Patricia Bustos; Rodrigo Fasce; Solon Narvaez                                                                                                                                                                     |
| EPI_ISL_940769, EPI_ISL_940773, EPI_ISL_940775, EPI_ISL_940781, EPI_ISL_940821                                                                                                                                                                                                                                                                         |           | INSPI-CRN de Influenza y otros virus respiratorios                                                  | INSPI-Centro de Investigación Multidisciplinaria de la DTIDI                                                                               | Alberto Orlando.; Alfredo Bruno; Andrés Carrazzo-Montalvo; Doménica de Mora; Leandro Patiño; Manuel González; Maritza Olmedo; Mary Regato-Arrata; Melissa Zambrano; Orson Mestanza                                                                                                                                                                                                                                                |
| EPI_ISL_981485                                                                                                                                                                                                                                                                                                                                         |           | INSTITUT GUSTAVE ROUSSY                                                                             | Department of Virology, Henri Mondor University Hospital, Assistance Publique Hôpitaux de Paris, Université Paris-Est Créteil, INSERM U955 | Alexandre Soulier; Christophe Rodriguez; Elisabeth Trawinski; Guillaume Gricourt; Jean-Michel Pawlotsky; Melissa N'Debi; Slim Fourati; Vanessa Demontant                                                                                                                                                                                                                                                                          |
| EPI_ISL_775239 to 775240, EPI_ISL_775243 to 775244, EPI_ISL_775246, EPI_ISL_775257, EPI_ISL_775259, EPI_ISL_775261                                                                                                                                                                                                                                     |           | INT Fondazione Pascale                                                                              | INT Fondazione Pascale                                                                                                                     | INT Fondazione Pascale                                                                                                                                                                                                                                                                                                                                                                                                            |
| EPI_ISL_751318 to 751447                                                                                                                                                                                                                                                                                                                               |           | IRCCS Sacro Cuore Don Calabria Hospital, Department of Infectious, Tropical Diseases & Microbiology | University of Verona, Department of Biotechnology                                                                                          | Antonio Mori; Chiara Degli Esposti; Chiara Piubelli; Cristina Beltrami; Elena Pomari; Emanuela Cosentino; Giulia Lopatriello; Luca Marcolongo; Massimo Delledonne; Michela Deiana                                                                                                                                                                                                                                                 |
| EPI_ISL_902755                                                                                                                                                                                                                                                                                                                                         |           | IRCCS San Raffaele                                                                                  | INMI Lazzaro Spallanzani IRCCS                                                                                                             | A Di Caro; B Bartolini; C.E.M Gruber; D Limongi; D Russo; E Giombini; F Messina; M Rueca; MR Capobianchi; O Butera                                                                                                                                                                                                                                                                                                                |
| EPI_ISL_833076                                                                                                                                                                                                                                                                                                                                         |           | IZSAM                                                                                               | Istituto Zooprofilattico Sperimentale dell'Abruzzo e Molise *G.                                                                            | Ancora M; Calistri P; Cammà C; Curini V; Delli Compagni E; Di Domenico M; Di Pasquale A; Lorusso A; Mangone I; Maracci M; Puglia I; Rinaldi A; Savini                                                                                                                                                                                                                                                                             |

|                                                                                                                                                                                                                                                                                                                                                                                                                                                                  |                                                                                                                                | Caporale*                                                                                                                      | G                                                                                                                                                                                                                                                                                                                                                                                                                                                                                                                                                                                                                                                                                                                  |
|------------------------------------------------------------------------------------------------------------------------------------------------------------------------------------------------------------------------------------------------------------------------------------------------------------------------------------------------------------------------------------------------------------------------------------------------------------------|--------------------------------------------------------------------------------------------------------------------------------|--------------------------------------------------------------------------------------------------------------------------------|--------------------------------------------------------------------------------------------------------------------------------------------------------------------------------------------------------------------------------------------------------------------------------------------------------------------------------------------------------------------------------------------------------------------------------------------------------------------------------------------------------------------------------------------------------------------------------------------------------------------------------------------------------------------------------------------------------------------|
| EPI_ISL_900574 to 900690                                                                                                                                                                                                                                                                                                                                                                                                                                         | IZSM                                                                                                                           | TIGEM                                                                                                                          | Andrea Ballabio; Anna Manfredi; Antonio Grimaldi; Antonio Limone; Biancamaria Pierri; Chiara Colantuono; Davide Cacchiarelli.; Denise Di Concilio; Francesco Panariello; Lucio Di Filippo; Marcello Salvi; Maria Concetta Cuomo; Patrizia Annunziata; Pellegrino Cerino; Valentina Bouche                                                                                                                                                                                                                                                                                                                                                                                                                          |
| EPI_ISL_738121 to 738132                                                                                                                                                                                                                                                                                                                                                                                                                                         | IZSM-U.O.C. Virologia                                                                                                          | Istituto Zooprofilattico Sperimentale del Mezzogiorno                                                                          | Giovanna Fusco; Lorena Cardillo; Maurizio Viscardi                                                                                                                                                                                                                                                                                                                                                                                                                                                                                                                                                                                                                                                                 |
| EPI_ISL_683657 to 683677, EPI_ISL_779715 to 779729, EPI_ISL_779738 to 779739, EPI_ISL_779741 to 779752, EPI_ISL_779754 to 779773, EPI_ISL_855402 to 855408, EPI_ISL_962914                                                                                                                                                                                                                                                                                       |                                                                                                                                |                                                                                                                                |                                                                                                                                                                                                                                                                                                                                                                                                                                                                                                                                                                                                                                                                                                                    |
| see above                                                                                                                                                                                                                                                                                                                                                                                                                                                        | IdISSC/Hospital Clínico San Carlos de Madrid                                                                                   | SeqCOVID-SPAIN consortium/IBV(CSIC)                                                                                            | Alberto Delgado-Iribarren; Esther Culebras Lopez; Esther Culebras López; Jorge Matias-Guiu; Luis Ortega Medina; Silvia Sánchez Ramón; Ulises Gómez-Pinedo and SeqCOVID-SPAIN consortium; Vicente Estrada Pérez                                                                                                                                                                                                                                                                                                                                                                                                                                                                                                     |
| EPI_ISL_632847 to 632889                                                                                                                                                                                                                                                                                                                                                                                                                                         | Idaho Bureau of Laboratories                                                                                                   | Center for Global Health, University of New Mexico Health Sciences Center                                                      | Christopher Ball; Darrell Dinwiddie; Daryl Domman; Kurt Schwalm; Matthew Burns; Robert Voermans                                                                                                                                                                                                                                                                                                                                                                                                                                                                                                                                                                                                                    |
| EPI_ISL_848203 to 848545, EPI_ISL_961883 to 962178                                                                                                                                                                                                                                                                                                                                                                                                               | Illinois Department of Public Health                                                                                           | Gagnon Lab, Southern Illinois University                                                                                       | Keith Gagnon                                                                                                                                                                                                                                                                                                                                                                                                                                                                                                                                                                                                                                                                                                       |
| EPI_ISL_637099 to 637104                                                                                                                                                                                                                                                                                                                                                                                                                                         | Indian Council of Medical Research-National Institute of Virology, Microbial Containment Complex                               | Indian Council of Medical Research-National Institute of Virology, Microbial Containment Complex                               | Anita Shete-Aich; Dimpal A. Nyayanit; Gururaj Rao Deshpande; Padinjarematthil Thankappan Ullas; Pragya D. Yadav; Prasad Sarkale; Priya Abraham; Varsha Potdar                                                                                                                                                                                                                                                                                                                                                                                                                                                                                                                                                      |
| EPI_ISL_969397, EPI_ISL_969509, EPI_ISL_969740                                                                                                                                                                                                                                                                                                                                                                                                                   | Indian Council of Medical Research-National Institute of Virology, Pune                                                        | Indian Council of Medical Research-National Institute of Virology, Maximum Containment Laboratory                              | Abhinendra Kumar; Anita Shete-Aich; Dimpal A. Nyayanit; Pragya D. Yadav; Savita Patil; Triparna D. Majumdar                                                                                                                                                                                                                                                                                                                                                                                                                                                                                                                                                                                                        |
| EPI_ISL_891141 to 891144, EPI_ISL_893214, EPI_ISL_955212 to 955228                                                                                                                                                                                                                                                                                                                                                                                               | Indiana Animal Disease Diagnostic Laboratory                                                                                   | Carpi Laboratory - Purdue University                                                                                           | Abebe A Fola; G Kenitra Hendrix; Giovanna Carpi; Ilinca I Ciubotariu; Jack Dorman; Lev Gorenstein; Rebecca P Wilkes                                                                                                                                                                                                                                                                                                                                                                                                                                                                                                                                                                                                |
| EPI_ISL_647986                                                                                                                                                                                                                                                                                                                                                                                                                                                   | Indiana State Department of Health                                                                                             | Pathogen Discovery, Respiratory Viruses Branch, Division of Viral Diseases, Centers for Disease Control and Prevention         | Anna Montmayeur; Anna Uehara; Brian Lynch; Clinton R. Paden; Haibin Wang; Jing Zhang; Krista Queen; Rachel Marine; Suxiang Tong; Yan Li; Ying Tao                                                                                                                                                                                                                                                                                                                                                                                                                                                                                                                                                                  |
| EPI_ISL_755587                                                                                                                                                                                                                                                                                                                                                                                                                                                   | Infection and Immunology, Translational Health Science and Technology Institute                                                | Infection and Immunology, Translational Health Science and Technology Institute                                                | A. and Medigeshi; A.K.; Das; G.R.; Kumar, S.; Pandey; Wangchuk, J.                                                                                                                                                                                                                                                                                                                                                                                                                                                                                                                                                                                                                                                 |
| EPI_ISL_936487                                                                                                                                                                                                                                                                                                                                                                                                                                                   | Infectious Disease Biology, Institute of Life Sciences                                                                         | Infectious Disease Biology, Institute of Life Sciences                                                                         | Avula, K.; Beuria; Biswas; Chattopadhyay, S.; Das, R.; Datey, A.; G.H.; Ghosh, A.; I.C. and Parida, A.; Jha, A.; Laha, E.; Madhulika, S.; Prasad, P.; Priyadarhini, M.; Puwan; Raghav, S.; S.S.; Senapati, S.; Singh, B.; Singh, D.; Singh, N.; Swain, R.; Syed; T.K.; Team; V.K.                                                                                                                                                                                                                                                                                                                                                                                                                                  |
| EPI_ISL_962528 to 962584, EPI_ISL_962868 to 962875                                                                                                                                                                                                                                                                                                                                                                                                               | Infectious Disease Control and Prevention Institute                                                                            | Infectious Disease Control and Prevention Institute                                                                            | Bo Pang; Jianxing Wang; Julong Wu; Mingxiao Yao; Ti Liu; Xiaolin Jiang; Yan Li; Yujie He; Yuwei Zhang; Zengqiang Kou                                                                                                                                                                                                                                                                                                                                                                                                                                                                                                                                                                                               |
| EPI_ISL_856712 to 856721                                                                                                                                                                                                                                                                                                                                                                                                                                         | Infectious Diseases Unit, Department of Internal Medicine, Azienda Ospedaliera-Universitaria di Padova                         | Laboratory of Infectious Diseases, Department of Biomedical and Clinical Sciences L. Sacco, University of Milan                | Alessia Lai; Anna Maria Cattelan; Annalisa Bergna; Carla Della Ventura; Claudia Balotta; Davide Leoni; Gianguglielmo Zehender on behalf of SARS-CoV-2 ITALIAN RESEARCH ENTERPRISE-(SCIRE) Collaborative Group; Lolita Sasset; Massimo Galli                                                                                                                                                                                                                                                                                                                                                                                                                                                                        |
| EPI_ISL_825028 to 825032                                                                                                                                                                                                                                                                                                                                                                                                                                         | Infectious Diseases, NC SLPH COVID-19 Response Team                                                                            | Infectious Diseases, NC SLPH COVID-19 Response Team                                                                            | Chase, K.; M.C.; Miller                                                                                                                                                                                                                                                                                                                                                                                                                                                                                                                                                                                                                                                                                            |
| EPI_ISL_884303 to 884444, EPI_ISL_906920 to 907074                                                                                                                                                                                                                                                                                                                                                                                                               | Infectious Diseases, Quest Diagnostics                                                                                         | Infectious Diseases, Quest Diagnostics                                                                                         | Anderson, B.; Bernstein; D.F.; Gerasimova, A.; Hua, M.; K.E.; Kagan; L.E.; Lacbawan, F.; Liu, Y.; Livingston; Owen, R.; R.M.; Rosenthal; S.H.; Shalhout                                                                                                                                                                                                                                                                                                                                                                                                                                                                                                                                                            |
| EPI_ISL_649152                                                                                                                                                                                                                                                                                                                                                                                                                                                   | Infectious diseases, Chan Zuckerberg Biohub                                                                                    | Infectious diseases, Chan Zuckerberg Biohub                                                                                    | Bhatt; K.D.                                                                                                                                                                                                                                                                                                                                                                                                                                                                                                                                                                                                                                                                                                        |
| EPI_ISL_872641 to 872642, EPI_ISL_875515                                                                                                                                                                                                                                                                                                                                                                                                                         | Influenza etiology and epidemiology laboratory                                                                                 | Pathogenic Microorganisms Variability Laboratory                                                                               | Alexander Gintsburg; Alexey Shchetinin; Andrei Siniavin; Andrey Pochtovy; Anna Ignatieva; Denis Logunov; Elena Burtseva; Elena Shidlovskaya; Elizaveta Divisenko; Evgeniya Mukasheva; Evgeny Usachev; Kirill Krasnoslobotsev; Ludmila Kolobukhina; Maria Nikiforova; Nadezhda Kuznetsova; Olesya Venchakova; Olga Burgasova; Svetlana Smetanina; Svetlana Trushakova; Valeria Bacalin; Vladimir Gushchin                                                                                                                                                                                                                                                                                                           |
| EPI_ISL_635124 to 635125, EPI_ISL_635130 to 635131, EPI_ISL_635183, EPI_ISL_668412 to 668416, EPI_ISL_708030 to 708031, EPI_ISL_708036 to 708039, EPI_ISL_708151 to 708153, EPI_ISL_775440 to 775441, EPI_ISL_860226 to 860228, EPI_ISL_860291 to 860292, EPI_ISL_906793, EPI_ISL_906796, EPI_ISL_906812, EPI_ISL_964996 to 964997                                                                                                                               |                                                                                                                                |                                                                                                                                |                                                                                                                                                                                                                                                                                                                                                                                                                                                                                                                                                                                                                                                                                                                    |
| see above                                                                                                                                                                                                                                                                                                                                                                                                                                                        | Innlandet Hospital Trust, Division Lillehammer, Department for Medical Microbiology                                            | Norwegian Institute of Public Health, Department of Virology                                                                   | Atiya R Ali; Hilde Elshaug; Hilde Vollan; Ignacio Garcia Lorente; Kamilla Heddeland Instefjord; Karoline Bragstad; Kathrine Stene-Johansen; Marie Paulsen Madsen; Olav Hungnes; Rasmus Riis Kopperud; Serina B Engebretsen                                                                                                                                                                                                                                                                                                                                                                                                                                                                                         |
| EPI_ISL_677821 to 677907, EPI_ISL_754857 to 754901, EPI_ISL_756312 to 756356, EPI_ISL_918177 to 918231, EPI_ISL_918233 to 918262, EPI_ISL_955126 to 955129, EPI_ISL_980840 to 981003, EPI_ISL_984659 to 984662                                                                                                                                                                                                                                                   |                                                                                                                                |                                                                                                                                |                                                                                                                                                                                                                                                                                                                                                                                                                                                                                                                                                                                                                                                                                                                    |
| see above                                                                                                                                                                                                                                                                                                                                                                                                                                                        | Innovative Genomics Institute, UC Berkeley                                                                                     | Innovative Genomics Institute, UC Berkeley                                                                                     | Haridha Shivram; Justin Choi; Liana Lareau; Phil Frankino; Shana McDevitt; Stacia Wyman                                                                                                                                                                                                                                                                                                                                                                                                                                                                                                                                                                                                                            |
| EPI_ISL_811130                                                                                                                                                                                                                                                                                                                                                                                                                                                   | Institut Central des Hôpitaux Valaisans ICHV/ZIWS Service des Maladies Infectieuses                                            | Department of Biosystems Science and Engineering, ETH Zürich                                                                   | Andrea Patrignani; Andreia Cabral de Gouvea; Catharine Aquino; Chaoran Chen; Christiane Beckmann; Christoph Noppen; David Dreifuss; Doris Popovic; Griffin White; Ivan Topolsky; Jay Tracy; Katharina Jahn; Lara Fuhrmann; Laura Neff; Lennart Opitz; Maria Domenica Motta; Maurice Redondo; Niko Beerewinkel; Noemie Santamaria de Souza; Olivier Kobel; Philipp Jablonski; Ralph Schlapbach; Sarah Nadeau; Simon Grütter; Sophie Seidel; Tanja Stadler; Timothy Sykes                                                                                                                                                                                                                                            |
| EPI_ISL_999030, EPI_ISL_999032                                                                                                                                                                                                                                                                                                                                                                                                                                   | Institut Pasteur de Guinée                                                                                                     | Institut Pasteur de Dakar                                                                                                      | Dia Ndongo; Diagne Moussa Moïse; Diallo Amadou; Diop Mamadou; Faye Ousmane; Grayo Solene; Loucoubar Cheikh; Mbengue Safietou Sankhe; Ndiaye Ndack; Sall Amadou Alpha; Tordo Noel                                                                                                                                                                                                                                                                                                                                                                                                                                                                                                                                   |
| EPI_ISL_934540 to 934547                                                                                                                                                                                                                                                                                                                                                                                                                                         | Institut für Virologie am Department für Hygiene, Mikrobiologie und Public Health                                              | Bergthaler laboratory, CeMM Research Center for Molecular Medicine of the Austrian Academy of Sciences                         | Andreas Bergthaler; Anna Schedl; Bekir Erguner; Benedikt Agerer; Christoph Bock; Jan Laine; Lukas Endler; Maelle Le Moing; Martin Senekowitsch; Michael Schuster; Thomas Penz                                                                                                                                                                                                                                                                                                                                                                                                                                                                                                                                      |
| EPI_ISL_955158 to 955168                                                                                                                                                                                                                                                                                                                                                                                                                                         | Institute for Biocides and Medical Ecology                                                                                     | Institute of microbiology and Immunology, Faculty of Medicine, University of Belgrade                                          | Jankovic, M.; Jovanovic, T.; Knezevic, A.; Milićević, O.; Sekler, M.; Tesovic, B.; Vidanovic, D.                                                                                                                                                                                                                                                                                                                                                                                                                                                                                                                                                                                                                   |
| EPI_ISL_855186 to 855339                                                                                                                                                                                                                                                                                                                                                                                                                                         | Institute for Computational Biomedicine, Weill Cornell Medicine                                                                | Institute for Computational Biomedicine, Weill Cornell Medicine                                                                | A.J.; A.M.; Afshinnekoo, E.; B.W.; Bezdan, D.; Bhattacharya, C.; Butler, C.D.; C.E.; Cong, L.; Crane, A.; Cushing, M.; D.J.; Danko, D.; F.J.; Foox, J.; Gawrys, J.; Gisladdottir, U.; Hajirasouliha, I.; Horner; Iftner, A.; Iftner, T.; Imielinski, M.; Ivanov; L.F.; Langhorst; Levy, S.; Loda, M.; Mackay, M.; Mason; Meleshko, D.; Melnick; Meydan, C.; Mozsary, C.; N.A.; P.A.D.; Pohle, D.; R.E.; Ramiall, V.; Rennett, H.; Rosiene, J.; Ruggiero, P.; Ryon, K.; S.M.; Salvatore, M.; Schwartz; Sedlazeck; Shaiber, A.; Shemesh; Sierra, M.; Siple, J.; Steel; Tanner, N.; Tatonetti, N.; Thierry-Mieg, D.; Thierry-Mieg, J.; Velu, P.; Westblade; Westover; Wu, S.; Xiang, J.; Xu, D.; Young, B.; Zietz, M. |
| EPI_ISL_830648, EPI_ISL_831649 to 831659, EPI_ISL_860719 to 860726, EPI_ISL_913436 to 913445, EPI_ISL_918164                                                                                                                                                                                                                                                                                                                                                     | Institute for Infectious Diseases, University of Bern, Switzerland                                                             | Institute for Infectious Diseases, University of Bern, Switzerland                                                             | Alban Ramette; Christian Baumann; Cora Sägesser; Franziska Suter-Riniker; Michel C Koch; Miguel A Terrazos Miani; Pascal Bittel; Peter Keller; Stephen L Leib                                                                                                                                                                                                                                                                                                                                                                                                                                                                                                                                                      |
| EPI_ISL_853784, EPI_ISL_853856 to 853873, EPI_ISL_853915 to 853916, EPI_ISL_854227                                                                                                                                                                                                                                                                                                                                                                               | Institute for Laboratory Diagnostics and Microbiology, Klinikum Klagenfurt am Worthersee                                       | Bergthaler laboratory, CeMM Research Center for Molecular Medicine of the Austrian Academy of Sciences                         | Alexander Lercher; Alexandra Popa; Andreas Bergthaler; Anna Schedl; Benedikt Agerer; Christoph Bock; Jakob-Wendelin Genger; Jan Laine; Lukas Endler; Martin Senekowitsch; Michael Schuster; Thomas Penz                                                                                                                                                                                                                                                                                                                                                                                                                                                                                                            |
| EPI_ISL_677723, EPI_ISL_678251, EPI_ISL_678253, EPI_ISL_909744, EPI_ISL_933804, EPI_ISL_954301                                                                                                                                                                                                                                                                                                                                                                   | Institute for Lung Diseases in Children - Skopje                                                                               | Research Center for Genetic Engineering and Biotechnology "Georgi D. Efremov" , Macedonian Academy of Sciences and Arts        | Aleksandar J. Dimovski; Dijana Plasheska-Karanfilska; Gjorgji Bozinovski; Milena Jakimovska; Predrag Noveski; RCGEB - MASA                                                                                                                                                                                                                                                                                                                                                                                                                                                                                                                                                                                         |
| EPI_ISL_644671 to 644672, EPI_ISL_718267 to 718272, EPI_ISL_718274 to 718315, EPI_ISL_728157 to 728158, EPI_ISL_728160 to 728167, EPI_ISL_728169 to 728170, EPI_ISL_728178, EPI_ISL_728209 to 728212, EPI_ISL_728241 to 728253, EPI_ISL_877228, EPI_ISL_912397, EPI_ISL_912399 to 912400, EPI_ISL_934424, EPI_ISL_936491, EPI_ISL_936496, EPI_ISL_944094 to 944096, EPI_ISL_944099 to 944104, EPI_ISL_962203 to 962207, EPI_ISL_962523 to 962527, EPI_ISL_968089 |                                                                                                                                |                                                                                                                                |                                                                                                                                                                                                                                                                                                                                                                                                                                                                                                                                                                                                                                                                                                                    |
| see above                                                                                                                                                                                                                                                                                                                                                                                                                                                        | Institute for Medical Research, Infectious Disease Research Centre, National Institutes of Health, Ministry of Health Malaysia | Institute for Medical Research, Infectious Disease Research Centre, National Institutes of Health, Ministry of Health Malaysia | Azizan MA; Kamel K; Mohd-Zawawi Z; Suppiah J; Thayan R                                                                                                                                                                                                                                                                                                                                                                                                                                                                                                                                                                                                                                                             |
| EPI_ISL_707707 to 707708, EPI_ISL_728557 to 728563, EPI_ISL_733528 to 733567, EPI_ISL_812929 to 812955, EPI_ISL_882773 to 882779, EPI_ISL_882781 to 882794, EPI_ISL_882800 to 882804, EPI_ISL_887105                                                                                                                                                                                                                                                             |                                                                                                                                |                                                                                                                                |                                                                                                                                                                                                                                                                                                                                                                                                                                                                                                                                                                                                                                                                                                                    |
| see above                                                                                                                                                                                                                                                                                                                                                                                                                                                        | Institute for Urban Disease Control and Prevention                                                                             | COVID-19 Network Investigations (CONI) Alliance                                                                                | Amornmas Kongkieng; Anek Mungaoklang; Angkana Huang; Anthony R. Jones; Arporn Wangwiwatsin; Bhakbhoon Panthan; Chonticha Klungtong; Duangkamon Loesbanluechai; Ekawat Pasomsu; Elizabeth Batty; Insee Sensor; Janjira Thaipadungpanit; Kamolthip Atsawararun; Khajohn                                                                                                                                                                                                                                                                                                                                                                                                                                              |

|                                                                                                                                                                                                                                                                                                                                                                                                    |                                                                                                                                             |                                                                                                                                                           |                                                                                                                                                                                                                                                                                                                                                                                                                                                                                                                                                                                                                                                                                                                                                                                                                                                                                                                                                                                                                                                 |
|----------------------------------------------------------------------------------------------------------------------------------------------------------------------------------------------------------------------------------------------------------------------------------------------------------------------------------------------------------------------------------------------------|---------------------------------------------------------------------------------------------------------------------------------------------|-----------------------------------------------------------------------------------------------------------------------------------------------------------|-------------------------------------------------------------------------------------------------------------------------------------------------------------------------------------------------------------------------------------------------------------------------------------------------------------------------------------------------------------------------------------------------------------------------------------------------------------------------------------------------------------------------------------------------------------------------------------------------------------------------------------------------------------------------------------------------------------------------------------------------------------------------------------------------------------------------------------------------------------------------------------------------------------------------------------------------------------------------------------------------------------------------------------------------|
| EPI_ISL_626211 to 626230, EPI_ISL_717977                                                                                                                                                                                                                                                                                                                                                           | Institute for Virology, University Hospital Essen                                                                                           | Center of Medical Microbiology, Virology, and Hospital Hygiene, University of Duesseldorf                                                                 | Joonsalak; Kingkan Rakmanee; Krittikorn Kumpornsin; Namfon Kotanan; Prayuth Kaewmalang; Pukkaporn Paruwitikul; Stefan Fernandez; Thanat Chookajakorn; Theerarat Kochakarn; Treewat Watthanachockchai; Vichan Pawun; Wasun Chantratita; Wudtichai Manasatienkij                                                                                                                                                                                                                                                                                                                                                                                                                                                                                                                                                                                                                                                                                                                                                                                  |
| EPI_ISL_853723, EPI_ISL_853752, EPI_ISL_853762, EPI_ISL_853787, EPI_ISL_853816, EPI_ISL_854233, EPI_ISL_934650 to 934651, EPI_ISL_934696                                                                                                                                                                                                                                                           | see above                                                                                                                                   | Institute for Water Quality and Resource Management, Technical University Vienna                                                                          | Berghaler Laboratory, CeMM Research Center for Molecular Medicine of the Austrian Academy of Sciences                                                                                                                                                                                                                                                                                                                                                                                                                                                                                                                                                                                                                                                                                                                                                                                                                                                                                                                                           |
| EPI_ISL_956403                                                                                                                                                                                                                                                                                                                                                                                     | Institute for prevention, treatment and rehabilitation of cardiovascular diseases - Ohrid                                                   | Research Center for Genetic Engineering and Biotechnology "Georgi D. Efremov", Macedonian Academy of Sciences and Arts                                    | Aleksandar J. Dimovski; Dijana Plasheska-Karanfilska; Gjorgji Bozinovski; Milena Jakimovska; Predrag Noveski                                                                                                                                                                                                                                                                                                                                                                                                                                                                                                                                                                                                                                                                                                                                                                                                                                                                                                                                    |
| EPI_ISL_918411                                                                                                                                                                                                                                                                                                                                                                                     | Institute of Biocides and Medical Ecology                                                                                                   | Virology Department Institute of Microbiology and Immunology Faculty of Medicine University of Belgrade                                                   | Abazovic Dzihan; Banko Ana; Despot Dragana; Loncar Ana; Milicevic Ognjen; Miljanovic Danijela                                                                                                                                                                                                                                                                                                                                                                                                                                                                                                                                                                                                                                                                                                                                                                                                                                                                                                                                                   |
| EPI_ISL_891267 to 891272                                                                                                                                                                                                                                                                                                                                                                           | Institute of Biocides and Medical Ecology, Belgrade, Serbia                                                                                 | Virology department Institute of microbiology and immunology Faculty of Medicine University of Belgrade                                                   | Abazovic Dzihan; Banko Ana; Despot Dragana; Loncar Ana; Milicevic Ognjen; Miljanovic Danijela                                                                                                                                                                                                                                                                                                                                                                                                                                                                                                                                                                                                                                                                                                                                                                                                                                                                                                                                                   |
| EPI_ISL_909737                                                                                                                                                                                                                                                                                                                                                                                     | Institute of Biocides and Medical Ecology, Belgrade, Serbia                                                                                 | Virology Department, Institute of microbiology and immunology, Faculty of Medicine University of Blegrade                                                 | Abazovic Dzihan; Banko Ana; Despot Dragana; Loncar Ana; Milicevic Ognjen; Miljanovic Danijela                                                                                                                                                                                                                                                                                                                                                                                                                                                                                                                                                                                                                                                                                                                                                                                                                                                                                                                                                   |
| EPI_ISL_891266                                                                                                                                                                                                                                                                                                                                                                                     | Institute of Biocides and Medical Ecology, Belgrade, Serbia                                                                                 | Virology department Institute of microbiology and immunology Faculty of Medicine University of Belgrade                                                   | Abazovic Dzihan; Banko Ana; Despot Dragana; Loncar Ana; Milicevic Ognjen; Miljanovic Danijela                                                                                                                                                                                                                                                                                                                                                                                                                                                                                                                                                                                                                                                                                                                                                                                                                                                                                                                                                   |
| EPI_ISL_854229, EPI_ISL_854237, EPI_ISL_934589 to 934592                                                                                                                                                                                                                                                                                                                                           | Institute of Legal Medicine, Medical University of Innsbruck                                                                                | Berghaler laboratory, CeMM Research Center for Molecular Medicine of the Austrian Academy of Sciences                                                     | Alexander Lercher; Alexandra Popa; Andreas Berghaler; Anna Schedl; Bekir Erguner; Benedikt Agerer; Christoph Bock; Christoph Bock; Jakob-Wendelin Genger; Jan Laine; Lukas Ender; Maelle Le Moing; Martin Senekowitsch; Martin Senekowitsch; Michael Schuster; Michael Schuster; Thomas Penz                                                                                                                                                                                                                                                                                                                                                                                                                                                                                                                                                                                                                                                                                                                                                    |
| EPI_ISL_723077 to 723117                                                                                                                                                                                                                                                                                                                                                                           | Institute of Medical Genetics and Applied Genomics                                                                                          | Institute of Medical Genetics and Applied Genomics                                                                                                        | Angel Angelov; Caspar Gross; Daniela Bezdán; Michael Bitzer; Michael Sonnabend; Michaela Pogoda; Nicolas Casadei; Siri Göpel; Stephan Ossowski; Thomas Iftner; Tina Ganzenmüller                                                                                                                                                                                                                                                                                                                                                                                                                                                                                                                                                                                                                                                                                                                                                                                                                                                                |
| EPI_ISL_803871, EPI_ISL_803874 to 803875, EPI_ISL_864544, EPI_ISL_864563, EPI_ISL_864566 to 864579, EPI_ISL_884260 to 884290, EPI_ISL_887115 to 887144, EPI_ISL_894161 to 894169, EPI_ISL_960834, EPI_ISL_960836 to 960837, EPI_ISL_960842, EPI_ISL_960845, EPI_ISL_960847 to 960848, EPI_ISL_960850, EPI_ISL_960853 to 960864, EPI_ISL_960866 to 960882, EPI_ISL_960893, EPI_ISL_960900 to 960901 | see above                                                                                                                                   | Institute of Medical Microbiology and Hospital Hygiene                                                                                                    | Aljoscha Tersteegen; Prof. Dr. Achim Kaasch                                                                                                                                                                                                                                                                                                                                                                                                                                                                                                                                                                                                                                                                                                                                                                                                                                                                                                                                                                                                     |
| EPI_ISL_886157, EPI_ISL_887106 to 887114                                                                                                                                                                                                                                                                                                                                                           | Institute of Medical Microbiology and Virology, University Hospital Carl Gustav Carus, TU Dresden                                           | DRESDEN-concept Genome Center, CMCB, TU Dresden                                                                                                           | Beil J.; Brown T.; Büttner L.; Gscheidel N.; Hochauf-Stange K.; Klemroth S.; Lindemann D.; Mehnert G.; Petzold A.; Reinhardt S.; Rost F.; Sameith K.; Winkler S.                                                                                                                                                                                                                                                                                                                                                                                                                                                                                                                                                                                                                                                                                                                                                                                                                                                                                |
| EPI_ISL_635200 to 635203, EPI_ISL_635205 to 635299, EPI_ISL_636459 to 636461, EPI_ISL_877424 to 877431, EPI_ISL_877437 to 877453, EPI_ISL_877455, EPI_ISL_906117 to 906127, EPI_ISL_906129 to 906130, EPI_ISL_979246 to 979270                                                                                                                                                                     | see above                                                                                                                                   | Institute of Microbiology and Immunology, Faculty of Medicine, University of Ljubljana                                                                    | Dorotheja Vljaj; Mario Poljak; Matic Brvar; Miša Korva; Patricija Pozvek; Samo Zakotnik; Tatjana Avši - Županc; Tatjana Avši - Županc; Tomaž Mark Zorec; Špela Pleh                                                                                                                                                                                                                                                                                                                                                                                                                                                                                                                                                                                                                                                                                                                                                                                                                                                                             |
| EPI_ISL_635204                                                                                                                                                                                                                                                                                                                                                                                     | Institute of Microbiology and Immunology, Faculty of Medicine, University of Ljubljana                                                      | The National Laboratory of Health, Environment and Food - Centre for Medical Microbiology Maribor                                                         | Mario Poljak; Miša Korva; Mojca Cimerman; Samo Zakotnik; Tatjana Avši - Županc; Tomaž Mark Zorec                                                                                                                                                                                                                                                                                                                                                                                                                                                                                                                                                                                                                                                                                                                                                                                                                                                                                                                                                |
| EPI_ISL_660529 to 660539, EPI_ISL_697783 to 697795, EPI_ISL_697798 to 697800, EPI_ISL_728202 to 728205, EPI_ISL_803098, EPI_ISL_824284 to 824294, EPI_ISL_877551 to 877562                                                                                                                                                                                                                         | see above                                                                                                                                   | Institute of Microbiology, Universidad San Francisco de Quito                                                                                             | Adriana Arnau; Alexandra Noboa; Alexandra Tino; Alvaro Davalos de Castro; Ana Diaz; Andrea Cungan; Andrea Macias; Andres Moreno; Belén Prado-Vivar; Bernardo Gutiérrez; Cristian Pelaez; David Acosta-España; Diana Zambrano; Diego Mora; Diego Morocho; Edgar Espinoza; Edison Chavez; Edmundo Encalada; Eduardo Males; Eulalia Pazmiño; Fabricio Picoita; Fernanda Garcia; Fernando Martinez; Francisco Cordova; Freddy Iza; Fredy Loo; Gabriel Trueba; Hector Moya; Hermelinda Paguay; Jonathan Araujo; Jorge Caamaño; Jorge Montaña; Juan José Guadalupe; Juan Monge; Juan Zuñiga; Katalina Pacheco; Kyllen Briones; Manuel Jaramillo; Manuel Jibaja; Marco Jimenez; Marco DiStefano; Maribel Cruz; Maureen Mosquera; Michelle Grunauer; Milton Tobar; Monica Becerra-Wong; Nabih Dahik; Nelson Remache; Ninfa Hernandez; Pablo Flores; Patricio Reyes; Patricio Rojas-Silva; Paul Cárdenas; Piedad Villacis; Rosa Avila; Sayra Caiza; Sully Márquez; Tania Guayasamin; Vanesa Ramirez; Veronica Paredes; Verónica Barragán; Viviana Medina |
| EPI_ISL_653826 to 653832                                                                                                                                                                                                                                                                                                                                                                           | Institute of Post Graduate Medical Education & Research                                                                                     | National Institute of Biomedical Genomics                                                                                                                 | Arindam Maitra; Aritra Biswas; Jayeeta Haldar; Monimoy Banerjee; Raja Ray; Saumitra Das                                                                                                                                                                                                                                                                                                                                                                                                                                                                                                                                                                                                                                                                                                                                                                                                                                                                                                                                                         |
| EPI_ISL_877421, EPI_ISL_882769, EPI_ISL_956280, EPI_ISL_956312, EPI_ISL_956316                                                                                                                                                                                                                                                                                                                     | Institute of Tropical Disease                                                                                                               | Institute of Tropical Disease, Universitas Airlangga                                                                                                      | Aldise M Nastri; Gatot Soegiarto; Jezzy R Dewantari; Kazufumi Shimizu; Krisnoadi Rahardjo; Laksmi Wulandari; Maria I Lusida; Resti Yudhawati; Rima R Prasetya; Soetjpto; Yasuko Mori                                                                                                                                                                                                                                                                                                                                                                                                                                                                                                                                                                                                                                                                                                                                                                                                                                                            |
| EPI_ISL_672701 to 672721, EPI_ISL_672746 to 672751                                                                                                                                                                                                                                                                                                                                                 | Institute of Tropical Medicine at the University of São Paulo (IMT-USP)                                                                     | Laboratório de Parasitologia Médica - Instituto de Medicina Tropical - Universidade de São Paulo                                                          | Brazil-UK Centre for Arbovirus Discovery Diagnosis Genomics and Epidemiology (CADDE) Genomic Network - Instituto de Medicina Tropical                                                                                                                                                                                                                                                                                                                                                                                                                                                                                                                                                                                                                                                                                                                                                                                                                                                                                                           |
| EPI_ISL_964878 to 964879                                                                                                                                                                                                                                                                                                                                                                           | Institute of Virology Ulm University Medical Center Prof. Dr. Thomas Stamminger                                                             | Münch Lab / Ulm University Medical Center Kirchhoff Lab / Ulm University Medical Center Sparrer Lab / Ulm University Medical Center Blum Lab / LMU Munich | Alexander Graf; Carina Conzelmann; Frank Kirchhoff; Helmut Blum; Jan Münch; Janis Müller; Konstantin Sparrer; Rüdiger Gross; Stefan Krebs; Thomas Stamminger                                                                                                                                                                                                                                                                                                                                                                                                                                                                                                                                                                                                                                                                                                                                                                                                                                                                                    |
| EPI_ISL_717975, EPI_ISL_718250 to 718260, EPI_ISL_779403, EPI_ISL_779651 to 779660, EPI_ISL_788979 to 788988, EPI_ISL_791990, EPI_ISL_831663 to 831676, EPI_ISL_875516 to 875539, EPI_ISL_903979 to 904003, EPI_ISL_959604 to 959649                                                                                                                                                               | see above                                                                                                                                   | Institute of Virology, Biomedical Research Center of the Slovak Academy of Sciences, Bratislava                                                           | Faculty of Natural Sciences, Comenius University, Bratislava                                                                                                                                                                                                                                                                                                                                                                                                                                                                                                                                                                                                                                                                                                                                                                                                                                                                                                                                                                                    |
| EPI_ISL_852633 to 852812, EPI_ISL_893743 to 893744, EPI_ISL_893746, EPI_ISL_893748, EPI_ISL_893750, EPI_ISL_893752, EPI_ISL_893755, EPI_ISL_893757, EPI_ISL_893759, EPI_ISL_893761, EPI_ISL_893764, EPI_ISL_893766, EPI_ISL_893769, EPI_ISL_893771, EPI_ISL_893773 to 893775, EPI_ISL_893777 to 893778, EPI_ISL_893781, EPI_ISL_893783, EPI_ISL_893785, EPI_ISL_918339 to 918358                   | see above                                                                                                                                   | Institute of Virology, Medical Center, University of Freiburg, Freiburg, Germany                                                                          | Institute of Virology, Clinical Virus Genomics, Medical Center, University of Freiburg, Freiburg, Germany                                                                                                                                                                                                                                                                                                                                                                                                                                                                                                                                                                                                                                                                                                                                                                                                                                                                                                                                       |
| EPI_ISL_983501 to 983587                                                                                                                                                                                                                                                                                                                                                                           | Institute of Virology, University Hospital, University of Bonn and German Center for Infection Research (DZIF), Bonn-Cologne, Bonn, Germany | Institute of Virology, University Hospital, University of Bonn and German Center for Infection Research (DZIF), Bonn-Cologne, Bonn, Germany               | Marek Korencak et al                                                                                                                                                                                                                                                                                                                                                                                                                                                                                                                                                                                                                                                                                                                                                                                                                                                                                                                                                                                                                            |
| EPI_ISL_796027 to 796063, EPI_ISL_803866, EPI_ISL_827042 to 827043                                                                                                                                                                                                                                                                                                                                 | Institute of Virology, University of Cologne                                                                                                | Institute of Virology, University of Cologne                                                                                                              | Alex Thielen; Alexander Dilthey; Andreas Walker; Dominik Aschenmeier; Elena Knops; Eva Heger; Gibrán Rubio; Jörg Timm; Martin Däumer; Maximilian Damagnez; Rolf Kaiser; Saleta Sierra; Zevanya Tesselonica                                                                                                                                                                                                                                                                                                                                                                                                                                                                                                                                                                                                                                                                                                                                                                                                                                      |
| EPI_ISL_728346, EPI_ISL_728348, EPI_ISL_728350 to 728351, EPI_ISL_728354, EPI_ISL_728356 to 728357, EPI_ISL_776711, EPI_ISL_776771                                                                                                                                                                                                                                                                 | see above                                                                                                                                   | Institute of medical Microbiology and hospital Hygiene                                                                                                    | Institute of medical Microbiology and hospital Hygiene                                                                                                                                                                                                                                                                                                                                                                                                                                                                                                                                                                                                                                                                                                                                                                                                                                                                                                                                                                                          |
| EPI_ISL_933732                                                                                                                                                                                                                                                                                                                                                                                     | Institution of Nefrology-Struga                                                                                                             | Research Center for Genetic Engineering and Biotechnology "Georgi D. Efremov", Macedonian Academy of Sciences and Arts                                    | Aljoscha Tersteegen; Prof. Dr. Achim Kaasch<br>RCGEB - MASA                                                                                                                                                                                                                                                                                                                                                                                                                                                                                                                                                                                                                                                                                                                                                                                                                                                                                                                                                                                     |
| EPI_ISL_755640, EPI_ISL_755642 to 755643, EPI_ISL_755651, EPI_ISL_755653 to 755654, EPI_ISL_776750 to 776756, EPI_ISL_776759 to 776763, EPI_ISL_792101 to 792102, EPI_ISL_792104 to 792114, EPI_ISL_833152 to 833155, EPI_ISL_833159, EPI_ISL_833161, EPI_ISL_861625 to 861627, EPI_ISL_861629 to 861634, EPI_ISL_861642 to 861643, EPI_ISL_861663, EPI_ISL_861677                                 | see above                                                                                                                                   | Instituto Adolfo Lutz - Central                                                                                                                           | Instituto Adolfo Lutz, Interdisciplinary Procedures Center,<br>Claudia Regina Gonçalves; Claudio Tavares Sacchi; Erica Valessa Ramos Gomes; Karoline Rodrigues Campos                                                                                                                                                                                                                                                                                                                                                                                                                                                                                                                                                                                                                                                                                                                                                                                                                                                                           |



|                                                                                                                                                                                                                                                                                                                                                                                                                                                                                                                                                                                                                                                  |                                                                                                                      |                                                                                                                                                                                                 |                                                                                                                                                                                                                                                                                                                                                                                                                                                         |                                                                                                                                                                                                                                                                                                                                                                                                                                            |
|--------------------------------------------------------------------------------------------------------------------------------------------------------------------------------------------------------------------------------------------------------------------------------------------------------------------------------------------------------------------------------------------------------------------------------------------------------------------------------------------------------------------------------------------------------------------------------------------------------------------------------------------------|----------------------------------------------------------------------------------------------------------------------|-------------------------------------------------------------------------------------------------------------------------------------------------------------------------------------------------|---------------------------------------------------------------------------------------------------------------------------------------------------------------------------------------------------------------------------------------------------------------------------------------------------------------------------------------------------------------------------------------------------------------------------------------------------------|--------------------------------------------------------------------------------------------------------------------------------------------------------------------------------------------------------------------------------------------------------------------------------------------------------------------------------------------------------------------------------------------------------------------------------------------|
|                                                                                                                                                                                                                                                                                                                                                                                                                                                                                                                                                                                                                                                  |                                                                                                                      | Strategic Laboratory                                                                                                                                                                            |                                                                                                                                                                                                                                                                                                                                                                                                                                                         |                                                                                                                                                                                                                                                                                                                                                                                                                                            |
| EPI_ISL_776768, EPI_ISL_977482                                                                                                                                                                                                                                                                                                                                                                                                                                                                                                                                                                                                                   | Instituto Adolfo Lutz - Regional de Aracatuba                                                                        | Instituto Adolfo Lutz, Interdisciplinary Procedures Center, Strategic Laboratory                                                                                                                | Claudia Regina Gonçalves; Claudio Tavares Sacchi; Erica Valessa Ramos Gomes; Karoline Rodrigues Campos                                                                                                                                                                                                                                                                                                                                                  |                                                                                                                                                                                                                                                                                                                                                                                                                                            |
| EPI_ISL_755655, EPI_ISL_861664, EPI_ISL_906068 to 906069                                                                                                                                                                                                                                                                                                                                                                                                                                                                                                                                                                                         | Instituto Adolfo Lutz - Regional de Campinas                                                                         | Instituto Adolfo Lutz, Interdisciplinary Procedures Center, Strategic Laboratory                                                                                                                | Claudia Regina Gonçalves; Claudio Tavares Sacchi; Erica Valessa Ramos Gomes; Karoline Rodrigues Campos                                                                                                                                                                                                                                                                                                                                                  |                                                                                                                                                                                                                                                                                                                                                                                                                                            |
| EPI_ISL_776757 to 776758, EPI_ISL_776767, EPI_ISL_833163, EPI_ISL_984243 to 984244                                                                                                                                                                                                                                                                                                                                                                                                                                                                                                                                                               | Instituto Adolfo Lutz - Regional de Marília                                                                          | Instituto Adolfo Lutz, Interdisciplinary Procedures Center, Strategic Laboratory                                                                                                                | Claudia Regina Gonçalves; Claudio Tavares Sacchi; Erica Valessa Ramos Gomes; Karoline Rodrigues Campos                                                                                                                                                                                                                                                                                                                                                  |                                                                                                                                                                                                                                                                                                                                                                                                                                            |
| EPI_ISL_977471, EPI_ISL_977475, EPI_ISL_977478, EPI_ISL_977480 to 977481, EPI_ISL_977485, EPI_ISL_977488, EPI_ISL_985170                                                                                                                                                                                                                                                                                                                                                                                                                                                                                                                         | see above                                                                                                            | Instituto Adolfo Lutz - Regional de Presidente Prudente                                                                                                                                         | Instituto Adolfo Lutz, Interdisciplinary Procedures Center, Strategic Laboratory                                                                                                                                                                                                                                                                                                                                                                        | Claudia Regina Gonçalves; Claudio Tavares Sacchi; Erica Valessa Ramos Gomes; Karoline Rodrigues Campos                                                                                                                                                                                                                                                                                                                                     |
| EPI_ISL_735401 to 735404, EPI_ISL_735410, EPI_ISL_861667                                                                                                                                                                                                                                                                                                                                                                                                                                                                                                                                                                                         | Instituto Adolfo Lutz - Regional de Rio Claro                                                                        | Instituto Adolfo Lutz, Interdisciplinary Procedures Center, Strategic Laboratory                                                                                                                | Claudia Regina Gonçalves; Claudio Tavares Sacchi; Erica Valessa Ramos Gomes; Karoline Rodrigues Campos                                                                                                                                                                                                                                                                                                                                                  |                                                                                                                                                                                                                                                                                                                                                                                                                                            |
| EPI_ISL_755641, EPI_ISL_755646 to 755647, EPI_ISL_755649, EPI_ISL_776764 to 776766, EPI_ISL_776769, EPI_ISL_792103, EPI_ISL_833157 to 833158, EPI_ISL_833160, EPI_ISL_977486                                                                                                                                                                                                                                                                                                                                                                                                                                                                     | see above                                                                                                            | Instituto Adolfo Lutz - Regional de Santo Andre                                                                                                                                                 | Instituto Adolfo Lutz, Interdisciplinary Procedures Center, Strategic Laboratory                                                                                                                                                                                                                                                                                                                                                                        | Claudia Regina Gonçalves; Claudio Tavares Sacchi; Erica Valessa Ramos Gomes; Karoline Rodrigues Campos                                                                                                                                                                                                                                                                                                                                     |
| EPI_ISL_735400, EPI_ISL_735427, EPI_ISL_735430                                                                                                                                                                                                                                                                                                                                                                                                                                                                                                                                                                                                   | Instituto Adolfo Lutz - Regional de Santos                                                                           | Instituto Adolfo Lutz, Interdisciplinary Procedures Center, Strategic Laboratory                                                                                                                | Claudia Regina Gonçalves; Claudio Tavares Sacchi; Erica Valessa Ramos Gomes; Karoline Rodrigues Campos                                                                                                                                                                                                                                                                                                                                                  |                                                                                                                                                                                                                                                                                                                                                                                                                                            |
| EPI_ISL_833156, EPI_ISL_860317, EPI_ISL_860633                                                                                                                                                                                                                                                                                                                                                                                                                                                                                                                                                                                                   | Instituto Adolfo Lutz - Regional de Sorocaba                                                                         | Instituto Adolfo Lutz, Interdisciplinary Procedures Center, Strategic Laboratory                                                                                                                | Claudia Regina Gonçalves; Claudio Tavares Sacchi; Erica Valessa Ramos Gomes; Karoline Rodrigues Campos                                                                                                                                                                                                                                                                                                                                                  |                                                                                                                                                                                                                                                                                                                                                                                                                                            |
| EPI_ISL_755648, EPI_ISL_755650, EPI_ISL_792115 to 792116, EPI_ISL_861665, EPI_ISL_861670, EPI_ISL_861679, EPI_ISL_985171 to 985174                                                                                                                                                                                                                                                                                                                                                                                                                                                                                                               | see above                                                                                                            | Instituto Adolfo Lutz - Regional de Taubate                                                                                                                                                     | Instituto Adolfo Lutz, Interdisciplinary Procedures Center, Strategic Laboratory                                                                                                                                                                                                                                                                                                                                                                        | Claudia Regina Gonçalves; Claudio Tavares Sacchi; Erica Valessa Ramos Gomes; Karoline Rodrigues Campos                                                                                                                                                                                                                                                                                                                                     |
| EPI_ISL_977472 to 977474, EPI_ISL_977476 to 977477, EPI_ISL_977483 to 977484, EPI_ISL_977487, EPI_ISL_984242, EPI_ISL_984245 to 984246, EPI_ISL_985175 to 985177                                                                                                                                                                                                                                                                                                                                                                                                                                                                                 | see above                                                                                                            | Instituto Adolfo Lutz Central                                                                                                                                                                   | Instituto Adolfo Lutz, Interdisciplinary Procedures Center, Strategic Laboratory                                                                                                                                                                                                                                                                                                                                                                        | Claudia Regina Gonçalves; Claudio Tavares Sacchi; Erica Valessa Ramos Gomes; Karoline Rodrigues Campos                                                                                                                                                                                                                                                                                                                                     |
| EPI_ISL_845634                                                                                                                                                                                                                                                                                                                                                                                                                                                                                                                                                                                                                                   | Instituto Nacional de Cancerologia                                                                                   | Instituto Nacional de Salud - Dirección de Investigación en Salud Pública                                                                                                                       | Carlos Franco-Muñoz; Diego A. Álvarez-Díaz; Diego Andrés Prada; Gerardo Santamaría; Jonathan Reales; Julian Naizaque; Katherine Laiton-Donato; Magdalena Wiesner; Marcela Mercado-Reyes; María T. Herrera-Sepúlveda; Martha Lucia Ospina Martinez; Mauricio Pacheco-Montealegre; Paola Muñoz-Laiton; Sheryll Corchuelo                                                                                                                                  |                                                                                                                                                                                                                                                                                                                                                                                                                                            |
| EPI_ISL_837600 to 837814, EPI_ISL_843191 to 843192                                                                                                                                                                                                                                                                                                                                                                                                                                                                                                                                                                                               | Instituto Nacional de Enfermedades Respiratorias (INER)                                                              | Instituto Nacional de Enfermedades Respiratorias (INER)                                                                                                                                         | Alejandra Hernández-Terán; Alma Rincón-Rubio; Celia Boukaddia; Edgar Sevilla-Reyes; Eduardo Becerril-Vargas; Fidencio Mejía-Nepomuceno; Hector Esteban Paz-Juárez; Joel Armando Vázquez-Pérez; Jorge Salas-Hernández; José Arturo Martínez-Orozco; Margarita Matías-Florentino; Mario Mújica-Sánchez; Olivia Briceño; Santiago Ávila-Ríos                                                                                                               |                                                                                                                                                                                                                                                                                                                                                                                                                                            |
| EPI_ISL_792351 to 792353                                                                                                                                                                                                                                                                                                                                                                                                                                                                                                                                                                                                                         | Instituto Nacional de Epidemiología Dr. Jara                                                                         | Área de Secuenciación del Laboratorio de Virología del Hospital de Niños Dr. Ricardo Gutiérrez on behalf of 'Proyecto Argentino Interinstitucional de genómica de SARS-CoV-2' (PAIS Consortium) | CJ; Cimmino; Goya; I; LE; Lusso; MI; MS; Nabaes Jodar; Natale; O; Pagano; S; Uez; Valinotto; Viegas, M.                                                                                                                                                                                                                                                                                                                                                 |                                                                                                                                                                                                                                                                                                                                                                                                                                            |
| EPI_ISL_770129                                                                                                                                                                                                                                                                                                                                                                                                                                                                                                                                                                                                                                   | Instituto Nacional de Investigación y Tecnología Agraria y Alimentaria (INIA) Departamento de Mejora Genética Animal | Instituto Nacional de Investigación y Tecnología Agraria y Alimentaria (INIA) Departamento de Mejora Genética Animal                                                                            | Jovita Fernández-Pinero and SeqCOVID-SPAIN consortium; Miguel Ángel Jiménez-Clavero; Mónica Gutiérrez-Rivas; Oscar González-Recio; Ramón Peiró-Pastor                                                                                                                                                                                                                                                                                                   |                                                                                                                                                                                                                                                                                                                                                                                                                                            |
| EPI_ISL_930783, EPI_ISL_933512 to 933531, EPI_ISL_944611 to 944633, EPI_ISL_955189 to 955209, EPI_ISL_985149 to 985167                                                                                                                                                                                                                                                                                                                                                                                                                                                                                                                           | Instituto Nacional de Medicina Genómica                                                                              | Instituto Nacional de Medicina Genómica                                                                                                                                                         | Cedro-Tanda A; Cisneros-Villanueva M; Herrera-Montalvo LA; Hidalgo-Miranda A; Mendoza-Vargas A; Peñaloza-Figueroa F; Reyes-Grajeda JP                                                                                                                                                                                                                                                                                                                   |                                                                                                                                                                                                                                                                                                                                                                                                                                            |
| EPI_ISL_791084 to 791096                                                                                                                                                                                                                                                                                                                                                                                                                                                                                                                                                                                                                         | Instituto Nacional de Salud - Unidad de Secuenciación y Análisis Genómico                                            | Instituto Nacional de Salud - Dirección de Investigación en Salud Pública                                                                                                                       | Carlos Franco-Muñoz; Diego A. Álvarez-Díaz; Diego Andrés Prada; Gerardo Santamaría; Jeadran Malagon-Rojas; Jesith Toloza; Jonathan Reales; Julia Almentero; Julian Naizaque; Katherine Laiton-Donato; Magdalena Wiesner; Marcela Mercado-Reyes; María T. Herrera; Martha Lucia Ospina Martinez; Mauricio Pacheco-Montealegre; Paola Muñoz-Laiton; Ronald Lopez; Sheryl Corchuelo                                                                        |                                                                                                                                                                                                                                                                                                                                                                                                                                            |
| EPI_ISL_941942 to 941943, EPI_ISL_941949, EPI_ISL_941951, EPI_ISL_941953, EPI_ISL_941955 to 941958, EPI_ISL_941960, EPI_ISL_941963, EPI_ISL_941984 to 941994, EPI_ISL_942003, EPI_ISL_942006                                                                                                                                                                                                                                                                                                                                                                                                                                                     | see above                                                                                                            | Instituto Nacional de Salud, Bogotá, Colombia                                                                                                                                                   | Adriana van de Guchte; Alberto Paniz-Mondolfi; Ana S. Gonzalez-Reiche; Carolina Flórez; Carolina Hernández; Emilia Mia Sordillo; Hala Alejel Alshammary; Harm van Bakel; Jayeeta Dutta; Juan David Ramírez; Luz Helena Patiño; Matthew M. Hernandez; Nathalia Ballesteros; Sergio Gomez; Viviana Simon; Zenab Khan                                                                                                                                      |                                                                                                                                                                                                                                                                                                                                                                                                                                            |
| EPI_ISL_653745 to 653762, EPI_ISL_653824 to 653825, EPI_ISL_654793, EPI_ISL_739663 to 739683                                                                                                                                                                                                                                                                                                                                                                                                                                                                                                                                                     | Instituto Nacional de Salud, Bogotá, Colombia                                                                        | Instituto Nacional de Salud, Bogotá, Colombia                                                                                                                                                   | Astrid C. Flórez; Carlos Andrés Durán; Carlos Franco-Muñoz; Carolina Ferro; Christian Julian Villabona-Arenas; Diana Marcela Waiteros-Acero; Diego A. Álvarez-Díaz; Diego Andrés Prada; Franklin Prieto; Jonathan Reales; Jose A. Usme-Ciro; Katherine Laiton-Donato; Liz Villabona-Arenas; Magdalena Weisner; Marcela Mercado-Reyes; Martha Lucia Ospina Martinez; Mauricio Pacheco-Montealegre; Sheryl Corchuelo; Sussy Echeverria; Zulma M. Cucunubá |                                                                                                                                                                                                                                                                                                                                                                                                                                            |
| EPI_ISL_956282 to 956297                                                                                                                                                                                                                                                                                                                                                                                                                                                                                                                                                                                                                         | Instituto Nacional de Salud- Dirección de Redes de Laboratorios de Salud Pública                                     | Instituto Nacional de Salud- Dirección de Investigación en Salud Pública                                                                                                                        | Carlos Franco-Muñoz; Diego A. Álvarez-Díaz; Diego Andrés Prada; Gerardo Santamaría; Hector Alejandro Ruiz-Moreno; Jhonnatan Reales-González; Julian Naizaque; Katherine Laiton-Donato; Magdalena Wiesner; Marcela Mercado-Reyes; María T. Herrera-Sepúlveda; Martha Lucia Ospina Martinez; Mauricio Pacheco-Montealegre; Sheryll Corchuelo                                                                                                              |                                                                                                                                                                                                                                                                                                                                                                                                                                            |
| EPI_ISL_887419 to 887505, EPI_ISL_964918 to 964948                                                                                                                                                                                                                                                                                                                                                                                                                                                                                                                                                                                               | Instituto Nacional de Saude (INS), Mozambique                                                                        | KRISP, KZN Research Innovation and Sequencing Platform                                                                                                                                          | Emmanuel S; Giandhari J; Nadia Siteo; Nalia Ismael; Nedio Mabunda; Paulo Arnaldo; Pillay S; Tegally H; Wilkinson E; de Oliveira T                                                                                                                                                                                                                                                                                                                       |                                                                                                                                                                                                                                                                                                                                                                                                                                            |
| EPI_ISL_693517, EPI_ISL_693521 to 693522, EPI_ISL_693525 to 693533, EPI_ISL_693538, EPI_ISL_693540 to 693629, EPI_ISL_731895 to 731896, EPI_ISL_731898 to 731899, EPI_ISL_731901 to 731902, EPI_ISL_731904 to 731905, EPI_ISL_731908 to 731911, EPI_ISL_731913, EPI_ISL_731916, EPI_ISL_731918 to 731923, EPI_ISL_731931 to 731939, EPI_ISL_731941 to 732117, EPI_ISL_738088 to 738120, EPI_ISL_738146, EPI_ISL_759707 to 759723, EPI_ISL_759761 to 759762, EPI_ISL_765210 to 765215, EPI_ISL_765219 to 765221, EPI_ISL_796733 to 796781, EPI_ISL_801516 to 801521, EPI_ISL_861529 to 861624, EPI_ISL_861707 to 861709, EPI_ISL_941339 to 941646 | see above                                                                                                            | Instituto Nacional de Saude (INSA)                                                                                                                                                              | Instituto Nacional de Saude (INSA)                                                                                                                                                                                                                                                                                                                                                                                                                      | Borges et al                                                                                                                                                                                                                                                                                                                                                                                                                               |
| EPI_ISL_731897, EPI_ISL_731900, EPI_ISL_731903, EPI_ISL_731906 to 731907, EPI_ISL_731912, EPI_ISL_731914 to 731915, EPI_ISL_731917, EPI_ISL_731924 to 731930, EPI_ISL_731940, EPI_ISL_732118 to 732293, EPI_ISL_765216 to 765218, EPI_ISL_941647 to 941900                                                                                                                                                                                                                                                                                                                                                                                       | see above                                                                                                            | Instituto Nacional de Saude (INSA) and Instituto Gulbenkian de Ciencia (IGC)                                                                                                                    | Instituto Nacional de Saude (INSA) and Instituto Gulbenkian de Ciencia (IGC)                                                                                                                                                                                                                                                                                                                                                                            | Borges et al                                                                                                                                                                                                                                                                                                                                                                                                                               |
| EPI_ISL_861242, EPI_ISL_875540 to 875550, EPI_ISL_888671 to 888672                                                                                                                                                                                                                                                                                                                                                                                                                                                                                                                                                                               | Instituto de Biotecnologia - UNESP-Botucatu-SP                                                                       | Instituto de Biotecnologia - UNESP-Botucatu-SP                                                                                                                                                  | Camila Dantas Malossi; Fábio Sossai Possebon; João Pessoa Araújo Jr.; Leila Sabrina Ullmann; Paula Rahal; Paulo Inacio da Costa                                                                                                                                                                                                                                                                                                                         |                                                                                                                                                                                                                                                                                                                                                                                                                                            |
| EPI_ISL_658863, EPI_ISL_658865, EPI_ISL_658868, EPI_ISL_658870, EPI_ISL_658873, EPI_ISL_658875, EPI_ISL_658878, EPI_ISL_658880, EPI_ISL_658883, EPI_ISL_658886, EPI_ISL_658888, EPI_ISL_658891, EPI_ISL_658893, EPI_ISL_658896, EPI_ISL_658899, EPI_ISL_658901, EPI_ISL_658904, EPI_ISL_861419 to 861421, EPI_ISL_872088 to 872093, EPI_ISL_872097 to 872099                                                                                                                                                                                                                                                                                     | see above                                                                                                            | Instituto de Diagnostico y Referencia Epidemiologicos (INDRE)                                                                                                                                   | Instituto de Diagnostico y Referencia Epidemiologicos (INDRE)                                                                                                                                                                                                                                                                                                                                                                                           | Abril Rodriguez-Maldonado; Adnan-Araiza Rodríguez; Claudia Wong-Arambula; Dayanira Arellano-Suarez; Edgar Mendieta-Condado; Ernesto Ramirez-Gonzalez; Ernesto Ramirez-Gonzalez.; Fabiola Garces-Ayala; Gaudalupe Herrera-Ramirez; Gisela Barrera-Badillo; Gisela Barrera-Badillo.; Irma Lopez-Martinez; Irma Lopez-Martinez.; Jazmin Galicia-Hernandez.; Linda Andarade-Sanchez; Lucia Hernandez-Rivas; Marisol Galindo-Galindo; Natividad |

|                                                                                                                                                                                                                                                                                                                                                                                                                                                                                                                                                                                                                                                                                                                                                                                                                                                                                                                                                                                                                                                                                                                                                                                                         |                                                                                                                                                                                                                                                               |                                                                                                                                                                                                 |                                                                                                                                                                                                                                                                                                                                                                                                                                                                                                                                                                                                                                                   |
|---------------------------------------------------------------------------------------------------------------------------------------------------------------------------------------------------------------------------------------------------------------------------------------------------------------------------------------------------------------------------------------------------------------------------------------------------------------------------------------------------------------------------------------------------------------------------------------------------------------------------------------------------------------------------------------------------------------------------------------------------------------------------------------------------------------------------------------------------------------------------------------------------------------------------------------------------------------------------------------------------------------------------------------------------------------------------------------------------------------------------------------------------------------------------------------------------------|---------------------------------------------------------------------------------------------------------------------------------------------------------------------------------------------------------------------------------------------------------------|-------------------------------------------------------------------------------------------------------------------------------------------------------------------------------------------------|---------------------------------------------------------------------------------------------------------------------------------------------------------------------------------------------------------------------------------------------------------------------------------------------------------------------------------------------------------------------------------------------------------------------------------------------------------------------------------------------------------------------------------------------------------------------------------------------------------------------------------------------------|
|                                                                                                                                                                                                                                                                                                                                                                                                                                                                                                                                                                                                                                                                                                                                                                                                                                                                                                                                                                                                                                                                                                                                                                                                         |                                                                                                                                                                                                                                                               |                                                                                                                                                                                                 | Cruz-Ortiz; Octavio Ruiz-Muñiz; Pamela Ramirez-Medina; Roman Canul-Aguilar; Tatiana Nunez-Garcia                                                                                                                                                                                                                                                                                                                                                                                                                                                                                                                                                  |
| EPI_ISL_660068                                                                                                                                                                                                                                                                                                                                                                                                                                                                                                                                                                                                                                                                                                                                                                                                                                                                                                                                                                                                                                                                                                                                                                                          | Instituto de Diagnostico y Referencia Epidemiologicos (INDRE)                                                                                                                                                                                                 | Instituto de diagnóstico y Referencia Epidemiologicos (INDRE) Departamento de Virología                                                                                                         | Abril Rodriguez-Maldonado; Claudia Wong-Arambula; Dayanira Arellano-Suarez; Ernesto Ramirez-Gonzalez.; Fabiola Garces-Ayala; Gisela Barrera-Badillo; Irma Lopez-Martinez; Lucia Hernandez-Rivas; Natividad Cruz-Ortiz; Tatiana Nunez-Garcia                                                                                                                                                                                                                                                                                                                                                                                                       |
| EPI_ISL_913911 to 913917, EPI_ISL_913919 to 913984, EPI_ISL_914879 to 914880, EPI_ISL_933661 to 933663, EPI_ISL_933665 to 933712, EPI_ISL_942928 to 942929                                                                                                                                                                                                                                                                                                                                                                                                                                                                                                                                                                                                                                                                                                                                                                                                                                                                                                                                                                                                                                              | Instituto de Diagnostico y Referencia Epidemiologicos INDRE_RNLSP                                                                                                                                                                                             | Instituto de Diagnostico y Referencia Epidemiologicos (INDRE)                                                                                                                                   | Abril Rodriguez-Maldonado; Adnan Araiza-Rodriguez; Claudia Wong-Arambula; David Fragoso-Fonseca; Ernesto Ramirez-Gonzalez.; Fabiola Garces-Ayala; Gisela Barrera-Badillo; Irma Lopez-Martinez; Lucia Hernandez-Rivas; Mayra Jimenez-Morales; Nancy Munoz-Hernandez; Natividad Cruz-Ortiz; Sergio Rangel-Guerrero; Tatiana Nunez-Garcia                                                                                                                                                                                                                                                                                                            |
| EPI_ISL_747615, EPI_ISL_748138 to 748145                                                                                                                                                                                                                                                                                                                                                                                                                                                                                                                                                                                                                                                                                                                                                                                                                                                                                                                                                                                                                                                                                                                                                                | Instituto de Investigaciones Biologicas Clemente Estable                                                                                                                                                                                                      | Institut Pasteur de Montevideo                                                                                                                                                                  | Ana Carolina Mendonça; Andres Lizasoain; Camila Simoes; Cecilia Alonso; Cecilia Salazar; Daiana Mir; Fernando Lopez-Tort; Fernando Motta; Gonzalo Bello; Ighor Arantes; Ignacio Ferrés; Jose Sotelo; Leticia Maya; Leticia Garay Martins; Luciana Appolinario; Lucia Spangenberg; Mailen Arleo; Mariana Brandes; Marilda Mendonça Siqueira; Marilda Tereza Mar da Rosa; Maria Jose Benitez-Galeano; Martin Graña; Matias Castells; Matias Victoria; Matias Salvo; Natalia Rego; Natalia Reyes; Pablo Smircich; Paola Cristina Resende; Rodney Colina; Tamara Fernandez-Calero; Tania Possi; Tatiana Schäffer Gregiani; Veronica Noya; Yasser Vega |
| EPI_ISL_792320 to 792332                                                                                                                                                                                                                                                                                                                                                                                                                                                                                                                                                                                                                                                                                                                                                                                                                                                                                                                                                                                                                                                                                                                                                                                | Instituto de Investigaciones Biomédicas en Retrovirus y SIDA                                                                                                                                                                                                  | Área de Secuenciación del Laboratorio de Virología del Hospital de Niños Dr. Ricardo Gutierrez on behalf of 'Proyecto Argentino Interinstitucional de genómica de SARS-CoV-2' (PAIS Consortium) | F; Goya; H; LE; Lusso; MI; MS; Nabaes Jodar; Natale; Remes Lenicov; S; Salomón; Seery; V; Valinotto; Viegas, M.                                                                                                                                                                                                                                                                                                                                                                                                                                                                                                                                   |
| EPI_ISL_722130 to 722133                                                                                                                                                                                                                                                                                                                                                                                                                                                                                                                                                                                                                                                                                                                                                                                                                                                                                                                                                                                                                                                                                                                                                                                | Instituto de Medicina Tropical Universidade de São Paulo                                                                                                                                                                                                      | Laboratório de Parasitologia Médica - Instituto de Medicina Tropical - Universidade de São Paulo                                                                                                | Brazil-UK Centre for Arbovirus Discovery Diagnosis Genomics and Epidemiology (CADDE) Genomic Network - Instituto de Medicina Tropical                                                                                                                                                                                                                                                                                                                                                                                                                                                                                                             |
| EPI_ISL_729869 to 729871, EPI_ISL_729902 to 729919                                                                                                                                                                                                                                                                                                                                                                                                                                                                                                                                                                                                                                                                                                                                                                                                                                                                                                                                                                                                                                                                                                                                                      | Instituto de Medicina Tropical, Universidad Nacional Toribio Rodríguez de Mendoza de Amazonas                                                                                                                                                                 | Laboratorio de Genómica Microbiana, Universidad Peruana Cayetano Heredia                                                                                                                        | Alejandra Dávila-Barclay; Brenda Ayzanoa; Carla Montenegro; Cecilia Pajuelo; Janet Huancachoque; Luis González; Pablo Tsukayama; Pedro E. Romero; Pool Marcos; Rafael Tapia; Stella Chenet                                                                                                                                                                                                                                                                                                                                                                                                                                                        |
| EPI_ISL_871972, EPI_ISL_871996 to 871998                                                                                                                                                                                                                                                                                                                                                                                                                                                                                                                                                                                                                                                                                                                                                                                                                                                                                                                                                                                                                                                                                                                                                                | Instituto de Salud Carlos III                                                                                                                                                                                                                                 | Instituto de Salud Carlos III                                                                                                                                                                   | A. Monzón; F. Casas; I. Jiménez; Iglesias-Caballero; M. Camarero; M. Cuesta, I.; M. González-Esguevillas; M. Pozo; M. Zaballos; P. Jiménez; S. Juliá; S. Molinero Calamita; S. Varona                                                                                                                                                                                                                                                                                                                                                                                                                                                             |
| EPI_ISL_812250                                                                                                                                                                                                                                                                                                                                                                                                                                                                                                                                                                                                                                                                                                                                                                                                                                                                                                                                                                                                                                                                                                                                                                                          | Invenimus AG                                                                                                                                                                                                                                                  | Institute of Medical Virology, University of Zurich                                                                                                                                             | Alexandra Trkola; Annette Audigé; Cyril Shah; Guido Bloemberg; Jon Huder; Jürg Böni; Kevin Steiner; Maria Grünberg; Maryam Zaheri; Michael Huber; Riccarda Capaul; Stefan Schmutz; Verena Kufner                                                                                                                                                                                                                                                                                                                                                                                                                                                  |
| EPI_ISL_836978                                                                                                                                                                                                                                                                                                                                                                                                                                                                                                                                                                                                                                                                                                                                                                                                                                                                                                                                                                                                                                                                                                                                                                                          | Irmandade da Santa Casa de Misericórdia de Lorena                                                                                                                                                                                                             | Instituto Adolfo Lutz, Interdisciplinary Procedures Center, Strategic Laboratory                                                                                                                | Claudia Regina Gonçalves; Claudio Tavares Sacchi; Erica Valessa Ramos Gomes; Karoline Rodrigues Campos                                                                                                                                                                                                                                                                                                                                                                                                                                                                                                                                            |
| EPI_ISL_918428                                                                                                                                                                                                                                                                                                                                                                                                                                                                                                                                                                                                                                                                                                                                                                                                                                                                                                                                                                                                                                                                                                                                                                                          | Isar-Amper-Klinikum Haar                                                                                                                                                                                                                                      | Bundeswehr Institute of Microbiology                                                                                                                                                            | Alexandra Rehn; Enrico Georgi; Malena Bestehorn-Willmann; Markus Antwerpen; Mathias Walter; Roman Wölfel; Sabine Zange                                                                                                                                                                                                                                                                                                                                                                                                                                                                                                                            |
| EPI_ISL_862858                                                                                                                                                                                                                                                                                                                                                                                                                                                                                                                                                                                                                                                                                                                                                                                                                                                                                                                                                                                                                                                                                                                                                                                          | Isehara Kyodo Hospital                                                                                                                                                                                                                                        | Fujita health University, School of Medicine, Department of Microbiology                                                                                                                        | Masahiro Suzuki; Yohei Doi                                                                                                                                                                                                                                                                                                                                                                                                                                                                                                                                                                                                                        |
| EPI_ISL_956311                                                                                                                                                                                                                                                                                                                                                                                                                                                                                                                                                                                                                                                                                                                                                                                                                                                                                                                                                                                                                                                                                                                                                                                          | Islamic Hospital                                                                                                                                                                                                                                              | Institute of Tropical Disease, Universitas Airlangga                                                                                                                                            | Aldise M Nastri; Dodo Anondo; Gatot Soegiarto; Jezza R Dewantari; Kazufumi Shimizu; Krisnoadi Rahardjo; Laksmi Wulandari; Maria I Lusida; Resti Yudhawati; Rima R Prasetya; Soetjipto; Yasuko Mori                                                                                                                                                                                                                                                                                                                                                                                                                                                |
| EPI_ISL_956385 to 956401                                                                                                                                                                                                                                                                                                                                                                                                                                                                                                                                                                                                                                                                                                                                                                                                                                                                                                                                                                                                                                                                                                                                                                                | Isolation - Virology Unit, Institut Pasteur du Cambodge; Sequencing - US National Institute of Allergy and Infectious Diseases Cambodia, US Naval Medical Research Unit -2, Cambodia National Institute for Public Health                                     | Virology Unit, Institut Pasteur du Cambodge                                                                                                                                                     | Chau Darapheak; Chin Savuth; Erik A Karlsson; Jennifer Bohl; Jessica Manning; Jose A Garcia-Rivera; Kraing Sidonn; Ly Sovann; Sophana Chea; Sreyngim Lay; Veasna Duong; Vireak Heang; Yi Sengdoeurn                                                                                                                                                                                                                                                                                                                                                                                                                                               |
| EPI_ISL_956384                                                                                                                                                                                                                                                                                                                                                                                                                                                                                                                                                                                                                                                                                                                                                                                                                                                                                                                                                                                                                                                                                                                                                                                          | Isolation - Virology Unit, Institut Pasteur du Cambodge; Sequencing - US National Institute of Allergy and Infectious Diseases Cambodia, US Naval Medical Research Unit -2, National Public Health Laboratory, National Institute for Public Health, Cambodia | Virology Unit, Institut Pasteur du Cambodge                                                                                                                                                     | Chau Darapheak; Chin Savuth; Erik A Karlsson; Jennifer Bohl; Jessica Manning; Jose A Garcia-Rivera; Kraing Sidonn; Ly Sovann; Sophana Chea; Sreyngim Lay; Veasna Duong; Vireak Heang; Yi Sengdoeurn                                                                                                                                                                                                                                                                                                                                                                                                                                               |
| EPI_ISL_649060 to 649107, EPI_ISL_745034 to 745081, EPI_ISL_745083 to 745086, EPI_ISL_776569 to 776656, EPI_ISL_776775 to 776868                                                                                                                                                                                                                                                                                                                                                                                                                                                                                                                                                                                                                                                                                                                                                                                                                                                                                                                                                                                                                                                                        | Israel Central Virology laboratory                                                                                                                                                                                                                            | Israel Central Virology laboratory                                                                                                                                                              | Efrat Dahan Bucris; Ella Mendelson; Michal Mandelboim; Neta Zuckerman; Oran Erster; Orna Mor                                                                                                                                                                                                                                                                                                                                                                                                                                                                                                                                                      |
| EPI_ISL_804056 to 804083, EPI_ISL_804085 to 804213, EPI_ISL_814092 to 814273, EPI_ISL_889023 to 889306, EPI_ISL_944188 to 944570                                                                                                                                                                                                                                                                                                                                                                                                                                                                                                                                                                                                                                                                                                                                                                                                                                                                                                                                                                                                                                                                        | Israel Central Virology laboratory                                                                                                                                                                                                                            | Israel National Consortium for SARS-CoV-2 sequencing                                                                                                                                            | Assaf Rokney; Dana Bar-Ilan; David A. Zeevi; Efrat Dahan Bucris; Efrat Glick-Saar; Efrat Rorman; Ella Mendelson; Ephraim Fass; Eva Nachum; Gal Zizelski Valenci; Gideon Rechavi; Israel Nissan; Joseph Jaffe; Maya Davidovich Cohen; Michal Mandelboim; Mor Rubinstein; Neta Zuckerman; Omer Murik; Omri Nayshoul; Oran Erster; Orna Mor; Tzvia Mann                                                                                                                                                                                                                                                                                              |
| EPI_ISL_824407 to 824408                                                                                                                                                                                                                                                                                                                                                                                                                                                                                                                                                                                                                                                                                                                                                                                                                                                                                                                                                                                                                                                                                                                                                                                | Istituto Nazionale Malattie Infettive Lazzaro Spallanzani IRCCS                                                                                                                                                                                               | Istituto Nazionale Malattie Infettive Lazzaro Spallanzani IRCCS                                                                                                                                 | Antonino Di Caro; Barbara Bartolini; Cesare E.M. Gruber; Concetta Castilletti; Emanuela Giombini; Francesca Colavita; Francesco Messina; Maria R. Capobianchi; Martina Rueca; Ornella Butera; Silvia Meschi                                                                                                                                                                                                                                                                                                                                                                                                                                       |
| EPI_ISL_983329                                                                                                                                                                                                                                                                                                                                                                                                                                                                                                                                                                                                                                                                                                                                                                                                                                                                                                                                                                                                                                                                                                                                                                                          | Istituto Zooprofilattico Sperimentale Lazio e Toscana "M. Aleandri"                                                                                                                                                                                           | INMI Lazzaro Spallanzani IRCCS                                                                                                                                                                  | A Cersini; A Di Caro; B Bartolini; CEM Gruber; E Giombini; F Messina; G Manna; M Rueca; MR Capobianchi; MT Siciliana; O Butera                                                                                                                                                                                                                                                                                                                                                                                                                                                                                                                    |
| EPI_ISL_882923, EPI_ISL_913449                                                                                                                                                                                                                                                                                                                                                                                                                                                                                                                                                                                                                                                                                                                                                                                                                                                                                                                                                                                                                                                                                                                                                                          | Istituto Zooprofilattico Sperimentale del Mezzogiorno                                                                                                                                                                                                         | INMI Lazzaro Spallanzani IRCCS                                                                                                                                                                  | A Di Caro; Antonino Di Caro; B Bartolini; B Pierri; Barbara Bartolini; C Buonerba; C.E.M Gruber; Cesare EM Gruber; Concetta Castilletti; D Di Concilio; E Giombini; Emanuela Giombini; F Messina; Francesca Colavita; Francesco Messina; M. Rueca; MC Cuomo; MR Capobianchi; Maria R Capobianchi; Martina Rueca; O Butera; Ornella Butera; P Cerino; Silvia Meschi                                                                                                                                                                                                                                                                                |
| EPI_ISL_736996 to 736997                                                                                                                                                                                                                                                                                                                                                                                                                                                                                                                                                                                                                                                                                                                                                                                                                                                                                                                                                                                                                                                                                                                                                                                | Istituto Zooprofilattico Sperimentale del Mezzogiorno                                                                                                                                                                                                         | National Institute for Infectious Diseases, INMI, "L. Spallanzani" IRCCS                                                                                                                        | A. Di Caro; B. Bartolini; B. Pierri; C. Buonerba; C.E.M Gruber; D. Di Concilio; E. Giombini; F. Carletti; F. Messina; M. Rueca; M.C. Cuomo; M.R Capobianchi; M.R. Capobianchi; P. Cerino                                                                                                                                                                                                                                                                                                                                                                                                                                                          |
| EPI_ISL_736777 to 736890, EPI_ISL_776879 to 776993, EPI_ISL_776995 to 777009, EPI_ISL_778646 to 778817, EPI_ISL_833522 to 833570, EPI_ISL_837247 to 837330, EPI_ISL_837433 to 837504, EPI_ISL_960442 to 960447, EPI_ISL_960449 to 960661                                                                                                                                                                                                                                                                                                                                                                                                                                                                                                                                                                                                                                                                                                                                                                                                                                                                                                                                                                | Istituto Zooprofilattico Sperimentale del Mezzogiorno                                                                                                                                                                                                         | TIGEM                                                                                                                                                                                           | Andrea Ballabio; Anna Manfredi; Antonio Grimaldi; Antonio Limone; Biancamaria Pierri; Chiara Colantuono; Davide Cacchiarelli.; Denise Di Concilio; Francesco Panariello; Lucio Di Filippo; Marcello Salvi; Maria Concetta Cuomo; Patrizia Annunziata; Pellegrino Cerino; Valentina Bouche                                                                                                                                                                                                                                                                                                                                                         |
| EPI_ISL_763069, EPI_ISL_763071 to 763073, EPI_ISL_763094 to 763098, EPI_ISL_763138, EPI_ISL_763318, EPI_ISL_763320, EPI_ISL_763322 to 763330                                                                                                                                                                                                                                                                                                                                                                                                                                                                                                                                                                                                                                                                                                                                                                                                                                                                                                                                                                                                                                                            | Istituto Zooprofilattico Sperimentale dell' Umbria e delle Marche -Togo Rosati                                                                                                                                                                                | Istituto Superiore di Sanità                                                                                                                                                                    | Gabriele Vaccari; Giovanni Ianori; Ilaria Di Bartolo; Luca De Sabato; Massimo Biagetti; Monica Giammaroli                                                                                                                                                                                                                                                                                                                                                                                                                                                                                                                                         |
| EPI_ISL_649189 to 649191, EPI_ISL_649940, EPI_ISL_653784 to 653786, EPI_ISL_653813, EPI_ISL_722873 to 722894, EPI_ISL_722901 to 722911, EPI_ISL_722913 to 722925, EPI_ISL_794745, EPI_ISL_794749, EPI_ISL_794752, EPI_ISL_794754 to 794755, EPI_ISL_794759 to 794817, EPI_ISL_876738 to 876741, EPI_ISL_876744 to 876813                                                                                                                                                                                                                                                                                                                                                                                                                                                                                                                                                                                                                                                                                                                                                                                                                                                                                | Istituto Zooprofilattico Sperimentale della Puglia e della Basilicata                                                                                                                                                                                         | Istituto Zooprofilattico Sperimentale della Puglia e della Basilicata                                                                                                                           | Bianco A.; Capozzi L.; Cipolletta D.; Del Sambro L.; Galante D.; Manzulli V; Pace L.; Parisi A.; Rondinone V.                                                                                                                                                                                                                                                                                                                                                                                                                                                                                                                                     |
| EPI_ISL_995700 to 995701, EPI_ISL_995720 to 995721                                                                                                                                                                                                                                                                                                                                                                                                                                                                                                                                                                                                                                                                                                                                                                                                                                                                                                                                                                                                                                                                                                                                                      | JAYANAGAR GENERAL HOSPITAL                                                                                                                                                                                                                                    | Department of Neurovirology, National Institute of Mental Health and Neurosciences (NIMHANS)                                                                                                    | Anita S Desai; Anson Kunjumon George; Chitra Pattabiraman; Darshan Sreenivas; Nakka Vijay Kiran Reddy; Pramada Prasad; Risha Rasheed; V Ravi                                                                                                                                                                                                                                                                                                                                                                                                                                                                                                      |
| EPI_ISL_631516, EPI_ISL_631524, EPI_ISL_631550 to 631551, EPI_ISL_631554, EPI_ISL_631571, EPI_ISL_631574 to 631575, EPI_ISL_631578, EPI_ISL_631582, EPI_ISL_631585, EPI_ISL_631590, EPI_ISL_631592 to 631593, EPI_ISL_631595, EPI_ISL_631597, EPI_ISL_631599, EPI_ISL_631601, EPI_ISL_631604, EPI_ISL_631608 to 631610, EPI_ISL_631612 to 631613, EPI_ISL_631615, EPI_ISL_631621, EPI_ISL_631634, EPI_ISL_631636 to 631637, EPI_ISL_631697 to 631698, EPI_ISL_631702 to 631706, EPI_ISL_631709, EPI_ISL_631711 to 631713, EPI_ISL_631716 to 631723, EPI_ISL_631726, EPI_ISL_631728 to 631731, EPI_ISL_631733 to 631747, EPI_ISL_631767 to 631768, EPI_ISL_631772, EPI_ISL_631775 to 631777, EPI_ISL_631788 to 631791, EPI_ISL_631795, EPI_ISL_631798, EPI_ISL_631809 to 631810, EPI_ISL_631812 to 631813, EPI_ISL_631820, EPI_ISL_631822 to 631823, EPI_ISL_631825, EPI_ISL_631833, EPI_ISL_631835 to 631836, EPI_ISL_631847, EPI_ISL_631849 to 631850, EPI_ISL_631852 to 631854, EPI_ISL_631866 to 631867, EPI_ISL_631870 to 631872, EPI_ISL_631876 to 631879, EPI_ISL_631882 to 631883, EPI_ISL_631887, EPI_ISL_631889 to 631890, EPI_ISL_631895 to 631896, EPI_ISL_631901 to 631902, EPI_ISL_631904, |                                                                                                                                                                                                                                                               |                                                                                                                                                                                                 |                                                                                                                                                                                                                                                                                                                                                                                                                                                                                                                                                                                                                                                   |

|                                                                                                                                                                                                                                                                                                                                                                                                                                                                                                                                                                                                                                                                                                                                                                                                                                                                                                                                                                                                                                                                                                                                                                                                                                                                                                                                                                    |                                                                                                          |                                                                                                                                      |                                                                                                                                                                                                                                                                                                                                                                                                                          |                                                                                                                                                                                            |
|--------------------------------------------------------------------------------------------------------------------------------------------------------------------------------------------------------------------------------------------------------------------------------------------------------------------------------------------------------------------------------------------------------------------------------------------------------------------------------------------------------------------------------------------------------------------------------------------------------------------------------------------------------------------------------------------------------------------------------------------------------------------------------------------------------------------------------------------------------------------------------------------------------------------------------------------------------------------------------------------------------------------------------------------------------------------------------------------------------------------------------------------------------------------------------------------------------------------------------------------------------------------------------------------------------------------------------------------------------------------|----------------------------------------------------------------------------------------------------------|--------------------------------------------------------------------------------------------------------------------------------------|--------------------------------------------------------------------------------------------------------------------------------------------------------------------------------------------------------------------------------------------------------------------------------------------------------------------------------------------------------------------------------------------------------------------------|--------------------------------------------------------------------------------------------------------------------------------------------------------------------------------------------|
| EPI_ISL_631909 to 631910, EPI_ISL_631921 to 631922, EPI_ISL_631925 to 631928, EPI_ISL_631930, EPI_ISL_631950 to 631951, EPI_ISL_631963, EPI_ISL_631966, EPI_ISL_631969 to 631970, EPI_ISL_631973, EPI_ISL_631979, EPI_ISL_631994, EPI_ISL_631996 to 631997, EPI_ISL_632005, EPI_ISL_632007 to 632009, EPI_ISL_632011 to 632012, EPI_ISL_632017, EPI_ISL_632021, EPI_ISL_632023, EPI_ISL_632025, EPI_ISL_632028 to 632029, EPI_ISL_632035, EPI_ISL_632037, EPI_ISL_632051, EPI_ISL_632061, EPI_ISL_632065 to 632066, EPI_ISL_632075, EPI_ISL_632086, EPI_ISL_632088, EPI_ISL_632090, EPI_ISL_632093 to 632096, EPI_ISL_632106 to 632110, EPI_ISL_632128, EPI_ISL_632130, EPI_ISL_632143, EPI_ISL_632145, EPI_ISL_632149 to 632152, EPI_ISL_632166 to 632172, EPI_ISL_632180, EPI_ISL_632182, EPI_ISL_632184, EPI_ISL_632188 to 632189, EPI_ISL_632191, EPI_ISL_632195, EPI_ISL_632198, EPI_ISL_632204, EPI_ISL_632209 to 632210, EPI_ISL_632214, EPI_ISL_632219, EPI_ISL_632221, EPI_ISL_632227 to 632229, EPI_ISL_632239 to 632241, EPI_ISL_632939, EPI_ISL_632941, EPI_ISL_632944, EPI_ISL_632949 to 632950, EPI_ISL_632953, EPI_ISL_632957 to 632958, EPI_ISL_632961, EPI_ISL_632969 to 632972, EPI_ISL_632974                                                                                                                                                   | see above                                                                                                | Jamaica Hospital Medical Center<br>James J. Peters VA Medical Center                                                                 | New York City Public Health Laboratory<br>New York City Public Health Laboratory                                                                                                                                                                                                                                                                                                                                         | Jade Wang; et al.<br>Jade Wang; et al.                                                                                                                                                     |
| EPI_ISL_779255 to 779290                                                                                                                                                                                                                                                                                                                                                                                                                                                                                                                                                                                                                                                                                                                                                                                                                                                                                                                                                                                                                                                                                                                                                                                                                                                                                                                                           | Jamil-ur-Rahman Center for Genome Research, Dr. Panjwani Center for Molecular Medicine and Drug Research | Jamil-ur-Rahman Center for Genome Research, Dr. Panjwani Center for Molecular Medicine and Drug Research                             |                                                                                                                                                                                                                                                                                                                                                                                                                          | Ansari, S.; Irfan, M.; Khan, I.; Nisa, Z.; Rashid, M.; Shakeel, M.                                                                                                                         |
| EPI_ISL_862874                                                                                                                                                                                                                                                                                                                                                                                                                                                                                                                                                                                                                                                                                                                                                                                                                                                                                                                                                                                                                                                                                                                                                                                                                                                                                                                                                     | Japanese Red Cross Nagoya Daiichi Hospital                                                               | Fujita health University, School of Medicine, Department of Microbiology                                                             |                                                                                                                                                                                                                                                                                                                                                                                                                          | Masahiro suzuki; Yohei Doi                                                                                                                                                                 |
| EPI_ISL_862848, EPI_ISL_862856, EPI_ISL_862872 to 862873, EPI_ISL_862885                                                                                                                                                                                                                                                                                                                                                                                                                                                                                                                                                                                                                                                                                                                                                                                                                                                                                                                                                                                                                                                                                                                                                                                                                                                                                           | Japanese Red Cross Narita Hospital                                                                       | Fujita health University, School of Medicine, Department of Microbiology                                                             |                                                                                                                                                                                                                                                                                                                                                                                                                          | Masahiro suzuki; Yohei Doi                                                                                                                                                                 |
| EPI_ISL_860193, EPI_ISL_995731, EPI_ISL_995743 to 995745                                                                                                                                                                                                                                                                                                                                                                                                                                                                                                                                                                                                                                                                                                                                                                                                                                                                                                                                                                                                                                                                                                                                                                                                                                                                                                           | Jayanagar General Hospital                                                                               | Department of Neurovirology, National Institute of Mental Health and Neurosciences (NIMHANS)                                         | Anita S Desai; Anson Kunjumon George; Chitra Pattabiraman; Darshan Sreenivas; Harsha.P.K; Nakka Vijay Kiran Reddy; Pramada Prasad; Risha Rasheed; V Ravi                                                                                                                                                                                                                                                                 | Brandt; Christian; Marquet; Matthias W.; Mike; Pletz; Riccardo; Spott                                                                                                                      |
| EPI_ISL_728288                                                                                                                                                                                                                                                                                                                                                                                                                                                                                                                                                                                                                                                                                                                                                                                                                                                                                                                                                                                                                                                                                                                                                                                                                                                                                                                                                     | Jena University Hospital, Institute for Infectious Diseases and Infection Control                        | Institute for infectious medicine & hospital hygiene, CaSe-Group                                                                     |                                                                                                                                                                                                                                                                                                                                                                                                                          | Brandt; Christian; Marquet; Matthias W.; Mike; Pletz; Riccardo; Spott                                                                                                                      |
| EPI_ISL_728292 to 728294, EPI_ISL_728296, EPI_ISL_728298, EPI_ISL_728302 to 728303, EPI_ISL_728321, EPI_ISL_728323 to 728324, EPI_ISL_728331, EPI_ISL_728333, EPI_ISL_728335, EPI_ISL_728337 to 728338, EPI_ISL_728341, EPI_ISL_728345, EPI_ISL_763077, EPI_ISL_763086 to 763093, EPI_ISL_768633, EPI_ISL_768726 to 768727                                                                                                                                                                                                                                                                                                                                                                                                                                                                                                                                                                                                                                                                                                                                                                                                                                                                                                                                                                                                                                         | see above                                                                                                | Jena University Hospital, Institute for Infectious Diseases and Infection Control                                                    | Institute of infectious medicine & hospital hygiene, CaSe-Group                                                                                                                                                                                                                                                                                                                                                          | Brandt; Christian; Marquet; Matthias W.; Mike; Pletz; Riccardo; Spott                                                                                                                      |
| EPI_ISL_632938                                                                                                                                                                                                                                                                                                                                                                                                                                                                                                                                                                                                                                                                                                                                                                                                                                                                                                                                                                                                                                                                                                                                                                                                                                                                                                                                                     | Jena University Hospital; Institute for Infectious Diseases and Infection Control                        | Institute of infectious medicine & hospital hygiene, CaSe-Group                                                                      |                                                                                                                                                                                                                                                                                                                                                                                                                          | Brandt; Christian; Marquet; Matthias W.; Mike; Pletz; Riccardo; Spott                                                                                                                      |
| EPI_ISL_871820 to 871839, EPI_ISL_940566 to 940572, EPI_ISL_940576 to 940579, EPI_ISL_940584 to 940606, EPI_ISL_948973, EPI_ISL_948975, EPI_ISL_948978, EPI_ISL_948981, EPI_ISL_948984, EPI_ISL_948986, EPI_ISL_948989, EPI_ISL_948991, EPI_ISL_948994, EPI_ISL_948997, EPI_ISL_949000, EPI_ISL_949003, EPI_ISL_949005, EPI_ISL_949008, EPI_ISL_949011, EPI_ISL_949013, EPI_ISL_949016, EPI_ISL_949019, EPI_ISL_949022, EPI_ISL_949024, EPI_ISL_949027, EPI_ISL_949070 to 949078, EPI_ISL_949082 to 949084, EPI_ISL_949086 to 949089, EPI_ISL_949092 to 949095, EPI_ISL_949097 to 949103, EPI_ISL_949126 to 949127, EPI_ISL_949129 to 949156, EPI_ISL_949158 to 949172, EPI_ISL_949174 to 949175, EPI_ISL_949254 to 949255, EPI_ISL_953382, EPI_ISL_953384, EPI_ISL_953428 to 953429, EPI_ISL_953431 to 953435, EPI_ISL_953437, EPI_ISL_953439 to 953449, EPI_ISL_953451 to 953488, EPI_ISL_960176 to 960182, EPI_ISL_960185, EPI_ISL_960187, EPI_ISL_995495 to 995517, EPI_ISL_995520 to 995525, EPI_ISL_995527 to 995539, EPI_ISL_995541 to 995547                                                                                                                                                                                                                                                                                                               | see above                                                                                                | Jessa<br>Jessa                                                                                                                       | Bert Cruys; Brigitte Maes; Jessa_cmdLab                                                                                                                                                                                                                                                                                                                                                                                  |                                                                                                                                                                                            |
| EPI_ISL_745135, EPI_ISL_745144                                                                                                                                                                                                                                                                                                                                                                                                                                                                                                                                                                                                                                                                                                                                                                                                                                                                                                                                                                                                                                                                                                                                                                                                                                                                                                                                     | Joe Slovo Hospital                                                                                       | National Health Laboratory Service (NHLS), Tygerberg                                                                                 | Bronwyn Kleinhans; Eduan Wilkindon; Gert van Zyl; Houriyah Tegally; Kayla Delaney; Susan Engelbrecht; Tulio de Oliveira; Wolfgang Preiser                                                                                                                                                                                                                                                                                |                                                                                                                                                                                            |
| EPI_ISL_791334 to 791487, EPI_ISL_860932 to 861104, EPI_ISL_862036 to 862038, EPI_ISL_887508 to 887586, EPI_ISL_890360, EPI_ISL_911755 to 911917, EPI_ISL_981057 to 981201                                                                                                                                                                                                                                                                                                                                                                                                                                                                                                                                                                                                                                                                                                                                                                                                                                                                                                                                                                                                                                                                                                                                                                                         | see above                                                                                                | Johns Hopkins Hospital Department of Pathology<br>Johns Hopkins Pathology                                                            | Johns Hopkins Hospital Department of Pathology<br>Johns Hopkins Hospital Department of Pathology                                                                                                                                                                                                                                                                                                                         | Adannaya Amadi; C. Paul Morris; Chun Huai Luo; Heba H. Mostafa; Matthew Schwartz; Nicholas Gallagher<br>Adannaya Amadi; C. Paul Morris; Chun Huai Luo; Heba H. Mostafa; Nicholas Gallagher |
| EPI_ISL_825013                                                                                                                                                                                                                                                                                                                                                                                                                                                                                                                                                                                                                                                                                                                                                                                                                                                                                                                                                                                                                                                                                                                                                                                                                                                                                                                                                     | Johns Hopkins Pathology                                                                                  | Johns Hopkins Hospital Department of Pathology                                                                                       |                                                                                                                                                                                                                                                                                                                                                                                                                          | Adannaya Amadi; C. Paul Morris; Chun Huai Luo; Heba H. Mostafa; Nicholas Gallagher                                                                                                         |
| EPI_ISL_830208, EPI_ISL_830210, EPI_ISL_830212, EPI_ISL_830223, EPI_ISL_830225, EPI_ISL_830227, EPI_ISL_830229 to 830230, EPI_ISL_830232, EPI_ISL_830234, EPI_ISL_830236, EPI_ISL_830238 to 830239, EPI_ISL_830241, EPI_ISL_830243, EPI_ISL_830571, EPI_ISL_830573, EPI_ISL_830575, EPI_ISL_830579 to 830627, EPI_ISL_861106 to 861108, EPI_ISL_861134, EPI_ISL_861144 to 861174, EPI_ISL_936060 to 936062, EPI_ISL_936067 to 936068, EPI_ISL_936070 to 936081, EPI_ISL_936083 to 936085, EPI_ISL_936087 to 936088, EPI_ISL_936090 to 936091, EPI_ISL_936094 to 936102, EPI_ISL_936144, EPI_ISL_983240 to 983242, EPI_ISL_983244, EPI_ISL_983246 to 983247, EPI_ISL_983250 to 983282, EPI_ISL_983284 to 983288, EPI_ISL_983296 to 983299                                                                                                                                                                                                                                                                                                                                                                                                                                                                                                                                                                                                                           | see above                                                                                                | KALEIDA CENTER FOR LABORATORY MEDICINE                                                                                               | Wadsworth Center, New York State Department of Health                                                                                                                                                                                                                                                                                                                                                                    | Alexis Russel; Daryl M. Lamson; Erasmus Schneider; Erica Lasek-Nesselquist; John Kelly; Jonathan Plitnick; Kirsten St. George; Matthew Shudt; Melissa A Leisner; Navjot Singh              |
| EPI_ISL_995185 to 995188                                                                                                                                                                                                                                                                                                                                                                                                                                                                                                                                                                                                                                                                                                                                                                                                                                                                                                                                                                                                                                                                                                                                                                                                                                                                                                                                           | KARWAR INSTITUTE OF MEDICAL SCIENCES                                                                     | Department of Neurovirology, National Institute of Mental Health and Neurosciences (NIMHANS)                                         | Anita S Desai; Anson Kunjumon George; Chitra Pattabiraman; Darshan Sreenivas; Nakka Vijay Kiran Reddy; Pramada Prasad; Risha Rasheed; V Ravi                                                                                                                                                                                                                                                                             |                                                                                                                                                                                            |
| EPI_ISL_995695                                                                                                                                                                                                                                                                                                                                                                                                                                                                                                                                                                                                                                                                                                                                                                                                                                                                                                                                                                                                                                                                                                                                                                                                                                                                                                                                                     | KASTURBA MEDICAL COLLEGE, MANGALORE                                                                      | Department of Neurovirology, National Institute of Mental Health and Neurosciences (NIMHANS)                                         | Anita S Desai; Anson Kunjumon George; Chitra Pattabiraman; Darshan Sreenivas; Nakka Vijay Kiran Reddy; Pramada Prasad; Risha Rasheed; V Ravi                                                                                                                                                                                                                                                                             |                                                                                                                                                                                            |
| EPI_ISL_995189 to 995190, EPI_ISL_995694, EPI_ISL_995697 to 995699, EPI_ISL_995713 to 995714, EPI_ISL_995759 to 995762, EPI_ISL_995764                                                                                                                                                                                                                                                                                                                                                                                                                                                                                                                                                                                                                                                                                                                                                                                                                                                                                                                                                                                                                                                                                                                                                                                                                             | KEMPEGOWDA INTERNATIONAL AIRPORT                                                                         | Department of Neurovirology, National Institute of Mental Health and Neurosciences (NIMHANS)                                         | Anita S Desai; Anson Kunjumon George; Chitra Pattabiraman; Darshan Sreenivas; Harsha.P.K; Nakka Vijay Kiran Reddy; Pramada Prasad; Risha Rasheed; V Ravi                                                                                                                                                                                                                                                                 |                                                                                                                                                                                            |
| EPI_ISL_806548 to 806621, EPI_ISL_806623 to 806717, EPI_ISL_855494 to 855531, EPI_ISL_855533 to 855548, EPI_ISL_968807 to 968808, EPI_ISL_968810, EPI_ISL_968813, EPI_ISL_968815, EPI_ISL_968817, EPI_ISL_968819 to 968822, EPI_ISL_968825 to 968829, EPI_ISL_968831 to 968832, EPI_ISL_968834 to 968835, EPI_ISL_968837 to 968839, EPI_ISL_968841 to 968844, EPI_ISL_968846 to 968847, EPI_ISL_968849 to 968851, EPI_ISL_968853 to 968856, EPI_ISL_968858, EPI_ISL_968860 to 968861, EPI_ISL_968863 to 968865, EPI_ISL_968868 to 968869, EPI_ISL_968871, EPI_ISL_968873, EPI_ISL_968877 to 968878, EPI_ISL_968881 to 968885, EPI_ISL_968887, EPI_ISL_968889 to 968892, EPI_ISL_968894, EPI_ISL_968896 to 968899, EPI_ISL_968901 to 968905, EPI_ISL_968907 to 968911, EPI_ISL_968913 to 968914, EPI_ISL_968916, EPI_ISL_968919 to 968920, EPI_ISL_968922, EPI_ISL_968924 to 968927, EPI_ISL_968929 to 968930, EPI_ISL_968941 to 968943, EPI_ISL_968955 to 968956, EPI_ISL_968958 to 968959, EPI_ISL_968961, EPI_ISL_968964, EPI_ISL_968972, EPI_ISL_968984 to 968990, EPI_ISL_968992 to 968993, EPI_ISL_968996 to 968999, EPI_ISL_969001 to 969005, EPI_ISL_969007 to 969014, EPI_ISL_969016 to 969021, EPI_ISL_969023 to 969031, EPI_ISL_969041 to 969044, EPI_ISL_969046 to 969051, EPI_ISL_969056 to 969061, EPI_ISL_969063 to 969069, EPI_ISL_969071 to 969074 | see above                                                                                                | KEMRI-Wellcome Trust Research Programme/KEMRI-CGMR-C Kilifi<br>KEMRI-Wellcome Trust Research Programme/KEMRI-CGMR-C Kilifi           | Githinji et al                                                                                                                                                                                                                                                                                                                                                                                                           |                                                                                                                                                                                            |
| EPI_ISL_660221 to 660222, EPI_ISL_660228 to 660233, EPI_ISL_660256 to 660258, EPI_ISL_660664                                                                                                                                                                                                                                                                                                                                                                                                                                                                                                                                                                                                                                                                                                                                                                                                                                                                                                                                                                                                                                                                                                                                                                                                                                                                       | KRISP, KZN Research Innovation and Sequencing Platform                                                   | KRISP, KZN Research Innovation and Sequencing Platform                                                                               |                                                                                                                                                                                                                                                                                                                                                                                                                          | Giandhari J; Khan S; Lessells R; Mdlalose K; Pillay S; Tegally H; Wilkinson E; York D; de Oliveira T                                                                                       |
| EPI_ISL_751572, EPI_ISL_751677, EPI_ISL_751707, EPI_ISL_751724, EPI_ISL_751730                                                                                                                                                                                                                                                                                                                                                                                                                                                                                                                                                                                                                                                                                                                                                                                                                                                                                                                                                                                                                                                                                                                                                                                                                                                                                     | KS Health and Environmental Laboratories                                                                 | Genomics and Discovery, Respiratory Viruses Branch, Division of Viral Diseases, Centers for Disease Control and Prevention           | Anna Montmayeur; Anna Uehara; Clinton R. Paden; Haibin Wang; Jing Zhang; Justin Lee; Krista Queen; Mili Sheth; Peter W. Cook; Rachel Marine; Suxiang Tong; Yan Li; Ying Tao                                                                                                                                                                                                                                              |                                                                                                                                                                                            |
| EPI_ISL_845566 to 845617, EPI_ISL_888683 to 888790, EPI_ISL_890238 to 890351, EPI_ISL_894171 to 894217, EPI_ISL_896447 to 896494, EPI_ISL_897986 to 898032, EPI_ISL_912404 to 912455, EPI_ISL_913748 to 913770, EPI_ISL_913772 to 913773, EPI_ISL_913775 to 913777, EPI_ISL_913779 to 913781, EPI_ISL_913783 to 913784, EPI_ISL_913786 to 913787, EPI_ISL_913789 to 913790, EPI_ISL_913792 to 913794, EPI_ISL_913796 to 913797, EPI_ISL_913799 to 913801, EPI_ISL_913803 to 913804, EPI_ISL_913806 to 913807, EPI_ISL_913810 to 913812, EPI_ISL_913814 to 913815, EPI_ISL_913816 to 913817, EPI_ISL_913819 to 913821, EPI_ISL_913823 to 913824, EPI_ISL_913826 to 913828, EPI_ISL_913830 to 913831, EPI_ISL_913833 to 913835, EPI_ISL_913837 to 913838, EPI_ISL_913840 to 913841, EPI_ISL_913843 to 913845, EPI_ISL_913847 to 913848, EPI_ISL_913850 to 913851, EPI_ISL_913853 to 913855, EPI_ISL_913857 to 913858, EPI_ISL_913860 to 913861, EPI_ISL_913863 to 913865, EPI_ISL_913867 to 913869, EPI_ISL_913871 to 913872, EPI_ISL_913874 to 913876, EPI_ISL_913878, EPI_ISL_935187 to 935358, EPI_ISL_995556 to 995693                                                                                                                                                                                                                                           | see above                                                                                                | KU Leuven, Rega Institute, Clinical and Epidemiological Virology<br>KU Leuven, Rega Institute, Clinical and Epidemiological Virology |                                                                                                                                                                                                                                                                                                                                                                                                                          | Bert Vanmechelen; Joan Marti-Carreras; Piet Maes; Tony Wawina-Bokalanga                                                                                                                    |
| EPI_ISL_751570, EPI_ISL_751594, EPI_ISL_751596, EPI_ISL_751648, EPI_ISL_751670, EPI_ISL_751754, EPI_ISL_751794                                                                                                                                                                                                                                                                                                                                                                                                                                                                                                                                                                                                                                                                                                                                                                                                                                                                                                                                                                                                                                                                                                                                                                                                                                                     | see above                                                                                                | KY State Public Health Lab                                                                                                           | Genomics and Discovery, Respiratory Viruses Branch, Division of Viral Diseases, Centers for Disease Control and Prevention                                                                                                                                                                                                                                                                                               | Anna Montmayeur; Anna Uehara; Clinton R. Paden; Haibin Wang; Jing Zhang; Justin Lee; Krista Queen; Mili Sheth; Peter W. Cook; Rachel Marine; Suxiang Tong; Yan Li; Ying Tao                |
| EPI_ISL_745197                                                                                                                                                                                                                                                                                                                                                                                                                                                                                                                                                                                                                                                                                                                                                                                                                                                                                                                                                                                                                                                                                                                                                                                                                                                                                                                                                     | Kakatiya Medical College                                                                                 | CSIR-Centre for Cellular and Molecular Biology                                                                                       | Archana Bharadwaj Siva; B Himasri; Blessy B John; Divya Tej Sowpati; Dr.P.Shashikala Reddy; Dr.S.Pavani; Dr.Satyaprasad; Dr.V.Sudha Rani; Karthik Bharadwaj Tallapaka; Lamuk Zaveri; M Soujanya Reddy; Namami Gaur; Nikhil Hajirnis; Onkar Kulkarni; Payel Mukherjee; Pratheusa Maccha; Priya Singh; Purushotham Vodnala; Rakesh K Mishra; Sakshi Shambhavi; Shagufta Khan; Sofia Banu; Tulasi Nagabandi; Viswagithe S L |                                                                                                                                                                                            |

|                                                                                                                                                                                                                                                                                                                                                                                                                                                                                                                                                                                                                                                                                                                                                                                                                                                                                                                                                                                                                                                                                                                                                                                                                                                                                                                                                                                                                                                                                                                                                                |                                                        |                                                                                                        |                                                                                                                                                                                                                                                                                                                                                                       |
|----------------------------------------------------------------------------------------------------------------------------------------------------------------------------------------------------------------------------------------------------------------------------------------------------------------------------------------------------------------------------------------------------------------------------------------------------------------------------------------------------------------------------------------------------------------------------------------------------------------------------------------------------------------------------------------------------------------------------------------------------------------------------------------------------------------------------------------------------------------------------------------------------------------------------------------------------------------------------------------------------------------------------------------------------------------------------------------------------------------------------------------------------------------------------------------------------------------------------------------------------------------------------------------------------------------------------------------------------------------------------------------------------------------------------------------------------------------------------------------------------------------------------------------------------------------|--------------------------------------------------------|--------------------------------------------------------------------------------------------------------|-----------------------------------------------------------------------------------------------------------------------------------------------------------------------------------------------------------------------------------------------------------------------------------------------------------------------------------------------------------------------|
| EPI_ISL_623091, EPI_ISL_648164, EPI_ISL_676534, EPI_ISL_710605                                                                                                                                                                                                                                                                                                                                                                                                                                                                                                                                                                                                                                                                                                                                                                                                                                                                                                                                                                                                                                                                                                                                                                                                                                                                                                                                                                                                                                                                                                 | Kalmar klinisk mikrobiologi                            | The Public Health Agency of Sweden                                                                     | Anna Risberg; Anna-Malin Linde; Department of Microbiology; Karin Tegmark-Wisell; Maria Lind Karlberg; Mattias Haukland; Mia Brytting; Olov Svartstrom; Oskar Karlsson Lindsjo; Petra Edquist; Reza Advani; Sandra Broddesson; The Public Health Agency of Sweden                                                                                                     |
| EPI_ISL_687043 to 687078, EPI_ISL_690818 to 690836, EPI_ISL_898523 to 898550                                                                                                                                                                                                                                                                                                                                                                                                                                                                                                                                                                                                                                                                                                                                                                                                                                                                                                                                                                                                                                                                                                                                                                                                                                                                                                                                                                                                                                                                                   | Kanagawa Prefectural Institute of Public Health        | Pathogen Genomics Center, National Institute of Infectious Diseases                                    | Kentaro Itokawa; Makoto Kuroda; Masanori Hashino; Rina Tanaka; Tsuyoshi Sekizuka                                                                                                                                                                                                                                                                                      |
| EPI_ISL_875675 to 875684, EPI_ISL_883037 to 883065, EPI_ISL_884223 to 884248, EPI_ISL_914866 to 914874, EPI_ISL_966334 to 966337, EPI_ISL_966339 to 966354, EPI_ISL_978553, EPI_ISL_983357 to 983358, EPI_ISL_983360 to 983367, EPI_ISL_983494 to 983499                                                                                                                                                                                                                                                                                                                                                                                                                                                                                                                                                                                                                                                                                                                                                                                                                                                                                                                                                                                                                                                                                                                                                                                                                                                                                                       | see above                                              | Kansas Health and Environmental Lab                                                                    | Ben Olsen; Carissa Robertson; Mike Grose; Paige Drury; and Phil Adam                                                                                                                                                                                                                                                                                                  |
| EPI_ISL_812251 to 812254                                                                                                                                                                                                                                                                                                                                                                                                                                                                                                                                                                                                                                                                                                                                                                                                                                                                                                                                                                                                                                                                                                                                                                                                                                                                                                                                                                                                                                                                                                                                       | Kantonsarztamt Bern                                    | Institute of Medical Virology, University of Zurich                                                    | Alexandra Trkola; Annette Audigé; Cyril Shah; Guido Bloembergen; Jon Huder; Jürg Böni; Kevin Steiner; Maria Grünberg; Maryam Zaheri; Michael Huber; Riccarda Capaul; Stefan Schmutz; Verena Kufner                                                                                                                                                                    |
| EPI_ISL_896091, EPI_ISL_896101 to 896102, EPI_ISL_896116                                                                                                                                                                                                                                                                                                                                                                                                                                                                                                                                                                                                                                                                                                                                                                                                                                                                                                                                                                                                                                                                                                                                                                                                                                                                                                                                                                                                                                                                                                       | Kantonsspital Aarau, Institut für Labormedizin         | University Hospital Basel, Clinical Bacteriology                                                       | Adrian Egli; Alfredo Mari; Hans Hirsch; Helena MB Seth-Smith; Julia Bielicki; Karoline Leuzinger; Madlen Stange; Manuel Battagay; Michael Oberle; Tim Roloff                                                                                                                                                                                                          |
| EPI_ISL_812255                                                                                                                                                                                                                                                                                                                                                                                                                                                                                                                                                                                                                                                                                                                                                                                                                                                                                                                                                                                                                                                                                                                                                                                                                                                                                                                                                                                                                                                                                                                                                 | Kantonsärztlicher Dienst Aargau                        | Institute of Medical Virology, University of Zurich                                                    | Alexandra Trkola; Annette Audigé; Cyril Shah; Guido Bloembergen; Jon Huder; Jürg Böni; Kevin Steiner; Maria Grünberg; Maryam Zaheri; Michael Huber; Riccarda Capaul; Stefan Schmutz; Verena Kufner                                                                                                                                                                    |
| EPI_ISL_676533                                                                                                                                                                                                                                                                                                                                                                                                                                                                                                                                                                                                                                                                                                                                                                                                                                                                                                                                                                                                                                                                                                                                                                                                                                                                                                                                                                                                                                                                                                                                                 | Karolinska Universitetslaboratoriet                    | The Public Health Agency of Sweden                                                                     | Department of Microbiology; The Public Health Agency of Sweden                                                                                                                                                                                                                                                                                                        |
| EPI_ISL_833498                                                                                                                                                                                                                                                                                                                                                                                                                                                                                                                                                                                                                                                                                                                                                                                                                                                                                                                                                                                                                                                                                                                                                                                                                                                                                                                                                                                                                                                                                                                                                 | Kartika Pulomas Hospital, Jakarta, Indonesia           | Biosafety Level-3 Laboratory, Indonesian Institute of Sciences (LIPI)                                  | Ade Andriani; Ahmad Fathoni; Andri Wardiana; Anggia Prasetyoputri; Anik Budhi Dharmayanthi; Isa Nuryana; Pinka Alisa Diena Shafa; Ratih Asmana Ningrum; Syam Budi Iryanto; Winda Tasia                                                                                                                                                                                |
| EPI_ISL_754062 to 754067                                                                                                                                                                                                                                                                                                                                                                                                                                                                                                                                                                                                                                                                                                                                                                                                                                                                                                                                                                                                                                                                                                                                                                                                                                                                                                                                                                                                                                                                                                                                       | Kathmandu University                                   | Nepal Health Research Council                                                                          | Meghnath Dhimal; Pradip Gyanwali                                                                                                                                                                                                                                                                                                                                      |
| EPI_ISL_860117 to 860181, EPI_ISL_915358 to 915420                                                                                                                                                                                                                                                                                                                                                                                                                                                                                                                                                                                                                                                                                                                                                                                                                                                                                                                                                                                                                                                                                                                                                                                                                                                                                                                                                                                                                                                                                                             | Keio University School of Medicine                     | Keio University School of Medicine                                                                     | Haruhiko Siomi; Hirotosugu Ishizu; Kenjiro Kosaki; Kodai Abe; Yuka Iwasaki                                                                                                                                                                                                                                                                                            |
| EPI_ISL_640092 to 640093                                                                                                                                                                                                                                                                                                                                                                                                                                                                                                                                                                                                                                                                                                                                                                                                                                                                                                                                                                                                                                                                                                                                                                                                                                                                                                                                                                                                                                                                                                                                       | Kensington CDC wc KSC                                  | NHLS/UCT                                                                                               | Arash Iranzadeh; Bruna Galvao; Carolyn Williamson; Deelan Doolabh; Diana Hardie; Innocent Mudau; Kruger Marais; Lynn Tyers; Marvin Hsiao; Stephen Korsman                                                                                                                                                                                                             |
| EPI_ISL_965815 to 965825, EPI_ISL_965827 to 965835, EPI_ISL_966315 to 966332, EPI_ISL_966355 to 966356, EPI_ISL_966358 to 966374, EPI_ISL_982506 to 982525, EPI_ISL_982762 to 982780, EPI_ISL_982842 to 982844, EPI_ISL_982853 to 982856, EPI_ISL_983073 to 983074, EPI_ISL_983082, EPI_ISL_983085, EPI_ISL_983092 to 983095                                                                                                                                                                                                                                                                                                                                                                                                                                                                                                                                                                                                                                                                                                                                                                                                                                                                                                                                                                                                                                                                                                                                                                                                                                   | see above                                              | Kentucky State Public Health Lab                                                                       | Joshua Tobias; Karim George; Matthew Johnson; Rachel Zinner; Rhonda Lucas; Stephanie Lunn; Vaneet Arora; William Grooms                                                                                                                                                                                                                                               |
| EPI_ISL_813655 to 813656                                                                                                                                                                                                                                                                                                                                                                                                                                                                                                                                                                                                                                                                                                                                                                                                                                                                                                                                                                                                                                                                                                                                                                                                                                                                                                                                                                                                                                                                                                                                       | Kettering General Hospital                             | COVID-19 Genomics UK (COG-UK) Consortium                                                               | Christopher Moore; Fei Sang; Johnny Debebe; Jonathan Ball; Joseph Chappell; Matthew Carlisle; Matthew Loose; Nadine Holmes; Patrick McClure; Theocharis Tsoleridis; Victoria Wright                                                                                                                                                                                   |
| EPI_ISL_696511                                                                                                                                                                                                                                                                                                                                                                                                                                                                                                                                                                                                                                                                                                                                                                                                                                                                                                                                                                                                                                                                                                                                                                                                                                                                                                                                                                                                                                                                                                                                                 | Keurhoek Clinic wc KTT & NHLS/UCT                      | KRISP, KZN Research Innovation and Sequencing Platform                                                 | Arash Iranzadeh; Bruna Galvao; Carolyn Williamson; Deelan Doolabh; Diana Hardie; Emanuel James San; Houriyah Tegally; Innocent Mudau; Jennifer Giandhari; Kruger Marais; Lynn Tyers; Marvin Hsiao; Stephen Korsman; Sureshnee Pillay; Tulio de Oliveira                                                                                                               |
| EPI_ISL_700423, EPI_ISL_700464, EPI_ISL_700468, EPI_ISL_700485, EPI_ISL_700505, EPI_ISL_700540                                                                                                                                                                                                                                                                                                                                                                                                                                                                                                                                                                                                                                                                                                                                                                                                                                                                                                                                                                                                                                                                                                                                                                                                                                                                                                                                                                                                                                                                 | Khayelethu Clinic wc KLC                               | NHLS/UCT                                                                                               | Arash Iranzadeh; Bruna Galvao; Carolyn Williamson; Deelan Doolabh; Diana Hardie; Houriyah Tegally; Innocent Mudau; Kruger Marais; Lynn Tyers; Marvin Hsiao; Stephen Korsman                                                                                                                                                                                           |
| EPI_ISL_696484, EPI_ISL_696505                                                                                                                                                                                                                                                                                                                                                                                                                                                                                                                                                                                                                                                                                                                                                                                                                                                                                                                                                                                                                                                                                                                                                                                                                                                                                                                                                                                                                                                                                                                                 | Khayelethu Clinic wc KLC & NHLS/UCT                    | KRISP, KZN Research Innovation and Sequencing Platform                                                 | Arash Iranzadeh; Bruna Galvao; Carolyn Williamson; Deelan Doolabh; Diana Hardie; Emanuel James San; Houriyah Tegally; Innocent Mudau; Jennifer Giandhari; Kruger Marais; Lynn Tyers; Marvin Hsiao; Stephen Korsman; Sureshnee Pillay; Tulio de Oliveira                                                                                                               |
| EPI_ISL_640083                                                                                                                                                                                                                                                                                                                                                                                                                                                                                                                                                                                                                                                                                                                                                                                                                                                                                                                                                                                                                                                                                                                                                                                                                                                                                                                                                                                                                                                                                                                                                 | Khayelitsha (Site B) CHC wc KHC                        | NHLS/UCT                                                                                               | Arash Iranzadeh; Bruna Galvao; Carolyn Williamson; Deelan Doolabh; Diana Hardie; Innocent Mudau; Kruger Marais; Lynn Tyers; Marvin Hsiao; Stephen Korsman                                                                                                                                                                                                             |
| EPI_ISL_745111, EPI_ISL_745127, EPI_ISL_745163                                                                                                                                                                                                                                                                                                                                                                                                                                                                                                                                                                                                                                                                                                                                                                                                                                                                                                                                                                                                                                                                                                                                                                                                                                                                                                                                                                                                                                                                                                                 | Khayelitsha (Site B) CHC wc KHC                        | National Health Laboratory Service (NHLS), Tygerberg                                                   | Bronwyn Kleinhans; Eduan Wilkindon; Gert van Zyl; Houriyah Tegally; Kayla Delaney; Susan Engelbrecht; Tulio de Oliveira; Wolfgang Preiser                                                                                                                                                                                                                             |
| EPI_ISL_745114 to 745116, EPI_ISL_745120, EPI_ISL_745122 to 745123, EPI_ISL_745145, EPI_ISL_745166                                                                                                                                                                                                                                                                                                                                                                                                                                                                                                                                                                                                                                                                                                                                                                                                                                                                                                                                                                                                                                                                                                                                                                                                                                                                                                                                                                                                                                                             | Khayelitsha Hospital wc KHA                            | National Health Laboratory Service (NHLS), Tygerberg                                                   | Bronwyn Kleinhans; Eduan Wilkindon; Gert van Zyl; Houriyah Tegally; Kayla Delaney; Susan Engelbrecht; Tulio de Oliveira; Wolfgang Preiser                                                                                                                                                                                                                             |
| EPI_ISL_803906 to 803907, EPI_ISL_803910, EPI_ISL_803914 to 803915, EPI_ISL_825146, EPI_ISL_825150 to 825151, EPI_ISL_845881                                                                                                                                                                                                                                                                                                                                                                                                                                                                                                                                                                                                                                                                                                                                                                                                                                                                                                                                                                                                                                                                                                                                                                                                                                                                                                                                                                                                                                   | Kidwai Memorial Institute of Oncology                  | Department of Neurovirology, National Institute of Mental Health and Neurosciences (NIMHANS)           | Anita S Desai; Chitra Pattabiraman; Darshan Sreenivas; Nakka Vijay Kiran Reddy; Pramada Prasad; Risha Rasheed; V Ravi                                                                                                                                                                                                                                                 |
| EPI_ISL_717723 to 717764, EPI_ISL_718105                                                                                                                                                                                                                                                                                                                                                                                                                                                                                                                                                                                                                                                                                                                                                                                                                                                                                                                                                                                                                                                                                                                                                                                                                                                                                                                                                                                                                                                                                                                       | Kingston Health Sciences Centre and Queen's University | Ontario Institute for Cancer Research                                                                  | Bernard Lam; Calvin Sjaarda; Ilina Lungu; Jared T. Simpson; Katya Douchant; Lawrence E. Heisler; Michael Laszloffy; Paul Krzyzanowski; Prameet M. Sheth; Richard de Borja; Robert Colautti                                                                                                                                                                            |
| EPI_ISL_862881                                                                                                                                                                                                                                                                                                                                                                                                                                                                                                                                                                                                                                                                                                                                                                                                                                                                                                                                                                                                                                                                                                                                                                                                                                                                                                                                                                                                                                                                                                                                                 | Kitakyushu Municipal Medical Center                    | Fujita health University, School of Medicine, Department of Microbiology                               | Masahiro Suzuki; Yohei Doi                                                                                                                                                                                                                                                                                                                                            |
| EPI_ISL_833388 to 833391, EPI_ISL_833495, EPI_ISL_833497, EPI_ISL_833500, EPI_ISL_833508                                                                                                                                                                                                                                                                                                                                                                                                                                                                                                                                                                                                                                                                                                                                                                                                                                                                                                                                                                                                                                                                                                                                                                                                                                                                                                                                                                                                                                                                       | Klinik Apotek Dein, Jakarta, Indonesia                 | Biosafety Level-3 Laboratory, Indonesian Institute of Sciences (LIPI)                                  | Ade Andriani; Ahmad Fathoni; Akhira Atikana; Alfi Taufik Fathurahman; Andri Wardiana; Anggia Prasetyoputri; Anik Budhi Dharmayanthi; Asrul M. Fuad; Dadang Supriatna; Dian Fitria Agustiyanti; Fahrurrozy; Hariyatun; Herman Irawan; Isa Nuryana; Pamela Apriliana; Popi Hadi Wisnuwardhani; Ratih Asmana Ningrum; Saiful anwar; Sri Swasthikawati; Syam Budi Iryanto |
| EPI_ISL_934652 to 934654                                                                                                                                                                                                                                                                                                                                                                                                                                                                                                                                                                                                                                                                                                                                                                                                                                                                                                                                                                                                                                                                                                                                                                                                                                                                                                                                                                                                                                                                                                                                       | Klinikum Wels-Grieskirchen                             | Bergthaler laboratory, CeMM Research Center for Molecular Medicine of the Austrian Academy of Sciences | Andreas Bergthaler; Anna Schedl; Bekir Erguner; Benedikt Agerer; Christoph Bock; Jan Laine; Lukas Endler; Maelle Le Moing; Martin Senekowitsch; Michael Schuster; Thomas Penz                                                                                                                                                                                         |
| EPI_ISL_654954, EPI_ISL_660427 to 660431, EPI_ISL_661301, EPI_ISL_676492, EPI_ISL_676497 to 676501, EPI_ISL_676518, EPI_ISL_766696, EPI_ISL_766713, EPI_ISL_775546 to 775548, EPI_ISL_789017, EPI_ISL_832005, EPI_ISL_913298 to 913299, EPI_ISL_913315, EPI_ISL_913334 to 913336, EPI_ISL_913370, EPI_ISL_934388 to 934396, EPI_ISL_934407 to 934409                                                                                                                                                                                                                                                                                                                                                                                                                                                                                                                                                                                                                                                                                                                                                                                                                                                                                                                                                                                                                                                                                                                                                                                                           | see above                                              | Klinisk Mikrobiologi                                                                                   | The Public Health Agency of Sweden                                                                                                                                                                                                                                                                                                                                    |
| EPI_ISL_654892 to 654899, EPI_ISL_654942, EPI_ISL_654944 to 654951, EPI_ISL_660416 to 660421, EPI_ISL_661274 to 661278, EPI_ISL_661280 to 661281, EPI_ISL_661288 to 661289, EPI_ISL_661293, EPI_ISL_661302 to 661303, EPI_ISL_676489 to 676491, EPI_ISL_676494 to 676496, EPI_ISL_676502 to 676508, EPI_ISL_676520, EPI_ISL_676531 to 676532, EPI_ISL_710595 to 710604, EPI_ISL_732654, EPI_ISL_766592 to 766593, EPI_ISL_766608 to 766611, EPI_ISL_766613, EPI_ISL_766615 to 766629, EPI_ISL_766633 to 766639, EPI_ISL_766694, EPI_ISL_766707, EPI_ISL_766710 to 766712, EPI_ISL_766714, EPI_ISL_766725 to 766730, EPI_ISL_775549, EPI_ISL_77572 to 77574, EPI_ISL_775584, EPI_ISL_775590 to 775592, EPI_ISL_788989 to 788990, EPI_ISL_789036 to 789045, EPI_ISL_789047, EPI_ISL_831941 to 831942, EPI_ISL_831958, EPI_ISL_831973, EPI_ISL_831980 to 831981, EPI_ISL_831990 to 831992, EPI_ISL_831996 to 831997, EPI_ISL_832001 to 832002, EPI_ISL_913258 to 913262, EPI_ISL_913264 to 913265, EPI_ISL_913268 to 913274, EPI_ISL_913278 to 913280, EPI_ISL_913283, EPI_ISL_913285, EPI_ISL_913295 to 913297, EPI_ISL_913300, EPI_ISL_913306 to 913308, EPI_ISL_913310 to 913311, EPI_ISL_913311, EPI_ISL_913313, EPI_ISL_913317, EPI_ISL_913319 to 913322, EPI_ISL_913325 to 913329, EPI_ISL_913344 to 913369, EPI_ISL_913371 to 913374, EPI_ISL_913453, EPI_ISL_913457 to 913458, EPI_ISL_913460 to 913463, EPI_ISL_913465, EPI_ISL_913469 to 913485, EPI_ISL_913487 to 913493, EPI_ISL_934323 to 934363, EPI_ISL_934375 to 934376, EPI_ISL_934378 to 934387 | see above                                              | Klinisk mikrobiologi                                                                                   | The Public Health Agency of Sweden                                                                                                                                                                                                                                                                                                                                    |
| EPI_ISL_623092 to 623094                                                                                                                                                                                                                                                                                                                                                                                                                                                                                                                                                                                                                                                                                                                                                                                                                                                                                                                                                                                                                                                                                                                                                                                                                                                                                                                                                                                                                                                                                                                                       | Klinisk mikrobiologi Lanssjukhuset Ryhov, Jonkoping    | The Public Health Agency of Sweden                                                                     | Anna Risberg; Anna-Malin Linde; Carlo Berg; Department of Microbiology; Karin Tegmark-Wisell; Maria Lind Karlberg; Mattias Haukland; Mia Brytting; Noura Wala; Olov Svartstrom; Oskar Karlsson Lindsjo; Petra Edquist; Petra Holmstrom; Reza Advani; Sandra Broddesson; Sofia Stamouli; The Public Health Agency of Sweden                                            |
| EPI_ISL_623089                                                                                                                                                                                                                                                                                                                                                                                                                                                                                                                                                                                                                                                                                                                                                                                                                                                                                                                                                                                                                                                                                                                                                                                                                                                                                                                                                                                                                                                                                                                                                 | Klinisk mikrobiologi Linkoping                         | The Public Health Agency of Sweden                                                                     | Anna Risberg; Anna-Malin Linde; Karin Tegmark-Wisell; Maria Lind Karlberg; Mattias Haukland; Mia Brytting; Olov Svartstrom; Oskar Karlsson Lindsjo; Petra Edquist; Reza Advani; Sandra Broddesson                                                                                                                                                                     |
| EPI_ISL_623087 to 623088, EPI_ISL_648169, EPI_ISL_648173, EPI_ISL_831974                                                                                                                                                                                                                                                                                                                                                                                                                                                                                                                                                                                                                                                                                                                                                                                                                                                                                                                                                                                                                                                                                                                                                                                                                                                                                                                                                                                                                                                                                       | Klinisk mikrobiologi NAL Trollhattan                   | The Public Health Agency of Sweden                                                                     | Anna Risberg; Anna-Malin Linde; Department of Microbiology; Karin Tegmark-Wisell; Maria Lind Karlberg; Mattias Haukland; Mia Brytting; Olov Svartstrom; Oskar Karlsson Lindsjo; Petra Edquist; Reza Advani; Sandra Broddesson; The Public Health Agency of Sweden                                                                                                     |

|                                                                                                                                                                                                                                                                                                                                           |                                                        |                                                                                                                            |                                                                                                                                                                                                                                                                                                                                                                                                                  |
|-------------------------------------------------------------------------------------------------------------------------------------------------------------------------------------------------------------------------------------------------------------------------------------------------------------------------------------------|--------------------------------------------------------|----------------------------------------------------------------------------------------------------------------------------|------------------------------------------------------------------------------------------------------------------------------------------------------------------------------------------------------------------------------------------------------------------------------------------------------------------------------------------------------------------------------------------------------------------|
| EPI_ISL_648193                                                                                                                                                                                                                                                                                                                            | Klinisk mikrobiologi SAS Boras                         | The Public Health Agency of Sweden                                                                                         | Anna Risberg; Anna-Malin Linde; Karin Tegmark-Wisell; Maria Lind Karlberg; Mattias Haukland; Mia Brytting; Olov Svartstrom; Oskar Karlsson Lindsjo; Petra Edquist; Reza Advani; Sandra Broddesson                                                                                                                                                                                                                |
| EPI_ISL_623090, EPI_ISL_648162, EPI_ISL_654504 to 654505, EPI_ISL_654957, EPI_ISL_710594                                                                                                                                                                                                                                                  | Klinisk mikrobiologi Vasternorrland                    | The Public Health Agency of Sweden                                                                                         | Anna Risberg; Anna-Malin Linde; Department of Microbiology; Karin Tegmark-Wisell; Maria Lind Karlberg; Mattias Haukland; Mia Brytting; Olov Svartstrom; Oskar Karlsson Lindsjo; Petra Edquist; Reza Advani; Sandra Broddesson; The Public Health Agency of Sweden                                                                                                                                                |
| EPI_ISL_648133                                                                                                                                                                                                                                                                                                                            | Klinisk mikrobiologi centralsjukhuset Karlstad         | The Public Health Agency of Sweden                                                                                         | Anna Risberg; Anna-Malin Linde; Karin Tegmark-Wisell; Maria Lind Karlberg; Mattias Haukland; Mia Brytting; Olov Svartstrom; Oskar Karlsson Lindsjo; Petra Edquist; Reza Advani; Sandra Broddesson                                                                                                                                                                                                                |
| EPI_ISL_766692 to 766693, EPI_ISL_789012 to 789013, EPI_ISL_789029 to 789035                                                                                                                                                                                                                                                              | Klinisk mikrobiologi, Laboratoriemedicin               | The Public Health Agency of Sweden                                                                                         | Department of Microbiology; The Public Health Agency of Sweden                                                                                                                                                                                                                                                                                                                                                   |
| EPI_ISL_984717 to 984735, EPI_ISL_984950 to 984979, EPI_ISL_985041 to 985057, EPI_ISL_985320 to 985392                                                                                                                                                                                                                                    | Klinisk mikrobiologi, Region Västerbotten              | CBRN Defence and Security, Swedish Defence Research Agency                                                                 | Andreas Sjödin; Anna-Lena Johansson; Annika Allard; Annika Osterman; Carolin Öhrman; David Sundell; Emelie Näslund Salomonsson; Ingrid Dacklin; Jonas Näslund; Kerstin Myrtennäs; Linda Karlsson; Malin Granberg; Mats Forsman; Stina Bäckman                                                                                                                                                                    |
| EPI_ISL_623080 to 623085                                                                                                                                                                                                                                                                                                                  | Klinisk mikrobiologi, Skanes universitetssjukhus, Lund | The Public Health Agency of Sweden                                                                                         | Anna Risberg; Anna-Malin Linde; Karin Tegmark-Wisell; Maria Lind Karlberg; Mattias Haukland; Mia Brytting; Olov Svartstrom; Oskar Karlsson Lindsjo; Petra Edquist; Reza Advani; Sandra Broddesson                                                                                                                                                                                                                |
| EPI_ISL_661290, EPI_ISL_676515, EPI_ISL_766630 to 766632, EPI_ISL_775531 to 775532, EPI_ISL_775542 to 775545, EPI_ISL_789048 to 789053, EPI_ISL_789055 to 789059, see above                                                                                                                                                               | Klinisk mikrobiologi, Viruslab                         | The Public Health Agency of Sweden                                                                                         | EPI_ISL_831979, EPI_ISL_913323 to 913324, EPI_ISL_934322<br>Anna Risberg; Anna-Malin Linde; Carlo Berg; Department of Microbiology; Karin Tegmark-Wisell; Maria Lind Karlberg; Mattias Haukland; Mia Brytting; Noura Walai; Oskar Karlsson Lindsjo; Petra Edquist; Petra Holmstrom; Reza Advani; Sofia Stamouli; The Public Health Agency of Sweden                                                              |
| EPI_ISL_766697                                                                                                                                                                                                                                                                                                                            | Klinisk mikrobiologi, bakteriologi                     | The Public Health Agency of Sweden                                                                                         | Department of Microbiology; The Public Health Agency of Sweden                                                                                                                                                                                                                                                                                                                                                   |
| EPI_ISL_788999, EPI_ISL_831945 to 831946                                                                                                                                                                                                                                                                                                  | Klinisk mikrobiologi, virus F68                        | The Public Health Agency of Sweden                                                                                         | Department of Microbiology; The Public Health Agency of Sweden                                                                                                                                                                                                                                                                                                                                                   |
| EPI_ISL_654952, EPI_ISL_660384 to 660414, EPI_ISL_661279, EPI_ISL_661284 to 661285, EPI_ISL_676512, EPI_ISL_676519                                                                                                                                                                                                                        | Klinisk mikrobiologi Linköping                         | The Public Health Agency of Sweden                                                                                         | Anna Risberg; Anna-Malin Linde; Department of Microbiology; Karin Tegmark-Wisell; Maria Lind Karlberg; Mattias Haukland; Mia Brytting; Olov Svartstrom; Oskar Karlsson Lindsjo; Petra Edquist; Reza Advani; Sandra Broddesson; The Public Health Agency of Sweden                                                                                                                                                |
| EPI_ISL_864547 to 864562                                                                                                                                                                                                                                                                                                                  | Knappschaftskrankenhaus Bochum                         | Bundeswehr Institute of Microbiology                                                                                       | Alexandra Rehn; Antonios Katsounas; Enrico Georgi; Malena Bestehorn-Willmann; Markus Antwerpen; Mathias Walter; Mustafa Özcürümec; Roman Wölfer; Sabine Zange                                                                                                                                                                                                                                                    |
| EPI_ISL_700433, EPI_ISL_700436, EPI_ISL_700440, EPI_ISL_700450, EPI_ISL_700469, EPI_ISL_700474, EPI_ISL_700526, EPI_ISL_700529, EPI_ISL_700531, EPI_ISL_700542, see above                                                                                                                                                                 | Knysna CDC wc WLC                                      | NHLS/UCT                                                                                                                   | Arash Iranzadeh; Bruna Galvao; Carolyn Williamson; Deelan Doolabh; Diana Hardie; Houriyah Tegally; Innocent Mudau; Kruger Marais; Lynn Tyers; Marvin Hsiao; Stephen Korsman                                                                                                                                                                                                                                      |
| EPI_ISL_696467, EPI_ISL_696495, EPI_ISL_696506                                                                                                                                                                                                                                                                                            | Knysna CDC wc WLC & NHLS/UCT                           | KRISP, KZN Research Innovation and Sequencing Platform                                                                     | Arash Iranzadeh; Bruna Galvao; Carolyn Williamson; Deelan Doolabh; Diana Hardie; Emanuel James San; Houriyah Tegally; Innocent Mudau; Jennifer Giandhari; Kruger Marais; Lynn Tyers; Marvin Hsiao; Stephen Korsman; Sureshnee Pillay; Tulio de Oliveira                                                                                                                                                          |
| EPI_ISL_640022, EPI_ISL_640038, EPI_ISL_640076, EPI_ISL_700419, EPI_ISL_700422, EPI_ISL_700426, EPI_ISL_700429, EPI_ISL_700456, EPI_ISL_700484, EPI_ISL_700501, EPI_ISL_700509 to 700510, EPI_ISL_700583, see above                                                                                                                       | Knysna Hospital wc KNY                                 | NHLS/UCT                                                                                                                   | Arash Iranzadeh; Bruna Galvao; Carolyn Williamson; Deelan Doolabh; Diana Hardie; Houriyah Tegally; Innocent Mudau; Kruger Marais; Lynn Tyers; Marvin Hsiao; Stephen Korsman                                                                                                                                                                                                                                      |
| EPI_ISL_960120                                                                                                                                                                                                                                                                                                                            | Knysna Hospital wc KNY                                 | National Health Laboratory Service/UCT                                                                                     | Arash Iranzadeh; Bruna Galvao; Carolyn Williamson; Deelan Doolabh; Diana Hardie; Innocent Mudau; Kruger Marais; Lynn Tyers; Marvin Hsiao; Stephen Korsman                                                                                                                                                                                                                                                        |
| EPI_ISL_696463, EPI_ISL_696469, EPI_ISL_696477 to 696478, EPI_ISL_696482, EPI_ISL_696491                                                                                                                                                                                                                                                  | Knysna Hospital wc KNY & NHLS/UCT                      | KRISP, KZN Research Innovation and Sequencing Platform                                                                     | Arash Iranzadeh; Bruna Galvao; Carolyn Williamson; Deelan Doolabh; Diana Hardie; Emanuel James San; Houriyah Tegally; Innocent Mudau; Jennifer Giandhari; Kruger Marais; Lynn Tyers; Marvin Hsiao; Stephen Korsman; Sureshnee Pillay; Tulio de Oliveira                                                                                                                                                          |
| EPI_ISL_862875                                                                                                                                                                                                                                                                                                                            | Komatsu Municipal Hospital                             | Fujita health University, School of Medicine, Department of Microbiology                                                   | Masahiro Suzuki; Yohei Doi                                                                                                                                                                                                                                                                                                                                                                                       |
| EPI_ISL_754847                                                                                                                                                                                                                                                                                                                            | Korian Villa d'Azon                                    | National Reference Center for Viruses of Respiratory Infections, Institut Pasteur, Paris                                   | Angela Brisebarre; Camille Capel; Etienne Simon-Lorière; Marion Barbet; Maud Vanpeene; Méline Bizard; Sylvie Behillil; Sylvie van der Werf; Vincent Enouf                                                                                                                                                                                                                                                        |
| EPI_ISL_745109, EPI_ISL_745131, EPI_ISL_745133, EPI_ISL_745136, EPI_ISL_745164, EPI_ISL_745179                                                                                                                                                                                                                                            | Kraaifontein CHC wc KFP                                | National Health Laboratory Service (NHLS), Tygerberg                                                                       | Bronwyn Kleinhans; Eduan Wilkindon; Gert van Zyl; Houriyah Tegally; Kayla Delaney; Susan Engelbrecht; Tulio de Oliveira; Wolfgang Preiser                                                                                                                                                                                                                                                                        |
| EPI_ISL_696460, EPI_ISL_696498                                                                                                                                                                                                                                                                                                            | Kranshoek Clinic wc KSH & NHLS/UCT                     | KRISP, KZN Research Innovation and Sequencing Platform                                                                     | Arash Iranzadeh; Bruna Galvao; Carolyn Williamson; Deelan Doolabh; Diana Hardie; Emanuel James San; Houriyah Tegally; Innocent Mudau; Jennifer Giandhari; Kruger Marais; Lynn Tyers; Marvin Hsiao; Stephen Korsman; Sureshnee Pillay; Tulio de Oliveira                                                                                                                                                          |
| EPI_ISL_869247, EPI_ISL_869250, EPI_ISL_869262 to 869264, EPI_ISL_872570                                                                                                                                                                                                                                                                  | Krasnoyarsk Regional Clinical Hospital                 | WHO National Influenza Centre Russian Federation                                                                           | Andrey Komissarov; Anna Ivanova; Artem Fadeev; Daria Danilenko; Dmitry Bazhenov; Dmitry Lioznov; Elena Nabieva; Georgii Bazykin; Ksenia Safina; Kseniya Komissarova; Mikhail Bakaev                                                                                                                                                                                                                              |
| EPI_ISL_735492                                                                                                                                                                                                                                                                                                                            | Kumilla Medical College                                | Central Biological Research Laboratory and Department of Biochemistry and Molecular Biology                                | H. M. Abdullah Al Masud; Imam Hossen; Md. Arif Hossain; Md. Imranul Hoq; Md. Khondakar Raziur Rahman; Md. Omer Faruq; Mohammad Omar Faruque; Robiul Hasan Bhuiyan; Sajib Rudra; Shanta Paul                                                                                                                                                                                                                      |
| EPI_ISL_747239                                                                                                                                                                                                                                                                                                                            | Kuningan Public Health Office                          | West Java Health Laboratory; School of Life Sciences and Technology, Institut Teknologi Bandung                            | Azzania Fibriani; Cut Nur Cinthia Alamanda; Erna Rahmawati; Isak Solihin; Karimatu Khoirunnisa; Miftahul Farid; Rifky Waluyajati Rachman; Rini Robiani; Ryan Bayusantika Ristandi                                                                                                                                                                                                                                |
| EPI_ISL_862268 to 862543                                                                                                                                                                                                                                                                                                                  | Kurnool Medical College (KMC)                          | CSIR Institute of Genomics and Integrative Biology                                                                         | A. Surekha; Abhinav Jain; Avula Renuka Devi; Bani Jolly; Dasari Ankaiah; Disha Sharma; Gyan Ranjan; J. Vijaya Lakshmi; Mercy Rophina; Mohamed Imran; Mohit Kumar Divakar; Nambi Rajesh; P R Vanaja; Pallavali Roja Rani; Panyam Suresh; Paras Sehgal; Pulala Chandra; Rahul C Bhojar; Rajamadugu Hymavathy; S. Afsar; S. Umadevi; Sanaga Shanthi Kumari; Sridhar Sivasubbu; Valluri Anitha Lavanya; Vinod Scaria |
| EPI_ISL_640030, EPI_ISL_700532                                                                                                                                                                                                                                                                                                            | Kwamandlenkosi Clinic wc KMN                           | NHLS/UCT                                                                                                                   | Arash Iranzadeh; Bruna Galvao; Carolyn Williamson; Deelan Doolabh; Diana Hardie; Innocent Mudau; Kruger Marais; Lynn Tyers; Marvin Hsiao; Stephen Korsman                                                                                                                                                                                                                                                        |
| EPI_ISL_700437, EPI_ISL_700495, EPI_ISL_700535, EPI_ISL_700537, EPI_ISL_700541, EPI_ISL_700579                                                                                                                                                                                                                                            | Kwanokuthula CDC wc KWA                                | NHLS/UCT                                                                                                                   | Arash Iranzadeh; Bruna Galvao; Carolyn Williamson; Deelan Doolabh; Diana Hardie; Houriyah Tegally; Innocent Mudau; Kruger Marais; Lynn Tyers; Marvin Hsiao; Stephen Korsman                                                                                                                                                                                                                                      |
| EPI_ISL_960123                                                                                                                                                                                                                                                                                                                            | Kwanokuthula CDC wc KWA                                | National Health Laboratory Service/UCT                                                                                     | Arash Iranzadeh; Bruna Galvao; Carolyn Williamson; Deelan Doolabh; Diana Hardie; Innocent Mudau; Kruger Marais; Lynn Tyers; Marvin Hsiao; Stephen Korsman                                                                                                                                                                                                                                                        |
| EPI_ISL_696465                                                                                                                                                                                                                                                                                                                            | Kwanokuthula CDC wc KWA & NHLS/UCT                     | KRISP, KZN Research Innovation and Sequencing Platform                                                                     | Arash Iranzadeh; Bruna Galvao; Carolyn Williamson; Deelan Doolabh; Diana Hardie; Emanuel James San; Houriyah Tegally; Innocent Mudau; Jennifer Giandhari; Kruger Marais; Lynn Tyers; Marvin Hsiao; Stephen Korsman; Sureshnee Pillay; Tulio de Oliveira                                                                                                                                                          |
| EPI_ISL_913667                                                                                                                                                                                                                                                                                                                            | LA Office of Public Health Laboratories                | Centers for Disease Control and Prevention Division of Viral Diseases, Pathogen Discovery                                  | Anna Uehara; Clinton R. Paden; Haibin Wang; Jing Zhang; Krista Queen; Peter Cook; Suxiang Tong; Yan Li; Ying Tao                                                                                                                                                                                                                                                                                                 |
| EPI_ISL_751620, EPI_ISL_751669, EPI_ISL_751696, EPI_ISL_751722, EPI_ISL_751752, EPI_ISL_903613, EPI_ISL_903627, EPI_ISL_903651, EPI_ISL_903689, EPI_ISL_903693, EPI_ISL_903709, EPI_ISL_903720, EPI_ISL_903728, EPI_ISL_903739, EPI_ISL_903752, EPI_ISL_903765, EPI_ISL_903776, EPI_ISL_903832, EPI_ISL_903877, EPI_ISL_903906, see above | LA Office of Public Health Laboratories                | Genomics and Discovery, Respiratory Viruses Branch, Division of Viral Diseases, Centers for Disease Control and Prevention | Anna Montmayeur; Anna Uehara; Ben L. Rambo-Martin; Clinton R. Paden; Dhvani Batra; Haibin Wang; Jasmine Padilla; Jing Zhang; Justin Lee; Krista Queen; Lori Rowe; Mark Burroughs; Mili Sheth; Peter W. Cook; Rachel Marine; Sarah Nobles; Suxiang Tong; Yan Li; Ying Tao                                                                                                                                         |

|                                                                                                                                                                                                            |                                                                               |                                                                                                                                                                                                                                               |                                                                                                                                                                                                                                                                                                                                                                                                                                                                                                                                                            |
|------------------------------------------------------------------------------------------------------------------------------------------------------------------------------------------------------------|-------------------------------------------------------------------------------|-----------------------------------------------------------------------------------------------------------------------------------------------------------------------------------------------------------------------------------------------|------------------------------------------------------------------------------------------------------------------------------------------------------------------------------------------------------------------------------------------------------------------------------------------------------------------------------------------------------------------------------------------------------------------------------------------------------------------------------------------------------------------------------------------------------------|
| EPI_ISL_913997 to 913998, EPI_ISL_914012, EPI_ISL_955269, EPI_ISL_955275                                                                                                                                   | LA Office of Public Health Laboratories                                       | Pathogen Discovery, Respiratory Viruses Branch, Division of Viral Diseases, Centers for Disease Control and Prevention                                                                                                                        | Anna Uehara; Clinton R. Paden; Haibin Wang; Jing Zhang; Krista Queen; Peter Cook; Suxiang Tong; Yan Li; Ying Tao                                                                                                                                                                                                                                                                                                                                                                                                                                           |
| EPI_ISL_981492, EPI_ISL_981497                                                                                                                                                                             | LABM BIOLAM CLINIQUE ESTREE                                                   | Department of Virology, Henri Mondor University Hospital, Assistance Publique Hôpitaux de Paris, Université Paris-Est Créteil, INSERM U955                                                                                                    | Alexandre Soulier; Christophe Rodriguez; Elisabeth Trawinski; Guillaume Gricourt; Jean-Michel Pawlotsky; Melissa N'Debi; Slim Fourati; Vanessa Demontant                                                                                                                                                                                                                                                                                                                                                                                                   |
| EPI_ISL_956303                                                                                                                                                                                             | LABORATORIO ANALIZAR SYNLAB                                                   | Instituto Nacional de Salud- Dirección de Investigación en Salud Pública                                                                                                                                                                      | Carlos Franco-Muñoz; Diego A. Álvarez-Díaz; Diego Andrés Prada; Gerardo Santamaría; Hector Alejandro Ruiz-Moreno; Jhonnatan Reales-González; Julian Naizaque; Katherine Laiton-Donato; Magdalena Wiesner; Marcela Mercado-Reyes; María T. Herrera-Sepúlveda; Martha Lucia Ospina Martínez; Mauricio Pacheco-Montealegre; Sheryll Corchuelo                                                                                                                                                                                                                 |
| EPI_ISL_914832 to 914833                                                                                                                                                                                   | LABORATORIO CLINICO LABIN                                                     | Inciensa, Instituto Costarricense de Investigación y Enseñanza en Nutrición y Salud                                                                                                                                                           | Adriana Godínez; Claudio Soto-Garita; Estela Cordero; Francisco Duarte; Hebleen Porras; Melany Calderón & Pei Ling Chan Ma                                                                                                                                                                                                                                                                                                                                                                                                                                 |
| EPI_ISL_792402 to 792423                                                                                                                                                                                   | LABORATORIO DE CAMPAÑA COVID 19 INTA                                          | Instituto de Biotecnología, IABIMO (CONICET), Instituto de Virología, IVIT(CONICET), Instituto de Patobiología, IPVET(CONICET), CICVyA, INTA on behalf of 'Proyecto Argentino Interinstitucional de genómica de SARS-CoV-2' (PAIS Consortium) | A; AF; AJ; AV; Asumendi; B; Bengoa Luoni; Cacciabué; Chimeno; Craig; D; Del Médico; Delgado; Diagiaco; Distéfano; Dus Santos; Díaz Carrasco; E; F; Farber; Fass; Ferández PC; Franco; Fusco; GA; Garbaccio; Gioffré; Gómez; Huertas; I; J; K; Klepp; König; L; LC; Lozano Calderón; Lucero; M; MD; MG; MI; MJ; MPD; MS; Muñoz Hidalgo; NB; Oliveira; P; PA; Paniego; Pedroarias; Peralta; Perea; Pereda; Puebla; Rimondi; Rivarola; Rodríguez; Rosende; S; Schammas; Sioya; Soria; Trono; V; VC; Vera; Viegas, M.; Vissani; W; Zavallo; Zumárraga; Álvarez |
| EPI_ISL_956302                                                                                                                                                                                             | LABORATORIO IMAT                                                              | Instituto Nacional de Salud- Dirección de Investigación en Salud Pública                                                                                                                                                                      | Carlos Franco-Muñoz; Diego A. Álvarez-Díaz; Diego Andrés Prada; Gerardo Santamaría; Hector Alejandro Ruiz-Moreno; Jhonnatan Reales-González; Julian Naizaque; Katherine Laiton-Donato; Magdalena Wiesner; Marcela Mercado-Reyes; María T. Herrera-Sepúlveda; Martha Lucia Ospina Martínez; Mauricio Pacheco-Montealegre; Sheryll Corchuelo                                                                                                                                                                                                                 |
| EPI_ISL_682275 to 682277                                                                                                                                                                                   | LABORATORIOS LABIN                                                            | Inciensa, Instituto Costarricense de Investigación y Enseñanza en Nutrición y Salud                                                                                                                                                           | Adriana Godínez; Claudio Soto-Garita; Estela Cordero; Francisco Duarte; Hebleen Porras; Melany Calderon & Pei Ling Chan                                                                                                                                                                                                                                                                                                                                                                                                                                    |
| EPI_ISL_918551, EPI_ISL_918553 to 918561                                                                                                                                                                   | LACEN - Laboratório Central de Saúde Pública do Amapa                         | Evandro Chagas Institute                                                                                                                                                                                                                      | A.M.; Barbagelata; E.C.; E.M.A.; Ferreira; J.A.; Junior; K.C.; L.C.; L.S.; M.C.; P.S.; Pinheiro; Santos; Silva; Sousa; Sousa Junior; W.D.C.; da Silva                                                                                                                                                                                                                                                                                                                                                                                                      |
| EPI_ISL_925846, EPI_ISL_925916, EPI_ISL_926446                                                                                                                                                             | LACEN - Laboratório Central de Saúde Pública do Amazonas                      | Evandro Chagas Institute Virology                                                                                                                                                                                                             | A.M.; Barbagelata; E.C.; E.M.A.; Ferreira; J.A.; Junior; K.C.; L.C.; L.S.; M.C.; P.S.; Pinheiro; Santos; Silva; Sousa; Sousa Junior; W.D.C.; da Silva                                                                                                                                                                                                                                                                                                                                                                                                      |
| EPI_ISL_918499 to 918512, EPI_ISL_918531 to 918535                                                                                                                                                         | LACEN - Laboratório Central de Saúde Pública do Amazonas                      | Evandro Chagas Institute                                                                                                                                                                                                                      | A.M.; Barbagelata; E.C.; E.M.A.; Ferreira; J.A.; Junior; K.C.; L.C.; L.S.; M.C.; P.S.; Pinheiro; Santos; Silva; Sousa; Sousa Junior; W.D.C.; da Silva                                                                                                                                                                                                                                                                                                                                                                                                      |
| EPI_ISL_918536 to 918544                                                                                                                                                                                   | LACEN - Laboratório Central de Saúde Pública do Ceara                         | Evandro Chagas Institute                                                                                                                                                                                                                      | A.M.; Barbagelata; E.C.; E.M.A.; Ferreira; J.A.; Junior; K.C.; L.C.; L.S.; M.C.; P.S.; Pinheiro; Santos; Silva; Sousa; Sousa Junior; W.D.C.; da Silva                                                                                                                                                                                                                                                                                                                                                                                                      |
| EPI_ISL_918515 to 918517, EPI_ISL_918522 to 918530, EPI_ISL_918545 to 918550, EPI_ISL_918552                                                                                                               | LACEN - Laboratório Central de Saúde Pública do Para                          | Evandro Chagas Institute                                                                                                                                                                                                                      | A.M.; Barbagelata; E.C.; E.M.A.; Ferreira; J.A.; Junior; K.C.; L.C.; L.S.; M.C.; P.S.; Pinheiro; Santos; Silva; Sousa; Sousa Junior; W.D.C.; da Silva                                                                                                                                                                                                                                                                                                                                                                                                      |
| EPI_ISL_904120 to 904121                                                                                                                                                                                   | LACEN - Laboratório Central de Saúde Pública do Pará                          | Evandro Chagas Institute                                                                                                                                                                                                                      | A.M.; Barbagelata; E.C.; E.M.A.; Ferreira; J.A.; Junior; K.C.; L.C.; L.S.; M.C.; P.S.; Pinheiro; Santos; Silva; Sousa; Sousa Junior; W.D.C.; da Silva                                                                                                                                                                                                                                                                                                                                                                                                      |
| EPI_ISL_918513                                                                                                                                                                                             | LACEN - Laboratório Central de Saúde Pública do Roraima                       | Evandro Chagas Institute                                                                                                                                                                                                                      | A.M.; Barbagelata; E.C.; E.M.A.; Ferreira; J.A.; Junior; K.C.; L.C.; L.S.; M.C.; P.S.; Pinheiro; Santos; Silva; Sousa; Sousa Junior; W.D.C.; da Silva                                                                                                                                                                                                                                                                                                                                                                                                      |
| EPI_ISL_717809, EPI_ISL_717832 to 717836, EPI_ISL_717841, EPI_ISL_717910 to 717919, EPI_ISL_717958, EPI_ISL_717963 to 717964                                                                               | LACEN Dr. Francisco Rimolo Neto                                               | Bioinformatics Laboratory / LNCC                                                                                                                                                                                                              | Alexandra L Gerber; Amílcar Tanuri; Ana Paula de C Guimarães; Ana Tereza R de Vasconcelos; Andréa Cony Cavalcanti; Carolina M Voloch; Claudia dos Santos Rodrigues; Cynthia C Cardoso; Diana Mariani; Luiz G P de Almeida; Otavio Bustrolini; Ronaldo da Silva F Jr; Terezinha M P P Castiñeira                                                                                                                                                                                                                                                            |
| EPI_ISL_717785 to 717790, EPI_ISL_717792, EPI_ISL_717794 to 717800, EPI_ISL_717803 to 717804, EPI_ISL_717809 to 717909, EPI_ISL_717962                                                                     | LACEN RJ - Noel Nutels                                                        | Bioinformatics Laboratory / LNCC                                                                                                                                                                                                              | Alexandra L Gerber; Amílcar Tanuri; Ana Paula de C Guimarães; Ana Tereza R de Vasconcelos; Andréa Cony Cavalcanti; Carolina M Voloch; Claudia dos Santos Rodrigues; Cynthia C Cardoso; Diana Mariani; Luiz G P de Almeida; Otavio Bustrolini; Ronaldo da Silva F Jr; Terezinha M P P Castiñeira                                                                                                                                                                                                                                                            |
| EPI_ISL_985318 to 985319                                                                                                                                                                                   | LACEN de Santa Catarina                                                       | Instituto Adolfo Lutz, Interdisciplinary Procedures Center, Strategic Laboratory                                                                                                                                                              | Claudia Regina Gonçalves; Claudio Tavares Sacchi; Erica Valessa Ramos Gomes; Karoline Rodrigues Campos                                                                                                                                                                                                                                                                                                                                                                                                                                                     |
| EPI_ISL_882663 to 882664                                                                                                                                                                                   | LACEN do Distrito Federal                                                     | Instituto Adolfo Lutz, Interdisciplinary Procedures Center, Strategic Laboratory                                                                                                                                                              | Claudia Regina Gonçalves; Claudio Tavares Sacchi; Erica Valessa Ramos Gomes; Karoline Rodrigues Campos                                                                                                                                                                                                                                                                                                                                                                                                                                                     |
| EPI_ISL_943988 to 943990, EPI_ISL_985303 to 985317                                                                                                                                                         | LACEN do Estado de Goias                                                      | Instituto Adolfo Lutz, Interdisciplinary Procedures Center, Strategic Laboratory                                                                                                                                                              | Claudia Regina Gonçalves; Claudio Tavares Sacchi; Erica Valessa Ramos Gomes; Karoline Rodrigues Campos                                                                                                                                                                                                                                                                                                                                                                                                                                                     |
| EPI_ISL_943973 to 943987, EPI_ISL_943991                                                                                                                                                                   | LACEN do Estado de Tocantins                                                  | Instituto Adolfo Lutz, Interdisciplinary Procedures Center, Strategic Laboratory                                                                                                                                                              | Claudia Regina Gonçalves; Claudio Tavares Sacchi; Erica Valessa Ramos Gomes; Karoline Rodrigues Campos                                                                                                                                                                                                                                                                                                                                                                                                                                                     |
| EPI_ISL_882657                                                                                                                                                                                             | LACEN do Estado do Piaui, Dr. Costa Alvarenga                                 | Instituto Adolfo Lutz, Interdisciplinary Procedures Center, Strategic Laboratory                                                                                                                                                              | Claudia Regina Gonçalves; Claudio Tavares Sacchi; Erica Valessa Ramos Gomes; Karoline Rodrigues Campos                                                                                                                                                                                                                                                                                                                                                                                                                                                     |
| EPI_ISL_906071, EPI_ISL_940613 to 940618                                                                                                                                                                   | LACEN-PI DR. Costa Alvarenga                                                  | Instituto Adolfo Lutz, Interdisciplinary Procedures Center, Strategic Laboratory                                                                                                                                                              | Claudia Regina Gonçalves; Claudio Tavares Sacchi; Erica Valessa Ramos Gomes; Karoline Rodrigues Campos                                                                                                                                                                                                                                                                                                                                                                                                                                                     |
| EPI_ISL_861867 to 861888, EPI_ISL_861890 to 861910, EPI_ISL_861912 to 861913, EPI_ISL_861915, EPI_ISL_884249 to 884250, EPI_ISL_977500                                                                     | LATE - Laboratório de Técnicas Especiais - Hospital Israelita Albert Einstein | LATE - Laboratório de Técnicas Especiais - Hospital Israelita Albert Einstein                                                                                                                                                                 | Ana Paula Moreira Salles; Deyvid Amgarten; Fernanda de Mello Malta; João Renato Rebello Pinho; Pedro Henrique Sebe Rodrigues; Raquel Riyuzo                                                                                                                                                                                                                                                                                                                                                                                                                |
| EPI_ISL_942927, EPI_ISL_961467 to 961469                                                                                                                                                                   | LESP Nuevo Leon/Grupo de Diagnostico ARIES                                    | Instituto de Diagnostico y Referencia Epidemiologicos (INDRE)                                                                                                                                                                                 | Abril Rodriguez-Maldonado; Claudia Wong-Arambula; Ernesto Ramirez-Gonzalez.; Fabiola Garces-Ayala; Gisela Barrera-Badillo; Irma Lopez-Martinez; Lucia Hernandez-Rivas; Natividad Cruz-Ortiz; Tatiana Nunez-Garcia                                                                                                                                                                                                                                                                                                                                          |
| EPI_ISL_961133, EPI_ISL_984297, EPI_ISL_996006                                                                                                                                                             | LHUB-ULB                                                                      | UAntwerp, Laboratory of Medical Microbiology                                                                                                                                                                                                  | Basil Britto Xavier; Christine Lammens; Herman Goossens; Jasmine Coppens; Marie Le Mercier; Veerle Matheussen                                                                                                                                                                                                                                                                                                                                                                                                                                              |
| EPI_ISL_940738, EPI_ISL_940741                                                                                                                                                                             | LHUB-ULB                                                                      | UAntwerp, Laboratory of Medical Microbiology, Campus Drie Eiken S6.26, Universiteitsplein 1, 2610, Wilrijk, Belgium                                                                                                                           | Basil Britto Xavier; Christine Lammens; Herman Goossens; Jasmine Coppens; Marie Le Mercier; Veerle Matheussen                                                                                                                                                                                                                                                                                                                                                                                                                                              |
| EPI_ISL_995548 to 995549, EPI_ISL_995551 to 995555                                                                                                                                                         | LKOLMC                                                                        | Jessa                                                                                                                                                                                                                                         | Jessa_cmdLab                                                                                                                                                                                                                                                                                                                                                                                                                                                                                                                                               |
| EPI_ISL_728221 to 728224, EPI_ISL_728235 to 728237                                                                                                                                                         | LNR National Reference Laboratory, Mohammed VI University of Health Sciences  | Medical Biotechnology Laboratory, Rabat Medical and Pharmacy School, Mohammed The Vth University in Rabat                                                                                                                                     | Adib Ghassan; Housna ARROUCHI; Lahcen BELYAMANI and Azeddine IBRAHIMI; Loubna ALLAM; Mouna OUAUGHIRI; Mouneem Essabbar; Nabila Soara; Saaid AMZAZI; Souad KARTTI; Tarek Aanniz                                                                                                                                                                                                                                                                                                                                                                             |
| EPI_ISL_794652 to 794653                                                                                                                                                                                   | LSP DEL TOLIMA                                                                | Instituto Nacional de Salud - Dirección de Investigación en Salud Pública                                                                                                                                                                     | Carlos Franco-Muñoz; Diego A. Álvarez-Díaz; Diego Andrés Prada; Gerardo Santamaría; Jonathan Reales; Julian Naizaque; Katherine Laiton-Donato; Magdalena Wiesner; Marcela Mercado-Reyes; María T. Herrera; Martha Lucia Ospina Martínez; Mauricio Pacheco-Montealegre; Paola Muñoz-Laiton; Sheryl Corchuelo                                                                                                                                                                                                                                                |
| EPI_ISL_653345 to 653744, EPI_ISL_666609, EPI_ISL_666613, EPI_ISL_768325 to 768520, EPI_ISL_768525, EPI_ISL_778918 to 779128, EPI_ISL_889444 to 889541, EPI_ISL_889543 to 889801, EPI_ISL_890361 to 890370 | see above                                                                     | LSUHS Emerging Viral Threat Laboratory                                                                                                                                                                                                        | Microbial Genome Sequencing Center                                                                                                                                                                                                                                                                                                                                                                                                                                                                                                                         |
| EPI_ISL_755644 to 755645, EPI_ISL_755652, EPI_ISL_833162, EPI_ISL_861669                                                                                                                                   | Lab LOC - Itapeperica da Serra                                                | Instituto Adolfo Lutz, Interdisciplinary Procedures Center, Strategic Laboratory                                                                                                                                                              | Claudia Regina Gonçalves; Claudio Tavares Sacchi; Erica Valessa Ramos Gomes; Karoline Rodrigues Campos                                                                                                                                                                                                                                                                                                                                                                                                                                                     |
|                                                                                                                                                                                                            |                                                                               |                                                                                                                                                                                                                                               | ; Andrew D. Yurochko; Camille F. Abshire; Christopher G. Kevil; Daniel J. Snyder; Jennifer L. Carroll; Jeremy P. Kamil; John A. Vanchiere; Katarzyna Zwolinska; Maarten Van Diest; Malgorzata Bienkowska-Haba; Martin J. Sapp; Mohammed N.A. Siddiquy; Rona S. Scott; Vaughn S. Cooper                                                                                                                                                                                                                                                                     |

|                                                                                                                                                                                                                                                                                                                                                                                                                                                                                                                                                                                                                                                                                                                                                                                                                                                                                                                                                                                                                                                                                                                                                                                                                                                                                                                                                                                                                                                                                                                                                                                                                                                                                                                                                                                                                                                                                    |                                                            |                                                                                                                            |                                                                                                                                                                                                                                                                                                                                                                                                                                                                                                                                                                                                                                                                                                                                                                                                                                                                                                             |                                                                                                                                                                                                                                                                                                                                                                                                                                                                                                                                                                                                                                                                                                                                        |
|------------------------------------------------------------------------------------------------------------------------------------------------------------------------------------------------------------------------------------------------------------------------------------------------------------------------------------------------------------------------------------------------------------------------------------------------------------------------------------------------------------------------------------------------------------------------------------------------------------------------------------------------------------------------------------------------------------------------------------------------------------------------------------------------------------------------------------------------------------------------------------------------------------------------------------------------------------------------------------------------------------------------------------------------------------------------------------------------------------------------------------------------------------------------------------------------------------------------------------------------------------------------------------------------------------------------------------------------------------------------------------------------------------------------------------------------------------------------------------------------------------------------------------------------------------------------------------------------------------------------------------------------------------------------------------------------------------------------------------------------------------------------------------------------------------------------------------------------------------------------------------|------------------------------------------------------------|----------------------------------------------------------------------------------------------------------------------------|-------------------------------------------------------------------------------------------------------------------------------------------------------------------------------------------------------------------------------------------------------------------------------------------------------------------------------------------------------------------------------------------------------------------------------------------------------------------------------------------------------------------------------------------------------------------------------------------------------------------------------------------------------------------------------------------------------------------------------------------------------------------------------------------------------------------------------------------------------------------------------------------------------------|----------------------------------------------------------------------------------------------------------------------------------------------------------------------------------------------------------------------------------------------------------------------------------------------------------------------------------------------------------------------------------------------------------------------------------------------------------------------------------------------------------------------------------------------------------------------------------------------------------------------------------------------------------------------------------------------------------------------------------------|
| EPI_ISL_977479, EPI_ISL_985178                                                                                                                                                                                                                                                                                                                                                                                                                                                                                                                                                                                                                                                                                                                                                                                                                                                                                                                                                                                                                                                                                                                                                                                                                                                                                                                                                                                                                                                                                                                                                                                                                                                                                                                                                                                                                                                     | Lab Loc - Itapeperica da Serra                             | Instituto Adolfo Lutz, Interdisciplinary Procedures Center, Strategic Laboratory                                           | Claudia Regina Gonçalves; Claudio Tavares Sacchi; Erica Valessa Ramos Gomes; Karoline Rodrigues Campos                                                                                                                                                                                                                                                                                                                                                                                                                                                                                                                                                                                                                                                                                                                                                                                                      |                                                                                                                                                                                                                                                                                                                                                                                                                                                                                                                                                                                                                                                                                                                                        |
| EPI_ISL_846541 to 846580, EPI_ISL_977491 to 977493, EPI_ISL_982237 to 982296                                                                                                                                                                                                                                                                                                                                                                                                                                                                                                                                                                                                                                                                                                                                                                                                                                                                                                                                                                                                                                                                                                                                                                                                                                                                                                                                                                                                                                                                                                                                                                                                                                                                                                                                                                                                       | Lab voor klinische biologie                                | Lab voor klinische biologie                                                                                                | Bruno Verhasselst; Hannelore Hamerlinck; Marija Janevska                                                                                                                                                                                                                                                                                                                                                                                                                                                                                                                                                                                                                                                                                                                                                                                                                                                    |                                                                                                                                                                                                                                                                                                                                                                                                                                                                                                                                                                                                                                                                                                                                        |
| EPI_ISL_634876 to 634895, EPI_ISL_717573 to 717633, EPI_ISL_717980 to 717983, EPI_ISL_717985 to 718026, EPI_ISL_745202 to 745221, EPI_ISL_794825, EPI_ISL_855902, EPI_ISL_855904, EPI_ISL_855906, EPI_ISL_855908, EPI_ISL_855910, EPI_ISL_855912, EPI_ISL_855914, EPI_ISL_855916 to 855917, EPI_ISL_855919, EPI_ISL_855921, EPI_ISL_855923, EPI_ISL_855925, EPI_ISL_855927 to 855928, EPI_ISL_855930, EPI_ISL_855932, EPI_ISL_855934, EPI_ISL_855936, EPI_ISL_855938, EPI_ISL_855940, EPI_ISL_855942, EPI_ISL_855944 to 855945, EPI_ISL_855947, EPI_ISL_855949, EPI_ISL_855951, EPI_ISL_855953, EPI_ISL_855955, EPI_ISL_855957, EPI_ISL_855959 to 855960, EPI_ISL_855962, EPI_ISL_855964, EPI_ISL_855966, EPI_ISL_855968                                                                                                                                                                                                                                                                                                                                                                                                                                                                                                                                                                                                                                                                                                                                                                                                                                                                                                                                                                                                                                                                                                                                                           | Lab voor klinische biologie                                | Onderzoeksgroep Virologie                                                                                                  | Bruno Verhasselst; Hans Nauwynck; Laurens Lambrechts; Linos Vandekerckhove; Marthe Pauwels; Nick Vereecke; Sebastiaan Theuns                                                                                                                                                                                                                                                                                                                                                                                                                                                                                                                                                                                                                                                                                                                                                                                |                                                                                                                                                                                                                                                                                                                                                                                                                                                                                                                                                                                                                                                                                                                                        |
| see above                                                                                                                                                                                                                                                                                                                                                                                                                                                                                                                                                                                                                                                                                                                                                                                                                                                                                                                                                                                                                                                                                                                                                                                                                                                                                                                                                                                                                                                                                                                                                                                                                                                                                                                                                                                                                                                                          | Lab. Biologi Molekular FKIK Unwar, Bali                    | National Institute of Health Research and Development                                                                      | AA; Dewi; HA; HD; Ikawati; KD; KNA; N; Nugraha; Pangesti; Pawestri; Puspa; Puspendari; SR; Setiawaty; Soekarso; Subangkit; T; V                                                                                                                                                                                                                                                                                                                                                                                                                                                                                                                                                                                                                                                                                                                                                                             |                                                                                                                                                                                                                                                                                                                                                                                                                                                                                                                                                                                                                                                                                                                                        |
| EPI_ISL_847825, EPI_ISL_852619, EPI_ISL_852622, EPI_ISL_852628 to 852632, EPI_ISL_852813, EPI_ISL_852819, EPI_ISL_852821, EPI_ISL_852823, EPI_ISL_852825, EPI_ISL_852828, EPI_ISL_855556, EPI_ISL_855573, EPI_ISL_855610 to 855614, EPI_ISL_856679, EPI_ISL_856682, EPI_ISL_856694, EPI_ISL_856698, EPI_ISL_856700, EPI_ISL_860095, EPI_ISL_860203 to 860205, EPI_ISL_860257, EPI_ISL_860290, EPI_ISL_860297, EPI_ISL_860794                                                                                                                                                                                                                                                                                                                                                                                                                                                                                                                                                                                                                                                                                                                                                                                                                                                                                                                                                                                                                                                                                                                                                                                                                                                                                                                                                                                                                                                       | Lab. Microbiologia e Virologia, Cotugno, A.O. dei Colli    | Lab. Microbiologia e Virologia, Cotugno, A.O. dei Colli                                                                    | Anna Perfetti; Claudia Tiberio; Luigi Atripaldi                                                                                                                                                                                                                                                                                                                                                                                                                                                                                                                                                                                                                                                                                                                                                                                                                                                             |                                                                                                                                                                                                                                                                                                                                                                                                                                                                                                                                                                                                                                                                                                                                        |
| see above                                                                                                                                                                                                                                                                                                                                                                                                                                                                                                                                                                                                                                                                                                                                                                                                                                                                                                                                                                                                                                                                                                                                                                                                                                                                                                                                                                                                                                                                                                                                                                                                                                                                                                                                                                                                                                                                          | LabCorp                                                    | Wyoming Public Health Laboratory                                                                                           | Ashley Norberg; Bailey Bowcutt; Channing Weber; Lynette Gumbleton; Noah Hull; Taylor Fearing; and Wanda Manley                                                                                                                                                                                                                                                                                                                                                                                                                                                                                                                                                                                                                                                                                                                                                                                              |                                                                                                                                                                                                                                                                                                                                                                                                                                                                                                                                                                                                                                                                                                                                        |
| EPI_ISL_622773 to 622774, EPI_ISL_622777, EPI_ISL_622779, EPI_ISL_622803, EPI_ISL_622807, EPI_ISL_622814 to 622816, EPI_ISL_622821 to 622823, EPI_ISL_626352 to 626356, EPI_ISL_637089 to 637095, EPI_ISL_661255 to 661259, EPI_ISL_661261 to 661264, EPI_ISL_682291 to 682294, EPI_ISL_707795 to 707805, EPI_ISL_732962, EPI_ISL_732964 to 732967, EPI_ISL_755627 to 755633, EPI_ISL_755637, EPI_ISL_794610 to 794623, EPI_ISL_843193, EPI_ISL_843196, EPI_ISL_877205 to 877213, EPI_ISL_877221 to 877226                                                                                                                                                                                                                                                                                                                                                                                                                                                                                                                                                                                                                                                                                                                                                                                                                                                                                                                                                                                                                                                                                                                                                                                                                                                                                                                                                                         | LabPLUS                                                    | Institute of Environmental Science and Research (ESR)                                                                      | Anja Werner; Antje van der Linden; Arlo Upton; Chris Mansell; David Hammer; Dragana Drinkovic; Erasmus Smit; Gary McAuliffe; Hana Sofia Andersson; Hermes Perez; James Ussher; Jill Sherwood; Jing Wang; Joep de Ligt; Josh Freeman; Julia Howard; Juliet Elvy; Lauren Jelly; Mary DeAlmeida; Matt Blakiston; Matt Storey; Matthew Rogers; Max Bloomfield; Michael Addidle; Michelle Balm; Muhammad Faisal; Nikki Freed; Olin Silander; Sally Roberts; Sarah Jefferies; Sharmini Muttaiyah; Susan Morpeth; Susan Taylor; Timothy Blackmore; Vani Sathyendran; Veronica Playle; Virginia Hope; Xiaoyun Ren                                                                                                                                                                                                                                                                                                   |                                                                                                                                                                                                                                                                                                                                                                                                                                                                                                                                                                                                                                                                                                                                        |
| EPI_ISL_622778, EPI_ISL_622793, EPI_ISL_637084, EPI_ISL_637096                                                                                                                                                                                                                                                                                                                                                                                                                                                                                                                                                                                                                                                                                                                                                                                                                                                                                                                                                                                                                                                                                                                                                                                                                                                                                                                                                                                                                                                                                                                                                                                                                                                                                                                                                                                                                     | LabTests                                                   | Institute of Environmental Science and Research (ESR)                                                                      | Anja Werner; Antje van der Linden; Arlo Upton; Chris Mansell; David Hammer; Dragana Drinkovic; Erasmus Smit; Gary McAuliffe; Hana Sofia Andersson; Hermes Perez; James Ussher; Jill Sherwood; Jing Wang; Joep de Ligt; Josh Freeman; Julia Howard; Juliet Elvy; Lauren Jelly; Mary DeAlmeida; Matt Blakiston; Matt Storey; Matthew Rogers; Max Bloomfield; Michael Addidle; Michelle Balm; Muhammad Faisal; Nikki Freed; Olin Silander; Sally Roberts; Sarah Jefferies; Sharmini Muttaiyah; Susan Morpeth; Susan Taylor; Timothy Blackmore; Vani Sathyendran; Veronica Playle; Virginia Hope; Xiaoyun Ren                                                                                                                                                                                                                                                                                                   |                                                                                                                                                                                                                                                                                                                                                                                                                                                                                                                                                                                                                                                                                                                                        |
| EPI_ISL_886158 to 886169, EPI_ISL_886173 to 886174, EPI_ISL_886179 to 886241, EPI_ISL_886243 to 886263, EPI_ISL_886265 to 886356, EPI_ISL_886358 to 886695, EPI_ISL_886697 to 886993, EPI_ISL_886995 to 887053, EPI_ISL_887075 to 887091, EPI_ISL_887093 to 887104, EPI_ISL_887591 to 887792, EPI_ISL_887794 to 887904, EPI_ISL_887945 to 888119, EPI_ISL_888121 to 888276, EPI_ISL_888312 to 888434, EPI_ISL_888448 to 888483, EPI_ISL_888485 to 888499, EPI_ISL_888502 to 888588                                                                                                                                                                                                                                                                                                                                                                                                                                                                                                                                                                                                                                                                                                                                                                                                                                                                                                                                                                                                                                                                                                                                                                                                                                                                                                                                                                                                 | Labcorp                                                    | Genomics and Discovery, Respiratory Viruses Branch, Division of Viral Diseases, Centers for Disease Control and Prevention | ; Amanda Douglas; Amanda Suchanek; Andrea Throop; Ayla Burns; Ben L. Rambo-Martin; Bobbi Croy; Brian Krueger; Brian Norvell; Christos Petropoulos; Clinton R. Paden; Craig Lukasik; Debbie Boles; Dhvani Batra; Duncan MacCannell; Eyad Mansari; Goran Stevovic; Howard Engler; Hrushikesh Deshmukh; Jake Humphrey; Jana Schroth; Joe Voshell; John Pruitt; Jonathan Meltzer; Jonathan Williams; Kimberly Wagner; Lax Iyer; Lyndon Tilson; Manoj Jain; Marcia Eisenberg; Mary Ann Cristobal; Mary Williamson; Michael Levandoski; Mike Sapeta; Mindy Nye; Minoo Agarwal; Mohan Kolli; Nuthawin Charoensri; Oren Cohen; Peter W. Cook; Prashant Gupta; Qian Zeng; Rama Ghatti; Scott Parker; Scott Ryan; Stanley Letovsky; Steven Ragan; Summer Galloway; Suresh Babu Selvaraju; Susan Countryman; Susan Hicks; Suxiang Tong; Suzanne Dale; Thomas Urban; Tim Kuphal; Tricia Zwiefelhofer; Vincent Drouillon |                                                                                                                                                                                                                                                                                                                                                                                                                                                                                                                                                                                                                                                                                                                                        |
| EPI_ISL_846642 to 846643, EPI_ISL_846645 to 846648, EPI_ISL_855357, EPI_ISL_855381, EPI_ISL_855387, EPI_ISL_860824, EPI_ISL_860829 to 860831, EPI_ISL_860833 to 860841, EPI_ISL_860852 to 860859, EPI_ISL_860864, EPI_ISL_860866, EPI_ISL_860869 to 860889, EPI_ISL_860931, EPI_ISL_861234, EPI_ISL_861237, EPI_ISL_872201, EPI_ISL_872203 to 872205, EPI_ISL_872207 to 872209, EPI_ISL_872234 to 872235, EPI_ISL_872239, EPI_ISL_872256 to 872260, EPI_ISL_872279 to 872280, EPI_ISL_872282, EPI_ISL_872290, EPI_ISL_872320 to 872324, EPI_ISL_883959 to 883963, EPI_ISL_883997 to 884001, EPI_ISL_884003 to 884005, EPI_ISL_890352 to 890354, EPI_ISL_909665, EPI_ISL_909667 to 909668, EPI_ISL_909675 to 909681, EPI_ISL_909707, EPI_ISL_909724 to 909727, EPI_ISL_909729 to 909731, EPI_ISL_909733 to 909735, EPI_ISL_912545, EPI_ISL_912547 to 912549, EPI_ISL_912564 to 912567, EPI_ISL_912600 to 912601, EPI_ISL_912603 to 912605, EPI_ISL_912607 to 912611, EPI_ISL_912617 to 912620, EPI_ISL_912622 to 912623, EPI_ISL_935527 to 935539, EPI_ISL_935546 to 935550, EPI_ISL_935563 to 935564, EPI_ISL_935576, EPI_ISL_935590, EPI_ISL_935605 to 935606, EPI_ISL_935637 to 935638, EPI_ISL_935642 to 935649, EPI_ISL_940987 to 940999, EPI_ISL_941004 to 941014, EPI_ISL_941026, EPI_ISL_941028 to 941103, EPI_ISL_953956, EPI_ISL_953968, EPI_ISL_953986, EPI_ISL_953988, EPI_ISL_953994, EPI_ISL_954007, EPI_ISL_954022 to 954025, EPI_ISL_954030 to 954031, EPI_ISL_954036 to 954038, EPI_ISL_954040 to 954041, EPI_ISL_954049 to 954052, EPI_ISL_954054, EPI_ISL_954059 to 954070, EPI_ISL_954078 to 954080, EPI_ISL_954091 to 954093, EPI_ISL_954105, EPI_ISL_954114, EPI_ISL_954119, EPI_ISL_954121, EPI_ISL_954123 to 954124, EPI_ISL_954127 to 954128, EPI_ISL_955073, EPI_ISL_955094, EPI_ISL_955180 to 955183, EPI_ISL_995468 to 995470, EPI_ISL_995491 to 995494 | see above                                                  | Labo Analyses Med                                                                                                          | National Reference Center for Viruses of Respiratory Infections, Institut Pasteur, Paris                                                                                                                                                                                                                                                                                                                                                                                                                                                                                                                                                                                                                                                                                                                                                                                                                    | ; Amzalag Jonas; Angela Brisebarre; Besson J; Bonnaudet Géraldine; Bour Jean Baptiste; Breton-Cazaux Jérôme; Camille Capel; Coignard Catherine; Delamare Catherine; Dlab Dieppe; Dornic Catherine; Etienne Simon-Lorière; Garand Anne-Laure; Garel FréDéRick; Gaumery Bertrand; Gestin (B) Brieuc; Girard Sophie; Griscelli Franck; Harich; Holstein Anne; Jacques Alexandra; Labm Hignard; Le Berre (D) David; Le Vicky; Lefaura Brieuc; Marion Barbet; Maud Vanpeene; Merah Kader; Michez Karine; Méline Bizard; Nativelle; Nizard Patrice; Pasquier; Potiron GréGoire; Rouah Raquel; Rousset Dominique; Selas Labomaine; Sylvie Behillil; Sylvie van der Werf; Takouju Eve-Marie; Tomasi Florent; Vincent Enouf; Wittersheim Pascal |
| EPI_ISL_860826, EPI_ISL_860842 to 860845, EPI_ISL_860860 to 860862, EPI_ISL_861239, EPI_ISL_883964 to 883971, EPI_ISL_894223, EPI_ISL_894232, EPI_ISL_909655 to 909664, EPI_ISL_909669 to 909673, EPI_ISL_935587 to 935589, EPI_ISL_935591 to 935604, EPI_ISL_935607 to 935636, EPI_ISL_955178 to 955179                                                                                                                                                                                                                                                                                                                                                                                                                                                                                                                                                                                                                                                                                                                                                                                                                                                                                                                                                                                                                                                                                                                                                                                                                                                                                                                                                                                                                                                                                                                                                                           | see above                                                  | Labo Analyses med                                                                                                          | National Reference Center for Viruses of Respiratory Infections, Institut Pasteur, Paris                                                                                                                                                                                                                                                                                                                                                                                                                                                                                                                                                                                                                                                                                                                                                                                                                    | Amzalag Jonas; Angela Brisebarre; Camille Capel; Etienne Simon-Lorière; Marion Barbet; Maud Vanpeene; Méline Bizard; Sylvie Behillil; Sylvie van der Werf; Vincent Enouf                                                                                                                                                                                                                                                                                                                                                                                                                                                                                                                                                               |
| EPI_ISL_930594 to 930595, EPI_ISL_959569 to 959588, EPI_ISL_965306 to 965308, EPI_ISL_965318 to 965319, EPI_ISL_965328, EPI_ISL_965330 to 965331, EPI_ISL_965343, EPI_ISL_965399, EPI_ISL_965406 to 965407, EPI_ISL_965409, EPI_ISL_965411 to 965413, EPI_ISL_965419 to 965420, EPI_ISL_965469, EPI_ISL_965474, EPI_ISL_965476 to 965478, EPI_ISL_965504                                                                                                                                                                                                                                                                                                                                                                                                                                                                                                                                                                                                                                                                                                                                                                                                                                                                                                                                                                                                                                                                                                                                                                                                                                                                                                                                                                                                                                                                                                                           | see above                                                  | Labo Luc Olivier                                                                                                           | GIGA Medical Genomics                                                                                                                                                                                                                                                                                                                                                                                                                                                                                                                                                                                                                                                                                                                                                                                                                                                                                       | Bouchra Boujemla; Cécile Meex; Keith Durkin; Maria Artesi; Marie-Pierre Hayette; Pierrette Melin; Raphaël Boreux; Sébastien Bontems; Vincent Bours                                                                                                                                                                                                                                                                                                                                                                                                                                                                                                                                                                                     |
| EPI_ISL_955062 to 955063, EPI_ISL_955068 to 955072, EPI_ISL_955076, EPI_ISL_955079 to 955080, EPI_ISL_955082, EPI_ISL_955086 to 955093                                                                                                                                                                                                                                                                                                                                                                                                                                                                                                                                                                                                                                                                                                                                                                                                                                                                                                                                                                                                                                                                                                                                                                                                                                                                                                                                                                                                                                                                                                                                                                                                                                                                                                                                             | see above                                                  | Labo analyses Med                                                                                                          | National Reference Center for Viruses of Respiratory Infections, Institut Pasteur, Paris                                                                                                                                                                                                                                                                                                                                                                                                                                                                                                                                                                                                                                                                                                                                                                                                                    | Angela Brisebarre; Camille Capel; Etienne Simon-Lorière; Marion Barbet; Maud Vanpeene; Méline Bizard; Potiron GréGoire; Sylvie Behillil; Sylvie van der Werf; Vincent Enouf                                                                                                                                                                                                                                                                                                                                                                                                                                                                                                                                                            |
| EPI_ISL_872212, EPI_ISL_872238, EPI_ISL_872264 to 872265, EPI_ISL_872309 to 872314, EPI_ISL_955066 to 955067, EPI_ISL_977661 to 977663                                                                                                                                                                                                                                                                                                                                                                                                                                                                                                                                                                                                                                                                                                                                                                                                                                                                                                                                                                                                                                                                                                                                                                                                                                                                                                                                                                                                                                                                                                                                                                                                                                                                                                                                             | see above                                                  | Labo analyses med                                                                                                          | National Reference Center for Viruses of Respiratory Infections, Institut Pasteur, Paris                                                                                                                                                                                                                                                                                                                                                                                                                                                                                                                                                                                                                                                                                                                                                                                                                    | Amzalag Jonas; Angela Brisebarre; Camille Capel; Etienne Simon-Lorière; Marion Barbet; Maud Vanpeene; Méline Bizard; Sylvie Behillil; Sylvie van der Werf; Vincent Enouf                                                                                                                                                                                                                                                                                                                                                                                                                                                                                                                                                               |
| EPI_ISL_831404 to 831405, EPI_ISL_831407, EPI_ISL_831412 to 831413, EPI_ISL_831417 to 831419, EPI_ISL_831423, EPI_ISL_831426                                                                                                                                                                                                                                                                                                                                                                                                                                                                                                                                                                                                                                                                                                                                                                                                                                                                                                                                                                                                                                                                                                                                                                                                                                                                                                                                                                                                                                                                                                                                                                                                                                                                                                                                                       | Labor Dr. Krause & Kollegen MVZ GmbH                       | Robert Koch Institute, Influenza and respiratory viruses FG17 & Bioinformatics MF1, Berlin, Germany                        | Aleksandar Radonic; Dr. Lorentz; Marianne Wedde; Oliver Drechsel; Ralf Duerwald; Rene Kmicinski; Stefan Kroeger; Stephan Fuchs; Thorsten Wolff                                                                                                                                                                                                                                                                                                                                                                                                                                                                                                                                                                                                                                                                                                                                                              |                                                                                                                                                                                                                                                                                                                                                                                                                                                                                                                                                                                                                                                                                                                                        |
| EPI_ISL_751799                                                                                                                                                                                                                                                                                                                                                                                                                                                                                                                                                                                                                                                                                                                                                                                                                                                                                                                                                                                                                                                                                                                                                                                                                                                                                                                                                                                                                                                                                                                                                                                                                                                                                                                                                                                                                                                                     | Labor Dr. Wisplinghoff - Köln                              | Robert Koch Institute, Bioinformatics MF1, Berlin, Germany                                                                 | Aleksandar Radonic; Dr. R. Grosse; Marianne Wedde; Oliver Drechsel; Ralf Duerwald; Rene Kmicinski; Stefan Kroeger; Stephan Fuchs; Thorsten Wolff                                                                                                                                                                                                                                                                                                                                                                                                                                                                                                                                                                                                                                                                                                                                                            |                                                                                                                                                                                                                                                                                                                                                                                                                                                                                                                                                                                                                                                                                                                                        |
| EPI_ISL_803955 to 803957, EPI_ISL_831402, EPI_ISL_831409, EPI_ISL_831411, EPI_ISL_831420 to 831422, EPI_ISL_831424 to 831425                                                                                                                                                                                                                                                                                                                                                                                                                                                                                                                                                                                                                                                                                                                                                                                                                                                                                                                                                                                                                                                                                                                                                                                                                                                                                                                                                                                                                                                                                                                                                                                                                                                                                                                                                       | Labor Dr. Wisplinghoff - Köln                              | Robert Koch Institute, Influenza and respiratory viruses FG17 & Bioinformatics MF1, Berlin, Germany                        | Aleksandar Radonic; Dr. R. Grosse; Marianne Wedde; Oliver Drechsel; Ralf Duerwald; Rene Kmicinski; Stefan Kroeger; Stephan Fuchs; Thorsten Wolff                                                                                                                                                                                                                                                                                                                                                                                                                                                                                                                                                                                                                                                                                                                                                            |                                                                                                                                                                                                                                                                                                                                                                                                                                                                                                                                                                                                                                                                                                                                        |
| EPI_ISL_831370 to 831372, EPI_ISL_831374, EPI_ISL_831379, EPI_ISL_831382 to 831385, EPI_ISL_831390, EPI_ISL_831392, EPI_ISL_831394 to 831395, EPI_ISL_831397 to 831399, EPI_ISL_831401                                                                                                                                                                                                                                                                                                                                                                                                                                                                                                                                                                                                                                                                                                                                                                                                                                                                                                                                                                                                                                                                                                                                                                                                                                                                                                                                                                                                                                                                                                                                                                                                                                                                                             | see above                                                  | Labor Krone                                                                                                                | Robert Koch Institute, Influenza and respiratory viruses FG17 & Bioinformatics MF1, Berlin, Germany                                                                                                                                                                                                                                                                                                                                                                                                                                                                                                                                                                                                                                                                                                                                                                                                         | Aleksandar Radonic; Dr. Münstermann. Prof. Tiemann; Marianne Wedde; Oliver Drechsel; Ralf Duerwald; Rene Kmicinski; Stefan Kroeger; Stephan Fuchs; Thorsten Wolff                                                                                                                                                                                                                                                                                                                                                                                                                                                                                                                                                                      |
| EPI_ISL_913063, EPI_ISL_913092                                                                                                                                                                                                                                                                                                                                                                                                                                                                                                                                                                                                                                                                                                                                                                                                                                                                                                                                                                                                                                                                                                                                                                                                                                                                                                                                                                                                                                                                                                                                                                                                                                                                                                                                                                                                                                                     | Labor Mustafa Wien                                         | Center for Virology                                                                                                        | Irene Goerzer; Jeremy V. Camp; Monika Redlberger-Fritz; Stephan W. Aberle                                                                                                                                                                                                                                                                                                                                                                                                                                                                                                                                                                                                                                                                                                                                                                                                                                   |                                                                                                                                                                                                                                                                                                                                                                                                                                                                                                                                                                                                                                                                                                                                        |
| EPI_ISL_831414 to 831416                                                                                                                                                                                                                                                                                                                                                                                                                                                                                                                                                                                                                                                                                                                                                                                                                                                                                                                                                                                                                                                                                                                                                                                                                                                                                                                                                                                                                                                                                                                                                                                                                                                                                                                                                                                                                                                           | Labor Prof. Dr. G. Enders MVZ GbR                          | Robert Koch Institute, Influenza and respiratory viruses FG17 & Bioinformatics MF1, Berlin, Germany                        | Aleksandar Radonic; Dr. Friedemann Tewald; Marianne Wedde; Oliver Drechsel; Ralf Duerwald; Rene Kmicinski; Stefan Kroeger; Stephan Fuchs; Thorsten Wolff                                                                                                                                                                                                                                                                                                                                                                                                                                                                                                                                                                                                                                                                                                                                                    |                                                                                                                                                                                                                                                                                                                                                                                                                                                                                                                                                                                                                                                                                                                                        |
| EPI_ISL_981372                                                                                                                                                                                                                                                                                                                                                                                                                                                                                                                                                                                                                                                                                                                                                                                                                                                                                                                                                                                                                                                                                                                                                                                                                                                                                                                                                                                                                                                                                                                                                                                                                                                                                                                                                                                                                                                                     | Laboratory for Respiratory Viruses, "Cantacuzino" National | Cantacuzino Institute Virology                                                                                             | Catalina Pascu; Luiza Ustea; Mihaela Lazar; Nicoleta Paraschiv                                                                                                                                                                                                                                                                                                                                                                                                                                                                                                                                                                                                                                                                                                                                                                                                                                              |                                                                                                                                                                                                                                                                                                                                                                                                                                                                                                                                                                                                                                                                                                                                        |

|                                                                                                                                                                                                                                                                    |                                                                                |                                                                                                 |                                                                                                                                                                                                                                                                                                                                |
|--------------------------------------------------------------------------------------------------------------------------------------------------------------------------------------------------------------------------------------------------------------------|--------------------------------------------------------------------------------|-------------------------------------------------------------------------------------------------|--------------------------------------------------------------------------------------------------------------------------------------------------------------------------------------------------------------------------------------------------------------------------------------------------------------------------------|
|                                                                                                                                                                                                                                                                    | Military-Medical Institute for Researarch and Development                      |                                                                                                 |                                                                                                                                                                                                                                                                                                                                |
| EPI_ISL_768818                                                                                                                                                                                                                                                     | Laboratoire 2A2B                                                               | CNR Virus des Infections Respiratoires - France SUD                                             | Antonin Bal; Bruno Lina; Gregory Destras; Gwendolyne Burfin; Hadrien Règue; Laurence Josset; Martine Valette; Quentin Semanas                                                                                                                                                                                                  |
| EPI_ISL_768825 to 768826                                                                                                                                                                                                                                           | Laboratoire AX Bio Ocean                                                       | CNR Virus des Infections Respiratoires - France SUD                                             | Antonin Bal; Bruno Lina; Gregory Destras; Gwendolyne Burfin; Hadrien Règue; Laurence Josset; Martine Valette; Quentin Semanas                                                                                                                                                                                                  |
| EPI_ISL_768824                                                                                                                                                                                                                                                     | Laboratoire BIOLAB33                                                           | CNR Virus des Infections Respiratoires - France SUD                                             | Antonin Bal; Bruno Lina; Gregory Destras; Gwendolyne Burfin; Hadrien Règue; Laurence Josset; Martine Valette; Quentin Semanas                                                                                                                                                                                                  |
| EPI_ISL_768830, EPI_ISL_779848 to 779849                                                                                                                                                                                                                           | Laboratoire BIOMED 05                                                          | CNR Virus des Infections Respiratoires - France SUD                                             | Antonin Bal; Bruno Lina; Gregory Destras; Gwendolyne Burfin; Hadrien Règue; Laurence Josset; Martine Valette; Quentin Semanas                                                                                                                                                                                                  |
| EPI_ISL_768819 to 768820                                                                                                                                                                                                                                           | Laboratoire BPO-BIOEPFINE                                                      | CNR Virus des Infections Respiratoires - France SUD                                             | Antonin Bal; Bruno Lina; Gregory Destras; Gwendolyne Burfin; Hadrien Règue; Laurence Josset; Martine Valette; Quentin Semanas                                                                                                                                                                                                  |
| EPI_ISL_768840, EPI_ISL_769863, EPI_ISL_775219 to 775222, EPI_ISL_775225, EPI_ISL_775256, EPI_ISL_775258, EPI_ISL_775260, EPI_ISL_775262 to 775263                                                                                                                 | Laboratoire Biolife                                                            | Laboratoire de Biotechnologie                                                                   | Afaf Alaoui; Amina Benouda; Bouchra Belquih; Hanae Dakka; Lahcen belyamani; Mohamed Chenaoui; Mohammed Walid Chemao Elfihri; Mouna Quadghiri; Otmame Touzani; Saaid Amzazi and Azeddine Ibrahim; Tarik Aanniz                                                                                                                  |
| see above                                                                                                                                                                                                                                                          |                                                                                |                                                                                                 |                                                                                                                                                                                                                                                                                                                                |
| EPI_ISL_912563 to 912564, EPI_ISL_912574                                                                                                                                                                                                                           | Laboratoire Central - American Hospital of Paris                               | National Reference Center for Viruses of Respiratory Infections, Institut Pasteur, Paris        | Angela Brisebarre; Camille Capel; Etienne Simon-Lorière; Marion Barbet; Maud Vanpeene; Méline Bizard; Ramirez José-Manuel; Sylvie Behillil; Sylvie van der Werf; Vincent Enouf                                                                                                                                                 |
| EPI_ISL_768817, EPI_ISL_779836                                                                                                                                                                                                                                     | Laboratoire Mirialis                                                           | CNR Virus des Infections Respiratoires - France SUD                                             | Antonin Bal; Bruno Lina; Gregory Destras; Gwendolyne Burfin; Hadrien Règue; Laurence Josset; Martine Valette; Quentin Semanas                                                                                                                                                                                                  |
| EPI_ISL_768821                                                                                                                                                                                                                                                     | Laboratoire Novabio                                                            | CNR Virus des Infections Respiratoires - France SUD                                             | Antonin Bal; Bruno Lina; Gregory Destras; Gwendolyne Burfin; Hadrien Règue; Laurence Josset; Martine Valette; Quentin Semanas                                                                                                                                                                                                  |
| EPI_ISL_754141 to 754172                                                                                                                                                                                                                                           | Laboratoire de Microbiologie                                                   | National Reference Center for Viruses of Respiratory Infections, Institut Pasteur, Paris        | Angela Brisebarre; Camille Capel; Etienne Simon-Lorière; Marie-Sarah Fangous; Marion Barbet; Maud Vanpeene; Méline Bizard; Sylvie Behillil; Sylvie van der Werf; Vincent Enouf                                                                                                                                                 |
| EPI_ISL_660445 to 660528                                                                                                                                                                                                                                           | Laboratoire de Microbiologie CHU Sourou Sanou                                  | Centre Muraz                                                                                    | Abdoul-Salam Ouedraogo; Arsène Zongo; Essia Belarbi; Fabian Leendertz; Grit Schubert; Halidou Tinto; Lassana Sangaré; Soumeya Ouangraoua; Yacouba Sawadogo; Zekiba Tarnagda                                                                                                                                                    |
| EPI_ISL_712062 to 712069, EPI_ISL_712568                                                                                                                                                                                                                           | Laboratoire de Microbiologie- CHU Habib Bourguiba - Sfax adresse               | Laboratoire des Procédés de Criblage Moléculaire et Cellulaire-Centre de Biotechnologie de Sfax | A. and Masmoudi, S.; Abdelmoulah, F.; Abid, N.; Ajili, F.; Aouni, M.; Ben Ayed, I.; Bensaïd, M.; Chtourou, A.; Elargoubi, A.; Fki-berrajah, L.; Gaaloul, I.; Gargouri, S.; Hammami, A.; Kamoun, S.; Karray Hakim, H.; Kharat, N.; Mastouri, M.; Mhalla, S.; Nabil, A.; Rebai; Smeti, I.; Souissi, A.; Stambouli, N.; Turki, M. |
| EPI_ISL_933715, EPI_ISL_933719                                                                                                                                                                                                                                     | Laboratoire de Recherche et d'Analyses Medicales de la Gendarmerie Royale      | Laboratoire de Recherche et d'Analyses Medicales de la Gendarmerie Royale                       | Amal Souiri; Mohammed Labioui; Momammed Labioui; Nabil Lemzaoui; S. El kabbaj; Sanaâ Lemriss; Saâd El kabbaj; elmostafa El Fahime                                                                                                                                                                                              |
| EPI_ISL_754843 to 754846, EPI_ISL_754849 to 754852                                                                                                                                                                                                                 | Laboratoire de Virologie Hôpital Robert Debré                                  | National Reference Center for Viruses of Respiratory Infections, Institut Pasteur, Paris        | Andreoletti Laurent; Angela Brisebarre; Camille Capel; Etienne Simon-Lorière; Marion Barbet; Maud Vanpeene; Méline Bizard; Sylvie Behillil; Sylvie van der Werf; Vincent Enouf                                                                                                                                                 |
| EPI_ISL_792000 to 792007                                                                                                                                                                                                                                           | Laboratoire de Virologie Hôpital Robert Debré                                  | National Reference Center for Viruses of Respiratory Infections, Institut Pasteur, Paris        | Andreoletti Laurent; Angela Brisebarre; Camille Capel; Etienne Simon-Lorière; Marion Barbet; Maud Vanpeene; Méline Bizard; Sylvie Behillil; Sylvie van der Werf; Vincent Enouf                                                                                                                                                 |
| EPI_ISL_912565, EPI_ISL_912568, EPI_ISL_912575 to 912578, EPI_ISL_912602, EPI_ISL_913608 to 913610                                                                                                                                                                 | Laboratoire de Virologie du CHU de Lille Bâtiment Paul Boulanger               | National Reference Center for Viruses of Respiratory Infections, Institut Pasteur, Paris        | Angela Brisebarre; Camille Capel; Etienne Simon-Lorière; Guignon Aurélie; Marion Barbet; Maud Vanpeene; Méline Bizard; Sylvie Behillil; Sylvie van der Werf; Vincent Enouf                                                                                                                                                     |
| EPI_ISL_666870                                                                                                                                                                                                                                                     | Laboratoire de Virologie, CHU de Caen, Normandie, France.                      | GRAM2.0, Université de Caen Normandie                                                           | Astrid VABRET; Estelle LEPERCHOIS; Januel VOUTEAU; Juliette ECHE; Meriadeg LE GOUIL                                                                                                                                                                                                                                            |
| EPI_ISL_911513                                                                                                                                                                                                                                                     | Laboratoire de Virologie, CHU de Caen, Normandie, France.                      | GRAM2.0, Université de Caen Normandie Laboratoire de Virologie, CHU de Caen                     | Astrid VABRET; Estelle LEPERCHOIS; Januel VOUTEAU; Juliette ECHE; Meriadeg LE GOUIL                                                                                                                                                                                                                                            |
| EPI_ISL_765479                                                                                                                                                                                                                                                     | Laboratoire de Virologie, Hôpital Robert Debré                                 | National Reference Center for Viruses of Respiratory Infections, Institut Pasteur, Paris        | Andreoletti Laurent; Angela Brisebarre; Camille Capel; Etienne Simon-Lorière; Marion Barbet; Maud Vanpeene; Méline Bizard; Sylvie Behillil; Sylvie van der Werf; Vincent Enouf                                                                                                                                                 |
| EPI_ISL_825634 to 825712, EPI_ISL_825715 to 825806, EPI_ISL_825808 to 825948, EPI_ISL_825950 to 826268, EPI_ISL_852834 to 852841, EPI_ISL_853405 to 853415, EPI_ISL_889802 to 890173, EPI_ISL_890371 to 890888, EPI_ISL_954302 to 954610, EPI_ISL_954612 to 954744 | Laboratoire de santé publique du Québec                                        | Laboratoire de santé publique du Québec                                                         | Guillaume Bourque; Ioannis Ragoussis; Jesse Shapiro; Mark Lathrop and Michel Roger on behalf of the CoVSeQ research group; Mark Lathrop and Michel Roger on behalf of the CoVSeQ research group ( <a href="http://covseq.ca/researchgroup">http://covseq.ca/researchgroup</a> ); Sandrine Moreira                              |
| see above                                                                                                                                                                                                                                                          |                                                                                |                                                                                                 |                                                                                                                                                                                                                                                                                                                                |
| EPI_ISL_779781 to 779782, EPI_ISL_779814 to 779835                                                                                                                                                                                                                 | Laboratoire de virologie, CHU de Grenoble                                      | CNR Virus des Infections Respiratoires - France SUD                                             | Antonin Bal; Bruno Lina; Gregory Destras; Gwendolyne Burfin; Hadrien Règue; Laurence Josset; Martine Valette; Quentin Semanas; Sylvie Larrat                                                                                                                                                                                   |
| EPI_ISL_634818, EPI_ISL_700349                                                                                                                                                                                                                                     | Laboratoire de virologie, CHU de Grenoble - CS 10217 - 38043 Grenoble cedex 10 | CNR Virus des Infections Respiratoires - France SUD                                             | Antonin Bal; Bruno Lina; Gregory Destras; Gwendolyne Burfin; Hadrien Règue; Laurence Josset; Martine Valette; Quentin Semanas; Sylvie Larrat                                                                                                                                                                                   |
| EPI_ISL_634819, EPI_ISL_700350                                                                                                                                                                                                                                     | Laboratoire de virologie, CHU de Grenoble - CS 10217 - 38043 Grenoble cedex 11 | CNR Virus des Infections Respiratoires - France SUD                                             | Antonin Bal; Bruno Lina; Gregory Destras; Gwendolyne Burfin; Hadrien Règue; Laurence Josset; Martine Valette; Quentin Semanas; Sylvie Larrat                                                                                                                                                                                   |
| EPI_ISL_634820, EPI_ISL_700351                                                                                                                                                                                                                                     | Laboratoire de virologie, CHU de Grenoble - CS 10217 - 38043 Grenoble cedex 12 | CNR Virus des Infections Respiratoires - France SUD                                             | Antonin Bal; Bruno Lina; Gregory Destras; Gwendolyne Burfin; Hadrien Règue; Laurence Josset; Martine Valette; Quentin Semanas; Sylvie Larrat                                                                                                                                                                                   |
| EPI_ISL_634821, EPI_ISL_700352                                                                                                                                                                                                                                     | Laboratoire de virologie, CHU de Grenoble - CS 10217 - 38043 Grenoble cedex 13 | CNR Virus des Infections Respiratoires - France SUD                                             | Antonin Bal; Bruno Lina; Gregory Destras; Gwendolyne Burfin; Hadrien Règue; Laurence Josset; Martine Valette; Quentin Semanas; Sylvie Larrat                                                                                                                                                                                   |
| EPI_ISL_634822, EPI_ISL_700353                                                                                                                                                                                                                                     | Laboratoire de virologie, CHU de Grenoble - CS 10217 - 38043 Grenoble cedex 14 | CNR Virus des Infections Respiratoires - France SUD                                             | Antonin Bal; Bruno Lina; Gregory Destras; Gwendolyne Burfin; Hadrien Règue; Laurence Josset; Martine Valette; Quentin Semanas; Sylvie Larrat                                                                                                                                                                                   |
| EPI_ISL_634823, EPI_ISL_700354                                                                                                                                                                                                                                     | Laboratoire de virologie, CHU de Grenoble - CS 10217 - 38043 Grenoble cedex 15 | CNR Virus des Infections Respiratoires - France SUD                                             | Antonin Bal; Bruno Lina; Gregory Destras; Gwendolyne Burfin; Hadrien Règue; Laurence Josset; Martine Valette; Quentin Semanas; Sylvie Larrat                                                                                                                                                                                   |
| EPI_ISL_634824, EPI_ISL_700355                                                                                                                                                                                                                                     | Laboratoire de virologie, CHU de Grenoble - CS 10217 - 38043 Grenoble cedex 16 | CNR Virus des Infections Respiratoires - France SUD                                             | Antonin Bal; Bruno Lina; Gregory Destras; Gwendolyne Burfin; Hadrien Règue; Laurence Josset; Martine Valette; Quentin Semanas; Sylvie Larrat                                                                                                                                                                                   |
| EPI_ISL_634825, EPI_ISL_700356                                                                                                                                                                                                                                     | Laboratoire de virologie, CHU de Grenoble - CS 10217 - 38043 Grenoble cedex 17 | CNR Virus des Infections Respiratoires - France SUD                                             | Antonin Bal; Bruno Lina; Gregory Destras; Gwendolyne Burfin; Hadrien Règue; Laurence Josset; Martine Valette; Quentin Semanas; Sylvie Larrat                                                                                                                                                                                   |
| EPI_ISL_634826, EPI_ISL_700357                                                                                                                                                                                                                                     | Laboratoire de virologie, CHU de Grenoble - CS 10217 - 38043 Grenoble cedex 18 | CNR Virus des Infections Respiratoires - France SUD                                             | Antonin Bal; Bruno Lina; Gregory Destras; Gwendolyne Burfin; Hadrien Règue; Laurence Josset; Martine Valette; Quentin Semanas; Sylvie Larrat                                                                                                                                                                                   |
| EPI_ISL_634827, EPI_ISL_700358                                                                                                                                                                                                                                     | Laboratoire de virologie, CHU de Grenoble - CS 10217 - 38043 Grenoble cedex 19 | CNR Virus des Infections Respiratoires - France SUD                                             | Antonin Bal; Bruno Lina; Gregory Destras; Gwendolyne Burfin; Hadrien Règue; Laurence Josset; Martine Valette; Quentin Semanas; Sylvie Larrat                                                                                                                                                                                   |
| EPI_ISL_634828, EPI_ISL_700359                                                                                                                                                                                                                                     | Laboratoire de virologie, CHU de Grenoble - CS 10217 - 38043 Grenoble cedex 20 | CNR Virus des Infections Respiratoires - France SUD                                             | Antonin Bal; Bruno Lina; Gregory Destras; Gwendolyne Burfin; Hadrien Règue; Laurence Josset; Martine Valette; Quentin Semanas; Sylvie Larrat                                                                                                                                                                                   |
| EPI_ISL_634829, EPI_ISL_700360                                                                                                                                                                                                                                     | Laboratoire de virologie, CHU de Grenoble - CS 10217 - 38043 Grenoble cedex 21 | CNR Virus des Infections Respiratoires - France SUD                                             | Antonin Bal; Bruno Lina; Gregory Destras; Gwendolyne Burfin; Hadrien Règue; Laurence Josset; Martine Valette; Quentin Semanas; Sylvie Larrat                                                                                                                                                                                   |
| EPI_ISL_634830, EPI_ISL_700361                                                                                                                                                                                                                                     | Laboratoire de virologie, CHU de Grenoble - CS 10217 - 38043 Grenoble cedex 22 | CNR Virus des Infections Respiratoires - France SUD                                             | Antonin Bal; Bruno Lina; Gregory Destras; Gwendolyne Burfin; Hadrien Règue; Laurence Josset; Martine Valette; Quentin Semanas; Sylvie Larrat                                                                                                                                                                                   |
| EPI_ISL_634831, EPI_ISL_700362                                                                                                                                                                                                                                     | Laboratoire de virologie, CHU de Grenoble - CS 10217 - 38043 Grenoble cedex 23 | CNR Virus des Infections Respiratoires - France SUD                                             | Antonin Bal; Bruno Lina; Gregory Destras; Gwendolyne Burfin; Hadrien Règue; Laurence Josset; Martine Valette; Quentin Semanas; Sylvie Larrat                                                                                                                                                                                   |
| EPI_ISL_634832, EPI_ISL_700363                                                                                                                                                                                                                                     | Laboratoire de virologie, CHU de Grenoble - CS 10217 - 38043 Grenoble cedex 24 | CNR Virus des Infections Respiratoires - France SUD                                             | Antonin Bal; Bruno Lina; Gregory Destras; Gwendolyne Burfin; Hadrien Règue; Laurence Josset; Martine Valette; Quentin Semanas; Sylvie Larrat                                                                                                                                                                                   |



|                                                                                                                                                                                                                                                          |                                                                                                                                                                                                                       |                                                                                                                                                                                                                                                        |                                                                                                                                                                                                                                                                                                                                                                                                                                                                                                                                                                                                                                                     |
|----------------------------------------------------------------------------------------------------------------------------------------------------------------------------------------------------------------------------------------------------------|-----------------------------------------------------------------------------------------------------------------------------------------------------------------------------------------------------------------------|--------------------------------------------------------------------------------------------------------------------------------------------------------------------------------------------------------------------------------------------------------|-----------------------------------------------------------------------------------------------------------------------------------------------------------------------------------------------------------------------------------------------------------------------------------------------------------------------------------------------------------------------------------------------------------------------------------------------------------------------------------------------------------------------------------------------------------------------------------------------------------------------------------------------------|
| EPI_ISL_634833, EPI_ISL_700364                                                                                                                                                                                                                           | Laboratoire de virologie, CHU de Grenoble - CS 10217 - 38043 Grenoble cedex 25                                                                                                                                        | CNR Virus des Infections Respiratoires - France SUD                                                                                                                                                                                                    | Antonin Bal; Bruno Lina; Gregory Destras; Gwendolyne Burfin; Hadrien Règue; Laurence Josset; Martine Valette; Quentin Semanas; Sylvie Larrat                                                                                                                                                                                                                                                                                                                                                                                                                                                                                                        |
| EPI_ISL_634834, EPI_ISL_700365                                                                                                                                                                                                                           | Laboratoire de virologie, CHU de Grenoble - CS 10217 - 38043 Grenoble cedex 26                                                                                                                                        | CNR Virus des Infections Respiratoires - France SUD                                                                                                                                                                                                    | Antonin Bal; Bruno Lina; Gregory Destras; Gwendolyne Burfin; Hadrien Règue; Laurence Josset; Martine Valette; Quentin Semanas; Sylvie Larrat                                                                                                                                                                                                                                                                                                                                                                                                                                                                                                        |
| EPI_ISL_634835, EPI_ISL_700366                                                                                                                                                                                                                           | Laboratoire de virologie, CHU de Grenoble - CS 10217 - 38043 Grenoble cedex 27                                                                                                                                        | CNR Virus des Infections Respiratoires - France SUD                                                                                                                                                                                                    | Antonin Bal; Bruno Lina; Gregory Destras; Gwendolyne Burfin; Hadrien Règue; Laurence Josset; Martine Valette; Quentin Semanas; Sylvie Larrat                                                                                                                                                                                                                                                                                                                                                                                                                                                                                                        |
| EPI_ISL_634836, EPI_ISL_700367                                                                                                                                                                                                                           | Laboratoire de virologie, CHU de Grenoble - CS 10217 - 38043 Grenoble cedex 28                                                                                                                                        | CNR Virus des Infections Respiratoires - France SUD                                                                                                                                                                                                    | Antonin Bal; Bruno Lina; Gregory Destras; Gwendolyne Burfin; Hadrien Règue; Laurence Josset; Martine Valette; Quentin Semanas; Sylvie Larrat                                                                                                                                                                                                                                                                                                                                                                                                                                                                                                        |
| EPI_ISL_634837, EPI_ISL_700368                                                                                                                                                                                                                           | Laboratoire de virologie, CHU de Grenoble - CS 10217 - 38043 Grenoble cedex 29                                                                                                                                        | CNR Virus des Infections Respiratoires - France SUD                                                                                                                                                                                                    | Antonin Bal; Bruno Lina; Gregory Destras; Gwendolyne Burfin; Hadrien Règue; Laurence Josset; Martine Valette; Quentin Semanas; Sylvie Larrat                                                                                                                                                                                                                                                                                                                                                                                                                                                                                                        |
| EPI_ISL_700369                                                                                                                                                                                                                                           | Laboratoire de virologie, CHU de Grenoble - CS 10217 - 38043 Grenoble cedex 30                                                                                                                                        | CNR Virus des Infections Respiratoires - France SUD                                                                                                                                                                                                    | Antonin Bal; Bruno Lina; Gregory Destras; Gwendolyne Burfin; Hadrien Règue; Laurence Josset; Martine Valette; Quentin Semanas; Sylvie Larrat                                                                                                                                                                                                                                                                                                                                                                                                                                                                                                        |
| EPI_ISL_700370                                                                                                                                                                                                                                           | Laboratoire de virologie, CHU de Grenoble - CS 10217 - 38043 Grenoble cedex 31                                                                                                                                        | CNR Virus des Infections Respiratoires - France SUD                                                                                                                                                                                                    | Antonin Bal; Bruno Lina; Gregory Destras; Gwendolyne Burfin; Hadrien Règue; Laurence Josset; Martine Valette; Quentin Semanas; Sylvie Larrat                                                                                                                                                                                                                                                                                                                                                                                                                                                                                                        |
| EPI_ISL_634817, EPI_ISL_700348, EPI_ISL_900510                                                                                                                                                                                                           | Laboratoire de virologie, CHU de Grenoble - CS 10217 - 38043 Grenoble cedex 9                                                                                                                                         | CNR Virus des Infections Respiratoires - France SUD                                                                                                                                                                                                    | Antonin Bal; Bruno Lina; Gregory Destras; Gwendolyne Burfin; Hadrien Règue; Laurence Josset; Martine Valette; Quentin Semanas; Sylvie Larrat                                                                                                                                                                                                                                                                                                                                                                                                                                                                                                        |
| EPI_ISL_629081 to 629108, EPI_ISL_666653 to 666681, EPI_ISL_683331 to 683333                                                                                                                                                                             | Laboratoire du Centre Hospitalier Anecy Genevois                                                                                                                                                                      | CNR Virus des Infections Respiratoires - France SUD                                                                                                                                                                                                    | Antonin Bal; Bruno Chanzy; Bruno Julia; Gregory Destras; Gwendolyne Burfin; Hadrien Règue; Hélène Petitprez; Laurence Josset; Martine Valette; Quentin Semanas                                                                                                                                                                                                                                                                                                                                                                                                                                                                                      |
| EPI_ISL_910342 to 911241                                                                                                                                                                                                                                 | Laboratoire national de sante, Microbiology, Virology                                                                                                                                                                 | Laboratoire national de sante, Microbiology, Microbial Genomics Platform                                                                                                                                                                               | Anke Wienecke-Baldacchino; Catherine Ragimbeau; Fatu Djabi; Jessica Tapp; Lise Pignon; Raoul Salmon; Tamir Abdelrahman                                                                                                                                                                                                                                                                                                                                                                                                                                                                                                                              |
| EPI_ISL_739700, EPI_ISL_739880, EPI_ISL_740129, EPI_ISL_744295, EPI_ISL_744819, EPI_ISL_744830                                                                                                                                                           | Laboratoire national de santé, Microbiology, Virology                                                                                                                                                                 | Laboratoire national de santé, Microbiology, Epidemiology and Microbial Genomics                                                                                                                                                                       | Anke Wienecke-Baldacchino; Catherine Ragimbeau; Fatu Djabi; Jessica Tapp; Tamir Abdelrahman; Trung Nguyen Nguyen                                                                                                                                                                                                                                                                                                                                                                                                                                                                                                                                    |
| EPI_ISL_739693 to 739699, EPI_ISL_739701 to 739879, EPI_ISL_739881 to 740128, EPI_ISL_740130 to 740546, EPI_ISL_744135 to 744294, EPI_ISL_744296 to 744818, EPI_ISL_744820 to 744829, EPI_ISL_744831 to 745027, EPI_ISL_755589, EPI_ISL_770845 to 771150 | Laboratoire national de santé, Microbiology, Virology                                                                                                                                                                 | Laboratoire national de santé, Microbiology, Microbial Genomics Platform                                                                                                                                                                               | Anke Wienecke-Baldacchino; Catherine Ragimbeau; Fatu Djabi; Jessica Tapp; Lise Pignon; Raoul Salmon; Tamir Abdelrahman                                                                                                                                                                                                                                                                                                                                                                                                                                                                                                                              |
| EPI_ISL_661299 to 661300, EPI_ISL_676516 to 676517, EPI_ISL_676535 to 676540, EPI_ISL_766640 to 766641, EPI_ISL_831953 to 831957, EPI_ISL_831998 to 831999, EPI_ISL_913294, EPI_ISL_913318, EPI_ISL_934316 to 934321                                     | Laboratoriemedicin, Klinisk mikrobiologi                                                                                                                                                                              | The Public Health Agency of Sweden                                                                                                                                                                                                                     | Anna Risberg; Anna-Malin Linde; Carlo Berg; Department of Microbiology; Karin Tegmark-Wisell; Maria Lind Karlberg; Mattias Haukland; Mia Brytting; Noura Walai; Oskar Karlsson Lindsjö; Petra Edquist; Petra Holmstrom; Reza Advani; Sofia Stamouli; The Public Health Agency of Sweden                                                                                                                                                                                                                                                                                                                                                             |
| EPI_ISL_906552                                                                                                                                                                                                                                           | Laboratorio Angel Diagnostica                                                                                                                                                                                         | Instituto Nacional de Salud- Dirección de Investigación en Salud Pública, Universidad de los Andes- Applied genomics research group, Vicerrectoria de Investigación y Creación, Universidad de los Andes- Systems and Computing Engineering Department | Carlos Franco-Muñoz; Diego A. Álvarez-Díaz; Diego Andrés Prada; Gerardo Santamaría Jorge Duitama; Héctor Alejandro Ruiz-Moreno; Jhonnatan Reales-González; Jorge Ivan Diaz; Julian Naizaque; Katherine Laiton-Donato; Laura Natalia Gonzalez; Magdalena Wiesner; Marcela Mercado-Reyes; Maria T. Herrera-Sepúlveda; Martha Lucia Ospina Martínez; Mauricio Pacheco-Montealegre; Sheryll Corchuelo; Silvia Restrepo-Restrepo                                                                                                                                                                                                                         |
| EPI_ISL_906553 to 906555                                                                                                                                                                                                                                 | Laboratorio Bienestar                                                                                                                                                                                                 | Instituto Nacional de Salud- Dirección de Investigación en Salud Pública, Universidad de los Andes- Applied genomics research group, Vicerrectoria de Investigación y Creación, Universidad de los Andes- Systems and Computing Engineering Department | Carlos Franco-Muñoz; Diego A. Álvarez-Díaz; Diego Andrés Prada; Gerardo Santamaría Jorge Duitama; Héctor Alejandro Ruiz-Moreno; Jhonnatan Reales-González; Jorge Ivan Diaz; Julian Naizaque; Katherine Laiton-Donato; Laura Natalia Gonzalez; Magdalena Wiesner; Marcela Mercado-Reyes; Maria T. Herrera-Sepúlveda; Martha Lucia Ospina Martínez; Mauricio Pacheco-Montealegre; Sheryll Corchuelo; Silvia Restrepo-Restrepo                                                                                                                                                                                                                         |
| EPI_ISL_965179                                                                                                                                                                                                                                           | Laboratorio Biologia Molecolare SARS-COV2- UOC Laboratorio Analisi- Servizio Medicina di Laboratorio, Ospedale San Francesco - ATS-ASSLNUoro                                                                          | LABORATORIO SPECIALISTICO UOC EMATOLOGIA- Ospedale San Francesco - ATS-ASSLNUoro                                                                                                                                                                       | ASPRONI ROSANNA; FANCELLO TATIANA; FIAMMA MAURA; FLORE ANNA RITA. PALMAS ANGELO DOMENICO; IANA LO MAGLIO; MAMELI GIUSEPPE; MONNE MARIA ITRIA; PIRAS GIOVANNA; SANNA FILOMENA; SULIS VINCENZO; TOJA ALESSANDRO                                                                                                                                                                                                                                                                                                                                                                                                                                       |
| EPI_ISL_637107 to 637109, EPI_ISL_965028, EPI_ISL_965031                                                                                                                                                                                                 | Laboratorio Biologia Molecolare Sars Cov2 - UOC Laboratorio Analisi - Servizio Medicina di Laboratorio, Ospedale "San Francesco" - ATS-ASSL NUoro                                                                     | Laboratorio specialistico UOC Ematologia - Ospedale "San Francesco" - ATS-ASSL NUoro                                                                                                                                                                   | Asproni Rosanna; Casu Gavino; Fancello Tatiana; Fiamma Maura; Floris Anna Rita; Lo Maglio Iana; Malune Paolo; Mamei Giuseppe; Monne Maria Itria; Palmas Angelo Domenico; Piras Giovanna; Sanna Filomena; Sulis Vincenzo; Toja Alessandro                                                                                                                                                                                                                                                                                                                                                                                                            |
| EPI_ISL_770018 to 770019                                                                                                                                                                                                                                 | Laboratorio Cenahce                                                                                                                                                                                                   | Incienza, Instituto Costarricense de Investigación y Enseñanza en Nutrición y Salud                                                                                                                                                                    | Adriana Godínez; Claudio Soto-Garita; Estela Cordero; Francisco Duarte; Hebleen Porras; Melany Calderón & Andrés Feoli-Grant                                                                                                                                                                                                                                                                                                                                                                                                                                                                                                                        |
| EPI_ISL_792474 to 792499                                                                                                                                                                                                                                 | Laboratorio Central Mg. Luis Alfredo Pianciola                                                                                                                                                                        | Hospital Regional Ushuaia - Centro Austral De Investigaciones Científicas - Universidad Nacional De Tierra Del Fuego on behalf of 'Proyecto Argentino Interinstitucional de genómica de SARS-CoV-2' (PAIS Consortium)                                  | C; CF; Ceballos; F; Gallego; Gramundi; ID; M; MC; Mazzeo; Nardi; Pianciola, L.; Pinto; SG; Ziehm                                                                                                                                                                                                                                                                                                                                                                                                                                                                                                                                                    |
| EPI_ISL_964887, EPI_ISL_964891, EPI_ISL_964893 to 964896, EPI_ISL_964898 to 964900, EPI_ISL_964902 to 964912, EPI_ISL_964914, EPI_ISL_981053                                                                                                             | Laboratorio Central Mg. Luis Alfredo Pianciola on behalf of 'Proyecto Argentino Interinstitucional de genómica de SARS-CoV-2' (PAIS Consortium)                                                                       | Laboratorio Central Mg. Luis Alfredo Pianciola on behalf of 'Proyecto Argentino Interinstitucional de genómica de SARS-CoV-2' (PAIS Consortium)                                                                                                        | C Pintos; C Ziehm; J Ousset; L Pianciola.; M Fernandez; M Mazzeo; M Nabaes                                                                                                                                                                                                                                                                                                                                                                                                                                                                                                                                                                          |
| EPI_ISL_981030 to 981052, EPI_ISL_981054 to 981056                                                                                                                                                                                                       | Laboratorio Central Sección Virología. Hospital Regional Artemides Zatti (Viedma, Río Negro); Laboratorio MICROBIOM (General Roca, Río Negro); Hospital Zonal Dr. Ramón Carrillo (San Carlos De Bariloche, Río Negro) | Laboratorio Central Mg. Luis Alfredo Pianciola on behalf of 'Proyecto Argentino Interinstitucional de genómica de SARS-CoV-2' (PAIS Consortium)                                                                                                        | Antonela De Fino; C Pintos; C Ziehm; Darío Fabián de Prátula; J Ousset; L Pianciola.; Liliana Fonseca; M Fernandez; M Mazzeo; M Nabaes; Marcela Nóbile; Maria Laura Álvarez; Patricia Valeria Blanco; Silvana Cecchi; Yesica Espasandin                                                                                                                                                                                                                                                                                                                                                                                                             |
| EPI_ISL_792512 to 792521                                                                                                                                                                                                                                 | Laboratorio Central de la Ciudad de Santa Fe                                                                                                                                                                          | Grupo de Genómica y Bioinformática del Instituto de Investigación de la Cadena Láctea CONICET-INTA on behalf of 'Proyecto Argentino Interinstitucional de genómica de SARS-CoV-2' (PAIS Consortium)                                                    | AF; Amadio; C; Eberhardt; G; Irazoqui; JM; MF; Mugna; Ojeda; Pastor; Rompató; V                                                                                                                                                                                                                                                                                                                                                                                                                                                                                                                                                                     |
| EPI_ISL_792526 to 792546                                                                                                                                                                                                                                 | Laboratorio Central, Ministerio de Salud Córdoba                                                                                                                                                                      | Instituto de Patología Vegetal (CIAP-INTA) on behalf of 'Proyecto Argentino Interinstitucional de genómica de SARS-CoV-2' (PAIS Consortium)                                                                                                            | Barbas, G.; Castro, G.; Debat, HJ.; FD; Fernández; MB; Pisano; Re; V                                                                                                                                                                                                                                                                                                                                                                                                                                                                                                                                                                                |
| EPI_ISL_769987, EPI_ISL_769991                                                                                                                                                                                                                           | Laboratorio Clinico Labin                                                                                                                                                                                             | Incienza, Instituto Costarricense de Investigación y Enseñanza en Nutrición y Salud                                                                                                                                                                    | Adriana Godínez; Adriana Godínez; Claudio Soto-Garita; Estela Cordero; Francisco Duarte; Hebleen Porras; Melany Calderon & Pei Chan Ma; Melany Calderón & Mariel López                                                                                                                                                                                                                                                                                                                                                                                                                                                                              |
| EPI_ISL_750163 to 750164, EPI_ISL_751201                                                                                                                                                                                                                 | Laboratorio DILAVE/MGAP-INIA-UdelaR -Tacuarembó                                                                                                                                                                       | Institut Pasteur de Montevideo                                                                                                                                                                                                                         | Ana Carolina Mendonça; Andres Lizasoain; Camila Simoes; Cecilia Alonso; Cecilia Salazar; Daiana Mir; Fernando Lopez-Tort; Fernando Motta; Gonzalo Bello; Ighor Arantes; Ignacio Ferrás; Jose Sotelo; Leticia Maya; Leticia Garay Martins; Luciana Appolinario; Lucia Spangenberg; Mailen Arleo; Mariana Brandes; Marilda Mendonça Siqueira; Marilda Tereza Mar da Rosa; Maria Jose Benitez-Galeano; Martín Graña; Matias Castells; Matias Victoria; Matias Salvo; Natalia Rego; Natalia Reyes; Pablo Smircich; Paola Cristina Resende; Rodney Colina; Tamara Fernandez-Calero; Tania Possi; Tatiana Schäffer Gregianini; Veronica Noya; Yasser Vega |

|                                                                                                                                                |                                                                                                                                                        |                                                                                                                                                                                                                                               |                                                                                                                                                                                                                                                                                                                                                                             |
|------------------------------------------------------------------------------------------------------------------------------------------------|--------------------------------------------------------------------------------------------------------------------------------------------------------|-----------------------------------------------------------------------------------------------------------------------------------------------------------------------------------------------------------------------------------------------|-----------------------------------------------------------------------------------------------------------------------------------------------------------------------------------------------------------------------------------------------------------------------------------------------------------------------------------------------------------------------------|
| EPI_ISL_779185 to 779198, EPI_ISL_979327 to 979352                                                                                             | Laboratorio Estatal de Salud Pública de Nuevo León                                                                                                     | Laboratorio de Infectología Molecular, Departamento de Bioquímica y Medicina Molecular, Facultad de Medicina - Universidad Autónoma de Nuevo León                                                                                             | Ana M. Rivas-Estilla; Consuelo Treviño-Garza; Daniel Arellanos-Soto; Else del Carmen García-García; Gloria A. Jasso-de-la-Peña; Kame A. Galán-Huerta; Manuel E. de-la-O-Cavazos; María F. Herrera-Saldivar; Natalia Martínez-Acuña; Roberto Montes-de-Oca; Samuel Buentello-Wong; Sonia A. Lozano-Sepúlveda                                                                 |
| EPI_ISL_794592                                                                                                                                 | Laboratorio Estatal de Salud Pública de Tamaulipas                                                                                                     | Instituto de diagnóstico y Referencia Epidemiológicos (INDRE)                                                                                                                                                                                 | Abril Rodríguez-Maldonado; Ana María Cortez-Calderon; Bernardita Reyes-Berrones; Celia Alpuche-Aranda; Claudia Wong-Arambula; Ernesto Ramírez-González.; Fabiola Garces-Ayala; Gisela Barrera-Badillo; Gloria Molina-Gambo; Hilda del Carmen-Selvera; Hugo Lopez Gateil-Ramirez; Irma Lopez-Martínez; Jose Luis Alomia-Zegarra; Lucia Hernandez-Rivas                       |
| EPI_ISL_735398                                                                                                                                 | Laboratorio Fleury                                                                                                                                     | Instituto Adolfo Lutz, Interdisciplinary Procedures Center, Strategic Laboratory                                                                                                                                                              | Claudia Regina Gonçalves; Claudio Tavares Sacchi; Erica Valessa Ramos Gomes; Karoline Rodrigues Campos                                                                                                                                                                                                                                                                      |
| EPI_ISL_956301, EPI_ISL_956306                                                                                                                 | Laboratorio Gencore- Universidad de los Andes                                                                                                          | Instituto Nacional de Salud- Dirección de Investigación en Salud Pública, Universidad de los Andes- Gencore                                                                                                                                   | Carlos Franco-Muñoz; Diego A. Álvarez-Díaz; Diego Andrés Prada; Gerardo Santamaría; Hector Alejandro Ruiz-Moreno; Jhonnatan Reales-González; Julian Naizaque; Katherine Laiton-Donato; Magdalena Wiesner; Marcela Mercado-Reyes; María T. Herrera-Sepúlveda; Martha Lucia Ospina Martinez; Mauricio Pacheco-Montealegre; Sheryll Corchuelo                                  |
| EPI_ISL_913446 to 913447                                                                                                                       | Laboratorio Genzano - ASL RM 6                                                                                                                         | INMI Lazzaro Spallanzani IRCCS                                                                                                                                                                                                                | Antonino Di Caro; Barbara Bartolini; Cesare E.M. Gruber; Cesare EM Gruber; Emanuela Conti; Emanuela Giombini; Francesco Messina; Grazia Tramini; Maria R Capobianchi; Maria R. Capobianchi; Martina Rueca; Ornella Butera                                                                                                                                                   |
| EPI_ISL_969131, EPI_ISL_969227, EPI_ISL_969884, EPI_ISL_970647, EPI_ISL_974745, EPI_ISL_977598, EPI_ISL_977601, EPI_ISL_977603, EPI_ISL_977651 |                                                                                                                                                        |                                                                                                                                                                                                                                               |                                                                                                                                                                                                                                                                                                                                                                             |
| see above                                                                                                                                      | Laboratorio Microbiologia e Virologia P.O. Cotugno A.O. dei Colli                                                                                      | Laboratorio Microbiologia e Virologia P.O. Cotugno A.O. dei Colli                                                                                                                                                                             | ; Anna Perfetti; Claudia Tiberio; Luigi Atripaldi                                                                                                                                                                                                                                                                                                                           |
| EPI_ISL_969297                                                                                                                                 | Laboratorio Microbiologia e Virologia, P.O. Cotugno, A.O. dei Colli                                                                                    | Laboratorio Microbiologia e Virologia, P.O. Cotugno, A.O. dei Colli                                                                                                                                                                           | Anna Perfetti; Claudia Tiberio; Luigi Atripaldi                                                                                                                                                                                                                                                                                                                             |
| EPI_ISL_861628, EPI_ISL_861678                                                                                                                 | Laboratorio Municipal de Guarulhos                                                                                                                     | Instituto Adolfo Lutz, Interdisciplinary Procedures Center, Strategic Laboratory                                                                                                                                                              | Claudia Regina Gonçalves; Claudio Tavares Sacchi; Erica Valessa Ramos Gomes; Karoline Rodrigues Campos                                                                                                                                                                                                                                                                      |
| EPI_ISL_693246                                                                                                                                 | Laboratorio Municipal de Rio Grande da Serra                                                                                                           | Instituto Adolfo Lutz, Interdisciplinary Procedures Center, Strategic Laboratory                                                                                                                                                              | Claudia Regina Gonçalves; Claudio Tavares Sacchi; Erica Valessa Ramos Gomes; Karoline Rodrigues Campos                                                                                                                                                                                                                                                                      |
| EPI_ISL_845628 to 845629                                                                                                                       | Laboratorio Médico Echavarría                                                                                                                          | Instituto Nacional de Salud - Dirección de Investigación en Salud Pública                                                                                                                                                                     | Carlos Franco-Muñoz; Diego A. Álvarez-Díaz; Diego Andrés Prada; Gerardo Santamaría; Jonathan Reales; Julian Naizaque; Katherine Laiton-Donato; Magdalena Wiesner; Marcela Mercado-Reyes; María T. Herrera-Sepúlveda; Martha Lucia Ospina Martinez; Mauricio Pacheco-Montealegre; Paola Muñoz-Laiton; Sheryll Corchuelo                                                      |
| EPI_ISL_837551 to 837552, EPI_ISL_837579 to 837596                                                                                             | Laboratorio Nacional de Salud                                                                                                                          | Laboratory of Respiratory Viruses and Measles, Oswaldo Cruz Institute, FIOCRUZ                                                                                                                                                                | Ana Carolina Mendonca; Anna Carolina Paixao; Cesar Roberto Conde Pereira; Claudia Estrada; Fernando Motta; Luciana Appolinario; Marilda Siqueira on behalf of the Fiocruz COVID-19 Genomic Surveillance Network; Paola Resende                                                                                                                                              |
| EPI_ISL_755301 to 755303                                                                                                                       | Laboratorio de Bioingeniería, Instituto de Ciencias de la Ingeniería, Universidad de O'Higgins                                                         | Center for Mathematical Modeling and Center for Genome Regulation. Santiago, Chile                                                                                                                                                            | Allende ML; Arriagada G; Bastias M; Bustos F; Castro E; G. Galvez; González M; J. Ortega; M; M. Latorre; Maass A; Meneses C.; Montecino; Orellana A; Sanhueza D; Travisany D;                                                                                                                                                                                               |
| EPI_ISL_842652                                                                                                                                 | Laboratorio de Biología Molecular Hospital Pedro de Elizalde                                                                                           | Grupo de Genómica y Bioinformática del Instituto de Investigación de la Cadena Láctea CONICET-INTA on behalf of 'Proyecto Argentino Interinstitucional de genómica de SARS-CoV-2' (PAIS Consortium)                                           | A; AF; Alegre; Alexay; Amadio; Aulicino; B; Bressan; C; Chamorro; Claps; D; Diaz; E; Eberhardt; F; FJ; G; Gondolesi; Goya; Gómez; Indart; Irazoqui; J; König; L; Lorenzo; Lusso; M; ME; MF; ML; MS; Marchetti; Martin; Montoto Piazza; Morandi; N; Nabaes Jodar; Natale; Osaba; P; Paez; Rocovich; Rosales; S; Sanchez; Sueiro; Torres; Valinotto; Viegas, M.; Wenk; Zamora |
| EPI_ISL_626549 to 626565                                                                                                                       | Laboratorio de Biología Molecular, Facultad de Medicina, Universidad de Atacama, Copiapo, Chile/ FONDAP CRG, Universidad Andrés Bello, Santiago, Chile | Center for Mathematical Modeling and Center for Genome Regulation. Santiago, Chile                                                                                                                                                            | Allende ML; Bastias M; Castro E; Echeverría C; González M; M; Maass A; Manríquez R; Meneses C.; Montecino; Orellana A; Sanhueza D; Travisany D                                                                                                                                                                                                                              |
| EPI_ISL_792354 to 792357                                                                                                                       | Laboratorio de Biología Molecular. Hospital Dr. Héctor Cura                                                                                            | Área de Secuenciación del Laboratorio de Virología del Hospital de Niños Dr. Ricardo Gutiérrez on behalf of 'Proyecto Argentino Interinstitucional de genómica de SARS-CoV-2' (PAIS Consortium)                                               | Ghiano; Goya; J; LE; Lusso; MB; MI; MS; N; Nabaes Jodar; Natale; R; S; Spina; Turrina; Valinotto; Viegas, M.; Zaffanella                                                                                                                                                                                                                                                    |
| EPI_ISL_792560, EPI_ISL_801386 to 801396, EPI_ISL_811148 to 811149, EPI_ISL_833131 to 833140                                                   | Laboratorio de Ecología de Doenças Transmissíveis na Amazonia, Instituto Leonidas e Maria Deane - Fiocruz Amazonia                                     | Laboratorio de Ecología de Doenças Transmissíveis na Amazonia, Instituto Leonidas e Maria Deane - Fiocruz Amazonia                                                                                                                            | André Corado; Debora Duarte; Felipe Naveca on behalf of the Fiocruz COVID-19 Genomic Surveillance Network; Fernanda Nascimento; George Silva; Karina Pessoa; Luciana Gonçalves; Maria Júlia Brandão; Matilde Mejía; Michele Jesus; Valdinete Nascimento; Victor Souza; Ágatha Costa                                                                                         |
| EPI_ISL_648380, EPI_ISL_648595, EPI_ISL_648597 to 648598, EPI_ISL_648600, EPI_ISL_648602 to 648603, EPI_ISL_648606                             | Laboratorio de Infectología Servicio de Infectología Hospital Universitario Dr. José Eleuterio González - Universidad Autónoma de Nuevo León           | Laboratorio de Infectología Molecular Departamento de Bioquímica y Medicina Molecular Facultad de Medicina - Universidad Autónoma de Nuevo León                                                                                               | Adrian Camacho-Ortiz; Ana M. Rivas-Estilla; Consuelo Treviño-Garza; Daniel Arellanos-Soto; Eduardo Perez-Alba; Elvira Garza-González; Kame A. Galán-Huerta; Laura Nuzzolo-Shihadeh; Manuel E. de-la-O-Cavazos; María F. Herrera-Saldivar; Natalia Martínez-Acuña; Paola Bocanegra-Ibarias; Roberto Montes-de-Oca; Samantha M. Flores-Treviño; Sonia A. Lozano-Sepúlveda     |
| EPI_ISL_648607 to 648609, EPI_ISL_779169 to 779184, EPI_ISL_961760 to 961800, EPI_ISL_965222                                                   | Laboratorio de Infectología, Servicio de Infectología, Hospital Universitario Dr. José Eleuterio González - Universidad Autónoma de Nuevo León         | Laboratorio de Infectología Molecular, Departamento de Bioquímica y Medicina Molecular, Facultad de Medicina - Universidad Autónoma de Nuevo León                                                                                             | Adrian Camacho-Ortiz; Ana M. Rivas-Estilla; Consuelo Treviño-Garza; Daniel Arellanos-Soto; Eduardo Perez-Alba; Elvira Garza-González; Kame A. Galán-Huerta; Laura Nuzzolo-Shihadeh; Manuel E. de-la-O-Cavazos; María F. Herrera-Saldivar; Natalia Martínez-Acuña; Paola Bocanegra-Ibarias; Roberto Montes-de-Oca; Samantha M. Flores-Treviño; Sonia A. Lozano-Sepúlveda     |
| EPI_ISL_792500 to 792511                                                                                                                       | Laboratorio de Inmunología del Hospital Perrando e Instituto de Medicina Regional de la UNNE                                                           | Grupo de Genómica y Bioinformática del Instituto de Investigación de la Cadena Láctea CONICET-INTA on behalf of 'Proyecto Argentino Interinstitucional de genómica de SARS-CoV-2' (PAIS Consortium)                                           | A; AF; Amadio; Ayala; Cayré; Deluca; Eberhardt; Foussal; G; Giusiano; Gómez; H; Irazoqui; JM; L; Lescano; Lucero; M; MD; MF; MV; Marin; NA                                                                                                                                                                                                                                  |
| EPI_ISL_792424 to 792442                                                                                                                       | Laboratorio de Inmunología del Hospital Perrando e Instituto de Medicina Regional de la UNNE                                                           | Instituto de Biotecnología, IABIMO (CONICET), Instituto de Virología, IVIT(CONICET), Instituto de Patobiología, IPVET(CONICET), CICVYA, INTA on behalf of 'Proyecto Argentino Interinstitucional de genómica de SARS-CoV-2' (PAIS Consortium) | A; AF; AJ; AV; Asurmendi; Ayala; Bengoa Luoni; Cacciabué; Cayré; D; Deluca; Distéfano; Farber; Fossal; G; GA; Giusiano; Gómez; H; König; L; LC; Lescano; Lozano Calderón; Lucero; M; MD; MG; MPD; MV; Marin; Muñoz Hidalgo; NA; NB; PA; Paniago; Pedroarias; Peratta; Puebla; Rivarolo; S; VC; Vera; Viegas, M.; Zavallo                                                    |
| EPI_ISL_953402 to 953425                                                                                                                       | Laboratorio de Investigaciones de Baney                                                                                                                | "Swiss Tropical and Public Health Institute"                                                                                                                                                                                                  | "Carlos Cortes; Bonifacio Manguire Nlavo; Claudia Daubenberger; Diosdado Odjama Nseng Ada; Elizabeth Nyakarungu; Guillermo Garcia; Maximilian Mpina; Mitoha Ondo O Ayekaba; Philip Wonder Phiri"; Salome Hosch; Tobias Schindler                                                                                                                                            |
| EPI_ISL_648303 to 648379, EPI_ISL_649155 to 649172                                                                                             | Laboratorio de Investigaciones de Baney                                                                                                                | University Hospital Basel, Clinical Bacteriology                                                                                                                                                                                              | Adrian Egli; Alfredo Mari; Bonifacio Manguire Nlavo; Carlos Cortes; Claudia Daubenberger; Diosdado Odjama Nseng Ada; Elizabeth Nyakarungu; Guillermo Garcia; Helena Seth-Smith; Madlen Stange; Maximilian Mpina; Mitoha Ondo O Ayekaba; Philip Wonder Phiri; Salome Hosch; Tim Roloff; Tobias Schindler                                                                     |
| EPI_ISL_796127 to 796134, EPI_ISL_941220 to 941232                                                                                             | Laboratorio de Microbiología. Hospital General Universitario de Elda, Alicante                                                                         | SeqCOVID-SPAIN consortium/IBV(CSIC)                                                                                                                                                                                                           | Cristina Torregrosa Hetland; Eva Pastor Boix; M <sup>8</sup> Isabel Gascón Ros; Paloma Cascales Ramos and SeqCOVID-SPAIN consortium                                                                                                                                                                                                                                         |
| EPI_ISL_925173                                                                                                                                 | Laboratorio de Referencia Nacional de Enteropatógenos. Instituto Nacional de Salud del Perú                                                            | Laboratorio de Referencia Nacional de Enteropatógenos. Instituto Nacional de Salud del Perú                                                                                                                                                   | ; Fiorella Orellana Peralta; Iris Silva Molina; Junior Caro Castro; Ronnie Gavilan Chavez; Veronica Hurtado Vela; Willi Quino Sifuentes                                                                                                                                                                                                                                     |
| EPI_ISL_833038, EPI_ISL_943570                                                                                                                 | Laboratorio de Referencia Nacional de Virus Respiratorio. Instituto Nacional de Salud Perú                                                             | Laboratorio de Referencia Nacional de Biotecnología y Biología Molecular. Instituto Nacional de Salud Perú                                                                                                                                    | Carlos Padilla Rojas; Henri Bailon Calderon; Johanna Balbuena Torrez; Karolyn Vega Chozo; Luis Barcena; Marco Galarza Perez; Maribel Huaranga Nuñez; Nancy Rojas Serrano; Omar Caceres Rey; Priscila Lope Pari                                                                                                                                                              |
| EPI_ISL_729862 to 729868, EPI_ISL_729872 to 729901, EPI_ISL_812443 to 812517, EPI_ISL_812712 to 812721                                         | Laboratorio de Referencia Nacional de Virus Respiratorios, Instituto Nacional de Salud Peru                                                            | Laboratorio de Genómica Microbiana, Universidad Peruana Cayetano Heredia                                                                                                                                                                      | Alejandra Dávila-Barclay; Brenda Ayzanoa; Camila Castillo-Vilcahuamán; Guillermo Salvatierra; Janet Huancachoque; Luis González; Marco Galarza; Nancy Rojas; Oscar Escalante; Pablo Tsukayama; Pedro E. Romero; Pool Marcos; Priscila Lope                                                                                                                                  |
| EPI_ISL_906144 to 906145, EPI_ISL_906534, EPI_ISL_906557 to 906561                                                                             | Laboratorio de Salud Publica de Amazonas                                                                                                               | Instituto Nacional de Salud- Dirección de Investigación en Salud Pública, Universidad de los Andes- Applied genomics                                                                                                                          | Carlos Franco-Muñoz; Diego A. Álvarez-Díaz; Diego Andrés Prada; Gerardo Santamaría Jorge Duitama; Héctor Alejandro Ruiz-Moreno; Jhonnatan Reales-González; Jorge Ivan Diaz; Julian Naizaque; Katherine Laiton-Donato; Laura Natalia Gonzalez; Magdalena Wiesner; Marcela Mercado-Reyes;                                                                                     |

|                                                                                                                                                                                                                                                |                                                                                                                                                                           |                                                                                                                                                                                                                                                        |                                                                                                                                                                                                                                                                                                                                                                                                                                                                |
|------------------------------------------------------------------------------------------------------------------------------------------------------------------------------------------------------------------------------------------------|---------------------------------------------------------------------------------------------------------------------------------------------------------------------------|--------------------------------------------------------------------------------------------------------------------------------------------------------------------------------------------------------------------------------------------------------|----------------------------------------------------------------------------------------------------------------------------------------------------------------------------------------------------------------------------------------------------------------------------------------------------------------------------------------------------------------------------------------------------------------------------------------------------------------|
|                                                                                                                                                                                                                                                |                                                                                                                                                                           | research group, Vicerrectoría de Investigación y Creación, Universidad de los Andes- Systems and Computing Engineering Department                                                                                                                      | Maria T. Herrera-Sepúlveda; Martha Lucia Ospina Martínez; Mauricio Pacheco-Montealegre; Sheryll Corchuelo; Silvia Restrepo-Restrepo                                                                                                                                                                                                                                                                                                                            |
| EPI_ISL_845635 to 845655                                                                                                                                                                                                                       | Laboratorio de Salud Pública - Secretaría Distrital de Salud                                                                                                              | Instituto Nacional de Salud - Dirección de Investigación en Salud Pública                                                                                                                                                                              | Carlos Franco-Muñoz; Diego A. Álvarez-Díaz; Diego Andrés Prada; Gerardo Santamaría; Jonathan Reales; Julian Naizaque; Katherine Laiton-Donato; Magdalena Wiesner; Marcela Mercado-Reyes; María T. Herrera-Sepúlveda; Martha Lucia Ospina Martínez; Mauricio Pacheco-Montealegre; Paola Muñoz-Laiton; Sheryll Corchuelo                                                                                                                                         |
| EPI_ISL_906548                                                                                                                                                                                                                                 | Laboratorio de Salud Pública Fronterizo de Arauca                                                                                                                         | Instituto Nacional de Salud- Dirección de Investigación en Salud Pública, Universidad de los Andes- Applied genomics research group, Vicerrectoría de Investigación y Creación, Universidad de los Andes- Systems and Computing Engineering Department | Carlos Franco-Muñoz; Diego A. Álvarez-Díaz; Diego Andrés Prada; Gerardo Santamaría Jorge Duitama; Héctor Alejandro Ruiz-Moreno; Jhonnatan Reales-González; Jorge Ivan Díaz; Julian Naizaque; Katherine Laiton-Donato; Laura Natalia Gonzalez; Magdalena Wiesner; Marcela Mercado-Reyes; Maria T. Herrera-Sepúlveda; Martha Lucia Ospina Martínez; Mauricio Pacheco-Montealegre; Sheryll Corchuelo; Silvia Restrepo-Restrepo                                    |
| EPI_ISL_792358 to 792370                                                                                                                                                                                                                       | Laboratorio de Virología - HIEAyC San Juan de Dios                                                                                                                        | Área de Secuenciación del Laboratorio de Virología del Hospital de Niños Dr. Ricardo Gutierrez on behalf of 'Proyecto Argentino Interinstitucional de genómica de SARS-CoV-2' (PAIS Consortium)                                                        | A; Colmeiro; Ercole; Ferioli; Gatelli; Goya; LE; Lusso; M; MI; MS; Nabaes Jodar; Natale; R; S; Valinotto; Viegas, M.                                                                                                                                                                                                                                                                                                                                           |
| EPI_ISL_965029                                                                                                                                                                                                                                 | Laboratorio de Virología HUCA                                                                                                                                             | Laboratorio de Virología HUCA                                                                                                                                                                                                                          | Abreu F; Alvarez-Arguelles ME; Boga JA; Castelló C; Costales I; Coto E; Gómez de Oña J; Martín-Rodríguez G; Melón S; Perez-Martinez Z; Rojo S; Sandoval M                                                                                                                                                                                                                                                                                                      |
| EPI_ISL_623106 to 623169, EPI_ISL_717791, EPI_ISL_717793, EPI_ISL_717801 to 717802, EPI_ISL_717805 to 717808, EPI_ISL_717810 to 717831, EPI_ISL_717837 to 717840, EPI_ISL_717842 to 717898, EPI_ISL_717920 to 717957, EPI_ISL_717959 to 717961 | see above                                                                                                                                                                 | Laboratorio de Virología Molecular / UFRJ                                                                                                                                                                                                              | Bioinformatics Laboratory / LNCC                                                                                                                                                                                                                                                                                                                                                                                                                               |
| EPI_ISL_964949                                                                                                                                                                                                                                 | Laboratorio de Virología del HUCA                                                                                                                                         | Laboratorio de Virología del HUCA                                                                                                                                                                                                                      | Alexandra L Gerber; Amílcar Tanuri; Ana Paula de C Guimarães; Ana Tereza R de Vasconcelos; Andréa Cony Cavalcanti; Carolina M Voloch; Claudia dos Santos Rodrigues; Covid19-UFRJ Workgroup; Cynthia C Cardoso; Diana Mariani; Luiz G P de Almeida; Luis Cristóvão Pôrto; Orlando C. Ferreira; Otavio Bustrolini; Otavio J. Bustrolini; Renato S Aguiar; Ronaldo S Francisco Jr; Ronaldo da Silva F Jr; Terezinha M P P Castañeira; Terezinha M P P Castañeiras |
| EPI_ISL_906533, EPI_ISL_906538, EPI_ISL_906542, EPI_ISL_906549                                                                                                                                                                                 | Laboratorio de Virología-Instituto Nacional de Salud                                                                                                                      | Instituto Nacional de Salud- Dirección de Investigación en Salud Pública, Universidad de los Andes- Applied genomics research group, Vicerrectoría de Investigación y Creación, Universidad de los Andes- Systems and Computing Engineering Department | Abreu F; Alvarez-Arguelles ME; Boga JA; Castelló C; Costales I; Coto E; Gómez de Oña J; Martín-Rodríguez G; Melón S; Perez-Martinez Z; Rojo S; Sandoval M                                                                                                                                                                                                                                                                                                      |
| EPI_ISL_974150, EPI_ISL_974853                                                                                                                                                                                                                 | Laboratorio de Virología / Hospital Universitario Central de Asturias (HUCA)                                                                                              | Laboratorio de Virología / Hospital Universitario Central de Asturias (HUCA)                                                                                                                                                                           | Carlos Franco-Muñoz; Diego A. Álvarez-Díaz; Diego Andrés Prada; Gerardo Santamaría Jorge Duitama; Héctor Alejandro Ruiz-Moreno; Jhonnatan Reales-González; Jorge Ivan Díaz; Julian Naizaque; Katherine Laiton-Donato; Laura Natalia Gonzalez; Magdalena Wiesner; Marcela Mercado-Reyes; Maria T. Herrera-Sepúlveda; Martha Lucia Ospina Martínez; Mauricio Pacheco-Montealegre; Sheryll Corchuelo; Silvia Restrepo-Restrepo                                    |
| EPI_ISL_965033, EPI_ISL_977505 to 977506, EPI_ISL_977510 to 977512, EPI_ISL_984678, EPI_ISL_984683                                                                                                                                             | Laboratorio de Virología HUCA                                                                                                                                             | Laboratorio de Virología HUCA                                                                                                                                                                                                                          | Abreu F; Alvarez-Arguelles ME; Boga JA; Castelló C; Costales I; Coto E; Gómez de Oña J; Martín-Rodríguez G; Melón S; Perez-Martinez Z; Rojo S; Sandoval M                                                                                                                                                                                                                                                                                                      |
| EPI_ISL_992956                                                                                                                                                                                                                                 | Laboratorio de Virología HUCA                                                                                                                                             | Laboratorio de Virología Hospital Universitario Central de Asturias (HUCA)                                                                                                                                                                             | Abreu F; Alvarez-Arguelles ME; Boga JA; Castelló C; Costales I; Coto E; Gómez de Oña J; Martín-Rodríguez G; Melón S; Perez-Martinez Z; Rojo S; Sandoval M                                                                                                                                                                                                                                                                                                      |
| EPI_ISL_792397 to 792401                                                                                                                                                                                                                       | Laboratorio de Virología del Hospital de Niños Dr. Ricardo Gutierrez                                                                                                      | Biocódices SA. on behalf of 'Proyecto Argentino Interinstitucional de genómica de SARS-CoV-2' (PAIS Consortium)                                                                                                                                        | Abreu F; Alvarez-Arguelles ME; Boga JA; Castelló C; Costales I; Coto E; Gómez de Oña J; Martín-Rodríguez G; Melón S; Perez-Martinez Z; Rojo S; Sandoval M                                                                                                                                                                                                                                                                                                      |
| EPI_ISL_792522 to 792524                                                                                                                                                                                                                       | Laboratorio de Virología del Hospital de Niños Dr. Ricardo Gutierrez                                                                                                      | Grupo de Genómica y Bioinformática del Instituto de Investigación de la Cadena Láctea CONICET-INTA on behalf of 'Proyecto Argentino Interinstitucional de genómica de SARS-CoV-2' (PAIS Consortium)                                                    | Acevedo; Alexay; Alvarez Lopez; Berros JM; C; Dopazo H; E; Gravis; Jacques; ME; Mistchenko; O; S; Zubrzycki J                                                                                                                                                                                                                                                                                                                                                  |
| EPI_ISL_792117 to 792290, EPI_ISL_793013                                                                                                                                                                                                       | Laboratorio de Virología del Hospital de Niños Dr. Ricardo Gutierrez                                                                                                      | Área de Secuenciación del Laboratorio de Virología del Hospital de Niños Dr. Ricardo Gutierrez on behalf of 'Proyecto Argentino Interinstitucional de genómica de SARS-CoV-2' (PAIS Consortium)                                                        | AF; AS; Acevedo; Alexay; Alvarez Lopez; Amadio; Aulicino; C; Eberhardt; G; Goya; Irazoqui; Jacques; König; M; ME; MF; MS; Mistchenko; Nabaes Jodar; O; P; S; Torres; Viegas, M.                                                                                                                                                                                                                                                                                |
| EPI_ISL_671974                                                                                                                                                                                                                                 | Laboratorio de Virología y Microbiología Molecular, Depto. de Microbiología, Facultad de Medicina, Universidad de El Salvador/INS-laboratorio de Ref. Ministerio de Salud | Área de Secuenciación del Laboratorio de Virología del Hospital de Niños Dr. Ricardo Gutierrez on behalf of 'Proyecto Argentino Interinstitucional de genómica de SARS-CoV-2' (PAIS Consortium)                                                        | AS; Acevedo; Alexay; Alvarez Lopez; C; E; Gallino; Goya; Gravis; I; Jacques; LE; Lusso; ME; MI; MS; Mistchenko; Nabaes Jodar; Natale; O; Primost; S; Valinotto; Viegas, M.                                                                                                                                                                                                                                                                                     |
| EPI_ISL_755304 to 755305                                                                                                                                                                                                                       | Laboratorio de Virología, Centro de Biotecnología Acuicola, Universidad de Santiato de Chile                                                                              | Laboratorio de Virología y Microbiología Molecular, Depto. de Microbiología, Facultad de Medicina, Universidad de El Salvador/INS-laboratorio de Ref. Ministerio de Salud                                                                              | Carlos Hernández Ávila; Ortega-Pérez C A; Rivera NR; Xochitl Sandoval López                                                                                                                                                                                                                                                                                                                                                                                    |
| EPI_ISL_792291 to 792298                                                                                                                                                                                                                       | Laboratorio de genética y biología molecular del Hospital de trauma y emergencia Dr Federico Abete                                                                        | Center for Mathematical Modeling and Center for Genome Regulation. Santiago, Chile                                                                                                                                                                     | A. Sandino; Allende ML; Ariagada G; Bastias M; Bustos F; Castro E; González M; M; Maass A; Meneses C.; Montecino; Orellana A; Reyes-López F.; Sanhueza D; Travisany D                                                                                                                                                                                                                                                                                          |
| EPI_ISL_956299 to 956300                                                                                                                                                                                                                       | Laboratorio de salud publica Arauca                                                                                                                                       | Área de Secuenciación del Laboratorio de Virología del Hospital de Niños Dr. Ricardo Gutierrez on behalf of 'Proyecto Argentino Interinstitucional de genómica de SARS-CoV-2' (PAIS Consortium)                                                        | Gallino; Goya; I; LE; Lusso; MI; MS; Nabaes Jodar; Natale; Primost; S; Valinotto; Viegas, M.                                                                                                                                                                                                                                                                                                                                                                   |
| EPI_ISL_906530                                                                                                                                                                                                                                 | Laboratorio de salud publica de Bogota                                                                                                                                    | Instituto Nacional de Salud- Dirección de Investigación en Salud Pública                                                                                                                                                                               | Carlos Franco-Muñoz; Diego A. Álvarez-Díaz; Diego Andrés Prada; Gerardo Santamaría; Hector Alejandro Ruiz-Moreno; Jhonnatan Reales-González; Julian Naizaque; Katherine Laiton-Donato; Magdalena Wiesner; Marcela Mercado-Reyes; María T. Herrera-Sepúlveda; Martha Lucia Ospina Martínez; Mauricio Pacheco-Montealegre; Sheryll Corchuelo                                                                                                                     |
| EPI_ISL_956298                                                                                                                                                                                                                                 | Laboratorio de salud publica del Valle del Cauca                                                                                                                          | Instituto Nacional de Salud- Dirección de Investigación en Salud Pública                                                                                                                                                                               | Carlos Franco-Muñoz; Diego A. Álvarez-Díaz; Diego Andrés Prada; Gerardo Santamaría; Gerardo Santamaría; Hector Alejandro Ruiz-Moreno; Jhonnatan Reales-González; Julian Naizaque; Katherine Laiton-Donato; Magdalena Wiesner; Marcela Mercado-Reyes; María T. Herrera-Sepúlveda; Martha Lucia Ospina Martínez; Mauricio Pacheco-Montealegre; Sheryll Corchuelo                                                                                                 |
| EPI_ISL_906531                                                                                                                                                                                                                                 | Laboratorio de salud publica del Valle del Cauca                                                                                                                          | Instituto Nacional de Salud- Dirección de Investigación en Salud Pública, Universidad de los Andes- Applied genomics research group, Vicerrectoría de Investigación y Creación, Universidad de los Andes- Systems and Computing Engineering Department | Carlos Franco-Muñoz; Diego A. Álvarez-Díaz; Diego Andrés Prada; Gerardo Santamaría Jorge Duitama; Héctor Alejandro Ruiz-Moreno; Jhonnatan Reales-González; Jorge Ivan Díaz; Julian Naizaque; Katherine Laiton-Donato; Laura Natalia Gonzalez; Magdalena Wiesner; Marcela Mercado-Reyes; Maria T. Herrera-Sepúlveda; Martha Lucia Ospina Martínez; Mauricio Pacheco-Montealegre; Sheryll Corchuelo; Silvia Restrepo-Restrepo                                    |
| EPI_ISL_792375 to 792385                                                                                                                                                                                                                       | Laboratorio de salud pública, Facultad de Ciencias Exactas, Universidad Nacional de La Plata                                                                              | Área de Secuenciación del Laboratorio de Virología del Hospital de Niños Dr. Ricardo Gutierrez on behalf of 'Proyecto Argentino Interinstitucional de genómica de SARS-CoV-2' (PAIS Consortium)                                                        | Carlos Franco-Muñoz; Diego A. Álvarez-Díaz; Diego Andrés Prada; Gerardo Santamaría; Hector Alejandro Ruiz-Moreno; Jhonnatan Reales-González; Julian Naizaque; Katherine Laiton-Donato; Magdalena Wiesner; Marcela Mercado-Reyes; María T. Herrera-Sepúlveda; Martha Lucia Ospina Martínez; Mauricio Pacheco-Montealegre; Sheryll Corchuelo                                                                                                                     |
| EPI_ISL_792299 to 792300                                                                                                                                                                                                                       | Laboratorio del Hospital Alemán                                                                                                                                           | Área de Secuenciación del Laboratorio de Virología del                                                                                                                                                                                                 | A; Angeletti; Cordero; Goya; LE; Lusso; MI; MS; Nabaes Jodar; Nadalich; Natale; R; S; Toro; V; Valinotto; Viegas, M.                                                                                                                                                                                                                                                                                                                                           |
|                                                                                                                                                                                                                                                |                                                                                                                                                                           |                                                                                                                                                                                                                                                        | Della Latta; E; García Allende; Goya; Ibañez; LE; Lusso; MI; MP; MS; N; Nabaes Jodar; Natale; S; Valinotto; Viegas, M.                                                                                                                                                                                                                                                                                                                                         |

|                                                                                                                                                                                                                                              |                                                                                                                                                                            |                                                                                                                                                                                                                                           |                                                                                                                                                                                                                                                                                                   |
|----------------------------------------------------------------------------------------------------------------------------------------------------------------------------------------------------------------------------------------------|----------------------------------------------------------------------------------------------------------------------------------------------------------------------------|-------------------------------------------------------------------------------------------------------------------------------------------------------------------------------------------------------------------------------------------|---------------------------------------------------------------------------------------------------------------------------------------------------------------------------------------------------------------------------------------------------------------------------------------------------|
|                                                                                                                                                                                                                                              |                                                                                                                                                                            | Hospital de Niños Dr. Ricardo Gutierrez on behalf of 'Proyecto Argentino Interinstitucional de genómica de SARS-CoV-2' (PAIS Consortium)                                                                                                  |                                                                                                                                                                                                                                                                                                   |
| EPI_ISL_792306 to 792319                                                                                                                                                                                                                     | Laboratorio del Hospital El Cruce Dr. Néstor C. Kirchner                                                                                                                   | Área de Secuenciación del Laboratorio de Virología del Hospital de Niños Dr. Ricardo Gutierrez on behalf of 'Proyecto Argentino Interinstitucional de genómica de SARS-CoV-2' (PAIS Consortium)                                           | Goya; LE; Lusso; M; MI; MS; Nabaes Jodar; Natale; Rahhal; S; Valinotto; Viegas, M.; Zubieta                                                                                                                                                                                                       |
| EPI_ISL_792371 to 792374                                                                                                                                                                                                                     | Laboratorio del Hospital Interzonal General de Agudos Eva Perón                                                                                                            | Área de Secuenciación del Laboratorio de Virología del Hospital de Niños Dr. Ricardo Gutierrez on behalf of 'Proyecto Argentino Interinstitucional de genómica de SARS-CoV-2' (PAIS Consortium)                                           | C; Carulla; Goya; Kairiyama; LE; Lusso; M; MI; MS; Nabaes Jodar; Natale; Pengue; Piñeyro C; S; Valinotto; Viegas, M.                                                                                                                                                                              |
| EPI_ISL_792525                                                                                                                                                                                                                               | Laboratorio del Hospital Interzonal General de Agudos Evita                                                                                                                | Grupo de Genómica y Bioinformática del Instituto de Investigación de la Cadena Láctea CONICET-INTA on behalf of 'Proyecto Argentino Interinstitucional de genómica de SARS-CoV-2' (PAIS Consortium)                                       | AF; Alexay; Amadio; Alicino; C; Desimone; E; Eberhardt; G; Goya; Grossi; I; Irazoqui; König; L; Luczac; M; MF; MS; Musto; Nabaes Jodar; O; P; S; Serrano; Torres; Viegas, M.                                                                                                                      |
| EPI_ISL_792333 to 792350                                                                                                                                                                                                                     | Laboratorio del Hospital Interzonal General de Agudos Evita                                                                                                                | Área de Secuenciación del Laboratorio de Virología del Hospital de Niños Dr. Ricardo Gutierrez on behalf of 'Proyecto Argentino Interinstitucional de genómica de SARS-CoV-2' (PAIS Consortium)                                           | A; Desimone; E; Goya; Grossi; I; L; LE; Luczac; Lusso; MI; MS; Musto; Nabaes Jodar; Natale; O; S; Serrano; Valinotto; Viegas, M.                                                                                                                                                                  |
| EPI_ISL_792443 to 792448, EPI_ISL_792450 to 792473                                                                                                                                                                                           | Laboratorio del Hospital Regional Ushuaia Gdor. Ernesto Campos                                                                                                             | Hospital Regional Ushuaia - Centro Austral De Investigaciones Cientificas - Universidad Nacional De Tierra Del Fuego on behalf of 'Proyecto Argentino Interinstitucional de genómica de SARS-CoV-2' (PAIS Consortium)                     | Boutureira, MF.; CA; CB; CF; Castro; Ceballos; Cáceres; De Roccis; F; G; Gallego; Gramundi; ID; Nardi; SB; SG; Yulan                                                                                                                                                                              |
| EPI_ISL_983326                                                                                                                                                                                                                               | Laboratorio di Genetica Medica Ospedale Belcolle                                                                                                                           | INMI Lazzaro Spallanzani IRCCS                                                                                                                                                                                                            | A Di Caro; B Bartolini; C.E.M Gruber; E Giombini; F Messina; F Natoni; G Pessina; M Rueca; MR Capobianchi; O Butera                                                                                                                                                                               |
| EPI_ISL_985027 to 985031                                                                                                                                                                                                                     | Laboratorio di Patologia Clinica, Ospedale San Paolo in Valloria, ASL 2 Liguria                                                                                            | U.O. Igiene, Ospedale Policlinico San Martino                                                                                                                                                                                             | Bruzzo Bianca; Caligiuri Patrizia; De Pace Vanessa; Domnich Alexander; Icardi Giancarlo; Lillo Flavia; Orsi Andrea; Ricucci Valentina                                                                                                                                                             |
| EPI_ISL_710503                                                                                                                                                                                                                               | Laboratorio specialistico UOC Ematologia - Ospedale "San Francesco" - ATS-ASSL Nuoro                                                                                       | Laboratorio specialistico UOC Ematologia - Ospedale "San Francesco" - ATS-ASSL Nuoro                                                                                                                                                      | Giovanna Piras                                                                                                                                                                                                                                                                                    |
| EPI_ISL_961466                                                                                                                                                                                                                               | Laboratorios Lister                                                                                                                                                        | Instituto de Diagnostico y Referencia Epidemiologicos (INDRE)                                                                                                                                                                             | Abril Rodriguez-Maldonado; Claudia Wong-Arambula; Ernesto Ramirez-Gonzalez.; Fabiola Garces-Ayala; Gisela Barrera-Badillo; Irma Lopez-Martinez; Lucia Hernandez-Rivas; Natividad Cruz-Ortiz; Tatiana Nunez-Garcia                                                                                 |
| EPI_ISL_904125                                                                                                                                                                                                                               | Laboratorium Analityczne Szpital Specjalistyczny w Chorzowie                                                                                                               | National Institute of Public Health - National Institute of Hygiene                                                                                                                                                                       | Wokowicz Tomasz; Zacharczuk Katarzyna                                                                                                                                                                                                                                                             |
| EPI_ISL_882960 to 882961                                                                                                                                                                                                                     | Laboratorium Diagnostyki Mikrobiologicznej z Pracowni Prtku Grulicy SPSzW im. Jana Boego w Lublinie                                                                        | National Institute of Public Health - National Institute of Hygiene                                                                                                                                                                       | Gawor Jan; Wokowicz Tomasz; Zacharczuk Katarzyna                                                                                                                                                                                                                                                  |
| EPI_ISL_905762                                                                                                                                                                                                                               | Laboratorium Genloxa Sp. z o.o.                                                                                                                                            | National Institute of Public Health - National Institute of Hygiene                                                                                                                                                                       | Wokowicz Tomasz; Zacharczuk Katarzyna                                                                                                                                                                                                                                                             |
| EPI_ISL_791977                                                                                                                                                                                                                               | Laboratorium Mikrobiologi Samarinda                                                                                                                                        | National Institute of Health Research and Development                                                                                                                                                                                     | AA; HA; HD; Ikawati; KD; KNA; N; Nugraha; Pangesti; Pawestri; Puspa; Pusparandi; Setiawaty; Soekarso; Subangkit; T; Tandirogang; V; Yadi                                                                                                                                                          |
| EPI_ISL_905752 to 905753                                                                                                                                                                                                                     | Laboratorium Mikrobiologiczne SYNEVO                                                                                                                                       | National Institute of Public Health - National Institute of Hygiene                                                                                                                                                                       | Wokowicz Tomasz; Zacharczuk Katarzyna                                                                                                                                                                                                                                                             |
| EPI_ISL_775589, EPI_ISL_831989                                                                                                                                                                                                               | Laboratorium for klinisk mikrobiologi                                                                                                                                      | The Public Health Agency of Sweden                                                                                                                                                                                                        | Department of Microbiology; The Public Health Agency of Sweden                                                                                                                                                                                                                                    |
| EPI_ISL_832182 to 832183, EPI_ISL_832188, EPI_ISL_832190 to 832195, EPI_ISL_890895                                                                                                                                                           | Laboratory Analyses Med                                                                                                                                                    | National Reference Center for Viruses of Respiratory Infections, Institut Pasteur, Paris                                                                                                                                                  | Angela Brisebarre; Briec Gestin; Briec Lefauve; Camille Capel; Céline Menaut; Etienne Simon-Lorière; Marion Barbet; Maud Vanpeene; Méline Bizard; Sylvie Behillil; Sylvie van der Werf; Vincent Enouf                                                                                             |
| EPI_ISL_644565 to 644567, EPI_ISL_904008                                                                                                                                                                                                     | Laboratory Diagnostic, Veterinary Specialized Institute Kraljevo                                                                                                           | Laboratory Diagnostic, Veterinary Specialized Institute Kraljevo                                                                                                                                                                          | Afonso, C.; Banovic Djeri, B.; Jankovic, M.; Jovanovic, T.; Knezevic, A.; Petrovic, T.; Sekler, M.; Tesovic, B.; Vidanovic, D.; Volkening, J.                                                                                                                                                     |
| EPI_ISL_754902 to 754913                                                                                                                                                                                                                     | Laboratory Diagnostics and Clinical Immunology of Developmental Age, Medical University of Warsaw                                                                          | genXone SA, Research & Development Laboratory; The Faculty of Mathematics, Informatics and Mechanics of the University of Warsaw                                                                                                          | Anna Gambin; Grzegorz Nowicki; Jakub Grabowski; Maciej Sykulski; Micha Kaszuba; Monika Makowska-Woniak; Natalia Drwska-Matelska; Urszula Demkow; ukasz Krych                                                                                                                                      |
| EPI_ISL_660543 to 660545, EPI_ISL_667807 to 667809, EPI_ISL_956317 to 956318, EPI_ISL_956320 to 956331                                                                                                                                       | Laboratory Medicine                                                                                                                                                        | Department of Laboratory Medicine, Lin-Kou Chang Gung Memorial Hospital, Taoyuan, Taiwan                                                                                                                                                  | Cheng-Hsun Chiu; Cheng-Ta Yang; Chung-Guei Huang; Guang-Wu Chen; Kuo-Chien Tsao; Kuo-Ming Lee; Mei-Jen Hsiao; Peng-Nien Huang; Po-Wei Huang; Shin-Ru Shih; Shu-Li Yang; Yi-Chun Liu; Yu-Nong Gong                                                                                                 |
| EPI_ISL_632286, EPI_ISL_738080                                                                                                                                                                                                               | Laboratory Services Section, Texas Department of State Health Services                                                                                                     | Laboratory Services Section, Texas Department of State Health Services                                                                                                                                                                    | Bonser, Bonser, J.; J.D.; Koag, M.; Lee, Oh, B.; Pedrueza, M.; Pokharel, A.; R. and Kubin, G.; Rahman, M.; Tuladhar, R.; Wang, C.; Zhang, J.                                                                                                                                                      |
| EPI_ISL_622767                                                                                                                                                                                                                               | Laboratory Services Section, Texas Department of State Health Services-SARS-CoV-2 submission group                                                                         | Laboratory Services Section, Texas Department of State Health Services-SARS-CoV-2 submission group                                                                                                                                        | G. and Pedrueza, M.; Koag, M.; Kubin; Lee, R.; Oh, B.; Pokharel, A.; Rahman, M.; Tuladhar, R.; Wang, C.; Zhang, J.                                                                                                                                                                                |
| EPI_ISL_933533                                                                                                                                                                                                                               | Laboratory for HIV and opportunistic infections diagnosis The Republican Research and Practical Center for Epidemiology and Microbiology (RRPCEM)                          | Laboratory for HIV and opportunistic infections diagnosis The Republican Research and Practical Center for Epidemiology and Microbiology (RRPCEM)                                                                                         | Artur Akhremchuk; Elena Gasich; Kirill Bulda; Leonid Valentovich; Vladimir Gorbunov                                                                                                                                                                                                               |
| EPI_ISL_754238, EPI_ISL_861710 to 861713, EPI_ISL_888677 to 888678, EPI_ISL_910016, EPI_ISL_910029, EPI_ISL_910339, EPI_ISL_935017, EPI_ISL_935021, EPI_ISL_939647, EPI_ISL_940144, EPI_ISL_940554, EPI_ISL_981374 to 981375, EPI_ISL_981377 | see above                                                                                                                                                                  | Cantacuzino Institute Virology                                                                                                                                                                                                            | Catalina Pascu; Luiza Ustea; Mihaela Lazar; Mühlemann Barbara; Nicoleta Paraschiv; Nicoleta Paraschiv; Tim Durfee                                                                                                                                                                                 |
| EPI_ISL_735392 to 735395, EPI_ISL_760059, EPI_ISL_760246                                                                                                                                                                                     | Laboratory of Genetics and Personalized Medicine, Zan Mitrev Clinic                                                                                                        | Laboratory of Genetics and Personalized Medicine, Zan Mitrev Clinic                                                                                                                                                                       | 2020; Kungulovski et al.; Kungulovski et al. 2020                                                                                                                                                                                                                                                 |
| EPI_ISL_778860, EPI_ISL_779704, EPI_ISL_779707, EPI_ISL_779709, EPI_ISL_779712 to 779714, EPI_ISL_780375 to 780376, EPI_ISL_780378, EPI_ISL_780381, EPI_ISL_780411 to 780413                                                                 | see above                                                                                                                                                                  | Laboratory of Infectious Diseases, Department of Biomedical and Clinical Sciences L. Sacco, University of Milan                                                                                                                           | Alessia Lai; Annalisa Bergna; Carla Della Ventura; Claudia Balotta; Gianguglielmo Zehender on behalf of SARS-CoV-2 ITALIAN RESEARCH ENTERPRISE-(SCIRE) Collaborative Group; Gianguglielmo Zehender on behalf of SARS-CoV-2 ITALIAN RESEARCH ENTERPRISE-(SCIRE) Collaborative Group; Massimo Galli |
| EPI_ISL_717979                                                                                                                                                                                                                               | Laboratory of Microbiology and Infectious Diseases, Faculty of Veterinary Medicine, Aristotle University of Thessaloniki, University Campus, 541 24, Thessaloniki, Greece. | Laboratory of Biology, Department of Medicine, Democritus University of Thrace, Alexandroupolis, Greece                                                                                                                                   | Bampali M.; Chaintoutis S.; Dimitriou M.; Dovas C.; Dvovolis N.; Karakasiliotis I.                                                                                                                                                                                                                |
| EPI_ISL_654016 to 654020                                                                                                                                                                                                                     | Laboratory of Microbiology, National Reference Lab, Charles Nicolle Hospital; 2-University of Tunis ElManar, Faculty of Medicine of Tunis, LR99ES09, Tunis, Tunisia        | 1-Clinical and Experimental Pharmacology Lab, LR16SP02, National Center of Pharmacovigilance, University of Tunis El Manar, Tunis, Tunisia. 2-Neurodegenerative diseases and psychiatric troubles, LR18SP03, Razi Hospital, University of | Alia Ben Kahla; Gaies Emna; Ilhem Boutiba-Ben Boubaker; Imen Kacem; Imen Mkada; Jalila Ben Kheilil; Maher Kharrat; Mouna Ben Sassi; Mouna Safer; Nissaf Ben Aleya; Riadh Daghfous; Riadh Gouider.; Salma Abid; Sameh Trabelsi; Sana Ferjani; Soumaya Rammeh                                       |

|                                                                                                                                                                                                                                                                                                                                                                                                                                                                                                                                                                                                |                                                                                                                                                                     |                                                                                                                                                                                                                                                                                                                                                                        |                                                                                                                                                                                                                                                                                                                                                                                                                                                                                                                                                                             |
|------------------------------------------------------------------------------------------------------------------------------------------------------------------------------------------------------------------------------------------------------------------------------------------------------------------------------------------------------------------------------------------------------------------------------------------------------------------------------------------------------------------------------------------------------------------------------------------------|---------------------------------------------------------------------------------------------------------------------------------------------------------------------|------------------------------------------------------------------------------------------------------------------------------------------------------------------------------------------------------------------------------------------------------------------------------------------------------------------------------------------------------------------------|-----------------------------------------------------------------------------------------------------------------------------------------------------------------------------------------------------------------------------------------------------------------------------------------------------------------------------------------------------------------------------------------------------------------------------------------------------------------------------------------------------------------------------------------------------------------------------|
|                                                                                                                                                                                                                                                                                                                                                                                                                                                                                                                                                                                                |                                                                                                                                                                     | Tunis El Manar, Tunis, Tunisia. 3- Ministry of Health, National Observatory of New and Emerging Diseases, 1006, Tunis, Tunisia                                                                                                                                                                                                                                         |                                                                                                                                                                                                                                                                                                                                                                                                                                                                                                                                                                             |
| EPI_ISL_796782, EPI_ISL_803119 to 803120, EPI_ISL_803430, EPI_ISL_803817, EPI_ISL_803851, EPI_ISL_811145                                                                                                                                                                                                                                                                                                                                                                                                                                                                                       | Laboratory of Microbiology, National Reference Lab, Charles Nicolle Hospital; 2-University of Tunis ElManar, Faculty of Medicine of Tunis, LR99ES09, Tunis, Tunisia | Clinical and Experimental Pharmacology Lab, LR16SP02, National Center of Pharmacovigilance, University of Tunis El Manar, Tunis, Tunisia. 2-Neurodegenerative diseases and psychiatric troubles, LR18SP03, Razi Hospital, University of Tunis El Manar, Tunis, Tunisia. 3- Ministry of Health, National Observatory of New and Emerging Diseases, 1006, Tunis, Tunisia | Ahmed Fakhfakh; Alia Ben Kahla; Alia BenKahla; Asma Ferjani; Awatef El Moussi; Gaïes Emna; Guedi Ali Barreh; Habiba Ben Romdhane; Hanen El Jebari; Ithem Boutiba-Ben Boubaker; Ines Mdini; Jalila Ben Khelil; Maher Kharrat; Mouna Ben Sassi; Mouna Safer; Nissaf Ben Alaya; Riadh Daghfous; Riadh Gouider.; Salma Abid; Sameh Trabelsi; Sana Ferjani; Sarra Chamman; Souissi Amira; Zaineb Hamzaoui                                                                                                                                                                        |
| EPI_ISL_906720, EPI_ISL_906727, EPI_ISL_906730, EPI_ISL_906736, EPI_ISL_906740, EPI_ISL_906743, EPI_ISL_906755, EPI_ISL_906757 to 906759, EPI_ISL_930785                                                                                                                                                                                                                                                                                                                                                                                                                                       | see above                                                                                                                                                           | Laboratory of Molecular Biology, Diagnostyka sp. z o.o.                                                                                                                                                                                                                                                                                                                | Laboratory of Recombinant Vaccines                                                                                                                                                                                                                                                                                                                                                                                                                                                                                                                                          |
| EPI_ISL_852842, EPI_ISL_875959 to 876031, EPI_ISL_925033 to 925047, EPI_ISL_935033, EPI_ISL_935035                                                                                                                                                                                                                                                                                                                                                                                                                                                                                             | Laboratory of Molecular Biology, Diagnostyka sp. z o.o.                                                                                                             | genXone SA, Research & Development Laboratory                                                                                                                                                                                                                                                                                                                          | Anna Piotrowska-Mietelska; Boguslaw Szweczyk; Izabela Szczygalska; Krystyna Bienkowska-Szweczyk; Lukasz Rabalski; Maciej Kosinski                                                                                                                                                                                                                                                                                                                                                                                                                                           |
| EPI_ISL_625673 to 625682                                                                                                                                                                                                                                                                                                                                                                                                                                                                                                                                                                       | Laboratory of Molecular Medicine, University of Magallanes                                                                                                          | Centro Asistencial Docente y de Investigacion, Universidad de Magallanes                                                                                                                                                                                                                                                                                               | Diego Alvarez; Jacqueline Aldridge; Jorge Gonzalez; Marcelo Navarrete                                                                                                                                                                                                                                                                                                                                                                                                                                                                                                       |
| EPI_ISL_801539 to 801860                                                                                                                                                                                                                                                                                                                                                                                                                                                                                                                                                                       | Laboratory of Molecular Virology, Pontificia Universidad Católica de Chile                                                                                          | MSHS Pathogen Surveillance Program                                                                                                                                                                                                                                                                                                                                     | Adolfo Garcia-Sastre; Adriana van De Guchte; Ajay Obla; Aldo Gaggero; Ana María Contreras; Ana S. Gonzalez-Reiche; Bremy Albuquerque; Carlos Palma; Constanza Maldonado; Edward C. Holmes; Eileen Serrano; Erick Salinas; Fernando Valiente; Hala Alshammary; Harm van Bakel; Jayeeta Dutta; Jorge Levican; Juan Soto; Leonardo I. Almonacid; M. Belen Leyton; Manuel Ampuero; Marcela Ferres; Matthew M. Hernandez; Melissa Smith; Rafael A. Medina; Rafael A. Medina.; Robert Sebra; Shwetha Hara Sridhar; Tamara Garcia-Salum; Viviana Simon; Ying-Chih Wang; Zenab Khan |
| EPI_ISL_939628 to 939629, EPI_ISL_939643 to 939644, EPI_ISL_939649 to 939650, EPI_ISL_940146, EPI_ISL_940157, EPI_ISL_940766, EPI_ISL_941163, EPI_ISL_944787, EPI_ISL_945547, EPI_ISL_946913, EPI_ISL_949176 to 949178, EPI_ISL_949180 to 949181, EPI_ISL_953426, EPI_ISL_954943, EPI_ISL_956413, EPI_ISL_956416, EPI_ISL_956420, EPI_ISL_959287, EPI_ISL_959290, EPI_ISL_959375 to 959376, EPI_ISL_959544, EPI_ISL_959546, EPI_ISL_962887, EPI_ISL_962889 to 962890, EPI_ISL_962893 to 962894, EPI_ISL_964881, EPI_ISL_964883, EPI_ISL_964950, EPI_ISL_965142, EPI_ISL_965145, EPI_ISL_965147 | see above                                                                                                                                                           | Laboratory of Virology and Molecular Diagnostics                                                                                                                                                                                                                                                                                                                       | Institute of Public Health of Republic of North Macedonia<br>Laboratory of Virology and Molecular Diagnostics                                                                                                                                                                                                                                                                                                                                                                                                                                                               |
| EPI_ISL_962891                                                                                                                                                                                                                                                                                                                                                                                                                                                                                                                                                                                 | Laboratory of Virology and Molecular Diagnostics                                                                                                                    | Laboratory of Virology and Molecular Diagnostics, Institute of Public Health of Republic of North Macedonia                                                                                                                                                                                                                                                            | Boshevska G.; Elizabeta Janchevska; G. Boshevska; Golubinka Bosevska; Golubinka Boshevska; Kuzmanovska M.; M. Kuzmanovska; Maja Kuzmanovska; Maja Kuzmanovska. Golubinka Boshevska                                                                                                                                                                                                                                                                                                                                                                                          |
| EPI_ISL_984682                                                                                                                                                                                                                                                                                                                                                                                                                                                                                                                                                                                 | Laboratory of Virology of Federal Budget Health Care Institution "Center of Hygiene and Epidemiology in Arkhangelsk region"                                         | Group of Genomics and Postgenomic Technologies of Central Research Institute of Epidemiology                                                                                                                                                                                                                                                                           | Boshevska G.; Kuzmanovska M.                                                                                                                                                                                                                                                                                                                                                                                                                                                                                                                                                |
| EPI_ISL_984628 to 984658                                                                                                                                                                                                                                                                                                                                                                                                                                                                                                                                                                       | Laboratory of Virology of Federal Budget Health Care Institution Center of Hygiene and Epidemiology in Arkhangelsk region                                           | Group of Genomics and Postgenomic Technologies of Central Research Institute of Epidemiology                                                                                                                                                                                                                                                                           | Akimkin VG; Bulanenko VP; Kaptelova VV; Kondrasheva LV; Korneenko EV; Ponomareva YA; Saenko SS; Samoilov AE; Semyina LV; Shishko LA; Speranskaya AS; Tivanova EV; Valdokhina AV                                                                                                                                                                                                                                                                                                                                                                                             |
| EPI_ISL_792561 to 792638                                                                                                                                                                                                                                                                                                                                                                                                                                                                                                                                                                       | Laboratório Central de Saúde Pública do Estado da Paraíba (LACEN-PB)                                                                                                | Laboratory of Respiratory Viruses and Measles, Oswaldo Cruz Institute, FIOCRUZ                                                                                                                                                                                                                                                                                         | Akimkin VG; Bulanenko VP; Kaptelova VV; Kondrasheva LV; Korneenko EV; Ponomareva YA; Saenko SS; Samoilov AE; Semyina LV; Shishko LA; Speranskaya AS; Tivanova EV; Valdokhina AV                                                                                                                                                                                                                                                                                                                                                                                             |
| EPI_ISL_792639 to 792644                                                                                                                                                                                                                                                                                                                                                                                                                                                                                                                                                                       | Laboratório Central de Saúde Pública do Estado de Alagoas (LACEN-AL)                                                                                                | Laboratory of Respiratory Viruses and Measles, Oswaldo Cruz Institute, FIOCRUZ                                                                                                                                                                                                                                                                                         | Ana Carolina Mendonca; Anderson Brandao Leite; Anna Carolina Paixao; Fernando Motta; João Felipe Bezerra; Luciana Appolinario; Marilda Siqueira on behalf of the Fiocruz COVID-19 Genomic Surveillance Network; Paola Resende; Romero Henrique Teixeira de Vasconcelos; Thiago Franco de Oliveira Carneiro                                                                                                                                                                                                                                                                  |
| EPI_ISL_801397 to 801403                                                                                                                                                                                                                                                                                                                                                                                                                                                                                                                                                                       | Laboratório Central de Saúde Pública do Estado do Amazonas (LACEN-AM)                                                                                               | Laboratório de Ecologia de Doenças Transmissíveis na Amazonia, Instituto Leonidas e Maria Deane - Fiocruz Amazonia                                                                                                                                                                                                                                                     | Ana Carolina Mendonca; Anderson Brandao Leite; Anna Carolina Paixao; Fernando Motta; Luciana Appolinario; Marilda Siqueira on behalf of the Fiocruz COVID-19 Genomic Surveillance Network; Paola Resende                                                                                                                                                                                                                                                                                                                                                                    |
| EPI_ISL_792645 to 792654                                                                                                                                                                                                                                                                                                                                                                                                                                                                                                                                                                       | Laboratório Central de Saúde Pública do Estado do Paraná (LACEN-PR)                                                                                                 | Laboratory of Respiratory Viruses and Measles, Oswaldo Cruz Institute, FIOCRUZ                                                                                                                                                                                                                                                                                         | André Corado; Debora Duarte; Felipe Naveca on behalf of the Fiocruz COVID-19 Genomic Surveillance Network; Fernanda Nascimento; George Silva; Luciana Gonçalves; Maria Júlia Brandão; Michele Jesus; Valdinete Nascimento; Victor Souza; Âgatha Costa                                                                                                                                                                                                                                                                                                                       |
| EPI_ISL_729794 to 729861                                                                                                                                                                                                                                                                                                                                                                                                                                                                                                                                                                       | Laboratório Central de Saúde Pública do Estado do Rio Grande do Sul (LACEN-RS)                                                                                      | Laboratory of Respiratory Viruses and Measles, Oswaldo Cruz Institute, FIOCRUZ                                                                                                                                                                                                                                                                                         | Ana Carolina Mendonca; Anna Carolina Paixão; Fernando Motta; Irina Nastassja Riediger; Luciana Appolinario; Maria do Carmo Debur; Marilda Siqueira on behalf of the Fiocruz COVID-19 Genomic Surveillance Network; Paola Resende                                                                                                                                                                                                                                                                                                                                            |
| EPI_ISL_693220, EPI_ISL_693223 to 693224, EPI_ISL_693243                                                                                                                                                                                                                                                                                                                                                                                                                                                                                                                                       | Laboratório Municipal de Piracicaba                                                                                                                                 | Instituto Adolfo Lutz, Interdisciplinary Procedures Center, Strategic Laboratory                                                                                                                                                                                                                                                                                       | Ana Carolina Mendonça; Anna Carolina Paixão; Fernando Motta; Luciana Appolinario; Marilda Siqueira on behalf of the Fiocruz COVID-19 Genomic Surveillance Network; Paola Resende; Tatiana Schaffer Gregjani                                                                                                                                                                                                                                                                                                                                                                 |
| EPI_ISL_940608                                                                                                                                                                                                                                                                                                                                                                                                                                                                                                                                                                                 | Laboratório Sao Lucas                                                                                                                                               | Instituto Adolfo Lutz, Interdisciplinary Procedures Center, Strategic Laboratory                                                                                                                                                                                                                                                                                       | Claudia Regina Gonçalves; Claudio Tavares Sacchi; Erica Valessa Ramos Gomes; Karoline Rodrigues Campos                                                                                                                                                                                                                                                                                                                                                                                                                                                                      |
| EPI_ISL_636737, EPI_ISL_636834 to 636838                                                                                                                                                                                                                                                                                                                                                                                                                                                                                                                                                       | Laboratório de Imunofarmacologia - Instituto Oswaldo Cruz                                                                                                           | Laboratório de Imunofarmacologia - Instituto Oswaldo Cruz                                                                                                                                                                                                                                                                                                              | Claudia Regina Gonçalves; Claudio Tavares Sacchi; Erica Valessa Ramos Gomes; Karoline Rodrigues Campos                                                                                                                                                                                                                                                                                                                                                                                                                                                                      |
| EPI_ISL_770551 to 770630, EPI_ISL_779155 to 779168                                                                                                                                                                                                                                                                                                                                                                                                                                                                                                                                             | Laboratório de Microbiologia Molecular - Universidade FEEVALE                                                                                                       | Bioinformatics Laboratory / LNCC                                                                                                                                                                                                                                                                                                                                       | A.D.; C.Q.; De Paula; F.B.; Ferreira; Fintelman-Rodrigues, N.; M.A. and Sacramento; Saraiva; Souza; T.M.                                                                                                                                                                                                                                                                                                                                                                                                                                                                    |
| EPI_ISL_831474, EPI_ISL_831645 to 831646, EPI_ISL_831660, EPI_ISL_831678, EPI_ISL_831681, EPI_ISL_831683, EPI_ISL_831685, EPI_ISL_831688 to 831689, EPI_ISL_831892, EPI_ISL_831898, EPI_ISL_831913, EPI_ISL_831938 to 831940, EPI_ISL_832009 to 832013                                                                                                                                                                                                                                                                                                                                         | see above                                                                                                                                                           | Laboratório de Microbiologia Molecular - Universidade FEEVALE                                                                                                                                                                                                                                                                                                          | Alana Witt Hansen; Alessandra Pavan Lamarca da Silva; Alexandra L Gerber; Ana Karolina Eisen Antunes; Ana Luiza Ziulkoski; Ana Paula de C Guimarães; Ana Tereza R de Vasconcelos; Bruna Hermann; Fagner Henrique Heldt; Felipe Benites; Fernando Rosado Spilki; Juliana Schons; Juliane Deise Fleck; Karoline Schallenberger; Larissa Mallmann; Luiz G P de Almeida; Matheus Nunes Weber; Meriane Demoliner; Paula Rodrigues de Almeida; Ronaldo da Silva F Jr; Victoria Goes                                                                                               |
| EPI_ISL_861856 to 861864, EPI_ISL_896069, EPI_ISL_896071, EPI_ISL_896073, EPI_ISL_896077, EPI_ISL_896079 to 896084, EPI_ISL_896087 to 896088, EPI_ISL_896090, EPI_ISL_896092, EPI_ISL_896096 to 896097, EPI_ISL_896099, EPI_ISL_896103 to 896104, EPI_ISL_896106, EPI_ISL_896108, EPI_ISL_896112, EPI_ISL_896115, EPI_ISL_959292 to 959293                                                                                                                                                                                                                                                     | see above                                                                                                                                                           | Labormedizinisches Zentrum Dr Risch                                                                                                                                                                                                                                                                                                                                    | Amanda de Menezes Mayer; Carla Andretta Moreira Neves; Claudia Elizabeth Thompson; Fernando Rosado Spilki; Gabriel Dickinson Caldana; Gabriela Bettella Cybis; Lívia Kmetzsch; Patrícia Aline Gröhs Ferrareze; Ricardo Ariel Zimerman; Vinicius Bonetti Franceschi                                                                                                                                                                                                                                                                                                          |
| EPI_ISL_900513, EPI_ISL_900524                                                                                                                                                                                                                                                                                                                                                                                                                                                                                                                                                                 | Labosud                                                                                                                                                             | CNR Virus des Infections Respiratoires - France SUD                                                                                                                                                                                                                                                                                                                    | Adrian Egli; Alfredo Mari; Hans Hirsch; Helena MB Seth-Smith; Julia Bielicki; Karoline Leuzinger; Lorenz Risch; Madlen Stange; Manuel Battegay; Martin Risch; Nadia Wohlwend; Tim Rolf                                                                                                                                                                                                                                                                                                                                                                                      |
| EPI_ISL_700466                                                                                                                                                                                                                                                                                                                                                                                                                                                                                                                                                                                 | Ladsmith (Nissenville) Clinic wc LAF                                                                                                                                | NHLS/UCT                                                                                                                                                                                                                                                                                                                                                               | Antonin Bal; Bruno Lina; Gregory Destras; Gwendolyne Burfin; Hadrien Règue; Laurence Josset; Martine Valette; Quentin Semanas                                                                                                                                                                                                                                                                                                                                                                                                                                               |
| EPI_ISL_745124, EPI_ISL_745152                                                                                                                                                                                                                                                                                                                                                                                                                                                                                                                                                                 | Laetitia Bam CHC                                                                                                                                                    | National Health Laboratory Service (NHLS), Tygerberg                                                                                                                                                                                                                                                                                                                   | Arash Iranzadeh; Bruna Galvao; Carolyn Williamson; Deelan Doolabh; Diana Hardie; Innocent Mudau; Kruger Marais; Lynn Tyers; Marvin Hsiao; Stephen Korsman                                                                                                                                                                                                                                                                                                                                                                                                                   |
| EPI_ISL_660130 to 660136                                                                                                                                                                                                                                                                                                                                                                                                                                                                                                                                                                       | Lancet                                                                                                                                                              | National Health Laboratory Service (NHLS), Tygerberg                                                                                                                                                                                                                                                                                                                   | Bronwyn Kleinhans; Eduan Wilkindon; Gert van Zyl; Houriyah Tegally; Kayla Delaney; Susan Engelbrecht; Tulio de Oliveira; Wolfgang Preiser                                                                                                                                                                                                                                                                                                                                                                                                                                   |
| EPI_ISL_622943, EPI_ISL_622946 to 622953, EPI_ISL_622955, EPI_ISL_622957, EPI_ISL_622959 to 622969, EPI_ISL_622978, EPI_ISL_622983, EPI_ISL_622985 to 622986, EPI_ISL_622988, EPI_ISL_622990, EPI_ISL_622994, EPI_ISL_623064, EPI_ISL_623068, EPI_ISL_623073                                                                                                                                                                                                                                                                                                                                   | see above                                                                                                                                                           | Lancet Laboratories                                                                                                                                                                                                                                                                                                                                                    | Bronwyn Kleinhans; Davis M-A; Draper C; Eduan Wilkindon; Gert van Zyl; Houriyah Tegally; Hsiao M; Kayla Delaney; Siegfried N; Susan Engelbrecht; Tulio de Oliveira; Williamson C; Wolfgang Preiser                                                                                                                                                                                                                                                                                                                                                                          |
| EPI_ISL_960835, EPI_ISL_960843, EPI_ISL_960846, EPI_ISL_960849, EPI_ISL_960851 to 960852, EPI_ISL_960884 to 960885, EPI_ISL_960887, EPI_ISL_960891 to 960892, EPI_ISL_960894 to 960898, EPI_ISL_960935 to 960940                                                                                                                                                                                                                                                                                                                                                                               | see above                                                                                                                                                           | National Institute for Communicable Diseases of the National Health Laboratory Service                                                                                                                                                                                                                                                                                 | Allam M; Bhiman JN; Ismail A; Khumalo Z; Kwenda S; Mnyameni F; Mohale T; Mtshali P; Subramoney K                                                                                                                                                                                                                                                                                                                                                                                                                                                                            |
|                                                                                                                                                                                                                                                                                                                                                                                                                                                                                                                                                                                                | Landesamt für Verbraucherschutz Sachsen Anhalt,                                                                                                                     | Institute of Medical Microbiology and Hospital Hygiene                                                                                                                                                                                                                                                                                                                 | Alioscha Tersteegen; Prof. Dr. Achim Kaasch                                                                                                                                                                                                                                                                                                                                                                                                                                                                                                                                 |













































## Prevention

|                                                                                                                                                                                                                                                                                                                                                                                                                        |                                                                                |                                                                                                                            |                                                                                                                                                                                                                                                                                                                                                                                                                                                                                                                                                                                                                                                                                                                                                                                            |
|------------------------------------------------------------------------------------------------------------------------------------------------------------------------------------------------------------------------------------------------------------------------------------------------------------------------------------------------------------------------------------------------------------------------|--------------------------------------------------------------------------------|----------------------------------------------------------------------------------------------------------------------------|--------------------------------------------------------------------------------------------------------------------------------------------------------------------------------------------------------------------------------------------------------------------------------------------------------------------------------------------------------------------------------------------------------------------------------------------------------------------------------------------------------------------------------------------------------------------------------------------------------------------------------------------------------------------------------------------------------------------------------------------------------------------------------------------|
| EPI_ISL_832105 to 832120, EPI_ISL_833417 to 833427, EPI_ISL_833490 to 833491, EPI_ISL_861700 to 861703, EPI_ISL_862121, EPI_ISL_882963 to 882966, EPI_ISL_882985 to 882996, EPI_ISL_892249 to 892266, EPI_ISL_902925, EPI_ISL_903373 to 903374, EPI_ISL_905765 to 905772, EPI_ISL_915434 to 915437, EPI_ISL_915439, EPI_ISL_917944 to 917950, EPI_ISL_939651, EPI_ISL_939653, EPI_ISL_962515 to 962516, EPI_ISL_962847 |                                                                                |                                                                                                                            |                                                                                                                                                                                                                                                                                                                                                                                                                                                                                                                                                                                                                                                                                                                                                                                            |
| see above                                                                                                                                                                                                                                                                                                                                                                                                              | MD Laboratories                                                                | Los Angeles County PHL                                                                                                     | P. Hemarajata et al.                                                                                                                                                                                                                                                                                                                                                                                                                                                                                                                                                                                                                                                                                                                                                                       |
| EPI_ISL_906047 to 906048                                                                                                                                                                                                                                                                                                                                                                                               | MD Laboratories                                                                | Los Angeles County Public Health Laboratory                                                                                | P. Hemarajata et al.                                                                                                                                                                                                                                                                                                                                                                                                                                                                                                                                                                                                                                                                                                                                                                       |
| EPI_ISL_633083 to 633099, EPI_ISL_648271 to 648302, EPI_ISL_660071 to 660105, EPI_ISL_935047, EPI_ISL_942326 to 942373                                                                                                                                                                                                                                                                                                 | MD PHL                                                                         | MD PHL                                                                                                                     | Maryland Department of Health Laboratories Administration                                                                                                                                                                                                                                                                                                                                                                                                                                                                                                                                                                                                                                                                                                                                  |
| EPI_ISL_736927, EPI_ISL_736930, EPI_ISL_736966 to 736968, EPI_ISL_736995                                                                                                                                                                                                                                                                                                                                               | MDS                                                                            | KRISP, KZN Research Innovation and Sequencing Platform                                                                     | ChimukangaraB; Giandhari J; Khan S; Lessells R; Mdlalose K; Pillay S; Tegally H; Wilkinson E; York D; de Oliveira T                                                                                                                                                                                                                                                                                                                                                                                                                                                                                                                                                                                                                                                                        |
| EPI_ISL_896295, EPI_ISL_896299, EPI_ISL_896310 to 896337, EPI_ISL_896343 to 896346, EPI_ISL_896349, EPI_ISL_896498 to 896501, EPI_ISL_896520 to 896524, EPI_ISL_896530, EPI_ISL_896533, EPI_ISL_896535 to 896536, EPI_ISL_896541 to 896548, EPI_ISL_896552, EPI_ISL_896555, EPI_ISL_896562, EPI_ISL_896570 to 896571, EPI_ISL_936149 to 936152, EPI_ISL_936154 to 936172, EPI_ISL_936174 to 936179                     |                                                                                |                                                                                                                            |                                                                                                                                                                                                                                                                                                                                                                                                                                                                                                                                                                                                                                                                                                                                                                                            |
| see above                                                                                                                                                                                                                                                                                                                                                                                                              | MEMORIAL SLOAN KETTERING CANCER CENTER                                         | Wadsworth Center, New York State Department of Health                                                                      | Alexis Russel; Daryl M. Lamson; Erasmus Schneider; Erica Lasek-Nesselquist; John Kelly; Jonathan Plitnick; Kirsten St. George; Matthew Shudt; Melissa A Leisner; Navjot Singh                                                                                                                                                                                                                                                                                                                                                                                                                                                                                                                                                                                                              |
| EPI_ISL_767583, EPI_ISL_767588, EPI_ISL_767591 to 767593, EPI_ISL_767596 to 767597, EPI_ISL_767629 to 767647, EPI_ISL_767649, EPI_ISL_767654 to 767664, EPI_ISL_767681 to 767715                                                                                                                                                                                                                                       |                                                                                |                                                                                                                            |                                                                                                                                                                                                                                                                                                                                                                                                                                                                                                                                                                                                                                                                                                                                                                                            |
| see above                                                                                                                                                                                                                                                                                                                                                                                                              | MEMORIAL SLOAN KETTERING CANCER CENTER                                         | Wadsworth Center, New York State Department of Health                                                                      | Alexis Russel; Daryl M. Lamson; Erasmus Schneider; Erica Lasek-Nesselquist; John Kelly; Jonathan Plitnick; Kirsten St. George; Matthew Shudt; Melissa A Leisner; Navjot Singh; Sara Griesemer                                                                                                                                                                                                                                                                                                                                                                                                                                                                                                                                                                                              |
| EPI_ISL_982861 to 982889, EPI_ISL_982892 to 982898, EPI_ISL_982900 to 982925, EPI_ISL_982930                                                                                                                                                                                                                                                                                                                           | MEPHI Aix Marseille University (AMU)                                           | MEPHI Aix Marseille University (AMU)                                                                                       | Anthony LEVASSEUR                                                                                                                                                                                                                                                                                                                                                                                                                                                                                                                                                                                                                                                                                                                                                                          |
| EPI_ISL_644375 to 644564, EPI_ISL_804467 to 804591, EPI_ISL_860093 to 860094, EPI_ISL_896118 to 896215, EPI_ISL_900055 to 900490, EPI_ISL_939630 to 939641, EPI_ISL_982228 to 982235                                                                                                                                                                                                                                   |                                                                                |                                                                                                                            |                                                                                                                                                                                                                                                                                                                                                                                                                                                                                                                                                                                                                                                                                                                                                                                            |
| see above                                                                                                                                                                                                                                                                                                                                                                                                              | MEPHI, Aix Marseille University                                                | MEPHI, Aix Marseille University                                                                                            | Anthony LEVASSEUR; Anthony Levasseur                                                                                                                                                                                                                                                                                                                                                                                                                                                                                                                                                                                                                                                                                                                                                       |
| EPI_ISL_856707 to 856710                                                                                                                                                                                                                                                                                                                                                                                               | MFD Veselbas centrs "Dziednieciba"                                             | Latvian Biomedical Research and Study Centre                                                                               | Ivars Silamielis; Iveta Bere; Jnis Klovici; Jnis Pjalkovskis; Kaspars Megnis; Marija Donaka; Monta Ustinova; Uga Dumpis; Vita Rovite; ikitā Zrelavs                                                                                                                                                                                                                                                                                                                                                                                                                                                                                                                                                                                                                                        |
| EPI_ISL_751569, EPI_ISL_751601, EPI_ISL_751622, EPI_ISL_751769, EPI_ISL_903575, EPI_ISL_903589, EPI_ISL_903605, EPI_ISL_903675, EPI_ISL_903705, EPI_ISL_903708, EPI_ISL_903710, EPI_ISL_903712, EPI_ISL_903724                                                                                                                                                                                                         |                                                                                |                                                                                                                            |                                                                                                                                                                                                                                                                                                                                                                                                                                                                                                                                                                                                                                                                                                                                                                                            |
| see above                                                                                                                                                                                                                                                                                                                                                                                                              | MI - Michigan Department of Health and Human Services - Bureau of Laboratories | Genomics and Discovery, Respiratory Viruses Branch, Division of Viral Diseases, Centers for Disease Control and Prevention | Anna Montmayer; Anna Uehara; Ben L. Rambo-Martin; Clinton R. Paden; Dhvani Batra; Haibin Wang; Jasmine Padilla; Jing Zhang; Justin Lee; Krista Queen; Lori Rowe; Mark Burroughs; Mili Sheth; Peter W. Cook; Rachel Marine; Sarah Nobles; Suxiang Tong; Yan Li; Ying Tao                                                                                                                                                                                                                                                                                                                                                                                                                                                                                                                    |
| EPI_ISL_710592 to 710593                                                                                                                                                                                                                                                                                                                                                                                               | MLF Care AB                                                                    | The Public Health Agency of Sweden                                                                                         | Department of Microbiology; The Public Health Agency of Sweden                                                                                                                                                                                                                                                                                                                                                                                                                                                                                                                                                                                                                                                                                                                             |
| EPI_ISL_751573, EPI_ISL_751576, EPI_ISL_751641, EPI_ISL_751653 to 751655, EPI_ISL_751660, EPI_ISL_751716, EPI_ISL_751733, EPI_ISL_751739, EPI_ISL_903608, EPI_ISL_903618, EPI_ISL_903659 to 903660, EPI_ISL_903677, EPI_ISL_903691, EPI_ISL_903701, EPI_ISL_903706 to 903707, EPI_ISL_903713, EPI_ISL_903737 to 903738, EPI_ISL_903746, EPI_ISL_903760, EPI_ISL_903857, EPI_ISL_903868, EPI_ISL_903951, EPI_ISL_903953 |                                                                                |                                                                                                                            |                                                                                                                                                                                                                                                                                                                                                                                                                                                                                                                                                                                                                                                                                                                                                                                            |
| see above                                                                                                                                                                                                                                                                                                                                                                                                              | MN PHL Division, Minnesota Department of Health                                | Genomics and Discovery, Respiratory Viruses Branch, Division of Viral Diseases, Centers for Disease Control and Prevention | Anna Montmayer; Anna Uehara; Ben L. Rambo-Martin; Clinton R. Paden; Dhvani Batra; Haibin Wang; Jasmine Padilla; Jing Zhang; Justin Lee; Krista Queen; Lori Rowe; Mark Burroughs; Mili Sheth; Peter W. Cook; Rachel Marine; Sarah Nobles; Suxiang Tong; Yan Li; Ying Tao                                                                                                                                                                                                                                                                                                                                                                                                                                                                                                                    |
| EPI_ISL_812198                                                                                                                                                                                                                                                                                                                                                                                                         | MN PHL Division, Minnesota Department of Health                                | Pathogen Discovery, Respiratory Viruses Branch, Division of Viral Diseases, Centers for Disease Control and Prevention     | Anna Montmayer; Anna Uehara; Brian Lynch; Clinton R. Paden; Haibin Wang; Jing Zhang; Krista Queen; Peter Cook; Rachel Marine; Suxiang Tong; Yan Li; Ying Tao                                                                                                                                                                                                                                                                                                                                                                                                                                                                                                                                                                                                                               |
| EPI_ISL_751634 to 751635, EPI_ISL_751656 to 751657, EPI_ISL_751715, EPI_ISL_751737, EPI_ISL_751740, EPI_ISL_751774, EPI_ISL_903566, EPI_ISL_903615, EPI_ISL_903787, EPI_ISL_903829, EPI_ISL_903831, EPI_ISL_903874, EPI_ISL_903898, EPI_ISL_903905, EPI_ISL_903916                                                                                                                                                     |                                                                                |                                                                                                                            |                                                                                                                                                                                                                                                                                                                                                                                                                                                                                                                                                                                                                                                                                                                                                                                            |
| see above                                                                                                                                                                                                                                                                                                                                                                                                              | MO State Public Health Laboratory                                              | Genomics and Discovery, Respiratory Viruses Branch, Division of Viral Diseases, Centers for Disease Control and Prevention | Anna Montmayer; Anna Uehara; Ben L. Rambo-Martin; Clinton R. Paden; Dhvani Batra; Haibin Wang; Jasmine Padilla; Jing Zhang; Justin Lee; Krista Queen; Lori Rowe; Mark Burroughs; Mili Sheth; Peter W. Cook; Rachel Marine; Sarah Nobles; Suxiang Tong; Yan Li; Ying Tao                                                                                                                                                                                                                                                                                                                                                                                                                                                                                                                    |
| EPI_ISL_903375 to 903389                                                                                                                                                                                                                                                                                                                                                                                               | MOH - Jaber Al-Ahmad Hospital (Innovation Research Laboratory)                 | MOH - Jaber Al-Ahmad Hospital (Innovation Research Laboratory)                                                             | Mohammad Alghounaim; Salman Al-Sabab                                                                                                                                                                                                                                                                                                                                                                                                                                                                                                                                                                                                                                                                                                                                                       |
| EPI_ISL_854373, EPI_ISL_854405 to 854420, EPI_ISL_854422 to 854435, EPI_ISL_854450, EPI_ISL_854452 to 854459, EPI_ISL_861244 to 861331, EPI_ISL_936248 to 936299, EPI_ISL_982425 to 982498, EPI_ISL_983099 to 983115, EPI_ISL_983132 to 983170                                                                                                                                                                         |                                                                                |                                                                                                                            |                                                                                                                                                                                                                                                                                                                                                                                                                                                                                                                                                                                                                                                                                                                                                                                            |
| see above                                                                                                                                                                                                                                                                                                                                                                                                              | MONTEFIORE MEDICAL CENTER LABORATORIES                                         | Wadsworth Center, New York State Department of Health                                                                      | Alexis Russel; Daryl M. Lamson; Erasmus Schneider; Erica Lasek-Nesselquist; John Kelly; Jonathan Plitnick; Kirsten St. George; Matthew Shudt; Melissa A Leisner; Navjot Singh                                                                                                                                                                                                                                                                                                                                                                                                                                                                                                                                                                                                              |
| EPI_ISL_765489 to 765495, EPI_ISL_765530 to 765566                                                                                                                                                                                                                                                                                                                                                                     | MONTEFIORE MEDICAL CENTER LABORATORIES                                         | Wadsworth Center, New York State Department of Health                                                                      | Alexis Russel; Daryl M. Lamson; Erasmus Schneider; Erica Lasek-Nesselquist; John Kelly; Jonathan Plitnick; Kirsten St. George; Matthew Shudt; Melissa A Leisner; Navjot Singh; Sara Griesemer                                                                                                                                                                                                                                                                                                                                                                                                                                                                                                                                                                                              |
| EPI_ISL_954226 to 954264, EPI_ISL_954266 to 954300, EPI_ISL_955136                                                                                                                                                                                                                                                                                                                                                     | MRC/UVRI & LSHTM Uganda Research Unit                                          | Where sequence data have been generated and submitted to GISAID                                                            | Dan Lule Bugembe; Isaac Sseeewanyana; Matthew Cotten; My V.T. Phan; Patrick Semanda; Pontiano Kaleebu; Susan Nabadda                                                                                                                                                                                                                                                                                                                                                                                                                                                                                                                                                                                                                                                                       |
| EPI_ISL_810971 to 811037, EPI_ISL_914970, EPI_ISL_915192, EPI_ISL_915421                                                                                                                                                                                                                                                                                                                                               | MRCG at LSHTM Genomics lab                                                     | MRCG at LSHTM Genomics lab                                                                                                 | Abdoulie Kante; Abdul Karim sesay; Bakary Sanyang; Jarra Manneh; Mariama Kujabi                                                                                                                                                                                                                                                                                                                                                                                                                                                                                                                                                                                                                                                                                                            |
| EPI_ISL_751549, EPI_ISL_751551, EPI_ISL_751568, EPI_ISL_751661, EPI_ISL_751679, EPI_ISL_751683, EPI_ISL_751776, EPI_ISL_903628, EPI_ISL_903630, EPI_ISL_903745, EPI_ISL_903850, EPI_ISL_903888, EPI_ISL_903937                                                                                                                                                                                                         |                                                                                |                                                                                                                            |                                                                                                                                                                                                                                                                                                                                                                                                                                                                                                                                                                                                                                                                                                                                                                                            |
| see above                                                                                                                                                                                                                                                                                                                                                                                                              | MS Public Health Laboratory                                                    | Genomics and Discovery, Respiratory Viruses Branch, Division of Viral Diseases, Centers for Disease Control and Prevention | Anna Montmayer; Anna Uehara; Ben L. Rambo-Martin; Clinton R. Paden; Dhvani Batra; Haibin Wang; Jasmine Padilla; Jing Zhang; Justin Lee; Krista Queen; Lori Rowe; Mark Burroughs; Mili Sheth; Peter W. Cook; Rachel Marine; Sarah Nobles; Suxiang Tong; Yan Li; Ying Tao                                                                                                                                                                                                                                                                                                                                                                                                                                                                                                                    |
| EPI_ISL_648004 to 648034, EPI_ISL_648037 to 648042                                                                                                                                                                                                                                                                                                                                                                     | MS Public Health Laboratory                                                    | Pathogen Discovery, Respiratory Viruses Branch, Division of Viral Diseases, Centers for Disease Control and Prevention     | Anna Montmayer; Anna Uehara; Brian Lynch; Clinton R. Paden; Haibin Wang; Jing Zhang; Krista Queen; Rachel Marine; Suxiang Tong; Yan Li; Ying Tao                                                                                                                                                                                                                                                                                                                                                                                                                                                                                                                                                                                                                                           |
| EPI_ISL_801861 to 802427, EPI_ISL_882805                                                                                                                                                                                                                                                                                                                                                                               | MSSH Clinical Microbiology Laboratories                                        | MSSH Pathogen Surveillance Program                                                                                         | Adolfo García-Sastre; Adriana van de Guchte; Ajay Obla; Alberto Paniz-Mondolfi; Ana S. Gonzalez-Reiche; Andrew Kasarskis; Angela Amoako; Ashley S. Salimbangon; Betsaida Salom Melo; Bremy Albuquerque; Brianna Ciferri; Charles Gleason; Deena R. Altman; Denise Jurczyk; Elena Hirsch; Emilia Mia Sordillo; Emily Ferrer; Gintaras Deikus; Giulio Kleiner; Gopi Patel; Hala Alshammary; Harm van Bakel; Inna Oussenko; Jayeeta Dutta; Juan Soto; Katherine Beach; Kathryn Twyman; Kayla Russo; Komal Srivastava; Levy Sominsky; Mahmoud Awawda; Marta Luksz; Matthew M. Hernandez; Melissa Gitman; Michael D. Nowak; Mitchell J. Sullivan; Nancy Francoeur; Rachel Chernet; Robert Sebra; Sarah Schaefer; Shelcie Fabre; Shwetha Hara Sridhar; Viviana Simon; Ying-Chih Wang; Zenab Khan |
| EPI_ISL_751561, EPI_ISL_751633, EPI_ISL_751640, EPI_ISL_751710 to 751711, EPI_ISL_751713, EPI_ISL_751738, EPI_ISL_751775, EPI_ISL_903849, EPI_ISL_903853                                                                                                                                                                                                                                                               |                                                                                |                                                                                                                            |                                                                                                                                                                                                                                                                                                                                                                                                                                                                                                                                                                                                                                                                                                                                                                                            |
| see above                                                                                                                                                                                                                                                                                                                                                                                                              | MT Public Health Laboratory                                                    | Genomics and Discovery, Respiratory Viruses Branch, Division of Viral Diseases, Centers for Disease Control and Prevention | Anna Montmayer; Anna Uehara; Ben L. Rambo-Martin; Clinton R. Paden; Dhvani Batra; Haibin Wang; Jasmine Padilla; Jing Zhang; Justin Lee; Krista Queen; Lori Rowe; Mark Burroughs; Mili Sheth; Peter W. Cook; Rachel Marine; Sarah Nobles; Suxiang Tong; Yan Li; Ying Tao                                                                                                                                                                                                                                                                                                                                                                                                                                                                                                                    |
| EPI_ISL_631277 to 631303, EPI_ISL_632311                                                                                                                                                                                                                                                                                                                                                                               | MVZ DIAMEDIS Diagnostische Medizin Sennestadt GmbH                             | Bielefeld University                                                                                                       | Alexander Sczyrba; Christiane Scherer; David Brandt; Jörn Kalinowski; Levin-Joe Klages; Marina Simunovic; Markus Haak; Svenja Vinke; Tobias Busche                                                                                                                                                                                                                                                                                                                                                                                                                                                                                                                                                                                                                                         |
| EPI_ISL_831403, EPI_ISL_831406, EPI_ISL_831408, EPI_ISL_831410                                                                                                                                                                                                                                                                                                                                                         | MVZ Düsseldorf Zentrum GbR                                                     | Robert Koch Institute, Influenza and respiratory viruses FG17 & Bioinformatics MF1, Berlin, Germany                        | Aleksandar Radonic; Dr. Finzer; Marianne Wedde; Oliver Drechsel; Ralf Duerwald; Rene Kmicinski; Stefan Kroeger; Stephan Fuchs; Thorsten Wolff                                                                                                                                                                                                                                                                                                                                                                                                                                                                                                                                                                                                                                              |
| EPI_ISL_860318 to 860319, EPI_ISL_860322 to 860346, EPI_ISL_860348 to 860364, EPI_ISL_860366 to 860368, EPI_ISL_860370 to 860373, EPI_ISL_860375, EPI_ISL_860378 to 860391, EPI_ISL_860393 to 860395, EPI_ISL_860397 to 860398, EPI_ISL_860400 to 860409, EPI_ISL_860411 to 860415, EPI_ISL_860417 to                                                                                                                  |                                                                                |                                                                                                                            |                                                                                                                                                                                                                                                                                                                                                                                                                                                                                                                                                                                                                                                                                                                                                                                            |

|                                                                                                                                                                                                                                                                                                                                                                                                                                                                                                                                                                                                                                                        |                                                                                                                                                                    |                                                                                                                                                                        |                                                                                                                                                                                          |                                                                                                                                                                                                                                                                                                                                                                                                                                                                                                                                                                                                                                                                          |
|--------------------------------------------------------------------------------------------------------------------------------------------------------------------------------------------------------------------------------------------------------------------------------------------------------------------------------------------------------------------------------------------------------------------------------------------------------------------------------------------------------------------------------------------------------------------------------------------------------------------------------------------------------|--------------------------------------------------------------------------------------------------------------------------------------------------------------------|------------------------------------------------------------------------------------------------------------------------------------------------------------------------|------------------------------------------------------------------------------------------------------------------------------------------------------------------------------------------|--------------------------------------------------------------------------------------------------------------------------------------------------------------------------------------------------------------------------------------------------------------------------------------------------------------------------------------------------------------------------------------------------------------------------------------------------------------------------------------------------------------------------------------------------------------------------------------------------------------------------------------------------------------------------|
| 860418, EPI_ISL_860420 to 860423, EPI_ISL_860427, EPI_ISL_860429 to 860430, EPI_ISL_860432 to 860434, EPI_ISL_860436 to 860441, EPI_ISL_860443 to 860448, EPI_ISL_860450 to 860478, EPI_ISL_860480 to 860483, EPI_ISL_860485 to 860486, EPI_ISL_860488 to 860489, EPI_ISL_860492 to 860493, EPI_ISL_860495, EPI_ISL_860497 to 860502, EPI_ISL_860504 to 860512, EPI_ISL_860514 to 860519, EPI_ISL_860522 to 860523, EPI_ISL_860525 to 860527, EPI_ISL_860529 to 860537, EPI_ISL_860539, EPI_ISL_860542 to 860544                                                                                                                                       | see above                                                                                                                                                          | MVZ Labor Krone GbR                                                                                                                                                    | Center of Medical Microbiology, Virology, and Hospital Hygiene, University of Duesseldorf                                                                                                | Alexander Dilthey; Andreas Walker; André Heimbach; Bärbel Lippke; Carsten Tiemann; Dennis Deschka; Janine Silvery; Julia Fazaal; Jörg Timm; Kerstin Ludwig; Klaus Pfeffer; Malte Kohns Vasconcelos; Per Hoffmann; Tobias Wienemann; Torsten Houwaart                                                                                                                                                                                                                                                                                                                                                                                                                     |
| EPI_ISL_640219 to 640272, EPI_ISL_660540                                                                                                                                                                                                                                                                                                                                                                                                                                                                                                                                                                                                               | EPI_ISL_933568, EPI_ISL_934416                                                                                                                                     | MVZ Laborärzte Singen<br>Macedonian Academy of Sciences and Arts                                                                                                       | MVZ Laborärzte Singen<br>Research Center for Genetic Engineering and Biotechnology "Georgi D. Efremov", Macedonian Academy of Sciences and Arts                                          | Folker Wenzel; Frithjof Blessing; Jonas Schmidt; Sandro Berghaus<br>RCGEB - MASA                                                                                                                                                                                                                                                                                                                                                                                                                                                                                                                                                                                         |
| EPI_ISL_648545 to 648554, EPI_ISL_672019, EPI_ISL_672022, EPI_ISL_672026, EPI_ISL_672037, EPI_ISL_672041, EPI_ISL_672046, EPI_ISL_672048, EPI_ISL_672059, EPI_ISL_672067, EPI_ISL_672081, EPI_ISL_672098 to 672102, EPI_ISL_672394 to 672422, EPI_ISL_672502 to 672530, EPI_ISL_738666, EPI_ISL_738707 to 738708, EPI_ISL_738916, EPI_ISL_738964, EPI_ISL_739061, EPI_ISL_739133, EPI_ISL_739172, EPI_ISL_739197, EPI_ISL_739390, EPI_ISL_739393, EPI_ISL_739429, EPI_ISL_739539, EPI_ISL_739567                                                                                                                                                       | see above                                                                                                                                                          | Madera County Department of Public Health                                                                                                                              | Chan-Zuckerberg Biohub                                                                                                                                                                   | CZB Cihahub Consortium                                                                                                                                                                                                                                                                                                                                                                                                                                                                                                                                                                                                                                                   |
| EPI_ISL_631528, EPI_ISL_631538, EPI_ISL_631546, EPI_ISL_631796, EPI_ISL_631863, EPI_ISL_631881, EPI_ISL_631915, EPI_ISL_631993                                                                                                                                                                                                                                                                                                                                                                                                                                                                                                                         | see above                                                                                                                                                          | Madigan Army Medical Center                                                                                                                                            | U.S. Air Force School of Aerospace Medicine                                                                                                                                              | Anthony Fries; Clarise Starr; Emily Parsons; Matthew Studer; Matthew Timlin; Rebecca Sainato; Ronald Wells                                                                                                                                                                                                                                                                                                                                                                                                                                                                                                                                                               |
| EPI_ISL_832823 to 833037, EPI_ISL_857396 to 857465, EPI_ISL_966756 to 966851                                                                                                                                                                                                                                                                                                                                                                                                                                                                                                                                                                           | EPI_ISL_755306 to 755567                                                                                                                                           | Maimonides Medical Center<br>Maine HETL                                                                                                                                | New York City Public Health Laboratory<br>Tewhey Lab, The Jackson Laboratory                                                                                                             | Jade Wang; et al.<br>Barter, M.; Dewey, H.; H. and Tewhey, R.; Iosue, F.; Lynch, R.; Matluk, N.; Munger                                                                                                                                                                                                                                                                                                                                                                                                                                                                                                                                                                  |
| EPI_ISL_906562 to 906710, EPI_ISL_937383 to 937513                                                                                                                                                                                                                                                                                                                                                                                                                                                                                                                                                                                                     | EPI_ISL_807151 to 807153                                                                                                                                           | Maine Health and Environmental Testing Laboratory<br>Maine Health and Environmental Testing Laboratory (Maine HETL)                                                    | Tewhey Lab, The Jackson Laboratory<br>Tewhey Lab, The Jackson Laboratory                                                                                                                 | Barter, M.; Dewey, H.; H. and Tewhey, R.; Iosue, F.; Lynch, R.; Matluk, N.; Munger<br>Barter, M.; Dewey, H.; H. and Tewhey, R.; Iosue, F.; Lynch, R.; Matluk, N.; Munger                                                                                                                                                                                                                                                                                                                                                                                                                                                                                                 |
| EPI_ISL_807150                                                                                                                                                                                                                                                                                                                                                                                                                                                                                                                                                                                                                                         | EPI_ISL_936490                                                                                                                                                     | Makmal Kesihatan Awam Kebangsaan, Kementerian Kesihatan Malaysia<br>Makmal Kesihatan Awam Kebangsaan, Kementerian Kesihatan Malaysia.                                  | Integrative Pharmacogenomics Institute (iPROMISE)<br>Integrative Pharmacogenomics Institute (iPROMISE)                                                                                   | Ariza Adnan; Fadzilah Mohd Nor; Hani Mat Hussin; Lim Wai Feng; Mohd Nur Fakhruzzaman Noorizhab; Mohd Zaki Salleh; Nor Zahrin Hasran; Sazzli Shahlan Kassim; Siti Farah Alwani Mohd Nawi; Siti Hamimah Sheikh Abdul Kadir; Teh Lay Kek; Wang Seok Mui<br>Ariza Adnan; Fadzilah Mohd Nor; Hani Mat Hussin; Lim Wai Feng; Mohd Nur Fakhruzzaman Noorizhab; Mohd Zaki Salleh; Nor Zahrin Hasran; Sazzli Shahlan Kassim; Siti Farah Alwani Mohd Nawi; Siti Hamimah Sheikh Abdul Kadir; Teh Lay Kek; Wang Seok Mui                                                                                                                                                             |
| EPI_ISL_977591 to 977593                                                                                                                                                                                                                                                                                                                                                                                                                                                                                                                                                                                                                               | EPI_ISL_640074                                                                                                                                                     | Makmal Kesihatan Awam Kota Bharu<br>Malaysia Genome Institute                                                                                                          | Institute for Medical Research, Infectious Disease Research Centre, National Institutes of Health, Ministry of Health Malaysia<br>Malaysia Genome Institute                              | Azizan MA; Kamel K; Suppiah J. Thayan R<br>Azrin Ahmad; Enizza Kasim; Imi Suhayu Sapian; Mohd Faizal Abu Bakar; Mohd Noor Mat Isa; Nor Azfa Johari.; Nurhezreen Md Iqbal; Shamsidar Sophie; Siti Noraini Othman; Yusuf Muhammad Noor                                                                                                                                                                                                                                                                                                                                                                                                                                     |
| EPI_ISL_955230                                                                                                                                                                                                                                                                                                                                                                                                                                                                                                                                                                                                                                         | EPI_ISL_965155 to 965156                                                                                                                                           | Mary Eliza Mahoney HC<br>Mary Eliza Mahoney HC                                                                                                                         | NJ Public Health and Environmental Laboratories<br>NJ_PHEL                                                                                                                               | Byeong Jeong; Dana Woell; Lindsey Bodnar; Shiv Verma<br>Byeong Jeong; Dana Woell; Lindsey Bodnar; Shiv Verma                                                                                                                                                                                                                                                                                                                                                                                                                                                                                                                                                             |
| EPI_ISL_629036 to 629090, EPI_ISL_666771 to 666813, EPI_ISL_682060 to 682078, EPI_ISL_710090 to 710098, EPI_ISL_778871 to 778917, EPI_ISL_804019 to 804036, EPI_ISL_804463 to 804465, EPI_ISL_804592 to 804598, EPI_ISL_824945 to 824984, EPI_ISL_843170 to 843190, EPI_ISL_882999 to 883035, EPI_ISL_884251 to 884259, EPI_ISL_902927 to 902949, EPI_ISL_955104 to 955125                                                                                                                                                                                                                                                                             | see above                                                                                                                                                          | Maryland Public Health Laboratory<br>Maryland Public Health Laboratory (MD PHL)                                                                                        | Maryland Public Health Laboratory<br>Maryland Public Health Laboratory (MD PHL)                                                                                                          | Maryland Department of Health Laboratories Administration<br>Maryland Department of Health Laboratories Administration                                                                                                                                                                                                                                                                                                                                                                                                                                                                                                                                                   |
| EPI_ISL_914702 to 914724, EPI_ISL_931451 to 931471, EPI_ISL_931486 to 931506                                                                                                                                                                                                                                                                                                                                                                                                                                                                                                                                                                           | EPI_ISL_700544                                                                                                                                                     | Masinedane Clinic wc MAS                                                                                                                                               | NHL/UCT                                                                                                                                                                                  | Arash Iranzadeh; Bruna Galvao; Carolyn Williamson; Deelan Doolabh; Diana Hardie; Innocent Mudau; Kruger Marais; Lynn Tyers; Marvin Hsiao; Stephen Korsman                                                                                                                                                                                                                                                                                                                                                                                                                                                                                                                |
| EPI_ISL_676652, EPI_ISL_676659, EPI_ISL_676661, EPI_ISL_676663, EPI_ISL_676665, EPI_ISL_676668, EPI_ISL_676673, EPI_ISL_676680, EPI_ISL_676709, EPI_ISL_676713, EPI_ISL_676726, EPI_ISL_676995 to 677025, EPI_ISL_677049 to 677076, EPI_ISL_677111 to 677129, EPI_ISL_677669, EPI_ISL_677672, EPI_ISL_734447 to 734481                                                                                                                                                                                                                                                                                                                                 | see above                                                                                                                                                          | Masonic Medical Research Institute                                                                                                                                     | Wadsworth Center, New York State Department of Health                                                                                                                                    | Alexis Russel; Daryl M. Lamson; Erasmus Schneider; Erica Lasek-Nesselquist; John Kelly; Jonathan Plitnick; Kirsten St. George; Nathan Tucker; Navjot Singh; Ryan D. Pfeiffer; Sara Griesemer                                                                                                                                                                                                                                                                                                                                                                                                                                                                             |
| EPI_ISL_893736 to 893738                                                                                                                                                                                                                                                                                                                                                                                                                                                                                                                                                                                                                               | EPI_ISL_765613 to 765817, EPI_ISL_765824 to 765892, EPI_ISL_765986, EPI_ISL_791729 to 791976, EPI_ISL_887145 to 887165, EPI_ISL_977078 to 977119                   | Massachusetts Department of Public Health<br>Massachusetts General Hospital                                                                                            | Pathogen Discovery, Respiratory Viruses Branch, Division of Viral Diseases, Centers for Disease Control and Prevention<br>Infectious Disease Program, Broad Institute of Harvard and MIT | Anna Montmayeur; Anna Uehara; Brian Lynch; Clinton R. Paden; Haibin Wang; Jing Zhang; Krista Queen; Peter Cook; Rachel Marine; Suxiang Tong; Yan Li; Ying Tao<br>A.E.; Adams, G.; Anahtar, M.; B.L.; B.W.; Bauer, M.; Birren; Branda, J.; Carter, A.; Cerrato, F.; Chaluviadi, S.; Chapman; Cusick, C.; D.J.; DeRuff, K.; E. and Sabeti; Flowers, K.; Gallagher, G.; Gladden-Young, A.; Gnirke, A.; Harris, J.; J.E.; K.J.; LaRoque, R.; Lagerborg, K.; Lemieux; Lin; Loreth, C.; MacInnis; Neumann, A.; Normandin, E.; P.C.; Park; Pierce, V.; Reilly, S.; Rosenberg; Rudy, M.; Ryan, E.; S.B.; Shaw, B.; Siddle; Slater, D.; Smole, S.; Tomkins-Tinch, C.; Turbett, S. |
| EPI_ISL_791514 to 791728                                                                                                                                                                                                                                                                                                                                                                                                                                                                                                                                                                                                                               | EPI_ISL_692769 to 693191, EPI_ISL_876045 to 876330, EPI_ISL_913393 to 913435, EPI_ISL_965855 to 965905                                                             | Massachusetts State Public Health Laboratory<br>Massachusetts State Public Health Laboratory                                                                           | Massachusetts State Public Health Laboratory<br>Massachusetts State Public Health Laboratory                                                                                             | Andrew Lang; Glen Gallagher; Sandra Smole; Timelia Fink                                                                                                                                                                                                                                                                                                                                                                                                                                                                                                                                                                                                                  |
| EPI_ISL_653833 to 653858                                                                                                                                                                                                                                                                                                                                                                                                                                                                                                                                                                                                                               | EPI_ISL_852564 to 852603                                                                                                                                           | Maulana Azad Medical College<br>Max von Pettenkofer Institute, Virology, National Reference Center for Retroviruses, LMU München                                       | National Institute of Biomedical Genomics<br>Laboratory for Functional Genome Analysis, Dept. Genomics, Gene Center of the LMU Munich                                                    | Arindam Maitra; Oves Siddiqui; Saumitra Das; Sonal Saxena; Vikas Manchanda<br>Alexander Graf; Helmut Blum; Max Muenchhoff; Oliver Keppler; Stefan Krebs                                                                                                                                                                                                                                                                                                                                                                                                                                                                                                                  |
| EPI_ISL_644936 to 644940, EPI_ISL_654698, EPI_ISL_683695, EPI_ISL_683714 to 683728, EPI_ISL_708483, EPI_ISL_723141 to 723145                                                                                                                                                                                                                                                                                                                                                                                                                                                                                                                           | EPI_ISL_873164 to 873165                                                                                                                                           | Mayo Clinic & Mayo Clinic Laboratories<br>Medical Laboratory Sciences, Arab American University                                                                        | Minnesota Department of Health, Public Health Laboratory<br>Medical Laboratory Sciences, Arab American University                                                                        | Alexandra Lorentz; Jacob Garfin; Matt Plumb; and Xiong Wang<br>Al-Jawabreh, A.; Al-Jawabreh, H.; Dumaidi, k.; Ereqat, S.; Nasereddin, A.                                                                                                                                                                                                                                                                                                                                                                                                                                                                                                                                 |
| EPI_ISL_635088, EPI_ISL_635092, EPI_ISL_635099, EPI_ISL_635101, EPI_ISL_635134, EPI_ISL_635159, EPI_ISL_635169, EPI_ISL_635192 to 635193, EPI_ISL_668400, EPI_ISL_708041, EPI_ISL_708115 to 708117, EPI_ISL_708136 to 708139, EPI_ISL_708196, EPI_ISL_708199, EPI_ISL_759977 to 759980, EPI_ISL_759983, EPI_ISL_775309 to 775311, EPI_ISL_775348, EPI_ISL_775394 to 775397, EPI_ISL_775442, EPI_ISL_796651, EPI_ISL_842634 to 842637, EPI_ISL_860114 to 860116, EPI_ISL_860216 to 860217, EPI_ISL_860224 to 860225, EPI_ISL_860237, EPI_ISL_906813 to 906816, EPI_ISL_962908, EPI_ISL_964966, EPI_ISL_964968, EPI_ISL_965011 to 965012, EPI_ISL_965015 | see above                                                                                                                                                          | Medical Microbiology Unit, Department for Laboratory Medicine, Drammen Hospital, Vestre Viken Health Trust,<br>Medical Microbiology, Radboud University Medical Center | Norwegian Institute of Public Health, Department of Virology<br>Medical Microbiology, Radboud University Medical Center                                                                  | Atiya R Ali; Hilde Elshaug; Hilde Vollan; Ignacio Garcia Lorente; Kamilla Heddeland Instefjord; Karoline Bragstad; Kathrine Stene-Johansen; Marie Paulsen Madsen; Olav Hungnes; Rasmus Riis Kopperud; Serina B Engebretsen<br>Coolen; F.S.; G.J.; J.P. and van Rij; Overheul; R.P.; Varghese                                                                                                                                                                                                                                                                                                                                                                             |
| EPI_ISL_944645                                                                                                                                                                                                                                                                                                                                                                                                                                                                                                                                                                                                                                         | EPI_ISL_707692, EPI_ISL_707696, EPI_ISL_707778, EPI_ISL_707890, EPI_ISL_708652, EPI_ISL_882645 to 882646, EPI_ISL_882656, EPI_ISL_883957, EPI_ISL_933575 to 933576 | Medical Microbiology, Radboud University Medical Center                                                                                                                | Medical Microbiology, Radboud University Medical Center                                                                                                                                  | Coolen; F.S.; G.J.; J.P. and van Rij; Overheul; R.P.; Varghese                                                                                                                                                                                                                                                                                                                                                                                                                                                                                                                                                                                                           |

|                                                                                                                                                                                                                                                                                                                                                                                                                                                                                                                                                                                                                                                                                                                                                                                                                                                                                                                                                                                                                                                                                                                                                                                                                                                                                                                                                                                                                                                                                                                                                                                                                                                                                                                                                                                                                                                                                                                                                                                                                                                                                                                                                                                                                                                                                                                                                                                                                                                                                                                                                                                                                                                                                                                                                                                                                                                                                                                                                                                                                                                                                                                                                                                                                                                                                                                                                                                |                                                                                                                              |                                                                                                                              |                                                                                                                                                                                                                       |                                                                                                                                                                                                                                                                                                                                                                                                                                                                                                                                                                                                         |
|--------------------------------------------------------------------------------------------------------------------------------------------------------------------------------------------------------------------------------------------------------------------------------------------------------------------------------------------------------------------------------------------------------------------------------------------------------------------------------------------------------------------------------------------------------------------------------------------------------------------------------------------------------------------------------------------------------------------------------------------------------------------------------------------------------------------------------------------------------------------------------------------------------------------------------------------------------------------------------------------------------------------------------------------------------------------------------------------------------------------------------------------------------------------------------------------------------------------------------------------------------------------------------------------------------------------------------------------------------------------------------------------------------------------------------------------------------------------------------------------------------------------------------------------------------------------------------------------------------------------------------------------------------------------------------------------------------------------------------------------------------------------------------------------------------------------------------------------------------------------------------------------------------------------------------------------------------------------------------------------------------------------------------------------------------------------------------------------------------------------------------------------------------------------------------------------------------------------------------------------------------------------------------------------------------------------------------------------------------------------------------------------------------------------------------------------------------------------------------------------------------------------------------------------------------------------------------------------------------------------------------------------------------------------------------------------------------------------------------------------------------------------------------------------------------------------------------------------------------------------------------------------------------------------------------------------------------------------------------------------------------------------------------------------------------------------------------------------------------------------------------------------------------------------------------------------------------------------------------------------------------------------------------------------------------------------------------------------------------------------------------|------------------------------------------------------------------------------------------------------------------------------|------------------------------------------------------------------------------------------------------------------------------|-----------------------------------------------------------------------------------------------------------------------------------------------------------------------------------------------------------------------|---------------------------------------------------------------------------------------------------------------------------------------------------------------------------------------------------------------------------------------------------------------------------------------------------------------------------------------------------------------------------------------------------------------------------------------------------------------------------------------------------------------------------------------------------------------------------------------------------------|
| see above                                                                                                                                                                                                                                                                                                                                                                                                                                                                                                                                                                                                                                                                                                                                                                                                                                                                                                                                                                                                                                                                                                                                                                                                                                                                                                                                                                                                                                                                                                                                                                                                                                                                                                                                                                                                                                                                                                                                                                                                                                                                                                                                                                                                                                                                                                                                                                                                                                                                                                                                                                                                                                                                                                                                                                                                                                                                                                                                                                                                                                                                                                                                                                                                                                                                                                                                                                      | Medical Research Center, Faculty of Medicine, Syarif Hidayatullah State Islamic University Jakarta                           | Medical Research Center, Faculty of Medicine, Syarif Hidayatullah State Islamic University Jakarta                           | Chris Adhianto; Dennis Nurjadi; Endah Wulandari; Erike A Suwarsono; Erike Suwarsono; Ferania Mela; Fika Ekayanti; Flori R Sari; Flori Ratna Sari; Hari Hendarto; Laifa Hendarmin; Rini Puspitaningrum; Zeti Harriyati |                                                                                                                                                                                                                                                                                                                                                                                                                                                                                                                                                                                                         |
| EPI_ISL_832820                                                                                                                                                                                                                                                                                                                                                                                                                                                                                                                                                                                                                                                                                                                                                                                                                                                                                                                                                                                                                                                                                                                                                                                                                                                                                                                                                                                                                                                                                                                                                                                                                                                                                                                                                                                                                                                                                                                                                                                                                                                                                                                                                                                                                                                                                                                                                                                                                                                                                                                                                                                                                                                                                                                                                                                                                                                                                                                                                                                                                                                                                                                                                                                                                                                                                                                                                                 | Medico Competente P.O. L'Aquila                                                                                              | Istituto Zooprofilattico Sperimentale dell'Abruzzo e Molise "G. Caporale"                                                    | Ancora M; Calistri P; Cammà C; Curini V; Di Domenico M; Di Pasquale A; Lorusso A; Mangone I; Marccacci M; Puglia I; Rinaldi A; Savini G.                                                                              |                                                                                                                                                                                                                                                                                                                                                                                                                                                                                                                                                                                                         |
| EPI_ISL_960838 to 960841, EPI_ISL_960844, EPI_ISL_960883, EPI_ISL_960886, EPI_ISL_960904 to 960934, EPI_ISL_960943 to 960950, EPI_ISL_960954 to 960956, EPI_ISL_960958 to 960981                                                                                                                                                                                                                                                                                                                                                                                                                                                                                                                                                                                                                                                                                                                                                                                                                                                                                                                                                                                                                                                                                                                                                                                                                                                                                                                                                                                                                                                                                                                                                                                                                                                                                                                                                                                                                                                                                                                                                                                                                                                                                                                                                                                                                                                                                                                                                                                                                                                                                                                                                                                                                                                                                                                                                                                                                                                                                                                                                                                                                                                                                                                                                                                               | see above                                                                                                                    | Medizinisches Labor Prof. Dr. Schenk/ Dr. Ansoerg & Kollegen, Magdeburg                                                      | Institute of Medical Microbiology and Hospital Hygiene                                                                                                                                                                | Aijoscha Tersteegen; Prof. Dr. Achim Kaasch                                                                                                                                                                                                                                                                                                                                                                                                                                                                                                                                                             |
| EPI_ISL_699643, EPI_ISL_767882 to 767883, EPI_ISL_806725, EPI_ISL_845802 to 845804, EPI_ISL_857309                                                                                                                                                                                                                                                                                                                                                                                                                                                                                                                                                                                                                                                                                                                                                                                                                                                                                                                                                                                                                                                                                                                                                                                                                                                                                                                                                                                                                                                                                                                                                                                                                                                                                                                                                                                                                                                                                                                                                                                                                                                                                                                                                                                                                                                                                                                                                                                                                                                                                                                                                                                                                                                                                                                                                                                                                                                                                                                                                                                                                                                                                                                                                                                                                                                                             | Medlab Pathology                                                                                                             | NSW Health Pathology - Institute of Clinical Pathology and Medical Research; Westmead Hospital; University of Sydney         |                                                                                                                                                                                                                       | CIDM-PH et al.                                                                                                                                                                                                                                                                                                                                                                                                                                                                                                                                                                                          |
| EPI_ISL_631832                                                                                                                                                                                                                                                                                                                                                                                                                                                                                                                                                                                                                                                                                                                                                                                                                                                                                                                                                                                                                                                                                                                                                                                                                                                                                                                                                                                                                                                                                                                                                                                                                                                                                                                                                                                                                                                                                                                                                                                                                                                                                                                                                                                                                                                                                                                                                                                                                                                                                                                                                                                                                                                                                                                                                                                                                                                                                                                                                                                                                                                                                                                                                                                                                                                                                                                                                                 | Metro Urgicare                                                                                                               | New York City Public Health Laboratory                                                                                       |                                                                                                                                                                                                                       | Jade Wang; et al.                                                                                                                                                                                                                                                                                                                                                                                                                                                                                                                                                                                       |
| EPI_ISL_640080                                                                                                                                                                                                                                                                                                                                                                                                                                                                                                                                                                                                                                                                                                                                                                                                                                                                                                                                                                                                                                                                                                                                                                                                                                                                                                                                                                                                                                                                                                                                                                                                                                                                                                                                                                                                                                                                                                                                                                                                                                                                                                                                                                                                                                                                                                                                                                                                                                                                                                                                                                                                                                                                                                                                                                                                                                                                                                                                                                                                                                                                                                                                                                                                                                                                                                                                                                 | Mfuleni CDC wc MFU                                                                                                           | NHLS/UCT                                                                                                                     | Arash Iranzadeh; Bruna Galvao; Carolyn Williamson; Deelan Doolabh; Diana Hardie; Innocent Mudau; Kruger Marais; Lynn Tyers; Marvin Hsiao; Stephen Korsman                                                             |                                                                                                                                                                                                                                                                                                                                                                                                                                                                                                                                                                                                         |
| EPI_ISL_925307 to 925360                                                                                                                                                                                                                                                                                                                                                                                                                                                                                                                                                                                                                                                                                                                                                                                                                                                                                                                                                                                                                                                                                                                                                                                                                                                                                                                                                                                                                                                                                                                                                                                                                                                                                                                                                                                                                                                                                                                                                                                                                                                                                                                                                                                                                                                                                                                                                                                                                                                                                                                                                                                                                                                                                                                                                                                                                                                                                                                                                                                                                                                                                                                                                                                                                                                                                                                                                       | Michigan Department of Agriculture and Rural Development                                                                     | Pathogen Discovery, Respiratory Viruses Branch, Division of Viral Diseases, Centers for Disease Control and Prevention       | Anna Uehara; Anna montmayeur; Brian Lynch; Clinton R. Paden; Haibin Wang; Jing Zhang; Krista Queen; Peter Cook; Rachel Marine; Suxiang Tong; Yan Li; Ying Tao                                                         |                                                                                                                                                                                                                                                                                                                                                                                                                                                                                                                                                                                                         |
| EPI_ISL_644346 to 644374, EPI_ISL_666891 to 666963, EPI_ISL_708200 to 708305, EPI_ISL_708309 to 708314, EPI_ISL_708316 to 708378, EPI_ISL_708531 to 708606, EPI_ISL_737100 to 737198, EPI_ISL_737262 to 737308, EPI_ISL_767344 to 767361, EPI_ISL_804599 to 804811, EPI_ISL_824334 to 824383, EPI_ISL_832127, EPI_ISL_847978 to 848062, EPI_ISL_888835 to 888906, EPI_ISL_913611 to 913665, EPI_ISL_961470 to 961554, EPI_ISL_977652 to 977654                                                                                                                                                                                                                                                                                                                                                                                                                                                                                                                                                                                                                                                                                                                                                                                                                                                                                                                                                                                                                                                                                                                                                                                                                                                                                                                                                                                                                                                                                                                                                                                                                                                                                                                                                                                                                                                                                                                                                                                                                                                                                                                                                                                                                                                                                                                                                                                                                                                                                                                                                                                                                                                                                                                                                                                                                                                                                                                                 | see above                                                                                                                    | Michigan Department of Health and Human Services, Bureau of Laboratories                                                     | Michigan Department of Health and Human Services, Bureau of Laboratories                                                                                                                                              | Blankenship HM; Riner D; Soehnlén MK                                                                                                                                                                                                                                                                                                                                                                                                                                                                                                                                                                    |
| EPI_ISL_763078 to 763085, EPI_ISL_875558, EPI_ISL_977160, EPI_ISL_977164, EPI_ISL_977166 to 977179, EPI_ISL_977207 to 977212, EPI_ISL_977246                                                                                                                                                                                                                                                                                                                                                                                                                                                                                                                                                                                                                                                                                                                                                                                                                                                                                                                                                                                                                                                                                                                                                                                                                                                                                                                                                                                                                                                                                                                                                                                                                                                                                                                                                                                                                                                                                                                                                                                                                                                                                                                                                                                                                                                                                                                                                                                                                                                                                                                                                                                                                                                                                                                                                                                                                                                                                                                                                                                                                                                                                                                                                                                                                                   | see above                                                                                                                    | Microbiologia e Virologia                                                                                                    | Istituto Zooprofilattico Sperimentale delle Venezie                                                                                                                                                                   | Adelaide Milani; Alessia Schivo; Alice Fusaro; Ambra Pastori; Annalisa Salviato; Antonia Ricci; Bianca Zecchin; Calogero Terregino; Erika Giorgia Quaranta; Isabella Monne                                                                                                                                                                                                                                                                                                                                                                                                                              |
| EPI_ISL_640301 to 640329, EPI_ISL_640331 to 640336, EPI_ISL_640338 to 640348, EPI_ISL_640351 to 640357, EPI_ISL_640359 to 640365, EPI_ISL_640367 to 640371, EPI_ISL_640373 to 640390, EPI_ISL_640392 to 640406, EPI_ISL_640408 to 640418, EPI_ISL_640420 to 640436, EPI_ISL_640438 to 640439, EPI_ISL_640441 to 640462, EPI_ISL_640464, EPI_ISL_640466 to 640518, EPI_ISL_640520 to 640524, EPI_ISL_640526 to 640547, EPI_ISL_640549, EPI_ISL_640551 to 640566, EPI_ISL_640568 to 640579, EPI_ISL_640581 to 640582, EPI_ISL_640584, EPI_ISL_640586 to 640587, EPI_ISL_640589 to 640595, EPI_ISL_640597 to 640606, EPI_ISL_640608 to 640642, EPI_ISL_640644 to 640645, EPI_ISL_640647 to 640655, EPI_ISL_640657 to 640659, EPI_ISL_640661 to 640740, EPI_ISL_640742 to 640759, EPI_ISL_640761 to 640762, EPI_ISL_640764 to 640783, EPI_ISL_640785 to 640799, EPI_ISL_640801 to 640802, EPI_ISL_640805 to 640813, EPI_ISL_640815 to 640818, EPI_ISL_640820 to 640844, EPI_ISL_640846 to 640860, EPI_ISL_640862 to 640897, EPI_ISL_640899 to 640920, EPI_ISL_640922 to 640925, EPI_ISL_640927 to 640938, EPI_ISL_640940 to 640941, EPI_ISL_640943 to 640946, EPI_ISL_640948 to 640958, EPI_ISL_640960 to 640964, EPI_ISL_640966 to 640983, EPI_ISL_640985 to 640987, EPI_ISL_640989 to 640991, EPI_ISL_640993 to 641006, EPI_ISL_641008 to 641011, EPI_ISL_641013 to 641016, EPI_ISL_641018 to 641034, EPI_ISL_641036 to 641038, EPI_ISL_641040 to 641043, EPI_ISL_641045 to 641076, EPI_ISL_641078 to 641084, EPI_ISL_641089 to 641101, EPI_ISL_641103 to 641115, EPI_ISL_641117 to 641120, EPI_ISL_641122 to 641124, EPI_ISL_641126 to 641139, EPI_ISL_641141 to 641155, EPI_ISL_641158 to 641173, EPI_ISL_641175 to 641206, EPI_ISL_641208 to 641209, EPI_ISL_641211 to 641238, EPI_ISL_641241 to 641252, EPI_ISL_641254 to 641272, EPI_ISL_641274 to 641286, EPI_ISL_641288 to 641300, EPI_ISL_641302 to 641308, EPI_ISL_663285 to 663287, EPI_ISL_663289 to 663300, EPI_ISL_663302 to 663306, EPI_ISL_663308 to 663310, EPI_ISL_663312 to 663315, EPI_ISL_663317 to 663339, EPI_ISL_663339 to 663408, EPI_ISL_663410 to 663411, EPI_ISL_663413 to 663449, EPI_ISL_663451 to 663466, EPI_ISL_663468 to 663486, EPI_ISL_663488 to 663614, EPI_ISL_663617, EPI_ISL_663620 to 663625, EPI_ISL_663627 to 663631, EPI_ISL_663633, EPI_ISL_663637, EPI_ISL_663639, EPI_ISL_663641 to 663645, EPI_ISL_663647 to 663658, EPI_ISL_663660 to 663674, EPI_ISL_663676 to 663677, EPI_ISL_663681 to 663684, EPI_ISL_663686 to 663689, EPI_ISL_663691 to 663781, EPI_ISL_663783 to 663820, EPI_ISL_663822, EPI_ISL_663824 to 663825, EPI_ISL_663827, EPI_ISL_663829, EPI_ISL_663834 to 663840, EPI_ISL_663843 to 663844, EPI_ISL_663846, EPI_ISL_663849, EPI_ISL_663851 to 663872, EPI_ISL_663874, EPI_ISL_663876 to 663877, EPI_ISL_663879 to 663900, EPI_ISL_663902 to 663994, EPI_ISL_663996 to 664019, EPI_ISL_779414 to 779604, EPI_ISL_779608, EPI_ISL_779610 to 779613, EPI_ISL_779616, EPI_ISL_779618, EPI_ISL_779624, EPI_ISL_779627 to 779628, EPI_ISL_779630, EPI_ISL_779634 to 779647, EPI_ISL_812424 to 812434, EPI_ISL_854750, EPI_ISL_854754 to 854756, EPI_ISL_854758, EPI_ISL_854760 to 854761, EPI_ISL_877570 to 877575, EPI_ISL_877579 to 877581, EPI_ISL_933778, EPI_ISL_962816 to 962822, EPI_ISL_962826 to 962827, EPI_ISL_979353 to 979355, EPI_ISL_979357 to 979361 | see above                                                                                                                    | Microbiological Diagnostic Unit - Public Health Laboratory (MDU-PHL)                                                         | MDU-PHL                                                                                                                                                                                                               | M.L.; N.L.; Sait; Schultz M.B.; Seemann T.; Sherry                                                                                                                                                                                                                                                                                                                                                                                                                                                                                                                                                      |
| EPI_ISL_649149 to 649151                                                                                                                                                                                                                                                                                                                                                                                                                                                                                                                                                                                                                                                                                                                                                                                                                                                                                                                                                                                                                                                                                                                                                                                                                                                                                                                                                                                                                                                                                                                                                                                                                                                                                                                                                                                                                                                                                                                                                                                                                                                                                                                                                                                                                                                                                                                                                                                                                                                                                                                                                                                                                                                                                                                                                                                                                                                                                                                                                                                                                                                                                                                                                                                                                                                                                                                                                       | Microbiological Diagnostic Unit - Public Health Laboratory (MDU-PHL), The Peter Doherty Institute for Infection and Immunity | Microbiological Diagnostic Unit - Public Health Laboratory (MDU-PHL), The Peter Doherty Institute for Infection and Immunity |                                                                                                                                                                                                                       | Caly, L.; Druce, J.; M.B.; M.L.; N.L.; Sait; Schultz; Seemann, T.; Sherry                                                                                                                                                                                                                                                                                                                                                                                                                                                                                                                               |
| EPI_ISL_833183, EPI_ISL_848199                                                                                                                                                                                                                                                                                                                                                                                                                                                                                                                                                                                                                                                                                                                                                                                                                                                                                                                                                                                                                                                                                                                                                                                                                                                                                                                                                                                                                                                                                                                                                                                                                                                                                                                                                                                                                                                                                                                                                                                                                                                                                                                                                                                                                                                                                                                                                                                                                                                                                                                                                                                                                                                                                                                                                                                                                                                                                                                                                                                                                                                                                                                                                                                                                                                                                                                                                 | Microbiology Department, Complejo Hospitalario Universitario de Vigo                                                         | Microbiology Department, Complejo Hospitalario Universitario de Vigo                                                         | Complejo Hospitalario Universitario de Vigo (CHUVI). EPICOVIGAL.; Complejo Hospitalario Universitario de Vigo. EPICOVIGAL.; Microbiology Department                                                                   |                                                                                                                                                                                                                                                                                                                                                                                                                                                                                                                                                                                                         |
| EPI_ISL_833184                                                                                                                                                                                                                                                                                                                                                                                                                                                                                                                                                                                                                                                                                                                                                                                                                                                                                                                                                                                                                                                                                                                                                                                                                                                                                                                                                                                                                                                                                                                                                                                                                                                                                                                                                                                                                                                                                                                                                                                                                                                                                                                                                                                                                                                                                                                                                                                                                                                                                                                                                                                                                                                                                                                                                                                                                                                                                                                                                                                                                                                                                                                                                                                                                                                                                                                                                                 | Microbiology Department, Hospital Clinico Universitario de Santiago                                                          | Microbiology Department, Complejo Hospitalario Universitario de Vigo                                                         | Microbiology Departments from Complejo Hospitalario Universitario de Vigo and Hospital Clinico Universitario de Santiago. EPICOVIGAL.                                                                                 |                                                                                                                                                                                                                                                                                                                                                                                                                                                                                                                                                                                                         |
| EPI_ISL_833344 to 833363                                                                                                                                                                                                                                                                                                                                                                                                                                                                                                                                                                                                                                                                                                                                                                                                                                                                                                                                                                                                                                                                                                                                                                                                                                                                                                                                                                                                                                                                                                                                                                                                                                                                                                                                                                                                                                                                                                                                                                                                                                                                                                                                                                                                                                                                                                                                                                                                                                                                                                                                                                                                                                                                                                                                                                                                                                                                                                                                                                                                                                                                                                                                                                                                                                                                                                                                                       | Microbiology Division, South Carolina Department of Health and Environmental Control (SC DHEC)                               | Microbiology Division, South Carolina Department of Health and Environmental Control (SC DHEC)                               |                                                                                                                                                                                                                       | Flores, H.; Freeman, J.                                                                                                                                                                                                                                                                                                                                                                                                                                                                                                                                                                                 |
| EPI_ISL_873166 to 873193                                                                                                                                                                                                                                                                                                                                                                                                                                                                                                                                                                                                                                                                                                                                                                                                                                                                                                                                                                                                                                                                                                                                                                                                                                                                                                                                                                                                                                                                                                                                                                                                                                                                                                                                                                                                                                                                                                                                                                                                                                                                                                                                                                                                                                                                                                                                                                                                                                                                                                                                                                                                                                                                                                                                                                                                                                                                                                                                                                                                                                                                                                                                                                                                                                                                                                                                                       | Microbiology Division, South Carolina Department of Health and Environmental Control (SC DHEC)                               | Microbiology Division, South Carolina Department of Health and Environmental Control (SC DHEC)                               |                                                                                                                                                                                                                       | Flores, H.; Freeman, J.                                                                                                                                                                                                                                                                                                                                                                                                                                                                                                                                                                                 |
| EPI_ISL_884295                                                                                                                                                                                                                                                                                                                                                                                                                                                                                                                                                                                                                                                                                                                                                                                                                                                                                                                                                                                                                                                                                                                                                                                                                                                                                                                                                                                                                                                                                                                                                                                                                                                                                                                                                                                                                                                                                                                                                                                                                                                                                                                                                                                                                                                                                                                                                                                                                                                                                                                                                                                                                                                                                                                                                                                                                                                                                                                                                                                                                                                                                                                                                                                                                                                                                                                                                                 | Microbiology Division, South Carolina Department of Health and Environmental Control Public Health Laboratory (SC DHEC PHL)  | Microbiology Division, South Carolina Department of Health and Environmental Control Public Health Laboratory (SC DHEC PHL)  |                                                                                                                                                                                                                       | Haley Flores; Jessica Freeman                                                                                                                                                                                                                                                                                                                                                                                                                                                                                                                                                                           |
| EPI_ISL_848188 to 848191, EPI_ISL_848193 to 848198, EPI_ISL_852820, EPI_ISL_852822, EPI_ISL_852824, EPI_ISL_852826 to 852827, EPI_ISL_852829 to 852833, EPI_ISL_853274, EPI_ISL_853315                                                                                                                                                                                                                                                                                                                                                                                                                                                                                                                                                                                                                                                                                                                                                                                                                                                                                                                                                                                                                                                                                                                                                                                                                                                                                                                                                                                                                                                                                                                                                                                                                                                                                                                                                                                                                                                                                                                                                                                                                                                                                                                                                                                                                                                                                                                                                                                                                                                                                                                                                                                                                                                                                                                                                                                                                                                                                                                                                                                                                                                                                                                                                                                         | see above                                                                                                                    | Microbiology Lab                                                                                                             | NBCC Sequencing Facility                                                                                                                                                                                              | Dr. Jeff Wrana                                                                                                                                                                                                                                                                                                                                                                                                                                                                                                                                                                                          |
| EPI_ISL_981850 to 981975                                                                                                                                                                                                                                                                                                                                                                                                                                                                                                                                                                                                                                                                                                                                                                                                                                                                                                                                                                                                                                                                                                                                                                                                                                                                                                                                                                                                                                                                                                                                                                                                                                                                                                                                                                                                                                                                                                                                                                                                                                                                                                                                                                                                                                                                                                                                                                                                                                                                                                                                                                                                                                                                                                                                                                                                                                                                                                                                                                                                                                                                                                                                                                                                                                                                                                                                                       | Microbiology Service, Hospital Universitario Clinico San Cecilio, Granada                                                    | Microbiology Service, Hospital Universitario Clinico San Cecilio, Granada                                                    |                                                                                                                                                                                                                       | Adolfo de Salazar; Ana Fuentes; Federico García; Laura Viñuela; Natalia Chueca                                                                                                                                                                                                                                                                                                                                                                                                                                                                                                                          |
| EPI_ISL_738147, EPI_ISL_738194, EPI_ISL_738243, EPI_ISL_825155 to 825156, EPI_ISL_911524 to 911527, EPI_ISL_983096 to 983098                                                                                                                                                                                                                                                                                                                                                                                                                                                                                                                                                                                                                                                                                                                                                                                                                                                                                                                                                                                                                                                                                                                                                                                                                                                                                                                                                                                                                                                                                                                                                                                                                                                                                                                                                                                                                                                                                                                                                                                                                                                                                                                                                                                                                                                                                                                                                                                                                                                                                                                                                                                                                                                                                                                                                                                                                                                                                                                                                                                                                                                                                                                                                                                                                                                   | Microbiology and Virology Unit, Florence Careggi University Hospital                                                         | Microbiology and Virology Unit, Florence Careggi University Hospital                                                         | Alberto Antonelli; Emanuele Gori; Fabio Morecchiato; Gian Maria Rossolini; Ilaria Baccani; Marco Coppi; Noemi Aiezza; Simona Pollini; Vincenzo Di Pilato                                                              |                                                                                                                                                                                                                                                                                                                                                                                                                                                                                                                                                                                                         |
| EPI_ISL_667758 to 667760, EPI_ISL_667762 to 667775                                                                                                                                                                                                                                                                                                                                                                                                                                                                                                                                                                                                                                                                                                                                                                                                                                                                                                                                                                                                                                                                                                                                                                                                                                                                                                                                                                                                                                                                                                                                                                                                                                                                                                                                                                                                                                                                                                                                                                                                                                                                                                                                                                                                                                                                                                                                                                                                                                                                                                                                                                                                                                                                                                                                                                                                                                                                                                                                                                                                                                                                                                                                                                                                                                                                                                                             | Microbiology, Infectious Diseases and Immunology, Centre de Recherche du Centre Hospitalier de l'Université de Montreal      | Microbiology, Infectious Diseases and Immunology, Centre de Recherche du Centre Hospitalier de l'Université de Montreal      |                                                                                                                                                                                                                       | Benoit, P.; Coutlee, F.; Gagnon, S.; Grandjean-Lapierre, S.; Hardy, I.; Kaufmann, D.; Point, F.; Tremblay, C.                                                                                                                                                                                                                                                                                                                                                                                                                                                                                           |
| EPI_ISL_622772, EPI_ISL_622776, EPI_ISL_622783, EPI_ISL_622787, EPI_ISL_622792, EPI_ISL_622802, EPI_ISL_622817 to 622820, EPI_ISL_622831 to 622832, EPI_ISL_637086 to 637087, EPI_ISL_649121 to 649122, EPI_ISL_661265, EPI_ISL_682278 to 682282, EPI_ISL_682287 to 682290, EPI_ISL_707806 to 707807, EPI_ISL_732968 to 732970, EPI_ISL_755624 to 755625, EPI_ISL_755634 to 755636, EPI_ISL_794624 to 794626, EPI_ISL_877214 to 877218                                                                                                                                                                                                                                                                                                                                                                                                                                                                                                                                                                                                                                                                                                                                                                                                                                                                                                                                                                                                                                                                                                                                                                                                                                                                                                                                                                                                                                                                                                                                                                                                                                                                                                                                                                                                                                                                                                                                                                                                                                                                                                                                                                                                                                                                                                                                                                                                                                                                                                                                                                                                                                                                                                                                                                                                                                                                                                                                         | see above                                                                                                                    | Middlemore Hospital                                                                                                          | Institute of Environmental Science and Research (ESR)                                                                                                                                                                 | Anja Werno; Antje van der Linden; Arlo Upton; Chris Mansell; David Hammer; Dragana Drinkovic; Erasmus Smit; Gary McAuliffe; Hana Sofia Andersson; Hermes Perez; James Ussher; Jill Sherwood; Jing Wang; Joep de Ligt; Josh Freeman; Julia Howard; Juliet Elvy; Lauren Jelly; Mary DeAlmeida; Matt Blakiston; Matt Storey; Matthew Rogers; Max Bloomfield; Michael Addidle; Michelle Balm; Muhammad Faisal; Nikki Freed; Olin Silander; Sally Roberts; Sarah Jeffries; Sharmini Muttaiyah; Susan Morpeth; Susan Taylor; Timothy Blackmore; Vani Sathyendran; Veronica Playle; Virginia Hope; Xiaoyun Ren |
| EPI_ISL_661291 to 661292, EPI_ISL_832003 to 832004, EPI_ISL_913312, EPI_ISL_913330 to 913333                                                                                                                                                                                                                                                                                                                                                                                                                                                                                                                                                                                                                                                                                                                                                                                                                                                                                                                                                                                                                                                                                                                                                                                                                                                                                                                                                                                                                                                                                                                                                                                                                                                                                                                                                                                                                                                                                                                                                                                                                                                                                                                                                                                                                                                                                                                                                                                                                                                                                                                                                                                                                                                                                                                                                                                                                                                                                                                                                                                                                                                                                                                                                                                                                                                                                   | Mikrobiologen                                                                                                                | The Public Health Agency of Sweden                                                                                           |                                                                                                                                                                                                                       | Anna Risberg; Anna-Malin Linde; Carlo Berg; Department of Microbiology; Karin Tegmark-Wisell; Maria Lind Karlberg; Mattias Haukland; Mia Brytting; Noura Walai; Oskar Karlsson Lindsjö; Petra Edquist; Petra Holmstrom; Reza Advani; Sofia Stamouli; The Public Health Agency of Sweden                                                                                                                                                                                                                                                                                                                 |
| EPI_ISL_678273 to 678289                                                                                                                                                                                                                                                                                                                                                                                                                                                                                                                                                                                                                                                                                                                                                                                                                                                                                                                                                                                                                                                                                                                                                                                                                                                                                                                                                                                                                                                                                                                                                                                                                                                                                                                                                                                                                                                                                                                                                                                                                                                                                                                                                                                                                                                                                                                                                                                                                                                                                                                                                                                                                                                                                                                                                                                                                                                                                                                                                                                                                                                                                                                                                                                                                                                                                                                                                       | Mikrobiologie, RARI                                                                                                          | Mikrobiologie, RARI                                                                                                          | A.V.; Badanin; D.V.; E.A.; Fedorov; Guseva; Krasnov; Kutnyev; N.A.; N.P.; Naryshkina; Portenko; S.A.; Sharapova; Shcherbakova; Sosedova; V.V.; Y.M.                                                                   |                                                                                                                                                                                                                                                                                                                                                                                                                                                                                                                                                                                                         |
| EPI_ISL_735413                                                                                                                                                                                                                                                                                                                                                                                                                                                                                                                                                                                                                                                                                                                                                                                                                                                                                                                                                                                                                                                                                                                                                                                                                                                                                                                                                                                                                                                                                                                                                                                                                                                                                                                                                                                                                                                                                                                                                                                                                                                                                                                                                                                                                                                                                                                                                                                                                                                                                                                                                                                                                                                                                                                                                                                                                                                                                                                                                                                                                                                                                                                                                                                                                                                                                                                                                                 | Militello Centro de Diagnosticos e Biopescusa Clinica                                                                        | Instituto Adolfo Lutz, Interdisciplinary Procedures Center, Strategic Laboratory                                             | Claudia Regina Gonçalves; Claudio Tavares Sacchi; Erica Valessa Ramos Gomes; Karoline Rodrigues Campos                                                                                                                |                                                                                                                                                                                                                                                                                                                                                                                                                                                                                                                                                                                                         |

|                                                                                                                                                                                                                                                                                                                                                                                                                                            |                                                                                                                                                                                                                |                                                                                                                                                                                  |                                                                                                                                                                                                                                                                                                                                                                                                                                    |
|--------------------------------------------------------------------------------------------------------------------------------------------------------------------------------------------------------------------------------------------------------------------------------------------------------------------------------------------------------------------------------------------------------------------------------------------|----------------------------------------------------------------------------------------------------------------------------------------------------------------------------------------------------------------|----------------------------------------------------------------------------------------------------------------------------------------------------------------------------------|------------------------------------------------------------------------------------------------------------------------------------------------------------------------------------------------------------------------------------------------------------------------------------------------------------------------------------------------------------------------------------------------------------------------------------|
| EPI_ISL_718132 to 718166, EPI_ISL_718168 to 718173, EPI_ISL_718175, EPI_ISL_718177, EPI_ISL_718179 to 718181, EPI_ISL_718183 to 718184, EPI_ISL_718186 to 718190, EPI_ISL_718193 to 718196, EPI_ISL_718199 to 718202, EPI_ISL_718206 to 718215, EPI_ISL_718217, EPI_ISL_718219 to 718221                                                                                                                                                   | Ministry of Health Hospitals                                                                                                                                                                                   | Institute of Health and Community Medicine                                                                                                                                       | Chan Chia Jui; Chua Hock Hin; David Perera; Ooi Mong How; Tonnie Sia Loong Loong; Wong Jyn Shan; Wong Kiing Aik                                                                                                                                                                                                                                                                                                                    |
| EPI_ISL_811136 to 811143, EPI_ISL_812761 to 812781, EPI_ISL_812873 to 812921, EPI_ISL_814062 to 814091, EPI_ISL_894246 to 894276, EPI_ISL_903347, EPI_ISL_906049, EPI_ISL_935048 to 935102, EPI_ISL_939627, EPI_ISL_940633 to 940682, EPI_ISL_940709 to 940713, EPI_ISL_983409 to 983437, EPI_ISL_984301                                                                                                                                   | Ministry of Health Turkey                                                                                                                                                                                      | Ministry of Health Turkey                                                                                                                                                        | Ayse Basak Altas; Aye Baak Alta; Fatma Bayrakdar; Gulay Korukluoglu; Gulay Korukluolu; Suleyman Yalcin; Suleyman Yalcin; Yasemin Cosgun; Yasemin Cogun                                                                                                                                                                                                                                                                             |
| EPI_ISL_634857                                                                                                                                                                                                                                                                                                                                                                                                                             | Minneapolis VA Health Care System                                                                                                                                                                              | Minnesota Department of Health, Public Health Laboratory                                                                                                                         | Alexandra Lorentz; Jacob Garfin; Matt Plumb; and Xiong Wang                                                                                                                                                                                                                                                                                                                                                                        |
| EPI_ISL_634838 to 634856, EPI_ISL_634858 to 634863, EPI_ISL_634866 to 634875, EPI_ISL_654695, EPI_ISL_654700 to 654729, EPI_ISL_683729 to 683750, EPI_ISL_708460 to 708482, EPI_ISL_708485 to 708503, EPI_ISL_723118 to 723140, EPI_ISL_723146, EPI_ISL_770778 to 770792, EPI_ISL_770796, EPI_ISL_770798 to 770799, EPI_ISL_770816 to 770817, EPI_ISL_770819, EPI_ISL_873270 to 873271, EPI_ISL_913676 to 913725, EPI_ISL_913737 to 913739 | Minnesota Department of Health, Public Health Laboratory                                                                                                                                                       | Minnesota Department of Health, Public Health Laboratory                                                                                                                         | Alexandra Lorentz; Jacob Garfin; Matt Plumb; and Xiong Wang                                                                                                                                                                                                                                                                                                                                                                        |
| EPI_ISL_900504 to 900505, EPI_ISL_900507 to 900509, EPI_ISL_925031 to 925032                                                                                                                                                                                                                                                                                                                                                               | Minialis                                                                                                                                                                                                       | CNR Virus des Infections Respiratoires - France SUD                                                                                                                              | Antonin Bal; Bruno Lina; Gregory Destras; Gwendolyne Burfin; Hadrien Règue; Laurence Josset; Martine Valette; Quentin Semanas                                                                                                                                                                                                                                                                                                      |
| EPI_ISL_913726                                                                                                                                                                                                                                                                                                                                                                                                                             | Missouri State Public Health Laboratory                                                                                                                                                                        | Minnesota Department of Health, Public Health Laboratory                                                                                                                         | Alexandra Lorentz; Jacob Garfin; Matt Plumb; and Xiong Wang                                                                                                                                                                                                                                                                                                                                                                        |
| EPI_ISL_640025                                                                                                                                                                                                                                                                                                                                                                                                                             | Mitchells Plain CHC wc MHC                                                                                                                                                                                     | NHLS/UCT                                                                                                                                                                         | Arash Iranzadeh; Bruna Galvao; Carolyn Williamson; Deelan Doolabh; Diana Hardie; Innocent Mudau; Kruger Marais; Lynn Tyers; Marvin Hsiao; Stephen Korsman                                                                                                                                                                                                                                                                          |
| EPI_ISL_640020, EPI_ISL_640028, EPI_ISL_640065, EPI_ISL_700489, EPI_ISL_700572, EPI_ISL_700597                                                                                                                                                                                                                                                                                                                                             | Mitchells Plain Hospital wc MPH                                                                                                                                                                                | NHLS/UCT                                                                                                                                                                         | Arash Iranzadeh; Bruna Galvao; Carolyn Williamson; Deelan Doolabh; Diana Hardie; Innocent Mudau; Kruger Marais; Lynn Tyers; Marvin Hsiao; Stephen Korsman                                                                                                                                                                                                                                                                          |
| EPI_ISL_960095, EPI_ISL_960097 to 960098, EPI_ISL_960100, EPI_ISL_960121, EPI_ISL_960125, EPI_ISL_960128 to 960129, EPI_ISL_960137, EPI_ISL_960148                                                                                                                                                                                                                                                                                         | Mitchells Plain Hospital wc MPH                                                                                                                                                                                | National Health Laboratory Service/UCT                                                                                                                                           | Arash Iranzadeh; Bruna Galvao; Carolyn Williamson; Deelan Doolabh; Diana Hardie; Innocent Mudau; Kruger Marais; Lynn Tyers; Marvin Hsiao; Stephen Korsman                                                                                                                                                                                                                                                                          |
| EPI_ISL_759964, EPI_ISL_956276                                                                                                                                                                                                                                                                                                                                                                                                             | Mitra Keluarga Hospital Waru                                                                                                                                                                                   | Institute of Tropical Disease, Universitas Airlangga                                                                                                                             | Aldise M Nastro; Christina Dian Anggraeni; Gatot Soegiarto; Jezzy R Dewantari; Kazufumi Shimizu; Krisnodi Rahardjo; Laksmi Wulandari; Maria I Lusida; Resti Yudhawati; Rima R Prasetya; Soetjipto; Yasuko Mori                                                                                                                                                                                                                     |
| EPI_ISL_768751                                                                                                                                                                                                                                                                                                                                                                                                                             | MoPH (Lebanese Ministry of public health)                                                                                                                                                                      | Microbial Genomics Lab LAU                                                                                                                                                       | Georgi Merhi; Hamad Hassan; Jad Koweyes; Sima Tokajian; Tamara Salloum                                                                                                                                                                                                                                                                                                                                                             |
| EPI_ISL_768798                                                                                                                                                                                                                                                                                                                                                                                                                             | MoPH (Lebanese ministry of Public Health)                                                                                                                                                                      | Microbial genomics lab LAU                                                                                                                                                       | Gerogi Merhi; Hamad Hassan; Jad Koweyes; Sima Tokajian; Tamara Salloum                                                                                                                                                                                                                                                                                                                                                             |
| EPI_ISL_768743                                                                                                                                                                                                                                                                                                                                                                                                                             | MoPH (Lebanese ministry of public health)                                                                                                                                                                      | Microbial Genomics Lab LAU Byblos                                                                                                                                                | Georgi Merhi; Hamad Hassan; Jad Koweyes; Sima Tokajian; Tamara Salloum                                                                                                                                                                                                                                                                                                                                                             |
| EPI_ISL_768799                                                                                                                                                                                                                                                                                                                                                                                                                             | MoPH (Lebanese ministry of public health)                                                                                                                                                                      | Microbial Genomics lab LAU                                                                                                                                                       | Gerogi Merhi; Hamad Hassan; Jad Koweyes; Sima Tokajian; Tamara Salloum                                                                                                                                                                                                                                                                                                                                                             |
| EPI_ISL_660259 to 660263                                                                                                                                                                                                                                                                                                                                                                                                                   | Molecular Diagnostic Services (MDS)                                                                                                                                                                            | KRISP, KZN Research Innovation and Sequencing Platform                                                                                                                           | Giandhari J; Khan S; Lessells R; Mlalose K; Pillay S; Tegally H; Wilkinson E; York D; de Oliveira T                                                                                                                                                                                                                                                                                                                                |
| EPI_ISL_904015 to 904016                                                                                                                                                                                                                                                                                                                                                                                                                   | Molecular Biology and Virology lab, Faculty of Veterinary Medicine, Jordan University of Science and Technology                                                                                                | Molecular Biology and Virology lab, Faculty of Veterinary Medicine, Jordan University of Science and Technology                                                                  | Dr. Moh'D Borhan Al-Zghoul; Dr.Mahmoud Hamad Gazo; Dr.Moh'D Borhan Al-Zghoul; Dr.Mustafa Ababneh; Dr.Saied Jaradat; Ghaya Abdellatif Alwahdanee; Hazaem Haddad; Hazem Haddad; Mohammad Hussien Alboom; Suhaila Ibrahim Khalil; Suhaila Ibrahim Khalil                                                                                                                                                                              |
| EPI_ISL_849763                                                                                                                                                                                                                                                                                                                                                                                                                             | Molecular Biology, IZS Sicilia                                                                                                                                                                                 | Molecular Biology, IZS Sicilia                                                                                                                                                   | Di Gaudio, F.; Reale, S.; S. and Vitale, F.; Scibetta; Seidita, G.                                                                                                                                                                                                                                                                                                                                                                 |
| EPI_ISL_681673 to 681701                                                                                                                                                                                                                                                                                                                                                                                                                   | Molecular Medicine Laboratory, University of Magallanes                                                                                                                                                        | Centro Asistencial Docente y de Investigacion, Universidad de Magallanes                                                                                                         | Diego Alvarez; Hermy Alvarez; Jacqueline Aldridge; Jorge González; Marcelo Navarrete; Marco Montes de Oca; Roberto Uribe-Paredes                                                                                                                                                                                                                                                                                                   |
| EPI_ISL_884445 to 884579                                                                                                                                                                                                                                                                                                                                                                                                                   | Molecular Microbiology & Immunology, University of Missouri                                                                                                                                                    | Molecular Microbiology & Immunology, University of Missouri                                                                                                                      | C.Y.; G.M.; Hang, J.; Li, T.; Lidi; Tang; Wan; X.-F.                                                                                                                                                                                                                                                                                                                                                                               |
| EPI_ISL_802545 to 802566                                                                                                                                                                                                                                                                                                                                                                                                                   | Molecular Microbiology and Food Research Laboratory (MMFRLAB) - Universidad San Sebastián                                                                                                                      | Facultad de Ciencias de la Vida, UNAB                                                                                                                                            | Claudio Meneses; César Echeverría; Dayán Sanhueza; Eduardo Castro; Jorge Olivares; Macarena Bastías; Sebastián Wolter; Waldo Diaz                                                                                                                                                                                                                                                                                                  |
| EPI_ISL_943808                                                                                                                                                                                                                                                                                                                                                                                                                             | Molecular Pathology, Pathology and Laboratory Medicine Institute, Cleveland Clinic, Ohio, USA                                                                                                                  | Molecular Pathology, Pathology and Laboratory Medicine Institute, Cleveland Clinic, Ohio, USA                                                                                    | Brian P. Rubin; Daniel H. Farkas; Frank P. Esper; Gary Procop; Jennifer Ko; Jing Li; Thamali M. Adhikari; Timothy A. Chan; Yu-Wei Cheng; Zheng Jin Tu                                                                                                                                                                                                                                                                              |
| EPI_ISL_895728 to 895755, EPI_ISL_895757 to 895847                                                                                                                                                                                                                                                                                                                                                                                         | Molecular biology division, Institute of Clinical Biochemistry and Diagnostics, Charles University, Faculty of Medicine in Hradec Králové and University Hospital Hradec Králové                               | Molecular biology division, Institute of Clinical Biochemistry and Diagnostics, Charles University, Faculty of Medicine in Hradec Králové and University Hospital Hradec Králové | Helena Kovaříková; Ivana Baranová; Jitka Novotná; Kateřina Hrochová; Kateřina Pehlíková; Petr Brož; Tereza Baková; Vladimír Palika. Cooperation project with BioVendor-R&D and bioinformatics company BIOXSYS s r.o.                                                                                                                                                                                                               |
| EPI_ISL_653922 to 653932, EPI_ISL_660433 to 660438, EPI_ISL_717965 to 717974, EPI_ISL_732659 to 732676, EPI_ISL_745223 to 745259, EPI_ISL_754196 to 754214                                                                                                                                                                                                                                                                                 | Molecular diagnostic laboratory of Federal Budget Institution of Science "Central Research Institute of Epidemiology" of The Federal Service on Customers' Rights Protection and Human Well-being Surveillance | Group of Genomics and Postgenomic Technologies of Central Research Institute of Epidemiology                                                                                     | Akimkin VG; Bulanenko VP; Dudorova A.V.; Dudorova AV; Kaptelova VV; Korneenko EV; Saenko SS; Samoilov AE; Shipulina OY; Speranskaya AS; Tivanova EV; Valdokhina AV                                                                                                                                                                                                                                                                 |
| EPI_ISL_681829 to 681842, EPI_ISL_682058 to 682059                                                                                                                                                                                                                                                                                                                                                                                         | Molecular diagnostic unit for viral haemorrhagic fevers and emerging viruses, Bouaké CHU Laboratory                                                                                                            | Project group Epidemiology of Highly Pathogenic Microorganisms, Robert Koch-Institute                                                                                            | Adjaratou Traoré; Bamba Fatoumata Touré; Chantal Akoua-Koffi; Coulibaly Mbegan; Diané Bamourou; Essia Belarbi; Etilé Anoch; Fabian Leendertz; Grit Schubert; Kra Ouifoué; Monemo Pacome; Safiatou Karidioula; Soundélé Maité                                                                                                                                                                                                       |
| EPI_ISL_759860 to 759865                                                                                                                                                                                                                                                                                                                                                                                                                   | Molecular, ProgenaBiome                                                                                                                                                                                        | Molecular, ProgenaBiome                                                                                                                                                          | A.J.; Papoutsis                                                                                                                                                                                                                                                                                                                                                                                                                    |
| EPI_ISL_826461, EPI_ISL_848630 to 848633, EPI_ISL_848642, EPI_ISL_888673                                                                                                                                                                                                                                                                                                                                                                   | Montana Public Health Laboratory                                                                                                                                                                               | Wyoming Public Health Laboratory                                                                                                                                                 | Ashley Norberg; Bailey Bowcutt; Channing Weber; Deborah Gibson; Joy Ritter; Lynette Gumbleton; Noah Hull; Taylor Fearing; Wanda Manley                                                                                                                                                                                                                                                                                             |
| EPI_ISL_826578 to 826670, EPI_ISL_876032 to 876041                                                                                                                                                                                                                                                                                                                                                                                         | Montefiore Medical Center                                                                                                                                                                                      | Albert Einstein College of Medicine, Dept. of Microbiology & Immunology, Chandran lab                                                                                            | Amy S. Fox; Ariel S. Wirchnianski; Aviv Bergman; Catalina Florez; D. Yitzchak Goldstein; David L. Goldman; Denise Haslwanter; Ethan Lauder Milch; Hnin Khine; J. Maximilian Fels; Jason Barnhill; Johanna P. Daily; Karin A. Skalina; Kartik Chandran; Libusha Kelly; Lucia R. Wolgast; M. Eugenia Dieterle; Robert H. Bortz III; Rohit K. Jangra; Ryan Forster; Saad Khan; Surksha Sirichand; Wendy Szymczak; William B. Mitchell |
| EPI_ISL_631513, EPI_ISL_631560 to 631561, EPI_ISL_631982, EPI_ISL_632111                                                                                                                                                                                                                                                                                                                                                                   | Montefiore Medical Center                                                                                                                                                                                      | New York City Public Health Laboratory                                                                                                                                           | Jade Wang; et al.                                                                                                                                                                                                                                                                                                                                                                                                                  |
| EPI_ISL_738506, EPI_ISL_738658, EPI_ISL_739101, EPI_ISL_739329, EPI_ISL_739336, EPI_ISL_739364, EPI_ISL_739372, EPI_ISL_739546                                                                                                                                                                                                                                                                                                             | Monterey County Public Health Lab                                                                                                                                                                              | Chan-Zuckerberg Biohub                                                                                                                                                           | CZB Ciliahub Consortium                                                                                                                                                                                                                                                                                                                                                                                                            |
| EPI_ISL_930788 to 930789, EPI_ISL_930791 to 930792, EPI_ISL_930794, EPI_ISL_930796 to 930797, EPI_ISL_930800, EPI_ISL_930804 to 930805, EPI_ISL_930830, EPI_ISL_930833, EPI_ISL_930845, EPI_ISL_930847 to 930848, EPI_ISL_930851 to 930852, EPI_ISL_968069 to 968079                                                                                                                                                                       | Monterey County Public Health Laboratory                                                                                                                                                                       | Monterey County Public Health Laboratory                                                                                                                                         | ; C. Anaya et al.; Monterey County Public Health Laboratory                                                                                                                                                                                                                                                                                                                                                                        |
| EPI_ISL_640039                                                                                                                                                                                                                                                                                                                                                                                                                             | Mossel Bay Hospital wc MBY                                                                                                                                                                                     | NHLS/UCT                                                                                                                                                                         | Arash Iranzadeh; Bruna Galvao; Carolyn Williamson; Deelan Doolabh; Diana Hardie; Innocent Mudau; Kruger Marais; Lynn Tyers; Marvin Hsiao; Stephen Korsman                                                                                                                                                                                                                                                                          |
| EPI_ISL_882997 to 882998                                                                                                                                                                                                                                                                                                                                                                                                                   | Motion Picture Television Fund Hospital Lab                                                                                                                                                                    | Los Angeles County PHL                                                                                                                                                           | P. Hemarajata et al.                                                                                                                                                                                                                                                                                                                                                                                                               |
| EPI_ISL_889307 to 889308, EPI_ISL_889356 to 889370, EPI_ISL_891217                                                                                                                                                                                                                                                                                                                                                                         | Motol University Hospital                                                                                                                                                                                      | Institute of Applied Biotechnologies a.s.                                                                                                                                        | Kateřina Kvapilová; Martin Kašný; Ondej Brzo; Pavel Devínek; Petr Klempt; Petr Kvapil                                                                                                                                                                                                                                                                                                                                              |
| EPI_ISL_631512, EPI_ISL_631521, EPI_ISL_631525, EPI_ISL_631532, EPI_ISL_631534, EPI_ISL_631537, EPI_ISL_631549, EPI_ISL_631764, EPI_ISL_631785 to 631786, EPI_ISL_631830, EPI_ISL_631834, EPI_ISL_631839, EPI_ISL_631913 to 631914, EPI_ISL_631983                                                                                                                                                                                         | Mount Sinai Hospital                                                                                                                                                                                           | New York City Public Health Laboratory                                                                                                                                           | Jade Wang; et al.                                                                                                                                                                                                                                                                                                                                                                                                                  |
| see above                                                                                                                                                                                                                                                                                                                                                                                                                                  | Mount Sinai Hospital                                                                                                                                                                                           | New York City Public Health Laboratory                                                                                                                                           | Jade Wang; et al.                                                                                                                                                                                                                                                                                                                                                                                                                  |
| EPI_ISL_632101 to 632102                                                                                                                                                                                                                                                                                                                                                                                                                   | Mount Sinai Queens                                                                                                                                                                                             | New York City Public Health Laboratory                                                                                                                                           | Jade Wang; et al.                                                                                                                                                                                                                                                                                                                                                                                                                  |
| EPI_ISL_631507, EPI_ISL_631880                                                                                                                                                                                                                                                                                                                                                                                                             | Mount Sinai West                                                                                                                                                                                               | New York City Public Health Laboratory                                                                                                                                           | Jade Wang; et al.                                                                                                                                                                                                                                                                                                                                                                                                                  |

|                                                                                                                                                                                                                                                                                                                                                                                                                        |                                                                                                              |                                                                                                                            |                                                                                                                                                                                                                                                                                                                                                                                                                                                                                                                                                                                                                                           |
|------------------------------------------------------------------------------------------------------------------------------------------------------------------------------------------------------------------------------------------------------------------------------------------------------------------------------------------------------------------------------------------------------------------------|--------------------------------------------------------------------------------------------------------------|----------------------------------------------------------------------------------------------------------------------------|-------------------------------------------------------------------------------------------------------------------------------------------------------------------------------------------------------------------------------------------------------------------------------------------------------------------------------------------------------------------------------------------------------------------------------------------------------------------------------------------------------------------------------------------------------------------------------------------------------------------------------------------|
| EPI_ISL_700479                                                                                                                                                                                                                                                                                                                                                                                                         | Mowbray Maternity Hospital wc MMH                                                                            | NHLS/UCT                                                                                                                   | Arash Iranzadeh; Bruna Galvao; Carolyn Williamson; Deelan Doolabh; Diana Hardie; Innocent Mudau; Kruger Marais; Lynn Tyers; Marvin Hsiao; Stephen Korsman                                                                                                                                                                                                                                                                                                                                                                                                                                                                                 |
| EPI_ISL_960104                                                                                                                                                                                                                                                                                                                                                                                                         | Mowbray Maternity Hospital wc MMH                                                                            | National Health Laboratory Service/UCT                                                                                     | Arash Iranzadeh; Bruna Galvao; Carolyn Williamson; Deelan Doolabh; Diana Hardie; Innocent Mudau; Kruger Marais; Lynn Tyers; Marvin Hsiao; Stephen Korsman                                                                                                                                                                                                                                                                                                                                                                                                                                                                                 |
| EPI_ISL_862051, EPI_ISL_871790                                                                                                                                                                                                                                                                                                                                                                                         | Multidisciplinary Research Unit, DHR-ICMR, Institute of Medical Sciences, Banaras Hindu University           | Multidisciplinary Research Unit, DHR-ICMR, Institute of Medical Sciences, Banaras Hindu University                         | Abhay Kumar Yadav; Arup Acharjee; Ashish; Chetan Sahni; Deepa Devadas; Gulshan Kumar; Jay Prakash Maurya; Manpreet Kaur; Nitish Kumar Singh; Prashant Singh; Priyoneel Basu; Richa Arya; Royana Singh; Sanjay Kumar; Surendra Pratap Mishra; Tribhuwan Mohan Mahapatra; Tribhuwan Mohan Mohapatra                                                                                                                                                                                                                                                                                                                                         |
| EPI_ISL_862815                                                                                                                                                                                                                                                                                                                                                                                                         | Multidisciplinary Research Unit, DHR-ICMR, Institute of Medical Sciences, Banaras Hindu University, Varanasi | Multidisciplinary Research Unit, DHR-ICMR, Institute of Medical Sciences, Banaras Hindu University, Varanasi               | Abhay Kumar Yadav; Ashish; Chetan Sahni; Deepa Devadas; Gulshan Kumar; Jay Prakash Maurya; Manpreet Kaur; Nitish Kumar Singh; Prashant Singh; Priyoneel Basu; Richa Arya; Royana Singh; Surendra Pratap Mishra; Tribhuwan Mohan Mahapatra                                                                                                                                                                                                                                                                                                                                                                                                 |
| EPI_ISL_861758                                                                                                                                                                                                                                                                                                                                                                                                         | Murphy Medical Associates                                                                                    | Grubaugh Lab - Yale School of Public Health                                                                                | Anderson Brito; Anne Wylie; Annie Watkins; Chaney Kalinich; Chantal Vogels; Isabel Ott; Joseph Fauver; Mallery Breban; Mary Petrone; Nathan Grubaugh; Tara Alpert                                                                                                                                                                                                                                                                                                                                                                                                                                                                         |
| EPI_ISL_730622, EPI_ISL_730626 to 730629, EPI_ISL_730631 to 730633, EPI_ISL_730637 to 730639                                                                                                                                                                                                                                                                                                                           | Männedorf Hospital                                                                                           | Institute of Medical Virology, University of Zurich                                                                        | Alexandra Trkola; Gabriela Ziltener; Jürg Böni; Maryam Zaheri; Michael Huber; Stefan Schmutz; Verena Kufner                                                                                                                                                                                                                                                                                                                                                                                                                                                                                                                               |
| EPI_ISL_915423, EPI_ISL_915428, EPI_ISL_918423, EPI_ISL_918426 to 918427, EPI_ISL_918429                                                                                                                                                                                                                                                                                                                               | München Klinik GmbH                                                                                          | Bundeswehr Institute of Microbiology                                                                                       | Alexandra Rehn; Enrico Georgi; Hans-Ulrich Schmidt; Malena Bestehorn-Willmann; Markus Antwerpen; Mathias Walter; Roman Wölfel; Sabine Zange                                                                                                                                                                                                                                                                                                                                                                                                                                                                                               |
| EPI_ISL_903568 to 903569, EPI_ISL_903632, EPI_ISL_903652, EPI_ISL_903777, EPI_ISL_903867, EPI_ISL_903871                                                                                                                                                                                                                                                                                                               | NC State Laboratory of Public Health                                                                         | Genomics and Discovery, Respiratory Viruses Branch, Division of Viral Diseases, Centers for Disease Control and Prevention | Anna Montmeyer; Anna Uehara; Ben L. Rambo-Martin; Clinton R. Paden; Dhvani Batra; Haibin Wang; Jasmine Padilla; Jing Zhang; Justin Lee; Krista Queen; Lori Rowe; Mark Burroughs; Mili Sheth; Peter W. Cook; Rachel Marine; Sarah Nobles; Suxiang Tong; Yan Li; Ying Tao                                                                                                                                                                                                                                                                                                                                                                   |
| EPI_ISL_955284, EPI_ISL_955298                                                                                                                                                                                                                                                                                                                                                                                         | NC State Laboratory of Public Health                                                                         | Pathogen Discovery, Respiratory Viruses Branch, Division of Viral Diseases, Centers for Disease Control and Prevention     | Anna Uehara; Clinton R. Paden; Haibin Wang; Jing Zhang; Krista Queen; Peter Cook; Suxiang Tong; Yan Li; Ying Tao                                                                                                                                                                                                                                                                                                                                                                                                                                                                                                                          |
| EPI_ISL_904017, EPI_ISL_925361, EPI_ISL_929763, EPI_ISL_940894, EPI_ISL_941273, EPI_ISL_977504, EPI_ISL_977508, EPI_ISL_977514 to 977515, EPI_ISL_977536, EPI_ISL_984310 to 984312, EPI_ISL_984314                                                                                                                                                                                                                     | see above                                                                                                    | NCSLPH                                                                                                                     | Chase K; Glover W; Greene S; Kitty Chase; Michael C Miller; Miller MC; Shermalyn Greene; William Glover                                                                                                                                                                                                                                                                                                                                                                                                                                                                                                                                   |
| EPI_ISL_903623, EPI_ISL_903814, EPI_ISL_903858, EPI_ISL_903942 to 903947                                                                                                                                                                                                                                                                                                                                               | ND Dept. of Health Laboratory Services-Microbiology                                                          | Genomics and Discovery, Respiratory Viruses Branch, Division of Viral Diseases, Centers for Disease Control and Prevention | Anna Montmeyer; Anna Uehara; Ben L. Rambo-Martin; Clinton R. Paden; Dhvani Batra; Haibin Wang; Jasmine Padilla; Jing Zhang; Justin Lee; Krista Queen; Lori Rowe; Mark Burroughs; Mili Sheth; Peter W. Cook; Rachel Marine; Sarah Nobles; Suxiang Tong; Yan Li; Ying Tao                                                                                                                                                                                                                                                                                                                                                                   |
| EPI_ISL_751563, EPI_ISL_751583, EPI_ISL_751585, EPI_ISL_751608, EPI_ISL_751638, EPI_ISL_751681, EPI_ISL_751732, EPI_ISL_751734, EPI_ISL_903747, EPI_ISL_903774, EPI_ISL_903791, EPI_ISL_903817, EPI_ISL_903845, EPI_ISL_903885, EPI_ISL_903901                                                                                                                                                                         | see above                                                                                                    | NE Public Health Laboratory                                                                                                | Anna Montmeyer; Anna Uehara; Ben L. Rambo-Martin; Clinton R. Paden; Dhvani Batra; Haibin Wang; Jasmine Padilla; Jing Zhang; Justin Lee; Krista Queen; Lori Rowe; Mark Burroughs; Mili Sheth; Peter W. Cook; Rachel Marine; Sarah Nobles; Suxiang Tong; Yan Li; Ying Tao                                                                                                                                                                                                                                                                                                                                                                   |
| EPI_ISL_854977 to 855013                                                                                                                                                                                                                                                                                                                                                                                               | NGS Lab, DNA SOLUTION LTD.                                                                                   | NGS Lab, DNA SOLUTION LTD.                                                                                                 | Chowdhury, M.; H.U.; Haider; Hasan; Hosen; K.N.; Khaleque, A.; Khan; Khan, M.; M.B.; M.F.A.; M.H.; M.I.; Rabbi; Rahman, M.; Razu; Sufian, A.                                                                                                                                                                                                                                                                                                                                                                                                                                                                                              |
| EPI_ISL_751544, EPI_ISL_751558, EPI_ISL_751582, EPI_ISL_751584, EPI_ISL_751587, EPI_ISL_751642, EPI_ISL_751678, EPI_ISL_751712, EPI_ISL_751735, EPI_ISL_903667, EPI_ISL_903681, EPI_ISL_903698, EPI_ISL_903860, EPI_ISL_903880                                                                                                                                                                                         | see above                                                                                                    | NH Dept. of Health and Human Services Public Health Labs                                                                   | Anna Montmeyer; Anna Uehara; Ben L. Rambo-Martin; Clinton R. Paden; Dhvani Batra; Haibin Wang; Jasmine Padilla; Jing Zhang; Justin Lee; Krista Queen; Lori Rowe; Mark Burroughs; Mili Sheth; Peter W. Cook; Rachel Marine; Sarah Nobles; Suxiang Tong; Yan Li; Ying Tao                                                                                                                                                                                                                                                                                                                                                                   |
| EPI_ISL_825043 to 825047, EPI_ISL_825050 to 825053, EPI_ISL_825059 to 825060, EPI_ISL_825063                                                                                                                                                                                                                                                                                                                           | NHL Municipal Medical College, Ahmedabad                                                                     | Gujarat Biotechnology Research Centre                                                                                      | Afzal Ansari; Apurvashini Puvar; Atit Shah; Bhavin Prajapati; Bimal Chauhan; Chaitanya Joshi; Dinesh Kumar; Janvi Raval; Jayshri Pethani; Labdhi Pandya; Madhvi Joshi; Monika Patel; NM Shaikh; Nikha Trivedi; Nitin Savaliya; Ramesh Pandit; Tanmay Mehta; Zarna Patel; Zuber Saiyed                                                                                                                                                                                                                                                                                                                                                     |
| EPI_ISL_682323 to 682352, EPI_ISL_684047, EPI_ISL_912456 to 912538, EPI_ISL_940147 to 940156, EPI_ISL_949618, EPI_ISL_949620, EPI_ISL_949622, EPI_ISL_949624, EPI_ISL_949626, EPI_ISL_949628, EPI_ISL_949630, EPI_ISL_949632, EPI_ISL_949634                                                                                                                                                                           | see above                                                                                                    | NHLS Universitas Academic                                                                                                  | D Goedhals; Emmanuel Ogunbayo; MM Nyaga; MT Mogotsi; P Nthiga; PA Bester; T de Oliveira                                                                                                                                                                                                                                                                                                                                                                                                                                                                                                                                                   |
| EPI_ISL_660159 to 660220, EPI_ISL_660223 to 660227, EPI_ISL_660234 to 660255, EPI_ISL_660605 to 660663, EPI_ISL_678566, EPI_ISL_678569 to 678570, EPI_ISL_678574 to 678575, EPI_ISL_678598 to 678643, EPI_ISL_736925 to 736926, EPI_ISL_736931 to 736935, EPI_ISL_736938, EPI_ISL_736940 to 736960, EPI_ISL_736969 to 736980, EPI_ISL_736984 to 736994, EPI_ISL_825090 to 825139, EPI_ISL_825438 to 825489             | see above                                                                                                    | NHLS-IALCH                                                                                                                 | KRISP, KZN Research Innovation and Sequencing Platform                                                                                                                                                                                                                                                                                                                                                                                                                                                                                                                                                                                    |
| EPI_ISL_860554 to 860630                                                                                                                                                                                                                                                                                                                                                                                               | see above                                                                                                    | NHLS-IALCH                                                                                                                 | KRISP, Kzn Research Innovation and Sequencing Platform                                                                                                                                                                                                                                                                                                                                                                                                                                                                                                                                                                                    |
| EPI_ISL_736928 to 736929, EPI_ISL_736939, EPI_ISL_736981 to 736983                                                                                                                                                                                                                                                                                                                                                     | see above                                                                                                    | NHLS-UCT                                                                                                                   | KRISP, KZN Research Innovation and Sequencing Platform                                                                                                                                                                                                                                                                                                                                                                                                                                                                                                                                                                                    |
| EPI_ISL_632242 to 632249                                                                                                                                                                                                                                                                                                                                                                                               | NHSGGC West of Scotland Specialist Virology Centre                                                           | MRC-University of Glasgow Centre for Virus Research                                                                        | Alasdair MacLean; Alex Alderton; Ana da Silva Filipe; Antonia Ho; Cordelia Langford; Daniel Mair; David K. Jackson; David L Robertson; Dominic Kwiatkowski; Emma Thomson; Ewan Harrison; Ian Johnston; James Shepherd; Jenna Nichols; John Sillitoe on behalf of the Wellcome Sanger Institute COVID-19 Surveillance Team ( <a href="http://www.sanger.ac.uk/covid-team">http://www.sanger.ac.uk/covid-team</a> ); Joseph Hughes; Kathy Li; Kathy Smollett; Kyriaki Nomikou; Lily Tong; Natasha Jesudason; Natasha Johnson; Rajni Shah; Richard Orton; Roberto Amato; Rory Gunson; Sonia Goncalves; Sreenu Vattipally; Stephen Carmichael |
| EPI_ISL_766861 to 766867, EPI_ISL_766869 to 766875                                                                                                                                                                                                                                                                                                                                                                     | NIC Viral Respiratory Unit - Institut Pasteur of Algeria                                                     | National Reference Center for Viruses of Respiratory Infections, Institut Pasteur, Paris                                   | Angela Brisebarre; Etienne Simon-Lorière; Fawzi Derrar; Flora Donati; Marion Barbet; Maud Vanpeene; Mélanie Albert; Méline Bizard; Sylvie Behillil; Sylvie van der Werf; Vincent Enouf                                                                                                                                                                                                                                                                                                                                                                                                                                                    |
| EPI_ISL_751659, EPI_ISL_751662, EPI_ISL_751680, EPI_ISL_751709, EPI_ISL_751773, EPI_ISL_903577, EPI_ISL_903594 to 903595, EPI_ISL_903609, EPI_ISL_903637 to 903638, EPI_ISL_903654 to 903655, EPI_ISL_903658, EPI_ISL_903673 to 903674, EPI_ISL_903678, EPI_ISL_903680, EPI_ISL_903683, EPI_ISL_903686, EPI_ISL_903692, EPI_ISL_903699, EPI_ISL_903704, EPI_ISL_903711, EPI_ISL_903714, EPI_ISL_903726, EPI_ISL_903734 | see above                                                                                                    | NJ Public Health and Environmental Laboratories                                                                            | Anna Montmeyer; Anna Uehara; Ben L. Rambo-Martin; Clinton R. Paden; Dhvani Batra; Haibin Wang; Jasmine Padilla; Jing Zhang; Justin Lee; Krista Queen; Lori Rowe; Mark Burroughs; Mili Sheth; Peter W. Cook; Rachel Marine; Sarah Nobles; Suxiang Tong; Yan Li; Ying Tao                                                                                                                                                                                                                                                                                                                                                                   |
| EPI_ISL_960304 to 960311, EPI_ISL_965183 to 965185                                                                                                                                                                                                                                                                                                                                                                     | NLZOH, Laboratory for Virology                                                                               | NLZOH, Laboratory for Virology                                                                                             | Cesare Camma (IZSAM); Erik Alm (ECDC); Katarina Prosenc (Laboratory for Virology)                                                                                                                                                                                                                                                                                                                                                                                                                                                                                                                                                         |
| EPI_ISL_903567, EPI_ISL_903614, EPI_ISL_903622, EPI_ISL_903626, EPI_ISL_903740, EPI_ISL_903755, EPI_ISL_903759, EPI_ISL_903769, EPI_ISL_903796, EPI_ISL_903800, EPI_ISL_903804, EPI_ISL_903811, EPI_ISL_903835, EPI_ISL_903839, EPI_ISL_903862, EPI_ISL_903870, EPI_ISL_903907                                                                                                                                         | see above                                                                                                    | NM Dept. Health, Scientific Laboratory Division                                                                            | Anna Montmeyer; Anna Uehara; Ben L. Rambo-Martin; Clinton R. Paden; Dhvani Batra; Haibin Wang; Jasmine Padilla; Jing Zhang; Justin Lee; Krista Queen; Lori Rowe; Mark Burroughs; Mili Sheth; Peter W. Cook; Rachel Marine; Sarah Nobles; Suxiang Tong; Yan Li; Ying Tao                                                                                                                                                                                                                                                                                                                                                                   |
| EPI_ISL_812199 to 812200                                                                                                                                                                                                                                                                                                                                                                                               | NM Dept. Health, Scientific Laboratory Division                                                              | Pathogen Discovery, Respiratory Viruses Branch, Division of Viral Diseases, Centers for Disease Control and Prevention     | Anna Montmeyer; Anna Uehara; Brian Lynch; Clinton R. Paden; Haibin Wang; Jing Zhang; Krista Queen; Peter Cook; Rachel Marine; Suxiang Tong; Yan Li; Ying Tao                                                                                                                                                                                                                                                                                                                                                                                                                                                                              |
| EPI_ISL_861186, EPI_ISL_861188 to 861198, EPI_ISL_861413 to 861418                                                                                                                                                                                                                                                                                                                                                     | NORTH SHORE UNIVERSITY HOSPITAL                                                                              | Wadsworth Center, New York State Department of Health                                                                      | Alexis Russel; Daryl M. Lamson; Erasmus Schneider; Erica Lasek-Nesselquist; John Kelly; Jonathan Plitnick; Kirsten St. George; Matthew Shudt; Melissa A Leisner; Navjot Singh                                                                                                                                                                                                                                                                                                                                                                                                                                                             |
| EPI_ISL_830572, EPI_ISL_830574, EPI_ISL_830576 to 830578, EPI_ISL_830628 to 830633, EPI_ISL_830635 to 830642, EPI_ISL_853650 to 853651, EPI_ISL_853653 to 853666, EPI_ISL_853670 to 853675, EPI_ISL_853683, EPI_ISL_853705, EPI_ISL_853712 to 853714, EPI_ISL_853716 to 853717, EPI_ISL_883426 to 883428, EPI_ISL_883431 to 883435, EPI_ISL_883445 to 883472, EPI_ISL_883474 to 883498                                 |                                                                                                              |                                                                                                                            |                                                                                                                                                                                                                                                                                                                                                                                                                                                                                                                                                                                                                                           |

|                                                                                                                                                                                                                                                                                                                                                                                                                                                                                                                                                                                                                                                                                                                                                                                                                                                                                                  |                                                                                          |                                                                                                                            |                                                                                                                                                                                                                                                                                                                                          |
|--------------------------------------------------------------------------------------------------------------------------------------------------------------------------------------------------------------------------------------------------------------------------------------------------------------------------------------------------------------------------------------------------------------------------------------------------------------------------------------------------------------------------------------------------------------------------------------------------------------------------------------------------------------------------------------------------------------------------------------------------------------------------------------------------------------------------------------------------------------------------------------------------|------------------------------------------------------------------------------------------|----------------------------------------------------------------------------------------------------------------------------|------------------------------------------------------------------------------------------------------------------------------------------------------------------------------------------------------------------------------------------------------------------------------------------------------------------------------------------|
| see above                                                                                                                                                                                                                                                                                                                                                                                                                                                                                                                                                                                                                                                                                                                                                                                                                                                                                        | NORTHWELL HEALTH LABORATORIES                                                            | Wadsworth Center, New York State Department of Health                                                                      | Alexis Russel; Daryl M. Lamson; Erasmus Schneider; Erica Lasek-Nesselquist; John Kelly; Jonathan Plitnick; Kirsten St. George; Matthew Shudt; Melissa A Leisner; Navjot Singh                                                                                                                                                            |
| EPI_ISL_794119 to 794158                                                                                                                                                                                                                                                                                                                                                                                                                                                                                                                                                                                                                                                                                                                                                                                                                                                                         | NORTHWELL HEALTH LABORATORIES                                                            | Wadsworth Center, New York State Department of Health                                                                      | Alexis Russel; Daryl M. Lamson; Erasmus Schneider; Erica Lasek-Nesselquist; John Kelly; Jonathan Plitnick; Kirsten St. George; Matthew Shudt; Melissa A Leisner; Navjot Singh; Sara Griesemer                                                                                                                                            |
| EPI_ISL_940777                                                                                                                                                                                                                                                                                                                                                                                                                                                                                                                                                                                                                                                                                                                                                                                                                                                                                   | NSPI-CRN de Influenza y otros virus respiratorios                                        | INSPI-Centro de Investigación Multidisciplinaria de la DTIDI                                                               | Alberto Orlando.; Alfredo Bruno; Andrés Carrazco-Montalvo; Doménica de Mora; Leandro Patiño; Manuel González; Maritza Olmedo; Mary Regato-Arrata; Melissa Zambrano; Orson Mestanza                                                                                                                                                       |
| EPI_ISL_862876                                                                                                                                                                                                                                                                                                                                                                                                                                                                                                                                                                                                                                                                                                                                                                                                                                                                                   | NTT East Sapporo Hospital                                                                | Fujita health University, School of Medicine, Department of Microbiology                                                   | Masahiro suzuki; Yohei Doi                                                                                                                                                                                                                                                                                                               |
| EPI_ISL_632313                                                                                                                                                                                                                                                                                                                                                                                                                                                                                                                                                                                                                                                                                                                                                                                                                                                                                   | NU-sjukvården                                                                            | Clinical Microbiology, Sahlgrenska University Hospital,                                                                    | Hedvig Engström Jakobsson; Johan Ringlander; Josefin Olausson; Magnus Lindh                                                                                                                                                                                                                                                              |
| EPI_ISL_632312                                                                                                                                                                                                                                                                                                                                                                                                                                                                                                                                                                                                                                                                                                                                                                                                                                                                                   | NU-sjukvården                                                                            | Clinical microbiology, Sahlgrenska University Hospital                                                                     | Hedvig Engström Jakobsson; Johan Ringlander; Josefin Olausson; Magnus Lindh                                                                                                                                                                                                                                                              |
| EPI_ISL_751556 to 751557, EPI_ISL_751636 to 751637, EPI_ISL_751639, EPI_ISL_751708, EPI_ISL_751714, EPI_ISL_751736, EPI_ISL_751778, EPI_ISL_903610, EPI_ISL_903664, EPI_ISL_903690, EPI_ISL_903700, EPI_ISL_903702 to 903703, EPI_ISL_903719, EPI_ISL_903721, EPI_ISL_903723, EPI_ISL_903727, EPI_ISL_903731 to 903733, EPI_ISL_903735                                                                                                                                                                                                                                                                                                                                                                                                                                                                                                                                                           |                                                                                          |                                                                                                                            |                                                                                                                                                                                                                                                                                                                                          |
| see above                                                                                                                                                                                                                                                                                                                                                                                                                                                                                                                                                                                                                                                                                                                                                                                                                                                                                        | NV State Public Health Laboratory                                                        | Genomics and Discovery, Respiratory Viruses Branch, Division of Viral Diseases, Centers for Disease Control and Prevention | Anna Montmayeur; Anna Uehara; Ben L. Rambo-Martin; Clinton R. Paden; Dhvani Batra; Haibin Wang; Jasmine Padilla; Jing Zhang; Justin Lee; Krista Queen; Lori Rowe; Mark Burroughs; Mili Sheth; Peter W. Cook; Rachel Marine; Sarah Nobles; Suxiang Tong; Yan Li; Ying Tao                                                                 |
| EPI_ISL_631506, EPI_ISL_631535, EPI_ISL_631541, EPI_ISL_631572, EPI_ISL_631862, EPI_ISL_632039, EPI_ISL_632062, EPI_ISL_632074, EPI_ISL_632083 to 632084, EPI_ISL_632963                                                                                                                                                                                                                                                                                                                                                                                                                                                                                                                                                                                                                                                                                                                         |                                                                                          |                                                                                                                            |                                                                                                                                                                                                                                                                                                                                          |
| see above                                                                                                                                                                                                                                                                                                                                                                                                                                                                                                                                                                                                                                                                                                                                                                                                                                                                                        | NYC Department Of Health And Mental Hygiene                                              | New York City Public Health Laboratory                                                                                     | Jade Wang; et al.                                                                                                                                                                                                                                                                                                                        |
| EPI_ISL_812201                                                                                                                                                                                                                                                                                                                                                                                                                                                                                                                                                                                                                                                                                                                                                                                                                                                                                   | NYC Department of Health and Mental Hygiene                                              | Pathogen Discovery, Respiratory Viruses Branch, Division of Viral Diseases, Centers for Disease Control and Prevention     | Anna Montmayeur; Anna Uehara; Brian Lynch; Clinton R. Paden; Haibin Wang; Jing Zhang; Krista Queen; Peter Cook; Rachel Marine; Suxiang Tong; Yan Li; Ying Tao                                                                                                                                                                            |
| EPI_ISL_631974                                                                                                                                                                                                                                                                                                                                                                                                                                                                                                                                                                                                                                                                                                                                                                                                                                                                                   | NYC HH Coney Island Hospital                                                             | New York City Public Health Laboratory                                                                                     | Jade Wang; et al.                                                                                                                                                                                                                                                                                                                        |
| EPI_ISL_631564, EPI_ISL_631865, EPI_ISL_937256 to 937272                                                                                                                                                                                                                                                                                                                                                                                                                                                                                                                                                                                                                                                                                                                                                                                                                                         | NYC HH Elmhurst Hospital Medical Center                                                  | New York City Public Health Laboratory                                                                                     | Jade Wang; et al.                                                                                                                                                                                                                                                                                                                        |
| EPI_ISL_631556                                                                                                                                                                                                                                                                                                                                                                                                                                                                                                                                                                                                                                                                                                                                                                                                                                                                                   | NYC HH Jacobi Medical Center                                                             | New York City Public Health Laboratory                                                                                     | Jade Wang; et al.                                                                                                                                                                                                                                                                                                                        |
| EPI_ISL_631520, EPI_ISL_631557, EPI_ISL_631577, EPI_ISL_631584, EPI_ISL_631587, EPI_ISL_631603, EPI_ISL_631607, EPI_ISL_631686, EPI_ISL_631691, EPI_ISL_631693, EPI_ISL_631752 to 631754, EPI_ISL_631799, EPI_ISL_631827, EPI_ISL_631886, EPI_ISL_631953, EPI_ISL_632026, EPI_ISL_632072, EPI_ISL_632116, EPI_ISL_632131, EPI_ISL_632146 to 632147, EPI_ISL_632177, EPI_ISL_632186 to 632187, EPI_ISL_632193, EPI_ISL_632235                                                                                                                                                                                                                                                                                                                                                                                                                                                                     |                                                                                          |                                                                                                                            |                                                                                                                                                                                                                                                                                                                                          |
| see above                                                                                                                                                                                                                                                                                                                                                                                                                                                                                                                                                                                                                                                                                                                                                                                                                                                                                        | NYC HH Lincoln Medical And Mental Health Center                                          | New York City Public Health Laboratory                                                                                     | Jade Wang; et al.                                                                                                                                                                                                                                                                                                                        |
| EPI_ISL_632060                                                                                                                                                                                                                                                                                                                                                                                                                                                                                                                                                                                                                                                                                                                                                                                                                                                                                   | NYC HH Queens Hospital Center                                                            | New York City Public Health Laboratory                                                                                     | Jade Wang; et al.                                                                                                                                                                                                                                                                                                                        |
| EPI_ISL_751545, EPI_ISL_751548, EPI_ISL_751560, EPI_ISL_751562, EPI_ISL_751580 to 751581, EPI_ISL_751658, EPI_ISL_751682, EPI_ISL_751717, EPI_ISL_903950, EPI_ISL_903977                                                                                                                                                                                                                                                                                                                                                                                                                                                                                                                                                                                                                                                                                                                         |                                                                                          |                                                                                                                            |                                                                                                                                                                                                                                                                                                                                          |
| see above                                                                                                                                                                                                                                                                                                                                                                                                                                                                                                                                                                                                                                                                                                                                                                                                                                                                                        | NYSDOH Wadsworth Center, Virology Lab                                                    | Genomics and Discovery, Respiratory Viruses Branch, Division of Viral Diseases, Centers for Disease Control and Prevention | Anna Montmayeur; Anna Uehara; Ben L. Rambo-Martin; Clinton R. Paden; Dhvani Batra; Haibin Wang; Jasmine Padilla; Jing Zhang; Justin Lee; Krista Queen; Lori Rowe; Mark Burroughs; Mili Sheth; Peter W. Cook; Rachel Marine; Sarah Nobles; Suxiang Tong; Yan Li; Ying Tao                                                                 |
| EPI_ISL_965303, EPI_ISL_965528, EPI_ISL_965770, EPI_ISL_965812, EPI_ISL_965814, EPI_ISL_965826, EPI_ISL_965837 to 965839, EPI_ISL_965910, EPI_ISL_965948, EPI_ISL_965962 to 965965, EPI_ISL_965967 to 965973, EPI_ISL_965977, EPI_ISL_965980, EPI_ISL_965989, EPI_ISL_966020, EPI_ISL_966044, EPI_ISL_966062, EPI_ISL_966084, EPI_ISL_966108, EPI_ISL_966160, EPI_ISL_966184, EPI_ISL_966204, EPI_ISL_966227, EPI_ISL_966245, EPI_ISL_966264, EPI_ISL_966289, EPI_ISL_966308, EPI_ISL_966311, EPI_ISL_966314, EPI_ISL_966333, EPI_ISL_966338, EPI_ISL_966357, EPI_ISL_966375 to 966378, EPI_ISL_966380, EPI_ISL_966406, EPI_ISL_966428, EPI_ISL_966452, EPI_ISL_966472, EPI_ISL_966489, EPI_ISL_966496, EPI_ISL_966549, EPI_ISL_966551 to 966552, EPI_ISL_966565, EPI_ISL_966591, EPI_ISL_966605, EPI_ISL_966623, EPI_ISL_966646, EPI_ISL_966663, EPI_ISL_966682, EPI_ISL_966707, EPI_ISL_977666 |                                                                                          |                                                                                                                            |                                                                                                                                                                                                                                                                                                                                          |
| see above                                                                                                                                                                                                                                                                                                                                                                                                                                                                                                                                                                                                                                                                                                                                                                                                                                                                                        | NYU Langone Health                                                                       | Departments of Pathology and Medicine, New York University School of Medicine                                              | Adriana Heguy; Christian Marier; Dacia Dimartino; Emily Guzman; Gael Westby; Guiqing Wang; Paolo Cotzia; Paul Zappile; Peter Meyn; Sitharam Ramaswami; Yutong Zhang                                                                                                                                                                      |
| EPI_ISL_631515, EPI_ISL_631523, EPI_ISL_631526 to 631527, EPI_ISL_631531, EPI_ISL_631558 to 631559, EPI_ISL_632043 to 632044, EPI_ISL_632067, EPI_ISL_632076, EPI_ISL_632079                                                                                                                                                                                                                                                                                                                                                                                                                                                                                                                                                                                                                                                                                                                     |                                                                                          |                                                                                                                            |                                                                                                                                                                                                                                                                                                                                          |
| see above                                                                                                                                                                                                                                                                                                                                                                                                                                                                                                                                                                                                                                                                                                                                                                                                                                                                                        | NYU Langone Health                                                                       | New York City Public Health Laboratory                                                                                     | Jade Wang; et al.                                                                                                                                                                                                                                                                                                                        |
| EPI_ISL_905740                                                                                                                                                                                                                                                                                                                                                                                                                                                                                                                                                                                                                                                                                                                                                                                                                                                                                   | NZOZ LM Diagnostyka Czstochowa                                                           | National Institute of Public Health - National Institute of Hygiene                                                        | Wokowicz Tomasz; Zacharczuk Katarzyna                                                                                                                                                                                                                                                                                                    |
| EPI_ISL_625559 to 625593                                                                                                                                                                                                                                                                                                                                                                                                                                                                                                                                                                                                                                                                                                                                                                                                                                                                         | NaN                                                                                      | Chan-Zuckerberg Biohub                                                                                                     | CZB Ciliahub Consortium                                                                                                                                                                                                                                                                                                                  |
| EPI_ISL_745188                                                                                                                                                                                                                                                                                                                                                                                                                                                                                                                                                                                                                                                                                                                                                                                                                                                                                   | Nababoop Hospital                                                                        | National Health Laboratory Service (NHLS), Tygerberg                                                                       | Bronwyn Kleinhans; Eduan Wilkindon; Gert van Zyl; Houriyah Tegally; Kayla Delaney; Susan Engelbrecht; Tulio de Oliveira; Wolfgang Preiser                                                                                                                                                                                                |
| EPI_ISL_738512, EPI_ISL_738541, EPI_ISL_738754, EPI_ISL_738777, EPI_ISL_738820, EPI_ISL_738836, EPI_ISL_738870, EPI_ISL_738897, EPI_ISL_738911, EPI_ISL_738952, EPI_ISL_738959, EPI_ISL_739169, EPI_ISL_739181, EPI_ISL_739223, EPI_ISL_739251, EPI_ISL_739301, EPI_ISL_739315, EPI_ISL_739325, EPI_ISL_739339, EPI_ISL_739469, EPI_ISL_739471, EPI_ISL_739474, EPI_ISL_739514, EPI_ISL_739557, EPI_ISL_739628, EPI_ISL_739635, EPI_ISL_739645                                                                                                                                                                                                                                                                                                                                                                                                                                                   |                                                                                          |                                                                                                                            |                                                                                                                                                                                                                                                                                                                                          |
| see above                                                                                                                                                                                                                                                                                                                                                                                                                                                                                                                                                                                                                                                                                                                                                                                                                                                                                        | Napa-Solano-Yolo- Marin County (NSYM) Public Health Laboratories                         | Chan-Zuckerberg Biohub                                                                                                     | CZB Ciliahub Consortium                                                                                                                                                                                                                                                                                                                  |
| EPI_ISL_862843 to 862847, EPI_ISL_862859 to 862860, EPI_ISL_862866, EPI_ISL_862871, EPI_ISL_862877 to 862878, EPI_ISL_862880                                                                                                                                                                                                                                                                                                                                                                                                                                                                                                                                                                                                                                                                                                                                                                     | Nara Medical University Hospital                                                         | Fujita health University, School of Medicine, Department of Microbiology                                                   | Masahiro suzuki; Yohei Doi                                                                                                                                                                                                                                                                                                               |
| EPI_ISL_825147                                                                                                                                                                                                                                                                                                                                                                                                                                                                                                                                                                                                                                                                                                                                                                                                                                                                                   | Narayana Nethralaya lab                                                                  | Department of Neurovirology, National Institute of Mental Health and Neurosciences (NIMHANS)                               | Anita S Desai; Chitra Pattabiraman; Pramada Prasad; V Ravi                                                                                                                                                                                                                                                                               |
| EPI_ISL_710589 to 710591, EPI_ISL_732655 to 732656, EPI_ISL_934315                                                                                                                                                                                                                                                                                                                                                                                                                                                                                                                                                                                                                                                                                                                                                                                                                               | Narhalsan Fjällbacka VC                                                                  | The Public Health Agency of Sweden                                                                                         | Anna Risberg; Anna-Malin Linde; Carlo Berg; Department of Microbiology; Karin Tegmark-Wisell; Maria Lind Karlberg; Mattias Haukland; Mia Brytting; Noura Walaï; Oskar Karlsson Lindsoj; Petra Edquist; Petra Holmstrom; Reza Advani; Sofia Stamouli; The Public Health Agency of Sweden                                                  |
| EPI_ISL_721646 to 721651, EPI_ISL_721653 to 721667, EPI_ISL_722177 to 722186                                                                                                                                                                                                                                                                                                                                                                                                                                                                                                                                                                                                                                                                                                                                                                                                                     | National Centre For Cell Science                                                         | National Centre For Cell Science                                                                                           | Arvind Sahu; Dhiraj Paul; Giridhar Lal; Janesh Kumar; Kavita Bala Anand; Kunal Jani; Manoj Kumar Bhat; Murlidhar Tambe; Radha Chauhan; Rajesh Karyakarte; Rajiv Mohan Gupta; Santosh Karade; Shelinder Pal Singh Shergill; Sourav Sen; Suvarna Joshi; Vasudevan Seshadri; Yogesh S Shouche                                               |
| EPI_ISL_626567 to 626569, EPI_ISL_626626 to 626627                                                                                                                                                                                                                                                                                                                                                                                                                                                                                                                                                                                                                                                                                                                                                                                                                                               | National Centre for Communicable Disease (NCCD) National Influenza Center                | National Centre for Communicable Disease (NCCD) National Influenza Center                                                  | Ankhubayar S; Bayasgalan N; Darmaa B; Erden-Ochir Ts; Naranzul Ts; Nyamkhuu D; Nymadawa P Chang-Seon Song                                                                                                                                                                                                                                |
| EPI_ISL_626566                                                                                                                                                                                                                                                                                                                                                                                                                                                                                                                                                                                                                                                                                                                                                                                                                                                                                   | National Centre for Communication Disease (NCCD) National Influenza Center               | National Centre for Communication Disease (NCCD) National Influenza Center                                                 | Ankhubayar S; Bayasgalan N; Chang-Seon Song; Darmaa B; Erden-Ochir Ts; Naranzul Ts; Nymadawa P; Tsogtbaatar B                                                                                                                                                                                                                            |
| EPI_ISL_636738 to 636825, EPI_ISL_636828 to 636833                                                                                                                                                                                                                                                                                                                                                                                                                                                                                                                                                                                                                                                                                                                                                                                                                                               | National Centre for Disease control (NCDC)                                               | NCDC/CSIR-IGIB                                                                                                             | Ajit Shewale; Anurag Agrawal#; Aparna Swaminathan; Asangla Kamai; Bharathram Upplii2#; Ishtaq Ahmed; Mahesh S. Dhar1#; Manish Kumar; Mohammed Faruq#; Nishu Tyagi; Partha Rakshit#; Pooja Sharma2#; RadhaKrishnan VS; Robin Marwal1#; Sandhya Kabra; Saruchi Wadhwa; Shaista Khan; Simmi Tiwari; Sujeet Singh; Tushar Nale; Vivekanand A |
| EPI_ISL_622942, EPI_ISL_622944 to 622945, EPI_ISL_622954, EPI_ISL_622958, EPI_ISL_622970 to 622977, EPI_ISL_622979 to 622982, EPI_ISL_622984, EPI_ISL_622987, EPI_ISL_622989, EPI_ISL_622991 to 622993, EPI_ISL_622995 to 623024, EPI_ISL_623026 to 623027, EPI_ISL_623029 to 623063, EPI_ISL_623065 to 623067, EPI_ISL_623069 to 623072                                                                                                                                                                                                                                                                                                                                                                                                                                                                                                                                                         |                                                                                          |                                                                                                                            |                                                                                                                                                                                                                                                                                                                                          |
| see above                                                                                                                                                                                                                                                                                                                                                                                                                                                                                                                                                                                                                                                                                                                                                                                                                                                                                        | National Health Laboratory Service                                                       | National Institute for Communicable Diseases of the National Health Laboratory Service                                     | Allam M; Bhiman JN; Ismail A; Khumalo Z; Kwenda S; Mnyameni F; Mohale T; Mtshali P; Subramoney K                                                                                                                                                                                                                                         |
| EPI_ISL_634978 to 635058                                                                                                                                                                                                                                                                                                                                                                                                                                                                                                                                                                                                                                                                                                                                                                                                                                                                         | National Health Laboratory Service - Inkosi Albert Luthuli Central Hospital (NHLS-IALCH) | KRISP, KZN Research Innovation and Sequencing Platform                                                                     | Giandhari J; Khan S; Lessells R; Mdlalose K; Pillay S; Tegally H; Wilkinson E; York D; de Oliveira T                                                                                                                                                                                                                                     |

|                                                                                                                                                                                                                                                                                                                                                                                                                                                                                                                                                                                                                                                                                                                                                                                                                                                                                                                    |                                                                                                          |                                                                                                                                                                                                                                                                                                                                                                                                                                                                                                                                                                                                                                                                         |                                                                                                                                                                                                                                                                                                                                                                                                                                                                                                                                                                                                                                                                                                                                                                                                                                                                                                                                                                                                                                |
|--------------------------------------------------------------------------------------------------------------------------------------------------------------------------------------------------------------------------------------------------------------------------------------------------------------------------------------------------------------------------------------------------------------------------------------------------------------------------------------------------------------------------------------------------------------------------------------------------------------------------------------------------------------------------------------------------------------------------------------------------------------------------------------------------------------------------------------------------------------------------------------------------------------------|----------------------------------------------------------------------------------------------------------|-------------------------------------------------------------------------------------------------------------------------------------------------------------------------------------------------------------------------------------------------------------------------------------------------------------------------------------------------------------------------------------------------------------------------------------------------------------------------------------------------------------------------------------------------------------------------------------------------------------------------------------------------------------------------|--------------------------------------------------------------------------------------------------------------------------------------------------------------------------------------------------------------------------------------------------------------------------------------------------------------------------------------------------------------------------------------------------------------------------------------------------------------------------------------------------------------------------------------------------------------------------------------------------------------------------------------------------------------------------------------------------------------------------------------------------------------------------------------------------------------------------------------------------------------------------------------------------------------------------------------------------------------------------------------------------------------------------------|
| EPI_ISL_944124 to 944177<br>EPI_ISL_770470 to 770474                                                                                                                                                                                                                                                                                                                                                                                                                                                                                                                                                                                                                                                                                                                                                                                                                                                               | National Health Laboratory Service, South Africa<br>National Health laboratory                           | KRISP, KZN Research Innovation and Sequencing Platform<br>Botswana Institute for Technology Research and Innovation                                                                                                                                                                                                                                                                                                                                                                                                                                                                                                                                                     | Emmanuel SJ; Giandhari J; Khan S; Laguda-Akingba O; Lessells R; Mdlalose K; Pillay S; Tegally H; Wilkinson E; York D; de Oliveira T<br>Dineo Emang Tshiamo. Gape Nyepetsi; Kefentse Arnold Tumedji; Madisa Mine; Maitshwarelo Ignatius Matsheka; Malebogo Kebabonye; Thongbotho Mphoyakgosi                                                                                                                                                                                                                                                                                                                                                                                                                                                                                                                                                                                                                                                                                                                                    |
| EPI_ISL_862855                                                                                                                                                                                                                                                                                                                                                                                                                                                                                                                                                                                                                                                                                                                                                                                                                                                                                                     | National Hospital Organization Kanazawa Medical Center                                                   | Fujita health University, School of Medicine, Department of Microbiology                                                                                                                                                                                                                                                                                                                                                                                                                                                                                                                                                                                                | Masahiro suzuki; Yohei Doi                                                                                                                                                                                                                                                                                                                                                                                                                                                                                                                                                                                                                                                                                                                                                                                                                                                                                                                                                                                                     |
| EPI_ISL_875688                                                                                                                                                                                                                                                                                                                                                                                                                                                                                                                                                                                                                                                                                                                                                                                                                                                                                                     | National Influenza Center - Istituto Adolfo Lutz                                                         | Istituto Adolfo Lutz, Interdisciplinary Procedures Center, Strategic Laboratory                                                                                                                                                                                                                                                                                                                                                                                                                                                                                                                                                                                         | Ana Lucia de Carvalho Avelino; Claudia Regina Gonçalves; Claudio Tavares Sacchi; Clovis Roberto Abe Constantino; Erica Valessa Ramos Gomes; Karoline Rodrigues Campos; Katia Correa de Oliveira Santos                                                                                                                                                                                                                                                                                                                                                                                                                                                                                                                                                                                                                                                                                                                                                                                                                         |
| EPI_ISL_660541                                                                                                                                                                                                                                                                                                                                                                                                                                                                                                                                                                                                                                                                                                                                                                                                                                                                                                     | National Influenza Center, National Institute of Hygiene and Epidemiology (NIHE)                         | National Influenza Center, National Institute of Hygiene and Epidemiology (NIHE)                                                                                                                                                                                                                                                                                                                                                                                                                                                                                                                                                                                        | Dang Duc Anh; Futoshi Hasebe; Hoang Vu Mai Phuong; Kouichi Morita; Le Quynh Mai; Le Thi Thanh; Meng Ling Moi; Nguyen Le Khanh Hang; Nguyen Phuong Anh; Nguyen Vu Son; Pham Hong Quynh Anh; Pham Thi Hien; Taichiro Takemura; Takeshi Nabeshima; Tran Thu Huong; Ung Thi Hong Trang; Vuong Duc Cuong                                                                                                                                                                                                                                                                                                                                                                                                                                                                                                                                                                                                                                                                                                                            |
| EPI_ISL_660542                                                                                                                                                                                                                                                                                                                                                                                                                                                                                                                                                                                                                                                                                                                                                                                                                                                                                                     | National Influenza Center, National Institute of Hygiene and Epidemiology (NIHE)                         | National Institute of Hygiene and Epidemiology (NIHE)                                                                                                                                                                                                                                                                                                                                                                                                                                                                                                                                                                                                                   | Dang Duc Anh; Futoshi Hasebe; Hoang Vu Mai Phuong; Kouichi Morita; Le Quynh Mai; Le Thi Thanh; Meng Ling Moi; Nguyen Le Khanh Hang; Nguyen Phuong Anh; Nguyen Vu Son; Pham Hong Quynh Anh; Pham Thi Hien; Taichiro Takemura; Takeshi Nabeshima; Tran Thu Huong; Ung Thi Hong Trang; Vuong Duc Cuong                                                                                                                                                                                                                                                                                                                                                                                                                                                                                                                                                                                                                                                                                                                            |
| EPI_ISL_862075 to 862081, EPI_ISL_959275 to 959284                                                                                                                                                                                                                                                                                                                                                                                                                                                                                                                                                                                                                                                                                                                                                                                                                                                                 | National Influenza Center, Virology Department                                                           | National Influenza Center                                                                                                                                                                                                                                                                                                                                                                                                                                                                                                                                                                                                                                               | A Nejadi; F Ajaminejad; F Ajaminejad and T Mokhtari Azad; J Yavarian; K Sadeghi; N Ghavvami; N Ghavvami and T Mokhtari Azad; NZ Shafiei Jandaghi; V Salimi                                                                                                                                                                                                                                                                                                                                                                                                                                                                                                                                                                                                                                                                                                                                                                                                                                                                     |
| EPI_ISL_622894 to 622941                                                                                                                                                                                                                                                                                                                                                                                                                                                                                                                                                                                                                                                                                                                                                                                                                                                                                           | National Institute for Communicable Diseases of the National Health Laboratory Service                   | National Institute for Communicable Diseases of the National Health Laboratory Service                                                                                                                                                                                                                                                                                                                                                                                                                                                                                                                                                                                  | Allam M; Bhiman JN; Ismail A; Khumalo Z; Kwenda S; Mnyameni F; Mohale T; Mtshali P; Subramoney K                                                                                                                                                                                                                                                                                                                                                                                                                                                                                                                                                                                                                                                                                                                                                                                                                                                                                                                               |
| EPI_ISL_939656 to 939659, EPI_ISL_940067, EPI_ISL_940138 to 940143                                                                                                                                                                                                                                                                                                                                                                                                                                                                                                                                                                                                                                                                                                                                                                                                                                                 | National Institute for Communicable Diseases, National Health Laboratory Services, Gauteng, South Africa | National Institute for Communicable Diseases of the National Health Laboratory Service                                                                                                                                                                                                                                                                                                                                                                                                                                                                                                                                                                                  | Allam M; Amoako DG; Bhiman JN; Ismail A; Mahlungu B; Mohale T; Ntuli N                                                                                                                                                                                                                                                                                                                                                                                                                                                                                                                                                                                                                                                                                                                                                                                                                                                                                                                                                         |
| EPI_ISL_710542 to 710546, EPI_ISL_718262 to 718265, EPI_ISL_721624 to 721628, EPI_ISL_728279 to 728287, see above                                                                                                                                                                                                                                                                                                                                                                                                                                                                                                                                                                                                                                                                                                                                                                                                  | National Institute for Infectious Diseases, INMI, "L. Spallanzani" IRCCS                                 | National Institute for Infectious Diseases, INMI, "L. Spallanzani" IRCCS                                                                                                                                                                                                                                                                                                                                                                                                                                                                                                                                                                                                | A Di Caro; A. Di Caro; B Bartolini; B. Bartolini; C.E.M Gruber; E Giombini; E. Giombini; F Messina; F. Carletti; F. Messina; G Parisi; M Rueca; M. Rueca; M.R Capobianchi; MR Capobianchi; O Butera                                                                                                                                                                                                                                                                                                                                                                                                                                                                                                                                                                                                                                                                                                                                                                                                                            |
| EPI_ISL_850946 to 850951                                                                                                                                                                                                                                                                                                                                                                                                                                                                                                                                                                                                                                                                                                                                                                                                                                                                                           | National Institute for Viral Disease Control and Prevention, China CDC                                   | National Institute for Viral Disease Control and Prevention, China CDC                                                                                                                                                                                                                                                                                                                                                                                                                                                                                                                                                                                                  | Cao Chen; Dayan Wang; Ji Wang; Jun Han; Kai Nie; Shiwen Wang; Weimin Zhou; Wenbo Xu; Wenjie Tan; Xiang Zhao; Yang Song; Yanhai Wang; Yao Meng; Yanan Feng; Yong Zhang; Yuchao Wu; Zhixiao Chen                                                                                                                                                                                                                                                                                                                                                                                                                                                                                                                                                                                                                                                                                                                                                                                                                                 |
| EPI_ISL_708839 to 708840, EPI_ISL_709044, EPI_ISL_709542                                                                                                                                                                                                                                                                                                                                                                                                                                                                                                                                                                                                                                                                                                                                                                                                                                                           | National Institute of Blood Diseases (NIBD), Molecular Biology Lab                                       | Genomics Lab NIBD                                                                                                                                                                                                                                                                                                                                                                                                                                                                                                                                                                                                                                                       | Aneeta Shahni; Arshi Naz; Gul Saufida; Samina Naz Mukry; Sayed Ali Raza; Sharif Ahmed; Tahir Sultan Shamsi                                                                                                                                                                                                                                                                                                                                                                                                                                                                                                                                                                                                                                                                                                                                                                                                                                                                                                                     |
| EPI_ISL_747233 to 747234, EPI_ISL_747237, see above                                                                                                                                                                                                                                                                                                                                                                                                                                                                                                                                                                                                                                                                                                                                                                                                                                                                | National Institute of Health Research and Development                                                    | National Institute of Health Research and Development                                                                                                                                                                                                                                                                                                                                                                                                                                                                                                                                                                                                                   | A; AA; Adam; Agustini; Arie Ardiansyah Nugraha; Asri Febriyani; Aulia Rizki; D; Estaria; F; Fauzul Muna; Febriyani; Febriyanti; HA; HD; Hana Apsari Pawestri; Hariastuti; Hartanti Dian Ikawati; Herman; Herna; Holy Arif Wibowo; IL; Ikawati; Indalao; Indrasari; Irene Lorinda Indalao; J; Juwita Kurniawati; K; KD; KNA; Kartika Dewi Puspa; Kindi Adam; Kipuw; Krisna Nur Andriana Pangesti; Kurniawati; M; Monika; Muhammad Nurhadi; Muna; Mursinah; N; ND; NI; NK; NL; Nafiandi; Natalie Laurencia Kipuw; Natalie Laurentia Kipuw; Nelly Puspandari; Ni Ketut Susilarini; Nike Susanti; Nikmah; Nugraha; Nur Ika Hariastuti; Nurhadi; Nurika Hariastuti; Paisal; Pangesti; Pawestri; Puspa; Puspandari; R; Ramadhany; Reni Herman; Rinin Ramadhany; Rizki; Rukminiati; Setiawaty; Soekarso; Subangkit; Susanti; Susilarini; T; Tati Febriyanti; Triyani Soekarso; UA; Uli Alfi Nikmah; Uly Alfi Nikmah; Uly Alfi Nikmah; V; Vivi; Vivi Setiawaty; Vivi Setiawaty.; Wibowo; Wulandari; Y; Yuni Rukminiati; vivi Setiawaty |
| EPI_ISL_794744, EPI_ISL_862831 to 862836, EPI_ISL_875346, EPI_ISL_885152 to 885154, EPI_ISL_979544, EPI_ISL_979798 to 979804, EPI_ISL_979893, EPI_ISL_979959 to 979961, EPI_ISL_979963 to 979969, EPI_ISL_985395                                                                                                                                                                                                                                                                                                                                                                                                                                                                                                                                                                                                                                                                                                   | National Institute of Infectious Diseases-Prof. Dr. Matei Bals Molecular Diagnostics Laboratory          | National Institute of Infectious Diseases-Prof. Dr. Matei Bals Molecular Diagnostics Laboratory                                                                                                                                                                                                                                                                                                                                                                                                                                                                                                                                                                         | Andreea Tudor; Corina Casangiu; Dan Otelea; Leontina Banica; Marius Surleac; Petre Milu; Simona Paraschiv                                                                                                                                                                                                                                                                                                                                                                                                                                                                                                                                                                                                                                                                                                                                                                                                                                                                                                                      |
| EPI_ISL_803117                                                                                                                                                                                                                                                                                                                                                                                                                                                                                                                                                                                                                                                                                                                                                                                                                                                                                                     | National Institute of Laboratory Medicine and Referral Center                                            | Bangladesh Council of Scientific and Industrial Research                                                                                                                                                                                                                                                                                                                                                                                                                                                                                                                                                                                                                | A. K. M. Shamsuzzaman; Abu Sayeed Mohammad Mahmud; Asish Kumar Ghosh; Barna Goswami; Eshrar Osman; Iffat Jahan; Mahmuda Yeasmin; Md. Ahasan Habib; Md. Maruf Ahmed Molla; Md. Masum Hossain Arif; Md. Murshed Hasan Sarkar; Md. Saddam Hossain; Md. Salim Khan; Mohammad Samir Uzzaman; Monira Parveen; Shahina Akter; Tanjina Akhter Banu; Tasnim Nafisa                                                                                                                                                                                                                                                                                                                                                                                                                                                                                                                                                                                                                                                                      |
| EPI_ISL_803118, EPI_ISL_803121, EPI_ISL_803850, EPI_ISL_803852 to 803853, EPI_ISL_803865, EPI_ISL_803867, EPI_ISL_803870, EPI_ISL_833150 to 833151, EPI_ISL_833177 to 833181, EPI_ISL_845807 to 845808, EPI_ISL_850180, EPI_ISL_850506, EPI_ISL_943549, EPI_ISL_943552, EPI_ISL_943554, EPI_ISL_943559, EPI_ISL_943561, EPI_ISL_943563, EPI_ISL_943566, EPI_ISL_943571 to 943572, EPI_ISL_954748 to 954749, EPI_ISL_954751 to 954752, EPI_ISL_954776, EPI_ISL_955101, EPI_ISL_955103, EPI_ISL_955172, EPI_ISL_959309, EPI_ISL_959367 to 959368, EPI_ISL_959370 to 959372, EPI_ISL_959374, EPI_ISL_959377, EPI_ISL_959386, EPI_ISL_959416, EPI_ISL_959475, EPI_ISL_959538, EPI_ISL_959545, EPI_ISL_964884, EPI_ISL_964886, EPI_ISL_964917, EPI_ISL_981977, EPI_ISL_982226, EPI_ISL_982505, EPI_ISL_982841, EPI_ISL_983001, EPI_ISL_983330, EPI_ISL_983344, EPI_ISL_983369 to 983370, EPI_ISL_983493, EPI_ISL_983500 | Genomic Research Lab, BCSIR                                                                              | ; A. K. M. Shamsuzzaman; A. K. M. Shamsuzzaman; A. K. M. Shamsuzzaman; A. K. M. Shamsuzzaman; A.K.M. Shamsuzzaman; Abu Sayeed Mohammad Mahmud; Abu Sayeed Mohammad Mahmud; Arifa Akram; Asish Kumar Ghosh; Barna Goswami; Bayzid Bin Monir; Eshrar Osman; Iffat Jahan; Mahmuda Yeasmin; Md. Ahasan Habib; Md. Ahasan Habib; Md. Maruf Ahmed Molla; Md. Masum Hossain Arif; Md. Murshed Hasan Sarkar; Md. Saddam Hossain; Md. Salim Khan; Md. Salim Khan; Md. Maruf Ahmed Molla; Md. Salim Khan; Mohammad Samir Uzzaman; Monira Parveen; Monira Parveen; Monira Parveen; Saddam Hossain; Shahina Akter; Tanjina Akhter Banu; Tasnim Nafisa; Tasnim Nafisa; Tasnim Nafisa |                                                                                                                                                                                                                                                                                                                                                                                                                                                                                                                                                                                                                                                                                                                                                                                                                                                                                                                                                                                                                                |
| EPI_ISL_964880                                                                                                                                                                                                                                                                                                                                                                                                                                                                                                                                                                                                                                                                                                                                                                                                                                                                                                     | National Institute of Laboratory Medicine and Referral Center                                            | Sher-e-Bangla Nagar, Agargaon, Dhaka-1207, Bangladesh.                                                                                                                                                                                                                                                                                                                                                                                                                                                                                                                                                                                                                  | A. K. M. Shamsuzzaman; Abu Sayeed Mohammad Mahmud; Arifa Akram; Asish Kumar Ghosh; Barna Goswami; Eshrar Osman; Iffat Jahan; Mahmuda Yeasmin; Md. Ahasan Habib; Md. Maruf Ahmed Molla; Md. Murshed Hasan Sarkar; Md. Saddam Hossain; Md. Salim Khan; Mohammad Samir Uzzaman; Shahina Akter; Tanjina Akhter Banu; Tasnim Nafisa                                                                                                                                                                                                                                                                                                                                                                                                                                                                                                                                                                                                                                                                                                 |
| EPI_ISL_803905, EPI_ISL_825152, EPI_ISL_845877, EPI_ISL_860191, EPI_ISL_860196, EPI_ISL_995707, EPI_ISL_995734, EPI_ISL_995737 to 995738                                                                                                                                                                                                                                                                                                                                                                                                                                                                                                                                                                                                                                                                                                                                                                           | National Institute of Mental Health and Neurosciences (NIMHANS)                                          | Department of Neurovirology, National Institute of Mental Health and Neurosciences (NIMHANS)                                                                                                                                                                                                                                                                                                                                                                                                                                                                                                                                                                            | Anita S Desai; Anson Kunjumon George; Chitra Pattabiraman; Darshan Sreenivas; Harsha.P.K; Nakka Vijay Kiran Reddy; Pramada Prasad; Risha Rasheed; V Ravi                                                                                                                                                                                                                                                                                                                                                                                                                                                                                                                                                                                                                                                                                                                                                                                                                                                                       |
| EPI_ISL_846587, EPI_ISL_856910 to 856911, EPI_ISL_882958 to 882959, EPI_ISL_882962, EPI_ISL_904122 to 904124, EPI_ISL_904126, EPI_ISL_905732 to 905739, EPI_ISL_905741 to 905751, EPI_ISL_905754 to 905761, EPI_ISL_905763                                                                                                                                                                                                                                                                                                                                                                                                                                                                                                                                                                                                                                                                                         | National Institute of Public Health - National Institute of Hygiene                                      | National Institute of Public Health - National Institute of Hygiene                                                                                                                                                                                                                                                                                                                                                                                                                                                                                                                                                                                                     | Gawor Jan; Wokowicz Tomasz; Zacharczuk Katarzyna                                                                                                                                                                                                                                                                                                                                                                                                                                                                                                                                                                                                                                                                                                                                                                                                                                                                                                                                                                               |
| EPI_ISL_864580                                                                                                                                                                                                                                                                                                                                                                                                                                                                                                                                                                                                                                                                                                                                                                                                                                                                                                     | National Institute of Public Health - National Institute of Hygiene                                      | National Institute of Public Health - National Institute of Hygiene, DNA Sequencing and Synthesis Facility (oligo.pl) - Institute of Biochemistry and Biophysics PAS                                                                                                                                                                                                                                                                                                                                                                                                                                                                                                    | Gawor Jan; Wokowicz Tomasz; Zacharczuk Katarzyna                                                                                                                                                                                                                                                                                                                                                                                                                                                                                                                                                                                                                                                                                                                                                                                                                                                                                                                                                                               |
| EPI_ISL_825149                                                                                                                                                                                                                                                                                                                                                                                                                                                                                                                                                                                                                                                                                                                                                                                                                                                                                                     | National Institute of Virology Bangalore Unit (NIV BU)                                                   | Department of Neurovirology, National Institute of Mental Health and Neurosciences (NIMHANS)                                                                                                                                                                                                                                                                                                                                                                                                                                                                                                                                                                            | Anita S Desai; Chitra Pattabiraman; Pramada Prasad; V Ravi                                                                                                                                                                                                                                                                                                                                                                                                                                                                                                                                                                                                                                                                                                                                                                                                                                                                                                                                                                     |
| EPI_ISL_833332                                                                                                                                                                                                                                                                                                                                                                                                                                                                                                                                                                                                                                                                                                                                                                                                                                                                                                     | National Jail Management and Penology Training Institute                                                 | Research Institute for Tropical Medicine                                                                                                                                                                                                                                                                                                                                                                                                                                                                                                                                                                                                                                | Catalino Demetria; Daria Manalo; Edelwisa Mercado; Francisco Gerardo Polotan; Hannah Leah Morito; Inez Andrea Medado; John Leonard Chan; Kirstyn Brunker; Ma Angelica Tujan; Othoniel Jan Onza                                                                                                                                                                                                                                                                                                                                                                                                                                                                                                                                                                                                                                                                                                                                                                                                                                 |
| EPI_ISL_775268, EPI_ISL_846540, EPI_ISL_846582, EPI_ISL_848192, EPI_ISL_852616, EPI_ISL_892244, EPI_ISL_892365, EPI_ISL_892367                                                                                                                                                                                                                                                                                                                                                                                                                                                                                                                                                                                                                                                                                                                                                                                     | National Laboratory for Health, Environment and Food                                                     | National Laboratory for Health, Environment and Food                                                                                                                                                                                                                                                                                                                                                                                                                                                                                                                                                                                                                    | Aleksander Mahnic; Maja Rupnik; Sandra Janezic                                                                                                                                                                                                                                                                                                                                                                                                                                                                                                                                                                                                                                                                                                                                                                                                                                                                                                                                                                                 |
| see above<br>EPI_ISL_671414 to 671418                                                                                                                                                                                                                                                                                                                                                                                                                                                                                                                                                                                                                                                                                                                                                                                                                                                                              | National Laboratory of Virology, Szentagotthai Research Centre                                           | National Laboratory of Virology, Szentagotthai Research Centre                                                                                                                                                                                                                                                                                                                                                                                                                                                                                                                                                                                                          | Balázs Somogyi; Brigitta; Endre Gábor Tóth; Ferenc Jakab; Gábor Kemenesi                                                                                                                                                                                                                                                                                                                                                                                                                                                                                                                                                                                                                                                                                                                                                                                                                                                                                                                                                       |
| EPI_ISL_644738 to 644789, EPI_ISL_644791 to 644798, EPI_ISL_644800 to 644821, EPI_ISL_647970 to 647984                                                                                                                                                                                                                                                                                                                                                                                                                                                                                                                                                                                                                                                                                                                                                                                                             | National Microbiology Reference Laboratory                                                               | Quadram Institute Bioscience                                                                                                                                                                                                                                                                                                                                                                                                                                                                                                                                                                                                                                            | Agnes Juru; Alexander Goredema; Ana-Victoria Gutierrez; Andrew J. Page; Andrew Tarupui; Barbra Murwira; Beuty Makamure; Charles Nyagupe; David Baker; Gaetan Thilliez; Gemma Kay; Gibson Mhlanga; Hlanai Gumbo; Isaac Phiri; Justin O'Grady; Leonardo de Oliveira Martins; Muchaneta Mugabe; Portia Manangazira; Robert Kingsley; Sekesai Zinyowera; Tapfumanel Mashe; Tatenda Takawira; Thanh Le Viet                                                                                                                                                                                                                                                                                                                                                                                                                                                                                                                                                                                                                         |

|                                                                                                                                                                                                                                                                                                                                                                                                                                                                                                                                        |                                                                       |                                                                                                  |                                                                                                                                                                                                                                                                                                                                                                                                                                                                                                       |
|----------------------------------------------------------------------------------------------------------------------------------------------------------------------------------------------------------------------------------------------------------------------------------------------------------------------------------------------------------------------------------------------------------------------------------------------------------------------------------------------------------------------------------------|-----------------------------------------------------------------------|--------------------------------------------------------------------------------------------------|-------------------------------------------------------------------------------------------------------------------------------------------------------------------------------------------------------------------------------------------------------------------------------------------------------------------------------------------------------------------------------------------------------------------------------------------------------------------------------------------------------|
| EPI_ISL_738086                                                                                                                                                                                                                                                                                                                                                                                                                                                                                                                         | National Public Health Laboratory                                     | Department of Medical Microbiology, Hospital Pengajar Universiti Putra Malaysia                  | Hui-Yee Chee; Jia-Yong Lam; Muhammad MI; Narcisse Joseph; Nor Zahrin Hasran; Syafinaz Amin-Nordin; Yien-Ping Wong                                                                                                                                                                                                                                                                                                                                                                                     |
| EPI_ISL_754060 to 754061, EPI_ISL_754072 to 754073                                                                                                                                                                                                                                                                                                                                                                                                                                                                                     | National Public Health Laboratory                                     | Nepal Health Research Council                                                                    | Meghnath Dhimal; Pradip Gyanwali                                                                                                                                                                                                                                                                                                                                                                                                                                                                      |
| EPI_ISL_845546 to 845565                                                                                                                                                                                                                                                                                                                                                                                                                                                                                                               | National Public Health Laboratory, Cameroon                           | African Centre of Excellence for Genomics of Infectious Diseases (ACEGID), Redeemer's University | Oluniyi P.E. et al                                                                                                                                                                                                                                                                                                                                                                                                                                                                                    |
| EPI_ISL_626628 to 626646, EPI_ISL_645115 to 645132, EPI_ISL_654810 to 654817, EPI_ISL_693307 to 693331, EPI_ISL_728179 to 728201, EPI_ISL_754074 to 754108, EPI_ISL_768618 to 768632, EPI_ISL_803958 to 804006, EPI_ISL_825064 to 825083, EPI_ISL_833373 to 833387, EPI_ISL_857469 to 857485, EPI_ISL_862816 to 862830, EPI_ISL_891231 to 891248, EPI_ISL_906833 to 906846, EPI_ISL_937515 to 937530, EPI_ISL_953385 to 953401, EPI_ISL_981007 to 981029, EPI_ISL_995294 to 995295, EPI_ISL_995297 to 995303, EPI_ISL_995305 to 995307 | see above                                                             | National Public Health Laboratory, National Centre for Infectious Diseases                       | Lin Cui; Raymond Tzer Pin Lin; Sophie Octavia; Tze Minn Mak; Zhenyang Zhou                                                                                                                                                                                                                                                                                                                                                                                                                            |
| EPI_ISL_625683, EPI_ISL_833578                                                                                                                                                                                                                                                                                                                                                                                                                                                                                                         | National Reference Laboratory for COVID-19, Pasteur Institute of Iran | National Reference Laboratory for COVID-19, Pasteur Institute of Iran                            | Ahmad Ghasemi; Farideh Niknam; Heasam Nemati; Hessam Nemati; Kayhan Azadmanesh; Mahsa Tavakkoli; Mahsa Tavakoli; Maryam Rostamtabar; Marzieh Sajjadi; Marzieh Sajjadi; Mohamad Sadegh Shams Nosrati; Mohammad Hassan Pouriayeyali; Mohammad Mehdi Mortazavi; Mostafa Salehi-Vaziri; Parastoo Yekta; Sahar Khakifrouz; Sana Eybpoosh; Sanam Azad-Manjiri; Sepideh Gerdooei; Setareh Kashanian; Tahereh Mohammadi; Tahmineh Jalali; Zabihollah Shoja; Zahra Ahmadi; Zahra Fereydouni; Zeynab Veisizadeh |
| EPI_ISL_737200 to 737201, EPI_ISL_737205 to 737207                                                                                                                                                                                                                                                                                                                                                                                                                                                                                     | National Reference Laboratory, Nigeria Centre for Disease Control.    | National Reference Laboratory, Nigeria Centre for Disease Control, Gaduwa, Abuja, Nigeria        | (JHU); Abdulmajid Musa; Adama Ahmad; Akinpelu Afolabi; Anthony Ahumibe; Bamidele Olorunfemi; Catherine Okoi; Celestina Obiekea; Chimaobi Chukwu; Dr Adesuyi Omoare; Dr Chikwe Ihekweazu.; Dr Chikwe Ochu; Dr Ndodo Nnaemeka; Dr Sikiru Badaru; Grace Esebanben; Kingsley Madubuikwe; Kingsley Njoku; Michael Popoola; Nneamaka Uba; Nwando Mba; Olusola Akanbi; Peter Van Heusden (SANBI); Shirlee Wohl; oluwaseyi Ajegbe                                                                             |
| EPI_ISL_962877 to 962878                                                                                                                                                                                                                                                                                                                                                                                                                                                                                                               | National Virology Reference Laboratory                                | National Public Health Laboratory, National Centre for Infectious Diseases                       | Lin Cui; Raymond Tzer Pin Lin; Taib Surita; Tze Minn Mak; Zaini Zainun; Zhenyang Zhou                                                                                                                                                                                                                                                                                                                                                                                                                 |
| EPI_ISL_666688 to 666710                                                                                                                                                                                                                                                                                                                                                                                                                                                                                                               | National Virus Reference Lab (NVRL)                                   | Irish Coronavirus Sequencing Consortium-Teagasc Grange                                           | Ajandro Abner Garcia Leon; Calum Walsh; Fiona Crispie; Matthew McCabe; Michael Carr; Paul Cotter                                                                                                                                                                                                                                                                                                                                                                                                      |
| EPI_ISL_981203 to 981269                                                                                                                                                                                                                                                                                                                                                                                                                                                                                                               | National Virus Reference Laboratory                                   | Irish Coronavirus Sequencing Consortium - Helixworks                                             | Conor Crosbie; Nimesh Pinnamaneni; Sachin Chalapati                                                                                                                                                                                                                                                                                                                                                                                                                                                   |
| EPI_ISL_848084 to 848171                                                                                                                                                                                                                                                                                                                                                                                                                                                                                                               | National Virus Reference Laboratory                                   | Irish Coronavirus Sequencing Consortium - National University of Ireland Galway                  | Grainne Mc Andrew; Kate Reddington; Simone Coughlan                                                                                                                                                                                                                                                                                                                                                                                                                                                   |
| EPI_ISL_671337 to 671403, EPI_ISL_681885 to 681928, EPI_ISL_682057, EPI_ISL_763350, EPI_ISL_763352, EPI_ISL_767716 to 767838, EPI_ISL_768744 to 768750, EPI_ISL_791280 to 791326, EPI_ISL_869144 to 869165, EPI_ISL_871815                                                                                                                                                                                                                                                                                                             | see above                                                             | National Virus Reference Laboratory                                                              | Alejandro Abner Garcia Leon; Calm Walsh; Calum Walsh; Fiona Crispie; Genuity Ireland; John Kenny; Matthew McCabe; Paddy Mallon; Paul Cotter                                                                                                                                                                                                                                                                                                                                                           |
| EPI_ISL_708508 to 708527, EPI_ISL_710119                                                                                                                                                                                                                                                                                                                                                                                                                                                                                               | National Virus Reference Laboratory                                   | Irish Coronavirus Sequencing Consortium - Teagasc Oakpark                                        | Ewen Mullins; Matthew McCabe; Michele Della Bartola                                                                                                                                                                                                                                                                                                                                                                                                                                                   |
| EPI_ISL_639825 to 639910, EPI_ISL_644610, EPI_ISL_671864 to 671940, EPI_ISL_732374 to 732523, EPI_ISL_735384 to 735390, EPI_ISL_752511 to 752597, EPI_ISL_789060 to 789101, EPI_ISL_837341 to 837432, EPI_ISL_875349 to 875513, EPI_ISL_875685 to 875686, EPI_ISL_888830 to 888834, EPI_ISL_909773 to 909848, EPI_ISL_909850 to 909945, EPI_ISL_911242 to 911247, EPI_ISL_959701 to 959861, EPI_ISL_959873                                                                                                                             | see above                                                             | National Virus Reference Laboratory                                                              | Cillian F De Gascun; Dana Alalwan; Daniel Hare; Gabriel Gonzalez; Jonathan Dean; Michael Carr                                                                                                                                                                                                                                                                                                                                                                                                         |
| EPI_ISL_770475                                                                                                                                                                                                                                                                                                                                                                                                                                                                                                                         | National health Laboratory                                            | Botswana Institute for Technology Research and Innovation                                        | Dineo Emang Tshiamo. Gape Nyepetsi; Kefentse Arnold Tumed; Madisa Mine; Maitshwarelo Ignatius Matsheka; Malebogo Kebabonye; Thongbtho Mphoyakgosi                                                                                                                                                                                                                                                                                                                                                     |
| EPI_ISL_877432 to 877434, EPI_ISL_877436                                                                                                                                                                                                                                                                                                                                                                                                                                                                                               | National laboratory of health, environment and food Celje             | Institute of Microbiology and Immunology, Faculty of Medicine, University of Ljubljana           | Mario Poljak; Matic Brvar; Miša Korva; Samo Zakotnik; Tatjana Avši - Županc; Tomaž Mark Zorec                                                                                                                                                                                                                                                                                                                                                                                                         |
| EPI_ISL_877454, EPI_ISL_906131                                                                                                                                                                                                                                                                                                                                                                                                                                                                                                         | National laboratory of health, environment and food Kranj             | Institute of Microbiology and Immunology, Faculty of Medicine, University of Ljubljana           | Mario Poljak; Matic Brvar; Miša Korva; Samo Zakotnik; Tatjana Avši - Županc; Tomaž Mark Zorec                                                                                                                                                                                                                                                                                                                                                                                                         |
| EPI_ISL_877435                                                                                                                                                                                                                                                                                                                                                                                                                                                                                                                         | National laboratory of health, environment and food Maribor           | Institute of Microbiology and Immunology, Faculty of Medicine, University of Ljubljana           | Mario Poljak; Matic Brvar; Miša Korva; Samo Zakotnik; Tatjana Avši - Županc; Tomaž Mark Zorec                                                                                                                                                                                                                                                                                                                                                                                                         |
| EPI_ISL_912166                                                                                                                                                                                                                                                                                                                                                                                                                                                                                                                         | Natural State Genomics                                                | Grubaguh Lab - Yale School of Public Health                                                      | Anderson Brito; Anne Wyllie; Annie Watkins; Chaney Kalinich; Chantal Vogels; Isabel Ott; Joseph Fauver; Mallery Breban; Mary Petrone; Nathan Grubaugh; Tara Alpert                                                                                                                                                                                                                                                                                                                                    |
| EPI_ISL_732820 to 732826                                                                                                                                                                                                                                                                                                                                                                                                                                                                                                               | Nebraska Public Health Laboratory                                     | UNMC COVID-19 Response Team                                                                      | UNMC COVID-19 Response Team                                                                                                                                                                                                                                                                                                                                                                                                                                                                           |
| EPI_ISL_754068 to 754071                                                                                                                                                                                                                                                                                                                                                                                                                                                                                                               | Nepal Korea Friendship Municipality Hospital                          | Nepal Health Research Council                                                                    | Meghnath Dhimal; Pradip Gyanwali                                                                                                                                                                                                                                                                                                                                                                                                                                                                      |
| EPI_ISL_678548 to 678565, EPI_ISL_678567 to 678568, EPI_ISL_678571 to 678573, EPI_ISL_678576 to 678597, EPI_ISL_736936 to 736937, EPI_ISL_736961 to 736965                                                                                                                                                                                                                                                                                                                                                                             | Netcare                                                               | KRISP, KZN Research Innovation and Sequencing Platform                                           | ChimukangaraB; Giandhari J; Khan S; Lessells R; Mdlalose K; Pillay S; Tegally H; Wilkinson E; York D; de Oliveira T                                                                                                                                                                                                                                                                                                                                                                                   |
| EPI_ISL_766938                                                                                                                                                                                                                                                                                                                                                                                                                                                                                                                         | Nevada State Health Lab                                               | Nevada State Health Lab                                                                          | Andrew Gorzalski                                                                                                                                                                                                                                                                                                                                                                                                                                                                                      |
| EPI_ISL_700442, EPI_ISL_700444                                                                                                                                                                                                                                                                                                                                                                                                                                                                                                         | New Horizon Clinic wc NZC                                             | NHLS/UCT                                                                                         | Arash Iranzadeh; Bruna Galvao; Carolyn Williamson; Deelan Doolabh; Diana Hardie; Houriyah Tegally; Innocent Mudau; Kruger Marais; Lynn Tyers; Marvin Hsiao; Stephen Korsman                                                                                                                                                                                                                                                                                                                           |
| EPI_ISL_960116                                                                                                                                                                                                                                                                                                                                                                                                                                                                                                                         | New Horizon Clinic wc NZC                                             | National Health Laboratory Service/UCT                                                           | Arash Iranzadeh; Bruna Galvao; Carolyn Williamson; Deelan Doolabh; Diana Hardie; Innocent Mudau; Kruger Marais; Lynn Tyers; Marvin Hsiao; Stephen Korsman                                                                                                                                                                                                                                                                                                                                             |
| EPI_ISL_696468, EPI_ISL_696489                                                                                                                                                                                                                                                                                                                                                                                                                                                                                                         | New Horizon Clinic wc NZC & NHLS/UCT                                  | KRISP, KZN Research Innovation and Sequencing Platform                                           | Arash Iranzadeh; Bruna Galvao; Carolyn Williamson; Deelan Doolabh; Diana Hardie; Emanuel James San; Houriyah Tegally; Innocent Mudau; Jennifer Giandhari; Kruger Marais; Lynn Tyers; Marvin Hsiao; Stephen Korsman; Sureshnee Pillay; Tulio de Oliveira                                                                                                                                                                                                                                               |
| EPI_ISL_869167 to 869239, EPI_ISL_872479 to 872566                                                                                                                                                                                                                                                                                                                                                                                                                                                                                     | New Mexico Department of Health Scientific Laboratory                 | Center for Global Health, University of New Mexico Health Sciences Center                        | Anastacia Griego; Darrell Dinwiddie; Daryl Domman; Joseph Hicks; Kurt Schwalm; Michael Edwards; Twila Kunde                                                                                                                                                                                                                                                                                                                                                                                           |
| EPI_ISL_632823 to 632845, EPI_ISL_644584 to 644609, EPI_ISL_732704 to 732747, EPI_ISL_751802 to 751846, EPI_ISL_766883 to 766923, EPI_ISL_767044 to 767088, EPI_ISL_824513 to 824554, EPI_ISL_831900 to 831912, EPI_ISL_831914 to 831937, EPI_ISL_862669 to 862713, EPI_ISL_904035 to 904119, EPI_ISL_906777 to 906779, EPI_ISL_925209 to 925257, EPI_ISL_941300 to 941335, EPI_ISL_979410 to 979452                                                                                                                                   | see above                                                             | New Mexico Department of Health Scientific Laboratory                                            | Anastacia Griego-Fisher; D'Eldra Malone; D'eldra Malone; Ellie Johnson; Jennifer Benoit                                                                                                                                                                                                                                                                                                                                                                                                               |
| EPI_ISL_960175                                                                                                                                                                                                                                                                                                                                                                                                                                                                                                                         | New Somerset Hospital wc NSH                                          | National Health Laboratory Service/UCT                                                           | Arash Iranzadeh; Bruna Galvao; Carolyn Williamson; Deelan Doolabh; Diana Hardie; Innocent Mudau; Kruger Marais; Lynn Tyers; Marvin Hsiao; Stephen Korsman                                                                                                                                                                                                                                                                                                                                             |
| EPI_ISL_631514, EPI_ISL_632055 to 632056                                                                                                                                                                                                                                                                                                                                                                                                                                                                                               | New York Community Hospital                                           | New York City Public Health Laboratory                                                           | Jade Wang; et al.                                                                                                                                                                                                                                                                                                                                                                                                                                                                                     |
| EPI_ISL_861109 to 861114, EPI_ISL_861118 to 861133, EPI_ISL_896294, EPI_ISL_896296, EPI_ISL_896298, EPI_ISL_896302 to 896306, EPI_ISL_896338 to 896342, EPI_ISL_896347 to 896348, EPI_ISL_896350 to 896372, EPI_ISL_896504 to 896507, EPI_ISL_896525 to 896529, EPI_ISL_896531 to 896532, EPI_ISL_896534, EPI_ISL_896537 to 896540, EPI_ISL_896549 to 896551, EPI_ISL_896553 to 896554, EPI_ISL_896556 to 896561, EPI_ISL_936130 to 936137, EPI_ISL_936145 to 936147                                                                   | see above                                                             | New York Presbyterian Hospital                                                                   | Alexis Russel; Daryl M. Lamson; Erasmus Schneider; Erica Lasek-Nesselquist; John Kelly; Jonathan Pitnick; Kirsten St. George; Matthew Shudt; Melissa A Leisner; Navjot Singh                                                                                                                                                                                                                                                                                                                          |
| EPI_ISL_631509, EPI_ISL_631533, EPI_ISL_631536, EPI_ISL_631539 to 631540, EPI_ISL_631542, EPI_ISL_632038, EPI_ISL_632041 to 632042, EPI_ISL_632045, EPI_ISL_632047                                                                                                                                                                                                                                                                                                                                                                     | see above                                                             | New York Presbyterian Lower Manhattan                                                            | Jade Wang; et al.                                                                                                                                                                                                                                                                                                                                                                                                                                                                                     |
| EPI_ISL_631530, EPI_ISL_631547, EPI_ISL_631568 to 631569, EPI_ISL_631861, EPI_ISL_632040, EPI_ISL_632049, EPI_ISL_632052 to 632053, EPI_ISL_632063 to 632064, EPI_ISL_632070 to 632071                                                                                                                                                                                                                                                                                                                                                 | see above                                                             | New York City Public Health Laboratory                                                           | Jade Wang; et al.                                                                                                                                                                                                                                                                                                                                                                                                                                                                                     |



|                                                                                                                                                                                                                                                                                                                                                                                                                                                                                                                                                                                                                                                                                                                                                                                                                                                                                                                                                                                                                                                                                                                                                                                                                                                                                                                                                                                                                                                                                                                                                                                                                                                                                                                                                                                                                                                                                                                                                                                                                                                                                                                                                                                                                                                                                                                                                                                                                                                                                                                                                                                                                                                                                                                                                                                                                                                                                                                                                                                                                                                                                                                                                                                                                                                                                                                                                                                                                                                                                                                                                                                                                                                                                                                                                                                                                                                                                                                                                                                                                                                                                                                                                                                                                                                                                                                                                                                                                                                                                                                                                                                                                                                                                                                                                                                                                                                                                                                                                                                                                                                                                                                                                                                                                                                                                                                                                                                                                                                                                                                                                                                                                                                                                                                                                                                                                                    |                                                                                                                                                                                                                     |                                                                                                                            |                                                                                                                                                                                                                                                                                                                                                                                                                                                                                                      |
|------------------------------------------------------------------------------------------------------------------------------------------------------------------------------------------------------------------------------------------------------------------------------------------------------------------------------------------------------------------------------------------------------------------------------------------------------------------------------------------------------------------------------------------------------------------------------------------------------------------------------------------------------------------------------------------------------------------------------------------------------------------------------------------------------------------------------------------------------------------------------------------------------------------------------------------------------------------------------------------------------------------------------------------------------------------------------------------------------------------------------------------------------------------------------------------------------------------------------------------------------------------------------------------------------------------------------------------------------------------------------------------------------------------------------------------------------------------------------------------------------------------------------------------------------------------------------------------------------------------------------------------------------------------------------------------------------------------------------------------------------------------------------------------------------------------------------------------------------------------------------------------------------------------------------------------------------------------------------------------------------------------------------------------------------------------------------------------------------------------------------------------------------------------------------------------------------------------------------------------------------------------------------------------------------------------------------------------------------------------------------------------------------------------------------------------------------------------------------------------------------------------------------------------------------------------------------------------------------------------------------------------------------------------------------------------------------------------------------------------------------------------------------------------------------------------------------------------------------------------------------------------------------------------------------------------------------------------------------------------------------------------------------------------------------------------------------------------------------------------------------------------------------------------------------------------------------------------------------------------------------------------------------------------------------------------------------------------------------------------------------------------------------------------------------------------------------------------------------------------------------------------------------------------------------------------------------------------------------------------------------------------------------------------------------------------------------------------------------------------------------------------------------------------------------------------------------------------------------------------------------------------------------------------------------------------------------------------------------------------------------------------------------------------------------------------------------------------------------------------------------------------------------------------------------------------------------------------------------------------------------------------------------------------------------------------------------------------------------------------------------------------------------------------------------------------------------------------------------------------------------------------------------------------------------------------------------------------------------------------------------------------------------------------------------------------------------------------------------------------------------------------------------------------------------------------------------------------------------------------------------------------------------------------------------------------------------------------------------------------------------------------------------------------------------------------------------------------------------------------------------------------------------------------------------------------------------------------------------------------------------------------------------------------------------------------------------------------------------------------------------------------------------------------------------------------------------------------------------------------------------------------------------------------------------------------------------------------------------------------------------------------------------------------------------------------------------------------------------------------------------------------------------------------------------------------------------------|---------------------------------------------------------------------------------------------------------------------------------------------------------------------------------------------------------------------|----------------------------------------------------------------------------------------------------------------------------|------------------------------------------------------------------------------------------------------------------------------------------------------------------------------------------------------------------------------------------------------------------------------------------------------------------------------------------------------------------------------------------------------------------------------------------------------------------------------------------------------|
| see above                                                                                                                                                                                                                                                                                                                                                                                                                                                                                                                                                                                                                                                                                                                                                                                                                                                                                                                                                                                                                                                                                                                                                                                                                                                                                                                                                                                                                                                                                                                                                                                                                                                                                                                                                                                                                                                                                                                                                                                                                                                                                                                                                                                                                                                                                                                                                                                                                                                                                                                                                                                                                                                                                                                                                                                                                                                                                                                                                                                                                                                                                                                                                                                                                                                                                                                                                                                                                                                                                                                                                                                                                                                                                                                                                                                                                                                                                                                                                                                                                                                                                                                                                                                                                                                                                                                                                                                                                                                                                                                                                                                                                                                                                                                                                                                                                                                                                                                                                                                                                                                                                                                                                                                                                                                                                                                                                                                                                                                                                                                                                                                                                                                                                                                                                                                                                          | New York Presbyterian Queens                                                                                                                                                                                        | New York City Public Health Laboratory                                                                                     | Jade Wang; et al.                                                                                                                                                                                                                                                                                                                                                                                                                                                                                    |
| EPI_ISL_631517 to 631519, EPI_ISL_631544 to 631545, EPI_ISL_631548, EPI_ISL_631566 to 631567, EPI_ISL_632046, EPI_ISL_632048, EPI_ISL_632054, EPI_ISL_632081                                                                                                                                                                                                                                                                                                                                                                                                                                                                                                                                                                                                                                                                                                                                                                                                                                                                                                                                                                                                                                                                                                                                                                                                                                                                                                                                                                                                                                                                                                                                                                                                                                                                                                                                                                                                                                                                                                                                                                                                                                                                                                                                                                                                                                                                                                                                                                                                                                                                                                                                                                                                                                                                                                                                                                                                                                                                                                                                                                                                                                                                                                                                                                                                                                                                                                                                                                                                                                                                                                                                                                                                                                                                                                                                                                                                                                                                                                                                                                                                                                                                                                                                                                                                                                                                                                                                                                                                                                                                                                                                                                                                                                                                                                                                                                                                                                                                                                                                                                                                                                                                                                                                                                                                                                                                                                                                                                                                                                                                                                                                                                                                                                                                       |                                                                                                                                                                                                                     |                                                                                                                            |                                                                                                                                                                                                                                                                                                                                                                                                                                                                                                      |
| see above                                                                                                                                                                                                                                                                                                                                                                                                                                                                                                                                                                                                                                                                                                                                                                                                                                                                                                                                                                                                                                                                                                                                                                                                                                                                                                                                                                                                                                                                                                                                                                                                                                                                                                                                                                                                                                                                                                                                                                                                                                                                                                                                                                                                                                                                                                                                                                                                                                                                                                                                                                                                                                                                                                                                                                                                                                                                                                                                                                                                                                                                                                                                                                                                                                                                                                                                                                                                                                                                                                                                                                                                                                                                                                                                                                                                                                                                                                                                                                                                                                                                                                                                                                                                                                                                                                                                                                                                                                                                                                                                                                                                                                                                                                                                                                                                                                                                                                                                                                                                                                                                                                                                                                                                                                                                                                                                                                                                                                                                                                                                                                                                                                                                                                                                                                                                                          | New York Presbyterian-Brooklyn Methodist Hospital                                                                                                                                                                   | New York City Public Health Laboratory                                                                                     | Jade Wang; et al.                                                                                                                                                                                                                                                                                                                                                                                                                                                                                    |
| EPI_ISL_631510 to 631511, EPI_ISL_631860, EPI_ISL_632082                                                                                                                                                                                                                                                                                                                                                                                                                                                                                                                                                                                                                                                                                                                                                                                                                                                                                                                                                                                                                                                                                                                                                                                                                                                                                                                                                                                                                                                                                                                                                                                                                                                                                                                                                                                                                                                                                                                                                                                                                                                                                                                                                                                                                                                                                                                                                                                                                                                                                                                                                                                                                                                                                                                                                                                                                                                                                                                                                                                                                                                                                                                                                                                                                                                                                                                                                                                                                                                                                                                                                                                                                                                                                                                                                                                                                                                                                                                                                                                                                                                                                                                                                                                                                                                                                                                                                                                                                                                                                                                                                                                                                                                                                                                                                                                                                                                                                                                                                                                                                                                                                                                                                                                                                                                                                                                                                                                                                                                                                                                                                                                                                                                                                                                                                                           | New York Presbyterian/ Weill Cornell Medical Center                                                                                                                                                                 | New York City Public Health Laboratory                                                                                     | Jade Wang; et al.                                                                                                                                                                                                                                                                                                                                                                                                                                                                                    |
| EPI_ISL_631502 to 631503, EPI_ISL_632057                                                                                                                                                                                                                                                                                                                                                                                                                                                                                                                                                                                                                                                                                                                                                                                                                                                                                                                                                                                                                                                                                                                                                                                                                                                                                                                                                                                                                                                                                                                                                                                                                                                                                                                                                                                                                                                                                                                                                                                                                                                                                                                                                                                                                                                                                                                                                                                                                                                                                                                                                                                                                                                                                                                                                                                                                                                                                                                                                                                                                                                                                                                                                                                                                                                                                                                                                                                                                                                                                                                                                                                                                                                                                                                                                                                                                                                                                                                                                                                                                                                                                                                                                                                                                                                                                                                                                                                                                                                                                                                                                                                                                                                                                                                                                                                                                                                                                                                                                                                                                                                                                                                                                                                                                                                                                                                                                                                                                                                                                                                                                                                                                                                                                                                                                                                           | New York-Prebyterian-Columbia University Medical Center                                                                                                                                                             | New York City Public Health Laboratory                                                                                     | Jade Wang; et al.                                                                                                                                                                                                                                                                                                                                                                                                                                                                                    |
| EPI_ISL_825385, EPI_ISL_825437, EPI_ISL_825617, EPI_ISL_825632 to 825633, EPI_ISL_825713 to 825714, EPI_ISL_825807                                                                                                                                                                                                                                                                                                                                                                                                                                                                                                                                                                                                                                                                                                                                                                                                                                                                                                                                                                                                                                                                                                                                                                                                                                                                                                                                                                                                                                                                                                                                                                                                                                                                                                                                                                                                                                                                                                                                                                                                                                                                                                                                                                                                                                                                                                                                                                                                                                                                                                                                                                                                                                                                                                                                                                                                                                                                                                                                                                                                                                                                                                                                                                                                                                                                                                                                                                                                                                                                                                                                                                                                                                                                                                                                                                                                                                                                                                                                                                                                                                                                                                                                                                                                                                                                                                                                                                                                                                                                                                                                                                                                                                                                                                                                                                                                                                                                                                                                                                                                                                                                                                                                                                                                                                                                                                                                                                                                                                                                                                                                                                                                                                                                                                                 | Nigeria Centre For Disease Control                                                                                                                                                                                  | National reference Laboratory, NCDC, Gaduwa, Abuja                                                                         | Anthony Ahumibe; Chimaobi Chukwu; Dr Chikwe Ihekweazu; Dr Ndodo Nnaemeka; Dr Omoare Adesuyi; Esebanm Grace; Kingsley Madubuike; Kingsley Njoku; Naidoo Dhamari; Nwando Mba; Olusola Anuoluwapo Akanbi                                                                                                                                                                                                                                                                                                |
| EPI_ISL_766051                                                                                                                                                                                                                                                                                                                                                                                                                                                                                                                                                                                                                                                                                                                                                                                                                                                                                                                                                                                                                                                                                                                                                                                                                                                                                                                                                                                                                                                                                                                                                                                                                                                                                                                                                                                                                                                                                                                                                                                                                                                                                                                                                                                                                                                                                                                                                                                                                                                                                                                                                                                                                                                                                                                                                                                                                                                                                                                                                                                                                                                                                                                                                                                                                                                                                                                                                                                                                                                                                                                                                                                                                                                                                                                                                                                                                                                                                                                                                                                                                                                                                                                                                                                                                                                                                                                                                                                                                                                                                                                                                                                                                                                                                                                                                                                                                                                                                                                                                                                                                                                                                                                                                                                                                                                                                                                                                                                                                                                                                                                                                                                                                                                                                                                                                                                                                     | Nigeria Centre For Disease Control,                                                                                                                                                                                 | National reference Laboratory, NCDC, Gaduwa, Abuja                                                                         | Anthony Ahumibe; Chimaobi Chukwu; Dr Chikwe Ihekweazu; Dr Ndodo Nnaemeka; Dr Omoare Adesuyi; Kingsley Madubuike; Naidoo Dhamari; Nwando Mba; Olusola Akanbi                                                                                                                                                                                                                                                                                                                                          |
| EPI_ISL_872601 to 872627, EPI_ISL_906275 to 906305, EPI_ISL_941275 to 941297, EPI_ISL_941925 to 941926                                                                                                                                                                                                                                                                                                                                                                                                                                                                                                                                                                                                                                                                                                                                                                                                                                                                                                                                                                                                                                                                                                                                                                                                                                                                                                                                                                                                                                                                                                                                                                                                                                                                                                                                                                                                                                                                                                                                                                                                                                                                                                                                                                                                                                                                                                                                                                                                                                                                                                                                                                                                                                                                                                                                                                                                                                                                                                                                                                                                                                                                                                                                                                                                                                                                                                                                                                                                                                                                                                                                                                                                                                                                                                                                                                                                                                                                                                                                                                                                                                                                                                                                                                                                                                                                                                                                                                                                                                                                                                                                                                                                                                                                                                                                                                                                                                                                                                                                                                                                                                                                                                                                                                                                                                                                                                                                                                                                                                                                                                                                                                                                                                                                                                                             | Nigeria Centre for Disease Control (NCDC)                                                                                                                                                                           | African Centre of Excellence for Genomics of Infectious Diseases (ACEGID), Redeemer's University                           | Oluniyi P.E. et al                                                                                                                                                                                                                                                                                                                                                                                                                                                                                   |
| EPI_ISL_729920 to 730048                                                                                                                                                                                                                                                                                                                                                                                                                                                                                                                                                                                                                                                                                                                                                                                                                                                                                                                                                                                                                                                                                                                                                                                                                                                                                                                                                                                                                                                                                                                                                                                                                                                                                                                                                                                                                                                                                                                                                                                                                                                                                                                                                                                                                                                                                                                                                                                                                                                                                                                                                                                                                                                                                                                                                                                                                                                                                                                                                                                                                                                                                                                                                                                                                                                                                                                                                                                                                                                                                                                                                                                                                                                                                                                                                                                                                                                                                                                                                                                                                                                                                                                                                                                                                                                                                                                                                                                                                                                                                                                                                                                                                                                                                                                                                                                                                                                                                                                                                                                                                                                                                                                                                                                                                                                                                                                                                                                                                                                                                                                                                                                                                                                                                                                                                                                                           | Nigeria Centre for Disease Control (NCDC)                                                                                                                                                                           | African Centre of Excellence for Genomics of Infectious Diseases (ACEGID), Redeemer's University, Ede, Osun State, Nigeria | Oluniyi P.E. et al                                                                                                                                                                                                                                                                                                                                                                                                                                                                                   |
| EPI_ISL_766049                                                                                                                                                                                                                                                                                                                                                                                                                                                                                                                                                                                                                                                                                                                                                                                                                                                                                                                                                                                                                                                                                                                                                                                                                                                                                                                                                                                                                                                                                                                                                                                                                                                                                                                                                                                                                                                                                                                                                                                                                                                                                                                                                                                                                                                                                                                                                                                                                                                                                                                                                                                                                                                                                                                                                                                                                                                                                                                                                                                                                                                                                                                                                                                                                                                                                                                                                                                                                                                                                                                                                                                                                                                                                                                                                                                                                                                                                                                                                                                                                                                                                                                                                                                                                                                                                                                                                                                                                                                                                                                                                                                                                                                                                                                                                                                                                                                                                                                                                                                                                                                                                                                                                                                                                                                                                                                                                                                                                                                                                                                                                                                                                                                                                                                                                                                                                     | Nigeria Centre for Disease Control (NCDC), National Reference Laboratory (NRL)                                                                                                                                      | National Reference Laboratory, NCDC, Abuja                                                                                 | Chimaobi Chukwu; Dr Chikwe Ihekweazu; Dr Ndodo Nnaemeka; Dr Omoare Adesuyi; Mrs Nwando Mba; Olusola Akanbi                                                                                                                                                                                                                                                                                                                                                                                           |
| EPI_ISL_977540 to 977565                                                                                                                                                                                                                                                                                                                                                                                                                                                                                                                                                                                                                                                                                                                                                                                                                                                                                                                                                                                                                                                                                                                                                                                                                                                                                                                                                                                                                                                                                                                                                                                                                                                                                                                                                                                                                                                                                                                                                                                                                                                                                                                                                                                                                                                                                                                                                                                                                                                                                                                                                                                                                                                                                                                                                                                                                                                                                                                                                                                                                                                                                                                                                                                                                                                                                                                                                                                                                                                                                                                                                                                                                                                                                                                                                                                                                                                                                                                                                                                                                                                                                                                                                                                                                                                                                                                                                                                                                                                                                                                                                                                                                                                                                                                                                                                                                                                                                                                                                                                                                                                                                                                                                                                                                                                                                                                                                                                                                                                                                                                                                                                                                                                                                                                                                                                                           | Nigeria Centre of Disease Control (NCDC)                                                                                                                                                                            | African Centre of Excellence for Genomics of Infectious Diseases (ACEGID), Redeemer's University                           | Olawoye I. B. et al                                                                                                                                                                                                                                                                                                                                                                                                                                                                                  |
| EPI_ISL_685297 to 685310, EPI_ISL_687699 to 687717, EPI_ISL_692051 to 692052, EPI_ISL_895002 to 895013, EPI_ISL_897056 to 897080                                                                                                                                                                                                                                                                                                                                                                                                                                                                                                                                                                                                                                                                                                                                                                                                                                                                                                                                                                                                                                                                                                                                                                                                                                                                                                                                                                                                                                                                                                                                                                                                                                                                                                                                                                                                                                                                                                                                                                                                                                                                                                                                                                                                                                                                                                                                                                                                                                                                                                                                                                                                                                                                                                                                                                                                                                                                                                                                                                                                                                                                                                                                                                                                                                                                                                                                                                                                                                                                                                                                                                                                                                                                                                                                                                                                                                                                                                                                                                                                                                                                                                                                                                                                                                                                                                                                                                                                                                                                                                                                                                                                                                                                                                                                                                                                                                                                                                                                                                                                                                                                                                                                                                                                                                                                                                                                                                                                                                                                                                                                                                                                                                                                                                   | Niigata Prefectural Institute of Public Health and Environmental Sciences                                                                                                                                           | Pathogen Genomics Centre, National Institute of Infectious Diseases                                                        | Kentaro Itokawa; Makoto Kuroda; Masanori Hashino; Rina Tanaka; Tsuyoshi Sekizuka                                                                                                                                                                                                                                                                                                                                                                                                                     |
| EPI_ISL_745200                                                                                                                                                                                                                                                                                                                                                                                                                                                                                                                                                                                                                                                                                                                                                                                                                                                                                                                                                                                                                                                                                                                                                                                                                                                                                                                                                                                                                                                                                                                                                                                                                                                                                                                                                                                                                                                                                                                                                                                                                                                                                                                                                                                                                                                                                                                                                                                                                                                                                                                                                                                                                                                                                                                                                                                                                                                                                                                                                                                                                                                                                                                                                                                                                                                                                                                                                                                                                                                                                                                                                                                                                                                                                                                                                                                                                                                                                                                                                                                                                                                                                                                                                                                                                                                                                                                                                                                                                                                                                                                                                                                                                                                                                                                                                                                                                                                                                                                                                                                                                                                                                                                                                                                                                                                                                                                                                                                                                                                                                                                                                                                                                                                                                                                                                                                                                     | Nizams Institute of Medical Sciences                                                                                                                                                                                | CSIR-Centre for Cellular and Molecular Biology                                                                             | Archana Bharadwaj Siva; B Himasri; Blessy B John; Divya Tej Sowpati; Dr.P.Shashikala Reddy; Dr.S.Pavani; Dr.Satyaprasad; Dr.V.Sudha Rani; Karthik Bharadwaj Tallapaka; Lamuk Zaveri; M Soujanya Reddy; Namami Gaur; Nikhil Hajirnis; Onkar Kulkarni; Payel Mukherjee; Pratheusa Maccha; Priya Singh; Purushotham Vodnala; Rakesh K Mishra; Sakshi Shambhavi; Shagufa Khan; Sofia Banu; Tulasi Nagabandi; Viswagithe S L                                                                              |
| EPI_ISL_745142 to 745143                                                                                                                                                                                                                                                                                                                                                                                                                                                                                                                                                                                                                                                                                                                                                                                                                                                                                                                                                                                                                                                                                                                                                                                                                                                                                                                                                                                                                                                                                                                                                                                                                                                                                                                                                                                                                                                                                                                                                                                                                                                                                                                                                                                                                                                                                                                                                                                                                                                                                                                                                                                                                                                                                                                                                                                                                                                                                                                                                                                                                                                                                                                                                                                                                                                                                                                                                                                                                                                                                                                                                                                                                                                                                                                                                                                                                                                                                                                                                                                                                                                                                                                                                                                                                                                                                                                                                                                                                                                                                                                                                                                                                                                                                                                                                                                                                                                                                                                                                                                                                                                                                                                                                                                                                                                                                                                                                                                                                                                                                                                                                                                                                                                                                                                                                                                                           | Nomangesi Jayiya Clinic                                                                                                                                                                                             | National Health Laboratory Service (NHL), Tygerberg                                                                        | Bronwyn Kleinhans; Eduan Wilkinton; Gert van Zyl; Houriyah Tegally; Kayla Delaney; Susan Engelbrecht; Tulio de Oliveira; Wolfgang Preiser                                                                                                                                                                                                                                                                                                                                                            |
| EPI_ISL_635142, EPI_ISL_635145, EPI_ISL_635182, EPI_ISL_668398 to 668399, EPI_ISL_668419, EPI_ISL_668422 to 668423, EPI_ISL_668429 to 668432, EPI_ISL_668434, EPI_ISL_708097 to 708105, EPI_ISL_775277, EPI_ISL_775281 to 775283, EPI_ISL_775286 to 775292, EPI_ISL_775295 to 775298, EPI_ISL_775301 to 775302, EPI_ISL_775312 to 775313, EPI_ISL_775319 to 775321, EPI_ISL_775330, EPI_ISL_775334, EPI_ISL_775372 to 775383, EPI_ISL_775398 to 775405, EPI_ISL_775439, EPI_ISL_775487, EPI_ISL_775480, EPI_ISL_775485 to 775487, EPI_ISL_796650, EPI_ISL_796667 to 796669, EPI_ISL_796672, EPI_ISL_796678, EPI_ISL_796689 to 796694, EPI_ISL_860261, EPI_ISL_860280, EPI_ISL_860282 to 860283, EPI_ISL_906798 to 906803, EPI_ISL_964956 to 964957, EPI_ISL_964967, EPI_ISL_964991, EPI_ISL_965008 to 965010, EPI_ISL_965013 to 965014                                                                                                                                                                                                                                                                                                                                                                                                                                                                                                                                                                                                                                                                                                                                                                                                                                                                                                                                                                                                                                                                                                                                                                                                                                                                                                                                                                                                                                                                                                                                                                                                                                                                                                                                                                                                                                                                                                                                                                                                                                                                                                                                                                                                                                                                                                                                                                                                                                                                                                                                                                                                                                                                                                                                                                                                                                                                                                                                                                                                                                                                                                                                                                                                                                                                                                                                                                                                                                                                                                                                                                                                                                                                                                                                                                                                                                                                                                                                                                                                                                                                                                                                                                                                                                                                                                                                                                                                                                                                                                                                                                                                                                                                                                                                                                                                                                                                                                                                                                                             |                                                                                                                                                                                                                     |                                                                                                                            |                                                                                                                                                                                                                                                                                                                                                                                                                                                                                                      |
| see above                                                                                                                                                                                                                                                                                                                                                                                                                                                                                                                                                                                                                                                                                                                                                                                                                                                                                                                                                                                                                                                                                                                                                                                                                                                                                                                                                                                                                                                                                                                                                                                                                                                                                                                                                                                                                                                                                                                                                                                                                                                                                                                                                                                                                                                                                                                                                                                                                                                                                                                                                                                                                                                                                                                                                                                                                                                                                                                                                                                                                                                                                                                                                                                                                                                                                                                                                                                                                                                                                                                                                                                                                                                                                                                                                                                                                                                                                                                                                                                                                                                                                                                                                                                                                                                                                                                                                                                                                                                                                                                                                                                                                                                                                                                                                                                                                                                                                                                                                                                                                                                                                                                                                                                                                                                                                                                                                                                                                                                                                                                                                                                                                                                                                                                                                                                                                          | Nordland Hospital - Bodo, Laboratory Department, Molecular Biology Unit                                                                                                                                             | Norwegian Institute of Public Health, Department of Virology                                                               | Atiya R Ali; Hilde Elshaug; Hilde Vollaen; Ignacio Garcia Llorente; Kamilla Heddeland Instefjord; Karoline Bragstad; Kathrine Stene-Johansen; Marie Paulsen Madsen; Olav Hungnes; Rasmus Riis Kopperud; Serina B Engebretsen                                                                                                                                                                                                                                                                         |
| EPI_ISL_983648                                                                                                                                                                                                                                                                                                                                                                                                                                                                                                                                                                                                                                                                                                                                                                                                                                                                                                                                                                                                                                                                                                                                                                                                                                                                                                                                                                                                                                                                                                                                                                                                                                                                                                                                                                                                                                                                                                                                                                                                                                                                                                                                                                                                                                                                                                                                                                                                                                                                                                                                                                                                                                                                                                                                                                                                                                                                                                                                                                                                                                                                                                                                                                                                                                                                                                                                                                                                                                                                                                                                                                                                                                                                                                                                                                                                                                                                                                                                                                                                                                                                                                                                                                                                                                                                                                                                                                                                                                                                                                                                                                                                                                                                                                                                                                                                                                                                                                                                                                                                                                                                                                                                                                                                                                                                                                                                                                                                                                                                                                                                                                                                                                                                                                                                                                                                                     | North Carolina State Laboratory of Public Health                                                                                                                                                                    | North Carolina State Laboratory of Public Health                                                                           | Chase K; Glover W; Greene S; Miller MC                                                                                                                                                                                                                                                                                                                                                                                                                                                               |
| EPI_ISL_812233 to 812248, EPI_ISL_848172 to 848187, EPI_ISL_848546 to 848554, EPI_ISL_848634 to 848641, EPI_ISL_873194 to 873208                                                                                                                                                                                                                                                                                                                                                                                                                                                                                                                                                                                                                                                                                                                                                                                                                                                                                                                                                                                                                                                                                                                                                                                                                                                                                                                                                                                                                                                                                                                                                                                                                                                                                                                                                                                                                                                                                                                                                                                                                                                                                                                                                                                                                                                                                                                                                                                                                                                                                                                                                                                                                                                                                                                                                                                                                                                                                                                                                                                                                                                                                                                                                                                                                                                                                                                                                                                                                                                                                                                                                                                                                                                                                                                                                                                                                                                                                                                                                                                                                                                                                                                                                                                                                                                                                                                                                                                                                                                                                                                                                                                                                                                                                                                                                                                                                                                                                                                                                                                                                                                                                                                                                                                                                                                                                                                                                                                                                                                                                                                                                                                                                                                                                                   | North Dakota Department of Health, Public Health Laboratory                                                                                                                                                         | North Dakota Department of Health, Public Health Laboratory                                                                | Lisa Wingerter                                                                                                                                                                                                                                                                                                                                                                                                                                                                                       |
| EPI_ISL_770818                                                                                                                                                                                                                                                                                                                                                                                                                                                                                                                                                                                                                                                                                                                                                                                                                                                                                                                                                                                                                                                                                                                                                                                                                                                                                                                                                                                                                                                                                                                                                                                                                                                                                                                                                                                                                                                                                                                                                                                                                                                                                                                                                                                                                                                                                                                                                                                                                                                                                                                                                                                                                                                                                                                                                                                                                                                                                                                                                                                                                                                                                                                                                                                                                                                                                                                                                                                                                                                                                                                                                                                                                                                                                                                                                                                                                                                                                                                                                                                                                                                                                                                                                                                                                                                                                                                                                                                                                                                                                                                                                                                                                                                                                                                                                                                                                                                                                                                                                                                                                                                                                                                                                                                                                                                                                                                                                                                                                                                                                                                                                                                                                                                                                                                                                                                                                     | North Memorial                                                                                                                                                                                                      | Minnesota Department of Health, Public Health Laboratory                                                                   | Alexandra Lorentz; Jacob Garfin; Matt Plumb; and Xiong Wang                                                                                                                                                                                                                                                                                                                                                                                                                                          |
| EPI_ISL_765818 to 765823                                                                                                                                                                                                                                                                                                                                                                                                                                                                                                                                                                                                                                                                                                                                                                                                                                                                                                                                                                                                                                                                                                                                                                                                                                                                                                                                                                                                                                                                                                                                                                                                                                                                                                                                                                                                                                                                                                                                                                                                                                                                                                                                                                                                                                                                                                                                                                                                                                                                                                                                                                                                                                                                                                                                                                                                                                                                                                                                                                                                                                                                                                                                                                                                                                                                                                                                                                                                                                                                                                                                                                                                                                                                                                                                                                                                                                                                                                                                                                                                                                                                                                                                                                                                                                                                                                                                                                                                                                                                                                                                                                                                                                                                                                                                                                                                                                                                                                                                                                                                                                                                                                                                                                                                                                                                                                                                                                                                                                                                                                                                                                                                                                                                                                                                                                                                           | North Shore Medical Center                                                                                                                                                                                          | Infectious Disease Program, Broad Institute of Harvard and MIT                                                             | A.E.; Adams, G.; Anahar, M.; B.L.; B.W.; Bauer, M.; Birren; Branda, J.; Carter, A.; Cerrato, F.; Chaluvadi, S.; Chapman; Cusick, C.; D.J.; DeRuff, K.; E. and Sabeti; Flowers, K.; Gallagher, G.; Gladden-York, A.; Gnirke, A.; Harris, J.; J.E.; K.J.; LaRoque, R.; Lagerborg, K.; Lemieux; Lin; Loreth, C.; MacInnis; Neumann, A.; Normandin, E.; P.C.; Park; Pierce, V.; Reilly, S.; Rosenberg; Rudy, M.; Ryan, E.; S.B.; Shaw, B.; Siddle; Slater, D.; Smole, S.; Tomkins-Tinch, C.; Turbett, S. |
| EPI_ISL_637280, EPI_ISL_637283, EPI_ISL_637311 to 637312, EPI_ISL_637322, EPI_ISL_637352, EPI_ISL_637373 to 637377, EPI_ISL_637382 to 637383, EPI_ISL_637455, EPI_ISL_637463, EPI_ISL_637520 to 637523, EPI_ISL_637581, EPI_ISL_637605, EPI_ISL_637784 to 637797, EPI_ISL_637883, EPI_ISL_637902, EPI_ISL_637943, EPI_ISL_637979, EPI_ISL_637988, EPI_ISL_637994, EPI_ISL_637996, EPI_ISL_638009 to 638010, EPI_ISL_638555 to 638580, EPI_ISL_650125, EPI_ISL_650142, EPI_ISL_650147 to 650148, EPI_ISL_650156, EPI_ISL_650241, EPI_ISL_650246 to 650247, EPI_ISL_650279, EPI_ISL_650282, EPI_ISL_650348, EPI_ISL_650351, EPI_ISL_650355, EPI_ISL_650359, EPI_ISL_650393 to 650394, EPI_ISL_650428, EPI_ISL_650572, EPI_ISL_650586 to 650588, EPI_ISL_650624 to 650625, EPI_ISL_650640, EPI_ISL_650648, EPI_ISL_650703, EPI_ISL_650785, EPI_ISL_650950, EPI_ISL_650967 to 650968, EPI_ISL_651013, EPI_ISL_651060 to 651063, EPI_ISL_651117, EPI_ISL_651126, EPI_ISL_651314, EPI_ISL_651345, EPI_ISL_651354, EPI_ISL_651356, EPI_ISL_651369, EPI_ISL_651388, EPI_ISL_652111 to 652116, EPI_ISL_652337 to 652344, EPI_ISL_664107, EPI_ISL_664121, EPI_ISL_664190, EPI_ISL_664192, EPI_ISL_664238, EPI_ISL_664240 to 664247, EPI_ISL_664360, EPI_ISL_664373, EPI_ISL_664385 to 664396, EPI_ISL_664503, EPI_ISL_664541, EPI_ISL_664544, EPI_ISL_664560 to 664564, EPI_ISL_664639, EPI_ISL_664696, EPI_ISL_664736, EPI_ISL_664856, EPI_ISL_665261 to 665262, EPI_ISL_665271 to 665272, EPI_ISL_665275, EPI_ISL_665278, EPI_ISL_665280, EPI_ISL_665300, EPI_ISL_665303, EPI_ISL_665305, EPI_ISL_665307 to 665308, EPI_ISL_665310 to 665314, EPI_ISL_665317 to 665319, EPI_ISL_665322 to 665323, EPI_ISL_665329, EPI_ISL_665349 to 665350, EPI_ISL_665368, EPI_ISL_665379, EPI_ISL_665387 to 665390, EPI_ISL_665392 to 665405, EPI_ISL_665407 to 665410, EPI_ISL_665412, EPI_ISL_665432, EPI_ISL_665489 to 665503, EPI_ISL_665506, EPI_ISL_665540, EPI_ISL_665549, EPI_ISL_665573 to 665574, EPI_ISL_665579, EPI_ISL_665587, EPI_ISL_665673, EPI_ISL_665676, EPI_ISL_665679 to 665681, EPI_ISL_665687, EPI_ISL_665701, EPI_ISL_665706, EPI_ISL_665717 to 665718, EPI_ISL_665735 to 665736, EPI_ISL_665739, EPI_ISL_665742, EPI_ISL_665744, EPI_ISL_665784, EPI_ISL_665787, EPI_ISL_665868 to 665875, EPI_ISL_665964 to 665970, EPI_ISL_665983 to 666021, EPI_ISL_666084 to 666106, EPI_ISL_666591 to 666592, EPI_ISL_702495, EPI_ISL_702550, EPI_ISL_702525, EPI_ISL_702533, EPI_ISL_702539, EPI_ISL_702547, EPI_ISL_702744, EPI_ISL_702748, EPI_ISL_702803, EPI_ISL_702809, EPI_ISL_702812, EPI_ISL_702815, EPI_ISL_702820, EPI_ISL_702823, EPI_ISL_702827, EPI_ISL_702835 to 702836, EPI_ISL_702855, EPI_ISL_702959, EPI_ISL_702982, EPI_ISL_702990, EPI_ISL_703002, EPI_ISL_703005, EPI_ISL_703007, EPI_ISL_703010, EPI_ISL_703013, EPI_ISL_703034, EPI_ISL_703064, EPI_ISL_703096, EPI_ISL_703105, EPI_ISL_703377, EPI_ISL_703390, EPI_ISL_703484, EPI_ISL_703487, EPI_ISL_703533, EPI_ISL_703535, EPI_ISL_703537, EPI_ISL_703540, EPI_ISL_703542, EPI_ISL_703545, EPI_ISL_703599, EPI_ISL_703701, EPI_ISL_703704, EPI_ISL_703707, EPI_ISL_703727 to 703728, EPI_ISL_704120, EPI_ISL_704166, EPI_ISL_704198, EPI_ISL_704262, EPI_ISL_704387, EPI_ISL_704422, EPI_ISL_704425, EPI_ISL_704564, EPI_ISL_704567, EPI_ISL_704570, EPI_ISL_704572 to 704579, EPI_ISL_704976, EPI_ISL_705010, EPI_ISL_705067, EPI_ISL_705102, EPI_ISL_705105, EPI_ISL_705137, EPI_ISL_705145, EPI_ISL_705148, EPI_ISL_705201, EPI_ISL_705207, EPI_ISL_705212, EPI_ISL_705214, EPI_ISL_705219, EPI_ISL_705224 to 705226, EPI_ISL_705266, EPI_ISL_705273, EPI_ISL_705279 to 705282, EPI_ISL_705293, EPI_ISL_705295, EPI_ISL_705302, EPI_ISL_705341, EPI_ISL_705343, EPI_ISL_705353, EPI_ISL_705355 to 705357, EPI_ISL_705361, EPI_ISL_705364, EPI_ISL_705367, EPI_ISL_705381, EPI_ISL_705457 to 705458, EPI_ISL_705486, EPI_ISL_705494 to 705496, EPI_ISL_706276 to 706282, EPI_ISL_706284 to 706286, EPI_ISL_706288 to 706314, EPI_ISL_706316 to 706339, EPI_ISL_706341 to 706354, EPI_ISL_723558 to 723630, EPI_ISL_724063 to 724123, EPI_ISL_724837, EPI_ISL_724842, EPI_ISL_724845, EPI_ISL_724848 to 725028, EPI_ISL_741425 to 741452, EPI_ISL_819448 to 819457, EPI_ISL_819460 to 819461, EPI_ISL_819568 to 819576, EPI_ISL_839484 to 839491, EPI_ISL_839493 to 839494, EPI_ISL_839497, EPI_ISL_839500, EPI_ISL_839504, EPI_ISL_839507 to 839511, EPI_ISL_839516 to 839518, EPI_ISL_839520 to 839592, EPI_ISL_839599 to 839603, EPI_ISL_839607 to 839822, EPI_ISL_866400 to 866431, EPI_ISL_866433 to 866540, EPI_ISL_920975, EPI_ISL_921137 to 921207, EPI_ISL_921209 to 921211, EPI_ISL_921213 to 921227, EPI_ISL_921229 to 921251, EPI_ISL_921253 to 921255, EPI_ISL_921258 to 921262, EPI_ISL_921264 to 921265, EPI_ISL_921268, EPI_ISL_921271 to 921277, EPI_ISL_921279 to 921287, EPI_ISL_921299 to 921300, EPI_ISL_921299 to 921300, EPI_ISL_921302, EPI_ISL_921304, EPI_ISL_921306 to 921312, EPI_ISL_921315 to 921316, EPI_ISL_921319 to 921782, EPI_ISL_950234 to 950235, EPI_ISL_950237 to 950238, EPI_ISL_950240 to 950241, EPI_ISL_950243 to 950245, EPI_ISL_950247 to 950250, EPI_ISL_950252 to 950270, EPI_ISL_950272, EPI_ISL_950280, EPI_ISL_950282 to 950285, EPI_ISL_950288 to 950294, EPI_ISL_950297 to 950298, EPI_ISL_950304 to 950312, EPI_ISL_950317, EPI_ISL_950321, EPI_ISL_950323 to 950350, EPI_ISL_950373, EPI_ISL_950376, EPI_ISL_950379, EPI_ISL_950382, EPI_ISL_950391 to 950415, EPI_ISL_950424 to 950543, EPI_ISL_998313 to 998314, EPI_ISL_998316 to 998321, EPI_ISL_998323 to 998460, EPI_ISL_998464 to 998491, EPI_ISL_998493 to 998504, EPI_ISL_998507 to 998516, EPI_ISL_998518 to 998519, EPI_ISL_998521 to 998524, EPI_ISL_998527 to 998535, EPI_ISL_998542 to 998544, EPI_ISL_998546, EPI_ISL_998552 to 998771 |                                                                                                                                                                                                                     |                                                                                                                            |                                                                                                                                                                                                                                                                                                                                                                                                                                                                                                      |
| see above                                                                                                                                                                                                                                                                                                                                                                                                                                                                                                                                                                                                                                                                                                                                                                                                                                                                                                                                                                                                                                                                                                                                                                                                                                                                                                                                                                                                                                                                                                                                                                                                                                                                                                                                                                                                                                                                                                                                                                                                                                                                                                                                                                                                                                                                                                                                                                                                                                                                                                                                                                                                                                                                                                                                                                                                                                                                                                                                                                                                                                                                                                                                                                                                                                                                                                                                                                                                                                                                                                                                                                                                                                                                                                                                                                                                                                                                                                                                                                                                                                                                                                                                                                                                                                                                                                                                                                                                                                                                                                                                                                                                                                                                                                                                                                                                                                                                                                                                                                                                                                                                                                                                                                                                                                                                                                                                                                                                                                                                                                                                                                                                                                                                                                                                                                                                                          | Northumbria University / South Tees Hospitals NHS Foundation Trust / North Cumbria Integrated Care NHS Foundation Trust / North Tees and Hartlepool NHS Foundation Trust / Newcastle Hospitals NHS Foundation Trust | COVID-19 Genomics UK (COG-UK) Consortium                                                                                   | Andrew Nelson; Brendan Payne; Clive Graham; Darren L Smith; Debra Padgett; Edward Barton; Emma Swindells; Garren Scott; Gary Black; Gary Eltringham; Giles S Holt; Greg R Young; Jane Greenaway; Jennifer Collins; John Allan; Joshua Loh; Lynn Dover; Matthew Bashton; Mohammad A Tariq; Paul Baker; Sarah Essex; Steve Liggett; Wen C Yew; Yusri Taha                                                                                                                                              |
| EPI_ISL_631505                                                                                                                                                                                                                                                                                                                                                                                                                                                                                                                                                                                                                                                                                                                                                                                                                                                                                                                                                                                                                                                                                                                                                                                                                                                                                                                                                                                                                                                                                                                                                                                                                                                                                                                                                                                                                                                                                                                                                                                                                                                                                                                                                                                                                                                                                                                                                                                                                                                                                                                                                                                                                                                                                                                                                                                                                                                                                                                                                                                                                                                                                                                                                                                                                                                                                                                                                                                                                                                                                                                                                                                                                                                                                                                                                                                                                                                                                                                                                                                                                                                                                                                                                                                                                                                                                                                                                                                                                                                                                                                                                                                                                                                                                                                                                                                                                                                                                                                                                                                                                                                                                                                                                                                                                                                                                                                                                                                                                                                                                                                                                                                                                                                                                                                                                                                                                     | Northwell Health-GoHealth Urgent Care 10025                                                                                                                                                                         | New York City Public Health Laboratory                                                                                     | Jade Wang; et al.                                                                                                                                                                                                                                                                                                                                                                                                                                                                                    |
| EPI_ISL_962481                                                                                                                                                                                                                                                                                                                                                                                                                                                                                                                                                                                                                                                                                                                                                                                                                                                                                                                                                                                                                                                                                                                                                                                                                                                                                                                                                                                                                                                                                                                                                                                                                                                                                                                                                                                                                                                                                                                                                                                                                                                                                                                                                                                                                                                                                                                                                                                                                                                                                                                                                                                                                                                                                                                                                                                                                                                                                                                                                                                                                                                                                                                                                                                                                                                                                                                                                                                                                                                                                                                                                                                                                                                                                                                                                                                                                                                                                                                                                                                                                                                                                                                                                                                                                                                                                                                                                                                                                                                                                                                                                                                                                                                                                                                                                                                                                                                                                                                                                                                                                                                                                                                                                                                                                                                                                                                                                                                                                                                                                                                                                                                                                                                                                                                                                                                                                     | Northwest Laboratories                                                                                                                                                                                              | Seattle Flu Study                                                                                                          | Amanda Adler; Barry R. Lutz; Benjamin Pelle; Brian Hiatt; Caitlin R. Wolf; Chris D. Frazar; Deborah A. Nickerson; Elisabeth Brandstetter; Erica Ryke; Geoff Melly; Helen Y. Chu; Janet A. Englund; Jay Shendure; Jover Lee; Kairsten Fay; Kirsten Lacombe; Lea M. Starita; Mark J. Rieder; Matthew Richardson; Matthew Thompson; Melissa Truong; Michael Boeckh; Michael Famulare; Misja Ilcinis; Peter D. Han; Philip Dykema; Romesh Gautam; Scott Lindquist; Thomas R. Sibley; Trevor Bedford      |
| EPI_ISL_832203 to 832204, EPI_ISL_934977, EPI_ISL_935022                                                                                                                                                                                                                                                                                                                                                                                                                                                                                                                                                                                                                                                                                                                                                                                                                                                                                                                                                                                                                                                                                                                                                                                                                                                                                                                                                                                                                                                                                                                                                                                                                                                                                                                                                                                                                                                                                                                                                                                                                                                                                                                                                                                                                                                                                                                                                                                                                                                                                                                                                                                                                                                                                                                                                                                                                                                                                                                                                                                                                                                                                                                                                                                                                                                                                                                                                                                                                                                                                                                                                                                                                                                                                                                                                                                                                                                                                                                                                                                                                                                                                                                                                                                                                                                                                                                                                                                                                                                                                                                                                                                                                                                                                                                                                                                                                                                                                                                                                                                                                                                                                                                                                                                                                                                                                                                                                                                                                                                                                                                                                                                                                                                                                                                                                                           | Northwest Pathology                                                                                                                                                                                                 | UW Virology Lab                                                                                                            | Alexander Greninger; Hong Xie; Keith R Jerome; Lasata Shrestha; Meei-Li Huang; Michelle Lin; Pavitra Roychoudhury                                                                                                                                                                                                                                                                                                                                                                                    |

|                                                                                                                                                                                                                                                                                                                                                                                                                                                                                                                                                                                                                                                                                                                                                                                                                                                                                                                                                                                                                                                                                                                                                                                                                                                                                                                                                                                                                                                                                                                                                                          |                                                                        |                                                                                                                        |                                                                                                                                                                                                                                                                                                                                                                                                                                                                                                                                           |                                                                                                                                                                                                                                                                          |
|--------------------------------------------------------------------------------------------------------------------------------------------------------------------------------------------------------------------------------------------------------------------------------------------------------------------------------------------------------------------------------------------------------------------------------------------------------------------------------------------------------------------------------------------------------------------------------------------------------------------------------------------------------------------------------------------------------------------------------------------------------------------------------------------------------------------------------------------------------------------------------------------------------------------------------------------------------------------------------------------------------------------------------------------------------------------------------------------------------------------------------------------------------------------------------------------------------------------------------------------------------------------------------------------------------------------------------------------------------------------------------------------------------------------------------------------------------------------------------------------------------------------------------------------------------------------------|------------------------------------------------------------------------|------------------------------------------------------------------------------------------------------------------------|-------------------------------------------------------------------------------------------------------------------------------------------------------------------------------------------------------------------------------------------------------------------------------------------------------------------------------------------------------------------------------------------------------------------------------------------------------------------------------------------------------------------------------------------|--------------------------------------------------------------------------------------------------------------------------------------------------------------------------------------------------------------------------------------------------------------------------|
| EPI_ISL_626357 to 626548, EPI_ISL_825014, EPI_ISL_854460, EPI_ISL_936497 to 937023                                                                                                                                                                                                                                                                                                                                                                                                                                                                                                                                                                                                                                                                                                                                                                                                                                                                                                                                                                                                                                                                                                                                                                                                                                                                                                                                                                                                                                                                                       | Northwestern Memorial Hospital                                         | Ozer Lab                                                                                                               | Alan R. Hauser; Chad J. Achenbach; Chao Qi; Egon A. Ozer; Egon A. Ozer; Hannah H. Nam; Judd F. Hultquist; Lacy M. Simons; Lawrence J. Jennings; Michael G. Ison; Ramon Lorenzo-Redondo; Scott C. Roberts                                                                                                                                                                                                                                                                                                                                  |                                                                                                                                                                                                                                                                          |
| EPI_ISL_635066 to 635067, EPI_ISL_635074 to 635079, EPI_ISL_635178, EPI_ISL_635187 to 635188, EPI_ISL_668410 to 668411, EPI_ISL_668435 to 668437, EPI_ISL_708028 to 708029, EPI_ISL_708040, EPI_ISL_708049 to 708051, EPI_ISL_708140 to 708141, EPI_ISL_708169 to 708170, EPI_ISL_708180 to 708181, EPI_ISL_759981, EPI_ISL_759989, EPI_ISL_775356, EPI_ISL_775414, EPI_ISL_775443 to 775444, EPI_ISL_775459 to 775462, EPI_ISL_775509 to 775515, EPI_ISL_796654 to 796657, EPI_ISL_796659 to 796662, EPI_ISL_796675 to 796676, EPI_ISL_796684 to 796685, EPI_ISL_796710, EPI_ISL_813976, EPI_ISL_842633, EPI_ISL_842642, EPI_ISL_860209, EPI_ISL_860215, EPI_ISL_860233 to 860234, EPI_ISL_860294, EPI_ISL_906794 to 906795, EPI_ISL_906804, EPI_ISL_962896, EPI_ISL_962898 to 962900, EPI_ISL_962909 to 962910, EPI_ISL_964262, EPI_ISL_964265, EPI_ISL_964267, EPI_ISL_964270, EPI_ISL_964962                                                                                                                                                                                                                                                                                                                                                                                                                                                                                                                                                                                                                                                                         | see above                                                              | Norwegian Institute of Public Health, Department of Virology                                                           | Norwegian Institute of Public Health, Department of Virology                                                                                                                                                                                                                                                                                                                                                                                                                                                                              | Atiya R Ali; Hilde Elshaug; Hilde Vollan; Ignacio Garcia Llorente; Kamilla Heddeland Insteftord; Karoline Bragstad; Kathrine Stene-Johansen; Marie Paulsen Madsen; Olav Hungnes; Rasmus Riis Kopperud; Serina B Engebretsen                                              |
| EPI_ISL_900521 to 900523, EPI_ISL_934974                                                                                                                                                                                                                                                                                                                                                                                                                                                                                                                                                                                                                                                                                                                                                                                                                                                                                                                                                                                                                                                                                                                                                                                                                                                                                                                                                                                                                                                                                                                                 | Novabio                                                                | CNR Virus des Infections Respiratoires - France SUD                                                                    | Antonin Bal; Bruno Lina; Gregory Destras; Gwendolyne Burfin; Hadrien Règue; Laurence Jousse; Martine Valette; Quentin Semanas; Sylvie Larrat                                                                                                                                                                                                                                                                                                                                                                                              |                                                                                                                                                                                                                                                                          |
| EPI_ISL_735438                                                                                                                                                                                                                                                                                                                                                                                                                                                                                                                                                                                                                                                                                                                                                                                                                                                                                                                                                                                                                                                                                                                                                                                                                                                                                                                                                                                                                                                                                                                                                           | Nuclei Acid Testing - Rwanda National Reference Laboratory             | GIGA Medical Genomics                                                                                                  | Bouchra Boujemla; Esperence Umumararungu; Jacob Souougui; Keith Durkin; Léon Mutesa; Maria Artesi; Marie-Pierre Hayette; Patrick Tuyisenge; Robert Rutayisire; Sabin Nsanzimana; Swaibu Gatara; Sébastien Bontems; Vincent Bours; Yvan Butera                                                                                                                                                                                                                                                                                             |                                                                                                                                                                                                                                                                          |
| EPI_ISL_735436 to 735437, EPI_ISL_735444, EPI_ISL_735446 to 735448                                                                                                                                                                                                                                                                                                                                                                                                                                                                                                                                                                                                                                                                                                                                                                                                                                                                                                                                                                                                                                                                                                                                                                                                                                                                                                                                                                                                                                                                                                       | Nucleic Acid Testing - Rwanda National Reference Laboratory            | GIGA Medical Genomics                                                                                                  | Bouchra Boujemla; Esperence Umumararungu; Jacob Souougui; Keith Durkin; Léon Mutesa; Maria Artesi; Marie-Pierre Hayette; Patrick Tuyisenge; Robert Rutayisire; Sabin Nsanzimana; Swaibu Gatara; Sébastien Bontems; Vincent Bours; Yvan Butera                                                                                                                                                                                                                                                                                             |                                                                                                                                                                                                                                                                          |
| EPI_ISL_925847 to 925915, EPI_ISL_930567, EPI_ISL_930634, EPI_ISL_930853, EPI_ISL_960227 to 960302                                                                                                                                                                                                                                                                                                                                                                                                                                                                                                                                                                                                                                                                                                                                                                                                                                                                                                                                                                                                                                                                                                                                                                                                                                                                                                                                                                                                                                                                       | Nucleic Acid Testing, National Reference Laboratory                    | GIGA Medical Genomics                                                                                                  | Bouchra Boujemla; Corinne Fausquelle; Esperence Umumararungu; Jacob Souougui; Keith Durkin; Léon Mutesa; Maria Artesi; Marie-Pierre Hayette; Nathalie Renotte; Patrick Tuyisenge; Robert Rutayisire; Sabin Nsanzimana; Swaibu Gatara; Sébastien Bontems; Vincent Bours; Yvan Butera                                                                                                                                                                                                                                                       |                                                                                                                                                                                                                                                                          |
| EPI_ISL_640105, EPI_ISL_700471 to 700472, EPI_ISL_700486, EPI_ISL_700511, EPI_ISL_700523, EPI_ISL_700580                                                                                                                                                                                                                                                                                                                                                                                                                                                                                                                                                                                                                                                                                                                                                                                                                                                                                                                                                                                                                                                                                                                                                                                                                                                                                                                                                                                                                                                                 | Nyanga CDC wc NGC                                                      | NHLS/UCT                                                                                                               | Arash Iranzadeh; Bruna Galvao; Carolyn Williamson; Deelan Doolabh; Diana Hardie; Innocent Mudau; Kruger Marais; Lynn Tyers; Marvin Hsiao; Stephen Korsman                                                                                                                                                                                                                                                                                                                                                                                 |                                                                                                                                                                                                                                                                          |
| EPI_ISL_631570, EPI_ISL_631591, EPI_ISL_631594, EPI_ISL_631598, EPI_ISL_631605, EPI_ISL_631611, EPI_ISL_631617 to 631619, EPI_ISL_631635, EPI_ISL_631639, EPI_ISL_631685, EPI_ISL_631687, EPI_ISL_631694 to 631695, EPI_ISL_631758 to 631763, EPI_ISL_631797, EPI_ISL_631840 to 631846, EPI_ISL_631898, EPI_ISL_631932, EPI_ISL_631934, EPI_ISL_631936 to 631938, EPI_ISL_631956, EPI_ISL_632006, EPI_ISL_632073, EPI_ISL_632175 to 632176, EPI_ISL_632178, EPI_ISL_632183, EPI_ISL_632202, EPI_ISL_632238, EPI_ISL_632945 to 632946, EPI_ISL_823971 to 823972, EPI_ISL_823974, EPI_ISL_857056 to 857062, EPI_ISL_857066, EPI_ISL_857186, EPI_ISL_857193, EPI_ISL_857199, EPI_ISL_857289, EPI_ISL_857291 to 857292, EPI_ISL_857294 to 857297, EPI_ISL_857299 to 857300, EPI_ISL_857302 to 857305, EPI_ISL_857307, EPI_ISL_883315 to 883316, EPI_ISL_883325, EPI_ISL_883328, EPI_ISL_883330, EPI_ISL_883336, EPI_ISL_883344 to 883345, EPI_ISL_883350 to 883353, EPI_ISL_883390 to 883394, EPI_ISL_883397 to 883402, EPI_ISL_883404 to 883408, EPI_ISL_937186 to 937190, EPI_ISL_937193 to 937199, EPI_ISL_937240 to 937247, EPI_ISL_937251 to 937255, EPI_ISL_966379, EPI_ISL_966381, EPI_ISL_966383, EPI_ISL_966390 to 966391, EPI_ISL_966393, EPI_ISL_966396 to 966397, EPI_ISL_966400, EPI_ISL_966402 to 966403, EPI_ISL_966411, EPI_ISL_966417 to 966419, EPI_ISL_966427, EPI_ISL_966429 to 966431, EPI_ISL_966438 to 966442, EPI_ISL_966453 to 966458, EPI_ISL_966470 to 966471, EPI_ISL_966473, EPI_ISL_966485 to 966488, EPI_ISL_966490, EPI_ISL_966492 to 966495 | see above                                                              | OCME Office Of Chief Medical Examiner                                                                                  | New York City Public Health Laboratory                                                                                                                                                                                                                                                                                                                                                                                                                                                                                                    | Jade Wang; et al.                                                                                                                                                                                                                                                        |
| EPI_ISL_751586, EPI_ISL_751609 to 751610, EPI_ISL_751613, EPI_ISL_751616, EPI_ISL_751741, EPI_ISL_751777, EPI_ISL_751788, EPI_ISL_903584                                                                                                                                                                                                                                                                                                                                                                                                                                                                                                                                                                                                                                                                                                                                                                                                                                                                                                                                                                                                                                                                                                                                                                                                                                                                                                                                                                                                                                 | see above                                                              | OH Department of Health Laboratory                                                                                     | Genomics and Discovery, Respiratory Viruses Branch, Division of Viral Diseases, Centers for Disease Control and Prevention                                                                                                                                                                                                                                                                                                                                                                                                                | Anna Montmayeur; Anna Uehara; Ben L. Rambo-Martin; Clinton R. Paden; Dhvani Batra; Haibin Wang; Jasmine Padilla; Jing Zhang; Justin Lee; Krista Queen; Lori Rowe; Mark Burroughs; Mili Sheth; Peter W. Cook; Rachel Marine; Sarah Nobles; Suxiang Tong; Yan Li; Ying Tao |
| EPI_ISL_667079 to 667558, EPI_ISL_832405 to 832803, EPI_ISL_832805 to 832807, EPI_ISL_832809 to 832814, EPI_ISL_861916 to 862035, EPI_ISL_905792 to 906046                                                                                                                                                                                                                                                                                                                                                                                                                                                                                                                                                                                                                                                                                                                                                                                                                                                                                                                                                                                                                                                                                                                                                                                                                                                                                                                                                                                                               | OHSU Lab Services Molecular Microbiology Lab                           | Oregon SARS-CoV-2 Genome Sequencing Center                                                                             | Alec J. Hirsch; Andrew C. Adey; Benjamin N. Bimber; Brendan L. O'Connell; Brian J. O'Roak; Daniel N. Strelbow; Donna Hansel; Guang Fan; Kayla Carter; Qin; Ruth V. Nichols; Sally Grindstaff; William B. Messer; Xuan; Xuan Qin                                                                                                                                                                                                                                                                                                           |                                                                                                                                                                                                                                                                          |
| EPI_ISL_903596, EPI_ISL_903695, EPI_ISL_903716, EPI_ISL_903722, EPI_ISL_903756, EPI_ISL_903758, EPI_ISL_903770, EPI_ISL_903783, EPI_ISL_903823                                                                                                                                                                                                                                                                                                                                                                                                                                                                                                                                                                                                                                                                                                                                                                                                                                                                                                                                                                                                                                                                                                                                                                                                                                                                                                                                                                                                                           | see above                                                              | OK Public Health Laboratory, Oklahoma State DOH                                                                        | Genomics and Discovery, Respiratory Viruses Branch, Division of Viral Diseases, Centers for Disease Control and Prevention                                                                                                                                                                                                                                                                                                                                                                                                                | Anna Montmayeur; Anna Uehara; Ben L. Rambo-Martin; Clinton R. Paden; Dhvani Batra; Haibin Wang; Jasmine Padilla; Jing Zhang; Justin Lee; Krista Queen; Lori Rowe; Mark Burroughs; Mili Sheth; Peter W. Cook; Rachel Marine; Sarah Nobles; Suxiang Tong; Yan Li; Ying Tao |
| EPI_ISL_955307 to 955308                                                                                                                                                                                                                                                                                                                                                                                                                                                                                                                                                                                                                                                                                                                                                                                                                                                                                                                                                                                                                                                                                                                                                                                                                                                                                                                                                                                                                                                                                                                                                 | OK Public Health Laboratory, Oklahoma State DOH                        | Pathogen Discovery, Respiratory Viruses Branch, Division of Viral Diseases, Centers for Disease Control and Prevention | Anna Uehara; Clinton R. Paden; Haibin Wang; Jing Zhang; Krista Queen; Peter Cook; Suxiang Tong; Yan Li; Ying Tao                                                                                                                                                                                                                                                                                                                                                                                                                          |                                                                                                                                                                                                                                                                          |
| EPI_ISL_751615, EPI_ISL_751689, EPI_ISL_751693, EPI_ISL_903601 to 903602, EPI_ISL_903611 to 903612, EPI_ISL_903649, EPI_ISL_903665 to 903666, EPI_ISL_903676, EPI_ISL_903687, EPI_ISL_903843                                                                                                                                                                                                                                                                                                                                                                                                                                                                                                                                                                                                                                                                                                                                                                                                                                                                                                                                                                                                                                                                                                                                                                                                                                                                                                                                                                             | see above                                                              | OR State PHL-Virology/Immunology Section                                                                               | Genomics and Discovery, Respiratory Viruses Branch, Division of Viral Diseases, Centers for Disease Control and Prevention                                                                                                                                                                                                                                                                                                                                                                                                                | Anna Montmayeur; Anna Uehara; Ben L. Rambo-Martin; Clinton R. Paden; Dhvani Batra; Haibin Wang; Jasmine Padilla; Jing Zhang; Justin Lee; Krista Queen; Lori Rowe; Mark Burroughs; Mili Sheth; Peter W. Cook; Rachel Marine; Sarah Nobles; Suxiang Tong; Yan Li; Ying Tao |
| EPI_ISL_965276                                                                                                                                                                                                                                                                                                                                                                                                                                                                                                                                                                                                                                                                                                                                                                                                                                                                                                                                                                                                                                                                                                                                                                                                                                                                                                                                                                                                                                                                                                                                                           | OSP CIV ATRI                                                           | Istituto Zooprofilattico Sperimentale dell'Abruzzo e Molise "G. Caporale"                                              | Ancora M; Calistri P; Cammà C; Curini V; Di Domenico M; Di Pasquale A; Lorusso A; Mangone I; Marcacci M; Puglia I; Rinaldi A; Savini G; Scialabba S                                                                                                                                                                                                                                                                                                                                                                                       |                                                                                                                                                                                                                                                                          |
| EPI_ISL_965246                                                                                                                                                                                                                                                                                                                                                                                                                                                                                                                                                                                                                                                                                                                                                                                                                                                                                                                                                                                                                                                                                                                                                                                                                                                                                                                                                                                                                                                                                                                                                           | OSP CIV GIULIANOVA, MED INT                                            | Istituto Zooprofilattico Sperimentale dell'Abruzzo e Molise "G. Caporale"                                              | Ancora M; Calistri P; Cammà C; Curini V; Di Domenico M; Di Pasquale A; Lorusso A; Mangone I; Marcacci M; Puglia I; Rinaldi A; Savini G; Scialabba S                                                                                                                                                                                                                                                                                                                                                                                       |                                                                                                                                                                                                                                                                          |
| EPI_ISL_918265                                                                                                                                                                                                                                                                                                                                                                                                                                                                                                                                                                                                                                                                                                                                                                                                                                                                                                                                                                                                                                                                                                                                                                                                                                                                                                                                                                                                                                                                                                                                                           | OSPEDALE ATRI                                                          | Istituto Zooprofilattico Sperimentale dell'Abruzzo e Molise "G. Caporale"                                              | Ancora M; Calistri P; Cammà C; Curini V; Di Domenico M; Di Pasquale A; Lorusso A; Mangone I; Marcacci M; Puglia I; Rinaldi A; Savini G; Scialabba S                                                                                                                                                                                                                                                                                                                                                                                       |                                                                                                                                                                                                                                                                          |
| EPI_ISL_833047 to 833048, EPI_ISL_833077 to 833078                                                                                                                                                                                                                                                                                                                                                                                                                                                                                                                                                                                                                                                                                                                                                                                                                                                                                                                                                                                                                                                                                                                                                                                                                                                                                                                                                                                                                                                                                                                       | OSPEDALE CIVILE ATRI                                                   | Istituto Zooprofilattico Sperimentale dell'Abruzzo e Molise "G. Caporale"                                              | Ancora M; Calistri P; Cammà C; Curini V; Delli Compagni E; Di Domenico M; Di Pasquale A; Lorusso A; Mangone I; Marcacci M; Puglia I; Rinaldi A; Savini G                                                                                                                                                                                                                                                                                                                                                                                  |                                                                                                                                                                                                                                                                          |
| EPI_ISL_833079 to 833080                                                                                                                                                                                                                                                                                                                                                                                                                                                                                                                                                                                                                                                                                                                                                                                                                                                                                                                                                                                                                                                                                                                                                                                                                                                                                                                                                                                                                                                                                                                                                 | OSPEDALE CIVILE TERAMO                                                 | Istituto Zooprofilattico Sperimentale dell'Abruzzo e Molise "G. Caporale"                                              | Ancora M; Calistri P; Cammà C; Curini V; Delli Compagni E; Di Domenico M; Di Pasquale A; Lorusso A; Mangone I; Marcacci M; Puglia I; Rinaldi A; Savini G                                                                                                                                                                                                                                                                                                                                                                                  |                                                                                                                                                                                                                                                                          |
| EPI_ISL_965245                                                                                                                                                                                                                                                                                                                                                                                                                                                                                                                                                                                                                                                                                                                                                                                                                                                                                                                                                                                                                                                                                                                                                                                                                                                                                                                                                                                                                                                                                                                                                           | OSPEDALE CIVILE TERAMO, DIV. PNEUMOLOGIA, PIA                          | Istituto Zooprofilattico Sperimentale dell'Abruzzo e Molise "G. Caporale"                                              | Ancora M; Calistri P; Cammà C; Curini V; Di Domenico M; Di Pasquale A; Lorusso A; Mangone I; Marcacci M; Puglia I; Rinaldi A; Savini G; Scialabba S                                                                                                                                                                                                                                                                                                                                                                                       |                                                                                                                                                                                                                                                                          |
| EPI_ISL_833081                                                                                                                                                                                                                                                                                                                                                                                                                                                                                                                                                                                                                                                                                                                                                                                                                                                                                                                                                                                                                                                                                                                                                                                                                                                                                                                                                                                                                                                                                                                                                           | OSPEDALE S.S. ANNUNZIATA CHIETI                                        | Istituto Zooprofilattico Sperimentale dell'Abruzzo e Molise "G. Caporale"                                              | Ancora M; Calistri P; Cammà C; Curini V; Delli Compagni E; Di Domenico M; Di Pasquale A; Lorusso A; Mangone I; Marcacci M; Puglia I; Rinaldi A; Savini G                                                                                                                                                                                                                                                                                                                                                                                  |                                                                                                                                                                                                                                                                          |
| EPI_ISL_833230                                                                                                                                                                                                                                                                                                                                                                                                                                                                                                                                                                                                                                                                                                                                                                                                                                                                                                                                                                                                                                                                                                                                                                                                                                                                                                                                                                                                                                                                                                                                                           | OSPEDALE S.S. ANNUNZIATA CHIETI - CLINICA MEDICA (MEDICINA GENERALE 1) | Istituto Zooprofilattico Sperimentale dell'Abruzzo e Molise "G. Caporale"                                              | Ancora M; Calistri P; Cammà C; Curini V; Di Domenico M; Di Pasquale A; Lorusso A; Mangone I; Marcacci M; Puglia I; Rinaldi A; Savini G                                                                                                                                                                                                                                                                                                                                                                                                    |                                                                                                                                                                                                                                                                          |
| EPI_ISL_833082                                                                                                                                                                                                                                                                                                                                                                                                                                                                                                                                                                                                                                                                                                                                                                                                                                                                                                                                                                                                                                                                                                                                                                                                                                                                                                                                                                                                                                                                                                                                                           | OSPEDALE SAN SALVATORE                                                 | Istituto Zooprofilattico Sperimentale dell'Abruzzo e Molise "G. Caporale"                                              | Ancora M; Calistri P; Cammà C; Curini V; Delli Compagni E; Di Domenico M; Di Pasquale A; Lorusso A; Mangone I; Marcacci M; Puglia I; Rinaldi A; Savini G                                                                                                                                                                                                                                                                                                                                                                                  |                                                                                                                                                                                                                                                                          |
| EPI_ISL_833042                                                                                                                                                                                                                                                                                                                                                                                                                                                                                                                                                                                                                                                                                                                                                                                                                                                                                                                                                                                                                                                                                                                                                                                                                                                                                                                                                                                                                                                                                                                                                           | OSPEDALE SAN SALVATORE L'AQUILA UOC PNEUMOLOGIAE UTSIR                 | Istituto Zooprofilattico Sperimentale dell'Abruzzo e Molise "G. Caporale"                                              | Ancora M; Calistri P; Cammà C; Curini V; Delli Compagni E; Di Domenico M; Di Pasquale A; Lorusso A; Mangone I; Marcacci M; Puglia I; Rinaldi A; Savini G                                                                                                                                                                                                                                                                                                                                                                                  |                                                                                                                                                                                                                                                                          |
| EPI_ISL_965224                                                                                                                                                                                                                                                                                                                                                                                                                                                                                                                                                                                                                                                                                                                                                                                                                                                                                                                                                                                                                                                                                                                                                                                                                                                                                                                                                                                                                                                                                                                                                           | OSPEDALE SS. ANNUNZIATA CHIETI                                         | Istituto Zooprofilattico Sperimentale dell'Abruzzo e Molise "G. Caporale"                                              | Ancora M; Calistri P; Cammà C; Curini V; Di Domenico M; Di Pasquale A; Lorusso A; Mangone I; Marcacci M; Puglia I; Rinaldi A; Savini G; Scialabba S                                                                                                                                                                                                                                                                                                                                                                                       |                                                                                                                                                                                                                                                                          |
| EPI_ISL_847835                                                                                                                                                                                                                                                                                                                                                                                                                                                                                                                                                                                                                                                                                                                                                                                                                                                                                                                                                                                                                                                                                                                                                                                                                                                                                                                                                                                                                                                                                                                                                           | Oak Ridge National Laboratory                                          | Grubaguh Lab - Yale School of Public Health                                                                            | Anderson Brito; Anne Wyllie; Chaney Kalinich; Chantal Vogels; Isabel Ott; Joseph Fauver; Mallery Breban; Mary Petrone; Nathan Grubaugh; Tara Alpert                                                                                                                                                                                                                                                                                                                                                                                       |                                                                                                                                                                                                                                                                          |
| EPI_ISL_767404 to 767405, EPI_ISL_767407 to 767408                                                                                                                                                                                                                                                                                                                                                                                                                                                                                                                                                                                                                                                                                                                                                                                                                                                                                                                                                                                                                                                                                                                                                                                                                                                                                                                                                                                                                                                                                                                       | Ochsner Health                                                         | BioInfo Experts, LLC                                                                                                   | Amy Feehan; David J. Nolan; David Moraga Amador; Julia-Garcia-Diaz; Luke Caruso; Lydia Von Borstel; Rebecca Rose; Sissy Cross; Susanna L. Lamers; Tong Yang; Wayra Navia; Xiao Hui Zhou                                                                                                                                                                                                                                                                                                                                                   |                                                                                                                                                                                                                                                                          |
| EPI_ISL_882772, EPI_ISL_882795 to 882799                                                                                                                                                                                                                                                                                                                                                                                                                                                                                                                                                                                                                                                                                                                                                                                                                                                                                                                                                                                                                                                                                                                                                                                                                                                                                                                                                                                                                                                                                                                                 | Office of Diseases Prevention and Control Region 4 Saraburi            | COVID-19 Network Investigations (CONI) Alliance                                                                        | Amornmas Kongkleng; Anek Mungaomklang; Angkana Huang; Anthony R. Jones; Arporn Wangwiwatsin; Bhakbhoon Panthan; Chonticha Klungtong; Duangkamon Loesbanluetchai; Ekawat Pasomsob; Elizabeth Batty; Insee Sensor; Janjira Thaipadungpanit; Kamolthip Atsawaranarunt; Khajohn Joonsalak; Kingkan Rakmanee; Krittikorn Kumpornsin; Namfon Kotanan; Prayuth Kaewmalang; Pukkapon Parnwittitkul; Stefan Fernandez; Thanat Chookajorn; Theerarat Kochakarn; Treewat Watthanachockchai; Vichan Pawun; Wasun Chantratita; Wudtichai Manasatienkij |                                                                                                                                                                                                                                                                          |

|                                                                                                                                                                                                                                                                                                                                                                                                                                                                                                                                                                                                                                                                                                                                                                                                                                                                                                                                                                                                                                                                                                                                                                                                                                                                                                                                                                                                                                                                                                                                                                                                                                                                                                                                                                                                                                                                                                                                                                                                                                                                                                                                                                                                                                                                                                                                                                                                                                                                                                                                                                                                                                                                                                                                                                                                                                                                                                                                                                                                                                                                                                                                                                                                                                                                                                                                                                                                                                                                                                                                                                                                                                                                                                                                                                                                                                                                                                                                                                                                                                                                                                                                                                                                                                                                                                                                                                                                                                                                                                                                                                                                                                                                                                                                                                                                                                                                                                                                                                                                                                                                                                                                                                                                                                                                                                                                                                                                                                                                                                                                                                                                                                                                                                                                                                                                                                                                                                           |                                                      |                                                                                                                        |                                                                                                                                                                                                                                                                                                        |
|-----------------------------------------------------------------------------------------------------------------------------------------------------------------------------------------------------------------------------------------------------------------------------------------------------------------------------------------------------------------------------------------------------------------------------------------------------------------------------------------------------------------------------------------------------------------------------------------------------------------------------------------------------------------------------------------------------------------------------------------------------------------------------------------------------------------------------------------------------------------------------------------------------------------------------------------------------------------------------------------------------------------------------------------------------------------------------------------------------------------------------------------------------------------------------------------------------------------------------------------------------------------------------------------------------------------------------------------------------------------------------------------------------------------------------------------------------------------------------------------------------------------------------------------------------------------------------------------------------------------------------------------------------------------------------------------------------------------------------------------------------------------------------------------------------------------------------------------------------------------------------------------------------------------------------------------------------------------------------------------------------------------------------------------------------------------------------------------------------------------------------------------------------------------------------------------------------------------------------------------------------------------------------------------------------------------------------------------------------------------------------------------------------------------------------------------------------------------------------------------------------------------------------------------------------------------------------------------------------------------------------------------------------------------------------------------------------------------------------------------------------------------------------------------------------------------------------------------------------------------------------------------------------------------------------------------------------------------------------------------------------------------------------------------------------------------------------------------------------------------------------------------------------------------------------------------------------------------------------------------------------------------------------------------------------------------------------------------------------------------------------------------------------------------------------------------------------------------------------------------------------------------------------------------------------------------------------------------------------------------------------------------------------------------------------------------------------------------------------------------------------------------------------------------------------------------------------------------------------------------------------------------------------------------------------------------------------------------------------------------------------------------------------------------------------------------------------------------------------------------------------------------------------------------------------------------------------------------------------------------------------------------------------------------------------------------------------------------------------------------------------------------------------------------------------------------------------------------------------------------------------------------------------------------------------------------------------------------------------------------------------------------------------------------------------------------------------------------------------------------------------------------------------------------------------------------------------------------------------------------------------------------------------------------------------------------------------------------------------------------------------------------------------------------------------------------------------------------------------------------------------------------------------------------------------------------------------------------------------------------------------------------------------------------------------------------------------------------------------------------------------------------------------------------------------------------------------------------------------------------------------------------------------------------------------------------------------------------------------------------------------------------------------------------------------------------------------------------------------------------------------------------------------------------------------------------------------------------------------------------------------------------------------------|------------------------------------------------------|------------------------------------------------------------------------------------------------------------------------|--------------------------------------------------------------------------------------------------------------------------------------------------------------------------------------------------------------------------------------------------------------------------------------------------------|
| EPI_ISL_763076                                                                                                                                                                                                                                                                                                                                                                                                                                                                                                                                                                                                                                                                                                                                                                                                                                                                                                                                                                                                                                                                                                                                                                                                                                                                                                                                                                                                                                                                                                                                                                                                                                                                                                                                                                                                                                                                                                                                                                                                                                                                                                                                                                                                                                                                                                                                                                                                                                                                                                                                                                                                                                                                                                                                                                                                                                                                                                                                                                                                                                                                                                                                                                                                                                                                                                                                                                                                                                                                                                                                                                                                                                                                                                                                                                                                                                                                                                                                                                                                                                                                                                                                                                                                                                                                                                                                                                                                                                                                                                                                                                                                                                                                                                                                                                                                                                                                                                                                                                                                                                                                                                                                                                                                                                                                                                                                                                                                                                                                                                                                                                                                                                                                                                                                                                                                                                                                                            | Ohio Department Of Health                            | Ohio Department of Health                                                                                              | Caitlin McDonnell; Eric Brandt; Glen McGillivray; Heather Blankenship; Jennifer Holmes; Kelsey Florek; Keoni Omura; Kirtana Ramadugu; Quanta Brown; and Tammy Bannerman                                                                                                                                |
| EPI_ISL_763321                                                                                                                                                                                                                                                                                                                                                                                                                                                                                                                                                                                                                                                                                                                                                                                                                                                                                                                                                                                                                                                                                                                                                                                                                                                                                                                                                                                                                                                                                                                                                                                                                                                                                                                                                                                                                                                                                                                                                                                                                                                                                                                                                                                                                                                                                                                                                                                                                                                                                                                                                                                                                                                                                                                                                                                                                                                                                                                                                                                                                                                                                                                                                                                                                                                                                                                                                                                                                                                                                                                                                                                                                                                                                                                                                                                                                                                                                                                                                                                                                                                                                                                                                                                                                                                                                                                                                                                                                                                                                                                                                                                                                                                                                                                                                                                                                                                                                                                                                                                                                                                                                                                                                                                                                                                                                                                                                                                                                                                                                                                                                                                                                                                                                                                                                                                                                                                                                            | Ohio Department of Health Laboratory                 | Ohio Depart of Health Laboratory                                                                                       | Caitlin McDonnell; Eric Brandt; Glen McGillivray; Heather Blankenship; Jennifer Holmes; Kelsey Florek; Keoni Omura; Kirtana Ramadugu; Quanta Brown; and Tammy Bannerman                                                                                                                                |
| EPI_ISL_765209, EPI_ISL_765222, EPI_ISL_770632, EPI_ISL_770775 to 770777, EPI_ISL_775600 to 775603, EPI_ISL_775605 to 775606, EPI_ISL_776567 to 776568, EPI_ISL_776773 to 776774, EPI_ISL_776869, EPI_ISL_776872, EPI_ISL_776874, EPI_ISL_776876, EPI_ISL_776994, EPI_ISL_778855 to 778859, EPI_ISL_778861 to 778862, EPI_ISL_778864, EPI_ISL_780377, EPI_ISL_780379 to 780380, EPI_ISL_780417, EPI_ISL_780419, EPI_ISL_780421 to 780426, EPI_ISL_780670, EPI_ISL_781113, EPI_ISL_789102 to 789104, EPI_ISL_802501, EPI_ISL_816135 to 816136, EPI_ISL_816432, EPI_ISL_819127, EPI_ISL_824332 to 824333, EPI_ISL_824384 to 824387, EPI_ISL_824389, EPI_ISL_846599 to 846600, EPI_ISL_846628 to 846630, EPI_ISL_846651, EPI_ISL_846655, EPI_ISL_847819, EPI_ISL_846658, EPI_ISL_847824 to 847824, EPI_ISL_847828, EPI_ISL_847842, EPI_ISL_852617 to 852618, EPI_ISL_852620 to 852621, EPI_ISL_852623, EPI_ISL_852625 to 852626, EPI_ISL_856986 to 856987, EPI_ISL_856989, EPI_ISL_856999, EPI_ISL_856701 to 856702, EPI_ISL_856705, EPI_ISL_860256, EPI_ISL_860258, EPI_ISL_860296, EPI_ISL_860549, EPI_ISL_860552, EPI_ISL_860710 to 860711, EPI_ISL_860714, EPI_ISL_860717 to 860718, EPI_ISL_860729, EPI_ISL_860731 to 860733, EPI_ISL_860795 to 860796, EPI_ISL_860819, EPI_ISL_861105, EPI_ISL_861233, EPI_ISL_861240 to 861241, EPI_ISL_861243, EPI_ISL_860979 to 860981, EPI_ISL_870065, EPI_ISL_871325, EPI_ISL_871788, EPI_ISL_871791, EPI_ISL_871816, EPI_ISL_871818 to 871819, EPI_ISL_871965 to 871969, EPI_ISL_872002, EPI_ISL_875347 to 875348, EPI_ISL_875561 to 875563, EPI_ISL_875565, EPI_ISL_875871 to 875872, EPI_ISL_876427, EPI_ISL_876518, EPI_ISL_882647, EPI_ISL_882650, EPI_ISL_889443, EPI_ISL_889542, EPI_ISL_890174 to 890176, EPI_ISL_890178 to 890182, EPI_ISL_892246, EPI_ISL_892248, EPI_ISL_892269, EPI_ISL_892364, EPI_ISL_892368, EPI_ISL_893367, EPI_ISL_893740 to 893742, EPI_ISL_894170, EPI_ISL_894947, EPI_ISL_895289, EPI_ISL_895727, EPI_ISL_900742, EPI_ISL_909741, EPI_ISL_909743, EPI_ISL_911514 to 911517, EPI_ISL_918485, EPI_ISL_918491, EPI_ISL_918494, EPI_ISL_918498, EPI_ISL_918562, EPI_ISL_934414, EPI_ISL_934417, EPI_ISL_934973, EPI_ISL_934975, EPI_ISL_935020, EPI_ISL_935023 to 935024, EPI_ISL_935027, EPI_ISL_935031, EPI_ISL_935036, EPI_ISL_935520 to 935521, EPI_ISL_935525, EPI_ISL_940158, EPI_ISL_940553, EPI_ISL_940556, EPI_ISL_940559, EPI_ISL_940563, EPI_ISL_940745, EPI_ISL_940748, EPI_ISL_940751, EPI_ISL_940754, EPI_ISL_940759, EPI_ISL_940846, EPI_ISL_940848, EPI_ISL_940860, EPI_ISL_941272, EPI_ISL_941274, EPI_ISL_941298 to 941299, EPI_ISL_953378 to 953383, EPI_ISL_953385, EPI_ISL_953938, EPI_ISL_959414 to 959415, EPI_ISL_959417, EPI_ISL_959472 to 959474, EPI_ISL_962182, EPI_ISL_965030, EPI_ISL_965032, EPI_ISL_965034, EPI_ISL_965113, EPI_ISL_965121, EPI_ISL_965143, EPI_ISL_965149, EPI_ISL_965301 to 965302, EPI_ISL_965813, EPI_ISL_981202, EPI_ISL_981305 to 981307, EPI_ISL_981368 to 981369                                                                                                                                                                                                                                                                                                                                                                                                                                                                                                                                                                                                                                                                                                                                                                                                                                                                                                                                                                                                                                                                                                                                                                                                                                                                                                                                                                                                                                                                                                                                                                                                                                                                                                                                                                                                                                                                                                                                                                                                                                                                                                                                                                                                                                                                                                                                                                                                                                                                                                                                                                                                                                                                                                                                                                                                                                                                                                          |                                                      |                                                                                                                        |                                                                                                                                                                                                                                                                                                        |
| see above                                                                                                                                                                                                                                                                                                                                                                                                                                                                                                                                                                                                                                                                                                                                                                                                                                                                                                                                                                                                                                                                                                                                                                                                                                                                                                                                                                                                                                                                                                                                                                                                                                                                                                                                                                                                                                                                                                                                                                                                                                                                                                                                                                                                                                                                                                                                                                                                                                                                                                                                                                                                                                                                                                                                                                                                                                                                                                                                                                                                                                                                                                                                                                                                                                                                                                                                                                                                                                                                                                                                                                                                                                                                                                                                                                                                                                                                                                                                                                                                                                                                                                                                                                                                                                                                                                                                                                                                                                                                                                                                                                                                                                                                                                                                                                                                                                                                                                                                                                                                                                                                                                                                                                                                                                                                                                                                                                                                                                                                                                                                                                                                                                                                                                                                                                                                                                                                                                 | Ohio Department of Health Laboratory                 | Ohio Department of Health Laboratory                                                                                   | Brent Lee; Caitlin McDonnell; Caitlin McDonnell; Eric Brandt; Erica Leaseur; Glen McGillivray; Heather Blankenship; Holmes; Jade Mowery; Jennifer; Kelsey Florek; Keoni Omura; Kirtana Ramadugu; Quanta Brown; Quanta Brown and Tammy Bannerman; Stephanie Mccracken; Tyler Payne; and Tammy Bannerman |
| EPI_ISL_763319                                                                                                                                                                                                                                                                                                                                                                                                                                                                                                                                                                                                                                                                                                                                                                                                                                                                                                                                                                                                                                                                                                                                                                                                                                                                                                                                                                                                                                                                                                                                                                                                                                                                                                                                                                                                                                                                                                                                                                                                                                                                                                                                                                                                                                                                                                                                                                                                                                                                                                                                                                                                                                                                                                                                                                                                                                                                                                                                                                                                                                                                                                                                                                                                                                                                                                                                                                                                                                                                                                                                                                                                                                                                                                                                                                                                                                                                                                                                                                                                                                                                                                                                                                                                                                                                                                                                                                                                                                                                                                                                                                                                                                                                                                                                                                                                                                                                                                                                                                                                                                                                                                                                                                                                                                                                                                                                                                                                                                                                                                                                                                                                                                                                                                                                                                                                                                                                                            | Ohio Department of Health Laboratory                 | Ohio Department of Health laboratory                                                                                   | Caitlin McDonnell; Eric Brandt; Glen McGillivray; Heather Blankenship; Jennifer Holmes; Kelsey Florek; Keoni Omura; Kirtana Ramadugu; Quanta Brown; and Tammy Bannerman                                                                                                                                |
| EPI_ISL_832378                                                                                                                                                                                                                                                                                                                                                                                                                                                                                                                                                                                                                                                                                                                                                                                                                                                                                                                                                                                                                                                                                                                                                                                                                                                                                                                                                                                                                                                                                                                                                                                                                                                                                                                                                                                                                                                                                                                                                                                                                                                                                                                                                                                                                                                                                                                                                                                                                                                                                                                                                                                                                                                                                                                                                                                                                                                                                                                                                                                                                                                                                                                                                                                                                                                                                                                                                                                                                                                                                                                                                                                                                                                                                                                                                                                                                                                                                                                                                                                                                                                                                                                                                                                                                                                                                                                                                                                                                                                                                                                                                                                                                                                                                                                                                                                                                                                                                                                                                                                                                                                                                                                                                                                                                                                                                                                                                                                                                                                                                                                                                                                                                                                                                                                                                                                                                                                                                            | Ohio State                                           | James Molecular Lab                                                                                                    | Dan Jones; Huolin Tu; Jason Garee; Keelie Thomas; Laura Kubatko; Matthew Hunt; Matthew R Avenarius; Peng Ru; Peter Mohler; Preeti Pancholi; Xiaokang Pan                                                                                                                                               |
| EPI_ISL_861433 to 861435                                                                                                                                                                                                                                                                                                                                                                                                                                                                                                                                                                                                                                                                                                                                                                                                                                                                                                                                                                                                                                                                                                                                                                                                                                                                                                                                                                                                                                                                                                                                                                                                                                                                                                                                                                                                                                                                                                                                                                                                                                                                                                                                                                                                                                                                                                                                                                                                                                                                                                                                                                                                                                                                                                                                                                                                                                                                                                                                                                                                                                                                                                                                                                                                                                                                                                                                                                                                                                                                                                                                                                                                                                                                                                                                                                                                                                                                                                                                                                                                                                                                                                                                                                                                                                                                                                                                                                                                                                                                                                                                                                                                                                                                                                                                                                                                                                                                                                                                                                                                                                                                                                                                                                                                                                                                                                                                                                                                                                                                                                                                                                                                                                                                                                                                                                                                                                                                                  | Ohio State University                                | James Molecular Laboratory                                                                                             | Dan Jones; Huolin Tu; Jason Garee; Keelie Thomas; Laura Kubatko; Matthew R Avenarius; Matthew Hunt; Peng Ru; Peter Mohler; Preeti Pancholi; Xiaokang Pan                                                                                                                                               |
| EPI_ISL_745126                                                                                                                                                                                                                                                                                                                                                                                                                                                                                                                                                                                                                                                                                                                                                                                                                                                                                                                                                                                                                                                                                                                                                                                                                                                                                                                                                                                                                                                                                                                                                                                                                                                                                                                                                                                                                                                                                                                                                                                                                                                                                                                                                                                                                                                                                                                                                                                                                                                                                                                                                                                                                                                                                                                                                                                                                                                                                                                                                                                                                                                                                                                                                                                                                                                                                                                                                                                                                                                                                                                                                                                                                                                                                                                                                                                                                                                                                                                                                                                                                                                                                                                                                                                                                                                                                                                                                                                                                                                                                                                                                                                                                                                                                                                                                                                                                                                                                                                                                                                                                                                                                                                                                                                                                                                                                                                                                                                                                                                                                                                                                                                                                                                                                                                                                                                                                                                                                            | Okiep CHC                                            | National Health Laboratory Service (NHLS), Tygerberg                                                                   | Bronwyn Kleinhans; Eduan Wilkindon; Gert van Zyl; Houriiyah Tegally; Kayla Delaney; Susan Engelbrecht; Tulio de Oliveira; Wolfgang Preiser                                                                                                                                                             |
| EPI_ISL_812346, EPI_ISL_861422 to 861426                                                                                                                                                                                                                                                                                                                                                                                                                                                                                                                                                                                                                                                                                                                                                                                                                                                                                                                                                                                                                                                                                                                                                                                                                                                                                                                                                                                                                                                                                                                                                                                                                                                                                                                                                                                                                                                                                                                                                                                                                                                                                                                                                                                                                                                                                                                                                                                                                                                                                                                                                                                                                                                                                                                                                                                                                                                                                                                                                                                                                                                                                                                                                                                                                                                                                                                                                                                                                                                                                                                                                                                                                                                                                                                                                                                                                                                                                                                                                                                                                                                                                                                                                                                                                                                                                                                                                                                                                                                                                                                                                                                                                                                                                                                                                                                                                                                                                                                                                                                                                                                                                                                                                                                                                                                                                                                                                                                                                                                                                                                                                                                                                                                                                                                                                                                                                                                                  | Oklahoma Animal Disease Diagnostic Laboratory        | Oklahoma Animal Disease Diagnostic Laboratory                                                                          | Akhlesh Ramachandran; Girish Patil; Jeremiah Saliki; Sai Narayanan; Sunil More                                                                                                                                                                                                                         |
| EPI_ISL_792679                                                                                                                                                                                                                                                                                                                                                                                                                                                                                                                                                                                                                                                                                                                                                                                                                                                                                                                                                                                                                                                                                                                                                                                                                                                                                                                                                                                                                                                                                                                                                                                                                                                                                                                                                                                                                                                                                                                                                                                                                                                                                                                                                                                                                                                                                                                                                                                                                                                                                                                                                                                                                                                                                                                                                                                                                                                                                                                                                                                                                                                                                                                                                                                                                                                                                                                                                                                                                                                                                                                                                                                                                                                                                                                                                                                                                                                                                                                                                                                                                                                                                                                                                                                                                                                                                                                                                                                                                                                                                                                                                                                                                                                                                                                                                                                                                                                                                                                                                                                                                                                                                                                                                                                                                                                                                                                                                                                                                                                                                                                                                                                                                                                                                                                                                                                                                                                                                            | Olive View Medical Center                            | Los Angeles County PHL                                                                                                 | P. Hemarajata et al.                                                                                                                                                                                                                                                                                   |
| EPI_ISL_889371 to 889439, EPI_ISL_891218                                                                                                                                                                                                                                                                                                                                                                                                                                                                                                                                                                                                                                                                                                                                                                                                                                                                                                                                                                                                                                                                                                                                                                                                                                                                                                                                                                                                                                                                                                                                                                                                                                                                                                                                                                                                                                                                                                                                                                                                                                                                                                                                                                                                                                                                                                                                                                                                                                                                                                                                                                                                                                                                                                                                                                                                                                                                                                                                                                                                                                                                                                                                                                                                                                                                                                                                                                                                                                                                                                                                                                                                                                                                                                                                                                                                                                                                                                                                                                                                                                                                                                                                                                                                                                                                                                                                                                                                                                                                                                                                                                                                                                                                                                                                                                                                                                                                                                                                                                                                                                                                                                                                                                                                                                                                                                                                                                                                                                                                                                                                                                                                                                                                                                                                                                                                                                                                  | Olomouc University Hospital                          | Institute of Applied Biotechnologies a.s.                                                                              | Kateina Kvapilová; Marián Hajdúch; Martin Kašný; Ondej Brzo; Petr Klemp; Petr Kvapil                                                                                                                                                                                                                   |
| EPI_ISL_766569 to 766570                                                                                                                                                                                                                                                                                                                                                                                                                                                                                                                                                                                                                                                                                                                                                                                                                                                                                                                                                                                                                                                                                                                                                                                                                                                                                                                                                                                                                                                                                                                                                                                                                                                                                                                                                                                                                                                                                                                                                                                                                                                                                                                                                                                                                                                                                                                                                                                                                                                                                                                                                                                                                                                                                                                                                                                                                                                                                                                                                                                                                                                                                                                                                                                                                                                                                                                                                                                                                                                                                                                                                                                                                                                                                                                                                                                                                                                                                                                                                                                                                                                                                                                                                                                                                                                                                                                                                                                                                                                                                                                                                                                                                                                                                                                                                                                                                                                                                                                                                                                                                                                                                                                                                                                                                                                                                                                                                                                                                                                                                                                                                                                                                                                                                                                                                                                                                                                                                  | Oman-National Influenza Center                       | Oman-National Influenza Center                                                                                         | Aisha Al-Busaidi; Amina Al-Jardani; Hamida Al-Barwani; Hanan Al-Kindi; Intisar Al-Shukri; Laila Al-Balushi; Samira Al-Kharusi; Samira Al-Mahruqi                                                                                                                                                       |
| EPI_ISL_629031 to 629034, EPI_ISL_639912 to 639947, EPI_ISL_733482 to 733493                                                                                                                                                                                                                                                                                                                                                                                                                                                                                                                                                                                                                                                                                                                                                                                                                                                                                                                                                                                                                                                                                                                                                                                                                                                                                                                                                                                                                                                                                                                                                                                                                                                                                                                                                                                                                                                                                                                                                                                                                                                                                                                                                                                                                                                                                                                                                                                                                                                                                                                                                                                                                                                                                                                                                                                                                                                                                                                                                                                                                                                                                                                                                                                                                                                                                                                                                                                                                                                                                                                                                                                                                                                                                                                                                                                                                                                                                                                                                                                                                                                                                                                                                                                                                                                                                                                                                                                                                                                                                                                                                                                                                                                                                                                                                                                                                                                                                                                                                                                                                                                                                                                                                                                                                                                                                                                                                                                                                                                                                                                                                                                                                                                                                                                                                                                                                              | Omsk Research Institute of Natural Focal Infections  | WHO National Influenza Centre Russian Federation                                                                       | Aleksei Vasilenko; Andrey Komissarov; Anna Ivanova; Artem Fadeev; Daria Danilenko; Daria Nashaturova; Dmitriy Bazhenov; Dmitry Lioznov; Ekaterina Gradoboeva; Ekaterina Savkina; Elena Nabieva; Elena Poleshchuk; Georgii Bazykin; Ksenia Safina; Kseniya Komissarova; Valery Yakimenko                |
| EPI_ISL_710587 to 710588                                                                                                                                                                                                                                                                                                                                                                                                                                                                                                                                                                                                                                                                                                                                                                                                                                                                                                                                                                                                                                                                                                                                                                                                                                                                                                                                                                                                                                                                                                                                                                                                                                                                                                                                                                                                                                                                                                                                                                                                                                                                                                                                                                                                                                                                                                                                                                                                                                                                                                                                                                                                                                                                                                                                                                                                                                                                                                                                                                                                                                                                                                                                                                                                                                                                                                                                                                                                                                                                                                                                                                                                                                                                                                                                                                                                                                                                                                                                                                                                                                                                                                                                                                                                                                                                                                                                                                                                                                                                                                                                                                                                                                                                                                                                                                                                                                                                                                                                                                                                                                                                                                                                                                                                                                                                                                                                                                                                                                                                                                                                                                                                                                                                                                                                                                                                                                                                                  | Omtanken Grimmered                                   | The Public Health Agency of Sweden                                                                                     | Department of Microbiology; The Public Health Agency of Sweden                                                                                                                                                                                                                                         |
| EPI_ISL_854763 to 854809                                                                                                                                                                                                                                                                                                                                                                                                                                                                                                                                                                                                                                                                                                                                                                                                                                                                                                                                                                                                                                                                                                                                                                                                                                                                                                                                                                                                                                                                                                                                                                                                                                                                                                                                                                                                                                                                                                                                                                                                                                                                                                                                                                                                                                                                                                                                                                                                                                                                                                                                                                                                                                                                                                                                                                                                                                                                                                                                                                                                                                                                                                                                                                                                                                                                                                                                                                                                                                                                                                                                                                                                                                                                                                                                                                                                                                                                                                                                                                                                                                                                                                                                                                                                                                                                                                                                                                                                                                                                                                                                                                                                                                                                                                                                                                                                                                                                                                                                                                                                                                                                                                                                                                                                                                                                                                                                                                                                                                                                                                                                                                                                                                                                                                                                                                                                                                                                                  | Ontario's COVID-19 Genomics Rapid Response Coalition | McMaster University                                                                                                    | Ahmed Draia; Allison McGeer; Ana Cabrera; Andrew G. McArthur; Angel Li; Emily Panousis; Hooman Derakhshani; Jalees Nasir; Kuganya Nirmalarajah; Michael Surette; Patryk Atanas; Samira Mubareka                                                                                                        |
| EPI_ISL_625627 to 625659, EPI_ISL_648496 to 648530, EPI_ISL_672075, EPI_ISL_672084, EPI_ISL_672103, EPI_ISL_672109 to 672110, EPI_ISL_672360 to 672374, EPI_ISL_672477 to 672487, EPI_ISL_738503, EPI_ISL_738507, EPI_ISL_738515, EPI_ISL_738518, EPI_ISL_738529, EPI_ISL_738548, EPI_ISL_738559, EPI_ISL_738569 to 738571, EPI_ISL_738588, EPI_ISL_738589, EPI_ISL_738594, EPI_ISL_738599, EPI_ISL_738602 to 738603, EPI_ISL_738620 to 738621, EPI_ISL_738624, EPI_ISL_738630, EPI_ISL_738632, EPI_ISL_738634, EPI_ISL_738641, EPI_ISL_738646, EPI_ISL_738655, EPI_ISL_738664, EPI_ISL_738669, EPI_ISL_738688, EPI_ISL_738693 to 738694, EPI_ISL_738703 to 738704, EPI_ISL_738709, EPI_ISL_738722, EPI_ISL_738729, EPI_ISL_738731 to 738741, EPI_ISL_738752, EPI_ISL_738755, EPI_ISL_738757, EPI_ISL_738758, EPI_ISL_738761 to 738762, EPI_ISL_738764, EPI_ISL_738784, EPI_ISL_738787, EPI_ISL_738790, EPI_ISL_738799, EPI_ISL_738808, EPI_ISL_738811, EPI_ISL_738815 to 738816, EPI_ISL_738818, EPI_ISL_738823 to 738824, EPI_ISL_738826, EPI_ISL_738829 to 738830, EPI_ISL_738840 to 738841, EPI_ISL_738845, EPI_ISL_738850, EPI_ISL_738856 to 738857, EPI_ISL_738860, EPI_ISL_738862 to 738863, EPI_ISL_738866, EPI_ISL_738869, EPI_ISL_738871 to 738874, EPI_ISL_738878, EPI_ISL_738880, EPI_ISL_738882, EPI_ISL_738884 to 738885, EPI_ISL_738888, EPI_ISL_738893, EPI_ISL_738899 to 738900, EPI_ISL_738905, EPI_ISL_738907 to 738908, EPI_ISL_738921, EPI_ISL_738928, EPI_ISL_738930, EPI_ISL_738937, EPI_ISL_738939, EPI_ISL_738944, EPI_ISL_738946, EPI_ISL_738949, EPI_ISL_738954, EPI_ISL_738959, EPI_ISL_739004, EPI_ISL_739013, EPI_ISL_739016, EPI_ISL_739028, EPI_ISL_739034, EPI_ISL_739042, EPI_ISL_739044, EPI_ISL_739048, EPI_ISL_739055, EPI_ISL_739063, EPI_ISL_739069, EPI_ISL_739071 to 739072, EPI_ISL_739076, EPI_ISL_739081, EPI_ISL_739089, EPI_ISL_739092, EPI_ISL_739094, EPI_ISL_739097, EPI_ISL_739099, EPI_ISL_739105, EPI_ISL_739108, EPI_ISL_739116, EPI_ISL_739125, EPI_ISL_739132, EPI_ISL_739139, EPI_ISL_739142 to 739143, EPI_ISL_739151, EPI_ISL_739154, EPI_ISL_739156, EPI_ISL_739162, EPI_ISL_739175 to 739176, EPI_ISL_739182, EPI_ISL_739185, EPI_ISL_739191, EPI_ISL_739199, EPI_ISL_739205, EPI_ISL_739211, EPI_ISL_739216, EPI_ISL_739222, EPI_ISL_739227, EPI_ISL_739230, EPI_ISL_739238 to 739239, EPI_ISL_739255, EPI_ISL_739258 to 739259, EPI_ISL_739265 to 739267, EPI_ISL_739271, EPI_ISL_739276, EPI_ISL_739279, EPI_ISL_739289, EPI_ISL_739291, EPI_ISL_739296, EPI_ISL_739304, EPI_ISL_739314, EPI_ISL_739322, EPI_ISL_739331, EPI_ISL_739337, EPI_ISL_739344, EPI_ISL_739346, EPI_ISL_739349, EPI_ISL_739354, EPI_ISL_739359, EPI_ISL_739369, EPI_ISL_739373, EPI_ISL_739384, EPI_ISL_739386, EPI_ISL_739396 to 739397, EPI_ISL_739401, EPI_ISL_739410, EPI_ISL_739412, EPI_ISL_739421, EPI_ISL_739423, EPI_ISL_739428, EPI_ISL_739432, EPI_ISL_739437, EPI_ISL_739441, EPI_ISL_739445, EPI_ISL_739450, EPI_ISL_739462, EPI_ISL_739464 to 739465, EPI_ISL_739477, EPI_ISL_739482, EPI_ISL_739486, EPI_ISL_739488, EPI_ISL_739490, EPI_ISL_739493, EPI_ISL_739494, EPI_ISL_739500, EPI_ISL_739513, EPI_ISL_739517, EPI_ISL_739524, EPI_ISL_739529, EPI_ISL_739532, EPI_ISL_739534, EPI_ISL_739540, EPI_ISL_739545, EPI_ISL_739547, EPI_ISL_739556, EPI_ISL_739559, EPI_ISL_739566, EPI_ISL_739568, EPI_ISL_739570, EPI_ISL_739573, EPI_ISL_739577, EPI_ISL_739581 to 739582, EPI_ISL_739586, EPI_ISL_739591 to 739592, EPI_ISL_739595, EPI_ISL_739599, EPI_ISL_739607, EPI_ISL_739609, EPI_ISL_739614, EPI_ISL_739620, EPI_ISL_739625, EPI_ISL_739627, EPI_ISL_739637, EPI_ISL_739641, EPI_ISL_739646, EPI_ISL_739654, EPI_ISL_739658, EPI_ISL_849922, EPI_ISL_885052 to 885127, EPI_ISL_955427 to 955495, EPI_ISL_955628 to 955692, EPI_ISL_979643 to 979709                                                                                                                                                                                                                                                                                                                                                                                                                                                                                                                                                                                                                                                                                                                                                                                                                                                                                                                                                                                                                                                                                                                                                                                                                                                                                                                                                                                                                                                                                                                                                                                                                                                                                                                                                                                                                                                                                                                                                                                                                                                                                    |                                                      |                                                                                                                        |                                                                                                                                                                                                                                                                                                        |
| see above                                                                                                                                                                                                                                                                                                                                                                                                                                                                                                                                                                                                                                                                                                                                                                                                                                                                                                                                                                                                                                                                                                                                                                                                                                                                                                                                                                                                                                                                                                                                                                                                                                                                                                                                                                                                                                                                                                                                                                                                                                                                                                                                                                                                                                                                                                                                                                                                                                                                                                                                                                                                                                                                                                                                                                                                                                                                                                                                                                                                                                                                                                                                                                                                                                                                                                                                                                                                                                                                                                                                                                                                                                                                                                                                                                                                                                                                                                                                                                                                                                                                                                                                                                                                                                                                                                                                                                                                                                                                                                                                                                                                                                                                                                                                                                                                                                                                                                                                                                                                                                                                                                                                                                                                                                                                                                                                                                                                                                                                                                                                                                                                                                                                                                                                                                                                                                                                                                 | Orange County Public Health Lab                      | Chan-Zuckerberg Biohub                                                                                                 | CZB Cliahub Consortium                                                                                                                                                                                                                                                                                 |
| EPI_ISL_648207 to 648208                                                                                                                                                                                                                                                                                                                                                                                                                                                                                                                                                                                                                                                                                                                                                                                                                                                                                                                                                                                                                                                                                                                                                                                                                                                                                                                                                                                                                                                                                                                                                                                                                                                                                                                                                                                                                                                                                                                                                                                                                                                                                                                                                                                                                                                                                                                                                                                                                                                                                                                                                                                                                                                                                                                                                                                                                                                                                                                                                                                                                                                                                                                                                                                                                                                                                                                                                                                                                                                                                                                                                                                                                                                                                                                                                                                                                                                                                                                                                                                                                                                                                                                                                                                                                                                                                                                                                                                                                                                                                                                                                                                                                                                                                                                                                                                                                                                                                                                                                                                                                                                                                                                                                                                                                                                                                                                                                                                                                                                                                                                                                                                                                                                                                                                                                                                                                                                                                  | Orebro                                               | The Public Health Agency of Sweden                                                                                     | Anna Risberg; Anna-Malin Linde; Karin Tegmark-Wisell; Maria Lind Karlberg; Mattias Haukland; Mia Brytting; Olov Svartstrom; Oskar Karlsson Lindsjö; Petra Edquist; Reza Advani; Sandra Brodsson                                                                                                        |
| EPI_ISL_648204 to 648206, EPI_ISL_654943, EPI_ISL_660378 to 660383, EPI_ISL_660422 to 660426, EPI_ISL_661282, EPI_ISL_676493, EPI_ISL_676513, EPI_ISL_831960 to 831968, EPI_ISL_831970 to 831972, EPI_ISL_831976                                                                                                                                                                                                                                                                                                                                                                                                                                                                                                                                                                                                                                                                                                                                                                                                                                                                                                                                                                                                                                                                                                                                                                                                                                                                                                                                                                                                                                                                                                                                                                                                                                                                                                                                                                                                                                                                                                                                                                                                                                                                                                                                                                                                                                                                                                                                                                                                                                                                                                                                                                                                                                                                                                                                                                                                                                                                                                                                                                                                                                                                                                                                                                                                                                                                                                                                                                                                                                                                                                                                                                                                                                                                                                                                                                                                                                                                                                                                                                                                                                                                                                                                                                                                                                                                                                                                                                                                                                                                                                                                                                                                                                                                                                                                                                                                                                                                                                                                                                                                                                                                                                                                                                                                                                                                                                                                                                                                                                                                                                                                                                                                                                                                                          | see above                                            | Orebro klinisk mikrobiologi                                                                                            | The Public Health Agency of Sweden                                                                                                                                                                                                                                                                     |
| EPI_ISL_893721 to 893723                                                                                                                                                                                                                                                                                                                                                                                                                                                                                                                                                                                                                                                                                                                                                                                                                                                                                                                                                                                                                                                                                                                                                                                                                                                                                                                                                                                                                                                                                                                                                                                                                                                                                                                                                                                                                                                                                                                                                                                                                                                                                                                                                                                                                                                                                                                                                                                                                                                                                                                                                                                                                                                                                                                                                                                                                                                                                                                                                                                                                                                                                                                                                                                                                                                                                                                                                                                                                                                                                                                                                                                                                                                                                                                                                                                                                                                                                                                                                                                                                                                                                                                                                                                                                                                                                                                                                                                                                                                                                                                                                                                                                                                                                                                                                                                                                                                                                                                                                                                                                                                                                                                                                                                                                                                                                                                                                                                                                                                                                                                                                                                                                                                                                                                                                                                                                                                                                  | Oregon State Public Health Laboratory                | Pathogen Discovery, Respiratory Viruses Branch, Division of Viral Diseases, Centers for Disease Control and Prevention | Anna Uehara; Clinton R. Paden; Haibin Wang; Jing Zhang; Krista Queen; Peter Cook; Suxiang Tong; Yan Li; Ying Tao                                                                                                                                                                                       |
| EPI_ISL_900511                                                                                                                                                                                                                                                                                                                                                                                                                                                                                                                                                                                                                                                                                                                                                                                                                                                                                                                                                                                                                                                                                                                                                                                                                                                                                                                                                                                                                                                                                                                                                                                                                                                                                                                                                                                                                                                                                                                                                                                                                                                                                                                                                                                                                                                                                                                                                                                                                                                                                                                                                                                                                                                                                                                                                                                                                                                                                                                                                                                                                                                                                                                                                                                                                                                                                                                                                                                                                                                                                                                                                                                                                                                                                                                                                                                                                                                                                                                                                                                                                                                                                                                                                                                                                                                                                                                                                                                                                                                                                                                                                                                                                                                                                                                                                                                                                                                                                                                                                                                                                                                                                                                                                                                                                                                                                                                                                                                                                                                                                                                                                                                                                                                                                                                                                                                                                                                                                            | Oriade                                               | CNR Virus des Infections Respiratoires - France SUD                                                                    | Antonin Bal; Bruno Lina; Gregory Destras; Gwendolyne Burfin; Hadrien Règue; Laurence Josset; Martine Valette; Quentin Sermanas; Sylvie Larrat                                                                                                                                                          |
| EPI_ISL_840370 to 840372, EPI_ISL_840374 to 840378, EPI_ISL_840380 to 840503, EPI_ISL_840505 to 840507, EPI_ISL_840509 to 840510, EPI_ISL_840513 to 840514, EPI_ISL_840516 to 840551, EPI_ISL_840553, EPI_ISL_840555 to 840569, EPI_ISL_840571 to 840578, EPI_ISL_840581 to 840583, EPI_ISL_840585, EPI_ISL_840587 to 840589, EPI_ISL_840591 to 840595, EPI_ISL_840599 to 840600, EPI_ISL_840603 to 840604, EPI_ISL_840606, EPI_ISL_840612, EPI_ISL_840615, EPI_ISL_840617 to 840636, EPI_ISL_840638 to 840641, EPI_ISL_840643 to 840653, EPI_ISL_840655 to 840658, EPI_ISL_840660 to 840664, EPI_ISL_840666 to 840703, EPI_ISL_840705 to 840710, EPI_ISL_840712 to 840714, EPI_ISL_840716, EPI_ISL_840719 to 840720, EPI_ISL_840723, EPI_ISL_840726, EPI_ISL_840728 to 840730, EPI_ISL_840733 to 840734, EPI_ISL_840737 to 840740, EPI_ISL_840742 to 840746, EPI_ISL_840754, EPI_ISL_840756 to 840767, EPI_ISL_840769, EPI_ISL_840774 to 840779, EPI_ISL_840783, EPI_ISL_840785, EPI_ISL_840787, EPI_ISL_840790, EPI_ISL_840794 to 840796, EPI_ISL_840801 to 840806, EPI_ISL_840808, EPI_ISL_840810 to 840815, EPI_ISL_841317 to 841324, EPI_ISL_841326 to 841328, EPI_ISL_841330 to 841372, EPI_ISL_841374 to 841397, EPI_ISL_841399 to 841406, EPI_ISL_841413 to 841414, EPI_ISL_841416 to 841432, EPI_ISL_841434 to 841437, EPI_ISL_841440, EPI_ISL_841443 to 841446, EPI_ISL_841448, EPI_ISL_841451, EPI_ISL_841453 to 841458, EPI_ISL_841460 to 841462, EPI_ISL_841464 to 841465, EPI_ISL_841467 to 841470, EPI_ISL_841472 to 841478, EPI_ISL_841480 to 841481, EPI_ISL_841484, EPI_ISL_841487 to 841489, EPI_ISL_841492 to 841498, EPI_ISL_841502 to 841566, EPI_ISL_841568 to 841581, EPI_ISL_841584, EPI_ISL_841586 to 841588, EPI_ISL_841590 to 841591, EPI_ISL_841594 to 841608, EPI_ISL_841610, EPI_ISL_841611, EPI_ISL_841613 to 841616, EPI_ISL_841621, EPI_ISL_841624 to 841625, EPI_ISL_841628 to 841629, EPI_ISL_841631 to 841632, EPI_ISL_841642, EPI_ISL_841644 to 841645, EPI_ISL_841659, EPI_ISL_841661, EPI_ISL_841662, EPI_ISL_841667, EPI_ISL_841669 to 841670, EPI_ISL_841673, EPI_ISL_841676 to 841677, EPI_ISL_841679, EPI_ISL_841684 to 841690, EPI_ISL_841694 to 841695, EPI_ISL_841700, EPI_ISL_841702, EPI_ISL_841704 to 841707, EPI_ISL_841709 to 841730, EPI_ISL_841733 to 841736, EPI_ISL_841738 to 841753, EPI_ISL_867186, EPI_ISL_867190 to 867301, EPI_ISL_867305 to 867315, EPI_ISL_867317 to 867346, EPI_ISL_867348 to 867355, EPI_ISL_867357 to 867362, EPI_ISL_867364 to 867375, EPI_ISL_867377 to 867379, EPI_ISL_867381 to 867388, EPI_ISL_867390 to 867401, EPI_ISL_867403 to 867405, EPI_ISL_867407 to 867417, EPI_ISL_867419 to 867434, EPI_ISL_867436 to 867460, EPI_ISL_867462 to 867485, EPI_ISL_867487 to 867489, EPI_ISL_867491 to 867492, EPI_ISL_867494 to 867503, EPI_ISL_867506, EPI_ISL_867509 to 867512, EPI_ISL_867515, EPI_ISL_867518 to 867523, EPI_ISL_867525, EPI_ISL_867536, EPI_ISL_867538 to 867543, EPI_ISL_867547, EPI_ISL_867549 to 867550, EPI_ISL_867552 to 867553, EPI_ISL_867556 to 867557, EPI_ISL_867561 to 867562, EPI_ISL_867567 to 867577, EPI_ISL_867579, EPI_ISL_867582, EPI_ISL_867584 to 867592, EPI_ISL_867594 to 867597, EPI_ISL_867599 to 867602, EPI_ISL_867605, EPI_ISL_867607 to 867608, EPI_ISL_867610 to 867611, EPI_ISL_867613 to 867618, EPI_ISL_867620 to 867621, EPI_ISL_867623 to 867625, EPI_ISL_867628 to 867631, EPI_ISL_867639 to 867644, EPI_ISL_867647, EPI_ISL_867649 to 867665, EPI_ISL_867667 to 867668, EPI_ISL_867670 to 867684, EPI_ISL_867686, EPI_ISL_867688 to 867690, EPI_ISL_867692, EPI_ISL_867696 to 867701, EPI_ISL_867704 to 867706, EPI_ISL_867708, EPI_ISL_867716 to 867728, EPI_ISL_867730 to 867735, EPI_ISL_867737 to 867741, EPI_ISL_867751, EPI_ISL_867758 to 867759, EPI_ISL_867762 to 867764, EPI_ISL_867766, EPI_ISL_867768, EPI_ISL_867771, EPI_ISL_867773, EPI_ISL_867776, EPI_ISL_867779, EPI_ISL_867795 to 867797, EPI_ISL_867800 to 867802, EPI_ISL_867804 to 867812, EPI_ISL_867815 to 867816, EPI_ISL_867819, EPI_ISL_867821, EPI_ISL_867823 to 867825, EPI_ISL_867828, EPI_ISL_867830, EPI_ISL_867832 to 867834, EPI_ISL_867837 to 867839, EPI_ISL_867841 to 867845, EPI_ISL_867847 to 867851, EPI_ISL_867853, EPI_ISL_867855 to 867856, EPI_ISL_867859 to 867863, EPI_ISL_867868, EPI_ISL_867873, EPI_ISL_867875 to 867876, EPI_ISL_867878 to 867881, EPI_ISL_867883 to 867885, EPI_ISL_867889 to 867890, EPI_ISL_867893, EPI_ISL_867895, EPI_ISL_867899 to 867901, EPI_ISL_867904, EPI_ISL_867906, EPI_ISL_867911 to 867918, EPI_ISL_867921 to 867924, EPI_ISL_867926 to 867929, EPI_ISL_951492 to 951506, EPI_ISL_951508, EPI_ISL_951510 to 951515, EPI_ISL_951517 to 951519, EPI_ISL_951521 to 951525, EPI_ISL_951527 to 951538, EPI_ISL_951541 to 951550, EPI_ISL_951552 to 951554, EPI_ISL_951556 to 951564, EPI_ISL_951567, EPI_ISL_951569 to 951583, EPI_ISL_951585, EPI_ISL_951589 to 951598, EPI_ISL_951601 to 951620, EPI_ISL_951624 to 951625, EPI_ISL_951635, EPI_ISL_951637, EPI_ISL_951639 to 951640, EPI_ISL_951643 to 951646, EPI_ISL_951648 to 951655, EPI_ISL_951658, EPI_ISL_951661, EPI_ISL_951664, EPI_ISL_951667 to 951670, EPI_ISL_951672 to 951677, EPI_ISL_951679 to 951681, EPI_ISL_951684 to 951691, EPI_ISL_951693 to 951696, EPI_ISL_951698, EPI_ISL_951700 to 951706, EPI_ISL_951708 to 951709, EPI_ISL_951711 to 951715, EPI_ISL_951717 to 951721, EPI_ISL_951725, EPI_ISL_951728, EPI_ISL_951730 to 951733, EPI_ISL_951735 to 951753, EPI_ISL_951755 to 951814, EPI_ISL_951816, EPI_ISL_951819 to 951821, EPI_ISL_951823, EPI_ISL_951825 to 951827, EPI_ISL_951829, EPI_ISL_951831 to 951834, EPI_ISL_951842 to 951853, EPI_ISL_951855 to 951859, EPI_ISL_951861 to 951863, EPI_ISL_951866 to 951867, EPI_ISL_951869, EPI_ISL_951875 to 951878, EPI_ISL_951881 to 951882, EPI_ISL_951884, EPI_ISL_951886 to 951888, EPI_ISL_951890, |                                                      |                                                                                                                        |                                                                                                                                                                                                                                                                                                        |

|                                                                                                                                                                                                                                                                                                                                                                                                                                                                                                                                                                                                                                                                                                                                                                                                                                                                                                                                                                                                                                                                                                                                                                                                                                                                                                                                                                                                                                                                                                                                                                                                                                                                                                                                                                                                                                                                                                                                                                                                                                                                                                                                                                                                                                                                                                                                                                                                                                                                                                                                                                                                                                                                                                                                                                                                                                                                                                                                                                                                                                                    |                                                     |                                                                                                              |                                                                                                                                                                                                                                                                                                                                                                                                                            |                                                                                                                                                                                                                                                                                                                                                                       |
|----------------------------------------------------------------------------------------------------------------------------------------------------------------------------------------------------------------------------------------------------------------------------------------------------------------------------------------------------------------------------------------------------------------------------------------------------------------------------------------------------------------------------------------------------------------------------------------------------------------------------------------------------------------------------------------------------------------------------------------------------------------------------------------------------------------------------------------------------------------------------------------------------------------------------------------------------------------------------------------------------------------------------------------------------------------------------------------------------------------------------------------------------------------------------------------------------------------------------------------------------------------------------------------------------------------------------------------------------------------------------------------------------------------------------------------------------------------------------------------------------------------------------------------------------------------------------------------------------------------------------------------------------------------------------------------------------------------------------------------------------------------------------------------------------------------------------------------------------------------------------------------------------------------------------------------------------------------------------------------------------------------------------------------------------------------------------------------------------------------------------------------------------------------------------------------------------------------------------------------------------------------------------------------------------------------------------------------------------------------------------------------------------------------------------------------------------------------------------------------------------------------------------------------------------------------------------------------------------------------------------------------------------------------------------------------------------------------------------------------------------------------------------------------------------------------------------------------------------------------------------------------------------------------------------------------------------------------------------------------------------------------------------------------------------|-----------------------------------------------------|--------------------------------------------------------------------------------------------------------------|----------------------------------------------------------------------------------------------------------------------------------------------------------------------------------------------------------------------------------------------------------------------------------------------------------------------------------------------------------------------------------------------------------------------------|-----------------------------------------------------------------------------------------------------------------------------------------------------------------------------------------------------------------------------------------------------------------------------------------------------------------------------------------------------------------------|
| EPI_ISL_951893 to 951898, EPI_ISL_951900 to 951913, EPI_ISL_951916 to 951966, EPI_ISL_951968 to 951969, EPI_ISL_951971 to 951973, EPI_ISL_951975 to 951987, EPI_ISL_951992, EPI_ISL_951998 to 952000, EPI_ISL_952002, EPI_ISL_952006 to 952015, EPI_ISL_952018 to 952023, EPI_ISL_952025, EPI_ISL_952027 to 952033, EPI_ISL_952035 to 952041, EPI_ISL_952044, EPI_ISL_952046 to 952050, EPI_ISL_952052 to 952058, EPI_ISL_952060 to 952067, EPI_ISL_952069 to 952079, EPI_ISL_952082 to 952093, EPI_ISL_952095 to 952097, EPI_ISL_952100, EPI_ISL_952102, EPI_ISL_952104, EPI_ISL_952108 to 952114, EPI_ISL_952119 to 952120, EPI_ISL_952122 to 952124, EPI_ISL_952126, EPI_ISL_952134, EPI_ISL_952136 to 952141, EPI_ISL_952143 to 952154, EPI_ISL_952156 to 952159, EPI_ISL_952161 to 952168, EPI_ISL_952170 to 952180, EPI_ISL_952187 to 952190, EPI_ISL_952192, EPI_ISL_952194 to 952196, EPI_ISL_952199, EPI_ISL_952201 to 952205, EPI_ISL_952207, EPI_ISL_952213 to 952217, EPI_ISL_952223 to 952224, EPI_ISL_952226, EPI_ISL_952231, EPI_ISL_952234 to 952235, EPI_ISL_952238 to 952239, EPI_ISL_952241, EPI_ISL_952244, EPI_ISL_952246, EPI_ISL_952248, EPI_ISL_952250 to 952253, EPI_ISL_952255 to 952259, EPI_ISL_952261 to 952264, EPI_ISL_952266 to 952297, EPI_ISL_952299 to 952335, EPI_ISL_952337 to 952364, EPI_ISL_952366 to 952368, EPI_ISL_952370 to 952376, EPI_ISL_999515 to 999526, EPI_ISL_999528 to 999534, EPI_ISL_999537 to 999538, EPI_ISL_999540 to 999550, EPI_ISL_999552 to 999554, EPI_ISL_999556 to 999557, EPI_ISL_999559 to 999563, EPI_ISL_999565 to 999567, EPI_ISL_999569, EPI_ISL_999571 to 999572, EPI_ISL_999574 to 999583, EPI_ISL_999585 to 999586, EPI_ISL_999588 to 999593, EPI_ISL_999595 to 999599, EPI_ISL_999601 to 999603, EPI_ISL_999605 to 999609, EPI_ISL_999611 to 999616, EPI_ISL_999618, EPI_ISL_999620 to 999623, EPI_ISL_999625 to 999628, EPI_ISL_999630, EPI_ISL_999633 to 999634, EPI_ISL_999642 to 999644, EPI_ISL_999646 to 999648, EPI_ISL_999650 to 999652, EPI_ISL_999655 to 999659, EPI_ISL_999664, EPI_ISL_999669, EPI_ISL_999683 to 999687, EPI_ISL_999694 to 999695, EPI_ISL_999701 to 999702, EPI_ISL_999704, EPI_ISL_999713 to 999714, EPI_ISL_999717, EPI_ISL_999720, EPI_ISL_999724 to 999725, EPI_ISL_999729, EPI_ISL_999735, EPI_ISL_999741 to 999742, EPI_ISL_999747, EPI_ISL_999750, EPI_ISL_999752 to 999753, EPI_ISL_999755 to 999758, EPI_ISL_999762, EPI_ISL_999764 to 999765, EPI_ISL_999767, EPI_ISL_999770 to 999779, EPI_ISL_999781 to 999811, EPI_ISL_999818 to 999819, EPI_ISL_999824 to 999826, EPI_ISL_999829 to 999830, EPI_ISL_999834 to 999834, EPI_ISL_999848 to 999848, EPI_ISL_999852 to 999853, EPI_ISL_999858 to 999859, EPI_ISL_999870 to 999871, EPI_ISL_999878 to 999879, EPI_ISL_999881, EPI_ISL_999886, EPI_ISL_999891 to 999892, EPI_ISL_999894, EPI_ISL_999900, EPI_ISL_999905 to 999908, EPI_ISL_999910 to 999912, EPI_ISL_999915 to 999927, EPI_ISL_999929 to 999931, EPI_ISL_999933, EPI_ISL_999935 to 999938, EPI_ISL_999943 to 999944 | see above                                           | Originating lab: Wales Specialist Virology Centre Sequencing lab: Pathogen Genomics Unit                     | Public Health Wales Microbiology Cardiff Wales Specialist Virology Centre                                                                                                                                                                                                                                                                                                                                                  | Alec Birchley; Alexander Adams; Amy Gaskin; Angela Marchbank; Bree Gatica-Wilcox; Catherine Moore; Jason Coombes; Joanne Watkins; Joel Southgate; Johnathan Evans; Laura Gifford; Lauren Gilbert; Lee Graham; Malorie Perry; Matthew Bull; Nicole Pachiari; Sally Corden; Sara Kunziene-Summerhayes; Sara Rey; Sarah Taylor; Simon Cottrell; Sophie Jones; Tom Connor |
| EPI_ISL_710585 to 710586                                                                                                                                                                                                                                                                                                                                                                                                                                                                                                                                                                                                                                                                                                                                                                                                                                                                                                                                                                                                                                                                                                                                                                                                                                                                                                                                                                                                                                                                                                                                                                                                                                                                                                                                                                                                                                                                                                                                                                                                                                                                                                                                                                                                                                                                                                                                                                                                                                                                                                                                                                                                                                                                                                                                                                                                                                                                                                                                                                                                                           | Orsa VC                                             | The Public Health Agency of Sweden                                                                           | Department of Microbiology; The Public Health Agency of Sweden                                                                                                                                                                                                                                                                                                                                                             |                                                                                                                                                                                                                                                                                                                                                                       |
| EPI_ISL_892515 to 892533, EPI_ISL_892561 to 892565                                                                                                                                                                                                                                                                                                                                                                                                                                                                                                                                                                                                                                                                                                                                                                                                                                                                                                                                                                                                                                                                                                                                                                                                                                                                                                                                                                                                                                                                                                                                                                                                                                                                                                                                                                                                                                                                                                                                                                                                                                                                                                                                                                                                                                                                                                                                                                                                                                                                                                                                                                                                                                                                                                                                                                                                                                                                                                                                                                                                 | Osaka Institute of Public Health, Morinomiya Center | Pathogen Genomics Center, National Institute of Infectious Diseases                                          | Kentaro Itokawa; Makoto Kuroda; Masanori Hashino; Rina Tanaka; Tsuyoshi Sekizuka                                                                                                                                                                                                                                                                                                                                           |                                                                                                                                                                                                                                                                                                                                                                       |
| EPI_ISL_635085, EPI_ISL_635093 to 635095, EPI_ISL_635119, EPI_ISL_635129, EPI_ISL_635155, EPI_ISL_635172, EPI_ISL_635197, EPI_ISL_668401 to 668402, EPI_ISL_708033 to 708034, EPI_ISL_708052 to 708054, EPI_ISL_708096, EPI_ISL_708118 to 708121, EPI_ISL_708175, EPI_ISL_759982, EPI_ISL_759990, EPI_ISL_775278, EPI_ISL_775284, EPI_ISL_775293, EPI_ISL_775307 to 775308, EPI_ISL_775316 to 775318, EPI_ISL_775391 to 775392, EPI_ISL_775410 to 775413, EPI_ISL_775415 to 775426, EPI_ISL_775457, EPI_ISL_796703, EPI_ISL_842639, EPI_ISL_860220 to 860221, EPI_ISL_860235, EPI_ISL_860263, EPI_ISL_906821, EPI_ISL_906832, EPI_ISL_964272, EPI_ISL_964275, EPI_ISL_964278, EPI_ISL_964281, EPI_ISL_964292, EPI_ISL_964295, EPI_ISL_964955, EPI_ISL_964960, EPI_ISL_964980, EPI_ISL_964987, EPI_ISL_964998 to 965000                                                                                                                                                                                                                                                                                                                                                                                                                                                                                                                                                                                                                                                                                                                                                                                                                                                                                                                                                                                                                                                                                                                                                                                                                                                                                                                                                                                                                                                                                                                                                                                                                                                                                                                                                                                                                                                                                                                                                                                                                                                                                                                                                                                                                             | see above                                           | Oslo University Hospital, Department of Medical Microbiology                                                 | Norwegian Institute of Public Health, Department of Virology                                                                                                                                                                                                                                                                                                                                                               | Atiya R Ali; Hilde Elshaug; Hilde Volla; Ignacio Garcia Lorente; Kamilla Heddeland Instefjord; Karoline Bragstad; Kathrine Stene-Johansen; Marie Paulsen Madsen; Olav Hungnes; Rasmus Riis Kopperud; Serina B Engebretsen                                                                                                                                             |
| EPI_ISL_644715 to 644734, EPI_ISL_745194 to 745196                                                                                                                                                                                                                                                                                                                                                                                                                                                                                                                                                                                                                                                                                                                                                                                                                                                                                                                                                                                                                                                                                                                                                                                                                                                                                                                                                                                                                                                                                                                                                                                                                                                                                                                                                                                                                                                                                                                                                                                                                                                                                                                                                                                                                                                                                                                                                                                                                                                                                                                                                                                                                                                                                                                                                                                                                                                                                                                                                                                                 | Osmania Medical College                             | CSIR-Centre for Cellular and Molecular Biology                                                               | Archana Bharadwaj Siva; B Himasri; Blessy B John; Divya Tej Sowpati; Dr.P.Shashikala Reddy; Dr.S.P.Savani; Dr.Satyaprasad; Dr.V.Sudha Rani; Karthik Bharadwaj Tallapakar; Lamuk Zaveri; M Soujanya Reddy; Namami Gaur; Nikhil Hajirnis; Onkar Kulkarni; Payal Mukherjee; Pratheusa Maccha; Priya Singh; Purushotham Vodnala; Rakesh K Mishra; Sakshi Shambhavi; Shagufa Khan; Sofia Banu; Tulasi Nagabandi; Viswagithe S L |                                                                                                                                                                                                                                                                                                                                                                       |
| EPI_ISL_788943 to 788978, EPI_ISL_872003 to 872036                                                                                                                                                                                                                                                                                                                                                                                                                                                                                                                                                                                                                                                                                                                                                                                                                                                                                                                                                                                                                                                                                                                                                                                                                                                                                                                                                                                                                                                                                                                                                                                                                                                                                                                                                                                                                                                                                                                                                                                                                                                                                                                                                                                                                                                                                                                                                                                                                                                                                                                                                                                                                                                                                                                                                                                                                                                                                                                                                                                                 | Ospedale "Di Venere"                                | Beaconlab (Bioinformatics, Evolution and Comparative Genomics lab), Dept of Biosciences, University on Milan | Chiara M; Iacobellis M; Manzari C; Parisi A; Pesole G; Piluscio R; d'Avenia M                                                                                                                                                                                                                                                                                                                                              |                                                                                                                                                                                                                                                                                                                                                                       |
| EPI_ISL_902750                                                                                                                                                                                                                                                                                                                                                                                                                                                                                                                                                                                                                                                                                                                                                                                                                                                                                                                                                                                                                                                                                                                                                                                                                                                                                                                                                                                                                                                                                                                                                                                                                                                                                                                                                                                                                                                                                                                                                                                                                                                                                                                                                                                                                                                                                                                                                                                                                                                                                                                                                                                                                                                                                                                                                                                                                                                                                                                                                                                                                                     | Ospedale "F. Spaziani" Frosinone                    | INMI Lazzaro Spallanzani IRCCS                                                                               | A Di Caro; B Bartolini; C Sias; C. Gargiulo; C.E.M Gruber; E Giombini; F Messina; M Rueca; MR Capobianchi; O Butera                                                                                                                                                                                                                                                                                                        |                                                                                                                                                                                                                                                                                                                                                                       |
| EPI_ISL_794753                                                                                                                                                                                                                                                                                                                                                                                                                                                                                                                                                                                                                                                                                                                                                                                                                                                                                                                                                                                                                                                                                                                                                                                                                                                                                                                                                                                                                                                                                                                                                                                                                                                                                                                                                                                                                                                                                                                                                                                                                                                                                                                                                                                                                                                                                                                                                                                                                                                                                                                                                                                                                                                                                                                                                                                                                                                                                                                                                                                                                                     | Ospedale Cardinale G. Panico                        | Istituto Zooprofilattico Sperimentale della Puglia e della Basilicata                                        | Bianco A.; Capozzi L.; Cipolletta D.; Del Sambro L.; Galante D.; Manzulli V; Pace L.; Parisi A.; Rondinone V.                                                                                                                                                                                                                                                                                                              |                                                                                                                                                                                                                                                                                                                                                                       |
| EPI_ISL_832818                                                                                                                                                                                                                                                                                                                                                                                                                                                                                                                                                                                                                                                                                                                                                                                                                                                                                                                                                                                                                                                                                                                                                                                                                                                                                                                                                                                                                                                                                                                                                                                                                                                                                                                                                                                                                                                                                                                                                                                                                                                                                                                                                                                                                                                                                                                                                                                                                                                                                                                                                                                                                                                                                                                                                                                                                                                                                                                                                                                                                                     | Ospedale Civile Atri                                | Istituto Zooprofilattico Sperimentale dell'Abruzzo e Molise "G. Caporale"                                    | Ancora M; Calistri P; Cammà C; Curini V; Di Domenico M; Di Pasquale A; Lorusso A; Mangone I; Marcacci M; Puglia I; Rinaldi A; Savini G.                                                                                                                                                                                                                                                                                    |                                                                                                                                                                                                                                                                                                                                                                       |
| EPI_ISL_833255 to 833257, EPI_ISL_833331                                                                                                                                                                                                                                                                                                                                                                                                                                                                                                                                                                                                                                                                                                                                                                                                                                                                                                                                                                                                                                                                                                                                                                                                                                                                                                                                                                                                                                                                                                                                                                                                                                                                                                                                                                                                                                                                                                                                                                                                                                                                                                                                                                                                                                                                                                                                                                                                                                                                                                                                                                                                                                                                                                                                                                                                                                                                                                                                                                                                           | Ospedale Civile Atri                                | Istituto Zooprofilattico Sperimentale dell'Abruzzo e Molise "G. Caporale"                                    | Ancora M; Calistri P; Cammà C; Curini V; Di Domenico M; Di Pasquale A; Lorusso A; Mangone I; Marcacci M; Puglia I; Rinaldi A; Savini G                                                                                                                                                                                                                                                                                     |                                                                                                                                                                                                                                                                                                                                                                       |
| EPI_ISL_833251                                                                                                                                                                                                                                                                                                                                                                                                                                                                                                                                                                                                                                                                                                                                                                                                                                                                                                                                                                                                                                                                                                                                                                                                                                                                                                                                                                                                                                                                                                                                                                                                                                                                                                                                                                                                                                                                                                                                                                                                                                                                                                                                                                                                                                                                                                                                                                                                                                                                                                                                                                                                                                                                                                                                                                                                                                                                                                                                                                                                                                     | Ospedale Civile Atri-Medicina Interna               | Istituto Zooprofilattico Sperimentale dell'Abruzzo e Molise "G. Caporale"                                    | Ancora M; Calistri P; Cammà C; Curini V; Di Domenico M; Di Pasquale A; Lorusso A; Mangone I; Marcacci M; Puglia I; Rinaldi A; Savini G                                                                                                                                                                                                                                                                                     |                                                                                                                                                                                                                                                                                                                                                                       |
| EPI_ISL_806784 to 806785, EPI_ISL_833276                                                                                                                                                                                                                                                                                                                                                                                                                                                                                                                                                                                                                                                                                                                                                                                                                                                                                                                                                                                                                                                                                                                                                                                                                                                                                                                                                                                                                                                                                                                                                                                                                                                                                                                                                                                                                                                                                                                                                                                                                                                                                                                                                                                                                                                                                                                                                                                                                                                                                                                                                                                                                                                                                                                                                                                                                                                                                                                                                                                                           | Ospedale Civile G.Mazzini-Teramo                    | Istituto Zooprofilattico Sperimentale dell'Abruzzo e Molise "G. Caporale"                                    | Ancora M; Calistri P; Cammà C; Curini V; Di Domenico M; Di Pasquale A; Lorusso A; Mangone I; Marcacci M; Puglia I; Rinaldi A; Savini G                                                                                                                                                                                                                                                                                     |                                                                                                                                                                                                                                                                                                                                                                       |
| EPI_ISL_806789, EPI_ISL_833297                                                                                                                                                                                                                                                                                                                                                                                                                                                                                                                                                                                                                                                                                                                                                                                                                                                                                                                                                                                                                                                                                                                                                                                                                                                                                                                                                                                                                                                                                                                                                                                                                                                                                                                                                                                                                                                                                                                                                                                                                                                                                                                                                                                                                                                                                                                                                                                                                                                                                                                                                                                                                                                                                                                                                                                                                                                                                                                                                                                                                     | Ospedale Civile Giulianova                          | Istituto Zooprofilattico Sperimentale dell'Abruzzo e Molise "G. Caporale"                                    | Ancora M; Calistri P; Cammà C; Curini V; Di Domenico M; Di Pasquale A; Lorusso A; Mangone I; Marcacci M; Puglia I; Rinaldi A; Savini G                                                                                                                                                                                                                                                                                     |                                                                                                                                                                                                                                                                                                                                                                       |
| EPI_ISL_833252                                                                                                                                                                                                                                                                                                                                                                                                                                                                                                                                                                                                                                                                                                                                                                                                                                                                                                                                                                                                                                                                                                                                                                                                                                                                                                                                                                                                                                                                                                                                                                                                                                                                                                                                                                                                                                                                                                                                                                                                                                                                                                                                                                                                                                                                                                                                                                                                                                                                                                                                                                                                                                                                                                                                                                                                                                                                                                                                                                                                                                     | Ospedale Civile Giulianova-Pronto Soccorso          | Istituto Zooprofilattico Sperimentale dell'Abruzzo e Molise "G. Caporale"                                    | Ancora M; Calistri P; Cammà C; Curini V; Di Domenico M; Di Pasquale A; Lorusso A; Mangone I; Marcacci M; Puglia I; Rinaldi A; Savini G                                                                                                                                                                                                                                                                                     |                                                                                                                                                                                                                                                                                                                                                                       |
| EPI_ISL_961701                                                                                                                                                                                                                                                                                                                                                                                                                                                                                                                                                                                                                                                                                                                                                                                                                                                                                                                                                                                                                                                                                                                                                                                                                                                                                                                                                                                                                                                                                                                                                                                                                                                                                                                                                                                                                                                                                                                                                                                                                                                                                                                                                                                                                                                                                                                                                                                                                                                                                                                                                                                                                                                                                                                                                                                                                                                                                                                                                                                                                                     | Ospedale Civile Teramo                              | Istituto Zooprofilattico Sperimentale dell'Abruzzo e Molise "G. Caporale"                                    | Ancora M; Calistri P; Cammà C; Curini V; Di Domenico M; Di Pasquale A; Lorusso A; Mangone I; Marcacci M; Puglia I; Rinaldi A; Savini G; Scialabba S                                                                                                                                                                                                                                                                        |                                                                                                                                                                                                                                                                                                                                                                       |
| EPI_ISL_961750                                                                                                                                                                                                                                                                                                                                                                                                                                                                                                                                                                                                                                                                                                                                                                                                                                                                                                                                                                                                                                                                                                                                                                                                                                                                                                                                                                                                                                                                                                                                                                                                                                                                                                                                                                                                                                                                                                                                                                                                                                                                                                                                                                                                                                                                                                                                                                                                                                                                                                                                                                                                                                                                                                                                                                                                                                                                                                                                                                                                                                     | Ospedale Civile Atri Med. Interna                   | Istituto Zooprofilattico Sperimentale dell'Abruzzo e Molise "G. Caporale"                                    | Ancora M; Calistri P; Cammà C; Curini V; Di Domenico M; Di Pasquale A; Lorusso A; Mangone I; Marcacci M; Puglia I; Rinaldi A; Savini G; Scialabba S                                                                                                                                                                                                                                                                        |                                                                                                                                                                                                                                                                                                                                                                       |
| EPI_ISL_745192 to 745193                                                                                                                                                                                                                                                                                                                                                                                                                                                                                                                                                                                                                                                                                                                                                                                                                                                                                                                                                                                                                                                                                                                                                                                                                                                                                                                                                                                                                                                                                                                                                                                                                                                                                                                                                                                                                                                                                                                                                                                                                                                                                                                                                                                                                                                                                                                                                                                                                                                                                                                                                                                                                                                                                                                                                                                                                                                                                                                                                                                                                           | Ospedale Di Venere                                  | Istituto Zooprofilattico Sperimentale della Puglia e della Basilicata                                        | Bianco A.; Capozzi L.; Chiara M.; De Sabato L.; Del Sambro L.; Iacobellis M; Iacobellis M.; Parisi A.; Pesole G.                                                                                                                                                                                                                                                                                                           |                                                                                                                                                                                                                                                                                                                                                                       |
| EPI_ISL_918410                                                                                                                                                                                                                                                                                                                                                                                                                                                                                                                                                                                                                                                                                                                                                                                                                                                                                                                                                                                                                                                                                                                                                                                                                                                                                                                                                                                                                                                                                                                                                                                                                                                                                                                                                                                                                                                                                                                                                                                                                                                                                                                                                                                                                                                                                                                                                                                                                                                                                                                                                                                                                                                                                                                                                                                                                                                                                                                                                                                                                                     | Ospedale Di Venere - Carbonara                      | Istituto Zooprofilattico Sperimentale della Puglia e della Basilicata                                        | Bianco A.; Capozzi L.; Cipolletta D.; Del Sambro L.; Galante D.; Manzulli V; Pace L.; Parisi A.; Rondinone V.; Simone D.                                                                                                                                                                                                                                                                                                   |                                                                                                                                                                                                                                                                                                                                                                       |
| EPI_ISL_747465 to 747470, EPI_ISL_747484 to 747485                                                                                                                                                                                                                                                                                                                                                                                                                                                                                                                                                                                                                                                                                                                                                                                                                                                                                                                                                                                                                                                                                                                                                                                                                                                                                                                                                                                                                                                                                                                                                                                                                                                                                                                                                                                                                                                                                                                                                                                                                                                                                                                                                                                                                                                                                                                                                                                                                                                                                                                                                                                                                                                                                                                                                                                                                                                                                                                                                                                                 | Ospedale Mater Salutus                              | Istituto Zooprofilattico Sperimentale delle Venezie                                                          | Adelaide Milani; Alessia Schivo; Alice Fusaro; Ambra Pastori; Annalisa Salviato; Antonia Ricci; Bianca Zecchin; Calogero Terregino; Erika Giorgia Quaranta; Isabella Monne                                                                                                                                                                                                                                                 |                                                                                                                                                                                                                                                                                                                                                                       |
| EPI_ISL_806773 to 806774                                                                                                                                                                                                                                                                                                                                                                                                                                                                                                                                                                                                                                                                                                                                                                                                                                                                                                                                                                                                                                                                                                                                                                                                                                                                                                                                                                                                                                                                                                                                                                                                                                                                                                                                                                                                                                                                                                                                                                                                                                                                                                                                                                                                                                                                                                                                                                                                                                                                                                                                                                                                                                                                                                                                                                                                                                                                                                                                                                                                                           | Ospedale S.Salvatore-Medicina Interna L'Aquila      | Istituto Zooprofilattico Sperimentale dell'Abruzzo e Molise "G. Caporale"                                    | Ancora M; Calistri P; Cammà C; Curini V; Di Domenico M; Di Pasquale A; Lorusso A; Mangone I; Marcacci M; Puglia I; Rinaldi A; Savini G                                                                                                                                                                                                                                                                                     |                                                                                                                                                                                                                                                                                                                                                                       |
| EPI_ISL_961093                                                                                                                                                                                                                                                                                                                                                                                                                                                                                                                                                                                                                                                                                                                                                                                                                                                                                                                                                                                                                                                                                                                                                                                                                                                                                                                                                                                                                                                                                                                                                                                                                                                                                                                                                                                                                                                                                                                                                                                                                                                                                                                                                                                                                                                                                                                                                                                                                                                                                                                                                                                                                                                                                                                                                                                                                                                                                                                                                                                                                                     | Ospedale SS Annunziata                              | Istituto Zooprofilattico Sperimentale dell'Abruzzo e Molise "G. Caporale"                                    | Ancora M; Calistri P; Cammà C; Curini V; Di Domenico M; Di Pasquale A; Lorusso A; Mangone I; Marcacci M; Puglia I; Rinaldi A; Savini G; Scialabba S                                                                                                                                                                                                                                                                        |                                                                                                                                                                                                                                                                                                                                                                       |
| EPI_ISL_833265 to 833269, EPI_ISL_833289, EPI_ISL_833325, EPI_ISL_833327                                                                                                                                                                                                                                                                                                                                                                                                                                                                                                                                                                                                                                                                                                                                                                                                                                                                                                                                                                                                                                                                                                                                                                                                                                                                                                                                                                                                                                                                                                                                                                                                                                                                                                                                                                                                                                                                                                                                                                                                                                                                                                                                                                                                                                                                                                                                                                                                                                                                                                                                                                                                                                                                                                                                                                                                                                                                                                                                                                           | Ospedale SS Annunziata Chieti                       | Istituto Zooprofilattico Sperimentale dell'Abruzzo e Molise "G. Caporale"                                    | Ancora M; Calistri P; Cammà C; Curini V; Di Domenico M; Di Pasquale A; Lorusso A; Mangone I; Marcacci M; Puglia I; Rinaldi A; Savini G                                                                                                                                                                                                                                                                                     |                                                                                                                                                                                                                                                                                                                                                                       |
| EPI_ISL_747459 to 747464, EPI_ISL_747482 to 747483                                                                                                                                                                                                                                                                                                                                                                                                                                                                                                                                                                                                                                                                                                                                                                                                                                                                                                                                                                                                                                                                                                                                                                                                                                                                                                                                                                                                                                                                                                                                                                                                                                                                                                                                                                                                                                                                                                                                                                                                                                                                                                                                                                                                                                                                                                                                                                                                                                                                                                                                                                                                                                                                                                                                                                                                                                                                                                                                                                                                 | Ospedale San Bonifacio                              | Istituto Zooprofilattico Sperimentale delle Venezie                                                          | Adelaide Milani; Alessia Schivo; Alice Fusaro; Ambra Pastori; Annalisa Salviato; Antonia Ricci; Bianca Zecchin; Calogero Terregino; Erika Giorgia Quaranta; Isabella Monne                                                                                                                                                                                                                                                 |                                                                                                                                                                                                                                                                                                                                                                       |
| EPI_ISL_882940 to 882942                                                                                                                                                                                                                                                                                                                                                                                                                                                                                                                                                                                                                                                                                                                                                                                                                                                                                                                                                                                                                                                                                                                                                                                                                                                                                                                                                                                                                                                                                                                                                                                                                                                                                                                                                                                                                                                                                                                                                                                                                                                                                                                                                                                                                                                                                                                                                                                                                                                                                                                                                                                                                                                                                                                                                                                                                                                                                                                                                                                                                           | Ospedale San Camillo De Lellis Rieti                | INMI Lazzaro Spallanzani IRCCS                                                                               | A De Luca; A Di Caro; B Bartolini; C.E.M Gruber; E Giombini; F Messina; L Casertano; M Rueca; MR Capobianchi; O Butera; S Venarubea                                                                                                                                                                                                                                                                                        |                                                                                                                                                                                                                                                                                                                                                                       |
| EPI_ISL_941336 to 941337                                                                                                                                                                                                                                                                                                                                                                                                                                                                                                                                                                                                                                                                                                                                                                                                                                                                                                                                                                                                                                                                                                                                                                                                                                                                                                                                                                                                                                                                                                                                                                                                                                                                                                                                                                                                                                                                                                                                                                                                                                                                                                                                                                                                                                                                                                                                                                                                                                                                                                                                                                                                                                                                                                                                                                                                                                                                                                                                                                                                                           | Ospedale San Camillo De Lellis di Rieti             | INMI Lazzaro Spallanzani IRCCS                                                                               | Antonino Di Caro; Assunta De Luca; Barbara Bartolini; Cesare E.M. Gruber; Emanuela Giombini; Francesco Messina; Luca Casertano; Maria R. Capobianchi; Martina Rueca; Ornella Butera; Stefano Venarubea                                                                                                                                                                                                                     |                                                                                                                                                                                                                                                                                                                                                                       |
| EPI_ISL_965231                                                                                                                                                                                                                                                                                                                                                                                                                                                                                                                                                                                                                                                                                                                                                                                                                                                                                                                                                                                                                                                                                                                                                                                                                                                                                                                                                                                                                                                                                                                                                                                                                                                                                                                                                                                                                                                                                                                                                                                                                                                                                                                                                                                                                                                                                                                                                                                                                                                                                                                                                                                                                                                                                                                                                                                                                                                                                                                                                                                                                                     | Ospedale San Salvatore UOC MED INT.                 | Istituto Zooprofilattico Sperimentale dell'Abruzzo e Molise "G. Caporale"                                    | Ancora M; Calistri P; Cammà C; Curini V; Di Domenico M; Di Pasquale A; Lorusso A; Mangone I; Marcacci M; Puglia I; Rinaldi A; Savini G; Scialabba S                                                                                                                                                                                                                                                                        |                                                                                                                                                                                                                                                                                                                                                                       |
| EPI_ISL_961705                                                                                                                                                                                                                                                                                                                                                                                                                                                                                                                                                                                                                                                                                                                                                                                                                                                                                                                                                                                                                                                                                                                                                                                                                                                                                                                                                                                                                                                                                                                                                                                                                                                                                                                                                                                                                                                                                                                                                                                                                                                                                                                                                                                                                                                                                                                                                                                                                                                                                                                                                                                                                                                                                                                                                                                                                                                                                                                                                                                                                                     | Ospedale San Salvatore UOC Malattie Infettive       | Istituto Zooprofilattico Sperimentale dell'Abruzzo e Molise "G. Caporale"                                    | Ancora M; Calistri P; Cammà C; Curini V; Di Domenico M; Di Pasquale A; Lorusso A; Mangone I; Marcacci M; Puglia I; Rinaldi A; Savini G; Scialabba S                                                                                                                                                                                                                                                                        |                                                                                                                                                                                                                                                                                                                                                                       |
| EPI_ISL_902751 to 902752, EPI_ISL_965130                                                                                                                                                                                                                                                                                                                                                                                                                                                                                                                                                                                                                                                                                                                                                                                                                                                                                                                                                                                                                                                                                                                                                                                                                                                                                                                                                                                                                                                                                                                                                                                                                                                                                                                                                                                                                                                                                                                                                                                                                                                                                                                                                                                                                                                                                                                                                                                                                                                                                                                                                                                                                                                                                                                                                                                                                                                                                                                                                                                                           | Ospedale Sandro Pertini ASL Roma2                   | INMI Lazzaro Spallanzani IRCCS                                                                               | A Di Caro; B Bartolini; C.E.M Gruber; E Giombini; F Messina; G Cappiello; M Rueca; MC Cava; MR Capobianchi; O Butera; R Longo; S Romano; V Michela                                                                                                                                                                                                                                                                         |                                                                                                                                                                                                                                                                                                                                                                       |
| EPI_ISL_794750, EPI_ISL_876742, EPI_ISL_918408 to 918409                                                                                                                                                                                                                                                                                                                                                                                                                                                                                                                                                                                                                                                                                                                                                                                                                                                                                                                                                                                                                                                                                                                                                                                                                                                                                                                                                                                                                                                                                                                                                                                                                                                                                                                                                                                                                                                                                                                                                                                                                                                                                                                                                                                                                                                                                                                                                                                                                                                                                                                                                                                                                                                                                                                                                                                                                                                                                                                                                                                           | Ospedale Santa Caterina Novella                     | Istituto Zooprofilattico Sperimentale della Puglia e della Basilicata                                        | Bianco A.; Capozzi L.; Cipolletta D.; Del Sambro L.; Galante D.; Manzulli V; Pace L.; Parisi A.; Rondinone V.; Simone D.                                                                                                                                                                                                                                                                                                   |                                                                                                                                                                                                                                                                                                                                                                       |
| EPI_ISL_794747, EPI_ISL_794751                                                                                                                                                                                                                                                                                                                                                                                                                                                                                                                                                                                                                                                                                                                                                                                                                                                                                                                                                                                                                                                                                                                                                                                                                                                                                                                                                                                                                                                                                                                                                                                                                                                                                                                                                                                                                                                                                                                                                                                                                                                                                                                                                                                                                                                                                                                                                                                                                                                                                                                                                                                                                                                                                                                                                                                                                                                                                                                                                                                                                     | Ospedale Vito Fazzi                                 | Istituto Zooprofilattico Sperimentale della Puglia e della Basilicata                                        | Bianco A.; Capozzi L.; Cipolletta D.; Del Sambro L.; Galante D.; Manzulli V; Pace L.; Parisi A.; Rondinone V.                                                                                                                                                                                                                                                                                                              |                                                                                                                                                                                                                                                                                                                                                                       |

| Basiliata                                                                                                                                                                                                                                                                                                                                                                                                                                                                                                                                                                                                                                                                                                                                                                                                                                                                                                                                                                                                                                                                                                                                                                                                                                                                                                                                                                                                                                                                                                                                                                                                                                                                                                                                                                                                                                                                                                                                                                                                                                                                                                                                                                                                                                                                                                                                                                                                                                                                                                                                                                                                                                                                                                                                                                                                                                                                                                                                                                                                                                                                                                                                                                                                                                                                                                                                                                                                                                                                                                                                                                                                                                                                                                                                                                                                                                                                                                                                                                                                                                                                                                                                                                                                                                                                                                                                                                                                                                                                                                                                                                                                                                                                                                                                                                                                                                                                                                                                                                                                                                                                                                                                                                                                                                                                                                                                                                                                                                                                                                                                                                                                                                                                                                                                                                                                                                                                                                                                                                                                                                                                                                                                                                                                                                                                                                                                                                                                                                                                                                                                                                                                                                                                                                                                                                                                                                                                                                                                                                                                                                                                                                                                                                                                                                                                                                                                                                                                                                                                                                                                                                                                                                                                                                                                                                                                                                                                                                                                                                                                                                                                                                                                                                                                                                                                                                                                                                                                                                                                                                                                                                                                                                                                                                                                                                                                                                                                                                                                                                                                                                                                                                                                                                                                                                                                                                                                                                                                                                                                                                                                                                                                                                                                                                                                                                                                                                                                                                                                                                                                                                                                                                                              |           |                                                                                                                     |                                                                                                                            |                                                                                                                                                                                                                                                                                                         |
|----------------------------------------------------------------------------------------------------------------------------------------------------------------------------------------------------------------------------------------------------------------------------------------------------------------------------------------------------------------------------------------------------------------------------------------------------------------------------------------------------------------------------------------------------------------------------------------------------------------------------------------------------------------------------------------------------------------------------------------------------------------------------------------------------------------------------------------------------------------------------------------------------------------------------------------------------------------------------------------------------------------------------------------------------------------------------------------------------------------------------------------------------------------------------------------------------------------------------------------------------------------------------------------------------------------------------------------------------------------------------------------------------------------------------------------------------------------------------------------------------------------------------------------------------------------------------------------------------------------------------------------------------------------------------------------------------------------------------------------------------------------------------------------------------------------------------------------------------------------------------------------------------------------------------------------------------------------------------------------------------------------------------------------------------------------------------------------------------------------------------------------------------------------------------------------------------------------------------------------------------------------------------------------------------------------------------------------------------------------------------------------------------------------------------------------------------------------------------------------------------------------------------------------------------------------------------------------------------------------------------------------------------------------------------------------------------------------------------------------------------------------------------------------------------------------------------------------------------------------------------------------------------------------------------------------------------------------------------------------------------------------------------------------------------------------------------------------------------------------------------------------------------------------------------------------------------------------------------------------------------------------------------------------------------------------------------------------------------------------------------------------------------------------------------------------------------------------------------------------------------------------------------------------------------------------------------------------------------------------------------------------------------------------------------------------------------------------------------------------------------------------------------------------------------------------------------------------------------------------------------------------------------------------------------------------------------------------------------------------------------------------------------------------------------------------------------------------------------------------------------------------------------------------------------------------------------------------------------------------------------------------------------------------------------------------------------------------------------------------------------------------------------------------------------------------------------------------------------------------------------------------------------------------------------------------------------------------------------------------------------------------------------------------------------------------------------------------------------------------------------------------------------------------------------------------------------------------------------------------------------------------------------------------------------------------------------------------------------------------------------------------------------------------------------------------------------------------------------------------------------------------------------------------------------------------------------------------------------------------------------------------------------------------------------------------------------------------------------------------------------------------------------------------------------------------------------------------------------------------------------------------------------------------------------------------------------------------------------------------------------------------------------------------------------------------------------------------------------------------------------------------------------------------------------------------------------------------------------------------------------------------------------------------------------------------------------------------------------------------------------------------------------------------------------------------------------------------------------------------------------------------------------------------------------------------------------------------------------------------------------------------------------------------------------------------------------------------------------------------------------------------------------------------------------------------------------------------------------------------------------------------------------------------------------------------------------------------------------------------------------------------------------------------------------------------------------------------------------------------------------------------------------------------------------------------------------------------------------------------------------------------------------------------------------------------------------------------------------------------------------------------------------------------------------------------------------------------------------------------------------------------------------------------------------------------------------------------------------------------------------------------------------------------------------------------------------------------------------------------------------------------------------------------------------------------------------------------------------------------------------------------------------------------------------------------------------------------------------------------------------------------------------------------------------------------------------------------------------------------------------------------------------------------------------------------------------------------------------------------------------------------------------------------------------------------------------------------------------------------------------------------------------------------------------------------------------------------------------------------------------------------------------------------------------------------------------------------------------------------------------------------------------------------------------------------------------------------------------------------------------------------------------------------------------------------------------------------------------------------------------------------------------------------------------------------------------------------------------------------------------------------------------------------------------------------------------------------------------------------------------------------------------------------------------------------------------------------------------------------------------------------------------------------------------------------------------------------------------------------------------------------------------------------------------------------------------------------------------------------------------------------------------------------------------------------------------------------------------------------------------------------------------------------------------------------------------------------------------------------------------------------------------------------------------------------------------------------------------------------------------------------------------------------------------------------------------------------------------------------------------------------------------------------------------------------------------------------------------------------------------------------------------------------------------------------------------------------------------------------------------------------------------------------------------------------------------------------------------------------------------------------------------------------------------------------------------------------------------------------------------------------|-----------|---------------------------------------------------------------------------------------------------------------------|----------------------------------------------------------------------------------------------------------------------------|---------------------------------------------------------------------------------------------------------------------------------------------------------------------------------------------------------------------------------------------------------------------------------------------------------|
| EPI_ISL_635107 to 635109, EPI_ISL_635116, EPI_ISL_635149 to 635152, EPI_ISL_635164, EPI_ISL_635174 to 635175, EPI_ISL_635185, EPI_ISL_668433, EPI_ISL_668438 to 668440, EPI_ISL_708032, EPI_ISL_708110 to 708114, EPI_ISL_775315, EPI_ISL_775322, EPI_ISL_775337 to 775343, EPI_ISL_775345, EPI_ISL_796674, EPI_ISL_796695 to 796697, EPI_ISL_860206 to 860207, EPI_ISL_860218, EPI_ISL_860229 to 860230, EPI_ISL_860273, EPI_ISL_860279, EPI_ISL_860293, EPI_ISL_962904 to 962907, EPI_ISL_964952, EPI_ISL_964972 to 964974                                                                                                                                                                                                                                                                                                                                                                                                                                                                                                                                                                                                                                                                                                                                                                                                                                                                                                                                                                                                                                                                                                                                                                                                                                                                                                                                                                                                                                                                                                                                                                                                                                                                                                                                                                                                                                                                                                                                                                                                                                                                                                                                                                                                                                                                                                                                                                                                                                                                                                                                                                                                                                                                                                                                                                                                                                                                                                                                                                                                                                                                                                                                                                                                                                                                                                                                                                                                                                                                                                                                                                                                                                                                                                                                                                                                                                                                                                                                                                                                                                                                                                                                                                                                                                                                                                                                                                                                                                                                                                                                                                                                                                                                                                                                                                                                                                                                                                                                                                                                                                                                                                                                                                                                                                                                                                                                                                                                                                                                                                                                                                                                                                                                                                                                                                                                                                                                                                                                                                                                                                                                                                                                                                                                                                                                                                                                                                                                                                                                                                                                                                                                                                                                                                                                                                                                                                                                                                                                                                                                                                                                                                                                                                                                                                                                                                                                                                                                                                                                                                                                                                                                                                                                                                                                                                                                                                                                                                                                                                                                                                                                                                                                                                                                                                                                                                                                                                                                                                                                                                                                                                                                                                                                                                                                                                                                                                                                                                                                                                                                                                                                                                                                                                                                                                                                                                                                                                                                                                                                                                                                                                                                           | see above | Ostfold Hospital Trust - Kalnes, Centre for Laboratory Medicine, Section for gene technology and infection serology | Norwegian Institute of Public Health, Department of Virology                                                               | Atiya R Ali; Hilde Elshaug; Hilde Vollan; Ignacio Garcia Llorente; Kamilla Heddeland Instefjord; Karoline Bragstad; Kathrine Stene-Johansen; Marie Paulsen Madsen; Olav Hungnes; Rasmus Riis Kopperud; Serina B Engebretsen                                                                             |
| EPI_ISL_640017, EPI_ISL_640023, EPI_ISL_640077, EPI_ISL_700417, EPI_ISL_700447, EPI_ISL_700575, EPI_ISL_700594                                                                                                                                                                                                                                                                                                                                                                                                                                                                                                                                                                                                                                                                                                                                                                                                                                                                                                                                                                                                                                                                                                                                                                                                                                                                                                                                                                                                                                                                                                                                                                                                                                                                                                                                                                                                                                                                                                                                                                                                                                                                                                                                                                                                                                                                                                                                                                                                                                                                                                                                                                                                                                                                                                                                                                                                                                                                                                                                                                                                                                                                                                                                                                                                                                                                                                                                                                                                                                                                                                                                                                                                                                                                                                                                                                                                                                                                                                                                                                                                                                                                                                                                                                                                                                                                                                                                                                                                                                                                                                                                                                                                                                                                                                                                                                                                                                                                                                                                                                                                                                                                                                                                                                                                                                                                                                                                                                                                                                                                                                                                                                                                                                                                                                                                                                                                                                                                                                                                                                                                                                                                                                                                                                                                                                                                                                                                                                                                                                                                                                                                                                                                                                                                                                                                                                                                                                                                                                                                                                                                                                                                                                                                                                                                                                                                                                                                                                                                                                                                                                                                                                                                                                                                                                                                                                                                                                                                                                                                                                                                                                                                                                                                                                                                                                                                                                                                                                                                                                                                                                                                                                                                                                                                                                                                                                                                                                                                                                                                                                                                                                                                                                                                                                                                                                                                                                                                                                                                                                                                                                                                                                                                                                                                                                                                                                                                                                                                                                                                                                                                                         | see above | Oudtshoorn Hospital wc OUD                                                                                          | NHLS/UCT                                                                                                                   | Arash Iranzadeh; Bruna Galvao; Carolyn Williamson; Deelan Doolabh; Diana Hardie; Innocent Mudau; Kruger Marais; Lynn Tyers; Marvin Hsiao; Stephen Korsman                                                                                                                                               |
| EPI_ISL_960144, EPI_ISL_960146 to 960147                                                                                                                                                                                                                                                                                                                                                                                                                                                                                                                                                                                                                                                                                                                                                                                                                                                                                                                                                                                                                                                                                                                                                                                                                                                                                                                                                                                                                                                                                                                                                                                                                                                                                                                                                                                                                                                                                                                                                                                                                                                                                                                                                                                                                                                                                                                                                                                                                                                                                                                                                                                                                                                                                                                                                                                                                                                                                                                                                                                                                                                                                                                                                                                                                                                                                                                                                                                                                                                                                                                                                                                                                                                                                                                                                                                                                                                                                                                                                                                                                                                                                                                                                                                                                                                                                                                                                                                                                                                                                                                                                                                                                                                                                                                                                                                                                                                                                                                                                                                                                                                                                                                                                                                                                                                                                                                                                                                                                                                                                                                                                                                                                                                                                                                                                                                                                                                                                                                                                                                                                                                                                                                                                                                                                                                                                                                                                                                                                                                                                                                                                                                                                                                                                                                                                                                                                                                                                                                                                                                                                                                                                                                                                                                                                                                                                                                                                                                                                                                                                                                                                                                                                                                                                                                                                                                                                                                                                                                                                                                                                                                                                                                                                                                                                                                                                                                                                                                                                                                                                                                                                                                                                                                                                                                                                                                                                                                                                                                                                                                                                                                                                                                                                                                                                                                                                                                                                                                                                                                                                                                                                                                                                                                                                                                                                                                                                                                                                                                                                                                                                                                                                               |           | Oudtshoorn Hospital wc OUD                                                                                          | National Health Laboratory Service/UCT                                                                                     | Arash Iranzadeh; Bruna Galvao; Carolyn Williamson; Deelan Doolabh; Diana Hardie; Innocent Mudau; Kruger Marais; Lynn Tyers; Marvin Hsiao; Stephen Korsman                                                                                                                                               |
| EPI_ISL_953952, EPI_ISL_953954, EPI_ISL_954035, EPI_ISL_954043 to 954044, EPI_ISL_954055 to 954058, EPI_ISL_954073 to 954075, EPI_ISL_954085 to 954090, EPI_ISL_954094 to 954102, EPI_ISL_954108 to 954111, EPI_ISL_954116 to 954118, EPI_ISL_954125                                                                                                                                                                                                                                                                                                                                                                                                                                                                                                                                                                                                                                                                                                                                                                                                                                                                                                                                                                                                                                                                                                                                                                                                                                                                                                                                                                                                                                                                                                                                                                                                                                                                                                                                                                                                                                                                                                                                                                                                                                                                                                                                                                                                                                                                                                                                                                                                                                                                                                                                                                                                                                                                                                                                                                                                                                                                                                                                                                                                                                                                                                                                                                                                                                                                                                                                                                                                                                                                                                                                                                                                                                                                                                                                                                                                                                                                                                                                                                                                                                                                                                                                                                                                                                                                                                                                                                                                                                                                                                                                                                                                                                                                                                                                                                                                                                                                                                                                                                                                                                                                                                                                                                                                                                                                                                                                                                                                                                                                                                                                                                                                                                                                                                                                                                                                                                                                                                                                                                                                                                                                                                                                                                                                                                                                                                                                                                                                                                                                                                                                                                                                                                                                                                                                                                                                                                                                                                                                                                                                                                                                                                                                                                                                                                                                                                                                                                                                                                                                                                                                                                                                                                                                                                                                                                                                                                                                                                                                                                                                                                                                                                                                                                                                                                                                                                                                                                                                                                                                                                                                                                                                                                                                                                                                                                                                                                                                                                                                                                                                                                                                                                                                                                                                                                                                                                                                                                                                                                                                                                                                                                                                                                                                                                                                                                                                                                                                                   | see above | Outre Mer                                                                                                           | National Reference Center for Viruses of Respiratory Infections, Institut Pasteur, Paris                                   | Angela Brisebarre; Camille Capel; Etienne Simon-Lorière; Marion Barbet; Maud Vanpeene; Méline Bizard; Rousset Dominique; Sylvie Behillili; Sylvie van der Werf; Vincent Enouf                                                                                                                           |
| EPI_ISL_627079, EPI_ISL_627085, EPI_ISL_627250 to 627251, EPI_ISL_627255 to 627263, EPI_ISL_627281 to 627290, EPI_ISL_627292, EPI_ISL_627294, EPI_ISL_627297, EPI_ISL_627299, EPI_ISL_627302 to 627303, EPI_ISL_627305, EPI_ISL_628334 to 628368, EPI_ISL_628414 to 628420, EPI_ISL_628422 to 628700, EPI_ISL_637855, EPI_ISL_637858, EPI_ISL_637861, EPI_ISL_637867, EPI_ISL_637871, EPI_ISL_638037, EPI_ISL_638073 to 638078, EPI_ISL_638086 to 638089, EPI_ISL_638144 to 638145, EPI_ISL_638170 to 638171, EPI_ISL_638173, EPI_ISL_638175 to 638176, EPI_ISL_638207, EPI_ISL_638459 to 638531, EPI_ISL_638736 to 638876, EPI_ISL_638894, EPI_ISL_638944 to 639001, EPI_ISL_639627 to 639630, EPI_ISL_651086 to 651088, EPI_ISL_651103 to 651106, EPI_ISL_651417, EPI_ISL_651421, EPI_ISL_651431 to 651433, EPI_ISL_651469 to 651483, EPI_ISL_651485, EPI_ISL_651505 to 651511, EPI_ISL_651513, EPI_ISL_651517, EPI_ISL_651525, EPI_ISL_651529, EPI_ISL_651541, EPI_ISL_651544 to 651545, EPI_ISL_651548 to 651549, EPI_ISL_651586 to 651587, EPI_ISL_652117 to 652150, EPI_ISL_652711 to 653026, EPI_ISL_679629 to 679851, EPI_ISL_680579, EPI_ISL_704594, EPI_ISL_704676, EPI_ISL_704679, EPI_ISL_704682, EPI_ISL_704685, EPI_ISL_704687, EPI_ISL_704690, EPI_ISL_704692, EPI_ISL_704695, EPI_ISL_704698, EPI_ISL_704701, EPI_ISL_704703, EPI_ISL_704706, EPI_ISL_704812, EPI_ISL_704815, EPI_ISL_704817, EPI_ISL_704836, EPI_ISL_704839, EPI_ISL_704845, EPI_ISL_704861, EPI_ISL_704864, EPI_ISL_704866, EPI_ISL_704869, EPI_ISL_704872, EPI_ISL_704874, EPI_ISL_704877, EPI_ISL_704879, EPI_ISL_704882, EPI_ISL_704885, EPI_ISL_705414, EPI_ISL_705417, EPI_ISL_705426 to 705430, EPI_ISL_705443 to 705444, EPI_ISL_705450 to 705456, EPI_ISL_705464 to 705470, EPI_ISL_705473 to 705485, EPI_ISL_705489, EPI_ISL_705493, EPI_ISL_705497 to 705500, EPI_ISL_705526, EPI_ISL_705972 to 706193, EPI_ISL_706195 to 706275, EPI_ISL_706891 to 706974, EPI_ISL_723631 to 723672, EPI_ISL_723674 to 723850, EPI_ISL_723949 to 724062, EPI_ISL_724778 to 724835, EPI_ISL_727807 to 727860, EPI_ISL_740897 to 740952, EPI_ISL_741018 to 741185, EPI_ISL_741349 to 741356, EPI_ISL_741362 to 741420, EPI_ISL_741760 to 741771, EPI_ISL_741935, EPI_ISL_742247 to 742259, EPI_ISL_742261, EPI_ISL_763838, EPI_ISL_763841, EPI_ISL_763859 to 763863, EPI_ISL_763928 to 763974, EPI_ISL_764066 to 764068, EPI_ISL_764077 to 764079, EPI_ISL_764085 to 764093, EPI_ISL_764117, EPI_ISL_764243, EPI_ISL_764250, EPI_ISL_764264 to 764265, EPI_ISL_764271, EPI_ISL_764525 to 764572, EPI_ISL_812970, EPI_ISL_813356, EPI_ISL_814466 to 814467, EPI_ISL_814572, EPI_ISL_814594, EPI_ISL_814604 to 814605, EPI_ISL_814688 to 814694, EPI_ISL_819578, EPI_ISL_819585 to 819593, EPI_ISL_819605 to 819608, EPI_ISL_819612 to 819646, EPI_ISL_819653 to 819670, EPI_ISL_819675 to 819685, EPI_ISL_819689 to 819723, EPI_ISL_819732 to 819756, EPI_ISL_819759 to 819762, EPI_ISL_819764 to 819794, EPI_ISL_819796 to 819798, EPI_ISL_819803 to 819820, EPI_ISL_819822 to 819827, EPI_ISL_819835 to 819850, EPI_ISL_819852 to 819863, EPI_ISL_819866, EPI_ISL_819868 to 819872, EPI_ISL_819877 to 819878, EPI_ISL_839360, EPI_ISL_839362 to 839365, EPI_ISL_839367 to 839384, EPI_ISL_839386 to 839411, EPI_ISL_839413 to 839436, EPI_ISL_839438 to 839443, EPI_ISL_839445 to 839483, EPI_ISL_840186 to 840199, EPI_ISL_840201 to 840202, EPI_ISL_840204 to 840207, EPI_ISL_840209 to 840217, EPI_ISL_840228 to 840224, EPI_ISL_840226, EPI_ISL_840338 to 840345, EPI_ISL_840348 to 840351, EPI_ISL_840353, EPI_ISL_840357 to 840363, EPI_ISL_840365 to 840366, EPI_ISL_842107, EPI_ISL_842111 to 842113, EPI_ISL_842116 to 842120, EPI_ISL_842122 to 842136, EPI_ISL_842138, EPI_ISL_842140, EPI_ISL_842148 to 842149, EPI_ISL_842147 to 842152, EPI_ISL_842154 to 842160, EPI_ISL_842162 to 842163, EPI_ISL_842165 to 842171, EPI_ISL_842175, EPI_ISL_842178 to 842181, EPI_ISL_842184, EPI_ISL_842186 to 842188, EPI_ISL_842190 to 842192, EPI_ISL_842194 to 842200, EPI_ISL_867035, EPI_ISL_867037 to 867041, EPI_ISL_867044 to 867069, EPI_ISL_867071 to 867075, EPI_ISL_867077 to 867082, EPI_ISL_867084, EPI_ISL_867087 to 867101, EPI_ISL_867103, EPI_ISL_867105 to 867110, EPI_ISL_867110 to 867114, EPI_ISL_867118 to 867121, EPI_ISL_867123, EPI_ISL_867125, EPI_ISL_867127 to 867134, EPI_ISL_867137 to 867142, EPI_ISL_867144 to 867145, EPI_ISL_867147 to 867148, EPI_ISL_867150 to 867152, EPI_ISL_867155, EPI_ISL_867159, EPI_ISL_867161 to 867175, EPI_ISL_867177 to 867179, EPI_ISL_867181 to 867185, EPI_ISL_922172 to 922175, EPI_ISL_922177 to 922178, EPI_ISL_922180, EPI_ISL_922182 to 922185, EPI_ISL_922188 to 922192, EPI_ISL_922194, EPI_ISL_922197 to 922201, EPI_ISL_922203, EPI_ISL_922206 to 922209, EPI_ISL_922211 to 922220, EPI_ISL_922223 to 922234, EPI_ISL_922237 to 922242, EPI_ISL_922244, EPI_ISL_922246, EPI_ISL_922249, EPI_ISL_922252 to 922255, EPI_ISL_922258 to 922264, EPI_ISL_922267 to 922271, EPI_ISL_922279, EPI_ISL_922281 to 922289, EPI_ISL_922299 to 922300, EPI_ISL_922302, EPI_ISL_922306, EPI_ISL_922307 to 922317, EPI_ISL_922319, EPI_ISL_922321, EPI_ISL_922323 to 922343, EPI_ISL_922345 to 922349, EPI_ISL_924078, EPI_ISL_950232, EPI_ISL_950763 to 950767, EPI_ISL_950769, EPI_ISL_950772 to 950781, EPI_ISL_950783 to 950786, EPI_ISL_950788 to 950791, EPI_ISL_950793 to 950812, EPI_ISL_950814 to 950817, EPI_ISL_950820 to 950823, EPI_ISL_950825 to 950829, EPI_ISL_950831 to 950834, EPI_ISL_950840 to 950843, EPI_ISL_950845 to 950846, EPI_ISL_950848 to 950859, EPI_ISL_950861 to 950865, EPI_ISL_950868 to 950871, EPI_ISL_950873 to 950877, EPI_ISL_950879 to 950882, EPI_ISL_950884 to 950887, EPI_ISL_950889 to 950901, EPI_ISL_950903 to 950905, EPI_ISL_950908 to 950918, EPI_ISL_950920 to 950929, EPI_ISL_950931, EPI_ISL_950933 to 950936, EPI_ISL_950938 to 950941, EPI_ISL_950943 to 950944, EPI_ISL_950946 to 950949, EPI_ISL_950952 to 950959, EPI_ISL_950961, EPI_ISL_950963 to 950966, EPI_ISL_950968, EPI_ISL_950970 to 950977, EPI_ISL_950979 to 950985, EPI_ISL_950987 to 950997, EPI_ISL_950999 to 951000, EPI_ISL_951002 to 951016, EPI_ISL_951018, EPI_ISL_951020 to 951021, EPI_ISL_951023 to 951034, EPI_ISL_951036 to 951038, EPI_ISL_951042 to 951046, EPI_ISL_951049 to 951050, EPI_ISL_951052 to 951059, EPI_ISL_951061 to 951062, EPI_ISL_951064, EPI_ISL_951066, EPI_ISL_951068 to 951075, EPI_ISL_951077 to 951085, EPI_ISL_951087 to 951091, EPI_ISL_951093 to 951094, EPI_ISL_951097 to 951098, EPI_ISL_951101 to 951112, EPI_ISL_951114 to 951122, EPI_ISL_951125 to 951126, EPI_ISL_951131 to 951132, EPI_ISL_951134 to 951139, EPI_ISL_951141, EPI_ISL_951143 to 951145, EPI_ISL_951147 to 951149, EPI_ISL_951152 to 951155, EPI_ISL_951158 to 951166, EPI_ISL_951169 to 951178, EPI_ISL_951180 to 951189, EPI_ISL_951191 to 951193, EPI_ISL_951195 to 951202, EPI_ISL_951204 to 951207, EPI_ISL_951209 to 951216, EPI_ISL_951218, EPI_ISL_951220 to 951221, EPI_ISL_951235, EPI_ISL_951237 to 951239, EPI_ISL_951241 to 951242, EPI_ISL_951245 to 951249, EPI_ISL_951251, EPI_ISL_951254 to 951256, EPI_ISL_951258, EPI_ISL_951264 to 951265, EPI_ISL_951267 to 951277, EPI_ISL_951281 to 951283, EPI_ISL_951286 to 951291, EPI_ISL_951293 to 951294, EPI_ISL_951297, EPI_ISL_951299 to 951301, EPI_ISL_951304 to 951305, EPI_ISL_951307 to 951309, EPI_ISL_951311, EPI_ISL_951313, EPI_ISL_951316 to 951320, EPI_ISL_951323 to 951324, EPI_ISL_951326 to 951329, EPI_ISL_951331, EPI_ISL_951333 to 951354, EPI_ISL_951356, EPI_ISL_951359 to 951364, EPI_ISL_951366 to 951384, EPI_ISL_951386 to 951389, EPI_ISL_951391 to 951393, EPI_ISL_951395 to 951398, EPI_ISL_951400 to 951402, EPI_ISL_951404 to 951410, EPI_ISL_951412 to 951417, EPI_ISL_951419 to 951421, EPI_ISL_951423 to 951429, EPI_ISL_951435 to 951439, EPI_ISL_951442, EPI_ISL_951444 to 951447, EPI_ISL_951449 to 951453, EPI_ISL_951456 to 951459, EPI_ISL_951461 to 951464, EPI_ISL_951466, EPI_ISL_951468 to 951471, EPI_ISL_951475 to 951482, EPI_ISL_951484 to 951489, EPI_ISL_952942, EPI_ISL_998986 to 998989, EPI_ISL_998991 to 998992, EPI_ISL_998994 to 999002, EPI_ISL_999004 to 999010, EPI_ISL_999012 to 999015, EPI_ISL_999017 to 999021, EPI_ISL_999023 to 999025, EPI_ISL_999027 to 999029, EPI_ISL_999031, EPI_ISL_999033 to 999042, EPI_ISL_999044 to 999045, EPI_ISL_999048 to 999069, EPI_ISL_999071, EPI_ISL_999076 to 999078, EPI_ISL_999080 to 999081, EPI_ISL_999083 to 999089, EPI_ISL_999092 to 999095, EPI_ISL_999099 to 999106, EPI_ISL_999108 to 999109, EPI_ISL_999111 to 999116, EPI_ISL_999119 to 999129, EPI_ISL_999131 to 999139, EPI_ISL_999141 to 999146, EPI_ISL_999148 to 999154, EPI_ISL_999156 to 999170, EPI_ISL_999173 to 999175, EPI_ISL_999177 to 999205, EPI_ISL_999207 to 999208, EPI_ISL_999210 to 999213, EPI_ISL_999215 to 999217, EPI_ISL_999219, EPI_ISL_999222 to 999230, EPI_ISL_999232 to 999236, EPI_ISL_999238 to 999239, EPI_ISL_999241 to 999246, EPI_ISL_999248 to 999254, EPI_ISL_999256 to 999263, EPI_ISL_999265, EPI_ISL_999267 to 999269, EPI_ISL_999273 to 999276, EPI_ISL_999278 to 999279, EPI_ISL_999281 to 999284, EPI_ISL_999287 to 999293, EPI_ISL_999296 to 999303, EPI_ISL_999307, EPI_ISL_999310 to 999311, EPI_ISL_999314, EPI_ISL_999317 to 999318, EPI_ISL_999320, EPI_ISL_999322 to 999332, EPI_ISL_999335, EPI_ISL_999337 to 999340, EPI_ISL_999342 to 999353, EPI_ISL_999355 to 999356, EPI_ISL_999360 to 999362, EPI_ISL_999364 to 999365, EPI_ISL_999368 to 999374, EPI_ISL_999377 to 999379, EPI_ISL_999381 to 999386, EPI_ISL_999388, EPI_ISL_999390 to 999397, EPI_ISL_999399, EPI_ISL_999401 to 999414, EPI_ISL_999416, EPI_ISL_999418 to 999420, EPI_ISL_999423 to 999428, EPI_ISL_999431 to 999434, EPI_ISL_999436 to 999438, EPI_ISL_999440, EPI_ISL_999442 to 999447, EPI_ISL_999449, EPI_ISL_999452 to 999460, EPI_ISL_999462 to 999463, EPI_ISL_999465 to 999476, EPI_ISL_999478 to 999479, EPI_ISL_999481 to 999494, EPI_ISL_999496 to 999507, EPI_ISL_999509 to 999514 | see above | Oxford Virolics, NDM, University of Oxford; Oxford University Hospitals; Basingstoke and North Hampshire Hospital   | COVID-19 Genomics UK (COG-UK) Consortium                                                                                   | Alex Mobbs; Amy Trebes; Anita Justice; Catrin Moore; Christopher Fraser; David Bonsall; David Buck; Emma Wise; George Macintyre; Jessica Lynch; John Todd; Mariateresa de Cesare; Matilda Morri; Monique Andersson; Nathan Moore; Nick Cortes; Robert Shaw; Stephen Kidd; Tanya Golubchik; Timothy Peto |
| EPI_ISL_965278 to 965300                                                                                                                                                                                                                                                                                                                                                                                                                                                                                                                                                                                                                                                                                                                                                                                                                                                                                                                                                                                                                                                                                                                                                                                                                                                                                                                                                                                                                                                                                                                                                                                                                                                                                                                                                                                                                                                                                                                                                                                                                                                                                                                                                                                                                                                                                                                                                                                                                                                                                                                                                                                                                                                                                                                                                                                                                                                                                                                                                                                                                                                                                                                                                                                                                                                                                                                                                                                                                                                                                                                                                                                                                                                                                                                                                                                                                                                                                                                                                                                                                                                                                                                                                                                                                                                                                                                                                                                                                                                                                                                                                                                                                                                                                                                                                                                                                                                                                                                                                                                                                                                                                                                                                                                                                                                                                                                                                                                                                                                                                                                                                                                                                                                                                                                                                                                                                                                                                                                                                                                                                                                                                                                                                                                                                                                                                                                                                                                                                                                                                                                                                                                                                                                                                                                                                                                                                                                                                                                                                                                                                                                                                                                                                                                                                                                                                                                                                                                                                                                                                                                                                                                                                                                                                                                                                                                                                                                                                                                                                                                                                                                                                                                                                                                                                                                                                                                                                                                                                                                                                                                                                                                                                                                                                                                                                                                                                                                                                                                                                                                                                                                                                                                                                                                                                                                                                                                                                                                                                                                                                                                                                                                                                                                                                                                                                                                                                                                                                                                                                                                                                                                                                                               |           | P.O.CARDARELLI                                                                                                      | Istituto Zooprofilattico Sperimentale dell'Abruzzo e Molise "G. Caporale"                                                  | Ancora M; Calistri P; Cammà C; Curini V; Di Domenico M; Di Pasquale A; Lorusso A; Mangione I; Marcacci M; Niro G; Puglia I; Rinaldi A; Savini G; Scialabba S; Scutellà M                                                                                                                                |
| EPI_ISL_903590, EPI_ISL_903592, EPI_ISL_903625, EPI_ISL_903642, EPI_ISL_903661 to 903662, EPI_ISL_903736, EPI_ISL_903748, EPI_ISL_903751, EPI_ISL_903778, EPI_ISL_903782, EPI_ISL_903785, EPI_ISL_903790, EPI_ISL_903820 to 903821, EPI_ISL_903825, EPI_ISL_903834, EPI_ISL_903837, EPI_ISL_903852, EPI_ISL_903854, EPI_ISL_903859, EPI_ISL_903876, EPI_ISL_903909, EPI_ISL_903917, EPI_ISL_903926, EPI_ISL_903933                                                                                                                                                                                                                                                                                                                                                                                                                                                                                                                                                                                                                                                                                                                                                                                                                                                                                                                                                                                                                                                                                                                                                                                                                                                                                                                                                                                                                                                                                                                                                                                                                                                                                                                                                                                                                                                                                                                                                                                                                                                                                                                                                                                                                                                                                                                                                                                                                                                                                                                                                                                                                                                                                                                                                                                                                                                                                                                                                                                                                                                                                                                                                                                                                                                                                                                                                                                                                                                                                                                                                                                                                                                                                                                                                                                                                                                                                                                                                                                                                                                                                                                                                                                                                                                                                                                                                                                                                                                                                                                                                                                                                                                                                                                                                                                                                                                                                                                                                                                                                                                                                                                                                                                                                                                                                                                                                                                                                                                                                                                                                                                                                                                                                                                                                                                                                                                                                                                                                                                                                                                                                                                                                                                                                                                                                                                                                                                                                                                                                                                                                                                                                                                                                                                                                                                                                                                                                                                                                                                                                                                                                                                                                                                                                                                                                                                                                                                                                                                                                                                                                                                                                                                                                                                                                                                                                                                                                                                                                                                                                                                                                                                                                                                                                                                                                                                                                                                                                                                                                                                                                                                                                                                                                                                                                                                                                                                                                                                                                                                                                                                                                                                                                                                                                                                                                                                                                                                                                                                                                                                                                                                                                                                                                                                     | see above | PA Department of Health, Bureau of Laboratories                                                                     | Genomics and Discovery, Respiratory Viruses Branch, Division of Viral Diseases, Centers for Disease Control and Prevention | Anna Montmayeur; Anna Uehara; Ben L. Rambo-Martin; Clinton R. Paden; Dhvani Batra; Haibin Wang; Jasmine Padilla; Jing Zhang; Justin Lee; Krista Queen; Lori Rowe; Mark Burroughs; Mili Sheth; Peter W. Cook; Rachel Marine; Sarah Nobles; Suxiang Tong; Yan Li; Ying Tao                                |
| EPI_ISL_861673                                                                                                                                                                                                                                                                                                                                                                                                                                                                                                                                                                                                                                                                                                                                                                                                                                                                                                                                                                                                                                                                                                                                                                                                                                                                                                                                                                                                                                                                                                                                                                                                                                                                                                                                                                                                                                                                                                                                                                                                                                                                                                                                                                                                                                                                                                                                                                                                                                                                                                                                                                                                                                                                                                                                                                                                                                                                                                                                                                                                                                                                                                                                                                                                                                                                                                                                                                                                                                                                                                                                                                                                                                                                                                                                                                                                                                                                                                                                                                                                                                                                                                                                                                                                                                                                                                                                                                                                                                                                                                                                                                                                                                                                                                                                                                                                                                                                                                                                                                                                                                                                                                                                                                                                                                                                                                                                                                                                                                                                                                                                                                                                                                                                                                                                                                                                                                                                                                                                                                                                                                                                                                                                                                                                                                                                                                                                                                                                                                                                                                                                                                                                                                                                                                                                                                                                                                                                                                                                                                                                                                                                                                                                                                                                                                                                                                                                                                                                                                                                                                                                                                                                                                                                                                                                                                                                                                                                                                                                                                                                                                                                                                                                                                                                                                                                                                                                                                                                                                                                                                                                                                                                                                                                                                                                                                                                                                                                                                                                                                                                                                                                                                                                                                                                                                                                                                                                                                                                                                                                                                                                                                                                                                                                                                                                                                                                                                                                                                                                                                                                                                                                                                                         |           | PA Novo Osasco                                                                                                      | Instituto Adolfo Lutz, Interdisciplinary Procedures Center, Strategic Laboratory                                           | Claudia Regina Gonçalves; Claudio Tavares Sacchi; Erica Valessa Ramos Gomes; Karoline Rodrigues Campos                                                                                                                                                                                                  |
| EPI_ISL_767877, EPI_ISL_767897                                                                                                                                                                                                                                                                                                                                                                                                                                                                                                                                                                                                                                                                                                                                                                                                                                                                                                                                                                                                                                                                                                                                                                                                                                                                                                                                                                                                                                                                                                                                                                                                                                                                                                                                                                                                                                                                                                                                                                                                                                                                                                                                                                                                                                                                                                                                                                                                                                                                                                                                                                                                                                                                                                                                                                                                                                                                                                                                                                                                                                                                                                                                                                                                                                                                                                                                                                                                                                                                                                                                                                                                                                                                                                                                                                                                                                                                                                                                                                                                                                                                                                                                                                                                                                                                                                                                                                                                                                                                                                                                                                                                                                                                                                                                                                                                                                                                                                                                                                                                                                                                                                                                                                                                                                                                                                                                                                                                                                                                                                                                                                                                                                                                                                                                                                                                                                                                                                                                                                                                                                                                                                                                                                                                                                                                                                                                                                                                                                                                                                                                                                                                                                                                                                                                                                                                                                                                                                                                                                                                                                                                                                                                                                                                                                                                                                                                                                                                                                                                                                                                                                                                                                                                                                                                                                                                                                                                                                                                                                                                                                                                                                                                                                                                                                                                                                                                                                                                                                                                                                                                                                                                                                                                                                                                                                                                                                                                                                                                                                                                                                                                                                                                                                                                                                                                                                                                                                                                                                                                                                                                                                                                                                                                                                                                                                                                                                                                                                                                                                                                                                                                                                         |           | PALMS                                                                                                               | NSW Health Pathology - Institute of Clinical Pathology and Medical Research; Westmead Hospital; University of Sydney       | CIDM-PH et al.                                                                                                                                                                                                                                                                                          |
| EPI_ISL_678257, EPI_ISL_949067                                                                                                                                                                                                                                                                                                                                                                                                                                                                                                                                                                                                                                                                                                                                                                                                                                                                                                                                                                                                                                                                                                                                                                                                                                                                                                                                                                                                                                                                                                                                                                                                                                                                                                                                                                                                                                                                                                                                                                                                                                                                                                                                                                                                                                                                                                                                                                                                                                                                                                                                                                                                                                                                                                                                                                                                                                                                                                                                                                                                                                                                                                                                                                                                                                                                                                                                                                                                                                                                                                                                                                                                                                                                                                                                                                                                                                                                                                                                                                                                                                                                                                                                                                                                                                                                                                                                                                                                                                                                                                                                                                                                                                                                                                                                                                                                                                                                                                                                                                                                                                                                                                                                                                                                                                                                                                                                                                                                                                                                                                                                                                                                                                                                                                                                                                                                                                                                                                                                                                                                                                                                                                                                                                                                                                                                                                                                                                                                                                                                                                                                                                                                                                                                                                                                                                                                                                                                                                                                                                                                                                                                                                                                                                                                                                                                                                                                                                                                                                                                                                                                                                                                                                                                                                                                                                                                                                                                                                                                                                                                                                                                                                                                                                                                                                                                                                                                                                                                                                                                                                                                                                                                                                                                                                                                                                                                                                                                                                                                                                                                                                                                                                                                                                                                                                                                                                                                                                                                                                                                                                                                                                                                                                                                                                                                                                                                                                                                                                                                                                                                                                                                                                         |           | PHI Institute of Nephrology - Struga                                                                                | Research Center for Genetic Engineering and Biotechnology "Georgi D. Elremov", Macedonian Academy of Sciences and Arts     | Aleksandar J. Dimovski; Dijana Plasheska-Karanfilska; Gjorgji Bozinovski; Milena Jakimovska; Predrag Noveski; RCGEB - MASA                                                                                                                                                                              |
| EPI_ISL_968212 to 968213                                                                                                                                                                                                                                                                                                                                                                                                                                                                                                                                                                                                                                                                                                                                                                                                                                                                                                                                                                                                                                                                                                                                                                                                                                                                                                                                                                                                                                                                                                                                                                                                                                                                                                                                                                                                                                                                                                                                                                                                                                                                                                                                                                                                                                                                                                                                                                                                                                                                                                                                                                                                                                                                                                                                                                                                                                                                                                                                                                                                                                                                                                                                                                                                                                                                                                                                                                                                                                                                                                                                                                                                                                                                                                                                                                                                                                                                                                                                                                                                                                                                                                                                                                                                                                                                                                                                                                                                                                                                                                                                                                                                                                                                                                                                                                                                                                                                                                                                                                                                                                                                                                                                                                                                                                                                                                                                                                                                                                                                                                                                                                                                                                                                                                                                                                                                                                                                                                                                                                                                                                                                                                                                                                                                                                                                                                                                                                                                                                                                                                                                                                                                                                                                                                                                                                                                                                                                                                                                                                                                                                                                                                                                                                                                                                                                                                                                                                                                                                                                                                                                                                                                                                                                                                                                                                                                                                                                                                                                                                                                                                                                                                                                                                                                                                                                                                                                                                                                                                                                                                                                                                                                                                                                                                                                                                                                                                                                                                                                                                                                                                                                                                                                                                                                                                                                                                                                                                                                                                                                                                                                                                                                                                                                                                                                                                                                                                                                                                                                                                                                                                                                                                               |           | PHV-FSS                                                                                                             | PHV-FSS                                                                                                                    | Son Nguyen et al.; Son Nguyen et al.                                                                                                                                                                                                                                                                    |
| EPI_ISL_733570                                                                                                                                                                                                                                                                                                                                                                                                                                                                                                                                                                                                                                                                                                                                                                                                                                                                                                                                                                                                                                                                                                                                                                                                                                                                                                                                                                                                                                                                                                                                                                                                                                                                                                                                                                                                                                                                                                                                                                                                                                                                                                                                                                                                                                                                                                                                                                                                                                                                                                                                                                                                                                                                                                                                                                                                                                                                                                                                                                                                                                                                                                                                                                                                                                                                                                                                                                                                                                                                                                                                                                                                                                                                                                                                                                                                                                                                                                                                                                                                                                                                                                                                                                                                                                                                                                                                                                                                                                                                                                                                                                                                                                                                                                                                                                                                                                                                                                                                                                                                                                                                                                                                                                                                                                                                                                                                                                                                                                                                                                                                                                                                                                                                                                                                                                                                                                                                                                                                                                                                                                                                                                                                                                                                                                                                                                                                                                                                                                                                                                                                                                                                                                                                                                                                                                                                                                                                                                                                                                                                                                                                                                                                                                                                                                                                                                                                                                                                                                                                                                                                                                                                                                                                                                                                                                                                                                                                                                                                                                                                                                                                                                                                                                                                                                                                                                                                                                                                                                                                                                                                                                                                                                                                                                                                                                                                                                                                                                                                                                                                                                                                                                                                                                                                                                                                                                                                                                                                                                                                                                                                                                                                                                                                                                                                                                                                                                                                                                                                                                                                                                                                                                                         |           | POK OI HOSPITAL                                                                                                     | Hong Kong Department of Health                                                                                             | Alan K.L. Tsang; Dominic N.C. Tsang; Edman T.K. Lam; Peter C.W. Yip; Rickjason C.W. Chan                                                                                                                                                                                                                |
| EPI_ISL_833288, EPI_ISL_833290                                                                                                                                                                                                                                                                                                                                                                                                                                                                                                                                                                                                                                                                                                                                                                                                                                                                                                                                                                                                                                                                                                                                                                                                                                                                                                                                                                                                                                                                                                                                                                                                                                                                                                                                                                                                                                                                                                                                                                                                                                                                                                                                                                                                                                                                                                                                                                                                                                                                                                                                                                                                                                                                                                                                                                                                                                                                                                                                                                                                                                                                                                                                                                                                                                                                                                                                                                                                                                                                                                                                                                                                                                                                                                                                                                                                                                                                                                                                                                                                                                                                                                                                                                                                                                                                                                                                                                                                                                                                                                                                                                                                                                                                                                                                                                                                                                                                                                                                                                                                                                                                                                                                                                                                                                                                                                                                                                                                                                                                                                                                                                                                                                                                                                                                                                                                                                                                                                                                                                                                                                                                                                                                                                                                                                                                                                                                                                                                                                                                                                                                                                                                                                                                                                                                                                                                                                                                                                                                                                                                                                                                                                                                                                                                                                                                                                                                                                                                                                                                                                                                                                                                                                                                                                                                                                                                                                                                                                                                                                                                                                                                                                                                                                                                                                                                                                                                                                                                                                                                                                                                                                                                                                                                                                                                                                                                                                                                                                                                                                                                                                                                                                                                                                                                                                                                                                                                                                                                                                                                                                                                                                                                                                                                                                                                                                                                                                                                                                                                                                                                                                                                                                         |           | PRESIDIO TERRITORIALE CASOLI CH                                                                                     | Istituto Zooprofilattico Sperimentale dell'Abruzzo e Molise "G. Caporale"                                                  | Ancora M; Calistri P; Cammà C; Curini V; Di Domenico M; Di Pasquale A; Lorusso A; Mangione I; Marcacci M; Puglia I; Rinaldi A; Savini G                                                                                                                                                                 |
| EPI_ISL_861659 to 861661, EPI_ISL_906067                                                                                                                                                                                                                                                                                                                                                                                                                                                                                                                                                                                                                                                                                                                                                                                                                                                                                                                                                                                                                                                                                                                                                                                                                                                                                                                                                                                                                                                                                                                                                                                                                                                                                                                                                                                                                                                                                                                                                                                                                                                                                                                                                                                                                                                                                                                                                                                                                                                                                                                                                                                                                                                                                                                                                                                                                                                                                                                                                                                                                                                                                                                                                                                                                                                                                                                                                                                                                                                                                                                                                                                                                                                                                                                                                                                                                                                                                                                                                                                                                                                                                                                                                                                                                                                                                                                                                                                                                                                                                                                                                                                                                                                                                                                                                                                                                                                                                                                                                                                                                                                                                                                                                                                                                                                                                                                                                                                                                                                                                                                                                                                                                                                                                                                                                                                                                                                                                                                                                                                                                                                                                                                                                                                                                                                                                                                                                                                                                                                                                                                                                                                                                                                                                                                                                                                                                                                                                                                                                                                                                                                                                                                                                                                                                                                                                                                                                                                                                                                                                                                                                                                                                                                                                                                                                                                                                                                                                                                                                                                                                                                                                                                                                                                                                                                                                                                                                                                                                                                                                                                                                                                                                                                                                                                                                                                                                                                                                                                                                                                                                                                                                                                                                                                                                                                                                                                                                                                                                                                                                                                                                                                                                                                                                                                                                                                                                                                                                                                                                                                                                                                                                               |           | PS e Maternidade Nair Fonseca Leitao Arantes                                                                        | Instituto Adolfo Lutz, Interdisciplinary Procedures Center, Strategic Laboratory                                           | Claudia Regina Gonçalves; Claudio Tavares Sacchi; Erica Valessa Ramos Gomes; Karoline Rodrigues Campos                                                                                                                                                                                                  |
| EPI_ISL_861666                                                                                                                                                                                                                                                                                                                                                                                                                                                                                                                                                                                                                                                                                                                                                                                                                                                                                                                                                                                                                                                                                                                                                                                                                                                                                                                                                                                                                                                                                                                                                                                                                                                                                                                                                                                                                                                                                                                                                                                                                                                                                                                                                                                                                                                                                                                                                                                                                                                                                                                                                                                                                                                                                                                                                                                                                                                                                                                                                                                                                                                                                                                                                                                                                                                                                                                                                                                                                                                                                                                                                                                                                                                                                                                                                                                                                                                                                                                                                                                                                                                                                                                                                                                                                                                                                                                                                                                                                                                                                                                                                                                                                                                                                                                                                                                                                                                                                                                                                                                                                                                                                                                                                                                                                                                                                                                                                                                                                                                                                                                                                                                                                                                                                                                                                                                                                                                                                                                                                                                                                                                                                                                                                                                                                                                                                                                                                                                                                                                                                                                                                                                                                                                                                                                                                                                                                                                                                                                                                                                                                                                                                                                                                                                                                                                                                                                                                                                                                                                                                                                                                                                                                                                                                                                                                                                                                                                                                                                                                                                                                                                                                                                                                                                                                                                                                                                                                                                                                                                                                                                                                                                                                                                                                                                                                                                                                                                                                                                                                                                                                                                                                                                                                                                                                                                                                                                                                                                                                                                                                                                                                                                                                                                                                                                                                                                                                                                                                                                                                                                                                                                                                                                         |           | PSF Dr. Antonio Pires de Almeida                                                                                    | Instituto Adolfo Lutz, Interdisciplinary Procedures Center, Strategic Laboratory                                           | Claudia Regina Gonçalves; Claudio Tavares Sacchi; Erica Valessa Ramos Gomes; Karoline Rodrigues Campos                                                                                                                                                                                                  |
| EPI_ISL_700435, EPI_ISL_700439, EPI_ISL_700449, EPI_ISL_700451 to 700452, EPI_ISL_700478, EPI_ISL_700551, EPI_ISL_700558                                                                                                                                                                                                                                                                                                                                                                                                                                                                                                                                                                                                                                                                                                                                                                                                                                                                                                                                                                                                                                                                                                                                                                                                                                                                                                                                                                                                                                                                                                                                                                                                                                                                                                                                                                                                                                                                                                                                                                                                                                                                                                                                                                                                                                                                                                                                                                                                                                                                                                                                                                                                                                                                                                                                                                                                                                                                                                                                                                                                                                                                                                                                                                                                                                                                                                                                                                                                                                                                                                                                                                                                                                                                                                                                                                                                                                                                                                                                                                                                                                                                                                                                                                                                                                                                                                                                                                                                                                                                                                                                                                                                                                                                                                                                                                                                                                                                                                                                                                                                                                                                                                                                                                                                                                                                                                                                                                                                                                                                                                                                                                                                                                                                                                                                                                                                                                                                                                                                                                                                                                                                                                                                                                                                                                                                                                                                                                                                                                                                                                                                                                                                                                                                                                                                                                                                                                                                                                                                                                                                                                                                                                                                                                                                                                                                                                                                                                                                                                                                                                                                                                                                                                                                                                                                                                                                                                                                                                                                                                                                                                                                                                                                                                                                                                                                                                                                                                                                                                                                                                                                                                                                                                                                                                                                                                                                                                                                                                                                                                                                                                                                                                                                                                                                                                                                                                                                                                                                                                                                                                                                                                                                                                                                                                                                                                                                                                                                                                                                                                                                               | see above | Pacaltsdorp Clinic wc PAC                                                                                           | NHLS/UCT                                                                                                                   | Arash Iranzadeh; Bruna Galvao; Carolyn Williamson; Deelan Doolabh; Diana Hardie; Houriyah Tegally; Innocent Mudau; Kruger Marais; Lynn Tyers; Marvin Hsiao; Stephen Korsman                                                                                                                             |
| EPI_ISL_696453, EPI_ISL_696456, EPI_ISL_696459, EPI_ISL_696470, EPI_ISL_696474, EPI_ISL_696504, EPI_ISL_696513                                                                                                                                                                                                                                                                                                                                                                                                                                                                                                                                                                                                                                                                                                                                                                                                                                                                                                                                                                                                                                                                                                                                                                                                                                                                                                                                                                                                                                                                                                                                                                                                                                                                                                                                                                                                                                                                                                                                                                                                                                                                                                                                                                                                                                                                                                                                                                                                                                                                                                                                                                                                                                                                                                                                                                                                                                                                                                                                                                                                                                                                                                                                                                                                                                                                                                                                                                                                                                                                                                                                                                                                                                                                                                                                                                                                                                                                                                                                                                                                                                                                                                                                                                                                                                                                                                                                                                                                                                                                                                                                                                                                                                                                                                                                                                                                                                                                                                                                                                                                                                                                                                                                                                                                                                                                                                                                                                                                                                                                                                                                                                                                                                                                                                                                                                                                                                                                                                                                                                                                                                                                                                                                                                                                                                                                                                                                                                                                                                                                                                                                                                                                                                                                                                                                                                                                                                                                                                                                                                                                                                                                                                                                                                                                                                                                                                                                                                                                                                                                                                                                                                                                                                                                                                                                                                                                                                                                                                                                                                                                                                                                                                                                                                                                                                                                                                                                                                                                                                                                                                                                                                                                                                                                                                                                                                                                                                                                                                                                                                                                                                                                                                                                                                                                                                                                                                                                                                                                                                                                                                                                                                                                                                                                                                                                                                                                                                                                                                                                                                                                                         |           |                                                                                                                     |                                                                                                                            |                                                                                                                                                                                                                                                                                                         |

|                                                                                                                                                                                                                                                                                                                                                                                                                                                                                                                                                                                                                                                                                                                                                                                                                                                                                                                                                                                                                                                                                                                                                                                                                                                                                                                                                                                                                                                                                                                                                                                                                                                                                                                                                                                                                                                                                                                                                                                                                                                                                                                                                                                                                                                                                                                                                                                                                                                                                                                                                                                                                                                                                                                                                                                                                                                                                                                                                                                                                                                                                                                                                                                                                                                                                                                                                                                                                                                                                                                                                                                                                                                                                                                                                                                                                                                                                                                                                                                                                                                                                                              |                                                                                                                                                                        |                                                                                                                                                                               |                                                                                                                                                                                                                                                                                                                                                                                                                                                                                                                                                                                                                                                                                                                                                                                                                                                                                                                                                                                                                                                                             |
|--------------------------------------------------------------------------------------------------------------------------------------------------------------------------------------------------------------------------------------------------------------------------------------------------------------------------------------------------------------------------------------------------------------------------------------------------------------------------------------------------------------------------------------------------------------------------------------------------------------------------------------------------------------------------------------------------------------------------------------------------------------------------------------------------------------------------------------------------------------------------------------------------------------------------------------------------------------------------------------------------------------------------------------------------------------------------------------------------------------------------------------------------------------------------------------------------------------------------------------------------------------------------------------------------------------------------------------------------------------------------------------------------------------------------------------------------------------------------------------------------------------------------------------------------------------------------------------------------------------------------------------------------------------------------------------------------------------------------------------------------------------------------------------------------------------------------------------------------------------------------------------------------------------------------------------------------------------------------------------------------------------------------------------------------------------------------------------------------------------------------------------------------------------------------------------------------------------------------------------------------------------------------------------------------------------------------------------------------------------------------------------------------------------------------------------------------------------------------------------------------------------------------------------------------------------------------------------------------------------------------------------------------------------------------------------------------------------------------------------------------------------------------------------------------------------------------------------------------------------------------------------------------------------------------------------------------------------------------------------------------------------------------------------------------------------------------------------------------------------------------------------------------------------------------------------------------------------------------------------------------------------------------------------------------------------------------------------------------------------------------------------------------------------------------------------------------------------------------------------------------------------------------------------------------------------------------------------------------------------------------------------------------------------------------------------------------------------------------------------------------------------------------------------------------------------------------------------------------------------------------------------------------------------------------------------------------------------------------------------------------------------------------------------------------------------------------------------------------------------|------------------------------------------------------------------------------------------------------------------------------------------------------------------------|-------------------------------------------------------------------------------------------------------------------------------------------------------------------------------|-----------------------------------------------------------------------------------------------------------------------------------------------------------------------------------------------------------------------------------------------------------------------------------------------------------------------------------------------------------------------------------------------------------------------------------------------------------------------------------------------------------------------------------------------------------------------------------------------------------------------------------------------------------------------------------------------------------------------------------------------------------------------------------------------------------------------------------------------------------------------------------------------------------------------------------------------------------------------------------------------------------------------------------------------------------------------------|
| see above                                                                                                                                                                                                                                                                                                                                                                                                                                                                                                                                                                                                                                                                                                                                                                                                                                                                                                                                                                                                                                                                                                                                                                                                                                                                                                                                                                                                                                                                                                                                                                                                                                                                                                                                                                                                                                                                                                                                                                                                                                                                                                                                                                                                                                                                                                                                                                                                                                                                                                                                                                                                                                                                                                                                                                                                                                                                                                                                                                                                                                                                                                                                                                                                                                                                                                                                                                                                                                                                                                                                                                                                                                                                                                                                                                                                                                                                                                                                                                                                                                                                                                    | Pacaltsdorp Clinic wc PAC & NHL/UCT                                                                                                                                    | KRISP, KZN Research Innovation and Sequencing Platform                                                                                                                        | Arash Iranzadeh; Bruna Galvao; Carolyn Williamson; Deelan Doolabh; Diana Hardie; Emanuel James San; Houriyah Tegally; Innocent Mudau; Jennifer Giandhari; Kruger Marais; Lynn Tyers; Marvin Hsiao; Stephen Korsman; Sureshnee Pillay; Tulo de Oliveira                                                                                                                                                                                                                                                                                                                                                                                                                                                                                                                                                                                                                                                                                                                                                                                                                      |
| EPI_ISL_955905                                                                                                                                                                                                                                                                                                                                                                                                                                                                                                                                                                                                                                                                                                                                                                                                                                                                                                                                                                                                                                                                                                                                                                                                                                                                                                                                                                                                                                                                                                                                                                                                                                                                                                                                                                                                                                                                                                                                                                                                                                                                                                                                                                                                                                                                                                                                                                                                                                                                                                                                                                                                                                                                                                                                                                                                                                                                                                                                                                                                                                                                                                                                                                                                                                                                                                                                                                                                                                                                                                                                                                                                                                                                                                                                                                                                                                                                                                                                                                                                                                                                                               | Pamela Youde Nethersole Eastern Hospital                                                                                                                               | Hong Kong Department of Health                                                                                                                                                | Alan K.L. Tsang; Dominic N.C. Tsang; Edman T.K. Lam; Peter C.W. Yip; Rickjason C.W. Chan                                                                                                                                                                                                                                                                                                                                                                                                                                                                                                                                                                                                                                                                                                                                                                                                                                                                                                                                                                                    |
| EPI_ISL_707936 to 707939, EPI_ISL_708184 to 708186, EPI_ISL_708188 to 708195                                                                                                                                                                                                                                                                                                                                                                                                                                                                                                                                                                                                                                                                                                                                                                                                                                                                                                                                                                                                                                                                                                                                                                                                                                                                                                                                                                                                                                                                                                                                                                                                                                                                                                                                                                                                                                                                                                                                                                                                                                                                                                                                                                                                                                                                                                                                                                                                                                                                                                                                                                                                                                                                                                                                                                                                                                                                                                                                                                                                                                                                                                                                                                                                                                                                                                                                                                                                                                                                                                                                                                                                                                                                                                                                                                                                                                                                                                                                                                                                                                 | Pamukkale University Hospital                                                                                                                                          | Pamukkale University Department of Medical Genetics                                                                                                                           | Onur TOKGUN et al.                                                                                                                                                                                                                                                                                                                                                                                                                                                                                                                                                                                                                                                                                                                                                                                                                                                                                                                                                                                                                                                          |
| EPI_ISL_968080, EPI_ISL_984756 to 984947, EPI_ISL_994802 to 995171                                                                                                                                                                                                                                                                                                                                                                                                                                                                                                                                                                                                                                                                                                                                                                                                                                                                                                                                                                                                                                                                                                                                                                                                                                                                                                                                                                                                                                                                                                                                                                                                                                                                                                                                                                                                                                                                                                                                                                                                                                                                                                                                                                                                                                                                                                                                                                                                                                                                                                                                                                                                                                                                                                                                                                                                                                                                                                                                                                                                                                                                                                                                                                                                                                                                                                                                                                                                                                                                                                                                                                                                                                                                                                                                                                                                                                                                                                                                                                                                                                           | Pandemic Response Lab - NYC                                                                                                                                            | Pandemic Response Lab, R&D                                                                                                                                                    | Cybill del Castillo; Haiping Hao; Henry Lee; Jon Laurent; Melissa Hopkins; Michael Hammerling; Pradeep Bugga; William Ward                                                                                                                                                                                                                                                                                                                                                                                                                                                                                                                                                                                                                                                                                                                                                                                                                                                                                                                                                  |
| EPI_ISL_883307 to 883308, EPI_ISL_883311, EPI_ISL_883317, EPI_ISL_883383 to 883389                                                                                                                                                                                                                                                                                                                                                                                                                                                                                                                                                                                                                                                                                                                                                                                                                                                                                                                                                                                                                                                                                                                                                                                                                                                                                                                                                                                                                                                                                                                                                                                                                                                                                                                                                                                                                                                                                                                                                                                                                                                                                                                                                                                                                                                                                                                                                                                                                                                                                                                                                                                                                                                                                                                                                                                                                                                                                                                                                                                                                                                                                                                                                                                                                                                                                                                                                                                                                                                                                                                                                                                                                                                                                                                                                                                                                                                                                                                                                                                                                           | Pandemic Response Laboratory                                                                                                                                           | New York City Public Health Laboratory                                                                                                                                        | Jade Wang; et al.                                                                                                                                                                                                                                                                                                                                                                                                                                                                                                                                                                                                                                                                                                                                                                                                                                                                                                                                                                                                                                                           |
| EPI_ISL_956277, EPI_ISL_956314                                                                                                                                                                                                                                                                                                                                                                                                                                                                                                                                                                                                                                                                                                                                                                                                                                                                                                                                                                                                                                                                                                                                                                                                                                                                                                                                                                                                                                                                                                                                                                                                                                                                                                                                                                                                                                                                                                                                                                                                                                                                                                                                                                                                                                                                                                                                                                                                                                                                                                                                                                                                                                                                                                                                                                                                                                                                                                                                                                                                                                                                                                                                                                                                                                                                                                                                                                                                                                                                                                                                                                                                                                                                                                                                                                                                                                                                                                                                                                                                                                                                               | Paru Hospital                                                                                                                                                          | Institute of Tropical Disease, Universitas Airlangga                                                                                                                          | Aldise M Nastri; Dyah Retno; Gatot Soegiarto; Jezy R Dewantari; Kazufumi Shimizu; Krisnoadi Rahardjo; Laksmi Wulandari; Maria I Lusida; Resti Yudhawati; Rima R Prasetya; Soetjpto; Yasuko Mori                                                                                                                                                                                                                                                                                                                                                                                                                                                                                                                                                                                                                                                                                                                                                                                                                                                                             |
| EPI_ISL_654866 to 654870, EPI_ISL_654872 to 654891, EPI_ISL_812922                                                                                                                                                                                                                                                                                                                                                                                                                                                                                                                                                                                                                                                                                                                                                                                                                                                                                                                                                                                                                                                                                                                                                                                                                                                                                                                                                                                                                                                                                                                                                                                                                                                                                                                                                                                                                                                                                                                                                                                                                                                                                                                                                                                                                                                                                                                                                                                                                                                                                                                                                                                                                                                                                                                                                                                                                                                                                                                                                                                                                                                                                                                                                                                                                                                                                                                                                                                                                                                                                                                                                                                                                                                                                                                                                                                                                                                                                                                                                                                                                                           | Pasteur Institute in Ho Chi Minh city                                                                                                                                  | Department of Microbiology and Immunology - Pasteur Institute in Ho Chi Minh city                                                                                             | Anh Hoang Nguyen; Cao Minh Thng; Hang Thi Thu Pham; Hieu Minh Le; Hieu Trung Nguyen; Hoàng Kim Loan; Hoàng Minh; Hoàng Nh ạo; Hoàng Quc Cng; Hoàng Thủy Linh; Hunh Kim Mai; Hunh Phng Tho; Hunh Th Kim Loan; Hà Bích Ngc; Khu Vn Ngha; La Hoàng Huy; Lan Trong Phan; Loan Thi Kim Huynh; Long Thanh Nguyen; Lê Hoàng Chng; Lê Ngc Tú; Lê Th Kim Trang; Lê Xuân Quang; Lng Chn Quang; Manh Huy Dao; Nguyen Bo Triu; Nguyen Hoàng Anh; Nguyen Hoàng Quân; Nguyen Hoàng V; Nguyen Ngc Anh Tun; Nguyen Thanh Long; Nguyen Thng Nc; Nguyen Th Ngc Tho; Nguyen Th Phng Thuy; Nguyen Th Thanh Thng; Nguyen Th Thanh Tho; Nguyen Trung Hiu; Nguyen Trng Toan; Nguyen Vit Thinh; Nguyen V Thng; Nhung Pham Hong Vu; Phan Trng Lát; Phm Duy Quang; Phm Th Nhung; Phm Th Thu Hng; Quang Chan Luong; Quang Duy Pham; Thang Minh Cao; Thao Thi Ngoc Nguyen; Trinh Viet Nguyen; Thuong Vu Nguyen.; Trng Công Hiu; Trng Thủy Dung; Trn Th Hng Kim; Trn Tôn; Trnh Hoàng Long; Viên ng Khánh Linh; V6 Th Trang; V 6 Phm Hng Nhung; oàn Ngc Minh Giang; ạo Huy Mnh; ng Thanh Giang; Thái Hùng |
| EPI_ISL_660143 to 660158, EPI_ISL_912401                                                                                                                                                                                                                                                                                                                                                                                                                                                                                                                                                                                                                                                                                                                                                                                                                                                                                                                                                                                                                                                                                                                                                                                                                                                                                                                                                                                                                                                                                                                                                                                                                                                                                                                                                                                                                                                                                                                                                                                                                                                                                                                                                                                                                                                                                                                                                                                                                                                                                                                                                                                                                                                                                                                                                                                                                                                                                                                                                                                                                                                                                                                                                                                                                                                                                                                                                                                                                                                                                                                                                                                                                                                                                                                                                                                                                                                                                                                                                                                                                                                                     | PathCare                                                                                                                                                               | National Health Laboratory Service (NHL), Tygerberg                                                                                                                           | Bronwyn Kleinhans; Davis M-A; Draper C; Eduan Wilkinton; Gert van Zyl; Houriyah Tegally; Hsiao M; Jean Maritz; Kayla Delaney; Siegfried N; Susan Engelbrecht; Tulo de Oliveira; Williamson C; Wolfgang Preiser                                                                                                                                                                                                                                                                                                                                                                                                                                                                                                                                                                                                                                                                                                                                                                                                                                                              |
| EPI_ISL_622805 to 622806, EPI_ISL_637088, EPI_ISL_755626                                                                                                                                                                                                                                                                                                                                                                                                                                                                                                                                                                                                                                                                                                                                                                                                                                                                                                                                                                                                                                                                                                                                                                                                                                                                                                                                                                                                                                                                                                                                                                                                                                                                                                                                                                                                                                                                                                                                                                                                                                                                                                                                                                                                                                                                                                                                                                                                                                                                                                                                                                                                                                                                                                                                                                                                                                                                                                                                                                                                                                                                                                                                                                                                                                                                                                                                                                                                                                                                                                                                                                                                                                                                                                                                                                                                                                                                                                                                                                                                                                                     | PathLab Bay of Plenty                                                                                                                                                  | Institute of Environmental Science and Research (ESR)                                                                                                                         | Anja Werno; Antje van der Linden; Arlo Upton; Chris Mansell; David Hammer; Dragana Drinkovic; Erasmus Smit; Gary McAuliffe; Hana Sofia Andersson; Hermes Perez; James Usher; Jill Sherwood; Jing Wang; Joep de Light; Josh Freeman; Julia Howard; Juliet Elvy; Lauren Jelly; Mary DeAlmeida; Matt Blakiston; Matt Storey; Matthew Rogers; Max Bloomfield; Michael Addidle; Michelle Balm; Muhammad Faisal; Nikki Freed; Olin Silander; Sally Roberts; Sarah Jefferies; Sharmini Muttaiyah; Susan Morpeth; Susan Taylor; Timothy Blackmore; Vani Sathyendran; Veronica Playle; Virginia Hope; Xiaoyun Ren                                                                                                                                                                                                                                                                                                                                                                                                                                                                    |
| EPI_ISL_672619 to 672654, EPI_ISL_708738 to 708796, EPI_ISL_794672 to 794734, EPI_ISL_810793 to 810794, EPI_ISL_810796, EPI_ISL_810798 to 810799, EPI_ISL_810801, EPI_ISL_810803 to 810804, EPI_ISL_810964 to 810969, EPI_ISL_857466 to 857468, EPI_ISL_857486 to 857488, EPI_ISL_885139 to 885140, EPI_ISL_933787 to 933796, EPI_ISL_933798 to 933802                                                                                                                                                                                                                                                                                                                                                                                                                                                                                                                                                                                                                                                                                                                                                                                                                                                                                                                                                                                                                                                                                                                                                                                                                                                                                                                                                                                                                                                                                                                                                                                                                                                                                                                                                                                                                                                                                                                                                                                                                                                                                                                                                                                                                                                                                                                                                                                                                                                                                                                                                                                                                                                                                                                                                                                                                                                                                                                                                                                                                                                                                                                                                                                                                                                                                                                                                                                                                                                                                                                                                                                                                                                                                                                                                       | see above                                                                                                                                                              | PathWest Laboratory Medicine WA                                                                                                                                               | PathWest Laboratory Medicine WA Microbial Surveillance Unit                                                                                                                                                                                                                                                                                                                                                                                                                                                                                                                                                                                                                                                                                                                                                                                                                                                                                                                                                                                                                 |
| see above                                                                                                                                                                                                                                                                                                                                                                                                                                                                                                                                                                                                                                                                                                                                                                                                                                                                                                                                                                                                                                                                                                                                                                                                                                                                                                                                                                                                                                                                                                                                                                                                                                                                                                                                                                                                                                                                                                                                                                                                                                                                                                                                                                                                                                                                                                                                                                                                                                                                                                                                                                                                                                                                                                                                                                                                                                                                                                                                                                                                                                                                                                                                                                                                                                                                                                                                                                                                                                                                                                                                                                                                                                                                                                                                                                                                                                                                                                                                                                                                                                                                                                    | PathWest Laboratory Medicine WA                                                                                                                                        | PathWest Laboratory Medicine WA Microbial Surveillance Unit                                                                                                                   | PathWest Laboratory Medicine WA Microbial Surveillance Unit                                                                                                                                                                                                                                                                                                                                                                                                                                                                                                                                                                                                                                                                                                                                                                                                                                                                                                                                                                                                                 |
| EPI_ISL_667559 to 667757, EPI_ISL_684110 to 684126, EPI_ISL_684128 to 684135, EPI_ISL_684139 to 684146, EPI_ISL_684150, EPI_ISL_684156 to 684158, EPI_ISL_684162 to 684175, EPI_ISL_684177 to 684219, EPI_ISL_684289 to 684295, EPI_ISL_684297 to 684303, EPI_ISL_684305 to 684324, EPI_ISL_684357 to 684407, EPI_ISL_684484 to 684490, EPI_ISL_684492 to 684500, EPI_ISL_684502 to 684505, EPI_ISL_684523 to 684555, EPI_ISL_684558 to 684565, EPI_ISL_684578 to 684614, EPI_ISL_684693 to 684722, EPI_ISL_684736 to 684797, EPI_ISL_685133 to 685219, EPI_ISL_685238 to 685278, EPI_ISL_685282 to 685296, EPI_ISL_685311 to 685406, EPI_ISL_685505 to 685605, EPI_ISL_685617 to 685665, EPI_ISL_685695 to 685782, EPI_ISL_685784 to 685791, EPI_ISL_685793 to 685917, EPI_ISL_685925 to 685929, EPI_ISL_685931 to 685961, EPI_ISL_685988 to 686016, EPI_ISL_686021 to 686023, EPI_ISL_686025 to 686027, EPI_ISL_686029 to 686032, EPI_ISL_686109 to 686520, EPI_ISL_686612 to 686658, EPI_ISL_686645 to 687042, EPI_ISL_687079 to 687532, EPI_ISL_687561 to 687618, EPI_ISL_687621 to 687698, EPI_ISL_687718 to 688283, EPI_ISL_688402 to 688582, EPI_ISL_688605 to 688611, EPI_ISL_688613 to 688618, EPI_ISL_688625 to 688633, EPI_ISL_688635 to 688639, EPI_ISL_688710 to 688896, EPI_ISL_688969 to 689046, EPI_ISL_689089 to 689459, EPI_ISL_689497 to 689611, EPI_ISL_689613 to 689616, EPI_ISL_689618 to 689642, EPI_ISL_689644 to 689645, EPI_ISL_689647 to 689679, EPI_ISL_689681 to 689685, EPI_ISL_689698 to 689758, EPI_ISL_689826 to 690010, EPI_ISL_690029 to 690209, EPI_ISL_690254 to 690431, EPI_ISL_690527 to 690552, EPI_ISL_690554 to 690611, EPI_ISL_690614 to 690618, EPI_ISL_690620 to 690625, EPI_ISL_690629, EPI_ISL_690632 to 690637, EPI_ISL_690684 to 690791, EPI_ISL_690845 to 690901, EPI_ISL_690909 to 690981, EPI_ISL_690987 to 691243, EPI_ISL_691245 to 691283, EPI_ISL_691289 to 691363, EPI_ISL_691379 to 691508, EPI_ISL_691546 to 691549, EPI_ISL_691552 to 691611, EPI_ISL_691733 to 691734, EPI_ISL_691736 to 691737, EPI_ISL_691739 to 691752, EPI_ISL_691754 to 691755, EPI_ISL_691757 to 691763, EPI_ISL_691767 to 692046, EPI_ISL_692059 to 692093, EPI_ISL_692098 to 692118, EPI_ISL_692129 to 692161, EPI_ISL_692164 to 692173, EPI_ISL_692188 to 692218, EPI_ISL_692230 to 692283, EPI_ISL_692328 to 692441, EPI_ISL_692498 to 692652, EPI_ISL_692680 to 692732, EPI_ISL_721568 to 721623, EPI_ISL_735439 to 735443, EPI_ISL_736891 to 736924, EPI_ISL_737208, EPI_ISL_768634 to 768724, EPI_ISL_779199 to 779253, EPI_ISL_779661 to 779702, EPI_ISL_792680 to 792683, EPI_ISL_803954, EPI_ISL_825386 to 825436, EPI_ISL_833367 to 833372, EPI_ISL_851041 to 851047, EPI_ISL_860096 to 860113, EPI_ISL_864864, EPI_ISL_892369 to 892514, EPI_ISL_892534 to 892560, EPI_ISL_892566 to 892588, EPI_ISL_892611 to 892703, EPI_ISL_892705 to 892725, EPI_ISL_892808 to 892943, EPI_ISL_892945 to 893019, EPI_ISL_893049 to 893085, EPI_ISL_893108 to 893181, EPI_ISL_893242 to 893366, EPI_ISL_894277, EPI_ISL_894280 to 894286, EPI_ISL_894288 to 894300, EPI_ISL_894302 to 894353, EPI_ISL_894364 to 894671, EPI_ISL_894817 to 894931, EPI_ISL_894933 to 894946, EPI_ISL_894948 to 895001, EPI_ISL_895095 to 895185, EPI_ISL_895189 to 895288, EPI_ISL_895290 to 895726, EPI_ISL_895849 to 895978, EPI_ISL_896013 to 896068, EPI_ISL_896602 to 896763, EPI_ISL_896855 to 897055, EPI_ISL_897081 to 897170, EPI_ISL_897206 to 897444, EPI_ISL_897447 to 897597, EPI_ISL_898033 to 898036, EPI_ISL_898057 to 898320, EPI_ISL_898326 to 898328, EPI_ISL_898338 to 898522, EPI_ISL_898551 to 898710, EPI_ISL_898810 to 898932, EPI_ISL_900743 to 901457, EPI_ISL_901491, EPI_ISL_901498, EPI_ISL_901501 to 901602, EPI_ISL_901604 to 901716, EPI_ISL_901722 to 901733, EPI_ISL_901737 to 901965, EPI_ISL_902019 to 902023, EPI_ISL_902054 to 902207, EPI_ISL_902209 to 902333, EPI_ISL_902351 to 902503, EPI_ISL_902553 to 902728, EPI_ISL_906466 to 906478, EPI_ISL_906506 to 906515, EPI_ISL_906519 to 906522, EPI_ISL_906524 to 906526, EPI_ISL_918129 to 918159 |                                                                                                                                                                        |                                                                                                                                                                               |                                                                                                                                                                                                                                                                                                                                                                                                                                                                                                                                                                                                                                                                                                                                                                                                                                                                                                                                                                                                                                                                             |
| see above                                                                                                                                                                                                                                                                                                                                                                                                                                                                                                                                                                                                                                                                                                                                                                                                                                                                                                                                                                                                                                                                                                                                                                                                                                                                                                                                                                                                                                                                                                                                                                                                                                                                                                                                                                                                                                                                                                                                                                                                                                                                                                                                                                                                                                                                                                                                                                                                                                                                                                                                                                                                                                                                                                                                                                                                                                                                                                                                                                                                                                                                                                                                                                                                                                                                                                                                                                                                                                                                                                                                                                                                                                                                                                                                                                                                                                                                                                                                                                                                                                                                                                    | Pathogen Genomics Center, National Institute of Infectious Diseases                                                                                                    | Pathogen Genomics Center, National Institute of Infectious Diseases                                                                                                           | Kentaro Itokawa; Makoto Kuroda; Masanori Hashino; Rina Tanaka; Tsuyoshi Sekizuka                                                                                                                                                                                                                                                                                                                                                                                                                                                                                                                                                                                                                                                                                                                                                                                                                                                                                                                                                                                            |
| EPI_ISL_636972, EPI_ISL_678247                                                                                                                                                                                                                                                                                                                                                                                                                                                                                                                                                                                                                                                                                                                                                                                                                                                                                                                                                                                                                                                                                                                                                                                                                                                                                                                                                                                                                                                                                                                                                                                                                                                                                                                                                                                                                                                                                                                                                                                                                                                                                                                                                                                                                                                                                                                                                                                                                                                                                                                                                                                                                                                                                                                                                                                                                                                                                                                                                                                                                                                                                                                                                                                                                                                                                                                                                                                                                                                                                                                                                                                                                                                                                                                                                                                                                                                                                                                                                                                                                                                                               | Pathogen Genomics Lab King Abdullah University of Science and Technology (KAUST)                                                                                       | Pathogen Genomics Lab King Abdullah University of Science and Technology (KAUST)                                                                                              | Abbas Al Mutairi; Afrah Alsomali; Amanda Ooi; Amit Kumar Subudhi; Anwar Hashem; Arnab Pain; Asim Khogeer; Awad Al-Omari; Fadwa Alofi; Fathia Ben Rached; Kahled Aligthami; Luke Esau; Muhammad Shuaib; Naif Almontashiri; Olga Douvropoulou; Raaeece Naeem; Rahul P Salunke; Raushan Nugmanova; Samer Salih; Sara Mfarrej; Sharif Hala                                                                                                                                                                                                                                                                                                                                                                                                                                                                                                                                                                                                                                                                                                                                      |
| EPI_ISL_636960 to 636968, EPI_ISL_677908 to 678246, EPI_ISL_751202 to 751238, EPI_ISL_751500 to 751503                                                                                                                                                                                                                                                                                                                                                                                                                                                                                                                                                                                                                                                                                                                                                                                                                                                                                                                                                                                                                                                                                                                                                                                                                                                                                                                                                                                                                                                                                                                                                                                                                                                                                                                                                                                                                                                                                                                                                                                                                                                                                                                                                                                                                                                                                                                                                                                                                                                                                                                                                                                                                                                                                                                                                                                                                                                                                                                                                                                                                                                                                                                                                                                                                                                                                                                                                                                                                                                                                                                                                                                                                                                                                                                                                                                                                                                                                                                                                                                                       | Pathogen Genomics Lab King Abdullah University of Science and Technology(KAUST)                                                                                        | Pathogen Genomics Lab King Abdullah University of Science and Technology(KAUST)                                                                                               | Abbas Al Mutairi; Abdulaziz Alahmadi; Afrah Alsomali; Ahmad Bakur Mahmoud; Amanda; Amanda Ooi; Amit Kumar Subudhi; Anwar Hashem; Arnab Pain; Asim Khogeer; Awad A-Omari; Awad Al-Omari; Fadwa Alofi; Fathia Ben Rached; Jumana Taha; Kahled Aligthami; Luke; Luke Esau; Muhammad Shuaib; Naif Almontashiri; Olga Douvropoulou; Raaeece Naeem; Rahul P Salunke; Raushan Nugmanova; Samer Salih; Sara Mfarrej; Sharif Hala                                                                                                                                                                                                                                                                                                                                                                                                                                                                                                                                                                                                                                                    |
| EPI_ISL_747242                                                                                                                                                                                                                                                                                                                                                                                                                                                                                                                                                                                                                                                                                                                                                                                                                                                                                                                                                                                                                                                                                                                                                                                                                                                                                                                                                                                                                                                                                                                                                                                                                                                                                                                                                                                                                                                                                                                                                                                                                                                                                                                                                                                                                                                                                                                                                                                                                                                                                                                                                                                                                                                                                                                                                                                                                                                                                                                                                                                                                                                                                                                                                                                                                                                                                                                                                                                                                                                                                                                                                                                                                                                                                                                                                                                                                                                                                                                                                                                                                                                                                               | Pathogen Lab (BSL3), Biomedical Innovation Department, Applied and Experimental Biology Division, Scientific Research Center and High Education from Ensenada (CICESE) | Pathogen Laboratory (BSL3), Biomedical Innovation Department, Experimental and Applied Biology Division, Scientific Research Center and High Education from Ensenada (CICESE) | Cervantes-Luevano K; Galindo C and Licea-Navarro A; Martinez M; Saavedra A                                                                                                                                                                                                                                                                                                                                                                                                                                                                                                                                                                                                                                                                                                                                                                                                                                                                                                                                                                                                  |
| EPI_ISL_872628 to 872640, EPI_ISL_872643                                                                                                                                                                                                                                                                                                                                                                                                                                                                                                                                                                                                                                                                                                                                                                                                                                                                                                                                                                                                                                                                                                                                                                                                                                                                                                                                                                                                                                                                                                                                                                                                                                                                                                                                                                                                                                                                                                                                                                                                                                                                                                                                                                                                                                                                                                                                                                                                                                                                                                                                                                                                                                                                                                                                                                                                                                                                                                                                                                                                                                                                                                                                                                                                                                                                                                                                                                                                                                                                                                                                                                                                                                                                                                                                                                                                                                                                                                                                                                                                                                                                     | Pathogenic Microorganisms Variability Laboratory                                                                                                                       | Pathogenic Microorganisms Variability Laboratory                                                                                                                              | Alexander Gintsburg; Alexey Shchetinin; Andrei Siniavin; Andrey Pochtovyy; Anna Ignatieva; Denis Logunov; Elena Burtseva; Elena Shidlovskaya; Elizaveta Divisenko; Evgeniya Mukasheva; Evgeny Usachev; Kirill Krasnoslobotsev; Ludmila Kolobukhina; Maria Nikiforova; Nadezhda Kuznetsova; Olesya Vnchakova; Olga Burgasova; Svetlana Smetanina; Svetlana Trushakova; Valeria Bacalini; Vladimir Gushchin                                                                                                                                                                                                                                                                                                                                                                                                                                                                                                                                                                                                                                                                   |
| EPI_ISL_733156 to 733182, EPI_ISL_733185 to 733222, EPI_ISL_770670                                                                                                                                                                                                                                                                                                                                                                                                                                                                                                                                                                                                                                                                                                                                                                                                                                                                                                                                                                                                                                                                                                                                                                                                                                                                                                                                                                                                                                                                                                                                                                                                                                                                                                                                                                                                                                                                                                                                                                                                                                                                                                                                                                                                                                                                                                                                                                                                                                                                                                                                                                                                                                                                                                                                                                                                                                                                                                                                                                                                                                                                                                                                                                                                                                                                                                                                                                                                                                                                                                                                                                                                                                                                                                                                                                                                                                                                                                                                                                                                                                           | Pathogenic Microorganisms Variability Laboratory                                                                                                                       | WHO National Influenza Centre Russian Federation                                                                                                                              | Alexander Gintsburg; Alexey Shchetinin; Andrey Komissarov; Andrey Pochtovyy; Anna Ivanova; Artem Fadeev; Artem Tkachuk; Daria Danilenko; Dmitry Bazhenov; Dmitry Lioznov; Elena Nabieva; Elena Shidlovskaya; Elena Vokalova; Elizaveta Divisenko; Evgeny Usachev; Georgiy Bazynkin; Ksenia Safina; Kseniya Komissarova; Maria Nikiforova; Maria Rubalsky; Nadezhda Kuznetsova; Oleg Rubalsky; Sergey Alkhovskiy; Tatiana Vishnevskaya; Vladimir Gushchin                                                                                                                                                                                                                                                                                                                                                                                                                                                                                                                                                                                                                    |
| EPI_ISL_745096                                                                                                                                                                                                                                                                                                                                                                                                                                                                                                                                                                                                                                                                                                                                                                                                                                                                                                                                                                                                                                                                                                                                                                                                                                                                                                                                                                                                                                                                                                                                                                                                                                                                                                                                                                                                                                                                                                                                                                                                                                                                                                                                                                                                                                                                                                                                                                                                                                                                                                                                                                                                                                                                                                                                                                                                                                                                                                                                                                                                                                                                                                                                                                                                                                                                                                                                                                                                                                                                                                                                                                                                                                                                                                                                                                                                                                                                                                                                                                                                                                                                                               | Pathology North - Hunter - NSW Health Pathology                                                                                                                        | CIDM-PH, Westmead Hospital                                                                                                                                                    | CIDM-PH et al.                                                                                                                                                                                                                                                                                                                                                                                                                                                                                                                                                                                                                                                                                                                                                                                                                                                                                                                                                                                                                                                              |
| EPI_ISL_740891, EPI_ISL_767920                                                                                                                                                                                                                                                                                                                                                                                                                                                                                                                                                                                                                                                                                                                                                                                                                                                                                                                                                                                                                                                                                                                                                                                                                                                                                                                                                                                                                                                                                                                                                                                                                                                                                                                                                                                                                                                                                                                                                                                                                                                                                                                                                                                                                                                                                                                                                                                                                                                                                                                                                                                                                                                                                                                                                                                                                                                                                                                                                                                                                                                                                                                                                                                                                                                                                                                                                                                                                                                                                                                                                                                                                                                                                                                                                                                                                                                                                                                                                                                                                                                                               | Pathology North - Hunter - NSW Health Pathology                                                                                                                        | NSW Health Pathology - Institute of Clinical Pathology and Medical Research; Westmead Hospital; University of Sydney                                                          | CIDM-PH et al.                                                                                                                                                                                                                                                                                                                                                                                                                                                                                                                                                                                                                                                                                                                                                                                                                                                                                                                                                                                                                                                              |
| EPI_ISL_710129                                                                                                                                                                                                                                                                                                                                                                                                                                                                                                                                                                                                                                                                                                                                                                                                                                                                                                                                                                                                                                                                                                                                                                                                                                                                                                                                                                                                                                                                                                                                                                                                                                                                                                                                                                                                                                                                                                                                                                                                                                                                                                                                                                                                                                                                                                                                                                                                                                                                                                                                                                                                                                                                                                                                                                                                                                                                                                                                                                                                                                                                                                                                                                                                                                                                                                                                                                                                                                                                                                                                                                                                                                                                                                                                                                                                                                                                                                                                                                                                                                                                                               | Pathology North - Royal North Shore Hospital - NSW Health Pathology                                                                                                    | CIDM-PH et al.                                                                                                                                                                | CIDM-PH et al.                                                                                                                                                                                                                                                                                                                                                                                                                                                                                                                                                                                                                                                                                                                                                                                                                                                                                                                                                                                                                                                              |
| EPI_ISL_745097 to 745107                                                                                                                                                                                                                                                                                                                                                                                                                                                                                                                                                                                                                                                                                                                                                                                                                                                                                                                                                                                                                                                                                                                                                                                                                                                                                                                                                                                                                                                                                                                                                                                                                                                                                                                                                                                                                                                                                                                                                                                                                                                                                                                                                                                                                                                                                                                                                                                                                                                                                                                                                                                                                                                                                                                                                                                                                                                                                                                                                                                                                                                                                                                                                                                                                                                                                                                                                                                                                                                                                                                                                                                                                                                                                                                                                                                                                                                                                                                                                                                                                                                                                     | Pathology North - Royal North Shore Hospital - NSW Health Pathology                                                                                                    | CIDM-PH, Westmead Hospital                                                                                                                                                    | CIDM-PH et al.                                                                                                                                                                                                                                                                                                                                                                                                                                                                                                                                                                                                                                                                                                                                                                                                                                                                                                                                                                                                                                                              |
| EPI_ISL_708799, EPI_ISL_740866, EPI_ISL_740875 to 740878, EPI_ISL_740883 to 740889, EPI_ISL_767868, EPI_ISL_767870 to 767871, EPI_ISL_779396, EPI_ISL_792024 to 792025, EPI_ISL_792027, EPI_ISL_806719, EPI_ISL_812521                                                                                                                                                                                                                                                                                                                                                                                                                                                                                                                                                                                                                                                                                                                                                                                                                                                                                                                                                                                                                                                                                                                                                                                                                                                                                                                                                                                                                                                                                                                                                                                                                                                                                                                                                                                                                                                                                                                                                                                                                                                                                                                                                                                                                                                                                                                                                                                                                                                                                                                                                                                                                                                                                                                                                                                                                                                                                                                                                                                                                                                                                                                                                                                                                                                                                                                                                                                                                                                                                                                                                                                                                                                                                                                                                                                                                                                                                       | see above                                                                                                                                                              | Pathology North - Royal North Shore Hospital - NSW Health Pathology                                                                                                           | NSW Health Pathology - Institute of Clinical Pathology and Medical Research; Westmead Hospital; University of Sydney                                                                                                                                                                                                                                                                                                                                                                                                                                                                                                                                                                                                                                                                                                                                                                                                                                                                                                                                                        |
| EPI_ISL_699647                                                                                                                                                                                                                                                                                                                                                                                                                                                                                                                                                                                                                                                                                                                                                                                                                                                                                                                                                                                                                                                                                                                                                                                                                                                                                                                                                                                                                                                                                                                                                                                                                                                                                                                                                                                                                                                                                                                                                                                                                                                                                                                                                                                                                                                                                                                                                                                                                                                                                                                                                                                                                                                                                                                                                                                                                                                                                                                                                                                                                                                                                                                                                                                                                                                                                                                                                                                                                                                                                                                                                                                                                                                                                                                                                                                                                                                                                                                                                                                                                                                                                               | Pathology Sydney South West - NSW Health Pathology                                                                                                                     | NSW Health Pathology - Institute of Clinical Pathology and Medical Research; Westmead Hospital; University of Sydney                                                          | CIDM-PH et al.                                                                                                                                                                                                                                                                                                                                                                                                                                                                                                                                                                                                                                                                                                                                                                                                                                                                                                                                                                                                                                                              |
| EPI_ISL_667777, EPI_ISL_699645 to 699646, EPI_ISL_699648, EPI_ISL_699652, EPI_ISL_740890, EPI_ISL_767898, EPI_ISL_767933 to 767937, EPI_ISL_792032, EPI_ISL_803108 to 803109                                                                                                                                                                                                                                                                                                                                                                                                                                                                                                                                                                                                                                                                                                                                                                                                                                                                                                                                                                                                                                                                                                                                                                                                                                                                                                                                                                                                                                                                                                                                                                                                                                                                                                                                                                                                                                                                                                                                                                                                                                                                                                                                                                                                                                                                                                                                                                                                                                                                                                                                                                                                                                                                                                                                                                                                                                                                                                                                                                                                                                                                                                                                                                                                                                                                                                                                                                                                                                                                                                                                                                                                                                                                                                                                                                                                                                                                                                                                 |                                                                                                                                                                        |                                                                                                                                                                               |                                                                                                                                                                                                                                                                                                                                                                                                                                                                                                                                                                                                                                                                                                                                                                                                                                                                                                                                                                                                                                                                             |

|                                                                                                                                                                                                                                                                                                                                                                                                                                                                                                                                                                                                                    |                                                                                                     |                                                                                                                                                                                                 |                                                                                                                                                                                                                                                         |
|--------------------------------------------------------------------------------------------------------------------------------------------------------------------------------------------------------------------------------------------------------------------------------------------------------------------------------------------------------------------------------------------------------------------------------------------------------------------------------------------------------------------------------------------------------------------------------------------------------------------|-----------------------------------------------------------------------------------------------------|-------------------------------------------------------------------------------------------------------------------------------------------------------------------------------------------------|---------------------------------------------------------------------------------------------------------------------------------------------------------------------------------------------------------------------------------------------------------|
| see above                                                                                                                                                                                                                                                                                                                                                                                                                                                                                                                                                                                                          | Pathology West - NSW Health Pathology                                                               | NSW Health Pathology - Institute of Clinical Pathology and Medical Research; Westmead Hospital; University of Sydney                                                                            | CIDM-PH et al.                                                                                                                                                                                                                                          |
| EPI_ISL_681320 to 681321                                                                                                                                                                                                                                                                                                                                                                                                                                                                                                                                                                                           | Pathology and Laboratory Medicine, UW-Madison                                                       | Pathology and Laboratory Medicine, UW-Madison                                                                                                                                                   | Baczenas; Baker, D.; Braun, K.; J.J.; Moreno, G.                                                                                                                                                                                                        |
| EPI_ISL_640042                                                                                                                                                                                                                                                                                                                                                                                                                                                                                                                                                                                                     | Pelican Park CDC wc PAX                                                                             | NHLS/UCT                                                                                                                                                                                        | Arash Iranzadeh; Bruna Galvao; Carolyn Williamson; Deelan Doolabh; Diana Hardie; Innocent Mudau; Kruger Marais; Lynn Tyers; Marvin Hsiao; Stephen Korsman                                                                                               |
| EPI_ISL_960111                                                                                                                                                                                                                                                                                                                                                                                                                                                                                                                                                                                                     | Pelican Park CDC wc PAX                                                                             | National Health Laboratory Service/UCT                                                                                                                                                          | Arash Iranzadeh; Bruna Galvao; Carolyn Williamson; Deelan Doolabh; Diana Hardie; Innocent Mudau; Kruger Marais; Lynn Tyers; Marvin Hsiao; Stephen Korsman                                                                                               |
| EPI_ISL_853754, EPI_ISL_853769 to 853774, EPI_ISL_853798 to 853799, EPI_ISL_853805, EPI_ISL_853874 to 853876, EPI_ISL_853917 to 853923, EPI_ISL_854217, EPI_ISL_854255 to 854257, EPI_ISL_854259 to 854260, EPI_ISL_854300, EPI_ISL_854302 to 854303                                                                                                                                                                                                                                                                                                                                                               | see above                                                                                           | Pharmgenetix GmbH                                                                                                                                                                               | Bergthaler laboratory, CeMM Research Center for Molecular Medicine of the Austrian Academy of Sciences                                                                                                                                                  |
| EPI_ISL_893724 to 893735                                                                                                                                                                                                                                                                                                                                                                                                                                                                                                                                                                                           | Pima County Health Department                                                                       | Pathogen Discovery, Respiratory Viruses Branch, Division of Viral Diseases, Centers for Disease Control and Prevention                                                                          | Alexander Lercher; Alexandra Popa; Andreas Bergthaler; Anna Schedl; Benedikt Agerer; Christoph Bock; Jakob-Wendelin Genger; Jan Laine; Lukas Endler; Martin Senekowitsch; Michael Schuster; Thomas Penz                                                 |
| EPI_ISL_792386 to 792396                                                                                                                                                                                                                                                                                                                                                                                                                                                                                                                                                                                           | Plataforma de Servicios Biotecnológicos: UTTIPP/PSB, Universidad Nacional de Quilmes.               | Área de Secuenciación del Laboratorio de Virología del Hospital de Niños Dr. Ricardo Gutierrez on behalf of 'Proyecto Argentino Interinstitucional de genómica de SARS-CoV-2' (PAIS Consortium) | Anna Montmayeur; Anna Uehara; Brian Lynch; Clinton R. Paden; Haibin Wang; Jing Zhang; Krista Queen; Peter Cook; Rachel Marine; Suxiang Tong; Yan Li; Ying Tao                                                                                           |
| EPI_ISL_984623 to 984627                                                                                                                                                                                                                                                                                                                                                                                                                                                                                                                                                                                           | Plateforme BIS Namur                                                                                | GIGA Medical Genomics                                                                                                                                                                           | A; Cardama; Castello; Farina; G; Goya; Goñi; H; LE; Lusso; MI; MS; Nabaes Jodar; Natale; S; Valinotto; Viegas, M.                                                                                                                                       |
| EPI_ISL_792016 to 792023                                                                                                                                                                                                                                                                                                                                                                                                                                                                                                                                                                                           | Plateforme COVID IDF                                                                                | National Reference Center for Viruses of Respiratory Infections, Institut Pasteur, Paris                                                                                                        | Bouchra Boujemla; Cécile Meex; Keith Durkin; Maria Artesi; Marie-Pierre Hayette; Pierrette Melin; Raphaël Boreux; Sébastien Bontems; Vincent Bours                                                                                                      |
| EPI_ISL_940780, EPI_ISL_940783, EPI_ISL_940843, EPI_ISL_940847, EPI_ISL_940849, EPI_ISL_940892, EPI_ISL_942951 to 942959, EPI_ISL_944110, EPI_ISL_955130, EPI_ISL_955137 to 955141, EPI_ISL_955143, EPI_ISL_955145, EPI_ISL_955147, EPI_ISL_955149, EPI_ISL_955152, EPI_ISL_960441, EPI_ISL_960662, EPI_ISL_960831 to 960833, EPI_ISL_960982 to 960984, EPI_ISL_961009, EPI_ISL_961017, EPI_ISL_961464 to 961465, EPI_ISL_984265, EPI_ISL_984267 to 984269, EPI_ISL_984272, EPI_ISL_984274 to 984275, EPI_ISL_984278 to 984287, EPI_ISL_984315 to 984317, EPI_ISL_984363, EPI_ISL_984614 to 984615, EPI_ISL_984618 | see above                                                                                           | Angela Brisebarre; Camille Capel; Etienne Simon-Lorière; Jacques Fourgeaud; Marion Barbet; Maud Vanpeene; Méline Bizard; Sylvie Behillili; Sylvie van der Werf; Vincent Enouf                   |                                                                                                                                                                                                                                                         |
| see above                                                                                                                                                                                                                                                                                                                                                                                                                                                                                                                                                                                                          | Platform BIS UZA/UAntwerpen                                                                         | UAntwerp, Laboratory of Medical Microbiology                                                                                                                                                    | Basil Britto Xavier; Christine Lammens; Herman Goossens; Jasmine Coppens; Marie Le Mercier; Veerle Matheusssen                                                                                                                                          |
| EPI_ISL_940772, EPI_ISL_940774, EPI_ISL_940779, EPI_ISL_940782, EPI_ISL_940822, EPI_ISL_940845, EPI_ISL_940893                                                                                                                                                                                                                                                                                                                                                                                                                                                                                                     | see above                                                                                           | UAntwerp, Laboratory of Medical Microbiology, Campus Drie Eiken S6.26, Universiteitsplein 1, 2610, Wilrijk, Belgium                                                                             | Basil Britto Xavier; Christine Lammens; Herman Goossens; Jasmine Coppens; Marie Le Mercier; Veerle Matheusssen                                                                                                                                          |
| EPI_ISL_856973, EPI_ISL_857040 to 857042, EPI_ISL_857051 to 857055, EPI_ISL_887587 to 887588, EPI_ISL_887590, EPI_ISL_888589 to 888590, EPI_ISL_888592, EPI_ISL_888595, EPI_ISL_888623, EPI_ISL_888626 to 888627, EPI_ISL_888818 to 888820                                                                                                                                                                                                                                                                                                                                                                         | see above                                                                                           | UAntwerp, Laboratory of Medical Microbiology, Campus Drie Eiken S6.26, Universiteitsplein 1, 2610, Wilrijk, Antwerp, Belgium                                                                    | Basil Britto Xavier; Christine Lammens; Herman Goossens; Jasmine Coppens; Veerle Matheusssen                                                                                                                                                            |
| EPI_ISL_833149                                                                                                                                                                                                                                                                                                                                                                                                                                                                                                                                                                                                     | Platform BIS UZA/UAntwerpen, University Hospital Antwerp, Edegem, Belgium                           | UAntwerp, Laboratory of Medical Microbiology, Campus Drie Eiken S6.26, Universiteitsplein 1, 2610, Wilrijk, Belgium                                                                             | Basil Britto Xavier; Christine Lammens; Herman Goossens; Jasmine Coppens; Sahaya Glingston Rajakani; Veerle Matheusssen                                                                                                                                 |
| EPI_ISL_700430, EPI_ISL_700434, EPI_ISL_700500, EPI_ISL_700518, EPI_ISL_700528, EPI_ISL_700560                                                                                                                                                                                                                                                                                                                                                                                                                                                                                                                     | Plettenberg Bay Clinic wc PLC                                                                       | NHLS/UCT                                                                                                                                                                                        | Arash Iranzadeh; Bruna Galvao; Carolyn Williamson; Deelan Doolabh; Diana Hardie; Houriyah Tegally; Innocent Mudau; Kruger Marais; Lynn Tyers; Marvin Hsiao; Stephen Korsman                                                                             |
| EPI_ISL_960115                                                                                                                                                                                                                                                                                                                                                                                                                                                                                                                                                                                                     | Plettenberg Bay Clinic wc PLC                                                                       | National Health Laboratory Service/UCT                                                                                                                                                          | Arash Iranzadeh; Bruna Galvao; Carolyn Williamson; Deelan Doolabh; Diana Hardie; Innocent Mudau; Kruger Marais; Lynn Tyers; Marvin Hsiao; Stephen Korsman                                                                                               |
| EPI_ISL_696454, EPI_ISL_696476                                                                                                                                                                                                                                                                                                                                                                                                                                                                                                                                                                                     | Plettenberg Bay Clinic wc PLC & NHLS/UCT                                                            | KRISP, KZN Research Innovation and Sequencing Platform                                                                                                                                          | Arash Iranzadeh; Bruna Galvao; Carolyn Williamson; Deelan Doolabh; Diana Hardie; Emanuel James San; Houriyah Tegally; Innocent Mudau; Jennifer Giandhari; Kruger Marais; Lynn Tyers; Marvin Hsiao; Stephen Korsman; Sureshnee Pillay; Tulio de Oliveira |
| EPI_ISL_917954                                                                                                                                                                                                                                                                                                                                                                                                                                                                                                                                                                                                     | Pomona Valley Hospital                                                                              | Los Angeles County PHL                                                                                                                                                                          | P. Hemarajata et al.                                                                                                                                                                                                                                    |
| EPI_ISL_891212                                                                                                                                                                                                                                                                                                                                                                                                                                                                                                                                                                                                     | Population Medicine and Diagnostic Sciences, Cornell University                                     | Population Medicine and Diagnostic Sciences, Cornell University                                                                                                                                 | Cardia Caserta, L.; D.G.; E. and Dietl; Mitchel; P.K.; Plachorzyc                                                                                                                                                                                       |
| EPI_ISL_712070 to 712076, EPI_ISL_712079 to 712091, EPI_ISL_712093 to 712096, EPI_ISL_723468                                                                                                                                                                                                                                                                                                                                                                                                                                                                                                                       | Port Elizabeth Provincial Hospital, National Health Laboratory Services, Eastern Cape, South Africa | National Institute for Communicable Diseases of the National Health Laboratory Service                                                                                                          | Allam M; Bhiman JN; Ismail A; Mahlangu B; Mohale T; Ntuli N                                                                                                                                                                                             |
| EPI_ISL_745129, EPI_ISL_745187                                                                                                                                                                                                                                                                                                                                                                                                                                                                                                                                                                                     | Port Nolloth Hospital                                                                               | National Health Laboratory Service (NHLS), Tygerberg                                                                                                                                            | Bronwyn Kleinhans; Eduan Wilkindon; Gert van Zyl; Houriyah Tegally; Kayla Delaney; Susan Engelbrecht; Tulio de Oliveira; Wolfgang Preiser                                                                                                               |
| EPI_ISL_735433                                                                                                                                                                                                                                                                                                                                                                                                                                                                                                                                                                                                     | Posto de Atendimento Saude Cidade Pasc Cajati                                                       | Instituto Adolfo Lutz, Interdisciplinary Procedures Center, Strategic Laboratory                                                                                                                | Claudia Regina Gonçalves; Claudio Tavares Sacchi; Erica Valessa Ramos Gomes; Karoline Rodrigues Campos                                                                                                                                                  |
| EPI_ISL_759959                                                                                                                                                                                                                                                                                                                                                                                                                                                                                                                                                                                                     | Premier Hospital Surabaya                                                                           | Institute of Tropical Disease, Universitas Airlangga                                                                                                                                            | Aldise M Nastri; Gatot Soegiarto; Hartono Tanto; Jezzy R Dewantari; Kazufumi Shimizu; Krisnoadi Rahardjo; Laksmi Wulandari; Maria I Lusida; Resti Yudhawati; Rima R Prasetya; Soetjipto; Yasuko Mori                                                    |
| EPI_ISL_965135                                                                                                                                                                                                                                                                                                                                                                                                                                                                                                                                                                                                     | Presidio Ospedaliero G. B. Grassi ASL RM3                                                           | INMI Lazzaro Spallanzani IRCCS                                                                                                                                                                  | A Di Caro; B Bartolini; C.E.M Gruber; E Giombini; E Ristori; F Messina; F Tabacco; M Rueca; MR Capobianchi; O Butera                                                                                                                                    |
| EPI_ISL_806730                                                                                                                                                                                                                                                                                                                                                                                                                                                                                                                                                                                                     | Presidio Ospedaliero S.Liberatore Atri                                                              | Istituto Zooprofilattico Sperimentale dell'Abruzzo e Molise "G. Caporale"                                                                                                                       | Ancora M; Calistri P; Cammà C; Curini V; Di Domenico M; Di Pasquale A; Lorusso A; Mangone I; Marccacci M; Puglia I; Rinaldi A; Savini G                                                                                                                 |
| EPI_ISL_961754                                                                                                                                                                                                                                                                                                                                                                                                                                                                                                                                                                                                     | Presidio Ospedaliero Sulmona                                                                        | Istituto Zooprofilattico Sperimentale dell'Abruzzo e Molise "G. Caporale"                                                                                                                       | Ancora M; Calistri P; Cammà C; Curini V; Di Domenico M; Di Pasquale A; Lorusso A; Mangone I; Marccacci M; Puglia I; Rinaldi A; Savini G; Scialabba S                                                                                                    |
| EPI_ISL_794756 to 794758, EPI_ISL_876743                                                                                                                                                                                                                                                                                                                                                                                                                                                                                                                                                                           | Presidio di Brindisi Di Summa - Perrino                                                             | Istituto Zooprofilattico Sperimentale della Puglia e della Basilicata                                                                                                                           | Bianco A.; Capozzi L.; Cipolletta D.; Del Sambre L.; Galante D.; Manzulli V; Pace L.; Parisi A.; Rondinone V.                                                                                                                                           |
| EPI_ISL_759955, EPI_ISL_877423, EPI_ISL_877456 to 877457, EPI_ISL_956307                                                                                                                                                                                                                                                                                                                                                                                                                                                                                                                                           | Primasatya Husada Citra Hospital                                                                    | Institute of Tropical Disease, Universitas Airlangga                                                                                                                                            | Aldise M Nastri; Gatot Soegiarto; Jezzy R Dewantari; Kazufumi Shimizu; Krisnoadi Rahardjo; Laksmi Wulandari; Maria I Lusida; Pudji Djanuartono; Resti Yudhawati; Rima R Prasetya; Soetjipto; Yasuko Mori                                                |
| EPI_ISL_693204                                                                                                                                                                                                                                                                                                                                                                                                                                                                                                                                                                                                     | Pronto Socorro Dr. Conrado Cesarino Nuvolini                                                        | Instituto Adolfo Lutz, Interdisciplinary Procedures Center, Strategic Laboratory                                                                                                                | Claudia Regina Gonçalves; Claudio Tavares Sacchi; Erica Valessa Ramos Gomes; Karoline Rodrigues Campos                                                                                                                                                  |
| EPI_ISL_693202                                                                                                                                                                                                                                                                                                                                                                                                                                                                                                                                                                                                     | Pronto Socorro Municipal Prof. Joao Catarin Mezomo                                                  | Instituto Adolfo Lutz, Interdisciplinary Procedures Center, Strategic Laboratory                                                                                                                | Claudia Regina Gonçalves; Claudio Tavares Sacchi; Erica Valessa Ramos Gomes; Karoline Rodrigues Campos                                                                                                                                                  |
| EPI_ISL_693231                                                                                                                                                                                                                                                                                                                                                                                                                                                                                                                                                                                                     | Pronto Socorro Municipal de Santa Branca                                                            | Instituto Adolfo Lutz, Interdisciplinary Procedures Center, Strategic Laboratory                                                                                                                | Claudia Regina Gonçalves; Claudio Tavares Sacchi; Erica Valessa Ramos Gomes; Karoline Rodrigues Campos                                                                                                                                                  |
| EPI_ISL_693210                                                                                                                                                                                                                                                                                                                                                                                                                                                                                                                                                                                                     | Pronto-Socorro Dr. Osmar Mesquita                                                                   | Instituto Adolfo Lutz, Interdisciplinary Procedures Center, Strategic Laboratory                                                                                                                | Claudia Regina Gonçalves; Claudio Tavares Sacchi; Erica Valessa Ramos Gomes; Karoline Rodrigues Campos                                                                                                                                                  |
| EPI_ISL_887166 to 887214, EPI_ISL_887216 to 887282, EPI_ISL_887284 to 887418                                                                                                                                                                                                                                                                                                                                                                                                                                                                                                                                       | Protzer Lab                                                                                         | Protzer Lab, Gagneur Lab, Robert Koch Institut                                                                                                                                                  | Aleksandar Radonic; Alexander Karollus; Andrea Theumer; Dieter Hoffmann; Eva Schulte; Julien Gagneur; Max von Kleist; Oliver Drechsel; Stephan Fuchs; Ulrike Protzer                                                                                    |
| EPI_ISL_632058 to 632059                                                                                                                                                                                                                                                                                                                                                                                                                                                                                                                                                                                           | Proximedical Urgent Care                                                                            | New York City Public Health Laboratory                                                                                                                                                          | Jade Wang; et al.                                                                                                                                                                                                                                       |





|                                                                                                                                                                                                                                                                                                                                                                                                                                                                                                                                                                                                                                                                                                                                                                                                                                                                                                                                                                                                                                                                                                                                                                                                                                                                                                                                                                                                                                                                                                                                                                                                                                                                                                                                                                                                                                                                                                                                                                                                                                                                                                                                                                                                                                                                                                                                                                                                                                                                                                                                                                                                                                                                                                                                                                                                                                                                                                                                                                                                                                                                                                                                                                                                                                                                                                                                                                                                                                                                                                                                                                                                                                                                                                                                                                                                                                                                                                                                                                                                                                                                                                                                                                                                                                                                                                                                                                                                                                                                |                                                                              |                                                                                                                                                  |                                                                                                                                                                                                                                                                                        |
|----------------------------------------------------------------------------------------------------------------------------------------------------------------------------------------------------------------------------------------------------------------------------------------------------------------------------------------------------------------------------------------------------------------------------------------------------------------------------------------------------------------------------------------------------------------------------------------------------------------------------------------------------------------------------------------------------------------------------------------------------------------------------------------------------------------------------------------------------------------------------------------------------------------------------------------------------------------------------------------------------------------------------------------------------------------------------------------------------------------------------------------------------------------------------------------------------------------------------------------------------------------------------------------------------------------------------------------------------------------------------------------------------------------------------------------------------------------------------------------------------------------------------------------------------------------------------------------------------------------------------------------------------------------------------------------------------------------------------------------------------------------------------------------------------------------------------------------------------------------------------------------------------------------------------------------------------------------------------------------------------------------------------------------------------------------------------------------------------------------------------------------------------------------------------------------------------------------------------------------------------------------------------------------------------------------------------------------------------------------------------------------------------------------------------------------------------------------------------------------------------------------------------------------------------------------------------------------------------------------------------------------------------------------------------------------------------------------------------------------------------------------------------------------------------------------------------------------------------------------------------------------------------------------------------------------------------------------------------------------------------------------------------------------------------------------------------------------------------------------------------------------------------------------------------------------------------------------------------------------------------------------------------------------------------------------------------------------------------------------------------------------------------------------------------------------------------------------------------------------------------------------------------------------------------------------------------------------------------------------------------------------------------------------------------------------------------------------------------------------------------------------------------------------------------------------------------------------------------------------------------------------------------------------------------------------------------------------------------------------------------------------------------------------------------------------------------------------------------------------------------------------------------------------------------------------------------------------------------------------------------------------------------------------------------------------------------------------------------------------------------------------------------------------------------------------------------------------|------------------------------------------------------------------------------|--------------------------------------------------------------------------------------------------------------------------------------------------|----------------------------------------------------------------------------------------------------------------------------------------------------------------------------------------------------------------------------------------------------------------------------------------|
| EPI_ISL_649154                                                                                                                                                                                                                                                                                                                                                                                                                                                                                                                                                                                                                                                                                                                                                                                                                                                                                                                                                                                                                                                                                                                                                                                                                                                                                                                                                                                                                                                                                                                                                                                                                                                                                                                                                                                                                                                                                                                                                                                                                                                                                                                                                                                                                                                                                                                                                                                                                                                                                                                                                                                                                                                                                                                                                                                                                                                                                                                                                                                                                                                                                                                                                                                                                                                                                                                                                                                                                                                                                                                                                                                                                                                                                                                                                                                                                                                                                                                                                                                                                                                                                                                                                                                                                                                                                                                                                                                                                                                 | Queen Astrid Military Hospital                                               | Institute of Tropical Medicine                                                                                                                   | Colin Anthony; Philippe Selhorst                                                                                                                                                                                                                                                       |
| EPI_ISL_759896                                                                                                                                                                                                                                                                                                                                                                                                                                                                                                                                                                                                                                                                                                                                                                                                                                                                                                                                                                                                                                                                                                                                                                                                                                                                                                                                                                                                                                                                                                                                                                                                                                                                                                                                                                                                                                                                                                                                                                                                                                                                                                                                                                                                                                                                                                                                                                                                                                                                                                                                                                                                                                                                                                                                                                                                                                                                                                                                                                                                                                                                                                                                                                                                                                                                                                                                                                                                                                                                                                                                                                                                                                                                                                                                                                                                                                                                                                                                                                                                                                                                                                                                                                                                                                                                                                                                                                                                                                                 | Queen Elizabeth Hospital                                                     | Hong Kong Department of Health                                                                                                                   | Alan K.L. Tsang; Dominic N.C. Tsang; Edman T.K. Lam; Peter C.W. Yip; Rickjason C.W. Chan                                                                                                                                                                                               |
| EPI_ISL_733571                                                                                                                                                                                                                                                                                                                                                                                                                                                                                                                                                                                                                                                                                                                                                                                                                                                                                                                                                                                                                                                                                                                                                                                                                                                                                                                                                                                                                                                                                                                                                                                                                                                                                                                                                                                                                                                                                                                                                                                                                                                                                                                                                                                                                                                                                                                                                                                                                                                                                                                                                                                                                                                                                                                                                                                                                                                                                                                                                                                                                                                                                                                                                                                                                                                                                                                                                                                                                                                                                                                                                                                                                                                                                                                                                                                                                                                                                                                                                                                                                                                                                                                                                                                                                                                                                                                                                                                                                                                 | Queen Mary Hospital                                                          | Hong Kong Department of Health                                                                                                                   | Alan K.L. Tsang; Dominic N.C. Tsang; Edman T.K. Lam; Peter C.W. Yip; Rickjason C.W. Chan                                                                                                                                                                                               |
| EPI_ISL_626659, EPI_ISL_626670, EPI_ISL_626688, EPI_ISL_626695, EPI_ISL_626740, EPI_ISL_626750, EPI_ISL_626770, EPI_ISL_626811, EPI_ISL_626816, EPI_ISL_626834, EPI_ISL_626881, EPI_ISL_626919, EPI_ISL_627053, EPI_ISL_627068, EPI_ISL_627147, EPI_ISL_627215 to 627216, EPI_ISL_627304, EPI_ISL_627309 to 627310, EPI_ISL_627666 to 627729, EPI_ISL_637298, EPI_ISL_637300, EPI_ISL_637342 to 637344, EPI_ISL_637419, EPI_ISL_637427, EPI_ISL_637555, EPI_ISL_637558, EPI_ISL_637582, EPI_ISL_637660 to 637661, EPI_ISL_637798 to 637800, EPI_ISL_637935, EPI_ISL_638584 to 638613, EPI_ISL_650136, EPI_ISL_650150, EPI_ISL_650154, EPI_ISL_650157, EPI_ISL_650178, EPI_ISL_650186 to 650187, EPI_ISL_650266, EPI_ISL_650238, EPI_ISL_650276, EPI_ISL_650291, EPI_ISL_650295, EPI_ISL_650314, EPI_ISL_650347, EPI_ISL_650386, EPI_ISL_650430, EPI_ISL_650443, EPI_ISL_650449 to 650450, EPI_ISL_650471, EPI_ISL_650556, EPI_ISL_650558, EPI_ISL_650599, EPI_ISL_650611, EPI_ISL_650641, EPI_ISL_650701, EPI_ISL_650723, EPI_ISL_650738, EPI_ISL_650767, EPI_ISL_650786, EPI_ISL_650803, EPI_ISL_650811, EPI_ISL_650820 to 650821, EPI_ISL_650830, EPI_ISL_650835, EPI_ISL_650846, EPI_ISL_650937, EPI_ISL_650979, EPI_ISL_650987, EPI_ISL_651065, EPI_ISL_651071 to 651073, EPI_ISL_651096, EPI_ISL_651107, EPI_ISL_651166, EPI_ISL_651189, EPI_ISL_651232, EPI_ISL_651242, EPI_ISL_651249, EPI_ISL_651260, EPI_ISL_651274, EPI_ISL_651285 to 651286, EPI_ISL_651293, EPI_ISL_651308 to 651309, EPI_ISL_651313, EPI_ISL_651386, EPI_ISL_651389, EPI_ISL_651398, EPI_ISL_651401, EPI_ISL_651408, EPI_ISL_651466, EPI_ISL_651504, EPI_ISL_651528, EPI_ISL_651584 to 651585, EPI_ISL_652184 to 652215, EPI_ISL_652364 to 652413, EPI_ISL_652627 to 652674, EPI_ISL_665290 to 665291, EPI_ISL_665344 to 665345, EPI_ISL_665365 to 665367, EPI_ISL_665415, EPI_ISL_665420 to 665421, EPI_ISL_665424, EPI_ISL_665426, EPI_ISL_665430, EPI_ISL_665441, EPI_ISL_665443, EPI_ISL_665452, EPI_ISL_665510, EPI_ISL_665512 to 665513, EPI_ISL_665543 to 665544, EPI_ISL_665550 to 665551, EPI_ISL_665561 to 665562, EPI_ISL_665601, EPI_ISL_665610, EPI_ISL_665612, EPI_ISL_665622 to 665623, EPI_ISL_665650, EPI_ISL_665699, EPI_ISL_665724, EPI_ISL_665740, EPI_ISL_665761, EPI_ISL_665789, EPI_ISL_665898 to 665945, EPI_ISL_665971 to 665982, EPI_ISL_678920 to 679007, EPI_ISL_679249 to 679314, EPI_ISL_679924 to 679945, EPI_ISL_702841, EPI_ISL_702846, EPI_ISL_702879, EPI_ISL_702889, EPI_ISL_703124, EPI_ISL_703720, EPI_ISL_703775 to 703776, EPI_ISL_703789, EPI_ISL_703794, EPI_ISL_703853, EPI_ISL_704315, EPI_ISL_704581 to 704583, EPI_ISL_704780, EPI_ISL_705094, EPI_ISL_705213, EPI_ISL_705223, EPI_ISL_705380, EPI_ISL_705487, EPI_ISL_705613 to 705614, EPI_ISL_706420 to 706437, EPI_ISL_725519 to 725539, EPI_ISL_725605 to 725669, EPI_ISL_741609 to 741657, EPI_ISL_763389, EPI_ISL_763444, EPI_ISL_763449, EPI_ISL_763547, EPI_ISL_763580, EPI_ISL_763650, EPI_ISL_763663, EPI_ISL_763673, EPI_ISL_763675, EPI_ISL_763678, EPI_ISL_763726, EPI_ISL_763819, EPI_ISL_763854 to 763858, EPI_ISL_763925 to 763927, EPI_ISL_764189 to 764190, EPI_ISL_764230, EPI_ISL_764233, EPI_ISL_764493 to 764524, EPI_ISL_819458 to 819459, EPI_ISL_819464, EPI_ISL_819558, EPI_ISL_819577, EPI_ISL_819579 to 819584, EPI_ISL_819594 to 819604, EPI_ISL_819609 to 819611, EPI_ISL_819647 to 819652, EPI_ISL_819671 to 819674, EPI_ISL_819686 to 819688, EPI_ISL_819724 to 819731, EPI_ISL_819757 to 819758, EPI_ISL_819763, EPI_ISL_819795, EPI_ISL_819799 to 819802, EPI_ISL_819821, EPI_ISL_819828 to 819834, EPI_ISL_819851, EPI_ISL_819864 to 819865, EPI_ISL_819867, EPI_ISL_819942, EPI_ISL_820006, EPI_ISL_820297, EPI_ISL_820394, EPI_ISL_820402, EPI_ISL_820418, EPI_ISL_820423, EPI_ISL_820428, EPI_ISL_820431, EPI_ISL_820433, EPI_ISL_820560, EPI_ISL_820573, EPI_ISL_820575, EPI_ISL_820578, EPI_ISL_820580, EPI_ISL_820583, EPI_ISL_820586, EPI_ISL_820588, EPI_ISL_820591, EPI_ISL_820593, EPI_ISL_820596, EPI_ISL_820598, EPI_ISL_820601, EPI_ISL_820603, EPI_ISL_820605, EPI_ISL_820606, EPI_ISL_820607, EPI_ISL_820610, EPI_ISL_820611, EPI_ISL_820612 to 820616, EPI_ISL_840016, EPI_ISL_840051 to 840061, EPI_ISL_866889 to 866984, EPI_ISL_866986 to 866991, EPI_ISL_921981 to 922040, EPI_ISL_949650 to 949654, EPI_ISL_950601 to 950697, EPI_ISL_950717 to 950728, EPI_ISL_950762, EPI_ISL_998889 to 998891, EPI_ISL_998893 to 998920 |                                                                              |                                                                                                                                                  |                                                                                                                                                                                                                                                                                        |
| see above                                                                                                                                                                                                                                                                                                                                                                                                                                                                                                                                                                                                                                                                                                                                                                                                                                                                                                                                                                                                                                                                                                                                                                                                                                                                                                                                                                                                                                                                                                                                                                                                                                                                                                                                                                                                                                                                                                                                                                                                                                                                                                                                                                                                                                                                                                                                                                                                                                                                                                                                                                                                                                                                                                                                                                                                                                                                                                                                                                                                                                                                                                                                                                                                                                                                                                                                                                                                                                                                                                                                                                                                                                                                                                                                                                                                                                                                                                                                                                                                                                                                                                                                                                                                                                                                                                                                                                                                                                                      | Queens Medical Centre, Clinical Microbiology Department / DeepSeq Nottingham | COVID-19 Genomics UK (COG-UK) Consortium                                                                                                         | Christopher Moore; Fei Sang; Gemma Clark; Hannah Howson-Wells; Johnny Debebe; Jonathan Ball; Joseph Chappell; Manjinder Khakh; Matthew Carlisle; Matthew Loose; Michelle M Lister; Nadine Holmes; Patrick McClure; Theocharis Tsoeridis; Vicki M Fleming; Victoria Wright; Wendy Smith |
| EPI_ISL_661252 to 661254, EPI_ISL_666964, EPI_ISL_802996 to 803097, EPI_ISL_845657 to 845679, EPI_ISL_845783, EPI_ISL_854810 to 854976, EPI_ISL_855014 to 855185, EPI_ISL_876814 to 876968, EPI_ISL_877037 to 877125, EPI_ISL_877186 to 877204, EPI_ISL_903390 to 903564, EPI_ISL_904127 to 904134, EPI_ISL_906307 to 906464, EPI_ISL_911704 to 911706, EPI_ISL_914890 to 914969, EPI_ISL_915193 to 915357, EPI_ISL_925137 to 925140, EPI_ISL_937024 to 937125                                                                                                                                                                                                                                                                                                                                                                                                                                                                                                                                                                                                                                                                                                                                                                                                                                                                                                                                                                                                                                                                                                                                                                                                                                                                                                                                                                                                                                                                                                                                                                                                                                                                                                                                                                                                                                                                                                                                                                                                                                                                                                                                                                                                                                                                                                                                                                                                                                                                                                                                                                                                                                                                                                                                                                                                                                                                                                                                                                                                                                                                                                                                                                                                                                                                                                                                                                                                                                                                                                                                                                                                                                                                                                                                                                                                                                                                                                                                                                                                 | Quest Diagnostics                                                            | Quest Diagnostics                                                                                                                                | Anderson, B.; Bernstein; D.F.; Gerasimova, A.; Hua, M.; I.A.; K.E.; Kagan; L.E.; Lacbawan, P.; Liu, Y.; Livingston; Owen, R.; Perez, A.; R.M.; Rosenthal; S.H.; Shalhout; Shlyakhter; Tanpaiboon, P.                                                                                   |
| EPI_ISL_914000 to 914002                                                                                                                                                                                                                                                                                                                                                                                                                                                                                                                                                                                                                                                                                                                                                                                                                                                                                                                                                                                                                                                                                                                                                                                                                                                                                                                                                                                                                                                                                                                                                                                                                                                                                                                                                                                                                                                                                                                                                                                                                                                                                                                                                                                                                                                                                                                                                                                                                                                                                                                                                                                                                                                                                                                                                                                                                                                                                                                                                                                                                                                                                                                                                                                                                                                                                                                                                                                                                                                                                                                                                                                                                                                                                                                                                                                                                                                                                                                                                                                                                                                                                                                                                                                                                                                                                                                                                                                                                                       | Quest Diagnostics Tucker GA                                                  | Pathogen Discovery, Respiratory Viruses Branch, Division of Viral Diseases, Centers for Disease Control and Prevention                           | Anna Uehara; Clinton R. Paden; Haibin Wang; Jing Zhang; Krista Queen; Peter Cook; Suxiang Tong; Yan Li; Ying Tao                                                                                                                                                                       |
| EPI_ISL_833342                                                                                                                                                                                                                                                                                                                                                                                                                                                                                                                                                                                                                                                                                                                                                                                                                                                                                                                                                                                                                                                                                                                                                                                                                                                                                                                                                                                                                                                                                                                                                                                                                                                                                                                                                                                                                                                                                                                                                                                                                                                                                                                                                                                                                                                                                                                                                                                                                                                                                                                                                                                                                                                                                                                                                                                                                                                                                                                                                                                                                                                                                                                                                                                                                                                                                                                                                                                                                                                                                                                                                                                                                                                                                                                                                                                                                                                                                                                                                                                                                                                                                                                                                                                                                                                                                                                                                                                                                                                 | Quezon Medical Center                                                        | Research Institute for Tropical Medicine                                                                                                         | Catalino Demetria; Daria Manalo; Edelwisa Mercado; Francisco Gerardo Polotan; Hannah Leah Morito; Inez Andrea Medado; John Leonard Chan; Kirstyn Brunker; Ma Angelica Tujan; Othoniel Jan Onza                                                                                         |
| EPI_ISL_833228 to 833229                                                                                                                                                                                                                                                                                                                                                                                                                                                                                                                                                                                                                                                                                                                                                                                                                                                                                                                                                                                                                                                                                                                                                                                                                                                                                                                                                                                                                                                                                                                                                                                                                                                                                                                                                                                                                                                                                                                                                                                                                                                                                                                                                                                                                                                                                                                                                                                                                                                                                                                                                                                                                                                                                                                                                                                                                                                                                                                                                                                                                                                                                                                                                                                                                                                                                                                                                                                                                                                                                                                                                                                                                                                                                                                                                                                                                                                                                                                                                                                                                                                                                                                                                                                                                                                                                                                                                                                                                                       | R.P. GUARDIAGRELE Ospedale di Comunità                                       | Istituto Zooprofilattico Sperimentale dell'Abruzzo e Molise "G.Caporale"                                                                         | Ancora M; Calistri P; Cammà C; Curini V; Di Domenico M; Di Pasquale A; Lorusso A; Mangone I; Marcacci M; Puglia I; Rinaldi A; Savini G.                                                                                                                                                |
| EPI_ISL_995191, EPI_ISL_995702 to 995703, EPI_ISL_995706, EPI_ISL_995722 to 995723, EPI_ISL_995749, EPI_ISL_995753                                                                                                                                                                                                                                                                                                                                                                                                                                                                                                                                                                                                                                                                                                                                                                                                                                                                                                                                                                                                                                                                                                                                                                                                                                                                                                                                                                                                                                                                                                                                                                                                                                                                                                                                                                                                                                                                                                                                                                                                                                                                                                                                                                                                                                                                                                                                                                                                                                                                                                                                                                                                                                                                                                                                                                                                                                                                                                                                                                                                                                                                                                                                                                                                                                                                                                                                                                                                                                                                                                                                                                                                                                                                                                                                                                                                                                                                                                                                                                                                                                                                                                                                                                                                                                                                                                                                             | RAILWAY HOSPITAL                                                             | Department of Neurology, National Institute of Mental Health and Neurosciences (NIMHANS)                                                         | Anita S Desai; Anson Kunjumon George; Chitra Pattabiraman; Darshan Sreenivas; Harsha.P.K; Nakka Vijay Kiran Reddy; Pramada Prasad; Risha Rasheed; V Ravi                                                                                                                               |
| EPI_ISL_751595, EPI_ISL_751667, EPI_ISL_751671, EPI_ISL_751695, EPI_ISL_751751, EPI_ISL_751757, EPI_ISL_751790, EPI_ISL_751795, EPI_ISL_903641, EPI_ISL_903644 to 903646, EPI_ISL_903856, EPI_ISL_903890, EPI_ISL_903914, EPI_ISL_903925                                                                                                                                                                                                                                                                                                                                                                                                                                                                                                                                                                                                                                                                                                                                                                                                                                                                                                                                                                                                                                                                                                                                                                                                                                                                                                                                                                                                                                                                                                                                                                                                                                                                                                                                                                                                                                                                                                                                                                                                                                                                                                                                                                                                                                                                                                                                                                                                                                                                                                                                                                                                                                                                                                                                                                                                                                                                                                                                                                                                                                                                                                                                                                                                                                                                                                                                                                                                                                                                                                                                                                                                                                                                                                                                                                                                                                                                                                                                                                                                                                                                                                                                                                                                                       | RI State Health Laboratories                                                 | Genomics and Discovery, Respiratory Viruses Branch, Division of Viral Diseases, Centers for Disease Control and Prevention                       | Anna Montmayeur; Anna Uehara; Ben L. Rambo-Martin; Clinton R. Paden; Dhvani Batra; Haibin Wang; Jasmine Padilla; Jing Zhang; Justin Lee; Krista Queen; Lori Rowe; Mark Burroughs; Mili Sheth; Peter W. Cook; Rachel Marine; Sarah Nobles; Suxiang Tong; Yan Li; Ying Tao               |
| EPI_ISL_647985, EPI_ISL_812202 to 812203                                                                                                                                                                                                                                                                                                                                                                                                                                                                                                                                                                                                                                                                                                                                                                                                                                                                                                                                                                                                                                                                                                                                                                                                                                                                                                                                                                                                                                                                                                                                                                                                                                                                                                                                                                                                                                                                                                                                                                                                                                                                                                                                                                                                                                                                                                                                                                                                                                                                                                                                                                                                                                                                                                                                                                                                                                                                                                                                                                                                                                                                                                                                                                                                                                                                                                                                                                                                                                                                                                                                                                                                                                                                                                                                                                                                                                                                                                                                                                                                                                                                                                                                                                                                                                                                                                                                                                                                                       | RI State Health Laboratories                                                 | Pathogen Discovery, Respiratory Viruses Branch, Division of Viral Diseases, Centers for Disease Control and Prevention                           | Anna Montmayeur; Anna Uehara; Brian Lynch; Clinton R. Paden; Haibin Wang; Jing Zhang; Krista Queen; Peter Cook; Rachel Marine; Suxiang Tong; Yan Li; Ying Tao                                                                                                                          |
| EPI_ISL_883291, EPI_ISL_883294 to 883295, EPI_ISL_883297, EPI_ISL_883301 to 883302                                                                                                                                                                                                                                                                                                                                                                                                                                                                                                                                                                                                                                                                                                                                                                                                                                                                                                                                                                                                                                                                                                                                                                                                                                                                                                                                                                                                                                                                                                                                                                                                                                                                                                                                                                                                                                                                                                                                                                                                                                                                                                                                                                                                                                                                                                                                                                                                                                                                                                                                                                                                                                                                                                                                                                                                                                                                                                                                                                                                                                                                                                                                                                                                                                                                                                                                                                                                                                                                                                                                                                                                                                                                                                                                                                                                                                                                                                                                                                                                                                                                                                                                                                                                                                                                                                                                                                             | RP Guardiagrele-Ospedale di Comunità                                         | Istituto Zooprofilattico Sperimentale dell'Abruzzo e Molise "G. Caporale"                                                                        | Ancora M; Calistri P; Cammà C; Curini V; Di Domenico M; Di Pasquale A; Lorusso A; Mangone I; Marcacci M; Puglia I; Rinaldi A; Savini G; Scialabba S                                                                                                                                    |
| EPI_ISL_833083 to 833084                                                                                                                                                                                                                                                                                                                                                                                                                                                                                                                                                                                                                                                                                                                                                                                                                                                                                                                                                                                                                                                                                                                                                                                                                                                                                                                                                                                                                                                                                                                                                                                                                                                                                                                                                                                                                                                                                                                                                                                                                                                                                                                                                                                                                                                                                                                                                                                                                                                                                                                                                                                                                                                                                                                                                                                                                                                                                                                                                                                                                                                                                                                                                                                                                                                                                                                                                                                                                                                                                                                                                                                                                                                                                                                                                                                                                                                                                                                                                                                                                                                                                                                                                                                                                                                                                                                                                                                                                                       | RPS                                                                          | Istituto Zooprofilattico Sperimentale dell'Abruzzo e Molise "G. Caporale"                                                                        | Ancora M; Calistri P; Cammà C; Curini V; Delli Compagni E; Di Domenico M; Di Pasquale A; Lorusso A; Mangone I; Marcacci M; Puglia I; Rinaldi A; Savini G                                                                                                                               |
| EPI_ISL_888980, EPI_ISL_889015, EPI_ISL_889022                                                                                                                                                                                                                                                                                                                                                                                                                                                                                                                                                                                                                                                                                                                                                                                                                                                                                                                                                                                                                                                                                                                                                                                                                                                                                                                                                                                                                                                                                                                                                                                                                                                                                                                                                                                                                                                                                                                                                                                                                                                                                                                                                                                                                                                                                                                                                                                                                                                                                                                                                                                                                                                                                                                                                                                                                                                                                                                                                                                                                                                                                                                                                                                                                                                                                                                                                                                                                                                                                                                                                                                                                                                                                                                                                                                                                                                                                                                                                                                                                                                                                                                                                                                                                                                                                                                                                                                                                 | RS Anna                                                                      | Eijkman Institute for Molecular Biology, Ministry of Research and Technology/National Agency for Research and Innovation                         | Amin Soebandrio; Edison Johar; Frilasita A Yudhaputri; Hidayat Trimarsanto; Iskandar Adnan; Khin Saw Myint; Lydia V. Panggalo; Safarina G Malik; Sukma Oktavianthi; Willy Agustine                                                                                                     |
| EPI_ISL_888979                                                                                                                                                                                                                                                                                                                                                                                                                                                                                                                                                                                                                                                                                                                                                                                                                                                                                                                                                                                                                                                                                                                                                                                                                                                                                                                                                                                                                                                                                                                                                                                                                                                                                                                                                                                                                                                                                                                                                                                                                                                                                                                                                                                                                                                                                                                                                                                                                                                                                                                                                                                                                                                                                                                                                                                                                                                                                                                                                                                                                                                                                                                                                                                                                                                                                                                                                                                                                                                                                                                                                                                                                                                                                                                                                                                                                                                                                                                                                                                                                                                                                                                                                                                                                                                                                                                                                                                                                                                 | RS Bhakti Mulia                                                              | Eijkman Institute for Molecular Biology, Ministry of Research and Technology/National Agency for Research and Innovation                         | Amin Soebandrio; Edison Johar; Frilasita A Yudhaputri; Hidayat Trimarsanto; Iskandar Adnan; Khin Saw Myint; Lydia V. Panggalo; Safarina G Malik; Sukma Oktavianthi; Willy Agustine                                                                                                     |
| EPI_ISL_766035                                                                                                                                                                                                                                                                                                                                                                                                                                                                                                                                                                                                                                                                                                                                                                                                                                                                                                                                                                                                                                                                                                                                                                                                                                                                                                                                                                                                                                                                                                                                                                                                                                                                                                                                                                                                                                                                                                                                                                                                                                                                                                                                                                                                                                                                                                                                                                                                                                                                                                                                                                                                                                                                                                                                                                                                                                                                                                                                                                                                                                                                                                                                                                                                                                                                                                                                                                                                                                                                                                                                                                                                                                                                                                                                                                                                                                                                                                                                                                                                                                                                                                                                                                                                                                                                                                                                                                                                                                                 | RS Bhayangkara Brimob Kelapa Dua                                             | Eijkman Institute for Molecular Biology, Ministry of Research and Technology/National Agency for Research and Innovation                         | Amin Soebandrio; David H Muljono; Edison Johar; Frilasita A Yudhaputri; Hidayat Trimarsanto; Khin Saw Myint; Safarina G Malik                                                                                                                                                          |
| EPI_ISL_766039, EPI_ISL_766048                                                                                                                                                                                                                                                                                                                                                                                                                                                                                                                                                                                                                                                                                                                                                                                                                                                                                                                                                                                                                                                                                                                                                                                                                                                                                                                                                                                                                                                                                                                                                                                                                                                                                                                                                                                                                                                                                                                                                                                                                                                                                                                                                                                                                                                                                                                                                                                                                                                                                                                                                                                                                                                                                                                                                                                                                                                                                                                                                                                                                                                                                                                                                                                                                                                                                                                                                                                                                                                                                                                                                                                                                                                                                                                                                                                                                                                                                                                                                                                                                                                                                                                                                                                                                                                                                                                                                                                                                                 | RS Bhayangkara Tk. III                                                       | Eijkman Institute for Molecular Biology, Ministry of Research and Technology/National Agency for Research and Innovation                         | Amin Soebandrio; David H Muljono; Edison Johar; Frilasita A Yudhaputri; Hidayat Trimarsanto; Khin Saw Myint; Safarina G Malik                                                                                                                                                          |
| EPI_ISL_947249, EPI_ISL_947252, EPI_ISL_947257                                                                                                                                                                                                                                                                                                                                                                                                                                                                                                                                                                                                                                                                                                                                                                                                                                                                                                                                                                                                                                                                                                                                                                                                                                                                                                                                                                                                                                                                                                                                                                                                                                                                                                                                                                                                                                                                                                                                                                                                                                                                                                                                                                                                                                                                                                                                                                                                                                                                                                                                                                                                                                                                                                                                                                                                                                                                                                                                                                                                                                                                                                                                                                                                                                                                                                                                                                                                                                                                                                                                                                                                                                                                                                                                                                                                                                                                                                                                                                                                                                                                                                                                                                                                                                                                                                                                                                                                                 | RS Bina Husada Cibinong                                                      | Eijkman Institute for Molecular Biology, Ministry of Research and Technology/National Agency for Research and Innovation                         | Amin Soebandrio; Edison Johar; Frilasita A Yudhaputri; Hidayat Trimarsanto; Iskandar Adnan; Khin Saw Myint; Lydia V. Panggalo; Safarina G Malik; Sukma Oktavianthi; Willy Agustine                                                                                                     |
| EPI_ISL_888987                                                                                                                                                                                                                                                                                                                                                                                                                                                                                                                                                                                                                                                                                                                                                                                                                                                                                                                                                                                                                                                                                                                                                                                                                                                                                                                                                                                                                                                                                                                                                                                                                                                                                                                                                                                                                                                                                                                                                                                                                                                                                                                                                                                                                                                                                                                                                                                                                                                                                                                                                                                                                                                                                                                                                                                                                                                                                                                                                                                                                                                                                                                                                                                                                                                                                                                                                                                                                                                                                                                                                                                                                                                                                                                                                                                                                                                                                                                                                                                                                                                                                                                                                                                                                                                                                                                                                                                                                                                 | RS Citra Medika Depok                                                        | Eijkman Institute for Molecular Biology, Ministry of Research and Technology/National Agency for Research and Innovation                         | Amin Soebandrio; Edison Johar; Frilasita A Yudhaputri; Hidayat Trimarsanto; Iskandar Adnan; Khin Saw Myint; Lydia V. Panggalo; Safarina G Malik; Sukma Oktavianthi; Willy Agustine                                                                                                     |
| EPI_ISL_947290                                                                                                                                                                                                                                                                                                                                                                                                                                                                                                                                                                                                                                                                                                                                                                                                                                                                                                                                                                                                                                                                                                                                                                                                                                                                                                                                                                                                                                                                                                                                                                                                                                                                                                                                                                                                                                                                                                                                                                                                                                                                                                                                                                                                                                                                                                                                                                                                                                                                                                                                                                                                                                                                                                                                                                                                                                                                                                                                                                                                                                                                                                                                                                                                                                                                                                                                                                                                                                                                                                                                                                                                                                                                                                                                                                                                                                                                                                                                                                                                                                                                                                                                                                                                                                                                                                                                                                                                                                                 | RS Hermina Bitung                                                            | Eijkman Institute for Molecular Biology, Ministry of Research and Technology/National Agency for Research and Innovation                         | Amin Soebandrio; Edison Johar; Frilasita A Yudhaputri; Hidayat Trimarsanto; Iskandar Adnan; Khin Saw Myint; Lydia V. Panggalo; Safarina G Malik; Sukma Oktavianthi; Willy Agustine                                                                                                     |
| EPI_ISL_888983                                                                                                                                                                                                                                                                                                                                                                                                                                                                                                                                                                                                                                                                                                                                                                                                                                                                                                                                                                                                                                                                                                                                                                                                                                                                                                                                                                                                                                                                                                                                                                                                                                                                                                                                                                                                                                                                                                                                                                                                                                                                                                                                                                                                                                                                                                                                                                                                                                                                                                                                                                                                                                                                                                                                                                                                                                                                                                                                                                                                                                                                                                                                                                                                                                                                                                                                                                                                                                                                                                                                                                                                                                                                                                                                                                                                                                                                                                                                                                                                                                                                                                                                                                                                                                                                                                                                                                                                                                                 | RS Hermina Daan Mogot                                                        | Eijkman Institute for Molecular Biology, Ministry of Research and Technology/National Agency for Research and Innovation                         | Amin Soebandrio; Edison Johar; Frilasita A Yudhaputri; Hidayat Trimarsanto; Iskandar Adnan; Khin Saw Myint; Lydia V. Panggalo; Safarina G Malik; Sukma Oktavianthi; Willy Agustine                                                                                                     |
| EPI_ISL_888984                                                                                                                                                                                                                                                                                                                                                                                                                                                                                                                                                                                                                                                                                                                                                                                                                                                                                                                                                                                                                                                                                                                                                                                                                                                                                                                                                                                                                                                                                                                                                                                                                                                                                                                                                                                                                                                                                                                                                                                                                                                                                                                                                                                                                                                                                                                                                                                                                                                                                                                                                                                                                                                                                                                                                                                                                                                                                                                                                                                                                                                                                                                                                                                                                                                                                                                                                                                                                                                                                                                                                                                                                                                                                                                                                                                                                                                                                                                                                                                                                                                                                                                                                                                                                                                                                                                                                                                                                                                 | RS Hermina Depok                                                             | Eijkman Institute for Molecular Biology, Ministry of Research and Technology/National Agency for Research and Innovation                         | Amin Soebandrio; Edison Johar; Frilasita A Yudhaputri; Hidayat Trimarsanto; Iskandar Adnan; Khin Saw Myint; Lydia V. Panggalo; Safarina G Malik; Sukma Oktavianthi; Willy Agustine                                                                                                     |
| EPI_ISL_888985                                                                                                                                                                                                                                                                                                                                                                                                                                                                                                                                                                                                                                                                                                                                                                                                                                                                                                                                                                                                                                                                                                                                                                                                                                                                                                                                                                                                                                                                                                                                                                                                                                                                                                                                                                                                                                                                                                                                                                                                                                                                                                                                                                                                                                                                                                                                                                                                                                                                                                                                                                                                                                                                                                                                                                                                                                                                                                                                                                                                                                                                                                                                                                                                                                                                                                                                                                                                                                                                                                                                                                                                                                                                                                                                                                                                                                                                                                                                                                                                                                                                                                                                                                                                                                                                                                                                                                                                                                                 | RS Hermina Serpong                                                           | Eijkman Institute for Molecular Biology, Ministry of Research and Technology/National Agency for Research and Innovation                         | Amin Soebandrio; Edison Johar; Frilasita A Yudhaputri; Hidayat Trimarsanto; Iskandar Adnan; Khin Saw Myint; Lydia V. Panggalo; Safarina G Malik; Sukma Oktavianthi; Willy Agustine                                                                                                     |
| EPI_ISL_889017                                                                                                                                                                                                                                                                                                                                                                                                                                                                                                                                                                                                                                                                                                                                                                                                                                                                                                                                                                                                                                                                                                                                                                                                                                                                                                                                                                                                                                                                                                                                                                                                                                                                                                                                                                                                                                                                                                                                                                                                                                                                                                                                                                                                                                                                                                                                                                                                                                                                                                                                                                                                                                                                                                                                                                                                                                                                                                                                                                                                                                                                                                                                                                                                                                                                                                                                                                                                                                                                                                                                                                                                                                                                                                                                                                                                                                                                                                                                                                                                                                                                                                                                                                                                                                                                                                                                                                                                                                                 | RS Hermina Tangerang                                                         | Eijkman Institute for Molecular Biology, Ministry of Research and Technology/National Agency for Research and Innovation                         | Amin Soebandrio; Edison Johar; Frilasita A Yudhaputri; Hidayat Trimarsanto; Iskandar Adnan; Khin Saw Myint; Lydia V. Panggalo; Safarina G Malik; Sukma Oktavianthi; Willy Agustine                                                                                                     |
| EPI_ISL_763064                                                                                                                                                                                                                                                                                                                                                                                                                                                                                                                                                                                                                                                                                                                                                                                                                                                                                                                                                                                                                                                                                                                                                                                                                                                                                                                                                                                                                                                                                                                                                                                                                                                                                                                                                                                                                                                                                                                                                                                                                                                                                                                                                                                                                                                                                                                                                                                                                                                                                                                                                                                                                                                                                                                                                                                                                                                                                                                                                                                                                                                                                                                                                                                                                                                                                                                                                                                                                                                                                                                                                                                                                                                                                                                                                                                                                                                                                                                                                                                                                                                                                                                                                                                                                                                                                                                                                                                                                                                 | RS Kasih Ibu, Surakarta                                                      | Universitas Sebelas Maret (UNS); Rumah Sakit UNS (RS-UNS); National Institute of Health Research and Development, Indonesian Ministry of Health. | Alif A Ghufron; Arie A Nugraha; Betty Suryawati; Dewi Puspa; Hana A Pawestri; Hartanti Dian Ika; Hartono; Kartika; Maryani; Revi G H Novika; Vivi Setiawaty.; Yulia Sari                                                                                                               |
| EPI_ISL_766047                                                                                                                                                                                                                                                                                                                                                                                                                                                                                                                                                                                                                                                                                                                                                                                                                                                                                                                                                                                                                                                                                                                                                                                                                                                                                                                                                                                                                                                                                                                                                                                                                                                                                                                                                                                                                                                                                                                                                                                                                                                                                                                                                                                                                                                                                                                                                                                                                                                                                                                                                                                                                                                                                                                                                                                                                                                                                                                                                                                                                                                                                                                                                                                                                                                                                                                                                                                                                                                                                                                                                                                                                                                                                                                                                                                                                                                                                                                                                                                                                                                                                                                                                                                                                                                                                                                                                                                                                                                 | RS Kramat 128                                                                | Eijkman Institute for Molecular Biology, Ministry of Research and Technology/National Agency for Research and Innovation                         | Amin Soebandrio; David H Muljono; Edison Johar; Frilasita A Yudhaputri; Hidayat Trimarsanto; Khin Saw Myint; Safarina G Malik                                                                                                                                                          |
| EPI_ISL_833393, EPI_ISL_833492                                                                                                                                                                                                                                                                                                                                                                                                                                                                                                                                                                                                                                                                                                                                                                                                                                                                                                                                                                                                                                                                                                                                                                                                                                                                                                                                                                                                                                                                                                                                                                                                                                                                                                                                                                                                                                                                                                                                                                                                                                                                                                                                                                                                                                                                                                                                                                                                                                                                                                                                                                                                                                                                                                                                                                                                                                                                                                                                                                                                                                                                                                                                                                                                                                                                                                                                                                                                                                                                                                                                                                                                                                                                                                                                                                                                                                                                                                                                                                                                                                                                                                                                                                                                                                                                                                                                                                                                                                 | RS MMC Jakarta, Indonesia                                                    | Biosafety Level-3 Laboratory, Indonesian Institute of Sciences (LIPI)                                                                            | Ade Andriani; Ahmad Fathoni; Andri Wardiana; Anggia Prasetyoputri; Anik Budhi Dharmayanthi; Eva Erdayani; Isa Nuryana; Linda Sukmarini; Noma Dilla Yanthi; Rathin Asmana Ningrum; Syam Budi Iryanto; Yulawati                                                                          |
| EPI_ISL_833503 to 833505, EPI_ISL_833507                                                                                                                                                                                                                                                                                                                                                                                                                                                                                                                                                                                                                                                                                                                                                                                                                                                                                                                                                                                                                                                                                                                                                                                                                                                                                                                                                                                                                                                                                                                                                                                                                                                                                                                                                                                                                                                                                                                                                                                                                                                                                                                                                                                                                                                                                                                                                                                                                                                                                                                                                                                                                                                                                                                                                                                                                                                                                                                                                                                                                                                                                                                                                                                                                                                                                                                                                                                                                                                                                                                                                                                                                                                                                                                                                                                                                                                                                                                                                                                                                                                                                                                                                                                                                                                                                                                                                                                                                       | RS MMC, Jakarta, Indonesia                                                   | Biosafety Level-3 Laboratory, Indonesian Institute of Sciences                                                                                   | Ade Andriani; Ahmad Fathoni; Ahmad Randy; Andri Wardiana; Anggia Prasetyoputri; Anik Budhi Dharmayanthi; Idris; Isa Nuryana; Listiana Oktavia;                                                                                                                                         |

|                                                                                              |                                           | (LIPI)                                                                                                                                                                          | Muhammad Ridwan; Pangda Sopha; Ratih Asmana Ningrum; Ruby Setiawan; Syaiful Rizal; Syam Budi Iryanto                                                                                                                                           |
|----------------------------------------------------------------------------------------------|-------------------------------------------|---------------------------------------------------------------------------------------------------------------------------------------------------------------------------------|------------------------------------------------------------------------------------------------------------------------------------------------------------------------------------------------------------------------------------------------|
| EPI_ISL_833509 to 833510                                                                     | RS Melania, Bogor, Indonesia              | Biosafety Level-3 Laboratory, Indonesian Institute of Sciences (LIPI)                                                                                                           | Ade Andriani; Ahmad Fathoni; Andri Wardiana; Anggia Prasetyoputri; Anik Budhi Dharmayanthi; Isa Nuryana; Ratih Asmana Ningrum; Syam Budi Iryanto                                                                                               |
| EPI_ISL_889016                                                                               | RS Mitra Husada                           | Eijkman Institute for Molecular Biology, Ministry of Research and Technology/National Agency for Research and Innovation                                                        | Amin Soebandrio; Edison Johar; Frilasita A Yudhaputri; Hidayat Trimarsanto; Iskandar Adnan; Khin Saw Myint; Lydia V. Panggalo; Safarina G Malik; Sukma Oktavianthi; Willy Agustine                                                             |
| EPI_ISL_766034, EPI_ISL_766036, EPI_ISL_889009                                               | RS Mitra Keluarga Bintaro                 | Eijkman Institute for Molecular Biology, Ministry of Research and Technology/National Agency for Research and Innovation                                                        | Amin Soebandrio; David H Muljono; Edison Johar; Frilasita A Yudhaputri; Hidayat Trimarsanto; Iskandar Adnan; Khin Saw Myint; Lydia V. Panggalo; Safarina G Malik; Sukma Oktavianthi; Willy Agustine                                            |
| EPI_ISL_888999, EPI_ISL_947301                                                               | RS Mitra Keluarga Cibubur                 | Eijkman Institute for Molecular Biology, Ministry of Research and Technology/National Agency for Research and Innovation                                                        | Amin Soebandrio; Edison Johar; Frilasita A Yudhaputri; Hidayat Trimarsanto; Iskandar Adnan; Khin Saw Myint; Lydia V. Panggalo; Safarina G Malik; Sukma Oktavianthi; Willy Agustine                                                             |
| EPI_ISL_947328                                                                               | RS Mitra Keluarga Depok                   | Eijkman Institute for Molecular Biology, Ministry of Research and Technology/National Agency for Research and Innovation                                                        | Amin Soebandrio; Edison Johar; Frilasita A Yudhaputri; Hidayat Trimarsanto; Iskandar Adnan; Khin Saw Myint; Lydia V. Panggalo; Safarina G Malik; Sukma Oktavianthi; Willy Agustine                                                             |
| EPI_ISL_888991 to 888992, EPI_ISL_889003 to 889004, EPI_ISL_947270, EPI_ISL_947326 to 947327 | RS Mitra Keluarga Gading Serpong          | Eijkman Institute for Molecular Biology, Ministry of Research and Technology/National Agency for Research and Innovation                                                        | Amin Soebandrio; Edison Johar; Frilasita A Yudhaputri; Hidayat Trimarsanto; Iskandar Adnan; Khin Saw Myint; Lydia V. Panggalo; Safarina G Malik; Sukma Oktavianthi; Willy Agustine                                                             |
| EPI_ISL_947322                                                                               | RS Mitra Keluarga Kelapa Gading           | Eijkman Institute for Molecular Biology, Ministry of Research and Technology/National Agency for Research and Innovation                                                        | Amin Soebandrio; Edison Johar; Frilasita A Yudhaputri; Hidayat Trimarsanto; Iskandar Adnan; Khin Saw Myint; Lydia V. Panggalo; Safarina G Malik; Sukma Oktavianthi; Willy Agustine                                                             |
| EPI_ISL_889012                                                                               | RS Mitra Keluarga Pratama Jatiasih        | Eijkman Institute for Molecular Biology, Ministry of Research and Technology/National Agency for Research and Innovation                                                        | Amin Soebandrio; Edison Johar; Frilasita A Yudhaputri; Hidayat Trimarsanto; Iskandar Adnan; Khin Saw Myint; Lydia V. Panggalo; Safarina G Malik; Sukma Oktavianthi; Willy Agustine                                                             |
| EPI_ISL_889020                                                                               | RS Omni Cikarang                          | Eijkman Institute for Molecular Biology, Ministry of Research and Technology/National Agency for Research and Innovation                                                        | Amin Soebandrio; Edison Johar; Frilasita A Yudhaputri; Hidayat Trimarsanto; Iskandar Adnan; Khin Saw Myint; Lydia V. Panggalo; Safarina G Malik; Sukma Oktavianthi; Willy Agustine                                                             |
| EPI_ISL_888981                                                                               | RS Omni Pulomas                           | Eijkman Institute for Molecular Biology, Ministry of Research and Technology/National Agency for Research and Innovation                                                        | Amin Soebandrio; Edison Johar; Frilasita A Yudhaputri; Hidayat Trimarsanto; Iskandar Adnan; Khin Saw Myint; Lydia V. Panggalo; Safarina G Malik; Sukma Oktavianthi; Willy Agustine                                                             |
| EPI_ISL_833493 to 833494, EPI_ISL_833496                                                     | RS PMI Bogor, Indonesia                   | Biosafety Level-3 Laboratory, Indonesian Institute of Sciences (LIPI)                                                                                                           | Ade Andriani; Ahmad Fathoni; Andri Wardiana; Anggia Prasetyoputri; Anik Budhi Dharmayanthi; Anky Zannati; Arie Wulandari; Indriawati; Isa Nuryana; Maritsa Nurfatwa; Nurulliaty; Ratih Asmana Ningrum; Syam Budi Iryanto; Yana Rubiyana        |
| EPI_ISL_833506                                                                               | RS PMI, Bogor, Indonesia                  | Biosafety Level-3 Laboratory, Indonesian Institute of Sciences (LIPI)                                                                                                           | Ade Andriani; Ahmad Fathoni; Andri Wardiana; Anggia Prasetyoputri; Anik Budhi Dharmayanthi; Gilang Akbariani; Isa Nuryana; Ratih Asmana Ningrum; Satrio Haryo Benowo; Syam Budi Iryanto                                                        |
| EPI_ISL_763063                                                                               | RS Pantii Waluyo, Surakarta               | Universitas Sebelas Maret (UNS); Rumah Sakit UNS (RS-UNS); National Institute of Health Research and Development, Indonesian Ministry of Health.                                | Afif A Ghufron; Arie A Nugraha; Betty Suryawati; Dewi Puspa; Hana A Pawestri; Hartanti Dian Ika; Hartono; Kartika; Maryani; Revi G H Novika; Vivi Setiawaty.; Yulia Sari                                                                       |
| EPI_ISL_766043, EPI_ISL_766045                                                               | RS Pelni                                  | Eijkman Institute for Molecular Biology, Ministry of Research and Technology/National Agency for Research and Innovation                                                        | Amin Soebandrio; David H Muljono; Edison Johar; Frilasita A Yudhaputri; Hidayat Trimarsanto; Khin Saw Myint; Safarina G Malik                                                                                                                  |
| EPI_ISL_775597                                                                               | RS Pertamina Sorong                       | National Institute of Health Research and Development                                                                                                                           | AA; HA; HD; Ikawati; KD; KNA; N; Nugraha; Pangesti; Pawestri; Puspa; Puspandari; Setiawaty; Soekarso; Subangkit; T; V; Yosepin                                                                                                                 |
| EPI_ISL_766041                                                                               | RS Polri                                  | Eijkman Institute for Molecular Biology, Ministry of Research and Technology/National Agency for Research and Innovation                                                        | Amin Soebandrio; David H Muljono; Edison Johar; Frilasita A Yudhaputri; Hidayat Trimarsanto; Khin Saw Myint; Safarina G Malik                                                                                                                  |
| EPI_ISL_888989 to 888990                                                                     | RS Pondok Indah Bintaro Jaya              | Eijkman Institute for Molecular Biology, Ministry of Research and Technology/National Agency for Research and Innovation                                                        | Amin Soebandrio; Edison Johar; Frilasita A Yudhaputri; Hidayat Trimarsanto; Iskandar Adnan; Khin Saw Myint; Lydia V. Panggalo; Safarina G Malik; Sukma Oktavianthi; Willy Agustine                                                             |
| EPI_ISL_888982                                                                               | RS Pondok Indah Hospital - Pondok Indah   | Eijkman Institute for Molecular Biology, Ministry of Research and Technology/National Agency for Research and Innovation                                                        | Amin Soebandrio; Edison Johar; Frilasita A Yudhaputri; Hidayat Trimarsanto; Iskandar Adnan; Khin Saw Myint; Lydia V. Panggalo; Safarina G Malik; Sukma Oktavianthi; Willy Agustine                                                             |
| EPI_ISL_888988, EPI_ISL_947262                                                               | RS Qadr                                   | Eijkman Institute for Molecular Biology, Ministry of Research and Technology/National Agency for Research and Innovation                                                        | Amin Soebandrio; Edison Johar; Frilasita A Yudhaputri; Hidayat Trimarsanto; Iskandar Adnan; Khin Saw Myint; Lydia V. Panggalo; Safarina G Malik; Sukma Oktavianthi; Willy Agustine                                                             |
| EPI_ISL_833499, EPI_ISL_833571                                                               | RS Qadr, Tangerang, Indonesia             | Biosafety Level-3 Laboratory, Indonesian Institute of Sciences (LIPI)                                                                                                           | Ade Andriani; Ahmad Fathoni; Andri Wardiana; Anggia Prasetyoputri; Anik Budhi Dharmayanthi; Erwin Fajar Hasrianda; Isa Nuryana; Ratih Asmana Ningrum; Ratna Dwi Ramadan; Ryan Haryo Setiawan; Sugiyono Saputra; Syam Budi Iryanto              |
| EPI_ISL_889013                                                                               | RS Rawa Lumbu                             | Eijkman Institute for Molecular Biology, Ministry of Research and Technology/National Agency for Research and Innovation                                                        | Amin Soebandrio; Edison Johar; Frilasita A Yudhaputri; Hidayat Trimarsanto; Iskandar Adnan; Khin Saw Myint; Lydia V. Panggalo; Safarina G Malik; Sukma Oktavianthi; Willy Agustine                                                             |
| EPI_ISL_791985                                                                               | RS Santa Maria Pekanbaru                  | National Institute of Health Research and Development                                                                                                                           | AA; Fridayenti; HA; HD; Ikawati; KD; KNA; N; Nugraha; Pangesti; Pawestri; Puspa; Puspandari; Setiawaty; Soekarso; Subangkit; T; V                                                                                                              |
| EPI_ISL_766042, EPI_ISL_947265, EPI_ISL_947320                                               | RS Sari Asih Ciledug                      | Eijkman Institute for Molecular Biology, Ministry of Research and Technology/National Agency for Research and Innovation                                                        | Amin Soebandrio; David H Muljono; Edison Johar; Frilasita A Yudhaputri; Hidayat Trimarsanto; Iskandar Adnan; Khin Saw Myint; Lydia V. Panggalo; Safarina G Malik; Sukma Oktavianthi; Willy Agustine                                            |
| EPI_ISL_833501 to 833502                                                                     | RS Sayang Bunda, Makasar, Indonesia       | Biosafety Level-3 Laboratory, Indonesian Institute of Sciences (LIPI)                                                                                                           | Ade Andriani; Ahmad Fathoni; Andri Wardiana; Anggia Prasetyoputri; Anik Budhi Dharmayanthi; Fajarrudin Ahmad; Herjuno Ari Eko Nugroho; I sa Nuryana; Isa Nuryana; Masrukhin; Onny Nurrahman Marwayana; Ratih Asmana Ningrum; Syam Budi Iryanto |
| EPI_ISL_889008                                                                               | RS Sentra Medika Cibinong                 | Eijkman Institute for Molecular Biology, Ministry of Research and Technology/National Agency for Research and Innovation                                                        | Amin Soebandrio; Edison Johar; Frilasita A Yudhaputri; Hidayat Trimarsanto; Iskandar Adnan; Khin Saw Myint; Lydia V. Panggalo; Safarina G Malik; Sukma Oktavianthi; Willy Agustine                                                             |
| EPI_ISL_947307, EPI_ISL_947309                                                               | RS Sentra Medika Cikarang                 | Eijkman Institute for Molecular Biology, Ministry of Research and Technology/National Agency for Research and Innovation                                                        | Amin Soebandrio; Edison Johar; Frilasita A Yudhaputri; Hidayat Trimarsanto; Iskandar Adnan; Khin Saw Myint; Lydia V. Panggalo; Safarina G Malik; Sukma Oktavianthi; Willy Agustine                                                             |
| EPI_ISL_947323                                                                               | RS Siloam Kebon Jeruk                     | Eijkman Institute for Molecular Biology, Ministry of Research and Technology/National Agency for Research and Innovation                                                        | Amin Soebandrio; Edison Johar; Frilasita A Yudhaputri; Hidayat Trimarsanto; Iskandar Adnan; Khin Saw Myint; Lydia V. Panggalo; Safarina G Malik; Sukma Oktavianthi; Willy Agustine                                                             |
| EPI_ISL_833039                                                                               | RS TK II 02.05.01 dr. AK Gani Palembang   | National Institute of Health Research and Development                                                                                                                           | A; AA; HA; HD; Ikawati; KD; KNA; N; Nugraha; Pangesti; Pawestri; Puspa; Puspandari; RP; Setiawaty; Soekarso; Subangkit; T; Tantula; V; Wiradharna                                                                                              |
| EPI_ISL_766040                                                                               | RS Tingkat II Moh. Ridwan Meuraksa        | Eijkman Institute for Molecular Biology, Ministry of Research and Technology/National Agency for Research and Innovation                                                        | Amin Soebandrio; David H Muljono; Edison Johar; Frilasita A Yudhaputri; Hidayat Trimarsanto; Khin Saw Myint; Safarina G Malik                                                                                                                  |
| EPI_ISL_759702                                                                               | RS UNS Surakarta                          | Universitas Sebelas Maret (UNS), Rumah sakit Universitas Sebelas Maret (RS-UNS) Surakarta, National Institute of Health Research and Development, Indonesian Ministry of Health | Afif Avicena Gufron; Arie Ardiansyah Nugraha; Betty Suryawati; Dewi Puspa; Hana Apsari Pawestri; Hartanti Dian Ika; Kartika; Vivi Setiawaty; Yulia sari; hartono; maryani                                                                      |
| EPI_ISL_759701                                                                               | RS UNS, Surakarta                         | UNS/RS-UNS, Faculty of Medicine                                                                                                                                                 | Afif Avicenna Gufron; Arie Ardiansyah Nugraha; Betty Suryawati; HanaHana Apsari Pawestri; Hartanti Dian Ika; Hartono; Kartika Dewi Puspa; Maryani; Vivi Setiawaty.; Yulia Sari                                                                 |
| EPI_ISL_947278                                                                               | RS Umum Ciputra Hospital Citragarden City | Eijkman Institute for Molecular Biology, Ministry of Research and Technology/National Agency for Research and Innovation                                                        | Amin Soebandrio; Edison Johar; Frilasita A Yudhaputri; Hidayat Trimarsanto; Iskandar Adnan; Khin Saw Myint; Lydia V. Panggalo; Safarina G Malik; Sukma Oktavianthi; Willy Agustine                                                             |
| EPI_ISL_947275                                                                               | RS Umum Mulia Pajajaran                   | Eijkman Institute for Molecular Biology, Ministry of Research and Technology/National Agency for Research and Innovation                                                        | Amin Soebandrio; Edison Johar; Frilasita A Yudhaputri; Hidayat Trimarsanto; Iskandar Adnan; Khin Saw Myint; Lydia V. Panggalo; Safarina G Malik; Sukma Oktavianthi; Willy Agustine                                                             |
| EPI_ISL_806745                                                                               | RSA Giulianova                            | Istituto Zooprofilattico Sperimentale dell'Abruzzo e Molise "G. Caporale"                                                                                                       | Ancora M; Calistri P; Cammà C; Curini V; Di Domenico M; Di Pasquale A; Lorusso A; Mangone I; Marcacci M; Puglia I; Rinaldi A; Savini G                                                                                                         |

|                                                                          |                                      |                                                                                                                                                                                                                                                                                                                                                                                                                                                                  |                                                                                                                                                                                                                                                                                                                                                                                                                                               |
|--------------------------------------------------------------------------|--------------------------------------|------------------------------------------------------------------------------------------------------------------------------------------------------------------------------------------------------------------------------------------------------------------------------------------------------------------------------------------------------------------------------------------------------------------------------------------------------------------|-----------------------------------------------------------------------------------------------------------------------------------------------------------------------------------------------------------------------------------------------------------------------------------------------------------------------------------------------------------------------------------------------------------------------------------------------|
| EPI_ISL_902737, EPI_ISL_902749, EPI_ISL_906050 to 906052, EPI_ISL_985398 | RSA UGM                              | Genetics Working Group (Pokja Genetik) Faculty of Medicine, Public Health and Nursing Universitas Gadjah Mada (FK-KMK UGM); Disease Investigation Center Wates Ministry of Agriculture Indonesia; Department of Microbiology FK-KMK UGM; Laboratorium Diagnostik Yayasan Tahija World Mosquito Program (WMP) Yogyakarta Center for Tropical Medicine FK-KMK UGM; Integrated Research center FK-KMK UGM; Department of Computer Science and Electronics FMIPA UGM | Aditya Rifqi Fauzi; Afiahayati; Alvin Santoso Kalim; Dwi AA Nugrahaningsih; Dwiki Afandy; Dwiki afandy; Dyah Ayu Puspitarani; Edwin W. Daniwijaya; Eggi Arguni; Endah Supriyati; Fadli Fahri; Gunadi; Hendra Wibawa; Kemal Athollah; Kristy Iskandar; Ludhang P. Rizki; Marcellus; Maria Patricia Inggriani; Mohamad S. Hakim; Nungki Anggorowati; Siswanto; Susan Simanjaya; Titik Nuryastuti; Tri Wibawa; Untung Riawan; William Widitjarso |
| EPI_ISL_759968                                                           | RSI Darus Syifa'                     | Institute of Tropical Disease, Universitas Airlangga                                                                                                                                                                                                                                                                                                                                                                                                             | Aldise M Nastri; Gatot Soegiarto; HM Faiz; Jezzy R Dewantari; Kazufumi Shimizu; Krisnoadi Rahardjo; Laksmi Wulandari; Maria I Lusida; Resti Yudhawati; Rima R Prasetya; Soetjipto; Yasuko Mori                                                                                                                                                                                                                                                |
| EPI_ISL_947284                                                           | RSIA Bunda Sejati                    | Eijkman Institute for Molecular Biology, Ministry of Research and Technology/National Agency for Research and Innovation                                                                                                                                                                                                                                                                                                                                         | Amin Soebandrio; Edison Johar; Frilasita A Yudhaputri; Hidayat Trimarsanto; Iskandar Adnan; Khin Saw Myint; Lydia V. Panggalo; Safarina G Malik; Sukma Oktavianthi; Willy Agustine                                                                                                                                                                                                                                                            |
| EPI_ISL_889021                                                           | RSIA Kenari Graha Medika             | Eijkman Institute for Molecular Biology, Ministry of Research and Technology/National Agency for Research and Innovation                                                                                                                                                                                                                                                                                                                                         | Amin Soebandrio; Edison Johar; Frilasita A Yudhaputri; Hidayat Trimarsanto; Iskandar Adnan; Khin Saw Myint; Lydia V. Panggalo; Safarina G Malik; Sukma Oktavianthi; Willy Agustine                                                                                                                                                                                                                                                            |
| EPI_ISL_947287, EPI_ISL_947325                                           | RSIA PKU Muhammadiyah                | Eijkman Institute for Molecular Biology, Ministry of Research and Technology/National Agency for Research and Innovation                                                                                                                                                                                                                                                                                                                                         | Amin Soebandrio; Edison Johar; Frilasita A Yudhaputri; Hidayat Trimarsanto; Iskandar Adnan; Khin Saw Myint; Lydia V. Panggalo; Safarina G Malik; Sukma Oktavianthi; Willy Agustine                                                                                                                                                                                                                                                            |
| EPI_ISL_889019, EPI_ISL_947273                                           | RSIA Sayyidah                        | Eijkman Institute for Molecular Biology, Ministry of Research and Technology/National Agency for Research and Innovation                                                                                                                                                                                                                                                                                                                                         | Amin Soebandrio; Edison Johar; Frilasita A Yudhaputri; Hidayat Trimarsanto; Iskandar Adnan; Khin Saw Myint; Lydia V. Panggalo; Safarina G Malik; Sukma Oktavianthi; Willy Agustine                                                                                                                                                                                                                                                            |
| EPI_ISL_766038                                                           | RSJPD Harapan Kita                   | Eijkman Institute for Molecular Biology, Ministry of Research and Technology/National Agency for Research and Innovation                                                                                                                                                                                                                                                                                                                                         | Amin Soebandrio; David H Muljono; Edison Johar; Frilasita A Yudhaputri; Hidayat Trimarsanto; Khin Saw Myint; Safarina G Malik                                                                                                                                                                                                                                                                                                                 |
| EPI_ISL_947268                                                           | RSU Angrek Mas                       | Eijkman Institute for Molecular Biology, Ministry of Research and Technology/National Agency for Research and Innovation                                                                                                                                                                                                                                                                                                                                         | Amin Soebandrio; Edison Johar; Frilasita A Yudhaputri; Hidayat Trimarsanto; Iskandar Adnan; Khin Saw Myint; Lydia V. Panggalo; Safarina G Malik; Sukma Oktavianthi; Willy Agustine                                                                                                                                                                                                                                                            |
| EPI_ISL_888997                                                           | RSU Asysyifaa                        | Eijkman Institute for Molecular Biology, Ministry of Research and Technology/National Agency for Research and Innovation                                                                                                                                                                                                                                                                                                                                         | Amin Soebandrio; Edison Johar; Frilasita A Yudhaputri; Hidayat Trimarsanto; Iskandar Adnan; Khin Saw Myint; Lydia V. Panggalo; Safarina G Malik; Sukma Oktavianthi; Willy Agustine                                                                                                                                                                                                                                                            |
| EPI_ISL_889001                                                           | RSU Azra                             | Eijkman Institute for Molecular Biology, Ministry of Research and Technology/National Agency for Research and Innovation                                                                                                                                                                                                                                                                                                                                         | Amin Soebandrio; Edison Johar; Frilasita A Yudhaputri; Hidayat Trimarsanto; Iskandar Adnan; Khin Saw Myint; Lydia V. Panggalo; Safarina G Malik; Sukma Oktavianthi; Willy Agustine                                                                                                                                                                                                                                                            |
| EPI_ISL_888986                                                           | RSU Bhakti Kartini                   | Eijkman Institute for Molecular Biology, Ministry of Research and Technology/National Agency for Research and Innovation                                                                                                                                                                                                                                                                                                                                         | Amin Soebandrio; Edison Johar; Frilasita A Yudhaputri; Hidayat Trimarsanto; Iskandar Adnan; Khin Saw Myint; Lydia V. Panggalo; Safarina G Malik; Sukma Oktavianthi; Willy Agustine                                                                                                                                                                                                                                                            |
| EPI_ISL_947247, EPI_ISL_947260, EPI_ISL_947312, EPI_ISL_947329 to 947330 | RSU Bunda Mulia                      | Eijkman Institute for Molecular Biology, Ministry of Research and Technology/National Agency for Research and Innovation                                                                                                                                                                                                                                                                                                                                         | Amin Soebandrio; Edison Johar; Frilasita A Yudhaputri; Hidayat Trimarsanto; Iskandar Adnan; Khin Saw Myint; Lydia V. Panggalo; Safarina G Malik; Sukma Oktavianthi; Willy Agustine                                                                                                                                                                                                                                                            |
| EPI_ISL_888996                                                           | RSU Graha Juanda                     | Eijkman Institute for Molecular Biology, Ministry of Research and Technology/National Agency for Research and Innovation                                                                                                                                                                                                                                                                                                                                         | Amin Soebandrio; Edison Johar; Frilasita A Yudhaputri; Hidayat Trimarsanto; Iskandar Adnan; Khin Saw Myint; Lydia V. Panggalo; Safarina G Malik; Sukma Oktavianthi; Willy Agustine                                                                                                                                                                                                                                                            |
| EPI_ISL_889006, EPI_ISL_947304, EPI_ISL_947315                           | RSU Harapan Bunda                    | Eijkman Institute for Molecular Biology, Ministry of Research and Technology/National Agency for Research and Innovation                                                                                                                                                                                                                                                                                                                                         | Amin Soebandrio; Edison Johar; Frilasita A Yudhaputri; Hidayat Trimarsanto; Iskandar Adnan; Khin Saw Myint; Lydia V. Panggalo; Safarina G Malik; Sukma Oktavianthi; Willy Agustine                                                                                                                                                                                                                                                            |
| EPI_ISL_947296                                                           | RSU Kartika Husada                   | Eijkman Institute for Molecular Biology, Ministry of Research and Technology/National Agency for Research and Innovation                                                                                                                                                                                                                                                                                                                                         | Amin Soebandrio; Edison Johar; Frilasita A Yudhaputri; Hidayat Trimarsanto; Iskandar Adnan; Khin Saw Myint; Lydia V. Panggalo; Safarina G Malik; Sukma Oktavianthi; Willy Agustine                                                                                                                                                                                                                                                            |
| EPI_ISL_888994                                                           | RSU MMC                              | Eijkman Institute for Molecular Biology, Ministry of Research and Technology/National Agency for Research and Innovation                                                                                                                                                                                                                                                                                                                                         | Amin Soebandrio; Edison Johar; Frilasita A Yudhaputri; Hidayat Trimarsanto; Iskandar Adnan; Khin Saw Myint; Lydia V. Panggalo; Safarina G Malik; Sukma Oktavianthi; Willy Agustine                                                                                                                                                                                                                                                            |
| EPI_ISL_889010, EPI_ISL_889014, EPI_ISL_889018, EPI_ISL_947281           | RSU Medika Dramaga                   | Eijkman Institute for Molecular Biology, Ministry of Research and Technology/National Agency for Research and Innovation                                                                                                                                                                                                                                                                                                                                         | Amin Soebandrio; Edison Johar; Frilasita A Yudhaputri; Hidayat Trimarsanto; Iskandar Adnan; Khin Saw Myint; Lydia V. Panggalo; Safarina G Malik; Sukma Oktavianthi; Willy Agustine                                                                                                                                                                                                                                                            |
| EPI_ISL_888993, EPI_ISL_947298, EPI_ISL_947317, EPI_ISL_947324           | RSU Medirossa                        | Eijkman Institute for Molecular Biology, Ministry of Research and Technology/National Agency for Research and Innovation                                                                                                                                                                                                                                                                                                                                         | Amin Soebandrio; Edison Johar; Frilasita A Yudhaputri; Hidayat Trimarsanto; Iskandar Adnan; Khin Saw Myint; Lydia V. Panggalo; Safarina G Malik; Sukma Oktavianthi; Willy Agustine                                                                                                                                                                                                                                                            |
| EPI_ISL_947255                                                           | RSU Meilia                           | Eijkman Institute for Molecular Biology, Ministry of Research and Technology/National Agency for Research and Innovation                                                                                                                                                                                                                                                                                                                                         | Amin Soebandrio; Edison Johar; Frilasita A Yudhaputri; Hidayat Trimarsanto; Iskandar Adnan; Khin Saw Myint; Lydia V. Panggalo; Safarina G Malik; Sukma Oktavianthi; Willy Agustine                                                                                                                                                                                                                                                            |
| EPI_ISL_889011                                                           | RSU Permata Cibubur                  | Eijkman Institute for Molecular Biology, Ministry of Research and Technology/National Agency for Research and Innovation                                                                                                                                                                                                                                                                                                                                         | Amin Soebandrio; Edison Johar; Frilasita A Yudhaputri; Hidayat Trimarsanto; Iskandar Adnan; Khin Saw Myint; Lydia V. Panggalo; Safarina G Malik; Sukma Oktavianthi; Willy Agustine                                                                                                                                                                                                                                                            |
| EPI_ISL_833392                                                           | RSU Sayang Bunda, Makasar, Indonesia | Biosafety Level-3 Laboratory, Indonesian Institute of Sciences (LIPI)                                                                                                                                                                                                                                                                                                                                                                                            | Ade Andriani; Ahmad Fathoni; Andri Wardiana; Anggia Prasetyoputri; Anik Budhi Dharmayanthi; Dini Nurdiani; Isa Nuryana; Ratih Asmana Ningrum; Syam Budi Iryanto; Wahyuni                                                                                                                                                                                                                                                                      |
| EPI_ISL_888995, EPI_ISL_889002                                           | RSU Sumber Waras                     | Eijkman Institute for Molecular Biology, Ministry of Research and Technology/National Agency for Research and Innovation                                                                                                                                                                                                                                                                                                                                         | Amin Soebandrio; Edison Johar; Frilasita A Yudhaputri; Hidayat Trimarsanto; Iskandar Adnan; Khin Saw Myint; Lydia V. Panggalo; Safarina G Malik; Sukma Oktavianthi; Willy Agustine                                                                                                                                                                                                                                                            |
| EPI_ISL_791980                                                           | RSUD Blambangan Banyuwangi           | National Institute of Health Research and Development                                                                                                                                                                                                                                                                                                                                                                                                            | AA; HA; HD; Ikawati; KD; KNA; N; Noor; Nugraha; Pangesti; Pawestri; Puspa; Pusparandi; R; Setiawaty; Soekarso; Subangkit; T; V                                                                                                                                                                                                                                                                                                                |
| EPI_ISL_759703                                                           | RSUD Bung Karno                      | Universitas Sebelas Maret (UNS), Rumah sakit Universitas Sebelas Maret (RS-UNS) Surakarta, National Institute of Health Research and Development, Indonesian Ministry of Health                                                                                                                                                                                                                                                                                  | Afif Avicena Gufron; Arie Ardiansyah Nugraha; Betty Suryawati; Dewi Puspa; Hana Apsari Pawestri; Hartanti Dian Ika; Kartika; Vivi Setiawaty; Yulia sari; hartono; maryani                                                                                                                                                                                                                                                                     |
| EPI_ISL_759705                                                           | RSUD Bung Karno, Surakarta           | Universitas Sebelas Maret (UNS); Rumah Sakit Universitas Sebelas Maret (RS-UNS), Surakarta; National Institute of Health Research and Development, Indonesian Ministry of Health, Jakarta).                                                                                                                                                                                                                                                                      | Afif Avicena Gufron; Arie Ardiansyah Nugraha; Betty Suryawati; Dewi Puspa; Hana Apsari Pawestri; Hartanti Dian Ika; Hartono; Kartika; Maryani; Vivi Setiawaty.; Yulia Sari                                                                                                                                                                                                                                                                    |
| EPI_ISL_888998, EPI_ISL_889000, EPI_ISL_889007                           | RSUD Cileungsi                       | Eijkman Institute for Molecular Biology, Ministry of Research and Technology/National Agency for Research and Innovation                                                                                                                                                                                                                                                                                                                                         | Amin Soebandrio; Edison Johar; Frilasita A Yudhaputri; Hidayat Trimarsanto; Iskandar Adnan; Khin Saw Myint; Lydia V. Panggalo; Safarina G Malik; Sukma Oktavianthi; Willy Agustine                                                                                                                                                                                                                                                            |
| EPI_ISL_791979                                                           | RSUD Curup Bengkulu                  | National Institute of Health Research and Development                                                                                                                                                                                                                                                                                                                                                                                                            | AA; HA; HD; Ikawati; KD; KNA; Mardiani; N; Nugraha; Pangesti; Pawestri; Puspa; Pusparandi; Setiawaty; Soekarso; Subangkit; T; V                                                                                                                                                                                                                                                                                                               |
| EPI_ISL_833040                                                           | RSUD Dr. Abdul Aziz Singkawang       | National Institute of Health Research and Development                                                                                                                                                                                                                                                                                                                                                                                                            | AA; HA; HD; HN; Ikawati; Junus; KD; KNA; N; Nugraha; Pangesti; Pawestri; Puspa; Pusparandi; Setiawaty; Soekarso; Subangkit; T; V                                                                                                                                                                                                                                                                                                              |
| EPI_ISL_759967                                                           | RSUD Dr. Iskak Tulungagung           | Institute of Tropical Disease, Universitas Airlangga                                                                                                                                                                                                                                                                                                                                                                                                             | Aldise M Nastri; Gatot Soegiarto; Jezzy R Dewantari; Kazufumi Shimizu; Krisnoadi Rahardjo; Laksmi Wulandari; Maria I Lusida; Resti Yudhawati; Rima R Prasetya; Soetjipto; Supriyanto Dharmoredjo; Yasuko Mori                                                                                                                                                                                                                                 |
| EPI_ISL_956308, EPI_ISL_956310                                           | RSUD Dr. M. Soewandhie               | Institute of Tropical Disease, Universitas Airlangga                                                                                                                                                                                                                                                                                                                                                                                                             | Aldise M Nastri; Febria Rachmanita; Gatot Soegiarto; Jezzy R Dewantari; Kazufumi Shimizu; Krisnoadi Rahardjo; Laksmi Wulandari; Maria I Lusida; Resti Yudhawati; Rima R Prasetya; Soetjipto; Yasuko Mori                                                                                                                                                                                                                                      |
| EPI_ISL_759962, EPI_ISL_759965                                           | RSUD Dr. Soetomo                     | Institute of Tropical Disease, Universitas Airlangga                                                                                                                                                                                                                                                                                                                                                                                                             | Aldise M Nastri; Gatot Soegiarto; Jezzy R Dewantari; Joni Wahyuhadi; Kazufumi Shimizu; Krisnoadi Rahardjo; Laksmi Wulandari; Maria I Lusida; Resti Yudhawati; Rima R Prasetya; Soetjipto; Yasuko Mori                                                                                                                                                                                                                                         |
| EPI_ISL_985396 to 985397                                                 | RSUD Dr. Tjitrowardoyo               | Genetics Working Group (Pokja Genetik) Faculty of Medicine, Public Health and Nursing Universitas Gadjah Mada (FK-KMK                                                                                                                                                                                                                                                                                                                                            | Afiahayati; Arry Setyowati; Chusni Mubarakhi; Dwi AA Nugrahaningsih; Dwiki afandy; Dyah Ayu Puspitarani; Edwin W. Daniwijaya; Eggi Arguni; Endah Supriyati; Gunadi; Havid Setyawan; Hendra Wibawa; Indaryati; Irene; Kristy Iskandar; Ludhang P. Rizki; Marcellus; Mohamad S. Hakim; Nungki                                                                                                                                                   |

|                                                                                                                                                                                                                                                                                                                                                                                                                                                                                                                                                                                                                                                                                                                                                                                                                                                                                                                                                                                                                                          |                                                                                                                                           |                                                                                                                                                                                                                                                                                                                                                                                                                                                                                                                                                          |                                                                                                                                                                                                                                                                                                                                                                                                                                                                                                                                                                                                                                                                                                                                                        |
|------------------------------------------------------------------------------------------------------------------------------------------------------------------------------------------------------------------------------------------------------------------------------------------------------------------------------------------------------------------------------------------------------------------------------------------------------------------------------------------------------------------------------------------------------------------------------------------------------------------------------------------------------------------------------------------------------------------------------------------------------------------------------------------------------------------------------------------------------------------------------------------------------------------------------------------------------------------------------------------------------------------------------------------|-------------------------------------------------------------------------------------------------------------------------------------------|----------------------------------------------------------------------------------------------------------------------------------------------------------------------------------------------------------------------------------------------------------------------------------------------------------------------------------------------------------------------------------------------------------------------------------------------------------------------------------------------------------------------------------------------------------|--------------------------------------------------------------------------------------------------------------------------------------------------------------------------------------------------------------------------------------------------------------------------------------------------------------------------------------------------------------------------------------------------------------------------------------------------------------------------------------------------------------------------------------------------------------------------------------------------------------------------------------------------------------------------------------------------------------------------------------------------------|
|                                                                                                                                                                                                                                                                                                                                                                                                                                                                                                                                                                                                                                                                                                                                                                                                                                                                                                                                                                                                                                          |                                                                                                                                           | UGM); Disease Investigation Center Wates Ministry of Agriculture Indonesia; Department of Microbiology FK-KMK UGM; Laboratorium Diagnostik Yayasan Tahija World Mosquito Program (WMP) Yogyakarta Center for Tropical Medicine FK-KMK UGM; Integrated Research Center FK-KMK UGM; Department of Computer Science and Electronics FMIPA UGM; Balai Besar Teknik Kesehatan Lingkungan dan Pengendalian Penyakit (BBTKLPP) Yogyakarta                                                                                                                       | Anggorowati; Siswanto; Titik Nuryastuti; Tri Wibawa; Try Nirmala Sari; Untung Riawan; William Widitjarso                                                                                                                                                                                                                                                                                                                                                                                                                                                                                                                                                                                                                                               |
| EPI_ISL_775598                                                                                                                                                                                                                                                                                                                                                                                                                                                                                                                                                                                                                                                                                                                                                                                                                                                                                                                                                                                                                           | RSUD Kota Mataram                                                                                                                         | National Institute of Health Research and Development                                                                                                                                                                                                                                                                                                                                                                                                                                                                                                    | AA; HA; HD; Ikawati; KD; KNA; N; Nugraha; Pangesti; Pawestri; Puspa; Puspendari; SK; Sari; Setiawaty; Soekarso; Subangkit; T; V                                                                                                                                                                                                                                                                                                                                                                                                                                                                                                                                                                                                                        |
| EPI_ISL_763068                                                                                                                                                                                                                                                                                                                                                                                                                                                                                                                                                                                                                                                                                                                                                                                                                                                                                                                                                                                                                           | RSUD Kota Surakarta                                                                                                                       | Universitas Sebelas Maret (UNS); Rumah Sakit UNS (RS-UNS); National Institute of Health Research and Development, Indonesian Ministry of Health.                                                                                                                                                                                                                                                                                                                                                                                                         | Aff A Ghufron; Arie A Nugraha; Betty Suryawati.; Dewi Puspa; Hana A Pawestri; Hartanti Dian Ika; Hartono; Kartika; Maryani; Revi G H Novika; Vivi Setiawaty; Yulia Sari                                                                                                                                                                                                                                                                                                                                                                                                                                                                                                                                                                                |
| EPI_ISL_791986                                                                                                                                                                                                                                                                                                                                                                                                                                                                                                                                                                                                                                                                                                                                                                                                                                                                                                                                                                                                                           | RSUD Morotai Maluku Utara                                                                                                                 | National Institute of Health Research and Development                                                                                                                                                                                                                                                                                                                                                                                                                                                                                                    | AA; Denggo; HA; HD; Ikawati; KD; KNA; N; Nugraha; Pangesti; Pawestri; Puspa; Puspendari; SD; Setiawaty; Soekarso; Subangkit; T; V                                                                                                                                                                                                                                                                                                                                                                                                                                                                                                                                                                                                                      |
| EPI_ISL_766033                                                                                                                                                                                                                                                                                                                                                                                                                                                                                                                                                                                                                                                                                                                                                                                                                                                                                                                                                                                                                           | RSUD Prof. DR. W. Z. Johannes Kupang                                                                                                      | Eijkman Institute for Molecular Biology, Ministry of Research and Technology/National Agency for Research and Innovation                                                                                                                                                                                                                                                                                                                                                                                                                                 | Amin Soebandrio; David H Muljono; Edison Johar; Frilasita A Yudhaputri; Hidayat Trimarsanto; Khin Saw Myint; Safarina G Malik                                                                                                                                                                                                                                                                                                                                                                                                                                                                                                                                                                                                                          |
| EPI_ISL_632937                                                                                                                                                                                                                                                                                                                                                                                                                                                                                                                                                                                                                                                                                                                                                                                                                                                                                                                                                                                                                           | RSUD Saptosari Gunung Kidul                                                                                                               | Genetics Working Group (Pokja Genetik) Faculty of Medicine, Public Health and Nursing Universitas Gadjah Mada (FK-KMK UGM); Disease Investigation Center Wates Ministry of Agriculture Indonesia; Department of Microbiology FK-KMK UGM; Laboratorium Diagnostik Yayasan Tahija World Mosquito Program (WMP) Yogyakarta Center for Tropical Medicine FK-KMK UGM; Integrated Research Center FK-KMK UGM; Department of Computer Science and Electronics FMIPA UGM; Balai Besar Teknik Kesehatan Lingkungan dan Pengendalian Penyakit (BBTKLPP) Yogyakarta | Afiahayati; Audric Kenny Tedja; Dwi AA Nugrahaningsih; Edwin W. Daniwijaya; Eggi Arguni; Eko Darmawan; Endah Supriyati; Gunadi; Havid Setyawan; Hendra Wibawa; Indaryati; Irene; Kristy Iskandar; Ludhang P. Rizki; Marcellus; Maria Patricia Inggriani; Mohamad S. Hakim; Nungki Anggorowati; Siswanto; Titik Nuryastuti; Tri Wibawa                                                                                                                                                                                                                                                                                                                                                                                                                  |
| EPI_ISL_759963, EPI_ISL_759966, EPI_ISL_956274, EPI_ISL_956309                                                                                                                                                                                                                                                                                                                                                                                                                                                                                                                                                                                                                                                                                                                                                                                                                                                                                                                                                                           | RSUD Sidoarjo                                                                                                                             | Institute of Tropical Disease, Universitas Airlangga                                                                                                                                                                                                                                                                                                                                                                                                                                                                                                     | Aldise M Nastro; Atok Irawan; Gatot Soegiarto; Jezzy R Dewantari; Kazufumi Shimizu; Krisnoadi Rahardjo; Laksmi Wulandari; Maria I Lusida; Resti Yudhawati; Rima R Prasetya; Soetjipto; Yasuko Mori                                                                                                                                                                                                                                                                                                                                                                                                                                                                                                                                                     |
| EPI_ISL_803876                                                                                                                                                                                                                                                                                                                                                                                                                                                                                                                                                                                                                                                                                                                                                                                                                                                                                                                                                                                                                           | RSUD Tarakan Kalimantan Utara                                                                                                             | National Institute of Health Research and Development                                                                                                                                                                                                                                                                                                                                                                                                                                                                                                    | AA; HA; HD; Ikawati; K; KD; KNA; N; Nugraha; Pangesti; Pawestri; Puspa; Puspendari; R; Setiawaty; Sindunata; Soekarso; Sriwedari; Subangkit; T; V                                                                                                                                                                                                                                                                                                                                                                                                                                                                                                                                                                                                      |
| EPI_ISL_753699                                                                                                                                                                                                                                                                                                                                                                                                                                                                                                                                                                                                                                                                                                                                                                                                                                                                                                                                                                                                                           | RSUD Ulin Banjarmasin Kalimantan Selatan                                                                                                  | National Institute of Health Research and Development                                                                                                                                                                                                                                                                                                                                                                                                                                                                                                    | AA; HA; HD; Ikawati; KD; KNA; M; N; Nugraha; Pangesti; Pasaribu; Pawestri; Puspa; Puspendari; Setiawaty; Soekarso; Subangkit; T; V                                                                                                                                                                                                                                                                                                                                                                                                                                                                                                                                                                                                                     |
| EPI_ISL_791989                                                                                                                                                                                                                                                                                                                                                                                                                                                                                                                                                                                                                                                                                                                                                                                                                                                                                                                                                                                                                           | RSUD Waluyo Jati Kota Kraksaan, Jawa Timur                                                                                                | National Institute of Health Research and Development                                                                                                                                                                                                                                                                                                                                                                                                                                                                                                    | AA; HA; HD; I; Ikawati; KD; KNA; Muhashonah; N; Nugraha; Pangesti; Pawestri; Puspa; Puspendari; Setiawaty; Soekarso; Subangkit; T; V                                                                                                                                                                                                                                                                                                                                                                                                                                                                                                                                                                                                                   |
| EPI_ISL_791983                                                                                                                                                                                                                                                                                                                                                                                                                                                                                                                                                                                                                                                                                                                                                                                                                                                                                                                                                                                                                           | RSUD dr. Kanujoso Djatiwibowo Balikpapan                                                                                                  | National Institute of Health Research and Development                                                                                                                                                                                                                                                                                                                                                                                                                                                                                                    | AA; HA; HD; Ikawati; Ivanna; KD; KNA; N; Nugraha; Pangesti; Pawestri; Puspa; Puspendari; Setiawaty; Soekarso; Subangkit; T; V                                                                                                                                                                                                                                                                                                                                                                                                                                                                                                                                                                                                                          |
| EPI_ISL_791987                                                                                                                                                                                                                                                                                                                                                                                                                                                                                                                                                                                                                                                                                                                                                                                                                                                                                                                                                                                                                           | RSUD dr. Loekmono Hadi Kudus                                                                                                              | National Institute of Health Research and Development                                                                                                                                                                                                                                                                                                                                                                                                                                                                                                    | AA; HA; HD; Ikawati; KD; KNA; Khoiriyah; N; Nugraha; Pangesti; Pawestri; Puspa; Puspendari; S; Setiawaty; Soekarso; Subangkit; T; V                                                                                                                                                                                                                                                                                                                                                                                                                                                                                                                                                                                                                    |
| EPI_ISL_791982                                                                                                                                                                                                                                                                                                                                                                                                                                                                                                                                                                                                                                                                                                                                                                                                                                                                                                                                                                                                                           | RSUP DR KARIADI Semarang                                                                                                                  | National Institute of Health Research and Development                                                                                                                                                                                                                                                                                                                                                                                                                                                                                                    | AA; HA; HD; I; Ikawati; KD; KNA; N; Nugraha; Pangesti; Pawestri; Puspa; Puspendari; Puspitasari; Setiawaty; Soekarso; Subangkit; T; V                                                                                                                                                                                                                                                                                                                                                                                                                                                                                                                                                                                                                  |
| EPI_ISL_766032                                                                                                                                                                                                                                                                                                                                                                                                                                                                                                                                                                                                                                                                                                                                                                                                                                                                                                                                                                                                                           | RSUP Dr. Sardjito                                                                                                                         | Eijkman Institute for Molecular Biology, Ministry of Research and Technology/National Agency for Research and Innovation                                                                                                                                                                                                                                                                                                                                                                                                                                 | Amin Soebandrio; David H Muljono; Edison Johar; Frilasita A Yudhaputri; Hidayat Trimarsanto; Khin Saw Myint; Safarina G Malik                                                                                                                                                                                                                                                                                                                                                                                                                                                                                                                                                                                                                          |
| EPI_ISL_862039 to 862041, EPI_ISL_872188 to 872190, EPI_ISL_885142                                                                                                                                                                                                                                                                                                                                                                                                                                                                                                                                                                                                                                                                                                                                                                                                                                                                                                                                                                       | RSUP Dr. Sardjito                                                                                                                         | Genetics Working Group (Pokja Genetik) Faculty of Medicine, Public Health and Nursing Universitas Gadjah Mada (FK-KMK UGM); Disease Investigation Center Wates Ministry of Agriculture Indonesia; Department of Microbiology FK-KMK UGM; Laboratorium Diagnostik Yayasan Tahija World Mosquito Program (WMP) Yogyakarta Center for Tropical Medicine FK-KMK UGM; Integrated Research Center FK-KMK UGM; Department of Computer Science and Electronics FMIPA UGM; RSUP Dr. Sardjito                                                                      | . Marcellus; Aditya Rifqi Fauzi; Afiahayati; Alvin S. Kalim; Alvin Santoso Kalim; Audric Kenny Tedja; Bambang Sigit Riyanto; Dwi AA Nugrahaningsih; Dwiki afandy; Dyah Ayu Puspitarani; Edwin W. Daniwijaya; Eggi Arguni; Eko Budiono; Endah Supriyati; Fadil Fahri; Gunadi; Hendra Wibawa; Henri Retnowulan; Ika Trisnawati; Ira Puspitawati; Kemala Athollah; Kristy Iskandar; Ludhang P. Rizki; Maria Patricia Inggriani; Mohamad S. Hakim; Munawar Gani; Nungki Anggorowati; Nur Imma Fatimah Harahap; Nur Rahmi Ananda; Osman Sianipar; Riat El Khair; Satria Maulana; Siswanto; Sumardi; Susan Simanjaya; Titik Nuryastuti; Tri Wibawa; Umi Solekha Intansari; Untung Riawan; William Widitjarso; Yunika Puspawati; Elizabeth Henny Herringtiyas |
| EPI_ISL_766044, EPI_ISL_766046                                                                                                                                                                                                                                                                                                                                                                                                                                                                                                                                                                                                                                                                                                                                                                                                                                                                                                                                                                                                           | RSUP Fatmawati                                                                                                                            | Eijkman Institute for Molecular Biology, Ministry of Research and Technology/National Agency for Research and Innovation                                                                                                                                                                                                                                                                                                                                                                                                                                 | Amin Soebandrio; David H Muljono; Edison Johar; Frilasita A Yudhaputri; Hidayat Trimarsanto; Khin Saw Myint; Safarina G Malik                                                                                                                                                                                                                                                                                                                                                                                                                                                                                                                                                                                                                          |
| EPI_ISL_984264                                                                                                                                                                                                                                                                                                                                                                                                                                                                                                                                                                                                                                                                                                                                                                                                                                                                                                                                                                                                                           | RSUPN Dr. Cipto Mangunkusumo                                                                                                              | National Institute of Health Research and Development                                                                                                                                                                                                                                                                                                                                                                                                                                                                                                    | Arie Ardiansyah Nugraha; Dewi Wulandari; Hana Aparsi Pawestri; Hartanti Dian Ikawati; Kartika Dewi Puspa; Krisna Nur Andriana Pangesti; Nelly Puspandari; Nuri Dyah Indrasari; Subangkit; Vivi Setiawaty                                                                                                                                                                                                                                                                                                                                                                                                                                                                                                                                               |
| EPI_ISL_878637, EPI_ISL_878640, EPI_ISL_878643, EPI_ISL_878645, EPI_ISL_878648, EPI_ISL_878651, EPI_ISL_878653, EPI_ISL_878656, EPI_ISL_878658, EPI_ISL_878661, EPI_ISL_878664, EPI_ISL_878666, EPI_ISL_878669, EPI_ISL_878671, EPI_ISL_878674, EPI_ISL_878677, EPI_ISL_878682, EPI_ISL_878684, EPI_ISL_878687, EPI_ISL_878690, EPI_ISL_878693, EPI_ISL_878695, EPI_ISL_878697, EPI_ISL_878700, EPI_ISL_878702, EPI_ISL_878705, EPI_ISL_878707, EPI_ISL_878710, EPI_ISL_878713, EPI_ISL_878716, EPI_ISL_878719, EPI_ISL_878721, EPI_ISL_878724, EPI_ISL_878726, EPI_ISL_878729, EPI_ISL_878732, EPI_ISL_878734, EPI_ISL_878736, EPI_ISL_878739, EPI_ISL_878742, EPI_ISL_878744, EPI_ISL_878747, EPI_ISL_878750, EPI_ISL_878752, EPI_ISL_878755, EPI_ISL_878757, EPI_ISL_878760, EPI_ISL_878763, EPI_ISL_878765, EPI_ISL_878768, EPI_ISL_878771, EPI_ISL_878773, EPI_ISL_878776, EPI_ISL_878779, EPI_ISL_878781, EPI_ISL_878784, EPI_ISL_878786, EPI_ISL_878789, EPI_ISL_878791, EPI_ISL_878794, EPI_ISL_878797, EPI_ISL_880171 to 880200 | Christina Clarke; David Dimmock; Denise Malicki; Kathryn Bouic; Linda Luo; SEARCH Alliance San Diego with Nanda Radamchar; Teresa Mueller |                                                                                                                                                                                                                                                                                                                                                                                                                                                                                                                                                          |                                                                                                                                                                                                                                                                                                                                                                                                                                                                                                                                                                                                                                                                                                                                                        |
| see above                                                                                                                                                                                                                                                                                                                                                                                                                                                                                                                                                                                                                                                                                                                                                                                                                                                                                                                                                                                                                                | Rady's Childrens Hospital                                                                                                                 | Andersen lab at Scripps Research                                                                                                                                                                                                                                                                                                                                                                                                                                                                                                                         | Georgi Merhi; Rita Feghali; Sima Tokajian; Tamara Salloum                                                                                                                                                                                                                                                                                                                                                                                                                                                                                                                                                                                                                                                                                              |
| EPI_ISL_637110, EPI_ISL_637112 to 637113                                                                                                                                                                                                                                                                                                                                                                                                                                                                                                                                                                                                                                                                                                                                                                                                                                                                                                                                                                                                 | Rafik Hariri University Hospital                                                                                                          | Microbial Pathogenomics Lab                                                                                                                                                                                                                                                                                                                                                                                                                                                                                                                              |                                                                                                                                                                                                                                                                                                                                                                                                                                                                                                                                                                                                                                                                                                                                                        |
| EPI_ISL_845885 to 845886, EPI_ISL_860190, EPI_ISL_860192, EPI_ISL_860198, EPI_ISL_995726 to 995727, EPI_ISL_995733, EPI_ISL_995742, EPI_ISL_995747                                                                                                                                                                                                                                                                                                                                                                                                                                                                                                                                                                                                                                                                                                                                                                                                                                                                                       | Railway Hospital                                                                                                                          | Department of Neurovirology, National Institute of Mental Health and Neurosciences (NIMHANS)                                                                                                                                                                                                                                                                                                                                                                                                                                                             | Anita S Desai; Anson Kunjumon George; Chitra Pattabiraman; Darshan Sreenivas; Harsha.P.K; Nakka Vijay Kiran Reddy; Pramada Prasad; Risha Rasheed; V Ravi                                                                                                                                                                                                                                                                                                                                                                                                                                                                                                                                                                                               |
| see above                                                                                                                                                                                                                                                                                                                                                                                                                                                                                                                                                                                                                                                                                                                                                                                                                                                                                                                                                                                                                                | Railway Hospital                                                                                                                          | Department of Neurovirology, National Institute of Mental Health and Neurosciences (NIMHANS)                                                                                                                                                                                                                                                                                                                                                                                                                                                             |                                                                                                                                                                                                                                                                                                                                                                                                                                                                                                                                                                                                                                                                                                                                                        |
| EPI_ISL_768616                                                                                                                                                                                                                                                                                                                                                                                                                                                                                                                                                                                                                                                                                                                                                                                                                                                                                                                                                                                                                           | Rajavithi Hospital                                                                                                                        | National Institute of Health, Department of Medical Sciences, Ministry of Public Health, Thailand                                                                                                                                                                                                                                                                                                                                                                                                                                                        | ; Natchaya Khadsang; Pakorn Piromtong; Pilailok Okada; Ratana Tacharoenuang; Siripaporn Phuygun; Sittiporn Parman; Sunthareeya Waicharen; Thanutsapa Thanadachakul; Warawan Wongboot; sirikanda wimol                                                                                                                                                                                                                                                                                                                                                                                                                                                                                                                                                  |
| EPI_ISL_882780                                                                                                                                                                                                                                                                                                                                                                                                                                                                                                                                                                                                                                                                                                                                                                                                                                                                                                                                                                                                                           | Ramathibodi Chakri Naruebodindra Hospital                                                                                                 | COVID-19 Network Investigations (CONI) Alliance                                                                                                                                                                                                                                                                                                                                                                                                                                                                                                          | Angkana Huang; Anthony R. Jones; Arporn Wangwiwatsin; Bhakbhoom Panthan; Chonticha Klungtong; Ekawat Pasomsab; Elizabeth Batty; Insee Sensorn; Janjira Thaipadungpanit; Khajohn Joonsalak; Kingkan Rakmanee; Krittikorn Kumpornsin; Namfon Kotanan; Stefan Fernandez; Thanat Chookajorn; Theerarat Kochakarn; Treewat Watthanachockchai; Wasun Chantratita; Wudtichai Manasatienkij                                                                                                                                                                                                                                                                                                                                                                    |
| EPI_ISL_693334 to 693386, EPI_ISL_812923 to 812928                                                                                                                                                                                                                                                                                                                                                                                                                                                                                                                                                                                                                                                                                                                                                                                                                                                                                                                                                                                       | Ramathibodi Hospital                                                                                                                      | COVID-19 Network Investigations (CONI) Alliance                                                                                                                                                                                                                                                                                                                                                                                                                                                                                                          | Angkana Huang; Anthony R. Jones; Arporn Wangwiwatsin; Bhakbhoom Panthan; Chonticha Klungtong; Duangkamon Loesbanluechai; Ekawat Pasomsab; Elizabeth Batty; Insee Sensorn; Janjira Thaipadungpanit; Khajohn Joonsalak; Kingkan Rakmanee; Krittikorn Kumpornsin; Namfon Kotanan; Stefan Fernandez; Thanat Chookajorn; Theerarat Kochakarn; Treewat Watthanachockchai; Wasun Chantratita; Wudtichai Manasatienkij                                                                                                                                                                                                                                                                                                                                         |
| EPI_ISL_735490                                                                                                                                                                                                                                                                                                                                                                                                                                                                                                                                                                                                                                                                                                                                                                                                                                                                                                                                                                                                                           | Rangamati General Hospital RT-PCR lab,                                                                                                    | Central Biological Research Laboratory and Department of Biochemistry and Molecular Biology                                                                                                                                                                                                                                                                                                                                                                                                                                                              | H. M. Abdullah Al Masud; Imam Hossen; Md. Arif Hossain; Md. Imranul Hoq; Md. Khondakar Raziur Rahman; Md. Omer Faruq; Mohammad Omar Faruque; Robiul Hasan Bhuiyan; Sajib Rudra; Shanta Paul                                                                                                                                                                                                                                                                                                                                                                                                                                                                                                                                                            |
| EPI_ISL_745199                                                                                                                                                                                                                                                                                                                                                                                                                                                                                                                                                                                                                                                                                                                                                                                                                                                                                                                                                                                                                           | Rangaraya Medical College                                                                                                                 | CSIR-Centre for Cellular and Molecular Biology                                                                                                                                                                                                                                                                                                                                                                                                                                                                                                           | Archana Bharadwaj Siva; B Himasri; Blessy B John; Divya Tej Sowpati; Dr.P.Shashikala Reddy; Dr.S.Pavani; Dr.Satyaprasad; Dr.V.Sudha Rani; Karthik Bharadwaj Tallapaka; Lamuk Zaveri; M Soujanya Reddy; Namami Gaur; Nikhil Hajirnis; Onkar Kulkarni; Payel Mukherjee; Pratheusa Maccha; Priya Singh; Purushotham Vodnala; Rakesh K Mishra; Sakshi Shambhavi; Shagufta Khan; Sofia Banu; Tulasi Nagabandi; Viswagithe S L                                                                                                                                                                                                                                                                                                                               |
| EPI_ISL_953963, EPI_ISL_954013, EPI_ISL_954034, EPI_ISL_954039, EPI_ISL_954042, EPI_ISL_954053, EPI_ISL_954082 to 954084, EPI_ISL_995473                                                                                                                                                                                                                                                                                                                                                                                                                                                                                                                                                                                                                                                                                                                                                                                                                                                                                                 | Recherche                                                                                                                                 | National Reference Center for Viruses of Respiratory Infections, Institut Pasteur, Paris                                                                                                                                                                                                                                                                                                                                                                                                                                                                 | Angela Brisebarre; Camille Capel; Etienne Simon-Lorière; Lerulez-Ville Marianne; Marion Barbet; Maud Vanpeene; Méline Bizard; Sylvie Behillil; Sylvie van der Werf; Vincent Enouf                                                                                                                                                                                                                                                                                                                                                                                                                                                                                                                                                                      |
| see above                                                                                                                                                                                                                                                                                                                                                                                                                                                                                                                                                                                                                                                                                                                                                                                                                                                                                                                                                                                                                                | Recherche                                                                                                                                 | National Reference Center for Viruses of Respiratory Infections, Institut Pasteur, Paris                                                                                                                                                                                                                                                                                                                                                                                                                                                                 |                                                                                                                                                                                                                                                                                                                                                                                                                                                                                                                                                                                                                                                                                                                                                        |

|                                                                                                                                                                                                                                                                                                                                                                                                                                                                                                                                                                                                                                                                                                                                                                                                                                                                                                                                                                                                                                                                                                                                                                                                                                                                                                                                                                                                                                                                                                                                                                                                                                                                                                                                                                                                                                                                                                                                                                                                                                                                                                                                                        |                                                                                                                            |                                                                                                                            |                                                                                                                                                                                                                                                                                                                                                                                                                                                                                                                                                                                                                                                                                                                                                      |
|--------------------------------------------------------------------------------------------------------------------------------------------------------------------------------------------------------------------------------------------------------------------------------------------------------------------------------------------------------------------------------------------------------------------------------------------------------------------------------------------------------------------------------------------------------------------------------------------------------------------------------------------------------------------------------------------------------------------------------------------------------------------------------------------------------------------------------------------------------------------------------------------------------------------------------------------------------------------------------------------------------------------------------------------------------------------------------------------------------------------------------------------------------------------------------------------------------------------------------------------------------------------------------------------------------------------------------------------------------------------------------------------------------------------------------------------------------------------------------------------------------------------------------------------------------------------------------------------------------------------------------------------------------------------------------------------------------------------------------------------------------------------------------------------------------------------------------------------------------------------------------------------------------------------------------------------------------------------------------------------------------------------------------------------------------------------------------------------------------------------------------------------------------|----------------------------------------------------------------------------------------------------------------------------|----------------------------------------------------------------------------------------------------------------------------|------------------------------------------------------------------------------------------------------------------------------------------------------------------------------------------------------------------------------------------------------------------------------------------------------------------------------------------------------------------------------------------------------------------------------------------------------------------------------------------------------------------------------------------------------------------------------------------------------------------------------------------------------------------------------------------------------------------------------------------------------|
| EPI_ISL_640086, EPI_ISL_640136                                                                                                                                                                                                                                                                                                                                                                                                                                                                                                                                                                                                                                                                                                                                                                                                                                                                                                                                                                                                                                                                                                                                                                                                                                                                                                                                                                                                                                                                                                                                                                                                                                                                                                                                                                                                                                                                                                                                                                                                                                                                                                                         | Red Cross Children's Hospital wc RXH                                                                                       | NHLS/UCT                                                                                                                   | Arash Iranzadeh; Bruna Galvao; Carolyn Williamson; Deelan Doolabh; Diana Hardie; Innocent Mudau; Kruger Marais; Lynn Tyers; Marvin Hsiao; Stephen Korsman                                                                                                                                                                                                                                                                                                                                                                                                                                                                                                                                                                                            |
| EPI_ISL_960106                                                                                                                                                                                                                                                                                                                                                                                                                                                                                                                                                                                                                                                                                                                                                                                                                                                                                                                                                                                                                                                                                                                                                                                                                                                                                                                                                                                                                                                                                                                                                                                                                                                                                                                                                                                                                                                                                                                                                                                                                                                                                                                                         | Red Cross Children's Hospital wc RXH                                                                                       | National Health Laboratory Service/UCT                                                                                     | Arash Iranzadeh; Bruna Galvao; Carolyn Williamson; Deelan Doolabh; Diana Hardie; Innocent Mudau; Kruger Marais; Lynn Tyers; Marvin Hsiao; Stephen Korsman                                                                                                                                                                                                                                                                                                                                                                                                                                                                                                                                                                                            |
| EPI_ISL_768524, EPI_ISL_768528 to 768529, EPI_ISL_768609, EPI_ISL_768614                                                                                                                                                                                                                                                                                                                                                                                                                                                                                                                                                                                                                                                                                                                                                                                                                                                                                                                                                                                                                                                                                                                                                                                                                                                                                                                                                                                                                                                                                                                                                                                                                                                                                                                                                                                                                                                                                                                                                                                                                                                                               | Regional Medical Sciences Center 1/1 Chiang Rai                                                                            | National Institute of Health, Department of Medical Sciences, Ministry of Public Health, Thailand                          | ; Natchaya Khiahsang; Pakorn Piromtong; Pilailuk Okada; Ratana Tacharoenmuang; Siripaporn Phuygun; Sittiporn Parmmen; Sunthareeya Waicharoen; Thanutsapa Thanadachakul; Warawan Wongboot; sirikanda wimol                                                                                                                                                                                                                                                                                                                                                                                                                                                                                                                                            |
| EPI_ISL_699464, EPI_ISL_708723, EPI_ISL_708735                                                                                                                                                                                                                                                                                                                                                                                                                                                                                                                                                                                                                                                                                                                                                                                                                                                                                                                                                                                                                                                                                                                                                                                                                                                                                                                                                                                                                                                                                                                                                                                                                                                                                                                                                                                                                                                                                                                                                                                                                                                                                                         | Regional Medical Sciences Center 11/1 phuket                                                                               | National Institute of Health, Department of Medical Sciences, Ministry of Public Health, Thailand                          | Malinee Chittaganpitch; Pilailuk Okada; Siripaporn Phuygun; Sittiporn Parmmen; Sunthareeya Waicharoen; Thanutsapa Thanadachakul; Warawan Wongboot                                                                                                                                                                                                                                                                                                                                                                                                                                                                                                                                                                                                    |
| EPI_ISL_768530 to 768544, EPI_ISL_768615, EPI_ISL_768617                                                                                                                                                                                                                                                                                                                                                                                                                                                                                                                                                                                                                                                                                                                                                                                                                                                                                                                                                                                                                                                                                                                                                                                                                                                                                                                                                                                                                                                                                                                                                                                                                                                                                                                                                                                                                                                                                                                                                                                                                                                                                               | Regional Medical Sciences Center 5 Samut Songkhram                                                                         | National Institute of Health, Department of Medical Sciences, Ministry of Public Health, Thailand                          | ; Natchaya Khiahsang; Pakorn Piromtong; Pilailuk Okada; Ratana Tacharoenmuang; Siripaporn Phuygun; Sittiporn Parmmen; Sunthareeya Waicharoen; Thanutsapa Thanadachakul; Warawan Wongboot; sirikanda wimol                                                                                                                                                                                                                                                                                                                                                                                                                                                                                                                                            |
| EPI_ISL_626828, EPI_ISL_626859, EPI_ISL_626953, EPI_ISL_627000, EPI_ISL_627008, EPI_ISL_627020, EPI_ISL_627038, EPI_ISL_627046, EPI_ISL_627070, EPI_ISL_627158, EPI_ISL_627199, EPI_ISL_627518 to 627569, EPI_ISL_650270, EPI_ISL_650334, EPI_ISL_650378, EPI_ISL_650415, EPI_ISL_650452, EPI_ISL_650513, EPI_ISL_650524, EPI_ISL_650535, EPI_ISL_650543, EPI_ISL_650598, EPI_ISL_650810, EPI_ISL_650888, EPI_ISL_650898, EPI_ISL_650901, EPI_ISL_650923, EPI_ISL_650930, EPI_ISL_651097, EPI_ISL_651128, EPI_ISL_651215, EPI_ISL_651318, EPI_ISL_651329, EPI_ISL_651387, EPI_ISL_651404, EPI_ISL_651410, EPI_ISL_651501, EPI_ISL_652304 to 652336, EPI_ISL_680198 to 680441, EPI_ISL_742118 to 742174, EPI_ISL_763367, EPI_ISL_763373, EPI_ISL_763388, EPI_ISL_763395, EPI_ISL_763400 to 763401, EPI_ISL_763405, EPI_ISL_763408, EPI_ISL_763417, EPI_ISL_763440, EPI_ISL_763446, EPI_ISL_763450, EPI_ISL_763463, EPI_ISL_763475, EPI_ISL_763482, EPI_ISL_763524, EPI_ISL_763573, EPI_ISL_763583, EPI_ISL_763596, EPI_ISL_763642, EPI_ISL_763646, EPI_ISL_763667, EPI_ISL_763719, EPI_ISL_763723, EPI_ISL_763729, EPI_ISL_764127, EPI_ISL_764143, EPI_ISL_764148, EPI_ISL_764154, EPI_ISL_764173, EPI_ISL_764187, EPI_ISL_764206, EPI_ISL_764261 to 764263, EPI_ISL_764387 to 764444, EPI_ISL_843151 to 843161, EPI_ISL_843163 to 843169, EPI_ISL_866346 to 866355, EPI_ISL_866357 to 866362, EPI_ISL_866364 to 866367, EPI_ISL_866370, EPI_ISL_866372 to 866382, EPI_ISL_866384 to 866399, EPI_ISL_920976 to 921077, EPI_ISL_921080 to 921085, EPI_ISL_921087 to 921095, EPI_ISL_921098 to 921100, EPI_ISL_921102 to 921104, EPI_ISL_921106 to 921127, EPI_ISL_921129 to 921131, EPI_ISL_921133 to 921136, EPI_ISL_998136, EPI_ISL_998138 to 998146, EPI_ISL_998148 to 998166, EPI_ISL_998168 to 998174, EPI_ISL_998176 to 998230, EPI_ISL_998232, EPI_ISL_998234 to 998236, EPI_ISL_998238 to 998241, EPI_ISL_998243 to 998255, EPI_ISL_998257 to 998263, EPI_ISL_998265 to 998266, EPI_ISL_998268, EPI_ISL_998270 to 998273, EPI_ISL_998280 to 998281, EPI_ISL_998283 to 998286, EPI_ISL_998288 to 998301, EPI_ISL_998303, EPI_ISL_998305 to 998312 |                                                                                                                            |                                                                                                                            |                                                                                                                                                                                                                                                                                                                                                                                                                                                                                                                                                                                                                                                                                                                                                      |
| see above                                                                                                                                                                                                                                                                                                                                                                                                                                                                                                                                                                                                                                                                                                                                                                                                                                                                                                                                                                                                                                                                                                                                                                                                                                                                                                                                                                                                                                                                                                                                                                                                                                                                                                                                                                                                                                                                                                                                                                                                                                                                                                                                              | Regional Virus Laboratory, Belfast Health and Social Care Trust                                                            | COVID-19 Genomics UK (COG-UK) Consortium                                                                                   | Alison Watt; Ciara Cox; Conall McCaughey; David Simpson; Derek Fairley; James McKenna; Mairead Connor; Susan Feeney; Tanya Curran; Zoltan Molnar                                                                                                                                                                                                                                                                                                                                                                                                                                                                                                                                                                                                     |
| EPI_ISL_708810 to 708811                                                                                                                                                                                                                                                                                                                                                                                                                                                                                                                                                                                                                                                                                                                                                                                                                                                                                                                                                                                                                                                                                                                                                                                                                                                                                                                                                                                                                                                                                                                                                                                                                                                                                                                                                                                                                                                                                                                                                                                                                                                                                                                               | Regional medical sciences center 2 Phitsanulok                                                                             | National Institute of Health, Department of Medical Sciences, Ministry of Public Health, Thailand                          | Malinee Chittaganpitch; Pakorn Piromtong; Pilailuk Okada; Siripaporn Phuygun; Sittiporn Parmmen; Sunthareeya Waicharoen; Thanutsapa Thanadachakul; Warawan Wongboot                                                                                                                                                                                                                                                                                                                                                                                                                                                                                                                                                                                  |
| EPI_ISL_755588, EPI_ISL_768610 to 768611                                                                                                                                                                                                                                                                                                                                                                                                                                                                                                                                                                                                                                                                                                                                                                                                                                                                                                                                                                                                                                                                                                                                                                                                                                                                                                                                                                                                                                                                                                                                                                                                                                                                                                                                                                                                                                                                                                                                                                                                                                                                                                               | Regional medical sciences center 6 Chonburi                                                                                | National Institute of Health, Department of Medical Sciences, Ministry of Public Health, Thailand                          | ; Malinee Chittaganpitch; Natchaya Khiahsang; Pakorn Piromtong; Pilailuk Okada; Ratana Tacharoenmuang; Siripaporn Phuygun; Sittiporn Parmmen; Sunthareeya Waicharoen; Thanutsapa Thanadachakul; Warawan Wongboot; sirikanda wimol                                                                                                                                                                                                                                                                                                                                                                                                                                                                                                                    |
| EPI_ISL_708737, EPI_ISL_708797, EPI_ISL_708800 to 708802, EPI_ISL_708804, EPI_ISL_708806 to 708808                                                                                                                                                                                                                                                                                                                                                                                                                                                                                                                                                                                                                                                                                                                                                                                                                                                                                                                                                                                                                                                                                                                                                                                                                                                                                                                                                                                                                                                                                                                                                                                                                                                                                                                                                                                                                                                                                                                                                                                                                                                     | Regional medical sciences center 6 chonburi                                                                                | National Institute of Health, Department of Medical Sciences, Ministry of Public Health, Thailand                          | Malinee Chittaganpitch; Pakorn Piromtong; Pilailuk Okada; Siripaporn Phuygun; Sittiporn Parmmen; Sunthareeya Waicharoen; Thanutsapa Thanadachakul; Warawan Wongboot                                                                                                                                                                                                                                                                                                                                                                                                                                                                                                                                                                                  |
| EPI_ISL_738567, EPI_ISL_738574 to 738576, EPI_ISL_738591, EPI_ISL_738660, EPI_ISL_738662, EPI_ISL_738712 to 738714, EPI_ISL_738723, EPI_ISL_738725, EPI_ISL_738727, EPI_ISL_738770, EPI_ISL_738851, EPI_ISL_738877, EPI_ISL_738901, EPI_ISL_738977, EPI_ISL_739014, EPI_ISL_739022, EPI_ISL_739316, EPI_ISL_739348, EPI_ISL_739355, EPI_ISL_739394, EPI_ISL_739466 to 739467, EPI_ISL_739478, EPI_ISL_739564, EPI_ISL_739630, EPI_ISL_739655, EPI_ISL_850019 to 850179                                                                                                                                                                                                                                                                                                                                                                                                                                                                                                                                                                                                                                                                                                                                                                                                                                                                                                                                                                                                                                                                                                                                                                                                                                                                                                                                                                                                                                                                                                                                                                                                                                                                                 |                                                                                                                            |                                                                                                                            |                                                                                                                                                                                                                                                                                                                                                                                                                                                                                                                                                                                                                                                                                                                                                      |
| see above                                                                                                                                                                                                                                                                                                                                                                                                                                                                                                                                                                                                                                                                                                                                                                                                                                                                                                                                                                                                                                                                                                                                                                                                                                                                                                                                                                                                                                                                                                                                                                                                                                                                                                                                                                                                                                                                                                                                                                                                                                                                                                                                              | Renegade                                                                                                                   | Chan-Zuckerberg Biohub                                                                                                     | CZB Ctlahub Consortium<br>He; M. and Fan, Z.                                                                                                                                                                                                                                                                                                                                                                                                                                                                                                                                                                                                                                                                                                         |
| EPI_ISL_661271                                                                                                                                                                                                                                                                                                                                                                                                                                                                                                                                                                                                                                                                                                                                                                                                                                                                                                                                                                                                                                                                                                                                                                                                                                                                                                                                                                                                                                                                                                                                                                                                                                                                                                                                                                                                                                                                                                                                                                                                                                                                                                                                         | Research platform for Transfusion-transmitted Disease, Institute of Blood Transfusion, Chinese Academy of Medical Sciences | Research platform for Transfusion-transmitted Disease, Institute of Blood Transfusion, Chinese Academy of Medical Sciences |                                                                                                                                                                                                                                                                                                                                                                                                                                                                                                                                                                                                                                                                                                                                                      |
| EPI_ISL_637114 to 637184, EPI_ISL_639821 to 639822, EPI_ISL_644162, EPI_ISL_645133 to 645136, EPI_ISL_649108, EPI_ISL_649110, EPI_ISL_649786 to 649790, EPI_ISL_649792 to 649797, EPI_ISL_649799 to 649803, EPI_ISL_649806 to 649892, EPI_ISL_649936 to 649937, EPI_ISL_653933, EPI_ISL_653935 to 653949, EPI_ISL_653951 to 654015, EPI_ISL_660546 to 660550, EPI_ISL_660601 to 660604, EPI_ISL_660742 to 660794, EPI_ISL_661175 to 661176, EPI_ISL_664020 to 664045, EPI_ISL_664049 to 664050, EPI_ISL_664053 to 664058, EPI_ISL_664060 to 664088, EPI_ISL_664093 to 664096, EPI_ISL_664098 to 664100, EPI_ISL_666726 to 666730, EPI_ISL_666732 to 666736, EPI_ISL_666738 to 666770, EPI_ISL_668442 to 668446, EPI_ISL_676510 to 676511, EPI_ISL_678644 to 678786, EPI_ISL_678828 to 678830, EPI_ISL_683452 to 683455, EPI_ISL_683457 to 683591, EPI_ISL_686108, EPI_ISL_686535 to 686611, EPI_ISL_693392 to 693470, EPI_ISL_693484 to 693487                                                                                                                                                                                                                                                                                                                                                                                                                                                                                                                                                                                                                                                                                                                                                                                                                                                                                                                                                                                                                                                                                                                                                                                                         |                                                                                                                            |                                                                                                                            |                                                                                                                                                                                                                                                                                                                                                                                                                                                                                                                                                                                                                                                                                                                                                      |
| see above                                                                                                                                                                                                                                                                                                                                                                                                                                                                                                                                                                                                                                                                                                                                                                                                                                                                                                                                                                                                                                                                                                                                                                                                                                                                                                                                                                                                                                                                                                                                                                                                                                                                                                                                                                                                                                                                                                                                                                                                                                                                                                                                              | Respiratory Virus Unit, Microbiology Services Colindale, Public Health England                                             | COVID-19 Genomics UK (COG-UK) Consortium                                                                                   | PHE Covid Sequencing Team                                                                                                                                                                                                                                                                                                                                                                                                                                                                                                                                                                                                                                                                                                                            |
| EPI_ISL_622833 to 622891, EPI_ISL_632796, EPI_ISL_636688 to 636703, EPI_ISL_636705 to 636717, EPI_ISL_636719 to 636723, EPI_ISL_636725 to 636727, EPI_ISL_636729 to 636730, EPI_ISL_636732 to 636736, EPI_ISL_636974, EPI_ISL_637097                                                                                                                                                                                                                                                                                                                                                                                                                                                                                                                                                                                                                                                                                                                                                                                                                                                                                                                                                                                                                                                                                                                                                                                                                                                                                                                                                                                                                                                                                                                                                                                                                                                                                                                                                                                                                                                                                                                   |                                                                                                                            |                                                                                                                            |                                                                                                                                                                                                                                                                                                                                                                                                                                                                                                                                                                                                                                                                                                                                                      |
| see above                                                                                                                                                                                                                                                                                                                                                                                                                                                                                                                                                                                                                                                                                                                                                                                                                                                                                                                                                                                                                                                                                                                                                                                                                                                                                                                                                                                                                                                                                                                                                                                                                                                                                                                                                                                                                                                                                                                                                                                                                                                                                                                                              | Respiratory Virus Unit, Microbiology Services Colindale, Public Health England                                             | Respiratory Virus Unit, Microbiology Services Colindale, Public Health England                                             | PHE Covid Sequencing Team                                                                                                                                                                                                                                                                                                                                                                                                                                                                                                                                                                                                                                                                                                                            |
| EPI_ISL_700624, EPI_ISL_700628, EPI_ISL_700637, EPI_ISL_700651, EPI_ISL_700658 to 700659, EPI_ISL_700665, EPI_ISL_700686 to 700698, EPI_ISL_700703 to 700705, EPI_ISL_722967 to 723044, EPI_ISL_728343, EPI_ISL_733580 to 733581, EPI_ISL_733583 to 733584, EPI_ISL_733586 to 733593, EPI_ISL_747490 to 747519, EPI_ISL_754242 to 754265, EPI_ISL_754267 to 754387, EPI_ISL_756135 to 756163, EPI_ISL_762995 to 762997, EPI_ISL_766059 to 766065, EPI_ISL_766068 to 766090, EPI_ISL_766092 to 766094, EPI_ISL_766096 to 766102, EPI_ISL_766104 to 766111, EPI_ISL_766113 to 766218, EPI_ISL_766220 to 766221, EPI_ISL_766223 to 766239, EPI_ISL_766241, EPI_ISL_766243 to 766254, EPI_ISL_766257 to 766261, EPI_ISL_766263 to 766317, EPI_ISL_766395 to 766506, EPI_ISL_766510 to 766522, EPI_ISL_766553 to 766555, EPI_ISL_766558 to 766567, EPI_ISL_766842, EPI_ISL_766853, EPI_ISL_766859 to 766880, EPI_ISL_768800 to 768816, EPI_ISL_769864 to 769870, EPI_ISL_769873 to 769878, EPI_ISL_770439 to 770441, EPI_ISL_770462 to 770469, EPI_ISL_791183 to 791194, EPI_ISL_791197 to 791198, EPI_ISL_791204 to 791208, EPI_ISL_791210 to 791221, EPI_ISL_791223 to 791248, EPI_ISL_791254 to 791268, EPI_ISL_804214 to 804215, EPI_ISL_804217 to 804264, EPI_ISL_804266 to 804369, EPI_ISL_804812, EPI_ISL_811040 to 811126, EPI_ISL_811150, EPI_ISL_825490 to 825616, EPI_ISL_826277 to 826282, EPI_ISL_836979 to 837052, EPI_ISL_837055 to 837106, EPI_ISL_837112 to 837171, EPI_ISL_837173 to 837197, EPI_ISL_837199 to 837246, EPI_ISL_846589 to 846598, EPI_ISL_846774, EPI_ISL_855574 to 855609, EPI_ISL_856703 to 856706, EPI_ISL_860635 to 860651, EPI_ISL_860653 to 860676, EPI_ISL_860678 to 860702, EPI_ISL_860704 to 860709, EPI_ISL_860782 to 860783, EPI_ISL_862048, EPI_ISL_862188 to 862266, EPI_ISL_866432, EPI_ISL_866619, EPI_ISL_866793, EPI_ISL_866985, EPI_ISL_867156                                                                                                                                                                                                                                                           |                                                                                                                            |                                                                                                                            |                                                                                                                                                                                                                                                                                                                                                                                                                                                                                                                                                                                                                                                                                                                                                      |
| see above                                                                                                                                                                                                                                                                                                                                                                                                                                                                                                                                                                                                                                                                                                                                                                                                                                                                                                                                                                                                                                                                                                                                                                                                                                                                                                                                                                                                                                                                                                                                                                                                                                                                                                                                                                                                                                                                                                                                                                                                                                                                                                                                              | Respiratory Virus Unit, National Infection Service, Public Health England                                                  | COVID-19 Genomics UK (COG-UK) Consortium                                                                                   | PHE Covid Sequencing Team                                                                                                                                                                                                                                                                                                                                                                                                                                                                                                                                                                                                                                                                                                                            |
| EPI_ISL_747032 to 747193, EPI_ISL_803099 to 803106, EPI_ISL_884580 to 884825, EPI_ISL_906848 to 906852                                                                                                                                                                                                                                                                                                                                                                                                                                                                                                                                                                                                                                                                                                                                                                                                                                                                                                                                                                                                                                                                                                                                                                                                                                                                                                                                                                                                                                                                                                                                                                                                                                                                                                                                                                                                                                                                                                                                                                                                                                                 | Respiratory Viruses Branch, Centers for Disease Control and Prevention                                                     | Respiratory Viruses Branch, Centers for Disease Control and Prevention                                                     | Allen, E.; Antico, J.; Ascencio, A.; B.L.; Barret; Batra, D.; Becker, D.; Bolze, A.; C.R.; Cassens, T.; Cho, R.; Cirulli, E.; Cook; Cook, P.; Febbo, P.; Galloway, S.; Gietzen, K.; Isaksson, M.; K.S.; Laurent, M.; Lee, J.; Lee, W.; Levan, G.; Li, Y.; Liu, J.; Lu, J.; MacCannell, D.; Marine, R.; Montmayeur, A.; N.L.; Nguyen, J.; P.W.; Paden; Queen, K.; Rambo-Martin; Ramirez, J.; Rivera-Garcia, C.; Sandoval, E.; Sheth, M.; Sickler, B.; Tao, Y.; Tolentino, M.; Tong, S.; Tran, C.; Uehara, A.; Wang, H.; Wang, S.; Washington; White, S.; Wickline, S.; Zhang, J.; de Feo, E.                                                                                                                                                          |
| EPI_ISL_890235                                                                                                                                                                                                                                                                                                                                                                                                                                                                                                                                                                                                                                                                                                                                                                                                                                                                                                                                                                                                                                                                                                                                                                                                                                                                                                                                                                                                                                                                                                                                                                                                                                                                                                                                                                                                                                                                                                                                                                                                                                                                                                                                         | Respiratory Viruses Branch, Centers for Disease Control and Prevention                                                     | Centers for Disease Control and Prevention                                                                                 | C.R.; Cook, P.; H. and Tong, S.; Li, Y.; Paden; Queen, K.; Tao, Y.; Uehara, A.; Wang; Zhang, J.                                                                                                                                                                                                                                                                                                                                                                                                                                                                                                                                                                                                                                                      |
| EPI_ISL_912195                                                                                                                                                                                                                                                                                                                                                                                                                                                                                                                                                                                                                                                                                                                                                                                                                                                                                                                                                                                                                                                                                                                                                                                                                                                                                                                                                                                                                                                                                                                                                                                                                                                                                                                                                                                                                                                                                                                                                                                                                                                                                                                                         | Respiratory Viruses Branch, Centers for Disease Control and Prevention                                                     | Respiratory Viruses Branch, Centers for Disease Control and Prevention                                                     | Agarwal, M.; Almasri, E.; B.L.; Batra, D.; Boles, D.; Burns, A.; C.R.; Charoensri, N.; Cohen, O.; Cook; Countryman, S.; Cristobal; Croy, B.; Dale, S.; Deshmukh, H.; Douglas, A.; Drouillon, V.; Eisenberg, M.; Engler, H.; Galloway, S.; Ghatt, R.; Gupta, P.; Hicks, S.; Humphrey, J.; Iyer, L.; Jain, M.; Koll, M.; Krueger, B.; Kuphal, T.; Letovsky, S.; Levandoski, M.; Lukasik, C.; M.A.; Meltzer, J.; Norvell, B.; Nye, M.; P.W.; Paden; Parker, S.; Petropoulos, C.; Pruitt, J.; Ragan, S.; Rambo-Martin; Ryan, S.; S. and MacCannell, D.; S.B.; Sapeta, M.; Schroth, J.; Selvaraju; Stevovic, G.; Suchanek, A.; Throop, A.; Tilson, L.; Tong; Urban, T.; Voshell, J.; Wagner, K.; Williams, J.; Williamson, M.; Zeng, Q.; Zwiefelhofer, T. |
| EPI_ISL_639740, EPI_ISL_641311, EPI_ISL_682298                                                                                                                                                                                                                                                                                                                                                                                                                                                                                                                                                                                                                                                                                                                                                                                                                                                                                                                                                                                                                                                                                                                                                                                                                                                                                                                                                                                                                                                                                                                                                                                                                                                                                                                                                                                                                                                                                                                                                                                                                                                                                                         | Respiratory virus Laboratory, Chinese Academy of Medical Science                                                           | Respiratory virus Laboratory, Chinese Academy of Medical Science                                                           | Chen; Li, J.; Y. and Liu, L.; Zhen, H.                                                                                                                                                                                                                                                                                                                                                                                                                                                                                                                                                                                                                                                                                                               |
| EPI_ISL_872680 to 872744, EPI_ISL_977024 to 977077                                                                                                                                                                                                                                                                                                                                                                                                                                                                                                                                                                                                                                                                                                                                                                                                                                                                                                                                                                                                                                                                                                                                                                                                                                                                                                                                                                                                                                                                                                                                                                                                                                                                                                                                                                                                                                                                                                                                                                                                                                                                                                     | Rhode Island Department of Health                                                                                          | Infectious Disease Program, Broad Institute of Harvard and MIT                                                             | Adams, G.; Azevedo, K.; B.L.; B.W.; Bauer, M.; Birren; Carter, A.; Chaluvadi, S.; D.J.; DeRuff, K.; Gallagher, G.; Gladden-Young, A.; Huard, R.; J.E.; K.J.; King, E.; Lagerborg, K.; Lemieux; Loreth, C.; MacInnis; Miller, A.; Normandin, E.; P.C.; Park; Reilly, S.; Rudy, M.; Siddle; Smole, S.; Tomkins-Tinch, C.; and Sabeti                                                                                                                                                                                                                                                                                                                                                                                                                   |
| EPI_ISL_631555, EPI_ISL_631576, EPI_ISL_631583, EPI_ISL_631622 to 631633, EPI_ISL_631755, EPI_ISL_631757, EPI_ISL_631792, EPI_ISL_631801, EPI_ISL_631814 to 631818, EPI_ISL_631821, EPI_ISL_631828, EPI_ISL_631837, EPI_ISL_631868 to 631869, EPI_ISL_631873, EPI_ISL_631875, EPI_ISL_631892, EPI_ISL_631897, EPI_ISL_631899, EPI_ISL_631903, EPI_ISL_631905, EPI_ISL_631919 to 631920, EPI_ISL_631954, EPI_ISL_631962, EPI_ISL_631965, EPI_ISL_631967, EPI_ISL_631972, EPI_ISL_631975, EPI_ISL_631982, EPI_ISL_631998 to 632002, EPI_ISL_632013 to 632016, EPI_ISL_632030 to 632033, EPI_ISL_632036, EPI_ISL_632085, EPI_ISL_632112 to 632113, EPI_ISL_632115, EPI_ISL_632117 to 632118, EPI_ISL_632154, EPI_ISL_632163 to 632165, EPI_ISL_632173, EPI_ISL_632199, EPI_ISL_632201, EPI_ISL_632203, EPI_ISL_632205 to 632208, EPI_ISL_632215 to 632218, EPI_ISL_632230 to 632234, EPI_ISL_632940, EPI_ISL_632942 to 632943, EPI_ISL_632948, EPI_ISL_632959, EPI_ISL_632962, EPI_ISL_632965, EPI_ISL_632975                                                                                                                                                                                                                                                                                                                                                                                                                                                                                                                                                                                                                                                                                                                                                                                                                                                                                                                                                                                                                                                                                                                                             |                                                                                                                            |                                                                                                                            |                                                                                                                                                                                                                                                                                                                                                                                                                                                                                                                                                                                                                                                                                                                                                      |
| see above                                                                                                                                                                                                                                                                                                                                                                                                                                                                                                                                                                                                                                                                                                                                                                                                                                                                                                                                                                                                                                                                                                                                                                                                                                                                                                                                                                                                                                                                                                                                                                                                                                                                                                                                                                                                                                                                                                                                                                                                                                                                                                                                              | Richmond University Medical Center                                                                                         | New York City Public Health Laboratory                                                                                     | Jade Wang; et al.                                                                                                                                                                                                                                                                                                                                                                                                                                                                                                                                                                                                                                                                                                                                    |
| EPI_ISL_640035, EPI_ISL_700465                                                                                                                                                                                                                                                                                                                                                                                                                                                                                                                                                                                                                                                                                                                                                                                                                                                                                                                                                                                                                                                                                                                                                                                                                                                                                                                                                                                                                                                                                                                                                                                                                                                                                                                                                                                                                                                                                                                                                                                                                                                                                                                         | Riversdale Clinic wc RAV                                                                                                   | NHLS/UCT                                                                                                                   | Arash Iranzadeh; Bruna Galvao; Carolyn Williamson; Deelan Doolabh; Diana Hardie; Innocent Mudau; Kruger Marais; Lynn Tyers; Marvin Hsiao; Stephen Korsman                                                                                                                                                                                                                                                                                                                                                                                                                                                                                                                                                                                            |

|                                                                                                                                                                                                                                                                                          |                                                                                                                                                                                                          |                                                                                                                                                                                                          |                                                                                                                                                                                                                                                                          |                                                                                                                                                                                                                                                                          |
|------------------------------------------------------------------------------------------------------------------------------------------------------------------------------------------------------------------------------------------------------------------------------------------|----------------------------------------------------------------------------------------------------------------------------------------------------------------------------------------------------------|----------------------------------------------------------------------------------------------------------------------------------------------------------------------------------------------------------|--------------------------------------------------------------------------------------------------------------------------------------------------------------------------------------------------------------------------------------------------------------------------|--------------------------------------------------------------------------------------------------------------------------------------------------------------------------------------------------------------------------------------------------------------------------|
| EPI_ISL_878529, EPI_ISL_878531, EPI_ISL_878534, EPI_ISL_878537, EPI_ISL_878539, EPI_ISL_878541, EPI_ISL_878544, EPI_ISL_878547, EPI_ISL_878549, EPI_ISL_878552, EPI_ISL_878554, EPI_ISL_878557, EPI_ISL_878560, EPI_ISL_878563, EPI_ISL_878565, EPI_ISL_878568, EPI_ISL_962812 to 962815 | see above                                                                                                                                                                                                | Robert Garry lab                                                                                                                                                                                         | Andersen lab at Scripps Research                                                                                                                                                                                                                                         | Allison Smither; Antoinette Bell; Arnaud Drouin; Dahlene Fusco; Gilberto Sabino-Santos; Kaylynn Genemaras; Lilia Melnik; Patricia Snarski; Robert Garry with SEARCH Alliance San Diego                                                                                   |
| EPI_ISL_803894                                                                                                                                                                                                                                                                           | Robert Koch Institut                                                                                                                                                                                     | Robert Koch Institut                                                                                                                                                                                     | Alexander Dalpke; Andreas Nitsche; Annika Brinkmann; Dirk Lindemann; Dominique Seifert; Janine Michel; Kristina Hochauf-Stange; Lars Schaade; Leo Büttner; Livia Schrick; Steven Uddin                                                                                   |                                                                                                                                                                                                                                                                          |
| EPI_ISL_803890                                                                                                                                                                                                                                                                           | Robert Koch Institute                                                                                                                                                                                    | Robert Koch Institute                                                                                                                                                                                    | Andreas Nitsche; Annika Brinkmann; Dominique Seifert; Janine Michel; Lars Schaade; Livia Schrick; Merle Corty; Steven Uddin                                                                                                                                              |                                                                                                                                                                                                                                                                          |
| EPI_ISL_825159 to 825172                                                                                                                                                                                                                                                                 | Robert Koch Institute, ZBS1 Highly Pathogenic Viruses, Berlin, Germany                                                                                                                                   | Robert Koch Institute, ZBS1 Highly Pathogenic Viruses & Bioinformatics MF1, Berlin, Germany                                                                                                              | Alexander Dalpke; Andreas Nitsche; Annika Brinkmann; Dirk Lindemann; Dominique Seifert; Janine Michel; Kristina Hochauf-Stange; Lars Schaade; Leo Büttner; Livia Schrick; Steven Uddin                                                                                   |                                                                                                                                                                                                                                                                          |
| EPI_ISL_631522, EPI_ISL_631543                                                                                                                                                                                                                                                           | Robert Kutnick                                                                                                                                                                                           | New York City Public Health Laboratory                                                                                                                                                                   | Jade Wang; et al.                                                                                                                                                                                                                                                        |                                                                                                                                                                                                                                                                          |
| EPI_ISL_641312 to 641317                                                                                                                                                                                                                                                                 | Rocky Mountain Laboratories, RTS Genomics Unit, National Institute of Allergy and Infectious Diseases, National Institutes of Health                                                                     | Rocky Mountain Laboratories, RTS Genomics Unit, National Institute of Allergy and Infectious Diseases, National Institutes of Health                                                                     | Anzick; Anzick, S.; Avanzato; B.N.; Barbian, K.; Bowden; C.A.; E.R.; F.X.; Fischer; Judson; M.J.; Martens; Martens, C.; Matson; Munster; Pryce, R.; Riedo; S.D.; S.L.; S.N.; Seifert; Siefert; T.A.; V.A.; V.J.; Williamson; Williamson; de Wit, E.                      |                                                                                                                                                                                                                                                                          |
| EPI_ISL_896070, EPI_ISL_896089, EPI_ISL_896098, EPI_ISL_910325                                                                                                                                                                                                                           | Rothen Medizinische Laboratorien AG                                                                                                                                                                      | University Hospital Basel, Clinical Bacteriology                                                                                                                                                         | Adrian Egli; Alfredo Mari; Hans Hirsch; Helena MB Seth-Smith; Ingrid Steffen; Julia Bielicki; Karoline Leuzinger; Madlen Stange; Manuel Battegay; Tim Roloff                                                                                                             |                                                                                                                                                                                                                                                                          |
| EPI_ISL_779405 to 779411, EPI_ISL_779413, EPI_ISL_812423, EPI_ISL_854745                                                                                                                                                                                                                 | Royal Darwin Hospital Pathology                                                                                                                                                                          | MDU-PHL                                                                                                                                                                                                  | Caly L.; Druce J.; M.L.; Meumann, E.; N.L.; Sait; Seemann T.; Sherry                                                                                                                                                                                                     |                                                                                                                                                                                                                                                                          |
| EPI_ISL_759842                                                                                                                                                                                                                                                                           | Rumah Sakit Universitas Sebelas Maret (RS-UNS)                                                                                                                                                           | Universitas Sebelas Maret (UNS); Rumah Sakit Universitas Sebelas Maret (RS-UNS), Surakarta; National Institute of Health Research and Development, Indonesian Ministry of Health, Jakarta.               | Afif Avicena Ghufron; Arie Ardiansyah Nugraha; Betty Suryawati; Dewi Puspa; Hana Apsari Pawestri; Hartanti Dian Ika; Hartono; Kartika; Maryani; Vivi Setiawaty.; Yulia Sari                                                                                              |                                                                                                                                                                                                                                                                          |
| EPI_ISL_735445                                                                                                                                                                                                                                                                           | Rwanda National Reference Laboratory                                                                                                                                                                     | GIGA Medical Genomics                                                                                                                                                                                    | Bouchra Boujemla; Esperence Umumarungu; Jacob Souopgui; Keith Durkin; Léon Mutesa; Maria Artesi; Marie-Pierre Hayette; Patrick Tuyisenge; Robert Rutayisire; Sabin Nsanzimana; Swaibu Gatara; Sébastien Bontems; Vincent Bours; Yvan Butera                              |                                                                                                                                                                                                                                                                          |
| EPI_ISL_707711 to 707713, EPI_ISL_707771 to 707774, EPI_ISL_707776 to 707777, EPI_ISL_707779 to 707780, EPI_ISL_707783, EPI_ISL_707787 to 707790                                                                                                                                         | Rwanda National Reference Laboratory                                                                                                                                                                     | Rwanda National Reference Laboratory                                                                                                                                                                     | ENatha MUKantwari; Enatha Mukantwari; Jeanne d'Arc; Jeanne d'Arc Mukantwari; Jeanne d'Arc UMuringa; Jeanne d'Arc Umuringa                                                                                                                                                |                                                                                                                                                                                                                                                                          |
| EPI_ISL_984997 to 984999, EPI_ISL_985001 to 985016                                                                                                                                                                                                                                       | S.C. Laboratorio Analisi, ASL 3 Liguria                                                                                                                                                                  | U.O. Igiene, Ospedale Policlinico San Martino                                                                                                                                                            | Bruzzoze Bianca; Caligiuri Patrizia; De Pace Vanessa; Domnich Alexander; Icardi Giancarlo; Orsi Andrea; Ricucci Valentina; Spitaleri Antonino                                                                                                                            |                                                                                                                                                                                                                                                                          |
| EPI_ISL_965025                                                                                                                                                                                                                                                                           | S.C. Microbiologia e Virologia Laboratorio Virologia -Speciale Centro Influenza - AOU di Sassari - Viale san Pietro 43/B Palazzo Infettivologia                                                          | Laboratorio specialistico UOC Ematologia - Ospedale "San Francesco" - ATS-ASSL Nuoro                                                                                                                     | Asproni Rosanna; Malune Paolo; Monne Maria Itria; Palmas Angelo Domenico Serra Caterina; Piras Giovanna; Rimini Elena; Rubino Salvatore                                                                                                                                  |                                                                                                                                                                                                                                                                          |
| EPI_ISL_985017                                                                                                                                                                                                                                                                           | S.C. Patologia Clinica, Ospedale Sant'Andrea, ASL 5                                                                                                                                                      | U.O. Igiene, Ospedale Policlinico San Martino                                                                                                                                                            | Battolla Enrico; Bruzzoze Bianca; Caligiuri Patrizia; De Pace Vanessa; Domnich Alexander; Icardi Giancarlo; Orsi Andrea; Ricucci Valentina                                                                                                                               |                                                                                                                                                                                                                                                                          |
| EPI_ISL_857395                                                                                                                                                                                                                                                                           | S.M.S.Medical College, Jaipur, Rajasthan                                                                                                                                                                 | S.M.S.Medical College, Jaipur, Rajasthan                                                                                                                                                                 | Dr. Bharti Malhotra; Dr. Swati Gautam                                                                                                                                                                                                                                    |                                                                                                                                                                                                                                                                          |
| EPI_ISL_985025 to 985026                                                                                                                                                                                                                                                                 | S.S.D. Microbiologia, Ospedale Santa Corona di Pietra Ligure, ASL 2 Liguria                                                                                                                              | U.O. Igiene, Ospedale Policlinico San Martino                                                                                                                                                            | Bruzzoze Bianca; Caligiuri Patrizia; De Pace Vanessa; Domnich Alexander; Icardi Giancarlo; Orsi Andrea; Ricucci Valentina; Valle Caterina                                                                                                                                |                                                                                                                                                                                                                                                                          |
| EPI_ISL_985018 to 985024                                                                                                                                                                                                                                                                 | S.S.D. Microbiologia, Stabilimento ospedaliero di Sanremo, ASL 1 Liguria                                                                                                                                 | U.O. Igiene, Ospedale Policlinico San Martino                                                                                                                                                            | Bruzzoze Bianca; Caligiuri Patrizia; De Pace Vanessa; Domnich Alexander; Dusi Pier Andrea; Icardi Giancarlo; Orsi Andrea; Ricucci Valentina                                                                                                                              |                                                                                                                                                                                                                                                                          |
| EPI_ISL_622761 to 622766, EPI_ISL_654795 to 654809, EPI_ISL_732960 to 732961, EPI_ISL_752598 to 752599, EPI_ISL_755568 to 755571, EPI_ISL_771367 to 771370, EPI_ISL_812356 to 812358, EPI_ISL_855344                                                                                     | see above                                                                                                                                                                                                | SA Pathology                                                                                                                                                                                             | SA Pathology                                                                                                                                                                                                                                                             | Chuan Kok Lim; Geoff Higgins; Ivan Bastian; Julien Soubrier; Karin Kassahn; Lex Leong; Mark Turra; Song Gao                                                                                                                                                              |
| EPI_ISL_854421, EPI_ISL_854436 to 854445                                                                                                                                                                                                                                                 | SARATOGA HOSPITAL LABORATORY                                                                                                                                                                             | Wadsworth Center, New York State Department of Health                                                                                                                                                    | Alexis Russel; Daryl M. Lamson; Erasmus Schneider; Erica Lasek-Nesselquist; John Kelly; Jonathan Plitnick; Kirsten St. George; Matthew Shudt; Melissa A Leisner; Navjot Singh                                                                                            |                                                                                                                                                                                                                                                                          |
| EPI_ISL_765481, EPI_ISL_765483, EPI_ISL_765517 to 765520, EPI_ISL_765522 to 765529, EPI_ISL_767589, EPI_ISL_767594, EPI_ISL_767599 to 767614, EPI_ISL_802428, EPI_ISL_802432, EPI_ISL_802437, EPI_ISL_802439, EPI_ISL_802467 to 802468, EPI_ISL_802491 to 802497                         | see above                                                                                                                                                                                                | SARATOGA HOSPITAL LABORATORY                                                                                                                                                                             | Wadsworth Center, New York State Department of Health                                                                                                                                                                                                                    | Alexis Russel; Daryl M. Lamson; Erasmus Schneider; Erica Lasek-Nesselquist; John Kelly; Jonathan Plitnick; Kirsten St. George; Matthew Shudt; Melissa A Leisner; Navjot Singh; Sara Griesemer                                                                            |
| EPI_ISL_745156                                                                                                                                                                                                                                                                           | SAS Saldanha                                                                                                                                                                                             | National Health Laboratory Service (NHLS), Tygerberg                                                                                                                                                     | Bronwyn Kleinhans; Eduan Wilkindon; Gert van Zyl; Houriyah Tegally; Kayla Delaney; Susan Engelbrecht; Tulio de Oliveira; Wolfgang Preiser                                                                                                                                |                                                                                                                                                                                                                                                                          |
| EPI_ISL_745157, EPI_ISL_745161                                                                                                                                                                                                                                                           | SAS Saldanha VPA                                                                                                                                                                                         | National Health Laboratory Service (NHLS), Tygerberg                                                                                                                                                     | Bronwyn Kleinhans; Eduan Wilkindon; Gert van Zyl; Houriyah Tegally; Kayla Delaney; Susan Engelbrecht; Tulio de Oliveira; Wolfgang Preiser                                                                                                                                |                                                                                                                                                                                                                                                                          |
| EPI_ISL_882635                                                                                                                                                                                                                                                                           | SC (UCO) Igiene e Sanità Pubblica (funzione integrata con SC Microbiologia e Virologia) e Laboratory of Molecular Virology of the International Centre for Genetic Engineering and Biotechnology (ICGEB) | ARGO Laboratorio Genomica ed EpigenomicaA                                                                                                                                                                | D'Agaro P; Dal Monego S; Degasperri M; Licastro D; Marcello A                                                                                                                                                                                                            |                                                                                                                                                                                                                                                                          |
| EPI_ISL_804038, EPI_ISL_804040 to 804042, EPI_ISL_804044, EPI_ISL_804048, EPI_ISL_804050 to 804054, EPI_ISL_833435 to 833455, EPI_ISL_882636, EPI_ISL_902926, EPI_ISL_949124, EPI_ISL_977604 to 977650                                                                                   | see above                                                                                                                                                                                                | SC (UCO) Igiene e Sanità Pubblica (funzione integrata con SC Microbiologia e Virologia) e Laboratory of Molecular Virology of the International Centre for Genetic Engineering and Biotechnology (ICGEB) | ARGO Laboratorio Genomica ed Epigenomica                                                                                                                                                                                                                                 | D'Agaro P; Dal Monego S; De Rosa R; Degasperri M; Licastro D; Lombardo F; Marcello A; Pipan C; Piscianz E; Segat L                                                                                                                                                       |
| EPI_ISL_887589, EPI_ISL_888120                                                                                                                                                                                                                                                           | SC Dept of Health and Env. Control-Bureau of Laboratories                                                                                                                                                | Centers for Disease Control and Prevention Division of Viral Diseases, Pathogen Discovery                                                                                                                | Anna Montmayeur; Anna Uehara; Clinton R. Paden; Haibin Wang; Jing Zhang; Krista Queen; Peter Cook; Rachel Marine; Suxiang Tong; Yan Li; Ying Tao                                                                                                                         |                                                                                                                                                                                                                                                                          |
| EPI_ISL_751542, EPI_ISL_751550, EPI_ISL_751611, EPI_ISL_751664 to 751665, EPI_ISL_751718, EPI_ISL_751744, EPI_ISL_903668, EPI_ISL_903671 to 903672, EPI_ISL_903688, EPI_ISL_903717, EPI_ISL_903819, EPI_ISL_903872                                                                       | see above                                                                                                                                                                                                | SC Dept of Health and Env. Control-Bureau of Laboratories                                                                                                                                                | Genomics and Discovery, Respiratory Viruses Branch, Division of Viral Diseases, Centers for Disease Control and Prevention                                                                                                                                               | Anna Montmayeur; Anna Uehara; Ben L. Rambo-Martin; Clinton R. Paden; Dhvani Batra; Haibin Wang; Jasmine Padilla; Jing Zhang; Justin Lee; Krista Queen; Lori Rowe; Mark Burroughs; Mili Sheth; Peter W. Cook; Rachel Marine; Sarah Nobles; Suxiang Tong; Yan Li; Ying Tao |
| EPI_ISL_751552, EPI_ISL_903725, EPI_ISL_903744, EPI_ISL_903836, EPI_ISL_903894, EPI_ISL_903934                                                                                                                                                                                           | SD Public Health Laboratory                                                                                                                                                                              | Genomics and Discovery, Respiratory Viruses Branch, Division of Viral Diseases, Centers for Disease Control and Prevention                                                                               | Anna Montmayeur; Anna Uehara; Ben L. Rambo-Martin; Clinton R. Paden; Dhvani Batra; Haibin Wang; Jasmine Padilla; Jing Zhang; Justin Lee; Krista Queen; Lori Rowe; Mark Burroughs; Mili Sheth; Peter W. Cook; Rachel Marine; Sarah Nobles; Suxiang Tong; Yan Li; Ying Tao |                                                                                                                                                                                                                                                                          |
| EPI_ISL_935156, EPI_ISL_935158 to 935159, EPI_ISL_935161 to 935162, EPI_ISL_935165 to 935169, EPI_ISL_935971 to 935972, EPI_ISL_965240, EPI_ISL_965247 to 965253, EPI_ISL_965261, EPI_ISL_965266, EPI_ISL_965270, EPI_ISL_965272                                                         | see above                                                                                                                                                                                                | SIESP CHIETI                                                                                                                                                                                             | Istituto Zooprofilattico Sperimentale dell'Abruzzo e Molise "G. Caporale"                                                                                                                                                                                                | Ancora M; Calistri P; Cammà C; Curini V; Di Domenico M; Di Pasquale A; Lorusso A; Mangone I; Marcacci M; Puglia I; Rinaldi A; Savini G; Scialabba S                                                                                                                      |
| EPI_ISL_806804 to 806805                                                                                                                                                                                                                                                                 | SIESP CHIETI - DISTRETTO SANITARIO CHIETI                                                                                                                                                                | Istituto Zooprofilattico Sperimentale dell'Abruzzo e Molise "G. Caporale"                                                                                                                                | Ancora M; Calistri P; Cammà C; Curini V; Di Domenico M; Di Pasquale A; Lorusso A; Mangone I; Marcacci M; Puglia I; Rinaldi A; Savini G                                                                                                                                   |                                                                                                                                                                                                                                                                          |
| EPI_ISL_832821, EPI_ISL_833232                                                                                                                                                                                                                                                           | SIESP CHIETI - DRIVE IN CHIETI                                                                                                                                                                           | Istituto Zooprofilattico Sperimentale dell'Abruzzo e Molise                                                                                                                                              | Ancora M; Calistri P; Cammà C; Curini V; Di Domenico M; Di Pasquale A; Lorusso A; Mangone I; Marcacci M; Puglia I; Rinaldi A; Savini G.                                                                                                                                  |                                                                                                                                                                                                                                                                          |

| "G.Caporale"                                                                                                                                                                                                                                                                                                                                                                                                                                                                                                                                                                                                                                                                                                                                                                                                                                                                                                                                     |                                                        |                                                                           |                                                                                                                                                                       |
|--------------------------------------------------------------------------------------------------------------------------------------------------------------------------------------------------------------------------------------------------------------------------------------------------------------------------------------------------------------------------------------------------------------------------------------------------------------------------------------------------------------------------------------------------------------------------------------------------------------------------------------------------------------------------------------------------------------------------------------------------------------------------------------------------------------------------------------------------------------------------------------------------------------------------------------------------|--------------------------------------------------------|---------------------------------------------------------------------------|-----------------------------------------------------------------------------------------------------------------------------------------------------------------------|
| EPI_ISL_806733, EPI_ISL_833044, EPI_ISL_833090 to 833096, EPI_ISL_833317 to 833318, EPI_ISL_833323, EPI_ISL_918267, EPI_ISL_961018, EPI_ISL_961021 to 961026, EPI_ISL_961028 to 961031, EPI_ISL_961034 to 961035, EPI_ISL_961037 to 961041, EPI_ISL_961043, EPI_ISL_961047, EPI_ISL_961057 to 961060, EPI_ISL_961062, EPI_ISL_961069, EPI_ISL_961071 to 961073, EPI_ISL_961081, EPI_ISL_961086, EPI_ISL_961090 to 961092, EPI_ISL_961674 to 961677, EPI_ISL_961679 to 961682, EPI_ISL_961684, EPI_ISL_961689 to 961690, EPI_ISL_961694, EPI_ISL_961697 to 961698, EPI_ISL_961700, EPI_ISL_961702, EPI_ISL_961706, EPI_ISL_961709 to 961711, EPI_ISL_961714, EPI_ISL_961717, EPI_ISL_961726 to 961727, EPI_ISL_961729, EPI_ISL_961731 to 961732, EPI_ISL_961735 to 961736, EPI_ISL_961740, EPI_ISL_961742, EPI_ISL_961746, EPI_ISL_965227 to 965229, EPI_ISL_965232 to 965233, EPI_ISL_965236 to 965239, EPI_ISL_965254 to 965255, EPI_ISL_965265 | SIESP CHIETI - DRIVE IN CHIETI                         | Istituto Zooprofilattico Sperimentale dell'Abruzzo e Molise "G. Caporale" | Ancora M; Calistri P; Cammà C; Curini V; Delli Compagni E; Di Domenico M; Di Pasquale A; Lorusso A; Mangone I; Marcacci M; Puglia I; Rinaldi A; Savini G; Scialabba S |
| see above                                                                                                                                                                                                                                                                                                                                                                                                                                                                                                                                                                                                                                                                                                                                                                                                                                                                                                                                        |                                                        |                                                                           |                                                                                                                                                                       |
| EPI_ISL_806800 to 806803, EPI_ISL_833271, EPI_ISL_833316                                                                                                                                                                                                                                                                                                                                                                                                                                                                                                                                                                                                                                                                                                                                                                                                                                                                                         | SIESP CHIETI - DRIVE IN GISSI                          | Istituto Zooprofilattico Sperimentale dell'Abruzzo e Molise "G. Caporale" | Ancora M; Calistri P; Cammà C; Curini V; Di Domenico M; Di Pasquale A; Lorusso A; Mangone I; Marcacci M; Puglia I; Rinaldi A; Savini G                                |
| EPI_ISL_832815 to 832816, EPI_ISL_832822, EPI_ISL_833231, EPI_ISL_833242                                                                                                                                                                                                                                                                                                                                                                                                                                                                                                                                                                                                                                                                                                                                                                                                                                                                         | SIESP CHIETI - DRIVE IN LANCIANO                       | Istituto Zooprofilattico Sperimentale dell'Abruzzo e Molise "G. Caporale" | Ancora M; Calistri P; Cammà C; Curini V; Di Domenico M; Di Pasquale A; Lorusso A; Mangone I; Marcacci M; Puglia I; Rinaldi A; Savini G.                               |
| EPI_ISL_738044, EPI_ISL_806734, EPI_ISL_806775 to 806776, EPI_ISL_806799, EPI_ISL_833049, EPI_ISL_833097 to 833098, EPI_ISL_833292 to 833294, EPI_ISL_833298, EPI_ISL_833300, EPI_ISL_833313 to 833315, EPI_ISL_918270, EPI_ISL_961066                                                                                                                                                                                                                                                                                                                                                                                                                                                                                                                                                                                                                                                                                                           | SIESP CHIETI - DRIVE IN LANCIANO                       | Istituto Zooprofilattico Sperimentale dell'Abruzzo e Molise "G. Caporale" | Ancora M; Calistri P; Cammà C; Curini V; Delli Compagni E; Di Domenico M; Di Pasquale A; Lorusso A; Mangone I; Marcacci M; Puglia I; Rinaldi A; Savini G; Scialabba S |
| see above                                                                                                                                                                                                                                                                                                                                                                                                                                                                                                                                                                                                                                                                                                                                                                                                                                                                                                                                        |                                                        |                                                                           |                                                                                                                                                                       |
| EPI_ISL_738046 to 738048, EPI_ISL_806762, EPI_ISL_806791 to 806798, EPI_ISL_833045, EPI_ISL_833099 to 833100, EPI_ISL_833250, EPI_ISL_833270, EPI_ISL_833272 to 833275, EPI_ISL_833284 to 833287, EPI_ISL_833306 to 833310, EPI_ISL_833328 to 833330, EPI_ISL_918268, EPI_ISL_961019 to 961020, EPI_ISL_961033, EPI_ISL_961036, EPI_ISL_961044 to 961046, EPI_ISL_961048 to 961049, EPI_ISL_961055 to 961056, EPI_ISL_961061, EPI_ISL_961064 to 961065, EPI_ISL_961074, EPI_ISL_961076, EPI_ISL_961085, EPI_ISL_961686 to 961687, EPI_ISL_961691 to 961693, EPI_ISL_961699, EPI_ISL_961715 to 961716, EPI_ISL_961718 to 961722, EPI_ISL_961724, EPI_ISL_961733, EPI_ISL_961744                                                                                                                                                                                                                                                                   | SIESP CHIETI - DRIVE IN ORTONA                         | Istituto Zooprofilattico Sperimentale dell'Abruzzo e Molise "G. Caporale" | Ancora M; Calistri P; Cammà C; Curini V; Delli Compagni E; Di Domenico M; Di Pasquale A; Lorusso A; Mangone I; Marcacci M; Puglia I; Rinaldi A; Savini G; Scialabba S |
| see above                                                                                                                                                                                                                                                                                                                                                                                                                                                                                                                                                                                                                                                                                                                                                                                                                                                                                                                                        |                                                        |                                                                           |                                                                                                                                                                       |
| EPI_ISL_961725, EPI_ISL_961743, EPI_ISL_961745                                                                                                                                                                                                                                                                                                                                                                                                                                                                                                                                                                                                                                                                                                                                                                                                                                                                                                   | SIESP CHIETI DRIVE IN GISSI                            | Istituto Zooprofilattico Sperimentale dell'Abruzzo e Molise "G. Caporale" | Ancora M; Calistri P; Cammà C; Curini V; Di Domenico M; Di Pasquale A; Lorusso A; Mangone I; Marcacci M; Puglia I; Rinaldi A; Savini G; Scialabba S                   |
| EPI_ISL_961673, EPI_ISL_961712 to 961713, EPI_ISL_961723, EPI_ISL_961738 to 961739, EPI_ISL_961748                                                                                                                                                                                                                                                                                                                                                                                                                                                                                                                                                                                                                                                                                                                                                                                                                                               | SIESP CHIETI DRIVE IN LANCIANO                         | Istituto Zooprofilattico Sperimentale dell'Abruzzo e Molise "G. Caporale" | Ancora M; Calistri P; Cammà C; Curini V; Di Domenico M; Di Pasquale A; Lorusso A; Mangone I; Marcacci M; Puglia I; Rinaldi A; Savini G; Scialabba S                   |
| EPI_ISL_965262, EPI_ISL_965268 to 965269, EPI_ISL_965271, EPI_ISL_965273 to 965275                                                                                                                                                                                                                                                                                                                                                                                                                                                                                                                                                                                                                                                                                                                                                                                                                                                               | SIESP CHIETI, DISTRETTO SAN CHIETI                     | Istituto Zooprofilattico Sperimentale dell'Abruzzo e Molise "G. Caporale" | Ancora M; Calistri P; Cammà C; Curini V; Di Domenico M; Di Pasquale A; Lorusso A; Mangone I; Marcacci M; Puglia I; Rinaldi A; Savini G; Scialabba S                   |
| EPI_ISL_965267                                                                                                                                                                                                                                                                                                                                                                                                                                                                                                                                                                                                                                                                                                                                                                                                                                                                                                                                   | SIESP CHIETI, DISTRETTO SAN CHIETI                     | Istituto Zooprofilattico Sperimentale dell'Abruzzo e Molise "G. Caporale" | Ancora M; Calistri P; Cammà C; Curini V; Di Domenico M; Di Pasquale A; Lorusso A; Mangone I; Marcacci M; Puglia I; Rinaldi A; Savini G; Scialabba S                   |
| EPI_ISL_833278 to 833280, EPI_ISL_833311 to 833312                                                                                                                                                                                                                                                                                                                                                                                                                                                                                                                                                                                                                                                                                                                                                                                                                                                                                               | SIESP CHIETI- DRIVE IN CHIETI                          | Istituto Zooprofilattico Sperimentale dell'Abruzzo e Molise "G. Caporale" | Ancora M; Calistri P; Cammà C; Curini V; Di Domenico M; Di Pasquale A; Lorusso A; Mangone I; Marcacci M; Puglia I; Rinaldi A; Savini G                                |
| EPI_ISL_961737, EPI_ISL_961741                                                                                                                                                                                                                                                                                                                                                                                                                                                                                                                                                                                                                                                                                                                                                                                                                                                                                                                   | SIESP CHIETI- DRIVE IN VASTO                           | Istituto Zooprofilattico Sperimentale dell'Abruzzo e Molise "G. Caporale" | Ancora M; Calistri P; Cammà C; Curini V; Di Domenico M; Di Pasquale A; Lorusso A; Mangone I; Marcacci M; Puglia I; Rinaldi A; Savini G; Scialabba S                   |
| EPI_ISL_883290, EPI_ISL_883300, EPI_ISL_918264                                                                                                                                                                                                                                                                                                                                                                                                                                                                                                                                                                                                                                                                                                                                                                                                                                                                                                   | SIESP CHIETI-DRIVE IN CHIETI                           | Istituto Zooprofilattico Sperimentale dell'Abruzzo e Molise "G. Caporale" | Ancora M; Calistri P; Cammà C; Curini V; Di Domenico M; Di Pasquale A; Lorusso A; Mangone I; Marcacci M; Puglia I; Rinaldi A; Savini G; Scialabba S                   |
| EPI_ISL_965257, EPI_ISL_965260                                                                                                                                                                                                                                                                                                                                                                                                                                                                                                                                                                                                                                                                                                                                                                                                                                                                                                                   | SIESP CHIETI-DRIVE IN GISSI                            | Istituto Zooprofilattico Sperimentale dell'Abruzzo e Molise "G. Caporale" | Ancora M; Calistri P; Cammà C; Curini V; Di Domenico M; Di Pasquale A; Lorusso A; Mangone I; Marcacci M; Puglia I; Rinaldi A; Savini G; Scialabba S                   |
| EPI_ISL_883293                                                                                                                                                                                                                                                                                                                                                                                                                                                                                                                                                                                                                                                                                                                                                                                                                                                                                                                                   | SIESP CHIETI-DRIVE IN LANCIANO                         | Istituto Zooprofilattico Sperimentale dell'Abruzzo e Molise "G. Caporale" | Ancora M; Calistri P; Cammà C; Curini V; Di Domenico M; Di Pasquale A; Lorusso A; Mangone I; Marcacci M; Puglia I; Rinaldi A; Savini G; Scialabba S                   |
| EPI_ISL_883288 to 883289, EPI_ISL_883292, EPI_ISL_883296, EPI_ISL_935157, EPI_ISL_935160, EPI_ISL_935163 to 935164, EPI_ISL_965243 to 965244, EPI_ISL_965263                                                                                                                                                                                                                                                                                                                                                                                                                                                                                                                                                                                                                                                                                                                                                                                     | SIESP CHIETI-DRIVE IN ORTONA                           | Istituto Zooprofilattico Sperimentale dell'Abruzzo e Molise "G. Caporale" | Ancora M; Calistri P; Cammà C; Curini V; Di Domenico M; Di Pasquale A; Lorusso A; Mangone I; Marcacci M; Puglia I; Rinaldi A; Savini G; Scialabba S                   |
| see above                                                                                                                                                                                                                                                                                                                                                                                                                                                                                                                                                                                                                                                                                                                                                                                                                                                                                                                                        |                                                        |                                                                           |                                                                                                                                                                       |
| EPI_ISL_961027, EPI_ISL_965256, EPI_ISL_965258 to 965259                                                                                                                                                                                                                                                                                                                                                                                                                                                                                                                                                                                                                                                                                                                                                                                                                                                                                         | SIESP CHIETI-DRIVE IN VASTO                            | Istituto Zooprofilattico Sperimentale dell'Abruzzo e Molise "G. Caporale" | Ancora M; Calistri P; Cammà C; Curini V; Di Domenico M; Di Pasquale A; Lorusso A; Mangone I; Marcacci M; Puglia I; Rinaldi A; Savini G; Scialabba S                   |
| EPI_ISL_918266                                                                                                                                                                                                                                                                                                                                                                                                                                                                                                                                                                                                                                                                                                                                                                                                                                                                                                                                   | SIESP CHIETI-Drive in Lanciano                         | Istituto Zooprofilattico Sperimentale dell'Abruzzo e Molise "G. Caporale" | Ancora M; Calistri P; Cammà C; Curini V; Di Domenico M; Di Pasquale A; Lorusso A; Mangone I; Marcacci M; Puglia I; Rinaldi A; Savini G; Scialabba S                   |
| EPI_ISL_883286 to 883287, EPI_ISL_883298 to 883299, EPI_ISL_883303 to 883305, EPI_ISL_918263                                                                                                                                                                                                                                                                                                                                                                                                                                                                                                                                                                                                                                                                                                                                                                                                                                                     | SIESP DIPARTIMENTO DI PREVENZIONE CHIE                 | Istituto Zooprofilattico Sperimentale dell'Abruzzo e Molise "G. Caporale" | Ancora M; Calistri P; Cammà C; Curini V; Di Domenico M; Di Pasquale A; Lorusso A; Mangone I; Marcacci M; Puglia I; Rinaldi A; Savini G; Scialabba S                   |
| EPI_ISL_833233 to 833238, EPI_ISL_833241, EPI_ISL_833243 to 833247, EPI_ISL_849634, EPI_ISL_849637 to 849646                                                                                                                                                                                                                                                                                                                                                                                                                                                                                                                                                                                                                                                                                                                                                                                                                                     | SIESP DIPARTIMENTO DI PREVENZIONE CHIETI               | Istituto Zooprofilattico Sperimentale dell'Abruzzo e Molise "G. Caporale" | Ancora M; Calistri P; Cammà C; Curini V; Di Domenico M; Di Pasquale A; Lorusso A; Mangone I; Marcacci M; Puglia I; Rinaldi A; Savini G.                               |
| EPI_ISL_738045, EPI_ISL_806731 to 806732, EPI_ISL_806806, EPI_ISL_833043, EPI_ISL_833101 to 833102, EPI_ISL_833262 to 833264, EPI_ISL_833299, EPI_ISL_833321, EPI_ISL_833324, EPI_ISL_833326, EPI_ISL_918271, EPI_ISL_961032, EPI_ISL_961050 to 961054, EPI_ISL_961063, EPI_ISL_961067 to 961068, EPI_ISL_961070, EPI_ISL_961075, EPI_ISL_961082, EPI_ISL_961087 to 961089, EPI_ISL_961685, EPI_ISL_961695, EPI_ISL_961703, EPI_ISL_961707 to 961708, EPI_ISL_961728, EPI_ISL_961749, EPI_ISL_961751                                                                                                                                                                                                                                                                                                                                                                                                                                             | SIESP DIPARTIMENTO DI PREVENZIONE CHIETI               | Istituto Zooprofilattico Sperimentale dell'Abruzzo e Molise "G. Caporale" | Ancora M; Calistri P; Cammà C; Curini V; Delli Compagni E; Di Domenico M; Di Pasquale A; Lorusso A; Mangone I; Marcacci M; Puglia I; Rinaldi A; Savini G; Scialabba S |
| see above                                                                                                                                                                                                                                                                                                                                                                                                                                                                                                                                                                                                                                                                                                                                                                                                                                                                                                                                        |                                                        |                                                                           |                                                                                                                                                                       |
| EPI_ISL_806790, EPI_ISL_833291                                                                                                                                                                                                                                                                                                                                                                                                                                                                                                                                                                                                                                                                                                                                                                                                                                                                                                                   | SIESP DIPARTIMENTO DI PREVENZIONE DELL'AQUILA          | Istituto Zooprofilattico Sperimentale dell'Abruzzo e Molise "G. Caporale" | Ancora M; Calistri P; Cammà C; Curini V; Di Domenico M; Di Pasquale A; Lorusso A; Mangone I; Marcacci M; Puglia I; Rinaldi A; Savini G                                |
| EPI_ISL_832819                                                                                                                                                                                                                                                                                                                                                                                                                                                                                                                                                                                                                                                                                                                                                                                                                                                                                                                                   | SIESP DIPARTIMENTO DI PREVENZIONE SULMONA              | Istituto Zooprofilattico Sperimentale dell'Abruzzo e Molise "G. Caporale" | Ancora M; Calistri P; Cammà C; Curini V; Di Domenico M; Di Pasquale A; Lorusso A; Mangone I; Marcacci M; Puglia I; Rinaldi A; Savini G.                               |
| EPI_ISL_806749 to 806757, EPI_ISL_833319 to 833320, EPI_ISL_833322                                                                                                                                                                                                                                                                                                                                                                                                                                                                                                                                                                                                                                                                                                                                                                                                                                                                               | SIESP DIPARTIMENTO DI PREVENZIONE SULMONA              | Istituto Zooprofilattico Sperimentale dell'Abruzzo e Molise "G. Caporale" | Ancora M; Calistri P; Cammà C; Curini V; Di Domenico M; Di Pasquale A; Lorusso A; Mangone I; Marcacci M; Puglia I; Rinaldi A; Savini G                                |
| EPI_ISL_832817, EPI_ISL_833239 to 833240                                                                                                                                                                                                                                                                                                                                                                                                                                                                                                                                                                                                                                                                                                                                                                                                                                                                                                         | SIESP DIPARTIMENTO DI PREVENZIONE TERAMO               | Istituto Zooprofilattico Sperimentale dell'Abruzzo e Molise "G. Caporale" | Ancora M; Calistri P; Cammà C; Curini V; Di Domenico M; Di Pasquale A; Lorusso A; Mangone I; Marcacci M; Puglia I; Rinaldi A; Savini G.                               |
| EPI_ISL_806735 to 806744, EPI_ISL_806746 to 806748, EPI_ISL_806766 to 806772, EPI_ISL_806777 to 806780, EPI_ISL_806786 to 806788, EPI_ISL_833258 to 833259, EPI_ISL_833281 to 833282, EPI_ISL_833295 to 833296, EPI_ISL_833302 to 833305, EPI_ISL_918269                                                                                                                                                                                                                                                                                                                                                                                                                                                                                                                                                                                                                                                                                         | SIESP DIPARTIMENTO DI PREVENZIONE TERAMO               | Istituto Zooprofilattico Sperimentale dell'Abruzzo e Molise "G. Caporale" | Ancora M; Calistri P; Cammà C; Curini V; Di Domenico M; Di Pasquale A; Lorusso A; Mangone I; Marcacci M; Puglia I; Rinaldi A; Savini G; Scialabba S                   |
| see above                                                                                                                                                                                                                                                                                                                                                                                                                                                                                                                                                                                                                                                                                                                                                                                                                                                                                                                                        |                                                        |                                                                           |                                                                                                                                                                       |
| EPI_ISL_833103 to 833118                                                                                                                                                                                                                                                                                                                                                                                                                                                                                                                                                                                                                                                                                                                                                                                                                                                                                                                         | SIESP DIPARTIMENTO DI PREVENZIONE TERAMO C.DA CASALENA | Istituto Zooprofilattico Sperimentale dell'Abruzzo e Molise "G. Caporale" | Ancora M; Calistri P; Cammà C; Curini V; Delli Compagni E; Di Domenico M; Di Pasquale A; Lorusso A; Mangone I; Marcacci M; Puglia I; Rinaldi A; Savini G              |
| EPI_ISL_833119, EPI_ISL_875566 to 875568, EPI_ISL_961096                                                                                                                                                                                                                                                                                                                                                                                                                                                                                                                                                                                                                                                                                                                                                                                                                                                                                         | SIESP L'AQUILA                                         | Istituto Zooprofilattico Sperimentale dell'Abruzzo e Molise "G. Caporale" | Ancora M; Calistri P; Cammà C; Curini V; Delli Compagni E; Di Domenico M; Di Pasquale A; Lorusso A; Mangone I; Marcacci M; Puglia I; Rinaldi A; Savini G; Scialabba S |
| EPI_ISL_833120 to 833122, EPI_ISL_961696, EPI_ISL_961704, EPI_ISL_961752 to 961753, EPI_ISL_961755 to 961758, EPI_ISL_965223, EPI_ISL_965234                                                                                                                                                                                                                                                                                                                                                                                                                                                                                                                                                                                                                                                                                                                                                                                                     |                                                        |                                                                           |                                                                                                                                                                       |

|                                                                                                                                                                                                                                                                                                                                                                                                                                                                                                                                                                                                                                                                                                                                                                                                                                                                                                                                                                                                                                                                                                                                                                                                                                                                                                                                                                                                                                                                                                                                                                                                                                                                                                                                                                                                                                                                                                                                                                                                                                                                                                                                                                                                                                                                                                                                                                                                                                                                                                                                                                                                                                                                                                                                                                                                                                                                                                                |                                                                |                                                                                                                        |                                                                                                                                                                                                                                                                                                                                                                                                          |
|----------------------------------------------------------------------------------------------------------------------------------------------------------------------------------------------------------------------------------------------------------------------------------------------------------------------------------------------------------------------------------------------------------------------------------------------------------------------------------------------------------------------------------------------------------------------------------------------------------------------------------------------------------------------------------------------------------------------------------------------------------------------------------------------------------------------------------------------------------------------------------------------------------------------------------------------------------------------------------------------------------------------------------------------------------------------------------------------------------------------------------------------------------------------------------------------------------------------------------------------------------------------------------------------------------------------------------------------------------------------------------------------------------------------------------------------------------------------------------------------------------------------------------------------------------------------------------------------------------------------------------------------------------------------------------------------------------------------------------------------------------------------------------------------------------------------------------------------------------------------------------------------------------------------------------------------------------------------------------------------------------------------------------------------------------------------------------------------------------------------------------------------------------------------------------------------------------------------------------------------------------------------------------------------------------------------------------------------------------------------------------------------------------------------------------------------------------------------------------------------------------------------------------------------------------------------------------------------------------------------------------------------------------------------------------------------------------------------------------------------------------------------------------------------------------------------------------------------------------------------------------------------------------------|----------------------------------------------------------------|------------------------------------------------------------------------------------------------------------------------|----------------------------------------------------------------------------------------------------------------------------------------------------------------------------------------------------------------------------------------------------------------------------------------------------------------------------------------------------------------------------------------------------------|
| see above                                                                                                                                                                                                                                                                                                                                                                                                                                                                                                                                                                                                                                                                                                                                                                                                                                                                                                                                                                                                                                                                                                                                                                                                                                                                                                                                                                                                                                                                                                                                                                                                                                                                                                                                                                                                                                                                                                                                                                                                                                                                                                                                                                                                                                                                                                                                                                                                                                                                                                                                                                                                                                                                                                                                                                                                                                                                                                      | SIESP SULMONA                                                  | Istituto Zooprofilattico Sperimentale dell'Abruzzo e Molise "G. Caporale"                                              | Ancora M; Calistri P; Cammà C; Curini V; Delli Compagni E; Di Domenico M; Di Pasquale A; Lorusso A; Mangone I; Marcacci M; Puglia I; Rinaldi A; Savini G; Scialabba S                                                                                                                                                                                                                                    |
| EPI_ISL_961042, EPI_ISL_961077, EPI_ISL_961084, EPI_ISL_961097 to 961103, EPI_ISL_961678, EPI_ISL_961683, EPI_ISL_961688                                                                                                                                                                                                                                                                                                                                                                                                                                                                                                                                                                                                                                                                                                                                                                                                                                                                                                                                                                                                                                                                                                                                                                                                                                                                                                                                                                                                                                                                                                                                                                                                                                                                                                                                                                                                                                                                                                                                                                                                                                                                                                                                                                                                                                                                                                                                                                                                                                                                                                                                                                                                                                                                                                                                                                                       |                                                                |                                                                                                                        |                                                                                                                                                                                                                                                                                                                                                                                                          |
| see above                                                                                                                                                                                                                                                                                                                                                                                                                                                                                                                                                                                                                                                                                                                                                                                                                                                                                                                                                                                                                                                                                                                                                                                                                                                                                                                                                                                                                                                                                                                                                                                                                                                                                                                                                                                                                                                                                                                                                                                                                                                                                                                                                                                                                                                                                                                                                                                                                                                                                                                                                                                                                                                                                                                                                                                                                                                                                                      | SIESP TERAMO                                                   | Istituto Zooprofilattico Sperimentale dell'Abruzzo e Molise "G. Caporale"                                              | Ancora M; Calistri P; Cammà C; Curini V; Di Domenico M; Di Pasquale A; Lorusso A; Mangone I; Marcacci M; Puglia I; Rinaldi A; Savini G; Scialabba S                                                                                                                                                                                                                                                      |
| EPI_ISL_965230, EPI_ISL_965235                                                                                                                                                                                                                                                                                                                                                                                                                                                                                                                                                                                                                                                                                                                                                                                                                                                                                                                                                                                                                                                                                                                                                                                                                                                                                                                                                                                                                                                                                                                                                                                                                                                                                                                                                                                                                                                                                                                                                                                                                                                                                                                                                                                                                                                                                                                                                                                                                                                                                                                                                                                                                                                                                                                                                                                                                                                                                 | SIESP TERAMO DIP PREV                                          | Istituto Zooprofilattico Sperimentale dell'Abruzzo e Molise "G. Caporale"                                              | Ancora M; Calistri P; Cammà C; Curini V; Di Domenico M; Di Pasquale A; Lorusso A; Mangone I; Marcacci M; Puglia I; Rinaldi A; Savini G; Scialabba S                                                                                                                                                                                                                                                      |
| EPI_ISL_849647 to 849649                                                                                                                                                                                                                                                                                                                                                                                                                                                                                                                                                                                                                                                                                                                                                                                                                                                                                                                                                                                                                                                                                                                                                                                                                                                                                                                                                                                                                                                                                                                                                                                                                                                                                                                                                                                                                                                                                                                                                                                                                                                                                                                                                                                                                                                                                                                                                                                                                                                                                                                                                                                                                                                                                                                                                                                                                                                                                       | SIESP- DRIVE IN CHIETI                                         | Istituto Zooprofilattico Sperimentale dell'Abruzzo e Molise "G. Caporale"                                              | Ancora M; Cammà C; Curini V; Di Domenico M; Di Pasquale A; Lorusso A; Mangone I; Marcacci M; Puglia I; Rinaldi A; Savini G.                                                                                                                                                                                                                                                                              |
| EPI_ISL_648217                                                                                                                                                                                                                                                                                                                                                                                                                                                                                                                                                                                                                                                                                                                                                                                                                                                                                                                                                                                                                                                                                                                                                                                                                                                                                                                                                                                                                                                                                                                                                                                                                                                                                                                                                                                                                                                                                                                                                                                                                                                                                                                                                                                                                                                                                                                                                                                                                                                                                                                                                                                                                                                                                                                                                                                                                                                                                                 | SILAB                                                          | Laboratorio Mixto de Biotecnología Acuática (LMBA)                                                                     | Adriana Giri; Agustina Cerri; Ana Cavatorta; Ana Paletta; Diego Chouhy; Elisa Bolatti; Elizabeth Tapia; Federico Remes Lenicov; Flavio Spetale; Gastón Viarengo; Ignacio García Labari; Javier Murillo; Joaquín Ezeleta; Julian Acosta; Laura Angelone; Leandro Ciappina; María Re; Pablo Casal; Pilar Bulacio; Silvana Spinelli; Silvia Arranz; Sofía Lavista Llanos; Vanina Villanova; Victoria Posner |
| EPI_ISL_794746, EPI_ISL_794748                                                                                                                                                                                                                                                                                                                                                                                                                                                                                                                                                                                                                                                                                                                                                                                                                                                                                                                                                                                                                                                                                                                                                                                                                                                                                                                                                                                                                                                                                                                                                                                                                                                                                                                                                                                                                                                                                                                                                                                                                                                                                                                                                                                                                                                                                                                                                                                                                                                                                                                                                                                                                                                                                                                                                                                                                                                                                 | SISP ASL BA AREA SUD                                           | Istituto Zooprofilattico Sperimentale della Puglia e della Basilicata                                                  | Bianco A.; Capozzi L.; Cipolletta D.; Del Sambro L.; Galante D.; Manzulli V.; Pace L.; Parisi A.; Rondinone V.                                                                                                                                                                                                                                                                                           |
| EPI_ISL_891152, EPI_ISL_891213 to 891214, EPI_ISL_891219                                                                                                                                                                                                                                                                                                                                                                                                                                                                                                                                                                                                                                                                                                                                                                                                                                                                                                                                                                                                                                                                                                                                                                                                                                                                                                                                                                                                                                                                                                                                                                                                                                                                                                                                                                                                                                                                                                                                                                                                                                                                                                                                                                                                                                                                                                                                                                                                                                                                                                                                                                                                                                                                                                                                                                                                                                                       | SMS Medical College Jaipur                                     | SMS Medical College Jaipur                                                                                             | Bharti Malhotra; Himanshu Sharma; Neha Bhomia; Nivedita Gupta; Pragya Yadav; Pratibha Sharma; Swati Gautam; Varsha Potdar                                                                                                                                                                                                                                                                                |
| EPI_ISL_891207, EPI_ISL_891211                                                                                                                                                                                                                                                                                                                                                                                                                                                                                                                                                                                                                                                                                                                                                                                                                                                                                                                                                                                                                                                                                                                                                                                                                                                                                                                                                                                                                                                                                                                                                                                                                                                                                                                                                                                                                                                                                                                                                                                                                                                                                                                                                                                                                                                                                                                                                                                                                                                                                                                                                                                                                                                                                                                                                                                                                                                                                 | SMS Medical College Jaipur                                     | SMS Medical College Jaipur                                                                                             | Bharti Malhotra; Himanshu Sharma; Neha Bhomia; Nivedita Gupta; Pragya Yadav; Pratibha Sharma; Swati Gautam; Varsha Potdar                                                                                                                                                                                                                                                                                |
| EPI_ISL_891210                                                                                                                                                                                                                                                                                                                                                                                                                                                                                                                                                                                                                                                                                                                                                                                                                                                                                                                                                                                                                                                                                                                                                                                                                                                                                                                                                                                                                                                                                                                                                                                                                                                                                                                                                                                                                                                                                                                                                                                                                                                                                                                                                                                                                                                                                                                                                                                                                                                                                                                                                                                                                                                                                                                                                                                                                                                                                                 | SMS Medical College Jaipur                                     | SMS Medical College Jaipur                                                                                             | Bharti Malhotra; Himanshu Sharma; Neha Bhomia; Nivedita Gupta; Pragya Yadav; Pratibha Sharma; Swati Gautam; Varsha Potdar                                                                                                                                                                                                                                                                                |
| EPI_ISL_733478 to 733481                                                                                                                                                                                                                                                                                                                                                                                                                                                                                                                                                                                                                                                                                                                                                                                                                                                                                                                                                                                                                                                                                                                                                                                                                                                                                                                                                                                                                                                                                                                                                                                                                                                                                                                                                                                                                                                                                                                                                                                                                                                                                                                                                                                                                                                                                                                                                                                                                                                                                                                                                                                                                                                                                                                                                                                                                                                                                       | SOGAZ PROFMEDICINA LLC                                         | WHO National Influenza Centre Russian Federation                                                                       | Andrey Komissarov; Anna Ivanova; Artem Fadeev; Daria Danilenko; Dmitry Bazhenov; Dmitry Lioznov; Elena Nabieva; Georgii Bazynkin; Ksenia Safina; Kseniya Komissarova                                                                                                                                                                                                                                     |
| EPI_ISL_995758                                                                                                                                                                                                                                                                                                                                                                                                                                                                                                                                                                                                                                                                                                                                                                                                                                                                                                                                                                                                                                                                                                                                                                                                                                                                                                                                                                                                                                                                                                                                                                                                                                                                                                                                                                                                                                                                                                                                                                                                                                                                                                                                                                                                                                                                                                                                                                                                                                                                                                                                                                                                                                                                                                                                                                                                                                                                                                 | SRI JAYADEVA INSTITUTE OF CARDIOVASCULAR SCIENCES AND RESEARCH | Department of Neurovirology, National Institute of Mental Health and Neurosciences (NIMHANS)                           | Anita S Desai; Anson Kunjumon George; Chitra Pattabiraman; Darshan Sreenivas; Harsha.P.K; Nakka Vijay Kiran Reddy; Pramada Prasad; Risha Rasheed; V Ravi                                                                                                                                                                                                                                                 |
| EPI_ISL_911918 to 911922                                                                                                                                                                                                                                                                                                                                                                                                                                                                                                                                                                                                                                                                                                                                                                                                                                                                                                                                                                                                                                                                                                                                                                                                                                                                                                                                                                                                                                                                                                                                                                                                                                                                                                                                                                                                                                                                                                                                                                                                                                                                                                                                                                                                                                                                                                                                                                                                                                                                                                                                                                                                                                                                                                                                                                                                                                                                                       | SRL (Sonic Reference Laboratory - Sonic Healthcare)            | Pathogen Discovery, Respiratory Viruses Branch, Division of Viral Diseases, Centers for Disease Control and Prevention | Anna Uehara; Clinton R. Paden; Haibin Wang; Jing Zhang; Krista Queen; Peter Cook; Suxiang Tong; Yan Li; Ying Tao                                                                                                                                                                                                                                                                                         |
| EPI_ISL_896301                                                                                                                                                                                                                                                                                                                                                                                                                                                                                                                                                                                                                                                                                                                                                                                                                                                                                                                                                                                                                                                                                                                                                                                                                                                                                                                                                                                                                                                                                                                                                                                                                                                                                                                                                                                                                                                                                                                                                                                                                                                                                                                                                                                                                                                                                                                                                                                                                                                                                                                                                                                                                                                                                                                                                                                                                                                                                                 | STONY BROOK UNIVERSITY HOSPITAL                                | Wadsworth Center, New York State Department of Health                                                                  | Alexis Russel; Daryl M. Lamson; Erasmus Schneider; Erica Lasek-Nesselquist; John Kelly; Jonathan Plitnick; Kirsten St. George; Matthew Shudt; Melissa A Leisner; Navjot Singh                                                                                                                                                                                                                            |
| EPI_ISL_802444                                                                                                                                                                                                                                                                                                                                                                                                                                                                                                                                                                                                                                                                                                                                                                                                                                                                                                                                                                                                                                                                                                                                                                                                                                                                                                                                                                                                                                                                                                                                                                                                                                                                                                                                                                                                                                                                                                                                                                                                                                                                                                                                                                                                                                                                                                                                                                                                                                                                                                                                                                                                                                                                                                                                                                                                                                                                                                 | SUNRISE MEDICAL LABORATORIES                                   | Wadsworth Center, New York State Department of Health                                                                  | Alexis Russel; Daryl M. Lamson; Erasmus Schneider; Erica Lasek-Nesselquist; John Kelly; Jonathan Plitnick; Kirsten St. George; Matthew Shudt; Melissa A Leisner; Navjot Singh; Sara Griesemer                                                                                                                                                                                                            |
| EPI_ISL_631581, EPI_ISL_631588, EPI_ISL_631793 to 631794, EPI_ISL_631802, EPI_ISL_631977, EPI_ISL_632080, EPI_ISL_632091 to 632092, EPI_ISL_632135, EPI_ISL_632148, EPI_ISL_632153, EPI_ISL_632158, EPI_ISL_632160 to 632161                                                                                                                                                                                                                                                                                                                                                                                                                                                                                                                                                                                                                                                                                                                                                                                                                                                                                                                                                                                                                                                                                                                                                                                                                                                                                                                                                                                                                                                                                                                                                                                                                                                                                                                                                                                                                                                                                                                                                                                                                                                                                                                                                                                                                                                                                                                                                                                                                                                                                                                                                                                                                                                                                   |                                                                |                                                                                                                        |                                                                                                                                                                                                                                                                                                                                                                                                          |
| see above                                                                                                                                                                                                                                                                                                                                                                                                                                                                                                                                                                                                                                                                                                                                                                                                                                                                                                                                                                                                                                                                                                                                                                                                                                                                                                                                                                                                                                                                                                                                                                                                                                                                                                                                                                                                                                                                                                                                                                                                                                                                                                                                                                                                                                                                                                                                                                                                                                                                                                                                                                                                                                                                                                                                                                                                                                                                                                      | SUNY Downstate Medical Center                                  | New York City Public Health Laboratory                                                                                 | Jade Wang; et al.                                                                                                                                                                                                                                                                                                                                                                                        |
| EPI_ISL_830650 to 830682, EPI_ISL_853689, EPI_ISL_853706 to 853708, EPI_ISL_853715, EPI_ISL_896218 to 896225, EPI_ISL_896228 to 896230, EPI_ISL_896235, EPI_ISL_896247 to 896293, EPI_ISL_935993 to 936022, EPI_ISL_936142 to 936143, EPI_ISL_983116 to 983118, EPI_ISL_983243, EPI_ISL_983245, EPI_ISL_983248 to 983249, EPI_ISL_983283, EPI_ISL_983289 to 983295, EPI_ISL_983300 to 983319                                                                                                                                                                                                                                                                                                                                                                                                                                                                                                                                                                                                                                                                                                                                                                                                                                                                                                                                                                                                                                                                                                                                                                                                                                                                                                                                                                                                                                                                                                                                                                                                                                                                                                                                                                                                                                                                                                                                                                                                                                                                                                                                                                                                                                                                                                                                                                                                                                                                                                                   |                                                                |                                                                                                                        |                                                                                                                                                                                                                                                                                                                                                                                                          |
| see above                                                                                                                                                                                                                                                                                                                                                                                                                                                                                                                                                                                                                                                                                                                                                                                                                                                                                                                                                                                                                                                                                                                                                                                                                                                                                                                                                                                                                                                                                                                                                                                                                                                                                                                                                                                                                                                                                                                                                                                                                                                                                                                                                                                                                                                                                                                                                                                                                                                                                                                                                                                                                                                                                                                                                                                                                                                                                                      | SUNY UPSTATE MEDICAL UNIVERSITY                                | Wadsworth Center, New York State Department of Health                                                                  | Alexis Russel; Daryl M. Lamson; Erasmus Schneider; Erica Lasek-Nesselquist; John Kelly; Jonathan Plitnick; Kirsten St. George; Matthew Shudt; Melissa A Leisner; Navjot Singh                                                                                                                                                                                                                            |
| EPI_ISL_845627                                                                                                                                                                                                                                                                                                                                                                                                                                                                                                                                                                                                                                                                                                                                                                                                                                                                                                                                                                                                                                                                                                                                                                                                                                                                                                                                                                                                                                                                                                                                                                                                                                                                                                                                                                                                                                                                                                                                                                                                                                                                                                                                                                                                                                                                                                                                                                                                                                                                                                                                                                                                                                                                                                                                                                                                                                                                                                 | SYNLAB COLOMBIA S.A.S                                          | Instituto Nacional de Salud - Dirección de Investigación en Salud Pública                                              | Carlos Franco-Muñoz; Diego A. Álvarez-Díaz; Diego Andrés Prada; Gerardo Santamaría; Jonathan Reales; Julian Naizaque; Katherine Laiton-Donato; Magdalena Wiesner; Marcela Mercado-Reyes; María T. Herrera-Sepúlveda; Martha Lucia Ospina Martínez; Mauricio Pacheco-Montealegre; Paola Muñoz-Laiton; Sheryll Corchuelo                                                                                   |
| EPI_ISL_794666 to 794667                                                                                                                                                                                                                                                                                                                                                                                                                                                                                                                                                                                                                                                                                                                                                                                                                                                                                                                                                                                                                                                                                                                                                                                                                                                                                                                                                                                                                                                                                                                                                                                                                                                                                                                                                                                                                                                                                                                                                                                                                                                                                                                                                                                                                                                                                                                                                                                                                                                                                                                                                                                                                                                                                                                                                                                                                                                                                       | SYNLAB REGIONAL NOROCCIDENTE                                   | Instituto Nacional de Salud - Dirección de Investigación en Salud Pública                                              | Carlos Franco-Muñoz; Diego A. Álvarez-Díaz; Diego Andrés Prada; Gerardo Santamaría; Jonathan Reales; Julian Naizaque; Katherine Laiton-Donato; Magdalena Wiesner; Marcela Mercado-Reyes; María T. Herrera; Martha Lucia Ospina Martínez; Mauricio Pacheco-Montealegre; Paola Muñoz-Laiton; Sheryll Corchuelo                                                                                             |
| EPI_ISL_862861 to 862862                                                                                                                                                                                                                                                                                                                                                                                                                                                                                                                                                                                                                                                                                                                                                                                                                                                                                                                                                                                                                                                                                                                                                                                                                                                                                                                                                                                                                                                                                                                                                                                                                                                                                                                                                                                                                                                                                                                                                                                                                                                                                                                                                                                                                                                                                                                                                                                                                                                                                                                                                                                                                                                                                                                                                                                                                                                                                       | Sagamihara Kyodo Hospital                                      | Fujita health University, School of Medicine, Department of Microbiology                                               | Masahiro suzuki; Yohei Doi                                                                                                                                                                                                                                                                                                                                                                               |
| EPI_ISL_862869 to 862870                                                                                                                                                                                                                                                                                                                                                                                                                                                                                                                                                                                                                                                                                                                                                                                                                                                                                                                                                                                                                                                                                                                                                                                                                                                                                                                                                                                                                                                                                                                                                                                                                                                                                                                                                                                                                                                                                                                                                                                                                                                                                                                                                                                                                                                                                                                                                                                                                                                                                                                                                                                                                                                                                                                                                                                                                                                                                       | Saiseikai Niigata Hospital                                     | Fujita health University, School of Medicine, Department of Microbiology                                               | Masahiro suzuki; Yohei Doi                                                                                                                                                                                                                                                                                                                                                                               |
| EPI_ISL_684148 to 684149, EPI_ISL_684881 to 685132, EPI_ISL_686083 to 686107, EPI_ISL_687619 to 687620, EPI_ISL_688284 to 688401, EPI_ISL_690619, EPI_ISL_690630 to 690631, EPI_ISL_690641 to 690683, EPI_ISL_691364 to 691378, EPI_ISL_691766, EPI_ISL_892589 to 892610                                                                                                                                                                                                                                                                                                                                                                                                                                                                                                                                                                                                                                                                                                                                                                                                                                                                                                                                                                                                                                                                                                                                                                                                                                                                                                                                                                                                                                                                                                                                                                                                                                                                                                                                                                                                                                                                                                                                                                                                                                                                                                                                                                                                                                                                                                                                                                                                                                                                                                                                                                                                                                       |                                                                |                                                                                                                        |                                                                                                                                                                                                                                                                                                                                                                                                          |
| see above                                                                                                                                                                                                                                                                                                                                                                                                                                                                                                                                                                                                                                                                                                                                                                                                                                                                                                                                                                                                                                                                                                                                                                                                                                                                                                                                                                                                                                                                                                                                                                                                                                                                                                                                                                                                                                                                                                                                                                                                                                                                                                                                                                                                                                                                                                                                                                                                                                                                                                                                                                                                                                                                                                                                                                                                                                                                                                      | Saitama Prefectural Institute of Public Health                 | Pathogen Genomics Center, National Institute of Infectious Diseases                                                    | Kentaro Itokawa; Makoto Kuroda; Masanori Hashino; Rina Tanaka; Tsuyoshi Sekizuka                                                                                                                                                                                                                                                                                                                         |
| EPI_ISL_684147, EPI_ISL_686521 to 686534, EPI_ISL_688700 to 688709, EPI_ISL_690011 to 690028, EPI_ISL_690626 to 690628, EPI_ISL_690837 to 690844, EPI_ISL_691509 to 691545, EPI_ISL_691753, EPI_ISL_692284 to 692315, EPI_ISL_692653 to 692679, EPI_ISL_893195 to 893213, EPI_ISL_893215 to 893238, EPI_ISL_898037 to 898056, EPI_ISL_901734 to 901736, EPI_ISL_906465, EPI_ISL_906479 to 906505                                                                                                                                                                                                                                                                                                                                                                                                                                                                                                                                                                                                                                                                                                                                                                                                                                                                                                                                                                                                                                                                                                                                                                                                                                                                                                                                                                                                                                                                                                                                                                                                                                                                                                                                                                                                                                                                                                                                                                                                                                                                                                                                                                                                                                                                                                                                                                                                                                                                                                               |                                                                |                                                                                                                        |                                                                                                                                                                                                                                                                                                                                                                                                          |
| see above                                                                                                                                                                                                                                                                                                                                                                                                                                                                                                                                                                                                                                                                                                                                                                                                                                                                                                                                                                                                                                                                                                                                                                                                                                                                                                                                                                                                                                                                                                                                                                                                                                                                                                                                                                                                                                                                                                                                                                                                                                                                                                                                                                                                                                                                                                                                                                                                                                                                                                                                                                                                                                                                                                                                                                                                                                                                                                      | Sakai City Institute of Public Health                          | Pathogen Genomics Center, National Institute of Infectious Diseases                                                    | Kentaro Itokawa; Makoto Kuroda; Masanori Hashino; Rina Tanaka; Tsuyoshi Sekizuka                                                                                                                                                                                                                                                                                                                         |
| EPI_ISL_902757                                                                                                                                                                                                                                                                                                                                                                                                                                                                                                                                                                                                                                                                                                                                                                                                                                                                                                                                                                                                                                                                                                                                                                                                                                                                                                                                                                                                                                                                                                                                                                                                                                                                                                                                                                                                                                                                                                                                                                                                                                                                                                                                                                                                                                                                                                                                                                                                                                                                                                                                                                                                                                                                                                                                                                                                                                                                                                 | San Camillo De Lellis Rieti Hospital                           | INMI Lazzaro Spallanzani IRCCS                                                                                         | A De Luca; A Di Caro; B Bartolini; C.E.M Gruber; E Giombini; F Messina; M Rueca; MR Capobianchi; O Butera; S Venarubea                                                                                                                                                                                                                                                                                   |
| EPI_ISL_635300 to 635478, EPI_ISL_635577 to 635776, EPI_ISL_635783 to 636112, EPI_ISL_636121 to 636266, EPI_ISL_648823 to 649056, EPI_ISL_666965 to 667078, EPI_ISL_730085 to 730126, EPI_ISL_730161 to 730196, EPI_ISL_730291 to 730371, EPI_ISL_755115 to 755117, EPI_ISL_755119, EPI_ISL_755130, EPI_ISL_755132, EPI_ISL_755134 to 755136, EPI_ISL_755138 to 755139, EPI_ISL_755269 to 755300, EPI_ISL_862722 to 862723, EPI_ISL_878152, EPI_ISL_878155, EPI_ISL_878157, EPI_ISL_878159, EPI_ISL_878162, EPI_ISL_878165, EPI_ISL_878167, EPI_ISL_878170, EPI_ISL_878172, EPI_ISL_878175, EPI_ISL_878178, EPI_ISL_878180, EPI_ISL_878183, EPI_ISL_878186, EPI_ISL_878189, EPI_ISL_878191, EPI_ISL_878194, EPI_ISL_878197, EPI_ISL_878199, EPI_ISL_878202, EPI_ISL_878205, EPI_ISL_878207, EPI_ISL_878209, EPI_ISL_878212, EPI_ISL_878215, EPI_ISL_878217, EPI_ISL_878221, EPI_ISL_878223, EPI_ISL_878226, EPI_ISL_878229, EPI_ISL_878231, EPI_ISL_878232, EPI_ISL_878234, EPI_ISL_878237, EPI_ISL_878239, EPI_ISL_878242, EPI_ISL_878245, EPI_ISL_878248, EPI_ISL_878250, EPI_ISL_878253, EPI_ISL_878256, EPI_ISL_878258, EPI_ISL_878260, EPI_ISL_878263, EPI_ISL_878266, EPI_ISL_878268, EPI_ISL_878271, EPI_ISL_878274, EPI_ISL_878276, EPI_ISL_878279, EPI_ISL_878281, EPI_ISL_878284, EPI_ISL_878287, EPI_ISL_878290, EPI_ISL_878292, EPI_ISL_878295, EPI_ISL_878298, EPI_ISL_878300, EPI_ISL_878303, EPI_ISL_878305, EPI_ISL_878308, EPI_ISL_878311, EPI_ISL_878314, EPI_ISL_878316, EPI_ISL_878319, EPI_ISL_878322, EPI_ISL_878325, EPI_ISL_878327, EPI_ISL_878330, EPI_ISL_878333, EPI_ISL_878336, EPI_ISL_878338, EPI_ISL_878341 to 878408, EPI_ISL_878411, EPI_ISL_878413, EPI_ISL_878416, EPI_ISL_878418, EPI_ISL_878421, EPI_ISL_878423, EPI_ISL_878426, EPI_ISL_878429, EPI_ISL_878431, EPI_ISL_878434, EPI_ISL_878437, EPI_ISL_878584, EPI_ISL_878587, EPI_ISL_878589, EPI_ISL_878592, EPI_ISL_878595, EPI_ISL_878597, EPI_ISL_878600, EPI_ISL_878603, EPI_ISL_878605, EPI_ISL_878608, EPI_ISL_878611, EPI_ISL_878613, EPI_ISL_878616, EPI_ISL_878619, EPI_ISL_878622, EPI_ISL_878624, EPI_ISL_878627, EPI_ISL_878629, EPI_ISL_878632, EPI_ISL_878635, EPI_ISL_879924, EPI_ISL_879926, EPI_ISL_879929, EPI_ISL_879932, EPI_ISL_879934, EPI_ISL_879937, EPI_ISL_879939, EPI_ISL_879942, EPI_ISL_879945, EPI_ISL_879947, EPI_ISL_879950, EPI_ISL_879953, EPI_ISL_879956, EPI_ISL_879959, EPI_ISL_879961, EPI_ISL_879964, EPI_ISL_879967, EPI_ISL_879969, EPI_ISL_879972, EPI_ISL_879975, EPI_ISL_879977, EPI_ISL_879980, EPI_ISL_879982, EPI_ISL_879985, EPI_ISL_879987, EPI_ISL_879990, EPI_ISL_879993, EPI_ISL_879995, EPI_ISL_879998, EPI_ISL_880000, EPI_ISL_880003, EPI_ISL_880006, EPI_ISL_880009, EPI_ISL_880011, EPI_ISL_880014, EPI_ISL_880017, EPI_ISL_880019, EPI_ISL_880022, EPI_ISL_880024, EPI_ISL_880027, EPI_ISL_880029, EPI_ISL_880032, EPI_ISL_880034, EPI_ISL_962760 to 962811 |                                                                |                                                                                                                        |                                                                                                                                                                                                                                                                                                                                                                                                          |
| see above                                                                                                                                                                                                                                                                                                                                                                                                                                                                                                                                                                                                                                                                                                                                                                                                                                                                                                                                                                                                                                                                                                                                                                                                                                                                                                                                                                                                                                                                                                                                                                                                                                                                                                                                                                                                                                                                                                                                                                                                                                                                                                                                                                                                                                                                                                                                                                                                                                                                                                                                                                                                                                                                                                                                                                                                                                                                                                      | San Diego County Public Health Laboratory                      | Andersen lab at Scripps Research                                                                                       | Brett Austin; Jovan Shephard; SEARCH Alliance San Diego with Tracy Basler                                                                                                                                                                                                                                                                                                                                |
| EPI_ISL_672077, EPI_ISL_672375 to 672385, EPI_ISL_739603                                                                                                                                                                                                                                                                                                                                                                                                                                                                                                                                                                                                                                                                                                                                                                                                                                                                                                                                                                                                                                                                                                                                                                                                                                                                                                                                                                                                                                                                                                                                                                                                                                                                                                                                                                                                                                                                                                                                                                                                                                                                                                                                                                                                                                                                                                                                                                                                                                                                                                                                                                                                                                                                                                                                                                                                                                                       | San Francisco Public Health Laboratory                         | Chan-Zuckerberg Biohub                                                                                                 | CZB Ciliahub Consortium                                                                                                                                                                                                                                                                                                                                                                                  |
| EPI_ISL_965134                                                                                                                                                                                                                                                                                                                                                                                                                                                                                                                                                                                                                                                                                                                                                                                                                                                                                                                                                                                                                                                                                                                                                                                                                                                                                                                                                                                                                                                                                                                                                                                                                                                                                                                                                                                                                                                                                                                                                                                                                                                                                                                                                                                                                                                                                                                                                                                                                                                                                                                                                                                                                                                                                                                                                                                                                                                                                                 | San Gallicano Dermatological Institute I.F.O.                  | INMI Lazzaro Spallanzani IRCCS                                                                                         | A Di Caro; A Mastrofrancesco; B Bartolini; CEM Gruber; E Giombini; F Ensolì; F Messina; F Pimpinelli; M Rueca; MR Capobianchi; O Butera                                                                                                                                                                                                                                                                  |
| EPI_ISL_625660                                                                                                                                                                                                                                                                                                                                                                                                                                                                                                                                                                                                                                                                                                                                                                                                                                                                                                                                                                                                                                                                                                                                                                                                                                                                                                                                                                                                                                                                                                                                                                                                                                                                                                                                                                                                                                                                                                                                                                                                                                                                                                                                                                                                                                                                                                                                                                                                                                                                                                                                                                                                                                                                                                                                                                                                                                                                                                 | San Joaquin County Public Health Lab                           | Chan-Zuckerberg Biohub                                                                                                 | CZB Ciliahub Consortium                                                                                                                                                                                                                                                                                                                                                                                  |
| EPI_ISL_748667, EPI_ISL_749036, EPI_ISL_749148 to 749155, EPI_ISL_749238, EPI_ISL_749474, EPI_ISL_749706, EPI_ISL_749906, EPI_ISL_750108, EPI_ISL_750161 to 750162, EPI_ISL_750166, EPI_ISL_750168 to 750174, EPI_ISL_750176 to 750179, EPI_ISL_750256, EPI_ISL_750430, EPI_ISL_750820, EPI_ISL_751011                                                                                                                                                                                                                                                                                                                                                                                                                                                                                                                                                                                                                                                                                                                                                                                                                                                                                                                                                                                                                                                                                                                                                                                                                                                                                                                                                                                                                                                                                                                                                                                                                                                                                                                                                                                                                                                                                                                                                                                                                                                                                                                                                                                                                                                                                                                                                                                                                                                                                                                                                                                                         |                                                                |                                                                                                                        |                                                                                                                                                                                                                                                                                                                                                                                                          |
| see above                                                                                                                                                                                                                                                                                                                                                                                                                                                                                                                                                                                                                                                                                                                                                                                                                                                                                                                                                                                                                                                                                                                                                                                                                                                                                                                                                                                                                                                                                                                                                                                                                                                                                                                                                                                                                                                                                                                                                                                                                                                                                                                                                                                                                                                                                                                                                                                                                                                                                                                                                                                                                                                                                                                                                                                                                                                                                                      | Sanatorio Americano                                            | Institut Pasteur de Montevideo                                                                                         | Ana Carolina Mendonça; Andres Lizoain; Camila Simoes; Cecilia Alonso; Cecilia Salazar; Daiiana Mir; Fernando Lopez-Tort; Fernando Motta; Gonzalo                                                                                                                                                                                                                                                         |



|                                                                                                                                                                                                                                                                                                                                                                                                                                                                                                                                                                                                                                                                                                                                                                                                                                                                                                                                                                                                                                                                                                                                                                                                                                                                                                                                                                                                                                                                                                                                                                                                                                                                                                                                                                                                                                                                                                                                                                                                                                                                                                                                                                                                                                                                                                                                                                                                                                                                                                                                                                                                                                                                                                                                                                                                                                                                                                                                                                                                                                                                                                                                                                                                                                                                                                                                                                                                                                                                                                                                                                                                                                                                                                                                                                                                                                                                                                                                                                                                                                                                                                                                                                                                                                                                                                                                                                                                                                                                                                                                                                                                                                                                                                                                                                                                                                                                                                                                                                                                                                                                                            |                                                            |                                                                                                                                                                                                                 |                                                                                                                                                                                                                                                                                                                                                                                                                                                                                                   |
|--------------------------------------------------------------------------------------------------------------------------------------------------------------------------------------------------------------------------------------------------------------------------------------------------------------------------------------------------------------------------------------------------------------------------------------------------------------------------------------------------------------------------------------------------------------------------------------------------------------------------------------------------------------------------------------------------------------------------------------------------------------------------------------------------------------------------------------------------------------------------------------------------------------------------------------------------------------------------------------------------------------------------------------------------------------------------------------------------------------------------------------------------------------------------------------------------------------------------------------------------------------------------------------------------------------------------------------------------------------------------------------------------------------------------------------------------------------------------------------------------------------------------------------------------------------------------------------------------------------------------------------------------------------------------------------------------------------------------------------------------------------------------------------------------------------------------------------------------------------------------------------------------------------------------------------------------------------------------------------------------------------------------------------------------------------------------------------------------------------------------------------------------------------------------------------------------------------------------------------------------------------------------------------------------------------------------------------------------------------------------------------------------------------------------------------------------------------------------------------------------------------------------------------------------------------------------------------------------------------------------------------------------------------------------------------------------------------------------------------------------------------------------------------------------------------------------------------------------------------------------------------------------------------------------------------------------------------------------------------------------------------------------------------------------------------------------------------------------------------------------------------------------------------------------------------------------------------------------------------------------------------------------------------------------------------------------------------------------------------------------------------------------------------------------------------------------------------------------------------------------------------------------------------------------------------------------------------------------------------------------------------------------------------------------------------------------------------------------------------------------------------------------------------------------------------------------------------------------------------------------------------------------------------------------------------------------------------------------------------------------------------------------------------------------------------------------------------------------------------------------------------------------------------------------------------------------------------------------------------------------------------------------------------------------------------------------------------------------------------------------------------------------------------------------------------------------------------------------------------------------------------------------------------------------------------------------------------------------------------------------------------------------------------------------------------------------------------------------------------------------------------------------------------------------------------------------------------------------------------------------------------------------------------------------------------------------------------------------------------------------------------------------------------------------------------------------------------------|------------------------------------------------------------|-----------------------------------------------------------------------------------------------------------------------------------------------------------------------------------------------------------------|---------------------------------------------------------------------------------------------------------------------------------------------------------------------------------------------------------------------------------------------------------------------------------------------------------------------------------------------------------------------------------------------------------------------------------------------------------------------------------------------------|
|                                                                                                                                                                                                                                                                                                                                                                                                                                                                                                                                                                                                                                                                                                                                                                                                                                                                                                                                                                                                                                                                                                                                                                                                                                                                                                                                                                                                                                                                                                                                                                                                                                                                                                                                                                                                                                                                                                                                                                                                                                                                                                                                                                                                                                                                                                                                                                                                                                                                                                                                                                                                                                                                                                                                                                                                                                                                                                                                                                                                                                                                                                                                                                                                                                                                                                                                                                                                                                                                                                                                                                                                                                                                                                                                                                                                                                                                                                                                                                                                                                                                                                                                                                                                                                                                                                                                                                                                                                                                                                                                                                                                                                                                                                                                                                                                                                                                                                                                                                                                                                                                                            |                                                            |                                                                                                                                                                                                                 | Bello; Igor Arantes; Ignacio Ferrés; Jose Sotelo; Leticia Maya; Leticia Garay Martins; Luciana Appolinario; Lucia Spangenberg; Mailen Arleo; Mariana Brandes; Marilda Mendonça Siqueira; Marilda Tereza Mar da Rosa; Maria Jose Benitez-Galeano; Martín Graña; Matias Castells; Matias Victoria; Matias Salvo; Natalia Rego; Natalia Reyes; Paola Smircich; Paola Cristina Resende; Rodney Colina; Tamara Fernandez-Calero; Tania Possi; Tatiana Schäffer Gregiainini; Veronica Noya; Yasser Vega |
| EPI_ISL_825140                                                                                                                                                                                                                                                                                                                                                                                                                                                                                                                                                                                                                                                                                                                                                                                                                                                                                                                                                                                                                                                                                                                                                                                                                                                                                                                                                                                                                                                                                                                                                                                                                                                                                                                                                                                                                                                                                                                                                                                                                                                                                                                                                                                                                                                                                                                                                                                                                                                                                                                                                                                                                                                                                                                                                                                                                                                                                                                                                                                                                                                                                                                                                                                                                                                                                                                                                                                                                                                                                                                                                                                                                                                                                                                                                                                                                                                                                                                                                                                                                                                                                                                                                                                                                                                                                                                                                                                                                                                                                                                                                                                                                                                                                                                                                                                                                                                                                                                                                                                                                                                                             | Sanjay Gandhi Institute of Trauma & Orthopaedics           | Department of Neurovirology, National Institute of Mental Health and Neurosciences (NIMHANS)                                                                                                                    | Anita S Desai; Chitra Pattabiraman; Pramada Prasad; V Ravi                                                                                                                                                                                                                                                                                                                                                                                                                                        |
| EPI_ISL_995730                                                                                                                                                                                                                                                                                                                                                                                                                                                                                                                                                                                                                                                                                                                                                                                                                                                                                                                                                                                                                                                                                                                                                                                                                                                                                                                                                                                                                                                                                                                                                                                                                                                                                                                                                                                                                                                                                                                                                                                                                                                                                                                                                                                                                                                                                                                                                                                                                                                                                                                                                                                                                                                                                                                                                                                                                                                                                                                                                                                                                                                                                                                                                                                                                                                                                                                                                                                                                                                                                                                                                                                                                                                                                                                                                                                                                                                                                                                                                                                                                                                                                                                                                                                                                                                                                                                                                                                                                                                                                                                                                                                                                                                                                                                                                                                                                                                                                                                                                                                                                                                                             | Sanjay Gandhi Institute of Trauma and Orthopaedics         | Department of Neurovirology, National Institute of Mental Health and Neurosciences (NIMHANS)                                                                                                                    | Anita S Desai; Anson Kunjumon George; Chitra Pattabiraman; Darshan Sreenivas; Harsha.P.K; Nakka Vijay Kiran Reddy; Pramada Prasad; Risha Rasheed; V Ravi                                                                                                                                                                                                                                                                                                                                          |
| EPI_ISL_693219                                                                                                                                                                                                                                                                                                                                                                                                                                                                                                                                                                                                                                                                                                                                                                                                                                                                                                                                                                                                                                                                                                                                                                                                                                                                                                                                                                                                                                                                                                                                                                                                                                                                                                                                                                                                                                                                                                                                                                                                                                                                                                                                                                                                                                                                                                                                                                                                                                                                                                                                                                                                                                                                                                                                                                                                                                                                                                                                                                                                                                                                                                                                                                                                                                                                                                                                                                                                                                                                                                                                                                                                                                                                                                                                                                                                                                                                                                                                                                                                                                                                                                                                                                                                                                                                                                                                                                                                                                                                                                                                                                                                                                                                                                                                                                                                                                                                                                                                                                                                                                                                             | Santa Casa da Misericórdia de Presidente Prudente          | Instituto Adolfo Lutz, Interdisciplinary Procedures Center, Strategic Laboratory                                                                                                                                | Claudia Regina Gonçalves; Claudio Tavares Sacchi; Erica Valessa Ramos Gomes; Karoline Rodrigues Campos                                                                                                                                                                                                                                                                                                                                                                                            |
| EPI_ISL_735407                                                                                                                                                                                                                                                                                                                                                                                                                                                                                                                                                                                                                                                                                                                                                                                                                                                                                                                                                                                                                                                                                                                                                                                                                                                                                                                                                                                                                                                                                                                                                                                                                                                                                                                                                                                                                                                                                                                                                                                                                                                                                                                                                                                                                                                                                                                                                                                                                                                                                                                                                                                                                                                                                                                                                                                                                                                                                                                                                                                                                                                                                                                                                                                                                                                                                                                                                                                                                                                                                                                                                                                                                                                                                                                                                                                                                                                                                                                                                                                                                                                                                                                                                                                                                                                                                                                                                                                                                                                                                                                                                                                                                                                                                                                                                                                                                                                                                                                                                                                                                                                                             | Santa Casa de Marília                                      | Instituto Adolfo Lutz, Interdisciplinary Procedures Center, Strategic Laboratory                                                                                                                                | Claudia Regina Gonçalves; Claudio Tavares Sacchi; Erica Valessa Ramos Gomes; Karoline Rodrigues Campos                                                                                                                                                                                                                                                                                                                                                                                            |
| EPI_ISL_693212                                                                                                                                                                                                                                                                                                                                                                                                                                                                                                                                                                                                                                                                                                                                                                                                                                                                                                                                                                                                                                                                                                                                                                                                                                                                                                                                                                                                                                                                                                                                                                                                                                                                                                                                                                                                                                                                                                                                                                                                                                                                                                                                                                                                                                                                                                                                                                                                                                                                                                                                                                                                                                                                                                                                                                                                                                                                                                                                                                                                                                                                                                                                                                                                                                                                                                                                                                                                                                                                                                                                                                                                                                                                                                                                                                                                                                                                                                                                                                                                                                                                                                                                                                                                                                                                                                                                                                                                                                                                                                                                                                                                                                                                                                                                                                                                                                                                                                                                                                                                                                                                             | Santa Casa de Misericórdia de Braganca Paulista            | Instituto Adolfo Lutz, Interdisciplinary Procedures Center, Strategic Laboratory                                                                                                                                | Claudia Regina Gonçalves; Claudio Tavares Sacchi; Erica Valessa Ramos Gomes; Karoline Rodrigues Campos                                                                                                                                                                                                                                                                                                                                                                                            |
| EPI_ISL_693198                                                                                                                                                                                                                                                                                                                                                                                                                                                                                                                                                                                                                                                                                                                                                                                                                                                                                                                                                                                                                                                                                                                                                                                                                                                                                                                                                                                                                                                                                                                                                                                                                                                                                                                                                                                                                                                                                                                                                                                                                                                                                                                                                                                                                                                                                                                                                                                                                                                                                                                                                                                                                                                                                                                                                                                                                                                                                                                                                                                                                                                                                                                                                                                                                                                                                                                                                                                                                                                                                                                                                                                                                                                                                                                                                                                                                                                                                                                                                                                                                                                                                                                                                                                                                                                                                                                                                                                                                                                                                                                                                                                                                                                                                                                                                                                                                                                                                                                                                                                                                                                                             | Santa Casa de Misericórdia de Sao Paulo - Hospital Central | Instituto Adolfo Lutz, Interdisciplinary Procedures Center, Strategic Laboratory                                                                                                                                | Claudia Regina Gonçalves; Claudio Tavares Sacchi; Erica Valessa Ramos Gomes; Karoline Rodrigues Campos                                                                                                                                                                                                                                                                                                                                                                                            |
| EPI_ISL_693211                                                                                                                                                                                                                                                                                                                                                                                                                                                                                                                                                                                                                                                                                                                                                                                                                                                                                                                                                                                                                                                                                                                                                                                                                                                                                                                                                                                                                                                                                                                                                                                                                                                                                                                                                                                                                                                                                                                                                                                                                                                                                                                                                                                                                                                                                                                                                                                                                                                                                                                                                                                                                                                                                                                                                                                                                                                                                                                                                                                                                                                                                                                                                                                                                                                                                                                                                                                                                                                                                                                                                                                                                                                                                                                                                                                                                                                                                                                                                                                                                                                                                                                                                                                                                                                                                                                                                                                                                                                                                                                                                                                                                                                                                                                                                                                                                                                                                                                                                                                                                                                                             | Santa Casa de Misericórdia e Maternidade                   | Instituto Adolfo Lutz, Interdisciplinary Procedures Center, Strategic Laboratory                                                                                                                                | Claudia Regina Gonçalves; Claudio Tavares Sacchi; Erica Valessa Ramos Gomes; Karoline Rodrigues Campos                                                                                                                                                                                                                                                                                                                                                                                            |
| EPI_ISL_671764 to 671768, EPI_ISL_672663                                                                                                                                                                                                                                                                                                                                                                                                                                                                                                                                                                                                                                                                                                                                                                                                                                                                                                                                                                                                                                                                                                                                                                                                                                                                                                                                                                                                                                                                                                                                                                                                                                                                                                                                                                                                                                                                                                                                                                                                                                                                                                                                                                                                                                                                                                                                                                                                                                                                                                                                                                                                                                                                                                                                                                                                                                                                                                                                                                                                                                                                                                                                                                                                                                                                                                                                                                                                                                                                                                                                                                                                                                                                                                                                                                                                                                                                                                                                                                                                                                                                                                                                                                                                                                                                                                                                                                                                                                                                                                                                                                                                                                                                                                                                                                                                                                                                                                                                                                                                                                                   | Santa Clara County Public Health Department                | Chiu Laboratory, University of California, San Francisco                                                                                                                                                        | Brandon Bonin; Debra A. Wadford; Elsa Villarino; Scot Federman; Wei Gu; Xianding Deng; and Charles Y. Chiu                                                                                                                                                                                                                                                                                                                                                                                        |
| EPI_ISL_625478 to 625499, EPI_ISL_625594 to 625610, EPI_ISL_648381 to 648495, EPI_ISL_648542, EPI_ISL_660108, EPI_ISL_672013, EPI_ISL_672031, EPI_ISL_672033, EPI_ISL_672035, EPI_ISL_672043 to 672044, EPI_ISL_672052, EPI_ISL_672057, EPI_ISL_672065, EPI_ISL_672069 to 672070, EPI_ISL_672072 to 672073, EPI_ISL_672080, EPI_ISL_672085, EPI_ISL_672088 to 672089, EPI_ISL_672104, EPI_ISL_672106 to 672108, EPI_ISL_672111, EPI_ISL_672275 to 672304, EPI_ISL_672429 to 672438, EPI_ISL_738500 to 738502, EPI_ISL_738508, EPI_ISL_738511, EPI_ISL_738516 to 738517, EPI_ISL_738520 to 738521, EPI_ISL_738525 to 738526, EPI_ISL_738532 to 738534, EPI_ISL_738536, EPI_ISL_738542 to 738543, EPI_ISL_738546, EPI_ISL_738549 to 738552, EPI_ISL_738555 to 738558, EPI_ISL_738560, EPI_ISL_738566, EPI_ISL_738568, EPI_ISL_738578 to 738579, EPI_ISL_738581 to 738583, EPI_ISL_738586, EPI_ISL_738589 to 738590, EPI_ISL_738593, EPI_ISL_738595 to 738598, EPI_ISL_738601, EPI_ISL_738608, EPI_ISL_738610 to 738612, EPI_ISL_738617 to 738618, EPI_ISL_738628, EPI_ISL_738631, EPI_ISL_738643 to 738645, EPI_ISL_738650, EPI_ISL_738652 to 738653, EPI_ISL_738657, EPI_ISL_738661, EPI_ISL_738663, EPI_ISL_738667, EPI_ISL_738670, EPI_ISL_738672 to 738673, EPI_ISL_738681 to 738685, EPI_ISL_738689 to 738691, EPI_ISL_738695 to 738698, EPI_ISL_738700 to 738702, EPI_ISL_738705 to 738706, EPI_ISL_738710, EPI_ISL_738716 to 738720, EPI_ISL_738726, EPI_ISL_738728, EPI_ISL_738730, EPI_ISL_738746 to 738747, EPI_ISL_738750, EPI_ISL_738763 to 738765, EPI_ISL_738769, EPI_ISL_738771 to 738772, EPI_ISL_738780, EPI_ISL_738789, EPI_ISL_738791, EPI_ISL_738794, EPI_ISL_738798, EPI_ISL_738803, EPI_ISL_738805, EPI_ISL_738812, EPI_ISL_738834, EPI_ISL_738839, EPI_ISL_738842, EPI_ISL_738853, EPI_ISL_738855, EPI_ISL_738859, EPI_ISL_738861, EPI_ISL_738864, EPI_ISL_738867, EPI_ISL_738883, EPI_ISL_738887, EPI_ISL_738889, EPI_ISL_738894, EPI_ISL_738898, EPI_ISL_738903, EPI_ISL_738906, EPI_ISL_738909 to 738910, EPI_ISL_738915, EPI_ISL_738920, EPI_ISL_738922, EPI_ISL_738924, EPI_ISL_738926 to 738927, EPI_ISL_738931, EPI_ISL_738933, EPI_ISL_738936, EPI_ISL_738941 to 738943, EPI_ISL_738948, EPI_ISL_738954 to 738956, EPI_ISL_738960, EPI_ISL_738962, EPI_ISL_738965, EPI_ISL_738967, EPI_ISL_738971 to 738972, EPI_ISL_738974, EPI_ISL_738979, EPI_ISL_738984, EPI_ISL_738986, EPI_ISL_738989, EPI_ISL_739005 to 739006, EPI_ISL_739008 to 739010, EPI_ISL_739012, EPI_ISL_739015, EPI_ISL_739019 to 739021, EPI_ISL_739024 to 739027, EPI_ISL_739030 to 739031, EPI_ISL_739036 to 739037, EPI_ISL_739039 to 739041, EPI_ISL_739045, EPI_ISL_739050, EPI_ISL_739053, EPI_ISL_739058, EPI_ISL_739060, EPI_ISL_739065 to 739068, EPI_ISL_739074, EPI_ISL_739076, EPI_ISL_739080, EPI_ISL_739088, EPI_ISL_739087, EPI_ISL_739091, EPI_ISL_739098, EPI_ISL_739103 to 739104, EPI_ISL_739107, EPI_ISL_739117, EPI_ISL_739121 to 739122, EPI_ISL_739128 to 739130, EPI_ISL_739138, EPI_ISL_739141, EPI_ISL_739145 to 739147, EPI_ISL_739152 to 739153, EPI_ISL_739157, EPI_ISL_739166 to 739168, EPI_ISL_739180, EPI_ISL_739184, EPI_ISL_739186 to 739188, EPI_ISL_739195, EPI_ISL_739204, EPI_ISL_739214, EPI_ISL_739219, EPI_ISL_739224, EPI_ISL_739232, EPI_ISL_739234, EPI_ISL_739237, EPI_ISL_739246 to 739249, EPI_ISL_739252 to 739254, EPI_ISL_739256, EPI_ISL_739260, EPI_ISL_739263, EPI_ISL_739273, EPI_ISL_739275, EPI_ISL_739277 to 739278, EPI_ISL_739281 to 739282, EPI_ISL_739284, EPI_ISL_739293, EPI_ISL_739298, EPI_ISL_739305, EPI_ISL_739310, EPI_ISL_739317, EPI_ISL_739319 to 739321, EPI_ISL_739327, EPI_ISL_739332, EPI_ISL_739335, EPI_ISL_739343 to 739344, EPI_ISL_739346, EPI_ISL_739352, EPI_ISL_739354, EPI_ISL_739357, EPI_ISL_739360, EPI_ISL_739365, EPI_ISL_739370 to 739371, EPI_ISL_739374, EPI_ISL_739376 to 739377, EPI_ISL_739380 to 739382, EPI_ISL_739388, EPI_ISL_739392, EPI_ISL_739398, EPI_ISL_739400, EPI_ISL_739402, EPI_ISL_739404, EPI_ISL_739409, EPI_ISL_739416 to 739418, EPI_ISL_739419, EPI_ISL_739431, EPI_ISL_739440, EPI_ISL_739443, EPI_ISL_739451, EPI_ISL_739453, EPI_ISL_739456 to 739458, EPI_ISL_739476, EPI_ISL_739479, EPI_ISL_739481, EPI_ISL_739485, EPI_ISL_739487, EPI_ISL_739491, EPI_ISL_739498, EPI_ISL_739501 to 739502, EPI_ISL_739504 to 739505, EPI_ISL_739508 to 739510, EPI_ISL_739512, EPI_ISL_739520 to 739521, EPI_ISL_739536 to 739537, EPI_ISL_739543, EPI_ISL_739548 to 739550, EPI_ISL_739554, EPI_ISL_739560 to 739562, EPI_ISL_739574, EPI_ISL_739579 to 739580, EPI_ISL_739584, EPI_ISL_739589, EPI_ISL_739593 to 739594, EPI_ISL_739596 to 739597, EPI_ISL_739602, EPI_ISL_739605, EPI_ISL_739612, EPI_ISL_739615, EPI_ISL_739617 to 739618, EPI_ISL_739624, EPI_ISL_739626, EPI_ISL_739629, EPI_ISL_739642, EPI_ISL_739647, EPI_ISL_739649 to 739650, EPI_ISL_739653, EPI_ISL_739657, EPI_ISL_849953 to 850018, EPI_ISL_853416 to 853565, EPI_ISL_884871 to 885051, EPI_ISL_955353 to 955385, EPI_ISL_955561 to 955627, EPI_ISL_978989 to 979158, EPI_ISL_979545 to 979642 |                                                            |                                                                                                                                                                                                                 |                                                                                                                                                                                                                                                                                                                                                                                                                                                                                                   |
| see above                                                                                                                                                                                                                                                                                                                                                                                                                                                                                                                                                                                                                                                                                                                                                                                                                                                                                                                                                                                                                                                                                                                                                                                                                                                                                                                                                                                                                                                                                                                                                                                                                                                                                                                                                                                                                                                                                                                                                                                                                                                                                                                                                                                                                                                                                                                                                                                                                                                                                                                                                                                                                                                                                                                                                                                                                                                                                                                                                                                                                                                                                                                                                                                                                                                                                                                                                                                                                                                                                                                                                                                                                                                                                                                                                                                                                                                                                                                                                                                                                                                                                                                                                                                                                                                                                                                                                                                                                                                                                                                                                                                                                                                                                                                                                                                                                                                                                                                                                                                                                                                                                  | Santa Clara County Public Health Laboratory                | Chan-Zuckerberg Biohub                                                                                                                                                                                          | CZB Cliahub Consortium                                                                                                                                                                                                                                                                                                                                                                                                                                                                            |
| EPI_ISL_806543, EPI_ISL_806545, EPI_ISL_812115 to 812116, EPI_ISL_812119 to 812121, EPI_ISL_812350, EPI_ISL_831648, EPI_ISL_831662, EPI_ISL_831687, EPI_ISL_831893 to 831897, EPI_ISL_831899, EPI_ISL_832066, EPI_ISL_832068, EPI_ISL_832075 to 832076, EPI_ISL_832079 to 832081, EPI_ISL_832090, EPI_ISL_832095, EPI_ISL_832097, EPI_ISL_832375 to 832377, EPI_ISL_832379 to 832383, EPI_ISL_832388, EPI_ISL_832391 to 832392, EPI_ISL_832394 to 832396, EPI_ISL_832398 to 832404, EPI_ISL_845544, EPI_ISL_884297 to 884302, EPI_ISL_902730 to 902734, EPI_ISL_914638 to 914644, EPI_ISL_914646, EPI_ISL_936493                                                                                                                                                                                                                                                                                                                                                                                                                                                                                                                                                                                                                                                                                                                                                                                                                                                                                                                                                                                                                                                                                                                                                                                                                                                                                                                                                                                                                                                                                                                                                                                                                                                                                                                                                                                                                                                                                                                                                                                                                                                                                                                                                                                                                                                                                                                                                                                                                                                                                                                                                                                                                                                                                                                                                                                                                                                                                                                                                                                                                                                                                                                                                                                                                                                                                                                                                                                                                                                                                                                                                                                                                                                                                                                                                                                                                                                                                                                                                                                                                                                                                                                                                                                                                                                                                                                                                                                                                                                                           | Santa Clara County Public Health Laboratory                | Santa Clara County Public Health Laboratory                                                                                                                                                                     | Santa Clara County Public Health Department; Santa Clara Co Public Health Department; Santa Clara County Public Health Department                                                                                                                                                                                                                                                                                                                                                                 |
| see above                                                                                                                                                                                                                                                                                                                                                                                                                                                                                                                                                                                                                                                                                                                                                                                                                                                                                                                                                                                                                                                                                                                                                                                                                                                                                                                                                                                                                                                                                                                                                                                                                                                                                                                                                                                                                                                                                                                                                                                                                                                                                                                                                                                                                                                                                                                                                                                                                                                                                                                                                                                                                                                                                                                                                                                                                                                                                                                                                                                                                                                                                                                                                                                                                                                                                                                                                                                                                                                                                                                                                                                                                                                                                                                                                                                                                                                                                                                                                                                                                                                                                                                                                                                                                                                                                                                                                                                                                                                                                                                                                                                                                                                                                                                                                                                                                                                                                                                                                                                                                                                                                  | Santa Clara County Public Health Laboratory                | Santa Clara County Public Health Laboratory                                                                                                                                                                     | Santa Clara County Public Health Department; Santa Clara Co Public Health Department; Santa Clara County Public Health Department                                                                                                                                                                                                                                                                                                                                                                 |
| EPI_ISL_754239                                                                                                                                                                                                                                                                                                                                                                                                                                                                                                                                                                                                                                                                                                                                                                                                                                                                                                                                                                                                                                                                                                                                                                                                                                                                                                                                                                                                                                                                                                                                                                                                                                                                                                                                                                                                                                                                                                                                                                                                                                                                                                                                                                                                                                                                                                                                                                                                                                                                                                                                                                                                                                                                                                                                                                                                                                                                                                                                                                                                                                                                                                                                                                                                                                                                                                                                                                                                                                                                                                                                                                                                                                                                                                                                                                                                                                                                                                                                                                                                                                                                                                                                                                                                                                                                                                                                                                                                                                                                                                                                                                                                                                                                                                                                                                                                                                                                                                                                                                                                                                                                             | Santosa Hospital Bandung Central                           | "School of Life Sciences and Technology & School of Pharmacy-Institut Teknologi Bandung; Molecular Genetics Laboratory-Faculty of Medicine-Universitas Padjadjaran; Laboratorium Kesehatan Provinsi Jawa Barat" | Agung Eru Wibowo; Azzania Fibrini; Catur Riani; Cut Nur Cinthia Alamanda; Ema Rahmawati; Hamka Riza; Hesti Lina Wiraswati; Husna Nugrahapraja; Irvan Faizal; Karimatu Khoirunnisa; Lia Faridah; Marselina Irasonia Tan; Miftahul Farid; Rifky Waluyajati Rachman; Ryan Bayusantika Ristandi; Savira Ekawardhani; Soni Solista Wirawan; Tarwadi; Yulia Sribudiani                                                                                                                                  |
| EPI_ISL_882922, EPI_ISL_882933 to 882936                                                                                                                                                                                                                                                                                                                                                                                                                                                                                                                                                                                                                                                                                                                                                                                                                                                                                                                                                                                                                                                                                                                                                                                                                                                                                                                                                                                                                                                                                                                                                                                                                                                                                                                                                                                                                                                                                                                                                                                                                                                                                                                                                                                                                                                                                                                                                                                                                                                                                                                                                                                                                                                                                                                                                                                                                                                                                                                                                                                                                                                                                                                                                                                                                                                                                                                                                                                                                                                                                                                                                                                                                                                                                                                                                                                                                                                                                                                                                                                                                                                                                                                                                                                                                                                                                                                                                                                                                                                                                                                                                                                                                                                                                                                                                                                                                                                                                                                                                                                                                                                   | Sant'Eugenio/CTO ASL Roma 2                                | INMI Lazzaro Spallanzani IRCCS                                                                                                                                                                                  | A Di Caro; B Bartolini; C Disegni; C.E.M Gruber; E Giombini; F Bondanini; F Messina; GC Cocciliollo; M Rueca; M. Rueca; MR Capobianchi; O Butera                                                                                                                                                                                                                                                                                                                                                  |
| EPI_ISL_965129                                                                                                                                                                                                                                                                                                                                                                                                                                                                                                                                                                                                                                                                                                                                                                                                                                                                                                                                                                                                                                                                                                                                                                                                                                                                                                                                                                                                                                                                                                                                                                                                                                                                                                                                                                                                                                                                                                                                                                                                                                                                                                                                                                                                                                                                                                                                                                                                                                                                                                                                                                                                                                                                                                                                                                                                                                                                                                                                                                                                                                                                                                                                                                                                                                                                                                                                                                                                                                                                                                                                                                                                                                                                                                                                                                                                                                                                                                                                                                                                                                                                                                                                                                                                                                                                                                                                                                                                                                                                                                                                                                                                                                                                                                                                                                                                                                                                                                                                                                                                                                                                             | Sant'Eugenio/CTO ASL Roma 2.                               | INMI Lazzaro Spallanzani IRCCS                                                                                                                                                                                  | A Di Caro; B Bartolini; C Disegni; C.E.M Gruber; E Giombini; F Bondanini; F Messina; GC Cocciliollo; M Rueca; MR Capobianchi; O Butera                                                                                                                                                                                                                                                                                                                                                            |
| EPI_ISL_936495                                                                                                                                                                                                                                                                                                                                                                                                                                                                                                                                                                                                                                                                                                                                                                                                                                                                                                                                                                                                                                                                                                                                                                                                                                                                                                                                                                                                                                                                                                                                                                                                                                                                                                                                                                                                                                                                                                                                                                                                                                                                                                                                                                                                                                                                                                                                                                                                                                                                                                                                                                                                                                                                                                                                                                                                                                                                                                                                                                                                                                                                                                                                                                                                                                                                                                                                                                                                                                                                                                                                                                                                                                                                                                                                                                                                                                                                                                                                                                                                                                                                                                                                                                                                                                                                                                                                                                                                                                                                                                                                                                                                                                                                                                                                                                                                                                                                                                                                                                                                                                                                             | Sarawak General Hospital                                   | Institute for Medical Research, Infectious Disease Research Centre, National Institutes of Health, Ministry of Health Malaysia                                                                                  | Azizan MA; Kamel K; Suppiah J; Thayan R                                                                                                                                                                                                                                                                                                                                                                                                                                                           |
| EPI_ISL_982298                                                                                                                                                                                                                                                                                                                                                                                                                                                                                                                                                                                                                                                                                                                                                                                                                                                                                                                                                                                                                                                                                                                                                                                                                                                                                                                                                                                                                                                                                                                                                                                                                                                                                                                                                                                                                                                                                                                                                                                                                                                                                                                                                                                                                                                                                                                                                                                                                                                                                                                                                                                                                                                                                                                                                                                                                                                                                                                                                                                                                                                                                                                                                                                                                                                                                                                                                                                                                                                                                                                                                                                                                                                                                                                                                                                                                                                                                                                                                                                                                                                                                                                                                                                                                                                                                                                                                                                                                                                                                                                                                                                                                                                                                                                                                                                                                                                                                                                                                                                                                                                                             | School of Pharmacy                                         | St. Jude Children's Research Hospital Infectious Diseases                                                                                                                                                       | Ahmed Kandeil; Ghazi Kayali; Mina Nabil Kamel; Mohamed A Ali; Rabeh El-Shesheny; Walid Abi Habib                                                                                                                                                                                                                                                                                                                                                                                                  |
| EPI_ISL_890232 to 890234                                                                                                                                                                                                                                                                                                                                                                                                                                                                                                                                                                                                                                                                                                                                                                                                                                                                                                                                                                                                                                                                                                                                                                                                                                                                                                                                                                                                                                                                                                                                                                                                                                                                                                                                                                                                                                                                                                                                                                                                                                                                                                                                                                                                                                                                                                                                                                                                                                                                                                                                                                                                                                                                                                                                                                                                                                                                                                                                                                                                                                                                                                                                                                                                                                                                                                                                                                                                                                                                                                                                                                                                                                                                                                                                                                                                                                                                                                                                                                                                                                                                                                                                                                                                                                                                                                                                                                                                                                                                                                                                                                                                                                                                                                                                                                                                                                                                                                                                                                                                                                                                   | School of Pharmacy, Shenandoah University                  | School of Pharmacy, Shenandoah University                                                                                                                                                                       | A.F.; Adams; G.W.; Harralson; Kidd; R.S.; S.M.; Sawyer                                                                                                                                                                                                                                                                                                                                                                                                                                            |
| EPI_ISL_873278, EPI_ISL_985131 to 985146                                                                                                                                                                                                                                                                                                                                                                                                                                                                                                                                                                                                                                                                                                                                                                                                                                                                                                                                                                                                                                                                                                                                                                                                                                                                                                                                                                                                                                                                                                                                                                                                                                                                                                                                                                                                                                                                                                                                                                                                                                                                                                                                                                                                                                                                                                                                                                                                                                                                                                                                                                                                                                                                                                                                                                                                                                                                                                                                                                                                                                                                                                                                                                                                                                                                                                                                                                                                                                                                                                                                                                                                                                                                                                                                                                                                                                                                                                                                                                                                                                                                                                                                                                                                                                                                                                                                                                                                                                                                                                                                                                                                                                                                                                                                                                                                                                                                                                                                                                                                                                                   | School of Pharmacy, Shenandoah University                  | School of Pharmacy, Shenandoah University                                                                                                                                                                       | A.F.; Adams; G.W.; Harralson; Kidd; R.S.; R.S. and Sawyer; S.M.; Sawyer                                                                                                                                                                                                                                                                                                                                                                                                                           |
| EPI_ISL_759858 to 759859                                                                                                                                                                                                                                                                                                                                                                                                                                                                                                                                                                                                                                                                                                                                                                                                                                                                                                                                                                                                                                                                                                                                                                                                                                                                                                                                                                                                                                                                                                                                                                                                                                                                                                                                                                                                                                                                                                                                                                                                                                                                                                                                                                                                                                                                                                                                                                                                                                                                                                                                                                                                                                                                                                                                                                                                                                                                                                                                                                                                                                                                                                                                                                                                                                                                                                                                                                                                                                                                                                                                                                                                                                                                                                                                                                                                                                                                                                                                                                                                                                                                                                                                                                                                                                                                                                                                                                                                                                                                                                                                                                                                                                                                                                                                                                                                                                                                                                                                                                                                                                                                   | School of Public Health, The University of Hong Kong       | School of Public Health, The University of Hong Kong                                                                                                                                                            | Barrs; Brackman; C.J.; Chu; D.K.W.; E.M.W.; K.W.S.; Law; P.Y.L.; Peiris, M.; Perera; R.A.P.M. and Sit; T.H.C.; Tam; To; V.R.; V.Y.T.; Yu                                                                                                                                                                                                                                                                                                                                                          |
| EPI_ISL_661179 to 661200, EPI_ISL_676574 to 676603, EPI_ISL_904004 to 904006, EPI_ISL_904009                                                                                                                                                                                                                                                                                                                                                                                                                                                                                                                                                                                                                                                                                                                                                                                                                                                                                                                                                                                                                                                                                                                                                                                                                                                                                                                                                                                                                                                                                                                                                                                                                                                                                                                                                                                                                                                                                                                                                                                                                                                                                                                                                                                                                                                                                                                                                                                                                                                                                                                                                                                                                                                                                                                                                                                                                                                                                                                                                                                                                                                                                                                                                                                                                                                                                                                                                                                                                                                                                                                                                                                                                                                                                                                                                                                                                                                                                                                                                                                                                                                                                                                                                                                                                                                                                                                                                                                                                                                                                                                                                                                                                                                                                                                                                                                                                                                                                                                                                                                               | Scientific Veterinary Institute Novi Sad                   | Veterinary Specialized Institute "Kraljevo", Serbia                                                                                                                                                             | Afonso, C.; Banovic Djeri, B.; Jankovic, M.; Jovanovic, T.; Knezevic, A.; Petrovic, T.; Sekler, M.; Tesovic, B.; Vidanovic, D.; Volkening, J.                                                                                                                                                                                                                                                                                                                                                     |
| see above                                                                                                                                                                                                                                                                                                                                                                                                                                                                                                                                                                                                                                                                                                                                                                                                                                                                                                                                                                                                                                                                                                                                                                                                                                                                                                                                                                                                                                                                                                                                                                                                                                                                                                                                                                                                                                                                                                                                                                                                                                                                                                                                                                                                                                                                                                                                                                                                                                                                                                                                                                                                                                                                                                                                                                                                                                                                                                                                                                                                                                                                                                                                                                                                                                                                                                                                                                                                                                                                                                                                                                                                                                                                                                                                                                                                                                                                                                                                                                                                                                                                                                                                                                                                                                                                                                                                                                                                                                                                                                                                                                                                                                                                                                                                                                                                                                                                                                                                                                                                                                                                                  | Scripps Medical Laboratory                                 | Andersen lab at Scripps Research                                                                                                                                                                                | Ellen Stefanski; Ian Mchardy; SEARCH Alliance San Diego with Michael Quigley                                                                                                                                                                                                                                                                                                                                                                                                                      |
| EPI_ISL_906074                                                                                                                                                                                                                                                                                                                                                                                                                                                                                                                                                                                                                                                                                                                                                                                                                                                                                                                                                                                                                                                                                                                                                                                                                                                                                                                                                                                                                                                                                                                                                                                                                                                                                                                                                                                                                                                                                                                                                                                                                                                                                                                                                                                                                                                                                                                                                                                                                                                                                                                                                                                                                                                                                                                                                                                                                                                                                                                                                                                                                                                                                                                                                                                                                                                                                                                                                                                                                                                                                                                                                                                                                                                                                                                                                                                                                                                                                                                                                                                                                                                                                                                                                                                                                                                                                                                                                                                                                                                                                                                                                                                                                                                                                                                                                                                                                                                                                                                                                                                                                                                                             | Searom Laboratorio Diagnostico                             | Instituto Adolfo Lutz, Interdisciplinary Procedures Center, Strategic Laboratory                                                                                                                                | Claudia Regina Gonçalves; Claudio Tavares Sacchi; Erica Valessa Ramos Gomes; Karoline Rodrigues Campos                                                                                                                                                                                                                                                                                                                                                                                            |
| EPI_ISL_806809, EPI_ISL_849408, EPI_ISL_849424, EPI_ISL_849430, EPI_ISL_849440 to 849442, EPI_ISL_849444, EPI_ISL_849462, EPI_ISL_849479 to 849517, EPI_ISL_849564, EPI_ISL_849571, EPI_ISL_849583 to 849584, EPI_ISL_849593 to 849615, EPI_ISL_890184, EPI_ISL_890896 to 890997, EPI_ISL_891058, EPI_ISL_891060 to 891093, EPI_ISL_902996 to 903069, EPI_ISL_903073 to 903104, EPI_ISL_903180 to 903207, EPI_ISL_911968 to 911971, EPI_ISL_962208 to 962304, EPI_ISL_962368 to 962377, EPI_ISL_962443 to 962480                                                                                                                                                                                                                                                                                                                                                                                                                                                                                                                                                                                                                                                                                                                                                                                                                                                                                                                                                                                                                                                                                                                                                                                                                                                                                                                                                                                                                                                                                                                                                                                                                                                                                                                                                                                                                                                                                                                                                                                                                                                                                                                                                                                                                                                                                                                                                                                                                                                                                                                                                                                                                                                                                                                                                                                                                                                                                                                                                                                                                                                                                                                                                                                                                                                                                                                                                                                                                                                                                                                                                                                                                                                                                                                                                                                                                                                                                                                                                                                                                                                                                                                                                                                                                                                                                                                                                                                                                                                                                                                                                                           |                                                            |                                                                                                                                                                                                                 |                                                                                                                                                                                                                                                                                                                                                                                                                                                                                                   |
| see above                                                                                                                                                                                                                                                                                                                                                                                                                                                                                                                                                                                                                                                                                                                                                                                                                                                                                                                                                                                                                                                                                                                                                                                                                                                                                                                                                                                                                                                                                                                                                                                                                                                                                                                                                                                                                                                                                                                                                                                                                                                                                                                                                                                                                                                                                                                                                                                                                                                                                                                                                                                                                                                                                                                                                                                                                                                                                                                                                                                                                                                                                                                                                                                                                                                                                                                                                                                                                                                                                                                                                                                                                                                                                                                                                                                                                                                                                                                                                                                                                                                                                                                                                                                                                                                                                                                                                                                                                                                                                                                                                                                                                                                                                                                                                                                                                                                                                                                                                                                                                                                                                  | Seattle Flu Study                                          | Seattle Flu Study                                                                                                                                                                                               | Amanda Adler; Barry R. Lutz; Benjamin Pelle; Caitlin R. Wolf; Chris D. Frazar; Deborah A. Nickerson; Elisabeth Brandstetter; Erica Ryke; Helen Y. Chu; Janet A. Englund; Jay Shendure; Jeff Duchin; Jover Lee; Kairsten Fay; Karen Cowling; Kirsten Lacombe; Lea M. Starita; Mark J. Rieder; Matthew Richardson; Matthew Thompson; Melissa Truong; Michael Boeckh; Michael Famulare; Misja Ilicisin; Peter D. Han; Stephanie Schrag; Thomas R. Sibley; Trevor Bedford                             |
| EPI_ISL_965976                                                                                                                                                                                                                                                                                                                                                                                                                                                                                                                                                                                                                                                                                                                                                                                                                                                                                                                                                                                                                                                                                                                                                                                                                                                                                                                                                                                                                                                                                                                                                                                                                                                                                                                                                                                                                                                                                                                                                                                                                                                                                                                                                                                                                                                                                                                                                                                                                                                                                                                                                                                                                                                                                                                                                                                                                                                                                                                                                                                                                                                                                                                                                                                                                                                                                                                                                                                                                                                                                                                                                                                                                                                                                                                                                                                                                                                                                                                                                                                                                                                                                                                                                                                                                                                                                                                                                                                                                                                                                                                                                                                                                                                                                                                                                                                                                                                                                                                                                                                                                                                                             | Seattle VA Medical Center                                  | Seattle Flu Study                                                                                                                                                                                               | Amanda Adler; Barry R. Lutz; Benjamin Pelle; Brian Hiatt; Caitlin R. Wolf; Chris D. Frazar; Deborah A. Nickerson; Elisabeth Brandstetter; Erica Ryke; Geoff Melly; Helen Y. Chu; Janet A. Englund; Jay Shendure; Jover Lee; Kairsten Fay; Kirsten Lacombe; Lea M. Starita; Mark J. Rieder; Matthew Richardson; Matthew Thompson; Melissa Truong; Michael Boeckh; Michael Famulare; Misja Ilicisin; Peter D. Han; Philip Dykema; Romesh Gautam; Scott Lindquist; Thomas R. Sibley; Trevor Bedford  |

|                                                                                                                                                                                                                                                                                            |                                                                                                                                                                                            |                                                                                                                                                                                            |                                                                                                                                                                                                                                                                          |
|--------------------------------------------------------------------------------------------------------------------------------------------------------------------------------------------------------------------------------------------------------------------------------------------|--------------------------------------------------------------------------------------------------------------------------------------------------------------------------------------------|--------------------------------------------------------------------------------------------------------------------------------------------------------------------------------------------|--------------------------------------------------------------------------------------------------------------------------------------------------------------------------------------------------------------------------------------------------------------------------|
| EPI_ISL_693238 to 693239, EPI_ISL_693247                                                                                                                                                                                                                                                   | Secao Centro de Diagnostico Secedi                                                                                                                                                         | Instituto Adolfo Lutz, Interdisciplinary Procedures Center, Strategic Laboratory                                                                                                           | Claudia Regina Gonçalves; Claudio Tavares Sacchi; Erica Valessa Ramos Gomes; Karoline Rodrigues Campos                                                                                                                                                                   |
| EPI_ISL_735405                                                                                                                                                                                                                                                                             | Secretaria Minucipal de Saude de Birigui                                                                                                                                                   | Instituto Adolfo Lutz, Interdisciplinary Procedures Center, Strategic Laboratory                                                                                                           | Claudia Regina Gonçalves; Claudio Tavares Sacchi; Erica Valessa Ramos Gomes; Karoline Rodrigues Campos                                                                                                                                                                   |
| EPI_ISL_882658                                                                                                                                                                                                                                                                             | Secretaria Municipal de Saude                                                                                                                                                              | Instituto Adolfo Lutz, Interdisciplinary Procedures Center, Strategic Laboratory                                                                                                           | Claudia Regina Gonçalves; Claudio Tavares Sacchi; Erica Valessa Ramos Gomes; Karoline Rodrigues Campos                                                                                                                                                                   |
| EPI_ISL_708530                                                                                                                                                                                                                                                                             | Secretaria Municipal de Saude de Fernandópolis                                                                                                                                             | Instituto Adolfo Lutz, Interdisciplinary Procedures Center, Strategic Laboratory                                                                                                           | Carlos Henrique Camargo; Claudia Regina Gonçalves; Claudio Tavares Sacchi; Erica Valessa Ramos Gomes; Fernanda Modesto Tolentino Binhardi; Janaina Other Martins Montanha; Karoline Rodrigues Campos; Marcia Maria Costa Nunes Soares; Maricelia Navarro Pinheiro Flores |
| EPI_ISL_833164                                                                                                                                                                                                                                                                             | Secretaria Municipal de Saude de Santa Barbara d'oeste                                                                                                                                     | Instituto Adolfo Lutz, Interdisciplinary Procedures Center, Strategic Laboratory                                                                                                           | Claudia Regina Gonçalves; Claudio Tavares Sacchi; Erica Valessa Ramos Gomes; Karoline Rodrigues Campos                                                                                                                                                                   |
| EPI_ISL_693221 to 693222                                                                                                                                                                                                                                                                   | Secretaria Municipal de Saúde de Birigui                                                                                                                                                   | Instituto Adolfo Lutz, Interdisciplinary Procedures Center, Strategic Laboratory                                                                                                           | Claudia Regina Gonçalves; Claudio Tavares Sacchi; Erica Valessa Ramos Gomes; Karoline Rodrigues Campos                                                                                                                                                                   |
| EPI_ISL_693215                                                                                                                                                                                                                                                                             | Secretaria Municipal de Saúde de Iracemapolis                                                                                                                                              | Instituto Adolfo Lutz, Interdisciplinary Procedures Center, Strategic Laboratory                                                                                                           | Claudia Regina Gonçalves; Claudio Tavares Sacchi; Erica Valessa Ramos Gomes; Karoline Rodrigues Campos                                                                                                                                                                   |
| EPI_ISL_693228                                                                                                                                                                                                                                                                             | Secretaria Municipal de Sorocaba                                                                                                                                                           | Instituto Adolfo Lutz, Interdisciplinary Procedures Center, Strategic Laboratory                                                                                                           | Claudia Regina Gonçalves; Claudio Tavares Sacchi; Erica Valessa Ramos Gomes; Karoline Rodrigues Campos                                                                                                                                                                   |
| EPI_ISL_708529                                                                                                                                                                                                                                                                             | Secretaria Municipal de Saude de Fernandópolis                                                                                                                                             | Instituto Adolfo Lutz, Interdisciplinary Procedures Center, Strategic Laboratory                                                                                                           | Carlos Henrique Camargo; Claudia Regina Gonçalves; Claudio Tavares Sacchi; Erica Valessa Ramos Gomes; Fernanda Modesto Tolentino Binhardi; Janaina Other Martins Montanha; Karoline Rodrigues Campos; Marcia Maria Costa Nunes Soares; Maricelia Navarro Pinheiro Flores |
| EPI_ISL_640034, EPI_ISL_700588                                                                                                                                                                                                                                                             | Sedgefield Clinic wc SGE                                                                                                                                                                   | NHLS/UCT                                                                                                                                                                                   | Arash Iranzadeh; Bruna Galvao; Carolyn Williamson; Deelan Doolabh; Diana Hardie; Innocent Mudau; Kruger Marais; Lynn Tyers; Marvin Hsia; Stephen Korsman                                                                                                                 |
| EPI_ISL_696462, EPI_ISL_696475, EPI_ISL_696487 to 696488, EPI_ISL_696510, EPI_ISL_696514 to 696518                                                                                                                                                                                         | Sedgefield Clinic wc SGE & NHLS/UCT                                                                                                                                                        | KRISP, KZN Research Innovation and Sequencing Platform                                                                                                                                     | Arash Iranzadeh; Bruna Galvao; Carolyn Williamson; Deelan Doolabh; Diana Hardie; Emanuel James San; Houriyah Tegally; Innocent Mudau; Jennifer Giandhari; Kruger Marais; Lynn Tyers; Marvin Hsia; Stephen Korsman; Sureshnee Pillay; Tulo de Oliveira                    |
| EPI_ISL_832128 to 832129                                                                                                                                                                                                                                                                   | Sentinelles IDF                                                                                                                                                                            | National Reference Center for Viruses of Respiratory Infections, Institut Pasteur, Paris                                                                                                   | Angela Brisebarre; Camille Capel; Claire Watermez; Etienne Simon-Lorière; Marion Barbet; Maud Vanpeene; Méline Bizard; Patricia Lefebure; Sylvie Behillil; Sylvie van der Werf; Vincent Enouf                                                                            |
| EPI_ISL_940996                                                                                                                                                                                                                                                                             | Sentinelles Idf                                                                                                                                                                            | National Reference Center for Viruses of Respiratory Infections, Institut Pasteur, Paris                                                                                                   | Angela Brisebarre; Camille Capel; Etienne Simon-Lorière; Garrigues Anne; Marion Barbet; Maud Vanpeene; Méline Bizard; Sylvie Behillil; Sylvie van der Werf; Vincent Enouf                                                                                                |
| EPI_ISL_832167 to 832168                                                                                                                                                                                                                                                                   | Sentinelles Province                                                                                                                                                                       | National Reference Center for Viruses of Respiratory Infections, Institut Pasteur, Paris                                                                                                   | Angela Brisebarre; Camille Capel; Denis Calvet; Etienne Simon-Lorière; Jean-Michel Monnier; Marion Barbet; Maud Vanpeene; Méline Bizard; Sylvie Behillil; Sylvie van der Werf; Vincent Enouf                                                                             |
| EPI_ISL_912579                                                                                                                                                                                                                                                                             | Service Biologie -CH de Versailles                                                                                                                                                         | National Reference Center for Viruses of Respiratory Infections, Institut Pasteur, Paris                                                                                                   | Angela Brisebarre; Camille Capel; Etienne Simon-Lorière; Marion Barbet; Marque Julietté Stéphanie; Maud Vanpeene; Méline Bizard; Sylvie Behillil; Sylvie van der Werf; Vincent Enouf                                                                                     |
| EPI_ISL_954788, EPI_ISL_965912, EPI_ISL_965916, EPI_ISL_965920, EPI_ISL_965922, EPI_ISL_965924 to 965925, EPI_ISL_965927, EPI_ISL_965931, EPI_ISL_965953 to 965954, EPI_ISL_965960, EPI_ISL_977597                                                                                         | see above                                                                                                                                                                                  | Servicio Murciano de Salud                                                                                                                                                                 | Instituto de Salud Carlos III                                                                                                                                                                                                                                            |
| EPI_ISL_778843, EPI_ISL_849148 to 849204, EPI_ISL_849279 to 849321, EPI_ISL_849350 to 849382, EPI_ISL_856756 to 856801                                                                                                                                                                     | Servicio Virosis Respiratorias-Departamento Virologia-INEI                                                                                                                                 | Instituto Nacional Enfermedades Infecciosas C.G.Malbran                                                                                                                                    | A. Monzón; F. Casas; I. Blázquez, A.; I. Jiménez; Iglesias-Caballero; M. Camarero; M. Sandonis; P. Zaballos; S. Camarero; S. Cuesta; S. Iglesias-Caballero; S. Pozo; S. Sandonis; S. Varona; Sandonis; V. Camarero; V. Vázquez; Vázquez                                  |
| EPI_ISL_779730, EPI_ISL_846653 to 846654, EPI_ISL_871908 to 871910, EPI_ISL_871913, EPI_ISL_871938 to 871964, EPI_ISL_892270 to 892272, EPI_ISL_892274 to 892277, EPI_ISL_892325 to 892363                                                                                                 | see above                                                                                                                                                                                  | Servicio de Microbiología Clínica (Complejo Hospitalario de Navarra, Pamplona), Instituto de Investigación Sanitaria de Navarra (IdISNA)                                                   | SeqCOVID-SPAIN consortium/IBV(CSIC)                                                                                                                                                                                                                                      |
| EPI_ISL_931584, EPI_ISL_933718, EPI_ISL_933721, EPI_ISL_933723, EPI_ISL_933725, EPI_ISL_933727 to 933731, EPI_ISL_933733 to 933734, EPI_ISL_933740, EPI_ISL_933767 to 933768, EPI_ISL_933770 to 933771, EPI_ISL_933773 to 933774                                                           | see above                                                                                                                                                                                  | Servicio de Microbiología Hospital Ramón y Cajal                                                                                                                                           | Servicio de Microbiología Hospital Ramón y Cajal                                                                                                                                                                                                                         |
| EPI_ISL_654401 to 654467, EPI_ISL_722210, EPI_ISL_722212 to 722215, EPI_ISL_722217 to 722234, EPI_ISL_722237, EPI_ISL_722240, EPI_ISL_722242 to 722272, EPI_ISL_779732 to 779737, EPI_ISL_779740, EPI_ISL_779753, EPI_ISL_779774 to 779779                                                 | see above                                                                                                                                                                                  | Servicio de Microbiología, Hospital Miguel Servet, Zaragoza                                                                                                                                | SeqCOVID-SPAIN consortium/IBV(CSIC)                                                                                                                                                                                                                                      |
| EPI_ISL_654616 to 654617, EPI_ISL_654619 to 654625, EPI_ISL_654627 to 654684, EPI_ISL_722241                                                                                                                                                                                               | Servicio de Microbiología, Hospital Universitario Central de Asturias                                                                                                                      | SeqCOVID-SPAIN consortium/IBV(CSIC)                                                                                                                                                        | Alexander Tristancho Baró; Ana Milagro; Antonio Rezusta López; Nieves Martínez Cameo and SeqCOVID-SPAIN consortium; Yolanda Gracia Grataloup                                                                                                                             |
| EPI_ISL_654618                                                                                                                                                                                                                                                                             | Servicio de Microbiología, Hospital Universitario Cruces, Bilbao                                                                                                                           | SeqCOVID-SPAIN consortium/IBV(CSIC)                                                                                                                                                        | Cristián Castelló Abietar; Jose A. Boga; Marta Elena Álvarez-Argüelles; Santiago Melón and SeqCOVID-SPAIN consortium; Susana Rojo-Alba                                                                                                                                   |
| EPI_ISL_691612 to 691622, EPI_ISL_691624 to 691638, EPI_ISL_691641 to 691660, EPI_ISL_691663 to 691665, EPI_ISL_691667 to 691676, EPI_ISL_691678 to 691680, EPI_ISL_779850 to 779921, EPI_ISL_819128 to 819202, EPI_ISL_911284 to 911352, EPI_ISL_959418 to 959471                         | see above                                                                                                                                                                                  | Servicio de Microbiología, Hospital Universitario Son Espases                                                                                                                              | SeqCOVID-SPAIN consortium/IBV(CSIC)                                                                                                                                                                                                                                      |
| EPI_ISL_904626 to 904657, EPI_ISL_959310 to 959338, EPI_ISL_959340 to 959347, EPI_ISL_959349 to 959366                                                                                                                                                                                     | Servicio de Microbiología, Laboratori Clínic Metropolitana Nord. Hospital Universitari Germans Trias i Pujol. Institut d'Investigació en Ciències de la Salut Germans Trias i Pujol (IGTP) | IrsiCaixa - Can Ruti CovidSeq                                                                                                                                                              | Antonio Oliver and SeqCOVID-SPAIN consortium; Carla López-Causapé; Jordi Reina                                                                                                                                                                                           |
| EPI_ISL_654509 to 654538, EPI_ISL_660265 to 660322, EPI_ISL_671834 to 671862, EPI_ISL_683598 to 683656, EPI_ISL_779731, EPI_ISL_855409 to 855493, EPI_ISL_871891, EPI_ISL_871912, EPI_ISL_871914 to 871937, EPI_ISL_962915 to 962928                                                       | see above                                                                                                                                                                                  | Servicio de Microbiología, Laboratori Clínic Metropolitana Nord. Hospital Universitari Germans Trias i Pujol. Institut d'Investigació en Ciències de la Salut Germans Trias i Pujol (IGTP) | SeqCOVID-SPAIN consortium/IBV(CSIC)                                                                                                                                                                                                                                      |
| EPI_ISL_846652                                                                                                                                                                                                                                                                             | Servicio de Microbiología. Consorcio Hospital General Universitario de Valencia                                                                                                            | SeqCOVID-SPAIN consortium/IBV(CSIC)                                                                                                                                                        | Adrián Antuori; Anabel Fernández; Anna Not; Antoni E. Bordoy; Cristina Casañ and SeqCOVID-SPAIN consortium; Elisa Martró; Nona Romani; Nona Romani and SeqCOVID-SPAIN consortium; Verónica Saludes                                                                       |
| EPI_ISL_941164                                                                                                                                                                                                                                                                             | Servicio de Microbiología. Hospital Arnau de Vilanova                                                                                                                                      | SeqCOVID-SPAIN consortium/IBV(CSIC)                                                                                                                                                        | Begoña Fuster Escrivá; Concepción Gimeno Cardona and SeqCOVID-SPAIN consortium; David Navalpotro; María Dolores Ocete; Rafael Medina González                                                                                                                            |
| EPI_ISL_654483 to 654497, EPI_ISL_728358, EPI_ISL_941174 to 941219                                                                                                                                                                                                                         | Servicio de Microbiología. Hospital Clínico Universitario de Valencia                                                                                                                      | SeqCOVID-SPAIN consortium/IBV(CSIC)                                                                                                                                                        | Amparo Farga and SeqCOVID-SPAIN consortium; Rocío Falcón; Victoria Domínguez                                                                                                                                                                                             |
| EPI_ISL_654468 to 654482, EPI_ISL_657450, EPI_ISL_657452, EPI_ISL_657455, EPI_ISL_657458, EPI_ISL_657460, EPI_ISL_657463, EPI_ISL_657465 to 657467, EPI_ISL_722211, EPI_ISL_722216, EPI_ISL_722235 to 722236, EPI_ISL_722238 to 722239, EPI_ISL_796064 to 796126, EPI_ISL_796135 to 796157 | see above                                                                                                                                                                                  | Servicio de Microbiología. Hospital General Universitario de Castellón                                                                                                                     | SeqCOVID-SPAIN consortium/IBV(CSIC)                                                                                                                                                                                                                                      |
| EPI_ISL_654539 to 654615, EPI_ISL_892273,                                                                                                                                                                                                                                                  | Servicio de Microbiología. Hospital Universitario Donostia. OSI                                                                                                                            | SeqCOVID-SPAIN consortium/IBV(CSIC)                                                                                                                                                        | David Navarro Ortega; Eliseo Albert Vicent; Ignacio Torres and SeqCOVID-SPAIN consortium                                                                                                                                                                                 |
|                                                                                                                                                                                                                                                                                            |                                                                                                                                                                                            |                                                                                                                                                                                            | Maria Dolores Tirado Balaguer and SeqCOVID-SPAIN consortium; Rosario Moreno Muñoz                                                                                                                                                                                        |
|                                                                                                                                                                                                                                                                                            |                                                                                                                                                                                            |                                                                                                                                                                                            | Ane Sorrarain; Gustavo Cilla Eguiluz; Jose Maria Marimón and SeqCOVID-SPAIN consortium; Luis Piñeiro Vázquez; Milagrosa Montes Ros                                                                                                                                       |

|                                                                                                                                                                                                                                                                                                                                                                                                                                                                                                                                                                                                                                                                                                                                                                                                                                                                                                                                                                                                                                                                                                                                                                                                                                                                                                                                                                                                                                                                                                                                                                                                                                                                                                |                                                                                                                                                                |                                                                                                                                                |                                                                                                                                                                                                                                                                                                                                                                                                                                                              |
|------------------------------------------------------------------------------------------------------------------------------------------------------------------------------------------------------------------------------------------------------------------------------------------------------------------------------------------------------------------------------------------------------------------------------------------------------------------------------------------------------------------------------------------------------------------------------------------------------------------------------------------------------------------------------------------------------------------------------------------------------------------------------------------------------------------------------------------------------------------------------------------------------------------------------------------------------------------------------------------------------------------------------------------------------------------------------------------------------------------------------------------------------------------------------------------------------------------------------------------------------------------------------------------------------------------------------------------------------------------------------------------------------------------------------------------------------------------------------------------------------------------------------------------------------------------------------------------------------------------------------------------------------------------------------------------------|----------------------------------------------------------------------------------------------------------------------------------------------------------------|------------------------------------------------------------------------------------------------------------------------------------------------|--------------------------------------------------------------------------------------------------------------------------------------------------------------------------------------------------------------------------------------------------------------------------------------------------------------------------------------------------------------------------------------------------------------------------------------------------------------|
| EPI_ISL_892278 to 892324                                                                                                                                                                                                                                                                                                                                                                                                                                                                                                                                                                                                                                                                                                                                                                                                                                                                                                                                                                                                                                                                                                                                                                                                                                                                                                                                                                                                                                                                                                                                                                                                                                                                       | Donostialdea. Área de Enfermedades Infecciosas, Grupo de Infección Respiratoria y Resistencia Antimicrobiana. Instituto de Investigación Sanitaria Biodonostia |                                                                                                                                                |                                                                                                                                                                                                                                                                                                                                                                                                                                                              |
| EPI_ISL_849654, EPI_ISL_849656 to 849661                                                                                                                                                                                                                                                                                                                                                                                                                                                                                                                                                                                                                                                                                                                                                                                                                                                                                                                                                                                                                                                                                                                                                                                                                                                                                                                                                                                                                                                                                                                                                                                                                                                       | Servizio Igiene Epidemiologia e Sanità Pubblica (SIESP)-L'Aquila                                                                                               | Istituto Zooprofilattico Sperimentale dell'Abruzzo e Molise "G. Caporale"                                                                      | Ancora M; Cammà C; Curini V; Di Domenico M; Di Pasquale A; Lorusso A; Mangone I; Marcacci M; Puglia I; Rinaldi A; Savini G.                                                                                                                                                                                                                                                                                                                                  |
| EPI_ISL_833085 to 833086                                                                                                                                                                                                                                                                                                                                                                                                                                                                                                                                                                                                                                                                                                                                                                                                                                                                                                                                                                                                                                                                                                                                                                                                                                                                                                                                                                                                                                                                                                                                                                                                                                                                       | Servizio di Igiene Epidemiologia e Sanità Pubblica (SIESP) CHIETI - DRIVE IN GISSI                                                                             | Istituto Zooprofilattico Sperimentale dell'Abruzzo e Molise "G. Caporale"                                                                      | Ancora M; Calistri P; Cammà C; Curini V; Delli Compagni E; Di Domenico M; Di Pasquale A; Lorusso A; Mangone I; Marcacci M; Puglia I; Rinaldi A; Savini G                                                                                                                                                                                                                                                                                                     |
| EPI_ISL_833087                                                                                                                                                                                                                                                                                                                                                                                                                                                                                                                                                                                                                                                                                                                                                                                                                                                                                                                                                                                                                                                                                                                                                                                                                                                                                                                                                                                                                                                                                                                                                                                                                                                                                 | Servizio di Igiene Epidemiologia e Sanità Pubblica (SIESP) L'AQUILA                                                                                            | Istituto Zooprofilattico Sperimentale dell'Abruzzo e Molise "G. Caporale"                                                                      | Ancora M; Calistri P; Cammà C; Curini V; Delli Compagni E; Di Domenico M; Di Pasquale A; Lorusso A; Mangone I; Marcacci M; Puglia I; Rinaldi A; Savini G                                                                                                                                                                                                                                                                                                     |
| EPI_ISL_833088 to 833089                                                                                                                                                                                                                                                                                                                                                                                                                                                                                                                                                                                                                                                                                                                                                                                                                                                                                                                                                                                                                                                                                                                                                                                                                                                                                                                                                                                                                                                                                                                                                                                                                                                                       | Servizio di Igiene Epidemiologia e Sanità Pubblica (SIESP) SULMONA                                                                                             | Istituto Zooprofilattico Sperimentale dell'Abruzzo e Molise "G. Caporale"                                                                      | Ancora M; Calistri P; Cammà C; Curini V; Delli Compagni E; Di Domenico M; Di Pasquale A; Lorusso A; Mangone I; Marcacci M; Puglia I; Rinaldi A; Savini G                                                                                                                                                                                                                                                                                                     |
| EPI_ISL_849653, EPI_ISL_849655                                                                                                                                                                                                                                                                                                                                                                                                                                                                                                                                                                                                                                                                                                                                                                                                                                                                                                                                                                                                                                                                                                                                                                                                                                                                                                                                                                                                                                                                                                                                                                                                                                                                 | Servizio di igiene e sanità pubblica (SIESP)-Teramo                                                                                                            | Istituto Zooprofilattico Sperimentale dell'Abruzzo e Molise "G. Caporale"                                                                      | Ancora M; Cammà C; Curini V; Di Domenico M; Di Pasquale A; Lorusso A; Mangone I; Marcacci M; Puglia I; Rinaldi A; Savini G.                                                                                                                                                                                                                                                                                                                                  |
| EPI_ISL_849650 to 849652, EPI_ISL_849662 to 849663                                                                                                                                                                                                                                                                                                                                                                                                                                                                                                                                                                                                                                                                                                                                                                                                                                                                                                                                                                                                                                                                                                                                                                                                                                                                                                                                                                                                                                                                                                                                                                                                                                             | Servizio di igiene epidemiologia e sanità pubblica (SIESP)-Chieti                                                                                              | Istituto Zooprofilattico Sperimentale dell'Abruzzo e Molise "G. Caporale"                                                                      | Ancora M; Cammà C; Curini V; Di Domenico M; Di Pasquale A; Lorusso A; Mangone I; Marcacci M; Puglia I; Rinaldi A; Savini G.                                                                                                                                                                                                                                                                                                                                  |
| EPI_ISL_710547, EPI_ISL_710554, EPI_ISL_710563                                                                                                                                                                                                                                                                                                                                                                                                                                                                                                                                                                                                                                                                                                                                                                                                                                                                                                                                                                                                                                                                                                                                                                                                                                                                                                                                                                                                                                                                                                                                                                                                                                                 | Sestre Milosrdnice University Hospital Center                                                                                                                  | Ruer Bošković Institute; Forensic Science Centre Ivan Vueti; University of Zagreb Faculty of Science                                           | Ana Livun; Antonela Blažeković; Boris Maek; Danilo Licastro; Dunja Glavaš; Fran Boroveki; Gordana Maravi Vlahoviek; Ivan Šamija; Ivana elap; Josipa Skelin; Kristian Vlahoviek; Kristina Gotovac Jere; Lidija Cvetko-Krajnovi; Lucija Markulin; Maja Kuzman; Marina Korolija; Mario Štefanovi; Mirjana Domazet-Lošo; Paula Stancl; Robert Beluži; Rosa Karli; Sanja Tadinac; Tomislav Domazet-Lošo; Vjekoslav Tomai; Vladimir Krajnovi; Željka Maak Šafranko |
| EPI_ISL_636113 to 636120, EPI_ISL_730127 to 730136, EPI_ISL_880037, EPI_ISL_880040, EPI_ISL_880042, EPI_ISL_880045, EPI_ISL_880048, EPI_ISL_880050, EPI_ISL_880053, EPI_ISL_880056, EPI_ISL_880058, EPI_ISL_880061, EPI_ISL_880063, EPI_ISL_880066, EPI_ISL_880069, EPI_ISL_880071, EPI_ISL_880074, EPI_ISL_880077, EPI_ISL_880079, EPI_ISL_880082, EPI_ISL_880085, EPI_ISL_880087, EPI_ISL_880090, EPI_ISL_880092, EPI_ISL_880095, EPI_ISL_880098, EPI_ISL_880101, EPI_ISL_880103, EPI_ISL_880106, EPI_ISL_880109, EPI_ISL_880111, EPI_ISL_880114, EPI_ISL_880117, EPI_ISL_880119, EPI_ISL_880122, EPI_ISL_880125, EPI_ISL_880128, EPI_ISL_880130, EPI_ISL_880133, EPI_ISL_880135, EPI_ISL_880138, EPI_ISL_880140 to 880170, EPI_ISL_962602 to 962608, EPI_ISL_962650 to 962765                                                                                                                                                                                                                                                                                                                                                                                                                                                                                                                                                                                                                                                                                                                                                                                                                                                                                                               | Andersen lab at Scripps Research<br>Child Health Research Foundation                                                                                           | Art Mendoza; Cathy Woerle; Jacquelyn Berumen; Liam McGinnis; Omid Bakhtar; SEARCH Alliance San Diego with Aaron Harding                        |                                                                                                                                                                                                                                                                                                                                                                                                                                                              |
| see above                                                                                                                                                                                                                                                                                                                                                                                                                                                                                                                                                                                                                                                                                                                                                                                                                                                                                                                                                                                                                                                                                                                                                                                                                                                                                                                                                                                                                                                                                                                                                                                                                                                                                      | Sharp HealthCare Laboratory                                                                                                                                    |                                                                                                                                                |                                                                                                                                                                                                                                                                                                                                                                                                                                                              |
| EPI_ISL_906091, EPI_ISL_906098                                                                                                                                                                                                                                                                                                                                                                                                                                                                                                                                                                                                                                                                                                                                                                                                                                                                                                                                                                                                                                                                                                                                                                                                                                                                                                                                                                                                                                                                                                                                                                                                                                                                 | Shimantik Pathology and Diagnostic Center                                                                                                                      |                                                                                                                                                | Áfroza Akter Tanni; Arif Mohammad Tanmoy; Md Hafizur Rahman; Md. Mobarok Karim; Md. Parvej Alam; Roly Malaker; Roly Malaker Md Hafizur Rahman; Samir K Saha; Senjuti Saha; Sharmistha Goswami; Syed Muktaadir Al Sium                                                                                                                                                                                                                                        |
| EPI_ISL_803903, EPI_ISL_803909, EPI_ISL_803913, EPI_ISL_803916, EPI_ISL_860187 to 860188                                                                                                                                                                                                                                                                                                                                                                                                                                                                                                                                                                                                                                                                                                                                                                                                                                                                                                                                                                                                                                                                                                                                                                                                                                                                                                                                                                                                                                                                                                                                                                                                       | Shimoga Institute of Medical Sciences                                                                                                                          | Department of Neurovirology, National Institute of Mental Health and Neurosciences (NIMHANS)                                                   | Anita S Desai; Anson Kunjumon George; Chitra Pattabiraman; Darshan Sreenivas; Nakka Vijay Kiran Reddy; Pramada Prasad; Risha Rasheed; V Ravi                                                                                                                                                                                                                                                                                                                 |
| EPI_ISL_623104 to 623105                                                                                                                                                                                                                                                                                                                                                                                                                                                                                                                                                                                                                                                                                                                                                                                                                                                                                                                                                                                                                                                                                                                                                                                                                                                                                                                                                                                                                                                                                                                                                                                                                                                                       | Simile Medicina Diagnóstica                                                                                                                                    | Bioinformatics Laboratory / LNCC                                                                                                               | Alexandra L Gerber; Amílcar Tanuri; Ana Paula de C Guimarães; Ana Tereza R de Vasconcelos; Carolina M Voloch; Covid19-UFRJ Workgroup; Cynthia C Cardoso; Diana Mariani; Luiz G P de Almeida; Luís Cristóvão Pórtio; Orlando C. Ferreira; Otavio J. Brustolini; Renato S Aguiar; Ronaldo S Francisco Jr; Terezinha M P P Castañeiras                                                                                                                          |
| EPI_ISL_768324, EPI_ISL_891251 to 891253                                                                                                                                                                                                                                                                                                                                                                                                                                                                                                                                                                                                                                                                                                                                                                                                                                                                                                                                                                                                                                                                                                                                                                                                                                                                                                                                                                                                                                                                                                                                                                                                                                                       | Singapore General Hospital                                                                                                                                     | Department of Microbiology                                                                                                                     | Chenhao Li; Karrie Ko; Kenneth Xin Long Chan; Kern Rei Chng; Kian Sing Chan; Kun Lee Lim; Lynette Oon; Niranjana Nagarajan; Nurdyana Abdul Rahman; Sui Sin Goh                                                                                                                                                                                                                                                                                               |
| EPI_ISL_768523                                                                                                                                                                                                                                                                                                                                                                                                                                                                                                                                                                                                                                                                                                                                                                                                                                                                                                                                                                                                                                                                                                                                                                                                                                                                                                                                                                                                                                                                                                                                                                                                                                                                                 | Singburi Hospital                                                                                                                                              | National Institute of Health, Department of Medical Sciences, Ministry of Public Health, Thailand                                              | ; Natchaya Khiahsang; Pakorn Piromtong; Pilailuk Okada; Ratana Tacharoenmuang; Siripaporn Phuygun; Sittiporn Parman; Sunthareeya Waicharen; Thanutsapa Thanadachakul; Warawan Wongboot; sirikanda wimol                                                                                                                                                                                                                                                      |
| EPI_ISL_833335, EPI_ISL_833338                                                                                                                                                                                                                                                                                                                                                                                                                                                                                                                                                                                                                                                                                                                                                                                                                                                                                                                                                                                                                                                                                                                                                                                                                                                                                                                                                                                                                                                                                                                                                                                                                                                                 | Siniloan Rural Health Unit                                                                                                                                     | Research Institute for Tropical Medicine                                                                                                       | Catalino Demetria; Daria Manalo; Edelwisa Mercado; Francisco Gerardo Polotan; Hannah Leah Morito; Inez Andrea Medado; John Leonard Chan; Kirstyn Brunker; Ma Angelica Tujan; Othoniel Jan Onza                                                                                                                                                                                                                                                               |
| EPI_ISL_756375                                                                                                                                                                                                                                                                                                                                                                                                                                                                                                                                                                                                                                                                                                                                                                                                                                                                                                                                                                                                                                                                                                                                                                                                                                                                                                                                                                                                                                                                                                                                                                                                                                                                                 | Siriraj Hospital, Mahidol University                                                                                                                           | National Institute of Health, Department of Medical Sciences, Ministry of Public Health, Thailand                                              | Archiraya Pattama; Chutikarn Chaimay; Natchaya Khiahsang; Navin Horthongkham; Niracha Athipanyasilp; Pakorn Piromtong; Pilailuk Okada; Ratana Tacharoenmuang; Ruengpung Suththeng; Sirikanda wimol; Siripaporn Phuygun; Sittiporn Parman; Sunthareeya Waicharen; Thanutsapa Thanadachakul; Wannee Kantakamalakul.; Warawan Wongboot                                                                                                                          |
| EPI_ISL_964888 to 964890, EPI_ISL_964892, EPI_ISL_964897, EPI_ISL_964901, EPI_ISL_964913, EPI_ISL_964915                                                                                                                                                                                                                                                                                                                                                                                                                                                                                                                                                                                                                                                                                                                                                                                                                                                                                                                                                                                                                                                                                                                                                                                                                                                                                                                                                                                                                                                                                                                                                                                       | Sistema Integrado de Emergencias de Neuquén (SIEN)                                                                                                             | Laboratorio Central Mg. Luis Alfredo Pianiola on behalf of 'Proyecto Argentino Interinstitucional de genómica de SARS-CoV-2' (PAIS Consortium) | Antonela De Fino; C Pintos; C Ziehm; Darío Fabián de Prátula; J Ousset; L Pianiola.; Liliana Fonseca; M Fernandez; M Mazzeo; M Nabaes; Marcela Nóbile; María Laura Álvarez; Patricia Valeria Blanco; Silvana Cecchi; Yesica Espasandin                                                                                                                                                                                                                       |
| EPI_ISL_759957, EPI_ISL_877419, EPI_ISL_877460, EPI_ISL_877538, EPI_ISL_882771, EPI_ISL_888591, EPI_ISL_888593, EPI_ISL_956278 to 956279, EPI_ISL_956281, EPI_ISL_956313, EPI_ISL_956315                                                                                                                                                                                                                                                                                                                                                                                                                                                                                                                                                                                                                                                                                                                                                                                                                                                                                                                                                                                                                                                                                                                                                                                                                                                                                                                                                                                                                                                                                                       | see above                                                                                                                                                      | Siti Khodijah Hospital                                                                                                                         | Institute of Tropical Disease, Universitas Airlangga                                                                                                                                                                                                                                                                                                                                                                                                         |
| EPI_ISL_648198 to 648199, EPI_ISL_654955 to 654956, EPI_ISL_710584                                                                                                                                                                                                                                                                                                                                                                                                                                                                                                                                                                                                                                                                                                                                                                                                                                                                                                                                                                                                                                                                                                                                                                                                                                                                                                                                                                                                                                                                                                                                                                                                                             | see above                                                                                                                                                      | Skovde/Unilabs                                                                                                                                 | The Public Health Agency of Sweden                                                                                                                                                                                                                                                                                                                                                                                                                           |
| EPI_ISL_801522 to 801536                                                                                                                                                                                                                                                                                                                                                                                                                                                                                                                                                                                                                                                                                                                                                                                                                                                                                                                                                                                                                                                                                                                                                                                                                                                                                                                                                                                                                                                                                                                                                                                                                                                                       | see above                                                                                                                                                      | Sonic Reference Laboratory                                                                                                                     | Pathogen Discovery, Respiratory Viruses Branch, Division of Viral Diseases, Centers for Disease Control and Prevention                                                                                                                                                                                                                                                                                                                                       |
| EPI_ISL_967890 to 967893, EPI_ISL_967895 to 967896, EPI_ISL_967898 to 967900, EPI_ISL_967903 to 967904, EPI_ISL_967907, EPI_ISL_967909, EPI_ISL_967915 to 967918, EPI_ISL_967920, EPI_ISL_967922, EPI_ISL_967924, EPI_ISL_967926 to 967927, EPI_ISL_967929, EPI_ISL_967932 to 967934, EPI_ISL_967940, EPI_ISL_967942 to 967943, EPI_ISL_967946, EPI_ISL_967951, EPI_ISL_967954, EPI_ISL_967957 to 967958, EPI_ISL_967962 to 967965, EPI_ISL_967968 to 967969, EPI_ISL_967972, EPI_ISL_967978, EPI_ISL_967980 to 967981, EPI_ISL_967984 to 967985, EPI_ISL_967989, EPI_ISL_967991, EPI_ISL_967993 to 967996, EPI_ISL_968000, EPI_ISL_968004, EPI_ISL_968006, EPI_ISL_968008, EPI_ISL_968010, EPI_ISL_968014, EPI_ISL_968018 to 968019, EPI_ISL_968021 to 968031, EPI_ISL_968033, EPI_ISL_968035 to 968036, EPI_ISL_968039 to 968040, EPI_ISL_968042 to 968043, EPI_ISL_968046 to 968049, EPI_ISL_968052, EPI_ISL_968054, EPI_ISL_968056, EPI_ISL_968058 to 968062, EPI_ISL_968066, EPI_ISL_981976, EPI_ISL_981979 to 981980, EPI_ISL_981983 to 981986, EPI_ISL_981989, EPI_ISL_981991 to 981995, EPI_ISL_981997, EPI_ISL_982000, EPI_ISL_982004 to 982006, EPI_ISL_982009, EPI_ISL_982013 to 982015, EPI_ISL_982017 to 982018, EPI_ISL_982024 to 982025, EPI_ISL_982028, EPI_ISL_982030 to 982037, EPI_ISL_982039 to 982042, EPI_ISL_982045 to 982046, EPI_ISL_982049 to 982051, EPI_ISL_982054 to 982055, EPI_ISL_982058, EPI_ISL_982060 to 982062, EPI_ISL_982064, EPI_ISL_982066 to 982067, EPI_ISL_982069, EPI_ISL_982072 to 982077, EPI_ISL_982079 to 982084, EPI_ISL_982087 to 982096, EPI_ISL_982098 to 982104, EPI_ISL_982107 to 982108, EPI_ISL_982110, EPI_ISL_982112, EPI_ISL_982114 | see above                                                                                                                                                      | Sonora Quest Laboratories                                                                                                                      |                                                                                                                                                                                                                                                                                                                                                                                                                                                              |
| EPI_ISL_695755 to 695829, EPI_ISL_695840 to 696450                                                                                                                                                                                                                                                                                                                                                                                                                                                                                                                                                                                                                                                                                                                                                                                                                                                                                                                                                                                                                                                                                                                                                                                                                                                                                                                                                                                                                                                                                                                                                                                                                                             | see above                                                                                                                                                      | Sonora Quest Laboratories, Laboratory Sciences of Arizona                                                                                      | TGen North                                                                                                                                                                                                                                                                                                                                                                                                                                                   |
| EPI_ISL_770820 to 770821                                                                                                                                                                                                                                                                                                                                                                                                                                                                                                                                                                                                                                                                                                                                                                                                                                                                                                                                                                                                                                                                                                                                                                                                                                                                                                                                                                                                                                                                                                                                                                                                                                                                       | see above                                                                                                                                                      | South East Regional Hospital                                                                                                                   | NSW Health Pathology - Institute of Clinical Pathology and Medical Research; Westmead Hospital; University of Sydney                                                                                                                                                                                                                                                                                                                                         |
| EPI_ISL_699649                                                                                                                                                                                                                                                                                                                                                                                                                                                                                                                                                                                                                                                                                                                                                                                                                                                                                                                                                                                                                                                                                                                                                                                                                                                                                                                                                                                                                                                                                                                                                                                                                                                                                 | see above                                                                                                                                                      | South Eastern Area Laboratory Services                                                                                                         | NSW Health Pathology - Institute of Clinical Pathology and Medical Research; Westmead Hospital; University of Sydney                                                                                                                                                                                                                                                                                                                                         |
| EPI_ISL_710120 to 710128                                                                                                                                                                                                                                                                                                                                                                                                                                                                                                                                                                                                                                                                                                                                                                                                                                                                                                                                                                                                                                                                                                                                                                                                                                                                                                                                                                                                                                                                                                                                                                                                                                                                       | see above                                                                                                                                                      | South Eastern Area Laboratory Services (SEALS)                                                                                                 | CIDM-PH et al.                                                                                                                                                                                                                                                                                                                                                                                                                                               |
| EPI_ISL_629001, EPI_ISL_629003 to 629006, EPI_ISL_629029 to 629030, EPI_ISL_639736 to 639738, EPI_ISL_667779 to 667806, EPI_ISL_671673, EPI_ISL_672655 to 672662, EPI_ISL_699642, EPI_ISL_699653 to 699654, EPI_ISL_740863 to 740865, EPI_ISL_740867 to 740871, EPI_ISL_740873 to 740874, EPI_ISL_767850 to 767852, EPI_ISL_767885 to 767892, EPI_ISL_767921 to 767924, EPI_ISL_767928, EPI_ISL_768600 to 768607, EPI_ISL_779397, EPI_ISL_779399 to 779402, EPI_ISL_791279, EPI_ISL_792035 to 792037, EPI_ISL_806722, EPI_ISL_812519 to 812520, EPI_ISL_845784 to 845795, EPI_ISL_845797, EPI_ISL_857308, EPI_ISL_857310 to 857313, EPI_ISL_872574 to 872575, EPI_ISL_872577, EPI_ISL_872582 to 872584, EPI_ISL_942895                                                                                                                                                                                                                                                                                                                                                                                                                                                                                                                                                                                                                                                                                                                                                                                                                                                                                                                                                                         | see above                                                                                                                                                      | South Eastern Area Laboratory Services (SEALS)                                                                                                 | NSW Health Pathology - Institute of Clinical Pathology and Medical Research; Westmead Hospital; University of Sydney                                                                                                                                                                                                                                                                                                                                         |
| EPI_ISL_832019                                                                                                                                                                                                                                                                                                                                                                                                                                                                                                                                                                                                                                                                                                                                                                                                                                                                                                                                                                                                                                                                                                                                                                                                                                                                                                                                                                                                                                                                                                                                                                                                                                                                                 | see above                                                                                                                                                      | Southern Nevada Public Health Laboratory                                                                                                       | Southern Nevada Public Health Laboratory                                                                                                                                                                                                                                                                                                                                                                                                                     |
| EPI_ISL_767929, EPI_ISL_767932                                                                                                                                                                                                                                                                                                                                                                                                                                                                                                                                                                                                                                                                                                                                                                                                                                                                                                                                                                                                                                                                                                                                                                                                                                                                                                                                                                                                                                                                                                                                                                                                                                                                 | see above                                                                                                                                                      | Southern. IML Pathology                                                                                                                        | NSW Health Pathology - Institute of Clinical Pathology and                                                                                                                                                                                                                                                                                                                                                                                                   |

|                                                                                                                                                                                                                                                                                                                                                                                                                                                                                                                                                                                                                                                                                                                                                                                                                                                                                                |                                                                                                            |                                                                                                                                                     |                                                                                                                                                                                                                                                                                                                                                                                                                                                                                                                          |
|------------------------------------------------------------------------------------------------------------------------------------------------------------------------------------------------------------------------------------------------------------------------------------------------------------------------------------------------------------------------------------------------------------------------------------------------------------------------------------------------------------------------------------------------------------------------------------------------------------------------------------------------------------------------------------------------------------------------------------------------------------------------------------------------------------------------------------------------------------------------------------------------|------------------------------------------------------------------------------------------------------------|-----------------------------------------------------------------------------------------------------------------------------------------------------|--------------------------------------------------------------------------------------------------------------------------------------------------------------------------------------------------------------------------------------------------------------------------------------------------------------------------------------------------------------------------------------------------------------------------------------------------------------------------------------------------------------------------|
| EPI_ISL_849736 to 849743                                                                                                                                                                                                                                                                                                                                                                                                                                                                                                                                                                                                                                                                                                                                                                                                                                                                       | Special Operations Medical Research Division, Defence Services Medical Research Centre                     | Medical Research; Westmead Hospital; University of Sydney<br>Special Operations Medical Research Division, Defence Services Medical Research Centre | Aung; Htun; K.K.; K.Z.; Lwin; Myint, K.; N.M.; Oo; P.K.; Win; Z.W.; Zaw, T.                                                                                                                                                                                                                                                                                                                                                                                                                                              |
| EPI_ISL_933577                                                                                                                                                                                                                                                                                                                                                                                                                                                                                                                                                                                                                                                                                                                                                                                                                                                                                 | Special hospital for orthopedic surgery and traumatology "Sv Erazmo" - Ohrid                               | Research Center for Genetic Engineering and Biotechnology "Georgi D. Efremov", Macedonian Academy of Sciences and Arts                              | RCGEB - MASA                                                                                                                                                                                                                                                                                                                                                                                                                                                                                                             |
| EPI_ISL_753697, EPI_ISL_753700 to 753701, EPI_ISL_754059, EPI_ISL_754109, EPI_ISL_754173, EPI_ISL_754176 to 754179                                                                                                                                                                                                                                                                                                                                                                                                                                                                                                                                                                                                                                                                                                                                                                             | Specialized Lab for COVID-19 Detection, Department of Genetic Engineering and Biotechnology                | Specialized Lab for COVID-19 Detection, Department of Genetic Engineering and Biotechnology                                                         | Ajit Ghosh; Amit Kumar Mondal; Asim Debnath; Avishek Sarkar; Diptha Chakraborty; Fahmid H. Bhuiyan; Hafiz Al Ashad; Hamdul Hoque; Mahedi Hasan Ridoy; Md Mohsin Bapary; Md. Akkas Ali; Md. Asraful Jahan; Md. Mainul Hossain Bakul; Md. Mashiur Rahaman; Md. Mobarok Karim; Md. Mosar Hossen; Md. Nazmul Hasan; Md. Rabiul Awal; Md. Rakib Wazed Nayon; Md. Tahsin Khan; Mumtahn Ahammed; Nurnabi Azad Jewel; Rahatul Islam; Salman Ahmed; Shahrear Arefin; Shamsul H. Prodhon; Sudipto Sakib Duranto; Ziaul Faruque Joy |
| EPI_ISL_882957                                                                                                                                                                                                                                                                                                                                                                                                                                                                                                                                                                                                                                                                                                                                                                                                                                                                                 | Specjalistyczny Szpital im. Dra A. Sokoowskiego                                                            | National Institute of Public Health - National Institute of Hygiene                                                                                 | Gawror Jan; Wokowicz Tomasz; Zacharczuk Katarzyna                                                                                                                                                                                                                                                                                                                                                                                                                                                                        |
| EPI_ISL_631748 to 631751, EPI_ISL_631778 to 631784, EPI_ISL_631856 to 631859, EPI_ISL_631888, EPI_ISL_631900, EPI_ISL_631911 to 631912, EPI_ISL_631917, EPI_ISL_631924, EPI_ISL_631933, EPI_ISL_631935, EPI_ISL_631939 to 631949, EPI_ISL_631952, EPI_ISL_631957 to 631958, EPI_ISL_631971, EPI_ISL_631980, EPI_ISL_631985, EPI_ISL_631987 to 631988, EPI_ISL_631990                                                                                                                                                                                                                                                                                                                                                                                                                                                                                                                           | see above                                                                                                  | see above                                                                                                                                           | see above                                                                                                                                                                                                                                                                                                                                                                                                                                                                                                                |
| EPI_ISL_745108                                                                                                                                                                                                                                                                                                                                                                                                                                                                                                                                                                                                                                                                                                                                                                                                                                                                                 | St Barnabas Hospital                                                                                       | New York City Public Health Laboratory                                                                                                              | Jade Wang; et al.                                                                                                                                                                                                                                                                                                                                                                                                                                                                                                        |
| EPI_ISL_767881, EPI_ISL_767894 to 767895, EPI_ISL_767915, EPI_ISL_767927, EPI_ISL_872581                                                                                                                                                                                                                                                                                                                                                                                                                                                                                                                                                                                                                                                                                                                                                                                                       | St Vincent's Pathology (SydPath)                                                                           | CIDM-PH, Westmead Hospital                                                                                                                          | CIDM-PH et al.                                                                                                                                                                                                                                                                                                                                                                                                                                                                                                           |
| EPI_ISL_833394 to 833404, EPI_ISL_833489                                                                                                                                                                                                                                                                                                                                                                                                                                                                                                                                                                                                                                                                                                                                                                                                                                                       | St. Francis Medical Center                                                                                 | Los Angeles County PHL                                                                                                                              | P. Hemarajata et al.                                                                                                                                                                                                                                                                                                                                                                                                                                                                                                     |
| EPI_ISL_631529                                                                                                                                                                                                                                                                                                                                                                                                                                                                                                                                                                                                                                                                                                                                                                                                                                                                                 | St. Johns Episcopal Hospital                                                                               | New York City Public Health Laboratory                                                                                                              | Jade Wang; et al.                                                                                                                                                                                                                                                                                                                                                                                                                                                                                                        |
| EPI_ISL_930578, EPI_ISL_930621, EPI_ISL_965338, EPI_ISL_965460, EPI_ISL_965466, EPI_ISL_965485 to 965492, EPI_ISL_965498, EPI_ISL_965500, EPI_ISL_965512 to 965513, EPI_ISL_965515, EPI_ISL_965520, EPI_ISL_965522 to 965523                                                                                                                                                                                                                                                                                                                                                                                                                                                                                                                                                                                                                                                                   | see above                                                                                                  | GIGA Medical Genomics                                                                                                                               | Bouchra Boujemla; Cécile Meex; Keith Durkin; Maria Artesi; Marie-Pierre Hayette; Pierrette Melin; Raphaël Boreux; Sébastien Bontems; Vincent Bours                                                                                                                                                                                                                                                                                                                                                                       |
| EPI_ISL_833339                                                                                                                                                                                                                                                                                                                                                                                                                                                                                                                                                                                                                                                                                                                                                                                                                                                                                 | St. Pascual De Baylon Hospital                                                                             | Research Institute for Tropical Medicine                                                                                                            | Catalino Demetria; Daria Manalo; Edelwisa Mercado; Francisco Gerardo Polotan; Hannah Leah Morito; Inez Andrea Medado; John Leonard Chan; Kirstyn Brunker; Ma Angelica Tujan; Othoniel Jan Onza                                                                                                                                                                                                                                                                                                                           |
| EPI_ISL_860548, EPI_ISL_860550                                                                                                                                                                                                                                                                                                                                                                                                                                                                                                                                                                                                                                                                                                                                                                                                                                                                 | St.Olavs hospital/NTNU                                                                                     | IKOM, NTNU                                                                                                                                          | Aleksandr Ianevski; Denis Kainov; Svein Arne Nordbo                                                                                                                                                                                                                                                                                                                                                                                                                                                                      |
| EPI_ISL_979457                                                                                                                                                                                                                                                                                                                                                                                                                                                                                                                                                                                                                                                                                                                                                                                                                                                                                 | State Hygienic Laboratory at the University of Iowa                                                        | State Hygienic Laboratory at the University of Iowa                                                                                                 | Alankar Kampooowale; Erik Twait; Valerie Reeb; Wes Hottel                                                                                                                                                                                                                                                                                                                                                                                                                                                                |
| EPI_ISL_752607 to 753261, EPI_ISL_756275 to 756281, EPI_ISL_967523, EPI_ISL_967525 to 967530, EPI_ISL_967532 to 967536, EPI_ISL_967538 to 967546, EPI_ISL_967548 to 967553, EPI_ISL_967555 to 967566, EPI_ISL_967568 to 967575, EPI_ISL_967577 to 967582, EPI_ISL_967584 to 967589, EPI_ISL_967591 to 967598, EPI_ISL_967600 to 967608, EPI_ISL_967610 to 967616, EPI_ISL_967618 to 967628, EPI_ISL_967630 to 967641, EPI_ISL_967643 to 967654, EPI_ISL_967656 to 967661, EPI_ISL_967663, EPI_ISL_967665 to 967670, EPI_ISL_967672 to 967676, EPI_ISL_967679 to 967683, EPI_ISL_967685 to 967692, EPI_ISL_967694 to 967699, EPI_ISL_967701 to 967709, EPI_ISL_967711 to 967715, EPI_ISL_967717 to 967718, EPI_ISL_967720 to 967725, EPI_ISL_967727 to 967735, EPI_ISL_967737 to 967747, EPI_ISL_967749 to 967752, EPI_ISL_967754 to 967760, EPI_ISL_967762 to 967766, EPI_ISL_967768 to 967771 | see above                                                                                                  | Ayana Garnet; Drew Kuwazaki; Edward Desmond; Pamela O'Brien; Razvan Sultana; Sabrina Diemert                                                        |                                                                                                                                                                                                                                                                                                                                                                                                                                                                                                                          |
| EPI_ISL_882954 to 882955                                                                                                                                                                                                                                                                                                                                                                                                                                                                                                                                                                                                                                                                                                                                                                                                                                                                       | State Veterinary Institute Prague                                                                          | State Veterinary Institute Prague                                                                                                                   | A; Cernikova; L; M; Nagy; Stara                                                                                                                                                                                                                                                                                                                                                                                                                                                                                          |
| EPI_ISL_944749 to 944755                                                                                                                                                                                                                                                                                                                                                                                                                                                                                                                                                                                                                                                                                                                                                                                                                                                                       | State Virus Research and Diagnostic Laboratory (VRDL), AIIMS Raipur                                        | State Virus Research and Diagnostic Laboratory (VRDL), AIIMS Raipur                                                                                 | Anudita Bhargava; Kuldeep Sharma; Pragma Agarwala; Priyanka Singh; Pushpendra Singh; Sanjay Singh Negi; Somya Sharma                                                                                                                                                                                                                                                                                                                                                                                                     |
| EPI_ISL_626340 to 626351                                                                                                                                                                                                                                                                                                                                                                                                                                                                                                                                                                                                                                                                                                                                                                                                                                                                       | Statens Serum Institute                                                                                    | Statens Serum Institute                                                                                                                             | A.S.; Afaro-Nunez, A.; Belsham; C.S.; Fonager, J.; Foomsgaard, A.; G.J. and Botner, A.; Halasa, T.; Hammer; Jorgensen; Lohse, L.; M.L.; M.W.; Mundbjerg, K.; Quaade; Rasmussen; Rasmussen, M.; Rosenstjerne; Strandbygaard, B.; T.B.                                                                                                                                                                                                                                                                                     |
| EPI_ISL_640079                                                                                                                                                                                                                                                                                                                                                                                                                                                                                                                                                                                                                                                                                                                                                                                                                                                                                 | Stellenbosch Hospital wc STB                                                                               | NHLS/UCT                                                                                                                                            | Arash Iranzadeh; Bruna Galvao; Carolyn Williamson; Deelan Doolabh; Diana Hardie; Innocent Mudau; Kruger Marais; Lynn Tyers; Marvin Hsiao; Stephen Korsman                                                                                                                                                                                                                                                                                                                                                                |
| EPI_ISL_826274 to 826276                                                                                                                                                                                                                                                                                                                                                                                                                                                                                                                                                                                                                                                                                                                                                                                                                                                                       | Sterling Hospital, Memnagar, Ahmedabad                                                                     | Gujarat Biotechnology Research Centre                                                                                                               | Afzal Ansari; Apurvashin Puvar; Atul K Patel; Chaitanya Joshi; Dinesh Kumar; Janvi Raval; Labdhi Pandya; Madhvi Joshi; Naman Shashtri; Nikha Trivedi; Nitin Savaliya; Ramesh Pandit; Zarna Patel; Zuber Saiyed                                                                                                                                                                                                                                                                                                           |
| EPI_ISL_648152 to 648155                                                                                                                                                                                                                                                                                                                                                                                                                                                                                                                                                                                                                                                                                                                                                                                                                                                                       | Stockholm                                                                                                  | The Public Health Agency of Sweden                                                                                                                  | Anna Risberg; Anna-Malin Linde; Karin Tegmark-Wisell; Maria Lind Karlberg; Mattias Haukland; Mia Brytting; Olov Svartstrom; Oskar Karlsson Lindsjö; Petra Edquist; Reza Advani; Sandra Brodsson                                                                                                                                                                                                                                                                                                                          |
| EPI_ISL_661273                                                                                                                                                                                                                                                                                                                                                                                                                                                                                                                                                                                                                                                                                                                                                                                                                                                                                 | Stockholm-StGoran                                                                                          | The Public Health Agency of Sweden                                                                                                                  | Department of Microbiology; The Public Health Agency of Sweden                                                                                                                                                                                                                                                                                                                                                                                                                                                           |
| EPI_ISL_747241                                                                                                                                                                                                                                                                                                                                                                                                                                                                                                                                                                                                                                                                                                                                                                                                                                                                                 | Subang Public Health Office                                                                                | West Java Health Laboratory; School of Life Sciences and Technology, Institut Teknologi Bandung                                                     | Azzania Fibrani; Cut Nur Cinthia Alamanda; Ema Rahmawati; Isak Solihin; Karimatu Khoirunnisa; Miftahul Faridi; Rifky Waluyajati Rachman; Rini Robiani; Ryan Bayusantika Ristandi                                                                                                                                                                                                                                                                                                                                         |
| EPI_ISL_678397 to 678398, EPI_ISL_891229, EPI_ISL_896378 to 896381                                                                                                                                                                                                                                                                                                                                                                                                                                                                                                                                                                                                                                                                                                                                                                                                                             | Suceava County Emergency Hospital                                                                          | "Stefan cel Mare" University Metagenomics Lab                                                                                                       | Gheorghita Roxana; Lobiuc Andrei; Puscaselu Roxana                                                                                                                                                                                                                                                                                                                                                                                                                                                                       |
| EPI_ISL_869241                                                                                                                                                                                                                                                                                                                                                                                                                                                                                                                                                                                                                                                                                                                                                                                                                                                                                 | Suceava County Emergency Hospital                                                                          | "Stefan cel Mare" University Metagenomics Laboratory                                                                                                | Lobiuc Andrei; Puscaselu Roxana                                                                                                                                                                                                                                                                                                                                                                                                                                                                                          |
| EPI_ISL_747235                                                                                                                                                                                                                                                                                                                                                                                                                                                                                                                                                                                                                                                                                                                                                                                                                                                                                 | Sukabumi Health Laboratory                                                                                 | West Java Health Laboratory; School of Life Sciences and Technology, Institut Teknologi Bandung                                                     | Azzania Fibrani; Cut Nur Cinthia Alamanda; Ema Rahmawati; Isak Solihin; Karimatu Khoirunnisa; Miftahul Faridi; Rifky Waluyajati Rachman; Rini Robiani; Ryan Bayusantika Ristandi                                                                                                                                                                                                                                                                                                                                         |
| EPI_ISL_747236                                                                                                                                                                                                                                                                                                                                                                                                                                                                                                                                                                                                                                                                                                                                                                                                                                                                                 | Sukabumi Public Health                                                                                     | West Java Health Laboratory; School of Life Sciences and Technology, Institut Teknologi Bandung                                                     | Azzania Fibrani; Cut Nur Cinthia Alamanda; Ema Rahmawati; Isak Solihin; Karimatu Khoirunnisa; Miftahul Faridi; Rifky Waluyajati Rachman; Rini Robiani; Ryan Bayusantika Ristandi                                                                                                                                                                                                                                                                                                                                         |
| EPI_ISL_648157 to 648161, EPI_ISL_648192                                                                                                                                                                                                                                                                                                                                                                                                                                                                                                                                                                                                                                                                                                                                                                                                                                                       | Sundsvall                                                                                                  | The Public Health Agency of Sweden                                                                                                                  | Anna Risberg; Anna-Malin Linde; Karin Tegmark-Wisell; Maria Lind Karlberg; Mattias Haukland; Mia Brytting; Olov Svartstrom; Oskar Karlsson Lindsjö; Petra Edquist; Reza Advani; Sandra Brodsson                                                                                                                                                                                                                                                                                                                          |
| EPI_ISL_955265, EPI_ISL_955300                                                                                                                                                                                                                                                                                                                                                                                                                                                                                                                                                                                                                                                                                                                                                                                                                                                                 | Sunrise Medical Laboratory                                                                                 | Pathogen Discovery, Respiratory Viruses Branch, Division of Viral Diseases, Centers for Disease Control and Prevention                              | Anna Uehara; Clinton R. Paden; Haibin Wang; Jing Zhang; Krista Queen; Peter Cook; Suxiang Tong; Yan Li; Ying Tao                                                                                                                                                                                                                                                                                                                                                                                                         |
| EPI_ISL_801537                                                                                                                                                                                                                                                                                                                                                                                                                                                                                                                                                                                                                                                                                                                                                                                                                                                                                 | Sunrise Medical Labs                                                                                       | Pathogen Discovery, Respiratory Viruses Branch, Division of Viral Diseases, Centers for Disease Control and Prevention                              | Anna Uehara; Clinton R. Paden; Haibin Wang; Jing Zhang; Krista Queen; Peter Cook; Suxiang Tong; Yan Li; Ying Tao                                                                                                                                                                                                                                                                                                                                                                                                         |
| EPI_ISL_759960                                                                                                                                                                                                                                                                                                                                                                                                                                                                                                                                                                                                                                                                                                                                                                                                                                                                                 | Surabaya Public Health Office                                                                              | Institute of Tropical Disease, Universitas Airlangga                                                                                                | Aldise M Nastri; Febria Rachmanita; Gatot Soegiarto; Jezzy R Dewantari; Kazufumi Shimizu; Krisnoadi Rahardjo; Laksmi Wulandari; Maria I Lusida; Resti Yudhawati; Rima R Prasetya; Soetjipto; Yasuko Mori                                                                                                                                                                                                                                                                                                                 |
| EPI_ISL_857489 to 857541, EPI_ISL_860730 to 860760, EPI_ISL_860762 to 860781                                                                                                                                                                                                                                                                                                                                                                                                                                                                                                                                                                                                                                                                                                                                                                                                                   | Swiss National Reference Centre for Influenza                                                              | Swiss National Reference Centre for Influenza                                                                                                       | Adrian Egli; Alfredo Mari; Ana Rita Gonçalves; Ana Rita Gonçalves Cabecinhas; Christoph Grönig; Emmanouil Dermitzakis; Florian Laubscher; Hans Hirsch; Helena MB Seth-Smith; Henri Pegeot; Ioannis Xenarios; Julia Bielicki; Karoline Leuzinger; Keith Harshman; Laurent Kaiser; Lorenzo Cerutti; Madlen Stange; Manuel Battegay; Melyssa Elies; Samuel Cordey; Tim Roloff                                                                                                                                               |
| EPI_ISL_882648 to 882649                                                                                                                                                                                                                                                                                                                                                                                                                                                                                                                                                                                                                                                                                                                                                                                                                                                                       | Swiss National Reference Centre for Influenza Virology laboratory, CNRI                                    | Swiss National Reference Centre for Influenza Virology laboratory, CNRI                                                                             | Adrian Egli; Alfredo Mari; Ana Rita Gonçalves; Hans Hirsch; Helena MB Seth-Smith; Julia Bielicki; Karoline Leuzinger; Laurent Kaiser; Madlen Stange; Manuel Battegay; Tim Roloff                                                                                                                                                                                                                                                                                                                                         |
| EPI_ISL_812518, EPI_ISL_912186                                                                                                                                                                                                                                                                                                                                                                                                                                                                                                                                                                                                                                                                                                                                                                                                                                                                 | Sydney South West Pathology Service (SSWPS) - Concord Repatriation General Hospital - NSW Health Pathology | NSW Health Pathology - Institute of Clinical Pathology and Medical Research; Westmead Hospital; University of Sydney                                | CIDM-PH et al.                                                                                                                                                                                                                                                                                                                                                                                                                                                                                                           |
| EPI_ISL_629002, EPI_ISL_639729 to 639730, EPI_ISL_639732, EPI_ISL_639734 to 639735, EPI_ISL_699641, EPI_ISL_699651, EPI_ISL_767876, EPI_ISL_767900 to 767901, EPI_ISL_767904 to 767905, EPI_ISL_767913, EPI_ISL_767939 to 767940, EPI_ISL_806728, EPI_ISL_872572, EPI_ISL_872578                                                                                                                                                                                                                                                                                                                                                                                                                                                                                                                                                                                                               | see above                                                                                                  | see above                                                                                                                                           | see above                                                                                                                                                                                                                                                                                                                                                                                                                                                                                                                |

|                                                                                                                                                                                                                                                                                                                                                                                                                                                                                                                                                                                                                                                                                                                                                                                                                                                                                                                                                                                                                                                                                                                                                                                                                                                                                                                                                                                                                                                                                                                                                                                                                                                                                                                                                                                                                                                                                                                                                                                                                                                                                                                                                                                                                                                                                                                                                                                                                                                                                                                                                                                                                                                                                                                                                                                                                                                                                      |                                                                                                    |                                                                                                                            |                                                                                                                                                                                                                                                                                                                                                          |
|--------------------------------------------------------------------------------------------------------------------------------------------------------------------------------------------------------------------------------------------------------------------------------------------------------------------------------------------------------------------------------------------------------------------------------------------------------------------------------------------------------------------------------------------------------------------------------------------------------------------------------------------------------------------------------------------------------------------------------------------------------------------------------------------------------------------------------------------------------------------------------------------------------------------------------------------------------------------------------------------------------------------------------------------------------------------------------------------------------------------------------------------------------------------------------------------------------------------------------------------------------------------------------------------------------------------------------------------------------------------------------------------------------------------------------------------------------------------------------------------------------------------------------------------------------------------------------------------------------------------------------------------------------------------------------------------------------------------------------------------------------------------------------------------------------------------------------------------------------------------------------------------------------------------------------------------------------------------------------------------------------------------------------------------------------------------------------------------------------------------------------------------------------------------------------------------------------------------------------------------------------------------------------------------------------------------------------------------------------------------------------------------------------------------------------------------------------------------------------------------------------------------------------------------------------------------------------------------------------------------------------------------------------------------------------------------------------------------------------------------------------------------------------------------------------------------------------------------------------------------------------------|----------------------------------------------------------------------------------------------------|----------------------------------------------------------------------------------------------------------------------------|----------------------------------------------------------------------------------------------------------------------------------------------------------------------------------------------------------------------------------------------------------------------------------------------------------------------------------------------------------|
| see above                                                                                                                                                                                                                                                                                                                                                                                                                                                                                                                                                                                                                                                                                                                                                                                                                                                                                                                                                                                                                                                                                                                                                                                                                                                                                                                                                                                                                                                                                                                                                                                                                                                                                                                                                                                                                                                                                                                                                                                                                                                                                                                                                                                                                                                                                                                                                                                                                                                                                                                                                                                                                                                                                                                                                                                                                                                                            | Sydney South West Pathology Service (SSWPS) - Liverpool Hospital - NSW Health Pathology            | NSW Health Pathology - Institute of Clinical Pathology and Medical Research; Westmead Hospital; University of Sydney       | CIDM-PH et al.                                                                                                                                                                                                                                                                                                                                           |
| EPI_ISL_629010, EPI_ISL_667778, EPI_ISL_708798, EPI_ISL_740894 to 740895, EPI_ISL_767853 to 767867, EPI_ISL_767906 to 767910, EPI_ISL_767914, EPI_ISL_767930, EPI_ISL_803110 to 803114, EPI_ISL_806718, EPI_ISL_806724, EPI_ISL_806729, EPI_ISL_825016, EPI_ISL_845798 to 845799, EPI_ISL_845805 to 845806, EPI_ISL_872579, EPI_ISL_872586 to 872588, EPI_ISL_914876 to 914877                                                                                                                                                                                                                                                                                                                                                                                                                                                                                                                                                                                                                                                                                                                                                                                                                                                                                                                                                                                                                                                                                                                                                                                                                                                                                                                                                                                                                                                                                                                                                                                                                                                                                                                                                                                                                                                                                                                                                                                                                                                                                                                                                                                                                                                                                                                                                                                                                                                                                                       |                                                                                                    |                                                                                                                            |                                                                                                                                                                                                                                                                                                                                                          |
| see above                                                                                                                                                                                                                                                                                                                                                                                                                                                                                                                                                                                                                                                                                                                                                                                                                                                                                                                                                                                                                                                                                                                                                                                                                                                                                                                                                                                                                                                                                                                                                                                                                                                                                                                                                                                                                                                                                                                                                                                                                                                                                                                                                                                                                                                                                                                                                                                                                                                                                                                                                                                                                                                                                                                                                                                                                                                                            | Sydney South West Pathology Service (SSWPS) - Royal Prince Alfred Hospital - NSW Health Pathology  | NSW Health Pathology - Institute of Clinical Pathology and Medical Research; Westmead Hospital; University of Sydney       | CIDM-PH et al.                                                                                                                                                                                                                                                                                                                                           |
| EPI_ISL_900568                                                                                                                                                                                                                                                                                                                                                                                                                                                                                                                                                                                                                                                                                                                                                                                                                                                                                                                                                                                                                                                                                                                                                                                                                                                                                                                                                                                                                                                                                                                                                                                                                                                                                                                                                                                                                                                                                                                                                                                                                                                                                                                                                                                                                                                                                                                                                                                                                                                                                                                                                                                                                                                                                                                                                                                                                                                                       | Synlab                                                                                             | CNR Virus des Infections Respiratoires - France SUD                                                                        | Antonin Bal; Bruno Lina; Gregory Destras; Gwendolyne Burfin; Hadrien Règue; Laurence Josset; Martine Valette; Quentin Semanas; Sylvie Larrat                                                                                                                                                                                                             |
| EPI_ISL_930579, EPI_ISL_930585 to 930593, EPI_ISL_930596 to 930602, EPI_ISL_930622, EPI_ISL_959555 to 959558, EPI_ISL_959599, EPI_ISL_959603, EPI_ISL_965304 to 965305, EPI_ISL_965309 to 965317, EPI_ISL_965320 to 965327, EPI_ISL_965332 to 965337, EPI_ISL_965392, EPI_ISL_965398, EPI_ISL_965400 to 965401, EPI_ISL_965403 to 965405, EPI_ISL_965408, EPI_ISL_965410, EPI_ISL_965416 to 965418, EPI_ISL_965431, EPI_ISL_965433 to 965436, EPI_ISL_965452 to 965456, EPI_ISL_965467 to 965468, EPI_ISL_965470 to 965473, EPI_ISL_965475, EPI_ISL_965479 to 965484, EPI_ISL_965493 to 965497, EPI_ISL_965499, EPI_ISL_965501 to 965503, EPI_ISL_965505 to 965511, EPI_ISL_965514, EPI_ISL_965516 to 965519, EPI_ISL_965521, EPI_ISL_965524, EPI_ISL_965526 to 965527                                                                                                                                                                                                                                                                                                                                                                                                                                                                                                                                                                                                                                                                                                                                                                                                                                                                                                                                                                                                                                                                                                                                                                                                                                                                                                                                                                                                                                                                                                                                                                                                                                                                                                                                                                                                                                                                                                                                                                                                                                                                                                               |                                                                                                    |                                                                                                                            |                                                                                                                                                                                                                                                                                                                                                          |
| see above                                                                                                                                                                                                                                                                                                                                                                                                                                                                                                                                                                                                                                                                                                                                                                                                                                                                                                                                                                                                                                                                                                                                                                                                                                                                                                                                                                                                                                                                                                                                                                                                                                                                                                                                                                                                                                                                                                                                                                                                                                                                                                                                                                                                                                                                                                                                                                                                                                                                                                                                                                                                                                                                                                                                                                                                                                                                            | Synlab                                                                                             | GIGA Medical Genomics                                                                                                      | Bouchra Boujemla; Cécile Meex; Keith Durkin; Maria Artesi; Marie-Pierre Hayette; Pierrette Melin; Raphaël Boreux; Sébastien Bontems; Vincent Bours                                                                                                                                                                                                       |
| EPI_ISL_775583, EPI_ISL_775587, EPI_ISL_831986 to 831988, EPI_ISL_913256 to 913257, EPI_ISL_913276, EPI_ISL_913284, EPI_ISL_913301 to 913305, EPI_ISL_913343, EPI_ISL_913456, EPI_ISL_913466 to 913467, EPI_ISL_934364 to 934374, EPI_ISL_934397 to 934404, EPI_ISL_934410 to 934412                                                                                                                                                                                                                                                                                                                                                                                                                                                                                                                                                                                                                                                                                                                                                                                                                                                                                                                                                                                                                                                                                                                                                                                                                                                                                                                                                                                                                                                                                                                                                                                                                                                                                                                                                                                                                                                                                                                                                                                                                                                                                                                                                                                                                                                                                                                                                                                                                                                                                                                                                                                                 |                                                                                                    |                                                                                                                            |                                                                                                                                                                                                                                                                                                                                                          |
| see above                                                                                                                                                                                                                                                                                                                                                                                                                                                                                                                                                                                                                                                                                                                                                                                                                                                                                                                                                                                                                                                                                                                                                                                                                                                                                                                                                                                                                                                                                                                                                                                                                                                                                                                                                                                                                                                                                                                                                                                                                                                                                                                                                                                                                                                                                                                                                                                                                                                                                                                                                                                                                                                                                                                                                                                                                                                                            | Synlab Medilab, Mikrobiologi                                                                       | The Public Health Agency of Sweden                                                                                         | Anna Risberg; Anna-Malin Linde; Carlo Berg; Department of Microbiology; Karin Tegmark-Wisell; Maria Lind Karlberg; Mattias Haukland; Mia Brytting; Noura Walai; Oskar Karlsson Lindsjö; Petra Edquist; Petra Holmstrom; Reza Advani; Sofia Stamouli; The Public Health Agency of Sweden                                                                  |
| EPI_ISL_708821, EPI_ISL_768522                                                                                                                                                                                                                                                                                                                                                                                                                                                                                                                                                                                                                                                                                                                                                                                                                                                                                                                                                                                                                                                                                                                                                                                                                                                                                                                                                                                                                                                                                                                                                                                                                                                                                                                                                                                                                                                                                                                                                                                                                                                                                                                                                                                                                                                                                                                                                                                                                                                                                                                                                                                                                                                                                                                                                                                                                                                       | Synphaet Hospital                                                                                  | National Institute of Health, Department of Medical Sciences, Ministry of Public Health, Thailand                          | ; Malinee Chittaganpiti; Natchaya Khiahsang; Pakorn Piromtong; Pilaiuk Okada; Ratana Thacharonmuang; Siripaporn Phuyung; Sittiporn Parmmen; Sunthareeya Waicharoen; Thanutsapa Thanadachakul; Warawan Wongboot; sirikanda wimol                                                                                                                          |
| EPI_ISL_977503                                                                                                                                                                                                                                                                                                                                                                                                                                                                                                                                                                                                                                                                                                                                                                                                                                                                                                                                                                                                                                                                                                                                                                                                                                                                                                                                                                                                                                                                                                                                                                                                                                                                                                                                                                                                                                                                                                                                                                                                                                                                                                                                                                                                                                                                                                                                                                                                                                                                                                                                                                                                                                                                                                                                                                                                                                                                       | Szpital Miejski im. Franciszka Raszei w Poznaniu, Oddzia Chirurgii Ogólnej i Minimalnie Inwazyjnej | genXone SA, Research & Development Laboratory                                                                              | Aleksandra Gidlewicz; Anna Brylak-Baszków; Grzegorz Nowicki; Jakub Grabowski; Karol Szeszko; Maciej Sykulski; Micha Kaszuba; Natalia Drwska-Matelska; ukasz Krych                                                                                                                                                                                        |
| EPI_ISL_914796 to 914797, EPI_ISL_914813, EPI_ISL_914824, EPI_ISL_914829                                                                                                                                                                                                                                                                                                                                                                                                                                                                                                                                                                                                                                                                                                                                                                                                                                                                                                                                                                                                                                                                                                                                                                                                                                                                                                                                                                                                                                                                                                                                                                                                                                                                                                                                                                                                                                                                                                                                                                                                                                                                                                                                                                                                                                                                                                                                                                                                                                                                                                                                                                                                                                                                                                                                                                                                             | TAMIZAJE COMUNITARIO - PASO CANOAS                                                                 | Incienza, Instituto Costarricense de Investigación y Enseñanza en Nutrición y Salud                                        | Adriana Godínez; Claudio Soto-Garita; Estela Cordero; Francisco Duarte; Hebleen Porras; Melany Calderón & Mariel López                                                                                                                                                                                                                                   |
| EPI_ISL_682261                                                                                                                                                                                                                                                                                                                                                                                                                                                                                                                                                                                                                                                                                                                                                                                                                                                                                                                                                                                                                                                                                                                                                                                                                                                                                                                                                                                                                                                                                                                                                                                                                                                                                                                                                                                                                                                                                                                                                                                                                                                                                                                                                                                                                                                                                                                                                                                                                                                                                                                                                                                                                                                                                                                                                                                                                                                                       | TAMIZAJE COMUNITARIO - PASO CANOAS                                                                 | Incienza, Instituto Costarricense de Investigación y Enseñanza en Nutrición y Salud                                        | Adriana Godínez & Melany Calderon; Claudio Soto-Garita; Estela Cordero; Francisco Duarte; Hebleen Porras                                                                                                                                                                                                                                                 |
| EPI_ISL_766724, EPI_ISL_775593, EPI_ISL_831993 to 831995                                                                                                                                                                                                                                                                                                                                                                                                                                                                                                                                                                                                                                                                                                                                                                                                                                                                                                                                                                                                                                                                                                                                                                                                                                                                                                                                                                                                                                                                                                                                                                                                                                                                                                                                                                                                                                                                                                                                                                                                                                                                                                                                                                                                                                                                                                                                                                                                                                                                                                                                                                                                                                                                                                                                                                                                                             | TATAA Biocenter                                                                                    | The Public Health Agency of Sweden                                                                                         | Department of Microbiology; The Public Health Agency of Sweden                                                                                                                                                                                                                                                                                           |
| EPI_ISL_854447 to 854448, EPI_ISL_884054, EPI_ISL_896226, EPI_ISL_936173                                                                                                                                                                                                                                                                                                                                                                                                                                                                                                                                                                                                                                                                                                                                                                                                                                                                                                                                                                                                                                                                                                                                                                                                                                                                                                                                                                                                                                                                                                                                                                                                                                                                                                                                                                                                                                                                                                                                                                                                                                                                                                                                                                                                                                                                                                                                                                                                                                                                                                                                                                                                                                                                                                                                                                                                             | TEMPUS LABS INC                                                                                    | Wadsworth Center, New York State Department of Health                                                                      | Alexis Russel; Daryl M. Lamson; Erasmus Schneider; Erica Lasek-Nesselquist; John Kelly; Jonathan Plitnick; Kirsten St. George; Matthew Shudt; Melissa A Leisner; Navjot Singh                                                                                                                                                                            |
| EPI_ISL_802436                                                                                                                                                                                                                                                                                                                                                                                                                                                                                                                                                                                                                                                                                                                                                                                                                                                                                                                                                                                                                                                                                                                                                                                                                                                                                                                                                                                                                                                                                                                                                                                                                                                                                                                                                                                                                                                                                                                                                                                                                                                                                                                                                                                                                                                                                                                                                                                                                                                                                                                                                                                                                                                                                                                                                                                                                                                                       | TEMPUS LABS INC                                                                                    | Wadsworth Center, New York State Department of Health                                                                      | Alexis Russel; Daryl M. Lamson; Erasmus Schneider; Erica Lasek-Nesselquist; John Kelly; Jonathan Plitnick; Kirsten St. George; Matthew Shudt; Melissa A Leisner; Navjot Singh; Sara Griesemer                                                                                                                                                            |
| EPI_ISL_694009 to 694040, EPI_ISL_694047 to 694048, EPI_ISL_694050 to 694052, EPI_ISL_694139 to 694147, EPI_ISL_694219 to 694247, EPI_ISL_694316 to 694404, EPI_ISL_694428 to 694457, EPI_ISL_694601 to 694723, EPI_ISL_694797 to 694798, EPI_ISL_694845 to 694884, EPI_ISL_694951 to 695102, EPI_ISL_695229 to 695315, EPI_ISL_695372 to 695392, EPI_ISL_695521 to 695562, EPI_ISL_695614 to 695664, EPI_ISL_695656 to 695664, EPI_ISL_695702 to 695711, EPI_ISL_695753 to 695754, EPI_ISL_845809 to 845873, EPI_ISL_913771, EPI_ISL_913774, EPI_ISL_913778, EPI_ISL_913782, EPI_ISL_913785, EPI_ISL_913788, EPI_ISL_913791, EPI_ISL_913795, EPI_ISL_913798, EPI_ISL_913802, EPI_ISL_913805, EPI_ISL_913808, EPI_ISL_913811, EPI_ISL_913815, EPI_ISL_913818, EPI_ISL_913822, EPI_ISL_913825, EPI_ISL_913829, EPI_ISL_913832, EPI_ISL_913836, EPI_ISL_913839, EPI_ISL_913842, EPI_ISL_913844, EPI_ISL_913849, EPI_ISL_913852, EPI_ISL_913856, EPI_ISL_913859, EPI_ISL_913862, EPI_ISL_913866, EPI_ISL_913870, EPI_ISL_913873, EPI_ISL_913877, EPI_ISL_913879 to 913910, EPI_ISL_914040 to 914427, EPI_ISL_914429 to 914530, EPI_ISL_914532 to 914637, EPI_ISL_914532 to 914637, EPI_ISL_967885 to 967889, EPI_ISL_967894, EPI_ISL_967897, EPI_ISL_967901 to 967902, EPI_ISL_967905 to 967906, EPI_ISL_967908, EPI_ISL_967910 to 967914, EPI_ISL_967919, EPI_ISL_967921, EPI_ISL_967923, EPI_ISL_967925, EPI_ISL_967928, EPI_ISL_967930 to 967931, EPI_ISL_967935 to 967939, EPI_ISL_967941, EPI_ISL_967944 to 967945, EPI_ISL_967947 to 967950, EPI_ISL_967952 to 967953, EPI_ISL_967955 to 967956, EPI_ISL_967959 to 967961, EPI_ISL_967966 to 967967, EPI_ISL_967970 to 967971, EPI_ISL_967973 to 967977, EPI_ISL_967979, EPI_ISL_967982 to 967983, EPI_ISL_967986 to 967988, EPI_ISL_967990, EPI_ISL_967992, EPI_ISL_967997, EPI_ISL_967999, EPI_ISL_968001 to 968003, EPI_ISL_968005, EPI_ISL_968007, EPI_ISL_968009, EPI_ISL_968011 to 968013, EPI_ISL_968015 to 968017, EPI_ISL_968020, EPI_ISL_968032, EPI_ISL_968034, EPI_ISL_968037 to 968038, EPI_ISL_968041, EPI_ISL_968044 to 968045, EPI_ISL_968050 to 968051, EPI_ISL_968053, EPI_ISL_968055, EPI_ISL_968063 to 968065, EPI_ISL_968067 to 968068, EPI_ISL_969178, EPI_ISL_981981 to 981982, EPI_ISL_981987 to 981988, EPI_ISL_981990, EPI_ISL_981996, EPI_ISL_981998 to 981999, EPI_ISL_982001 to 982003, EPI_ISL_982007 to 982008, EPI_ISL_982010 to 982012, EPI_ISL_982016, EPI_ISL_982019 to 982023, EPI_ISL_982026 to 982027, EPI_ISL_982029, EPI_ISL_982038, EPI_ISL_982043 to 982044, EPI_ISL_982047 to 982048, EPI_ISL_982052 to 982053, EPI_ISL_982056 to 982057, EPI_ISL_982059, EPI_ISL_982063, EPI_ISL_982065, EPI_ISL_982068, EPI_ISL_982070 to 982071, EPI_ISL_982078, EPI_ISL_982085 to 982086, EPI_ISL_982097, EPI_ISL_982105 to 982106, EPI_ISL_982109, EPI_ISL_982111, EPI_ISL_982113, EPI_ISL_982115 |                                                                                                    |                                                                                                                            |                                                                                                                                                                                                                                                                                                                                                          |
| see above                                                                                                                                                                                                                                                                                                                                                                                                                                                                                                                                                                                                                                                                                                                                                                                                                                                                                                                                                                                                                                                                                                                                                                                                                                                                                                                                                                                                                                                                                                                                                                                                                                                                                                                                                                                                                                                                                                                                                                                                                                                                                                                                                                                                                                                                                                                                                                                                                                                                                                                                                                                                                                                                                                                                                                                                                                                                            | TGen North                                                                                         | TGen North                                                                                                                 | *Jolene Bowers; Ashley Pfeiffer; Chris French; Daniel Jasso-Selles; Darrin Lemmer; Dave Engelthaler; David M Engelthaler; Hayley D Yaglom; Hayley Yaglom; Jolene Bowers; Jolene R Bowers; Marette Gebhardt; Mary Ellen Ormsby; Matthew Maurer; Megan Folkerts; The Arizona COVID Genomics Union (ACGU); The Arizona COVID Genomics Union (ACGU)          |
| EPI_ISL_853648 to 853649, EPI_ISL_853652, EPI_ISL_853667 to 853669, EPI_ISL_853688, EPI_ISL_936023 to 936035, EPI_ISL_936138 to 936141, EPI_ISL_936153, EPI_ISL_983119 to 983131, EPI_ISL_983445 to 983446, EPI_ISL_983477, EPI_ISL_983485 to 983492                                                                                                                                                                                                                                                                                                                                                                                                                                                                                                                                                                                                                                                                                                                                                                                                                                                                                                                                                                                                                                                                                                                                                                                                                                                                                                                                                                                                                                                                                                                                                                                                                                                                                                                                                                                                                                                                                                                                                                                                                                                                                                                                                                                                                                                                                                                                                                                                                                                                                                                                                                                                                                 |                                                                                                    |                                                                                                                            |                                                                                                                                                                                                                                                                                                                                                          |
| see above                                                                                                                                                                                                                                                                                                                                                                                                                                                                                                                                                                                                                                                                                                                                                                                                                                                                                                                                                                                                                                                                                                                                                                                                                                                                                                                                                                                                                                                                                                                                                                                                                                                                                                                                                                                                                                                                                                                                                                                                                                                                                                                                                                                                                                                                                                                                                                                                                                                                                                                                                                                                                                                                                                                                                                                                                                                                            | THE MARY IMOGENE BASSETT HOSPITAL                                                                  | Wadsworth Center, New York State Department of Health                                                                      | Alexis Russel; Daryl M. Lamson; Erasmus Schneider; Erica Lasek-Nesselquist; John Kelly; Jonathan Plitnick; Kirsten St. George; Matthew Shudt; Melissa A Leisner; Navjot Singh                                                                                                                                                                            |
| EPI_ISL_914010 to 914011, EPI_ISL_955290, EPI_ISL_955292 to 955293                                                                                                                                                                                                                                                                                                                                                                                                                                                                                                                                                                                                                                                                                                                                                                                                                                                                                                                                                                                                                                                                                                                                                                                                                                                                                                                                                                                                                                                                                                                                                                                                                                                                                                                                                                                                                                                                                                                                                                                                                                                                                                                                                                                                                                                                                                                                                                                                                                                                                                                                                                                                                                                                                                                                                                                                                   | TMC/Pathology                                                                                      | Pathogen Discovery, Respiratory Viruses Branch, Division of Viral Diseases, Centers for Disease Control and Prevention     | Anna Uehara; Clinton R. Paden; Haibin Wang; Jing Zhang; Krista Queen; Peter Cook; Suxiang Tong; Yan Li; Ying Tao                                                                                                                                                                                                                                         |
| EPI_ISL_903582, EPI_ISL_903757, EPI_ISL_903797, EPI_ISL_903802, EPI_ISL_903805, EPI_ISL_903882, EPI_ISL_903912, EPI_ISL_903924, EPI_ISL_903939                                                                                                                                                                                                                                                                                                                                                                                                                                                                                                                                                                                                                                                                                                                                                                                                                                                                                                                                                                                                                                                                                                                                                                                                                                                                                                                                                                                                                                                                                                                                                                                                                                                                                                                                                                                                                                                                                                                                                                                                                                                                                                                                                                                                                                                                                                                                                                                                                                                                                                                                                                                                                                                                                                                                       |                                                                                                    |                                                                                                                            |                                                                                                                                                                                                                                                                                                                                                          |
| see above                                                                                                                                                                                                                                                                                                                                                                                                                                                                                                                                                                                                                                                                                                                                                                                                                                                                                                                                                                                                                                                                                                                                                                                                                                                                                                                                                                                                                                                                                                                                                                                                                                                                                                                                                                                                                                                                                                                                                                                                                                                                                                                                                                                                                                                                                                                                                                                                                                                                                                                                                                                                                                                                                                                                                                                                                                                                            | TN Division of Laboratory Services                                                                 | Genomics and Discovery, Respiratory Viruses Branch, Division of Viral Diseases, Centers for Disease Control and Prevention | Anna Montmayeur; Anna Uehara; Ben L. Rambo-Martin; Clinton R. Paden; Dhvani Batra; Haibin Wang; Jasmine Padilla; Jing Zhang; Justin Lee; Krista Queen; Lori Rowe; Mark Burroughs; Mili Sheth; Peter W. Cook; Rachel Marine; Sarah Nobles; Suxiang Tong; Yan Li; Ying Tao                                                                                 |
| EPI_ISL_812132, EPI_ISL_812139, EPI_ISL_812204 to 812231, EPI_ISL_876590 to 876596, EPI_ISL_913992 to 913994, EPI_ISL_955310                                                                                                                                                                                                                                                                                                                                                                                                                                                                                                                                                                                                                                                                                                                                                                                                                                                                                                                                                                                                                                                                                                                                                                                                                                                                                                                                                                                                                                                                                                                                                                                                                                                                                                                                                                                                                                                                                                                                                                                                                                                                                                                                                                                                                                                                                                                                                                                                                                                                                                                                                                                                                                                                                                                                                         | TN Division of Laboratory Services                                                                 | Pathogen Discovery, Respiratory Viruses Branch, Division of Viral Diseases, Centers for Disease Control and Prevention     | Anna Montmayeur; Anna Uehara; Brian Lynch; Clinton R. Paden; Haibin Wang; Jing Zhang; Krista Queen; Peter Cook; Rachel Marine; Suxiang Tong; Yan Li; Ying Tao                                                                                                                                                                                            |
| EPI_ISL_801538                                                                                                                                                                                                                                                                                                                                                                                                                                                                                                                                                                                                                                                                                                                                                                                                                                                                                                                                                                                                                                                                                                                                                                                                                                                                                                                                                                                                                                                                                                                                                                                                                                                                                                                                                                                                                                                                                                                                                                                                                                                                                                                                                                                                                                                                                                                                                                                                                                                                                                                                                                                                                                                                                                                                                                                                                                                                       | TNMC & BYL NAIR CH. HOSPITAL                                                                       | CSIR-IGIB                                                                                                                  | Akshay Kankan; Amol Borse; Janani Srinivasa Vasudevan; Jasmina Savak; Jayanthi Shastri; Mahesh Sangar; Manish Pathak; Mayuresh Vishwanathan; Nirjhar Chatterjee; Rajesh Pandey; Ranjeet Maurya; Sachee Agrawal; Shruthi Sachidanandan; Shrutika Pophale; Shweta Kawankar; Subrat Thanapati; Suresh Pojari; Swapnell Parikh; Utkarsha Yelve; Vasil Nachan |
| EPI_ISL_676509, EPI_ISL_676541                                                                                                                                                                                                                                                                                                                                                                                                                                                                                                                                                                                                                                                                                                                                                                                                                                                                                                                                                                                                                                                                                                                                                                                                                                                                                                                                                                                                                                                                                                                                                                                                                                                                                                                                                                                                                                                                                                                                                                                                                                                                                                                                                                                                                                                                                                                                                                                                                                                                                                                                                                                                                                                                                                                                                                                                                                                       | TNMC & Nair ch. Hospital                                                                           | CSIR-Institute of Genomics and Integrative Biology                                                                         | Akshay Kankan; Amol Borse; Janani Srinivasa Vasudevan; Jasmina Savak; Jayanthi Shastri; Mahesh Sangar; Manish Pathak; Mayuresh Vishwanathan; Nirjhar Chatterjee; Rajesh Pandey; Ranjeet Maurya; Sachee Agrawal; Shruthi Sachidanandan; Shrutika Pophale; Shweta Kawankar; Subrat Thanapati; Suresh Pojari; Swapnell Parikh; Utkarsha Yelve; Vasil Nachan |
| EPI_ISL_751571, EPI_ISL_751617, EPI_ISL_751644 to 751646, EPI_ISL_751684, EPI_ISL_751720, EPI_ISL_751749, EPI_ISL_751787, EPI_ISL_903597, EPI_ISL_903767 to 903768, EPI_ISL_903788, EPI_ISL_903884, EPI_ISL_903889, EPI_ISL_903893, EPI_ISL_903897, EPI_ISL_903931                                                                                                                                                                                                                                                                                                                                                                                                                                                                                                                                                                                                                                                                                                                                                                                                                                                                                                                                                                                                                                                                                                                                                                                                                                                                                                                                                                                                                                                                                                                                                                                                                                                                                                                                                                                                                                                                                                                                                                                                                                                                                                                                                                                                                                                                                                                                                                                                                                                                                                                                                                                                                   |                                                                                                    |                                                                                                                            |                                                                                                                                                                                                                                                                                                                                                          |
| see above                                                                                                                                                                                                                                                                                                                                                                                                                                                                                                                                                                                                                                                                                                                                                                                                                                                                                                                                                                                                                                                                                                                                                                                                                                                                                                                                                                                                                                                                                                                                                                                                                                                                                                                                                                                                                                                                                                                                                                                                                                                                                                                                                                                                                                                                                                                                                                                                                                                                                                                                                                                                                                                                                                                                                                                                                                                                            | TX DSHS, Lab Services Section MC 1947                                                              | Genomics and Discovery, Respiratory Viruses Branch, Division of Viral Diseases, Centers for Disease Control and Prevention | Anna Montmayeur; Anna Uehara; Ben L. Rambo-Martin; Clinton R. Paden; Dhvani Batra; Haibin Wang; Jasmine Padilla; Jing Zhang; Justin Lee; Krista Queen; Lori Rowe; Mark Burroughs; Mili Sheth; Peter W. Cook; Rachel Marine; Sarah Nobles; Suxiang Tong; Yan Li; Ying Tao                                                                                 |
| EPI_ISL_913985 to 913989, EPI_ISL_913999, EPI_ISL_955311                                                                                                                                                                                                                                                                                                                                                                                                                                                                                                                                                                                                                                                                                                                                                                                                                                                                                                                                                                                                                                                                                                                                                                                                                                                                                                                                                                                                                                                                                                                                                                                                                                                                                                                                                                                                                                                                                                                                                                                                                                                                                                                                                                                                                                                                                                                                                                                                                                                                                                                                                                                                                                                                                                                                                                                                                             | TX DSHS, Lab Services Section MC 1947                                                              | Pathogen Discovery, Respiratory Viruses Branch, Division of Viral Diseases, Centers for Disease Control and Prevention     | Anna Uehara; Clinton R. Paden; Haibin Wang; Jing Zhang; Krista Queen; Peter Cook; Suxiang Tong; Yan Li; Ying Tao                                                                                                                                                                                                                                         |
| EPI_ISL_765896 to 765941, EPI_ISL_925048 to 925080                                                                                                                                                                                                                                                                                                                                                                                                                                                                                                                                                                                                                                                                                                                                                                                                                                                                                                                                                                                                                                                                                                                                                                                                                                                                                                                                                                                                                                                                                                                                                                                                                                                                                                                                                                                                                                                                                                                                                                                                                                                                                                                                                                                                                                                                                                                                                                                                                                                                                                                                                                                                                                                                                                                                                                                                                                   | TXDSHS                                                                                             | TXDSHS                                                                                                                     | Anita Pokharel; Bonnie Oh; Chung Wang; Grace Kubin; James Daniel Bonser; Jenny Zhang; Malika Rahman; Mayela Pedruza; Myong Koag; Rachel Lee; Rashmi Tuladhar                                                                                                                                                                                             |
| EPI_ISL_984298 to 984300                                                                                                                                                                                                                                                                                                                                                                                                                                                                                                                                                                                                                                                                                                                                                                                                                                                                                                                                                                                                                                                                                                                                                                                                                                                                                                                                                                                                                                                                                                                                                                                                                                                                                                                                                                                                                                                                                                                                                                                                                                                                                                                                                                                                                                                                                                                                                                                                                                                                                                                                                                                                                                                                                                                                                                                                                                                             | Tampa General Hospital Esoteric Lab                                                                | Tampa General Hospital Esoteric Research & Development Lab                                                                 | Amorce Lima; Deanna Becker; Dominic Uy; Grant Vestal; Suzane Silbert                                                                                                                                                                                                                                                                                     |
| EPI_ISL_902917 to 902919, EPI_ISL_902921 to 902922, EPI_ISL_902924, EPI_ISL_911633, EPI_ISL_911675, EPI_ISL_911708, EPI_ISL_911732, EPI_ISL_911750                                                                                                                                                                                                                                                                                                                                                                                                                                                                                                                                                                                                                                                                                                                                                                                                                                                                                                                                                                                                                                                                                                                                                                                                                                                                                                                                                                                                                                                                                                                                                                                                                                                                                                                                                                                                                                                                                                                                                                                                                                                                                                                                                                                                                                                                                                                                                                                                                                                                                                                                                                                                                                                                                                                                   |                                                                                                    |                                                                                                                            |                                                                                                                                                                                                                                                                                                                                                          |
| see above                                                                                                                                                                                                                                                                                                                                                                                                                                                                                                                                                                                                                                                                                                                                                                                                                                                                                                                                                                                                                                                                                                                                                                                                                                                                                                                                                                                                                                                                                                                                                                                                                                                                                                                                                                                                                                                                                                                                                                                                                                                                                                                                                                                                                                                                                                                                                                                                                                                                                                                                                                                                                                                                                                                                                                                                                                                                            | Tanjungpura University Hospital                                                                    | Tanjungpura University Hospital                                                                                            | Ambar Rialita; Andriani; Arif Wicaksono; Delima Fajar Liana; Eka Ardiani Putri; Eka Ardiani Putri EA; Helmi Sastriarwan; Kahtan MI; Liana DF; Mahyarudin;                                                                                                                                                                                                |

|                                                                                                                                                                                                                                                                                                                                                                                                                                                                                                                                                                                                                                                                                                                                                                                                                                                                                                                                                                                                                                                                                                                                                                                                                                                                                                                                                                                                                                                                                                                                                                                                                                                                                                                                                                                                                                                                                                                                                                                                                                                                                                                                                                                                                                                                                                                                                                                                                                                                                                                                                                                                                                                                                                                                                                                                                                                                                                                                                                                                                                                                                                                                                                                                                                                                                                                                                                                                                                                                                                                                                                                                                                                                                                                                                                                                                                                                                                                                                                                                                                                                                                                                                                                                                                                                                                                                                                                                                                                                                                                                                                                                                                                                                                                                                                                                                                                                                                                                                                                                                                                                                                                                                                                                                                                                                                                                                                                                                                                                                                                                                                                                                                                                                                                                                                                                                                                                                                                                                                                                                                                                                                                                                                                                                                                                                                                                                                                                                                                                                                                                                                                                                                                                                                                                                                                                                                                                                                                                                                                                                                                                                                                                                                                                                                                                                                                                                                                                                                                                                                                                                                                                                                                                                                                                                                                                                                                            |                                                                                                                                          |                                                                                                                              |                                                                                                                                                                                                                                                                                                                                                                                                                                                                                                                                                                                                                                                                                                                                                                                                                                     |
|------------------------------------------------------------------------------------------------------------------------------------------------------------------------------------------------------------------------------------------------------------------------------------------------------------------------------------------------------------------------------------------------------------------------------------------------------------------------------------------------------------------------------------------------------------------------------------------------------------------------------------------------------------------------------------------------------------------------------------------------------------------------------------------------------------------------------------------------------------------------------------------------------------------------------------------------------------------------------------------------------------------------------------------------------------------------------------------------------------------------------------------------------------------------------------------------------------------------------------------------------------------------------------------------------------------------------------------------------------------------------------------------------------------------------------------------------------------------------------------------------------------------------------------------------------------------------------------------------------------------------------------------------------------------------------------------------------------------------------------------------------------------------------------------------------------------------------------------------------------------------------------------------------------------------------------------------------------------------------------------------------------------------------------------------------------------------------------------------------------------------------------------------------------------------------------------------------------------------------------------------------------------------------------------------------------------------------------------------------------------------------------------------------------------------------------------------------------------------------------------------------------------------------------------------------------------------------------------------------------------------------------------------------------------------------------------------------------------------------------------------------------------------------------------------------------------------------------------------------------------------------------------------------------------------------------------------------------------------------------------------------------------------------------------------------------------------------------------------------------------------------------------------------------------------------------------------------------------------------------------------------------------------------------------------------------------------------------------------------------------------------------------------------------------------------------------------------------------------------------------------------------------------------------------------------------------------------------------------------------------------------------------------------------------------------------------------------------------------------------------------------------------------------------------------------------------------------------------------------------------------------------------------------------------------------------------------------------------------------------------------------------------------------------------------------------------------------------------------------------------------------------------------------------------------------------------------------------------------------------------------------------------------------------------------------------------------------------------------------------------------------------------------------------------------------------------------------------------------------------------------------------------------------------------------------------------------------------------------------------------------------------------------------------------------------------------------------------------------------------------------------------------------------------------------------------------------------------------------------------------------------------------------------------------------------------------------------------------------------------------------------------------------------------------------------------------------------------------------------------------------------------------------------------------------------------------------------------------------------------------------------------------------------------------------------------------------------------------------------------------------------------------------------------------------------------------------------------------------------------------------------------------------------------------------------------------------------------------------------------------------------------------------------------------------------------------------------------------------------------------------------------------------------------------------------------------------------------------------------------------------------------------------------------------------------------------------------------------------------------------------------------------------------------------------------------------------------------------------------------------------------------------------------------------------------------------------------------------------------------------------------------------------------------------------------------------------------------------------------------------------------------------------------------------------------------------------------------------------------------------------------------------------------------------------------------------------------------------------------------------------------------------------------------------------------------------------------------------------------------------------------------------------------------------------------------------------------------------------------------------------------------------------------------------------------------------------------------------------------------------------------------------------------------------------------------------------------------------------------------------------------------------------------------------------------------------------------------------------------------------------------------------------------------------------------------------------------------------------------------------------------------------------------------------------------------------------------------------------------------------------------------------------------------------------------------------------------------------------------------------------------------------------------------------------------------------------------------------------------------------------------------------------------------------------------------------------------------------------------|------------------------------------------------------------------------------------------------------------------------------------------|------------------------------------------------------------------------------------------------------------------------------|-------------------------------------------------------------------------------------------------------------------------------------------------------------------------------------------------------------------------------------------------------------------------------------------------------------------------------------------------------------------------------------------------------------------------------------------------------------------------------------------------------------------------------------------------------------------------------------------------------------------------------------------------------------------------------------------------------------------------------------------------------------------------------------------------------------------------------------|
|                                                                                                                                                                                                                                                                                                                                                                                                                                                                                                                                                                                                                                                                                                                                                                                                                                                                                                                                                                                                                                                                                                                                                                                                                                                                                                                                                                                                                                                                                                                                                                                                                                                                                                                                                                                                                                                                                                                                                                                                                                                                                                                                                                                                                                                                                                                                                                                                                                                                                                                                                                                                                                                                                                                                                                                                                                                                                                                                                                                                                                                                                                                                                                                                                                                                                                                                                                                                                                                                                                                                                                                                                                                                                                                                                                                                                                                                                                                                                                                                                                                                                                                                                                                                                                                                                                                                                                                                                                                                                                                                                                                                                                                                                                                                                                                                                                                                                                                                                                                                                                                                                                                                                                                                                                                                                                                                                                                                                                                                                                                                                                                                                                                                                                                                                                                                                                                                                                                                                                                                                                                                                                                                                                                                                                                                                                                                                                                                                                                                                                                                                                                                                                                                                                                                                                                                                                                                                                                                                                                                                                                                                                                                                                                                                                                                                                                                                                                                                                                                                                                                                                                                                                                                                                                                                                                                                                                            |                                                                                                                                          |                                                                                                                              | Muhammad Ibnu Kahtan; Muhammad Kahtan; Novianry V; Puji Astuti; Puji Astuti P; Putri EA; Rialita A; Rini Andriani; Sastriawan W; Shofiyah SS Astuti P; Sofi Siti Shofiyah; Virhan Novianry; Willy Handoko; Windarti W; Wiwik Windarti                                                                                                                                                                                                                                                                                                                                                                                                                                                                                                                                                                                               |
| EPI_ISL_966940                                                                                                                                                                                                                                                                                                                                                                                                                                                                                                                                                                                                                                                                                                                                                                                                                                                                                                                                                                                                                                                                                                                                                                                                                                                                                                                                                                                                                                                                                                                                                                                                                                                                                                                                                                                                                                                                                                                                                                                                                                                                                                                                                                                                                                                                                                                                                                                                                                                                                                                                                                                                                                                                                                                                                                                                                                                                                                                                                                                                                                                                                                                                                                                                                                                                                                                                                                                                                                                                                                                                                                                                                                                                                                                                                                                                                                                                                                                                                                                                                                                                                                                                                                                                                                                                                                                                                                                                                                                                                                                                                                                                                                                                                                                                                                                                                                                                                                                                                                                                                                                                                                                                                                                                                                                                                                                                                                                                                                                                                                                                                                                                                                                                                                                                                                                                                                                                                                                                                                                                                                                                                                                                                                                                                                                                                                                                                                                                                                                                                                                                                                                                                                                                                                                                                                                                                                                                                                                                                                                                                                                                                                                                                                                                                                                                                                                                                                                                                                                                                                                                                                                                                                                                                                                                                                                                                                             | Technical Support Units for Scientific Research (UATRS), National Centre for Scientific and Technical Research (CNRST)                   | Technical Support Units for Scientific Research (UATRS), National Centre for Scientific and Technical Research (CNRST)       | Alaoui; Elaloui; Elannaz, H.; Elouanass, M.; Ennibi; H. and El Fahime, E.; Hemlali, M.; Lahlou, M.A.; Melloul, M.; Rfaki, A.; S.A.; Touil, N.; a.l.                                                                                                                                                                                                                                                                                                                                                                                                                                                                                                                                                                                                                                                                                 |
| EPI_ISL_733572 to 733579, EPI_ISL_759892 to 759894                                                                                                                                                                                                                                                                                                                                                                                                                                                                                                                                                                                                                                                                                                                                                                                                                                                                                                                                                                                                                                                                                                                                                                                                                                                                                                                                                                                                                                                                                                                                                                                                                                                                                                                                                                                                                                                                                                                                                                                                                                                                                                                                                                                                                                                                                                                                                                                                                                                                                                                                                                                                                                                                                                                                                                                                                                                                                                                                                                                                                                                                                                                                                                                                                                                                                                                                                                                                                                                                                                                                                                                                                                                                                                                                                                                                                                                                                                                                                                                                                                                                                                                                                                                                                                                                                                                                                                                                                                                                                                                                                                                                                                                                                                                                                                                                                                                                                                                                                                                                                                                                                                                                                                                                                                                                                                                                                                                                                                                                                                                                                                                                                                                                                                                                                                                                                                                                                                                                                                                                                                                                                                                                                                                                                                                                                                                                                                                                                                                                                                                                                                                                                                                                                                                                                                                                                                                                                                                                                                                                                                                                                                                                                                                                                                                                                                                                                                                                                                                                                                                                                                                                                                                                                                                                                                                                         | Temporary Specimen Collection Centre                                                                                                     | Hong Kong Department of Health                                                                                               | Alan K.L. Tsang; Dominic N.C. Tsang; Edman T.K. Lam; Peter C.W. Yip; Rickjason C.W. Chan                                                                                                                                                                                                                                                                                                                                                                                                                                                                                                                                                                                                                                                                                                                                            |
| EPI_ISL_847829 to 847830, EPI_ISL_847836, EPI_ISL_847839 to 847840, EPI_ISL_861732 to 861733, EPI_ISL_861735, EPI_ISL_861737 to 861744, EPI_ISL_861746 to 861749, EPI_ISL_861751, EPI_ISL_861754 to 861757, EPI_ISL_861759 to 861763, EPI_ISL_861765 to 861766, EPI_ISL_861769, EPI_ISL_861772, EPI_ISL_912161, EPI_ISL_912170 to 912178                                                                                                                                                                                                                                                                                                                                                                                                                                                                                                                                                                                                                                                                                                                                                                                                                                                                                                                                                                                                                                                                                                                                                                                                                                                                                                                                                                                                                                                                                                                                                                                                                                                                                                                                                                                                                                                                                                                                                                                                                                                                                                                                                                                                                                                                                                                                                                                                                                                                                                                                                                                                                                                                                                                                                                                                                                                                                                                                                                                                                                                                                                                                                                                                                                                                                                                                                                                                                                                                                                                                                                                                                                                                                                                                                                                                                                                                                                                                                                                                                                                                                                                                                                                                                                                                                                                                                                                                                                                                                                                                                                                                                                                                                                                                                                                                                                                                                                                                                                                                                                                                                                                                                                                                                                                                                                                                                                                                                                                                                                                                                                                                                                                                                                                                                                                                                                                                                                                                                                                                                                                                                                                                                                                                                                                                                                                                                                                                                                                                                                                                                                                                                                                                                                                                                                                                                                                                                                                                                                                                                                                                                                                                                                                                                                                                                                                                                                                                                                                                                                                   |                                                                                                                                          |                                                                                                                              |                                                                                                                                                                                                                                                                                                                                                                                                                                                                                                                                                                                                                                                                                                                                                                                                                                     |
| see above                                                                                                                                                                                                                                                                                                                                                                                                                                                                                                                                                                                                                                                                                                                                                                                                                                                                                                                                                                                                                                                                                                                                                                                                                                                                                                                                                                                                                                                                                                                                                                                                                                                                                                                                                                                                                                                                                                                                                                                                                                                                                                                                                                                                                                                                                                                                                                                                                                                                                                                                                                                                                                                                                                                                                                                                                                                                                                                                                                                                                                                                                                                                                                                                                                                                                                                                                                                                                                                                                                                                                                                                                                                                                                                                                                                                                                                                                                                                                                                                                                                                                                                                                                                                                                                                                                                                                                                                                                                                                                                                                                                                                                                                                                                                                                                                                                                                                                                                                                                                                                                                                                                                                                                                                                                                                                                                                                                                                                                                                                                                                                                                                                                                                                                                                                                                                                                                                                                                                                                                                                                                                                                                                                                                                                                                                                                                                                                                                                                                                                                                                                                                                                                                                                                                                                                                                                                                                                                                                                                                                                                                                                                                                                                                                                                                                                                                                                                                                                                                                                                                                                                                                                                                                                                                                                                                                                                  | Tempus                                                                                                                                   | Grubaugh Lab - Yale School of Public Health                                                                                  | Anderson Brito; Anne Wyllie; Annie Watkins; Chaney Kalinich; Chantal Vogels; Isabel Ott; Joseph Fauver; Mallery Breban; Mary Petrone; Nathan Grubaugh; Tara Alpert                                                                                                                                                                                                                                                                                                                                                                                                                                                                                                                                                                                                                                                                  |
| EPI_ISL_979455, EPI_ISL_979458                                                                                                                                                                                                                                                                                                                                                                                                                                                                                                                                                                                                                                                                                                                                                                                                                                                                                                                                                                                                                                                                                                                                                                                                                                                                                                                                                                                                                                                                                                                                                                                                                                                                                                                                                                                                                                                                                                                                                                                                                                                                                                                                                                                                                                                                                                                                                                                                                                                                                                                                                                                                                                                                                                                                                                                                                                                                                                                                                                                                                                                                                                                                                                                                                                                                                                                                                                                                                                                                                                                                                                                                                                                                                                                                                                                                                                                                                                                                                                                                                                                                                                                                                                                                                                                                                                                                                                                                                                                                                                                                                                                                                                                                                                                                                                                                                                                                                                                                                                                                                                                                                                                                                                                                                                                                                                                                                                                                                                                                                                                                                                                                                                                                                                                                                                                                                                                                                                                                                                                                                                                                                                                                                                                                                                                                                                                                                                                                                                                                                                                                                                                                                                                                                                                                                                                                                                                                                                                                                                                                                                                                                                                                                                                                                                                                                                                                                                                                                                                                                                                                                                                                                                                                                                                                                                                                                             | Test Iowa                                                                                                                                | State Hygienic Laboratory at the University of Iowa                                                                          | Alankar Kampooale; Erik Twait; Valerie Reeb; Wes Hottel                                                                                                                                                                                                                                                                                                                                                                                                                                                                                                                                                                                                                                                                                                                                                                             |
| EPI_ISL_628701 to 628744, EPI_ISL_631640 to 631684, EPI_ISL_634934 to 634975, EPI_ISL_644163 to 644208, EPI_ISL_648219 to 648264, EPI_ISL_654731 to 654736, EPI_ISL_654738 to 654763, EPI_ISL_654765 to 654774, EPI_ISL_654900 to 654941, EPI_ISL_667776, EPI_ISL_671607 to 671651, EPI_ISL_676604 to 676647, EPI_ISL_681843 to 681884, EPI_ISL_683403 to 683448, EPI_ISL_700699 to 700742, EPI_ISL_708607 to 708651, EPI_ISL_710043 to 710089, EPI_ISL_710374 to 710415, EPI_ISL_738148 to 738193, EPI_ISL_745261 to 745306, EPI_ISL_751504 to 751541, EPI_ISL_766646 to 766691, EPI_ISL_766731 to 766773, EPI_ISL_826537 to 826577, EPI_ISL_831289 to 831333, EPI_ISL_961134 to 961180, EPI_ISL_978227 to 978352, EPI_ISL_983588 to 983631                                                                                                                                                                                                                                                                                                                                                                                                                                                                                                                                                                                                                                                                                                                                                                                                                                                                                                                                                                                                                                                                                                                                                                                                                                                                                                                                                                                                                                                                                                                                                                                                                                                                                                                                                                                                                                                                                                                                                                                                                                                                                                                                                                                                                                                                                                                                                                                                                                                                                                                                                                                                                                                                                                                                                                                                                                                                                                                                                                                                                                                                                                                                                                                                                                                                                                                                                                                                                                                                                                                                                                                                                                                                                                                                                                                                                                                                                                                                                                                                                                                                                                                                                                                                                                                                                                                                                                                                                                                                                                                                                                                                                                                                                                                                                                                                                                                                                                                                                                                                                                                                                                                                                                                                                                                                                                                                                                                                                                                                                                                                                                                                                                                                                                                                                                                                                                                                                                                                                                                                                                                                                                                                                                                                                                                                                                                                                                                                                                                                                                                                                                                                                                                                                                                                                                                                                                                                                                                                                                                                                                                                                                               |                                                                                                                                          |                                                                                                                              |                                                                                                                                                                                                                                                                                                                                                                                                                                                                                                                                                                                                                                                                                                                                                                                                                                     |
| see above                                                                                                                                                                                                                                                                                                                                                                                                                                                                                                                                                                                                                                                                                                                                                                                                                                                                                                                                                                                                                                                                                                                                                                                                                                                                                                                                                                                                                                                                                                                                                                                                                                                                                                                                                                                                                                                                                                                                                                                                                                                                                                                                                                                                                                                                                                                                                                                                                                                                                                                                                                                                                                                                                                                                                                                                                                                                                                                                                                                                                                                                                                                                                                                                                                                                                                                                                                                                                                                                                                                                                                                                                                                                                                                                                                                                                                                                                                                                                                                                                                                                                                                                                                                                                                                                                                                                                                                                                                                                                                                                                                                                                                                                                                                                                                                                                                                                                                                                                                                                                                                                                                                                                                                                                                                                                                                                                                                                                                                                                                                                                                                                                                                                                                                                                                                                                                                                                                                                                                                                                                                                                                                                                                                                                                                                                                                                                                                                                                                                                                                                                                                                                                                                                                                                                                                                                                                                                                                                                                                                                                                                                                                                                                                                                                                                                                                                                                                                                                                                                                                                                                                                                                                                                                                                                                                                                                                  | Texas Department of State Health Services                                                                                                | Texas Department of State Health Services                                                                                    | Anita Pokharel; Bonnie Oh; Chung Wang; G. and Bonser, J.; Grace Kubin; James Daniel Bonser; Jenny Zhang; Koag, M.; Kubin; Lee, R.; Maliha Rahman; Mayela Pedruza; Myong Koag; Oh, B.; Pedruza, M.; Pokharel, A.; Rachel Lee; Rahman, M.; Rashmi Tuladhar; Tuladhar, R.; Wang, C.; Zhang, J.                                                                                                                                                                                                                                                                                                                                                                                                                                                                                                                                         |
| EPI_ISL_857349 to 857394, EPI_ISL_872350 to 872393, EPI_ISL_911635 to 911673                                                                                                                                                                                                                                                                                                                                                                                                                                                                                                                                                                                                                                                                                                                                                                                                                                                                                                                                                                                                                                                                                                                                                                                                                                                                                                                                                                                                                                                                                                                                                                                                                                                                                                                                                                                                                                                                                                                                                                                                                                                                                                                                                                                                                                                                                                                                                                                                                                                                                                                                                                                                                                                                                                                                                                                                                                                                                                                                                                                                                                                                                                                                                                                                                                                                                                                                                                                                                                                                                                                                                                                                                                                                                                                                                                                                                                                                                                                                                                                                                                                                                                                                                                                                                                                                                                                                                                                                                                                                                                                                                                                                                                                                                                                                                                                                                                                                                                                                                                                                                                                                                                                                                                                                                                                                                                                                                                                                                                                                                                                                                                                                                                                                                                                                                                                                                                                                                                                                                                                                                                                                                                                                                                                                                                                                                                                                                                                                                                                                                                                                                                                                                                                                                                                                                                                                                                                                                                                                                                                                                                                                                                                                                                                                                                                                                                                                                                                                                                                                                                                                                                                                                                                                                                                                                                               | Texas Department of State Health Services (TXDSHS)                                                                                       | Texas Department of State Health Services (TXDSHS)                                                                           | Anita Pokharel; Bonnie Oh; Chung Wang; Grace Kubin; James Daniel Bonser; Jenny Zhang; Maliha Rahman; Mayela Pedruza; Myong Koag; Rachel Lee; Rashmi Tuladhar                                                                                                                                                                                                                                                                                                                                                                                                                                                                                                                                                                                                                                                                        |
| EPI_ISL_911634                                                                                                                                                                                                                                                                                                                                                                                                                                                                                                                                                                                                                                                                                                                                                                                                                                                                                                                                                                                                                                                                                                                                                                                                                                                                                                                                                                                                                                                                                                                                                                                                                                                                                                                                                                                                                                                                                                                                                                                                                                                                                                                                                                                                                                                                                                                                                                                                                                                                                                                                                                                                                                                                                                                                                                                                                                                                                                                                                                                                                                                                                                                                                                                                                                                                                                                                                                                                                                                                                                                                                                                                                                                                                                                                                                                                                                                                                                                                                                                                                                                                                                                                                                                                                                                                                                                                                                                                                                                                                                                                                                                                                                                                                                                                                                                                                                                                                                                                                                                                                                                                                                                                                                                                                                                                                                                                                                                                                                                                                                                                                                                                                                                                                                                                                                                                                                                                                                                                                                                                                                                                                                                                                                                                                                                                                                                                                                                                                                                                                                                                                                                                                                                                                                                                                                                                                                                                                                                                                                                                                                                                                                                                                                                                                                                                                                                                                                                                                                                                                                                                                                                                                                                                                                                                                                                                                                             | Texas Department of State Health Services (Texas Department of State Health Services (TXDSHS))                                           | Texas Department of State Health Services (TXDSHS)                                                                           | Anita Pokharel; Bonnie Oh; Chung Wang; Grace Kubin; James Daniel Bonser; Jenny Zhang; Maliha Rahman; Mayela Pedruza; Myong Koag; Rachel Lee; Rashmi Tuladhar                                                                                                                                                                                                                                                                                                                                                                                                                                                                                                                                                                                                                                                                        |
| EPI_ISL_877227, EPI_ISL_877766, EPI_ISL_918160 to 918163, EPI_ISL_918166, EPI_ISL_934971 to 934972, EPI_ISL_937531 to 937544, EPI_ISL_956272, EPI_ISL_956275, EPI_ISL_976893 to 976909, EPI_ISL_981004, EPI_ISL_984303 to 984304                                                                                                                                                                                                                                                                                                                                                                                                                                                                                                                                                                                                                                                                                                                                                                                                                                                                                                                                                                                                                                                                                                                                                                                                                                                                                                                                                                                                                                                                                                                                                                                                                                                                                                                                                                                                                                                                                                                                                                                                                                                                                                                                                                                                                                                                                                                                                                                                                                                                                                                                                                                                                                                                                                                                                                                                                                                                                                                                                                                                                                                                                                                                                                                                                                                                                                                                                                                                                                                                                                                                                                                                                                                                                                                                                                                                                                                                                                                                                                                                                                                                                                                                                                                                                                                                                                                                                                                                                                                                                                                                                                                                                                                                                                                                                                                                                                                                                                                                                                                                                                                                                                                                                                                                                                                                                                                                                                                                                                                                                                                                                                                                                                                                                                                                                                                                                                                                                                                                                                                                                                                                                                                                                                                                                                                                                                                                                                                                                                                                                                                                                                                                                                                                                                                                                                                                                                                                                                                                                                                                                                                                                                                                                                                                                                                                                                                                                                                                                                                                                                                                                                                                                           |                                                                                                                                          |                                                                                                                              |                                                                                                                                                                                                                                                                                                                                                                                                                                                                                                                                                                                                                                                                                                                                                                                                                                     |
| see above                                                                                                                                                                                                                                                                                                                                                                                                                                                                                                                                                                                                                                                                                                                                                                                                                                                                                                                                                                                                                                                                                                                                                                                                                                                                                                                                                                                                                                                                                                                                                                                                                                                                                                                                                                                                                                                                                                                                                                                                                                                                                                                                                                                                                                                                                                                                                                                                                                                                                                                                                                                                                                                                                                                                                                                                                                                                                                                                                                                                                                                                                                                                                                                                                                                                                                                                                                                                                                                                                                                                                                                                                                                                                                                                                                                                                                                                                                                                                                                                                                                                                                                                                                                                                                                                                                                                                                                                                                                                                                                                                                                                                                                                                                                                                                                                                                                                                                                                                                                                                                                                                                                                                                                                                                                                                                                                                                                                                                                                                                                                                                                                                                                                                                                                                                                                                                                                                                                                                                                                                                                                                                                                                                                                                                                                                                                                                                                                                                                                                                                                                                                                                                                                                                                                                                                                                                                                                                                                                                                                                                                                                                                                                                                                                                                                                                                                                                                                                                                                                                                                                                                                                                                                                                                                                                                                                                                  | Thai Red Cross Emerging Infectious Diseases Health Science Centre, Chulalongkorn Hospital, Faculty of Medicine, Chulalongkorn University | Thai Red Cross Emerging Infectious Diseases Center and Faculty of Medicine, Chulalongkorn University                         | Apaporn Rodpan; Gompol Suwamkol; Kirik Asavametha; Leilani Paitoonpong; Opass Patsaroen; Panpit Suwangoon; Pattama Torvorapanit; Ratima Samorn; Rome Buathong; Sininat Petcharat; Sopon Iamthirathaworn; Supaporn Wacharapluesadee; Thiravat Hemachudha; Watsamon Jantarabenjakul; Weenassarin Ampoot; Wichai Thanasopon; Yutthana Jojyinda; Yutthana Jojyinda                                                                                                                                                                                                                                                                                                                                                                                                                                                                      |
| EPI_ISL_672017, EPI_ISL_672027, EPI_ISL_672030, EPI_ISL_672042, EPI_ISL_672047, EPI_ISL_672049, EPI_ISL_672051, EPI_ISL_672055 to 672056, EPI_ISL_672058, EPI_ISL_672061, EPI_ISL_672063, EPI_ISL_672071, EPI_ISL_672074, EPI_ISL_672079, EPI_ISL_672083, EPI_ISL_672090, EPI_ISL_672093 to 672094, EPI_ISL_672096, EPI_ISL_672105, EPI_ISL_672112 to 672274, EPI_ISL_856974 to 857039                                                                                                                                                                                                                                                                                                                                                                                                                                                                                                                                                                                                                                                                                                                                                                                                                                                                                                                                                                                                                                                                                                                                                                                                                                                                                                                                                                                                                                                                                                                                                                                                                                                                                                                                                                                                                                                                                                                                                                                                                                                                                                                                                                                                                                                                                                                                                                                                                                                                                                                                                                                                                                                                                                                                                                                                                                                                                                                                                                                                                                                                                                                                                                                                                                                                                                                                                                                                                                                                                                                                                                                                                                                                                                                                                                                                                                                                                                                                                                                                                                                                                                                                                                                                                                                                                                                                                                                                                                                                                                                                                                                                                                                                                                                                                                                                                                                                                                                                                                                                                                                                                                                                                                                                                                                                                                                                                                                                                                                                                                                                                                                                                                                                                                                                                                                                                                                                                                                                                                                                                                                                                                                                                                                                                                                                                                                                                                                                                                                                                                                                                                                                                                                                                                                                                                                                                                                                                                                                                                                                                                                                                                                                                                                                                                                                                                                                                                                                                                                                     |                                                                                                                                          |                                                                                                                              |                                                                                                                                                                                                                                                                                                                                                                                                                                                                                                                                                                                                                                                                                                                                                                                                                                     |
| see above                                                                                                                                                                                                                                                                                                                                                                                                                                                                                                                                                                                                                                                                                                                                                                                                                                                                                                                                                                                                                                                                                                                                                                                                                                                                                                                                                                                                                                                                                                                                                                                                                                                                                                                                                                                                                                                                                                                                                                                                                                                                                                                                                                                                                                                                                                                                                                                                                                                                                                                                                                                                                                                                                                                                                                                                                                                                                                                                                                                                                                                                                                                                                                                                                                                                                                                                                                                                                                                                                                                                                                                                                                                                                                                                                                                                                                                                                                                                                                                                                                                                                                                                                                                                                                                                                                                                                                                                                                                                                                                                                                                                                                                                                                                                                                                                                                                                                                                                                                                                                                                                                                                                                                                                                                                                                                                                                                                                                                                                                                                                                                                                                                                                                                                                                                                                                                                                                                                                                                                                                                                                                                                                                                                                                                                                                                                                                                                                                                                                                                                                                                                                                                                                                                                                                                                                                                                                                                                                                                                                                                                                                                                                                                                                                                                                                                                                                                                                                                                                                                                                                                                                                                                                                                                                                                                                                                                  | The Ashley Laboratory, Stanford University                                                                                               | Chan-Zuckerberg Biohub                                                                                                       | CZB Cliahub Consortium                                                                                                                                                                                                                                                                                                                                                                                                                                                                                                                                                                                                                                                                                                                                                                                                              |
| EPI_ISL_756306 to 756311, EPI_ISL_756357 to 756359, EPI_ISL_756361, EPI_ISL_756364 to 756368                                                                                                                                                                                                                                                                                                                                                                                                                                                                                                                                                                                                                                                                                                                                                                                                                                                                                                                                                                                                                                                                                                                                                                                                                                                                                                                                                                                                                                                                                                                                                                                                                                                                                                                                                                                                                                                                                                                                                                                                                                                                                                                                                                                                                                                                                                                                                                                                                                                                                                                                                                                                                                                                                                                                                                                                                                                                                                                                                                                                                                                                                                                                                                                                                                                                                                                                                                                                                                                                                                                                                                                                                                                                                                                                                                                                                                                                                                                                                                                                                                                                                                                                                                                                                                                                                                                                                                                                                                                                                                                                                                                                                                                                                                                                                                                                                                                                                                                                                                                                                                                                                                                                                                                                                                                                                                                                                                                                                                                                                                                                                                                                                                                                                                                                                                                                                                                                                                                                                                                                                                                                                                                                                                                                                                                                                                                                                                                                                                                                                                                                                                                                                                                                                                                                                                                                                                                                                                                                                                                                                                                                                                                                                                                                                                                                                                                                                                                                                                                                                                                                                                                                                                                                                                                                                               | The Caribbean Public Health Agency                                                                                                       | Carrington Lab, Department of PreClinical Sciences, Faculty of Medical Sciences, The University of the West Indies           | ; Adesh Ramsuhag; Arianne Brown-Jordan; Avery Hinds; Chinna Chinnadurai; Christine V. F. Carrington; Christopher Oura; Gabriel Escobar; Jacqueline Bisasar-McKenzie; Jacqueline Bissor-McKenzie; Jaya Jayaraman; Jerome Foster; Karla Georges; Marsha Ivey; Naresh Nandram; Nikita S. D. Sahadeo; Nuno Faria; Oliver Pybus; Rahul Naidu; Rajini Haraksingh; Risha Singh; Roshan Parasram; Sarah Hill; Stanley Giddings; SueMin Nathaniel; Vernie Ramkissoon                                                                                                                                                                                                                                                                                                                                                                         |
| EPI_ISL_779703, EPI_ISL_779705 to 779706, EPI_ISL_779708, EPI_ISL_779710                                                                                                                                                                                                                                                                                                                                                                                                                                                                                                                                                                                                                                                                                                                                                                                                                                                                                                                                                                                                                                                                                                                                                                                                                                                                                                                                                                                                                                                                                                                                                                                                                                                                                                                                                                                                                                                                                                                                                                                                                                                                                                                                                                                                                                                                                                                                                                                                                                                                                                                                                                                                                                                                                                                                                                                                                                                                                                                                                                                                                                                                                                                                                                                                                                                                                                                                                                                                                                                                                                                                                                                                                                                                                                                                                                                                                                                                                                                                                                                                                                                                                                                                                                                                                                                                                                                                                                                                                                                                                                                                                                                                                                                                                                                                                                                                                                                                                                                                                                                                                                                                                                                                                                                                                                                                                                                                                                                                                                                                                                                                                                                                                                                                                                                                                                                                                                                                                                                                                                                                                                                                                                                                                                                                                                                                                                                                                                                                                                                                                                                                                                                                                                                                                                                                                                                                                                                                                                                                                                                                                                                                                                                                                                                                                                                                                                                                                                                                                                                                                                                                                                                                                                                                                                                                                                                   | The Foundation for Medical Research                                                                                                      | The Foundation for Medical Research                                                                                          | Ambreen Shaikh; Ayan Mandal; Grishma Patel; Jayanthi Shastri; Kalpana Sriraman; Kayzad Nilgiriwala; Nerges Mistry; Nirjhar Chatterjee; Shreevatsa Udupa; Smriti Vaswani; Swapneil Parkh; Tejal Mestry                                                                                                                                                                                                                                                                                                                                                                                                                                                                                                                                                                                                                               |
| EPI_ISL_791488 to 791513                                                                                                                                                                                                                                                                                                                                                                                                                                                                                                                                                                                                                                                                                                                                                                                                                                                                                                                                                                                                                                                                                                                                                                                                                                                                                                                                                                                                                                                                                                                                                                                                                                                                                                                                                                                                                                                                                                                                                                                                                                                                                                                                                                                                                                                                                                                                                                                                                                                                                                                                                                                                                                                                                                                                                                                                                                                                                                                                                                                                                                                                                                                                                                                                                                                                                                                                                                                                                                                                                                                                                                                                                                                                                                                                                                                                                                                                                                                                                                                                                                                                                                                                                                                                                                                                                                                                                                                                                                                                                                                                                                                                                                                                                                                                                                                                                                                                                                                                                                                                                                                                                                                                                                                                                                                                                                                                                                                                                                                                                                                                                                                                                                                                                                                                                                                                                                                                                                                                                                                                                                                                                                                                                                                                                                                                                                                                                                                                                                                                                                                                                                                                                                                                                                                                                                                                                                                                                                                                                                                                                                                                                                                                                                                                                                                                                                                                                                                                                                                                                                                                                                                                                                                                                                                                                                                                                                   | The Hospital for Sick Children                                                                                                           | The Hospital for Sick Children                                                                                               | Aaron Campigotto; Christian Marshall; Lynette Lau                                                                                                                                                                                                                                                                                                                                                                                                                                                                                                                                                                                                                                                                                                                                                                                   |
| EPI_ISL_856972                                                                                                                                                                                                                                                                                                                                                                                                                                                                                                                                                                                                                                                                                                                                                                                                                                                                                                                                                                                                                                                                                                                                                                                                                                                                                                                                                                                                                                                                                                                                                                                                                                                                                                                                                                                                                                                                                                                                                                                                                                                                                                                                                                                                                                                                                                                                                                                                                                                                                                                                                                                                                                                                                                                                                                                                                                                                                                                                                                                                                                                                                                                                                                                                                                                                                                                                                                                                                                                                                                                                                                                                                                                                                                                                                                                                                                                                                                                                                                                                                                                                                                                                                                                                                                                                                                                                                                                                                                                                                                                                                                                                                                                                                                                                                                                                                                                                                                                                                                                                                                                                                                                                                                                                                                                                                                                                                                                                                                                                                                                                                                                                                                                                                                                                                                                                                                                                                                                                                                                                                                                                                                                                                                                                                                                                                                                                                                                                                                                                                                                                                                                                                                                                                                                                                                                                                                                                                                                                                                                                                                                                                                                                                                                                                                                                                                                                                                                                                                                                                                                                                                                                                                                                                                                                                                                                                                             | The Institute of Tropical Medicine in Antwerp, Belgium                                                                                   | UAntwerp, Laboratory of Medical Microbiology, Campus Drie Eiken S6.26, Universiteitsplein 1, 2610, Wilrijk, Antwerp, Belgium | Basil Britto Xavier; Christine Lammens; Herman Goossens; Jasmine Coppens; Veerle Matheussen                                                                                                                                                                                                                                                                                                                                                                                                                                                                                                                                                                                                                                                                                                                                         |
| EPI_ISL_826286 to 826295, EPI_ISL_826522, EPI_ISL_891136 to 891140, EPI_ISL_979365 to 979378                                                                                                                                                                                                                                                                                                                                                                                                                                                                                                                                                                                                                                                                                                                                                                                                                                                                                                                                                                                                                                                                                                                                                                                                                                                                                                                                                                                                                                                                                                                                                                                                                                                                                                                                                                                                                                                                                                                                                                                                                                                                                                                                                                                                                                                                                                                                                                                                                                                                                                                                                                                                                                                                                                                                                                                                                                                                                                                                                                                                                                                                                                                                                                                                                                                                                                                                                                                                                                                                                                                                                                                                                                                                                                                                                                                                                                                                                                                                                                                                                                                                                                                                                                                                                                                                                                                                                                                                                                                                                                                                                                                                                                                                                                                                                                                                                                                                                                                                                                                                                                                                                                                                                                                                                                                                                                                                                                                                                                                                                                                                                                                                                                                                                                                                                                                                                                                                                                                                                                                                                                                                                                                                                                                                                                                                                                                                                                                                                                                                                                                                                                                                                                                                                                                                                                                                                                                                                                                                                                                                                                                                                                                                                                                                                                                                                                                                                                                                                                                                                                                                                                                                                                                                                                                                                               | The Jackson Laboratory                                                                                                                   | The Jackson Laboratory                                                                                                       | Adams M; Kelly K; Li L; Lloyd M; Maurya R; Omerza G; Renzette N; Sanderson B; Srivastava A; Wei C L                                                                                                                                                                                                                                                                                                                                                                                                                                                                                                                                                                                                                                                                                                                                 |
| EPI_ISL_626570 to 626625, EPI_ISL_660553 to 660599, EPI_ISL_693660 to 693687, EPI_ISL_736998 to 737033, EPI_ISL_792684 to 792707, EPI_ISL_850663 to 850688, EPI_ISL_882943 to 882953, EPI_ISL_960404 to 960440                                                                                                                                                                                                                                                                                                                                                                                                                                                                                                                                                                                                                                                                                                                                                                                                                                                                                                                                                                                                                                                                                                                                                                                                                                                                                                                                                                                                                                                                                                                                                                                                                                                                                                                                                                                                                                                                                                                                                                                                                                                                                                                                                                                                                                                                                                                                                                                                                                                                                                                                                                                                                                                                                                                                                                                                                                                                                                                                                                                                                                                                                                                                                                                                                                                                                                                                                                                                                                                                                                                                                                                                                                                                                                                                                                                                                                                                                                                                                                                                                                                                                                                                                                                                                                                                                                                                                                                                                                                                                                                                                                                                                                                                                                                                                                                                                                                                                                                                                                                                                                                                                                                                                                                                                                                                                                                                                                                                                                                                                                                                                                                                                                                                                                                                                                                                                                                                                                                                                                                                                                                                                                                                                                                                                                                                                                                                                                                                                                                                                                                                                                                                                                                                                                                                                                                                                                                                                                                                                                                                                                                                                                                                                                                                                                                                                                                                                                                                                                                                                                                                                                                                                                             |                                                                                                                                          |                                                                                                                              |                                                                                                                                                                                                                                                                                                                                                                                                                                                                                                                                                                                                                                                                                                                                                                                                                                     |
| see above                                                                                                                                                                                                                                                                                                                                                                                                                                                                                                                                                                                                                                                                                                                                                                                                                                                                                                                                                                                                                                                                                                                                                                                                                                                                                                                                                                                                                                                                                                                                                                                                                                                                                                                                                                                                                                                                                                                                                                                                                                                                                                                                                                                                                                                                                                                                                                                                                                                                                                                                                                                                                                                                                                                                                                                                                                                                                                                                                                                                                                                                                                                                                                                                                                                                                                                                                                                                                                                                                                                                                                                                                                                                                                                                                                                                                                                                                                                                                                                                                                                                                                                                                                                                                                                                                                                                                                                                                                                                                                                                                                                                                                                                                                                                                                                                                                                                                                                                                                                                                                                                                                                                                                                                                                                                                                                                                                                                                                                                                                                                                                                                                                                                                                                                                                                                                                                                                                                                                                                                                                                                                                                                                                                                                                                                                                                                                                                                                                                                                                                                                                                                                                                                                                                                                                                                                                                                                                                                                                                                                                                                                                                                                                                                                                                                                                                                                                                                                                                                                                                                                                                                                                                                                                                                                                                                                                                  | The National Institute of Public Health                                                                                                  | State Veterinary Institute Prague                                                                                            | A; Cermikova; D; H; J; JTrnka; Jirincova; L; M; Nagy; Novakova; Stara; Trinklova; Trnka; Vecerova                                                                                                                                                                                                                                                                                                                                                                                                                                                                                                                                                                                                                                                                                                                                   |
| EPI_ISL_826677 to 826678, EPI_ISL_826681, EPI_ISL_826683, EPI_ISL_826693, EPI_ISL_826715, EPI_ISL_826792, EPI_ISL_826801, EPI_ISL_826813, EPI_ISL_826815, EPI_ISL_826817, EPI_ISL_826819, EPI_ISL_826821, EPI_ISL_826824, EPI_ISL_826826, EPI_ISL_826828, EPI_ISL_826854 to 826856, EPI_ISL_826858, EPI_ISL_826862, EPI_ISL_826884 to 826885, EPI_ISL_826893, EPI_ISL_826897, EPI_ISL_826916, EPI_ISL_826937, EPI_ISL_826955, EPI_ISL_826969 to 826970, EPI_ISL_826972 to 826974, EPI_ISL_826980 to 826981, EPI_ISL_826990, EPI_ISL_826994, EPI_ISL_826999, EPI_ISL_827009, EPI_ISL_827011 to 827012, EPI_ISL_827014, EPI_ISL_827016 to 827017, EPI_ISL_827027, EPI_ISL_827032 to 827033, EPI_ISL_827035 to 827037, EPI_ISL_827040, EPI_ISL_827045, EPI_ISL_827048, EPI_ISL_827051 to 827071, EPI_ISL_827074 to 827077, EPI_ISL_827079, EPI_ISL_827081 to 827088, EPI_ISL_827090, EPI_ISL_827110, EPI_ISL_827121 to 827124, EPI_ISL_827126, EPI_ISL_827142, EPI_ISL_827163 to 827164, EPI_ISL_827195, EPI_ISL_827197 to 827199, EPI_ISL_827202 to 827203, EPI_ISL_827205 to 827208, EPI_ISL_827210, EPI_ISL_827212, EPI_ISL_827229, EPI_ISL_827238, EPI_ISL_827242, EPI_ISL_827252 to 827254, EPI_ISL_827256 to 827258, EPI_ISL_827266, EPI_ISL_827270 to 827271, EPI_ISL_827288 to 827291, EPI_ISL_827293, EPI_ISL_827306, EPI_ISL_827309 to 827310, EPI_ISL_827330 to 827331, EPI_ISL_827333 to 827335, EPI_ISL_827337, EPI_ISL_827354, EPI_ISL_827359 to 827363, EPI_ISL_827367 to 827368, EPI_ISL_827372, EPI_ISL_827374, EPI_ISL_827377, EPI_ISL_827379, EPI_ISL_827383, EPI_ISL_827395 to 827396, EPI_ISL_827413, EPI_ISL_827419, EPI_ISL_827435, EPI_ISL_827437, EPI_ISL_827461, EPI_ISL_827484 to 827485, EPI_ISL_827492 to 827494, EPI_ISL_827496, EPI_ISL_827513 to 827514, EPI_ISL_827529, EPI_ISL_827531 to 827537, EPI_ISL_827539 to 827544, EPI_ISL_827548 to 827551, EPI_ISL_827553, EPI_ISL_827575 to 827577, EPI_ISL_827582 to 827584, EPI_ISL_827586 to 827590, EPI_ISL_827608 to 827609, EPI_ISL_827644, EPI_ISL_827660, EPI_ISL_827663, EPI_ISL_827687 to 827688, EPI_ISL_827692 to 827693, EPI_ISL_827695 to 827697, EPI_ISL_827713 to 827716, EPI_ISL_827718, EPI_ISL_827722 to 827725, EPI_ISL_827736 to 827737, EPI_ISL_827746, EPI_ISL_827754, EPI_ISL_827781 to 827783, EPI_ISL_827800 to 827805, EPI_ISL_827821 to 827822, EPI_ISL_827825, EPI_ISL_827831, EPI_ISL_827859 to 827860, EPI_ISL_827863, EPI_ISL_827865 to 827870, EPI_ISL_827876 to 827881, EPI_ISL_827895, EPI_ISL_827899, EPI_ISL_827902 to 827905, EPI_ISL_827907 to 827911, EPI_ISL_827913, EPI_ISL_827935, EPI_ISL_827938 to 827940, EPI_ISL_827942 to 827943, EPI_ISL_828008 to 828016, EPI_ISL_828020 to 828023, EPI_ISL_828025, EPI_ISL_828027, EPI_ISL_828029 to 828033, EPI_ISL_828035 to 828038, EPI_ISL_828053, EPI_ISL_828064, EPI_ISL_828066, EPI_ISL_828070, EPI_ISL_828087, EPI_ISL_828089, EPI_ISL_828099, EPI_ISL_828137, EPI_ISL_828142 to 828144, EPI_ISL_828147, EPI_ISL_828157 to 828160, EPI_ISL_828162, EPI_ISL_828174 to 828175, EPI_ISL_828177, EPI_ISL_828188, EPI_ISL_828190 to 828191, EPI_ISL_828205, EPI_ISL_828209, EPI_ISL_828211 to 828212, EPI_ISL_828214 to 828215, EPI_ISL_828224 to 828227, EPI_ISL_828229, EPI_ISL_828241 to 828244, EPI_ISL_828250 to 828251, EPI_ISL_828265 to 828266, EPI_ISL_828270, EPI_ISL_828283, EPI_ISL_828285 to 828287, EPI_ISL_828320, EPI_ISL_828322 to 828327, EPI_ISL_828330 to 828334, EPI_ISL_828336, EPI_ISL_828352, EPI_ISL_828360, EPI_ISL_828363 to 828364, EPI_ISL_828366, EPI_ISL_828383, EPI_ISL_828405 to 828406, EPI_ISL_828408, EPI_ISL_828413, EPI_ISL_828464 to 828467, EPI_ISL_828469, EPI_ISL_828483 to 828487, EPI_ISL_828493 to 828495, EPI_ISL_828503 to 828507, EPI_ISL_828518, EPI_ISL_828522, EPI_ISL_828530, EPI_ISL_828537, EPI_ISL_828543, EPI_ISL_828554 to 828555, EPI_ISL_828557, EPI_ISL_828589, EPI_ISL_828591, EPI_ISL_828593 to 828596, EPI_ISL_828618, EPI_ISL_828630 to 828631, EPI_ISL_828634 to 828635, EPI_ISL_828641 to 828644, EPI_ISL_828646, EPI_ISL_828653, EPI_ISL_828655, EPI_ISL_828657 to 828663, EPI_ISL_828677, EPI_ISL_828679, EPI_ISL_828709, EPI_ISL_828741, EPI_ISL_828753 to 828755, EPI_ISL_828757 to 828759, EPI_ISL_828762, EPI_ISL_828774 to 828776, EPI_ISL_828779 to 828780, EPI_ISL_828802, EPI_ISL_828804, EPI_ISL_828811, EPI_ISL_828826, EPI_ISL_828828, EPI_ISL_828843, EPI_ISL_828862 to 828863, EPI_ISL_828869, EPI_ISL_828876, EPI_ISL_828889 to 828890, EPI_ISL_828892 to 828898, EPI_ISL_828924, EPI_ISL_828931 to 828932, EPI_ISL_828934, EPI_ISL_828940, EPI_ISL_828946, EPI_ISL_828948, EPI_ISL_828951, EPI_ISL_828960 to 828961, EPI_ISL_828964, EPI_ISL_828970 to 828971, EPI_ISL_828976 to 828977, EPI_ISL_828982 to 828993, EPI_ISL_828995 to 828997, EPI_ISL_828999, EPI_ISL_829002 to 829000, EPI_ISL_829002 to 829007, EPI_ISL_829009 to 829011, EPI_ISL_829049, EPI_ISL_829053, EPI_ISL_829055, EPI_ISL_829059 to 829060, EPI_ISL_829103, EPI_ISL_829105, EPI_ISL_829116, EPI_ISL_829132 to 829133, EPI_ISL_829142, EPI_ISL_829144, EPI_ISL_829146, EPI_ISL_829153 to 829156, EPI_ISL_829165 to 829166, EPI_ISL_829188 to 829190, EPI_ISL_829192 to 829197, EPI_ISL_829199, EPI_ISL_829220, EPI_ISL_829223 to 829224, EPI_ISL_829236 to 829237, EPI_ISL_829239, EPI_ISL_829241, EPI_ISL_829273, EPI_ISL_829275, EPI_ISL_829286, EPI_ISL_829290 to 829293, EPI_ISL_829314 to 829315, EPI_ISL_829317 to 829318, EPI_ISL_829360 to 829361, EPI_ISL_829364, EPI_ISL_829366, EPI_ISL_829369 to 829372, EPI_ISL_829376 to 829379, EPI_ISL_829381, EPI_ISL_829414, EPI_ISL_829426, EPI_ISL_829449, EPI_ISL_829459 to 829460, EPI_ISL_829464, EPI_ISL_829470 to 829471, EPI_ISL_829476 to 829477, EPI_ISL_829512, EPI_ISL_829518, EPI_ISL_829524 to 829526, EPI_ISL_829529, EPI_ISL_829543 to 829544, EPI_ISL_829581, EPI_ISL_829590, EPI_ISL_829601, EPI_ISL_829607 to 829608, EPI_ISL_829617, EPI_ISL_829622 to 829625, EPI_ISL_829675, EPI_ISL_829679, EPI_ISL_829697, EPI_ISL_829707 to 829709, EPI_ISL_829721, EPI_ISL_829725, EPI_ISL_829734 to 829735, EPI_ISL_829759, EPI_ISL_829793, EPI_ISL_829798 to 829802, EPI_ISL_829849 to 829851, EPI_ISL_829859 to 829860, EPI_ISL_829864, EPI_ISL_829869, EPI_ISL_829881 to 829882, EPI_ISL_829885, EPI_ISL_829887 to 829889, EPI_ISL_829891, EPI_ISL_829914 to 829916, EPI_ISL_829930 to 829931, EPI_ISL_829934, EPI_ISL_829937 to 829940, EPI_ISL_829948, EPI_ISL_829953, EPI_ISL_829955, EPI_ISL_829957, EPI_ISL_829959, EPI_ISL_829970, EPI_ISL_829989, EPI_ISL_830005, EPI_ISL_830007, EPI_ISL_830019, EPI_ISL_830033 to 830034, EPI_ISL_830037 to 830038, EPI_ISL_830069, EPI_ISL_830072, EPI_ISL_830085 to 830086, EPI_ISL_830093 to 830098, EPI_ISL_830100, EPI_ISL_830102 to 830105, EPI_ISL_830119 to 830120, EPI_ISL_830127 to 830129, EPI_ISL_830131 to 830132, EPI_ISL_830140 to 830147, EPI_ISL_830152, EPI_ISL_830168 to 830169, EPI_ISL_830177, EPI_ISL_830184 to 830185, EPI_ISL_830191, EPI_ISL_830193, EPI_ISL_830209, EPI_ISL_830213, EPI_ISL_830235, EPI_ISL_830237, EPI_ISL_830240, EPI_ISL_830242, EPI_ISL_830245, EPI_ISL_830254, EPI_ISL_830264, EPI_ISL_830266, EPI_ISL_830268, EPI_ISL_830305, EPI_ISL_830307, EPI_ISL_830309, EPI_ISL_830311, EPI_ISL_830314, EPI_ISL_830316, EPI_ISL_830320, EPI_ISL_830327 to 830328, EPI_ISL_830354, EPI_ISL_830359, EPI_ISL_830361 to 830368, EPI_ISL_830377 to 830382, EPI_ISL_830387, EPI_ISL_830393, EPI_ISL_830397, EPI_ISL_830407, EPI_ISL_830410, EPI_ISL_830415, EPI_ISL_830417, EPI_ISL_830424 to 830425, EPI_ISL_830428 to 830429, EPI_ISL_830445, EPI_ISL_830449, EPI_ISL_830468, EPI_ISL_830471 to 830480, EPI_ISL_830487, EPI_ISL_830492, EPI_ISL_830501 to 830502, EPI_ISL_830529 to 830530, EPI_ISL_830535, EPI_ISL_830537, EPI_ISL_830555, EPI_ISL_830557 to 830559, EPI_ISL_830588 |                                                                                                                                          |                                                                                                                              |                                                                                                                                                                                                                                                                                                                                                                                                                                                                                                                                                                                                                                                                                                                                                                                                                                     |
| see above                                                                                                                                                                                                                                                                                                                                                                                                                                                                                                                                                                                                                                                                                                                                                                                                                                                                                                                                                                                                                                                                                                                                                                                                                                                                                                                                                                                                                                                                                                                                                                                                                                                                                                                                                                                                                                                                                                                                                                                                                                                                                                                                                                                                                                                                                                                                                                                                                                                                                                                                                                                                                                                                                                                                                                                                                                                                                                                                                                                                                                                                                                                                                                                                                                                                                                                                                                                                                                                                                                                                                                                                                                                                                                                                                                                                                                                                                                                                                                                                                                                                                                                                                                                                                                                                                                                                                                                                                                                                                                                                                                                                                                                                                                                                                                                                                                                                                                                                                                                                                                                                                                                                                                                                                                                                                                                                                                                                                                                                                                                                                                                                                                                                                                                                                                                                                                                                                                                                                                                                                                                                                                                                                                                                                                                                                                                                                                                                                                                                                                                                                                                                                                                                                                                                                                                                                                                                                                                                                                                                                                                                                                                                                                                                                                                                                                                                                                                                                                                                                                                                                                                                                                                                                                                                                                                                                                                  | The National University Hospital of Iceland                                                                                              | deCODE genetics                                                                                                              | Agnar Helgason; Alma Moller; Arna B Agustsdottir; Arnaldur Gylfason; Asgeir Sigurdsson; Aslaug Jonasdottir; Berglind Eiriksdotir; Bjarni Thorbjornsson; Brynjar O Jansson; Daniel F Gudbjartsson; Droplaug N Magnusdottir; Elisabet E Gardarsdottir; Emil A Thorarensen; Gardar Sveinbjornsson; Gisli Masson; Gudmundur Georgsson; Gudmundur L Norddahl; Gudrun Sigmundsdottir; Hakon Jonsson; Hannes Eggertsson; Hilma Holm; Ingileif Jonsdottir; Jona Saemundsdottir; Kamilla S Joesfudsdottir; Karl Stefansson; Karl G Kristinnsson; Kjartan R Gudmundsson; Kristin E Sveinsdottir; Louise Le Roux; Maney Sveinsdottir; Olafia S Gretarsdottir; Olafur T Magnusson; Pall Melsted; Patrick Sulem; Run Fridriksdottir; Solvi Rognvaldsson; Thora R Gunnarsdottir; Thordur Kristjansson; Thorolfur Gudnason; Unnur Thorsteinsdottir |

|                                                                                                                                                                                                                                                                                                                                                                                                                                                                                                                                                                                                                                                      |                                                                                         |                                                                                                                    |                                                                                                                                                                                                                                                                                                                                                 |
|------------------------------------------------------------------------------------------------------------------------------------------------------------------------------------------------------------------------------------------------------------------------------------------------------------------------------------------------------------------------------------------------------------------------------------------------------------------------------------------------------------------------------------------------------------------------------------------------------------------------------------------------------|-----------------------------------------------------------------------------------------|--------------------------------------------------------------------------------------------------------------------|-------------------------------------------------------------------------------------------------------------------------------------------------------------------------------------------------------------------------------------------------------------------------------------------------------------------------------------------------|
| EPI_ISL_826521, EPI_ISL_861439 to 861442                                                                                                                                                                                                                                                                                                                                                                                                                                                                                                                                                                                                             | The Ohio State University                                                               | James Molecular Laboratory                                                                                         | Dan Jones; Dan Jones; Huolin Tu; Huolin Tu; Jason Garee; Jason Garee; Keele Thomas; Keele Thomas; Laura Kubatko; Laura Kubatko; Matthew Hunt; Matthew R Avenarius; Matthew R Avenarius; Matthew Hunt; Peng Ru; Peng Ru; Peter Mohler; Peter Mohler; Preeti Pancholi; Preeti Pancholi; Xiaokang Pan; Xiaokang Pan                                |
| EPI_ISL_826463                                                                                                                                                                                                                                                                                                                                                                                                                                                                                                                                                                                                                                       | The Ohio State University                                                               | OSU Polaris Molecular Laboratory                                                                                   | Dan Jones; Huolin Tu; Jason Garee; Keele Thomas; Laura Kubatko; Matthew Hunt; Matthew R Avenarius; Peng Ru; Peter Mohler; Preeti Pancholi; Xiaokang Pan                                                                                                                                                                                         |
| EPI_ISL_877132                                                                                                                                                                                                                                                                                                                                                                                                                                                                                                                                                                                                                                       | The Ohio State University Wexner Medical Center                                         | James Molecular Lab                                                                                                | Dan Jones; Huolin Tu; Jason Garee; Keele Thomas; Laura Kubatko; Matthew Hunt; Matthew R Avenarius; Peng Ru; Peter Mohler; Preeti Pancholi; Xiaokang Pan                                                                                                                                                                                         |
| EPI_ISL_891222 to 891227, EPI_ISL_891230                                                                                                                                                                                                                                                                                                                                                                                                                                                                                                                                                                                                             | The Oncology Institute "Prof. Dr. Ion Chiricuta" Cluj Napoca                            | "Stefan cel Mare" University Metagenomics Lab                                                                      | Gheorghita Roxana; Lobiuc Andrei                                                                                                                                                                                                                                                                                                                |
| EPI_ISL_648129, EPI_ISL_648132, EPI_ISL_648134 to 648139, EPI_ISL_648143, EPI_ISL_648145 to 648147, EPI_ISL_648149 to 648150, EPI_ISL_648156, EPI_ISL_648165, EPI_ISL_648170 to 648172, EPI_ISL_648174 to 648191, EPI_ISL_648194 to 648197, EPI_ISL_654498 to 654503, EPI_ISL_654506 to 654508, EPI_ISL_710581 to 710583, EPI_ISL_738133, EPI_ISL_766594 to 766607, EPI_ISL_766612, EPI_ISL_766700 to 766706, EPI_ISL_913263, EPI_ISL_913267, EPI_ISL_913286, EPI_ISL_913314, EPI_ISL_913375 to 913377, EPI_ISL_913451 to 913452, EPI_ISL_913464, EPI_ISL_913468, EPI_ISL_913494, EPI_ISL_934406                                                     | The Public Health Agency of Sweden                                                      | The Public Health Agency of Sweden                                                                                 | Anna Risberg; Anna-Malin Linde; Carlo Berg; Department of Microbiology; Karin Tegmark-Wisell; Maria Lind Karlberg; Mattias Haukland; Mia Brytting; Noura Walai; Olov Svartstrom; Oskar Karlsson Lindsoj; Petra Edquist; Petra Holmstrom; Reza Advani; Sandra Broddesson; Shaman Muradrasoli; Sofia Stamouli; The Public Health Agency of Sweden |
| EPI_ISL_754229 to 754235                                                                                                                                                                                                                                                                                                                                                                                                                                                                                                                                                                                                                             | The Republican Research and Practical Center for Epidemiology and Microbiology (RRPCEM) | WHO National Influenza Centre Russian Federation                                                                   | Anatoly Krasko; Andrey Komissarov; Anna Ivanova; Artem Fadeev; Daria Danilenko; Dmitry Bazhenov; Dmitry Lioznov; Elena Gasich; Elena Nabieva; Georgii Bazykin; Kirill Bulda; Ksenia Safina; Kseniya Komissarova                                                                                                                                 |
| EPI_ISL_779711, EPI_ISL_889309 to 889327, EPI_ISL_889331 to 889355                                                                                                                                                                                                                                                                                                                                                                                                                                                                                                                                                                                   | The University Hospital Brno                                                            | Institute of Applied Biotechnologies a.s.                                                                          | Kateina Kvapilová; Martin Kašný; Martina Lengerová; Ondej Brzo; Petr Klemp; Petr Kvapil                                                                                                                                                                                                                                                         |
| EPI_ISL_640019, EPI_ISL_640026, EPI_ISL_700424 to 700425, EPI_ISL_700428, EPI_ISL_700431, EPI_ISL_700438, EPI_ISL_700460 to 700461, EPI_ISL_700482 to 700483, EPI_ISL_700487, EPI_ISL_700490, EPI_ISL_700498, EPI_ISL_700502                                                                                                                                                                                                                                                                                                                                                                                                                         | see above                                                                               | Thembaletu CDC wc THC                                                                                              | NHLS/UCT                                                                                                                                                                                                                                                                                                                                        |
| EPI_ISL_960139                                                                                                                                                                                                                                                                                                                                                                                                                                                                                                                                                                                                                                       | Thembaletu CDC wc THC                                                                   | National Health Laboratory Service/UCT                                                                             | Arash Iranzadeh; Bruna Galvao; Carolyn Williamson; Deelan Doolabh; Diana Hardie; Innocent Mudau; Kruger Marais; Lynn Tyers; Marvin Hsiao; Stephen Korsman                                                                                                                                                                                       |
| EPI_ISL_696521                                                                                                                                                                                                                                                                                                                                                                                                                                                                                                                                                                                                                                       | Thembaletu CDC wc THC & NHLS/UC                                                         | KRISP, KZN Research Innovation and Sequencing Platform                                                             | Arash Iranzadeh; Bruna Galvao; Carolyn Williamson; Deelan Doolabh; Diana Hardie; Emanuel James San; Houriyah Tegally; Innocent Mudau; Jennifer Giandhari; Kruger Marais; Lynn Tyers; Marvin Hsiao; Stephen Korsman; Sureshnee Pillay; Tulio de Oliveira                                                                                         |
| EPI_ISL_696452, EPI_ISL_696455, EPI_ISL_696461, EPI_ISL_696493 to 696494, EPI_ISL_696496, EPI_ISL_696499 to 696500, EPI_ISL_696519 to 696520                                                                                                                                                                                                                                                                                                                                                                                                                                                                                                         | see above                                                                               | Thembaletu CDC wc THC & NHLS/UCT                                                                                   | KRISP, KZN Research Innovation and Sequencing Platform                                                                                                                                                                                                                                                                                          |
| EPI_ISL_906053 to 906064                                                                                                                                                                                                                                                                                                                                                                                                                                                                                                                                                                                                                             | Tilia Laboratories s.r.o.                                                               | Tilia Laboratories s.r.o.                                                                                          | MD; PhD.; Sona Pekova; Sona Pekova MD                                                                                                                                                                                                                                                                                                           |
| EPI_ISL_684136 to 684138, EPI_ISL_684154 to 684155, EPI_ISL_684506 to 684522, EPI_ISL_684556 to 684557, EPI_ISL_684615 to 684632, EPI_ISL_684728 to 684735, EPI_ISL_685220 to 685231, EPI_ISL_685407 to 685491, EPI_ISL_685494, EPI_ISL_685496 to 685497, EPI_ISL_685606 to 685616, EPI_ISL_685666 to 685694, EPI_ISL_685963 to 685987, EPI_ISL_688583 to 688604, EPI_ISL_689077 to 689088, EPI_ISL_690612 to 690613, EPI_ISL_690638 to 690640, EPI_ISL_690792 to 690817, EPI_ISL_690902 to 690908, EPI_ISL_692119 to 692128, EPI_ISL_692162 to 692163, EPI_ISL_893241, EPI_ISL_895979 to 896012, EPI_ISL_897171 to 897205, EPI_ISL_901499 to 901500 | see above                                                                               | Tokyo Metropolitan Institute of Public Health                                                                      | Pathogen Genomics Center, National Institute of Infectious Diseases                                                                                                                                                                                                                                                                             |
| EPI_ISL_729259 to 729335, EPI_ISL_755656 to 755939, EPI_ISL_770828 to 770829, EPI_ISL_792059 to 792091, EPI_ISL_845751 to 845753, EPI_ISL_876597 to 876624, EPI_ISL_911746 to 911749, EPI_ISL_933603 to 933659, EPI_ISL_961356 to 961378, EPI_ISL_961380 to 961462, EPI_ISL_962183 to 962202, EPI_ISL_966312                                                                                                                                                                                                                                                                                                                                         | see above                                                                               | Toronto Invasive Bacterial Diseases Network                                                                        | McMaster University                                                                                                                                                                                                                                                                                                                             |
| EPI_ISL_852843 to 852857, EPI_ISL_852862 to 852946, EPI_ISL_853033 to 853273, EPI_ISL_853566 to 853647                                                                                                                                                                                                                                                                                                                                                                                                                                                                                                                                               | see above                                                                               | Toronto Invasive Bacterial Diseases Network                                                                        | Ontario Institute for Cancer Research                                                                                                                                                                                                                                                                                                           |
| EPI_ISL_833432                                                                                                                                                                                                                                                                                                                                                                                                                                                                                                                                                                                                                                       | EPI_ISL_862852 to 862854                                                                | Torrance Memorial Medical Center Microbiology                                                                      | Los Angeles County PHL                                                                                                                                                                                                                                                                                                                          |
| EPI_ISL_696485, EPI_ISL_696490                                                                                                                                                                                                                                                                                                                                                                                                                                                                                                                                                                                                                       | Touwsrante Clinic wc TST & NHLS/UCT                                                     | KRISP, KZN Research Innovation and Sequencing Platform                                                             | Arash Iranzadeh; Bruna Galvao; Carolyn Williamson; Deelan Doolabh; Diana Hardie; Emanuel James San; Houriyah Tegally; Innocent Mudau; Jennifer Giandhari; Kruger Marais; Lynn Tyers; Marvin Hsiao; Stephen Korsman; Sureshnee Pillay; Tulio de Oliveira                                                                                         |
| EPI_ISL_893086 to 893107, EPI_ISL_898321 to 898325, EPI_ISL_902334 to 902350                                                                                                                                                                                                                                                                                                                                                                                                                                                                                                                                                                         | Toyama Institute of Health                                                              | Pathogen Genomics Center, National Institute of Infectious Diseases                                                | Kentaro Itokawa; Makoto Kuroda; Masanori Hashino; Rina Tanaka; Tsuyoshi Sekizuka                                                                                                                                                                                                                                                                |
| EPI_ISL_653859 to 653915, EPI_ISL_653917                                                                                                                                                                                                                                                                                                                                                                                                                                                                                                                                                                                                             | Translational Health Science and Technology Institute                                   | National Institute of Biomedical Genomics                                                                          | Anbalagan Ananthraj; Arindam Maitra; Gagandeep Kang; Guruprasad Medigeshi; Imran Khan; Madhu Pareek; Saumitra Das; Sharanabasava Patil                                                                                                                                                                                                          |
| EPI_ISL_722208                                                                                                                                                                                                                                                                                                                                                                                                                                                                                                                                                                                                                                       | Triemli Hospital Zurich                                                                 | Institute of Medical Virology, University of Zurich                                                                | Alexandra Trkola; Annette Audigé; Cyril Shah; Jon Huder; Jürg Böni; Kevin Steiner; Maria Grünberg; Maryam Zaheri; Michael Huber; Riccarda Capaul; Stefan Schmutz; Verena Kufner                                                                                                                                                                 |
| EPI_ISL_717692, EPI_ISL_717694 to 717700, EPI_ISL_756362 to 756363                                                                                                                                                                                                                                                                                                                                                                                                                                                                                                                                                                                   | Trinidad Public Health Laboratory                                                       | Carrington Lab, Department of PreClinical Sciences, Faculty of Medical Sciences, The University of the West Indies | Alexandra Trkola; Daniel Rössli; Gabriela Ziltener; Gerhard Eich; Jürg Böni; Maryam Zaheri; Michael Huber; Stefan Schmutz; Verena Kufner                                                                                                                                                                                                        |
| EPI_ISL_940580 to 940583                                                                                                                                                                                                                                                                                                                                                                                                                                                                                                                                                                                                                             | Trudo                                                                                   | Jessa                                                                                                              | Jessa_cmdLab                                                                                                                                                                                                                                                                                                                                    |
| EPI_ISL_960152                                                                                                                                                                                                                                                                                                                                                                                                                                                                                                                                                                                                                                       | Tshwaragano Hospital                                                                    | National Health Laboratory Service/UCT                                                                             | Arash Iranzadeh; Bruna Galvao; Carolyn Williamson; Deelan Doolabh; Diana Hardie; Innocent Mudau; Kruger Marais; Lynn Tyers; Marvin Hsiao; Stephen Korsman                                                                                                                                                                                       |
| EPI_ISL_848069                                                                                                                                                                                                                                                                                                                                                                                                                                                                                                                                                                                                                                       | Tulane Medical Center                                                                   | Centers for Disease Control and Prevention Division of Viral Diseases, Pathogen Discovery                          | Anna Uehara; Clinton R. Paden; Haibin Wang; Jing Zhang; Krista Queen; Peter Cook; Suxiang Tong; Yan Li; Ying Tao                                                                                                                                                                                                                                |
| EPI_ISL_648531 to 648541, EPI_ISL_739119, EPI_ISL_739193, EPI_ISL_739639                                                                                                                                                                                                                                                                                                                                                                                                                                                                                                                                                                             | Tulare County Public Health Lab                                                         | Chan-Zuckerberg Biohub                                                                                             | CZB Cilahub Consortium                                                                                                                                                                                                                                                                                                                          |
| EPI_ISL_983870                                                                                                                                                                                                                                                                                                                                                                                                                                                                                                                                                                                                                                       | TwinStrand Biosciences, Inc.                                                            | TwinStrand Biosciences, Inc.                                                                                       | Alexandra Golubeva; Charles C Valentine III; Daniel D Sommer; Lindsey N Williams; Tan Li                                                                                                                                                                                                                                                        |
| EPI_ISL_745140 to 745141, EPI_ISL_745147 to 745150, EPI_ISL_745180 to 745185                                                                                                                                                                                                                                                                                                                                                                                                                                                                                                                                                                         | Tygerberg Hospital wc TBH                                                               | National Health Laboratory Service (NHLS), Tygerberg                                                               | Bronwyn Kleinhans; Eduan Wilkindon; Gert van Zyl; Houriyah Tegally; Kayla Delaney; Susan Engelbrecht; Tulio de Oliveira; Wolfgang Preiser                                                                                                                                                                                                       |
| EPI_ISL_984995 to 984996, EPI_ISL_985000, EPI_ISL_985032                                                                                                                                                                                                                                                                                                                                                                                                                                                                                                                                                                                             | U.O. Igiene, Ospedale Policlinico San Martino                                           | U.O. Igiene, Ospedale Policlinico San Martino                                                                      | Bruzzo Bianca; Caligiuri Patrizia; De Pace Vanessa; Domnich Alexander; Icardi Giancarlo; Orsi Andrea; Ricucci Valentina; Spitaleri Antonino                                                                                                                                                                                                     |
| EPI_ISL_735419                                                                                                                                                                                                                                                                                                                                                                                                                                                                                                                                                                                                                                       | UBS Alvarenga                                                                           | Instituto Adolfo Lutz, Interdisciplinary Procedures Center, Strategic Laboratory                                   | Claudia Regina Gonçalves; Claudio Tavares Sacchi; Erica Valessa Ramos Gomes; Karoline Rodrigues Campos                                                                                                                                                                                                                                          |
| EPI_ISL_837053                                                                                                                                                                                                                                                                                                                                                                                                                                                                                                                                                                                                                                       | UBS Darcy Alves e Robalinho                                                             | Instituto Adolfo Lutz, Interdisciplinary Procedures Center, Strategic Laboratory                                   | Claudia Regina Gonçalves; Claudio Tavares Sacchi; Erica Valessa Ramos Gomes; Karoline Rodrigues Campos                                                                                                                                                                                                                                          |

|                                                                                                                                                                                                                                                                                                                                                                                    |                                                                                                                 |                                                                                        |                                                                                                                                                                                                                                                                                                                                                                                                                                                 |
|------------------------------------------------------------------------------------------------------------------------------------------------------------------------------------------------------------------------------------------------------------------------------------------------------------------------------------------------------------------------------------|-----------------------------------------------------------------------------------------------------------------|----------------------------------------------------------------------------------------|-------------------------------------------------------------------------------------------------------------------------------------------------------------------------------------------------------------------------------------------------------------------------------------------------------------------------------------------------------------------------------------------------------------------------------------------------|
| EPI_ISL_735422                                                                                                                                                                                                                                                                                                                                                                     | UBS Dematchi                                                                                                    | Instituto Adolfo Lutz, Interdisciplinary Procedures Center, Strategic Laboratory       | Claudia Regina Gonçalves; Claudio Tavares Sacchi; Erica Valessa Ramos Gomes; Karoline Rodrigues Campos                                                                                                                                                                                                                                                                                                                                          |
| EPI_ISL_837054                                                                                                                                                                                                                                                                                                                                                                     | UBS Jose Sabino Ferreira                                                                                        | Instituto Adolfo Lutz, Interdisciplinary Procedures Center, Strategic Laboratory       | Claudia Regina Gonçalves; Claudio Tavares Sacchi; Erica Valessa Ramos Gomes; Karoline Rodrigues Campos                                                                                                                                                                                                                                                                                                                                          |
| EPI_ISL_735420                                                                                                                                                                                                                                                                                                                                                                     | UBS Riacho Grande                                                                                               | Instituto Adolfo Lutz, Interdisciplinary Procedures Center, Strategic Laboratory       | Claudia Regina Gonçalves; Claudio Tavares Sacchi; Erica Valessa Ramos Gomes; Karoline Rodrigues Campos                                                                                                                                                                                                                                                                                                                                          |
| EPI_ISL_735421                                                                                                                                                                                                                                                                                                                                                                     | UBS Sta Terezinha                                                                                               | Instituto Adolfo Lutz, Interdisciplinary Procedures Center, Strategic Laboratory       | Claudia Regina Gonçalves; Claudio Tavares Sacchi; Erica Valessa Ramos Gomes; Karoline Rodrigues Campos                                                                                                                                                                                                                                                                                                                                          |
| EPI_ISL_693227                                                                                                                                                                                                                                                                                                                                                                     | UBS Vila Marchi                                                                                                 | Instituto Adolfo Lutz, Interdisciplinary Procedures Center, Strategic Laboratory       | Claudia Regina Gonçalves; Claudio Tavares Sacchi; Erica Valessa Ramos Gomes; Karoline Rodrigues Campos                                                                                                                                                                                                                                                                                                                                          |
| EPI_ISL_849928 to 849952, EPI_ISL_955337 to 955352                                                                                                                                                                                                                                                                                                                                 | UC Davis- Department of Pathology and Laboratory Medicine                                                       | Chan-Zuckerberg Biohub                                                                 | CZB Ciliahub Consortium                                                                                                                                                                                                                                                                                                                                                                                                                         |
| EPI_ISL_754110 to 754123, EPI_ISL_765987 to 765993, EPI_ISL_794641 to 794648, EPI_ISL_794670, EPI_ISL_833428 to 833431, EPI_ISL_861704 to 861706, EPI_ISL_862122 to 862123, EPI_ISL_882967 to 882984, EPI_ISL_892267 to 892268, EPI_ISL_905773 to 905791, EPI_ISL_962505 to 962514, EPI_ISL_962521, EPI_ISL_962833 to 962846, EPI_ISL_962876, EPI_ISL_962879                       | see above                                                                                                       | see above                                                                              | see above                                                                                                                                                                                                                                                                                                                                                                                                                                       |
| EPI_ISL_877765                                                                                                                                                                                                                                                                                                                                                                     | UCLA Clinical Micro Lab                                                                                         | Los Angeles County PHL                                                                 | P. Hemarajata et al.                                                                                                                                                                                                                                                                                                                                                                                                                            |
| EPI_ISL_751801                                                                                                                                                                                                                                                                                                                                                                     | UCO Igiene e Sanità Pubblica, ASUGI, Trieste, Italy; Laboratorio di Virologia Molecolare, ICGEB, Trieste, Italy | Laboratorio di Genomica ed Epigenomica sistema Argo, Area SciencePark, Trieste, Italy; | Alessandro Marcello; Danilo Licastro; Pierlanfranco D'Agaro                                                                                                                                                                                                                                                                                                                                                                                     |
| EPI_ISL_75133, EPI_ISL_755137, EPI_ISL_755140, EPI_ISL_755146 to 755209, EPI_ISL_755215 to 755231                                                                                                                                                                                                                                                                                  | UCSD EXCITE                                                                                                     | Andersen lab at Scripps Research                                                       | SEARCH Alliance San Diego                                                                                                                                                                                                                                                                                                                                                                                                                       |
| EPI_ISL_625550 to 625558, EPI_ISL_625661 to 625670, EPI_ISL_648543 to 648544, EPI_ISL_672015 to 672016, EPI_ISL_672018, EPI_ISL_672020 to 672021, EPI_ISL_672025, EPI_ISL_672386 to 672393, EPI_ISL_672426 to 672428, EPI_ISL_672490 to 672501, EPI_ISL_738544, EPI_ISL_739004, EPI_ISL_739203, EPI_ISL_739295, EPI_ISL_739613, EPI_ISL_739632 to 739633, EPI_ISL_849923 to 849927 | UCSD EXCITE lab                                                                                                 | Andersen lab at Scripps Research                                                       | SEARCH Alliance San Diego                                                                                                                                                                                                                                                                                                                                                                                                                       |
| EPI_ISL_628750 to 628761, EPI_ISL_648124 to 648128, EPI_ISL_861459 to 861471                                                                                                                                                                                                                                                                                                       | see above                                                                                                       | see above                                                                              | see above                                                                                                                                                                                                                                                                                                                                                                                                                                       |
| EPI_ISL_982845 to 982852                                                                                                                                                                                                                                                                                                                                                           | UCSF Clinical Microbiology Laboratory                                                                           | Chan-Zuckerberg Biohub                                                                 | CZB Ciliahub Consortium                                                                                                                                                                                                                                                                                                                                                                                                                         |
| EPI_ISL_883156, EPI_ISL_883176 to 883189, EPI_ISL_883191 to 883192                                                                                                                                                                                                                                                                                                                 | UHAS COVID-19 Lab                                                                                               | UHAS COVID-19 Lab                                                                      | John O. Gyapong and the UHAS COVID-19 Lab Team; Jones Gyamfi; Kwabena O. Duedu; Reuben Ayivor-Djanie                                                                                                                                                                                                                                                                                                                                            |
| EPI_ISL_962892, EPI_ISL_977155 to 977158, EPI_ISL_977161, EPI_ISL_977242 to 977245, EPI_ISL_977247 to 977250                                                                                                                                                                                                                                                                       | UK Healthcare Clinical Microbiology                                                                             | Kentucky State Public Health Lab                                                       | Joshua Tobias; Karim George; Matthew Johnson; Rachel Zinner; Rhonda Lucas; Stephanie Lunn; Vaneet Arora; William Grooms                                                                                                                                                                                                                                                                                                                         |
| EPI_ISL_875551, EPI_ISL_977213 to 977230                                                                                                                                                                                                                                                                                                                                           | UK Tübingen, Medical Microbiology                                                                               | Hannover Medical School, Institute of Virology                                         | Jasper Göting; Lars Steinbrück                                                                                                                                                                                                                                                                                                                                                                                                                  |
| EPI_ISL_766580 to 766581, EPI_ISL_875552 to 875557, EPI_ISL_977154, EPI_ISL_977163, EPI_ISL_977188 to 977193, EPI_ISL_977195 to 977199                                                                                                                                                                                                                                             | ULSS 03 Venezia                                                                                                 | Istituto Zooprofilattico Sperimentale delle Venezie                                    | Adelaide Milani; Alessia Schivo; Alice Fusaro; Ambra Pastori; Annalisa Salviato; Antonia Ricci; Bellinati Laura; Bianca Zecchin; Bonfante Francesco; Bortolami Alessio; Calogero Terregino; Ceglie Letizia; Erika Giorgia Quaranta; Fincato Alice; Guadagno Carmine; Isabella Monne; Lucchese L; Mason Nicoletta; Mazzotta Elisa; Mion Monica; Monne Isabella; Natale Alda; Pastori Ambra; Quaranta Erika; Stefani Annalisa; Terregino Calogero |
| EPI_ISL_747477 to 747481, EPI_ISL_747486 to 747489, EPI_ISL_977159, EPI_ISL_977231 to 977241                                                                                                                                                                                                                                                                                       | ULSS 1 Dolomiti                                                                                                 | Istituto Zooprofilattico Sperimentale delle Venezie                                    | Adelaide Milani; Alessia Schivo; Alice Fusaro; Ambra Pastori; Annalisa Salviato; Antonia Ricci; Bianca Zecchin; Calogero Terregino; Erika Giorgia Quaranta; Isabella Monne                                                                                                                                                                                                                                                                      |
| EPI_ISL_977165 to 977166, EPI_ISL_977180 to 977187                                                                                                                                                                                                                                                                                                                                 | ULSS 2 Treviso                                                                                                  | Istituto Zooprofilattico Sperimentale delle Venezie                                    | Adelaide Milani; Alessia Schivo; Alice Fusaro; Ambra Pastori; Annalisa Salviato; Antonia Ricci; Bianca Zecchin; Calogero Terregino; Erika Giorgia Quaranta; Isabella Monne                                                                                                                                                                                                                                                                      |
| EPI_ISL_766571 to 766573, EPI_ISL_977203 to 977206                                                                                                                                                                                                                                                                                                                                 | ULSS 5 Polesana                                                                                                 | Istituto Zooprofilattico Sperimentale delle Venezie                                    | Adelaide Milani; Alessia Schivo; Alice Fusaro; Ambra Pastori; Annalisa Salviato; Antonia Ricci; Bianca Zecchin; Calogero Terregino; Erika Giorgia Quaranta; Isabella Monne                                                                                                                                                                                                                                                                      |
| EPI_ISL_794826 to 794828, EPI_ISL_977200 to 977202                                                                                                                                                                                                                                                                                                                                 | ULSS 6 Euganea                                                                                                  | Istituto Zooprofilattico Sperimentale delle Venezie                                    | Adelaide Milani; Alessia Schivo; Alice Fusaro; Ambra Pastori; Annalisa Salviato; Antonia Ricci; Bianca Zecchin; Calogero Terregino; Erika Giorgia Quaranta; Isabella Monne                                                                                                                                                                                                                                                                      |
| EPI_ISL_766574 to 766579, EPI_ISL_977194                                                                                                                                                                                                                                                                                                                                           | ULSS 7 Pedemontana - Distretto 1                                                                                | Istituto Zooprofilattico Sperimentale delle Venezie                                    | Adelaide Milani; Alessia Schivo; Alice Fusaro; Ambra Pastori; Annalisa Salviato; Antonia Ricci; Bianca Zecchin; Calogero Terregino; Erika Giorgia Quaranta; Isabella Monne                                                                                                                                                                                                                                                                      |
| EPI_ISL_636467 to 636470, EPI_ISL_636474 to 636475                                                                                                                                                                                                                                                                                                                                 | ULSS 8 Berica                                                                                                   | Istituto Zooprofilattico Sperimentale delle Venezie                                    | Adelaide Milani; Alessia Schivo; Alice Fusaro; Ambra Pastori; Annalisa Salviato; Antonia Ricci; Bianca Zecchin; Calogero Terregino; Erika Giorgia Quaranta; Isabella Monne                                                                                                                                                                                                                                                                      |
| EPI_ISL_636462 to 636463, EPI_ISL_636465 to 636466                                                                                                                                                                                                                                                                                                                                 | ULSS6 Distretto Padova Terme Colli                                                                              | Istituto Zooprofilattico Sperimentale delle Venezie                                    | Adelaide Milani; Alessia Schivo; Alice Fusaro; Ambra Pastori; Annalisa Salviato; Antonia Ricci; Bianca Zecchin; Calogero Terregino; Erika Giorgia Quaranta; Isabella Monne                                                                                                                                                                                                                                                                      |
| EPI_ISL_636464, EPI_ISL_636471 to 636473                                                                                                                                                                                                                                                                                                                                           | ULSS6 Euganea                                                                                                   | Istituto Zooprofilattico Sperimentale delle Venezie                                    | Adelaide Milani; Alessia Schivo; Alice Fusaro; Ambra Pastori; Annalisa Salviato; Antonia Ricci; Bianca Zecchin; Calogero Terregino; Erika Giorgia Quaranta; Isabella Monne                                                                                                                                                                                                                                                                      |
| EPI_ISL_747471 to 747476                                                                                                                                                                                                                                                                                                                                                           | ULSS6 Piove di Sacco                                                                                            | Istituto Zooprofilattico Sperimentale delle Venezie                                    | Adelaide Milani; Alessia Schivo; Alice Fusaro; Ambra Pastori; Annalisa Salviato; Antonia Ricci; Bianca Zecchin; Calogero Terregino; Erika Giorgia Quaranta; Isabella Monne                                                                                                                                                                                                                                                                      |
| EPI_ISL_636488                                                                                                                                                                                                                                                                                                                                                                     | ULSS9 Distretto di Bussolengo                                                                                   | Istituto Zooprofilattico Sperimentale delle Venezie                                    | Adelaide Milani; Alessia Schivo; Alice Fusaro; Ambra Pastori; Annalisa Salviato; Antonia Ricci; Bianca Zecchin; Calogero Terregino; Erika Giorgia Quaranta; Isabella Monne                                                                                                                                                                                                                                                                      |
| EPI_ISL_955235                                                                                                                                                                                                                                                                                                                                                                     | ULSS9 Scaligera                                                                                                 | Istituto Zooprofilattico Sperimentale delle Venezie                                    | Adelaide Milani; Alessia Schivo; Alice Fusaro; Ambra Pastori; Annalisa Salviato; Antonia Ricci; Bianca Zecchin; Calogero Terregino; Erika Giorgia Quaranta; Isabella Monne                                                                                                                                                                                                                                                                      |
| EPI_ISL_955244                                                                                                                                                                                                                                                                                                                                                                     | UMF 23 UNIDAD MORELOS                                                                                           | BIOBANCO / COCTI                                                                       | Arias C; Borja-Aburto VH; Grajales-Muñiz C; Grande R; Isa P; López S; Muñoz-Medina JE; Ochoa Carrera LA; Rojas-Mendoza T; Santacruz Tinoco CE; Sánchez A; Taboada B                                                                                                                                                                                                                                                                             |
| EPI_ISL_955254                                                                                                                                                                                                                                                                                                                                                                     | UMF 26 ACAPULCO                                                                                                 | BIOBANCO / COCTI                                                                       | Arias C; Borja-Aburto VH; Grajales-Muñiz C; Grande R; Isa P; López S; Muñoz-Medina JE; Ochoa Carrera LA; Rojas-Mendoza T; Santacruz Tinoco CE; Sánchez A; Taboada B                                                                                                                                                                                                                                                                             |
| EPI_ISL_955237                                                                                                                                                                                                                                                                                                                                                                     | UMF 28 DEL VALLE                                                                                                | BIOBANCO / COCTI                                                                       | Arias C; Borja-Aburto VH; Grajales-Muñiz C; Grande R; Isa P; López S; Muñoz-Medina JE; Ochoa Carrera LA; Rojas-Mendoza T; Santacruz Tinoco CE; Sánchez A; Taboada B                                                                                                                                                                                                                                                                             |
| EPI_ISL_732990 to 733004, EPI_ISL_733223 to 733240, EPI_ISL_733405 to 733416, EPI_ISL_770638, EPI_ISL_770642, EPI_ISL_770647 to 770652, EPI_ISL_770654 to 770657, EPI_ISL_770659, EPI_ISL_770662 to 770665, EPI_ISL_770667 to 770668, EPI_ISL_770671 to 770672, EPI_ISL_869242 to 869246, EPI_ISL_869248 to 869249, EPI_ISL_869251 to 869261, EPI_ISL_872569                       | UMF 75 NETZAHUALCOYOTL                                                                                          | BIOBANCO / COCTI                                                                       | Arias C; Borja-Aburto VH; Grajales-Muñiz C; Grande R; Isa P; López S; Muñoz-Medina JE; Ochoa Carrera LA; Rojas-Mendoza T; Santacruz Tinoco CE; Sánchez A; Taboada B                                                                                                                                                                                                                                                                             |
| see above                                                                                                                                                                                                                                                                                                                                                                          | UMMC-Health                                                                                                     | WHO National Influenza Centre Russian Federation                                       | Andrey Komissarov; Anna Ivanova; Artem Fadeev; Daria Danilenko; Dmitry Bazhenov; Dmitry Lioznov; Elena Nabieva; Georgij Bazykin; Ksenia Safina;                                                                                                                                                                                                                                                                                                 |



|                                                                                                                                                                                                                                                                                                                                                                                                                  |                                                                                                                                    |                                                                                                                                            |                                                                                                                                                                                                                                                                                                                       |
|------------------------------------------------------------------------------------------------------------------------------------------------------------------------------------------------------------------------------------------------------------------------------------------------------------------------------------------------------------------------------------------------------------------|------------------------------------------------------------------------------------------------------------------------------------|--------------------------------------------------------------------------------------------------------------------------------------------|-----------------------------------------------------------------------------------------------------------------------------------------------------------------------------------------------------------------------------------------------------------------------------------------------------------------------|
|                                                                                                                                                                                                                                                                                                                                                                                                                  |                                                                                                                                    |                                                                                                                                            | Kseniya Komissarova; Mikhail Bakaev; Tatiana Platonova<br>Alexandra Lorentz; Jacob Garfin; Matt Plumb; and Xiong Wang                                                                                                                                                                                                 |
| EPI_ISL_802572                                                                                                                                                                                                                                                                                                                                                                                                   | UMN Advanced Research and Diagnostics                                                                                              | Minnesota Department of Health, Public Health Laboratory                                                                                   |                                                                                                                                                                                                                                                                                                                       |
| EPI_ISL_918165                                                                                                                                                                                                                                                                                                                                                                                                   | UMR190-Unité des virus émergents                                                                                                   | UMR190-Unité des virus émergents                                                                                                           | Cecile Baronti                                                                                                                                                                                                                                                                                                        |
| EPI_ISL_882666, EPI_ISL_882668                                                                                                                                                                                                                                                                                                                                                                                   | UMS de Juquitiba                                                                                                                   | Instituto Adolfo Lutz, Interdisciplinary Procedures Center, Strategic Laboratory                                                           | Claudia Regina Gonçalves; Claudio Tavares Ramos Gomes; Karoline Rodrigues Campos                                                                                                                                                                                                                                      |
| EPI_ISL_794656 to 794657                                                                                                                                                                                                                                                                                                                                                                                         | UNIDAD HEMATOLOGICA ESPECIALIZADA                                                                                                  | Instituto Nacional de Salud - Dirección de Investigación en Salud Pública                                                                  | Carlos Franco-Muñoz; Diego A. Álvarez-Díaz; Diego Andrés Prada; Gerardo Santamaría; Jonathan Reales; Julian Naizaque; Katherine Laiton-Donato; Magdalena Wiesner; Marcela Mercado-Reyes; María T. Herrera; Martha Lucia Ospina Martínez; Mauricio Pacheco-Montealegre; Paola Muñoz-Laiton; Sheryl Corchuelo           |
| EPI_ISL_845656                                                                                                                                                                                                                                                                                                                                                                                                   | UNIDAD HEMATOLÓGICA ESPECIALIZADA                                                                                                  | Instituto Nacional de Salud - Dirección de Investigación en Salud Pública                                                                  | Carlos Franco-Muñoz; Diego A. Álvarez-Díaz; Diego Andrés Prada; Gerardo Santamaría; Jonathan Reales; Julian Naizaque; Katherine Laiton-Donato; Magdalena Wiesner; Marcela Mercado-Reyes; María T. Herrera-Sepúlveda; Martha Lucia Ospina Martínez; Mauricio Pacheco-Montealegre; Paola Muñoz-Laiton; Sheryl Corchuelo |
| EPI_ISL_965140                                                                                                                                                                                                                                                                                                                                                                                                   | UOC "Microbiologia e Virologia" AOU "Policlinico Umberto I", Roma; Dipartimento di Medicina Molecolare Sapienza Università di Roma | INMI Lazzaro Spallanzani IRCCS                                                                                                             | A Di Caro; B Bartolini; C.E.M Gruber; E Giombini; F Messina; G Antonelli; M Rueca; MR Capobianchi; O Butera; O Turriziani                                                                                                                                                                                             |
| EPI_ISL_861674 to 861675                                                                                                                                                                                                                                                                                                                                                                                         | UPA Central de Caraguatatuba                                                                                                       | Instituto Adolfo Lutz, Interdisciplinary Procedures Center, Strategic Laboratory                                                           | Claudia Regina Gonçalves; Claudio Tavares Sacchi; Erica Valessa Ramos Gomes; Karoline Rodrigues Campos                                                                                                                                                                                                                |
| EPI_ISL_906070, EPI_ISL_906072, EPI_ISL_977489                                                                                                                                                                                                                                                                                                                                                                   | UPA Dr. Akira Tada                                                                                                                 | Instituto Adolfo Lutz, Interdisciplinary Procedures Center, Strategic Laboratory                                                           | Claudia Regina Gonçalves; Claudio Tavares Sacchi; Erica Valessa Ramos Gomes; Karoline Rodrigues Campos                                                                                                                                                                                                                |
| EPI_ISL_693237, EPI_ISL_693245                                                                                                                                                                                                                                                                                                                                                                                   | UPA Santa Isabel                                                                                                                   | Instituto Adolfo Lutz, Interdisciplinary Procedures Center, Strategic Laboratory                                                           | Claudia Regina Gonçalves; Claudio Tavares Sacchi; Erica Valessa Ramos Gomes; Karoline Rodrigues Campos                                                                                                                                                                                                                |
| EPI_ISL_861676, EPI_ISL_861682, EPI_ISL_882669                                                                                                                                                                                                                                                                                                                                                                   | UPA Vila Santa Catarina                                                                                                            | Instituto Adolfo Lutz, Interdisciplinary Procedures Center, Strategic Laboratory                                                           | Claudia Regina Gonçalves; Claudio Tavares Sacchi; Erica Valessa Ramos Gomes; Karoline Rodrigues Campos                                                                                                                                                                                                                |
| EPI_ISL_861656                                                                                                                                                                                                                                                                                                                                                                                                   | UPA de Jandira                                                                                                                     | Instituto Adolfo Lutz, Interdisciplinary Procedures Center, Strategic Laboratory                                                           | Claudia Regina Gonçalves; Claudio Tavares Sacchi; Erica Valessa Ramos Gomes; Karoline Rodrigues Campos                                                                                                                                                                                                                |
| EPI_ISL_853275 to 853314, EPI_ISL_853317 to 853393                                                                                                                                                                                                                                                                                                                                                               | UPMC Clinical Microbiology Laboratory                                                                                              | Microbial Genome Sequencing Center; Microbial Genomic Epidemiology Laboratory                                                              | Chinelo Ezeonwuku; Dan Snyder; Jane W. Marsh; Kady D. Waggle; Lee H. Harrison; Marissa P. Griffith; Mustapha M. Mustapha; Stephanie L. Mitchell; Vatsala R. Srinivasa; Vaughn S. Cooper                                                                                                                               |
| EPI_ISL_681929 to 681941, EPI_ISL_681943 to 681944, EPI_ISL_681946 to 682056                                                                                                                                                                                                                                                                                                                                     | UPMC Clinical Microbiology Laboratory                                                                                              | Microbial Genomic Epidemiology Laboratory, University of Pittsburgh                                                                        | Chinelo Ezeonwuku; Dan Snyder; Jane W. Marsh; Kady D. Waggle; Lee H. Harrison; Marissa P. Griffith; Mustapha M. Mustapha; Stephanie L. Mitchell; Vatsala R. Srinivasa; Vaughn S. Cooper                                                                                                                               |
| EPI_ISL_854306 to 854349, EPI_ISL_854370 to 854371, EPI_ISL_854399, EPI_ISL_854404, EPI_ISL_861183 to 861184, EPI_ISL_861199 to 861209, EPI_ISL_896385, EPI_ISL_896387 to 896388, EPI_ISL_896390, EPI_ISL_896396 to 896421, EPI_ISL_896495 to 896497, EPI_ISL_896502 to 896503, EPI_ISL_896508 to 896519, EPI_ISL_896563 to 896569, EPI_ISL_983438 to 983444, EPI_ISL_983447 to 983475, EPI_ISL_983478 to 983484 |                                                                                                                                    |                                                                                                                                            |                                                                                                                                                                                                                                                                                                                       |
| see above                                                                                                                                                                                                                                                                                                                                                                                                        | URMC LABS                                                                                                                          | Wadsworth Center, New York State Department of Health                                                                                      | Alexis Russel; Daryl M. Lamson; Erasmus Schneider; Erica Lasek-Nesselquist; John Kelly; Jonathan Plitnick; Kirsten St. George; Matthew Shudt; Melissa A Leisner; Navjot Singh                                                                                                                                         |
| EPI_ISL_767417, EPI_ISL_767419, EPI_ISL_767423 to 767424, EPI_ISL_767538 to 767577, EPI_ISL_767579, EPI_ISL_794083 to 794106, EPI_ISL_794182 to 794205                                                                                                                                                                                                                                                           |                                                                                                                                    |                                                                                                                                            |                                                                                                                                                                                                                                                                                                                       |
| see above                                                                                                                                                                                                                                                                                                                                                                                                        | URMC LABS                                                                                                                          | Wadsworth Center, New York State Department of Health                                                                                      | Alexis Russel; Daryl M. Lamson; Erasmus Schneider; Erica Lasek-Nesselquist; John Kelly; Jonathan Plitnick; Kirsten St. George; Matthew Shudt; Melissa A Leisner; Navjot Singh; Sara Griesemer                                                                                                                         |
| EPI_ISL_982527 to 982538, EPI_ISL_982540 to 982584, EPI_ISL_982586 to 982612, EPI_ISL_982614 to 982626, EPI_ISL_982631 to 982761                                                                                                                                                                                                                                                                                 | US Air Force School of Aerospace Medicine                                                                                          | US Air Force School of Aerospace Medicine                                                                                                  | Amanda Javorina; Anthony Fries; Clarise Starr; Elizabeth Macias; Jennifer Meyer; Sarah Purves; William Buggele; William Gruner                                                                                                                                                                                        |
| EPI_ISL_754124 to 754129, EPI_ISL_754133 to 754135, EPI_ISL_754390, EPI_ISL_765994 to 765997, EPI_ISL_766015, EPI_ISL_794635 to 794640, EPI_ISL_794669, EPI_ISL_833414 to 833416, EPI_ISL_939619 to 939625                                                                                                                                                                                                       |                                                                                                                                    |                                                                                                                                            |                                                                                                                                                                                                                                                                                                                       |
| see above                                                                                                                                                                                                                                                                                                                                                                                                        | USC Clinical Lab                                                                                                                   | Los Angeles County PHL                                                                                                                     | P. Hemarajata et al.; P. Hemarajata et al.                                                                                                                                                                                                                                                                            |
| EPI_ISL_965225 to 965226, EPI_ISL_965241 to 965242                                                                                                                                                                                                                                                                                                                                                               | USCA SULMONA                                                                                                                       | Istituto Zooprofilattico Sperimentale dell'Abruzzo e Molise "G. Caporale"                                                                  | Ancora M; Calistri P; Cammà C; Curini V; Di Domenico M; Di Pasquale A; Lorusso A; Mangone I; Marcacci M; Puglia I; Rinaldi A; Savini G; Scialabba S                                                                                                                                                                   |
| EPI_ISL_833124 to 833128                                                                                                                                                                                                                                                                                                                                                                                         | USCA Sulmona                                                                                                                       | Istituto Zooprofilattico Sperimentale dell'Abruzzo e Molise "G. Caporale"                                                                  | Ancora M; Calistri P; Cammà C; Curini V; Delli Compagni E; Di Domenico M; Di Pasquale A; Lorusso A; Mangone I; Marcacci M; Puglia I; Rinaldi A; Savini G                                                                                                                                                              |
| EPI_ISL_833129                                                                                                                                                                                                                                                                                                                                                                                                   | USCA Tagliacozzo                                                                                                                   | Istituto Zooprofilattico Sperimentale dell'Abruzzo e Molise "G. Caporale"                                                                  | Ancora M; Calistri P; Cammà C; Curini V; Delli Compagni E; Di Domenico M; Di Pasquale A; Lorusso A; Mangone I; Marcacci M; Puglia I; Rinaldi A; Savini G                                                                                                                                                              |
| EPI_ISL_833253                                                                                                                                                                                                                                                                                                                                                                                                   | USCA-Avezzano                                                                                                                      | Istituto Zooprofilattico Sperimentale dell'Abruzzo e Molise "G. Caporale"                                                                  | Ancora M; Calistri P; Cammà C; Curini V; Di Domenico M; Di Pasquale A; Lorusso A; Mangone I; Marcacci M; Puglia I; Rinaldi A; Savini G                                                                                                                                                                                |
| EPI_ISL_833254                                                                                                                                                                                                                                                                                                                                                                                                   | USCA-Pescina                                                                                                                       | Istituto Zooprofilattico Sperimentale dell'Abruzzo e Molise "G. Caporale"                                                                  | Ancora M; Calistri P; Cammà C; Curini V; Di Domenico M; Di Pasquale A; Lorusso A; Mangone I; Marcacci M; Puglia I; Rinaldi A; Savini G                                                                                                                                                                                |
| EPI_ISL_833277                                                                                                                                                                                                                                                                                                                                                                                                   | USCA-Sulmona                                                                                                                       | Istituto Zooprofilattico Sperimentale dell'Abruzzo e Molise "G. Caporale"                                                                  | Ancora M; Calistri P; Cammà C; Curini V; Di Domenico M; Di Pasquale A; Lorusso A; Mangone I; Marcacci M; Puglia I; Rinaldi A; Savini G                                                                                                                                                                                |
| EPI_ISL_903598, EPI_ISL_903617, EPI_ISL_903766, EPI_ISL_903841, EPI_ISL_903879, EPI_ISL_903891, EPI_ISL_903910, EPI_ISL_903938                                                                                                                                                                                                                                                                                   |                                                                                                                                    |                                                                                                                                            |                                                                                                                                                                                                                                                                                                                       |
| see above                                                                                                                                                                                                                                                                                                                                                                                                        | UT-Unified State Labs: Public Health Utah DOH                                                                                      | Genomics and Discovery, Respiratory Viruses Branch, Division of Viral Diseases, Centers for Disease Control and Prevention                 | Anna Montmayeur; Anna Uehara; Ben L. Rambo-Martin; Clinton R. Paden; Dhvani Batra; Haibin Wang; Jasmine Padilla; Jing Zhang; Justin Lee; Krista Queen; Lori Rowe; Mark Burroughs; Mili Sheth; Peter W. Cook; Rachel Marine; Sarah Nobles; Suxiang Tong; Yan Li; Ying Tao                                              |
| EPI_ISL_812134 to 812135, EPI_ISL_812232                                                                                                                                                                                                                                                                                                                                                                         | UT-Unified State Labs: Public Health Utah DOH                                                                                      | Pathogen Discovery, Respiratory Viruses Branch, Division of Viral Diseases, Centers for Disease Control and Prevention                     | Anna Montmayeur; Anna Uehara; Brian Lynch; Clinton R. Paden; Haibin Wang; Jing Zhang; Krista Queen; Peter Cook; Rachel Marine; Suxiang Tong; Yan Li; Ying Tao                                                                                                                                                         |
| EPI_ISL_717766 to 717784, EPI_ISL_735449 to 735489, EPI_ISL_736775 to 736776, EPI_ISL_737081 to 737099, EPI_ISL_737309, EPI_ISL_747195 to 747232, EPI_ISL_756191 to 756240, EPI_ISL_756295 to 756305, EPI_ISL_776657 to 776710, EPI_ISL_776712 to 776749, EPI_ISL_792092 to 792100, EPI_ISL_824865 to 824919, EPI_ISL_825015, EPI_ISL_837505 to 837549, EPI_ISL_861730 to 861731                                 |                                                                                                                                    |                                                                                                                                            |                                                                                                                                                                                                                                                                                                                       |
| see above                                                                                                                                                                                                                                                                                                                                                                                                        | UW Virology Lab                                                                                                                    | UW Virology Lab                                                                                                                            | Alexander Greninger; Hong Xie; Keith R Jerome; Lasata Shrestha; Meei-Li Huang; Michelle Lin; Pavitra Roychoudhury                                                                                                                                                                                                     |
| EPI_ISL_734482 to 735249, EPI_ISL_738195 to 738242, EPI_ISL_738360 to 738499, EPI_ISL_745222, EPI_ISL_791332 to 791333, EPI_ISL_794321 to 794323                                                                                                                                                                                                                                                                 | UZ Leuven, National Reference Laboratory for Coronaviruses, Laboratory Medicine, Leuven, Belgium                                   | KU Leuven, Rega Institute, Clinical and Epidemiological Virology                                                                           | Bert Vanmechelen; Joan Mari-Carerras; Piet Maes; Tony Wawina-Bokalanga                                                                                                                                                                                                                                                |
| EPI_ISL_833433 to 833434, EPI_ISL_833456, EPI_ISL_833481, EPI_ISL_833483 to 833484, EPI_ISL_833486                                                                                                                                                                                                                                                                                                               | UZA/UAntwerpen (BIS lab), University Hospital Antwerp, Edegem, Belgium                                                             | Laboratory of Medical Microbiology, University of Antwerp, Campus Drie Eiken, S6.26, Universiteitsplein 1, 2610, Wilrijk, Antwerp, Belgium | Basil Britto Xavier; Christine Lammens; Herman Goossens; Jasmine Coppens; Sahaya Glingston Rajakani; Veerle Matheeußen                                                                                                                                                                                                |
| EPI_ISL_693225                                                                                                                                                                                                                                                                                                                                                                                                   | Ubs Vila Rosa - Olimpia Gomes De Almeida                                                                                           | Instituto Adolfo Lutz, Interdisciplinary Procedures Center, Strategic Laboratory                                                           | Claudia Regina Gonçalves; Claudio Tavares Sacchi; Erica Valessa Ramos Gomes; Karoline Rodrigues Campos                                                                                                                                                                                                                |

|                                                                                                                                                                                                                                                                                                                                                                                                                                                                                                                                                                                                                                                                                                                                                                                                                                                                                                                                                                                                                                                                                                                                                                                                                                                                                                                                                                                                                                                                                                                                                                                                                                                                                                                                                                                                                                                                                                                                                                                                                                                                                                                                                                                                                                                                                                                                                                                                                                                                                                                                                                                                                                                                                                                                                                                                                                                                                                                                                                                                                    |                                                                                                                                                               |                                                                                                                                                                                                                                              |                                                                                                                                                                                                                                                                                                                                                                |
|--------------------------------------------------------------------------------------------------------------------------------------------------------------------------------------------------------------------------------------------------------------------------------------------------------------------------------------------------------------------------------------------------------------------------------------------------------------------------------------------------------------------------------------------------------------------------------------------------------------------------------------------------------------------------------------------------------------------------------------------------------------------------------------------------------------------------------------------------------------------------------------------------------------------------------------------------------------------------------------------------------------------------------------------------------------------------------------------------------------------------------------------------------------------------------------------------------------------------------------------------------------------------------------------------------------------------------------------------------------------------------------------------------------------------------------------------------------------------------------------------------------------------------------------------------------------------------------------------------------------------------------------------------------------------------------------------------------------------------------------------------------------------------------------------------------------------------------------------------------------------------------------------------------------------------------------------------------------------------------------------------------------------------------------------------------------------------------------------------------------------------------------------------------------------------------------------------------------------------------------------------------------------------------------------------------------------------------------------------------------------------------------------------------------------------------------------------------------------------------------------------------------------------------------------------------------------------------------------------------------------------------------------------------------------------------------------------------------------------------------------------------------------------------------------------------------------------------------------------------------------------------------------------------------------------------------------------------------------------------------------------------------|---------------------------------------------------------------------------------------------------------------------------------------------------------------|----------------------------------------------------------------------------------------------------------------------------------------------------------------------------------------------------------------------------------------------|----------------------------------------------------------------------------------------------------------------------------------------------------------------------------------------------------------------------------------------------------------------------------------------------------------------------------------------------------------------|
| EPI_ISL_737931 to 737983, EPI_ISL_737985 to 737995, EPI_ISL_737997 to 738023, EPI_ISL_738025 to 738043<br>EPI_ISL_792302 to 792305                                                                                                                                                                                                                                                                                                                                                                                                                                                                                                                                                                                                                                                                                                                                                                                                                                                                                                                                                                                                                                                                                                                                                                                                                                                                                                                                                                                                                                                                                                                                                                                                                                                                                                                                                                                                                                                                                                                                                                                                                                                                                                                                                                                                                                                                                                                                                                                                                                                                                                                                                                                                                                                                                                                                                                                                                                                                                 | Uganda Central Public Health Lab and Uganda Virus Research Institute<br><br>Unidad de Virología, Centro de Educación Médica en Investigaciones Clínicas CEMIC | MRC/UVRI & LSHTM Uganda Research Unit<br><br>Área de Secuenciación del Laboratorio de Virología del Hospital de Niños Dr. Ricardo Gutiérrez on behalf of 'Proyecto Argentino Interinstitucional de genómica de SARS-CoV-2' (PAIS Consortium) | Dan Lule Bugembe; Matthew Cotten; My V.T. Phan; Pontiano Kaleebu et al.<br><br>AS; Echavarría; Goya; LE; Lusso; M; MI; MS; Mistchenko; Nabaes Jodar; Natale; S; Valinotto; Viegas, M.                                                                                                                                                                          |
| EPI_ISL_940628                                                                                                                                                                                                                                                                                                                                                                                                                                                                                                                                                                                                                                                                                                                                                                                                                                                                                                                                                                                                                                                                                                                                                                                                                                                                                                                                                                                                                                                                                                                                                                                                                                                                                                                                                                                                                                                                                                                                                                                                                                                                                                                                                                                                                                                                                                                                                                                                                                                                                                                                                                                                                                                                                                                                                                                                                                                                                                                                                                                                     | Unidade Mista de Iguape                                                                                                                                       | Instituto Adolfo Lutz, Interdisciplinary Procedures Center, Strategic Laboratory                                                                                                                                                             | Claudia Regina Gonçalves; Claudio Tavares Sacchi; Erica Valessa Ramos Gomes; Karoline Rodrigues Campos                                                                                                                                                                                                                                                         |
| EPI_ISL_735397                                                                                                                                                                                                                                                                                                                                                                                                                                                                                                                                                                                                                                                                                                                                                                                                                                                                                                                                                                                                                                                                                                                                                                                                                                                                                                                                                                                                                                                                                                                                                                                                                                                                                                                                                                                                                                                                                                                                                                                                                                                                                                                                                                                                                                                                                                                                                                                                                                                                                                                                                                                                                                                                                                                                                                                                                                                                                                                                                                                                     | Unidade Respiratória Nova Hortolândia                                                                                                                         | Instituto Adolfo Lutz, Interdisciplinary Procedures Center, Strategic Laboratory                                                                                                                                                             | Claudia Regina Gonçalves; Claudio Tavares Sacchi; Erica Valessa Ramos Gomes; Karoline Rodrigues Campos                                                                                                                                                                                                                                                         |
| EPI_ISL_735409                                                                                                                                                                                                                                                                                                                                                                                                                                                                                                                                                                                                                                                                                                                                                                                                                                                                                                                                                                                                                                                                                                                                                                                                                                                                                                                                                                                                                                                                                                                                                                                                                                                                                                                                                                                                                                                                                                                                                                                                                                                                                                                                                                                                                                                                                                                                                                                                                                                                                                                                                                                                                                                                                                                                                                                                                                                                                                                                                                                                     | Unidade de Pronto Atendimento Carlos Lourenco                                                                                                                 | Instituto Adolfo Lutz, Interdisciplinary Procedures Center, Strategic Laboratory                                                                                                                                                             | Claudia Regina Gonçalves; Claudio Tavares Sacchi; Erica Valessa Ramos Gomes; Karoline Rodrigues Campos                                                                                                                                                                                                                                                         |
| EPI_ISL_693214                                                                                                                                                                                                                                                                                                                                                                                                                                                                                                                                                                                                                                                                                                                                                                                                                                                                                                                                                                                                                                                                                                                                                                                                                                                                                                                                                                                                                                                                                                                                                                                                                                                                                                                                                                                                                                                                                                                                                                                                                                                                                                                                                                                                                                                                                                                                                                                                                                                                                                                                                                                                                                                                                                                                                                                                                                                                                                                                                                                                     | Unidade de Pronto Atendimento Central de Caraguatubá                                                                                                          | Instituto Adolfo Lutz, Interdisciplinary Procedures Center, Strategic Laboratory                                                                                                                                                             | Claudia Regina Gonçalves; Claudio Tavares Sacchi; Erica Valessa Ramos Gomes; Karoline Rodrigues Campos                                                                                                                                                                                                                                                         |
| EPI_ISL_882665                                                                                                                                                                                                                                                                                                                                                                                                                                                                                                                                                                                                                                                                                                                                                                                                                                                                                                                                                                                                                                                                                                                                                                                                                                                                                                                                                                                                                                                                                                                                                                                                                                                                                                                                                                                                                                                                                                                                                                                                                                                                                                                                                                                                                                                                                                                                                                                                                                                                                                                                                                                                                                                                                                                                                                                                                                                                                                                                                                                                     | Unidade de Pronto Atendimento Dra Zilda Arns                                                                                                                  | Instituto Adolfo Lutz, Interdisciplinary Procedures Center, Strategic Laboratory                                                                                                                                                             | Claudia Regina Gonçalves; Claudio Tavares Sacchi; Erica Valessa Ramos Gomes; Karoline Rodrigues Campos                                                                                                                                                                                                                                                         |
| EPI_ISL_693226                                                                                                                                                                                                                                                                                                                                                                                                                                                                                                                                                                                                                                                                                                                                                                                                                                                                                                                                                                                                                                                                                                                                                                                                                                                                                                                                                                                                                                                                                                                                                                                                                                                                                                                                                                                                                                                                                                                                                                                                                                                                                                                                                                                                                                                                                                                                                                                                                                                                                                                                                                                                                                                                                                                                                                                                                                                                                                                                                                                                     | Unidade de Pronto Atendimento Sao José                                                                                                                        | Instituto Adolfo Lutz, Interdisciplinary Procedures Center, Strategic Laboratory                                                                                                                                                             | Claudia Regina Gonçalves; Claudio Tavares Sacchi; Erica Valessa Ramos Gomes; Karoline Rodrigues Campos                                                                                                                                                                                                                                                         |
| EPI_ISL_735406                                                                                                                                                                                                                                                                                                                                                                                                                                                                                                                                                                                                                                                                                                                                                                                                                                                                                                                                                                                                                                                                                                                                                                                                                                                                                                                                                                                                                                                                                                                                                                                                                                                                                                                                                                                                                                                                                                                                                                                                                                                                                                                                                                                                                                                                                                                                                                                                                                                                                                                                                                                                                                                                                                                                                                                                                                                                                                                                                                                                     | Unidade de Pronto Atendimento UPA I Sta Isabel                                                                                                                | Instituto Adolfo Lutz, Interdisciplinary Procedures Center, Strategic Laboratory                                                                                                                                                             | Claudia Regina Gonçalves; Claudio Tavares Sacchi; Erica Valessa Ramos Gomes; Karoline Rodrigues Campos                                                                                                                                                                                                                                                         |
| EPI_ISL_735414 to 735415, EPI_ISL_735417                                                                                                                                                                                                                                                                                                                                                                                                                                                                                                                                                                                                                                                                                                                                                                                                                                                                                                                                                                                                                                                                                                                                                                                                                                                                                                                                                                                                                                                                                                                                                                                                                                                                                                                                                                                                                                                                                                                                                                                                                                                                                                                                                                                                                                                                                                                                                                                                                                                                                                                                                                                                                                                                                                                                                                                                                                                                                                                                                                           | Unidade de Pronto Atendimento de Agenor de Campos                                                                                                             | Instituto Adolfo Lutz, Interdisciplinary Procedures Center, Strategic Laboratory                                                                                                                                                             | Claudia Regina Gonçalves; Claudio Tavares Sacchi; Erica Valessa Ramos Gomes; Karoline Rodrigues Campos                                                                                                                                                                                                                                                         |
| EPI_ISL_693216 to 693217                                                                                                                                                                                                                                                                                                                                                                                                                                                                                                                                                                                                                                                                                                                                                                                                                                                                                                                                                                                                                                                                                                                                                                                                                                                                                                                                                                                                                                                                                                                                                                                                                                                                                                                                                                                                                                                                                                                                                                                                                                                                                                                                                                                                                                                                                                                                                                                                                                                                                                                                                                                                                                                                                                                                                                                                                                                                                                                                                                                           | Unidade de Vigilância Epidemiológica de Araras                                                                                                                | Instituto Adolfo Lutz, Interdisciplinary Procedures Center, Strategic Laboratory                                                                                                                                                             | Claudia Regina Gonçalves; Claudio Tavares Sacchi; Erica Valessa Ramos Gomes; Karoline Rodrigues Campos                                                                                                                                                                                                                                                         |
| EPI_ISL_661294 to 661298                                                                                                                                                                                                                                                                                                                                                                                                                                                                                                                                                                                                                                                                                                                                                                                                                                                                                                                                                                                                                                                                                                                                                                                                                                                                                                                                                                                                                                                                                                                                                                                                                                                                                                                                                                                                                                                                                                                                                                                                                                                                                                                                                                                                                                                                                                                                                                                                                                                                                                                                                                                                                                                                                                                                                                                                                                                                                                                                                                                           | Unilabs                                                                                                                                                       | The Public Health Agency of Sweden                                                                                                                                                                                                           | Department of Microbiology; The Public Health Agency of Sweden                                                                                                                                                                                                                                                                                                 |
| EPI_ISL_775585 to 775586, EPI_ISL_789054                                                                                                                                                                                                                                                                                                                                                                                                                                                                                                                                                                                                                                                                                                                                                                                                                                                                                                                                                                                                                                                                                                                                                                                                                                                                                                                                                                                                                                                                                                                                                                                                                                                                                                                                                                                                                                                                                                                                                                                                                                                                                                                                                                                                                                                                                                                                                                                                                                                                                                                                                                                                                                                                                                                                                                                                                                                                                                                                                                           | Unilabs AB                                                                                                                                                    | The Public Health Agency of Sweden                                                                                                                                                                                                           | Department of Microbiology; The Public Health Agency of Sweden                                                                                                                                                                                                                                                                                                 |
| EPI_ISL_832006 to 832007, EPI_ISL_913266, EPI_ISL_913337 to 913338, EPI_ISL_913450, EPI_ISL_913455                                                                                                                                                                                                                                                                                                                                                                                                                                                                                                                                                                                                                                                                                                                                                                                                                                                                                                                                                                                                                                                                                                                                                                                                                                                                                                                                                                                                                                                                                                                                                                                                                                                                                                                                                                                                                                                                                                                                                                                                                                                                                                                                                                                                                                                                                                                                                                                                                                                                                                                                                                                                                                                                                                                                                                                                                                                                                                                 | Unilabs AB Skovde                                                                                                                                             | The Public Health Agency of Sweden                                                                                                                                                                                                           | Anna Risberg; Anna-Malin Linde; Carlo Berg; Department of Microbiology; Karin Tegmark-Wisell; Maria Lind Karlberg; Mattias Haukland; Mia Brytting; Noura Walai; Oskar Karlsson Lindsjö; Petra Edquist; Petra Holmstrom; Reza Advani; Sofia Stamouli; The Public Health Agency of Sweden                                                                        |
| EPI_ISL_635104, EPI_ISL_635132, EPI_ISL_635153 to 635154, EPI_ISL_635158, EPI_ISL_635162, EPI_ISL_635191, EPI_ISL_668409, EPI_ISL_708046 to 708048, EPI_ISL_708060 to 708064, EPI_ISL_708147 to 708150, EPI_ISL_738314, EPI_ISL_775305, EPI_ISL_775349 to 775352, EPI_ISL_775358 to 775361, EPI_ISL_775384 to 775385, EPI_ISL_775406, EPI_ISL_775463, EPI_ISL_775468 to 775471, EPI_ISL_775476 to 775478, EPI_ISL_775495, EPI_ISL_775516 to 775517, EPI_ISL_796673, EPI_ISL_796679 to 796680, EPI_ISL_796686, EPI_ISL_796700 to 796702, EPI_ISL_796705, EPI_ISL_842641, EPI_ISL_860270                                                                                                                                                                                                                                                                                                                                                                                                                                                                                                                                                                                                                                                                                                                                                                                                                                                                                                                                                                                                                                                                                                                                                                                                                                                                                                                                                                                                                                                                                                                                                                                                                                                                                                                                                                                                                                                                                                                                                                                                                                                                                                                                                                                                                                                                                                                                                                                                                             | Unilabs Laboratory Medicine<br>Norwegian Institute of Public Health, Department of Virology                                                                   | Atiya R Ali; Hilde Elishaug; Hilde Volland; Kamilla Heddeland Instefjord; Karoline Bragstad; Kathrine Stene-Johansen; Marie Paulsen Madsen; Olav Hungnes; Rasmus Riis Kopperud                                                               |                                                                                                                                                                                                                                                                                                                                                                |
| see above                                                                                                                                                                                                                                                                                                                                                                                                                                                                                                                                                                                                                                                                                                                                                                                                                                                                                                                                                                                                                                                                                                                                                                                                                                                                                                                                                                                                                                                                                                                                                                                                                                                                                                                                                                                                                                                                                                                                                                                                                                                                                                                                                                                                                                                                                                                                                                                                                                                                                                                                                                                                                                                                                                                                                                                                                                                                                                                                                                                                          | Unilabs Mikrobiologiska laboratoriet                                                                                                                          | The Public Health Agency of Sweden                                                                                                                                                                                                           | Anna Risberg; Anna-Malin Linde; Carlo Berg; Department of Microbiology; Karin Tegmark-Wisell; Maria Lind Karlberg; Mattias Haukland; Mia Brytting; Noura Walai; Oskar Karlsson Lindsjö; Petra Edquist; Petra Holmstrom; Reza Advani; Sofia Stamouli; The Public Health Agency of Sweden                                                                        |
| EPI_ISL_831943, EPI_ISL_832000, EPI_ISL_832008, EPI_ISL_913339 to 913342                                                                                                                                                                                                                                                                                                                                                                                                                                                                                                                                                                                                                                                                                                                                                                                                                                                                                                                                                                                                                                                                                                                                                                                                                                                                                                                                                                                                                                                                                                                                                                                                                                                                                                                                                                                                                                                                                                                                                                                                                                                                                                                                                                                                                                                                                                                                                                                                                                                                                                                                                                                                                                                                                                                                                                                                                                                                                                                                           | Unit 17: Influenza & Other Respiratory Viruses, German National Influenza Center                                                                              | Project group Epidemiology of Highly Pathogenic Microorganisms, Robert Koch-Institut                                                                                                                                                         | Andreas Sachse; Ariane Düx; Djin-Ye Oh; Essia Belarbi; Fabian Leendertz; Grit Schubert; Marianne Wedde; Ralf Dürwald; Sébastien Calvignac-Spencer; Thorsten Wolff                                                                                                                                                                                              |
| EPI_ISL_762999 to 763061, EPI_ISL_765893 to 765895, EPI_ISL_860298 to 860307, EPI_ISL_860309 to 860316                                                                                                                                                                                                                                                                                                                                                                                                                                                                                                                                                                                                                                                                                                                                                                                                                                                                                                                                                                                                                                                                                                                                                                                                                                                                                                                                                                                                                                                                                                                                                                                                                                                                                                                                                                                                                                                                                                                                                                                                                                                                                                                                                                                                                                                                                                                                                                                                                                                                                                                                                                                                                                                                                                                                                                                                                                                                                                             | Unit of Infectious Diseases, Azienda Socio Sanitaria Territoriale di Cremona                                                                                  | Laboratory of Infectious Diseases, Department of Biomedical and Clinical Sciences L. Sacco, University of Milan                                                                                                                              | Alessia Lai; Alice Ferraresi; Annalisa Bergna; Antonio Coluccello; Carla Della Ventura; Chiara Fornabaio; Claudia Balotta; Fabio Sagradi; Gianguglielmo Zehender on behalf of SARS-CoV-2 ITALIAN RESEARCH ENTERPRISE-(SCIRE) Collaborative Group; Massimo Galli; Matteo Giorgi Pierfranceschi; Sophie Testa                                                    |
| EPI_ISL_882882 to 882883, EPI_ISL_882896                                                                                                                                                                                                                                                                                                                                                                                                                                                                                                                                                                                                                                                                                                                                                                                                                                                                                                                                                                                                                                                                                                                                                                                                                                                                                                                                                                                                                                                                                                                                                                                                                                                                                                                                                                                                                                                                                                                                                                                                                                                                                                                                                                                                                                                                                                                                                                                                                                                                                                                                                                                                                                                                                                                                                                                                                                                                                                                                                                           | United Christian Hospital                                                                                                                                     | Hong Kong Department of Health                                                                                                                                                                                                               | Alan K.L. Tsang; Dominic N.C. Tsang; Edman T.K. Lam; Peter C.W. Yip; Rickjason C.W. Chan                                                                                                                                                                                                                                                                       |
| EPI_ISL_759895, EPI_ISL_759897 to 759898<br>EPI_ISL_914039                                                                                                                                                                                                                                                                                                                                                                                                                                                                                                                                                                                                                                                                                                                                                                                                                                                                                                                                                                                                                                                                                                                                                                                                                                                                                                                                                                                                                                                                                                                                                                                                                                                                                                                                                                                                                                                                                                                                                                                                                                                                                                                                                                                                                                                                                                                                                                                                                                                                                                                                                                                                                                                                                                                                                                                                                                                                                                                                                         | United States Air Force School of Aerospace Medicine                                                                                                          | U.S. Air Force School of Aerospace Medicine                                                                                                                                                                                                  | Amanda Javorina; Anthony Fries; Clarise Starr; Elizabeth Macias; Jennifer Meyer; Sarah Purves; William Buggele; William Gruner                                                                                                                                                                                                                                 |
| EPI_ISL_812308 to 812345, EPI_ISL_812526 to 812711, EPI_ISL_831690 to 831891                                                                                                                                                                                                                                                                                                                                                                                                                                                                                                                                                                                                                                                                                                                                                                                                                                                                                                                                                                                                                                                                                                                                                                                                                                                                                                                                                                                                                                                                                                                                                                                                                                                                                                                                                                                                                                                                                                                                                                                                                                                                                                                                                                                                                                                                                                                                                                                                                                                                                                                                                                                                                                                                                                                                                                                                                                                                                                                                       | United States Air Force School of Aerospace Medicine                                                                                                          | United States Air Force School of Aerospace Medicine                                                                                                                                                                                         | Amanda Javorina; Anthony Fries; Clarise Starr; Elizabeth Macias; Jennifer Meyer; Sarah Purves; William Gruner                                                                                                                                                                                                                                                  |
| EPI_ISL_671652 to 671672, EPI_ISL_698079 to 698104                                                                                                                                                                                                                                                                                                                                                                                                                                                                                                                                                                                                                                                                                                                                                                                                                                                                                                                                                                                                                                                                                                                                                                                                                                                                                                                                                                                                                                                                                                                                                                                                                                                                                                                                                                                                                                                                                                                                                                                                                                                                                                                                                                                                                                                                                                                                                                                                                                                                                                                                                                                                                                                                                                                                                                                                                                                                                                                                                                 | Unity Health Toronto                                                                                                                                          | Ontario Institute for Cancer Research                                                                                                                                                                                                        | Bernard Lam; Felicia Vincelli; Ilinca Lungu; Jared T. Simpson; Jeremy Johns; Karel Boissinot; Larissa M. Matukas; Le Luu; Mark Downing; Paul Krzyzanowski; Philip Zuzante; Ramzi Fattouh; Richard de Borja; Samira Mubareka, TIBDN; Trina Otterman; Wai Sum Sui; Yan Chen; Zhi Cui                                                                             |
| EPI_ISL_644703 to 644714, EPI_ISL_645212 to 645214, EPI_ISL_649188, EPI_ISL_660732 to 660741                                                                                                                                                                                                                                                                                                                                                                                                                                                                                                                                                                                                                                                                                                                                                                                                                                                                                                                                                                                                                                                                                                                                                                                                                                                                                                                                                                                                                                                                                                                                                                                                                                                                                                                                                                                                                                                                                                                                                                                                                                                                                                                                                                                                                                                                                                                                                                                                                                                                                                                                                                                                                                                                                                                                                                                                                                                                                                                       | Unité des Virus Émergents                                                                                                                                     | CNR Virus des Infections Respiratoires - France SUD                                                                                                                                                                                          | Antoine Nougairède; Antonin Bal; Bruno Lina; Gregory Destras; Gwendolynne Burfin; Hadrien Régue; Laetitia Ninove; Laurence Josset; Léa Luciani; Martine Valette; Quentin Semanas                                                                                                                                                                               |
| EPI_ISL_877133 to 877185, EPI_ISL_888628 to 888651, EPI_ISL_888791 to 888817                                                                                                                                                                                                                                                                                                                                                                                                                                                                                                                                                                                                                                                                                                                                                                                                                                                                                                                                                                                                                                                                                                                                                                                                                                                                                                                                                                                                                                                                                                                                                                                                                                                                                                                                                                                                                                                                                                                                                                                                                                                                                                                                                                                                                                                                                                                                                                                                                                                                                                                                                                                                                                                                                                                                                                                                                                                                                                                                       | Univeristy of New Mexico Hospital                                                                                                                             | Center for Global Health, University of New Mexico Health Sciences Center                                                                                                                                                                    | Darrell Dinwiddie; Daryl Domman; Jon Femling; Justin Bacca; Kurt Schwalm                                                                                                                                                                                                                                                                                       |
| EPI_ISL_697796                                                                                                                                                                                                                                                                                                                                                                                                                                                                                                                                                                                                                                                                                                                                                                                                                                                                                                                                                                                                                                                                                                                                                                                                                                                                                                                                                                                                                                                                                                                                                                                                                                                                                                                                                                                                                                                                                                                                                                                                                                                                                                                                                                                                                                                                                                                                                                                                                                                                                                                                                                                                                                                                                                                                                                                                                                                                                                                                                                                                     | Universidad Regional Amazonica IKIAM                                                                                                                          | Institute of Microbiology, Universidad San Francisco de Quito                                                                                                                                                                                | Andrea Carrera; Belén Prado-Vivar; Bernardo Gutiérrez; Carolina Proaño-Bolaños; Fabian Aguilar; Gabriel Trueba; Giovanna Moran; Juan José Guadalupe; Katherine Apunte; Marcelo Ortiz; Michelle Grunauer; Monica Becerra-Wong; Nina Espinoza de los Monteros; Patricio Rojas-Silva; Paúl Cárdenas; Sonia Sislema; Sully Márquez; Verónica Barragán; Yeimy Rojas |
| EPI_ISL_759958, EPI_ISL_759961, EPI_ISL_956270, EPI_ISL_956273                                                                                                                                                                                                                                                                                                                                                                                                                                                                                                                                                                                                                                                                                                                                                                                                                                                                                                                                                                                                                                                                                                                                                                                                                                                                                                                                                                                                                                                                                                                                                                                                                                                                                                                                                                                                                                                                                                                                                                                                                                                                                                                                                                                                                                                                                                                                                                                                                                                                                                                                                                                                                                                                                                                                                                                                                                                                                                                                                     | Universitas Airlangga Hospital                                                                                                                                | Institute of Tropical Disease, Universitas Airlangga                                                                                                                                                                                         | Aldise M Nastro; Gatot Soegiarto; Jezzy R Dewantari; Kazufumi Shimizu; Krisnoadi Rahardjo; Laksmi Wulandari; Maria I Lusida; Nasronudin; Resti Yudhawati; Rima R Prasetya; Soetjipto; Yasuko Mori                                                                                                                                                              |
| EPI_ISL_812966 to 812967                                                                                                                                                                                                                                                                                                                                                                                                                                                                                                                                                                                                                                                                                                                                                                                                                                                                                                                                                                                                                                                                                                                                                                                                                                                                                                                                                                                                                                                                                                                                                                                                                                                                                                                                                                                                                                                                                                                                                                                                                                                                                                                                                                                                                                                                                                                                                                                                                                                                                                                                                                                                                                                                                                                                                                                                                                                                                                                                                                                           | University Clinical Research Center, University of Sciences                                                                                                   | University Clinical Research Center, University of Sciences                                                                                                                                                                                  | A.A.; Bane, S.; Dao, S.; Diakite, M.; Diarra, B.; Dombia, S.; Guindo, I.; Iknane; Kone, A.                                                                                                                                                                                                                                                                     |
| EPI_ISL_664125, EPI_ISL_664147, EPI_ISL_664171, EPI_ISL_664187 to 664189, EPI_ISL_664196 to 664197, EPI_ISL_664225, EPI_ISL_664228, EPI_ISL_664233, EPI_ISL_664236, EPI_ISL_664281, EPI_ISL_664335, EPI_ISL_664340, EPI_ISL_664342, EPI_ISL_664352 to 664353, EPI_ISL_664356, EPI_ISL_664359, EPI_ISL_664361, EPI_ISL_664367, EPI_ISL_664372, EPI_ISL_664427, EPI_ISL_664438, EPI_ISL_664447, EPI_ISL_664449, EPI_ISL_664471 to 664472, EPI_ISL_664479, EPI_ISL_664490, EPI_ISL_664497 to 664500, EPI_ISL_664505, EPI_ISL_664507, EPI_ISL_664510, EPI_ISL_664512, EPI_ISL_664517, EPI_ISL_664521, EPI_ISL_664525, EPI_ISL_664540, EPI_ISL_664605, EPI_ISL_664618, EPI_ISL_664651, EPI_ISL_664661, EPI_ISL_664669, EPI_ISL_664672 to 664673, EPI_ISL_664694, EPI_ISL_664701 to 664703, EPI_ISL_664711 to 664712, EPI_ISL_664723 to 664724, EPI_ISL_664728, EPI_ISL_664734, EPI_ISL_664742, EPI_ISL_664744 to 664745, EPI_ISL_664753 to 664755, EPI_ISL_664839, EPI_ISL_665143 to 665253, EPI_ISL_665287, EPI_ISL_665297, EPI_ISL_665299, EPI_ISL_665320, EPI_ISL_665334, EPI_ISL_665352, EPI_ISL_665374, EPI_ISL_665376, EPI_ISL_665382, EPI_ISL_665466, EPI_ISL_665517, EPI_ISL_665525, EPI_ISL_665530, EPI_ISL_665559, EPI_ISL_665572, EPI_ISL_665580, EPI_ISL_665597, EPI_ISL_665611, EPI_ISL_665632, EPI_ISL_665634 to 665637, EPI_ISL_665643 to 665645, EPI_ISL_665648 to 665649, EPI_ISL_665757 to 665759, EPI_ISL_665785 to 665786, EPI_ISL_665801, EPI_ISL_665805 to 665848, EPI_ISL_679406 to 679446, EPI_ISL_702507, EPI_ISL_702602, EPI_ISL_702669, EPI_ISL_702862, EPI_ISL_702961, EPI_ISL_703222, EPI_ISL_703340, EPI_ISL_703369, EPI_ISL_703886, EPI_ISL_703966, EPI_ISL_704041, EPI_ISL_704052, EPI_ISL_704102, EPI_ISL_704105, EPI_ISL_704607 to 704608, EPI_ISL_704666, EPI_ISL_704669, EPI_ISL_704671, EPI_ISL_704674, EPI_ISL_704674, EPI_ISL_705247, EPI_ISL_705378, EPI_ISL_705472, EPI_ISL_705942 to 705960, EPI_ISL_842653 to 842672, EPI_ISL_842674 to 842691, EPI_ISL_842693 to 842703, EPI_ISL_842705 to 842708, EPI_ISL_842710 to 842723, EPI_ISL_842725 to 842744, EPI_ISL_842746 to 842747, EPI_ISL_842749 to 842767, EPI_ISL_842769 to 842774, EPI_ISL_842776, EPI_ISL_842778 to 842784, EPI_ISL_842786 to 842792, EPI_ISL_866048 to 866074, EPI_ISL_866076 to 866080, EPI_ISL_866082 to 866083, EPI_ISL_866085 to 866107, EPI_ISL_866109 to 866143, EPI_ISL_866145 to 866156, EPI_ISL_866156, EPI_ISL_866158 to 866179, EPI_ISL_866179, EPI_ISL_866181 to 866186, EPI_ISL_920174 to 920184, EPI_ISL_920186 to 920203, EPI_ISL_920205 to 920278, EPI_ISL_920280 to 920303, EPI_ISL_920345, EPI_ISL_920347 to 920381, EPI_ISL_920385 to 920401, EPI_ISL_920412, EPI_ISL_920414 to 920416, EPI_ISL_920418 to 920464, EPI_ISL_920466 to 920472, EPI_ISL_920474 to 920478, EPI_ISL_920480 to 920567, EPI_ISL_920569 to 920616, EPI_ISL_920618 to 920644, EPI_ISL_920647 to 920660, EPI_ISL_920662 to 920721, EPI_ISL_920723 to 920736, EPI_ISL_920738 to 920764, EPI_ISL_920766 to 920781 | University Clinical Research Center, University of Sciences                                                                                                   |                                                                                                                                                                                                                                              |                                                                                                                                                                                                                                                                                                                                                                |
| see above                                                                                                                                                                                                                                                                                                                                                                                                                                                                                                                                                                                                                                                                                                                                                                                                                                                                                                                                                                                                                                                                                                                                                                                                                                                                                                                                                                                                                                                                                                                                                                                                                                                                                                                                                                                                                                                                                                                                                                                                                                                                                                                                                                                                                                                                                                                                                                                                                                                                                                                                                                                                                                                                                                                                                                                                                                                                                                                                                                                                          | University College London Hospital                                                                                                                            | COVID-19 Genomics UK (COG-UK) Consortium                                                                                                                                                                                                     | Catherine Houlihan; Dan Frampton; Judith Heaney; Matthew Byott; Moira Spyer and Eleni Nastouli; Stuart Kirk                                                                                                                                                                                                                                                    |
| EPI_ISL_627082, EPI_ISL_627104, EPI_ISL_627108, EPI_ISL_627110, EPI_ISL_627115, EPI_ISL_627211, EPI_ISL_627450 to 627481, EPI_ISL_627491, EPI_ISL_637446, EPI_ISL_637895, EPI_ISL_637912, EPI_ISL_637937, EPI_ISL_637995, EPI_ISL_637999, EPI_ISL_638003, EPI_ISL_638022, EPI_ISL_638031 to 638032,                                                                                                                                                                                                                                                                                                                                                                                                                                                                                                                                                                                                                                                                                                                                                                                                                                                                                                                                                                                                                                                                                                                                                                                                                                                                                                                                                                                                                                                                                                                                                                                                                                                                                                                                                                                                                                                                                                                                                                                                                                                                                                                                                                                                                                                                                                                                                                                                                                                                                                                                                                                                                                                                                                                |                                                                                                                                                               |                                                                                                                                                                                                                                              |                                                                                                                                                                                                                                                                                                                                                                |

|                                                                                                                                                                                                                                                                                                                                                                                                                                                                                                                                                                                                                                                                                                                                                                                                                                                                                                                                                                                                                                                                                                                                                                                                                                                                                                                                                                                                                                                                                                                                                                                                                                                                                                                                                                                                                                                                                                                                                                                                                                                                                                                                                                                                                                                                                                                                                                                                                                                                                                                                                                                                                                                                                                                                                                                                                                                                                                                                                                                                                                                                                                                                                                                                                                                                                                                                                                                                                                                                                                                                                                                                                                                                                                                                                                                                                                                                                                                                                                                                                                                                                                                                                                                                                                                                                                                                                                                                                                                                                                                                                                                                                                                                                                                                                                                                                                                                                                                                            |                                                                                                                                  |                                                                                                                                |                                                                                                                                                                                                                                                                                                                                                                                                                                                                                                                                                                                  |
|--------------------------------------------------------------------------------------------------------------------------------------------------------------------------------------------------------------------------------------------------------------------------------------------------------------------------------------------------------------------------------------------------------------------------------------------------------------------------------------------------------------------------------------------------------------------------------------------------------------------------------------------------------------------------------------------------------------------------------------------------------------------------------------------------------------------------------------------------------------------------------------------------------------------------------------------------------------------------------------------------------------------------------------------------------------------------------------------------------------------------------------------------------------------------------------------------------------------------------------------------------------------------------------------------------------------------------------------------------------------------------------------------------------------------------------------------------------------------------------------------------------------------------------------------------------------------------------------------------------------------------------------------------------------------------------------------------------------------------------------------------------------------------------------------------------------------------------------------------------------------------------------------------------------------------------------------------------------------------------------------------------------------------------------------------------------------------------------------------------------------------------------------------------------------------------------------------------------------------------------------------------------------------------------------------------------------------------------------------------------------------------------------------------------------------------------------------------------------------------------------------------------------------------------------------------------------------------------------------------------------------------------------------------------------------------------------------------------------------------------------------------------------------------------------------------------------------------------------------------------------------------------------------------------------------------------------------------------------------------------------------------------------------------------------------------------------------------------------------------------------------------------------------------------------------------------------------------------------------------------------------------------------------------------------------------------------------------------------------------------------------------------------------------------------------------------------------------------------------------------------------------------------------------------------------------------------------------------------------------------------------------------------------------------------------------------------------------------------------------------------------------------------------------------------------------------------------------------------------------------------------------------------------------------------------------------------------------------------------------------------------------------------------------------------------------------------------------------------------------------------------------------------------------------------------------------------------------------------------------------------------------------------------------------------------------------------------------------------------------------------------------------------------------------------------------------------------------------------------------------------------------------------------------------------------------------------------------------------------------------------------------------------------------------------------------------------------------------------------------------------------------------------------------------------------------------------------------------------------------------------------------------------------------------------------------------|----------------------------------------------------------------------------------------------------------------------------------|--------------------------------------------------------------------------------------------------------------------------------|----------------------------------------------------------------------------------------------------------------------------------------------------------------------------------------------------------------------------------------------------------------------------------------------------------------------------------------------------------------------------------------------------------------------------------------------------------------------------------------------------------------------------------------------------------------------------------|
| EPI_ISL_650123, EPI_ISL_651132, EPI_ISL_651179, EPI_ISL_651201, EPI_ISL_651240, EPI_ISL_651253, EPI_ISL_665266, EPI_ISL_665270, EPI_ISL_665335, EPI_ISL_665339, EPI_ISL_665378, EPI_ISL_665413, EPI_ISL_665428, EPI_ISL_665661, EPI_ISL_665664, EPI_ISL_665669, EPI_ISL_665674, EPI_ISL_665688, EPI_ISL_665695, EPI_ISL_665703, EPI_ISL_665705, EPI_ISL_665709 to 665711, EPI_ISL_665715 to 665716, EPI_ISL_665720, EPI_ISL_665733, EPI_ISL_665741, EPI_ISL_679447 to 679628, EPI_ISL_702544, EPI_ISL_702610, EPI_ISL_702661, EPI_ISL_702690, EPI_ISL_702731, EPI_ISL_702824, EPI_ISL_702831, EPI_ISL_702839, EPI_ISL_702910, EPI_ISL_702930, EPI_ISL_702999, EPI_ISL_703069, EPI_ISL_703107, EPI_ISL_703179, EPI_ISL_703319, EPI_ISL_703332, EPI_ISL_703335, EPI_ISL_703383, EPI_ISL_703385, EPI_ISL_703706, EPI_ISL_703739 to 703740, EPI_ISL_703745, EPI_ISL_703767, EPI_ISL_703865, EPI_ISL_703879, EPI_ISL_704025, EPI_ISL_704036, EPI_ISL_704046, EPI_ISL_704084, EPI_ISL_704086, EPI_ISL_704092, EPI_ISL_704163, EPI_ISL_704179, EPI_ISL_704193, EPI_ISL_704312, EPI_ISL_704372, EPI_ISL_704955, EPI_ISL_704963, EPI_ISL_704965, EPI_ISL_704965, EPI_ISL_704994, EPI_ISL_704997, EPI_ISL_704999, EPI_ISL_705007, EPI_ISL_705018, EPI_ISL_705035, EPI_ISL_705072, EPI_ISL_705078, EPI_ISL_705132, EPI_ISL_705143, EPI_ISL_705171, EPI_ISL_705184, EPI_ISL_705205, EPI_ISL_705209, EPI_ISL_705215 to 705216, EPI_ISL_705232, EPI_ISL_705236, EPI_ISL_705243, EPI_ISL_705268, EPI_ISL_705278, EPI_ISL_705283, EPI_ISL_705285, EPI_ISL_705297, EPI_ISL_705307 to 705310, EPI_ISL_705331, EPI_ISL_705337 to 705338, EPI_ISL_705342, EPI_ISL_705368, EPI_ISL_705392, EPI_ISL_705395 to 705397, EPI_ISL_705425, EPI_ISL_705961 to 705971, EPI_ISL_724540 to 724777, EPI_ISL_741186 to 741346, EPI_ISL_763377, EPI_ISL_763381, EPI_ISL_763393, EPI_ISL_763399, EPI_ISL_763404, EPI_ISL_763442, EPI_ISL_763468, EPI_ISL_763485 to 763486, EPI_ISL_763491, EPI_ISL_763500, EPI_ISL_763510, EPI_ISL_763520, EPI_ISL_763540, EPI_ISL_763544 to 763545, EPI_ISL_763551 to 763552, EPI_ISL_763567, EPI_ISL_763578, EPI_ISL_763582, EPI_ISL_763628, EPI_ISL_763640, EPI_ISL_763643 to 763644, EPI_ISL_763682, EPI_ISL_763687, EPI_ISL_763700, EPI_ISL_763720, EPI_ISL_763728, EPI_ISL_763730, EPI_ISL_763745, EPI_ISL_763756 to 763757, EPI_ISL_763767, EPI_ISL_763772, EPI_ISL_763784 to 763785, EPI_ISL_763809 to 763811, EPI_ISL_763813, EPI_ISL_763826, EPI_ISL_764037 to 764060, EPI_ISL_764128, EPI_ISL_764131, EPI_ISL_764146, EPI_ISL_764160, EPI_ISL_764175, EPI_ISL_764188, EPI_ISL_764228, EPI_ISL_764238, EPI_ISL_764241, EPI_ISL_764383 to 764386, EPI_ISL_813832 to 813970, EPI_ISL_819462 to 819463, EPI_ISL_819465 to 819475, EPI_ISL_819477, EPI_ISL_819483 to 819486, EPI_ISL_819490 to 819492, EPI_ISL_819494 to 819498, EPI_ISL_819500 to 819502, EPI_ISL_819505, EPI_ISL_819508 to 819519, EPI_ISL_819524 to 819528, EPI_ISL_819530 to 819531, EPI_ISL_819533 to 819557, EPI_ISL_819559 to 819567, EPI_ISL_819873 to 819876, EPI_ISL_819878 to 819884, EPI_ISL_819888 to 819889, EPI_ISL_819892 to 819893, EPI_ISL_819919 to 819927, EPI_ISL_819929 to 819930, EPI_ISL_819936 to 819941, EPI_ISL_819943 to 819944, EPI_ISL_819946 to 819952, EPI_ISL_819954 to 819955, EPI_ISL_819957 to 819958, EPI_ISL_819961 to 819962, EPI_ISL_819964 to 819969, EPI_ISL_819978 to 819989, EPI_ISL_819991 to 819995, EPI_ISL_819997 to 820000, EPI_ISL_820007 to 820010, EPI_ISL_820012 to 820014, EPI_ISL_820016 to 820020, EPI_ISL_820024, EPI_ISL_820031 to 820040, EPI_ISL_820045 to 820054, EPI_ISL_820057 to 820061, EPI_ISL_820063 to 820066, EPI_ISL_820081, EPI_ISL_820083 to 820087, EPI_ISL_820089, EPI_ISL_820094, EPI_ISL_820099 to 820101, EPI_ISL_820109, EPI_ISL_820111, EPI_ISL_820113 to 820118, EPI_ISL_820120 to 820123, EPI_ISL_820125, EPI_ISL_820127 to 820128, EPI_ISL_820138, EPI_ISL_820204, EPI_ISL_820206, EPI_ISL_820209, EPI_ISL_820211, EPI_ISL_820213, EPI_ISL_820216, EPI_ISL_820218, EPI_ISL_820226, EPI_ISL_820229, EPI_ISL_820236, EPI_ISL_820246, EPI_ISL_820249, EPI_ISL_820251, EPI_ISL_820256, EPI_ISL_820259, EPI_ISL_820264, EPI_ISL_820266, EPI_ISL_820268, EPI_ISL_820271, EPI_ISL_820273, EPI_ISL_820276, EPI_ISL_820282, EPI_ISL_820309, EPI_ISL_820314, EPI_ISL_820316, EPI_ISL_820318, EPI_ISL_820321, EPI_ISL_820326, EPI_ISL_820328, EPI_ISL_820331, EPI_ISL_820333, EPI_ISL_820335, EPI_ISL_820337, EPI_ISL_820340, EPI_ISL_820343, EPI_ISL_820345, EPI_ISL_820347, EPI_ISL_820350, EPI_ISL_820373, EPI_ISL_820376, EPI_ISL_820381, EPI_ISL_820383, EPI_ISL_820385, EPI_ISL_820396, EPI_ISL_820420, EPI_ISL_838673 to 839359, EPI_ISL_865485 to 865487, EPI_ISL_865584 to 866047, EPI_ISL_866187 to 866345, EPI_ISL_919725 to 919778, EPI_ISL_919856 to 920173, EPI_ISL_920782 to 920893, EPI_ISL_949747, EPI_ISL_949785 to 950231, EPI_ISL_997571 to 997614, EPI_ISL_997677 to 998098 | University College London, Great Ormond Street Hospital for Children NHS Foundation Trust, Imperial College Healthcare NHS Trust | COVID-19 Genomics UK (COG-UK) Consortium                                                                                       | Alison Holmes; Charlotte Williams; Helena Tutill; Jacqueline Findlay; James Price; Judith Breuer; Julianne Brown; Kathryn Harris; Leysa Forrest; Mark Kristiansen; Paola Niola; Paola Resende Silva; Patricia Dyal; Paul Randell; Rachel Williams; Samuel Weeks; Sergi Castellano; Sunando Roy; Tony Brooks; Yasmin Panchbhaya                                                                                                                                                                                                                                                   |
| EPI_ISL_877229 to 877236, EPI_ISL_877329 to 877330                                                                                                                                                                                                                                                                                                                                                                                                                                                                                                                                                                                                                                                                                                                                                                                                                                                                                                                                                                                                                                                                                                                                                                                                                                                                                                                                                                                                                                                                                                                                                                                                                                                                                                                                                                                                                                                                                                                                                                                                                                                                                                                                                                                                                                                                                                                                                                                                                                                                                                                                                                                                                                                                                                                                                                                                                                                                                                                                                                                                                                                                                                                                                                                                                                                                                                                                                                                                                                                                                                                                                                                                                                                                                                                                                                                                                                                                                                                                                                                                                                                                                                                                                                                                                                                                                                                                                                                                                                                                                                                                                                                                                                                                                                                                                                                                                                                                                         | University College Sedaya International (UCSI) University                                                                        | Institute for Medical Research, Infectious Disease Research Centre, National Institutes of Health, Ministry of Health Malaysia | Azizan MA; Kamel K; Sekaran SD; Suppiah J; Thayan R                                                                                                                                                                                                                                                                                                                                                                                                                                                                                                                              |
| EPI_ISL_982781 to 982840, EPI_ISL_982931 to 983000, EPI_ISL_983002 to 983062, EPI_ISL_983171 to 983239                                                                                                                                                                                                                                                                                                                                                                                                                                                                                                                                                                                                                                                                                                                                                                                                                                                                                                                                                                                                                                                                                                                                                                                                                                                                                                                                                                                                                                                                                                                                                                                                                                                                                                                                                                                                                                                                                                                                                                                                                                                                                                                                                                                                                                                                                                                                                                                                                                                                                                                                                                                                                                                                                                                                                                                                                                                                                                                                                                                                                                                                                                                                                                                                                                                                                                                                                                                                                                                                                                                                                                                                                                                                                                                                                                                                                                                                                                                                                                                                                                                                                                                                                                                                                                                                                                                                                                                                                                                                                                                                                                                                                                                                                                                                                                                                                                     | University Health Network/Mount Sinai Hospital Department of Microbiology                                                        | Ontario Institute for Cancer Research                                                                                          | Aimee Paterson; Allison McGeer; Angel Liu; Bernard Lam; Cassandra Bergwerff; Ilina Lungu; Jared T. Simpson; Javier Hernandez; Jeff Wrana; Jessica Bourke; Kin Chan; Kuganya Nirmalrajah; Laurence Pelletier; Lawrence E. Heisler; Lubaina Kothari; Marc Mazzulli; Marie-Ming Aynaud; Michael Laszloffy; Patryk Aftanas; Paul Krzyzanowski; Richard de Borja; Samira Mubareka; Seda Barutcu; Tony Mazzulli                                                                                                                                                                        |
| EPI_ISL_830727 to 831019, EPI_ISL_842646 to 842651, EPI_ISL_930859 to 931450, EPI_ISL_942515, EPI_ISL_949186, EPI_ISL_949189 to 949190                                                                                                                                                                                                                                                                                                                                                                                                                                                                                                                                                                                                                                                                                                                                                                                                                                                                                                                                                                                                                                                                                                                                                                                                                                                                                                                                                                                                                                                                                                                                                                                                                                                                                                                                                                                                                                                                                                                                                                                                                                                                                                                                                                                                                                                                                                                                                                                                                                                                                                                                                                                                                                                                                                                                                                                                                                                                                                                                                                                                                                                                                                                                                                                                                                                                                                                                                                                                                                                                                                                                                                                                                                                                                                                                                                                                                                                                                                                                                                                                                                                                                                                                                                                                                                                                                                                                                                                                                                                                                                                                                                                                                                                                                                                                                                                                     | University Hospital Basel, Clinical Virology                                                                                     | University Hospital Basel, Clinical Bacteriology                                                                               | Adrian Egli; Alfredo Mari; Hans Hirsch; Helena MB Seth-Smith; Julia Bielicki; Karoline Leuzinger; Madlen Stange; Manuel Battegay; Tim Roloff                                                                                                                                                                                                                                                                                                                                                                                                                                     |
| EPI_ISL_631377 to 631386, EPI_ISL_631388                                                                                                                                                                                                                                                                                                                                                                                                                                                                                                                                                                                                                                                                                                                                                                                                                                                                                                                                                                                                                                                                                                                                                                                                                                                                                                                                                                                                                                                                                                                                                                                                                                                                                                                                                                                                                                                                                                                                                                                                                                                                                                                                                                                                                                                                                                                                                                                                                                                                                                                                                                                                                                                                                                                                                                                                                                                                                                                                                                                                                                                                                                                                                                                                                                                                                                                                                                                                                                                                                                                                                                                                                                                                                                                                                                                                                                                                                                                                                                                                                                                                                                                                                                                                                                                                                                                                                                                                                                                                                                                                                                                                                                                                                                                                                                                                                                                                                                   | University Hospital Cologne                                                                                                      | Center of Medical Microbiology, Virology, and Hospital Hygiene, University of Duesseldorf                                      | Alexander Dilthey; Andreas Walker; Ashley-Jane Duplessis; Daniel Strelow; Elena Knops; Eva Heger; Florian Klein; Gibran Rubio Quintanares; Jessica Nicolai; Jörg Timm; Klaus Pfeffer; Malte Kohns Vasconcelos; Maximilian Damagnez; Rolf Kaiser; Saleta Sierra-Aragón; Tobias Wienemann; Torsten Houwaart                                                                                                                                                                                                                                                                        |
| EPI_ISL_710548 to 710553, EPI_ISL_710555 to 710562, EPI_ISL_710564 to 710574                                                                                                                                                                                                                                                                                                                                                                                                                                                                                                                                                                                                                                                                                                                                                                                                                                                                                                                                                                                                                                                                                                                                                                                                                                                                                                                                                                                                                                                                                                                                                                                                                                                                                                                                                                                                                                                                                                                                                                                                                                                                                                                                                                                                                                                                                                                                                                                                                                                                                                                                                                                                                                                                                                                                                                                                                                                                                                                                                                                                                                                                                                                                                                                                                                                                                                                                                                                                                                                                                                                                                                                                                                                                                                                                                                                                                                                                                                                                                                                                                                                                                                                                                                                                                                                                                                                                                                                                                                                                                                                                                                                                                                                                                                                                                                                                                                                               | University Hospital Dubrava                                                                                                      | Ruer Boškovic Institute; Forensic Science Centre Ivan Vueti; University of Zagreb Faculty of Science                           | Ana Livun; Antonela Blažeković; Boris Maek; Danilo Licastro; Dunja Glavaš; Fran Boroveki; Fuad osovi; Gordana Maravi Vlahovick; Ivan Šamija; Ivana elap; Jasna Kašman; Josipa Skelin; Katarina Marija Tupek; Kristian Vlahovick; Kristina Gotovac Jere; Lidija Cvetko-Krajinovi; Lucija Basi; Lucija Markulin; Maja Kuzman; Marina Korolija; Mario Štefanovi; Mirjana Domazet-Lošo; Paula Stanci; Petra Vrabec; Robert Beluži; Rosa Karli; Sanja Tadinac; Senica Pejša; Tomislav Domazet-Lošo; Valentina umljan-Comba; Vjekoslav Tomai; Vladimir Krajinovi; Zeljka Maak Safranko |
| EPI_ISL_862863 to 862865, EPI_ISL_862882 to 862884                                                                                                                                                                                                                                                                                                                                                                                                                                                                                                                                                                                                                                                                                                                                                                                                                                                                                                                                                                                                                                                                                                                                                                                                                                                                                                                                                                                                                                                                                                                                                                                                                                                                                                                                                                                                                                                                                                                                                                                                                                                                                                                                                                                                                                                                                                                                                                                                                                                                                                                                                                                                                                                                                                                                                                                                                                                                                                                                                                                                                                                                                                                                                                                                                                                                                                                                                                                                                                                                                                                                                                                                                                                                                                                                                                                                                                                                                                                                                                                                                                                                                                                                                                                                                                                                                                                                                                                                                                                                                                                                                                                                                                                                                                                                                                                                                                                                                         | University Hospital Kyoto Prefectural University of Medicine                                                                     | Fujita health University, School of Medicine, Department of Microbiology                                                       | Masahiro Suzuki; Yohei Doi                                                                                                                                                                                                                                                                                                                                                                                                                                                                                                                                                       |
| EPI_ISL_681705 to 681775, EPI_ISL_763351                                                                                                                                                                                                                                                                                                                                                                                                                                                                                                                                                                                                                                                                                                                                                                                                                                                                                                                                                                                                                                                                                                                                                                                                                                                                                                                                                                                                                                                                                                                                                                                                                                                                                                                                                                                                                                                                                                                                                                                                                                                                                                                                                                                                                                                                                                                                                                                                                                                                                                                                                                                                                                                                                                                                                                                                                                                                                                                                                                                                                                                                                                                                                                                                                                                                                                                                                                                                                                                                                                                                                                                                                                                                                                                                                                                                                                                                                                                                                                                                                                                                                                                                                                                                                                                                                                                                                                                                                                                                                                                                                                                                                                                                                                                                                                                                                                                                                                   | University Hospital Limerick                                                                                                     | Irish Coronavirus Sequencing Consortium - Teagasc Moorepark                                                                    | Amy Fitzpatrick; Calum Walsh; Carolyn Meaney; Elaine Lawton; Fiona Crispie; John Kenny; Patrick Stapleton; Paul Cotter                                                                                                                                                                                                                                                                                                                                                                                                                                                           |
| EPI_ISL_902754                                                                                                                                                                                                                                                                                                                                                                                                                                                                                                                                                                                                                                                                                                                                                                                                                                                                                                                                                                                                                                                                                                                                                                                                                                                                                                                                                                                                                                                                                                                                                                                                                                                                                                                                                                                                                                                                                                                                                                                                                                                                                                                                                                                                                                                                                                                                                                                                                                                                                                                                                                                                                                                                                                                                                                                                                                                                                                                                                                                                                                                                                                                                                                                                                                                                                                                                                                                                                                                                                                                                                                                                                                                                                                                                                                                                                                                                                                                                                                                                                                                                                                                                                                                                                                                                                                                                                                                                                                                                                                                                                                                                                                                                                                                                                                                                                                                                                                                             | University Hospital Sant'Andrea-Sapienza                                                                                         | INMI Lazzaro Spallanzani IRCCS                                                                                                 | A Di Caro; B Bartolini; C.E.M Gruber; E Giombini; F Messina; I Santino; M Rueca; M Simmaco; MR Capobianchi; O Butera                                                                                                                                                                                                                                                                                                                                                                                                                                                             |
| EPI_ISL_722202 to 722207                                                                                                                                                                                                                                                                                                                                                                                                                                                                                                                                                                                                                                                                                                                                                                                                                                                                                                                                                                                                                                                                                                                                                                                                                                                                                                                                                                                                                                                                                                                                                                                                                                                                                                                                                                                                                                                                                                                                                                                                                                                                                                                                                                                                                                                                                                                                                                                                                                                                                                                                                                                                                                                                                                                                                                                                                                                                                                                                                                                                                                                                                                                                                                                                                                                                                                                                                                                                                                                                                                                                                                                                                                                                                                                                                                                                                                                                                                                                                                                                                                                                                                                                                                                                                                                                                                                                                                                                                                                                                                                                                                                                                                                                                                                                                                                                                                                                                                                   | University Hospital Zurich                                                                                                       | Institute of Medical Virology, University of Zurich                                                                            | Alexandra Trkola; Aline Wolfensberger; Gabriela Ziltener; Jürg Böni; Maryam Zaheri; Michael Huber; Stefan Schmutz; Thomas Scheiber; Verena Kufner                                                                                                                                                                                                                                                                                                                                                                                                                                |
| EPI_ISL_730634, EPI_ISL_730636, EPI_ISL_733496 to 733497, EPI_ISL_751193, EPI_ISL_812256                                                                                                                                                                                                                                                                                                                                                                                                                                                                                                                                                                                                                                                                                                                                                                                                                                                                                                                                                                                                                                                                                                                                                                                                                                                                                                                                                                                                                                                                                                                                                                                                                                                                                                                                                                                                                                                                                                                                                                                                                                                                                                                                                                                                                                                                                                                                                                                                                                                                                                                                                                                                                                                                                                                                                                                                                                                                                                                                                                                                                                                                                                                                                                                                                                                                                                                                                                                                                                                                                                                                                                                                                                                                                                                                                                                                                                                                                                                                                                                                                                                                                                                                                                                                                                                                                                                                                                                                                                                                                                                                                                                                                                                                                                                                                                                                                                                   | University Hospital Zürich                                                                                                       | Institute of Medical Virology, University of Zurich                                                                            | Alexandra Trkola; Annette Audigé; Cyril Shah; Gabriela Ziltener; Guido Bloemberg; Jon Huder; Jürg Böni; Kevin Steiner; Maria Gruber; Maryam Zaheri; Michael Huber; Riccardo Capaul; Stefan Schmutz; Thomas Scheiber; Verena Kufner                                                                                                                                                                                                                                                                                                                                               |
| EPI_ISL_635068 to 635073, EPI_ISL_635113 to 635115, EPI_ISL_635117 to 635118, EPI_ISL_635137, EPI_ISL_635141, EPI_ISL_635147 to 635148, EPI_ISL_635156 to 635157, EPI_ISL_635160, EPI_ISL_635163, EPI_ISL_635179 to 635181, EPI_ISL_635186, EPI_ISL_635190, EPI_ISL_635198, EPI_ISL_668424 to 668426, EPI_ISL_708026 to 708027, EPI_ISL_708065 to 708072, EPI_ISL_708079 to 708080, EPI_ISL_708082 to 708095, EPI_ISL_708197 to 708198, EPI_ISL_759986 to 759987, EPI_ISL_775445 to 775448, EPI_ISL_775452 to 775456, EPI_ISL_775458, EPI_ISL_796670, EPI_ISL_796704, EPI_ISL_796707 to 796709, EPI_ISL_813978, EPI_ISL_842638, EPI_ISL_842640, EPI_ISL_906806 to 906811, EPI_ISL_964969 to 964970                                                                                                                                                                                                                                                                                                                                                                                                                                                                                                                                                                                                                                                                                                                                                                                                                                                                                                                                                                                                                                                                                                                                                                                                                                                                                                                                                                                                                                                                                                                                                                                                                                                                                                                                                                                                                                                                                                                                                                                                                                                                                                                                                                                                                                                                                                                                                                                                                                                                                                                                                                                                                                                                                                                                                                                                                                                                                                                                                                                                                                                                                                                                                                                                                                                                                                                                                                                                                                                                                                                                                                                                                                                                                                                                                                                                                                                                                                                                                                                                                                                                                                                                                                                                                                         | University Hospital of Northern Norway, Department for Microbiology and Infectious Disease Control                               | Norwegian Institute of Public Health, Department of Virology                                                                   | Atiya R Ali; Hilde Elshaug; Hilde Vollen; Ignacio Garcia Llorente; Kamilla Heddeland Instefjord; Karoline Bragstad; Kathrine Stene-Johansen; Marie Paulsen Madsen; Olav Hungnes; Rasmus Riis Kopperud; Serina B Engebretsen                                                                                                                                                                                                                                                                                                                                                      |
| EPI_ISL_997367 to 997375                                                                                                                                                                                                                                                                                                                                                                                                                                                                                                                                                                                                                                                                                                                                                                                                                                                                                                                                                                                                                                                                                                                                                                                                                                                                                                                                                                                                                                                                                                                                                                                                                                                                                                                                                                                                                                                                                                                                                                                                                                                                                                                                                                                                                                                                                                                                                                                                                                                                                                                                                                                                                                                                                                                                                                                                                                                                                                                                                                                                                                                                                                                                                                                                                                                                                                                                                                                                                                                                                                                                                                                                                                                                                                                                                                                                                                                                                                                                                                                                                                                                                                                                                                                                                                                                                                                                                                                                                                                                                                                                                                                                                                                                                                                                                                                                                                                                                                                   | University Hospitals Of Leicester NHS Trust and DeepSeq Nottingham                                                               | COVID-19 Genomics UK (COG-UK) Consortium                                                                                       | Christopher Holmes; Christopher Moore; Fei Sang; Joseph Chappell; Johnny Debebe; Jonathan Ball; Julian Tang; Karlie Fallon; Matthew Carlisle; Matthew Loose; Nadine Holmes; Patrick McClure; Paul Bird; Thomas Helmer; Victoria Wright                                                                                                                                                                                                                                                                                                                                           |
| EPI_ISL_956339, EPI_ISL_984663 to 984669                                                                                                                                                                                                                                                                                                                                                                                                                                                                                                                                                                                                                                                                                                                                                                                                                                                                                                                                                                                                                                                                                                                                                                                                                                                                                                                                                                                                                                                                                                                                                                                                                                                                                                                                                                                                                                                                                                                                                                                                                                                                                                                                                                                                                                                                                                                                                                                                                                                                                                                                                                                                                                                                                                                                                                                                                                                                                                                                                                                                                                                                                                                                                                                                                                                                                                                                                                                                                                                                                                                                                                                                                                                                                                                                                                                                                                                                                                                                                                                                                                                                                                                                                                                                                                                                                                                                                                                                                                                                                                                                                                                                                                                                                                                                                                                                                                                                                                   | University Hospitals Translational Laboratory (UHTL), University Hospitals                                                       | University Hospitals Translational Laboratory (UHTL), University Hospitals                                                     | Alouani; Alouani, D.; D. and Song, X.; Sadri, N.; Song, X.                                                                                                                                                                                                                                                                                                                                                                                                                                                                                                                       |
| EPI_ISL_860240 to 860255                                                                                                                                                                                                                                                                                                                                                                                                                                                                                                                                                                                                                                                                                                                                                                                                                                                                                                                                                                                                                                                                                                                                                                                                                                                                                                                                                                                                                                                                                                                                                                                                                                                                                                                                                                                                                                                                                                                                                                                                                                                                                                                                                                                                                                                                                                                                                                                                                                                                                                                                                                                                                                                                                                                                                                                                                                                                                                                                                                                                                                                                                                                                                                                                                                                                                                                                                                                                                                                                                                                                                                                                                                                                                                                                                                                                                                                                                                                                                                                                                                                                                                                                                                                                                                                                                                                                                                                                                                                                                                                                                                                                                                                                                                                                                                                                                                                                                                                   | University Hospitals of Geneva, Laboratory of Virology                                                                           | HUG, Laboratory of Virology and Universitätsspital Basel                                                                       | Adrian Egli; Alfredo Mari; Ana Rita Goncalves; Hans Hirsch; Helena MB Seth-Smith; Julia Bielicki; Karoline Leuzinger; Laurent Kaiser; Madlen Stange; Manuel Battegay; Samuel Cordey; Tim Roloff                                                                                                                                                                                                                                                                                                                                                                                  |
| EPI_ISL_847843 to 847977, EPI_ISL_864594 to 864737, EPI_ISL_897598 to 897985, EPI_ISL_940068 to 940074, EPI_ISL_953489 to 953937, EPI_ISL_981549 to 981849                                                                                                                                                                                                                                                                                                                                                                                                                                                                                                                                                                                                                                                                                                                                                                                                                                                                                                                                                                                                                                                                                                                                                                                                                                                                                                                                                                                                                                                                                                                                                                                                                                                                                                                                                                                                                                                                                                                                                                                                                                                                                                                                                                                                                                                                                                                                                                                                                                                                                                                                                                                                                                                                                                                                                                                                                                                                                                                                                                                                                                                                                                                                                                                                                                                                                                                                                                                                                                                                                                                                                                                                                                                                                                                                                                                                                                                                                                                                                                                                                                                                                                                                                                                                                                                                                                                                                                                                                                                                                                                                                                                                                                                                                                                                                                                 | University Hospitals of Geneva, Laboratory of Virology                                                                           | HUG, Laboratory of Virology and the Health2030 Genome Center                                                                   | Ana Rita Goncalves; Deborah Penet; Emmanouil Dermitzakis; Henri Pegeot; Ioannis Xenarios; Keith Harshman; Laurent Kaiser; Lorenzo Cerutti; Melyssa Elies; Samuel Cordey                                                                                                                                                                                                                                                                                                                                                                                                          |
| EPI_ISL_708306 to 708308, EPI_ISL_708315, EPI_ISL_708379 to 708381, EPI_ISL_738085                                                                                                                                                                                                                                                                                                                                                                                                                                                                                                                                                                                                                                                                                                                                                                                                                                                                                                                                                                                                                                                                                                                                                                                                                                                                                                                                                                                                                                                                                                                                                                                                                                                                                                                                                                                                                                                                                                                                                                                                                                                                                                                                                                                                                                                                                                                                                                                                                                                                                                                                                                                                                                                                                                                                                                                                                                                                                                                                                                                                                                                                                                                                                                                                                                                                                                                                                                                                                                                                                                                                                                                                                                                                                                                                                                                                                                                                                                                                                                                                                                                                                                                                                                                                                                                                                                                                                                                                                                                                                                                                                                                                                                                                                                                                                                                                                                                         | University Hospitals of Geneva, Laboratory of Virology                                                                           | University Hospitals of Geneva, Laboratory of Virology                                                                         | Cordey Samuel; Cordey Samuel and Laubscher Florian; Laubscher Florian                                                                                                                                                                                                                                                                                                                                                                                                                                                                                                            |
| EPI_ISL_775607 to 776566, EPI_ISL_825085, EPI_ISL_903364 to 903366, EPI_ISL_959897 to 959910, EPI_ISL_959912 to 960093                                                                                                                                                                                                                                                                                                                                                                                                                                                                                                                                                                                                                                                                                                                                                                                                                                                                                                                                                                                                                                                                                                                                                                                                                                                                                                                                                                                                                                                                                                                                                                                                                                                                                                                                                                                                                                                                                                                                                                                                                                                                                                                                                                                                                                                                                                                                                                                                                                                                                                                                                                                                                                                                                                                                                                                                                                                                                                                                                                                                                                                                                                                                                                                                                                                                                                                                                                                                                                                                                                                                                                                                                                                                                                                                                                                                                                                                                                                                                                                                                                                                                                                                                                                                                                                                                                                                                                                                                                                                                                                                                                                                                                                                                                                                                                                                                     | University Medical Center Hamburg Eppendorf                                                                                      | Heinrich Pette Institute, Leibniz Institute for Experimental Virology                                                          | Adam Grundhoff; Alexis Robitaille; Johannes Knobloch; Martin Aepfelbacher; Nicole Fischer; Thomas Günther                                                                                                                                                                                                                                                                                                                                                                                                                                                                        |
| EPI_ISL_735504 to 735506, EPI_ISL_738144, EPI_ISL_767013, EPI_ISL_767043, EPI_ISL_826284, EPI_ISL_826458, EPI_ISL_826520, EPI_ISL_940565, EPI_ISL_940631 to 940632, EPI_ISL_940739, EPI_ISL_940749, EPI_ISL_940753, EPI_ISL_949182, EPI_ISL_949184 to 949185, EPI_ISL_949188, EPI_ISL_949191, EPI_ISL_977495 to 977498                                                                                                                                                                                                                                                                                                                                                                                                                                                                                                                                                                                                                                                                                                                                                                                                                                                                                                                                                                                                                                                                                                                                                                                                                                                                                                                                                                                                                                                                                                                                                                                                                                                                                                                                                                                                                                                                                                                                                                                                                                                                                                                                                                                                                                                                                                                                                                                                                                                                                                                                                                                                                                                                                                                                                                                                                                                                                                                                                                                                                                                                                                                                                                                                                                                                                                                                                                                                                                                                                                                                                                                                                                                                                                                                                                                                                                                                                                                                                                                                                                                                                                                                                                                                                                                                                                                                                                                                                                                                                                                                                                                                                     | University of Bari Biomedical Sciences and Human Oncology                                                                        | University of Bari Biomedical Sciences and Human Oncology                                                                      | Accogli A.; Accogli M.; Accogli Marisa; Anna Sallustio; Chironna A.; Chironna M.; Chironna M.; Chironna Maria; Daniela Loconsole; Loconsole D.; Loconsole Daniela; Maria Chironna; Marisa Accogli; Sallustio A.; Sallustio Anna                                                                                                                                                                                                                                                                                                                                                  |
| EPI_ISL_730652                                                                                                                                                                                                                                                                                                                                                                                                                                                                                                                                                                                                                                                                                                                                                                                                                                                                                                                                                                                                                                                                                                                                                                                                                                                                                                                                                                                                                                                                                                                                                                                                                                                                                                                                                                                                                                                                                                                                                                                                                                                                                                                                                                                                                                                                                                                                                                                                                                                                                                                                                                                                                                                                                                                                                                                                                                                                                                                                                                                                                                                                                                                                                                                                                                                                                                                                                                                                                                                                                                                                                                                                                                                                                                                                                                                                                                                                                                                                                                                                                                                                                                                                                                                                                                                                                                                                                                                                                                                                                                                                                                                                                                                                                                                                                                                                                                                                                                                             | University of Bari, Valenzano, Italy                                                                                             | Dept. Food safety, Nutrition and Veterinary Public Health, Istituto superiore di sanità                                        | C. Buonavoglia; C. Desario; D. Buonavoglia, V.; E. Lorusso; G. Elia; G. Vacca; I. Di Bartolo; L. De Sabato; Martella; N. Decaro; U. Agrimi                                                                                                                                                                                                                                                                                                                                                                                                                                       |
| EPI_ISL_730653                                                                                                                                                                                                                                                                                                                                                                                                                                                                                                                                                                                                                                                                                                                                                                                                                                                                                                                                                                                                                                                                                                                                                                                                                                                                                                                                                                                                                                                                                                                                                                                                                                                                                                                                                                                                                                                                                                                                                                                                                                                                                                                                                                                                                                                                                                                                                                                                                                                                                                                                                                                                                                                                                                                                                                                                                                                                                                                                                                                                                                                                                                                                                                                                                                                                                                                                                                                                                                                                                                                                                                                                                                                                                                                                                                                                                                                                                                                                                                                                                                                                                                                                                                                                                                                                                                                                                                                                                                                                                                                                                                                                                                                                                                                                                                                                                                                                                                                             | University of Bari, Valenzano, Italy                                                                                             | Istituto Zooprofilattico Sperimentale dell'Abruzzo e del Molise "G. Caporale".                                                 | A. Lorusso; C. Buonavoglia; C. Cammà; C. Desario; D. Buonavoglia, V.; E. Lorusso; G. Elia; Martella; N. Decaro; V. Curini                                                                                                                                                                                                                                                                                                                                                                                                                                                        |
| EPI_ISL_650119, EPI_ISL_650126, EPI_ISL_650137, EPI_ISL_650144, EPI_ISL_650153, EPI_ISL_650155, EPI_ISL_650158, EPI_ISL_650171 to 650172, EPI_ISL_650176, EPI_ISL_650212, EPI_ISL_650216, EPI_ISL_650218, EPI_ISL_650233 to 650235, EPI_ISL_650245, EPI_ISL_650250 to 650254, EPI_ISL_650271,                                                                                                                                                                                                                                                                                                                                                                                                                                                                                                                                                                                                                                                                                                                                                                                                                                                                                                                                                                                                                                                                                                                                                                                                                                                                                                                                                                                                                                                                                                                                                                                                                                                                                                                                                                                                                                                                                                                                                                                                                                                                                                                                                                                                                                                                                                                                                                                                                                                                                                                                                                                                                                                                                                                                                                                                                                                                                                                                                                                                                                                                                                                                                                                                                                                                                                                                                                                                                                                                                                                                                                                                                                                                                                                                                                                                                                                                                                                                                                                                                                                                                                                                                                                                                                                                                                                                                                                                                                                                                                                                                                                                                                              |                                                                                                                                  |                                                                                                                                |                                                                                                                                                                                                                                                                                                                                                                                                                                                                                                                                                                                  |



|                                                                                                                                                                                                                                                                                                                                                                                                                                                                                                                                                                                                                                                                                |                                                                                                  |                                                                                                                            |                                                                                                                                                                                                                                                                                                                                                                                                                                                                                                 |
|--------------------------------------------------------------------------------------------------------------------------------------------------------------------------------------------------------------------------------------------------------------------------------------------------------------------------------------------------------------------------------------------------------------------------------------------------------------------------------------------------------------------------------------------------------------------------------------------------------------------------------------------------------------------------------|--------------------------------------------------------------------------------------------------|----------------------------------------------------------------------------------------------------------------------------|-------------------------------------------------------------------------------------------------------------------------------------------------------------------------------------------------------------------------------------------------------------------------------------------------------------------------------------------------------------------------------------------------------------------------------------------------------------------------------------------------|
| EPI_ISL_833123                                                                                                                                                                                                                                                                                                                                                                                                                                                                                                                                                                                                                                                                 | Usca Pizzoli                                                                                     | Istituto Zooprofilattico Sperimentale dell'Abruzzo e Molise "G. Caporale"                                                  | Ancora M; Calistri P; Cammà C; Curini V; Delli Compagni E; Di Domenico M; Di Pasquale A; Lorusso A; Mangone I; Marcacci M; Puglia I; Rinaldi A; Savini G                                                                                                                                                                                                                                                                                                                                        |
| EPI_ISL_623170 to 623210, EPI_ISL_628932 to 628999, EPI_ISL_634896 to 634933, EPI_ISL_640276 to 640300, EPI_ISL_648555 to 648594, EPI_ISL_672531 to 672569, EPI_ISL_678509 to 678533, EPI_ISL_684000 to 684027, EPI_ISL_738316, EPI_ISL_738350 to 738359, EPI_ISL_746325 to 746477, EPI_ISL_746836 to 747031, EPI_ISL_802864 to 802993, EPI_ISL_812360 to 812420, EPI_ISL_832014, EPI_ISL_849205 to 849278, EPI_ISL_849764 to 849793, EPI_ISL_849867 to 849921, EPI_ISL_856802 to 856868, EPI_ISL_914647 to 914701, EPI_ISL_930665 to 930782, EPI_ISL_931507 to 931583, EPI_ISL_937273 to 937382, EPI_ISL_943614 to 943804, EPI_ISL_943810 to 943966, EPI_ISL_983371 to 983408 | Utah Public Health Laboratory                                                                    | Utah Public Health Laboratory                                                                                              | Erin L. Young; Erin Young; Kelly F. Oakeson; Kelly Oakeson; Tara Gallagher                                                                                                                                                                                                                                                                                                                                                                                                                      |
| see above                                                                                                                                                                                                                                                                                                                                                                                                                                                                                                                                                                                                                                                                      | Utah Public Health Laboratory                                                                    | Utah Public Health Laboratory                                                                                              | Erin L. Young; Erin Young; Kelly F. Oakeson; Kelly Oakeson; Tara Gallagher                                                                                                                                                                                                                                                                                                                                                                                                                      |
| EPI_ISL_644665 to 644670, EPI_ISL_710485 to 710486, EPI_ISL_752600 to 752604, EPI_ISL_755575 to 755586, EPI_ISL_779291 to 779318, EPI_ISL_825017 to 825027, EPI_ISL_862728 to 862782, EPI_ISL_956333 to 956336                                                                                                                                                                                                                                                                                                                                                                                                                                                                 | Utah Public Health Laboratory, Utah Public Health Laboratory Infectious Disease submission group | Utah Public Health Laboratory, Utah Public Health Laboratory Infectious Disease submission group                           | E.L.; Gallagher, T.; K.F.; Oakeson; Oakeson, K.; Young; Young, E.                                                                                                                                                                                                                                                                                                                                                                                                                               |
| see above                                                                                                                                                                                                                                                                                                                                                                                                                                                                                                                                                                                                                                                                      | Utah Public Health Laboratory, Utah Public Health Laboratory Infectious Disease submission group | Utah Public Health Laboratory, Utah Public Health Laboratory Infectious Disease submission group                           | E.L.; Gallagher, T.; K.F.; Oakeson; Oakeson, K.; Young; Young, E.                                                                                                                                                                                                                                                                                                                                                                                                                               |
| EPI_ISL_962517 to 962520                                                                                                                                                                                                                                                                                                                                                                                                                                                                                                                                                                                                                                                       | VA Medical Center                                                                                | Los Angeles County PHL                                                                                                     | P. Hemarajata et al.                                                                                                                                                                                                                                                                                                                                                                                                                                                                            |
| EPI_ISL_631831, EPI_ISL_632099                                                                                                                                                                                                                                                                                                                                                                                                                                                                                                                                                                                                                                                 | VA NY Harbor Healthcare System                                                                   | New York City Public Health Laboratory                                                                                     | Jade Wang; et al.                                                                                                                                                                                                                                                                                                                                                                                                                                                                               |
| EPI_ISL_751546, EPI_ISL_751564, EPI_ISL_751588, EPI_ISL_751685 to 751686, EPI_ISL_751690, EPI_ISL_751745, EPI_ISL_751747, EPI_ISL_751784, EPI_ISL_903604, EPI_ISL_903741, EPI_ISL_903771, EPI_ISL_903792, EPI_ISL_903824, EPI_ISL_903826, EPI_ISL_903830, EPI_ISL_903869                                                                                                                                                                                                                                                                                                                                                                                                       | VA-Division of Consolidated Laboratory Services                                                  | Genomics and Discovery, Respiratory Viruses Branch, Division of Viral Diseases, Centers for Disease Control and Prevention | Anna Montmayeur; Anna Uehara; Ben L. Rambo-Martin; Clinton R. Paden; Dhvani Batra; Haibin Wang; Jasmine Padilla; Jing Zhang; Justin Lee; Krista Queen; Lori Rowe; Mark Burroughs; Mili Sheth; Peter W. Cook; Rachel Marine; Sarah Nobles; Suxiang Tong; Yan Li; Ying Tao                                                                                                                                                                                                                        |
| see above                                                                                                                                                                                                                                                                                                                                                                                                                                                                                                                                                                                                                                                                      | VA-Division of Consolidated Laboratory Services                                                  | Genomics and Discovery, Respiratory Viruses Branch, Division of Viral Diseases, Centers for Disease Control and Prevention | Anna Montmayeur; Anna Uehara; Ben L. Rambo-Martin; Clinton R. Paden; Dhvani Batra; Haibin Wang; Jasmine Padilla; Jing Zhang; Justin Lee; Krista Queen; Lori Rowe; Mark Burroughs; Mili Sheth; Peter W. Cook; Rachel Marine; Sarah Nobles; Suxiang Tong; Yan Li; Ying Tao                                                                                                                                                                                                                        |
| EPI_ISL_648122                                                                                                                                                                                                                                                                                                                                                                                                                                                                                                                                                                                                                                                                 | VA-Division of Consolidated Laboratory Services                                                  | Pathogen Discovery, Respiratory Viruses Branch, Division of Viral Diseases, Centers for Disease Control and Prevention     | Anna Montmayeur; Anna Uehara; Brian Lynch; Clinton R. Paden; Haibin Wang; Jing Zhang; Krista Queen; Rachel Marine; Suxiang Tong; Yan Li; Ying Tao                                                                                                                                                                                                                                                                                                                                               |
| EPI_ISL_710576                                                                                                                                                                                                                                                                                                                                                                                                                                                                                                                                                                                                                                                                 | VC Sorgenfrimottagningen                                                                         | The Public Health Agency of Sweden                                                                                         | Department of Microbiology; The Public Health Agency of Sweden                                                                                                                                                                                                                                                                                                                                                                                                                                  |
| EPI_ISL_845882                                                                                                                                                                                                                                                                                                                                                                                                                                                                                                                                                                                                                                                                 | VRDL, Mysore Medical College                                                                     | Department of Neurovirology, National Institute of Mental Health and Neurosciences (NIMHANS)                               | Anita S Desai; Chitra Pattabiraman; Darshan Sreenivas; Nakka Vijay Kiran Reddy; Pramada Prasad; Risha Rasheed; V Ravi                                                                                                                                                                                                                                                                                                                                                                           |
| EPI_ISL_903572, EPI_ISL_903579, EPI_ISL_903635 to 903636, EPI_ISL_903650, EPI_ISL_903657, EPI_ISL_903694, EPI_ISL_903696, EPI_ISL_903715, EPI_ISL_903718, EPI_ISL_903730, EPI_ISL_903816, EPI_ISL_903929                                                                                                                                                                                                                                                                                                                                                                                                                                                                       | VT Dept. of Health Laboratory                                                                    | Genomics and Discovery, Respiratory Viruses Branch, Division of Viral Diseases, Centers for Disease Control and Prevention | Anna Montmayeur; Anna Uehara; Ben L. Rambo-Martin; Clinton R. Paden; Dhvani Batra; Haibin Wang; Jasmine Padilla; Jing Zhang; Justin Lee; Krista Queen; Lori Rowe; Mark Burroughs; Mili Sheth; Peter W. Cook; Rachel Marine; Sarah Nobles; Suxiang Tong; Yan Li; Ying Tao                                                                                                                                                                                                                        |
| see above                                                                                                                                                                                                                                                                                                                                                                                                                                                                                                                                                                                                                                                                      | VT Dept. of Health Laboratory                                                                    | Genomics and Discovery, Respiratory Viruses Branch, Division of Viral Diseases, Centers for Disease Control and Prevention | Anna Montmayeur; Anna Uehara; Ben L. Rambo-Martin; Clinton R. Paden; Dhvani Batra; Haibin Wang; Jasmine Padilla; Jing Zhang; Justin Lee; Krista Queen; Lori Rowe; Mark Burroughs; Mili Sheth; Peter W. Cook; Rachel Marine; Sarah Nobles; Suxiang Tong; Yan Li; Ying Tao                                                                                                                                                                                                                        |
| EPI_ISL_940850 to 940859, EPI_ISL_940861 to 940891                                                                                                                                                                                                                                                                                                                                                                                                                                                                                                                                                                                                                             | Vaccines and Infectious Diseases Analytics Research Unit (VIDA)                                  | KRISP, KZN Research Innovation and Sequencing Platform                                                                     | Baillie Vicky; Giandhari Jennifer; Madhi Shabir; Naidoo Yesheene; Pillay Sureshnee; Tegally Houriyah; de Oliveira Tulio; du Plessis Jeanine                                                                                                                                                                                                                                                                                                                                                     |
| EPI_ISL_708820                                                                                                                                                                                                                                                                                                                                                                                                                                                                                                                                                                                                                                                                 | Vajira Hospital                                                                                  | National Institute of Health, Department of Medical Sciences, Ministry of Public Health, Thailand                          | Malinee Chittaganpitch; Pakorn Piromtong; Pilailuk Okada; Siripaporn Phuygun; Sittiporn Parmmen; Sunthareeya Waicharoen; Thanutsapa Thanadachakul; Warawan Wongboot                                                                                                                                                                                                                                                                                                                             |
| EPI_ISL_640037, EPI_ISL_640046, EPI_ISL_640114                                                                                                                                                                                                                                                                                                                                                                                                                                                                                                                                                                                                                                 | Valkenberg Hospital wc VBH                                                                       | NHLS/UCT                                                                                                                   | Arash Iranzadeh; Bruna Galvao; Carolyn Williamson; Deelan Doolabh; Diana Hardie; Innocent Mudau; Kruger Marais; Lynn Tyers; Marvin Hsiao; Stephen Korsman                                                                                                                                                                                                                                                                                                                                       |
| EPI_ISL_965974                                                                                                                                                                                                                                                                                                                                                                                                                                                                                                                                                                                                                                                                 | Vancouver Clinic                                                                                 | Seattle Flu Study                                                                                                          | Amanda Adler; Barry R. Lutz; Benjamin Pelle; Brian Hiatt; Caitlin R. Wolf; Chris D. Frazar; Deborah A. Nickerson; Elisabeth Brandstetter; Erica Ryke; Geoff Melly; Helen Y. Chu; Janet A. Englund; Jay Shendure; Jover Lee; Kairsten Fay; Kirsten Lacombe; Lea M. Starita; Mark J. Rieder; Matthew Richardson; Matthew Thompson; Melissa Truong; Michael Boeckh; Michael Famulare; Misja Ilcisin; Peter D. Han; Philip Dykema; Romesh Gautam; Scott Lindquist; Thomas R. Sibley; Trevor Bedford |
| EPI_ISL_677678 to 677689, EPI_ISL_677692, EPI_ISL_677695 to 677696, EPI_ISL_677699                                                                                                                                                                                                                                                                                                                                                                                                                                                                                                                                                                                             | Vanda Pharmaceuticals Clinical Site                                                              | Vanda Pharmaceuticals                                                                                                      | Vanda Pharmaceuticals                                                                                                                                                                                                                                                                                                                                                                                                                                                                           |
| EPI_ISL_640072, EPI_ISL_640081, EPI_ISL_640096 to 640099, EPI_ISL_640102, EPI_ISL_700413, EPI_ISL_700462, EPI_ISL_700527                                                                                                                                                                                                                                                                                                                                                                                                                                                                                                                                                       | Vanguard CHC wc VGC                                                                              | NHLS/UCT                                                                                                                   | Arash Iranzadeh; Bruna Galvao; Carolyn Williamson; Deelan Doolabh; Diana Hardie; Innocent Mudau; Kruger Marais; Lynn Tyers; Marvin Hsiao; Stephen Korsman                                                                                                                                                                                                                                                                                                                                       |
| see above                                                                                                                                                                                                                                                                                                                                                                                                                                                                                                                                                                                                                                                                      | Vanguard CHC wc VGC                                                                              | NHLS/UCT                                                                                                                   | Arash Iranzadeh; Bruna Galvao; Carolyn Williamson; Deelan Doolabh; Diana Hardie; Innocent Mudau; Kruger Marais; Lynn Tyers; Marvin Hsiao; Stephen Korsman                                                                                                                                                                                                                                                                                                                                       |
| EPI_ISL_960159                                                                                                                                                                                                                                                                                                                                                                                                                                                                                                                                                                                                                                                                 | Vanguard CHC wc VGC                                                                              | National Health Laboratory Service/UCT                                                                                     | Arash Iranzadeh; Bruna Galvao; Carolyn Williamson; Deelan Doolabh; Diana Hardie; Innocent Mudau; Kruger Marais; Lynn Tyers; Marvin Hsiao; Stephen Korsman                                                                                                                                                                                                                                                                                                                                       |
| EPI_ISL_710577 to 710578, EPI_ISL_766642 to 766644                                                                                                                                                                                                                                                                                                                                                                                                                                                                                                                                                                                                                             | Vardcentralen Brinken                                                                            | The Public Health Agency of Sweden                                                                                         | Department of Microbiology; The Public Health Agency of Sweden                                                                                                                                                                                                                                                                                                                                                                                                                                  |
| EPI_ISL_723147 to 723154, EPI_ISL_770800 to 770807, EPI_ISL_770814 to 770815, EPI_ISL_802574 to 802598, EPI_ISL_873272 to 873275, EPI_ISL_913586 to 913591, EPI_ISL_913668 to 913675, EPI_ISL_983649 to 983698                                                                                                                                                                                                                                                                                                                                                                                                                                                                 | Vault Health                                                                                     | Minnesota Department of Health, Public Health Laboratory                                                                   | Alexandra Lorentz; Jacob Garfin; Matt Plumb; and Xiong Wang                                                                                                                                                                                                                                                                                                                                                                                                                                     |
| see above                                                                                                                                                                                                                                                                                                                                                                                                                                                                                                                                                                                                                                                                      | Vault Health                                                                                     | Minnesota Department of Health, Public Health Laboratory                                                                   | Alexandra Lorentz; Jacob Garfin; Matt Plumb; and Xiong Wang                                                                                                                                                                                                                                                                                                                                                                                                                                     |
| EPI_ISL_635103, EPI_ISL_635105 to 635106, EPI_ISL_635112, EPI_ISL_635139 to 635140, EPI_ISL_635168, EPI_ISL_635171, EPI_ISL_635195, EPI_ISL_668390, EPI_ISL_668406, EPI_ISL_708154 to 708168, EPI_ISL_775331 to 775332, EPI_ISL_775393, EPI_ISL_775449 to 775451, EPI_ISL_775472 to 775474, EPI_ISL_775482 to 775483, EPI_ISL_775498 to 775504, EPI_ISL_860231, EPI_ISL_860264 to 860268, EPI_ISL_906805, EPI_ISL_964977 to 964978                                                                                                                                                                                                                                             | Vestfold Hospital, Toensberg Department of Microbiology                                          | Norwegian Institute of Public Health, Department of Virology                                                               | Atiya R Ali; Hilde Elshaug; Hilde Vollan; Ignacio Garcia Lorente; Kamilla Heddeland Instefjord; Karoline Bragstad; Kathrine Stene-Johansen; Marie Paulsen Madsen; Olav Hungnes; Rasmus Riis Kopperud; Serina B Engebretsen                                                                                                                                                                                                                                                                      |
| see above                                                                                                                                                                                                                                                                                                                                                                                                                                                                                                                                                                                                                                                                      | Vestfold Hospital, Toensberg Department of Microbiology                                          | Norwegian Institute of Public Health, Department of Virology                                                               | Atiya R Ali; Hilde Elshaug; Hilde Vollan; Ignacio Garcia Lorente; Kamilla Heddeland Instefjord; Karoline Bragstad; Kathrine Stene-Johansen; Marie Paulsen Madsen; Olav Hungnes; Rasmus Riis Kopperud; Serina B Engebretsen                                                                                                                                                                                                                                                                      |
| EPI_ISL_644568 to 644583                                                                                                                                                                                                                                                                                                                                                                                                                                                                                                                                                                                                                                                       | Veterinary Specialized Institute "Kraljevo", Serbia                                              | Veterinary Specialized Institute "Kraljevo", Serbia                                                                        | Afonso, C.; Banovic Djeri, B.; Jankovic, M.; Jovanovic, T.; Knezevic, A.; Petrovic, T.; Sekler, M.; Tesovic, B.; Vidanovic, D.; Volkening, J.                                                                                                                                                                                                                                                                                                                                                   |
| EPI_ISL_678486 to 678493                                                                                                                                                                                                                                                                                                                                                                                                                                                                                                                                                                                                                                                       | Veterinary Specialized Institute "Sabac", Serbia                                                 | Veterinary Specialized Institute "Kraljevo", Serbia                                                                        | Afonso, C.; Banovic Djeri, B.; Jankovic, M.; Jovanovic, T.; Knezevic, A.; Mrkovacki, S.; Petrovic, T.; Sekler, M.; Tesovic, B.; Vidanovic, D.; Volkening, J.                                                                                                                                                                                                                                                                                                                                    |
| EPI_ISL_904007, EPI_ISL_904010 to 904011                                                                                                                                                                                                                                                                                                                                                                                                                                                                                                                                                                                                                                       | Veterinary Specialized Institute Kraljevo                                                        | Veterinary Specialized Institute "Kraljevo", Serbia                                                                        | Afonso, C.; Banovic Djeri, B.; Jankovic, M.; Jovanovic, T.; Knezevic, A.; Petrovic, T.; Sekler, M.; Tesovic, B.; Vidanovic, D.; Volkening, J.                                                                                                                                                                                                                                                                                                                                                   |
| EPI_ISL_904012 to 904014                                                                                                                                                                                                                                                                                                                                                                                                                                                                                                                                                                                                                                                       | Veterinary Specialized Institute Nis                                                             | Veterinary Specialized Institute "Kraljevo", Serbia                                                                        | Afonso, C.; Banovic Djeri, B.; Jankovic, M.; Jovanovic, T.; Knezevic, A.; M.M.; Manic, M.; Petrovic; Sekler, M.; Tesovic, B.; Vidanovic, D.; Volkening, J.                                                                                                                                                                                                                                                                                                                                      |
| EPI_ISL_833572                                                                                                                                                                                                                                                                                                                                                                                                                                                                                                                                                                                                                                                                 | Veterinary Specialized Institute "Nis"                                                           | Scientific Veterinary Institute "Novi Sad"                                                                                 | Afonso, C.; Banovic Djeri, B.; Jankovic, M.; Jovanovic, T.; Knezevic, A.; Manic, M.; Petrovic, M.; Petrovic, T.; Sekler, M.; Tesovic, B.; Vidanovic, D.; Volkening, J.                                                                                                                                                                                                                                                                                                                          |
| EPI_ISL_833511 to 833521                                                                                                                                                                                                                                                                                                                                                                                                                                                                                                                                                                                                                                                       | Veterinary Specialized Institute "Nis"                                                           | Veterinary Specialized Institute "Kraljevo", Serbia                                                                        | Afonso, C.; Banovic Djeri, B.; Jankovic, M.; Jovanovic, T.; Knezevic, A.; Manic, M.; Petrovic, M.; Petrovic, T.; Sekler, M.; Tesovic, B.; Vidanovic, D.; Volkening, J.                                                                                                                                                                                                                                                                                                                          |
| EPI_ISL_833576 to 833577                                                                                                                                                                                                                                                                                                                                                                                                                                                                                                                                                                                                                                                       | Veterinary Specialized Institute "Nis"                                                           | Veterinary Specialized Institute "Nis", Serbia                                                                             | Afonso, C.; Banovic Djeri, B.; Jankovic, M.; Jovanovic, T.; Knezevic, A.; Manic, M.; Petrovic, M.; Petrovic, T.; Sekler, M.; Tesovic, B.; Vidanovic, D.; Volkening, J.                                                                                                                                                                                                                                                                                                                          |
| EPI_ISL_833573 to 833575                                                                                                                                                                                                                                                                                                                                                                                                                                                                                                                                                                                                                                                       | Veterinary Specialized Institute "Nis"                                                           | Veterinary Specialized Institute "Sabac", Serbia                                                                           | Afonso, C.; Banovic Djeri, B.; Jankovic, M.; Jovanovic, T.; Knezevic, A.; Mrkovacki, S.; Petrovic, T.; Sekler, M.; Tesovic, B.; Vidanovic, D.; Volkening, J.; Vujinovic, S., .                                                                                                                                                                                                                                                                                                                  |
| EPI_ISL_708823                                                                                                                                                                                                                                                                                                                                                                                                                                                                                                                                                                                                                                                                 | Vibharam Hospital                                                                                | National Institute of Health, Department of Medical Sciences, Ministry of Public Health, Thailand                          | Malinee Chittaganpitch; Pakorn Piromtong; Pilailuk Okada; Siripaporn Phuygun; Sittiporn Parmmen; Sunthareeya Waicharoen; Thanutsapa Thanadachakul; Warawan Wongboot                                                                                                                                                                                                                                                                                                                             |
| EPI_ISL_640021, EPI_ISL_640032, EPI_ISL_640085, EPI_ISL_640087, EPI_ISL_640108 to 640110, EPI_ISL_640113, EPI_ISL_640126, EPI_ISL_640141, EPI_ISL_700421, EPI_ISL_700546, EPI_ISL_700596                                                                                                                                                                                                                                                                                                                                                                                                                                                                                       | Victoria Hospital wc VHW                                                                         | NHLS/UCT                                                                                                                   | Arash Iranzadeh; Bruna Galvao; Carolyn Williamson; Deelan Doolabh; Diana Hardie; Innocent Mudau; Kruger Marais; Lynn Tyers; Marvin Hsiao; Stephen Korsman                                                                                                                                                                                                                                                                                                                                       |
| see above                                                                                                                                                                                                                                                                                                                                                                                                                                                                                                                                                                                                                                                                      | Victoria Hospital wc VHW                                                                         | NHLS/UCT                                                                                                                   | Arash Iranzadeh; Bruna Galvao; Carolyn Williamson; Deelan Doolabh; Diana Hardie; Innocent Mudau; Kruger Marais; Lynn Tyers; Marvin Hsiao; Stephen Korsman                                                                                                                                                                                                                                                                                                                                       |
| EPI_ISL_960094, EPI_ISL_960099, EPI_ISL_960101, EPI_ISL_960108, EPI_ISL_960113 to 960114, EPI_ISL_960131, EPI_ISL_960138, EPI_ISL_960150                                                                                                                                                                                                                                                                                                                                                                                                                                                                                                                                       | Victoria Hospital wc VHW                                                                         | National Health Laboratory Service/UCT                                                                                     | Arash Iranzadeh; Bruna Galvao; Carolyn Williamson; Deelan Doolabh; Diana Hardie; Innocent Mudau; Kruger Marais; Lynn Tyers; Marvin Hsiao; Stephen Korsman                                                                                                                                                                                                                                                                                                                                       |
| see above                                                                                                                                                                                                                                                                                                                                                                                                                                                                                                                                                                                                                                                                      | Victoria Hospital wc VHW                                                                         | National Health Laboratory Service/UCT                                                                                     | Arash Iranzadeh; Bruna Galvao; Carolyn Williamson; Deelan Doolabh; Diana Hardie; Innocent Mudau; Kruger Marais; Lynn Tyers; Marvin Hsiao; Stephen Korsman                                                                                                                                                                                                                                                                                                                                       |

|                                                                                                                                                                                                                                                                                                                                                                                                                                                                                                                                                                                                                                                                                                                                                                                                                                                                                                                                                                                                                                                                                                                                                                                                                                                                                                                                                                                                                                                                                                                                                                                                                                                                                                                                                                                                                                                                                                                                                                                                                                                                                                                                                                                                                                                                                                                                                                                                                                                                                                                                                                                                                                                                                                                                                                                                                                                                                                                                                                                                                                                                                                                                                                                                                                                                                                                                                                                                                                                                                                                                                                                                                                                                                                                                                                                                                                                                                                                                                                                                                                                                                                                                                                                                                                                                                                                                                                                                                                                                                                                                                                                                                                                                                                                                                                                                                                                                                                                                                                                                                                                                                                                                                                                                                                                                                                                                                                                                                                                                                                                                                                                                                                                                                                                                                                                                                                                                                                                                                                                                                                                                                                                                                                                                                                |                                                                                                                                                                                                 |                                                                                       |  |                                                                                                                                                                                                                                                                                                                                                                                                                                                                                                                                                                                                                                                                                                          |
|--------------------------------------------------------------------------------------------------------------------------------------------------------------------------------------------------------------------------------------------------------------------------------------------------------------------------------------------------------------------------------------------------------------------------------------------------------------------------------------------------------------------------------------------------------------------------------------------------------------------------------------------------------------------------------------------------------------------------------------------------------------------------------------------------------------------------------------------------------------------------------------------------------------------------------------------------------------------------------------------------------------------------------------------------------------------------------------------------------------------------------------------------------------------------------------------------------------------------------------------------------------------------------------------------------------------------------------------------------------------------------------------------------------------------------------------------------------------------------------------------------------------------------------------------------------------------------------------------------------------------------------------------------------------------------------------------------------------------------------------------------------------------------------------------------------------------------------------------------------------------------------------------------------------------------------------------------------------------------------------------------------------------------------------------------------------------------------------------------------------------------------------------------------------------------------------------------------------------------------------------------------------------------------------------------------------------------------------------------------------------------------------------------------------------------------------------------------------------------------------------------------------------------------------------------------------------------------------------------------------------------------------------------------------------------------------------------------------------------------------------------------------------------------------------------------------------------------------------------------------------------------------------------------------------------------------------------------------------------------------------------------------------------------------------------------------------------------------------------------------------------------------------------------------------------------------------------------------------------------------------------------------------------------------------------------------------------------------------------------------------------------------------------------------------------------------------------------------------------------------------------------------------------------------------------------------------------------------------------------------------------------------------------------------------------------------------------------------------------------------------------------------------------------------------------------------------------------------------------------------------------------------------------------------------------------------------------------------------------------------------------------------------------------------------------------------------------------------------------------------------------------------------------------------------------------------------------------------------------------------------------------------------------------------------------------------------------------------------------------------------------------------------------------------------------------------------------------------------------------------------------------------------------------------------------------------------------------------------------------------------------------------------------------------------------------------------------------------------------------------------------------------------------------------------------------------------------------------------------------------------------------------------------------------------------------------------------------------------------------------------------------------------------------------------------------------------------------------------------------------------------------------------------------------------------------------------------------------------------------------------------------------------------------------------------------------------------------------------------------------------------------------------------------------------------------------------------------------------------------------------------------------------------------------------------------------------------------------------------------------------------------------------------------------------------------------------------------------------------------------------------------------------------------------------------------------------------------------------------------------------------------------------------------------------------------------------------------------------------------------------------------------------------------------------------------------------------------------------------------------------------------------------------------------------------------------------------------------------------|-------------------------------------------------------------------------------------------------------------------------------------------------------------------------------------------------|---------------------------------------------------------------------------------------|--|----------------------------------------------------------------------------------------------------------------------------------------------------------------------------------------------------------------------------------------------------------------------------------------------------------------------------------------------------------------------------------------------------------------------------------------------------------------------------------------------------------------------------------------------------------------------------------------------------------------------------------------------------------------------------------------------------------|
| EPI_ISL_640337, EPI_ISL_640391, EPI_ISL_640519, EPI_ISL_640583, EPI_ISL_640588, EPI_ISL_640607, EPI_ISL_640763, EPI_ISL_640784, EPI_ISL_640939, EPI_ISL_640942, EPI_ISL_641012, EPI_ISL_641017, EPI_ISL_641088, EPI_ISL_641102, EPI_ISL_641121, EPI_ISL_641125, EPI_ISL_641273, EPI_ISL_779605 to 779606, EPI_ISL_779609, EPI_ISL_779614 to 779615, EPI_ISL_779617, EPI_ISL_779619 to 779623, EPI_ISL_779626, EPI_ISL_779631 to 779633, EPI_ISL_779648 to 779650, EPI_ISL_812435 to 812442, EPI_ISL_854748 to 854749, EPI_ISL_854751 to 854753, EPI_ISL_854757, EPI_ISL_854759, EPI_ISL_854762, EPI_ISL_877564 to 877569, EPI_ISL_877576 to 877578, EPI_ISL_877582 to 877584, EPI_ISL_933777, EPI_ISL_933779, EPI_ISL_962823 to 962825, EPI_ISL_962828 to 962832, EPI_ISL_979356, EPI_ISL_979362 to 979364                                                                                                                                                                                                                                                                                                                                                                                                                                                                                                                                                                                                                                                                                                                                                                                                                                                                                                                                                                                                                                                                                                                                                                                                                                                                                                                                                                                                                                                                                                                                                                                                                                                                                                                                                                                                                                                                                                                                                                                                                                                                                                                                                                                                                                                                                                                                                                                                                                                                                                                                                                                                                                                                                                                                                                                                                                                                                                                                                                                                                                                                                                                                                                                                                                                                                                                                                                                                                                                                                                                                                                                                                                                                                                                                                                                                                                                                                                                                                                                                                                                                                                                                                                                                                                                                                                                                                                                                                                                                                                                                                                                                                                                                                                                                                                                                                                                                                                                                                                                                                                                                                                                                                                                                                                                                                                                                                                                                                     |                                                                                                                                                                                                 |                                                                                       |  |                                                                                                                                                                                                                                                                                                                                                                                                                                                                                                                                                                                                                                                                                                          |
| see above                                                                                                                                                                                                                                                                                                                                                                                                                                                                                                                                                                                                                                                                                                                                                                                                                                                                                                                                                                                                                                                                                                                                                                                                                                                                                                                                                                                                                                                                                                                                                                                                                                                                                                                                                                                                                                                                                                                                                                                                                                                                                                                                                                                                                                                                                                                                                                                                                                                                                                                                                                                                                                                                                                                                                                                                                                                                                                                                                                                                                                                                                                                                                                                                                                                                                                                                                                                                                                                                                                                                                                                                                                                                                                                                                                                                                                                                                                                                                                                                                                                                                                                                                                                                                                                                                                                                                                                                                                                                                                                                                                                                                                                                                                                                                                                                                                                                                                                                                                                                                                                                                                                                                                                                                                                                                                                                                                                                                                                                                                                                                                                                                                                                                                                                                                                                                                                                                                                                                                                                                                                                                                                                                                                                                      | Victorian Infectious Diseases Reference Laboratory (VIDRL)                                                                                                                                      | VIDRL and MDU-PHL                                                                     |  | Caly L.; Druce J.; M.L.; N.L.; Sait; Schultz M.B.; Seemann T.; Sherry                                                                                                                                                                                                                                                                                                                                                                                                                                                                                                                                                                                                                                    |
| EPI_ISL_802852 to 802863, EPI_ISL_904935 to 904957                                                                                                                                                                                                                                                                                                                                                                                                                                                                                                                                                                                                                                                                                                                                                                                                                                                                                                                                                                                                                                                                                                                                                                                                                                                                                                                                                                                                                                                                                                                                                                                                                                                                                                                                                                                                                                                                                                                                                                                                                                                                                                                                                                                                                                                                                                                                                                                                                                                                                                                                                                                                                                                                                                                                                                                                                                                                                                                                                                                                                                                                                                                                                                                                                                                                                                                                                                                                                                                                                                                                                                                                                                                                                                                                                                                                                                                                                                                                                                                                                                                                                                                                                                                                                                                                                                                                                                                                                                                                                                                                                                                                                                                                                                                                                                                                                                                                                                                                                                                                                                                                                                                                                                                                                                                                                                                                                                                                                                                                                                                                                                                                                                                                                                                                                                                                                                                                                                                                                                                                                                                                                                                                                                             | Vilnius University Hospital Santaros Klinikos, Vilnius University                                                                                                                               | Institute of Biotechnology, Life Sciences Center, Vilnius University                  |  | Albertas Timinskas; Alma Gedvilaitė; Aurelija Zvirbliene; Daniel Naumovas; Emilija Vasiluonaite; Laimonas Griskevicius; Milda Norkiene                                                                                                                                                                                                                                                                                                                                                                                                                                                                                                                                                                   |
| EPI_ISL_914881 to 914889                                                                                                                                                                                                                                                                                                                                                                                                                                                                                                                                                                                                                                                                                                                                                                                                                                                                                                                                                                                                                                                                                                                                                                                                                                                                                                                                                                                                                                                                                                                                                                                                                                                                                                                                                                                                                                                                                                                                                                                                                                                                                                                                                                                                                                                                                                                                                                                                                                                                                                                                                                                                                                                                                                                                                                                                                                                                                                                                                                                                                                                                                                                                                                                                                                                                                                                                                                                                                                                                                                                                                                                                                                                                                                                                                                                                                                                                                                                                                                                                                                                                                                                                                                                                                                                                                                                                                                                                                                                                                                                                                                                                                                                                                                                                                                                                                                                                                                                                                                                                                                                                                                                                                                                                                                                                                                                                                                                                                                                                                                                                                                                                                                                                                                                                                                                                                                                                                                                                                                                                                                                                                                                                                                                                       | Vilnius university hospital Santaros Klinikos, Center of Laboratory Medicine                                                                                                                    | Vilnius University Hospital Santaros Klinikos                                         |  | Daniel Naumovas; Dovilė Ezerškytė; Ingrida Olen draite; Justinas Štikas; Rimvydas Norvilas                                                                                                                                                                                                                                                                                                                                                                                                                                                                                                                                                                                                               |
| EPI_ISL_933805 to 934091, EPI_ISL_934093 to 934313                                                                                                                                                                                                                                                                                                                                                                                                                                                                                                                                                                                                                                                                                                                                                                                                                                                                                                                                                                                                                                                                                                                                                                                                                                                                                                                                                                                                                                                                                                                                                                                                                                                                                                                                                                                                                                                                                                                                                                                                                                                                                                                                                                                                                                                                                                                                                                                                                                                                                                                                                                                                                                                                                                                                                                                                                                                                                                                                                                                                                                                                                                                                                                                                                                                                                                                                                                                                                                                                                                                                                                                                                                                                                                                                                                                                                                                                                                                                                                                                                                                                                                                                                                                                                                                                                                                                                                                                                                                                                                                                                                                                                                                                                                                                                                                                                                                                                                                                                                                                                                                                                                                                                                                                                                                                                                                                                                                                                                                                                                                                                                                                                                                                                                                                                                                                                                                                                                                                                                                                                                                                                                                                                                             | Vilnius university hospital Santaros Klinikos, Center of Laboratory Medicine                                                                                                                    | Vilnius university hospital Santaros Klinikos, Center of Laboratory Medicine          |  | Daniel Naumovas; Dovilė Ezerškytė; Gytis Dudas; Ingrida Olen draite; Justinas Štikas; Rimvydas Norvilas                                                                                                                                                                                                                                                                                                                                                                                                                                                                                                                                                                                                  |
| EPI_ISL_693775 to 694008, EPI_ISL_721670 to 721979, EPI_ISL_728764 to 729258, EPI_ISL_737395 to 737929, EPI_ISL_767941 to 768014, EPI_ISL_768016 to 768323, EPI_ISL_796159 to 796646, EPI_ISL_811129, EPI_ISL_811131 to 811133, EPI_ISL_898993 to 899710, EPI_ISL_899712 to 900053                                                                                                                                                                                                                                                                                                                                                                                                                                                                                                                                                                                                                                                                                                                                                                                                                                                                                                                                                                                                                                                                                                                                                                                                                                                                                                                                                                                                                                                                                                                                                                                                                                                                                                                                                                                                                                                                                                                                                                                                                                                                                                                                                                                                                                                                                                                                                                                                                                                                                                                                                                                                                                                                                                                                                                                                                                                                                                                                                                                                                                                                                                                                                                                                                                                                                                                                                                                                                                                                                                                                                                                                                                                                                                                                                                                                                                                                                                                                                                                                                                                                                                                                                                                                                                                                                                                                                                                                                                                                                                                                                                                                                                                                                                                                                                                                                                                                                                                                                                                                                                                                                                                                                                                                                                                                                                                                                                                                                                                                                                                                                                                                                                                                                                                                                                                                                                                                                                                                             |                                                                                                                                                                                                 |                                                                                       |  |                                                                                                                                                                                                                                                                                                                                                                                                                                                                                                                                                                                                                                                                                                          |
| see above                                                                                                                                                                                                                                                                                                                                                                                                                                                                                                                                                                                                                                                                                                                                                                                                                                                                                                                                                                                                                                                                                                                                                                                                                                                                                                                                                                                                                                                                                                                                                                                                                                                                                                                                                                                                                                                                                                                                                                                                                                                                                                                                                                                                                                                                                                                                                                                                                                                                                                                                                                                                                                                                                                                                                                                                                                                                                                                                                                                                                                                                                                                                                                                                                                                                                                                                                                                                                                                                                                                                                                                                                                                                                                                                                                                                                                                                                                                                                                                                                                                                                                                                                                                                                                                                                                                                                                                                                                                                                                                                                                                                                                                                                                                                                                                                                                                                                                                                                                                                                                                                                                                                                                                                                                                                                                                                                                                                                                                                                                                                                                                                                                                                                                                                                                                                                                                                                                                                                                                                                                                                                                                                                                                                                      | Viollier AG                                                                                                                                                                                     | Department of Biosystems Science and Engineering, ETH Zürich                          |  | Andrea Patrignani; Andrea Cabral de Gouveia; Catherine Aquino; Chaoan Chen; Christian Beisel; Christiane Beckmann; Christoph Noppen; David Dreifuss; Deborah Penet; Doris Popovic; Elodie Burcklen; Emmanuel Dermatzakis; Griffin White; Henri Peckert; Ina Nissen; Ioannis Xenarios; Ivan Topolsky; Jay Tracy; Katharina Jahn; Keith Harshman; Lara Fuhrmann; Laura Neff; Lennart Opitz; Lorenzo Cerutti; Maria Domonica Moccia; Maurice Redondo; Natascha Santacrose; Niko Beerenwinkel; Noémie Santamaria de Souza; Alfreid Kobel; Pedro Ferreira; Philipp Jablonksi; Ralph Schlapbach; Sarah Nadeau; Simon Grüter; Sophie Seidel; Susana Posada-Céspedes; Tanja Stadler; Timothy Sykes; Tobias Schär |
| EPI_ISL_896072, EPI_ISL_896074 to 896076, EPI_ISL_896078, EPI_ISL_896085 to 896086, EPI_ISL_896093 to 896094, EPI_ISL_896100, EPI_ISL_896105, EPI_ISL_896107, EPI_ISL_896110 to 896111, EPI_ISL_896113 to 896114, EPI_ISL_896117, EPI_ISL_910030, EPI_ISL_910222, EPI_ISL_910324, EPI_ISL_942376, EPI_ISL_942406, EPI_ISL_959369                                                                                                                                                                                                                                                                                                                                                                                                                                                                                                                                                                                                                                                                                                                                                                                                                                                                                                                                                                                                                                                                                                                                                                                                                                                                                                                                                                                                                                                                                                                                                                                                                                                                                                                                                                                                                                                                                                                                                                                                                                                                                                                                                                                                                                                                                                                                                                                                                                                                                                                                                                                                                                                                                                                                                                                                                                                                                                                                                                                                                                                                                                                                                                                                                                                                                                                                                                                                                                                                                                                                                                                                                                                                                                                                                                                                                                                                                                                                                                                                                                                                                                                                                                                                                                                                                                                                                                                                                                                                                                                                                                                                                                                                                                                                                                                                                                                                                                                                                                                                                                                                                                                                                                                                                                                                                                                                                                                                                                                                                                                                                                                                                                                                                                                                                                                                                                                                                               |                                                                                                                                                                                                 |                                                                                       |  |                                                                                                                                                                                                                                                                                                                                                                                                                                                                                                                                                                                                                                                                                                          |
| see above                                                                                                                                                                                                                                                                                                                                                                                                                                                                                                                                                                                                                                                                                                                                                                                                                                                                                                                                                                                                                                                                                                                                                                                                                                                                                                                                                                                                                                                                                                                                                                                                                                                                                                                                                                                                                                                                                                                                                                                                                                                                                                                                                                                                                                                                                                                                                                                                                                                                                                                                                                                                                                                                                                                                                                                                                                                                                                                                                                                                                                                                                                                                                                                                                                                                                                                                                                                                                                                                                                                                                                                                                                                                                                                                                                                                                                                                                                                                                                                                                                                                                                                                                                                                                                                                                                                                                                                                                                                                                                                                                                                                                                                                                                                                                                                                                                                                                                                                                                                                                                                                                                                                                                                                                                                                                                                                                                                                                                                                                                                                                                                                                                                                                                                                                                                                                                                                                                                                                                                                                                                                                                                                                                                                                      | Viollier AG                                                                                                                                                                                     | University Hospital Basel, Clinical Bacteriology                                      |  | Adrian Egli; Alfredo Mari; Christiane Beckmann; Hans Hirsch; Helena MB Seth-Smith; Julia Bielicki; Karoline Leuzinger; Madlen Stange; Manuel Battegay; Kim Roloff                                                                                                                                                                                                                                                                                                                                                                                                                                                                                                                                        |
| EPI_ISL_961010 to 961016, EPI_ISL_961759, EPI_ISL_965122 to 965124                                                                                                                                                                                                                                                                                                                                                                                                                                                                                                                                                                                                                                                                                                                                                                                                                                                                                                                                                                                                                                                                                                                                                                                                                                                                                                                                                                                                                                                                                                                                                                                                                                                                                                                                                                                                                                                                                                                                                                                                                                                                                                                                                                                                                                                                                                                                                                                                                                                                                                                                                                                                                                                                                                                                                                                                                                                                                                                                                                                                                                                                                                                                                                                                                                                                                                                                                                                                                                                                                                                                                                                                                                                                                                                                                                                                                                                                                                                                                                                                                                                                                                                                                                                                                                                                                                                                                                                                                                                                                                                                                                                                                                                                                                                                                                                                                                                                                                                                                                                                                                                                                                                                                                                                                                                                                                                                                                                                                                                                                                                                                                                                                                                                                                                                                                                                                                                                                                                                                                                                                                                                                                                                                             | Viral Respiratory Lab, National Institute for Biomedical Research (INRB)                                                                                                                        | Pathogen Sequencing Lab, National Institute for Biomedical Research (INRB)            |  | Allison Black; Amuri Aziza; Andrew Rambaut; Catherine Pratt; Eddy Kinganda-Lusamaki; Edith Nkwembe; Emmanuel Lokilo Lofiko; Francisca Muyembe Mawete; Ian Goodfellow; James Hadfield; Jean-Claude Makangara Cigolo; Jean-Jacques Muyembe Tamfum; Josh Quick; Kristian Andersen; Matthias Pauthner; Michael Wiley; Nick Loman; Placida Mbala-Kingebeni; Steve Ahuka-Mundeke; Trevor Bedford                                                                                                                                                                                                                                                                                                               |
| EPI_ISL_644825 to 644932, EPI_ISL_723470 to 723491, EPI_ISL_925141 to 925172, EPI_ISL_925174 to 925207, EPI_ISL_940823 to 940841, EPI_ISL_941240 to 941269, EPI_ISL_941901 to 941924, EPI_ISL_942377 to 942405                                                                                                                                                                                                                                                                                                                                                                                                                                                                                                                                                                                                                                                                                                                                                                                                                                                                                                                                                                                                                                                                                                                                                                                                                                                                                                                                                                                                                                                                                                                                                                                                                                                                                                                                                                                                                                                                                                                                                                                                                                                                                                                                                                                                                                                                                                                                                                                                                                                                                                                                                                                                                                                                                                                                                                                                                                                                                                                                                                                                                                                                                                                                                                                                                                                                                                                                                                                                                                                                                                                                                                                                                                                                                                                                                                                                                                                                                                                                                                                                                                                                                                                                                                                                                                                                                                                                                                                                                                                                                                                                                                                                                                                                                                                                                                                                                                                                                                                                                                                                                                                                                                                                                                                                                                                                                                                                                                                                                                                                                                                                                                                                                                                                                                                                                                                                                                                                                                                                                                                                                 |                                                                                                                                                                                                 |                                                                                       |  |                                                                                                                                                                                                                                                                                                                                                                                                                                                                                                                                                                                                                                                                                                          |
| see above                                                                                                                                                                                                                                                                                                                                                                                                                                                                                                                                                                                                                                                                                                                                                                                                                                                                                                                                                                                                                                                                                                                                                                                                                                                                                                                                                                                                                                                                                                                                                                                                                                                                                                                                                                                                                                                                                                                                                                                                                                                                                                                                                                                                                                                                                                                                                                                                                                                                                                                                                                                                                                                                                                                                                                                                                                                                                                                                                                                                                                                                                                                                                                                                                                                                                                                                                                                                                                                                                                                                                                                                                                                                                                                                                                                                                                                                                                                                                                                                                                                                                                                                                                                                                                                                                                                                                                                                                                                                                                                                                                                                                                                                                                                                                                                                                                                                                                                                                                                                                                                                                                                                                                                                                                                                                                                                                                                                                                                                                                                                                                                                                                                                                                                                                                                                                                                                                                                                                                                                                                                                                                                                                                                                                      | Virginia DCLS                                                                                                                                                                                   | Virginia DCLS                                                                         |  | Virginia DCLS<br>Virginia DCLS                                                                                                                                                                                                                                                                                                                                                                                                                                                                                                                                                                                                                                                                           |
| EPI_ISL_677134 to 677240, EPI_ISL_960188 to 960222, EPI_ISL_965186 to 965221, EPI_ISL_978169 to 978226                                                                                                                                                                                                                                                                                                                                                                                                                                                                                                                                                                                                                                                                                                                                                                                                                                                                                                                                                                                                                                                                                                                                                                                                                                                                                                                                                                                                                                                                                                                                                                                                                                                                                                                                                                                                                                                                                                                                                                                                                                                                                                                                                                                                                                                                                                                                                                                                                                                                                                                                                                                                                                                                                                                                                                                                                                                                                                                                                                                                                                                                                                                                                                                                                                                                                                                                                                                                                                                                                                                                                                                                                                                                                                                                                                                                                                                                                                                                                                                                                                                                                                                                                                                                                                                                                                                                                                                                                                                                                                                                                                                                                                                                                                                                                                                                                                                                                                                                                                                                                                                                                                                                                                                                                                                                                                                                                                                                                                                                                                                                                                                                                                                                                                                                                                                                                                                                                                                                                                                                                                                                                                                         | Virginia Division of Consolidated Laboratory Services                                                                                                                                           | Virginia Division of Consolidated Laboratory Services                                 |  |                                                                                                                                                                                                                                                                                                                                                                                                                                                                                                                                                                                                                                                                                                          |
| EPI_ISL_723492 to 723520, EPI_ISL_734170 to 734286, EPI_ISL_914841 to 914865                                                                                                                                                                                                                                                                                                                                                                                                                                                                                                                                                                                                                                                                                                                                                                                                                                                                                                                                                                                                                                                                                                                                                                                                                                                                                                                                                                                                                                                                                                                                                                                                                                                                                                                                                                                                                                                                                                                                                                                                                                                                                                                                                                                                                                                                                                                                                                                                                                                                                                                                                                                                                                                                                                                                                                                                                                                                                                                                                                                                                                                                                                                                                                                                                                                                                                                                                                                                                                                                                                                                                                                                                                                                                                                                                                                                                                                                                                                                                                                                                                                                                                                                                                                                                                                                                                                                                                                                                                                                                                                                                                                                                                                                                                                                                                                                                                                                                                                                                                                                                                                                                                                                                                                                                                                                                                                                                                                                                                                                                                                                                                                                                                                                                                                                                                                                                                                                                                                                                                                                                                                                                                                                                   | Virginia Division of Consolidated Laboratory Services (DCLS)                                                                                                                                    | Virginia Division of Consolidated Laboratory Services (DCLS)                          |  | Virginia DCLS                                                                                                                                                                                                                                                                                                                                                                                                                                                                                                                                                                                                                                                                                            |
| EPI_ISL_710487 to 710492                                                                                                                                                                                                                                                                                                                                                                                                                                                                                                                                                                                                                                                                                                                                                                                                                                                                                                                                                                                                                                                                                                                                                                                                                                                                                                                                                                                                                                                                                                                                                                                                                                                                                                                                                                                                                                                                                                                                                                                                                                                                                                                                                                                                                                                                                                                                                                                                                                                                                                                                                                                                                                                                                                                                                                                                                                                                                                                                                                                                                                                                                                                                                                                                                                                                                                                                                                                                                                                                                                                                                                                                                                                                                                                                                                                                                                                                                                                                                                                                                                                                                                                                                                                                                                                                                                                                                                                                                                                                                                                                                                                                                                                                                                                                                                                                                                                                                                                                                                                                                                                                                                                                                                                                                                                                                                                                                                                                                                                                                                                                                                                                                                                                                                                                                                                                                                                                                                                                                                                                                                                                                                                                                                                                       | Virology (microbiology), Hospital Universitario Central de Asturias                                                                                                                             | Virology (microbiology), Hospital Universitario Central de Asturias                   |  | Abreu, F.; Alvarez-Argueelles; Boga; Castello, C.; Costales, I.; Coto, E.; Gomez-deOna, J.; J.A.; M.E.; Martin-Rodriguez, G.; Melon, S.; Perez-Martinez, Z.; Rojo, S.; Sandoval, M.                                                                                                                                                                                                                                                                                                                                                                                                                                                                                                                      |
| EPI_ISL_997072 to 997164                                                                                                                                                                                                                                                                                                                                                                                                                                                                                                                                                                                                                                                                                                                                                                                                                                                                                                                                                                                                                                                                                                                                                                                                                                                                                                                                                                                                                                                                                                                                                                                                                                                                                                                                                                                                                                                                                                                                                                                                                                                                                                                                                                                                                                                                                                                                                                                                                                                                                                                                                                                                                                                                                                                                                                                                                                                                                                                                                                                                                                                                                                                                                                                                                                                                                                                                                                                                                                                                                                                                                                                                                                                                                                                                                                                                                                                                                                                                                                                                                                                                                                                                                                                                                                                                                                                                                                                                                                                                                                                                                                                                                                                                                                                                                                                                                                                                                                                                                                                                                                                                                                                                                                                                                                                                                                                                                                                                                                                                                                                                                                                                                                                                                                                                                                                                                                                                                                                                                                                                                                                                                                                                                                                                       | Virology Department, Royal Infirmary of Edinburgh, NHS Lothian / School of Biological Sciences, University of Edinburgh                                                                         | COVID-19 Genomics UK (COG-UK) Consortium                                              |  | Colquhoun R; Cotton S; Dewar R; Hill V; Jackson B; McCrone JT; McHugh M; O'Toole A.; Rambaut A; Rooke S; Scher E; Templeton K; Yu X                                                                                                                                                                                                                                                                                                                                                                                                                                                                                                                                                                      |
| EPI_ISL_650135, EPI_ISL_650138, EPI_ISL_650152, EPI_ISL_650159, EPI_ISL_650165, EPI_ISL_650167, EPI_ISL_650173, EPI_ISL_650177, EPI_ISL_650179 to 650180, EPI_ISL_650182, EPI_ISL_650191, EPI_ISL_650220, EPI_ISL_650255, EPI_ISL_650263 to 650264, EPI_ISL_650267, EPI_ISL_650277, EPI_ISL_650280, EPI_ISL_650286, EPI_ISL_650300 to 650308, EPI_ISL_650311, EPI_ISL_650426 to 650427, EPI_ISL_650433, EPI_ISL_650435, EPI_ISL_650439, EPI_ISL_650456, EPI_ISL_650478, EPI_ISL_650495, EPI_ISL_650499 to 650501, EPI_ISL_650531, EPI_ISL_650618, EPI_ISL_650680, EPI_ISL_650757, EPI_ISL_650775 to 650781, EPI_ISL_650793 to 650800, EPI_ISL_650812 to 650815, EPI_ISL_650819, EPI_ISL_650826, EPI_ISL_650832 to 650834, EPI_ISL_651012, EPI_ISL_651120, EPI_ISL_651141, EPI_ISL_651158, EPI_ISL_651169, EPI_ISL_651171, EPI_ISL_651188, EPI_ISL_651221, EPI_ISL_651228 to 651230, EPI_ISL_651294, EPI_ISL_651299, EPI_ISL_651301, EPI_ISL_651316, EPI_ISL_651320, EPI_ISL_651322, EPI_ISL_651343, EPI_ISL_651350, EPI_ISL_651366 to 651367, EPI_ISL_651385, EPI_ISL_651394 to 651395, EPI_ISL_651425 to 651428, EPI_ISL_651520 to 651524, EPI_ISL_651957 to 652066, EPI_ISL_665340, EPI_ISL_665552 to 665555, EPI_ISL_665563, EPI_ISL_665646, EPI_ISL_665725, EPI_ISL_665762, EPI_ISL_665790 to 665791, EPI_ISL_668060 to 668083, EPI_ISL_680461 to 680555, EPI_ISL_702528, EPI_ISL_702594, EPI_ISL_702620, EPI_ISL_702679, EPI_ISL_702937, EPI_ISL_703144, EPI_ISL_703198, EPI_ISL_703297, EPI_ISL_703414, EPI_ISL_703572, EPI_ISL_703622, EPI_ISL_703779, EPI_ISL_703782, EPI_ISL_703784, EPI_ISL_703787, EPI_ISL_703810, EPI_ISL_703813, EPI_ISL_703863, EPI_ISL_703950, EPI_ISL_704187, EPI_ISL_704559, EPI_ISL_705113, EPI_ISL_705118, EPI_ISL_705391, EPI_ISL_705416, EPI_ISL_705492, EPI_ISL_705734 to 705804, EPI_ISL_724222 to 724252, EPI_ISL_742175 to 742246, EPI_ISL_763447, EPI_ISL_763511, EPI_ISL_763548, EPI_ISL_763647, EPI_ISL_763649, EPI_ISL_763694, EPI_ISL_763696 to 763699, EPI_ISL_763732, EPI_ISL_763817, EPI_ISL_763992 to 763996, EPI_ISL_764061, EPI_ISL_764069 to 764075, EPI_ISL_764083, EPI_ISL_764147, EPI_ISL_764195, EPI_ISL_764198, EPI_ISL_764221, EPI_ISL_764278 to 764279, EPI_ISL_764356 to 764372, EPI_ISL_814333, EPI_ISL_814365, EPI_ISL_814460 to 814465, EPI_ISL_814533 to 814535, EPI_ISL_814546, EPI_ISL_814569 to 814571, EPI_ISL_814665 to 814687, EPI_ISL_838214 to 838314, EPI_ISL_865069 to 865162, EPI_ISL_919308 to 919406, EPI_ISL_949637 to 949649                                                                                                                                                                                                                                                                                                                                                                                                                                                                                                                                                                                                                                                                                                                                                                                                                                                                                                                                                                                                                                                                                                                                                                                                                                                                                                                                                                                                                                                                                                                                                                                                                                                                                                                                                                                                                                                                                                                                                                                                                                                                                                                                                                                                                                                                                                                                                                                                                                                                                                                                                                                                                                                                                                                                                                                                                                                                                                                                                                                                                                                                                                                                                                                                                                                                                                                                                                                                                                                                                                                                                                                                                                                                                                                   |                                                                                                                                                                                                 |                                                                                       |  |                                                                                                                                                                                                                                                                                                                                                                                                                                                                                                                                                                                                                                                                                                          |
| see above                                                                                                                                                                                                                                                                                                                                                                                                                                                                                                                                                                                                                                                                                                                                                                                                                                                                                                                                                                                                                                                                                                                                                                                                                                                                                                                                                                                                                                                                                                                                                                                                                                                                                                                                                                                                                                                                                                                                                                                                                                                                                                                                                                                                                                                                                                                                                                                                                                                                                                                                                                                                                                                                                                                                                                                                                                                                                                                                                                                                                                                                                                                                                                                                                                                                                                                                                                                                                                                                                                                                                                                                                                                                                                                                                                                                                                                                                                                                                                                                                                                                                                                                                                                                                                                                                                                                                                                                                                                                                                                                                                                                                                                                                                                                                                                                                                                                                                                                                                                                                                                                                                                                                                                                                                                                                                                                                                                                                                                                                                                                                                                                                                                                                                                                                                                                                                                                                                                                                                                                                                                                                                                                                                                                                      | Virology Department, Royal Infirmary of Edinburgh, NHS Lothian / School of Biological Sciences, University of Edinburgh / Institute of Genetics and Molecular Medicine, University of Edinburgh | COVID-19 Genomics UK (COG-UK) Consortium                                              |  | Balceza C; Colquhoun R; Dewar R; Gallagher M; Hill V; Jackson B; McCrone JT; McHugh M; O'Toole A.; Rambaut A; Rooke S; Scher E; Templeton K; Williams TC; Yu X                                                                                                                                                                                                                                                                                                                                                                                                                                                                                                                                           |
| EPI_ISL_626664, EPI_ISL_626679 to 626680, EPI_ISL_626710, EPI_ISL_626734 to 626735, EPI_ISL_626739, EPI_ISL_626743, EPI_ISL_626747, EPI_ISL_626752, EPI_ISL_626754, EPI_ISL_626757, EPI_ISL_626771, EPI_ISL_626781, EPI_ISL_626786, EPI_ISL_626791, EPI_ISL_626809, EPI_ISL_626817, EPI_ISL_626821, EPI_ISL_626823 to 626824, EPI_ISL_626827, EPI_ISL_626830, EPI_ISL_626852, EPI_ISL_626896, EPI_ISL_626898 to 626903, EPI_ISL_626906 to 626909, EPI_ISL_626911 to 626913, EPI_ISL_626915 to 626916, EPI_ISL_626918, EPI_ISL_626922 to 626924, EPI_ISL_626929, EPI_ISL_626932, EPI_ISL_626938, EPI_ISL_626947 to 626951, EPI_ISL_627019, EPI_ISL_627047, EPI_ISL_627103, EPI_ISL_627130, EPI_ISL_627164, EPI_ISL_627184, EPI_ISL_627191, EPI_ISL_627252 to 627254, EPI_ISL_627264, EPI_ISL_627280, EPI_ISL_627298, EPI_ISL_627313, EPI_ISL_627492 to 627517, EPI_ISL_628369 to 628413, EPI_ISL_628421, EPI_ISL_637266, EPI_ISL_637273, EPI_ISL_637285, EPI_ISL_637290 to 637291, EPI_ISL_637297, EPI_ISL_637320, EPI_ISL_637326, EPI_ISL_637358, EPI_ISL_637361, EPI_ISL_637381, EPI_ISL_637409, EPI_ISL_637436, EPI_ISL_637531, EPI_ISL_637533, EPI_ISL_637535, EPI_ISL_637538 to 637541, EPI_ISL_637553, EPI_ISL_637559, EPI_ISL_637561, EPI_ISL_637580, EPI_ISL_637584 to 637585, EPI_ISL_637594, EPI_ISL_637621, EPI_ISL_637862 to 637863, EPI_ISL_637872, EPI_ISL_637876, EPI_ISL_637879, EPI_ISL_637881, EPI_ISL_637887, EPI_ISL_637897, EPI_ISL_637901, EPI_ISL_637905, EPI_ISL_637944, EPI_ISL_637946, EPI_ISL_637973, EPI_ISL_637985, EPI_ISL_638017, EPI_ISL_638024, EPI_ISL_638090, EPI_ISL_638168, EPI_ISL_638532 to 638554, EPI_ISL_638877 to 638893, EPI_ISL_639008 to 639010, EPI_ISL_650121, EPI_ISL_650124, EPI_ISL_650131, EPI_ISL_650134, EPI_ISL_650208 to 650210, EPI_ISL_650237, EPI_ISL_650244, EPI_ISL_650283, EPI_ISL_650349, EPI_ISL_650362 to 650363, EPI_ISL_650367 to 650370, EPI_ISL_650372, EPI_ISL_650374, EPI_ISL_650384, EPI_ISL_650395, EPI_ISL_650406 to 650408, EPI_ISL_650422 to 650423, EPI_ISL_650425, EPI_ISL_650448, EPI_ISL_650554, EPI_ISL_650646, EPI_ISL_650650 to 650653, EPI_ISL_650659, EPI_ISL_650662 to 650663, EPI_ISL_650670, EPI_ISL_650674 to 650676, EPI_ISL_650678 to 650680, EPI_ISL_650689, EPI_ISL_650691, EPI_ISL_650705, EPI_ISL_650718, EPI_ISL_650807 to 650808, EPI_ISL_651076 to 651078, EPI_ISL_651109, EPI_ISL_651121, EPI_ISL_651152, EPI_ISL_651184, EPI_ISL_651224, EPI_ISL_651233, EPI_ISL_651243, EPI_ISL_651291, EPI_ISL_651341, EPI_ISL_651374, EPI_ISL_651414, EPI_ISL_651437, EPI_ISL_651443, EPI_ISL_651453, EPI_ISL_651514, EPI_ISL_651518, EPI_ISL_651530, EPI_ISL_651715 to 651732, EPI_ISL_652180 to 652183, EPI_ISL_653059 to 653097, EPI_ISL_664283, EPI_ISL_664298, EPI_ISL_664370, EPI_ISL_664425 to 664426, EPI_ISL_664431, EPI_ISL_664437, EPI_ISL_664600, EPI_ISL_664602, EPI_ISL_664630, EPI_ISL_664636, EPI_ISL_664689, EPI_ISL_664713, EPI_ISL_664752, EPI_ISL_665023 to 665045, EPI_ISL_665864, EPI_ISL_679852 to 679923, EPI_ISL_679986 to 680015, EPI_ISL_680101 to 680197, EPI_ISL_680556 to 680561, EPI_ISL_702476, EPI_ISL_702487, EPI_ISL_702518, EPI_ISL_702531, EPI_ISL_702550, EPI_ISL_702564, EPI_ISL_702579, EPI_ISL_702607, EPI_ISL_702633, EPI_ISL_702682, EPI_ISL_702705, EPI_ISL_702761, EPI_ISL_702776, EPI_ISL_702798, EPI_ISL_702829 to 702830, EPI_ISL_702830, EPI_ISL_702833, EPI_ISL_702842 to 702843, EPI_ISL_702852, EPI_ISL_702880 to 702881, EPI_ISL_702964, EPI_ISL_703018, EPI_ISL_703026, EPI_ISL_703029, EPI_ISL_703038, EPI_ISL_703040, EPI_ISL_703048, EPI_ISL_703056, EPI_ISL_703133, EPI_ISL_703400, EPI_ISL_703449, EPI_ISL_703568, EPI_ISL_703560, EPI_ISL_703671, EPI_ISL_703674, EPI_ISL_703676, EPI_ISL_703684, EPI_ISL_703723, EPI_ISL_703765 to 703766, EPI_ISL_703894, EPI_ISL_704190, EPI_ISL_704600 to 704605, EPI_ISL_704636 to 704639, EPI_ISL_704828, EPI_ISL_704960, EPI_ISL_704978, EPI_ISL_705026, EPI_ISL_705088, EPI_ISL_705096, EPI_ISL_705129, EPI_ISL_705153, EPI_ISL_705163, EPI_ISL_705195, EPI_ISL_705204, EPI_ISL_705210, EPI_ISL_705220, EPI_ISL_705230, EPI_ISL_705233, EPI_ISL_705270, EPI_ISL_705272, EPI_ISL_705276, EPI_ISL_705288, EPI_ISL_705317, EPI_ISL_705319, EPI_ISL_705335, EPI_ISL_705351, EPI_ISL_705371, EPI_ISL_705374, EPI_ISL_705405, EPI_ISL_705421, EPI_ISL_705615 to 705628, EPI_ISL_706975 to 707006, EPI_ISL_727861 to 727997, EPI_ISL_741936 to 742116, EPI_ISL_763365, EPI_ISL_763368 to 763369, EPI_ISL_763394, EPI_ISL_763402 to 763403, EPI_ISL_763415, EPI_ISL_763419, EPI_ISL_763424, EPI_ISL_763427 to 763429, EPI_ISL_763439, EPI_ISL_763499, EPI_ISL_763501, EPI_ISL_763504, EPI_ISL_763506 to 763507, EPI_ISL_763514, EPI_ISL_763588, EPI_ISL_763632, EPI_ISL_763634 to 763636, EPI_ISL_763639, EPI_ISL_763645, EPI_ISL_763651 to 763654, EPI_ISL_763677, EPI_ISL_763731, EPI_ISL_763736, EPI_ISL_763740 to 763744, EPI_ISL_763746, EPI_ISL_763842, EPI_ISL_763866 to 763871, EPI_ISL_764032 to 764033, EPI_ISL_764076, EPI_ISL_764099 to 764100, EPI_ISL_764103 to 764112, EPI_ISL_764144 to 764145, EPI_ISL_764149, EPI_ISL_764153, EPI_ISL_764167, EPI_ISL_764210, EPI_ISL_764213, EPI_ISL_764216, EPI_ISL_764226 to 764227, EPI_ISL_764231, EPI_ISL_764239, EPI_ISL_764269, EPI_ISL_765149 to 765187, EPI_ISL_765189 to 765208, EPI_ISL_816226 to 816431, EPI_ISL_816433 to 816656, EPI_ISL_842201 to 842210, EPI_ISL_842213 to 842235, EPI_ISL_842237, EPI_ISL_842239 to 842249, EPI_ISL_842251 to 842273, EPI_ISL_842275 to 842277, EPI_ISL_842279 to 842282, EPI_ISL_842284 to 842303, EPI_ISL_842305 to 842326, EPI_ISL_842328 to 842338, EPI_ISL_842340 to 842341, EPI_ISL_842343 to 842354, EPI_ISL_868357 to 868440, EPI_ISL_868442 to 868487, EPI_ISL_868489 to 868525, EPI_ISL_868527 to 868529, EPI_ISL_868531 to 868547, EPI_ISL_868549 to 868553, EPI_ISL_868555 to 868573, EPI_ISL_868575 to 868588, EPI_ISL_868590 to 868616, EPI_ISL_868618 to 868715, EPI_ISL_918563, EPI_ISL_924079 to 924177, EPI_ISL_924179 to 924278, EPI_ISL_924280 to 924408, EPI_ISL_924410 to 924429, EPI_ISL_952953 to 952968, EPI_ISL_952970 to 952982, EPI_ISL_952984 to 953031, EPI_ISL_953015 to 953023, EPI_ISL_998099 to 998135 |                                                                                                                                                                                                 |                                                                                       |  |                                                                                                                                                                                                                                                                                                                                                                                                                                                                                                                                                                                                                                                                                                          |
| see above                                                                                                                                                                                                                                                                                                                                                                                                                                                                                                                                                                                                                                                                                                                                                                                                                                                                                                                                                                                                                                                                                                                                                                                                                                                                                                                                                                                                                                                                                                                                                                                                                                                                                                                                                                                                                                                                                                                                                                                                                                                                                                                                                                                                                                                                                                                                                                                                                                                                                                                                                                                                                                                                                                                                                                                                                                                                                                                                                                                                                                                                                                                                                                                                                                                                                                                                                                                                                                                                                                                                                                                                                                                                                                                                                                                                                                                                                                                                                                                                                                                                                                                                                                                                                                                                                                                                                                                                                                                                                                                                                                                                                                                                                                                                                                                                                                                                                                                                                                                                                                                                                                                                                                                                                                                                                                                                                                                                                                                                                                                                                                                                                                                                                                                                                                                                                                                                                                                                                                                                                                                                                                                                                                                                                      | Virology Department, Sheffield Teaching Hospitals NHS Foundation Trust/Department of Infection, Immunity and Cardiovascular Disease, The Medical School, University of Sheffield                | COVID-19 Genomics UK (COG-UK) Consortium                                              |  | Adri Angyal; Alex Keeley; Benjamin Lindsey; Cariad Evans; Danielle Groves; Dave Partridge; Katie Johnson; Laura Carrilero; Luke Green; Matthew Parker; Matthew Wyles; Mehmet Yavuz; Mohammad Raza; Nikki Smith; Paul Parsons; Rachel Tucker; Rebecca Brown; Thushan de Silva                                                                                                                                                                                                                                                                                                                                                                                                                             |
| EPI_ISL_636982 to 636988                                                                                                                                                                                                                                                                                                                                                                                                                                                                                                                                                                                                                                                                                                                                                                                                                                                                                                                                                                                                                                                                                                                                                                                                                                                                                                                                                                                                                                                                                                                                                                                                                                                                                                                                                                                                                                                                                                                                                                                                                                                                                                                                                                                                                                                                                                                                                                                                                                                                                                                                                                                                                                                                                                                                                                                                                                                                                                                                                                                                                                                                                                                                                                                                                                                                                                                                                                                                                                                                                                                                                                                                                                                                                                                                                                                                                                                                                                                                                                                                                                                                                                                                                                                                                                                                                                                                                                                                                                                                                                                                                                                                                                                                                                                                                                                                                                                                                                                                                                                                                                                                                                                                                                                                                                                                                                                                                                                                                                                                                                                                                                                                                                                                                                                                                                                                                                                                                                                                                                                                                                                                                                                                                                                                       | Virology Lab, National Institute for Biomedical Research (INRB)                                                                                                                                 | Project group Epidemiology of Highly Pathogenic Microorganisms, Robert Koch-Institute |  | Eddy Kinganda-Lusamaki; Essia Belarbi; Fabian Leendertz; Gabriel Mbunso; Grit Schubert; Jasmin Schlotterbeck; Jean-Jacques Muyembe Tamfum; Sheila Makiala; Steve Ahuka-Mundeke                                                                                                                                                                                                                                                                                                                                                                                                                                                                                                                           |

|                                                                                                                                                                                                                                                                                                                                                                                                              |                                                                                                |                                                                                                                            |                                                                                                                                                                                                                                                                             |
|--------------------------------------------------------------------------------------------------------------------------------------------------------------------------------------------------------------------------------------------------------------------------------------------------------------------------------------------------------------------------------------------------------------|------------------------------------------------------------------------------------------------|----------------------------------------------------------------------------------------------------------------------------|-----------------------------------------------------------------------------------------------------------------------------------------------------------------------------------------------------------------------------------------------------------------------------|
| EPI_ISL_778868                                                                                                                                                                                                                                                                                                                                                                                               | Virology Lab, Ospedali Riuniti di Ancona                                                       | Dipartimento di Scienze Biomediche e Cliniche, L.Sacco, Università di Milano                                               | Alessia Lai; Annalisa Bergna; Claudia Balotta; Gianni Zehender; Laura Di Sante; Massimo Galli; Patrizia Bagnarelli; Roberta Longo; Sara Caucci; Sofia Maria Luigia Tiano; Stefano Menzo                                                                                     |
| EPI_ISL_778869                                                                                                                                                                                                                                                                                                                                                                                               | Virology Lab, Ospedali Riuniti, Ancona                                                         | Dipartimento di Scienze Biomediche e Cliniche, L. Sacco, Università di Milano                                              | Alessia Lai; Annalisa Bergna; Claudia Balotta; Gianni Zehender; Laura Di Sante; Massimo Galli; Patrizia Bagnarelli; Roberta Longo; Sara Caucci; Sofia Maria Luigia Tiano; Stefano Menzo                                                                                     |
| EPI_ISL_856869 to 856870, EPI_ISL_856872 to 856879, EPI_ISL_856882 to 856883, EPI_ISL_856885                                                                                                                                                                                                                                                                                                                 | Virology Laboratory, Scientific Department, Army Medical Center                                | Virology Laboratory, Scientific Department, Army Medical Center                                                            | Anella Monte; Anna Anselmo; Antonella Fortunato; Filippo Molinari; Florigio Lista; Francesco Giordani; Giancarlo Petralito; Giovanni Faggioni; Nino D'Amore; Riccardo De Sanctis; Silvia Fillo; Vanessa Vera Fain                                                           |
| EPI_ISL_625456, EPI_ISL_677634 to 677636                                                                                                                                                                                                                                                                                                                                                                     | Virology Unit, Institut Pasteur de Madagascar                                                  | Virology Unit, Institut Pasteur de Madagascar                                                                              | Cara Brook; Cara E. Brook; Christian Ranaivoson; Cristina M. Tato; Helisoa Razafimanjato; Jean-Michel Heraud; Joseph L. DeRisi; Michelle Tan; Norosoa Razanajatovo; Philippe Dussart; Soa Fy Andriamandimby; Tsiy Randriambolanantsoa; Vida Ahyong; Vololoniaina Raharinosy |
| EPI_ISL_918359 to 918376, EPI_ISL_933780 to 933785                                                                                                                                                                                                                                                                                                                                                           | Virology Unit, Institut Pasteur du Cambodge                                                    | Virology Unit, Institut Pasteur du Cambodge                                                                                | Chau Darapheak; Chin Savuth; Erik A Karlsson; Etienne Simon-Lorier; Kraing Sidonn; Ly Sovann; Sokhoun Yann; Veasna Duong; Yi Sengdoeurn                                                                                                                                     |
| EPI_ISL_803896                                                                                                                                                                                                                                                                                                                                                                                               | Virology Unit, Pisa University Hospital and Retrovirus Center, University of Pisa              | National Institute for Infectious Diseases, INMI, "L. Spallanzani" IRCCS                                                   | A Di Caro; A Rosellini; B Bartolini; C.E.M Gruber; E Giombini; F Messina; M Pistello; M Rucca; MR Capobianchi; O Butera; P Mazzetti                                                                                                                                         |
| EPI_ISL_779254                                                                                                                                                                                                                                                                                                                                                                                               | Virology, CHU Pitie Salpetriere Charles Foix                                                   | Virology, CHU Pitie Salpetriere Charles Foix                                                                               | A.-G.; Boutolleau, D.; Bruel, T.; Burrel, S.; Calvez; Dorgham, K.; Gorochov, G.; Gothland, A.; Jary, A.; Leducq, V.; Malet, I.; Marot, S.; Planas, D.; Schwartz, O.; Sterlin, D.; V. and Marcelin; Zafilaza, K.                                                             |
| EPI_ISL_862814, EPI_ISL_873210                                                                                                                                                                                                                                                                                                                                                                               | Virology, Ecole Nationale Veterinaire de Toulouse                                              | Virology, Ecole Nationale Veterinaire de Toulouse                                                                          | Bessiere, P.; Cadiergues; Croville, G.; Fusade-Boyer, M.; J.-L.; Lebre, L.; M.-C. and Guerin; Walch, M.                                                                                                                                                                     |
| EPI_ISL_930834 to 930843                                                                                                                                                                                                                                                                                                                                                                                     | Virology, ICAR-National Research Centre on Equines                                             | Virology, ICAR-National Research Centre on Equines                                                                         | Anand, T.; B.C.; B.R.; Barua, S.; Bera; Bhardwaj, A.; Gulati; Gupta, S.; H.S.; Khandelwal; Khandelwal, N.; Kumar; Kumar, B.; Kumar, N.; Kumar, R.; Manuja, A.; N. and Kumar, R.; R. and Pal, Y.; R.K.; Riyesh, T.; Shanmugasundram, K.; Singha; Vaid; Virmani, N.           |
| EPI_ISL_890237                                                                                                                                                                                                                                                                                                                                                                                               | Virology, International Centre for Diarrhoeal Disease Research, Bangladesh (ICDDR,B)           | International Centre for Diarrhoeal Disease Research (ICDDR,B)                                                             | A.F.; Alam; Hoque; Hossain; Karim; M.E.; M.K.; M.M.; M.S.; M.Y.; M.Z. and Rahman, M.; Rahman; Sumiya                                                                                                                                                                        |
| EPI_ISL_949187                                                                                                                                                                                                                                                                                                                                                                                               | Virology, NHLS, CMJAH                                                                          | Virology, NHLS, CMJAH                                                                                                      | Arshad Ismail; Florette K. Treurnicht; Kathleen Subramoney; Mushal Ali; Thabo Mohale                                                                                                                                                                                        |
| EPI_ISL_949125                                                                                                                                                                                                                                                                                                                                                                                               | Virology, National Health Laboratory Service, Charlotte Maxeke Johannesburg Academic Institute | Virology, National Health Laboratory Service, Charlotte Maxeke Johannesburg Academic Institute                             | Ashard Ismail; Florette K. Treurnicht; Kathleen Subramoney; Mushal Ali; Thabo Mohale                                                                                                                                                                                        |
| EPI_ISL_707940 to 708025                                                                                                                                                                                                                                                                                                                                                                                     | Virology, Universitätsklinikum des Saarlandes                                                  | Epigenetics, Saarland University                                                                                           | Jörn Walter; Kathrin Kattler; Markus Vogelgesang; Sascha Tierling; Sigrun Smola; Stefan Lohse                                                                                                                                                                               |
| EPI_ISL_648822                                                                                                                                                                                                                                                                                                                                                                                               | Virus Ecology Section, RML                                                                     | Virus Ecology Section, RML                                                                                                 | Barbian; Bushmaker, C.; Bushmaker, T.; C.A. and Munster; Holbrook; K.D.; M.G.; Martens; V.J.; van Doremalen, N.                                                                                                                                                             |
| EPI_ISL_825145, EPI_ISL_825153 to 825154                                                                                                                                                                                                                                                                                                                                                                     | Virus Research and Diagnostic Laboratory (DH-VRDL)                                             | Department of Neurovirology, National Institute of Mental Health and Neurosciences (NIMHANS)                               | Anita S Desai; Chitra Pattabiraman; Pramada Prasad; V Ravi                                                                                                                                                                                                                  |
| EPI_ISL_722201                                                                                                                                                                                                                                                                                                                                                                                               | Vitalis Mostar                                                                                 | Alea Genetic Center                                                                                                        | Konjhdzic R.; Pecar D.; Salihefendic L.                                                                                                                                                                                                                                     |
| EPI_ISL_959554, EPI_ISL_959559 to 959560, EPI_ISL_959562, EPI_ISL_959564 to 959565, EPI_ISL_959567 to 959568, EPI_ISL_959589 to 959598                                                                                                                                                                                                                                                                       | Vivalia - Clinique Saint-Joseph                                                                | GIGA Medical Genomics                                                                                                      | Bouchara Boujemla; Cécile Meex; Keith Durkin; Maria Artesi; Marie-Pierre Hayette; Pierrette Melin; Raphaël Boreux; Sébastien Bontems; Vincent Bours                                                                                                                         |
| EPI_ISL_745117, EPI_ISL_745165, EPI_ISL_745167, EPI_ISL_745189                                                                                                                                                                                                                                                                                                                                               | Vredenburg Hospital wc VBG                                                                     | National Health Laboratory Service (NHLS), Tygerberg                                                                       | Bronwyn Kleinhans; Eduan Wilkindon; Gert van Zyl; Houriyah Tegally; Kayla Delaney; Susan Engelbrecht; Tulio de Oliveira; Wolfgang Preiser                                                                                                                                   |
| EPI_ISL_745146                                                                                                                                                                                                                                                                                                                                                                                               | Vredendal Hospital wc VRE                                                                      | National Health Laboratory Service (NHLS), Tygerberg                                                                       | Bronwyn Kleinhans; Eduan Wilkindon; Gert van Zyl; Houriyah Tegally; Kayla Delaney; Susan Engelbrecht; Tulio de Oliveira; Wolfgang Preiser                                                                                                                                   |
| EPI_ISL_903573, EPI_ISL_903578, EPI_ISL_903631, EPI_ISL_903633, EPI_ISL_903653, EPI_ISL_903948 to 903949, EPI_ISL_903952, EPI_ISL_903954 to 903956, EPI_ISL_903960 to 903962, EPI_ISL_903965 to 903966, EPI_ISL_903968, EPI_ISL_903970 to 903972, EPI_ISL_903974 to 903975, EPI_ISL_903978                                                                                                                   | see above<br>WA State Department of Health                                                     | Genomics and Discovery, Respiratory Viruses Branch, Division of Viral Diseases, Centers for Disease Control and Prevention | Anna Montmayeur; Anna Uehara; Ben L. Rambo-Martin; Clinton R. Paden; Dhvani Batra; Haibin Wang; Jasmine Padilla; Jing Zhang; Justin Lee; Krista Queen; Lori Rowe; Mark Burroughs; Mili Sheth; Peter W. Cook; Rachel Marine; Sarah Nobles; Suxiang Tong; Yan Li; Ying Tao    |
| EPI_ISL_854374 to 854398, EPI_ISL_854400 to 854403, EPI_ISL_854449, EPI_ISL_854451, EPI_ISL_861333 to 861412, EPI_ISL_936103 to 936129                                                                                                                                                                                                                                                                       | WESTCHESTER MEDICAL CENTER                                                                     | Wadsworth Center, New York State Department of Health                                                                      | Alexis Russel; Daryl M. Lamson; Erasmus Schneider; Erica Lasek-Nesselquist; John Kelly; Jonathan Plitnick; Kirsten St. George; Matthew Shudt; Melissa A Leisner; Navjot Singh                                                                                               |
| EPI_ISL_794208 to 794282, EPI_ISL_802434 to 802435, EPI_ISL_802440 to 802441, EPI_ISL_802443, EPI_ISL_802448, EPI_ISL_802469 to 802490                                                                                                                                                                                                                                                                       | WESTCHESTER MEDICAL CENTER                                                                     | Wadsworth Center, New York State Department of Health                                                                      | Alexis Russel; Daryl M. Lamson; Erasmus Schneider; Erica Lasek-Nesselquist; John Kelly; Jonathan Plitnick; Kirsten St. George; Matthew Shudt; Melissa A Leisner; Navjot Singh; Sara Griesemer                                                                               |
| EPI_ISL_767580 to 767582, EPI_ISL_767584 to 767587, EPI_ISL_767590, EPI_ISL_767595, EPI_ISL_767598, EPI_ISL_767615 to 767627                                                                                                                                                                                                                                                                                 | WHITE PLAINS HOSPITAL CENTER LABORATORY                                                        | Wadsworth Center, New York State Department of Health                                                                      | Alexis Russel; Daryl M. Lamson; Erasmus Schneider; Erica Lasek-Nesselquist; John Kelly; Jonathan Plitnick; Kirsten St. George; Matthew Shudt; Melissa A Leisner; Navjot Singh; Sara Griesemer                                                                               |
| EPI_ISL_732971 to 732989, EPI_ISL_733005 to 733022, EPI_ISL_733154 to 733155, EPI_ISL_733183 to 733184, EPI_ISL_733241 to 733300, EPI_ISL_733392, EPI_ISL_733394 to 733395, EPI_ISL_733402 to 733404, EPI_ISL_733459 to 733477, EPI_ISL_733494 to 733495, EPI_ISL_770633, EPI_ISL_770635, EPI_ISL_770658, EPI_ISL_770661, EPI_ISL_770673 to 770674, EPI_ISL_811147, EPI_ISL_872898 to 872971, EPI_ISL_873040 | see above<br>WHO National Influenza Centre Russian Federation                                  | WHO National Influenza Centre Russian Federation                                                                           | Andrey Komissarov; Anna Ivanova; Artem Fadeev; Daria Danilenko; Dmitry Bazhenov; Dmitry Lioznov; Elena Nabieva; Georgii Bazykin; Ksenia Safina; Kseniya Komissarova; Maxim Burlakov; Mikhail Bakaev                                                                         |
| EPI_ISL_860797 to 860818, EPI_ISL_861456 to 861458                                                                                                                                                                                                                                                                                                                                                           | WHO/Minsk                                                                                      | Charité Universitätsmedizin Berlin, Institut für Virologie                                                                 | Barbara Mühlemann; Christian Drosten; Julia Schneider; Julia Tesch; Jörn Beheim-Schwarzbach; Shmialiova Natalia; Sivets Natalia; Talitha Veith; Terry Jones; Tobias Bleicker; Victor M Corman                                                                               |
| EPI_ISL_903684, EPI_ISL_903801, EPI_ISL_903822, EPI_ISL_903846, EPI_ISL_903865, EPI_ISL_903903, EPI_ISL_903940                                                                                                                                                                                                                                                                                               | see above<br>WI State Laboratory of Hygiene                                                    | Genomics and Discovery, Respiratory Viruses Branch, Division of Viral Diseases, Centers for Disease Control and Prevention | Anna Montmayeur; Anna Uehara; Ben L. Rambo-Martin; Clinton R. Paden; Dhvani Batra; Haibin Wang; Jasmine Padilla; Jing Zhang; Justin Lee; Krista Queen; Lori Rowe; Mark Burroughs; Mili Sheth; Peter W. Cook; Rachel Marine; Sarah Nobles; Suxiang Tong; Yan Li; Ying Tao    |
| EPI_ISL_648035 to 648036                                                                                                                                                                                                                                                                                                                                                                                     | WI State Laboratory of Hygiene                                                                 | Pathogen Discovery, Respiratory Viruses Branch, Division of Viral Diseases, Centers for Disease Control and Prevention     | Anna Montmayeur; Anna Uehara; Brian Lynch; Clinton R. Paden; Haibin Wang; Jing Zhang; Krista Queen; Rachel Marine; Suxiang Tong; Yan Li; Ying Tao                                                                                                                           |
| EPI_ISL_751566, EPI_ISL_751589, EPI_ISL_751746, EPI_ISL_751785 to 751786, EPI_ISL_903570, EPI_ISL_903576, EPI_ISL_903645, EPI_ISL_903775, EPI_ISL_903784, EPI_ISL_903786, EPI_ISL_903795, EPI_ISL_903813, EPI_ISL_903881                                                                                                                                                                                     | see above<br>WVDHHR - Office of Laboratory Services                                            | Genomics and Discovery, Respiratory Viruses Branch, Division of Viral Diseases, Centers for Disease Control and Prevention | Anna Montmayeur; Anna Uehara; Ben L. Rambo-Martin; Clinton R. Paden; Dhvani Batra; Haibin Wang; Jasmine Padilla; Jing Zhang; Justin Lee; Krista Queen; Lori Rowe; Mark Burroughs; Mili Sheth; Peter W. Cook; Rachel Marine; Sarah Nobles; Suxiang Tong; Yan Li; Ying Tao    |
| EPI_ISL_751555, EPI_ISL_751591, EPI_ISL_751619, EPI_ISL_751643, EPI_ISL_751663, EPI_ISL_751688, EPI_ISL_751691, EPI_ISL_751743, EPI_ISL_751781, EPI_ISL_903599, EPI_ISL_903749, EPI_ISL_903763 to 903764, EPI_ISL_903803, EPI_ISL_903806, EPI_ISL_903809, EPI_ISL_903863, EPI_ISL_903895, EPI_ISL_903930                                                                                                     | see above<br>WY Public Health Laboratory                                                       | Genomics and Discovery, Respiratory Viruses Branch, Division of Viral Diseases, Centers for Disease Control and Prevention | Anna Montmayeur; Anna Uehara; Ben L. Rambo-Martin; Clinton R. Paden; Dhvani Batra; Haibin Wang; Jasmine Padilla; Jing Zhang; Justin Lee; Krista Queen; Lori Rowe; Mark Burroughs; Mili Sheth; Peter W. Cook; Rachel Marine; Sarah Nobles; Suxiang Tong; Yan Li; Ying Tao    |





|                                                                                                                                                                                                                                                                                                                                                                                                                                                                                                                                                                                                                                                                                                                                                                                                                                                                                                                                                                                                                                                                                                                                                                                                                                                                                                                                                                                                                                                                                                                                                                                                                                                                                                                                                                                                                                                                                                                                                                                                                                                                                                                                                                                                                                                                                                                                                                                                                                                                                                                                                                                                                                                                                                                                                                                                                                                                                                                                                                                                                                                                                                                                                                                                                                                                                                                                                                                                                                                                                                                                                                                                                                                                                                                                                                                                                                                                                                                                                                                                                                                                                                                                |                                                                                                                                                |                                                                                                                     |                                                                                                                                                                                                                                                                                                                                                                                                                                                                                                                                                                                                        |
|--------------------------------------------------------------------------------------------------------------------------------------------------------------------------------------------------------------------------------------------------------------------------------------------------------------------------------------------------------------------------------------------------------------------------------------------------------------------------------------------------------------------------------------------------------------------------------------------------------------------------------------------------------------------------------------------------------------------------------------------------------------------------------------------------------------------------------------------------------------------------------------------------------------------------------------------------------------------------------------------------------------------------------------------------------------------------------------------------------------------------------------------------------------------------------------------------------------------------------------------------------------------------------------------------------------------------------------------------------------------------------------------------------------------------------------------------------------------------------------------------------------------------------------------------------------------------------------------------------------------------------------------------------------------------------------------------------------------------------------------------------------------------------------------------------------------------------------------------------------------------------------------------------------------------------------------------------------------------------------------------------------------------------------------------------------------------------------------------------------------------------------------------------------------------------------------------------------------------------------------------------------------------------------------------------------------------------------------------------------------------------------------------------------------------------------------------------------------------------------------------------------------------------------------------------------------------------------------------------------------------------------------------------------------------------------------------------------------------------------------------------------------------------------------------------------------------------------------------------------------------------------------------------------------------------------------------------------------------------------------------------------------------------------------------------------------------------------------------------------------------------------------------------------------------------------------------------------------------------------------------------------------------------------------------------------------------------------------------------------------------------------------------------------------------------------------------------------------------------------------------------------------------------------------------------------------------------------------------------------------------------------------------------------------------------------------------------------------------------------------------------------------------------------------------------------------------------------------------------------------------------------------------------------------------------------------------------------------------------------------------------------------------------------------------------------------------------------------------------------------------------|------------------------------------------------------------------------------------------------------------------------------------------------|---------------------------------------------------------------------------------------------------------------------|--------------------------------------------------------------------------------------------------------------------------------------------------------------------------------------------------------------------------------------------------------------------------------------------------------------------------------------------------------------------------------------------------------------------------------------------------------------------------------------------------------------------------------------------------------------------------------------------------------|
| EPI_ISL_884087 to 884088                                                                                                                                                                                                                                                                                                                                                                                                                                                                                                                                                                                                                                                                                                                                                                                                                                                                                                                                                                                                                                                                                                                                                                                                                                                                                                                                                                                                                                                                                                                                                                                                                                                                                                                                                                                                                                                                                                                                                                                                                                                                                                                                                                                                                                                                                                                                                                                                                                                                                                                                                                                                                                                                                                                                                                                                                                                                                                                                                                                                                                                                                                                                                                                                                                                                                                                                                                                                                                                                                                                                                                                                                                                                                                                                                                                                                                                                                                                                                                                                                                                                                                       | Wazed Mia Science Research Center, Jahangirnagar University in collaboration with GRMDRC, Dhaka and Invent Technologies Ltd, Dhaka, Bangladesh | COVID Research Cell (CRC), Wazed Miah Science Research Center                                                       | Abdullah Al Nahid; Bishajit Sarkar; Md. Abdul Matin; Md. Asad Ullah; Mohammad Shahedur Rahman; Nihad Adnan; Rashedul Islam; Yusha Araf                                                                                                                                                                                                                                                                                                                                                                                                                                                                 |
| EPI_ISL_637085, EPI_ISL_649123, EPI_ISL_649125                                                                                                                                                                                                                                                                                                                                                                                                                                                                                                                                                                                                                                                                                                                                                                                                                                                                                                                                                                                                                                                                                                                                                                                                                                                                                                                                                                                                                                                                                                                                                                                                                                                                                                                                                                                                                                                                                                                                                                                                                                                                                                                                                                                                                                                                                                                                                                                                                                                                                                                                                                                                                                                                                                                                                                                                                                                                                                                                                                                                                                                                                                                                                                                                                                                                                                                                                                                                                                                                                                                                                                                                                                                                                                                                                                                                                                                                                                                                                                                                                                                                                 | Wellington SCL (WN)                                                                                                                            | Institute of Environmental Science and Research (ESR)                                                               | Anja Werno; Antje van der Linden; Arlo Upton; Chris Mansell; David Hammer; Dragana Drinkovic; Erasmus Smit; Gary McAuliffe; Hana Sofia Andersson; Hermes Perez; James Ussher; Jill Sherwood; Jing Wang; Joep de Lig; Josh Freeman; Julia Howard; Juliet Elvy; Lauren Jelly; Mary DeAlmeida; Matt Blakiston; Matt Storey; Matthew Rogers; Max Bloomfield; Michael Addide; Michelle Balm; Muhammad Faisal; Nikki Freed; Olin Silander; Sally Roberts; Sarah Jefferies; Sharmine Muttayah; Susan Moorhead; Susan Taylor; Timothy Blackmore; Vanu Sathyendran; Veronica Playle; Virginia Hope; Xiaoyun Ren |
| EPI_ISL_745033                                                                                                                                                                                                                                                                                                                                                                                                                                                                                                                                                                                                                                                                                                                                                                                                                                                                                                                                                                                                                                                                                                                                                                                                                                                                                                                                                                                                                                                                                                                                                                                                                                                                                                                                                                                                                                                                                                                                                                                                                                                                                                                                                                                                                                                                                                                                                                                                                                                                                                                                                                                                                                                                                                                                                                                                                                                                                                                                                                                                                                                                                                                                                                                                                                                                                                                                                                                                                                                                                                                                                                                                                                                                                                                                                                                                                                                                                                                                                                                                                                                                                                                 | West Java Health Laboratory                                                                                                                    | West Java Health Laboratory                                                                                         | Azzania Fibriani; Cut Nur Cinthia Alarmanda; Ema Rahmawati; Isak Solihin; Karimatu Khoirunnisa; Miftahul Farid; Rifky Waluyajati Rachman; Rini Robiani; Ryan Bayusantika Ristandi                                                                                                                                                                                                                                                                                                                                                                                                                      |
| EPI_ISL_629000                                                                                                                                                                                                                                                                                                                                                                                                                                                                                                                                                                                                                                                                                                                                                                                                                                                                                                                                                                                                                                                                                                                                                                                                                                                                                                                                                                                                                                                                                                                                                                                                                                                                                                                                                                                                                                                                                                                                                                                                                                                                                                                                                                                                                                                                                                                                                                                                                                                                                                                                                                                                                                                                                                                                                                                                                                                                                                                                                                                                                                                                                                                                                                                                                                                                                                                                                                                                                                                                                                                                                                                                                                                                                                                                                                                                                                                                                                                                                                                                                                                                                                                 | West of Scotland Specialist Virology Centre, NHSGCC                                                                                            | MRC-University of Glasgow Centre for Virus Research                                                                 | Alasdair MacLean; Ana da Silva Filipe; Antonia Ho; Daniel Mair; David L Robertson; Emma Thomson; James Shepherd; Jenna Nichols; Joseph Hughes; Kathy Li; Kathy Smollett; Lily Tong; Natasha Jesudason; Natasha Johnson; Rajiv Shah; Richard Orton; Rory Gunson.; Sarah McDonald; Sreenu Vattipally; Stephen Carmichael                                                                                                                                                                                                                                                                                 |
| EPI_ISL_626687, EPI_ISL_626691 to 626692, EPI_ISL_626749, EPI_ISL_626758, EPI_ISL_626812, EPI_ISL_626818, EPI_ISL_626822, EPI_ISL_626826, EPI_ISL_626831, EPI_ISL_626835, EPI_ISL_626837 to 626849, EPI_ISL_626851, EPI_ISL_626855, EPI_ISL_626873, EPI_ISL_626897, EPI_ISL_626904, EPI_ISL_626917, EPI_ISL_626927, EPI_ISL_626933 to 626935, EPI_ISL_626952, EPI_ISL_626957 to 626958, EPI_ISL_626962 to 626963, EPI_ISL_626966 to 626992, EPI_ISL_626995, EPI_ISL_627014, EPI_ISL_627030, EPI_ISL_627040, EPI_ISL_627045, EPI_ISL_627049, EPI_ISL_627063, EPI_ISL_627117, EPI_ISL_627165, EPI_ISL_627173, EPI_ISL_627195, EPI_ISL_627200 to 627202, EPI_ISL_627208 to 627209, EPI_ISL_627329 to 627423, EPI_ISL_650146, EPI_ISL_650164, EPI_ISL_650175, EPI_ISL_650292 to 650293, EPI_ISL_650297 to 650298, EPI_ISL_650310, EPI_ISL_650312 to 650313, EPI_ISL_650316, EPI_ISL_650328, EPI_ISL_650375, EPI_ISL_650412, EPI_ISL_650424, EPI_ISL_650438, EPI_ISL_650451, EPI_ISL_650477, EPI_ISL_650482 to 650484, EPI_ISL_650490 to 650492, EPI_ISL_650494, EPI_ISL_650497 to 650498, EPI_ISL_650503 to 650511, EPI_ISL_650514, EPI_ISL_650517 to 650521, EPI_ISL_650523, EPI_ISL_650525 to 650526, EPI_ISL_650538, EPI_ISL_650550, EPI_ISL_650649, EPI_ISL_650709, EPI_ISL_650712, EPI_ISL_650725 to 650728, EPI_ISL_650730 to 650736, EPI_ISL_650739, EPI_ISL_650745 to 650754, EPI_ISL_650759, EPI_ISL_650762 to 650764, EPI_ISL_650789, EPI_ISL_650802, EPI_ISL_650804 to 650806, EPI_ISL_650816, EPI_ISL_650837 to 650843, EPI_ISL_650845, EPI_ISL_650848, EPI_ISL_650850 to 650876, EPI_ISL_650925, EPI_ISL_650927, EPI_ISL_650963, EPI_ISL_651011, EPI_ISL_651125, EPI_ISL_651187, EPI_ISL_651160, EPI_ISL_651303, EPI_ISL_651310, EPI_ISL_651315, EPI_ISL_651330, EPI_ISL_651359, EPI_ISL_651377, EPI_ISL_651380, EPI_ISL_651402, EPI_ISL_651406, EPI_ISL_651493 to 651498, EPI_ISL_651583, EPI_ISL_651733 to 651789, EPI_ISL_651811 to 651885, EPI_ISL_651887 to 651956, EPI_ISL_665283, EPI_ISL_665286, EPI_ISL_665321, EPI_ISL_665363, EPI_ISL_665385, EPI_ISL_665416, EPI_ISL_665425, EPI_ISL_665436, EPI_ISL_665439, EPI_ISL_665521 to 665524, EPI_ISL_665529, EPI_ISL_665531 to 665532, EPI_ISL_665535 to 665538, EPI_ISL_665541, EPI_ISL_665564 to 665566, EPI_ISL_665578 to 665579, EPI_ISL_665609, EPI_ISL_665633, EPI_ISL_665640 to 665641, EPI_ISL_665685, EPI_ISL_665727, EPI_ISL_665748, EPI_ISL_665792, EPI_ISL_665804, EPI_ISL_666023 to 666059, EPI_ISL_680442 to 680460, EPI_ISL_702618, EPI_ISL_702659, EPI_ISL_702771, EPI_ISL_702867, EPI_ISL_702892 to 702893, EPI_ISL_703136, EPI_ISL_703141, EPI_ISL_703155, EPI_ISL_703190, EPI_ISL_703192, EPI_ISL_703233, EPI_ISL_703240, EPI_ISL_703243, EPI_ISL_703246, EPI_ISL_703249, EPI_ISL_703269, EPI_ISL_703287, EPI_ISL_703430, EPI_ISL_703717 to 703719, EPI_ISL_703737, EPI_ISL_703743, EPI_ISL_703748 to 703758, EPI_ISL_703771, EPI_ISL_703773, EPI_ISL_703829, EPI_ISL_703831, EPI_ISL_703834, EPI_ISL_703837, EPI_ISL_703839, EPI_ISL_703842, EPI_ISL_703845, EPI_ISL_703911, EPI_ISL_703921, EPI_ISL_703924, EPI_ISL_703927, EPI_ISL_704089, EPI_ISL_704118, EPI_ISL_704184, EPI_ISL_704206, EPI_ISL_704228, EPI_ISL_704595 to 704597, EPI_ISL_704804, EPI_ISL_704807, EPI_ISL_704809, EPI_ISL_704952, EPI_ISL_705002, EPI_ISL_705124, EPI_ISL_705253, EPI_ISL_705296, EPI_ISL_705300, EPI_ISL_705316, EPI_ISL_705399, EPI_ISL_705490, EPI_ISL_705528, EPI_ISL_705636 to 705718, EPI_ISL_705720 to 705733, EPI_ISL_724210 to 724221, EPI_ISL_814312, EPI_ISL_814335, EPI_ISL_814339, EPI_ISL_814344 to 814345, EPI_ISL_814348, EPI_ISL_814355, EPI_ISL_814439 to 814459, EPI_ISL_814547, EPI_ISL_814549, EPI_ISL_814568, EPI_ISL_814590 to 814593, EPI_ISL_814609, EPI_ISL_814620 to 814664, EPI_ISL_838055 to 838213, EPI_ISL_864960 to 864999, EPI_ISL_865013 to 865067, EPI_ISL_919190 to 919300, EPI_ISL_919302 to 919307, EPI_ISL_949608 to 949617, EPI_ISL_949619, EPI_ISL_949621, EPI_ISL_949623, EPI_ISL_949625, EPI_ISL_949627, EPI_ISL_949629, EPI_ISL_949631, EPI_ISL_949633, EPI_ISL_949635 to 949636, EPI_ISL_997050 to 997071 |                                                                                                                                                |                                                                                                                     |                                                                                                                                                                                                                                                                                                                                                                                                                                                                                                                                                                                                        |
| see above                                                                                                                                                                                                                                                                                                                                                                                                                                                                                                                                                                                                                                                                                                                                                                                                                                                                                                                                                                                                                                                                                                                                                                                                                                                                                                                                                                                                                                                                                                                                                                                                                                                                                                                                                                                                                                                                                                                                                                                                                                                                                                                                                                                                                                                                                                                                                                                                                                                                                                                                                                                                                                                                                                                                                                                                                                                                                                                                                                                                                                                                                                                                                                                                                                                                                                                                                                                                                                                                                                                                                                                                                                                                                                                                                                                                                                                                                                                                                                                                                                                                                                                      | West of Scotland Specialist Virology Centre, NHSGCC / MRC-University of Glasgow Centre for Virus Research                                      | COVID-19 Genomics UK (COG-UK) Consortium                                                                            | Alasdair MacLean; Alice Broos; Ana da Silva Filipe; Antonia Ho; Daniel Mair; David L Robertson; Elihu Aranday-Cortes; Emma Thomson; Guy Mollett; Igor Starniskij; Jenna Shepherd; Jenna Nichols; Joseph Hughes; Kathy Li; Kathy Smollett; Kyriaki Nomikou; Lily Tong; Marc Niebel; Matthew Holden; Natasha Jesudason; Natasha Johnson; Patawee Asamaphan; Rachel Blacow; Rajiv Shah; Richard Orton; Rory Gunson; Sarah McDonald; Sharif Shaaban; Sreenu Vattipally; Stephen Carmichael                                                                                                                 |
| EPI_ISL_631688                                                                                                                                                                                                                                                                                                                                                                                                                                                                                                                                                                                                                                                                                                                                                                                                                                                                                                                                                                                                                                                                                                                                                                                                                                                                                                                                                                                                                                                                                                                                                                                                                                                                                                                                                                                                                                                                                                                                                                                                                                                                                                                                                                                                                                                                                                                                                                                                                                                                                                                                                                                                                                                                                                                                                                                                                                                                                                                                                                                                                                                                                                                                                                                                                                                                                                                                                                                                                                                                                                                                                                                                                                                                                                                                                                                                                                                                                                                                                                                                                                                                                                                 | Wildlife Conservation Society - Bronx Zoo                                                                                                      | New York City Public Health Laboratory                                                                              | Jade Wang; et al.                                                                                                                                                                                                                                                                                                                                                                                                                                                                                                                                                                                      |
| EPI_ISL_631389 to 631501, EPI_ISL_803122 to 803429, EPI_ISL_803431 to 803816, EPI_ISL_803818 to 803849, EPI_ISL_942014 to 942325, EPI_ISL_983871 to 984241                                                                                                                                                                                                                                                                                                                                                                                                                                                                                                                                                                                                                                                                                                                                                                                                                                                                                                                                                                                                                                                                                                                                                                                                                                                                                                                                                                                                                                                                                                                                                                                                                                                                                                                                                                                                                                                                                                                                                                                                                                                                                                                                                                                                                                                                                                                                                                                                                                                                                                                                                                                                                                                                                                                                                                                                                                                                                                                                                                                                                                                                                                                                                                                                                                                                                                                                                                                                                                                                                                                                                                                                                                                                                                                                                                                                                                                                                                                                                                     | Wisconsin State Laboratory of Hygiene Communicable Disease Division                                                                            | Wisconsin State Laboratory of Hygiene Communicable Disease Division                                                 | Abigail C. Shockey; Kelsey R. Florek                                                                                                                                                                                                                                                                                                                                                                                                                                                                                                                                                                   |
| EPI_ISL_708812 to 708814                                                                                                                                                                                                                                                                                                                                                                                                                                                                                                                                                                                                                                                                                                                                                                                                                                                                                                                                                                                                                                                                                                                                                                                                                                                                                                                                                                                                                                                                                                                                                                                                                                                                                                                                                                                                                                                                                                                                                                                                                                                                                                                                                                                                                                                                                                                                                                                                                                                                                                                                                                                                                                                                                                                                                                                                                                                                                                                                                                                                                                                                                                                                                                                                                                                                                                                                                                                                                                                                                                                                                                                                                                                                                                                                                                                                                                                                                                                                                                                                                                                                                                       | World Medical Hospital                                                                                                                         | National Institute of Health, Department of Medical Sciences, Ministry of Public Health, Thailand                   | Malinee Chittaganpitch; Pakorn Piromtong; Pilailuk Okada; Siripaporn Phuygun; Sittiporn Parmmen; Sunthareeya Waicharoen; Thanutsapa Thanadachakul; Warawan Wongboot                                                                                                                                                                                                                                                                                                                                                                                                                                    |
| EPI_ISL_765942 to 765959                                                                                                                                                                                                                                                                                                                                                                                                                                                                                                                                                                                                                                                                                                                                                                                                                                                                                                                                                                                                                                                                                                                                                                                                                                                                                                                                                                                                                                                                                                                                                                                                                                                                                                                                                                                                                                                                                                                                                                                                                                                                                                                                                                                                                                                                                                                                                                                                                                                                                                                                                                                                                                                                                                                                                                                                                                                                                                                                                                                                                                                                                                                                                                                                                                                                                                                                                                                                                                                                                                                                                                                                                                                                                                                                                                                                                                                                                                                                                                                                                                                                                                       | Worobey Lab, Department of Ecology and Evolutionary Biology, University of Arizona                                                             | Worobey Lab, Department of Ecology and Evolutionary Biology, University of Arizona                                  | Brendan Larsen; David Baltrus; Grace Quirk; Michael Worobey; Thomas Watts                                                                                                                                                                                                                                                                                                                                                                                                                                                                                                                              |
| EPI_ISL_631504, EPI_ISL_631808, EPI_ISL_631811, EPI_ISL_631995, EPI_ISL_632129, EPI_ISL_632141, EPI_ISL_632157, EPI_ISL_632159                                                                                                                                                                                                                                                                                                                                                                                                                                                                                                                                                                                                                                                                                                                                                                                                                                                                                                                                                                                                                                                                                                                                                                                                                                                                                                                                                                                                                                                                                                                                                                                                                                                                                                                                                                                                                                                                                                                                                                                                                                                                                                                                                                                                                                                                                                                                                                                                                                                                                                                                                                                                                                                                                                                                                                                                                                                                                                                                                                                                                                                                                                                                                                                                                                                                                                                                                                                                                                                                                                                                                                                                                                                                                                                                                                                                                                                                                                                                                                                                 |                                                                                                                                                |                                                                                                                     |                                                                                                                                                                                                                                                                                                                                                                                                                                                                                                                                                                                                        |
| see above                                                                                                                                                                                                                                                                                                                                                                                                                                                                                                                                                                                                                                                                                                                                                                                                                                                                                                                                                                                                                                                                                                                                                                                                                                                                                                                                                                                                                                                                                                                                                                                                                                                                                                                                                                                                                                                                                                                                                                                                                                                                                                                                                                                                                                                                                                                                                                                                                                                                                                                                                                                                                                                                                                                                                                                                                                                                                                                                                                                                                                                                                                                                                                                                                                                                                                                                                                                                                                                                                                                                                                                                                                                                                                                                                                                                                                                                                                                                                                                                                                                                                                                      | Wyckoff Heights Medical Center                                                                                                                 | New York City Public Health Laboratory                                                                              | Jade Wang; et al.                                                                                                                                                                                                                                                                                                                                                                                                                                                                                                                                                                                      |
| EPI_ISL_754183                                                                                                                                                                                                                                                                                                                                                                                                                                                                                                                                                                                                                                                                                                                                                                                                                                                                                                                                                                                                                                                                                                                                                                                                                                                                                                                                                                                                                                                                                                                                                                                                                                                                                                                                                                                                                                                                                                                                                                                                                                                                                                                                                                                                                                                                                                                                                                                                                                                                                                                                                                                                                                                                                                                                                                                                                                                                                                                                                                                                                                                                                                                                                                                                                                                                                                                                                                                                                                                                                                                                                                                                                                                                                                                                                                                                                                                                                                                                                                                                                                                                                                                 | Wyoming Public Health Laboratory                                                                                                               | Wyoming Public Health Laboratory                                                                                    | Ashley Norberg; Bailey Bowcutt; Channing Weber; Noah Hull; Taylor Fearing; and Wanda Manley                                                                                                                                                                                                                                                                                                                                                                                                                                                                                                            |
| EPI_ISL_754182, EPI_ISL_754215 to 754228, EPI_ISL_754388 to 754399, EPI_ISL_756126 to 756134, EPI_ISL_756164, EPI_ISL_756184 to 756190, EPI_ISL_756241 to 756246, EPI_ISL_756253 to 756270, EPI_ISL_756960 to 756985, EPI_ISL_766775 to 766790, EPI_ISL_766877 to 766882, EPI_ISL_769879 to 769915, EPI_ISL_770063 to 770128, EPI_ISL_770442 to 770461, EPI_ISL_770476 to 770497, EPI_ISL_779131 to 779136, EPI_ISL_819125, EPI_ISL_819204 to 819292, EPI_ISL_826297 to 826318, EPI_ISL_832023 to 832064, EPI_ISL_837815 to 837833, EPI_ISL_840637, EPI_ISL_840650, EPI_ISL_842609 to 842632, EPI_ISL_856711, EPI_ISL_856912 to 856970, EPI_ISL_861427 to 861432, EPI_ISL_861476 to 861480, EPI_ISL_861482 to 861487, EPI_ISL_871840 to 871871, EPI_ISL_871873 to 871875, EPI_ISL_871877 to 871878, EPI_ISL_871970 to 871971, EPI_ISL_871999 to 872001, EPI_ISL_872094 to 872096, EPI_ISL_872156 to 872187, EPI_ISL_884182 to 884195, EPI_ISL_884204 to 884206, EPI_ISL_888597 to 888622, EPI_ISL_888624 to 888625, EPI_ISL_888907 to 888978, EPI_ISL_889440 to 889442, EPI_ISL_903348 to 903360, EPI_ISL_911929 to 911966, EPI_ISL_914725 to 914793, EPI_ISL_925081 to 925092, EPI_ISL_925258 to 925306, EPI_ISL_935171 to 935186, EPI_ISL_942013, EPI_ISL_942935 to 942939, EPI_ISL_965044 to 965112                                                                                                                                                                                                                                                                                                                                                                                                                                                                                                                                                                                                                                                                                                                                                                                                                                                                                                                                                                                                                                                                                                                                                                                                                                                                                                                                                                                                                                                                                                                                                                                                                                                                                                                                                                                                                                                                                                                                                                                                                                                                                                                                                                                                                                                                                                                                                                                                                                                                                                                                                                                                                                                                                                                                                                                                                         |                                                                                                                                                |                                                                                                                     |                                                                                                                                                                                                                                                                                                                                                                                                                                                                                                                                                                                                        |
| see above                                                                                                                                                                                                                                                                                                                                                                                                                                                                                                                                                                                                                                                                                                                                                                                                                                                                                                                                                                                                                                                                                                                                                                                                                                                                                                                                                                                                                                                                                                                                                                                                                                                                                                                                                                                                                                                                                                                                                                                                                                                                                                                                                                                                                                                                                                                                                                                                                                                                                                                                                                                                                                                                                                                                                                                                                                                                                                                                                                                                                                                                                                                                                                                                                                                                                                                                                                                                                                                                                                                                                                                                                                                                                                                                                                                                                                                                                                                                                                                                                                                                                                                      | Wyoming Public Health Laboratory                                                                                                               | Wyoming Public Health Laboratory                                                                                    | Ashley Norberg; Bailey Bowcutt; Channing Weber; Joel Sevinsky; Kevin Libuit; Lynette Gumbleton; Noah Hull; Taylor Fearing; and Wanda Manley                                                                                                                                                                                                                                                                                                                                                                                                                                                            |
| EPI_ISL_766588                                                                                                                                                                                                                                                                                                                                                                                                                                                                                                                                                                                                                                                                                                                                                                                                                                                                                                                                                                                                                                                                                                                                                                                                                                                                                                                                                                                                                                                                                                                                                                                                                                                                                                                                                                                                                                                                                                                                                                                                                                                                                                                                                                                                                                                                                                                                                                                                                                                                                                                                                                                                                                                                                                                                                                                                                                                                                                                                                                                                                                                                                                                                                                                                                                                                                                                                                                                                                                                                                                                                                                                                                                                                                                                                                                                                                                                                                                                                                                                                                                                                                                                 | Xundheitszentrum Wengen                                                                                                                        | Institute of Medical Virology, University of Zurich                                                                 | Alexandra Trkola; Annette Audigé; Cyril Shah; Jon Huder; Jürg Böni; Kevin Steiner; Maria Grünberg; Maryam Zaheri; Michael Huber; Riccarda Capaul; Stefan Schmutz; Verena Kufner                                                                                                                                                                                                                                                                                                                                                                                                                        |
| EPI_ISL_730049 to 730052                                                                                                                                                                                                                                                                                                                                                                                                                                                                                                                                                                                                                                                                                                                                                                                                                                                                                                                                                                                                                                                                                                                                                                                                                                                                                                                                                                                                                                                                                                                                                                                                                                                                                                                                                                                                                                                                                                                                                                                                                                                                                                                                                                                                                                                                                                                                                                                                                                                                                                                                                                                                                                                                                                                                                                                                                                                                                                                                                                                                                                                                                                                                                                                                                                                                                                                                                                                                                                                                                                                                                                                                                                                                                                                                                                                                                                                                                                                                                                                                                                                                                                       | Yale COVID-19 Biorepository                                                                                                                    | Grubaugh Lab - Yale School of Public Health                                                                         | Adam Moore; Akiko Iwasaki; Albert Ko; Alice Lu; Allison Nelson; Anderson Brito; Anne Wyllie; Annie Watkins; Arnau Casanovas; Catherine Muenker; Chaney Kalinich; Chantal Vogels; Charlese Dela Cruz; Isabel Ott; Joseph Fauver; Maria Tokuyama; Mary Petrone; Nathan Grubaugh; Patrick Wong; Peiwen Lu; Richard Martinello; Saad Omer; Shelli Farhadian; Tara Alpert                                                                                                                                                                                                                                   |
| EPI_ISL_861750, EPI_ISL_861752 to 861753, EPI_ISL_861771, EPI_ISL_912160                                                                                                                                                                                                                                                                                                                                                                                                                                                                                                                                                                                                                                                                                                                                                                                                                                                                                                                                                                                                                                                                                                                                                                                                                                                                                                                                                                                                                                                                                                                                                                                                                                                                                                                                                                                                                                                                                                                                                                                                                                                                                                                                                                                                                                                                                                                                                                                                                                                                                                                                                                                                                                                                                                                                                                                                                                                                                                                                                                                                                                                                                                                                                                                                                                                                                                                                                                                                                                                                                                                                                                                                                                                                                                                                                                                                                                                                                                                                                                                                                                                       | Yale Clinical Virology Lab                                                                                                                     | Grubaugh Lab - Yale School of Public Health                                                                         | Anderson Brito; Anne Wyllie; Annie Watkins; Chaney Kalinich; Chantal Vogels; Isabel Ott; Joseph Fauver; Mallery Breban; Mary Petrone; Nathan Grubaugh; Tara Alpert                                                                                                                                                                                                                                                                                                                                                                                                                                     |
| EPI_ISL_730062 to 730084, EPI_ISL_779137 to 779152                                                                                                                                                                                                                                                                                                                                                                                                                                                                                                                                                                                                                                                                                                                                                                                                                                                                                                                                                                                                                                                                                                                                                                                                                                                                                                                                                                                                                                                                                                                                                                                                                                                                                                                                                                                                                                                                                                                                                                                                                                                                                                                                                                                                                                                                                                                                                                                                                                                                                                                                                                                                                                                                                                                                                                                                                                                                                                                                                                                                                                                                                                                                                                                                                                                                                                                                                                                                                                                                                                                                                                                                                                                                                                                                                                                                                                                                                                                                                                                                                                                                             | Yale Clinical Virology Laboratory                                                                                                              | Grubaugh Lab - Yale School of Public Health                                                                         | Adam Moore; Akiko Iwasaki; Albert Ko; Alice Lu; Allison Nelson; Anderson Brito; Anne Wyllie; Annie Watkins; Arnau Casanovas; Catherine Muenker; Chaney Kalinich; Chantal Vogels; Charlese Dela Cruz; Isabel Ott; Joseph Fauver; Mallery Breban; Maria Tokuyama; Mary Petrone; Nathan Grubaugh; Patrick Wong; Peiwen Lu; Richard Martinello; Saad Omer; Shelli Farhadian; Tara Alpert                                                                                                                                                                                                                   |
| EPI_ISL_847831 to 847833, EPI_ISL_847837, EPI_ISL_847841                                                                                                                                                                                                                                                                                                                                                                                                                                                                                                                                                                                                                                                                                                                                                                                                                                                                                                                                                                                                                                                                                                                                                                                                                                                                                                                                                                                                                                                                                                                                                                                                                                                                                                                                                                                                                                                                                                                                                                                                                                                                                                                                                                                                                                                                                                                                                                                                                                                                                                                                                                                                                                                                                                                                                                                                                                                                                                                                                                                                                                                                                                                                                                                                                                                                                                                                                                                                                                                                                                                                                                                                                                                                                                                                                                                                                                                                                                                                                                                                                                                                       | Yale New Haven Hospital                                                                                                                        | Grubaugh Lab - Yale School of Public Health                                                                         | Anderson Brito; Anne Wyllie; Chaney Kalinich; Chantal Vogels; Isabel Ott; Joseph Fauver; Mallery Breban; Mary Petrone; Nathan Grubaugh; Tara Alpert                                                                                                                                                                                                                                                                                                                                                                                                                                                    |
| EPI_ISL_729738, EPI_ISL_729742, EPI_ISL_729751, EPI_ISL_729757, EPI_ISL_729761 to 729764, EPI_ISL_729766 to 729770, EPI_ISL_729777, EPI_ISL_738290 to 738297, EPI_ISL_752606, EPI_ISL_779153 to 779154, EPI_ISL_861734, EPI_ISL_861736, EPI_ISL_861745, EPI_ISL_861764, EPI_ISL_861767 to 861768, EPI_ISL_861770, EPI_ISL_912167 to 912168, EPI_ISL_912179 to 912184                                                                                                                                                                                                                                                                                                                                                                                                                                                                                                                                                                                                                                                                                                                                                                                                                                                                                                                                                                                                                                                                                                                                                                                                                                                                                                                                                                                                                                                                                                                                                                                                                                                                                                                                                                                                                                                                                                                                                                                                                                                                                                                                                                                                                                                                                                                                                                                                                                                                                                                                                                                                                                                                                                                                                                                                                                                                                                                                                                                                                                                                                                                                                                                                                                                                                                                                                                                                                                                                                                                                                                                                                                                                                                                                                           |                                                                                                                                                |                                                                                                                     |                                                                                                                                                                                                                                                                                                                                                                                                                                                                                                                                                                                                        |
| see above                                                                                                                                                                                                                                                                                                                                                                                                                                                                                                                                                                                                                                                                                                                                                                                                                                                                                                                                                                                                                                                                                                                                                                                                                                                                                                                                                                                                                                                                                                                                                                                                                                                                                                                                                                                                                                                                                                                                                                                                                                                                                                                                                                                                                                                                                                                                                                                                                                                                                                                                                                                                                                                                                                                                                                                                                                                                                                                                                                                                                                                                                                                                                                                                                                                                                                                                                                                                                                                                                                                                                                                                                                                                                                                                                                                                                                                                                                                                                                                                                                                                                                                      | Yale Pathology Lab                                                                                                                             | Grubaugh Lab - Yale School of Public Health                                                                         | Adam Moore; Akiko Iwasaki; Albert Ko; Alice Lu; Allison Nelson; Anderson Brito; Anne Wyllie; Annie Watkins; Arnau Casanovas; Catherine Muenker; Chaney Kalinich; Chantal Vogels; Charlese Dela Cruz; Chen Liu; Danielle Plank; Ellen Foxman; Isabel Ott; Jianhui Wang; Joseph Fauver; Kien Pham; Mallery Breban; Maria Tokuyama; Mary Petrone; Nathan Grubaugh; Patrick Wong; Pei Hui; Peiwen Lu; Richard Martinello; Saad Omer; Shaili Gupta; Shelli Farhadian; Susan Bell and Han Zhou; Tara Alpert                                                                                                  |
| EPI_ISL_684798 to 684856, EPI_ISL_685498 to 685504, EPI_ISL_692094 to 692097, EPI_ISL_893020 to 893048, EPI_ISL_898329 to 898337                                                                                                                                                                                                                                                                                                                                                                                                                                                                                                                                                                                                                                                                                                                                                                                                                                                                                                                                                                                                                                                                                                                                                                                                                                                                                                                                                                                                                                                                                                                                                                                                                                                                                                                                                                                                                                                                                                                                                                                                                                                                                                                                                                                                                                                                                                                                                                                                                                                                                                                                                                                                                                                                                                                                                                                                                                                                                                                                                                                                                                                                                                                                                                                                                                                                                                                                                                                                                                                                                                                                                                                                                                                                                                                                                                                                                                                                                                                                                                                               | Yamagata Prefectural Institute of Public Health                                                                                                | Pathogen Genomics Center, National Institute of Infectious Diseases                                                 | Kentaro Itokawa; Makoto Kuroda; Masanori Hashino; Rina Tanaka; Tsuyoshi Sekizuka                                                                                                                                                                                                                                                                                                                                                                                                                                                                                                                       |
| EPI_ISL_862867                                                                                                                                                                                                                                                                                                                                                                                                                                                                                                                                                                                                                                                                                                                                                                                                                                                                                                                                                                                                                                                                                                                                                                                                                                                                                                                                                                                                                                                                                                                                                                                                                                                                                                                                                                                                                                                                                                                                                                                                                                                                                                                                                                                                                                                                                                                                                                                                                                                                                                                                                                                                                                                                                                                                                                                                                                                                                                                                                                                                                                                                                                                                                                                                                                                                                                                                                                                                                                                                                                                                                                                                                                                                                                                                                                                                                                                                                                                                                                                                                                                                                                                 | Yokohama City University Hospital                                                                                                              | Fujita health University, School of Medicine, Department of Microbiology                                            | Masahiro Suzuki; Yohei Doi                                                                                                                                                                                                                                                                                                                                                                                                                                                                                                                                                                             |
| EPI_ISL_940763                                                                                                                                                                                                                                                                                                                                                                                                                                                                                                                                                                                                                                                                                                                                                                                                                                                                                                                                                                                                                                                                                                                                                                                                                                                                                                                                                                                                                                                                                                                                                                                                                                                                                                                                                                                                                                                                                                                                                                                                                                                                                                                                                                                                                                                                                                                                                                                                                                                                                                                                                                                                                                                                                                                                                                                                                                                                                                                                                                                                                                                                                                                                                                                                                                                                                                                                                                                                                                                                                                                                                                                                                                                                                                                                                                                                                                                                                                                                                                                                                                                                                                                 | ZNA Middelheim                                                                                                                                 | UAntwerp, Laboratory of Medical Microbiology, Campus Drie Eiken S6.26, Universiteitsplein 1, 2610, Wilrijk, Belgium | Basil Britto Xavier; Christine Lammens; Herman Goossens; Jasmine Coppens; Marie Le Mercier; Veerle Matheusens                                                                                                                                                                                                                                                                                                                                                                                                                                                                                          |

|                                                                                                                                                                                                                                                                      |                                                                                              |                                                                                          |                                                                                                                                                                                                                                                                                                                          |                                                                                                  |
|----------------------------------------------------------------------------------------------------------------------------------------------------------------------------------------------------------------------------------------------------------------------|----------------------------------------------------------------------------------------------|------------------------------------------------------------------------------------------|--------------------------------------------------------------------------------------------------------------------------------------------------------------------------------------------------------------------------------------------------------------------------------------------------------------------------|--------------------------------------------------------------------------------------------------|
| EPI_ISL_631304 to 631320, EPI_ISL_631344 to 631376, EPI_ISL_631387, EPI_ISL_666623 to 666652, EPI_ISL_718027 to 718104, EPI_ISL_733501 to 733523, EPI_ISL_747520, EPI_ISL_770688 to 770774, EPI_ISL_778844, EPI_ISL_779954, EPI_ISL_819203, EPI_ISL_861509 to 861528 |                                                                                              |                                                                                          |                                                                                                                                                                                                                                                                                                                          |                                                                                                  |
| see above                                                                                                                                                                                                                                                            | ZOTZ KLIMAS MVZ Düsseldorf-Centrum GbR ÜBAG für Labormedizin, Genetik, Zytologie, Pathologie | Center of Medical Microbiology, Virology, and Hospital Hygiene, University of Dusseldorf | Alexander Dilthey; Andreas Walker; Ashley-Jane Duplessis; Daniel Strelow; Jessica Nicolai; Jörg Timm; Katrin Hoffmann; Klaus Pfeffer; Lisanna Hülse; Malte Kohns Vasconcelos; Marek Koreskan; Maximilian Damagnez; Nadine Lübke; Patrick Finzer; Rainer Zotz; Tobias Wienemans; Torsten Houwaart                         |                                                                                                  |
| EPI_ISL_905764                                                                                                                                                                                                                                                       | Zakad Diagnostyki Laboratoryjnej i Mikrobiologii, Wojewódzki Szpital Podkarpacki w Kronie    | National Institute of Public Health - National Institute of Hygiene                      |                                                                                                                                                                                                                                                                                                                          | Wokowicz Tomasz; Zacharczuk Katarzyna                                                            |
| EPI_ISL_700416                                                                                                                                                                                                                                                       | Zoar Clinic w ZOA                                                                            | NHLS/UCT                                                                                 | Arash Iranzadeh; Bruna Galvao; Carolyn Williamson; Deelan Doolabh; Diana Hardie; Innocent Mudau; Kruger Marais; Lynn Tyers; Marvin Hsiao; Stephen Korsman                                                                                                                                                                |                                                                                                  |
| EPI_ISL_660069 to 660070, EPI_ISL_681702 to 681703                                                                                                                                                                                                                   | Zurita & Zurita Laboratorios                                                                 | Zurita & Zurita Laboratorios                                                             | Camilo Zurita-Salinas; Gabriela Sevillano; Gabriela Sevillano Camilo Zurita-Salinas Karen Loaiza David Ortega-Paredes Jeannete Zurita; Jeannete Zurita                                                                                                                                                                   |                                                                                                  |
| EPI_ISL_977984                                                                                                                                                                                                                                                       |                                                                                              | Chiu Laboratory, University of California, San Francisco                                 |                                                                                                                                                                                                                                                                                                                          | Candace Wang; Charles Chiu; Debra Wadford; Jill Hacker; Venice Servellita; Xianding (Wayne) Deng |
| EPI_ISL_845620                                                                                                                                                                                                                                                       | compensar calle 63                                                                           | Instituto Nacional de Salud - Dirección de Investigación en Salud Pública                | Carlos Franco-Muñoz; Diego A. Álvarez-Díaz; Diego Andrés Prada; Gerardo Santamaría; Jonathan Reales; Jonathan Naizaque; Katherine Laiton-Donato; Magdalena Wiesner; Marcela Mercado-Reyes; María T. Herrera-Sepúlveda; Martha Lucia Ospina Martínez; Mauricio Pacheco-Montealegre; Paola Muñoz-Laiton; Sheryll Corchuelo |                                                                                                  |

EPI\_ISL\_826671 to 826676, EPI\_ISL\_826679 to 826680, EPI\_ISL\_826682, EPI\_ISL\_826684 to 826692, EPI\_ISL\_826694 to 826699, EPI\_ISL\_826701 to 826703, EPI\_ISL\_826705 to 826714, EPI\_ISL\_826716, EPI\_ISL\_826718 to 826741, EPI\_ISL\_826743 to 826746, EPI\_ISL\_826748 to 826791, EPI\_ISL\_826793 to 826797, EPI\_ISL\_826799, EPI\_ISL\_826803, EPI\_ISL\_826806, EPI\_ISL\_826808, EPI\_ISL\_826811, EPI\_ISL\_826833, EPI\_ISL\_826835, EPI\_ISL\_826837 to 826841, EPI\_ISL\_826843 to 826853, EPI\_ISL\_826857, EPI\_ISL\_826859 to 826860, EPI\_ISL\_826863 to 826879, EPI\_ISL\_826881 to 826883, EPI\_ISL\_826886 to 826892, EPI\_ISL\_826895 to 826896, EPI\_ISL\_826898 to 826914, EPI\_ISL\_826917 to 826918, EPI\_ISL\_826920 to 826926, EPI\_ISL\_826928 to 826929, EPI\_ISL\_826931 to 826936, EPI\_ISL\_826938 to 826948, EPI\_ISL\_826950 to 826954, EPI\_ISL\_826956 to 826968, EPI\_ISL\_826975 to 826979, EPI\_ISL\_826982 to 826989, EPI\_ISL\_826991 to 826993, EPI\_ISL\_826995 to 826996, EPI\_ISL\_826998, EPI\_ISL\_827000, EPI\_ISL\_827002 to 827008, EPI\_ISL\_827010, EPI\_ISL\_827013, EPI\_ISL\_827015, EPI\_ISL\_827018 to 827026, EPI\_ISL\_827028 to 827031, EPI\_ISL\_827034, EPI\_ISL\_827038 to 827039, EPI\_ISL\_827041, EPI\_ISL\_827044, EPI\_ISL\_827046 to 827047, EPI\_ISL\_827049 to 827050, EPI\_ISL\_827052 to 827062, EPI\_ISL\_827065, EPI\_ISL\_827068, EPI\_ISL\_827072 to 827073, EPI\_ISL\_827078, EPI\_ISL\_827080, EPI\_ISL\_827089, EPI\_ISL\_827109, EPI\_ISL\_827111 to 827120, EPI\_ISL\_827127 to 827128, EPI\_ISL\_827130 to 827141, EPI\_ISL\_827143 to 827162, EPI\_ISL\_827165 to 827178, EPI\_ISL\_827183 to 827186, EPI\_ISL\_827189 to 827194, EPI\_ISL\_827196, EPI\_ISL\_827200 to 827201, EPI\_ISL\_827209, EPI\_ISL\_827211, EPI\_ISL\_827213 to 827228, EPI\_ISL\_827230 to 827237, EPI\_ISL\_827239 to 827241, EPI\_ISL\_827243 to 827251, EPI\_ISL\_827255, EPI\_ISL\_827259 to 827265, EPI\_ISL\_827267 to 827269, EPI\_ISL\_827272, EPI\_ISL\_827274 to 827278, EPI\_ISL\_827280 to 827286, EPI\_ISL\_827292, EPI\_ISL\_827294 to 827305, EPI\_ISL\_827307 to 827308, EPI\_ISL\_827311 to 827323, EPI\_ISL\_827325 to 827329, EPI\_ISL\_827332, EPI\_ISL\_827336, EPI\_ISL\_827338 to 827342, EPI\_ISL\_827344 to 827353, EPI\_ISL\_827355 to 827356, EPI\_ISL\_827358, EPI\_ISL\_827364 to 827366, EPI\_ISL\_827369 to 827370, EPI\_ISL\_827373, EPI\_ISL\_827376, EPI\_ISL\_827378, EPI\_ISL\_827380 to 827382, EPI\_ISL\_827384, EPI\_ISL\_827386 to 827391, EPI\_ISL\_827393 to 827394, EPI\_ISL\_827397 to 827412, EPI\_ISL\_827414 to 827418, EPI\_ISL\_827420 to 827426, EPI\_ISL\_827428 to 827434, EPI\_ISL\_827436, EPI\_ISL\_827440, EPI\_ISL\_827442, EPI\_ISL\_827444, EPI\_ISL\_827447 to 827448, EPI\_ISL\_827460 to 827462, EPI\_ISL\_827464 to 827467, EPI\_ISL\_827470 to 827472, EPI\_ISL\_827474 to 827475, EPI\_ISL\_827478 to 827481, EPI\_ISL\_827483, EPI\_ISL\_827486 to 827491, EPI\_ISL\_827495, EPI\_ISL\_827497 to 827512, EPI\_ISL\_827515 to 827528, EPI\_ISL\_827530, EPI\_ISL\_827538, EPI\_ISL\_827545 to 827547, EPI\_ISL\_827552, EPI\_ISL\_827554 to 827558, EPI\_ISL\_827560 to 827574, EPI\_ISL\_827578 to 827581, EPI\_ISL\_827585, EPI\_ISL\_827591 to 827606, EPI\_ISL\_827610 to 827632, EPI\_ISL\_827634 to 827643, EPI\_ISL\_827645, EPI\_ISL\_827647 to 827659, EPI\_ISL\_827664 to 827662, EPI\_ISL\_827664 to 827682, EPI\_ISL\_827685 to 827686, EPI\_ISL\_827689 to 827691, EPI\_ISL\_827694, EPI\_ISL\_827698 to 827712, EPI\_ISL\_827717, EPI\_ISL\_827719 to 827721, EPI\_ISL\_827726 to 827735, EPI\_ISL\_827738, EPI\_ISL\_827740 to 827745, EPI\_ISL\_827747 to 827753, EPI\_ISL\_827755 to 827780, EPI\_ISL\_827785 to 827788, EPI\_ISL\_827790 to 827799, EPI\_ISL\_827800 to 827807, EPI\_ISL\_827809 to 827815, EPI\_ISL\_827817, EPI\_ISL\_827819 to 827820, EPI\_ISL\_827823 to 827824, EPI\_ISL\_827826 to 827827, EPI\_ISL\_827830, EPI\_ISL\_827832 to 827858, EPI\_ISL\_827861 to 827862, EPI\_ISL\_827871, EPI\_ISL\_827883 to 827884, EPI\_ISL\_827894, EPI\_ISL\_827896 to 827898, EPI\_ISL\_827901, EPI\_ISL\_827906, EPI\_ISL\_827912, EPI\_ISL\_827914 to 827934, EPI\_ISL\_827936 to 827937, EPI\_ISL\_827941, EPI\_ISL\_827944 to 827969, EPI\_ISL\_827971 to 827981, EPI\_ISL\_827983 to 828007, EPI\_ISL\_828017 to 828019, EPI\_ISL\_828024, EPI\_ISL\_828026, EPI\_ISL\_828028, EPI\_ISL\_828034, EPI\_ISL\_828039 to 828052, EPI\_ISL\_828054 to 828063, EPI\_ISL\_828065, EPI\_ISL\_828068 to 828069, EPI\_ISL\_828071 to 828086, EPI\_ISL\_828088, EPI\_ISL\_828090 to 828098, EPI\_ISL\_828100 to 828120, EPI\_ISL\_828122 to 828136, EPI\_ISL\_828138 to 828141, EPI\_ISL\_828145 to 828146, EPI\_ISL\_828148 to 828153, EPI\_ISL\_828155 to 828156, EPI\_ISL\_828161 to 828164 to 828173, EPI\_ISL\_828176, EPI\_ISL\_828178 to 828183, EPI\_ISL\_828185 to 828187, EPI\_ISL\_828189, EPI\_ISL\_828192 to 828199, EPI\_ISL\_828201 to 828203, EPI\_ISL\_828206 to 828208, EPI\_ISL\_828210, EPI\_ISL\_828213, EPI\_ISL\_828217 to 828218, EPI\_ISL\_828221 to 828222, EPI\_ISL\_828228 to 828230, EPI\_ISL\_828232 to 828239, EPI\_ISL\_828242 to 828244, EPI\_ISL\_828246 to 828250, EPI\_ISL\_828252 to 828259, EPI\_ISL\_828262 to 828269, EPI\_ISL\_828271 to 828272, EPI\_ISL\_828274 to 828282, EPI\_ISL\_828284 to 828304, EPI\_ISL\_828306 to 828319, EPI\_ISL\_828321, EPI\_ISL\_828328 to 828329, EPI\_ISL\_828335, EPI\_ISL\_828337 to 828351, EPI\_ISL\_828353 to 828358, EPI\_ISL\_828361 to 828362, EPI\_ISL\_828365 to 828366, EPI\_ISL\_828368 to 828372, EPI\_ISL\_828374 to 828382, EPI\_ISL\_828384 to 828396, EPI\_ISL\_828403 to 828404, EPI\_ISL\_828407, EPI\_ISL\_828410 to 828412, EPI\_ISL\_828414 to 828417, EPI\_ISL\_828419 to 828434, EPI\_ISL\_828436 to 828449, EPI\_ISL\_828451 to 828454, EPI\_ISL\_828456 to 828463, EPI\_ISL\_828468, EPI\_ISL\_828471 to 828482, EPI\_ISL\_828488 to 828490, EPI\_ISL\_828492, EPI\_ISL\_828496 to 828500, EPI\_ISL\_828508 to 828516, EPI\_ISL\_828520 to 828521, EPI\_ISL\_828523 to 828529, EPI\_ISL\_828531, EPI\_ISL\_828533 to 828536, EPI\_ISL\_828538, EPI\_ISL\_828542, EPI\_ISL\_828545 to 828553, EPI\_ISL\_828558 to 828561, EPI\_ISL\_828563 to 828575, EPI\_ISL\_828577 to 828587, EPI\_ISL\_828590, EPI\_ISL\_828592, EPI\_ISL\_828597 to 828600, EPI\_ISL\_828602 to 828617, EPI\_ISL\_828619 to 828629, EPI\_ISL\_828632, EPI\_ISL\_828636 to 828640, EPI\_ISL\_828645, EPI\_ISL\_828647 to 828652, EPI\_ISL\_828654, EPI\_ISL\_828664 to 828675, EPI\_ISL\_828678, EPI\_ISL\_828680 to 828708, EPI\_ISL\_828710 to 828718, EPI\_ISL\_828720 to 828729, EPI\_ISL\_828731 to 828740, EPI\_ISL\_828742 to 828751, EPI\_ISL\_828760, EPI\_ISL\_828763 to 828773, EPI\_ISL\_828777 to 828778, EPI\_ISL\_828781 to 828789, EPI\_ISL\_828791 to 828801, EPI\_ISL\_828803, EPI\_ISL\_828805 to 828806, EPI\_ISL\_828809, EPI\_ISL\_828813 to 828825, EPI\_ISL\_828828 to 828835, EPI\_ISL\_828837 to 828842, EPI\_ISL\_828844 to 828846, EPI\_ISL\_828848 to 828851, EPI\_ISL\_828864, EPI\_ISL\_828866 to 828868, EPI\_ISL\_828870 to 828875, EPI\_ISL\_828877 to 828880, EPI\_ISL\_828882 to 828888, EPI\_ISL\_828891, EPI\_ISL\_828899 to 828903, EPI\_ISL\_828905 to 828923, EPI\_ISL\_828927 to 828928, EPI\_ISL\_828933, EPI\_ISL\_828935 to 828939, EPI\_ISL\_828941 to 828943, EPI\_ISL\_828945, EPI\_ISL\_828947 to 828969, EPI\_ISL\_828972 to 828975, EPI\_ISL\_828978 to 828981, EPI\_ISL\_828988, EPI\_ISL\_829001, EPI\_ISL\_829011, EPI\_ISL\_829012 to 829029, EPI\_ISL\_829031 to 829036, EPI\_ISL\_829038, EPI\_ISL\_829040 to 829048, EPI\_ISL\_829051 to 829052, EPI\_ISL\_829054, EPI\_ISL\_829056 to 829058, EPI\_ISL\_829061 to 829065, EPI\_ISL\_829067 to 829073, EPI\_ISL\_829075 to 829102, EPI\_ISL\_829104, EPI\_ISL\_829106 to 829115, EPI\_ISL\_829117 to 829131, EPI\_ISL\_829134 to 829141, EPI\_ISL\_829143, EPI\_ISL\_829145, EPI\_ISL\_829148 to 829152, EPI\_ISL\_829158 to 829164, EPI\_ISL\_829167, EPI\_ISL\_829169 to 829178, EPI\_ISL\_829181 to 829187, EPI\_ISL\_829191, EPI\_ISL\_829198, EPI\_ISL\_829200 to 829219, EPI\_ISL\_829221 to 829222, EPI\_ISL\_829225, EPI\_ISL\_829227 to 829235, EPI\_ISL\_829240, EPI\_ISL\_829242 to 829248, EPI\_ISL\_829251 to 829260, EPI\_ISL\_829274, EPI\_ISL\_829276 to 829285, EPI\_ISL\_829287 to 829289, EPI\_ISL\_829294 to 829295, EPI\_ISL\_829297 to 829313, EPI\_ISL\_829316, EPI\_ISL\_829319 to 829321, EPI\_ISL\_829323 to 829334, EPI\_ISL\_829336 to 829359, EPI\_ISL\_829362 to 829363, EPI\_ISL\_829365, EPI\_ISL\_829367 to 829368, EPI\_ISL\_829373 to 829375, EPI\_ISL\_829380, EPI\_ISL\_829382 to 829389, EPI\_ISL\_829411 to 829413, EPI\_ISL\_829415 to 829425, EPI\_ISL\_829427 to 829428, EPI\_ISL\_829430 to 829433, EPI\_ISL\_829435 to 829445, EPI\_ISL\_829447 to 829448, EPI\_ISL\_829450 to 829458, EPI\_ISL\_829461 to 829463, EPI\_ISL\_829466 to 829469, EPI\_ISL\_829472 to 829475, EPI\_ISL\_829479 to 829511, EPI\_ISL\_829513 to 829523, EPI\_ISL\_829527 to 829528, EPI\_ISL\_829530 to 829535, EPI\_ISL\_829537 to 829542, EPI\_ISL\_829545 to 829549, EPI\_ISL\_829551 to 829557, EPI\_ISL\_829559 to 829567, EPI\_ISL\_829569, EPI\_ISL\_829571 to 829580, EPI\_ISL\_829582 to 829584, EPI\_ISL\_829586 to 829589, EPI\_ISL\_829591 to 829598, EPI\_ISL\_829600, EPI\_ISL\_829602 to 829606, EPI\_ISL\_829609 to 829616, EPI\_ISL\_829618 to 829621, EPI\_ISL\_829622 to 829628, EPI\_ISL\_829630 to 829641, EPI\_ISL\_829643 to 829653, EPI\_ISL\_829655, EPI\_ISL\_829657 to 829664, EPI\_ISL\_829672 to 829674, EPI\_ISL\_829676 to 829678, EPI\_ISL\_829681 to 829685, EPI\_ISL\_829687 to 829696, EPI\_ISL\_829698 to 829706, EPI\_ISL\_829710 to 829720, EPI\_ISL\_829722 to 829724, EPI\_ISL\_829726 to 829733, EPI\_ISL\_829736, EPI\_ISL\_829738 to 829758, EPI\_ISL\_829760 to 829766, EPI\_ISL\_829768 to 829781, EPI\_ISL\_829783 to 829792, EPI\_ISL\_829794 to 829797, EPI\_ISL\_829803 to 829810, EPI\_ISL\_829812 to 829815, EPI\_ISL\_829817 to 829837, EPI\_ISL\_829839 to 829848, EPI\_ISL\_829852 to 829858, EPI\_ISL\_829861 to 829863, EPI\_ISL\_829865, EPI\_ISL\_829867 to 829874, EPI\_ISL\_829876 to 829880, EPI\_ISL\_829883 to 829884, EPI\_ISL\_829886, EPI\_ISL\_829892 to 829901, EPI\_ISL\_829903 to 829906, EPI\_ISL\_829908, EPI\_ISL\_829910 to 829913, EPI\_ISL\_829917 to 829922, EPI\_ISL\_829924, EPI\_ISL\_829926 to 829929, EPI\_ISL\_829932, EPI\_ISL\_829935 to 829936, EPI\_ISL\_829941 to 829944, EPI\_ISL\_829946 to 829947, EPI\_ISL\_829949 to 829951, EPI\_ISL\_829954 to 829955, EPI\_ISL\_829958 to 829969, EPI\_ISL\_829971 to 829980, EPI\_ISL\_829982 to 829987, EPI\_ISL\_829990 to 830004, EPI\_ISL\_830006, EPI\_ISL\_830008 to 830009, EPI\_ISL\_830011 to 830018, EPI\_ISL\_830020 to 830024, EPI\_ISL\_830026 to 830032, EPI\_ISL\_830035 to 830036, EPI\_ISL\_830039 to 830060, EPI\_ISL\_830062 to 830066, EPI\_ISL\_830068, EPI\_ISL\_830070 to 830071, EPI\_ISL\_830073 to 830084, EPI\_ISL\_830087 to 830092, EPI\_ISL\_830099, EPI\_ISL\_830106 to 830113, EPI\_ISL\_830115 to 830118, EPI\_ISL\_830121 to 830124, EPI\_ISL\_830126, EPI\_ISL\_830130, EPI\_ISL\_830133 to 830139, EPI\_ISL\_830148 to 830150, EPI\_ISL\_830153 to 830166, EPI\_ISL\_830170 to 830176, EPI\_ISL\_830178 to 830183, EPI\_ISL\_830186 to 830190, EPI\_ISL\_830194 to 830197, EPI\_ISL\_830207, EPI\_ISL\_830219, EPI\_ISL\_830222, EPI\_ISL\_830224, EPI\_ISL\_830226, EPI\_ISL\_830228, EPI\_ISL\_830231, EPI\_ISL\_830233, EPI\_ISL\_830247, EPI\_ISL\_830249, EPI\_ISL\_830251, EPI\_ISL\_830256, EPI\_ISL\_830258, EPI\_ISL\_830260, EPI\_ISL\_830262, EPI\_ISL\_830271, EPI\_ISL\_830273, EPI\_ISL\_830275, EPI\_ISL\_830277, EPI\_ISL\_830279, EPI\_ISL\_830281, EPI\_ISL\_830283, EPI\_ISL\_830285, EPI\_ISL\_830287, EPI\_ISL\_830290, EPI\_ISL\_830292, EPI\_ISL\_830295, EPI\_ISL\_830297, EPI\_ISL\_830299, EPI\_ISL\_830301, EPI\_ISL\_830306, EPI\_ISL\_830318, EPI\_ISL\_830322, EPI\_ISL\_830324, EPI\_ISL\_830330, EPI\_ISL\_830332, EPI\_ISL\_830336, EPI\_ISL\_830339, EPI\_ISL\_830341, EPI\_ISL\_830343, EPI\_ISL\_830345, EPI\_ISL\_830347, EPI\_ISL\_830350, EPI\_ISL\_830352 to 830353, EPI\_ISL\_830357 to 830358, EPI\_ISL\_830360, EPI\_ISL\_830369 to 830376, EPI\_ISL\_830383 to 830386, EPI\_ISL\_830388, EPI\_ISL\_830392, EPI\_ISL\_830394 to 830396, EPI\_ISL\_830398 to 830404, EPI\_ISL\_830406, EPI\_ISL\_830408 to 830409, EPI\_ISL\_830411 to 830412, EPI\_ISL\_830414, EPI\_ISL\_830416, EPI\_ISL\_830418 to 830423, EPI\_ISL\_830426 to 830427, EPI\_ISL\_830430 to 830437, EPI\_ISL\_830439 to 830444, EPI\_ISL\_830446 to 830448, EPI\_ISL\_830450 to 830458, EPI\_ISL\_830460 to 830467, EPI\_ISL\_830469 to 830470, EPI\_ISL\_830481, EPI\_ISL\_830483 to 830486, EPI\_ISL\_830488 to 830491, EPI\_ISL\_830493 to 830500, EPI\_ISL\_830503 to 830518, EPI\_ISL\_830520 to 830528, EPI\_ISL\_830531 to 830534, EPI\_ISL\_830536, EPI\_ISL\_830540, EPI\_ISL\_830544, EPI\_ISL\_830547 to 830550, EPI\_ISL\_830556, EPI\_ISL\_830561 to 830567, EPI\_ISL\_830569 to 830570

|                                                                                              |                                                     |                                                                                          |                                                                                                                                                                                                                                                                                                                                                                                                                                                                                                                                                                                                                                                                                                                                                                                                                                     |  |
|----------------------------------------------------------------------------------------------|-----------------------------------------------------|------------------------------------------------------------------------------------------|-------------------------------------------------------------------------------------------------------------------------------------------------------------------------------------------------------------------------------------------------------------------------------------------------------------------------------------------------------------------------------------------------------------------------------------------------------------------------------------------------------------------------------------------------------------------------------------------------------------------------------------------------------------------------------------------------------------------------------------------------------------------------------------------------------------------------------------|--|
| see above                                                                                    | deCODE genetics                                     | deCODE genetics                                                                          | Agnar Helgason; Alma Moller; Arna B Agustsdottir; Arnaldur Gylfason; Asgeir Sigurdsson; Aslaug Jonasdottir; Berglind Eiriksdottir; Bjarni Thorbjornsson; Brynjar O Jansson; Daniel F Gudbjartsson; Droplaug N Magnúsdottir; Elisabet E Gardarsdottir; Emil A Thorarensen; Gardar Sveinbjornsson; Gisli Masson; Gudmundur Georgsson; Gudmundur L Norddahl; Gudrun Sigmundsdottir; Hakon Jonsson; Hannes Eggertsson; Hilma Holm; Ingileif Jonsdottir; Jona Saemundsdottir; Kamilla S Josefsdottir; Kari Stefansson; Karl G Kristinsson; Kjartan R Gudmundsson; Kristin E Sveinsdottir; Louise le Roux; Maney Sveinsdottir; Ofelia S Grettarsdottir; Olafur T Magnusson; Pall Melsted; Patrick Sulem; Run Fridriksdottir; Solvi Rognvaldsson; Thorar H Gunnarsdottir; Thordur Kristjansson; Thorolfur Gudnason; Unnur Thorsteinsdottir |  |
| EPI_ISL_959388 to 959413, EPI_ISL_980807 to 980809                                           | genXone SA, Molecular Diagnostics Laboratory / NZOZ | genXone SA, Research & Development Laboratory                                            | Aleksandra Gidlewicz; Anna Brylak-Baszczkó; Grzegorz Nowicki; Jakub Grabowski; Karol Szeszkó; Maciej Sykulski; Micha Kaszuba; Natalia Drwska-Matelska; ukasz Krych                                                                                                                                                                                                                                                                                                                                                                                                                                                                                                                                                                                                                                                                  |  |
| EPI_ISL_872254, EPI_ISL_883990 to 883996, EPI_ISL_954021                                     | hopital                                             | National Reference Center for Viruses of Respiratory Infections, Institut Pasteur, Paris | Andre-Garnier Elisabeth; Angela Brisebarre; Camille Capel; Dyanecelle Alexandra; Etienne Simon-Lorière; Isabelle Joly; Marion Barbet; Maud Vanpeene; Méline Bizard; Sylvie Behillil; Sylvie van der Werf; Vincent Enouf                                                                                                                                                                                                                                                                                                                                                                                                                                                                                                                                                                                                             |  |
| EPI_ISL_693765, EPI_ISL_792055                                                               | hospital                                            | National Reference Center for Viruses of Respiratory Infections, Institut Pasteur, Paris | Angela Brisebarre; Camille Capel; Etienne Simon-Lorière; Gisèle Lagathu; Marion Barbet; Maud Vanpeene; Méline Bizard; Patricia Stoessel; Sylvie Behillil; Sylvie van der Werf; Vincent Enouf                                                                                                                                                                                                                                                                                                                                                                                                                                                                                                                                                                                                                                        |  |
| EPI_ISL_640073                                                                               | unknown                                             | NHLS/UCT                                                                                 | Arash Iranzadeh; Bruna Galvao; Carolyn Williamson; Deelan Doolabh; Diana Hardie; Innocent Mudau; Kruger Marais; Lynn Tyers; Marvin Hsiao; Stephen Korsman                                                                                                                                                                                                                                                                                                                                                                                                                                                                                                                                                                                                                                                                           |  |
| EPI_ISL_660415, EPI_ISL_766614, EPI_ISL_789046, EPI_ISL_831969                               | unknown                                             | The Public Health Agency of Sweden                                                       | Anna Risberg; Anna-Malin Linde; Department of Microbiology; Karin Tegmark-Wisell; Maria Lind Karlberg; Mattias Haukland; Mia Brytting; Olov Svartstrom; Oskar Karlsson Lindsjö; Petra Edquist; Reza Advani; Sandra Brodresen; The Public Health Agency of Sweden                                                                                                                                                                                                                                                                                                                                                                                                                                                                                                                                                                    |  |
| EPI_ISL_848555 to 848602, EPI_ISL_848605 to 848629, EPI_ISL_918514, EPI_ISL_918518 to 918521 | Evandro Chagas Institute                            | Evandro Chagas Institute                                                                 | A.M.; Barbagelata; E.C.; E.M.A.; Ferreira; J.A.; Junior; K.C.; L.C.; L.S.; M.C.; P.S.; Pinheiro; Santos; Silva; Sousa; Sousa Junior; W.D.C.; da Silva                                                                                                                                                                                                                                                                                                                                                                                                                                                                                                                                                                                                                                                                               |  |

We gratefully acknowledge the following Authors from the Originating laboratories responsible for obtaining the specimens, as well as the Submitting laboratories where the genome data were generated and shared via GISAID, on which this research is based.

All Submitters of data may be contacted directly via [www.gisaid.org](http://www.gisaid.org)

Authors are sorted alphabetically.

| Accession ID                                                                                                                                                                                                                          | Originating Laboratory                                                                         | Submitting Laboratory                                                                                                      | Authors                                                                                                                                                                                                                                                                                                                                                                                                                     |
|---------------------------------------------------------------------------------------------------------------------------------------------------------------------------------------------------------------------------------------|------------------------------------------------------------------------------------------------|----------------------------------------------------------------------------------------------------------------------------|-----------------------------------------------------------------------------------------------------------------------------------------------------------------------------------------------------------------------------------------------------------------------------------------------------------------------------------------------------------------------------------------------------------------------------|
| EPI_ISL_1225874 to 1225880,<br>EPI_ISL_1226177 to 1226191                                                                                                                                                                             | "AK State Public Health Lab, State Health Department"                                          | Genomics and Discovery, Respiratory Viruses Branch, Division of Viral Diseases, Centers for Disease Control and Prevention | Anna Montmayer; Anna Uehara; Ben L. Rambo-Martin; Clinton R. Paden; Dhvani Batra; Haibin Wang; Jasmine Padilla; Jing Zhang; Justin Lee; Katie Dillon; Krista Queen; Kristen Knipe; Kristine Lacek; Lori Rowe; Mark Burroughs; Matthew Schmerer; Mili Sheth; Peter W. Cook; Rachel Marine; Sam Shepard; Sarah Nobles; Shoshona Le; Suxiang Tong; Yan Li; Ying Tao                                                            |
| EPI_ISL_1318510 to 1318524                                                                                                                                                                                                            | "AR Dept. of Health-PHL, Molecular Diagnostics"                                                | Centers for Disease Control and Prevention Division of Viral Diseases, Pathogen Discovery                                  | Anna Montmayer; Anna Uehara; Ben L. Rambo-Martin; Clinton R. Paden; Dhvani Batra; Haibin Wang; Jasmine Padilla; Jing Zhang; Justin Lee; Katie Dillon; Krista Queen; Kristen Knipe; Kristine Lacek; Lori Rowe; Mark Burroughs; Matthew Schmerer; Mili Sheth; Peter W. Cook; Rachel Marine; Sam Shepard; Sarah Nobles; Shoshona Le; Suxiang Tong; Yan Li; Ying Tao                                                            |
| EPI_ISL_1318230, EPI_ISL_1318239                                                                                                                                                                                                      | "AR Dept. of Health-PHL, Molecular Diagnostics"                                                | Genomics and Discovery, Respiratory Viruses Branch, Division of Viral Diseases, Centers for Disease Control and Prevention | Anna Kelleher; Anna Uehara; Brian Lynch; Clinton R. Paden; Haibin Wang; Han Jia Justin Ng; Jing Zhang; Krista Queen; Peter Cook; Suxiang Tong; Yan Li; Ying Tao                                                                                                                                                                                                                                                             |
| EPI_ISL_1226381, EPI_ISL_1226407                                                                                                                                                                                                      | "AZ SPHL, Arizona Department of Health Services"                                               | Genomics and Discovery, Respiratory Viruses Branch, Division of Viral Diseases, Centers for Disease Control and Prevention | Anna Montmayer; Anna Uehara; Ben L. Rambo-Martin; Clinton R. Paden; Dhvani Batra; Haibin Wang; Jasmine Padilla; Jing Zhang; Justin Lee; Katie Dillon; Krista Queen; Kristen Knipe; Kristine Lacek; Lori Rowe; Mark Burroughs; Matthew Schmerer; Mili Sheth; Peter W. Cook; Rachel Marine; Sam Shepard; Sarah Nobles; Shoshona Le; Suxiang Tong; Yan Li; Ying Tao                                                            |
| EPI_ISL_1318634 to 1318657,<br>EPI_ISL_1318659 to 1318667                                                                                                                                                                             | "CDPH, Viral and Rickettsial Disease Laboratory"                                               | Centers for Disease Control and Prevention Division of Viral Diseases, Pathogen Discovery                                  | Anna Montmayer; Anna Uehara; Ben L. Rambo-Martin; Clinton R. Paden; Dhvani Batra; Haibin Wang; Jasmine Padilla; Jing Zhang; Justin Lee; Katie Dillon; Krista Queen; Kristen Knipe; Kristine Lacek; Lori Rowe; Mark Burroughs; Matthew Schmerer; Mili Sheth; Peter W. Cook; Rachel Marine; Sam Shepard; Sarah Nobles; Shoshona Le; Suxiang Tong; Yan Li; Ying Tao                                                            |
| EPI_ISL_1225958 to 1225974,<br>EPI_ISL_1226237 to 1226275                                                                                                                                                                             | "CDPH, Viral and Rickettsial Disease Laboratory"                                               | Genomics and Discovery, Respiratory Viruses Branch, Division of Viral Diseases, Centers for Disease Control and Prevention | Anna Montmayer; Anna Uehara; Ben L. Rambo-Martin; Clinton R. Paden; Dhvani Batra; Haibin Wang; Jasmine Padilla; Jing Zhang; Justin Lee; Katie Dillon; Krista Queen; Kristen Knipe; Kristine Lacek; Lori Rowe; Mark Burroughs; Matthew Schmerer; Mili Sheth; Peter W. Cook; Rachel Marine; Sam Shepard; Sarah Nobles; Shoshona Le; Suxiang Tong; Yan Li; Ying Tao                                                            |
| EPI_ISL_1318381 to 1318401                                                                                                                                                                                                            | "CO Dept. of Public Health and Environment, Lab Services Division"                             | Centers for Disease Control and Prevention Division of Viral Diseases, Pathogen Discovery                                  | Anna Montmayer; Anna Uehara; Ben L. Rambo-Martin; Clinton R. Paden; Dhvani Batra; Haibin Wang; Jasmine Padilla; Jing Zhang; Justin Lee; Katie Dillon; Krista Queen; Kristen Knipe; Kristine Lacek; Lori Rowe; Mark Burroughs; Matthew Schmerer; Mili Sheth; Peter W. Cook; Rachel Marine; Sam Shepard; Sarah Nobles; Shoshona Le; Suxiang Tong; Yan Li; Ying Tao                                                            |
| EPI_ISL_1225975 to 1225986,<br>EPI_ISL_1226192 to 1226211                                                                                                                                                                             | "CO Dept. of Public Health and Environment, Lab Services Division"                             | Genomics and Discovery, Respiratory Viruses Branch, Division of Viral Diseases, Centers for Disease Control and Prevention | Anna Montmayer; Anna Uehara; Ben L. Rambo-Martin; Clinton R. Paden; Dhvani Batra; Haibin Wang; Jasmine Padilla; Jing Zhang; Justin Lee; Katie Dillon; Krista Queen; Kristen Knipe; Kristine Lacek; Lori Rowe; Mark Burroughs; Matthew Schmerer; Mili Sheth; Peter W. Cook; Rachel Marine; Sam Shepard; Sarah Nobles; Shoshona Le; Suxiang Tong; Yan Li; Ying Tao                                                            |
| EPI_ISL_1251018                                                                                                                                                                                                                       | "DIP. PREV. AVEZZANO SERVIZIO DI IGIENE EPIDEMIOLOGIA E SANITA' PUBBLICA"                      | Istituto Zooprofilattico Sperimentale dell'Abruzzo e Molise "G. Caporale"                                                  | Ancora M; Calistri P; Cammà C; Curini V; Di Domenico M; Di Pasquale A; Lorusso A; Mangone I; Marcecci M; Puglia I; Rinaldi A; Savini G; Scialabba S                                                                                                                                                                                                                                                                         |
| EPI_ISL_1167022 to 1167087,<br>EPI_ISL_1191610                                                                                                                                                                                        | "Dr. Andrija Stampar" Teaching Institute of Public Health, Department of Clinical Microbiology | Istituto di Genomica Applicata                                                                                             | Davide Scaglione; Eleonora Paparelli; Fedrica Cattonaro; Gabriele Magris; Irena Jurman; Jasmina Vranes; Michele Morgante; Slobodanka Radovic; Vera Vendramin                                                                                                                                                                                                                                                                |
| EPI_ISL_1109549 to 1109552,<br>EPI_ISL_1109555 to 1109557,<br>EPI_ISL_1168769, EPI_ISL_1180208                                                                                                                                        | "Dr. Andrija Stampar" Teaching Institute of Public Health                                      | Croatian Institute of Public Health                                                                                        | Irena Tabain; Ivana Ferenak                                                                                                                                                                                                                                                                                                                                                                                                 |
| EPI_ISL_1318488 to 1318500                                                                                                                                                                                                            | "HI Dept. of Health, State Laboratories Division"                                              | Centers for Disease Control and Prevention Division of Viral Diseases, Pathogen Discovery                                  | Anna Montmayer; Anna Uehara; Ben L. Rambo-Martin; Clinton R. Paden; Dhvani Batra; Haibin Wang; Jasmine Padilla; Jing Zhang; Justin Lee; Katie Dillon; Krista Queen; Kristen Knipe; Kristine Lacek; Lori Rowe; Mark Burroughs; Matthew Schmerer; Mili Sheth; Peter W. Cook; Rachel Marine; Sam Shepard; Sarah Nobles; Shoshona Le; Suxiang Tong; Yan Li; Ying Tao                                                            |
| EPI_ISL_1302448, EPI_ISL_1302460,<br>EPI_ISL_1302464, EPI_ISL_1302475 to 1302492, EPI_ISL_1302659 to 1302665                                                                                                                          | "InMedica"                                                                                     | Lithuanian University of Health Sciences Hospital, Department of Genetics and Molecular Medicine                           | Astra Vitkauskienė; Darius Cereskevicius; Inga Nasvytiene; Mantas Saraukas; Marius Sukys; Rasa Ugenskiene; Renaldas Jurkevicius; Zivile Zemeckiene                                                                                                                                                                                                                                                                          |
| EPI_ISL_1226035 to 1226038,<br>EPI_ISL_1226341 to 1226343                                                                                                                                                                             | "MN PHL Division, Minnesota Department of Health"                                              | Genomics and Discovery, Respiratory Viruses Branch, Division of Viral Diseases, Centers for Disease Control and Prevention | Anna Montmayer; Anna Uehara; Ben L. Rambo-Martin; Clinton R. Paden; Dhvani Batra; Haibin Wang; Jasmine Padilla; Jing Zhang; Justin Lee; Katie Dillon; Krista Queen; Kristen Knipe; Kristine Lacek; Lori Rowe; Mark Burroughs; Matthew Schmerer; Mili Sheth; Peter W. Cook; Rachel Marine; Sam Shepard; Sarah Nobles; Shoshona Le; Suxiang Tong; Yan Li; Ying Tao                                                            |
| EPI_ISL_1226281 to 1226287                                                                                                                                                                                                            | "NM Dept. Health, Scientific Laboratory Division "                                             | Genomics and Discovery, Respiratory Viruses Branch, Division of Viral Diseases, Centers for Disease Control and Prevention | Anna Montmayer; Anna Uehara; Ben L. Rambo-Martin; Clinton R. Paden; Dhvani Batra; Haibin Wang; Jasmine Padilla; Jing Zhang; Justin Lee; Katie Dillon; Krista Queen; Kristen Knipe; Kristine Lacek; Lori Rowe; Mark Burroughs; Matthew Schmerer; Mili Sheth; Peter W. Cook; Rachel Marine; Sam Shepard; Sarah Nobles; Shoshona Le; Suxiang Tong; Yan Li; Ying Tao                                                            |
| EPI_ISL_1226003 to 1226006,<br>EPI_ISL_1226048 to 1226081                                                                                                                                                                             | "NYSDOH Wadsworth Center, Virology Lab"                                                        | Genomics and Discovery, Respiratory Viruses Branch, Division of Viral Diseases, Centers for Disease Control and Prevention | Anna Montmayer; Anna Uehara; Ben L. Rambo-Martin; Clinton R. Paden; Dhvani Batra; Haibin Wang; Jasmine Padilla; Jing Zhang; Justin Lee; Katie Dillon; Krista Queen; Kristen Knipe; Kristine Lacek; Lori Rowe; Mark Burroughs; Matthew Schmerer; Mili Sheth; Peter W. Cook; Rachel Marine; Sam Shepard; Sarah Nobles; Shoshona Le; Suxiang Tong; Yan Li; Ying Tao                                                            |
| EPI_ISL_1226326 to 1226340,<br>EPI_ISL_1318238, EPI_ISL_1318255,<br>EPI_ISL_1318262, EPI_ISL_1323117                                                                                                                                  | "OK Public Health Laboratory, Oklahoma State DOH"                                              | Genomics and Discovery, Respiratory Viruses Branch, Division of Viral Diseases, Centers for Disease Control and Prevention | Anna Kelleher; Anna Montmayer; Anna Uehara; Ben L. Rambo-Martin; Brian Lynch; Clinton R. Paden; Dhvani Batra; Haibin Wang; Han Jia Justin Ng; Jasmine Padilla; Jing Zhang; Justin Lee; Katie Dillon; Krista Queen; Kristen Knipe; Kristine Lacek; Lori Rowe; Mark Burroughs; Matthew Schmerer; Mili Sheth; Peter Cook; Peter W. Cook; Rachel Marine; Sam Shepard; Sarah Nobles; Shoshona Le; Suxiang Tong; Yan Li; Ying Tao |
| EPI_ISL_1318668 to 1318680                                                                                                                                                                                                            | "PA Department of Health, Bureau of Laboratories"                                              | Centers for Disease Control and Prevention Division of Viral Diseases, Pathogen Discovery                                  | Anna Montmayer; Anna Uehara; Ben L. Rambo-Martin; Clinton R. Paden; Dhvani Batra; Haibin Wang; Jasmine Padilla; Jing Zhang; Justin Lee; Katie Dillon; Krista Queen; Kristen Knipe; Kristine Lacek; Lori Rowe; Mark Burroughs; Matthew Schmerer; Mili Sheth; Peter W. Cook; Rachel Marine; Sam Shepard; Sarah Nobles; Shoshona Le; Suxiang Tong; Yan Li; Ying Tao                                                            |
| EPI_ISL_1167936 to 1167937,<br>EPI_ISL_1167999 to 1168000,<br>EPI_ISL_1226016 to 1226034,<br>EPI_ISL_1226382 to 1226384                                                                                                               | "PA Department of Health, Bureau of Laboratories"                                              | Genomics and Discovery, Respiratory Viruses Branch, Division of Viral Diseases, Centers for Disease Control and Prevention | ; Anna Montmayer; Anna Uehara; Ben L. Rambo-Martin; Brian Lynch; Clinton R. Paden; Dhvani Batra; Haibin Wang; Jasmine Padilla; Jing Zhang; Justin Lee; Katie Dillon; Krista Queen; Kristen Knipe; Kristine Lacek; Lori Rowe; Mark Burroughs; Matthew Schmerer; Mili Sheth; Peter W. Cook; Rachel Marine; Sam Shepard; Sarah Nobles; Shoshona Le; Suxiang Tong; Yan Li; Ying Tao                                             |
| EPI_ISL_1251078                                                                                                                                                                                                                       | "Presidio Ospedaliero "San Liberatore" Atri                                                    | Istituto Zooprofilattico Sperimentale dell'Abruzzo e Molise "G. Caporale"                                                  | Ancora M; Calistri P; Cammà C; Curini V; Di Domenico M; Di Pasquale A; Lorusso A; Mangone I; Marcecci M; Puglia I; Rinaldi A; Savini G; Scialabba S                                                                                                                                                                                                                                                                         |
| EPI_ISL_1081954, EPI_ISL_1081958 to 1081961, EPI_ISL_1082252, EPI_ISL_1082269, EPI_ISL_1082290 to 1082291, EPI_ISL_1082294, EPI_ISL_1251274 to 1251277, EPI_ISL_1260862, EPI_ISL_1260871, EPI_ISL_1265368, EPI_ISL_1265371 to 1265373 | see above                                                                                      | "Stefan S. Nicolau" Institute of Virology                                                                                  | Adriana Plesa; Alina Nastasie; Ana Iulia Neagu; Anca Botezatu; Camelia Sultana; Carmen Cristina Diaconu; Carmen Cristina Diaconu.; Coralia Bleotu; Cristina Mambet; Denisa Dragu; Gabriela Anton; Ioana Pitica; Iulia Virginia Iancu; Laura Grecu; Laura Necula; Lilia Matei; Marinela Bostan; Mihaela Economescu; Mirela Mihaila; Saviana Nedeianu; Simona Ruta                                                            |
| EPI_ISL_1081962, EPI_ISL_1082296                                                                                                                                                                                                      | "Stefan S. Nicolau" Institute of Virology                                                      | 285 Mihai Bravu Ave, Bucharest, Romania                                                                                    | Adriana Plesa; Alina Nastasie; Ana Iulia Neagu; Anca Botezatu; Camelia Sultana; Carmen Cristina Diaconu; Coralia Bleotu; Cristina Mambet; Denisa Dragu; Gabriela Anton; Ioana Pitica; Iulia Virginia Iancu; Laura Grecu; Laura Necula; Lilia Matei; Marinela Bostan; Mihaela Economescu; Mirela Mihaila;                                                                                                                    |

| EPI_ISL                                                                                                                                                                                                        | Study Name                                                                                                                                                                                                                                                                                                                                                                                                                                                                                                                                                                                                                                                                                                                                                                                                                                                                                                                                                                                                                                                                                                                              | Location                                                                                                                                                                                                          | Principal Investigator        | Study Description | Collaborators                                                                                                                                                                                                                                                                                                                                                                                                                                                                                                                                                                                                                                                                                                                                                                                                                                                                                                                                                                                                                                                                                                                                                                                                                                                   |
|----------------------------------------------------------------------------------------------------------------------------------------------------------------------------------------------------------------|-----------------------------------------------------------------------------------------------------------------------------------------------------------------------------------------------------------------------------------------------------------------------------------------------------------------------------------------------------------------------------------------------------------------------------------------------------------------------------------------------------------------------------------------------------------------------------------------------------------------------------------------------------------------------------------------------------------------------------------------------------------------------------------------------------------------------------------------------------------------------------------------------------------------------------------------------------------------------------------------------------------------------------------------------------------------------------------------------------------------------------------------|-------------------------------------------------------------------------------------------------------------------------------------------------------------------------------------------------------------------|-------------------------------|-------------------|-----------------------------------------------------------------------------------------------------------------------------------------------------------------------------------------------------------------------------------------------------------------------------------------------------------------------------------------------------------------------------------------------------------------------------------------------------------------------------------------------------------------------------------------------------------------------------------------------------------------------------------------------------------------------------------------------------------------------------------------------------------------------------------------------------------------------------------------------------------------------------------------------------------------------------------------------------------------------------------------------------------------------------------------------------------------------------------------------------------------------------------------------------------------------------------------------------------------------------------------------------------------|
| EPI_ISL_1318446 to 1318448                                                                                                                                                                                     | "TX DSHS, Lab Services Section MC 1947"                                                                                                                                                                                                                                                                                                                                                                                                                                                                                                                                                                                                                                                                                                                                                                                                                                                                                                                                                                                                                                                                                                 | Centers for Disease Control and Prevention Division of Viral Diseases, Pathogen Discovery                                                                                                                         | Saviana Nedeianu; Simona Ruta |                   | Anna Montmayeur; Anna Uehara; Ben L. Rambo-Martin; Clinton R. Paden; Dhvani Batra; Haibin Wang; Jasmine Padilla; Jing Zhang; Justin Lee; Katie Dillon; Krista Queen; Kristen Knipe; Kristine Lacey; Lori Rowe; Mark Burroughs; Matthew Schmeer; Mili Sheth; Peter W. Cook; Rachel Marine; Sam Shepard; Sarah Nobles; Shoshona Le; Suxiang Tong; Yan Li; Ying Tao                                                                                                                                                                                                                                                                                                                                                                                                                                                                                                                                                                                                                                                                                                                                                                                                                                                                                                |
| EPI_ISL_1225931 to 1225935                                                                                                                                                                                     | "TX DSHS, Lab Services Section MC 1947"                                                                                                                                                                                                                                                                                                                                                                                                                                                                                                                                                                                                                                                                                                                                                                                                                                                                                                                                                                                                                                                                                                 | Genomics and Discovery, Respiratory Viruses Branch, Division of Viral Diseases, Centers for Disease Control and Prevention                                                                                        |                               |                   | Anna Montmayeur; Anna Uehara; Ben L. Rambo-Martin; Clinton R. Paden; Dhvani Batra; Haibin Wang; Jasmine Padilla; Jing Zhang; Justin Lee; Katie Dillon; Krista Queen; Kristen Knipe; Kristine Lacey; Lori Rowe; Mark Burroughs; Matthew Schmeer; Mili Sheth; Peter W. Cook; Rachel Marine; Sam Shepard; Sarah Nobles; Shoshona Le; Suxiang Tong; Yan Li; Ying Tao                                                                                                                                                                                                                                                                                                                                                                                                                                                                                                                                                                                                                                                                                                                                                                                                                                                                                                |
| EPI_ISL_1378845 to 1378910                                                                                                                                                                                     | 1. Główny Inspektorat Sanitarny. 2. Diagnostyka. Laboratoria Medyczne.                                                                                                                                                                                                                                                                                                                                                                                                                                                                                                                                                                                                                                                                                                                                                                                                                                                                                                                                                                                                                                                                  | 1. ViroGenetics - BSL3 Laboratory of Virology, Maopolska Centre of Biotechnology, Jagiellonian University; 2. genXone SA, Research & Development Laboratory                                                       |                               |                   | Aleksandra Gidlewicz; Anna Brylak; Gromowski, T.; Grzegorz Nowicki; Jakub Grabowski; Karol Szeszko; Kowalski, M.; Labaj; Maciej Sykulski; Mazur-Panasiuk, N.; Micha Kaszuba; Natalia Drweska-Matelska; P.P.; Pyrc, K.; Sylwia Januszczak; Szulc, P.; ukasz Krych                                                                                                                                                                                                                                                                                                                                                                                                                                                                                                                                                                                                                                                                                                                                                                                                                                                                                                                                                                                                |
| EPI_ISL_1340927 to 1341148                                                                                                                                                                                     | 1. Główny Inspektorat Sanitarny; 2. Diagnostyka. Laboratoria Medyczne.                                                                                                                                                                                                                                                                                                                                                                                                                                                                                                                                                                                                                                                                                                                                                                                                                                                                                                                                                                                                                                                                  | 1. ViroGenetics - BSL3 Laboratory of Virology, Maopolska Centre of Biotechnology, Jagiellonian University; 2. Diagtron Laboratoria Lukasz Rabalski                                                                |                               |                   | Gromowski, T.; Kowalski, M.; Labaj; Maciej Kosinski; Mazur-Panasiuk, N.; Natalia Derewonko; P.P.; Pyrc, K.; Rabalski L.; Sylwia Januszczak; Szulc, P.                                                                                                                                                                                                                                                                                                                                                                                                                                                                                                                                                                                                                                                                                                                                                                                                                                                                                                                                                                                                                                                                                                           |
| EPI_ISL_1265393 to 1265440                                                                                                                                                                                     | 1. Wojewódzka Stacja Sanitarno - Epidemiologiczna w Katowicach (WSSE Katowice); 2. Wojewódzka Stacja Sanitarno - Epidemiologiczna w Kielcach (WSSE Kielce); 3. Wojewódzka Stacja Sanitarno - Epidemiologiczna w Szczecinie (WSSE Szczecin); 4. Wojewódzka Stacja Sanitarno - Epidemiologiczna w Lublinie (WSSE Lublin); 5. Wojewódzka Stacja Sanitarno - Epidemiologiczna w Gorzowie Wielkopolskim (WSSE Gorzów Wielkopolski); 6. Wojewódzka Stacja Sanitarno-Epidemiologiczna w Gdasku (WSSE Gdask); 7. Wojewódzka Stacja Sanitarno-Epidemiologiczna w Poznaniu (WSSE Pozna); 8. Wojewódzka Stacja Sanitarno-Epidemiologiczna w Opolu (WSSE Opole); 9. Wojewódzka Stacja Sanitarno-Epidemiologiczna we Wrocławiu (WSSE Wrocław); 10. Wojewódzka Stacja Sanitarno-Epidemiologiczna w Krakowie (WSSE Kraków); 11. Wojewódzka Stacja Sanitarno-Epidemiologiczna w Olsztynie (WSSE Olsztyn); 12. Wojewódzka Stacja Sanitarno-Epidemiologiczna w Bydgoszczy (WSSE Bydgoszcz); 13. Wojewódzka Stacja Sanitarno-Epidemiologiczna w Rzeszowie (WSSE Rzeszów); 14. Wojewódzka Stacja Sanitarno-Epidemiologiczna w Białymstoku (WSSE Białystok); | 1. ViroGenetics - BSL3 Laboratory of Virology, Maopolska Centre of Biotechnology, Jagiellonian University; 2. Human Genome Variation Research Group, Malopolska Centre of Biotechnology, Jagiellonian University; |                               |                   | Branicki, W.; Gromowski, T.; Klajmon, A.; Kowalski, M.; Labaj; Marszalek, K.; Mazur-Panasiuk, N.; P.P.; Pyrc, K.; Szulc, P.                                                                                                                                                                                                                                                                                                                                                                                                                                                                                                                                                                                                                                                                                                                                                                                                                                                                                                                                                                                                                                                                                                                                     |
| EPI_ISL_1013523 to 1013582, EPI_ISL_1366890 to 1366920                                                                                                                                                         | 1.AO Universitaria 'S. Giovanni di Dio e Ruggi D'Aragona, Scuola Medica Salernitana' Hospital / 2.UOC di Virologia e Microbiologia, Università della Campania 'L. Vanvitelli' / 3.AO Universitaria 'Federico II' Napoli Hospital / 4.AORN 'San Giuseppe Moscati' Avellino Hospital / 5.AO 'San Pio - presidio G. Rummo' Benevento Hospital / 6.AO 'Sant'Anna e San Sebastiano' Caserta Hospital / 7.PO 'Maria Santissima Addolorata' Eboli Hospital / 8.Biogen Istituto di Ricerche Genetiche                                                                                                                                                                                                                                                                                                                                                                                                                                                                                                                                                                                                                                           | 1. Genome Research Center for Health (CRGS) / 2. Laboratory of Molecular Medicine and Genomics(LMMGE) / 3. Center for Research in Pure and Applied Mathematics (CRMPA)                                            |                               |                   | Alessandro Weisz; Alessandro Weisz (Corresponding Author); Alessia Cossu; Andreina Baj; Aniello Gentile; Annamaria Salvati; Antonello Saccomanno; Arnolfo Petruzzello; Assunta Sellitto; Carlo Ferravante; Domenico Memoli; Domenico Palumbo; Edmondo Adorasio; Elena Alexandrova; Emilia Vaccaro; Fausto Sessa.; Francesca Marciano; Francesca Rizzo; Francesca Rizzo (Corresponding Author); Francesco Curcio; Gianluigi Franci; Giorgio Dirani; Giorgio Giurato; Giorgio Giurato (Corresponding Author); Giovanni Nassa; Giovanni Pecoraro; Giuseppe Fenza; Giuseppe Portella; Gregorio Goffredi; Ilaria Terenzi; Jessica Lamberti; Maddalena Schioppa; Maria Grazia Foti; Maria Landi; Marianna Scrima; Mariarosaria Ingino; Massimiliano Galdiero; Maurizio Fumi; Michela Iacobellis; Michele Caraglia; Michele Cennamo; Morena D'Avenia; Oriana Strianese; Pasquale Pagliano; Rita Greco; Roberta Tarallo; Rosanna Piluscio; Silvia Zanolì; Simona Sempri; Sonia Amabile; Stefania Marzinotto; Teresa Rocco; Valeria Mirici Cappa; Vincenzo Rocco; Viola Melone; Vittoria Letizia; Vittorio Sambri; Ylenia D'Agostino                                                                                                                                     |
| EPI_ISL_1360389 to 1360392, EPI_ISL_1361510 to 1361592, EPI_ISL_1361594 to 1361630, EPI_ISL_1366498 to 1366501, EPI_ISL_1372414                                                                                | 1.AO Universitaria 'S. Giovanni di Dio e Ruggi D'Aragona, Scuola Medica Salernitana' Hospital / 2.UOC di Virologia e Microbiologia, Università della Campania 'L. Vanvitelli' / 3.AO Universitaria 'Federico II' Napoli Hospital / 4.AORN 'San Giuseppe Moscati' Avellino Hospital / 5.AO 'San Pio - presidio G. Rummo' Benevento Hospital / 6.AO 'Sant'Anna e San Sebastiano' Caserta Hospital / 7.PO 'Maria Santissima Addolorata' Eboli Hospital / 8.Biogen Istituto di Ricerche Genetiche / 9. U.O.C. di Genetica Medica e di Laboratorio A.O.R.N., Azienda Ospedaliera di Rilievo Nazionale Antonio Cardarelli, Napoli / 10. Centro di riferimento Oncologico della Basilicata (IRCCS-CROB), Rionero in Vulture (PZ) / 11. Presidio Ospedaliero di Agropoli, Agropoli (SA).                                                                                                                                                                                                                                                                                                                                                        | 1. Genome Research Center for Health (CRGS) / 2. Laboratory of Molecular Medicine and Genomics(LMMGE) / 3. Center for Research in Pure and Applied Mathematics (CRMPA)                                            |                               |                   | Alessandro Weisz; Alessandro Weisz (Corresponding Author); Alessia Cossu; Andreina Baj; Aniello Gentile; Annamaria Salvati; Antonello Saccomanno; Arnolfo Petruzzello; Assunta Sellitto; Caivano Antonella; Carlo Ferravante; D'Auria Fiorella.; De Luca Luciana.; Domenico Memoli; Domenico Palumbo; Edmondo Adorasio; Elena Alexandrova; Emilia Vaccaro; Fausto Sessa.; Francesca Marciano; Francesca Rizzo; Francesca Rizzo (Corresponding Author); Francesco Curcio; Gianluigi Franci; Giorgio Dirani; Giorgio Giurato; Giorgio Giurato (Corresponding Author); Giovanni Nassa; Giovanni Pecoraro; Giuseppe Fenza; Giuseppe Portella; Gregorio Goffredi; Ilaria Terenzi; Jessica Lamberti; Maddalena Schioppa; Marcello Ametrano; Maria Grazia Foti; Maria Landi; Marianna Scrima; Mariano Fiorenza; Mariarosaria Ingino; Marina Tarsitano; Massimiliano Chetta; Massimiliano Galdiero; Maurizio Fumi; Michela Iacobellis; Michele Caraglia; Michele Cennamo; Morena D'Avenia; Oriana Strianese; Pasquale Pagliano; Rita Greco; Roberta Tarallo; Rosanna Piluscio; Silvia Zanolì; Simona Sempri; Sonia Amabile; Stefania Marzinotto; Teresa Rocco; Valeria Mirici Cappa; Vincenzo Rocco; Viola Melone; Vittoria Letizia; Vittorio Sambri; Ylenia D'Agostino |
| EPI_ISL_1040736 to 1040737, EPI_ISL_1040741, EPI_ISL_1040743 to 1040744, EPI_ISL_1040769 to 1040773, EPI_ISL_1040790 to 1040792                                                                                | 2 Military Hospital wc MAA                                                                                                                                                                                                                                                                                                                                                                                                                                                                                                                                                                                                                                                                                                                                                                                                                                                                                                                                                                                                                                                                                                              | NHLS/UCT                                                                                                                                                                                                          |                               |                   | Arash Iranzadeh; Bruna Galvao; Carolyn Williamson; Deelan Doolabh; Diana Hardie; Innocent Mudau; Kruger Marais; Lynn Tyers; Marvin Hsiao; Stephen Korsman                                                                                                                                                                                                                                                                                                                                                                                                                                                                                                                                                                                                                                                                                                                                                                                                                                                                                                                                                                                                                                                                                                       |
| EPI_ISL_1135041                                                                                                                                                                                                | 21551 AU ACCUEIL URGENCES MEDICALES N                                                                                                                                                                                                                                                                                                                                                                                                                                                                                                                                                                                                                                                                                                                                                                                                                                                                                                                                                                                                                                                                                                   | CNR Virus des Infections Respiratoires - France SUD                                                                                                                                                               |                               |                   | Antonin Bal; Bruno Lina; Gregory Destras; Gwendolyne Burfin; Hadrien Regue; Laurence Josset; Martine Valette; Quentin Semanas                                                                                                                                                                                                                                                                                                                                                                                                                                                                                                                                                                                                                                                                                                                                                                                                                                                                                                                                                                                                                                                                                                                                   |
| EPI_ISL_1135044                                                                                                                                                                                                | 21625 HJ PATHO OSS RHUMATO CLIMA PAV F                                                                                                                                                                                                                                                                                                                                                                                                                                                                                                                                                                                                                                                                                                                                                                                                                                                                                                                                                                                                                                                                                                  | CNR Virus des Infections Respiratoires - France SUD                                                                                                                                                               |                               |                   | Antonin Bal; Bruno Lina; Gregory Destras; Gwendolyne Burfin; Hadrien Regue; Laurence Josset; Martine Valette; Quentin Semanas                                                                                                                                                                                                                                                                                                                                                                                                                                                                                                                                                                                                                                                                                                                                                                                                                                                                                                                                                                                                                                                                                                                                   |
| EPI_ISL_1165901, EPI_ISL_1165903, EPI_ISL_1165908 to 1165910, EPI_ISL_1165914 to 1165918, EPI_ISL_1165933, EPI_ISL_1165946 to 1165949, EPI_ISL_1165954, EPI_ISL_1165968 to 1166009, EPI_ISL_1166054 to 1166081 | see above                                                                                                                                                                                                                                                                                                                                                                                                                                                                                                                                                                                                                                                                                                                                                                                                                                                                                                                                                                                                                                                                                                                               | CNR Virus des Infections Respiratoires - France SUD                                                                                                                                                               |                               |                   | Antonin Bal; Bruno Lina; Gregory Destras; Gwendolyne Burfin; Hadrien Regue; Laurence Josset; Martine Valette; Quentin Semanas                                                                                                                                                                                                                                                                                                                                                                                                                                                                                                                                                                                                                                                                                                                                                                                                                                                                                                                                                                                                                                                                                                                                   |
| EPI_ISL_1135040, EPI_ISL_1135043                                                                                                                                                                               | 24530 AU SERVICE ACCUEIL MEDICAL UPATOU                                                                                                                                                                                                                                                                                                                                                                                                                                                                                                                                                                                                                                                                                                                                                                                                                                                                                                                                                                                                                                                                                                 | CNR Virus des Infections Respiratoires - France SUD                                                                                                                                                               |                               |                   | Antonin Bal; Bruno Lina; Gregory Destras; Gwendolyne Burfin; Hadrien Regue; Laurence Josset; Martine Valette; Quentin Semanas                                                                                                                                                                                                                                                                                                                                                                                                                                                                                                                                                                                                                                                                                                                                                                                                                                                                                                                                                                                                                                                                                                                                   |
| EPI_ISL_1081097                                                                                                                                                                                                | 2e_CMA-9e_AM                                                                                                                                                                                                                                                                                                                                                                                                                                                                                                                                                                                                                                                                                                                                                                                                                                                                                                                                                                                                                                                                                                                            | IRBA, 2MI                                                                                                                                                                                                         |                               |                   | CHAPUS C.; DEPEILLE A.; GORGE O.; JALADY A.-M.                                                                                                                                                                                                                                                                                                                                                                                                                                                                                                                                                                                                                                                                                                                                                                                                                                                                                                                                                                                                                                                                                                                                                                                                                  |
| EPI_ISL_1118064, EPI_ISL_1209365 to 1209368                                                                                                                                                                    | 3. Medizinische Abteilung, Hanusch Krankenhaus                                                                                                                                                                                                                                                                                                                                                                                                                                                                                                                                                                                                                                                                                                                                                                                                                                                                                                                                                                                                                                                                                          | Bergthaler laboratory, CeMM Research Center for Molecular Medicine of the Austrian Academy of Sciences                                                                                                            |                               |                   | Andreas Bergthaler; Anna Schedl; Bekir Erguner; Benedikt Agerer; Christoph Bock; Fabian Amman; Jan Laine; Lukas Endler; Maelle Le Moing; Martin Senekowitsch; Michael Schuster; Thomas Penz                                                                                                                                                                                                                                                                                                                                                                                                                                                                                                                                                                                                                                                                                                                                                                                                                                                                                                                                                                                                                                                                     |
| EPI_ISL_1135042                                                                                                                                                                                                | 36313 AU SAU URGENCES                                                                                                                                                                                                                                                                                                                                                                                                                                                                                                                                                                                                                                                                                                                                                                                                                                                                                                                                                                                                                                                                                                                   | CNR Virus des Infections Respiratoires - France SUD                                                                                                                                                               |                               |                   | Antonin Bal; Bruno Lina; Gregory Destras; Gwendolyne Burfin; Hadrien Regue; Laurence Josset; Martine Valette; Quentin Semanas                                                                                                                                                                                                                                                                                                                                                                                                                                                                                                                                                                                                                                                                                                                                                                                                                                                                                                                                                                                                                                                                                                                                   |
| EPI_ISL_1064693 to 1064694, EPI_ISL_1168051                                                                                                                                                                    | A05                                                                                                                                                                                                                                                                                                                                                                                                                                                                                                                                                                                                                                                                                                                                                                                                                                                                                                                                                                                                                                                                                                                                     | The Public Health Agency of Sweden                                                                                                                                                                                |                               |                   | Anna Risberg; Anna-Malin Linde; Carlo Berg; Karin Tegmark-Wisell; Maria Lind Karlberg; Mattias Haukland; Mia Brytting; Noura Walai; Oskar Karlsson Lindsjo; Petra Edquist; Petra Holmstrom; Reza Advani; Samuel Ohman; Sofia Stamouli                                                                                                                                                                                                                                                                                                                                                                                                                                                                                                                                                                                                                                                                                                                                                                                                                                                                                                                                                                                                                           |
| EPI_ISL_1008401 to 1008411                                                                                                                                                                                     | A05 Diagnostics                                                                                                                                                                                                                                                                                                                                                                                                                                                                                                                                                                                                                                                                                                                                                                                                                                                                                                                                                                                                                                                                                                                         | The Public Health Agency of Sweden                                                                                                                                                                                |                               |                   | Anna Risberg; Anna-Malin Linde; Carlo Berg; Karin Tegmark-Wisell; Maria Lind Karlberg; Mattias Haukland; Mia Brytting; Noura Walai; Oskar Karlsson Lindsjo; Petra Edquist; Petra Holmstrom; Reza Advani; Sofia Stamouli                                                                                                                                                                                                                                                                                                                                                                                                                                                                                                                                                                                                                                                                                                                                                                                                                                                                                                                                                                                                                                         |
| EPI_ISL_1008534 to 1008539, EPI_ISL_1008601, EPI_ISL_1168099 to 1168106, EPI_ISL_1231917 to 1231918, EPI_ISL_1231944, EPI_ISL_1231957, EPI_ISL_1231969, EPI_ISL_1231978 to 1231980, EPI_ISL_1231991 to 1231993 | see above                                                                                                                                                                                                                                                                                                                                                                                                                                                                                                                                                                                                                                                                                                                                                                                                                                                                                                                                                                                                                                                                                                                               | The Public Health Agency of Sweden                                                                                                                                                                                |                               |                   | Anna Risberg; Anna-Malin Linde; Carlo Berg; Karin Tegmark-Wisell; Maria Lind Karlberg; Mattias Haukland; Mia Brytting; Noura Walai; Oskar Karlsson Lindsjo; Petra Edquist; Petra Holmstrom; Reza Advani; Sofia Stamouli                                                                                                                                                                                                                                                                                                                                                                                                                                                                                                                                                                                                                                                                                                                                                                                                                                                                                                                                                                                                                                         |

|                                                                                                                                                                                                                                                                                                                                                                                                                                                                                                                                                                                                         |                                                                                           |                                                                                                                                        |                                                                                                                                                                                                                                                                                                                                                                   |
|---------------------------------------------------------------------------------------------------------------------------------------------------------------------------------------------------------------------------------------------------------------------------------------------------------------------------------------------------------------------------------------------------------------------------------------------------------------------------------------------------------------------------------------------------------------------------------------------------------|-------------------------------------------------------------------------------------------|----------------------------------------------------------------------------------------------------------------------------------------|-------------------------------------------------------------------------------------------------------------------------------------------------------------------------------------------------------------------------------------------------------------------------------------------------------------------------------------------------------------------|
| EPI_ISL_1008597                                                                                                                                                                                                                                                                                                                                                                                                                                                                                                                                                                                         | A23 Lab AB                                                                                | The Public Health Agency of Sweden                                                                                                     | Anna Risberg; Anna-Malin Linde; Carlo Berg; Karin Tegmark-Wisell; Maria Lind Karlberg; Mattias Haukland; Mia Brytting; Noura Walai; Oskar Karlsson Lindsjo; Petra Edquist; Petra Holmstrom; Reza Advani; Sofia Stamouli                                                                                                                                           |
| EPI_ISL_1008586 to 1008588, EPI_ISL_1168069, EPI_ISL_1168136                                                                                                                                                                                                                                                                                                                                                                                                                                                                                                                                            | ABC labs                                                                                  | The Public Health Agency of Sweden                                                                                                     | Anna Risberg; Anna-Malin Linde; Carlo Berg; Karin Tegmark-Wisell; Maria Lind Karlberg; Mattias Haukland; Mia Brytting; Noura Walai; Oskar Karlsson Lindsjo; Petra Edquist; Petra Holmstrom; Reza Advani; Sofia Stamouli                                                                                                                                           |
| EPI_ISL_1336623                                                                                                                                                                                                                                                                                                                                                                                                                                                                                                                                                                                         | ACM BIO UNILAB                                                                            | CNR Virus des Infections Respiratoires - France SUD                                                                                    | Antonin Bal; Bruno Lina; Gregory Destras; Gwendolynne Burfin; Hadrien Regue; Laurence Josset; Martine Valette; Quentin Semanas                                                                                                                                                                                                                                    |
| EPI_ISL_1170946 to 1170947, EPI_ISL_1208400 to 1208402                                                                                                                                                                                                                                                                                                                                                                                                                                                                                                                                                  | ACT Pathology                                                                             | Schwessinger Lab                                                                                                                       | Ashley Jones; Benjamin Schwessinger; Craig Kennedy; Karina Kennedy; Kevin Murray; Megan McDonald; Ming-Dao Chia; Robert Lanfear; Robyn N Hall                                                                                                                                                                                                                     |
| EPI_ISL_1227555, EPI_ISL_1228292                                                                                                                                                                                                                                                                                                                                                                                                                                                                                                                                                                        | ADIRONDAK MEDICAL CENTER                                                                  | Wadsworth Center, New York State Department of Health                                                                                  | Alexis Russel; Daryl M. Lamson; Erasmus Schneider; Erica Lasek-Nesselquist; John Kelly; Jonathan Plitnick; Kirsten St. George; Matthew Shudt; Melissa A Leisner; Navjot Singh                                                                                                                                                                                     |
| EPI_ISL_1007605 to 1007610, EPI_ISL_1120875                                                                                                                                                                                                                                                                                                                                                                                                                                                                                                                                                             | ADMED                                                                                     | Laboratory of genomics and metagenomics, Institute of Microbiology, University Hospital Centre and University of Lausanne, Switzerland | Claire Bertelli; Damien Jacot; Gilbert Greub; Sébastien Aeby; Trestan Pilonel                                                                                                                                                                                                                                                                                     |
| EPI_ISL_1302788 to 1303030                                                                                                                                                                                                                                                                                                                                                                                                                                                                                                                                                                              | ADMED Microbiologie                                                                       | Genomics and Transcriptomics, Philip Morris International                                                                              | David Bornand; Emmanuel Guedj; Manuel Peitsch; Marie-Lise Tritten; Maxime Berthouzoz; Mehdi Auberson; Nicolas Siervo; Nikolai Ivanov; Reto Lienhard; Rémi Dulize                                                                                                                                                                                                  |
| EPI_ISL_1229367 to 1229368, EPI_ISL_1200655                                                                                                                                                                                                                                                                                                                                                                                                                                                                                                                                                             | AHRI-Sigal<br>AIDS Vaccine Research Laboratories                                          | KRISP, KZn Research Innovation and Sequencing Platform<br>AIDS Vaccine Research Laboratories                                           | Cele S; Gazy I; Giandhari J; Karim F; Pillay S; Sigal A; Tegally H; Wilkinson E; de Oliveira T<br>AVRL et al.; Gage Moreno; Katarina Braun                                                                                                                                                                                                                        |
| EPI_ISL_1272681 to 1272688                                                                                                                                                                                                                                                                                                                                                                                                                                                                                                                                                                              | AK State Public Health Lab, State Health Department                                       | Centers for Disease Control and Prevention Division of Viral Diseases, Pathogen Discovery                                              | Anna Montmayeur; Anna Uehara; Ben L. Rambo-Martin; Clinton R. Paden; Dhvani Batra; Haibin Wang; Jasmine Padilla; Jing Zhang; Justin Lee; Katie Dillon; Krista Queen; Kristen Knipe; Kristine Lacey; Lori Rowe; Mark Burroughs; Matthew Schmerer; Mili Sheth; Peter W. Cook; Rachel Marine; Sam Shepard; Sarah Nobles; Shoshona Le; Suxiang Tong; Yan Li; Ying Tao |
| EPI_ISL_1094238, EPI_ISL_1094272, EPI_ISL_1094319, EPI_ISL_1094353, EPI_ISL_1094366, EPI_ISL_1094380, EPI_ISL_1094707 to 1094719, EPI_ISL_1095227 to 1095232                                                                                                                                                                                                                                                                                                                                                                                                                                            | AK State Public Health Lab, State Health Department                                       | Respiratory Viruses Branch, Division of Viral Diseases, Centers for Disease Control and Prevention                                     | Anna Montmayeur; Anna Uehara; Ben L. Rambo-Martin; Clinton R. Paden; Dhvani Batra; Haibin Wang; Jasmine Padilla; Jing Zhang; Justin Lee; Krista Queen; Lori Rowe; Mark Burroughs; Mili Sheth; Peter W. Cook; Rachel Marine; Sarah Nobles; Suxiang Tong; Yan Li; Ying Tao                                                                                          |
| see above                                                                                                                                                                                                                                                                                                                                                                                                                                                                                                                                                                                               | AKH Wien, Klinik für Notfallmedizin, Notfallambulanz                                      | Dept. of Laboratory Medicine                                                                                                           | Harald Esterbauer; Oswald Wagner; Petra Jurkowitsch; Robert Strassl                                                                                                                                                                                                                                                                                               |
| EPI_ISL_1303431                                                                                                                                                                                                                                                                                                                                                                                                                                                                                                                                                                                         | AL Dept. of Public Health Bureau of Clinical Laboratories                                 | Centers for Disease Control and Prevention Division of Viral Diseases, Pathogen Discovery                                              | Anna Montmayeur; Anna Uehara; Ben L. Rambo-Martin; Clinton R. Paden; Dhvani Batra; Haibin Wang; Jasmine Padilla; Jing Zhang; Justin Lee; Katie Dillon; Krista Queen; Kristen Knipe; Kristine Lacey; Lori Rowe; Mark Burroughs; Matthew Schmerer; Mili Sheth; Peter W. Cook; Rachel Marine; Sam Shepard; Sarah Nobles; Shoshona Le; Suxiang Tong; Yan Li; Ying Tao |
| EPI_ISL_1318538 to 1318547                                                                                                                                                                                                                                                                                                                                                                                                                                                                                                                                                                              | AL Dept. of Public Health Bureau of Clinical Laboratories                                 | Genomics and Discovery, Respiratory Viruses Branch, Division of Viral Diseases, Centers for Disease Control and Prevention             | : Anna Montmayeur; Anna Uehara; Brian Lynch; Clinton R. Paden; Haibin Wang; Jing Zhang; Krista Queen; Peter W. Cook; Rachel Marine; Suxiang Tong; Yan Li; Ying Tao                                                                                                                                                                                                |
| EPI_ISL_1168016                                                                                                                                                                                                                                                                                                                                                                                                                                                                                                                                                                                         | AL Dept. of Public Health Bureau of Clinical Laboratories                                 | Respiratory Viruses Branch, Division of Viral Diseases, Centers for Disease Control and Prevention                                     | Anna Montmayeur; Anna Uehara; Ben L. Rambo-Martin; Clinton R. Paden; Dhvani Batra; Haibin Wang; Jasmine Padilla; Jing Zhang; Justin Lee; Krista Queen; Lori Rowe; Mark Burroughs; Mili Sheth; Peter W. Cook; Rachel Marine; Sarah Nobles; Suxiang Tong; Yan Li; Ying Tao                                                                                          |
| EPI_ISL_1094888 to 1094898, EPI_ISL_1095262                                                                                                                                                                                                                                                                                                                                                                                                                                                                                                                                                             | ALB FILS KLINIKEN GmbH - Institut für Laboratoriumsmedizin<br>Klinik am Eichert Göppingen | Robert Koch Institute                                                                                                                  |                                                                                                                                                                                                                                                                                                                                                                   |
| EPI_ISL_1156537, EPI_ISL_1156646, EPI_ISL_1156715, EPI_ISL_1211182, EPI_ISL_1216495, EPI_ISL_1216619, EPI_ISL_1216701, EPI_ISL_1354216, EPI_ISL_1354236                                                                                                                                                                                                                                                                                                                                                                                                                                                 | ALBANY MEDICAL CENTER                                                                     | Wadsworth Center, New York State Department of Health                                                                                  | Alexis Russel; Daryl M. Lamson; Erasmus Schneider; Erica Lasek-Nesselquist; John Kelly; Jonathan Plitnick; Kirsten St. George; Matthew Shudt; Melissa A Leisner; Navjot Singh                                                                                                                                                                                     |
| see above                                                                                                                                                                                                                                                                                                                                                                                                                                                                                                                                                                                               | ALBANY MEDICAL CENTER HOSPITAL CLINICAL LABORATORIES                                      | Wadsworth Center, New York State Department of Health                                                                                  | Alexis Russel; Daryl M. Lamson; Erasmus Schneider; Erica Lasek-Nesselquist; John Kelly; Jonathan Plitnick; Kirsten St. George; Matthew Shudt; Melissa A Leisner; Navjot Singh                                                                                                                                                                                     |
| EPI_ISL_1226485, EPI_ISL_1226511, EPI_ISL_1226563, EPI_ISL_1226704 to 1226706, EPI_ISL_1226819, EPI_ISL_1227029, EPI_ISL_1227031 to 1227032, EPI_ISL_1227208 to 1227209, EPI_ISL_1227232 to 1227233, EPI_ISL_1227235, EPI_ISL_1227249 to 1227253, EPI_ISL_1227256, EPI_ISL_1227263 to 1227271, EPI_ISL_1227458 to 1227462, EPI_ISL_1227556, EPI_ISL_1227558, EPI_ISL_1227564 to 1227565, EPI_ISL_1227572 to 1227573, EPI_ISL_1227790, EPI_ISL_1228218 to 1228221, EPI_ISL_1228270, EPI_ISL_1228275 to 1228277, EPI_ISL_1228279, EPI_ISL_1228282 to 1228283, EPI_ISL_1228430, EPI_ISL_1228477 to 1228479 | ALGEMEEN MEDISCH LABO                                                                     | UAntwerp, Laboratory of Medical Microbiology                                                                                           |                                                                                                                                                                                                                                                                                                                                                                   |
| see above                                                                                                                                                                                                                                                                                                                                                                                                                                                                                                                                                                                               | ALGEMEEN MEDISCH LABO                                                                     | UAntwerp, Laboratory of Medical Microbiology,                                                                                          | Basil Britto Xavier; Christine Lammens; Herman Goossens; Jasmine Coppens; Marie Le Mercier; Veerle Matheeußen                                                                                                                                                                                                                                                     |
| EPI_ISL_1016417, EPI_ISL_1016468 to 1016475                                                                                                                                                                                                                                                                                                                                                                                                                                                                                                                                                             | ALPHABIO                                                                                  | CNR Virus des Infections Respiratoires - France SUD                                                                                    | Antonin Bal; Bruno Lina; Gregory Destras; Gwendolynne Burfin; Hadrien Regue; Laurence Josset; Martine Valette; Quentin Semanas                                                                                                                                                                                                                                    |
| EPI_ISL_1073008, EPI_ISL_1073029, EPI_ISL_1336263 to 1336264, EPI_ISL_1336267                                                                                                                                                                                                                                                                                                                                                                                                                                                                                                                           | ANALICEMOS LABORATORIO CLINICO ESPECIALIZADO                                              | Instituto Nacional de Salud- Dirección de Investigación en Salud Pública                                                               | Carlos Franco-Muñoz; Diego A. Álvarez-Díaz; Diego Andrés Prada; Gerardo Santamaría; Hector Alejandro Ruiz-Moreno; Jhonnatan Reales-González; Julian Naizaque; Katherine Laiton-Donato; Magdalena Wiesner; Marcela Mercado-Reyes.; María T. Herrera-Sepúlveda; Martha Lucia Ospina Martínez; Sheryll Corchuelo                                                     |
| EPI_ISL_1112340                                                                                                                                                                                                                                                                                                                                                                                                                                                                                                                                                                                         | ANALICEMOS LABORATORIO ESPECIALIZADO                                                      | Instituto Nacional de Salud- Dirección de Investigación en Salud Pública                                                               | Carlos Franco-Muñoz; Diego A. Álvarez-Díaz; Diego Andrés Prada; Gerardo Santamaría; Hector Alejandro Ruiz-Moreno; Jhonnatan Reales-González; Julian Naizaque; Katherine Laiton-Donato; Magdalena Wiesner; Marcela Mercado-Reyes.; María T. Herrera-Sepúlveda; Martha Lucia Ospina Martínez; Sheryll Corchuelo                                                     |
| EPI_ISL_1336647                                                                                                                                                                                                                                                                                                                                                                                                                                                                                                                                                                                         |                                                                                           |                                                                                                                                        |                                                                                                                                                                                                                                                                                                                                                                   |
| EPI_ISL_1220051                                                                                                                                                                                                                                                                                                                                                                                                                                                                                                                                                                                         |                                                                                           |                                                                                                                                        |                                                                                                                                                                                                                                                                                                                                                                   |
| EPI_ISL_1220052                                                                                                                                                                                                                                                                                                                                                                                                                                                                                                                                                                                         |                                                                                           |                                                                                                                                        |                                                                                                                                                                                                                                                                                                                                                                   |
| EPI_ISL_1048244 to 1048245, EPI_ISL_1048249, EPI_ISL_1048251, EPI_ISL_1048256 to 1048257, EPI_ISL_1048261, EPI_ISL_1048272 to 1048273, EPI_ISL_1048280, EPI_ISL_1048289, EPI_ISL_1048297, EPI_ISL_1048321 to 1048323                                                                                                                                                                                                                                                                                                                                                                                    | ANICON Labor, Landkreis Cloppenburg , Gesundheitsamt                                      | Robert Koch Institute, Influenza and respiratory viruses FG17 & Bioinformatics MF1, Berlin, Germany                                    | Aleksandar Radonic; J. Haneke; Marianne Wedde; Oliver Drechsel; R. Dürrwald; Ralf Duerrwald; Rene Kmiecinski; Stefan Kroeger; Stephan Fuchs; Thorsten Wolff                                                                                                                                                                                                       |
| see above                                                                                                                                                                                                                                                                                                                                                                                                                                                                                                                                                                                               | AOU Policlinico Umberto I; Sapienza Università di Roma                                    | INMI Lazzaro Spallanzani IRCCS                                                                                                         | A Di Caro; B Bartolini; C.E.M Gruber; CEM Gruber; E Giombini; F Messina; G Antonelli; M Rueca; M. Rueca; MR Capobianchi; O Butera; O Turriziani                                                                                                                                                                                                                   |
| EPI_ISL_1009028 to 1009031                                                                                                                                                                                                                                                                                                                                                                                                                                                                                                                                                                              | AP SSO                                                                                    | CSIR-Centre for Cellular and Molecular Biology - INSACOG                                                                               | Amreshwar Vodapalli; Ara Sreenivas; B Himasri; Divya Tej Sowpati; Karthik Bharadwaj Tallapaka; Lamuk Zaveri; Onkar Kulkarni; Rakesh K Mishra; Sharath Chandra Thota; Shreekant Verma; Sofia Banu; Viswagithe S L                                                                                                                                                  |
| EPI_ISL_1372268, EPI_ISL_1372271, EPI_ISL_1372273, EPI_ISL_1372275, EPI_ISL_1372277                                                                                                                                                                                                                                                                                                                                                                                                                                                                                                                     | AR Dept. of Health-PHL, Molecular Diagnostics                                             | Centers for Disease Control and Prevention Division of Viral Diseases, Pathogen Discovery                                              | Anna Montmayeur; Anna Uehara; Ben L. Rambo-Martin; Clinton R. Paden; Dhvani Batra; Haibin Wang; Jasmine Padilla; Jing Zhang; Justin Lee; Katie Dillon; Krista Queen; Kristen Knipe; Kristine Lacey; Lori Rowe; Mark Burroughs; Matthew Schmerer; Mili Sheth; Peter W. Cook; Rachel Marine; Sam Shepard; Sarah Nobles; Shoshona Le; Suxiang Tong; Yan Li; Ying Tao |
| EPI_ISL_1272856 to 1272868                                                                                                                                                                                                                                                                                                                                                                                                                                                                                                                                                                              |                                                                                           |                                                                                                                                        |                                                                                                                                                                                                                                                                                                                                                                   |
| EPI_ISL_1094208, EPI_ISL_1094211, EPI_ISL_1094308 to 1094309, EPI_ISL_1094317 to 1094318, EPI_ISL_1094321, EPI_ISL_1094814 to 1094833, EPI_ISL_1095249 to 1095253                                                                                                                                                                                                                                                                                                                                                                                                                                       | AR Dept. of Health-Public Health Lab                                                      | Respiratory Viruses Branch, Division of Viral Diseases, Centers for Disease Control and Prevention                                     | Anna Montmayeur; Anna Uehara; Ben L. Rambo-Martin; Clinton R. Paden; Dhvani Batra; Haibin Wang; Jasmine Padilla; Jing Zhang; Justin Lee; Krista Queen; Lori Rowe; Mark Burroughs; Mili Sheth; Peter W. Cook; Rachel Marine; Sarah Nobles; Suxiang Tong; Yan Li; Ying Tao                                                                                          |
| see above                                                                                                                                                                                                                                                                                                                                                                                                                                                                                                                                                                                               | ARC LEMANIQUE SA                                                                          | Laboratory of genomics and metagenomics, Institute of Microbiology, University Hospital Centre and University of Lausanne, Switzerland | Claire Bertelli; Damien Jacot; Gilbert Greub; Sébastien Aeby; Trestan Pilonel                                                                                                                                                                                                                                                                                     |
| EPI_ISL_1120855                                                                                                                                                                                                                                                                                                                                                                                                                                                                                                                                                                                         |                                                                                           |                                                                                                                                        |                                                                                                                                                                                                                                                                                                                                                                   |
| EPI_ISL_1067609                                                                                                                                                                                                                                                                                                                                                                                                                                                                                                                                                                                         | AREA DE SALUD ALAJUELA NORTE - CLINICA DR. MARCIAL RODRIGUEZ                              | Incienza, Instituto Costarricense de Investigación y Enseñanza en Nutrición y Salud                                                    | Adriana Godínez; Claudio Soto-Garita; Estela Cordero; Francisco Duarte; Hebleen Porras; Melany Calderón & Mariel López                                                                                                                                                                                                                                            |

|                                                                                                                                                                                                                                                                                                                                                                                                                                                                                                                                                                                                                                                                                                                                                                                                                                                                                                                                                                                                                                                                                                                                                                                                                                                                                                                                                                                                                                                                                                                                                                                                                                                                                                                                                                                                                                            |                                                                                    |                                                                                                    |                                                                                                                                                                                                                                                                          |
|--------------------------------------------------------------------------------------------------------------------------------------------------------------------------------------------------------------------------------------------------------------------------------------------------------------------------------------------------------------------------------------------------------------------------------------------------------------------------------------------------------------------------------------------------------------------------------------------------------------------------------------------------------------------------------------------------------------------------------------------------------------------------------------------------------------------------------------------------------------------------------------------------------------------------------------------------------------------------------------------------------------------------------------------------------------------------------------------------------------------------------------------------------------------------------------------------------------------------------------------------------------------------------------------------------------------------------------------------------------------------------------------------------------------------------------------------------------------------------------------------------------------------------------------------------------------------------------------------------------------------------------------------------------------------------------------------------------------------------------------------------------------------------------------------------------------------------------------|------------------------------------------------------------------------------------|----------------------------------------------------------------------------------------------------|--------------------------------------------------------------------------------------------------------------------------------------------------------------------------------------------------------------------------------------------------------------------------|
| EPI_ISL_1067588, EPI_ISL_1067610                                                                                                                                                                                                                                                                                                                                                                                                                                                                                                                                                                                                                                                                                                                                                                                                                                                                                                                                                                                                                                                                                                                                                                                                                                                                                                                                                                                                                                                                                                                                                                                                                                                                                                                                                                                                           | AREA DE SALUD BUENOS AIRES                                                         | Inciensa, Instituto Costarricense de Investigación y Enseñanza en Nutrición y Salud                | Adriana Godínez; Claudio Soto-Garita; Estela Cordero; Francisco Duarte; Hebleen Porras; Melany Calderón & Mariel López; Melany Calderón & Mónica Charpentier-Artavia                                                                                                     |
| EPI_ISL_1379413 to 1379414                                                                                                                                                                                                                                                                                                                                                                                                                                                                                                                                                                                                                                                                                                                                                                                                                                                                                                                                                                                                                                                                                                                                                                                                                                                                                                                                                                                                                                                                                                                                                                                                                                                                                                                                                                                                                 | AREA DE SALUD CORONADO                                                             | Inciensa, Instituto Costarricense de Investigación y Enseñanza en Nutrición y Salud                | Adriana Godínez & Melany Calderón; Claudio Soto-Garita; Estela Cordero; Francisco Duarte; Hebleen Porras                                                                                                                                                                 |
| EPI_ISL_1067618, EPI_ISL_1196438                                                                                                                                                                                                                                                                                                                                                                                                                                                                                                                                                                                                                                                                                                                                                                                                                                                                                                                                                                                                                                                                                                                                                                                                                                                                                                                                                                                                                                                                                                                                                                                                                                                                                                                                                                                                           | AREA DE SALUD CORRALILLO                                                           | Inciensa, Instituto Costarricense de Investigación y Enseñanza en Nutrición y Salud                | Adriana Godínez; Caterina Guzmán; Claudio Soto-Garita; Estela Cordero; Francisco Duarte; Hebleen Porras; Melany Calderón; Melany Calderón & Mónica Charpentier-Artavia; Nazareth Ruiz & Mónica Charpentier-Artavia                                                       |
| EPI_ISL_1196421, EPI_ISL_1379394                                                                                                                                                                                                                                                                                                                                                                                                                                                                                                                                                                                                                                                                                                                                                                                                                                                                                                                                                                                                                                                                                                                                                                                                                                                                                                                                                                                                                                                                                                                                                                                                                                                                                                                                                                                                           | AREA DE SALUD CORREDORES                                                           | Inciensa, Instituto Costarricense de Investigación y Enseñanza en Nutrición y Salud                | Adriana Godínez; Adriana Godínez & Melany Calderón; Claudio Soto-Garita; Estela Cordero; Francisco Duarte; Hebleen Porras; Melany Calderón & Mariel López                                                                                                                |
| EPI_ISL_1201437                                                                                                                                                                                                                                                                                                                                                                                                                                                                                                                                                                                                                                                                                                                                                                                                                                                                                                                                                                                                                                                                                                                                                                                                                                                                                                                                                                                                                                                                                                                                                                                                                                                                                                                                                                                                                            | AREA DE SALUD COTO BRUS                                                            | Inciensa, Instituto Costarricense de Investigación y Enseñanza en Nutrición y Salud                | Adriana Godínez; Claudio Soto-Garita; Estela Cordero; Francisco Duarte; Hebleen Porras; Melany Calderón & Mónica Charpentier-Artavia                                                                                                                                     |
| EPI_ISL_1196424                                                                                                                                                                                                                                                                                                                                                                                                                                                                                                                                                                                                                                                                                                                                                                                                                                                                                                                                                                                                                                                                                                                                                                                                                                                                                                                                                                                                                                                                                                                                                                                                                                                                                                                                                                                                                            | AREA DE SALUD DESAMPARADOS 1 - CLINICA DR. MARCIAL FALLAS                          | Inciensa, Instituto Costarricense de Investigación y Enseñanza en Nutrición y Salud                | Adriana Godínez; Claudio Soto-Garita; Estela Cordero; Francisco Duarte; Hebleen Porras; Melany Calderón & Daniel Cascante-Serrano                                                                                                                                        |
| EPI_ISL_1379420                                                                                                                                                                                                                                                                                                                                                                                                                                                                                                                                                                                                                                                                                                                                                                                                                                                                                                                                                                                                                                                                                                                                                                                                                                                                                                                                                                                                                                                                                                                                                                                                                                                                                                                                                                                                                            | AREA DE SALUD DESAMPARADOS 2 (COOPESALUD)                                          | Inciensa, Instituto Costarricense de Investigación y Enseñanza en Nutrición y Salud                | Adriana Godínez; Claudio Soto-Garita; Estela Cordero; Francisco Duarte; Hebleen Porras; Melany Calderón & Tashana Anglin-Williams                                                                                                                                        |
| EPI_ISL_1067591, EPI_ISL_1067603, EPI_ISL_1067616 to 1067617, EPI_ISL_1379403, EPI_ISL_1379416                                                                                                                                                                                                                                                                                                                                                                                                                                                                                                                                                                                                                                                                                                                                                                                                                                                                                                                                                                                                                                                                                                                                                                                                                                                                                                                                                                                                                                                                                                                                                                                                                                                                                                                                             | AREA DE SALUD GOICOECHEA 2 - CLINICA DR. JIMENEZ NUÑEZ                             | Inciensa, Instituto Costarricense de Investigación y Enseñanza en Nutrición y Salud                | Adriana Godínez; Adriana Godínez & Melany Calderón; Claudio Soto-Garita; Estela Cordero; Francisco Duarte; Hebleen Porras; Melany Calderón & Mariel López                                                                                                                |
| EPI_ISL_1067605                                                                                                                                                                                                                                                                                                                                                                                                                                                                                                                                                                                                                                                                                                                                                                                                                                                                                                                                                                                                                                                                                                                                                                                                                                                                                                                                                                                                                                                                                                                                                                                                                                                                                                                                                                                                                            | AREA DE SALUD HATILLO - CLINICA DR. SOLON NUÑEZ                                    | Inciensa, Instituto Costarricense de Investigación y Enseñanza en Nutrición y Salud                | Adriana Godínez; Claudio Soto-Garita; Estela Cordero; Francisco Duarte; Hebleen Porras; Melany Calderón & Daniel Cascante-Serrano                                                                                                                                        |
| EPI_ISL_1067621                                                                                                                                                                                                                                                                                                                                                                                                                                                                                                                                                                                                                                                                                                                                                                                                                                                                                                                                                                                                                                                                                                                                                                                                                                                                                                                                                                                                                                                                                                                                                                                                                                                                                                                                                                                                                            | AREA DE SALUD LA CRUZ                                                              | Inciensa, Instituto Costarricense de Investigación y Enseñanza en Nutrición y Salud                | Adriana Godínez; Caterina Guzmán; Claudio Soto-Garita; Estela Cordero; Francisco Duarte; Hebleen Porras; Melany Calderón; Nazareth Ruiz & Ivanna Krize-Morún                                                                                                             |
| EPI_ISL_1196423                                                                                                                                                                                                                                                                                                                                                                                                                                                                                                                                                                                                                                                                                                                                                                                                                                                                                                                                                                                                                                                                                                                                                                                                                                                                                                                                                                                                                                                                                                                                                                                                                                                                                                                                                                                                                            | AREA DE SALUD MATA REDONDA-HOSPITAL - CLINICA DR. MORENO CAÑAS                     | Inciensa, Instituto Costarricense de Investigación y Enseñanza en Nutrición y Salud                | Adriana Godínez; Claudio Soto-Garita; Estela Cordero; Francisco Duarte; Hebleen Porras; Melany Calderón & Daniel Cascante-Serrano                                                                                                                                        |
| EPI_ISL_1067619                                                                                                                                                                                                                                                                                                                                                                                                                                                                                                                                                                                                                                                                                                                                                                                                                                                                                                                                                                                                                                                                                                                                                                                                                                                                                                                                                                                                                                                                                                                                                                                                                                                                                                                                                                                                                            | AREA DE SALUD MATA REDONDA-HOSPITAL - CLINICA DR. MORENO CAÑAS [SAN JOSE/SAN JOSE] | Inciensa, Instituto Costarricense de Investigación y Enseñanza en Nutrición y Salud                | Adriana Godínez; Caterina Guzmán; Claudio Soto-Garita; Estela Cordero; Francisco Duarte; Hebleen Porras; Melany Calderón; Nazareth Ruiz & Nicole Vargas-Viquez                                                                                                           |
| EPI_ISL_1067622, EPI_ISL_1201439, EPI_ISL_1379415                                                                                                                                                                                                                                                                                                                                                                                                                                                                                                                                                                                                                                                                                                                                                                                                                                                                                                                                                                                                                                                                                                                                                                                                                                                                                                                                                                                                                                                                                                                                                                                                                                                                                                                                                                                          | AREA DE SALUD PAVAS (COOPESALUD)                                                   | Inciensa, Instituto Costarricense de Investigación y Enseñanza en Nutrición y Salud                | Adriana Godínez; Adriana Godínez & Melany Calderón; Caterina Guzmán; Claudio Soto-Garita; Estela Cordero; Francisco Duarte; Hebleen Porras; Melany Calderón; Melany Calderón & Melissa Carazo-Gutiérrez; Nazareth Ruiz & Melissa Carazo-Gutiérrez                        |
| EPI_ISL_1067599, EPI_ISL_1196429                                                                                                                                                                                                                                                                                                                                                                                                                                                                                                                                                                                                                                                                                                                                                                                                                                                                                                                                                                                                                                                                                                                                                                                                                                                                                                                                                                                                                                                                                                                                                                                                                                                                                                                                                                                                           | AREA DE SALUD TURRIALBA-JIMENEZ                                                    | Inciensa, Instituto Costarricense de Investigación y Enseñanza en Nutrición y Salud                | Adriana Godínez; Claudio Soto-Garita; Estela Cordero; Francisco Duarte; Hebleen Porras; Melany Calderón & Mónica Charpentier-Artavia                                                                                                                                     |
| EPI_ISL_1067607, EPI_ISL_1067612                                                                                                                                                                                                                                                                                                                                                                                                                                                                                                                                                                                                                                                                                                                                                                                                                                                                                                                                                                                                                                                                                                                                                                                                                                                                                                                                                                                                                                                                                                                                                                                                                                                                                                                                                                                                           | AREA DE SALUD ZAPOTE-CATEDRAL - CLINICA DR. CARLOS DURAN                           | Inciensa, Instituto Costarricense de Investigación y Enseñanza en Nutrición y Salud                | Adriana Godínez; Caterina Guzmán; Claudio Soto-Garita; Estela Cordero; Francisco Duarte; Hebleen Porras; Melany Calderón; Nazareth Ruiz & Melissa Carazo-Gutiérrez; Nazareth Ruiz & Nicole Vargas-Viquez                                                                 |
| EPI_ISL_1036211                                                                                                                                                                                                                                                                                                                                                                                                                                                                                                                                                                                                                                                                                                                                                                                                                                                                                                                                                                                                                                                                                                                                                                                                                                                                                                                                                                                                                                                                                                                                                                                                                                                                                                                                                                                                                            | ASL AVEZZANO-SULMONA-L'AQUILA                                                      | Istituto Zooprofilattico Sperimentale dell'Abruzzo e Molise "G. Caporale"                          | Ancora M; Calistri P; Cammà C; Curini V; Di Domenico M; Di Pasquale A; Lorusso A; Mangone I; Marccaci M; Puglia I; Rinaldi A; Savini G; Scialabba S                                                                                                                      |
| EPI_ISL_1036198                                                                                                                                                                                                                                                                                                                                                                                                                                                                                                                                                                                                                                                                                                                                                                                                                                                                                                                                                                                                                                                                                                                                                                                                                                                                                                                                                                                                                                                                                                                                                                                                                                                                                                                                                                                                                            | ASL AVEZZANO-SULMONA-L'AQUILA DIP PREV SERV IGIENE E SAN PUBBLICA                  | Istituto Zooprofilattico Sperimentale dell'Abruzzo e Molise "G. Caporale"                          | Ancora M; Calistri P; Cammà C; Curini V; Di Domenico M; Di Pasquale A; Lorusso A; Mangone I; Marccaci M; Puglia I; Rinaldi A; Savini G; Scialabba S                                                                                                                      |
| EPI_ISL_1073034, EPI_ISL_1074622 to 1074623, EPI_ISL_1080605 to 1080679, EPI_ISL_1080681 to 1080745, EPI_ISL_1080748, EPI_ISL_1082454 to 1082525, EPI_ISL_1085025 to 1085030, EPI_ISL_1085032 to 1085090, EPI_ISL_1085096 to 1085160, EPI_ISL_1085176 to 1085229, EPI_ISL_1087353 to 1087381, EPI_ISL_1087383 to 1087413, EPI_ISL_1088008 to 1088076, EPI_ISL_1096349 to 1096981, EPI_ISL_1157894 to 1158030, EPI_ISL_1166221 to 1166223, EPI_ISL_1166225 to 1166229, EPI_ISL_1166231 to 1166233, EPI_ISL_1166238 to 1166242, EPI_ISL_1166245, EPI_ISL_1166247, EPI_ISL_1166249, EPI_ISL_1166251 to 1166253, EPI_ISL_1166255 to 1166256, EPI_ISL_1166261, EPI_ISL_1166263 to 1166265, EPI_ISL_1166267 to 1166269, EPI_ISL_1166271 to 1166273, EPI_ISL_1166275 to 1166277, EPI_ISL_1166279 to 1166287, EPI_ISL_1166289 to 1166291, EPI_ISL_1166293 to 1166294, EPI_ISL_1166296 to 1166308, EPI_ISL_1166311 to 1166314, EPI_ISL_1166316, EPI_ISL_1166318 to 1166320, EPI_ISL_1166322 to 1166336, EPI_ISL_1166338 to 1166351, EPI_ISL_1166353 to 1166354, EPI_ISL_1166356, EPI_ISL_1166358 to 1166359, EPI_ISL_1166361 to 1166364, EPI_ISL_1166366 to 1166368, EPI_ISL_1166371, EPI_ISL_1166373 to 1166377, EPI_ISL_1166379 to 1166380, EPI_ISL_1166382 to 1166384, EPI_ISL_1166386, EPI_ISL_1166389 to 1166391, EPI_ISL_1166394, EPI_ISL_1166397 to 1166413, EPI_ISL_1166415 to 1166438, EPI_ISL_1166440, EPI_ISL_1166443 to 1166444, EPI_ISL_1166446 to 1166447, EPI_ISL_1166449 to 1166451, EPI_ISL_1166453 to 1166472, EPI_ISL_1166474 to 1166507, EPI_ISL_1166509 to 1166533, EPI_ISL_1167308 to 1167453, EPI_ISL_1167455 to 1167546, EPI_ISL_1169061 to 1169482, EPI_ISL_1219040 to 1219131, EPI_ISL_1229179 to 1229366, EPI_ISL_1229353 to 1229938, EPI_ISL_1298493 to 1299194, EPI_ISL_1359088 to 1359738, EPI_ISL_1359740 to 1359742 | ASL Napoli 1 Centro                                                                | AMES Centro Poldiagnostico Strumentale S.r.l.                                                      | "Giovanni Savarese; Antonella Di Carlo; Antonio Fico; Antonio Fico"; Eloisa Evangelista; Giovanni Savarese; Luigi D'Amore; Luisa Circelli; Maurizio D'Amora; Monica Ianniello; Nadia Petrillo; Raffaella Ruggiero; Roberto Sirica                                        |
| EPI_ISL_1312836 to 1312837, EPI_ISL_1312881 to 1312882, EPI_ISL_1312891 to 1312893, EPI_ISL_1312897 to 1312899, EPI_ISL_1371836                                                                                                                                                                                                                                                                                                                                                                                                                                                                                                                                                                                                                                                                                                                                                                                                                                                                                                                                                                                                                                                                                                                                                                                                                                                                                                                                                                                                                                                                                                                                                                                                                                                                                                            | ASTRALAB                                                                           | CNR Virus des Infections Respiratoires - France SUD                                                | Antonin Bal; Bruno Lina; Gregory Destras; Gwendolynne Burfin; Hadrien Regue; Laurence Josset; Martine Valette; Quentin Semanas                                                                                                                                           |
| EPI_ISL_1229105 to 1229113                                                                                                                                                                                                                                                                                                                                                                                                                                                                                                                                                                                                                                                                                                                                                                                                                                                                                                                                                                                                                                                                                                                                                                                                                                                                                                                                                                                                                                                                                                                                                                                                                                                                                                                                                                                                                 | ASTRALAB LIMOGES                                                                   | CNR Virus des Infections Respiratoires - France SUD                                                | Antonin Bal; Bruno Lina; Gregory Destras; Gwendolynne Burfin; Hadrien Regue; Laurence Josset; Martine Valette; Quentin Semanas                                                                                                                                           |
| EPI_ISL_1135057, EPI_ISL_1135060, EPI_ISL_1155709, EPI_ISL_1155711, EPI_ISL_1155713, EPI_ISL_1190786, EPI_ISL_1313121 to 1313122, EPI_ISL_1314037, EPI_ISL_1322358 to 1322359, EPI_ISL_1360010, EPI_ISL_1371815                                                                                                                                                                                                                                                                                                                                                                                                                                                                                                                                                                                                                                                                                                                                                                                                                                                                                                                                                                                                                                                                                                                                                                                                                                                                                                                                                                                                                                                                                                                                                                                                                            | AX BIO OCEAN                                                                       | CNR Virus des Infections Respiratoires - France SUD                                                | Antonin Bal; Bruno Lina; Gregory Destras; Gwendolynne Burfin; Hadrien Regue; Hadrien Règue; Laurence Josset; Martine Valette; Quentin Semanas                                                                                                                            |
| EPI_ISL_1265683, EPI_ISL_1290839 to 1290840                                                                                                                                                                                                                                                                                                                                                                                                                                                                                                                                                                                                                                                                                                                                                                                                                                                                                                                                                                                                                                                                                                                                                                                                                                                                                                                                                                                                                                                                                                                                                                                                                                                                                                                                                                                                | AXBIO                                                                              | CNR Virus des Infections Respiratoires - France SUD                                                | Antonin Bal; Bruno Lina; Gregory Destras; Gwendolynne Burfin; Hadrien Regue; Laurence Josset; Martine Valette; Quentin Semanas                                                                                                                                           |
| EPI_ISL_1373368                                                                                                                                                                                                                                                                                                                                                                                                                                                                                                                                                                                                                                                                                                                                                                                                                                                                                                                                                                                                                                                                                                                                                                                                                                                                                                                                                                                                                                                                                                                                                                                                                                                                                                                                                                                                                            | AZ Jan Portaels                                                                    | Imelda Hospital                                                                                    | Dagmar Obbels; Hanne Valgaeren; Johan Frans                                                                                                                                                                                                                              |
| EPI_ISL_1018110, EPI_ISL_1018112, EPI_ISL_1018114, EPI_ISL_1018116, EPI_ISL_1020018 to 1020020, EPI_ISL_1020127, EPI_ISL_1020129 to 1020130, EPI_ISL_1020133, EPI_ISL_1020136 to 1020137, EPI_ISL_1020139, EPI_ISL_1020142, EPI_ISL_1020144, EPI_ISL_1020147 to 1020150, EPI_ISL_1020152 to 1020153, EPI_ISL_1020155 to 1020159, EPI_ISL_1020171 to 1020174, EPI_ISL_1020207, EPI_ISL_1020285 to 1020287, EPI_ISL_1020289 to 1020293, EPI_ISL_1103561, EPI_ISL_1103563, EPI_ISL_1103573, EPI_ISL_1103577 to 1103578, EPI_ISL_1103581, EPI_ISL_1103583, EPI_ISL_1105178, EPI_ISL_1108017, EPI_ISL_1108255, EPI_ISL_1108503, EPI_ISL_1108770, EPI_ISL_1109036, EPI_ISL_1109283, EPI_ISL_1109392 to 1109393, EPI_ISL_1109483, EPI_ISL_1109631, EPI_ISL_1176301 to 1176302, EPI_ISL_1176304, EPI_ISL_1176306, EPI_ISL_1176308 to 1176310, EPI_ISL_1176312, EPI_ISL_1176314 to 1176315, EPI_ISL_1176317, EPI_ISL_1176319, EPI_ISL_1176321 to 1176332, EPI_ISL_1315578 to 1315579, EPI_ISL_1315581, EPI_ISL_1315605, EPI_ISL_1315607 to 1315608, EPI_ISL_1315610 to 1315613, EPI_ISL_1315615 to 1315616, EPI_ISL_1315618 to 1315619, EPI_ISL_1315621 to 1315622, EPI_ISL_1315624 to 1315625, EPI_ISL_1315629 to 1315633, EPI_ISL_1315637, EPI_ISL_1315639 to 1315642                                                                                                                                                                                                                                                                                                                                                                                                                                                                                                                                                                             | AZ Klinia                                                                          | AZ Klinia                                                                                          | Carl Vael; Dr. C. Vael; Dr.C. Vael; Lynsey Berckmans                                                                                                                                                                                                                     |
| EPI_ISL_1299454 to 1299455                                                                                                                                                                                                                                                                                                                                                                                                                                                                                                                                                                                                                                                                                                                                                                                                                                                                                                                                                                                                                                                                                                                                                                                                                                                                                                                                                                                                                                                                                                                                                                                                                                                                                                                                                                                                                 | AZ Rivierenland, Campus Rumst                                                      | UAntwerp, Laboratory of Medical Microbiology                                                       | Basil Britto Xavier; Christine Lammens; Herman Goossens; Jasmine Coppens; Marie Le Mercier; Veerle Matheusussen                                                                                                                                                          |
| EPI_ISL_1094297, EPI_ISL_1094327, EPI_ISL_1094346, EPI_ISL_1094984 to 1094992, EPI_ISL_1095270 to 1095275                                                                                                                                                                                                                                                                                                                                                                                                                                                                                                                                                                                                                                                                                                                                                                                                                                                                                                                                                                                                                                                                                                                                                                                                                                                                                                                                                                                                                                                                                                                                                                                                                                                                                                                                  | AZ SPHL, Arizona Department of Health Services                                     | Respiratory Viruses Branch, Division of Viral Diseases, Centers for Disease Control and Prevention | Anna Montmayeur; Anna Uehara; Ben L. Rambo-Martin; Clinton R. Paden; Dhvani Batra; Haibin Wang; Jasmine Padilla; Jing Zhang; Justin Lee; Krista Queen; Lori Rowe; Mark Burroughs; Mili Sheth; Peter W. Cook; Rachel Marine; Sarah Nobles; Suxiang Tong; Yan Li; Ying Tao |
| EPI_ISL_1335873 to 1335875, EPI_ISL_1335882                                                                                                                                                                                                                                                                                                                                                                                                                                                                                                                                                                                                                                                                                                                                                                                                                                                                                                                                                                                                                                                                                                                                                                                                                                                                                                                                                                                                                                                                                                                                                                                                                                                                                                                                                                                                | AZ Sint-Jan                                                                        | AZ SINT-JAN BRUGGE                                                                                 | Jorn Hellemans; Laurien Hoornaert; Marijke Reynders; Patrick Descheemaeker; Thomas Van Landschoot                                                                                                                                                                        |
| EPI_ISL_1265144 to 1265148, EPI_ISL_1265152 to 1265155, EPI_ISL_1265157 to 1265160                                                                                                                                                                                                                                                                                                                                                                                                                                                                                                                                                                                                                                                                                                                                                                                                                                                                                                                                                                                                                                                                                                                                                                                                                                                                                                                                                                                                                                                                                                                                                                                                                                                                                                                                                         | AZ Sint-Jan Brugge-Oostende AV                                                     | AZ SINT-JAN BRUGGE                                                                                 | Jorn Hellemans; Laurien Hoornaert; Marijke Reynders; Patrick Descheemaeker; Thomas Van Landschoot                                                                                                                                                                        |
| EPI_ISL_1252485, EPI_ISL_1265170, EPI_ISL_1265172                                                                                                                                                                                                                                                                                                                                                                                                                                                                                                                                                                                                                                                                                                                                                                                                                                                                                                                                                                                                                                                                                                                                                                                                                                                                                                                                                                                                                                                                                                                                                                                                                                                                                                                                                                                          | AZ Sint-Maarten                                                                    | Imelda hospital Bonheiden                                                                          | Dagmar Obbels; Hanne Valgaeren; Johan Frans                                                                                                                                                                                                                              |



|                                                                                                                                                                                                                                                                                                                                                                                                                                                                                                                                                                                                                                                                                                                                                                                                                                                                                                                                                                                                                                                                                                                                                                                                                                                                                                                                                                                                                   |                                                                                                     |                                                                                                                                   |                                                                                                                                                           |                                                                                                                                                                                                                                                                                                                                                                                                                                                                                                                                                                                                                                                                                                                                                                   |
|-------------------------------------------------------------------------------------------------------------------------------------------------------------------------------------------------------------------------------------------------------------------------------------------------------------------------------------------------------------------------------------------------------------------------------------------------------------------------------------------------------------------------------------------------------------------------------------------------------------------------------------------------------------------------------------------------------------------------------------------------------------------------------------------------------------------------------------------------------------------------------------------------------------------------------------------------------------------------------------------------------------------------------------------------------------------------------------------------------------------------------------------------------------------------------------------------------------------------------------------------------------------------------------------------------------------------------------------------------------------------------------------------------------------|-----------------------------------------------------------------------------------------------------|-----------------------------------------------------------------------------------------------------------------------------------|-----------------------------------------------------------------------------------------------------------------------------------------------------------|-------------------------------------------------------------------------------------------------------------------------------------------------------------------------------------------------------------------------------------------------------------------------------------------------------------------------------------------------------------------------------------------------------------------------------------------------------------------------------------------------------------------------------------------------------------------------------------------------------------------------------------------------------------------------------------------------------------------------------------------------------------------|
| EPI_ISL_1039712 to 1039736, EPI_ISL_1049483 to 1049512, EPI_ISL_1061279 to 1061308, EPI_ISL_1068293 to 1068314, EPI_ISL_1182693 to 1182811, EPI_ISL_1195910 to 1195945, EPI_ISL_1195964 to 1195999                                                                                                                                                                                                                                                                                                                                                                                                                                                                                                                                                                                                                                                                                                                                                                                                                                                                                                                                                                                                                                                                                                                                                                                                                |                                                                                                     |                                                                                                                                   |                                                                                                                                                           | Elva House; Jack Chen; Lisa Smith; Ph.D.; Stephanie DeRonde                                                                                                                                                                                                                                                                                                                                                                                                                                                                                                                                                                                                                                                                                                       |
| see above                                                                                                                                                                                                                                                                                                                                                                                                                                                                                                                                                                                                                                                                                                                                                                                                                                                                                                                                                                                                                                                                                                                                                                                                                                                                                                                                                                                                         | Alaska State Virology Laboratory                                                                    | Alaska State Virology Laboratory                                                                                                  |                                                                                                                                                           |                                                                                                                                                                                                                                                                                                                                                                                                                                                                                                                                                                                                                                                                                                                                                                   |
| EPI_ISL_1287284 to 1287319, EPI_ISL_1354475 to 1354477, EPI_ISL_1354479 to 1354485, EPI_ISL_1354488, EPI_ISL_1354490 to 1354500                                                                                                                                                                                                                                                                                                                                                                                                                                                                                                                                                                                                                                                                                                                                                                                                                                                                                                                                                                                                                                                                                                                                                                                                                                                                                   | Alexianer DaKS GmbH (eigenes IT-Tochterunternehmen der Alexianer Krankenhäuser)                     | Robert Koch Institute                                                                                                             |                                                                                                                                                           |                                                                                                                                                                                                                                                                                                                                                                                                                                                                                                                                                                                                                                                                                                                                                                   |
| EPI_ISL_1014940                                                                                                                                                                                                                                                                                                                                                                                                                                                                                                                                                                                                                                                                                                                                                                                                                                                                                                                                                                                                                                                                                                                                                                                                                                                                                                                                                                                                   | Algemeen Klinisch Labo Lier                                                                         | KU Leuven, Rega Institute, Clinical and Epidemiological Virology                                                                  |                                                                                                                                                           | Bert Vanmechelen; Joan Marti-Carerras; Piet Maes; Tony Wawina-Bokalanga                                                                                                                                                                                                                                                                                                                                                                                                                                                                                                                                                                                                                                                                                           |
| EPI_ISL_1036727, EPI_ISL_1103562, EPI_ISL_1103564                                                                                                                                                                                                                                                                                                                                                                                                                                                                                                                                                                                                                                                                                                                                                                                                                                                                                                                                                                                                                                                                                                                                                                                                                                                                                                                                                                 | Algemeen Medisch Laboratorium                                                                       | UAntwerp, Laboratory of Medical Microbiology                                                                                      |                                                                                                                                                           | Basil Britto Xavier; Christine Lammens; Herman Goossens; Jasmine Coppens; Marie Le Mercier; Veerle Matheeußen                                                                                                                                                                                                                                                                                                                                                                                                                                                                                                                                                                                                                                                     |
| EPI_ISL_1039162, EPI_ISL_1039207, EPI_ISL_1039209 to 1039211, EPI_ISL_1039218, EPI_ISL_1039221, EPI_ISL_1039242 to 1039247, EPI_ISL_1164849, EPI_ISL_1171465 to 1171473, EPI_ISL_1190852, EPI_ISL_1259237, EPI_ISL_1259240, EPI_ISL_1279939, EPI_ISL_1381267 to 1381270, EPI_ISL_1381290, EPI_ISL_1381297 to 1381299                                                                                                                                                                                                                                                                                                                                                                                                                                                                                                                                                                                                                                                                                                                                                                                                                                                                                                                                                                                                                                                                                              |                                                                                                     |                                                                                                                                   |                                                                                                                                                           |                                                                                                                                                                                                                                                                                                                                                                                                                                                                                                                                                                                                                                                                                                                                                                   |
| see above                                                                                                                                                                                                                                                                                                                                                                                                                                                                                                                                                                                                                                                                                                                                                                                                                                                                                                                                                                                                                                                                                                                                                                                                                                                                                                                                                                                                         | Algemeen Medisch Laboratorium (AML)                                                                 | UAntwerp, Laboratory of Medical Microbiology                                                                                      |                                                                                                                                                           | Basil Britto Xavier; Christine Lammens; Herman Goossens; Jasmine Coppens; Marie Le Mercier; Veerle Matheeußen                                                                                                                                                                                                                                                                                                                                                                                                                                                                                                                                                                                                                                                     |
| EPI_ISL_1132813                                                                                                                                                                                                                                                                                                                                                                                                                                                                                                                                                                                                                                                                                                                                                                                                                                                                                                                                                                                                                                                                                                                                                                                                                                                                                                                                                                                                   | Allina Health Laboratory                                                                            | Minnesota Department of Health, Public Health Laboratory                                                                          |                                                                                                                                                           | Alexandra Lorentz; Jacob Garfin; Matt Plumb; and Xiong Wang                                                                                                                                                                                                                                                                                                                                                                                                                                                                                                                                                                                                                                                                                                       |
| EPI_ISL_1040749                                                                                                                                                                                                                                                                                                                                                                                                                                                                                                                                                                                                                                                                                                                                                                                                                                                                                                                                                                                                                                                                                                                                                                                                                                                                                                                                                                                                   | Alma CDC wc AHC                                                                                     | NHLS/UCT                                                                                                                          | Arash Irazandeh; Bruna Galvao; Carolyn Williamson; Deelan Doolabh; Diana Hardie; Innocent Mudau; Kruger Marais; Lynn Tyers; Marvin Hsiao; Stephen Korsman |                                                                                                                                                                                                                                                                                                                                                                                                                                                                                                                                                                                                                                                                                                                                                                   |
| EPI_ISL_1018220 to 1018228, EPI_ISL_1109636 to 1109645, EPI_ISL_1180210 to 1180228                                                                                                                                                                                                                                                                                                                                                                                                                                                                                                                                                                                                                                                                                                                                                                                                                                                                                                                                                                                                                                                                                                                                                                                                                                                                                                                                | Althaiia. Xarxa Assistencial Universitària de Manresa                                               | IrsiCaixa - Can Ruti CovidSeq                                                                                                     |                                                                                                                                                           | Bonaventura Clotet; Bonaventura Clotet Gloria Trujillo; Carolina Gonzalez Fernandez; Eulalia Grau; Francesc Catala-Moll; Jaume Trape Pujol; Marc Noguera-Julian; Maria Casadellà; Mariona Parera; Pilar Armengol; Rafel Perez Vidal; Roger Paredes                                                                                                                                                                                                                                                                                                                                                                                                                                                                                                                |
| EPI_ISL_1222616 to 1222694, EPI_ISL_1229174 to 1229175                                                                                                                                                                                                                                                                                                                                                                                                                                                                                                                                                                                                                                                                                                                                                                                                                                                                                                                                                                                                                                                                                                                                                                                                                                                                                                                                                            | Altius Institute                                                                                    | Seattle Flu Study                                                                                                                 |                                                                                                                                                           | Alex Nguyen; Amanda Adler; Andrew Meuser; Barry R. Lutz; Benjamin Pelle; Caitlin R. Wolf; Chris D. Frazar; Clem Green; Daniel Bates; Deborah A. Nickerson; Elisabeth Brandstetter; Erica Ryke; Hannah Petersen; Helen Y. Chu; Jacob Rodriguez; Janet A. Englund; Jay Shendure; Jessica Halow; John Stamatoyannopoulos; Joshua Richards; Jover Lee; Julia Wald; Kairsten Fay; Kirsten Lacombe; Kneshay Harper; Lea M. Starita; Mark J. Rieder; Matt Hartman; Matthew Richardson; Matthew Thompson; Melissa Truong; Michael Boeckh; Michael Famulare; Misja Ilcisin; Muhammad Halimun; Olivia Waltner; Peter D. Han; Rebecca Bruders; Ryan Alexander; Sadie Patraw; Sofia Olsson; Stephanie DeBaun; Thomas R. Sibley; Tobias Ragoczy; Trevor Bedford; Truong Nguyen |
| EPI_ISL_1015757 to 1015876, EPI_ISL_1015887 to 1016003, EPI_ISL_1049666 to 1049691, EPI_ISL_1049693 to 1049711, EPI_ISL_1049713 to 1049842, EPI_ISL_1114291 to 1114351                                                                                                                                                                                                                                                                                                                                                                                                                                                                                                                                                                                                                                                                                                                                                                                                                                                                                                                                                                                                                                                                                                                                                                                                                                            | Altius Institute for Biomedical Sciences                                                            | Seattle Flu Study                                                                                                                 |                                                                                                                                                           | Alex Nguyen; Amanda Adler; Andrew Meuser; Barry R. Lutz; Benjamin Pelle; Caitlin R. Wolf; Chris D. Frazar; Clem Green; Daniel Bates; Deborah A. Nickerson; Elisabeth Brandstetter; Erica Ryke; Hannah Petersen; Helen Y. Chu; Jacob Rodriguez; Janet A. Englund; Jay Shendure; Jessica Halow; John Stamatoyannopoulos; Joshua Richards; Jover Lee; Julia Wald; Kairsten Fay; Kirsten Lacombe; Kneshay Harper; Lea M. Starita; Mark J. Rieder; Matt Hartman; Matthew Richardson; Matthew Thompson; Melissa Truong; Michael Boeckh; Michael Famulare; Misja Ilcisin; Muhammad Halimun; Olivia Waltner; Peter D. Han; Rebecca Bruders; Ryan Alexander; Sadie Patraw; Sofia Olsson; Stephanie DeBaun; Thomas R. Sibley; Tobias Ragoczy; Trevor Bedford; Truong Nguyen |
| EPI_ISL_1009161 to 1009212                                                                                                                                                                                                                                                                                                                                                                                                                                                                                                                                                                                                                                                                                                                                                                                                                                                                                                                                                                                                                                                                                                                                                                                                                                                                                                                                                                                        | American Esoteric Laboratories                                                                      | Colleen B. Jonsson                                                                                                                |                                                                                                                                                           | Colleen B. Jonsson; Jyothi Parvathareddy; Mariah K. Taylor; Walter Reichard                                                                                                                                                                                                                                                                                                                                                                                                                                                                                                                                                                                                                                                                                       |
| EPI_ISL_1138745                                                                                                                                                                                                                                                                                                                                                                                                                                                                                                                                                                                                                                                                                                                                                                                                                                                                                                                                                                                                                                                                                                                                                                                                                                                                                                                                                                                                   | Analysis laboratory                                                                                 | National Reference Center for Viruses of Respiratory Infections, Institut Pasteur, Paris                                          |                                                                                                                                                           | Angela Brisebarre; Camille Capel; Etienne Simon-Lorière; J. Besson; Marion Barbet; Maud Vanpeene; Méline Bizard; Sylvie Behillil; Sylvie van der Werf; Vincent Enouf                                                                                                                                                                                                                                                                                                                                                                                                                                                                                                                                                                                              |
| EPI_ISL_1216046, EPI_ISL_1216113, EPI_ISL_1216135, EPI_ISL_1216213, EPI_ISL_1216430                                                                                                                                                                                                                                                                                                                                                                                                                                                                                                                                                                                                                                                                                                                                                                                                                                                                                                                                                                                                                                                                                                                                                                                                                                                                                                                               | AniCon Labor GmbH                                                                                   | Robert Koch Institute                                                                                                             |                                                                                                                                                           |                                                                                                                                                                                                                                                                                                                                                                                                                                                                                                                                                                                                                                                                                                                                                                   |
| EPI_ISL_1252705, EPI_ISL_1252728 to 1252731, EPI_ISL_1252837 to 1252843, EPI_ISL_1315224 to 1315271, EPI_ISL_1315305 to 1315308, EPI_ISL_1324479 to 1324513, EPI_ISL_1324516, EPI_ISL_1324527, EPI_ISL_1324535, EPI_ISL_1324546, EPI_ISL_1324555, EPI_ISL_1324563, EPI_ISL_1324572, EPI_ISL_1324576 to 1324617, EPI_ISL_1324619 to 1324651, EPI_ISL_1327543, EPI_ISL_1327546, EPI_ISL_1327549, EPI_ISL_1327554, EPI_ISL_1327557, EPI_ISL_1330214, EPI_ISL_1330257, EPI_ISL_1330260                                                                                                                                                                                                                                                                                                                                                                                                                                                                                                                                                                                                                                                                                                                                                                                                                                                                                                                                |                                                                                                     |                                                                                                                                   |                                                                                                                                                           |                                                                                                                                                                                                                                                                                                                                                                                                                                                                                                                                                                                                                                                                                                                                                                   |
| see above                                                                                                                                                                                                                                                                                                                                                                                                                                                                                                                                                                                                                                                                                                                                                                                                                                                                                                                                                                                                                                                                                                                                                                                                                                                                                                                                                                                                         | Anteja laboratorija (UAB Diagnostikos laboratorija)                                                 | Vilnius University Hospital Santaros Klinikos, Center of Laboratory Medicine                                                      |                                                                                                                                                           | Daniel Naumovas; Dovile Ezerskyte; Gytis Dudas; Ingrida Olen draite; Laimonas Griskevicius; Ligita Raugaite; Mindaugas Stoskus; Monika Katenaite; Rimvydas Norvilas                                                                                                                                                                                                                                                                                                                                                                                                                                                                                                                                                                                               |
| EPI_ISL_1165068, EPI_ISL_1165071                                                                                                                                                                                                                                                                                                                                                                                                                                                                                                                                                                                                                                                                                                                                                                                                                                                                                                                                                                                                                                                                                                                                                                                                                                                                                                                                                                                  | Anwar Medika General Hospital                                                                       | Institute of Tropical Disease, Universitas Airlangga                                                                              |                                                                                                                                                           | Aldise M Nastri; Gatot Soegiarto; Jezzy R Dewantari; Kafuzumi Shimizu; Krisnoadi Rahardjo; Laksmi Wulandari; Maria I Lusida; Nungky Taniyasi; Resti Yudhawati; Rima R Prasetya; Soetjpto; Yasuko Mori                                                                                                                                                                                                                                                                                                                                                                                                                                                                                                                                                             |
| EPI_ISL_1297827 to 1297829                                                                                                                                                                                                                                                                                                                                                                                                                                                                                                                                                                                                                                                                                                                                                                                                                                                                                                                                                                                                                                                                                                                                                                                                                                                                                                                                                                                        | Arcispedale Santa Maria Nuova, Autoimmunità, Allergologia e Biotechnologie Innovative               | Istituto Zooprofilattico Sperimentale della Lombardia e dell'Emilia Romagna (IZSLER), Risk Analysis and Genomic Epidemiology Unit |                                                                                                                                                           | Alessandro Zerbini; Erika Scaltriti; Ilaria Menozzi; Lucia Belloni; Marina Morganti; Stefania Croci; Stefano Pongolini                                                                                                                                                                                                                                                                                                                                                                                                                                                                                                                                                                                                                                            |
| EPI_ISL_1120120, EPI_ISL_1154361, EPI_ISL_1154890                                                                                                                                                                                                                                                                                                                                                                                                                                                                                                                                                                                                                                                                                                                                                                                                                                                                                                                                                                                                                                                                                                                                                                                                                                                                                                                                                                 | Area Biologia Molecolare - Istituto Zooprofilattico Sperimentale della Sicilia                      | Area Biologia Molecolare - Istituto Zooprofilattico Sperimentale della Sicilia                                                    |                                                                                                                                                           | BRUNO Federica; BRUNO Gabriella; CASTELLI Germano; DI NARO Daniela; MAIDA Carmelo Massimo; MAZZUCCO Walter; PIAZZA Angela; RANDAZZO Giulia; REALE Stefano; SCIBETTA Silvia; TRAMUTO Fabio; VITALE Fabrizio; VITALE Francesco                                                                                                                                                                                                                                                                                                                                                                                                                                                                                                                                      |
| EPI_ISL_1205815, EPI_ISL_1240991 to 1240992, EPI_ISL_1255309 to 1255310                                                                                                                                                                                                                                                                                                                                                                                                                                                                                                                                                                                                                                                                                                                                                                                                                                                                                                                                                                                                                                                                                                                                                                                                                                                                                                                                           | Area of Virology, Serology and Virology Division (SAVID), New South Wales Health Pathology Randwick | Area of Virology, Serology and Virology Division (SAVID), New South Wales Health Pathology Randwick                               |                                                                                                                                                           | Au, J.; Bull, R.; Deveson, I.; Foster, C.; Rawlinson, W.; Ruiz Silva, M.; Van Hal, S.                                                                                                                                                                                                                                                                                                                                                                                                                                                                                                                                                                                                                                                                             |
| EPI_ISL_1010705 to 1010706                                                                                                                                                                                                                                                                                                                                                                                                                                                                                                                                                                                                                                                                                                                                                                                                                                                                                                                                                                                                                                                                                                                                                                                                                                                                                                                                                                                        | Area of Virology, Serology and Virology Division (SAVID), New South Wales Health Pathology Randwick | Microbiology RPAH                                                                                                                 |                                                                                                                                                           | Au, J.; Bull, R.; Deveson, I.; Foster, C.; Rawlinson, W.; Ruiz Silva, M.; Van Hal, S.                                                                                                                                                                                                                                                                                                                                                                                                                                                                                                                                                                                                                                                                             |
| EPI_ISL_1005536 to 1005540, EPI_ISL_1069080, EPI_ISL_1098798 to 1098799, EPI_ISL_1121031, EPI_ISL_1121974 to 1121976, EPI_ISL_1184504 to 1184506, EPI_ISL_1293047 to 1293050                                                                                                                                                                                                                                                                                                                                                                                                                                                                                                                                                                                                                                                                                                                                                                                                                                                                                                                                                                                                                                                                                                                                                                                                                                      |                                                                                                     |                                                                                                                                   |                                                                                                                                                           |                                                                                                                                                                                                                                                                                                                                                                                                                                                                                                                                                                                                                                                                                                                                                                   |
| see above                                                                                                                                                                                                                                                                                                                                                                                                                                                                                                                                                                                                                                                                                                                                                                                                                                                                                                                                                                                                                                                                                                                                                                                                                                                                                                                                                                                                         | Area of Virology, Serology and Virology Division (SAVID), New South Wales Health Pathology Randwick | Virology Research Laboratory; Area of Virology, Serology and Virology Division (SAVID), New South Wales Health Pathology Randwick |                                                                                                                                                           | Au, J.; Bull, R.; Deveson, I.; Foster, C.; Rawlinson, W.; Ruiz Silva, M.; Van Hal, S.                                                                                                                                                                                                                                                                                                                                                                                                                                                                                                                                                                                                                                                                             |
| EPI_ISL_11133293 to 1113328, EPI_ISL_1113387 to 1113391, EPI_ISL_1113496 to 1113565, EPI_ISL_1183834 to 1183870                                                                                                                                                                                                                                                                                                                                                                                                                                                                                                                                                                                                                                                                                                                                                                                                                                                                                                                                                                                                                                                                                                                                                                                                                                                                                                   | Arizona Department of Health Services                                                               | TGen North                                                                                                                        |                                                                                                                                                           | *Jolene Bowers; Ashlyn Pfeiffer; Chris French; Darrin Lemmer; Dave Engelthaler; Hayley Yaglom; Heather Centner; Jolene Bowers; Megan Folkerts; The Arizona COVID Genomics Union (ACGU); The Arizona COVID Genomics Union (ACGU)"                                                                                                                                                                                                                                                                                                                                                                                                                                                                                                                                  |
| EPI_ISL_1014993 to 1014995, EPI_ISL_1015713 to 1015732, EPI_ISL_1016887 to 1016895, EPI_ISL_1016897 to 1016912, EPI_ISL_1016914 to 1016946, EPI_ISL_1064172 to 1064196, EPI_ISL_1066758, EPI_ISL_1066760, EPI_ISL_1066762, EPI_ISL_1066764 to 1066765, EPI_ISL_1066767, EPI_ISL_1066769, EPI_ISL_1066771, EPI_ISL_1066773, EPI_ISL_1066775, EPI_ISL_1066777 to 1066778, EPI_ISL_1066780, EPI_ISL_1066783 to 1066786, EPI_ISL_1066788, EPI_ISL_1066790, EPI_ISL_1066792, EPI_ISL_1066794, EPI_ISL_1066796, EPI_ISL_1067696 to 1067716, EPI_ISL_1132643 to 1132667, EPI_ISL_1133209 to 1133222, EPI_ISL_1135078 to 1135112, EPI_ISL_1184599 to 1184581, EPI_ISL_1196391 to 1196412, EPI_ISL_1201441 to 1201460, EPI_ISL_1205356 to 1205380, EPI_ISL_1239048 to 1239108, EPI_ISL_1270202, EPI_ISL_1270204, EPI_ISL_1270206, EPI_ISL_1270208, EPI_ISL_1270210, EPI_ISL_1270212, EPI_ISL_1270214, EPI_ISL_1270216, EPI_ISL_1270218, EPI_ISL_1270220, EPI_ISL_1270222, EPI_ISL_1270224, EPI_ISL_1270227, EPI_ISL_1270229, EPI_ISL_1270231, EPI_ISL_1270233, EPI_ISL_1270235, EPI_ISL_1270237, EPI_ISL_1270239, EPI_ISL_1270241, EPI_ISL_1270243, EPI_ISL_1270245, EPI_ISL_1270247, EPI_ISL_1270250, EPI_ISL_1270254, EPI_ISL_1270797 to 1270821, EPI_ISL_1271968 to 1271986, EPI_ISL_1272077 to 1272094, EPI_ISL_1272276 to 1272299, EPI_ISL_1306093 to 1306120, EPI_ISL_1315583 to 1315604, EPI_ISL_1334581 to 1334599 |                                                                                                     |                                                                                                                                   |                                                                                                                                                           |                                                                                                                                                                                                                                                                                                                                                                                                                                                                                                                                                                                                                                                                                                                                                                   |
| see above                                                                                                                                                                                                                                                                                                                                                                                                                                                                                                                                                                                                                                                                                                                                                                                                                                                                                                                                                                                                                                                                                                                                                                                                                                                                                                                                                                                                         | Arizona State Public Health Laboratory                                                              | Arizona State Public Health Laboratory                                                                                            |                                                                                                                                                           | Jessica Escobar; Katherine Fullerton; Linda Getsinger; Nobuko Fukushima; Stacy White; Trung Huynh; Victor Waddell                                                                                                                                                                                                                                                                                                                                                                                                                                                                                                                                                                                                                                                 |
| EPI_ISL_1048801, EPI_ISL_1048804, EPI_ISL_1050502, EPI_ISL_1050703, EPI_ISL_1050950, EPI_ISL_1051176, EPI_ISL_1091576, EPI_ISL_1132729, EPI_ISL_1167185, EPI_ISL_1184079 to 1184093, EPI_ISL_1291657 to 1291740, EPI_ISL_1292809 to 1292811, EPI_ISL_1299316 to 1299324, EPI_ISL_1300536 to 1300539, EPI_ISL_1364450 to 1364465, EPI_ISL_1364622 to 1364669, EPI_ISL_1364671 to 1364862, EPI_ISL_1365452 to 1365509, EPI_ISL_1365511 to 1365637                                                                                                                                                                                                                                                                                                                                                                                                                                                                                                                                                                                                                                                                                                                                                                                                                                                                                                                                                                   |                                                                                                     |                                                                                                                                   |                                                                                                                                                           |                                                                                                                                                                                                                                                                                                                                                                                                                                                                                                                                                                                                                                                                                                                                                                   |
| see above                                                                                                                                                                                                                                                                                                                                                                                                                                                                                                                                                                                                                                                                                                                                                                                                                                                                                                                                                                                                                                                                                                                                                                                                                                                                                                                                                                                                         | Arizona State University                                                                            | Arizona State University                                                                                                          |                                                                                                                                                           | Efrem S. Lim; Emily A. Kaelin; Joshua LaBaer; Joy M. Blain; Kristina Buss; LaRinda A. Holland; Neal W Woodbury; Nicholas J. Mellor; Peter T. Skidmore; Rabia Maqsood; Valerie Harris; Vel Murugan                                                                                                                                                                                                                                                                                                                                                                                                                                                                                                                                                                 |
| EPI_ISL_1255065, EPI_ISL_1255079                                                                                                                                                                                                                                                                                                                                                                                                                                                                                                                                                                                                                                                                                                                                                                                                                                                                                                                                                                                                                                                                                                                                                                                                                                                                                                                                                                                  | Arlon                                                                                               | Plateforme de testing Namuroise                                                                                                   |                                                                                                                                                           | ; Degosserie Jonathan; Denis Olivier; Mullier François; Otto Gaetan                                                                                                                                                                                                                                                                                                                                                                                                                                                                                                                                                                                                                                                                                               |
| EPI_ISL_1315065                                                                                                                                                                                                                                                                                                                                                                                                                                                                                                                                                                                                                                                                                                                                                                                                                                                                                                                                                                                                                                                                                                                                                                                                                                                                                                                                                                                                   | Armed Forces Medical Research Laboratories and Blood Bank,                                          | Department of Microbial Biotechnology, Genetic Engineering                                                                        |                                                                                                                                                           | Ahmed Elsayed; Ahmed Taha; Ayman Farghaly; Mohamed Khalifa; Mohamed Shemis; Reham Dawood                                                                                                                                                                                                                                                                                                                                                                                                                                                                                                                                                                                                                                                                          |



|                                                                                                                                                                                                                                                                                                                                                                                                                                                                                             |                                                                                                          |                                                                                                                                   |                                                                                                                                                                                                                                                                                                                                                                                                                                                                                                |
|---------------------------------------------------------------------------------------------------------------------------------------------------------------------------------------------------------------------------------------------------------------------------------------------------------------------------------------------------------------------------------------------------------------------------------------------------------------------------------------------|----------------------------------------------------------------------------------------------------------|-----------------------------------------------------------------------------------------------------------------------------------|------------------------------------------------------------------------------------------------------------------------------------------------------------------------------------------------------------------------------------------------------------------------------------------------------------------------------------------------------------------------------------------------------------------------------------------------------------------------------------------------|
| Egypt                                                                                                                                                                                                                                                                                                                                                                                                                                                                                       | Division, National Research Centre                                                                       |                                                                                                                                   |                                                                                                                                                                                                                                                                                                                                                                                                                                                                                                |
| EPI_ISL_1315064                                                                                                                                                                                                                                                                                                                                                                                                                                                                             | Armed Forces Medical Research Laboratories and Blood Bank, Egypt                                         | Department of Microbial Biotechnology, Genetic Engineering Division, National Research Centre,                                    | Ahmed Elsayed; Ahmed Taha; Ayman Farhaly; Mohamed Khalifa; Mohamed Shemis; Reham Dawood                                                                                                                                                                                                                                                                                                                                                                                                        |
| EPI_ISL_1110879 to 1110880, EPI_ISL_1110917, EPI_ISL_1111047, EPI_ISL_1111049, EPI_ISL_1168203 to 1168204, EPI_ISL_1168212 to 1168217, EPI_ISL_1201537 to 1201538, EPI_ISL_1262747 to 1262750, EPI_ISL_1301829, EPI_ISL_1301860, EPI_ISL_1301877 to 1301881, EPI_ISL_1381210 to 1381212                                                                                                                                                                                                     | Armies                                                                                                   | National Reference Center for Viruses of Respiratory Infections, Institut Pasteur, Paris                                          | Angela Brisebarre; Camille Capel; Desroches Marine; Etienne Simon-Lorière; Foissaud Vincent; Louise Lefrançois; Marion Barbet; Maud Vanpeene; Méline Bizard; Rousset Dominique; Sylvie Behillil; Sylvie van der Werf; Vincent Enouf                                                                                                                                                                                                                                                            |
| see above                                                                                                                                                                                                                                                                                                                                                                                                                                                                                   | Armies                                                                                                   | National Reference Center for Viruses of Respiratory Infections, Institut Pasteur, Paris                                          | Angela Brisebarre; Camille Capel; Desroches Marine; Etienne Simon-Lorière; Marion Barbet; Maud Vanpeene; Méline Bizard; Sylvie Behillil; Sylvie van der Werf; Vincent Enouf                                                                                                                                                                                                                                                                                                                    |
| EPI_ISL_1118900                                                                                                                                                                                                                                                                                                                                                                                                                                                                             | Army                                                                                                     | National Reference Center for Viruses of Respiratory Infections, Institut Pasteur, Paris                                          | Angela Brisebarre; Camille Capel; Desroches Marine; Etienne Simon-Lorière; Marion Barbet; Maud Vanpeene; Méline Bizard; Sylvie Behillil; Sylvie van der Werf; Vincent Enouf                                                                                                                                                                                                                                                                                                                    |
| EPI_ISL_1365747                                                                                                                                                                                                                                                                                                                                                                                                                                                                             | Associação Fundo de Incentivo a Pesquisa                                                                 | Associação Fundo de Incentivo a Pesquisa                                                                                          | Debora Ribeiro Ramadan; Erika Rodrigues de Oliveira; Juliana Nogueira Martins Rodrigues; Priscila Farias Tempaku; Sergio Tufik; Soraya Sgambatti de Andrade                                                                                                                                                                                                                                                                                                                                    |
| EPI_ISL_1159701 to 1159728, EPI_ISL_1255416 to 1255423, EPI_ISL_1273379 to 1273381                                                                                                                                                                                                                                                                                                                                                                                                          | Atlas Genomics                                                                                           | Atlas Genomics                                                                                                                    | MD; Michael Kalnoski                                                                                                                                                                                                                                                                                                                                                                                                                                                                           |
| EPI_ISL_1049603                                                                                                                                                                                                                                                                                                                                                                                                                                                                             | Atlas Genomics                                                                                           | Seattle Flu Study                                                                                                                 | Amanda Adler; Barry R. Lutz; Benjamin Pelle; Brian Hiatt; Caitlin R. Wolf; Chris D. Frazier; Deborah A. Nickerson; Elisabeth Brandstetter; Erica Ryke; Geoff Melly; Helen Y. Chu; Janet A. Englund; Jay Shendure; Jover Lee; Kairsten Fay; Kirsten Lacombe; Lea M. Starita; Mark J. Rieder; Matthew Richardson; Matthew Thompson; Melissa Truong; Michael Boeckh; Michael Famulare; Misja Ilcin; Peter D. Han; Philip Dykema; Romesh Gautam; Scott Lindquist; Thomas R. Sibley; Trevor Bedford |
| EPI_ISL_1009666, EPI_ISL_1009668, EPI_ISL_1009670                                                                                                                                                                                                                                                                                                                                                                                                                                           | Auburn Sports Medicine                                                                                   | Synergy Laboratories                                                                                                              | Megan Cornwell                                                                                                                                                                                                                                                                                                                                                                                                                                                                                 |
| EPI_ISL_1008019 to 1008081, EPI_ISL_1008083 to 1008191, EPI_ISL_1117776, EPI_ISL_1117796, EPI_ISL_1117798 to 1117799, EPI_ISL_1117804, EPI_ISL_1117824 to 1117830, EPI_ISL_1117838 to 1117839, EPI_ISL_1117854 to 1117869, EPI_ISL_1117887, EPI_ISL_1117907, EPI_ISL_1117914, EPI_ISL_1117916, EPI_ISL_1117923, EPI_ISL_1117927, EPI_ISL_1117937 to 1117950, EPI_ISL_1118029 to 1118049, EPI_ISL_1118073 to 1118080, EPI_ISL_1180752 to 1180830, EPI_ISL_1180932 to 1180934                 | Austrian Agency for Health and Food Safety (AGES)                                                        | Berghaler laboratory, CeMM Research Center for Molecular Medicine of the Austrian Academy of Sciences                             | Andreas Berghaler; Anna Schedl; Bekir Erguner; Benedikt Agerer; Christoph Bock; Fabian Amman; Jan Laine; Lukas Endler; Maelle Le Moing; Martin Senekowitsch; Michael Schuster; Thomas Penz                                                                                                                                                                                                                                                                                                     |
| see above                                                                                                                                                                                                                                                                                                                                                                                                                                                                                   | Austrian Agency for Health and Food Safety (AGES)                                                        | Berghaler laboratory, CeMM Research Center for Molecular Medicine of the Austrian Academy of Sciences                             | Andreas Berghaler; Anna Schedl; Bekir Erguner; Benedikt Agerer; Christoph Bock; Fabian Amman; Jan Laine; Lukas Endler; Maelle Le Moing; Martin Senekowitsch; Michael Schuster; Thomas Penz                                                                                                                                                                                                                                                                                                     |
| EPI_ISL_1009019 to 1009020, EPI_ISL_1039784, EPI_ISL_1079362 to 1079363, EPI_ISL_1079383, EPI_ISL_1079386, EPI_ISL_1079994, EPI_ISL_1091280 to 1091286, EPI_ISL_1091797                                                                                                                                                                                                                                                                                                                     | Azienda Ospedaliera San Camillo Forlanini                                                                | INMI Lazzaro Spallanzani IRCCS                                                                                                    | A D'Agostino; A Di Caro; B Bartolini; C.E.M Gruber; CEM Gruber; D Gallone; D.Gallone; E Giombini; F Basile; F Messina; G Meoni; G Parisi; M Irno Consalvo; M Rueca; M. Rueca; MI Consalvo; ML Guarino; MR Capobianchi; O Butera; R.Sperning                                                                                                                                                                                                                                                    |
| see above                                                                                                                                                                                                                                                                                                                                                                                                                                                                                   | Azienda Ospedaliera San Camillo Forlanini                                                                | INMI Lazzaro Spallanzani IRCCS                                                                                                    | A D'Agostino; A Di Caro; B Bartolini; C.E.M Gruber; CEM Gruber; D Gallone; D.Gallone; E Giombini; F Basile; F Messina; G Meoni; G Parisi; M Irno Consalvo; M Rueca; M. Rueca; MI Consalvo; ML Guarino; MR Capobianchi; O Butera; R.Sperning                                                                                                                                                                                                                                                    |
| EPI_ISL_1296263 to 1296267, EPI_ISL_1296269 to 1296278, EPI_ISL_1296280 to 1296287, EPI_ISL_1299501 to 1299520, EPI_ISL_1299522 to 1299526, EPI_ISL_1299563, EPI_ISL_1299570, EPI_ISL_1321756 to 1321763, EPI_ISL_1321765 to 1321773, EPI_ISL_1321775 to 1321784, EPI_ISL_1321786 to 1321794, EPI_ISL_1336178, EPI_ISL_1336651, EPI_ISL_1336800 to 1336820, EPI_ISL_1336822 to 1336831, EPI_ISL_1336833 to 1336841, EPI_ISL_1336843 to 1336852, EPI_ISL_1336854 to 1336859, EPI_ISL_1336862 | Azienda Ospedaliera Terni                                                                                | Istituto Zooprofilattico Sperimentale dell'Abruzzo e Molise "G. Caporale"                                                         | ; Ancora M; Calistri P; Cammà C; Caporale M; Curini V; Di Domenico M; Di Pasquale A; Lorusso A; Mangone I; Marcacci M; Palumbo M; Palumbo m; Puglia I; Rinaldi A; Savini G; Scaccetti A; Scialabba S                                                                                                                                                                                                                                                                                           |
| see above                                                                                                                                                                                                                                                                                                                                                                                                                                                                                   | Azienda Ospedaliera Terni                                                                                | Istituto Zooprofilattico Sperimentale dell'Abruzzo e Molise "G. Caporale"                                                         | ; Ancora M; Calistri P; Cammà C; Caporale M; Curini V; Di Domenico M; Di Pasquale A; Lorusso A; Mangone I; Marcacci M; Palumbo M; Palumbo m; Puglia I; Rinaldi A; Savini G; Scaccetti A; Scialabba S                                                                                                                                                                                                                                                                                           |
| EPI_ISL_1259009 to 1259018                                                                                                                                                                                                                                                                                                                                                                                                                                                                  | Azienda Ospedaliero - Universitaria di Bologna IRCCS Policlinico di Sant'Orsola - Unità di Microbiologia | Istituto Zooprofilattico Sperimentale della Lombardia e dell'Emilia Romagna (IZSLER), Risk Analysis and Genomic Epidemiology Unit | Erika Scaltriti; Giada Rossini; Giuliano Furlini; Ilaria Menozzi; Marina Morganti; Stefano Pongolini; Tiziana Lazzarotto                                                                                                                                                                                                                                                                                                                                                                       |
| EPI_ISL_1181933 to 1181945                                                                                                                                                                                                                                                                                                                                                                                                                                                                  | Azienda Ospedaliero - Universitaria di Modena Policlinico - Virologia e Microbiologia Molecolare         | Istituto Zooprofilattico Sperimentale della Lombardia e dell'Emilia Romagna (IZSLER), Risk Analysis and Genomic Epidemiology Unit | Erika Scaltriti; Giulia Fregni Serpini; Ilaria Menozzi; Marina Morganti; Monica Pecorari; Stefano Pongolini; William Gennari                                                                                                                                                                                                                                                                                                                                                                   |
| EPI_ISL_1132668                                                                                                                                                                                                                                                                                                                                                                                                                                                                             | Azienda Ospedaliero - Universitaria di Modena Policlinico - Virologia e Microbiologia Molecolare         | Zooprofilattico Sperimentale dell'Emilia Romagna e della Lombardia (IZSLER), Risk Analysis and Genomic Epidemiology Unit          | Erika Scaltriti; Giulia Fregni Serpini; Ilaria Menozzi; Marina Morganti; Monica Pecorari; Stefano Pongolini; William Gennari                                                                                                                                                                                                                                                                                                                                                                   |
| EPI_ISL_1069204                                                                                                                                                                                                                                                                                                                                                                                                                                                                             | Azienda Sanitaria Locale Napoli 1                                                                        | Centro Polidiagnostico strumentale AMES                                                                                           | Sirica Roberto                                                                                                                                                                                                                                                                                                                                                                                                                                                                                 |
| EPI_ISL_1295615                                                                                                                                                                                                                                                                                                                                                                                                                                                                             | Azienda Sanitaria Locale Roma 5                                                                          | INMI Lazzaro Spallanzani IRCCS                                                                                                    | A Di Caro; B Bartolini; CEM Gruber; D Cerini; D Di Fusco; E Giombini; F Messina; F Santini; G Bonfiglio; M Rueca; MR Capobianchi; O Butera                                                                                                                                                                                                                                                                                                                                                     |
| EPI_ISL_1321809                                                                                                                                                                                                                                                                                                                                                                                                                                                                             | Azienda Sanitaria Locale di Piacenza - Presidio Ospedaliero - Laboratorio di Microbiologia               | U.O. Microbiologia, Laboratorio Unico Centro Servizi - AUSL della Romagna                                                         | Giorgio Dirani; Lo Cascio Giuliana; Schiavo Roberta; Silvia Zannoli; Vittorio Sambri                                                                                                                                                                                                                                                                                                                                                                                                           |
| EPI_ISL_1063404 to 1063493, EPI_ISL_1110295 to 1110388, EPI_ISL_1185777 to 1185827, EPI_ISL_1185829 to 1185846, EPI_ISL_1222783 to 1222785, EPI_ISL_1222787 to 1222797, EPI_ISL_1222799 to 1222820, EPI_ISL_1222822 to 1222829, EPI_ISL_1222831 to 1222843, EPI_ISL_1222845 to 1222861, EPI_ISL_1222863 to 1222866, EPI_ISL_1222868 to 1222869, EPI_ISL_1222871 to 1222886, EPI_ISL_1222888 to 1222891, EPI_ISL_1222893 to 1222914, EPI_ISL_1222916 to 1222922, EPI_ISL_1222924 to 1222926  | Azienda Sanitaria dell'Alto Adige Laboratorio Aziendale di Microbiologia e Virologia                     | Istituto di Genomica Applicata                                                                                                    | Davide Scaglione; Eleonora Paparelli; Elisa Masi; Elisabetta Giacobazzi; Elisabetta Pagani; Gabriele Magris; Irena Jurman; Irene Bianconi; Michele Morgante; Stefanie Wieser; Vera Vendramin                                                                                                                                                                                                                                                                                                   |
| see above                                                                                                                                                                                                                                                                                                                                                                                                                                                                                   | Azienda Sanitaria dell'Alto Adige Laboratorio Aziendale di Microbiologia e Virologia                     | Istituto di Genomica Applicata                                                                                                    | Davide Scaglione; Eleonora Paparelli; Elisa Masi; Elisabetta Giacobazzi; Elisabetta Pagani; Gabriele Magris; Irena Jurman; Irene Bianconi; Michele Morgante; Stefanie Wieser; Vera Vendramin                                                                                                                                                                                                                                                                                                   |
| EPI_ISL_1013095                                                                                                                                                                                                                                                                                                                                                                                                                                                                             | Azienda Sanitaria dell'Alto Adige Laboratorio Aziendale di Microbiologia e Virologia                     | Istituto di Genomica Applicata                                                                                                    | Davide Scaglione; Eleonora Paparelli; Elisa Masi; Elisabetta Giacobazzi; Elisabetta Pagani; Gabriele Magris; Irena Jurman; Irene Bianconi; Michele Morgante; Stefanie Wieser; Vera Vendramin                                                                                                                                                                                                                                                                                                   |
| EPI_ISL_1015515 to 1015521, EPI_ISL_1015532 to 1015560, EPI_ISL_1048822 to 1048828                                                                                                                                                                                                                                                                                                                                                                                                          | Azienda Sanitaria dell'Alto Adige Laboratorio Aziendale di Microbiologia e Virologia                     | Istituto di Genomica Applicata                                                                                                    | Davide Scaglione; Eleonora Paparelli; Elisa Masi; Elisabetta Giacobazzi; Elisabetta Pagani; Gabriele Magris; Irena Jurman; Irene Bianconi; Michele Morgante; Stefanie Wieser; Vera Vendramin                                                                                                                                                                                                                                                                                                   |
| EPI_ISL_1163795 to 1163797, EPI_ISL_1164754 to 1164756, EPI_ISL_1299500, EPI_ISL_1299521, EPI_ISL_1299532, EPI_ISL_1299543, EPI_ISL_1299554, EPI_ISL_1336860                                                                                                                                                                                                                                                                                                                                | Azienda USL Umbria 2                                                                                     | Istituto Zooprofilattico Sperimentale dell'Abruzzo e Molise "G. Caporale"                                                         | Ancora M; Calistri P; Cammà C; Caporale M; Curini V; Di Domenico M; Di Pasquale A; Lorusso A; Mangone I; Marcacci M; Pistoni E.; Proietti A; Proietti A.; Puglia I; Rinaldi A; Savini G; Scialabba S                                                                                                                                                                                                                                                                                           |
| see above                                                                                                                                                                                                                                                                                                                                                                                                                                                                                   | Azienda USL Umbria 2                                                                                     | Istituto Zooprofilattico Sperimentale dell'Abruzzo e Molise "G. Caporale"                                                         | Ancora M; Calistri P; Cammà C; Caporale M; Curini V; Di Domenico M; Di Pasquale A; Lorusso A; Mangone I; Marcacci M; Pistoni E.; Proietti A; Proietti A.; Puglia I; Rinaldi A; Savini G; Scialabba S                                                                                                                                                                                                                                                                                           |
| EPI_ISL_1336861                                                                                                                                                                                                                                                                                                                                                                                                                                                                             | Azienda USL Umbria 3                                                                                     | Istituto Zooprofilattico Sperimentale dell'Abruzzo e Molise "G. Caporale"                                                         | Ancora M; Calistri P; Cammà C; Caporale M; Curini V; Di Domenico M; Di Pasquale A; Lorusso A; Mangone I; Marcacci M; Pistoni E.; Proietti A; Puglia I; Rinaldi A; Savini G; Scialabba S                                                                                                                                                                                                                                                                                                        |
| EPI_ISL_1007660 to 1007661, EPI_ISL_1250853 to 1250858                                                                                                                                                                                                                                                                                                                                                                                                                                      | BBMP Urban PHC                                                                                           | Department of Neurovirology, National Institute of Mental Health and Neurosciences (NIMHANS)                                      | Anita S Desai; Anson Kunjumon George; Chitra Pattabiraman; Darshan Sreenivas; Nakka Vijay Kiran Reddy; Pramada Prasad; Risha Rasheed; V Ravi                                                                                                                                                                                                                                                                                                                                                   |
| EPI_ISL_1257851 to 1257854                                                                                                                                                                                                                                                                                                                                                                                                                                                                  | BBTKLPP Banjarbaru                                                                                       | National Institute of Health Research and Development                                                                             | Arie Ardiansyah Nugraha; Dewi Hermawati; Hana Apsari Pawestri; Hartanti Dian Ikawati; Kartika Dewi Puspa; Krisna Pangesti; Mutia Raudah; Nelly Puspandari; Subangkit; Vivi Setiawaty                                                                                                                                                                                                                                                                                                           |
| EPI_ISL_1169048                                                                                                                                                                                                                                                                                                                                                                                                                                                                             | BBTKLPP Banjarbaru, Kalimantan Selatan                                                                   | National Institute of Health Research and Development                                                                             | Arie Ardiansyah Nugraha; Hana Apsari Pawestri; Hartanti Dian Ikawati; Kartika Dewi Puspa; Nelly Puspandari; Subangkit; Vivi Setiawaty                                                                                                                                                                                                                                                                                                                                                          |
| EPI_ISL_1257856 to 1257858                                                                                                                                                                                                                                                                                                                                                                                                                                                                  | BBTKLPP Yogyakarta                                                                                       | National Institute of Health Research and Development                                                                             | Arie Ardiansyah Nugraha; Hana Apsari Pawestri; Hartanti Dian Ikawati; Havid Setyawan; Indaryati; Irene; Kartika Dewi Puspa; Krisna Pangesti; Nelly Puspandari; Subangkit; Vivi Setiawaty                                                                                                                                                                                                                                                                                                       |
| EPI_ISL_1008876 to 1008892, EPI_ISL_1041959 to 1041968, EPI_ISL_1095457                                                                                                                                                                                                                                                                                                                                                                                                                     | BCN-PEP-COV-2 Group - Fundació Lluita contra la SIDA i les malalties infeccioses                         | SeqCOVID-SPAIN consortium/IBV(CSIC)                                                                                               | Andrea Alemany Ortiz MD; Barbara Baro Sastre BSc PhD; Camila González Beiras BSc MSc PhD; Marc Corbacho Monné MD; Martí Vall Mayans MD PhD and SeqCOVID-SPAIN consortium; Maria Ubals Cazorla MD; Oriol Mitjà i Villar MD PhD; Pau Rodó de Yebra BSc MSc                                                                                                                                                                                                                                       |
| EPI_ISL_1015370, EPI_ISL_1015372, EPI_ISL_1015391                                                                                                                                                                                                                                                                                                                                                                                                                                           | BCRM Cherbourg                                                                                           | IRBA, 2MI                                                                                                                         | EVRRARD A.; GORGE O.; NOLENT F.; SARILAR V.                                                                                                                                                                                                                                                                                                                                                                                                                                                    |
| EPI_ISL_1226551, EPI_ISL_1226556, EPI_ISL_1226571 to 1226572, EPI_ISL_1226574, EPI_ISL_1226577, EPI_ISL_1226583, EPI_ISL_1226622, EPI_ISL_1226645 to 1226646, EPI_ISL_1226658, EPI_ISL_1226669, EPI_ISL_1226932, EPI_ISL_1226985                                                                                                                                                                                                                                                            |                                                                                                          |                                                                                                                                   |                                                                                                                                                                                                                                                                                                                                                                                                                                                                                                |

|                                                                                                                                                                                                                                                                                                                                                                                                                                                                                                                                                                                                                                                                                                                                                                                                                                                                                                                                                                                                                                                                                                                                                                                                                                                                                                                                                                                                                                                                                                                                                                                                                                                                                                                                                                                                                                                                                                                                                                                                                                                                                                                                                                                                                                                                                                                                                                      |                                                                                                                           |                                                                                                                                                                                 |                                                                                                                                                                                                                                                                                                                                                                                                                                                                                                                                                                                                                                                                                                               |
|----------------------------------------------------------------------------------------------------------------------------------------------------------------------------------------------------------------------------------------------------------------------------------------------------------------------------------------------------------------------------------------------------------------------------------------------------------------------------------------------------------------------------------------------------------------------------------------------------------------------------------------------------------------------------------------------------------------------------------------------------------------------------------------------------------------------------------------------------------------------------------------------------------------------------------------------------------------------------------------------------------------------------------------------------------------------------------------------------------------------------------------------------------------------------------------------------------------------------------------------------------------------------------------------------------------------------------------------------------------------------------------------------------------------------------------------------------------------------------------------------------------------------------------------------------------------------------------------------------------------------------------------------------------------------------------------------------------------------------------------------------------------------------------------------------------------------------------------------------------------------------------------------------------------------------------------------------------------------------------------------------------------------------------------------------------------------------------------------------------------------------------------------------------------------------------------------------------------------------------------------------------------------------------------------------------------------------------------------------------------|---------------------------------------------------------------------------------------------------------------------------|---------------------------------------------------------------------------------------------------------------------------------------------------------------------------------|---------------------------------------------------------------------------------------------------------------------------------------------------------------------------------------------------------------------------------------------------------------------------------------------------------------------------------------------------------------------------------------------------------------------------------------------------------------------------------------------------------------------------------------------------------------------------------------------------------------------------------------------------------------------------------------------------------------|
| see above                                                                                                                                                                                                                                                                                                                                                                                                                                                                                                                                                                                                                                                                                                                                                                                                                                                                                                                                                                                                                                                                                                                                                                                                                                                                                                                                                                                                                                                                                                                                                                                                                                                                                                                                                                                                                                                                                                                                                                                                                                                                                                                                                                                                                                                                                                                                                            | BIO-REFERENCE LABORATORIES                                                                                                | Wadsworth Center, New York State Department of Health                                                                                                                           | Alexis Russel; Daryl M. Lamson; Erasmus Schneider; Erica Lasek-Nesselquist; John Kelly; Jonathan Plitnick; Kirsten St. George; Matthew Shudt; Melissa A Leisner; Navjot Singh                                                                                                                                                                                                                                                                                                                                                                                                                                                                                                                                 |
| EPI_ISL_1017704                                                                                                                                                                                                                                                                                                                                                                                                                                                                                                                                                                                                                                                                                                                                                                                                                                                                                                                                                                                                                                                                                                                                                                                                                                                                                                                                                                                                                                                                                                                                                                                                                                                                                                                                                                                                                                                                                                                                                                                                                                                                                                                                                                                                                                                                                                                                                      | BIO-TEST                                                                                                                  | Instituto Nacional de Salud- Dirección de Investigación en Salud Pública                                                                                                        | Carlos Franco-Muñoz; Diego A. Álvarez-Díaz; Diego Andrés Prada; Gerardo Santamaría; Hector Alejandro Ruiz-Moreno; Jhonnatan Reales-González; Julian Naizaque; Katherine Laiton-Donato; Magdalena Wiesner; Marcela Mercado-Reyes; Maria T. Herrera-Sepúlveda; Martha Lucia Ospina Martínez; Sheryll Corchuelo                                                                                                                                                                                                                                                                                                                                                                                                  |
| EPI_ISL_1190805 to 1190810                                                                                                                                                                                                                                                                                                                                                                                                                                                                                                                                                                                                                                                                                                                                                                                                                                                                                                                                                                                                                                                                                                                                                                                                                                                                                                                                                                                                                                                                                                                                                                                                                                                                                                                                                                                                                                                                                                                                                                                                                                                                                                                                                                                                                                                                                                                                           | BIOAXIOME SITE SAINT GILLES                                                                                               | CNR Virus des Infections Respiratoires - France SUD                                                                                                                             | Antonin Bal; Bruno Lina; Gregory Destras; Gwendolynne Burfin; Hadrien Règue; Laurence Josset; Martine Valette; Quentin Semanas                                                                                                                                                                                                                                                                                                                                                                                                                                                                                                                                                                                |
| EPI_ISL_1359752 to 1359785,<br>EPI_ISL_1359790, EPI_ISL_1359828 to 1359830, EPI_ISL_1359832 to 1359835,<br>EPI_ISL_1359888, EPI_ISL_1359895                                                                                                                                                                                                                                                                                                                                                                                                                                                                                                                                                                                                                                                                                                                                                                                                                                                                                                                                                                                                                                                                                                                                                                                                                                                                                                                                                                                                                                                                                                                                                                                                                                                                                                                                                                                                                                                                                                                                                                                                                                                                                                                                                                                                                          | BIOESTEREL BIOGROUP                                                                                                       | CNR Virus des Infections Respiratoires - France SUD                                                                                                                             | Antonin Bal; Bruno Lina; Gregory Destras; Gwendolynne Burfin; Hadrien Regue; Laurence Josset; Martine Valette; Quentin Semanas                                                                                                                                                                                                                                                                                                                                                                                                                                                                                                                                                                                |
| EPI_ISL_1165934 to 1165935,<br>EPI_ISL_1165950, EPI_ISL_1166082,<br>EPI_ISL_1166084 to 1166093,<br>EPI_ISL_1220097 to 1220181,<br>EPI_ISL_1253560                                                                                                                                                                                                                                                                                                                                                                                                                                                                                                                                                                                                                                                                                                                                                                                                                                                                                                                                                                                                                                                                                                                                                                                                                                                                                                                                                                                                                                                                                                                                                                                                                                                                                                                                                                                                                                                                                                                                                                                                                                                                                                                                                                                                                    | BIOGROUP                                                                                                                  | CNR Virus des Infections Respiratoires - France SUD                                                                                                                             | Antonin Bal; Bruno Lina; Gregory Destras; Gwendolynne Burfin; Hadrien Regue; Laurence Josset; Martine Valette; Quentin Semanas                                                                                                                                                                                                                                                                                                                                                                                                                                                                                                                                                                                |
| EPI_ISL_1163914 to 1163930, EPI_ISL_1163932 to 1163942, EPI_ISL_1163944, EPI_ISL_1163946 to 1163947, EPI_ISL_1163949 to 1163952, EPI_ISL_1163954 to 1163958, EPI_ISL_1163960 to 1163961, EPI_ISL_1163963 to 1163965, EPI_ISL_1163967 to 1163984, EPI_ISL_1359750, EPI_ISL_1359821 to 1359827,<br>EPI_ISL_1359859, EPI_ISL_1359868, EPI_ISL_1359889                                                                                                                                                                                                                                                                                                                                                                                                                                                                                                                                                                                                                                                                                                                                                                                                                                                                                                                                                                                                                                                                                                                                                                                                                                                                                                                                                                                                                                                                                                                                                                                                                                                                                                                                                                                                                                                                                                                                                                                                                   |                                                                                                                           |                                                                                                                                                                                 |                                                                                                                                                                                                                                                                                                                                                                                                                                                                                                                                                                                                                                                                                                               |
| see above                                                                                                                                                                                                                                                                                                                                                                                                                                                                                                                                                                                                                                                                                                                                                                                                                                                                                                                                                                                                                                                                                                                                                                                                                                                                                                                                                                                                                                                                                                                                                                                                                                                                                                                                                                                                                                                                                                                                                                                                                                                                                                                                                                                                                                                                                                                                                            | BIOGROUP BIOLITTORAL                                                                                                      | CNR Virus des Infections Respiratoires - France SUD                                                                                                                             | Antonin Bal; Bruno Lina; Gregory Destras; Gwendolynne Burfin; Hadrien Regue; Laurence Josset; Martine Valette; Quentin Semanas                                                                                                                                                                                                                                                                                                                                                                                                                                                                                                                                                                                |
| EPI_ISL_1359747, EPI_ISL_1359795 to 1359798, EPI_ISL_1359802 to 1359804, EPI_ISL_1359806 to 1359820, EPI_ISL_1359861 to 1359867, EPI_ISL_1359890, EPI_ISL_1359960, EPI_ISL_1359966 to 1359967, EPI_ISL_1359978                                                                                                                                                                                                                                                                                                                                                                                                                                                                                                                                                                                                                                                                                                                                                                                                                                                                                                                                                                                                                                                                                                                                                                                                                                                                                                                                                                                                                                                                                                                                                                                                                                                                                                                                                                                                                                                                                                                                                                                                                                                                                                                                                       |                                                                                                                           |                                                                                                                                                                                 |                                                                                                                                                                                                                                                                                                                                                                                                                                                                                                                                                                                                                                                                                                               |
| see above                                                                                                                                                                                                                                                                                                                                                                                                                                                                                                                                                                                                                                                                                                                                                                                                                                                                                                                                                                                                                                                                                                                                                                                                                                                                                                                                                                                                                                                                                                                                                                                                                                                                                                                                                                                                                                                                                                                                                                                                                                                                                                                                                                                                                                                                                                                                                            | BIOGROUP MOUANS SARTOUX                                                                                                   | CNR Virus des Infections Respiratoires - France SUD                                                                                                                             | Antonin Bal; Bruno Lina; Gregory Destras; Gwendolynne Burfin; Hadrien Regue; Laurence Josset; Martine Valette; Quentin Semanas                                                                                                                                                                                                                                                                                                                                                                                                                                                                                                                                                                                |
| EPI_ISL_1166051 to 1166052,<br>EPI_ISL_1359907 to 1359909,<br>EPI_ISL_1371831 to 1371835                                                                                                                                                                                                                                                                                                                                                                                                                                                                                                                                                                                                                                                                                                                                                                                                                                                                                                                                                                                                                                                                                                                                                                                                                                                                                                                                                                                                                                                                                                                                                                                                                                                                                                                                                                                                                                                                                                                                                                                                                                                                                                                                                                                                                                                                             | BIOLAB 33                                                                                                                 | CNR Virus des Infections Respiratoires - France SUD                                                                                                                             | Antonin Bal; Bruno Lina; Gregory Destras; Gwendolynne Burfin; Hadrien Regue; Laurence Josset; Martine Valette; Quentin Semanas                                                                                                                                                                                                                                                                                                                                                                                                                                                                                                                                                                                |
| EPI_ISL_1322343                                                                                                                                                                                                                                                                                                                                                                                                                                                                                                                                                                                                                                                                                                                                                                                                                                                                                                                                                                                                                                                                                                                                                                                                                                                                                                                                                                                                                                                                                                                                                                                                                                                                                                                                                                                                                                                                                                                                                                                                                                                                                                                                                                                                                                                                                                                                                      | BIOLAB UNILABS BOUCICAUT                                                                                                  | CNR Virus des Infections Respiratoires - France SUD                                                                                                                             | Antonin Bal; Bruno Lina; Gregory Destras; Gwendolynne Burfin; Hadrien Regue; Laurence Josset; Martine Valette; Quentin Semanas                                                                                                                                                                                                                                                                                                                                                                                                                                                                                                                                                                                |
| EPI_ISL_1359892                                                                                                                                                                                                                                                                                                                                                                                                                                                                                                                                                                                                                                                                                                                                                                                                                                                                                                                                                                                                                                                                                                                                                                                                                                                                                                                                                                                                                                                                                                                                                                                                                                                                                                                                                                                                                                                                                                                                                                                                                                                                                                                                                                                                                                                                                                                                                      | BIOLAC - SIEGE                                                                                                            | CNR Virus des Infections Respiratoires - France SUD                                                                                                                             | Antonin Bal; Bruno Lina; Gregory Destras; Gwendolynne Burfin; Hadrien Regue; Laurence Josset; Martine Valette; Quentin Semanas                                                                                                                                                                                                                                                                                                                                                                                                                                                                                                                                                                                |
| EPI_ISL_1190840, EPI_ISL_1371893                                                                                                                                                                                                                                                                                                                                                                                                                                                                                                                                                                                                                                                                                                                                                                                                                                                                                                                                                                                                                                                                                                                                                                                                                                                                                                                                                                                                                                                                                                                                                                                                                                                                                                                                                                                                                                                                                                                                                                                                                                                                                                                                                                                                                                                                                                                                     | BIOLITTORAL BIOGROUP PLATEAU TECH                                                                                         | CNR Virus des Infections Respiratoires - France SUD                                                                                                                             | Antonin Bal; Bruno Lina; Gregory Destras; Gwendolynne Burfin; Hadrien Regue; Hadrien Règue; Laurence Josset; Martine Valette; Quentin Semanas                                                                                                                                                                                                                                                                                                                                                                                                                                                                                                                                                                 |
| EPI_ISL_1134907, EPI_ISL_1134915 to 1134968, EPI_ISL_1134970 to 1135026, EPI_ISL_1135029 to 1135037, EPI_ISL_1155702, EPI_ISL_1155704, EPI_ISL_1155706, EPI_ISL_1155708, EPI_ISL_1165900, EPI_ISL_1165902, EPI_ISL_1165904 to 1165905, EPI_ISL_1165907, EPI_ISL_1165911, EPI_ISL_1165913, EPI_ISL_1165919 to 1165932, EPI_ISL_1165936 to 1165945, EPI_ISL_1165951 to 1165952, EPI_ISL_1165955 to 1165957, EPI_ISL_1191634 to 1191637, EPI_ISL_1191639 to 1191641, EPI_ISL_1191644, EPI_ISL_1191647 to 1191672, EPI_ISL_1191684, EPI_ISL_1191686 to 1191700, EPI_ISL_1191702, EPI_ISL_1191707 to 1191708, EPI_ISL_1200656 to 1200837, EPI_ISL_1200843, EPI_ISL_1200847, EPI_ISL_1200849 to 1200850, EPI_ISL_1200852, EPI_ISL_1200854, EPI_ISL_1201781 to 1201851, EPI_ISL_1201853, EPI_ISL_1220200 to 1220303, EPI_ISL_1239445, EPI_ISL_1239449 to 1239451, EPI_ISL_1241862, EPI_ISL_1241866 to 1241875, EPI_ISL_1241880, EPI_ISL_1241891 to 1241906, EPI_ISL_1241908 to 1241913, EPI_ISL_1241915 to 1241927, EPI_ISL_1241929 to 1241932, EPI_ISL_1241934, EPI_ISL_1241936 to 1241954, EPI_ISL_1253538 to 1253542, EPI_ISL_1253544 to 1253547, EPI_ISL_1253549 to 1253551, EPI_ISL_1253558 to 1253559, EPI_ISL_1253565, EPI_ISL_1265470, EPI_ISL_1265472, EPI_ISL_1265475, EPI_ISL_1265478, EPI_ISL_1265480, EPI_ISL_1265484, EPI_ISL_1265487, EPI_ISL_1265492 to 1265493, EPI_ISL_1265495 to 1265496, EPI_ISL_1265502 to 1265505, EPI_ISL_1265508, EPI_ISL_1265518 to 1265545, EPI_ISL_1265547, EPI_ISL_1265556 to 1265569, EPI_ISL_1265572 to 1265577, EPI_ISL_1265587 to 1265590, EPI_ISL_1265607, EPI_ISL_1265715, EPI_ISL_1290837, EPI_ISL_1290841 to 1290854, EPI_ISL_1297204, EPI_ISL_1297206, EPI_ISL_1297210, EPI_ISL_1297215, EPI_ISL_1297217, EPI_ISL_1297228, EPI_ISL_1297319 to 1297320, EPI_ISL_1297322 to 1297333, EPI_ISL_1297423 to 1297434, EPI_ISL_1297437 to 1297453, EPI_ISL_1297460 to 1297471, EPI_ISL_1297480 to 1297486, EPI_ISL_1312377 to 1312381, EPI_ISL_1313052 to 1313079, EPI_ISL_1313085 to 1313090, EPI_ISL_1313093 to 1313113, EPI_ISL_1313116, EPI_ISL_1313118 to 1313119, EPI_ISL_1313157 to 1313159, EPI_ISL_1313161 to 1313162, EPI_ISL_1336512, EPI_ISL_1336518, EPI_ISL_1336523, EPI_ISL_1336526, EPI_ISL_1336528, EPI_ISL_1336533, EPI_ISL_1336536, EPI_ISL_1336547 to 1336549, EPI_ISL_1336563 to 1336564, EPI_ISL_1359965 |                                                                                                                           |                                                                                                                                                                                 |                                                                                                                                                                                                                                                                                                                                                                                                                                                                                                                                                                                                                                                                                                               |
| see above                                                                                                                                                                                                                                                                                                                                                                                                                                                                                                                                                                                                                                                                                                                                                                                                                                                                                                                                                                                                                                                                                                                                                                                                                                                                                                                                                                                                                                                                                                                                                                                                                                                                                                                                                                                                                                                                                                                                                                                                                                                                                                                                                                                                                                                                                                                                                            | BIOMNIS LYON                                                                                                              | CNR Virus des Infections Respiratoires - France SUD                                                                                                                             | Antonin Bal; Bruno Lina; Gregory Destras; Gwendolynne Burfin; Hadrien Regue; Laurence Josset; Martine Valette; Quentin Semanas                                                                                                                                                                                                                                                                                                                                                                                                                                                                                                                                                                                |
| EPI_ISL_1134908 to 1134914, EPI_ISL_1191680, EPI_ISL_1297205, EPI_ISL_1297207 to 1297209, EPI_ISL_1297211 to 1297214, EPI_ISL_1297218 to 1297227, EPI_ISL_1297229 to 1297306, EPI_ISL_1297308 to 1297318, EPI_ISL_1297321, EPI_ISL_1297385 to 1297420, EPI_ISL_1297456 to 1297459, EPI_ISL_1297472 to 1297479, EPI_ISL_1297487 to 1297488, EPI_ISL_1312367 to 1312376, EPI_ISL_1313080 to 1313081, EPI_ISL_1359787 to 1359789, EPI_ISL_1359836 to 1359857, EPI_ISL_1359869 to 1359881, EPI_ISL_1359883, EPI_ISL_1359885, EPI_ISL_1359902 to 1359904, EPI_ISL_1359955, EPI_ISL_1359961 to 1359963                                                                                                                                                                                                                                                                                                                                                                                                                                                                                                                                                                                                                                                                                                                                                                                                                                                                                                                                                                                                                                                                                                                                                                                                                                                                                                                                                                                                                                                                                                                                                                                                                                                                                                                                                                     |                                                                                                                           |                                                                                                                                                                                 |                                                                                                                                                                                                                                                                                                                                                                                                                                                                                                                                                                                                                                                                                                               |
| see above                                                                                                                                                                                                                                                                                                                                                                                                                                                                                                                                                                                                                                                                                                                                                                                                                                                                                                                                                                                                                                                                                                                                                                                                                                                                                                                                                                                                                                                                                                                                                                                                                                                                                                                                                                                                                                                                                                                                                                                                                                                                                                                                                                                                                                                                                                                                                            | BIOMNIS PARIS                                                                                                             | CNR Virus des Infections Respiratoires - France SUD                                                                                                                             | Antonin Bal; Bruno Lina; Gregory Destras; Gwendolynne Burfin; Hadrien Regue; Laurence Josset; Martine Valette; Quentin Semanas                                                                                                                                                                                                                                                                                                                                                                                                                                                                                                                                                                                |
| EPI_ISL_1219159 to 1219193, EPI_ISL_1219287 to 1219312, EPI_ISL_1219314 to 1219315, EPI_ISL_1219317, EPI_ISL_1219352 to 1219392, EPI_ISL_1219412 to 1219457, EPI_ISL_1219472 to 1219502, EPI_ISL_1219609 to 1219657, EPI_ISL_1312730 to 1312771                                                                                                                                                                                                                                                                                                                                                                                                                                                                                                                                                                                                                                                                                                                                                                                                                                                                                                                                                                                                                                                                                                                                                                                                                                                                                                                                                                                                                                                                                                                                                                                                                                                                                                                                                                                                                                                                                                                                                                                                                                                                                                                      |                                                                                                                           |                                                                                                                                                                                 |                                                                                                                                                                                                                                                                                                                                                                                                                                                                                                                                                                                                                                                                                                               |
| see above                                                                                                                                                                                                                                                                                                                                                                                                                                                                                                                                                                                                                                                                                                                                                                                                                                                                                                                                                                                                                                                                                                                                                                                                                                                                                                                                                                                                                                                                                                                                                                                                                                                                                                                                                                                                                                                                                                                                                                                                                                                                                                                                                                                                                                                                                                                                                            | BIOR                                                                                                                      | Latvian Biomedical Research and Study Centre                                                                                                                                    | Daina Pule; Davids Fridmanis; Guntars Zarins; Irena Meistere; Ivars Silamikelis; Janis Klovins; Janis Pjalkovskis; Juris Perevoscikovs; Kaspars Megnis; Laila Silamikele; Lauma Freimane; Laura Ansona; Liga Birniece; Monta Ustinova; Nikita Zrelavs; Uga Dumpis; Una Krumina; Vita Rovite                                                                                                                                                                                                                                                                                                                                                                                                                   |
| EPI_ISL_1226540                                                                                                                                                                                                                                                                                                                                                                                                                                                                                                                                                                                                                                                                                                                                                                                                                                                                                                                                                                                                                                                                                                                                                                                                                                                                                                                                                                                                                                                                                                                                                                                                                                                                                                                                                                                                                                                                                                                                                                                                                                                                                                                                                                                                                                                                                                                                                      | BOSTON HEART DIAGNOSTICS CORP                                                                                             | Wadsworth Center, New York State Department of Health                                                                                                                           | Alexis Russel; Daryl M. Lamson; Erasmus Schneider; Erica Lasek-Nesselquist; John Kelly; Jonathan Plitnick; Kirsten St. George; Matthew Shudt; Melissa A Leisner; Navjot Singh                                                                                                                                                                                                                                                                                                                                                                                                                                                                                                                                 |
| EPI_ISL_1241972 to 1241973,<br>EPI_ISL_1241990 to 1241991,<br>EPI_ISL_1253568 to 1253573,<br>EPI_ISL_1253577 to 1253578,<br>EPI_ISL_1265482, EPI_ISL_1265585 to 1265586                                                                                                                                                                                                                                                                                                                                                                                                                                                                                                                                                                                                                                                                                                                                                                                                                                                                                                                                                                                                                                                                                                                                                                                                                                                                                                                                                                                                                                                                                                                                                                                                                                                                                                                                                                                                                                                                                                                                                                                                                                                                                                                                                                                              | BOURG LES VALENCE                                                                                                         | CNR Virus des Infections Respiratoires - France SUD                                                                                                                             | Antonin Bal; Bruno Lina; Gregory Destras; Gwendolynne Burfin; Hadrien Regue; Laurence Josset; Martine Valette; Quentin Semanas                                                                                                                                                                                                                                                                                                                                                                                                                                                                                                                                                                                |
| EPI_ISL_1257855                                                                                                                                                                                                                                                                                                                                                                                                                                                                                                                                                                                                                                                                                                                                                                                                                                                                                                                                                                                                                                                                                                                                                                                                                                                                                                                                                                                                                                                                                                                                                                                                                                                                                                                                                                                                                                                                                                                                                                                                                                                                                                                                                                                                                                                                                                                                                      | BPOM Mamuju                                                                                                               | National Institute of Health Research and Development                                                                                                                           | Arie Ardiansyah Nugraha; Hana Apsari Pawestri; Hartanti Dian Ikawati; Kartika Dewi Puspa; Krisna Pangesti; Nelly Puspandari; Subangkit; Vivi Setiawaty                                                                                                                                                                                                                                                                                                                                                                                                                                                                                                                                                        |
| EPI_ISL_1239672, EPI_ISL_1273838                                                                                                                                                                                                                                                                                                                                                                                                                                                                                                                                                                                                                                                                                                                                                                                                                                                                                                                                                                                                                                                                                                                                                                                                                                                                                                                                                                                                                                                                                                                                                                                                                                                                                                                                                                                                                                                                                                                                                                                                                                                                                                                                                                                                                                                                                                                                     | BRUSS                                                                                                                     | 1. National Institute of Public Health - National Institute of Hygiene; 2. Eurofins Genomics Europe Sequencing GmbH                                                             | ECDC COVID-19 WGS support team; Eurofins Genomics Europe Sequencing Team; Gierczycki Rafa; Sadkowska-Todys Magorzata; Wokowicz Tomasz; Zacharczuk Katarzyna                                                                                                                                                                                                                                                                                                                                                                                                                                                                                                                                                   |
| EPI_ISL_1259400, EPI_ISL_1260834 to 1260836                                                                                                                                                                                                                                                                                                                                                                                                                                                                                                                                                                                                                                                                                                                                                                                                                                                                                                                                                                                                                                                                                                                                                                                                                                                                                                                                                                                                                                                                                                                                                                                                                                                                                                                                                                                                                                                                                                                                                                                                                                                                                                                                                                                                                                                                                                                          | BSL-3 Lab, National Institute for Viral Disease Control and Prevention, Chinese Center for Disease Control and Prevention | BSL-3 Lab, National Institute for Viral Disease Control and Prevention, Chinese Center for Disease Control and Prevention                                                       | Dayan Wang; George F. Gao; Guizhen Wu; Jing Zhang; Jun Han; Peipei Liu; Shumei Zou; Xiang Zhao; Yuchao Wu; Zhixiao Chen                                                                                                                                                                                                                                                                                                                                                                                                                                                                                                                                                                                       |
| EPI_ISL_1020186, EPI_ISL_1137600                                                                                                                                                                                                                                                                                                                                                                                                                                                                                                                                                                                                                                                                                                                                                                                                                                                                                                                                                                                                                                                                                                                                                                                                                                                                                                                                                                                                                                                                                                                                                                                                                                                                                                                                                                                                                                                                                                                                                                                                                                                                                                                                                                                                                                                                                                                                     | BSL3 Laboratory, Bogor, West Java                                                                                         | Biosafety Level-3 Laboratory, Indonesian Institute of Sciences (LIPI)                                                                                                           | Anggia Prasetyoputri; Eko Wahyu Putro; Gita Syahputra; Isa Nuryana; Rath Asmana Ningrum; Sri Swasthikawati; Sugiyono Saputra; Syam Budi Iryanto                                                                                                                                                                                                                                                                                                                                                                                                                                                                                                                                                               |
| EPI_ISL_1257832, EPI_ISL_1257864                                                                                                                                                                                                                                                                                                                                                                                                                                                                                                                                                                                                                                                                                                                                                                                                                                                                                                                                                                                                                                                                                                                                                                                                                                                                                                                                                                                                                                                                                                                                                                                                                                                                                                                                                                                                                                                                                                                                                                                                                                                                                                                                                                                                                                                                                                                                     | BTKL-PP Ambon                                                                                                             | National Institute of Health Research and Development                                                                                                                           | Arie Ardiansyah Nugraha; Hana Apsari Pawestri; Hartanti Dian Ikawati; Kartika Dewi Puspa; Krisna Pangesti; Nelly Puspandari; Subangkit; Vivi Setiawaty                                                                                                                                                                                                                                                                                                                                                                                                                                                                                                                                                        |
| EPI_ISL_1263459                                                                                                                                                                                                                                                                                                                                                                                                                                                                                                                                                                                                                                                                                                                                                                                                                                                                                                                                                                                                                                                                                                                                                                                                                                                                                                                                                                                                                                                                                                                                                                                                                                                                                                                                                                                                                                                                                                                                                                                                                                                                                                                                                                                                                                                                                                                                                      | BTKLPP Ambon                                                                                                              | National Institute of Health Research and Development                                                                                                                           | Arie Ardiansyah Nugraha; Hana Apsari Pawestri; Hartanti Dian Ikawati; Kartika Dewi Puspa; Krisna Pangesti; Nelly Puspandari; Subangkit; Vivi Setiawaty                                                                                                                                                                                                                                                                                                                                                                                                                                                                                                                                                        |
| EPI_ISL_1265441 to 1265462                                                                                                                                                                                                                                                                                                                                                                                                                                                                                                                                                                                                                                                                                                                                                                                                                                                                                                                                                                                                                                                                                                                                                                                                                                                                                                                                                                                                                                                                                                                                                                                                                                                                                                                                                                                                                                                                                                                                                                                                                                                                                                                                                                                                                                                                                                                                           | BTKLPP Kelas I Makassar                                                                                                   | Eijkman Institute for Molecular Biology, Ministry of Research and Technology/National Agency for Research and Innovation; National Institute of Health Research and Development | Amin Soebandrio; Edison Johar; Filasita A Yudhaputri; Hana Apsari Pawestri; Hidayat Trimarsanto; Iskandar Adnan; Khin Saw Myint; Lydia V. Panggalo; Safarina G Malik; Slamet; Sukma Oktavianthi; Vivi Setiawaty; Willy Agustine                                                                                                                                                                                                                                                                                                                                                                                                                                                                               |
| EPI_ISL_1081797 to 1081809,<br>EPI_ISL_1081823 to 1081826                                                                                                                                                                                                                                                                                                                                                                                                                                                                                                                                                                                                                                                                                                                                                                                                                                                                                                                                                                                                                                                                                                                                                                                                                                                                                                                                                                                                                                                                                                                                                                                                                                                                                                                                                                                                                                                                                                                                                                                                                                                                                                                                                                                                                                                                                                            | Baguio General Hospital and Medical Center                                                                                | Philippine Genome Center                                                                                                                                                        | Alethea R. de Guzman; Anna Ong-Lim; Arianne A. Zamora; Asia Louisa U. Chong; Benedict A. Maralit; Candice Francheska B. Tambaoan; Carlo M. Lapid; Celia Carlos; Cynthia P. Saloma; Devon Ray Pacial; Edsel Maurice Salvaña; El King D. Morado; Eva Maria Cutiongco-de la Paz; Francis A. Tablizo; Irish Coleen A. Asin; Jaime C. Montoya; Jan Michael C. Yap; Jo-Hannah S. Lames; John Q. Wong; Joshua Gregor A. Dizon; Juan Antonio R. Magalang; Karol Sophia Agape R. Padilla; Kenneth M. Kim; Kris P. Punayan; Marc Edsel C. Ayes; Marc Jerrone R. Castro; Maria Sofia L. Yangzon; Marissa Alejandria; Razel Nikka M. Hao; Rianna Patricia S. Cruz; Sheila Mae M. Araiza; and Maria Rosario Singh-Vergeire |
| EPI_ISL_1159375                                                                                                                                                                                                                                                                                                                                                                                                                                                                                                                                                                                                                                                                                                                                                                                                                                                                                                                                                                                                                                                                                                                                                                                                                                                                                                                                                                                                                                                                                                                                                                                                                                                                                                                                                                                                                                                                                                                                                                                                                                                                                                                                                                                                                                                                                                                                                      | Bahman Hospital                                                                                                           | Laboratory of Molecular Biology and Cancer Immunology, Lebanese University Public Health England                                                                                | Fadi Abdel Sater; Steven Pullan                                                                                                                                                                                                                                                                                                                                                                                                                                                                                                                                                                                                                                                                               |
| EPI_ISL_1020199                                                                                                                                                                                                                                                                                                                                                                                                                                                                                                                                                                                                                                                                                                                                                                                                                                                                                                                                                                                                                                                                                                                                                                                                                                                                                                                                                                                                                                                                                                                                                                                                                                                                                                                                                                                                                                                                                                                                                                                                                                                                                                                                                                                                                                                                                                                                                      | Balai Besar Rehabilitasi (BNN)                                                                                            | Biosafety Level-3 Laboratory, Indonesian Institute of Sciences (LIPI)                                                                                                           | Alfi T. Fathurahman; Idris; Linda Sukmarini; Masrukhin; Rath Asmana Ningrum; Ruby Setiawan; Sri Swasthikawati; Sugiyono Saputra                                                                                                                                                                                                                                                                                                                                                                                                                                                                                                                                                                               |

|                                                                                                                                                                                                                                                                                                                                                                                                                                                                                                                                                                                                                                                                                                                                                                                                                                                                                                                                                                                                                                                                                                                                                                                                                                                                                                                                                                                                                                                                                                                                                                                                                                                                                                                                                                                                                                                                                                                                                                                                                                                                                                                                                                                                                                                                                                                                                                                   |                                                                                                        |                                                                                                                                            |                                                                                                                                                                                                                                                                                                                                                                                   |
|-----------------------------------------------------------------------------------------------------------------------------------------------------------------------------------------------------------------------------------------------------------------------------------------------------------------------------------------------------------------------------------------------------------------------------------------------------------------------------------------------------------------------------------------------------------------------------------------------------------------------------------------------------------------------------------------------------------------------------------------------------------------------------------------------------------------------------------------------------------------------------------------------------------------------------------------------------------------------------------------------------------------------------------------------------------------------------------------------------------------------------------------------------------------------------------------------------------------------------------------------------------------------------------------------------------------------------------------------------------------------------------------------------------------------------------------------------------------------------------------------------------------------------------------------------------------------------------------------------------------------------------------------------------------------------------------------------------------------------------------------------------------------------------------------------------------------------------------------------------------------------------------------------------------------------------------------------------------------------------------------------------------------------------------------------------------------------------------------------------------------------------------------------------------------------------------------------------------------------------------------------------------------------------------------------------------------------------------------------------------------------------|--------------------------------------------------------------------------------------------------------|--------------------------------------------------------------------------------------------------------------------------------------------|-----------------------------------------------------------------------------------------------------------------------------------------------------------------------------------------------------------------------------------------------------------------------------------------------------------------------------------------------------------------------------------|
| EPI_ISL_1257818 to 1257822                                                                                                                                                                                                                                                                                                                                                                                                                                                                                                                                                                                                                                                                                                                                                                                                                                                                                                                                                                                                                                                                                                                                                                                                                                                                                                                                                                                                                                                                                                                                                                                                                                                                                                                                                                                                                                                                                                                                                                                                                                                                                                                                                                                                                                                                                                                                                        | Balai Litbangkes Papua                                                                                 | National Institute of Health Research and Development                                                                                      | Antonius Octavian; Arie Ardiansyah Nugraha; Hana Apsari Pawestri; Hartanti Dian Ikawati; Hotma Sitompul; Kartika Dewi Puspa; Krisna Pangesti; Nelly Puspandari; Subangkit; Vivi Setiawaty                                                                                                                                                                                         |
| EPI_ISL_1257830 to 1257831                                                                                                                                                                                                                                                                                                                                                                                                                                                                                                                                                                                                                                                                                                                                                                                                                                                                                                                                                                                                                                                                                                                                                                                                                                                                                                                                                                                                                                                                                                                                                                                                                                                                                                                                                                                                                                                                                                                                                                                                                                                                                                                                                                                                                                                                                                                                                        | Balai Litbangkes Tanah Bumbu                                                                           | National Institute of Health Research and Development                                                                                      | Arie Ardiansyah Nugraha; Hana Apsari Pawestri; Hartanti Dian Ikawati; Juhairiyah; Kartika Dewi Puspa; Krisna Pangesti; Nelly Puspandari; Subangkit; Syarif Hidayat; Vivi Setiawaty                                                                                                                                                                                                |
| EPI_ISL_1048406                                                                                                                                                                                                                                                                                                                                                                                                                                                                                                                                                                                                                                                                                                                                                                                                                                                                                                                                                                                                                                                                                                                                                                                                                                                                                                                                                                                                                                                                                                                                                                                                                                                                                                                                                                                                                                                                                                                                                                                                                                                                                                                                                                                                                                                                                                                                                                   | Balai Penelitian dan Pengembangan Biomedis Papua                                                       | National Institute of Health Research and Development                                                                                      | Anton Oktavianus; Arie Ardiansyah Nugraha; Hana Apsari Pawestri; Hartanti Dian Ikawati; Hotma Sitompul; Kartika Dewi Puspa; Krisna Nur Andriana Pangesti; Nelly Puspandari; Subangkit; Vivi Setiawaty.                                                                                                                                                                            |
| EPI_ISL_1302465 to 1302472, EPI_ISL_1302653 to 1302658, EPI_ISL_1357608, EPI_ISL_1357613, EPI_ISL_1357617, EPI_ISL_1357619 to 1357620, EPI_ISL_1357622 to 1357623, EPI_ISL_1357625 to 1357626, EPI_ISL_1357631                                                                                                                                                                                                                                                                                                                                                                                                                                                                                                                                                                                                                                                                                                                                                                                                                                                                                                                                                                                                                                                                                                                                                                                                                                                                                                                                                                                                                                                                                                                                                                                                                                                                                                                                                                                                                                                                                                                                                                                                                                                                                                                                                                    | see above                                                                                              | Baltic Medics                                                                                                                              | Lithuanian University of Health Sciences Hospital, Department of Genetics and Molecular Medicine                                                                                                                                                                                                                                                                                  |
| see above                                                                                                                                                                                                                                                                                                                                                                                                                                                                                                                                                                                                                                                                                                                                                                                                                                                                                                                                                                                                                                                                                                                                                                                                                                                                                                                                                                                                                                                                                                                                                                                                                                                                                                                                                                                                                                                                                                                                                                                                                                                                                                                                                                                                                                                                                                                                                                         | Baltic Medics                                                                                          | Lithuanian University of Health Sciences Hospital, Department of Genetics and Molecular Medicine                                           | Astra Vitkauskienė; Darius Cereskevicius; Inga Nasvytiene; Mantas Sarauskas; Marius Sukys; Rasa Ugenskiene; Renaldas Jurkevicius; Zivile Zemeckiene                                                                                                                                                                                                                               |
| EPI_ISL_1265369                                                                                                                                                                                                                                                                                                                                                                                                                                                                                                                                                                                                                                                                                                                                                                                                                                                                                                                                                                                                                                                                                                                                                                                                                                                                                                                                                                                                                                                                                                                                                                                                                                                                                                                                                                                                                                                                                                                                                                                                                                                                                                                                                                                                                                                                                                                                                                   | Barts Health NHS Trust                                                                                 | Barts Health NHS Trust                                                                                                                     | BROAD; Beatrix; CUTINO-MOGUEL; Claire; David; Dola; Esin; HARRINGTON; KARAA; KELE; KULASEGARAN-SHYLINI; Maria-Teresa; OWOYEMI; Raghavendran                                                                                                                                                                                                                                       |
| EPI_ISL_1048053 to 1048135, EPI_ISL_1050356, EPI_ISL_1177989 to 1178008, EPI_ISL_1247947, EPI_ISL_1308949 to 1308950                                                                                                                                                                                                                                                                                                                                                                                                                                                                                                                                                                                                                                                                                                                                                                                                                                                                                                                                                                                                                                                                                                                                                                                                                                                                                                                                                                                                                                                                                                                                                                                                                                                                                                                                                                                                                                                                                                                                                                                                                                                                                                                                                                                                                                                              | Barts Health NHS Trust                                                                                 | COVID-19 Genomics UK (COG-UK) Consortium                                                                                                   | BROAD; Beatrix; CUTINO-MOGUEL; Claire; David; Dola; HARRINGTON; KELE; KULASEGARAN-SHYLINI; Maria-Teresa; OWOYEMI; Raghavendran                                                                                                                                                                                                                                                    |
| EPI_ISL_1069187                                                                                                                                                                                                                                                                                                                                                                                                                                                                                                                                                                                                                                                                                                                                                                                                                                                                                                                                                                                                                                                                                                                                                                                                                                                                                                                                                                                                                                                                                                                                                                                                                                                                                                                                                                                                                                                                                                                                                                                                                                                                                                                                                                                                                                                                                                                                                                   | Batangas Provincial Health Office                                                                      | Research Institute for Tropical Medicine                                                                                                   | Catalino Demetria; Daria Manalo; Edelwisa Mercado; Francisco Gerardo Polotan; Hannah Leah Morito; Inez Andrea Medado; John Leonard Chan; Joseph Hughes; Kirstyn Brunker; Ma Angelica Tujan; Othoniel Jan Onza                                                                                                                                                                     |
| EPI_ISL_1143696 to 1143704, EPI_ISL_1143706 to 1143745, EPI_ISL_1143747 to 1143812, EPI_ISL_1143814 to 1143815, EPI_ISL_1143821, EPI_ISL_1143829 to 1143832, EPI_ISL_1143834 to 1143846, EPI_ISL_1143945 to 1143963, EPI_ISL_1143965 to 1143979, EPI_ISL_1143981 to 1143994, EPI_ISL_1143996 to 1143998, EPI_ISL_1144000 to 1144012, EPI_ISL_1144012 to 1144018, EPI_ISL_1144112 to 1144118, EPI_ISL_1148059 to 1148060, EPI_ISL_1148075 to 1148077, EPI_ISL_1148079, EPI_ISL_1148081 to 1148084, EPI_ISL_1148087, EPI_ISL_1148089 to 1148092, EPI_ISL_1148094 to 1148104, EPI_ISL_1148106 to 1148107, EPI_ISL_1148109, EPI_ISL_1148111, EPI_ISL_1148113 to 1148114, EPI_ISL_1148116 to 1148123, EPI_ISL_1148125 to 1148128, EPI_ISL_1148130 to 1148135, EPI_ISL_1148137 to 1148139, EPI_ISL_1148141 to 1148148, EPI_ISL_1148150, EPI_ISL_1148152 to 1148156, EPI_ISL_1148158, EPI_ISL_1148160, EPI_ISL_1148162, EPI_ISL_1151810 to 1151815, EPI_ISL_1151817 to 1151821, EPI_ISL_1151823 to 1151829, EPI_ISL_1151831, EPI_ISL_1151833 to 1151840, EPI_ISL_1151842, EPI_ISL_1151844 to 1151858, EPI_ISL_1151860 to 1151864, EPI_ISL_1151866, EPI_ISL_1151868 to 1151870, EPI_ISL_1151872 to 1151885, EPI_ISL_1151889, EPI_ISL_1157277, EPI_ISL_1157279, EPI_ISL_1157281, EPI_ISL_1157283, EPI_ISL_1157285, EPI_ISL_1157287 to 1157288, EPI_ISL_1157291 to 1157295, EPI_ISL_1157297 to 1157299, EPI_ISL_1157302 to 1157304, EPI_ISL_1157306 to 1157307, EPI_ISL_1157309 to 1157310, EPI_ISL_1157312 to 1157327, EPI_ISL_1157329 to 1157333, EPI_ISL_1157336 to 1157338, EPI_ISL_1157340 to 1157361, EPI_ISL_1280602, EPI_ISL_1280604 to 1280605, EPI_ISL_1280608 to 1280609, EPI_ISL_1280611, EPI_ISL_1280613 to 1280617, EPI_ISL_1280619, EPI_ISL_1280621 to 1280644, EPI_ISL_1280646 to 1280647, EPI_ISL_1280649 to 1280661, EPI_ISL_1280665, EPI_ISL_1348979 to 1348990, EPI_ISL_1348992 to 1349026, EPI_ISL_1349028 to 1349074, EPI_ISL_1349076, EPI_ISL_1349079, EPI_ISL_1349081, EPI_ISL_1349083, EPI_ISL_1349086, EPI_ISL_1349088, EPI_ISL_1349090, EPI_ISL_1349092, EPI_ISL_1349094 to 1349141, EPI_ISL_1349143 to 1349146, EPI_ISL_1349148, EPI_ISL_1357068 to 1357094, EPI_ISL_1357096 to 1357127, EPI_ISL_1357129 to 1357131, EPI_ISL_1357133 to 1357157, EPI_ISL_1357159 to 1357184, EPI_ISL_1357186 to 1357210, EPI_ISL_1357212 to 1357232, EPI_ISL_1357234 to 1357238 | see above                                                                                              | Bayerisches Landesamt für Gesundheit und Lebensmittelsicherheit (LGL)                                                                      | Robert Koch Institute                                                                                                                                                                                                                                                                                                                                                             |
| EPI_ISL_1112947 to 1113041                                                                                                                                                                                                                                                                                                                                                                                                                                                                                                                                                                                                                                                                                                                                                                                                                                                                                                                                                                                                                                                                                                                                                                                                                                                                                                                                                                                                                                                                                                                                                                                                                                                                                                                                                                                                                                                                                                                                                                                                                                                                                                                                                                                                                                                                                                                                                        | Baylor College of Medicine/ GCID                                                                       | Baylor College of Medicine/ GCID                                                                                                           | David Henke; Donna Muzny; Erin Nicholson; George Weissenberger; Ginger Metcalf; Harsha Doddapaneni; Hsu Chao; Hua Shen; Joseph F. Petrosino; Kavya Kottapalli; Kristi L. Hoffman; Matthew C. Ross; Matthew Wong; Pedro Piedra; Qingchang Meng; Richard Suggang; Sara J.J. Cregeen; Sejal Salvi; Tulin Ayvaz; Vasanthi Avadhanula; Vipin Menon; Yimithi Meiheerguli; Zeineen Momin |
| EPI_ISL_1109635, EPI_ISL_1182692, EPI_ISL_1191094, EPI_ISL_1195294, EPI_ISL_1231436, EPI_ISL_1307717, EPI_ISL_1311848                                                                                                                                                                                                                                                                                                                                                                                                                                                                                                                                                                                                                                                                                                                                                                                                                                                                                                                                                                                                                                                                                                                                                                                                                                                                                                                                                                                                                                                                                                                                                                                                                                                                                                                                                                                                                                                                                                                                                                                                                                                                                                                                                                                                                                                             | see above                                                                                              | Baylor Esoteric + Molecular Lab                                                                                                            | Baylor Esoteric + Molecular Lab                                                                                                                                                                                                                                                                                                                                                   |
| see above                                                                                                                                                                                                                                                                                                                                                                                                                                                                                                                                                                                                                                                                                                                                                                                                                                                                                                                                                                                                                                                                                                                                                                                                                                                                                                                                                                                                                                                                                                                                                                                                                                                                                                                                                                                                                                                                                                                                                                                                                                                                                                                                                                                                                                                                                                                                                                         | Baylor Esoteric + Molecular Lab                                                                        | Baylor Esoteric + Molecular Lab                                                                                                            | Dawn Richards; Elizabeth Forrester; Elizabeth Forrester and Dawn Richards                                                                                                                                                                                                                                                                                                         |
| EPI_ISL_1058066                                                                                                                                                                                                                                                                                                                                                                                                                                                                                                                                                                                                                                                                                                                                                                                                                                                                                                                                                                                                                                                                                                                                                                                                                                                                                                                                                                                                                                                                                                                                                                                                                                                                                                                                                                                                                                                                                                                                                                                                                                                                                                                                                                                                                                                                                                                                                                   | Baylor Scott & White - Irving                                                                          | Baylor Scott & White-Temple                                                                                                                | Ari Rao; Kimberly Walker; Linden Morales; Marcus Volz; Shelby Hendrickson                                                                                                                                                                                                                                                                                                         |
| EPI_ISL_1058061                                                                                                                                                                                                                                                                                                                                                                                                                                                                                                                                                                                                                                                                                                                                                                                                                                                                                                                                                                                                                                                                                                                                                                                                                                                                                                                                                                                                                                                                                                                                                                                                                                                                                                                                                                                                                                                                                                                                                                                                                                                                                                                                                                                                                                                                                                                                                                   | Baylor Scott & White - Southlake Family Medicine                                                       | Baylor Scott & White-Temple                                                                                                                | Ari Rao; Kimberly Walker; Linden Morales; Marcus Volz; Shelby Hendrickson                                                                                                                                                                                                                                                                                                         |
| EPI_ISL_1109990, EPI_ISL_1110024, EPI_ISL_1110026, EPI_ISL_1172020, EPI_ISL_1235680, EPI_ISL_1292089                                                                                                                                                                                                                                                                                                                                                                                                                                                                                                                                                                                                                                                                                                                                                                                                                                                                                                                                                                                                                                                                                                                                                                                                                                                                                                                                                                                                                                                                                                                                                                                                                                                                                                                                                                                                                                                                                                                                                                                                                                                                                                                                                                                                                                                                              | Baylor Scott & White-Irving                                                                            | Baylor Scott & White-Temple                                                                                                                | Ari Rao; Caitlin Maloney; Kimberly Walker; Linden Morales; Marcus Volz; Shelby Hendrickson                                                                                                                                                                                                                                                                                        |
| EPI_ISL_1080853, EPI_ISL_1080855, EPI_ISL_1080857, EPI_ISL_1081136, EPI_ISL_1081149 to 1081151, EPI_ISL_1081171 to 1081191, EPI_ISL_1097018, EPI_ISL_110290 to 1110292, EPI_ISL_1110294, EPI_ISL_1171707, EPI_ISL_1171710 to 1171711, EPI_ISL_1171770, EPI_ISL_1172018 to 1172019, EPI_ISL_1172021, EPI_ISL_1180229, EPI_ISL_1180231, EPI_ISL_1180235, EPI_ISL_1180237 to 1180238, EPI_ISL_1180258, EPI_ISL_1180279, EPI_ISL_1180669 to 1180670, EPI_ISL_1180958, EPI_ISL_1235678 to 1235679, EPI_ISL_1235681 to 1235685                                                                                                                                                                                                                                                                                                                                                                                                                                                                                                                                                                                                                                                                                                                                                                                                                                                                                                                                                                                                                                                                                                                                                                                                                                                                                                                                                                                                                                                                                                                                                                                                                                                                                                                                                                                                                                                          | see above                                                                                              | Baylor Scott & White-Temple                                                                                                                | Baylor Scott & White-Temple                                                                                                                                                                                                                                                                                                                                                       |
| see above                                                                                                                                                                                                                                                                                                                                                                                                                                                                                                                                                                                                                                                                                                                                                                                                                                                                                                                                                                                                                                                                                                                                                                                                                                                                                                                                                                                                                                                                                                                                                                                                                                                                                                                                                                                                                                                                                                                                                                                                                                                                                                                                                                                                                                                                                                                                                                         | Baylor Scott & White-Temple                                                                            | Baylor Scott & White-Temple                                                                                                                | Ari Rao; Caitlin Maloney; Kimberly Walker; Linden Morales; Marcus Volz; Shelby Hendrickson; ri Rao                                                                                                                                                                                                                                                                                |
| EPI_ISL_1117376 to 1117378, EPI_ISL_1168770 to 1168771                                                                                                                                                                                                                                                                                                                                                                                                                                                                                                                                                                                                                                                                                                                                                                                                                                                                                                                                                                                                                                                                                                                                                                                                                                                                                                                                                                                                                                                                                                                                                                                                                                                                                                                                                                                                                                                                                                                                                                                                                                                                                                                                                                                                                                                                                                                            | Beijing Center for Disease Prevention and Control                                                      | Beijing Center for Disease Prevention and Control                                                                                          | Bing Lyu; Daitao Zhang; Fu Li; Lijuan Chen; Quanyi Wang; Shujuan Cui; Yang Pan; Zhaoimin Feng; Zhichao Liang                                                                                                                                                                                                                                                                      |
| EPI_ISL_1085362, EPI_ISL_1085413, EPI_ISL_1085934 to 1085935                                                                                                                                                                                                                                                                                                                                                                                                                                                                                                                                                                                                                                                                                                                                                                                                                                                                                                                                                                                                                                                                                                                                                                                                                                                                                                                                                                                                                                                                                                                                                                                                                                                                                                                                                                                                                                                                                                                                                                                                                                                                                                                                                                                                                                                                                                                      | Besançon Laboratoire CBM25 Terre Rouge                                                                 | Department of Virology, Henri Mondor University Hospital, Assistance Publique Hôpitaux de Paris, Université Paris-Est Créteil, INSERM U955 | Alexandre Soulier; Christophe Rodriguez; Elisabeth Trawinski; Guillaume Gricourt; Jean-Michel Pawlowsky; Melissa N'Debi; Slim Fourati; Vanessa Demontant                                                                                                                                                                                                                          |
| EPI_ISL_1072964                                                                                                                                                                                                                                                                                                                                                                                                                                                                                                                                                                                                                                                                                                                                                                                                                                                                                                                                                                                                                                                                                                                                                                                                                                                                                                                                                                                                                                                                                                                                                                                                                                                                                                                                                                                                                                                                                                                                                                                                                                                                                                                                                                                                                                                                                                                                                                   | Bhayangkara Hospital Medan                                                                             | Institute of Tropical Disease, Universitas Airlangga; Faculty of Medicine, Universitas Sumatera Utara                                      | Aldise M Nastri; Franciscus Ginting; Inke N D Lubis; Irbah R Nainggolan; Jezy R Dewantari; Kazufumi Shimizu; Krisnoadi Rahardjo; Maria I Lusida; Meliani; Mirzan Hasibuan; Muhammad Ichwan; R Andika D Cahyadi; R Lia Kusumawati; Ramadhan Bestari; Rima R Prasetya; Soetjipto; Yasuko Mori                                                                                       |
| EPI_ISL_1069153                                                                                                                                                                                                                                                                                                                                                                                                                                                                                                                                                                                                                                                                                                                                                                                                                                                                                                                                                                                                                                                                                                                                                                                                                                                                                                                                                                                                                                                                                                                                                                                                                                                                                                                                                                                                                                                                                                                                                                                                                                                                                                                                                                                                                                                                                                                                                                   | Binjai Health Office                                                                                   | Institute of Tropical Disease, Universitas Airlangga; Fakultas Kedokteran, Universitas Sumatra Utara                                       | Aldise M Nastri; Franciscus Ginting; Inke N D Lubis; Irbah R Nainggolan; Jezy R Dewantari; Kazufumi Shimizu; Krisnoadi Rahardjo; Maria I Lusida; Meliani; Mirzan Hasibuan; Muhammad Ichwan; R Andika D Cahyadi; R Lia Kusumawati; Ramadhan Bestari; Rima R Prasetya; Soetjipto; Yasuko Mori                                                                                       |
| EPI_ISL_1273084 to 1273096                                                                                                                                                                                                                                                                                                                                                                                                                                                                                                                                                                                                                                                                                                                                                                                                                                                                                                                                                                                                                                                                                                                                                                                                                                                                                                                                                                                                                                                                                                                                                                                                                                                                                                                                                                                                                                                                                                                                                                                                                                                                                                                                                                                                                                                                                                                                                        | Biochemistry and Molecular Biology Department-Faculty of Medicine, Al-Quds University                  | Biochemistry and Molecular Biology Department-Faculty of Medicine, Al-Quds University                                                      | Al-Jawabreh, A.; Al-Jawabreh, H.; Dumaidi, K.; Ereقات, S.; Nasereddin, A.                                                                                                                                                                                                                                                                                                         |
| EPI_ISL_1000795 to 1000881, EPI_ISL_1000883 to 1000909, EPI_ISL_1000911 to 1000925, EPI_ISL_1000927 to 1000933, EPI_ISL_1000935 to 1000939, EPI_ISL_1000941 to 1000959, EPI_ISL_1000961 to 1000966, EPI_ISL_1054710 to 1054755, EPI_ISL_1054757 to 1054769, EPI_ISL_1054771 to 1054774, EPI_ISL_1054776 to 1054794, EPI_ISL_1054796 to 1054851, EPI_ISL_1054853 to 1054860, EPI_ISL_1180105 to 1180140, EPI_ISL_1250310 to 1250317                                                                                                                                                                                                                                                                                                                                                                                                                                                                                                                                                                                                                                                                                                                                                                                                                                                                                                                                                                                                                                                                                                                                                                                                                                                                                                                                                                                                                                                                                                                                                                                                                                                                                                                                                                                                                                                                                                                                                | see above                                                                                              | Bioinformatics and Biostatistics Lab, Advanced Sequencing Facility                                                                         | COVID-19 Genomics UK (COG-UK) Consortium                                                                                                                                                                                                                                                                                                                                          |
| see above                                                                                                                                                                                                                                                                                                                                                                                                                                                                                                                                                                                                                                                                                                                                                                                                                                                                                                                                                                                                                                                                                                                                                                                                                                                                                                                                                                                                                                                                                                                                                                                                                                                                                                                                                                                                                                                                                                                                                                                                                                                                                                                                                                                                                                                                                                                                                                         | Bioinformatics and Biostatistics Lab, Advanced Sequencing Facility                                     | COVID-19 Genomics UK (COG-UK) Consortium                                                                                                   | Aengus Stewart; Chelsea Sawyer; Harshil Patel; Jerome Nicod; Laura Cubitt; Margaret Crawford                                                                                                                                                                                                                                                                                      |
| EPI_ISL_1383233 to 1383234                                                                                                                                                                                                                                                                                                                                                                                                                                                                                                                                                                                                                                                                                                                                                                                                                                                                                                                                                                                                                                                                                                                                                                                                                                                                                                                                                                                                                                                                                                                                                                                                                                                                                                                                                                                                                                                                                                                                                                                                                                                                                                                                                                                                                                                                                                                                                        | Bioinformatics and Life Sciences, Noblis                                                               | Bioinformatics and Life Sciences, Noblis                                                                                                   | Brinkac; Diepold, S.; Kang, J.; Kolakowski; L.F.; L.M.; Mitchell, S.; Nelson; W.M. and Jennings, K.                                                                                                                                                                                                                                                                               |
| EPI_ISL_1089783, EPI_ISL_1116758                                                                                                                                                                                                                                                                                                                                                                                                                                                                                                                                                                                                                                                                                                                                                                                                                                                                                                                                                                                                                                                                                                                                                                                                                                                                                                                                                                                                                                                                                                                                                                                                                                                                                                                                                                                                                                                                                                                                                                                                                                                                                                                                                                                                                                                                                                                                                  | Biomed Diagnostic Laboratories                                                                         | Biomed Diagnostic Laboratories                                                                                                             | Ahmad Tibi; Amid Abdelnour; Badia Sadeddin; Eiad Atwa; Issa Abu-Dayyeh; Lama Hussein; Shayma Ali                                                                                                                                                                                                                                                                                  |
| EPI_ISL_1040927                                                                                                                                                                                                                                                                                                                                                                                                                                                                                                                                                                                                                                                                                                                                                                                                                                                                                                                                                                                                                                                                                                                                                                                                                                                                                                                                                                                                                                                                                                                                                                                                                                                                                                                                                                                                                                                                                                                                                                                                                                                                                                                                                                                                                                                                                                                                                                   | Biología molecular de enfermedades emergentes y EPOC, Instituto Nacional de Enfermedades Respiratorias | Biología molecular de enfermedades emergentes y EPOC, Instituto Nacional de Enfermedades Respiratorias                                     | Hernández-Teran Alejandra; Mejía-Nepomuceno Fidencio; Perez-Padilla Rogelio; Ramirez-Gonzalez Ernesto.; Rodríguez-Maldonado Abril; Salas-Hernández Jorge; Serna Ricardo; Vazquez-Perez Joel Armando; Wong-Arambula Claudia                                                                                                                                                        |
| EPI_ISL_1015380, EPI_ISL_1081098, EPI_ISL_1081100 to 1081101, EPI_ISL_1081103 to 1081104, EPI_ISL_1081106 to 1081107, EPI_ISL_1081110 to 1081113                                                                                                                                                                                                                                                                                                                                                                                                                                                                                                                                                                                                                                                                                                                                                                                                                                                                                                                                                                                                                                                                                                                                                                                                                                                                                                                                                                                                                                                                                                                                                                                                                                                                                                                                                                                                                                                                                                                                                                                                                                                                                                                                                                                                                                  | Biology Lab, HIA BEGIN                                                                                 | IRBA, 2MI                                                                                                                                  | CHAPUS C.; DEPEILLE A.; GORGE O.; JARJAVAL F.; MERENS-GONTIER A.; NOLENT F.; SARILAR V.                                                                                                                                                                                                                                                                                           |
| EPI_ISL_1015382                                                                                                                                                                                                                                                                                                                                                                                                                                                                                                                                                                                                                                                                                                                                                                                                                                                                                                                                                                                                                                                                                                                                                                                                                                                                                                                                                                                                                                                                                                                                                                                                                                                                                                                                                                                                                                                                                                                                                                                                                                                                                                                                                                                                                                                                                                                                                                   | Biology Lab, HIA CLERMONT-TONNERRE                                                                     | IRBA, 2MI                                                                                                                                  | DESIDERI C.; GORGE O.; NOLENT F.; SARILAR V.                                                                                                                                                                                                                                                                                                                                      |
| EPI_ISL_1015369, EPI_ISL_1015376, EPI_ISL_1015378, EPI_ISL_1015383 to 1015387, EPI_ISL_1015390, EPI_ISL_1015408 to 1015413, EPI_ISL_1081108 to 1081109, EPI_ISL_1081114 to 1081130                                                                                                                                                                                                                                                                                                                                                                                                                                                                                                                                                                                                                                                                                                                                                                                                                                                                                                                                                                                                                                                                                                                                                                                                                                                                                                                                                                                                                                                                                                                                                                                                                                                                                                                                                                                                                                                                                                                                                                                                                                                                                                                                                                                                | see above                                                                                              | Biology Lab, HIA PERCY                                                                                                                     | IRBA, 2MI                                                                                                                                                                                                                                                                                                                                                                         |
| see above                                                                                                                                                                                                                                                                                                                                                                                                                                                                                                                                                                                                                                                                                                                                                                                                                                                                                                                                                                                                                                                                                                                                                                                                                                                                                                                                                                                                                                                                                                                                                                                                                                                                                                                                                                                                                                                                                                                                                                                                                                                                                                                                                                                                                                                                                                                                                                         | Biology Lab, HIA PERCY                                                                                 | IRBA, 2MI                                                                                                                                  | CHAPUS C.; DEPEILLE A.; FOISSAUD V.; GORGE O.; JARJAVAL F.; NOLENT F.; SARILAR V.; VERGUET N.                                                                                                                                                                                                                                                                                     |
| EPI_ISL_1015379, EPI_ISL_1081131 to 1081134                                                                                                                                                                                                                                                                                                                                                                                                                                                                                                                                                                                                                                                                                                                                                                                                                                                                                                                                                                                                                                                                                                                                                                                                                                                                                                                                                                                                                                                                                                                                                                                                                                                                                                                                                                                                                                                                                                                                                                                                                                                                                                                                                                                                                                                                                                                                       | Biology Lab, HIA STE-ANNE                                                                              | IRBA, 2MI                                                                                                                                  | GORGE O.; JANVIER F.; NOLENT F.; OTTO M.-P.; SARILAR V.; VERGUET N.                                                                                                                                                                                                                                                                                                               |
| EPI_ISL_1039212                                                                                                                                                                                                                                                                                                                                                                                                                                                                                                                                                                                                                                                                                                                                                                                                                                                                                                                                                                                                                                                                                                                                                                                                                                                                                                                                                                                                                                                                                                                                                                                                                                                                                                                                                                                                                                                                                                                                                                                                                                                                                                                                                                                                                                                                                                                                                                   | Biosafety Level 3 (BSL-3) core facility at Huazhong Agricultural University                            | State Key Laboratory of Agriculture Microbiology, Huazhong Agric Laboratory of Animal Virology, College of Veterinary                      | Yufei Zhang Kun HuangZhong Zou Meilin Jin                                                                                                                                                                                                                                                                                                                                         |



|                                                                                                                                                                                                                                                                                                                                                                                                                                                                                                                                                                                                                                                                                                                                                                                                                                                                                                                                                                                                                                                                                                                                                                                                                                                                                                                                                                                                                                                                                                                                                                                                                                                                                                                                                                                                                                                                                                                                                                                                                                                                                                                                                                                                                                                                                                                                                                                                                                                                                                                                                                                                                                                                                                                                                                                                                                                                                                                                                                                                                                                                                                                                                                                                                                                                   |                                      |                                                                                                                                            |                                                                                                                                                                                                 |
|-------------------------------------------------------------------------------------------------------------------------------------------------------------------------------------------------------------------------------------------------------------------------------------------------------------------------------------------------------------------------------------------------------------------------------------------------------------------------------------------------------------------------------------------------------------------------------------------------------------------------------------------------------------------------------------------------------------------------------------------------------------------------------------------------------------------------------------------------------------------------------------------------------------------------------------------------------------------------------------------------------------------------------------------------------------------------------------------------------------------------------------------------------------------------------------------------------------------------------------------------------------------------------------------------------------------------------------------------------------------------------------------------------------------------------------------------------------------------------------------------------------------------------------------------------------------------------------------------------------------------------------------------------------------------------------------------------------------------------------------------------------------------------------------------------------------------------------------------------------------------------------------------------------------------------------------------------------------------------------------------------------------------------------------------------------------------------------------------------------------------------------------------------------------------------------------------------------------------------------------------------------------------------------------------------------------------------------------------------------------------------------------------------------------------------------------------------------------------------------------------------------------------------------------------------------------------------------------------------------------------------------------------------------------------------------------------------------------------------------------------------------------------------------------------------------------------------------------------------------------------------------------------------------------------------------------------------------------------------------------------------------------------------------------------------------------------------------------------------------------------------------------------------------------------------------------------------------------------------------------------------------------|--------------------------------------|--------------------------------------------------------------------------------------------------------------------------------------------|-------------------------------------------------------------------------------------------------------------------------------------------------------------------------------------------------|
| 1353677, EPI_ISL_1353680, EPI_ISL_1353688 to 1353690, EPI_ISL_1353692 to 1353694, EPI_ISL_1353697, EPI_ISL_1353700, EPI_ISL_1353706 to 1353707, EPI_ISL_1353711, EPI_ISL_1353715, EPI_ISL_1353721 to 1353722, EPI_ISL_1353724 to 1353725, EPI_ISL_1353727, EPI_ISL_1353733 to 1353734, EPI_ISL_1353737, EPI_ISL_1353741, EPI_ISL_1353743 to 1353744, EPI_ISL_1353746 to 1353747, EPI_ISL_1353751, EPI_ISL_1353753, EPI_ISL_1353755 to 1353757, EPI_ISL_1353764, EPI_ISL_1353768, EPI_ISL_1353773 to 1353775, EPI_ISL_1353783, EPI_ISL_1353789, EPI_ISL_1353792, EPI_ISL_1353794, EPI_ISL_1353799, EPI_ISL_1353804, EPI_ISL_1353811 to 1353814, EPI_ISL_1353816 to 1353818, EPI_ISL_1353821, EPI_ISL_1353824 to 1353825, EPI_ISL_1353831, EPI_ISL_1353835, EPI_ISL_1353840 to 1353842, EPI_ISL_1353845 to 1353849, EPI_ISL_1353854 to 1353855, EPI_ISL_1353858, EPI_ISL_1353864, EPI_ISL_1353866 to 1353867, EPI_ISL_1353871 to 1353872, EPI_ISL_1353874, EPI_ISL_1353878 to 1353879, EPI_ISL_1353881, EPI_ISL_1353886 to 1353887, EPI_ISL_1353892, EPI_ISL_1353895, EPI_ISL_1353897 to 1353898, EPI_ISL_1353900 to 1353904, EPI_ISL_1353910, EPI_ISL_1353912, EPI_ISL_1353915 to 1353917, EPI_ISL_1353921 to 1353922, EPI_ISL_1353926, EPI_ISL_1353934 to 1353935, EPI_ISL_1353942, EPI_ISL_1353944 to 1353945, EPI_ISL_1353948, EPI_ISL_1353950 to 1353951, EPI_ISL_1353953, EPI_ISL_1353956, EPI_ISL_1353958, EPI_ISL_1353966 to 1353967, EPI_ISL_1353969 to 1353971, EPI_ISL_1353974, EPI_ISL_1353978, EPI_ISL_1353981, EPI_ISL_1353984, EPI_ISL_1353987, EPI_ISL_1354015, EPI_ISL_1354017, EPI_ISL_1354026, EPI_ISL_1354061, EPI_ISL_1354128, EPI_ISL_1354157, EPI_ISL_1354161, EPI_ISL_1354187, EPI_ISL_1354228, EPI_ISL_1354230, EPI_ISL_1354250                                                                                                                                                                                                                                                                                                                                                                                                                                                                                                                                                                                                                                                                                                                                                                                                                                                                                                                                                                                                                                                                                                                                                                                                                                                                                                                                                                                                                                                                                                            | Bioscientia Labor Wermsdorf          | Robert Koch Institute                                                                                                                      |                                                                                                                                                                                                 |
| see above                                                                                                                                                                                                                                                                                                                                                                                                                                                                                                                                                                                                                                                                                                                                                                                                                                                                                                                                                                                                                                                                                                                                                                                                                                                                                                                                                                                                                                                                                                                                                                                                                                                                                                                                                                                                                                                                                                                                                                                                                                                                                                                                                                                                                                                                                                                                                                                                                                                                                                                                                                                                                                                                                                                                                                                                                                                                                                                                                                                                                                                                                                                                                                                                                                                         |                                      |                                                                                                                                            |                                                                                                                                                                                                 |
| EPI_ISL_1142292, EPI_ISL_1142299, EPI_ISL_1142307 to 1142308, EPI_ISL_1142319, EPI_ISL_1142329, EPI_ISL_1142355, EPI_ISL_1142369, EPI_ISL_1142399, EPI_ISL_1142418, EPI_ISL_1142428, EPI_ISL_1142452, EPI_ISL_1142512, EPI_ISL_1142514, EPI_ISL_1142521, EPI_ISL_1142523, EPI_ISL_1143045, EPI_ISL_1143055, EPI_ISL_1143060, EPI_ISL_1143091, EPI_ISL_1143124 to 1143125, EPI_ISL_1143152, EPI_ISL_1143179, EPI_ISL_1143185 to 1143186, EPI_ISL_1143194, EPI_ISL_1143230, EPI_ISL_1143154, EPI_ISL_1145183, EPI_ISL_1145192, EPI_ISL_1145926, EPI_ISL_1145992, EPI_ISL_1146098 to 1146099, EPI_ISL_1146113, EPI_ISL_1146124, EPI_ISL_1148176, EPI_ISL_1148222, EPI_ISL_1148245, EPI_ISL_1148250, EPI_ISL_1148284, EPI_ISL_1148301, EPI_ISL_1148324, EPI_ISL_1148347, EPI_ISL_1148364 to 1148365, EPI_ISL_1148426, EPI_ISL_1148430, EPI_ISL_1150208, EPI_ISL_1150216, EPI_ISL_1154620, EPI_ISL_1154648, EPI_ISL_1154688, EPI_ISL_1154714, EPI_ISL_1154781, EPI_ISL_1154906, EPI_ISL_1155030 to 1155031, EPI_ISL_1155060, EPI_ISL_1155079, EPI_ISL_1155107, EPI_ISL_1155129, EPI_ISL_1156536, EPI_ISL_1156717, EPI_ISL_1211075, EPI_ISL_1211105, EPI_ISL_1211109, EPI_ISL_1211142, EPI_ISL_1211151, EPI_ISL_1211155 to 1211156, EPI_ISL_1211159, EPI_ISL_1211166, EPI_ISL_1211209, EPI_ISL_1211229, EPI_ISL_1211239 to 1211240, EPI_ISL_1211249, EPI_ISL_1211254, EPI_ISL_1211276, EPI_ISL_1211299, EPI_ISL_1211303, EPI_ISL_1211331, EPI_ISL_1211336, EPI_ISL_1211341, EPI_ISL_1211346, EPI_ISL_1211350, EPI_ISL_1211374, EPI_ISL_1211403, EPI_ISL_1211407, EPI_ISL_1212516, EPI_ISL_1212614, EPI_ISL_1212618, EPI_ISL_1212694, EPI_ISL_1212710, EPI_ISL_1212729, EPI_ISL_1212812, EPI_ISL_1216066, EPI_ISL_1216144, EPI_ISL_1216155, EPI_ISL_1216162, EPI_ISL_1216173, EPI_ISL_1216195, EPI_ISL_1216199, EPI_ISL_1216210, EPI_ISL_1216259, EPI_ISL_1216273, EPI_ISL_1216275, EPI_ISL_1216284, EPI_ISL_1216289, EPI_ISL_1216332, EPI_ISL_1216366, EPI_ISL_1216373 to 1216375, EPI_ISL_1216383, EPI_ISL_1216641, EPI_ISL_1216690, EPI_ISL_1216779, EPI_ISL_1281997, EPI_ISL_1282000, EPI_ISL_1282017, EPI_ISL_1282102, EPI_ISL_1282141, EPI_ISL_1282158, EPI_ISL_1282228, EPI_ISL_1282244, EPI_ISL_1282253, EPI_ISL_1282258, EPI_ISL_1282279, EPI_ISL_1282299, EPI_ISL_1284558, EPI_ISL_1284562, EPI_ISL_1284569, EPI_ISL_1284578, EPI_ISL_1284614, EPI_ISL_1284620, EPI_ISL_1284623 to 1284624, EPI_ISL_1284635, EPI_ISL_1284663, EPI_ISL_1284670, EPI_ISL_1284674, EPI_ISL_1284698, EPI_ISL_1284708, EPI_ISL_1284711 to 1284712, EPI_ISL_1284719, EPI_ISL_1284740, EPI_ISL_1284763, EPI_ISL_1284788, EPI_ISL_1284816, EPI_ISL_1284822 to 1284823, EPI_ISL_1284837, EPI_ISL_1284849, EPI_ISL_1353652, EPI_ISL_1353654 to 1353655, EPI_ISL_1353660, EPI_ISL_1353668, EPI_ISL_1353683, EPI_ISL_1353687, EPI_ISL_1353708, EPI_ISL_1353731 to 1353732, EPI_ISL_1353736, EPI_ISL_1353776, EPI_ISL_1353780, EPI_ISL_1353784, EPI_ISL_1353795 to 1353797, EPI_ISL_1353805 to 1353806, EPI_ISL_1353823, EPI_ISL_1353834, EPI_ISL_1353852, EPI_ISL_1353862, EPI_ISL_1353890 to 1353891, EPI_ISL_1353907, EPI_ISL_1353913, EPI_ISL_1353928, EPI_ISL_1353938, EPI_ISL_1353954, EPI_ISL_1353960, EPI_ISL_1353962 to 1353963, EPI_ISL_1353965, EPI_ISL_1353976, EPI_ISL_1353982 | Bioscientia MVZ Labor Karlsruhe GmbH | Robert Koch Institute                                                                                                                      |                                                                                                                                                                                                 |
| see above                                                                                                                                                                                                                                                                                                                                                                                                                                                                                                                                                                                                                                                                                                                                                                                                                                                                                                                                                                                                                                                                                                                                                                                                                                                                                                                                                                                                                                                                                                                                                                                                                                                                                                                                                                                                                                                                                                                                                                                                                                                                                                                                                                                                                                                                                                                                                                                                                                                                                                                                                                                                                                                                                                                                                                                                                                                                                                                                                                                                                                                                                                                                                                                                                                                         |                                      |                                                                                                                                            |                                                                                                                                                                                                 |
| EPI_ISL_1049207 to 1049208, EPI_ISL_1049210 to 1049211, EPI_ISL_1049220                                                                                                                                                                                                                                                                                                                                                                                                                                                                                                                                                                                                                                                                                                                                                                                                                                                                                                                                                                                                                                                                                                                                                                                                                                                                                                                                                                                                                                                                                                                                                                                                                                                                                                                                                                                                                                                                                                                                                                                                                                                                                                                                                                                                                                                                                                                                                                                                                                                                                                                                                                                                                                                                                                                                                                                                                                                                                                                                                                                                                                                                                                                                                                                           | Blackhawk Genomics                   | Pathogen Discovery, Respiratory Viruses Branch, Division of Viral Diseases, Centers for Disease Control and Prevention                     | Anna Uehara; Brian Lynch; Clinton R. Paden; Haibin Wang; Han Jia Ng; Jing Zhang; Krista Queen; Peter Cook; Suxiang Tong; Yan Li; Ying Tao                                                       |
| EPI_ISL_1298483, EPI_ISL_1298488                                                                                                                                                                                                                                                                                                                                                                                                                                                                                                                                                                                                                                                                                                                                                                                                                                                                                                                                                                                                                                                                                                                                                                                                                                                                                                                                                                                                                                                                                                                                                                                                                                                                                                                                                                                                                                                                                                                                                                                                                                                                                                                                                                                                                                                                                                                                                                                                                                                                                                                                                                                                                                                                                                                                                                                                                                                                                                                                                                                                                                                                                                                                                                                                                                  | Bogorodchany CRH                     | The Institute of Molecular Biology and Genetics of NASU                                                                                    | M.Tukalo et al.                                                                                                                                                                                 |
| EPI_ISL_1213504, EPI_ISL_1213506, EPI_ISL_1213508 to 1213509, EPI_ISL_1213511, EPI_ISL_1213513 to 1213514, EPI_ISL_1213516, EPI_ISL_1213518 to 1213519, EPI_ISL_1213521, EPI_ISL_1213523 to 1213524, EPI_ISL_1213526, EPI_ISL_1213528, EPI_ISL_1213530 to 1213531                                                                                                                                                                                                                                                                                                                                                                                                                                                                                                                                                                                                                                                                                                                                                                                                                                                                                                                                                                                                                                                                                                                                                                                                                                                                                                                                                                                                                                                                                                                                                                                                                                                                                                                                                                                                                                                                                                                                                                                                                                                                                                                                                                                                                                                                                                                                                                                                                                                                                                                                                                                                                                                                                                                                                                                                                                                                                                                                                                                                 | Bohol Containerized PCR Laboratory   | Philippine Genome Center                                                                                                                   |                                                                                                                                                                                                 |
| see above                                                                                                                                                                                                                                                                                                                                                                                                                                                                                                                                                                                                                                                                                                                                                                                                                                                                                                                                                                                                                                                                                                                                                                                                                                                                                                                                                                                                                                                                                                                                                                                                                                                                                                                                                                                                                                                                                                                                                                                                                                                                                                                                                                                                                                                                                                                                                                                                                                                                                                                                                                                                                                                                                                                                                                                                                                                                                                                                                                                                                                                                                                                                                                                                                                                         |                                      |                                                                                                                                            |                                                                                                                                                                                                 |
| EPI_ISL_1363119 to 1363123                                                                                                                                                                                                                                                                                                                                                                                                                                                                                                                                                                                                                                                                                                                                                                                                                                                                                                                                                                                                                                                                                                                                                                                                                                                                                                                                                                                                                                                                                                                                                                                                                                                                                                                                                                                                                                                                                                                                                                                                                                                                                                                                                                                                                                                                                                                                                                                                                                                                                                                                                                                                                                                                                                                                                                                                                                                                                                                                                                                                                                                                                                                                                                                                                                        | Borneo Medical Centre                | Institute of Health and Community Medicine                                                                                                 | Chan Chia Jui; Hock Hong Hin; David Perera; Ooi Mong How; Tonnie Sia Loong Loong; Wong Yin Shan; Wong Kiing Aik                                                                                 |
| EPI_ISL_1373730, EPI_ISL_1373752, EPI_ISL_1373754, EPI_ISL_1373758 to 1373759, EPI_ISL_1373768, EPI_ISL_1373772, EPI_ISL_1373777, EPI_ISL_1373781 to 1373784, EPI_ISL_1373797, EPI_ISL_1373799, EPI_ISL_1373812, EPI_ISL_1373821, EPI_ISL_1373847, EPI_ISL_1373850, EPI_ISL_1373853 to 1373854, EPI_ISL_1373858, EPI_ISL_1373862 to 1373863, EPI_ISL_1373865, EPI_ISL_1373872, EPI_ISL_1373877                                                                                                                                                                                                                                                                                                                                                                                                                                                                                                                                                                                                                                                                                                                                                                                                                                                                                                                                                                                                                                                                                                                                                                                                                                                                                                                                                                                                                                                                                                                                                                                                                                                                                                                                                                                                                                                                                                                                                                                                                                                                                                                                                                                                                                                                                                                                                                                                                                                                                                                                                                                                                                                                                                                                                                                                                                                                    |                                      |                                                                                                                                            |                                                                                                                                                                                                 |
| see above                                                                                                                                                                                                                                                                                                                                                                                                                                                                                                                                                                                                                                                                                                                                                                                                                                                                                                                                                                                                                                                                                                                                                                                                                                                                                                                                                                                                                                                                                                                                                                                                                                                                                                                                                                                                                                                                                                                                                                                                                                                                                                                                                                                                                                                                                                                                                                                                                                                                                                                                                                                                                                                                                                                                                                                                                                                                                                                                                                                                                                                                                                                                                                                                                                                         |                                      |                                                                                                                                            |                                                                                                                                                                                                 |
| EPI_ISL_1287349, EPI_ISL_1287737, EPI_ISL_1287760, EPI_ISL_1293046, EPI_ISL_1296316, EPI_ISL_1307686, EPI_ISL_1307690, EPI_ISL_1307719                                                                                                                                                                                                                                                                                                                                                                                                                                                                                                                                                                                                                                                                                                                                                                                                                                                                                                                                                                                                                                                                                                                                                                                                                                                                                                                                                                                                                                                                                                                                                                                                                                                                                                                                                                                                                                                                                                                                                                                                                                                                                                                                                                                                                                                                                                                                                                                                                                                                                                                                                                                                                                                                                                                                                                                                                                                                                                                                                                                                                                                                                                                            | Boston Childrens (Overcoming COVID)  | Genomics and Discovery, Respiratory Viruses Branch, Division of Viral Diseases, Centers for Disease Control and Prevention                 | Anna Kelleher; Anna Uehara; Brian Lynch; Clinton R. Paden; Haibin Wang; Han Jia Justin Ng; Jing Zhang; Krista Queen; Peter Cook; Suxiang Tong; Yan Li; Ying Tao                                 |
| see above                                                                                                                                                                                                                                                                                                                                                                                                                                                                                                                                                                                                                                                                                                                                                                                                                                                                                                                                                                                                                                                                                                                                                                                                                                                                                                                                                                                                                                                                                                                                                                                                                                                                                                                                                                                                                                                                                                                                                                                                                                                                                                                                                                                                                                                                                                                                                                                                                                                                                                                                                                                                                                                                                                                                                                                                                                                                                                                                                                                                                                                                                                                                                                                                                                                         |                                      |                                                                                                                                            |                                                                                                                                                                                                 |
| EPI_ISL_1135076 to 1135077                                                                                                                                                                                                                                                                                                                                                                                                                                                                                                                                                                                                                                                                                                                                                                                                                                                                                                                                                                                                                                                                                                                                                                                                                                                                                                                                                                                                                                                                                                                                                                                                                                                                                                                                                                                                                                                                                                                                                                                                                                                                                                                                                                                                                                                                                                                                                                                                                                                                                                                                                                                                                                                                                                                                                                                                                                                                                                                                                                                                                                                                                                                                                                                                                                        | Bourg-en-Bresse                      | CNR Virus des Infections Respiratoires - France SUD                                                                                        | Antonin Bal; Bruno Lina; Gregory Destras; Gwendolynne Burfin; Hadrien Regue; Laurence Josset; Martine Valette; Quentin Semanas                                                                  |
| EPI_ISL_1081312 to 1081323                                                                                                                                                                                                                                                                                                                                                                                                                                                                                                                                                                                                                                                                                                                                                                                                                                                                                                                                                                                                                                                                                                                                                                                                                                                                                                                                                                                                                                                                                                                                                                                                                                                                                                                                                                                                                                                                                                                                                                                                                                                                                                                                                                                                                                                                                                                                                                                                                                                                                                                                                                                                                                                                                                                                                                                                                                                                                                                                                                                                                                                                                                                                                                                                                                        | Bozeman Health Deaconess Hospital    | Wiedenhft lab, Montana State University                                                                                                    | Anna Nemudraia; Artem Nemudryi; Calvin Cicha; Deann T. Snyder; Diane Bimczok; Helen Lee; Jodi F. Hedges; Joseph Nichols; Karl K. Vanderwood; Mark A. Jutila and Blake Wiedenhft; Tanner Wiegand |
| EPI_ISL_1040762                                                                                                                                                                                                                                                                                                                                                                                                                                                                                                                                                                                                                                                                                                                                                                                                                                                                                                                                                                                                                                                                                                                                                                                                                                                                                                                                                                                                                                                                                                                                                                                                                                                                                                                                                                                                                                                                                                                                                                                                                                                                                                                                                                                                                                                                                                                                                                                                                                                                                                                                                                                                                                                                                                                                                                                                                                                                                                                                                                                                                                                                                                                                                                                                                                                   | Bredasdorp clinic                    | NHLS/UCT                                                                                                                                   | Arash Iranzadeh; Bruna Galvao; Carolyn Williamson; Deelan Doolabh; Diana Hardie; Innocent Mudau; Kruger Marais; Lynn Tyers; Marvin Hsiao; Stephen Korsman                                       |
| EPI_ISL_1011678 to 1011705, EPI_ISL_1067739 to 1067817, EPI_ISL_1121633 to 1121702, EPI_ISL_1121879 to 1121886, EPI_ISL_1121963 to 1121968, EPI_ISL_1121973, EPI_ISL_1253719 to 1253884                                                                                                                                                                                                                                                                                                                                                                                                                                                                                                                                                                                                                                                                                                                                                                                                                                                                                                                                                                                                                                                                                                                                                                                                                                                                                                                                                                                                                                                                                                                                                                                                                                                                                                                                                                                                                                                                                                                                                                                                                                                                                                                                                                                                                                                                                                                                                                                                                                                                                                                                                                                                                                                                                                                                                                                                                                                                                                                                                                                                                                                                           |                                      |                                                                                                                                            |                                                                                                                                                                                                 |
| see above                                                                                                                                                                                                                                                                                                                                                                                                                                                                                                                                                                                                                                                                                                                                                                                                                                                                                                                                                                                                                                                                                                                                                                                                                                                                                                                                                                                                                                                                                                                                                                                                                                                                                                                                                                                                                                                                                                                                                                                                                                                                                                                                                                                                                                                                                                                                                                                                                                                                                                                                                                                                                                                                                                                                                                                                                                                                                                                                                                                                                                                                                                                                                                                                                                                         |                                      |                                                                                                                                            |                                                                                                                                                                                                 |
| EPI_ISL_1201681 to 1201694, EPI_ISL_1239549, EPI_ISL_1239591, EPI_ISL_1239673, EPI_ISL_1273822                                                                                                                                                                                                                                                                                                                                                                                                                                                                                                                                                                                                                                                                                                                                                                                                                                                                                                                                                                                                                                                                                                                                                                                                                                                                                                                                                                                                                                                                                                                                                                                                                                                                                                                                                                                                                                                                                                                                                                                                                                                                                                                                                                                                                                                                                                                                                                                                                                                                                                                                                                                                                                                                                                                                                                                                                                                                                                                                                                                                                                                                                                                                                                    | Bruss                                | 1. National Institute of Public Health - National Institute of Hygiene; 2. Eurofins Genomics Europe Sequencing GmbH                        | ECDC COVID-19 WGS support team; Eurofins Genomics Europe Sequencing Team; Gierczyk Rafa; Sadkowska-Todys Magorzata; Wokowicz Tomasz; Zacharczuk Katarzyna                                       |
| EPI_ISL_1000998 to 1001004, EPI_ISL_1034755 to 1034760, EPI_ISL_1046791 to 1046793, EPI_ISL_1364881 to 1364883, EPI_ISL_1364911, EPI_ISL_1364953, EPI_ISL_1364964, EPI_ISL_1364967, EPI_ISL_1364987 to 1364988, EPI_ISL_1365014                                                                                                                                                                                                                                                                                                                                                                                                                                                                                                                                                                                                                                                                                                                                                                                                                                                                                                                                                                                                                                                                                                                                                                                                                                                                                                                                                                                                                                                                                                                                                                                                                                                                                                                                                                                                                                                                                                                                                                                                                                                                                                                                                                                                                                                                                                                                                                                                                                                                                                                                                                                                                                                                                                                                                                                                                                                                                                                                                                                                                                   | Bundeswehr Institute of Microbiology | Bundeswehr Institute of Microbiology                                                                                                       | Alexandra Rehn; Enrico Georgi; Malena Bestehorn-Willmann; Markus Antwerpen; Mathias Walter; Mike Pillukat; Roman Wölfel; Sabine Zange                                                           |
| see above                                                                                                                                                                                                                                                                                                                                                                                                                                                                                                                                                                                                                                                                                                                                                                                                                                                                                                                                                                                                                                                                                                                                                                                                                                                                                                                                                                                                                                                                                                                                                                                                                                                                                                                                                                                                                                                                                                                                                                                                                                                                                                                                                                                                                                                                                                                                                                                                                                                                                                                                                                                                                                                                                                                                                                                                                                                                                                                                                                                                                                                                                                                                                                                                                                                         |                                      |                                                                                                                                            |                                                                                                                                                                                                 |
| EPI_ISL_1364892, EPI_ISL_1364905 to 1364906, EPI_ISL_1364927, EPI_ISL_1364932 to 1364933, EPI_ISL_1364941 to 1364944, EPI_ISL_1364970 to 1364971, EPI_ISL_1364973 to 1364974, EPI_ISL_1364983 to 1364985, EPI_ISL_1364996, EPI_ISL_1365006 to 1365008                                                                                                                                                                                                                                                                                                                                                                                                                                                                                                                                                                                                                                                                                                                                                                                                                                                                                                                                                                                                                                                                                                                                                                                                                                                                                                                                                                                                                                                                                                                                                                                                                                                                                                                                                                                                                                                                                                                                                                                                                                                                                                                                                                                                                                                                                                                                                                                                                                                                                                                                                                                                                                                                                                                                                                                                                                                                                                                                                                                                             | Bundeswehrkrankenhaus Berlin         | Bundeswehr Institute of Microbiology                                                                                                       | Alexandra Rehn; Enrico Georgi; Malena Bestehorn-Willmann; Markus Antwerpen; Mathias Walter; Mike Pillukat; Roman Wölfel; Sabine Zange                                                           |
| see above                                                                                                                                                                                                                                                                                                                                                                                                                                                                                                                                                                                                                                                                                                                                                                                                                                                                                                                                                                                                                                                                                                                                                                                                                                                                                                                                                                                                                                                                                                                                                                                                                                                                                                                                                                                                                                                                                                                                                                                                                                                                                                                                                                                                                                                                                                                                                                                                                                                                                                                                                                                                                                                                                                                                                                                                                                                                                                                                                                                                                                                                                                                                                                                                                                                         |                                      |                                                                                                                                            |                                                                                                                                                                                                 |
| EPI_ISL_1364907, EPI_ISL_1364937 to 1364938, EPI_ISL_1364965 to 1364966, EPI_ISL_1364980 to 1364982, EPI_ISL_1364986, EPI_ISL_1364992, EPI_ISL_1364995, EPI_ISL_1365020 to 1365021                                                                                                                                                                                                                                                                                                                                                                                                                                                                                                                                                                                                                                                                                                                                                                                                                                                                                                                                                                                                                                                                                                                                                                                                                                                                                                                                                                                                                                                                                                                                                                                                                                                                                                                                                                                                                                                                                                                                                                                                                                                                                                                                                                                                                                                                                                                                                                                                                                                                                                                                                                                                                                                                                                                                                                                                                                                                                                                                                                                                                                                                                | Bundeswehrkrankenhaus Hamburg        | Bundeswehr Institute of Microbiology                                                                                                       | Alexandra Rehn; Enrico Georgi; Malena Bestehorn-Willmann; Markus Antwerpen; Mathias Walter; Mike Pillukat; Roman Wölfel; Sabine Zange                                                           |
| see above                                                                                                                                                                                                                                                                                                                                                                                                                                                                                                                                                                                                                                                                                                                                                                                                                                                                                                                                                                                                                                                                                                                                                                                                                                                                                                                                                                                                                                                                                                                                                                                                                                                                                                                                                                                                                                                                                                                                                                                                                                                                                                                                                                                                                                                                                                                                                                                                                                                                                                                                                                                                                                                                                                                                                                                                                                                                                                                                                                                                                                                                                                                                                                                                                                                         |                                      |                                                                                                                                            |                                                                                                                                                                                                 |
| EPI_ISL_1364910, EPI_ISL_1364931, EPI_ISL_1364950 to 1364952, EPI_ISL_1364979, EPI_ISL_1364989 to 1364990, EPI_ISL_1365005                                                                                                                                                                                                                                                                                                                                                                                                                                                                                                                                                                                                                                                                                                                                                                                                                                                                                                                                                                                                                                                                                                                                                                                                                                                                                                                                                                                                                                                                                                                                                                                                                                                                                                                                                                                                                                                                                                                                                                                                                                                                                                                                                                                                                                                                                                                                                                                                                                                                                                                                                                                                                                                                                                                                                                                                                                                                                                                                                                                                                                                                                                                                        | Bundeswehrkrankenhaus Ulm            | Bundeswehr Institute of Microbiology                                                                                                       | Alexandra Rehn; Enrico Georgi; Malena Bestehorn-Willmann; Markus Antwerpen; Mathias Walter; Mike Pillukat; Roman Wölfel; Sabine Zange                                                           |
| EPI_ISL_1364894, EPI_ISL_1364896                                                                                                                                                                                                                                                                                                                                                                                                                                                                                                                                                                                                                                                                                                                                                                                                                                                                                                                                                                                                                                                                                                                                                                                                                                                                                                                                                                                                                                                                                                                                                                                                                                                                                                                                                                                                                                                                                                                                                                                                                                                                                                                                                                                                                                                                                                                                                                                                                                                                                                                                                                                                                                                                                                                                                                                                                                                                                                                                                                                                                                                                                                                                                                                                                                  | Bundeswehrkrankenhaus Westerstede    | Bundeswehr Institute of Microbiology                                                                                                       | Alexandra Rehn; Enrico Georgi; Malena Bestehorn-Willmann; Markus Antwerpen; Mathias Walter; Mike Pillukat; Roman Wölfel; Sabine Zange                                                           |
| EPI_ISL_1364886, EPI_ISL_1364897 to 1364901, EPI_ISL_1364903 to 1364904, EPI_ISL_1364912, EPI_ISL_1364935, EPI_ISL_1364939 to 1364940, EPI_ISL_1364954 to 1364961, EPI_ISL_1364975, EPI_ISL_1364997 to 1364998, EPI_ISL_1365000 to 1365004, EPI_ISL_1365010 to 1365013, EPI_ISL_1365015, EPI_ISL_1365017 to 1365018                                                                                                                                                                                                                                                                                                                                                                                                                                                                                                                                                                                                                                                                                                                                                                                                                                                                                                                                                                                                                                                                                                                                                                                                                                                                                                                                                                                                                                                                                                                                                                                                                                                                                                                                                                                                                                                                                                                                                                                                                                                                                                                                                                                                                                                                                                                                                                                                                                                                                                                                                                                                                                                                                                                                                                                                                                                                                                                                               | Bundeswehrzentralrankenhaus Koblenz  | Bundeswehr Institute of Microbiology                                                                                                       | Alexandra Rehn; Enrico Georgi; Malena Bestehorn-Willmann; Markus Antwerpen; Mathias Walter; Mike Pillukat; Roman Wölfel; Sabine Zange                                                           |
| see above                                                                                                                                                                                                                                                                                                                                                                                                                                                                                                                                                                                                                                                                                                                                                                                                                                                                                                                                                                                                                                                                                                                                                                                                                                                                                                                                                                                                                                                                                                                                                                                                                                                                                                                                                                                                                                                                                                                                                                                                                                                                                                                                                                                                                                                                                                                                                                                                                                                                                                                                                                                                                                                                                                                                                                                                                                                                                                                                                                                                                                                                                                                                                                                                                                                         |                                      |                                                                                                                                            |                                                                                                                                                                                                 |
| EPI_ISL_1298474                                                                                                                                                                                                                                                                                                                                                                                                                                                                                                                                                                                                                                                                                                                                                                                                                                                                                                                                                                                                                                                                                                                                                                                                                                                                                                                                                                                                                                                                                                                                                                                                                                                                                                                                                                                                                                                                                                                                                                                                                                                                                                                                                                                                                                                                                                                                                                                                                                                                                                                                                                                                                                                                                                                                                                                                                                                                                                                                                                                                                                                                                                                                                                                                                                                   | Burshtyn CCH                         | The Institute of Molecular Biology and Genetics of NASU                                                                                    | M.Tukalo et al.                                                                                                                                                                                 |
| EPI_ISL_1371896 to 1371905                                                                                                                                                                                                                                                                                                                                                                                                                                                                                                                                                                                                                                                                                                                                                                                                                                                                                                                                                                                                                                                                                                                                                                                                                                                                                                                                                                                                                                                                                                                                                                                                                                                                                                                                                                                                                                                                                                                                                                                                                                                                                                                                                                                                                                                                                                                                                                                                                                                                                                                                                                                                                                                                                                                                                                                                                                                                                                                                                                                                                                                                                                                                                                                                                                        | C H DE LA POLYNESIE FRANCAISE        | CNR Virus des Infections Respiratoires - France SUD                                                                                        | Antonin Bal; Bruno Lina; Gregory Destras; Gwendolynne Burfin; Hadrien Regue; Laurence Josset; Martine Valette; Quentin Semanas                                                                  |
| EPI_ISL_1241704                                                                                                                                                                                                                                                                                                                                                                                                                                                                                                                                                                                                                                                                                                                                                                                                                                                                                                                                                                                                                                                                                                                                                                                                                                                                                                                                                                                                                                                                                                                                                                                                                                                                                                                                                                                                                                                                                                                                                                                                                                                                                                                                                                                                                                                                                                                                                                                                                                                                                                                                                                                                                                                                                                                                                                                                                                                                                                                                                                                                                                                                                                                                                                                                                                                   | C.H Peltzer - la Tourelle            | GIGA Medical Genomics                                                                                                                      | Bouchra Boujemla; Cécile Meex; Keith Durkin; Maria Artesi; Marie-Pierre Hayette; Nathalie Renotte; Pierrette Melin; Raphaël Boreux; Sébastien Bontems; Vincent Bours                            |
| EPI_ISL_1085408                                                                                                                                                                                                                                                                                                                                                                                                                                                                                                                                                                                                                                                                                                                                                                                                                                                                                                                                                                                                                                                                                                                                                                                                                                                                                                                                                                                                                                                                                                                                                                                                                                                                                                                                                                                                                                                                                                                                                                                                                                                                                                                                                                                                                                                                                                                                                                                                                                                                                                                                                                                                                                                                                                                                                                                                                                                                                                                                                                                                                                                                                                                                                                                                                                                   | C.H du Cotentin                      | Department of Virology, Henri Mondor University Hospital, Assistance Publique Hôpitaux de Paris, Université Paris-Est Créteil, INSERM U955 | Alexandre Soulier; Christophe Rodriguez; Elisabeth Trawinski; Guillaume Gricourt; Jean-Michel Pawlowsky; Melissa N'Debi; Slim Fourati; Vanessa Demontant                                        |



|                                                                                                                                                                                                                                                                                                                                                                                                                                                                                                                                                                                                                                                                                                                                                                                                                                                                                                                                                                                                                                                                    |                                           |                                                                                |                                                                                                                                               |
|--------------------------------------------------------------------------------------------------------------------------------------------------------------------------------------------------------------------------------------------------------------------------------------------------------------------------------------------------------------------------------------------------------------------------------------------------------------------------------------------------------------------------------------------------------------------------------------------------------------------------------------------------------------------------------------------------------------------------------------------------------------------------------------------------------------------------------------------------------------------------------------------------------------------------------------------------------------------------------------------------------------------------------------------------------------------|-------------------------------------------|--------------------------------------------------------------------------------|-----------------------------------------------------------------------------------------------------------------------------------------------|
| EPI_ISL_1322398                                                                                                                                                                                                                                                                                                                                                                                                                                                                                                                                                                                                                                                                                                                                                                                                                                                                                                                                                                                                                                                    |                                           |                                                                                |                                                                                                                                               |
| EPI_ISL_1265515 to 1265516, EPI_ISL_1312945 to 1312946, EPI_ISL_1313565, EPI_ISL_1313568, EPI_ISL_1313574 to 1313575, EPI_ISL_1313589, EPI_ISL_1313596, EPI_ISL_1313897 to 1313898, EPI_ISL_1313902, EPI_ISL_1313998, EPI_ISL_1314010, EPI_ISL_1314015                                                                                                                                                                                                                                                                                                                                                                                                                                                                                                                                                                                                                                                                                                                                                                                                             |                                           |                                                                                |                                                                                                                                               |
| see above                                                                                                                                                                                                                                                                                                                                                                                                                                                                                                                                                                                                                                                                                                                                                                                                                                                                                                                                                                                                                                                          | CENTRE HOSPITALIER DU HAUT BUGEY          | CNR Virus des Infections Respiratoires - France SUD                            | Antonin Bal; Bruno Lina; Gregory Destras; Gwendolynne Burfin; Hadrien Regue; Laurence Josset; Martine Valette; Quentin Semanas                |
| EPI_ISL_1336561, EPI_ISL_1336573, EPI_ISL_1359950, EPI_ISL_1359957, EPI_ISL_1359981, EPI_ISL_1371869                                                                                                                                                                                                                                                                                                                                                                                                                                                                                                                                                                                                                                                                                                                                                                                                                                                                                                                                                               | CENTRE HOSPITALIER GAP                    | CNR Virus des Infections Respiratoires - France SUD                            | Antonin Bal; Bruno Lina; Gregory Destras; Gwendolynne Burfin; Hadrien Regue; Laurence Josset; Martine Valette; Quentin Semanas                |
| EPI_ISL_1265887                                                                                                                                                                                                                                                                                                                                                                                                                                                                                                                                                                                                                                                                                                                                                                                                                                                                                                                                                                                                                                                    | CENTRE HOSPITALIER AGEN                   | CNR Virus des Infections Respiratoires - France SUD                            | Antonin Bal; Bruno Lina; Gregory Destras; Gwendolynne Burfin; Hadrien Regue; Laurence Josset; Martine Valette; Quentin Semanas                |
| EPI_ISL_1190776, EPI_ISL_1359982, EPI_ISL_1359992, EPI_ISL_1360005, EPI_ISL_1360022                                                                                                                                                                                                                                                                                                                                                                                                                                                                                                                                                                                                                                                                                                                                                                                                                                                                                                                                                                                | CENTRE HOSPITALIER ANNECY GENEVOIS        | CNR Virus des Infections Respiratoires - France SUD                            | Antonin Bal; Bruno Lina; Gregory Destras; Gwendolynne Burfin; Hadrien Regue; Hadrien Règue; Laurence Josset; Martine Valette; Quentin Semanas |
| EPI_ISL_1165953, EPI_ISL_1165960, EPI_ISL_1336540 to 1336541, EPI_ISL_1360023 to 1360024                                                                                                                                                                                                                                                                                                                                                                                                                                                                                                                                                                                                                                                                                                                                                                                                                                                                                                                                                                           | CENTRE HOSPITALIER ARDECHE NORD           | CNR Virus des Infections Respiratoires - France SUD                            | Antonin Bal; Bruno Lina; Gregory Destras; Gwendolynne Burfin; Hadrien Regue; Laurence Josset; Martine Valette; Quentin Semanas                |
| EPI_ISL_1313082, EPI_ISL_1336516, EPI_ISL_1336559, EPI_ISL_1336568 to 1336570                                                                                                                                                                                                                                                                                                                                                                                                                                                                                                                                                                                                                                                                                                                                                                                                                                                                                                                                                                                      | CENTRE HOSPITALIER CAREMEAU               | CNR Virus des Infections Respiratoires - France SUD                            | Antonin Bal; Bruno Lina; Gregory Destras; Gwendolynne Burfin; Hadrien Regue; Laurence Josset; Martine Valette; Quentin Semanas                |
| EPI_ISL_1166050, EPI_ISL_1359905, EPI_ISL_1371817 to 1371829                                                                                                                                                                                                                                                                                                                                                                                                                                                                                                                                                                                                                                                                                                                                                                                                                                                                                                                                                                                                       | CENTRE HOSPITALIER DAX                    | CNR Virus des Infections Respiratoires - France SUD                            | Antonin Bal; Bruno Lina; Gregory Destras; Gwendolynne Burfin; Hadrien Regue; Laurence Josset; Martine Valette; Quentin Semanas                |
| EPI_ISL_1336605                                                                                                                                                                                                                                                                                                                                                                                                                                                                                                                                                                                                                                                                                                                                                                                                                                                                                                                                                                                                                                                    | CENTRE HOSPITALIER DE MONTELMAR           | CNR Virus des Infections Respiratoires - France SUD                            | Antonin Bal; Bruno Lina; Gregory Destras; Gwendolynne Burfin; Hadrien Regue; Laurence Josset; Martine Valette; Quentin Semanas                |
| EPI_ISL_1220309, EPI_ISL_1220312 to 1220314, EPI_ISL_1265717, EPI_ISL_1265773, EPI_ISL_1265853 to 1265857, EPI_ISL_1297436, EPI_ISL_1312943, EPI_ISL_1312992, EPI_ISL_1312999, EPI_ISL_1313570, EPI_ISL_1313584, EPI_ISL_1313699, EPI_ISL_1322340 to 1322341, EPI_ISL_1322346 to 1322347, EPI_ISL_1336590 to 1336592                                                                                                                                                                                                                                                                                                                                                                                                                                                                                                                                                                                                                                                                                                                                               |                                           |                                                                                |                                                                                                                                               |
| see above                                                                                                                                                                                                                                                                                                                                                                                                                                                                                                                                                                                                                                                                                                                                                                                                                                                                                                                                                                                                                                                          | CENTRE HOSPITALIER DE BOURG EN BRESSE     | CNR Virus des Infections Respiratoires - France SUD                            | Antonin Bal; Bruno Lina; Gregory Destras; Gwendolynne Burfin; Hadrien Regue; Laurence Josset; Martine Valette; Quentin Semanas                |
| EPI_ISL_1190837, EPI_ISL_1312948, EPI_ISL_1313558, EPI_ISL_1313707, EPI_ISL_1371853                                                                                                                                                                                                                                                                                                                                                                                                                                                                                                                                                                                                                                                                                                                                                                                                                                                                                                                                                                                | CENTRE HOSPITALIER DE CANNES              | CNR Virus des Infections Respiratoires - France SUD                            | Antonin Bal; Bruno Lina; Gregory Destras; Gwendolynne Burfin; Hadrien Regue; Hadrien Règue; Laurence Josset; Martine Valette; Quentin Semanas |
| EPI_ISL_1190787 to 1190797, EPI_ISL_1314033                                                                                                                                                                                                                                                                                                                                                                                                                                                                                                                                                                                                                                                                                                                                                                                                                                                                                                                                                                                                                        | CENTRE HOSPITALIER DE LA COTE BASQUE      | CNR Virus des Infections Respiratoires - France SUD                            | Antonin Bal; Bruno Lina; Gregory Destras; Gwendolynne Burfin; Hadrien Regue; Hadrien Règue; Laurence Josset; Martine Valette; Quentin Semanas |
| EPI_ISL_1371855 to 1371856                                                                                                                                                                                                                                                                                                                                                                                                                                                                                                                                                                                                                                                                                                                                                                                                                                                                                                                                                                                                                                         | CENTRE HOSPITALIER DE LA DRACENIE         | CNR Virus des Infections Respiratoires - France SUD                            | Antonin Bal; Bruno Lina; Gregory Destras; Gwendolynne Burfin; Hadrien Regue; Laurence Josset; Martine Valette; Quentin Semanas                |
| EPI_ISL_1265786, EPI_ISL_1297435                                                                                                                                                                                                                                                                                                                                                                                                                                                                                                                                                                                                                                                                                                                                                                                                                                                                                                                                                                                                                                   | CENTRE HOSPITALIER DE MACON               | CNR Virus des Infections Respiratoires - France SUD                            | Antonin Bal; Bruno Lina; Gregory Destras; Gwendolynne Burfin; Hadrien Regue; Laurence Josset; Martine Valette; Quentin Semanas                |
| EPI_ISL_1322390 to 1322391                                                                                                                                                                                                                                                                                                                                                                                                                                                                                                                                                                                                                                                                                                                                                                                                                                                                                                                                                                                                                                         | CENTRE HOSPITALIER DE MARTIGUES           | CNR Virus des Infections Respiratoires - France SUD                            | Antonin Bal; Bruno Lina; Gregory Destras; Gwendolynne Burfin; Hadrien Regue; Laurence Josset; Martine Valette; Quentin Semanas                |
| EPI_ISL_1336606, EPI_ISL_1360403                                                                                                                                                                                                                                                                                                                                                                                                                                                                                                                                                                                                                                                                                                                                                                                                                                                                                                                                                                                                                                   | CENTRE HOSPITALIER DE MONTELMAR           | CNR Virus des Infections Respiratoires - France SUD                            | Antonin Bal; Bruno Lina; Gregory Destras; Gwendolynne Burfin; Hadrien Regue; Laurence Josset; Martine Valette; Quentin Semanas                |
| EPI_ISL_1322399                                                                                                                                                                                                                                                                                                                                                                                                                                                                                                                                                                                                                                                                                                                                                                                                                                                                                                                                                                                                                                                    | CENTRE HOSPITALIER DE PAU                 | CNR Virus des Infections Respiratoires - France SUD                            | Antonin Bal; Bruno Lina; Gregory Destras; Gwendolynne Burfin; Hadrien Regue; Laurence Josset; Martine Valette; Quentin Semanas                |
| EPI_ISL_1134969                                                                                                                                                                                                                                                                                                                                                                                                                                                                                                                                                                                                                                                                                                                                                                                                                                                                                                                                                                                                                                                    | CENTRE HOSPITALIER DE VOIRON              | CNR Virus des Infections Respiratoires - France SUD                            | Antonin Bal; Bruno Lina; Gregory Destras; Gwendolynne Burfin; Hadrien Regue; Laurence Josset; Martine Valette; Quentin Semanas                |
| EPI_ISL_1312982, EPI_ISL_1359953 to 1359954, EPI_ISL_1360007, EPI_ISL_1371854, EPI_ISL_1371857 to 1371864                                                                                                                                                                                                                                                                                                                                                                                                                                                                                                                                                                                                                                                                                                                                                                                                                                                                                                                                                          | CENTRE HOSPITALIER DRAGUIGNAN             | CNR Virus des Infections Respiratoires - France SUD                            | Antonin Bal; Bruno Lina; Gregory Destras; Gwendolynne Burfin; Hadrien Regue; Laurence Josset; Martine Valette; Quentin Semanas                |
| EPI_ISL_1220310                                                                                                                                                                                                                                                                                                                                                                                                                                                                                                                                                                                                                                                                                                                                                                                                                                                                                                                                                                                                                                                    | CENTRE HOSPITALIER DU HAUT BUGEY          | CNR Virus des Infections Respiratoires - France SUD                            | Antonin Bal; Bruno Lina; Gregory Destras; Gwendolynne Burfin; Hadrien Regue; Laurence Josset; Martine Valette; Quentin Semanas                |
| EPI_ISL_1359945 to 1359946, EPI_ISL_1359956, EPI_ISL_1359976, EPI_ISL_1359984, EPI_ISL_1359987                                                                                                                                                                                                                                                                                                                                                                                                                                                                                                                                                                                                                                                                                                                                                                                                                                                                                                                                                                     | CENTRE HOSPITALIER DU PAYS D'AIX          | CNR Virus des Infections Respiratoires - France SUD                            | Antonin Bal; Bruno Lina; Gregory Destras; Gwendolynne Burfin; Hadrien Regue; Laurence Josset; Martine Valette; Quentin Semanas                |
| EPI_ISL_1241883                                                                                                                                                                                                                                                                                                                                                                                                                                                                                                                                                                                                                                                                                                                                                                                                                                                                                                                                                                                                                                                    | CENTRE HOSPITALIER EDMOND GARCIN          | CNR Virus des Infections Respiratoires - France SUD                            | Antonin Bal; Bruno Lina; Gregory Destras; Gwendolynne Burfin; Hadrien Regue; Laurence Josset; Martine Valette; Quentin Semanas                |
| EPI_ISL_1359958                                                                                                                                                                                                                                                                                                                                                                                                                                                                                                                                                                                                                                                                                                                                                                                                                                                                                                                                                                                                                                                    | CENTRE HOSPITALIER EMILE ROUX             | CNR Virus des Infections Respiratoires - France SUD                            | Antonin Bal; Bruno Lina; Gregory Destras; Gwendolynne Burfin; Hadrien Regue; Laurence Josset; Martine Valette; Quentin Semanas                |
| EPI_ISL_1135027, EPI_ISL_1371805 to 1371814                                                                                                                                                                                                                                                                                                                                                                                                                                                                                                                                                                                                                                                                                                                                                                                                                                                                                                                                                                                                                        | CENTRE HOSPITALIER INTERCOMMUNAL          | CNR Virus des Infections Respiratoires - France SUD                            | Antonin Bal; Bruno Lina; Gregory Destras; Gwendolynne Burfin; Hadrien Regue; Laurence Josset; Martine Valette; Quentin Semanas                |
| EPI_ISL_1135053, EPI_ISL_1201872, EPI_ISL_1241986, EPI_ISL_1265483, EPI_ISL_1265510, EPI_ISL_1265720, EPI_ISL_1265726, EPI_ISL_1265758, EPI_ISL_1265884 to 1265886, EPI_ISL_1297216, EPI_ISL_1312827, EPI_ISL_1312928, EPI_ISL_1312932, EPI_ISL_1312958, EPI_ISL_1312984, EPI_ISL_1313018, EPI_ISL_1313021, EPI_ISL_1313652, EPI_ISL_1313674, EPI_ISL_1313678 to 1313679, EPI_ISL_1313687, EPI_ISL_1313705 to 1313706, EPI_ISL_1313907, EPI_ISL_1313917, EPI_ISL_1313994, EPI_ISL_1336521                                                                                                                                                                                                                                                                                                                                                                                                                                                                                                                                                                          |                                           |                                                                                |                                                                                                                                               |
| see above                                                                                                                                                                                                                                                                                                                                                                                                                                                                                                                                                                                                                                                                                                                                                                                                                                                                                                                                                                                                                                                          | CENTRE HOSPITALIER LUCIEN HUSSEL          | CNR Virus des Infections Respiratoires - France SUD                            | Antonin Bal; Bruno Lina; Gregory Destras; Gwendolynne Burfin; Hadrien Regue; Laurence Josset; Martine Valette; Quentin Semanas                |
| EPI_ISL_1190784                                                                                                                                                                                                                                                                                                                                                                                                                                                                                                                                                                                                                                                                                                                                                                                                                                                                                                                                                                                                                                                    | CENTRE HOSPITALIER PARIS ST JOSEPH        | CNR Virus des Infections Respiratoires - France SUD                            | Antonin Bal; Bruno Lina; Gregory Destras; Gwendolynne Burfin; Hadrien Règue; Laurence Josset; Martine Valette; Quentin Semanas                |
| EPI_ISL_1134904 to 1134906, EPI_ISL_1135038, EPI_ISL_1241962 to 1241963, EPI_ISL_1241967, EPI_ISL_1241977 to 1241978, EPI_ISL_1241980, EPI_ISL_1241982, EPI_ISL_1241992 to 1241993, EPI_ISL_1265465, EPI_ISL_1265488, EPI_ISL_1265501, EPI_ISL_1265517, EPI_ISL_1265553, EPI_ISL_1265555, EPI_ISL_1265591, EPI_ISL_1265594 to 1265596, EPI_ISL_1265696, EPI_ISL_1265718, EPI_ISL_1265728 to 1265729, EPI_ISL_1265732, EPI_ISL_1265844, EPI_ISL_1265858, EPI_ISL_1312822 to 1312823, EPI_ISL_1312927, EPI_ISL_1312957, EPI_ISL_1312962, EPI_ISL_1312968, EPI_ISL_1312988, EPI_ISL_1312993, EPI_ISL_1312998, EPI_ISL_1313559, EPI_ISL_1313578, EPI_ISL_1313603, EPI_ISL_1313615, EPI_ISL_1313627, EPI_ISL_1313637, EPI_ISL_1313648, EPI_ISL_1313656 to 1313657, EPI_ISL_1313684, EPI_ISL_1313688 to 1313689, EPI_ISL_1313696, EPI_ISL_1313698, EPI_ISL_1313704, EPI_ISL_1313913, EPI_ISL_1313920, EPI_ISL_1313960, EPI_ISL_1313979, EPI_ISL_1314002, EPI_ISL_1314006, EPI_ISL_1314019 to 1314020, EPI_ISL_1314029, EPI_ISL_1314031, EPI_ISL_1314036, EPI_ISL_1359913 |                                           |                                                                                |                                                                                                                                               |
| see above                                                                                                                                                                                                                                                                                                                                                                                                                                                                                                                                                                                                                                                                                                                                                                                                                                                                                                                                                                                                                                                          | CENTRE HOSPITALIER PIERRE OUDOT           | CNR Virus des Infections Respiratoires - France SUD                            | Antonin Bal; Bruno Lina; Gregory Destras; Gwendolynne Burfin; Hadrien Regue; Laurence Josset; Martine Valette; Quentin Semanas                |
| EPI_ISL_1190798 to 1190800, EPI_ISL_1287755, EPI_ISL_1322355, EPI_ISL_1322357, EPI_ISL_1322369, EPI_ISL_1359743 to 1359744, EPI_ISL_1359886, EPI_ISL_1359891, EPI_ISL_1359906, EPI_ISL_1359910, EPI_ISL_1360394, EPI_ISL_1360399, EPI_ISL_1371843                                                                                                                                                                                                                                                                                                                                                                                                                                                                                                                                                                                                                                                                                                                                                                                                                  |                                           |                                                                                |                                                                                                                                               |
| see above                                                                                                                                                                                                                                                                                                                                                                                                                                                                                                                                                                                                                                                                                                                                                                                                                                                                                                                                                                                                                                                          | CENTRE HOSPITALIER POITIERS               | CNR Virus des Infections Respiratoires - France SUD                            | Antonin Bal; Bruno Lina; Gregory Destras; Gwendolynne Burfin; Hadrien Regue; Hadrien Règue; Laurence Josset; Martine Valette; Quentin Semanas |
| EPI_ISL_1241958, EPI_ISL_1265551, EPI_ISL_1265710, EPI_ISL_1265734, EPI_ISL_1265807, EPI_ISL_1265876 to 1265877, EPI_ISL_1312829, EPI_ISL_1312959, EPI_ISL_1312990 to 1312991, EPI_ISL_1313561, EPI_ISL_1313646 to 1313647, EPI_ISL_1313666, EPI_ISL_1313677, EPI_ISL_1313908, EPI_ISL_1313921, EPI_ISL_1313942 to 1313943, EPI_ISL_1313959, EPI_ISL_1313980, EPI_ISL_1314012, EPI_ISL_1314032                                                                                                                                                                                                                                                                                                                                                                                                                                                                                                                                                                                                                                                                     |                                           |                                                                                |                                                                                                                                               |
| see above                                                                                                                                                                                                                                                                                                                                                                                                                                                                                                                                                                                                                                                                                                                                                                                                                                                                                                                                                                                                                                                          | CENTRE HOSPITALIER ST JOSEPH ST LUC       | CNR Virus des Infections Respiratoires - France SUD                            | Antonin Bal; Bruno Lina; Gregory Destras; Gwendolynne Burfin; Hadrien Regue; Laurence Josset; Martine Valette; Quentin Semanas                |
| EPI_ISL_1336514, EPI_ISL_1336632, EPI_ISL_1359911 to 1359912, EPI_ISL_1371830                                                                                                                                                                                                                                                                                                                                                                                                                                                                                                                                                                                                                                                                                                                                                                                                                                                                                                                                                                                      | CENTRE HOSPITALIER SUD GIRONDE            | CNR Virus des Infections Respiratoires - France SUD                            | Antonin Bal; Bruno Lina; Gregory Destras; Gwendolynne Burfin; Hadrien Regue; Laurence Josset; Martine Valette; Quentin Semanas                |
| EPI_ISL_1191685                                                                                                                                                                                                                                                                                                                                                                                                                                                                                                                                                                                                                                                                                                                                                                                                                                                                                                                                                                                                                                                    | CENTRE LEON BERARD                        | CNR Virus des Infections Respiratoires - France SUD                            | Antonin Bal; Bruno Lina; Gregory Destras; Gwendolynne Burfin; Hadrien Regue; Laurence Josset; Martine Valette; Quentin Semanas                |
| EPI_ISL_1195275 to 1195276, EPI_ISL_1195279                                                                                                                                                                                                                                                                                                                                                                                                                                                                                                                                                                                                                                                                                                                                                                                                                                                                                                                                                                                                                        | CENTRO DE REFERENCIA EM SINDROMES GRIPAIS | Epiclin                                                                        | Ana Paula Muterle; Carolina Comerlato; Eliana Márcia Da Ros Wendland; Fernando Hayashi Sant'Anna; Janira Prichula; Juliana Comerlato          |
| EPI_ISL_1235688                                                                                                                                                                                                                                                                                                                                                                                                                                                                                                                                                                                                                                                                                                                                                                                                                                                                                                                                                                                                                                                    | CENTRO MEDICO COLSANITAS LA CALLEJA       | Laboratorio de salud pública (Bogotá) and Gorencore (Universidad de los Andes) | Alejandro Gómez; David González; Johana Hernandez Gabriela Delgado; Johanna Vargas; Luisa Sacristán; Marcela Guevara-Suarez; Silvia Restrepo  |
| EPI_ISL_1265673, EPI_ISL_1265681, EPI_ISL_1265695, EPI_ISL_1265707 to 1265709, EPI_ISL_1265712, EPI_ISL_1265716, EPI_ISL_1265733, EPI_ISL_1265737 to 1265738                                                                                                                                                                                                                                                                                                                                                                                                                                                                                                                                                                                                                                                                                                                                                                                                                                                                                                       |                                           |                                                                                |                                                                                                                                               |
| see above                                                                                                                                                                                                                                                                                                                                                                                                                                                                                                                                                                                                                                                                                                                                                                                                                                                                                                                                                                                                                                                          | CERBA                                     | CNR Virus des Infections Respiratoires - France SUD                            | Antonin Bal; Bruno Lina; Gregory Destras; Gwendolynne Burfin; Hadrien Regue; Laurence Josset; Martine Valette; Quentin Semanas                |

|                                                                                                                                                                                                                |                                             |                                                                                                                                            |                                                                                                                                                                                                                                     |
|----------------------------------------------------------------------------------------------------------------------------------------------------------------------------------------------------------------|---------------------------------------------|--------------------------------------------------------------------------------------------------------------------------------------------|-------------------------------------------------------------------------------------------------------------------------------------------------------------------------------------------------------------------------------------|
| EPI_ISL_1371872                                                                                                                                                                                                | CERBALLIANE PROVENCE                        | CNR Virus des Infections Respiratoires - France SUD                                                                                        | Antonin Bal; Bruno Lina; Gregory Destras; Gwendolynne Burfin; Hadrien Regue; Laurence Josset; Martine Valette; Quentin Semanas                                                                                                      |
| EPI_ISL_1191632, EPI_ISL_1191676, EPI_ISL_1191720 to 1191721, EPI_ISL_1239452                                                                                                                                  | CERBALLIANE                                 | CNR Virus des Infections Respiratoires - France SUD                                                                                        | Antonin Bal; Bruno Lina; Gregory Destras; Gwendolynne Burfin; Hadrien Regue; Laurence Josset; Martine Valette; Quentin Semanas                                                                                                      |
| EPI_ISL_1201867 to 1201871                                                                                                                                                                                     | CERBALLIANE CHARENTES                       | CNR Virus des Infections Respiratoires - France SUD                                                                                        | Antonin Bal; Bruno Lina; Gregory Destras; Gwendolynne Burfin; Hadrien Regue; Laurence Josset; Martine Valette; Quentin Semanas                                                                                                      |
| EPI_ISL_1166053                                                                                                                                                                                                | CERBALLIANE CHARENTES PONS                  | CNR Virus des Infections Respiratoires - France SUD                                                                                        | Antonin Bal; Bruno Lina; Gregory Destras; Gwendolynne Burfin; Hadrien Regue; Laurence Josset; Martine Valette; Quentin Semanas                                                                                                      |
| EPI_ISL_1313006                                                                                                                                                                                                | CERBALLIANE CHARENTES SAINTES               | CNR Virus des Infections Respiratoires - France SUD                                                                                        | Antonin Bal; Bruno Lina; Gregory Destras; Gwendolynne Burfin; Hadrien Regue; Laurence Josset; Martine Valette; Quentin Semanas                                                                                                      |
| EPI_ISL_1265833, EPI_ISL_1265847 to 1265848, EPI_ISL_1287752 to 1287753                                                                                                                                        | CERBALLIANE PACA                            | CNR Virus des Infections Respiratoires - France SUD                                                                                        | Antonin Bal; Bruno Lina; Gregory Destras; Gwendolynne Burfin; Hadrien Regue; Laurence Josset; Martine Valette; Quentin Semanas                                                                                                      |
| EPI_ISL_1313012 to 1313014, EPI_ISL_1322335 to 1322336, EPI_ISL_1322416, EPI_ISL_1322423, EPI_ISL_1322425, EPI_ISL_1336599, EPI_ISL_1360014 to 1360015, EPI_ISL_1371782 to 1371783, EPI_ISL_1371788 to 1371790 |                                             |                                                                                                                                            |                                                                                                                                                                                                                                     |
| see above                                                                                                                                                                                                      | CERBALLIANE RHONE ALPES                     | CNR Virus des Infections Respiratoires - France SUD                                                                                        | Antonin Bal; Bruno Lina; Gregory Destras; Gwendolynne Burfin; Hadrien Regue; Laurence Josset; Martine Valette; Quentin Semanas                                                                                                      |
| EPI_ISL_1312914                                                                                                                                                                                                | CH AGEN NERAC                               | CNR Virus des Infections Respiratoires - France SUD                                                                                        | Antonin Bal; Bruno Lina; Gregory Destras; Gwendolynne Burfin; Hadrien Regue; Laurence Josset; Martine Valette; Quentin Semanas                                                                                                      |
| EPI_ISL_1265792 to 1265794, EPI_ISL_1287740, EPI_ISL_1312797 to 1312799, EPI_ISL_1312877 to 1312879                                                                                                            | CH ALBI                                     | CNR Virus des Infections Respiratoires - France SUD                                                                                        | Antonin Bal; Bruno Lina; Gregory Destras; Gwendolynne Burfin; Hadrien Regue; Laurence Josset; Martine Valette; Quentin Semanas                                                                                                      |
| EPI_ISL_1190816 to 1190835, EPI_ISL_1190841, EPI_ISL_1201873 to 1201874, EPI_ISL_1228964, EPI_ISL_1313004, EPI_ISL_1313007, EPI_ISL_1313123 to 1313127, EPI_ISL_1371848                                        |                                             |                                                                                                                                            |                                                                                                                                                                                                                                     |
| see above                                                                                                                                                                                                      | CH ANTIBES - JUAN LES PINS                  | CNR Virus des Infections Respiratoires - France SUD                                                                                        | Antonin Bal; Bruno Lina; Gregory Destras; Gwendolynne Burfin; Hadrien Regue; Hadrien Règue; Laurence Josset; Martine Valette; Quentin Semanas                                                                                       |
| EPI_ISL_1312832 to 1312834                                                                                                                                                                                     | CH ARDECHE NORD                             | CNR Virus des Infections Respiratoires - France SUD                                                                                        | Antonin Bal; Bruno Lina; Gregory Destras; Gwendolynne Burfin; Hadrien Regue; Laurence Josset; Martine Valette; Quentin Semanas                                                                                                      |
| EPI_ISL_1209385, EPI_ISL_1209401 to 1209402                                                                                                                                                                    | CH ARMENTIERES                              | CHU Lille - Laboratoire de Virologie                                                                                                       | AIT YAHYA Emilie; ALIDJINOU Enagnon Kazali; BOCKET Laurence; CREPIN Michel; DEMAY Christophe; ENGELMANN Ilka; GEFFROY Sandrine; GUIGON Aurélie; LAZREK Mouna; NOBILLIAUX Florian; PREVOST Brigitte; THULLIER Caroline; TINEZ Claire |
| EPI_ISL_1209373                                                                                                                                                                                                | CH ARRAS                                    | CHU Lille - Laboratoire de Virologie                                                                                                       | AIT YAHYA Emilie; ALIDJINOU Enagnon Kazali; BOCKET Laurence; CREPIN Michel; DEMAY Christophe; ENGELMANN Ilka; GEFFROY Sandrine; GUIGON Aurélie; LAZREK Mouna; NOBILLIAUX Florian; PREVOST Brigitte; THULLIER Caroline; TINEZ Claire |
| EPI_ISL_1085254, EPI_ISL_1085409                                                                                                                                                                               | CH AVRANCHES                                | Department of Virology, Henri Mondor University Hospital, Assistance Publique Hôpitaux de Paris, Université Paris-Est Créteil, INSERM U955 | Alexandre Soulier; Christophe Rodriguez; Elisabeth Trawinski; Guillaume Gricourt; Jean-Michel Pawlowsky; Melissa N'Debi; Slim Fourati; Vanessa Demontant                                                                            |
| EPI_ISL_1265787 to 1265789, EPI_ISL_1312800 to 1312801                                                                                                                                                         | CH BASTIA                                   | CNR Virus des Infections Respiratoires - France SUD                                                                                        | Antonin Bal; Bruno Lina; Gregory Destras; Gwendolynne Burfin; Hadrien Regue; Laurence Josset; Martine Valette; Quentin Semanas                                                                                                      |
| EPI_ISL_1253557                                                                                                                                                                                                | CH BAYONNE                                  | CNR Virus des Infections Respiratoires - France SUD                                                                                        | Antonin Bal; Bruno Lina; Gregory Destras; Gwendolynne Burfin; Hadrien Regue; Laurence Josset; Martine Valette; Quentin Semanas                                                                                                      |
| EPI_ISL_1209370, EPI_ISL_1209390, EPI_ISL_1209403, EPI_ISL_1209405                                                                                                                                             | CH BETHUNE                                  | CHU Lille - Laboratoire de Virologie                                                                                                       | AIT YAHYA Emilie; ALIDJINOU Enagnon Kazali; BOCKET Laurence; CREPIN Michel; DEMAY Christophe; ENGELMANN Ilka; GEFFROY Sandrine; GUIGON Aurélie; LAZREK Mouna; NOBILLIAUX Florian; PREVOST Brigitte; THULLIER Caroline; TINEZ Claire |
| EPI_ISL_1165961 to 1165964                                                                                                                                                                                     | CH BOURG EN BRESSE                          | CNR Virus des Infections Respiratoires - France SUD                                                                                        | Antonin Bal; Bruno Lina; Gregory Destras; Gwendolynne Burfin; Hadrien Regue; Laurence Josset; Martine Valette; Quentin Semanas                                                                                                      |
| EPI_ISL_1241960, EPI_ISL_1253566, EPI_ISL_1265476, EPI_ISL_1265509, EPI_ISL_1265570, EPI_ISL_1265727                                                                                                           | CH BOURG-EN-BRESSE                          | CNR Virus des Infections Respiratoires - France SUD                                                                                        | Antonin Bal; Bruno Lina; Gregory Destras; Gwendolynne Burfin; Hadrien Regue; Laurence Josset; Martine Valette; Quentin Semanas                                                                                                      |
| EPI_ISL_1220322, EPI_ISL_1220324 to 1220326                                                                                                                                                                    | CH CAHORS                                   | CNR Virus des Infections Respiratoires - France SUD                                                                                        | Antonin Bal; Bruno Lina; Gregory Destras; Gwendolynne Burfin; Hadrien Regue; Laurence Josset; Martine Valette; Quentin Semanas                                                                                                      |
| EPI_ISL_1209383                                                                                                                                                                                                | CH CALAIS                                   | CHU Lille - Laboratoire de Virologie                                                                                                       | AIT YAHYA Emilie; ALIDJINOU Enagnon Kazali; BOCKET Laurence; CREPIN Michel; DEMAY Christophe; ENGELMANN Ilka; GEFFROY Sandrine; GUIGON Aurélie; LAZREK Mouna; NOBILLIAUX Florian; PREVOST Brigitte; THULLIER Caroline; TINEZ Claire |
| EPI_ISL_1228933                                                                                                                                                                                                | CH COTE BASQUE                              | CNR Virus des Infections Respiratoires - France SUD                                                                                        | Antonin Bal; Bruno Lina; Gregory Destras; Gwendolynne Burfin; Hadrien Regue; Laurence Josset; Martine Valette; Quentin Semanas                                                                                                      |
| EPI_ISL_1228930 to 1228931                                                                                                                                                                                     | CH Cahors                                   | CNR Virus des Infections Respiratoires - France SUD                                                                                        | Antonin Bal; Bruno Lina; Gregory Destras; Gwendolynne Burfin; Hadrien Regue; Laurence Josset; Martine Valette; Quentin Semanas                                                                                                      |
| EPI_ISL_1209371 to 1209372, EPI_ISL_1209396                                                                                                                                                                    | CH DOUAI                                    | CHU Lille - Laboratoire de Virologie                                                                                                       | AIT YAHYA Emilie; ALIDJINOU Enagnon Kazali; BOCKET Laurence; CREPIN Michel; DEMAY Christophe; ENGELMANN Ilka; GEFFROY Sandrine; GUIGON Aurélie; LAZREK Mouna; NOBILLIAUX Florian; PREVOST Brigitte; THULLIER Caroline; TINEZ Claire |
| EPI_ISL_1312941, EPI_ISL_1313595, EPI_ISL_1313599 to 1313600, EPI_ISL_1313639, EPI_ISL_1313691, EPI_ISL_1313915 to 1313916, EPI_ISL_1336562, EPI_ISL_1359786                                                   |                                             |                                                                                                                                            |                                                                                                                                                                                                                                     |
| see above                                                                                                                                                                                                      | CH GIVORS                                   | CNR Virus des Infections Respiratoires - France SUD                                                                                        | Antonin Bal; Bruno Lina; Gregory Destras; Gwendolynne Burfin; Hadrien Regue; Laurence Josset; Martine Valette; Quentin Semanas                                                                                                      |
| EPI_ISL_1297422                                                                                                                                                                                                | CH Givors                                   | CNR Virus des Infections Respiratoires - France SUD                                                                                        | Antonin Bal; Bruno Lina; Gregory Destras; Gwendolynne Burfin; Hadrien Regue; Laurence Josset; Martine Valette; Quentin Semanas                                                                                                      |
| EPI_ISL_1209381, EPI_ISL_1209388                                                                                                                                                                               | CH LENS                                     | CHU Lille - Laboratoire de Virologie                                                                                                       | AIT YAHYA Emilie; ALIDJINOU Enagnon Kazali; BOCKET Laurence; CREPIN Michel; DEMAY Christophe; ENGELMANN Ilka; GEFFROY Sandrine; GUIGON Aurélie; LAZREK Mouna; NOBILLIAUX Florian; PREVOST Brigitte; THULLIER Caroline; TINEZ Claire |
| EPI_ISL_1085294, EPI_ISL_1085412                                                                                                                                                                               | CH Louis Jaillon (Saint-Claude) Laboratoire | Department of Virology, Henri Mondor University Hospital, Assistance Publique Hôpitaux de Paris, Université Paris-Est Créteil, INSERM U955 | Alexandre Soulier; Christophe Rodriguez; Elisabeth Trawinski; Guillaume Gricourt; Jean-Michel Pawlowsky; Melissa N'Debi; Slim Fourati; Vanessa Demontant                                                                            |
| EPI_ISL_1165912, EPI_ISL_1165959, EPI_ISL_1166047 to 1166048                                                                                                                                                   | CH MACON                                    | CNR Virus des Infections Respiratoires - France SUD                                                                                        | Antonin Bal; Bruno Lina; Gregory Destras; Gwendolynne Burfin; Hadrien Regue; Laurence Josset; Martine Valette; Quentin Semanas                                                                                                      |
| EPI_ISL_1209391, EPI_ISL_1209404                                                                                                                                                                               | CH MAUBEUGE                                 | CHU Lille - Laboratoire de Virologie                                                                                                       | AIT YAHYA Emilie; ALIDJINOU Enagnon Kazali; BOCKET Laurence; CREPIN Michel; DEMAY Christophe; ENGELMANN Ilka; GEFFROY Sandrine; GUIGON Aurélie; LAZREK Mouna; NOBILLIAUX Florian; PREVOST Brigitte; THULLIER Caroline; TINEZ Claire |
| EPI_ISL_1190780, EPI_ISL_1229103 to 1229104, EPI_ISL_1336542 to 1336546, EPI_ISL_1359997, EPI_ISL_1371766 to 1371769                                                                                           | CH METROPOLE SAVOIE                         | CNR Virus des Infections Respiratoires - France SUD                                                                                        | Antonin Bal; Bruno Lina; Gregory Destras; Gwendolynne Burfin; Hadrien Regue; Hadrien Règue; Laurence Josset; Martine Valette; Quentin Semanas                                                                                       |
| EPI_ISL_1220330 to 1220333                                                                                                                                                                                     | CH MONTAUBAN                                | CNR Virus des Infections Respiratoires - France SUD                                                                                        | Antonin Bal; Bruno Lina; Gregory Destras; Gwendolynne Burfin; Hadrien Regue; Laurence Josset; Martine Valette; Quentin Semanas                                                                                                      |
| EPI_ISL_1265879                                                                                                                                                                                                | CH MONTLUCON                                | CNR Virus des Infections Respiratoires - France SUD                                                                                        | Antonin Bal; Bruno Lina; Gregory Destras; Gwendolynne Burfin; Hadrien Regue; Laurence Josset; Martine Valette; Quentin Semanas                                                                                                      |
| EPI_ISL_1085376                                                                                                                                                                                                | CH Mémorial F.E.U Laboratoire               | Department of Virology, Henri Mondor University Hospital, Assistance Publique Hôpitaux de Paris, Université Paris-Est Créteil, INSERM U955 | Alexandre Soulier; Christophe Rodriguez; Elisabeth Trawinski; Guillaume Gricourt; Jean-Michel Pawlowsky; Melissa N'Debi; Slim Fourati; Vanessa Demontant                                                                            |
| EPI_ISL_1220343, EPI_ISL_1312804, EPI_ISL_1312835                                                                                                                                                              | CH NIORT                                    | CNR Virus des Infections Respiratoires - France SUD                                                                                        | Antonin Bal; Bruno Lina; Gregory Destras; Gwendolynne Burfin; Hadrien Regue; Laurence Josset; Martine Valette; Quentin Semanas                                                                                                      |
| EPI_ISL_1209382, EPI_ISL_1209397 to 1209398                                                                                                                                                                    | CH ROUBAIX                                  | CHU Lille - Laboratoire de Virologie                                                                                                       | AIT YAHYA Emilie; ALIDJINOU Enagnon Kazali; BOCKET Laurence; CREPIN Michel; DEMAY Christophe; ENGELMANN Ilka; GEFFROY Sandrine; GUIGON Aurélie; LAZREK Mouna; NOBILLIAUX Florian; PREVOST Brigitte; THULLIER Caroline; TINEZ Claire |
| EPI_ISL_1228975 to 1228976, EPI_ISL_1228980 to 1228981, EPI_ISL_1228983 to 1228984, EPI_ISL_1228988, EPI_ISL_1228990 to 1228991, EPI_ISL_1228993 to 1228996, EPI_ISL_1228999                                   |                                             |                                                                                                                                            |                                                                                                                                                                                                                                     |



|                                                                                                                                                                                                                                                                                                                                                                                                                                                                                                                                                                                                                                                                                                                                                                                                                                                                                                                                                                                                                                                                                                                                                                                                                                                                                                                                                                                                                                 |                             |                                                                                                                                            |                                                                                                                                                                                                                                      |
|---------------------------------------------------------------------------------------------------------------------------------------------------------------------------------------------------------------------------------------------------------------------------------------------------------------------------------------------------------------------------------------------------------------------------------------------------------------------------------------------------------------------------------------------------------------------------------------------------------------------------------------------------------------------------------------------------------------------------------------------------------------------------------------------------------------------------------------------------------------------------------------------------------------------------------------------------------------------------------------------------------------------------------------------------------------------------------------------------------------------------------------------------------------------------------------------------------------------------------------------------------------------------------------------------------------------------------------------------------------------------------------------------------------------------------|-----------------------------|--------------------------------------------------------------------------------------------------------------------------------------------|--------------------------------------------------------------------------------------------------------------------------------------------------------------------------------------------------------------------------------------|
| see above                                                                                                                                                                                                                                                                                                                                                                                                                                                                                                                                                                                                                                                                                                                                                                                                                                                                                                                                                                                                                                                                                                                                                                                                                                                                                                                                                                                                                       | CH ROYAN                    | CNR Virus des Infections Respiratoires - France SUD                                                                                        | Antonin Bal; Bruno Lina; Gregory Destras; Gwendolynne Burfin; Hadrien Regue; Laurence Josset; Martine Valette; Quentin Semanas                                                                                                       |
| EPI_ISL_1209384, EPI_ISL_1209393                                                                                                                                                                                                                                                                                                                                                                                                                                                                                                                                                                                                                                                                                                                                                                                                                                                                                                                                                                                                                                                                                                                                                                                                                                                                                                                                                                                                | CH SAINT-OMER               | CHU Lille - Laboratoire de Virologie                                                                                                       | AIT YAHYA Emilie; ALIDJINOU Enagnon Kazali; BOCKET Laurence; CREPIN Michel; DEMAY Christophe; ENGELMANN Ilka; GEFFROY Sandrine; GUIGON Aurélie; LAZREK Mouna; NOBILLIAUX Florian; PREVOST Brigitte; THUILLIER Caroline; TINEZ Claire |
| EPI_ISL_1220334, EPI_ISL_1220337 to 1220340                                                                                                                                                                                                                                                                                                                                                                                                                                                                                                                                                                                                                                                                                                                                                                                                                                                                                                                                                                                                                                                                                                                                                                                                                                                                                                                                                                                     | CH SAINTONGE                | CNR Virus des Infections Respiratoires - France SUD                                                                                        | Antonin Bal; Bruno Lina; Gregory Destras; Gwendolynne Burfin; Hadrien Regue; Laurence Josset; Martine Valette; Quentin Semanas                                                                                                       |
| EPI_ISL_1209374, EPI_ISL_1209399                                                                                                                                                                                                                                                                                                                                                                                                                                                                                                                                                                                                                                                                                                                                                                                                                                                                                                                                                                                                                                                                                                                                                                                                                                                                                                                                                                                                | CH SECLIN                   | CHU Lille - Laboratoire de Virologie                                                                                                       | AIT YAHYA Emilie; ALIDJINOU Enagnon Kazali; BOCKET Laurence; CREPIN Michel; DEMAY Christophe; ENGELMANN Ilka; GEFFROY Sandrine; GUIGON Aurélie; LAZREK Mouna; NOBILLIAUX Florian; PREVOST Brigitte; THUILLIER Caroline; TINEZ Claire |
| EPI_ISL_1163945, EPI_ISL_1163959, EPI_ISL_1163962, EPI_ISL_1163985                                                                                                                                                                                                                                                                                                                                                                                                                                                                                                                                                                                                                                                                                                                                                                                                                                                                                                                                                                                                                                                                                                                                                                                                                                                                                                                                                              | CH SUD GIRONDE              | CNR Virus des Infections Respiratoires - France SUD                                                                                        | Antonin Bal; Bruno Lina; Gregory Destras; Gwendolynne Burfin; Hadrien Regue; Laurence Josset; Martine Valette; Quentin Semanas                                                                                                       |
| EPI_ISL_1322384, EPI_ISL_1359959, EPI_ISL_1359989, EPI_ISL_1360011, EPI_ISL_1371894                                                                                                                                                                                                                                                                                                                                                                                                                                                                                                                                                                                                                                                                                                                                                                                                                                                                                                                                                                                                                                                                                                                                                                                                                                                                                                                                             | CH TOULON LA SEYNE SUR MER  | CNR Virus des Infections Respiratoires - France SUD                                                                                        | Antonin Bal; Bruno Lina; Gregory Destras; Gwendolynne Burfin; Hadrien Regue; Laurence Josset; Martine Valette; Quentin Semanas                                                                                                       |
| EPI_ISL_1220336, EPI_ISL_1220344 to 1220347, EPI_ISL_1253556                                                                                                                                                                                                                                                                                                                                                                                                                                                                                                                                                                                                                                                                                                                                                                                                                                                                                                                                                                                                                                                                                                                                                                                                                                                                                                                                                                    | CH TOULOUSE                 | CNR Virus des Infections Respiratoires - France SUD                                                                                        | Antonin Bal; Bruno Lina; Gregory Destras; Gwendolynne Burfin; Hadrien Regue; Laurence Josset; Martine Valette; Quentin Semanas                                                                                                       |
| EPI_ISL_1166041 to 1166046, EPI_ISL_1220335, EPI_ISL_1220341 to 1220342                                                                                                                                                                                                                                                                                                                                                                                                                                                                                                                                                                                                                                                                                                                                                                                                                                                                                                                                                                                                                                                                                                                                                                                                                                                                                                                                                         | CH VALENCE                  | CNR Virus des Infections Respiratoires - France SUD                                                                                        | Antonin Bal; Bruno Lina; Gregory Destras; Gwendolynne Burfin; Hadrien Regue; Laurence Josset; Martine Valette; Quentin Semanas                                                                                                       |
| EPI_ISL_1209375, EPI_ISL_1209389                                                                                                                                                                                                                                                                                                                                                                                                                                                                                                                                                                                                                                                                                                                                                                                                                                                                                                                                                                                                                                                                                                                                                                                                                                                                                                                                                                                                | CH VALENCIENNES             | CHU Lille - Laboratoire de Virologie                                                                                                       | AIT YAHYA Emilie; ALIDJINOU Enagnon Kazali; BOCKET Laurence; CREPIN Michel; DEMAY Christophe; ENGELMANN Ilka; GEFFROY Sandrine; GUIGON Aurélie; LAZREK Mouna; NOBILLIAUX Florian; PREVOST Brigitte; THUILLIER Caroline; TINEZ Claire |
| EPI_ISL_1265766, EPI_ISL_1265883, EPI_ISL_1312906                                                                                                                                                                                                                                                                                                                                                                                                                                                                                                                                                                                                                                                                                                                                                                                                                                                                                                                                                                                                                                                                                                                                                                                                                                                                                                                                                                               | CH VICHY                    | CNR Virus des Infections Respiratoires - France SUD                                                                                        | Antonin Bal; Bruno Lina; Gregory Destras; Gwendolynne Burfin; Hadrien Regue; Laurence Josset; Martine Valette; Quentin Semanas                                                                                                       |
| EPI_ISL_1273842                                                                                                                                                                                                                                                                                                                                                                                                                                                                                                                                                                                                                                                                                                                                                                                                                                                                                                                                                                                                                                                                                                                                                                                                                                                                                                                                                                                                                 | CH de Lens                  | CHU Lille - Laboratoire de Virologie                                                                                                       | AIT YAHYA Emilie; ALIDJINOU Enagnon Kazali; BOCKET Laurence; CREPIN Michel; DEMAY Christophe; ENGELMANN Ilka; GEFFROY Sandrine; GUIGON Aurélie; LAZREK Mouna; NOBILLIAUX Florian; PREVOST Brigitte; THUILLIER Caroline; TINEZ Claire |
| EPI_ISL_1118928                                                                                                                                                                                                                                                                                                                                                                                                                                                                                                                                                                                                                                                                                                                                                                                                                                                                                                                                                                                                                                                                                                                                                                                                                                                                                                                                                                                                                 | CH de ROUBAIX               | CHU Lille - Laboratoire de Virologie                                                                                                       | AIT YAHYA Emilie; ALIDJINOU Enagnon Kazali; BOCKET Laurence; CREPIN Michel; DEMAY Christophe; ENGELMANN Ilka; GEFFROY Sandrine; GUIGON Aurélie; LAZREK Mouna; NOBILLIAUX Florian; PREVOST Brigitte; THUILLIER Caroline; TINEZ Claire |
| EPI_ISL_1085298                                                                                                                                                                                                                                                                                                                                                                                                                                                                                                                                                                                                                                                                                                                                                                                                                                                                                                                                                                                                                                                                                                                                                                                                                                                                                                                                                                                                                 | CH. ALENCON-MAMERS          | Department of Virology, Henri Mondor University Hospital, Assistance Publique Hôpitaux de Paris, Université Paris-Est Créteil, INSERM U955 | Alexandre Soulier; Christophe Rodriguez; Elisabeth Trawinski; Guillaume Gricourt; Jean-Michel Pawlotsky; Melissa N'Debi; Slim Fourati; Vanessa Demontant                                                                             |
| EPI_ISL_1085380, EPI_ISL_1085418                                                                                                                                                                                                                                                                                                                                                                                                                                                                                                                                                                                                                                                                                                                                                                                                                                                                                                                                                                                                                                                                                                                                                                                                                                                                                                                                                                                                | CH. BEGIN                   | Department of Virology, Henri Mondor University Hospital, Assistance Publique Hôpitaux de Paris, Université Paris-Est Créteil, INSERM U955 | Alexandre Soulier; Christophe Rodriguez; Elisabeth Trawinski; Guillaume Gricourt; Jean-Michel Pawlotsky; Melissa N'Debi; Slim Fourati; Vanessa Demontant                                                                             |
| EPI_ISL_1085910, EPI_ISL_1085938 to 1085940, EPI_ISL_1110189                                                                                                                                                                                                                                                                                                                                                                                                                                                                                                                                                                                                                                                                                                                                                                                                                                                                                                                                                                                                                                                                                                                                                                                                                                                                                                                                                                    | CH. CHU DE REIMS            | Department of Virology, Henri Mondor University Hospital, Assistance Publique Hôpitaux de Paris, Université Paris-Est Créteil, INSERM U955 | Alexandre Soulier; Christophe Rodriguez; Elisabeth Trawinski; Guillaume Gricourt; Jean-Michel Pawlotsky; Melissa N'Debi; Slim Fourati; Vanessa Demontant                                                                             |
| EPI_ISL_1085519 to 1085522, EPI_ISL_1110140                                                                                                                                                                                                                                                                                                                                                                                                                                                                                                                                                                                                                                                                                                                                                                                                                                                                                                                                                                                                                                                                                                                                                                                                                                                                                                                                                                                     | CH. DE LILLE                | Department of Virology, Henri Mondor University Hospital, Assistance Publique Hôpitaux de Paris, Université Paris-Est Créteil, INSERM U955 | Alexandre Soulier; Christophe Rodriguez; Elisabeth Trawinski; Guillaume Gricourt; Jean-Michel Pawlotsky; Melissa N'Debi; Slim Fourati; Vanessa Demontant                                                                             |
| EPI_ISL_1085260, EPI_ISL_1085379, EPI_ISL_1085410, EPI_ISL_1085415                                                                                                                                                                                                                                                                                                                                                                                                                                                                                                                                                                                                                                                                                                                                                                                                                                                                                                                                                                                                                                                                                                                                                                                                                                                                                                                                                              | CH. E. MULLER               | Department of Virology, Henri Mondor University Hospital, Assistance Publique Hôpitaux de Paris, Université Paris-Est Créteil, INSERM U955 | Alexandre Soulier; Christophe Rodriguez; Elisabeth Trawinski; Guillaume Gricourt; Jean-Michel Pawlotsky; Melissa N'Debi; Slim Fourati; Vanessa Demontant                                                                             |
| EPI_ISL_1085406, EPI_ISL_1110193                                                                                                                                                                                                                                                                                                                                                                                                                                                                                                                                                                                                                                                                                                                                                                                                                                                                                                                                                                                                                                                                                                                                                                                                                                                                                                                                                                                                | CH. FLERS Jacques MONOD     | Department of Virology, Henri Mondor University Hospital, Assistance Publique Hôpitaux de Paris, Université Paris-Est Créteil, INSERM U955 | Alexandre Soulier; Christophe Rodriguez; Elisabeth Trawinski; Guillaume Gricourt; Jean-Michel Pawlotsky; Melissa N'Debi; Slim Fourati; Vanessa Demontant                                                                             |
| EPI_ISL_1085259, EPI_ISL_1085320 to 1085321, EPI_ISL_1085330 to 1085331, EPI_ISL_1085373, EPI_ISL_1110206                                                                                                                                                                                                                                                                                                                                                                                                                                                                                                                                                                                                                                                                                                                                                                                                                                                                                                                                                                                                                                                                                                                                                                                                                                                                                                                       | CH. HOPITAL CIVIL           | Department of Virology, Henri Mondor University Hospital, Assistance Publique Hôpitaux de Paris, Université Paris-Est Créteil, INSERM U955 | Alexandre Soulier; Christophe Rodriguez; Elisabeth Trawinski; Guillaume Gricourt; Jean-Michel Pawlotsky; Melissa N'Debi; Slim Fourati; Vanessa Demontant                                                                             |
| EPI_ISL_1085816, EPI_ISL_1085818, EPI_ISL_1085822, EPI_ISL_1085826, EPI_ISL_1085828 to 1085830, EPI_ISL_1085834, EPI_ISL_1085839, EPI_ISL_1085842, EPI_ISL_1085857, EPI_ISL_1085869 to 1085872, EPI_ISL_1085876, EPI_ISL_1085887, EPI_ISL_1085897, EPI_ISL_1085899, EPI_ISL_1085906, EPI_ISL_1085911 to 1085915, EPI_ISL_1088551, EPI_ISL_1088557, EPI_ISL_1088576, EPI_ISL_1088579, EPI_ISL_1110151 to 1110153, EPI_ISL_1110180, EPI_ISL_1110199, EPI_ISL_1110201 to 1110202, EPI_ISL_1110205, EPI_ISL_1110208 to 1110209                                                                                                                                                                                                                                                                                                                                                                                                                                                                                                                                                                                                                                                                                                                                                                                                                                                                                                      | CH. ROBERT BISSON           | Department of Virology, Henri Mondor University Hospital, Assistance Publique Hôpitaux de Paris, Université Paris-Est Créteil, INSERM U955 | Alexandre Soulier; Christophe Rodriguez; Elisabeth Trawinski; Guillaume Gricourt; Jean-Michel Pawlotsky; Melissa N'Debi; Slim Fourati; Vanessa Demontant                                                                             |
| EPI_ISL_1085424                                                                                                                                                                                                                                                                                                                                                                                                                                                                                                                                                                                                                                                                                                                                                                                                                                                                                                                                                                                                                                                                                                                                                                                                                                                                                                                                                                                                                 | CH. ST DENIS                | Department of Virology, Henri Mondor University Hospital, Assistance Publique Hôpitaux de Paris, Université Paris-Est Créteil, INSERM U955 | Alexandre Soulier; Christophe Rodriguez; Elisabeth Trawinski; Guillaume Gricourt; Jean-Michel Pawlotsky; Melissa N'Debi; Slim Fourati; Vanessa Demontant                                                                             |
| EPI_ISL_1085232, EPI_ISL_1085235, EPI_ISL_1085245, EPI_ISL_1085251, EPI_ISL_1085253, EPI_ISL_1085261 to 1085262, EPI_ISL_1085266 to 1085266, EPI_ISL_1085286, EPI_ISL_1085295, EPI_ISL_1085316, EPI_ISL_1085344, EPI_ISL_1085358, EPI_ISL_1085363 to 1085369, EPI_ISL_1085377, EPI_ISL_1085383, EPI_ISL_1085392 to 1085395, EPI_ISL_1085443, EPI_ISL_1085455, EPI_ISL_1085461, EPI_ISL_1085509 to 1085510, EPI_ISL_1085512, EPI_ISL_1085518, EPI_ISL_1085527, EPI_ISL_1085529, EPI_ISL_1085550 to 1085551, EPI_ISL_1085562, EPI_ISL_1085599, EPI_ISL_1085602, EPI_ISL_1085609, EPI_ISL_1085614, EPI_ISL_1085618, EPI_ISL_1085623, EPI_ISL_1085629 to 1085636, EPI_ISL_1085642 to 1085643, EPI_ISL_1085645, EPI_ISL_1085652, EPI_ISL_1085657, EPI_ISL_1085662 to 1085663, EPI_ISL_1085768 to 1085769, EPI_ISL_1085771, EPI_ISL_1085790, EPI_ISL_1085794, EPI_ISL_1085799, EPI_ISL_1085803 to 1085806, EPI_ISL_1085816, EPI_ISL_1085818, EPI_ISL_1085822, EPI_ISL_1085826, EPI_ISL_1085828 to 1085830, EPI_ISL_1085834, EPI_ISL_1085839, EPI_ISL_1085842, EPI_ISL_1085857, EPI_ISL_1085869 to 1085872, EPI_ISL_1085876, EPI_ISL_1085887, EPI_ISL_1085897, EPI_ISL_1085899, EPI_ISL_1085906, EPI_ISL_1085911 to 1085915, EPI_ISL_1088551, EPI_ISL_1088557, EPI_ISL_1088576, EPI_ISL_1088579, EPI_ISL_1110151 to 1110153, EPI_ISL_1110180, EPI_ISL_1110199, EPI_ISL_1110201 to 1110202, EPI_ISL_1110205, EPI_ISL_1110208 to 1110209 | CH.INTERCOMMUNAL DE CRETEIL | Department of Virology, Henri Mondor University Hospital, Assistance Publique Hôpitaux de Paris, Université Paris-Est Créteil, INSERM U955 | Alexandre Soulier; Christophe Rodriguez; Elisabeth Trawinski; Guillaume Gricourt; Jean-Michel Pawlotsky; Melissa N'Debi; Slim Fourati; Vanessa Demontant                                                                             |
| EPI_ISL_1085838, EPI_ISL_1085883, EPI_ISL_1085932                                                                                                                                                                                                                                                                                                                                                                                                                                                                                                                                                                                                                                                                                                                                                                                                                                                                                                                                                                                                                                                                                                                                                                                                                                                                                                                                                                               | CH.de LONS LE SAUNIER       | Department of Virology, Henri Mondor University Hospital, Assistance Publique Hôpitaux de Paris, Université Paris-Est Créteil, INSERM U955 | Alexandre Soulier; Christophe Rodriguez; Elisabeth Trawinski; Guillaume Gricourt; Jean-Michel Pawlotsky; Melissa N'Debi; Slim Fourati; Vanessa Demontant                                                                             |
| EPI_ISL_1360020                                                                                                                                                                                                                                                                                                                                                                                                                                                                                                                                                                                                                                                                                                                                                                                                                                                                                                                                                                                                                                                                                                                                                                                                                                                                                                                                                                                                                 | CHG GRASSE                  | CNR Virus des Infections Respiratoires - France SUD                                                                                        | Antonin Bal; Bruno Lina; Gregory Destras; Gwendolynne Burfin; Hadrien Regue; Laurence Josset; Martine Valette; Quentin Semanas                                                                                                       |
| EPI_ISL_1009673                                                                                                                                                                                                                                                                                                                                                                                                                                                                                                                                                                                                                                                                                                                                                                                                                                                                                                                                                                                                                                                                                                                                                                                                                                                                                                                                                                                                                 | CHI Andre Gregoire          | Cerba                                                                                                                                      | Benadza M; Fremont-Goudot G; Haïm-Boukoba S; Lecorche E; Olivi M; Penot P; Roquebert B; Trombert-Paolantoni S                                                                                                                        |
| EPI_ISL_1250609, EPI_ISL_1250635                                                                                                                                                                                                                                                                                                                                                                                                                                                                                                                                                                                                                                                                                                                                                                                                                                                                                                                                                                                                                                                                                                                                                                                                                                                                                                                                                                                                | CHI Eibeuf                  | Centre Hospitalier Universitaire de Rouen Laboratoire de Virologie                                                                         | Alice Moisan; Fabienne De Oliveira; Marie Leoz                                                                                                                                                                                       |
| EPI_ISL_1265817, EPI_ISL_1265896 to 1265898, EPI_ISL_1287748                                                                                                                                                                                                                                                                                                                                                                                                                                                                                                                                                                                                                                                                                                                                                                                                                                                                                                                                                                                                                                                                                                                                                                                                                                                                                                                                                                    | CHI TOULON LA SEYNE         | CNR Virus des Infections Respiratoires - France SUD                                                                                        | Antonin Bal; Bruno Lina; Gregory Destras; Gwendolynne Burfin; Hadrien Regue; Laurence Josset; Martine Valette; Quentin Semanas                                                                                                       |
| EPI_ISL_1085241, EPI_ISL_1085337, EPI_ISL_1085342, EPI_ISL_1085414, EPI_ISL_1085420, EPI_ISL_1085427 to 1085428, EPI_ISL_1085441, EPI_ISL_1085472, EPI_ISL_1085476 to 1085478, EPI_ISL_1085501, EPI_ISL_1085505, EPI_ISL_1085511, EPI_ISL_1085525, EPI_ISL_1085535 to 1085539, EPI_ISL_1085542 to 1085543, EPI_ISL_1085546 to 1085548, EPI_ISL_1085557, EPI_ISL_1085561, EPI_ISL_1085563 to 1085564, EPI_ISL_1085570, EPI_ISL_1085573, EPI_ISL_1085581 to 1085582, EPI_ISL_1085584, EPI_ISL_1085596 to 1085598, EPI_ISL_1085601, EPI_ISL_1085638, EPI_ISL_1085644, EPI_ISL_1085653 to 1085654, EPI_ISL_1085783, EPI_ISL_1085791, EPI_ISL_1085793, EPI_ISL_1085797 to 1085798, EPI_ISL_1085799, EPI_ISL_1085807, EPI_ISL_1085880, EPI_ISL_1085896, EPI_ISL_1085902, EPI_ISL_1085904, EPI_ISL_1088572 to 1088574, EPI_ISL_1110138, EPI_ISL_1110155                                                                                                                                                                                                                                                                                                                                                                                                                                                                                                                                                                                | CH. VILLENEUVE ST GEORGES   | Department of Virology, Henri Mondor University Hospital, Assistance Publique Hôpitaux de Paris, Université Paris-Est Créteil, INSERM U955 | Alexandre Soulier; Christophe Rodriguez; Elisabeth Trawinski; Guillaume Gricourt; Jean-Michel Pawlotsky; Melissa N'Debi; Slim Fourati; Vanessa Demontant                                                                             |

|                                                                                                                                                                                                                                                                                                                                                                                                                                                                                                                                                                                                                                                                                                                                                                                                                                                                                                                                                                                                                                                                                                                                                                                                                                                                                                                                                                                                                                                                                                                                                                                                                                                                                                                                                                                                                                                                                                                                                                                                                                                                                                                                                                                                                                                                                                                                                                                                                                                                                                                                                                                                                                                                              |                                                                        |                                                                                                                                            |                                                                                                                                                                                                                                                     |
|------------------------------------------------------------------------------------------------------------------------------------------------------------------------------------------------------------------------------------------------------------------------------------------------------------------------------------------------------------------------------------------------------------------------------------------------------------------------------------------------------------------------------------------------------------------------------------------------------------------------------------------------------------------------------------------------------------------------------------------------------------------------------------------------------------------------------------------------------------------------------------------------------------------------------------------------------------------------------------------------------------------------------------------------------------------------------------------------------------------------------------------------------------------------------------------------------------------------------------------------------------------------------------------------------------------------------------------------------------------------------------------------------------------------------------------------------------------------------------------------------------------------------------------------------------------------------------------------------------------------------------------------------------------------------------------------------------------------------------------------------------------------------------------------------------------------------------------------------------------------------------------------------------------------------------------------------------------------------------------------------------------------------------------------------------------------------------------------------------------------------------------------------------------------------------------------------------------------------------------------------------------------------------------------------------------------------------------------------------------------------------------------------------------------------------------------------------------------------------------------------------------------------------------------------------------------------------------------------------------------------------------------------------------------------|------------------------------------------------------------------------|--------------------------------------------------------------------------------------------------------------------------------------------|-----------------------------------------------------------------------------------------------------------------------------------------------------------------------------------------------------------------------------------------------------|
|                                                                                                                                                                                                                                                                                                                                                                                                                                                                                                                                                                                                                                                                                                                                                                                                                                                                                                                                                                                                                                                                                                                                                                                                                                                                                                                                                                                                                                                                                                                                                                                                                                                                                                                                                                                                                                                                                                                                                                                                                                                                                                                                                                                                                                                                                                                                                                                                                                                                                                                                                                                                                                                                              |                                                                        | Assistance Publique Hôpitaux de Paris, Université Paris-Est Créteil, INSERM U955                                                           | Demontant                                                                                                                                                                                                                                           |
| EPI_ISL_1190836                                                                                                                                                                                                                                                                                                                                                                                                                                                                                                                                                                                                                                                                                                                                                                                                                                                                                                                                                                                                                                                                                                                                                                                                                                                                                                                                                                                                                                                                                                                                                                                                                                                                                                                                                                                                                                                                                                                                                                                                                                                                                                                                                                                                                                                                                                                                                                                                                                                                                                                                                                                                                                                              | CHIAP LABORATOIRE MULTISITES                                           | CNR Virus des Infections Respiratoires - France SUD                                                                                        | Antonin Bal; Bruno Lina; Gregory Destras; Gwendolynne Burfin; Hadrien Règue; Laurence Josset; Martine Valette; Quentin Semanas                                                                                                                      |
| EPI_ISL_1265735, EPI_ISL_1265753, EPI_ISL_1265799, EPI_ISL_1265862 to 1265863                                                                                                                                                                                                                                                                                                                                                                                                                                                                                                                                                                                                                                                                                                                                                                                                                                                                                                                                                                                                                                                                                                                                                                                                                                                                                                                                                                                                                                                                                                                                                                                                                                                                                                                                                                                                                                                                                                                                                                                                                                                                                                                                                                                                                                                                                                                                                                                                                                                                                                                                                                                                | CHMS CHAMBERY                                                          | CNR Virus des Infections Respiratoires - France SUD                                                                                        | Antonin Bal; Bruno Lina; Gregory Destras; Gwendolynne Burfin; Hadrien Regue; Laurence Josset; Martine Valette; Quentin Semanas                                                                                                                      |
| EPI_ISL_1190785, EPI_ISL_1336529 to 1336532, EPI_ISL_1336574 to 1336578, EPI_ISL_1336580 to 1336589, EPI_ISL_1371761                                                                                                                                                                                                                                                                                                                                                                                                                                                                                                                                                                                                                                                                                                                                                                                                                                                                                                                                                                                                                                                                                                                                                                                                                                                                                                                                                                                                                                                                                                                                                                                                                                                                                                                                                                                                                                                                                                                                                                                                                                                                                                                                                                                                                                                                                                                                                                                                                                                                                                                                                         | CHR LA REUNION FELIX GUYON                                             | CNR Virus des Infections Respiratoires - France SUD                                                                                        | Antonin Bal; Bruno Lina; Gregory Destras; Gwendolynne Burfin; Hadrien Regue; Hadrien Règue; Laurence Josset; Martine Valette; Quentin Semanas                                                                                                       |
| EPI_ISL_1085255, EPI_ISL_1085370, EPI_ISL_1085918 to 1085919, EPI_ISL_1085950                                                                                                                                                                                                                                                                                                                                                                                                                                                                                                                                                                                                                                                                                                                                                                                                                                                                                                                                                                                                                                                                                                                                                                                                                                                                                                                                                                                                                                                                                                                                                                                                                                                                                                                                                                                                                                                                                                                                                                                                                                                                                                                                                                                                                                                                                                                                                                                                                                                                                                                                                                                                | CHR METZ THIONVILLE Hôpital de Mercy                                   | Department of Virology, Henri Mondor University Hospital, Assistance Publique Hôpitaux de Paris, Université Paris-Est Créteil, INSERM U955 | Alexandre Soulier; Christophe Rodriguez; Elisabeth Trawinski; Guillaume Gricourt; Jean-Michel Pawlowsky; Melissa N'Debi; Slim Fourati; Vanessa Demontant                                                                                            |
| EPI_ISL_1058445 to 1058462, EPI_ISL_1058534 to 1058557, EPI_ISL_1058604 to 1058614, EPI_ISL_1059070, EPI_ISL_1076397 to 1076398, EPI_ISL_1076409, EPI_ISL_1076446, EPI_ISL_1113084 to 1113110, EPI_ISL_1171512, EPI_ISL_1241688, EPI_ISL_1318122, EPI_ISL_1318155                                                                                                                                                                                                                                                                                                                                                                                                                                                                                                                                                                                                                                                                                                                                                                                                                                                                                                                                                                                                                                                                                                                                                                                                                                                                                                                                                                                                                                                                                                                                                                                                                                                                                                                                                                                                                                                                                                                                                                                                                                                                                                                                                                                                                                                                                                                                                                                                            | see above                                                              | CHR de La Citadelle                                                                                                                        | GIGA Medical Genomics                                                                                                                                                                                                                               |
| EPI_ISL_1318197                                                                                                                                                                                                                                                                                                                                                                                                                                                                                                                                                                                                                                                                                                                                                                                                                                                                                                                                                                                                                                                                                                                                                                                                                                                                                                                                                                                                                                                                                                                                                                                                                                                                                                                                                                                                                                                                                                                                                                                                                                                                                                                                                                                                                                                                                                                                                                                                                                                                                                                                                                                                                                                              | CHR de Namur                                                           | GIGA Medical Genomics                                                                                                                      | Bouchra Boujemla; Cécile Meex; Keith Durkin; Maria Artesi; Marie-Pierre Hayette; Nathalie Renotte; Pierrette Melin; Raphaël Boreux; Sébastien Bontems; Vincent Bours                                                                                |
| EPI_ISL_1085263, EPI_ISL_1085299 to 1085300, EPI_ISL_1085361, EPI_ISL_1085407                                                                                                                                                                                                                                                                                                                                                                                                                                                                                                                                                                                                                                                                                                                                                                                                                                                                                                                                                                                                                                                                                                                                                                                                                                                                                                                                                                                                                                                                                                                                                                                                                                                                                                                                                                                                                                                                                                                                                                                                                                                                                                                                                                                                                                                                                                                                                                                                                                                                                                                                                                                                | CHRU HOPITAUX de BRABOIS                                               | Department of Virology, Henri Mondor University Hospital, Assistance Publique Hôpitaux de Paris, Université Paris-Est Créteil, INSERM U955 | Alexandre Soulier; Christophe Rodriguez; Elisabeth Trawinski; Guillaume Gricourt; Jean-Michel Pawlowsky; Melissa N'Debi; Slim Fourati; Vanessa Demontant                                                                                            |
| EPI_ISL_1013408 to 1013414                                                                                                                                                                                                                                                                                                                                                                                                                                                                                                                                                                                                                                                                                                                                                                                                                                                                                                                                                                                                                                                                                                                                                                                                                                                                                                                                                                                                                                                                                                                                                                                                                                                                                                                                                                                                                                                                                                                                                                                                                                                                                                                                                                                                                                                                                                                                                                                                                                                                                                                                                                                                                                                   | CHU - Hôpital Cavale Blanche                                           | National Reference Center for Viruses of Respiratory Infections, Institut Pasteur, Paris                                                   | Angela Brisebarre; Camille Capel; Etienne Simon-Lorière; Marion Barbet; Maud Vanpeene; Méline Bizard; Pilorge LÉA; Sylvie Behillil; Sylvie van der Werf; Vincent Enouf                                                                              |
| EPI_ISL_1190778 to 1190779, EPI_ISL_1265777, EPI_ISL_1265830, EPI_ISL_1265866 to 1265867, EPI_ISL_1312880, EPI_ISL_1312883 to 1312885, EPI_ISL_1312900 to 1312902, EPI_ISL_1312905                                                                                                                                                                                                                                                                                                                                                                                                                                                                                                                                                                                                                                                                                                                                                                                                                                                                                                                                                                                                                                                                                                                                                                                                                                                                                                                                                                                                                                                                                                                                                                                                                                                                                                                                                                                                                                                                                                                                                                                                                                                                                                                                                                                                                                                                                                                                                                                                                                                                                           | see above                                                              | CHU CLERMONT FERRAND                                                                                                                       | CNR Virus des Infections Respiratoires - France SUD                                                                                                                                                                                                 |
| EPI_ISL_1163943, EPI_ISL_1163948, EPI_ISL_1163953, EPI_ISL_1163966, EPI_ISL_1181959 to 1181966, EPI_ISL_1190777, EPI_ISL_1228938 to 1228942, EPI_ISL_1228945, EPI_ISL_1228947, EPI_ISL_1228949, EPI_ISL_1228952, EPI_ISL_1322368, EPI_ISL_1322430                                                                                                                                                                                                                                                                                                                                                                                                                                                                                                                                                                                                                                                                                                                                                                                                                                                                                                                                                                                                                                                                                                                                                                                                                                                                                                                                                                                                                                                                                                                                                                                                                                                                                                                                                                                                                                                                                                                                                                                                                                                                                                                                                                                                                                                                                                                                                                                                                            | see above                                                              | CHU GRENOBLE                                                                                                                               | CNR Virus des Infections Respiratoires - France SUD                                                                                                                                                                                                 |
| EPI_ISL_1209377, EPI_ISL_1209386 to 1209387, EPI_ISL_1209392, EPI_ISL_1209395, EPI_ISL_1209400                                                                                                                                                                                                                                                                                                                                                                                                                                                                                                                                                                                                                                                                                                                                                                                                                                                                                                                                                                                                                                                                                                                                                                                                                                                                                                                                                                                                                                                                                                                                                                                                                                                                                                                                                                                                                                                                                                                                                                                                                                                                                                                                                                                                                                                                                                                                                                                                                                                                                                                                                                               | CHU LILLE                                                              | CHU Lille - Laboratoire de Virologie                                                                                                       | AIT YAHYA Emilie; ALIDJINOU Enagnon Kazali; BOCKET Laurence; CREPIN Michel; DEMAY Christophe; ENGELMANN Ilka; GEFFROY Sandrine; GUIGON Aurélie; LAZREK Mouna; NOBILLIAUX Florian; PREVOST Brigitte; THUILLIER Caroline; TINEZ Claire                |
| EPI_ISL_1229064 to 1229067, EPI_ISL_1265768, EPI_ISL_1265770, EPI_ISL_1265888 to 1265894                                                                                                                                                                                                                                                                                                                                                                                                                                                                                                                                                                                                                                                                                                                                                                                                                                                                                                                                                                                                                                                                                                                                                                                                                                                                                                                                                                                                                                                                                                                                                                                                                                                                                                                                                                                                                                                                                                                                                                                                                                                                                                                                                                                                                                                                                                                                                                                                                                                                                                                                                                                     | CHU LIMOGES                                                            | CNR Virus des Infections Respiratoires - France SUD                                                                                        | Antonin Bal; Bruno Lina; Gregory Destras; Gwendolynne Burfin; Hadrien Regue; Laurence Josset; Martine Valette; Quentin Semanas                                                                                                                      |
| EPI_ISL_1229004 to 1229005, EPI_ISL_1229010, EPI_ISL_1229015                                                                                                                                                                                                                                                                                                                                                                                                                                                                                                                                                                                                                                                                                                                                                                                                                                                                                                                                                                                                                                                                                                                                                                                                                                                                                                                                                                                                                                                                                                                                                                                                                                                                                                                                                                                                                                                                                                                                                                                                                                                                                                                                                                                                                                                                                                                                                                                                                                                                                                                                                                                                                 | CHU MONTAUBAN                                                          | CNR Virus des Infections Respiratoires - France SUD                                                                                        | Antonin Bal; Bruno Lina; Gregory Destras; Gwendolynne Burfin; Hadrien Regue; Laurence Josset; Martine Valette; Quentin Semanas                                                                                                                      |
| EPI_ISL_1322344, EPI_ISL_1322417, EPI_ISL_1371874 to 1371889                                                                                                                                                                                                                                                                                                                                                                                                                                                                                                                                                                                                                                                                                                                                                                                                                                                                                                                                                                                                                                                                                                                                                                                                                                                                                                                                                                                                                                                                                                                                                                                                                                                                                                                                                                                                                                                                                                                                                                                                                                                                                                                                                                                                                                                                                                                                                                                                                                                                                                                                                                                                                 | CHU NICE - HOPITAL ARCHET 2                                            | CNR Virus des Infections Respiratoires - France SUD                                                                                        | Antonin Bal; Bruno Lina; Gregory Destras; Gwendolynne Burfin; Hadrien Regue; Laurence Josset; Martine Valette; Quentin Semanas                                                                                                                      |
| EPI_ISL_1312949, EPI_ISL_1312979                                                                                                                                                                                                                                                                                                                                                                                                                                                                                                                                                                                                                                                                                                                                                                                                                                                                                                                                                                                                                                                                                                                                                                                                                                                                                                                                                                                                                                                                                                                                                                                                                                                                                                                                                                                                                                                                                                                                                                                                                                                                                                                                                                                                                                                                                                                                                                                                                                                                                                                                                                                                                                             | CHU NIMES                                                              | CNR Virus des Infections Respiratoires - France SUD                                                                                        | Antonin Bal; Bruno Lina; Gregory Destras; Gwendolynne Burfin; Hadrien Regue; Laurence Josset; Martine Valette; Quentin Semanas                                                                                                                      |
| EPI_ISL_1323112 to 1323115, EPI_ISL_1337552 to 1337554, EPI_ISL_1367483 to 1367485                                                                                                                                                                                                                                                                                                                                                                                                                                                                                                                                                                                                                                                                                                                                                                                                                                                                                                                                                                                                                                                                                                                                                                                                                                                                                                                                                                                                                                                                                                                                                                                                                                                                                                                                                                                                                                                                                                                                                                                                                                                                                                                                                                                                                                                                                                                                                                                                                                                                                                                                                                                           | CHU Purpan - Laboratoire de Virologie - Institut Fédératif de Biologie | CHU Purpan - Laboratoire de Virologie - Institut Fédératif de Biologie                                                                     | Agnès Harter; Boyer P.; Carcenac R.; Dubois M.; Harter A.; Izopet J.; Jacques Izopet; Jeanne N.; Justine Latour; Latour J.; Martine Dubois; Nicolas Jeanne; Noémie Ranger; Pauline Boyer; Pauline Tremeaux; Ranger N.; Romain Carcenac; Tremeaux P. |
| EPI_ISL_1265825 to 1265826, EPI_ISL_1265834, EPI_ISL_1265839 to 1265841, EPI_ISL_1265851 to 1265852                                                                                                                                                                                                                                                                                                                                                                                                                                                                                                                                                                                                                                                                                                                                                                                                                                                                                                                                                                                                                                                                                                                                                                                                                                                                                                                                                                                                                                                                                                                                                                                                                                                                                                                                                                                                                                                                                                                                                                                                                                                                                                                                                                                                                                                                                                                                                                                                                                                                                                                                                                          | CHU REUNION                                                            | CNR Virus des Infections Respiratoires - France SUD                                                                                        | Antonin Bal; Bruno Lina; Gregory Destras; Gwendolynne Burfin; Hadrien Regue; Laurence Josset; Martine Valette; Quentin Semanas                                                                                                                      |
| EPI_ISL_1241885 to 1241890, EPI_ISL_1290836, EPI_ISL_1318289                                                                                                                                                                                                                                                                                                                                                                                                                                                                                                                                                                                                                                                                                                                                                                                                                                                                                                                                                                                                                                                                                                                                                                                                                                                                                                                                                                                                                                                                                                                                                                                                                                                                                                                                                                                                                                                                                                                                                                                                                                                                                                                                                                                                                                                                                                                                                                                                                                                                                                                                                                                                                 | CHU Rennes                                                             | CNR Virus des Infections Respiratoires - France SUD                                                                                        | Antonin Bal; Bruno Lina; Gregory Destras; Gwendolynne Burfin; Hadrien Regue; Laurence Josset; Martine Valette; Quentin Semanas                                                                                                                      |
| EPI_ISL_1228910 to 1228924                                                                                                                                                                                                                                                                                                                                                                                                                                                                                                                                                                                                                                                                                                                                                                                                                                                                                                                                                                                                                                                                                                                                                                                                                                                                                                                                                                                                                                                                                                                                                                                                                                                                                                                                                                                                                                                                                                                                                                                                                                                                                                                                                                                                                                                                                                                                                                                                                                                                                                                                                                                                                                                   | CHU SAINT-ETIENNE                                                      | CNR Virus des Infections Respiratoires - France SUD                                                                                        | Antonin Bal; Bruno Lina; Gregory Destras; Gwendolynne Burfin; Hadrien Regue; Laurence Josset; Martine Valette; Quentin Semanas                                                                                                                      |
| EPI_ISL_1163931, EPI_ISL_1191701, EPI_ISL_1191711 to 1191712, EPI_ISL_1359746                                                                                                                                                                                                                                                                                                                                                                                                                                                                                                                                                                                                                                                                                                                                                                                                                                                                                                                                                                                                                                                                                                                                                                                                                                                                                                                                                                                                                                                                                                                                                                                                                                                                                                                                                                                                                                                                                                                                                                                                                                                                                                                                                                                                                                                                                                                                                                                                                                                                                                                                                                                                | CHU ST ETIENNE                                                         | CNR Virus des Infections Respiratoires - France SUD                                                                                        | Antonin Bal; Bruno Lina; Gregory Destras; Gwendolynne Burfin; Hadrien Regue; Laurence Josset; Martine Valette; Quentin Semanas                                                                                                                      |
| EPI_ISL_1313709, EPI_ISL_1322413 to 1322415, EPI_ISL_1336609, EPI_ISL_1360019                                                                                                                                                                                                                                                                                                                                                                                                                                                                                                                                                                                                                                                                                                                                                                                                                                                                                                                                                                                                                                                                                                                                                                                                                                                                                                                                                                                                                                                                                                                                                                                                                                                                                                                                                                                                                                                                                                                                                                                                                                                                                                                                                                                                                                                                                                                                                                                                                                                                                                                                                                                                | CHU ST ETIENNE HOPITAL NORD                                            | CNR Virus des Infections Respiratoires - France SUD                                                                                        | Antonin Bal; Bruno Lina; Gregory Destras; Gwendolynne Burfin; Hadrien Regue; Laurence Josset; Martine Valette; Quentin Semanas                                                                                                                      |
| EPI_ISL_1265713                                                                                                                                                                                                                                                                                                                                                                                                                                                                                                                                                                                                                                                                                                                                                                                                                                                                                                                                                                                                                                                                                                                                                                                                                                                                                                                                                                                                                                                                                                                                                                                                                                                                                                                                                                                                                                                                                                                                                                                                                                                                                                                                                                                                                                                                                                                                                                                                                                                                                                                                                                                                                                                              | CHU STRASBOURG                                                         | CNR Virus des Infections Respiratoires - France SUD                                                                                        | Antonin Bal; Bruno Lina; Gregory Destras; Gwendolynne Burfin; Hadrien Regue; Laurence Josset; Martine Valette; Quentin Semanas                                                                                                                      |
| EPI_ISL_1239444                                                                                                                                                                                                                                                                                                                                                                                                                                                                                                                                                                                                                                                                                                                                                                                                                                                                                                                                                                                                                                                                                                                                                                                                                                                                                                                                                                                                                                                                                                                                                                                                                                                                                                                                                                                                                                                                                                                                                                                                                                                                                                                                                                                                                                                                                                                                                                                                                                                                                                                                                                                                                                                              | CHU Saint-Étienne                                                      | CNR Virus des Infections Respiratoires - France SUD                                                                                        | Antonin Bal; Bruno Lina; Gregory Destras; Gwendolynne Burfin; Hadrien Regue; Laurence Josset; Martine Valette; Quentin Semanas                                                                                                                      |
| EPI_ISL_1312803, EPI_ISL_1312842, EPI_ISL_1312844, EPI_ISL_1312846 to 1312847, EPI_ISL_1312849, EPI_ISL_1312852 to 1312853, EPI_ISL_1312855, EPI_ISL_1312857 to 1312858, EPI_ISL_1312861, EPI_ISL_1322332, EPI_ISL_1322338, EPI_ISL_1322354, EPI_ISL_1322362 to 1322363                                                                                                                                                                                                                                                                                                                                                                                                                                                                                                                                                                                                                                                                                                                                                                                                                                                                                                                                                                                                                                                                                                                                                                                                                                                                                                                                                                                                                                                                                                                                                                                                                                                                                                                                                                                                                                                                                                                                                                                                                                                                                                                                                                                                                                                                                                                                                                                                      | see above                                                              | CHU TOULOUSE                                                                                                                               | CNR Virus des Infections Respiratoires - France SUD                                                                                                                                                                                                 |
| EPI_ISL_1085411, EPI_ISL_1085881, EPI_ISL_1110185, EPI_ISL_1110200                                                                                                                                                                                                                                                                                                                                                                                                                                                                                                                                                                                                                                                                                                                                                                                                                                                                                                                                                                                                                                                                                                                                                                                                                                                                                                                                                                                                                                                                                                                                                                                                                                                                                                                                                                                                                                                                                                                                                                                                                                                                                                                                                                                                                                                                                                                                                                                                                                                                                                                                                                                                           | CHU. COTE DE NACRE                                                     | Department of Virology, Henri Mondor University Hospital, Assistance Publique Hôpitaux de Paris, Université Paris-Est Créteil, INSERM U955 | Alexandre Soulier; Christophe Rodriguez; Elisabeth Trawinski; Guillaume Gricourt; Jean-Michel Pawlowsky; Melissa N'Debi; Slim Fourati; Vanessa Demontant                                                                                            |
| EPI_ISL_1265610 to 1265669                                                                                                                                                                                                                                                                                                                                                                                                                                                                                                                                                                                                                                                                                                                                                                                                                                                                                                                                                                                                                                                                                                                                                                                                                                                                                                                                                                                                                                                                                                                                                                                                                                                                                                                                                                                                                                                                                                                                                                                                                                                                                                                                                                                                                                                                                                                                                                                                                                                                                                                                                                                                                                                   | CHUGA-IBP-laboratoire de Virologie                                     | IBP-laboratoire de virologie                                                                                                               | Anne Signori -Schmuck; Anne-Karen Faure; Aurélie Truffot; Benjamin Nemoz; Julien Andréani; Julien Lupo; Léa Ponderand; Pascal Poignard; Patrice Morand; Raphaël Germi; Sylvie Larrat                                                                |
| EPI_ISL_1007586 to 1007587, EPI_ISL_1007591 to 1007595, EPI_ISL_1007599 to 1007601, EPI_ISL_1007603, EPI_ISL_1007611, EPI_ISL_1007614 to 1007615, EPI_ISL_1007620 to 1007623, EPI_ISL_1007637, EPI_ISL_1007639, EPI_ISL_1120824, EPI_ISL_1120831 to 1120835, EPI_ISL_1120874, EPI_ISL_1120876 to 1120877, EPI_ISL_1369376 to 1369413, EPI_ISL_1369415 to 1369430, EPI_ISL_1369432 to 1369442, EPI_ISL_1369444 to 1369464, EPI_ISL_1369469, EPI_ISL_1370020, EPI_ISL_1370022, EPI_ISL_1370024, EPI_ISL_1370031, EPI_ISL_1370033, EPI_ISL_1370035, EPI_ISL_1370039, EPI_ISL_1370041, EPI_ISL_1370043, EPI_ISL_1370048, EPI_ISL_1370081, EPI_ISL_1370086, EPI_ISL_1370090, EPI_ISL_1370098, EPI_ISL_1370100, EPI_ISL_1370111, EPI_ISL_1370113, EPI_ISL_1370115, EPI_ISL_1370117, EPI_ISL_1370119, EPI_ISL_1370127, EPI_ISL_1370129, EPI_ISL_1370131, EPI_ISL_1370133, EPI_ISL_1370135, EPI_ISL_1370137, EPI_ISL_1370139, EPI_ISL_1370141, EPI_ISL_1370143, EPI_ISL_1370156, EPI_ISL_1370158, EPI_ISL_1370160, EPI_ISL_1370162, EPI_ISL_1370164, EPI_ISL_1370166, EPI_ISL_1370173, EPI_ISL_1370175, EPI_ISL_1370177, EPI_ISL_1370179, EPI_ISL_1370181, EPI_ISL_1370183, EPI_ISL_1370187, EPI_ISL_1370189, EPI_ISL_1370191, EPI_ISL_1370193, EPI_ISL_1370195, EPI_ISL_1370198, EPI_ISL_1370200, EPI_ISL_1370202, EPI_ISL_1370204, EPI_ISL_1370208, EPI_ISL_1370210, EPI_ISL_1370212, EPI_ISL_1370214, EPI_ISL_1370216, EPI_ISL_1370219, EPI_ISL_1370221, EPI_ISL_1370223, EPI_ISL_1370227, EPI_ISL_1370229, EPI_ISL_1370231, EPI_ISL_1370233, EPI_ISL_1370236 to 1370237, EPI_ISL_1370240, EPI_ISL_1370244, EPI_ISL_1370252, EPI_ISL_1370254, EPI_ISL_1370256, EPI_ISL_1370261, EPI_ISL_1370263, EPI_ISL_1370265, EPI_ISL_1370269, EPI_ISL_1370271, EPI_ISL_1370273, EPI_ISL_1370276, EPI_ISL_1370278, EPI_ISL_1370280, EPI_ISL_1370284, EPI_ISL_1370288, EPI_ISL_1370292, EPI_ISL_1370294, EPI_ISL_1370298, EPI_ISL_1370300, EPI_ISL_1370302, EPI_ISL_1370304, EPI_ISL_1370306, EPI_ISL_1370308, EPI_ISL_1370310, EPI_ISL_1370313, EPI_ISL_1370338, EPI_ISL_1370340, EPI_ISL_1370342, EPI_ISL_1370344, EPI_ISL_1370346, EPI_ISL_1370348, EPI_ISL_1370353, EPI_ISL_1370355, EPI_ISL_1370357, EPI_ISL_1370359, EPI_ISL_1370361, EPI_ISL_1370363, EPI_ISL_1370365, EPI_ISL_1370367, EPI_ISL_1370369, EPI_ISL_1370371, EPI_ISL_1370376, EPI_ISL_1370378, EPI_ISL_1370380, EPI_ISL_1370382, EPI_ISL_1370384, EPI_ISL_1370387 to 1370388, EPI_ISL_1370390, EPI_ISL_1370392, EPI_ISL_1370395, EPI_ISL_1370401, EPI_ISL_1370403, EPI_ISL_1370405, EPI_ISL_1370407, EPI_ISL_1370409, EPI_ISL_1370412, EPI_ISL_1370414, EPI_ISL_1370416, EPI_ISL_1370418, EPI_ISL_1370420, EPI_ISL_1370426 | see above                                                              | CHUV                                                                                                                                       | Laboratory of genomics and metagenomics, Institute of Microbiology, University Hospital Centre and University of                                                                                                                                    |
|                                                                                                                                                                                                                                                                                                                                                                                                                                                                                                                                                                                                                                                                                                                                                                                                                                                                                                                                                                                                                                                                                                                                                                                                                                                                                                                                                                                                                                                                                                                                                                                                                                                                                                                                                                                                                                                                                                                                                                                                                                                                                                                                                                                                                                                                                                                                                                                                                                                                                                                                                                                                                                                                              |                                                                        |                                                                                                                                            | Claire Bertelli; Damien Jacot; Gilbert Greub; Sébastien Aeby; Trestan Pillonel                                                                                                                                                                      |

| Lausanne, Switzerland                                                                                                                                                                                                                                                                                                                                                                                                                                                                                                                                                                                                                                                                                                                                                                                                                                                                                                                                                                                                                                                                                                                                                                                                                                                                                                                                                                                                                                                                                                                                                                                                                                                                                                                                                                                                                                                                                                                                                                                                                                                                                                                                                                                                                                                                                                                                                                                                                                                                                                                                                                                                                                                                                                                                                                                                                                                                                                                                                                                                                                                                                                                                                                                                                                                                                                                                                                                                                                                                                                                                                                                                                                                                                                                                                                                                                                                                                                                                                                                                                                                                                                                                                                                                                                                                                                                                                                                                                                                                                                                                                                                                                                                                                                                                        |                                                                               |                                                                                                                                            |  |                                                                                                                                                                                                                                                                                                                                                                                                                                    |
|--------------------------------------------------------------------------------------------------------------------------------------------------------------------------------------------------------------------------------------------------------------------------------------------------------------------------------------------------------------------------------------------------------------------------------------------------------------------------------------------------------------------------------------------------------------------------------------------------------------------------------------------------------------------------------------------------------------------------------------------------------------------------------------------------------------------------------------------------------------------------------------------------------------------------------------------------------------------------------------------------------------------------------------------------------------------------------------------------------------------------------------------------------------------------------------------------------------------------------------------------------------------------------------------------------------------------------------------------------------------------------------------------------------------------------------------------------------------------------------------------------------------------------------------------------------------------------------------------------------------------------------------------------------------------------------------------------------------------------------------------------------------------------------------------------------------------------------------------------------------------------------------------------------------------------------------------------------------------------------------------------------------------------------------------------------------------------------------------------------------------------------------------------------------------------------------------------------------------------------------------------------------------------------------------------------------------------------------------------------------------------------------------------------------------------------------------------------------------------------------------------------------------------------------------------------------------------------------------------------------------------------------------------------------------------------------------------------------------------------------------------------------------------------------------------------------------------------------------------------------------------------------------------------------------------------------------------------------------------------------------------------------------------------------------------------------------------------------------------------------------------------------------------------------------------------------------------------------------------------------------------------------------------------------------------------------------------------------------------------------------------------------------------------------------------------------------------------------------------------------------------------------------------------------------------------------------------------------------------------------------------------------------------------------------------------------------------------------------------------------------------------------------------------------------------------------------------------------------------------------------------------------------------------------------------------------------------------------------------------------------------------------------------------------------------------------------------------------------------------------------------------------------------------------------------------------------------------------------------------------------------------------------------------------------------------------------------------------------------------------------------------------------------------------------------------------------------------------------------------------------------------------------------------------------------------------------------------------------------------------------------------------------------------------------------------------------------------------------------------------------------------|-------------------------------------------------------------------------------|--------------------------------------------------------------------------------------------------------------------------------------------|--|------------------------------------------------------------------------------------------------------------------------------------------------------------------------------------------------------------------------------------------------------------------------------------------------------------------------------------------------------------------------------------------------------------------------------------|
| EPI_ISL_1299240 to 1299248,<br>EPI_ISL_1299251 to 1299253,<br>EPI_ISL_1299255 to 1299256,<br>EPI_ISL_1311966 to 1311972,<br>EPI_ISL_1362986 to 1362992,<br>EPI_ISL_1371706                                                                                                                                                                                                                                                                                                                                                                                                                                                                                                                                                                                                                                                                                                                                                                                                                                                                                                                                                                                                                                                                                                                                                                                                                                                                                                                                                                                                                                                                                                                                                                                                                                                                                                                                                                                                                                                                                                                                                                                                                                                                                                                                                                                                                                                                                                                                                                                                                                                                                                                                                                                                                                                                                                                                                                                                                                                                                                                                                                                                                                                                                                                                                                                                                                                                                                                                                                                                                                                                                                                                                                                                                                                                                                                                                                                                                                                                                                                                                                                                                                                                                                                                                                                                                                                                                                                                                                                                                                                                                                                                                                                   | CHWAPI - SITE NOTRE DAME                                                      | Institut de Pathologie et Genetique (IPG)                                                                                                  |  | J r mie Gras; Pascale Hilbert                                                                                                                                                                                                                                                                                                                                                                                                      |
| EPI_ISL_1191728 to 1191735,<br>EPI_ISL_1201554 to 1201557,<br>EPI_ISL_1219011 to 1219020,<br>EPI_ISL_1229169 to 1229170                                                                                                                                                                                                                                                                                                                                                                                                                                                                                                                                                                                                                                                                                                                                                                                                                                                                                                                                                                                                                                                                                                                                                                                                                                                                                                                                                                                                                                                                                                                                                                                                                                                                                                                                                                                                                                                                                                                                                                                                                                                                                                                                                                                                                                                                                                                                                                                                                                                                                                                                                                                                                                                                                                                                                                                                                                                                                                                                                                                                                                                                                                                                                                                                                                                                                                                                                                                                                                                                                                                                                                                                                                                                                                                                                                                                                                                                                                                                                                                                                                                                                                                                                                                                                                                                                                                                                                                                                                                                                                                                                                                                                                      | CHWAPI - SITE NOTRE DAME                                                      | Institut de Pathologie et G n tique (IPG)                                                                                                  |  | J r mie Gras; Pascale Hilbert                                                                                                                                                                                                                                                                                                                                                                                                      |
| EPI_ISL_1219714                                                                                                                                                                                                                                                                                                                                                                                                                                                                                                                                                                                                                                                                                                                                                                                                                                                                                                                                                                                                                                                                                                                                                                                                                                                                                                                                                                                                                                                                                                                                                                                                                                                                                                                                                                                                                                                                                                                                                                                                                                                                                                                                                                                                                                                                                                                                                                                                                                                                                                                                                                                                                                                                                                                                                                                                                                                                                                                                                                                                                                                                                                                                                                                                                                                                                                                                                                                                                                                                                                                                                                                                                                                                                                                                                                                                                                                                                                                                                                                                                                                                                                                                                                                                                                                                                                                                                                                                                                                                                                                                                                                                                                                                                                                                              | CICSaB/UASLP/LESP SLP                                                         | Instituto de Diagnostico y Referencia Epidemiologicos (INDRE)                                                                              |  | Abril Rodriguez-Maldonado; Andreu Comas-Garcia; Ariadna Medina-Benitez; Claudia Wong-Arambula; David Fragoso-Fonseca; Ernesto Ramirez-Gonzalez.; Gisela Barrera-Badillo; Irma Lopez-Martinez; Joaquin Quiroz-Mercado; Lucia Hernandez-Rivas; Natividad Cruz-Ortiz; Sergio Rangel-Guerrero; Tatiana Nunez-Garcia; Vanessa Rivero-Arredondo                                                                                          |
| EPI_ISL_1303374                                                                                                                                                                                                                                                                                                                                                                                                                                                                                                                                                                                                                                                                                                                                                                                                                                                                                                                                                                                                                                                                                                                                                                                                                                                                                                                                                                                                                                                                                                                                                                                                                                                                                                                                                                                                                                                                                                                                                                                                                                                                                                                                                                                                                                                                                                                                                                                                                                                                                                                                                                                                                                                                                                                                                                                                                                                                                                                                                                                                                                                                                                                                                                                                                                                                                                                                                                                                                                                                                                                                                                                                                                                                                                                                                                                                                                                                                                                                                                                                                                                                                                                                                                                                                                                                                                                                                                                                                                                                                                                                                                                                                                                                                                                                              | CLINICA COLSANITAS CENTRAL DE REFERENCIA                                      | Instituto Nacional de Salud- Direcci n de Investigaci n en Salud P blica                                                                   |  | Carlos Franco-Mu oz; Carmen Osorio; Diana Malo; Diego A.  lvarez-D az; Diego Andr s Prada; Gerardo Santamar a; Hector Alejandro Ruiz-Moreno; Jhonnatan Reales-Gonz lez; Juan Camilo Martnez; Julian Naizaque; Katherine Laiton-Donato; Liseth Pardo; Magdalena Wiesner; Marcela Mercado-Reyes; Maria T. Herrera-Sepulveda; Marta Lopez Blanco; Martha Lucia Ospina Martinez; Sergio Gomez; Sherryll Corchuelo;  ngela Alarcon Cruz |
| EPI_ISL_1299497 to 1299498                                                                                                                                                                                                                                                                                                                                                                                                                                                                                                                                                                                                                                                                                                                                                                                                                                                                                                                                                                                                                                                                                                                                                                                                                                                                                                                                                                                                                                                                                                                                                                                                                                                                                                                                                                                                                                                                                                                                                                                                                                                                                                                                                                                                                                                                                                                                                                                                                                                                                                                                                                                                                                                                                                                                                                                                                                                                                                                                                                                                                                                                                                                                                                                                                                                                                                                                                                                                                                                                                                                                                                                                                                                                                                                                                                                                                                                                                                                                                                                                                                                                                                                                                                                                                                                                                                                                                                                                                                                                                                                                                                                                                                                                                                                                   | CMA Danu                                                                      | Centre Muraz                                                                                                                               |  | Abdoul-Salam Ouedraogo; Ange Badjo; Ars ne Zongo; Essia Belarbi; Fabian Leendertz; Grit Schubert; Jasmin Schlotterbeck; Soumeiya Ouangraoua; Th r se Kagone; Yacouba Sawadogo                                                                                                                                                                                                                                                      |
| EPI_ISL_1135054 to 1135055, EPI_ISL_1135062 to 1135075, EPI_ISL_1165906, EPI_ISL_1190769 to 1190775, EPI_ISL_1190783, EPI_ISL_1191630 to 1191631, EPI_ISL_1191633, EPI_ISL_1191638, EPI_ISL_1191642 to 1191643, EPI_ISL_1191645 to 1191646, EPI_ISL_1191673 to 1191674, EPI_ISL_1191677 to 1191679, EPI_ISL_1191710, EPI_ISL_1191713 to 1191715, EPI_ISL_1201854 to 1201856, EPI_ISL_1201875 to 1201879, EPI_ISL_1220096, EPI_ISL_1220182 to 1220199, EPI_ISL_1220304 to 1220308, EPI_ISL_1220311, EPI_ISL_1220315, EPI_ISL_1220349, EPI_ISL_1239443, EPI_ISL_1239446, EPI_ISL_1241863 to 1241865, EPI_ISL_1241955 to 1241957, EPI_ISL_1241959, EPI_ISL_1241961, EPI_ISL_1241964 to 1241966, EPI_ISL_1241968 to 1241971, EPI_ISL_1241974 to 1241975, EPI_ISL_1241984 to 1241985, EPI_ISL_1241987 to 1241989, EPI_ISL_1241994 to 1242004, EPI_ISL_1242006, EPI_ISL_1253548, EPI_ISL_1253555, EPI_ISL_1253567, EPI_ISL_1253579, EPI_ISL_1265463, EPI_ISL_1265466, EPI_ISL_1265468 to 1265469, EPI_ISL_1265481, EPI_ISL_1265485, EPI_ISL_1265489, EPI_ISL_1265491, EPI_ISL_1265497 to 1265499, EPI_ISL_1265506 to 1265507, EPI_ISL_1265512 to 1265514, EPI_ISL_1265548 to 1265550, EPI_ISL_1265552, EPI_ISL_1265554, EPI_ISL_1265571, EPI_ISL_1265578 to 1265584, EPI_ISL_1265592 to 1265593, EPI_ISL_1265598 to 1265606, EPI_ISL_1265674 to 1265680, EPI_ISL_1265682, EPI_ISL_1265684, EPI_ISL_1265686 to 1265687, EPI_ISL_1265689 to 1265692, EPI_ISL_1265697 to 1265700, EPI_ISL_1265702 to 1265706, EPI_ISL_1265711, EPI_ISL_1265714, EPI_ISL_1265721 to 1265725, EPI_ISL_1265730 to 1265731, EPI_ISL_1265752, EPI_ISL_1265754 to 1265756, EPI_ISL_1265759, EPI_ISL_1265761, EPI_ISL_1265765, EPI_ISL_1265767, EPI_ISL_1265769, EPI_ISL_1265771 to 1265772, EPI_ISL_1265776 to 1265784, EPI_ISL_1265797 to 1265798, EPI_ISL_1265800 to 1265806, EPI_ISL_1265808 to 1265815, EPI_ISL_1265818 to 1265819, EPI_ISL_1265828 to 1265829, EPI_ISL_1265831 to 1265832, EPI_ISL_1265835, EPI_ISL_1265864 to 1265865, EPI_ISL_1265868 to 1265875, EPI_ISL_1265878, EPI_ISL_1267756 to 1267758, EPI_ISL_1297384, EPI_ISL_1297421, EPI_ISL_1297454 to 1297455, EPI_ISL_1312806 to 1312821, EPI_ISL_1312824 to 1312826, EPI_ISL_1312828, EPI_ISL_1312915 to 1312922, EPI_ISL_1312924 to 1312926, EPI_ISL_1312929 to 1312931, EPI_ISL_1312942, EPI_ISL_1312944, EPI_ISL_1312952 to 1312956, EPI_ISL_1312960 to 1312961, EPI_ISL_1312963 to 1312967, EPI_ISL_1312969 to 1312978, EPI_ISL_1312980 to 1312981, EPI_ISL_1312985 to 1312987, EPI_ISL_1312995 to 1312997, EPI_ISL_1313002, EPI_ISL_1313009 to 1313011, EPI_ISL_1313019 to 1313020, EPI_ISL_1313022 to 1313023, EPI_ISL_1313026 to 1313029, EPI_ISL_1313034 to 1313038, EPI_ISL_1313047 to 1313048, EPI_ISL_1313083 to 1313084, EPI_ISL_1313114 to 1313115, EPI_ISL_1313117, EPI_ISL_1313120, EPI_ISL_1313128 to 1313132, EPI_ISL_1313135 to 1313136, EPI_ISL_1313141 to 1313145, EPI_ISL_1313147, EPI_ISL_1313151, EPI_ISL_1313153 to 1313155, EPI_ISL_1313160, EPI_ISL_1313163, EPI_ISL_1313165 to 1313167, EPI_ISL_1313171 to 1313177, EPI_ISL_1313560, EPI_ISL_1313562 to 1313564, EPI_ISL_1313566, EPI_ISL_1313568, EPI_ISL_1313571 to 1313573, EPI_ISL_1313576 to 1313577, EPI_ISL_1313579 to 1313583, EPI_ISL_1313585 to 1313588, EPI_ISL_1313594, EPI_ISL_1313597 to 1313598, EPI_ISL_1313601 to 1313602, EPI_ISL_1313604 to 1313614, EPI_ISL_1313616 to 1313626, EPI_ISL_1313628 to 1313636, EPI_ISL_1313638, EPI_ISL_1313640 to 1313645, EPI_ISL_1313649 to 1313651, EPI_ISL_1313653 to 1313655, EPI_ISL_1313658 to 1313665, EPI_ISL_1313667 to 1313670, EPI_ISL_1313672 to 1313673, EPI_ISL_1313675, EPI_ISL_1313680 to 1313683, EPI_ISL_1313685 to 1313686, EPI_ISL_1313690, EPI_ISL_1313692 to 1313695, EPI_ISL_1313697, EPI_ISL_1313700 to 1313703, EPI_ISL_1313711, EPI_ISL_1313886 to 1313896, EPI_ISL_1313899 to 1313901, EPI_ISL_1313903 to 1313906, EPI_ISL_1313909 to 1313912, EPI_ISL_1313914, EPI_ISL_1313922, EPI_ISL_1313924 to 1313941, EPI_ISL_1313944 to 1313958, EPI_ISL_1313981 to 1313993, EPI_ISL_1313995 to 1313997, EPI_ISL_1313999 to 1314001, EPI_ISL_1314003 to 1314005, EPI_ISL_1314007 to 1314009, EPI_ISL_1314011, EPI_ISL_1314013 to 1314014, EPI_ISL_1314016 to 1314017, EPI_ISL_1314021, EPI_ISL_1314028, EPI_ISL_1314030, EPI_ISL_1314042, EPI_ISL_1314052 to 1314053, EPI_ISL_1336565, EPI_ISL_1336596 to 1336597, EPI_ISL_1336604, EPI_ISL_1359748 to 1359749, EPI_ISL_1359858, EPI_ISL_1359882, EPI_ISL_1359884, EPI_ISL_1359887, EPI_ISL_1359917, EPI_ISL_1359916 to 1359917, EPI_ISL_1359930 to 1359931, EPI_ISL_1359932 to 1359942, EPI_ISL_1359947, EPI_ISL_1359973 to 1359975, EPI_ISL_1359980, EPI_ISL_1359993, EPI_ISL_1360404, EPI_ISL_1371785 to 1371787 |                                                                               |                                                                                                                                            |  |                                                                                                                                                                                                                                                                                                                                                                                                                                    |
| see above                                                                                                                                                                                                                                                                                                                                                                                                                                                                                                                                                                                                                                                                                                                                                                                                                                                                                                                                                                                                                                                                                                                                                                                                                                                                                                                                                                                                                                                                                                                                                                                                                                                                                                                                                                                                                                                                                                                                                                                                                                                                                                                                                                                                                                                                                                                                                                                                                                                                                                                                                                                                                                                                                                                                                                                                                                                                                                                                                                                                                                                                                                                                                                                                                                                                                                                                                                                                                                                                                                                                                                                                                                                                                                                                                                                                                                                                                                                                                                                                                                                                                                                                                                                                                                                                                                                                                                                                                                                                                                                                                                                                                                                                                                                                                    | CNR Virus des Infections Respiratoires - France SUD                           | CNR Virus des Infections Respiratoires - France SUD                                                                                        |  | Antonin Bal; Bruno Lina; Gregory Destras; Gwendolyne Burfin; Hadrien Regue; Hadrien R guez; Laurence Josset; Martine Valette; Quentin Semanas                                                                                                                                                                                                                                                                                      |
| EPI_ISL_1094231, EPI_ISL_1094234,<br>EPI_ISL_1094261, EPI_ISL_1094511 to<br>1094516, EPI_ISL_1094899 to 1094906                                                                                                                                                                                                                                                                                                                                                                                                                                                                                                                                                                                                                                                                                                                                                                                                                                                                                                                                                                                                                                                                                                                                                                                                                                                                                                                                                                                                                                                                                                                                                                                                                                                                                                                                                                                                                                                                                                                                                                                                                                                                                                                                                                                                                                                                                                                                                                                                                                                                                                                                                                                                                                                                                                                                                                                                                                                                                                                                                                                                                                                                                                                                                                                                                                                                                                                                                                                                                                                                                                                                                                                                                                                                                                                                                                                                                                                                                                                                                                                                                                                                                                                                                                                                                                                                                                                                                                                                                                                                                                                                                                                                                                              | CO Dept. of Public Health and Environment, Lab Services Division              | Respiratory Viruses Branch, Division of Viral Diseases, Centers for Disease Control and Prevention                                         |  | Anna Montmayeur; Anna Uehara; Ben L. Rambo-Martin; Clinton R. Paden; Dhvani Batra; Haibin Wang; Jasmine Padilla; Jing Zhang; Justin Lee; Krista Queen; Lori Rowe; Mark Burroughs; Mili Sheth; Peter W. Cook; Rachel Marine; Sarah Nobles; Suxiang Tong; Yan Li; Ying Tao                                                                                                                                                           |
| EPI_ISL_1159194 to 1159197, EPI_ISL_1261458, EPI_ISL_1261479, EPI_ISL_1261495, EPI_ISL_1261508 to 1261509, EPI_ISL_1261518, EPI_ISL_1261538 to 1261539, EPI_ISL_1261680, EPI_ISL_1261682                                                                                                                                                                                                                                                                                                                                                                                                                                                                                                                                                                                                                                                                                                                                                                                                                                                                                                                                                                                                                                                                                                                                                                                                                                                                                                                                                                                                                                                                                                                                                                                                                                                                                                                                                                                                                                                                                                                                                                                                                                                                                                                                                                                                                                                                                                                                                                                                                                                                                                                                                                                                                                                                                                                                                                                                                                                                                                                                                                                                                                                                                                                                                                                                                                                                                                                                                                                                                                                                                                                                                                                                                                                                                                                                                                                                                                                                                                                                                                                                                                                                                                                                                                                                                                                                                                                                                                                                                                                                                                                                                                     | COMPLEJO HOSPITALARIO DE NAVARRA                                              | Instituto de Salud Carlos III                                                                                                              |  | A; A. Monz n; ANA; F. Casas; I. Jim nez; I.NAVASCUES ORTEGA; I.Navascues; Iglesias-Caballero; M. Sandonis; P. Zaballos; S. Camarero; S. Cuesta; S. Iglesias-Caballero; S. Pozo; S. Varona; V. Camarero; V. V zquez-Mor n; V zquez-Mor n                                                                                                                                                                                            |
| EPI_ISL_1059924 to 1059926,<br>EPI_ISL_1159136, EPI_ISL_1261480                                                                                                                                                                                                                                                                                                                                                                                                                                                                                                                                                                                                                                                                                                                                                                                                                                                                                                                                                                                                                                                                                                                                                                                                                                                                                                                                                                                                                                                                                                                                                                                                                                                                                                                                                                                                                                                                                                                                                                                                                                                                                                                                                                                                                                                                                                                                                                                                                                                                                                                                                                                                                                                                                                                                                                                                                                                                                                                                                                                                                                                                                                                                                                                                                                                                                                                                                                                                                                                                                                                                                                                                                                                                                                                                                                                                                                                                                                                                                                                                                                                                                                                                                                                                                                                                                                                                                                                                                                                                                                                                                                                                                                                                                              | COMPLEJO HOSPITALARIO UNIVERSITARIO LA CORU A                                 | Instituto de Salud Carlos III                                                                                                              |  | A. Monz n; F; F. Casas; FERNANDA; I. Jim nez; I. Pe a, F.; I.PE A RODRIGUEZ; I.Pe a; Iglesias-Caballero; M. Sandonis; P. Zaballos; S. Camarero; S. Cuesta; S. Iglesias-Caballero; S. Pozo; S. Varona; V. Camarero; V. V zquez-Mor n; V zquez-Mor n                                                                                                                                                                                 |
| EPI_ISL_1059984, EPI_ISL_1159220, EPI_ISL_1159225 to 1159226, EPI_ISL_1261502 to 1261503, EPI_ISL_1261507, EPI_ISL_1261516, EPI_ISL_1261533, EPI_ISL_1262079, EPI_ISL_1262081 to 1262082, EPI_ISL_1262084 to 1262085                                                                                                                                                                                                                                                                                                                                                                                                                                                                                                                                                                                                                                                                                                                                                                                                                                                                                                                                                                                                                                                                                                                                                                                                                                                                                                                                                                                                                                                                                                                                                                                                                                                                                                                                                                                                                                                                                                                                                                                                                                                                                                                                                                                                                                                                                                                                                                                                                                                                                                                                                                                                                                                                                                                                                                                                                                                                                                                                                                                                                                                                                                                                                                                                                                                                                                                                                                                                                                                                                                                                                                                                                                                                                                                                                                                                                                                                                                                                                                                                                                                                                                                                                                                                                                                                                                                                                                                                                                                                                                                                         | CONSEJERIA DE SANIDAD Y ASUNTOS SOCIALES                                      | Instituto de Salud Carlos III                                                                                                              |  | A. Monz n; F. Casas; G; GONZALO; I. Guti rrez, G.; I. Jim nez; I.GUTIERREZ AVILA; I.Guti rrez; Iglesias-Caballero; M. Camarero; M. Sandonis; P. Zaballos; S. Camarero; S. Cuesta; S. Iglesias-Caballero; S. Pozo; S. Varona; Sandonis; V. Camarero; V. V zquez-Mor n; V zquez-Mor n                                                                                                                                                |
| EPI_ISL_1190749 to 1190768                                                                                                                                                                                                                                                                                                                                                                                                                                                                                                                                                                                                                                                                                                                                                                                                                                                                                                                                                                                                                                                                                                                                                                                                                                                                                                                                                                                                                                                                                                                                                                                                                                                                                                                                                                                                                                                                                                                                                                                                                                                                                                                                                                                                                                                                                                                                                                                                                                                                                                                                                                                                                                                                                                                                                                                                                                                                                                                                                                                                                                                                                                                                                                                                                                                                                                                                                                                                                                                                                                                                                                                                                                                                                                                                                                                                                                                                                                                                                                                                                                                                                                                                                                                                                                                                                                                                                                                                                                                                                                                                                                                                                                                                                                                                   | CREMER(Centre de Rechercherches sur les Maladies Emergentes et R - mergentes) | TransVIHM(Recherches Translationnelles sur le VIH et les Maladies Infectieuses)                                                            |  | Ahidjo Ayouba; Celestin Godwe; Christelle Bulet; Dowbiss Meta Djoms; Eitel Mpoudi Ngole; Eric Delaporte; Esemu Livo; Laetitia Serrano; Marcel Tongo; Marie Amougou; Martin Maidadi Foudi; Martine Peeters; Nicole Vidal; Rodrigue Kamga                                                                                                                                                                                            |
| EPI_ISL_1085292 to 1085293,<br>EPI_ISL_1085333 to 1085334,<br>EPI_ISL_1085405                                                                                                                                                                                                                                                                                                                                                                                                                                                                                                                                                                                                                                                                                                                                                                                                                                                                                                                                                                                                                                                                                                                                                                                                                                                                                                                                                                                                                                                                                                                                                                                                                                                                                                                                                                                                                                                                                                                                                                                                                                                                                                                                                                                                                                                                                                                                                                                                                                                                                                                                                                                                                                                                                                                                                                                                                                                                                                                                                                                                                                                                                                                                                                                                                                                                                                                                                                                                                                                                                                                                                                                                                                                                                                                                                                                                                                                                                                                                                                                                                                                                                                                                                                                                                                                                                                                                                                                                                                                                                                                                                                                                                                                                                | CRICQUEBOEUF Cerballiance Normandie                                           | Department of Virology, Henri Mondor University Hospital, Assistance Publique H pitaux de Paris, Universit  Paris-Est Cr teil, INSERM U955 |  | Alexandre Soulier; Christophe Rodriguez; Elisabeth Trawinski; Guillaume Gricourt; Jean-Michel Pawlowsky; Melissa N'Debi; Slim Fourati; Vanessa Demontant                                                                                                                                                                                                                                                                           |
| EPI_ISL_1380066 to 1380498                                                                                                                                                                                                                                                                                                                                                                                                                                                                                                                                                                                                                                                                                                                                                                                                                                                                                                                                                                                                                                                                                                                                                                                                                                                                                                                                                                                                                                                                                                                                                                                                                                                                                                                                                                                                                                                                                                                                                                                                                                                                                                                                                                                                                                                                                                                                                                                                                                                                                                                                                                                                                                                                                                                                                                                                                                                                                                                                                                                                                                                                                                                                                                                                                                                                                                                                                                                                                                                                                                                                                                                                                                                                                                                                                                                                                                                                                                                                                                                                                                                                                                                                                                                                                                                                                                                                                                                                                                                                                                                                                                                                                                                                                                                                   | CSIR-Centre for Cellular and Molecular Biology                                | CSIR-Centre for Cellular and Molecular Biology                                                                                             |  | Archana Bharadwaj Siva; B Himasri; Blessy B John; Divya Tej Sowpati; Karthik Bharadwaj Tallapaka; Lamuk Zaveri; Namami Gaur; Payel Mukherjee; Pratheusa Maccha; Priya Singh; Purushotham Vodnal; Rakesh K Mishra; Sofia Banu; Tulasi Nagabandi; Viswagithe S L                                                                                                                                                                     |
| EPI_ISL_1360295 to 1360388,<br>EPI_ISL_1372279                                                                                                                                                                                                                                                                                                                                                                                                                                                                                                                                                                                                                                                                                                                                                                                                                                                                                                                                                                                                                                                                                                                                                                                                                                                                                                                                                                                                                                                                                                                                                                                                                                                                                                                                                                                                                                                                                                                                                                                                                                                                                                                                                                                                                                                                                                                                                                                                                                                                                                                                                                                                                                                                                                                                                                                                                                                                                                                                                                                                                                                                                                                                                                                                                                                                                                                                                                                                                                                                                                                                                                                                                                                                                                                                                                                                                                                                                                                                                                                                                                                                                                                                                                                                                                                                                                                                                                                                                                                                                                                                                                                                                                                                                                               | CSIR-National Environmental Engineering Research Institute                    | CSIR-Centre for Cellular and Molecular Biology - INSACOG                                                                                   |  | Amreshwar Vodapalli; Ara Sreenivas; B Himasri; Divya Tej Sowpati; Karthik Bharadwaj Tallapaka; Krishna Khairnar; Lamuk Zaveri; Onkar Kulkarni; Rakesh K Mishra; Sharath Chandra Thota; Shreekant Verma; Sofia Banu; Viswagithe S L                                                                                                                                                                                                 |
| EPI_ISL_1272720 to 1272726,<br>EPI_ISL_1318465 to 1318467                                                                                                                                                                                                                                                                                                                                                                                                                                                                                                                                                                                                                                                                                                                                                                                                                                                                                                                                                                                                                                                                                                                                                                                                                                                                                                                                                                                                                                                                                                                                                                                                                                                                                                                                                                                                                                                                                                                                                                                                                                                                                                                                                                                                                                                                                                                                                                                                                                                                                                                                                                                                                                                                                                                                                                                                                                                                                                                                                                                                                                                                                                                                                                                                                                                                                                                                                                                                                                                                                                                                                                                                                                                                                                                                                                                                                                                                                                                                                                                                                                                                                                                                                                                                                                                                                                                                                                                                                                                                                                                                                                                                                                                                                                    | CT-Dr. Katherine A. Kelley State Public Health Lab                            | Centers for Disease Control and Prevention Division of Viral Diseases, Pathogen Discovery                                                  |  | Anna Montmayeur; Anna Uehara; Ben L. Rambo-Martin; Clinton R. Paden; Dhvani Batra; Haibin Wang; Jasmine Padilla; Jing Zhang; Justin Lee; Katie Dillon; Krista Queen; Kristen Knipe; Kristine Lacek; Lori Rowe; Mark Burroughs; Matthew Schmerer; Mili Sheth; Peter W. Cook; Rachel Marine; Sam Shepard; Sarah Nobles; Shoshona Le; Suxiang Tong; Yan Li; Ying Tao                                                                  |
| EPI_ISL_1226212 to 1226213                                                                                                                                                                                                                                                                                                                                                                                                                                                                                                                                                                                                                                                                                                                                                                                                                                                                                                                                                                                                                                                                                                                                                                                                                                                                                                                                                                                                                                                                                                                                                                                                                                                                                                                                                                                                                                                                                                                                                                                                                                                                                                                                                                                                                                                                                                                                                                                                                                                                                                                                                                                                                                                                                                                                                                                                                                                                                                                                                                                                                                                                                                                                                                                                                                                                                                                                                                                                                                                                                                                                                                                                                                                                                                                                                                                                                                                                                                                                                                                                                                                                                                                                                                                                                                                                                                                                                                                                                                                                                                                                                                                                                                                                                                                                   | CT-Dr. Katherine A. Kelley State Public Health Lab                            | Genomics and Discovery, Respiratory Viruses Branch, Division of Viral Diseases, Centers for Disease Control and Prevention                 |  | Anna Montmayeur; Anna Uehara; Ben L. Rambo-Martin; Clinton R. Paden; Dhvani Batra; Haibin Wang; Jasmine Padilla; Jing Zhang; Justin Lee; Katie Dillon; Krista Queen; Kristen Knipe; Kristine Lacek; Lori Rowe; Mark Burroughs; Matthew Schmerer; Mili Sheth; Peter W. Cook; Rachel Marine; Sam Shepard; Sarah Nobles; Shoshona Le; Suxiang Tong; Yan Li; Ying Tao                                                                  |
| EPI_ISL_1008916                                                                                                                                                                                                                                                                                                                                                                                                                                                                                                                                                                                                                                                                                                                                                                                                                                                                                                                                                                                                                                                                                                                                                                                                                                                                                                                                                                                                                                                                                                                                                                                                                                                                                                                                                                                                                                                                                                                                                                                                                                                                                                                                                                                                                                                                                                                                                                                                                                                                                                                                                                                                                                                                                                                                                                                                                                                                                                                                                                                                                                                                                                                                                                                                                                                                                                                                                                                                                                                                                                                                                                                                                                                                                                                                                                                                                                                                                                                                                                                                                                                                                                                                                                                                                                                                                                                                                                                                                                                                                                                                                                                                                                                                                                                                              | CT-Dr. Katherine A. Kelley State Public Health Lab                            | Pathogen Discovery, Respiratory Viruses Branch, Division of Viral Diseases, Centers for Disease Control and Prevention                     |  | Anna Uehara; Clinton R. Paden; Haibin Wang; Jing Zhang; Krista Queen; Peter Cook; Suxiang Tong; Yan Li; Ying Tao                                                                                                                                                                                                                                                                                                                   |
| EPI_ISL_1094210, EPI_ISL_1094473 to<br>1094481, EPI_ISL_1094685 to 1094686                                                                                                                                                                                                                                                                                                                                                                                                                                                                                                                                                                                                                                                                                                                                                                                                                                                                                                                                                                                                                                                                                                                                                                                                                                                                                                                                                                                                                                                                                                                                                                                                                                                                                                                                                                                                                                                                                                                                                                                                                                                                                                                                                                                                                                                                                                                                                                                                                                                                                                                                                                                                                                                                                                                                                                                                                                                                                                                                                                                                                                                                                                                                                                                                                                                                                                                                                                                                                                                                                                                                                                                                                                                                                                                                                                                                                                                                                                                                                                                                                                                                                                                                                                                                                                                                                                                                                                                                                                                                                                                                                                                                                                                                                   | CT-Dr. Katherine A. Kelley State Public Health Lab                            | Respiratory Viruses Branch, Division of Viral Diseases, Centers for Disease Control and Prevention                                         |  | Anna Montmayeur; Anna Uehara; Ben L. Rambo-Martin; Clinton R. Paden; Dhvani Batra; Haibin Wang; Jasmine Padilla; Jing Zhang; Justin Lee; Krista Queen; Lori Rowe; Mark Burroughs; Mili Sheth; Peter W. Cook; Rachel Marine; Sarah Nobles; Suxiang Tong; Yan Li; Ying Tao                                                                                                                                                           |
| EPI_ISL_1299249 to 1299250,<br>EPI_ISL_1299254                                                                                                                                                                                                                                                                                                                                                                                                                                                                                                                                                                                                                                                                                                                                                                                                                                                                                                                                                                                                                                                                                                                                                                                                                                                                                                                                                                                                                                                                                                                                                                                                                                                                                                                                                                                                                                                                                                                                                                                                                                                                                                                                                                                                                                                                                                                                                                                                                                                                                                                                                                                                                                                                                                                                                                                                                                                                                                                                                                                                                                                                                                                                                                                                                                                                                                                                                                                                                                                                                                                                                                                                                                                                                                                                                                                                                                                                                                                                                                                                                                                                                                                                                                                                                                                                                                                                                                                                                                                                                                                                                                                                                                                                                                               | Cabinet Priv                                                                  | Institut de Pathologie et Genetique (IPG)                                                                                                  |  | J r mie Gras; Pascale Hilbert                                                                                                                                                                                                                                                                                                                                                                                                      |
| EPI_ISL_1085287, EPI_ISL_1085289,<br>EPI_ISL_1085403, EPI_ISL_1110192                                                                                                                                                                                                                                                                                                                                                                                                                                                                                                                                                                                                                                                                                                                                                                                                                                                                                                                                                                                                                                                                                                                                                                                                                                                                                                                                                                                                                                                                                                                                                                                                                                                                                                                                                                                                                                                                                                                                                                                                                                                                                                                                                                                                                                                                                                                                                                                                                                                                                                                                                                                                                                                                                                                                                                                                                                                                                                                                                                                                                                                                                                                                                                                                                                                                                                                                                                                                                                                                                                                                                                                                                                                                                                                                                                                                                                                                                                                                                                                                                                                                                                                                                                                                                                                                                                                                                                                                                                                                                                                                                                                                                                                                                        | Cabinet m dical                                                               | Department of Virology, Henri Mondor University Hospital, Assistance Publique H pitaux de Paris, Universit  Paris-Est Cr teil, INSERM U955 |  | Alexandre Soulier; Christophe Rodriguez; Elisabeth Trawinski; Guillaume Gricourt; Jean-Michel Pawlowsky; Melissa N'Debi; Slim Fourati; Vanessa Demontant                                                                                                                                                                                                                                                                           |
| EPI_ISL_1069176                                                                                                                                                                                                                                                                                                                                                                                                                                                                                                                                                                                                                                                                                                                                                                                                                                                                                                                                                                                                                                                                                                                                                                                                                                                                                                                                                                                                                                                                                                                                                                                                                                                                                                                                                                                                                                                                                                                                                                                                                                                                                                                                                                                                                                                                                                                                                                                                                                                                                                                                                                                                                                                                                                                                                                                                                                                                                                                                                                                                                                                                                                                                                                                                                                                                                                                                                                                                                                                                                                                                                                                                                                                                                                                                                                                                                                                                                                                                                                                                                                                                                                                                                                                                                                                                                                                                                                                                                                                                                                                                                                                                                                                                                                                                              | Calamba Doctors Hospital                                                      | Research Institute for Tropical Medicine                                                                                                   |  | Catalino Demetria; Daria Manalo; Edelwisa Mercado; Francisco Gerardo Polotan; Hannah Leah Morito; Inez Andrea Medado; John Leonard Chan; Joseph Hughes; Kirstyn Brunker; Ma Angelica Tujan; Othoniel Jan Onza                                                                                                                                                                                                                      |

|                                                                                                                                                                                                                                                                                                                                                                                                                                                                                                                                                                                                                                                                                                                                                                                                                                                                                                                                                                                                                                                                                                                                                                                                                                                                                                                                                                                                                                                                                                                                                                                                                                                                                                                                                                                                                                                                                                                                                                                                                                                                                                                                                                                                                                                                                                                                                                                                                                                                                                                                                                                                                                                                 |           |                                                                                           |                                                                                                                     |                                                                                                                                                                                                                                                                                                                                                                                                                                                                                                                                                                                                                                                                                                                 |
|-----------------------------------------------------------------------------------------------------------------------------------------------------------------------------------------------------------------------------------------------------------------------------------------------------------------------------------------------------------------------------------------------------------------------------------------------------------------------------------------------------------------------------------------------------------------------------------------------------------------------------------------------------------------------------------------------------------------------------------------------------------------------------------------------------------------------------------------------------------------------------------------------------------------------------------------------------------------------------------------------------------------------------------------------------------------------------------------------------------------------------------------------------------------------------------------------------------------------------------------------------------------------------------------------------------------------------------------------------------------------------------------------------------------------------------------------------------------------------------------------------------------------------------------------------------------------------------------------------------------------------------------------------------------------------------------------------------------------------------------------------------------------------------------------------------------------------------------------------------------------------------------------------------------------------------------------------------------------------------------------------------------------------------------------------------------------------------------------------------------------------------------------------------------------------------------------------------------------------------------------------------------------------------------------------------------------------------------------------------------------------------------------------------------------------------------------------------------------------------------------------------------------------------------------------------------------------------------------------------------------------------------------------------------|-----------|-------------------------------------------------------------------------------------------|---------------------------------------------------------------------------------------------------------------------|-----------------------------------------------------------------------------------------------------------------------------------------------------------------------------------------------------------------------------------------------------------------------------------------------------------------------------------------------------------------------------------------------------------------------------------------------------------------------------------------------------------------------------------------------------------------------------------------------------------------------------------------------------------------------------------------------------------------|
| EPI_ISL_1234813, EPI_ISL_1234845, EPI_ISL_1234867, EPI_ISL_1234885, EPI_ISL_1234891, EPI_ISL_1234915, EPI_ISL_1234947, EPI_ISL_1234951, EPI_ISL_1234964, EPI_ISL_1234967, EPI_ISL_1234978, EPI_ISL_1234992, EPI_ISL_1234994, EPI_ISL_1235014, EPI_ISL_1235026 to 1235027, EPI_ISL_1235035 to 1235036, EPI_ISL_1235055 to 1235056                                                                                                                                                                                                                                                                                                                                                                                                                                                                                                                                                                                                                                                                                                                                                                                                                                                                                                                                                                                                                                                                                                                                                                                                                                                                                                                                                                                                                                                                                                                                                                                                                                                                                                                                                                                                                                                                                                                                                                                                                                                                                                                                                                                                                                                                                                                                | see above | California Institute of Technology                                                        | Chan-Zuckerberg Biohub                                                                                              | CZB Cihahub Consortium                                                                                                                                                                                                                                                                                                                                                                                                                                                                                                                                                                                                                                                                                          |
| EPI_ISL_1096139 to 1096140, EPI_ISL_1096347 to 1096348, EPI_ISL_1098602 to 1098605                                                                                                                                                                                                                                                                                                                                                                                                                                                                                                                                                                                                                                                                                                                                                                                                                                                                                                                                                                                                                                                                                                                                                                                                                                                                                                                                                                                                                                                                                                                                                                                                                                                                                                                                                                                                                                                                                                                                                                                                                                                                                                                                                                                                                                                                                                                                                                                                                                                                                                                                                                              |           | Cambodian National Public Health Laboratory, National Institute of Public Health          | Virology Unit, Institut Pasteur du Cambodge                                                                         | Chau Darapeak; Chin Savuth; Erik A Karlsson; Kraing Sidonn; Ly Sovann; Sokhoun Yann; Veasna Duong; Yi Sengdoeurn                                                                                                                                                                                                                                                                                                                                                                                                                                                                                                                                                                                                |
| EPI_ISL_1040916                                                                                                                                                                                                                                                                                                                                                                                                                                                                                                                                                                                                                                                                                                                                                                                                                                                                                                                                                                                                                                                                                                                                                                                                                                                                                                                                                                                                                                                                                                                                                                                                                                                                                                                                                                                                                                                                                                                                                                                                                                                                                                                                                                                                                                                                                                                                                                                                                                                                                                                                                                                                                                                 |           | Cancer Biology Department, National Cancer Institute                                      | Cancer Biology Department, National Cancer Institute                                                                | A.A.; A.E.; A.N.; Ahmed; Bahnassy; Elhosieny; F.W.; Gad; H.K.; Hafez; Hamdy; L. and Abouelhoda, M.; M.G.; M.M.; M.S.; O.S.; Sedawy; Soliman; Zekri                                                                                                                                                                                                                                                                                                                                                                                                                                                                                                                                                              |
| EPI_ISL_1016882, EPI_ISL_1082255                                                                                                                                                                                                                                                                                                                                                                                                                                                                                                                                                                                                                                                                                                                                                                                                                                                                                                                                                                                                                                                                                                                                                                                                                                                                                                                                                                                                                                                                                                                                                                                                                                                                                                                                                                                                                                                                                                                                                                                                                                                                                                                                                                                                                                                                                                                                                                                                                                                                                                                                                                                                                                |           | Canterbury Health Laboratories                                                            | Institute of Environmental Science and Research (ESR)                                                               | Anja Werno; Antje van der Linden; Arlo Upton; Chris Mansell; David Hammer; Dragana Drinkovic; Erasmus Smit; Gary McAuliffe; Hana Sofia Andersson; Hermes Perez; James Ussher; Jill Sherwood; Jing Wang; Joep de Light; Josh Freeman; Julia Howard; Juliet Elvy; Lauren Jelly; Mary DeAlmeida; Matt Blakiston; Matt Storey; Matthew Rogers; Max Bloomfield; Michael Addie; Michelle Balm; Muhammad Faisal; Nikki Freed; Olin Silander; Paula scholes; Sally Roberts; Sarah Jefferies; Sharmini Muttaiyah; Susan Lin; Susan Morpeth; Susan Taylor; Timothy Blackmore; Vani Sathyendran; Veronica Playle; Virginia Hope; Xiaoyun Ren                                                                               |
| EPI_ISL_1300646, EPI_ISL_1300654 to 1300655                                                                                                                                                                                                                                                                                                                                                                                                                                                                                                                                                                                                                                                                                                                                                                                                                                                                                                                                                                                                                                                                                                                                                                                                                                                                                                                                                                                                                                                                                                                                                                                                                                                                                                                                                                                                                                                                                                                                                                                                                                                                                                                                                                                                                                                                                                                                                                                                                                                                                                                                                                                                                     |           | Cantonal Hospital Zenica; Department of Microbiological Diagnostics                       | Clinical Center, University of Sarajevo; Unit for Clinical Microbiology                                             | Amela Dedei-Ljubovi; Edina Zahirovi; Golubinka Boshevka; Irma Salimovi-Beši; Maja Kuzmanovska; Sandra Vegar-Zubovi; Sebjia Izetbegovi; Suzana Arapi                                                                                                                                                                                                                                                                                                                                                                                                                                                                                                                                                             |
| EPI_ISL_1372011                                                                                                                                                                                                                                                                                                                                                                                                                                                                                                                                                                                                                                                                                                                                                                                                                                                                                                                                                                                                                                                                                                                                                                                                                                                                                                                                                                                                                                                                                                                                                                                                                                                                                                                                                                                                                                                                                                                                                                                                                                                                                                                                                                                                                                                                                                                                                                                                                                                                                                                                                                                                                                                 |           | Capital hospital, Bhubaneswar                                                             | Institute of Life Sciences - INSACOG                                                                                | Ajay Parida; Amol M. Kanampalliwar; Arup Ghosh; Atimukta Jha; INSACOG Consortium; Punit Prasad; Rajeeb Swain; Rupesh Dash; Safal Walia; Shifu Aggarwal; Sunil K. Raghav                                                                                                                                                                                                                                                                                                                                                                                                                                                                                                                                         |
| EPI_ISL_1372199                                                                                                                                                                                                                                                                                                                                                                                                                                                                                                                                                                                                                                                                                                                                                                                                                                                                                                                                                                                                                                                                                                                                                                                                                                                                                                                                                                                                                                                                                                                                                                                                                                                                                                                                                                                                                                                                                                                                                                                                                                                                                                                                                                                                                                                                                                                                                                                                                                                                                                                                                                                                                                                 |           | Carris Health Rice Memorial Hospital                                                      | Minnesota Department of Health, Public Health Laboratory                                                            | Alexandra Lorentz; Jacob Garfin; Matt Plumb; and Xiong Wang                                                                                                                                                                                                                                                                                                                                                                                                                                                                                                                                                                                                                                                     |
| EPI_ISL_1220046                                                                                                                                                                                                                                                                                                                                                                                                                                                                                                                                                                                                                                                                                                                                                                                                                                                                                                                                                                                                                                                                                                                                                                                                                                                                                                                                                                                                                                                                                                                                                                                                                                                                                                                                                                                                                                                                                                                                                                                                                                                                                                                                                                                                                                                                                                                                                                                                                                                                                                                                                                                                                                                 |           | Carvajal Laboratorio IPS SAS                                                              | Instituto Nacional de Salud- Dirección de Investigación en Salud Pública                                            | Carlos Franco-Muñoz; Diego A. Álvarez-Díaz; Diego Andrés Prada; Gerardo Santamaría; Hector Alejandro Ruiz-Moreno; Jhonattan Reales-González; Julian Naizaque; Katherine Laiton-Donato; Magdalena Wiesner; Marcela Mercado-Reyes.; María T. Herrera-Sepúlveda; Martha Lucia Ospina Martínez; Sheryll Corchuelo                                                                                                                                                                                                                                                                                                                                                                                                   |
| EPI_ISL_1336923                                                                                                                                                                                                                                                                                                                                                                                                                                                                                                                                                                                                                                                                                                                                                                                                                                                                                                                                                                                                                                                                                                                                                                                                                                                                                                                                                                                                                                                                                                                                                                                                                                                                                                                                                                                                                                                                                                                                                                                                                                                                                                                                                                                                                                                                                                                                                                                                                                                                                                                                                                                                                                                 |           | Casa di Cura Di Lorenzo                                                                   | Istituto Zooprofilattico Sperimentale dell'Abruzzo e Molise "G. Caporale"                                           | Ancora M; Calistri P; Cammà C; Caporale M; Curini V; Di Domenico M; Di Lollo Valeria; Di Pasquale A; Lorusso A; Mangone I; Marccaci M; Puglia I; Rinaldi A; Savini G; Scialabba S                                                                                                                                                                                                                                                                                                                                                                                                                                                                                                                               |
| EPI_ISL_1147607, EPI_ISL_1155982 to 1155993, EPI_ISL_1285343, EPI_ISL_1285346, EPI_ISL_1285348, EPI_ISL_1285351 to 1285352, EPI_ISL_1285354, EPI_ISL_1285356, EPI_ISL_1285359, EPI_ISL_1285362, EPI_ISL_1285364, EPI_ISL_1285367, EPI_ISL_1285374                                                                                                                                                                                                                                                                                                                                                                                                                                                                                                                                                                                                                                                                                                                                                                                                                                                                                                                                                                                                                                                                                                                                                                                                                                                                                                                                                                                                                                                                                                                                                                                                                                                                                                                                                                                                                                                                                                                                                                                                                                                                                                                                                                                                                                                                                                                                                                                                               | see above | CeGaT Management                                                                          | Robert Koch Institute                                                                                               |                                                                                                                                                                                                                                                                                                                                                                                                                                                                                                                                                                                                                                                                                                                 |
| EPI_ISL_1122426 to 1122454, EPI_ISL_1213533, EPI_ISL_1213535, EPI_ISL_1213537, EPI_ISL_1213539 to 1213540, EPI_ISL_1213542, EPI_ISL_1213544, EPI_ISL_1213546 to 1213547, EPI_ISL_1213549, EPI_ISL_1213551 to 1213552, EPI_ISL_1213554, EPI_ISL_1213556, EPI_ISL_1213558 to 1213559, EPI_ISL_1213561, EPI_ISL_1219702                                                                                                                                                                                                                                                                                                                                                                                                                                                                                                                                                                                                                                                                                                                                                                                                                                                                                                                                                                                                                                                                                                                                                                                                                                                                                                                                                                                                                                                                                                                                                                                                                                                                                                                                                                                                                                                                                                                                                                                                                                                                                                                                                                                                                                                                                                                                            | see above | Cebu TB Reference Laboratory                                                              | Philippine Genome Center                                                                                            | Alethea R. de Guzman; Anna Ong-Lim; Arianne A. Zamora; Asia Louisa U. Chong; Benedict A. Maralit; Candice Francheska B. Tambaoan; Carlo M. Lapid; Celia Carlos; Devon Ray Pacial; Edsel Maurice S. Llaanes; El King D. Morado; Eva Maria Cutiongco-de la Paz; Francis A. Tablizo; Irish Coleen A. Asin; Jaime C. Montoya; Jan Michael C. Yap; Jo-Hannah S. Llamas; John Q. Wong; Joshua Gregor A. Dizon; Juan Antonio R. Magalang; Kara Sophia Agape R. Padilla; Kenneth M. Kim; Kris P. Punayan; Marc Edsel C. Ayes; Marc Jerrone R. Castro; Maria Rosario Singh-Verguire and Cynthia P. Saloma; Maria Sofia L. Yangzon; Marissa Alejandria; Razel Nikka M. Hao; Rianna Patricia S. Cruz; Sheila Mae M. Araiza |
| EPI_ISL_1239674, EPI_ISL_1239736                                                                                                                                                                                                                                                                                                                                                                                                                                                                                                                                                                                                                                                                                                                                                                                                                                                                                                                                                                                                                                                                                                                                                                                                                                                                                                                                                                                                                                                                                                                                                                                                                                                                                                                                                                                                                                                                                                                                                                                                                                                                                                                                                                                                                                                                                                                                                                                                                                                                                                                                                                                                                                |           | Cell-T                                                                                    | 1. National Institute of Public Health - National Institute of Hygiene; 2. Eurofins Genomics Europe Sequencing GmbH | ECDC COVID-19 WGS support team; Eurofins Genomics Europe Sequencing Team; Gierczyki Rafa; Sadkowska-Todys Magorzata; Wokowicz Tomasz; Zacharczuk Katarzyna                                                                                                                                                                                                                                                                                                                                                                                                                                                                                                                                                      |
| EPI_ISL_1239592                                                                                                                                                                                                                                                                                                                                                                                                                                                                                                                                                                                                                                                                                                                                                                                                                                                                                                                                                                                                                                                                                                                                                                                                                                                                                                                                                                                                                                                                                                                                                                                                                                                                                                                                                                                                                                                                                                                                                                                                                                                                                                                                                                                                                                                                                                                                                                                                                                                                                                                                                                                                                                                 |           | Cell-T Sp. z o.o.                                                                         | 1. National Institute of Public Health - National Institute of Hygiene; 2. Eurofins Genomics Europe Sequencing GmbH | ECDC COVID-19 WGS support team; Eurofins Genomics Europe Sequencing Team; Gierczyki Rafa; Sadkowska-Todys Magorzata; Wokowicz Tomasz; Zacharczuk Katarzyna                                                                                                                                                                                                                                                                                                                                                                                                                                                                                                                                                      |
| EPI_ISL_1201656 to 1201665, EPI_ISL_1273820                                                                                                                                                                                                                                                                                                                                                                                                                                                                                                                                                                                                                                                                                                                                                                                                                                                                                                                                                                                                                                                                                                                                                                                                                                                                                                                                                                                                                                                                                                                                                                                                                                                                                                                                                                                                                                                                                                                                                                                                                                                                                                                                                                                                                                                                                                                                                                                                                                                                                                                                                                                                                     |           | Cell-t                                                                                    | 1. National Institute of Public Health - National Institute of Hygiene; 2. Eurofins Genomics Europe Sequencing GmbH | ECDC COVID-19 WGS support team; Eurofins Genomics Europe Sequencing Team; Gierczyki Rafa; Sadkowska-Todys Magorzata; Wokowicz Tomasz; Zacharczuk Katarzyna                                                                                                                                                                                                                                                                                                                                                                                                                                                                                                                                                      |
| EPI_ISL_1067728, EPI_ISL_1067732, EPI_ISL_1067736                                                                                                                                                                                                                                                                                                                                                                                                                                                                                                                                                                                                                                                                                                                                                                                                                                                                                                                                                                                                                                                                                                                                                                                                                                                                                                                                                                                                                                                                                                                                                                                                                                                                                                                                                                                                                                                                                                                                                                                                                                                                                                                                                                                                                                                                                                                                                                                                                                                                                                                                                                                                               |           | Center for Biotechnology and Cell Therapy, São Rafael Hospital, Salvador, Brazil          | Central Public Health Laboratory - LACEN -Bahia, Salvador, Brazil                                                   | Arabela Leal; Breno Dominguez; Felicidade Pereira; Jaqueline Gomes; Luciana Oliveira; Luiz Alcantara; Marcela Gómez; Marta Giovanetti; Patrícia Cajado; Stephane Tosta; Vagner Fonseca; Vanessa Nardy                                                                                                                                                                                                                                                                                                                                                                                                                                                                                                           |
| EPI_ISL_1004179 to 1004212, EPI_ISL_1036246 to 1036267                                                                                                                                                                                                                                                                                                                                                                                                                                                                                                                                                                                                                                                                                                                                                                                                                                                                                                                                                                                                                                                                                                                                                                                                                                                                                                                                                                                                                                                                                                                                                                                                                                                                                                                                                                                                                                                                                                                                                                                                                                                                                                                                                                                                                                                                                                                                                                                                                                                                                                                                                                                                          |           | Center for Genome Research and Biocomputing                                               | Center for Genome Research and Biocomputing                                                                         | Oregon State University TRACE Project                                                                                                                                                                                                                                                                                                                                                                                                                                                                                                                                                                                                                                                                           |
| EPI_ISL_1020297 to 1020298, EPI_ISL_1020300 to 1020301, EPI_ISL_1116458 to 1116459, EPI_ISL_1191132 to 1191140                                                                                                                                                                                                                                                                                                                                                                                                                                                                                                                                                                                                                                                                                                                                                                                                                                                                                                                                                                                                                                                                                                                                                                                                                                                                                                                                                                                                                                                                                                                                                                                                                                                                                                                                                                                                                                                                                                                                                                                                                                                                                                                                                                                                                                                                                                                                                                                                                                                                                                                                                  |           | Center for Virology                                                                       | Center for Virology                                                                                                 | Irene Goerzer; Jeremy V. Camp; Monika Redlberger-Fritz; Stephan W. Aberle                                                                                                                                                                                                                                                                                                                                                                                                                                                                                                                                                                                                                                       |
| EPI_ISL_1117786, EPI_ISL_1117817 to 1117820, EPI_ISL_1117822 to 1117823, EPI_ISL_1117836 to 1117837, EPI_ISL_1117848 to 1117853, EPI_ISL_1117874, EPI_ISL_1117876 to 1117881, EPI_ISL_1117886, EPI_ISL_1117889, EPI_ISL_1117925 to 1117926, EPI_ISL_1118065 to 1118071                                                                                                                                                                                                                                                                                                                                                                                                                                                                                                                                                                                                                                                                                                                                                                                                                                                                                                                                                                                                                                                                                                                                                                                                                                                                                                                                                                                                                                                                                                                                                                                                                                                                                                                                                                                                                                                                                                                                                                                                                                                                                                                                                                                                                                                                                                                                                                                          | see above | Center for Virology, Medical University of Vienna                                         | Bergthaler laboratory, CeMM Research Center for Molecular Medicine of the Austrian Academy of Sciences              | Andreas Bergthaler; Anna Schedl; Bekir Erguner; Benedikt Agerer; Christoph Bock; Jan Laine; Lukas Endler; Maelle Le Moing; Martin Senekowitsch; Michael Schuster; Thomas Penz                                                                                                                                                                                                                                                                                                                                                                                                                                                                                                                                   |
| EPI_ISL_1034737 to 1034739, EPI_ISL_1034748 to 1034753, EPI_ISL_1036235 to 1036239, EPI_ISL_1093477 to 1093491, EPI_ISL_1097002, EPI_ISL_1201280 to 1201286, EPI_ISL_1260840 to 1260854, EPI_ISL_1336653 to 1336658                                                                                                                                                                                                                                                                                                                                                                                                                                                                                                                                                                                                                                                                                                                                                                                                                                                                                                                                                                                                                                                                                                                                                                                                                                                                                                                                                                                                                                                                                                                                                                                                                                                                                                                                                                                                                                                                                                                                                                                                                                                                                                                                                                                                                                                                                                                                                                                                                                             | see above | Center of Advanced Studies and Technology, Molecular Genetics Laboratory                  | Center of Advanced Studies and Technology, Molecular Genetics Laboratory                                            | Anaclerio Federico; Damiani Verena; De Fabritiis Simone; Ferrante Rossella; Mandatori Domitilla                                                                                                                                                                                                                                                                                                                                                                                                                                                                                                                                                                                                                 |
| EPI_ISL_1346626, EPI_ISL_1346628, EPI_ISL_1346630 to 1346631, EPI_ISL_1346634, EPI_ISL_1346636                                                                                                                                                                                                                                                                                                                                                                                                                                                                                                                                                                                                                                                                                                                                                                                                                                                                                                                                                                                                                                                                                                                                                                                                                                                                                                                                                                                                                                                                                                                                                                                                                                                                                                                                                                                                                                                                                                                                                                                                                                                                                                                                                                                                                                                                                                                                                                                                                                                                                                                                                                  |           | Center of Excellence in Clinical Virology                                                 | Research Unit of Systems Microbiology                                                                               | Amornmas Kongklieng; Anek Mungaomklang; Jira Chansaensai; Jiratchaya Puenpa; Kamolthip Atsawawanun; Orapan Mayuramart; Pakkaporn Panwijitkul; Pattaraporn Nimsamer; Ritthideach Yorsaeng; Sunchai Payungporn; Suwanna Petto; Vichan Pawan; Vorthon Sasawong; Yong Poovowan                                                                                                                                                                                                                                                                                                                                                                                                                                      |
| EPI_ISL_1039057 to 1039123                                                                                                                                                                                                                                                                                                                                                                                                                                                                                                                                                                                                                                                                                                                                                                                                                                                                                                                                                                                                                                                                                                                                                                                                                                                                                                                                                                                                                                                                                                                                                                                                                                                                                                                                                                                                                                                                                                                                                                                                                                                                                                                                                                                                                                                                                                                                                                                                                                                                                                                                                                                                                                      |           | Center of Hygiene and Epidemiology in Belgorod Region                                     | WHO National Influenza Centre Russian Federation                                                                    | Andrey Komissarov; Anna Ivanova; Artem Fadeev; Daria Danilenko; Dmitry Bazhenov; Dmitry Lioznov; Elena Nabieva; Georgii Bazykin; Kseniya Safina; Kseniya Komissarova; Lyudmila Berdinskikh; Maria Pisareva; Maria Timofeeva; Tamila Musaveva; Veronika Eder                                                                                                                                                                                                                                                                                                                                                                                                                                                     |
| EPI_ISL_1160123, EPI_ISL_1160125, EPI_ISL_1160133, EPI_ISL_1160137 to 1160138, EPI_ISL_1160140, EPI_ISL_1160146, EPI_ISL_1160148, EPI_ISL_1160150, EPI_ISL_1160152, EPI_ISL_1160155, EPI_ISL_1160157, EPI_ISL_1160159, EPI_ISL_1160161, EPI_ISL_1160165, EPI_ISL_1160167, EPI_ISL_1160169, EPI_ISL_1160171 to 1160172, EPI_ISL_1160174, EPI_ISL_1160176, EPI_ISL_1160178, EPI_ISL_1160180, EPI_ISL_1160182, EPI_ISL_1160184, EPI_ISL_1160186, EPI_ISL_1160188, EPI_ISL_1160190, EPI_ISL_1160192, EPI_ISL_1160194 to 1160195, EPI_ISL_1160200, EPI_ISL_1160202, EPI_ISL_1160205, EPI_ISL_1160207, EPI_ISL_1160209, EPI_ISL_1160211, EPI_ISL_1160213, EPI_ISL_1160215, EPI_ISL_1160217, EPI_ISL_1160219, EPI_ISL_1161006, EPI_ISL_1161009, EPI_ISL_1161011, EPI_ISL_1161013 to 1161014, EPI_ISL_1161016, EPI_ISL_1161018, EPI_ISL_1161022, EPI_ISL_1161026, EPI_ISL_1161030, EPI_ISL_1161032, EPI_ISL_1161034, EPI_ISL_1161036, EPI_ISL_1161038, EPI_ISL_1161040 to 1161041, EPI_ISL_1161043, EPI_ISL_1161045, EPI_ISL_1161047, EPI_ISL_1161049 to 1161050, EPI_ISL_1161052, EPI_ISL_1161054, EPI_ISL_1161056, EPI_ISL_1161058, EPI_ISL_1161069, EPI_ISL_1346717 to 1346723, EPI_ISL_1346725 to 1346732, EPI_ISL_1346734 to 1346748, EPI_ISL_1346752, EPI_ISL_1346754 to 1346770, EPI_ISL_1346772 to 1346780, EPI_ISL_1346782 to 1346786, EPI_ISL_1346788 to 1346791, EPI_ISL_1346793 to 1346795, EPI_ISL_1346798 to 1346801, EPI_ISL_1346806 to 1346849, EPI_ISL_1346851 to 1346853, EPI_ISL_1346855, EPI_ISL_1346857 to 1346887, EPI_ISL_1346890 to 1346908, EPI_ISL_1346910 to 1346919, EPI_ISL_1346921, EPI_ISL_1346923, EPI_ISL_1346929 to 1346930, EPI_ISL_1346932 to 1346933, EPI_ISL_1346936, EPI_ISL_1346938 to 1346948, EPI_ISL_1346950, EPI_ISL_1346952 to 1346963, EPI_ISL_1346965, EPI_ISL_1346967 to 1346968, EPI_ISL_1347205 to 1347209, EPI_ISL_1347211 to 1347218, EPI_ISL_1347220 to 1347225, EPI_ISL_1347227 to 1347231, EPI_ISL_1347233 to 1347241, EPI_ISL_1347298 to 1347300, EPI_ISL_1347302 to 1347322, EPI_ISL_1347324 to 1347333, EPI_ISL_1347335 to 1347347, EPI_ISL_1347444 to 1347462, EPI_ISL_1347464 to 1347470, EPI_ISL_1347473 to 1347475, EPI_ISL_1347475 to 1347564, EPI_ISL_1347698 to 1347700, EPI_ISL_1347703 to 1347706, EPI_ISL_1347711, EPI_ISL_1347713 to 1347714, EPI_ISL_1347716 to 1347717, EPI_ISL_1347720 to 1347727, EPI_ISL_1347729, EPI_ISL_1347731 to 1347732, EPI_ISL_1347734, EPI_ISL_1347754 to 1347776, EPI_ISL_1347790 to 1347820, EPI_ISL_1347951 to 1347958, EPI_ISL_1347960 to 1347962, EPI_ISL_1347964 to 1347967, EPI_ISL_1347987 to 1347991, EPI_ISL_1347993 to 1348000, EPI_ISL_1348002 to 1348033 | see above | Center of Medical Microbiology, Virology, and Hospital Hygiene, University of Duesseldorf | Center of Medical Microbiology, Virology, and Hospital Hygiene, University of Duesseldorf                           | Alexander Dilthey; Andreas Walker; Daniel Strelow; Jessica Nicolai; Jörg Timm; Klaus Pfeffer; Lisanna Hülse; Malte Kohns Vasconcelos; Maximilian Damagnez; Nadine Lübke; Tobias Wienemann; Torsten Houwaart                                                                                                                                                                                                                                                                                                                                                                                                                                                                                                     |
| EPI_ISL_1168653 to 1168681                                                                                                                                                                                                                                                                                                                                                                                                                                                                                                                                                                                                                                                                                                                                                                                                                                                                                                                                                                                                                                                                                                                                                                                                                                                                                                                                                                                                                                                                                                                                                                                                                                                                                                                                                                                                                                                                                                                                                                                                                                                                                                                                                                                                                                                                                                                                                                                                                                                                                                                                                                                                                                      |           | Centers for Disease Control and Prevention, Dengue Branch                                 | Centers for Disease Control and Prevention, Dengue Branch                                                           | Betzabel Flores; Gabriela Paz-Bailey; Gilberto A. Santiago; Glenda Gonzalez; Jorge L. Munoz-Jordan; Keyla Charriez                                                                                                                                                                                                                                                                                                                                                                                                                                                                                                                                                                                              |
| EPI_ISL_1381386                                                                                                                                                                                                                                                                                                                                                                                                                                                                                                                                                                                                                                                                                                                                                                                                                                                                                                                                                                                                                                                                                                                                                                                                                                                                                                                                                                                                                                                                                                                                                                                                                                                                                                                                                                                                                                                                                                                                                                                                                                                                                                                                                                                                                                                                                                                                                                                                                                                                                                                                                                                                                                                 |           | Centers for Disease Control, R.O.C. (Taiwan)                                              | Centers for Disease Control, R.O.C. (Taiwan)                                                                        | Ji-Rong Yang; Jung-Jung Mu; Ming-Tsan Liu; Yu-Chi Lin                                                                                                                                                                                                                                                                                                                                                                                                                                                                                                                                                                                                                                                           |
| EPI_ISL_1307639 to 1307681, EPI_ISL_1322321 to 1322330                                                                                                                                                                                                                                                                                                                                                                                                                                                                                                                                                                                                                                                                                                                                                                                                                                                                                                                                                                                                                                                                                                                                                                                                                                                                                                                                                                                                                                                                                                                                                                                                                                                                                                                                                                                                                                                                                                                                                                                                                                                                                                                                                                                                                                                                                                                                                                                                                                                                                                                                                                                                          |           | Central Public Health Laboratory                                                          | National Public Health Laboratory, National Centre for Infectious Diseases                                          | Esorom Daoni; Lin Cui; Raymond Tzer Pin Lin; Theresa Palou; Tze Minn Mak; Zhenyang Zhou                                                                                                                                                                                                                                                                                                                                                                                                                                                                                                                                                                                                                         |

|                                                                                                                                                                                                                                                                                                                                                                                                                                                                                                                                                                                                                                                                                                                                                                                                                                                                                                                                                                                                                                                                                                                                                                                                                                                                                                                                                                                                                                                                                                                                                                                                                                                                                                                                                                                                                                                                                                                                                                                                                                                                                                                                                                                                                                                                                                                                                                                                                                                                                                                                                                                                                                                                                                                                                                                                                                                                                                                                                                                                                                                                                                                                     |                                                                                                                            |                                                                                                                                                  |                                                                                                                                                                                                                                                                                                                                                                                                                                                                                                                                                                                                                                                                                                                                                                                                                                                                                                                                                                                                                                |
|-------------------------------------------------------------------------------------------------------------------------------------------------------------------------------------------------------------------------------------------------------------------------------------------------------------------------------------------------------------------------------------------------------------------------------------------------------------------------------------------------------------------------------------------------------------------------------------------------------------------------------------------------------------------------------------------------------------------------------------------------------------------------------------------------------------------------------------------------------------------------------------------------------------------------------------------------------------------------------------------------------------------------------------------------------------------------------------------------------------------------------------------------------------------------------------------------------------------------------------------------------------------------------------------------------------------------------------------------------------------------------------------------------------------------------------------------------------------------------------------------------------------------------------------------------------------------------------------------------------------------------------------------------------------------------------------------------------------------------------------------------------------------------------------------------------------------------------------------------------------------------------------------------------------------------------------------------------------------------------------------------------------------------------------------------------------------------------------------------------------------------------------------------------------------------------------------------------------------------------------------------------------------------------------------------------------------------------------------------------------------------------------------------------------------------------------------------------------------------------------------------------------------------------------------------------------------------------------------------------------------------------------------------------------------------------------------------------------------------------------------------------------------------------------------------------------------------------------------------------------------------------------------------------------------------------------------------------------------------------------------------------------------------------------------------------------------------------------------------------------------------------|----------------------------------------------------------------------------------------------------------------------------|--------------------------------------------------------------------------------------------------------------------------------------------------|--------------------------------------------------------------------------------------------------------------------------------------------------------------------------------------------------------------------------------------------------------------------------------------------------------------------------------------------------------------------------------------------------------------------------------------------------------------------------------------------------------------------------------------------------------------------------------------------------------------------------------------------------------------------------------------------------------------------------------------------------------------------------------------------------------------------------------------------------------------------------------------------------------------------------------------------------------------------------------------------------------------------------------|
| EPI_ISL_1067729 to 1067731,<br>EPI_ISL_1067733 to 1067735,<br>EPI_ISL_1067737 to 1067738,<br>EPI_ISL_1068315 to 1068323,<br>EPI_ISL_1068363 to 1068394                                                                                                                                                                                                                                                                                                                                                                                                                                                                                                                                                                                                                                                                                                                                                                                                                                                                                                                                                                                                                                                                                                                                                                                                                                                                                                                                                                                                                                                                                                                                                                                                                                                                                                                                                                                                                                                                                                                                                                                                                                                                                                                                                                                                                                                                                                                                                                                                                                                                                                                                                                                                                                                                                                                                                                                                                                                                                                                                                                              | Central Public Health Laboratory - LACEN -Bahia, Salvador, Brazil                                                          | Central Public Health Laboratory - LACEN -Bahia, Salvador, Brazil                                                                                | Arabela Leal; Breno Dominguez; Felicidade Pereira; Jaqueline Gomes; Luciana Oliveira; Luiz Alcantara; Marcela Gómez; Marta Giovanetti; Patricia Cajado; Stephane Tosta; Vagner Fonseca; Vanessa Nardy                                                                                                                                                                                                                                                                                                                                                                                                                                                                                                                                                                                                                                                                                                                                                                                                                          |
| EPI_ISL_1222766                                                                                                                                                                                                                                                                                                                                                                                                                                                                                                                                                                                                                                                                                                                                                                                                                                                                                                                                                                                                                                                                                                                                                                                                                                                                                                                                                                                                                                                                                                                                                                                                                                                                                                                                                                                                                                                                                                                                                                                                                                                                                                                                                                                                                                                                                                                                                                                                                                                                                                                                                                                                                                                                                                                                                                                                                                                                                                                                                                                                                                                                                                                     | Central Scientific Research Department, Gomel State Medical University,<br>Centrala laboratorija                           | Laboratory of Genomics and Bioinformatics of the Forest Research Institute of the NAS of Belarus<br>Latvian Biomedical Research and Study Centre | A.A.; A.S.; Baranov; E.V.; I.O.; Kiryanov; L.V.; O.V.; O.Y.; Osipkina; P.S. and Mozharovskaya; Paduto; Panteleev; S.V.; Shaforost; Stoma; V.E.; Voropaev; Zyatskov<br>Davids Fridmanis; Elina Dimina; Guntars Zarins; Ivars Silamikelis; Jana Osite; Janis Klovinis; Janis Pjalkovskis; Jurisj Perevoscikovs; Kaspars Megnis; Laila Silamikele; Lauma Freimane; Laura Ansonie; Liga Birzniece; Marta Priedite; Monta Ustinova; Nikita Zrelvos; Uga Dumpis; Una Krumina; Vita Rovite                                                                                                                                                                                                                                                                                                                                                                                                                                                                                                                                            |
| EPI_ISL_1219503, EPI_ISL_1219595,<br>EPI_ISL_1312510 to 1312564,<br>EPI_ISL_1312620 to 1312623,<br>EPI_ISL_1312659 to 1312682,<br>EPI_ISL_1321951                                                                                                                                                                                                                                                                                                                                                                                                                                                                                                                                                                                                                                                                                                                                                                                                                                                                                                                                                                                                                                                                                                                                                                                                                                                                                                                                                                                                                                                                                                                                                                                                                                                                                                                                                                                                                                                                                                                                                                                                                                                                                                                                                                                                                                                                                                                                                                                                                                                                                                                                                                                                                                                                                                                                                                                                                                                                                                                                                                                   | Centre For Biotechnology Research And Development                                                                          | THE AFRICA GENOMICS CENTRE AND CONSULTANCY                                                                                                       | Adede Hawi; Cecilia Waruhui; Damaris Matoke Muhia; Damaris Matoke-Muhia; George Michuki; John Njuguna; Lilian Kanjau; Ravena Mubichi                                                                                                                                                                                                                                                                                                                                                                                                                                                                                                                                                                                                                                                                                                                                                                                                                                                                                           |
| EPI_ISL_1357599, EPI_ISL_1357601,<br>EPI_ISL_1357603 to 1357604                                                                                                                                                                                                                                                                                                                                                                                                                                                                                                                                                                                                                                                                                                                                                                                                                                                                                                                                                                                                                                                                                                                                                                                                                                                                                                                                                                                                                                                                                                                                                                                                                                                                                                                                                                                                                                                                                                                                                                                                                                                                                                                                                                                                                                                                                                                                                                                                                                                                                                                                                                                                                                                                                                                                                                                                                                                                                                                                                                                                                                                                     | Centre For Biotechnology Research And Development                                                                          | THE AFRICA GENOMICS CENTRE AND CONSULTANCY LIMITED                                                                                               | Adede Hawi; Cecilia Waruhui; Damaris Matoke-Muhia; George Michuki; John Njuguna; Lilian Kanjau; Ravena Mubichi                                                                                                                                                                                                                                                                                                                                                                                                                                                                                                                                                                                                                                                                                                                                                                                                                                                                                                                 |
| EPI_ISL_1250633                                                                                                                                                                                                                                                                                                                                                                                                                                                                                                                                                                                                                                                                                                                                                                                                                                                                                                                                                                                                                                                                                                                                                                                                                                                                                                                                                                                                                                                                                                                                                                                                                                                                                                                                                                                                                                                                                                                                                                                                                                                                                                                                                                                                                                                                                                                                                                                                                                                                                                                                                                                                                                                                                                                                                                                                                                                                                                                                                                                                                                                                                                                     | Centre Hospitalier Eure Seine                                                                                              | Centre Hospitalier Universitaire de Rouen Laboratoire de Virologie                                                                               | Alice Moisan; Fabienne De Oliveira; Marie Leoz                                                                                                                                                                                                                                                                                                                                                                                                                                                                                                                                                                                                                                                                                                                                                                                                                                                                                                                                                                                 |
| EPI_ISL_1250602                                                                                                                                                                                                                                                                                                                                                                                                                                                                                                                                                                                                                                                                                                                                                                                                                                                                                                                                                                                                                                                                                                                                                                                                                                                                                                                                                                                                                                                                                                                                                                                                                                                                                                                                                                                                                                                                                                                                                                                                                                                                                                                                                                                                                                                                                                                                                                                                                                                                                                                                                                                                                                                                                                                                                                                                                                                                                                                                                                                                                                                                                                                     | Centre Hospitalier Dieppe                                                                                                  | Centre Hospitalier Universitaire de Rouen Laboratoire de Virologie                                                                               | Alice Moisan; Fabienne De Oliveira; Marie Leoz                                                                                                                                                                                                                                                                                                                                                                                                                                                                                                                                                                                                                                                                                                                                                                                                                                                                                                                                                                                 |
| EPI_ISL_1241280                                                                                                                                                                                                                                                                                                                                                                                                                                                                                                                                                                                                                                                                                                                                                                                                                                                                                                                                                                                                                                                                                                                                                                                                                                                                                                                                                                                                                                                                                                                                                                                                                                                                                                                                                                                                                                                                                                                                                                                                                                                                                                                                                                                                                                                                                                                                                                                                                                                                                                                                                                                                                                                                                                                                                                                                                                                                                                                                                                                                                                                                                                                     | Centre Hospitalier Régional de Lanaudière                                                                                  | Laboratoire de santé publique du Québec                                                                                                          | Guillaume Bourque; Ioannis Ragoussis; Jesse Shapiro; Mark Lathrop and Michel Roger on behalf of the CoVSeQ research group; Sandrine Moreira                                                                                                                                                                                                                                                                                                                                                                                                                                                                                                                                                                                                                                                                                                                                                                                                                                                                                    |
| EPI_ISL_1250599 to 1250601, EPI_ISL_1250603 to 1250608,<br>EPI_ISL_1250610 to 1250622, EPI_ISL_1250625 to 1250626,<br>EPI_ISL_1250630 to 1250632, EPI_ISL_1250634, EPI_ISL_1250636 to 1250644                                                                                                                                                                                                                                                                                                                                                                                                                                                                                                                                                                                                                                                                                                                                                                                                                                                                                                                                                                                                                                                                                                                                                                                                                                                                                                                                                                                                                                                                                                                                                                                                                                                                                                                                                                                                                                                                                                                                                                                                                                                                                                                                                                                                                                                                                                                                                                                                                                                                                                                                                                                                                                                                                                                                                                                                                                                                                                                                       | Centre Hospitalier Universitaire de Rouen Laboratoire de Virologie                                                         | Centre Hospitalier Universitaire de Rouen Laboratoire de Virologie                                                                               | Alice Moisan; Fabienne De Oliveira; Marie Leoz                                                                                                                                                                                                                                                                                                                                                                                                                                                                                                                                                                                                                                                                                                                                                                                                                                                                                                                                                                                 |
| see above                                                                                                                                                                                                                                                                                                                                                                                                                                                                                                                                                                                                                                                                                                                                                                                                                                                                                                                                                                                                                                                                                                                                                                                                                                                                                                                                                                                                                                                                                                                                                                                                                                                                                                                                                                                                                                                                                                                                                                                                                                                                                                                                                                                                                                                                                                                                                                                                                                                                                                                                                                                                                                                                                                                                                                                                                                                                                                                                                                                                                                                                                                                           | Centre Hospitalier de Wallonie Picarde (CHWaPi)                                                                            | Institut de Pathologie et Génétique (IPG)                                                                                                        | Jérémie Gras; Pascale Hilbert                                                                                                                                                                                                                                                                                                                                                                                                                                                                                                                                                                                                                                                                                                                                                                                                                                                                                                                                                                                                  |
| EPI_ISL_1079689 to 1079690,<br>EPI_ISL_1079692 to 1079693,<br>EPI_ISL_1079695 to 1079697,<br>EPI_ISL_1079699 to 1079701,<br>EPI_ISL_1079703, EPI_ISL_1081842                                                                                                                                                                                                                                                                                                                                                                                                                                                                                                                                                                                                                                                                                                                                                                                                                                                                                                                                                                                                                                                                                                                                                                                                                                                                                                                                                                                                                                                                                                                                                                                                                                                                                                                                                                                                                                                                                                                                                                                                                                                                                                                                                                                                                                                                                                                                                                                                                                                                                                                                                                                                                                                                                                                                                                                                                                                                                                                                                                        | Centre Hospitalier de Wallonie picarde (CHwapi)                                                                            | Institut de Pathologie et Génétique (IPG)                                                                                                        | Hilbert Pascale; Jeremie Gras; Jérémie Gras; Pascale Hilbert                                                                                                                                                                                                                                                                                                                                                                                                                                                                                                                                                                                                                                                                                                                                                                                                                                                                                                                                                                   |
| EPI_ISL_1007746, EPI_ISL_1007810,<br>EPI_ISL_1007860                                                                                                                                                                                                                                                                                                                                                                                                                                                                                                                                                                                                                                                                                                                                                                                                                                                                                                                                                                                                                                                                                                                                                                                                                                                                                                                                                                                                                                                                                                                                                                                                                                                                                                                                                                                                                                                                                                                                                                                                                                                                                                                                                                                                                                                                                                                                                                                                                                                                                                                                                                                                                                                                                                                                                                                                                                                                                                                                                                                                                                                                                | Centre Hospitalier de Wallonie picarde (CHwapi)                                                                            | Institut de Pathologie et Génétique (IPG)                                                                                                        | Hilbert Pascale; Jeremie Gras; Jérémie Gras; Pascale Hilbert                                                                                                                                                                                                                                                                                                                                                                                                                                                                                                                                                                                                                                                                                                                                                                                                                                                                                                                                                                   |
| EPI_ISL_1165834, EPI_ISL_1165846 to 1165857                                                                                                                                                                                                                                                                                                                                                                                                                                                                                                                                                                                                                                                                                                                                                                                                                                                                                                                                                                                                                                                                                                                                                                                                                                                                                                                                                                                                                                                                                                                                                                                                                                                                                                                                                                                                                                                                                                                                                                                                                                                                                                                                                                                                                                                                                                                                                                                                                                                                                                                                                                                                                                                                                                                                                                                                                                                                                                                                                                                                                                                                                         | Centre Hospitalier de l'Ardenne                                                                                            | GIGA Medical Genomics                                                                                                                            | Bouchra Boujemla; Cécile Meex; Keith Durkin; Maria Artesi; Marie-Pierre Hayette; Nathalie Renotte; Pierrette Melin; Raphaël Boreux; Sébastien Bontems; Vincent Bours                                                                                                                                                                                                                                                                                                                                                                                                                                                                                                                                                                                                                                                                                                                                                                                                                                                           |
| EPI_ISL_1250627 to 1250629                                                                                                                                                                                                                                                                                                                                                                                                                                                                                                                                                                                                                                                                                                                                                                                                                                                                                                                                                                                                                                                                                                                                                                                                                                                                                                                                                                                                                                                                                                                                                                                                                                                                                                                                                                                                                                                                                                                                                                                                                                                                                                                                                                                                                                                                                                                                                                                                                                                                                                                                                                                                                                                                                                                                                                                                                                                                                                                                                                                                                                                                                                          | Centre Hospitalier de l'Austreberthe                                                                                       | Centre Hospitalier Universitaire de Rouen Laboratoire de Virologie                                                                               | Alice Moisan; Fabienne De Oliveira; Marie Leoz                                                                                                                                                                                                                                                                                                                                                                                                                                                                                                                                                                                                                                                                                                                                                                                                                                                                                                                                                                                 |
| EPI_ISL_1299491 to 1299496,<br>EPI_ISL_1299499                                                                                                                                                                                                                                                                                                                                                                                                                                                                                                                                                                                                                                                                                                                                                                                                                                                                                                                                                                                                                                                                                                                                                                                                                                                                                                                                                                                                                                                                                                                                                                                                                                                                                                                                                                                                                                                                                                                                                                                                                                                                                                                                                                                                                                                                                                                                                                                                                                                                                                                                                                                                                                                                                                                                                                                                                                                                                                                                                                                                                                                                                      | Centre Hospitalo Universitaire Souro Sanou                                                                                 | Centre Muraz                                                                                                                                     | Abdoul-Salam Ouedraogo; Ange Badjo; Arsène Zongo; Essia Belarbi; Fabian Leendertz; Grit Schubert; Jasmin Schlotterbeck; Soumeya Ouangraoua; Thérèse Kagone; Yacouba Sawadogo                                                                                                                                                                                                                                                                                                                                                                                                                                                                                                                                                                                                                                                                                                                                                                                                                                                   |
| EPI_ISL_1015368, EPI_ISL_1015371,<br>EPI_ISL_1015373 to 1015375,<br>EPI_ISL_1015389, EPI_ISL_1015392 to 1015400                                                                                                                                                                                                                                                                                                                                                                                                                                                                                                                                                                                                                                                                                                                                                                                                                                                                                                                                                                                                                                                                                                                                                                                                                                                                                                                                                                                                                                                                                                                                                                                                                                                                                                                                                                                                                                                                                                                                                                                                                                                                                                                                                                                                                                                                                                                                                                                                                                                                                                                                                                                                                                                                                                                                                                                                                                                                                                                                                                                                                     | Centre Marine La Villeneuve                                                                                                | IRBA, 2MI                                                                                                                                        | BRAESCU J.; GORGE O.; NOLENT F.; SARILAR V.; VERMEULENE L.                                                                                                                                                                                                                                                                                                                                                                                                                                                                                                                                                                                                                                                                                                                                                                                                                                                                                                                                                                     |
| EPI_ISL_1233054 to 1233138,<br>EPI_ISL_1239361 to 1239368                                                                                                                                                                                                                                                                                                                                                                                                                                                                                                                                                                                                                                                                                                                                                                                                                                                                                                                                                                                                                                                                                                                                                                                                                                                                                                                                                                                                                                                                                                                                                                                                                                                                                                                                                                                                                                                                                                                                                                                                                                                                                                                                                                                                                                                                                                                                                                                                                                                                                                                                                                                                                                                                                                                                                                                                                                                                                                                                                                                                                                                                           | Centre for Dengue Research and AICBU, Department of Immunology and Molecular Medicine                                      | Centre for Dengue Research and AICBU, Department of Immunology and Molecular Medicine                                                            | Chandima Jeewandara; Deshni Jayathilaka; Dinuka Ariyaratne; Diyanath Ranasinghe; Gathsaurie Neelika Malavige; Laksiri Gomes; Tibutius Thanesh Pramanayagam                                                                                                                                                                                                                                                                                                                                                                                                                                                                                                                                                                                                                                                                                                                                                                                                                                                                     |
| EPI_ISL_1000187 to 1000240, EPI_ISL_1000242 to 1000251, EPI_ISL_1000253 to 1000254, EPI_ISL_1000256 to 1000265, EPI_ISL_1000267 to 1000278, EPI_ISL_1000280 to 1000282, EPI_ISL_1000288 to 1000324, EPI_ISL_1000404 to 1000418, EPI_ISL_1000420 to 1000439, EPI_ISL_1000441 to 1000442, EPI_ISL_1000444 to 1000445, EPI_ISL_1000447 to 1000453, EPI_ISL_1000455 to 1000464, EPI_ISL_1000466 to 1000471, EPI_ISL_1000473 to 1000477, EPI_ISL_1000482 to 1000483, EPI_ISL_1000525, EPI_ISL_1000542, EPI_ISL_1000546, EPI_ISL_1000573, EPI_ISL_1000576, EPI_ISL_1000596 to 1000608, EPI_ISL_1000610 to 1000630, EPI_ISL_1050075 to 1050173, EPI_ISL_1050748 to 1050827, EPI_ISL_1050835 to 1050839, EPI_ISL_1050842 to 1050861, EPI_ISL_1050871 to 1050882, EPI_ISL_1050909 to 1050915, EPI_ISL_1053749 to 1053753, EPI_ISL_1053902, EPI_ISL_1053907, EPI_ISL_1053915 to 1053916, EPI_ISL_1053922 to 1053923, EPI_ISL_1053926 to 1053927, EPI_ISL_1053932 to 1053976, EPI_ISL_1054542 to 1054619, EPI_ISL_1103594 to 1103611, EPI_ISL_1103613, EPI_ISL_1103615, EPI_ISL_1103618, EPI_ISL_1103620, EPI_ISL_1103622, EPI_ISL_1103625, EPI_ISL_1103627 to 1103648, EPI_ISL_1104085, EPI_ISL_1104088, EPI_ISL_1105494 to 1105495, EPI_ISL_1105511 to 1105512, EPI_ISL_1105656, EPI_ISL_1107518 to 1107543, EPI_ISL_1107586 to 1107587, EPI_ISL_1107631 to 1107699, EPI_ISL_1107708, EPI_ISL_1107713 to 1107792, EPI_ISL_1108835, EPI_ISL_1109229 to 1109230, EPI_ISL_1109237 to 1109242, EPI_ISL_1177231 to 1177450, EPI_ISL_1178096 to 1178120, EPI_ISL_1179646 to 1179679, EPI_ISL_1179681, EPI_ISL_1179683, EPI_ISL_1179685, EPI_ISL_1179687, EPI_ISL_1179689, EPI_ISL_1179691 to 1179692, EPI_ISL_1179694 to 1179695, EPI_ISL_1179697, EPI_ISL_1179699 to 1179700, EPI_ISL_1179702, EPI_ISL_1179704 to 1179705, EPI_ISL_1179707, EPI_ISL_1179709, EPI_ISL_1179711 to 1179712, EPI_ISL_1179714, EPI_ISL_1179716 to 1179717, EPI_ISL_1179719, EPI_ISL_1179721 to 1179722, EPI_ISL_1179724, EPI_ISL_1179726, EPI_ISL_1179728 to 1179729, EPI_ISL_1179731, EPI_ISL_1179736 to 1179739, EPI_ISL_1179741, EPI_ISL_1179743 to 1179744, EPI_ISL_1179746, EPI_ISL_1179748, EPI_ISL_1179750 to 1179751, EPI_ISL_1179753, EPI_ISL_1179755 to 1179756, EPI_ISL_1179758, EPI_ISL_1179760, EPI_ISL_1179765, EPI_ISL_1179767, EPI_ISL_1179769, EPI_ISL_1179771, EPI_ISL_1179774, EPI_ISL_1179776, EPI_ISL_1179783, EPI_ISL_1179787, EPI_ISL_1179790, EPI_ISL_1179792, EPI_ISL_1179794, EPI_ISL_1179796, EPI_ISL_1179803, EPI_ISL_1179812, EPI_ISL_1179814, EPI_ISL_1179816, EPI_ISL_1179818 to 1179825, EPI_ISL_1179827 to 1179844, EPI_ISL_1179852 to 1179890, EPI_ISL_1247033 to 1247119, EPI_ISL_1248679 to 1248675, EPI_ISL_1249959, EPI_ISL_1249967 to 1249985, EPI_ISL_1249987, EPI_ISL_1249989, EPI_ISL_1249991 to 1249992, EPI_ISL_1249994 to 1249995, EPI_ISL_1249997 to 1249998, EPI_ISL_1250000 to 1250001, EPI_ISL_1250003 to 1250004, EPI_ISL_1250006 to 1250030, EPI_ISL_1250036 to 1250039, EPI_ISL_1250099 to 1250119, EPI_ISL_1309374 to 1309431, EPI_ISL_1310291 to 1310326, EPI_ISL_1310328 to 1310361, EPI_ISL_1310438 to 1310454 | Centre for Enzyme Innovation, University of Portsmouth / Translational Research Laboratory, Portsmouth Hospitals NHS Trust | COVID-19 Genomics UK (COG-UK) Consortium                                                                                                         | Angela Beckett; Christopher Fearn; Kate Cook; Katie Loveson; Salman Goudarzi; Samuel Robson; Scott Elliott; Sharon Glaysler                                                                                                                                                                                                                                                                                                                                                                                                                                                                                                                                                                                                                                                                                                                                                                                                                                                                                                    |
| EPI_ISL_1164228 to 1164352                                                                                                                                                                                                                                                                                                                                                                                                                                                                                                                                                                                                                                                                                                                                                                                                                                                                                                                                                                                                                                                                                                                                                                                                                                                                                                                                                                                                                                                                                                                                                                                                                                                                                                                                                                                                                                                                                                                                                                                                                                                                                                                                                                                                                                                                                                                                                                                                                                                                                                                                                                                                                                                                                                                                                                                                                                                                                                                                                                                                                                                                                                          | Centro Hospitalar de Entre o Douro e Vouga (CHEDV)                                                                         | Institute of Biomedicine (IBiMED), Universidade de Aveiro                                                                                        | Gabriela Moura; Miguel Pinheiro and Manuel Santos; Patricia Arinto; Sofia Marques                                                                                                                                                                                                                                                                                                                                                                                                                                                                                                                                                                                                                                                                                                                                                                                                                                                                                                                                              |
| EPI_ISL_1138761 to 1138827,<br>EPI_ISL_1159127 to 1159128,<br>EPI_ISL_1164184 to 1164227                                                                                                                                                                                                                                                                                                                                                                                                                                                                                                                                                                                                                                                                                                                                                                                                                                                                                                                                                                                                                                                                                                                                                                                                                                                                                                                                                                                                                                                                                                                                                                                                                                                                                                                                                                                                                                                                                                                                                                                                                                                                                                                                                                                                                                                                                                                                                                                                                                                                                                                                                                                                                                                                                                                                                                                                                                                                                                                                                                                                                                            | Centro Hospitalar do Baixo Vouga (CHBV)                                                                                    | Institute of Biomedicine (IBiMED), Universidade de Aveiro                                                                                        | Gabriela Moura; Miguel Pinheiro and Manuel Santos; Patricia Arinto; Sofia Marques                                                                                                                                                                                                                                                                                                                                                                                                                                                                                                                                                                                                                                                                                                                                                                                                                                                                                                                                              |
| EPI_ISL_1007893                                                                                                                                                                                                                                                                                                                                                                                                                                                                                                                                                                                                                                                                                                                                                                                                                                                                                                                                                                                                                                                                                                                                                                                                                                                                                                                                                                                                                                                                                                                                                                                                                                                                                                                                                                                                                                                                                                                                                                                                                                                                                                                                                                                                                                                                                                                                                                                                                                                                                                                                                                                                                                                                                                                                                                                                                                                                                                                                                                                                                                                                                                                     | Centro Nacional de Gripe (Valladolid)                                                                                      | SeqCOVID-SPAIN consortium/IBV(CSIC)                                                                                                              | Diana Perez San José and SeqCOVID-SPAIN consortium; Iván Sanz Muñoz                                                                                                                                                                                                                                                                                                                                                                                                                                                                                                                                                                                                                                                                                                                                                                                                                                                                                                                                                            |
| EPI_ISL_1023783 to 1023784, EPI_ISL_1023786, EPI_ISL_1023788, EPI_ISL_1023790, EPI_ISL_1023792, EPI_ISL_1023794, EPI_ISL_1023796, EPI_ISL_1023798, EPI_ISL_1023800 to 1023801, EPI_ISL_1023803, EPI_ISL_1023805, EPI_ISL_1023807, EPI_ISL_1023809, EPI_ISL_1023810 to 1023812, EPI_ISL_1023815 to 1023816, EPI_ISL_1023818, EPI_ISL_1023820, EPI_ISL_1023822, EPI_ISL_1023824, EPI_ISL_1023826 to 1023827, EPI_ISL_1023829, EPI_ISL_1023831, EPI_ISL_1023833, EPI_ISL_1023835, EPI_ISL_1023837, EPI_ISL_1023839, EPI_ISL_1023841, EPI_ISL_1023843, EPI_ISL_1023845                                                                                                                                                                                                                                                                                                                                                                                                                                                                                                                                                                                                                                                                                                                                                                                                                                                                                                                                                                                                                                                                                                                                                                                                                                                                                                                                                                                                                                                                                                                                                                                                                                                                                                                                                                                                                                                                                                                                                                                                                                                                                                                                                                                                                                                                                                                                                                                                                                                                                                                                                                  | Centro de Desenvolvimento Tecnológico em Saúde - CDTS                                                                      | Centro de Desenvolvimento Tecnológico em Saúde - CDTS                                                                                            | A.D.; C.Q.; De Paula; F.B.; Ferreira; Fintelman-Rodrigues, N.; M.A. and Sacramento; Saraiva; Souza; T.M.                                                                                                                                                                                                                                                                                                                                                                                                                                                                                                                                                                                                                                                                                                                                                                                                                                                                                                                       |
| see above                                                                                                                                                                                                                                                                                                                                                                                                                                                                                                                                                                                                                                                                                                                                                                                                                                                                                                                                                                                                                                                                                                                                                                                                                                                                                                                                                                                                                                                                                                                                                                                                                                                                                                                                                                                                                                                                                                                                                                                                                                                                                                                                                                                                                                                                                                                                                                                                                                                                                                                                                                                                                                                                                                                                                                                                                                                                                                                                                                                                                                                                                                                           | Centro de Especialidades Triunfo                                                                                           | Epicin                                                                                                                                           | Ana Paula Mutterle; Carolina Comerlato; Eliana Márcia Da Ros Wendland; Fernando Hayashi Sant'Anna; Janira Prichula; Juliana Comerlato                                                                                                                                                                                                                                                                                                                                                                                                                                                                                                                                                                                                                                                                                                                                                                                                                                                                                          |
| EPI_ISL_1195284                                                                                                                                                                                                                                                                                                                                                                                                                                                                                                                                                                                                                                                                                                                                                                                                                                                                                                                                                                                                                                                                                                                                                                                                                                                                                                                                                                                                                                                                                                                                                                                                                                                                                                                                                                                                                                                                                                                                                                                                                                                                                                                                                                                                                                                                                                                                                                                                                                                                                                                                                                                                                                                                                                                                                                                                                                                                                                                                                                                                                                                                                                                     | Centro de Especialidades Triunfo                                                                                           | Epicin                                                                                                                                           | Ana Paula Mutterle; Carolina Comerlato; Eliana Márcia Da Ros Wendland; Fernando Hayashi Sant'Anna; Janira Prichula; Juliana Comerlato                                                                                                                                                                                                                                                                                                                                                                                                                                                                                                                                                                                                                                                                                                                                                                                                                                                                                          |
| EPI_ISL_1381234 to 1381258                                                                                                                                                                                                                                                                                                                                                                                                                                                                                                                                                                                                                                                                                                                                                                                                                                                                                                                                                                                                                                                                                                                                                                                                                                                                                                                                                                                                                                                                                                                                                                                                                                                                                                                                                                                                                                                                                                                                                                                                                                                                                                                                                                                                                                                                                                                                                                                                                                                                                                                                                                                                                                                                                                                                                                                                                                                                                                                                                                                                                                                                                                          | Centro de Investigación Biomedica del Noreste (CIBIN)                                                                      | Unidad de Genómica Avanzada                                                                                                                      | Alejandro Sanchez-Flores; Alfredo Herrera-Estrella; Alicia Ocana-Mondragon; Angel Gustavo Salas-Lais; Bernardo Martinez-Miguel; Blanca Taboada; Brenda Irasema Maldonado-Meza; Carla Ivon Herrera-Najera; Carlos F. Arias; Celia Boukadida; Clara Esperanza Santacruz-Tinoco; Concepcion Grajales-Muniz; Consorcio Mexicano de Vigilancia Genómica (CoViGen-Mex). Authors (in alphabetical order): Julio Elias Alvarado-Yaah; Fernando Fontove-Herrera; Francisco Pulido; Gloria Elena Espinoza-Ayala; Gloria Maria Molina-Salinas; Gloria Vazquez; Hector Esteban Paz-Juarez; Hector Montoya-Fuentes; Helen Haydee Fernanda Ramirez-Plascencia; Jorge Ivan Salinal-Navarez; Jose Antonio Enciso-Moreno; Jose Esteban Munoz-Medina; Jose de Jesus Nunez-Contreras; Juan Bautista Chale-Dzul; Luis Alberto Ochoa-Carrera; Margarita Matias-Florentino; Maria Guadalupe Santiago-Mauricio; Maria Guadalupe de Jesus Mireles-Rivera; Nelly Selem-Mojica; Pavel Isa; Ricardo Grande; Santiago Avila-Rios; Victor Hugo Borja-Aburto |

|                                                                                                                                                                                                                                                                                                                                                                                                                                                                                                                                                                                                                                                                                                                                                                                                                                                                                                                                                                                                                                                                                                                                                                                   |           |                                                                             |                                                                                                                      |                                                                                                                                                                                                                                                                                                                                                                                                                                                                                                                                                                                                                                                                                                                                                                                                                                                                                                                                                                                                                                |
|-----------------------------------------------------------------------------------------------------------------------------------------------------------------------------------------------------------------------------------------------------------------------------------------------------------------------------------------------------------------------------------------------------------------------------------------------------------------------------------------------------------------------------------------------------------------------------------------------------------------------------------------------------------------------------------------------------------------------------------------------------------------------------------------------------------------------------------------------------------------------------------------------------------------------------------------------------------------------------------------------------------------------------------------------------------------------------------------------------------------------------------------------------------------------------------|-----------|-----------------------------------------------------------------------------|----------------------------------------------------------------------------------------------------------------------|--------------------------------------------------------------------------------------------------------------------------------------------------------------------------------------------------------------------------------------------------------------------------------------------------------------------------------------------------------------------------------------------------------------------------------------------------------------------------------------------------------------------------------------------------------------------------------------------------------------------------------------------------------------------------------------------------------------------------------------------------------------------------------------------------------------------------------------------------------------------------------------------------------------------------------------------------------------------------------------------------------------------------------|
| EPI_ISL_1351511, EPI_ISL_1351514, EPI_ISL_1351517, EPI_ISL_1351520, EPI_ISL_1351523, EPI_ISL_1351526, EPI_ISL_1351529, EPI_ISL_1351532, EPI_ISL_1351535, EPI_ISL_1351538, EPI_ISL_1351540, EPI_ISL_1351543, EPI_ISL_1351547, EPI_ISL_1351549, EPI_ISL_1351552, EPI_ISL_1351555, EPI_ISL_1351558, EPI_ISL_1351561, EPI_ISL_1351564, EPI_ISL_1351567, EPI_ISL_1351571, EPI_ISL_1351574, EPI_ISL_1351577, EPI_ISL_1351580, EPI_ISL_1351583, EPI_ISL_1351585, EPI_ISL_1351589, EPI_ISL_1351592, EPI_ISL_1351595, EPI_ISL_1351598, EPI_ISL_1351601, EPI_ISL_1351605, EPI_ISL_1351608, EPI_ISL_1351611, EPI_ISL_1351614, EPI_ISL_1351617, EPI_ISL_1351620, EPI_ISL_1351623, EPI_ISL_1351626, EPI_ISL_1351629, EPI_ISL_1351632, EPI_ISL_1351635, EPI_ISL_1351638, EPI_ISL_1351642, EPI_ISL_1351645, EPI_ISL_1351648, EPI_ISL_1351651, EPI_ISL_1351654, EPI_ISL_1351656, EPI_ISL_1351659, EPI_ISL_1351662, EPI_ISL_1351665, EPI_ISL_1351668, EPI_ISL_1351670, EPI_ISL_1351672, EPI_ISL_1351675, EPI_ISL_1351679, EPI_ISL_1351682, EPI_ISL_1351685, EPI_ISL_1351688, EPI_ISL_1351691, EPI_ISL_1351694, EPI_ISL_1351697, EPI_ISL_1351700, EPI_ISL_1351703, EPI_ISL_1351706, EPI_ISL_1351709 | see above | Centro de Investigaci3n Biom3dica de Occidente (CIBO)                       | Unidad de Genomica Avanzada                                                                                          | Alejandro Sanchez-Flores; Alfredo Herrera-Estrella; Alicia Ocana-Mondragon; Angel Gustavo Salas-Lais; Bernardo Mart3nez-Miguel; Blanca Taboada; Brenda Irasema Maldonado-Meza; Carla Iv3n Herrera-Najera; Carlos F. Arias; Celia Boukadida; Clara Esperanza Santacruz-Tinoco; Concepcion Grajales-Muniz; Consorcio Mexicano de Vigilancia Genomica (CoViGen-Mex). Authors (in alphabetical order): Julio Elias Alvarado-Yaah; Fernando Fontove-Herrera; Francisco Pulido; Gloria Elena Espinoza-Ayala; Gloria Maria Molina-Salinas; Gloria Vazquez; Hector Esteban Paz-Juarez; Hector Montoya-Fuentes; Helen Haydee Fernanda Ramirez-Plascencia; Jorge Ivan Salinal-Navarez; Jose Antonio Enciso-Moreno; Jose Esteban Munoz-Medina; Jose de Jesus Nunez-Contreras; Juan Bautista Chale-Dzul; Luis Alberto Ochoa-Carrera; Margarita Matias-Florentino; Maria Guadalupe Santiago-Mauricio; Maria Guadalupe de Jesus Mireles-Rivera; Nelly Selem-Mojica; Pavel Isa; Ricardo Grande; Santiago Avila-Rios; Victor Hugo Borja-Aburto |
| EPI_ISL_1351416, EPI_ISL_1351418, EPI_ISL_1351420, EPI_ISL_1351422, EPI_ISL_1351424, EPI_ISL_1351426, EPI_ISL_1351428, EPI_ISL_1351430, EPI_ISL_1351433, EPI_ISL_1351435, EPI_ISL_1351437, EPI_ISL_1351439, EPI_ISL_1351441, EPI_ISL_1351443, EPI_ISL_1351445, EPI_ISL_1351448, EPI_ISL_1351451, EPI_ISL_1351454, EPI_ISL_1351457, EPI_ISL_1351460, EPI_ISL_1351462                                                                                                                                                                                                                                                                                                                                                                                                                                                                                                                                                                                                                                                                                                                                                                                                               | see above | Centro de Investigaci3n Biom3dica del Noreste (CIBIN)                       | Unidad de Genomica Avanzada                                                                                          | Alejandro Sanchez-Flores; Alfredo Herrera-Estrella; Alicia Ocana-Mondragon; Angel Gustavo Salas-Lais; Bernardo Mart3nez-Miguel; Blanca Taboada; Brenda Irasema Maldonado-Meza; Carla Iv3n Herrera-Najera; Carlos F. Arias; Celia Boukadida; Clara Esperanza Santacruz-Tinoco; Concepcion Grajales-Muniz; Consorcio Mexicano de Vigilancia Genomica (CoViGen-Mex). Authors (in alphabetical order): Julio Elias Alvarado-Yaah; Fernando Fontove-Herrera; Francisco Pulido; Gloria Elena Espinoza-Ayala; Gloria Maria Molina-Salinas; Gloria Vazquez; Hector Esteban Paz-Juarez; Hector Montoya-Fuentes; Helen Haydee Fernanda Ramirez-Plascencia; Jorge Ivan Salinal-Navarez; Jose Antonio Enciso-Moreno; Jose Esteban Munoz-Medina; Jose de Jesus Nunez-Contreras; Juan Bautista Chale-Dzul; Luis Alberto Ochoa-Carrera; Margarita Matias-Florentino; Maria Guadalupe Santiago-Mauricio; Maria Guadalupe de Jesus Mireles-Rivera; Nelly Selem-Mojica; Pavel Isa; Ricardo Grande; Santiago Avila-Rios; Victor Hugo Borja-Aburto |
| EPI_ISL_1093069 to 1093143, EPI_ISL_1217774, EPI_ISL_1217776 to 1217777, EPI_ISL_1217779, EPI_ISL_1217781, EPI_ISL_1217783 to 1217784, EPI_ISL_1217786, EPI_ISL_1217788 to 1217789, EPI_ISL_1217791, EPI_ISL_1217794, EPI_ISL_1217796, EPI_ISL_1217799, EPI_ISL_1217801, EPI_ISL_1217803, EPI_ISL_1217805, EPI_ISL_1217808, EPI_ISL_1217810, EPI_ISL_1217813, EPI_ISL_1217815, EPI_ISL_1217817, EPI_ISL_1217820, EPI_ISL_1217822, EPI_ISL_1217825, EPI_ISL_1217827, EPI_ISL_1217830, EPI_ISL_1217835, EPI_ISL_1217838, EPI_ISL_1217841, EPI_ISL_1217843, EPI_ISL_1217845, EPI_ISL_1217848, EPI_ISL_1217851, EPI_ISL_1217854, EPI_ISL_1217856, EPI_ISL_1217859, EPI_ISL_1217861, EPI_ISL_1217864, EPI_ISL_1217867 to 1217869, EPI_ISL_1217871, EPI_ISL_1217874, EPI_ISL_1217876, EPI_ISL_1217879, EPI_ISL_1217882, EPI_ISL_1217885, EPI_ISL_1217888, EPI_ISL_1217891, EPI_ISL_1217894, EPI_ISL_1217897, EPI_ISL_1217900, EPI_ISL_1217903, EPI_ISL_1217905, EPI_ISL_1217908, EPI_ISL_1217911, EPI_ISL_1217914, EPI_ISL_1217916, EPI_ISL_1217919, EPI_ISL_1217922, EPI_ISL_1217924, EPI_ISL_1217928, EPI_ISL_1217930, EPI_ISL_1369172 to 1369220, EPI_ISL_1369293 to 1369375         | see above | Centro de Investigaci3n Biom3dica de La Rioja - Hospital San Pedro Logro3no | SeqCOVID-SPAIN consortium/IBV(CSIC)                                                                                  | Jos3 Manuel Azcona Guti3rrez; Mar3a Pilar Bea Escudero; Mar3a de Toro; Miriam Blasco Alberdi and SeqCOVID-SPAIN consortium                                                                                                                                                                                                                                                                                                                                                                                                                                                                                                                                                                                                                                                                                                                                                                                                                                                                                                     |
| EPI_ISL_1279264, EPI_ISL_1279266 to 1279267, EPI_ISL_1279275 to 1279276, EPI_ISL_1279284 to 1279285, EPI_ISL_1279287, EPI_ISL_1279298, EPI_ISL_1279302, EPI_ISL_1279462 to 1279536, EPI_ISL_1287771 to 1287773                                                                                                                                                                                                                                                                                                                                                                                                                                                                                                                                                                                                                                                                                                                                                                                                                                                                                                                                                                    | see above | Centro de Investigaci3n Biom3dica del Noreste (CIBIN)                       | Instituto Nacional de Enfermedades Respiratorias (INER); Centro de Investigaci3n en Enfermedades Infecciosas (CIENI) | Alejandro Sanchez-Flores; Alfredo Herrera-Estrella; Alicia Oca3a-Mondrag3n; Angel Gustavo Salas-Lais; Bernardo Mart3nez-Miguel; Blanca Taboada; Brenda Irasema Maldonado-Meza; Carla Iv3n Herrera-Najera; Carlos F. Arias; Celia Boukadida; Clara Esperanza Santacruz-Tinoco; Concepci3n Grajales-Muniz; Consorcio Mexicano de Vigilancia Gen3mica (CoViGen-Mex). Authors (in alphabetical order): Julio Elias Alvarado-Yaah; Fernando Fontove-Herrera; Francisco Pulido; Gloria Elena Espinoza-Ayala; Gloria Maria Molina-Salinas; Gloria Vazquez; Hector Esteban Paz-Juarez; Hector Montoya-Fuentes; Helen Haydee Fernanda Ramirez-Plascencia; Jorge Ivan Salinal-Navarez; Jose Antonio Enciso-Moreno; Jose Esteban Munoz-Medina; Jose de Jesus Nunez-Contreras; Juan Bautista Chale-Dzul; Luis Alberto Ochoa-Carrera; Margarita Matias-Florentino; Maria Guadalupe Santiago-Mauricio; Maria Guadalupe de Jesus Mireles-Rivera; Nelly Selem-Mojica; Pavel Isa; Ricardo Grande; Santiago Avila-Rios; Victor Hugo Borja-Aburto |
| EPI_ISL_1171648 to 1171650                                                                                                                                                                                                                                                                                                                                                                                                                                                                                                                                                                                                                                                                                                                                                                                                                                                                                                                                                                                                                                                                                                                                                        |           | Centro de Saude Dr. Jose Paione em Mococa                                   | Instituto Adolfo Lutz, Interdisciplinary Procedures Center, Strategic Laboratory                                     | Caio Vinicius Dias Lopes; Claudia Regina Goncalves; Claudio Tavares Sacchi; Erica Valessa Ramos Gomes; Karoline Rodrigues Campos                                                                                                                                                                                                                                                                                                                                                                                                                                                                                                                                                                                                                                                                                                                                                                                                                                                                                               |
| EPI_ISL_1121311, EPI_ISL_1196296                                                                                                                                                                                                                                                                                                                                                                                                                                                                                                                                                                                                                                                                                                                                                                                                                                                                                                                                                                                                                                                                                                                                                  |           | Centro de Saude II Dr. Jose Paione Mococa                                   | Instituto Adolfo Lutz, Interdisciplinary Procedures Center, Strategic Laboratory                                     | Caio Vinicius Dias Lopes; Claudia Regina Goncalves; Claudio Tavares Sacchi; Erica Valessa Ramos Gomes; Karoline Rodrigues Campos                                                                                                                                                                                                                                                                                                                                                                                                                                                                                                                                                                                                                                                                                                                                                                                                                                                                                               |
| EPI_ISL_1358285                                                                                                                                                                                                                                                                                                                                                                                                                                                                                                                                                                                                                                                                                                                                                                                                                                                                                                                                                                                                                                                                                                                                                                   |           | Centro de Treinamento e Referencia DST AIDS                                 | Instituto Adolfo Lutz, Interdisciplinary Procedures Center, Strategic Laboratory                                     | Caio Vinicius Dias Lopes; Claudia Regina Goncalves; Claudio Tavares Sacchi; Erica Valessa Ramos Gomes; Karoline Rodrigues Campos                                                                                                                                                                                                                                                                                                                                                                                                                                                                                                                                                                                                                                                                                                                                                                                                                                                                                               |
| EPI_ISL_1239537, EPI_ISL_1239575 to 1239578, EPI_ISL_1239580 to 1239581, EPI_ISL_1239631, EPI_ISL_1239717 to 1239718, EPI_ISL_1273829 to 1273832                                                                                                                                                                                                                                                                                                                                                                                                                                                                                                                                                                                                                                                                                                                                                                                                                                                                                                                                                                                                                                  |           | Centrum Medycyny Klinicznej i Estetycznej DiMedical Sp. z o.o.              | 1. National Institute of Public Health - National Institute of Hygiene; 2. Eurofins Genomics Europe Sequencing GmbH  | ECDC COVID-19 WGS support team; Eurofins Genomics Europe Sequencing Team; Gierczyki Rafa; Sadkowska-Todys Magorzata; Wokowicz Tomasz; Zacharczuk Katarzyna                                                                                                                                                                                                                                                                                                                                                                                                                                                                                                                                                                                                                                                                                                                                                                                                                                                                     |
| EPI_ISL_1228951, EPI_ISL_1228954 to 1228963, EPI_ISL_1228965 to 1228967, EPI_ISL_1228969, EPI_ISL_1228972, EPI_ISL_1228974, EPI_ISL_1228978, EPI_ISL_1228997, EPI_ISL_1229000, EPI_ISL_1229002 to 1229003, EPI_ISL_1229008, EPI_ISL_1229012 to 1229013, EPI_ISL_1229017, EPI_ISL_1229024, EPI_ISL_1229028 to 1229035, EPI_ISL_1229039                                                                                                                                                                                                                                                                                                                                                                                                                                                                                                                                                                                                                                                                                                                                                                                                                                             | see above | Cerballiance                                                                | CNR Virus des Infections Respiratoires - France SUD                                                                  | Antonin Bai; Bruno Lina; Gregory Destras; Gwendolynne Burfin; Hadrien Regue; Laurence Josset; Martine Valette; Quentin Semanas                                                                                                                                                                                                                                                                                                                                                                                                                                                                                                                                                                                                                                                                                                                                                                                                                                                                                                 |
| EPI_ISL_1001461                                                                                                                                                                                                                                                                                                                                                                                                                                                                                                                                                                                                                                                                                                                                                                                                                                                                                                                                                                                                                                                                                                                                                                   |           | Cerballiance                                                                | Cerba                                                                                                                | Haim-Boukobza S; Lecorche E; Meyer S; Roig JC; Roquebert B; Trombert-Paolantoni S                                                                                                                                                                                                                                                                                                                                                                                                                                                                                                                                                                                                                                                                                                                                                                                                                                                                                                                                              |
| EPI_ISL_1005688                                                                                                                                                                                                                                                                                                                                                                                                                                                                                                                                                                                                                                                                                                                                                                                                                                                                                                                                                                                                                                                                                                                                                                   |           | Cerballiance Antony Velpeau                                                 | Cerba                                                                                                                | Benazra M; Collin T; Delaplace E; Gresset N; Haim-Boukobza S; Lecorche E; Lesenne A; Olivi M; Ricard B; Roquebert B; Trombert-Paolantoni S                                                                                                                                                                                                                                                                                                                                                                                                                                                                                                                                                                                                                                                                                                                                                                                                                                                                                     |
| EPI_ISL_1005686                                                                                                                                                                                                                                                                                                                                                                                                                                                                                                                                                                                                                                                                                                                                                                                                                                                                                                                                                                                                                                                                                                                                                                   |           | Cerballiance Bligny                                                         | Cerba                                                                                                                | Benazra M; Collin T; Delaplace E; Gresset N; Haim-Boukobza S; Lecorche E; Lesenne A; Olivi M; Ricard B; Roquebert B; Trombert-Paolantoni S                                                                                                                                                                                                                                                                                                                                                                                                                                                                                                                                                                                                                                                                                                                                                                                                                                                                                     |
| EPI_ISL_1009667                                                                                                                                                                                                                                                                                                                                                                                                                                                                                                                                                                                                                                                                                                                                                                                                                                                                                                                                                                                                                                                                                                                                                                   |           | Cerballiance Bourg-la-Reine                                                 | Cerba                                                                                                                | Benazra M; Collin T; Delaplace E; Gresset N; Haim-Boukobza S; Lecorche E; Lesenne A; Olivi M; Ricard B; Roquebert B; Trombert-Paolantoni S                                                                                                                                                                                                                                                                                                                                                                                                                                                                                                                                                                                                                                                                                                                                                                                                                                                                                     |
| EPI_ISL_1001465, EPI_ISL_1001467                                                                                                                                                                                                                                                                                                                                                                                                                                                                                                                                                                                                                                                                                                                                                                                                                                                                                                                                                                                                                                                                                                                                                  |           | Cerballiance Carpentras CV                                                  | Cerba                                                                                                                | Haim-Boukobza S; Lecorche E; Meyer S; Roig JC; Roquebert B; Trombert-Paolantoni S                                                                                                                                                                                                                                                                                                                                                                                                                                                                                                                                                                                                                                                                                                                                                                                                                                                                                                                                              |
| EPI_ISL_1009618                                                                                                                                                                                                                                                                                                                                                                                                                                                                                                                                                                                                                                                                                                                                                                                                                                                                                                                                                                                                                                                                                                                                                                   |           | Cerballiance Carrières-le-Buisson                                           | Cerba                                                                                                                | Benazra M; Collin T; Delaplace E; Gresset N; Haim-Boukobza S; Lecorche E; Lesenne A; Olivi M; Ricard B; Roquebert B; Trombert-Paolantoni S                                                                                                                                                                                                                                                                                                                                                                                                                                                                                                                                                                                                                                                                                                                                                                                                                                                                                     |
| EPI_ISL_1003769                                                                                                                                                                                                                                                                                                                                                                                                                                                                                                                                                                                                                                                                                                                                                                                                                                                                                                                                                                                                                                                                                                                                                                   |           | Cerballiance Endoume                                                        | Cerba                                                                                                                | Haim-Boukobza S; Lecorche E; Meyer S; Roig JC; Roquebert B; Trombert-Paolantoni S                                                                                                                                                                                                                                                                                                                                                                                                                                                                                                                                                                                                                                                                                                                                                                                                                                                                                                                                              |
| EPI_ISL_1011752                                                                                                                                                                                                                                                                                                                                                                                                                                                                                                                                                                                                                                                                                                                                                                                                                                                                                                                                                                                                                                                                                                                                                                   |           | Cerballiance Grigny                                                         | Cerba                                                                                                                | Benazra M; Collin T; Delaplace E; Gresset N; Haim-Boukobza S; Lecorche E; Lesenne A; Olivi M; Ricard B; Roquebert B; Trombert-Paolantoni S                                                                                                                                                                                                                                                                                                                                                                                                                                                                                                                                                                                                                                                                                                                                                                                                                                                                                     |
| EPI_ISL_1001466                                                                                                                                                                                                                                                                                                                                                                                                                                                                                                                                                                                                                                                                                                                                                                                                                                                                                                                                                                                                                                                                                                                                                                   |           | Cerballiance Haifa                                                          | Cerba                                                                                                                | Haim-Boukobza S; Lecorche E; Meyer S; Roig JC; Roquebert B; Trombert-Paolantoni S                                                                                                                                                                                                                                                                                                                                                                                                                                                                                                                                                                                                                                                                                                                                                                                                                                                                                                                                              |
| EPI_ISL_1222710                                                                                                                                                                                                                                                                                                                                                                                                                                                                                                                                                                                                                                                                                                                                                                                                                                                                                                                                                                                                                                                                                                                                                                   |           | Cerballiance IDF site Vaureal                                               | Cerba Lab                                                                                                            | Benazra M; Haim-Boukobza S; Lecorche E; Mallek R; Olivi M; Roquebert B; Trombert-Paolantoni S                                                                                                                                                                                                                                                                                                                                                                                                                                                                                                                                                                                                                                                                                                                                                                                                                                                                                                                                  |
| EPI_ISL_1005687                                                                                                                                                                                                                                                                                                                                                                                                                                                                                                                                                                                                                                                                                                                                                                                                                                                                                                                                                                                                                                                                                                                                                                   |           | Cerballiance Lardy                                                          | Cerba                                                                                                                | Benazra M; Collin T; Delaplace E; Gresset N; Haim-Boukobza S; Lecorche E; Lesenne A; Olivi M; Ricard B; Roquebert B; Trombert-Paolantoni S                                                                                                                                                                                                                                                                                                                                                                                                                                                                                                                                                                                                                                                                                                                                                                                                                                                                                     |
| EPI_ISL_1001573                                                                                                                                                                                                                                                                                                                                                                                                                                                                                                                                                                                                                                                                                                                                                                                                                                                                                                                                                                                                                                                                                                                                                                   |           | Cerballiance Luynes                                                         | Cerba                                                                                                                | Haim-Boukobza S; Lecorche E; Meyer S; Roig JC; Roquebert B; Trombert-Paolantoni S                                                                                                                                                                                                                                                                                                                                                                                                                                                                                                                                                                                                                                                                                                                                                                                                                                                                                                                                              |
| EPI_ISL_1222720                                                                                                                                                                                                                                                                                                                                                                                                                                                                                                                                                                                                                                                                                                                                                                                                                                                                                                                                                                                                                                                                                                                                                                   |           | Cerballiance Maule                                                          | Cerba Lab                                                                                                            | Besrana M; Haim-Boukobza S; Lecorche E; Mallek R; Olivi M; Roquebert B; Trombert-Paolantoni S; Zimmer S                                                                                                                                                                                                                                                                                                                                                                                                                                                                                                                                                                                                                                                                                                                                                                                                                                                                                                                        |
| EPI_ISL_1005684                                                                                                                                                                                                                                                                                                                                                                                                                                                                                                                                                                                                                                                                                                                                                                                                                                                                                                                                                                                                                                                                                                                                                                   |           | Cerballiance Monthl3ry                                                      | Cerba                                                                                                                | Benazra M; Collin T; Delaplace E; Gresset N; Haim-Boukobza S; Lecorche E; Lesenne A; Olivi M; Ricard B; Roquebert B; Trombert-Paolantoni S                                                                                                                                                                                                                                                                                                                                                                                                                                                                                                                                                                                                                                                                                                                                                                                                                                                                                     |
| EPI_ISL_1005685                                                                                                                                                                                                                                                                                                                                                                                                                                                                                                                                                                                                                                                                                                                                                                                                                                                                                                                                                                                                                                                                                                                                                                   |           | Cerballiance Month3ry                                                       | Cerba                                                                                                                | Benazra M; Collin T; Delaplace E; Gresset N; Haim-Boukobza S; Lecorche E; Lesenne A; Olivi M; Ricard B; Roquebert B; Trombert-Paolantoni S                                                                                                                                                                                                                                                                                                                                                                                                                                                                                                                                                                                                                                                                                                                                                                                                                                                                                     |
| EPI_ISL_1004174                                                                                                                                                                                                                                                                                                                                                                                                                                                                                                                                                                                                                                                                                                                                                                                                                                                                                                                                                                                                                                                                                                                                                                   |           | Cerballiance Port de Bouc                                                   | Cerba                                                                                                                | Haim-Boukobza S; Lecorche E; Meyer S; Roig JC; Roquebert B; Trombert-Paolantoni S                                                                                                                                                                                                                                                                                                                                                                                                                                                                                                                                                                                                                                                                                                                                                                                                                                                                                                                                              |
| EPI_ISL_1001463                                                                                                                                                                                                                                                                                                                                                                                                                                                                                                                                                                                                                                                                                                                                                                                                                                                                                                                                                                                                                                                                                                                                                                   |           | Cerballiance Port de bouc                                                   | Cerba                                                                                                                | Haim-Boukobza S; Lecorche E; Meyer S; Roig JC; Roquebert B; Trombert-Paolantoni S                                                                                                                                                                                                                                                                                                                                                                                                                                                                                                                                                                                                                                                                                                                                                                                                                                                                                                                                              |
| EPI_ISL_1000968, EPI_ISL_1001462                                                                                                                                                                                                                                                                                                                                                                                                                                                                                                                                                                                                                                                                                                                                                                                                                                                                                                                                                                                                                                                                                                                                                  |           | Cerballiance Provence                                                       | Cerba                                                                                                                | Haim-Boukobza S; Lecorche E; Meyer S; Roig JC; Roquebert B; Trombert-Paolantoni S                                                                                                                                                                                                                                                                                                                                                                                                                                                                                                                                                                                                                                                                                                                                                                                                                                                                                                                                              |
| EPI_ISL_1002710                                                                                                                                                                                                                                                                                                                                                                                                                                                                                                                                                                                                                                                                                                                                                                                                                                                                                                                                                                                                                                                                                                                                                                   |           | Cerballiance Rouvi3re                                                       | Cerba                                                                                                                | Haim-Boukobza S; Lecorche E; Meyer S; Roig JC; Roquebert B; Trombert-Paolantoni S                                                                                                                                                                                                                                                                                                                                                                                                                                                                                                                                                                                                                                                                                                                                                                                                                                                                                                                                              |
| EPI_ISL_1060597                                                                                                                                                                                                                                                                                                                                                                                                                                                                                                                                                                                                                                                                                                                                                                                                                                                                                                                                                                                                                                                                                                                                                                   |           | Cerballiance Vaur3al                                                        | Cerba                                                                                                                | Benazra M; Haim-Boukobza S; Lecorche E; Olivi M; Roquebert B; Trombert-Paolantoni S                                                                                                                                                                                                                                                                                                                                                                                                                                                                                                                                                                                                                                                                                                                                                                                                                                                                                                                                            |

|                                                                                                                                                                                                                                                                                                                                                                                                                                                                                                                                                                                                                                                                                                                                                                                                                                                                                                                                                                                                                                                                                                                                                                                                                                                                                                                                                                                                                                                                                                                                                                                        |                                                                                                             |                                                                                                       |                                                                                                                                                                                                                                                                                                                                                                                                                                     |
|----------------------------------------------------------------------------------------------------------------------------------------------------------------------------------------------------------------------------------------------------------------------------------------------------------------------------------------------------------------------------------------------------------------------------------------------------------------------------------------------------------------------------------------------------------------------------------------------------------------------------------------------------------------------------------------------------------------------------------------------------------------------------------------------------------------------------------------------------------------------------------------------------------------------------------------------------------------------------------------------------------------------------------------------------------------------------------------------------------------------------------------------------------------------------------------------------------------------------------------------------------------------------------------------------------------------------------------------------------------------------------------------------------------------------------------------------------------------------------------------------------------------------------------------------------------------------------------|-------------------------------------------------------------------------------------------------------------|-------------------------------------------------------------------------------------------------------|-------------------------------------------------------------------------------------------------------------------------------------------------------------------------------------------------------------------------------------------------------------------------------------------------------------------------------------------------------------------------------------------------------------------------------------|
| EPI_ISL_1271520                                                                                                                                                                                                                                                                                                                                                                                                                                                                                                                                                                                                                                                                                                                                                                                                                                                                                                                                                                                                                                                                                                                                                                                                                                                                                                                                                                                                                                                                                                                                                                        | Cerballiance Vauréal                                                                                        | Cerba Lab                                                                                             | Benazra M; Costa JM; Haïm-Boukobza S; Lecorche E; Olivi M; Roquebert B; Trombert-Paolantoni S; Verdurme L; Zimmer S                                                                                                                                                                                                                                                                                                                 |
| EPI_ISL_1222721                                                                                                                                                                                                                                                                                                                                                                                                                                                                                                                                                                                                                                                                                                                                                                                                                                                                                                                                                                                                                                                                                                                                                                                                                                                                                                                                                                                                                                                                                                                                                                        | Cerballiance Viry Chatillon                                                                                 | Cerba LAB                                                                                             | Haïm-Boukobza S; Lecorche E; Lesenne A; Mallek R; Olivi M; Picard B; Roquebert B; Trombert-Paolantoni S; Zimmer S                                                                                                                                                                                                                                                                                                                   |
| EPI_ISL_1009674                                                                                                                                                                                                                                                                                                                                                                                                                                                                                                                                                                                                                                                                                                                                                                                                                                                                                                                                                                                                                                                                                                                                                                                                                                                                                                                                                                                                                                                                                                                                                                        | Cerballiance Wilson                                                                                         | Cerba                                                                                                 | Benazra M; Haïm-Boukobza S; Lecorche E; Merah K; Olivi M; Roquebert B; Trombert-Paolantoni S                                                                                                                                                                                                                                                                                                                                        |
| EPI_ISL_1164522 to 1164595                                                                                                                                                                                                                                                                                                                                                                                                                                                                                                                                                                                                                                                                                                                                                                                                                                                                                                                                                                                                                                                                                                                                                                                                                                                                                                                                                                                                                                                                                                                                                             | Charite Universitätsmedizin Berlin, Institut für Virologie/Labor Berlin                                     | Charite Universitätsmedizin Berlin, Institut für Virologie                                            | Barbara Mühlemann; Christian Drosten; Julia Schneider; Jörn Beheim-Schwarzbach; Talitha Veith; Terry Jones; Victor M Corman                                                                                                                                                                                                                                                                                                         |
| EPI_ISL_1239267 to 1239285, EPI_ISL_1239287 to 1239326, EPI_ISL_1239328 to 1239329                                                                                                                                                                                                                                                                                                                                                                                                                                                                                                                                                                                                                                                                                                                                                                                                                                                                                                                                                                                                                                                                                                                                                                                                                                                                                                                                                                                                                                                                                                     | Charlotte Maxeke Johannesburg Academic Hospital, National Health Laboratory Services, Gauteng, South Africa | National Institute for Communicable Diseases of the National Health Laboratory Service                | Amoako DG; Bhiman JN; Ismail A; Mahlangu B; Mohale T; Ntuli N; Scheepers C                                                                                                                                                                                                                                                                                                                                                          |
| EPI_ISL_1123268                                                                                                                                                                                                                                                                                                                                                                                                                                                                                                                                                                                                                                                                                                                                                                                                                                                                                                                                                                                                                                                                                                                                                                                                                                                                                                                                                                                                                                                                                                                                                                        | Chattogram Veterinary and Animal Sciences University                                                        | Central Biological Research Laboratory and Department of Biochemistry and Molecular Biology           | H. M. Abdullah Al Masud; Imam Hossen; Md. Arif Hossain; Md. Imranul Hoq; Md. Khondakar Raziur Rahman; Md. Omer Faruq; Mohammad Omar Faruque; Robiul Hasan Bhuiyan; Sajib Rudra; Shanta Paul                                                                                                                                                                                                                                         |
| EPI_ISL_1153448, EPI_ISL_1153530 to 1153538, EPI_ISL_1156362 to 1156370, EPI_ISL_1157100 to 1157104, EPI_ISL_1157106 to 1157116, EPI_ISL_1211988, EPI_ISL_1211990, EPI_ISL_1211992 to 1211993, EPI_ISL_1211996 to 1211997, EPI_ISL_1212000 to 1212005, EPI_ISL_1212007, EPI_ISL_1212009, EPI_ISL_1280590 to 1280600, EPI_ISL_1349415 to 1349427, EPI_ISL_1350215 to 1350220                                                                                                                                                                                                                                                                                                                                                                                                                                                                                                                                                                                                                                                                                                                                                                                                                                                                                                                                                                                                                                                                                                                                                                                                            | see above                                                                                                   | Chemische und Veterinäruntersuchungsamt Münsterland-Emscher-Lippe                                     | Robert Koch Institute                                                                                                                                                                                                                                                                                                                                                                                                               |
| EPI_ISL_1211989, EPI_ISL_1211991, EPI_ISL_1211994 to 1211995, EPI_ISL_1211998 to 1211999, EPI_ISL_1212006, EPI_ISL_1212008                                                                                                                                                                                                                                                                                                                                                                                                                                                                                                                                                                                                                                                                                                                                                                                                                                                                                                                                                                                                                                                                                                                                                                                                                                                                                                                                                                                                                                                             | see above                                                                                                   | Chemisches und Veterinäruntersuchungsamt Ostwestfalen-Lippe                                           | Robert Koch Institute                                                                                                                                                                                                                                                                                                                                                                                                               |
| EPI_ISL_1127138, EPI_ISL_1127144 to 1127145, EPI_ISL_1127164 to 1127183, EPI_ISL_1128018 to 1128056                                                                                                                                                                                                                                                                                                                                                                                                                                                                                                                                                                                                                                                                                                                                                                                                                                                                                                                                                                                                                                                                                                                                                                                                                                                                                                                                                                                                                                                                                    | Chiba Prefectural Institute of Public Health                                                                | Pathogen Genomics Center, National Institute of Infectious Diseases                                   | Kentaro Itokawa; Makoto Kuroda; Masanori Hashino; Rina Tanaka; Tsuyoshi Sekizuka                                                                                                                                                                                                                                                                                                                                                    |
| EPI_ISL_1360413 to 1360432, EPI_ISL_1360446 to 1360452                                                                                                                                                                                                                                                                                                                                                                                                                                                                                                                                                                                                                                                                                                                                                                                                                                                                                                                                                                                                                                                                                                                                                                                                                                                                                                                                                                                                                                                                                                                                 | Child Health Research Foundation                                                                            | Child Health Research Foundation                                                                      | CHRF Bangladesh Genomics Team                                                                                                                                                                                                                                                                                                                                                                                                       |
| EPI_ISL_1314300                                                                                                                                                                                                                                                                                                                                                                                                                                                                                                                                                                                                                                                                                                                                                                                                                                                                                                                                                                                                                                                                                                                                                                                                                                                                                                                                                                                                                                                                                                                                                                        | Children's Hospitals and Clinics of Minnesota                                                               | Minnesota Department of Health, Public Health Laboratory                                              | Alexandra Lorentz; Jacob Garfin; Matt Plumb; and Xiong Wang                                                                                                                                                                                                                                                                                                                                                                         |
| EPI_ISL_1239330 to 1239358, EPI_ISL_1239360                                                                                                                                                                                                                                                                                                                                                                                                                                                                                                                                                                                                                                                                                                                                                                                                                                                                                                                                                                                                                                                                                                                                                                                                                                                                                                                                                                                                                                                                                                                                            | Chris Hani Baragwanath Hospital, National Health Laboratory Services, Gauteng, South Africa                 | National Institute for Communicable Diseases of the National Health Laboratory Service                | Amoako DG; Bhiman JN; Ismail A; Mahlangu B; Mohale T; Ntuli N; Scheepers C                                                                                                                                                                                                                                                                                                                                                          |
| EPI_ISL_1346485                                                                                                                                                                                                                                                                                                                                                                                                                                                                                                                                                                                                                                                                                                                                                                                                                                                                                                                                                                                                                                                                                                                                                                                                                                                                                                                                                                                                                                                                                                                                                                        | Cianjur Public Health                                                                                       | West Java Health Laboratory; School of Life Sciences and Technology, Institut Teknologi Bandung       | Azzania Fibriani; Cut Nur Cinthia Alamanda; Ema Rahmawati; Isak Solihin; Karimatu Khoirunnisa; Miftahul Faridi; Rifky Waluyajati Rachman; Rini Robiani; Ryan Bayusantika Ristandi                                                                                                                                                                                                                                                   |
| EPI_ISL_1192363                                                                                                                                                                                                                                                                                                                                                                                                                                                                                                                                                                                                                                                                                                                                                                                                                                                                                                                                                                                                                                                                                                                                                                                                                                                                                                                                                                                                                                                                                                                                                                        | City of Hope Comprehensive Cancer Center                                                                    | Los Angeles County PHL                                                                                | P. Hemarajata et al.                                                                                                                                                                                                                                                                                                                                                                                                                |
| EPI_ISL_1015493 to 1015514, EPI_ISL_1262586 to 1262609                                                                                                                                                                                                                                                                                                                                                                                                                                                                                                                                                                                                                                                                                                                                                                                                                                                                                                                                                                                                                                                                                                                                                                                                                                                                                                                                                                                                                                                                                                                                 | City of Milwaukee Health Department Laboratory                                                              | City of Milwaukee Health Department Laboratory                                                        | Sanjib Bhattacharyya                                                                                                                                                                                                                                                                                                                                                                                                                |
| EPI_ISL_1278373 to 1278942                                                                                                                                                                                                                                                                                                                                                                                                                                                                                                                                                                                                                                                                                                                                                                                                                                                                                                                                                                                                                                                                                                                                                                                                                                                                                                                                                                                                                                                                                                                                                             | Clalit Health Services Laboratories, Israel                                                                 | Stern Lab                                                                                             | Stern Lab                                                                                                                                                                                                                                                                                                                                                                                                                           |
| EPI_ISL_1363787                                                                                                                                                                                                                                                                                                                                                                                                                                                                                                                                                                                                                                                                                                                                                                                                                                                                                                                                                                                                                                                                                                                                                                                                                                                                                                                                                                                                                                                                                                                                                                        | Clin & Gen Lab                                                                                              | Microbiología Molecular, Instituto SELADIS, Universidad Mayor de San Andrés                           | Aneth Vasquez Michel; Oscar M. Rollano-Peñaloza                                                                                                                                                                                                                                                                                                                                                                                     |
| EPI_ISL_1250842, EPI_ISL_1278275 to 1278276                                                                                                                                                                                                                                                                                                                                                                                                                                                                                                                                                                                                                                                                                                                                                                                                                                                                                                                                                                                                                                                                                                                                                                                                                                                                                                                                                                                                                                                                                                                                            | Clin & Gen Lab                                                                                              | Molecular Genetics Laboratory, Instituto de Investigaciones Químicas, Universidad Mayor de San Andrés | Aneth Vasquez Michel; Oscar M. Rollano-Peñaloza                                                                                                                                                                                                                                                                                                                                                                                     |
| EPI_ISL_1303368                                                                                                                                                                                                                                                                                                                                                                                                                                                                                                                                                                                                                                                                                                                                                                                                                                                                                                                                                                                                                                                                                                                                                                                                                                                                                                                                                                                                                                                                                                                                                                        | Clinica de la Costa                                                                                         | Instituto Nacional de Salud- Dirección de Investigación en Salud Pública                              | Carlos Franco-Muñoz; Carmen Osorio; Diana Malo; Diego A. Álvarez-Díaz; Diego Andrés Prada; Gerardo Santamaría; Hector Alejandro Ruiz-Moreno; Jhonnatan Reales-González; Juan Camilo Martínez; Julian Naizaque; Katherine Laiton-Donato; Lisseth Pardo; Magdalena Wiesner; Marcela Mercado-Reyes; María T. Herrera-Sepúlveda; Marta Lopez Blanco; Martha Lucia Ospina Martínez; Sergio Gomez; Sheryll Corchuelo; Ángela Alarcon Cruz |
| EPI_ISL_1017711                                                                                                                                                                                                                                                                                                                                                                                                                                                                                                                                                                                                                                                                                                                                                                                                                                                                                                                                                                                                                                                                                                                                                                                                                                                                                                                                                                                                                                                                                                                                                                        | Clinica del norte                                                                                           | Instituto Nacional de Salud- Dirección de Investigación en Salud Pública                              | Carlos Franco-Muñoz; Diego A. Álvarez-Díaz; Diego Andrés Prada; Gerardo Santamaría; Hector Alejandro Ruiz-Moreno; Jhonnatan Reales-González; Julian Naizaque; Katherine Laiton-Donato; Magdalena Wiesner; Marcela Mercado-Reyes; María T. Herrera-Sepúlveda; Martha Lucia Ospina Martínez; Sheryll Corchuelo                                                                                                                        |
| EPI_ISL_1240071 to 1240076, EPI_ISL_1300645, EPI_ISL_1300647 to 1300651, EPI_ISL_1300653, EPI_ISL_1300656 to 1300659                                                                                                                                                                                                                                                                                                                                                                                                                                                                                                                                                                                                                                                                                                                                                                                                                                                                                                                                                                                                                                                                                                                                                                                                                                                                                                                                                                                                                                                                   | Clinical Center, University of Sarajevo; Unit for Clinical Microbiology                                     | Clinical Center, University of Sarajevo; Unit for Clinical Microbiology                               | Amela Dedei-Ljubovi; Edina Zahirovi; Golubinka Boshevskaja; Irma Salimovi-Beši; Maja Kuzmanovska; Sandra Vegar-Zubovi; Sebjia Izetbegovi; Suzana Arapi                                                                                                                                                                                                                                                                              |
| EPI_ISL_1233898                                                                                                                                                                                                                                                                                                                                                                                                                                                                                                                                                                                                                                                                                                                                                                                                                                                                                                                                                                                                                                                                                                                                                                                                                                                                                                                                                                                                                                                                                                                                                                        | Clinical Division, Fred Hutchinson Cancer Research Center                                                   | Clinical Division, Fred Hutchinson Cancer Research Center                                             | A.K.; C.-W.; D.E.; Geraghty; Greninger, A.; Ishitani, A.; Jerome, K.; L.P.; Li, R.; M.G.; Mills; Nelson; Pyo; Randhawa; Roychoudhury, P.; W.C.; Wang, R.; Zhao                                                                                                                                                                                                                                                                      |
| EPI_ISL_1005699                                                                                                                                                                                                                                                                                                                                                                                                                                                                                                                                                                                                                                                                                                                                                                                                                                                                                                                                                                                                                                                                                                                                                                                                                                                                                                                                                                                                                                                                                                                                                                        | Clinical Laboratory, Vetsuisse Faculty, University of Zurich                                                | Department of Biosystems Science and Engineering, ETH Zurich                                          | Chaoran Chen; Christian Beisel; David Dreifuss; Elodie Burcklen; Ina Nissen; Ivan Topolsky; Julia Klaus; Katharina Jahn; Lara Fuhrmann; Marina Luisa Meil; Natascha Santacrocce; Niko Beerewinkel; Philipp Jablonski; Rebecca Denes; Regina Hofmann-Lehmann; Sarah Nadeau; Tanja Stadler                                                                                                                                            |
| EPI_ISL_1248934, EPI_ISL_1249610, EPI_ISL_1250222, EPI_ISL_1258423 to 1258424, EPI_ISL_1258463 to 1258465, EPI_ISL_1263319 to 1263323                                                                                                                                                                                                                                                                                                                                                                                                                                                                                                                                                                                                                                                                                                                                                                                                                                                                                                                                                                                                                                                                                                                                                                                                                                                                                                                                                                                                                                                  | Clinical Microbiology Lab RSPTN Universitas Hasanuddin                                                      | Clinical Microbiology Lab RSPTN Universitas Hasanuddin                                                | Gita Vita Soraya; Handayani; Handayani Halik; Muhammad Nasrum Massi; Muhammad Yusuf Usman; Rizalinda Sjahri; Rufika Shari; Triwibawa                                                                                                                                                                                                                                                                                                |
| EPI_ISL_1203843                                                                                                                                                                                                                                                                                                                                                                                                                                                                                                                                                                                                                                                                                                                                                                                                                                                                                                                                                                                                                                                                                                                                                                                                                                                                                                                                                                                                                                                                                                                                                                        | Clinical Microbiology Laboratory                                                                            | James Molecular Laboratory                                                                            | Amy Leber; Dan Jones; Huanyu Wang; Pam Snyder; Zachary Rudy                                                                                                                                                                                                                                                                                                                                                                         |
| EPI_ISL_1382117                                                                                                                                                                                                                                                                                                                                                                                                                                                                                                                                                                                                                                                                                                                                                                                                                                                                                                                                                                                                                                                                                                                                                                                                                                                                                                                                                                                                                                                                                                                                                                        | Clinical Microbiology Laboratory Basurto University Hospital                                                | BioCruces Bizkaia                                                                                     | Ana Belén de la Hoz Rastrollo; Estibaliz Ugalde Zarraga; Jose Luis Díaz de Tuesta Del Arco; Mikel Gallego Rodrigo; Mikel Urrutikoetxea-Gutierrez; M <sup>a</sup> Carmen Nieto Toboso                                                                                                                                                                                                                                                |
| EPI_ISL_1122422 to 1122424                                                                                                                                                                                                                                                                                                                                                                                                                                                                                                                                                                                                                                                                                                                                                                                                                                                                                                                                                                                                                                                                                                                                                                                                                                                                                                                                                                                                                                                                                                                                                             | Clinical Microbiology Laboratory, Faculty of Medicine, Universitas Indonesia                                | Clinical Microbiology Laboratory, Faculty of Medicine, Universitas Indonesia                          | Andi Yasmon; Anis Karuniawati; Augustine Natasha; Erni J. Nelwan; Fera Ibrahim; Fithriyah; Pratiwi Sudarmono; Yulia Rosa Saharman                                                                                                                                                                                                                                                                                                   |
| EPI_ISL_1196774, EPI_ISL_1196792 to 1196793, EPI_ISL_1196795, EPI_ISL_1196798                                                                                                                                                                                                                                                                                                                                                                                                                                                                                                                                                                                                                                                                                                                                                                                                                                                                                                                                                                                                                                                                                                                                                                                                                                                                                                                                                                                                                                                                                                          | Clinical Microbiology Laboratory, Faculty of Medicine, Universitas Indonesia                                | Faculty of Medicine, Universitas Indonesia                                                            | Andi Yasmon; Anis Karuniawati; Ari Fahrial Syam; Badriul Hegar; Beti Ernawati dewi; Budi Wiwoko; Dwiana Ocviyanti; Fadilah; Fera Ibrahim; Khaerunnisa Anbar Istiadi; Linda Erlina; Pratiwi Sudarmono; Rafika Indah Paramita                                                                                                                                                                                                         |
| EPI_ISL_1081843 to 1081921, EPI_ISL_1081923, EPI_ISL_1081925, EPI_ISL_1081927, EPI_ISL_1081929, EPI_ISL_1081931, EPI_ISL_1081933, EPI_ISL_1081936, EPI_ISL_1081938, EPI_ISL_1081940, EPI_ISL_1081942, EPI_ISL_1081944, EPI_ISL_1128779, EPI_ISL_1128782, EPI_ISL_1128784, EPI_ISL_1128786, EPI_ISL_1128789, EPI_ISL_1128791, EPI_ISL_1128794, EPI_ISL_1128796, EPI_ISL_1128798, EPI_ISL_1128801, EPI_ISL_1128803, EPI_ISL_1128805, EPI_ISL_1128808, EPI_ISL_1128810, EPI_ISL_1128812, EPI_ISL_1128815, EPI_ISL_1128817, EPI_ISL_1128819, EPI_ISL_1128822, EPI_ISL_1128824, EPI_ISL_1128826, EPI_ISL_1128829, EPI_ISL_1128831, EPI_ISL_1128833, EPI_ISL_1128835, EPI_ISL_1128837, EPI_ISL_1128839, EPI_ISL_1128842, EPI_ISL_1128844, EPI_ISL_1128846, EPI_ISL_1128849, EPI_ISL_1128851, EPI_ISL_1128853, EPI_ISL_1128855, EPI_ISL_1128858, EPI_ISL_1128860, EPI_ISL_1128862, EPI_ISL_1128866, EPI_ISL_1128868, EPI_ISL_1128870, EPI_ISL_1128873, EPI_ISL_1128875, EPI_ISL_1128878, EPI_ISL_1128880, EPI_ISL_1128882, EPI_ISL_1128884, EPI_ISL_1128887, EPI_ISL_1128889, EPI_ISL_1128892, EPI_ISL_1128894, EPI_ISL_1128896, EPI_ISL_1128901, EPI_ISL_1128903, EPI_ISL_1128906, EPI_ISL_1128908 to 1128909, EPI_ISL_1128911, EPI_ISL_1128913 to 1128914, EPI_ISL_1128916, EPI_ISL_1128918 to 1128919, EPI_ISL_1128921, EPI_ISL_1128923, EPI_ISL_1128925, EPI_ISL_1128928, EPI_ISL_1128930, EPI_ISL_1128932, EPI_ISL_1128935, EPI_ISL_1128937, EPI_ISL_1128939, EPI_ISL_1128941, EPI_ISL_1128944, EPI_ISL_1128946, EPI_ISL_1176401, EPI_ISL_1239146 to 1239215, EPI_ISL_1315428 to 1315474 | see above                                                                                                   | Clinical Microbiology, Infection Prevention and Control                                               |                                                                                                                                                                                                                                                                                                                                                                                                                                     |
| see above                                                                                                                                                                                                                                                                                                                                                                                                                                                                                                                                                                                                                                                                                                                                                                                                                                                                                                                                                                                                                                                                                                                                                                                                                                                                                                                                                                                                                                                                                                                                                                              | Clinical Microbiology, Nationwide Children's Hospital                                                       | Section for Molecular Diagnostics                                                                     | Björn Hallström; Jonas Björkman                                                                                                                                                                                                                                                                                                                                                                                                     |
| EPI_ISL_1164183                                                                                                                                                                                                                                                                                                                                                                                                                                                                                                                                                                                                                                                                                                                                                                                                                                                                                                                                                                                                                                                                                                                                                                                                                                                                                                                                                                                                                                                                                                                                                                        | Clinical Microbiology, Nationwide Children's Hospital                                                       | James Molecular Laboratory                                                                            | Amy Leber; Dan Jones; Huanyu Wang; Pam Snyder; Zachary Rudy                                                                                                                                                                                                                                                                                                                                                                         |
| EPI_ISL_1067985 to 1068024, EPI_ISL_1163738 to 1163793,                                                                                                                                                                                                                                                                                                                                                                                                                                                                                                                                                                                                                                                                                                                                                                                                                                                                                                                                                                                                                                                                                                                                                                                                                                                                                                                                                                                                                                                                                                                                | Clinical Molecular Microbiology Laboratory, UNC Hospital                                                    | Dirk Dittmer                                                                                          | Andrea McDaniel-Harper; Angelica Juarez; Ashwini Roy-Chaudhury; Billy Fisher; Blossom Damania; Brent A. Eason; Cameroon Grant; Carolina Caro-Vegas; Cecilia Thompson; Danielle Chappell; Dirk Dittmer; Evelyn Hoffman; Jason Smedberg; Jason Wong; Justin T. Landis; Linda Pluta; Melissa B.                                                                                                                                        |

|                                                                                                                                                                                                                                                                                                                                                                                                                                                                                                                                                                                                                                                                                                                                                                                                                                                                                                                                                                                                                                                                                                                                                                                                                                                                                                                                                                                                                                                                                                                                                                                |                                                                                                                                                                                                                   |                                                                                                                                                                                                           |                                                                                                                                                                                                                                                                                                                                                                                                                                                                                                                                                 |
|--------------------------------------------------------------------------------------------------------------------------------------------------------------------------------------------------------------------------------------------------------------------------------------------------------------------------------------------------------------------------------------------------------------------------------------------------------------------------------------------------------------------------------------------------------------------------------------------------------------------------------------------------------------------------------------------------------------------------------------------------------------------------------------------------------------------------------------------------------------------------------------------------------------------------------------------------------------------------------------------------------------------------------------------------------------------------------------------------------------------------------------------------------------------------------------------------------------------------------------------------------------------------------------------------------------------------------------------------------------------------------------------------------------------------------------------------------------------------------------------------------------------------------------------------------------------------------|-------------------------------------------------------------------------------------------------------------------------------------------------------------------------------------------------------------------|-----------------------------------------------------------------------------------------------------------------------------------------------------------------------------------------------------------|-------------------------------------------------------------------------------------------------------------------------------------------------------------------------------------------------------------------------------------------------------------------------------------------------------------------------------------------------------------------------------------------------------------------------------------------------------------------------------------------------------------------------------------------------|
| EPI_ISL_1168697, EPI_ISL_1334518 to 1334568                                                                                                                                                                                                                                                                                                                                                                                                                                                                                                                                                                                                                                                                                                                                                                                                                                                                                                                                                                                                                                                                                                                                                                                                                                                                                                                                                                                                                                                                                                                                    |                                                                                                                                                                                                                   |                                                                                                                                                                                                           | Miller; Patricio Cano; Razia Moorad; Ryan McNamara; Shawn Hawken                                                                                                                                                                                                                                                                                                                                                                                                                                                                                |
| EPI_ISL_1137506 to 1137507, EPI_ISL_1137509 to 1137511, EPI_ISL_1137513 to 1137517, EPI_ISL_1137519 to 1137520, EPI_ISL_1137522 to 1137523, EPI_ISL_1137526, EPI_ISL_1137529, EPI_ISL_1137532, EPI_ISL_1137534, EPI_ISL_1137537 to 1137540, EPI_ISL_1137546 to 1137547, EPI_ISL_1137550 to 1137551, EPI_ISL_1137553 to 1137554, EPI_ISL_1137556 to 1137562, EPI_ISL_1137565 to 1137568, EPI_ISL_1137573 to 1137574, EPI_ISL_1137582, EPI_ISL_1137587 to 1137590, EPI_ISL_1137592 to 1137594, EPI_ISL_1137596, EPI_ISL_1137598, EPI_ISL_1163846 to 1163848, EPI_ISL_1163850, EPI_ISL_1163853 to 1163880, EPI_ISL_1163882 to 1163888, EPI_ISL_1164179 to 1164182, EPI_ISL_1192336 to 1192362, EPI_ISL_1240795 to 1240937, EPI_ISL_1321646 to 1321733, EPI_ISL_1373462 to 1373464, EPI_ISL_1373466 to 1373470, EPI_ISL_1373472 to 1373481, EPI_ISL_1373483 to 1373484, EPI_ISL_1373486, EPI_ISL_1373488, EPI_ISL_1373490 to 1373498, EPI_ISL_1373501 to 1373507, EPI_ISL_1373509 to 1373511, EPI_ISL_1380050 to 1380054, EPI_ISL_1380056 to 1380059, EPI_ISL_1382116                                                                                                                                                                                                                                                                                                                                                                                                                                                                                                              | Clinical Molecular Microbiology Laboratory, UNC Hospitals<br>Clinical Specimen Feeces<br>Clinical microbiology lab, RSPTN Universitas Hasanuddin<br>Clinical virology Laboratory, Children's Hospital Los Angeles | Jeremy Wang<br>Enteric Viruses Group, ICMR-National Institute of Virology<br>Clinical microbiology lab, RSPTN Universitas Hasanuddin<br>Center for Personalized Medicine, Children's Hospital Los Angeles | Alexander Rubinsteyn; Colleen Rice; Corbin Jones; Jason Smedberg; Jeremy Wang; Melissa Miller; Robert Hagan; Shawn Hawken<br>Dr. Mallika Lavania; Dr. Varsha Potdar<br>Gita Vita Soraya; Handayani; Muhammad Nasrum Massi; Muhammad Yusuf Usman; Rizalinda Sjahri; Rufika Shari; Triwibawa<br>Alex Ryutov; Alexander R. Judkins; Ananthanarayanan Govindarajan; David Ruble; Dejerianne Ostrow; Dennis Maglinte; Jaclyn A. Biegel; Jennifer Dien Bard; Jennifer Han; Lishuang Shen; Moiz Bootwalla; Timothy J. Triche; Utsav Pandey; Xiaowu Gai |
| see above                                                                                                                                                                                                                                                                                                                                                                                                                                                                                                                                                                                                                                                                                                                                                                                                                                                                                                                                                                                                                                                                                                                                                                                                                                                                                                                                                                                                                                                                                                                                                                      | Clinique N.D de Grâce Gosselies                                                                                                                                                                                   | GIGA Medical Genomics                                                                                                                                                                                     | Bouchra Boujemla; Cécile Meex; Keith Durkin; Maria Artesi; Marie-Pierre Hayette; Nathalie Renotte; Pierrette Melin; Raphaël Boreux; Sébastien Bontems; Vincent Bours                                                                                                                                                                                                                                                                                                                                                                            |
| EPI_ISL_1058533                                                                                                                                                                                                                                                                                                                                                                                                                                                                                                                                                                                                                                                                                                                                                                                                                                                                                                                                                                                                                                                                                                                                                                                                                                                                                                                                                                                                                                                                                                                                                                | Clinique St Joseph Saint Vith                                                                                                                                                                                     | GIGA Medical Genomics                                                                                                                                                                                     | Bouchra Boujemla; Cécile Meex; Keith Durkin; Maria Artesi; Marie-Pierre Hayette; Nathalie Renotte; Pierrette Melin; Raphaël Boreux; Sébastien Bontems; Vincent Bours                                                                                                                                                                                                                                                                                                                                                                            |
| EPI_ISL_1171513 to 1171526, EPI_ISL_1171567                                                                                                                                                                                                                                                                                                                                                                                                                                                                                                                                                                                                                                                                                                                                                                                                                                                                                                                                                                                                                                                                                                                                                                                                                                                                                                                                                                                                                                                                                                                                    | Cliniques Cud-Luxembourg                                                                                                                                                                                          | GIGA Medical Genomics                                                                                                                                                                                     | Bouchra Boujemla; Cécile Meex; Keith Durkin; Maria Artesi; Marie-Pierre Hayette; Nathalie Renotte; Pierrette Melin; Raphaël Boreux; Sébastien Bontems; Vincent Bours                                                                                                                                                                                                                                                                                                                                                                            |
| EPI_ISL_1113066 to 1113074, EPI_ISL_1123370                                                                                                                                                                                                                                                                                                                                                                                                                                                                                                                                                                                                                                                                                                                                                                                                                                                                                                                                                                                                                                                                                                                                                                                                                                                                                                                                                                                                                                                                                                                                    | Cliniques Sud-Luxembourg                                                                                                                                                                                          | GIGA Medical Genomics                                                                                                                                                                                     | Bouchra Boujemla; Cécile Meex; Keith Durkin; Maria Artesi; Marie-Pierre Hayette; Nathalie Renotte; Pierrette Melin; Raphaël Boreux; Sébastien Bontems; Vincent Bours                                                                                                                                                                                                                                                                                                                                                                            |
| EPI_ISL_1029957 to 1029973, EPI_ISL_1372181 to 1372187                                                                                                                                                                                                                                                                                                                                                                                                                                                                                                                                                                                                                                                                                                                                                                                                                                                                                                                                                                                                                                                                                                                                                                                                                                                                                                                                                                                                                                                                                                                         | Cliniques universitaires Saint-Luc                                                                                                                                                                                | UCLouvain/REC/MBLG                                                                                                                                                                                        | Benoit Kabamba Mukadi; Eleonore Ngyuvula Mantu; Jean Ruelle; Lysa Pinsmaye                                                                                                                                                                                                                                                                                                                                                                                                                                                                      |
| EPI_ISL_1179759, EPI_ISL_1179761 to 1179762, EPI_ISL_1179764, EPI_ISL_1179766, EPI_ISL_1179768, EPI_ISL_1179770, EPI_ISL_1179772 to 1179773, EPI_ISL_1179775, EPI_ISL_1179777 to 1179778, EPI_ISL_1179780, EPI_ISL_1179782, EPI_ISL_1179784 to 1179785, EPI_ISL_1179788 to 1179789, EPI_ISL_1179791, EPI_ISL_1179793, EPI_ISL_1179795, EPI_ISL_1179797 to 1179798, EPI_ISL_1179800, EPI_ISL_1179802, EPI_ISL_1179804, EPI_ISL_1179806, EPI_ISL_1179808 to 1179809, EPI_ISL_1179811, EPI_ISL_1179813, EPI_ISL_1179815, EPI_ISL_1179817                                                                                                                                                                                                                                                                                                                                                                                                                                                                                                                                                                                                                                                                                                                                                                                                                                                                                                                                                                                                                                          | Clinica Universidad de Navarra. Servicio de Enfermedades Infecciosas y Microbiología clínica                                                                                                                      | SeqCOVID-SPAIN consortium/IBV(CSIC)                                                                                                                                                                       | Jose Luis del Pozo and SeqCOVID-SPAIN consortium; Mirian Fernández-Alonso                                                                                                                                                                                                                                                                                                                                                                                                                                                                       |
| EPI_ISL_1040819 to 1040821                                                                                                                                                                                                                                                                                                                                                                                                                                                                                                                                                                                                                                                                                                                                                                                                                                                                                                                                                                                                                                                                                                                                                                                                                                                                                                                                                                                                                                                                                                                                                     | CoVid WC Cape Town Metro                                                                                                                                                                                          | NHLS/UCT                                                                                                                                                                                                  | Arash Iranzadeh; Bruna Galvao; Carolyn Williamson; Deelan Doolabh; Diana Hardie; Innocent Muda; Kruger Marais; Lynn Tyers; Marvin Hsiao; Stephen Korsman                                                                                                                                                                                                                                                                                                                                                                                        |
| EPI_ISL_1015361                                                                                                                                                                                                                                                                                                                                                                                                                                                                                                                                                                                                                                                                                                                                                                                                                                                                                                                                                                                                                                                                                                                                                                                                                                                                                                                                                                                                                                                                                                                                                                | Coast Diagnostics                                                                                                                                                                                                 | Synergy Laboratories                                                                                                                                                                                      | Megan Cornwell                                                                                                                                                                                                                                                                                                                                                                                                                                                                                                                                  |
| EPI_ISL_1191727                                                                                                                                                                                                                                                                                                                                                                                                                                                                                                                                                                                                                                                                                                                                                                                                                                                                                                                                                                                                                                                                                                                                                                                                                                                                                                                                                                                                                                                                                                                                                                | Coast Diagnostics                                                                                                                                                                                                 | Synergy Laboratories, Inc.                                                                                                                                                                                | Tina Louise Sutton-Young                                                                                                                                                                                                                                                                                                                                                                                                                                                                                                                        |
| EPI_ISL_1169609 to 1169817, EPI_ISL_1233975 to 1234044, EPI_ISL_1234046 to 1234381, EPI_ISL_1300053 to 1300174                                                                                                                                                                                                                                                                                                                                                                                                                                                                                                                                                                                                                                                                                                                                                                                                                                                                                                                                                                                                                                                                                                                                                                                                                                                                                                                                                                                                                                                                 | Colorado Department of Public Health and Environment                                                                                                                                                              | Colorado Department of Public Health and Environment                                                                                                                                                      | Diana Ir; Emily A. Travanty; Laura Bankers; Molly C. Hetherington-Rauth; Sarah Elizabeth Totten; Shannon Ely; Shannon R. Matzinger                                                                                                                                                                                                                                                                                                                                                                                                              |
| EPI_ISL_1038842 to 1038923, EPI_ISL_1097446 to 1097643                                                                                                                                                                                                                                                                                                                                                                                                                                                                                                                                                                                                                                                                                                                                                                                                                                                                                                                                                                                                                                                                                                                                                                                                                                                                                                                                                                                                                                                                                                                         | Colorado Department of Public Health and Environment                                                                                                                                                              | Colorado Department of Public Health and Environment                                                                                                                                                      | Diana Ir; Emily A. Travanty; Laura Bankers; Molly C. Hetherington-Rauth; Sarah Elizabeth Totten; Shannon Ely; Shannon R. Matzinger                                                                                                                                                                                                                                                                                                                                                                                                              |
| EPI_ISL_1335896                                                                                                                                                                                                                                                                                                                                                                                                                                                                                                                                                                                                                                                                                                                                                                                                                                                                                                                                                                                                                                                                                                                                                                                                                                                                                                                                                                                                                                                                                                                                                                | Columbia Asia Hospital Medan                                                                                                                                                                                      | Faculty of Medicine, Universitas Sumatera Utara; Institute of Tropical Disease, Universitas Airlangga                                                                                                     | Aldise M Nastri; Franciscus Ginting; Inke N D Lubis; Irbah R Nainggolang; Jezy R Dewantari; Kazufumi Shimizu; Krisnoadi Rahardjo; Maria I Lusida; Meliani; Mirzan Hasibuan; Muhammad Ichwan; R Andika D Cahyadi; R Lia Kusumawati; Ramadhan Bestari; Rima R Prasetya; Soetjipto; Yasuko Mori                                                                                                                                                                                                                                                    |
| EPI_ISL_1015653 to 1015712, EPI_ISL_1016111 to 1016117, EPI_ISL_1016260 to 1016261, EPI_ISL_1016267 to 1016268, EPI_ISL_1016270, EPI_ISL_1016281 to 1016284, EPI_ISL_1016287 to 1016297, EPI_ISL_1016323 to 1016326, EPI_ISL_1016328 to 1016331, EPI_ISL_1020487 to 1020550, EPI_ISL_1226456, EPI_ISL_1226461, EPI_ISL_1226463, EPI_ISL_1226466, EPI_ISL_1226502 to 1226503, EPI_ISL_1226512, EPI_ISL_1226518, EPI_ISL_1226596, EPI_ISL_1226599, EPI_ISL_1226637 to 1226638, EPI_ISL_1226671, EPI_ISL_1226674, EPI_ISL_1226728, EPI_ISL_1226743, EPI_ISL_1226759, EPI_ISL_1226765, EPI_ISL_1226800 to 1226807, EPI_ISL_1226823 to 1226824, EPI_ISL_1226874 to 1226875, EPI_ISL_1226901 to 1226906, EPI_ISL_1226926, EPI_ISL_1226930, EPI_ISL_1226988 to 1226997, EPI_ISL_1227002 to 1227004, EPI_ISL_1227068 to 1227069, EPI_ISL_1227088 to 1227089, EPI_ISL_1227096, EPI_ISL_1227163, EPI_ISL_1227166, EPI_ISL_1227222, EPI_ISL_1227237, EPI_ISL_1227283, EPI_ISL_1227289 to 1227290, EPI_ISL_1227293, EPI_ISL_1227295 to 1227296, EPI_ISL_1227304 to 1227305, EPI_ISL_1227314, EPI_ISL_1227320, EPI_ISL_1227326, EPI_ISL_1227357, EPI_ISL_1227360 to 1227363, EPI_ISL_1227401 to 1227402, EPI_ISL_1227406 to 1227409, EPI_ISL_1227416, EPI_ISL_1227435, EPI_ISL_1227536, EPI_ISL_1227675, EPI_ISL_1227895 to 1227902, EPI_ISL_1227904 to 1227908, EPI_ISL_1227910, EPI_ISL_1227913 to 1227919, EPI_ISL_1227921 to 1227931, EPI_ISL_1227934, EPI_ISL_1228158, EPI_ISL_1228253, EPI_ISL_1228509, EPI_ISL_1228514, EPI_ISL_1228529, EPI_ISL_1228543 to 1228544, EPI_ISL_1228576 | Columbia University Irving Medical Center                                                                                                                                                                         | Wadsworth Center, New York State Department of Health                                                                                                                                                     | Alexis Russel; Daryl M. Lamson; Erasmus Schneider; Erica Lasek-Nesselquist; John Kelly; Jonathan Plitnick; Kirsten St. George; Matthew Shudt; Melissa A Leisner; Navjot Singh                                                                                                                                                                                                                                                                                                                                                                   |
| EPI_ISL_1169483 to 1169486, EPI_ISL_1169493 to 1169497, EPI_ISL_1169499, EPI_ISL_1169502, EPI_ISL_1169504 to 1169544, EPI_ISL_1169549                                                                                                                                                                                                                                                                                                                                                                                                                                                                                                                                                                                                                                                                                                                                                                                                                                                                                                                                                                                                                                                                                                                                                                                                                                                                                                                                                                                                                                          | Commonwealth Healthcare Center                                                                                                                                                                                    | Genomics and Discovery, Respiratory Viruses Branch, Division of Viral Diseases, Centers for Disease Control and Prevention                                                                                | Anna Montmayeur; Anna Uehara; Ben L. Rambo-Martin; Clinton R. Paden; Dhvani Batra; Haibin Wang; Jasmine Padilla; Jing Zhang; Justin Lee; Krista Queen; Lori Rowe; Mark Burroughs; Mili Sheth; Peter W. Cook; Rachel Marine; Sarah Nobles; Suxiang Tong; Yan Li; Ying Tao                                                                                                                                                                                                                                                                        |
| EPI_ISL_1233891                                                                                                                                                                                                                                                                                                                                                                                                                                                                                                                                                                                                                                                                                                                                                                                                                                                                                                                                                                                                                                                                                                                                                                                                                                                                                                                                                                                                                                                                                                                                                                | Communicable Disease Laboratory, Public Health Directorate                                                                                                                                                        | Communicable Disease Laboratory, Public Health Directorate                                                                                                                                                | AlAbbas, Z.; AlHujairi, Z.; Altaif, Z.; Alwasti, H.; Marhoon, A.                                                                                                                                                                                                                                                                                                                                                                                                                                                                                |
| EPI_ISL_1121323 to 1121324                                                                                                                                                                                                                                                                                                                                                                                                                                                                                                                                                                                                                                                                                                                                                                                                                                                                                                                                                                                                                                                                                                                                                                                                                                                                                                                                                                                                                                                                                                                                                     | Complexo Hospitalar Padre Bentode Guarulhos                                                                                                                                                                       | Instituto Adolfo Lutz, Interdisciplinary Procedures Center, Strategic Laboratory                                                                                                                          | Caio Vinicius Dias Lopes; Claudia Regina Gonçalves; Claudio Tavares Sacchi; Erica Valessa Ramos Gomes; Karoline Rodrigues Campos                                                                                                                                                                                                                                                                                                                                                                                                                |
| EPI_ISL_1381068                                                                                                                                                                                                                                                                                                                                                                                                                                                                                                                                                                                                                                                                                                                                                                                                                                                                                                                                                                                                                                                                                                                                                                                                                                                                                                                                                                                                                                                                                                                                                                | Conjunto Hospitalar do Mandaqui de Sao Paulo                                                                                                                                                                      | Instituto Adolfo Lutz, Interdisciplinary Procedures Center, Strategic Laboratory                                                                                                                          | Caio Vinicius Dias Lopes; Claudia Regina Gonçalves; Claudio Tavares Sacchi; Erica Valessa Ramos Gomes; Karoline Rodrigues Campos                                                                                                                                                                                                                                                                                                                                                                                                                |
| EPI_ISL_1182027 to 1182030, EPI_ISL_1225640, EPI_ISL_1225654, EPI_ISL_1225661, EPI_ISL_1225722, EPI_ISL_1225728, EPI_ISL_1292971 to 1292978, EPI_ISL_1293140                                                                                                                                                                                                                                                                                                                                                                                                                                                                                                                                                                                                                                                                                                                                                                                                                                                                                                                                                                                                                                                                                                                                                                                                                                                                                                                                                                                                                   | Connecticut DPH                                                                                                                                                                                                   | Grubaugh Lab - Yale School of Public Health                                                                                                                                                               | Anderson Brito; Annie Watkins; Anthony Muyombwe; Chaney Kalinich; Chantal Vogels; Isabel Ott; Jafar Razeq; Jessica Rothman; Joseph Fauver; Mallery Breban; Mary Petrone; Nathan Grubaugh; Randy Downing; Stephen M. Bart; Tara Alpert                                                                                                                                                                                                                                                                                                           |
| EPI_ISL_1168737                                                                                                                                                                                                                                                                                                                                                                                                                                                                                                                                                                                                                                                                                                                                                                                                                                                                                                                                                                                                                                                                                                                                                                                                                                                                                                                                                                                                                                                                                                                                                                | Connecticut Department of Health                                                                                                                                                                                  | Grubaugh Lab - Yale School of Public Health                                                                                                                                                               | Anderson Brito; Anne Wyllie; Annie Watkins; Chaney Kalinich; Chantal Vogels; Isabel Ott; Joseph Fauver; Mallery Breban; Mary Petrone; Nathan Grubaugh; Tara Alpert                                                                                                                                                                                                                                                                                                                                                                              |
| EPI_ISL_1091805, EPI_ISL_1091808 to 1091809, EPI_ISL_1091811, EPI_ISL_1091821 to 1091823, EPI_ISL_1091828 to 1091829, EPI_ISL_1091835, EPI_ISL_1091838, EPI_ISL_1091840 to 1091841, EPI_ISL_1091843 to 1091848, EPI_ISL_1091854 to 1091857, EPI_ISL_1091865, EPI_ISL_1112933, EPI_ISL_1112940 to 1112943, EPI_ISL_1112945, EPI_ISL_1239849                                                                                                                                                                                                                                                                                                                                                                                                                                                                                                                                                                                                                                                                                                                                                                                                                                                                                                                                                                                                                                                                                                                                                                                                                                     | Connecticut Department of Public Health                                                                                                                                                                           | Grubaugh Lab - Yale School of Public Health                                                                                                                                                               | Anderson Brito; Anne Wyllie; Annie Watkins; Chaney Kalinich; Chantal Vogels; Isabel Ott; Joseph Fauver; Mallery Breban; Mary Petrone; Nathan Grubaugh; Tara Alpert                                                                                                                                                                                                                                                                                                                                                                              |
| EPI_ISL_1017585 to 1017677, EPI_ISL_1067639, EPI_ISL_1067642 to 1067644, EPI_ISL_1067646 to 1067647, EPI_ISL_1067649, EPI_ISL_1067655, EPI_ISL_1067660 to 1067667, EPI_ISL_1067670 to 1067671, EPI_ISL_1067673, EPI_ISL_1067678 to 1067679, EPI_ISL_1067681 to 1067684, EPI_ISL_1067686 to 1067687, EPI_ISL_1067689 to 1067691, EPI_ISL_1080455, EPI_ISL_1080457 to 1080459, EPI_ISL_1080462, EPI_ISL_1091799, EPI_ISL_1091839, EPI_ISL_1091869, EPI_ISL_1091883 to 1091890, EPI_ISL_1112935, EPI_ISL_1112938, EPI_ISL_1239847                                                                                                                                                                                                                                                                                                                                                                                                                                                                                                                                                                                                                                                                                                                                                                                                                                                                                                                                                                                                                                                 | Connecticut Veterans' Affairs Hospital                                                                                                                                                                            | Grubaugh Lab - Yale School of Public Health                                                                                                                                                               | Chantal Vogels; Danielle Plank; Isabel Ott; Joseph Fauver; Mary Petrone; Nathan Grubaugh; Shaili Gupta; Tara Alpert                                                                                                                                                                                                                                                                                                                                                                                                                             |
| EPI_ISL_1241386                                                                                                                                                                                                                                                                                                                                                                                                                                                                                                                                                                                                                                                                                                                                                                                                                                                                                                                                                                                                                                                                                                                                                                                                                                                                                                                                                                                                                                                                                                                                                                | Connecticut Veterinary Medical Diagnostic Laboratory                                                                                                                                                              | Department of Pathobiology, University of Connecticut                                                                                                                                                     | Alyza Barbieri; Amelia Hunt; David H. Chung; Dong-Hun Lee; Guillermo Risatti; Ji-yeon Hyeon; Junwon Kim; Zeinab H. Helal                                                                                                                                                                                                                                                                                                                                                                                                                        |
| EPI_ISL_1030269, EPI_ISL_1030281 to 1030303, EPI_ISL_1030302 to 1030306 to 1030307, EPI_ISL_1030309 to 1030311, EPI_ISL_1030313 to 1030329, EPI_ISL_1030331 to 1030339, EPI_ISL_1234538, EPI_ISL_1234540, EPI_ISL_1234546, EPI_ISL_1234552 to 1234553, EPI_ISL_1234556, EPI_ISL_1234558 to 1234559, EPI_ISL_1234563, EPI_ISL_1234569 to 1234570, EPI_ISL_1234572 to 1234573, EPI_ISL_1234577, EPI_ISL_1234579 to 1234580, EPI_ISL_1234583, EPI_ISL_1234585, EPI_ISL_1234587, EPI_ISL_1234590, EPI_ISL_1234596, EPI_ISL_1234598, EPI_ISL_1234602, EPI_ISL_1234607,                                                                                                                                                                                                                                                                                                                                                                                                                                                                                                                                                                                                                                                                                                                                                                                                                                                                                                                                                                                                              |                                                                                                                                                                                                                   |                                                                                                                                                                                                           |                                                                                                                                                                                                                                                                                                                                                                                                                                                                                                                                                 |



|                                                                                                                                                                                                                                                                                                                                                                                                                                                                                                                                                                                                                                                                                                                                                                                                                                                                                                                                                                                                                                                                                                                                                                                                                                                                                                                                                                                                                                                                                                                                                                                                                                                                                                                                                                                                                                                                                                                                                                                                                                                                                                                                                                                                                                                                                                                                                                                                                                                                                                                                    |           |                                                                         |                                                                                                    |                                                                                                                                                                                                                                                                                                                                                                    |                                                                                                           |
|------------------------------------------------------------------------------------------------------------------------------------------------------------------------------------------------------------------------------------------------------------------------------------------------------------------------------------------------------------------------------------------------------------------------------------------------------------------------------------------------------------------------------------------------------------------------------------------------------------------------------------------------------------------------------------------------------------------------------------------------------------------------------------------------------------------------------------------------------------------------------------------------------------------------------------------------------------------------------------------------------------------------------------------------------------------------------------------------------------------------------------------------------------------------------------------------------------------------------------------------------------------------------------------------------------------------------------------------------------------------------------------------------------------------------------------------------------------------------------------------------------------------------------------------------------------------------------------------------------------------------------------------------------------------------------------------------------------------------------------------------------------------------------------------------------------------------------------------------------------------------------------------------------------------------------------------------------------------------------------------------------------------------------------------------------------------------------------------------------------------------------------------------------------------------------------------------------------------------------------------------------------------------------------------------------------------------------------------------------------------------------------------------------------------------------------------------------------------------------------------------------------------------------|-----------|-------------------------------------------------------------------------|----------------------------------------------------------------------------------------------------|--------------------------------------------------------------------------------------------------------------------------------------------------------------------------------------------------------------------------------------------------------------------------------------------------------------------------------------------------------------------|-----------------------------------------------------------------------------------------------------------|
| EPI_ISL_1234610, EPI_ISL_1234614 to 1234616, EPI_ISL_1234618, EPI_ISL_1234622, EPI_ISL_1234626, EPI_ISL_1234628 to 1234632, EPI_ISL_1234636, EPI_ISL_1234642 to 1234643, EPI_ISL_1234647, EPI_ISL_1234654 to 1234655, EPI_ISL_1234659, EPI_ISL_1234662, EPI_ISL_1234664, EPI_ISL_1234674 to 1234675, EPI_ISL_1234680, EPI_ISL_1234682, EPI_ISL_1234684 to 1234686, EPI_ISL_1234688, EPI_ISL_1234690 to 1234693, EPI_ISL_1234696 to 1234697, EPI_ISL_1234702, EPI_ISL_1234705, EPI_ISL_1234707 to 1234710, EPI_ISL_1234726 to 1234727, EPI_ISL_1234736, EPI_ISL_1234741, EPI_ISL_1234745 to 1234746, EPI_ISL_1234749, EPI_ISL_1234756 to 1234757, EPI_ISL_1234763 to 1234764, EPI_ISL_1234768, EPI_ISL_1234770, EPI_ISL_1234772, EPI_ISL_1234775, EPI_ISL_1234777, EPI_ISL_1234783, EPI_ISL_1235061 to 1235062, EPI_ISL_1235064 to 1235067, EPI_ISL_1235069, EPI_ISL_1235071 to 1235073, EPI_ISL_1235076, EPI_ISL_1235078, EPI_ISL_1235080 to 1235082, EPI_ISL_1235085 to 1235090, EPI_ISL_1235096, EPI_ISL_1235100 to 1235101, EPI_ISL_1235103, EPI_ISL_1235105 to 1235106, EPI_ISL_1235108 to 1235110, EPI_ISL_1235113 to 1235114, EPI_ISL_1235117, EPI_ISL_1235120, EPI_ISL_1235129 to 1235131, EPI_ISL_1235134, EPI_ISL_1235137, EPI_ISL_1235139, EPI_ISL_1235143, EPI_ISL_1235145 to 1235146, EPI_ISL_1235151, EPI_ISL_1235153 to 1235157, EPI_ISL_1235159 to 1235161, EPI_ISL_1235163 to 1235164, EPI_ISL_1235166 to 1235170, EPI_ISL_1235172 to 1235174, EPI_ISL_1235177, EPI_ISL_1235179 to 1235180, EPI_ISL_1235184, EPI_ISL_1235187, EPI_ISL_1235189, EPI_ISL_1235191, EPI_ISL_1235196, EPI_ISL_1235200 to 1235202, EPI_ISL_1235204 to 1235205, EPI_ISL_1235207 to 1235209, EPI_ISL_1235211, EPI_ISL_1235214 to 1235216, EPI_ISL_1235218, EPI_ISL_1235221, EPI_ISL_1235224 to 1235225, EPI_ISL_1235227 to 1235228, EPI_ISL_1235231, EPI_ISL_1235233, EPI_ISL_1235237, EPI_ISL_1235239 to 1235240, EPI_ISL_1235245 to 1235247, EPI_ISL_1235250, EPI_ISL_1235253, EPI_ISL_1235257 to 1235262, EPI_ISL_1235264 to 1235268, EPI_ISL_1235271, EPI_ISL_1235275, EPI_ISL_1235277 to 1235278, EPI_ISL_1235280, EPI_ISL_1235283 to 1235284, EPI_ISL_1235286, EPI_ISL_1235288, EPI_ISL_1235293, EPI_ISL_1235296 to 1235297, EPI_ISL_1235300 to 1235302, EPI_ISL_1235304 to 1235306, EPI_ISL_1235311, EPI_ISL_1235315 to 1235316, EPI_ISL_1235319 to 1235321, EPI_ISL_1235323 to 1235334, EPI_ISL_1235336 to 1235337, EPI_ISL_1235340 to 1235345, EPI_ISL_1235347 to 1235350, EPI_ISL_1235352 to 1235353, EPI_ISL_1235355 to 1235358 | see above | Contra Costa County Public Health Lab                                   | Chan-Zuckerberg Biohub                                                                             |                                                                                                                                                                                                                                                                                                                                                                    | CZB Clichub Consortium                                                                                    |
| EPI_ISL_1147265 to 1147266                                                                                                                                                                                                                                                                                                                                                                                                                                                                                                                                                                                                                                                                                                                                                                                                                                                                                                                                                                                                                                                                                                                                                                                                                                                                                                                                                                                                                                                                                                                                                                                                                                                                                                                                                                                                                                                                                                                                                                                                                                                                                                                                                                                                                                                                                                                                                                                                                                                                                                         |           | Corona-Testzentrum ifp Institut für Produktqualität GmbH                | Robert Koch Institute                                                                              |                                                                                                                                                                                                                                                                                                                                                                    |                                                                                                           |
| EPI_ISL_1213563                                                                                                                                                                                                                                                                                                                                                                                                                                                                                                                                                                                                                                                                                                                                                                                                                                                                                                                                                                                                                                                                                                                                                                                                                                                                                                                                                                                                                                                                                                                                                                                                                                                                                                                                                                                                                                                                                                                                                                                                                                                                                                                                                                                                                                                                                                                                                                                                                                                                                                                    |           | Cotabato Regional and Medical Center                                    | Philippine Genome Center                                                                           |                                                                                                                                                                                                                                                                                                                                                                    |                                                                                                           |
| EPI_ISL_1116461                                                                                                                                                                                                                                                                                                                                                                                                                                                                                                                                                                                                                                                                                                                                                                                                                                                                                                                                                                                                                                                                                                                                                                                                                                                                                                                                                                                                                                                                                                                                                                                                                                                                                                                                                                                                                                                                                                                                                                                                                                                                                                                                                                                                                                                                                                                                                                                                                                                                                                                    |           | County Emergency Clinical Hospital of Targu Mures                       | National Institute of Infectious Diseases-Prof. Dr. Matei Bals Molecular Diagnostics Laboratory    |                                                                                                                                                                                                                                                                                                                                                                    | Andreea Tudor; Corina Casangiu; Dan Otelea; Leontina Banica; Marius Surleac; Petre Milu; Simona Paraschiv |
| EPI_ISL_1116460                                                                                                                                                                                                                                                                                                                                                                                                                                                                                                                                                                                                                                                                                                                                                                                                                                                                                                                                                                                                                                                                                                                                                                                                                                                                                                                                                                                                                                                                                                                                                                                                                                                                                                                                                                                                                                                                                                                                                                                                                                                                                                                                                                                                                                                                                                                                                                                                                                                                                                                    |           | County Emergency Clinical Hospital of Tg. Mures                         | National Institute of Infectious Diseases-Prof. Dr. Matei Bals Molecular Diagnostics Laboratory    |                                                                                                                                                                                                                                                                                                                                                                    | Andreea Tudor; Corina Casangiu; Dan Otelea; Leontina Banica; Marius Surleac; Petre Milu; Simona Paraschiv |
| EPI_ISL_1027366 to 1027367, EPI_ISL_1185288, EPI_ISL_1185387, EPI_ISL_1185443, EPI_ISL_1234806, EPI_ISL_1234938, EPI_ISL_1235029                                                                                                                                                                                                                                                                                                                                                                                                                                                                                                                                                                                                                                                                                                                                                                                                                                                                                                                                                                                                                                                                                                                                                                                                                                                                                                                                                                                                                                                                                                                                                                                                                                                                                                                                                                                                                                                                                                                                                                                                                                                                                                                                                                                                                                                                                                                                                                                                   | see above | County of San Luis Obispo Public Health Laboratory                      | Chan-Zuckerberg Biohub                                                                             |                                                                                                                                                                                                                                                                                                                                                                    | CZB Clichub Consortium                                                                                    |
| EPI_ISL_1123266 to 1123267                                                                                                                                                                                                                                                                                                                                                                                                                                                                                                                                                                                                                                                                                                                                                                                                                                                                                                                                                                                                                                                                                                                                                                                                                                                                                                                                                                                                                                                                                                                                                                                                                                                                                                                                                                                                                                                                                                                                                                                                                                                                                                                                                                                                                                                                                                                                                                                                                                                                                                         |           | Cox's Bazar Medical College                                             | Central Biological Research Laboratory and Department of Biochemistry and Molecular Biology        | H. M. Abdullah Al Masud; Imam Hossen; Md. Arif Hossain; Md. Imanul Hoq; Md. Khondakar Raziur Rahman; Md. Omer Faruq; Mohammad Omar Faruque; Robiul Hasan Bhuiyan; Sajib Rudra; Shanta Paul                                                                                                                                                                         |                                                                                                           |
| EPI_ISL_1084742 to 1084760, EPI_ISL_1091176 to 1091240, EPI_ISL_1096343 to 1096346, EPI_ISL_1109487, EPI_ISL_1109489, EPI_ISL_1109495 to 1109499, EPI_ISL_1109504, EPI_ISL_1109510 to 1109511, EPI_ISL_1109515 to 1109516, EPI_ISL_1109519 to 1109520, EPI_ISL_1109525 to 1109526, EPI_ISL_1109529, EPI_ISL_1109537, EPI_ISL_1109539, EPI_ISL_1109547 to 1109548, EPI_ISL_1109553 to 1109554, EPI_ISL_1109563, EPI_ISL_1109571 to 1109573, EPI_ISL_1110766, EPI_ISL_1110780 to 1110782, EPI_ISL_1110792, EPI_ISL_1110804 to 1110833, EPI_ISL_1195672 to 1195676, EPI_ISL_1195730 to 1195743, EPI_ISL_1271988 to 1271995, EPI_ISL_1272050 to 1272057, EPI_ISL_1283137, EPI_ISL_1287369 to 1287410                                                                                                                                                                                                                                                                                                                                                                                                                                                                                                                                                                                                                                                                                                                                                                                                                                                                                                                                                                                                                                                                                                                                                                                                                                                                                                                                                                                                                                                                                                                                                                                                                                                                                                                                                                                                                                   | see above | Croatian Institute of Public Health                                     | Croatian Institute of Public Health                                                                |                                                                                                                                                                                                                                                                                                                                                                    | Irena Tabain; Ivana Ferenak                                                                               |
| EPI_ISL_1123265                                                                                                                                                                                                                                                                                                                                                                                                                                                                                                                                                                                                                                                                                                                                                                                                                                                                                                                                                                                                                                                                                                                                                                                                                                                                                                                                                                                                                                                                                                                                                                                                                                                                                                                                                                                                                                                                                                                                                                                                                                                                                                                                                                                                                                                                                                                                                                                                                                                                                                                    |           | Cumilla Medical College                                                 | Central Biological Research Laboratory and Department of Biochemistry and Molecular Biology        | H. M. Abdullah Al Masud; Imam Hossen; Md. Arif Hossain; Md. Imanul Hoq; Md. Khondakar Raziur Rahman; Md. Omer Faruq; Mohammad Omar Faruque; Robiul Hasan Bhuiyan; Sajib Rudra; Shanta Paul                                                                                                                                                                         |                                                                                                           |
| EPI_ISL_1195946, EPI_ISL_1255102                                                                                                                                                                                                                                                                                                                                                                                                                                                                                                                                                                                                                                                                                                                                                                                                                                                                                                                                                                                                                                                                                                                                                                                                                                                                                                                                                                                                                                                                                                                                                                                                                                                                                                                                                                                                                                                                                                                                                                                                                                                                                                                                                                                                                                                                                                                                                                                                                                                                                                   |           | Curative Inc                                                            | Curative Inc                                                                                       |                                                                                                                                                                                                                                                                                                                                                                    | Katie Bond; Vladimir Slepnev                                                                              |
| EPI_ISL_1009796 to 1009812, EPI_ISL_1009814 to 1009826, EPI_ISL_1009828 to 1009867                                                                                                                                                                                                                                                                                                                                                                                                                                                                                                                                                                                                                                                                                                                                                                                                                                                                                                                                                                                                                                                                                                                                                                                                                                                                                                                                                                                                                                                                                                                                                                                                                                                                                                                                                                                                                                                                                                                                                                                                                                                                                                                                                                                                                                                                                                                                                                                                                                                 |           | Curative Labs, Inc.                                                     | Wyoming Public Health Laboratory                                                                   | Ashley Norberg; Bailey Bowcutt; Channing Weber; Lynette Gumbleton; Noah Hull; Taylor Fearing; and Wanda Manley                                                                                                                                                                                                                                                     |                                                                                                           |
| EPI_ISL_1058076 to 1058078, EPI_ISL_1060594 to 1060596, EPI_ISL_1167666, EPI_ISL_1299220 to 1299221, EPI_ISL_1312364, EPI_ISL_1314262 to 1314263, EPI_ISL_1338004 to 1338015                                                                                                                                                                                                                                                                                                                                                                                                                                                                                                                                                                                                                                                                                                                                                                                                                                                                                                                                                                                                                                                                                                                                                                                                                                                                                                                                                                                                                                                                                                                                                                                                                                                                                                                                                                                                                                                                                                                                                                                                                                                                                                                                                                                                                                                                                                                                                       | see above | Cytocheck Laboratory                                                    | Kansas Health and Environmental Lab                                                                |                                                                                                                                                                                                                                                                                                                                                                    | Ben Olsen; Carissa Robertson; Jonathan Barnell; Mike Grose; Paige Drury; and Phil Adam                    |
| EPI_ISL_1069186                                                                                                                                                                                                                                                                                                                                                                                                                                                                                                                                                                                                                                                                                                                                                                                                                                                                                                                                                                                                                                                                                                                                                                                                                                                                                                                                                                                                                                                                                                                                                                                                                                                                                                                                                                                                                                                                                                                                                                                                                                                                                                                                                                                                                                                                                                                                                                                                                                                                                                                    |           | D.T. Protacio Hospital                                                  | Research Institute for Tropical Medicine                                                           | Catalino Demetria; Daria Manalo; Edelwisa Mercado; Francisco Gerardo Polotan; Hannah Leah Morito; Inez Andrea Medado; John Leonard Chan; Joseph Hughes; Kirstyn Brunker; Ma Angelica Tujan; Othoniel Jan Onza                                                                                                                                                      |                                                                                                           |
| EPI_ISL_1060876, EPI_ISL_1060884, EPI_ISL_1060886 to 1060887, EPI_ISL_1060891, EPI_ISL_1060900, EPI_ISL_1060902, EPI_ISL_1060904, EPI_ISL_1060910, EPI_ISL_1060914, EPI_ISL_1060918, EPI_ISL_1060920, EPI_ISL_1060923 to 1060928, EPI_ISL_1060947, EPI_ISL_1060949, EPI_ISL_1060954, EPI_ISL_1060963, EPI_ISL_1060967, EPI_ISL_1060971 to 1060972, EPI_ISL_1060974, EPI_ISL_1060978, EPI_ISL_1060981, EPI_ISL_1060990, EPI_ISL_1060994 to 1060995, EPI_ISL_1060997, EPI_ISL_1061006, EPI_ISL_1061025, EPI_ISL_1061027, EPI_ISL_1061029                                                                                                                                                                                                                                                                                                                                                                                                                                                                                                                                                                                                                                                                                                                                                                                                                                                                                                                                                                                                                                                                                                                                                                                                                                                                                                                                                                                                                                                                                                                                                                                                                                                                                                                                                                                                                                                                                                                                                                                             | see above | DB Diagnosticos do Brasil                                               | Instituto de Medicina Tropical de Sao Paulo                                                        | Brazil-UK Centre for Arbovirus Discovery Diagnosis Genomics and Epidemiology (CADDE) Genomic Network - Instituto de Medicina Tropical                                                                                                                                                                                                                              |                                                                                                           |
| EPI_ISL_1084726, EPI_ISL_1084730, EPI_ISL_1084737 to 1084738, EPI_ISL_1084740                                                                                                                                                                                                                                                                                                                                                                                                                                                                                                                                                                                                                                                                                                                                                                                                                                                                                                                                                                                                                                                                                                                                                                                                                                                                                                                                                                                                                                                                                                                                                                                                                                                                                                                                                                                                                                                                                                                                                                                                                                                                                                                                                                                                                                                                                                                                                                                                                                                      |           | DB Diagnosticos do Brasil                                               | Laboratório de Parasitologia Médica - Instituto de Medicina Tropical - Universidade de São Paulo   | Brazil-UK Centre for Arbovirus Discovery Diagnosis Genomics and Epidemiology (CADDE) Genomic Network - Instituto de Medicina Tropical                                                                                                                                                                                                                              |                                                                                                           |
| EPI_ISL_1272842 to 1272855, EPI_ISL_1318328 to 1318346                                                                                                                                                                                                                                                                                                                                                                                                                                                                                                                                                                                                                                                                                                                                                                                                                                                                                                                                                                                                                                                                                                                                                                                                                                                                                                                                                                                                                                                                                                                                                                                                                                                                                                                                                                                                                                                                                                                                                                                                                                                                                                                                                                                                                                                                                                                                                                                                                                                                             |           | DC Public Health Lab/ Dept. of Forensic Sciences                        | Centers for Disease Control and Prevention Division of Viral Diseases, Pathogen Discovery          | Anna Montmayeur; Anna Uehara; Ben L. Rambo-Martin; Clinton R. Paden; Dhvani Batra; Haibin Wang; Jasmine Padilla; Jing Zhang; Justin Lee; Krista Dillon; Krista Queen; Kristen Knipe; Kristine Lacek; Lori Rowe; Mark Burroughs; Matthew Schmerer; Mili Sheth; Peter W. Cook; Rachel Marine; Sam Shepard; Sarah Nobles; Shoshona Le; Suxiang Tong; Yan Li; Ying Tao |                                                                                                           |
| EPI_ISL_1121222 to 1121228, EPI_ISL_1121281 to 1121302, EPI_ISL_1133106 to 1133118, EPI_ISL_1159108 to 1159125, EPI_ISL_1168442 to 1168451, EPI_ISL_1180239 to 1180249, EPI_ISL_1181948 to 1181958, EPI_ISL_1191612 to 1191623, EPI_ISL_1195477 to 1195498, EPI_ISL_1295619 to 1295637, EPI_ISL_1297198 to 1297201, EPI_ISL_1337989 to 1338002, EPI_ISL_1357842 to 1357845                                                                                                                                                                                                                                                                                                                                                                                                                                                                                                                                                                                                                                                                                                                                                                                                                                                                                                                                                                                                                                                                                                                                                                                                                                                                                                                                                                                                                                                                                                                                                                                                                                                                                                                                                                                                                                                                                                                                                                                                                                                                                                                                                         | see above | DC Public Health Lab/ Dept. of Forensic Sciences                        | DC Public Health Lab/ Dept. of Forensic Sciences                                                   | Brittany Hamilton; Connie Maza; David Payne; Elizabeth Zelaya; Janis Doss; Jocelyn Hauser; Monica Mann; Sarah Scott; Scott Nguyen                                                                                                                                                                                                                                  |                                                                                                           |
| EPI_ISL_1094248, EPI_ISL_1094311, EPI_ISL_1094330 to 1094332, EPI_ISL_1094341 to 1094344, EPI_ISL_1094403 to 1094409, EPI_ISL_1094851 to 1094854                                                                                                                                                                                                                                                                                                                                                                                                                                                                                                                                                                                                                                                                                                                                                                                                                                                                                                                                                                                                                                                                                                                                                                                                                                                                                                                                                                                                                                                                                                                                                                                                                                                                                                                                                                                                                                                                                                                                                                                                                                                                                                                                                                                                                                                                                                                                                                                   |           | DC Public Health Lab/ Dept. of Forensic Sciences                        | Respiratory Viruses Branch, Division of Viral Diseases, Centers for Disease Control and Prevention | Anna Montmayeur; Anna Uehara; Ben L. Rambo-Martin; Clinton R. Paden; Dhvani Batra; Haibin Wang; Jasmine Padilla; Jing Zhang; Justin Lee; Krista Queen; Lori Rowe; Mark Burroughs; Mili Sheth; Peter W. Cook; Rachel Marine; Sarah Nobles; Suxiang Tong; Yan Li; Ying Tao                                                                                           |                                                                                                           |
| EPI_ISL_1020204                                                                                                                                                                                                                                                                                                                                                                                                                                                                                                                                                                                                                                                                                                                                                                                                                                                                                                                                                                                                                                                                                                                                                                                                                                                                                                                                                                                                                                                                                                                                                                                                                                                                                                                                                                                                                                                                                                                                                                                                                                                                                                                                                                                                                                                                                                                                                                                                                                                                                                                    |           | DD Klinik Ciputat, South Tangerang, Banten                              | Biosafety Level-3 Laboratory, Indonesian Institute of Sciences (LIPI)                              | Anggia Prasetyoputri; Eko Wahyu Putro; Fahrurrozi; Isa Nuryana; Ratih Asmana Ningrum; Sri Swasthikawati; Sugiyono Saputra; Syam Budi Iryanto                                                                                                                                                                                                                       |                                                                                                           |
| EPI_ISL_1094269, EPI_ISL_1094375 to 1094376, EPI_ISL_1094467 to 1094472, EPI_ISL_1094622 to 1094638                                                                                                                                                                                                                                                                                                                                                                                                                                                                                                                                                                                                                                                                                                                                                                                                                                                                                                                                                                                                                                                                                                                                                                                                                                                                                                                                                                                                                                                                                                                                                                                                                                                                                                                                                                                                                                                                                                                                                                                                                                                                                                                                                                                                                                                                                                                                                                                                                                |           | DE Public Health Laboratory                                             | Respiratory Viruses Branch, Division of Viral Diseases, Centers for Disease Control and Prevention | Anna Montmayeur; Anna Uehara; Ben L. Rambo-Martin; Clinton R. Paden; Dhvani Batra; Haibin Wang; Jasmine Padilla; Jing Zhang; Justin Lee; Krista Queen; Lori Rowe; Mark Burroughs; Mili Sheth; Peter W. Cook; Rachel Marine; Sarah Nobles; Suxiang Tong; Yan Li; Ying Tao                                                                                           |                                                                                                           |
| EPI_ISL_1228375 to 1228377                                                                                                                                                                                                                                                                                                                                                                                                                                                                                                                                                                                                                                                                                                                                                                                                                                                                                                                                                                                                                                                                                                                                                                                                                                                                                                                                                                                                                                                                                                                                                                                                                                                                                                                                                                                                                                                                                                                                                                                                                                                                                                                                                                                                                                                                                                                                                                                                                                                                                                         |           | DEPARTMENT OF VETERANS AFFAIR MEDICAL CENTER                            | Wadsworth Center, New York State Department of Health                                              | Alexis Russel; Daryl M. Lamson; Erasmus Schneider; Erica Lasek-Nesselquist; John Kelly; Jonathan Piltnick; Kirsten St. George; Matthew Shudt; Melissa A Leisner; Navjot Singh                                                                                                                                                                                      |                                                                                                           |
| EPI_ISL_1117488, EPI_ISL_1117521                                                                                                                                                                                                                                                                                                                                                                                                                                                                                                                                                                                                                                                                                                                                                                                                                                                                                                                                                                                                                                                                                                                                                                                                                                                                                                                                                                                                                                                                                                                                                                                                                                                                                                                                                                                                                                                                                                                                                                                                                                                                                                                                                                                                                                                                                                                                                                                                                                                                                                   |           | DIP PREV AVEZZANO, SERVIZIO DI IGIENE EPIDEMIOLOGIA E SANITÀ PUBBLICA   | Istituto Zooprofilattico Sperimentale dell'Abruzzo e Molise "G. Caporale"                          | Ancora M; Calistri P; Cammà C; Curini V; Di Domenico M; Di Pasquale A; Lorusso A; Mangone I; Marcacci M; Puglia I; Rinaldi A; Savini G; Scialabba S                                                                                                                                                                                                                |                                                                                                           |
| EPI_ISL_1117675, EPI_ISL_1117686, EPI_ISL_1117690, EPI_ISL_1117697                                                                                                                                                                                                                                                                                                                                                                                                                                                                                                                                                                                                                                                                                                                                                                                                                                                                                                                                                                                                                                                                                                                                                                                                                                                                                                                                                                                                                                                                                                                                                                                                                                                                                                                                                                                                                                                                                                                                                                                                                                                                                                                                                                                                                                                                                                                                                                                                                                                                 |           | DIP PREV AVEZZANO-SERVIZIO DI IGIENE EPIDEMIOLOGIA E SANITÀ PUBBLICA    | Istituto Zooprofilattico Sperimentale dell'Abruzzo e Molise "G. Caporale"                          | Ancora M; Calistri P; Cammà C; Curini V; Di Domenico M; Di Pasquale A; Lorusso A; Mangone I; Marcacci M; Puglia I; Rinaldi A; Savini G; Scialabba S                                                                                                                                                                                                                |                                                                                                           |
| EPI_ISL_1250981 to 1250982                                                                                                                                                                                                                                                                                                                                                                                                                                                                                                                                                                                                                                                                                                                                                                                                                                                                                                                                                                                                                                                                                                                                                                                                                                                                                                                                                                                                                                                                                                                                                                                                                                                                                                                                                                                                                                                                                                                                                                                                                                                                                                                                                                                                                                                                                                                                                                                                                                                                                                         |           | DIP. PREV. AVEZZANO                                                     | Istituto Zooprofilattico Sperimentale dell'Abruzzo e Molise "G. Caporale"                          | Ancora M; Calistri P; Cammà C; Curini V; Di Domenico M; Di Pasquale A; Lorusso A; Mangone I; Marcacci M; Puglia I; Rinaldi A; Savini G; Scialabba S                                                                                                                                                                                                                |                                                                                                           |
| EPI_ISL_1251039, EPI_ISL_1251061, EPI_ISL_1290805, EPI_ISL_1336676, EPI_ISL_1336706, EPI_ISL_1336726, EPI_ISL_1336735, EPI_ISL_1336749, EPI_ISL_1336761, EPI_ISL_1336785, EPI_ISL_1336797, EPI_ISL_1336888, EPI_ISL_1336901, EPI_ISL_1336922, EPI_ISL_1336925, EPI_ISL_1336932                                                                                                                                                                                                                                                                                                                                                                                                                                                                                                                                                                                                                                                                                                                                                                                                                                                                                                                                                                                                                                                                                                                                                                                                                                                                                                                                                                                                                                                                                                                                                                                                                                                                                                                                                                                                                                                                                                                                                                                                                                                                                                                                                                                                                                                     | see above | DIP. PREV. AVEZZANO SERVIZIO DI IGIENE EPIDEMIOLOGIA E SANITA' PUBBLICA | Istituto Zooprofilattico Sperimentale dell'Abruzzo e Molise "G. Caporale"                          | Ancora M; Calistri P; Cammà C; Caporale M; Curini V; Di Domenico M; Di Lollo V; Di Lollo Valeria; Di Pasquale A; Lorusso A; Mangone I; Marcacci M; Puglia I; Rinaldi A; Savini G; Scialabba S                                                                                                                                                                      |                                                                                                           |
| EPI_ISL_1055818                                                                                                                                                                                                                                                                                                                                                                                                                                                                                                                                                                                                                                                                                                                                                                                                                                                                                                                                                                                                                                                                                                                                                                                                                                                                                                                                                                                                                                                                                                                                                                                                                                                                                                                                                                                                                                                                                                                                                                                                                                                                                                                                                                                                                                                                                                                                                                                                                                                                                                                    |           | DIP. PREV. AVEZZANO SERVIZIO DI IGIENE                                  | Istituto Zooprofilattico Sperimentale dell'Abruzzo e Molise "G. Caporale"                          | Ancora M; Calistri P; Cammà C; Curini V; Delli Compagni E; Di Domenico M; Di Pasquale A; Lorusso A; Mangone I; Marcacci M; Puglia I; Rinaldi A; Savini                                                                                                                                                                                                             |                                                                                                           |

|                                                                                                                                                                                                                                                                                                                                                                                                                                                                                                                                                                                                                                                                                                                                                                                                                                                                                                                                                                                                                                                                                                                                                      | EPIDEMIOLOGIAE SANITA' PUBBLICA<br>DIRETORIA DE VIGILANCIA EM SAUDE                                                | Caporale*<br>Epiclin                                                                                             | G; Scialabba S<br>Ana Paula Muterle; Carolina Comerlato; Eliana Mária Da Ros Wendland; Fernando Hayashi Sant'Anna; Janira Prichula; Juliana Comerlato                                                                                                                                                                                                                                                                                                                                                                                                                                                                                                                                                         |
|------------------------------------------------------------------------------------------------------------------------------------------------------------------------------------------------------------------------------------------------------------------------------------------------------------------------------------------------------------------------------------------------------------------------------------------------------------------------------------------------------------------------------------------------------------------------------------------------------------------------------------------------------------------------------------------------------------------------------------------------------------------------------------------------------------------------------------------------------------------------------------------------------------------------------------------------------------------------------------------------------------------------------------------------------------------------------------------------------------------------------------------------------|--------------------------------------------------------------------------------------------------------------------|------------------------------------------------------------------------------------------------------------------|---------------------------------------------------------------------------------------------------------------------------------------------------------------------------------------------------------------------------------------------------------------------------------------------------------------------------------------------------------------------------------------------------------------------------------------------------------------------------------------------------------------------------------------------------------------------------------------------------------------------------------------------------------------------------------------------------------------|
| EPI_ISL_1195278, EPI_ISL_1195288, EPI_ISL_1195291                                                                                                                                                                                                                                                                                                                                                                                                                                                                                                                                                                                                                                                                                                                                                                                                                                                                                                                                                                                                                                                                                                    |                                                                                                                    |                                                                                                                  |                                                                                                                                                                                                                                                                                                                                                                                                                                                                                                                                                                                                                                                                                                               |
| EPI_ISL_1020205                                                                                                                                                                                                                                                                                                                                                                                                                                                                                                                                                                                                                                                                                                                                                                                                                                                                                                                                                                                                                                                                                                                                      | DMC Dompot Dhuafa, South Tangerang, Banten                                                                         | Biosafety Level-3 Laboratory, Indonesian Institute of Sciences (LIPI)                                            | Anggia Prasetyoputri; Anik B. Dharmayanthi; Isa Nuryana; Nuruliaty Utami; Rath Asmana Ningrum; Sri Swasthikawati; Sugiyono Saputra; Syam Budi Iryanto                                                                                                                                                                                                                                                                                                                                                                                                                                                                                                                                                         |
| EPI_ISL_1059902                                                                                                                                                                                                                                                                                                                                                                                                                                                                                                                                                                                                                                                                                                                                                                                                                                                                                                                                                                                                                                                                                                                                      | DNA Laboratories Sdn. Bhd.                                                                                         | Malaysia Genome Institute                                                                                        | Azrin Ahmad; Enizza Kasim; Irni Suhayu Sapian; Mohd Faizal Abu Bakar; Mohd Noor Mat Isa; Nor Azfa Johari.; Nurhezreen Md Iqbal; Shamsidar Sophie; Siti Noraini Othman; Wong Yong Wee; Yusuf Muhammad Noor                                                                                                                                                                                                                                                                                                                                                                                                                                                                                                     |
| EPI_ISL_1017982 to 1017985, EPI_ISL_1018001, EPI_ISL_1064775, EPI_ISL_1064803, EPI_ISL_1064809, EPI_ISL_1064820, EPI_ISL_1064825, EPI_ISL_1064831, EPI_ISL_1064876, EPI_ISL_1064909, EPI_ISL_1200522, EPI_ISL_1200541, EPI_ISL_1200552, EPI_ISL_1200556, EPI_ISL_1200577, EPI_ISL_1200594, EPI_ISL_1200621 to 1200622, EPI_ISL_1200624 to 1200625, EPI_ISL_1261801, EPI_ISL_1261804, EPI_ISL_1261807 to 1261808, EPI_ISL_1261824, EPI_ISL_1261843, EPI_ISL_1261856, EPI_ISL_1261858, EPI_ISL_1261864, EPI_ISL_1337465, EPI_ISL_1337476, EPI_ISL_1337489, EPI_ISL_1337517, EPI_ISL_1337520, EPI_ISL_1337536, EPI_ISL_1337548 to 1337549                                                                                                                                                                                                                                                                                                                                                                                                                                                                                                               | DOHMH Central Harlem                                                                                               | New York City Public Health Laboratory                                                                           | Jade Wang; et al.                                                                                                                                                                                                                                                                                                                                                                                                                                                                                                                                                                                                                                                                                             |
| EPI_ISL_1017978, EPI_ISL_1018011, EPI_ISL_1064766, EPI_ISL_1064779, EPI_ISL_1064782, EPI_ISL_1064797, EPI_ISL_1064872, EPI_ISL_1064895 to 1064896, EPI_ISL_1200518, EPI_ISL_1200528 to 1200530, EPI_ISL_1200534, EPI_ISL_1200560, EPI_ISL_1200564, EPI_ISL_1200574, EPI_ISL_1200584, EPI_ISL_1261817, EPI_ISL_1261852, EPI_ISL_1261855, EPI_ISL_1261862 to 1261863, EPI_ISL_1337464, EPI_ISL_1337479, EPI_ISL_1337500, EPI_ISL_1337542                                                                                                                                                                                                                                                                                                                                                                                                                                                                                                                                                                                                                                                                                                               | DOHMH Chelsea                                                                                                      | New York City Public Health Laboratory                                                                           | Jade Wang; et al.                                                                                                                                                                                                                                                                                                                                                                                                                                                                                                                                                                                                                                                                                             |
| EPI_ISL_1017975, EPI_ISL_1017986 to 1017988, EPI_ISL_1017995 to 1017999, EPI_ISL_1018005, EPI_ISL_1018027 to 1018031, EPI_ISL_1064757, EPI_ISL_1064760 to 1064761, EPI_ISL_1064767, EPI_ISL_1064784, EPI_ISL_1064786, EPI_ISL_1064789, EPI_ISL_1064808, EPI_ISL_1064811, EPI_ISL_1064847, EPI_ISL_1064870 to 1064871, EPI_ISL_1064873 to 1064874, EPI_ISL_1064888, EPI_ISL_1064893, EPI_ISL_1064897, EPI_ISL_1064905, EPI_ISL_1200533, EPI_ISL_1200540, EPI_ISL_1200545 to 1200546, EPI_ISL_1200565, EPI_ISL_1200568 to 1200570, EPI_ISL_1200591 to 1200593, EPI_ISL_1200597 to 1200598, EPI_ISL_1200603, EPI_ISL_1200613 to 1200614, EPI_ISL_1200626, EPI_ISL_1261806, EPI_ISL_1261810, EPI_ISL_1261812 to 1261813, EPI_ISL_1261832 to 1261833, EPI_ISL_1261835 to 1261837, EPI_ISL_1261844, EPI_ISL_1261859, EPI_ISL_1337467, EPI_ISL_1337475, EPI_ISL_1337477, EPI_ISL_1337484, EPI_ISL_1337491, EPI_ISL_1337507, EPI_ISL_1337511 to 1337512, EPI_ISL_1337514 to 1337515, EPI_ISL_1337531, EPI_ISL_1337551                                                                                                                                        | DOHMH Corona                                                                                                       | New York City Public Health Laboratory                                                                           | Jade Wang; et al.                                                                                                                                                                                                                                                                                                                                                                                                                                                                                                                                                                                                                                                                                             |
| EPI_ISL_1018021, EPI_ISL_1018024, EPI_ISL_1064777, EPI_ISL_1064791, EPI_ISL_1064798, EPI_ISL_1064824, EPI_ISL_1064835, EPI_ISL_1064883, EPI_ISL_1064890, EPI_ISL_1064904, EPI_ISL_1200524, EPI_ISL_1200543, EPI_ISL_1200554, EPI_ISL_1200571, EPI_ISL_1200605, EPI_ISL_1261803, EPI_ISL_1261821, EPI_ISL_1261825, EPI_ISL_1261834, EPI_ISL_1261861, EPI_ISL_1337474, EPI_ISL_1337488, EPI_ISL_1337490, EPI_ISL_1337492 to 1337494, EPI_ISL_1337499, EPI_ISL_1337528, EPI_ISL_1337534 to 1337535, EPI_ISL_1337544                                                                                                                                                                                                                                                                                                                                                                                                                                                                                                                                                                                                                                     | DOHMH Crown Heights                                                                                                | New York City Public Health Laboratory                                                                           | Jade Wang; et al.                                                                                                                                                                                                                                                                                                                                                                                                                                                                                                                                                                                                                                                                                             |
| EPI_ISL_1064762, EPI_ISL_1064771, EPI_ISL_1064780, EPI_ISL_1064785, EPI_ISL_1064790, EPI_ISL_1064794, EPI_ISL_1064836, EPI_ISL_1064885, EPI_ISL_1064891, EPI_ISL_1200523, EPI_ISL_1200620, EPI_ISL_1261809, EPI_ISL_1261818, EPI_ISL_1261847, EPI_ISL_1261850, EPI_ISL_1337468, EPI_ISL_1337471, EPI_ISL_1337510                                                                                                                                                                                                                                                                                                                                                                                                                                                                                                                                                                                                                                                                                                                                                                                                                                     | DOHMH Fort Greene                                                                                                  | New York City Public Health Laboratory                                                                           | Jade Wang; et al.                                                                                                                                                                                                                                                                                                                                                                                                                                                                                                                                                                                                                                                                                             |
| EPI_ISL_1017976 to 1017977, EPI_ISL_1017992 to 1017994, EPI_ISL_1018012 to 1018020, EPI_ISL_1018022 to 1018023, EPI_ISL_1064755, EPI_ISL_1064759, EPI_ISL_1064781, EPI_ISL_1064788, EPI_ISL_1064807, EPI_ISL_1064819, EPI_ISL_1064830, EPI_ISL_1064837 to 1064840, EPI_ISL_1064848, EPI_ISL_1064858, EPI_ISL_1064865 to 1064869, EPI_ISL_1064884, EPI_ISL_1064886, EPI_ISL_1064892, EPI_ISL_1064906 to 1064907, EPI_ISL_1200520 to 1200521, EPI_ISL_1200535 to 1200536, EPI_ISL_1200542, EPI_ISL_1200544, EPI_ISL_1200547, EPI_ISL_1200551, EPI_ISL_1200553, EPI_ISL_1200563, EPI_ISL_1200572 to 1200573, EPI_ISL_1200581, EPI_ISL_1200583, EPI_ISL_1200585, EPI_ISL_1200590, EPI_ISL_1200595 to 1200596, EPI_ISL_1200615 to 1200618, EPI_ISL_1261790 to 1261794, EPI_ISL_1261802, EPI_ISL_1261815, EPI_ISL_1261822, EPI_ISL_1261831, EPI_ISL_1261857, EPI_ISL_1261860, EPI_ISL_1261866, EPI_ISL_1337469, EPI_ISL_1337486 to 1337487, EPI_ISL_1337495 to 1337498, EPI_ISL_1337501, EPI_ISL_1337504 to 1337505, EPI_ISL_1337513, EPI_ISL_1337521 to 1337522, EPI_ISL_1337525, EPI_ISL_1337532 to 1337533, EPI_ISL_1337537 to 1337538, EPI_ISL_1337550 | DOHMH Jamaica                                                                                                      | New York City Public Health Laboratory                                                                           | Jade Wang; et al.                                                                                                                                                                                                                                                                                                                                                                                                                                                                                                                                                                                                                                                                                             |
| EPI_ISL_1017974, EPI_ISL_1017980 to 1017981, EPI_ISL_1018000, EPI_ISL_1018006 to 1018010, EPI_ISL_1018025 to 1018026, EPI_ISL_1064787, EPI_ISL_1064801 to 1064802, EPI_ISL_1064812, EPI_ISL_1064834, EPI_ISL_1064841 to 1064842, EPI_ISL_1064849 to 1064850, EPI_ISL_1064861 to 1064862, EPI_ISL_1064875, EPI_ISL_1200550, EPI_ISL_1200557 to 1200559, EPI_ISL_1200567, EPI_ISL_1200575, EPI_ISL_1200578 to 1200580, EPI_ISL_1200582, EPI_ISL_1200588 to 1200589, EPI_ISL_1200600, EPI_ISL_1200604, EPI_ISL_1200612, EPI_ISL_1261814, EPI_ISL_1261826, EPI_ISL_1261838 to 1261839, EPI_ISL_1261848, EPI_ISL_1261851, EPI_ISL_1337463, EPI_ISL_1337473, EPI_ISL_1337478, EPI_ISL_1337481, EPI_ISL_1337485, EPI_ISL_1337502, EPI_ISL_1337506, EPI_ISL_1337523, EPI_ISL_1337540, EPI_ISL_1337545                                                                                                                                                                                                                                                                                                                                                        | DOHMH Morrisania                                                                                                   | New York City Public Health Laboratory                                                                           | Jade Wang; et al.                                                                                                                                                                                                                                                                                                                                                                                                                                                                                                                                                                                                                                                                                             |
| EPI_ISL_1017969 to 1017970, EPI_ISL_1017979, EPI_ISL_1017991, EPI_ISL_1018002 to 1018004, EPI_ISL_1064756, EPI_ISL_1064769, EPI_ISL_1064799, EPI_ISL_1064805 to 1064806, EPI_ISL_1064821 to 1064822, EPI_ISL_1064826, EPI_ISL_1064859 to 1064860, EPI_ISL_1064887, EPI_ISL_1064894, EPI_ISL_1200538, EPI_ISL_1200548, EPI_ISL_1200566, EPI_ISL_1200586 to 1200587, EPI_ISL_1200602, EPI_ISL_1200619, EPI_ISL_1200623, EPI_ISL_1261805, EPI_ISL_1261823, EPI_ISL_1337508 to 1337509, EPI_ISL_1337516, EPI_ISL_1337530                                                                                                                                                                                                                                                                                                                                                                                                                                                                                                                                                                                                                                 | DOHMH PHL                                                                                                          | New York City Public Health Laboratory                                                                           | Jade Wang; et al.                                                                                                                                                                                                                                                                                                                                                                                                                                                                                                                                                                                                                                                                                             |
| EPI_ISL_1017971 to 1017973, EPI_ISL_1064823, EPI_ISL_1064908, EPI_ISL_1200525, EPI_ISL_1200537, EPI_ISL_1200606, EPI_ISL_1200611, EPI_ISL_1261795, EPI_ISL_1261799, EPI_ISL_1261816, EPI_ISL_1261840 to 1261842, EPI_ISL_1261845, EPI_ISL_1261849, EPI_ISL_1337480, EPI_ISL_1337483, EPI_ISL_1337503, EPI_ISL_1337526, EPI_ISL_1337543, EPI_ISL_1337547                                                                                                                                                                                                                                                                                                                                                                                                                                                                                                                                                                                                                                                                                                                                                                                              | DOHMH Riverside                                                                                                    | New York City Public Health Laboratory                                                                           | Jade Wang; et al.                                                                                                                                                                                                                                                                                                                                                                                                                                                                                                                                                                                                                                                                                             |
| EPI_ISL_1018063 to 1018070                                                                                                                                                                                                                                                                                                                                                                                                                                                                                                                                                                                                                                                                                                                                                                                                                                                                                                                                                                                                                                                                                                                           | DPH, Massachusetts State Public Health Lab                                                                         | DPH, Massachusetts State Public Health Lab                                                                       | A.S.; Fink, T.; G.R.; Gallagher; Lang; S.C.; Smole                                                                                                                                                                                                                                                                                                                                                                                                                                                                                                                                                                                                                                                            |
| EPI_ISL_1009632 to 1009654, EPI_ISL_1181629 to 1181657, EPI_ISL_1181661 to 1181678, EPI_ISL_1181680 to 1181694, EPI_ISL_1268194 to 1268195, EPI_ISL_1268198, EPI_ISL_1268200, EPI_ISL_1268202, EPI_ISL_1268204 to 1268205, EPI_ISL_1268207, EPI_ISL_1268209, EPI_ISL_1268211, EPI_ISL_1268213, EPI_ISL_1268215, EPI_ISL_1268217, EPI_ISL_1268219, EPI_ISL_1268221, EPI_ISL_1268223 to 1268224, EPI_ISL_1268226, EPI_ISL_1268228, EPI_ISL_1268230, EPI_ISL_1268232, EPI_ISL_1268234, EPI_ISL_1268236, EPI_ISL_1268238, EPI_ISL_1268240, EPI_ISL_1268243 to 1268244, EPI_ISL_1268246, EPI_ISL_1268248, EPI_ISL_1268250, EPI_ISL_1268253, EPI_ISL_1268255, EPI_ISL_1268257, EPI_ISL_1268259, EPI_ISL_1268261, EPI_ISL_1268263, EPI_ISL_1339968 to 1340021                                                                                                                                                                                                                                                                                                                                                                                               | DPHL                                                                                                               | Delaware Public Health Lab                                                                                       | Gregory Hovan; Rebecca Savage                                                                                                                                                                                                                                                                                                                                                                                                                                                                                                                                                                                                                                                                                 |
| EPI_ISL_1229051, EPI_ISL_1229054 to 1229063, EPI_ISL_1229068 to 1229102, EPI_ISL_1312830 to 1312831, EPI_ISL_1312838, EPI_ISL_1312896                                                                                                                                                                                                                                                                                                                                                                                                                                                                                                                                                                                                                                                                                                                                                                                                                                                                                                                                                                                                                | DYOMEDEA LYON                                                                                                      | CNR Virus des Infections Respiratoires - France SUD                                                              | Antonin Bal; Bruno Lina; Gregory Destras; Gwendolynne Burfin; Hadrien Regue; Laurence Josset; Martine Valette; Quentin Semanas                                                                                                                                                                                                                                                                                                                                                                                                                                                                                                                                                                                |
| EPI_ISL_1322385                                                                                                                                                                                                                                                                                                                                                                                                                                                                                                                                                                                                                                                                                                                                                                                                                                                                                                                                                                                                                                                                                                                                      | DYOMEDEA NEOLAB ST RAMBERT                                                                                         | CNR Virus des Infections Respiratoires - France SUD                                                              | Antonin Bal; Bruno Lina; Gregory Destras; Gwendolynne Burfin; Hadrien Regue; Laurence Josset; Martine Valette; Quentin Semanas                                                                                                                                                                                                                                                                                                                                                                                                                                                                                                                                                                                |
| EPI_ISL_1371781                                                                                                                                                                                                                                                                                                                                                                                                                                                                                                                                                                                                                                                                                                                                                                                                                                                                                                                                                                                                                                                                                                                                      | DYOMEDEA-LABORATOIRE DE LA SAUVEGARDE                                                                              | CNR Virus des Infections Respiratoires - France SUD                                                              | Antonin Bal; Bruno Lina; Gregory Destras; Gwendolynne Burfin; Hadrien Regue; Laurence Josset; Martine Valette; Quentin Semanas                                                                                                                                                                                                                                                                                                                                                                                                                                                                                                                                                                                |
| EPI_ISL_1191703 to 1191704, EPI_ISL_1191716, EPI_ISL_1191718, EPI_ISL_1239448                                                                                                                                                                                                                                                                                                                                                                                                                                                                                                                                                                                                                                                                                                                                                                                                                                                                                                                                                                                                                                                                        | DYOMEDEA-NEOLAB                                                                                                    | CNR Virus des Infections Respiratoires - France SUD                                                              | Antonin Bal; Bruno Lina; Gregory Destras; Gwendolynne Burfin; Hadrien Regue; Laurence Josset; Martine Valette; Quentin Semanas                                                                                                                                                                                                                                                                                                                                                                                                                                                                                                                                                                                |
| EPI_ISL_1159389                                                                                                                                                                                                                                                                                                                                                                                                                                                                                                                                                                                                                                                                                                                                                                                                                                                                                                                                                                                                                                                                                                                                      | Darmo Hospital                                                                                                     | Institute of Tropical Disease, Universitas Airlangga                                                             | Aldise M Nastri; Gatot Soegiarto; Jezzy R Dewantari; Kazufumi Shimizu; Krisnoadi Rahardjo; Laksmi Wulandari; Maria I Lusida; Resti Yudhawati; Rima R Prasetya; Soetjipto; Sulung Budianto; Yasuko Mori                                                                                                                                                                                                                                                                                                                                                                                                                                                                                                        |
| EPI_ISL_1165073                                                                                                                                                                                                                                                                                                                                                                                                                                                                                                                                                                                                                                                                                                                                                                                                                                                                                                                                                                                                                                                                                                                                      | Darus Syaifa' Islamic Hospital                                                                                     | Institute of Tropical Disease, Universitas Airlangga                                                             | Aldise M Nastri; Gatot Soegiarto; HM Faiz; Jezzy R Dewantari; Kazufumi Shimizu; Krisnoadi Rahardjo; Laksmi Wulandari; Maria I Lusida; Resti Yudhawati; Rima R Prasetya; Soetjipto; Yasuko Mori                                                                                                                                                                                                                                                                                                                                                                                                                                                                                                                |
| EPI_ISL_1081828, EPI_ISL_1081840                                                                                                                                                                                                                                                                                                                                                                                                                                                                                                                                                                                                                                                                                                                                                                                                                                                                                                                                                                                                                                                                                                                     | Davao One World                                                                                                    | Philippine Genome Center                                                                                         | Alethea R. de Guzman; Anna Ong-Lim; Arianne A. Zamora; Asia Louisa U. Chong; Benedict A. Maralit; Candice Francheska B. Tamboan; Carlo M. Lapid; Celia Carlos; Cynthia P. Saloma; Devon Ray Pacial; Edsel Maurice Salvaña; El King D. Morado; Eva Maria Cutiongco-de la Paz; Francis A. Tablizo; Irish Coleen A. Asin; Jaime C. Montoya; Jan Michael C. Yap; Jo-Hannah S. Llamas; John Q. Wong; Joshua Gregor A. Dizon; Juan Antonio R. Magalang; Karol Sophia Agape R. Padilla; Kenneth M. Kim; Kris P. Punayan; Marc Edsel C. Ayes; Marc Jerrone R. Castro; Maria Sofia L. Yangzon; Marissa Alejandria; Razel Nikka M. Hao; Rianna Patricia S. Cruz; Sheila Mae M. Araiza; and Maria Rosario Singh-Vergeire |
| EPI_ISL_1093602 to 1094191, EPI_ISL_1098800 to 1098829, EPI_ISL_1318697 to 1318988, EPI_ISL_1347778 to 1347789, EPI_ISL_1349075, EPI_ISL_1349077 to 1349078, EPI_ISL_1349080, EPI_ISL_1349082, EPI_ISL_1349084 to 1349085, EPI_ISL_1349087, EPI_ISL_1349089, EPI_ISL_1349091, EPI_ISL_1349093                                                                                                                                                                                                                                                                                                                                                                                                                                                                                                                                                                                                                                                                                                                                                                                                                                                        | DeRisi Lab, University of California, San Francisco                                                                | DeRisi Lab, University of California, San Francisco                                                              | Amy Kistler; Anthea Mitchell; Carina Marquez; Diane Havir; Diane Jones; Douglas Black; Eric Chow; Gabriel Chamie; Genay Pilarowski; IDseq Team; Jackie Martinez; James Peng; Jamin Liu; Jon Jacobo; Lucy Li; Luis Rubio; Manu Vanaerschoot; Matthew Laurie; Maya Petersen; Patrick Ayscue; Sabrina Mann; Sara Sunshine; Susana Rojas; Susy Rojas; Valerie Tulier-Laiwa; and Joseph DeRisi                                                                                                                                                                                                                                                                                                                     |
| EPI_ISL_1136975 to 1137047                                                                                                                                                                                                                                                                                                                                                                                                                                                                                                                                                                                                                                                                                                                                                                                                                                                                                                                                                                                                                                                                                                                           | Delaware Public Health Lab                                                                                         | Delaware Public Health Lab                                                                                       | Gregory Hovan                                                                                                                                                                                                                                                                                                                                                                                                                                                                                                                                                                                                                                                                                                 |
| EPI_ISL_1096142, EPI_ISL_1096983, EPI_ISL_1096985                                                                                                                                                                                                                                                                                                                                                                                                                                                                                                                                                                                                                                                                                                                                                                                                                                                                                                                                                                                                                                                                                                    | Departamento de Cuidados Intensivos-Unidad de Investigación Médica en Inmunología, UMAE Hospital de Especialidades | Laboratorio de Secuenciación-Centro de Instrumentos, IMSS México /Unidad de Investigación Médica en Inmunología, | Alejandro Torres Flores; Arturo Cébulo-Vázquez; Aura Angélica López García; Carolina González-Torres; Constantino López-Macias.; César Raúl González-Bonilla; Eduardo Ferat-Osorio; Elizabeth Rubi Duran Castañeda; Horacio Zamudio-Meza; Javier Gaytán-Cervantes; Jesús Mena López;                                                                                                                                                                                                                                                                                                                                                                                                                          |

|                                                                                                                                                                                                                                                                                                                                                                                                                                                                                                                                                                                                                                                                                                                                                                                                                                                                                                                                                                                                                                                                                                                                                                                                                                                                                                                                                                                                                                                                                                                                                                                                                                                                                                                                                                                                                                                                                                                           |                                                                                                                                                                                                                                           |                                                                                                                                                                                                                                                                         |                                                                                                                                                                                                                                                                                                                                                                                                                                                                                                                                                                               |
|---------------------------------------------------------------------------------------------------------------------------------------------------------------------------------------------------------------------------------------------------------------------------------------------------------------------------------------------------------------------------------------------------------------------------------------------------------------------------------------------------------------------------------------------------------------------------------------------------------------------------------------------------------------------------------------------------------------------------------------------------------------------------------------------------------------------------------------------------------------------------------------------------------------------------------------------------------------------------------------------------------------------------------------------------------------------------------------------------------------------------------------------------------------------------------------------------------------------------------------------------------------------------------------------------------------------------------------------------------------------------------------------------------------------------------------------------------------------------------------------------------------------------------------------------------------------------------------------------------------------------------------------------------------------------------------------------------------------------------------------------------------------------------------------------------------------------------------------------------------------------------------------------------------------------|-------------------------------------------------------------------------------------------------------------------------------------------------------------------------------------------------------------------------------------------|-------------------------------------------------------------------------------------------------------------------------------------------------------------------------------------------------------------------------------------------------------------------------|-------------------------------------------------------------------------------------------------------------------------------------------------------------------------------------------------------------------------------------------------------------------------------------------------------------------------------------------------------------------------------------------------------------------------------------------------------------------------------------------------------------------------------------------------------------------------------|
|                                                                                                                                                                                                                                                                                                                                                                                                                                                                                                                                                                                                                                                                                                                                                                                                                                                                                                                                                                                                                                                                                                                                                                                                                                                                                                                                                                                                                                                                                                                                                                                                                                                                                                                                                                                                                                                                                                                           | "Bernardo Sepúlveda Gutiérrez", Centro Médico Nacional Siglo XXI, Instituto Mexicano del Seguro Social (IMSS), México.                                                                                                                    | UMAE Hospital de Especialidades "Bernardo Sepúlveda Gutiérrez", Centro Médico Nacional Siglo XXI, Instituto Mexicano del Seguro Social (IMSS), México.                                                                                                                  | Joaquín González-Ibarra; José Manuel Ruiz Rincón; Juan Carlos Guerrero Escobar; Lourdes Arriaga-Pizano; Luis Sánchez Hurtado; Zuleima Maldonado Galeana                                                                                                                                                                                                                                                                                                                                                                                                                       |
| EPI_ISL_1096141                                                                                                                                                                                                                                                                                                                                                                                                                                                                                                                                                                                                                                                                                                                                                                                                                                                                                                                                                                                                                                                                                                                                                                                                                                                                                                                                                                                                                                                                                                                                                                                                                                                                                                                                                                                                                                                                                                           | Departamento de Cuidados Intensivos-Unidad de Investigación Médica en Inmunología, UMAE Hospital de Especialidades "Bernardo Sepúlveda Gutiérrez", Centro Médico Nacional Siglo XXI, Instituto Mexicano del Seguro Social (IMSS), México. | Laboratorio de Secuenciación-Centro de Instrumentos, IMSS México /Unidad de Investigación Médica en Inmunología, UMAE Hospital de Especialidades "Bernardo Sepúlveda Gutiérrez", Centro Médico Nacional Siglo XXI, Instituto Mexicano del Seguro Social (IMSS), México. | Alejandro Torres Flores; Arturo Cérbuló-Vázquez; Aura Angélica López García; Carolina González-Torres; Constantino López-Macias.; César Raúl González-Bonilla; Eduardo Ferat-Osorio; Elizabeth Rubi Duran Castañeda; Horacio Zamudio-Meza; Javier Gaytán-Cervantes; Jesús Mena López; Joaquín González-Ibarra; José Manuel Ruiz Rincón; Juan Carlos Guerrero Escobar; Lourdes Arriaga-Pizano; Luis Sánchez Hurtado; Zuleima Maldonado Galeana                                                                                                                                 |
| EPI_ISL_1194046 to 1194047, EPI_ISL_1194049 to 1194050, EPI_ISL_1194052 to 1194053, EPI_ISL_1194055, EPI_ISL_1194057 to 1194058, EPI_ISL_1194060 to 1194061, EPI_ISL_1194063 to 1194064, EPI_ISL_1194066 to 1194067, EPI_ISL_1194069 to 1194070, EPI_ISL_1194072 to 1194073, EPI_ISL_1194075 to 1194076, EPI_ISL_1194078 to 1194079, EPI_ISL_1194081 to 1194082, EPI_ISL_1194084 to 1194085, EPI_ISL_1194087 to 1194088, EPI_ISL_1194090 to 1194091, EPI_ISL_1194093, EPI_ISL_1194095 to 1194096, EPI_ISL_1194098 to 1194099, EPI_ISL_1194613 to 1194629                                                                                                                                                                                                                                                                                                                                                                                                                                                                                                                                                                                                                                                                                                                                                                                                                                                                                                                                                                                                                                                                                                                                                                                                                                                                                                                                                                  |                                                                                                                                                                                                                                           |                                                                                                                                                                                                                                                                         |                                                                                                                                                                                                                                                                                                                                                                                                                                                                                                                                                                               |
| see above                                                                                                                                                                                                                                                                                                                                                                                                                                                                                                                                                                                                                                                                                                                                                                                                                                                                                                                                                                                                                                                                                                                                                                                                                                                                                                                                                                                                                                                                                                                                                                                                                                                                                                                                                                                                                                                                                                                 | Departamento de Microbiología, CDB, Hospital Clínic, Barcelona                                                                                                                                                                            | SeqCOVID-SPAIN consortium/IBV(CSIC)                                                                                                                                                                                                                                     | Aida Peiró and SeqCOVID-SPAIN consortium; Andrea Vergara; Elisa Rubio; Jéssica Navero; Mikel Martínez                                                                                                                                                                                                                                                                                                                                                                                                                                                                         |
| EPI_ISL_1340750 to 1340764                                                                                                                                                                                                                                                                                                                                                                                                                                                                                                                                                                                                                                                                                                                                                                                                                                                                                                                                                                                                                                                                                                                                                                                                                                                                                                                                                                                                                                                                                                                                                                                                                                                                                                                                                                                                                                                                                                | Departamento de Virología, Laboratorio Central de Salud Pública, Avenida Venezuela y Teniente Escurra, Asunción, Paraguay                                                                                                                 | Laboratory of Respiratory Viruses and Measles, Oswaldo Cruz Institute, FIOCRUZ                                                                                                                                                                                          | Alice Sampaio Rocha; Ana Carolina Mendonca; Anna Carolina Paixao; Cynthia Vazquez; Fernando Motta; Luciana Appolinario; Marilda Siqueira on behalf of the Fiocruz COVID-19 Genomic Surveillance Network; Paola Resende; Renata Serrano Lopes                                                                                                                                                                                                                                                                                                                                  |
| EPI_ISL_1013596 to 1013614                                                                                                                                                                                                                                                                                                                                                                                                                                                                                                                                                                                                                                                                                                                                                                                                                                                                                                                                                                                                                                                                                                                                                                                                                                                                                                                                                                                                                                                                                                                                                                                                                                                                                                                                                                                                                                                                                                | Department for Molecular Diagnostics, Centre for Medical Microbiology, Institute of Public Health, Montenegro                                                                                                                             | Charité Universitätsmedizin Berlin, Institut für Virologie                                                                                                                                                                                                              | Barbara Mühlemann; Christian Drosten; Danijela Vujošević; Julia Schneider; Julia Tesch; Jörn Beheim-Schwarzbach; Marija Govedarica; Talitha Veith; Terry Jones; Tobias Bleicker; Victor M Corman                                                                                                                                                                                                                                                                                                                                                                              |
| EPI_ISL_1048367                                                                                                                                                                                                                                                                                                                                                                                                                                                                                                                                                                                                                                                                                                                                                                                                                                                                                                                                                                                                                                                                                                                                                                                                                                                                                                                                                                                                                                                                                                                                                                                                                                                                                                                                                                                                                                                                                                           | Department for Virology, Molecular Biology and Genome Research, R. G. Lugar Center for Public Health Research, National Center for Disease Control and Public Health (NCDC) of Georgia.                                                   | Department for Virology, Molecular Biology and Genome Research, R. G. Lugar Center for Public Health Research, National Center for Disease Control and Public Health (NCDC) of Georgia.                                                                                 | Adam Kotorashvili; Amiran Gamkrelidze.; Ana Pakkauri; Ann Machablishvili; Anna Kasradze; Davit Tsaguria; Ekaterine Khmaladze; Ekaterine Zangaladze; Ekaterine Zhghenti; Giorgi Gogoladze; Giorgi Tomashvili; Gvantsa Brachveli; Gvantsa Chanturia; Irma Burjanadze; Ketevan Sidamonidze; Khatuna Zakhshvili; Lela Sabadze; Lela Urushadze; Magda Dgebuadze; Maia Alkhashvili; Mari Gavashelidze; Mariam Zakalashvili; Marine Murtskhaladze; Meri Pantsulaia; Nato Kotaria; Nino Berishvili; Paata Imnadze; Roena Sukhiasvili; Tamar Jashiasvili; Tata Imnadze; Tea Tvedoradze |
| EPI_ISL_1036592 to 1036593, EPI_ISL_1036603 to 1036604, EPI_ISL_1036609, EPI_ISL_1036612, EPI_ISL_1036617, EPI_ISL_1040438 to 1040451, EPI_ISL_1058515 to 1058519, EPI_ISL_1058527, EPI_ISL_1058558 to 1058559, EPI_ISL_1058566, EPI_ISL_1058571, EPI_ISL_1058576 to 1058578, EPI_ISL_1058603, EPI_ISL_1058619 to 1058622, EPI_ISL_1076367, EPI_ISL_1076369, EPI_ISL_1076381, EPI_ISL_1076411 to 1076412, EPI_ISL_1076414, EPI_ISL_1076419, EPI_ISL_1076421, EPI_ISL_1076431, EPI_ISL_1076448 to 1076450, EPI_ISL_1076452 to 1076453, EPI_ISL_1076455 to 1076457, EPI_ISL_1076459 to 1076460, EPI_ISL_1081135, EPI_ISL_1081138, EPI_ISL_1081141, EPI_ISL_1121173, EPI_ISL_1121184, EPI_ISL_1121190, EPI_ISL_1121197, EPI_ISL_1121203, EPI_ISL_1121217, EPI_ISL_1123371, EPI_ISL_1171479 to 1171490, EPI_ISL_1241689, EPI_ISL_1241693 to 1241697, EPI_ISL_1241700, EPI_ISL_1241703, EPI_ISL_1241706 to 1241708, EPI_ISL_1241754 to 1241759, EPI_ISL_1241819 to 1241830, EPI_ISL_1318095 to 1318096, EPI_ISL_1318100, EPI_ISL_1318107 to 1318108, EPI_ISL_1318132 to 1318134, EPI_ISL_1318137 to 1318138, EPI_ISL_1318143, EPI_ISL_1318158 to 1318160, EPI_ISL_1318175, EPI_ISL_1318183 to 1318184, EPI_ISL_1318186, EPI_ISL_1318193, EPI_ISL_1318195 to 1318196, EPI_ISL_1318198, EPI_ISL_1360105, EPI_ISL_1381947, EPI_ISL_1381971 to 1381975, EPI_ISL_1381987 to 1381989, EPI_ISL_1382009 to 1382010, EPI_ISL_1382037 to 1382040, EPI_ISL_1382050, EPI_ISL_1382053, EPI_ISL_1382057, EPI_ISL_1382062, EPI_ISL_1382071, EPI_ISL_1382073                                                                                                                                                                                                                                                                                                                                                                                   |                                                                                                                                                                                                                                           |                                                                                                                                                                                                                                                                         |                                                                                                                                                                                                                                                                                                                                                                                                                                                                                                                                                                               |
| see above                                                                                                                                                                                                                                                                                                                                                                                                                                                                                                                                                                                                                                                                                                                                                                                                                                                                                                                                                                                                                                                                                                                                                                                                                                                                                                                                                                                                                                                                                                                                                                                                                                                                                                                                                                                                                                                                                                                 | Department of Clinical Microbiology                                                                                                                                                                                                       | GIGA Medical Genomics                                                                                                                                                                                                                                                   | Bouchra Boujemla; Cécile Meex; Keith Durkin; Maria Artesi; Marie-Pierre Hayette; Nathalie Renotte; Pierrette Melin; Raphaël Boreux; Sébastien Bontems; Vincent Bours                                                                                                                                                                                                                                                                                                                                                                                                          |
| EPI_ISL_1130784                                                                                                                                                                                                                                                                                                                                                                                                                                                                                                                                                                                                                                                                                                                                                                                                                                                                                                                                                                                                                                                                                                                                                                                                                                                                                                                                                                                                                                                                                                                                                                                                                                                                                                                                                                                                                                                                                                           | Department of Dermatology                                                                                                                                                                                                                 | Switzerland                                                                                                                                                                                                                                                             | Department of Biosystems Science and Engineering; ETH Zürich                                                                                                                                                                                                                                                                                                                                                                                                                                                                                                                  |
| EPI_ISL_1280092 to 1280164                                                                                                                                                                                                                                                                                                                                                                                                                                                                                                                                                                                                                                                                                                                                                                                                                                                                                                                                                                                                                                                                                                                                                                                                                                                                                                                                                                                                                                                                                                                                                                                                                                                                                                                                                                                                                                                                                                | Department of Genetics, Medirex                                                                                                                                                                                                           | Laboratory of Genomics and Bioinformatics, Comenius University Science Park                                                                                                                                                                                             | Anna Giová; Diana Rusáková; Gabriel Minárik; Jaroslav Budiš; Miroslav Böhmér; Renáta Lukáková; Tatiana Sedláková; Tomáš Szemes; Werner Krampfl                                                                                                                                                                                                                                                                                                                                                                                                                                |
| EPI_ISL_1121893, EPI_ISL_1121900, EPI_ISL_1121945 to 1121946, EPI_ISL_1121950                                                                                                                                                                                                                                                                                                                                                                                                                                                                                                                                                                                                                                                                                                                                                                                                                                                                                                                                                                                                                                                                                                                                                                                                                                                                                                                                                                                                                                                                                                                                                                                                                                                                                                                                                                                                                                             | Department of Health & Mental Hygiene Central Harlem                                                                                                                                                                                      | New York City Public Health Laboratory                                                                                                                                                                                                                                  | Jade Wang; et al.                                                                                                                                                                                                                                                                                                                                                                                                                                                                                                                                                             |
| EPI_ISL_1121925, EPI_ISL_1121927 to 1121928, EPI_ISL_1121960                                                                                                                                                                                                                                                                                                                                                                                                                                                                                                                                                                                                                                                                                                                                                                                                                                                                                                                                                                                                                                                                                                                                                                                                                                                                                                                                                                                                                                                                                                                                                                                                                                                                                                                                                                                                                                                              | Department of Health & Mental Hygiene Chelsea                                                                                                                                                                                             | New York City Public Health Laboratory                                                                                                                                                                                                                                  | Jade Wang; et al.                                                                                                                                                                                                                                                                                                                                                                                                                                                                                                                                                             |
| EPI_ISL_1121887, EPI_ISL_1121899, EPI_ISL_1121905 to 1121908, EPI_ISL_1121932 to 1121936                                                                                                                                                                                                                                                                                                                                                                                                                                                                                                                                                                                                                                                                                                                                                                                                                                                                                                                                                                                                                                                                                                                                                                                                                                                                                                                                                                                                                                                                                                                                                                                                                                                                                                                                                                                                                                  | Department of Health & Mental Hygiene Corona                                                                                                                                                                                              | New York City Public Health Laboratory                                                                                                                                                                                                                                  | Jade Wang; et al.                                                                                                                                                                                                                                                                                                                                                                                                                                                                                                                                                             |
| EPI_ISL_1121890 to 1121892, EPI_ISL_1121904, EPI_ISL_1121938 to 1121939                                                                                                                                                                                                                                                                                                                                                                                                                                                                                                                                                                                                                                                                                                                                                                                                                                                                                                                                                                                                                                                                                                                                                                                                                                                                                                                                                                                                                                                                                                                                                                                                                                                                                                                                                                                                                                                   | Department of Health & Mental Hygiene Crown Heights                                                                                                                                                                                       | New York City Public Health Laboratory                                                                                                                                                                                                                                  | Jade Wang; et al.                                                                                                                                                                                                                                                                                                                                                                                                                                                                                                                                                             |
| EPI_ISL_1121889, EPI_ISL_1121901 to 1121903, EPI_ISL_1121937                                                                                                                                                                                                                                                                                                                                                                                                                                                                                                                                                                                                                                                                                                                                                                                                                                                                                                                                                                                                                                                                                                                                                                                                                                                                                                                                                                                                                                                                                                                                                                                                                                                                                                                                                                                                                                                              | Department of Health & Mental Hygiene Fort Greene                                                                                                                                                                                         | New York City Public Health Laboratory                                                                                                                                                                                                                                  | Jade Wang; et al.                                                                                                                                                                                                                                                                                                                                                                                                                                                                                                                                                             |
| EPI_ISL_1121915 to 1121918, EPI_ISL_1121924, EPI_ISL_1121951 to 1121959                                                                                                                                                                                                                                                                                                                                                                                                                                                                                                                                                                                                                                                                                                                                                                                                                                                                                                                                                                                                                                                                                                                                                                                                                                                                                                                                                                                                                                                                                                                                                                                                                                                                                                                                                                                                                                                   | Department of Health & Mental Hygiene Jamaica                                                                                                                                                                                             | New York City Public Health Laboratory                                                                                                                                                                                                                                  | Jade Wang; et al.                                                                                                                                                                                                                                                                                                                                                                                                                                                                                                                                                             |
| EPI_ISL_1121888, EPI_ISL_1121913, EPI_ISL_1121919 to 1121923, EPI_ISL_1121926, EPI_ISL_1121940 to 1121942, EPI_ISL_1121944, EPI_ISL_1121947 to 1121949                                                                                                                                                                                                                                                                                                                                                                                                                                                                                                                                                                                                                                                                                                                                                                                                                                                                                                                                                                                                                                                                                                                                                                                                                                                                                                                                                                                                                                                                                                                                                                                                                                                                                                                                                                    |                                                                                                                                                                                                                                           |                                                                                                                                                                                                                                                                         |                                                                                                                                                                                                                                                                                                                                                                                                                                                                                                                                                                               |
| see above                                                                                                                                                                                                                                                                                                                                                                                                                                                                                                                                                                                                                                                                                                                                                                                                                                                                                                                                                                                                                                                                                                                                                                                                                                                                                                                                                                                                                                                                                                                                                                                                                                                                                                                                                                                                                                                                                                                 | Department of Health & Mental Hygiene Morrisania                                                                                                                                                                                          | New York City Public Health Laboratory                                                                                                                                                                                                                                  | Jade Wang; et al.                                                                                                                                                                                                                                                                                                                                                                                                                                                                                                                                                             |
| EPI_ISL_1121894, EPI_ISL_1121909 to 1121912, EPI_ISL_1121929 to 1121931                                                                                                                                                                                                                                                                                                                                                                                                                                                                                                                                                                                                                                                                                                                                                                                                                                                                                                                                                                                                                                                                                                                                                                                                                                                                                                                                                                                                                                                                                                                                                                                                                                                                                                                                                                                                                                                   | Department of Health & Mental Hygiene PHL                                                                                                                                                                                                 | New York City Public Health Laboratory                                                                                                                                                                                                                                  | Jade Wang; et al.                                                                                                                                                                                                                                                                                                                                                                                                                                                                                                                                                             |
| EPI_ISL_1121914, EPI_ISL_1121943                                                                                                                                                                                                                                                                                                                                                                                                                                                                                                                                                                                                                                                                                                                                                                                                                                                                                                                                                                                                                                                                                                                                                                                                                                                                                                                                                                                                                                                                                                                                                                                                                                                                                                                                                                                                                                                                                          | Department of Health & Mental Hygiene Riverside                                                                                                                                                                                           | New York City Public Health Laboratory                                                                                                                                                                                                                                  | Jade Wang; et al.                                                                                                                                                                                                                                                                                                                                                                                                                                                                                                                                                             |
| EPI_ISL_1018118 to 1018217, EPI_ISL_1018229 to 1018328, EPI_ISL_1019637, EPI_ISL_1019640, EPI_ISL_1019642, EPI_ISL_1019645, EPI_ISL_1019647, EPI_ISL_1019650, EPI_ISL_1019653, EPI_ISL_1019655, EPI_ISL_1019658, EPI_ISL_1019660, EPI_ISL_1019663, EPI_ISL_1019665, EPI_ISL_1019668, EPI_ISL_1019671, EPI_ISL_1019674, EPI_ISL_1019676, EPI_ISL_1019678, EPI_ISL_1019681, EPI_ISL_1019683, EPI_ISL_1019686, EPI_ISL_1019688, EPI_ISL_1019691, EPI_ISL_1019693, EPI_ISL_1019696, EPI_ISL_1019699, EPI_ISL_1019702, EPI_ISL_1019705, EPI_ISL_1019707, EPI_ISL_1019710, EPI_ISL_1019713, EPI_ISL_1019715, EPI_ISL_1019718, EPI_ISL_1019720, EPI_ISL_1019722, EPI_ISL_1019724, EPI_ISL_1019726, EPI_ISL_1019729, EPI_ISL_1019731, EPI_ISL_1019734, EPI_ISL_1019737, EPI_ISL_1019739, EPI_ISL_1019745, EPI_ISL_1019748, EPI_ISL_1019750, EPI_ISL_1019753, EPI_ISL_1019756, EPI_ISL_1019759, EPI_ISL_1019762, EPI_ISL_1019764, EPI_ISL_1019767, EPI_ISL_1019770, EPI_ISL_1019772, EPI_ISL_1019775, EPI_ISL_1019778, EPI_ISL_1019780, EPI_ISL_1019783, EPI_ISL_1019785, EPI_ISL_1019788, EPI_ISL_1019790, EPI_ISL_1019793, EPI_ISL_1019795, EPI_ISL_1019798, EPI_ISL_1019800, EPI_ISL_1019803, EPI_ISL_1019805, EPI_ISL_1019807, EPI_ISL_1019810, EPI_ISL_1019813, EPI_ISL_1019815, EPI_ISL_1019818, EPI_ISL_1019820, EPI_ISL_1019823, EPI_ISL_1019825, EPI_ISL_1019828, EPI_ISL_1019830, EPI_ISL_1019833, EPI_ISL_1019836, EPI_ISL_1019838, EPI_ISL_1019841, EPI_ISL_1019843, EPI_ISL_1019846, EPI_ISL_1019849, EPI_ISL_1019851, EPI_ISL_1019853, EPI_ISL_1019855, EPI_ISL_1019858, EPI_ISL_1019861, EPI_ISL_1019863, EPI_ISL_1019866, EPI_ISL_1019869, EPI_ISL_1019872, EPI_ISL_1019875, EPI_ISL_1019877, EPI_ISL_1019880, EPI_ISL_1019882, EPI_ISL_1019885, EPI_ISL_1019888, EPI_ISL_1019890, EPI_ISL_1019893, EPI_ISL_1020021 to 1020120, EPI_ISL_1020208 to 1020284, EPI_ISL_1159070 to 1159106, EPI_ISL_1289435 to 1289446 |                                                                                                                                                                                                                                           |                                                                                                                                                                                                                                                                         |                                                                                                                                                                                                                                                                                                                                                                                                                                                                                                                                                                               |
| see above                                                                                                                                                                                                                                                                                                                                                                                                                                                                                                                                                                                                                                                                                                                                                                                                                                                                                                                                                                                                                                                                                                                                                                                                                                                                                                                                                                                                                                                                                                                                                                                                                                                                                                                                                                                                                                                                                                                 | Department of Health Technology and Informatics, The Hong Kong Polytechnic University                                                                                                                                                     | Department of Health Technology and Informatics, The Hong Kong Polytechnic University                                                                                                                                                                                   | Alan Ka-Lun Wu; Alex Yat-Man Ho; Barry Kin-Chung Wong; Chloe Toi-Mei Chan; David Ho-Kung Shum; Denise Sze-Hang Wong; Gilman Kit-Hang Siu; Hiu-Yin Lao; Jake Siu-Lun Leung; Kam-Tong Yip; Kenneth Siu-Sing Leung; Kingsley King-Gee Tam; Kitty Sau-Chun Fung; Kristine Luk; Lam-Kwong Lee; Miranda Chong-Yee Yau; Sandy Ka-Yee Chau; Shea Ping Yip; Tak-Lun Que; Timothy Ting-Leung Ng; Wing Cheong Yam; Wing-Kin To; Yvette Wai-Man Lai                                                                                                                                       |
| EPI_ISL_1114470 to 1114471, EPI_ISL_1114492 to 1114493                                                                                                                                                                                                                                                                                                                                                                                                                                                                                                                                                                                                                                                                                                                                                                                                                                                                                                                                                                                                                                                                                                                                                                                                                                                                                                                                                                                                                                                                                                                                                                                                                                                                                                                                                                                                                                                                    | Department of Health and Mental Hygiene Central Harlem                                                                                                                                                                                    | New York City Public Health Laboratory                                                                                                                                                                                                                                  | Jade Wang; et al.                                                                                                                                                                                                                                                                                                                                                                                                                                                                                                                                                             |
| EPI_ISL_1114500 to 1114501, EPI_ISL_1114509, EPI_ISL_1114524                                                                                                                                                                                                                                                                                                                                                                                                                                                                                                                                                                                                                                                                                                                                                                                                                                                                                                                                                                                                                                                                                                                                                                                                                                                                                                                                                                                                                                                                                                                                                                                                                                                                                                                                                                                                                                                              | Department of Health and Mental Hygiene Chelsea                                                                                                                                                                                           | New York City Public Health Laboratory                                                                                                                                                                                                                                  | Jade Wang; et al.                                                                                                                                                                                                                                                                                                                                                                                                                                                                                                                                                             |
| EPI_ISL_1114472 to 1114475, EPI_ISL_1114504 to 1114507, EPI_ISL_1114513 to 1114515                                                                                                                                                                                                                                                                                                                                                                                                                                                                                                                                                                                                                                                                                                                                                                                                                                                                                                                                                                                                                                                                                                                                                                                                                                                                                                                                                                                                                                                                                                                                                                                                                                                                                                                                                                                                                                        | Department of Health and Mental Hygiene Corona                                                                                                                                                                                            | New York City Public Health Laboratory                                                                                                                                                                                                                                  | Jade Wang; et al.                                                                                                                                                                                                                                                                                                                                                                                                                                                                                                                                                             |
| EPI_ISL_1114485, EPI_ISL_1114499, EPI_ISL_1114502, EPI_ISL_1114516 to 1114517                                                                                                                                                                                                                                                                                                                                                                                                                                                                                                                                                                                                                                                                                                                                                                                                                                                                                                                                                                                                                                                                                                                                                                                                                                                                                                                                                                                                                                                                                                                                                                                                                                                                                                                                                                                                                                             | Department of Health and Mental Hygiene Crown Heights                                                                                                                                                                                     | New York City Public Health Laboratory                                                                                                                                                                                                                                  | Jade Wang; et al.                                                                                                                                                                                                                                                                                                                                                                                                                                                                                                                                                             |

|                                                                                                                                                                                                                                                                                                                                                                                                                                                                                                                                                                                                                                                                                                                                                                                                                                                                                                                                                                                                                                                                                                                                                                                         |                                                                                                                                                       |                                                                                                                                                  |                                                                                                                                                                                                                                                                                                                                                                         |
|-----------------------------------------------------------------------------------------------------------------------------------------------------------------------------------------------------------------------------------------------------------------------------------------------------------------------------------------------------------------------------------------------------------------------------------------------------------------------------------------------------------------------------------------------------------------------------------------------------------------------------------------------------------------------------------------------------------------------------------------------------------------------------------------------------------------------------------------------------------------------------------------------------------------------------------------------------------------------------------------------------------------------------------------------------------------------------------------------------------------------------------------------------------------------------------------|-------------------------------------------------------------------------------------------------------------------------------------------------------|--------------------------------------------------------------------------------------------------------------------------------------------------|-------------------------------------------------------------------------------------------------------------------------------------------------------------------------------------------------------------------------------------------------------------------------------------------------------------------------------------------------------------------------|
| EPI_ISL_1114494 to 1114496                                                                                                                                                                                                                                                                                                                                                                                                                                                                                                                                                                                                                                                                                                                                                                                                                                                                                                                                                                                                                                                                                                                                                              | Department of Health and Mental Hygiene Fort Greene                                                                                                   | New York City Public Health Laboratory                                                                                                           | Jade Wang; et al.                                                                                                                                                                                                                                                                                                                                                       |
| EPI_ISL_1114477 to 1114481,<br>EPI_ISL_1114508, EPI_ISL_1114518                                                                                                                                                                                                                                                                                                                                                                                                                                                                                                                                                                                                                                                                                                                                                                                                                                                                                                                                                                                                                                                                                                                         | Department of Health and Mental Hygiene Jamaica                                                                                                       | New York City Public Health Laboratory                                                                                                           | Jade Wang; et al.                                                                                                                                                                                                                                                                                                                                                       |
| EPI_ISL_1114487 to 1114491                                                                                                                                                                                                                                                                                                                                                                                                                                                                                                                                                                                                                                                                                                                                                                                                                                                                                                                                                                                                                                                                                                                                                              | Department of Health and Mental Hygiene Morrisania                                                                                                    | New York City Public Health Laboratory                                                                                                           | Jade Wang; et al.                                                                                                                                                                                                                                                                                                                                                       |
| EPI_ISL_1114469, EPI_ISL_1114476,<br>EPI_ISL_1114482 to 1114484,<br>EPI_ISL_1114486, EPI_ISL_1114510,<br>EPI_ISL_1114519 to 1114523                                                                                                                                                                                                                                                                                                                                                                                                                                                                                                                                                                                                                                                                                                                                                                                                                                                                                                                                                                                                                                                     | Department of Health and Mental Hygiene Public Health Laboratory                                                                                      | New York City Public Health Laboratory                                                                                                           | Jade Wang; et al.                                                                                                                                                                                                                                                                                                                                                       |
| EPI_ISL_1114497 to 1114498,<br>EPI_ISL_1114503                                                                                                                                                                                                                                                                                                                                                                                                                                                                                                                                                                                                                                                                                                                                                                                                                                                                                                                                                                                                                                                                                                                                          | Department of Health and Mental Hygiene Riverside                                                                                                     | New York City Public Health Laboratory                                                                                                           | Jade Wang; et al.                                                                                                                                                                                                                                                                                                                                                       |
| EPI_ISL_1017989 to 1017990, EPI_ISL_1064758, EPI_ISL_1064768, EPI_ISL_1064810, EPI_ISL_1064827 to 1064828, EPI_ISL_1064851 to 1064852, EPI_ISL_1064889, EPI_ISL_1064898, EPI_ISL_1114511 to 1114512, EPI_ISL_1200562, EPI_ISL_1200599, EPI_ISL_1261800, EPI_ISL_1261830, EPI_ISL_1261853,<br>EPI_ISL_1261867, EPI_ISL_1337466, EPI_ISL_1337472                                                                                                                                                                                                                                                                                                                                                                                                                                                                                                                                                                                                                                                                                                                                                                                                                                          |                                                                                                                                                       |                                                                                                                                                  |                                                                                                                                                                                                                                                                                                                                                                         |
| see above                                                                                                                                                                                                                                                                                                                                                                                                                                                                                                                                                                                                                                                                                                                                                                                                                                                                                                                                                                                                                                                                                                                                                                               | Department of Homeless Services                                                                                                                       | New York City Public Health Laboratory                                                                                                           | Jade Wang; et al.                                                                                                                                                                                                                                                                                                                                                       |
| EPI_ISL_1255104                                                                                                                                                                                                                                                                                                                                                                                                                                                                                                                                                                                                                                                                                                                                                                                                                                                                                                                                                                                                                                                                                                                                                                         | Department of Infectious Disease Prevention and Control, Henan Provincial Center for Disease Control and Prevention                                   | Department of Infectious Disease Prevention and Control, Henan Provincial Center for Disease Control and Prevention                              | B. and Huang, X.; Li, X.; Lu, S.; Wu                                                                                                                                                                                                                                                                                                                                    |
| EPI_ISL_1020317 to 1020322,<br>EPI_ISL_1020324 to 1020327                                                                                                                                                                                                                                                                                                                                                                                                                                                                                                                                                                                                                                                                                                                                                                                                                                                                                                                                                                                                                                                                                                                               | Department of Infectious Diseases and Immunology, National Hospital Organization Nagoya Medical Center                                                | Clinical Research Center, National Hospital Organization Nagoya Medical Center                                                                   | Hirotaoka Ode; Kazuhiro Matsuoka; Mai Kubota; Masakazu Matsuda; Mayumi Imahashi; Miho Nakasuji; Mikiko Mori; Yasumasa Iwatani; Yoshihiro Nakata; Yoshiyuki Yokomaku                                                                                                                                                                                                     |
| EPI_ISL_1224943                                                                                                                                                                                                                                                                                                                                                                                                                                                                                                                                                                                                                                                                                                                                                                                                                                                                                                                                                                                                                                                                                                                                                                         | Department of Infectious Diseases, Istituto Superiore di Sanità, Rome, Italy; Azienda Ospedaliera Universitaria Pisana, Pisa, Italy                   | Istituto Superiore di Sanità (ISS)                                                                                                               | Alessandra Lo Presti; Angela Di Martino; Anna Lisa Capria; Flavia Favilli; Giovanni Segatori; Lisa Macera; Manuela Marra; Marco Crescenzi; Maria Carollo; Maria Linda Vatteroni; Mauro Pistello; Paola Mazzetti; Paola Stefanelli; Sabrina Gabbriellini; Stefano Fiore                                                                                                  |
| EPI_ISL_1200635 to 1200637,<br>EPI_ISL_1372550 to 1372561                                                                                                                                                                                                                                                                                                                                                                                                                                                                                                                                                                                                                                                                                                                                                                                                                                                                                                                                                                                                                                                                                                                               | Department of Infectious Diseases, Istituto Superiore di Sanità, Rome, Italy; AOR San Carlo, Potenza, Italy                                           | Department of Infectious Diseases, Istituto Superiore di Sanità                                                                                  | Alessandra Lo Presti; Angela Di Martino; Angela Menchise; Anna Curci; Antonio Picerno; Lopizzo Teresa; Manuela Marra; Marco Crescenzi; Maria Carollo; Paola Stefanelli; Stefano Fiore                                                                                                                                                                                   |
| EPI_ISL_1181344                                                                                                                                                                                                                                                                                                                                                                                                                                                                                                                                                                                                                                                                                                                                                                                                                                                                                                                                                                                                                                                                                                                                                                         | Department of Infectious Diseases, Istituto Superiore di Sanità, Rome, Italy; AOR San Carlo, Potenza, Italy                                           | Istituto Superiore di Sanità (ISS)                                                                                                               | Alessandra Lo Presti; Angela Di Martino; Angela Menchise; Anna Curci; Antonio Picerno; Lopizzo Teresa; Manuela Marra; Marco Crescenzi; Maria Carollo; Paola Stefanelli; Stefano Fiore                                                                                                                                                                                   |
| EPI_ISL_1012923 to 1012924                                                                                                                                                                                                                                                                                                                                                                                                                                                                                                                                                                                                                                                                                                                                                                                                                                                                                                                                                                                                                                                                                                                                                              | Department of Infectious Diseases, Istituto Superiore di Sanità, Rome, Italy; ASST Sette Laghi, Varese, Italy                                         | Istituto Superiore di Sanità (ISS)                                                                                                               | Alessandra Lo Presti; Andreina Baj; Angela Di Martino; Fabrizio Maggi; Federica Novazzi; Manuela Marra; Marco Crescenzi; Maria Carollo; Paola Stefanelli; Stefano Fiore                                                                                                                                                                                                 |
| EPI_ISL_1181352, EPI_ISL_1198007                                                                                                                                                                                                                                                                                                                                                                                                                                                                                                                                                                                                                                                                                                                                                                                                                                                                                                                                                                                                                                                                                                                                                        | Department of Infectious Diseases, Istituto Superiore di Sanità, Rome, Italy; Azienda Ospedaliera Santa Maria di Terni, Terni, Italy                  | Istituto Superiore di Sanità (ISS)                                                                                                               | Alessandra Lo Presti; Angela Di Martino; Augusto Scaccetti; Cinzia Di Giuli; Manuela Marra; Marco Crescenzi; Maria Carollo; Michele Palumbo; Paola Stefanelli; Stefano Fiore                                                                                                                                                                                            |
| EPI_ISL_1197038, EPI_ISL_1197040                                                                                                                                                                                                                                                                                                                                                                                                                                                                                                                                                                                                                                                                                                                                                                                                                                                                                                                                                                                                                                                                                                                                                        | Department of Infectious Diseases, Istituto Superiore di Sanità, Rome, Italy; Azienda Sanitaria Locale TO5, Torino, Italy                             | Istituto Superiore di Sanità (ISS)                                                                                                               | Alessandra Allocco; Alessandra Lo Presti; Angela Di Martino; Cagnoli Claudia; Manuela Marra; Marco Crescenzi; Maria Carollo; Paola Stefanelli; Stefano Fiore                                                                                                                                                                                                            |
| EPI_ISL_1181627                                                                                                                                                                                                                                                                                                                                                                                                                                                                                                                                                                                                                                                                                                                                                                                                                                                                                                                                                                                                                                                                                                                                                                         | Department of Infectious Diseases, Istituto Superiore di Sanità, Rome, Italy; Azienda Usl Toscana sud est, Arezzo, Italy                              | Istituto Superiore di Sanità (ISS)                                                                                                               | Agostino Ognibene; Alessandra Lo Presti; Angela Di Martino; Manuela Marra; Marco Crescenzi; Maria Carollo; Paola Stefanelli; Stefano Fiore                                                                                                                                                                                                                              |
| EPI_ISL_1198918, EPI_ISL_1199386,<br>EPI_ISL_1199633                                                                                                                                                                                                                                                                                                                                                                                                                                                                                                                                                                                                                                                                                                                                                                                                                                                                                                                                                                                                                                                                                                                                    | Department of Infectious Diseases, Istituto Superiore di Sanità, Rome, Italy; L.C. Laboratori Campisi s.r.l., Siracusa, Sicily, Italy                 | Istituto Superiore di Sanità (ISS)                                                                                                               | Alessandra Lo Presti; Angela Di Martino; Campisi Corrado; Iemmolo Rosario; Manuela Marra; Marco Crescenzi; Maria Carollo; Paola Stefanelli; Stefano Fiore                                                                                                                                                                                                               |
| EPI_ISL_1181347, EPI_ISL_1181349,<br>EPI_ISL_1198794 to 1198796                                                                                                                                                                                                                                                                                                                                                                                                                                                                                                                                                                                                                                                                                                                                                                                                                                                                                                                                                                                                                                                                                                                         | Department of Infectious Diseases, Istituto Superiore di Sanità, Rome, Italy; U.O.S.D. Laboratorio Analisi Distretto 4 Ovest AULSS 9 Scaligera, Italy | Istituto Superiore di Sanità (ISS)                                                                                                               | Alessandra Lo Presti; Angela Di Martino; Manuela Marra; Marco Crescenzi; Maria Carollo; Maria Pompilia Visconti; Paola Stefanelli; Rosa Sforza; Stefano Fiore                                                                                                                                                                                                           |
| EPI_ISL_1014545, EPI_ISL_1014675, EPI_ISL_1178582, EPI_ISL_1199634 to 1199635, EPI_ISL_1199707, EPI_ISL_1200004, EPI_ISL_1200515 to 1200517                                                                                                                                                                                                                                                                                                                                                                                                                                                                                                                                                                                                                                                                                                                                                                                                                                                                                                                                                                                                                                             |                                                                                                                                                       |                                                                                                                                                  |                                                                                                                                                                                                                                                                                                                                                                         |
| see above                                                                                                                                                                                                                                                                                                                                                                                                                                                                                                                                                                                                                                                                                                                                                                                                                                                                                                                                                                                                                                                                                                                                                                               | Department of Infectious Diseases, Istituto Superiore di Sanità, Rome, Italy; Università degli Studi di Perugia, Perugia, Italy                       | Istituto Superiore di Sanità (ISS)                                                                                                               | Alessandra Lo Presti; Angela Di Martino; Antonella Mencacci; Barbara Camilloni; Luca De Sabato; Manuela Marra; Marco Crescenzi; Maria Carollo; Paola Stefanelli; Stefano Fiore                                                                                                                                                                                          |
| EPI_ISL_1035871, EPI_ISL_1035900 to 1035901, EPI_ISL_1035966                                                                                                                                                                                                                                                                                                                                                                                                                                                                                                                                                                                                                                                                                                                                                                                                                                                                                                                                                                                                                                                                                                                            | Department of Infectious Diseases, Istituto Superiore di Sanità, Rome, Italy; Università degli Studi di Siena, Siena, Italy                           | Istituto Superiore di Sanità (ISS)                                                                                                               | Alessandra Lo Presti; Angela Di Martino; Claudia Gandolfo; Gabriele Anichini; Gianni Gori Savellini; Manuela Marra; Marco Crescenzi; Maria Carollo; Maria Grazia Cusi; Paola Stefanelli; Stefano Fiore                                                                                                                                                                  |
| EPI_ISL_1168772 to 1169045                                                                                                                                                                                                                                                                                                                                                                                                                                                                                                                                                                                                                                                                                                                                                                                                                                                                                                                                                                                                                                                                                                                                                              | Department of Infectious Diseases, Kobe Institute of Health                                                                                           | Department of Infectious Diseases, Kobe Institute of Health                                                                                      | Kentarō Itokawa; Makoto Kuroda; Masanori Hashino; Noriko Nakanishi; Rina Tanaka; Ryohei Nomoto; Tomotada Iwamoto; Tsuyoshi Sekizuka                                                                                                                                                                                                                                     |
| EPI_ISL_1128148, EPI_ISL_1128158,<br>EPI_ISL_1128161, EPI_ISL_1128198 to 1128272                                                                                                                                                                                                                                                                                                                                                                                                                                                                                                                                                                                                                                                                                                                                                                                                                                                                                                                                                                                                                                                                                                        | Department of Infectious Diseases, Kobe Institute of Health                                                                                           | Pathogen Genomics Center, National Institute of Infectious Diseases                                                                              | Kentarō Itokawa; Makoto Kuroda; Masanori Hashino; Rina Tanaka; Tsuyoshi Sekizuka                                                                                                                                                                                                                                                                                        |
| EPI_ISL_1301441                                                                                                                                                                                                                                                                                                                                                                                                                                                                                                                                                                                                                                                                                                                                                                                                                                                                                                                                                                                                                                                                                                                                                                         | Department of Infectious and Tropical Diseases, Bichat Claude Bernard Hospital, Paris                                                                 | NBACC                                                                                                                                            | Aaron Phillips; Adam Bazinet; Amanda Graham; Brian Holland; David Miller; Denise Freeburger; Elyse Abbott; Gregory Williams; Jason Yoltz; Jennifer Biryukov; Jordan Bohannon; Karla Garcia; Katie Beck; M.J. Rosovitz; Melissa Krause; Michael Schuit; Paul Dabisch; Sean Lovett; Shanna Ratnesar-Shumate; Stewart Wood; Victoria Wahl; Wade Weaver                     |
| EPI_ISL_1007662 to 1007679                                                                                                                                                                                                                                                                                                                                                                                                                                                                                                                                                                                                                                                                                                                                                                                                                                                                                                                                                                                                                                                                                                                                                              | Department of Internal Medicine, College of Medicine, Chosun University                                                                               | Department of Internal Medicine, College of Medicine, Chosun University                                                                          | Dong-Min Kim                                                                                                                                                                                                                                                                                                                                                            |
| EPI_ISL_1233874, EPI_ISL_1233877 to 1233878, EPI_ISL_1306139 to 1306252                                                                                                                                                                                                                                                                                                                                                                                                                                                                                                                                                                                                                                                                                                                                                                                                                                                                                                                                                                                                                                                                                                                 | Department of Laboratory Medicine, Clinical Center, National Institutes of Health                                                                     | Laboratory of Parasitic Diseases, Systems Genomics Section, National Institute of Allergy and Infectious Diseases, National Institutes of Health | Allison Roder; Elodie Ghedin; Heike Bailin; Jennifer Kwan; Jessica McCormick-Ell; Jung-ho Youn; Matthew Chung; Michael Bell; Rachel Mercado; Sanchita Das; Stephanie Banakis; Tara Palmore; Wei Wang                                                                                                                                                                    |
| EPI_ISL_1008215 to 1008265,<br>EPI_ISL_1008327 to 1008388,<br>EPI_ISL_1117821, EPI_ISL_1180839 to 1180885, EPI_ISL_1209269 to 1209334                                                                                                                                                                                                                                                                                                                                                                                                                                                                                                                                                                                                                                                                                                                                                                                                                                                                                                                                                                                                                                                   | Department of Laboratory Medicine, Division of Clinical Virology, University of Medicine, Vienna                                                      | Bergthaler laboratory, CeMM Research Center for Molecular Medicine of the Austrian Academy of Sciences                                           | Andreas Bergthaler; Anna Schedl; Bekir Erguner; Benedikt Agerer; Christoph Bock; Fabian Amman; Jan Laine; Lukas Endler; Maelle Le Moing; Martin Senekowitsch; Michael Schuster; Thomas Penz                                                                                                                                                                             |
| EPI_ISL_1010728 to 1010731,<br>EPI_ISL_1020315 to 1020316,<br>EPI_ISL_1039160, EPI_ISL_1041957 to 1041958                                                                                                                                                                                                                                                                                                                                                                                                                                                                                                                                                                                                                                                                                                                                                                                                                                                                                                                                                                                                                                                                               | Department of Laboratory Medicine, National Taiwan University Hospital                                                                                | Microbial Genomics Core Lab, National Taiwan University Centers of Genomic and Precision Medicine                                                | Chiao-Ling Li; Pei-Jer Chen; Shan-Chwen Chang; Shiou-Hwei Yeh; Sui-Yuan Chang; Ya-Yun Lai; You-Yu Lin                                                                                                                                                                                                                                                                   |
| EPI_ISL_1013457 to 1013458, EPI_ISL_1013484 to 1013485, EPI_ISL_1013488, EPI_ISL_1034324, EPI_ISL_1034330 to 1034331, EPI_ISL_1073934, EPI_ISL_1073944 to 1073945, EPI_ISL_1118459, EPI_ISL_1118520, EPI_ISL_1118602, EPI_ISL_1118610, EPI_ISL_1118614, EPI_ISL_1192252 to 1192253, EPI_ISL_1192266, EPI_ISL_1251417 to 1251419, EPI_ISL_1251470 to 1251471, EPI_ISL_1251631 to 1251633, EPI_ISL_1251824 to 1251826, EPI_ISL_1252003 to 1252004, EPI_ISL_1252491, EPI_ISL_1317681, EPI_ISL_1317683, EPI_ISL_1317685, EPI_ISL_1317836, EPI_ISL_1317976, EPI_ISL_1318013, EPI_ISL_1318041, EPI_ISL_1323119, EPI_ISL_1323166                                                                                                                                                                                                                                                                                                                                                                                                                                                                                                                                                               |                                                                                                                                                       |                                                                                                                                                  |                                                                                                                                                                                                                                                                                                                                                                         |
| see above                                                                                                                                                                                                                                                                                                                                                                                                                                                                                                                                                                                                                                                                                                                                                                                                                                                                                                                                                                                                                                                                                                                                                                               | Department of Medical Microbiology - section Molde, Molde Hospital                                                                                    | Norwegian Institute of Public Health, Department of Virology                                                                                     | Atiya R Ali; Debec Nadia; Engebretsen Serina Beate; Engebretsen Serina Beate Atiya R Ali; Garcia Llorente Ignacio; Hilde Elshaug; Hilde Vollan; Ignacio Garcia Llorente; Jon Bråte; Kamilla Heddeland Instefjord; Karoline Bragstad; Kathrine Stene-Johansen; Marie Paulsen Madsen; Olav Hungnes; Pedersen Benedikte Nevjen; Rasmus Riis Kopperud; Serina B Engebretsen |
| EPI_ISL_1013455 to 1013456, EPI_ISL_1034309, EPI_ISL_1034346 to 1034361, EPI_ISL_1040156, EPI_ISL_1073918, EPI_ISL_1073923 to 1073924, EPI_ISL_1073941 to 1073942, EPI_ISL_1118286, EPI_ISL_1118291, EPI_ISL_1118306, EPI_ISL_1118313, EPI_ISL_1118347, EPI_ISL_1118349, EPI_ISL_1118354 to 1118355, EPI_ISL_1118408, EPI_ISL_1118460, EPI_ISL_1118462 to 1118464, EPI_ISL_1118468, EPI_ISL_1118476, EPI_ISL_1118497, EPI_ISL_1118500, EPI_ISL_1118509 to 1118510, EPI_ISL_1118514, EPI_ISL_1186128 to 1186132, EPI_ISL_1192168, EPI_ISL_1192188, EPI_ISL_1192204, EPI_ISL_1192206, EPI_ISL_1192227, EPI_ISL_1192254, EPI_ISL_1192299 to 1192304, EPI_ISL_1251440, EPI_ISL_1251447 to 1251448, EPI_ISL_1251765 to 1251768, EPI_ISL_1251957, EPI_ISL_1251966, EPI_ISL_1251968, EPI_ISL_1251970, EPI_ISL_1252019, EPI_ISL_1254535, EPI_ISL_1254619 to 1254620, EPI_ISL_1254622 to 1254623, EPI_ISL_1254625, EPI_ISL_1254629 to 1254632, EPI_ISL_1317252 to 1317253, EPI_ISL_1317291, EPI_ISL_1317294, EPI_ISL_1317314, EPI_ISL_1317392, EPI_ISL_1317413, EPI_ISL_1317437, EPI_ISL_1317444, EPI_ISL_1317729 to 1317730, EPI_ISL_1317752, EPI_ISL_1317790, EPI_ISL_1317818, EPI_ISL_1317832 |                                                                                                                                                       |                                                                                                                                                  |                                                                                                                                                                                                                                                                                                                                                                         |

|                                                                                                                                                                                                                                                                                                                                                                                                                                                                                                                                                                                                                                                                                                                                                                                                                                                                                                                                                                                                                                                                                                                                                                                                                                                                                                                                                                                                                                                                                                                                                                                                                                                                                                                                                                                                                                                                                                                                                                                                                                                                                                                                                                                                                                                                                                                                                                                                                                                                                                                                                                                                                                                                                                                                                                                                                                                                                                                                                                                                                                                                                                                                                                                                                                                                                                                                                                                                                                                                                                                                                                                                                                                                                                                                                                                                                                                                                                                                                                                                                                                                                                                                                                                                                                                                                                                                                                                                                                                                                                                                                                                                                                                                                                                                                                                                                                                                                                                                                                                                                                                                                                                                                                                                                                                                                                                                                                                                                                                                                                                                                                                                                                                                                                                                                                                                                                                                                                                                                                                                                                                                                                                                                                                                                                                                                                                                                                                                                                                                                                                                                                                                                                                                                                                                                                                                                                                                                                                                                                                                                                                                                                                                                                                                                                                                                                                                                                                                                                                                                                                                                                                                                                                                                                                                                                                                                                                                                                                                                                                                                                                                                                                                                                                                                                                                                                                                                                                                                                                                                                                                                                                                                                                                                                  |                                                                                                                                          |                                                                                                                                                                                                                                                                                   |                                                                                                                                                                                                                                                                                                                                                                                                                                         |
|--------------------------------------------------------------------------------------------------------------------------------------------------------------------------------------------------------------------------------------------------------------------------------------------------------------------------------------------------------------------------------------------------------------------------------------------------------------------------------------------------------------------------------------------------------------------------------------------------------------------------------------------------------------------------------------------------------------------------------------------------------------------------------------------------------------------------------------------------------------------------------------------------------------------------------------------------------------------------------------------------------------------------------------------------------------------------------------------------------------------------------------------------------------------------------------------------------------------------------------------------------------------------------------------------------------------------------------------------------------------------------------------------------------------------------------------------------------------------------------------------------------------------------------------------------------------------------------------------------------------------------------------------------------------------------------------------------------------------------------------------------------------------------------------------------------------------------------------------------------------------------------------------------------------------------------------------------------------------------------------------------------------------------------------------------------------------------------------------------------------------------------------------------------------------------------------------------------------------------------------------------------------------------------------------------------------------------------------------------------------------------------------------------------------------------------------------------------------------------------------------------------------------------------------------------------------------------------------------------------------------------------------------------------------------------------------------------------------------------------------------------------------------------------------------------------------------------------------------------------------------------------------------------------------------------------------------------------------------------------------------------------------------------------------------------------------------------------------------------------------------------------------------------------------------------------------------------------------------------------------------------------------------------------------------------------------------------------------------------------------------------------------------------------------------------------------------------------------------------------------------------------------------------------------------------------------------------------------------------------------------------------------------------------------------------------------------------------------------------------------------------------------------------------------------------------------------------------------------------------------------------------------------------------------------------------------------------------------------------------------------------------------------------------------------------------------------------------------------------------------------------------------------------------------------------------------------------------------------------------------------------------------------------------------------------------------------------------------------------------------------------------------------------------------------------------------------------------------------------------------------------------------------------------------------------------------------------------------------------------------------------------------------------------------------------------------------------------------------------------------------------------------------------------------------------------------------------------------------------------------------------------------------------------------------------------------------------------------------------------------------------------------------------------------------------------------------------------------------------------------------------------------------------------------------------------------------------------------------------------------------------------------------------------------------------------------------------------------------------------------------------------------------------------------------------------------------------------------------------------------------------------------------------------------------------------------------------------------------------------------------------------------------------------------------------------------------------------------------------------------------------------------------------------------------------------------------------------------------------------------------------------------------------------------------------------------------------------------------------------------------------------------------------------------------------------------------------------------------------------------------------------------------------------------------------------------------------------------------------------------------------------------------------------------------------------------------------------------------------------------------------------------------------------------------------------------------------------------------------------------------------------------------------------------------------------------------------------------------------------------------------------------------------------------------------------------------------------------------------------------------------------------------------------------------------------------------------------------------------------------------------------------------------------------------------------------------------------------------------------------------------------------------------------------------------------------------------------------------------------------------------------------------------------------------------------------------------------------------------------------------------------------------------------------------------------------------------------------------------------------------------------------------------------------------------------------------------------------------------------------------------------------------------------------------------------------------------------------------------------------------------------------------------------------------------------------------------------------------------------------------------------------------------------------------------------------------------------------------------------------------------------------------------------------------------------------------------------------------------------------------------------------------------------------------------------------------------------------------------------------------------------------------------------------------------------------------------------------------------------------------------------------------------------------------------------------------------------------------------------------------------------------------------------------------------------------------------------------------------------------------------------------------------------------------------------------------------------------------------------------------------------------------------------------------------------------------|------------------------------------------------------------------------------------------------------------------------------------------|-----------------------------------------------------------------------------------------------------------------------------------------------------------------------------------------------------------------------------------------------------------------------------------|-----------------------------------------------------------------------------------------------------------------------------------------------------------------------------------------------------------------------------------------------------------------------------------------------------------------------------------------------------------------------------------------------------------------------------------------|
| see above                                                                                                                                                                                                                                                                                                                                                                                                                                                                                                                                                                                                                                                                                                                                                                                                                                                                                                                                                                                                                                                                                                                                                                                                                                                                                                                                                                                                                                                                                                                                                                                                                                                                                                                                                                                                                                                                                                                                                                                                                                                                                                                                                                                                                                                                                                                                                                                                                                                                                                                                                                                                                                                                                                                                                                                                                                                                                                                                                                                                                                                                                                                                                                                                                                                                                                                                                                                                                                                                                                                                                                                                                                                                                                                                                                                                                                                                                                                                                                                                                                                                                                                                                                                                                                                                                                                                                                                                                                                                                                                                                                                                                                                                                                                                                                                                                                                                                                                                                                                                                                                                                                                                                                                                                                                                                                                                                                                                                                                                                                                                                                                                                                                                                                                                                                                                                                                                                                                                                                                                                                                                                                                                                                                                                                                                                                                                                                                                                                                                                                                                                                                                                                                                                                                                                                                                                                                                                                                                                                                                                                                                                                                                                                                                                                                                                                                                                                                                                                                                                                                                                                                                                                                                                                                                                                                                                                                                                                                                                                                                                                                                                                                                                                                                                                                                                                                                                                                                                                                                                                                                                                                                                                                                                        | Department of Medical Microbiology, St. Olavs hospital                                                                                   | Norwegian Institute of Public Health, Department of Virology                                                                                                                                                                                                                      | Atiya R Ali; Debec Nadia; Engebretsen Serina Beate; Engebretsen Serina Beate Atiya R Ali; Garcia Llorente Ignacio; Hilde Elshaug; Hilde Volland; Ignacio Garcia Llorente; Jon Bråte; Kamilla Heddeland Instefjord; Karoline Bragstad; Kathrine Stene-Johansen; Marie Paulsen Madsen; Olav Hungnes; Pedersen Benedikte Nevjen; Rasmus Riis Kopperud; Serina B Engebretsen                                                                |
| EPI_ISL_1273103                                                                                                                                                                                                                                                                                                                                                                                                                                                                                                                                                                                                                                                                                                                                                                                                                                                                                                                                                                                                                                                                                                                                                                                                                                                                                                                                                                                                                                                                                                                                                                                                                                                                                                                                                                                                                                                                                                                                                                                                                                                                                                                                                                                                                                                                                                                                                                                                                                                                                                                                                                                                                                                                                                                                                                                                                                                                                                                                                                                                                                                                                                                                                                                                                                                                                                                                                                                                                                                                                                                                                                                                                                                                                                                                                                                                                                                                                                                                                                                                                                                                                                                                                                                                                                                                                                                                                                                                                                                                                                                                                                                                                                                                                                                                                                                                                                                                                                                                                                                                                                                                                                                                                                                                                                                                                                                                                                                                                                                                                                                                                                                                                                                                                                                                                                                                                                                                                                                                                                                                                                                                                                                                                                                                                                                                                                                                                                                                                                                                                                                                                                                                                                                                                                                                                                                                                                                                                                                                                                                                                                                                                                                                                                                                                                                                                                                                                                                                                                                                                                                                                                                                                                                                                                                                                                                                                                                                                                                                                                                                                                                                                                                                                                                                                                                                                                                                                                                                                                                                                                                                                                                                                                                                                  | Department of Microbial Biotechnology, Genetic Engineering Division, National Research Centre                                            | Department of Microbial Biotechnology, Genetic Engineering Division, National Research Centre                                                                                                                                                                                     | A.E. and Shemis, M.; A.G.; Dawood; Farghaly, A.; Fikry; Khalifa; M.K.; R.M.; Taha                                                                                                                                                                                                                                                                                                                                                       |
| EPI_ISL_1335884, EPI_ISL_1335892 to 1335894, EPI_ISL_1335898 to 1335899                                                                                                                                                                                                                                                                                                                                                                                                                                                                                                                                                                                                                                                                                                                                                                                                                                                                                                                                                                                                                                                                                                                                                                                                                                                                                                                                                                                                                                                                                                                                                                                                                                                                                                                                                                                                                                                                                                                                                                                                                                                                                                                                                                                                                                                                                                                                                                                                                                                                                                                                                                                                                                                                                                                                                                                                                                                                                                                                                                                                                                                                                                                                                                                                                                                                                                                                                                                                                                                                                                                                                                                                                                                                                                                                                                                                                                                                                                                                                                                                                                                                                                                                                                                                                                                                                                                                                                                                                                                                                                                                                                                                                                                                                                                                                                                                                                                                                                                                                                                                                                                                                                                                                                                                                                                                                                                                                                                                                                                                                                                                                                                                                                                                                                                                                                                                                                                                                                                                                                                                                                                                                                                                                                                                                                                                                                                                                                                                                                                                                                                                                                                                                                                                                                                                                                                                                                                                                                                                                                                                                                                                                                                                                                                                                                                                                                                                                                                                                                                                                                                                                                                                                                                                                                                                                                                                                                                                                                                                                                                                                                                                                                                                                                                                                                                                                                                                                                                                                                                                                                                                                                                                                          | Department of Microbiology, Faculty of Medicine, Universitas Sumatera Utara                                                              | Faculty of Medicine, Universitas Sumatera Utara; Institute of Tropical Disease, Universitas Airlangga                                                                                                                                                                             | Aldise M Nastro; Franciscus Ginting; Inke N D Lubis; Irbah R Nainggolan; Jezzy R Dewantari; Kazufumi Shimizu; Krisnoadi Rahardjo; Maria I Lusida; Meliani; Mirzan Hasibuan; Muhammad Ichwan; R Andika D Cahyadi; R Lia Kusumawati; Ramadhan Bestari; Rima R Prasetya; Soetjipto; Yasuko Mori                                                                                                                                            |
| EPI_ISL_1072965, EPI_ISL_1072986                                                                                                                                                                                                                                                                                                                                                                                                                                                                                                                                                                                                                                                                                                                                                                                                                                                                                                                                                                                                                                                                                                                                                                                                                                                                                                                                                                                                                                                                                                                                                                                                                                                                                                                                                                                                                                                                                                                                                                                                                                                                                                                                                                                                                                                                                                                                                                                                                                                                                                                                                                                                                                                                                                                                                                                                                                                                                                                                                                                                                                                                                                                                                                                                                                                                                                                                                                                                                                                                                                                                                                                                                                                                                                                                                                                                                                                                                                                                                                                                                                                                                                                                                                                                                                                                                                                                                                                                                                                                                                                                                                                                                                                                                                                                                                                                                                                                                                                                                                                                                                                                                                                                                                                                                                                                                                                                                                                                                                                                                                                                                                                                                                                                                                                                                                                                                                                                                                                                                                                                                                                                                                                                                                                                                                                                                                                                                                                                                                                                                                                                                                                                                                                                                                                                                                                                                                                                                                                                                                                                                                                                                                                                                                                                                                                                                                                                                                                                                                                                                                                                                                                                                                                                                                                                                                                                                                                                                                                                                                                                                                                                                                                                                                                                                                                                                                                                                                                                                                                                                                                                                                                                                                                                 | Department of Microbiology, Faculty of Medicine, Universitas Sumatera Utara                                                              | Institute of Tropical Disease, Universitas Airlangga; Faculty of Medicine, Universitas Sumatera Utara                                                                                                                                                                             | Aldise M Nastro; Franciscus Ginting; Inke N D Lubis; Irbah R Nainggolan; Jezzy R Dewantari; Kazufumi Shimizu; Krisnoadi Rahardjo; Maria I Lusida; Meliani; Mirzan Hasibuan; Muhamad Ichwan; R Andika D Cahyadi; R Lia Kusumawati; Ramadhan Bestari; Rima R Prasetya; Soetjipto; Yasuko Mori                                                                                                                                             |
| EPI_ISL_1171857                                                                                                                                                                                                                                                                                                                                                                                                                                                                                                                                                                                                                                                                                                                                                                                                                                                                                                                                                                                                                                                                                                                                                                                                                                                                                                                                                                                                                                                                                                                                                                                                                                                                                                                                                                                                                                                                                                                                                                                                                                                                                                                                                                                                                                                                                                                                                                                                                                                                                                                                                                                                                                                                                                                                                                                                                                                                                                                                                                                                                                                                                                                                                                                                                                                                                                                                                                                                                                                                                                                                                                                                                                                                                                                                                                                                                                                                                                                                                                                                                                                                                                                                                                                                                                                                                                                                                                                                                                                                                                                                                                                                                                                                                                                                                                                                                                                                                                                                                                                                                                                                                                                                                                                                                                                                                                                                                                                                                                                                                                                                                                                                                                                                                                                                                                                                                                                                                                                                                                                                                                                                                                                                                                                                                                                                                                                                                                                                                                                                                                                                                                                                                                                                                                                                                                                                                                                                                                                                                                                                                                                                                                                                                                                                                                                                                                                                                                                                                                                                                                                                                                                                                                                                                                                                                                                                                                                                                                                                                                                                                                                                                                                                                                                                                                                                                                                                                                                                                                                                                                                                                                                                                                                                                  | Department of Microbiology, Icahn School of Medicine at Mount Sinai                                                                      | MSHS Pathogen Surveillance Program                                                                                                                                                                                                                                                | Aaron J. Schmitz; Ali H. Ellebedy; Ana Gonzalez Reichel; Daniel C. Adelsberg; Emilia Mia Sordillo; Fatima Amanat; Florian Krammer; Goran Bajic; Hala Alshammary; Harm van Bakel; Jackson S. Turner; Juan Manuel Carreno; Julian Q Zhou; Komal Srivastava; Mahima Thapa; Nicholas Borcherding; Sarah Zafar; Shaza M. Sayed Ahmed; Shirin Strohmeier; The Personalized Virology Initiative; Tinting Lei; Viviana Simon; Willemijn Rijnink |
| EPI_ISL_1027637 to 1027657                                                                                                                                                                                                                                                                                                                                                                                                                                                                                                                                                                                                                                                                                                                                                                                                                                                                                                                                                                                                                                                                                                                                                                                                                                                                                                                                                                                                                                                                                                                                                                                                                                                                                                                                                                                                                                                                                                                                                                                                                                                                                                                                                                                                                                                                                                                                                                                                                                                                                                                                                                                                                                                                                                                                                                                                                                                                                                                                                                                                                                                                                                                                                                                                                                                                                                                                                                                                                                                                                                                                                                                                                                                                                                                                                                                                                                                                                                                                                                                                                                                                                                                                                                                                                                                                                                                                                                                                                                                                                                                                                                                                                                                                                                                                                                                                                                                                                                                                                                                                                                                                                                                                                                                                                                                                                                                                                                                                                                                                                                                                                                                                                                                                                                                                                                                                                                                                                                                                                                                                                                                                                                                                                                                                                                                                                                                                                                                                                                                                                                                                                                                                                                                                                                                                                                                                                                                                                                                                                                                                                                                                                                                                                                                                                                                                                                                                                                                                                                                                                                                                                                                                                                                                                                                                                                                                                                                                                                                                                                                                                                                                                                                                                                                                                                                                                                                                                                                                                                                                                                                                                                                                                                                                       | Department of Microbiology, National Institute for Public Health of Kosovo                                                               | Charité Universitätsmedizin Berlin, Institut für Virologie                                                                                                                                                                                                                        | Barbara Mühlemann; Christian Drosten; Donjeta Hajdari; Julia Schneider; Jörn Beheim-Schwarzbach; Talitha Veith; Terry Jones; Victor M Corman; Xhevat Jakupi; Zana Deva                                                                                                                                                                                                                                                                  |
| EPI_ISL_1034368 to 1034735, EPI_ISL_1055452 to 1055455, EPI_ISL_1197067 to 1197128, EPI_ISL_1205464 to 1205467, EPI_ISL_1273444                                                                                                                                                                                                                                                                                                                                                                                                                                                                                                                                                                                                                                                                                                                                                                                                                                                                                                                                                                                                                                                                                                                                                                                                                                                                                                                                                                                                                                                                                                                                                                                                                                                                                                                                                                                                                                                                                                                                                                                                                                                                                                                                                                                                                                                                                                                                                                                                                                                                                                                                                                                                                                                                                                                                                                                                                                                                                                                                                                                                                                                                                                                                                                                                                                                                                                                                                                                                                                                                                                                                                                                                                                                                                                                                                                                                                                                                                                                                                                                                                                                                                                                                                                                                                                                                                                                                                                                                                                                                                                                                                                                                                                                                                                                                                                                                                                                                                                                                                                                                                                                                                                                                                                                                                                                                                                                                                                                                                                                                                                                                                                                                                                                                                                                                                                                                                                                                                                                                                                                                                                                                                                                                                                                                                                                                                                                                                                                                                                                                                                                                                                                                                                                                                                                                                                                                                                                                                                                                                                                                                                                                                                                                                                                                                                                                                                                                                                                                                                                                                                                                                                                                                                                                                                                                                                                                                                                                                                                                                                                                                                                                                                                                                                                                                                                                                                                                                                                                                                                                                                                                                                  | Department of Microbiology, The University of Hong Kong                                                                                  | Department of Microbiology, The University of Hong Kong                                                                                                                                                                                                                           | Kelvin K.W. To; Kwok-Yung Yuen                                                                                                                                                                                                                                                                                                                                                                                                          |
| EPI_ISL_1008280 to 1008291, EPI_ISL_1008315 to 1008326, EPI_ISL_1117775, EPI_ISL_1117778, EPI_ISL_1117782 to 1117785, EPI_ISL_1117787, EPI_ISL_1117790, EPI_ISL_1117795, EPI_ISL_1117802, EPI_ISL_1117805, EPI_ISL_1117807, EPI_ISL_1117809, EPI_ISL_1117888, EPI_ISL_1117891, EPI_ISL_1117893, EPI_ISL_1117895 to 1117896, EPI_ISL_1117911, EPI_ISL_1117913, EPI_ISL_1117917, EPI_ISL_1118083 to 1118085, EPI_ISL_1180886 to 1180909                                                                                                                                                                                                                                                                                                                                                                                                                                                                                                                                                                                                                                                                                                                                                                                                                                                                                                                                                                                                                                                                                                                                                                                                                                                                                                                                                                                                                                                                                                                                                                                                                                                                                                                                                                                                                                                                                                                                                                                                                                                                                                                                                                                                                                                                                                                                                                                                                                                                                                                                                                                                                                                                                                                                                                                                                                                                                                                                                                                                                                                                                                                                                                                                                                                                                                                                                                                                                                                                                                                                                                                                                                                                                                                                                                                                                                                                                                                                                                                                                                                                                                                                                                                                                                                                                                                                                                                                                                                                                                                                                                                                                                                                                                                                                                                                                                                                                                                                                                                                                                                                                                                                                                                                                                                                                                                                                                                                                                                                                                                                                                                                                                                                                                                                                                                                                                                                                                                                                                                                                                                                                                                                                                                                                                                                                                                                                                                                                                                                                                                                                                                                                                                                                                                                                                                                                                                                                                                                                                                                                                                                                                                                                                                                                                                                                                                                                                                                                                                                                                                                                                                                                                                                                                                                                                                                                                                                                                                                                                                                                                                                                                                                                                                                                                                            | Department of Microbiology, University Innsbruck                                                                                         | Berghaler laboratory, CeMM Research Center for Molecular Medicine of the Austrian Academy of Sciences                                                                                                                                                                             | Andreas Berghaler; Anna Schedl; Bekir Erguner; Benedikt Agerer; Christoph Bock; Fabian Amman; Jan Laine; Lukas Endler; Maelle Le Moing; Martin Senekowitsch; Michael Schuster; Thomas Penz                                                                                                                                                                                                                                              |
| EPI_ISL_1164626 to 1164654, EPI_ISL_1164656 to 1164751                                                                                                                                                                                                                                                                                                                                                                                                                                                                                                                                                                                                                                                                                                                                                                                                                                                                                                                                                                                                                                                                                                                                                                                                                                                                                                                                                                                                                                                                                                                                                                                                                                                                                                                                                                                                                                                                                                                                                                                                                                                                                                                                                                                                                                                                                                                                                                                                                                                                                                                                                                                                                                                                                                                                                                                                                                                                                                                                                                                                                                                                                                                                                                                                                                                                                                                                                                                                                                                                                                                                                                                                                                                                                                                                                                                                                                                                                                                                                                                                                                                                                                                                                                                                                                                                                                                                                                                                                                                                                                                                                                                                                                                                                                                                                                                                                                                                                                                                                                                                                                                                                                                                                                                                                                                                                                                                                                                                                                                                                                                                                                                                                                                                                                                                                                                                                                                                                                                                                                                                                                                                                                                                                                                                                                                                                                                                                                                                                                                                                                                                                                                                                                                                                                                                                                                                                                                                                                                                                                                                                                                                                                                                                                                                                                                                                                                                                                                                                                                                                                                                                                                                                                                                                                                                                                                                                                                                                                                                                                                                                                                                                                                                                                                                                                                                                                                                                                                                                                                                                                                                                                                                                                           | Department of Molecular Virology, Cyprus Institute of Neurology and Genetics                                                             | Department of Molecular Virology, Cyprus Institute of Neurology and Genetics                                                                                                                                                                                                      | Anastasis Oulas; Andreas Hadjisavvas; Christina Christodoulou; Christina Tryfonos; Dana Koptides; Denise Alexandrou; George Krashias; George Spyrou; Jan Richter; Maria Loizidou; Mihalis Panayiotidis; Olga Kalakouta; Pavlos Fanis; Stavros Bashiardes                                                                                                                                                                                |
| EPI_ISL_1379391, EPI_ISL_1379435 to 1379437, EPI_ISL_1379439 to 1379442                                                                                                                                                                                                                                                                                                                                                                                                                                                                                                                                                                                                                                                                                                                                                                                                                                                                                                                                                                                                                                                                                                                                                                                                                                                                                                                                                                                                                                                                                                                                                                                                                                                                                                                                                                                                                                                                                                                                                                                                                                                                                                                                                                                                                                                                                                                                                                                                                                                                                                                                                                                                                                                                                                                                                                                                                                                                                                                                                                                                                                                                                                                                                                                                                                                                                                                                                                                                                                                                                                                                                                                                                                                                                                                                                                                                                                                                                                                                                                                                                                                                                                                                                                                                                                                                                                                                                                                                                                                                                                                                                                                                                                                                                                                                                                                                                                                                                                                                                                                                                                                                                                                                                                                                                                                                                                                                                                                                                                                                                                                                                                                                                                                                                                                                                                                                                                                                                                                                                                                                                                                                                                                                                                                                                                                                                                                                                                                                                                                                                                                                                                                                                                                                                                                                                                                                                                                                                                                                                                                                                                                                                                                                                                                                                                                                                                                                                                                                                                                                                                                                                                                                                                                                                                                                                                                                                                                                                                                                                                                                                                                                                                                                                                                                                                                                                                                                                                                                                                                                                                                                                                                                                          | Department of Molecular and Translational Medicine, Section of Microbiology, University of Brescia, ASST Spedali Civili, Brescia         | Department of Molecular and Translational Medicine, Section of Microbiology, University of Brescia, ASST Spedali Civili, Brescia                                                                                                                                                  | Alberto Zani; Anna Bertelli; Arnaldo Caruso; Erika Scalfritti; Francesca Caccuri; Serena Messali; Simona Fiorentini                                                                                                                                                                                                                                                                                                                     |
| EPI_ISL_1000631, EPI_ISL_1000633 to 1000640, EPI_ISL_1047069 to 1047070, EPI_ISL_1047072 to 1047077, EPI_ISL_1047080 to 1047084, EPI_ISL_1047086 to 1047088, EPI_ISL_1047090 to 1047098, EPI_ISL_1047100 to 1047139, EPI_ISL_1047141 to 1047154, EPI_ISL_1047156 to 1047204, EPI_ISL_1047206 to 1047217, EPI_ISL_1047220 to 1047233, EPI_ISL_1047235 to 1047252, EPI_ISL_1047254 to 1047273, EPI_ISL_1047275 to 1047278, EPI_ISL_1047280 to 1047292, EPI_ISL_1047294 to 1047302, EPI_ISL_1047305 to 1047331, EPI_ISL_1047333 to 1047336, EPI_ISL_1047338 to 1047370, EPI_ISL_1047372 to 1047421, EPI_ISL_1047423 to 1047465, EPI_ISL_1047467 to 1047493, EPI_ISL_1047495 to 1047498, EPI_ISL_1047500 to 1047542, EPI_ISL_1047544 to 1047581, EPI_ISL_1050605 to 1050606, EPI_ISL_1050610, EPI_ISL_1050614, EPI_ISL_1050619, EPI_ISL_1050632 to 1050649, EPI_ISL_1050651 to 1050675, EPI_ISL_1050685 to 1050690, EPI_ISL_1050692 to 1050696, EPI_ISL_1050698 to 1050702, EPI_ISL_1050705 to 1050722, EPI_ISL_1054258 to 1054259, EPI_ISL_1054265 to 1054266, EPI_ISL_1054269, EPI_ISL_1054271 to 1054276, EPI_ISL_1054279 to 1054280, EPI_ISL_1054282 to 1054285, EPI_ISL_1054287, EPI_ISL_1054289 to 1054291, EPI_ISL_1054293 to 1054294, EPI_ISL_1054298, EPI_ISL_1054300 to 1054303, EPI_ISL_1054305, EPI_ISL_1054309 to 1054320, EPI_ISL_1054322 to 1054326, EPI_ISL_1054328 to 1054332, EPI_ISL_1054334, EPI_ISL_1054336 to 1054344, EPI_ISL_1054347 to 1054351, EPI_ISL_1054353 to 1054358, EPI_ISL_1054360 to 1054361, EPI_ISL_1054363 to 1054368, EPI_ISL_1054370 to 1054371, EPI_ISL_1103883 to 1103885, EPI_ISL_1103888, EPI_ISL_1103890 to 1103948, EPI_ISL_1107804 to 1107825, EPI_ISL_1107830 to 1107831, EPI_ISL_1107839, EPI_ISL_1176402 to 1176812, EPI_ISL_1177636 to 1177642, EPI_ISL_1177647, EPI_ISL_1177649, EPI_ISL_1177651 to 1177675, EPI_ISL_1177677 to 1177687, EPI_ISL_1179891 to 1180052, EPI_ISL_1247032, EPI_ISL_1247289 to 1247358, EPI_ISL_1247360 to 1247368, EPI_ISL_1247571 to 1247574, EPI_ISL_1247576, EPI_ISL_1247578, EPI_ISL_1247580 to 1247592, EPI_ISL_1247594 to 1247601, EPI_ISL_1247603, EPI_ISL_1247605, EPI_ISL_1247608, EPI_ISL_1247611 to 1247622, EPI_ISL_1247624 to 1247629, EPI_ISL_1247631 to 1247632, EPI_ISL_1250124 to 1250221, EPI_ISL_1308676 to 1308697, EPI_ISL_1308699 to 1308702, EPI_ISL_1310455 to 1310701                                                                                                                                                                                                                                                                                                                                                                                                                                                                                                                                                                                                                                                                                                                                                                                                                                                                                                                                                                                                                                                                                                                                                                                                                                                                                                                                                                                                                                                                                                                                                                                                                                                                                                                                                                                                                                                                                                                                                                                                                                                                                                                                                                                                                                                                                                                                                                                                                                                                                                                                                                                                                                                                                                                                                                                                                                                                                                                                                                                                                                                                                                                                                                                                                                                                                                                                                                                                                                                                                                                                                                                                                                                                                                                                                                                                                                                                                                                                                                                                                                                                                                                                                                                                                                                                                                                                                                                                                                                                                                                                                                                                                                                                                                                                                                                                                                                                                                                                                                                                                                                                                                                                                                                                                                                                                                                                                                                                                                                                                                                                                                                                                                                                                                                                                                                                                                                                                                                                                                                                                                                                                                                                                                                                                                                                                                                        | Department of Pathology, University of Cambridge                                                                                         | COVID-19 Genomics UK (COG-UK) Consortium                                                                                                                                                                                                                                          | Aminu S. Jahun; Ian Goodfellow; Iliana Georgiana; Martin D. Curran; Myra Hossimli; Rhys Izuagbe; Surendra Parmar; William L. Hamilton; Yasmin Chaudhry                                                                                                                                                                                                                                                                                  |
| EPI_ISL_1034281 to 1034301, EPI_ISL_1289789 to 1289955                                                                                                                                                                                                                                                                                                                                                                                                                                                                                                                                                                                                                                                                                                                                                                                                                                                                                                                                                                                                                                                                                                                                                                                                                                                                                                                                                                                                                                                                                                                                                                                                                                                                                                                                                                                                                                                                                                                                                                                                                                                                                                                                                                                                                                                                                                                                                                                                                                                                                                                                                                                                                                                                                                                                                                                                                                                                                                                                                                                                                                                                                                                                                                                                                                                                                                                                                                                                                                                                                                                                                                                                                                                                                                                                                                                                                                                                                                                                                                                                                                                                                                                                                                                                                                                                                                                                                                                                                                                                                                                                                                                                                                                                                                                                                                                                                                                                                                                                                                                                                                                                                                                                                                                                                                                                                                                                                                                                                                                                                                                                                                                                                                                                                                                                                                                                                                                                                                                                                                                                                                                                                                                                                                                                                                                                                                                                                                                                                                                                                                                                                                                                                                                                                                                                                                                                                                                                                                                                                                                                                                                                                                                                                                                                                                                                                                                                                                                                                                                                                                                                                                                                                                                                                                                                                                                                                                                                                                                                                                                                                                                                                                                                                                                                                                                                                                                                                                                                                                                                                                                                                                                                                                           | Department of Public Health Microbiology Ljubljana, National Laboratory for Health, Environment and Food                                 | Department of Public Health Microbiology Ljubljana, National Laboratory for Health, Environment and Food                                                                                                                                                                          | José Gonçalves; Katarina Prosenec; Martin Bosilj; Metka Paragi; Tom Koritnik                                                                                                                                                                                                                                                                                                                                                            |
| EPI_ISL_1121961 to 1121962                                                                                                                                                                                                                                                                                                                                                                                                                                                                                                                                                                                                                                                                                                                                                                                                                                                                                                                                                                                                                                                                                                                                                                                                                                                                                                                                                                                                                                                                                                                                                                                                                                                                                                                                                                                                                                                                                                                                                                                                                                                                                                                                                                                                                                                                                                                                                                                                                                                                                                                                                                                                                                                                                                                                                                                                                                                                                                                                                                                                                                                                                                                                                                                                                                                                                                                                                                                                                                                                                                                                                                                                                                                                                                                                                                                                                                                                                                                                                                                                                                                                                                                                                                                                                                                                                                                                                                                                                                                                                                                                                                                                                                                                                                                                                                                                                                                                                                                                                                                                                                                                                                                                                                                                                                                                                                                                                                                                                                                                                                                                                                                                                                                                                                                                                                                                                                                                                                                                                                                                                                                                                                                                                                                                                                                                                                                                                                                                                                                                                                                                                                                                                                                                                                                                                                                                                                                                                                                                                                                                                                                                                                                                                                                                                                                                                                                                                                                                                                                                                                                                                                                                                                                                                                                                                                                                                                                                                                                                                                                                                                                                                                                                                                                                                                                                                                                                                                                                                                                                                                                                                                                                                                                                       | Department of Respiratory Medicine, Nagasaki University Hospital, Nagasaki, Japan                                                        | Department of Virology, Institute of Tropical Medicine, Nagasaki University, Nagasaki, Japan                                                                                                                                                                                      | Ayumi Fujita; Katsunori Yanagihara; Kazuko Yamamoto; Kenji Ota; Koichi Izumikawa; Kouichi Morita; Masato Tashiro; Nobuyuki Ashizawa; Satoshi Irfune; Taiga Miyazaki; Takahiro Takazono; Takeshi Tanaka; Tatsuro Hirayama; Yoshifumi Imamura; and Hiroshi Mukae                                                                                                                                                                          |
| EPI_ISL_1121990 to 1121992, EPI_ISL_1122014, EPI_ISL_1315427, EPI_ISL_1315475 to 1315478                                                                                                                                                                                                                                                                                                                                                                                                                                                                                                                                                                                                                                                                                                                                                                                                                                                                                                                                                                                                                                                                                                                                                                                                                                                                                                                                                                                                                                                                                                                                                                                                                                                                                                                                                                                                                                                                                                                                                                                                                                                                                                                                                                                                                                                                                                                                                                                                                                                                                                                                                                                                                                                                                                                                                                                                                                                                                                                                                                                                                                                                                                                                                                                                                                                                                                                                                                                                                                                                                                                                                                                                                                                                                                                                                                                                                                                                                                                                                                                                                                                                                                                                                                                                                                                                                                                                                                                                                                                                                                                                                                                                                                                                                                                                                                                                                                                                                                                                                                                                                                                                                                                                                                                                                                                                                                                                                                                                                                                                                                                                                                                                                                                                                                                                                                                                                                                                                                                                                                                                                                                                                                                                                                                                                                                                                                                                                                                                                                                                                                                                                                                                                                                                                                                                                                                                                                                                                                                                                                                                                                                                                                                                                                                                                                                                                                                                                                                                                                                                                                                                                                                                                                                                                                                                                                                                                                                                                                                                                                                                                                                                                                                                                                                                                                                                                                                                                                                                                                                                                                                                                                                                         | Department of Respiratory and other Viral Infections of L.V.Gromashevsky Institute of Epidemiology & Infectious Diseases NAMS of Ukraine | Department of Respiratory and other Viral Infections of L.V.Gromashevsky Institute of Epidemiology & Infectious Diseases NAMS of Ukraine, JSC "Farmak"                                                                                                                            | Alla Mironenko; Andriy Goy; Ihor Kravchuk; Larysa Radchenko; Ludmyla Bolotova; Nataliia Teteriuk                                                                                                                                                                                                                                                                                                                                        |
| EPI_ISL_1215947, EPI_ISL_1216923, EPI_ISL_1217356, EPI_ISL_1217709                                                                                                                                                                                                                                                                                                                                                                                                                                                                                                                                                                                                                                                                                                                                                                                                                                                                                                                                                                                                                                                                                                                                                                                                                                                                                                                                                                                                                                                                                                                                                                                                                                                                                                                                                                                                                                                                                                                                                                                                                                                                                                                                                                                                                                                                                                                                                                                                                                                                                                                                                                                                                                                                                                                                                                                                                                                                                                                                                                                                                                                                                                                                                                                                                                                                                                                                                                                                                                                                                                                                                                                                                                                                                                                                                                                                                                                                                                                                                                                                                                                                                                                                                                                                                                                                                                                                                                                                                                                                                                                                                                                                                                                                                                                                                                                                                                                                                                                                                                                                                                                                                                                                                                                                                                                                                                                                                                                                                                                                                                                                                                                                                                                                                                                                                                                                                                                                                                                                                                                                                                                                                                                                                                                                                                                                                                                                                                                                                                                                                                                                                                                                                                                                                                                                                                                                                                                                                                                                                                                                                                                                                                                                                                                                                                                                                                                                                                                                                                                                                                                                                                                                                                                                                                                                                                                                                                                                                                                                                                                                                                                                                                                                                                                                                                                                                                                                                                                                                                                                                                                                                                                                                               | Department of Sciences for Health Promotion and Mother-Child Care "G. D'Alessandro", University of Palermo                               | Tumor Immunology Unit, Department of Health Sciences, University of Palermo School of Medicine; Section of Microbiology, University of Palermo School of Medicine; National Research Council of Italy - High Performance Computing and Networking Institute (CNR-ICAR) of Palermo | Alfonso Maurizio; Antonino; Antonio; Bonura; Cancila; Celestino; Claudio; Craxi; Davide; Di Bernardo; Fiannaca; Floriana; Francesca; Francesco; Gaia; Giammanico; La Paglia; La Rosa; Laura; Massimo; Maurizio Giovanni.; Morello; Tripodo; Urso; Vacca; Valeria; Vitale                                                                                                                                                                |
| EPI_ISL_1122890, EPI_ISL_1123289                                                                                                                                                                                                                                                                                                                                                                                                                                                                                                                                                                                                                                                                                                                                                                                                                                                                                                                                                                                                                                                                                                                                                                                                                                                                                                                                                                                                                                                                                                                                                                                                                                                                                                                                                                                                                                                                                                                                                                                                                                                                                                                                                                                                                                                                                                                                                                                                                                                                                                                                                                                                                                                                                                                                                                                                                                                                                                                                                                                                                                                                                                                                                                                                                                                                                                                                                                                                                                                                                                                                                                                                                                                                                                                                                                                                                                                                                                                                                                                                                                                                                                                                                                                                                                                                                                                                                                                                                                                                                                                                                                                                                                                                                                                                                                                                                                                                                                                                                                                                                                                                                                                                                                                                                                                                                                                                                                                                                                                                                                                                                                                                                                                                                                                                                                                                                                                                                                                                                                                                                                                                                                                                                                                                                                                                                                                                                                                                                                                                                                                                                                                                                                                                                                                                                                                                                                                                                                                                                                                                                                                                                                                                                                                                                                                                                                                                                                                                                                                                                                                                                                                                                                                                                                                                                                                                                                                                                                                                                                                                                                                                                                                                                                                                                                                                                                                                                                                                                                                                                                                                                                                                                                                                 | Department of Virology I, National Institute of Infectious Diseases                                                                      | Department of Veterinary Science, National Institute of Infectious Diseases                                                                                                                                                                                                       | Keita Ishijima; Ken Maeda; Shuetsu Fukushi; Souichi Yamada; Tsukasa Yamamoto; Yudai Kuroda                                                                                                                                                                                                                                                                                                                                              |
| EPI_ISL_1081963 to 1082135, EPI_ISL_1082137 to 1082251, EPI_ISL_1184542 to 1184557, EPI_ISL_1217188, EPI_ISL_1217190, EPI_ISL_1217192 to 1217193, EPI_ISL_1217195, EPI_ISL_1217197 to 1217198, EPI_ISL_1217200, EPI_ISL_1217202, EPI_ISL_1217205, EPI_ISL_1217207, EPI_ISL_1217210, EPI_ISL_1217212, EPI_ISL_1217215, EPI_ISL_1217217, EPI_ISL_1217220, EPI_ISL_1217222, EPI_ISL_1217225, EPI_ISL_1217227, EPI_ISL_1217230, EPI_ISL_1217233, EPI_ISL_1217235, EPI_ISL_1218645 to 1218652, EPI_ISL_1219684 to 1219700, EPI_ISL_1219719 to 1219745, EPI_ISL_1229272 to 12292943, EPI_ISL_1229156 to 1229161, EPI_ISL_1229388 to 1229399, EPI_ISL_1231207 to 1231292, EPI_ISL_1233188 to 1233221, EPI_ISL_1239428 to 1239442, EPI_ISL_1240077 to 1240184, EPI_ISL_1240658 to 1240676, EPI_ISL_1240681 to 1240714, EPI_ISL_1240938 to 1240990, EPI_ISL_1241843 to 1241859, EPI_ISL_1278943 to 1279218                                                                                                                                                                                                                                                                                                                                                                                                                                                                                                                                                                                                                                                                                                                                                                                                                                                                                                                                                                                                                                                                                                                                                                                                                                                                                                                                                                                                                                                                                                                                                                                                                                                                                                                                                                                                                                                                                                                                                                                                                                                                                                                                                                                                                                                                                                                                                                                                                                                                                                                                                                                                                                                                                                                                                                                                                                                                                                                                                                                                                                                                                                                                                                                                                                                                                                                                                                                                                                                                                                                                                                                                                                                                                                                                                                                                                                                                                                                                                                                                                                                                                                                                                                                                                                                                                                                                                                                                                                                                                                                                                                                                                                                                                                                                                                                                                                                                                                                                                                                                                                                                                                                                                                                                                                                                                                                                                                                                                                                                                                                                                                                                                                                                                                                                                                                                                                                                                                                                                                                                                                                                                                                                                                                                                                                                                                                                                                                                                                                                                                                                                                                                                                                                                                                                                                                                                                                                                                                                                                                                                                                                                                                                                                                                                                                                                                                                                                                                                                                                                                                                                                                                                                                                                                                                                                                                | Department of Virology and Immunology, University of Helsinki and Helsinki University Hospital, HUSLAB Finland                           | Department of Virology, Faculty of Medicine, University of Helsinki, Helsinki, Finland                                                                                                                                                                                            | Essi Korhonen; Fathiah Zakhham; Hanna Jarva; Hanna Liimatainen; Hannimari Kallio-Kokko; Harri Kangas; Hussein Alburkat; Jenni Virtanen; Maija Lalpala; Maija Suvano; Mert Erdin; Olii Vapalahti; Pekka Ellonen; Phuoc Truong; Ravi Kant; Sari Hannah; Satu Kurkela; Teemu Smura                                                                                                                                                         |
| EPI_ISL_1273443                                                                                                                                                                                                                                                                                                                                                                                                                                                                                                                                                                                                                                                                                                                                                                                                                                                                                                                                                                                                                                                                                                                                                                                                                                                                                                                                                                                                                                                                                                                                                                                                                                                                                                                                                                                                                                                                                                                                                                                                                                                                                                                                                                                                                                                                                                                                                                                                                                                                                                                                                                                                                                                                                                                                                                                                                                                                                                                                                                                                                                                                                                                                                                                                                                                                                                                                                                                                                                                                                                                                                                                                                                                                                                                                                                                                                                                                                                                                                                                                                                                                                                                                                                                                                                                                                                                                                                                                                                                                                                                                                                                                                                                                                                                                                                                                                                                                                                                                                                                                                                                                                                                                                                                                                                                                                                                                                                                                                                                                                                                                                                                                                                                                                                                                                                                                                                                                                                                                                                                                                                                                                                                                                                                                                                                                                                                                                                                                                                                                                                                                                                                                                                                                                                                                                                                                                                                                                                                                                                                                                                                                                                                                                                                                                                                                                                                                                                                                                                                                                                                                                                                                                                                                                                                                                                                                                                                                                                                                                                                                                                                                                                                                                                                                                                                                                                                                                                                                                                                                                                                                                                                                                                                                                  | Department of Virology, Bangabandhu Sheikh Mujib Medical University                                                                      | Bioinformatics Division, National Institute of Biotechnology (NIB)                                                                                                                                                                                                                | Arittra Bhattacharjee; Ishfaq Ahammad; Md. Salimullah; Mohammad Uzzal Hossain; Munira Jahan; Raad Rahmat; S M Rashedul Islam; Saif Ullah Munshi; Tahmina Akhter                                                                                                                                                                                                                                                                         |
| EPI_ISL_1259182 to 1259207                                                                                                                                                                                                                                                                                                                                                                                                                                                                                                                                                                                                                                                                                                                                                                                                                                                                                                                                                                                                                                                                                                                                                                                                                                                                                                                                                                                                                                                                                                                                                                                                                                                                                                                                                                                                                                                                                                                                                                                                                                                                                                                                                                                                                                                                                                                                                                                                                                                                                                                                                                                                                                                                                                                                                                                                                                                                                                                                                                                                                                                                                                                                                                                                                                                                                                                                                                                                                                                                                                                                                                                                                                                                                                                                                                                                                                                                                                                                                                                                                                                                                                                                                                                                                                                                                                                                                                                                                                                                                                                                                                                                                                                                                                                                                                                                                                                                                                                                                                                                                                                                                                                                                                                                                                                                                                                                                                                                                                                                                                                                                                                                                                                                                                                                                                                                                                                                                                                                                                                                                                                                                                                                                                                                                                                                                                                                                                                                                                                                                                                                                                                                                                                                                                                                                                                                                                                                                                                                                                                                                                                                                                                                                                                                                                                                                                                                                                                                                                                                                                                                                                                                                                                                                                                                                                                                                                                                                                                                                                                                                                                                                                                                                                                                                                                                                                                                                                                                                                                                                                                                                                                                                                                                       | Department of Virology, Istituto Zooprofilattico Sperimentale del Lazio e della Toscana (IZSLT)                                          | Department of General Diagnostics; Department of Virology; Istituto Zooprofilattico Sperimentale del Lazio e della Toscana (IZSLT)                                                                                                                                                | Alessia Franco; Antonella Cersini; Antonio Battisti.; Elena L. Diaconu; Fabiola Feltrin; Giuseppe Manna; Patricia Alba; Raffaella Conti; Teresa Scicluna; Virginia Carfora                                                                                                                                                                                                                                                              |
| EPI_ISL_1014996 to 1015334, EPI_ISL_1063398, EPI_ISL_1063906                                                                                                                                                                                                                                                                                                                                                                                                                                                                                                                                                                                                                                                                                                                                                                                                                                                                                                                                                                                                                                                                                                                                                                                                                                                                                                                                                                                                                                                                                                                                                                                                                                                                                                                                                                                                                                                                                                                                                                                                                                                                                                                                                                                                                                                                                                                                                                                                                                                                                                                                                                                                                                                                                                                                                                                                                                                                                                                                                                                                                                                                                                                                                                                                                                                                                                                                                                                                                                                                                                                                                                                                                                                                                                                                                                                                                                                                                                                                                                                                                                                                                                                                                                                                                                                                                                                                                                                                                                                                                                                                                                                                                                                                                                                                                                                                                                                                                                                                                                                                                                                                                                                                                                                                                                                                                                                                                                                                                                                                                                                                                                                                                                                                                                                                                                                                                                                                                                                                                                                                                                                                                                                                                                                                                                                                                                                                                                                                                                                                                                                                                                                                                                                                                                                                                                                                                                                                                                                                                                                                                                                                                                                                                                                                                                                                                                                                                                                                                                                                                                                                                                                                                                                                                                                                                                                                                                                                                                                                                                                                                                                                                                                                                                                                                                                                                                                                                                                                                                                                                                                                                                                                                                     | Department of Virology, Pitié-Salpêtrière hospital                                                                                       | Department of Virology, Pitié-Salpêtrière hospital                                                                                                                                                                                                                                | Anne-Genevieve Marcelin; Aude Jary; Karen Zafilaza; Stéphane Marot; Valentin Leducq; Vincent Calvez                                                                                                                                                                                                                                                                                                                                     |
| EPI_ISL_1022420 to 1023447, EPI_ISL_1023449, EPI_ISL_1023451, EPI_ISL_1023453, EPI_ISL_1023455, EPI_ISL_1023458, EPI_ISL_1023460, EPI_ISL_1023462, EPI_ISL_1023464, EPI_ISL_1023466, EPI_ISL_1023469, EPI_ISL_1023471 to 1023523, EPI_ISL_1023525 to 1023581, EPI_ISL_1023583, EPI_ISL_1023585, EPI_ISL_1023587, EPI_ISL_1023589, EPI_ISL_1023591, EPI_ISL_1023593, EPI_ISL_1023596, EPI_ISL_1023598, EPI_ISL_1023600, EPI_ISL_1023602, EPI_ISL_1023604, EPI_ISL_1023607, EPI_ISL_1023609, EPI_ISL_1023611, EPI_ISL_1023613, EPI_ISL_1023616, EPI_ISL_1023618 to 1023670, EPI_ISL_1023672, EPI_ISL_1023674, EPI_ISL_1023676, EPI_ISL_1023678, EPI_ISL_1023680, EPI_ISL_1023682, EPI_ISL_1023684, EPI_ISL_1023687, EPI_ISL_1023689, EPI_ISL_1023691, EPI_ISL_1023694, EPI_ISL_1023696, EPI_ISL_1023698, EPI_ISL_1023700, EPI_ISL_1023702, EPI_ISL_1023705, EPI_ISL_1023707, EPI_ISL_1023709, EPI_ISL_1023711, EPI_ISL_1023713, EPI_ISL_1023715, EPI_ISL_1023717, EPI_ISL_1023719, EPI_ISL_1023721, EPI_ISL_1023723, EPI_ISL_1023725, EPI_ISL_1023727, EPI_ISL_1023729, EPI_ISL_1023731, EPI_ISL_1023733, EPI_ISL_1023735, EPI_ISL_1023737, EPI_ISL_1023739, EPI_ISL_1023741, EPI_ISL_1023743, EPI_ISL_1023745, EPI_ISL_1023747, EPI_ISL_1023749, EPI_ISL_1023751, EPI_ISL_1023753, EPI_ISL_1023755, EPI_ISL_1023757, EPI_ISL_1023759, EPI_ISL_1023761, EPI_ISL_1023763, EPI_ISL_1023765, EPI_ISL_1023767, EPI_ISL_1023769, EPI_ISL_1023771, EPI_ISL_1023773, EPI_ISL_1023775, EPI_ISL_1023777, EPI_ISL_1023779, EPI_ISL_1023781, EPI_ISL_1023783, EPI_ISL_1023785, EPI_ISL_1023787, EPI_ISL_1023789, EPI_ISL_1023791, EPI_ISL_1023793, EPI_ISL_1023795, EPI_ISL_1023797, EPI_ISL_1023799, EPI_ISL_1023801, EPI_ISL_1023803, EPI_ISL_1023805, EPI_ISL_1023807, EPI_ISL_1023809, EPI_ISL_1023811, EPI_ISL_1023813 to 1023814, EPI_ISL_1023817, EPI_ISL_1023819, EPI_ISL_1023821, EPI_ISL_1023823, EPI_ISL_1023825, EPI_ISL_1023827, EPI_ISL_1023829, EPI_ISL_1023831, EPI_ISL_1023833, EPI_ISL_1023835, EPI_ISL_1023837, EPI_ISL_1023839, EPI_ISL_1023841, EPI_ISL_1023843, EPI_ISL_1023845, EPI_ISL_1023847, EPI_ISL_1023849, EPI_ISL_1023851, EPI_ISL_1023853, EPI_ISL_1023855, EPI_ISL_1023857, EPI_ISL_1023859, EPI_ISL_1023861, EPI_ISL_1023863, EPI_ISL_1023865, EPI_ISL_1023867, EPI_ISL_1023869, EPI_ISL_1023871, EPI_ISL_1023873, EPI_ISL_1023875, EPI_ISL_1023877, EPI_ISL_1023879, EPI_ISL_1023881, EPI_ISL_1023883, EPI_ISL_1023885, EPI_ISL_1023887, EPI_ISL_1023889, EPI_ISL_1023891, EPI_ISL_1023893, EPI_ISL_1023895, EPI_ISL_1023897, EPI_ISL_1023899, EPI_ISL_1023901, EPI_ISL_1023903, EPI_ISL_1023905, EPI_ISL_1023907, EPI_ISL_1023909, EPI_ISL_1023911, EPI_ISL_1023913, EPI_ISL_1023915, EPI_ISL_1023917, EPI_ISL_1023919, EPI_ISL_1023921, EPI_ISL_1023923, EPI_ISL_1023925, EPI_ISL_1023927, EPI_ISL_1023929, EPI_ISL_1023931, EPI_ISL_1023933, EPI_ISL_1023935, EPI_ISL_1023937, EPI_ISL_1023939, EPI_ISL_1023941, EPI_ISL_1023943, EPI_ISL_1023945, EPI_ISL_1023947, EPI_ISL_1023949, EPI_ISL_1023951, EPI_ISL_1023953, EPI_ISL_1023955, EPI_ISL_1023957, EPI_ISL_1023959, EPI_ISL_1023961, EPI_ISL_1023963, EPI_ISL_1023965, EPI_ISL_1023967, EPI_ISL_1023969, EPI_ISL_1023971, EPI_ISL_1023973, EPI_ISL_1023975, EPI_ISL_1023977, EPI_ISL_1023979, EPI_ISL_1023981, EPI_ISL_1023983, EPI_ISL_1023985, EPI_ISL_1023987, EPI_ISL_1023989, EPI_ISL_1023991, EPI_ISL_1023993, EPI_ISL_1023995, EPI_ISL_1023997, EPI_ISL_1023999, EPI_ISL_1024001, EPI_ISL_1024003, EPI_ISL_1024005, EPI_ISL_1024007, EPI_ISL_1024009, EPI_ISL_1024011, EPI_ISL_1024013, EPI_ISL_1024015, EPI_ISL_1024017, EPI_ISL_1024019, EPI_ISL_1024021, EPI_ISL_1024023, EPI_ISL_1024025, EPI_ISL_1024027, EPI_ISL_1024029, EPI_ISL_1024031, EPI_ISL_1024033, EPI_ISL_1024035, EPI_ISL_1024037, EPI_ISL_1024039, EPI_ISL_1024041, EPI_ISL_1024043, EPI_ISL_1024045, EPI_ISL_1024047, EPI_ISL_1024049, EPI_ISL_1024051, EPI_ISL_1024053, EPI_ISL_1024055, EPI_ISL_1024057, EPI_ISL_1024059, EPI_ISL_1024061, EPI_ISL_1024063, EPI_ISL_1024065, EPI_ISL_1024067, EPI_ISL_1024069, EPI_ISL_1024071, EPI_ISL_1024073, EPI_ISL_1024075, EPI_ISL_1024077, EPI_ISL_1024079, EPI_ISL_1024081, EPI_ISL_1024083, EPI_ISL_1024085, EPI_ISL_1024087, EPI_ISL_1024089, EPI_ISL_1024091, EPI_ISL_1024093, EPI_ISL_1024095, EPI_ISL_1024097, EPI_ISL_1024099, EPI_ISL_1024101, EPI_ISL_1024103, EPI_ISL_1024105, EPI_ISL_1024107, EPI_ISL_1024109, EPI_ISL_1024111, EPI_ISL_1024113, EPI_ISL_1024115, EPI_ISL_1024117, EPI_ISL_1024119, EPI_ISL_1024121, EPI_ISL_1024123, EPI_ISL_1024125, EPI_ISL_1024127, EPI_ISL_1024129, EPI_ISL_1024131, EPI_ISL_1024133, EPI_ISL_1024135, EPI_ISL_1024137, EPI_ISL_1024139, EPI_ISL_1024141, EPI_ISL_1024143, EPI_ISL_1024145, EPI_ISL_1024147, EPI_ISL_1024149, EPI_ISL_1024151, EPI_ISL_1024153, EPI_ISL_1024155, EPI_ISL_1024157, EPI_ISL_1024159, EPI_ISL_1024161, EPI_ISL_1024163, EPI_ISL_1024165, EPI_ISL_1024167, EPI_ISL_1024169, EPI_ISL_1024171, EPI_ISL_1024173, EPI_ISL_1024175, EPI_ISL_1024177, EPI_ISL_1024179, EPI_ISL_1024181, EPI_ISL_1024183, EPI_ISL_1024185, EPI_ISL_1024187, EPI_ISL_1024189, EPI_ISL_1024191, EPI_ISL_1024193, EPI_ISL_1024195, EPI_ISL_1024197, EPI_ISL_1024199, EPI_ISL_1024201, EPI_ISL_1024203, EPI_ISL_1024205, EPI_ISL_1024207, EPI_ISL_1024209, EPI_ISL_1024211, EPI_ISL_1024213, EPI_ISL_1024215, EPI_ISL_1024217, EPI_ISL_1024219, EPI_ISL_1024221, EPI_ISL_1024223, EPI_ISL_1024225, EPI_ISL_1024227, EPI_ISL_1024229, EPI_ISL_1024231, EPI_ISL_1024233, EPI_ISL_1024235, EPI_ISL_1024237, EPI_ISL_1024239, EPI_ISL_1024241, EPI_ISL_1024243, EPI_ISL_1024245, EPI_ISL_1024247, EPI_ISL_1024249, EPI_ISL_1024251, EPI_ISL_1024253, EPI_ISL_1024255, EPI_ISL_1024257, EPI_ISL_1024259, EPI_ISL_1024261, EPI_ISL_1024263, EPI_ISL_1024265, EPI_ISL_1024267, EPI_ISL_1024269, EPI_ISL_1024271, EPI_ISL_1024273, EPI_ISL_1024275, EPI_ISL_1024277, EPI_ISL_1024279, EPI_ISL_1024281, EPI_ISL_1024283, EPI_ISL_1024285, EPI_ISL_1024287, EPI_ISL_1024289, EPI_ISL_1024291, EPI_ISL_1024293, EPI_ISL_1024295, EPI_ISL_1024297, EPI_ISL_1024299, EPI_ISL_1024301, EPI_ISL_1024303, EPI_ISL_1024305, EPI_ISL_1024307, EPI_ISL_1024309, EPI_ISL_1024311, EPI_ISL_1024313, EPI_ISL_1024315, EPI_ISL_1024317, EPI_ISL_1024319, EPI_ISL_1024321, EPI_ISL_1024323, EPI_ISL_1024325, EPI_ISL_1024327, EPI_ISL_1024329, EPI_ISL_1024331, EPI_ISL_1024333, EPI_ISL_1024335, EPI_ISL_1024337, EPI_ISL_1024339, EPI_ISL_1024341, EPI_ISL_1024343, EPI_ISL_1024345, EPI_ISL_1024347, EPI_ISL_1024349, EPI_ISL_1024351, EPI_ISL_1024353, EPI_ISL_1024355, EPI_ISL_1024357, EPI_ISL_1024359, EPI_ISL_1024361, EPI_ISL_1024363, EPI_ISL_1024365, EPI_ISL_1024367, EPI_ISL_1024369, EPI_ISL_1024371, EPI_ISL_1024373, EPI_ISL_1024375, EPI_ISL_1024377, EPI_ISL_1024379, EPI_ISL_1024381, EPI_ISL_1024383, EPI_ISL_1024385, EPI_ISL_1024387, EPI_ISL_1024389, EPI_ISL_1024391, EPI_ISL_1024393, EPI_ISL_1024395, EPI_ISL_1024397, EPI_ISL_1024399, EPI_ISL_1024401, EPI_ISL_1024403, EPI_ISL_1024405, EPI_ISL_1024407, EPI_ISL_1024409, EPI_ISL_1024411, EPI_ISL_1024413, EPI_ISL_1024415, EPI_ISL_1024417, EPI_ISL_1024419, EPI_ISL_1024421, EPI_ISL_1024423, EPI_ISL_1024425, EPI_ISL_1024427, EPI_ISL_1024429, EPI_ISL_1024431, EPI_ISL_1024433, EPI_ISL_1024435, EPI_ISL_1024437, EPI_ISL_1024439, EPI_ISL_1024441, EPI_ISL_1024443, EPI_ISL_1024445, EPI_ISL_1024447, EPI_ISL_1024449, EPI_ISL_1024451, EPI_ISL_1024453, EPI_ISL_1024455, EPI_ISL_1024457, EPI_ISL_1024459, EPI_ISL_1024461, EPI_ISL_1024463, EPI_ISL_1024465, EPI_ISL_1024467, EPI_ISL_1024469, EPI_ISL_1024471, EPI_ISL_1024473, EPI_ISL_1024475, EPI_ISL_1024477, EPI_ISL_1024479, EPI_ISL_1024481, EPI_ISL_1024483, EPI_ISL_1024485, EPI_ISL_1024487, EPI_ISL_1024489, EPI_ISL_1024491, EPI_ISL_1024493, EPI_ISL_1024495, EPI_ISL_1024497, EPI_ISL_1024499, EPI_ISL_1024501, EPI_ISL_1024503, EPI_ISL_1024505, EPI_ISL_1024507, EPI_ISL_1024509, EPI_ISL_1024511, EPI_ISL_1024513, EPI_ISL_1024515, EPI_ISL_1024517, EPI_ISL_1024519, EPI_ISL_1024521, EPI_ISL_1024523, EPI_ISL_1024525, EPI_ISL_1024527, EPI_ISL_1024529, EPI_ISL_1024531, EPI_ISL_1024533, EPI_ISL_1024535, EPI_ISL_1024537, EPI_ISL_1024539, EPI_ISL_1024541, EPI_ISL_1024543, EPI_ISL_1024545, EPI_ISL_1024547, EPI_ISL_1024549, EPI_ISL_1024551, EPI_ISL_1024553, EPI_ISL_1024555, EPI_ISL_1024557, EPI_ISL_1024559, EPI_ISL_1024561, EPI_ISL_1024563, EPI_ISL_1024565, EPI_ISL_1024567, EPI_ISL_1024569, EPI_ISL_1024571, EPI_ISL_1024573, EPI_ISL_1024575, EPI_ISL_1024577, EPI_ISL_1024579, EPI_ISL_1024581, EPI_ISL_1024583, EPI_ISL_1024585, EPI_ISL_1024587, EPI_ISL_1024589, EPI_ISL_1024591, E |                                                                                                                                          |                                                                                                                                                                                                                                                                                   |                                                                                                                                                                                                                                                                                                                                                                                                                                         |



|                                                                                                                                                                                                                                                                                                                                                                                                                                                                                                                                                                                                                                                                                                                                                                                                                                                                                                                                                                                                                                                                                                                                                                                                                                                                                                                                                                                                                                                                                                                                                                                                                                                                                                                                                                                                                                                                                                                                                                                                                                                                                                                                                                                                                                                                                                                                                                                                                                                                                                                                                                                                                                                                                                                                                                                                                                                                                                                                                                                                                                                                                                                                                                                                                                                                                                                                                                                                                                                                                                                                                                                                                                                                                                                                                                                                                                                                                                                                                                                                                                                                                                                                                                                                                                                                                                                                                                                                                                                                                                                                                                                                                                                                                                                                                                                                                                                                                                                                                                                                                                                                                                                                                                                                                                                                                                                                                                                                                                                                                      | Hygiene; 2. Eurofins Genomics Europe Sequencing GmbH                                                                                   | Zacharczuk Katarzyna                                                                                                                                                                                                                                                                                                                                                                                                                                      |
|--------------------------------------------------------------------------------------------------------------------------------------------------------------------------------------------------------------------------------------------------------------------------------------------------------------------------------------------------------------------------------------------------------------------------------------------------------------------------------------------------------------------------------------------------------------------------------------------------------------------------------------------------------------------------------------------------------------------------------------------------------------------------------------------------------------------------------------------------------------------------------------------------------------------------------------------------------------------------------------------------------------------------------------------------------------------------------------------------------------------------------------------------------------------------------------------------------------------------------------------------------------------------------------------------------------------------------------------------------------------------------------------------------------------------------------------------------------------------------------------------------------------------------------------------------------------------------------------------------------------------------------------------------------------------------------------------------------------------------------------------------------------------------------------------------------------------------------------------------------------------------------------------------------------------------------------------------------------------------------------------------------------------------------------------------------------------------------------------------------------------------------------------------------------------------------------------------------------------------------------------------------------------------------------------------------------------------------------------------------------------------------------------------------------------------------------------------------------------------------------------------------------------------------------------------------------------------------------------------------------------------------------------------------------------------------------------------------------------------------------------------------------------------------------------------------------------------------------------------------------------------------------------------------------------------------------------------------------------------------------------------------------------------------------------------------------------------------------------------------------------------------------------------------------------------------------------------------------------------------------------------------------------------------------------------------------------------------------------------------------------------------------------------------------------------------------------------------------------------------------------------------------------------------------------------------------------------------------------------------------------------------------------------------------------------------------------------------------------------------------------------------------------------------------------------------------------------------------------------------------------------------------------------------------------------------------------------------------------------------------------------------------------------------------------------------------------------------------------------------------------------------------------------------------------------------------------------------------------------------------------------------------------------------------------------------------------------------------------------------------------------------------------------------------------------------------------------------------------------------------------------------------------------------------------------------------------------------------------------------------------------------------------------------------------------------------------------------------------------------------------------------------------------------------------------------------------------------------------------------------------------------------------------------------------------------------------------------------------------------------------------------------------------------------------------------------------------------------------------------------------------------------------------------------------------------------------------------------------------------------------------------------------------------------------------------------------------------------------------------------------------------------------------------------------------------------------------------------------------------|----------------------------------------------------------------------------------------------------------------------------------------|-----------------------------------------------------------------------------------------------------------------------------------------------------------------------------------------------------------------------------------------------------------------------------------------------------------------------------------------------------------------------------------------------------------------------------------------------------------|
| EPI_ISL_1009675 to 1009678                                                                                                                                                                                                                                                                                                                                                                                                                                                                                                                                                                                                                                                                                                                                                                                                                                                                                                                                                                                                                                                                                                                                                                                                                                                                                                                                                                                                                                                                                                                                                                                                                                                                                                                                                                                                                                                                                                                                                                                                                                                                                                                                                                                                                                                                                                                                                                                                                                                                                                                                                                                                                                                                                                                                                                                                                                                                                                                                                                                                                                                                                                                                                                                                                                                                                                                                                                                                                                                                                                                                                                                                                                                                                                                                                                                                                                                                                                                                                                                                                                                                                                                                                                                                                                                                                                                                                                                                                                                                                                                                                                                                                                                                                                                                                                                                                                                                                                                                                                                                                                                                                                                                                                                                                                                                                                                                                                                                                                                           | Diagnósticos da América - DASA                                                                                                         | Instituto de Medicina Tropical de Sao Paulo                                                                                                                                                                                                                                                                                                                                                                                                               |
| EPI_ISL_1144226 to 1144251, EPI_ISL_1145662 to 1145670, EPI_ISL_1145672 to 1145690, EPI_ISL_1147725 to 1147743, EPI_ISL_1147745 to 1147761, EPI_ISL_1155202 to 1155221, EPI_ISL_1155223 to 1155233, EPI_ISL_1211955 to 1211970, EPI_ISL_1211972 to 1211987, EPI_ISL_1285797 to 1285798, EPI_ISL_1285801 to 1285812, EPI_ISL_1285814 to 1285818, EPI_ISL_1285820 to 1285829, EPI_ISL_1285831 to 1285832, EPI_ISL_1285834, EPI_ISL_1285836 to 1285839                                                                                                                                                                                                                                                                                                                                                                                                                                                                                                                                                                                                                                                                                                                                                                                                                                                                                                                                                                                                                                                                                                                                                                                                                                                                                                                                                                                                                                                                                                                                                                                                                                                                                                                                                                                                                                                                                                                                                                                                                                                                                                                                                                                                                                                                                                                                                                                                                                                                                                                                                                                                                                                                                                                                                                                                                                                                                                                                                                                                                                                                                                                                                                                                                                                                                                                                                                                                                                                                                                                                                                                                                                                                                                                                                                                                                                                                                                                                                                                                                                                                                                                                                                                                                                                                                                                                                                                                                                                                                                                                                                                                                                                                                                                                                                                                                                                                                                                                                                                                                                  |                                                                                                                                        | Brazil-UK Centre for Arbovirus Discovery Diagnosis Genomics and Epidemiology (CADDE) Genomic Network - Instituto de Medicina Tropical                                                                                                                                                                                                                                                                                                                     |
| see above                                                                                                                                                                                                                                                                                                                                                                                                                                                                                                                                                                                                                                                                                                                                                                                                                                                                                                                                                                                                                                                                                                                                                                                                                                                                                                                                                                                                                                                                                                                                                                                                                                                                                                                                                                                                                                                                                                                                                                                                                                                                                                                                                                                                                                                                                                                                                                                                                                                                                                                                                                                                                                                                                                                                                                                                                                                                                                                                                                                                                                                                                                                                                                                                                                                                                                                                                                                                                                                                                                                                                                                                                                                                                                                                                                                                                                                                                                                                                                                                                                                                                                                                                                                                                                                                                                                                                                                                                                                                                                                                                                                                                                                                                                                                                                                                                                                                                                                                                                                                                                                                                                                                                                                                                                                                                                                                                                                                                                                                            | Dianovis GmbH Greiz                                                                                                                    | Robert Koch Institute                                                                                                                                                                                                                                                                                                                                                                                                                                     |
| EPI_ISL_1152566                                                                                                                                                                                                                                                                                                                                                                                                                                                                                                                                                                                                                                                                                                                                                                                                                                                                                                                                                                                                                                                                                                                                                                                                                                                                                                                                                                                                                                                                                                                                                                                                                                                                                                                                                                                                                                                                                                                                                                                                                                                                                                                                                                                                                                                                                                                                                                                                                                                                                                                                                                                                                                                                                                                                                                                                                                                                                                                                                                                                                                                                                                                                                                                                                                                                                                                                                                                                                                                                                                                                                                                                                                                                                                                                                                                                                                                                                                                                                                                                                                                                                                                                                                                                                                                                                                                                                                                                                                                                                                                                                                                                                                                                                                                                                                                                                                                                                                                                                                                                                                                                                                                                                                                                                                                                                                                                                                                                                                                                      | Dietrich-Bonhoeffer-Klinikum Institut für Laboratoriumsdiagnostik Mikrobiologie und Transfusionsmedizin                                | Robert Koch Institute                                                                                                                                                                                                                                                                                                                                                                                                                                     |
| EPI_ISL_1020197, EPI_ISL_1117591                                                                                                                                                                                                                                                                                                                                                                                                                                                                                                                                                                                                                                                                                                                                                                                                                                                                                                                                                                                                                                                                                                                                                                                                                                                                                                                                                                                                                                                                                                                                                                                                                                                                                                                                                                                                                                                                                                                                                                                                                                                                                                                                                                                                                                                                                                                                                                                                                                                                                                                                                                                                                                                                                                                                                                                                                                                                                                                                                                                                                                                                                                                                                                                                                                                                                                                                                                                                                                                                                                                                                                                                                                                                                                                                                                                                                                                                                                                                                                                                                                                                                                                                                                                                                                                                                                                                                                                                                                                                                                                                                                                                                                                                                                                                                                                                                                                                                                                                                                                                                                                                                                                                                                                                                                                                                                                                                                                                                                                     | Dinkes, Bogor, West Java                                                                                                               | Biosafety Level-3 Laboratory, Indonesian Institute of Sciences (LIPI)                                                                                                                                                                                                                                                                                                                                                                                     |
| EPI_ISL_1112236 to 1112291, EPI_ISL_1116471 to 1116472, EPI_ISL_1116475                                                                                                                                                                                                                                                                                                                                                                                                                                                                                                                                                                                                                                                                                                                                                                                                                                                                                                                                                                                                                                                                                                                                                                                                                                                                                                                                                                                                                                                                                                                                                                                                                                                                                                                                                                                                                                                                                                                                                                                                                                                                                                                                                                                                                                                                                                                                                                                                                                                                                                                                                                                                                                                                                                                                                                                                                                                                                                                                                                                                                                                                                                                                                                                                                                                                                                                                                                                                                                                                                                                                                                                                                                                                                                                                                                                                                                                                                                                                                                                                                                                                                                                                                                                                                                                                                                                                                                                                                                                                                                                                                                                                                                                                                                                                                                                                                                                                                                                                                                                                                                                                                                                                                                                                                                                                                                                                                                                                              | Dipartimento di Scienze Biomediche e Oncologia Umana - Azienda Ospedaliero Universitaria Consorziale Policlinico                       | Istituto Zooprofilattico Sperimentale della Puglia e della Basilicata                                                                                                                                                                                                                                                                                                                                                                                     |
| EPI_ISL_1137618, EPI_ISL_1303371 to 1303373                                                                                                                                                                                                                                                                                                                                                                                                                                                                                                                                                                                                                                                                                                                                                                                                                                                                                                                                                                                                                                                                                                                                                                                                                                                                                                                                                                                                                                                                                                                                                                                                                                                                                                                                                                                                                                                                                                                                                                                                                                                                                                                                                                                                                                                                                                                                                                                                                                                                                                                                                                                                                                                                                                                                                                                                                                                                                                                                                                                                                                                                                                                                                                                                                                                                                                                                                                                                                                                                                                                                                                                                                                                                                                                                                                                                                                                                                                                                                                                                                                                                                                                                                                                                                                                                                                                                                                                                                                                                                                                                                                                                                                                                                                                                                                                                                                                                                                                                                                                                                                                                                                                                                                                                                                                                                                                                                                                                                                          | Dirección de Sanidad Policía Nacional                                                                                                  | Instituto Nacional de Salud- Dirección de Investigación en Salud Pública                                                                                                                                                                                                                                                                                                                                                                                  |
| EPI_ISL_1007643 to 1007657, EPI_ISL_1063537 to 1063626, EPI_ISL_1063628 to 1063773, EPI_ISL_1138900 to 1138968, EPI_ISL_1138970 to 1138982, EPI_ISL_1165001 to 1165065, EPI_ISL_1209021, EPI_ISL_1209408 to 1209452, EPI_ISL_1228588 to 1228664, EPI_ISL_1252366 to 1252445, EPI_ISL_1315328 to 1315420, EPI_ISL_1318989 to 1319041                                                                                                                                                                                                                                                                                                                                                                                                                                                                                                                                                                                                                                                                                                                                                                                                                                                                                                                                                                                                                                                                                                                                                                                                                                                                                                                                                                                                                                                                                                                                                                                                                                                                                                                                                                                                                                                                                                                                                                                                                                                                                                                                                                                                                                                                                                                                                                                                                                                                                                                                                                                                                                                                                                                                                                                                                                                                                                                                                                                                                                                                                                                                                                                                                                                                                                                                                                                                                                                                                                                                                                                                                                                                                                                                                                                                                                                                                                                                                                                                                                                                                                                                                                                                                                                                                                                                                                                                                                                                                                                                                                                                                                                                                                                                                                                                                                                                                                                                                                                                                                                                                                                                                  |                                                                                                                                        | Carlos Franco-Muñoz; Carmen Osorio; Diana Malo; Diego A. Álvarez-Díaz; Diego Andrés Prada; Gerardo Santamaría; Hector Alejandro Ruiz-Moreno; Jhonattan Reales-González; Juan Camilo Martínez; Julian Naizaque; Katherine Laiton-Donato; Liseth Pardo; Magdalena Wiesner; Marcela Mercado-Reyes; Marcela Mercado-Reyes; Marta T. Herrera-Sepúlveda; Marta Lopez Blanco; Martha Lucia Ospina Martínez; Sergio Gomez; Sheryll Corchuelo; Angela Alarcon Cruz |
| see above                                                                                                                                                                                                                                                                                                                                                                                                                                                                                                                                                                                                                                                                                                                                                                                                                                                                                                                                                                                                                                                                                                                                                                                                                                                                                                                                                                                                                                                                                                                                                                                                                                                                                                                                                                                                                                                                                                                                                                                                                                                                                                                                                                                                                                                                                                                                                                                                                                                                                                                                                                                                                                                                                                                                                                                                                                                                                                                                                                                                                                                                                                                                                                                                                                                                                                                                                                                                                                                                                                                                                                                                                                                                                                                                                                                                                                                                                                                                                                                                                                                                                                                                                                                                                                                                                                                                                                                                                                                                                                                                                                                                                                                                                                                                                                                                                                                                                                                                                                                                                                                                                                                                                                                                                                                                                                                                                                                                                                                                            | Division of Emerging Infectious Diseases, Bureau of Infectious Diseases Diagnosis Control, Korea Disease Control and Prevention Agency | Division of Emerging Infectious Diseases, Bureau of Infectious Diseases Diagnosis Control, Korea Disease Control and Prevention Agency                                                                                                                                                                                                                                                                                                                    |
| EPI_ISL_1233905 to 1233918, EPI_ISL_1233936 to 1233937                                                                                                                                                                                                                                                                                                                                                                                                                                                                                                                                                                                                                                                                                                                                                                                                                                                                                                                                                                                                                                                                                                                                                                                                                                                                                                                                                                                                                                                                                                                                                                                                                                                                                                                                                                                                                                                                                                                                                                                                                                                                                                                                                                                                                                                                                                                                                                                                                                                                                                                                                                                                                                                                                                                                                                                                                                                                                                                                                                                                                                                                                                                                                                                                                                                                                                                                                                                                                                                                                                                                                                                                                                                                                                                                                                                                                                                                                                                                                                                                                                                                                                                                                                                                                                                                                                                                                                                                                                                                                                                                                                                                                                                                                                                                                                                                                                                                                                                                                                                                                                                                                                                                                                                                                                                                                                                                                                                                                               | Division of Viral Diseases, CDC Pathogen Discovery Team                                                                                | Division of Viral Diseases, CDC Pathogen Discovery Team                                                                                                                                                                                                                                                                                                                                                                                                   |
| EPI_ISL_1357605                                                                                                                                                                                                                                                                                                                                                                                                                                                                                                                                                                                                                                                                                                                                                                                                                                                                                                                                                                                                                                                                                                                                                                                                                                                                                                                                                                                                                                                                                                                                                                                                                                                                                                                                                                                                                                                                                                                                                                                                                                                                                                                                                                                                                                                                                                                                                                                                                                                                                                                                                                                                                                                                                                                                                                                                                                                                                                                                                                                                                                                                                                                                                                                                                                                                                                                                                                                                                                                                                                                                                                                                                                                                                                                                                                                                                                                                                                                                                                                                                                                                                                                                                                                                                                                                                                                                                                                                                                                                                                                                                                                                                                                                                                                                                                                                                                                                                                                                                                                                                                                                                                                                                                                                                                                                                                                                                                                                                                                                      | Dr. Ann Chahroudi's Lab                                                                                                                | Dr. Thomas Vanderford's Lab                                                                                                                                                                                                                                                                                                                                                                                                                               |
| EPI_ISL_1007612 to 1007613, EPI_ISL_1370096, EPI_ISL_1370148, EPI_ISL_1370325                                                                                                                                                                                                                                                                                                                                                                                                                                                                                                                                                                                                                                                                                                                                                                                                                                                                                                                                                                                                                                                                                                                                                                                                                                                                                                                                                                                                                                                                                                                                                                                                                                                                                                                                                                                                                                                                                                                                                                                                                                                                                                                                                                                                                                                                                                                                                                                                                                                                                                                                                                                                                                                                                                                                                                                                                                                                                                                                                                                                                                                                                                                                                                                                                                                                                                                                                                                                                                                                                                                                                                                                                                                                                                                                                                                                                                                                                                                                                                                                                                                                                                                                                                                                                                                                                                                                                                                                                                                                                                                                                                                                                                                                                                                                                                                                                                                                                                                                                                                                                                                                                                                                                                                                                                                                                                                                                                                                        | Dr. Bard                                                                                                                               | Laboratory of genomics and metagenomics, Institute of Microbiology, University Hospital Centre and University of Lausanne, Switzerland                                                                                                                                                                                                                                                                                                                    |
| EPI_ISL_1007638                                                                                                                                                                                                                                                                                                                                                                                                                                                                                                                                                                                                                                                                                                                                                                                                                                                                                                                                                                                                                                                                                                                                                                                                                                                                                                                                                                                                                                                                                                                                                                                                                                                                                                                                                                                                                                                                                                                                                                                                                                                                                                                                                                                                                                                                                                                                                                                                                                                                                                                                                                                                                                                                                                                                                                                                                                                                                                                                                                                                                                                                                                                                                                                                                                                                                                                                                                                                                                                                                                                                                                                                                                                                                                                                                                                                                                                                                                                                                                                                                                                                                                                                                                                                                                                                                                                                                                                                                                                                                                                                                                                                                                                                                                                                                                                                                                                                                                                                                                                                                                                                                                                                                                                                                                                                                                                                                                                                                                                                      | Dr. Borel                                                                                                                              | Laboratory of genomics and metagenomics, Institute of Microbiology, University Hospital Centre and University of Lausanne, Switzerland                                                                                                                                                                                                                                                                                                                    |
| EPI_ISL_1041030                                                                                                                                                                                                                                                                                                                                                                                                                                                                                                                                                                                                                                                                                                                                                                                                                                                                                                                                                                                                                                                                                                                                                                                                                                                                                                                                                                                                                                                                                                                                                                                                                                                                                                                                                                                                                                                                                                                                                                                                                                                                                                                                                                                                                                                                                                                                                                                                                                                                                                                                                                                                                                                                                                                                                                                                                                                                                                                                                                                                                                                                                                                                                                                                                                                                                                                                                                                                                                                                                                                                                                                                                                                                                                                                                                                                                                                                                                                                                                                                                                                                                                                                                                                                                                                                                                                                                                                                                                                                                                                                                                                                                                                                                                                                                                                                                                                                                                                                                                                                                                                                                                                                                                                                                                                                                                                                                                                                                                                                      | Dr. Cipto Mangunkusumo (RSCM) Hospital                                                                                                 | Faculty of Medicine, Universitas Indonesia                                                                                                                                                                                                                                                                                                                                                                                                                |
| EPI_ISL_1055385 to 1055451                                                                                                                                                                                                                                                                                                                                                                                                                                                                                                                                                                                                                                                                                                                                                                                                                                                                                                                                                                                                                                                                                                                                                                                                                                                                                                                                                                                                                                                                                                                                                                                                                                                                                                                                                                                                                                                                                                                                                                                                                                                                                                                                                                                                                                                                                                                                                                                                                                                                                                                                                                                                                                                                                                                                                                                                                                                                                                                                                                                                                                                                                                                                                                                                                                                                                                                                                                                                                                                                                                                                                                                                                                                                                                                                                                                                                                                                                                                                                                                                                                                                                                                                                                                                                                                                                                                                                                                                                                                                                                                                                                                                                                                                                                                                                                                                                                                                                                                                                                                                                                                                                                                                                                                                                                                                                                                                                                                                                                                           | Dr. Leonard A. Miller Centre for Health Services                                                                                       | National Microbiology Laboratory (NML)                                                                                                                                                                                                                                                                                                                                                                                                                    |
| EPI_ISL_1364466 to 1364468, EPI_ISL_1366083, EPI_ISL_1366238, EPI_ISL_1366269, EPI_ISL_1366271                                                                                                                                                                                                                                                                                                                                                                                                                                                                                                                                                                                                                                                                                                                                                                                                                                                                                                                                                                                                                                                                                                                                                                                                                                                                                                                                                                                                                                                                                                                                                                                                                                                                                                                                                                                                                                                                                                                                                                                                                                                                                                                                                                                                                                                                                                                                                                                                                                                                                                                                                                                                                                                                                                                                                                                                                                                                                                                                                                                                                                                                                                                                                                                                                                                                                                                                                                                                                                                                                                                                                                                                                                                                                                                                                                                                                                                                                                                                                                                                                                                                                                                                                                                                                                                                                                                                                                                                                                                                                                                                                                                                                                                                                                                                                                                                                                                                                                                                                                                                                                                                                                                                                                                                                                                                                                                                                                                       | Dr. Soetomo Teaching Hospital                                                                                                          | Research Center for Vaccine Technology and Development, Institute of Tropical Disease, Airlangga University                                                                                                                                                                                                                                                                                                                                               |
| EPI_ISL_1310833 to 1310835, EPI_ISL_1310837 to 1310841, EPI_ISL_1310843 to 1310864, EPI_ISL_1310866 to 1310869, EPI_ISL_1310871 to 1310879, EPI_ISL_1310881 to 1310896, EPI_ISL_1310898 to 1310900, EPI_ISL_1310902 to 1310903, EPI_ISL_1310905 to 1310914, EPI_ISL_1310916 to 1310917, EPI_ISL_1310919 to 1310922, EPI_ISL_1310924 to 1310939, EPI_ISL_1310942 to 1310943, EPI_ISL_1310945 to 1310959, EPI_ISL_1310961 to 1310963, EPI_ISL_1310965 to 1310980, EPI_ISL_1310982 to 1310985, EPI_ISL_1310990 to 1310995, EPI_ISL_1310997 to 1310998, EPI_ISL_1311000 to 1311007, EPI_ISL_1311009 to 1311010, EPI_ISL_1311012 to 1311013, EPI_ISL_1311017, EPI_ISL_1311019 to 1311024, EPI_ISL_1311027 to 1311041, EPI_ISL_1311043 to 1311056, EPI_ISL_1311058 to 1311093, EPI_ISL_1311095 to 1311098, EPI_ISL_1311102 to 1311121, EPI_ISL_1311123 to 1311127, EPI_ISL_1311136 to 1311148, EPI_ISL_1311154 to 1311158, EPI_ISL_1311169 to 1311186, EPI_ISL_1311188 to 1311193, EPI_ISL_1311195 to 1311203, EPI_ISL_1311205 to 1311208, EPI_ISL_1311211 to 1311236, EPI_ISL_1311238, EPI_ISL_1311240 to 1311241, EPI_ISL_1311244 to 1311247, EPI_ISL_1311249, EPI_ISL_1311251 to 1311253, EPI_ISL_1311255 to 1311259, EPI_ISL_1311261 to 1311281, EPI_ISL_1311283 to 1311292, EPI_ISL_1311294 to 1311295, EPI_ISL_1311297 to 1311301, EPI_ISL_1311304 to 1311306, EPI_ISL_1311310 to 1311344, EPI_ISL_1311356 to 1311366, EPI_ISL_1311370, EPI_ISL_1311372 to 1311375, EPI_ISL_1311377, EPI_ISL_1311379 to 1311388, EPI_ISL_1311390 to 1311407, EPI_ISL_1311413 to 1311435, EPI_ISL_1311439 to 1311462, EPI_ISL_1311464 to 1311470, EPI_ISL_1311472, EPI_ISL_1311474 to 1311626, EPI_ISL_1311535 to 1311537, EPI_ISL_1311539, EPI_ISL_1311541 to 1311551, EPI_ISL_1311558 to 1311565, EPI_ISL_1311569 to 1311577, EPI_ISL_1311581 to 1311586, EPI_ISL_1311591 to 1311594, EPI_ISL_1311597 to 1311618, EPI_ISL_1311624 to 1311627, EPI_ISL_1311630 to 1311635, EPI_ISL_1311639 to 1311688, EPI_ISL_1311696 to 1311701, EPI_ISL_1311710 to 1311723, EPI_ISL_1311725 to 1311747, EPI_ISL_1311752 to 1311753, EPI_ISL_1311755 to 1311821, EPI_ISL_1311825, EPI_ISL_1311829 to 1311834, EPI_ISL_1311836 to 1311847, EPI_ISL_1321994 to 1321995, EPI_ISL_1321997 to 1321998, EPI_ISL_1322000 to 1322002, EPI_ISL_1322006 to 1322009, EPI_ISL_1322013 to 1322015, EPI_ISL_1324030 to 1324036, EPI_ISL_1324062 to 1324066, EPI_ISL_1324068 to 1324076, EPI_ISL_1324078 to 1324092, EPI_ISL_1324095 to 1324106, EPI_ISL_1324117, EPI_ISL_1324120                                                                                                                                                                                                                                                                                                                                                                                                                                                                                                                                                                                                                                                                                                                                                                                                                                                                                                                                                                                                                                                                                                                                                                                                                                                                                                                                                                                                                                                                                                                                                                                                                                                                                                                                                                                                                                                                                                                                                                                                                                                                                                                                                                                                                                                                                                                                                                                                                                                                                                                                                                                                                                                                                                                                                                                                                                                                                                                                                 |                                                                                                                                        | Adel Malek; Anna Majer; Anneliese Landgraf; CanCOGeN's metadata curation team; Darian Hole; Elsie Grudeski; Gary Van Domselaar; George Zahariadis; Grace Seo; Jennifer Tanner; Kerr Smith; Kirsten Biggar; Laura Gilbert; Madison Chapel; Morag Graham; Natalie Knox; Nathalie Bastien; Philip Mabon; Public Health Agency of Canada CanCOGeN team; Rhiannon Huzarewich; Robert Needle; Russell Mandes; Shari Tyson; Timothy Booth; Yan Li; Yang Yu       |
| see above                                                                                                                                                                                                                                                                                                                                                                                                                                                                                                                                                                                                                                                                                                                                                                                                                                                                                                                                                                                                                                                                                                                                                                                                                                                                                                                                                                                                                                                                                                                                                                                                                                                                                                                                                                                                                                                                                                                                                                                                                                                                                                                                                                                                                                                                                                                                                                                                                                                                                                                                                                                                                                                                                                                                                                                                                                                                                                                                                                                                                                                                                                                                                                                                                                                                                                                                                                                                                                                                                                                                                                                                                                                                                                                                                                                                                                                                                                                                                                                                                                                                                                                                                                                                                                                                                                                                                                                                                                                                                                                                                                                                                                                                                                                                                                                                                                                                                                                                                                                                                                                                                                                                                                                                                                                                                                                                                                                                                                                                            | Dutch COVID-19 response team                                                                                                           | Erasmus Medical Center                                                                                                                                                                                                                                                                                                                                                                                                                                    |
| EPI_ISL_1120140 to 1120594, EPI_ISL_1158581 to 1158845, EPI_ISL_1158847 to 1158927, EPI_ISL_1210351 to 1210493, EPI_ISL_1337763 to 1337856, EPI_ISL_1337859 to 1337871, EPI_ISL_1337874 to 1337888, EPI_ISL_1337890 to 1337908, EPI_ISL_1337911 to 1337987                                                                                                                                                                                                                                                                                                                                                                                                                                                                                                                                                                                                                                                                                                                                                                                                                                                                                                                                                                                                                                                                                                                                                                                                                                                                                                                                                                                                                                                                                                                                                                                                                                                                                                                                                                                                                                                                                                                                                                                                                                                                                                                                                                                                                                                                                                                                                                                                                                                                                                                                                                                                                                                                                                                                                                                                                                                                                                                                                                                                                                                                                                                                                                                                                                                                                                                                                                                                                                                                                                                                                                                                                                                                                                                                                                                                                                                                                                                                                                                                                                                                                                                                                                                                                                                                                                                                                                                                                                                                                                                                                                                                                                                                                                                                                                                                                                                                                                                                                                                                                                                                                                                                                                                                                           |                                                                                                                                        | Andi Yasmin Wijaya; Aryati; Cita Rosita Sigit Prakoeswa; Damayanti Tinduh; Dominicus Husada; Dwiyanti Puspitasari; Fedik Abdul Rantam; Helen Susilowati; Jusak Nugraha; Neneng Dewi Kurniati; Ni Nyoman Tri Puspianingsih                                                                                                                                                                                                                                 |
| see above                                                                                                                                                                                                                                                                                                                                                                                                                                                                                                                                                                                                                                                                                                                                                                                                                                                                                                                                                                                                                                                                                                                                                                                                                                                                                                                                                                                                                                                                                                                                                                                                                                                                                                                                                                                                                                                                                                                                                                                                                                                                                                                                                                                                                                                                                                                                                                                                                                                                                                                                                                                                                                                                                                                                                                                                                                                                                                                                                                                                                                                                                                                                                                                                                                                                                                                                                                                                                                                                                                                                                                                                                                                                                                                                                                                                                                                                                                                                                                                                                                                                                                                                                                                                                                                                                                                                                                                                                                                                                                                                                                                                                                                                                                                                                                                                                                                                                                                                                                                                                                                                                                                                                                                                                                                                                                                                                                                                                                                                            | Dutch COVID-19 response team                                                                                                           | Medical Microbiology, Maastricht University Medical Center                                                                                                                                                                                                                                                                                                                                                                                                |
| EPI_ISL_1013616 to 1013770, EPI_ISL_1013772 to 1013778, EPI_ISL_1013780 to 1014101, EPI_ISL_1014103 to 1014235, EPI_ISL_1014239 to 1014544, EPI_ISL_1014546 to 1014592, EPI_ISL_1014594 to 1014674, EPI_ISL_1020302 to 1020304, EPI_ISL_1034917 to 1035808, EPI_ISL_1059903 to 1059921, EPI_ISL_1089434 to 1089782, EPI_ISL_1089784 to 1090273, EPI_ISL_1165144 to 1165441, EPI_ISL_1165443 to 1165769, EPI_ISL_1165771 to 1165810, EPI_ISL_1216226, EPI_ISL_1216228, EPI_ISL_1216230, EPI_ISL_1216232, EPI_ISL_1216234, EPI_ISL_1216236, EPI_ISL_1216238, EPI_ISL_1216239, EPI_ISL_1216242, EPI_ISL_1216244, EPI_ISL_1216246, EPI_ISL_1216248, EPI_ISL_1216249, EPI_ISL_1216250, EPI_ISL_1216252, EPI_ISL_1216254, EPI_ISL_1216256, EPI_ISL_1216258, EPI_ISL_1216260 to 1216261, EPI_ISL_1216263, EPI_ISL_1216265, EPI_ISL_1216267, EPI_ISL_1216269, EPI_ISL_1216271 to 1216272, EPI_ISL_1216274, EPI_ISL_1216276, EPI_ISL_1216278 to 1216279, EPI_ISL_1216281, EPI_ISL_1216283, EPI_ISL_1216285, EPI_ISL_1216288, EPI_ISL_1216290, EPI_ISL_1216292, EPI_ISL_1216294, EPI_ISL_1216296 to 1216297, EPI_ISL_1216299, EPI_ISL_1216301, EPI_ISL_1216303, EPI_ISL_1216305, EPI_ISL_1216307 to 1216308, EPI_ISL_1216310, EPI_ISL_1216312, EPI_ISL_1216314 to 1216315, EPI_ISL_1216317, EPI_ISL_1216319 to 1216320, EPI_ISL_1216322, EPI_ISL_1216324, EPI_ISL_1216326, EPI_ISL_1216328, EPI_ISL_1216330 to 1216331, EPI_ISL_1216333 to 1216334, EPI_ISL_1216336, EPI_ISL_1216338 to 1216339, EPI_ISL_1216341, EPI_ISL_1216343, EPI_ISL_1216345, EPI_ISL_1216347 to 1216348, EPI_ISL_1216350, EPI_ISL_1216352, EPI_ISL_1232243 to 1233007, EPI_ISL_1287783 to 1288152, EPI_ISL_1288534, EPI_ISL_1288536, EPI_ISL_1288539 to 1288804, EPI_ISL_1288871 to 1289402, EPI_ISL_1289404, EPI_ISL_1289406 to 1370017, EPI_ISL_1370019, EPI_ISL_1370021, EPI_ISL_1370023, EPI_ISL_1370025, EPI_ISL_1370027 to 1370028, EPI_ISL_1370030, EPI_ISL_1370032, EPI_ISL_1370034, EPI_ISL_1370036, EPI_ISL_1370038, EPI_ISL_1370040, EPI_ISL_1370042, EPI_ISL_1370044, EPI_ISL_1370046 to 1370047, EPI_ISL_1370049, EPI_ISL_1370051, EPI_ISL_1370053, EPI_ISL_1370055, EPI_ISL_1370057, EPI_ISL_1370059, EPI_ISL_1370061 to 1370062, EPI_ISL_1370064, EPI_ISL_1370066, EPI_ISL_1370068, EPI_ISL_1370070, EPI_ISL_1370072, EPI_ISL_1370074, EPI_ISL_1370076, EPI_ISL_1370078, EPI_ISL_1370080, EPI_ISL_1370082, EPI_ISL_1370084 to 1370085, EPI_ISL_1370087, EPI_ISL_1370089, EPI_ISL_1370091, EPI_ISL_1370093, EPI_ISL_1370095, EPI_ISL_1370097, EPI_ISL_1370099, EPI_ISL_1370101, EPI_ISL_1370103, EPI_ISL_1370105 to 1370106, EPI_ISL_1370108, EPI_ISL_1370110, EPI_ISL_1370112, EPI_ISL_1370114, EPI_ISL_1370116, EPI_ISL_1370118, EPI_ISL_1370120, EPI_ISL_1370122, EPI_ISL_1370124, EPI_ISL_1370126, EPI_ISL_1370128, EPI_ISL_1370130, EPI_ISL_1370132, EPI_ISL_1370134, EPI_ISL_1370136, EPI_ISL_1370138, EPI_ISL_1370140, EPI_ISL_1370142, EPI_ISL_1370144, EPI_ISL_1370146 to 1370147, EPI_ISL_1370149, EPI_ISL_1370151, EPI_ISL_1370153, EPI_ISL_1370155, EPI_ISL_1370157, EPI_ISL_1370159, EPI_ISL_1370161, EPI_ISL_1370163, EPI_ISL_1370165, EPI_ISL_1370167 to 1370168, EPI_ISL_1370170, EPI_ISL_1370172, EPI_ISL_1370174, EPI_ISL_1370176, EPI_ISL_1370178, EPI_ISL_1370180, EPI_ISL_1370182, EPI_ISL_1370184, EPI_ISL_1370186, EPI_ISL_1370188, EPI_ISL_1370190, EPI_ISL_1370192, EPI_ISL_1370194, EPI_ISL_1370196 to 1370197, EPI_ISL_1370199, EPI_ISL_1370201, EPI_ISL_1370203, EPI_ISL_1370205, EPI_ISL_1370207, EPI_ISL_1370209, EPI_ISL_1370211, EPI_ISL_1370213, EPI_ISL_1370215, EPI_ISL_1370217 to 1370218, EPI_ISL_1370220, EPI_ISL_1370222, EPI_ISL_1370224, EPI_ISL_1370226, EPI_ISL_1370228, EPI_ISL_1370230, EPI_ISL_1370232, EPI_ISL_1370234 to 1370235, EPI_ISL_1370238 to 1370239, EPI_ISL_1370241, EPI_ISL_1370243, EPI_ISL_1370245, EPI_ISL_1370247, EPI_ISL_1370249, EPI_ISL_1370251, EPI_ISL_1370253, EPI_ISL_1370255, EPI_ISL_1370257, EPI_ISL_1370259 to 1370260, EPI_ISL_1370262, EPI_ISL_1370264, EPI_ISL_1370266, EPI_ISL_1370268, EPI_ISL_1370270, EPI_ISL_1370272, EPI_ISL_1370274 to 1370275, EPI_ISL_1370277, EPI_ISL_1370279, EPI_ISL_1370281, EPI_ISL_1370283, EPI_ISL_1370285, EPI_ISL_1370287, EPI_ISL_1370289, EPI_ISL_1370291, EPI_ISL_1370293, EPI_ISL_1370295, EPI_ISL_1370297, EPI_ISL_1370299, EPI_ISL_1370301, EPI_ISL_1370303, EPI_ISL_1370305, EPI_ISL_1370307, EPI_ISL_1370309, EPI_ISL_1370311 to 1370312, EPI_ISL_1370314, EPI_ISL_1370316, EPI_ISL_1370318, EPI_ISL_1370320, EPI_ISL_1370322, EPI_ISL_1370324, EPI_ISL_1370326, EPI_ISL_1370328, EPI_ISL_1370330, EPI_ISL_1370332, EPI_ISL_1370334, EPI_ISL_1370336, EPI_ISL_1370338, EPI_ISL_1370340, EPI_ISL_1370342, EPI_ISL_1370344, EPI_ISL_1370346 to 1370347, EPI_ISL_1370349, EPI_ISL_1370350, EPI_ISL_1370352, EPI_ISL_1370354, EPI_ISL_1370356, EPI_ISL_1370358, EPI_ISL_1370360, EPI_ISL_1370362, EPI_ISL_1370364, EPI_ISL_1370366, EPI_ISL_1370368, EPI_ISL_1370370, EPI_ISL_1370372 to 1370373, EPI_ISL_1370375, EPI_ISL_1370377, EPI_ISL_1370379, EPI_ISL_1370381, EPI_ISL_1370383, EPI_ISL_1370385 to 1370386, EPI_ISL_1370389, EPI_ISL_1370391, EPI_ISL_1370393 to 1370394, EPI_ISL_1370396, EPI_ISL_1370398, EPI_ISL_1370400, EPI_ISL_1370402, EPI_ISL_1370404, EPI_ISL_1370406, EPI_ISL_1370408, EPI_ISL_1370410 to 1370411, EPI_ISL_1370413, EPI_ISL_1370415, EPI_ISL_1370417, EPI_ISL_1370419, EPI_ISL_1370421, EPI_ISL_1370423, EPI_ISL_1370425, EPI_ISL_1370427 to 1371705 |                                                                                                                                        | Adam Meijer; AnneMarie van den Brandt; Bas van der Veer; Chantal Reusken; Dennis Schmitz; Dirk Eggink; Florian Zwagemaker; Harry Vennema; Jeroen Cremer; Sharon van den Brink; on behalf of the national COVID-19 response team                                                                                                                                                                                                                           |
| see above                                                                                                                                                                                                                                                                                                                                                                                                                                                                                                                                                                                                                                                                                                                                                                                                                                                                                                                                                                                                                                                                                                                                                                                                                                                                                                                                                                                                                                                                                                                                                                                                                                                                                                                                                                                                                                                                                                                                                                                                                                                                                                                                                                                                                                                                                                                                                                                                                                                                                                                                                                                                                                                                                                                                                                                                                                                                                                                                                                                                                                                                                                                                                                                                                                                                                                                                                                                                                                                                                                                                                                                                                                                                                                                                                                                                                                                                                                                                                                                                                                                                                                                                                                                                                                                                                                                                                                                                                                                                                                                                                                                                                                                                                                                                                                                                                                                                                                                                                                                                                                                                                                                                                                                                                                                                                                                                                                                                                                                                            | Dutch COVID-19 response team                                                                                                           | National Institute for Public Health and the Environment (RIVM)                                                                                                                                                                                                                                                                                                                                                                                           |
| EPI_ISL_1008479 to 1008489, EPI_ISL_1064551, EPI_ISL_1064607, EPI_ISL_1064613 to 1064620,                                                                                                                                                                                                                                                                                                                                                                                                                                                                                                                                                                                                                                                                                                                                                                                                                                                                                                                                                                                                                                                                                                                                                                                                                                                                                                                                                                                                                                                                                                                                                                                                                                                                                                                                                                                                                                                                                                                                                                                                                                                                                                                                                                                                                                                                                                                                                                                                                                                                                                                                                                                                                                                                                                                                                                                                                                                                                                                                                                                                                                                                                                                                                                                                                                                                                                                                                                                                                                                                                                                                                                                                                                                                                                                                                                                                                                                                                                                                                                                                                                                                                                                                                                                                                                                                                                                                                                                                                                                                                                                                                                                                                                                                                                                                                                                                                                                                                                                                                                                                                                                                                                                                                                                                                                                                                                                                                                                            | Dynamic Code AB                                                                                                                        | The Public Health Agency of Sweden                                                                                                                                                                                                                                                                                                                                                                                                                        |
|                                                                                                                                                                                                                                                                                                                                                                                                                                                                                                                                                                                                                                                                                                                                                                                                                                                                                                                                                                                                                                                                                                                                                                                                                                                                                                                                                                                                                                                                                                                                                                                                                                                                                                                                                                                                                                                                                                                                                                                                                                                                                                                                                                                                                                                                                                                                                                                                                                                                                                                                                                                                                                                                                                                                                                                                                                                                                                                                                                                                                                                                                                                                                                                                                                                                                                                                                                                                                                                                                                                                                                                                                                                                                                                                                                                                                                                                                                                                                                                                                                                                                                                                                                                                                                                                                                                                                                                                                                                                                                                                                                                                                                                                                                                                                                                                                                                                                                                                                                                                                                                                                                                                                                                                                                                                                                                                                                                                                                                                                      |                                                                                                                                        | Anna Risberg; Anna-Malin Linde; Carlo Berg; Karin Tegmark-Wilse; Maria Lind Karlberg; Mattias Haukland; Mia Brynting; Noura Walai; Oskar Karlsson Lindsjö; Petra Edquist; Petra Holmström; Reza Advani; Samuel Ohman; Sofia Stantoni                                                                                                                                                                                                                      |

|                                                                                                                                                                                                                                                                                                                                                                                                                                                                                                                                                                                                                                                                                                      |                                                                                                       |                                                                                                                                            |                                                                                                                                                                                                                                                                                                                                                                                                                                                                                                                                                                                                                                                       |                                                                                                                                                                                                                                                                                                                                                                                                                                                                                                                                                                                                                                                       |
|------------------------------------------------------------------------------------------------------------------------------------------------------------------------------------------------------------------------------------------------------------------------------------------------------------------------------------------------------------------------------------------------------------------------------------------------------------------------------------------------------------------------------------------------------------------------------------------------------------------------------------------------------------------------------------------------------|-------------------------------------------------------------------------------------------------------|--------------------------------------------------------------------------------------------------------------------------------------------|-------------------------------------------------------------------------------------------------------------------------------------------------------------------------------------------------------------------------------------------------------------------------------------------------------------------------------------------------------------------------------------------------------------------------------------------------------------------------------------------------------------------------------------------------------------------------------------------------------------------------------------------------------|-------------------------------------------------------------------------------------------------------------------------------------------------------------------------------------------------------------------------------------------------------------------------------------------------------------------------------------------------------------------------------------------------------------------------------------------------------------------------------------------------------------------------------------------------------------------------------------------------------------------------------------------------------|
| EPI_ISL_1168046                                                                                                                                                                                                                                                                                                                                                                                                                                                                                                                                                                                                                                                                                      |                                                                                                       |                                                                                                                                            |                                                                                                                                                                                                                                                                                                                                                                                                                                                                                                                                                                                                                                                       |                                                                                                                                                                                                                                                                                                                                                                                                                                                                                                                                                                                                                                                       |
| EPI_ISL_1137609                                                                                                                                                                                                                                                                                                                                                                                                                                                                                                                                                                                                                                                                                      | Département de Maladies Infectieuses, CHU Farhat Hached Sousse, Tunisie                               | Laboratoire des Procédés de Criblage Moléculaire et Cellulaire-Centre de Biotechnologie de Sfax                                            | A, and Masmoudi, S.; Abdelmoulah, F.; Abid, M.; Abid, N.; Ajili, F.; Aouni, M.; Ben Ayed, I.; Bensaïd, M.; Chawech, H.; Chtourou, A.; Elargoubi, A.; Fki-berrajah, L.; Gaaloul, I.; Gargouri, S.; Hammami, A.; Kamoun, S.; Karray Hakim, H.; Kharat, N.; Letaïef, A.; Mastouri, M.; Mhalla, S.; Nabil, A.; Rebai, Smeti, I.; Souissi, A.; Stambouli, N.; Turki, M.                                                                                                                                                                                                                                                                                    |                                                                                                                                                                                                                                                                                                                                                                                                                                                                                                                                                                                                                                                       |
| EPI_ISL_1219194 to 1219268, EPI_ISL_1219313, EPI_ISL_1219316, EPI_ISL_1219318 to 1219351, EPI_ISL_1219458 to 1219471, EPI_ISL_1219504 to 1219558, EPI_ISL_1219579 to 1219594, EPI_ISL_1219596 to 1219608, EPI_ISL_1219658 to 1219683, EPI_ISL_1312390 to 1312497, EPI_ISL_1312565 to 1312619, EPI_ISL_1312624 to 1312658, EPI_ISL_1312683 to 1312703, EPI_ISL_1312721 to 1312729, EPI_ISL_1321916, EPI_ISL_1321920 to 1321939, EPI_ISL_1321941 to 1321948, EPI_ISL_1321950, EPI_ISL_1321952 to 1321960, EPI_ISL_1321962, EPI_ISL_1321963 to 1321989                                                                                                                                                  | see above                                                                                             | E. Gulbja laboratorija                                                                                                                     | Latvian Biomedical Research and Study Centre                                                                                                                                                                                                                                                                                                                                                                                                                                                                                                                                                                                                          | Daivids Fridmanis; Dmitrijs Perminovs; Elina Dimina; Guntars Zarins; Ivars Silamikelis; Janis Klovinis; Janis Pjalkovskis; Juris Perevoscikovs; Kaspars Megnis; Laila Silamikele; Lauma Freimane; Laura Ansone; Liga Birziece; Mikus Gavars; Monta Ustinova; Nikita Zrelavs; Uga Dumpis; Una Krumina; Vita Rovite                                                                                                                                                                                                                                                                                                                                     |
| EPI_ISL_1085329, EPI_ISL_1085371, EPI_ISL_1085416, EPI_ISL_1085419                                                                                                                                                                                                                                                                                                                                                                                                                                                                                                                                                                                                                                   | E.F.S B.F.C JEAN MINJOZ                                                                               | Department of Virology, Henri Mondor University Hospital, Assistance Publique Hôpitaux de Paris, Université Paris-Est Créteil, INSERM U955 | Alexandre Soulier; Christophe Rodriguez; Elisabeth Trawinski; Guillaume Gricourt; Jean-Michel Pawlowsky; Melissa N'Debi; Slim Fourati; Vanessa Demontant                                                                                                                                                                                                                                                                                                                                                                                                                                                                                              |                                                                                                                                                                                                                                                                                                                                                                                                                                                                                                                                                                                                                                                       |
| EPI_ISL_1220066                                                                                                                                                                                                                                                                                                                                                                                                                                                                                                                                                                                                                                                                                      | E.S.E. HOSPITAL SAN JOSE DE MAICAO                                                                    | Instituto Nacional de Salud- Dirección de Investigación en Salud Pública                                                                   | Carlos Franco-Muñoz; Diego A. Álvarez-Díaz; Diego Andrés Prada; Gerardo Santamaría; Hector Alejandro Ruiz-Moreno; Jhonnatan Reales-González; Julian Naizaque; Katherine Laiton-Donato; Magdalena Wiesner; Marcela Mercado-Reyes.; Maria T. Herrera-Sepúlveda; Martha Lucia Ospina Martínez; Sheryll Corchuelo                                                                                                                                                                                                                                                                                                                                         |                                                                                                                                                                                                                                                                                                                                                                                                                                                                                                                                                                                                                                                       |
| EPI_ISL_1007585, EPI_ISL_1370045, EPI_ISL_1370083, EPI_ISL_1370125, EPI_ISL_1370145, EPI_ISL_1370169, EPI_ISL_1370185, EPI_ISL_1370267, EPI_ISL_1370282                                                                                                                                                                                                                                                                                                                                                                                                                                                                                                                                              | see above                                                                                             | EHC MORGES                                                                                                                                 | Laboratory of genomics and metagenomics, Institute of Microbiology, University Hospital Centre and University of Lausanne, Switzerland                                                                                                                                                                                                                                                                                                                                                                                                                                                                                                                | Claire Bertelli; Damien Jacot; Gilbert Greub; Sébastien Aeby; Trestan Pillonel                                                                                                                                                                                                                                                                                                                                                                                                                                                                                                                                                                        |
| EPI_ISL_1007597 to 1007598, EPI_ISL_1007602, EPI_ISL_1007625 to 1007628, EPI_ISL_1007631, EPI_ISL_1007634 to 1007635, EPI_ISL_1120836 to 1120841, EPI_ISL_1120857 to 1120871, EPI_ISL_1369467 to 1369468, EPI_ISL_1370018, EPI_ISL_1370029, EPI_ISL_1370052, EPI_ISL_1370054, EPI_ISL_1370056, EPI_ISL_1370058, EPI_ISL_1370060, EPI_ISL_1370063, EPI_ISL_1370065, EPI_ISL_1370067, EPI_ISL_1370071, EPI_ISL_1370073, EPI_ISL_1370075, EPI_ISL_1370088, EPI_ISL_1370397                                                                                                                                                                                                                              | see above                                                                                             | EHN                                                                                                                                        | Laboratory of genomics and metagenomics, Institute of Microbiology, University Hospital Centre and University of Lausanne, Switzerland                                                                                                                                                                                                                                                                                                                                                                                                                                                                                                                | Claire Bertelli; Damien Jacot; Gilbert Greub; Sébastien Aeby; Trestan Pillonel                                                                                                                                                                                                                                                                                                                                                                                                                                                                                                                                                                        |
| EPI_ISL_1336622                                                                                                                                                                                                                                                                                                                                                                                                                                                                                                                                                                                                                                                                                      | EHPAD LE VILLAGE DE LA CROIX BLANCHE                                                                  | CNR Virus des Infections Respiratoires - France SUD                                                                                        | Antonin Bal; Bruno Lina; Gregory Destras; Gwendolynne Burfin; Hadrien Regue; Laurence Josset; Martine Valette; Quentin Semanas                                                                                                                                                                                                                                                                                                                                                                                                                                                                                                                        |                                                                                                                                                                                                                                                                                                                                                                                                                                                                                                                                                                                                                                                       |
| EPI_ISL_1285044, EPI_ISL_1285046, EPI_ISL_1285048, EPI_ISL_1285053, EPI_ISL_1285061 to 1285063, EPI_ISL_1285065, EPI_ISL_1285071, EPI_ISL_1285076, EPI_ISL_1285083, EPI_ISL_1285086, EPI_ISL_1285089, EPI_ISL_1285092, EPI_ISL_1285095, EPI_ISL_1285100, EPI_ISL_1285108 to 1285109, EPI_ISL_1285113, EPI_ISL_1285122 to 1285123, EPI_ISL_1285131, EPI_ISL_1285133, EPI_ISL_1285138, EPI_ISL_1285142, EPI_ISL_1285150, EPI_ISL_1285155, EPI_ISL_1285157, EPI_ISL_1354366, EPI_ISL_1354371, EPI_ISL_1354379, EPI_ISL_1354384, EPI_ISL_1354388 to 1354389, EPI_ISL_1354400, EPI_ISL_1354431, EPI_ISL_1354436 to 1354438, EPI_ISL_1354443, EPI_ISL_1354463                                              | see above                                                                                             | ELBLAB GmbH Zentrum für LaborMedizin                                                                                                       | Robert Koch Institute                                                                                                                                                                                                                                                                                                                                                                                                                                                                                                                                                                                                                                 | Carlos Franco-Muñoz; Diego A. Álvarez-Díaz; Diego Andrés Prada; Gerardo Santamaría; Hector Alejandro Ruiz-Moreno; Jhonnatan Reales-González; Julian Naizaque; Katherine Laiton-Donato; Magdalena Wiesner; Marcela Mercado-Reyes.; Maria T. Herrera-Sepúlveda; Martha Lucia Ospina Martínez; Sheryll Corchuelo                                                                                                                                                                                                                                                                                                                                         |
| EPI_ISL_1220053                                                                                                                                                                                                                                                                                                                                                                                                                                                                                                                                                                                                                                                                                      | EMPRESA SOCIAL DEL ESTADO HOSPITAL UNIVERSITARIO DE SANTANDER                                         | Instituto Nacional de Salud- Dirección de Investigación en Salud Pública                                                                   | Antonin Bal; Bruno Lina; Gregory Destras; Gwendolynne Burfin; Hadrien Regue; Laurence Josset; Martine Valette; Quentin Semanas                                                                                                                                                                                                                                                                                                                                                                                                                                                                                                                        |                                                                                                                                                                                                                                                                                                                                                                                                                                                                                                                                                                                                                                                       |
| EPI_ISL_1322424, EPI_ISL_1322426 to 1322429, EPI_ISL_1322431, EPI_ISL_1371865 to 1371868                                                                                                                                                                                                                                                                                                                                                                                                                                                                                                                                                                                                             | ETABLISSEMENT DE SANTE JEAN LACHENAUD                                                                 | CNR Virus des Infections Respiratoires - France SUD                                                                                        | Antonin Bal; Bruno Lina; Gregory Destras; Gwendolynne Burfin; Hadrien Regue; Laurence Josset; Martine Valette; Quentin Semanas                                                                                                                                                                                                                                                                                                                                                                                                                                                                                                                        |                                                                                                                                                                                                                                                                                                                                                                                                                                                                                                                                                                                                                                                       |
| EPI_ISL_1336619 to 1336621                                                                                                                                                                                                                                                                                                                                                                                                                                                                                                                                                                                                                                                                           | EUROFINS CBM 69 MEDIPOLE                                                                              | CNR Virus des Infections Respiratoires - France SUD                                                                                        | Antonin Bal; Bruno Lina; Gregory Destras; Gwendolynne Burfin; Hadrien Regue; Laurence Josset; Martine Valette; Quentin Semanas                                                                                                                                                                                                                                                                                                                                                                                                                                                                                                                        |                                                                                                                                                                                                                                                                                                                                                                                                                                                                                                                                                                                                                                                       |
| EPI_ISL_1166049                                                                                                                                                                                                                                                                                                                                                                                                                                                                                                                                                                                                                                                                                      | EXALAB BIOLOGIE MEDICALE                                                                              | CNR Virus des Infections Respiratoires - France SUD                                                                                        | Antonin Bal; Bruno Lina; Gregory Destras; Gwendolynne Burfin; Hadrien Regue; Laurence Josset; Martine Valette; Quentin Semanas                                                                                                                                                                                                                                                                                                                                                                                                                                                                                                                        |                                                                                                                                                                                                                                                                                                                                                                                                                                                                                                                                                                                                                                                       |
| EPI_ISL_1359335                                                                                                                                                                                                                                                                                                                                                                                                                                                                                                                                                                                                                                                                                      | EXALAB LE HAILLAN                                                                                     | CNR Virus des Infections Respiratoires - France SUD                                                                                        | Antonin Bal; Bruno Lina; Gregory Destras; Gwendolynne Burfin; Hadrien Regue; Laurence Josset; Martine Valette; Quentin Semanas                                                                                                                                                                                                                                                                                                                                                                                                                                                                                                                        |                                                                                                                                                                                                                                                                                                                                                                                                                                                                                                                                                                                                                                                       |
| EPI_ISL_1238787 to 1238793                                                                                                                                                                                                                                                                                                                                                                                                                                                                                                                                                                                                                                                                           | Ecological and Evolutionary Genomics. UGA-CINVESTAV                                                   | Unidad Universitaria de Secuenciación Masiva y Bioinformática (UUSMB). IBT-UNAM                                                            | Angelica Cibrian                                                                                                                                                                                                                                                                                                                                                                                                                                                                                                                                                                                                                                      |                                                                                                                                                                                                                                                                                                                                                                                                                                                                                                                                                                                                                                                       |
| EPI_ISL_1258425, EPI_ISL_1258443, EPI_ISL_1258452                                                                                                                                                                                                                                                                                                                                                                                                                                                                                                                                                                                                                                                    | Elias Emergency University Hospital, Bucharest                                                        | National Institute of Infectious Diseases-Prof. Dr. Matei Bals Molecular Diagnostics Laboratory                                            | Corina Casangiu; Dan Otelea; Ionelia Nicolae; Leontina Banica; Marius Surleac; Ovidiu Vlaicu; Simona Paraschiv                                                                                                                                                                                                                                                                                                                                                                                                                                                                                                                                        |                                                                                                                                                                                                                                                                                                                                                                                                                                                                                                                                                                                                                                                       |
| EPI_ISL_1335890                                                                                                                                                                                                                                                                                                                                                                                                                                                                                                                                                                                                                                                                                      | Elisabeth Hospital Medan                                                                              | Faculty of Medicine, Universitas Sumatera Utara; Institute of Tropical Disease, Universitas Airlangga                                      | Aldise M Nastri; Franciscus Ginting; Inke N D Lubis; Irbah R Nainggolan; Jezzy R Dewantari; Kazufumi Shimizu; Krisnoadi Rahardjo; Maria I Lusida; Meliani; Mirzan Hasibuan; Muhammad Ichwan; R Andika D Cahyadi; R Lia Kusumawati; Ramadhan Bestari; Rima R Prasetya; Soetiptjo; Yasuko Mori                                                                                                                                                                                                                                                                                                                                                          |                                                                                                                                                                                                                                                                                                                                                                                                                                                                                                                                                                                                                                                       |
| EPI_ISL_1117780, EPI_ISL_1118072                                                                                                                                                                                                                                                                                                                                                                                                                                                                                                                                                                                                                                                                     | Elling group, Institute of Molecular Biotechnology (IMBA)                                             | Bergthaler laboratory, CeMM Research Center for Molecular Medicine of the Austrian Academy of Sciences                                     | Andreas Bergthaler; Anna Schedl; Bekir Erguner; Benedikt Agerer; Christoph Bock; Jan Laine; Lukas Eandler; Maelle Le Moing; Martin Senekowitsch; Michael Schuster; Thomas Penz                                                                                                                                                                                                                                                                                                                                                                                                                                                                        |                                                                                                                                                                                                                                                                                                                                                                                                                                                                                                                                                                                                                                                       |
| EPI_ISL_1121993, EPI_ISL_1122015 to 1122016                                                                                                                                                                                                                                                                                                                                                                                                                                                                                                                                                                                                                                                          | Emergency department of COVID-19, Beijing Ditan Hospital                                              | National Institute for Viral Disease Control and Prevention                                                                                | 3*; Di Tian1; Gang Liu1; Gang Wan1; Jianbo Tan1; Long Liu1; Pan Xiang1; Shuangli Zhu2; Shuping Cui1; Tingyu Zhang1; Wei Zhang1#; Wenbo Xu2# and Zhihai Chen1#; Xianbo Wang1; Xiang Zhao2; Yang Song2*; Yanhai Wang2; Yanli Xu1; Yu Wang1; Ziruo Ge1*                                                                                                                                                                                                                                                                                                                                                                                                  |                                                                                                                                                                                                                                                                                                                                                                                                                                                                                                                                                                                                                                                       |
| EPI_ISL_1122017                                                                                                                                                                                                                                                                                                                                                                                                                                                                                                                                                                                                                                                                                      | Emergency department of COVID-19, Beijing Ditan Hospital, Capital Medical University, Beijing, China. | National Institute for Viral Disease Control and Prevention                                                                                | 3*; Di Tian1; Gang Liu1; Gang Wan1; Jianbo Tan1; Long Liu1; Pan Xiang1; Shuangli Zhu2; Shuping Cui1; Tingyu Zhang1; Wei Zhang1#; Wenbo Xu2# and Zhihai Chen1#; Xianbo Wang1; Xiang Zhao2; Yang Song2*; Yanhai Wang2; Yanli Xu1; Yu Wang1; Ziruo Ge1*                                                                                                                                                                                                                                                                                                                                                                                                  |                                                                                                                                                                                                                                                                                                                                                                                                                                                                                                                                                                                                                                                       |
| EPI_ISL_1278055 to 1278100                                                                                                                                                                                                                                                                                                                                                                                                                                                                                                                                                                                                                                                                           | Emory Molecular Diagnostics Laboratory, Emory Healthcare                                              | Piantadosi Lab, Emory Department of Pathology                                                                                              | Ahmed Babiker; Anne Piantadosi                                                                                                                                                                                                                                                                                                                                                                                                                                                                                                                                                                                                                        |                                                                                                                                                                                                                                                                                                                                                                                                                                                                                                                                                                                                                                                       |
| EPI_ISL_1273074 to 1273075                                                                                                                                                                                                                                                                                                                                                                                                                                                                                                                                                                                                                                                                           | Environmental and Global Health, University of Florida                                                | Environmental and Global Health, University of Florida                                                                                     | A.T.; Bisesi; J.A. and Bisesi; J.C.; J.H.; Lednický; Loeb; Maurelli; Rainey, A.; S.E.; Sabo-Attwood, T.                                                                                                                                                                                                                                                                                                                                                                                                                                                                                                                                               |                                                                                                                                                                                                                                                                                                                                                                                                                                                                                                                                                                                                                                                       |
| EPI_ISL_1300448                                                                                                                                                                                                                                                                                                                                                                                                                                                                                                                                                                                                                                                                                      | Epidemiology of Microbial Diseases, Yale School of Public Health                                      | Yale School of Public Health                                                                                                               | Fauver; J.R.                                                                                                                                                                                                                                                                                                                                                                                                                                                                                                                                                                                                                                          |                                                                                                                                                                                                                                                                                                                                                                                                                                                                                                                                                                                                                                                       |
| EPI_ISL_1009289 to 1009616                                                                                                                                                                                                                                                                                                                                                                                                                                                                                                                                                                                                                                                                           | Erie County Public Health (ECPHL)                                                                     | University at Buffalo Genomics and Bioinformatics Core                                                                                     | Alyssa Pohlman; Amanda Bocolucci; Brandon Marzullo; Donald Yergeau; Jennifer Surtees; Jonathan Bard; Natalie Lamb; Norma Nowak                                                                                                                                                                                                                                                                                                                                                                                                                                                                                                                        |                                                                                                                                                                                                                                                                                                                                                                                                                                                                                                                                                                                                                                                       |
| EPI_ISL_1097644 to 1097723                                                                                                                                                                                                                                                                                                                                                                                                                                                                                                                                                                                                                                                                           | Eurofins Diatherix                                                                                    | Hudsonalpha Genome Sequencing Center                                                                                                       | Ada Stewart; Jane Grimwood; Jenell Webber; Jennifer Cart; John Lovell; Joshua Stough; Leslie Malone; Lori H. Handley; Melissa Williams; Stefan Brzezinski; Theresa Jones; and Jeremy Schmutz                                                                                                                                                                                                                                                                                                                                                                                                                                                          |                                                                                                                                                                                                                                                                                                                                                                                                                                                                                                                                                                                                                                                       |
| EPI_ISL_1153163, EPI_ISL_1153165 to 1153174, EPI_ISL_1153176 to 1153187, EPI_ISL_1153189, EPI_ISL_1153192 to 1153197, EPI_ISL_1153199 to 1153239, EPI_ISL_1153241 to 1153242, EPI_ISL_1157070 to 1157083, EPI_ISL_1157085 to 1157099, EPI_ISL_1285843 to 1285852, EPI_ISL_1285855 to 1285857, EPI_ISL_1285859 to 1285884, EPI_ISL_1285886 to 1285898, EPI_ISL_1285900 to 1285909, EPI_ISL_1285911 to 1285925, EPI_ISL_1286138 to 1286226, EPI_ISL_1353222 to 1353264, EPI_ISL_1355172 to 1355190, EPI_ISL_1355192 to 1355223, EPI_ISL_1355225 to 1355233, EPI_ISL_1356534 to 1356538, EPI_ISL_1356540 to 1356544, EPI_ISL_1356546 to 1356555, EPI_ISL_1356557 to 1356568, EPI_ISL_1356570 to 1356615 | see above                                                                                             | Eurofins LifeCodexx GmbH                                                                                                                   | Robert Koch Institute                                                                                                                                                                                                                                                                                                                                                                                                                                                                                                                                                                                                                                 | A.M.; Barbagelata; E.C.; E.M.A.; Ferreira; J.A.; Junior; K.C.; L.C.; L.S.; M.C.; P.S.; Pinheiro; Santos; Silva; Sousa; Sousa Junior; W.D.C.; da Silva Amanda Adler; Barry R. Lutz; Benjamin Pelle; Brian Hiatt; Caitlin R. Wolf; Chris D. Frazar; Deborah A. Nickerson; Elisabeth Brandstetter; Erica Ryke; Geoff Melly; Helen Y. Chu; Janet A. Englund; Jay Shendure; Jover Lee; Kairsten Fay; Kirsten Lacombe; Lea M. Starita; Mark J. Rieder; Matthew Richardson; Matthew Thompson; Melissa Truong; Michael Boeckh; Michael Famulare; Misja Ilcisin; Peter D. Han; Philip Dykema; Romesh Gautom; Scott Lindquist; Thomas R. Sibley; Trevor Bedford |
| EPI_ISL_1063789                                                                                                                                                                                                                                                                                                                                                                                                                                                                                                                                                                                                                                                                                      | Evandro Chagas Institute                                                                              | Evandro Chagas Institute Virology                                                                                                          | A.M.; Barbagelata; E.C.; E.M.A.; Ferreira; J.A.; Junior; K.C.; L.C.; L.S.; M.C.; P.S.; Pinheiro; Santos; Silva; Sousa; Sousa Junior; W.D.C.; da Silva Amanda Adler; Barry R. Lutz; Benjamin Pelle; Brian Hiatt; Caitlin R. Wolf; Chris D. Frazar; Deborah A. Nickerson; Elisabeth Brandstetter; Erica Ryke; Geoff Melly; Helen Y. Chu; Janet A. Englund; Jay Shendure; Jover Lee; Kairsten Fay; Kirsten Lacombe; Lea M. Starita; Mark J. Rieder; Matthew Richardson; Matthew Thompson; Melissa Truong; Michael Boeckh; Michael Famulare; Misja Ilcisin; Peter D. Han; Philip Dykema; Romesh Gautom; Scott Lindquist; Thomas R. Sibley; Trevor Bedford |                                                                                                                                                                                                                                                                                                                                                                                                                                                                                                                                                                                                                                                       |
| EPI_ISL_1114374                                                                                                                                                                                                                                                                                                                                                                                                                                                                                                                                                                                                                                                                                      | Evergreen Health                                                                                      | Seattle Flu Study                                                                                                                          | Amanda Adler; Barry R. Lutz; Benjamin Pelle; Brian Hiatt; Caitlin R. Wolf; Chris D. Frazar; Deborah A. Nickerson; Elisabeth Brandstetter; Erica Ryke; Geoff Melly; Helen Y. Chu; Janet A. Englund; Jay Shendure; Jover Lee; Kairsten Fay; Kirsten Lacombe; Lea M. Starita; Mark J. Rieder; Matthew Richardson; Matthew Thompson; Melissa Truong; Michael Boeckh; Michael Famulare; Misja Ilcisin; Peter D. Han; Philip Dykema; Romesh Gautom; Scott Lindquist; Thomas R. Sibley; Trevor Bedford                                                                                                                                                       |                                                                                                                                                                                                                                                                                                                                                                                                                                                                                                                                                                                                                                                       |
| EPI_ISL_1222613 to 1222615, EPI_ISL_1222704 to 1222708                                                                                                                                                                                                                                                                                                                                                                                                                                                                                                                                                                                                                                               | Evergreen Healthcare                                                                                  | Seattle Flu Study                                                                                                                          | Amanda Adler; Barry R. Lutz; Benjamin Pelle; Brian Hiatt; Caitlin R. Wolf; Chris D. Frazar; Deborah A. Nickerson; Elisabeth Brandstetter; Erica Ryke; Geoff Melly; Helen Y. Chu; Janet A. Englund; Jay Shendure; Jover Lee; Kairsten Fay; Kirsten Lacombe; Lea M. Starita; Mark J. Rieder; Matthew Richardson; Matthew Thompson; Melissa Truong; Michael Boeckh; Michael Famulare; Misja Ilcisin; Peter D. Han; Philip Dykema; Romesh Gautom; Scott Lindquist; Thomas R. Sibley; Trevor Bedford                                                                                                                                                       |                                                                                                                                                                                                                                                                                                                                                                                                                                                                                                                                                                                                                                                       |
| EPI_ISL_1048246, EPI_ISL_1048248, EPI_ISL_1048254, EPI_ISL_1048259, EPI_ISL_1048266, EPI_ISL_1048270, EPI_ISL_1048276, EPI_ISL_1048279, EPI_ISL_1048281, EPI_ISL_1048283 to 1048284, EPI_ISL_1048298, EPI_ISL_1048304, EPI_ISL_1048307 to 1048309, EPI_ISL_1048312, EPI_ISL_1048314 to 1048315,                                                                                                                                                                                                                                                                                                                                                                                                      |                                                                                                       |                                                                                                                                            |                                                                                                                                                                                                                                                                                                                                                                                                                                                                                                                                                                                                                                                       |                                                                                                                                                                                                                                                                                                                                                                                                                                                                                                                                                                                                                                                       |



|                                                                                                                                                                                                                                                                                                                                                                                    |           |                                                                                    |                                                                                                                            |                                                                                                                                                                                                                                                                                                                                                                                                                                                                                                                                                                                                                                                                                                               |
|------------------------------------------------------------------------------------------------------------------------------------------------------------------------------------------------------------------------------------------------------------------------------------------------------------------------------------------------------------------------------------|-----------|------------------------------------------------------------------------------------|----------------------------------------------------------------------------------------------------------------------------|---------------------------------------------------------------------------------------------------------------------------------------------------------------------------------------------------------------------------------------------------------------------------------------------------------------------------------------------------------------------------------------------------------------------------------------------------------------------------------------------------------------------------------------------------------------------------------------------------------------------------------------------------------------------------------------------------------------|
| EPI_ISL_1048324 to 1048335                                                                                                                                                                                                                                                                                                                                                         | see above | FG17 - NRZ Influenzaviren                                                          | Robert Koch Institute, Influenza and respiratory viruses FG17 & Bioinformatics MF1, Berlin, Germany                        | Aleksandar Radonic; Marianne Wedde; Oliver Drechsel; R. Dürwald; Ralf Duerrwald; Rene Kriecinski; Stefan Kroeger; Stephan Fuchs; Thorsten Wolff                                                                                                                                                                                                                                                                                                                                                                                                                                                                                                                                                               |
| EPI_ISL_1272814 to 1272822, EPI_ISL_1318525 to 1318531                                                                                                                                                                                                                                                                                                                             |           | FL Bur. of Public Health Laboratories-Jacksonville                                 | Centers for Disease Control and Prevention Division of Viral Diseases, Pathogen Discovery                                  | Anna Montmayeur; Anna Uehara; Ben L. Rambo-Martin; Clinton R. Paden; Dhvani Batra; Haibin Wang; Jasmine Padilla; Jing Zhang; Justin Lee; Katie Dillon; Krista Queen; Kristen Knipe; Kristine Lacek; Lori Rowe; Mark Burroughs; Matthew Schmerer; Mili Sheth; Peter W. Cook; Rachel Marine; Sam Shepard; Sarah Nobles; Shoshona Le; Suxiang Tong; Yan Li; Ying Tao                                                                                                                                                                                                                                                                                                                                             |
| EPI_ISL_1094242, EPI_ISL_1094265, EPI_ISL_1094293, EPI_ISL_1094537 to 1094539, EPI_ISL_1095186, EPI_ISL_1095287                                                                                                                                                                                                                                                                    |           | FL Bur. of Public Health Laboratories-Jacksonville                                 | Respiratory Viruses Branch, Division of Viral Diseases, Centers for Disease Control and Prevention                         | Anna Montmayeur; Anna Uehara; Ben L. Rambo-Martin; Clinton R. Paden; Dhvani Batra; Haibin Wang; Jasmine Padilla; Jing Zhang; Justin Lee; Krista Queen; Lori Rowe; Mark Burroughs; Mili Sheth; Peter W. Cook; Rachel Marine; Sarah Nobles; Suxiang Tong; Yan Li; Ying Tao                                                                                                                                                                                                                                                                                                                                                                                                                                      |
| EPI_ISL_1272971                                                                                                                                                                                                                                                                                                                                                                    |           | FL Bureau of Public Health Laboratories-Miami                                      | Centers for Disease Control and Prevention Division of Viral Diseases, Pathogen Discovery                                  | Anna Montmayeur; Anna Uehara; Ben L. Rambo-Martin; Clinton R. Paden; Dhvani Batra; Haibin Wang; Jasmine Padilla; Jing Zhang; Justin Lee; Katie Dillon; Krista Queen; Kristen Knipe; Kristine Lacek; Lori Rowe; Mark Burroughs; Matthew Schmerer; Mili Sheth; Peter W. Cook; Rachel Marine; Sam Shepard; Sarah Nobles; Shoshona Le; Suxiang Tong; Yan Li; Ying Tao                                                                                                                                                                                                                                                                                                                                             |
| EPI_ISL_1169489                                                                                                                                                                                                                                                                                                                                                                    |           | FL Bureau of Public Health Laboratories-Miami                                      | Genomics and Discovery, Respiratory Viruses Branch, Division of Viral Diseases, Centers for Disease Control and Prevention | Anna Montmayeur; Anna Uehara; Ben L. Rambo-Martin; Clinton R. Paden; Dhvani Batra; Haibin Wang; Jasmine Padilla; Jing Zhang; Justin Lee; Krista Queen; Lori Rowe; Mark Burroughs; Mili Sheth; Peter W. Cook; Rachel Marine; Sarah Nobles; Suxiang Tong; Yan Li; Ying Tao                                                                                                                                                                                                                                                                                                                                                                                                                                      |
| EPI_ISL_1094299, EPI_ISL_1094545 to 1094546, EPI_ISL_1095290 to 1095294                                                                                                                                                                                                                                                                                                            |           | FL Bureau of Public Health Laboratories-Miami                                      | Respiratory Viruses Branch, Division of Viral Diseases, Centers for Disease Control and Prevention                         | Anna Montmayeur; Anna Uehara; Ben L. Rambo-Martin; Clinton R. Paden; Dhvani Batra; Haibin Wang; Jasmine Padilla; Jing Zhang; Justin Lee; Krista Queen; Lori Rowe; Mark Burroughs; Mili Sheth; Peter W. Cook; Rachel Marine; Sarah Nobles; Suxiang Tong; Yan Li; Ying Tao                                                                                                                                                                                                                                                                                                                                                                                                                                      |
| EPI_ISL_1272713 to 1272719, EPI_ISL_1318479 to 1318487                                                                                                                                                                                                                                                                                                                             |           | FL Bureau of Public Health Laboratories-Tampa                                      | Centers for Disease Control and Prevention Division of Viral Diseases, Pathogen Discovery                                  | Anna Montmayeur; Anna Uehara; Ben L. Rambo-Martin; Clinton R. Paden; Dhvani Batra; Haibin Wang; Jasmine Padilla; Jing Zhang; Justin Lee; Katie Dillon; Krista Queen; Kristen Knipe; Kristine Lacek; Lori Rowe; Mark Burroughs; Matthew Schmerer; Mili Sheth; Peter W. Cook; Rachel Marine; Sam Shepard; Sarah Nobles; Shoshona Le; Suxiang Tong; Yan Li; Ying Tao                                                                                                                                                                                                                                                                                                                                             |
| EPI_ISL_1094315, EPI_ISL_1094540 to 1094541, EPI_ISL_1095288 to 1095289                                                                                                                                                                                                                                                                                                            |           | FL Bureau of Public Health Laboratories-Tampa                                      | Respiratory Viruses Branch, Division of Viral Diseases, Centers for Disease Control and Prevention                         | Anna Montmayeur; Anna Uehara; Ben L. Rambo-Martin; Clinton R. Paden; Dhvani Batra; Haibin Wang; Jasmine Padilla; Jing Zhang; Justin Lee; Krista Queen; Lori Rowe; Mark Burroughs; Mili Sheth; Peter W. Cook; Rachel Marine; Sarah Nobles; Suxiang Tong; Yan Li; Ying Tao                                                                                                                                                                                                                                                                                                                                                                                                                                      |
| EPI_ISL_1036217                                                                                                                                                                                                                                                                                                                                                                    |           | FONDAZIONE PICCOLA OPERA CARITAS                                                   | Istituto Zooprofilattico Sperimentale dell'Abruzzo e Molise "G. Caporale"                                                  | Ancora M; Calistri P; Cammà C; Curini V; Di Domenico M; Di Pasquale A; Lorusso A; Mangone I; Marcelli M; Puglia I; Rinaldi A; Savini G; Scialabba S                                                                                                                                                                                                                                                                                                                                                                                                                                                                                                                                                           |
| EPI_ISL_1195273, EPI_ISL_1195281                                                                                                                                                                                                                                                                                                                                                   |           | FUNDACAO DE SAUDE PUBLICA SAO CAMILO DE ESTEIO                                     | Epiclin                                                                                                                    | Ana Paula Muterle; Carolina Comerlato; Eliana Márcia Da Ros Wendland; Fernando Hayashi Sant'Anna; Janira Pichula; Juliana Comerlato                                                                                                                                                                                                                                                                                                                                                                                                                                                                                                                                                                           |
| EPI_ISL_1195272                                                                                                                                                                                                                                                                                                                                                                    |           | FUNDACAO HOSPITALAR DE SAPUCAIA DO SUL                                             | Epiclin                                                                                                                    | Ana Paula Muterle; Carolina Comerlato; Eliana Márcia Da Ros Wendland; Fernando Hayashi Sant'Anna; Janira Pichula; Juliana Comerlato                                                                                                                                                                                                                                                                                                                                                                                                                                                                                                                                                                           |
| EPI_ISL_1220058 to 1220060                                                                                                                                                                                                                                                                                                                                                         |           | FUNDACION VALLE DEL LILI                                                           | Instituto Nacional de Salud- Dirección de Investigación en Salud Pública                                                   | Carlos Franco-Muñoz; Diego A. Álvarez-Díaz; Hector Andrés Prada; Gerardo Santamaría; Gerardo Alejandro Ruiz-Moreno; Jhonattan Reales-González; Julian Naizaque; Katherine Laiton-Donato; Magdalena Wiesner; Marcela Mercado-Reyes.; María T. Herrera-Sepúlveda; Martha Lucia Ospina Martínez; Sheryll Corchuelo                                                                                                                                                                                                                                                                                                                                                                                               |
| EPI_ISL_1273097 to 1273102                                                                                                                                                                                                                                                                                                                                                         |           | Faculty of Medicine, Al-Quds University                                            | Faculty of Medicine, Al-Quds University                                                                                    | Al-Jawabreh, A.; Dumaidi, K.; Ereqat, S.; Nasereddin, A.                                                                                                                                                                                                                                                                                                                                                                                                                                                                                                                                                                                                                                                      |
| EPI_ISL_1038997                                                                                                                                                                                                                                                                                                                                                                    |           | Fair Haven CHC                                                                     | Grubaugh Lab - Yale School of Public Health                                                                                | Anderson Brito; Anne Wyllie; Annie Watkins; Chaney Kalinich; Chantal Vogels; Isabel Ott; Joseph Fauver; Mallery Breban; Mary Petrone; Nathan Grubaugh; Tara Alpert                                                                                                                                                                                                                                                                                                                                                                                                                                                                                                                                            |
| EPI_ISL_1040681 to 1040682, EPI_ISL_1040739 to 1040740, EPI_ISL_1040775, EPI_ISL_1040777, EPI_ISL_1040779 to 1040780                                                                                                                                                                                                                                                               |           | False Bay Hospital wc FBH                                                          | NHLS/UCT                                                                                                                   | Arash Iranzadeh; Bruna Galvao; Carolyn Williamson; Deelan Doolabh; Diana Hardie; Innocent Mudau; Kruger Marais; Lynn Tyers; Marvin Hsiao; Stephen Korsman                                                                                                                                                                                                                                                                                                                                                                                                                                                                                                                                                     |
| EPI_ISL_1257860 to 1257862                                                                                                                                                                                                                                                                                                                                                         |           | Farmalab Indoutama                                                                 | National Institute of Health Research and Development                                                                      | Arie Ardiansyah Nugraha; Hana Apsari Pawestri; Hartanti Dian Ikawati; Kartika Dewi Puspa; Krisna Pangesti; Nelly Puspandari; Subangkit; Vivi Setiawaty                                                                                                                                                                                                                                                                                                                                                                                                                                                                                                                                                        |
| EPI_ISL_1048372, EPI_ISL_1048375, EPI_ISL_1048381                                                                                                                                                                                                                                                                                                                                  |           | Farmalab Indoutama Jakarta                                                         | National Institute of Health Research and Development                                                                      | Arie Ardiansyah Nugraha; Hana Apsari Pawestri; Hartanti Dian Ikawati; Kartika Dewi Puspa; Krisna Nur Andriana Pangesti; Nelly Puspandari; Subangkit; Vivi Setiawaty.                                                                                                                                                                                                                                                                                                                                                                                                                                                                                                                                          |
| EPI_ISL_1181469, EPI_ISL_1219138                                                                                                                                                                                                                                                                                                                                                   |           | Federal University of Mato Grosso (UFMT)                                           | Laboratory of Respiratory Viruses and Measles, Oswaldo Cruz Institute, FIOCRUZ                                             | Alice Sampaio Rocha; Ana Carolina Mendonca; Anna Carolina Paixao; Fernando Motta; Luciana Appolinario; Marilda Siqueira on behalf of the Fiocruz COVID-19 Genomic Surveillance Network; Paola Resende; Renata Dezengrini; Renata Serrano Lopes                                                                                                                                                                                                                                                                                                                                                                                                                                                                |
| EPI_ISL_1181364, EPI_ISL_1181435 to 1181436, EPI_ISL_1181443, EPI_ISL_1181450                                                                                                                                                                                                                                                                                                      |           | Federal University of Southern Bahia (UFSB - Universidade Federal do Sul da Bahia) | Laboratory of Respiratory Viruses and Measles, Oswaldo Cruz Institute, FIOCRUZ                                             | Alice Sampaio Rocha; Ana Carolina Mendonca; Anna Carolina Paixao; Fernando Motta; Luciana Appolinario; Marilda Siqueira on behalf of the Fiocruz COVID-19 Genomic Surveillance Network; Paola Resende; Renata Serrano Lopes; Thiago Mafra                                                                                                                                                                                                                                                                                                                                                                                                                                                                     |
| EPI_ISL_1114369 to 1114370                                                                                                                                                                                                                                                                                                                                                         |           | FidaLab                                                                            | Seattle Flu Study                                                                                                          | Amanda Adler; Barry R. Lutz; Benjamin Pelle; Brian Hiatt; Caitlin R. Wolf; Chris D. Frazier; Deborah A. Nickerson; Elisabeth Brandstetter; Erica Ryke; Geoff Melly; Helen Y. Chu; Janet A. Englund; Jay Shendure; Jover Lee; Kairsten Fay; Kirsten Lacombe; Lea M. Starita; Mark J. Rieder; Matthew Richardson; Matthew Thompson; Melissa Truong; Michael Boeckh; Michael Famulare; Misja Ilcisin; Peter D. Han; Philip Dykema; Romesh Gautam; Scott Lindquist; Thomas R. Sibley; Trevor Bedford                                                                                                                                                                                                              |
| EPI_ISL_1085172                                                                                                                                                                                                                                                                                                                                                                    |           | Fidalab                                                                            | Hyde Lab                                                                                                                   | Jennifer L. Hyde; Quinne Feng; Roger Peck                                                                                                                                                                                                                                                                                                                                                                                                                                                                                                                                                                                                                                                                     |
| EPI_ISL_1069189                                                                                                                                                                                                                                                                                                                                                                    |           | Filinvest Tent Covid Quarantine Facility                                           | Research Institute for Tropical Medicine                                                                                   | Catalino Demetria; Daria Manalo; Edelwisa Mercado; Francisco Gerardo Polotan; Hannah Leah Morito; Inez Andrea Medado; John Leonard Chan; Joseph Hughes; Kirstyn Brunker; Ma Angelica Tujan; Othoniel Jan Onza                                                                                                                                                                                                                                                                                                                                                                                                                                                                                                 |
| EPI_ISL_1081812                                                                                                                                                                                                                                                                                                                                                                    |           | First Aide Diagnostic Center                                                       | Philippine Genome Center                                                                                                   | Alethea R. de Guzman; Anna Ong-Lim; Arienne A. Zamora; Asia Louisa U. Chong; Benedict A. Maralit; Candice Francheska B. Tambaoan; Carlo M. Lapid; Celia Carlos; Cynthia P. Saloma; Devon Ray Pacial; Edsel Maurice Salvaña; El King D. Morado; Eva Maria Cutiongco-de la Paz; Francis A. Tablizo; Irish Coleen A. Asin; Jaime C. Montoya; Jan Michael C. Yap; Jo-Hannah S. Llamas; John Q. Wong; Joshua Gregor A. Dizon; Juan Antonio R. Magalang; Karol Sophia Agape R. Padilla; Kenneth M. Kim; Kris P. Punayan; Marc Edsel C. Ayes; Marc Jerrone R. Castro; Maria Sofia L. Yangzon; Marissa Alejandria; Razel Nikka M. Hao; Rianna Patricia S. Cruz; Sheila Mae M. Ariza; and Maria Rosario Singh-Vergeire |
| EPI_ISL_1029974 to 1030251, EPI_ISL_1049859 to 1050007, EPI_ISL_1097347 to 1097445, EPI_ISL_1132133 to 1132366, EPI_ISL_1191462 to 1191586, EPI_ISL_1218655 to 1219001, EPI_ISL_1238766, EPI_ISL_1239883 to 1240070, EPI_ISL_1250852, EPI_ISL_1259401 to 1259404, EPI_ISL_1372280 to 1372282                                                                                       | see above | Florida Bureau of Public Health Laboratories                                       | Florida Bureau of Public Health Laboratories                                                                               | Jason Blanton; Sarah Schmedes                                                                                                                                                                                                                                                                                                                                                                                                                                                                                                                                                                                                                                                                                 |
| EPI_ISL_1097739, EPI_ISL_1098636 to 1098637, EPI_ISL_1098641, EPI_ISL_1192369 to 1192371, EPI_ISL_1197058 to 1197061, EPI_ISL_1198005, EPI_ISL_1303426, EPI_ISL_1303474 to 1303479, EPI_ISL_1303484 to 1303488, EPI_ISL_1307636 to 1307637, EPI_ISL_1379978                                                                                                                        | see above | Flow Diagnostics Lab                                                               | Los Angeles County PHL                                                                                                     | P. Hemarajata et al.                                                                                                                                                                                                                                                                                                                                                                                                                                                                                                                                                                                                                                                                                          |
| EPI_ISL_1253710 to 1253718, EPI_ISL_1254009 to 1254012                                                                                                                                                                                                                                                                                                                             |           | Flow Health                                                                        | Infectious Disease Program, Broad Institute of Harvard and MIT                                                             | Adams, G.; B.L.; B.W.; Bauer, M.; Birren; Carter, A.; Chaluvadi, S.; D.J.; DeRuff, K.; Gallagher, G.; Gladden-Young, A.; J.E.; K.J.; Lagerborg, K.; Lemieux; Loreth, C.; MacInnis; Normandin, E.; P.C.; Park; Reilly, S.; Rudy, M.; Siddle; Smole, S.; Tomkins-Tinch, C.; and Sabeti                                                                                                                                                                                                                                                                                                                                                                                                                          |
| EPI_ISL_1013454, EPI_ISL_1118282, EPI_ISL_1118428 to 1118433, EPI_ISL_1118477, EPI_ISL_1118615, EPI_ISL_1118649, EPI_ISL_1192162, EPI_ISL_1192238 to 1192248, EPI_ISL_1192307 to 1192310, EPI_ISL_1251313 to 1251316, EPI_ISL_1251416, EPI_ISL_1251677 to 1251681, EPI_ISL_1251802, EPI_ISL_1251805, EPI_ISL_1251807, EPI_ISL_1251809 to 1251811, EPI_ISL_1317651, EPI_ISL_1317979 | see above | Foerde Hospital, Department of Microbiology                                        | Norwegian Institute of Public Health, Department of Virology                                                               | Atiya R Ali; Debech Nadia; Engebretsen Serina Beate; Engebretsen Serina Beate Atiya R Ali; Garcia Llorente Ignacio; Hilde Elshaug; Hilde Volla; Jon Bråte; Kamilla Heddeland Instefjord; Karoline Bragstad; Kathrine Stene-Johansen; Marie Paulsen Madsen; Olav Hungnes; Pedersen Benedikte Nevjen; Rasmus Riis Kopperud                                                                                                                                                                                                                                                                                                                                                                                      |
| EPI_ISL_1079359, EPI_ISL_1079371, EPI_ISL_1079373                                                                                                                                                                                                                                                                                                                                  |           | Fondazione Policlinico Tor Vergata                                                 | INMI Lazzaro Spallanzani IRCCS                                                                                             | A Di Caro; B Bartolini; C D'Agostini; C Fontana; CEM Gruber; D Di Cave; D Ombres; E Giombini; F Messina; M Ciotti; M Rueca; MR Capobianchi; O Butera; P Paba; S Grelli                                                                                                                                                                                                                                                                                                                                                                                                                                                                                                                                        |
| EPI_ISL_1009024 to 1009027, EPI_ISL_1295613                                                                                                                                                                                                                                                                                                                                        |           | Fondazione Policlinico Universitario "A. Gemelli" IRCCS                            | INMI Lazzaro Spallanzani IRCCS                                                                                             | A Di Caro; B Bartolini; C.E.M Gruber; CEM Gruber; E Giombini; F Messina; F Santini; G Bonfiglio; M Rueca; M Sanguinetti; M. Rueca; MR Capobianchi; O Butera; P Cattani                                                                                                                                                                                                                                                                                                                                                                                                                                                                                                                                        |
| EPI_ISL_1235371, EPI_ISL_1235408,                                                                                                                                                                                                                                                                                                                                                  |           | Fresno County Public Health Laboratory                                             | Chan-Zuckerberg Biohub                                                                                                     | CZB Cliahub Consortium                                                                                                                                                                                                                                                                                                                                                                                                                                                                                                                                                                                                                                                                                        |

|                                                                                                                                                                                                                                                                                                                                                                                                                                                                                                                                                                                                                                                                                                                                                                                                                                                                                                                                                                                                                                                                                                                                                                                                                                                                                                                                                                                                                                                                                                                                                                                                                                                                                                                                                                                                                                                                                                                                                                                                                                                                                                                                                                                                                                                                                                                                                                                                                                                                                                                                                                                                                                                                                                                                                                                                                                                                                                                                                                                                                                                                                                                                                                                                                                                                                                                                                                                                                                                                                                                                                                                                                                                                                                                                                                                                                                                                                                                                                                                                                                                                                                                                                                                                                                                                                                                                                                                                                                                                                                                                                                                                                                                                                                                                                                                                                                                                                                                                                                                                                                                                                                                                                                                                                                                                                                                                                                                   |                                                        |                                                                                                                                            |                                                                                                                                                                                                                                                                                                                                                                                                                               |
|-----------------------------------------------------------------------------------------------------------------------------------------------------------------------------------------------------------------------------------------------------------------------------------------------------------------------------------------------------------------------------------------------------------------------------------------------------------------------------------------------------------------------------------------------------------------------------------------------------------------------------------------------------------------------------------------------------------------------------------------------------------------------------------------------------------------------------------------------------------------------------------------------------------------------------------------------------------------------------------------------------------------------------------------------------------------------------------------------------------------------------------------------------------------------------------------------------------------------------------------------------------------------------------------------------------------------------------------------------------------------------------------------------------------------------------------------------------------------------------------------------------------------------------------------------------------------------------------------------------------------------------------------------------------------------------------------------------------------------------------------------------------------------------------------------------------------------------------------------------------------------------------------------------------------------------------------------------------------------------------------------------------------------------------------------------------------------------------------------------------------------------------------------------------------------------------------------------------------------------------------------------------------------------------------------------------------------------------------------------------------------------------------------------------------------------------------------------------------------------------------------------------------------------------------------------------------------------------------------------------------------------------------------------------------------------------------------------------------------------------------------------------------------------------------------------------------------------------------------------------------------------------------------------------------------------------------------------------------------------------------------------------------------------------------------------------------------------------------------------------------------------------------------------------------------------------------------------------------------------------------------------------------------------------------------------------------------------------------------------------------------------------------------------------------------------------------------------------------------------------------------------------------------------------------------------------------------------------------------------------------------------------------------------------------------------------------------------------------------------------------------------------------------------------------------------------------------------------------------------------------------------------------------------------------------------------------------------------------------------------------------------------------------------------------------------------------------------------------------------------------------------------------------------------------------------------------------------------------------------------------------------------------------------------------------------------------------------------------------------------------------------------------------------------------------------------------------------------------------------------------------------------------------------------------------------------------------------------------------------------------------------------------------------------------------------------------------------------------------------------------------------------------------------------------------------------------------------------------------------------------------------------------------------------------------------------------------------------------------------------------------------------------------------------------------------------------------------------------------------------------------------------------------------------------------------------------------------------------------------------------------------------------------------------------------------------------------------------------------------------------------------|--------------------------------------------------------|--------------------------------------------------------------------------------------------------------------------------------------------|-------------------------------------------------------------------------------------------------------------------------------------------------------------------------------------------------------------------------------------------------------------------------------------------------------------------------------------------------------------------------------------------------------------------------------|
| EPI_ISL_1235413, EPI_ISL_1235422, EPI_ISL_1235560, EPI_ISL_1235607                                                                                                                                                                                                                                                                                                                                                                                                                                                                                                                                                                                                                                                                                                                                                                                                                                                                                                                                                                                                                                                                                                                                                                                                                                                                                                                                                                                                                                                                                                                                                                                                                                                                                                                                                                                                                                                                                                                                                                                                                                                                                                                                                                                                                                                                                                                                                                                                                                                                                                                                                                                                                                                                                                                                                                                                                                                                                                                                                                                                                                                                                                                                                                                                                                                                                                                                                                                                                                                                                                                                                                                                                                                                                                                                                                                                                                                                                                                                                                                                                                                                                                                                                                                                                                                                                                                                                                                                                                                                                                                                                                                                                                                                                                                                                                                                                                                                                                                                                                                                                                                                                                                                                                                                                                                                                                                |                                                        |                                                                                                                                            |                                                                                                                                                                                                                                                                                                                                                                                                                               |
| EPI_ISL_1098660 to 1098754, EPI_ISL_1319754 to 1319755, EPI_ISL_1319757 to 1319759, EPI_ISL_1319761 to 1319762, EPI_ISL_1319764 to 1319766, EPI_ISL_1319768 to 1319769                                                                                                                                                                                                                                                                                                                                                                                                                                                                                                                                                                                                                                                                                                                                                                                                                                                                                                                                                                                                                                                                                                                                                                                                                                                                                                                                                                                                                                                                                                                                                                                                                                                                                                                                                                                                                                                                                                                                                                                                                                                                                                                                                                                                                                                                                                                                                                                                                                                                                                                                                                                                                                                                                                                                                                                                                                                                                                                                                                                                                                                                                                                                                                                                                                                                                                                                                                                                                                                                                                                                                                                                                                                                                                                                                                                                                                                                                                                                                                                                                                                                                                                                                                                                                                                                                                                                                                                                                                                                                                                                                                                                                                                                                                                                                                                                                                                                                                                                                                                                                                                                                                                                                                                                            | Fukuoka Institute of Health and Environmental Sciences | Fukuoka Institute of Health and Environmental Sciences                                                                                     | Akira Ohishi; Asako Nakamura; Chiharu Katamune; Hiroaki Shigemura; Kentaro Itokawa; Makoto Kuroda; Masanori Hashino; Mitsuhiro Hamasaki; Rina Tanaka; Saori Ueda; Takayuki Kobayashi; Tsuyoshi Sekizuka; Yoshiki Etoh; Yuki Ashizuka                                                                                                                                                                                          |
| EPI_ISL_1005583 to 1005654, EPI_ISL_1009868 to 1010307, EPI_ISL_1010309 to 1010698, EPI_ISL_1010737 to 1011508, EPI_ISL_1026866 to 1027247, EPI_ISL_1032946 to 1033023, EPI_ISL_1068395 to 1068592, EPI_ISL_1068594 to 1068681, EPI_ISL_1068683 to 1068848, EPI_ISL_1068852 to 1068926, EPI_ISL_1068930 to 1068995, EPI_ISL_1069000 to 1069075, EPI_ISL_1069085 to 1069152, EPI_ISL_1095645 to 1095912, EPI_ISL_1095914 to 1096029, EPI_ISL_1132845 to 1132970, EPI_ISL_1134840 to 1134903, EPI_ISL_1164360 to 1164438, EPI_ISL_1172046 to 1172109, EPI_ISL_1195947 to 1195949, EPI_ISL_1231437 to 1231530, EPI_ISL_1231533, EPI_ISL_1231537, EPI_ISL_1231541, EPI_ISL_1231545, EPI_ISL_1231549, EPI_ISL_1231553, EPI_ISL_1231557, EPI_ISL_1231561, EPI_ISL_1231565, EPI_ISL_1231569, EPI_ISL_1231573, EPI_ISL_1231577, EPI_ISL_1231581, EPI_ISL_1231585, EPI_ISL_1231590, EPI_ISL_1231594, EPI_ISL_1231598, EPI_ISL_1231602, EPI_ISL_1231606, EPI_ISL_1231610, EPI_ISL_1231615, EPI_ISL_1231618, EPI_ISL_1231623, EPI_ISL_1231626, EPI_ISL_1231630, EPI_ISL_1231634, EPI_ISL_1231638, EPI_ISL_1231642, EPI_ISL_1231646, EPI_ISL_1231651, EPI_ISL_1231655, EPI_ISL_1231659, EPI_ISL_1231663, EPI_ISL_1231666, EPI_ISL_1231670, EPI_ISL_1231675, EPI_ISL_1231678, EPI_ISL_1231682, EPI_ISL_1231686, EPI_ISL_1231690, EPI_ISL_1231694, EPI_ISL_1231698, EPI_ISL_1231702, EPI_ISL_1231706, EPI_ISL_1231710, EPI_ISL_1231714, EPI_ISL_1231719, EPI_ISL_1231723, EPI_ISL_1231727, EPI_ISL_1231730, EPI_ISL_1231735, EPI_ISL_1231739, EPI_ISL_1231743, EPI_ISL_1231747, EPI_ISL_1231751, EPI_ISL_1231755, EPI_ISL_1231758, EPI_ISL_1231762, EPI_ISL_1231771, EPI_ISL_1231774 to 1231913, EPI_ISL_1232029 to 1232192, EPI_ISL_1251260, EPI_ISL_1251273, EPI_ISL_1252050                                                                                                                                                                                                                                                                                                                                                                                                                                                                                                                                                                                                                                                                                                                                                                                                                                                                                                                                                                                                                                                                                                                                                                                                                                                                                                                                                                                                                                                                                                                                                                                                                                                                                                                                                                                                                                                                                                                                                                                                                                                                                                                                                                                                                                                                                                                                                                                                                                                                                                                                                                                                                                                                                                                                                                                                                                                                                                                                                                                                                                                                                                                                                                                                                                                                                                                                                                                                                                                                                                                                                                                                                  |                                                        |                                                                                                                                            |                                                                                                                                                                                                                                                                                                                                                                                                                               |
| see above                                                                                                                                                                                                                                                                                                                                                                                                                                                                                                                                                                                                                                                                                                                                                                                                                                                                                                                                                                                                                                                                                                                                                                                                                                                                                                                                                                                                                                                                                                                                                                                                                                                                                                                                                                                                                                                                                                                                                                                                                                                                                                                                                                                                                                                                                                                                                                                                                                                                                                                                                                                                                                                                                                                                                                                                                                                                                                                                                                                                                                                                                                                                                                                                                                                                                                                                                                                                                                                                                                                                                                                                                                                                                                                                                                                                                                                                                                                                                                                                                                                                                                                                                                                                                                                                                                                                                                                                                                                                                                                                                                                                                                                                                                                                                                                                                                                                                                                                                                                                                                                                                                                                                                                                                                                                                                                                                                         | Fulgent Genetics                                       | Fulgent Genetics                                                                                                                           | Becky Tsai; Benafsh Sapra; Doreen Ng; Harry Gao; James Xie; John Gao; Joseph Fierro; Mickey Li; Yan Meng                                                                                                                                                                                                                                                                                                                      |
| EPI_ISL_1137616 to 1137617, EPI_ISL_1201897                                                                                                                                                                                                                                                                                                                                                                                                                                                                                                                                                                                                                                                                                                                                                                                                                                                                                                                                                                                                                                                                                                                                                                                                                                                                                                                                                                                                                                                                                                                                                                                                                                                                                                                                                                                                                                                                                                                                                                                                                                                                                                                                                                                                                                                                                                                                                                                                                                                                                                                                                                                                                                                                                                                                                                                                                                                                                                                                                                                                                                                                                                                                                                                                                                                                                                                                                                                                                                                                                                                                                                                                                                                                                                                                                                                                                                                                                                                                                                                                                                                                                                                                                                                                                                                                                                                                                                                                                                                                                                                                                                                                                                                                                                                                                                                                                                                                                                                                                                                                                                                                                                                                                                                                                                                                                                                                       | Fundación Cardio Infantil                              | Instituto Nacional de Salud- Dirección de Investigación en Salud Pública                                                                   | Carlos Franco-Muñoz; Diego A. Álvarez-Díaz; Diego Andrés Prada; Gerardo Santamaría; Hector Alejandro Ruiz-Moreno; Jhonattan Reales-González; Julian Naizaque; Katherine Laiton-Donato; Magdalena Wiesner; Marcela Mercado-Reyes; María T. Herrera-Sepúlveda; Martha Lucia Ospina Martínez; Sheryll Corchuelo                                                                                                                  |
| EPI_ISL_1239124, EPI_ISL_1239137 to 1239139, EPI_ISL_1240642                                                                                                                                                                                                                                                                                                                                                                                                                                                                                                                                                                                                                                                                                                                                                                                                                                                                                                                                                                                                                                                                                                                                                                                                                                                                                                                                                                                                                                                                                                                                                                                                                                                                                                                                                                                                                                                                                                                                                                                                                                                                                                                                                                                                                                                                                                                                                                                                                                                                                                                                                                                                                                                                                                                                                                                                                                                                                                                                                                                                                                                                                                                                                                                                                                                                                                                                                                                                                                                                                                                                                                                                                                                                                                                                                                                                                                                                                                                                                                                                                                                                                                                                                                                                                                                                                                                                                                                                                                                                                                                                                                                                                                                                                                                                                                                                                                                                                                                                                                                                                                                                                                                                                                                                                                                                                                                      | Fundação Ezequiel Dias                                 | Coordenação Geral de Laboratórios de Saúde Pública (CGLAB)                                                                                 | ; Vagner Fonseca et al; Vagner Fonseca et al.                                                                                                                                                                                                                                                                                                                                                                                 |
| EPI_ISL_1182541, EPI_ISL_1182543 to 1182545, EPI_ISL_1182548 to 1182551, EPI_ISL_1182555, EPI_ISL_1182559 to 1182561, EPI_ISL_1182564, EPI_ISL_1182566, EPI_ISL_1182569 to 1182570, EPI_ISL_1182573 to 1182574, EPI_ISL_1182577 to 1182579, EPI_ISL_1182585 to 1182587, EPI_ISL_1182590 to 1182591, EPI_ISL_1182593, EPI_ISL_1182598, EPI_ISL_1182600 to 1182602, EPI_ISL_1182609, EPI_ISL_1182611 to 1182612, EPI_ISL_1182615, EPI_ISL_1182618, EPI_ISL_1182625                                                                                                                                                                                                                                                                                                                                                                                                                                                                                                                                                                                                                                                                                                                                                                                                                                                                                                                                                                                                                                                                                                                                                                                                                                                                                                                                                                                                                                                                                                                                                                                                                                                                                                                                                                                                                                                                                                                                                                                                                                                                                                                                                                                                                                                                                                                                                                                                                                                                                                                                                                                                                                                                                                                                                                                                                                                                                                                                                                                                                                                                                                                                                                                                                                                                                                                                                                                                                                                                                                                                                                                                                                                                                                                                                                                                                                                                                                                                                                                                                                                                                                                                                                                                                                                                                                                                                                                                                                                                                                                                                                                                                                                                                                                                                                                                                                                                                                                  | Fundação Ezequiel Dias (FUNED)                         | Coordenação Geral de Laboratórios de Saúde Pública (CGLAB/DAEVS/SVS/MS)                                                                    | Vagner Fonseca; et al.                                                                                                                                                                                                                                                                                                                                                                                                        |
| EPI_ISL_1013468, EPI_ISL_1013474, EPI_ISL_1013476, EPI_ISL_1013486 to 1013487, EPI_ISL_1013517 to 1013520, EPI_ISL_1034313, EPI_ISL_1040145, EPI_ISL_1040161 to 1040165, EPI_ISL_1058048, EPI_ISL_1058054, EPI_ISL_1058063, EPI_ISL_1073915, EPI_ISL_1073931, EPI_ISL_1073952, EPI_ISL_1110521 to 1110523, EPI_ISL_1110538 to 1110540, EPI_ISL_1118287 to 1118288, EPI_ISL_1118290, EPI_ISL_1118295, EPI_ISL_1118303, EPI_ISL_1118315, EPI_ISL_1118331, EPI_ISL_1118334, EPI_ISL_1118336 to 1118337, EPI_ISL_1118339, EPI_ISL_1118353, EPI_ISL_1118361 to 1118362, EPI_ISL_1118367, EPI_ISL_1118370, EPI_ISL_1118372, EPI_ISL_1118376 to 1118378, EPI_ISL_1118381 to 1118382, EPI_ISL_1118388, EPI_ISL_1118395, EPI_ISL_1118397, EPI_ISL_1118400 to 1118401, EPI_ISL_1118418 to 1118419, EPI_ISL_1118426, EPI_ISL_1118434, EPI_ISL_1118471, EPI_ISL_1118496, EPI_ISL_1118504 to 1118508, EPI_ISL_1118516, EPI_ISL_1118531, EPI_ISL_1118562, EPI_ISL_1118569, EPI_ISL_1118600, EPI_ISL_1118612, EPI_ISL_1118618, EPI_ISL_1118633 to 1118635, EPI_ISL_1118637 to 1118641, EPI_ISL_1118643, EPI_ISL_1118646, EPI_ISL_1118664, EPI_ISL_1118665, EPI_ISL_1118669, EPI_ISL_1118666, EPI_ISL_1118678, EPI_ISL_1118682 to 1118683, EPI_ISL_1118685 to 1118687, EPI_ISL_1186072 to 1186073, EPI_ISL_1186075, EPI_ISL_1186084, EPI_ISL_1186091 to 1186100, EPI_ISL_1186106 to 1186110, EPI_ISL_1186112, EPI_ISL_1186127, EPI_ISL_1186124 to 1186127, EPI_ISL_1186150, EPI_ISL_1186163, EPI_ISL_1186168, EPI_ISL_1186171, EPI_ISL_1186173 to 1186175, EPI_ISL_1186179 to 1186186, EPI_ISL_1192163, EPI_ISL_1192167, EPI_ISL_1192175 to 1192176, EPI_ISL_1192184 to 1192185, EPI_ISL_1192190, EPI_ISL_1192201 to 1192203, EPI_ISL_1192205, EPI_ISL_1192226, EPI_ISL_1192230, EPI_ISL_1192251, EPI_ISL_1192274 to 1192284, EPI_ISL_1192292 to 1192296, EPI_ISL_1251285, EPI_ISL_1251297, EPI_ISL_1251318, EPI_ISL_1251358 to 1251359, EPI_ISL_1251462, EPI_ISL_1251493 to 1251494, EPI_ISL_1251611 to 1251612, EPI_ISL_1251615, EPI_ISL_1251676, EPI_ISL_1251706 to 1251705, EPI_ISL_1251796 to 1251797, EPI_ISL_1251828, EPI_ISL_1251893 to 1251906, EPI_ISL_1251908, EPI_ISL_1251910 to 1251913, EPI_ISL_1251916 to 1251919, EPI_ISL_1251931 to 1251932, EPI_ISL_1251937, EPI_ISL_1251939, EPI_ISL_1251942 to 1251952, EPI_ISL_1251994 to 1251996, EPI_ISL_1251998 to 1252001, EPI_ISL_1252005, EPI_ISL_1252013, EPI_ISL_1252015 to 1252018, EPI_ISL_1252021 to 1252022, EPI_ISL_1252025 to 1252027, EPI_ISL_1252036 to 1252038, EPI_ISL_1252042 to 1252043, EPI_ISL_1252048 to 1252049, EPI_ISL_1252486, EPI_ISL_1252488, EPI_ISL_1252490, EPI_ISL_1252493 to 1252496, EPI_ISL_1252500 to 1252501, EPI_ISL_1252546 to 1252548, EPI_ISL_1254545, EPI_ISL_1254555, EPI_ISL_1254571, EPI_ISL_1254586, EPI_ISL_1254593 to 1254594, EPI_ISL_1254608, EPI_ISL_1314453 to 1314457, EPI_ISL_1314483 to 1314484, EPI_ISL_1314524, EPI_ISL_1314529, EPI_ISL_1314536 to 1314537, EPI_ISL_1317217, EPI_ISL_1317219 to 1317220, EPI_ISL_1317224, EPI_ISL_1317231, EPI_ISL_1317234, EPI_ISL_1317238, EPI_ISL_1317241, EPI_ISL_1317245 to 1317246, EPI_ISL_1317251, EPI_ISL_1317254 to 1317257, EPI_ISL_1317262, EPI_ISL_1317264, EPI_ISL_1317275, EPI_ISL_1317277 to 1317278, EPI_ISL_1317286, EPI_ISL_1317289, EPI_ISL_1317300, EPI_ISL_1317306, EPI_ISL_1317309, EPI_ISL_1317316 to 1317318, EPI_ISL_1317320, EPI_ISL_1317323, EPI_ISL_1317325 to 1317327, EPI_ISL_1317329 to 1317332, EPI_ISL_1317334 to 1317339, EPI_ISL_1317344, EPI_ISL_1317349 to 1317350, EPI_ISL_1317353 to 1317355, EPI_ISL_1317357 to 1317361, EPI_ISL_1317366 to 1317370, EPI_ISL_1317374 to 1317376, EPI_ISL_1317380 to 1317383, EPI_ISL_1317389, EPI_ISL_1317395 to 1317397, EPI_ISL_1317401 to 1317407, EPI_ISL_1317412, EPI_ISL_1317418 to 1317431, EPI_ISL_1317441 to 1317442, EPI_ISL_1317447 to 1317448, EPI_ISL_1317450 to 1317462, EPI_ISL_1317470 to 1317479, EPI_ISL_1317490 to 1317496, EPI_ISL_1317503, EPI_ISL_1317564 to 1317567, EPI_ISL_1317570, EPI_ISL_1317573 to 1317575, EPI_ISL_1317580 to 1317582, EPI_ISL_1317586, EPI_ISL_1317597 to 1317600, EPI_ISL_1317602, EPI_ISL_1317605 to 1317606, EPI_ISL_1317608, EPI_ISL_1317611, EPI_ISL_1317613 to 1317619, EPI_ISL_1317625, EPI_ISL_1317649, EPI_ISL_1317653, EPI_ISL_1317655, EPI_ISL_1317656, EPI_ISL_1317725 to 1317726, EPI_ISL_1317728, EPI_ISL_1317731, EPI_ISL_1317763, EPI_ISL_1317767 to 1317774, EPI_ISL_1317778 to 1317785, EPI_ISL_1317791 to 1317799, EPI_ISL_1317799 to 1317803, EPI_ISL_1317809 to 1317815, EPI_ISL_1317824 to 1317829, EPI_ISL_1317838 to 1317842, EPI_ISL_1317844 to 1317845, EPI_ISL_1317847 to 1317851, EPI_ISL_1317863 to 1317865, EPI_ISL_1317870 to 1317872, EPI_ISL_1317876 to 1317877, EPI_ISL_1317881 to 1317884, EPI_ISL_1317895 to 1317897, EPI_ISL_1317900, EPI_ISL_1317903 to 1317906, EPI_ISL_1317909 to 1317911, EPI_ISL_1317916 to 1317922, EPI_ISL_1317926, EPI_ISL_1317935, EPI_ISL_1317940 to 1317941, EPI_ISL_1317943, EPI_ISL_1317945 to 1317954, EPI_ISL_1317956, EPI_ISL_1317958 to 1317960, EPI_ISL_1317962 to 1317964, EPI_ISL_1317968 to 1317969, EPI_ISL_1317980 to 1317986, EPI_ISL_1317988 to 1317993, EPI_ISL_1318001, EPI_ISL_1318003 to 1318009, EPI_ISL_1318015 to 1318026, EPI_ISL_1318037 to 1318040, EPI_ISL_1323189, EPI_ISL_1324001, EPI_ISL_1324003 to 1324004, EPI_ISL_1347602 |                                                        |                                                                                                                                            |                                                                                                                                                                                                                                                                                                                                                                                                                               |
| see above                                                                                                                                                                                                                                                                                                                                                                                                                                                                                                                                                                                                                                                                                                                                                                                                                                                                                                                                                                                                                                                                                                                                                                                                                                                                                                                                                                                                                                                                                                                                                                                                                                                                                                                                                                                                                                                                                                                                                                                                                                                                                                                                                                                                                                                                                                                                                                                                                                                                                                                                                                                                                                                                                                                                                                                                                                                                                                                                                                                                                                                                                                                                                                                                                                                                                                                                                                                                                                                                                                                                                                                                                                                                                                                                                                                                                                                                                                                                                                                                                                                                                                                                                                                                                                                                                                                                                                                                                                                                                                                                                                                                                                                                                                                                                                                                                                                                                                                                                                                                                                                                                                                                                                                                                                                                                                                                                                         | Furst Medical Laboratory                               | Norwegian Institute of Public Health, Department of Virology                                                                               | Atiya R Ali; Debech Nadia; Engebretsen Serina Beate; Engebretsen Serina Beate Atiya R Ali; Garcia Llorente Ignacio; Hilde Elshaug; Hilde Vollen; Ignacio Garcia Llorente; Jon Bråte; Kamilla Heddeland Instefjord; Karoline Bragstad; Kathrine Stene-Johansen; Marie Paulsen Madsen; Olav Hungenes; Pedersen Benedikte Nevjen; Rasmus Riis Kopperud; Serina B Engebretsen                                                     |
| EPI_ISL_1085237, EPI_ISL_1085264, EPI_ISL_1085301, EPI_ISL_1085351, EPI_ISL_1085355, EPI_ISL_1085401, EPI_ISL_1110194 to 1110198                                                                                                                                                                                                                                                                                                                                                                                                                                                                                                                                                                                                                                                                                                                                                                                                                                                                                                                                                                                                                                                                                                                                                                                                                                                                                                                                                                                                                                                                                                                                                                                                                                                                                                                                                                                                                                                                                                                                                                                                                                                                                                                                                                                                                                                                                                                                                                                                                                                                                                                                                                                                                                                                                                                                                                                                                                                                                                                                                                                                                                                                                                                                                                                                                                                                                                                                                                                                                                                                                                                                                                                                                                                                                                                                                                                                                                                                                                                                                                                                                                                                                                                                                                                                                                                                                                                                                                                                                                                                                                                                                                                                                                                                                                                                                                                                                                                                                                                                                                                                                                                                                                                                                                                                                                                  |                                                        |                                                                                                                                            |                                                                                                                                                                                                                                                                                                                                                                                                                               |
| see above                                                                                                                                                                                                                                                                                                                                                                                                                                                                                                                                                                                                                                                                                                                                                                                                                                                                                                                                                                                                                                                                                                                                                                                                                                                                                                                                                                                                                                                                                                                                                                                                                                                                                                                                                                                                                                                                                                                                                                                                                                                                                                                                                                                                                                                                                                                                                                                                                                                                                                                                                                                                                                                                                                                                                                                                                                                                                                                                                                                                                                                                                                                                                                                                                                                                                                                                                                                                                                                                                                                                                                                                                                                                                                                                                                                                                                                                                                                                                                                                                                                                                                                                                                                                                                                                                                                                                                                                                                                                                                                                                                                                                                                                                                                                                                                                                                                                                                                                                                                                                                                                                                                                                                                                                                                                                                                                                                         | G.H.E.F.Grand Hôpital EST Francilien                   | Department of Virology, Henri Mondor University Hospital, Assistance Publique Hôpitaux de Paris, Université Paris-Est Créteil, INSERM U955 | Alexandre Soulier; Christophe Rodriguez; Elisabeth Trawinski; Guillaume Gricourt; Jean-Michel Pawlowsky; Melissa N'Debi; Slim Fourati; Vanessa Demontant                                                                                                                                                                                                                                                                      |
| EPI_ISL_1225320 to 1225329, EPI_ISL_1238994 to 1239011, EPI_ISL_1262459 to 1262500, EPI_ISL_1278007 to 1278028                                                                                                                                                                                                                                                                                                                                                                                                                                                                                                                                                                                                                                                                                                                                                                                                                                                                                                                                                                                                                                                                                                                                                                                                                                                                                                                                                                                                                                                                                                                                                                                                                                                                                                                                                                                                                                                                                                                                                                                                                                                                                                                                                                                                                                                                                                                                                                                                                                                                                                                                                                                                                                                                                                                                                                                                                                                                                                                                                                                                                                                                                                                                                                                                                                                                                                                                                                                                                                                                                                                                                                                                                                                                                                                                                                                                                                                                                                                                                                                                                                                                                                                                                                                                                                                                                                                                                                                                                                                                                                                                                                                                                                                                                                                                                                                                                                                                                                                                                                                                                                                                                                                                                                                                                                                                    | GA Department of Public Health                         | GA Department of Public Health                                                                                                             | Aiyah Fields; Cynthia Dixey; Jonathan Edwards; Stacy Reeves; Taylor Smith; Tonia Parrott                                                                                                                                                                                                                                                                                                                                      |
| EPI_ISL_1272998 to 1273036, EPI_ISL_1318548 to 1318594                                                                                                                                                                                                                                                                                                                                                                                                                                                                                                                                                                                                                                                                                                                                                                                                                                                                                                                                                                                                                                                                                                                                                                                                                                                                                                                                                                                                                                                                                                                                                                                                                                                                                                                                                                                                                                                                                                                                                                                                                                                                                                                                                                                                                                                                                                                                                                                                                                                                                                                                                                                                                                                                                                                                                                                                                                                                                                                                                                                                                                                                                                                                                                                                                                                                                                                                                                                                                                                                                                                                                                                                                                                                                                                                                                                                                                                                                                                                                                                                                                                                                                                                                                                                                                                                                                                                                                                                                                                                                                                                                                                                                                                                                                                                                                                                                                                                                                                                                                                                                                                                                                                                                                                                                                                                                                                            | GA Department of Public Health Laboratory              | Centers for Disease Control and Prevention Division of Viral Diseases, Pathogen Discovery                                                  | Anna Montmayer; Anna Uehara; Ben L. Rambo-Martin; Clinton R. Paden; Dhvani Batra; Haibin Wang; Jasmine Padilla; Jing Zhang; Justin Lee; Katie Dillon; Krista Queen; Kristen Knipe; Kristine Lacey; Lori Rowe; Mark Burroughs; Matthew Schmerer; Mili Sheth; Peter W. Cook; Rachel Marine; Sam Shepard; Sarah Nobles; Shoshona Le; Suxiang Tong; Yan Li; Ying Tao                                                              |
| EPI_ISL_1167938 to 1167988, EPI_ISL_1168001 to 1168006, EPI_ISL_1168015, EPI_ISL_1168020 to 1168036, EPI_ISL_1226082 to 1226091, EPI_ISL_1226105, EPI_ISL_1373811                                                                                                                                                                                                                                                                                                                                                                                                                                                                                                                                                                                                                                                                                                                                                                                                                                                                                                                                                                                                                                                                                                                                                                                                                                                                                                                                                                                                                                                                                                                                                                                                                                                                                                                                                                                                                                                                                                                                                                                                                                                                                                                                                                                                                                                                                                                                                                                                                                                                                                                                                                                                                                                                                                                                                                                                                                                                                                                                                                                                                                                                                                                                                                                                                                                                                                                                                                                                                                                                                                                                                                                                                                                                                                                                                                                                                                                                                                                                                                                                                                                                                                                                                                                                                                                                                                                                                                                                                                                                                                                                                                                                                                                                                                                                                                                                                                                                                                                                                                                                                                                                                                                                                                                                                 |                                                        |                                                                                                                                            |                                                                                                                                                                                                                                                                                                                                                                                                                               |
| see above                                                                                                                                                                                                                                                                                                                                                                                                                                                                                                                                                                                                                                                                                                                                                                                                                                                                                                                                                                                                                                                                                                                                                                                                                                                                                                                                                                                                                                                                                                                                                                                                                                                                                                                                                                                                                                                                                                                                                                                                                                                                                                                                                                                                                                                                                                                                                                                                                                                                                                                                                                                                                                                                                                                                                                                                                                                                                                                                                                                                                                                                                                                                                                                                                                                                                                                                                                                                                                                                                                                                                                                                                                                                                                                                                                                                                                                                                                                                                                                                                                                                                                                                                                                                                                                                                                                                                                                                                                                                                                                                                                                                                                                                                                                                                                                                                                                                                                                                                                                                                                                                                                                                                                                                                                                                                                                                                                         | GA Department of Public Health Laboratory              | Genomics and Discovery, Respiratory Viruses Branch, Division of Viral Diseases, Centers for Disease Control and Prevention                 | ; Anna Kelleher; Anna Montmayer; Anna Uehara; Ben L. Rambo-Martin; Brian Lynch; Clinton R. Paden; Dhvani Batra; Haibin Wang; Han Jia Justin Ng; Jasmine Padilla; Jing Zhang; Justin Lee; Katie Dillon; Krista Queen; Kristen Knipe; Kristine Lacey; Lori Rowe; Mark Burroughs; Matthew Schmerer; Mili Sheth; Peter Cook; Peter W. Cook; Rachel Marine; Sam Shepard; Sarah Nobles; Shoshona Le; Suxiang Tong; Yan Li; Ying Tao |
| EPI_ISL_1008910 to 1008915                                                                                                                                                                                                                                                                                                                                                                                                                                                                                                                                                                                                                                                                                                                                                                                                                                                                                                                                                                                                                                                                                                                                                                                                                                                                                                                                                                                                                                                                                                                                                                                                                                                                                                                                                                                                                                                                                                                                                                                                                                                                                                                                                                                                                                                                                                                                                                                                                                                                                                                                                                                                                                                                                                                                                                                                                                                                                                                                                                                                                                                                                                                                                                                                                                                                                                                                                                                                                                                                                                                                                                                                                                                                                                                                                                                                                                                                                                                                                                                                                                                                                                                                                                                                                                                                                                                                                                                                                                                                                                                                                                                                                                                                                                                                                                                                                                                                                                                                                                                                                                                                                                                                                                                                                                                                                                                                                        | GA Department of Public Health Laboratory              | Pathogen Discovery, Respiratory Viruses Branch, Division of Viral Diseases, Centers for Disease Control and Prevention                     | Anna Uehara; Clinton R. Paden; Haibin Wang; Jing Zhang; Krista Queen; Peter Cook; Suxiang Tong; Yan Li; Ying Tao                                                                                                                                                                                                                                                                                                              |
| EPI_ISL_1094255 to 1094256, EPI_ISL_1094284, EPI_ISL_1094312, EPI_ISL_1094364, EPI_ISL_1094425 to 1094432, EPI_ISL_1095097 to 1095119                                                                                                                                                                                                                                                                                                                                                                                                                                                                                                                                                                                                                                                                                                                                                                                                                                                                                                                                                                                                                                                                                                                                                                                                                                                                                                                                                                                                                                                                                                                                                                                                                                                                                                                                                                                                                                                                                                                                                                                                                                                                                                                                                                                                                                                                                                                                                                                                                                                                                                                                                                                                                                                                                                                                                                                                                                                                                                                                                                                                                                                                                                                                                                                                                                                                                                                                                                                                                                                                                                                                                                                                                                                                                                                                                                                                                                                                                                                                                                                                                                                                                                                                                                                                                                                                                                                                                                                                                                                                                                                                                                                                                                                                                                                                                                                                                                                                                                                                                                                                                                                                                                                                                                                                                                             | GA Department of Public Health Laboratory              | Respiratory Viruses Branch, Division of Viral Diseases, Centers for Disease Control and Prevention                                         | Anna Montmayer; Anna Uehara; Ben L. Rambo-Martin; Clinton R. Paden; Dhvani Batra; Haibin Wang; Jasmine Padilla; Jing Zhang; Justin Lee; Krista Queen; Lori Rowe; Mark Burroughs; Mili Sheth; Peter W. Cook; Rachel Marine; Sarah Nobles; Suxiang Tong; Yan Li; Ying Tao                                                                                                                                                       |
| EPI_ISL_1048313                                                                                                                                                                                                                                                                                                                                                                                                                                                                                                                                                                                                                                                                                                                                                                                                                                                                                                                                                                                                                                                                                                                                                                                                                                                                                                                                                                                                                                                                                                                                                                                                                                                                                                                                                                                                                                                                                                                                                                                                                                                                                                                                                                                                                                                                                                                                                                                                                                                                                                                                                                                                                                                                                                                                                                                                                                                                                                                                                                                                                                                                                                                                                                                                                                                                                                                                                                                                                                                                                                                                                                                                                                                                                                                                                                                                                                                                                                                                                                                                                                                                                                                                                                                                                                                                                                                                                                                                                                                                                                                                                                                                                                                                                                                                                                                                                                                                                                                                                                                                                                                                                                                                                                                                                                                                                                                                                                   | GA Kreis Wesel                                         | Robert Koch Institute, Influenza and respiratory viruses FG17 & Bioinformatics MF1, Berlin, Germany                                        | Aleksandar Radonic; B. Dittmar; Marianne Wedde; Oliver Drechsel; R. Dürrwald; Ralf Duerrwald; Rene Kmiecinski; Stefan Kroeger; Stephan Fuchs; Thorsten Wolff                                                                                                                                                                                                                                                                  |
| EPI_ISL_1059950, EPI_ISL_1059988                                                                                                                                                                                                                                                                                                                                                                                                                                                                                                                                                                                                                                                                                                                                                                                                                                                                                                                                                                                                                                                                                                                                                                                                                                                                                                                                                                                                                                                                                                                                                                                                                                                                                                                                                                                                                                                                                                                                                                                                                                                                                                                                                                                                                                                                                                                                                                                                                                                                                                                                                                                                                                                                                                                                                                                                                                                                                                                                                                                                                                                                                                                                                                                                                                                                                                                                                                                                                                                                                                                                                                                                                                                                                                                                                                                                                                                                                                                                                                                                                                                                                                                                                                                                                                                                                                                                                                                                                                                                                                                                                                                                                                                                                                                                                                                                                                                                                                                                                                                                                                                                                                                                                                                                                                                                                                                                                  | GERENCIA DE ASITENCIA SANITARIA DE SORIA               | Instituto de Salud Carlos III                                                                                                              | A. Monzón; F. Casas; I. Aldea, C.; I. Jiménez; M. Sandonis; P. Zaballos; S. Cuesta; S. Iglesias-Caballero; S. Pozo; S. Varona; V. Camarero; Vázquez-Morón                                                                                                                                                                                                                                                                     |
| EPI_ISL_1155714                                                                                                                                                                                                                                                                                                                                                                                                                                                                                                                                                                                                                                                                                                                                                                                                                                                                                                                                                                                                                                                                                                                                                                                                                                                                                                                                                                                                                                                                                                                                                                                                                                                                                                                                                                                                                                                                                                                                                                                                                                                                                                                                                                                                                                                                                                                                                                                                                                                                                                                                                                                                                                                                                                                                                                                                                                                                                                                                                                                                                                                                                                                                                                                                                                                                                                                                                                                                                                                                                                                                                                                                                                                                                                                                                                                                                                                                                                                                                                                                                                                                                                                                                                                                                                                                                                                                                                                                                                                                                                                                                                                                                                                                                                                                                                                                                                                                                                                                                                                                                                                                                                                                                                                                                                                                                                                                                                   | GERLAND CDP                                            | CNR Virus des Infections Respiratoires - France SUD                                                                                        | Antonin Bal; Bruno Lina; Gregory Destras; Gwendolyne Burfin; Hadrien Regue; Laurence Josset; Martine Valette; Quentin Semanas                                                                                                                                                                                                                                                                                                 |
| EPI_ISL_1220316 to 1220321, EPI_ISL_1220323                                                                                                                                                                                                                                                                                                                                                                                                                                                                                                                                                                                                                                                                                                                                                                                                                                                                                                                                                                                                                                                                                                                                                                                                                                                                                                                                                                                                                                                                                                                                                                                                                                                                                                                                                                                                                                                                                                                                                                                                                                                                                                                                                                                                                                                                                                                                                                                                                                                                                                                                                                                                                                                                                                                                                                                                                                                                                                                                                                                                                                                                                                                                                                                                                                                                                                                                                                                                                                                                                                                                                                                                                                                                                                                                                                                                                                                                                                                                                                                                                                                                                                                                                                                                                                                                                                                                                                                                                                                                                                                                                                                                                                                                                                                                                                                                                                                                                                                                                                                                                                                                                                                                                                                                                                                                                                                                       | GH BORDEAUX                                            | CNR Virus des Infections Respiratoires - France SUD                                                                                        | Antonin Bal; Bruno Lina; Gregory Destras; Gwendolyne Burfin; Hadrien Regue; Laurence Josset; Martine Valette; Quentin Semanas                                                                                                                                                                                                                                                                                                 |
| EPI_ISL_1313044, EPI_ISL_1313046, EPI_ISL_1313148, EPI_ISL_1313178,                                                                                                                                                                                                                                                                                                                                                                                                                                                                                                                                                                                                                                                                                                                                                                                                                                                                                                                                                                                                                                                                                                                                                                                                                                                                                                                                                                                                                                                                                                                                                                                                                                                                                                                                                                                                                                                                                                                                                                                                                                                                                                                                                                                                                                                                                                                                                                                                                                                                                                                                                                                                                                                                                                                                                                                                                                                                                                                                                                                                                                                                                                                                                                                                                                                                                                                                                                                                                                                                                                                                                                                                                                                                                                                                                                                                                                                                                                                                                                                                                                                                                                                                                                                                                                                                                                                                                                                                                                                                                                                                                                                                                                                                                                                                                                                                                                                                                                                                                                                                                                                                                                                                                                                                                                                                                                               | GH BOURG CENTRE PRELEVEMENT                            | CNR Virus des Infections Respiratoires - France SUD                                                                                        | Antonin Bal; Bruno Lina; Gregory Destras; Gwendolyne Burfin; Hadrien Regue; Laurence Josset; Martine Valette; Quentin Semanas                                                                                                                                                                                                                                                                                                 |

|                                                                                                                                                                                                                                                                                                    |                                                               |                                                                                                                                            |                                                                                                                                                                               |
|----------------------------------------------------------------------------------------------------------------------------------------------------------------------------------------------------------------------------------------------------------------------------------------------------|---------------------------------------------------------------|--------------------------------------------------------------------------------------------------------------------------------------------|-------------------------------------------------------------------------------------------------------------------------------------------------------------------------------|
| EPI_ISL_1313710                                                                                                                                                                                                                                                                                    |                                                               |                                                                                                                                            |                                                                                                                                                                               |
| EPI_ISL_1261183, EPI_ISL_1261195 to 1261202, EPI_ISL_1261293 to 1261302, EPI_ISL_1261394, EPI_ISL_1261411                                                                                                                                                                                          | GHC Genetics s.r.o.                                           | National Reference Laboratory for Influenza and Respiratory Viruses CZE                                                                    | Alexander Nagy; Dusan Trnka; Helena Jirincova; Jaromira Vecerova; Timotej Suri                                                                                                |
| EPI_ISL_1265757, EPI_ISL_1265820 to 1265824, EPI_ISL_1265836 to 1265838, EPI_ISL_1265849 to 1265850                                                                                                                                                                                                | GHE REUNION                                                   | CNR Virus des Infections Respiratoires - France SUD                                                                                        | Antonin Bai; Bruno Lina; Gregory Destras; Gwendolynne Burfin; Hadrien Regue; Laurence Josset; Martine Valette; Quentin Semanas                                                |
| EPI_ISL_1007633, EPI_ISL_1120825, EPI_ISL_1370077, EPI_ISL_1370079                                                                                                                                                                                                                                 | GHOL                                                          | Laboratory of genomics and metagenomics, Institute of Microbiology, University Hospital Centre and University of Lausanne, Switzerland     | Claire Bertelli; Damien Jacot; Gilbert Greub; Sébastien Aeby; Trestan Pillonel                                                                                                |
| EPI_ISL_1265490, EPI_ISL_1265597, EPI_ISL_1265701, EPI_ISL_1265719                                                                                                                                                                                                                                 | GIVORS                                                        | CNR Virus des Infections Respiratoires - France SUD                                                                                        | Antonin Bai; Bruno Lina; Gregory Destras; Gwendolynne Burfin; Hadrien Regue; Laurence Josset; Martine Valette; Quentin Semanas                                                |
| EPI_ISL_1226418, EPI_ISL_1226452, EPI_ISL_1228268 to 1228269, EPI_ISL_1228272 to 1228274, EPI_ISL_1228434 to 1228443, EPI_ISL_1228447 to 1228449, EPI_ISL_1228451, EPI_ISL_1228454 to 1228459, EPI_ISL_1228463 to 1228464, EPI_ISL_1228467 to 1228468, EPI_ISL_1228470 to 1228473, EPI_ISL_1228476 | GLENS FALLS HOSPITAL LABORATORY                               | Wadsworth Center, New York State Department of Health                                                                                      | Alexis Russel; Daryl M. Lamson; Erasmus Schneider; Erica Lasek-Nesselquist; John Kelly; Jonathan Plitnick; Kirsten St. George; Matthew Shudt; Melissa A Leisner; Navjot Singh |
| see above                                                                                                                                                                                                                                                                                          |                                                               |                                                                                                                                            |                                                                                                                                                                               |
| EPI_ISL_1228925 to 1228929, EPI_ISL_1228932, EPI_ISL_1228934 to 1228937, EPI_ISL_1228943 to 1228944, EPI_ISL_1228946, EPI_ISL_1228948, EPI_ISL_1228950, EPI_ISL_1228953, EPI_ISL_1265474                                                                                                           | GROUPE HOSPITALIER SAINT ANDRE                                | CNR Virus des Infections Respiratoires - France SUD                                                                                        | Antonin Bai; Bruno Lina; Gregory Destras; Gwendolynne Burfin; Hadrien Regue; Laurence Josset; Martine Valette; Quentin Semanas                                                |
| see above                                                                                                                                                                                                                                                                                          |                                                               |                                                                                                                                            |                                                                                                                                                                               |
| EPI_ISL_1085302, EPI_ISL_1085324 to 1085326, EPI_ISL_1085328, EPI_ISL_1085554, EPI_ISL_1085558, EPI_ISL_1085575 to 1085576, EPI_ISL_1085580, EPI_ISL_1085606, EPI_ISL_1085624                                                                                                                      | GROUPE HOSPITALIER SUD ILE DE FRANCE                          | Department of Virology, Henri Mondor University Hospital, Assistance Publique Hôpitaux de Paris, Université Paris-Est Créteil, INSERM U955 | Alexandre Soulier; Christophe Rodriguez; Elisabeth Trawinski; Guillaume Gricourt; Jean-Michel Pawlowsky; Melissa N'Debi; Slim Fourati; Vanessa Demontant                      |
| see above                                                                                                                                                                                                                                                                                          |                                                               |                                                                                                                                            |                                                                                                                                                                               |
| EPI_ISL_1039222                                                                                                                                                                                                                                                                                    | GZA Sint-Augustinus                                           | UAntwerp, Laboratory of Medical Microbiology                                                                                               | Basil Britto Xavier; Christine Lammens; Herman Goossens; Jasmine Coppens; Marie Le Mercier; Veerle Matheeußen                                                                 |
| EPI_ISL_1169920                                                                                                                                                                                                                                                                                    | Galdakao University Hospital                                  | Cruces University Hospital                                                                                                                 | Ana Belén de la Oz; Ana Gual-de-Torrella; Mikel Gallego; Pilar Berdonces                                                                                                      |
| EPI_ISL_1340922                                                                                                                                                                                                                                                                                    | Gallup Indian Medical Center                                  | New Mexico Department of Health Scientific Laboratory                                                                                      | Anastacia Griego-Fisher; D'eldra Malone; Ellie Johnson; Jennifer Benoit                                                                                                       |
| EPI_ISL_1239609 to 1239612, EPI_ISL_1239761 to 1239762, EPI_ISL_1273840                                                                                                                                                                                                                            | GenXOne SA                                                    | 1. National Institute of Public Health - National Institute of Hygiene; 2. Eurofins Genomics Europe Sequencing GmbH                        | ECDC COVID-19 WGS support team; Eurofins Genomics Europe Sequencing Team; Gierczyki Rafa; Sadkowska-Todys Magorzata; Wokowicz Tomasz; Zacharczuk Katarzyna                    |
| EPI_ISL_1184582, EPI_ISL_1185245, EPI_ISL_1186201                                                                                                                                                                                                                                                  | Genelabs Medical (Pvt) Ltd                                    | Genelabs Medical (Pvt) Ltd                                                                                                                 | Chandanamali Punchihewa; K. Dasuki Hansana Perera; K.Dasuki Hansana Perera; Ravithra Roshan Rajasegar; Tharmini Sundralingam; Viveka Selvarasa                                |
| EPI_ISL_1011755                                                                                                                                                                                                                                                                                    | General Hospital - Bitola                                     | Research Center for Genetic Engineering and Biotechnology "Georgi D. Efremov" , Macedonian Academy of Sciences and Arts                    | Aleksandar J. Dimovski; Dijana Plasheska-Karanfilska; Gjorgji Bozinovski; Milena Jakimovska; Predrag Noveski                                                                  |
| EPI_ISL_1013098, EPI_ISL_1013450 to 1013451, EPI_ISL_1018105, EPI_ISL_1143746                                                                                                                                                                                                                      | General Hospital - Kumanovo                                   | Research Center for Genetic Engineering and Biotechnology "Georgi D. Efremov" , Macedonian Academy of Sciences and Arts                    | Aleksandar J. Dimovski; Dijana Plasheska-Karanfilska; Gjorgji Bozinovski; Milena Jakimovska; Predrag Noveski; Ileksandar J. Dimovski                                          |
| EPI_ISL_1014934, EPI_ISL_1018103, EPI_ISL_1018107, EPI_ISL_1018113, EPI_ISL_1018115, EPI_ISL_1138222, EPI_ISL_1138410, EPI_ISL_1138423, EPI_ISL_1138752, EPI_ISL_1138760, EPI_ISL_1140098 to 1140100, EPI_ISL_1142575, EPI_ISL_1144121                                                             | General Hospital - Ohrid                                      | Research Center for Genetic Engineering and Biotechnology "Georgi D. Efremov" , Macedonian Academy of Sciences and Arts                    | Aleksandar J. Dimovski; Dijana Plasheska-Karanfilska; Gjorgji Bozinovski; Milena Jakimovska; Predrag Noveski                                                                  |
| see above                                                                                                                                                                                                                                                                                          |                                                               |                                                                                                                                            |                                                                                                                                                                               |
| EPI_ISL_1013583, EPI_ISL_1014762, EPI_ISL_1014766, EPI_ISL_1014936, EPI_ISL_1137612, EPI_ISL_1137620, EPI_ISL_1138749, EPI_ISL_1138759, EPI_ISL_1140070, EPI_ISL_1140124, EPI_ISL_1142172                                                                                                          | General Hospital - Prilep                                     | Research Center for Genetic Engineering and Biotechnology "Georgi D. Efremov" , Macedonian Academy of Sciences and Arts                    | Aleksandar J. Dimovski; Dijana Plasheska-Karanfilska; Gjorgji Bozinovski; Milena Jakimovska; Predrag Noveski                                                                  |
| see above                                                                                                                                                                                                                                                                                          |                                                               |                                                                                                                                            |                                                                                                                                                                               |
| EPI_ISL_1013521, EPI_ISL_1018104, EPI_ISL_1018111, EPI_ISL_1018117, EPI_ISL_1137623, EPI_ISL_1138406, EPI_ISL_1138412, EPI_ISL_1138748, EPI_ISL_1138751, EPI_ISL_1140120, EPI_ISL_1140123, EPI_ISL_1144534                                                                                         | General Hospital - Shtip                                      | Research Center for Genetic Engineering and Biotechnology "Georgi D. Efremov" , Macedonian Academy of Sciences and Arts                    | Aleksandar J. Dimovski; Dijana Plasheska-Karanfilska; Gjorgji Bozinovski; Milena Jakimovska; Predrag Noveski                                                                  |
| see above                                                                                                                                                                                                                                                                                          |                                                               |                                                                                                                                            |                                                                                                                                                                               |
| EPI_ISL_1014939, EPI_ISL_1018106, EPI_ISL_1018218 to 1018219, EPI_ISL_1138424, EPI_ISL_1138743 to 1138744, EPI_ISL_1138746, EPI_ISL_1138753 to 1138754, EPI_ISL_1138758                                                                                                                            | General Hospital - Struga                                     | Research Center for Genetic Engineering and Biotechnology "Georgi D. Efremov" , Macedonian Academy of Sciences and Arts                    | Aleksandar J. Dimovski; Dijana Plasheska-Karanfilska; Gjorgji Bozinovski; Milena Jakimovska; Predrag Noveski                                                                  |
| see above                                                                                                                                                                                                                                                                                          |                                                               |                                                                                                                                            |                                                                                                                                                                               |
| EPI_ISL_1013452, EPI_ISL_1014763, EPI_ISL_1014933, EPI_ISL_1018102, EPI_ISL_1137622, EPI_ISL_1138757                                                                                                                                                                                               | General Hospital - Strumica                                   | Research Center for Genetic Engineering and Biotechnology "Georgi D. Efremov" , Macedonian Academy of Sciences and Arts                    | Aleksandar J. Dimovski; Dijana Plasheska-Karanfilska; Gjorgji Bozinovski; Milena Jakimovska; Predrag Noveski                                                                  |
| EPI_ISL_1018109                                                                                                                                                                                                                                                                                    | General Hospital - Stuga                                      | Research Center for Genetic Engineering and Biotechnology "Georgi D. Efremov" , Macedonian Academy of Sciences and Arts                    | Aleksandar J. Dimovski; Dijana Plasheska-Karanfilska; Gjorgji Bozinovski; Milena Jakimovska; Predrag Noveski                                                                  |
| EPI_ISL_1013522, EPI_ISL_1014764, EPI_ISL_1014912, EPI_ISL_1018108, EPI_ISL_1137611, EPI_ISL_1137614, EPI_ISL_1140512, EPI_ISL_1140936, EPI_ISL_1141320, EPI_ISL_1142968, EPI_ISL_1143347                                                                                                          | General Hospital - Tetovo                                     | Research Center for Genetic Engineering and Biotechnology "Georgi D. Efremov" , Macedonian Academy of Sciences and Arts                    | Aleksandar J. Dimovski; Dijana Plasheska-Karanfilska; Gjorgji Bozinovski; Milena Jakimovska; Predrag Noveski                                                                  |
| see above                                                                                                                                                                                                                                                                                          |                                                               |                                                                                                                                            |                                                                                                                                                                               |
| EPI_ISL_1011754, EPI_ISL_1011756, EPI_ISL_1013097, EPI_ISL_1014938, EPI_ISL_1138755, EPI_ISL_1141754                                                                                                                                                                                               | General Hospital - Veles                                      | Research Center for Genetic Engineering and Biotechnology "Georgi D. Efremov" , Macedonian Academy of Sciences and Arts                    | Aleksandar J. Dimovski; Dijana Plasheska-Karanfilska; Gjorgji Bozinovski; Milena Jakimovska; Predrag Noveski                                                                  |
| EPI_ISL_1261386 to 1261388                                                                                                                                                                                                                                                                         | General University Hospital                                   | National Reference Laboratory for Influenza and Respiratory Viruses CZE                                                                    | Alexander Nagy; Dusan Trnka; Helena Jirincova; Jaromira Vecerova; Timotej Suri                                                                                                |
| EPI_ISL_1167668 to 1167933, EPI_ISL_1300449 to 1300495, EPI_ISL_1300497 to 1300520, EPI_ISL_1321447 to 1321600                                                                                                                                                                                     | Genetica Molecular and Subdepartamento de Virologia ISP Chile | Instituto de Salud Publica de Chile                                                                                                        | Andres Castillo; Barbara Parra; Gisselle Barra; Jaime Lagos; Javier Tognarelli; Jorge Fernandez; Karen Orostica; Loredana Arata; Patricia Bustos; Rodrigo Fasce               |
| EPI_ISL_1324384, EPI_ISL_1324466                                                                                                                                                                                                                                                                   | Genome Analysis Center, Kamma Memorial Hospital               | Genome Analysis Center, Kamma Memorial Hospital                                                                                            | Hanako Yazawa; Hiroshi Kamma; Jun Ishii; Kaori Watanabe; Michiaki Masuda; Satoko Soma; Takuya Yazawa                                                                          |

|                                                                                                                                                                                                                                                                                                                                                                                                                                                                                                                                                                                                                                                                                                                                                                                                                                                                                                             |                                                                                                                                                                      |                                                                                                                                                    |                                                                                                                                                                                                                                                                                                                                                                                                                                                                                                                               |
|-------------------------------------------------------------------------------------------------------------------------------------------------------------------------------------------------------------------------------------------------------------------------------------------------------------------------------------------------------------------------------------------------------------------------------------------------------------------------------------------------------------------------------------------------------------------------------------------------------------------------------------------------------------------------------------------------------------------------------------------------------------------------------------------------------------------------------------------------------------------------------------------------------------|----------------------------------------------------------------------------------------------------------------------------------------------------------------------|----------------------------------------------------------------------------------------------------------------------------------------------------|-------------------------------------------------------------------------------------------------------------------------------------------------------------------------------------------------------------------------------------------------------------------------------------------------------------------------------------------------------------------------------------------------------------------------------------------------------------------------------------------------------------------------------|
| EPI_ISL_1164927 to 1164929                                                                                                                                                                                                                                                                                                                                                                                                                                                                                                                                                                                                                                                                                                                                                                                                                                                                                  | Genome Analysis Center, Yamanashi Central Hospital                                                                                                                   | Genome Analysis Center, Yamanashi Central Hospital                                                                                                 | Yosuke Hirotsu                                                                                                                                                                                                                                                                                                                                                                                                                                                                                                                |
| EPI_ISL_1079352, EPI_ISL_1079355                                                                                                                                                                                                                                                                                                                                                                                                                                                                                                                                                                                                                                                                                                                                                                                                                                                                            | Genomic Medicine Laboratory, IRCCS Santa Lucia Foundation                                                                                                            | INMI Lazzaro Spallanzani IRCCS                                                                                                                     | A Di Caro; B Bartolini; CEM Gruber; E Giardina; E Giombini; F Messina; M Rueca; MR Capobianchi; O Butera                                                                                                                                                                                                                                                                                                                                                                                                                      |
| EPI_ISL_1290802                                                                                                                                                                                                                                                                                                                                                                                                                                                                                                                                                                                                                                                                                                                                                                                                                                                                                             | Genomic and molecular Biology Group, A.C.Camargo Cancer Center                                                                                                       | Laboratory of Bioinformatics and Computational Biology, A.C.Camargo Cancer Center                                                                  | Alexandre Defelicibus; Dirce Carraro; Giovana Torrezan; Israel Tojal                                                                                                                                                                                                                                                                                                                                                                                                                                                          |
| EPI_ISL_1366326 to 1366334                                                                                                                                                                                                                                                                                                                                                                                                                                                                                                                                                                                                                                                                                                                                                                                                                                                                                  | Genomica Lab Molecular, Mexico                                                                                                                                       | Andersen lab at Scripps Research                                                                                                                   | Jose Horacio Reyna Verdugo; Jose Roman Chavez Mendez; Luis Alberto Rangel Gonzalez; Martin Gonzalez Ibarra; SEARCH Alliance San Diego with Jonathan Gonzalez Garcia                                                                                                                                                                                                                                                                                                                                                           |
| EPI_ISL_1081423 to 1081456, EPI_ISL_1081473 to 1081495                                                                                                                                                                                                                                                                                                                                                                                                                                                                                                                                                                                                                                                                                                                                                                                                                                                      | Genomica Lab Molecular, M@xico                                                                                                                                       | Andersen lab at Scripps Research                                                                                                                   | Jose Horacio Reyna Verdugo; Jose Roman Chavez Mendez; Luis Alberto Rangel Gonzalez; Martin Gonzalez Ibarra; SEARCH Alliance San Diego with Jonathan Gonzalez Garcia                                                                                                                                                                                                                                                                                                                                                           |
| EPI_ISL_1048250                                                                                                                                                                                                                                                                                                                                                                                                                                                                                                                                                                                                                                                                                                                                                                                                                                                                                             | Gesundheitsamt Region Kassel/Synlab Trier                                                                                                                            | Robert Koch Institute, Influenza and respiratory viruses FG17 & Bioinformatics MF1, Berlin, Germany                                                | Aleksandar Radonic; Kapp; Marianne Wedde; Oliver Drechsel; R. Dürrwald; Ralf Duerrwald; Rene Kmiecinski; Stefan Kroeger; Stephan Fuchs; Thorsten Wolff; Volk                                                                                                                                                                                                                                                                                                                                                                  |
| EPI_ISL_1156473, EPI_ISL_1156488, EPI_ISL_1156524, EPI_ISL_1156549, EPI_ISL_1156628, EPI_ISL_1156753, EPI_ISL_1211080, EPI_ISL_1211130, EPI_ISL_1211133, EPI_ISL_1211143, EPI_ISL_1211150, EPI_ISL_1211169, EPI_ISL_1211179, EPI_ISL_1211181, EPI_ISL_1211197, EPI_ISL_1211210, EPI_ISL_1211222, EPI_ISL_1211232, EPI_ISL_1211250, EPI_ISL_1211258, EPI_ISL_1211380, EPI_ISL_1211389, EPI_ISL_1216048, EPI_ISL_1216103, EPI_ISL_1216129, EPI_ISL_1216194, EPI_ISL_1216206, EPI_ISL_1216439                                                                                                                                                                                                                                                                                                                                                                                                                  | Gesundheitszentrum Brandenburg an der Havel GmbH bzw. Institut für Laboratoriumsmedizin Brandenburg an der Havel                                                     | Robert Koch Institute                                                                                                                              |                                                                                                                                                                                                                                                                                                                                                                                                                                                                                                                               |
| see above                                                                                                                                                                                                                                                                                                                                                                                                                                                                                                                                                                                                                                                                                                                                                                                                                                                                                                   | Gesundheitszentrum Brandenburg an der Havel GmbH bzw. Institut für Laboratoriumsmedizin Brandenburg an der Havel                                                     | Robert Koch Institute                                                                                                                              |                                                                                                                                                                                                                                                                                                                                                                                                                                                                                                                               |
| EPI_ISL_1135039                                                                                                                                                                                                                                                                                                                                                                                                                                                                                                                                                                                                                                                                                                                                                                                                                                                                                             | Givros                                                                                                                                                               | CNR Virus des Infections Respiratoires - France SUD                                                                                                | Antonin Bal; Bruno Lina; Gregory Destras; Gwendolynne Burfin; Hadrien Regue; Laurence Josset; Martine Valette; Quentin Semanas                                                                                                                                                                                                                                                                                                                                                                                                |
| EPI_ISL_1233922 to 1233923                                                                                                                                                                                                                                                                                                                                                                                                                                                                                                                                                                                                                                                                                                                                                                                                                                                                                  | Gonoshasthaya-RNA Research Center, Gonoshasthaya-RNA Molecular Diagnostics and Research Center                                                                       | Gonoshasthaya-RNA Research Center, Gonoshasthaya-RNA Molecular Diagnostics and Research Center                                                     | Adnan, N.; Ahmed; Akter, S.; Ali, T.; Azmuda, N.; Chaity, M.; Haq; Jahan, N.; Jamiruddin; Jamiruddin, M.; Khandker; Khondoker; Liza; M.A.; M.F.; M.R.; M.U.; Marzan, M.; Mou; Nahar, S.; Oishee, M.; S.M.; S.S.; Sharif, N.; Sharmin, S.; T.J.                                                                                                                                                                                                                                                                                |
| EPI_ISL_1181354 to 1181355, EPI_ISL_1181379 to 1181380, EPI_ISL_1181408, EPI_ISL_1181419, EPI_ISL_1181424, EPI_ISL_1181429, EPI_ISL_1181440 to 1181441, EPI_ISL_1181444 to 1181445, EPI_ISL_1181449, EPI_ISL_1181484 to 1181485, EPI_ISL_1219136                                                                                                                                                                                                                                                                                                                                                                                                                                                                                                                                                                                                                                                            | Gonçalo Moniz Institute, FIOCRUZ, Bahia                                                                                                                              | Laboratory of Respiratory Viruses and Measles, Oswaldo Cruz Institute, FIOCRUZ                                                                     | Alice Sampaio Rocha; Ana Carolina Mendonca; Anna Carolina Paixao; Fernando Motta; Luciana Apolinario; Marilda Siqueira on behalf of the Fiocruz COVID-19 Genomic Surveillance Network; Paola Resende; Renata Serrano Lopes; Ricardo Khouri; Tiago Graf                                                                                                                                                                                                                                                                        |
| see above                                                                                                                                                                                                                                                                                                                                                                                                                                                                                                                                                                                                                                                                                                                                                                                                                                                                                                   | Gonçalo Moniz Institute, FIOCRUZ, Bahia                                                                                                                              | Laboratory of Respiratory Viruses and Measles, Oswaldo Cruz Institute, FIOCRUZ                                                                     | Alice Sampaio Rocha; Ana Carolina Mendonca; Anna Carolina Paixao; Fernando Motta; Luciana Apolinario; Marilda Siqueira on behalf of the Fiocruz COVID-19 Genomic Surveillance Network; Paola Resende; Renata Serrano Lopes; Ricardo Khouri; Tiago Graf                                                                                                                                                                                                                                                                        |
| EPI_ISL_1225330 to 1225583                                                                                                                                                                                                                                                                                                                                                                                                                                                                                                                                                                                                                                                                                                                                                                                                                                                                                  | Gorgas Memorial Laboratory of Health Studies                                                                                                                         | Gorgas Memorial Laboratory of Health Studies                                                                                                       | Adriana Weeden; Alejandra Valoy; Alexander Martinez; Ambar Moreno; Anyuri Ortiz; Brechla Moreno; Claudia Gonzalez; Daniel Castillo; Danilo Franco; Davis Beltran; Dimelza Arauz; Elimelec Valdespino; Gretel Vasquez; Ilka Guerra; Isela Guerrero; Jessica Gondola; Jim Chang; Juan Miguel Pascale; Layda Abrego; Lisseth Saenz; Mabel Martinez-Montero; Maria Chen-German; Marlene Castillo; Melissa Gaitan; Oris Chavarria; Rita Corrales; Rita Rodriguez; Sandra Lopez-Verges; Yamilka Diaz; Yaneth Pitti; Zumara Chaverra |
| EPI_ISL_1001457                                                                                                                                                                                                                                                                                                                                                                                                                                                                                                                                                                                                                                                                                                                                                                                                                                                                                             | Gorgas memorial Institute For Health Studies                                                                                                                         | Gorgas memorial Institute For Health Studies                                                                                                       | Arauz D; Castillo D; Castillo M; Chavarria O; Diaz Y; Franco D; Gaitan M; Gondola J; González C; Lopez-Verges S.; Martinez AA; Moreno A; Moreno B; Pitti Y; Saenz L                                                                                                                                                                                                                                                                                                                                                           |
| EPI_ISL_1001458                                                                                                                                                                                                                                                                                                                                                                                                                                                                                                                                                                                                                                                                                                                                                                                                                                                                                             | Gorgas memorial Institute for Health Studies                                                                                                                         | Gorgas memorial Institute for Health Studies                                                                                                       | Arauz D; Castillo D; Castillo M; Chavarria O; Diaz Y; Franco D; Gaitan M; Gondola J; González C; Lopez-Verges S.; Martinez AA; Moreno A; Moreno B; Pitti Y; Saenz L                                                                                                                                                                                                                                                                                                                                                           |
| EPI_ISL_1258459 to 1258462                                                                                                                                                                                                                                                                                                                                                                                                                                                                                                                                                                                                                                                                                                                                                                                                                                                                                  | Gorj County Directorate of Public Health                                                                                                                             | National Institute of Infectious Diseases-Prof. Dr. Matei Bals Molecular Diagnostics Laboratory                                                    | Corina Casangiu; Dan Otelea; Ionelia Nicolae; Leontina Banica; Marius Surfeac; Ovidiu Vlaicu; Simona Paraschiv                                                                                                                                                                                                                                                                                                                                                                                                                |
| EPI_ISL_1159385                                                                                                                                                                                                                                                                                                                                                                                                                                                                                                                                                                                                                                                                                                                                                                                                                                                                                             | Graha Medika Maternity Hospital                                                                                                                                      | Institute of Tropical Disease, Universitas Airlangga                                                                                               | Aldise M Nastri; Diah R Kusumawati; Gatot Soegiarto; Jezzy R Dewantari; Kazufumi Shimizu; Krisnodi Rahardjo; Laksmi Wulandari; Maria I Lusida; Resti Yudhawati; Rima R Prasetya; Soetjipto; Yasuko Mori                                                                                                                                                                                                                                                                                                                       |
| EPI_ISL_1302685 to 1302686, EPI_ISL_1302694 to 1302697, EPI_ISL_1302699 to 1302700, EPI_ISL_1302708 to 1302716, EPI_ISL_1312344 to 1312345, EPI_ISL_1312354 to 1312363, EPI_ISL_1314168 to 1314169, EPI_ISL_1314178 to 1314189, EPI_ISL_1314198 to 1314207                                                                                                                                                                                                                                                                                                                                                                                                                                                                                                                                                                                                                                                  | Gravity Diagnostics                                                                                                                                                  | Kentucky State Public Health Lab                                                                                                                   | Joshua Tobias; Karim George; Matthew Johnson; Rachel Zinner; Rhonda Lucas; Stephanie Lunn; Vaneet Arora; William Grooms                                                                                                                                                                                                                                                                                                                                                                                                       |
| see above                                                                                                                                                                                                                                                                                                                                                                                                                                                                                                                                                                                                                                                                                                                                                                                                                                                                                                   | Gravity Diagnostics                                                                                                                                                  | Kentucky State Public Health Lab                                                                                                                   | Joshua Tobias; Karim George; Matthew Johnson; Rachel Zinner; Rhonda Lucas; Stephanie Lunn; Vaneet Arora; William Grooms                                                                                                                                                                                                                                                                                                                                                                                                       |
| EPI_ISL_1040644 to 1040646, EPI_ISL_1040648 to 1040654, EPI_ISL_1040656 to 1040661, EPI_ISL_1040663, EPI_ISL_1040668, EPI_ISL_1040672 to 1040673, EPI_ISL_1040676, EPI_ISL_1040683 to 1040687, EPI_ISL_1040689 to 1040693, EPI_ISL_1040696 to 1040700, EPI_ISL_1040704 to 1040708, EPI_ISL_1040711, EPI_ISL_1040714, EPI_ISL_1040716, EPI_ISL_1040720, EPI_ISL_1040722 to 1040723, EPI_ISL_1040725 to 1040729, EPI_ISL_1040731, EPI_ISL_1040733, EPI_ISL_1040735, EPI_ISL_1040738, EPI_ISL_1040745, EPI_ISL_1040747 to 1040748, EPI_ISL_1040750 to 1040756, EPI_ISL_1040758 to 1040759, EPI_ISL_1040763, EPI_ISL_1040765, EPI_ISL_1040767 to 1040768, EPI_ISL_1040781 to 1040783, EPI_ISL_1040785 to 1040787, EPI_ISL_1040789, EPI_ISL_1040795 to 1040796, EPI_ISL_1040800 to 1040802, EPI_ISL_1040804, EPI_ISL_1040807 to 1040808, EPI_ISL_1040811 to 1040813, EPI_ISL_1040815 to 1040818, EPI_ISL_1040822 | Groote Schuur Hospital wc GSH                                                                                                                                        | NHLs/UCT                                                                                                                                           | Arash Iranzadeh; Bruna Galvao; Carolyn Williamson; Deelan Doolabh; Diana Hardie; Innocent Mudau; Kruger Marais; Lynn Tyers; Marvin Hsiao; Stephen Korsman                                                                                                                                                                                                                                                                                                                                                                     |
| see above                                                                                                                                                                                                                                                                                                                                                                                                                                                                                                                                                                                                                                                                                                                                                                                                                                                                                                   | Groote Schuur Hospital wc GSH                                                                                                                                        | NHLs/UCT                                                                                                                                           | Arash Iranzadeh; Bruna Galvao; Carolyn Williamson; Deelan Doolabh; Diana Hardie; Innocent Mudau; Kruger Marais; Lynn Tyers; Marvin Hsiao; Stephen Korsman                                                                                                                                                                                                                                                                                                                                                                     |
| EPI_ISL_1259282 to 1259283                                                                                                                                                                                                                                                                                                                                                                                                                                                                                                                                                                                                                                                                                                                                                                                                                                                                                  | Group for molecular genetics of pathogens                                                                                                                            | Group for molecular genetics of pathogens                                                                                                          | Anna S. Gladkikh; Areg A.Totolian; Ekaterina A. Goncharova; Valerya A. Sbarzaglia; Vladimir G. Dedkov                                                                                                                                                                                                                                                                                                                                                                                                                         |
| EPI_ISL_1085422 to 1085423, EPI_ISL_1085426, EPI_ISL_1085429 to 1085432, EPI_ISL_1085434, EPI_ISL_1085437, EPI_ISL_1085439, EPI_ISL_1085442, EPI_ISL_1085444 to 1085446, EPI_ISL_1085448, EPI_ISL_1085450, EPI_ISL_1085456 to 1085460, EPI_ISL_1085462 to 1085471, EPI_ISL_1085479 to 1085496, EPI_ISL_1085498, EPI_ISL_1085502 to 1085503, EPI_ISL_1085514, EPI_ISL_1085517, EPI_ISL_1085523 to 1085524, EPI_ISL_1085549, EPI_ISL_1085572, EPI_ISL_1085595, EPI_ISL_1085622, EPI_ISL_1085844 to 1085845, EPI_ISL_1085878, EPI_ISL_1085907, EPI_ISL_1088560, EPI_ISL_1088564, EPI_ISL_1088567 to 1088571, EPI_ISL_1110142 to 1110150, EPI_ISL_1110176                                                                                                                                                                                                                                                       | Groupe LCD                                                                                                                                                           | Department of Virology, Henri Mondor University Hospital, Assistance Publique Hôpitaux de Paris, Université Paris-Est Créteil, INSERM U955         | Alexandre Soulier; Christophe Rodriguez; Elisabeth Trawinski; Guillaume Gricourt; Jean-Michel Pawlitosky; Melissa N'Debi; Slim Fourati; Vanessa Demontant                                                                                                                                                                                                                                                                                                                                                                     |
| see above                                                                                                                                                                                                                                                                                                                                                                                                                                                                                                                                                                                                                                                                                                                                                                                                                                                                                                   | Groupe LCD                                                                                                                                                           | Department of Virology, Henri Mondor University Hospital, Assistance Publique Hôpitaux de Paris, Université Paris-Est Créteil, INSERM U955         | Alexandre Soulier; Christophe Rodriguez; Elisabeth Trawinski; Guillaume Gricourt; Jean-Michel Pawlitosky; Melissa N'Debi; Slim Fourati; Vanessa Demontant                                                                                                                                                                                                                                                                                                                                                                     |
| EPI_ISL_1039001 to 1039007, EPI_ISL_1091882, EPI_ISL_1168736, EPI_ISL_1225677, EPI_ISL_1293217, EPI_ISL_1378726, EPI_ISL_1378753, EPI_ISL_1378830 to 1378832                                                                                                                                                                                                                                                                                                                                                                                                                                                                                                                                                                                                                                                                                                                                                | Grubaugh Lab - Yale School of Public Health                                                                                                                          | Grubaugh Lab - Yale School of Public Health                                                                                                        | Anderson Brito; Anne Wylie; Annie Watkins; Chaney Kalinich; Chantal Vogels; Isabel Ott; Isabell Ott; Jessica Rothman; Joseph Fauver; Mallory Breban; Marie L. Landry; Mary Petrone; Nathan Grubaugh; Tara Alpert                                                                                                                                                                                                                                                                                                              |
| see above                                                                                                                                                                                                                                                                                                                                                                                                                                                                                                                                                                                                                                                                                                                                                                                                                                                                                                   | Grubaugh Lab - Yale School of Public Health                                                                                                                          | Grubaugh Lab - Yale School of Public Health                                                                                                        | Anderson Brito; Anne Wylie; Annie Watkins; Chaney Kalinich; Chantal Vogels; Isabel Ott; Isabell Ott; Jessica Rothman; Joseph Fauver; Mallory Breban; Marie L. Landry; Mary Petrone; Nathan Grubaugh; Tara Alpert                                                                                                                                                                                                                                                                                                              |
| EPI_ISL_1123373                                                                                                                                                                                                                                                                                                                                                                                                                                                                                                                                                                                                                                                                                                                                                                                                                                                                                             | Grupo Tecnico de Vigilancia Sanitaria e Epidemiologica                                                                                                               | Instituto Adolfo Lutz, Interdisciplinary Procedures Center, Strategic Laboratory                                                                   | Caio Vinicius Dias Lopes; Claudia Regina Gonçalves; Claudio Tavares Sacchi; Erica Valessa Ramos Gomes; Karoline Rodrigues Campos                                                                                                                                                                                                                                                                                                                                                                                              |
| EPI_ISL_1040921 to 1040926                                                                                                                                                                                                                                                                                                                                                                                                                                                                                                                                                                                                                                                                                                                                                                                                                                                                                  | Grupo de Investigación en Enfermedades Tropicales del Ejército (GINETEJ), Laboratorio de Referencia e Investigación, Dirección de Sanidad Ejército, Bogotá, Colombia | Centro de Investigaciones en Microbiología y Biotecnología-UR (CIMBIUR), Facultad de Ciencias Naturales, Universidad del Rosario, Bogotá, Colombia | Alberto Paniz-Mondolfi; Camilo Correa-Cardenas; Carlos A. Rincón; Claudia P. Mendez; Elizabeth K. Marquez; Frank de los Santos Ortiz; Juan David Ramírez; Julie J. Perez; Luz H. Patiño; Magda C. Oliveros; Maria C. Duque; Marina Muñoz; Nathalia Ballesteros; Sergio Castañeda                                                                                                                                                                                                                                              |
| EPI_ISL_1273048 to 1273073                                                                                                                                                                                                                                                                                                                                                                                                                                                                                                                                                                                                                                                                                                                                                                                                                                                                                  | Guam Public Health Laboratory                                                                                                                                        | Centers for Disease Control and Prevention Division of Viral Diseases, Pathogen Discovery                                                          | Anna Montmayeur; Anna Uehara; Ben L. Rambo-Martin; Clinton R. Paden; Dhvani Batra; Haibin Wang; Jasmine Padilla; Jing Zhang; Justin Lee; Katie Dillon; Krista Queen; Kristen Knipe; Kristine Lacey; Lori Rowe; Mark Burroughs; Matthew Schmerer; Mili Sheth; Peter W. Cook; Rachel Marine; Sam Shepard; Sarah Nobles; Shoshona Le; Suxiang Tong; Yan Li; Ying Tao                                                                                                                                                             |
| EPI_ISL_1040761                                                                                                                                                                                                                                                                                                                                                                                                                                                                                                                                                                                                                                                                                                                                                                                                                                                                                             | Guguletu CHC                                                                                                                                                         | NHLs/UCT                                                                                                                                           | Arash Iranzadeh; Bruna Galvao; Carolyn Williamson; Deelan Doolabh; Diana Hardie; Innocent Mudau; Kruger Marais; Lynn Tyers; Marvin Hsiao; Stephen Korsman                                                                                                                                                                                                                                                                                                                                                                     |
| EPI_ISL_1040666 to 1040667, EPI_ISL_1040669, EPI_ISL_1040671, EPI_ISL_1040675, EPI_ISL_1040678, EPI_ISL_1040710, EPI_ISL_1040713, EPI_ISL_1040715, EPI_ISL_1040718, EPI_ISL_1040721, EPI_ISL_1040724, EPI_ISL_1040732, EPI_ISL_1040734, EPI_ISL_1040793, EPI_ISL_1040805                                                                                                                                                                                                                                                                                                                                                                                                                                                                                                                                                                                                                                    | Guguletu CHC wc GDH                                                                                                                                                  | NHLs/UCT                                                                                                                                           | Arash Iranzadeh; Bruna Galvao; Carolyn Williamson; Deelan Doolabh; Diana Hardie; Innocent Mudau; Kruger Marais; Lynn Tyers; Marvin Hsiao; Stephen Korsman                                                                                                                                                                                                                                                                                                                                                                     |
| see above                                                                                                                                                                                                                                                                                                                                                                                                                                                                                                                                                                                                                                                                                                                                                                                                                                                                                                   | Guguletu CHC wc GDH                                                                                                                                                  | NHLs/UCT                                                                                                                                           | Arash Iranzadeh; Bruna Galvao; Carolyn Williamson; Deelan Doolabh; Diana Hardie; Innocent Mudau; Kruger Marais; Lynn Tyers; Marvin Hsiao; Stephen Korsman                                                                                                                                                                                                                                                                                                                                                                     |
| EPI_ISL_1113182 to 1113185, EPI_ISL_1366614 to 1366653, EPI_ISL_1382118 to 1382144                                                                                                                                                                                                                                                                                                                                                                                                                                                                                                                                                                                                                                                                                                                                                                                                                          | Gundersen Clinical Microbiology Laboratory                                                                                                                           | Kabara Cancer Research Institute                                                                                                                   | Craig S. Richmond; Paraic A. Kenny                                                                                                                                                                                                                                                                                                                                                                                                                                                                                            |
| EPI_ISL_1113176 to 1113181, EPI_ISL_1113186 to 1113225, EPI_ISL_1239453 to 1239457                                                                                                                                                                                                                                                                                                                                                                                                                                                                                                                                                                                                                                                                                                                                                                                                                          | Gundersen Molecular Diagnostics Laboratory                                                                                                                           | Kabara Cancer Research Institute                                                                                                                   | Craig S. Richmond; Paraic A. Kenny                                                                                                                                                                                                                                                                                                                                                                                                                                                                                            |
| EPI_ISL_1257796 to 1257811                                                                                                                                                                                                                                                                                                                                                                                                                                                                                                                                                                                                                                                                                                                                                                                                                                                                                  | Gunma Prefectural Institute of Public Health and Environmental Sciences                                                                                              | Gunma Prefectural Institute of Public Health and Environmental Sciences                                                                            | Daisuke Shinoda; Hiroyuki Tsukagoshi; Kentaro Itokawa; Makoto Kuroda; Mariko Saito; Masanori Hashino; Rina Tanaka; Tsuyoshi Sekizuka                                                                                                                                                                                                                                                                                                                                                                                          |

|                                                                                                                                                                                                                                                                                                                                                                                                                                                                                                                                                                                                                                                                                                                                                                                                                                                                                                                                                                                                                                                                                                                                                                                                                                                                                                                                                                                         |           |                                                                         |                                                                                                                                        |                                                                                                                                                                                                                                                                                                                                                                   |
|-----------------------------------------------------------------------------------------------------------------------------------------------------------------------------------------------------------------------------------------------------------------------------------------------------------------------------------------------------------------------------------------------------------------------------------------------------------------------------------------------------------------------------------------------------------------------------------------------------------------------------------------------------------------------------------------------------------------------------------------------------------------------------------------------------------------------------------------------------------------------------------------------------------------------------------------------------------------------------------------------------------------------------------------------------------------------------------------------------------------------------------------------------------------------------------------------------------------------------------------------------------------------------------------------------------------------------------------------------------------------------------------|-----------|-------------------------------------------------------------------------|----------------------------------------------------------------------------------------------------------------------------------------|-------------------------------------------------------------------------------------------------------------------------------------------------------------------------------------------------------------------------------------------------------------------------------------------------------------------------------------------------------------------|
| EPI_ISL_1123435, EPI_ISL_1123437, EPI_ISL_1123451 to 1123452, EPI_ISL_1123467, EPI_ISL_1123525, EPI_ISL_1123527, EPI_ISL_1123529, EPI_ISL_1123531 to 1123532, EPI_ISL_1123534, EPI_ISL_1123536, EPI_ISL_1123538, EPI_ISL_1123540 to 1123541, EPI_ISL_1123543, EPI_ISL_1123545, EPI_ISL_1123547 to 1123548, EPI_ISL_1123550, EPI_ISL_1123552 to 1123553, EPI_ISL_1123555, EPI_ISL_1123557, EPI_ISL_1123559, EPI_ISL_1123561, EPI_ISL_1123563 to 1123564, EPI_ISL_1123566, EPI_ISL_1123568, EPI_ISL_1123570, EPI_ISL_1123572, EPI_ISL_1123574, EPI_ISL_1123576 to 1123577, EPI_ISL_1123579, EPI_ISL_1123581, EPI_ISL_1123583 to 1123584, EPI_ISL_1123586, EPI_ISL_1123588, EPI_ISL_1123590 to 1123591, EPI_ISL_1123593, EPI_ISL_1123595, EPI_ISL_1123597, EPI_ISL_1123599, EPI_ISL_1123601 to 1123602, EPI_ISL_1123604, EPI_ISL_1123606, EPI_ISL_1123608 to 1123609, EPI_ISL_1123611, EPI_ISL_1123613, EPI_ISL_1123615, EPI_ISL_1123617 to 1123618, EPI_ISL_1123620, EPI_ISL_1123622, EPI_ISL_1123624, EPI_ISL_1123626 to 1123627, EPI_ISL_1123629, EPI_ISL_1123631 to 1123632, EPI_ISL_1123634, EPI_ISL_1123636 to 1123637, EPI_ISL_1123639, EPI_ISL_1123641, EPI_ISL_1123643, EPI_ISL_1123645 to 1123646, EPI_ISL_1123648, EPI_ISL_1123650 to 1123651, EPI_ISL_1123653, EPI_ISL_1123655, EPI_ISL_1123657, EPI_ISL_1123659 to 1123660, EPI_ISL_1123662, EPI_ISL_1123664, EPI_ISL_1123666 | see above | Gunma Prefectural Institute of Public Health and Environmental Sciences | Pathogen Genomics Center, National Institute of Infectious Diseases                                                                    | Kentaro Itokawa; Makoto Kuroda; Masanori Hashino; Rina Tanaka; Tsuyoshi Sekizuka                                                                                                                                                                                                                                                                                  |
| EPI_ISL_1069185                                                                                                                                                                                                                                                                                                                                                                                                                                                                                                                                                                                                                                                                                                                                                                                                                                                                                                                                                                                                                                                                                                                                                                                                                                                                                                                                                                         |           | H.M. Corachea General Hospital                                          | Research Institute for Tropical Medicine                                                                                               | Catalino Demetria; Daria Manalo; Edelwisa Mercado; Francisco Gerardo Polotan; Hannah Leah Morito; Inez Andrea Medado; John Leonard Chan; Joseph Hughes; Kirstyn Brunker; Ma Angelica Tujan; Othoniel Jan Onza                                                                                                                                                     |
| EPI_ISL_1084739, EPI_ISL_1172014 to 1172017                                                                                                                                                                                                                                                                                                                                                                                                                                                                                                                                                                                                                                                                                                                                                                                                                                                                                                                                                                                                                                                                                                                                                                                                                                                                                                                                             |           | HC_FMUSP                                                                | Laboratório de Parasitologia Médica - Instituto de Medicina Tropical - Universidade de São Paulo                                       | Brazil-UK Centre for Arbovirus Discovery Diagnosis Genomics and Epidemiology (CADDE) Genomic Network - Instituto de Medicina Tropical                                                                                                                                                                                                                             |
| EPI_ISL_1039124 to 1039137, EPI_ISL_1372318 to 1372399                                                                                                                                                                                                                                                                                                                                                                                                                                                                                                                                                                                                                                                                                                                                                                                                                                                                                                                                                                                                                                                                                                                                                                                                                                                                                                                                  |           | HELIX LLC                                                               | WHO National Influenza Centre Russian Federation                                                                                       | Andrey Komissarov; Anna Ivanova; Artem Fadeev; Daria Danilenko; Dmitry Bazhenov; Dmitry Lioznov; Elena Nabieva; Georgii Bazykin; Kseniya Safina; Kseniya Komissarova; Maria Pisareva; Maria Timofeeva; Tamila Musaeva; Veronika Eder                                                                                                                              |
| EPI_ISL_1117779, EPI_ISL_1117791 to 1117792, EPI_ISL_1117797, EPI_ISL_1117800 to 1117801, EPI_ISL_1117806, EPI_ISL_1117808, EPI_ISL_1117831 to 1117833, EPI_ISL_1117870 to 1117872, EPI_ISL_1117882 to 1117885, EPI_ISL_1117919 to 1117920, EPI_ISL_1117922, EPI_ISL_1117928 to 1117936, EPI_ISL_1117951 to 1118028, EPI_ISL_1118081 to 1118082, EPI_ISL_1180715 to 1180751                                                                                                                                                                                                                                                                                                                                                                                                                                                                                                                                                                                                                                                                                                                                                                                                                                                                                                                                                                                                             | see above | HG Pharma GmbH                                                          | Bergthaler laboratory, CeMM Research Center for Molecular Medicine of the Austrian Academy of Sciences                                 | Andreas Bergthaler; Anna Schedl; Bekir Erguner; Benedikt Agerer; Christoph Bock; Fabian Amman; Jan Laine; Lukas Endler; Maelle Le Moing; Martin Senekowitsch; Michael Schuster; Thomas Penz                                                                                                                                                                       |
| EPI_ISL_1272638 to 1272652                                                                                                                                                                                                                                                                                                                                                                                                                                                                                                                                                                                                                                                                                                                                                                                                                                                                                                                                                                                                                                                                                                                                                                                                                                                                                                                                                              |           | HI Dept. of Health, State Laboratories Division                         | Centers for Disease Control and Prevention Division of Viral Diseases, Pathogen Discovery                                              | Anna Montmayeur; Anna Uehara; Ben L. Rambo-Martin; Clinton R. Paden; Dhvani Batra; Haibin Wang; Jasmine Padilla; Jing Zhang; Justin Lee; Katie Dillon; Krista Queen; Kristen Knipe; Kristine Lacey; Lori Rowe; Mark Burroughs; Matthew Schmerer; Mili Sheth; Peter W. Cook; Rachel Marine; Sam Shepard; Sarah Nobles; Shoshona Le; Suxiang Tong; Yan Li; Ying Tao |
| EPI_ISL_1094198, EPI_ISL_1094209, EPI_ISL_1094221, EPI_ISL_1094276, EPI_ISL_1094772 to 1094775                                                                                                                                                                                                                                                                                                                                                                                                                                                                                                                                                                                                                                                                                                                                                                                                                                                                                                                                                                                                                                                                                                                                                                                                                                                                                          |           | HI Dept. of Health, State Laboratories Division                         | Respiratory Viruses Branch, Division of Viral Diseases, Centers for Disease Control and Prevention                                     | Anna Montmayeur; Anna Uehara; Ben L. Rambo-Martin; Clinton R. Paden; Dhvani Batra; Haibin Wang; Jasmine Padilla; Jing Zhang; Justin Lee; Krista Queen; Lori Rowe; Mark Burroughs; Mili Sheth; Peter W. Cook; Rachel Marine; Sarah Nobles; Suxiang Tong; Yan Li; Ying Tao                                                                                          |
| EPI_ISL_1371895                                                                                                                                                                                                                                                                                                                                                                                                                                                                                                                                                                                                                                                                                                                                                                                                                                                                                                                                                                                                                                                                                                                                                                                                                                                                                                                                                                         |           | HIA SAINTE ANNE                                                         | CNR Virus des Infections Respiratoires - France SUD                                                                                    | Antonin Bal; Bruno Lina; Gregory Destras; Gwendolynne Burfin; Hadrien Regue; Laurence Josset; Martine Valette; Quentin Semanas                                                                                                                                                                                                                                    |
| EPI_ISL_1007590, EPI_ISL_1007641, EPI_ISL_1370102, EPI_ISL_1370104, EPI_ISL_1370107, EPI_ISL_1370154                                                                                                                                                                                                                                                                                                                                                                                                                                                                                                                                                                                                                                                                                                                                                                                                                                                                                                                                                                                                                                                                                                                                                                                                                                                                                    |           | HIB                                                                     | Laboratory of genomics and metagenomics, Institute of Microbiology, University Hospital Centre and University of Lausanne, Switzerland | Claire Bertelli; Damien Jacot; Gilbert Greub; Sébastien Aeby; Trestan Pillonel                                                                                                                                                                                                                                                                                    |
| EPI_ISL_1170956                                                                                                                                                                                                                                                                                                                                                                                                                                                                                                                                                                                                                                                                                                                                                                                                                                                                                                                                                                                                                                                                                                                                                                                                                                                                                                                                                                         |           | HIV Molecular Lab, Ethiopian Public Health Institute                    | HIV Molecular Lab                                                                                                                      | A.G.; Abichu, G.; Ahyong, V.; D. and Tato, C.; Damena, D.; Detweiler, A.; Fahsbender, E.; Gutema, G.; Kalantar, K.; Kidane, E.; Leta; Neff, N.; S.K.; Tan, M.; Tessema; Vanaerschot, M.; Weldemariam                                                                                                                                                              |
| EPI_ISL_1169919                                                                                                                                                                                                                                                                                                                                                                                                                                                                                                                                                                                                                                                                                                                                                                                                                                                                                                                                                                                                                                                                                                                                                                                                                                                                                                                                                                         |           | HIV Molecular Laboratory, Ethiopian Public Health Institute             | HIV Molecular Laboratory, Ethiopian Public Health Institute                                                                            | A.G.; Abichu, G.; Ahyong, V.; D. and Tato, C.; Damena, D.; Detweiler, A.; Fahsbender, E.; Gutema, G.; Kalantar, K.; Kidane, E.; Leta; Neff, N.; S.K.; Tan, M.; Tessema; Vanaerschot, M.; Weldemariam                                                                                                                                                              |
| EPI_ISL_1170958                                                                                                                                                                                                                                                                                                                                                                                                                                                                                                                                                                                                                                                                                                                                                                                                                                                                                                                                                                                                                                                                                                                                                                                                                                                                                                                                                                         |           | HIV Molecular Laboratory, Ethiopian Public Health Institute, Ethiopia   | HIV molecular lab, Ethiopian Public Health Institute, Ethiopian                                                                        | A.G.; Abichu, G.; Ahyong, V.; D. and Tato, C.; Damena, D.; Detweiler, A.; Fahsbender, E.; Gutema, G.; Kalantar, K.; Kidane, E.; Leta; Neff, N.; S.K.; Tan, M.; Tessema; Vanaerschot, M.; Weldemariam                                                                                                                                                              |
| EPI_ISL_1170957                                                                                                                                                                                                                                                                                                                                                                                                                                                                                                                                                                                                                                                                                                                                                                                                                                                                                                                                                                                                                                                                                                                                                                                                                                                                                                                                                                         |           | HIV Molecular laboratory, Ethiopian Public Health Institute             | HIV Molecular Laboratory                                                                                                               | A.G.; Abichu, G.; Ahyong, V.; D. and Tato, C.; Damena, D.; Detweiler, A.; Fahsbender, E.; Gutema, G.; Kalantar, K.; Kidane, E.; Leta; Neff, N.; S.K.; Tan, M.; Tessema; Vanaerschot, M.; Weldemariam                                                                                                                                                              |
| EPI_ISL_1359979, EPI_ISL_1359998                                                                                                                                                                                                                                                                                                                                                                                                                                                                                                                                                                                                                                                                                                                                                                                                                                                                                                                                                                                                                                                                                                                                                                                                                                                                                                                                                        |           | HOPITAL SCHWEITZER                                                      | CNR Virus des Infections Respiratoires - France SUD                                                                                    | Antonin Bal; Bruno Lina; Gregory Destras; Gwendolynne Burfin; Hadrien Regue; Laurence Josset; Martine Valette; Quentin Semanas                                                                                                                                                                                                                                    |
| EPI_ISL_1359936 to 1359937                                                                                                                                                                                                                                                                                                                                                                                                                                                                                                                                                                                                                                                                                                                                                                                                                                                                                                                                                                                                                                                                                                                                                                                                                                                                                                                                                              |           | HOPITAL DE RAMBOUILLET                                                  | CNR Virus des Infections Respiratoires - France SUD                                                                                    | Antonin Bal; Bruno Lina; Gregory Destras; Gwendolynne Burfin; Hadrien Regue; Laurence Josset; Martine Valette; Quentin Semanas                                                                                                                                                                                                                                    |
| EPI_ISL_1336646, EPI_ISL_1336648                                                                                                                                                                                                                                                                                                                                                                                                                                                                                                                                                                                                                                                                                                                                                                                                                                                                                                                                                                                                                                                                                                                                                                                                                                                                                                                                                        |           | HOPITAL EUROPEEN MARSEILLE 3                                            | CNR Virus des Infections Respiratoires - France SUD                                                                                    | Antonin Bal; Bruno Lina; Gregory Destras; Gwendolynne Burfin; Hadrien Regue; Laurence Josset; Martine Valette; Quentin Semanas                                                                                                                                                                                                                                    |
| EPI_ISL_1239447                                                                                                                                                                                                                                                                                                                                                                                                                                                                                                                                                                                                                                                                                                                                                                                                                                                                                                                                                                                                                                                                                                                                                                                                                                                                                                                                                                         |           | HOPITAL MARIN HENDAYE                                                   | CNR Virus des Infections Respiratoires - France SUD                                                                                    | Antonin Bal; Bruno Lina; Gregory Destras; Gwendolynne Burfin; Hadrien Regue; Laurence Josset; Martine Valette; Quentin Semanas                                                                                                                                                                                                                                    |
| EPI_ISL_1313712, EPI_ISL_1359994                                                                                                                                                                                                                                                                                                                                                                                                                                                                                                                                                                                                                                                                                                                                                                                                                                                                                                                                                                                                                                                                                                                                                                                                                                                                                                                                                        |           | HOPITAL NORD OUEST - CH VILLEFRANCHE                                    | CNR Virus des Infections Respiratoires - France SUD                                                                                    | Antonin Bal; Bruno Lina; Gregory Destras; Gwendolynne Burfin; Hadrien Regue; Laurence Josset; Martine Valette; Quentin Semanas                                                                                                                                                                                                                                    |
| EPI_ISL_1253543, EPI_ISL_1359969                                                                                                                                                                                                                                                                                                                                                                                                                                                                                                                                                                                                                                                                                                                                                                                                                                                                                                                                                                                                                                                                                                                                                                                                                                                                                                                                                        |           | HOPITAL NOTRE-DAME LA MISERICORDE                                       | CNR Virus des Infections Respiratoires - France SUD                                                                                    | Antonin Bal; Bruno Lina; Gregory Destras; Gwendolynne Burfin; Hadrien Regue; Laurence Josset; Martine Valette; Quentin Semanas                                                                                                                                                                                                                                    |
| EPI_ISL_1336649                                                                                                                                                                                                                                                                                                                                                                                                                                                                                                                                                                                                                                                                                                                                                                                                                                                                                                                                                                                                                                                                                                                                                                                                                                                                                                                                                                         |           | HOPITAL PRINCESSE GRACE                                                 | CNR Virus des Infections Respiratoires - France SUD                                                                                    | Antonin Bal; Bruno Lina; Gregory Destras; Gwendolynne Burfin; Hadrien Regue; Laurence Josset; Martine Valette; Quentin Semanas                                                                                                                                                                                                                                    |
| EPI_ISL_1200838 to 1200842, EPI_ISL_1200844 to 1200846, EPI_ISL_1200848, EPI_ISL_1200851, EPI_ISL_1200853, EPI_ISL_1200855 to 1200859, EPI_ISL_1201852, EPI_ISL_1241876, EPI_ISL_1265467, EPI_ISL_1265479                                                                                                                                                                                                                                                                                                                                                                                                                                                                                                                                                                                                                                                                                                                                                                                                                                                                                                                                                                                                                                                                                                                                                                               | see above | HOPITAL SAINT ANDRE                                                     | CNR Virus des Infections Respiratoires - France SUD                                                                                    | Antonin Bal; Bruno Lina; Gregory Destras; Gwendolynne Burfin; Hadrien Regue; Laurence Josset; Martine Valette; Quentin Semanas                                                                                                                                                                                                                                    |
| EPI_ISL_1191681 to 1191682, EPI_ISL_1191705, EPI_ISL_1191722 to 1191725, EPI_ISL_1265464, EPI_ISL_1265477, EPI_ISL_1265486, EPI_ISL_1265494, EPI_ISL_1265500, EPI_ISL_1265546, EPI_ISL_1265608 to 1265609, EPI_ISL_1359964, EPI_ISL_1359968, EPI_ISL_1359971, EPI_ISL_1359977, EPI_ISL_1360026 to 1360029                                                                                                                                                                                                                                                                                                                                                                                                                                                                                                                                                                                                                                                                                                                                                                                                                                                                                                                                                                                                                                                                               | see above | HOPITAL UNIVERSITAIRE DE FORT DE FRANCE                                 | CNR Virus des Infections Respiratoires - France SUD                                                                                    | Antonin Bal; Bruno Lina; Gregory Destras; Gwendolynne Burfin; Hadrien Regue; Laurence Josset; Martine Valette; Quentin Semanas                                                                                                                                                                                                                                    |
| EPI_ISL_1336608                                                                                                                                                                                                                                                                                                                                                                                                                                                                                                                                                                                                                                                                                                                                                                                                                                                                                                                                                                                                                                                                                                                                                                                                                                                                                                                                                                         |           | HOPITAUX DROME NORD                                                     | CNR Virus des Infections Respiratoires - France SUD                                                                                    | Antonin Bal; Bruno Lina; Gregory Destras; Gwendolynne Burfin; Hadrien Regue; Laurence Josset; Martine Valette; Quentin Semanas                                                                                                                                                                                                                                    |
| EPI_ISL_1322349 to 1322350, EPI_ISL_1371797 to 1371799                                                                                                                                                                                                                                                                                                                                                                                                                                                                                                                                                                                                                                                                                                                                                                                                                                                                                                                                                                                                                                                                                                                                                                                                                                                                                                                                  |           | HOPITAUX DU LEMAN                                                       | CNR Virus des Infections Respiratoires - France SUD                                                                                    | Antonin Bal; Bruno Lina; Gregory Destras; Gwendolynne Burfin; Hadrien Regue; Laurence Josset; Martine Valette; Quentin Semanas                                                                                                                                                                                                                                    |
| EPI_ISL_1379392, EPI_ISL_1379432, EPI_ISL_1379434                                                                                                                                                                                                                                                                                                                                                                                                                                                                                                                                                                                                                                                                                                                                                                                                                                                                                                                                                                                                                                                                                                                                                                                                                                                                                                                                       |           | HOSPITAL CIUDAD NEILY                                                   | Incienza, Instituto Costarricense de Investigación y Enseñanza en Nutrición y Salud                                                    | Adriana Godínez; Adriana Godínez & Melany Calderón; Claudio Soto-Garita; Estela Cordero; Francisco Duarte; Hebleen Porras; Melany Calderón & Mariel López                                                                                                                                                                                                         |
| EPI_ISL_1159173 to 1159182                                                                                                                                                                                                                                                                                                                                                                                                                                                                                                                                                                                                                                                                                                                                                                                                                                                                                                                                                                                                                                                                                                                                                                                                                                                                                                                                                              |           | HOSPITAL CLINIC                                                         | Instituto de Salud Carlos III                                                                                                          | A. Monzón; F. Casas; I. Jiménez; I. VILA ESTAPE; JORDI; M. Camarero; P. Zaballos; S. Cuesta; S. Iglesias-Caballero; S. Pozo; S. Varona; Sandonis; V. Vázquez-Morón                                                                                                                                                                                                |
| EPI_ISL_1059955, EPI_ISL_1059976 to 1059977, EPI_ISL_1159133 to 1159135, EPI_ISL_1159137 to 1159147, EPI_ISL_1167198, EPI_ISL_1261460 to 1261462, EPI_ISL_1261476 to 1261477, EPI_ISL_1261517, EPI_ISL_1261532, EPI_ISL_1262118, EPI_ISL_1262120 to 1262121, EPI_ISL_1262123 to 1262124, EPI_ISL_1262126                                                                                                                                                                                                                                                                                                                                                                                                                                                                                                                                                                                                                                                                                                                                                                                                                                                                                                                                                                                                                                                                                | see above | HOSPITAL COMARCAL DE MELILLA                                            | Instituto de Salud Carlos III                                                                                                          | A. Monzón; F. Casas; I. Jiménez; I. Román, S.; I.ROMAN SOTO; I.Roman, S.; I.Roman. S.; Iglesias-Caballero; M. Sandonis; P. Zaballos; S. Camarero; S. Cuesta; S. Iglesias-Caballero; S. Pozo; S. Varona; SERGIO; V. Camarero; V. Vázquez-Morón; Vázquez-Morón                                                                                                      |
| EPI_ISL_1059937                                                                                                                                                                                                                                                                                                                                                                                                                                                                                                                                                                                                                                                                                                                                                                                                                                                                                                                                                                                                                                                                                                                                                                                                                                                                                                                                                                         |           | HOSPITAL DE LA VEGA LORENZO GUIRAO                                      | Instituto de Salud Carlos III                                                                                                          | A. Monzón; F. Casas; I. Jiménez; I. Álvarez, J.; Iglesias-Caballero; M. Sandonis; P. Zaballos; S. Camarero; S. Cuesta; S. Pozo; S. Varona; V. Vázquez-Morón                                                                                                                                                                                                       |
| EPI_ISL_1059934 to 1059935                                                                                                                                                                                                                                                                                                                                                                                                                                                                                                                                                                                                                                                                                                                                                                                                                                                                                                                                                                                                                                                                                                                                                                                                                                                                                                                                                              |           | HOSPITAL DE MERIDA - SERVICIO DE CONTABILIDAD - C.D.02                  | Instituto de Salud Carlos III                                                                                                          | A. Monzón; F. Casas; I. Jiménez; I. Sánchez, J.; Iglesias-Caballero; M. Sandonis; P. Zaballos; S. Camarero; S. Cuesta; S. Pozo; S. Varona; V. Vázquez-Morón                                                                                                                                                                                                       |
| EPI_ISL_1059981                                                                                                                                                                                                                                                                                                                                                                                                                                                                                                                                                                                                                                                                                                                                                                                                                                                                                                                                                                                                                                                                                                                                                                                                                                                                                                                                                                         |           | HOSPITAL DE MOSTOLES                                                    | Instituto de Salud Carlos III                                                                                                          | A. Monzón; F. Casas; I. Jiménez; I. López, M.; M. Sandonis; P. Zaballos; S. Cuesta; S. Iglesias-Caballero; S. Pozo; S. Varona; V. Camarero; Vázquez-Morón                                                                                                                                                                                                         |
| EPI_ISL_1067611, EPI_ISL_1196433                                                                                                                                                                                                                                                                                                                                                                                                                                                                                                                                                                                                                                                                                                                                                                                                                                                                                                                                                                                                                                                                                                                                                                                                                                                                                                                                                        |           | HOSPITAL DR. ENRIQUE BALTODANO BRICEÑO                                  | Incienza, Instituto Costarricense de Investigación y Enseñanza en Nutrición y Salud                                                    | Adriana Godínez; Caterina Guzmán; Claudio Soto-Garita; Estela Cordero; Francisco Duarte; Hebleen Porras; Melany Calderón; Melany Calderón & Adriana Bermúdez-Espinoza; Nazareth Ruiz & Mariel López                                                                                                                                                               |
| EPI_ISL_1067589, EPI_ISL_1201438                                                                                                                                                                                                                                                                                                                                                                                                                                                                                                                                                                                                                                                                                                                                                                                                                                                                                                                                                                                                                                                                                                                                                                                                                                                                                                                                                        |           | HOSPITAL DR. FERNANDO ESCALANTE PRADILLA                                | Incienza, Instituto Costarricense de Investigación y Enseñanza en Nutrición y Salud                                                    | Adriana Godínez; Caterina Guzmán; Claudio Soto-Garita; Estela Cordero; Francisco Duarte; Hebleen Porras; Melany Calderón; Melany Calderón & Nicole Vargas-Viquez; Nazareth Ruiz & Nicole Vargas-Viquez                                                                                                                                                            |
| EPI_ISL_1196430, EPI_ISL_1379426                                                                                                                                                                                                                                                                                                                                                                                                                                                                                                                                                                                                                                                                                                                                                                                                                                                                                                                                                                                                                                                                                                                                                                                                                                                                                                                                                        |           | HOSPITAL DR. MAX PERALTA JIMENEZ                                        | Incienza, Instituto Costarricense de Investigación y                                                                                   | Adriana Godínez; Claudio Soto-Garita; Estela Cordero; Francisco Duarte; Hebleen Porras; Melany Calderón & Mónica Charpentier-Artavia                                                                                                                                                                                                                              |

| EPI_ID                                                                                                                                                                                                                                                                                                                                                                                                                                                                                                                                                                                                                                                                                                                                                                                                                                                                                                                     | Facility                                       | Country    | Principal Investigator                                                              | Co-Investigator                                                                                                                                                                                                                                                                                                         |
|----------------------------------------------------------------------------------------------------------------------------------------------------------------------------------------------------------------------------------------------------------------------------------------------------------------------------------------------------------------------------------------------------------------------------------------------------------------------------------------------------------------------------------------------------------------------------------------------------------------------------------------------------------------------------------------------------------------------------------------------------------------------------------------------------------------------------------------------------------------------------------------------------------------------------|------------------------------------------------|------------|-------------------------------------------------------------------------------------|-------------------------------------------------------------------------------------------------------------------------------------------------------------------------------------------------------------------------------------------------------------------------------------------------------------------------|
| EPI_ISL_1379417 to 1379418                                                                                                                                                                                                                                                                                                                                                                                                                                                                                                                                                                                                                                                                                                                                                                                                                                                                                                 | HOSPITAL DR. TONY FACIO CASTRO                 | Costa Rica | Inciensa, Instituto Costarricense de Investigación y Enseñanza en Nutrición y Salud | Adriana Godínez; Claudio Soto-Garita; Estela Cordero; Francisco Duarte; Hebleen Porras; Melany Calderón & Tashana Anglin-Williams                                                                                                                                                                                       |
| EPI_ISL_1159132                                                                                                                                                                                                                                                                                                                                                                                                                                                                                                                                                                                                                                                                                                                                                                                                                                                                                                            | HOSPITAL GENERAL RIO CARRION                   | Venezuela  | Instituto de Salud Carlos III                                                       | A. Monzón; ANTONIA; F. Casas; I. Jiménez; I.GARCIA CASTRO; M. Sandonis; P. Zaballos; S. Cuesta; S. Iglesias-Caballero; S. Pozo; S. Varona; V. Camarero; Vázquez-Morón                                                                                                                                                   |
| EPI_ISL_1059982, EPI_ISL_1159227 to 1159228, EPI_ISL_1262050                                                                                                                                                                                                                                                                                                                                                                                                                                                                                                                                                                                                                                                                                                                                                                                                                                                               | HOSPITAL GENERAL UNIVERSITARIO DE CIUDAD REAL  | Spain      | Instituto de Salud Carlos III                                                       | A. Monzón; F. Casas; I. Illescas; I. Jiménez; I.ILLESCAS FERNANDEZ-BERMEJO; I. Illescas; Iglesias-Caballero; M. S.; M. SOLEDAD; M. Sandonis; M.S.; P. Zaballos; S. Camarero; S. Cuesta; S. Pozo; S. Varona; V. Vázquez-Morón                                                                                            |
| EPI_ISL_1059945                                                                                                                                                                                                                                                                                                                                                                                                                                                                                                                                                                                                                                                                                                                                                                                                                                                                                                            | HOSPITAL GENERAL UNIVERSITARIO DE ELCHE        | Spain      | Instituto de Salud Carlos III                                                       | A. Monzón; F. Casas; I. De Gonzalo, N.; I. Jiménez; Iglesias-Caballero; M. Sandonis; P. Zaballos; S. Camarero; S. Cuesta; S. Pozo; S. Varona; V. Vázquez-Morón                                                                                                                                                          |
| EPI_ISL_1159198 to 1159209, EPI_ISL_1261519                                                                                                                                                                                                                                                                                                                                                                                                                                                                                                                                                                                                                                                                                                                                                                                                                                                                                | HOSPITAL GENERAL UNIVERSITARIO REINA SOFIA     | Spain      | Instituto de Salud Carlos III                                                       | A. Monzón; F. Casas; I. Jiménez; I. NUÑEZ TRIGUEROS; I. Nuñez; Iglesias-Caballero; M. Sandonis; M.L; Mª LUZ; P. Zaballos; S. Camarero; S. Cuesta; S. Pozo; S. Varona; V. Vázquez-Morón                                                                                                                                  |
| EPI_ISL_1059923, EPI_ISL_1059927 to 1059933, EPI_ISL_1159155 to 1159166, EPI_ISL_1159221 to 1159224, EPI_ISL_1261464 to 1261468, EPI_ISL_1261473 to 1261475, EPI_ISL_1261481, EPI_ISL_1261520, EPI_ISL_1261531, EPI_ISL_1262066, EPI_ISL_1262068 to 1262069, EPI_ISL_1262071 to 1262072, EPI_ISL_1262074 to 1262075, EPI_ISL_1262077                                                                                                                                                                                                                                                                                                                                                                                                                                                                                                                                                                                       | HOSPITAL GENERAL UNIVERSITARIO SANTA LUCIA     | Spain      | Instituto de Salud Carlos III                                                       | A; A. Monzón; ANA; F. Casas; I. BLAZQUEZ ABELLAN; I. Blazquez, A.; I. Blázquez, A.; I. Jiménez; I.BLAZQUEZ ABELLAN; I. Blazquez; I. Blazquez, A.; Iglesias-Caballero; M. Camarero; M. Sandonis; P. Zaballos; S. Camarero; S. Cuesta; S. Iglesias-Caballero; S. Pozo; S. Varona; Sandonis; V. Camarero; V. Vázquez-Morón |
| see above                                                                                                                                                                                                                                                                                                                                                                                                                                                                                                                                                                                                                                                                                                                                                                                                                                                                                                                  | HOSPITAL GENERAL UNIVERSITARIO SANTA LUCIA     | Spain      | Instituto de Salud Carlos III                                                       | A. Monzón; F. Casas; I. Jiménez; I. Rodríguez; M. Sandonis; M.J; P. Zaballos; S. Cuesta; S. Iglesias-Caballero; S. Pozo; S. Varona; V. Camarero; Vázquez-Morón                                                                                                                                                          |
| EPI_ISL_1261478, EPI_ISL_1261494                                                                                                                                                                                                                                                                                                                                                                                                                                                                                                                                                                                                                                                                                                                                                                                                                                                                                           | HOSPITAL GENERAL VIRGEN DE LA LUZ              | Spain      | Instituto de Salud Carlos III                                                       | A. Monzón; F. Casas; I. Jiménez; I. Rodríguez; M. Sandonis; M.J; P. Zaballos; S. Cuesta; S. Iglesias-Caballero; S. Pozo; S. Varona; V. Camarero; Vázquez-Morón                                                                                                                                                          |
| EPI_ISL_1067592                                                                                                                                                                                                                                                                                                                                                                                                                                                                                                                                                                                                                                                                                                                                                                                                                                                                                                            | HOSPITAL GOLFITO MANUEL MORA VALVERDE          | Costa Rica | Inciensa, Instituto Costarricense de Investigación y Enseñanza en Nutrición y Salud | Adriana Godínez; Claudio Soto-Garita; Estela Cordero; Francisco Duarte; Hebleen Porras; Melany Calderón & Mariel López                                                                                                                                                                                                  |
| EPI_ISL_1059938 to 1059942, EPI_ISL_1059948 to 1059949, EPI_ISL_1059951 to 1059954, EPI_ISL_1059957 to 1059974, EPI_ISL_1059980, EPI_ISL_1059993 to 1059995, EPI_ISL_1261482, EPI_ISL_1262039, EPI_ISL_1262078                                                                                                                                                                                                                                                                                                                                                                                                                                                                                                                                                                                                                                                                                                             | HOSPITAL J.M. MORALES MESEGUER                 | Spain      | Instituto de Salud Carlos III                                                       | A. Monzón; F. Casas; I. Antequera, P.; I. Antequera; I. Antequera, P.; I. Jiménez; I. Antequera, P.; Iglesias-Caballero; M. Camarero; M. Sandonis; P; P. Zaballos; S. Camarero; S. Cuesta; S. Iglesias-Caballero; S. Pozo; S. Varona; Sandonis; V. Camarero; V. Vázquez-Morón; Vázquez-Morón                            |
| EPI_ISL_1159183 to 1159193, EPI_ISL_1261471 to 1261472, EPI_ISL_1261483 to 1261493, EPI_ISL_1261500 to 1261501                                                                                                                                                                                                                                                                                                                                                                                                                                                                                                                                                                                                                                                                                                                                                                                                             | HOSPITAL LOS ARCOS                             | Spain      | Instituto de Salud Carlos III                                                       | A. Monzón; F. Casas; I. CAMARA SIMON; I. Camara; I. Jiménez; I. Camara; M; M. Camarero; M. Sandonis; MARGARITA; P. Zaballos; S. Cuesta; S. Iglesias-Caballero; S. Pozo; S. Varona; Sandonis; V. Camarero; V. Vázquez-Morón; Vázquez-Morón                                                                               |
| EPI_ISL_1067613 to 1067614, EPI_ISL_1067623 to 1067625, EPI_ISL_1196431                                                                                                                                                                                                                                                                                                                                                                                                                                                                                                                                                                                                                                                                                                                                                                                                                                                    | HOSPITAL MEXICO                                | Costa Rica | Inciensa, Instituto Costarricense de Investigación y Enseñanza en Nutrición y Salud | Adriana Godínez; Caterina Guzmán; Claudio Soto-Garita; Estela Cordero; Francisco Duarte; Hebleen Porras; Melany Calderón; Melany Calderón & Teresita Somogyi; Nazareth Ruiz & Teresita Somogyi                                                                                                                          |
| EPI_ISL_1261540                                                                                                                                                                                                                                                                                                                                                                                                                                                                                                                                                                                                                                                                                                                                                                                                                                                                                                            | HOSPITAL RAFAEL MENDEZ                         | Venezuela  | Instituto de Salud Carlos III                                                       | A. Monzón; E; F. Casas; I. Jiménez; I. Cascales; M. Sandonis; P. Zaballos; S. Cuesta; S. Iglesias-Caballero; S. Pozo; S. Varona; V. Camarero; Vázquez-Morón                                                                                                                                                             |
| EPI_ISL_1067604, EPI_ISL_1196437, EPI_ISL_1379422                                                                                                                                                                                                                                                                                                                                                                                                                                                                                                                                                                                                                                                                                                                                                                                                                                                                          | HOSPITAL SAN JUAN DE DIOS                      | Costa Rica | Inciensa, Instituto Costarricense de Investigación y Enseñanza en Nutrición y Salud | Adriana Godínez; Claudio Soto-Garita; Estela Cordero; Francisco Duarte; Hebleen Porras; Melany Calderón & Daniel Cascante-Serrano; Melany Calderón & Melissa Carazo-Gutiérrez                                                                                                                                           |
| EPI_ISL_1159168 to 1159172                                                                                                                                                                                                                                                                                                                                                                                                                                                                                                                                                                                                                                                                                                                                                                                                                                                                                                 | HOSPITAL SAN PEDRO DE ALCANTARA - C.D. 05      | Venezuela  | Instituto de Salud Carlos III                                                       | A. Monzón; F. Casas; GUADALUPE; I. Jiménez; I. RODRIGUEZ RODRIGUEZ; M. Camarero; P. Zaballos; S. Cuesta; S. Iglesias-Caballero; S. Pozo; S. Varona; Sandonis; V. Vázquez-Morón                                                                                                                                          |
| EPI_ISL_1060011                                                                                                                                                                                                                                                                                                                                                                                                                                                                                                                                                                                                                                                                                                                                                                                                                                                                                                            | HOSPITAL SEVERO OCHOA                          | Venezuela  | Instituto de Salud Carlos III                                                       | A. Monzón; F. Casas; I. Jiménez; I. Reyes, S.; Iglesias-Caballero; M. Sandonis; P. Zaballos; S. Camarero; S. Cuesta; S. Pozo; S. Varona; V. Vázquez-Morón                                                                                                                                                               |
| EPI_ISL_1059936, EPI_ISL_1059975, EPI_ISL_1059978 to 1059979, EPI_ISL_1059983, EPI_ISL_1059996 to 1060010, EPI_ISL_1060012, EPI_ISL_1261459, EPI_ISL_1261469 to 1261470, EPI_ISL_1261504 to 1261506, EPI_ISL_1261521 to 1261530, EPI_ISL_1262040, EPI_ISL_1262042 to 1262044, EPI_ISL_1262046 to 1262047, EPI_ISL_1262049                                                                                                                                                                                                                                                                                                                                                                                                                                                                                                                                                                                                  | HOSPITAL UNIV. MIGUEL SERVET                   | Spain      | Instituto de Salud Carlos III                                                       | A; A. M.; A. Monzón; F. Casas; I. Milagro; I. Jiménez; I. Martinez, A.; I. Milagro; I. Milagro; I. Milagro, A.; Iglesias-Caballero; M. Camarero; M. Sandonis; P. Zaballos; S. Camarero; S. Cuesta; S. Iglesias-Caballero; S. Pozo; S. Varona; Sandonis; V. Vázquez-Morón                                                |
| see above                                                                                                                                                                                                                                                                                                                                                                                                                                                                                                                                                                                                                                                                                                                                                                                                                                                                                                                  | HOSPITAL UNIV. MIGUEL SERVET                   | Spain      | Instituto de Salud Carlos III                                                       | A. Monzón; C; CARLOS ANTONIO; F. Casas; I. Jiménez; I. SALAS VENERO; I. Salas; Iglesias-Caballero; M. Sandonis; P. Zaballos; S. Camarero; S. Cuesta; S. Iglesias-Caballero; S. Pozo; S. Varona; V. Camarero; V. Vázquez-Morón; Vázquez-Morón                                                                            |
| EPI_ISL_1159216 to 1159217, EPI_ISL_1261457, EPI_ISL_1261498 to 1261499, EPI_ISL_1261534 to 1261537                                                                                                                                                                                                                                                                                                                                                                                                                                                                                                                                                                                                                                                                                                                                                                                                                        | HOSPITAL UNIVERS MARQUES DE VALDECILLA         | Spain      | Instituto de Salud Carlos III                                                       | A. Monzón; C; CARLOS ANTONIO; F. Casas; I. Jiménez; I. SALAS VENERO; I. Salas; Iglesias-Caballero; M. Sandonis; P. Zaballos; S. Camarero; S. Cuesta; S. Iglesias-Caballero; S. Pozo; S. Varona; V. Camarero; V. Vázquez-Morón; Vázquez-Morón                                                                            |
| EPI_ISL_1059922, EPI_ISL_1059989 to 1059992, EPI_ISL_1159218 to 1159219, EPI_ISL_1262111 to 1262112, EPI_ISL_1262114 to 1262115, EPI_ISL_1262117                                                                                                                                                                                                                                                                                                                                                                                                                                                                                                                                                                                                                                                                                                                                                                           | HOSPITAL UNIVERSITARIO DE CEUTA                | Spain      | Instituto de Salud Carlos III                                                       | A. Monzón; F. Casas; I. López, J.; I. Jiménez; I. López, J.; I. Hijano, S.; I. LOPEZ BARBA; Iglesias-Caballero; JOSE; M. Camarero; M. Sandonis; P. Zaballos; S. Camarero; S. Cuesta; S. Iglesias-Caballero; S. Pozo; S. Varona; Sandonis; V. Camarero; V. Vázquez-Morón; Vázquez-Morón                                  |
| EPI_ISL_1059944, EPI_ISL_1059956, EPI_ISL_1159167, EPI_ISL_1159215, EPI_ISL_1261681                                                                                                                                                                                                                                                                                                                                                                                                                                                                                                                                                                                                                                                                                                                                                                                                                                        | HOSPITAL UNIVERSITARIO DE GUADALAJARA          | Spain      | Instituto de Salud Carlos III                                                       | A; A. Monzón; ALEJANDRO; F. Casas; I. GONZALEZ PRAETORIUS; I. González, A.; I. Jiménez; I. GONZALEZ PRAETORIUS; I. Gonzalez; Iglesias-Caballero; M. Camarero; M. Sandonis; P. Zaballos; S. Camarero; S. Cuesta; S. Iglesias-Caballero; S. Pozo; S. Varona; Sandonis; V. Camarero; V. Vázquez-Morón; Vázquez-Morón       |
| EPI_ISL_1159131, EPI_ISL_1261510 to 1261515, EPI_ISL_1262087 to 1262088, EPI_ISL_1262090 to 1262091, EPI_ISL_1262093 to 1262094, EPI_ISL_1262096 to 1262097, EPI_ISL_1262099 to 1262100, EPI_ISL_1262102 to 1262103, EPI_ISL_1262105 to 1262106, EPI_ISL_1262108 to 1262109                                                                                                                                                                                                                                                                                                                                                                                                                                                                                                                                                                                                                                                | HOSPITAL UNIVERSITARIO INSULAR DE GRAN CANARIA | Spain      | Instituto de Salud Carlos III                                                       | A. Monzón; C; CRISTOBAL; F. Casas; I. Del Rosario, C.; I. Jiménez; I. DEL ROSARIO QUINTANA; I. Del Rosario; I. Del Rosario, C.; Iglesias-Caballero; M. Camarero; M. Sandonis; P. Zaballos; S. Camarero; S. Cuesta; S. Iglesias-Caballero; S. Pozo; S. Varona; Sandonis; V. Camarero; V. Vázquez-Morón; Vázquez-Morón    |
| EPI_ISL_1159148 to 1159154, EPI_ISL_1159210 to 1159214, EPI_ISL_1167199, EPI_ISL_1261496 to 1261497, EPI_ISL_1262052 to 1262053, EPI_ISL_1262055 to 1262056, EPI_ISL_1262058 to 1262060, EPI_ISL_1262062 to 1262063, EPI_ISL_1262065                                                                                                                                                                                                                                                                                                                                                                                                                                                                                                                                                                                                                                                                                       | HOSPITAL UNIVERSITARIO VIRGEN DE LA ARRIXACA   | Spain      | Instituto de Salud Carlos III                                                       | A. Monzón; F. Casas; I. Jiménez; I. MORENO PARRADO; I. Moreno; I. Moreno, L.; Iglesias-Caballero; L; LAURA; M. Sandonis; P. Zaballos; S. Camarero; S. Cuesta; S. Iglesias-Caballero; S. Pozo; S. Varona; V. Camarero; V. Vázquez-Morón; Vázquez-Morón                                                                   |
| see above                                                                                                                                                                                                                                                                                                                                                                                                                                                                                                                                                                                                                                                                                                                                                                                                                                                                                                                  | HOSPITAL UNIVERSITARIO VIRGEN DE LA ARRIXACA   | Spain      | Instituto de Salud Carlos III                                                       | A. Monzón; F. Casas; I. Jiménez; I. MORENO PARRADO; I. Moreno; I. Moreno, L.; Iglesias-Caballero; L; LAURA; M. Sandonis; P. Zaballos; S. Camarero; S. Cuesta; S. Iglesias-Caballero; S. Pozo; S. Varona; V. Camarero; V. Vázquez-Morón; Vázquez-Morón                                                                   |
| EPI_ISL_1379267 to 1379338                                                                                                                                                                                                                                                                                                                                                                                                                                                                                                                                                                                                                                                                                                                                                                                                                                                                                                 | Hackensack Meridian Health                     | USA        | New York Genome Center                                                              | Andre Corvelo; Barry Kreiswirth; David Perlin; Dayna M. Oschwald; Jose Mediavilla; Kaelea Composto; Kar Chow; Liang Chen; Marcus Cunningham; Michael Zody; Samantha Fennessey; Tom Maniatis                                                                                                                             |
| EPI_ISL_1268648, EPI_ISL_1268650 to 1268651, EPI_ISL_1268661 to 1268662, EPI_ISL_1268664 to 1268665, EPI_ISL_1268698, EPI_ISL_1268700, EPI_ISL_1268702 to 1268703, EPI_ISL_1268705, EPI_ISL_1268707, EPI_ISL_1268709, EPI_ISL_1268711, EPI_ISL_1268713, EPI_ISL_1268715, EPI_ISL_1268717, EPI_ISL_1268719, EPI_ISL_1268721, EPI_ISL_1268723, EPI_ISL_1268725, EPI_ISL_1268727, EPI_ISL_1268729, EPI_ISL_1268731, EPI_ISL_1268733, EPI_ISL_1268771, EPI_ISL_1268773, EPI_ISL_1268778, EPI_ISL_1268782, EPI_ISL_1268784, EPI_ISL_1268794, EPI_ISL_1268796, EPI_ISL_1268799, EPI_ISL_1268807, EPI_ISL_1268809, EPI_ISL_1268811, EPI_ISL_1268813, EPI_ISL_1268815, EPI_ISL_1268828, EPI_ISL_1268830 to 1268832, EPI_ISL_1268834, EPI_ISL_1268836, EPI_ISL_1268858 to 1268859, EPI_ISL_1268861 to 1268862, EPI_ISL_1268864 to 1268865, EPI_ISL_1268867 to 1268869, EPI_ISL_1268887, EPI_ISL_1268889 to 1268890, EPI_ISL_1268892 | Hannover Medical School, Institute of Virology | Germany    | Hannover Medical School, Institute of Virology                                      | Lars Steinbrück                                                                                                                                                                                                                                                                                                         |
| see above                                                                                                                                                                                                                                                                                                                                                                                                                                                                                                                                                                                                                                                                                                                                                                                                                                                                                                                  | Hannover Medical School, Institute of Virology | Germany    | Hannover Medical School, Institute of Virology                                      | Lars Steinbrück                                                                                                                                                                                                                                                                                                         |
| EPI_ISL_1040694 to 1040695, EPI_ISL_1040717, EPI_ISL_1040730, EPI_ISL_1040764, EPI_ISL_1040797, EPI_ISL_1040809                                                                                                                                                                                                                                                                                                                                                                                                                                                                                                                                                                                                                                                                                                                                                                                                            | Hanover Park CHC wc HPH                        | Canada     | NHLS/UCT                                                                            | Arash Iranzadeh; Bruna Galvao; Carolyn Williamson; Deelan Doolabh; Diana Hardie; Innocent Mudau; Kruger Marais; Lynn Tyers; Marvin Hsiao; Stephen Korsman                                                                                                                                                               |
| EPI_ISL_1346625, EPI_ISL_1346627                                                                                                                                                                                                                                                                                                                                                                                                                                                                                                                                                                                                                                                                                                                                                                                                                                                                                           | Hasan Sadikin Hospital                         | Indonesia  | West Java Health Laboratory; School of Life Sciences and                            | Anggraini Alam; Azzania Fibriani; Basti Andriyoko; Cut Nur Cinthia Alamanda; Djatnika Setiabudi; Ema Rahmawati; Ida Parwati; Isak Solihin; Karimatu                                                                                                                                                                     |

| Technology, Institut Teknologi Bandung                                                                                                                                                                                                                                                                                                                                                                                                                                                                                                                                                                                                                                                                                                                                                                                                                                                                                                                                                                                                                                                                                                                                                                                                                                                                                                                                                                                                                                                                                                                                                                                                                                                                                                                                                                                                                                                                                                                                                                                                                                                                                                                                                                                                                                                                                                                                                                                                                                                                                                                                                                                                                                                                                                                                                                                                                                                                                                                                                                                                                                                                                                                                                                                                                                                                                                                                                                                                                                                                                                                                                                                                                                                                                                                                                                                                                                                                                                                                                                                                                                                                                                                                                                                                                                                                                                                                                                                                                                                                                                                                                                                                                                                                                                                                                                                                                                                                                                                                                                                                                                                                                                                                                                                                                                                                                                                                                                                                                                                                                                                                                                                                                                                                                                                                                                                                                                                                                                                                                                                                                                                                                                                                                                                                                                                                                                                                                                                                                                                                                                                                                                                                                                                                                                                                                                                                                                                                                                                                                                                                                                                                                                                                                                                                                                                                                                                                                                                                                                                                                                                                                                                                                                                                                                                                                                                                                                                                                                                                                                                                                                                                                                                                                                                                                                                                                                                                                                                                                                                                                                                                                                                                                                                                                                                                                                                                                                                                                                                                                                                                                                                                                                                                                                                                                                                                                                                                                                                                                                                                                                                                                                                                                                                                                                                                                                                                                                                                                                                                                                                                                                                                                                                                                                                                                                                                                                                                                                                                                                                                                                                                                                                                                                                                                                                                                                                                                                                                                                                                                                                                                                                                                                                                                                                                                                                                                                                                                                                                                                                                                                                                                                                                                                                                                                                                                                                                                                                                                                                                                                                                                                                                                                                                                                                                                                                                                                                                                                                                                                                                                                                                                                                                                                                                                                                                                                                                                                                                                                                                                                                                                                                                                                                                                                                                                                                                                                                                                                                                                                                                                                                                                                                                                                                                                                                                                                                                                                                                                                                                                                                              |                                                         |                                                                                                               | Khoirunnisa; Miftahul Faridi; Nina Susana Dewi; Rifky Waluyajati Rachman; Rini Robiani; Ryan Bayusantika Ristandi                                                                                                                                                                  |                                                                                                                                                                                                                                                                                                                                                                                                                                                                                                                                                                                                  |  |
|-------------------------------------------------------------------------------------------------------------------------------------------------------------------------------------------------------------------------------------------------------------------------------------------------------------------------------------------------------------------------------------------------------------------------------------------------------------------------------------------------------------------------------------------------------------------------------------------------------------------------------------------------------------------------------------------------------------------------------------------------------------------------------------------------------------------------------------------------------------------------------------------------------------------------------------------------------------------------------------------------------------------------------------------------------------------------------------------------------------------------------------------------------------------------------------------------------------------------------------------------------------------------------------------------------------------------------------------------------------------------------------------------------------------------------------------------------------------------------------------------------------------------------------------------------------------------------------------------------------------------------------------------------------------------------------------------------------------------------------------------------------------------------------------------------------------------------------------------------------------------------------------------------------------------------------------------------------------------------------------------------------------------------------------------------------------------------------------------------------------------------------------------------------------------------------------------------------------------------------------------------------------------------------------------------------------------------------------------------------------------------------------------------------------------------------------------------------------------------------------------------------------------------------------------------------------------------------------------------------------------------------------------------------------------------------------------------------------------------------------------------------------------------------------------------------------------------------------------------------------------------------------------------------------------------------------------------------------------------------------------------------------------------------------------------------------------------------------------------------------------------------------------------------------------------------------------------------------------------------------------------------------------------------------------------------------------------------------------------------------------------------------------------------------------------------------------------------------------------------------------------------------------------------------------------------------------------------------------------------------------------------------------------------------------------------------------------------------------------------------------------------------------------------------------------------------------------------------------------------------------------------------------------------------------------------------------------------------------------------------------------------------------------------------------------------------------------------------------------------------------------------------------------------------------------------------------------------------------------------------------------------------------------------------------------------------------------------------------------------------------------------------------------------------------------------------------------------------------------------------------------------------------------------------------------------------------------------------------------------------------------------------------------------------------------------------------------------------------------------------------------------------------------------------------------------------------------------------------------------------------------------------------------------------------------------------------------------------------------------------------------------------------------------------------------------------------------------------------------------------------------------------------------------------------------------------------------------------------------------------------------------------------------------------------------------------------------------------------------------------------------------------------------------------------------------------------------------------------------------------------------------------------------------------------------------------------------------------------------------------------------------------------------------------------------------------------------------------------------------------------------------------------------------------------------------------------------------------------------------------------------------------------------------------------------------------------------------------------------------------------------------------------------------------------------------------------------------------------------------------------------------------------------------------------------------------------------------------------------------------------------------------------------------------------------------------------------------------------------------------------------------------------------------------------------------------------------------------------------------------------------------------------------------------------------------------------------------------------------------------------------------------------------------------------------------------------------------------------------------------------------------------------------------------------------------------------------------------------------------------------------------------------------------------------------------------------------------------------------------------------------------------------------------------------------------------------------------------------------------------------------------------------------------------------------------------------------------------------------------------------------------------------------------------------------------------------------------------------------------------------------------------------------------------------------------------------------------------------------------------------------------------------------------------------------------------------------------------------------------------------------------------------------------------------------------------------------------------------------------------------------------------------------------------------------------------------------------------------------------------------------------------------------------------------------------------------------------------------------------------------------------------------------------------------------------------------------------------------------------------------------------------------------------------------------------------------------------------------------------------------------------------------------------------------------------------------------------------------------------------------------------------------------------------------------------------------------------------------------------------------------------------------------------------------------------------------------------------------------------------------------------------------------------------------------------------------------------------------------------------------------------------------------------------------------------------------------------------------------------------------------------------------------------------------------------------------------------------------------------------------------------------------------------------------------------------------------------------------------------------------------------------------------------------------------------------------------------------------------------------------------------------------------------------------------------------------------------------------------------------------------------------------------------------------------------------------------------------------------------------------------------------------------------------------------------------------------------------------------------------------------------------------------------------------------------------------------------------------------------------------------------------------------------------------------------------------------------------------------------------------------------------------------------------------------------------------------------------------------------------------------------------------------------------------------------------------------------------------------------------------------------------------------------------------------------------------------------------------------------------------------------------------------------------------------------------------------------------------------------------------------------------------------------------------------------------------------------------------------------------------------------------------------------------------------------------------------------------------------------------------------------------------------------------------------------------------------------------------------------------------------------------------------------------------------------------------------------------------------------------------------------------------------------------------------------------------------------------------------------------------------------------------------------------------------------------------------------------------------------------------------------------------------------------------------------------------------------------------------------------------------------------------------------------------------------------------------------------------------------------------------------------------------------------------------------------------------------------------------------------------------------------------------------------------------------------------------------------------------------------------------------------------------------------------------------------------------------------------------------------------------------------------------------------------------------------------------------------------------------------------------------------------------------------------------------------------------------------------------------------------------------------------------------------------------------------------------------------------------------------------------------------------------------------------------------------------------------------------------------------------------------------------------------------------------------------------------------------------------------------------------------------------------------------------------------------------------------------------------------------------------------------------------------------------------------------------------------------------------------------------------------------------------------------------------------------------------------------------------------------------------------------------------------------------------------------------------------------------------------------------------------------------------------------------------------------------------------------------------------------------------------------------------------------------------------------------------------------------------------------------------------------------------------------------------------------------------------------------------------------------------------------------------------------------------------------------------------------------------------------------------------------------------------------------------------------------------------------------------------------------------------------------------------------------------------------------------------------------------------------------------------------------------------------------------------------------------------------------------------------------------------------------------------------------------------------------------------------------------------------------------------------------------------------------------------------------------------------------------------------------------------------------------------|---------------------------------------------------------|---------------------------------------------------------------------------------------------------------------|------------------------------------------------------------------------------------------------------------------------------------------------------------------------------------------------------------------------------------------------------------------------------------|--------------------------------------------------------------------------------------------------------------------------------------------------------------------------------------------------------------------------------------------------------------------------------------------------------------------------------------------------------------------------------------------------------------------------------------------------------------------------------------------------------------------------------------------------------------------------------------------------|--|
| EPI_ISL_1323158                                                                                                                                                                                                                                                                                                                                                                                                                                                                                                                                                                                                                                                                                                                                                                                                                                                                                                                                                                                                                                                                                                                                                                                                                                                                                                                                                                                                                                                                                                                                                                                                                                                                                                                                                                                                                                                                                                                                                                                                                                                                                                                                                                                                                                                                                                                                                                                                                                                                                                                                                                                                                                                                                                                                                                                                                                                                                                                                                                                                                                                                                                                                                                                                                                                                                                                                                                                                                                                                                                                                                                                                                                                                                                                                                                                                                                                                                                                                                                                                                                                                                                                                                                                                                                                                                                                                                                                                                                                                                                                                                                                                                                                                                                                                                                                                                                                                                                                                                                                                                                                                                                                                                                                                                                                                                                                                                                                                                                                                                                                                                                                                                                                                                                                                                                                                                                                                                                                                                                                                                                                                                                                                                                                                                                                                                                                                                                                                                                                                                                                                                                                                                                                                                                                                                                                                                                                                                                                                                                                                                                                                                                                                                                                                                                                                                                                                                                                                                                                                                                                                                                                                                                                                                                                                                                                                                                                                                                                                                                                                                                                                                                                                                                                                                                                                                                                                                                                                                                                                                                                                                                                                                                                                                                                                                                                                                                                                                                                                                                                                                                                                                                                                                                                                                                                                                                                                                                                                                                                                                                                                                                                                                                                                                                                                                                                                                                                                                                                                                                                                                                                                                                                                                                                                                                                                                                                                                                                                                                                                                                                                                                                                                                                                                                                                                                                                                                                                                                                                                                                                                                                                                                                                                                                                                                                                                                                                                                                                                                                                                                                                                                                                                                                                                                                                                                                                                                                                                                                                                                                                                                                                                                                                                                                                                                                                                                                                                                                                                                                                                                                                                                                                                                                                                                                                                                                                                                                                                                                                                                                                                                                                                                                                                                                                                                                                                                                                                                                                                                                                                                                                                                                                                                                                                                                                                                                                                                                                                                                                                                                                                     | Haugesund Hospital, laboratory for Medical Microbiology | Norwegian Institute of Public Health, Department of Virology                                                  | Atiya R Ali; Debech Nadia; Engebretsen Serina Beate; Garcia Lorente Ignacio; Hilde Elshaug; Hilde Vollan; Jon Bråte; Kamilla Heddeland Instefjord; Karoline Bragstad; Kathrine Stene-Johansen; Marie Paulsen Madsen; Olav Hungnes; Pedersen Benedikte Nevjen; Rasmus Riis Kopperud |                                                                                                                                                                                                                                                                                                                                                                                                                                                                                                                                                                                                  |  |
| EPI_ISL_1034310, EPI_ISL_1040153, EPI_ISL_1058047, EPI_ISL_1058049 to 1058053, EPI_ISL_1058055 to 1058058, EPI_ISL_1058060, EPI_ISL_1058062, EPI_ISL_1110512 to 1110513, EPI_ISL_1110536, EPI_ISL_1110541 to 1110542, EPI_ISL_1118289, EPI_ISL_1118327, EPI_ISL_1186177 to 1186178, EPI_ISL_1251530, EPI_ISL_1317351, EPI_ISL_1317589, EPI_ISL_1317591, EPI_ISL_1317609, EPI_ISL_1317930, EPI_ISL_1317970, EPI_ISL_1318065, EPI_ISL_1318079, EPI_ISL_1323124, EPI_ISL_1323126 to 1323127                                                                                                                                                                                                                                                                                                                                                                                                                                                                                                                                                                                                                                                                                                                                                                                                                                                                                                                                                                                                                                                                                                                                                                                                                                                                                                                                                                                                                                                                                                                                                                                                                                                                                                                                                                                                                                                                                                                                                                                                                                                                                                                                                                                                                                                                                                                                                                                                                                                                                                                                                                                                                                                                                                                                                                                                                                                                                                                                                                                                                                                                                                                                                                                                                                                                                                                                                                                                                                                                                                                                                                                                                                                                                                                                                                                                                                                                                                                                                                                                                                                                                                                                                                                                                                                                                                                                                                                                                                                                                                                                                                                                                                                                                                                                                                                                                                                                                                                                                                                                                                                                                                                                                                                                                                                                                                                                                                                                                                                                                                                                                                                                                                                                                                                                                                                                                                                                                                                                                                                                                                                                                                                                                                                                                                                                                                                                                                                                                                                                                                                                                                                                                                                                                                                                                                                                                                                                                                                                                                                                                                                                                                                                                                                                                                                                                                                                                                                                                                                                                                                                                                                                                                                                                                                                                                                                                                                                                                                                                                                                                                                                                                                                                                                                                                                                                                                                                                                                                                                                                                                                                                                                                                                                                                                                                                                                                                                                                                                                                                                                                                                                                                                                                                                                                                                                                                                                                                                                                                                                                                                                                                                                                                                                                                                                                                                                                                                                                                                                                                                                                                                                                                                                                                                                                                                                                                                                                                                                                                                                                                                                                                                                                                                                                                                                                                                                                                                                                                                                                                                                                                                                                                                                                                                                                                                                                                                                                                                                                                                                                                                                                                                                                                                                                                                                                                                                                                                                                                                                                                                                                                                                                                                                                                                                                                                                                                                                                                                                                                                                                                                                                                                                                                                                                                                                                                                                                                                                                                                                                                                                                                                                                                                                                                                                                                                                                                                                                                                                                                                                                                                                            | see above                                               | Haukeland University Hospital, Dept. of Microbiology                                                          | Norwegian Institute of Public Health, Department of Virology                                                                                                                                                                                                                       | Atiya R Ali; Debech Nadia; Engebretsen Serina Beate; Engebretsen Serina Beate Atiya R Ali; Garcia Lorente Ignacio; Hilde Elshaug; Hilde Vollan; Ignacio Garcia Lorente; Jon Bråte; Kamilla Heddeland Instefjord; Karoline Bragstad; Kathrine Stene-Johansen; Marie Paulsen Madsen; Olav Hungnes; Pedersen Benedikte Nevjen; Rasmus Riis Kopperud; Serina B Engebretsen                                                                                                                                                                                                                           |  |
| EPI_ISL_1132743, EPI_ISL_1372130                                                                                                                                                                                                                                                                                                                                                                                                                                                                                                                                                                                                                                                                                                                                                                                                                                                                                                                                                                                                                                                                                                                                                                                                                                                                                                                                                                                                                                                                                                                                                                                                                                                                                                                                                                                                                                                                                                                                                                                                                                                                                                                                                                                                                                                                                                                                                                                                                                                                                                                                                                                                                                                                                                                                                                                                                                                                                                                                                                                                                                                                                                                                                                                                                                                                                                                                                                                                                                                                                                                                                                                                                                                                                                                                                                                                                                                                                                                                                                                                                                                                                                                                                                                                                                                                                                                                                                                                                                                                                                                                                                                                                                                                                                                                                                                                                                                                                                                                                                                                                                                                                                                                                                                                                                                                                                                                                                                                                                                                                                                                                                                                                                                                                                                                                                                                                                                                                                                                                                                                                                                                                                                                                                                                                                                                                                                                                                                                                                                                                                                                                                                                                                                                                                                                                                                                                                                                                                                                                                                                                                                                                                                                                                                                                                                                                                                                                                                                                                                                                                                                                                                                                                                                                                                                                                                                                                                                                                                                                                                                                                                                                                                                                                                                                                                                                                                                                                                                                                                                                                                                                                                                                                                                                                                                                                                                                                                                                                                                                                                                                                                                                                                                                                                                                                                                                                                                                                                                                                                                                                                                                                                                                                                                                                                                                                                                                                                                                                                                                                                                                                                                                                                                                                                                                                                                                                                                                                                                                                                                                                                                                                                                                                                                                                                                                                                                                                                                                                                                                                                                                                                                                                                                                                                                                                                                                                                                                                                                                                                                                                                                                                                                                                                                                                                                                                                                                                                                                                                                                                                                                                                                                                                                                                                                                                                                                                                                                                                                                                                                                                                                                                                                                                                                                                                                                                                                                                                                                                                                                                                                                                                                                                                                                                                                                                                                                                                                                                                                                                                                                                                                                                                                                                                                                                                                                                                                                                                                                                                                                                                                    | HealthPartners Central Lab                              | Minnesota Department of Health, Public Health Laboratory                                                      | Alexandra Lorentz; Jacob Garfin; Matt Plumb; and Xiong Wang                                                                                                                                                                                                                        |                                                                                                                                                                                                                                                                                                                                                                                                                                                                                                                                                                                                  |  |
| EPI_ISL_1200519                                                                                                                                                                                                                                                                                                                                                                                                                                                                                                                                                                                                                                                                                                                                                                                                                                                                                                                                                                                                                                                                                                                                                                                                                                                                                                                                                                                                                                                                                                                                                                                                                                                                                                                                                                                                                                                                                                                                                                                                                                                                                                                                                                                                                                                                                                                                                                                                                                                                                                                                                                                                                                                                                                                                                                                                                                                                                                                                                                                                                                                                                                                                                                                                                                                                                                                                                                                                                                                                                                                                                                                                                                                                                                                                                                                                                                                                                                                                                                                                                                                                                                                                                                                                                                                                                                                                                                                                                                                                                                                                                                                                                                                                                                                                                                                                                                                                                                                                                                                                                                                                                                                                                                                                                                                                                                                                                                                                                                                                                                                                                                                                                                                                                                                                                                                                                                                                                                                                                                                                                                                                                                                                                                                                                                                                                                                                                                                                                                                                                                                                                                                                                                                                                                                                                                                                                                                                                                                                                                                                                                                                                                                                                                                                                                                                                                                                                                                                                                                                                                                                                                                                                                                                                                                                                                                                                                                                                                                                                                                                                                                                                                                                                                                                                                                                                                                                                                                                                                                                                                                                                                                                                                                                                                                                                                                                                                                                                                                                                                                                                                                                                                                                                                                                                                                                                                                                                                                                                                                                                                                                                                                                                                                                                                                                                                                                                                                                                                                                                                                                                                                                                                                                                                                                                                                                                                                                                                                                                                                                                                                                                                                                                                                                                                                                                                                                                                                                                                                                                                                                                                                                                                                                                                                                                                                                                                                                                                                                                                                                                                                                                                                                                                                                                                                                                                                                                                                                                                                                                                                                                                                                                                                                                                                                                                                                                                                                                                                                                                                                                                                                                                                                                                                                                                                                                                                                                                                                                                                                                                                                                                                                                                                                                                                                                                                                                                                                                                                                                                                                                                                                                                                                                                                                                                                                                                                                                                                                                                                                                                                                                     | HealthQuest Esoterics                                   | New York City Public Health Laboratory                                                                        | Jade Wang; et al.                                                                                                                                                                                                                                                                  |                                                                                                                                                                                                                                                                                                                                                                                                                                                                                                                                                                                                  |  |
| EPI_ISL_1040719                                                                                                                                                                                                                                                                                                                                                                                                                                                                                                                                                                                                                                                                                                                                                                                                                                                                                                                                                                                                                                                                                                                                                                                                                                                                                                                                                                                                                                                                                                                                                                                                                                                                                                                                                                                                                                                                                                                                                                                                                                                                                                                                                                                                                                                                                                                                                                                                                                                                                                                                                                                                                                                                                                                                                                                                                                                                                                                                                                                                                                                                                                                                                                                                                                                                                                                                                                                                                                                                                                                                                                                                                                                                                                                                                                                                                                                                                                                                                                                                                                                                                                                                                                                                                                                                                                                                                                                                                                                                                                                                                                                                                                                                                                                                                                                                                                                                                                                                                                                                                                                                                                                                                                                                                                                                                                                                                                                                                                                                                                                                                                                                                                                                                                                                                                                                                                                                                                                                                                                                                                                                                                                                                                                                                                                                                                                                                                                                                                                                                                                                                                                                                                                                                                                                                                                                                                                                                                                                                                                                                                                                                                                                                                                                                                                                                                                                                                                                                                                                                                                                                                                                                                                                                                                                                                                                                                                                                                                                                                                                                                                                                                                                                                                                                                                                                                                                                                                                                                                                                                                                                                                                                                                                                                                                                                                                                                                                                                                                                                                                                                                                                                                                                                                                                                                                                                                                                                                                                                                                                                                                                                                                                                                                                                                                                                                                                                                                                                                                                                                                                                                                                                                                                                                                                                                                                                                                                                                                                                                                                                                                                                                                                                                                                                                                                                                                                                                                                                                                                                                                                                                                                                                                                                                                                                                                                                                                                                                                                                                                                                                                                                                                                                                                                                                                                                                                                                                                                                                                                                                                                                                                                                                                                                                                                                                                                                                                                                                                                                                                                                                                                                                                                                                                                                                                                                                                                                                                                                                                                                                                                                                                                                                                                                                                                                                                                                                                                                                                                                                                                                                                                                                                                                                                                                                                                                                                                                                                                                                                                                                                                     | Heideveld CDC wc HVP                                    | NHLS/UCT                                                                                                      | Arash Irazadeh; Bruna Galvao; Carolyn Williamson; Deelan Doolabh; Diana Hardie; Innocent Mudau; Kruger Marais; Lynn Tyers; Marvin Hsiao; Stephen Korsman                                                                                                                           |                                                                                                                                                                                                                                                                                                                                                                                                                                                                                                                                                                                                  |  |
| EPI_ISL_1040662, EPI_ISL_1040665, EPI_ISL_1040670, EPI_ISL_1040680, EPI_ISL_1040688, EPI_ISL_1040757, EPI_ISL_1040798, EPI_ISL_1040803, EPI_ISL_1040806, EPI_ISL_1040810                                                                                                                                                                                                                                                                                                                                                                                                                                                                                                                                                                                                                                                                                                                                                                                                                                                                                                                                                                                                                                                                                                                                                                                                                                                                                                                                                                                                                                                                                                                                                                                                                                                                                                                                                                                                                                                                                                                                                                                                                                                                                                                                                                                                                                                                                                                                                                                                                                                                                                                                                                                                                                                                                                                                                                                                                                                                                                                                                                                                                                                                                                                                                                                                                                                                                                                                                                                                                                                                                                                                                                                                                                                                                                                                                                                                                                                                                                                                                                                                                                                                                                                                                                                                                                                                                                                                                                                                                                                                                                                                                                                                                                                                                                                                                                                                                                                                                                                                                                                                                                                                                                                                                                                                                                                                                                                                                                                                                                                                                                                                                                                                                                                                                                                                                                                                                                                                                                                                                                                                                                                                                                                                                                                                                                                                                                                                                                                                                                                                                                                                                                                                                                                                                                                                                                                                                                                                                                                                                                                                                                                                                                                                                                                                                                                                                                                                                                                                                                                                                                                                                                                                                                                                                                                                                                                                                                                                                                                                                                                                                                                                                                                                                                                                                                                                                                                                                                                                                                                                                                                                                                                                                                                                                                                                                                                                                                                                                                                                                                                                                                                                                                                                                                                                                                                                                                                                                                                                                                                                                                                                                                                                                                                                                                                                                                                                                                                                                                                                                                                                                                                                                                                                                                                                                                                                                                                                                                                                                                                                                                                                                                                                                                                                                                                                                                                                                                                                                                                                                                                                                                                                                                                                                                                                                                                                                                                                                                                                                                                                                                                                                                                                                                                                                                                                                                                                                                                                                                                                                                                                                                                                                                                                                                                                                                                                                                                                                                                                                                                                                                                                                                                                                                                                                                                                                                                                                                                                                                                                                                                                                                                                                                                                                                                                                                                                                                                                                                                                                                                                                                                                                                                                                                                                                                                                                                                                                                                            | see above                                               | Heideveld Emergency Centre                                                                                    | NHLS/UCT                                                                                                                                                                                                                                                                           | Arash Irazadeh; Bruna Galvao; Carolyn Williamson; Deelan Doolabh; Diana Hardie; Innocent Mudau; Kruger Marais; Lynn Tyers; Marvin Hsiao; Stephen Korsman                                                                                                                                                                                                                                                                                                                                                                                                                                         |  |
| EPI_ISL_1176311, EPI_ISL_1176313, EPI_ISL_1176316, EPI_ISL_1176318, EPI_ISL_1176320                                                                                                                                                                                                                                                                                                                                                                                                                                                                                                                                                                                                                                                                                                                                                                                                                                                                                                                                                                                                                                                                                                                                                                                                                                                                                                                                                                                                                                                                                                                                                                                                                                                                                                                                                                                                                                                                                                                                                                                                                                                                                                                                                                                                                                                                                                                                                                                                                                                                                                                                                                                                                                                                                                                                                                                                                                                                                                                                                                                                                                                                                                                                                                                                                                                                                                                                                                                                                                                                                                                                                                                                                                                                                                                                                                                                                                                                                                                                                                                                                                                                                                                                                                                                                                                                                                                                                                                                                                                                                                                                                                                                                                                                                                                                                                                                                                                                                                                                                                                                                                                                                                                                                                                                                                                                                                                                                                                                                                                                                                                                                                                                                                                                                                                                                                                                                                                                                                                                                                                                                                                                                                                                                                                                                                                                                                                                                                                                                                                                                                                                                                                                                                                                                                                                                                                                                                                                                                                                                                                                                                                                                                                                                                                                                                                                                                                                                                                                                                                                                                                                                                                                                                                                                                                                                                                                                                                                                                                                                                                                                                                                                                                                                                                                                                                                                                                                                                                                                                                                                                                                                                                                                                                                                                                                                                                                                                                                                                                                                                                                                                                                                                                                                                                                                                                                                                                                                                                                                                                                                                                                                                                                                                                                                                                                                                                                                                                                                                                                                                                                                                                                                                                                                                                                                                                                                                                                                                                                                                                                                                                                                                                                                                                                                                                                                                                                                                                                                                                                                                                                                                                                                                                                                                                                                                                                                                                                                                                                                                                                                                                                                                                                                                                                                                                                                                                                                                                                                                                                                                                                                                                                                                                                                                                                                                                                                                                                                                                                                                                                                                                                                                                                                                                                                                                                                                                                                                                                                                                                                                                                                                                                                                                                                                                                                                                                                                                                                                                                                                                                                                                                                                                                                                                                                                                                                                                                                                                                                                                                                 | Heilig Hart Hospital                                    | Imelda Hospital                                                                                               | Dagmar Obbels; Dagmar obbels; Hanne Valgaeren; Johan Frans                                                                                                                                                                                                                         |                                                                                                                                                                                                                                                                                                                                                                                                                                                                                                                                                                                                  |  |
| EPI_ISL_1265163                                                                                                                                                                                                                                                                                                                                                                                                                                                                                                                                                                                                                                                                                                                                                                                                                                                                                                                                                                                                                                                                                                                                                                                                                                                                                                                                                                                                                                                                                                                                                                                                                                                                                                                                                                                                                                                                                                                                                                                                                                                                                                                                                                                                                                                                                                                                                                                                                                                                                                                                                                                                                                                                                                                                                                                                                                                                                                                                                                                                                                                                                                                                                                                                                                                                                                                                                                                                                                                                                                                                                                                                                                                                                                                                                                                                                                                                                                                                                                                                                                                                                                                                                                                                                                                                                                                                                                                                                                                                                                                                                                                                                                                                                                                                                                                                                                                                                                                                                                                                                                                                                                                                                                                                                                                                                                                                                                                                                                                                                                                                                                                                                                                                                                                                                                                                                                                                                                                                                                                                                                                                                                                                                                                                                                                                                                                                                                                                                                                                                                                                                                                                                                                                                                                                                                                                                                                                                                                                                                                                                                                                                                                                                                                                                                                                                                                                                                                                                                                                                                                                                                                                                                                                                                                                                                                                                                                                                                                                                                                                                                                                                                                                                                                                                                                                                                                                                                                                                                                                                                                                                                                                                                                                                                                                                                                                                                                                                                                                                                                                                                                                                                                                                                                                                                                                                                                                                                                                                                                                                                                                                                                                                                                                                                                                                                                                                                                                                                                                                                                                                                                                                                                                                                                                                                                                                                                                                                                                                                                                                                                                                                                                                                                                                                                                                                                                                                                                                                                                                                                                                                                                                                                                                                                                                                                                                                                                                                                                                                                                                                                                                                                                                                                                                                                                                                                                                                                                                                                                                                                                                                                                                                                                                                                                                                                                                                                                                                                                                                                                                                                                                                                                                                                                                                                                                                                                                                                                                                                                                                                                                                                                                                                                                                                                                                                                                                                                                                                                                                                                                                                                                                                                                                                                                                                                                                                                                                                                                                                                                                                                                     | Heilig Hart Hospital Lier                               | Imelda Hospital                                                                                               | Dagmar Obbels; Hanne Valgaeren; Johan Frans                                                                                                                                                                                                                                        |                                                                                                                                                                                                                                                                                                                                                                                                                                                                                                                                                                                                  |  |
| EPI_ISL_1252474 to 1252477, EPI_ISL_1265166, EPI_ISL_1281693                                                                                                                                                                                                                                                                                                                                                                                                                                                                                                                                                                                                                                                                                                                                                                                                                                                                                                                                                                                                                                                                                                                                                                                                                                                                                                                                                                                                                                                                                                                                                                                                                                                                                                                                                                                                                                                                                                                                                                                                                                                                                                                                                                                                                                                                                                                                                                                                                                                                                                                                                                                                                                                                                                                                                                                                                                                                                                                                                                                                                                                                                                                                                                                                                                                                                                                                                                                                                                                                                                                                                                                                                                                                                                                                                                                                                                                                                                                                                                                                                                                                                                                                                                                                                                                                                                                                                                                                                                                                                                                                                                                                                                                                                                                                                                                                                                                                                                                                                                                                                                                                                                                                                                                                                                                                                                                                                                                                                                                                                                                                                                                                                                                                                                                                                                                                                                                                                                                                                                                                                                                                                                                                                                                                                                                                                                                                                                                                                                                                                                                                                                                                                                                                                                                                                                                                                                                                                                                                                                                                                                                                                                                                                                                                                                                                                                                                                                                                                                                                                                                                                                                                                                                                                                                                                                                                                                                                                                                                                                                                                                                                                                                                                                                                                                                                                                                                                                                                                                                                                                                                                                                                                                                                                                                                                                                                                                                                                                                                                                                                                                                                                                                                                                                                                                                                                                                                                                                                                                                                                                                                                                                                                                                                                                                                                                                                                                                                                                                                                                                                                                                                                                                                                                                                                                                                                                                                                                                                                                                                                                                                                                                                                                                                                                                                                                                                                                                                                                                                                                                                                                                                                                                                                                                                                                                                                                                                                                                                                                                                                                                                                                                                                                                                                                                                                                                                                                                                                                                                                                                                                                                                                                                                                                                                                                                                                                                                                                                                                                                                                                                                                                                                                                                                                                                                                                                                                                                                                                                                                                                                                                                                                                                                                                                                                                                                                                                                                                                                                                                                                                                                                                                                                                                                                                                                                                                                                                                                                                                                                                        | Heilig hart Lier                                        | Imelda hospital Bonheiden                                                                                     | Dagmar Obbels; Hanne Valgaeren; Johan Frans                                                                                                                                                                                                                                        |                                                                                                                                                                                                                                                                                                                                                                                                                                                                                                                                                                                                  |  |
| EPI_ISL_1144020 to 1144021, EPI_ISL_1153463, EPI_ISL_1153508, EPI_ISL_1156095 to 1156098, EPI_ISL_1156101, EPI_ISL_1156115, EPI_ISL_1156122, EPI_ISL_1156152, EPI_ISL_1214847                                                                                                                                                                                                                                                                                                                                                                                                                                                                                                                                                                                                                                                                                                                                                                                                                                                                                                                                                                                                                                                                                                                                                                                                                                                                                                                                                                                                                                                                                                                                                                                                                                                                                                                                                                                                                                                                                                                                                                                                                                                                                                                                                                                                                                                                                                                                                                                                                                                                                                                                                                                                                                                                                                                                                                                                                                                                                                                                                                                                                                                                                                                                                                                                                                                                                                                                                                                                                                                                                                                                                                                                                                                                                                                                                                                                                                                                                                                                                                                                                                                                                                                                                                                                                                                                                                                                                                                                                                                                                                                                                                                                                                                                                                                                                                                                                                                                                                                                                                                                                                                                                                                                                                                                                                                                                                                                                                                                                                                                                                                                                                                                                                                                                                                                                                                                                                                                                                                                                                                                                                                                                                                                                                                                                                                                                                                                                                                                                                                                                                                                                                                                                                                                                                                                                                                                                                                                                                                                                                                                                                                                                                                                                                                                                                                                                                                                                                                                                                                                                                                                                                                                                                                                                                                                                                                                                                                                                                                                                                                                                                                                                                                                                                                                                                                                                                                                                                                                                                                                                                                                                                                                                                                                                                                                                                                                                                                                                                                                                                                                                                                                                                                                                                                                                                                                                                                                                                                                                                                                                                                                                                                                                                                                                                                                                                                                                                                                                                                                                                                                                                                                                                                                                                                                                                                                                                                                                                                                                                                                                                                                                                                                                                                                                                                                                                                                                                                                                                                                                                                                                                                                                                                                                                                                                                                                                                                                                                                                                                                                                                                                                                                                                                                                                                                                                                                                                                                                                                                                                                                                                                                                                                                                                                                                                                                                                                                                                                                                                                                                                                                                                                                                                                                                                                                                                                                                                                                                                                                                                                                                                                                                                                                                                                                                                                                                                                                                                                                                                                                                                                                                                                                                                                                                                                                                                                                                                                                       | see above                                               | Helios Universitätsklinikum Wuppertal: Universität Witten/Herdecke: Institut für Medizinische Labordiagnostik | Robert Koch Institute                                                                                                                                                                                                                                                              | Alexandre Bolze; Ary Ascencio; Ben L. Rambo-Martin; Brad Sickler; Charlotte Rivera-Garcia; Christine Tran; Clinton R. Paden; Dakota Howard; David Becker; Dhvani Batra; Duncan MacCannell; Efrén Sandoval; Eileen de Feo; Elizabeth Ciriulli; Eric Allen; Geraint Levan; James Lu; Jan Antico; Jason Nguyen; Jimmy Ramirez; Jingtao Liu; Kelly Schiabor Barrett; Kim Gietzen; Magnus Isaksson; Marc Laurent; Matthew Tolentino; Nicole L. Washington; Peter W. Cook; Phil Febbo; Ryan Cho; Shannon Wickline; Sherry Wang; Simon White; Summer Galloway; Suxiang Tong; Tyler Cassens; William Lee |  |
| EPI_ISL_1088585 to 1089433, EPI_ISL_1255398 to 1255414                                                                                                                                                                                                                                                                                                                                                                                                                                                                                                                                                                                                                                                                                                                                                                                                                                                                                                                                                                                                                                                                                                                                                                                                                                                                                                                                                                                                                                                                                                                                                                                                                                                                                                                                                                                                                                                                                                                                                                                                                                                                                                                                                                                                                                                                                                                                                                                                                                                                                                                                                                                                                                                                                                                                                                                                                                                                                                                                                                                                                                                                                                                                                                                                                                                                                                                                                                                                                                                                                                                                                                                                                                                                                                                                                                                                                                                                                                                                                                                                                                                                                                                                                                                                                                                                                                                                                                                                                                                                                                                                                                                                                                                                                                                                                                                                                                                                                                                                                                                                                                                                                                                                                                                                                                                                                                                                                                                                                                                                                                                                                                                                                                                                                                                                                                                                                                                                                                                                                                                                                                                                                                                                                                                                                                                                                                                                                                                                                                                                                                                                                                                                                                                                                                                                                                                                                                                                                                                                                                                                                                                                                                                                                                                                                                                                                                                                                                                                                                                                                                                                                                                                                                                                                                                                                                                                                                                                                                                                                                                                                                                                                                                                                                                                                                                                                                                                                                                                                                                                                                                                                                                                                                                                                                                                                                                                                                                                                                                                                                                                                                                                                                                                                                                                                                                                                                                                                                                                                                                                                                                                                                                                                                                                                                                                                                                                                                                                                                                                                                                                                                                                                                                                                                                                                                                                                                                                                                                                                                                                                                                                                                                                                                                                                                                                                                                                                                                                                                                                                                                                                                                                                                                                                                                                                                                                                                                                                                                                                                                                                                                                                                                                                                                                                                                                                                                                                                                                                                                                                                                                                                                                                                                                                                                                                                                                                                                                                                                                                                                                                                                                                                                                                                                                                                                                                                                                                                                                                                                                                                                                                                                                                                                                                                                                                                                                                                                                                                                                                                                                                                                                                                                                                                                                                                                                                                                                                                                                                                                                                                              | Helix / Illumina                                        | Respiratory Viruses Branch, Division of Viral Diseases, Centers for Disease Control and Prevention            |                                                                                                                                                                                                                                                                                    |                                                                                                                                                                                                                                                                                                                                                                                                                                                                                                                                                                                                  |  |
| EPI_ISL_1194731 to 1194865, EPI_ISL_1261895 to 1262038, EPI_ISL_1262041, EPI_ISL_1262045, EPI_ISL_1262048, EPI_ISL_1262051, EPI_ISL_1262054, EPI_ISL_1262057, EPI_ISL_1262061, EPI_ISL_1262064, EPI_ISL_1262067, EPI_ISL_1262070, EPI_ISL_1262073, EPI_ISL_1262076, EPI_ISL_1262080, EPI_ISL_1262083, EPI_ISL_1262086, EPI_ISL_1262089, EPI_ISL_1262092, EPI_ISL_1262095, EPI_ISL_1262098, EPI_ISL_1262101, EPI_ISL_1262104, EPI_ISL_1262107, EPI_ISL_1262110, EPI_ISL_1262113, EPI_ISL_1262116, EPI_ISL_1262119, EPI_ISL_1262122, EPI_ISL_1262125, EPI_ISL_1262127 to 1262454, EPI_ISL_1267502 to 1267589, EPI_ISL_1267592, EPI_ISL_1267595, EPI_ISL_1267598, EPI_ISL_1267601, EPI_ISL_1267603, EPI_ISL_1267606 to 1268193, EPI_ISL_1268196 to 1268197, EPI_ISL_1268199, EPI_ISL_1268201, EPI_ISL_1268203, EPI_ISL_1268206, EPI_ISL_1268208, EPI_ISL_1268210, EPI_ISL_1268212, EPI_ISL_1268214, EPI_ISL_1268216, EPI_ISL_1268218, EPI_ISL_1268220, EPI_ISL_1268222, EPI_ISL_1268225, EPI_ISL_1268227, EPI_ISL_1268229, EPI_ISL_1268231, EPI_ISL_1268232, EPI_ISL_1268233, EPI_ISL_1268235, EPI_ISL_1268237, EPI_ISL_1268239, EPI_ISL_1268241 to 1268242, EPI_ISL_1268245, EPI_ISL_1268247, EPI_ISL_1268249, EPI_ISL_1268251 to 1268252, EPI_ISL_1268254, EPI_ISL_1268256, EPI_ISL_1268258, EPI_ISL_1268260, EPI_ISL_1268262, EPI_ISL_1268264 to 1268647, EPI_ISL_1268649, EPI_ISL_1268652, EPI_ISL_1268654, EPI_ISL_1268657, EPI_ISL_1268660, EPI_ISL_1268663, EPI_ISL_1268666, EPI_ISL_1268667, EPI_ISL_1268670, EPI_ISL_1268672, EPI_ISL_1268675, EPI_ISL_1268678, EPI_ISL_1268681, EPI_ISL_1268684, EPI_ISL_1268687, EPI_ISL_1268690, EPI_ISL_1268693, EPI_ISL_1268696, EPI_ISL_1268699, EPI_ISL_1268701, EPI_ISL_1268704, EPI_ISL_1268706, EPI_ISL_1268708, EPI_ISL_1268710, EPI_ISL_1268712, EPI_ISL_1268714, EPI_ISL_1268716, EPI_ISL_1268718, EPI_ISL_1268720, EPI_ISL_1268722, EPI_ISL_1268724, EPI_ISL_1268726, EPI_ISL_1268728, EPI_ISL_1268730, EPI_ISL_1268732, EPI_ISL_1268734, EPI_ISL_1268736, EPI_ISL_1268738, EPI_ISL_1268740, EPI_ISL_1268742, EPI_ISL_1268744, EPI_ISL_1268746, EPI_ISL_1268748, EPI_ISL_1268751 to 1268752, EPI_ISL_1268754, EPI_ISL_1268756, EPI_ISL_1268758, EPI_ISL_1268760, EPI_ISL_1268762, EPI_ISL_1268764, EPI_ISL_1268766, EPI_ISL_1268768, EPI_ISL_1268770, EPI_ISL_1268772, EPI_ISL_1268774, EPI_ISL_1268777, EPI_ISL_1268779, EPI_ISL_1268781, EPI_ISL_1268783, EPI_ISL_1268785, EPI_ISL_1268787, EPI_ISL_1268789, EPI_ISL_1268791, EPI_ISL_1268793, EPI_ISL_1268795, EPI_ISL_1268798, EPI_ISL_1268800, EPI_ISL_1268802, EPI_ISL_1268804, EPI_ISL_1268806, EPI_ISL_1268808, EPI_ISL_1268810, EPI_ISL_1268812, EPI_ISL_1268814, EPI_ISL_1268816, EPI_ISL_1268818, EPI_ISL_1268820, EPI_ISL_1268822, EPI_ISL_1268824, EPI_ISL_1268826 to 1268827, EPI_ISL_1268829, EPI_ISL_1268832, EPI_ISL_1268835, EPI_ISL_1268839 to 1268840, EPI_ISL_1268842, EPI_ISL_1268844, EPI_ISL_1268847 to 1268848, EPI_ISL_1268851, EPI_ISL_1268854, EPI_ISL_1268857, EPI_ISL_1268860, EPI_ISL_1268862, EPI_ISL_1268866, EPI_ISL_1268870, EPI_ISL_1268873, EPI_ISL_1268876, EPI_ISL_1268879, EPI_ISL_1268882, EPI_ISL_1268885, EPI_ISL_1268888, EPI_ISL_1268891, EPI_ISL_1268894, EPI_ISL_1268897, EPI_ISL_1268900, EPI_ISL_1268903, EPI_ISL_1268906, EPI_ISL_1268909, EPI_ISL_1268912, EPI_ISL_1268915, EPI_ISL_1268918, EPI_ISL_1268921, EPI_ISL_1268924, EPI_ISL_1268927, EPI_ISL_1268930, EPI_ISL_1268933, EPI_ISL_1268936, EPI_ISL_1268939, EPI_ISL_1268942, EPI_ISL_1268945, EPI_ISL_1268948, EPI_ISL_1268951, EPI_ISL_1268954, EPI_ISL_1268957, EPI_ISL_1268960, EPI_ISL_1268963, EPI_ISL_1268966, EPI_ISL_1268969, EPI_ISL_1268972, EPI_ISL_1268975, EPI_ISL_1268978, EPI_ISL_1268981, EPI_ISL_1268984, EPI_ISL_1268987, EPI_ISL_1268990, EPI_ISL_1268993, EPI_ISL_1268996, EPI_ISL_1268999, EPI_ISL_1269002, EPI_ISL_1269005, EPI_ISL_1269008, EPI_ISL_1269011, EPI_ISL_1269014, EPI_ISL_1269017, EPI_ISL_1269019 to 1269313, EPI_ISL_1269316, EPI_ISL_1269319, EPI_ISL_1269322, EPI_ISL_1269325, EPI_ISL_1269328, EPI_ISL_1269331, EPI_ISL_1269334, EPI_ISL_1269337, EPI_ISL_1269340, EPI_ISL_1269343, EPI_ISL_1269346, EPI_ISL_1269349, EPI_ISL_1269352, EPI_ISL_1269355, EPI_ISL_1269358, EPI_ISL_1269361, EPI_ISL_1269364, EPI_ISL_1269367, EPI_ISL_1269370, EPI_ISL_1269373, EPI_ISL_1269376, EPI_ISL_1269379, EPI_ISL_1269382, EPI_ISL_1269385, EPI_ISL_1269388, EPI_ISL_1269391, EPI_ISL_1269394, EPI_ISL_1269397, EPI_ISL_1269400, EPI_ISL_1269403, EPI_ISL_1269406, EPI_ISL_1269409, EPI_ISL_1269412, EPI_ISL_1269415, EPI_ISL_1269418, EPI_ISL_1269421, EPI_ISL_1269424, EPI_ISL_1269427, EPI_ISL_1269430, EPI_ISL_1269433, EPI_ISL_1269436, EPI_ISL_1269439, EPI_ISL_1269442, EPI_ISL_1269445, EPI_ISL_1269448, EPI_ISL_1269451, EPI_ISL_1269454, EPI_ISL_1269457, EPI_ISL_1269460, EPI_ISL_1269463, EPI_ISL_1269466, EPI_ISL_1269469, EPI_ISL_1269472, EPI_ISL_1269475, EPI_ISL_1269478, EPI_ISL_1269481, EPI_ISL_1269484, EPI_ISL_1269487, EPI_ISL_1269490, EPI_ISL_1269493, EPI_ISL_1269496, EPI_ISL_1269499, EPI_ISL_1269502, EPI_ISL_1269505, EPI_ISL_1269508, EPI_ISL_1269511, EPI_ISL_1269514, EPI_ISL_1269517, EPI_ISL_1269520, EPI_ISL_1269523, EPI_ISL_1269526, EPI_ISL_1269529, EPI_ISL_1269532, EPI_ISL_1269535, EPI_ISL_1269538, EPI_ISL_1269541, EPI_ISL_1269544, EPI_ISL_1269547, EPI_ISL_1269550, EPI_ISL_1269553, EPI_ISL_1269556, EPI_ISL_1269559, EPI_ISL_1269562, EPI_ISL_1269565, EPI_ISL_1269568, EPI_ISL_1269571, EPI_ISL_1269574, EPI_ISL_1269577, EPI_ISL_1269580, EPI_ISL_1269583, EPI_ISL_1269586, EPI_ISL_1269589, EPI_ISL_1269592, EPI_ISL_1269595, EPI_ISL_1269598, EPI_ISL_1269601, EPI_ISL_1269604, EPI_ISL_1269607, EPI_ISL_1269610, EPI_ISL_1269613, EPI_ISL_1269616, EPI_ISL_1269619, EPI_ISL_1269622, EPI_ISL_1269625, EPI_ISL_1269628, EPI_ISL_1269631, EPI_ISL_1269634, EPI_ISL_1269637, EPI_ISL_1269640, EPI_ISL_1269643, EPI_ISL_1269646, EPI_ISL_1269649, EPI_ISL_1269652, EPI_ISL_1269655, EPI_ISL_1269658, EPI_ISL_1269661, EPI_ISL_1269664, EPI_ISL_1269667, EPI_ISL_1269670, EPI_ISL_1269673, EPI_ISL_1269676, EPI_ISL_1269679, EPI_ISL_1269682, EPI_ISL_1269685, EPI_ISL_1269688, EPI_ISL_1269691, EPI_ISL_1269694, EPI_ISL_1269697, EPI_ISL_1269700, EPI_ISL_1269703, EPI_ISL_1269706, EPI_ISL_1269709, EPI_ISL_1269712, EPI_ISL_1269715, EPI_ISL_1269718, EPI_ISL_1269721, EPI_ISL_1269724, EPI_ISL_1269727, EPI_ISL_1269730, EPI_ISL_1269733, EPI_ISL_1269736, EPI_ISL_1269739, EPI_ISL_1269742, EPI_ISL_1269745, EPI_ISL_1269748, EPI_ISL_1269751, EPI_ISL_1269754, EPI_ISL_1269757, EPI_ISL_1269760, EPI_ISL_1269763, EPI_ISL_1269766, EPI_ISL_1269769, EPI_ISL_1269772, EPI_ISL_1269775, EPI_ISL_1269778, EPI_ISL_1269781, EPI_ISL_1269784, EPI_ISL_1269787, EPI_ISL_1269790, EPI_ISL_1269793, EPI_ISL_1269796, EPI_ISL_1269799, EPI_ISL_1269802, EPI_ISL_1269805, EPI_ISL_1269808, EPI_ISL_1269811, EPI_ISL_1269814, EPI_ISL_1269817, EPI_ISL_1269820, EPI_ISL_1269823, EPI_ISL_1269826, EPI_ISL_1269829, EPI_ISL_1269832, EPI_ISL_1269835, EPI_ISL_1269838, EPI_ISL_1269841, EPI_ISL_1269844, EPI_ISL_1269847, EPI_ISL_1269850, EPI_ISL_1269853, EPI_ISL_1269856, EPI_ISL_1269859, EPI_ISL_1269862, EPI_ISL_1269865, EPI_ISL_1269868, EPI_ISL_1269871, EPI_ISL_1269874, EPI_ISL_1269877, EPI_ISL_1269880, EPI_ISL_1269883, EPI_ISL_1269886, EPI_ISL_1269889, EPI_ISL_1269892, EPI_ISL_1269895, EPI_ISL_1269898, EPI_ISL_1269901, EPI_ISL_1269904, EPI_ISL_1269907, EPI_ISL_1269910, EPI_ISL_1269913, EPI_ISL_1269916, EPI_ISL_1269919, EPI_ISL_1269922, EPI_ISL_1269925, EPI_ISL_1269928, EPI_ISL_1269931, EPI_ISL_1269934, EPI_ISL_1269937, EPI_ISL_1269940, EPI_ISL_1269943, EPI_ISL_1269946, EPI_ISL_1269949, EPI_ISL_1269952, EPI_ISL_1269955, EPI_ISL_1269958, EPI_ISL_1269961, EPI_ISL_1269964, EPI_ISL_1269967, EPI_ISL_1269970, EPI_ISL_1269973, EPI_ISL_1269976, EPI_ISL_1269979, EPI_ISL_1269982, EPI_ISL_1269985, EPI_ISL_1269988, EPI_ISL_1269991, EPI_ISL_1269994, EPI_ISL_1269997, EPI_ISL_1270000, EPI_ISL_1270003, EPI_ISL_1270006, EPI_ISL_1270009, EPI_ISL_1270012, EPI_ISL_1270015, EPI_ISL_1270018, EPI_ISL_1270021, EPI_ISL_1270024, EPI_ISL_1270027, EPI_ISL_1270030, EPI_ISL_1270033, EPI_ISL_1270036, EPI_ISL_1270039, EPI_ISL_1270042, EPI_ISL_1270045, EPI_ISL_1270048, EPI_ISL_1270051, EPI_ISL_1270054, EPI_ISL_1270057, EPI_ISL_1270060, EPI_ISL_1270063, EPI_ISL_1270066, EPI_ISL_1270069, EPI_ISL_1270072, EPI_ISL_1270075, EPI_ISL_1270078, EPI_ISL_1270081, EPI_ISL_1270084, EPI_ISL_1270087, EPI_ISL_1270090, EPI_ISL_1270093, EPI_ISL_1270096, EPI_ISL_1270099, EPI_ISL_1271000, EPI_ISL_1271003, EPI_ISL_1271006, EPI_ISL_1271009, EPI_ISL_1271012, EPI_ISL_1271015, EPI_ISL_1271018, EPI_ISL_1271021, EPI_ISL_1271024, EPI_ISL_1271027, EPI_ISL_1271030, EPI_ISL_1271033, EPI_ISL_1271036, EPI_ISL_1271039, EPI_ISL_1271042, EPI_ISL_1271045, EPI_ISL_1271048, EPI_ISL_1271051, EPI_ISL_1271054, EPI_ISL_1271057, EPI_ISL_1271060, EPI_ISL_1271063, EPI_ISL_1271066, EPI_ISL_1271069, EPI_ISL_1271072, EPI_ISL_1271075, EPI_ISL_1271078, EPI_ISL_1271081, EPI_ISL_1271084, EPI_ISL_1271087, EPI_ISL_1271090, EPI_ISL_1271093, EPI_ISL_1271096, EPI_ISL_1271099, EPI_ISL_1272020, EPI_ISL_1272023, EPI_ISL_1272026, EPI_ISL_1272029, EPI_ISL_1272032, EPI_ISL_1272035, EPI_ISL_1272038, EPI_ISL_1272041, EPI_ISL_1272044, EPI_ISL_1272047, EPI_ISL_1272050, EPI_ISL_1272053, EPI_ISL_1272056, EPI_ISL_1272059, EPI_ISL_1272062, EPI_ISL_1272065, EPI_ISL_1272068, EPI_ISL_1272071, EPI_ISL_1272074, EPI_ISL_1272077, EPI_ISL_1272080, EPI_ISL_1272083, EPI_ISL_1272086, EPI_ISL_1272089, EPI_ISL_1272092, EPI_ISL_1272095, EPI_ISL_1272098, EPI_ISL_1272019 to 1270786, EPI_ISL_1283377, EPI_ISL_1283379, EPI_ISL_1283381, EPI_ISL_1283383, EPI_ISL_1283385, EPI_ISL_1283387, EPI_ISL_1283389, EPI_ISL_1283391, EPI_ISL_1283393, EPI_ISL_1283395, EPI_ISL_1283397, EPI_ISL_1283400, EPI_ISL_1283402, EPI_ISL_1283404, EPI_ISL_1283406, EPI_ISL_1283408, EPI_ISL_1283410, EPI_ISL_1283412, EPI_ISL_1283414, EPI_ISL_1283416, EPI_ISL_1283418, EPI_ISL_1283420, EPI_ISL_1283422, EPI_ISL_1283424, EPI_ISL_1283426, EPI_ISL_1283428, EPI_ISL_1283430, EPI_ISL_1283432, EPI_ISL_1283434, EPI_ISL_1283436, EPI_ISL_1283438, EPI_ISL_1283440, EPI_ISL_1283442, EPI_ISL_1283444, EPI_ISL_1283446, EPI_ISL_1283448, EPI_ISL_1283450, EPI_ISL_1283452, EPI_ISL_1283454, EPI_ISL_1283456, EPI_ISL_1283458, EPI_ISL_1283460, EPI_ISL_1283462, EPI_ISL_1283464, EPI_ISL_1283466, EPI_ISL_1283468, EPI_ISL_1283470, EPI_ISL_1283472, EPI_ISL_1283474, EPI_ISL_1283476, EPI_ISL_1283478, EPI_ISL_1283480, EPI_ISL_1283482, EPI_ISL_1283484, EPI_ISL_1283486, EPI_ISL_1283488, EPI_ISL_1283490, EPI_ISL_1283492, EPI_ISL_1283494, EPI_ISL_1283496, EPI_ISL_1283498, EPI_ISL_1283500, EPI_ISL_1283502, EPI_ISL_1283504, EPI_ISL_1283506, EPI_ISL_1283508, EPI_ISL_1283510, EPI_ISL_1283512, EPI_ISL_1283514, EPI_ISL_1283516, EPI_ISL_1283518, EPI_ISL_1283520, EPI_ISL_1283522, EPI_ISL_1283524, EPI_ISL_1283526, EPI_ISL_1283528, EPI_ISL_1283530, EPI_ISL_1283532, EPI_ISL_1283534, EPI_ISL_1283536, EPI_ISL_1283538, EPI_ISL_1283540, EPI_ISL_1283542, EPI_ISL_1283544, EPI_ISL_1283546, EPI_ISL_1283548, EPI_ISL_1283550, EPI_ISL_1283552, EPI_ISL_1283554, EPI_ISL_1283556, EPI_ISL_1283558, EPI_ISL_1283560, EPI_ISL_1283562, EPI_ISL_1283564, EPI_ISL_1283566, EPI_ISL_1283568, EPI_ISL_1283570, EPI_ISL_1283572, EPI_ISL_1283574, EPI_ISL_1283576, EPI_ISL_1283578, EPI_ISL_1283580, EPI_ISL_1283582, EPI_ISL_1283584, EPI_ISL_1283586, EPI_ISL_1283588, EPI_ISL_1283590, EPI_ISL_1283592, EPI_ISL_1283594, EPI_ISL_1283596, EPI_ISL_1283598, EPI_ISL_1283600, EPI_ISL_1283602, EPI_ISL_1283604, EPI_ISL_1283606, EPI_ISL_1283608, EPI_ISL_1283610, EPI_ISL_1283612, EPI_ISL_1283614, EPI_ISL_1283616, EPI_ISL_1283618, EPI_ISL_1283620, EPI_ISL_1283622, EPI_ISL_1283624, EPI_ISL_1283626, EPI_ISL_1283628, EPI_ISL_1283630, EPI_ISL_1283632, EPI_ISL_1283634, EPI_ISL_1283636, EPI_ISL_1283638, EPI_ISL_1283640, EPI_ISL_1283642, EPI_ISL_1283644, EPI_ISL_1283646, EPI_ISL_1283648, EPI_ISL_1283650, EPI_ISL_1283652, EPI_ISL_1283654, EPI_ISL_1283656, EPI_ISL_1283658, EPI_ISL_1283660, EPI_ISL_1283662, EPI_ISL_1283664, EPI_ISL_1283666, EPI_ISL_1283668, EPI_ISL_1283670, EPI_ISL_1283672, EPI_ISL_1283674, EPI_ISL_1283676, EPI_ISL_1283678, EPI_ISL_1283680, EPI_ISL_1283682, EPI_ISL_1283684, EPI_ISL_1283686, EPI_ISL_1283688, EPI_ISL_1283690, EPI_ISL_1283692, EPI_ISL_1283694, EPI_ISL_1283696, EPI_ISL_1283698, EPI_ISL_1283700, EPI_ISL_1283702, EPI_ISL_1283704, EPI_ISL_1283706, EPI_ISL_1283708, EPI_ISL_1283710, EPI_ISL_1283712, EPI_ISL_1283714, EPI_ISL_1283716, EPI_ISL_1283718, EPI_ISL_1283720, EPI_ISL_1283722, EPI_ISL_1283724, EPI_ISL_1283726, EPI_ISL_1283728, EPI_ISL_1283730, EPI_ISL_1283732, EPI_ISL_1283734, EPI_ISL_1283736, EPI_ISL_1283738, EPI_ISL_1283740, EPI_ISL_1283742, EPI_ISL_1283744, EPI_ISL_1283746, EPI_ISL_1283748, EPI_ISL_1283750, EPI_ISL_1283752, EPI_ISL_1283754, EPI_ISL_1283756, EPI_ISL_1283758, EPI_ISL_1283760, EPI_ISL_1283762, EPI_ISL_1283764, EPI_ISL_1283766, EPI_ISL_1283768, EPI_ISL_1283770, EPI_ISL_1283772, EPI_ISL_1283774, EPI_ISL_1283776, EPI_ISL_1283778, EPI_ISL_1283780, EPI_ISL_1283782, EPI_ISL_1283784, EPI_ISL_1283786, EPI_ISL_1283788, EPI_ISL_1283790, EPI_ISL_1283792, EPI_ISL_1283794, EPI_ISL_1283796, EPI_ISL_1283798, EPI_ISL_1283800, EPI_ISL_1283802, EPI_ISL_1283804, EPI_ISL_1283806, EPI_ISL_1283808, EPI_ISL_1283810, EPI_ISL_1283812, EPI_ISL_1283814, EPI_ISL_1283816, EPI_ISL_1283818, EPI_ISL_1283820, EPI_ISL_1283822, EPI_ISL_1283824, EPI_ISL_1283826, EPI_ISL_1283828, EPI_ISL_1283830, EPI_ISL_1283832, EPI_ISL_1283834, EPI_ISL_1283836, EPI_ISL_1283838, EPI_ISL_1283840, EPI_ISL_1283842, EPI_ISL_1283844, EPI_ISL_1283846, EPI_ISL_1283848, EPI_ISL_1283850, EPI_ISL_1283852, EPI_ISL_1283854, EPI_ISL_1283856, EPI_ISL_1283858, EPI_ISL_1283860, EPI_ISL_1283862, EPI_ISL_1283864, |                                                         |                                                                                                               |                                                                                                                                                                                                                                                                                    |                                                                                                                                                                                                                                                                                                                                                                                                                                                                                                                                                                                                  |  |

|                                                                                                                                                                                                                                                                                                                                                                                                                                                                                                                                                                                                                                                                                                                                                                                                                                                                                                                                                                                                                                                                                                                                                                                                                                                                                                                                                                                                                                                                                                                                                                                                                                                                                                                                                                                                                                                                                                                                                                                                                                                                                                                                                                                                                                                                                                                                                                                                                                                                                                                                                                                                        |                                                                                                                                       |                                                                                                                        |                                                                                                                                                                                                                                                                                                                                                                                                                                                                                                                                                                                                                                                                                                                                                                                                                                                                                                                                                                                                                                                                                                                                                                                                                                                                                                                                                                                                                   |
|--------------------------------------------------------------------------------------------------------------------------------------------------------------------------------------------------------------------------------------------------------------------------------------------------------------------------------------------------------------------------------------------------------------------------------------------------------------------------------------------------------------------------------------------------------------------------------------------------------------------------------------------------------------------------------------------------------------------------------------------------------------------------------------------------------------------------------------------------------------------------------------------------------------------------------------------------------------------------------------------------------------------------------------------------------------------------------------------------------------------------------------------------------------------------------------------------------------------------------------------------------------------------------------------------------------------------------------------------------------------------------------------------------------------------------------------------------------------------------------------------------------------------------------------------------------------------------------------------------------------------------------------------------------------------------------------------------------------------------------------------------------------------------------------------------------------------------------------------------------------------------------------------------------------------------------------------------------------------------------------------------------------------------------------------------------------------------------------------------------------------------------------------------------------------------------------------------------------------------------------------------------------------------------------------------------------------------------------------------------------------------------------------------------------------------------------------------------------------------------------------------------------------------------------------------------------------------------------------------|---------------------------------------------------------------------------------------------------------------------------------------|------------------------------------------------------------------------------------------------------------------------|-------------------------------------------------------------------------------------------------------------------------------------------------------------------------------------------------------------------------------------------------------------------------------------------------------------------------------------------------------------------------------------------------------------------------------------------------------------------------------------------------------------------------------------------------------------------------------------------------------------------------------------------------------------------------------------------------------------------------------------------------------------------------------------------------------------------------------------------------------------------------------------------------------------------------------------------------------------------------------------------------------------------------------------------------------------------------------------------------------------------------------------------------------------------------------------------------------------------------------------------------------------------------------------------------------------------------------------------------------------------------------------------------------------------|
| see above                                                                                                                                                                                                                                                                                                                                                                                                                                                                                                                                                                                                                                                                                                                                                                                                                                                                                                                                                                                                                                                                                                                                                                                                                                                                                                                                                                                                                                                                                                                                                                                                                                                                                                                                                                                                                                                                                                                                                                                                                                                                                                                                                                                                                                                                                                                                                                                                                                                                                                                                                                                              | Helix/Illumina                                                                                                                        | Centers for Disease Control and Prevention Division of Viral Diseases, Pathogen Discovery                              | Alexandre Bolze; Ary Ascencio; Ben L. Rambo-Martin; Brad Sickler; Charlotte Rivera-Garcia; Christine Tran; Clinton R. Paden; Dakota Howard; David Becker; Dhvani Batra; Duncan MacCannell; Eftren Sandoval; Eileen de Feo; Elizabeth Cirulli; Eric Allen; Geraint Levan; James Lu; Jan Antico; Jason Nguyen; Jimmy Ramirez; Jingtao Liu; Kelly Schiabor Barrett; Kim Gietzen; Magnus Isaksson; Marc Laurent; Matthew Tolentino; Nicole L. Washington; Peter W. Cook; Phil Febbo; Ryan Cho; Shannon Wickline; Sherry Wang; Simon White; Summer Galloway; Suxiang Tong; Tyler Cassens; William Lee                                                                                                                                                                                                                                                                                                                                                                                                                                                                                                                                                                                                                                                                                                                                                                                                                  |
| EPI_ISL_1016509 to 1016689, EPI_ISL_1016691 to 1016821, EPI_ISL_1016823 to 1016841, EPI_ISL_1036684 to 1036726, EPI_ISL_1081045 to 1081096, EPI_ISL_1110650 to 1110666, EPI_ISL_1133792 to 1134839, EPI_ISL_1255415                                                                                                                                                                                                                                                                                                                                                                                                                                                                                                                                                                                                                                                                                                                                                                                                                                                                                                                                                                                                                                                                                                                                                                                                                                                                                                                                                                                                                                                                                                                                                                                                                                                                                                                                                                                                                                                                                                                                                                                                                                                                                                                                                                                                                                                                                                                                                                                    |                                                                                                                                       |                                                                                                                        |                                                                                                                                                                                                                                                                                                                                                                                                                                                                                                                                                                                                                                                                                                                                                                                                                                                                                                                                                                                                                                                                                                                                                                                                                                                                                                                                                                                                                   |
| see above                                                                                                                                                                                                                                                                                                                                                                                                                                                                                                                                                                                                                                                                                                                                                                                                                                                                                                                                                                                                                                                                                                                                                                                                                                                                                                                                                                                                                                                                                                                                                                                                                                                                                                                                                                                                                                                                                                                                                                                                                                                                                                                                                                                                                                                                                                                                                                                                                                                                                                                                                                                              | Helix/Illumina                                                                                                                        | Respiratory Viruses Branch, Division of Viral Diseases, Centers for Disease Control and Prevention                     | Alexandre Bolze; Ary Ascencio; Ben L. Rambo-Martin; Brad Sickler; Charlotte Rivera-Garcia; Christine Tran; Clinton R. Paden; Dakota Howard; David Becker; Dhvani Batra; Duncan MacCannell; Eftren Sandoval; Eileen de Feo; Elizabeth Cirulli; Eric Allen; Geraint Levan; James Lu; Jan Antico; Jason Nguyen; Jimmy Ramirez; Jingtao Liu; Kelly Schiabor Barrett; Kim Gietzen; Magnus Isaksson; Marc Laurent; Matthew Tolentino; Nicole L. Washington; Peter W. Cook; Phil Febbo; Ryan Cho; Shannon Wickline; Sherry Wang; Simon White; Summer Galloway; Suxiang Tong; Tyler Cassens; William Lee                                                                                                                                                                                                                                                                                                                                                                                                                                                                                                                                                                                                                                                                                                                                                                                                                  |
| EPI_ISL_1017712                                                                                                                                                                                                                                                                                                                                                                                                                                                                                                                                                                                                                                                                                                                                                                                                                                                                                                                                                                                                                                                                                                                                                                                                                                                                                                                                                                                                                                                                                                                                                                                                                                                                                                                                                                                                                                                                                                                                                                                                                                                                                                                                                                                                                                                                                                                                                                                                                                                                                                                                                                                        | Hemato Oncologos S.A                                                                                                                  | Instituto Nacional de Salud- Dirección de Investigación en Salud Pública                                               | Carlos Franco-Muñoz; Diego A. Álvarez-Díaz; Diego Andrés Prada; Gerardo Santamaría; Hector Alejandro Ruiz-Moreno; Jhonattan Reales-González; Julian Naizaque; Katherine Laiton-Donato; Magdalena Wiesner; Marcela Mercado-Reyes; María T. Herrera-Sepúlveda; Martha Lucia Ospina Martínez; Sheryll Corchuelo                                                                                                                                                                                                                                                                                                                                                                                                                                                                                                                                                                                                                                                                                                                                                                                                                                                                                                                                                                                                                                                                                                      |
| EPI_ISL_1229508, EPI_ISL_1229528, EPI_ISL_1229533 to 1229534, EPI_ISL_1239033 to 1239046                                                                                                                                                                                                                                                                                                                                                                                                                                                                                                                                                                                                                                                                                                                                                                                                                                                                                                                                                                                                                                                                                                                                                                                                                                                                                                                                                                                                                                                                                                                                                                                                                                                                                                                                                                                                                                                                                                                                                                                                                                                                                                                                                                                                                                                                                                                                                                                                                                                                                                               | Hematology Laboratory, Section of Molecular Diagnostics, University Clinical Centre, Medical University of Gdansk                     | 1. Laboratory of Recombinant Vaccines 2. Department of Biology and Medical Genetics 3. Laboratory of Clinical Genetics | Adam Sodoł; Aneta Szulc; Bartosz Wasag; Bogusław Szewczyk; Ewa Miłoś; Krystyna Bienkowska-Szewczyk; Krzysztof Lewandowski; Lukasz Rabalski; Maciej Kosinski; Marlena Robakowska                                                                                                                                                                                                                                                                                                                                                                                                                                                                                                                                                                                                                                                                                                                                                                                                                                                                                                                                                                                                                                                                                                                                                                                                                                   |
| EPI_ISL_1040939 to 1040986, EPI_ISL_1040994 to 1040996, EPI_ISL_1096155 to 1096166, EPI_ISL_1096170 to 1096195, EPI_ISL_1096204 to 1096209, EPI_ISL_1229400 to 1229414, EPI_ISL_1229507, EPI_ISL_1229509 to 1229527, EPI_ISL_1229529 to 1229532, EPI_ISL_1239047                                                                                                                                                                                                                                                                                                                                                                                                                                                                                                                                                                                                                                                                                                                                                                                                                                                                                                                                                                                                                                                                                                                                                                                                                                                                                                                                                                                                                                                                                                                                                                                                                                                                                                                                                                                                                                                                                                                                                                                                                                                                                                                                                                                                                                                                                                                                       |                                                                                                                                       |                                                                                                                        |                                                                                                                                                                                                                                                                                                                                                                                                                                                                                                                                                                                                                                                                                                                                                                                                                                                                                                                                                                                                                                                                                                                                                                                                                                                                                                                                                                                                                   |
| see above                                                                                                                                                                                                                                                                                                                                                                                                                                                                                                                                                                                                                                                                                                                                                                                                                                                                                                                                                                                                                                                                                                                                                                                                                                                                                                                                                                                                                                                                                                                                                                                                                                                                                                                                                                                                                                                                                                                                                                                                                                                                                                                                                                                                                                                                                                                                                                                                                                                                                                                                                                                              | Hematology Laboratory, Section of Molecular Diagnostics, University Clinical Centre, Medical University of Gdansk                     | Laboratory of Recombinant Vaccines                                                                                     | Adam Sodoł; Aneta Szulc; Bogusław Szewczyk; Ewa Miłoś; Krystyna Bienkowska-Szewczyk; Krzysztof Lewandowski; Lukasz Rabalski; Maciej Grzybek; Maciej Kosinski; Marlena Robakowska                                                                                                                                                                                                                                                                                                                                                                                                                                                                                                                                                                                                                                                                                                                                                                                                                                                                                                                                                                                                                                                                                                                                                                                                                                  |
| EPI_ISL_1358954 to 1358959<br>EPI_ISL_1303471                                                                                                                                                                                                                                                                                                                                                                                                                                                                                                                                                                                                                                                                                                                                                                                                                                                                                                                                                                                                                                                                                                                                                                                                                                                                                                                                                                                                                                                                                                                                                                                                                                                                                                                                                                                                                                                                                                                                                                                                                                                                                                                                                                                                                                                                                                                                                                                                                                                                                                                                                          | Hennepin County Medical Center<br>Henry Mayo Newhall Hospital                                                                         | Minnesota Department of Health, Public Health Laboratory<br>Los Angeles County PHL                                     | Alexandra Lorentz; Jacob Garfin; Matt Plumb; and Xiong Wang<br>P. Hemarajata et al.                                                                                                                                                                                                                                                                                                                                                                                                                                                                                                                                                                                                                                                                                                                                                                                                                                                                                                                                                                                                                                                                                                                                                                                                                                                                                                                               |
| EPI_ISL_1141141 to 1141152, EPI_ISL_1141612 to 1141626, EPI_ISL_1144803 to 1144816, EPI_ISL_1147578 to 1147606                                                                                                                                                                                                                                                                                                                                                                                                                                                                                                                                                                                                                                                                                                                                                                                                                                                                                                                                                                                                                                                                                                                                                                                                                                                                                                                                                                                                                                                                                                                                                                                                                                                                                                                                                                                                                                                                                                                                                                                                                                                                                                                                                                                                                                                                                                                                                                                                                                                                                         | Herz- und Diabeteszentrum NRW: Universitätsklinik der Ruhr-Universität Bochum --> Institut für Laboratoriums- und Transfusionsmedizin | Robert Koch Institute                                                                                                  |                                                                                                                                                                                                                                                                                                                                                                                                                                                                                                                                                                                                                                                                                                                                                                                                                                                                                                                                                                                                                                                                                                                                                                                                                                                                                                                                                                                                                   |
| EPI_ISL_1213565 to 1213566                                                                                                                                                                                                                                                                                                                                                                                                                                                                                                                                                                                                                                                                                                                                                                                                                                                                                                                                                                                                                                                                                                                                                                                                                                                                                                                                                                                                                                                                                                                                                                                                                                                                                                                                                                                                                                                                                                                                                                                                                                                                                                                                                                                                                                                                                                                                                                                                                                                                                                                                                                             | Hi-Precision Diagnostic Center (QC)                                                                                                   | Philippine Genome Center                                                                                               | Alethea R. de Guzman; Anna Ong-Lim; Arianne A. Zamora; Asia Louisa U. Chong; Benedict A. Maralit; Candice Francheska B. Tambaoan; Carlo M. Lapid; Celia Carlos; Devon Ray Pacial; Edsel Maurice Salvaña; El King D. Morado; Eva Maria Cutiongco-de la Paz; Francis A. Tablizo; Irish Coleen A. Asin; Jaime C. Montoya; Jan Michael C. Yap; Jo-Hannah S. Llamas; John Q. Wong; Joshua Gregor A. Dizon; Juan Antonio R. Magalang; Karol Sophia Agape R. Padilla; Kenneth M. Kim; Kris P. Punayan; Marc Edsel C. Ayes; Marc Jerrone R. Castro; Maria Rosario Singh-Vergeire and Cynthia P. Saloma; Maria Sofia L. Yangzon; Marissa Alejandria; Razel Nikka M. Hao; Rianna Patricia S. Cruz; Sheila Mae M. Araiza                                                                                                                                                                                                                                                                                                                                                                                                                                                                                                                                                                                                                                                                                                     |
| EPI_ISL_1122457                                                                                                                                                                                                                                                                                                                                                                                                                                                                                                                                                                                                                                                                                                                                                                                                                                                                                                                                                                                                                                                                                                                                                                                                                                                                                                                                                                                                                                                                                                                                                                                                                                                                                                                                                                                                                                                                                                                                                                                                                                                                                                                                                                                                                                                                                                                                                                                                                                                                                                                                                                                        | Hi-Precision Diagnostics                                                                                                              | Philippine Genome Center                                                                                               | Alethea R. de Guzman; Anna Ong-Lim; Arianne A. Zamora; Asia Louisa U. Chong; Benedict A. Maralit; Candice Francheska B. Tambaoan; Carlo M. Lapid; Celia Carlos; Devon Ray Pacial; Edsel Maurice Salvaña; El King D. Morado; Eva Maria Cutiongco-de la Paz; Francis A. Tablizo; Irish Coleen A. Asin; Jaime C. Montoya; Jan Michael C. Yap; Jo-Hannah S. Llamas; John Q. Wong; Joshua Gregor A. Dizon; Juan Antonio R. Magalang; Karol Sophia Agape R. Padilla; Kenneth M. Kim; Kris P. Punayan; Marc Edsel C. Ayes; Marc Jerrone R. Castro; Maria Rosario Singh-Vergeire and Cynthia P. Saloma; Maria Sofia L. Yangzon; Marissa Alejandria; Razel Nikka M. Hao; Rianna Patricia S. Cruz; Sheila Mae M. Araiza                                                                                                                                                                                                                                                                                                                                                                                                                                                                                                                                                                                                                                                                                                     |
| EPI_ISL_1196013                                                                                                                                                                                                                                                                                                                                                                                                                                                                                                                                                                                                                                                                                                                                                                                                                                                                                                                                                                                                                                                                                                                                                                                                                                                                                                                                                                                                                                                                                                                                                                                                                                                                                                                                                                                                                                                                                                                                                                                                                                                                                                                                                                                                                                                                                                                                                                                                                                                                                                                                                                                        | Hlathikhulu Government Hospital                                                                                                       | National Institute for Communicable Diseases of the National Health Laboratory Service                                 | Amoako DG; Bhiman JN; Ismail A; Mahlangu B; Maphalala GP; Mohale T; Ntuli N; Scheepers C                                                                                                                                                                                                                                                                                                                                                                                                                                                                                                                                                                                                                                                                                                                                                                                                                                                                                                                                                                                                                                                                                                                                                                                                                                                                                                                          |
| EPI_ISL_1196003, EPI_ISL_1196011 to 1196012, EPI_ISL_1196014                                                                                                                                                                                                                                                                                                                                                                                                                                                                                                                                                                                                                                                                                                                                                                                                                                                                                                                                                                                                                                                                                                                                                                                                                                                                                                                                                                                                                                                                                                                                                                                                                                                                                                                                                                                                                                                                                                                                                                                                                                                                                                                                                                                                                                                                                                                                                                                                                                                                                                                                           | Homecare                                                                                                                              | National Institute for Communicable Diseases of the National Health Laboratory Service                                 | Amoako DG; Bhiman JN; Ismail A; Mahlangu B; Maphalala GP; Mohale T; Ntuli N; Scheepers C                                                                                                                                                                                                                                                                                                                                                                                                                                                                                                                                                                                                                                                                                                                                                                                                                                                                                                                                                                                                                                                                                                                                                                                                                                                                                                                          |
| EPI_ISL_1001300 to 1001309, EPI_ISL_1001312 to 1001317, EPI_ISL_1001319 to 1001325, EPI_ISL_1001328, EPI_ISL_1001330, EPI_ISL_1001336 to 1001337, EPI_ISL_1001352, EPI_ISL_1001354 to 1001367, EPI_ISL_1001372 to 1001373, EPI_ISL_1001386 to 1001388, EPI_ISL_1001390 to 1001393, EPI_ISL_1001403 to 1001407, EPI_ISL_1001415, EPI_ISL_1001450 to 1001451, EPI_ISL_1001456, EPI_ISL_1060333 to 1060336, EPI_ISL_1060338 to 1060358, EPI_ISL_1060368, EPI_ISL_1060379 to 1060394, EPI_ISL_1060402, EPI_ISL_1060429 to 1060432, EPI_ISL_1060441 to 1060442, EPI_ISL_1060446 to 1060460, EPI_ISL_1060557 to 1060560, EPI_ISL_1060567, EPI_ISL_1060575, EPI_ISL_1096242, EPI_ISL_1096244 to 1096246, EPI_ISL_1096248, EPI_ISL_1096253 to 1096261, EPI_ISL_1096264 to 1096266, EPI_ISL_1096270 to 1096273, EPI_ISL_1096275 to 1096302, EPI_ISL_1096304 to 1096312, EPI_ISL_1096312 to 1096320, EPI_ISL_1096324, EPI_ISL_1110390 to 1110398, EPI_ISL_1110406 to 1110407, EPI_ISL_1110409 to 1110419, EPI_ISL_1110421, EPI_ISL_1110428, EPI_ISL_1110431, EPI_ISL_1110435 to 1110438, EPI_ISL_1110440 to 1110441, EPI_ISL_1110444 to 1110459, EPI_ISL_1110462, EPI_ISL_1110464 to 1110466, EPI_ISL_1110475 to 1110510, EPI_ISL_1110877 to 1110878, EPI_ISL_1110881 to 1110887, EPI_ISL_1110890 to 1110891, EPI_ISL_1110895 to 1110916, EPI_ISL_1110918 to 1110923, EPI_ISL_1110928 to 1110951, EPI_ISL_1110953 to 1110979, EPI_ISL_1110981 to 1111046, EPI_ISL_1111048, EPI_ISL_1111050 to 1111056, EPI_ISL_1111059, EPI_ISL_1111061, EPI_ISL_1118876 to 1118878, EPI_ISL_1118883, EPI_ISL_1118892 to 1118895, EPI_ISL_1118898 to 1118899, EPI_ISL_1118901, EPI_ISL_1168206 to 1168211, EPI_ISL_1168202, EPI_ISL_1168210 to 1168220, EPI_ISL_1201507 to 1201510, EPI_ISL_1201522 to 1201525, EPI_ISL_1201539 to 1201543, EPI_ISL_1219924 to 1219929, EPI_ISL_1219932 to 1219934, EPI_ISL_1219937, EPI_ISL_1219939 to 1219941, EPI_ISL_1219943 to 1219948, EPI_ISL_1219951 to 1219958, EPI_ISL_1233224 to 1233236, EPI_ISL_1233247 to 1233253, EPI_ISL_1239369 to 1239371, EPI_ISL_1259296, EPI_ISL_1259299 to 1259300, EPI_ISL_1259307, EPI_ISL_1259310, EPI_ISL_1262718 to 1262746, EPI_ISL_1262751 to 1262759, EPI_ISL_1262815 to 1262818, EPI_ISL_1262898 to 1262907, EPI_ISL_1262914, EPI_ISL_1262917 to 1262933, EPI_ISL_1262981 to 1262989, EPI_ISL_1301804 to 1301815, EPI_ISL_1301831, EPI_ISL_1301838 to 1301858, EPI_ISL_1301882, EPI_ISL_1301890 to 1301894, EPI_ISL_1301896 to 1301898, EPI_ISL_1301921 to 1301922, EPI_ISL_1301930 to 1301937, EPI_ISL_1336329, EPI_ISL_1336334, EPI_ISL_1336341 |                                                                                                                                       |                                                                                                                        |                                                                                                                                                                                                                                                                                                                                                                                                                                                                                                                                                                                                                                                                                                                                                                                                                                                                                                                                                                                                                                                                                                                                                                                                                                                                                                                                                                                                                   |
| see above                                                                                                                                                                                                                                                                                                                                                                                                                                                                                                                                                                                                                                                                                                                                                                                                                                                                                                                                                                                                                                                                                                                                                                                                                                                                                                                                                                                                                                                                                                                                                                                                                                                                                                                                                                                                                                                                                                                                                                                                                                                                                                                                                                                                                                                                                                                                                                                                                                                                                                                                                                                              | Hopital                                                                                                                               | National Reference Center for Viruses of Respiratory Infections, Institut Pasteur, Paris                               | ; Amade (W); Andre-Garnier Elisabeth; Angela Brisebarre; Bernardi Franck; Bigaillon Christine; Billy Pierre Alain; Bisiau H; Bour Jean Baptiste; Bressollette (C) CéLine; Cady Anne; Cady Anne; Camille Capel; Capron Nicolas; Cariou Marie-Estelle; Cartier Riviere B; Castelain Sandrine; Coste-Burel Marianne; Delamare Catherine; Delépine Alain; Descamps Dominique; Desroches Marine; Djamdjian Laura; Ducancelle Alexandra; Ducancelle Alexandra; Dufour Mj; Durivault Jérôme; Engelmann Ilka; Etienne Simon-Lorière; Farfour Eric; Febreau Christine; Foissaud Vincent; Forgeaud Jacques; Gastli Nabil; Griscelli Franck; Gros Isabelle; Guiard Carine; Guillaume Clémence; Guillotel Eléha; Guinard Jérôme; Guinoiseau Thibault; Hermann CéCile; Hochart A; Irimia Alix; L'Honneur Anne-Sophie; Labourdette Isabelle; Lagathu Gisèle; Laplanche Sophie; Ledru Sylvie; LefeuveCaroline; Lepiller Quentin; Leruez-Ville Marianne; Louis Mathilde; Louise Lefrançois; Luizy Nelly; Marichal A.; Marion Barbet; Marquie Juliette Stéphanie; Martres Pascale; Marty Quinternet Solene; Maud Vanpeene; Morvan Pauline; Méline Bizard; Patoz Pierre; Pham Stéphanie; Pilgore Léa; Ramanantsoa CéLine; Ramirez José-Manuel; Riverain Emeline; Serazin V; Stoessel-Thouvenin Patricia; Sylvie Behillili; Sylvie van der Werf; Thellier; Thibault Vincent; Vachee Anne; Van Agt S.; Vincent Enouf; Woercl Isabelle |
| EPI_ISL_1035958                                                                                                                                                                                                                                                                                                                                                                                                                                                                                                                                                                                                                                                                                                                                                                                                                                                                                                                                                                                                                                                                                                                                                                                                                                                                                                                                                                                                                                                                                                                                                                                                                                                                                                                                                                                                                                                                                                                                                                                                                                                                                                                                                                                                                                                                                                                                                                                                                                                                                                                                                                                        | Hopital CH Jeanne de Navarre Laboratoire de Biologie                                                                                  | National Reference Center for Viruses of Respiratory Infections, Institut Pasteur, Paris                               | Angela Brisebarre; Camille Capel; Etienne Simon-Lorière; Marion Barbet; Maud Vanpeene; Méline Bizard; Sylvie Behillili; Sylvie van der Werf; Thellier; Vincent Enouf                                                                                                                                                                                                                                                                                                                                                                                                                                                                                                                                                                                                                                                                                                                                                                                                                                                                                                                                                                                                                                                                                                                                                                                                                                              |
| EPI_ISL_1036398 to 1036402                                                                                                                                                                                                                                                                                                                                                                                                                                                                                                                                                                                                                                                                                                                                                                                                                                                                                                                                                                                                                                                                                                                                                                                                                                                                                                                                                                                                                                                                                                                                                                                                                                                                                                                                                                                                                                                                                                                                                                                                                                                                                                                                                                                                                                                                                                                                                                                                                                                                                                                                                                             | Hopital CH René Dubos - Laboratoire de Biologie médicale                                                                              | National Reference Center for Viruses of Respiratory Infections, Institut Pasteur, Paris                               | Angela Brisebarre; Blanchard Geneviève; Camille Capel; Etienne Simon-Lorière; Marion Barbet; Maud Vanpeene; Méline Bizard; Sylvie Behillili; Sylvie van der Werf; Vincent Enouf                                                                                                                                                                                                                                                                                                                                                                                                                                                                                                                                                                                                                                                                                                                                                                                                                                                                                                                                                                                                                                                                                                                                                                                                                                   |
| EPI_ISL_1035904 to 1035916, EPI_ISL_1035924, EPI_ISL_1035927                                                                                                                                                                                                                                                                                                                                                                                                                                                                                                                                                                                                                                                                                                                                                                                                                                                                                                                                                                                                                                                                                                                                                                                                                                                                                                                                                                                                                                                                                                                                                                                                                                                                                                                                                                                                                                                                                                                                                                                                                                                                                                                                                                                                                                                                                                                                                                                                                                                                                                                                           | Hopital CH de Troyes                                                                                                                  | National Reference Center for Viruses of Respiratory Infections, Institut Pasteur, Paris                               | Angela Brisebarre; Camille Capel; Etienne Simon-Lorière; Marion Barbet; Maud Vanpeene; Méline Bizard; Stoessel-Thouvenin Patricia; Sylvie Behillili; Sylvie van der Werf; Vincent Enouf                                                                                                                                                                                                                                                                                                                                                                                                                                                                                                                                                                                                                                                                                                                                                                                                                                                                                                                                                                                                                                                                                                                                                                                                                           |
| EPI_ISL_1035925 to 1035926, EPI_ISL_1035929, EPI_ISL_1035952 to 1035957                                                                                                                                                                                                                                                                                                                                                                                                                                                                                                                                                                                                                                                                                                                                                                                                                                                                                                                                                                                                                                                                                                                                                                                                                                                                                                                                                                                                                                                                                                                                                                                                                                                                                                                                                                                                                                                                                                                                                                                                                                                                                                                                                                                                                                                                                                                                                                                                                                                                                                                                | Hopital CHRU Tours                                                                                                                    | National Reference Center for Viruses of Respiratory Infections, Institut Pasteur, Paris                               | Angela Brisebarre; Camille Capel; Etienne Simon-Lorière; Guinoiseau Thibault; Marion Barbet; Maud Vanpeene; Méline Bizard; Sylvie Behillili; Sylvie van der Werf; Vincent Enouf                                                                                                                                                                                                                                                                                                                                                                                                                                                                                                                                                                                                                                                                                                                                                                                                                                                                                                                                                                                                                                                                                                                                                                                                                                   |
| EPI_ISL_1035930                                                                                                                                                                                                                                                                                                                                                                                                                                                                                                                                                                                                                                                                                                                                                                                                                                                                                                                                                                                                                                                                                                                                                                                                                                                                                                                                                                                                                                                                                                                                                                                                                                                                                                                                                                                                                                                                                                                                                                                                                                                                                                                                                                                                                                                                                                                                                                                                                                                                                                                                                                                        | Hopital Centre Hospitalier d'Arpajon                                                                                                  | National Reference Center for Viruses of Respiratory Infections, Institut Pasteur, Paris                               | Angela Brisebarre; Barboux; Camille Capel; Etienne Simon-Lorière; Marion Barbet; Maud Vanpeene; Méline Bizard; Sylvie Behillili; Sylvie van der Werf; Vincent Enouf                                                                                                                                                                                                                                                                                                                                                                                                                                                                                                                                                                                                                                                                                                                                                                                                                                                                                                                                                                                                                                                                                                                                                                                                                                               |
| EPI_ISL_1036405 to 1036406                                                                                                                                                                                                                                                                                                                                                                                                                                                                                                                                                                                                                                                                                                                                                                                                                                                                                                                                                                                                                                                                                                                                                                                                                                                                                                                                                                                                                                                                                                                                                                                                                                                                                                                                                                                                                                                                                                                                                                                                                                                                                                                                                                                                                                                                                                                                                                                                                                                                                                                                                                             | Hopital Groupe Hospitalier Intercommunal Le Raincy Montfermeil                                                                        | National Reference Center for Viruses of Respiratory Infections, Institut Pasteur, Paris                               | Angela Brisebarre; Camille Capel; Etienne Simon-Lorière; Luizy Nelly; Marion Barbet; Maud Vanpeene; Méline Bizard; Sylvie Behillili; Sylvie van der Werf; Vincent Enouf                                                                                                                                                                                                                                                                                                                                                                                                                                                                                                                                                                                                                                                                                                                                                                                                                                                                                                                                                                                                                                                                                                                                                                                                                                           |
| EPI_ISL_1036407                                                                                                                                                                                                                                                                                                                                                                                                                                                                                                                                                                                                                                                                                                                                                                                                                                                                                                                                                                                                                                                                                                                                                                                                                                                                                                                                                                                                                                                                                                                                                                                                                                                                                                                                                                                                                                                                                                                                                                                                                                                                                                                                                                                                                                                                                                                                                                                                                                                                                                                                                                                        | Hopital HIA PERCY                                                                                                                     | National Reference Center for Viruses of Respiratory Infections, Institut Pasteur, Paris                               | Angela Brisebarre; Camille Capel; Etienne Simon-Lorière; Foissaud Vincent; Marion Barbet; Maud Vanpeene; Méline Bizard; Sylvie Behillili; Sylvie van der Werf; Vincent Enouf                                                                                                                                                                                                                                                                                                                                                                                                                                                                                                                                                                                                                                                                                                                                                                                                                                                                                                                                                                                                                                                                                                                                                                                                                                      |
| EPI_ISL_1036426                                                                                                                                                                                                                                                                                                                                                                                                                                                                                                                                                                                                                                                                                                                                                                                                                                                                                                                                                                                                                                                                                                                                                                                                                                                                                                                                                                                                                                                                                                                                                                                                                                                                                                                                                                                                                                                                                                                                                                                                                                                                                                                                                                                                                                                                                                                                                                                                                                                                                                                                                                                        | Hopital Laboratoire CH Laon                                                                                                           | National Reference Center for Viruses of Respiratory Infections, Institut Pasteur, Paris                               | Angela Brisebarre; Camille Capel; Etienne Simon-Lorière; Marion Barbet; Maud Vanpeene; Méline Bizard; Ravaux Jean Jacques; Sylvie Behillili; Sylvie van der Werf; Vincent Enouf                                                                                                                                                                                                                                                                                                                                                                                                                                                                                                                                                                                                                                                                                                                                                                                                                                                                                                                                                                                                                                                                                                                                                                                                                                   |
| EPI_ISL_1036427 to 1036432                                                                                                                                                                                                                                                                                                                                                                                                                                                                                                                                                                                                                                                                                                                                                                                                                                                                                                                                                                                                                                                                                                                                                                                                                                                                                                                                                                                                                                                                                                                                                                                                                                                                                                                                                                                                                                                                                                                                                                                                                                                                                                                                                                                                                                                                                                                                                                                                                                                                                                                                                                             | Hopital Laboratoire de Virologie                                                                                                      | National Reference Center for Viruses of Respiratory Infections, Institut Pasteur, Paris                               | Angela Brisebarre; Camille Capel; Etienne Simon-Lorière; Griscelli Franck; Marion Barbet; Maud Vanpeene; Méline Bizard; Sylvie Behillili; Sylvie van der Werf; Vincent Enouf                                                                                                                                                                                                                                                                                                                                                                                                                                                                                                                                                                                                                                                                                                                                                                                                                                                                                                                                                                                                                                                                                                                                                                                                                                      |



|                                                                                                                                                                                                                                                                                                                                                                                                                                                |                                                                                                           | Infections, Institut Pasteur, Paris                                                                                            | Werf; Vincent Enouf                                                                                                                                                                                                                                                                                                                                                |
|------------------------------------------------------------------------------------------------------------------------------------------------------------------------------------------------------------------------------------------------------------------------------------------------------------------------------------------------------------------------------------------------------------------------------------------------|-----------------------------------------------------------------------------------------------------------|--------------------------------------------------------------------------------------------------------------------------------|--------------------------------------------------------------------------------------------------------------------------------------------------------------------------------------------------------------------------------------------------------------------------------------------------------------------------------------------------------------------|
| EPI_ISL_1058581                                                                                                                                                                                                                                                                                                                                                                                                                                | Hopital Sainte Therese Bastogne                                                                           | GIGA Medical Genomics                                                                                                          | Bouchra Boujemla; Cécile Meex; Keith Durkin; Maria Artesi; Marie-Pierre Hayette; Nathalie Renotte; Pierrette Melin; Raphaël Boreux; Sébastien Bontems; Vincent Bours                                                                                                                                                                                               |
| EPI_ISL_1381072 to 1381159, EPI_ISL_1381163 to 1381164, EPI_ISL_1381196 to 1381208, EPI_ISL_1381213, EPI_ISL_1381215 to 1381217, EPI_ISL_1381225 to 1381230, EPI_ISL_1381233, EPI_ISL_1381816 to 1381821, EPI_ISL_1381826 to 1381830                                                                                                                                                                                                           | see above                                                                                                 | National Reference Center for Viruses of Respiratory Infections, Institut Pasteur, Paris                                       | Angela Brisebarre; Bastian Sylvaine; Bressollette Céline; Camille Capel; Desroches Marine; Dufour Mj; Etienne Simon-Lorière; Gastli Nabil; Hecquet Denise; Hervé Céline; Leruez-Ville Marianne; Louise Lefrançois; Louvet Laurence; Marion Barbet; Maud Vanpeene; Méline Bizard; Piorgé Léa; Rousset Dominique; Sylvie Behilli; Sylvie van der Werf; Vincent Enouf |
| EPI_ISL_1196864                                                                                                                                                                                                                                                                                                                                                                                                                                | Hospital Alor Gajah                                                                                       | Institute for Medical Research, Infectious Disease Research Centre, National Institutes of Health, Ministry of Health Malaysia | Kamel K; Mohd Zawawi Z; Ramly N; Robert F; Suppiah J; Thayan R                                                                                                                                                                                                                                                                                                     |
| EPI_ISL_1219021                                                                                                                                                                                                                                                                                                                                                                                                                                | Hospital Aviccena                                                                                         | Instituto Adolfo Lutz, Interdisciplinary Procedures Center, Strategic Laboratory                                               | Caio Vinicius Dias Lopes; Claudia Regina Gonçalves; Claudio Tavares Sacchi; Erica Valessa Ramos Gomes; Karoline Rodrigues Campos                                                                                                                                                                                                                                   |
| EPI_ISL_1007859, EPI_ISL_1007861 to 1007892, EPI_ISL_1225136 to 1225154                                                                                                                                                                                                                                                                                                                                                                        | Hospital Clínico Universitario Lozano Blesa de Zaragoza (España)                                          | SeqCOVID-SPAIN consortium/IBV(CSIC)                                                                                            | Jessica Bueno and SeqCOVID-SPAIN consortium; Rafael Benito; Sonia Algarate                                                                                                                                                                                                                                                                                         |
| EPI_ISL_1194516 to 1194517, EPI_ISL_1194519 to 1194520, EPI_ISL_1194522 to 1194523, EPI_ISL_1194525 to 1194526, EPI_ISL_1194528 to 1194537, EPI_ISL_1194539, EPI_ISL_1194541 to 1194542, EPI_ISL_1194544 to 1194545, EPI_ISL_1194547, EPI_ISL_1194549 to 1194558, EPI_ISL_1194560, EPI_ISL_1194562 to 1194563, EPI_ISL_1194565 to 1194566, EPI_ISL_1194568 to 1194569, EPI_ISL_1194571 to 1194572, EPI_ISL_1194574, EPI_ISL_1194576 to 1194577 | see above                                                                                                 | Hospital Clínico Universitario Virgen de la Arrixaca (Murcia)                                                                  | SeqCOVID-SPAIN consortium/IBV(CSIC)                                                                                                                                                                                                                                                                                                                                |
| EPI_ISL_1007680 to 1007697                                                                                                                                                                                                                                                                                                                                                                                                                     | Hospital Clínico Universitario de Valladolid-Hospital Universitario Río Hortega                           | SeqCOVID-SPAIN consortium/IBV(CSIC)                                                                                            | Antonio Moreno Docón; Genoveva Yagüe and SeqCOVID-SPAIN consortium; Manuel Segovia Hernández                                                                                                                                                                                                                                                                       |
| EPI_ISL_1091919 to 1091921                                                                                                                                                                                                                                                                                                                                                                                                                     | Hospital Departamental María Inmaculada                                                                   | Instituto Nacional de Salud- Dirección de Investigación en Salud Pública                                                       | Carlos Franco-Muñoz; Diego A. Álvarez-Díaz; Diego Andrés Prada; Gerardo Santamaría; Hector Alejandro Ruiz-Moreno; Jhonnatan Reales-González; Julian Naizaque; Katherine Laiton-Donato; Magdalena Wiesner; Marcela Mercado-Reyes; María T. Herrera-Sepúlveda; Martha Lucia Ospina Martínez; Sheryll Corchuelo                                                       |
| EPI_ISL_1121307                                                                                                                                                                                                                                                                                                                                                                                                                                | Hospital E Antonio Policarpo de Oliveira                                                                  | Instituto Adolfo Lutz, Interdisciplinary Procedures Center, Strategic Laboratory                                               | Caio Vinicius Dias Lopes; Claudia Regina Gonçalves; Claudio Tavares Sacchi; Erica Valessa Ramos Gomes; Karoline Rodrigues Campos                                                                                                                                                                                                                                   |
| EPI_ISL_1303542 to 1303543                                                                                                                                                                                                                                                                                                                                                                                                                     | Hospital Estadual de Campanha Barradas                                                                    | Instituto Adolfo Lutz, Interdisciplinary Procedures Center, Strategic Laboratory                                               | Caio Vinicius Dias Lopes; Claudia Regina Gonçalves; Claudio Tavares Sacchi; Erica Valessa Ramos Gomes; Karoline Rodrigues Campos                                                                                                                                                                                                                                   |
| EPI_ISL_1303537                                                                                                                                                                                                                                                                                                                                                                                                                                | Hospital Estadual de Vila Alpina                                                                          | Instituto Adolfo Lutz, Interdisciplinary Procedures Center, Strategic Laboratory                                               | Caio Vinicius Dias Lopes; Claudia Regina Gonçalves; Claudio Tavares Sacchi; Erica Valessa Ramos Gomes; Karoline Rodrigues Campos                                                                                                                                                                                                                                   |
| EPI_ISL_1173765, EPI_ISL_1180260 to 1180278, EPI_ISL_1184469 to 1184503, EPI_ISL_1185847, EPI_ISL_1185849, EPI_ISL_1185851, EPI_ISL_1185853, EPI_ISL_1201203 to 1201279, EPI_ISL_1201298, EPI_ISL_1233377, EPI_ISL_1233379 to 1233423, EPI_ISL_1233819, EPI_ISL_1233873, EPI_ISL_1307715, EPI_ISL_1314364 to 1314400, EPI_ISL_1314403 to 1314406, EPI_ISL_1315623, EPI_ISL_1346487, EPI_ISL_1381833 to 1381879                                 | see above                                                                                                 | Hospital General Universitario Gregorio Marañón                                                                                | Hospital General Universitario Gregorio Marañón                                                                                                                                                                                                                                                                                                                    |
| EPI_ISL_1272405 to 1272548                                                                                                                                                                                                                                                                                                                                                                                                                     | Hospital General Universitario Gregorio Marañón                                                           | SeqCOVID-SPAIN consortium/IBV(CSIC)                                                                                            | Cristina Rodríguez-Grande; Darío García de Viedma; Darío García de Viedma; Darío García de Viedma"; Laura Pérez-Lago; Patricia Muñoz; Pedro Sola Campoy; Pilar Catalán; Sergio Buenestado Serrano; "Sergio Buenestado Serrano                                                                                                                                      |
| EPI_ISL_1311867 to 1311948                                                                                                                                                                                                                                                                                                                                                                                                                     | Hospital General Universitario de Alicante - Instituto de Investigación Sanitaria y Biomédica de Alicante | SeqCOVID-SPAIN consortium/IBV(CSIC)                                                                                            | Darío García de Viedma; Julia Suárez; Laura Pérez-Lago; Marta Herranz; Patricia Muñoz and SeqCOVID-SPAIN consortium; Pedro J Sola-Campoy; Pilar Catalán; Sergio Buenestado-Serrano; Victor Manuel de la Cueva                                                                                                                                                      |
| EPI_ISL_1110240 to 1110247                                                                                                                                                                                                                                                                                                                                                                                                                     | Hospital General de Requena                                                                               | SeqCOVID-SPAIN consortium/IBV(CSIC)                                                                                            | Carmen Molina Pardines and SeqCOVID-SPAIN consortium; Maripaz Ventero Martín                                                                                                                                                                                                                                                                                       |
| EPI_ISL_1138411                                                                                                                                                                                                                                                                                                                                                                                                                                | Hospital HIA Percy, Medical Biology                                                                       | National Reference Center for Viruses of Respiratory Infections, Institut Pasteur, Paris                                       | Carolina Pla Cortes and SeqCOVID-SPAIN consortium; Martín Yago López; María Ángeles Goberna Bravo                                                                                                                                                                                                                                                                  |
| EPI_ISL_1303535 to 1303536, EPI_ISL_1381069                                                                                                                                                                                                                                                                                                                                                                                                    | Hospital Heliopolis                                                                                       | Instituto Adolfo Lutz, Interdisciplinary Procedures Center, Strategic Laboratory                                               | Angela Brisebarre; Camille Capel; Etienne Simon-Lorière; Marion Barbet; Maud Vanpeene; Méline Bizard; Sylvie Behilli; Sylvie van der Werf; Vincent Enouf; Vincent Foissaud                                                                                                                                                                                         |
| EPI_ISL_1120614                                                                                                                                                                                                                                                                                                                                                                                                                                | Hospital Margarita Maza de Juarez                                                                         | CIAD LDM-LGM                                                                                                                   | Caio Vinicius Dias Lopes; Claudia Regina Gonçalves; Claudio Tavares Sacchi; Erica Valessa Ramos Gomes; Karoline Rodrigues Campos                                                                                                                                                                                                                                   |
| EPI_ISL_1196660, EPI_ISL_1196705 to 1196706, EPI_ISL_1196768, EPI_ISL_1196770 to 1196771                                                                                                                                                                                                                                                                                                                                                       | Hospital Melaka                                                                                           | Institute for Medical Research, Infectious Disease Research Centre, National Institutes of Health, Ministry of Health Malaysia | Bruno Gome-Gil; Julissa Enciso-Ibarra                                                                                                                                                                                                                                                                                                                              |
| EPI_ISL_1381070 to 1381071                                                                                                                                                                                                                                                                                                                                                                                                                     | Hospital Municipal Cidade Tiradentes Carmem Prudente                                                      | Instituto Adolfo Lutz, Interdisciplinary Procedures Center, Strategic Laboratory                                               | Kamel K; Mohd Zawawi Z; Ramly N; Robert F; Suppiah J; Thayan R                                                                                                                                                                                                                                                                                                     |
| EPI_ISL_1303540 to 1303541, EPI_ISL_1303544 to 1303545                                                                                                                                                                                                                                                                                                                                                                                         | Hospital Municipal Cidade Tiradentes Carmen Prudente                                                      | Instituto Adolfo Lutz, Interdisciplinary Procedures Center, Strategic Laboratory                                               | Caio Vinicius Dias Lopes; Claudia Regina Gonçalves; Claudio Tavares Sacchi; Erica Valessa Ramos Gomes; Karoline Rodrigues Campos                                                                                                                                                                                                                                   |
| EPI_ISL_1220095                                                                                                                                                                                                                                                                                                                                                                                                                                | Hospital Municipal Gov. Mario Covas Jr.                                                                   | Instituto Butantan (genome assembly and bioinformatics) and Mendelics (sequencing)                                             | Caio Vinicius Dias Lopes; Claudia Regina Gonçalves; Claudio Tavares Sacchi; Erica Valessa Ramos Gomes; Karoline Rodrigues Campos                                                                                                                                                                                                                                   |
| EPI_ISL_1358286                                                                                                                                                                                                                                                                                                                                                                                                                                | Hospital Municipal Josanias Castanha Braga                                                                | Instituto Adolfo Lutz, Interdisciplinary Procedures Center, Strategic Laboratory                                               | Caio Vinicius Dias Lopes; Claudia Regina Gonçalves; Claudio Tavares Sacchi; Erica Valessa Ramos Gomes; Karoline Rodrigues Campos                                                                                                                                                                                                                                   |
| EPI_ISL_1358287                                                                                                                                                                                                                                                                                                                                                                                                                                | Hospital Nipo Brasileiro                                                                                  | Instituto Adolfo Lutz, Interdisciplinary Procedures Center, Strategic Laboratory                                               | Caio Vinicius Dias Lopes; Claudia Regina Gonçalves; Claudio Tavares Sacchi; Erica Valessa Ramos Gomes; Karoline Rodrigues Campos                                                                                                                                                                                                                                   |
| EPI_ISL_1015358 to 1015360                                                                                                                                                                                                                                                                                                                                                                                                                     | Hospital Pablo Tobón Uribe                                                                                | Universidad Nacional de Colombia - Laboratorio Genómico One Health                                                             | Caio Vinicius Dias Lopes; Claudia Regina Gonçalves; Claudio Tavares Sacchi; Erica Valessa Ramos Gomes; Karoline Rodrigues Campos                                                                                                                                                                                                                                   |
| EPI_ISL_1303538 to 1303539                                                                                                                                                                                                                                                                                                                                                                                                                     | Hospital Presidente                                                                                       | Instituto Adolfo Lutz, Interdisciplinary Procedures Center, Strategic Laboratory                                               | Andres F. Cardona-Rios; Carlos Franco-Muñoz; Daniel O. Maldonado-Perez; Diego A. Álvarez-Díaz; Idabely Betancur Ortiz; Jorge E. Osorio; Juan P. Hernandez-Ortiz; Karl A Ciuderis; Laura Silvana Perez; Marcela Mercado-Reyes; Sandra Ines Cano                                                                                                                     |
| EPI_ISL_1196794, EPI_ISL_1196796 to 1196797                                                                                                                                                                                                                                                                                                                                                                                                    | Hospital Pulau Pinang                                                                                     | Institute for Medical Research, Infectious Disease Research Centre, National Institutes of Health, Ministry of Health Malaysia | Caio Vinicius Dias Lopes; Claudia Regina Gonçalves; Claudio Tavares Sacchi; Erica Valessa Ramos Gomes; Karoline Rodrigues Campos                                                                                                                                                                                                                                   |
| EPI_ISL_1186114                                                                                                                                                                                                                                                                                                                                                                                                                                | Hospital Queen Elizabeth                                                                                  | Institute for Medical Research, Infectious Disease Research Centre, National Institutes of Health, Ministry of Health Malaysia | Kamel K; Mohd Zawawi Z; Ramly N; Robert F; Suppiah J; Thayan R                                                                                                                                                                                                                                                                                                     |
| EPI_ISL_1020017, EPI_ISL_1020125                                                                                                                                                                                                                                                                                                                                                                                                               | Hospital San Agustín                                                                                      | Laboratorio de Virología HUCA                                                                                                  | Abreu F; Alvarez-Arguelles ME; Boga JA; Castelló C; Costales I; Coto E; Gómez de Oña J; Martín-Rodríguez G; Melón S; Perez-Martinez Z; Rojo S; Sandoval M                                                                                                                                                                                                          |
| EPI_ISL_1057039, EPI_ISL_1058151 to 1058158, EPI_ISL_1058167 to 1058180, EPI_ISL_1063791, EPI_ISL_1063795, EPI_ISL_1169865 to 1169866, EPI_ISL_1169868, EPI_ISL_1169875 to 1169880, EPI_ISL_1264385, EPI_ISL_1264387, EPI_ISL_1264390, EPI_ISL_1264393, EPI_ISL_1264395, EPI_ISL_1264397, EPI_ISL_1264400, EPI_ISL_1264403, EPI_ISL_1264405, EPI_ISL_1264408, EPI_ISL_1264410, EPI_ISL_1264412, EPI_ISL_1334344 to 1334362                     | see above                                                                                                 | Hospital Universitari Arnau de Vilanova                                                                                        | Hospital Universitari Vall d'Hebron - Vall d'Hebron Institut de Recerca                                                                                                                                                                                                                                                                                            |
|                                                                                                                                                                                                                                                                                                                                                                                                                                                |                                                                                                           |                                                                                                                                | Andrés Antón; Ariadna Rando; Carla Castillo; Cristina Andrés; Damir Garcia-Cehic; Josep F Abril; Josep Quer; Juliana Esperalba; María Carmen Martín; María Gema Codina; María Piñana; Tomás Pumarola                                                                                                                                                               |

|                                                                                                                                                                                                                                                                                                                                                                                                                                                                                                                                                                                                                                                                                                                                                                                                                                                                                                                                                                                                                                                                                                                                                                                                                                                                                                                                                                                                                                                                                                                                                                                                                                                                                                                          |           |                                                                                             |                                                                                                                                                                                                                                                   |                                                                                                                                                                                                                                                                                                              |
|--------------------------------------------------------------------------------------------------------------------------------------------------------------------------------------------------------------------------------------------------------------------------------------------------------------------------------------------------------------------------------------------------------------------------------------------------------------------------------------------------------------------------------------------------------------------------------------------------------------------------------------------------------------------------------------------------------------------------------------------------------------------------------------------------------------------------------------------------------------------------------------------------------------------------------------------------------------------------------------------------------------------------------------------------------------------------------------------------------------------------------------------------------------------------------------------------------------------------------------------------------------------------------------------------------------------------------------------------------------------------------------------------------------------------------------------------------------------------------------------------------------------------------------------------------------------------------------------------------------------------------------------------------------------------------------------------------------------------|-----------|---------------------------------------------------------------------------------------------|---------------------------------------------------------------------------------------------------------------------------------------------------------------------------------------------------------------------------------------------------|--------------------------------------------------------------------------------------------------------------------------------------------------------------------------------------------------------------------------------------------------------------------------------------------------------------|
| EPI_ISL_1194101 to 1194102, EPI_ISL_1194104 to 1194106, EPI_ISL_1194108 to 1194109, EPI_ISL_1194111 to 1194112, EPI_ISL_1194114 to 1194115, EPI_ISL_1194117 to 1194118, EPI_ISL_1194120 to 1194121, EPI_ISL_1194123 to 1194124, EPI_ISL_1194126 to 1194127, EPI_ISL_1194129 to 1194130, EPI_ISL_1194132 to 1194133, EPI_ISL_1194135 to 1194136, EPI_ISL_1194138 to 1194139, EPI_ISL_1194141 to 1194142, EPI_ISL_1194144, EPI_ISL_1194146 to 1194147, EPI_ISL_1194497, EPI_ISL_1194499 to 1194500, EPI_ISL_1194502 to 1194503, EPI_ISL_1194505, EPI_ISL_1194507 to 1194508, EPI_ISL_1194510 to 1194511, EPI_ISL_1194513 to 1194514                                                                                                                                                                                                                                                                                                                                                                                                                                                                                                                                                                                                                                                                                                                                                                                                                                                                                                                                                                                                                                                                                        | see above | Hospital Universitari Arnau de Vilanova de Lleida                                           | SeqCOVID-SPAIN consortium/IBV(CSIC)                                                                                                                                                                                                               | Alba Bellés Bellés; Albert Bernet Sánchez; Eric López González; Iván Prats Sánchez; Mercè García González and SeqCOVID-SPAIN consortium                                                                                                                                                                      |
| EPI_ISL_1360113 to 1360294                                                                                                                                                                                                                                                                                                                                                                                                                                                                                                                                                                                                                                                                                                                                                                                                                                                                                                                                                                                                                                                                                                                                                                                                                                                                                                                                                                                                                                                                                                                                                                                                                                                                                               |           | Hospital Universitari Bellvitge                                                             | Microbiology Department                                                                                                                                                                                                                           | Aida Gonzalez-Diaz; Aida González-Díaz; Carmen Ardanuy; Jordi Camara; Jordi Càmarà; Jordi Niubó; Laura Calatayud; M Angeles Domínguez; Miguel Fernandez-Huerta; Sara Martí; Sara Martí                                                                                                                       |
| EPI_ISL_1012925                                                                                                                                                                                                                                                                                                                                                                                                                                                                                                                                                                                                                                                                                                                                                                                                                                                                                                                                                                                                                                                                                                                                                                                                                                                                                                                                                                                                                                                                                                                                                                                                                                                                                                          |           | Hospital Universitari Germans Trias i Pujol(HUGTIP)/Fundació Lluita contra la SIDA (FLSIDa) | IrsiCaixa - Can Ruti CovidSeq                                                                                                                                                                                                                     | Bonaventura Clotet; Bonaventura Clotet Marta Massanella; Ester Ballana; Francesc Catala-Moll; Joaquim Segalés; Jorge Carrillo; Julia Blanco; Lidia Ruiz; Marc Noguera-Julian; Maria Casadellà; Mariona Parera; Núria Izquierdo; Pilar Armengol; Roger Paredes                                                |
| EPI_ISL_1058159 to 1058160, EPI_ISL_1058181 to 1058189, EPI_ISL_1063790, EPI_ISL_1063792 to 1063794, EPI_ISL_1117529 to 1117549, EPI_ISL_1117551 to 1117588, EPI_ISL_1169853 to 1169859, EPI_ISL_1169861 to 1169862, EPI_ISL_1169869, EPI_ISL_1169881 to 1169882, EPI_ISL_1264414, EPI_ISL_1264416, EPI_ISL_1264418, EPI_ISL_1264421 to 1264422, EPI_ISL_1264425, EPI_ISL_1264427, EPI_ISL_1264430, EPI_ISL_1264433, EPI_ISL_1264435, EPI_ISL_1334363 to 1334364                                                                                                                                                                                                                                                                                                                                                                                                                                                                                                                                                                                                                                                                                                                                                                                                                                                                                                                                                                                                                                                                                                                                                                                                                                                         | see above | Hospital Universitari Joan XXIII de Tarragona                                               | Hospital Universitari Vall d'Hebron - Vall d'Hebron Institut de Recerca                                                                                                                                                                           | Andrés Antón; Ariadna Rando; Carla Castillo; Cristina Andrés; Damir Garcia-Cehic; Josep F Abril; Josep Quer; Juliana Esperalba; María Carmen Martín; María Gema Codina; María Piñana; Tomás Pumarola                                                                                                         |
| EPI_ISL_1020140, EPI_ISL_1020551 to 1020591, EPI_ISL_1059022 to 1059065, EPI_ISL_1063998 to 1064015, EPI_ISL_1080811 to 1080852, EPI_ISL_1116556 to 1116591, EPI_ISL_1117550, EPI_ISL_1125255, EPI_ISL_1125257, EPI_ISL_1125259 to 1125260, EPI_ISL_1125262, EPI_ISL_1125264, EPI_ISL_1125266, EPI_ISL_1125268 to 1125269, EPI_ISL_1125271, EPI_ISL_1125273, EPI_ISL_1125275 to 1125276, EPI_ISL_1125278, EPI_ISL_1125280, EPI_ISL_1125282 to 1125283, EPI_ISL_1125285, EPI_ISL_1125287, EPI_ISL_1125289, EPI_ISL_1125291, EPI_ISL_1125293 to 1125294, EPI_ISL_1125296, EPI_ISL_1125298 to 1125299, EPI_ISL_1125302 to 1125303, EPI_ISL_1125305, EPI_ISL_1125307, EPI_ISL_1125309 to 1125310, EPI_ISL_1125312, EPI_ISL_1125314 to 1125315, EPI_ISL_1125317, EPI_ISL_1125319, EPI_ISL_1125321 to 1125322, EPI_ISL_1137608, EPI_ISL_1169860, EPI_ISL_1169863 to 1169864, EPI_ISL_1169867, EPI_ISL_1169870 to 1169874, EPI_ISL_1195208 to 1195271, EPI_ISL_1216811, EPI_ISL_1216813, EPI_ISL_1216815, EPI_ISL_1216818, EPI_ISL_1216820, EPI_ISL_1216823, EPI_ISL_1216825, EPI_ISL_1216827, EPI_ISL_1216829, EPI_ISL_1216832, EPI_ISL_1216835, EPI_ISL_1216837, EPI_ISL_1216840, EPI_ISL_1216842, EPI_ISL_1216845, EPI_ISL_1216847, EPI_ISL_1216850, EPI_ISL_1216853, EPI_ISL_1216855, EPI_ISL_1216858, EPI_ISL_1216861, EPI_ISL_1216863, EPI_ISL_1216866, EPI_ISL_1216868, EPI_ISL_1216871, EPI_ISL_1216874, EPI_ISL_1216877, EPI_ISL_1216879, EPI_ISL_1216881, EPI_ISL_1216884, EPI_ISL_1216886, EPI_ISL_1216889, EPI_ISL_1216892, EPI_ISL_1216895, EPI_ISL_1234498 to 1234524, EPI_ISL_1250738 to 1250813, EPI_ISL_1289403 to 1289434, EPI_ISL_1298430 to 1298433, EPI_ISL_1323862 to 1323964, EPI_ISL_1334326 to 1334343 | see above | Hospital Universitari Vall d'Hebron - Vall d'Hebron Institut de Recerca                     | Hospital Universitari Vall d'Hebron - Vall d'Hebron Institut de Recerca                                                                                                                                                                           | Andrés Antón; Ariadna Rando; Carla Castillo; Cristina Andrés; Damir Garcia-Cehic; Josep F Abril; Josep Quer; Juliana Esperalba; María Carmen Martín; María Gema Codina; María Piñana; Tomás Pumarola                                                                                                         |
| EPI_ISL_1060491                                                                                                                                                                                                                                                                                                                                                                                                                                                                                                                                                                                                                                                                                                                                                                                                                                                                                                                                                                                                                                                                                                                                                                                                                                                                                                                                                                                                                                                                                                                                                                                                                                                                                                          |           | Hospital Universitari de La Plana                                                           | SeqCOVID-SPAIN consortium/IBV(CSIC)                                                                                                                                                                                                               | Alberto Yagüe Muñoz; Helena Buj Jordá; Juan B. Bellido Blasco; María Gil Fortuño and SeqCOVID-SPAIN consortium; Noelia Henández Pérez; Óscar Pérez Olaso                                                                                                                                                     |
| EPI_ISL_1120908 to 1120962, EPI_ISL_1195499 to 1195617, EPI_ISL_1201047, EPI_ISL_1272549 to 1272593, EPI_ISL_1312301 to 1312343                                                                                                                                                                                                                                                                                                                                                                                                                                                                                                                                                                                                                                                                                                                                                                                                                                                                                                                                                                                                                                                                                                                                                                                                                                                                                                                                                                                                                                                                                                                                                                                          |           | Hospital Universitario 12 de Octubre                                                        | SeqCOVID-SPAIN consortium/IBV(CSIC)                                                                                                                                                                                                               | Esther Viedma; Irene Muñoz-Gallego; Jennifer Villa; M.ª Dolores Folgueira and SeqCOVID-SPAIN consortium; Mar Aguilera; Mª Dolores Folgueira and SeqCOVID-SPAIN consortium; Rafael Delgado; Raúl Recio; Sagrario Zurita                                                                                       |
| EPI_ISL_1017706 to 1017710                                                                                                                                                                                                                                                                                                                                                                                                                                                                                                                                                                                                                                                                                                                                                                                                                                                                                                                                                                                                                                                                                                                                                                                                                                                                                                                                                                                                                                                                                                                                                                                                                                                                                               |           | Hospital Universitario Hernando Moncaleano Perdomo                                          | Instituto Nacional de Salud- Dirección de Investigación en Salud Pública                                                                                                                                                                          | Carlos Franco-Muñoz; Diego A. Álvarez-Díaz; Diego Andrés Prada; Gerardo Santamaría; Hector Alejandro Ruiz-Moreno; Jhonnatan Reales-González; Julian Naizaque; Katherine Laiton-Donato; Magdalena Wiesner; Marcela Mercado-Reyes; María T. Herrera-Sepúlveda; Martha Lucia Ospina Martínez; Sheryll Corchuelo |
| EPI_ISL_1279903 to 1279935, EPI_ISL_1322926 to 1323111                                                                                                                                                                                                                                                                                                                                                                                                                                                                                                                                                                                                                                                                                                                                                                                                                                                                                                                                                                                                                                                                                                                                                                                                                                                                                                                                                                                                                                                                                                                                                                                                                                                                   |           | Hospital Universitario La Paz (Madrid)                                                      | SeqCOVID-SPAIN consortium/IBV(CSIC)                                                                                                                                                                                                               | Elias Dahdouh; Fernando Lázaro-Perona; Jesús Mingorance and SeqCOVID-SPAIN consortium; María Rodríguez-Tejedor                                                                                                                                                                                               |
| EPI_ISL_1007698 to 1007712, EPI_ISL_1007768 to 1007808, EPI_ISL_1007811 to 1007832, EPI_ISL_1008981 to 1009010, EPI_ISL_1192424 to 1192467                                                                                                                                                                                                                                                                                                                                                                                                                                                                                                                                                                                                                                                                                                                                                                                                                                                                                                                                                                                                                                                                                                                                                                                                                                                                                                                                                                                                                                                                                                                                                                               |           | Hospital Universitario Marqués de Valdecilla - IDIVAL (Santander, Cantabria)                | SeqCOVID-SPAIN consortium/IBV(CSIC)                                                                                                                                                                                                               | Daniel Pablo Marcos; Jesús Rodríguez Rodríguez; Jose Manuel Méndez Legaza; María Eleicer Cano García; María Siller Ruiz and SeqCOVID-SPAIN consortium; Mónica Gozalo Margüello                                                                                                                               |
| EPI_ISL_1007747 to 1007767, EPI_ISL_1272058 to 1272073                                                                                                                                                                                                                                                                                                                                                                                                                                                                                                                                                                                                                                                                                                                                                                                                                                                                                                                                                                                                                                                                                                                                                                                                                                                                                                                                                                                                                                                                                                                                                                                                                                                                   |           | Hospital Universitario Virgen de las Nieves de Granada-SAS                                  | SeqCOVID-SPAIN consortium/IBV(CSIC)                                                                                                                                                                                                               | Irene Pedrosa Corral; José M. Navarro-Marí and SeqCOVID-SPAIN consortium; Mercedes Pérez Ruiz; Sara Sanbonmatsu Gámez                                                                                                                                                                                        |
| EPI_ISL_1000972 to 1000992                                                                                                                                                                                                                                                                                                                                                                                                                                                                                                                                                                                                                                                                                                                                                                                                                                                                                                                                                                                                                                                                                                                                                                                                                                                                                                                                                                                                                                                                                                                                                                                                                                                                                               |           | Hospital Universitario de Gran Canaria Dr. Negrín                                           | SeqCOVID-SPAIN consortium/IBV(CSIC)                                                                                                                                                                                                               | Ana Bordes Benítez and SeqCOVID-SPAIN consortium; Francisco J. Chamizo López; M. Carmen Pérez González                                                                                                                                                                                                       |
| EPI_ISL_1220047                                                                                                                                                                                                                                                                                                                                                                                                                                                                                                                                                                                                                                                                                                                                                                                                                                                                                                                                                                                                                                                                                                                                                                                                                                                                                                                                                                                                                                                                                                                                                                                                                                                                                                          |           | Hospital Universitario de San Rafael de Tunja                                               | Instituto Nacional de Salud- Dirección de Investigación en Salud Pública                                                                                                                                                                          | Carlos Franco-Muñoz; Diego A. Álvarez-Díaz; Diego Andrés Prada; Gerardo Santamaría; Hector Alejandro Ruiz-Moreno; Jhonnatan Reales-González; Julian Naizaque; Katherine Laiton-Donato; Magdalena Wiesner; Marcela Mercado-Reyes; María T. Herrera-Sepúlveda; Martha Lucia Ospina Martínez; Sheryll Corchuelo |
| EPI_ISL_1103551, EPI_ISL_1123376                                                                                                                                                                                                                                                                                                                                                                                                                                                                                                                                                                                                                                                                                                                                                                                                                                                                                                                                                                                                                                                                                                                                                                                                                                                                                                                                                                                                                                                                                                                                                                                                                                                                                         |           | Hospital Valle del Nalón                                                                    | Laboratorio de Virología HUCA                                                                                                                                                                                                                     | Abreu F; Alvarez-Arguelles ME; Boga JA; Castelló C; Costales I; Coto E; Gómez de Oña J; Martín-Rodríguez G; Melón S; Perez-Martinez Z; Rojo S; Sandoval M                                                                                                                                                    |
| EPI_ISL_1124087                                                                                                                                                                                                                                                                                                                                                                                                                                                                                                                                                                                                                                                                                                                                                                                                                                                                                                                                                                                                                                                                                                                                                                                                                                                                                                                                                                                                                                                                                                                                                                                                                                                                                                          |           | Hospital Valle del Nalón                                                                    | Laboratorio de Virología Hospital Universitario Central de Asturias (HUCA)                                                                                                                                                                        | Abreu F; Alvarez-Arguelles ME; Boga JA; Castelló C; Costales I; Coto E; Gómez de Oña J; Martín-Rodríguez G; Melón S; Perez-Martinez Z; Rojo S; Sandoval M                                                                                                                                                    |
| EPI_ISL_1020124, EPI_ISL_1020145, EPI_ISL_1098843, EPI_ISL_1123364, EPI_ISL_1138407, EPI_ISL_1242040, EPI_ISL_1310782 to 1310783, EPI_ISL_1318202, EPI_ISL_1324736                                                                                                                                                                                                                                                                                                                                                                                                                                                                                                                                                                                                                                                                                                                                                                                                                                                                                                                                                                                                                                                                                                                                                                                                                                                                                                                                                                                                                                                                                                                                                       | see above | Hospital de Cabueñes                                                                        | Laboratorio de Virología HUCA                                                                                                                                                                                                                     | Abreu F; Alvarez-Arguelles ME; Boga JA; Castelló C; Costales I; Coto E; Gómez de Oña J; Martín-Rodríguez G; Melón S; Perez-Martinez Z; Rojo S; Sandoval M                                                                                                                                                    |
| EPI_ISL_1121318 to 1121319                                                                                                                                                                                                                                                                                                                                                                                                                                                                                                                                                                                                                                                                                                                                                                                                                                                                                                                                                                                                                                                                                                                                                                                                                                                                                                                                                                                                                                                                                                                                                                                                                                                                                               |           | Hospital de Campanha COVID 19 Caieiras                                                      | Instituto Adolfo Lutz, Interdisciplinary Procedures Center, Strategic Laboratory                                                                                                                                                                  | Caio Vinicius Dias Lopes; Claudia Regina Gonçalves; Claudio Tavares Sacchi; Erica Valessa Ramos Gomes; Karoline Rodrigues Campos                                                                                                                                                                             |
| EPI_ISL_1110214 to 1110239, EPI_ISL_1110248 to 1110287                                                                                                                                                                                                                                                                                                                                                                                                                                                                                                                                                                                                                                                                                                                                                                                                                                                                                                                                                                                                                                                                                                                                                                                                                                                                                                                                                                                                                                                                                                                                                                                                                                                                   |           | Hospital de Sagunto                                                                         | SeqCOVID-SPAIN consortium/IBV(CSIC)                                                                                                                                                                                                               | Noelia Lozano Rodríguez; Sandra Moreno and SeqCOVID-SPAIN consortium                                                                                                                                                                                                                                         |
| EPI_ISL_1138405, EPI_ISL_1324735, EPI_ISL_1324738                                                                                                                                                                                                                                                                                                                                                                                                                                                                                                                                                                                                                                                                                                                                                                                                                                                                                                                                                                                                                                                                                                                                                                                                                                                                                                                                                                                                                                                                                                                                                                                                                                                                        |           | Hospital del Oriente de Asturias                                                            | Laboratorio de Virología HUCA                                                                                                                                                                                                                     | Abreu F; Alvarez-Arguelles ME; Boga JA; Castelló C; Costales I; Coto E; Gómez de Oña J; Martín-Rodríguez G; Melón S; Perez-Martinez Z; Rojo S; Sandoval M                                                                                                                                                    |
| EPI_ISL_1121308                                                                                                                                                                                                                                                                                                                                                                                                                                                                                                                                                                                                                                                                                                                                                                                                                                                                                                                                                                                                                                                                                                                                                                                                                                                                                                                                                                                                                                                                                                                                                                                                                                                                                                          |           | Hospital e Pronto Socorro Portinari                                                         | Instituto Adolfo Lutz, Interdisciplinary Procedures Center, Strategic Laboratory                                                                                                                                                                  | Caio Vinicius Dias Lopes; Claudia Regina Gonçalves; Claudio Tavares Sacchi; Erica Valessa Ramos Gomes; Karoline Rodrigues Campos                                                                                                                                                                             |
| EPI_ISL_1084635                                                                                                                                                                                                                                                                                                                                                                                                                                                                                                                                                                                                                                                                                                                                                                                                                                                                                                                                                                                                                                                                                                                                                                                                                                                                                                                                                                                                                                                                                                                                                                                                                                                                                                          |           | Hospital for Infectious Diseases, Molecular Diagnostics Laboratory, Warsaw, Poland          | 0. Laboratory of Recombinant Vaccines, Intercollegiate Faculty of Biotechnology University of Gdansk and Medical University of Gdansk. 2. ViroGenetics - BSL3 Laboratory of Virology, Maopolska Centre of Biotechnology, Jagiellonian University  | Andrzej Horban; Aneta Kopacz; Krystyna Bienkowska-Szewczyk; Krzysztof Pyrc; Lukasz Rabalski; Maciej Kosinski; Natalia Mazur-Panasiuk; Piotr Zabek; Tomasz Dyda                                                                                                                                               |
| EPI_ISL_1084636                                                                                                                                                                                                                                                                                                                                                                                                                                                                                                                                                                                                                                                                                                                                                                                                                                                                                                                                                                                                                                                                                                                                                                                                                                                                                                                                                                                                                                                                                                                                                                                                                                                                                                          |           | Hospital for Infectious Diseases, Molecular Diagnostics Laboratory, Warsaw, Poland          | 1. Laboratory of Recombinant Vaccines, Intercollegiate Faculty of Biotechnology University of Gdansk and Medical University of Gdansk. 2. ViroGenetics - BSL3 Laboratory of Virology, Maopolska Centre of Biotechnology, Jagiellonian University  | Andrzej Horban; Aneta Kopacz; Krystyna Bienkowska-Szewczyk; Krzysztof Pyrc; Lukasz Rabalski; Maciej Kosinski; Natalia Mazur-Panasiuk; Piotr Zabek; Tomasz Dyda                                                                                                                                               |
| EPI_ISL_1084620                                                                                                                                                                                                                                                                                                                                                                                                                                                                                                                                                                                                                                                                                                                                                                                                                                                                                                                                                                                                                                                                                                                                                                                                                                                                                                                                                                                                                                                                                                                                                                                                                                                                                                          |           | Hospital for Infectious Diseases, Molecular Diagnostics Laboratory, Warsaw, Poland          | 10. Laboratory of Recombinant Vaccines, Intercollegiate Faculty of Biotechnology University of Gdansk and Medical University of Gdansk. 2. ViroGenetics - BSL3 Laboratory of Virology, Maopolska Centre of Biotechnology, Jagiellonian University | Andrzej Horban; Aneta Kopacz; Krystyna Bienkowska-Szewczyk; Krzysztof Pyrc; Lukasz Rabalski; Maciej Kosinski; Natalia Mazur-Panasiuk; Piotr Zabek; Tomasz Dyda                                                                                                                                               |
| EPI_ISL_1084642                                                                                                                                                                                                                                                                                                                                                                                                                                                                                                                                                                                                                                                                                                                                                                                                                                                                                                                                                                                                                                                                                                                                                                                                                                                                                                                                                                                                                                                                                                                                                                                                                                                                                                          |           | Hospital for Infectious Diseases, Molecular Diagnostics Laboratory, Warsaw, Poland          | 11. Laboratory of Recombinant Vaccines, Intercollegiate Faculty of Biotechnology University of Gdansk and Medical                                                                                                                                 | Andrzej Horban; Aneta Kopacz; Krystyna Bienkowska-Szewczyk; Krzysztof Pyrc; Lukasz Rabalski; Maciej Kosinski; Natalia Mazur-Panasiuk; Piotr Zabek; Tomasz Dyda                                                                                                                                               |







|                                                                                                                                                                                                                                                                                                                                                                                                                                                                                                                                                                                                                                                                                                                                                                                                                                                                                                                                                                                                                                                                                                                                                                                                                                                                                                                                                                                                                                                                                                                                                                                                                                                                                                                                                                                                                                                                                                                                                                                                                                                                                                                                                                                                                                                                                                                                                                                                                                                                                                                                                                                                                                                    |                                                                                    |                                                                                                                                                                                                                                                                                                                                                                         |                                                                                                                                                                                                                                                                              |
|----------------------------------------------------------------------------------------------------------------------------------------------------------------------------------------------------------------------------------------------------------------------------------------------------------------------------------------------------------------------------------------------------------------------------------------------------------------------------------------------------------------------------------------------------------------------------------------------------------------------------------------------------------------------------------------------------------------------------------------------------------------------------------------------------------------------------------------------------------------------------------------------------------------------------------------------------------------------------------------------------------------------------------------------------------------------------------------------------------------------------------------------------------------------------------------------------------------------------------------------------------------------------------------------------------------------------------------------------------------------------------------------------------------------------------------------------------------------------------------------------------------------------------------------------------------------------------------------------------------------------------------------------------------------------------------------------------------------------------------------------------------------------------------------------------------------------------------------------------------------------------------------------------------------------------------------------------------------------------------------------------------------------------------------------------------------------------------------------------------------------------------------------------------------------------------------------------------------------------------------------------------------------------------------------------------------------------------------------------------------------------------------------------------------------------------------------------------------------------------------------------------------------------------------------------------------------------------------------------------------------------------------------|------------------------------------------------------------------------------------|-------------------------------------------------------------------------------------------------------------------------------------------------------------------------------------------------------------------------------------------------------------------------------------------------------------------------------------------------------------------------|------------------------------------------------------------------------------------------------------------------------------------------------------------------------------------------------------------------------------------------------------------------------------|
| EPI_ISL_1084618                                                                                                                                                                                                                                                                                                                                                                                                                                                                                                                                                                                                                                                                                                                                                                                                                                                                                                                                                                                                                                                                                                                                                                                                                                                                                                                                                                                                                                                                                                                                                                                                                                                                                                                                                                                                                                                                                                                                                                                                                                                                                                                                                                                                                                                                                                                                                                                                                                                                                                                                                                                                                                    | Hospital for Infectious Diseases, Molecular Diagnostics Laboratory, Warsaw, Poland | 59. Laboratory of Recombinant Vaccines, Intercollegiate Faculty of Biotechnology University of Gdansk and Medical University of Gdansk. 2. ViroGenetics - BSL3 Laboratory of Virology, Maopolska Centre of Biotechnology, Jagiellonian University                                                                                                                       | Andrzej Horban; Aneta Kopacz; Krystyna Bienkowska-Szewczyk; Krzysztof Pyrc; Lukasz Rabalski; Maciej Kosinski; Natalia Mazur-Panasiuk; Piotr Zabek; Tomasz Dyda                                                                                                               |
| EPI_ISL_1084632, EPI_ISL_1084640                                                                                                                                                                                                                                                                                                                                                                                                                                                                                                                                                                                                                                                                                                                                                                                                                                                                                                                                                                                                                                                                                                                                                                                                                                                                                                                                                                                                                                                                                                                                                                                                                                                                                                                                                                                                                                                                                                                                                                                                                                                                                                                                                                                                                                                                                                                                                                                                                                                                                                                                                                                                                   | Hospital for Infectious Diseases, Molecular Diagnostics Laboratory, Warsaw, Poland | 6. Laboratory of Recombinant Vaccines, Intercollegiate Faculty of Biotechnology University of Gdansk and Medical University of Gdansk. 2. ViroGenetics - BSL3 Laboratory of Virology, Maopolska Centre of Biotechnology, Jagiellonian University                                                                                                                        | Andrzej Horban; Aneta Kopacz; Krystyna Bienkowska-Szewczyk; Krzysztof Pyrc; Lukasz Rabalski; Maciej Kosinski; Natalia Mazur-Panasiuk; Piotr Zabek; Tomasz Dyda                                                                                                               |
| EPI_ISL_1084671                                                                                                                                                                                                                                                                                                                                                                                                                                                                                                                                                                                                                                                                                                                                                                                                                                                                                                                                                                                                                                                                                                                                                                                                                                                                                                                                                                                                                                                                                                                                                                                                                                                                                                                                                                                                                                                                                                                                                                                                                                                                                                                                                                                                                                                                                                                                                                                                                                                                                                                                                                                                                                    | Hospital for Infectious Diseases, Molecular Diagnostics Laboratory, Warsaw, Poland | 60. Laboratory of Recombinant Vaccines, Intercollegiate Faculty of Biotechnology University of Gdansk and Medical University of Gdansk. 2. ViroGenetics - BSL3 Laboratory of Virology, Maopolska Centre of Biotechnology, Jagiellonian University                                                                                                                       | Andrzej Horban; Aneta Kopacz; Krystyna Bienkowska-Szewczyk; Krzysztof Pyrc; Lukasz Rabalski; Maciej Kosinski; Natalia Mazur-Panasiuk; Piotr Zabek; Tomasz Dyda                                                                                                               |
| EPI_ISL_1084609                                                                                                                                                                                                                                                                                                                                                                                                                                                                                                                                                                                                                                                                                                                                                                                                                                                                                                                                                                                                                                                                                                                                                                                                                                                                                                                                                                                                                                                                                                                                                                                                                                                                                                                                                                                                                                                                                                                                                                                                                                                                                                                                                                                                                                                                                                                                                                                                                                                                                                                                                                                                                                    | Hospital for Infectious Diseases, Molecular Diagnostics Laboratory, Warsaw, Poland | 61. Laboratory of Recombinant Vaccines, Intercollegiate Faculty of Biotechnology University of Gdansk and Medical University of Gdansk. 2. ViroGenetics - BSL3 Laboratory of Virology, Maopolska Centre of Biotechnology, Jagiellonian University                                                                                                                       | Andrzej Horban; Aneta Kopacz; Krystyna Bienkowska-Szewczyk; Krzysztof Pyrc; Lukasz Rabalski; Maciej Kosinski; Natalia Mazur-Panasiuk; Piotr Zabek; Tomasz Dyda                                                                                                               |
| EPI_ISL_1084672                                                                                                                                                                                                                                                                                                                                                                                                                                                                                                                                                                                                                                                                                                                                                                                                                                                                                                                                                                                                                                                                                                                                                                                                                                                                                                                                                                                                                                                                                                                                                                                                                                                                                                                                                                                                                                                                                                                                                                                                                                                                                                                                                                                                                                                                                                                                                                                                                                                                                                                                                                                                                                    | Hospital for Infectious Diseases, Molecular Diagnostics Laboratory, Warsaw, Poland | 62. Laboratory of Recombinant Vaccines, Intercollegiate Faculty of Biotechnology University of Gdansk and Medical University of Gdansk. 2. ViroGenetics - BSL3 Laboratory of Virology, Maopolska Centre of Biotechnology, Jagiellonian University                                                                                                                       | Andrzej Horban; Aneta Kopacz; Krystyna Bienkowska-Szewczyk; Krzysztof Pyrc; Lukasz Rabalski; Maciej Kosinski; Natalia Mazur-Panasiuk; Piotr Zabek; Tomasz Dyda                                                                                                               |
| EPI_ISL_1084613                                                                                                                                                                                                                                                                                                                                                                                                                                                                                                                                                                                                                                                                                                                                                                                                                                                                                                                                                                                                                                                                                                                                                                                                                                                                                                                                                                                                                                                                                                                                                                                                                                                                                                                                                                                                                                                                                                                                                                                                                                                                                                                                                                                                                                                                                                                                                                                                                                                                                                                                                                                                                                    | Hospital for Infectious Diseases, Molecular Diagnostics Laboratory, Warsaw, Poland | 63. Laboratory of Recombinant Vaccines, Intercollegiate Faculty of Biotechnology University of Gdansk and Medical University of Gdansk. 2. ViroGenetics - BSL3 Laboratory of Virology, Maopolska Centre of Biotechnology, Jagiellonian University                                                                                                                       | Andrzej Horban; Aneta Kopacz; Krystyna Bienkowska-Szewczyk; Krzysztof Pyrc; Lukasz Rabalski; Maciej Kosinski; Natalia Mazur-Panasiuk; Piotr Zabek; Tomasz Dyda                                                                                                               |
| EPI_ISL_1084628, EPI_ISL_1084631                                                                                                                                                                                                                                                                                                                                                                                                                                                                                                                                                                                                                                                                                                                                                                                                                                                                                                                                                                                                                                                                                                                                                                                                                                                                                                                                                                                                                                                                                                                                                                                                                                                                                                                                                                                                                                                                                                                                                                                                                                                                                                                                                                                                                                                                                                                                                                                                                                                                                                                                                                                                                   | Hospital for Infectious Diseases, Molecular Diagnostics Laboratory, Warsaw, Poland | 7. Laboratory of Recombinant Vaccines, Intercollegiate Faculty of Biotechnology University of Gdansk and Medical University of Gdansk. 2. ViroGenetics - BSL3 Laboratory of Virology, Maopolska Centre of Biotechnology, Jagiellonian University                                                                                                                        | Andrzej Horban; Aneta Kopacz; Krystyna Bienkowska-Szewczyk; Krzysztof Pyrc; Lukasz Rabalski; Maciej Kosinski; Natalia Mazur-Panasiuk; Piotr Zabek; Tomasz Dyda                                                                                                               |
| EPI_ISL_1084610                                                                                                                                                                                                                                                                                                                                                                                                                                                                                                                                                                                                                                                                                                                                                                                                                                                                                                                                                                                                                                                                                                                                                                                                                                                                                                                                                                                                                                                                                                                                                                                                                                                                                                                                                                                                                                                                                                                                                                                                                                                                                                                                                                                                                                                                                                                                                                                                                                                                                                                                                                                                                                    | Hospital for Infectious Diseases, Molecular Diagnostics Laboratory, Warsaw, Poland | 8. Laboratory of Recombinant Vaccines, Intercollegiate Faculty of Biotechnology University of Gdansk and Medical University of Gdansk. 2. ViroGenetics - BSL3 Laboratory of Virology, Maopolska Centre of Biotechnology, Jagiellonian University                                                                                                                        | Andrzej Horban; Aneta Kopacz; Krystyna Bienkowska-Szewczyk; Krzysztof Pyrc; Lukasz Rabalski; Maciej Kosinski; Natalia Mazur-Panasiuk; Piotr Zabek; Tomasz Dyda                                                                                                               |
| EPI_ISL_1084641                                                                                                                                                                                                                                                                                                                                                                                                                                                                                                                                                                                                                                                                                                                                                                                                                                                                                                                                                                                                                                                                                                                                                                                                                                                                                                                                                                                                                                                                                                                                                                                                                                                                                                                                                                                                                                                                                                                                                                                                                                                                                                                                                                                                                                                                                                                                                                                                                                                                                                                                                                                                                                    | Hospital for Infectious Diseases, Molecular Diagnostics Laboratory, Warsaw, Poland | 9. Laboratory of Recombinant Vaccines, Intercollegiate Faculty of Biotechnology University of Gdansk and Medical University of Gdansk. 2. ViroGenetics - BSL3 Laboratory of Virology, Maopolska Centre of Biotechnology, Jagiellonian University                                                                                                                        | Andrzej Horban; Aneta Kopacz; Krystyna Bienkowska-Szewczyk; Krzysztof Pyrc; Lukasz Rabalski; Maciej Kosinski; Natalia Mazur-Panasiuk; Piotr Zabek; Tomasz Dyda                                                                                                               |
| EPI_ISL_1034321, EPI_ISL_1040152, EPI_ISL_1110546 to 1110547, EPI_ISL_1118294, EPI_ISL_1118446, EPI_ISL_1118537, EPI_ISL_1118557, EPI_ISL_1118671 to 1118673, EPI_ISL_1186158 to 1186159, EPI_ISL_1192170, EPI_ISL_1192179 to 1192180, EPI_ISL_1192197, EPI_ISL_1192229, EPI_ISL_1192257 to 1192265, EPI_ISL_1192334, EPI_ISL_1251320 to 1251321, EPI_ISL_1251399, EPI_ISL_1251420, EPI_ISL_1251486 to 1251487, EPI_ISL_1251610, EPI_ISL_1251757, EPI_ISL_1251847, EPI_ISL_1251981 to 1251983, EPI_ISL_1252047, EPI_ISL_1252529 to 1252530, EPI_ISL_1254531, EPI_ISL_1254542, EPI_ISL_1254565, EPI_ISL_1254567, EPI_ISL_1254604, EPI_ISL_1254607, EPI_ISL_1254628, EPI_ISL_1314435 to 1314452, EPI_ISL_1314527, EPI_ISL_1314534, EPI_ISL_1317230, EPI_ISL_1317343, EPI_ISL_1317394, EPI_ISL_1317504, EPI_ISL_1317587, EPI_ISL_1317749, EPI_ISL_1317776, EPI_ISL_1317873, EPI_ISL_1317927 to 1317929, EPI_ISL_1317936 to 1317937, EPI_ISL_1317965, EPI_ISL_1317972 to 1317975, EPI_ISL_1317999, EPI_ISL_1318011 to 1318012, EPI_ISL_1318027 to 1318031, EPI_ISL_1318033 to 1318036, EPI_ISL_1318043 to 1318049, EPI_ISL_1318052 to 1318057, EPI_ISL_1318060 to 1318064, EPI_ISL_1318066 to 1318069, EPI_ISL_1318072 to 1318076, EPI_ISL_1318083 to 1318085, EPI_ISL_1318088, EPI_ISL_1318092 to 1318093, EPI_ISL_1323179 to 1323185                                                                                                                                                                                                                                                                                                                                                                                                                                                                                                                                                                                                                                                                                                                                                                                                                                                                                                                                                                                                                                                                                                                                                                                                                                                                                                                 | Norwegian Institute of Public Health, Department of Virology                       | Atiya R Ali; Debec Nadia; Engebretsen Serina Beate; Engebretsen Serina Beate Atiya R Ali; Garcia Llorente Ignacio; Hilde Elshaug; Hilde Vollan; Ignacio Garcia Llorente; Jon Bråte; Kamilla Heddeland Instefjord; Karoline Bragstad; Kathrine Stene-Johansen; Marie Paulsen Madsen; Olav Hungnes; Pedersen Benedikte Nevjen; Rasmus Riis Kopperud; Serina B Engebretsen |                                                                                                                                                                                                                                                                              |
| see above                                                                                                                                                                                                                                                                                                                                                                                                                                                                                                                                                                                                                                                                                                                                                                                                                                                                                                                                                                                                                                                                                                                                                                                                                                                                                                                                                                                                                                                                                                                                                                                                                                                                                                                                                                                                                                                                                                                                                                                                                                                                                                                                                                                                                                                                                                                                                                                                                                                                                                                                                                                                                                          | Hospital of Southern Norway - Kristiansand, Department of Medical Microbiology     |                                                                                                                                                                                                                                                                                                                                                                         |                                                                                                                                                                                                                                                                              |
| EPI_ISL_1233900                                                                                                                                                                                                                                                                                                                                                                                                                                                                                                                                                                                                                                                                                                                                                                                                                                                                                                                                                                                                                                                                                                                                                                                                                                                                                                                                                                                                                                                                                                                                                                                                                                                                                                                                                                                                                                                                                                                                                                                                                                                                                                                                                                                                                                                                                                                                                                                                                                                                                                                                                                                                                                    | Houston Health Department, Disease Prevention and Control                          | Houston Health Department                                                                                                                                                                                                                                                                                                                                               | Brown, P.; Lara, A.; Penn, R.                                                                                                                                                                                                                                                |
| EPI_ISL_1059239 to 1059295, EPI_ISL_1163717 to 1163735, EPI_ISL_1168698 to 1168727, EPI_ISL_1195903 to 1195909, EPI_ISL_1224913 to 1224940, EPI_ISL_1260610 to 1260632, EPI_ISL_1260634 to 1260660, EPI_ISL_1340022 to 1340039                                                                                                                                                                                                                                                                                                                                                                                                                                                                                                                                                                                                                                                                                                                                                                                                                                                                                                                                                                                                                                                                                                                                                                                                                                                                                                                                                                                                                                                                                                                                                                                                                                                                                                                                                                                                                                                                                                                                                                                                                                                                                                                                                                                                                                                                                                                                                                                                                     |                                                                                    |                                                                                                                                                                                                                                                                                                                                                                         |                                                                                                                                                                                                                                                                              |
| see above                                                                                                                                                                                                                                                                                                                                                                                                                                                                                                                                                                                                                                                                                                                                                                                                                                                                                                                                                                                                                                                                                                                                                                                                                                                                                                                                                                                                                                                                                                                                                                                                                                                                                                                                                                                                                                                                                                                                                                                                                                                                                                                                                                                                                                                                                                                                                                                                                                                                                                                                                                                                                                          | Houston Health Dept.                                                               | Houston Health Dept.                                                                                                                                                                                                                                                                                                                                                    | Adolpho Lara; Pamela Brown; Ryker Penn; Yanlai Lai                                                                                                                                                                                                                           |
| EPI_ISL_1074302 to 1074621, EPI_ISL_1074624 to 1074742, EPI_ISL_1074744 to 1075266, EPI_ISL_1075268 to 1075349, EPI_ISL_1075351 to 1075643, EPI_ISL_1075645 to 1075656, EPI_ISL_1075658 to 1076022, EPI_ISL_1076024 to 1076305, EPI_ISL_1076307 to 1076352, EPI_ISL_1076357, EPI_ISL_1076360, EPI_ISL_1076365, EPI_ISL_1076368, EPI_ISL_1076372, EPI_ISL_1076375, EPI_ISL_1076378, EPI_ISL_1076382, EPI_ISL_1076386, EPI_ISL_1076389, EPI_ISL_1076393, EPI_ISL_1076396, EPI_ISL_1076400, EPI_ISL_1076410, EPI_ISL_1076413, EPI_ISL_1076416, EPI_ISL_1076420, EPI_ISL_1076423, EPI_ISL_1076427, EPI_ISL_1076430, EPI_ISL_1076434, EPI_ISL_1076437, EPI_ISL_1076440, EPI_ISL_1076444, EPI_ISL_1076447, EPI_ISL_1076451, EPI_ISL_1076454, EPI_ISL_1076458, EPI_ISL_1076461 to 1076536, EPI_ISL_1076538 to 1076688, EPI_ISL_1076690 to 1077347, EPI_ISL_1077350 to 1078588, EPI_ISL_1078591, EPI_ISL_1078595, EPI_ISL_1078598, EPI_ISL_1078602, EPI_ISL_1078605, EPI_ISL_1078612, EPI_ISL_1078615, EPI_ISL_1078619, EPI_ISL_1078622 to 1078980, EPI_ISL_1078982, EPI_ISL_1078985, EPI_ISL_1078990, EPI_ISL_1078994, EPI_ISL_1078998, EPI_ISL_1079001, EPI_ISL_1079005, EPI_ISL_1079009 to 1079157, EPI_ISL_1079160, EPI_ISL_1079164, EPI_ISL_1079167 to 1079338, EPI_ISL_1079340 to 1079341, EPI_ISL_1079343 to 1079351, EPI_ISL_1079354, EPI_ISL_1079357, EPI_ISL_1079361, EPI_ISL_1079365, EPI_ISL_1079367, EPI_ISL_1079369, EPI_ISL_1079372, EPI_ISL_1079374 to 1079375, EPI_ISL_1079377, EPI_ISL_1079379, EPI_ISL_1079381, EPI_ISL_1079384 to 1079385, EPI_ISL_1079387, EPI_ISL_1079389, EPI_ISL_1079393, EPI_ISL_1079396 to 1079397, EPI_ISL_1079399, EPI_ISL_1079401 to 1079435, EPI_ISL_1079437 to 1079688, EPI_ISL_1079691, EPI_ISL_1079694, EPI_ISL_1079698, EPI_ISL_1079702, EPI_ISL_1079704 to 1079889, EPI_ISL_1079892, EPI_ISL_1079895 to 1079991, EPI_ISL_1079992, EPI_ISL_1080000, EPI_ISL_1080002 to 1080045, EPI_ISL_1080047 to 1080333, EPI_ISL_1080335, EPI_ISL_1080340, EPI_ISL_1080345, EPI_ISL_1080349, EPI_ISL_1080352 to 1080374, EPI_ISL_1080377, EPI_ISL_1080383, EPI_ISL_1080392 to 1080432, EPI_ISL_1080558 to 1080930, EPI_ISL_1080934, EPI_ISL_1080938, EPI_ISL_1080942, EPI_ISL_1080946, EPI_ISL_1080951, EPI_ISL_1080955, EPI_ISL_1080960, EPI_ISL_1080964, EPI_ISL_1080968, EPI_ISL_1080973, EPI_ISL_1080977, EPI_ISL_1080980, EPI_ISL_1080985 to 1081044, EPI_ISL_1201898 to 1202565, EPI_ISL_1202567 to 1203815, EPI_ISL_1235691 to 1236444, EPI_ISL_1236446 to 1236900, EPI_ISL_1236902 to 1238194, EPI_ISL_1238196 to 1238303, EPI_ISL_1238305 to 1238765, EPI_ISL_1303551 to 1303775, EPI_ISL_1303777 to 1305773 |                                                                                    |                                                                                                                                                                                                                                                                                                                                                                         |                                                                                                                                                                                                                                                                              |
| see above                                                                                                                                                                                                                                                                                                                                                                                                                                                                                                                                                                                                                                                                                                                                                                                                                                                                                                                                                                                                                                                                                                                                                                                                                                                                                                                                                                                                                                                                                                                                                                                                                                                                                                                                                                                                                                                                                                                                                                                                                                                                                                                                                                                                                                                                                                                                                                                                                                                                                                                                                                                                                                          | Houston Methodist Hospital                                                         | Houston Methodist Hospital                                                                                                                                                                                                                                                                                                                                              | Ilya J. Finkelstein; James J. Davis; Jessica Cambric; Jimmy Gollihar; Kristina Reppond; Layne Pruitt; Madison N. Shyer; Matthew Ojeda Saavedra; Paul A. Christensen; Prasanti Yerramilli; Randall J. Olsen; Robert Olson; S. Wesley Long; Sishir Subedi; and James M. Musser |
| EPI_ISL_1085425, EPI_ISL_1085474, EPI_ISL_1085507, EPI_ISL_1085532, EPI_ISL_1085555, EPI_ISL_1085578 to 1085579, EPI_ISL_1085586 to 1085587, EPI_ISL_1085592, EPI_ISL_1085603, EPI_ISL_1085605, EPI_ISL_1085625, EPI_ISL_1110141, EPI_ISL_1110154                                                                                                                                                                                                                                                                                                                                                                                                                                                                                                                                                                                                                                                                                                                                                                                                                                                                                                                                                                                                                                                                                                                                                                                                                                                                                                                                                                                                                                                                                                                                                                                                                                                                                                                                                                                                                                                                                                                                                                                                                                                                                                                                                                                                                                                                                                                                                                                                  |                                                                                    |                                                                                                                                                                                                                                                                                                                                                                         |                                                                                                                                                                                                                                                                              |
| see above                                                                                                                                                                                                                                                                                                                                                                                                                                                                                                                                                                                                                                                                                                                                                                                                                                                                                                                                                                                                                                                                                                                                                                                                                                                                                                                                                                                                                                                                                                                                                                                                                                                                                                                                                                                                                                                                                                                                                                                                                                                                                                                                                                                                                                                                                                                                                                                                                                                                                                                                                                                                                                          | Hpital Avicenne                                                                    | Department of Virology, Henri Mondor University Hospital, Assistance Publique Hôpitaux de Paris, Université Paris-Est Créteil, INSERM U955                                                                                                                                                                                                                              | Alexandre Soulier; Christophe Rodriguez; Elisabeth Trawinski; Guillaume Gricourt; Jean-Michel Pawlowsky; Melissa N'Debi; Slim Fourati; Vanessa Demontant                                                                                                                     |
| EPI_ISL_1085552                                                                                                                                                                                                                                                                                                                                                                                                                                                                                                                                                                                                                                                                                                                                                                                                                                                                                                                                                                                                                                                                                                                                                                                                                                                                                                                                                                                                                                                                                                                                                                                                                                                                                                                                                                                                                                                                                                                                                                                                                                                                                                                                                                                                                                                                                                                                                                                                                                                                                                                                                                                                                                    | Hpital Necker-Enfants malades                                                      | Department of Virology, Henri Mondor University Hospital, Assistance Publique Hôpitaux de Paris, Université Paris-Est Créteil, INSERM U955                                                                                                                                                                                                                              | Alexandre Soulier; Christophe Rodriguez; Elisabeth Trawinski; Guillaume Gricourt; Jean-Michel Pawlowsky; Melissa N'Debi; Slim Fourati; Vanessa Demontant                                                                                                                     |
| EPI_ISL_1085433, EPI_ISL_1085435 to 1085436, EPI_ISL_1085438, EPI_ISL_1085447, EPI_ISL_1085449, EPI_ISL_1085452, EPI_ISL_1085475, EPI_ISL_1085497, EPI_ISL_1085506, EPI_ISL_1085508, EPI_ISL_1085513, EPI_ISL_1085515 to 1085516, EPI_ISL_1085528, EPI_ISL_1085530 to 1085531                                                                                                                                                                                                                                                                                                                                                                                                                                                                                                                                                                                                                                                                                                                                                                                                                                                                                                                                                                                                                                                                                                                                                                                                                                                                                                                                                                                                                                                                                                                                                                                                                                                                                                                                                                                                                                                                                                                                                                                                                                                                                                                                                                                                                                                                                                                                                                      |                                                                                    |                                                                                                                                                                                                                                                                                                                                                                         |                                                                                                                                                                                                                                                                              |
| see above                                                                                                                                                                                                                                                                                                                                                                                                                                                                                                                                                                                                                                                                                                                                                                                                                                                                                                                                                                                                                                                                                                                                                                                                                                                                                                                                                                                                                                                                                                                                                                                                                                                                                                                                                                                                                                                                                                                                                                                                                                                                                                                                                                                                                                                                                                                                                                                                                                                                                                                                                                                                                                          | Hpital Piti-Salpêtrière                                                            | Department of Virology, Henri Mondor University Hospital,                                                                                                                                                                                                                                                                                                               | Alexandre Soulier; Christophe Rodriguez; Elisabeth Trawinski; Guillaume Gricourt; Jean-Michel Pawlowsky; Melissa N'Debi; Slim Fourati; Vanessa                                                                                                                               |

|                                                                                                                                                                                                                                                                                                                                                                                                                                                                                                                                                                                                                                                                                                                                                                                                                                                                                                                                                                                                                                                                                                                                                                                                                                                                                                                                                                                                                                                                                                                                                                                                                                                                                                                                                                                                                                                                                                                                                                                                                                                                                                                                                                                                                                                                                                                                                                                                                                                           |                                                         |                                                                                                                                            |                                                                                                                                                                                                                                                                                                                                                                                                         |                        |
|-----------------------------------------------------------------------------------------------------------------------------------------------------------------------------------------------------------------------------------------------------------------------------------------------------------------------------------------------------------------------------------------------------------------------------------------------------------------------------------------------------------------------------------------------------------------------------------------------------------------------------------------------------------------------------------------------------------------------------------------------------------------------------------------------------------------------------------------------------------------------------------------------------------------------------------------------------------------------------------------------------------------------------------------------------------------------------------------------------------------------------------------------------------------------------------------------------------------------------------------------------------------------------------------------------------------------------------------------------------------------------------------------------------------------------------------------------------------------------------------------------------------------------------------------------------------------------------------------------------------------------------------------------------------------------------------------------------------------------------------------------------------------------------------------------------------------------------------------------------------------------------------------------------------------------------------------------------------------------------------------------------------------------------------------------------------------------------------------------------------------------------------------------------------------------------------------------------------------------------------------------------------------------------------------------------------------------------------------------------------------------------------------------------------------------------------------------------|---------------------------------------------------------|--------------------------------------------------------------------------------------------------------------------------------------------|---------------------------------------------------------------------------------------------------------------------------------------------------------------------------------------------------------------------------------------------------------------------------------------------------------------------------------------------------------------------------------------------------------|------------------------|
| EPI_ISL_1027476, EPI_ISL_1027517, EPI_ISL_1027535 to 1027541, EPI_ISL_1027561, EPI_ISL_1030499, EPI_ISL_1185287, EPI_ISL_1185291 to 1185292, EPI_ISL_1185294, EPI_ISL_1185298, EPI_ISL_1185300 to 1185302, EPI_ISL_1185304, EPI_ISL_1185306, EPI_ISL_1185308 to 1185309, EPI_ISL_1185312, EPI_ISL_1185318 to 1185319, EPI_ISL_1185323 to 1185326, EPI_ISL_1185328 to 1185329, EPI_ISL_1185340, EPI_ISL_1185345 to 1185346, EPI_ISL_1185352 to 1185353, EPI_ISL_1185355, EPI_ISL_1185359 to 1185361, EPI_ISL_1185365, EPI_ISL_1185369, EPI_ISL_1185382, EPI_ISL_1185385, EPI_ISL_1185394 to 1185395, EPI_ISL_1185399, EPI_ISL_1185407 to 1185410, EPI_ISL_1185410, EPI_ISL_1185412 to 1185413, EPI_ISL_1185417, EPI_ISL_1185425, EPI_ISL_1185428, EPI_ISL_1185432, EPI_ISL_1185436, EPI_ISL_1185438 to 1185440, EPI_ISL_1185448, EPI_ISL_1185454 to 1185455, EPI_ISL_1185460, EPI_ISL_1185463, EPI_ISL_1185468 to 1185469, EPI_ISL_1185471, EPI_ISL_1185474, EPI_ISL_1185476, EPI_ISL_1185479, EPI_ISL_1185481, EPI_ISL_1185486 to 1185489, EPI_ISL_1185497 to 1185498, EPI_ISL_1185504 to 1185505, EPI_ISL_1185507, EPI_ISL_1185509, EPI_ISL_1185516, EPI_ISL_1185518 to 1185519, EPI_ISL_1185521, EPI_ISL_1185526, EPI_ISL_1185528, EPI_ISL_1234786, EPI_ISL_1234786, EPI_ISL_1234789, EPI_ISL_1234792 to 1234794, EPI_ISL_1234799, EPI_ISL_1234801, EPI_ISL_1234803, EPI_ISL_1234805, EPI_ISL_1234807, EPI_ISL_1234811, EPI_ISL_1234814, EPI_ISL_1234816 to 1234817, EPI_ISL_1234821 to 1234824, EPI_ISL_1234826, EPI_ISL_1234831, EPI_ISL_1234833, EPI_ISL_1234836, EPI_ISL_1234852 to 1234853, EPI_ISL_1234856, EPI_ISL_1234859, EPI_ISL_1234861, EPI_ISL_1234863, EPI_ISL_1234868, EPI_ISL_1234871, EPI_ISL_1234874, EPI_ISL_1234882, EPI_ISL_1234888 to 1234890, EPI_ISL_1234893, EPI_ISL_1234896, EPI_ISL_1234898, EPI_ISL_1234903 to 1234906, EPI_ISL_1234908, EPI_ISL_1234910 to 1234912, EPI_ISL_1234914, EPI_ISL_1234916, EPI_ISL_1234922, EPI_ISL_1234927 to 1234928, EPI_ISL_1234930 to 1234931, EPI_ISL_1234934, EPI_ISL_1234936, EPI_ISL_1234948 to 1234949, EPI_ISL_1234955, EPI_ISL_1234960, EPI_ISL_1234963, EPI_ISL_1234966, EPI_ISL_1234971, EPI_ISL_1234974, EPI_ISL_1234980 to 1234981, EPI_ISL_1234984, EPI_ISL_1234989, EPI_ISL_1234998, EPI_ISL_1235001 to 1235005, EPI_ISL_1235011 to 1235012, EPI_ISL_1235023, EPI_ISL_1235030, EPI_ISL_1235033, EPI_ISL_1235037, EPI_ISL_1235039 to 1235040, EPI_ISL_1235046, EPI_ISL_1235053 |                                                         |                                                                                                                                            |                                                                                                                                                                                                                                                                                                                                                                                                         |                        |
| see above                                                                                                                                                                                                                                                                                                                                                                                                                                                                                                                                                                                                                                                                                                                                                                                                                                                                                                                                                                                                                                                                                                                                                                                                                                                                                                                                                                                                                                                                                                                                                                                                                                                                                                                                                                                                                                                                                                                                                                                                                                                                                                                                                                                                                                                                                                                                                                                                                                                 | Humboldt County Public Health Laboratory                | Chan-Zuckerberg Biohub                                                                                                                     |                                                                                                                                                                                                                                                                                                                                                                                                         | CZB Cliahub Consortium |
| EPI_ISL_1041195 to 1041212                                                                                                                                                                                                                                                                                                                                                                                                                                                                                                                                                                                                                                                                                                                                                                                                                                                                                                                                                                                                                                                                                                                                                                                                                                                                                                                                                                                                                                                                                                                                                                                                                                                                                                                                                                                                                                                                                                                                                                                                                                                                                                                                                                                                                                                                                                                                                                                                                                | Hungarian Defence Forces Military Medical Centre        | National Laboratory of Virology, Szentágothai Research Centre                                                                              | Balázs Somogyi; Csaba Pereszlényi; Endre Gábor Tóth; Ferenc Jakab; Gábor Kemenesi; Ágnes Balázs-Nagy                                                                                                                                                                                                                                                                                                    |                        |
| EPI_ISL_1192364 to 1192365                                                                                                                                                                                                                                                                                                                                                                                                                                                                                                                                                                                                                                                                                                                                                                                                                                                                                                                                                                                                                                                                                                                                                                                                                                                                                                                                                                                                                                                                                                                                                                                                                                                                                                                                                                                                                                                                                                                                                                                                                                                                                                                                                                                                                                                                                                                                                                                                                                | Huntington Memorial Hospital                            | Los Angeles County PHL                                                                                                                     |                                                                                                                                                                                                                                                                                                                                                                                                         | P. Hemarajata et al.   |
| EPI_ISL_1085921 to 1085924, EPI_ISL_1110182                                                                                                                                                                                                                                                                                                                                                                                                                                                                                                                                                                                                                                                                                                                                                                                                                                                                                                                                                                                                                                                                                                                                                                                                                                                                                                                                                                                                                                                                                                                                                                                                                                                                                                                                                                                                                                                                                                                                                                                                                                                                                                                                                                                                                                                                                                                                                                                                               | Hôpital Ambroise-Paré                                   | Department of Virology, Henri Mondor University Hospital, Assistance Publique Hôpitaux de Paris, Université Paris-Est Créteil, INSERM U955 | Alexandre Soulier; Christophe Rodriguez; Elisabeth Trawinski; Guillaume Gricourt; Jean-Michel Pawlowsky; Melissa N'Debi; Slim Fourati; Vanessa Demontant                                                                                                                                                                                                                                                |                        |
| EPI_ISL_1085835, EPI_ISL_1085875, EPI_ISL_1085948                                                                                                                                                                                                                                                                                                                                                                                                                                                                                                                                                                                                                                                                                                                                                                                                                                                                                                                                                                                                                                                                                                                                                                                                                                                                                                                                                                                                                                                                                                                                                                                                                                                                                                                                                                                                                                                                                                                                                                                                                                                                                                                                                                                                                                                                                                                                                                                                         | Hôpital Antoine-Bécclère                                | Department of Virology, Henri Mondor University Hospital, Assistance Publique Hôpitaux de Paris, Université Paris-Est Créteil, INSERM U955 | Alexandre Soulier; Christophe Rodriguez; Elisabeth Trawinski; Guillaume Gricourt; Jean-Michel Pawlowsky; Melissa N'Debi; Slim Fourati; Vanessa Demontant                                                                                                                                                                                                                                                |                        |
| EPI_ISL_1085825, EPI_ISL_1085882, EPI_ISL_1085916, EPI_ISL_1085920, EPI_ISL_1085947, EPI_ISL_1085949                                                                                                                                                                                                                                                                                                                                                                                                                                                                                                                                                                                                                                                                                                                                                                                                                                                                                                                                                                                                                                                                                                                                                                                                                                                                                                                                                                                                                                                                                                                                                                                                                                                                                                                                                                                                                                                                                                                                                                                                                                                                                                                                                                                                                                                                                                                                                      | Hôpital Armand-Trousseau                                | Department of Virology, Henri Mondor University Hospital, Assistance Publique Hôpitaux de Paris, Université Paris-Est Créteil, INSERM U955 | Alexandre Soulier; Christophe Rodriguez; Elisabeth Trawinski; Guillaume Gricourt; Jean-Michel Pawlowsky; Melissa N'Debi; Slim Fourati; Vanessa Demontant                                                                                                                                                                                                                                                |                        |
| EPI_ISL_1085311 to 1085313, EPI_ISL_1085315, EPI_ISL_1085332, EPI_ISL_1085352, EPI_ISL_1085402, EPI_ISL_1085697 to 1085698, EPI_ISL_1085800 to 1085801, EPI_ISL_1085810, EPI_ISL_1085824, EPI_ISL_1085892 to 1085893, EPI_ISL_1085925 to 1085927, EPI_ISL_1110174, EPI_ISL_1110181, EPI_ISL_1110207, EPI_ISL_1110212                                                                                                                                                                                                                                                                                                                                                                                                                                                                                                                                                                                                                                                                                                                                                                                                                                                                                                                                                                                                                                                                                                                                                                                                                                                                                                                                                                                                                                                                                                                                                                                                                                                                                                                                                                                                                                                                                                                                                                                                                                                                                                                                      |                                                         |                                                                                                                                            |                                                                                                                                                                                                                                                                                                                                                                                                         |                        |
| see above                                                                                                                                                                                                                                                                                                                                                                                                                                                                                                                                                                                                                                                                                                                                                                                                                                                                                                                                                                                                                                                                                                                                                                                                                                                                                                                                                                                                                                                                                                                                                                                                                                                                                                                                                                                                                                                                                                                                                                                                                                                                                                                                                                                                                                                                                                                                                                                                                                                 | Hôpital Avicenne                                        | Department of Virology, Henri Mondor University Hospital, Assistance Publique Hôpitaux de Paris, Université Paris-Est Créteil, INSERM U955 | Alexandre Soulier; Christophe Rodriguez; Elisabeth Trawinski; Guillaume Gricourt; Jean-Michel Pawlowsky; Melissa N'Debi; Slim Fourati; Vanessa Demontant                                                                                                                                                                                                                                                |                        |
| EPI_ISL_1296364 to 1296407                                                                                                                                                                                                                                                                                                                                                                                                                                                                                                                                                                                                                                                                                                                                                                                                                                                                                                                                                                                                                                                                                                                                                                                                                                                                                                                                                                                                                                                                                                                                                                                                                                                                                                                                                                                                                                                                                                                                                                                                                                                                                                                                                                                                                                                                                                                                                                                                                                | Hôpital Bichat Claude Bernard, Laboratoire de Virologie | IAME UMR1137 Inserm, Université de Paris, Hôpital Bichat                                                                                   | Alexandre Storto; Amélie Reccoing; Antoine Bridier-Nahmias; Benoit Visseaux; Charlotte Charpentier; Diane Descamps; Gilles Collin; Lena Daniel; Mélanie Bertine; Nadhira Houhou-Fidouh; Quentin Le Hingrat; Siham Hamri                                                                                                                                                                                 |                        |
| EPI_ISL_1085852 to 1085853, EPI_ISL_1085936                                                                                                                                                                                                                                                                                                                                                                                                                                                                                                                                                                                                                                                                                                                                                                                                                                                                                                                                                                                                                                                                                                                                                                                                                                                                                                                                                                                                                                                                                                                                                                                                                                                                                                                                                                                                                                                                                                                                                                                                                                                                                                                                                                                                                                                                                                                                                                                                               | Hôpital Bichat-Claude Bernard                           | Department of Virology, Henri Mondor University Hospital, Assistance Publique Hôpitaux de Paris, Université Paris-Est Créteil, INSERM U955 | Alexandre Soulier; Christophe Rodriguez; Elisabeth Trawinski; Guillaume Gricourt; Jean-Michel Pawlowsky; Melissa N'Debi; Slim Fourati; Vanessa Demontant                                                                                                                                                                                                                                                |                        |
| EPI_ISL_1085322, EPI_ISL_1085327, EPI_ISL_1085417, EPI_ISL_1085917, EPI_ISL_1110175, EPI_ISL_1110188                                                                                                                                                                                                                                                                                                                                                                                                                                                                                                                                                                                                                                                                                                                                                                                                                                                                                                                                                                                                                                                                                                                                                                                                                                                                                                                                                                                                                                                                                                                                                                                                                                                                                                                                                                                                                                                                                                                                                                                                                                                                                                                                                                                                                                                                                                                                                      | Hôpital Bicêtre                                         | Department of Virology, Henri Mondor University Hospital, Assistance Publique Hôpitaux de Paris, Université Paris-Est Créteil, INSERM U955 | Alexandre Soulier; Christophe Rodriguez; Elisabeth Trawinski; Guillaume Gricourt; Jean-Michel Pawlowsky; Melissa N'Debi; Slim Fourati; Vanessa Demontant                                                                                                                                                                                                                                                |                        |
| EPI_ISL_1241283                                                                                                                                                                                                                                                                                                                                                                                                                                                                                                                                                                                                                                                                                                                                                                                                                                                                                                                                                                                                                                                                                                                                                                                                                                                                                                                                                                                                                                                                                                                                                                                                                                                                                                                                                                                                                                                                                                                                                                                                                                                                                                                                                                                                                                                                                                                                                                                                                                           | Hôpital Charles-LeMoyne                                 | Laboratoire de santé publique du Québec                                                                                                    | Guillaume Bourque; Ioannis Ragoussis; Jesse Shapiro; Mark Lathrop and Michel Roger on behalf of the CoVSeQ research group; Sandrine Moreira                                                                                                                                                                                                                                                             |                        |
| EPI_ISL_1085849, EPI_ISL_1085854, EPI_ISL_1085909                                                                                                                                                                                                                                                                                                                                                                                                                                                                                                                                                                                                                                                                                                                                                                                                                                                                                                                                                                                                                                                                                                                                                                                                                                                                                                                                                                                                                                                                                                                                                                                                                                                                                                                                                                                                                                                                                                                                                                                                                                                                                                                                                                                                                                                                                                                                                                                                         | Hôpital Cochin                                          | Department of Virology, Henri Mondor University Hospital, Assistance Publique Hôpitaux de Paris, Université Paris-Est Créteil, INSERM U955 | Alexandre Soulier; Christophe Rodriguez; Elisabeth Trawinski; Guillaume Gricourt; Jean-Michel Pawlowsky; Melissa N'Debi; Slim Fourati; Vanessa Demontant                                                                                                                                                                                                                                                |                        |
| EPI_ISL_1085250, EPI_ISL_1085296 to 1085297                                                                                                                                                                                                                                                                                                                                                                                                                                                                                                                                                                                                                                                                                                                                                                                                                                                                                                                                                                                                                                                                                                                                                                                                                                                                                                                                                                                                                                                                                                                                                                                                                                                                                                                                                                                                                                                                                                                                                                                                                                                                                                                                                                                                                                                                                                                                                                                                               | Hôpital Européen G-Pompidou-Broussais                   | Department of Virology, Henri Mondor University Hospital, Assistance Publique Hôpitaux de Paris, Université Paris-Est Créteil, INSERM U955 | Alexandre Soulier; Christophe Rodriguez; Elisabeth Trawinski; Guillaume Gricourt; Jean-Michel Pawlowsky; Melissa N'Debi; Slim Fourati; Vanessa Demontant                                                                                                                                                                                                                                                |                        |
| EPI_ISL_1164947 to 1164968                                                                                                                                                                                                                                                                                                                                                                                                                                                                                                                                                                                                                                                                                                                                                                                                                                                                                                                                                                                                                                                                                                                                                                                                                                                                                                                                                                                                                                                                                                                                                                                                                                                                                                                                                                                                                                                                                                                                                                                                                                                                                                                                                                                                                                                                                                                                                                                                                                | Hôpital Georges L. Dumont                               | National Microbiology Laboratory (NML)                                                                                                     | Anna Majer; Anneliese Landgraf; CanCOGeN's metadata curation team; Darian Hole; Elsie Grudeski; Gary Van Domselaar; Grace Seo; Guillaume Desnoyers; Jennifer Tanner; Kirsten Biggar; Madison Chapel; Morag Graham; Natalie Knox; Nathalie Bastien; Philip Mabon; Public Health Agency of Canada CanCOGeN team; Rhiannon Huzarewich; Richard Garceau; Russell Mandes; Shari Tyson; Timothy Booth; Yan Li |                        |
| EPI_ISL_1085231, EPI_ISL_1085233 to 1085234, EPI_ISL_1085239 to 1085240, EPI_ISL_1085243, EPI_ISL_1085247 to 1085249, EPI_ISL_1085252, EPI_ISL_1085256, EPI_ISL_1085267 to 1085285, EPI_ISL_1085303 to 1085310, EPI_ISL_1085314, EPI_ISL_1085335 to 1085336, EPI_ISL_1085343, EPI_ISL_1085346 to 1085347, EPI_ISL_1085354, EPI_ISL_1085356 to 1085357, EPI_ISL_1085360, EPI_ISL_1085372, EPI_ISL_1085384 to 1085391, EPI_ISL_1085396 to 1085400, EPI_ISL_1085440, EPI_ISL_1085451, EPI_ISL_1085453 to 1085454, EPI_ISL_1085473, EPI_ISL_1085500, EPI_ISL_1085504, EPI_ISL_1085526, EPI_ISL_1085533 to 1085534, EPI_ISL_1085540 to 1085541, EPI_ISL_1085544 to 1085545, EPI_ISL_1085553, EPI_ISL_1085556, EPI_ISL_1085559 to 1085560, EPI_ISL_1085565 to 1085569, EPI_ISL_1085571, EPI_ISL_1085574, EPI_ISL_1085577, EPI_ISL_1085583, EPI_ISL_1085585, EPI_ISL_1085588 to 1085591, EPI_ISL_1085593 to 1085594, EPI_ISL_1085600, EPI_ISL_1085604, EPI_ISL_1085607 to 1085608, EPI_ISL_1085610 to 1085613, EPI_ISL_1085615 to 1085617, EPI_ISL_1085619 to 1085621, EPI_ISL_1085626 to 1085628, EPI_ISL_1085637, EPI_ISL_1085639 to 1085641, EPI_ISL_1085646 to 1085651, EPI_ISL_1085655 to 1085656, EPI_ISL_1085658 to 1085661, EPI_ISL_1085664 to 1085675, EPI_ISL_1085706 to 1085735, EPI_ISL_1085767, EPI_ISL_1085784 to 1085789, EPI_ISL_1085792, EPI_ISL_1085795 to 1085796, EPI_ISL_1085808 to 1085809, EPI_ISL_1085811 to 1085815, EPI_ISL_1085831, EPI_ISL_1085837, EPI_ISL_1085843, EPI_ISL_1085856, EPI_ISL_1085858 to 1085868, EPI_ISL_1085895, EPI_ISL_1085898, EPI_ISL_1085901, EPI_ISL_1085903, EPI_ISL_1085905, EPI_ISL_1085908, EPI_ISL_1085928 to 1085929, EPI_ISL_1085941 to 1085946, EPI_ISL_1085952 to 1085956, EPI_ISL_1085958 to 1085959, EPI_ISL_1088561 to 1088563, EPI_ISL_1088565 to 1088566, EPI_ISL_1088575, EPI_ISL_1088577 to 1088578, EPI_ISL_1088580 to 1088584, EPI_ISL_1110139, EPI_ISL_1110156 to 1110162, EPI_ISL_1110171 to 1110173, EPI_ISL_1110177 to 1110179, EPI_ISL_1110190 to 1110191, EPI_ISL_1110203 to 1110204                                                                                                                                                                                                                                                                                                                                                                                                 |                                                         |                                                                                                                                            |                                                                                                                                                                                                                                                                                                                                                                                                         |                        |
| see above                                                                                                                                                                                                                                                                                                                                                                                                                                                                                                                                                                                                                                                                                                                                                                                                                                                                                                                                                                                                                                                                                                                                                                                                                                                                                                                                                                                                                                                                                                                                                                                                                                                                                                                                                                                                                                                                                                                                                                                                                                                                                                                                                                                                                                                                                                                                                                                                                                                 | Hôpital Henri Mondor                                    | Department of Virology, Henri Mondor University Hospital, Assistance Publique Hôpitaux de Paris, Université Paris-Est Créteil, INSERM U955 | Alexandre Soulier; Christophe Rodriguez; Elisabeth Trawinski; Guillaume Gricourt; Jean-Michel Pawlowsky; Melissa N'Debi; Slim Fourati; Vanessa Demontant                                                                                                                                                                                                                                                |                        |
| EPI_ISL_1085884                                                                                                                                                                                                                                                                                                                                                                                                                                                                                                                                                                                                                                                                                                                                                                                                                                                                                                                                                                                                                                                                                                                                                                                                                                                                                                                                                                                                                                                                                                                                                                                                                                                                                                                                                                                                                                                                                                                                                                                                                                                                                                                                                                                                                                                                                                                                                                                                                                           | Hôpital Louis Mourier                                   | Department of Virology, Henri Mondor University Hospital, Assistance Publique Hôpitaux de Paris, Université Paris-Est Créteil, INSERM U955 | Alexandre Soulier; Christophe Rodriguez; Elisabeth Trawinski; Guillaume Gricourt; Jean-Michel Pawlowsky; Melissa N'Debi; Slim Fourati; Vanessa Demontant                                                                                                                                                                                                                                                |                        |
| EPI_ISL_1013210 to 1013213, EPI_ISL_1013235, EPI_ISL_1013415 to 1013416                                                                                                                                                                                                                                                                                                                                                                                                                                                                                                                                                                                                                                                                                                                                                                                                                                                                                                                                                                                                                                                                                                                                                                                                                                                                                                                                                                                                                                                                                                                                                                                                                                                                                                                                                                                                                                                                                                                                                                                                                                                                                                                                                                                                                                                                                                                                                                                   | Hôpital Necker                                          | National Reference Center for Viruses of Respiratory Infections, Institut Pasteur, Paris                                                   | Angela Brisebarre; Camille Capel; Etienne Simon-Lorière; Fourgeaud Jacques; Leruez-Ville Marianne; Marion Barbet; Maud Vanpeene; Méline Bizard; Sylvie Behillit; Sylvie van der Werf; Vincent Enouf                                                                                                                                                                                                     |                        |
| EPI_ISL_1085846                                                                                                                                                                                                                                                                                                                                                                                                                                                                                                                                                                                                                                                                                                                                                                                                                                                                                                                                                                                                                                                                                                                                                                                                                                                                                                                                                                                                                                                                                                                                                                                                                                                                                                                                                                                                                                                                                                                                                                                                                                                                                                                                                                                                                                                                                                                                                                                                                                           | Hôpital Necker-Enfants malades                          | Department of Virology, Henri Mondor University Hospital, Assistance Publique Hôpitaux de Paris, Université Paris-Est Créteil, INSERM U955 | Alexandre Soulier; Christophe Rodriguez; Elisabeth Trawinski; Guillaume Gricourt; Jean-Michel Pawlowsky; Melissa N'Debi; Slim Fourati; Vanessa Demontant                                                                                                                                                                                                                                                |                        |
| EPI_ISL_1085238, EPI_ISL_1085242, EPI_ISL_1085244, EPI_ISL_1085246, EPI_ISL_1085257 to 1085258, EPI_ISL_1085323, EPI_ISL_1085338 to 1085341, EPI_ISL_1085345, EPI_ISL_1085348 to 1085350, EPI_ISL_1085353, EPI_ISL_1085381 to 1085382, EPI_ISL_1085678 to 1085696, EPI_ISL_1085699 to 1085705, EPI_ISL_1085736 to 1085766, EPI_ISL_1085770, EPI_ISL_1085772 to 1085782, EPI_ISL_1085802, EPI_ISL_1085819, EPI_ISL_1085821, EPI_ISL_1085823, EPI_ISL_1085827, EPI_ISL_1085833, EPI_ISL_1085841, EPI_ISL_1085873 to 1085874, EPI_ISL_1085888 to 1085891, EPI_ISL_1085894, EPI_ISL_1085900, EPI_ISL_1110163 to 1110170, EPI_ISL_1110183 to 1110184, EPI_ISL_1110186 to 1110187, EPI_ISL_1110210 to 1110211                                                                                                                                                                                                                                                                                                                                                                                                                                                                                                                                                                                                                                                                                                                                                                                                                                                                                                                                                                                                                                                                                                                                                                                                                                                                                                                                                                                                                                                                                                                                                                                                                                                                                                                                                   |                                                         |                                                                                                                                            |                                                                                                                                                                                                                                                                                                                                                                                                         |                        |
| see above                                                                                                                                                                                                                                                                                                                                                                                                                                                                                                                                                                                                                                                                                                                                                                                                                                                                                                                                                                                                                                                                                                                                                                                                                                                                                                                                                                                                                                                                                                                                                                                                                                                                                                                                                                                                                                                                                                                                                                                                                                                                                                                                                                                                                                                                                                                                                                                                                                                 | Hôpital Pitié-Salpêtrière                               | Department of Virology, Henri Mondor University Hospital, Assistance Publique Hôpitaux de Paris, Université Paris-Est Créteil, INSERM U955 | Alexandre Soulier; Christophe Rodriguez; Elisabeth Trawinski; Guillaume Gricourt; Jean-Michel Pawlowsky; Melissa N'Debi; Slim Fourati; Vanessa Demontant                                                                                                                                                                                                                                                |                        |
| EPI_ISL_1085375                                                                                                                                                                                                                                                                                                                                                                                                                                                                                                                                                                                                                                                                                                                                                                                                                                                                                                                                                                                                                                                                                                                                                                                                                                                                                                                                                                                                                                                                                                                                                                                                                                                                                                                                                                                                                                                                                                                                                                                                                                                                                                                                                                                                                                                                                                                                                                                                                                           | Hôpital Robert Schuman-Laboratoire                      | Department of Virology, Henri Mondor University Hospital, Assistance Publique Hôpitaux de Paris, Université Paris-Est Créteil, INSERM U955 | Alexandre Soulier; Christophe Rodriguez; Elisabeth Trawinski; Guillaume Gricourt; Jean-Michel Pawlowsky; Melissa N'Debi; Slim Fourati; Vanessa Demontant                                                                                                                                                                                                                                                |                        |

|                                                                                                                                                                                                                                                                                                                                                                                                                                                                                                                                                                                             |                                                   |                                                                                                                                            |                                                                                                                                                                                                                                                                                                                                                                   |                                                                                                                                  |
|---------------------------------------------------------------------------------------------------------------------------------------------------------------------------------------------------------------------------------------------------------------------------------------------------------------------------------------------------------------------------------------------------------------------------------------------------------------------------------------------------------------------------------------------------------------------------------------------|---------------------------------------------------|--------------------------------------------------------------------------------------------------------------------------------------------|-------------------------------------------------------------------------------------------------------------------------------------------------------------------------------------------------------------------------------------------------------------------------------------------------------------------------------------------------------------------|----------------------------------------------------------------------------------------------------------------------------------|
| EPI_ISL_1085855                                                                                                                                                                                                                                                                                                                                                                                                                                                                                                                                                                             | Hôpital Robert- Debré                             | Department of Virology, Henri Mondor University Hospital, Assistance Publique Hôpitaux de Paris, Université Paris-Est Créteil, INSERM U955 | Alexandre Soulier; Christophe Rodriguez; Elisabeth Trawinski; Guillaume Gricourt; Jean-Michel Pawlowsky; Melissa N'Debi; Slim Fourati; Vanessa Demontant                                                                                                                                                                                                          |                                                                                                                                  |
| EPI_ISL_1085840, EPI_ISL_1085877, EPI_ISL_1085885 to 1085886, EPI_ISL_1085937                                                                                                                                                                                                                                                                                                                                                                                                                                                                                                               | Hôpital Saint-Louis                               | Department of Virology, Henri Mondor University Hospital, Assistance Publique Hôpitaux de Paris, Université Paris-Est Créteil, INSERM U955 | Alexandre Soulier; Christophe Rodriguez; Elisabeth Trawinski; Guillaume Gricourt; Jean-Michel Pawlowsky; Melissa N'Debi; Slim Fourati; Vanessa Demontant                                                                                                                                                                                                          |                                                                                                                                  |
| EPI_ISL_1241279                                                                                                                                                                                                                                                                                                                                                                                                                                                                                                                                                                             | Hôpital et Centre d'Hébergement de Sept-Iles      | Laboratoire de santé publique du Québec                                                                                                    | Guillaume Bourque; Ioannis Ragoussis; Jesse Shapiro; Mark Lathrop and Michel Roger on behalf of the CoVSeQ research group; Sandrine Moreira                                                                                                                                                                                                                       |                                                                                                                                  |
| EPI_ISL_1058582 to 1058583, EPI_ISL_1058585 to 1058586, EPI_ISL_1165811 to 1165833, EPI_ISL_1171568 to 1171584                                                                                                                                                                                                                                                                                                                                                                                                                                                                              | I.F.A.C. Hopital Princesse Paola                  | GIGA Medical Genomics                                                                                                                      | Bouchra Boujemla; Cécile Meex; Keith Durkin; Maria Artesi; Marie-Pierre Hayette; Nathalie Renotte; Pierrette Melin; Raphaël Boreux; Sébastien Bontems; Vincent Bours                                                                                                                                                                                              |                                                                                                                                  |
| EPI_ISL_1272928 to 1272941, EPI_ISL_1318614 to 1318622                                                                                                                                                                                                                                                                                                                                                                                                                                                                                                                                      | IA State Hygienic Laboratory                      | Centers for Disease Control and Prevention Division of Viral Diseases, Pathogen Discovery                                                  | Anna Montmayeur; Anna Uehara; Ben L. Rambo-Martin; Clinton R. Paden; Dhvani Batra; Haibin Wang; Jasmine Padilla; Jing Zhang; Justin Lee; Katie Dillon; Krista Queen; Kristen Knipe; Kristine Lacek; Lori Rowe; Mark Burroughs; Matthew Schmerer; Mili Sheth; Peter W. Cook; Rachel Marine; Sam Shepard; Sarah Nobles; Shoshona Le; Suxiang Tong; Yan Li; Ying Tao |                                                                                                                                  |
| EPI_ISL_1094300, EPI_ISL_1094329, EPI_ISL_1094388, EPI_ISL_1094687 to 1094706, EPI_ISL_1095225 to 1095226                                                                                                                                                                                                                                                                                                                                                                                                                                                                                   | IA State Hygienic Laboratory                      | Respiratory Viruses Branch, Division of Viral Diseases, Centers for Disease Control and Prevention                                         | Anna Montmayeur; Anna Uehara; Ben L. Rambo-Martin; Clinton R. Paden; Dhvani Batra; Haibin Wang; Jasmine Padilla; Jing Zhang; Justin Lee; Krista Queen; Lori Rowe; Mark Burroughs; Mili Sheth; Peter W. Cook; Rachel Marine; Sarah Nobles; Suxiang Tong; Yan Li; Ying Tao                                                                                          |                                                                                                                                  |
| EPI_ISL_1358288 to 1358290                                                                                                                                                                                                                                                                                                                                                                                                                                                                                                                                                                  | IAL Regional de Aracatuba                         | Instituto Adolfo Lutz, Interdisciplinary Procedures Center, Strategic Laboratory                                                           | Caio Vinicius Dias Lopes; Claudia Regina Gonçalves; Claudio Tavares Sacchi; Erica Valessa Ramos Gomes; Karoline Rodrigues Campos                                                                                                                                                                                                                                  |                                                                                                                                  |
| EPI_ISL_1078981, EPI_ISL_1078983 to 1078984, EPI_ISL_1078986 to 1078989, EPI_ISL_1078991 to 1078993, EPI_ISL_1078995 to 1078997, EPI_ISL_1078999 to 1079000, EPI_ISL_1079002 to 1079004, EPI_ISL_1079006 to 1079008, EPI_ISL_1079158 to 1079159, EPI_ISL_1079161 to 1079163, EPI_ISL_1079165 to 1079166, EPI_ISL_1086035 to 1086036, EPI_ISL_1086044 to 1086057, EPI_ISL_1092360, EPI_ISL_1095913, EPI_ISL_1096120, EPI_ISL_1096122 to 1096134, EPI_ISL_1096136, EPI_ISL_1121306, EPI_ISL_1121310, EPI_ISL_1121312 to 1121315, EPI_ISL_1121317, EPI_ISL_1121320 to 1121321, EPI_ISL_1121326 | see above                                         | IAL Regional de Bauru                                                                                                                      | Instituto Adolfo Lutz, Interdisciplinary Procedures Center, Strategic Laboratory                                                                                                                                                                                                                                                                                  | Caio Vinicius Dias Lopes; Claudia Regina Gonçalves; Claudio Tavares Sacchi; Erica Valessa Ramos Gomes; Karoline Rodrigues Campos |
| EPI_ISL_1171641 to 1171647, EPI_ISL_1196297 to 1196302, EPI_ISL_1201889 to 1201892                                                                                                                                                                                                                                                                                                                                                                                                                                                                                                          | IAL Regional de Marilia                           | Instituto Adolfo Lutz, Interdisciplinary Procedures Center, Strategic Laboratory                                                           | Caio Vinicius Dias Lopes; Claudia Regina Gonçalves; Claudio Tavares Sacchi; Erica Valessa Ramos Gomes; Karoline Rodrigues Campos                                                                                                                                                                                                                                  |                                                                                                                                  |
| EPI_ISL_1171619, EPI_ISL_1171651 to 1171674, EPI_ISL_1219027, EPI_ISL_1219037                                                                                                                                                                                                                                                                                                                                                                                                                                                                                                               | IAL Regional de Presidente Prudente               | Instituto Adolfo Lutz, Interdisciplinary Procedures Center, Strategic Laboratory                                                           | Caio Vinicius Dias Lopes; Claudia Regina Gonçalves; Claudio Tavares Sacchi; Erica Valessa Ramos Gomes; Karoline Rodrigues Campos                                                                                                                                                                                                                                  |                                                                                                                                  |
| EPI_ISL_1139070                                                                                                                                                                                                                                                                                                                                                                                                                                                                                                                                                                             | IAL Regional de Ribeirao Preto                    | Instituto Adolfo Lutz, Interdisciplinary Procedures Center, Strategic Laboratory                                                           | Caio Vinicius Dias Lopes; Claudia Regina Gonçalves; Claudio Tavares Sacchi; Erica Valessa Ramos Gomes; Karoline Rodrigues Campos                                                                                                                                                                                                                                  |                                                                                                                                  |
| EPI_ISL_1358291 to 1358299, EPI_ISL_1381043 to 1381065                                                                                                                                                                                                                                                                                                                                                                                                                                                                                                                                      | IAL Regional de Santo Andre                       | Instituto Adolfo Lutz, Interdisciplinary Procedures Center, Strategic Laboratory                                                           | Caio Vinicius Dias Lopes; Claudia Regina Gonçalves; Claudio Tavares Sacchi; Erica Valessa Ramos Gomes; Karoline Rodrigues Campos                                                                                                                                                                                                                                  |                                                                                                                                  |
| EPI_ISL_1121325, EPI_ISL_1123374 to 1123375, EPI_ISL_1171622 to 1171640                                                                                                                                                                                                                                                                                                                                                                                                                                                                                                                     | IAL Regional de Santos                            | Instituto Adolfo Lutz, Interdisciplinary Procedures Center, Strategic Laboratory                                                           | Caio Vinicius Dias Lopes; Claudia Regina Gonçalves; Claudio Tavares Sacchi; Erica Valessa Ramos Gomes; Karoline Rodrigues Campos                                                                                                                                                                                                                                  |                                                                                                                                  |
| EPI_ISL_1201893, EPI_ISL_1219022 to 1219026, EPI_ISL_1293056 to 1293081                                                                                                                                                                                                                                                                                                                                                                                                                                                                                                                     | IAL Regional de Sorocaba                          | Instituto Adolfo Lutz, Interdisciplinary Procedures Center, Strategic Laboratory                                                           | Caio Vinicius Dias Lopes; Claudia Regina Gonçalves; Claudio Tavares Sacchi; Erica Valessa Ramos Gomes; Karoline Rodrigues Campos                                                                                                                                                                                                                                  |                                                                                                                                  |
| EPI_ISL_1303518 to 1303534                                                                                                                                                                                                                                                                                                                                                                                                                                                                                                                                                                  | IAL Regional de São Jose do Rio Preto             | Instituto Adolfo Lutz, Interdisciplinary Procedures Center, Strategic Laboratory                                                           | Caio Vinicius Dias Lopes; Claudia Regina Gonçalves; Claudio Tavares Sacchi; Erica Valessa Ramos Gomes; Karoline Rodrigues Campos                                                                                                                                                                                                                                  |                                                                                                                                  |
| EPI_ISL_1370026                                                                                                                                                                                                                                                                                                                                                                                                                                                                                                                                                                             | ICH-RIVIERA                                       | Laboratory of genomics and metagenomics, Institute of Microbiology, University Hospital Centre and University of Lausanne, Switzerland     | Claire Bertelli; Damien Jacot; Gilbert Greub; Sébastien Aebly; Trestan Pillonel                                                                                                                                                                                                                                                                                   |                                                                                                                                  |
| EPI_ISL_1007617, EPI_ISL_1007629 to 1007630, EPI_ISL_1120821 to 1120823, EPI_ISL_1120828 to 1120830, EPI_ISL_1370092, EPI_ISL_1370094, EPI_ISL_1370225, EPI_ISL_1370246, EPI_ISL_1370248, EPI_ISL_1370250, EPI_ISL_1370315, EPI_ISL_1370317, EPI_ISL_1370328, EPI_ISL_1370330                                                                                                                                                                                                                                                                                                               | see above                                         | ICH-SION                                                                                                                                   | Laboratory of genomics and metagenomics, Institute of Microbiology, University Hospital Centre and University of Lausanne, Switzerland                                                                                                                                                                                                                            | Claire Bertelli; Damien Jacot; Gilbert Greub; Sébastien Aebly; Trestan Pillonel                                                  |
| EPI_ISL_1091779 to 1091781                                                                                                                                                                                                                                                                                                                                                                                                                                                                                                                                                                  | ICMT                                              | Universidad Nacional de Colombia - Laboratorio Genómico One Health                                                                         | Andres F. Cardona-Rios; Carlos Franco-Muñoz; Daniel O. Maldonado-Perez; Diego A. Álvarez-Díaz; Idabely Betancur Ortiz; Jorge E. Osorio; Juan P. Hernandez-Ortiz; Karl A Ciudodis; Laura Silvana Perez; Marcela Mercado-Reyes; Sandra Ines Cano                                                                                                                    |                                                                                                                                  |
| EPI_ISL_1318402 to 1318407, EPI_ISL_1318409 to 1318419                                                                                                                                                                                                                                                                                                                                                                                                                                                                                                                                      | ID Bureau of Laboratories                         | Centers for Disease Control and Prevention Division of Viral Diseases, Pathogen Discovery                                                  | Anna Montmayeur; Anna Uehara; Ben L. Rambo-Martin; Clinton R. Paden; Dhvani Batra; Haibin Wang; Jasmine Padilla; Jing Zhang; Justin Lee; Katie Dillon; Krista Queen; Kristen Knipe; Kristine Lacek; Lori Rowe; Mark Burroughs; Matthew Schmerer; Mili Sheth; Peter W. Cook; Rachel Marine; Sam Shepard; Sarah Nobles; Shoshona Le; Suxiang Tong; Yan Li; Ying Tao |                                                                                                                                  |
| EPI_ISL_1229142 to 1229143, EPI_ISL_1299217                                                                                                                                                                                                                                                                                                                                                                                                                                                                                                                                                 | IDI-IRCCS                                         | INMI Lazzaro Spallanzani IRCCS                                                                                                             | A Di Caro; B Bartolini; CEM Gruber; D Castiglia; E Giombini; F Messina; F Santini; G Bonfiglio; G Russo; M Rueca; MR Capobianchi; O Butera; S Madonna                                                                                                                                                                                                             |                                                                                                                                  |
| EPI_ISL_1081170                                                                                                                                                                                                                                                                                                                                                                                                                                                                                                                                                                             | IEH Laboratories & Consulting Group               | ID Genomics                                                                                                                                | Curtis Fowler; Evgeni Sokurenko; Hao Geng; Hemantha Kulakesara; Kai Deng; Kirithi Kutumbaka; Lydia Larson; Mansour Samadpour; Veronika Tchesnokova                                                                                                                                                                                                                |                                                                                                                                  |
| EPI_ISL_1081332, EPI_ISL_1081337, EPI_ISL_1081339, EPI_ISL_1081341, EPI_ISL_1081346 to 1081347                                                                                                                                                                                                                                                                                                                                                                                                                                                                                              | IEH Laboratories and Consulting Group             | IEH and ID Genomics                                                                                                                        | Curtis Fowler; Evgeni Sokurenko; Hao Geng; Hemantha Kulakesara; Kai Deng; Kirithi Kutumbaka; Lydia Larson; Mansour Samadpour; Veronika Tchesnokova                                                                                                                                                                                                                |                                                                                                                                  |
| EPI_ISL_1097023 to 1097024                                                                                                                                                                                                                                                                                                                                                                                                                                                                                                                                                                  | IHU Mediterranee Infection                        | IHU Mediterranee Infection                                                                                                                 | Philippe Colson et al.                                                                                                                                                                                                                                                                                                                                            |                                                                                                                                  |
| EPI_ISL_1318424                                                                                                                                                                                                                                                                                                                                                                                                                                                                                                                                                                             | IL Department of Public Health Chicago Laboratory | Centers for Disease Control and Prevention Division of Viral Diseases, Pathogen Discovery                                                  | Anna Montmayeur; Anna Uehara; Ben L. Rambo-Martin; Clinton R. Paden; Dhvani Batra; Haibin Wang; Jasmine Padilla; Jing Zhang; Justin Lee; Katie Dillon; Krista Queen; Kristen Knipe; Kristine Lacek; Lori Rowe; Mark Burroughs; Matthew Schmerer; Mili Sheth; Peter W. Cook; Rachel Marine; Sam Shepard; Sarah Nobles; Shoshona Le; Suxiang Tong; Yan Li; Ying Tao |                                                                                                                                  |
| EPI_ISL_1318224, EPI_ISL_1318234, EPI_ISL_1318259, EPI_ISL_1323116                                                                                                                                                                                                                                                                                                                                                                                                                                                                                                                          | IL Department of Public Health Chicago Laboratory | Genomics and Discovery, Respiratory Viruses Branch, Division of Viral Diseases, Centers for Disease Control and Prevention                 | Anna Kelleher; Anna Uehara; Brian Lynch; Clinton R. Paden; Haibin Wang; Han Jia Justin Ng; Jing Zhang; Krista Queen; Peter Cook; Suxiang Tong; Yan Li; Ying Tao                                                                                                                                                                                                   |                                                                                                                                  |
| EPI_ISL_1008919 to 1008920, EPI_ISL_1111065, EPI_ISL_1111067, EPI_ISL_1196886                                                                                                                                                                                                                                                                                                                                                                                                                                                                                                               | IL Department of Public Health Chicago Laboratory | Pathogen Discovery, Respiratory Viruses Branch, Division of Viral Diseases, Centers for Disease Control and Prevention                     | Anna Kelleher; Anna Uehara; Brian Lynch; Clinton R. Paden; Haibin Wang; Han Jia Justin Ng; Han Jia Ng; Jing Zhang; Krista Queen; Peter Cook; Suxiang Tong; Yan Li; Ying Tao                                                                                                                                                                                       |                                                                                                                                  |
| EPI_ISL_1196887                                                                                                                                                                                                                                                                                                                                                                                                                                                                                                                                                                             | IL Dept. of Public Health Carbondale Laboratory   | Pathogen Discovery, Respiratory Viruses Branch, Division of Viral Diseases, Centers for Disease Control and Prevention                     | Anna Kelleher; Anna Uehara; Brian Lynch; Clinton R. Paden; Haibin Wang; Han Jia Justin Ng; Jing Zhang; Krista Queen; Peter Cook; Suxiang Tong; Yan Li; Ying Tao                                                                                                                                                                                                   |                                                                                                                                  |
| EPI_ISL_1272697 to 1272712                                                                                                                                                                                                                                                                                                                                                                                                                                                                                                                                                                  | IL Dept. of Public Health Springfield Laboratory  | Centers for Disease Control and Prevention Division of Viral Diseases, Pathogen Discovery                                                  | Anna Montmayeur; Anna Uehara; Ben L. Rambo-Martin; Clinton R. Paden; Dhvani Batra; Haibin Wang; Jasmine Padilla; Jing Zhang; Justin Lee; Katie Dillon; Krista Queen; Kristen Knipe; Kristine Lacek; Lori Rowe; Mark Burroughs; Matthew Schmerer; Mili Sheth; Peter W. Cook; Rachel Marine; Sam Shepard; Sarah Nobles; Shoshona Le; Suxiang Tong; Yan Li; Ying Tao |                                                                                                                                  |
| EPI_ISL_1225872, EPI_ISL_1226092 to                                                                                                                                                                                                                                                                                                                                                                                                                                                                                                                                                         | IL Dept. of Public Health Springfield Laboratory  | Genomics and Discovery, Respiratory Viruses Branch,                                                                                        | Anna Kelleher; Anna Montmayeur; Anna Uehara; Ben L. Rambo-Martin; Brian Lynch; Clinton R. Paden; Dhvani Batra; Haibin Wang; Han Jia Justin Ng;                                                                                                                                                                                                                    |                                                                                                                                  |



|                                                                                                                                                                                                                                                                                                                                                                                                                                                                                                                                                                                                                                                                                                                                                                                                                                                                                                                                                                                                                                                                                                                                                                                                                                                                                                                                                                                                                                                                                                                                                                                                                                                                                                                                                                                                                                                                                                                                                                                                                                                                                                                                                                                                                                                                                                                                                                                                                                                                                                                                                                                                                                                                                                                                                                                                                                                                                                                                                     |                                                           |                                                                                                                            |                                                                                                                                                                                                                                                                                                                                                                                                                                                                                                                                                                             |
|-----------------------------------------------------------------------------------------------------------------------------------------------------------------------------------------------------------------------------------------------------------------------------------------------------------------------------------------------------------------------------------------------------------------------------------------------------------------------------------------------------------------------------------------------------------------------------------------------------------------------------------------------------------------------------------------------------------------------------------------------------------------------------------------------------------------------------------------------------------------------------------------------------------------------------------------------------------------------------------------------------------------------------------------------------------------------------------------------------------------------------------------------------------------------------------------------------------------------------------------------------------------------------------------------------------------------------------------------------------------------------------------------------------------------------------------------------------------------------------------------------------------------------------------------------------------------------------------------------------------------------------------------------------------------------------------------------------------------------------------------------------------------------------------------------------------------------------------------------------------------------------------------------------------------------------------------------------------------------------------------------------------------------------------------------------------------------------------------------------------------------------------------------------------------------------------------------------------------------------------------------------------------------------------------------------------------------------------------------------------------------------------------------------------------------------------------------------------------------------------------------------------------------------------------------------------------------------------------------------------------------------------------------------------------------------------------------------------------------------------------------------------------------------------------------------------------------------------------------------------------------------------------------------------------------------------------------|-----------------------------------------------------------|----------------------------------------------------------------------------------------------------------------------------|-----------------------------------------------------------------------------------------------------------------------------------------------------------------------------------------------------------------------------------------------------------------------------------------------------------------------------------------------------------------------------------------------------------------------------------------------------------------------------------------------------------------------------------------------------------------------------|
| 1226104, EPI_ISL_1318249, EPI_ISL_1318258                                                                                                                                                                                                                                                                                                                                                                                                                                                                                                                                                                                                                                                                                                                                                                                                                                                                                                                                                                                                                                                                                                                                                                                                                                                                                                                                                                                                                                                                                                                                                                                                                                                                                                                                                                                                                                                                                                                                                                                                                                                                                                                                                                                                                                                                                                                                                                                                                                                                                                                                                                                                                                                                                                                                                                                                                                                                                                           |                                                           | Division of Viral Diseases, Centers for Disease Control and Prevention                                                     | Jasmine Padilla; Jing Zhang; Justin Lee; Katie Dillon; Krista Queen; Kristen Knipe; Kristine Lacey; Lori Rowe; Mark Burroughs; Matthew Schmerer; Mili Sheth; Peter Cook; Peter W. Cook; Rachel Marine; Sam Shepard; Sarah Nobles; Shoshona Le; Suxiang Tong; Yan Li; Ying Tao                                                                                                                                                                                                                                                                                               |
| EPI_ISL_1008893 to 1008896, EPI_ISL_1196868, EPI_ISL_1196895 to 1196896                                                                                                                                                                                                                                                                                                                                                                                                                                                                                                                                                                                                                                                                                                                                                                                                                                                                                                                                                                                                                                                                                                                                                                                                                                                                                                                                                                                                                                                                                                                                                                                                                                                                                                                                                                                                                                                                                                                                                                                                                                                                                                                                                                                                                                                                                                                                                                                                                                                                                                                                                                                                                                                                                                                                                                                                                                                                             | IL Dept. of Public Health Springfield Laboratory          | Pathogen Discovery, Respiratory Viruses Branch, Division of Viral Diseases, Centers for Disease Control and Prevention     | Anna Kelleher; Anna Uehara; Brian Lynch; Clinton R. Paden; Haibin Wang; Han Jia Justin Ng; Jing Zhang; Krista Queen; Peter Cook; Suxiang Tong; Yan Li; Ying Tao                                                                                                                                                                                                                                                                                                                                                                                                             |
| EPI_ISL_1094202, EPI_ISL_1094222, EPI_ISL_1094249 to 1094250, EPI_ISL_1094258, EPI_ISL_1094289, EPI_ISL_1094488 to 1094491, EPI_ISL_1094723 to 1094725, EPI_ISL_1095233 to 1095234                                                                                                                                                                                                                                                                                                                                                                                                                                                                                                                                                                                                                                                                                                                                                                                                                                                                                                                                                                                                                                                                                                                                                                                                                                                                                                                                                                                                                                                                                                                                                                                                                                                                                                                                                                                                                                                                                                                                                                                                                                                                                                                                                                                                                                                                                                                                                                                                                                                                                                                                                                                                                                                                                                                                                                  |                                                           |                                                                                                                            |                                                                                                                                                                                                                                                                                                                                                                                                                                                                                                                                                                             |
| see above                                                                                                                                                                                                                                                                                                                                                                                                                                                                                                                                                                                                                                                                                                                                                                                                                                                                                                                                                                                                                                                                                                                                                                                                                                                                                                                                                                                                                                                                                                                                                                                                                                                                                                                                                                                                                                                                                                                                                                                                                                                                                                                                                                                                                                                                                                                                                                                                                                                                                                                                                                                                                                                                                                                                                                                                                                                                                                                                           | IL Dept. of Public Health Springfield Laboratory          | Respiratory Viruses Branch, Division of Viral Diseases, Centers for Disease Control and Prevention                         | Anna Montmayeur; Anna Uehara; Ben L. Rambo-Martin; Clinton R. Paden; Dhvani Batra; Haibin Wang; Jasmine Padilla; Jing Zhang; Justin Lee; Krista Queen; Lori Rowe; Mark Burroughs; Mili Sheth; Peter W. Cook; Rachel Marine; Sarah Nobles; Suxiang Tong; Yan Li; Ying Tao                                                                                                                                                                                                                                                                                                    |
| EPI_ISL_1209267                                                                                                                                                                                                                                                                                                                                                                                                                                                                                                                                                                                                                                                                                                                                                                                                                                                                                                                                                                                                                                                                                                                                                                                                                                                                                                                                                                                                                                                                                                                                                                                                                                                                                                                                                                                                                                                                                                                                                                                                                                                                                                                                                                                                                                                                                                                                                                                                                                                                                                                                                                                                                                                                                                                                                                                                                                                                                                                                     | ILV Kärnten                                               | Bergthaler laboratory, CeMM Research Center for Molecular Medicine of the Austrian Academy of Sciences                     | Andreas Bergthaler; Anna Schedl; Bekir Erguner; Benedikt Agerer; Christoph Bock; Fabian Amman; Jan Laine; Lukas Endler; Maelle Le Moing; Martin Senekowitsch; Michael Schuster; Thomas Penz                                                                                                                                                                                                                                                                                                                                                                                 |
| EPI_ISL_1141654 to 1141655, EPI_ISL_1143471, EPI_ISL_1143473, EPI_ISL_1143490, EPI_ISL_1143533 to 1143537, EPI_ISL_1143539, EPI_ISL_1143546 to 1143550, EPI_ISL_1143553, EPI_ISL_1147415, EPI_ISL_1147417 to 1147420, EPI_ISL_1147422, EPI_ISL_1147429 to 1147430, EPI_ISL_1151966, EPI_ISL_1151969 to 1151970, EPI_ISL_1151973, EPI_ISL_1151979, EPI_ISL_1151982 to 1151984, EPI_ISL_1156380 to 1156382, EPI_ISL_1156386, EPI_ISL_1156388, EPI_ISL_1156392, EPI_ISL_1156442, EPI_ISL_1212019, EPI_ISL_1212023 to 1212024, EPI_ISL_1212032 to 1212033, EPI_ISL_1212036, EPI_ISL_1212039, EPI_ISL_1212041, EPI_ISL_1212048, EPI_ISL_1212052, EPI_ISL_1212058, EPI_ISL_1212060, EPI_ISL_1212063 to 1212064, EPI_ISL_1282310, EPI_ISL_1282312 to 1282313, EPI_ISL_1282319 to 1282320, EPI_ISL_1282325 to 1282326, EPI_ISL_1282330 to 1282331, EPI_ISL_1282339, EPI_ISL_1282341, EPI_ISL_1282364, EPI_ISL_1282371, EPI_ISL_1282373, EPI_ISL_1350107 to 1350108, EPI_ISL_1350110, EPI_ISL_1350118, EPI_ISL_1350120, EPI_ISL_1350122, EPI_ISL_1350124, EPI_ISL_1350127, EPI_ISL_1350129, EPI_ISL_1350131 to 1350132, EPI_ISL_1350134 to 1350136, EPI_ISL_1350141, EPI_ISL_1350144 to 1350146, EPI_ISL_1350148, EPI_ISL_1350152, EPI_ISL_1350159, EPI_ISL_1354293, EPI_ISL_1354304, EPI_ISL_1354319, EPI_ISL_1354331                                                                                                                                                                                                                                                                                                                                                                                                                                                                                                                                                                                                                                                                                                                                                                                                                                                                                                                                                                                                                                                                                                                                                                                                                                                                                                                                                                                                                                                                                                                                                                                                                                       | IMD - Institut für Medizinische Diagnostik Berlin-Potsdam | Robert Koch Institute                                                                                                      |                                                                                                                                                                                                                                                                                                                                                                                                                                                                                                                                                                             |
| see above                                                                                                                                                                                                                                                                                                                                                                                                                                                                                                                                                                                                                                                                                                                                                                                                                                                                                                                                                                                                                                                                                                                                                                                                                                                                                                                                                                                                                                                                                                                                                                                                                                                                                                                                                                                                                                                                                                                                                                                                                                                                                                                                                                                                                                                                                                                                                                                                                                                                                                                                                                                                                                                                                                                                                                                                                                                                                                                                           | IMD - Institut für Medizinische Diagnostik Berlin-Potsdam | Robert Koch Institute                                                                                                      |                                                                                                                                                                                                                                                                                                                                                                                                                                                                                                                                                                             |
| EPI_ISL_1143449 to 1143454, EPI_ISL_1143456 to 1143467, EPI_ISL_1143469 to 1143470, EPI_ISL_1143472, EPI_ISL_1143474, EPI_ISL_1143476 to 1143487, EPI_ISL_1143501, EPI_ISL_1143518, EPI_ISL_1143522, EPI_ISL_1143525, EPI_ISL_1143527, EPI_ISL_1143532, EPI_ISL_1143551, EPI_ISL_1147454, EPI_ISL_1147457 to 1147458, EPI_ISL_1147460 to 1147461, EPI_ISL_1147464 to 1147469, EPI_ISL_1147473 to 1147474, EPI_ISL_1147477 to 1147478, EPI_ISL_1147480, EPI_ISL_1147486 to 1147487, EPI_ISL_1147491, EPI_ISL_1147495 to 1147496, EPI_ISL_1147500, EPI_ISL_1147502 to 1147505, EPI_ISL_1147507, EPI_ISL_1147509, EPI_ISL_1147511 to 1147513, EPI_ISL_1147515 to 1147516, EPI_ISL_1147518 to 1147528, EPI_ISL_1151895, EPI_ISL_1151897, EPI_ISL_1151898, EPI_ISL_1151900 to 1151901, EPI_ISL_1151904, EPI_ISL_1151910 to 1151914, EPI_ISL_1151918, EPI_ISL_1151922, EPI_ISL_1151924 to 1151926, EPI_ISL_1151929, EPI_ISL_1151931 to 1151934, EPI_ISL_1151936, EPI_ISL_1151939 to 1151941, EPI_ISL_1151943, EPI_ISL_1151946 to 1151949, EPI_ISL_1151951 to 1151953, EPI_ISL_1151955 to 1151956, EPI_ISL_1151958 to 1151959, EPI_ISL_1151963, EPI_ISL_1151966, EPI_ISL_1156375, EPI_ISL_1156385, EPI_ISL_1156400, EPI_ISL_1156415, EPI_ISL_1156419, EPI_ISL_1156426, EPI_ISL_1156429 to 1156430, EPI_ISL_1156435 to 1156436, EPI_ISL_1212022, EPI_ISL_1212025, EPI_ISL_1212035, EPI_ISL_1212038, EPI_ISL_1212046, EPI_ISL_1212051, EPI_ISL_1212056, EPI_ISL_1212059, EPI_ISL_1212061, EPI_ISL_1212065, EPI_ISL_1217355, EPI_ISL_1217358, EPI_ISL_1217362, EPI_ISL_1217364, EPI_ISL_1217367, EPI_ISL_1217370, EPI_ISL_1217369 to 1217370, EPI_ISL_1217372 to 1217373, EPI_ISL_1217379, EPI_ISL_1217382, EPI_ISL_1217389 to 1217391, EPI_ISL_1217394 to 1217396, EPI_ISL_1217398, EPI_ISL_1217401 to 1217402, EPI_ISL_1217405, EPI_ISL_1217407 to 1217408, EPI_ISL_1217410 to 1217412, EPI_ISL_1217415, EPI_ISL_1217419 to 1217422, EPI_ISL_1282324, EPI_ISL_1282332, EPI_ISL_1282335, EPI_ISL_1282337, EPI_ISL_1282356, EPI_ISL_1282365 to 1282366, EPI_ISL_1282369, EPI_ISL_1282374, EPI_ISL_1282383, EPI_ISL_1285734, EPI_ISL_1285736, EPI_ISL_1285739, EPI_ISL_1285741, EPI_ISL_1285744 to 1285748, EPI_ISL_1285750, EPI_ISL_1285754, EPI_ISL_1285757 to 1285758, EPI_ISL_1285760, EPI_ISL_1285764, EPI_ISL_1285766, EPI_ISL_1285768 to 1285770, EPI_ISL_1285772 to 1285775, EPI_ISL_1285778 to 1285780, EPI_ISL_1285784, EPI_ISL_1285787 to 1285790, EPI_ISL_1285792, EPI_ISL_1285794 to 1285795, EPI_ISL_1354283 to 1354284, EPI_ISL_1354286 to 1354287, EPI_ISL_1354290 to 1354292, EPI_ISL_1354295 to 1354298, EPI_ISL_1354301 to 1354302, EPI_ISL_1354307 to 1354310, EPI_ISL_1354312 to 1354313, EPI_ISL_1354317 to 1354318, EPI_ISL_1354320 to 1354323, EPI_ISL_1354327 to 1354330, EPI_ISL_1354333 to 1354334, EPI_ISL_1354338, EPI_ISL_1354341 to 1354348, EPI_ISL_1354350 to 1354351, EPI_ISL_1354354 to 1354358, EPI_ISL_1354360 to 1354363 | IMD - Labor Oderland                                      | Robert Koch Institute                                                                                                      |                                                                                                                                                                                                                                                                                                                                                                                                                                                                                                                                                                             |
| see above                                                                                                                                                                                                                                                                                                                                                                                                                                                                                                                                                                                                                                                                                                                                                                                                                                                                                                                                                                                                                                                                                                                                                                                                                                                                                                                                                                                                                                                                                                                                                                                                                                                                                                                                                                                                                                                                                                                                                                                                                                                                                                                                                                                                                                                                                                                                                                                                                                                                                                                                                                                                                                                                                                                                                                                                                                                                                                                                           | IMD - Labor Oderland                                      | Robert Koch Institute                                                                                                      |                                                                                                                                                                                                                                                                                                                                                                                                                                                                                                                                                                             |
| EPI_ISL_1143448, EPI_ISL_1143488 to 1143489, EPI_ISL_1143491 to 1143492, EPI_ISL_1143494 to 1143500, EPI_ISL_1143502 to 1143505, EPI_ISL_1143507 to 1143515, EPI_ISL_1143517, EPI_ISL_1143519 to 1143521, EPI_ISL_1143523 to 1143524, EPI_ISL_1143528 to 1143531, EPI_ISL_1143542 to 1143543, EPI_ISL_1143552, EPI_ISL_1147453, EPI_ISL_1147456, EPI_ISL_1147458, EPI_ISL_1147459, EPI_ISL_1147471, EPI_ISL_1147482, EPI_ISL_1147492, EPI_ISL_1147497, EPI_ISL_1147499, EPI_ISL_1147501, EPI_ISL_1151968, EPI_ISL_1151971 to 1151972, EPI_ISL_1151974 to 1151975, EPI_ISL_1151977, EPI_ISL_1151989 to 1151990, EPI_ISL_1156374, EPI_ISL_1156377 to 1156379, EPI_ISL_1156383, EPI_ISL_1156387, EPI_ISL_1156391, EPI_ISL_1156397 to 1156399, EPI_ISL_1156403, EPI_ISL_1156412, EPI_ISL_1156416, EPI_ISL_1156420, EPI_ISL_1156423, EPI_ISL_1156427 to 1156428, EPI_ISL_1156433, EPI_ISL_1156439, EPI_ISL_1156441, EPI_ISL_1210790, EPI_ISL_1210797 to 1210798, EPI_ISL_1210802, EPI_ISL_1212025, EPI_ISL_1212028, EPI_ISL_1212034, EPI_ISL_1212040, EPI_ISL_1212045, EPI_ISL_1212049, EPI_ISL_1212053, EPI_ISL_1217357, EPI_ISL_1217359, EPI_ISL_1217375, EPI_ISL_1217384 to 1217385, EPI_ISL_1217393, EPI_ISL_1217400, EPI_ISL_1217403, EPI_ISL_1217413 to 1217414, EPI_ISL_1217423, EPI_ISL_1282311, EPI_ISL_1282314 to 1282315, EPI_ISL_1282317 to 1282318, EPI_ISL_1282322 to 1282323, EPI_ISL_1282327 to 1282329, EPI_ISL_1282333, EPI_ISL_1282336, EPI_ISL_1282338, EPI_ISL_1282342 to 1282343, EPI_ISL_1282345 to 1282346, EPI_ISL_1282349 to 1282350, EPI_ISL_1282352 to 1282354, EPI_ISL_1282357 to 1282363, EPI_ISL_1282372, EPI_ISL_1282375 to 1282379, EPI_ISL_1282381 to 1282382, EPI_ISL_1350113, EPI_ISL_1350115 to 1350117, EPI_ISL_1350119, EPI_ISL_1350125, EPI_ISL_1350128, EPI_ISL_1350130, EPI_ISL_1350137 to 1350138, EPI_ISL_1350140, EPI_ISL_1350143, EPI_ISL_1350150, EPI_ISL_1350156 to 1350158, EPI_ISL_1350160                                                                                                                                                                                                                                                                                                                                                                                                                                                                                                                                                                                                                                                                                                                                                                                                                                                                                                                                                                                                             | IMD - MVZ Labor Greifswald                                | Robert Koch Institute                                                                                                      |                                                                                                                                                                                                                                                                                                                                                                                                                                                                                                                                                                             |
| see above                                                                                                                                                                                                                                                                                                                                                                                                                                                                                                                                                                                                                                                                                                                                                                                                                                                                                                                                                                                                                                                                                                                                                                                                                                                                                                                                                                                                                                                                                                                                                                                                                                                                                                                                                                                                                                                                                                                                                                                                                                                                                                                                                                                                                                                                                                                                                                                                                                                                                                                                                                                                                                                                                                                                                                                                                                                                                                                                           | IMD - MVZ Labor Greifswald                                | Robert Koch Institute, Influenza and respiratory viruses FG17 & Bioinformatics MF1, Berlin, Germany                        | A. Kruggel; Aleksandar Radonic; K. Meinck; Marianne Wedde; Oliver Drechselt; Ralf Duerwald; Rene Kmicinski; Stefan Kroeger; Stephan Fuchs; Thorsten Wolff                                                                                                                                                                                                                                                                                                                                                                                                                   |
| EPI_ISL_1048286, EPI_ISL_1048306, EPI_ISL_1048310, EPI_ISL_1048316 to 1048317                                                                                                                                                                                                                                                                                                                                                                                                                                                                                                                                                                                                                                                                                                                                                                                                                                                                                                                                                                                                                                                                                                                                                                                                                                                                                                                                                                                                                                                                                                                                                                                                                                                                                                                                                                                                                                                                                                                                                                                                                                                                                                                                                                                                                                                                                                                                                                                                                                                                                                                                                                                                                                                                                                                                                                                                                                                                       | IMD - MVZ Labor Greifswald                                | Robert Koch Institute, Influenza and respiratory viruses FG17 & Bioinformatics MF1, Berlin, Germany                        | A. Kruggel; Aleksandar Radonic; K. Meinck; Marianne Wedde; Oliver Drechselt; Ralf Duerwald; Rene Kmicinski; Stefan Kroeger; Stephan Fuchs; Thorsten Wolff                                                                                                                                                                                                                                                                                                                                                                                                                   |
| EPI_ISL_1350109, EPI_ISL_1350111 to 1350112, EPI_ISL_1350114, EPI_ISL_1350121, EPI_ISL_1350123, EPI_ISL_1350126, EPI_ISL_1350133, EPI_ISL_1350139, EPI_ISL_1350142, EPI_ISL_1350147, EPI_ISL_1350149, EPI_ISL_1350151, EPI_ISL_1350154, EPI_ISL_1354285, EPI_ISL_1354288, EPI_ISL_1354303, EPI_ISL_1354311, EPI_ISL_1354324, EPI_ISL_1354332, EPI_ISL_1354337, EPI_ISL_1354340, EPI_ISL_1354349, EPI_ISL_1354352, EPI_ISL_1354359                                                                                                                                                                                                                                                                                                                                                                                                                                                                                                                                                                                                                                                                                                                                                                                                                                                                                                                                                                                                                                                                                                                                                                                                                                                                                                                                                                                                                                                                                                                                                                                                                                                                                                                                                                                                                                                                                                                                                                                                                                                                                                                                                                                                                                                                                                                                                                                                                                                                                                                   | IMD - MVZ Labor Martinsried                               | Robert Koch Institute                                                                                                      |                                                                                                                                                                                                                                                                                                                                                                                                                                                                                                                                                                             |
| see above                                                                                                                                                                                                                                                                                                                                                                                                                                                                                                                                                                                                                                                                                                                                                                                                                                                                                                                                                                                                                                                                                                                                                                                                                                                                                                                                                                                                                                                                                                                                                                                                                                                                                                                                                                                                                                                                                                                                                                                                                                                                                                                                                                                                                                                                                                                                                                                                                                                                                                                                                                                                                                                                                                                                                                                                                                                                                                                                           | IMD - MVZ Labor Martinsried                               | Robert Koch Institute                                                                                                      |                                                                                                                                                                                                                                                                                                                                                                                                                                                                                                                                                                             |
| EPI_ISL_1143538, EPI_ISL_1143540 to 1143541, EPI_ISL_1143545, EPI_ISL_1143554, EPI_ISL_1147463, EPI_ISL_1147470, EPI_ISL_1147482, EPI_ISL_1147484, EPI_ISL_1147487, EPI_ISL_1147488 to 1147489, EPI_ISL_1147494, EPI_ISL_1147508, EPI_ISL_1151896, EPI_ISL_1151907, EPI_ISL_1151920, EPI_ISL_1151923, EPI_ISL_1151944, EPI_ISL_1151960, EPI_ISL_1210777, EPI_ISL_1210783, EPI_ISL_1210786, EPI_ISL_1210791 to 1210792, EPI_ISL_1210794 to 1210795, EPI_ISL_1210802, EPI_ISL_1210815, EPI_ISL_1217363, EPI_ISL_1217365, EPI_ISL_1217381, EPI_ISL_1217406, EPI_ISL_1217409, EPI_ISL_1217416 to 1217417, EPI_ISL_1285735, EPI_ISL_1285738, EPI_ISL_1285749, EPI_ISL_1285751 to 1285753, EPI_ISL_1285755, EPI_ISL_1285765, EPI_ISL_1285771, EPI_ISL_1285776, EPI_ISL_1285786, EPI_ISL_1285791, EPI_ISL_1285796, EPI_ISL_1354282, EPI_ISL_1354299, EPI_ISL_1354306, EPI_ISL_1354316, EPI_ISL_1354326, EPI_ISL_1354336, EPI_ISL_1354339, EPI_ISL_1354353                                                                                                                                                                                                                                                                                                                                                                                                                                                                                                                                                                                                                                                                                                                                                                                                                                                                                                                                                                                                                                                                                                                                                                                                                                                                                                                                                                                                                                                                                                                                                                                                                                                                                                                                                                                                                                                                                                                                                                                                  | IMD - Medizinisches Labor Rostock                         | Robert Koch Institute                                                                                                      |                                                                                                                                                                                                                                                                                                                                                                                                                                                                                                                                                                             |
| see above                                                                                                                                                                                                                                                                                                                                                                                                                                                                                                                                                                                                                                                                                                                                                                                                                                                                                                                                                                                                                                                                                                                                                                                                                                                                                                                                                                                                                                                                                                                                                                                                                                                                                                                                                                                                                                                                                                                                                                                                                                                                                                                                                                                                                                                                                                                                                                                                                                                                                                                                                                                                                                                                                                                                                                                                                                                                                                                                           | IMD - Medizinisches Labor Rostock                         | Robert Koch Institute                                                                                                      |                                                                                                                                                                                                                                                                                                                                                                                                                                                                                                                                                                             |
| EPI_ISL_1140525 to 1140528, EPI_ISL_1140534 to 1140539, EPI_ISL_1144370, EPI_ISL_1144372, EPI_ISL_1144376 to 1144383, EPI_ISL_1146717 to 1146726, EPI_ISL_1147981 to 1147988, EPI_ISL_1148468, EPI_ISL_1148470, EPI_ISL_1148472, EPI_ISL_1148477, EPI_ISL_1148487 to 1148490, EPI_ISL_1148493, EPI_ISL_1148496, EPI_ISL_1148501, EPI_ISL_1148509, EPI_ISL_1152513, EPI_ISL_1152516 to 1152517, EPI_ISL_1152519, EPI_ISL_1152521, EPI_ISL_1155431 to 1155432, EPI_ISL_1155437 to 1155438, EPI_ISL_1155443 to 1155444, EPI_ISL_1155446, EPI_ISL_1155455, EPI_ISL_1155457, EPI_ISL_1155462, EPI_ISL_1155464 to 1155467, EPI_ISL_1216787, EPI_ISL_1216802, EPI_ISL_1216817, EPI_ISL_1216828, EPI_ISL_1216838, EPI_ISL_1216841, EPI_ISL_1216846, EPI_ISL_1216851, EPI_ISL_1216856, EPI_ISL_1216870, EPI_ISL_1216875, EPI_ISL_1216905, EPI_ISL_1216909, EPI_ISL_1216920, EPI_ISL_1216924, EPI_ISL_1216929, EPI_ISL_1216934 to 1216936, EPI_ISL_1216983, EPI_ISL_1216985 to 1216986, EPI_ISL_1216989, EPI_ISL_1216994, EPI_ISL_1280680, EPI_ISL_1280683, EPI_ISL_1280693 to 1280694, EPI_ISL_1280696, EPI_ISL_1280717, EPI_ISL_1284516, EPI_ISL_1284518, EPI_ISL_1284520, EPI_ISL_1284523, EPI_ISL_1284528, EPI_ISL_1284538, EPI_ISL_1284541, EPI_ISL_1284547, EPI_ISL_1284549, EPI_ISL_1284553, EPI_ISL_1349436 to 1349437, EPI_ISL_1349439 to 1349466, EPI_ISL_1349468 to 1349493, EPI_ISL_1353357, EPI_ISL_1353360, EPI_ISL_1353364, EPI_ISL_1353370, EPI_ISL_1353374, EPI_ISL_1353382 to 1353383, EPI_ISL_1353385 to 1353386, EPI_ISL_1353388 to 1353389, EPI_ISL_1353391 to 1353393, EPI_ISL_1353395, EPI_ISL_1353398 to 1353399, EPI_ISL_1353403, EPI_ISL_1353407 to 1353408, EPI_ISL_1353412, EPI_ISL_1353416 to 1353421                                                                                                                                                                                                                                                                                                                                                                                                                                                                                                                                                                                                                                                                                                                                                                                                                                                                                                                                                                                                                                                                                                                                                                                                                            | IMD Labor Frankfurt                                       | Robert Koch Institute                                                                                                      |                                                                                                                                                                                                                                                                                                                                                                                                                                                                                                                                                                             |
| see above                                                                                                                                                                                                                                                                                                                                                                                                                                                                                                                                                                                                                                                                                                                                                                                                                                                                                                                                                                                                                                                                                                                                                                                                                                                                                                                                                                                                                                                                                                                                                                                                                                                                                                                                                                                                                                                                                                                                                                                                                                                                                                                                                                                                                                                                                                                                                                                                                                                                                                                                                                                                                                                                                                                                                                                                                                                                                                                                           | IMD Labor Frankfurt                                       | Robert Koch Institute                                                                                                      |                                                                                                                                                                                                                                                                                                                                                                                                                                                                                                                                                                             |
| EPI_ISL_1213173, EPI_ISL_1213175, EPI_ISL_1213177 to 1213178, EPI_ISL_1213180, EPI_ISL_1213182 to 1213183, EPI_ISL_1213185, EPI_ISL_1213187, EPI_ISL_1213192, EPI_ISL_1213194, EPI_ISL_1213196 to 1213197, EPI_ISL_1213199, EPI_ISL_1213209, EPI_ISL_1213275, EPI_ISL_1213277, EPI_ISL_1213279, EPI_ISL_1213281 to 1213282, EPI_ISL_1213284, EPI_ISL_1213286, EPI_ISL_1213288 to 1213289, EPI_ISL_1213291, EPI_ISL_1213293, EPI_ISL_1213315, EPI_ISL_1213317, EPI_ISL_1213319, EPI_ISL_1213322, EPI_ISL_1213329, EPI_ISL_1213345 to 1213346, EPI_ISL_1213348, EPI_ISL_1213350, EPI_ISL_1213352 to 1213353, EPI_ISL_1213355, EPI_ISL_1213357 to 1213358, EPI_ISL_1213360, EPI_ISL_1213362, EPI_ISL_1213364                                                                                                                                                                                                                                                                                                                                                                                                                                                                                                                                                                                                                                                                                                                                                                                                                                                                                                                                                                                                                                                                                                                                                                                                                                                                                                                                                                                                                                                                                                                                                                                                                                                                                                                                                                                                                                                                                                                                                                                                                                                                                                                                                                                                                                           | IMT-UFRN/RN                                               | Bioinformatics Laboratory / LNCC                                                                                           | Alessandra P Lamarca; Alexandra L Gerber; Ana Paula Melo Mariano; Ana Paula de C Guimarães; Ana Tereza R Vasconcelos; Angela Maria Guimarães Santos; Bianca Mendes Maciel; Danielle Angst Secco; Eduardo Sérgio Soares Sousa; Eloiza Helena Campana; Francisco Paulo Freire Neto; George Rego Albuquerque; Kátia Castanho Scorteci; Lucymara Fassarella Agnez Lima; Luiz G P de Almeida; Luis Cristiano Vaz Porto; Otavio J. Brustolini; Paulo Ricardo Nascimento; Ronaldo da Silva Francisco Jr; Sandra Rocha Gadelha; Selma Maria Bezerra Jeronimo; Vinicius Pietta Perez |
| EPI_ISL_1084723 to 1084725, EPI_ISL_1084727 to 1084729, EPI_ISL_1084731 to 1084736, EPI_ISL_1171871                                                                                                                                                                                                                                                                                                                                                                                                                                                                                                                                                                                                                                                                                                                                                                                                                                                                                                                                                                                                                                                                                                                                                                                                                                                                                                                                                                                                                                                                                                                                                                                                                                                                                                                                                                                                                                                                                                                                                                                                                                                                                                                                                                                                                                                                                                                                                                                                                                                                                                                                                                                                                                                                                                                                                                                                                                                 | IMT_USP                                                   | Laboratório de Parasitologia Médica - Instituto de Medicina Tropical - Universidade de São Paulo                           | Brazil-UK Centre for Arbovirus Discovery Diagnosis Genomics and Epidemiology (CADDE) Genomic Network - Instituto de Medicina Tropical                                                                                                                                                                                                                                                                                                                                                                                                                                       |
| EPI_ISL_1272653 to 1272659                                                                                                                                                                                                                                                                                                                                                                                                                                                                                                                                                                                                                                                                                                                                                                                                                                                                                                                                                                                                                                                                                                                                                                                                                                                                                                                                                                                                                                                                                                                                                                                                                                                                                                                                                                                                                                                                                                                                                                                                                                                                                                                                                                                                                                                                                                                                                                                                                                                                                                                                                                                                                                                                                                                                                                                                                                                                                                                          | IN State Department of Health Laboratory Services         | Centers for Disease Control and Prevention Division of Viral Diseases, Pathogen Discovery                                  | Anna Montmayeur; Anna Uehara; Ben L. Rambo-Martin; Clinton R. Paden; Dhvani Batra; Haibin Wang; Jasmine Padilla; Jing Zhang; Justin Lee; Katie Dillon; Krista Queen; Kristen Knipe; Kristine Lacey; Lori Rowe; Mark Burroughs; Matthew Schmerer; Mili Sheth; Peter W. Cook; Rachel Marine; Sam Shepard; Sarah Nobles; Shoshona Le; Suxiang Tong; Yan Li; Ying Tao                                                                                                                                                                                                           |
| EPI_ISL_1225987 to 1225991, EPI_ISL_1318226, EPI_ISL_1318236, EPI_ISL_1318251, EPI_ISL_1318256                                                                                                                                                                                                                                                                                                                                                                                                                                                                                                                                                                                                                                                                                                                                                                                                                                                                                                                                                                                                                                                                                                                                                                                                                                                                                                                                                                                                                                                                                                                                                                                                                                                                                                                                                                                                                                                                                                                                                                                                                                                                                                                                                                                                                                                                                                                                                                                                                                                                                                                                                                                                                                                                                                                                                                                                                                                      | IN State Department of Health Laboratory Services         | Genomics and Discovery, Respiratory Viruses Branch, Division of Viral Diseases, Centers for Disease Control and Prevention | Anna Kelleher; Anna Montmayeur; Anna Uehara; Ben L. Rambo-Martin; Brian Lynch; Clinton R. Paden; Dhvani Batra; Haibin Wang; Han Jia Justin Ng; Jasmine Padilla; Jing Zhang; Justin Lee; Katie Dillon; Krista Queen; Kristen Knipe; Kristine Lacey; Lori Rowe; Mark Burroughs; Matthew Schmerer; Mili Sheth; Peter Cook; Peter W. Cook; Rachel Marine; Sam Shepard; Sarah Nobles; Shoshona Le; Suxiang Tong; Yan Li; Ying Tao                                                                                                                                                |
| EPI_ISL_1358904 to 1358917, EPI_ISL_1363151 to 1363166, EPI_ISL_1363788 to 1363802                                                                                                                                                                                                                                                                                                                                                                                                                                                                                                                                                                                                                                                                                                                                                                                                                                                                                                                                                                                                                                                                                                                                                                                                                                                                                                                                                                                                                                                                                                                                                                                                                                                                                                                                                                                                                                                                                                                                                                                                                                                                                                                                                                                                                                                                                                                                                                                                                                                                                                                                                                                                                                                                                                                                                                                                                                                                  | IN State Department of Health Laboratory Services         | IN State Department of Health Laboratory Services                                                                          | Ankita Kashikar; Brian Pope; Cassandra Campion; Jamie Yeardon; Kyle Brownlee; Lixia Liu; Mark Glazier; Melissa Hindenlang                                                                                                                                                                                                                                                                                                                                                                                                                                                   |
| EPI_ISL_1008917 to 1008918, EPI_ISL_1008924 to 1008927                                                                                                                                                                                                                                                                                                                                                                                                                                                                                                                                                                                                                                                                                                                                                                                                                                                                                                                                                                                                                                                                                                                                                                                                                                                                                                                                                                                                                                                                                                                                                                                                                                                                                                                                                                                                                                                                                                                                                                                                                                                                                                                                                                                                                                                                                                                                                                                                                                                                                                                                                                                                                                                                                                                                                                                                                                                                                              | IN State Department of Health Laboratory Services         | Pathogen Discovery, Respiratory Viruses Branch, Division of Viral Diseases, Centers for Disease Control and Prevention     | Anna Uehara; Clinton R. Paden; Haibin Wang; Jing Zhang; Krista Queen; Peter Cook; Suxiang Tong; Yan Li; Ying Tao                                                                                                                                                                                                                                                                                                                                                                                                                                                            |

|                                                                                                                                                                                                                                                                                                                                                                                                                                                                                                                                                                                                                                                                                                                                                                                                                                                                                                                                                              |                                                                                                        |                                                                                                                |                                                                                                                                                                                                                                                                                               |                                                                                                                                                                                                                                                                                                                                                                                                                                                                                                                                                                 |
|--------------------------------------------------------------------------------------------------------------------------------------------------------------------------------------------------------------------------------------------------------------------------------------------------------------------------------------------------------------------------------------------------------------------------------------------------------------------------------------------------------------------------------------------------------------------------------------------------------------------------------------------------------------------------------------------------------------------------------------------------------------------------------------------------------------------------------------------------------------------------------------------------------------------------------------------------------------|--------------------------------------------------------------------------------------------------------|----------------------------------------------------------------------------------------------------------------|-----------------------------------------------------------------------------------------------------------------------------------------------------------------------------------------------------------------------------------------------------------------------------------------------|-----------------------------------------------------------------------------------------------------------------------------------------------------------------------------------------------------------------------------------------------------------------------------------------------------------------------------------------------------------------------------------------------------------------------------------------------------------------------------------------------------------------------------------------------------------------|
| EPI_ISL_1094240 to 1094241,<br>EPI_ISL_1094326, EPI_ISL_1094339,<br>EPI_ISL_1094776 to 1094790,<br>EPI_ISL_1095243 to 1095248                                                                                                                                                                                                                                                                                                                                                                                                                                                                                                                                                                                                                                                                                                                                                                                                                                | IN State Department of Health Laboratory Services                                                      | Respiratory Viruses Branch, Division of Viral Diseases,<br>Centers for Disease Control and Prevention          | Anna Montmayeur; Anna Uehara; Ben L. Rambo-Martin; Clinton R. Paden; Dhvani Batra; Haibin Wang; Jasmine Padilla; Jing Zhang; Justin Lee; Krista Queen; Lori Rowe; Mark Burroughs; Mili Sheth; Peter W. Cook; Rachel Marine; Sarah Nobles; Suxiang Tong; Yan Li; Ying Tao                      |                                                                                                                                                                                                                                                                                                                                                                                                                                                                                                                                                                 |
| EPI_ISL_1340629                                                                                                                                                                                                                                                                                                                                                                                                                                                                                                                                                                                                                                                                                                                                                                                                                                                                                                                                              | INER                                                                                                   | Instituto de Diagnostico y Referencia Epidemiologicos<br>(INDRE)                                               | Abril Rodriguez-Maldonado; Ariadna Medina-Benitez; Claudia Wong-Arambula; Ernesto Ramirez-Gonzalez.; Gisela Barrera-Badillo; Irma Lopez-Martinez; Joaquin Quiroz-Mercado; Lucia Hernandez-Rivas; Natividad Cruz-Ortiz; Sergio Rangel-Guerrero; Tatiana Nunez-Garcia; Vanessa Rivero-Arredondo |                                                                                                                                                                                                                                                                                                                                                                                                                                                                                                                                                                 |
| EPI_ISL_1034280, EPI_ISL_1039782 to 1039783, EPI_ISL_1063911, EPI_ISL_1079995, EPI_ISL_1091276 to 1091279, EPI_ISL_1091788 to 1091789, EPI_ISL_1169883 to 1169886, EPI_ISL_1195950, EPI_ISL_1198698, EPI_ISL_1210494 to 1210496, EPI_ISL_1229131, EPI_ISL_1259405 to 1259408, EPI_ISL_1259410 to 1259411, EPI_ISL_1259413 to 1259415, EPI_ISL_1290803 to 1290804, EPI_ISL_1295606, EPI_ISL_1295609, EPI_ISL_1295616 to 1295617, EPI_ISL_1295642, EPI_ISL_1296237, EPI_ISL_1296292, EPI_ISL_1299218                                                                                                                                                                                                                                                                                                                                                                                                                                                           | see above                                                                                              | INMI Lazzaro Spallanzani IRCCS                                                                                 | INMI Lazzaro Spallanzani IRCCS                                                                                                                                                                                                                                                                | A Di Caro; Alessandra D'Abramo; Antonino Di Caro; B Bartolini; Barbara Bartolini; C.E.M Gruber; CEM Gruber; Cesare E.M. Gruber; E Giombini; Emanuela Giombini; Emanuele Nicastri; F Messina; F Santini; Francesco Messina; G Bonfiglio; M Rueca; M Rueca; O Butera; Ornella Butera                                                                                                                                                                                                                                                                              |
| EPI_ISL_1109633, EPI_ISL_1201486,<br>EPI_ISL_1235668 to 1235677,<br>EPI_ISL_1252844 to 1252846                                                                                                                                                                                                                                                                                                                                                                                                                                                                                                                                                                                                                                                                                                                                                                                                                                                               | INNO Diagnostics Reference Laboratory                                                                  | RCMI-Center for Research Resources, Ponce Research<br>Institute                                                | Andrea Arias-Garcia; Raphael Sánchez-Torres; Vanessa Rivera-Amill                                                                                                                                                                                                                             |                                                                                                                                                                                                                                                                                                                                                                                                                                                                                                                                                                 |
| EPI_ISL_1357691 to 1357706                                                                                                                                                                                                                                                                                                                                                                                                                                                                                                                                                                                                                                                                                                                                                                                                                                                                                                                                   | INSACOG-WB                                                                                             | National Institute of Biomedical Genomics                                                                      | Ajay Chakraborti; Arindam Maitra; Bhaswati Bandyopadhyay; Nidhan Kumar Biswas; Saumitra Das; Sreedhar Chinnaswamy; Tamal Ghosh                                                                                                                                                                |                                                                                                                                                                                                                                                                                                                                                                                                                                                                                                                                                                 |
| EPI_ISL_1191683, EPI_ISL_1312947                                                                                                                                                                                                                                                                                                                                                                                                                                                                                                                                                                                                                                                                                                                                                                                                                                                                                                                             | INSTITUT BERGONIE                                                                                      | CNR Virus des Infections Respiratoires - France SUD                                                            | Antonin Bal; Bruno Lina; Gregory Destras; Gwendolynne Burfin; Hadrien Regue; Laurence Josset; Martine Valette; Quentin Semanas                                                                                                                                                                |                                                                                                                                                                                                                                                                                                                                                                                                                                                                                                                                                                 |
| EPI_ISL_1082292 to 1082293,<br>EPI_ISL_1082295, EPI_ISL_1257899 to<br>1257900, EPI_ISL_1347245                                                                                                                                                                                                                                                                                                                                                                                                                                                                                                                                                                                                                                                                                                                                                                                                                                                               | INT Fondazione Pascale                                                                                 | INT Fondazione Pascale                                                                                         | INT Fondazione Pascale                                                                                                                                                                                                                                                                        |                                                                                                                                                                                                                                                                                                                                                                                                                                                                                                                                                                 |
| EPI_ISL_1064018 to 1064021                                                                                                                                                                                                                                                                                                                                                                                                                                                                                                                                                                                                                                                                                                                                                                                                                                                                                                                                   | IRCCS Sacro Cuore Don Calabria Hospital, Department of<br>Infectious, Tropical Diseases & Microbiology | University of Verona, Department of Biotechnology                                                              | Antonio Mori; Chiara Degli Esposti; Chiara Piubelli; Cristina Beltrami; Elena Pomari; Emanuela Cosentino; Giulia Lopatriello; Luca Marcolungo; Massimo Delledonne; Michela Deiana                                                                                                             |                                                                                                                                                                                                                                                                                                                                                                                                                                                                                                                                                                 |
| EPI_ISL_1079353, EPI_ISL_1079395,<br>EPI_ISL_1229130                                                                                                                                                                                                                                                                                                                                                                                                                                                                                                                                                                                                                                                                                                                                                                                                                                                                                                         | IRCCS San Raffaele                                                                                     | INMI Lazzaro Spallanzani IRCCS                                                                                 | A Di Caro; B Bartolini; CEM Gruber; D Limongi; D Russo; E Giombini; F Ciatti; F Messina; M Rueca; MR Capobianchi; O Butera                                                                                                                                                                    |                                                                                                                                                                                                                                                                                                                                                                                                                                                                                                                                                                 |
| EPI_ISL_1027628                                                                                                                                                                                                                                                                                                                                                                                                                                                                                                                                                                                                                                                                                                                                                                                                                                                                                                                                              | IRSESSEF GENOMICS LAB                                                                                  | IRSESSEF GENOMICS LAB                                                                                          | Abdoulie Kante; Dr Abdul PADANE; Dr Abdul Karim Sesay; Dr Aminata MBOUP; Dr Badara CISSE; Dr Birahim Pierre NDIAYE; Dr Moustapha MBOW; Dr Papa Alassane DIAW; Professor Ndeye Coumba Touré KANE; Professor Souleymane MBOUP                                                                   |                                                                                                                                                                                                                                                                                                                                                                                                                                                                                                                                                                 |
| EPI_ISL_1117526                                                                                                                                                                                                                                                                                                                                                                                                                                                                                                                                                                                                                                                                                                                                                                                                                                                                                                                                              | IZS TERAMO                                                                                             | Istituto Zooprofilattico Sperimentale dell'Abruzzo e Molise "G.<br>Caporale"                                   | Ancora M; Calistri P; Cammà C; Curini V; Di Domenico M; Di Pasquale A; Lorusso A; Mangone I; Marcacci M; Puglia I; Rinaldi A; Savini G; Scialabba S                                                                                                                                           |                                                                                                                                                                                                                                                                                                                                                                                                                                                                                                                                                                 |
| EPI_ISL_1086058 to 1086064, EPI_ISL_1086066 to 1086067, EPI_ISL_1086069 to 1086072, EPI_ISL_1086074 to 1086075, EPI_ISL_1086077 to 1086081, EPI_ISL_1086085 to 1086091, EPI_ISL_1086093 to 1086094, EPI_ISL_1086096, EPI_ISL_1086098, EPI_ISL_1086100 to 1086102, EPI_ISL_1086104 to 1086106,<br>EPI_ISL_1086108 to 1086109, EPI_ISL_1086111 to 1086112, EPI_ISL_1086114, EPI_ISL_1086116 to 1086118, EPI_ISL_1086121 to 1086122, EPI_ISL_1086131, EPI_ISL_1086133 to 1086146, EPI_ISL_1086149 to 1086150, EPI_ISL_1086153 to 1086155, EPI_ISL_1086157 to 1086160,<br>EPI_ISL_1086163 to 1086166, EPI_ISL_1086168 to 1086173, EPI_ISL_1086175, EPI_ISL_1086177, EPI_ISL_1086179 to 1086188, EPI_ISL_1086190 to 1086195, EPI_ISL_1086198 to 1086214, EPI_ISL_1086217, EPI_ISL_1185704 to 1185708, EPI_ISL_1185711 to 1185714, EPI_ISL_1185716 to 1185717, EPI_ISL_1196955 to 1196970, EPI_ISL_1196986, EPI_ISL_1196988 to 1197005, EPI_ISL_1197013 to 1197036 | see above                                                                                              | IZSM                                                                                                           | TIGEM                                                                                                                                                                                                                                                                                         | Andrea Ballabio; Anna Manfredi; Antonio Grimaldi; Antonio Grimaldi Patrizia Annunziata Francesco Panariello Biancamaria Pierri Valentina Bouche Chiara Colantuono Maria Concetta Denise Di Concilio Lucio Di Filippo Anna Manfredi Marcello Salvi Antonio Limone Pellegrino Cerino Andrea Ballabio Davide Cacchiarelli; Antonio Limone; Biancamaria Pierri; Chiara Colantuono; Davide Cacchiarelli.; Denise Di Concilio; Francesco Panariello; Lucio Di Filippo; Marcello Salvi; Maria Concetta Cuomo; Patrizia Annunziata; Pellegrino Cerino; Valentina Bouche |
| EPI_ISL_1122349 to 1122356                                                                                                                                                                                                                                                                                                                                                                                                                                                                                                                                                                                                                                                                                                                                                                                                                                                                                                                                   | Ibaraki Prefectural Institute of Public Health                                                         | Ibaraki Prefectural Institute of Public Health                                                                 | Keiko Goto; Kentaro Itokawa; Makoto Kuroda; Masanori Hashino; Rina Tanaka; Tsuyoshi Sekizuka                                                                                                                                                                                                  |                                                                                                                                                                                                                                                                                                                                                                                                                                                                                                                                                                 |
| EPI_ISL_1190729 to 1190737                                                                                                                                                                                                                                                                                                                                                                                                                                                                                                                                                                                                                                                                                                                                                                                                                                                                                                                                   | Idaho Bureau of Laboratories                                                                           | Center for Global Health, University of New Mexico Health<br>Sciences Center                                   | Christopher Ball; Darrell Dinwiddie; Daryl Domman; Kurt Schwalm; Matthew Burns; Robert Voermans                                                                                                                                                                                               |                                                                                                                                                                                                                                                                                                                                                                                                                                                                                                                                                                 |
| EPI_ISL_1164782 to 1164793,<br>EPI_ISL_1164795 to 1164815                                                                                                                                                                                                                                                                                                                                                                                                                                                                                                                                                                                                                                                                                                                                                                                                                                                                                                    | Idaho Bureau of Laboratories                                                                           | IBL                                                                                                            | "R. Beukelman; Aimee Ceniseros; Christopher Ball"; Matthew C. Burns; Robert L. Voermans                                                                                                                                                                                                       |                                                                                                                                                                                                                                                                                                                                                                                                                                                                                                                                                                 |
| EPI_ISL_1219911 to 1219923,<br>EPI_ISL_1363168 to 1363171,<br>EPI_ISL_1363175 to 1363194,<br>EPI_ISL_1366701 to 1366713                                                                                                                                                                                                                                                                                                                                                                                                                                                                                                                                                                                                                                                                                                                                                                                                                                      | Idaho Bureau of Laboratories                                                                           | Idaho Bureau of Laboratories                                                                                   | "R. Beukelman; Aimee Ceniseros; Christopher Ball"; Matthew Charles Burns; Robert L. Voermans                                                                                                                                                                                                  |                                                                                                                                                                                                                                                                                                                                                                                                                                                                                                                                                                 |
| EPI_ISL_1032667 to 1032945,<br>EPI_ISL_1138425 to 1138511,<br>EPI_ISL_1225736 to 1225779,<br>EPI_ISL_1323205 to 1323209,<br>EPI_ISL_1323211 to 1323546,<br>EPI_ISL_1367486                                                                                                                                                                                                                                                                                                                                                                                                                                                                                                                                                                                                                                                                                                                                                                                   | Illinois Department of Public Health                                                                   | Gagnon Lab, Southern Illinois University                                                                       | Keith Gagnon                                                                                                                                                                                                                                                                                  |                                                                                                                                                                                                                                                                                                                                                                                                                                                                                                                                                                 |
| EPI_ISL_1013094, EPI_ISL_1013096, EPI_ISL_1013594 to 1013595, EPI_ISL_1013771, EPI_ISL_1169896 to 1169904, EPI_ISL_1173355, EPI_ISL_1173509, EPI_ISL_1173517 to 1173518, EPI_ISL_1173766 to 1173768, EPI_ISL_1176298, EPI_ISL_1176300, EPI_ISL_1176303, EPI_ISL_1373359 to 1373361, EPI_ISL_1373365 to 1373367, EPI_ISL_1373370 to 1373372, EPI_ISL_1373374 to 1373375                                                                                                                                                                                                                                                                                                                                                                                                                                                                                                                                                                                       | see above                                                                                              | Imelda Hospital                                                                                                | Dagmar Obbels; Hanne Valgaeren; Hanne valgaeren; Johan Frans                                                                                                                                                                                                                                  |                                                                                                                                                                                                                                                                                                                                                                                                                                                                                                                                                                 |
| EPI_ISL_1252479 to 1252484,<br>EPI_ISL_1265169                                                                                                                                                                                                                                                                                                                                                                                                                                                                                                                                                                                                                                                                                                                                                                                                                                                                                                               | Imelda hospital                                                                                        | Imelda hospital Bonheiden                                                                                      | Dagmar Obbels; Hanne Valgaeren; Johan Frans                                                                                                                                                                                                                                                   |                                                                                                                                                                                                                                                                                                                                                                                                                                                                                                                                                                 |
| EPI_ISL_1281680, EPI_ISL_1281682, EPI_ISL_1281686, EPI_ISL_1281688, EPI_ISL_1281690, EPI_ISL_1281692, EPI_ISL_1347150                                                                                                                                                                                                                                                                                                                                                                                                                                                                                                                                                                                                                                                                                                                                                                                                                                        | see above                                                                                              | Imelda hospital Bonheiden                                                                                      | Dagmar Obbels; Hanne Valgaeren; Johan Frans                                                                                                                                                                                                                                                   |                                                                                                                                                                                                                                                                                                                                                                                                                                                                                                                                                                 |
| EPI_ISL_1063796 to 1063805,<br>EPI_ISL_1063808, EPI_ISL_1063810 to<br>1063839, EPI_ISL_1063862 to 1063896,<br>EPI_ISL_1063899                                                                                                                                                                                                                                                                                                                                                                                                                                                                                                                                                                                                                                                                                                                                                                                                                                | Immunogenomics lab, Institute of Life Sciences, Bhubaneswar                                            | Immunogenomics lab, Institute of Life Sciences, Bhubaneswar                                                    | Ajay Parida; Amol M. Kanampalliar; Arup Ghosh; Atimukta Jha; INSACOG Consortium; Kirtal Hansdah; Punit Prasad; Rajeeb Swain; Rupesh Dash; Safal Wallia; Shifu Aggarwal; Sunil K. Raghav                                                                                                       |                                                                                                                                                                                                                                                                                                                                                                                                                                                                                                                                                                 |
| EPI_ISL_1372010, EPI_ISL_1372086 to<br>1372093                                                                                                                                                                                                                                                                                                                                                                                                                                                                                                                                                                                                                                                                                                                                                                                                                                                                                                               | Immunogenomics lab, Institute of Life Sciences, Bhubaneswar                                            | Institute of Life Sciences - INSACOG                                                                           | Ajay Parida; Amol M. Kanampalliar; Arup Ghosh; Atimukta Jha; INSACOG Consortium; Punit Prasad; Rajeeb Swain; Rupesh Dash; Safal Wallia; Shifu Aggarwal; Sunil K. Raghav                                                                                                                       |                                                                                                                                                                                                                                                                                                                                                                                                                                                                                                                                                                 |
| EPI_ISL_1018071 to 1018101                                                                                                                                                                                                                                                                                                                                                                                                                                                                                                                                                                                                                                                                                                                                                                                                                                                                                                                                   | Immunology, Noguchi Memorial Institute for Medical Research                                            | Immunology, Noguchi Memorial Institute for Medical Research                                                    | Adu, B.; Adusei-Poku; Agbodzi, B.; Ampofo; Appiah-Kubi, J.; Asare; Bonney; Egyir, B.; J.K.; K.M.; Kumordjie, S.; M.A.; Mohktar, Q.; Odoom; Oteng, F.; Owusu-Nyantakyi, C.; W.K.; Yeboah, C.                                                                                                   |                                                                                                                                                                                                                                                                                                                                                                                                                                                                                                                                                                 |
| EPI_ISL_1061417                                                                                                                                                                                                                                                                                                                                                                                                                                                                                                                                                                                                                                                                                                                                                                                                                                                                                                                                              | Indian Council of Medical Research-National Institute of<br>Virology, Microbial Containment Complex    | Indian Council of Medical Research-National Institute of<br>Virology, Microbial Containment Complex            | Pragya D. Yadav                                                                                                                                                                                                                                                                               |                                                                                                                                                                                                                                                                                                                                                                                                                                                                                                                                                                 |
| EPI_ISL_1184169 to 1184219,<br>EPI_ISL_1255279 to 1255295                                                                                                                                                                                                                                                                                                                                                                                                                                                                                                                                                                                                                                                                                                                                                                                                                                                                                                    | Indiana Animal Disease Diagnostic Laboratory                                                           | Carpi Laboratory - Purdue University                                                                           | Abebe A Fola; G Kenitra Hendrix; Giovanna Carpi; Ilinca I Ciubotariu; Jack Dorman; Jobin J Kattoor; Lev Gorenstein; Nicole M Perry; Rebecca P Wilkes                                                                                                                                          |                                                                                                                                                                                                                                                                                                                                                                                                                                                                                                                                                                 |
| EPI_ISL_1366503, EPI_ISL_1366505,<br>EPI_ISL_1366509                                                                                                                                                                                                                                                                                                                                                                                                                                                                                                                                                                                                                                                                                                                                                                                                                                                                                                         | Indrapura Field Hospital (part of Dr. Soetomo Teaching<br>Hospital)                                    | Research Center for Vaccine Technology and Development,<br>Institute of Tropical Disease, Airlangga University | Andi Yasmin Wijaya; Aryati; Christijogo Soemartono Waloejo; Cita Rosita Sigit Prakoeswa; Damayanti Tinduh; Dominicus Husada; Dwiyantri Puspitasari; Fedik Abdul Rantam; Helen Susilowati; Jusak Nugraha; Neneng Dewi Kurniati; Ni Nyoman Tri Puspaningsih                                     |                                                                                                                                                                                                                                                                                                                                                                                                                                                                                                                                                                 |
| EPI_ISL_1383249 to 1383252                                                                                                                                                                                                                                                                                                                                                                                                                                                                                                                                                                                                                                                                                                                                                                                                                                                                                                                                   | Infectious Disease Biology, Institute of Life Sciences                                                 | Infectious Disease Biology, Institute of Life Sciences                                                         | Avula, K.; Beuria; Chattopadhyay, S.; Das, R.; Datey, A.; G.H.; Ghosh, A.; I.C.; Jha, A.; Laha, E.; Madhulika, S.; Parida, A.; Prasad, P.; Priyadarhini, M.; Puwan; Raghav, S.; S.S.; Senapati, S.; Singh, B.; Singh, D.; Swain, R.; Syed, T.K.; Team; Wallia, S.                             |                                                                                                                                                                                                                                                                                                                                                                                                                                                                                                                                                                 |

|                                                                                                                                                                                                                                                                                                                                                                                                                                                                                                                                                                                                                                                                                                                                                                   |                                                                                                                                    |                                                                                                                                                 |                                                                                                                                                                                                                                                                                                                                                             |                                                                                                                                                                                                                                                                                                                                                                          |
|-------------------------------------------------------------------------------------------------------------------------------------------------------------------------------------------------------------------------------------------------------------------------------------------------------------------------------------------------------------------------------------------------------------------------------------------------------------------------------------------------------------------------------------------------------------------------------------------------------------------------------------------------------------------------------------------------------------------------------------------------------------------|------------------------------------------------------------------------------------------------------------------------------------|-------------------------------------------------------------------------------------------------------------------------------------------------|-------------------------------------------------------------------------------------------------------------------------------------------------------------------------------------------------------------------------------------------------------------------------------------------------------------------------------------------------------------|--------------------------------------------------------------------------------------------------------------------------------------------------------------------------------------------------------------------------------------------------------------------------------------------------------------------------------------------------------------------------|
| EPI_ISL_1229134 to 1229135                                                                                                                                                                                                                                                                                                                                                                                                                                                                                                                                                                                                                                                                                                                                        | Infectious Diseases Clinic, Udine University Hospital                                                                              | INMI Lazzaro Spallanzani IRCCS                                                                                                                  | A Di Caro; B Bartolini; C Tascini; CEM Gruber; D Pecori; E Giombini; F Messina; M Rueca; MR Capobianchi; O Butera                                                                                                                                                                                                                                           |                                                                                                                                                                                                                                                                                                                                                                          |
| EPI_ISL_1233893 to 1233894                                                                                                                                                                                                                                                                                                                                                                                                                                                                                                                                                                                                                                                                                                                                        | Infectious Diseases, Chan-Zuckerberg Biohub Covidtracker                                                                           | Infectious Diseases, Chan-Zuckerberg Biohub Covidtracker                                                                                        | CZB Ciliahub Consortium                                                                                                                                                                                                                                                                                                                                     |                                                                                                                                                                                                                                                                                                                                                                          |
| EPI_ISL_1233901 to 1233903,<br>EPI_ISL_1233919 to 1233921,<br>EPI_ISL_1233924                                                                                                                                                                                                                                                                                                                                                                                                                                                                                                                                                                                                                                                                                     | Infectious Diseases, Quest Diagnostics                                                                                             | Infectious Diseases, Quest Diagnostics                                                                                                          | Anderson, B.; Bernstein; D.F.; Gerasimova, A.; Hua, M.; I.A.; K.E.; Kagan; L.E.; Lacbawan, F.; Liu, Y.; Livingston; Owen, R.; Perez, A.; R.M.; Rosenthal; S.H.; Shalhout; Shlyakhter; Tanpaiboon, P.                                                                                                                                                        |                                                                                                                                                                                                                                                                                                                                                                          |
| EPI_ISL_1034327, EPI_ISL_1040157, EPI_ISL_1058059, EPI_ISL_1073948, EPI_ISL_1118308, EPI_ISL_1118565, EPI_ISL_1118577, EPI_ISL_1118583, EPI_ISL_1118588 to 1118589, EPI_ISL_1118598 to 1118599, EPI_ISL_1118609, EPI_ISL_1118656 to 1118657, EPI_ISL_1118669 to 1118670, EPI_ISL_1192166, EPI_ISL_1192189, EPI_ISL_1251360 to 1251362, EPI_ISL_1251370 to 1251376, EPI_ISL_1251398, EPI_ISL_1251408 to 1251415, EPI_ISL_1251532, EPI_ISL_1251585, EPI_ISL_1251587, EPI_ISL_1251589, EPI_ISL_1251776 to 1251779, EPI_ISL_1251786, EPI_ISL_1254537, EPI_ISL_1254579, EPI_ISL_1314540, EPI_ISL_1317228, EPI_ISL_1317519, EPI_ISL_1317866, EPI_ISL_1317878, EPI_ISL_1317901 to 1317902, EPI_ISL_1317918, EPI_ISL_1318014, EPI_ISL_1318087, EPI_ISL_1323175 to 1323178 | see above                                                                                                                          | Innlandet Hospital Trust, Division Lillehammer, Department for Medical Microbiology                                                             | Norwegian Institute of Public Health, Department of Virology                                                                                                                                                                                                                                                                                                | Atiya R Ali; Debech Nadia; Engebretsen Serina Beate; Engebretsen Serina Beate Atiya R Ali; Garcia Llorente Ignacio; Hilde Elshaug; Hilde Vollan; Ignacio Garcia Llorente; Jon Bråte; Kamilla Heddeland Instefjord; Karoline Bragstad; Kathrine Stene-Johansen; Marie Paulsen Madsen; Olav Hungnes; Pedersen Benedikte Nevjen; Rasmus Riis Kopperud; Serina B Engebretsen |
| EPI_ISL_1120708, EPI_ISL_1168682 to 1168685                                                                                                                                                                                                                                                                                                                                                                                                                                                                                                                                                                                                                                                                                                                       | Inno Diagnostics/Center for Research Resources, Ponce Medical School Foundation, Inc.                                              | Centers for Disease Control and Prevention, Dengue Branch                                                                                       | Andrea Arias-Garcia; Betzabel Flores; Gabriela Paz-Bailey; Gilberto A. Santiago; Glenda Gonzalez; Jorge L. Munoz-Jordan; Keyla Charriez; Raphael Sanchez-Torres; Vanessa Rivera-Amill                                                                                                                                                                       |                                                                                                                                                                                                                                                                                                                                                                          |
| EPI_ISL_1041034 to 1041053,<br>EPI_ISL_1041055 to 1041107,<br>EPI_ISL_1041181 to 1041194,<br>EPI_ISL_1049262 to 1049337,<br>EPI_ISL_1060040 to 1060191,<br>EPI_ISL_1081284 to 1081290                                                                                                                                                                                                                                                                                                                                                                                                                                                                                                                                                                             | Innovative Genomics Institute, UC Berkeley                                                                                         | Innovative Genomics Institute, UC Berkeley                                                                                                      | Alison Ciling; Haridha Shivram; Liana Lareau; Netravathi Krishnappa; Phil Frankino; Stacia Wyman                                                                                                                                                                                                                                                            |                                                                                                                                                                                                                                                                                                                                                                          |
| EPI_ISL_1293351, EPI_ISL_1303031,<br>EPI_ISL_1321604                                                                                                                                                                                                                                                                                                                                                                                                                                                                                                                                                                                                                                                                                                              | Institut National d'Hygiène (INH)                                                                                                  | Unité Mixte Internationale TransVIHMI (UMI 233 IRD - U1175 INSERM - Université de Montpellier)IRD (Institut de recherche pour le développement) | Abla A. KONOU; Adodo SADJI; Ahidjo AYOUBA; Akoélé SILIADIN; Alassane OURO-MEDEL; Amivi EHLAN; Améyo DORKENOO; Anoumou DAGNRA; Christelle BUTEL; Délima MABA; Eric DELAPORTE; Issaka Maman; Kokou TEGUENI; Laetitia SERRANO; Martine PEETERS; Messanh DOUFFAN; Mireille PRINCE-DAVID; Mounerou SALOU; Sidonie A.M.KAGNISSODE; Sika DOSSIM; Wembo A. HALATOKO |                                                                                                                                                                                                                                                                                                                                                                          |
| EPI_ISL_1013214 to 1013216,<br>EPI_ISL_1013236, EPI_ISL_1013417 to 1013436                                                                                                                                                                                                                                                                                                                                                                                                                                                                                                                                                                                                                                                                                        | Institut Pasteur de Guadeloupe                                                                                                     | National Reference Center for Viruses of Respiratory Infections, Institut Pasteur, Paris                                                        | Angela Brisebarre; Camille Capel; Etienne Simon-Lorière; Marion Barbet; Maud Vanpeene; Méline Bizard; Sylvie Behillil; Sylvie van der Werf; Talarmin Antoine; Vincent Enouf                                                                                                                                                                                 |                                                                                                                                                                                                                                                                                                                                                                          |
| EPI_ISL_1362993                                                                                                                                                                                                                                                                                                                                                                                                                                                                                                                                                                                                                                                                                                                                                   | Institut de Pathologie et Genetique (IPG)                                                                                          | Institut de Pathologie et Genetique (IPG)                                                                                                       | Jérémie Gras; Pascale Hilbert                                                                                                                                                                                                                                                                                                                               |                                                                                                                                                                                                                                                                                                                                                                          |
| EPI_ISL_1140522 to 1140524, EPI_ISL_1140529 to 1140533, EPI_ISL_1144363, EPI_ISL_1148474, EPI_ISL_1148476, EPI_ISL_1148504, EPI_ISL_1217519 to 1217520, EPI_ISL_1284532, EPI_ISL_1284544                                                                                                                                                                                                                                                                                                                                                                                                                                                                                                                                                                          | see above                                                                                                                          | Institut für Immunologie und Genetik Kaiserslautern: Medizinisches Labor Dr. med. B. Thiele                                                     | Robert Koch Institute                                                                                                                                                                                                                                                                                                                                       |                                                                                                                                                                                                                                                                                                                                                                          |
| EPI_ISL_1145222 to 1145224,<br>EPI_ISL_1149299, EPI_ISL_1153471,<br>EPI_ISL_1214986, EPI_ISL_1353328                                                                                                                                                                                                                                                                                                                                                                                                                                                                                                                                                                                                                                                              | Institut für Klinische Chemie Transfusions- und Laboratoriumsmedizin/Berufsgenossenschaftliches Universitätsklinikum Bergmannsheil | Robert Koch Institute                                                                                                                           | Robert Koch Institute                                                                                                                                                                                                                                                                                                                                       |                                                                                                                                                                                                                                                                                                                                                                          |
| EPI_ISL_1143653, EPI_ISL_1156445 to 1156446, EPI_ISL_1285733, EPI_ISL_1351183                                                                                                                                                                                                                                                                                                                                                                                                                                                                                                                                                                                                                                                                                     | Institut für Medizinische Mikrobiologie - Universitätsmedizin Göttingen                                                            | Robert Koch Institute                                                                                                                           | Robert Koch Institute                                                                                                                                                                                                                                                                                                                                       |                                                                                                                                                                                                                                                                                                                                                                          |
| EPI_ISL_1048262, EPI_ISL_1048265,<br>EPI_ISL_1048300, EPI_ISL_1048311,<br>EPI_ISL_1048336                                                                                                                                                                                                                                                                                                                                                                                                                                                                                                                                                                                                                                                                         | Institut für Medizinische Mikrobiologie und Hygiene, Institut für Virologie, Technische Universität Dresden                        | Robert Koch Institute, Influenza and respiratory viruses FG17 & Bioinformatics MF1, Berlin, Germany                                             | A. Dalpke; Aleksandar Radonic; K. Hochauf-Stange; Marianne Wedde; Oliver Drechsel; Ralf Duerwald; Rene Kmicinski; Stefan Kroeger; Stephan Fuchs; Thorsten Wolff                                                                                                                                                                                             |                                                                                                                                                                                                                                                                                                                                                                          |
| EPI_ISL_1138605, EPI_ISL_1138614, EPI_ISL_1138618, EPI_ISL_1138675, EPI_ISL_1138682, EPI_ISL_1138724, EPI_ISL_1138734                                                                                                                                                                                                                                                                                                                                                                                                                                                                                                                                                                                                                                             | see above                                                                                                                          | Institut für Medizinische Virologie, Universitätsklinikum Frankfurt                                                                             | Charité Universitätsmedizin Berlin, Institut für Virologie                                                                                                                                                                                                                                                                                                  | Barbara Mühlemann; Christian Drosten; Christiane Pallas; Julia Schneider; Julia Tesch; Jörn Beheim-Schwarzbach; Marek Widera; Niko Kohmer; Sandra Ciesek; Talitha Veith; Terry Jones; Tobias Bleicker; Tuna Toptan Grabmair; Victor M Corman                                                                                                                             |
| EPI_ISL_1138599 to 1138604, EPI_ISL_1138606 to 1138613, EPI_ISL_1138615 to 1138617, EPI_ISL_1138619 to 1138674, EPI_ISL_1138676 to 1138681, EPI_ISL_1138683 to 1138723, EPI_ISL_1138725 to 1138733                                                                                                                                                                                                                                                                                                                                                                                                                                                                                                                                                                | see above                                                                                                                          | Institut für Medizinische Virologie, Universitätsklinikum Frankfurt                                                                             | Institut für Medizinische Virologie, Universitätsklinikum Frankfurt                                                                                                                                                                                                                                                                                         | Barbara Muehlemann et al                                                                                                                                                                                                                                                                                                                                                 |
| EPI_ISL_1117810 to 1117816,<br>EPI_ISL_1117846 to 1117847,<br>EPI_ISL_1118062                                                                                                                                                                                                                                                                                                                                                                                                                                                                                                                                                                                                                                                                                     | Institut für Pathologie, Salzkammergut Klinikum Vöcklabruck                                                                        | Bergthaler laboratory, CeMM Research Center for Molecular Medicine of the Austrian Academy of Sciences                                          | Andreas Bergthaler; Anna Schedl; Bekir Erguner; Benedikt Agerer; Christoph Bock; Jan Laine; Lukas Endler; Maelle Le Moing; Martin Senekowitsch; Michael Schuster; Thomas Penz                                                                                                                                                                               |                                                                                                                                                                                                                                                                                                                                                                          |
| EPI_ISL_1008010 to 1008018,<br>EPI_ISL_1008192 to 1008201,<br>EPI_ISL_1180671 to 1180674                                                                                                                                                                                                                                                                                                                                                                                                                                                                                                                                                                                                                                                                          | Institut für Pathologie, Salzkammergut Klinikum Vöcklabruck                                                                        | Bergthaler laboratory, CeMM Research Center for Molecular Medicine of the Austrian Academy of Sciences                                          | Andreas Bergthaler; Anna Schedl; Bekir Erguner; Benedikt Agerer; Christoph Bock; Fabian Amman; Jan Laine; Lukas Endler; Maelle Le Moing; Martin Senekowitsch; Michael Schuster; Thomas Penz                                                                                                                                                                 |                                                                                                                                                                                                                                                                                                                                                                          |
| EPI_ISL_1008299 to 1008310,<br>EPI_ISL_1117910                                                                                                                                                                                                                                                                                                                                                                                                                                                                                                                                                                                                                                                                                                                    | Institut für Virologie am Department für Hygiene, Mikrobiologie und Public Health                                                  | Bergthaler laboratory, CeMM Research Center for Molecular Medicine of the Austrian Academy of Sciences                                          | Andreas Bergthaler; Anna Schedl; Bekir Erguner; Benedikt Agerer; Christoph Bock; Jan Laine; Lukas Endler; Maelle Le Moing; Martin Senekowitsch; Michael Schuster; Thomas Penz                                                                                                                                                                               |                                                                                                                                                                                                                                                                                                                                                                          |
| EPI_ISL_1140505 to 1140511,<br>EPI_ISL_1140513 to 1140518,<br>EPI_ISL_1141627 to 1141653                                                                                                                                                                                                                                                                                                                                                                                                                                                                                                                                                                                                                                                                          | Institut für Virologie des Universitätsklinikums Tübingen                                                                          | Robert Koch Institute                                                                                                                           | Robert Koch Institute                                                                                                                                                                                                                                                                                                                                       |                                                                                                                                                                                                                                                                                                                                                                          |
| EPI_ISL_1155563, EPI_ISL_1155565 to 1155566, EPI_ISL_1155568 to 1155570,<br>EPI_ISL_1281287, EPI_ISL_1281291                                                                                                                                                                                                                                                                                                                                                                                                                                                                                                                                                                                                                                                      | Institut für med. Mikrobiologie u. Virologie Klinikum Oldenburg                                                                    | Robert Koch Institute                                                                                                                           | Robert Koch Institute                                                                                                                                                                                                                                                                                                                                       |                                                                                                                                                                                                                                                                                                                                                                          |
| EPI_ISL_1020296                                                                                                                                                                                                                                                                                                                                                                                                                                                                                                                                                                                                                                                                                                                                                   | Institute for Hygiene and Microbiology                                                                                             | Center for Virology                                                                                                                             | Irene Goerzer; Jeremy V. Camp; Monika Redlberger-Fritz; Stephan W. Aberle                                                                                                                                                                                                                                                                                   |                                                                                                                                                                                                                                                                                                                                                                          |
| EPI_ISL_1209263 to 1209266                                                                                                                                                                                                                                                                                                                                                                                                                                                                                                                                                                                                                                                                                                                                        | Institute for Laboratory Diagnostics and Microbiology, Klinikum Klagenfurt am Wörthersee                                           | Bergthaler laboratory, CeMM Research Center for Molecular Medicine of the Austrian Academy of Sciences                                          | Andreas Bergthaler; Anna Schedl; Bekir Erguner; Benedikt Agerer; Christoph Bock; Fabian Amman; Jan Laine; Lukas Endler; Maelle Le Moing; Martin Senekowitsch; Michael Schuster; Thomas Penz                                                                                                                                                                 |                                                                                                                                                                                                                                                                                                                                                                          |
| EPI_ISL_1013453, EPI_ISL_1013615,<br>EPI_ISL_1014765, EPI_ISL_1140122,<br>EPI_ISL_1140424                                                                                                                                                                                                                                                                                                                                                                                                                                                                                                                                                                                                                                                                         | Institute for Lung Diseases in Children - Skopje                                                                                   | Research Center for Genetic Engineering and Biotechnology "Georgi D. Efremov", Macedonian Academy of Sciences and Arts                          | Aleksandar J. Dimovski; Dijana Plasheska-Karanfilska; Gjorgji Bozinovski; Milena Jakimovska; Predrag Noveski                                                                                                                                                                                                                                                |                                                                                                                                                                                                                                                                                                                                                                          |
| EPI_ISL_1055037, EPI_ISL_1055261 to 1055264, EPI_ISL_1055365, EPI_ISL_1068849 to 1068851, EPI_ISL_1068927 to 1068929, EPI_ISL_1081327, EPI_ISL_1081333, EPI_ISL_1081350 to 1081352, EPI_ISL_1114717 to 1114724, EPI_ISL_1114726, EPI_ISL_1114734, EPI_ISL_1114744, EPI_ISL_1114765, EPI_ISL_1138598, EPI_ISL_1138750, EPI_ISL_1186028, EPI_ISL_1196867, EPI_ISL_1196930, EPI_ISL_1204503, EPI_ISL_1263458, EPI_ISL_1263460, EPI_ISL_1263540, EPI_ISL_1264762, EPI_ISL_1265161                                                                                                                                                                                                                                                                                     | see above                                                                                                                          | Institute for Medical Research, Infectious Disease Research Centre, National Institutes of Health, Ministry of Health Malaysia                  | Institute for Medical Research, Infectious Disease Research Centre, National Institutes of Health, Ministry of Health Malaysia                                                                                                                                                                                                                              | Azizan MA; Kamel K; Moh Zawawi Z; Mohd Zawawi Z; Ramly MN; Ramly N; Robert F; Suppiah J; Thayan R                                                                                                                                                                                                                                                                        |
| EPI_ISL_1008212 to 1008214                                                                                                                                                                                                                                                                                                                                                                                                                                                                                                                                                                                                                                                                                                                                        | Institute for Medical and Chemical Laboratory Diagnostics, Kepler Universitätsklinikum                                             | Bergthaler laboratory, CeMM Research Center for Molecular Medicine of the Austrian Academy of Sciences                                          | Andreas Bergthaler; Anna Schedl; Bekir Erguner; Benedikt Agerer; Christoph Bock; Jan Laine; Lukas Endler; Maelle Le Moing; Martin Senekowitsch; Michael Schuster; Thomas Penz                                                                                                                                                                               |                                                                                                                                                                                                                                                                                                                                                                          |
| EPI_ISL_1138828 to 1138829                                                                                                                                                                                                                                                                                                                                                                                                                                                                                                                                                                                                                                                                                                                                        | Institute for Urban Disease Control and Prevention                                                                                 | COVID-19 Network Investigations (CONI) Alliance                                                                                                 | Amornmas Kongklieng; Angkana Huang; Anthony R. Jones; Arporn Wangiwatsin; Bhakbhoon Panthan; Chonticha Klungtong; Duangkamon Loesbanluetchai; Ekawat Pasomsub; Elizabeth Batty; Insee Sornson; Janjira Thaipadungpanit; Kamolthip Atsawararunat; Khajohn Joonlasak; Kingkan                                                                                 |                                                                                                                                                                                                                                                                                                                                                                          |

|                                                                                                                                                                                                                                                                                                                                                                                                                                                                                                                                                                                                                                                                                                                                                                                                                                                                                                                                                                                                                                                                                                                                                                                                                                                       |           |                                                                                                                                                    |                                                                                                                                                                                                                                                                                             |                                                                                                                                                                                                                                                                                                                                                                                                                                        |
|-------------------------------------------------------------------------------------------------------------------------------------------------------------------------------------------------------------------------------------------------------------------------------------------------------------------------------------------------------------------------------------------------------------------------------------------------------------------------------------------------------------------------------------------------------------------------------------------------------------------------------------------------------------------------------------------------------------------------------------------------------------------------------------------------------------------------------------------------------------------------------------------------------------------------------------------------------------------------------------------------------------------------------------------------------------------------------------------------------------------------------------------------------------------------------------------------------------------------------------------------------|-----------|----------------------------------------------------------------------------------------------------------------------------------------------------|---------------------------------------------------------------------------------------------------------------------------------------------------------------------------------------------------------------------------------------------------------------------------------------------|----------------------------------------------------------------------------------------------------------------------------------------------------------------------------------------------------------------------------------------------------------------------------------------------------------------------------------------------------------------------------------------------------------------------------------------|
|                                                                                                                                                                                                                                                                                                                                                                                                                                                                                                                                                                                                                                                                                                                                                                                                                                                                                                                                                                                                                                                                                                                                                                                                                                                       |           |                                                                                                                                                    | Rakmanee; Krittikorn Kumpornsin; Namfon Kotanan; Prayuth Kaewmalang; Pukkaporn Parnwijitkul; Stefan Fernandez; Thanat Chookajorn; Theerarat Kochakarn; Treewat Watthanachockchai; Wasun Chantrattita; Wudtichai Manasatienki                                                                |                                                                                                                                                                                                                                                                                                                                                                                                                                        |
| EPI_ISL_1008266 to 1008279, EPI_ISL_1008311 to 1008314, EPI_ISL_1117781, EPI_ISL_1117793, EPI_ISL_1117803, EPI_ISL_1117892, EPI_ISL_1117903, EPI_ISL_1117908, EPI_ISL_1117912, EPI_ISL_1117915, EPI_ISL_1117918, EPI_ISL_1117919, EPI_ISL_11180910 to 1180931, EPI_ISL_1209335 to 1209364, EPI_ISL_1209369                                                                                                                                                                                                                                                                                                                                                                                                                                                                                                                                                                                                                                                                                                                                                                                                                                                                                                                                            | see above | Institute for Water Quality and Resource Management, Technical University Vienna                                                                   | Bergthaler laboratory, CeMM Research Center for Molecular Medicine of the Austrian Academy of Sciences                                                                                                                                                                                      |                                                                                                                                                                                                                                                                                                                                                                                                                                        |
| EPI_ISL_1140101                                                                                                                                                                                                                                                                                                                                                                                                                                                                                                                                                                                                                                                                                                                                                                                                                                                                                                                                                                                                                                                                                                                                                                                                                                       |           | Institute for prevention, treatment and rehabilitation of cardiovascular diseases - Ohrid                                                          | Research Center for Genetic Engineering and Biotechnology "Georgi D. Efremov", Macedonian Academy of Sciences and Arts                                                                                                                                                                      |                                                                                                                                                                                                                                                                                                                                                                                                                                        |
| EPI_ISL_1055778 to 1055779, EPI_ISL_1055782 to 1055783, EPI_ISL_1055786 to 1055787, EPI_ISL_1055790 to 1055791, EPI_ISL_1055793 to 1055794, EPI_ISL_1056956 to 1056957, EPI_ISL_1056959, EPI_ISL_1056968, EPI_ISL_1056970, EPI_ISL_1056972, EPI_ISL_1056974, EPI_ISL_1057035 to 1057036, EPI_ISL_1057038, EPI_ISL_1057040 to 1057041, EPI_ISL_1057097 to 1057098, EPI_ISL_1057102 to 1057105, EPI_ISL_1061425, EPI_ISL_1061427, EPI_ISL_1061429 to 1061431                                                                                                                                                                                                                                                                                                                                                                                                                                                                                                                                                                                                                                                                                                                                                                                            | see above | Institute of Biocides and Medical Ecology, Belgarde, Serbia                                                                                        | Virology Department Institute of Microbiology and Immunology Faculty of Medicine University of Belgrade                                                                                                                                                                                     |                                                                                                                                                                                                                                                                                                                                                                                                                                        |
| EPI_ISL_1118929                                                                                                                                                                                                                                                                                                                                                                                                                                                                                                                                                                                                                                                                                                                                                                                                                                                                                                                                                                                                                                                                                                                                                                                                                                       |           | Institute of Clinical Hygiene, Medical Microbiology and Infectiology, General Hospital Nürnberg, Paracelsus Medical University, Nuremberg, Germany | Department of Molecular & Medical Virology, Ruhr University Bochum, 44801 Bochum, Germany   Institute of Virology, Charité - Universitätsmedizin Berlin, corporate member of Freie Universität Berlin, Humboldt-Universität zu Berlin and Berlin Institute of Health (BIH), Berlin, Germany |                                                                                                                                                                                                                                                                                                                                                                                                                                        |
| EPI_ISL_1061277 to 1061278                                                                                                                                                                                                                                                                                                                                                                                                                                                                                                                                                                                                                                                                                                                                                                                                                                                                                                                                                                                                                                                                                                                                                                                                                            |           | Institute of Hematology and Transfusion Medicine                                                                                                   | Laboratory of Recombinant Vaccines                                                                                                                                                                                                                                                          |                                                                                                                                                                                                                                                                                                                                                                                                                                        |
| EPI_ISL_1048376 to 1048380                                                                                                                                                                                                                                                                                                                                                                                                                                                                                                                                                                                                                                                                                                                                                                                                                                                                                                                                                                                                                                                                                                                                                                                                                            |           | Institute of Human Genetics, Polish Academy of Sciences                                                                                            | Institute of Human Genetics, Polish Academy of Sciences                                                                                                                                                                                                                                     |                                                                                                                                                                                                                                                                                                                                                                                                                                        |
| EPI_ISL_1008202 to 1008204, EPI_ISL_1117897 to 1117899, EPI_ISL_1117902, EPI_ISL_1117905, EPI_ISL_1180831, EPI_ISL_1209268                                                                                                                                                                                                                                                                                                                                                                                                                                                                                                                                                                                                                                                                                                                                                                                                                                                                                                                                                                                                                                                                                                                            |           | Institute of Legal Medicine, Medical University of Innsbruck                                                                                       | Bergthaler laboratory, CeMM Research Center for Molecular Medicine of the Austrian Academy of Sciences                                                                                                                                                                                      |                                                                                                                                                                                                                                                                                                                                                                                                                                        |
| EPI_ISL_1190402, EPI_ISL_1196305, EPI_ISL_1241861, EPI_ISL_1242007, EPI_ISL_1242030, EPI_ISL_1255308, EPI_ISL_1255389 to 1255390                                                                                                                                                                                                                                                                                                                                                                                                                                                                                                                                                                                                                                                                                                                                                                                                                                                                                                                                                                                                                                                                                                                      | see above | Institute of Life Sciences                                                                                                                         | Institute of Life Sciences                                                                                                                                                                                                                                                                  |                                                                                                                                                                                                                                                                                                                                                                                                                                        |
| EPI_ISL_1034799, EPI_ISL_1034806 to 1034811, EPI_ISL_1034815 to 1034816, EPI_ISL_1034827 to 1034829, EPI_ISL_1034831 to 1034834, EPI_ISL_1034840 to 1034847, EPI_ISL_1034854, EPI_ISL_1034878 to 1034879, EPI_ISL_1034893, EPI_ISL_1034897, EPI_ISL_1034901, EPI_ISL_1034907 to 1034910, EPI_ISL_1279618 to 1279619, EPI_ISL_1279622, EPI_ISL_1279625 to 1279626, EPI_ISL_1279631 to 1279635, EPI_ISL_1279647 to 1279648, EPI_ISL_1279651 to 1279652, EPI_ISL_1279660 to 1279664, EPI_ISL_1279671 to 1279677, EPI_ISL_1279685 to 1279690, EPI_ISL_1279698 to 1279699, EPI_ISL_1279706 to 1279708, EPI_ISL_1279713 to 1279718, EPI_ISL_1279732, EPI_ISL_1279745 to 1279747, EPI_ISL_1279754 to 1279756, EPI_ISL_1279766 to 1279768, EPI_ISL_1279771 to 1279773, EPI_ISL_1279784 to 1279785, EPI_ISL_1279791 to 1279792, EPI_ISL_1279805 to 1279806, EPI_ISL_1279813, EPI_ISL_1279815, EPI_ISL_1279819, EPI_ISL_1279821, EPI_ISL_1279828, EPI_ISL_1279831, EPI_ISL_1279844 to 1279848, EPI_ISL_1279851 to 1279856, EPI_ISL_1279865 to 1279869, EPI_ISL_1279875 to 1279879, EPI_ISL_1361693 to 1361702, EPI_ISL_1361709 to 1361712, EPI_ISL_1361751, EPI_ISL_1361774 to 1361782, EPI_ISL_1361823 to 1361833, EPI_ISL_1361869 to 1361874, EPI_ISL_1361908 | see above | Institute of Medical Microbiology and Hospital Hygiene                                                                                             | Institute of Medical Microbiology and Hospital Hygiene                                                                                                                                                                                                                                      | Alijoscha Tersteegen; Prof. Dr. Achim Kaasch                                                                                                                                                                                                                                                                                                                                                                                           |
| EPI_ISL_1020294, EPI_ISL_1063495 to 1063525, EPI_ISL_1063996, EPI_ISL_1098755 to 1098797, EPI_ISL_1118849 to 1118870, EPI_ISL_1181822 to 1181852, EPI_ISL_1181854 to 1181864, EPI_ISL_1185774 to 1185775, EPI_ISL_1190964 to 1191053, EPI_ISL_1201128 to 1201131, EPI_ISL_1210501 to 1210529, EPI_ISL_1228587, EPI_ISL_1250645 to 1250694, EPI_ISL_1250713 to 1250737, EPI_ISL_1250814 to 1250841, EPI_ISL_1265165, EPI_ISL_1265167, EPI_ISL_1265174 to 1265272, EPI_ISL_1265274 to 1265352, EPI_ISL_1273382 to 1273390, EPI_ISL_1366574, EPI_ISL_1366577 to 1366609                                                                                                                                                                                                                                                                                                                                                                                                                                                                                                                                                                                                                                                                                  | see above | Institute of Microbiology and Immunology, Faculty of Medicine, University of Ljubljana                                                             | Institute of Microbiology and Immunology, Faculty of Medicine, University of Ljubljana                                                                                                                                                                                                      | Alen Sulji; Andraž Celar; Andrej Celar; Dominika Šturm; Doroteja Vlač; Mario Poljak; Matic Brvar; Miša Korva; Patricija Pozvek; Samo Zakotnik; Tatjana Avši - Županc; Tatjana Avši - Županc; Tomaž Mark Zorec; Špela Pleh                                                                                                                                                                                                              |
| EPI_ISL_1233820 to 1233867                                                                                                                                                                                                                                                                                                                                                                                                                                                                                                                                                                                                                                                                                                                                                                                                                                                                                                                                                                                                                                                                                                                                                                                                                            |           | Institute of Molecular and Translational Medicine / Laboratory of Experimental Medicine, Faculty of Medicine and Dentistry, Palacky University     | Institute of Molecular and Translational Medicine / Laboratory of Experimental Medicine                                                                                                                                                                                                     | Hana Jaworek; Marián Hajdúch; Rastislav Slavkovský; Vladimíra Koudeláková                                                                                                                                                                                                                                                                                                                                                              |
| EPI_ISL_1138756, EPI_ISL_1140094                                                                                                                                                                                                                                                                                                                                                                                                                                                                                                                                                                                                                                                                                                                                                                                                                                                                                                                                                                                                                                                                                                                                                                                                                      |           | Institute of Nephrology - Struga                                                                                                                   | Research Center for Genetic Engineering and Biotechnology "Georgi D. Efremov", Macedonian Academy of Sciences and Arts                                                                                                                                                                      | Aleksandar J. Dimovski; Dijana Plasheska-Karanfilska; Gjorgji Bozinovski; Milena Jakimovska; Predrag Noveski                                                                                                                                                                                                                                                                                                                           |
| EPI_ISL_1300652                                                                                                                                                                                                                                                                                                                                                                                                                                                                                                                                                                                                                                                                                                                                                                                                                                                                                                                                                                                                                                                                                                                                                                                                                                       |           | Institute of Public Health of Central Bosnia Canton, Travnik                                                                                       | Clinical Center, University of Sarajevo; Unit for Clinical Microbiology                                                                                                                                                                                                                     | Amela Dedei-Ljubovi; Edina Zahirovi; Golubinka Boshevska; Irma Salimovi-Beši; Maja Kuzmanovska; Sandra Vegar-Zubovi; Sebija Izetbegovi; Suzana Arapi                                                                                                                                                                                                                                                                                   |
| EPI_ISL_1159384, EPI_ISL_1165072, EPI_ISL_1165074                                                                                                                                                                                                                                                                                                                                                                                                                                                                                                                                                                                                                                                                                                                                                                                                                                                                                                                                                                                                                                                                                                                                                                                                     |           | Institute of Tropical Disease                                                                                                                      | Institute of Tropical Disease, Universitas Airlangga                                                                                                                                                                                                                                        | Aldise M Nastri; Gatot Soegiarto; Jezzy R Dewantari; Kazufumi Shimizu; Krisnoadi Rahardjo; Laksmi Wulandari; Maria I Lusida; Resti Yudhawati; Rima R Prasetya; Soejipto; Yasuko Mori                                                                                                                                                                                                                                                   |
| EPI_ISL_1091487 to 1091492, EPI_ISL_1234384 to 1234473, EPI_ISL_1239372 to 1239427, EPI_ISL_1299292 to 1299315, EPI_ISL_1310813 to 1310831, EPI_ISL_1347634 to 1347645, EPI_ISL_1381749 to 1381812                                                                                                                                                                                                                                                                                                                                                                                                                                                                                                                                                                                                                                                                                                                                                                                                                                                                                                                                                                                                                                                    | see above | Institute of Virology, Biomedical Research Center of the Slovak Academy of Sciences, Bratislava                                                    | Faculty of Natural Sciences, Comenius University, Bratislava                                                                                                                                                                                                                                | Boris Klempa; Brona Brejova; Broa Brejová; Jozef Nosek; Juraj Kopacek; Juraj Kopáek; Kristina Borsova; Kristína Boršová; Lubomira Lukacikova; Martina Licikova; Martina Liková; Martina Neboháčova; Martina Neboháčová; Monika Slávikova; Monika Sláviková; Sabina Fumacova Havlikova; Sabina Fumaová Havlíková; Tomas Vinar; Tomáš Vlna; Viktoria Cabanová; Viktoria Hodorova; Viktória Hodorová; Viktória abanová; ubomíra Lukáiková |
| EPI_ISL_1195302 to 1195426, EPI_ISL_1357646 to 1357690                                                                                                                                                                                                                                                                                                                                                                                                                                                                                                                                                                                                                                                                                                                                                                                                                                                                                                                                                                                                                                                                                                                                                                                                |           | Institute of Virology, Medical Center, University of Freiburg, Freiburg, Germany                                                                   | Institute of Virology, Clinical Virus Genomics, Medical Center, University of Freiburg, Freiburg, Germany                                                                                                                                                                                   | Hajo Grundmann; Jonas Fuchs; Lisa Kern; Marcus Panning; Sandra Reuter                                                                                                                                                                                                                                                                                                                                                                  |
| EPI_ISL_1017679 to 1017689, EPI_ISL_1017691 to 1017700                                                                                                                                                                                                                                                                                                                                                                                                                                                                                                                                                                                                                                                                                                                                                                                                                                                                                                                                                                                                                                                                                                                                                                                                |           | Institute of Virology, Vaccines and Sera "Torlak"                                                                                                  | Institute of microbiology and Immunology, Faculty of Medicine, University of Belgrade                                                                                                                                                                                                       | Jankovic, M.; Jovanovic, T.; Knezevic, A.; Milicevic, O.; Sekler, M.; Tesovic, B.; Vidanovic, D.                                                                                                                                                                                                                                                                                                                                       |
| EPI_ISL_1039702                                                                                                                                                                                                                                                                                                                                                                                                                                                                                                                                                                                                                                                                                                                                                                                                                                                                                                                                                                                                                                                                                                                                                                                                                                       |           | Instituto Adolfo Lutz - Regional de Aracatuba                                                                                                      | Instituto Adolfo Lutz, Interdisciplinary Procedures Center, Strategic Laboratory                                                                                                                                                                                                            | Claudia Regina Gonçalves; Claudio Tavares Sacchi; Erica Valessa Ramos Gomes; Karoline Rodrigues Campos                                                                                                                                                                                                                                                                                                                                 |
| EPI_ISL_1039696                                                                                                                                                                                                                                                                                                                                                                                                                                                                                                                                                                                                                                                                                                                                                                                                                                                                                                                                                                                                                                                                                                                                                                                                                                       |           | Instituto Adolfo Lutz - Regional de Presidente Prudente                                                                                            | Instituto Adolfo Lutz, Interdisciplinary Procedures Center, Strategic Laboratory                                                                                                                                                                                                            | Claudia Regina Gonçalves; Claudio Tavares Sacchi; Erica Valessa Ramos Gomes; Karoline Rodrigues Campos                                                                                                                                                                                                                                                                                                                                 |
| EPI_ISL_1039699, EPI_ISL_1039703                                                                                                                                                                                                                                                                                                                                                                                                                                                                                                                                                                                                                                                                                                                                                                                                                                                                                                                                                                                                                                                                                                                                                                                                                      |           | Instituto Adolfo Lutz - Regional de Taubate                                                                                                        | Instituto Adolfo Lutz, Interdisciplinary Procedures Center, Strategic Laboratory                                                                                                                                                                                                            | Claudia Regina Gonçalves; Claudio Tavares Sacchi; Erica Valessa Ramos Gomes; Karoline Rodrigues Campos                                                                                                                                                                                                                                                                                                                                 |
| EPI_ISL_1039697, EPI_ISL_1039700 to 1039701, EPI_ISL_1039705 to 1039710, EPI_ISL_1139071 to 1139074, EPI_ISL_1171620                                                                                                                                                                                                                                                                                                                                                                                                                                                                                                                                                                                                                                                                                                                                                                                                                                                                                                                                                                                                                                                                                                                                  |           | Instituto Adolfo Lutz Central                                                                                                                      | Instituto Adolfo Lutz, Interdisciplinary Procedures Center, Strategic Laboratory                                                                                                                                                                                                            | Caio Vinicius Dias Lopes; Claudia Regina Gonçalves; Claudio Tavares Sacchi; Erica Valessa Ramos Gomes; Karoline Rodrigues Campos                                                                                                                                                                                                                                                                                                       |
| EPI_ISL_1181362                                                                                                                                                                                                                                                                                                                                                                                                                                                                                                                                                                                                                                                                                                                                                                                                                                                                                                                                                                                                                                                                                                                                                                                                                                       |           | Instituto Aggeu Magalhães - Oswaldo Cruz Foundation, FIOCRUZ (FIOCRUZ-PE)                                                                          | Laboratory of Respiratory Viruses and Measles, Oswaldo Cruz Institute, FIOCRUZ                                                                                                                                                                                                              | Alice Sampaio Rocha; Ana Carolina Mendonca; Anna Carolina Paixao; Fernando Motta; Gabriel Wallau; Luciana Appolinario; Marilda Siqueira on behalf of the Fiocruz COVID-19 Genomic Surveillance Network; Paola Resende; Renata Serrano Lopes                                                                                                                                                                                            |
| EPI_ISL_1015735                                                                                                                                                                                                                                                                                                                                                                                                                                                                                                                                                                                                                                                                                                                                                                                                                                                                                                                                                                                                                                                                                                                                                                                                                                       |           | Instituto Nacional de Cancerologia                                                                                                                 | Instituto Nacional de Salud                                                                                                                                                                                                                                                                 | Carlos Franco-Muñoz; Diego A. Álvarez-Díaz; Diego Andrés Prada; Gerardo Santamaría; Hector Alejandro Ruiz-Moreno; Jhonnatan Reales-González; Julian Naizaque; Katherine Laiton-Donato; Magdalena Wiesner; Marcela Mercado-Reyes; María T. Herrera-Sepúlveda; Martha Lucia Ospina Martínez; Sheryll Corchuelo                                                                                                                           |
| EPI_ISL_1301445, EPI_ISL_1301452 to 1301453, EPI_ISL_1301465, EPI_ISL_1301471 to 1301472, EPI_ISL_1301488 to 1301490, EPI_ISL_1301499, EPI_ISL_1301503 to 1301504, EPI_ISL_1301506 to 1301507, EPI_ISL_1301510, EPI_ISL_1301515, EPI_ISL_1301515, EPI_ISL_1301520, EPI_ISL_1301522, EPI_ISL_1301524, EPI_ISL_1301533, EPI_ISL_1301539, EPI_ISL_1301545, EPI_ISL_1301550 to 1301551, EPI_ISL_1301554, EPI_ISL_1301598, EPI_ISL_1301600, EPI_ISL_1301602 to 1301619, EPI_ISL_1301717 to 1301729, EPI_ISL_1301731 to 1301733, EPI_ISL_1302152, EPI_ISL_1302155, EPI_ISL_1302159 to 1302160, EPI_ISL_1302163, EPI_ISL_1302170                                                                                                                                                                                                                                                                                                                                                                                                                                                                                                                                                                                                                             |           |                                                                                                                                                    |                                                                                                                                                                                                                                                                                             |                                                                                                                                                                                                                                                                                                                                                                                                                                        |

|                                                                                                                                                                                                                                                                                                                                                                                                                                                                                                                                                                                                                                                                                                                                                                                                                                                                                                                                                                                                                                                                                                                                                                                                                                                                                                                                                                                                                                                                                      |           |                                                                                                  |                                                                                                  |                                                                                                                                                                                                                                                                                                                                                                                                                                                                                                                                                                                                                                                                                                                                                                                                                                                                      |
|--------------------------------------------------------------------------------------------------------------------------------------------------------------------------------------------------------------------------------------------------------------------------------------------------------------------------------------------------------------------------------------------------------------------------------------------------------------------------------------------------------------------------------------------------------------------------------------------------------------------------------------------------------------------------------------------------------------------------------------------------------------------------------------------------------------------------------------------------------------------------------------------------------------------------------------------------------------------------------------------------------------------------------------------------------------------------------------------------------------------------------------------------------------------------------------------------------------------------------------------------------------------------------------------------------------------------------------------------------------------------------------------------------------------------------------------------------------------------------------|-----------|--------------------------------------------------------------------------------------------------|--------------------------------------------------------------------------------------------------|----------------------------------------------------------------------------------------------------------------------------------------------------------------------------------------------------------------------------------------------------------------------------------------------------------------------------------------------------------------------------------------------------------------------------------------------------------------------------------------------------------------------------------------------------------------------------------------------------------------------------------------------------------------------------------------------------------------------------------------------------------------------------------------------------------------------------------------------------------------------|
| to 1302171, EPI_ISL_1302179 to 1302180, EPI_ISL_1302185 to 1302186, EPI_ISL_1302191 to 1302194, EPI_ISL_1302198, EPI_ISL_1302205 to 1302208, EPI_ISL_1302227 to 1302234, EPI_ISL_1302245 to 1302247, EPI_ISL_1302249 to 1302250, EPI_ISL_1302253, EPI_ISL_1302255 to 1302258, EPI_ISL_1302263, EPI_ISL_1302266 to 1302267, EPI_ISL_1302271, EPI_ISL_1302273, EPI_ISL_1302277 to 1302278, EPI_ISL_1302280, EPI_ISL_1302290 to 1302292, EPI_ISL_1302297 to 1302299, EPI_ISL_1302301 to 1302304, EPI_ISL_1302306 to 1302308, EPI_ISL_1302312, EPI_ISL_1302316 to 1302317, EPI_ISL_1302319 to 1302320, EPI_ISL_1302325 to 1302330, EPI_ISL_1302334, EPI_ISL_1302338 to 1302339, EPI_ISL_1302346, EPI_ISL_1302349 to 1302350, EPI_ISL_1302356 to 1302357, EPI_ISL_1302360 to 1302361, EPI_ISL_1302364 to 1302366, EPI_ISL_1302368 to 1302369, EPI_ISL_1302373 to 1302377, EPI_ISL_1302381, EPI_ISL_1302383 to 1302387, EPI_ISL_1302389, EPI_ISL_1302391, EPI_ISL_1302394 to 1302395, EPI_ISL_1302399 to 1302400                                                                                                                                                                                                                                                                                                                                                                                                                                                                           | see above | Instituto Nacional de Enfermedades Respiratorias (INER)                                          | Instituto de Biotecnología de la UNAM                                                            | Alejandra Hernández-Terán; Alejandro Sanchez-Flores; Alma Rincón-Rubio; Andrea Santos Coy-Arechavaleta; Authors from IBT; Blanca Taboada; Celia Boukadda; Clara Esperanza Santa Cruz-Tinoco; Edgar Mendieta-Condado; Eduardo Becerril-Vargas; Fidencio Mejía-Nepomuceno; Francisco Pulido; Gisela Barrera-Badillo; Gloria Vázquez; Hector Esteban Paz-Juárez; IMSS; INDRE and INER (in alphabetical order); Carlos F. Arias; Irma Lopez-Martinez; Jerome Jean Verleyen; Joel Armando Vázquez-Pérez; Jorge Salas-Hernández; José Arturo Martínez-Orozco; José Ernesto Ramírez-González; José Esteban Muñoz-Medina; Larissa Fernandes-Matano; Lucia Hernandez-Rivas; Luis Alberto Ochoa-Carrera; Margarita Matías-Florentino; Mario Mújica-Sánchez; Natividad Cruz-Ortiz; Pavel Isa; Ricardo Grande; Santiago Ávila-Rios; Tatiana Nunez-Garcia; Teresita Rojas-Mendoza |
| EPI_ISL_1347878 to 1347948                                                                                                                                                                                                                                                                                                                                                                                                                                                                                                                                                                                                                                                                                                                                                                                                                                                                                                                                                                                                                                                                                                                                                                                                                                                                                                                                                                                                                                                           | see above | Instituto Nacional de Investigación em Saúde                                                     | KRISP, KZN Research Innovation and Sequencing Platform                                           | Afonso P; David K; Emmanuel SJ; Freitas RH; Giandhari J; Inglês L; Lutucua S; Miranda J; Morais J; Mufinda M; Naidoo Y; Neto Z; Paulo A Carralero RR Paixão JP; Pereira A; Pillay S; Tegally H; Wilkinson E; de Oliveira T                                                                                                                                                                                                                                                                                                                                                                                                                                                                                                                                                                                                                                           |
| EPI_ISL_1005559 to 1005582, EPI_ISL_1005656 to 1005673, EPI_ISL_1040535 to 1040643, EPI_ISL_1055005 to 1055025, EPI_ISL_1058046, EPI_ISL_1060598 to 1060615, EPI_ISL_1075267, EPI_ISL_1075657, EPI_ISL_1080433 to 1080453, EPI_ISL_1081152 to 1081169, EPI_ISL_1085421, EPI_ISL_1095493 to 1095516, EPI_ISL_1117353 to 1117375, EPI_ISL_1120878 to 1120896, EPI_ISL_1133103, EPI_ISL_1137460 to 1137474, EPI_ISL_1168634 to 1168652, EPI_ISL_1181700 to 1181719, EPI_ISL_1193558, EPI_ISL_1205203 to 1205218, EPI_ISL_1262630 to 1262717, EPI_ISL_1265902 to 1265908, EPI_ISL_1298451 to 1298473, EPI_ISL_1300425, EPI_ISL_1310808, EPI_ISL_1310811, EPI_ISL_1315479 to 1315572                                                                                                                                                                                                                                                                                                                                                                                                                                                                                                                                                                                                                                                                                                                                                                                                      | see above | Instituto Nacional de Medicina Genómica                                                          | Instituto Nacional de Medicina Genómica                                                          | Alcaraz N; Alcaraz-Millman M; Arriaga-Canon C; Cedro-Tanda A; Cisneros-Villanueva M; Frías-Jimenez E; García-Cárdenas FJ; Gonzalez-Barrera D; González-Wogge MA; Herrera-Montalvo LA; Herrera-Montalvo LA.; Hidalgo-Miranda A.; Mendoza-Vargas A.; Munguia-Garza; Peñaloza-Figueroa F.; Ramirez-Vega O.; Rangel-DeLeon D.; Reyes-Grajeda JP; Sifuentes-Rojas C                                                                                                                                                                                                                                                                                                                                                                                                                                                                                                       |
| EPI_ISL_1017705, EPI_ISL_1303366 to 1303367, EPI_ISL_1303376 to 1303377                                                                                                                                                                                                                                                                                                                                                                                                                                                                                                                                                                                                                                                                                                                                                                                                                                                                                                                                                                                                                                                                                                                                                                                                                                                                                                                                                                                                              | see above | Instituto Nacional de Salud- Dirección de Redes de Laboratorios de Salud Pública                 | Instituto Nacional de Salud- Dirección de Investigación en Salud Pública                         | Carlos Franco-Muñoz; Carmen Osorio; Diana Malo; Diego A. Álvarez-Díaz; Diego Andrés Prada; Gerardo Santamaría; Hector Alejandro Ruiz-Moreno; Jhonnatan Reales-González; Juan Camilo Martínez; Julian Naizaque; Katherine Laiton-Donato; Lisseth Pardo; Magdalena Wiesner; Marcela Mercado-Reyes; Maria T. Herrera-Sepúlveda; Marta Lopez Blanco; Martha Lucia Ospina Martínez; Sergio Gomez; Sheryll Corchuelo; Ángela Alarcon Cruz                                                                                                                                                                                                                                                                                                                                                                                                                                  |
| EPI_ISL_1132818 to 1132844                                                                                                                                                                                                                                                                                                                                                                                                                                                                                                                                                                                                                                                                                                                                                                                                                                                                                                                                                                                                                                                                                                                                                                                                                                                                                                                                                                                                                                                           | see above | Instituto Nacional de Saude (INS), Mozambique                                                    | KRISP, KZN Research Innovation and Sequencing Platform                                           | Emmanuel S; Giandhari J; Nadia Siteo; Nalia Ismael; Nedio Mabunda; Paulo Arnaldo; Pillay S; Tegally H; Wilkinson E; de Oliveira T                                                                                                                                                                                                                                                                                                                                                                                                                                                                                                                                                                                                                                                                                                                                    |
| EPI_ISL_1023448, EPI_ISL_1023450, EPI_ISL_1023452, EPI_ISL_1023454, EPI_ISL_1023456 to 1023457, EPI_ISL_1023459, EPI_ISL_1023461, EPI_ISL_1023463, EPI_ISL_1023465, EPI_ISL_1023467 to 1023468, EPI_ISL_1023470, EPI_ISL_1116593 to 1116594, EPI_ISL_1116598, EPI_ISL_1116600 to 1116605, EPI_ISL_1116607 to 1116623, EPI_ISL_1116625 to 1116646, EPI_ISL_1116649 to 1116659, EPI_ISL_1116661, EPI_ISL_1116665 to 1116666, EPI_ISL_1116670 to 1116671, EPI_ISL_1116688 to 1116757, EPI_ISL_1116759 to 1116815, EPI_ISL_1116857, EPI_ISL_1116860 to 1116861, EPI_ISL_1116865, EPI_ISL_1116867 to 1116871, EPI_ISL_1116890 to 1116946, EPI_ISL_1116995 to 1117006, EPI_ISL_1117009 to 1117017, EPI_ISL_1117019 to 1117030, EPI_ISL_1117035 to 1117042, EPI_ISL_1117044 to 1117045, EPI_ISL_1117047 to 1117056, EPI_ISL_1117063 to 1117064, EPI_ISL_1117084 to 1117230, EPI_ISL_1117026, EPI_ISL_11170126, EPI_ISL_11170131 to 11170134, EPI_ISL_11170138, EPI_ISL_11170140 to 11170146, EPI_ISL_11170150, EPI_ISL_11170154 to 11170158, EPI_ISL_11170161 to 11170162, EPI_ISL_11170164 to 11170175, EPI_ISL_11170177 to 11170189, EPI_ISL_11170192, EPI_ISL_11170194 to 11170204, EPI_ISL_11170207 to 11170208, EPI_ISL_11170210, EPI_ISL_11170214 to 11170223, EPI_ISL_11170225 to 11170227, EPI_ISL_11170229 to 11170232, EPI_ISL_11171966 to 11172013, EPI_ISL_1191070 to 1191079, EPI_ISL_1260855 to 1260861                                                                       | see above | Instituto Nacional de Saude (INSA)                                                               | Instituto Nacional de Saude (INSA)                                                               | Borges et al                                                                                                                                                                                                                                                                                                                                                                                                                                                                                                                                                                                                                                                                                                                                                                                                                                                         |
| EPI_ISL_1170127 to 1170130, EPI_ISL_1170139, EPI_ISL_1170151, EPI_ISL_1170153, EPI_ISL_1170163, EPI_ISL_1170211 to 1170213                                                                                                                                                                                                                                                                                                                                                                                                                                                                                                                                                                                                                                                                                                                                                                                                                                                                                                                                                                                                                                                                                                                                                                                                                                                                                                                                                           | see above | Instituto Nacional de Saude (INSA)                                                               | Instituto Nacional de Saude (INSA) and Institute of Biomedicine (IBiMed), Universidade de Aveiro | Borges et al                                                                                                                                                                                                                                                                                                                                                                                                                                                                                                                                                                                                                                                                                                                                                                                                                                                         |
| EPI_ISL_1170135 to 1170137, EPI_ISL_1170147 to 1170149, EPI_ISL_1170152, EPI_ISL_1170159 to 1170160, EPI_ISL_1170176, EPI_ISL_1170190 to 1170191, EPI_ISL_1170193, EPI_ISL_1170205 to 1170206, EPI_ISL_1170209, EPI_ISL_1170224, EPI_ISL_1170228                                                                                                                                                                                                                                                                                                                                                                                                                                                                                                                                                                                                                                                                                                                                                                                                                                                                                                                                                                                                                                                                                                                                                                                                                                     | see above | Instituto Nacional de Saude (INSA)                                                               | Instituto Nacional de Saude (INSA) and Instituto Gulbenkian de Ciencia (IGC)                     | Borges et al                                                                                                                                                                                                                                                                                                                                                                                                                                                                                                                                                                                                                                                                                                                                                                                                                                                         |
| EPI_ISL_1116599, EPI_ISL_1116662 to 1116664, EPI_ISL_1116672 to 1116687, EPI_ISL_1116863, EPI_ISL_1116883 to 1116889, EPI_ISL_1117031, EPI_ISL_1117043, EPI_ISL_1117057, EPI_ISL_1117065 to 1117083                                                                                                                                                                                                                                                                                                                                                                                                                                                                                                                                                                                                                                                                                                                                                                                                                                                                                                                                                                                                                                                                                                                                                                                                                                                                                  | see above | Instituto Nacional de Saude (INSA) and Institute of Biomedicine (IBiMed), Universidade de Aveiro | Instituto Nacional de Saude (INSA) and Institute of Biomedicine (IBiMed), Universidade de Aveiro | Borges et al                                                                                                                                                                                                                                                                                                                                                                                                                                                                                                                                                                                                                                                                                                                                                                                                                                                         |
| EPI_ISL_1116595, EPI_ISL_1116606, EPI_ISL_1116624, EPI_ISL_1116647 to 1116648, EPI_ISL_1116660, EPI_ISL_1116667 to 1116669, EPI_ISL_1116816 to 1116856, EPI_ISL_1116858 to 1116859, EPI_ISL_1116862, EPI_ISL_1116864, EPI_ISL_1116866, EPI_ISL_1116872 to 1116882, EPI_ISL_1116947 to 1116994, EPI_ISL_1117007 to 1117008, EPI_ISL_1117032 to 1117034, EPI_ISL_1117046, EPI_ISL_1117058 to 1117062, EPI_ISL_1117231 to 1117288, EPI_ISL_1117290 to 1117352                                                                                                                                                                                                                                                                                                                                                                                                                                                                                                                                                                                                                                                                                                                                                                                                                                                                                                                                                                                                                           | see above | Instituto Nacional de Saude (INSA) and Instituto Gulbenkian de Ciencia (IGC)                     | Instituto Nacional de Saude (INSA) and Instituto Gulbenkian de Ciencia (IGC)                     | Borges et al                                                                                                                                                                                                                                                                                                                                                                                                                                                                                                                                                                                                                                                                                                                                                                                                                                                         |
| EPI_ISL_1000668, EPI_ISL_1000670 to 1000671, EPI_ISL_1000673, EPI_ISL_1000675, EPI_ISL_1000677                                                                                                                                                                                                                                                                                                                                                                                                                                                                                                                                                                                                                                                                                                                                                                                                                                                                                                                                                                                                                                                                                                                                                                                                                                                                                                                                                                                       | see above | Instituto de Biotecnologia - UNESP-Botucatu-SP                                                   | Instituto de Biotecnologia - UNESP-Botucatu-SP                                                   | Camila Dantas Malossi; Fábio Sossai Possebon; João Pessoa Araújo Jr.; Leila Sabrina Ullmann; Paula Rahal; Paulo Inacio da Costa                                                                                                                                                                                                                                                                                                                                                                                                                                                                                                                                                                                                                                                                                                                                      |
| EPI_ISL_1060676 to 1060763                                                                                                                                                                                                                                                                                                                                                                                                                                                                                                                                                                                                                                                                                                                                                                                                                                                                                                                                                                                                                                                                                                                                                                                                                                                                                                                                                                                                                                                           | see above | Instituto de Diagnostico y Referencia Epidemiologicos (INDRE)_RNLSP                              | Instituto de Diagnostico y Referencia Epidemiologicos (INDRE)                                    | Abril Rodriguez-Maldonado; Adnan Araiza-Rodriguez; Claudia Wong-Arambula; David Fragoso-Fonseca; Ernesto Ramirez-Gonzalez.; Fabiola Garces-Ayala; Gisela Barrera-Badillo; Irma Lopez-Martinez; Lucia Hernandez-Rivas; Mayra Jimenez-Morales; Nancy Munoz-Hernandez; Natividad Cruz-Ortiz; Sergio Rangel-Guerrero; Tatiana Nunez-Garcia                                                                                                                                                                                                                                                                                                                                                                                                                                                                                                                               |
| EPI_ISL_1054940 to 1054996, EPI_ISL_1168452 to 1168633, EPI_ISL_1219711 to 1219713, EPI_ISL_1219715 to 1219718                                                                                                                                                                                                                                                                                                                                                                                                                                                                                                                                                                                                                                                                                                                                                                                                                                                                                                                                                                                                                                                                                                                                                                                                                                                                                                                                                                       | see above | Instituto de Diagnostico y Referencia Epidemiologicos (INDRE)_RNLSP                              | Instituto de Diagnostico y Referencia Epidemiologicos (INDRE)                                    | Abril Rodriguez-Maldonado; Adnan Araiza-Rodriguez; Ariadna Medina-Benitez; Claudia Wong-Arambula; David Fragoso-Fonseca; Ernesto Ramirez-Gonzalez.; Fabiola Garces-Ayala; Gisela Barrera-Badillo; Irma Lopez-Martinez; Joaquin Quiroz-Mercado; Lucia Hernandez-Rivas; Mayra Jimenez-Morales; Nancy Munoz-Hernandez; Natividad Cruz-Ortiz; Sergio Rangel-Guerrero; Tatiana Nunez-Garcia; Vanessa Rivero-Arredondo                                                                                                                                                                                                                                                                                                                                                                                                                                                     |
| EPI_ISL_1301444, EPI_ISL_1301447 to 1301449, EPI_ISL_1301451, EPI_ISL_1301454 to 1301461, EPI_ISL_1301464, EPI_ISL_1301469 to 1301470, EPI_ISL_1301474 to 1301483, EPI_ISL_1301485 to 1301487, EPI_ISL_1301491 to 1301495, EPI_ISL_1301497, EPI_ISL_1301500 to 1301502, EPI_ISL_1301505, EPI_ISL_1301508, EPI_ISL_1301511 to 1301514, EPI_ISL_1301517, EPI_ISL_1301519, EPI_ISL_1301521, EPI_ISL_1301523, EPI_ISL_1301526 to 1301529, EPI_ISL_1301531 to 1301532, EPI_ISL_1301534, EPI_ISL_1301537, EPI_ISL_1301540 to 1301544, EPI_ISL_1301546 to 1301549, EPI_ISL_1301555 to 1301592, EPI_ISL_1301679 to 1301713, EPI_ISL_1301730, EPI_ISL_1302154, EPI_ISL_1302162, EPI_ISL_1302166 to 1302168, EPI_ISL_1302174 to 1302177, EPI_ISL_1302181 to 1302184, EPI_ISL_1302187 to 1302189, EPI_ISL_1302197, EPI_ISL_1302199 to 1302202, EPI_ISL_1302209 to 1302219, EPI_ISL_1302241 to 1302242, EPI_ISL_1302254, EPI_ISL_1302259, EPI_ISL_1302262, EPI_ISL_1302265, EPI_ISL_1302274, EPI_ISL_1302276, EPI_ISL_1302279, EPI_ISL_1302283, EPI_ISL_1302286 to 1302287, EPI_ISL_1302289, EPI_ISL_1302293, EPI_ISL_1302295 to 1302296, EPI_ISL_1302300, EPI_ISL_1302309 to 1302310, EPI_ISL_1302313 to 1302314, EPI_ISL_1302321 to 1302323, EPI_ISL_1302331, EPI_ISL_1302333, EPI_ISL_1302335, EPI_ISL_1302337, EPI_ISL_1302340, EPI_ISL_1302342 to 1302344, EPI_ISL_1302358, EPI_ISL_1302363, EPI_ISL_1302371, EPI_ISL_1302380, EPI_ISL_1302382, EPI_ISL_1302388, EPI_ISL_1302396 to 1302398 | see above | Instituto de Diagnostico y Referencia Epidemiologicos (INDRE)_RNLSP                              | Instituto de Biotecnología de la UNAM                                                            | Alejandra Hernández-Terán; Alejandro Sanchez-Flores; Alma Rincón-Rubio; Andrea Santos Coy-Arechavaleta; Authors from IBT; Blanca Taboada; Celia Boukadda; Clara Esperanza Santa Cruz-Tinoco; Edgar Mendieta-Condado; Eduardo Becerril-Vargas; Fidencio Mejía-Nepomuceno; Francisco Pulido; Gisela Barrera-Badillo; Gloria Vázquez; Hector Esteban Paz-Juárez; IMSS; INDRE and INER (in alphabetical order); Carlos F. Arias; Irma Lopez-Martinez; Jerome Jean Verleyen; Joel Armando Vázquez-Pérez; Jorge Salas-Hernández; José Arturo Martínez-Orozco; José Ernesto Ramírez-González; José Esteban Muñoz-Medina; Larissa Fernandes-Matano; Lucia Hernandez-Rivas; Luis Alberto Ochoa-Carrera; Margarita Matías-Florentino; Mario Mújica-Sánchez; Natividad Cruz-Ortiz; Pavel Isa; Ricardo Grande; Santiago Ávila-Rios; Tatiana Nunez-Garcia; Teresita Rojas-Mendoza |
| EPI_ISL_1378833 to 1378842, EPI_ISL_1378844                                                                                                                                                                                                                                                                                                                                                                                                                                                                                                                                                                                                                                                                                                                                                                                                                                                                                                                                                                                                                                                                                                                                                                                                                                                                                                                                                                                                                                          | see above | Instituto de Medicina Tropical & Salud Global Universidad Iberoamericana                         | Grubaugh Lab - Yale School of Public Health                                                      | Alejandaro Vallejo Degaudenzi; Anderson Brito; Annie Watkins; Chaney Kalinich; Chantal Vogels; Elisa Contreras; Esperanza Mendoza; Isabell Ott; Jessica Rothman; Joseph Fauver; Mallory Brehan; Mary Petrone; Nathan Grubaugh; Robert Paulino-Ramirez; Tara Alpert; Victor Virgilio Calderon                                                                                                                                                                                                                                                                                                                                                                                                                                                                                                                                                                         |
| EPI_ISL_1059943                                                                                                                                                                                                                                                                                                                                                                                                                                                                                                                                                                                                                                                                                                                                                                                                                                                                                                                                                                                                                                                                                                                                                                                                                                                                                                                                                                                                                                                                      | see above | Instituto de Salud Carlos III                                                                    | Instituto de Salud Carlos III                                                                    | A. Monzón; F. Casas; I. Gil, G.; I. Jiménez; Iglesias-Caballero; M. Sardonis; P. Zaballos; S. Camarero; S. Cuesta; S. Pozo; S. Varona; V. Vázquez-Morón                                                                                                                                                                                                                                                                                                                                                                                                                                                                                                                                                                                                                                                                                                              |
| EPI_ISL_1220061 to 1220065                                                                                                                                                                                                                                                                                                                                                                                                                                                                                                                                                                                                                                                                                                                                                                                                                                                                                                                                                                                                                                                                                                                                                                                                                                                                                                                                                                                                                                                           | see above | Investigaciones Biomédicas - Universidad de Sucre                                                | Instituto Nacional de Salud- Dirección de Investigación en Salud Pública                         | Carlos Franco-Muñoz; Diego A. Álvarez-Díaz; Diego Andrés Prada; Gerardo Santamaría; Hector Alejandro Ruiz-Moreno; Jhonnatan Reales-González; Julian Naizaque; Katherine Laiton-Donato; Magdalena Wiesner; Marcela Mercado-Reyes.; María T. Herrera-Sepúlveda; Martha Lucia Ospina Martínez; Sheryll Corchuelo                                                                                                                                                                                                                                                                                                                                                                                                                                                                                                                                                        |
| EPI_ISL_1261701 to 1261774                                                                                                                                                                                                                                                                                                                                                                                                                                                                                                                                                                                                                                                                                                                                                                                                                                                                                                                                                                                                                                                                                                                                                                                                                                                                                                                                                                                                                                                           | see above | Iressef Genomics lab                                                                             | IRESEEF                                                                                          | Abdou PADANE; Abdoulie KANTEH; Abdul Karim SESAY; Ambroise AHOUIDI; Aminata DIA; Aminata MBOUP; Astou Gaye GAYE; Barada CISSE; Bira Him Piere NDIAYE; Gora LO; Khadim GUEYE; Moustapha MBOU; Nafisatou LEYE; Ndeye Coumba Toure KANE; Papa Alassane DIAW; Souleymane MBOUP; Yacine DIA                                                                                                                                                                                                                                                                                                                                                                                                                                                                                                                                                                               |
| EPI_ISL_1167125 to 1167184                                                                                                                                                                                                                                                                                                                                                                                                                                                                                                                                                                                                                                                                                                                                                                                                                                                                                                                                                                                                                                                                                                                                                                                                                                                                                                                                                                                                                                                           | see above | Iressef Genomics lab                                                                             | L'institut de Recherche en Santé, de Surveillance Épidémiologique et de Formation (IRESEEF)      | Abdou PADANE; Abdoulie KANTEH; Abdul Karim SESAY; Ambroise AHOUIDI; Aminata DIA; Aminata MBOUP; Astou Gaye GAYE; Barada CISSE; Bira Him Piere NDIAYE; Gora LO; Khadim GUEYE; Moustapha MBOU; Nafisatou LEYE; Ndeye Coumba Toure KANE; Papa Alassane DIAW;                                                                                                                                                                                                                                                                                                                                                                                                                                                                                                                                                                                                            |

| Souleymane MBOUP; Yacine DIA                                                                                                                                                                                                                                                                                                                                                                                                                                                                                                                                                                                                                                                                                                                                                                                                                                                                                                                                                                                                                                                                                                                                                                                                                                                                                                                             |                                                                                                                  |                                                                                                          |                                                                                                                                                                                                                                                                                                                                                                                                                                                                                                                                                                                                                          |  |
|----------------------------------------------------------------------------------------------------------------------------------------------------------------------------------------------------------------------------------------------------------------------------------------------------------------------------------------------------------------------------------------------------------------------------------------------------------------------------------------------------------------------------------------------------------------------------------------------------------------------------------------------------------------------------------------------------------------------------------------------------------------------------------------------------------------------------------------------------------------------------------------------------------------------------------------------------------------------------------------------------------------------------------------------------------------------------------------------------------------------------------------------------------------------------------------------------------------------------------------------------------------------------------------------------------------------------------------------------------|------------------------------------------------------------------------------------------------------------------|----------------------------------------------------------------------------------------------------------|--------------------------------------------------------------------------------------------------------------------------------------------------------------------------------------------------------------------------------------------------------------------------------------------------------------------------------------------------------------------------------------------------------------------------------------------------------------------------------------------------------------------------------------------------------------------------------------------------------------------------|--|
| EPI_ISL_1322204 to 1322218                                                                                                                                                                                                                                                                                                                                                                                                                                                                                                                                                                                                                                                                                                                                                                                                                                                                                                                                                                                                                                                                                                                                                                                                                                                                                                                               | IrsiCaixa                                                                                                        | IrsiCaixa                                                                                                | Bonaventura Clotet; Bonaventura Clotet Gloria Trujillo; Carolina Gonzalez Fernandez; Eulalia Grau; Francesc Catala-Moll; Jaume Trape Pujol; Marc Noguera-Julian; Maria Casadella; Mariona Parera; Pilar Armengol; Rafael Perez Vidal; Roger Paredes                                                                                                                                                                                                                                                                                                                                                                      |  |
| EPI_ISL_1372094                                                                                                                                                                                                                                                                                                                                                                                                                                                                                                                                                                                                                                                                                                                                                                                                                                                                                                                                                                                                                                                                                                                                                                                                                                                                                                                                          | Ispat General Hospital (IGH), Rourkela                                                                           | Institute of Life Sciences - INSACOG                                                                     | Ajay Parida; Amol M. Kanampalliwar; Arup Ghosh; Atimukta Jha; INSACOG Consortium; Punit Prasad; Rajeeb Swain; Rupesh Dash; Safal Wallia; Shifu Aggarwal; Sunil K. Raghav                                                                                                                                                                                                                                                                                                                                                                                                                                                 |  |
| EPI_ISL_1240645 to 1240650                                                                                                                                                                                                                                                                                                                                                                                                                                                                                                                                                                                                                                                                                                                                                                                                                                                                                                                                                                                                                                                                                                                                                                                                                                                                                                                               | Israel Central Virology Laboratory                                                                               | Israel National Consortium for SARS-CoV-2 sequencing                                                     | Assaf Rokney; Dana Bar-Ilan; David A. Zeevi; Efrat Dahan Bucris; Efrat Glick-Saar; Efrat Rorman; Ella Mendelson; Ephraim Fass; Eva Nachum; Gal Zizelski Valenci; Gideon Rechavi; Israel Nissan; Joseph Jaffe; Maya Davidovich Cohen; Michal Mandelboim; Mor Rubinstein; Neta Zuckerman; Omer Murik; Omri Nayshool; Oran Erster; Orna Mor; Tzvia Mann                                                                                                                                                                                                                                                                     |  |
| EPI_ISL_1073142 to 1073385, EPI_ISL_1073387 to 1073546, EPI_ISL_1073548, EPI_ISL_1073551 to 1073553, EPI_ISL_1073555 to 1073556, EPI_ISL_1073559 to 1073637, EPI_ISL_1209469 to 1210216, EPI_ISL_1210218 to 1210297, EPI_ISL_1210299 to 1210350, EPI_ISL_1240651 to 1240654, EPI_ISL_1240656 to 1240657, EPI_ISL_1240678 to 1240679, EPI_ISL_1259181, EPI_ISL_1259208 to 1259213, EPI_ISL_1259263 to 1259265, EPI_ISL_1259278 to 1259281, EPI_ISL_1357777 to 1357841, EPI_ISL_1358415 to 1358903                                                                                                                                                                                                                                                                                                                                                                                                                                                                                                                                                                                                                                                                                                                                                                                                                                                         | Israel Central Virology laboratory                                                                               | Israel National Consortium for SARS-CoV-2 sequencing                                                     | *Neta Zuckerman; Assaf Rokney; Dana Bar-Ilan; David A. Zeevi; Efrat Dahan Bucris; Efrat Glick-Saar; Efrat Rorman; Ella Mendelson; Ephraim Fass; Eva Nachum; Gal Zizelski Valenci; Gideon Rechavi; Israel Nissan; Joseph Jaffe; Maya Davidovich Cohen; Michal Mandelboim; Mor Rubinstein; Neta Zuckerman; Omer Murik; Omri Nayshool; Oran Erster; Orna Mor; Orna Mor*; Tzvia Mann                                                                                                                                                                                                                                         |  |
| see above                                                                                                                                                                                                                                                                                                                                                                                                                                                                                                                                                                                                                                                                                                                                                                                                                                                                                                                                                                                                                                                                                                                                                                                                                                                                                                                                                | Israel Central Virology laboratory                                                                               | Israel National Consortium for SARS-CoV-2 sequencing                                                     |                                                                                                                                                                                                                                                                                                                                                                                                                                                                                                                                                                                                                          |  |
| EPI_ISL_1061413                                                                                                                                                                                                                                                                                                                                                                                                                                                                                                                                                                                                                                                                                                                                                                                                                                                                                                                                                                                                                                                                                                                                                                                                                                                                                                                                          | Istanbul University-Cerrahpasa, Cerrahpasa School of Medicine, COVID-19 Laboratory                               | Istanbul University-Cerrahpasa, Cerrahpasa School of Medicine, COVID-19 Laboratory                       | Ebru Yucebag; Fusun Can; Haluk Eraksoy; Kenan Midilli; Mert Ahmet Kuskucu; Okan Kadir Nohut; Serap imek Yavuz; Yesim Tuyji Tok; Zarifa Abullayeva                                                                                                                                                                                                                                                                                                                                                                                                                                                                        |  |
| EPI_ISL_1009018                                                                                                                                                                                                                                                                                                                                                                                                                                                                                                                                                                                                                                                                                                                                                                                                                                                                                                                                                                                                                                                                                                                                                                                                                                                                                                                                          | Istituto Zooprofilattico Sperimentale Lazio e Toscana "M. Aleandri"                                              | INMI Lazzaro Spallanzani IRCCS                                                                           | A Cersini; A Di Caro; B Bartolini; CEM Gruber; E Giombini; F Messina; G Manna; M Rucca; MR Capobianchi; MT Scicluna; O Butera                                                                                                                                                                                                                                                                                                                                                                                                                                                                                            |  |
| EPI_ISL_1163829 to 1163830, EPI_ISL_1166172 to 1166188, EPI_ISL_1169894 to 1169895, EPI_ISL_1212673, EPI_ISL_1212675, EPI_ISL_1212677, EPI_ISL_1212679, EPI_ISL_1212681, EPI_ISL_1212684, EPI_ISL_1212686, EPI_ISL_1212689, EPI_ISL_1212691, EPI_ISL_1212693, EPI_ISL_1212696, EPI_ISL_1212698, EPI_ISL_1212700, EPI_ISL_1296261 to 1296262, EPI_ISL_1299527 to 1299531, EPI_ISL_1299533 to 1299542, EPI_ISL_1299544, EPI_ISL_1321795, EPI_ISL_1321797 to 1321803, EPI_ISL_1336179, EPI_ISL_1336821, EPI_ISL_1336832, EPI_ISL_1336842, EPI_ISL_1336853, EPI_ISL_1336873, EPI_ISL_1336880                                                                                                                                                                                                                                                                                                                                                                                                                                                                                                                                                                                                                                                                                                                                                                 | Istituto Zooprofilattico Sperimentale Umbria e Marche "Togo Rosati"                                              | Istituto Zooprofilattico Sperimentale dell'Abruzzo e Molise "G. Caporale"                                | Ancora M; Biagetti M; Biagetti M.; Biagetti M.; Calistri P; Cammà C; Caporale M; Curini V; Di Domenico M; Di Pasquale A; Giammarioli M; Giammarioli M.; Lorusso A; Mangone I; Marcacci M; Puglia I; Rinaldi A; Savini G; Scialabba S                                                                                                                                                                                                                                                                                                                                                                                     |  |
| see above                                                                                                                                                                                                                                                                                                                                                                                                                                                                                                                                                                                                                                                                                                                                                                                                                                                                                                                                                                                                                                                                                                                                                                                                                                                                                                                                                | Istituto Zooprofilattico Sperimentale Umbria e Marche "Togo Rosati"                                              | Istituto Zooprofilattico Sperimentale dell'Abruzzo e Molise "G. Caporale"                                |                                                                                                                                                                                                                                                                                                                                                                                                                                                                                                                                                                                                                          |  |
| EPI_ISL_1095366 to 1095383, EPI_ISL_1095385 to 1095407, EPI_ISL_1129215                                                                                                                                                                                                                                                                                                                                                                                                                                                                                                                                                                                                                                                                                                                                                                                                                                                                                                                                                                                                                                                                                                                                                                                                                                                                                  | Istituto Zooprofilattico Sperimentale del Mezzogiorno                                                            | Lab. Microbiologia e Virologia, Cotugno, A.O. dei Colli                                                  | Anna Perfetti; Biancamaria Pierrri; Claudia Tiberio; Luigi Atripaldi; Maria Concetta Cuomo; Pellegrino Cerino                                                                                                                                                                                                                                                                                                                                                                                                                                                                                                            |  |
| EPI_ISL_1287411 to 1287736, EPI_ISL_1307722 to 1307799, EPI_ISL_1307842 to 1307941, EPI_ISL_1310795, EPI_ISL_1310799                                                                                                                                                                                                                                                                                                                                                                                                                                                                                                                                                                                                                                                                                                                                                                                                                                                                                                                                                                                                                                                                                                                                                                                                                                     | Istituto Zooprofilattico Sperimentale del Mezzogiorno                                                            | TIGEM                                                                                                    | Antonio Grimaldi Patrizia Annunziata Francesco Panariello Biancamaria Pierrri Claudia Tiberio Valentina Bouche Chiara Colantuono Maria Concetta Cuomo Denise Di Concilio Lucio Di Filippo Anna Manfredi Marcello Salvi Antonio Limone Luigi Atripaldi Pellegrino Cerino Andrea Ballabio Davide Cacchiarelli; Antonio Grimaldi Patrizia Annunziata Francesco Panariello Biancamaria Pierrri Claudia Tiberio Valentina Bouche Chiara Colantuono Maria Concetta Cuomo Denise Di Concilio Lucio Di Filippo Anna Manfredi Marcello Salvi Antonio Limone Luigi Atripaldi Pellegrino Cerino Andrea Ballabio Davide Cacchiarelli |  |
| EPI_ISL_1254715 to 1254823, EPI_ISL_1254825 to 1255050                                                                                                                                                                                                                                                                                                                                                                                                                                                                                                                                                                                                                                                                                                                                                                                                                                                                                                                                                                                                                                                                                                                                                                                                                                                                                                   | Istituto Zooprofilattico Sperimentale del Mezzogiorno                                                            | Telethon Institute of Genetics and Medicine (TIGEM)                                                      | Antonio Grimaldi Patrizia Annunziata Francesco Panariello Biancamaria Pierrri Claudia Tiberio Valentina Bouche Chiara Colantuono Maria Concetta Cuomo Denise Di Concilio Lucio Di Filippo Anna Manfredi Marcello Salvi Antonio Limone Luigi Atripaldi Pellegrino Cerino Andrea Ballabio Davide Cacchiarelli                                                                                                                                                                                                                                                                                                              |  |
| EPI_ISL_1061067, EPI_ISL_1061091 to 1061098, EPI_ISL_1061100 to 1061130, EPI_ISL_1061141, EPI_ISL_1061150 to 1061154, EPI_ISL_1061157, EPI_ISL_1061192, EPI_ISL_1061206 to 1061210, EPI_ISL_1061225, EPI_ISL_1061252 to 1061259, EPI_ISL_1061259, EPI_ISL_1061259                                                                                                                                                                                                                                                                                                                                                                                                                                                                                                                                                                                                                                                                                                                                                                                                                                                                                                                                                                                                                                                                                        | Istituto Zooprofilattico Sperimentale del Mezzogiorno (IZSM)                                                     | Telethon Institute of Genetics and Medicine (TIGEM)                                                      | Andrea Ballabio; Anna Manfredi; Antonio Grimaldi; Antonio Limone; Biancamaria Pierrri; Chiara Colantuono; Davide Cacchiarelli.; Denise Di Concilio; Francesco Panariello; Lucio Di Filippo; Marcello Salvi; Maria Concetta Cuomo; Patrizia Annunziata; Pellegrino Cerino; Valentina Bouche                                                                                                                                                                                                                                                                                                                               |  |
| see above                                                                                                                                                                                                                                                                                                                                                                                                                                                                                                                                                                                                                                                                                                                                                                                                                                                                                                                                                                                                                                                                                                                                                                                                                                                                                                                                                | Istituto Zooprofilattico Sperimentale del Mezzogiorno (IZSM)                                                     | Telethon Institute of Genetics and Medicine (TIGEM)                                                      |                                                                                                                                                                                                                                                                                                                                                                                                                                                                                                                                                                                                                          |  |
| EPI_ISL_1020160 to 1020170, EPI_ISL_1020306 to 1020309, EPI_ISL_1020313, EPI_ISL_1020328, EPI_ISL_1020330                                                                                                                                                                                                                                                                                                                                                                                                                                                                                                                                                                                                                                                                                                                                                                                                                                                                                                                                                                                                                                                                                                                                                                                                                                                | Istituto Zooprofilattico Sperimentale dell' Umbria e delle Marche -Togo Rosati Università degli Studi di Perugia | Department of Food safety, Nutrition and Veterinary public health - Istituto Superiore di Sanità         | Antonella Mencacci; Barbara Camilloni; Gabriele Vaccari; Giovanni Ianiro; Ilaria Di Bartolo; Luca De Sabato; Massimo Biagetti; Monica Giammarioli                                                                                                                                                                                                                                                                                                                                                                                                                                                                        |  |
| EPI_ISL_1008663, EPI_ISL_1008665 to 1008677, EPI_ISL_1008679 to 1008699, EPI_ISL_1008701 to 1008702, EPI_ISL_1112227 to 1112234, EPI_ISL_1116473 to 1116474, EPI_ISL_1254652 to 1254657, EPI_ISL_1254671 to 1254674, EPI_ISL_1254688 to 1254695, EPI_ISL_1261870                                                                                                                                                                                                                                                                                                                                                                                                                                                                                                                                                                                                                                                                                                                                                                                                                                                                                                                                                                                                                                                                                         | Istituto Zooprofilattico Sperimentale della Puglia e della Basilicata                                            | Istituto Zooprofilattico Sperimentale della Puglia e della Basilicata                                    | Bianco A.; Capozzi L.; Chironna M.; Cipolletta D.; Del Sambro L.; Galante D.; Giannico A.; Loconsole D.; Manzulli V; Pace L.; Parisi A.; Ridolfi D.; Rondinone V.; Sallustio A.; Simone D.                                                                                                                                                                                                                                                                                                                                                                                                                               |  |
| see above                                                                                                                                                                                                                                                                                                                                                                                                                                                                                                                                                                                                                                                                                                                                                                                                                                                                                                                                                                                                                                                                                                                                                                                                                                                                                                                                                | Istituto Zooprofilattico Sperimentale della Puglia e della Basilicata                                            | Istituto Zooprofilattico Sperimentale della Puglia e della Basilicata                                    |                                                                                                                                                                                                                                                                                                                                                                                                                                                                                                                                                                                                                          |  |
| EPI_ISL_1298476 to 1298477, EPI_ISL_1298481                                                                                                                                                                                                                                                                                                                                                                                                                                                                                                                                                                                                                                                                                                                                                                                                                                                                                                                                                                                                                                                                                                                                                                                                                                                                                                              | Ivano-Frankivsk CCH#1                                                                                            | The Institute of Molecular Biology and Genetics of NASU                                                  | M.Tukalo et al.                                                                                                                                                                                                                                                                                                                                                                                                                                                                                                                                                                                                          |  |
| EPI_ISL_1233953                                                                                                                                                                                                                                                                                                                                                                                                                                                                                                                                                                                                                                                                                                                                                                                                                                                                                                                                                                                                                                                                                                                                                                                                                                                                                                                                          | Jamil-ur-Rahman Center for Genome Research, Dr. Panjwani Center for Molecular Medicine and Drug Research         | Jamil-ur-Rahman Center for Genome Research, Dr. Panjwani Center for Molecular Medicine and Drug Research | Ansari; I.A.; Irfan, M.; Khan; Nisa, Z.; Rashid, M.; S.K.; Shakeel, M.; Zaibunnisa                                                                                                                                                                                                                                                                                                                                                                                                                                                                                                                                       |  |
| EPI_ISL_1014904, EPI_ISL_1014906 to 1014911, EPI_ISL_1014913 to 1014916, EPI_ISL_1014918 to 1014923, EPI_ISL_1014925 to 1014932, EPI_ISL_1014935, EPI_ISL_1041969, EPI_ISL_1041971 to 1041973, EPI_ISL_1041975 to 1041980, EPI_ISL_1041982 to 1041985, EPI_ISL_1041987 to 1041991, EPI_ISL_1041993 to 1041997, EPI_ISL_1041999 to 1042000, EPI_ISL_1098844 to 1098865, EPI_ISL_1098872 to 1098890, EPI_ISL_1128118 to 1128139, EPI_ISL_1138883 to 1138887, EPI_ISL_1138889, EPI_ISL_1138891 to 1138898, EPI_ISL_1164439 to 1164465, EPI_ISL_1193398 to 1193399, EPI_ISL_1193401 to 1193402, EPI_ISL_1193404, EPI_ISL_1193406 to 1193407, EPI_ISL_1193409 to 1193410, EPI_ISL_1193412, EPI_ISL_1223329, EPI_ISL_1223332, EPI_ISL_1223335, EPI_ISL_1223338, EPI_ISL_1223341, EPI_ISL_1223344, EPI_ISL_1223347, EPI_ISL_1223349, EPI_ISL_1223352, EPI_ISL_1223355, EPI_ISL_1223358, EPI_ISL_1223361, EPI_ISL_1223364, EPI_ISL_1223367, EPI_ISL_1223370, EPI_ISL_1223373, EPI_ISL_1223376, EPI_ISL_1223378, EPI_ISL_1223381, EPI_ISL_1223384, EPI_ISL_1223387, EPI_ISL_1223390, EPI_ISL_1223393, EPI_ISL_1223396, EPI_ISL_1223399, EPI_ISL_1223402, EPI_ISL_1223405, EPI_ISL_1223408, EPI_ISL_1240185 to 1240221, EPI_ISL_1296656 to 1296676, EPI_ISL_1297165 to 1297193, EPI_ISL_1311949 to 1311963, EPI_ISL_1361631 to 1361637, EPI_ISL_1367487 to 1367544 | Jessa                                                                                                            | Jessa                                                                                                    | Cruys et al. on behalf of the Jessa_cmdLab; Jessa_cmdLab                                                                                                                                                                                                                                                                                                                                                                                                                                                                                                                                                                 |  |
| see above                                                                                                                                                                                                                                                                                                                                                                                                                                                                                                                                                                                                                                                                                                                                                                                                                                                                                                                                                                                                                                                                                                                                                                                                                                                                                                                                                | Jessa                                                                                                            | Jessa                                                                                                    |                                                                                                                                                                                                                                                                                                                                                                                                                                                                                                                                                                                                                          |  |
| EPI_ISL_1036273 to 1036372, EPI_ISL_1091924 to 1092004, EPI_ISL_1171771 to 1171855, EPI_ISL_1238903 to 1238993, EPI_ISL_1305819 to 1305973                                                                                                                                                                                                                                                                                                                                                                                                                                                                                                                                                                                                                                                                                                                                                                                                                                                                                                                                                                                                                                                                                                                                                                                                               | Johns Hopkins Hospital Department of Pathology                                                                   | Johns Hopkins Hospital Department of Pathology                                                           | Adannaya Amadi; C. Paul Morris; Chun Huai Luo; Heba H. Mostafa; Matthew Schwartz; Nicholas Gallagher                                                                                                                                                                                                                                                                                                                                                                                                                                                                                                                     |  |
| EPI_ISL_1226436, EPI_ISL_1226458, EPI_ISL_1226488, EPI_ISL_1226499, EPI_ISL_1226541 to 1226542, EPI_ISL_1226617, EPI_ISL_1226684, EPI_ISL_1226696, EPI_ISL_1226846 to 1226848, EPI_ISL_1227546 to 1227554, EPI_ISL_1227965 to 1227972, EPI_ISL_1228042                                                                                                                                                                                                                                                                                                                                                                                                                                                                                                                                                                                                                                                                                                                                                                                                                                                                                                                                                                                                                                                                                                   | KALEIDA CENTER FOR LABORATORY MEDICINE                                                                           | Wadsworth Center, New York State Department of Health                                                    | Alexis Russel; Daryl M. Lamson; Erasmus Schneider; Erica Lasek-Nesselquist; John Kelly; Jonathan Pitnick; Kirsten St. George; Matthew Shudt; Melissa A Leisner; Navjot Singh                                                                                                                                                                                                                                                                                                                                                                                                                                             |  |
| see above                                                                                                                                                                                                                                                                                                                                                                                                                                                                                                                                                                                                                                                                                                                                                                                                                                                                                                                                                                                                                                                                                                                                                                                                                                                                                                                                                | KALEIDA CENTER FOR LABORATORY MEDICINE                                                                           | Wadsworth Center, New York State Department of Health                                                    |                                                                                                                                                                                                                                                                                                                                                                                                                                                                                                                                                                                                                          |  |
| EPI_ISL_1039223 to 1039229, EPI_ISL_1323658 to 1323663                                                                                                                                                                                                                                                                                                                                                                                                                                                                                                                                                                                                                                                                                                                                                                                                                                                                                                                                                                                                                                                                                                                                                                                                                                                                                                   | KEMRI-Wellcome Trust Research Programme/KEMRI-CGMR-C Kilifi                                                      | KEMRI-Wellcome Trust Research Programme/KEMRI-CGMR-C Kilifi                                              | Githinji G.; Githinji et al                                                                                                                                                                                                                                                                                                                                                                                                                                                                                                                                                                                              |  |
| EPI_ISL_1257859                                                                                                                                                                                                                                                                                                                                                                                                                                                                                                                                                                                                                                                                                                                                                                                                                                                                                                                                                                                                                                                                                                                                                                                                                                                                                                                                          | KKP Soekarno Hatta                                                                                               | National Institute of Health Research and Development                                                    | Arie Ardiansyah Nugraha; Hana Apsari Pawestri; Hartanti Dian Ikwati; Kartika Dewi Puspa; Krisna Pangesti; Nelly Puspandari; Subangkit; Vivi Setiawaty                                                                                                                                                                                                                                                                                                                                                                                                                                                                    |  |
| EPI_ISL_1284924 to 1284941, EPI_ISL_1284943 to 1284946                                                                                                                                                                                                                                                                                                                                                                                                                                                                                                                                                                                                                                                                                                                                                                                                                                                                                                                                                                                                                                                                                                                                                                                                                                                                                                   | KRH Klinikum Region Hannover: Institut für Med. Mikrobiologie und Krankenhaushygiene                             | Robert Koch Institute                                                                                    |                                                                                                                                                                                                                                                                                                                                                                                                                                                                                                                                                                                                                          |  |
| EPI_ISL_1318350 to 1318355                                                                                                                                                                                                                                                                                                                                                                                                                                                                                                                                                                                                                                                                                                                                                                                                                                                                                                                                                                                                                                                                                                                                                                                                                                                                                                                               | KS Health and Environmental Laboratories                                                                         | Centers for Disease Control and Prevention Division of Viral Diseases, Pathogen Discovery                | Anna Montmayeur; Anna Uehara; Ben L. Rambo-Martin; Clinton R. Paden; Dhvani Batra; Haibin Wang; Jasmine Padilla; Jing Zhang; Justin Lee; Katie Dillon; Krista Queen; Kristen Knipe; Kristine Lacey; Lori Rowe; Mark Burroughs; Matthew Schmeer; Mili Sheth; Peter W. Cook; Rachel Marine; Sam Shepard; Sarah Nobles; Shoshona Le; Suxiang Tong; Yan Li; Ying Tao                                                                                                                                                                                                                                                         |  |
| EPI_ISL_1094246, EPI_ISL_1094254, EPI_ISL_1094270, EPI_ISL_1094313, EPI_ISL_1094349, EPI_ISL_1094639 to 1094656, EPI_ISL_1095210 to 1095214                                                                                                                                                                                                                                                                                                                                                                                                                                                                                                                                                                                                                                                                                                                                                                                                                                                                                                                                                                                                                                                                                                                                                                                                              | KS Health and Environmental Laboratories                                                                         | Respiratory Viruses Branch, Division of Viral Diseases, Centers for Disease Control and Prevention       | Anna Montmayeur; Anna Uehara; Ben L. Rambo-Martin; Clinton R. Paden; Dhvani Batra; Haibin Wang; Jasmine Padilla; Jing Zhang; Justin Lee; Krista Queen; Lori Rowe; Mark Burroughs; Mili Sheth; Peter W. Cook; Rachel Marine; Sarah Nobles; Suxiang Tong; Yan Li; Ying Tao                                                                                                                                                                                                                                                                                                                                                 |  |
| see above                                                                                                                                                                                                                                                                                                                                                                                                                                                                                                                                                                                                                                                                                                                                                                                                                                                                                                                                                                                                                                                                                                                                                                                                                                                                                                                                                | KS Health and Environmental Laboratories                                                                         | Respiratory Viruses Branch, Division of Viral Diseases, Centers for Disease Control and Prevention       |                                                                                                                                                                                                                                                                                                                                                                                                                                                                                                                                                                                                                          |  |
| EPI_ISL_1000993, EPI_ISL_1001041, EPI_ISL_1048814 to 1048821, EPI_ISL_1048843 to 1049202, EPI_ISL_1050358 to 1050368, EPI_ISL_1050370 to 1050391, EPI_ISL_1050393 to 1050416, EPI_ISL_1051042, EPI_ISL_1051044, EPI_ISL_1051046 to 1051047, EPI_ISL_1051049, EPI_ISL_1051051, EPI_ISL_1051053,                                                                                                                                                                                                                                                                                                                                                                                                                                                                                                                                                                                                                                                                                                                                                                                                                                                                                                                                                                                                                                                           |                                                                                                                  |                                                                                                          |                                                                                                                                                                                                                                                                                                                                                                                                                                                                                                                                                                                                                          |  |

|                                                                                                                                                                                                                                                                                                                                                                                                                                                                                                                                                                                                                                                                                                                                                                                                                                                                                                                                                                                                                                                                                                                                                                                                                                                                 |           |                                                                                      |                                                                                                                            |                                                                                                                                                                                                                                                                                                                                                                                                                                                                                           |
|-----------------------------------------------------------------------------------------------------------------------------------------------------------------------------------------------------------------------------------------------------------------------------------------------------------------------------------------------------------------------------------------------------------------------------------------------------------------------------------------------------------------------------------------------------------------------------------------------------------------------------------------------------------------------------------------------------------------------------------------------------------------------------------------------------------------------------------------------------------------------------------------------------------------------------------------------------------------------------------------------------------------------------------------------------------------------------------------------------------------------------------------------------------------------------------------------------------------------------------------------------------------|-----------|--------------------------------------------------------------------------------------|----------------------------------------------------------------------------------------------------------------------------|-------------------------------------------------------------------------------------------------------------------------------------------------------------------------------------------------------------------------------------------------------------------------------------------------------------------------------------------------------------------------------------------------------------------------------------------------------------------------------------------|
| EPI_ISL_1051055, EPI_ISL_1051057, EPI_ISL_1051059, EPI_ISL_1051061, EPI_ISL_1051064, EPI_ISL_1051066, EPI_ISL_1051068, EPI_ISL_1051070, EPI_ISL_1051072, EPI_ISL_1051074, EPI_ISL_1051076, EPI_ISL_1051078 to 1051079, EPI_ISL_1051081, EPI_ISL_1051083, EPI_ISL_1051085 to 1051086, EPI_ISL_1051088, EPI_ISL_1051090, EPI_ISL_1051092, EPI_ISL_1051094, EPI_ISL_1051096, EPI_ISL_1051098, EPI_ISL_1051100, EPI_ISL_1051102, EPI_ISL_1051104, EPI_ISL_1051106, EPI_ISL_1051108 to 1051109, EPI_ISL_1051111, EPI_ISL_1051113, EPI_ISL_1051115, EPI_ISL_1055821 to 1055823, EPI_ISL_1056975 to 1057034, EPI_ISL_1057042 to 1057096, EPI_ISL_1064405 to 1064490, EPI_ISL_1091292 to 1091400, EPI_ISL_1093183 to 1093396, EPI_ISL_1094192 to 1094195, EPI_ISL_1103612, EPI_ISL_1103614, EPI_ISL_1103616 to 1103617, EPI_ISL_1103619, EPI_ISL_1103621, EPI_ISL_1103623 to 1103624, EPI_ISL_1103626, EPI_ISL_1111057 to 1111058, EPI_ISL_1120963 to 1120966, EPI_ISL_1312064 to 1312300, EPI_ISL_1322466 to 1322672, EPI_ISL_1322674 to 1322743, EPI_ISL_1380500 to 1381042, EPI_ISL_1382145 to 1382878                                                                                                                                                               | see above | KU Leuven, Rega Institute, Clinical and Epidemiological Virology                     | KU Leuven, Rega Institute, Clinical and Epidemiological Virology                                                           | Bert Vanmechelen; Joan Marti-Carerras; Piet Maes; Tony Wawina-Bokalanga                                                                                                                                                                                                                                                                                                                                                                                                                   |
| EPI_ISL_1167934 to 1167935, EPI_ISL_1225992 to 1226002                                                                                                                                                                                                                                                                                                                                                                                                                                                                                                                                                                                                                                                                                                                                                                                                                                                                                                                                                                                                                                                                                                                                                                                                          |           | KY State Public Health Lab                                                           | Genomics and Discovery, Respiratory Viruses Branch, Division of Viral Diseases, Centers for Disease Control and Prevention | ; Anna Montmayeur; Anna Uehara; Ben L. Rambo-Martin; Brian Lynch; Clinton R. Paden; Dhvani Batra; Haibin Wang; Jasmine Padilla; Jing Zhang; Justin Lee; Katie Dillon; Krista Queen; Kristen Kripe; Kristine Lacey; Lori Rowe; Mark Burroughs; Matthew Schmeer; Mili Sheth; Peter W. Cook; Rachel Marine; Sam Shepard; Sarah Nobles; Shoshona Le; Suxiang Tong; Yan Li; Ying Tao                                                                                                           |
| EPI_ISL_1094298, EPI_ISL_1094345, EPI_ISL_1094945 to 1094961                                                                                                                                                                                                                                                                                                                                                                                                                                                                                                                                                                                                                                                                                                                                                                                                                                                                                                                                                                                                                                                                                                                                                                                                    |           | KY State Public Health Lab                                                           | Respiratory Viruses Branch, Division of Viral Diseases, Centers for Disease Control and Prevention                         | Anna Montmayeur; Anna Uehara; Ben L. Rambo-Martin; Clinton R. Paden; Dhvani Batra; Haibin Wang; Jasmine Padilla; Jing Zhang; Justin Lee; Krista Queen; Lori Rowe; Mark Burroughs; Mili Sheth; Peter W. Cook; Rachel Marine; Sarah Nobles; Suxiang Tong; Yan Li; Ying Tao                                                                                                                                                                                                                  |
| EPI_ISL_1114385                                                                                                                                                                                                                                                                                                                                                                                                                                                                                                                                                                                                                                                                                                                                                                                                                                                                                                                                                                                                                                                                                                                                                                                                                                                 |           | Kaiser Permanente                                                                    | Seattle Flu Study                                                                                                          | Amanda Adler; Barry R. Lutz; Benjamin Pelle; Brian Hiatt; Caitlin R. Wolf; Chris D. Frazer; Deborah A. Nickerson; Elisabeth Brandt; Erica Ryke; Geoff Melly; Helen Y. Chu; Janet A. Englund; Jay Shendure; Jover Lee; Kairsten Fay; Kristen Lacombe; Lea M. Starita; Mark J. Rieder; Matthew Richardson; Matthew Thompson; Melissa Truong; Michael Boeckh; Michael Famulare; Misja Ilcisin; Peter D. Han; Philip Dykema; Romesh Gautom; Scott Lindquist; Thomas R. Sibley; Trevor Bedford |
| EPI_ISL_1298487                                                                                                                                                                                                                                                                                                                                                                                                                                                                                                                                                                                                                                                                                                                                                                                                                                                                                                                                                                                                                                                                                                                                                                                                                                                 |           | Kalush CRH                                                                           | The Institute of Molecular Biology and Genetics of NASU                                                                    | M.Tukalo et al.                                                                                                                                                                                                                                                                                                                                                                                                                                                                           |
| EPI_ISL_1039012 to 1039056                                                                                                                                                                                                                                                                                                                                                                                                                                                                                                                                                                                                                                                                                                                                                                                                                                                                                                                                                                                                                                                                                                                                                                                                                                      |           | Kamchatka Regional Children's Infectious Diseases Hospital                           | WHO National Influenza Centre Russian Federation                                                                           | Andrey Komissarov; Anna Ivanova; Artem Fadeev; Daria Danilenko; Dmitry Bazhenov; Dmitry Lioznov; Elena Nabieva; Georgii Bazykin; Ksenia Safina; Kseniya Komissarova; Maria Pisareva; Maria Timofeeva; Tamila Musaeva; Veronika Eder                                                                                                                                                                                                                                                       |
| EPI_ISL_1127143, EPI_ISL_1127999 to 1128017                                                                                                                                                                                                                                                                                                                                                                                                                                                                                                                                                                                                                                                                                                                                                                                                                                                                                                                                                                                                                                                                                                                                                                                                                     |           | Kanagawa Prefectural Institute of Public Health                                      | Pathogen Genomics Center, National Institute of Infectious Diseases                                                        | Kentaro Itokawa; Makoto Kuroda; Masanori Hashino; Rina Tanaka; Tsuyoshi Sekizuka                                                                                                                                                                                                                                                                                                                                                                                                          |
| EPI_ISL_1287778 to 1287782                                                                                                                                                                                                                                                                                                                                                                                                                                                                                                                                                                                                                                                                                                                                                                                                                                                                                                                                                                                                                                                                                                                                                                                                                                      |           | Kansas Health and Environmental Lab                                                  | Cytocheck Laboratory                                                                                                       | Ben Olsen; Jonathan Barnell; Mike Grose; and Phil Adam                                                                                                                                                                                                                                                                                                                                                                                                                                    |
| EPI_ISL_1000971, EPI_ISL_1004218 to 1004232, EPI_ISL_1048830 to 1048842, EPI_ISL_1049843 to 1049858, EPI_ISL_1054886 to 1054891, EPI_ISL_1058067 to 1058075, EPI_ISL_1064711 to 1064735, EPI_ISL_1067717 to 1067725, EPI_ISL_1073813 to 1073824, EPI_ISL_1079890 to 1079891, EPI_ISL_1079893 to 1079894, EPI_ISL_1092009, EPI_ISL_1110553 to 1110579, EPI_ISL_1113042 to 1113055, EPI_ISL_1118885 to 1118889, EPI_ISL_1120108 to 1120119, EPI_ISL_1120121 to 1120132, EPI_ISL_1121338 to 1121354, EPI_ISL_1133100 to 1133102, EPI_ISL_1137048 to 1137080, EPI_ISL_1159682 to 1159696, EPI_ISL_1163794, EPI_ISL_1167547 to 1167567, EPI_ISL_1167664 to 1167665, EPI_ISL_1229369 to 1229387, EPI_ISL_1231192 to 1231206, EPI_ISL_1261124 to 1261134, EPI_ISL_1263324 to 1263330, EPI_ISL_1272075, EPI_ISL_1298489 to 1298490, EPI_ISL_1299222 to 1299226, EPI_ISL_1314258 to 1314261, EPI_ISL_1322432 to 1322464, EPI_ISL_1323846 to 1323861, EPI_ISL_1334571, EPI_ISL_1336352 to 1336353, EPI_ISL_1337224, EPI_ISL_1337226 to 1337227, EPI_ISL_1337229 to 1337230, EPI_ISL_1337232, EPI_ISL_1337235, EPI_ISL_1337237 to 1337238, EPI_ISL_1337240 to 1337242, EPI_ISL_1338003, EPI_ISL_1357846 to 1357859, EPI_ISL_1362982 to 1362985, EPI_ISL_1364866 to 1364878 | see above | Kansas Health and Environmental Lab                                                  | Kansas Health and Environmental Lab                                                                                        | Ben Olsen; Carissa Robertson; Jonathan Barnell; Mike Grose; Paige Drury; and Phil Adam                                                                                                                                                                                                                                                                                                                                                                                                    |
| EPI_ISL_1039788, EPI_ISL_1039805 to 1039808, EPI_ISL_1082343, EPI_ISL_1082346 to 1082347, EPI_ISL_1082382 to 1082383                                                                                                                                                                                                                                                                                                                                                                                                                                                                                                                                                                                                                                                                                                                                                                                                                                                                                                                                                                                                                                                                                                                                            |           | Kantonsspital Baden AG                                                               | Institute of Medical Virology, University of Zurich                                                                        | Alexandra Trkola; Annette Audigé; Cyril Shah; Gabriela Ziltener; Guido Bloemberg; Jon Huder; Jürg Böni; Kevin Steiner; Maria Grünberg; Maryam Zaheri; Michael Huber; Riccarda Capaul; Stefan Schmutz; Verena Kufner                                                                                                                                                                                                                                                                       |
| EPI_ISL_1039809, EPI_ISL_1082331, EPI_ISL_1082355, EPI_ISL_1082380                                                                                                                                                                                                                                                                                                                                                                                                                                                                                                                                                                                                                                                                                                                                                                                                                                                                                                                                                                                                                                                                                                                                                                                              |           | Kantonsspital Frauenfeld                                                             | Institute of Medical Virology, University of Zurich                                                                        | Alexandra Trkola; Annette Audigé; Cyril Shah; Gabriela Ziltener; Guido Bloemberg; Jon Huder; Jürg Böni; Kevin Steiner; Maria Grünberg; Maryam Zaheri; Michael Huber; Riccarda Capaul; Stefan Schmutz; Verena Kufner                                                                                                                                                                                                                                                                       |
| EPI_ISL_1039786, EPI_ISL_1082350, EPI_ISL_1082362, EPI_ISL_1082385                                                                                                                                                                                                                                                                                                                                                                                                                                                                                                                                                                                                                                                                                                                                                                                                                                                                                                                                                                                                                                                                                                                                                                                              |           | Kantonsspital Münsterlingen                                                          | Institute of Medical Virology, University of Zurich                                                                        | Alexandra Trkola; Annette Audigé; Cyril Shah; Gabriela Ziltener; Guido Bloemberg; Jon Huder; Jürg Böni; Kevin Steiner; Maria Grünberg; Maryam Zaheri; Michael Huber; Riccarda Capaul; Stefan Schmutz; Verena Kufner                                                                                                                                                                                                                                                                       |
| EPI_ISL_1313181 to 1313279, EPI_ISL_1313282 to 1313541, EPI_ISL_1360110 to 1360111                                                                                                                                                                                                                                                                                                                                                                                                                                                                                                                                                                                                                                                                                                                                                                                                                                                                                                                                                                                                                                                                                                                                                                              |           | Karolinska University Hospital                                                       | Karolinska University Hospital                                                                                             | Annelie Bjerkner; Isak Sylvin; Jan Albert; Karolina Ininbergs; Lina Guerra Blomqvist; Lynda Eneh; Martin Ekman; Martina Wahlund; Robert Dyrdak; Sandra Brodsson; Tanja Normark; Tobias Allander; Valterri Wirta; Zhibing Yun                                                                                                                                                                                                                                                              |
| EPI_ISL_1073037, EPI_ISL_1075644                                                                                                                                                                                                                                                                                                                                                                                                                                                                                                                                                                                                                                                                                                                                                                                                                                                                                                                                                                                                                                                                                                                                                                                                                                |           | Kasane Primary Hospital Laboratory                                                   | Botswana Harvard HIV Reference Laboratory                                                                                  | Boitumelo Zuze; Botshelo Radibe; David Lawrence; Dorcas Maruapula; Joseph; Joseph Makhema; Legodile Kooepile; Makhema; Mosepele Mosepele; Roger Shapiro; Shahin Lockman; Sikhulile Moyo; Simani Gaseitsiwe; Wonderful T. Choga                                                                                                                                                                                                                                                            |
| EPI_ISL_1113704 to 1113708, EPI_ISL_1113754, EPI_ISL_1113759 to 1113763, EPI_ISL_1113843, EPI_ISL_1114066, EPI_ISL_1121041 to 1121045, EPI_ISL_1121047 to 1121048, EPI_ISL_1121050 to 1121056, EPI_ISL_1121221, EPI_ISL_1121229 to 1121232, EPI_ISL_1121304, EPI_ISL_1121331 to 1121335, EPI_ISL_1121337, EPI_ISL_1121355, EPI_ISL_1233424 to 1233425, EPI_ISL_1233436, EPI_ISL_1233438, EPI_ISL_1233483, EPI_ISL_1233868 to 1233872                                                                                                                                                                                                                                                                                                                                                                                                                                                                                                                                                                                                                                                                                                                                                                                                                            | see above | Kashi Clinical Laboratory                                                            | Kashi Clinical Laboratory                                                                                                  | Jenefeer DeKoning; Zahra Kashi                                                                                                                                                                                                                                                                                                                                                                                                                                                            |
| EPI_ISL_1239550, EPI_ISL_1239559, EPI_ISL_1239621 to 1239623, EPI_ISL_1239765 to 1239768, EPI_ISL_1273841                                                                                                                                                                                                                                                                                                                                                                                                                                                                                                                                                                                                                                                                                                                                                                                                                                                                                                                                                                                                                                                                                                                                                       |           | Katedra Medycyny Sdowej PUM w Szczecinie                                             | 1. National Institute of Public Health - National Institute of Hygiene; 2. Eurofins Genomics Europe Sequencing GmbH        | ECDC COVID-19 WGS support team; Eurofins Genomics Europe Sequencing Team; Gierczycki Rafa; Sadkowska-Todys Magorzata; Wokowicz Tomasz; Zacharczuk Katarzyna                                                                                                                                                                                                                                                                                                                               |
| EPI_ISL_1145218 to 1145219, EPI_ISL_1149270, EPI_ISL_1149281, EPI_ISL_1149296, EPI_ISL_1150458, EPI_ISL_1153480, EPI_ISL_1153487, EPI_ISL_1153499 to 1153500, EPI_ISL_1217522, EPI_ISL_1217530, EPI_ISL_1217559, EPI_ISL_1281972, EPI_ISL_1353333                                                                                                                                                                                                                                                                                                                                                                                                                                                                                                                                                                                                                                                                                                                                                                                                                                                                                                                                                                                                               | see above | Kath. St.-Johannes-Gesellschaft Dortmund gGmbH                                       | Robert Koch Institute                                                                                                      |                                                                                                                                                                                                                                                                                                                                                                                                                                                                                           |
| EPI_ISL_1150459                                                                                                                                                                                                                                                                                                                                                                                                                                                                                                                                                                                                                                                                                                                                                                                                                                                                                                                                                                                                                                                                                                                                                                                                                                                 |           | Katholisches Klinikum Lünen/Werne GmbH - St.-Marien-Hospital Lünen                   | Robert Koch Institute                                                                                                      |                                                                                                                                                                                                                                                                                                                                                                                                                                                                                           |
| EPI_ISL_1137610                                                                                                                                                                                                                                                                                                                                                                                                                                                                                                                                                                                                                                                                                                                                                                                                                                                                                                                                                                                                                                                                                                                                                                                                                                                 |           | Keio University School of Medicine                                                   | Keio University School of Medicine                                                                                         | Haruhiko Siomi; Hirotugu Ishizu; Kenjiro Kosaki; Kodai Abe; Yuka Iwasaki                                                                                                                                                                                                                                                                                                                                                                                                                  |
| EPI_ISL_1040760                                                                                                                                                                                                                                                                                                                                                                                                                                                                                                                                                                                                                                                                                                                                                                                                                                                                                                                                                                                                                                                                                                                                                                                                                                                 |           | Kensington CDC                                                                       | NHLS/UCT                                                                                                                   | Arash Iranzadeh; Bruna Galvao; Carolyn Williamson; Deelan Doolabh; Diana Hardie; Innocent Mudau; Kruger Marais; Lynn Tyers; Marvin Hsiao; Stephen Korsman                                                                                                                                                                                                                                                                                                                                 |
| EPI_ISL_1121994 to 1122013, EPI_ISL_1171858 to 1171870, EPI_ISL_1184115 to 1184134, EPI_ISL_1302682 to 1302684, EPI_ISL_1302687 to 1302693, EPI_ISL_1302698, EPI_ISL_1302701 to 1302707, EPI_ISL_1312346 to 1312353, EPI_ISL_1314170 to 1314177, EPI_ISL_1314190 to 1314197                                                                                                                                                                                                                                                                                                                                                                                                                                                                                                                                                                                                                                                                                                                                                                                                                                                                                                                                                                                     | see above | Kentucky State Public Health Lab                                                     | Kentucky State Public Health Lab                                                                                           | Joshua Tobias; Karim George; Matthew Johnson; Rachel Zinner; Rhonda Lucas; Stephanie Lunn; Vaneet Arora; William Grooms                                                                                                                                                                                                                                                                                                                                                                   |
| EPI_ISL_1239225 to 1239266, EPI_ISL_1239458, EPI_ISL_1239460 to 1239461, EPI_ISL_1239463, EPI_ISL_1239466 to 1239468, EPI_ISL_1239471, EPI_ISL_1239474 to 1239478, EPI_ISL_1239480 to 1239481, EPI_ISL_1239483, EPI_ISL_1239485 to 1239486, EPI_ISL_1239488 to 1239489, EPI_ISL_1239508, EPI_ISL_1239512, EPI_ISL_1239518 to 1239520, EPI_ISL_1239522, EPI_ISL_1239527, EPI_ISL_1239529, EPI_ISL_1239531                                                                                                                                                                                                                                                                                                                                                                                                                                                                                                                                                                                                                                                                                                                                                                                                                                                        | see above | Kimberley Hospital, National Health Laboratory Services, Northern Cape, South Africa | National Institute for Communicable Diseases of the National Health Laboratory Service                                     | Amoako DG; Bhiman JN; Ismail A; Mahlangu B; Mohale T; Ntuli N; Scheepers C                                                                                                                                                                                                                                                                                                                                                                                                                |
| EPI_ISL_1015363 to 1015367, EPI_ISL_1015530                                                                                                                                                                                                                                                                                                                                                                                                                                                                                                                                                                                                                                                                                                                                                                                                                                                                                                                                                                                                                                                                                                                                                                                                                     |           | Kingston Health Sciences Centre and Queen's University                               | Ontario Institute for Cancer Research                                                                                      | Bernard Lam; Calvin Sjaarda; Felicia Vincelli; Ilinca Lungu; Jared T. Simpson; Jeremy Johns; Johns; Katya Douchant; Paul Krzyzanowski; Philip Zuzarte; Prameet M. Sheth; Richard de Borja; Robert Colautti                                                                                                                                                                                                                                                                                |
| EPI_ISL_1252692, EPI_ISL_1252696, EPI_ISL_1252703, EPI_ISL_1252726 to 1252727, EPI_ISL_1252733 to 1252734, EPI_ISL_1252739, EPI_ISL_1252744, EPI_ISL_1252809, EPI_ISL_1252815 to 1252836, EPI_ISL_1324665 to 1324727, EPI_ISL_1330158, EPI_ISL_1330191, EPI_ISL_1330199, EPI_ISL_1330201, EPI_ISL_1330204, EPI_ISL_1330206                                                                                                                                                                                                                                                                                                                                                                                                                                                                                                                                                                                                                                                                                                                                                                                                                                                                                                                                      | see above | Klaipeda University Hospital                                                         | Vilnius University Hospital Santaros Klinikos, Center of Laboratory Medicine                                               | Daniel Naumovas; Dovile Ezerskyte; Gytis Dudas; Ingrida Olendraite; Laimonas Griskevicius; Ligita Raugaite; Mindaugas Stoksus; Monika Katenaite; Rimvydas Norvilas                                                                                                                                                                                                                                                                                                                        |
| EPI_ISL_1365686 to 1365696                                                                                                                                                                                                                                                                                                                                                                                                                                                                                                                                                                                                                                                                                                                                                                                                                                                                                                                                                                                                                                                                                                                                                                                                                                      |           | Klaipeda university hospital                                                         | Lithuanian University of Health Sciences                                                                                   | Arnoldas Pautienius; Dovydas Gecys; Gediminas Alzbutas; Kamile Tamusauskaite; Lukas Zernaitis; Vaiva Lesauskaite                                                                                                                                                                                                                                                                                                                                                                          |
| EPI_ISL_1020203, EPI_ISL_1117457                                                                                                                                                                                                                                                                                                                                                                                                                                                                                                                                                                                                                                                                                                                                                                                                                                                                                                                                                                                                                                                                                                                                                                                                                                |           | Klinik Apotik Dien, Jakarta                                                          | Biosafety Level-3 Laboratory, Indonesian Institute of Sciences (LIPI)                                                      | Ade Andriani; Anik Budhi Dharmayanthi; Asep M. Ridwanuloh; Eko Wahyu Putro; Gita Syahputra; Hariyatun; Inswasti Cahyani; Matthew W. Loose; Mohammad Ilyas; Susanti; Syam Budi Iryanto; Wien Kusharyoto                                                                                                                                                                                                                                                                                    |
| EPI_ISL_1284204                                                                                                                                                                                                                                                                                                                                                                                                                                                                                                                                                                                                                                                                                                                                                                                                                                                                                                                                                                                                                                                                                                                                                                                                                                                 |           | Klinik Ciputra Medical Center                                                        | Eijkman Institute for Molecular Biology, Ministry of Research and Technology/National Agency for Research and Innovation   | Amin Soebandrio; Edison Johar; Frilasita A Yudhaputri; Hidayat Trimarsanto; Iskandar Adnan; Khin Saw Myint; Lydia V. Panggalo; Safarina G Malik; Sukma Oktavianthi; Willy Agustine                                                                                                                                                                                                                                                                                                        |
| EPI_ISL_1181337 to 1181340                                                                                                                                                                                                                                                                                                                                                                                                                                                                                                                                                                                                                                                                                                                                                                                                                                                                                                                                                                                                                                                                                                                                                                                                                                      |           | Klinikum Bielefeld Mitte                                                             | Bielefeld University                                                                                                       | Alexander Sczyrba; David Brandt; Jörn Kalinowski; Levin-Joe Klages; Marina Simunovic; Markus Haak; Svenja Vinke; Tobias Busche                                                                                                                                                                                                                                                                                                                                                            |

|                                                                                                                                                                                                                                                                                                                                                                                                                                                                                                                                                                                                                                                                                                                                                                                                                                                                                                                                                                                                                                                                                                                                                       |                                                                                                |                                                                                                                            |                                                                                                                                                                                                                                                                                                                                                                   |
|-------------------------------------------------------------------------------------------------------------------------------------------------------------------------------------------------------------------------------------------------------------------------------------------------------------------------------------------------------------------------------------------------------------------------------------------------------------------------------------------------------------------------------------------------------------------------------------------------------------------------------------------------------------------------------------------------------------------------------------------------------------------------------------------------------------------------------------------------------------------------------------------------------------------------------------------------------------------------------------------------------------------------------------------------------------------------------------------------------------------------------------------------------|------------------------------------------------------------------------------------------------|----------------------------------------------------------------------------------------------------------------------------|-------------------------------------------------------------------------------------------------------------------------------------------------------------------------------------------------------------------------------------------------------------------------------------------------------------------------------------------------------------------|
| EPI_ISL_1352266, EPI_ISL_1353123, EPI_ISL_1355235                                                                                                                                                                                                                                                                                                                                                                                                                                                                                                                                                                                                                                                                                                                                                                                                                                                                                                                                                                                                                                                                                                     | Klinikum Darmstadt GmbH                                                                        | Robert Koch Institute                                                                                                      |                                                                                                                                                                                                                                                                                                                                                                   |
| EPI_ISL_1217964 to 1217971, EPI_ISL_1217973 to 1218006, EPI_ISL_1218008 to 1218015, EPI_ISL_1218018 to 1218047, EPI_ISL_1218049 to 1218069, EPI_ISL_1218071 to 1218085, EPI_ISL_1218087 to 1218105, EPI_ISL_1218188 to 1218200, EPI_ISL_1282754 to 1282764, EPI_ISL_1285166 to 1285176, EPI_ISL_1349227 to 1349241, EPI_ISL_1357239 to 1357264                                                                                                                                                                                                                                                                                                                                                                                                                                                                                                                                                                                                                                                                                                                                                                                                        |                                                                                                |                                                                                                                            |                                                                                                                                                                                                                                                                                                                                                                   |
| see above                                                                                                                                                                                                                                                                                                                                                                                                                                                                                                                                                                                                                                                                                                                                                                                                                                                                                                                                                                                                                                                                                                                                             | Klinikum Ernst von Bergmann gemeinnützige GmbH - stationärer Bereich                           | Robert Koch Institute                                                                                                      |                                                                                                                                                                                                                                                                                                                                                                   |
| EPI_ISL_1156471, EPI_ISL_1156502, EPI_ISL_1282146, EPI_ISL_1353786                                                                                                                                                                                                                                                                                                                                                                                                                                                                                                                                                                                                                                                                                                                                                                                                                                                                                                                                                                                                                                                                                    | Klinikum Fulda gAG                                                                             | Robert Koch Institute                                                                                                      |                                                                                                                                                                                                                                                                                                                                                                   |
| EPI_ISL_1364928                                                                                                                                                                                                                                                                                                                                                                                                                                                                                                                                                                                                                                                                                                                                                                                                                                                                                                                                                                                                                                                                                                                                       | Klinikum Starnberg                                                                             | Bundeswehr Institute of Microbiology                                                                                       | Alexandra Rehn; Enrico Georgi; Malena Bestehorn-Willmann; Markus Antwerpen; Mathias Walter; Mike Pillukat; Roman Wölfel; Sabine Zange                                                                                                                                                                                                                             |
| EPI_ISL_1286893, EPI_ISL_1286895, EPI_ISL_1286897, EPI_ISL_1286900, EPI_ISL_1286902, EPI_ISL_1286904                                                                                                                                                                                                                                                                                                                                                                                                                                                                                                                                                                                                                                                                                                                                                                                                                                                                                                                                                                                                                                                  | Klinikum Stuttgart                                                                             | Robert Koch Institute                                                                                                      |                                                                                                                                                                                                                                                                                                                                                                   |
| EPI_ISL_1007993 to 1008009, EPI_ISL_1008292 to 1008298, EPI_ISL_1117777, EPI_ISL_1117788 to 1117789, EPI_ISL_1117794, EPI_ISL_1117834 to 1117835, EPI_ISL_1117840 to 1117845, EPI_ISL_1117894, EPI_ISL_1117900 to 1117901, EPI_ISL_1117904, EPI_ISL_1117909, EPI_ISL_1117921, EPI_ISL_1118050 to 1118061, EPI_ISL_1118063, EPI_ISL_1180832 to 1180838                                                                                                                                                                                                                                                                                                                                                                                                                                                                                                                                                                                                                                                                                                                                                                                                 |                                                                                                |                                                                                                                            |                                                                                                                                                                                                                                                                                                                                                                   |
| see above                                                                                                                                                                                                                                                                                                                                                                                                                                                                                                                                                                                                                                                                                                                                                                                                                                                                                                                                                                                                                                                                                                                                             | Klinikum Wels-Grieskirchen                                                                     | Bergthaler laboratory, CeMM Research Center for Molecular Medicine of the Austrian Academy of Sciences                     | Andreas Bergthaler; Anna Schedl; Bekir Erguner; Benedikt Agerer; Christoph Bock; Fabian Amman; Jan Laine; Lukas Endler; Maelle Le Moing; Martin Senekowitsch; Michael Schuster; Thomas Penz                                                                                                                                                                       |
| EPI_ISL_1153981, EPI_ISL_1154022, EPI_ISL_1157057, EPI_ISL_1283690                                                                                                                                                                                                                                                                                                                                                                                                                                                                                                                                                                                                                                                                                                                                                                                                                                                                                                                                                                                                                                                                                    | Klinikum Wolfsburg - Institut für Klinische Chemie Laboratorien- und Transfusionsmedizin       | Robert Koch Institute                                                                                                      |                                                                                                                                                                                                                                                                                                                                                                   |
| EPI_ISL_1144384 to 1144388, EPI_ISL_1148471, EPI_ISL_1148475, EPI_ISL_1148479, EPI_ISL_1148482, EPI_ISL_1148485 to 1148486, EPI_ISL_1148491, EPI_ISL_1148497, EPI_ISL_1148499, EPI_ISL_1148502, EPI_ISL_1148505 to 1148508, EPI_ISL_1216790, EPI_ISL_1216793, EPI_ISL_1216814, EPI_ISL_1216869, EPI_ISL_1216894, EPI_ISL_1216907, EPI_ISL_1216911, EPI_ISL_1216918 to 1216919, EPI_ISL_1216921, EPI_ISL_1216928, EPI_ISL_1216948, EPI_ISL_1216951, EPI_ISL_1216954, EPI_ISL_1216958, EPI_ISL_1216960, EPI_ISL_1216968, EPI_ISL_1216970, EPI_ISL_1216991, EPI_ISL_1216993, EPI_ISL_1216995, EPI_ISL_1217001, EPI_ISL_1280666 to 1280673, EPI_ISL_1280675 to 1280679, EPI_ISL_1280681 to 1280682, EPI_ISL_1280684 to 1280692, EPI_ISL_1280697 to 1280706, EPI_ISL_1280708 to 1280716, EPI_ISL_1280718 to 1280734, EPI_ISL_1280736, EPI_ISL_1284534                                                                                                                                                                                                                                                                                                      |                                                                                                |                                                                                                                            |                                                                                                                                                                                                                                                                                                                                                                   |
| see above                                                                                                                                                                                                                                                                                                                                                                                                                                                                                                                                                                                                                                                                                                                                                                                                                                                                                                                                                                                                                                                                                                                                             | Klinikum der Stadt Ludwigshafen - Institut für Labordiagnostik Hygiene und Transfusionsmedizin | Robert Koch Institute                                                                                                      |                                                                                                                                                                                                                                                                                                                                                                   |
| EPI_ISL_1259313, EPI_ISL_1265740 to 1265750, EPI_ISL_1360031 to 1360054                                                                                                                                                                                                                                                                                                                                                                                                                                                                                                                                                                                                                                                                                                                                                                                                                                                                                                                                                                                                                                                                               | Klinisch Laboratorium ZNA                                                                      | Klinisch Laboratorium ZNA                                                                                                  | Verstrepen et al.                                                                                                                                                                                                                                                                                                                                                 |
| EPI_ISL_1008459 to 1008469, EPI_ISL_1008471 to 1008478, EPI_ISL_1008552 to 1008556, EPI_ISL_1008559 to 1008585, EPI_ISL_1008598 to 1008600, EPI_ISL_1064576 to 1064580, EPI_ISL_1064583 to 1064588, EPI_ISL_1064625, EPI_ISL_1064698 to 1064699, EPI_ISL_1168052 to 1168053, EPI_ISL_1168085, EPI_ISL_1168162 to 1168167, EPI_ISL_1190856 to 1190860, EPI_ISL_1190866 to 1190867, EPI_ISL_1190881 to 1190884, EPI_ISL_1231914, EPI_ISL_1231919, EPI_ISL_1231931 to 1231939, EPI_ISL_1231948 to 1231950, EPI_ISL_1231953 to 1231956, EPI_ISL_1231958 to 1231964, EPI_ISL_1231968, EPI_ISL_1231971 to 1231976, EPI_ISL_1231982, EPI_ISL_1231984 to 1231985, EPI_ISL_1231994 to 1231996, EPI_ISL_1232015 to 1232028                                                                                                                                                                                                                                                                                                                                                                                                                                      |                                                                                                |                                                                                                                            |                                                                                                                                                                                                                                                                                                                                                                   |
| see above                                                                                                                                                                                                                                                                                                                                                                                                                                                                                                                                                                                                                                                                                                                                                                                                                                                                                                                                                                                                                                                                                                                                             | Klinisk Mikrobiologi                                                                           | The Public Health Agency of Sweden                                                                                         | Anna Risberg; Anna-Malin Linde; Carlo Berg; Karin Tegmark-Wisell; Maria Lind Karlberg; Mattias Haukland; Mia Brytting; Noura Walai; Oskar Karlsson Lindsjo; Petra Edquist; Petra Holmstrom; Reza Advani; Samuel Ohman; Sofia Stamouli                                                                                                                             |
| EPI_ISL_1008400, EPI_ISL_1008412 to 1008445, EPI_ISL_1008447 to 1008450, EPI_ISL_1008455 to 1008458, EPI_ISL_1008470, EPI_ISL_1008490 to 1008533, EPI_ISL_1008548, EPI_ISL_1008589 to 1008595, EPI_ISL_1008602, EPI_ISL_1064552 to 1064554, EPI_ISL_1064556 to 1064574, EPI_ISL_1064581 to 1064582, EPI_ISL_1064589 to 1064606, EPI_ISL_1064621 to 1064622, EPI_ISL_1064624, EPI_ISL_1064626 to 1064676, EPI_ISL_1064678 to 1064681, EPI_ISL_1064691 to 1064692, EPI_ISL_1064695 to 1064697, EPI_ISL_1064703 to 1064707, EPI_ISL_1168039 to 1168045, EPI_ISL_1168048 to 1168050, EPI_ISL_1168060 to 1168068, EPI_ISL_1168070 to 1168084, EPI_ISL_1168086 to 1168093, EPI_ISL_1168107 to 1168135, EPI_ISL_1168137 to 1168161, EPI_ISL_1168168 to 1168190, EPI_ISL_1190861 to 1190865, EPI_ISL_1190869 to 1190872, EPI_ISL_1190879, EPI_ISL_1231920 to 1231923, EPI_ISL_1231940 to 1231943, EPI_ISL_1231947, EPI_ISL_1231951, EPI_ISL_1231965 to 1231967, EPI_ISL_1231970, EPI_ISL_1231977, EPI_ISL_1231983, EPI_ISL_1231986 to 1231990, EPI_ISL_1231997 to 1232003, EPI_ISL_1232008 to 1232011, EPI_ISL_1300277 to 1300285, EPI_ISL_1300287 to 1300334 |                                                                                                |                                                                                                                            |                                                                                                                                                                                                                                                                                                                                                                   |
| see above                                                                                                                                                                                                                                                                                                                                                                                                                                                                                                                                                                                                                                                                                                                                                                                                                                                                                                                                                                                                                                                                                                                                             | Klinisk mikrobiologi                                                                           | The Public Health Agency of Sweden                                                                                         | Anna Risberg; Anna-Malin Linde; Carlo Berg; Karin Tegmark-Wisell; Maria Lind Karlberg; Mattias Haukland; Mia Brytting; Noura Walai; Oskar Karlsson Lindsjo; Petra Edquist; Petra Holmstrom; Reza Advani; Samuel Ohman; Sofia Stamouli                                                                                                                             |
| EPI_ISL_1091493 to 1091575, EPI_ISL_1093492 to 1093545, EPI_ISL_1166539 to 1166614, EPI_ISL_1224950 to 1224988, EPI_ISL_1303381 to 1303403, EPI_ISL_1305974 to 1306012, EPI_ISL_1372898 to 1372964                                                                                                                                                                                                                                                                                                                                                                                                                                                                                                                                                                                                                                                                                                                                                                                                                                                                                                                                                    |                                                                                                |                                                                                                                            |                                                                                                                                                                                                                                                                                                                                                                   |
| see above                                                                                                                                                                                                                                                                                                                                                                                                                                                                                                                                                                                                                                                                                                                                                                                                                                                                                                                                                                                                                                                                                                                                             | Klinisk mikrobiologi, Region Västerbotten                                                      | CBRN Defence and Security, Swedish Defence Research Agency                                                                 | Andreas Sjödin; Anna-Lena Johansson; Annika Allard; Annika Osterman; Caroline Öhrman; David Sundell; Emelie Näslund Salomonsson; Ingrid Dacklin; Jonas Näslund; Kerstin Myrtennäs; Linda Karlsson; Malin Granberg; Mats Forsman; Stina Bäckman                                                                                                                    |
| EPI_ISL_1064709                                                                                                                                                                                                                                                                                                                                                                                                                                                                                                                                                                                                                                                                                                                                                                                                                                                                                                                                                                                                                                                                                                                                       | Klinisk mikrobiologi, bakteriologi                                                             | The Public Health Agency of Sweden                                                                                         | Anna Risberg; Anna-Malin Linde; Carlo Berg; Karin Tegmark-Wisell; Maria Lind Karlberg; Mattias Haukland; Mia Brytting; Noura Walai; Oskar Karlsson Lindsjo; Petra Edquist; Petra Holmstrom; Reza Advani; Samuel Ohman; Sofia Stamouli                                                                                                                             |
| EPI_ISL_1231926                                                                                                                                                                                                                                                                                                                                                                                                                                                                                                                                                                                                                                                                                                                                                                                                                                                                                                                                                                                                                                                                                                                                       | Klinisk mikrobiologi, molekylar virologi                                                       | The Public Health Agency of Sweden                                                                                         | Anna Risberg; Anna-Malin Linde; Carlo Berg; Karin Tegmark-Wisell; Maria Lind Karlberg; Mattias Haukland; Mia Brytting; Noura Walai; Oskar Karlsson Lindsjo; Petra Edquist; Petra Holmstrom; Reza Advani; Sofia Stamouli                                                                                                                                           |
| EPI_ISL_1231916                                                                                                                                                                                                                                                                                                                                                                                                                                                                                                                                                                                                                                                                                                                                                                                                                                                                                                                                                                                                                                                                                                                                       | Klinisk mikrobiologi, virus F68                                                                | The Public Health Agency of Sweden                                                                                         | Anna Risberg; Anna-Malin Linde; Carlo Berg; Karin Tegmark-Wisell; Maria Lind Karlberg; Mattias Haukland; Mia Brytting; Noura Walai; Oskar Karlsson Lindsjo; Petra Edquist; Petra Holmstrom; Reza Advani; Sofia Stamouli                                                                                                                                           |
| EPI_ISL_1298475, EPI_ISL_1298478 to 1298479, EPI_ISL_1298485 to 1298486                                                                                                                                                                                                                                                                                                                                                                                                                                                                                                                                                                                                                                                                                                                                                                                                                                                                                                                                                                                                                                                                               | Kosov CRH                                                                                      | The Institute of Molecular Biology and Genetics of NASU                                                                    | M.Tukalo et al.                                                                                                                                                                                                                                                                                                                                                   |
| EPI_ISL_1072962                                                                                                                                                                                                                                                                                                                                                                                                                                                                                                                                                                                                                                                                                                                                                                                                                                                                                                                                                                                                                                                                                                                                       | Kota Nopan Primary Health Centre, Mandailing Natal District                                    | Institute of Tropical Disease, Universitas Airlangga; Faculty of Medicine, Universitas Sumatera Utara                      | Aldise M Nastri; Franciscus Ginting; Inke N D Lubis; Irbah R Nainggolan; Jezy R Dewantari; Kazufumi Shimizu; Krisnoadi Rahardjo; Maria I Lusida; Mellani; Mirzan Hasibuan; Muhammad Ichwan; R Andika D Cahyadi; R Lia Kusumawati; Ramadhan Bestari; Rima R Prasetya; Soetjipto; Yasuko Mori                                                                       |
| EPI_ISL_1103556 to 1103557                                                                                                                                                                                                                                                                                                                                                                                                                                                                                                                                                                                                                                                                                                                                                                                                                                                                                                                                                                                                                                                                                                                            | Kurnool Medical College (KMC)                                                                  | CSIR Institute of Genomics and Integrative Biology                                                                         | Abhinav Jain; Avileli Surekha; Bani Jolly; Damam Srinivasulu; Juturu Vijaya Lakshmi; Mohamed Imran; Mohit Kumar Divakar; PR Vanaja; Pallavali Roja Rani; Pulala Chandrasekhar; Rahul C Bhojar; Sridhar Sivasubbu; Vigneshwar Senthivel; Vinod Scaria                                                                                                              |
| EPI_ISL_1040674                                                                                                                                                                                                                                                                                                                                                                                                                                                                                                                                                                                                                                                                                                                                                                                                                                                                                                                                                                                                                                                                                                                                       | Kwamandlenkosi Clinic wc KMN                                                                   | NHLS/UCT                                                                                                                   | Arash Iranzadeh; Bruna Galvao; Carolyn Williamson; Deelan Doolabh; Diana Hardie; Innocent Mudau; Kruger Marais; Lynn Tyers; Marvin Hsiao; Stephen Korsman                                                                                                                                                                                                         |
| EPI_ISL_1061406, EPI_ISL_1061408                                                                                                                                                                                                                                                                                                                                                                                                                                                                                                                                                                                                                                                                                                                                                                                                                                                                                                                                                                                                                                                                                                                      | Kwong Wah Hospital                                                                             | Hong Kong Children's Hospital                                                                                              | David Christopher Lung; Garnet Kwan-Yue Choi; Herman Tse; Sally Cheuk-Ying Wong                                                                                                                                                                                                                                                                                   |
| EPI_ISL_1336911                                                                                                                                                                                                                                                                                                                                                                                                                                                                                                                                                                                                                                                                                                                                                                                                                                                                                                                                                                                                                                                                                                                                       | L'AQUILONE                                                                                     | Istituto Zooprofilattico Sperimentale dell'Abruzzo e Molise "G. Caporale"                                                  | Ancora M; Calistri P; Cammà C; Caporale M; Curini V; Di Domenico M; Di Lollo Valeria; Di Pasquale A; Lorusso A; Mangone I; Marcacci M; Puglia I; Rinaldi A; Savini G; Scialabba S                                                                                                                                                                                 |
| EPI_ISL_1371870                                                                                                                                                                                                                                                                                                                                                                                                                                                                                                                                                                                                                                                                                                                                                                                                                                                                                                                                                                                                                                                                                                                                       | L.B.M. BIOESTEREL                                                                              | CNR Virus des Infections Respiratoires - France SUD                                                                        | Antonin Bal; Bruno Lina; Gregory Destras; Gwendolyne Burfin; Hadrien Regue; Laurence Josset; Martine Valette; Quentin Semanas                                                                                                                                                                                                                                     |
| EPI_ISL_1272782 to 1272797, EPI_ISL_1318623 to 1318633                                                                                                                                                                                                                                                                                                                                                                                                                                                                                                                                                                                                                                                                                                                                                                                                                                                                                                                                                                                                                                                                                                | LA Office of Public Health Laboratories                                                        | Centers for Disease Control and Prevention Division of Viral Diseases, Pathogen Discovery                                  | Anna Montmayeur; Anna Uehara; Ben L. Rambo-Martin; Clinton R. Paden; Dhvani Batra; Haibin Wang; Jasmine Padilla; Jing Zhang; Justin Lee; Katie Dillon; Krista Queen; Kristen Knipe; Kristine Lacek; Lori Rowe; Mark Burroughs; Matthew Schmerer; Mili Sheth; Peter W. Cook; Rachel Marine; Sam Shepard; Sarah Nobles; Shoshona Le; Suxiang Tong; Yan Li; Ying Tao |
| EPI_ISL_1318222 to 1318223, EPI_ISL_1318225, EPI_ISL_1318227 to 1318229, EPI_ISL_1318232, EPI_ISL_1318235, EPI_ISL_1318237, EPI_ISL_1318240 to 1318244, EPI_ISL_1318246, EPI_ISL_1318250, EPI_ISL_1318254, EPI_ISL_1318260 to 1318261, EPI_ISL_1318263 to 1318264, EPI_ISL_1323118                                                                                                                                                                                                                                                                                                                                                                                                                                                                                                                                                                                                                                                                                                                                                                                                                                                                    |                                                                                                |                                                                                                                            |                                                                                                                                                                                                                                                                                                                                                                   |
| see above                                                                                                                                                                                                                                                                                                                                                                                                                                                                                                                                                                                                                                                                                                                                                                                                                                                                                                                                                                                                                                                                                                                                             | LA Office of Public Health Laboratories                                                        | Genomics and Discovery, Respiratory Viruses Branch, Division of Viral Diseases, Centers for Disease Control and Prevention | Anna Kelleher; Anna Uehara; Brian Lynch; Clinton R. Paden; Haibin Wang; Han Jia Justin Ng; Jing Zhang; Krista Queen; Peter Cook; Suxiang Tong; Yan Li; Ying Tao                                                                                                                                                                                                   |
| EPI_ISL_1008897 to 1008900, EPI_ISL_1008921 to 1008923, EPI_ISL_1196872 to 1196885                                                                                                                                                                                                                                                                                                                                                                                                                                                                                                                                                                                                                                                                                                                                                                                                                                                                                                                                                                                                                                                                    | LA Office of Public Health Laboratories                                                        | Pathogen Discovery, Respiratory Viruses Branch, Division of Viral Diseases, Centers for Disease Control and Prevention     | Anna Kelleher; Anna Uehara; Brian Lynch; Clinton R. Paden; Haibin Wang; Han Jia Justin Ng; Jing Zhang; Krista Queen; Peter Cook; Suxiang Tong; Yan Li; Ying Tao                                                                                                                                                                                                   |
| EPI_ISL_1094235 to 1094236, EPI_ISL_1094333, EPI_ISL_1094410 to 1094412, EPI_ISL_1094871 to 1094887,                                                                                                                                                                                                                                                                                                                                                                                                                                                                                                                                                                                                                                                                                                                                                                                                                                                                                                                                                                                                                                                  | LA Office of Public Health Laboratories                                                        | Respiratory Viruses Branch, Division of Viral Diseases, Centers for Disease Control and Prevention                         | Anna Montmayeur; Anna Uehara; Ben L. Rambo-Martin; Clinton R. Paden; Dhvani Batra; Haibin Wang; Jasmine Padilla; Jing Zhang; Justin Lee; Krista Queen; Lori Rowe; Mark Burroughs; Mili Sheth; Peter W. Cook; Rachel Marine; Sarah Nobles; Suxiang Tong; Yan Li; Ying Tao                                                                                          |



|                                                                                                                                                                                                                                                                          |           |                                                              |                                                                                                                                                                                                                                                                                                                                                                                                                                                                                                                                                                              |
|--------------------------------------------------------------------------------------------------------------------------------------------------------------------------------------------------------------------------------------------------------------------------|-----------|--------------------------------------------------------------|------------------------------------------------------------------------------------------------------------------------------------------------------------------------------------------------------------------------------------------------------------------------------------------------------------------------------------------------------------------------------------------------------------------------------------------------------------------------------------------------------------------------------------------------------------------------------|
| EPI_ISL_1095260 to 1095261                                                                                                                                                                                                                                               |           |                                                              |                                                                                                                                                                                                                                                                                                                                                                                                                                                                                                                                                                              |
| EPI_ISL_1007632, EPI_ISL_1120842, EPI_ISL_1120845 to 1120854, EPI_ISL_1370037, EPI_ISL_1370109, EPI_ISL_1370171, EPI_ISL_1370258, EPI_ISL_1370374                                                                                                                        | see above | LA SOURCE                                                    | Laboratory of genomics and metagenomics, Institute of Microbiology, University Hospital Centre and University of Lausanne, Switzerland                                                                                                                                                                                                                                                                                                                                                                                                                                       |
|                                                                                                                                                                                                                                                                          |           |                                                              | Claire Bertelli; Damien Jacot; Gilbert Greub; Sébastien Aeby; Trestan Pillonel                                                                                                                                                                                                                                                                                                                                                                                                                                                                                               |
| EPI_ISL_1359972                                                                                                                                                                                                                                                          |           | LAB 77                                                       | CNR Virus des Infections Respiratoires - France SUD                                                                                                                                                                                                                                                                                                                                                                                                                                                                                                                          |
| EPI_ISL_1118159 to 1118204, EPI_ISL_1121034 to 1121036                                                                                                                                                                                                                   |           | LAB ANALISI PO CARDARELLI CAMPOBASSO                         | Istituto Zooprofilattico Sperimentale dell'Abruzzo e Molise "G. Caporale"                                                                                                                                                                                                                                                                                                                                                                                                                                                                                                    |
| EPI_ISL_1110581 to 1110595                                                                                                                                                                                                                                               |           | LAB ANALISI PO CARDARELLI CB                                 | Istituto Zooprofilattico Sperimentale dell'Abruzzo e Molise "G. Caporale"                                                                                                                                                                                                                                                                                                                                                                                                                                                                                                    |
| EPI_ISL_1359896 to 1359900, EPI_ISL_1371890 to 1371892                                                                                                                                                                                                                   |           | LABAZUR NICE L'ARIANE                                        | CNR Virus des Infections Respiratoires - France SUD                                                                                                                                                                                                                                                                                                                                                                                                                                                                                                                          |
| EPI_ISL_1137459, EPI_ISL_1137475 to 1137477, EPI_ISL_1158060 to 1158062                                                                                                                                                                                                  |           | LABDIS-UAGro                                                 | Instituto Nacional de Medicina Genomica                                                                                                                                                                                                                                                                                                                                                                                                                                                                                                                                      |
|                                                                                                                                                                                                                                                                          |           |                                                              | Adolfo Roman-Roman; Alcaraz N; Azucena D. Alvarez-Diaz; Berenice Illades-Aguir; Cedro-Tanda A; Cirestheil Bello-Rios; Cisneros-Villanueva M; Daniel Hernandez-Sotelo; Fredy O Beltran-Anaya; Gladys W. Valente-Nio; Gonzalez-Barrera D; Herrera-Montalvo LA; Hidalgo-Miranda A; Hugo A. Rodriguez-Ruiz; Jacqueline Loeaza-Loeza; Julio C. Azucar-Hesiquio; Luis I. Basilio-Leyva.; Madian Valadez-Quinones; Marco Antonio-Leyva; Mendoza-Vargas A; Oscar del Moral-Hernandez; Ramirez-Vega O; Rangel-DeLeon D; Reyes-Grajeda JP; Roberto Dircio-Maldonado; Sifuentes-Rojas C |
| EPI_ISL_1336475, EPI_ISL_1336633                                                                                                                                                                                                                                         |           | LABM                                                         | CNR Virus des Infections Respiratoires - France SUD                                                                                                                                                                                                                                                                                                                                                                                                                                                                                                                          |
| EPI_ISL_1360009, EPI_ISL_1360016, EPI_ISL_1371850 to 1371852                                                                                                                                                                                                             |           | LABM BIOMEDIAVAL                                             | CNR Virus des Infections Respiratoires - France SUD                                                                                                                                                                                                                                                                                                                                                                                                                                                                                                                          |
| EPI_ISL_1085290 to 1085291, EPI_ISL_1085317, EPI_ISL_1085404                                                                                                                                                                                                             |           | LABM SAINT MARTIN                                            | Department of Virology, Henri Mondor University Hospital, Assistance Publique Hôpitaux de Paris, Université Paris-Est Créteil, INSERM U955                                                                                                                                                                                                                                                                                                                                                                                                                                   |
|                                                                                                                                                                                                                                                                          |           |                                                              | Alexandre Soulier; Christophe Rodriguez; Elisabeth Trawinski; Guillaume Gricourt; Jean-Michel Pawlowsky; Melissa N'Debi; Slim Fourati; Vanessa Demontant                                                                                                                                                                                                                                                                                                                                                                                                                     |
| EPI_ISL_1336630 to 1336631, EPI_ISL_1359995, EPI_ISL_1360003 to 1360004                                                                                                                                                                                                  |           | LABO HOSPILAB 47 SITE D AGEN                                 | CNR Virus des Infections Respiratoires - France SUD                                                                                                                                                                                                                                                                                                                                                                                                                                                                                                                          |
|                                                                                                                                                                                                                                                                          |           |                                                              | Antonin Bal; Bruno Lina; Gregory Destras; Gwendolynne Burfin; Hadrien Regue; Laurence Josset; Martine Valette; Quentin Semanas                                                                                                                                                                                                                                                                                                                                                                                                                                               |
| EPI_ISL_1336558, EPI_ISL_1336637 to 1336644, EPI_ISL_1371844 to 1371846                                                                                                                                                                                                  |           | LABO SUD OC-BIOLOGIE                                         | CNR Virus des Infections Respiratoires - France SUD                                                                                                                                                                                                                                                                                                                                                                                                                                                                                                                          |
|                                                                                                                                                                                                                                                                          |           |                                                              | Antonin Bal; Bruno Lina; Gregory Destras; Gwendolynne Burfin; Hadrien Regue; Laurence Josset; Martine Valette; Quentin Semanas                                                                                                                                                                                                                                                                                                                                                                                                                                               |
| EPI_ISL_1147555 to 1147556, EPI_ISL_1151781, EPI_ISL_1157261, EPI_ISL_1217618, EPI_ISL_1217652, EPI_ISL_1217702, EPI_ISL_1285088, EPI_ISL_1285090, EPI_ISL_1285105, EPI_ISL_1354368, EPI_ISL_1354387, EPI_ISL_1354393, EPI_ISL_1354409, EPI_ISL_1354416, EPI_ISL_1354469 | see above | LABOR CHEMNITZ - Zentrum für Diagnostik am Klinikum Chemnitz | Robert Koch Institute                                                                                                                                                                                                                                                                                                                                                                                                                                                                                                                                                        |
| EPI_ISL_1336527, EPI_ISL_1336535                                                                                                                                                                                                                                         |           | LABORATOIRE LABOSUD BIO 2000                                 | CNR Virus des Infections Respiratoires - France SUD                                                                                                                                                                                                                                                                                                                                                                                                                                                                                                                          |
| EPI_ISL_1336522, EPI_ISL_1371839 to 1371842                                                                                                                                                                                                                              |           | LABORATOIRE ACCOLAB SUD OUEST                                | CNR Virus des Infections Respiratoires - France SUD                                                                                                                                                                                                                                                                                                                                                                                                                                                                                                                          |
| EPI_ISL_1312950 to 1312951, EPI_ISL_1312989, EPI_ISL_1313016 to 1313017, EPI_ISL_1313039 to 1313043                                                                                                                                                                      |           | LABORATOIRE ALPIGENE                                         | CNR Virus des Infections Respiratoires - France SUD                                                                                                                                                                                                                                                                                                                                                                                                                                                                                                                          |
| EPI_ISL_1313091 to 1313092, EPI_ISL_1336566, EPI_ISL_1359792, EPI_ISL_1359894                                                                                                                                                                                            |           | LABORATOIRE ANABIO BERGSON                                   | CNR Virus des Infections Respiratoires - France SUD                                                                                                                                                                                                                                                                                                                                                                                                                                                                                                                          |
| EPI_ISL_1135045                                                                                                                                                                                                                                                          |           | LABORATOIRE BIOAXIOME                                        | CNR Virus des Infections Respiratoires - France SUD                                                                                                                                                                                                                                                                                                                                                                                                                                                                                                                          |
| EPI_ISL_1322337                                                                                                                                                                                                                                                          |           | LABORATOIRE BIOAXIOME MAZAN                                  | CNR Virus des Infections Respiratoires - France SUD                                                                                                                                                                                                                                                                                                                                                                                                                                                                                                                          |
| EPI_ISL_1190838 to 1190839                                                                                                                                                                                                                                               |           | LABORATOIRE BIOESTEREL                                       | CNR Virus des Infections Respiratoires - France SUD                                                                                                                                                                                                                                                                                                                                                                                                                                                                                                                          |
| EPI_ISL_1135046 to 1135052, EPI_ISL_1359915                                                                                                                                                                                                                              |           | LABORATOIRE BIOFUSION                                        | CNR Virus des Infections Respiratoires - France SUD                                                                                                                                                                                                                                                                                                                                                                                                                                                                                                                          |
| EPI_ISL_1371764 to 1371765                                                                                                                                                                                                                                               |           | LABORATOIRE BIOPTTEAM - BOURG EN BRESSE (LALANDE)            | CNR Virus des Infections Respiratoires - France SUD                                                                                                                                                                                                                                                                                                                                                                                                                                                                                                                          |
| EPI_ISL_1322356, EPI_ISL_1322386, EPI_ISL_1359791, EPI_ISL_1359893, EPI_ISL_1359932, EPI_ISL_1359983, EPI_ISL_1359985 to 1359986, EPI_ISL_1359988, EPI_ISL_1371791 to 1371795                                                                                            | see above | LABORATOIRE BOUVIER                                          | CNR Virus des Infections Respiratoires - France SUD                                                                                                                                                                                                                                                                                                                                                                                                                                                                                                                          |
| EPI_ISL_1336572, EPI_ISL_1336624, EPI_ISL_1371804                                                                                                                                                                                                                        |           | LABORATOIRE CANARELLI-FERNANDEZ                              | CNR Virus des Infections Respiratoires - France SUD                                                                                                                                                                                                                                                                                                                                                                                                                                                                                                                          |
| EPI_ISL_1322351, EPI_ISL_1322392, EPI_ISL_1322394 to 1322396, EPI_ISL_1322418 to 1322422, EPI_ISL_1360395 to 1360398                                                                                                                                                     |           | LABORATOIRE CBM DE MURET                                     | CNR Virus des Infections Respiratoires - France SUD                                                                                                                                                                                                                                                                                                                                                                                                                                                                                                                          |
| EPI_ISL_1165966 to 1165967, EPI_ISL_1336598, EPI_ISL_1336600 to 1336603                                                                                                                                                                                                  |           | LABORATOIRE CERBALLIANE PTL VILLON                           | CNR Virus des Infections Respiratoires - France SUD                                                                                                                                                                                                                                                                                                                                                                                                                                                                                                                          |
| EPI_ISL_1313005                                                                                                                                                                                                                                                          |           | LABORATOIRE CERDIBIO-CHARENTES                               | CNR Virus des Infections Respiratoires - France SUD                                                                                                                                                                                                                                                                                                                                                                                                                                                                                                                          |
| EPI_ISL_1322345, EPI_ISL_1322393, EPI_ISL_1336634 to 1336635, EPI_ISL_1371837                                                                                                                                                                                            |           | LABORATOIRE CREAVALLEE                                       | CNR Virus des Infections Respiratoires - France SUD                                                                                                                                                                                                                                                                                                                                                                                                                                                                                                                          |
| EPI_ISL_1359996                                                                                                                                                                                                                                                          |           | LABORATOIRE DE L'OSPEDALE - 2A 2B                            | CNR Virus des Infections Respiratoires - France SUD                                                                                                                                                                                                                                                                                                                                                                                                                                                                                                                          |
| EPI_ISL_1371871                                                                                                                                                                                                                                                          |           | LABORATOIRE DE LA LONDE                                      | CNR Virus des Infections Respiratoires - France SUD                                                                                                                                                                                                                                                                                                                                                                                                                                                                                                                          |
| EPI_ISL_1371873                                                                                                                                                                                                                                                          |           | LABORATOIRE DEPARTEMENTAL D'ANALYSES                         | CNR Virus des Infections Respiratoires - France SUD                                                                                                                                                                                                                                                                                                                                                                                                                                                                                                                          |
| EPI_ISL_1371780                                                                                                                                                                                                                                                          |           | LABORATOIRE DES CANUTS - DYOMEDEA                            | CNR Virus des Infections Respiratoires - France SUD                                                                                                                                                                                                                                                                                                                                                                                                                                                                                                                          |
| EPI_ISL_1359943                                                                                                                                                                                                                                                          |           | LABORATOIRE DU C.H.A.R.M.E.                                  | CNR Virus des Infections Respiratoires - France SUD                                                                                                                                                                                                                                                                                                                                                                                                                                                                                                                          |
| EPI_ISL_1359970                                                                                                                                                                                                                                                          |           | LABORATOIRE FORESTIER                                        | CNR Virus des Infections Respiratoires - France SUD                                                                                                                                                                                                                                                                                                                                                                                                                                                                                                                          |
| EPI_ISL_1322352                                                                                                                                                                                                                                                          |           | LABORATOIRE JAMET                                            | CNR Virus des Infections Respiratoires - France SUD                                                                                                                                                                                                                                                                                                                                                                                                                                                                                                                          |
| EPI_ISL_1190815                                                                                                                                                                                                                                                          |           | LABORATOIRE LABOSUD BIO 2000                                 | CNR Virus des Infections Respiratoires - France SUD                                                                                                                                                                                                                                                                                                                                                                                                                                                                                                                          |

|                                                                                                                                                                                                     |                                                                     |                                                                                                                     |                                                                                                                                                                                                                                                                                                               |
|-----------------------------------------------------------------------------------------------------------------------------------------------------------------------------------------------------|---------------------------------------------------------------------|---------------------------------------------------------------------------------------------------------------------|---------------------------------------------------------------------------------------------------------------------------------------------------------------------------------------------------------------------------------------------------------------------------------------------------------------|
| EPI_ISL_1265846                                                                                                                                                                                     | LABORATOIRE LARTAUD et MONNERY                                      | CNR Virus des Infections Respiratoires - France SUD                                                                 | Antonin Bal; Bruno Lina; Gregory Destras; Gwendolynne Burfin; Hadrien Regue; Laurence Josset; Martine Valette; Quentin Semanas                                                                                                                                                                                |
| EPI_ISL_1336534, EPI_ISL_1336607                                                                                                                                                                    | LABORATOIRE MAYMAT                                                  | CNR Virus des Infections Respiratoires - France SUD                                                                 | Antonin Bal; Bruno Lina; Gregory Destras; Gwendolynne Burfin; Hadrien Regue; Laurence Josset; Martine Valette; Quentin Semanas                                                                                                                                                                                |
| EPI_ISL_1371763                                                                                                                                                                                     | LABORATOIRE MIRIALIS BELLEGARDE                                     | CNR Virus des Infections Respiratoires - France SUD                                                                 | Antonin Bal; Bruno Lina; Gregory Destras; Gwendolynne Burfin; Hadrien Regue; Laurence Josset; Martine Valette; Quentin Semanas                                                                                                                                                                                |
| EPI_ISL_1336537 to 1336539,<br>EPI_ISL_1336552 to 1336557,<br>EPI_ISL_1336567                                                                                                                       | LABORATOIRE MULTISITE VIALLE                                        | CNR Virus des Infections Respiratoires - France SUD                                                                 | Antonin Bal; Bruno Lina; Gregory Destras; Gwendolynne Burfin; Hadrien Regue; Laurence Josset; Martine Valette; Quentin Semanas                                                                                                                                                                                |
| EPI_ISL_1201857 to 1201866,<br>EPI_ISL_1313168, EPI_ISL_1313713,<br>EPI_ISL_1313923, EPI_ISL_1336613 to<br>1336618, EPI_ISL_1371800 to 1371803                                                      | LABORATOIRE NOVELAB                                                 | CNR Virus des Infections Respiratoires - France SUD                                                                 | Antonin Bal; Bruno Lina; Gregory Destras; Gwendolynne Burfin; Hadrien Regue; Laurence Josset; Martine Valette; Quentin Semanas                                                                                                                                                                                |
| EPI_ISL_1265760, EPI_ISL_1265785,<br>EPI_ISL_1265880 to 1265882                                                                                                                                     | LABORATOIRE ORIADE                                                  | CNR Virus des Infections Respiratoires - France SUD                                                                 | Antonin Bal; Bruno Lina; Gregory Destras; Gwendolynne Burfin; Hadrien Regue; Laurence Josset; Martine Valette; Quentin Semanas                                                                                                                                                                                |
| EPI_ISL_1322331                                                                                                                                                                                     | LABORATOIRE REPUBLIQUE                                              | CNR Virus des Infections Respiratoires - France SUD                                                                 | Antonin Bal; Bruno Lina; Gregory Destras; Gwendolynne Burfin; Hadrien Regue; Laurence Josset; Martine Valette; Quentin Semanas                                                                                                                                                                                |
| EPI_ISL_1336524, EPI_ISL_1336645,<br>EPI_ISL_1359919, EPI_ISL_1359921 to<br>1359923                                                                                                                 | LABORATOIRE SYNERGIE                                                | CNR Virus des Infections Respiratoires - France SUD                                                                 | Antonin Bal; Bruno Lina; Gregory Destras; Gwendolynne Burfin; Hadrien Regue; Laurence Josset; Martine Valette; Quentin Semanas                                                                                                                                                                                |
| EPI_ISL_1322389, EPI_ISL_1359751,<br>EPI_ISL_1359914                                                                                                                                                | LABORATOIRE SYNLAB BARLA                                            | CNR Virus des Infections Respiratoires - France SUD                                                                 | Antonin Bal; Bruno Lina; Gregory Destras; Gwendolynne Burfin; Hadrien Regue; Laurence Josset; Martine Valette; Quentin Semanas                                                                                                                                                                                |
| EPI_ISL_1371779                                                                                                                                                                                     | LABORATOIRE UNILIANS DECINES                                        | CNR Virus des Infections Respiratoires - France SUD                                                                 | Antonin Bal; Bruno Lina; Gregory Destras; Gwendolynne Burfin; Hadrien Regue; Laurence Josset; Martine Valette; Quentin Semanas                                                                                                                                                                                |
| EPI_ISL_1322339, EPI_ISL_1359924                                                                                                                                                                    | LABORATOIRE d'ANALYSES de BIOLOGIE MEDICALES                        | CNR Virus des Infections Respiratoires - France SUD                                                                 | Antonin Bal; Bruno Lina; Gregory Destras; Gwendolynne Burfin; Hadrien Regue; Laurence Josset; Martine Valette; Quentin Semanas                                                                                                                                                                                |
| EPI_ISL_1360017                                                                                                                                                                                     | LABORATOIRE- BIOESTERL                                              | CNR Virus des Infections Respiratoires - France SUD                                                                 | Antonin Bal; Bruno Lina; Gregory Destras; Gwendolynne Burfin; Hadrien Regue; Laurence Josset; Martine Valette; Quentin Semanas                                                                                                                                                                                |
| EPI_ISL_1220055 to 1220057                                                                                                                                                                          | LABORATORIO BIOLOGIA MOLECULAR IMAT SAS                             | Instituto Nacional de Salud- Dirección de Investigación en Salud Pública                                            | Carlos Franco-Muñoz; Diego A. Álvarez-Díaz; Diego Andrés Prada; Gerardo Santamaría; Hector Alejandro Ruiz-Moreno; Jhonnatan Reales-González; Julian Naizaque; Katherine Laiton-Donato; Magdalena Wiesner; Marcela Mercado-Reyes.; Maria T. Herrera-Sepúlveda; Martha Lucia Ospina Martínez; Sheryll Corchuelo |
| EPI_ISL_1196426 to 1196427                                                                                                                                                                          | LABORATORIO CLINICO CENAHCE                                         | Incienza, Instituto Costarricense de Investigación y Enseñanza en Nutrición y Salud                                 | Adriana Godínez; Claudio Soto-Garita; Estela Cordero; Francisco Duarte; Hebleen Porras; Melany Calderón & Andrés Feoli-Grant                                                                                                                                                                                  |
| EPI_ISL_1067593, EPI_ISL_1067620,<br>EPI_ISL_1196432, EPI_ISL_1379393,<br>EPI_ISL_1379427                                                                                                           | LABORATORIO CLINICO LABIN                                           | Incienza, Instituto Costarricense de Investigación y Enseñanza en Nutrición y Salud                                 | Adriana Godínez; Adriana Godínez & Melany Calderón; Caterina Guzmán; Claudio Soto-Garita; Estela Cordero; Francisco Duarte; Hebleen Porras; Melany Calderón; Melany Calderón & David Rodríguez-Masís; Melany Calderón & Pei Ling Chan Ma; Nazareth Ruiz & Pei Ling Chan Ma                                    |
| EPI_ISL_1220048                                                                                                                                                                                     | LABORATORIO CLÍNICO FUNDACIÓN HOSPITAL SAN PEDRO                    | Instituto Nacional de Salud- Dirección de Investigación en Salud Pública                                            | Carlos Franco-Muñoz; Diego A. Álvarez-Díaz; Diego Andrés Prada; Gerardo Santamaría; Hector Alejandro Ruiz-Moreno; Jhonnatan Reales-González; Julian Naizaque; Katherine Laiton-Donato; Magdalena Wiesner; Marcela Mercado-Reyes.; Maria T. Herrera-Sepúlveda; Martha Lucia Ospina Martínez; Sheryll Corchuelo |
| EPI_ISL_1239554, EPI_ISL_1239560, EPI_ISL_1239563, EPI_ISL_1239583 to 1239584, EPI_ISL_1239624, EPI_ISL_1239656 to 1239660, EPI_ISL_1239705, EPI_ISL_1239724 to 1239726, EPI_ISL_1239728 to 1239729 | LABORATORIUM BADA KLINICZNYCH WSSE w OPOLU                          | 1. National Institute of Public Health - National Institute of Hygiene; 2. Eurofins Genomics Europe Sequencing GmbH | ECDC COVID-19 WGS support team; Eurofins Genomics Europe Sequencing Team; Gierczyk Rafa; Sadkowska-Todys Magorzata; Wokowicz Tomasz; Zacharczuk Katarzyna                                                                                                                                                     |
| EPI_ISL_1359948, EPI_ISL_1359951,<br>EPI_ISL_1360012 to 1360013,<br>EPI_ISL_1371847                                                                                                                 | LABOSUD                                                             | CNR Virus des Infections Respiratoires - France SUD                                                                 | Antonin Bal; Bruno Lina; Gregory Destras; Gwendolynne Burfin; Hadrien Regue; Laurence Josset; Martine Valette; Quentin Semanas                                                                                                                                                                                |
| EPI_ISL_1313049 to 1313051,<br>EPI_ISL_1313150                                                                                                                                                      | LABOSUD PROVENCE                                                    | CNR Virus des Infections Respiratoires - France SUD                                                                 | Antonin Bal; Bruno Lina; Gregory Destras; Gwendolynne Burfin; Hadrien Regue; Laurence Josset; Martine Valette; Quentin Semanas                                                                                                                                                                                |
| EPI_ISL_1261698 to 1261699                                                                                                                                                                          | LACEN - Laboratório Central de Saúde Pública de Pernambuco          | Evandro Chagas Institute                                                                                            | A.M.; Barbagelata; E.C.; E.M.A.; Ferreira; J.A.; Junior; K.C.; L.C.; L.S.; M.C.; P.S.; Pinheiro; Santos; Silva; Sousa; Sousa Junior; W.D.C.; da Silva                                                                                                                                                         |
| EPI_ISL_1261687                                                                                                                                                                                     | LACEN - Laboratório Central de Saúde Pública de Roraima             | Evandro Chagas Institute                                                                                            | A.M.; Barbagelata; E.C.; E.M.A.; Ferreira; J.A.; Junior; K.C.; L.C.; L.S.; M.C.; P.S.; Pinheiro; Santos; Silva; Sousa; Sousa Junior; W.D.C.; da Silva                                                                                                                                                         |
| EPI_ISL_1164976, EPI_ISL_1164981 to 1164982, EPI_ISL_1164984 to 1164985, EPI_ISL_1261686, EPI_ISL_1261688, EPI_ISL_1261689, EPI_ISL_1261692, EPI_ISL_1261695 to 1261696                             | LACEN - Laboratório Central de Saúde Pública do Amapá               | Evandro Chagas Institute                                                                                            | A.M.; Barbagelata; E.C.; E.M.A.; Ferreira; J.A.; Junior; K.C.; L.C.; L.S.; M.C.; P.S.; Pinheiro; Santos; Silva; Sousa; Sousa Junior; W.D.C.; da Silva                                                                                                                                                         |
| EPI_ISL_1261683, EPI_ISL_1261685,<br>EPI_ISL_1261690, EPI_ISL_1261694                                                                                                                               | LACEN - Laboratório Central de Saúde Pública do Amazonas            | Evandro Chagas Institute                                                                                            | A.M.; Barbagelata; E.C.; E.M.A.; Ferreira; J.A.; Junior; K.C.; L.C.; L.S.; M.C.; P.S.; Pinheiro; Santos; Silva; Sousa; Sousa Junior; W.D.C.; da Silva                                                                                                                                                         |
| EPI_ISL_1164970 to 1164971, EPI_ISL_1164973, EPI_ISL_1164980, EPI_ISL_1164986, EPI_ISL_1164993, EPI_ISL_1164995, EPI_ISL_1261684, EPI_ISL_1261693, EPI_ISL_1261697                                  | LACEN - Laboratório Central de Saúde Pública do Ceará               | Evandro Chagas Institute                                                                                            | A.M.; Barbagelata; E.C.; E.M.A.; Ferreira; J.A.; Junior; K.C.; L.C.; L.S.; M.C.; P.S.; Pinheiro; Santos; Silva; Sousa; Sousa Junior; W.D.C.; da Silva                                                                                                                                                         |
| EPI_ISL_1086373 to 1086374,<br>EPI_ISL_1164979, EPI_ISL_1164996,<br>EPI_ISL_1164998, EPI_ISL_1261700                                                                                                | LACEN - Laboratório Central de Saúde Pública do Maranhao            | Evandro Chagas Institute                                                                                            | A.M.; Barbagelata; E.C.; E.M.A.; Ferreira; J.A.; Junior; K.C.; L.C.; L.S.; M.C.; P.S.; Pinheiro; Santos; Silva; Sousa; Sousa Junior; W.D.C.; da Silva                                                                                                                                                         |
| EPI_ISL_1086377, EPI_ISL_1164989 to<br>1164992, EPI_ISL_1164994, EPI_ISL_1164999                                                                                                                    | LACEN - Laboratório Central de Saúde Pública do Paraíba             | Evandro Chagas Institute                                                                                            | A.M.; Barbagelata; E.C.; E.M.A.; Ferreira; J.A.; Junior; K.C.; L.C.; L.S.; M.C.; P.S.; Pinheiro; Santos; Silva; Sousa; Sousa Junior; W.D.C.; da Silva                                                                                                                                                         |
| EPI_ISL_1164972, EPI_ISL_1164974 to<br>1164975, EPI_ISL_1164978, EPI_ISL_1164983                                                                                                                    | LACEN - Laboratório Central de Saúde Pública do Pará                | Evandro Chagas Institute                                                                                            | A.M.; Barbagelata; E.C.; E.M.A.; Ferreira; J.A.; Junior; K.C.; L.C.; L.S.; M.C.; P.S.; Pinheiro; Santos; Silva; Sousa; Sousa Junior; W.D.C.; da Silva                                                                                                                                                         |
| EPI_ISL_1166615                                                                                                                                                                                     | LACEN - Laboratório Central de Saúde Pública do Rio Grande do Norte | Evandro Chagas Institute Virology                                                                                   | A.M.; Barbagelata; E.C.; E.M.A.; Ferreira; J.A.; Junior; K.C.; L.C.; L.S.; M.C.; P.S.; Pinheiro; Santos; Silva; Sousa; Sousa Junior; W.D.C.; da Silva                                                                                                                                                         |
| EPI_ISL_1086375 to 1086376,<br>EPI_ISL_1164977, EPI_ISL_1164987 to<br>1164988, EPI_ISL_1164997                                                                                                      | LACEN - Laboratório Central de Saúde Pública do Rio Grande do Norte | Evandro Chagas Institute                                                                                            | A.M.; Barbagelata; E.C.; E.M.A.; Ferreira; J.A.; Junior; K.C.; L.C.; L.S.; M.C.; P.S.; Pinheiro; Santos; Silva; Sousa; Sousa Junior; W.D.C.; da Silva                                                                                                                                                         |
| EPI_ISL_1293052 to 1293055,<br>EPI_ISL_1303499 to 1303505                                                                                                                                           | LACEN de Rondonia                                                   | Instituto Adolfo Lutz, Interdisciplinary Procedures Center, Strategic Laboratory                                    | Caio Vinicius Dias Lopes; Claudia Regina Gonçalves; Claudio Tavares Sacchi; Erica Valessa Ramos Gomes; Karoline Rodrigues Campos                                                                                                                                                                              |
| EPI_ISL_1196285 to 1196294,<br>EPI_ISL_1293051, EPI_ISL_1303506 to<br>1303508                                                                                                                       | LACEN do Distrito Federal                                           | Instituto Adolfo Lutz, Interdisciplinary Procedures Center, Strategic Laboratory                                    | Caio Vinicius Dias Lopes; Claudia Regina Gonçalves; Claudio Tavares Sacchi; Erica Valessa Ramos Gomes; Karoline Rodrigues Campos                                                                                                                                                                              |
| EPI_ISL_1039691 to 1039695,<br>EPI_ISL_1041509, EPI_ISL_1303510 to<br>1303517                                                                                                                       | LACEN do Estado de Goias                                            | Instituto Adolfo Lutz, Interdisciplinary Procedures Center, Strategic Laboratory                                    | Caio Vinicius Dias Lopes; Claudia Regina Gonçalves; Claudio Tavares Sacchi; Erica Valessa Ramos Gomes; Karoline Rodrigues Campos                                                                                                                                                                              |
| EPI_ISL_1303509                                                                                                                                                                                     | LACEN do Estado de Tocantins                                        | Instituto Adolfo Lutz, Interdisciplinary Procedures Center,                                                         | Caio Vinicius Dias Lopes; Claudia Regina Gonçalves; Claudio Tavares Sacchi; Erica Valessa Ramos Gomes; Karoline Rodrigues Campos                                                                                                                                                                              |

| Strategic Laboratory                                                                                                                                                                                                                                                                                                                                                                                                                                                                                                                                                                                                                                                                                                                                                                                                                                                                                                                                                                                                                                                                                                                                                                                                                                                                                                                                                                                                                                                                                                                                                                                                                                                                                                                                                                                                                                                                                                                                                                                                                                                                                                                                                                                                                                                                                                                                                                                                                                                                                                                                                                                                                                                                                                                                                                                                                                                                                                                                                                                                                                                                                                                                                                                                                                                                                                                                                                                                                                                                                                                                                                                                                                                                                                                                                                                                                                                                                                                                                                                                                                                                                               |                                                    |                                                                                                                                            |                                                                                                                                                                                                                                                                                                                                                                                                                                                                                                                                                                         |
|--------------------------------------------------------------------------------------------------------------------------------------------------------------------------------------------------------------------------------------------------------------------------------------------------------------------------------------------------------------------------------------------------------------------------------------------------------------------------------------------------------------------------------------------------------------------------------------------------------------------------------------------------------------------------------------------------------------------------------------------------------------------------------------------------------------------------------------------------------------------------------------------------------------------------------------------------------------------------------------------------------------------------------------------------------------------------------------------------------------------------------------------------------------------------------------------------------------------------------------------------------------------------------------------------------------------------------------------------------------------------------------------------------------------------------------------------------------------------------------------------------------------------------------------------------------------------------------------------------------------------------------------------------------------------------------------------------------------------------------------------------------------------------------------------------------------------------------------------------------------------------------------------------------------------------------------------------------------------------------------------------------------------------------------------------------------------------------------------------------------------------------------------------------------------------------------------------------------------------------------------------------------------------------------------------------------------------------------------------------------------------------------------------------------------------------------------------------------------------------------------------------------------------------------------------------------------------------------------------------------------------------------------------------------------------------------------------------------------------------------------------------------------------------------------------------------------------------------------------------------------------------------------------------------------------------------------------------------------------------------------------------------------------------------------------------------------------------------------------------------------------------------------------------------------------------------------------------------------------------------------------------------------------------------------------------------------------------------------------------------------------------------------------------------------------------------------------------------------------------------------------------------------------------------------------------------------------------------------------------------------------------------------------------------------------------------------------------------------------------------------------------------------------------------------------------------------------------------------------------------------------------------------------------------------------------------------------------------------------------------------------------------------------------------------------------------------------------------------------------------|----------------------------------------------------|--------------------------------------------------------------------------------------------------------------------------------------------|-------------------------------------------------------------------------------------------------------------------------------------------------------------------------------------------------------------------------------------------------------------------------------------------------------------------------------------------------------------------------------------------------------------------------------------------------------------------------------------------------------------------------------------------------------------------------|
| EPI_ISL_1040824 to 1040851, EPI_ISL_1121327 to 1121330, EPI_ISL_1139052 to 1139068, EPI_ISL_1171621, EPI_ISL_1196282 to 1196284, EPI_ISL_1201883, EPI_ISL_1358304 to 1358317, EPI_ISL_1381066 to 1381067                                                                                                                                                                                                                                                                                                                                                                                                                                                                                                                                                                                                                                                                                                                                                                                                                                                                                                                                                                                                                                                                                                                                                                                                                                                                                                                                                                                                                                                                                                                                                                                                                                                                                                                                                                                                                                                                                                                                                                                                                                                                                                                                                                                                                                                                                                                                                                                                                                                                                                                                                                                                                                                                                                                                                                                                                                                                                                                                                                                                                                                                                                                                                                                                                                                                                                                                                                                                                                                                                                                                                                                                                                                                                                                                                                                                                                                                                                           |                                                    |                                                                                                                                            |                                                                                                                                                                                                                                                                                                                                                                                                                                                                                                                                                                         |
| see above                                                                                                                                                                                                                                                                                                                                                                                                                                                                                                                                                                                                                                                                                                                                                                                                                                                                                                                                                                                                                                                                                                                                                                                                                                                                                                                                                                                                                                                                                                                                                                                                                                                                                                                                                                                                                                                                                                                                                                                                                                                                                                                                                                                                                                                                                                                                                                                                                                                                                                                                                                                                                                                                                                                                                                                                                                                                                                                                                                                                                                                                                                                                                                                                                                                                                                                                                                                                                                                                                                                                                                                                                                                                                                                                                                                                                                                                                                                                                                                                                                                                                                          | LACEN do Mato Grosso do Sul                        | Instituto Adolfo Lutz, Interdisciplinary Procedures Center, Strategic Laboratory                                                           | Caio Vinicius Dias Lopes; Claudia Regina Gonçalves; Claudio Tavares Sacchi; Erica Valessa Ramos Gomes; Karoline Rodrigues Campos                                                                                                                                                                                                                                                                                                                                                                                                                                        |
| EPI_ISL_1121316                                                                                                                                                                                                                                                                                                                                                                                                                                                                                                                                                                                                                                                                                                                                                                                                                                                                                                                                                                                                                                                                                                                                                                                                                                                                                                                                                                                                                                                                                                                                                                                                                                                                                                                                                                                                                                                                                                                                                                                                                                                                                                                                                                                                                                                                                                                                                                                                                                                                                                                                                                                                                                                                                                                                                                                                                                                                                                                                                                                                                                                                                                                                                                                                                                                                                                                                                                                                                                                                                                                                                                                                                                                                                                                                                                                                                                                                                                                                                                                                                                                                                                    | LACEN do Rio Grande do Sul                         | Instituto Adolfo Lutz, Interdisciplinary Procedures Center, Strategic Laboratory                                                           | Caio Vinicius Dias Lopes; Claudia Regina Gonçalves; Claudio Tavares Sacchi; Erica Valessa Ramos Gomes; Karoline Rodrigues Campos                                                                                                                                                                                                                                                                                                                                                                                                                                        |
| EPI_ISL_1321612 to 1321645                                                                                                                                                                                                                                                                                                                                                                                                                                                                                                                                                                                                                                                                                                                                                                                                                                                                                                                                                                                                                                                                                                                                                                                                                                                                                                                                                                                                                                                                                                                                                                                                                                                                                                                                                                                                                                                                                                                                                                                                                                                                                                                                                                                                                                                                                                                                                                                                                                                                                                                                                                                                                                                                                                                                                                                                                                                                                                                                                                                                                                                                                                                                                                                                                                                                                                                                                                                                                                                                                                                                                                                                                                                                                                                                                                                                                                                                                                                                                                                                                                                                                         | LADR GmbH MVZ Dr. Kramer & Kollegen Geesthacht     | Hannover Medical School, Institute of Virology                                                                                             | Lars Steinbrück                                                                                                                                                                                                                                                                                                                                                                                                                                                                                                                                                         |
| EPI_ISL_1140481 to 1140484, EPI_ISL_1140540 to 1140551, EPI_ISL_1141656 to 1141658, EPI_ISL_1147413 to 1147414, EPI_ISL_1147416, EPI_ISL_1147421, EPI_ISL_1147423 to 1147428, EPI_ISL_1147431 to 1147435, EPI_ISL_1147455, EPI_ISL_1147462, EPI_ISL_1147479, EPI_ISL_1147489, EPI_ISL_1147493, EPI_ISL_1147498, EPI_ISL_1147506, EPI_ISL_1147510, EPI_ISL_1147517, EPI_ISL_1147565 to 1147568, EPI_ISL_1147570 to 1147577, EPI_ISL_1151899, EPI_ISL_1151902 to 1151903, EPI_ISL_1151906, EPI_ISL_1151908 to 1151909, EPI_ISL_1151915 to 1151917, EPI_ISL_1151919, EPI_ISL_1151921, EPI_ISL_1151930, EPI_ISL_1151935, EPI_ISL_1151937 to 1151938, EPI_ISL_1151942, EPI_ISL_1151945, EPI_ISL_1151954, EPI_ISL_1151957, EPI_ISL_1151964 to 1151965, EPI_ISL_1151967, EPI_ISL_1151976, EPI_ISL_1151978, EPI_ISL_1151980 to 1151981, EPI_ISL_1151985 to 1151988, EPI_ISL_1151991, EPI_ISL_1156371 to 1156373, EPI_ISL_1156375, EPI_ISL_1156384, EPI_ISL_1156389 to 1156390, EPI_ISL_1156396, EPI_ISL_1156401 to 1156402, EPI_ISL_1156404 to 1156411, EPI_ISL_1156413 to 1156414, EPI_ISL_1156418, EPI_ISL_1156421 to 1156422, EPI_ISL_1156425 to 1156426, EPI_ISL_1156432, EPI_ISL_1156434, EPI_ISL_1156437 to 1156438, EPI_ISL_1156440, EPI_ISL_1156443 to 1156444, EPI_ISL_1210772 to 1210776, EPI_ISL_1210778 to 1210782, EPI_ISL_1210784 to 1210785, EPI_ISL_1210787 to 1210789, EPI_ISL_1210793, EPI_ISL_1210796, EPI_ISL_1210799 to 1210801, EPI_ISL_1210803 to 1210814, EPI_ISL_1212026, EPI_ISL_1212030 to 1212031, EPI_ISL_1212037, EPI_ISL_1212044, EPI_ISL_1212050, EPI_ISL_1212054 to 1212055, EPI_ISL_1212057, EPI_ISL_1212062, EPI_ISL_1212066, EPI_ISL_1212068, EPI_ISL_1212069, EPI_ISL_1212071, EPI_ISL_1212073, EPI_ISL_1212076, EPI_ISL_1212078, EPI_ISL_1212081, EPI_ISL_1212083, EPI_ISL_1212085, EPI_ISL_1212087, EPI_ISL_1212089, EPI_ISL_1212091, EPI_ISL_1212093, EPI_ISL_1212095, EPI_ISL_1212097, EPI_ISL_1212099, EPI_ISL_1212101, EPI_ISL_1212103, EPI_ISL_1212105, EPI_ISL_1212107, EPI_ISL_1212109, EPI_ISL_1212111, EPI_ISL_1212113, EPI_ISL_1212115, EPI_ISL_1212117, EPI_ISL_1212119, EPI_ISL_1212121, EPI_ISL_1212123, EPI_ISL_1212125, EPI_ISL_1212127, EPI_ISL_1212129, EPI_ISL_1212131, EPI_ISL_1212133, EPI_ISL_1212135, EPI_ISL_1212137, EPI_ISL_1212139, EPI_ISL_1212141, EPI_ISL_1212143, EPI_ISL_1212145, EPI_ISL_1212147, EPI_ISL_1212149, EPI_ISL_1212151, EPI_ISL_1212153, EPI_ISL_1212155, EPI_ISL_1212157, EPI_ISL_1212159, EPI_ISL_1212161, EPI_ISL_1212163, EPI_ISL_1212165, EPI_ISL_1212167, EPI_ISL_1212169, EPI_ISL_1212171, EPI_ISL_1212173, EPI_ISL_1212175, EPI_ISL_1212177, EPI_ISL_1212179, EPI_ISL_1212181, EPI_ISL_1212183, EPI_ISL_1212185, EPI_ISL_1212187, EPI_ISL_1212189, EPI_ISL_1212191, EPI_ISL_1212193, EPI_ISL_1212195, EPI_ISL_1212197, EPI_ISL_1212199, EPI_ISL_1212201, EPI_ISL_1212203, EPI_ISL_1212205, EPI_ISL_1212207, EPI_ISL_1212209, EPI_ISL_1212211, EPI_ISL_1212213, EPI_ISL_1212215, EPI_ISL_1212217, EPI_ISL_1212219, EPI_ISL_1212221, EPI_ISL_1212223, EPI_ISL_1212225, EPI_ISL_1212227, EPI_ISL_1212229, EPI_ISL_1212231, EPI_ISL_1212233, EPI_ISL_1212235, EPI_ISL_1212237, EPI_ISL_1212239, EPI_ISL_1212241, EPI_ISL_1212243, EPI_ISL_1212245, EPI_ISL_1212247, EPI_ISL_1212249, EPI_ISL_1212251, EPI_ISL_1212253, EPI_ISL_1212255, EPI_ISL_1212257, EPI_ISL_1212259, EPI_ISL_1212261, EPI_ISL_1212263, EPI_ISL_1212265, EPI_ISL_1212267, EPI_ISL_1212269, EPI_ISL_1212271, EPI_ISL_1212273, EPI_ISL_1212275, EPI_ISL_1212277, EPI_ISL_1212279, EPI_ISL_1212281, EPI_ISL_1212283, EPI_ISL_1212285, EPI_ISL_1212287, EPI_ISL_1212289, EPI_ISL_1212291, EPI_ISL_1212293, EPI_ISL_1212295, EPI_ISL_1212297, EPI_ISL_1212299, EPI_ISL_1212301, EPI_ISL_1212303, EPI_ISL_1212305, EPI_ISL_1212307, EPI_ISL_1212309, EPI_ISL_1212311, EPI_ISL_1212313, EPI_ISL_1212315, EPI_ISL_1212317, EPI_ISL_1212319, EPI_ISL_1212321, EPI_ISL_1212323, EPI_ISL_1212325, EPI_ISL_1212327, EPI_ISL_1212329, EPI_ISL_1212331, EPI_ISL_1212333, EPI_ISL_1212335, EPI_ISL_1212337, EPI_ISL_1212339, EPI_ISL_1212341, EPI_ISL_1212343, EPI_ISL_1212345 |                                                    |                                                                                                                                            |                                                                                                                                                                                                                                                                                                                                                                                                                                                                                                                                                                         |
| see above                                                                                                                                                                                                                                                                                                                                                                                                                                                                                                                                                                                                                                                                                                                                                                                                                                                                                                                                                                                                                                                                                                                                                                                                                                                                                                                                                                                                                                                                                                                                                                                                                                                                                                                                                                                                                                                                                                                                                                                                                                                                                                                                                                                                                                                                                                                                                                                                                                                                                                                                                                                                                                                                                                                                                                                                                                                                                                                                                                                                                                                                                                                                                                                                                                                                                                                                                                                                                                                                                                                                                                                                                                                                                                                                                                                                                                                                                                                                                                                                                                                                                                          | LADR MVZ Zweigpraxis Bernau                        | Robert Koch Institute                                                                                                                      |                                                                                                                                                                                                                                                                                                                                                                                                                                                                                                                                                                         |
| EPI_ISL_1141702 to 1141710, EPI_ISL_1141712 to 1141750, EPI_ISL_1141752 to 1141753, EPI_ISL_1141755 to 1141758, EPI_ISL_1142580 to 1142596, EPI_ISL_1142598 to 1142625, EPI_ISL_1142627 to 1142628, EPI_ISL_1142630 to 1142657, EPI_ISL_1145494 to 1145521, EPI_ISL_1145523 to 1145531                                                                                                                                                                                                                                                                                                                                                                                                                                                                                                                                                                                                                                                                                                                                                                                                                                                                                                                                                                                                                                                                                                                                                                                                                                                                                                                                                                                                                                                                                                                                                                                                                                                                                                                                                                                                                                                                                                                                                                                                                                                                                                                                                                                                                                                                                                                                                                                                                                                                                                                                                                                                                                                                                                                                                                                                                                                                                                                                                                                                                                                                                                                                                                                                                                                                                                                                                                                                                                                                                                                                                                                                                                                                                                                                                                                                                             |                                                    |                                                                                                                                            |                                                                                                                                                                                                                                                                                                                                                                                                                                                                                                                                                                         |
| see above                                                                                                                                                                                                                                                                                                                                                                                                                                                                                                                                                                                                                                                                                                                                                                                                                                                                                                                                                                                                                                                                                                                                                                                                                                                                                                                                                                                                                                                                                                                                                                                                                                                                                                                                                                                                                                                                                                                                                                                                                                                                                                                                                                                                                                                                                                                                                                                                                                                                                                                                                                                                                                                                                                                                                                                                                                                                                                                                                                                                                                                                                                                                                                                                                                                                                                                                                                                                                                                                                                                                                                                                                                                                                                                                                                                                                                                                                                                                                                                                                                                                                                          | LADR Zentrallabor DR. Kramer & Kollegen Geesthacht | Robert Koch Institute                                                                                                                      |                                                                                                                                                                                                                                                                                                                                                                                                                                                                                                                                                                         |
| EPI_ISL_1213168, EPI_ISL_1213170, EPI_ISL_1213211, EPI_ISL_1213216, EPI_ISL_1213218, EPI_ISL_1213220, EPI_ISL_1213222, EPI_ISL_1213224, EPI_ISL_1213226 to 1213227, EPI_ISL_1213229 to 1213230, EPI_ISL_1213232, EPI_ISL_1213234, EPI_ISL_1213236 to 1213237, EPI_ISL_1213239, EPI_ISL_1213241 to 1213242, EPI_ISL_1213244 to 1213245, EPI_ISL_1213251 to 1213252, EPI_ISL_1213254, EPI_ISL_1213256, EPI_ISL_1213258 to 1213259, EPI_ISL_1213261, EPI_ISL_1213263, EPI_ISL_1213265, EPI_ISL_1213267, EPI_ISL_1213269, EPI_ISL_1213274, EPI_ISL_1213294, EPI_ISL_1213297 to 1213298, EPI_ISL_1213300, EPI_ISL_1213302 to 1213303, EPI_ISL_1213305, EPI_ISL_1213324, EPI_ISL_1213326, EPI_ISL_1213328, EPI_ISL_1213331, EPI_ISL_1213333, EPI_ISL_1213335, EPI_ISL_1213341 to 1213342, EPI_ISL_1213365, EPI_ISL_1213384, EPI_ISL_1213386, EPI_ISL_1213390, EPI_ISL_1213399, EPI_ISL_1213401 to 1213402, EPI_ISL_1213411, EPI_ISL_1213413, EPI_ISL_1213415                                                                                                                                                                                                                                                                                                                                                                                                                                                                                                                                                                                                                                                                                                                                                                                                                                                                                                                                                                                                                                                                                                                                                                                                                                                                                                                                                                                                                                                                                                                                                                                                                                                                                                                                                                                                                                                                                                                                                                                                                                                                                                                                                                                                                                                                                                                                                                                                                                                                                                                                                                                                                                                                                                                                                                                                                                                                                                                                                                                                                                                                                                                                                             |                                                    |                                                                                                                                            |                                                                                                                                                                                                                                                                                                                                                                                                                                                                                                                                                                         |
| see above                                                                                                                                                                                                                                                                                                                                                                                                                                                                                                                                                                                                                                                                                                                                                                                                                                                                                                                                                                                                                                                                                                                                                                                                                                                                                                                                                                                                                                                                                                                                                                                                                                                                                                                                                                                                                                                                                                                                                                                                                                                                                                                                                                                                                                                                                                                                                                                                                                                                                                                                                                                                                                                                                                                                                                                                                                                                                                                                                                                                                                                                                                                                                                                                                                                                                                                                                                                                                                                                                                                                                                                                                                                                                                                                                                                                                                                                                                                                                                                                                                                                                                          | LAFEM/UESC                                         | Bioinformatics Laboratory / LNCC                                                                                                           | Alessandra P Lamarca; Alexandra L Gerber; Ana Paula Melo Mariano; Ana Paula de C Guimarães; Ana Tereza R Vasconcelos; Angela Maria Guimarães Santos; Bianca Mendes Maciel; Danielle Angst Secco; Eduardo Sérgio Soares Sousa; Eloiza Helena Campana; Francisco Paulo Freire Neto; George Rego Albuquerque; Kátia Castanho Scorecci; Lucymara Fassarella Agnez Lima; Luiz G P de Almeida; Luís Cristóvão Porto; Otavio J. Brustolini; Paulo Ricardo Nascimento; Ronaldo da Silva Francisco Jr; Sandra Rocha Gadelha; Selma Maria Bezerra Jeronimo; Vinicius Pietta Perez |
| EPI_ISL_1372486                                                                                                                                                                                                                                                                                                                                                                                                                                                                                                                                                                                                                                                                                                                                                                                                                                                                                                                                                                                                                                                                                                                                                                                                                                                                                                                                                                                                                                                                                                                                                                                                                                                                                                                                                                                                                                                                                                                                                                                                                                                                                                                                                                                                                                                                                                                                                                                                                                                                                                                                                                                                                                                                                                                                                                                                                                                                                                                                                                                                                                                                                                                                                                                                                                                                                                                                                                                                                                                                                                                                                                                                                                                                                                                                                                                                                                                                                                                                                                                                                                                                                                    | LAKE REGION HEALTHCARE                             | Minnesota Department of Health, Public Health Laboratory                                                                                   | Alexandra Lorentz; Jacob Garfin; Matt Plumb; and Xiong Wang                                                                                                                                                                                                                                                                                                                                                                                                                                                                                                             |
| EPI_ISL_1336560                                                                                                                                                                                                                                                                                                                                                                                                                                                                                                                                                                                                                                                                                                                                                                                                                                                                                                                                                                                                                                                                                                                                                                                                                                                                                                                                                                                                                                                                                                                                                                                                                                                                                                                                                                                                                                                                                                                                                                                                                                                                                                                                                                                                                                                                                                                                                                                                                                                                                                                                                                                                                                                                                                                                                                                                                                                                                                                                                                                                                                                                                                                                                                                                                                                                                                                                                                                                                                                                                                                                                                                                                                                                                                                                                                                                                                                                                                                                                                                                                                                                                                    | LAM ANABIO 05 TOKORO                               | CNR Virus des Infections Respiratoires - France SUD                                                                                        | Antonin Bal; Bruno Lina; Gregory Destras; Gwendolynne Burfin; Hadrien Regue; Laurence Josset; Martine Valette; Quentin Semanas                                                                                                                                                                                                                                                                                                                                                                                                                                          |
| EPI_ISL_1322402 to 1322405                                                                                                                                                                                                                                                                                                                                                                                                                                                                                                                                                                                                                                                                                                                                                                                                                                                                                                                                                                                                                                                                                                                                                                                                                                                                                                                                                                                                                                                                                                                                                                                                                                                                                                                                                                                                                                                                                                                                                                                                                                                                                                                                                                                                                                                                                                                                                                                                                                                                                                                                                                                                                                                                                                                                                                                                                                                                                                                                                                                                                                                                                                                                                                                                                                                                                                                                                                                                                                                                                                                                                                                                                                                                                                                                                                                                                                                                                                                                                                                                                                                                                         | LAM BAYARD-BIOPYRENEES                             | CNR Virus des Infections Respiratoires - France SUD                                                                                        | Antonin Bal; Bruno Lina; Gregory Destras; Gwendolynne Burfin; Hadrien Regue; Laurence Josset; Martine Valette; Quentin Semanas                                                                                                                                                                                                                                                                                                                                                                                                                                          |
| EPI_ISL_1241983                                                                                                                                                                                                                                                                                                                                                                                                                                                                                                                                                                                                                                                                                                                                                                                                                                                                                                                                                                                                                                                                                                                                                                                                                                                                                                                                                                                                                                                                                                                                                                                                                                                                                                                                                                                                                                                                                                                                                                                                                                                                                                                                                                                                                                                                                                                                                                                                                                                                                                                                                                                                                                                                                                                                                                                                                                                                                                                                                                                                                                                                                                                                                                                                                                                                                                                                                                                                                                                                                                                                                                                                                                                                                                                                                                                                                                                                                                                                                                                                                                                                                                    | LAM BIO 86 SITE DE CHAUMONT                        | CNR Virus des Infections Respiratoires - France SUD                                                                                        | Antonin Bal; Bruno Lina; Gregory Destras; Gwendolynne Burfin; Hadrien Regue; Laurence Josset; Martine Valette; Quentin Semanas                                                                                                                                                                                                                                                                                                                                                                                                                                          |
| EPI_ISL_1209376                                                                                                                                                                                                                                                                                                                                                                                                                                                                                                                                                                                                                                                                                                                                                                                                                                                                                                                                                                                                                                                                                                                                                                                                                                                                                                                                                                                                                                                                                                                                                                                                                                                                                                                                                                                                                                                                                                                                                                                                                                                                                                                                                                                                                                                                                                                                                                                                                                                                                                                                                                                                                                                                                                                                                                                                                                                                                                                                                                                                                                                                                                                                                                                                                                                                                                                                                                                                                                                                                                                                                                                                                                                                                                                                                                                                                                                                                                                                                                                                                                                                                                    | LAM BIOCENTRE MERCURE                              | CHU Lille - Laboratoire de Virologie                                                                                                       | AIT YAHYA Emilie; ALIDJINOUE Enagnon Kazali; BOCKET Laurence; CREPIN Michel; DEMAY Christophe; ENGELMANN Ilka; GEFFROY Sandrine; GUIGON Aurélie; LAZREK Mouna; NOBILLIAUX Florian; PREVOST Brigitte; THUILLIER Caroline; TINEZ Claire                                                                                                                                                                                                                                                                                                                                   |
| EPI_ISL_1209380, EPI_ISL_1209394                                                                                                                                                                                                                                                                                                                                                                                                                                                                                                                                                                                                                                                                                                                                                                                                                                                                                                                                                                                                                                                                                                                                                                                                                                                                                                                                                                                                                                                                                                                                                                                                                                                                                                                                                                                                                                                                                                                                                                                                                                                                                                                                                                                                                                                                                                                                                                                                                                                                                                                                                                                                                                                                                                                                                                                                                                                                                                                                                                                                                                                                                                                                                                                                                                                                                                                                                                                                                                                                                                                                                                                                                                                                                                                                                                                                                                                                                                                                                                                                                                                                                   | LAM BIOPATH                                        | CHU Lille - Laboratoire de Virologie                                                                                                       | AIT YAHYA Emilie; ALIDJINOUE Enagnon Kazali; BOCKET Laurence; CREPIN Michel; DEMAY Christophe; ENGELMANN Ilka; GEFFROY Sandrine; GUIGON Aurélie; LAZREK Mouna; NOBILLIAUX Florian; PREVOST Brigitte; THUILLIER Caroline; TINEZ Claire                                                                                                                                                                                                                                                                                                                                   |
| EPI_ISL_1322334, EPI_ISL_1371838                                                                                                                                                                                                                                                                                                                                                                                                                                                                                                                                                                                                                                                                                                                                                                                                                                                                                                                                                                                                                                                                                                                                                                                                                                                                                                                                                                                                                                                                                                                                                                                                                                                                                                                                                                                                                                                                                                                                                                                                                                                                                                                                                                                                                                                                                                                                                                                                                                                                                                                                                                                                                                                                                                                                                                                                                                                                                                                                                                                                                                                                                                                                                                                                                                                                                                                                                                                                                                                                                                                                                                                                                                                                                                                                                                                                                                                                                                                                                                                                                                                                                   | LAM BIPOLE ORTHEZ                                  | CNR Virus des Infections Respiratoires - France SUD                                                                                        | Antonin Bal; Bruno Lina; Gregory Destras; Gwendolynne Burfin; Hadrien Regue; Laurence Josset; Martine Valette; Quentin Semanas                                                                                                                                                                                                                                                                                                                                                                                                                                          |
| EPI_ISL_1336636                                                                                                                                                                                                                                                                                                                                                                                                                                                                                                                                                                                                                                                                                                                                                                                                                                                                                                                                                                                                                                                                                                                                                                                                                                                                                                                                                                                                                                                                                                                                                                                                                                                                                                                                                                                                                                                                                                                                                                                                                                                                                                                                                                                                                                                                                                                                                                                                                                                                                                                                                                                                                                                                                                                                                                                                                                                                                                                                                                                                                                                                                                                                                                                                                                                                                                                                                                                                                                                                                                                                                                                                                                                                                                                                                                                                                                                                                                                                                                                                                                                                                                    | LAM CERBALLIANE LANGUEDOC                          | CNR Virus des Infections Respiratoires - France SUD                                                                                        | Antonin Bal; Bruno Lina; Gregory Destras; Gwendolynne Burfin; Hadrien Regue; Laurence Josset; Martine Valette; Quentin Semanas                                                                                                                                                                                                                                                                                                                                                                                                                                          |
| EPI_ISL_1322397                                                                                                                                                                                                                                                                                                                                                                                                                                                                                                                                                                                                                                                                                                                                                                                                                                                                                                                                                                                                                                                                                                                                                                                                                                                                                                                                                                                                                                                                                                                                                                                                                                                                                                                                                                                                                                                                                                                                                                                                                                                                                                                                                                                                                                                                                                                                                                                                                                                                                                                                                                                                                                                                                                                                                                                                                                                                                                                                                                                                                                                                                                                                                                                                                                                                                                                                                                                                                                                                                                                                                                                                                                                                                                                                                                                                                                                                                                                                                                                                                                                                                                    | LAM CHAPONOST                                      | CNR Virus des Infections Respiratoires - France SUD                                                                                        | Antonin Bal; Bruno Lina; Gregory Destras; Gwendolynne Burfin; Hadrien Regue; Laurence Josset; Martine Valette; Quentin Semanas                                                                                                                                                                                                                                                                                                                                                                                                                                          |
| EPI_ISL_1371796                                                                                                                                                                                                                                                                                                                                                                                                                                                                                                                                                                                                                                                                                                                                                                                                                                                                                                                                                                                                                                                                                                                                                                                                                                                                                                                                                                                                                                                                                                                                                                                                                                                                                                                                                                                                                                                                                                                                                                                                                                                                                                                                                                                                                                                                                                                                                                                                                                                                                                                                                                                                                                                                                                                                                                                                                                                                                                                                                                                                                                                                                                                                                                                                                                                                                                                                                                                                                                                                                                                                                                                                                                                                                                                                                                                                                                                                                                                                                                                                                                                                                                    | LAM CHAZE BIOPTIMA                                 | CNR Virus des Infections Respiratoires - France SUD                                                                                        | Antonin Bal; Bruno Lina; Gregory Destras; Gwendolynne Burfin; Hadrien Regue; Laurence Josset; Martine Valette; Quentin Semanas                                                                                                                                                                                                                                                                                                                                                                                                                                          |
| EPI_ISL_1209378 to 1209379, EPI_ISL_1209406                                                                                                                                                                                                                                                                                                                                                                                                                                                                                                                                                                                                                                                                                                                                                                                                                                                                                                                                                                                                                                                                                                                                                                                                                                                                                                                                                                                                                                                                                                                                                                                                                                                                                                                                                                                                                                                                                                                                                                                                                                                                                                                                                                                                                                                                                                                                                                                                                                                                                                                                                                                                                                                                                                                                                                                                                                                                                                                                                                                                                                                                                                                                                                                                                                                                                                                                                                                                                                                                                                                                                                                                                                                                                                                                                                                                                                                                                                                                                                                                                                                                        | LAM DIAGNOVIE RONCHIN                              | CHU Lille - Laboratoire de Virologie                                                                                                       | AIT YAHYA Emilie; ALIDJINOUE Enagnon Kazali; BOCKET Laurence; CREPIN Michel; DEMAY Christophe; ENGELMANN Ilka; GEFFROY Sandrine; GUIGON Aurélie; LAZREK Mouna; NOBILLIAUX Florian; PREVOST Brigitte; THUILLIER Caroline; TINEZ Claire                                                                                                                                                                                                                                                                                                                                   |
| EPI_ISL_1336362, EPI_ISL_1336513, EPI_ISL_1336515, EPI_ISL_1336519 to 1336520, EPI_ISL_1336525, EPI_ISL_1336593 to 1336595, EPI_ISL_1371770                                                                                                                                                                                                                                                                                                                                                                                                                                                                                                                                                                                                                                                                                                                                                                                                                                                                                                                                                                                                                                                                                                                                                                                                                                                                                                                                                                                                                                                                                                                                                                                                                                                                                                                                                                                                                                                                                                                                                                                                                                                                                                                                                                                                                                                                                                                                                                                                                                                                                                                                                                                                                                                                                                                                                                                                                                                                                                                                                                                                                                                                                                                                                                                                                                                                                                                                                                                                                                                                                                                                                                                                                                                                                                                                                                                                                                                                                                                                                                        |                                                    |                                                                                                                                            |                                                                                                                                                                                                                                                                                                                                                                                                                                                                                                                                                                         |
| see above                                                                                                                                                                                                                                                                                                                                                                                                                                                                                                                                                                                                                                                                                                                                                                                                                                                                                                                                                                                                                                                                                                                                                                                                                                                                                                                                                                                                                                                                                                                                                                                                                                                                                                                                                                                                                                                                                                                                                                                                                                                                                                                                                                                                                                                                                                                                                                                                                                                                                                                                                                                                                                                                                                                                                                                                                                                                                                                                                                                                                                                                                                                                                                                                                                                                                                                                                                                                                                                                                                                                                                                                                                                                                                                                                                                                                                                                                                                                                                                                                                                                                                          | LAM GEN-BIO GRAVANCHES                             | CNR Virus des Infections Respiratoires - France SUD                                                                                        | Antonin Bal; Bruno Lina; Gregory Destras; Gwendolynne Burfin; Hadrien Regue; Laurence Josset; Martine Valette; Quentin Semanas                                                                                                                                                                                                                                                                                                                                                                                                                                          |
| EPI_ISL_1359918                                                                                                                                                                                                                                                                                                                                                                                                                                                                                                                                                                                                                                                                                                                                                                                                                                                                                                                                                                                                                                                                                                                                                                                                                                                                                                                                                                                                                                                                                                                                                                                                                                                                                                                                                                                                                                                                                                                                                                                                                                                                                                                                                                                                                                                                                                                                                                                                                                                                                                                                                                                                                                                                                                                                                                                                                                                                                                                                                                                                                                                                                                                                                                                                                                                                                                                                                                                                                                                                                                                                                                                                                                                                                                                                                                                                                                                                                                                                                                                                                                                                                                    | LAM GEN-BIO REPUBLIQUE                             | CNR Virus des Infections Respiratoires - France SUD                                                                                        | Antonin Bal; Bruno Lina; Gregory Destras; Gwendolynne Burfin; Hadrien Regue; Laurence Josset; Martine Valette; Quentin Semanas                                                                                                                                                                                                                                                                                                                                                                                                                                          |
| EPI_ISL_1265816                                                                                                                                                                                                                                                                                                                                                                                                                                                                                                                                                                                                                                                                                                                                                                                                                                                                                                                                                                                                                                                                                                                                                                                                                                                                                                                                                                                                                                                                                                                                                                                                                                                                                                                                                                                                                                                                                                                                                                                                                                                                                                                                                                                                                                                                                                                                                                                                                                                                                                                                                                                                                                                                                                                                                                                                                                                                                                                                                                                                                                                                                                                                                                                                                                                                                                                                                                                                                                                                                                                                                                                                                                                                                                                                                                                                                                                                                                                                                                                                                                                                                                    | LAM LXBIO                                          | CNR Virus des Infections Respiratoires - France SUD                                                                                        | Antonin Bal; Bruno Lina; Gregory Destras; Gwendolynne Burfin; Hadrien Regue; Laurence Josset; Martine Valette; Quentin Semanas                                                                                                                                                                                                                                                                                                                                                                                                                                          |
| EPI_ISL_1265762 to 1265764                                                                                                                                                                                                                                                                                                                                                                                                                                                                                                                                                                                                                                                                                                                                                                                                                                                                                                                                                                                                                                                                                                                                                                                                                                                                                                                                                                                                                                                                                                                                                                                                                                                                                                                                                                                                                                                                                                                                                                                                                                                                                                                                                                                                                                                                                                                                                                                                                                                                                                                                                                                                                                                                                                                                                                                                                                                                                                                                                                                                                                                                                                                                                                                                                                                                                                                                                                                                                                                                                                                                                                                                                                                                                                                                                                                                                                                                                                                                                                                                                                                                                         | LAM PALAIS DES PYRENEES                            | CNR Virus des Infections Respiratoires - France SUD                                                                                        | Antonin Bal; Bruno Lina; Gregory Destras; Gwendolynne Burfin; Hadrien Regue; Laurence Josset; Martine Valette; Quentin Semanas                                                                                                                                                                                                                                                                                                                                                                                                                                          |
| EPI_ISL_1313708                                                                                                                                                                                                                                                                                                                                                                                                                                                                                                                                                                                                                                                                                                                                                                                                                                                                                                                                                                                                                                                                                                                                                                                                                                                                                                                                                                                                                                                                                                                                                                                                                                                                                                                                                                                                                                                                                                                                                                                                                                                                                                                                                                                                                                                                                                                                                                                                                                                                                                                                                                                                                                                                                                                                                                                                                                                                                                                                                                                                                                                                                                                                                                                                                                                                                                                                                                                                                                                                                                                                                                                                                                                                                                                                                                                                                                                                                                                                                                                                                                                                                                    | LAM SANTA DEVOTA                                   | CNR Virus des Infections Respiratoires - France SUD                                                                                        | Antonin Bal; Bruno Lina; Gregory Destras; Gwendolynne Burfin; Hadrien Regue; Laurence Josset; Martine Valette; Quentin Semanas                                                                                                                                                                                                                                                                                                                                                                                                                                          |
| EPI_ISL_1322406 to 1322412                                                                                                                                                                                                                                                                                                                                                                                                                                                                                                                                                                                                                                                                                                                                                                                                                                                                                                                                                                                                                                                                                                                                                                                                                                                                                                                                                                                                                                                                                                                                                                                                                                                                                                                                                                                                                                                                                                                                                                                                                                                                                                                                                                                                                                                                                                                                                                                                                                                                                                                                                                                                                                                                                                                                                                                                                                                                                                                                                                                                                                                                                                                                                                                                                                                                                                                                                                                                                                                                                                                                                                                                                                                                                                                                                                                                                                                                                                                                                                                                                                                                                         | LAM SELARL 2A-2B                                   | CNR Virus des Infections Respiratoires - France SUD                                                                                        | Antonin Bal; Bruno Lina; Gregory Destras; Gwendolynne Burfin; Hadrien Regue; Laurence Josset; Martine Valette; Quentin Semanas                                                                                                                                                                                                                                                                                                                                                                                                                                          |
| EPI_ISL_1322388                                                                                                                                                                                                                                                                                                                                                                                                                                                                                                                                                                                                                                                                                                                                                                                                                                                                                                                                                                                                                                                                                                                                                                                                                                                                                                                                                                                                                                                                                                                                                                                                                                                                                                                                                                                                                                                                                                                                                                                                                                                                                                                                                                                                                                                                                                                                                                                                                                                                                                                                                                                                                                                                                                                                                                                                                                                                                                                                                                                                                                                                                                                                                                                                                                                                                                                                                                                                                                                                                                                                                                                                                                                                                                                                                                                                                                                                                                                                                                                                                                                                                                    | LAM SYNLAB BORDEAUX ATLANTIQUE                     | CNR Virus des Infections Respiratoires - France SUD                                                                                        | Antonin Bal; Bruno Lina; Gregory Destras; Gwendolynne Burfin; Hadrien Regue; Laurence Josset; Martine Valette; Quentin Semanas                                                                                                                                                                                                                                                                                                                                                                                                                                          |
| EPI_ISL_1313008                                                                                                                                                                                                                                                                                                                                                                                                                                                                                                                                                                                                                                                                                                                                                                                                                                                                                                                                                                                                                                                                                                                                                                                                                                                                                                                                                                                                                                                                                                                                                                                                                                                                                                                                                                                                                                                                                                                                                                                                                                                                                                                                                                                                                                                                                                                                                                                                                                                                                                                                                                                                                                                                                                                                                                                                                                                                                                                                                                                                                                                                                                                                                                                                                                                                                                                                                                                                                                                                                                                                                                                                                                                                                                                                                                                                                                                                                                                                                                                                                                                                                                    | LBA                                                | CNR Virus des Infections Respiratoires - France SUD                                                                                        | Antonin Bal; Bruno Lina; Gregory Destras; Gwendolynne Burfin; Hadrien Regue; Laurence Josset; Martine Valette; Quentin Semanas                                                                                                                                                                                                                                                                                                                                                                                                                                          |
| EPI_ISL_1336517, EPI_ISL_1359929, EPI_ISL_1360021, EPI_ISL_1371849                                                                                                                                                                                                                                                                                                                                                                                                                                                                                                                                                                                                                                                                                                                                                                                                                                                                                                                                                                                                                                                                                                                                                                                                                                                                                                                                                                                                                                                                                                                                                                                                                                                                                                                                                                                                                                                                                                                                                                                                                                                                                                                                                                                                                                                                                                                                                                                                                                                                                                                                                                                                                                                                                                                                                                                                                                                                                                                                                                                                                                                                                                                                                                                                                                                                                                                                                                                                                                                                                                                                                                                                                                                                                                                                                                                                                                                                                                                                                                                                                                                 | LBM BIOESTEREL                                     | CNR Virus des Infections Respiratoires - France SUD                                                                                        | Antonin Bal; Bruno Lina; Gregory Destras; Gwendolynne Burfin; Hadrien Regue; Laurence Josset; Martine Valette; Quentin Semanas                                                                                                                                                                                                                                                                                                                                                                                                                                          |
| EPI_ISL_1314018, EPI_ISL_1314043 to 1314051                                                                                                                                                                                                                                                                                                                                                                                                                                                                                                                                                                                                                                                                                                                                                                                                                                                                                                                                                                                                                                                                                                                                                                                                                                                                                                                                                                                                                                                                                                                                                                                                                                                                                                                                                                                                                                                                                                                                                                                                                                                                                                                                                                                                                                                                                                                                                                                                                                                                                                                                                                                                                                                                                                                                                                                                                                                                                                                                                                                                                                                                                                                                                                                                                                                                                                                                                                                                                                                                                                                                                                                                                                                                                                                                                                                                                                                                                                                                                                                                                                                                        | LBM BIOLYSS                                        | CNR Virus des Infections Respiratoires - France SUD                                                                                        | Antonin Bal; Bruno Lina; Gregory Destras; Gwendolynne Burfin; Hadrien Regue; Laurence Josset; Martine Valette; Quentin Semanas                                                                                                                                                                                                                                                                                                                                                                                                                                          |
| EPI_ISL_1322333                                                                                                                                                                                                                                                                                                                                                                                                                                                                                                                                                                                                                                                                                                                                                                                                                                                                                                                                                                                                                                                                                                                                                                                                                                                                                                                                                                                                                                                                                                                                                                                                                                                                                                                                                                                                                                                                                                                                                                                                                                                                                                                                                                                                                                                                                                                                                                                                                                                                                                                                                                                                                                                                                                                                                                                                                                                                                                                                                                                                                                                                                                                                                                                                                                                                                                                                                                                                                                                                                                                                                                                                                                                                                                                                                                                                                                                                                                                                                                                                                                                                                                    | LBM BIPOLE IDRON                                   | CNR Virus des Infections Respiratoires - France SUD                                                                                        | Antonin Bal; Bruno Lina; Gregory Destras; Gwendolynne Burfin; Hadrien Regue; Laurence Josset; Martine Valette; Quentin Semanas                                                                                                                                                                                                                                                                                                                                                                                                                                          |
| EPI_ISL_1322364 to 1322367                                                                                                                                                                                                                                                                                                                                                                                                                                                                                                                                                                                                                                                                                                                                                                                                                                                                                                                                                                                                                                                                                                                                                                                                                                                                                                                                                                                                                                                                                                                                                                                                                                                                                                                                                                                                                                                                                                                                                                                                                                                                                                                                                                                                                                                                                                                                                                                                                                                                                                                                                                                                                                                                                                                                                                                                                                                                                                                                                                                                                                                                                                                                                                                                                                                                                                                                                                                                                                                                                                                                                                                                                                                                                                                                                                                                                                                                                                                                                                                                                                                                                         | LBM CERBALLIANE "LA VILLA"                         | CNR Virus des Infections Respiratoires - France SUD                                                                                        | Antonin Bal; Bruno Lina; Gregory Destras; Gwendolynne Burfin; Hadrien Regue; Laurence Josset; Martine Valette; Quentin Semanas                                                                                                                                                                                                                                                                                                                                                                                                                                          |
| EPI_ISL_1359999, EPI_ISL_1360006                                                                                                                                                                                                                                                                                                                                                                                                                                                                                                                                                                                                                                                                                                                                                                                                                                                                                                                                                                                                                                                                                                                                                                                                                                                                                                                                                                                                                                                                                                                                                                                                                                                                                                                                                                                                                                                                                                                                                                                                                                                                                                                                                                                                                                                                                                                                                                                                                                                                                                                                                                                                                                                                                                                                                                                                                                                                                                                                                                                                                                                                                                                                                                                                                                                                                                                                                                                                                                                                                                                                                                                                                                                                                                                                                                                                                                                                                                                                                                                                                                                                                   | LBM CHARENTE-MARITIME NORD                         | CNR Virus des Infections Respiratoires - France SUD                                                                                        | Antonin Bal; Bruno Lina; Gregory Destras; Gwendolynne Burfin; Hadrien Regue; Laurence Josset; Martine Valette; Quentin Semanas                                                                                                                                                                                                                                                                                                                                                                                                                                          |
| EPI_ISL_1297489 to 1297490                                                                                                                                                                                                                                                                                                                                                                                                                                                                                                                                                                                                                                                                                                                                                                                                                                                                                                                                                                                                                                                                                                                                                                                                                                                                                                                                                                                                                                                                                                                                                                                                                                                                                                                                                                                                                                                                                                                                                                                                                                                                                                                                                                                                                                                                                                                                                                                                                                                                                                                                                                                                                                                                                                                                                                                                                                                                                                                                                                                                                                                                                                                                                                                                                                                                                                                                                                                                                                                                                                                                                                                                                                                                                                                                                                                                                                                                                                                                                                                                                                                                                         | LBM EXALAB                                         | CNR Virus des Infections Respiratoires - France SUD                                                                                        | Antonin Bal; Bruno Lina; Gregory Destras; Gwendolynne Burfin; Hadrien Regue; Laurence Josset; Martine Valette; Quentin Semanas                                                                                                                                                                                                                                                                                                                                                                                                                                          |
| EPI_ISL_1085817, EPI_ISL_1085850 to 1085851, EPI_ISL_1085933                                                                                                                                                                                                                                                                                                                                                                                                                                                                                                                                                                                                                                                                                                                                                                                                                                                                                                                                                                                                                                                                                                                                                                                                                                                                                                                                                                                                                                                                                                                                                                                                                                                                                                                                                                                                                                                                                                                                                                                                                                                                                                                                                                                                                                                                                                                                                                                                                                                                                                                                                                                                                                                                                                                                                                                                                                                                                                                                                                                                                                                                                                                                                                                                                                                                                                                                                                                                                                                                                                                                                                                                                                                                                                                                                                                                                                                                                                                                                                                                                                                       | LBM NEVERS                                         | Department of Virology, Henri Mondor University Hospital, Assistance Publique Hôpitaux de Paris, Université Paris-Est Créteil, INSERM U955 | Alexandre Soulier; Christophe Rodriguez; Elisabeth Trawinski; Guillaume Gricourt; Jean-Michel Pawlowsky; Melissa N'Debi; Slim Fourati; Vanessa Demontant                                                                                                                                                                                                                                                                                                                                                                                                                |
| EPI_ISL_1359925 to 1359928                                                                                                                                                                                                                                                                                                                                                                                                                                                                                                                                                                                                                                                                                                                                                                                                                                                                                                                                                                                                                                                                                                                                                                                                                                                                                                                                                                                                                                                                                                                                                                                                                                                                                                                                                                                                                                                                                                                                                                                                                                                                                                                                                                                                                                                                                                                                                                                                                                                                                                                                                                                                                                                                                                                                                                                                                                                                                                                                                                                                                                                                                                                                                                                                                                                                                                                                                                                                                                                                                                                                                                                                                                                                                                                                                                                                                                                                                                                                                                                                                                                                                         | LBM OLIVOT - MARIOTTI                              | CNR Virus des Infections Respiratoires - France SUD                                                                                        | Antonin Bal; Bruno Lina; Gregory Destras; Gwendolynne Burfin; Hadrien Regue; Laurence Josset; Martine Valette; Quentin Semanas                                                                                                                                                                                                                                                                                                                                                                                                                                          |
| EPI_ISL_1359952, EPI_ISL_1360008                                                                                                                                                                                                                                                                                                                                                                                                                                                                                                                                                                                                                                                                                                                                                                                                                                                                                                                                                                                                                                                                                                                                                                                                                                                                                                                                                                                                                                                                                                                                                                                                                                                                                                                                                                                                                                                                                                                                                                                                                                                                                                                                                                                                                                                                                                                                                                                                                                                                                                                                                                                                                                                                                                                                                                                                                                                                                                                                                                                                                                                                                                                                                                                                                                                                                                                                                                                                                                                                                                                                                                                                                                                                                                                                                                                                                                                                                                                                                                                                                                                                                   | LBM SEALAB BIARRITZ                                | CNR Virus des Infections Respiratoires - France SUD                                                                                        | Antonin Bal; Bruno Lina; Gregory Destras; Gwendolynne Burfin; Hadrien Regue; Laurence Josset; Martine Valette; Quentin Semanas                                                                                                                                                                                                                                                                                                                                                                                                                                          |
| EPI_ISL_1297491                                                                                                                                                                                                                                                                                                                                                                                                                                                                                                                                                                                                                                                                                                                                                                                                                                                                                                                                                                                                                                                                                                                                                                                                                                                                                                                                                                                                                                                                                                                                                                                                                                                                                                                                                                                                                                                                                                                                                                                                                                                                                                                                                                                                                                                                                                                                                                                                                                                                                                                                                                                                                                                                                                                                                                                                                                                                                                                                                                                                                                                                                                                                                                                                                                                                                                                                                                                                                                                                                                                                                                                                                                                                                                                                                                                                                                                                                                                                                                                                                                                                                                    | LBM SEALAB DARRASSE ET ASSOCIÉS                    | CNR Virus des Infections Respiratoires - France SUD                                                                                        | Antonin Bal; Bruno Lina; Gregory Destras; Gwendolynne Burfin; Hadrien Regue; Laurence Josset; Martine Valette; Quentin Semanas                                                                                                                                                                                                                                                                                                                                                                                                                                          |
| EPI_ISL_1190801 to 1190804                                                                                                                                                                                                                                                                                                                                                                                                                                                                                                                                                                                                                                                                                                                                                                                                                                                                                                                                                                                                                                                                                                                                                                                                                                                                                                                                                                                                                                                                                                                                                                                                                                                                                                                                                                                                                                                                                                                                                                                                                                                                                                                                                                                                                                                                                                                                                                                                                                                                                                                                                                                                                                                                                                                                                                                                                                                                                                                                                                                                                                                                                                                                                                                                                                                                                                                                                                                                                                                                                                                                                                                                                                                                                                                                                                                                                                                                                                                                                                                                                                                                                         | LBM SEALAB PAU LOUP                                | CNR Virus des Infections Respiratoires - France SUD                                                                                        | Antonin Bal; Bruno Lina; Gregory Destras; Gwendolynne Burfin; Hadrien Regue; Laurence Josset; Martine Valette; Quentin Semanas                                                                                                                                                                                                                                                                                                                                                                                                                                          |
| EPI_ISL_1313170, EPI_ISL_1336579                                                                                                                                                                                                                                                                                                                                                                                                                                                                                                                                                                                                                                                                                                                                                                                                                                                                                                                                                                                                                                                                                                                                                                                                                                                                                                                                                                                                                                                                                                                                                                                                                                                                                                                                                                                                                                                                                                                                                                                                                                                                                                                                                                                                                                                                                                                                                                                                                                                                                                                                                                                                                                                                                                                                                                                                                                                                                                                                                                                                                                                                                                                                                                                                                                                                                                                                                                                                                                                                                                                                                                                                                                                                                                                                                                                                                                                                                                                                                                                                                                                                                   | LBM TRONQUIERES                                    | CNR Virus des Infections Respiratoires - France SUD                                                                                        | Antonin Bal; Bruno Lina; Gregory Destras; Gwendolynne Burfin; Hadrien Regue; Laurence Josset; Martine Valette; Quentin Semanas                                                                                                                                                                                                                                                                                                                                                                                                                                          |
| EPI_ISL_1253552 to 1253554, EPI_ISL_1265827, EPI_ISL_1265842 to 1265843, EPI_ISL_1287741 to 1287747, EPI_ISL_1287749 to 1287751, EPI_ISL_1312994, EPI_ISL_1313000 to 1313001, EPI_ISL_1313003, EPI_ISL_1314034 to 1314035, EPI_ISL_1314038 to 1314041, EPI_ISL_1336511, EPI_ISL_1359944,                                                                                                                                                                                                                                                                                                                                                                                                                                                                                                                                                                                                                                                                                                                                                                                                                                                                                                                                                                                                                                                                                                                                                                                                                                                                                                                                                                                                                                                                                                                                                                                                                                                                                                                                                                                                                                                                                                                                                                                                                                                                                                                                                                                                                                                                                                                                                                                                                                                                                                                                                                                                                                                                                                                                                                                                                                                                                                                                                                                                                                                                                                                                                                                                                                                                                                                                                                                                                                                                                                                                                                                                                                                                                                                                                                                                                           |                                                    |                                                                                                                                            |                                                                                                                                                                                                                                                                                                                                                                                                                                                                                                                                                                         |

|                                                                                                                                                                                                                                                                                                                                                                                                                                                                                                                                                                                                                                                                                                                                                 |                          |                                                                                                                                            |                                                                                                                                                                                                                                                                                                                                                                                                                                                                                                                                                                         |  |
|-------------------------------------------------------------------------------------------------------------------------------------------------------------------------------------------------------------------------------------------------------------------------------------------------------------------------------------------------------------------------------------------------------------------------------------------------------------------------------------------------------------------------------------------------------------------------------------------------------------------------------------------------------------------------------------------------------------------------------------------------|--------------------------|--------------------------------------------------------------------------------------------------------------------------------------------|-------------------------------------------------------------------------------------------------------------------------------------------------------------------------------------------------------------------------------------------------------------------------------------------------------------------------------------------------------------------------------------------------------------------------------------------------------------------------------------------------------------------------------------------------------------------------|--|
| EPI_ISL_1359949, EPI_ISL_1360000 to 1360002                                                                                                                                                                                                                                                                                                                                                                                                                                                                                                                                                                                                                                                                                                     |                          |                                                                                                                                            |                                                                                                                                                                                                                                                                                                                                                                                                                                                                                                                                                                         |  |
| see above                                                                                                                                                                                                                                                                                                                                                                                                                                                                                                                                                                                                                                                                                                                                       | LBM UNIBIO VALENTIN      | CNR Virus des Infections Respiratoires - France SUD                                                                                        | Antonin Bal; Bruno Lina; Gregory Destras; Gwendolynne Burfin; Hadrien Regue; Laurence Josset; Martine Valette; Quentin Semanas                                                                                                                                                                                                                                                                                                                                                                                                                                          |  |
| EPI_ISL_1213153, EPI_ISL_1213156, EPI_ISL_1213160 to 1213161, EPI_ISL_1213165 to 1213166, EPI_ISL_1213189 to 1213190, EPI_ISL_1213201 to 1213202, EPI_ISL_1213204, EPI_ISL_1213206 to 1213207, EPI_ISL_1213213, EPI_ISL_1213215, EPI_ISL_1213336, EPI_ISL_1213343 to 1213344, EPI_ISL_1213367, EPI_ISL_1213369 to 1213370, EPI_ISL_1213388, EPI_ISL_1213392, EPI_ISL_1213404, EPI_ISL_1213406, EPI_ISL_1213427, EPI_ISL_1213429, EPI_ISL_1213431, EPI_ISL_1213433 to 1213434, EPI_ISL_1213436, EPI_ISL_1213438 to 1213439, EPI_ISL_1213441, EPI_ISL_1213443 to 1213444, EPI_ISL_1213446, EPI_ISL_1213448 to 1213449, EPI_ISL_1213451, EPI_ISL_1213453 to 1213454, EPI_ISL_1213456, EPI_ISL_1213458 to 1213459, EPI_ISL_1213461, EPI_ISL_1213463 |                          |                                                                                                                                            |                                                                                                                                                                                                                                                                                                                                                                                                                                                                                                                                                                         |  |
| see above                                                                                                                                                                                                                                                                                                                                                                                                                                                                                                                                                                                                                                                                                                                                       | LBM/UFPB                 | Bioinformatics Laboratory / LNCC                                                                                                           | Alessandra P Lamarca; Alexandra L Gerber; Ana Paula Melo Mariano; Ana Paula de C Guimarães; Ana Tereza R Vasconcelos; Angela Maria Guimarães Santos; Bianca Mendes Maciel; Danielle Angst Secco; Eduardo Sérgio Soares Sousa; Eloiza Helena Campana; Francisco Paulo Freire Neto; George Rego Albuquerque; Kátia Castanho Scorteci; Lucymara Fassarella Agnez Lima; Luiz G P de Almeida; Luís Cristóvão Porto; Otávio J. Brustolini; Paulo Ricardo Nascimento; Ronaldo da Silva Francisco Jr; Sandra Rocha Gadelha; Selma Maria Bezerra Jeronimo; Vinicius Pietta Perez |  |
| EPI_ISL_1091784 to 1091786                                                                                                                                                                                                                                                                                                                                                                                                                                                                                                                                                                                                                                                                                                                      | LDSP                     | Universidad Nacional de Colombia - Laboratorio Genómico One Health                                                                         | Andres F. Cardona-Rios; Carlos Franco-Muñoz; Daniel O. Maldonado-Perez; Diego A. Álvarez-Díaz; Idabely Betancur Ortiz; Jorge E. Osorio; Juan P. Hernandez-Ortiz; Karl A Ciudoderis; Laura Silvana Perez; Marcela Mercado-Reyes; Maria Angélica Maya; Sandra Ines Cano                                                                                                                                                                                                                                                                                                   |  |
| EPI_ISL_1322353                                                                                                                                                                                                                                                                                                                                                                                                                                                                                                                                                                                                                                                                                                                                 | LEM LXBIO SITE DE MILLAU | CNR Virus des Infections Respiratoires - France SUD                                                                                        | Antonin Bal; Bruno Lina; Gregory Destras; Gwendolynne Burfin; Hadrien Regue; Laurence Josset; Martine Valette; Quentin Semanas                                                                                                                                                                                                                                                                                                                                                                                                                                          |  |
| EPI_ISL_1337390, EPI_ISL_1365658 to 1365660                                                                                                                                                                                                                                                                                                                                                                                                                                                                                                                                                                                                                                                                                                     | LESP Baja California     | Instituto de Diagnostico y Referencia Epidemiologicos (INDRE)                                                                              | Abril Rodriguez-Maldonado; Ariadna Medina-Benitez; Claudia Wong-Arambula; Ernesto Ramirez-Gonzalez.; Gisela Barrera-Badillo; Irma Lopez-Martinez; Joaquin Quiroz-Mercado; Lucia Hernandez-Rivas; Natividad Cruz-Ortiz; Sergio Rangel-Guerrero; Tatiana Nunez-Garcia; Vanessa Rivero-Arredondo                                                                                                                                                                                                                                                                           |  |
| EPI_ISL_1337370 to 1337371, EPI_ISL_1337373 to 1337374, EPI_ISL_1337392 to 1337393                                                                                                                                                                                                                                                                                                                                                                                                                                                                                                                                                                                                                                                              | LESP Baja California Sur | Instituto de Diagnostico y Referencia Epidemiologicos (INDRE)                                                                              | Abril Rodriguez-Maldonado; Ariadna Medina-Benitez; Claudia Wong-Arambula; Ernesto Ramirez-Gonzalez.; Gisela Barrera-Badillo; Irma Lopez-Martinez; Joaquin Quiroz-Mercado; Lucia Hernandez-Rivas; Natividad Cruz-Ortiz; Sergio Rangel-Guerrero; Tatiana Nunez-Garcia; Vanessa Rivero-Arredondo                                                                                                                                                                                                                                                                           |  |
| EPI_ISL_1365657, EPI_ISL_1366687 to 1366689                                                                                                                                                                                                                                                                                                                                                                                                                                                                                                                                                                                                                                                                                                     | LESP Ciudad de Mexico    | Instituto de Diagnostico y Referencia Epidemiologicos (INDRE)                                                                              | Abril Rodriguez-Maldonado; Ariadna Medina-Benitez; Claudia Wong-Arambula; Ernesto Ramirez-Gonzalez.; Gisela Barrera-Badillo; Irma Lopez-Martinez; Joaquin Quiroz-Mercado; Lucia Hernandez-Rivas; Natividad Cruz-Ortiz; Sergio Rangel-Guerrero; Tatiana Nunez-Garcia; Vanessa Rivero-Arredondo                                                                                                                                                                                                                                                                           |  |
| EPI_ISL_1365662 to 1365667                                                                                                                                                                                                                                                                                                                                                                                                                                                                                                                                                                                                                                                                                                                      | LESP Coahuila            | Instituto de Diagnostico y Referencia Epidemiologicos (INDRE)                                                                              | Abril Rodriguez-Maldonado; Ariadna Medina-Benitez; Claudia Wong-Arambula; Ernesto Ramirez-Gonzalez.; Gisela Barrera-Badillo; Irma Lopez-Martinez; Joaquin Quiroz-Mercado; Lucia Hernandez-Rivas; Natividad Cruz-Ortiz; Sergio Rangel-Guerrero; Tatiana Nunez-Garcia; Vanessa Rivero-Arredondo                                                                                                                                                                                                                                                                           |  |
| EPI_ISL_1337395                                                                                                                                                                                                                                                                                                                                                                                                                                                                                                                                                                                                                                                                                                                                 | LESP Colima              | Instituto de Diagnostico y Referencia Epidemiologicos (INDRE)                                                                              | Abril Rodriguez-Maldonado; Ariadna Medina-Benitez; Claudia Wong-Arambula; Ernesto Ramirez-Gonzalez.; Gisela Barrera-Badillo; Irma Lopez-Martinez; Joaquin Quiroz-Mercado; Lucia Hernandez-Rivas; Natividad Cruz-Ortiz; Sergio Rangel-Guerrero; Tatiana Nunez-Garcia; Vanessa Rivero-Arredondo                                                                                                                                                                                                                                                                           |  |
| EPI_ISL_1334386, EPI_ISL_1337363, EPI_ISL_1337365, EPI_ISL_1337367, EPI_ISL_1337376 to 1337377, EPI_ISL_1337379 to 1337380, EPI_ISL_1337382 to 1337384, EPI_ISL_1337386 to 1337387, EPI_ISL_1340608, EPI_ISL_1340610 to 1340611, EPI_ISL_1340614, EPI_ISL_1340616 to 1340617, EPI_ISL_1340624, EPI_ISL_1340626 to 1340627, EPI_ISL_1340630 to 1340631, EPI_ISL_1340633, EPI_ISL_1340643 to 1340644, EPI_ISL_1340646 to 1340648, EPI_ISL_1340650, EPI_ISL_1359070 to 1359087, EPI_ISL_1365675, EPI_ISL_1366700                                                                                                                                                                                                                                   |                          |                                                                                                                                            |                                                                                                                                                                                                                                                                                                                                                                                                                                                                                                                                                                         |  |
| see above                                                                                                                                                                                                                                                                                                                                                                                                                                                                                                                                                                                                                                                                                                                                       | LESP Guanajuato          | Instituto de Diagnostico y Referencia Epidemiologicos (INDRE)                                                                              | Abril Rodriguez-Maldonado; Ariadna Medina-Benitez; Claudia Wong-Arambula; Ernesto Ramirez-Gonzalez.; Gisela Barrera-Badillo; Irma Lopez-Martinez; Joaquin Quiroz-Mercado; Lucia Hernandez-Rivas; Natividad Cruz-Ortiz; Sergio Rangel-Guerrero; Tatiana Nunez-Garcia; Vanessa Rivero-Arredondo                                                                                                                                                                                                                                                                           |  |
| EPI_ISL_1334381                                                                                                                                                                                                                                                                                                                                                                                                                                                                                                                                                                                                                                                                                                                                 | LESP Guerrero            | Instituto de Diagnostico y Referencia Epidemiologicos (INDRE)                                                                              | Abril Rodriguez-Maldonado; Ariadna Medina-Benitez; Claudia Wong-Arambula; Ernesto Ramirez-Gonzalez.; Gisela Barrera-Badillo; Irma Lopez-Martinez; Joaquin Quiroz-Mercado; Lucia Hernandez-Rivas; Natividad Cruz-Ortiz; Sergio Rangel-Guerrero; Tatiana Nunez-Garcia; Vanessa Rivero-Arredondo                                                                                                                                                                                                                                                                           |  |
| EPI_ISL_1340640, EPI_ISL_1340642, EPI_ISL_1366690 to 1366692                                                                                                                                                                                                                                                                                                                                                                                                                                                                                                                                                                                                                                                                                    | LESP Hidalgo             | Instituto de Diagnostico y Referencia Epidemiologicos (INDRE)                                                                              | Abril Rodriguez-Maldonado; Ariadna Medina-Benitez; Claudia Wong-Arambula; Ernesto Ramirez-Gonzalez.; Gisela Barrera-Badillo; Irma Lopez-Martinez; Joaquin Quiroz-Mercado; Lucia Hernandez-Rivas; Natividad Cruz-Ortiz; Sergio Rangel-Guerrero; Tatiana Nunez-Garcia; Vanessa Rivero-Arredondo                                                                                                                                                                                                                                                                           |  |
| EPI_ISL_1366661 to 1366662                                                                                                                                                                                                                                                                                                                                                                                                                                                                                                                                                                                                                                                                                                                      | LESP Jalisco             | Instituto de Diagnostico y Referencia Epidemiologicos (INDRE)                                                                              | Abril Rodriguez-Maldonado; Ariadna Medina-Benitez; Claudia Wong-Arambula; Ernesto Ramirez-Gonzalez.; Gisela Barrera-Badillo; Irma Lopez-Martinez; Joaquin Quiroz-Mercado; Lucia Hernandez-Rivas; Natividad Cruz-Ortiz; Sergio Rangel-Guerrero; Tatiana Nunez-Garcia; Vanessa Rivero-Arredondo                                                                                                                                                                                                                                                                           |  |
| EPI_ISL_1365650 to 1365655, EPI_ISL_1366677 to 1366681                                                                                                                                                                                                                                                                                                                                                                                                                                                                                                                                                                                                                                                                                          | LESP Morelos             | Instituto de Diagnostico y Referencia Epidemiologicos (INDRE)                                                                              | Abril Rodriguez-Maldonado; Ariadna Medina-Benitez; Claudia Wong-Arambula; Ernesto Ramirez-Gonzalez.; Gisela Barrera-Badillo; Irma Lopez-Martinez; Joaquin Quiroz-Mercado; Lucia Hernandez-Rivas; Natividad Cruz-Ortiz; Sergio Rangel-Guerrero; Tatiana Nunez-Garcia; Vanessa Rivero-Arredondo                                                                                                                                                                                                                                                                           |  |
| EPI_ISL_1337368, EPI_ISL_1365639 to 1365648, EPI_ISL_1365668 to 1365674, EPI_ISL_1366663 to 1366665, EPI_ISL_1366693 to 1366699                                                                                                                                                                                                                                                                                                                                                                                                                                                                                                                                                                                                                 | LESP Nuevo Leon          | Instituto de Diagnostico y Referencia Epidemiologicos (INDRE)                                                                              | Abril Rodriguez-Maldonado; Ariadna Medina-Benitez; Claudia Wong-Arambula; Ernesto Ramirez-Gonzalez.; Gisela Barrera-Badillo; Irma Lopez-Martinez; Joaquin Quiroz-Mercado; Lucia Hernandez-Rivas; Natividad Cruz-Ortiz; Sergio Rangel-Guerrero; Tatiana Nunez-Garcia; Vanessa Rivero-Arredondo                                                                                                                                                                                                                                                                           |  |
| EPI_ISL_1340651 to 1340652, EPI_ISL_1366660                                                                                                                                                                                                                                                                                                                                                                                                                                                                                                                                                                                                                                                                                                     | LESP Puebla              | Instituto de Diagnostico y Referencia Epidemiologicos (INDRE)                                                                              | Abril Rodriguez-Maldonado; Ariadna Medina-Benitez; Claudia Wong-Arambula; Ernesto Ramirez-Gonzalez.; Gisela Barrera-Badillo; Irma Lopez-Martinez; Joaquin Quiroz-Mercado; Lucia Hernandez-Rivas; Natividad Cruz-Ortiz; Sergio Rangel-Guerrero; Tatiana Nunez-Garcia; Vanessa Rivero-Arredondo                                                                                                                                                                                                                                                                           |  |
| EPI_ISL_1337360, EPI_ISL_1337362, EPI_ISL_1340636 to 1340637, EPI_ISL_1340639, EPI_ISL_1340655, EPI_ISL_1340657, EPI_ISL_1359064 to 1359065, EPI_ISL_1366667 to 1366676                                                                                                                                                                                                                                                                                                                                                                                                                                                                                                                                                                         |                          |                                                                                                                                            |                                                                                                                                                                                                                                                                                                                                                                                                                                                                                                                                                                         |  |
| see above                                                                                                                                                                                                                                                                                                                                                                                                                                                                                                                                                                                                                                                                                                                                       | LESP Queretaro           | Instituto de Diagnostico y Referencia Epidemiologicos (INDRE)                                                                              | Abril Rodriguez-Maldonado; Ariadna Medina-Benitez; Claudia Wong-Arambula; Ernesto Ramirez-Gonzalez.; Gisela Barrera-Badillo; Irma Lopez-Martinez; Joaquin Quiroz-Mercado; Lucia Hernandez-Rivas; Natividad Cruz-Ortiz; Sergio Rangel-Guerrero; Tatiana Nunez-Garcia; Vanessa Rivero-Arredondo                                                                                                                                                                                                                                                                           |  |
| EPI_ISL_1324767, EPI_ISL_1365661                                                                                                                                                                                                                                                                                                                                                                                                                                                                                                                                                                                                                                                                                                                | LESP Quintana Roo        | Instituto de Diagnostico y Referencia Epidemiologicos (INDRE)                                                                              | Abril Rodriguez-Maldonado; Ariadna Medina-Benitez; Claudia Wong-Arambula; Ernesto Ramirez-Gonzalez.; Gisela Barrera-Badillo; Irma Lopez-Martinez; Joaquin Quiroz-Mercado; Lucia Hernandez-Rivas; Natali Vega-Magana; Natividad Cruz-Ortiz; Sergio Rangel-Guerrero; Tatiana Nunez-Garcia; Vanessa Rivero-Arredondo                                                                                                                                                                                                                                                       |  |
| EPI_ISL_1337389                                                                                                                                                                                                                                                                                                                                                                                                                                                                                                                                                                                                                                                                                                                                 | LESP Sinaloa             | Instituto de Diagnostico y Referencia Epidemiologicos (INDRE)                                                                              | Abril Rodriguez-Maldonado; Ariadna Medina-Benitez; Claudia Wong-Arambula; Ernesto Ramirez-Gonzalez.; Gisela Barrera-Badillo; Irma Lopez-Martinez; Joaquin Quiroz-Mercado; Lucia Hernandez-Rivas; Natividad Cruz-Ortiz; Sergio Rangel-Guerrero; Tatiana Nunez-Garcia; Vanessa Rivero-Arredondo                                                                                                                                                                                                                                                                           |  |
| EPI_ISL_1365649                                                                                                                                                                                                                                                                                                                                                                                                                                                                                                                                                                                                                                                                                                                                 | LESP Tamaulipas          | Instituto de Diagnostico y Referencia Epidemiologicos (INDRE)                                                                              | Abril Rodriguez-Maldonado; Ariadna Medina-Benitez; Claudia Wong-Arambula; Ernesto Ramirez-Gonzalez.; Gisela Barrera-Badillo; Irma Lopez-Martinez; Joaquin Quiroz-Mercado; Lucia Hernandez-Rivas; Natividad Cruz-Ortiz; Sergio Rangel-Guerrero; Tatiana Nunez-Garcia; Vanessa Rivero-Arredondo                                                                                                                                                                                                                                                                           |  |
| EPI_ISL_1365656, EPI_ISL_1366682 to 1366686                                                                                                                                                                                                                                                                                                                                                                                                                                                                                                                                                                                                                                                                                                     | LESP Veracruz            | Instituto de Diagnostico y Referencia Epidemiologicos (INDRE)                                                                              | Abril Rodriguez-Maldonado; Ariadna Medina-Benitez; Claudia Wong-Arambula; Ernesto Ramirez-Gonzalez.; Gisela Barrera-Badillo; Irma Lopez-Martinez; Joaquin Quiroz-Mercado; Lucia Hernandez-Rivas; Natividad Cruz-Ortiz; Sergio Rangel-Guerrero; Tatiana Nunez-Garcia; Vanessa Rivero-Arredondo                                                                                                                                                                                                                                                                           |  |
| EPI_ISL_1340658, EPI_ISL_1340661, EPI_ISL_1359066 to 1359067, EPI_ISL_1366666                                                                                                                                                                                                                                                                                                                                                                                                                                                                                                                                                                                                                                                                   | LESP Yucatan             | Instituto de Diagnostico y Referencia Epidemiologicos (INDRE)                                                                              | Abril Rodriguez-Maldonado; Ariadna Medina-Benitez; Claudia Wong-Arambula; Ernesto Ramirez-Gonzalez.; Gisela Barrera-Badillo; Irma Lopez-Martinez; Joaquin Quiroz-Mercado; Lucia Hernandez-Rivas; Natividad Cruz-Ortiz; Sergio Rangel-Guerrero; Tatiana Nunez-Garcia; Vanessa Rivero-Arredondo                                                                                                                                                                                                                                                                           |  |
| EPI_ISL_1340660, EPI_ISL_1359068 to 1359069                                                                                                                                                                                                                                                                                                                                                                                                                                                                                                                                                                                                                                                                                                     | LESP Zacatecas           | Instituto de Diagnostico y Referencia Epidemiologicos (INDRE)                                                                              | Abril Rodriguez-Maldonado; Ariadna Medina-Benitez; Claudia Wong-Arambula; Ernesto Ramirez-Gonzalez.; Gisela Barrera-Badillo; Irma Lopez-Martinez; Joaquin Quiroz-Mercado; Lucia Hernandez-Rivas; Natividad Cruz-Ortiz; Sergio Rangel-Guerrero; Tatiana Nunez-Garcia; Vanessa Rivero-Arredondo                                                                                                                                                                                                                                                                           |  |
| EPI_ISL_1335757                                                                                                                                                                                                                                                                                                                                                                                                                                                                                                                                                                                                                                                                                                                                 | LESP Zacatecas           | Instituto de diagnóstico y Referencia Epidemiologicos (INDRE) Departamento de Virología                                                    | Abril Rodriguez-Maldonado; Ariadna Medina-Benitez; Claudia Wong-Arambula; Ernesto Ramirez-Gonzalez.; Gisela Barrera-Badillo; Irma Lopez-Martinez; Joaquin Quiroz-Mercado; Lucia Hernandez-Rivas; Natividad Cruz-Ortiz; Sergio Rangel-Guerrero; Tatiana Nunez-Garcia; Vanessa Rivero-Arredondo                                                                                                                                                                                                                                                                           |  |
| EPI_ISL_1180935                                                                                                                                                                                                                                                                                                                                                                                                                                                                                                                                                                                                                                                                                                                                 | LHUB-ULB                 | LHUB-ULB                                                                                                                                   | Charlotte Michel; Marie Hallin; Olivier Vandenberg                                                                                                                                                                                                                                                                                                                                                                                                                                                                                                                      |  |
| EPI_ISL_1039233, EPI_ISL_1039237, EPI_ISL_1039248, EPI_ISL_1039250, EPI_ISL_1039711, EPI_ISL_1039737, EPI_ISL_1039830, EPI_ISL_1039832 to 1039835, EPI_ISL_1039948 to 1039951, EPI_ISL_1040471 to 1040472, EPI_ISL_1040475 to 1040478, EPI_ISL_1164846, EPI_ISL_1164848, EPI_ISL_1164852, EPI_ISL_1166890, EPI_ISL_1190842 to 1190843, EPI_ISL_1259242 to 1259249, EPI_ISL_1259251, EPI_ISL_1259253 to 1259258, EPI_ISL_1259260 to 1259262, EPI_ISL_1259267 to 1259269, EPI_ISL_1259271 to 1259277, EPI_ISL_1279945 to 1279946, EPI_ISL_1298181, EPI_ISL_1298186, EPI_ISL_1298191, EPI_ISL_1305783, EPI_ISL_1305786 to 1305788, EPI_ISL_1336268, EPI_ISL_1337448 to 1337453, EPI_ISL_1337630                                                    |                          |                                                                                                                                            |                                                                                                                                                                                                                                                                                                                                                                                                                                                                                                                                                                         |  |
| see above                                                                                                                                                                                                                                                                                                                                                                                                                                                                                                                                                                                                                                                                                                                                       | LHUB-ULB                 | UAntwerp, Laboratory of Medical Microbiology                                                                                               | Basil Britto Xavier; Christine Lammens; Herman Goossens; Jasmine Coppens; Marie Le Mercier; Veerle Matheussen                                                                                                                                                                                                                                                                                                                                                                                                                                                           |  |
| EPI_ISL_1219139 to 1219158, EPI_ISL_1219269 to 1219286, EPI_ISL_1219393 to 1219411, EPI_ISL_1219559 to 1219578, EPI_ISL_1312498 to 1312509, EPI_ISL_1321898 to 1321906, EPI_ISL_1321940, EPI_ISL_1321949, EPI_ISL_1321961 to 1321962, EPI_ISL_1321983, EPI_ISL_1321990 to 1321991                                                                                                                                                                                                                                                                                                                                                                                                                                                               |                          |                                                                                                                                            |                                                                                                                                                                                                                                                                                                                                                                                                                                                                                                                                                                         |  |
| see above                                                                                                                                                                                                                                                                                                                                                                                                                                                                                                                                                                                                                                                                                                                                       | LIC                      | Latvian Biomedical Research and Study Centre                                                                                               | Davidis Fridmanis; Diana Dusacka; Eilina Dimina; Gunars Zarins; Ivars Silamkelis; Janis Klavins; Janis Pjalkovskis; Juris Pjalkovskis; Kaspars Megnis; Laila Silamkele; Lauma Freimane; Laura Ansonē; Liga Birzniece; Monta Ustinova; Nikita Zrelvos; Reinis Zeltmatis; Uga Dumpis; Una Krūmina; Vita Rovite                                                                                                                                                                                                                                                            |  |
| EPI_ISL_1085288                                                                                                                                                                                                                                                                                                                                                                                                                                                                                                                                                                                                                                                                                                                                 | LISIEUX Cerballiance     | Department of Virology, Henri Mondor University Hospital, Assistance Publique Hôpitaux de Paris, Université Paris-Est Créteil, INSERM U955 | Alexandre Soulier; Christophe Rodriguez; Elisabeth Trawinski; Guillaume Gricourt; Jean-Michel Pawlotsky; Melissa N'Debi; Slim Fourati; Vanessa Demontant                                                                                                                                                                                                                                                                                                                                                                                                                |  |

| EPI_ISL_1138890                                                                                                                                                                                                                                                                                                                                                                                                                                                                                                                                                                                                                                                                                                                                                                                                                                                                                                                                                                                                                                                                                                                                                                                                                                                                                                                                                                                                                                                                                                                                                                                                                                                                                                                                                                                                                                                                                                                                                                                                                                                                                                                                                                                                                                                                                                                                                                                                                                                                                                                                                                                                                                                                                                                                                                                                                                                                                                                                                                                                                                                                                                                                                                                                                                                                                                                                                                                                                                                                                                                                                                                                                                                                                                                                                                                                                                                                                                                                                                                                                                                                                                                                                                                                                                                                                                                                                                                                                                                                                                                                                                                                                                                                                                                                                                                                                                                                                                                                                                                                                                                                                                                                                                                                                                                                                                                                                                                                                                                                                                                                                                                                                                                                                                                                                                                                                                                                                                                                                                                                                                                                                                                                                                                                                                                                                                                                                                                                                                                                                                                                                                                                                                                                                                                                                                                                                                                                                                                                                                                                                                                                                                                                                                                                                                                                                                                                                                                                                                                                                                                                                                                                                                                                                                                                                                                                                                                                                                                                                                                                                                                                                                                                                                                                                                                                                                                                                                                                                                                                                                                                                                                                                                                                                                                                                                                                                                                                                                                                                                                                                                                                                                                                                                                                                                                                                                                                                                                                                                                                                                                                                                                                                                                                                                                                                                                                                                                                                                                                                                                                                                                                                                                                                                                                                                                                                                                                                                                                                                                                                                                                                                                                                                                                                                                                                                                          | LKOLMC                                                    | Jessa                                                                                                               | Cruys et al. on behalf of the Jessa_cmdLab                                                                                                                                                                                                                                                                                                                                                                                                                                                     |
|----------------------------------------------------------------------------------------------------------------------------------------------------------------------------------------------------------------------------------------------------------------------------------------------------------------------------------------------------------------------------------------------------------------------------------------------------------------------------------------------------------------------------------------------------------------------------------------------------------------------------------------------------------------------------------------------------------------------------------------------------------------------------------------------------------------------------------------------------------------------------------------------------------------------------------------------------------------------------------------------------------------------------------------------------------------------------------------------------------------------------------------------------------------------------------------------------------------------------------------------------------------------------------------------------------------------------------------------------------------------------------------------------------------------------------------------------------------------------------------------------------------------------------------------------------------------------------------------------------------------------------------------------------------------------------------------------------------------------------------------------------------------------------------------------------------------------------------------------------------------------------------------------------------------------------------------------------------------------------------------------------------------------------------------------------------------------------------------------------------------------------------------------------------------------------------------------------------------------------------------------------------------------------------------------------------------------------------------------------------------------------------------------------------------------------------------------------------------------------------------------------------------------------------------------------------------------------------------------------------------------------------------------------------------------------------------------------------------------------------------------------------------------------------------------------------------------------------------------------------------------------------------------------------------------------------------------------------------------------------------------------------------------------------------------------------------------------------------------------------------------------------------------------------------------------------------------------------------------------------------------------------------------------------------------------------------------------------------------------------------------------------------------------------------------------------------------------------------------------------------------------------------------------------------------------------------------------------------------------------------------------------------------------------------------------------------------------------------------------------------------------------------------------------------------------------------------------------------------------------------------------------------------------------------------------------------------------------------------------------------------------------------------------------------------------------------------------------------------------------------------------------------------------------------------------------------------------------------------------------------------------------------------------------------------------------------------------------------------------------------------------------------------------------------------------------------------------------------------------------------------------------------------------------------------------------------------------------------------------------------------------------------------------------------------------------------------------------------------------------------------------------------------------------------------------------------------------------------------------------------------------------------------------------------------------------------------------------------------------------------------------------------------------------------------------------------------------------------------------------------------------------------------------------------------------------------------------------------------------------------------------------------------------------------------------------------------------------------------------------------------------------------------------------------------------------------------------------------------------------------------------------------------------------------------------------------------------------------------------------------------------------------------------------------------------------------------------------------------------------------------------------------------------------------------------------------------------------------------------------------------------------------------------------------------------------------------------------------------------------------------------------------------------------------------------------------------------------------------------------------------------------------------------------------------------------------------------------------------------------------------------------------------------------------------------------------------------------------------------------------------------------------------------------------------------------------------------------------------------------------------------------------------------------------------------------------------------------------------------------------------------------------------------------------------------------------------------------------------------------------------------------------------------------------------------------------------------------------------------------------------------------------------------------------------------------------------------------------------------------------------------------------------------------------------------------------------------------------------------------------------------------------------------------------------------------------------------------------------------------------------------------------------------------------------------------------------------------------------------------------------------------------------------------------------------------------------------------------------------------------------------------------------------------------------------------------------------------------------------------------------------------------------------------------------------------------------------------------------------------------------------------------------------------------------------------------------------------------------------------------------------------------------------------------------------------------------------------------------------------------------------------------------------------------------------------------------------------------------------------------------------------------------------------------------------------------------------------------------------------------------------------------------------------------------------------------------------------------------------------------------------------------------------------------------------------------------------------------------------------------------------------------------------------------------------------------------------------------------------------------------------------------------------------------------------------------------------------------------------------------------------------------------------------------------------------------------------------------------------------------------------------------------------------------------------------------------------------------------------------------------------------------------------------------------------------------------------------------------------------------------------------------------------------------------------------------------------------------------------------------------------------------------------------------------------------------------------------------------------------------------------------------------------------------------------------------------------------------------------------------------------------------------------------------------------------------------------------------------------------------------------------------------------------------------------------------------------------------------------------------------------------------------------------------------------------------------------------------------------------------------------------------------------------------------------------------------------------------------------------------------------------------------------------------------------------------------------------------------------------------------------------------------------------------------------------------------------------------------------------------------------------------------------------------------------------------------------------------------------------------------------------------------------------------------------------------------------------------------------------------------------------------------------------------------------------------------------------------------------------------------------------------------------------------------------------------------------------------------------------------------------------------------------------------------------|-----------------------------------------------------------|---------------------------------------------------------------------------------------------------------------------|------------------------------------------------------------------------------------------------------------------------------------------------------------------------------------------------------------------------------------------------------------------------------------------------------------------------------------------------------------------------------------------------------------------------------------------------------------------------------------------------|
| EPI_ISL_1039521 to 1039541, EPI_ISL_1039543 to 1039689, EPI_ISL_1040072 to 1040118, EPI_ISL_1164856 to 1164926, EPI_ISL_1168348 to 1168353, EPI_ISL_1324153 to 1324383, EPI_ISL_1341783 to 1341791                                                                                                                                                                                                                                                                                                                                                                                                                                                                                                                                                                                                                                                                                                                                                                                                                                                                                                                                                                                                                                                                                                                                                                                                                                                                                                                                                                                                                                                                                                                                                                                                                                                                                                                                                                                                                                                                                                                                                                                                                                                                                                                                                                                                                                                                                                                                                                                                                                                                                                                                                                                                                                                                                                                                                                                                                                                                                                                                                                                                                                                                                                                                                                                                                                                                                                                                                                                                                                                                                                                                                                                                                                                                                                                                                                                                                                                                                                                                                                                                                                                                                                                                                                                                                                                                                                                                                                                                                                                                                                                                                                                                                                                                                                                                                                                                                                                                                                                                                                                                                                                                                                                                                                                                                                                                                                                                                                                                                                                                                                                                                                                                                                                                                                                                                                                                                                                                                                                                                                                                                                                                                                                                                                                                                                                                                                                                                                                                                                                                                                                                                                                                                                                                                                                                                                                                                                                                                                                                                                                                                                                                                                                                                                                                                                                                                                                                                                                                                                                                                                                                                                                                                                                                                                                                                                                                                                                                                                                                                                                                                                                                                                                                                                                                                                                                                                                                                                                                                                                                                                                                                                                                                                                                                                                                                                                                                                                                                                                                                                                                                                                                                                                                                                                                                                                                                                                                                                                                                                                                                                                                                                                                                                                                                                                                                                                                                                                                                                                                                                                                                                                                                                                                                                                                                                                                                                                                                                                                                                                                                                                                                                                                       | see above                                                 | see above                                                                                                           | see above                                                                                                                                                                                                                                                                                                                                                                                                                                                                                      |
| see above                                                                                                                                                                                                                                                                                                                                                                                                                                                                                                                                                                                                                                                                                                                                                                                                                                                                                                                                                                                                                                                                                                                                                                                                                                                                                                                                                                                                                                                                                                                                                                                                                                                                                                                                                                                                                                                                                                                                                                                                                                                                                                                                                                                                                                                                                                                                                                                                                                                                                                                                                                                                                                                                                                                                                                                                                                                                                                                                                                                                                                                                                                                                                                                                                                                                                                                                                                                                                                                                                                                                                                                                                                                                                                                                                                                                                                                                                                                                                                                                                                                                                                                                                                                                                                                                                                                                                                                                                                                                                                                                                                                                                                                                                                                                                                                                                                                                                                                                                                                                                                                                                                                                                                                                                                                                                                                                                                                                                                                                                                                                                                                                                                                                                                                                                                                                                                                                                                                                                                                                                                                                                                                                                                                                                                                                                                                                                                                                                                                                                                                                                                                                                                                                                                                                                                                                                                                                                                                                                                                                                                                                                                                                                                                                                                                                                                                                                                                                                                                                                                                                                                                                                                                                                                                                                                                                                                                                                                                                                                                                                                                                                                                                                                                                                                                                                                                                                                                                                                                                                                                                                                                                                                                                                                                                                                                                                                                                                                                                                                                                                                                                                                                                                                                                                                                                                                                                                                                                                                                                                                                                                                                                                                                                                                                                                                                                                                                                                                                                                                                                                                                                                                                                                                                                                                                                                                                                                                                                                                                                                                                                                                                                                                                                                                                                                                                                | LSUHS Emerging Viral Threat Laboratory                    | Microbial Genome Sequencing Center                                                                                  | Andrew D. Yurochko; Christopher G. Kevill; Daniel J. Snyder; Jennifer L. Carroll; Jeremy P. Kamil; John A. Vanchiere; Maarten Van Diest; Martin J. Sapp; Rona S. Scott; Vaughn S. Cooper                                                                                                                                                                                                                                                                                                       |
| EPI_ISL_1313015, EPI_ISL_1322361                                                                                                                                                                                                                                                                                                                                                                                                                                                                                                                                                                                                                                                                                                                                                                                                                                                                                                                                                                                                                                                                                                                                                                                                                                                                                                                                                                                                                                                                                                                                                                                                                                                                                                                                                                                                                                                                                                                                                                                                                                                                                                                                                                                                                                                                                                                                                                                                                                                                                                                                                                                                                                                                                                                                                                                                                                                                                                                                                                                                                                                                                                                                                                                                                                                                                                                                                                                                                                                                                                                                                                                                                                                                                                                                                                                                                                                                                                                                                                                                                                                                                                                                                                                                                                                                                                                                                                                                                                                                                                                                                                                                                                                                                                                                                                                                                                                                                                                                                                                                                                                                                                                                                                                                                                                                                                                                                                                                                                                                                                                                                                                                                                                                                                                                                                                                                                                                                                                                                                                                                                                                                                                                                                                                                                                                                                                                                                                                                                                                                                                                                                                                                                                                                                                                                                                                                                                                                                                                                                                                                                                                                                                                                                                                                                                                                                                                                                                                                                                                                                                                                                                                                                                                                                                                                                                                                                                                                                                                                                                                                                                                                                                                                                                                                                                                                                                                                                                                                                                                                                                                                                                                                                                                                                                                                                                                                                                                                                                                                                                                                                                                                                                                                                                                                                                                                                                                                                                                                                                                                                                                                                                                                                                                                                                                                                                                                                                                                                                                                                                                                                                                                                                                                                                                                                                                                                                                                                                                                                                                                                                                                                                                                                                                                                                                                                         | LX BIO                                                    | CNR Virus des Infections Respiratoires - France SUD                                                                 | Antonin Bal; Bruno Lina; Gregory Destras; Gwendolynne Burfin; Hadrien Regue; Laurence Josset; Martine Valette; Quentin Semanas                                                                                                                                                                                                                                                                                                                                                                 |
| EPI_ISL_1060792, EPI_ISL_1060796                                                                                                                                                                                                                                                                                                                                                                                                                                                                                                                                                                                                                                                                                                                                                                                                                                                                                                                                                                                                                                                                                                                                                                                                                                                                                                                                                                                                                                                                                                                                                                                                                                                                                                                                                                                                                                                                                                                                                                                                                                                                                                                                                                                                                                                                                                                                                                                                                                                                                                                                                                                                                                                                                                                                                                                                                                                                                                                                                                                                                                                                                                                                                                                                                                                                                                                                                                                                                                                                                                                                                                                                                                                                                                                                                                                                                                                                                                                                                                                                                                                                                                                                                                                                                                                                                                                                                                                                                                                                                                                                                                                                                                                                                                                                                                                                                                                                                                                                                                                                                                                                                                                                                                                                                                                                                                                                                                                                                                                                                                                                                                                                                                                                                                                                                                                                                                                                                                                                                                                                                                                                                                                                                                                                                                                                                                                                                                                                                                                                                                                                                                                                                                                                                                                                                                                                                                                                                                                                                                                                                                                                                                                                                                                                                                                                                                                                                                                                                                                                                                                                                                                                                                                                                                                                                                                                                                                                                                                                                                                                                                                                                                                                                                                                                                                                                                                                                                                                                                                                                                                                                                                                                                                                                                                                                                                                                                                                                                                                                                                                                                                                                                                                                                                                                                                                                                                                                                                                                                                                                                                                                                                                                                                                                                                                                                                                                                                                                                                                                                                                                                                                                                                                                                                                                                                                                                                                                                                                                                                                                                                                                                                                                                                                                                                                                                         | Lab Corp of America-Raritan                               | New Jersey Public Health Environmental Laboratories (NJ-PHEL)                                                       | Byeong Jeong; Dana Woell; Lindsey Bodnar; Shiv Verma                                                                                                                                                                                                                                                                                                                                                                                                                                           |
| EPI_ISL_1039698, EPI_ISL_1039704, EPI_ISL_1139075, EPI_ISL_1139077                                                                                                                                                                                                                                                                                                                                                                                                                                                                                                                                                                                                                                                                                                                                                                                                                                                                                                                                                                                                                                                                                                                                                                                                                                                                                                                                                                                                                                                                                                                                                                                                                                                                                                                                                                                                                                                                                                                                                                                                                                                                                                                                                                                                                                                                                                                                                                                                                                                                                                                                                                                                                                                                                                                                                                                                                                                                                                                                                                                                                                                                                                                                                                                                                                                                                                                                                                                                                                                                                                                                                                                                                                                                                                                                                                                                                                                                                                                                                                                                                                                                                                                                                                                                                                                                                                                                                                                                                                                                                                                                                                                                                                                                                                                                                                                                                                                                                                                                                                                                                                                                                                                                                                                                                                                                                                                                                                                                                                                                                                                                                                                                                                                                                                                                                                                                                                                                                                                                                                                                                                                                                                                                                                                                                                                                                                                                                                                                                                                                                                                                                                                                                                                                                                                                                                                                                                                                                                                                                                                                                                                                                                                                                                                                                                                                                                                                                                                                                                                                                                                                                                                                                                                                                                                                                                                                                                                                                                                                                                                                                                                                                                                                                                                                                                                                                                                                                                                                                                                                                                                                                                                                                                                                                                                                                                                                                                                                                                                                                                                                                                                                                                                                                                                                                                                                                                                                                                                                                                                                                                                                                                                                                                                                                                                                                                                                                                                                                                                                                                                                                                                                                                                                                                                                                                                                                                                                                                                                                                                                                                                                                                                                                                                                                                                                       | Lab Loc - Itapecerica da Serra                            | Instituto Adolfo Lutz, Interdisciplinary Procedures Center, Strategic Laboratory                                    | Caio Vinicius Dias Lopes; Claudia Regina Gonçalves; Claudio Tavares Sacchi; Erica Valessa Ramos Gomes; Karoline Rodrigues Campos                                                                                                                                                                                                                                                                                                                                                               |
| EPI_ISL_1073827 to 1073914, EPI_ISL_1109737 to 1109902, EPI_ISL_1117593 to 1117596, EPI_ISL_1118818 to 1118848, EPI_ISL_1273105 to 1273213, EPI_ISL_1322016 to 1322105, EPI_ISL_1334414 to 1334515, EPI_ISL_1369051 to 1369171, EPI_ISL_1373037 to 1373134                                                                                                                                                                                                                                                                                                                                                                                                                                                                                                                                                                                                                                                                                                                                                                                                                                                                                                                                                                                                                                                                                                                                                                                                                                                                                                                                                                                                                                                                                                                                                                                                                                                                                                                                                                                                                                                                                                                                                                                                                                                                                                                                                                                                                                                                                                                                                                                                                                                                                                                                                                                                                                                                                                                                                                                                                                                                                                                                                                                                                                                                                                                                                                                                                                                                                                                                                                                                                                                                                                                                                                                                                                                                                                                                                                                                                                                                                                                                                                                                                                                                                                                                                                                                                                                                                                                                                                                                                                                                                                                                                                                                                                                                                                                                                                                                                                                                                                                                                                                                                                                                                                                                                                                                                                                                                                                                                                                                                                                                                                                                                                                                                                                                                                                                                                                                                                                                                                                                                                                                                                                                                                                                                                                                                                                                                                                                                                                                                                                                                                                                                                                                                                                                                                                                                                                                                                                                                                                                                                                                                                                                                                                                                                                                                                                                                                                                                                                                                                                                                                                                                                                                                                                                                                                                                                                                                                                                                                                                                                                                                                                                                                                                                                                                                                                                                                                                                                                                                                                                                                                                                                                                                                                                                                                                                                                                                                                                                                                                                                                                                                                                                                                                                                                                                                                                                                                                                                                                                                                                                                                                                                                                                                                                                                                                                                                                                                                                                                                                                                                                                                                                                                                                                                                                                                                                                                                                                                                                                                                                                                                                               | see above                                                 | see above                                                                                                           | see above                                                                                                                                                                                                                                                                                                                                                                                                                                                                                      |
| see above                                                                                                                                                                                                                                                                                                                                                                                                                                                                                                                                                                                                                                                                                                                                                                                                                                                                                                                                                                                                                                                                                                                                                                                                                                                                                                                                                                                                                                                                                                                                                                                                                                                                                                                                                                                                                                                                                                                                                                                                                                                                                                                                                                                                                                                                                                                                                                                                                                                                                                                                                                                                                                                                                                                                                                                                                                                                                                                                                                                                                                                                                                                                                                                                                                                                                                                                                                                                                                                                                                                                                                                                                                                                                                                                                                                                                                                                                                                                                                                                                                                                                                                                                                                                                                                                                                                                                                                                                                                                                                                                                                                                                                                                                                                                                                                                                                                                                                                                                                                                                                                                                                                                                                                                                                                                                                                                                                                                                                                                                                                                                                                                                                                                                                                                                                                                                                                                                                                                                                                                                                                                                                                                                                                                                                                                                                                                                                                                                                                                                                                                                                                                                                                                                                                                                                                                                                                                                                                                                                                                                                                                                                                                                                                                                                                                                                                                                                                                                                                                                                                                                                                                                                                                                                                                                                                                                                                                                                                                                                                                                                                                                                                                                                                                                                                                                                                                                                                                                                                                                                                                                                                                                                                                                                                                                                                                                                                                                                                                                                                                                                                                                                                                                                                                                                                                                                                                                                                                                                                                                                                                                                                                                                                                                                                                                                                                                                                                                                                                                                                                                                                                                                                                                                                                                                                                                                                                                                                                                                                                                                                                                                                                                                                                                                                                                                                                | Lab voor klinische biologie                               | Lab voor klinische biologie                                                                                         | Bruno Verhassel; Hannelore Hamerlinck; Marija Janevska                                                                                                                                                                                                                                                                                                                                                                                                                                         |
| EPI_ISL_1239548, EPI_ISL_1239553, EPI_ISL_1239587 to 1239590, EPI_ISL_1239665 to 1239671, EPI_ISL_1239698, EPI_ISL_1239707 to 1239708, EPI_ISL_1239730 to 1239735, EPI_ISL_1273837                                                                                                                                                                                                                                                                                                                                                                                                                                                                                                                                                                                                                                                                                                                                                                                                                                                                                                                                                                                                                                                                                                                                                                                                                                                                                                                                                                                                                                                                                                                                                                                                                                                                                                                                                                                                                                                                                                                                                                                                                                                                                                                                                                                                                                                                                                                                                                                                                                                                                                                                                                                                                                                                                                                                                                                                                                                                                                                                                                                                                                                                                                                                                                                                                                                                                                                                                                                                                                                                                                                                                                                                                                                                                                                                                                                                                                                                                                                                                                                                                                                                                                                                                                                                                                                                                                                                                                                                                                                                                                                                                                                                                                                                                                                                                                                                                                                                                                                                                                                                                                                                                                                                                                                                                                                                                                                                                                                                                                                                                                                                                                                                                                                                                                                                                                                                                                                                                                                                                                                                                                                                                                                                                                                                                                                                                                                                                                                                                                                                                                                                                                                                                                                                                                                                                                                                                                                                                                                                                                                                                                                                                                                                                                                                                                                                                                                                                                                                                                                                                                                                                                                                                                                                                                                                                                                                                                                                                                                                                                                                                                                                                                                                                                                                                                                                                                                                                                                                                                                                                                                                                                                                                                                                                                                                                                                                                                                                                                                                                                                                                                                                                                                                                                                                                                                                                                                                                                                                                                                                                                                                                                                                                                                                                                                                                                                                                                                                                                                                                                                                                                                                                                                                                                                                                                                                                                                                                                                                                                                                                                                                                                                                                       | see above                                                 | see above                                                                                                           | see above                                                                                                                                                                                                                                                                                                                                                                                                                                                                                      |
| see above                                                                                                                                                                                                                                                                                                                                                                                                                                                                                                                                                                                                                                                                                                                                                                                                                                                                                                                                                                                                                                                                                                                                                                                                                                                                                                                                                                                                                                                                                                                                                                                                                                                                                                                                                                                                                                                                                                                                                                                                                                                                                                                                                                                                                                                                                                                                                                                                                                                                                                                                                                                                                                                                                                                                                                                                                                                                                                                                                                                                                                                                                                                                                                                                                                                                                                                                                                                                                                                                                                                                                                                                                                                                                                                                                                                                                                                                                                                                                                                                                                                                                                                                                                                                                                                                                                                                                                                                                                                                                                                                                                                                                                                                                                                                                                                                                                                                                                                                                                                                                                                                                                                                                                                                                                                                                                                                                                                                                                                                                                                                                                                                                                                                                                                                                                                                                                                                                                                                                                                                                                                                                                                                                                                                                                                                                                                                                                                                                                                                                                                                                                                                                                                                                                                                                                                                                                                                                                                                                                                                                                                                                                                                                                                                                                                                                                                                                                                                                                                                                                                                                                                                                                                                                                                                                                                                                                                                                                                                                                                                                                                                                                                                                                                                                                                                                                                                                                                                                                                                                                                                                                                                                                                                                                                                                                                                                                                                                                                                                                                                                                                                                                                                                                                                                                                                                                                                                                                                                                                                                                                                                                                                                                                                                                                                                                                                                                                                                                                                                                                                                                                                                                                                                                                                                                                                                                                                                                                                                                                                                                                                                                                                                                                                                                                                                                                                | Lab. Biologii molekularnej USK                            | 1. National Institute of Public Health - National Institute of Hygiene; 2. Eurofins Genomics Europe Sequencing GmbH | ECDC COVID-19 WGS support team; Eurofins Genomics Europe Sequencing Team; Gierczyki Rafa; Sadkowska-Todys Magorzata; Wokowicz Tomasz; Zacharczuk Katarzyna                                                                                                                                                                                                                                                                                                                                     |
| EPI_ISL_1307800 to 1307841                                                                                                                                                                                                                                                                                                                                                                                                                                                                                                                                                                                                                                                                                                                                                                                                                                                                                                                                                                                                                                                                                                                                                                                                                                                                                                                                                                                                                                                                                                                                                                                                                                                                                                                                                                                                                                                                                                                                                                                                                                                                                                                                                                                                                                                                                                                                                                                                                                                                                                                                                                                                                                                                                                                                                                                                                                                                                                                                                                                                                                                                                                                                                                                                                                                                                                                                                                                                                                                                                                                                                                                                                                                                                                                                                                                                                                                                                                                                                                                                                                                                                                                                                                                                                                                                                                                                                                                                                                                                                                                                                                                                                                                                                                                                                                                                                                                                                                                                                                                                                                                                                                                                                                                                                                                                                                                                                                                                                                                                                                                                                                                                                                                                                                                                                                                                                                                                                                                                                                                                                                                                                                                                                                                                                                                                                                                                                                                                                                                                                                                                                                                                                                                                                                                                                                                                                                                                                                                                                                                                                                                                                                                                                                                                                                                                                                                                                                                                                                                                                                                                                                                                                                                                                                                                                                                                                                                                                                                                                                                                                                                                                                                                                                                                                                                                                                                                                                                                                                                                                                                                                                                                                                                                                                                                                                                                                                                                                                                                                                                                                                                                                                                                                                                                                                                                                                                                                                                                                                                                                                                                                                                                                                                                                                                                                                                                                                                                                                                                                                                                                                                                                                                                                                                                                                                                                                                                                                                                                                                                                                                                                                                                                                                                                                                                                                               | Lab. Microbiologia e Virologia - Cotugno - A.O. dei Colli | TIGEM                                                                                                               | Antonio Grimaldi Patrizia Annunziata Francesco Panariello Biancamaria Pierri Claudia Tiberio Valentina Bouche Chiara Colantuono Maria Concetta Cuomo Denise Di Concilio Lucio Di Filippo Anna Manfredi Marcello Salvi Antonio Limone Luigi Atripaldi Pellegrino Cerino Andrea Ballabio Davide Cacchiarelli                                                                                                                                                                                     |
| EPI_ISL_1307942 to 1308009                                                                                                                                                                                                                                                                                                                                                                                                                                                                                                                                                                                                                                                                                                                                                                                                                                                                                                                                                                                                                                                                                                                                                                                                                                                                                                                                                                                                                                                                                                                                                                                                                                                                                                                                                                                                                                                                                                                                                                                                                                                                                                                                                                                                                                                                                                                                                                                                                                                                                                                                                                                                                                                                                                                                                                                                                                                                                                                                                                                                                                                                                                                                                                                                                                                                                                                                                                                                                                                                                                                                                                                                                                                                                                                                                                                                                                                                                                                                                                                                                                                                                                                                                                                                                                                                                                                                                                                                                                                                                                                                                                                                                                                                                                                                                                                                                                                                                                                                                                                                                                                                                                                                                                                                                                                                                                                                                                                                                                                                                                                                                                                                                                                                                                                                                                                                                                                                                                                                                                                                                                                                                                                                                                                                                                                                                                                                                                                                                                                                                                                                                                                                                                                                                                                                                                                                                                                                                                                                                                                                                                                                                                                                                                                                                                                                                                                                                                                                                                                                                                                                                                                                                                                                                                                                                                                                                                                                                                                                                                                                                                                                                                                                                                                                                                                                                                                                                                                                                                                                                                                                                                                                                                                                                                                                                                                                                                                                                                                                                                                                                                                                                                                                                                                                                                                                                                                                                                                                                                                                                                                                                                                                                                                                                                                                                                                                                                                                                                                                                                                                                                                                                                                                                                                                                                                                                                                                                                                                                                                                                                                                                                                                                                                                                                                                                                               | Lab. Microbiologia e Virologia Cotugno A.O. dei Colli     | TIGEM                                                                                                               | Antonio Grimaldi Patrizia Annunziata Francesco Panariello Biancamaria Pierri Claudia Tiberio Valentina Bouche Chiara Colantuono Maria Concetta Cuomo Denise Di Concilio Lucio Di Filippo Anna Manfredi Marcello Salvi Antonio Limone Luigi Atripaldi Pellegrino Cerino Andrea Ballabio Davide Cacchiarelli                                                                                                                                                                                     |
| EPI_ISL_1372111                                                                                                                                                                                                                                                                                                                                                                                                                                                                                                                                                                                                                                                                                                                                                                                                                                                                                                                                                                                                                                                                                                                                                                                                                                                                                                                                                                                                                                                                                                                                                                                                                                                                                                                                                                                                                                                                                                                                                                                                                                                                                                                                                                                                                                                                                                                                                                                                                                                                                                                                                                                                                                                                                                                                                                                                                                                                                                                                                                                                                                                                                                                                                                                                                                                                                                                                                                                                                                                                                                                                                                                                                                                                                                                                                                                                                                                                                                                                                                                                                                                                                                                                                                                                                                                                                                                                                                                                                                                                                                                                                                                                                                                                                                                                                                                                                                                                                                                                                                                                                                                                                                                                                                                                                                                                                                                                                                                                                                                                                                                                                                                                                                                                                                                                                                                                                                                                                                                                                                                                                                                                                                                                                                                                                                                                                                                                                                                                                                                                                                                                                                                                                                                                                                                                                                                                                                                                                                                                                                                                                                                                                                                                                                                                                                                                                                                                                                                                                                                                                                                                                                                                                                                                                                                                                                                                                                                                                                                                                                                                                                                                                                                                                                                                                                                                                                                                                                                                                                                                                                                                                                                                                                                                                                                                                                                                                                                                                                                                                                                                                                                                                                                                                                                                                                                                                                                                                                                                                                                                                                                                                                                                                                                                                                                                                                                                                                                                                                                                                                                                                                                                                                                                                                                                                                                                                                                                                                                                                                                                                                                                                                                                                                                                                                                                                                                          | LabCorp Lakewood                                          | Minnesota Department of Health, Public Health Laboratory                                                            | Alexandra Lorentz; Jacob Garfin; Matt Plumb; and Xiong Wang                                                                                                                                                                                                                                                                                                                                                                                                                                    |
| EPI_ISL_1114257, EPI_ISL_1114375                                                                                                                                                                                                                                                                                                                                                                                                                                                                                                                                                                                                                                                                                                                                                                                                                                                                                                                                                                                                                                                                                                                                                                                                                                                                                                                                                                                                                                                                                                                                                                                                                                                                                                                                                                                                                                                                                                                                                                                                                                                                                                                                                                                                                                                                                                                                                                                                                                                                                                                                                                                                                                                                                                                                                                                                                                                                                                                                                                                                                                                                                                                                                                                                                                                                                                                                                                                                                                                                                                                                                                                                                                                                                                                                                                                                                                                                                                                                                                                                                                                                                                                                                                                                                                                                                                                                                                                                                                                                                                                                                                                                                                                                                                                                                                                                                                                                                                                                                                                                                                                                                                                                                                                                                                                                                                                                                                                                                                                                                                                                                                                                                                                                                                                                                                                                                                                                                                                                                                                                                                                                                                                                                                                                                                                                                                                                                                                                                                                                                                                                                                                                                                                                                                                                                                                                                                                                                                                                                                                                                                                                                                                                                                                                                                                                                                                                                                                                                                                                                                                                                                                                                                                                                                                                                                                                                                                                                                                                                                                                                                                                                                                                                                                                                                                                                                                                                                                                                                                                                                                                                                                                                                                                                                                                                                                                                                                                                                                                                                                                                                                                                                                                                                                                                                                                                                                                                                                                                                                                                                                                                                                                                                                                                                                                                                                                                                                                                                                                                                                                                                                                                                                                                                                                                                                                                                                                                                                                                                                                                                                                                                                                                                                                                                                                                                         | LabCorp Seattle                                           | Seattle Flu Study                                                                                                   | Amanda Adler; Barry R. Lutz; Benjamin Pelle; Brian Hiett; Caitlin R. Wolf; Chris D. Frazier; Deborah A. Nickerson; Elisabeth Brandtetter; Erica Ryke; Geoff Mely; Helen Y. Chu; Janet A. Englund; Jay Shendure; Jover Lee; Kairsten Fay; Kristen Lacombe; Lea M. Starita; Mark J. Rieder; Matthew Richardson; Matthew Thompson; Melissa Truong; Michael Boeckh; Michael Famulare; Mlaissa Ijcin; Peter D. Han; Philip Dykema; Romesh Gautam; Scott Lindquist; Thomas R. Sibley; Trevor Bedford |
| EPI_ISL_1141223, EPI_ISL_1141239, EPI_ISL_1141243, EPI_ISL_1141251, EPI_ISL_1141263, EPI_ISL_1141277, EPI_ISL_1141284, EPI_ISL_1141293, EPI_ISL_1141308, EPI_ISL_1141310, EPI_ISL_1141313, EPI_ISL_1141315, EPI_ISL_1141318, EPI_ISL_1141326, EPI_ISL_1141335, EPI_ISL_1141340, EPI_ISL_1141342 to 1141343, EPI_ISL_1141354, EPI_ISL_1141356, EPI_ISL_1141361, EPI_ISL_1141368, EPI_ISL_1141373, EPI_ISL_1141379, EPI_ISL_1141383, EPI_ISL_1141389, EPI_ISL_1141392 to 1141393, EPI_ISL_1141398, EPI_ISL_1141404, EPI_ISL_1141426, EPI_ISL_1141430, EPI_ISL_1141440 to 1141441, EPI_ISL_1141447, EPI_ISL_1141454, EPI_ISL_1141458 to 1141461, EPI_ISL_1141464, EPI_ISL_1141477 to 1141478, EPI_ISL_1141486, EPI_ISL_1141488 to 1141489, EPI_ISL_1141492, EPI_ISL_1141495, EPI_ISL_1141504, EPI_ISL_1141507 to 1141508, EPI_ISL_1141523 to 1141524, EPI_ISL_1142274, EPI_ISL_1142277, EPI_ISL_1142285 to 1142287, EPI_ISL_1142300, EPI_ISL_1142305, EPI_ISL_1142310 to 1142311, EPI_ISL_1142327 to 1142328, EPI_ISL_1142341 to 1142343, EPI_ISL_1142346, EPI_ISL_1142362 to 1142363, EPI_ISL_1142374, EPI_ISL_1142391, EPI_ISL_1142395, EPI_ISL_1142401, EPI_ISL_1142412, EPI_ISL_1142419, EPI_ISL_1142426 to 1142427, EPI_ISL_1142432, EPI_ISL_1142439, EPI_ISL_1142443, EPI_ISL_1142444, EPI_ISL_1142449, EPI_ISL_1142455, EPI_ISL_1142467, EPI_ISL_1142470, EPI_ISL_1142475, EPI_ISL_1142479, EPI_ISL_1142482 to 1142483, EPI_ISL_1142493, EPI_ISL_1142497, EPI_ISL_1142502, EPI_ISL_1142510, EPI_ISL_1142730 to 1142731, EPI_ISL_1142733, EPI_ISL_1142736, EPI_ISL_1142740, EPI_ISL_1142748, EPI_ISL_1142760, EPI_ISL_1142780, EPI_ISL_1142785, EPI_ISL_1142807, EPI_ISL_1142811, EPI_ISL_1142818 to 1142819, EPI_ISL_1142829, EPI_ISL_1142847, EPI_ISL_1142856, EPI_ISL_1142875, EPI_ISL_1142889, EPI_ISL_1142910, EPI_ISL_1142915, EPI_ISL_1142921, EPI_ISL_1142925, EPI_ISL_1142930, EPI_ISL_1142942, EPI_ISL_1142944, EPI_ISL_1142946, EPI_ISL_1142950, EPI_ISL_1142953, EPI_ISL_1142974, EPI_ISL_1142976, EPI_ISL_1142980, EPI_ISL_1142987, EPI_ISL_1142992 to 1142993, EPI_ISL_1142996, EPI_ISL_1143002, EPI_ISL_1143024 to 1143026, EPI_ISL_1143038, EPI_ISL_1145911, EPI_ISL_1145931, EPI_ISL_1145977, EPI_ISL_1145983, EPI_ISL_1145987, EPI_ISL_1145991, EPI_ISL_1145994, EPI_ISL_1146020, EPI_ISL_1146027, EPI_ISL_1146034, EPI_ISL_1146047, EPI_ISL_1146049, EPI_ISL_1146102, EPI_ISL_1146111, EPI_ISL_1146142, EPI_ISL_1146146, EPI_ISL_1146148, EPI_ISL_1146155, EPI_ISL_1146161, EPI_ISL_1146163, EPI_ISL_1146165, EPI_ISL_1146168 to 1146169, EPI_ISL_1148323, EPI_ISL_1148376, EPI_ISL_1148395, EPI_ISL_1150020, EPI_ISL_1150025, EPI_ISL_1150039, EPI_ISL_1150046, EPI_ISL_1150049, EPI_ISL_1150052, EPI_ISL_1150056, EPI_ISL_1150063, EPI_ISL_1150067, EPI_ISL_1150070, EPI_ISL_1150079, EPI_ISL_1150091, EPI_ISL_1150091, EPI_ISL_1150095, EPI_ISL_1150099, EPI_ISL_1150102, EPI_ISL_1150107, EPI_ISL_1150109, EPI_ISL_1150112, EPI_ISL_1150117, EPI_ISL_1150125, EPI_ISL_1150131, EPI_ISL_1150136, EPI_ISL_1150139, EPI_ISL_1150143, EPI_ISL_1150148, EPI_ISL_1150150 to 1150151, EPI_ISL_1150169, EPI_ISL_1150173, EPI_ISL_1150179, EPI_ISL_1150194 to 1150196, EPI_ISL_1150199, EPI_ISL_1150206, EPI_ISL_1150210, EPI_ISL_1150218, EPI_ISL_1150225, EPI_ISL_1150227, EPI_ISL_1150234, EPI_ISL_1150238, EPI_ISL_1150240, EPI_ISL_1150243, EPI_ISL_1150246 to 1150247, EPI_ISL_1150252, EPI_ISL_1150255, EPI_ISL_1150259 to 1150260, EPI_ISL_1150271, EPI_ISL_1150273, EPI_ISL_1150281, EPI_ISL_1150291, EPI_ISL_1150302, EPI_ISL_1150308 to 1150309, EPI_ISL_1150321, EPI_ISL_1150330, EPI_ISL_1150337, EPI_ISL_1150343, EPI_ISL_1150346, EPI_ISL_1150354, EPI_ISL_1150358, EPI_ISL_1150363, EPI_ISL_1150376 to 1150377, EPI_ISL_1154441, EPI_ISL_1154447, EPI_ISL_1154449, EPI_ISL_1154452, EPI_ISL_1154454, EPI_ISL_1154460, EPI_ISL_1154466, EPI_ISL_1154463, EPI_ISL_1154474, EPI_ISL_1154477, EPI_ISL_1154492, EPI_ISL_1154497, EPI_ISL_1154499, EPI_ISL_1154506 to 1154507, EPI_ISL_1154511, EPI_ISL_1154515, EPI_ISL_1154521, EPI_ISL_1154529, EPI_ISL_1154539 to 1154542, EPI_ISL_1154550, EPI_ISL_1154560, EPI_ISL_1154564, EPI_ISL_1154573, EPI_ISL_1154575 to 1154576, EPI_ISL_1154578, EPI_ISL_1154581, EPI_ISL_1154582, EPI_ISL_1154588, EPI_ISL_1154599, EPI_ISL_1154601, EPI_ISL_1154603, EPI_ISL_1154606, EPI_ISL_1154613, EPI_ISL_1154615, EPI_ISL_1154617, EPI_ISL_1154619, EPI_ISL_1154621 to 1154622, EPI_ISL_1154630 to 1154631, EPI_ISL_1154636 to 1154637, EPI_ISL_1154643 to 1154645, EPI_ISL_1154650 to 1154651, EPI_ISL_1154656, EPI_ISL_1154661, EPI_ISL_1154666, EPI_ISL_1154670, EPI_ISL_1154672, EPI_ISL_1154678, EPI_ISL_1154685, EPI_ISL_1154691, EPI_ISL_1154694, EPI_ISL_1154696 to 1154697, EPI_ISL_1154700, EPI_ISL_1154704, EPI_ISL_1154707, EPI_ISL_1154723, EPI_ISL_1154726 to 1154727, EPI_ISL_1154732 to 1154734, EPI_ISL_1154738, EPI_ISL_1154740, EPI_ISL_1154747, EPI_ISL_1154751, EPI_ISL_1154755 to 1154756, EPI_ISL_1154762 to 1154765, EPI_ISL_1154767, EPI_ISL_1154770, EPI_ISL_1154885, EPI_ISL_1154913, EPI_ISL_1154998, EPI_ISL_1155134, EPI_ISL_1156483, EPI_ISL_1156514, EPI_ISL_1156521, EPI_ISL_1156584, EPI_ISL_1156589, EPI_ISL_1156612, EPI_ISL_1156616, EPI_ISL_1156623, EPI_ISL_1156638, EPI_ISL_1156644, EPI_ISL_1156666, EPI_ISL_1156670, EPI_ISL_1156675, EPI_ISL_1156688, EPI_ISL_1156734, EPI_ISL_1156760, EPI_ISL_1156762, EPI_ISL_1212500 to 1212501, EPI_ISL_1212503, EPI_ISL_1212506, EPI_ISL_1212510, EPI_ISL_1212515, EPI_ISL_1212520, EPI_ISL_1212524, EPI_ISL_1212529, EPI_ISL_1212532, EPI_ISL_1212534, EPI_ISL_1212538, EPI_ISL_1212540, EPI_ISL_1212542, EPI_ISL_1212545, EPI_ISL_1212547, EPI_ISL_1212549, EPI_ISL_1212561, EPI_ISL_1212566, EPI_ISL_1212567, EPI_ISL_1212575 to 1212576, EPI_ISL_1212582, EPI_ISL_1212584, EPI_ISL_1212588, EPI_ISL_1212594, EPI_ISL_1212596 to 1212598, EPI_ISL_1212601, EPI_ISL_1212607, EPI_ISL_1212611 to 1212613, EPI_ISL_1212616, EPI_ISL_1212642, EPI_ISL_1212651, EPI_ISL_1212663, EPI_ISL_1212665, EPI_ISL_1212675, EPI_ISL_1212682, EPI_ISL_1212667, EPI_ISL_1212672, EPI_ISL_1212678, EPI_ISL_1212680, EPI_ISL_1212688, EPI_ISL_1212697, EPI_ISL_1212703, EPI_ISL_1212705, EPI_ISL_1212711, EPI_ISL_1212714, EPI_ISL_1212726, EPI_ISL_1212731, EPI_ISL_1212733, EPI_ISL_1212737, EPI_ISL_1212755, EPI_ISL_1212775 to 1212776, EPI_ISL_1212776 to 1212767, EPI_ISL_1212773, EPI_ISL_1212775, EPI_ISL_1212778, EPI_ISL_1212779, EPI_ISL_1212783, EPI_ISL_1212788, EPI_ISL_1212801, EPI_ISL_1212804, EPI_ISL_1212810, EPI_ISL_1212813, EPI_ISL_1212818, EPI_ISL_1212822, EPI_ISL_1212825, EPI_ISL_1212827, EPI_ISL_1212830 to 1212833, EPI_ISL_1212836, EPI_ISL_1212844, EPI_ISL_1212850 to 1212852, EPI_ISL_1212854, EPI_ISL_1212857, EPI_ISL_1214350, EPI_ISL_1214355, EPI_ISL_1214374, EPI_ISL_1214379, EPI_ISL_1214402, EPI_ISL_1214432, EPI_ISL_1214434, EPI_ISL_1214448, EPI_ISL_1214449, EPI_ISL_1214459, EPI_ISL_1214468, EPI_ISL_1214477, EPI_ISL_1214486, EPI_ISL_1214495, EPI_ISL_1214500, EPI_ISL_1214526, EPI_ISL_1214537, EPI_ISL_1214547, EPI_ISL_1214561, EPI_ISL_1214570, EPI_ISL_1214581, EPI_ISL_1214589, EPI_ISL_1214599, EPI_ISL_1214612, EPI_ISL_1214621, EPI_ISL_1214633, EPI_ISL_1214645, EPI_ISL_1214645, EPI_ISL_1214664, EPI_ISL_1214684, EPI_ISL_1214686, EPI_ISL_1214695, EPI_ISL_1214697, EPI_ISL_1214704, EPI_ISL_1214721, EPI_ISL_1214723, EPI_ISL_1214752, EPI_ISL_1281992 to 1281994, EPI_ISL_1281999, EPI_ISL_1282006, EPI_ISL_1282010, EPI_ISL_1282012 to 1282013, EPI_ISL_1282016, EPI_ISL_1282022, EPI_ISL_1282026, EPI_ISL_1282026, EPI_ISL_1282029, EPI_ISL_1282033, EPI_ISL_1282038 to 1282041, EPI_ISL_1282048 to 1282049, EPI_ISL_1282053 to 1282054, EPI_ISL_1282056 to 1282057, EPI_ISL_1282061, EPI_ISL_1282063, EPI_ISL_1282065, EPI_ISL_1282070, EPI_ISL_1282075, EPI_ISL_1282079 to 1282080, EPI_ISL_1282087, EPI_ISL_1282097, EPI_ISL_1282100, EPI_ISL_1282106 to 1282107, EPI_ISL_1282109, EPI_ISL_1282111, EPI_ISL_1282120 to 1282121, EPI_ISL_1282126 to 1282127, EPI_ISL_1282130 to 1282131, EPI_ISL_1282144 to 1282145, EPI_ISL_1282149, EPI_ISL_1282151, EPI_ISL_1282153 to 1282154, EPI_ISL_1282156 to 1282157, EPI_ISL_1282161, EPI_ISL_1282165, EPI_ISL_1282169, EPI_ISL_1282172 to 1282175, EPI_ISL_1282178, EPI_ISL_1282185 to 1282186, EPI_ISL_1282192, EPI_ISL_1282198 to 1282199, EPI_ISL_1282202, EPI_ISL_1282207, EPI_ISL_1282216, EPI_ISL_1282214, EPI_ISL_1282216, EPI_ISL_1282219, EPI_ISL_1282227, EPI_ISL_1282230, EPI_ISL_1282233, EPI_ISL_1282235, EPI_ISL_1282241 to 1282243, EPI_ISL_1282256 to 1282256, EPI_ISL_1282262, EPI_ISL_1282264, EPI_ISL_1282269, EPI_ISL_1282271 to 1282272, EPI_ISL_1282276 to 1282277, EPI_ISL_1282281 to 1282283, EPI_ISL_1282288, EPI_ISL_1282290 to 1282291, EPI_ISL_1282293 to 1282294, EPI_ISL_1282302 to 1282303, EPI_ISL_1282306 to 1282307, EPI_ISL_1285432, EPI_ISL_1285442, EPI_ISL_1285447, EPI_ISL_1285450 to 1285451, EPI_ISL_1285453 to 1285455, EPI_ISL_1285460, EPI_ISL_1285462 to 1285463, EPI_ISL_1285465, EPI_ISL_1285467, EPI_ISL_1285476, EPI_ISL_1285478, EPI_ISL_1285480 to 1285481, EPI_ISL_1285483, EPI_ISL_1285486, EPI_ISL_1285492, EPI_ISL_1285495, EPI_ISL_1285498, EPI_ISL_1285500, EPI_ISL_1285502, EPI_ISL_1285504, EPI_ISL_1285504, EPI_ISL_1285510 to 1285511, EPI_ISL_1285513, EPI_ISL_1285518, EPI_ISL_1285520, EPI_ISL_1285523 to 1285524, EPI_ISL_1285528 to 1285529, EPI_ISL_1285533, EPI_ISL_1285535, EPI_ISL_1285535, EPI_ISL_1285537, EPI_ISL_1285537, EPI_ISL_1285543, EPI_ISL_1285545, EPI_ISL_1285549, EPI_ISL_1285553, EPI_ISL_1285555, EPI_ISL_1285559, EPI_ISL_1285563, EPI_ISL_1285572 to 1285573, EPI_ISL_1285575, EPI_ISL_1285577, EPI_ISL_1285580 to 1285582, EPI_ISL_1285585, EPI_ISL_1285591, EPI_ISL_1285593, EPI_ISL_1285595, EPI_ISL_1285597, EPI_ISL_1285601, EPI_ISL_1285604, EPI_ISL_1285606, EPI_ISL_1285608 to 1285609, EPI_ISL_1285613 to 1285614, EPI_ISL_1285616 to 1285618, EPI_ISL_1285625, EPI_ISL_1285628, EPI_ISL_1285632, EPI_ISL_1285634, EPI_ISL_1285636 to 1285637, EPI_ISL_1285640 to 1285641, EPI_ISL_1285644, EPI_ISL_1285651 to 1285652, EPI_ISL_1285654 to 1285655, EPI_ISL_1285662 to 1285663, EPI_ISL_1285667, EPI_ISL_1285672, EPI_ISL_1285679, EPI_ISL_1285682, EPI_ISL_1285685, EPI_ISL_1285694, EPI_ISL_1285698 to 1285702, EPI_ISL_1285705 to 1285706, EPI_ISL_1285709 to 1285710, EPI_ISL_1285716, EPI_ISL_1349727, EPI_ISL_1349792, EPI_ISL_1349820, EPI_ISL_1349831 to 1349832, EPI_ISL_1349840, EPI_ISL_1349846 to 1349847, EPI_ISL_1349859, EPI_ISL_1349919, EPI_ISL_1349951, EPI_ISL_1349966, EPI_ISL_1349971, EPI_ISL_1349981, EPI_ISL_1349991, EPI_ISL_1349994, EPI_ISL_1350001, EPI_ISL_1350077, EPI_ISL_1353666, EPI_ISL_1353674, EPI_ISL_1353888 |                                                           |                                                                                                                     |                                                                                                                                                                                                                                                                                                                                                                                                                                                                                                |
| see above                                                                                                                                                                                                                                                                                                                                                                                                                                                                                                                                                                                                                                                                                                                                                                                                                                                                                                                                                                                                                                                                                                                                                                                                                                                                                                                                                                                                                                                                                                                                                                                                                                                                                                                                                                                                                                                                                                                                                                                                                                                                                                                                                                                                                                                                                                                                                                                                                                                                                                                                                                                                                                                                                                                                                                                                                                                                                                                                                                                                                                                                                                                                                                                                                                                                                                                                                                                                                                                                                                                                                                                                                                                                                                                                                                                                                                                                                                                                                                                                                                                                                                                                                                                                                                                                                                                                                                                                                                                                                                                                                                                                                                                                                                                                                                                                                                                                                                                                                                                                                                                                                                                                                                                                                                                                                                                                                                                                                                                                                                                                                                                                                                                                                                                                                                                                                                                                                                                                                                                                                                                                                                                                                                                                                                                                                                                                                                                                                                                                                                                                                                                                                                                                                                                                                                                                                                                                                                                                                                                                                                                                                                                                                                                                                                                                                                                                                                                                                                                                                                                                                                                                                                                                                                                                                                                                                                                                                                                                                                                                                                                                                                                                                                                                                                                                                                                                                                                                                                                                                                                                                                                                                                                                                                                                                                                                                                                                                                                                                                                                                                                                                                                                                                                                                                                                                                                                                                                                                                                                                                                                                                                                                                                                                                                                                                                                                                                                                                                                                                                                                                                                                                                                                                                                                                                                                                                                                                                                                                                                                                                                                                                                                                                                                                                                                                                                | LabKom - Labor Augsburg MVZ GmbH                          | Robert Koch Institute                                                                                               | see above                                                                                                                                                                                                                                                                                                                                                                                                                                                                                      |
| EPI_ISL_1142332, EPI_ISL_1142347, EPI_ISL_1142352, EPI_ISL_1142490, EPI_ISL_1143084, EPI_ISL_1143105, EPI_ISL_1143131, EPI_ISL_1143176, EPI_ISL_1143300, EPI_ISL_1145942, EPI_ISL_1154478, EPI_ISL_1154509, EPI_ISL_1154535, EPI_ISL_1154563, EPI_ISL_1154596, EPI_ISL_1154702, EPI_ISL_1154746, EPI_ISL_1154768, EPI_ISL_1285435, EPI_ISL_1285487, EPI_ISL_1285550, EPI_ISL_1285554, EPI_ISL_1285598                                                                                                                                                                                                                                                                                                                                                                                                                                                                                                                                                                                                                                                                                                                                                                                                                                                                                                                                                                                                                                                                                                                                                                                                                                                                                                                                                                                                                                                                                                                                                                                                                                                                                                                                                                                                                                                                                                                                                                                                                                                                                                                                                                                                                                                                                                                                                                                                                                                                                                                                                                                                                                                                                                                                                                                                                                                                                                                                                                                                                                                                                                                                                                                                                                                                                                                                                                                                                                                                                                                                                                                                                                                                                                                                                                                                                                                                                                                                                                                                                                                                                                                                                                                                                                                                                                                                                                                                                                                                                                                                                                                                                                                                                                                                                                                                                                                                                                                                                                                                                                                                                                                                                                                                                                                                                                                                                                                                                                                                                                                                                                                                                                                                                                                                                                                                                                                                                                                                                                                                                                                                                                                                                                                                                                                                                                                                                                                                                                                                                                                                                                                                                                                                                                                                                                                                                                                                                                                                                                                                                                                                                                                                                                                                                                                                                                                                                                                                                                                                                                                                                                                                                                                                                                                                                                                                                                                                                                                                                                                                                                                                                                                                                                                                                                                                                                                                                                                                                                                                                                                                                                                                                                                                                                                                                                                                                                                                                                                                                                                                                                                                                                                                                                                                                                                                                                                                                                                                                                                                                                                                                                                                                                                                                                                                                                                                                                                                                                                                                                                                                                                                                                                                                                                                                                                                                                                                                                                                    | see above                                                 | see above                                                                                                           | see above                                                                                                                                                                                                                                                                                                                                                                                                                                                                                      |
| see above                                                                                                                                                                                                                                                                                                                                                                                                                                                                                                                                                                                                                                                                                                                                                                                                                                                                                                                                                                                                                                                                                                                                                                                                                                                                                                                                                                                                                                                                                                                                                                                                                                                                                                                                                                                                                                                                                                                                                                                                                                                                                                                                                                                                                                                                                                                                                                                                                                                                                                                                                                                                                                                                                                                                                                                                                                                                                                                                                                                                                                                                                                                                                                                                                                                                                                                                                                                                                                                                                                                                                                                                                                                                                                                                                                                                                                                                                                                                                                                                                                                                                                                                                                                                                                                                                                                                                                                                                                                                                                                                                                                                                                                                                                                                                                                                                                                                                                                                                                                                                                                                                                                                                                                                                                                                                                                                                                                                                                                                                                                                                                                                                                                                                                                                                                                                                                                                                                                                                                                                                                                                                                                                                                                                                                                                                                                                                                                                                                                                                                                                                                                                                                                                                                                                                                                                                                                                                                                                                                                                                                                                                                                                                                                                                                                                                                                                                                                                                                                                                                                                                                                                                                                                                                                                                                                                                                                                                                                                                                                                                                                                                                                                                                                                                                                                                                                                                                                                                                                                                                                                                                                                                                                                                                                                                                                                                                                                                                                                                                                                                                                                                                                                                                                                                                                                                                                                                                                                                                                                                                                                                                                                                                                                                                                                                                                                                                                                                                                                                                                                                                                                                                                                                                                                                                                                                                                                                                                                                                                                                                                                                                                                                                                                                                                                                                                                | LabKom - Labor Hamburg-Lübeck                             | Robert Koch Institute                                                                                               | see above                                                                                                                                                                                                                                                                                                                                                                                                                                                                                      |
| EPI_ISL_1142281, EPI_ISL_1142312, EPI_ISL_1142314, EPI_ISL_1142378, EPI_ISL_1142380, EPI_ISL_1142425, EPI_ISL_1142429, EPI_ISL_1142429, EPI_ISL_1142477 to 1142478, EPI_ISL_1142516, EPI_ISL_1142518, EPI_ISL_1142750, EPI_ISL_1142758, EPI_ISL_1142772, EPI_ISL_1142796, EPI_ISL_1142804, EPI_ISL_1142808, EPI_ISL_1142810, EPI_ISL_1142848, EPI_ISL_1142886, EPI_ISL_1142899, EPI_ISL_1142907, EPI_ISL_1142931, EPI_ISL_1142948, EPI_ISL_1142973, EPI_ISL_1143018, EPI_ISL_1143022, EPI_ISL_1143028 to 1143029, EPI_ISL_1143032, EPI_ISL_1143036, EPI_ISL_1143036, EPI_ISL_1143037, EPI_ISL_1143041, EPI_ISL_1143042, EPI_ISL_1143044, EPI_ISL_1143048, EPI_ISL_1143053, EPI_ISL_1143058, EPI_ISL_1143060, EPI_ISL_1143062, EPI_ISL_1143064, EPI_ISL_1143068, EPI_ISL_1143070, EPI_ISL_1143072, EPI_ISL_1143074, EPI_ISL_1143076, EPI_ISL_1143078, EPI_ISL_1143080, EPI_ISL_1143082, EPI_ISL_1143084, EPI_ISL_1143086, EPI_ISL_1143088, EPI_ISL_1143090, EPI_ISL_1143092, EPI_ISL_1143094, EPI_ISL_1143096, EPI_ISL_1143098, EPI_ISL_1143100, EPI_ISL_1143102, EPI_ISL_1143104, EPI_ISL_1143106, EPI_ISL_1143108, EPI_ISL_1143110, EPI_ISL_1143112, EPI_ISL_1143114, EPI_ISL_1143116, EPI_ISL_1143118, EPI_ISL_1143120, EPI_ISL_1143122, EPI_ISL_1143124, EPI_ISL_1143126, EPI_ISL_1143128, EPI_ISL_1143130, EPI_ISL_1143132, EPI_ISL_1143134, EPI_ISL_1143136, EPI_ISL_1143138, EPI_ISL_1143140, EPI_ISL_1143142, EPI_ISL_1143144, EPI_ISL_1143146, EPI_ISL_1143148, EPI_ISL_1143150, EPI_ISL_1143152, EPI_ISL_1143154, EPI_ISL_1143156, EPI_ISL_1143158, EPI_ISL_1143160, EPI_ISL_1143162, EPI_ISL_1143164, EPI_ISL_1143166, EPI_ISL_1143168, EPI_ISL_1143170, EPI_ISL_1143172, EPI_ISL_1143174, EPI_ISL_1143176, EPI_ISL_1143178, EPI_ISL_1143180, EPI_ISL_1143182, EPI_ISL_1143184, EPI_ISL_1143186, EPI_ISL_1143188, EPI_ISL_1143190, EPI_ISL_1143192, EPI_ISL_1143194, EPI_ISL_1143196, EPI_ISL_1143198, EPI_ISL_1143200, EPI_ISL_1143202, EPI_ISL_1143204, EPI_ISL_1143206, EPI_ISL_1143208, EPI_ISL_1143210, EPI_ISL_1143212, EPI_ISL_1143214, EPI_ISL_1143216, EPI_ISL_1143218, EPI_ISL_1143220, EPI_ISL_1143222, EPI_ISL_1143224, EPI_ISL_1143226, EPI_ISL_1143228, EPI_ISL_1143230, EPI_ISL_1143232, EPI_ISL_1143234, EPI_ISL_1143236, EPI_ISL_1143238, EPI_ISL_1143240, EPI_ISL_1143242, EPI_ISL_1143244, EPI_ISL_1143246, EPI_ISL_1143248, EPI_ISL_1143250, EPI_ISL_1143252, EPI_ISL_1143254, EPI_ISL_1143256, EPI_ISL_1143258, EPI_ISL_1143260, EPI_ISL_1143262, EPI_ISL_1143264, EPI_ISL_1143266, EPI_ISL_1143268, EPI_ISL_1143270, EPI_ISL_1143272, EPI_ISL_1143274, EPI_ISL_1143276, EPI_ISL_1143278, EPI_ISL_1143280, EPI_ISL_1143282, EPI_ISL_1143284, EPI_ISL_1143286, EPI_ISL_1143288, EPI_ISL_1143290, EPI_ISL_1143292, EPI_ISL_1143294, EPI_ISL_1143296, EPI_ISL_1143298, EPI_ISL_1143300, EPI_ISL_                                                                                                                                                                                                                                                                                                                                                                                                                                                                                                                                                                                                                                                                                                                                                                                                                                                                                                                                                                                                                                                                                                                                                                                                                                                                                                                                                                                                                                                                                                                                                                                                                                                                                                                                                                                                                                                                                                                                                                                                                                                                                                                                                                                                                                                                                                                                                                                                                                                                                                                                                                                                                                                                                                                                                                                                                                                                                                                                                                                                                                                                                                                                                                                                                                                                                                                                                                                                                                                                                                                                                                                                                                                                                                                                                                                                                                                                                                                                                                                                                                                                                                                                                                                                                                                                                                                                                                                                                                                                                                                                                                                                                                                                                                                                                                                                                                                                                                                                                                                                                                                                                                                                                                                                                                                                                                                                                                                                                                                                                                                                                                                                                                                                                                                                                                                                                                                                                                                                                                                                                                                                                                                                                                                                                                                                                                                                                                                                                                                                                                                                                                                                                                                                                                                                                                                                                                                                                                                                                                                                                                                                                                                                                                                                                                                                                                                                                                                                                                                                                                                                                                                                                                                                                                                                                                                                                                                                                                                                                                             |                                                           |                                                                                                                     |                                                                                                                                                                                                                                                                                                                                                                                                                                                                                                |

EPI\_ISL\_1211372, EPI\_ISL\_1211391, EPI\_ISL\_1211393 to 1211394, EPI\_ISL\_1211420, EPI\_ISL\_1349750, EPI\_ISL\_1349754, EPI\_ISL\_1349762, EPI\_ISL\_1349793, EPI\_ISL\_1349800, EPI\_ISL\_1349803, EPI\_ISL\_1349839, EPI\_ISL\_1349844, EPI\_ISL\_1349851, EPI\_ISL\_1349863 to 1349864, EPI\_ISL\_1349868, EPI\_ISL\_1349870, EPI\_ISL\_1349874, EPI\_ISL\_1349883, EPI\_ISL\_1349884, EPI\_ISL\_1349894, EPI\_ISL\_1349896, EPI\_ISL\_1349899, EPI\_ISL\_1349909, EPI\_ISL\_1349917, EPI\_ISL\_1349931, EPI\_ISL\_1349933, EPI\_ISL\_1349938, EPI\_ISL\_1349962, EPI\_ISL\_1349976, EPI\_ISL\_1349983, EPI\_ISL\_1349999, EPI\_ISL\_1350005, EPI\_ISL\_1350013, EPI\_ISL\_1350032 to 1350033, EPI\_ISL\_1350040, EPI\_ISL\_1350046, EPI\_ISL\_1350055, EPI\_ISL\_1350062, EPI\_ISL\_1350067

see above  
LabKom - Labor Hannover MVZ GmbH  
Robert Koch Institute  
EPI\_ISL\_1142284, EPI\_ISL\_1142293, EPI\_ISL\_1142315, EPI\_ISL\_1142317, EPI\_ISL\_1142321, EPI\_ISL\_1142326, EPI\_ISL\_1142340, EPI\_ISL\_1142356, EPI\_ISL\_1142361, EPI\_ISL\_1142367, EPI\_ISL\_1142376, EPI\_ISL\_1142385, EPI\_ISL\_1142389, EPI\_ISL\_1142402, EPI\_ISL\_1142404, EPI\_ISL\_1142408, EPI\_ISL\_1142415, EPI\_ISL\_1142424, EPI\_ISL\_1142431, EPI\_ISL\_1142433, EPI\_ISL\_1142463, EPI\_ISL\_1142472 to 1142473, EPI\_ISL\_1142498, EPI\_ISL\_1142501, EPI\_ISL\_1142575, EPI\_ISL\_1142815, EPI\_ISL\_1142838, EPI\_ISL\_1142896, EPI\_ISL\_1142967, EPI\_ISL\_1142997, EPI\_ISL\_1143001, EPI\_ISL\_1143030, EPI\_ISL\_1143090, EPI\_ISL\_1143113, EPI\_ISL\_1143119, EPI\_ISL\_1143122, EPI\_ISL\_1143126 to 1143127, EPI\_ISL\_1143130, EPI\_ISL\_1143135, EPI\_ISL\_1143159, EPI\_ISL\_1143164, EPI\_ISL\_1143167, EPI\_ISL\_1143187, EPI\_ISL\_1143193, EPI\_ISL\_1143198, EPI\_ISL\_1143211, EPI\_ISL\_1143221, EPI\_ISL\_1143223, EPI\_ISL\_1143226, EPI\_ISL\_1143234, EPI\_ISL\_1143241, EPI\_ISL\_1143245, EPI\_ISL\_1143255, EPI\_ISL\_1143260, EPI\_ISL\_1143289, EPI\_ISL\_1143294, EPI\_ISL\_1143294, EPI\_ISL\_1143296, EPI\_ISL\_1143302, EPI\_ISL\_1145952, EPI\_ISL\_1145989, EPI\_ISL\_1146153, EPI\_ISL\_1154456, EPI\_ISL\_1154459, EPI\_ISL\_1154472 to 1154473, EPI\_ISL\_1154480, EPI\_ISL\_1154488, EPI\_ISL\_1154488, EPI\_ISL\_1154505, EPI\_ISL\_1154508, EPI\_ISL\_1154516 to 1154517, EPI\_ISL\_1154528, EPI\_ISL\_1154531 to 1154532, EPI\_ISL\_1154538, EPI\_ISL\_1154557, EPI\_ISL\_1154570, EPI\_ISL\_1154579, EPI\_ISL\_1154582, EPI\_ISL\_1154587, EPI\_ISL\_1154594, EPI\_ISL\_1154608, EPI\_ISL\_1154639, EPI\_ISL\_1154642, EPI\_ISL\_1154647, EPI\_ISL\_1154652, EPI\_ISL\_1154654, EPI\_ISL\_1154679, EPI\_ISL\_1154689, EPI\_ISL\_1154693, EPI\_ISL\_1154705, EPI\_ISL\_1154720, EPI\_ISL\_1154731, EPI\_ISL\_1154735, EPI\_ISL\_1154752, EPI\_ISL\_1154769, EPI\_ISL\_1154855, EPI\_ISL\_1154865, EPI\_ISL\_1154922, EPI\_ISL\_1154927, EPI\_ISL\_1154977, EPI\_ISL\_1155017, EPI\_ISL\_1155044, EPI\_ISL\_1155051, EPI\_ISL\_1155069, EPI\_ISL\_1155118, EPI\_ISL\_1155187, EPI\_ISL\_1155670, EPI\_ISL\_1211071, EPI\_ISL\_1211086, EPI\_ISL\_1211099, EPI\_ISL\_1211104, EPI\_ISL\_1211113, EPI\_ISL\_1211136, EPI\_ISL\_1211139, EPI\_ISL\_1211149, EPI\_ISL\_1211167, EPI\_ISL\_1211174 to 1211175, EPI\_ISL\_1211192, EPI\_ISL\_1211195, EPI\_ISL\_1211205, EPI\_ISL\_121212, EPI\_ISL\_1211256, EPI\_ISL\_1211262, EPI\_ISL\_1211269, EPI\_ISL\_1211285, EPI\_ISL\_1211291, EPI\_ISL\_1211301, EPI\_ISL\_1211322, EPI\_ISL\_1211329, EPI\_ISL\_1211334, EPI\_ISL\_1211351, EPI\_ISL\_1211363, EPI\_ISL\_1211395, EPI\_ISL\_1211402, EPI\_ISL\_1211404, EPI\_ISL\_1212572, EPI\_ISL\_1212702, EPI\_ISL\_1212835, EPI\_ISL\_1282117, EPI\_ISL\_1349726, EPI\_ISL\_1349764, EPI\_ISL\_1349809, EPI\_ISL\_1349821, EPI\_ISL\_1349830, EPI\_ISL\_1349836, EPI\_ISL\_1349850, EPI\_ISL\_1349875, EPI\_ISL\_1349901, EPI\_ISL\_1349937, EPI\_ISL\_1349943, EPI\_ISL\_1349953, EPI\_ISL\_1349957, EPI\_ISL\_1349965, EPI\_ISL\_1349967, EPI\_ISL\_1349975, EPI\_ISL\_1350012, EPI\_ISL\_1350044, EPI\_ISL\_1350052, EPI\_ISL\_1350061, EPI\_ISL\_1350072, EPI\_ISL\_1350079, EPI\_ISL\_1353787

see above  
LabKom - Labor Mainz MVZ GmbH  
Robert Koch Institute  
EPI\_ISL\_1142275, EPI\_ISL\_1142288, EPI\_ISL\_1142303, EPI\_ISL\_1142316, EPI\_ISL\_1142323, EPI\_ISL\_1142330 to 1142331, EPI\_ISL\_1142333 to 1142334, EPI\_ISL\_1142339 to 1142351, EPI\_ISL\_1142359, EPI\_ISL\_1142373, EPI\_ISL\_1142383, EPI\_ISL\_1142397, EPI\_ISL\_1142399, EPI\_ISL\_1142402, EPI\_ISL\_1142404, EPI\_ISL\_1142408, EPI\_ISL\_1142415, EPI\_ISL\_1142417, EPI\_ISL\_1142420 to 1142423, EPI\_ISL\_1142442, EPI\_ISL\_1142446, EPI\_ISL\_1142465 to 1142466, EPI\_ISL\_1142487, EPI\_ISL\_1142504, EPI\_ISL\_1142753, EPI\_ISL\_1142763, EPI\_ISL\_1142781, EPI\_ISL\_1142790, EPI\_ISL\_1142817, EPI\_ISL\_1142827, EPI\_ISL\_1142849, EPI\_ISL\_1142954, EPI\_ISL\_1142963, EPI\_ISL\_1142975, EPI\_ISL\_1142979, EPI\_ISL\_1142989, EPI\_ISL\_1142998, EPI\_ISL\_1143013, EPI\_ISL\_1143035, EPI\_ISL\_1145966 to 1145967, EPI\_ISL\_1145975, EPI\_ISL\_1146000, EPI\_ISL\_1146017, EPI\_ISL\_1146032, EPI\_ISL\_1146069, EPI\_ISL\_1146081, EPI\_ISL\_1148173, EPI\_ISL\_1148177, EPI\_ISL\_1148191, EPI\_ISL\_1148235, EPI\_ISL\_1148272, EPI\_ISL\_1148278, EPI\_ISL\_1148283, EPI\_ISL\_1148305, EPI\_ISL\_1148308, EPI\_ISL\_1148316, EPI\_ISL\_1148325, EPI\_ISL\_1148343, EPI\_ISL\_1148366, EPI\_ISL\_1148383, EPI\_ISL\_1148396, EPI\_ISL\_1148429, EPI\_ISL\_1150045, EPI\_ISL\_1150058, EPI\_ISL\_1150068, EPI\_ISL\_1150114, EPI\_ISL\_1150116, EPI\_ISL\_1150141, EPI\_ISL\_1150163, EPI\_ISL\_1150178, EPI\_ISL\_1150182, EPI\_ISL\_1150224, EPI\_ISL\_1150311, EPI\_ISL\_1150316, EPI\_ISL\_1150323, EPI\_ISL\_1150368, EPI\_ISL\_1154458, EPI\_ISL\_1154466, EPI\_ISL\_1154477, EPI\_ISL\_1154519, EPI\_ISL\_1154534, EPI\_ISL\_1154545, EPI\_ISL\_1154555 to 1154556, EPI\_ISL\_1154566, EPI\_ISL\_1154614, EPI\_ISL\_1154627, EPI\_ISL\_1154635, EPI\_ISL\_1154638, EPI\_ISL\_1154641, EPI\_ISL\_1154658, EPI\_ISL\_1154681, EPI\_ISL\_1154690, EPI\_ISL\_1154698, EPI\_ISL\_1154703, EPI\_ISL\_1154710 to 1154711, EPI\_ISL\_1154717, EPI\_ISL\_1154728, EPI\_ISL\_1154744 to 1154745, EPI\_ISL\_1154748 to 1154749, EPI\_ISL\_1154758, EPI\_ISL\_1154760, EPI\_ISL\_1154776, EPI\_ISL\_1154814, EPI\_ISL\_1154819, EPI\_ISL\_1154829, EPI\_ISL\_1154839, EPI\_ISL\_1154846, EPI\_ISL\_1154872, EPI\_ISL\_1154879, EPI\_ISL\_1154882, EPI\_ISL\_1154910, EPI\_ISL\_1154920, EPI\_ISL\_1154923, EPI\_ISL\_1154925, EPI\_ISL\_1154932, EPI\_ISL\_1154944, EPI\_ISL\_1154951, EPI\_ISL\_1154968, EPI\_ISL\_1154987, EPI\_ISL\_1155009, EPI\_ISL\_1155020, EPI\_ISL\_1155039, EPI\_ISL\_1155050, EPI\_ISL\_1155055 to 1155057, EPI\_ISL\_1155066, EPI\_ISL\_1155073, EPI\_ISL\_1155075 to 1155076, EPI\_ISL\_1155080, EPI\_ISL\_1155083, EPI\_ISL\_1155090, EPI\_ISL\_1155104, EPI\_ISL\_1155108, EPI\_ISL\_1155116, EPI\_ISL\_1156455, EPI\_ISL\_1156459, EPI\_ISL\_1156463, EPI\_ISL\_1156469, EPI\_ISL\_1156475, EPI\_ISL\_1156481, EPI\_ISL\_1156484, EPI\_ISL\_1156493, EPI\_ISL\_1156497, EPI\_ISL\_1156500, EPI\_ISL\_1156506, EPI\_ISL\_1156508, EPI\_ISL\_1156515, EPI\_ISL\_1156520, EPI\_ISL\_1156533, EPI\_ISL\_1156546 to 1156547, EPI\_ISL\_1156559, EPI\_ISL\_1156565, EPI\_ISL\_1156585, EPI\_ISL\_1156596, EPI\_ISL\_1156610, EPI\_ISL\_1156617, EPI\_ISL\_1156624, EPI\_ISL\_1156627, EPI\_ISL\_1156632, EPI\_ISL\_1156635 to 1156636, EPI\_ISL\_1156641, EPI\_ISL\_1156654, EPI\_ISL\_1156656, EPI\_ISL\_1156665, EPI\_ISL\_1156669, EPI\_ISL\_1156672, EPI\_ISL\_1156680, EPI\_ISL\_1156683, EPI\_ISL\_1156693, EPI\_ISL\_1156698, EPI\_ISL\_1156700, EPI\_ISL\_1156719 to 1156721, EPI\_ISL\_1156739, EPI\_ISL\_1156742 to 1156743, EPI\_ISL\_1156756, EPI\_ISL\_1156758, EPI\_ISL\_1156761, EPI\_ISL\_1156764, EPI\_ISL\_1156769, EPI\_ISL\_1156771, EPI\_ISL\_1211074, EPI\_ISL\_1211102, EPI\_ISL\_1211152 to 1211153, EPI\_ISL\_1211165, EPI\_ISL\_1211178, EPI\_ISL\_1211288, EPI\_ISL\_1211326, EPI\_ISL\_1211338, EPI\_ISL\_1211378, EPI\_ISL\_1211405, EPI\_ISL\_1212511, EPI\_ISL\_1212527, EPI\_ISL\_1212528, EPI\_ISL\_1212563, EPI\_ISL\_1212577, EPI\_ISL\_1212615, EPI\_ISL\_1212617, EPI\_ISL\_1212671, EPI\_ISL\_1212676, EPI\_ISL\_1212708, EPI\_ISL\_1212768, EPI\_ISL\_1212797, EPI\_ISL\_1212855, EPI\_ISL\_1281995, EPI\_ISL\_1282011, EPI\_ISL\_1282014, EPI\_ISL\_1282024, EPI\_ISL\_1282027, EPI\_ISL\_1282032, EPI\_ISL\_1282034 to 1282035, EPI\_ISL\_1282042, EPI\_ISL\_1282052, EPI\_ISL\_1282055, EPI\_ISL\_1282059 to 1282059, EPI\_ISL\_1282067 to 1282069, EPI\_ISL\_1282076, EPI\_ISL\_1282078, EPI\_ISL\_1282083 to 1282085, EPI\_ISL\_1282093 to 1282094, EPI\_ISL\_1282096, EPI\_ISL\_1282099, EPI\_ISL\_1282112, EPI\_ISL\_1282116, EPI\_ISL\_1282119, EPI\_ISL\_1282122, EPI\_ISL\_1282124, EPI\_ISL\_1282135, EPI\_ISL\_1282140, EPI\_ISL\_1282150, EPI\_ISL\_1282176 to 1282177, EPI\_ISL\_1282183 to 1282184, EPI\_ISL\_1282187 to 1282188, EPI\_ISL\_1282190, EPI\_ISL\_1282194 to 1282195, EPI\_ISL\_1282204 to 1282206, EPI\_ISL\_1282213, EPI\_ISL\_1282217 to 1282218, EPI\_ISL\_1282229, EPI\_ISL\_1282231, EPI\_ISL\_1282273, EPI\_ISL\_1282304 to 1282305, EPI\_ISL\_1282308, EPI\_ISL\_1285583, EPI\_ISL\_1285587, EPI\_ISL\_1349731, EPI\_ISL\_1349736, EPI\_ISL\_1349741, EPI\_ISL\_1349752, EPI\_ISL\_1349779, EPI\_ISL\_1349795, EPI\_ISL\_1349875, EPI\_ISL\_1349877, EPI\_ISL\_1349898, EPI\_ISL\_1349900, EPI\_ISL\_1349964, EPI\_ISL\_1349969, EPI\_ISL\_1350022, EPI\_ISL\_1350026

see above  
LabKom - Labor an der Salzbrücke MVZ GmbH  
Robert Koch Institute  
EPI\_ISL\_1142735, EPI\_ISL\_1142745, EPI\_ISL\_1142751, EPI\_ISL\_1142756, EPI\_ISL\_1142761, EPI\_ISL\_1142769, EPI\_ISL\_1142786, EPI\_ISL\_1142795, EPI\_ISL\_1142805 to 1142806, EPI\_ISL\_1142809, EPI\_ISL\_1142813 to 1142814, EPI\_ISL\_1142822 to 1142823, EPI\_ISL\_1142832 to 1142833, EPI\_ISL\_1142842, EPI\_ISL\_1142846, EPI\_ISL\_1142850, EPI\_ISL\_1142852, EPI\_ISL\_1142855, EPI\_ISL\_1142864 to 1142865, EPI\_ISL\_1142870, EPI\_ISL\_1142876, EPI\_ISL\_1142878, EPI\_ISL\_1142883, EPI\_ISL\_1142890, EPI\_ISL\_1142892 to 1142893, EPI\_ISL\_1142912, EPI\_ISL\_1142918, EPI\_ISL\_1142927, EPI\_ISL\_1142941, EPI\_ISL\_1142956 to 1142957, EPI\_ISL\_1142965 to 1142966, EPI\_ISL\_1142971, EPI\_ISL\_1142978, EPI\_ISL\_1143009, EPI\_ISL\_1143021, EPI\_ISL\_1143023, EPI\_ISL\_1143031, EPI\_ISL\_1143034, EPI\_ISL\_1143053, EPI\_ISL\_1143062, EPI\_ISL\_1143066, EPI\_ISL\_1143077, EPI\_ISL\_1143079, EPI\_ISL\_1143088, EPI\_ISL\_1143100, EPI\_ISL\_1143101, EPI\_ISL\_1143144, EPI\_ISL\_1143153, EPI\_ISL\_1143162 to 1143163, EPI\_ISL\_1143166, EPI\_ISL\_1143247 to 1143248, EPI\_ISL\_1143251, EPI\_ISL\_1143266, EPI\_ISL\_1143270, EPI\_ISL\_1143274, EPI\_ISL\_1143277, EPI\_ISL\_1143283 to 1143284, EPI\_ISL\_1143288, EPI\_ISL\_1143297, EPI\_ISL\_1145993, EPI\_ISL\_1146054, EPI\_ISL\_1146160, EPI\_ISL\_1148169, EPI\_ISL\_1148189, EPI\_ISL\_1148203, EPI\_ISL\_1148255, EPI\_ISL\_1148266, EPI\_ISL\_1148401, EPI\_ISL\_1150065, EPI\_ISL\_1150081, EPI\_ISL\_1150156, EPI\_ISL\_1150162, EPI\_ISL\_1150222, EPI\_ISL\_1150245, EPI\_ISL\_1150282 to 1150284, EPI\_ISL\_1150342, EPI\_ISL\_1154682, EPI\_ISL\_1154791, EPI\_ISL\_1154793, EPI\_ISL\_1154797, EPI\_ISL\_1154804, EPI\_ISL\_1154823, EPI\_ISL\_1154832, EPI\_ISL\_1154844, EPI\_ISL\_1154847, EPI\_ISL\_1154871, EPI\_ISL\_1154908, EPI\_ISL\_1154912, EPI\_ISL\_1154917, EPI\_ISL\_1154931, EPI\_ISL\_1154935, EPI\_ISL\_1154942, EPI\_ISL\_1154954 to 1154955, EPI\_ISL\_1154960, EPI\_ISL\_1154975, EPI\_ISL\_1154981, EPI\_ISL\_1155013, EPI\_ISL\_1155028, EPI\_ISL\_1155033, EPI\_ISL\_1155034, EPI\_ISL\_1155047, EPI\_ISL\_1155072 to 1155073, EPI\_ISL\_1155091, EPI\_ISL\_1155093, EPI\_ISL\_1155126, EPI\_ISL\_1156453, EPI\_ISL\_1156464, EPI\_ISL\_1156467, EPI\_ISL\_1156485, EPI\_ISL\_1156490 to 1156491, EPI\_ISL\_1156496, EPI\_ISL\_1156570, EPI\_ISL\_1156573, EPI\_ISL\_1156576, EPI\_ISL\_1156583, EPI\_ISL\_1156598 to 1156599, EPI\_ISL\_1156610, EPI\_ISL\_1156612 to 1156613, EPI\_ISL\_1156616, EPI\_ISL\_1156621, EPI\_ISL\_1156624, EPI\_ISL\_1156643, EPI\_ISL\_1156652, EPI\_ISL\_1156655, EPI\_ISL\_1156666, EPI\_ISL\_1156668, EPI\_ISL\_1156671, EPI\_ISL\_1156674, EPI\_ISL\_1156681, EPI\_ISL\_1156687, EPI\_ISL\_1156690, EPI\_ISL\_1156710, EPI\_ISL\_1156714, EPI\_ISL\_1156725, EPI\_ISL\_1156736, EPI\_ISL\_1156740 to 1156741, EPI\_ISL\_1156745 to 1156746, EPI\_ISL\_1156754 to 1156755, EPI\_ISL\_1156763, EPI\_ISL\_1156778, EPI\_ISL\_1212509, EPI\_ISL\_1212514, EPI\_ISL\_1212517, EPI\_ISL\_1212539, EPI\_ISL\_1212555, EPI\_ISL\_1212557, EPI\_ISL\_1212559 to 1212560, EPI\_ISL\_1212567, EPI\_ISL\_1212580 to 1212581, EPI\_ISL\_1212585, EPI\_ISL\_1212592, EPI\_ISL\_1212606, EPI\_ISL\_1212620, EPI\_ISL\_1212624, EPI\_ISL\_1212635, EPI\_ISL\_1212640, EPI\_ISL\_1212712, EPI\_ISL\_1212722, EPI\_ISL\_1212755, EPI\_ISL\_1212763, EPI\_ISL\_1212790, EPI\_ISL\_1212819, EPI\_ISL\_1212821, EPI\_ISL\_1212826, EPI\_ISL\_1212834, EPI\_ISL\_1212843, EPI\_ISL\_1212853, EPI\_ISL\_1216577, EPI\_ISL\_1216638, EPI\_ISL\_1216708 to 1216709, EPI\_ISL\_1216711, EPI\_ISL\_1216740, EPI\_ISL\_1216749, EPI\_ISL\_1216749, EPI\_ISL\_1216765, EPI\_ISL\_1216765, EPI\_ISL\_1285431, EPI\_ISL\_1285433, EPI\_ISL\_1285436, EPI\_ISL\_1285440 to 1285441, EPI\_ISL\_1285444, EPI\_ISL\_1285452, EPI\_ISL\_1285456, EPI\_ISL\_1285458 to 1285459, EPI\_ISL\_1285466, EPI\_ISL\_1285479, EPI\_ISL\_1285482, EPI\_ISL\_1285491, EPI\_ISL\_1285503, EPI\_ISL\_1285505, EPI\_ISL\_1285506, EPI\_ISL\_1285514 to 1285515, EPI\_ISL\_1285519, EPI\_ISL\_1285527, EPI\_ISL\_1285530, EPI\_ISL\_1285536, EPI\_ISL\_1285538, EPI\_ISL\_1285540 to 1285542, EPI\_ISL\_1285544, EPI\_ISL\_1285548, EPI\_ISL\_1285558, EPI\_ISL\_1285567, EPI\_ISL\_1285569, EPI\_ISL\_1285578 to 1285579, EPI\_ISL\_1285584, EPI\_ISL\_1285586, EPI\_ISL\_1285589, EPI\_ISL\_1285592, EPI\_ISL\_1285599, EPI\_ISL\_1285607, EPI\_ISL\_1285611, EPI\_ISL\_1285620, EPI\_ISL\_1285622, EPI\_ISL\_1285627, EPI\_ISL\_1285629, EPI\_ISL\_1285635, EPI\_ISL\_1285645, EPI\_ISL\_1285645, EPI\_ISL\_1285647, EPI\_ISL\_1285649, EPI\_ISL\_1285660 to 1285661, EPI\_ISL\_1285665, EPI\_ISL\_1285668, EPI\_ISL\_1285676 to 1285677, EPI\_ISL\_1285680, EPI\_ISL\_1285683 to 1285684, EPI\_ISL\_1285687 to 1285688, EPI\_ISL\_1285691, EPI\_ISL\_1285693, EPI\_ISL\_1285695, EPI\_ISL\_1285703, EPI\_ISL\_1285708, EPI\_ISL\_1285712 to 1285715, EPI\_ISL\_1285717

see above  
LabKom - MVZ Labor Bochum MLB GmbH  
Robert Koch Institute  
EPI\_ISL\_1016846 to 1016847, EPI\_ISL\_1016849, EPI\_ISL\_1016851, EPI\_ISL\_1016853 to 1016854, EPI\_ISL\_1016858 to 1016862, EPI\_ISL\_1016864, EPI\_ISL\_1016867, EPI\_ISL\_1016869, EPI\_ISL\_1016871, EPI\_ISL\_1016873, EPI\_ISL\_1016877, EPI\_ISL\_1016880, EPI\_ISL\_1016883, EPI\_ISL\_1082260, EPI\_ISL\_1082263, EPI\_ISL\_1082265 to 1082266, EPI\_ISL\_1082268, EPI\_ISL\_1172028 to 1172033, EPI\_ISL\_1250698 to 1250701, EPI\_ISL\_1250705, EPI\_ISL\_1250708 to 1250711, EPI\_ISL\_1315309, EPI\_ISL\_1315312, EPI\_ISL\_1315314, EPI\_ISL\_1315320 to 1315324, EPI\_ISL\_1315326  
see above  
LabPLUS  
Institute of Environmental Science and Research (ESR)  
Anja Werno; Antje van der Linden; Arlo Upton; Chris Mansell; David Hammer; Dragana Drinkovic; Erasmus Smit; Gary McAuliffe; Hana Sofia Andersson; Hermes Perez; James Ussher; Jiri Sherwood; Jing Wang; Joep de Lig; Josh Freeman; Julia Howard; Juliet Elvy; Lauren Jolly; Mary DeAlmeida; Matt Blakiston; Matt Storey; Matthew Rogers; Max Bloomfield; Michael Addie; Michelle Balm; Muhammad Faisal; Nikki Freed; Olin Silander; Olivia Stroeven; Rachel Boyle; Sally Roberts; SallyAnn Harbison; Sarah Jefferies; Sharmini Muttaiyah; Susan Morphett; Susan Taylor; Timothy Blackmore; Vani Sathyendran; Veronica Playle; Virginia Hope; Xiaoyun Ren  
EPI\_ISL\_1016856, EPI\_ISL\_1082261, EPI\_ISL\_1113757, EPI\_ISL\_1315317  
Institute of Environmental Science and Research (ESR)  
Anja Werno; Antje van der Linden; Arlo Upton; Chris Mansell; David Hammer; Dragana Drinkovic; Erasmus Smit; Gary McAuliffe; Hana Sofia Andersson; Hermes Perez; James Ussher; Jiri Sherwood; Jing Wang; Joep de Lig; Josh Freeman; Julia Howard; Juliet Elvy; Lauren Jolly; Mary DeAlmeida; Matt Blakiston; Matt Storey; Matthew Rogers; Max Bloomfield; Michael Addie; Michelle Balm; Muhammad Faisal; Nikki Freed; Olin Silander; Olivia Stroeven; Rachel Boyle; Sally Roberts; SallyAnn Harbison; Sarah Jefferies; Sharmini Muttaiyah; Susan Morphett; Susan Taylor; Timothy Blackmore; Vani Sathyendran; Veronica Playle; Virginia Hope; Xiaoyun Ren

EPI\_ISL\_1001310, EPI\_ISL\_1001318, EPI\_ISL\_1001329, EPI\_ISL\_1001394, EPI\_ISL\_1035902, EPI\_ISL\_1035960, EPI\_ISL\_1035962 to 1035965, EPI\_ISL\_1036403 to 1036404, EPI\_ISL\_1060369 to 1060376, EPI\_ISL\_1060396, EPI\_ISL\_1060399 to 1060401, EPI\_ISL\_1060403 to 1060404, EPI\_ISL\_1060443 to 1060445, EPI\_ISL\_1060463 to 1060474, EPI\_ISL\_1060476 to 1060490, EPI\_ISL\_1060562, EPI\_ISL\_1060568 to 1060569, EPI\_ISL\_1060572 to 1060574, EPI\_ISL\_1060576, EPI\_ISL\_1060593, EPI\_ISL\_1096243, EPI\_ISL\_1096247, EPI\_ISL\_1096252 to 1096252, EPI\_ISL\_1096268 to 1096269, EPI\_ISL\_1096303, EPI\_ISL\_1096313 to 1096316, EPI\_ISL\_1110399 to 1110405, EPI\_ISL\_1110408, EPI\_ISL\_1110420, EPI\_ISL\_1110422 to 1110427, EPI\_ISL\_1110430, EPI\_ISL\_1110434, EPI\_ISL\_1110439, EPI\_ISL\_1110442 to 1110443, EPI\_ISL\_1110446 to 1110447, EPI\_ISL\_1110461 to 1110467 to 1110471, EPI\_ISL\_1110473 to 1110474, EPI\_ISL\_1110888 to 1110889, EPI\_ISL\_1110892 to 1110894, EPI\_ISL\_1110924 to 1110927, EPI\_ISL\_1110980, EPI\_ISL\_1111060, EPI\_ISL\_1111062 to 1111064, EPI\_ISL\_1118902 to 1118909, EPI\_ISL\_1168195 to 1168201, EPI\_ISL\_1201521, EPI\_ISL\_1201544 to 1201553, EPI\_ISL\_1219935 to 1219936, EPI\_ISL\_1219938, EPI\_ISL\_1219949 to 1219950, EPI\_ISL\_1219959 to 1219960, EPI\_ISL\_1219962 to 1219963, EPI\_ISL\_1233237 to 1233246, EPI\_ISL\_1259298, EPI\_ISL\_1259301 to 1259303, EPI\_ISL\_1262763 to 1262812, EPI\_ISL\_1262881 to 1262897, EPI\_ISL\_1262915 to 1262916, EPI\_ISL\_1262934 to 1262939, EPI\_ISL\_1262990 to 1263089, EPI\_ISL\_1301821 to 1301822, EPI\_ISL\_1301861, EPI\_ISL\_1301862, EPI\_ISL\_1301884 to 1301886, EPI\_ISL\_1301901 to 1301902, EPI\_ISL\_1301916 to 1301919, EPI\_ISL\_1301923, EPI\_ISL\_1301945 to 1301947, EPI\_ISL\_1301959, EPI\_ISL\_1336330 to 1336333, EPI\_ISL\_1336342 to 1336351, EPI\_ISL\_1381160, EPI\_ISL\_1381162, EPI\_ISL\_1381218 to 1381224

see above  
Labo Analyses Med  
National Reference Center for Viruses of Respiratory Infections, Institut Pasteur, Paris  
; Angela Brisebarre; Bendayan James; Besson J; Bonnet Cyrille; Cady Anne; Camille Capel; Cerballiance Paris; Chauvet; Coignard Catherine; Desjardins Nicolas; Duancelle Alexandra; Dufour M; Durivault Jérôme; Dyalab; Ebel Anne; Etienne Elodie; Etienne Simon-Lorière; Felloni Claire; Fiorina JC; Foissaud Vincent; Garand Anne-Laure; Gestin Brieuc; Germaine Anne; Jouard Charles; Holstein Anne; Jourd Charles; Laroche Christine; Le Vicki; Lebhan David; Lecorche; Leonard Pierre-Yves; Lescaux Alexandre; Lesmile Béatrice; Louise LeFrançois; Marion Barbet; Martres Pascale; Maud Vanpeene; Morvan Odile; Méline Bizard; Oliel Jonathan; Pasquier; Potiron Gr



|                                                                                                                                                                                                                                                                                                                                                                                                                                                                                                                                                                                                                                                                                                                                                                                                                                                                                                                                                                                                                                                                                                                                                                                                                                                                                                                                                                                                                                                                                                                                                                                                                                                                                                                                                                                                                                                                                                                                                                                                                                                                                                                                                                                                                                                                                                                                                                                             |                                                                                                           |                                                                                                     |                                                                                                                                                                                                                                                                                                           |
|---------------------------------------------------------------------------------------------------------------------------------------------------------------------------------------------------------------------------------------------------------------------------------------------------------------------------------------------------------------------------------------------------------------------------------------------------------------------------------------------------------------------------------------------------------------------------------------------------------------------------------------------------------------------------------------------------------------------------------------------------------------------------------------------------------------------------------------------------------------------------------------------------------------------------------------------------------------------------------------------------------------------------------------------------------------------------------------------------------------------------------------------------------------------------------------------------------------------------------------------------------------------------------------------------------------------------------------------------------------------------------------------------------------------------------------------------------------------------------------------------------------------------------------------------------------------------------------------------------------------------------------------------------------------------------------------------------------------------------------------------------------------------------------------------------------------------------------------------------------------------------------------------------------------------------------------------------------------------------------------------------------------------------------------------------------------------------------------------------------------------------------------------------------------------------------------------------------------------------------------------------------------------------------------------------------------------------------------------------------------------------------------|-----------------------------------------------------------------------------------------------------------|-----------------------------------------------------------------------------------------------------|-----------------------------------------------------------------------------------------------------------------------------------------------------------------------------------------------------------------------------------------------------------------------------------------------------------|
| EPI_ISL_1153472 to 1153473, EPI_ISL_1153483, EPI_ISL_1153486, EPI_ISL_1153492, EPI_ISL_1153503 to 1153504, EPI_ISL_1153522, EPI_ISL_1153526, EPI_ISL_1156099, EPI_ISL_1156124, EPI_ISL_1212257, EPI_ISL_1212273, EPI_ISL_1212284, EPI_ISL_1212287, EPI_ISL_1212290, EPI_ISL_1212294, EPI_ISL_1214866, EPI_ISL_1214906, EPI_ISL_1214925, EPI_ISL_1214971, EPI_ISL_1214975, EPI_ISL_1214977, EPI_ISL_1217540, EPI_ISL_1217549, EPI_ISL_1281915, EPI_ISL_1281923, EPI_ISL_1281964 to 1281965, EPI_ISL_1281968, EPI_ISL_1281976, EPI_ISL_1285290, EPI_ISL_1285306, EPI_ISL_1285317, EPI_ISL_1285319 to 1285340, EPI_ISL_1350276, EPI_ISL_1350286, EPI_ISL_1350295, EPI_ISL_1350305, EPI_ISL_1350315, EPI_ISL_1350317, EPI_ISL_1353284, EPI_ISL_1353298, EPI_ISL_1353300, EPI_ISL_1353317, EPI_ISL_1353323, EPI_ISL_1353334, EPI_ISL_1353337, EPI_ISL_1353343, EPI_ISL_1353351                                                                                                                                                                                                                                                                                                                                                                                                                                                                                                                                                                                                                                                                                                                                                                                                                                                                                                                                                                                                                                                                                                                                                                                                                                                                                                                                                                                                                                                                                                                   | Labor Lübeck bzw. Laborärztliche Gemeinschaftspraxis Lübeck                                               | Robert Koch Institute                                                                               |                                                                                                                                                                                                                                                                                                           |
| see above                                                                                                                                                                                                                                                                                                                                                                                                                                                                                                                                                                                                                                                                                                                                                                                                                                                                                                                                                                                                                                                                                                                                                                                                                                                                                                                                                                                                                                                                                                                                                                                                                                                                                                                                                                                                                                                                                                                                                                                                                                                                                                                                                                                                                                                                                                                                                                                   |                                                                                                           |                                                                                                     |                                                                                                                                                                                                                                                                                                           |
| EPI_ISL_1153340, EPI_ISL_1153345, EPI_ISL_1153361, EPI_ISL_1153363, EPI_ISL_1153369, EPI_ISL_1153390, EPI_ISL_1153397 to 1153398, EPI_ISL_1153401, EPI_ISL_1153404, EPI_ISL_1153425, EPI_ISL_1153429 to 1153430, EPI_ISL_1153436, EPI_ISL_1153971, EPI_ISL_1153973, EPI_ISL_1153976, EPI_ISL_1153978, EPI_ISL_1154006, EPI_ISL_1155483, EPI_ISL_1155557, EPI_ISL_1155661, EPI_ISL_1157061, EPI_ISL_1215776, EPI_ISL_1217016 to 1217017, EPI_ISL_1217039, EPI_ISL_1217043, EPI_ISL_1217064, EPI_ISL_1217066, EPI_ISL_1217082, EPI_ISL_1217088, EPI_ISL_1217091, EPI_ISL_1283131, EPI_ISL_1283133 to 1283136, EPI_ISL_1283138, EPI_ISL_1283142, EPI_ISL_1283149 to 1283150, EPI_ISL_1283152, EPI_ISL_1283154, EPI_ISL_1283175, EPI_ISL_1283177, EPI_ISL_1283182, EPI_ISL_1283189, EPI_ISL_1283193, EPI_ISL_1283201, EPI_ISL_1283203, EPI_ISL_1283206, EPI_ISL_1283209, EPI_ISL_1283211, EPI_ISL_1283214, EPI_ISL_1283227, EPI_ISL_1283242, EPI_ISL_1283705, EPI_ISL_1283733, EPI_ISL_1283739, EPI_ISL_1283758, EPI_ISL_1283770, EPI_ISL_1283787, EPI_ISL_1283805, EPI_ISL_1283807, EPI_ISL_1283825, EPI_ISL_1283836, EPI_ISL_1283852, EPI_ISL_1286136 to 1286137, EPI_ISL_1349569 to 1349571, EPI_ISL_1349576, EPI_ISL_1349578, EPI_ISL_1349580 to 1349581, EPI_ISL_1349583 to 1349585, EPI_ISL_1349587 to 1349588, EPI_ISL_1349591 to 1349592, EPI_ISL_1349595 to 1349598, EPI_ISL_1349600 to 1349603, EPI_ISL_1350222, EPI_ISL_1350224, EPI_ISL_1350229 to 1350230, EPI_ISL_1350234, EPI_ISL_1350237, EPI_ISL_1350239, EPI_ISL_1350241, EPI_ISL_1351269, EPI_ISL_1353058 to 1353060, EPI_ISL_1353062, EPI_ISL_1353065, EPI_ISL_1353067 to 1353068, EPI_ISL_1353070 to 1353072, EPI_ISL_1353076 to 1353078, EPI_ISL_1353081, EPI_ISL_1353085 to 1353087, EPI_ISL_1353091 to 1353093, EPI_ISL_1353096, EPI_ISL_1353101, EPI_ISL_1353103, EPI_ISL_1353113, EPI_ISL_1353116, EPI_ISL_1353127, EPI_ISL_1353130, EPI_ISL_1353132 to 1353134, EPI_ISL_1353137, EPI_ISL_1353139, EPI_ISL_1354281                                                                                                                                                                                                                                                                                                                                                                                                    | Labor MönchengladbachMVZ Dr. Stein + Kollegen GbR                                                         | Robert Koch Institute                                                                               |                                                                                                                                                                                                                                                                                                           |
| see above                                                                                                                                                                                                                                                                                                                                                                                                                                                                                                                                                                                                                                                                                                                                                                                                                                                                                                                                                                                                                                                                                                                                                                                                                                                                                                                                                                                                                                                                                                                                                                                                                                                                                                                                                                                                                                                                                                                                                                                                                                                                                                                                                                                                                                                                                                                                                                                   |                                                                                                           |                                                                                                     |                                                                                                                                                                                                                                                                                                           |
| EPI_ISL_1285345, EPI_ISL_1285347, EPI_ISL_1285349 to 1285350, EPI_ISL_1285353, EPI_ISL_1285355, EPI_ISL_1285357 to 1285358, EPI_ISL_1285360, EPI_ISL_1285363, EPI_ISL_1285365, EPI_ISL_1285368 to 1285370, EPI_ISL_1285372 to 1285373, EPI_ISL_1285375 to 1285384                                                                                                                                                                                                                                                                                                                                                                                                                                                                                                                                                                                                                                                                                                                                                                                                                                                                                                                                                                                                                                                                                                                                                                                                                                                                                                                                                                                                                                                                                                                                                                                                                                                                                                                                                                                                                                                                                                                                                                                                                                                                                                                           | Labor Prof. Dr. G. Enders MVZ GbR                                                                         | Robert Koch Institute                                                                               |                                                                                                                                                                                                                                                                                                           |
| see above                                                                                                                                                                                                                                                                                                                                                                                                                                                                                                                                                                                                                                                                                                                                                                                                                                                                                                                                                                                                                                                                                                                                                                                                                                                                                                                                                                                                                                                                                                                                                                                                                                                                                                                                                                                                                                                                                                                                                                                                                                                                                                                                                                                                                                                                                                                                                                                   |                                                                                                           |                                                                                                     |                                                                                                                                                                                                                                                                                                           |
| EPI_ISL_1048252, EPI_ISL_1048258, EPI_ISL_1048260, EPI_ISL_1048267, EPI_ISL_1048295, EPI_ISL_1048350 to 1048351                                                                                                                                                                                                                                                                                                                                                                                                                                                                                                                                                                                                                                                                                                                                                                                                                                                                                                                                                                                                                                                                                                                                                                                                                                                                                                                                                                                                                                                                                                                                                                                                                                                                                                                                                                                                                                                                                                                                                                                                                                                                                                                                                                                                                                                                             | Labor Prof. Dr. G. Enders MVZ GbR                                                                         | Robert Koch Institute, Influenza and respiratory viruses FG17 & Bioinformatics MF1, Berlin, Germany | Aleksandar Radonic; F. Tewald; Marianne Wedde; Oliver Drechsel; Ralf Duerwald; Rene Kmicinski; Stefan Kroeger; Stephan Fuchs; Thorsten Wolff                                                                                                                                                              |
| EPI_ISL_1140190 to 1140388, EPI_ISL_1140390 to 1140422, EPI_ISL_1140427 to 1140456, EPI_ISL_1140459 to 1140477, EPI_ISL_1143555 to 1143567, EPI_ISL_1143847 to 1143915, EPI_ISL_1211903 to 1211933, EPI_ISL_1212417 to 1212419, EPI_ISL_1212422 to 1212426, EPI_ISL_1212428, EPI_ISL_1212430, EPI_ISL_1212432 to 1212434, EPI_ISL_1212436, EPI_ISL_1212438, EPI_ISL_1212440, EPI_ISL_1212443, EPI_ISL_1212445 to 1212450, EPI_ISL_1212452 to 1212458, EPI_ISL_1212461 to 1212462, EPI_ISL_1212465 to 1212467, EPI_ISL_1212469 to 1212472, EPI_ISL_1212476 to 1212478, EPI_ISL_1212480 to 1212488, EPI_ISL_1212490 to 1212499, EPI_ISL_1218109 to 1218120, EPI_ISL_1218122 to 1218146, EPI_ISL_1218148 to 1218187, EPI_ISL_1282836, EPI_ISL_1282838, EPI_ISL_1282842 to 1282851, EPI_ISL_1282853 to 1282854, EPI_ISL_1282856, EPI_ISL_1282857, EPI_ISL_1282859, EPI_ISL_1282861, EPI_ISL_1282864, EPI_ISL_1282866 to 1282867, EPI_ISL_1282869, EPI_ISL_1282871 to 1282875, EPI_ISL_1282879, EPI_ISL_1282881, EPI_ISL_1282885, EPI_ISL_1282888 to 1282891, EPI_ISL_1282894 to 1282895, EPI_ISL_1282897, EPI_ISL_1282899 to 1282901, EPI_ISL_1282908 to 1282913, EPI_ISL_1282915 to 1282916, EPI_ISL_1282918 to 1282919, EPI_ISL_1282922, EPI_ISL_1282924, EPI_ISL_1282932, EPI_ISL_1282930, EPI_ISL_1282936, EPI_ISL_1282942 to 1282944, EPI_ISL_1282950 to 1282951, EPI_ISL_1282953 to 1282955, EPI_ISL_1282960, EPI_ISL_1282962 to 1282965, EPI_ISL_1285178 to 1285179, EPI_ISL_1285181 to 1285182, EPI_ISL_1285184, EPI_ISL_1285190 to 1285193, EPI_ISL_1285195, EPI_ISL_1285197, EPI_ISL_1285200, EPI_ISL_1285203, EPI_ISL_1285209 to 1285210, EPI_ISL_1285212, EPI_ISL_1285215, EPI_ISL_1285217, EPI_ISL_1285219, EPI_ISL_1285222 to 1285223, EPI_ISL_1285225, EPI_ISL_1285228, EPI_ISL_1285232 to 1285234, EPI_ISL_1285240, EPI_ISL_1285243, EPI_ISL_1285248, EPI_ISL_1285249, EPI_ISL_1285250, EPI_ISL_1285252, EPI_ISL_1285254, EPI_ISL_1285256, EPI_ISL_1285262 to 1285264, EPI_ISL_1285266 to 1285271, EPI_ISL_1285273 to 1285276, EPI_ISL_1285280, EPI_ISL_1350322 to 1350323, EPI_ISL_1350325, EPI_ISL_1350327, EPI_ISL_1350329 to 1350330, EPI_ISL_1350332 to 1350333, EPI_ISL_1350339, EPI_ISL_1350344, EPI_ISL_1350347, EPI_ISL_1350351 to 1350353, EPI_ISL_1350356 to 1350357, EPI_ISL_1350360, EPI_ISL_1350366, EPI_ISL_1350368, EPI_ISL_1350370, EPI_ISL_1350373 to 1350374 | Labor ZOTZ KLIMAS; MVZ Düsseldorf-Centrum                                                                 | Robert Koch Institute                                                                               |                                                                                                                                                                                                                                                                                                           |
| see above                                                                                                                                                                                                                                                                                                                                                                                                                                                                                                                                                                                                                                                                                                                                                                                                                                                                                                                                                                                                                                                                                                                                                                                                                                                                                                                                                                                                                                                                                                                                                                                                                                                                                                                                                                                                                                                                                                                                                                                                                                                                                                                                                                                                                                                                                                                                                                                   |                                                                                                           |                                                                                                     |                                                                                                                                                                                                                                                                                                           |
| EPI_ISL_1151430, EPI_ISL_1151497, EPI_ISL_1151512, EPI_ISL_1151563, EPI_ISL_1151616, EPI_ISL_1151661, EPI_ISL_1151674, EPI_ISL_1151676, EPI_ISL_1151683, EPI_ISL_1151690, EPI_ISL_1151692, EPI_ISL_1151720, EPI_ISL_1151732, EPI_ISL_1152624, EPI_ISL_1152644, EPI_ISL_1152657, EPI_ISL_1152660, EPI_ISL_1152763, EPI_ISL_1152776, EPI_ISL_1152791, EPI_ISL_1152842 to 1152843, EPI_ISL_1213592, EPI_ISL_1213666, EPI_ISL_1213671, EPI_ISL_1213676, EPI_ISL_1213724, EPI_ISL_1213729, EPI_ISL_1213732, EPI_ISL_1213758, EPI_ISL_1213761, EPI_ISL_1213811, EPI_ISL_1213839, EPI_ISL_1213855, EPI_ISL_1213860, EPI_ISL_1213908, EPI_ISL_1213914 to 1213915, EPI_ISL_1213924, EPI_ISL_1213975, EPI_ISL_1213988, EPI_ISL_1214007, EPI_ISL_1214038, EPI_ISL_1214046, EPI_ISL_1214087, EPI_ISL_1218301, EPI_ISL_1218307, EPI_ISL_1218314, EPI_ISL_1218332, EPI_ISL_1280789, EPI_ISL_1280807, EPI_ISL_1280830, EPI_ISL_1280867, EPI_ISL_1280871, EPI_ISL_1280879, EPI_ISL_1280897, EPI_ISL_1352071, EPI_ISL_1352078, EPI_ISL_1352129, EPI_ISL_1352131, EPI_ISL_1352215, EPI_ISL_1357399, EPI_ISL_1357421, EPI_ISL_1357430, EPI_ISL_1357438, EPI_ISL_1357455, EPI_ISL_1357503, EPI_ISL_1357523, EPI_ISL_1357546, EPI_ISL_1357572                                                                                                                                                                                                                                                                                                                                                                                                                                                                                                                                                                                                                                                                                                                                                                                                                                                                                                                                                                                                                                                                                                                                                                    | Labor für medizinische Mikrobiologie Bakteriologie Mykologie Virologie & Infektionsserologie              | Robert Koch Institute                                                                               |                                                                                                                                                                                                                                                                                                           |
| EPI_ISL_1356618 to 1356620, EPI_ISL_1356622 to 1356624, EPI_ISL_1356626 to 1356627, EPI_ISL_1356629 to 1356638                                                                                                                                                                                                                                                                                                                                                                                                                                                                                                                                                                                                                                                                                                                                                                                                                                                                                                                                                                                                                                                                                                                                                                                                                                                                                                                                                                                                                                                                                                                                                                                                                                                                                                                                                                                                                                                                                                                                                                                                                                                                                                                                                                                                                                                                              | Laborarztpraxis Jochen Hüter                                                                              | Robert Koch Institute                                                                               |                                                                                                                                                                                                                                                                                                           |
| EPI_ISL_1009627                                                                                                                                                                                                                                                                                                                                                                                                                                                                                                                                                                                                                                                                                                                                                                                                                                                                                                                                                                                                                                                                                                                                                                                                                                                                                                                                                                                                                                                                                                                                                                                                                                                                                                                                                                                                                                                                                                                                                                                                                                                                                                                                                                                                                                                                                                                                                                             | Laboratoire Cerballiance Bretigny                                                                         | Cerba                                                                                               | Benazra M; Collin T; Delaplace E; Gresset N; Haim-Boukobza S; Lecorche E; Lesenne A; Olivi M; Ricard B; Roquebert B; Trombert-Paolantoni S                                                                                                                                                                |
| EPI_ISL_1001459                                                                                                                                                                                                                                                                                                                                                                                                                                                                                                                                                                                                                                                                                                                                                                                                                                                                                                                                                                                                                                                                                                                                                                                                                                                                                                                                                                                                                                                                                                                                                                                                                                                                                                                                                                                                                                                                                                                                                                                                                                                                                                                                                                                                                                                                                                                                                                             | Laboratoire Cerballiance Port de Bouc                                                                     | Cerba                                                                                               | Haim-Boukobza S; Lecorche E; Meyer S; Roig JC; Roquebert B; Trombert-Paolantoni S                                                                                                                                                                                                                         |
| EPI_ISL_1001464                                                                                                                                                                                                                                                                                                                                                                                                                                                                                                                                                                                                                                                                                                                                                                                                                                                                                                                                                                                                                                                                                                                                                                                                                                                                                                                                                                                                                                                                                                                                                                                                                                                                                                                                                                                                                                                                                                                                                                                                                                                                                                                                                                                                                                                                                                                                                                             | Laboratoire Cerballiance du pole santé                                                                    | Cerba                                                                                               | Haim-Boukobza S; Lecorche E; Meyer S; Roig JC; Roquebert B; Trombert-Paolantoni S                                                                                                                                                                                                                         |
| EPI_ISL_1250623 to 1250624                                                                                                                                                                                                                                                                                                                                                                                                                                                                                                                                                                                                                                                                                                                                                                                                                                                                                                                                                                                                                                                                                                                                                                                                                                                                                                                                                                                                                                                                                                                                                                                                                                                                                                                                                                                                                                                                                                                                                                                                                                                                                                                                                                                                                                                                                                                                                                  | Laboratoire D Lab                                                                                         | Centre Hospitalier Universitaire de Rouen Laboratoire de Virologie                                  | Alice Moisan; Fabienne De Oliveira; Marie Leoz                                                                                                                                                                                                                                                            |
| EPI_ISL_1259250, EPI_ISL_1259252, EPI_ISL_1259270, EPI_ISL_1279944, EPI_ISL_1381265 to 1381266, EPI_ISL_1381271 to 1381279, EPI_ISL_1381283 to 1381288, EPI_ISL_1381291 to 1381296                                                                                                                                                                                                                                                                                                                                                                                                                                                                                                                                                                                                                                                                                                                                                                                                                                                                                                                                                                                                                                                                                                                                                                                                                                                                                                                                                                                                                                                                                                                                                                                                                                                                                                                                                                                                                                                                                                                                                                                                                                                                                                                                                                                                          | Laboratoire Hospitalier Universitaire de Bruxelles (LHUB-ULB)                                             | UAntwerp, Laboratory of Medical Microbiology                                                        | Basil Britto Xavier; Christine Lammens; Herman Goossens; Jasmine Coppens; Marie Le Mercier; Veerle Matheussen                                                                                                                                                                                             |
| EPI_ISL_1336571                                                                                                                                                                                                                                                                                                                                                                                                                                                                                                                                                                                                                                                                                                                                                                                                                                                                                                                                                                                                                                                                                                                                                                                                                                                                                                                                                                                                                                                                                                                                                                                                                                                                                                                                                                                                                                                                                                                                                                                                                                                                                                                                                                                                                                                                                                                                                                             | Laboratoire UNILIANS St Just-St rambert                                                                   | CNR Virus des Infections Respiratoires - France SUD                                                 | Antonin Bal; Bruno Lina; Gregory Destras; Gwendolynne Burfin; Hadrien Regue; Laurence Josset; Martine Valette; Quentin Semanas                                                                                                                                                                            |
| EPI_ISL_1158547 to 1158548, EPI_ISL_1158579 to 1158580, EPI_ISL_1158928, EPI_ISL_1159069, EPI_ISL_1159107, EPI_ISL_1159126, EPI_ISL_1159129 to 1159130, EPI_ISL_1159229, EPI_ISL_1159231 to 1159232                                                                                                                                                                                                                                                                                                                                                                                                                                                                                                                                                                                                                                                                                                                                                                                                                                                                                                                                                                                                                                                                                                                                                                                                                                                                                                                                                                                                                                                                                                                                                                                                                                                                                                                                                                                                                                                                                                                                                                                                                                                                                                                                                                                         | Laboratoire Vivalia - Cliniques St-Joseph                                                                 | Plateforme de testing Namuroise                                                                     | Degosserie Jonathan; Denis Olivier; Maschietto Céline; Mullier François; Otto Gaetan; Technologue                                                                                                                                                                                                         |
| EPI_ISL_1158578                                                                                                                                                                                                                                                                                                                                                                                                                                                                                                                                                                                                                                                                                                                                                                                                                                                                                                                                                                                                                                                                                                                                                                                                                                                                                                                                                                                                                                                                                                                                                                                                                                                                                                                                                                                                                                                                                                                                                                                                                                                                                                                                                                                                                                                                                                                                                                             | Laboratoire Vivalia - Cliniques St-Joseph                                                                 | Plateforme de testing Namuroise                                                                     | Degosserie Jonathan; Denis Olivier; Maschietto Céline; Mullier François; Otto Gaetan                                                                                                                                                                                                                      |
| EPI_ISL_1013438 to 1013443, EPI_ISL_1013445 to 1013449                                                                                                                                                                                                                                                                                                                                                                                                                                                                                                                                                                                                                                                                                                                                                                                                                                                                                                                                                                                                                                                                                                                                                                                                                                                                                                                                                                                                                                                                                                                                                                                                                                                                                                                                                                                                                                                                                                                                                                                                                                                                                                                                                                                                                                                                                                                                      | Laboratoire associé au CNR des Virus Influenzae                                                           | National Reference Center for Viruses of Respiratory Infections, Institut Pasteur, Paris            | Angela Brisebarre; Camille Capel; Etienne Simon-Lorière; Marion Barbet; Maud Vanpeene; Méline Bizard; Rousset (Guy) Dominique; Sylvie Behillili; Sylvie van der Werf; Vincent Enouf                                                                                                                       |
| EPI_ISL_1103576, EPI_ISL_1107189, EPI_ISL_1109622 to 1109623, EPI_ISL_1116465 to 1116466, EPI_ISL_1116470, EPI_ISL_1116555, EPI_ISL_1116592, EPI_ISL_1117289, EPI_ISL_1120732, EPI_ISL_1137621, EPI_ISL_1159697 to 1159700                                                                                                                                                                                                                                                                                                                                                                                                                                                                                                                                                                                                                                                                                                                                                                                                                                                                                                                                                                                                                                                                                                                                                                                                                                                                                                                                                                                                                                                                                                                                                                                                                                                                                                                                                                                                                                                                                                                                                                                                                                                                                                                                                                  | Laboratoire central de Virologie                                                                          | Laboratoire de Biotechnologie                                                                       | Abdelmunim Essabbar; Amal Zouaki; Ghizlane EL Amin; Hakima Kabbaj; Lahcen Belyamani and Azeddine Ibrahim; Lahcen Belyamani and Azeddine Ibrahim; Mouna Ouadghiri; Myriam Seffar; Saaid Amzazi; Tarik Aanniz                                                                                               |
| EPI_ISL_1103584                                                                                                                                                                                                                                                                                                                                                                                                                                                                                                                                                                                                                                                                                                                                                                                                                                                                                                                                                                                                                                                                                                                                                                                                                                                                                                                                                                                                                                                                                                                                                                                                                                                                                                                                                                                                                                                                                                                                                                                                                                                                                                                                                                                                                                                                                                                                                                             | Laboratoire central de Virologie, Centre hospitalo-universitaire Ibn Sina, Hôpital des spécialités        | Laboratoire de Biotechnologie                                                                       | Abdelmunim Essabbar; Amal Zouaki; Ghizlane EL Amin; Hakima Kabbaj; Lahcen Belyamani and Azeddine Ibrahim; Mouna Ouadghiri; Myriam Seffar; Saaid Amzazi; Tarik Aanniz                                                                                                                                      |
| EPI_ISL_1105946                                                                                                                                                                                                                                                                                                                                                                                                                                                                                                                                                                                                                                                                                                                                                                                                                                                                                                                                                                                                                                                                                                                                                                                                                                                                                                                                                                                                                                                                                                                                                                                                                                                                                                                                                                                                                                                                                                                                                                                                                                                                                                                                                                                                                                                                                                                                                                             | Laboratoire central de Virologie, Centre hospitalo-universitaire Ibn Sina Hôpital des spécialités         | Laboratoire de Biotechnologie                                                                       | Abdelmunim Essabbar; Amal Zouaki; Ghizlane EL Amin; Hakima Kabbaj; Lahcen Belyamani and Azeddine Ibrahim; Mouna Ouadghiri; Myriam Seffar; Saaid Amzazi; Tarik Aanniz                                                                                                                                      |
| EPI_ISL_1103579                                                                                                                                                                                                                                                                                                                                                                                                                                                                                                                                                                                                                                                                                                                                                                                                                                                                                                                                                                                                                                                                                                                                                                                                                                                                                                                                                                                                                                                                                                                                                                                                                                                                                                                                                                                                                                                                                                                                                                                                                                                                                                                                                                                                                                                                                                                                                                             | Laboratoire central de Virologie, Centre hospitalo-universitaire Ibn Sina, Hôpital des spécialités        | Laboratoire de Biotechnologie                                                                       | Abdelmunim Essabbar; Amal Zouaki; Ghizlane EL Amin; Hakima Kabbaj; Lahcen Belyamani and Azeddine Ibrahim; Mouna Ouadghiri; Myriam Seffar; Saaid Amzazi; Tarik Aanniz                                                                                                                                      |
| EPI_ISL_1103569                                                                                                                                                                                                                                                                                                                                                                                                                                                                                                                                                                                                                                                                                                                                                                                                                                                                                                                                                                                                                                                                                                                                                                                                                                                                                                                                                                                                                                                                                                                                                                                                                                                                                                                                                                                                                                                                                                                                                                                                                                                                                                                                                                                                                                                                                                                                                                             | Laboratoire central de Virologie, Centre hospitalo-universitaire Ibn Sina, Hôpital des spécialités, Rabat | Laboratoire de Biotechnologie                                                                       | Abdelmunim Essabbar; Amal Zouaki; Ghizlane EL Amin; Hakima Kabbaj; Lahcen Belyamani and Azeddine Ibrahim; Mouna Ouadghiri; Myriam Seffar; Saaid Amzazi; Tarik Aanniz                                                                                                                                      |
| EPI_ISL_1013217 to 1013221                                                                                                                                                                                                                                                                                                                                                                                                                                                                                                                                                                                                                                                                                                                                                                                                                                                                                                                                                                                                                                                                                                                                                                                                                                                                                                                                                                                                                                                                                                                                                                                                                                                                                                                                                                                                                                                                                                                                                                                                                                                                                                                                                                                                                                                                                                                                                                  | Laboratoire de Microbiologie                                                                              | National Reference Center for Viruses of Respiratory Infections, Institut Pasteur, Paris            | Angela Brisebarre; Camille Capel; Etienne Simon-Lorière; Marion Barbet; Martres Pascale; Maud Vanpeene; Méline Bizard; Sylvie Behillili; Sylvie van der Werf; Vincent Enouf                                                                                                                               |
| EPI_ISL_1116464, EPI_ISL_1116467 to 1116469, EPI_ISL_1118675, EPI_ISL_1118884, EPI_ISL_1118923, EPI_ISL_1118926, EPI_ISL_1138747                                                                                                                                                                                                                                                                                                                                                                                                                                                                                                                                                                                                                                                                                                                                                                                                                                                                                                                                                                                                                                                                                                                                                                                                                                                                                                                                                                                                                                                                                                                                                                                                                                                                                                                                                                                                                                                                                                                                                                                                                                                                                                                                                                                                                                                            | Laboratoire de Microbiologie- CHU Habib Bourguiba - Sfax                                                  | Laboratoire des Procédés de Criblage Moléculaire et Cellulaire-Centre de Biotechnologie de Sfax     | A. and Masmoudi, S.; Abdelmoulah, F.; Abid, N.; Ajili, F.; Aouni, M.; Ben Ayed, I.; Bensaïd, M.; Chtourou, A.; Elargoubi, A.; Fki-berrajah, L.; Gaaloui, I.; Gargouri, S.; Hammami, A.; Kamoun, S.; Karray Hakim, H.; Kharat, N.; Mhalla, S.; Nabli, A.; Rebai, I.; Souissi, A.; Stambouli, N.; Turki, M. |
| EPI_ISL_1190738                                                                                                                                                                                                                                                                                                                                                                                                                                                                                                                                                                                                                                                                                                                                                                                                                                                                                                                                                                                                                                                                                                                                                                                                                                                                                                                                                                                                                                                                                                                                                                                                                                                                                                                                                                                                                                                                                                                                                                                                                                                                                                                                                                                                                                                                                                                                                                             | Laboratoire de biologie moléculaire - Plateforme Clinique                                                 | Laboratoire de biologie moléculaire - Plateforme Clinique                                           | Bogaerts Pierre; Denis Olivier; Evrard Stephanie; Huang Te-Din; Mullier François; Rouze Pauline                                                                                                                                                                                                           |



|                                                                                                                                                                                                                                                                                                                                                                                                                                                                                                                                                                                                                                                                                                                                                                                                                                                                                                                                                                                                                                                                                                                                                                                                                                                                                                                                                                                                                                                                                                                                                                                                                                                                                                                                                                                                                                                                                                                                                                                                                                                                                                                                                              |                                                                                                                                                   |                                                                                                                                                                       |                                                                                                                                                                                                                                                                                                                                                                                                                                                                                                                                                                                                                                                                                                                                                                                                                                                                                                                                                                                                                                |
|--------------------------------------------------------------------------------------------------------------------------------------------------------------------------------------------------------------------------------------------------------------------------------------------------------------------------------------------------------------------------------------------------------------------------------------------------------------------------------------------------------------------------------------------------------------------------------------------------------------------------------------------------------------------------------------------------------------------------------------------------------------------------------------------------------------------------------------------------------------------------------------------------------------------------------------------------------------------------------------------------------------------------------------------------------------------------------------------------------------------------------------------------------------------------------------------------------------------------------------------------------------------------------------------------------------------------------------------------------------------------------------------------------------------------------------------------------------------------------------------------------------------------------------------------------------------------------------------------------------------------------------------------------------------------------------------------------------------------------------------------------------------------------------------------------------------------------------------------------------------------------------------------------------------------------------------------------------------------------------------------------------------------------------------------------------------------------------------------------------------------------------------------------------|---------------------------------------------------------------------------------------------------------------------------------------------------|-----------------------------------------------------------------------------------------------------------------------------------------------------------------------|--------------------------------------------------------------------------------------------------------------------------------------------------------------------------------------------------------------------------------------------------------------------------------------------------------------------------------------------------------------------------------------------------------------------------------------------------------------------------------------------------------------------------------------------------------------------------------------------------------------------------------------------------------------------------------------------------------------------------------------------------------------------------------------------------------------------------------------------------------------------------------------------------------------------------------------------------------------------------------------------------------------------------------|
| EPI_ISL_1220862                                                                                                                                                                                                                                                                                                                                                                                                                                                                                                                                                                                                                                                                                                                                                                                                                                                                                                                                                                                                                                                                                                                                                                                                                                                                                                                                                                                                                                                                                                                                                                                                                                                                                                                                                                                                                                                                                                                                                                                                                                                                                                                                              | Laboratoire de microbiologie CHU NIMES                                                                                                            | Laboratoire de microbiologie CHU NIMES                                                                                                                                | Agathe Boudet; Marie-Josée Carles; Sophie Bravo; Stephan Robin                                                                                                                                                                                                                                                                                                                                                                                                                                                                                                                                                                                                                                                                                                                                                                                                                                                                                                                                                                 |
| EPI_ISL_1001069 to 1001108, EPI_ISL_1004175 to 1004177, EPI_ISL_1009129 to 1009158, EPI_ISL_1167298 to 1167307, EPI_ISL_1241005 to 1241278, EPI_ISL_1241281 to 1241282, EPI_ISL_1241284 to 1241385, EPI_ISL_1241387 to 1241679, EPI_ISL_1314968 to 1314969, EPI_ISL_1324739 to 1324757, EPI_ISL_1365748 to 1365839, EPI_ISL_1365841 to 1366069, EPI_ISL_1378940 to 1379156                                                                                                                                                                                                                                                                                                                                                                                                                                                                                                                                                                                                                                                                                                                                                                                                                                                                                                                                                                                                                                                                                                                                                                                                                                                                                                                                                                                                                                                                                                                                                                                                                                                                                                                                                                                   |                                                                                                                                                   |                                                                                                                                                                       |                                                                                                                                                                                                                                                                                                                                                                                                                                                                                                                                                                                                                                                                                                                                                                                                                                                                                                                                                                                                                                |
| see above                                                                                                                                                                                                                                                                                                                                                                                                                                                                                                                                                                                                                                                                                                                                                                                                                                                                                                                                                                                                                                                                                                                                                                                                                                                                                                                                                                                                                                                                                                                                                                                                                                                                                                                                                                                                                                                                                                                                                                                                                                                                                                                                                    | Laboratoire de santé publique du Québec                                                                                                           | Laboratoire de santé publique du Québec                                                                                                                               | Guillaume Bourque; Ioannis Ragoussis; Jesse Shapiro; Mark Lathrop and Michel Roger on behalf of the CoVSeQ research group; Mark Lathrop and Michel Roger on behalf of the CoVSeQ research group ( <a href="http://covseq.ca/researchgroup/">http://covseq.ca/researchgroup/</a> ); Sandrine Moreira                                                                                                                                                                                                                                                                                                                                                                                                                                                                                                                                                                                                                                                                                                                            |
| EPI_ISL_1197037, EPI_ISL_1208399                                                                                                                                                                                                                                                                                                                                                                                                                                                                                                                                                                                                                                                                                                                                                                                                                                                                                                                                                                                                                                                                                                                                                                                                                                                                                                                                                                                                                                                                                                                                                                                                                                                                                                                                                                                                                                                                                                                                                                                                                                                                                                                             | Laboratoire de virologie clinique - Institut Pasteur de Tunis                                                                                     | 1-Laboratory of Microbiology, National Reference Lab, Charles Nicolle Hospital; 2-University of Tunis ElManar, Faculty of Medicine of Tunis, LR99ES09, Tunis, Tunisia | Alia BenKahla; Anissa Chouhika; Fares Wasfi; Henda Triki; Ilhem Boutiba-Ben Boubaker; Imen Kacem; Ines Mdimi; Jallia Ben Khelil; Maher Kharrat; Manel Ben Sassi; Mariem Gdoura; Mouna Ben Sassi; Mouna Safer; Nissaf Ben Alaya; Riadh Daghfous; Riadh Gouider; Roua Ben Othman; Salma Abid; Sameh Trabelsi; Sana Ferjani; Sara Chamman; Sondes Haddad                                                                                                                                                                                                                                                                                                                                                                                                                                                                                                                                                                                                                                                                          |
| EPI_ISL_1383253 to 1383641                                                                                                                                                                                                                                                                                                                                                                                                                                                                                                                                                                                                                                                                                                                                                                                                                                                                                                                                                                                                                                                                                                                                                                                                                                                                                                                                                                                                                                                                                                                                                                                                                                                                                                                                                                                                                                                                                                                                                                                                                                                                                                                                   | Laboratoire national de sante, Microbiology, Virology                                                                                             | Laboratoire national de sante, Microbiology, Microbial Genomics Platform                                                                                              | Anke Wienecke-Baldacchino; Catherine Ragimbeau; Fatu Djabi; Jessica Tapp; Lise Pignon; Raoul Salmon; Tamir Abdelrahman; Trung Nguyen Nguyen                                                                                                                                                                                                                                                                                                                                                                                                                                                                                                                                                                                                                                                                                                                                                                                                                                                                                    |
| EPI_ISL_1366746                                                                                                                                                                                                                                                                                                                                                                                                                                                                                                                                                                                                                                                                                                                                                                                                                                                                                                                                                                                                                                                                                                                                                                                                                                                                                                                                                                                                                                                                                                                                                                                                                                                                                                                                                                                                                                                                                                                                                                                                                                                                                                                                              | Laboratori de Referencia de Catalunya                                                                                                             | Laboratori de Referencia de Catalunya                                                                                                                                 | Bellosilo B.; Canal M.; Hernandez JJ.; Padilla E.; Ramirez A.; Vilas A.                                                                                                                                                                                                                                                                                                                                                                                                                                                                                                                                                                                                                                                                                                                                                                                                                                                                                                                                                        |
| EPI_ISL_1058161 to 1058166                                                                                                                                                                                                                                                                                                                                                                                                                                                                                                                                                                                                                                                                                                                                                                                                                                                                                                                                                                                                                                                                                                                                                                                                                                                                                                                                                                                                                                                                                                                                                                                                                                                                                                                                                                                                                                                                                                                                                                                                                                                                                                                                   | Laboratori de Referència de Catalunya                                                                                                             | Hospital Universitari Vall d'Hebron - Vall d'Hebron Institut de Recerca                                                                                               | Andrés Antón; Ariadna Rando; Carla Castillo; Cristina Andrés; Damir Garcia-Cehic; Josep F Abril; Josep Quer; Juliana Esperalba; Maria Carmen Martin; Maria Gema Codina; Maria Piñana; Tomás Pumarola                                                                                                                                                                                                                                                                                                                                                                                                                                                                                                                                                                                                                                                                                                                                                                                                                           |
| EPI_ISL_1194149 to 1194150, EPI_ISL_1194152 to 1194153, EPI_ISL_1194155 to 1194156, EPI_ISL_1194158 to 1194159, EPI_ISL_1194161, EPI_ISL_1194163 to 1194164, EPI_ISL_1194166                                                                                                                                                                                                                                                                                                                                                                                                                                                                                                                                                                                                                                                                                                                                                                                                                                                                                                                                                                                                                                                                                                                                                                                                                                                                                                                                                                                                                                                                                                                                                                                                                                                                                                                                                                                                                                                                                                                                                                                 |                                                                                                                                                   |                                                                                                                                                                       |                                                                                                                                                                                                                                                                                                                                                                                                                                                                                                                                                                                                                                                                                                                                                                                                                                                                                                                                                                                                                                |
| see above                                                                                                                                                                                                                                                                                                                                                                                                                                                                                                                                                                                                                                                                                                                                                                                                                                                                                                                                                                                                                                                                                                                                                                                                                                                                                                                                                                                                                                                                                                                                                                                                                                                                                                                                                                                                                                                                                                                                                                                                                                                                                                                                                    | Laboratori de Referència de Catalunya                                                                                                             | SeqCOVID-SPAIN consortium/IBV(CSIC)                                                                                                                                   | Aida Esperanza Ramirez Marinero; Alba Vilas Basil; Eduardo Padilla León; Mireia Canal Aranda and SeqCOVID-SPAIN consortium                                                                                                                                                                                                                                                                                                                                                                                                                                                                                                                                                                                                                                                                                                                                                                                                                                                                                                     |
| EPI_ISL_1313179                                                                                                                                                                                                                                                                                                                                                                                                                                                                                                                                                                                                                                                                                                                                                                                                                                                                                                                                                                                                                                                                                                                                                                                                                                                                                                                                                                                                                                                                                                                                                                                                                                                                                                                                                                                                                                                                                                                                                                                                                                                                                                                                              | LaboratorieMedicinsk Centrum Gotland                                                                                                              | Karolinska University Hospital                                                                                                                                        | Annelie Bjerkner; Isak Sylvin; Jan Albert; Karolina Ininberg; Lina Guerra Blomqvist; Lynda Eneh; Martin Ekman; Martina Wahlund; Robert Dyrdak; Sandra Brodsson; Tanja Normark; Tobias Allander; Valterri Wirta; Zhibing Yun                                                                                                                                                                                                                                                                                                                                                                                                                                                                                                                                                                                                                                                                                                                                                                                                    |
| EPI_ISL_1168094, EPI_ISL_1232007                                                                                                                                                                                                                                                                                                                                                                                                                                                                                                                                                                                                                                                                                                                                                                                                                                                                                                                                                                                                                                                                                                                                                                                                                                                                                                                                                                                                                                                                                                                                                                                                                                                                                                                                                                                                                                                                                                                                                                                                                                                                                                                             | Laboratoriemedicin, Klinisk mikrobiologi                                                                                                          | The Public Health Agency of Sweden                                                                                                                                    | Anna Risberg; Anna-Malin Linde; Carlo Berg; Karin Tegmark-Wisell; Maria Lind Karlberg; Mattias Haukland; Mia Brytting; Noura Walai; Oskar Karlsson Lindsjö; Petra Edquist; Petra Holmstrom; Reza Advani; Sofia Stamouli                                                                                                                                                                                                                                                                                                                                                                                                                                                                                                                                                                                                                                                                                                                                                                                                        |
| EPI_ISL_1166147 to 1166148, EPI_ISL_1296253 to 1296257, EPI_ISL_1296259 to 1296260, EPI_ISL_1299545 to 1299553, EPI_ISL_1299555, EPI_ISL_1336863                                                                                                                                                                                                                                                                                                                                                                                                                                                                                                                                                                                                                                                                                                                                                                                                                                                                                                                                                                                                                                                                                                                                                                                                                                                                                                                                                                                                                                                                                                                                                                                                                                                                                                                                                                                                                                                                                                                                                                                                             | Laboratorio Analisi Osp. Città di Castello - Azienda USL Umbria1                                                                                  | Istituto Zooprofilattico Sperimentale dell'Abruzzo e Molise "G. Caporale"                                                                                             | Ancora M; Calistri P; Camilloni B; Cammà C; Caporale M; Curini V; Di Domenico M; Di Pasquale A; Lorusso A; Malagigi V; Mangone I; Marcacci M; Mencacci A; Puglia I; Rinaldi A; Savini G; Scialabba S; Tacconi P                                                                                                                                                                                                                                                                                                                                                                                                                                                                                                                                                                                                                                                                                                                                                                                                                |
| EPI_ISL_1336864                                                                                                                                                                                                                                                                                                                                                                                                                                                                                                                                                                                                                                                                                                                                                                                                                                                                                                                                                                                                                                                                                                                                                                                                                                                                                                                                                                                                                                                                                                                                                                                                                                                                                                                                                                                                                                                                                                                                                                                                                                                                                                                                              | Laboratorio Analisi Osp. Città di Castello - Azienda USL Umbria2                                                                                  | Istituto Zooprofilattico Sperimentale dell'Abruzzo e Molise "G. Caporale"                                                                                             | Ancora M; Calistri P; Cammà C; Caporale M; Curini V; Di Domenico M; Di Pasquale A; Lorusso A; Malagigi V; Mangone I; Marcacci M; Puglia I; Rinaldi A; Savini G; Scialabba S; Tacconi P                                                                                                                                                                                                                                                                                                                                                                                                                                                                                                                                                                                                                                                                                                                                                                                                                                         |
| EPI_ISL_1336865                                                                                                                                                                                                                                                                                                                                                                                                                                                                                                                                                                                                                                                                                                                                                                                                                                                                                                                                                                                                                                                                                                                                                                                                                                                                                                                                                                                                                                                                                                                                                                                                                                                                                                                                                                                                                                                                                                                                                                                                                                                                                                                                              | Laboratorio Analisi Osp. Città di Castello - Azienda USL Umbria3                                                                                  | Istituto Zooprofilattico Sperimentale dell'Abruzzo e Molise "G. Caporale"                                                                                             | Ancora M; Calistri P; Cammà C; Caporale M; Curini V; Di Domenico M; Di Pasquale A; Lorusso A; Malagigi V; Mangone I; Marcacci M; Puglia I; Rinaldi A; Savini G; Scialabba S; Tacconi P                                                                                                                                                                                                                                                                                                                                                                                                                                                                                                                                                                                                                                                                                                                                                                                                                                         |
| EPI_ISL_1336866                                                                                                                                                                                                                                                                                                                                                                                                                                                                                                                                                                                                                                                                                                                                                                                                                                                                                                                                                                                                                                                                                                                                                                                                                                                                                                                                                                                                                                                                                                                                                                                                                                                                                                                                                                                                                                                                                                                                                                                                                                                                                                                                              | Laboratorio Analisi Osp. Città di Castello - Azienda USL Umbria4                                                                                  | Istituto Zooprofilattico Sperimentale dell'Abruzzo e Molise "G. Caporale"                                                                                             | Ancora M; Calistri P; Cammà C; Caporale M; Curini V; Di Domenico M; Di Pasquale A; Lorusso A; Malagigi V; Mangone I; Marcacci M; Puglia I; Rinaldi A; Savini G; Scialabba S; Tacconi P                                                                                                                                                                                                                                                                                                                                                                                                                                                                                                                                                                                                                                                                                                                                                                                                                                         |
| EPI_ISL_1336867                                                                                                                                                                                                                                                                                                                                                                                                                                                                                                                                                                                                                                                                                                                                                                                                                                                                                                                                                                                                                                                                                                                                                                                                                                                                                                                                                                                                                                                                                                                                                                                                                                                                                                                                                                                                                                                                                                                                                                                                                                                                                                                                              | Laboratorio Analisi Osp. Città di Castello - Azienda USL Umbria5                                                                                  | Istituto Zooprofilattico Sperimentale dell'Abruzzo e Molise "G. Caporale"                                                                                             | Ancora M; Calistri P; Cammà C; Caporale M; Curini V; Di Domenico M; Di Pasquale A; Lorusso A; Malagigi V; Mangone I; Marcacci M; Puglia I; Rinaldi A; Savini G; Scialabba S; Tacconi P                                                                                                                                                                                                                                                                                                                                                                                                                                                                                                                                                                                                                                                                                                                                                                                                                                         |
| EPI_ISL_1336868                                                                                                                                                                                                                                                                                                                                                                                                                                                                                                                                                                                                                                                                                                                                                                                                                                                                                                                                                                                                                                                                                                                                                                                                                                                                                                                                                                                                                                                                                                                                                                                                                                                                                                                                                                                                                                                                                                                                                                                                                                                                                                                                              | Laboratorio Analisi Osp. Città di Castello - Azienda USL Umbria6                                                                                  | Istituto Zooprofilattico Sperimentale dell'Abruzzo e Molise "G. Caporale"                                                                                             | Ancora M; Calistri P; Cammà C; Caporale M; Curini V; Di Domenico M; Di Pasquale A; Lorusso A; Malagigi V; Mangone I; Marcacci M; Puglia I; Rinaldi A; Savini G; Scialabba S; Tacconi P                                                                                                                                                                                                                                                                                                                                                                                                                                                                                                                                                                                                                                                                                                                                                                                                                                         |
| EPI_ISL_1336869                                                                                                                                                                                                                                                                                                                                                                                                                                                                                                                                                                                                                                                                                                                                                                                                                                                                                                                                                                                                                                                                                                                                                                                                                                                                                                                                                                                                                                                                                                                                                                                                                                                                                                                                                                                                                                                                                                                                                                                                                                                                                                                                              | Laboratorio Analisi Osp. Città di Castello - Azienda USL Umbria7                                                                                  | Istituto Zooprofilattico Sperimentale dell'Abruzzo e Molise "G. Caporale"                                                                                             | Ancora M; Calistri P; Cammà C; Caporale M; Curini V; Di Domenico M; Di Pasquale A; Lorusso A; Malagigi V; Mangone I; Marcacci M; Puglia I; Rinaldi A; Savini G; Scialabba S; Tacconi P                                                                                                                                                                                                                                                                                                                                                                                                                                                                                                                                                                                                                                                                                                                                                                                                                                         |
| EPI_ISL_1336870                                                                                                                                                                                                                                                                                                                                                                                                                                                                                                                                                                                                                                                                                                                                                                                                                                                                                                                                                                                                                                                                                                                                                                                                                                                                                                                                                                                                                                                                                                                                                                                                                                                                                                                                                                                                                                                                                                                                                                                                                                                                                                                                              | Laboratorio Analisi Osp. Città di Castello - Azienda USL Umbria8                                                                                  | Istituto Zooprofilattico Sperimentale dell'Abruzzo e Molise "G. Caporale"                                                                                             | Ancora M; Calistri P; Cammà C; Caporale M; Curini V; Di Domenico M; Di Pasquale A; Lorusso A; Malagigi V; Mangone I; Marcacci M; Puglia I; Rinaldi A; Savini G; Scialabba S; Tacconi P                                                                                                                                                                                                                                                                                                                                                                                                                                                                                                                                                                                                                                                                                                                                                                                                                                         |
| EPI_ISL_1340620 to 1340621, EPI_ISL_1340623, EPI_ISL_1359063                                                                                                                                                                                                                                                                                                                                                                                                                                                                                                                                                                                                                                                                                                                                                                                                                                                                                                                                                                                                                                                                                                                                                                                                                                                                                                                                                                                                                                                                                                                                                                                                                                                                                                                                                                                                                                                                                                                                                                                                                                                                                                 | Laboratorio BIOMEDICA                                                                                                                             | Instituto de Diagnostico y Referencia Epidemiologicos (INDRE)                                                                                                         | Abril Rodriguez-Maldonado; Ariadna Medina-Benitez; Claudia Wong-Arambula; Ernesto Ramirez-Gonzalez.; Gisela Barrera-Badillo; Irma Lopez-Martinez; Joaquin Quiroz-Mercado; Lucia Hernandez-Rivas; Natividia Cruz-Ortiz; Sergio Rangel-Guerrero; Tatiana Nunez-Garcia; Vanessa Rivero-Arredondo                                                                                                                                                                                                                                                                                                                                                                                                                                                                                                                                                                                                                                                                                                                                  |
| EPI_ISL_1085013                                                                                                                                                                                                                                                                                                                                                                                                                                                                                                                                                                                                                                                                                                                                                                                                                                                                                                                                                                                                                                                                                                                                                                                                                                                                                                                                                                                                                                                                                                                                                                                                                                                                                                                                                                                                                                                                                                                                                                                                                                                                                                                                              | Laboratorio Biologia Molecolare Sars Cov2 - UOC Laboratorio Analisi - Servizio Medicina di Laboratorio, Ospedale "San Francesco" - ATS-ASSL Nuoro | Laboratorio Biologia Molecolare Sars Cov2 - UOC Laboratorio Analisi - Servizio Medicina di Laboratorio, Ospedale "San Francesco" - ATS-ASSL Nuoro                     | ; Asproni Rosanna; Fiamma Maura; Lo Maglio Iana; Marnelli Giuseppe; Monne Maria Itria; Palmas Angelo Domenico; Piras Giovanna                                                                                                                                                                                                                                                                                                                                                                                                                                                                                                                                                                                                                                                                                                                                                                                                                                                                                                  |
| EPI_ISL_1173202                                                                                                                                                                                                                                                                                                                                                                                                                                                                                                                                                                                                                                                                                                                                                                                                                                                                                                                                                                                                                                                                                                                                                                                                                                                                                                                                                                                                                                                                                                                                                                                                                                                                                                                                                                                                                                                                                                                                                                                                                                                                                                                                              | Laboratorio Biologia Molecolare Sars Cov2 - UOC Laboratorio Analisi - Servizio Medicina di Laboratorio, Ospedale "San Francesco" - ATS-ASSL Nuoro | Laboratorio Specialistico Ematologia, UOC Ematologia, Ospedale "San Francesco" - ATS-ASSL Nuoro                                                                       | Asproni Rosanna; Carta Franco; Fancello Patrizia; Fiamma Maura; Lo Maglio Iana; Malune Paolo; Marnelli Giuseppe; Monne Maria Itria; Palmas Angelo Domenico; Pira Giovanna; Piras Giovanna; Rosu Valentina; Serra Silvia                                                                                                                                                                                                                                                                                                                                                                                                                                                                                                                                                                                                                                                                                                                                                                                                        |
| EPI_ISL_1034916, EPI_ISL_1063912, EPI_ISL_1082253, EPI_ISL_1104650, EPI_ISL_1180141 to 1180144, EPI_ISL_1180250 to 1180253, EPI_ISL_1191141 to 1191145, EPI_ISL_1191736 to 1191739, EPI_ISL_1219707 to 1219710, EPI_ISL_1229144 to 1229149, EPI_ISL_1311860 to 1311863, EPI_ISL_1372540, EPI_ISL_1372546, EPI_ISL_1380060 to 1380065                                                                                                                                                                                                                                                                                                                                                                                                                                                                                                                                                                                                                                                                                                                                                                                                                                                                                                                                                                                                                                                                                                                                                                                                                                                                                                                                                                                                                                                                                                                                                                                                                                                                                                                                                                                                                         |                                                                                                                                                   |                                                                                                                                                                       |                                                                                                                                                                                                                                                                                                                                                                                                                                                                                                                                                                                                                                                                                                                                                                                                                                                                                                                                                                                                                                |
| see above                                                                                                                                                                                                                                                                                                                                                                                                                                                                                                                                                                                                                                                                                                                                                                                                                                                                                                                                                                                                                                                                                                                                                                                                                                                                                                                                                                                                                                                                                                                                                                                                                                                                                                                                                                                                                                                                                                                                                                                                                                                                                                                                                    | Laboratorio Biologia Molecolare Sars Cov2 - UOC Laboratorio Analisi - Servizio Medicina di Laboratorio, Ospedale "San Francesco" - ATS-ASSL Nuoro | Laboratorio specialistico UOC Ematologia - Ospedale "San Francesco" - ATS-ASSL Nuoro                                                                                  | ; Angelo Domenico Palmas; Asproni Rosanna; Fiamma Maura; Giovanna Piras; Giuseppe Marnelli; Iana Lo Maglio; Lo Maglio Iana; Malune Paolo; Marnelli Giuseppe; Maria Itria Monne; Maura Fiamma; Monne Maria Itria; Palmas Angelo Domenico; Paolo Malune; Piras Giovanna; Rosanna Asproni                                                                                                                                                                                                                                                                                                                                                                                                                                                                                                                                                                                                                                                                                                                                         |
| EPI_ISL_1351713, EPI_ISL_1351716, EPI_ISL_1351719, EPI_ISL_1351725, EPI_ISL_1351728, EPI_ISL_1351731, EPI_ISL_1351734, EPI_ISL_1351737, EPI_ISL_1351739, EPI_ISL_1351743, EPI_ISL_1351746, EPI_ISL_1351749, EPI_ISL_1351752, EPI_ISL_1351754, EPI_ISL_1351757, EPI_ISL_1351760, EPI_ISL_1351764, EPI_ISL_1351767, EPI_ISL_1351770, EPI_ISL_1351774, EPI_ISL_1351777, EPI_ISL_1351780, EPI_ISL_1351783, EPI_ISL_1351787, EPI_ISL_1351790, EPI_ISL_1351793, EPI_ISL_1351796, EPI_ISL_1351799, EPI_ISL_1351802, EPI_ISL_1351805, EPI_ISL_1351809 to 1351811, EPI_ISL_1351815, EPI_ISL_1351818, EPI_ISL_1351821, EPI_ISL_1351824, EPI_ISL_1351827, EPI_ISL_1351830, EPI_ISL_1351833, EPI_ISL_1351836, EPI_ISL_1351839, EPI_ISL_1351842, EPI_ISL_1351845, EPI_ISL_1351848, EPI_ISL_1351851, EPI_ISL_1351854, EPI_ISL_1351857, EPI_ISL_1351860, EPI_ISL_1351863, EPI_ISL_1351866, EPI_ISL_1351869, EPI_ISL_1351872, EPI_ISL_1351875, EPI_ISL_1351878, EPI_ISL_1351880, EPI_ISL_1351883, EPI_ISL_1351886, EPI_ISL_1351890, EPI_ISL_1351893, EPI_ISL_1351896, EPI_ISL_1351899, EPI_ISL_1351902, EPI_ISL_1351905, EPI_ISL_1351908, EPI_ISL_1351911, EPI_ISL_1351914, EPI_ISL_1351917, EPI_ISL_1351921, EPI_ISL_1351924, EPI_ISL_1351927, EPI_ISL_1351930 to 1351931, EPI_ISL_1351933, EPI_ISL_1351935, EPI_ISL_1351937, EPI_ISL_1351941, EPI_ISL_1351944, EPI_ISL_1351947, EPI_ISL_1351950, EPI_ISL_1351952, EPI_ISL_1351954, EPI_ISL_1351956, EPI_ISL_1351958, EPI_ISL_1351960, EPI_ISL_1351963, EPI_ISL_1351966, EPI_ISL_1351969, EPI_ISL_1351972, EPI_ISL_1351975, EPI_ISL_1351978, EPI_ISL_1351981, EPI_ISL_1351984, EPI_ISL_1351987, EPI_ISL_1351990, EPI_ISL_1351993, EPI_ISL_1351997, EPI_ISL_1352000, EPI_ISL_1352002, EPI_ISL_1352006, EPI_ISL_1352012, EPI_ISL_1352015, EPI_ISL_1352018, EPI_ISL_1352020, EPI_ISL_1352023, EPI_ISL_1352026, EPI_ISL_1352029, EPI_ISL_1352032, EPI_ISL_1352035, EPI_ISL_1352038, EPI_ISL_1352041, EPI_ISL_1352043, EPI_ISL_1352047 to 1352048, EPI_ISL_1352050 to 1352051, EPI_ISL_1352053, EPI_ISL_1352055, EPI_ISL_1352057, EPI_ISL_1352059 to 1352060, EPI_ISL_1352062, EPI_ISL_1352066, EPI_ISL_1352070, EPI_ISL_1352072 |                                                                                                                                                   |                                                                                                                                                                       |                                                                                                                                                                                                                                                                                                                                                                                                                                                                                                                                                                                                                                                                                                                                                                                                                                                                                                                                                                                                                                |
| see above                                                                                                                                                                                                                                                                                                                                                                                                                                                                                                                                                                                                                                                                                                                                                                                                                                                                                                                                                                                                                                                                                                                                                                                                                                                                                                                                                                                                                                                                                                                                                                                                                                                                                                                                                                                                                                                                                                                                                                                                                                                                                                                                                    | Laboratorio Central de Epidemiologã-a (LCE)                                                                                                       | Unidad de Genomica Avanzada                                                                                                                                           | Alejandro Sanchez-Flores; Alfredo Herrera-Estrella; Alicia Ocana-Mondragon; Angel Gustavo Salas-Lais; Bernardo Martínez-Miguel; Blanca Taboada; Brenda Irasema Maldonado-Meza; Carla Ivon Herrera-Najera; Carlos F. Arias; Celia Boukadida; Clara Esperanza Santacruz-Tinoco; Concepcion Grajales-Muniz; Consorcio Mexicano de Vigilancia Genomica (CoViGen-Mex). Authors (in alphabetical order): Julio Elias Alvarado-Yaah; Fernando Fontove-Herrera; Francisco Pulido; Gloria Elena Espinoza-Ayala; Gloria Maria Molina-Salinas; Gloria Vazquez; Hector Esteban Paz-Juarez; Hector Montoya-Fuentes; Helen Haydee Fernanda Ramirez-Plascencia; Jorge Ivan Salinal-Navarez; Jose Antonio Enciso-Moreno; Jose Esteban Muñoz-Medina; Jose de Jesus Nunez-Contreras; Juan Bautista Chale-Dzul; Luis Alberto Ochoa-Carrera; Margarita Matias-Florentino; Maria Guadalupe Santiago-Mauricio; Maria Guadalupe de Jesus Mireles-Rivera; Nelly Selem-Mojica; Pavel Isa; Ricardo Grande; Santiago Avila-Rios; Victor Hugo Borja-Aburto |
| EPI_ISL_1279263, EPI_ISL_1279268 to 1279269, EPI_ISL_1279274, EPI_ISL_1279277 to 1279278, EPI_ISL_1279283, EPI_ISL_1279286, EPI_ISL_1279288 to 1279293, EPI_ISL_1279296 to 1279297, EPI_ISL_1279299, EPI_ISL_1279303, EPI_ISL_1279383 to 1279439, EPI_ISL_1279441 to 1279461, EPI_ISL_1279537 to 1279603, EPI_ISL_1287768 to 1287770, EPI_ISL_1287774 to 1287777                                                                                                                                                                                                                                                                                                                                                                                                                                                                                                                                                                                                                                                                                                                                                                                                                                                                                                                                                                                                                                                                                                                                                                                                                                                                                                                                                                                                                                                                                                                                                                                                                                                                                                                                                                                             |                                                                                                                                                   |                                                                                                                                                                       |                                                                                                                                                                                                                                                                                                                                                                                                                                                                                                                                                                                                                                                                                                                                                                                                                                                                                                                                                                                                                                |
| see above                                                                                                                                                                                                                                                                                                                                                                                                                                                                                                                                                                                                                                                                                                                                                                                                                                                                                                                                                                                                                                                                                                                                                                                                                                                                                                                                                                                                                                                                                                                                                                                                                                                                                                                                                                                                                                                                                                                                                                                                                                                                                                                                                    | Laboratorio Central de Epidemiologia (LCE)                                                                                                        | Instituto Nacional de Enfermedades Respiratorias (INER): Centro de Investigación en Enfermedades Infecciosas (CIENI)                                                  | Alejandro Sanchez-Flores; Alfredo Herrera-Estrella; Alicia Ocaña-Mondragón; Angel Gustavo Salas-Lais; Bernardo Martínez-Miguel; Blanca Taboada; Brenda Irasema Maldonado-Meza; Carla Ivón Herrera-Najera; Carlos F. Arias; Celia Boukadida; Clara Esperanza Santacruz-Tinoco; Concepción Grajales-Muñiz; Consorcio Mexicano de Vigilancia Genómica (CoViGen-Mex). Authors (in alphabetical order): Julio Elias Alvarado-Yaah; Fernando Fontove-Herrera; Francisco Pulido; Gloria Elena Espinoza-Ayala; Gloria Maria Molina-Salinas; Gloria Vazquez; Hector Esteban Paz-Juarez; Hector Montoya-Fuentes; Helen Haydee Fernanda Ramirez-Plascencia; Jorge Ivan Salinal-Navarez; José Antonio Enciso-Moreno; José Esteban Muñoz-Medina;                                                                                                                                                                                                                                                                                            |

|                                                                                                                                                                                                                                                                                                                                                                                                                                                                                                                                                                                                                                                                                                                                                                                                                                                                                                                                                                                                                                                                                                                                                                                                                                                                                                                    |                                                                                |                                                                                                                                                   |                                                                                                                                                                                                                                                                                                                                                                                                                                                                                                                                                                                                                                                                                                                                                                                                                                                                                                                                                                                                                                |
|--------------------------------------------------------------------------------------------------------------------------------------------------------------------------------------------------------------------------------------------------------------------------------------------------------------------------------------------------------------------------------------------------------------------------------------------------------------------------------------------------------------------------------------------------------------------------------------------------------------------------------------------------------------------------------------------------------------------------------------------------------------------------------------------------------------------------------------------------------------------------------------------------------------------------------------------------------------------------------------------------------------------------------------------------------------------------------------------------------------------------------------------------------------------------------------------------------------------------------------------------------------------------------------------------------------------|--------------------------------------------------------------------------------|---------------------------------------------------------------------------------------------------------------------------------------------------|--------------------------------------------------------------------------------------------------------------------------------------------------------------------------------------------------------------------------------------------------------------------------------------------------------------------------------------------------------------------------------------------------------------------------------------------------------------------------------------------------------------------------------------------------------------------------------------------------------------------------------------------------------------------------------------------------------------------------------------------------------------------------------------------------------------------------------------------------------------------------------------------------------------------------------------------------------------------------------------------------------------------------------|
|                                                                                                                                                                                                                                                                                                                                                                                                                                                                                                                                                                                                                                                                                                                                                                                                                                                                                                                                                                                                                                                                                                                                                                                                                                                                                                                    |                                                                                |                                                                                                                                                   | José de Jesús Nuñez-Contreras; Juan Bautista Chale-Dzul; Luis Alberto Ochoa-Carrera; Margarita Matías-Florentino; María Guadalupe Santiago-Mauricio; María Guadalupe de Jesús Mireles-Rivera; Nelly Sélem-Mojica; Pavel Isa; Ricardo Grande; Santiago Ávila-Ríos; Víctor Hugo Borja-Aburto                                                                                                                                                                                                                                                                                                                                                                                                                                                                                                                                                                                                                                                                                                                                     |
| EPI_ISL_1288153 to 1288533                                                                                                                                                                                                                                                                                                                                                                                                                                                                                                                                                                                                                                                                                                                                                                                                                                                                                                                                                                                                                                                                                                                                                                                                                                                                                         | Laboratorio Central de Epidemiología (LCE)                                     | Instituto de Biotecnología de la UNAM                                                                                                             | Alejandro Sanchez-Flores; Alfredo Herrera-Estrella; Alicia Ocaña-Mondragón; Angel Gustavo Salas-Lais; Bernardo Martínez-Miguel; Blanca Taboada; Brenda Irasema Maldonado-Meza; Carla Ivón Herrera-Najera; Carlos F. Arias; Celia Boukaidia; Clara Esperanza Santacruz-Tinoco; Concepción Grajales-Muñiz; Consorcio Mexicano de Vigilancia Genómica (CoViGen-Mex). Authors (in alphabetical order): Julio Elias Alvarado-Yaah; Fernando Fontove-Herrera; Francisco Pulido; Gloria Elena Espinoza-Ayala; Gloria María Molina-Salinas; Gloria Vazquez; Hector Esteban Paz-Juárez; Hector Montoya-Fuentes; Helen Haydee Fernanda Ramirez-Plascencia; Jorge Ivan Salinal-Navarez; José Antonio Enciso-Moreno; José Esteban Muñoz-Medina; José de Jesús Nuñez-Contreras; Juan Bautista Chale-Dzul; Luis Alberto Ochoa-Carrera; Margarita Matías-Florentino; María Guadalupe Santiago-Mauricio; María Guadalupe de Jesús Mireles-Rivera; Nelly Sélem-Mojica; Pavel Isa; Ricardo Grande; Santiago Ávila-Ríos; Víctor Hugo Borja-Aburto |
| EPI_ISL_1301446, EPI_ISL_1301450, EPI_ISL_1301462 to 1301463, EPI_ISL_1301466 to 1301468, EPI_ISL_1301473, EPI_ISL_1301484, EPI_ISL_1301498, EPI_ISL_1301509, EPI_ISL_1301516, EPI_ISL_1301518, EPI_ISL_1301525, EPI_ISL_1301530, EPI_ISL_1301535 to 1301536, EPI_ISL_1301538, EPI_ISL_1301552 to 1301553, EPI_ISL_1301593 to 1301597, EPI_ISL_1301620 to 1301678, EPI_ISL_1301714 to 1301716, EPI_ISL_1302153, EPI_ISL_1302156 to 1302158, EPI_ISL_1302161, EPI_ISL_1302165, EPI_ISL_1302169, EPI_ISL_1302172 to 1302173, EPI_ISL_1302178, EPI_ISL_1302190, EPI_ISL_1302195 to 1302196, EPI_ISL_1302203 to 1302204, EPI_ISL_1302220 to 1302226, EPI_ISL_1302235 to 1302240, EPI_ISL_1302244, EPI_ISL_1302248, EPI_ISL_1302251 to 1302252, EPI_ISL_1302260 to 1302261, EPI_ISL_1302264, EPI_ISL_1302268, EPI_ISL_1302270, EPI_ISL_1302272, EPI_ISL_1302275, EPI_ISL_1302281 to 1302282, EPI_ISL_1302284 to 1302285, EPI_ISL_1302288, EPI_ISL_1302294, EPI_ISL_1302305, EPI_ISL_1302311, EPI_ISL_1302315, EPI_ISL_1302318, EPI_ISL_1302324, EPI_ISL_1302332, EPI_ISL_1302341, EPI_ISL_1302347 to 1302348, EPI_ISL_1302351 to 1302355, EPI_ISL_1302359, EPI_ISL_1302362, EPI_ISL_1302367, EPI_ISL_1302370, EPI_ISL_1302372, EPI_ISL_1302378 to 1302379, EPI_ISL_1302390, EPI_ISL_1302392 to 1302393, EPI_ISL_1302401 | Laboratorio Central de Epidemiología IMSS                                      | Instituto de Biotecnología de la UNAM                                                                                                             | Alejandra Hernández-Terán; Alejandro Sanchez-Flores; Alma Rincón-Rubio; Andrea Santos Coy-Arechavaleta; Authors from IBT; Blanca Taboada; Celia Boukaidia; Clara Esperanza Santacruz-Tinoco; Edgar Mendieta-Condado; Eduardo Becerril-Vargas; Fidencio Mejía-Nepomuceno; Francisco Pulido; Gisela Barrera-Badillo; Gloria Vazquez; Hector Esteban Paz-Juárez; IMSS; INDRE and INER (in alphabetical order); Carlos F. Arias; Irma Lopez-Martinez; Jerome Jean Verleyen; Joel Armando Vázquez-Pérez; Jorge Salas-Hernández; José Arturo Martínez-Orozco; José Ernesto Ramirez-González; José Esteban Muñoz-Medina; Larissa Fernandes-Matano; Lucia Hernandez-Rivas; Luis Alberto Ochoa-Carrera; Margarita Matías-Florentino; Mario Mújica-Sánchez; Natividad Cruz-Ortiz; Pavel Isa; Ricardo Grande; Santiago Ávila-Ríos; Tatiana Nunez-Garcia; Teresita Rojas-Mendoza                                                                                                                                                           |
| see above                                                                                                                                                                                                                                                                                                                                                                                                                                                                                                                                                                                                                                                                                                                                                                                                                                                                                                                                                                                                                                                                                                                                                                                                                                                                                                          | Laboratorio Central de Saude Publica do Estado Maranhao (LACEN-MA)             | Laboratory of Respiratory Viruses and Measles, Oswaldo Cruz Institute, FIOCRUZ                                                                    | Alice Sampaio Rocha; Ana Carolina Mendonca; Anna Carolina Paixao; Fernando Motta; Lidio Gonçalves Lima Neto; Luciana Appolinario; Marilda Siqueira on behalf of the Fiocruz COVID-19 Genomic Surveillance Network; Paola Resende; Renata Serrano Lopes                                                                                                                                                                                                                                                                                                                                                                                                                                                                                                                                                                                                                                                                                                                                                                         |
| EPI_ISL_1181370 to 1181371, EPI_ISL_1181400 to 1181401, EPI_ISL_1181413 to 1181414                                                                                                                                                                                                                                                                                                                                                                                                                                                                                                                                                                                                                                                                                                                                                                                                                                                                                                                                                                                                                                                                                                                                                                                                                                 | Laboratorio Central de Saude Publica do Estado da Paraiba (LACEN-PB)           | Laboratory of Respiratory Viruses and Measles, Oswaldo Cruz Institute, FIOCRUZ                                                                    | Alice Sampaio Rocha; Ana Carolina Mendonca; Anna Carolina Paixao; Dalane Loudal Florentino Teixeira; Fernando Motta; Joao Felipe Bezerra; Luciana Appolinario; Marilda Siqueira on behalf of the Fiocruz COVID-19 Genomic Surveillance Network; Paola Resende; Renata Serrano Lopes                                                                                                                                                                                                                                                                                                                                                                                                                                                                                                                                                                                                                                                                                                                                            |
| EPI_ISL_1181399, EPI_ISL_1181426 to 1181428, EPI_ISL_1219137                                                                                                                                                                                                                                                                                                                                                                                                                                                                                                                                                                                                                                                                                                                                                                                                                                                                                                                                                                                                                                                                                                                                                                                                                                                       | Laboratorio Central de Saude Publica do Estado de Minas Gerais (LACEN-MG)      | Laboratory of Respiratory Viruses and Measles, Oswaldo Cruz Institute, FIOCRUZ                                                                    | Alice Sampaio Rocha; Ana Carolina Mendonca; Anna Carolina Paixao; Felipe Iani; Fernando Motta; Luciana Appolinario; Marilda Siqueira on behalf of the Fiocruz COVID-19 Genomic Surveillance Network; Paola Resende; Renata Serrano Lopes                                                                                                                                                                                                                                                                                                                                                                                                                                                                                                                                                                                                                                                                                                                                                                                       |
| EPI_ISL_1181403 to 1181404, EPI_ISL_1181412, EPI_ISL_1181453                                                                                                                                                                                                                                                                                                                                                                                                                                                                                                                                                                                                                                                                                                                                                                                                                                                                                                                                                                                                                                                                                                                                                                                                                                                       | Laboratorio Central de Saude Publica do Estado de Santa Catarina (LACEN-SC)    | Laboratory of Respiratory Viruses and Measles, Oswaldo Cruz Institute, FIOCRUZ                                                                    | Alice Sampaio Rocha; Ana Carolina Mendonca; Anna Carolina Paixao; Darcita Buerger Rovaris; Fernando Motta; Luciana Appolinario; Marilda Siqueira on behalf of the Fiocruz COVID-19 Genomic Surveillance Network; Paola Resende; Renata Serrano Lopes; Sandra Bianchini Fernandes                                                                                                                                                                                                                                                                                                                                                                                                                                                                                                                                                                                                                                                                                                                                               |
| EPI_ISL_1181405 to 1181407, EPI_ISL_1181409, EPI_ISL_1181590, EPI_ISL_1181595                                                                                                                                                                                                                                                                                                                                                                                                                                                                                                                                                                                                                                                                                                                                                                                                                                                                                                                                                                                                                                                                                                                                                                                                                                      | Laboratorio Central de Saude Publica do Estado de Sergipe (LACEN-SE)           | Laboratory of Respiratory Viruses and Measles, Oswaldo Cruz Institute, FIOCRUZ                                                                    | Alice Sampaio Rocha; Ana Carolina Mendonca; Anna Carolina Paixao; Cliomar Alves dos Santos; Fernando Motta; Luciana Appolinario; Marilda Siqueira on behalf of the Fiocruz COVID-19 Genomic Surveillance Network; Paola Resende; Renata Serrano Lopes                                                                                                                                                                                                                                                                                                                                                                                                                                                                                                                                                                                                                                                                                                                                                                          |
| EPI_ISL_1181365, EPI_ISL_1181396, EPI_ISL_1181592, EPI_ISL_1219134 to 1219135                                                                                                                                                                                                                                                                                                                                                                                                                                                                                                                                                                                                                                                                                                                                                                                                                                                                                                                                                                                                                                                                                                                                                                                                                                      | Laboratorio Central de Saude Publica do Estado do Alagoas (LACEN-AL)           | Laboratory of Respiratory Viruses and Measles, Oswaldo Cruz Institute, FIOCRUZ                                                                    | Alice Sampaio Rocha; Ana Carolina Mendonca; Anderson Brandao Leite; Anna Carolina Paixao; Fernando Motta; Luciana Appolinario; Marilda Siqueira on behalf of the Fiocruz COVID-19 Genomic Surveillance Network; Paola Resende; Renata Serrano Lopes                                                                                                                                                                                                                                                                                                                                                                                                                                                                                                                                                                                                                                                                                                                                                                            |
| EPI_ISL_1181395, EPI_ISL_1181397, EPI_ISL_1181418, EPI_ISL_1181420 to 1181421, EPI_ISL_1181423, EPI_ISL_1181432, EPI_ISL_1181582 to 1181583, EPI_ISL_1181585                                                                                                                                                                                                                                                                                                                                                                                                                                                                                                                                                                                                                                                                                                                                                                                                                                                                                                                                                                                                                                                                                                                                                       | Laboratorio Central de Saude Publica do Estado do Espiitito Santo (LACEN-ES)   | Laboratory of Respiratory Viruses and Measles, Oswaldo Cruz Institute, FIOCRUZ                                                                    | Alice Sampaio Rocha; Ana Carolina Mendonca; Anna Carolina Paixao; Fernando Motta; Luciana Appolinario; Marilda Siqueira on behalf of the Fiocruz COVID-19 Genomic Surveillance Network; Paola Resende; Renata Serrano Lopes; Rodrigo Ribeiro Rodrigues                                                                                                                                                                                                                                                                                                                                                                                                                                                                                                                                                                                                                                                                                                                                                                         |
| see above                                                                                                                                                                                                                                                                                                                                                                                                                                                                                                                                                                                                                                                                                                                                                                                                                                                                                                                                                                                                                                                                                                                                                                                                                                                                                                          | Laboratorio Central de Saude Publica do Estado do Parana (LACEN-PR)            | Laboratory of Respiratory Viruses and Measles, Oswaldo Cruz Institute, FIOCRUZ                                                                    | Alice Sampaio Rocha; Ana Carolina Mendonca; Anna Carolina Paixao; Fernando Motta; Irina Nastassja Riediger; Luciana Appolinario; Maria do Carmo Debur; Marilda Siqueira on behalf of the Fiocruz COVID-19 Genomic Surveillance Network; Paola Resende; Renata Serrano Lopes                                                                                                                                                                                                                                                                                                                                                                                                                                                                                                                                                                                                                                                                                                                                                    |
| EPI_ISL_1181390, EPI_ISL_1181392, EPI_ISL_1181394, EPI_ISL_1181474, EPI_ISL_1181498, EPI_ISL_1181517, EPI_ISL_1181526 to 1181528, EPI_ISL_1181530, EPI_ISL_1181533 to 1181534, EPI_ISL_1181536 to 1181545, EPI_ISL_1181551 to 1181559, EPI_ISL_1181563 to 1181566, EPI_ISL_1181568, EPI_ISL_1181570, EPI_ISL_1181576, EPI_ISL_1181580 to 1181581, EPI_ISL_1181584, EPI_ISL_1181605, EPI_ISL_1181609 to 1181610, EPI_ISL_1181614 to 1181619, EPI_ISL_1219132 to 1219133                                                                                                                                                                                                                                                                                                                                                                                                                                                                                                                                                                                                                                                                                                                                                                                                                                             | Laboratorio Central de Saude Publica do Estado do Rio Grande do Sul (LACEN-RS) | Laboratory of Respiratory Viruses and Measles, Oswaldo Cruz Institute, FIOCRUZ                                                                    | Alice Sampaio Rocha; Ana Carolina Mendonca; Anna Carolina Paixao; Fernando Motta; Luciana Appolinario; Marilda Siqueira on behalf of the Fiocruz COVID-19 Genomic Surveillance Network; Paola Resende; Renata Serrano Lopes; Tatiana Schaffer Gregianini                                                                                                                                                                                                                                                                                                                                                                                                                                                                                                                                                                                                                                                                                                                                                                       |
| see above                                                                                                                                                                                                                                                                                                                                                                                                                                                                                                                                                                                                                                                                                                                                                                                                                                                                                                                                                                                                                                                                                                                                                                                                                                                                                                          | Laboratorio Central de Saude Publica do Estado do Rio de Janeiro (LACEN-RJ)    | Laboratory of Respiratory Viruses and Measles, Oswaldo Cruz Institute, FIOCRUZ                                                                    | Alice Sampaio Rocha; Ana Carolina Mendonca; Andrea Cony Cavalcanti; Anna Carolina Paixao; Fernando Motta; Luciana Appolinario; Marilda Siqueira on behalf of the Fiocruz COVID-19 Genomic Surveillance Network; Paola Resende; Renata Serrano Lopes                                                                                                                                                                                                                                                                                                                                                                                                                                                                                                                                                                                                                                                                                                                                                                            |
| EPI_ISL_1181368, EPI_ISL_1181411, EPI_ISL_1181433 to 1181434, EPI_ISL_1181451, EPI_ISL_1181468, EPI_ISL_1181524, EPI_ISL_1181567, EPI_ISL_1181620                                                                                                                                                                                                                                                                                                                                                                                                                                                                                                                                                                                                                                                                                                                                                                                                                                                                                                                                                                                                                                                                                                                                                                  | Laboratorio Clinico Clinica General del Norte                                  | Instituto Nacional de Salud- Dirección de Investigación en Salud Pública                                                                          | Carlos Franco-Muñoz; Diego A. Álvarez-Díaz; Diego Andrés Prada; Gerardo Santamaría; Hector Alejandro Ruiz-Moreno; Jhonnatan Reales-González; Julian Naizaque; Katherine Laiton-Donato; Magdalena Wiesner; Marcela Mercado-Reyes.; María T. Herrera-Sepúlveda; Martha Lucia Ospina Martínez; Sheryll Corchuelo                                                                                                                                                                                                                                                                                                                                                                                                                                                                                                                                                                                                                                                                                                                  |
| see above                                                                                                                                                                                                                                                                                                                                                                                                                                                                                                                                                                                                                                                                                                                                                                                                                                                                                                                                                                                                                                                                                                                                                                                                                                                                                                          | Laboratorio Clinico Clinica General del norte SAS                              | Instituto Nacional de Salud- Dirección de Investigación en Salud Pública                                                                          | Carlos Franco-Muñoz; Diego A. Álvarez-Díaz; Diego Andrés Prada; Gerardo Santamaría; Hector Alejandro Ruiz-Moreno; Jhonnatan Reales-González; Julian Naizaque; Katherine Laiton-Donato; Magdalena Wiesner; Marcela Mercado-Reyes.; María T. Herrera-Sepúlveda; Martha Lucia Ospina Martínez; Sheryll Corchuelo                                                                                                                                                                                                                                                                                                                                                                                                                                                                                                                                                                                                                                                                                                                  |
| EPI_ISL_1220050                                                                                                                                                                                                                                                                                                                                                                                                                                                                                                                                                                                                                                                                                                                                                                                                                                                                                                                                                                                                                                                                                                                                                                                                                                                                                                    | Laboratorio Clinico Clinica General del Norte                                  | Instituto Nacional de Salud- Dirección de Investigación en Salud Pública                                                                          | Carlos Franco-Muñoz; Diego A. Álvarez-Díaz; Diego Andrés Prada; Gerardo Santamaría; Hector Alejandro Ruiz-Moreno; Jhonnatan Reales-González; Julian Naizaque; Katherine Laiton-Donato; Magdalena Wiesner; Marcela Mercado-Reyes.; María T. Herrera-Sepúlveda; Martha Lucia Ospina Martínez; Sheryll Corchuelo                                                                                                                                                                                                                                                                                                                                                                                                                                                                                                                                                                                                                                                                                                                  |
| EPI_ISL_1220049                                                                                                                                                                                                                                                                                                                                                                                                                                                                                                                                                                                                                                                                                                                                                                                                                                                                                                                                                                                                                                                                                                                                                                                                                                                                                                    | Laboratorio Clinico Clinica General del norte SAS                              | Instituto Nacional de Salud- Dirección de Investigación en Salud Pública                                                                          | Carlos Franco-Muñoz; Diego A. Álvarez-Díaz; Diego Andrés Prada; Gerardo Santamaría; Hector Alejandro Ruiz-Moreno; Jhonnatan Reales-González; Julian Naizaque; Katherine Laiton-Donato; Magdalena Wiesner; Marcela Mercado-Reyes.; María T. Herrera-Sepúlveda; Martha Lucia Ospina Martínez; Sheryll Corchuelo                                                                                                                                                                                                                                                                                                                                                                                                                                                                                                                                                                                                                                                                                                                  |
| EPI_ISL_1092007                                                                                                                                                                                                                                                                                                                                                                                                                                                                                                                                                                                                                                                                                                                                                                                                                                                                                                                                                                                                                                                                                                                                                                                                                                                                                                    | Laboratorio Continental                                                        | Instituto Nacional de Salud- Dirección de Investigación en Salud Pública                                                                          | Carlos Franco-Muñoz; Diego A. Álvarez-Díaz; Diego Andrés Prada; Gerardo Santamaría; Hector Alejandro Ruiz-Moreno; Jhonnatan Reales-González; Julian Naizaque; Katherine Laiton-Donato; Magdalena Wiesner; Marcela Mercado-Reyes.; María T. Herrera-Sepúlveda; Martha Lucia Ospina Martínez; Sheryll Corchuelo                                                                                                                                                                                                                                                                                                                                                                                                                                                                                                                                                                                                                                                                                                                  |
| EPI_ISL_1017702                                                                                                                                                                                                                                                                                                                                                                                                                                                                                                                                                                                                                                                                                                                                                                                                                                                                                                                                                                                                                                                                                                                                                                                                                                                                                                    | Laboratorio Docente Asistencial-Universidad de Antioquia                       | Instituto Nacional de Salud- Dirección de Investigación en Salud Pública                                                                          | Carlos Franco-Muñoz; Diego A. Álvarez-Díaz; Diego Andrés Prada; Gerardo Santamaría; Hector Alejandro Ruiz-Moreno; Jhonnatan Reales-González; Julian Naizaque; Katherine Laiton-Donato; Magdalena Wiesner; Marcela Mercado-Reyes.; María T. Herrera-Sepúlveda; Martha Lucia Ospina Martínez; Sheryll Corchuelo                                                                                                                                                                                                                                                                                                                                                                                                                                                                                                                                                                                                                                                                                                                  |
| EPI_ISL_1060251 to 1060258, EPI_ISL_1060260                                                                                                                                                                                                                                                                                                                                                                                                                                                                                                                                                                                                                                                                                                                                                                                                                                                                                                                                                                                                                                                                                                                                                                                                                                                                        | Laboratorio Echevarne S.A.                                                     | SeqCOVID-SPAIN consortium/IBV(CSIC)                                                                                                               | Beatriz Fernández Forner and SeqCOVID-SPAIN consortium; Raúl Santamaría Merino                                                                                                                                                                                                                                                                                                                                                                                                                                                                                                                                                                                                                                                                                                                                                                                                                                                                                                                                                 |
| EPI_ISL_1091241 to 1091246, EPI_ISL_1091249, EPI_ISL_1091253 to 1091257, EPI_ISL_1091262, EPI_ISL_1092458                                                                                                                                                                                                                                                                                                                                                                                                                                                                                                                                                                                                                                                                                                                                                                                                                                                                                                                                                                                                                                                                                                                                                                                                          | Laboratorio Estatal de Salud Pública de Nuevo León                             | Laboratorio de Infectología Molecular, Departamento de Bioquímica y Medicina Molecular, Facultad de Medicina - Universidad Autónoma de Nuevo León | Ana M. Rivas-Estilla; Consuelo Treviño-Garza; Daniel Arellanos-Soto; Else del Carmen García-García; Gloria A. Jasso-de-la-Peña; Kame A. Galán-Huerta; Manuel E. de-la-O-Cavazos; María F. Herrera-Saldivar; Natalia Martínez-Acuna; Roberto Montes-de-Oca; Samuel Buentello-Wong; Sonia A. Lozano-Sepúlveda                                                                                                                                                                                                                                                                                                                                                                                                                                                                                                                                                                                                                                                                                                                    |
| EPI_ISL_1195952, EPI_ISL_1217383                                                                                                                                                                                                                                                                                                                                                                                                                                                                                                                                                                                                                                                                                                                                                                                                                                                                                                                                                                                                                                                                                                                                                                                                                                                                                   | Laboratorio Genzano - ASL RM 10                                                | INMI Lazzaro Spallanzani IRCCS                                                                                                                    | A Di Caro; B Bartolini; CEM Gruber; E Conti; E Giombini; F Messina; G Tramini; M Rueca; MR Capobianchi; O Butera                                                                                                                                                                                                                                                                                                                                                                                                                                                                                                                                                                                                                                                                                                                                                                                                                                                                                                               |
| EPI_ISL_1222714                                                                                                                                                                                                                                                                                                                                                                                                                                                                                                                                                                                                                                                                                                                                                                                                                                                                                                                                                                                                                                                                                                                                                                                                                                                                                                    | Laboratorio Genzano - ASL RM 11                                                | INMI Lazzaro Spallanzani IRCCS                                                                                                                    | A Di Caro; B Bartolini; CEM Gruber; E Conti; E Giombini; F Messina; G Tramini; M Rueca; MR Capobianchi; O Butera                                                                                                                                                                                                                                                                                                                                                                                                                                                                                                                                                                                                                                                                                                                                                                                                                                                                                                               |
| EPI_ISL_1063909, EPI_ISL_1079390 to 1079391, EPI_ISL_1091793, EPI_ISL_1091795, EPI_ISL_1169890, EPI_ISL_1195957, EPI_ISL_1217388, EPI_ISL_1222711, EPI_ISL_1229139, EPI_ISL_1295607                                                                                                                                                                                                                                                                                                                                                                                                                                                                                                                                                                                                                                                                                                                                                                                                                                                                                                                                                                                                                                                                                                                                | Laboratorio Genzano - ASL RM 6                                                 | INMI Lazzaro Spallanzani IRCCS                                                                                                                    | A Di Caro; B Bartolini; C.E.M Gruber; CEM Gruber; E Conti; E Giombini; F Messina; F Santini; G Bonfiglio; G Tramini; M Rueca; MR Capobianchi; O Butera                                                                                                                                                                                                                                                                                                                                                                                                                                                                                                                                                                                                                                                                                                                                                                                                                                                                         |
| see above                                                                                                                                                                                                                                                                                                                                                                                                                                                                                                                                                                                                                                                                                                                                                                                                                                                                                                                                                                                                                                                                                                                                                                                                                                                                                                          | Laboratorio Genzano - ASL RM 7                                                 | INMI Lazzaro Spallanzani IRCCS                                                                                                                    | A Di Caro; B Bartolini; CEM Gruber; E Conti; E Giombini; F Messina; G Tramini; M Rueca; MR Capobianchi; O Butera                                                                                                                                                                                                                                                                                                                                                                                                                                                                                                                                                                                                                                                                                                                                                                                                                                                                                                               |
| EPI_ISL_1210498, EPI_ISL_1222712                                                                                                                                                                                                                                                                                                                                                                                                                                                                                                                                                                                                                                                                                                                                                                                                                                                                                                                                                                                                                                                                                                                                                                                                                                                                                   | Laboratorio Genzano - ASL RM 7                                                 | INMI Lazzaro Spallanzani IRCCS                                                                                                                    | A Di Caro; B Bartolini; CEM Gruber; E Conti; E Giombini; F Messina; G Tramini; M Rueca; MR Capobianchi; O Butera                                                                                                                                                                                                                                                                                                                                                                                                                                                                                                                                                                                                                                                                                                                                                                                                                                                                                                               |

|                                                                                                                                                                                                                                                                                                                                                                                                                            |                                                                                                                    |                                                                                                                                                   |                                                                                                                                                                                                                                                                                                                                                                                                                                                                             |
|----------------------------------------------------------------------------------------------------------------------------------------------------------------------------------------------------------------------------------------------------------------------------------------------------------------------------------------------------------------------------------------------------------------------------|--------------------------------------------------------------------------------------------------------------------|---------------------------------------------------------------------------------------------------------------------------------------------------|-----------------------------------------------------------------------------------------------------------------------------------------------------------------------------------------------------------------------------------------------------------------------------------------------------------------------------------------------------------------------------------------------------------------------------------------------------------------------------|
| EPI_ISL_1195958, EPI_ISL_1217380                                                                                                                                                                                                                                                                                                                                                                                           | Laboratorio Genzano - ASL RM 8                                                                                     | INMI Lazzaro Spallanzani IRCCS                                                                                                                    | A Di Caro; B Bartolini; CEM Gruber; E Conti; E Giombini; F Messina; G Tramini; M Rueca; MR Capobianchi; O Butera                                                                                                                                                                                                                                                                                                                                                            |
| EPI_ISL_1195951, EPI_ISL_1222713                                                                                                                                                                                                                                                                                                                                                                                           | Laboratorio Genzano - ASL RM 9                                                                                     | INMI Lazzaro Spallanzani IRCCS                                                                                                                    | A Di Caro; B Bartolini; CEM Gruber; E Conti; E Giombini; F Messina; G Tramini; M Rueca; MR Capobianchi; O Butera                                                                                                                                                                                                                                                                                                                                                            |
| EPI_ISL_1092006                                                                                                                                                                                                                                                                                                                                                                                                            | Laboratorio IMAT                                                                                                   | Instituto Nacional de Salud- Dirección de Investigación en Salud Pública                                                                          | Carlos Franco-Muñoz; Diego A. Álvarez-Díaz; Diego Andrés Prada; Gerardo Santamaría; Hector Alejandro Ruiz-Moreno; Jhonnatan Reales-González; Julian Naizaque; Katherine Laiton-Donato; Magdalena Wiesner; Marcela Mercado-Reyes; María T. Herrera-Sepúlveda; Martha Lucia Ospina Martínez; Sheryll Corchuelo                                                                                                                                                                |
| EPI_ISL_1097016                                                                                                                                                                                                                                                                                                                                                                                                            | Laboratorio Microbiología e Virología P.O. Cotugno A.O. dei Colli                                                  | Laboratorio Microbiología e Virología P.O. Cotugno A.O. dei Colli                                                                                 | Anna Perfetti; Biancamaria Pierri; Claudia Tiberio; Luigi Atripaldi; Maria Concetta Cuomo; Pellegrino Cerino                                                                                                                                                                                                                                                                                                                                                                |
| EPI_ISL_1095384, EPI_ISL_1095449, EPI_ISL_1096228 to 1096233, EPI_ISL_1096342, EPI_ISL_1096982, EPI_ISL_1096984, EPI_ISL_1096986, EPI_ISL_1096989, EPI_ISL_1096991, EPI_ISL_1096993 to 1096994, EPI_ISL_1096996, EPI_ISL_1096998, EPI_ISL_1097000, EPI_ISL_1097004 to 1097005, EPI_ISL_1097007 to 1097015, EPI_ISL_1097017, EPI_ISL_1097019 to 1097022, EPI_ISL_1118930, EPI_ISL_1118932, EPI_ISL_1118934, EPI_ISL_1119567 | Laboratorio Microbiología e Virología P.O. Cotugno A.O. dei Colli                                                  | Laboratorio Microbiología e Virología P.O. Cotugno A.O. dei Colli                                                                                 | Anna Perfetti; Biancamaria Pierri; Claudia Tiberio; Luigi Atripaldi; Maria Concetta Cuomo; Pellegrino Cerino                                                                                                                                                                                                                                                                                                                                                                |
| see above                                                                                                                                                                                                                                                                                                                                                                                                                  | Laboratorio Microbiología e Virología P.O. Cotugno A.O. dei Colli                                                  | Laboratorio Microbiología e Virología P.O. Cotugno A.O. dei Colli                                                                                 | Anna Perfetti; Biancamaria Pierri; Claudia Tiberio; Luigi Atripaldi; Maria Concetta Cuomo; Pellegrino Cerino                                                                                                                                                                                                                                                                                                                                                                |
| EPI_ISL_1091247 to 1091248, EPI_ISL_1091250 to 1091252, EPI_ISL_1091258 to 1091260, EPI_ISL_1091263 to 1091274                                                                                                                                                                                                                                                                                                             | Laboratorio PGM                                                                                                    | Laboratorio de Infectología Molecular, Departamento de Bioquímica y Medicina Molecular, Facultad de Medicina - Universidad Autónoma de Nuevo León | Ana M. Rivas-Estilla; Daniel Arellanos-Soto; Eduardo Garza-de-la-Peña; Gabriela Elizondo; Javier Ramos-Jimenez; Kame A. Galán-Huerta; María F. Herrera-Saldivar; Natalia Martínez-Acuña; Sonia A. Lozano-Sepúlveda                                                                                                                                                                                                                                                          |
| EPI_ISL_1253609, EPI_ISL_1253705, EPI_ISL_1265899, EPI_ISL_1265901                                                                                                                                                                                                                                                                                                                                                         | Laboratorio Unico Provinciale Azienda Ospedaliero-Universitaria di Ferrara                                         | U.O. Microbiologia, Laboratorio Unico Centro Servizi - AUSL della Romagna                                                                         | Giorgio Dirani; Michela Boni; Sara Ghisellini; Silvia Zannoli; Vittorio Sambri                                                                                                                                                                                                                                                                                                                                                                                              |
| EPI_ISL_1091261, EPI_ISL_1092361                                                                                                                                                                                                                                                                                                                                                                                           | Laboratorio de Apoyo a la Vigilancia e Investigación Epidemiológica - CIBO                                         | Laboratorio de Infectología Molecular, Departamento de Bioquímica y Medicina Molecular, Facultad de Medicina - Universidad Autónoma de Nuevo León | Alma M. Perez-Rios; Ana M. Rivas-Estilla; Blanca M. Torres; Claudia L. Charles-Niño; Daniel Arellanos-Soto; Diego A. Gonzalez-Altamirano; Hector Montoya-Fuentes; Javier Ramos-Jimenez; Jose J. Figueroa-Delgadillo; Kame A. Galán-Huerta; María F. Herrera-Saldivar; Natalia Martínez-Acuña; Rafael Soto-Alvarez; Sonia A. Lozano-Sepúlveda                                                                                                                                |
| EPI_ISL_1278277 to 1278280                                                                                                                                                                                                                                                                                                                                                                                                 | Laboratorio de Biología Molecular, Hospital San Pedro Claver                                                       | Molecular Genetics Laboratory, Instituto de Investigaciones Químicas, Universidad Mayor de San Andrés                                             | Aneth Vasquez Michel; Carmen Delgado Barrera; Oscar M. Rollano-Peñaloza                                                                                                                                                                                                                                                                                                                                                                                                     |
| EPI_ISL_1278281 to 1278284                                                                                                                                                                                                                                                                                                                                                                                                 | Laboratorio de Biología Molecular, SEDES-Potosi                                                                    | Molecular Genetics Laboratory, Instituto de Investigaciones Químicas, Universidad Mayor de San Andrés                                             | Aneth Vasquez Michel; Oscar M. Rollano-Peñaloza                                                                                                                                                                                                                                                                                                                                                                                                                             |
| EPI_ISL_1093145 to 1093147, EPI_ISL_1324758 to 1324766                                                                                                                                                                                                                                                                                                                                                                     | Laboratorio de Diagnostico de Enfermedades Emergentes y Reemergentes                                               | Instituto de Diagnostico y Referencia Epidemiologicos (INDRE)                                                                                     | Abril Rodríguez-Maldonado; Ariadna Medina-Benitez; Claudia Wong-Arambula; Ernesto Ramirez-Gonzalez.; Fabiola Garces-Ayala; Gisela Barrera-Badillo; Irma Lopez-Martinez; Joaquin Quiroz-Mercado; Lucia Hernandez-Rivas; Natali Vega-Magana; Natividad Cruz-Ortiz; Sergio Rangel-Guerrero; Tatiana Nunez-Garcia; Vanessa Rivero-Arredondo                                                                                                                                     |
| EPI_ISL_1034304 to 1034306, EPI_ISL_1068078 to 1068292, EPI_ISL_1114151, EPI_ISL_1261122 to 1261123                                                                                                                                                                                                                                                                                                                        | Laboratorio de Ecología de Doenças Transmissíveis na Amazonia, Instituto Leonidas e Maria Deane - Fiocruz Amazonia | Laboratorio de Ecología de Doenças Transmissíveis na Amazonia, Instituto Leonidas e Maria Deane - Fiocruz Amazonia                                | André Corado; Debora Duarte; Felipe Naveca; Felipe Naveca on behalf of the Fiocruz COVID-19 Genomic Surveillance Network; Fernanda Nascimento; George Silva; Karina Pessoa; Luciana Gonçalves; Maria Júlia Brandão; Matilde Mejia; Michele Jesus; Valdinete Nascimento; Victor Souza; Ágatha Costa                                                                                                                                                                          |
| EPI_ISL_1360407 to 1360412                                                                                                                                                                                                                                                                                                                                                                                                 | Laboratorio de Enfermedades Emergentes y Reemergentes                                                              | Laboratorio de Enfermedades Emergentes y Reemergentes                                                                                             | García-Chagollan Mariel; Hernández-Bello Jorge; Muñoz-Valle José Francisco; Peña-Rodríguez Marcela; Vega-Magaña Natali; Viera-Segura Oliver                                                                                                                                                                                                                                                                                                                                 |
| EPI_ISL_1181378, EPI_ISL_1181452, EPI_ISL_1181471 to 1181473, EPI_ISL_1181478 to 1181480, EPI_ISL_1181487, EPI_ISL_1181492, EPI_ISL_1181516, EPI_ISL_1181525, EPI_ISL_1181532, EPI_ISL_1181535, EPI_ISL_1181546 to 1181550, EPI_ISL_1181569                                                                                                                                                                                | Laboratorio de Imunología de Transplantes de Goias LTDA (HLAGYN)                                                   | Laboratory of Respiratory Viruses and Measles, Oswaldo Cruz Institute, FIOCRUZ                                                                    | Alessandro Leonardo Alvares Magalhaes; Alice Sampaio Rocha; Ana Carolina Mendonca; Anna Carolina Paixao; Erika Lopes Rocha Batista; Fernando Antonio Vinhal dos Santos; Fernando Motta; Luciana Apolinario; Marilda Siqueira on behalf of the Fiocruz COVID-19 Genomic Surveillance Network; Paola Resende; Renata Serrano Lopes                                                                                                                                            |
| EPI_ISL_1060214 to 1060242, EPI_ISL_1060245 to 1060246, EPI_ISL_1060248 to 1060250, EPI_ISL_1060259, EPI_ISL_1060261 to 1060285, EPI_ISL_1060293 to 1060297                                                                                                                                                                                                                                                                | Laboratorio de Microbiología, Hospital Marina Baixa, Villajoyosa                                                   | SeqCOVID-SPAIN consortium/IBV(CSIC)                                                                                                               | Carmen Martínez Peinado and SeqCOVID-SPAIN consortium; Francisco José Arjona Zaragoza; Mónica Parra Grande                                                                                                                                                                                                                                                                                                                                                                  |
| EPI_ISL_1060243 to 1060244, EPI_ISL_1060247, EPI_ISL_1060286 to 1060292                                                                                                                                                                                                                                                                                                                                                    | Laboratorio de Microbiología, Hospital General Universitario de Elda, Alicante                                     | SeqCOVID-SPAIN consortium/IBV(CSIC)                                                                                                               | Cristina Torregrosa Hetland; Eva Pastor Boix; Mª Isabel Gascón Ros; Paloma Cascales Ramos and SeqCOVID-SPAIN consortium                                                                                                                                                                                                                                                                                                                                                     |
| EPI_ISL_1111068, EPI_ISL_1111070 to 1111073, EPI_ISL_1111385 to 1111445                                                                                                                                                                                                                                                                                                                                                    | Laboratorio de Referencia Nacional de Enteropatógenos. Instituto Nacional de Salud del Perú                        | Laboratorio de Referencia Nacional de Enteropatógenos. Instituto Nacional de Salud del Perú                                                       | Fiorella Orellana Peralta; Iris Silva Molina; Junior Caro Castro; Ronnie Gavilan Chavez; Veronica Hurtado Vela; Willi Quino Sifuentes                                                                                                                                                                                                                                                                                                                                       |
| EPI_ISL_1092324 to 1092359, EPI_ISL_1093148 to 1093181, EPI_ISL_1137479 to 1137491, EPI_ISL_1138413 to 1138422                                                                                                                                                                                                                                                                                                             | Laboratorio de Referencia Nacional de Virus Respiratorio. Instituto Nacional de Salud Perú                         | Laboratorio de Referencia Nacional de Biotecnología y Biología Molecular. Instituto Nacional de Salud Perú                                        | Carlos Padilla Rojas; Henri Bailon Calderon; Johanna Balbuena Torrez; Karolyn Vega Chozo; Luis Barcena; Marco Galarza Perez; Maribel Huaranga Nuñez; Nancy Rojas Serrano; Omar Caceres Rey; Priscila Lope Pari                                                                                                                                                                                                                                                              |
| EPI_ISL_1111069, EPI_ISL_1111074 to 1111384, EPI_ISL_1111446 to 1111505                                                                                                                                                                                                                                                                                                                                                    | Laboratorio de Referencia Nacional de Virus Respiratorio. Instituto Nacional de Salud Perú                         | Laboratorio de Referencia Nacional de Enteropatógenos. Instituto Nacional de Salud del Perú                                                       | Fiorella Orellana Peralta; Iris Silva Molina; Junior Caro Castro; Ronnie Gavilan Chavez; Veronica Hurtado Vela; Willi Quino Sifuentes                                                                                                                                                                                                                                                                                                                                       |
| EPI_ISL_1092008                                                                                                                                                                                                                                                                                                                                                                                                            | Laboratorio de Salud Publica de Bogota                                                                             | Instituto Nacional de Salud- Dirección de Investigación en Salud Pública                                                                          | Carlos Franco-Muñoz; Diego A. Álvarez-Díaz; Diego Andrés Prada; Gerardo Santamaría; Hector Alejandro Ruiz-Moreno; Jhonnatan Reales-González; Julian Naizaque; Katherine Laiton-Donato; Magdalena Wiesner; Marcela Mercado-Reyes; María T. Herrera-Sepúlveda; Martha Lucia Ospina Martínez; Sheryll Corchuelo                                                                                                                                                                |
| EPI_ISL_1137615, EPI_ISL_1137619                                                                                                                                                                                                                                                                                                                                                                                           | Laboratorio de Salud Pública de Cauca                                                                              | Instituto Nacional de Salud- Dirección de Investigación en Salud Pública                                                                          | Carlos Franco-Muñoz; Diego A. Álvarez-Díaz; Diego Andrés Prada; Gerardo Santamaría; Hector Alejandro Ruiz-Moreno; Jhonnatan Reales-González; Julian Naizaque; Katherine Laiton-Donato; Magdalena Wiesner; Marcela Mercado-Reyes.; María T. Herrera-Sepúlveda; Martha Lucia Ospina Martínez; Sheryll Corchuelo                                                                                                                                                               |
| EPI_ISL_1092005                                                                                                                                                                                                                                                                                                                                                                                                            | Laboratorio de Salud Publica de Cesar                                                                              | Instituto Nacional de Salud- Dirección de Investigación en Salud Pública                                                                          | Carlos Franco-Muñoz; Diego A. Álvarez-Díaz; Diego Andrés Prada; Gerardo Santamaría; Hector Alejandro Ruiz-Moreno; Jhonnatan Reales-González; Julian Naizaque; Katherine Laiton-Donato; Magdalena Wiesner; Marcela Mercado-Reyes; María T. Herrera-Sepúlveda; Martha Lucia Ospina Martínez; Sheryll Corchuelo                                                                                                                                                                |
| EPI_ISL_1235686                                                                                                                                                                                                                                                                                                                                                                                                            | Laboratorio de Salud Pública (Bogota)                                                                              | Gencore- Universidad de los Andes                                                                                                                 | Alejandro Gómez; David González; Johana Hernandez Gabriela Delgado; Luisa Sacristán; Marcela Guevara-Suarez; Silvia Restrepo                                                                                                                                                                                                                                                                                                                                                |
| EPI_ISL_1137478, EPI_ISL_1303378 to 1303380                                                                                                                                                                                                                                                                                                                                                                                | Laboratorio de Salud Pública - Secretaría Distrital de Salud                                                       | Instituto Nacional de Salud- Dirección de Investigación en Salud Pública                                                                          | Carlos Franco-Muñoz; Carmen Osorio; Diana Malo; Diego A. Álvarez-Díaz; Diego Andrés Prada; Gerardo Santamaría; Hector Alejandro Ruiz-Moreno; Jhonnatan Reales-González; Juan Camilo Martínez; Julian Naizaque; Katherine Laiton-Donato; Lisseth Pardo; Magdalena Wiesner; Marcela Mercado-Reyes; Marcela Mercado-Reyes.; María T. Herrera-Sepúlveda; Marta Lopez Blanco; Martha Lucia Ospina Martínez; Martha Lucia Ospina Martínez; Sheryll Corchuelo; Ángela Alarcon Cruz |
| EPI_ISL_1017703                                                                                                                                                                                                                                                                                                                                                                                                            | Laboratorio de Salud Pública de Bogota                                                                             | Instituto Nacional de Salud- Dirección de Investigación en Salud Pública                                                                          | Carlos Franco-Muñoz; Diego A. Álvarez-Díaz; Diego Andrés Prada; Gerardo Santamaría; Hector Alejandro Ruiz-Moreno; Jhonnatan Reales-González; Julian Naizaque; Katherine Laiton-Donato; Magdalena Wiesner; Marcela Mercado-Reyes; María T. Herrera-Sepúlveda; Martha Lucia Ospina Martínez; Sheryll Corchuelo                                                                                                                                                                |
| EPI_ISL_1036756                                                                                                                                                                                                                                                                                                                                                                                                            | Laboratorio de Salud Pública de Bogotá                                                                             | Instituto Nacional de Salud- Dirección de Investigación en Salud Pública                                                                          | Carlos Franco-Muñoz; Diego A. Álvarez-Díaz; Diego Andrés Prada; Gerardo Santamaría; Hector Alejandro Ruiz-Moreno; Jhonnatan Reales-González; Julian Naizaque; Katherine Laiton-Donato; Magdalena Wiesner; Marcela Mercado-Reyes; María T. Herrera-Sepúlveda; Martha Lucia Ospina Martínez; Sheryll Corchuelo                                                                                                                                                                |
| EPI_ISL_1017701                                                                                                                                                                                                                                                                                                                                                                                                            | Laboratorio de Salud Pública de Boyacá                                                                             | Instituto Nacional de Salud- Dirección de Investigación en                                                                                        | Carlos Franco-Muñoz; Diego A. Álvarez-Díaz; Diego Andrés Prada; Gerardo Santamaría; Hector Alejandro Ruiz-Moreno; Jhonnatan Reales-González;                                                                                                                                                                                                                                                                                                                                |

|                                                                                                                                                                                                                                                                                                                                                                                                                                                                                                                                                                                                                                                                                                                                                                                                                                                                                                                                                                                                                                                                                                                                                                                                                                                                                                                                                                                                                                                                                                                                                                                                                                                                                                                                                                                                                                                                                                                                                                                                                                                                                                                                                                                                                               | Salud Pública                                                                                                                                     |                                                                                                                                                                                                                                                                                                                                                                                                                                                                                                                                                                                                                                                                                                                                                                                                                                                                                                                                   | Julian Naizaque; Katherine Laiton-Donato; Magdalena Wiesner; Marcela Mercado-Reyes; María T. Herrera-Sepúlveda; Martha Lucia Ospina Martínez; Sheryll Corchuelo                                                                                                                                                                                                                                                                                                                                                                                                                                                                                                                                                                                                                                                                                                                                                                                                                                                                                                                                                                                                                                                                                                                                                                                                        |
|-------------------------------------------------------------------------------------------------------------------------------------------------------------------------------------------------------------------------------------------------------------------------------------------------------------------------------------------------------------------------------------------------------------------------------------------------------------------------------------------------------------------------------------------------------------------------------------------------------------------------------------------------------------------------------------------------------------------------------------------------------------------------------------------------------------------------------------------------------------------------------------------------------------------------------------------------------------------------------------------------------------------------------------------------------------------------------------------------------------------------------------------------------------------------------------------------------------------------------------------------------------------------------------------------------------------------------------------------------------------------------------------------------------------------------------------------------------------------------------------------------------------------------------------------------------------------------------------------------------------------------------------------------------------------------------------------------------------------------------------------------------------------------------------------------------------------------------------------------------------------------------------------------------------------------------------------------------------------------------------------------------------------------------------------------------------------------------------------------------------------------------------------------------------------------------------------------------------------------|---------------------------------------------------------------------------------------------------------------------------------------------------|-----------------------------------------------------------------------------------------------------------------------------------------------------------------------------------------------------------------------------------------------------------------------------------------------------------------------------------------------------------------------------------------------------------------------------------------------------------------------------------------------------------------------------------------------------------------------------------------------------------------------------------------------------------------------------------------------------------------------------------------------------------------------------------------------------------------------------------------------------------------------------------------------------------------------------------|------------------------------------------------------------------------------------------------------------------------------------------------------------------------------------------------------------------------------------------------------------------------------------------------------------------------------------------------------------------------------------------------------------------------------------------------------------------------------------------------------------------------------------------------------------------------------------------------------------------------------------------------------------------------------------------------------------------------------------------------------------------------------------------------------------------------------------------------------------------------------------------------------------------------------------------------------------------------------------------------------------------------------------------------------------------------------------------------------------------------------------------------------------------------------------------------------------------------------------------------------------------------------------------------------------------------------------------------------------------------|
| EPI_ISL_1020121 to 1020123, EPI_ISL_1020126, EPI_ISL_1020128, EPI_ISL_1020132, EPI_ISL_1020135, EPI_ISL_1020151, EPI_ISL_1020154, EPI_ISL_1020305, EPI_ISL_1033159, EPI_ISL_1033161 to 1033162, EPI_ISL_1034145 to 1034151, EPI_ISL_1034153, EPI_ISL_1034190 to 1034195, EPI_ISL_1034209 to 1034211, EPI_ISL_1034227 to 1034230, EPI_ISL_1034303, EPI_ISL_1098832, EPI_ISL_1098841 to 1098842, EPI_ISL_1098867 to 1098871, EPI_ISL_1098891 to 1098892, EPI_ISL_1098894, EPI_ISL_1098896, EPI_ISL_1098898, EPI_ISL_1103544 to 1103546, EPI_ISL_1103548 to 1103549, EPI_ISL_1103553 to 1103554, EPI_ISL_1123388, EPI_ISL_1125886, EPI_ISL_1138056, EPI_ISL_1138296, EPI_ISL_1138408 to 1138409, EPI_ISL_1242451, EPI_ISL_1310778 to 1310781, EPI_ISL_1310784 to 1310786, EPI_ISL_1315582, EPI_ISL_1315634 to 1315636, EPI_ISL_1315638, EPI_ISL_1317214, EPI_ISL_1324478, EPI_ISL_1324618, EPI_ISL_1324652, EPI_ISL_1324654 to 1324656, EPI_ISL_1324731 to 1324734, EPI_ISL_1324737, EPI_ISL_1324768                                                                                                                                                                                                                                                                                                                                                                                                                                                                                                                                                                                                                                                                                                                                                                                                                                                                                                                                                                                                                                                                                                                                                                                                                             | Laboratorio de Virología HUCA                                                                                                                     | Laboratorio de Virología HUCA                                                                                                                                                                                                                                                                                                                                                                                                                                                                                                                                                                                                                                                                                                                                                                                                                                                                                                     | Abreu F; Alvarez-Arguelles ME; Boga JA; Castelló C; Costales I; Coto E; Gómez de Oña J; Martín-Rodríguez G; Melón S; Perez-Martínez Z; Rojo S; Sandoval M                                                                                                                                                                                                                                                                                                                                                                                                                                                                                                                                                                                                                                                                                                                                                                                                                                                                                                                                                                                                                                                                                                                                                                                                              |
| see above                                                                                                                                                                                                                                                                                                                                                                                                                                                                                                                                                                                                                                                                                                                                                                                                                                                                                                                                                                                                                                                                                                                                                                                                                                                                                                                                                                                                                                                                                                                                                                                                                                                                                                                                                                                                                                                                                                                                                                                                                                                                                                                                                                                                                     | Laboratorio de Virología Hospital Universitario Central de Asturias (HUCA)                                                                        | Laboratorio de Virología Hospital Universitario Central de Asturias (HUCA)                                                                                                                                                                                                                                                                                                                                                                                                                                                                                                                                                                                                                                                                                                                                                                                                                                                        | Abreu F; Alvarez-Arguelles ME; Boga JA; Castelló C; Costales I; Coto E; Gómez de Oña J; Martín-Rodríguez G; Melón S; Perez-Martínez Z; Rojo S; Sandoval M                                                                                                                                                                                                                                                                                                                                                                                                                                                                                                                                                                                                                                                                                                                                                                                                                                                                                                                                                                                                                                                                                                                                                                                                              |
| EPI_ISL_1123413 to 1123414, EPI_ISL_1125210, EPI_ISL_1125577                                                                                                                                                                                                                                                                                                                                                                                                                                                                                                                                                                                                                                                                                                                                                                                                                                                                                                                                                                                                                                                                                                                                                                                                                                                                                                                                                                                                                                                                                                                                                                                                                                                                                                                                                                                                                                                                                                                                                                                                                                                                                                                                                                  | Laboratorio de biología molecular diagnóstico de COVID-19 U Caldas                                                                                | Instituto Nacional de Salud- Dirección de Investigación en Salud Pública                                                                                                                                                                                                                                                                                                                                                                                                                                                                                                                                                                                                                                                                                                                                                                                                                                                          | Carlos Franco-Muñoz; Diego A. Álvarez-Díaz; Diego Andrés Prada; Gerardo Santamaría; Hector Alejandro Ruiz-Moreno; Jhonnatan Reales-González; Julian Naizaque; Katherine Laiton-Donato; Magdalena Wiesner; Marcela Mercado-Reyes.; María T. Herrera-Sepúlveda; Martha Lucia Ospina Martínez; Sheryll Corchuelo                                                                                                                                                                                                                                                                                                                                                                                                                                                                                                                                                                                                                                                                                                                                                                                                                                                                                                                                                                                                                                                          |
| EPI_ISL_1220054                                                                                                                                                                                                                                                                                                                                                                                                                                                                                                                                                                                                                                                                                                                                                                                                                                                                                                                                                                                                                                                                                                                                                                                                                                                                                                                                                                                                                                                                                                                                                                                                                                                                                                                                                                                                                                                                                                                                                                                                                                                                                                                                                                                                               | Laboratorio de salud público de Atlantico                                                                                                         | Instituto Nacional de Salud- Dirección de Investigación en Salud Pública                                                                                                                                                                                                                                                                                                                                                                                                                                                                                                                                                                                                                                                                                                                                                                                                                                                          | Carlos Franco-Muñoz; Diego A. Álvarez-Díaz; Diego Andrés Prada; Gerardo Santamaría; Hector Alejandro Ruiz-Moreno; Jhonnatan Reales-González; Julian Naizaque; Katherine Laiton-Donato; Magdalena Wiesner; Marcela Mercado-Reyes; María T. Herrera-Sepúlveda; Martha Lucia Ospina Martínez; Sheryll Corchuelo                                                                                                                                                                                                                                                                                                                                                                                                                                                                                                                                                                                                                                                                                                                                                                                                                                                                                                                                                                                                                                                           |
| EPI_ISL_1091922 to 1091923                                                                                                                                                                                                                                                                                                                                                                                                                                                                                                                                                                                                                                                                                                                                                                                                                                                                                                                                                                                                                                                                                                                                                                                                                                                                                                                                                                                                                                                                                                                                                                                                                                                                                                                                                                                                                                                                                                                                                                                                                                                                                                                                                                                                    |                                                                                                                                                   |                                                                                                                                                                                                                                                                                                                                                                                                                                                                                                                                                                                                                                                                                                                                                                                                                                                                                                                                   |                                                                                                                                                                                                                                                                                                                                                                                                                                                                                                                                                                                                                                                                                                                                                                                                                                                                                                                                                                                                                                                                                                                                                                                                                                                                                                                                                                        |
| EPI_ISL_12020310, EPI_ISL_12020314, EPI_ISL_12020329, EPI_ISL_12020331, EPI_ISL_12020333 to 12020337, EPI_ISL_12020339, EPI_ISL_1081953, EPI_ISL_1176355, EPI_ISL_1241860, EPI_ISL_1315620, EPI_ISL_1365746                                                                                                                                                                                                                                                                                                                                                                                                                                                                                                                                                                                                                                                                                                                                                                                                                                                                                                                                                                                                                                                                                                                                                                                                                                                                                                                                                                                                                                                                                                                                                                                                                                                                                                                                                                                                                                                                                                                                                                                                                   | Laboratorio di Riferimento Regionale della Sicilia Occidentale per l'Emergenza COVID-19                                                           | Laboratorio di Riferimento Regionale della Sicilia Occidentale per l'Emergenza COVID-19                                                                                                                                                                                                                                                                                                                                                                                                                                                                                                                                                                                                                                                                                                                                                                                                                                           | Carmelo Massimo Maida; Claudio Costantino; Daniela Di Naro; Fabio Tramuto; Francesco Vitale; Giorgio Graziano; Giulia Randazzo; Stefano Giaromida; Vincenzo Restivo; Walter Mazzucco                                                                                                                                                                                                                                                                                                                                                                                                                                                                                                                                                                                                                                                                                                                                                                                                                                                                                                                                                                                                                                                                                                                                                                                   |
| see above                                                                                                                                                                                                                                                                                                                                                                                                                                                                                                                                                                                                                                                                                                                                                                                                                                                                                                                                                                                                                                                                                                                                                                                                                                                                                                                                                                                                                                                                                                                                                                                                                                                                                                                                                                                                                                                                                                                                                                                                                                                                                                                                                                                                                     |                                                                                                                                                   |                                                                                                                                                                                                                                                                                                                                                                                                                                                                                                                                                                                                                                                                                                                                                                                                                                                                                                                                   |                                                                                                                                                                                                                                                                                                                                                                                                                                                                                                                                                                                                                                                                                                                                                                                                                                                                                                                                                                                                                                                                                                                                                                                                                                                                                                                                                                        |
| EPI_ISL_1340619, EPI_ISL_1340634, EPI_ISL_1340654                                                                                                                                                                                                                                                                                                                                                                                                                                                                                                                                                                                                                                                                                                                                                                                                                                                                                                                                                                                                                                                                                                                                                                                                                                                                                                                                                                                                                                                                                                                                                                                                                                                                                                                                                                                                                                                                                                                                                                                                                                                                                                                                                                             | Laboratorios BIMODI                                                                                                                               | Instituto de Diagnostico y Referencia Epidemiologicos (INDRE)                                                                                                                                                                                                                                                                                                                                                                                                                                                                                                                                                                                                                                                                                                                                                                                                                                                                     | Abril Rodriguez-Maldonado; Ariadna Medina-Benitez; Claudia Wong-Arambula; Ernesto Ramirez-Gonzalez.; Gisela Barrera-Badillo; Irma Lopez-Martinez; Joaquin Quiroz-Mercado; Lucia Hernandez-Rivas; Natividad Cruz-Ortiz; Sergio Rangel-Guerrero; Tatiana Nunez-Garcia; Vanessa Rivero-Arredondo                                                                                                                                                                                                                                                                                                                                                                                                                                                                                                                                                                                                                                                                                                                                                                                                                                                                                                                                                                                                                                                                          |
| EPI_ISL_1340613                                                                                                                                                                                                                                                                                                                                                                                                                                                                                                                                                                                                                                                                                                                                                                                                                                                                                                                                                                                                                                                                                                                                                                                                                                                                                                                                                                                                                                                                                                                                                                                                                                                                                                                                                                                                                                                                                                                                                                                                                                                                                                                                                                                                               | Laboratorios DIAGNOMOL                                                                                                                            | Instituto de Diagnostico y Referencia Epidemiologicos (INDRE)                                                                                                                                                                                                                                                                                                                                                                                                                                                                                                                                                                                                                                                                                                                                                                                                                                                                     | Abril Rodriguez-Maldonado; Ariadna Medina-Benitez; Claudia Wong-Arambula; Ernesto Ramirez-Gonzalez.; Gisela Barrera-Badillo; Irma Lopez-Martinez; Joaquin Quiroz-Mercado; Lucia Hernandez-Rivas; Natividad Cruz-Ortiz; Sergio Rangel-Guerrero; Tatiana Nunez-Garcia; Vanessa Rivero-Arredondo                                                                                                                                                                                                                                                                                                                                                                                                                                                                                                                                                                                                                                                                                                                                                                                                                                                                                                                                                                                                                                                                          |
| EPI_ISL_1359062                                                                                                                                                                                                                                                                                                                                                                                                                                                                                                                                                                                                                                                                                                                                                                                                                                                                                                                                                                                                                                                                                                                                                                                                                                                                                                                                                                                                                                                                                                                                                                                                                                                                                                                                                                                                                                                                                                                                                                                                                                                                                                                                                                                                               | Laboratorios LISTER                                                                                                                               | Instituto de Diagnostico y Referencia Epidemiologicos (INDRE)                                                                                                                                                                                                                                                                                                                                                                                                                                                                                                                                                                                                                                                                                                                                                                                                                                                                     | Abril Rodriguez-Maldonado; Ariadna Medina-Benitez; Claudia Wong-Arambula; Ernesto Ramirez-Gonzalez.; Gisela Barrera-Badillo; Irma Lopez-Martinez; Joaquin Quiroz-Mercado; Lucia Hernandez-Rivas; Natividad Cruz-Ortiz; Sergio Rangel-Guerrero; Tatiana Nunez-Garcia; Vanessa Rivero-Arredondo                                                                                                                                                                                                                                                                                                                                                                                                                                                                                                                                                                                                                                                                                                                                                                                                                                                                                                                                                                                                                                                                          |
| EPI_ISL_1334380, EPI_ISL_1334382 to 1334385                                                                                                                                                                                                                                                                                                                                                                                                                                                                                                                                                                                                                                                                                                                                                                                                                                                                                                                                                                                                                                                                                                                                                                                                                                                                                                                                                                                                                                                                                                                                                                                                                                                                                                                                                                                                                                                                                                                                                                                                                                                                                                                                                                                   | Laboratorios Lister                                                                                                                               | Instituto de Diagnostico y Referencia Epidemiologicos (INDRE)                                                                                                                                                                                                                                                                                                                                                                                                                                                                                                                                                                                                                                                                                                                                                                                                                                                                     | Abril Rodriguez-Maldonado; Ariadna Medina-Benitez; Claudia Wong-Arambula; Ernesto Ramirez-Gonzalez.; Gisela Barrera-Badillo; Irma Lopez-Martinez; Joaquin Quiroz-Mercado; Lucia Hernandez-Rivas; Natividad Cruz-Ortiz; Sergio Rangel-Guerrero; Tatiana Nunez-Garcia; Vanessa Rivero-Arredondo                                                                                                                                                                                                                                                                                                                                                                                                                                                                                                                                                                                                                                                                                                                                                                                                                                                                                                                                                                                                                                                                          |
| EPI_ISL_1239556, EPI_ISL_1239600 to 1239605, EPI_ISL_1239680, EPI_ISL_1239749 to 1239755                                                                                                                                                                                                                                                                                                                                                                                                                                                                                                                                                                                                                                                                                                                                                                                                                                                                                                                                                                                                                                                                                                                                                                                                                                                                                                                                                                                                                                                                                                                                                                                                                                                                                                                                                                                                                                                                                                                                                                                                                                                                                                                                      | Laboratorium Badawczo-Rozwojowe Vitagenum                                                                                                         | 1. National Institute of Public Health - National Institute of Hygiene; 2. Eurofins Genomics Europe Sequencing GmbH                                                                                                                                                                                                                                                                                                                                                                                                                                                                                                                                                                                                                                                                                                                                                                                                               | ECDC COVID-19 WGS support team; Eurofins Genomics Europe Sequencing Team; Gierczyki Rafa; Sadkowska-Todys Magorzata; Wokowicz Tomasz; Zacharczuk Katarzyna                                                                                                                                                                                                                                                                                                                                                                                                                                                                                                                                                                                                                                                                                                                                                                                                                                                                                                                                                                                                                                                                                                                                                                                                             |
| EPI_ISL_1239606, EPI_ISL_1239756 to 1239757                                                                                                                                                                                                                                                                                                                                                                                                                                                                                                                                                                                                                                                                                                                                                                                                                                                                                                                                                                                                                                                                                                                                                                                                                                                                                                                                                                                                                                                                                                                                                                                                                                                                                                                                                                                                                                                                                                                                                                                                                                                                                                                                                                                   | Laboratorium Genetyczne Alab Plus Sp. z o.o.                                                                                                      | 1. National Institute of Public Health - National Institute of Hygiene; 2. Eurofins Genomics Europe Sequencing GmbH                                                                                                                                                                                                                                                                                                                                                                                                                                                                                                                                                                                                                                                                                                                                                                                                               | ECDC COVID-19 WGS support team; Eurofins Genomics Europe Sequencing Team; Gierczyki Rafa; Sadkowska-Todys Magorzata; Wokowicz Tomasz; Zacharczuk Katarzyna                                                                                                                                                                                                                                                                                                                                                                                                                                                                                                                                                                                                                                                                                                                                                                                                                                                                                                                                                                                                                                                                                                                                                                                                             |
| EPI_ISL_1239561, EPI_ISL_1239618 to 1239620, EPI_ISL_1239764                                                                                                                                                                                                                                                                                                                                                                                                                                                                                                                                                                                                                                                                                                                                                                                                                                                                                                                                                                                                                                                                                                                                                                                                                                                                                                                                                                                                                                                                                                                                                                                                                                                                                                                                                                                                                                                                                                                                                                                                                                                                                                                                                                  | Laboratorium Epidemiologii WSSE w Szczecinie                                                                                                      | 1. National Institute of Public Health - National Institute of Hygiene; 2. Eurofins Genomics Europe Sequencing GmbH                                                                                                                                                                                                                                                                                                                                                                                                                                                                                                                                                                                                                                                                                                                                                                                                               | ECDC COVID-19 WGS support team; Eurofins Genomics Europe Sequencing Team; Gierczyki Rafa; Sadkowska-Todys Magorzata; Wokowicz Tomasz; Zacharczuk Katarzyna                                                                                                                                                                                                                                                                                                                                                                                                                                                                                                                                                                                                                                                                                                                                                                                                                                                                                                                                                                                                                                                                                                                                                                                                             |
| EPI_ISL_1193260 to 1193373, EPI_ISL_1220894 to 1222442, EPI_ISL_1255086 to 1255101, EPI_ISL_1291198 to 1291306, EPI_ISL_1298247 to 1298429, EPI_ISL_1319042 to 1319253, EPI_ISL_1319257, EPI_ISL_1319261, EPI_ISL_1319264, EPI_ISL_1319268, EPI_ISL_1319273, EPI_ISL_1319278, EPI_ISL_1319282, EPI_ISL_1319285, EPI_ISL_1319289, EPI_ISL_1319293, EPI_ISL_1319296, EPI_ISL_1319301, EPI_ISL_1319304, EPI_ISL_1319307, EPI_ISL_1319311, EPI_ISL_1319315, EPI_ISL_1319323, EPI_ISL_1319326, EPI_ISL_1319330, EPI_ISL_1319334, EPI_ISL_1319338, EPI_ISL_1319342, EPI_ISL_1319346, EPI_ISL_1319349, EPI_ISL_1319353, EPI_ISL_1319357, EPI_ISL_1319361, EPI_ISL_1319364, EPI_ISL_1319368, EPI_ISL_1319376, EPI_ISL_1319381, EPI_ISL_1319386, EPI_ISL_1319389, EPI_ISL_1319391, EPI_ISL_1319394, EPI_ISL_1319396, EPI_ISL_1319398, EPI_ISL_1319402, EPI_ISL_1319405, EPI_ISL_1319408, EPI_ISL_1319410, EPI_ISL_1319414, EPI_ISL_1319418, EPI_ISL_1319421, EPI_ISL_1319425, EPI_ISL_1319428, EPI_ISL_1319435, EPI_ISL_1319439, EPI_ISL_1319442, EPI_ISL_1319444, EPI_ISL_1319446, EPI_ISL_1319448, EPI_ISL_1319451, EPI_ISL_1319453, EPI_ISL_1319456, EPI_ISL_1319458 to 1319753, EPI_ISL_1319756, EPI_ISL_1319760, EPI_ISL_1319763, EPI_ISL_1319767, EPI_ISL_1319770 to 1320170, EPI_ISL_1320175, EPI_ISL_1320178, EPI_ISL_1320183, EPI_ISL_1320186, EPI_ISL_1320189, EPI_ISL_1320196, EPI_ISL_1320201 to 1321155, EPI_ISL_1321157 to 1321308, EPI_ISL_1321310 to 1321355, EPI_ISL_1338399 to 1338611, EPI_ISL_1338614, EPI_ISL_1338617 to 1339302, EPI_ISL_1339305, EPI_ISL_1339308, EPI_ISL_1339311, EPI_ISL_1339314, EPI_ISL_1339317, EPI_ISL_1339321, EPI_ISL_1339324, EPI_ISL_1339327, EPI_ISL_1339331, EPI_ISL_1339334, EPI_ISL_1339337, EPI_ISL_1339340, EPI_ISL_1339343, EPI_ISL_1339347, EPI_ISL_1339350, EPI_ISL_1339353, EPI_ISL_1339356, EPI_ISL_1339360, EPI_ISL_1339363, EPI_ISL_1339366, EPI_ISL_1339370, EPI_ISL_1339373, EPI_ISL_1339376, EPI_ISL_1339379, EPI_ISL_1339382, EPI_ISL_1339384, EPI_ISL_1339387, EPI_ISL_1339390, EPI_ISL_1339393, EPI_ISL_1339397, EPI_ISL_1339400, EPI_ISL_1339403, EPI_ISL_1339406, EPI_ISL_1339409, EPI_ISL_1339412, EPI_ISL_1339415, EPI_ISL_1339418, EPI_ISL_1339421 to 1339822 | Centers for Disease Control and Prevention Division of Viral Diseases, Pathogen Discovery                                                         | Amanda Douglas; Amanda Suchanek; Andrea Throop; Ayla Burns; Ben L. Rambo-Martin; Bobbi Croy; Brian Krueger; Brian Norvell; Christos Petropoulos; Clinton R. Paden; Craig Lukasik; Dakota Howard; Debbie Boles; Dhvani Batra; Duncan MacCannell; Eyad Almasri; Eyad Almasri Debbie Boles; Goran Stevovic; Howard Engler; Hrushikesh Deshmukh; Jake Humphrey; Jana Schroth; Joe Voshell; John Pruitt; Jonathan Meltzer; Jonathan Williams; Kimberly Wagner; Lax Iyer; Lyndon Tilson; Manoj Jain; Marcia Eisenberg; Mary Ann Cristobal; Mary Williamson; Michael Levandoski; Mike Sapeta; Mindy Nye; Minoo Agarwal; Mohan Koll; Nuthawin Charoensri; Oren Cohen; Peter W. Cook; Prashant Gupta; Qian Zeng; Rama Ghatti; Scott Parker; Scott Ryan; Stanley Letovsky; Steven Ragan; Suresh Babu Selvaraju; Susan Countryman; Susan Hicks; Suxiang Tong; Suzanne Dale; Thomas Urban; Tim Kuphal; Tricia Zwiefelhofer; Vincent Drouillon |                                                                                                                                                                                                                                                                                                                                                                                                                                                                                                                                                                                                                                                                                                                                                                                                                                                                                                                                                                                                                                                                                                                                                                                                                                                                                                                                                                        |
| see above                                                                                                                                                                                                                                                                                                                                                                                                                                                                                                                                                                                                                                                                                                                                                                                                                                                                                                                                                                                                                                                                                                                                                                                                                                                                                                                                                                                                                                                                                                                                                                                                                                                                                                                                                                                                                                                                                                                                                                                                                                                                                                                                                                                                                     | Laboratory Corporation of America                                                                                                                 |                                                                                                                                                                                                                                                                                                                                                                                                                                                                                                                                                                                                                                                                                                                                                                                                                                                                                                                                   |                                                                                                                                                                                                                                                                                                                                                                                                                                                                                                                                                                                                                                                                                                                                                                                                                                                                                                                                                                                                                                                                                                                                                                                                                                                                                                                                                                        |
| EPI_ISL_1020592 to 1022419, EPI_ISL_1025963 to 1026865, EPI_ISL_1027668 to 1029955, EPI_ISL_1030503 to 1032582, EPI_ISL_1036937 to 1038790, EPI_ISL_1081200 to 1081218, EPI_ISL_1081267 to 1081283, EPI_ISL_1159885 to 1160122, EPI_ISL_1160124, EPI_ISL_1160126, EPI_ISL_1160128, EPI_ISL_1160130, EPI_ISL_1160132, EPI_ISL_1160134, EPI_ISL_1160136, EPI_ISL_1160139, EPI_ISL_1160141, EPI_ISL_1160143, EPI_ISL_1160145, EPI_ISL_1160147, EPI_ISL_1160149, EPI_ISL_1160151, EPI_ISL_1160153 to 1160154, EPI_ISL_1160156, EPI_ISL_1160158, EPI_ISL_1160160, EPI_ISL_1160162, EPI_ISL_1160164, EPI_ISL_1160166, EPI_ISL_1160168, EPI_ISL_1160170, EPI_ISL_1160173, EPI_ISL_1160175, EPI_ISL_1160177, EPI_ISL_1160179, EPI_ISL_1160181, EPI_ISL_1160183, EPI_ISL_1160185, EPI_ISL_1160187, EPI_ISL_1160189, EPI_ISL_1160191, EPI_ISL_1160193, EPI_ISL_1160196 to 1160197, EPI_ISL_1160199, EPI_ISL_1160201, EPI_ISL_1160203, EPI_ISL_1160206, EPI_ISL_1160208, EPI_ISL_1160210, EPI_ISL_1160212, EPI_ISL_1160214, EPI_ISL_1160216, EPI_ISL_1160218, EPI_ISL_1160220 to 1161005, EPI_ISL_1161007 to 1161008, EPI_ISL_1161010, EPI_ISL_1161012, EPI_ISL_1161015, EPI_ISL_1161017, EPI_ISL_1161019, EPI_ISL_1161021, EPI_ISL_1161023, EPI_ISL_1161025, EPI_ISL_1161027, EPI_ISL_1161029, EPI_ISL_1161031, EPI_ISL_1161033, EPI_ISL_1161035, EPI_ISL_1161037, EPI_ISL_1161039, EPI_ISL_1161042, EPI_ISL_1161044, EPI_ISL_1161046, EPI_ISL_1161048, EPI_ISL_1161051, EPI_ISL_1161053, EPI_ISL_1161055, EPI_ISL_1161057, EPI_ISL_1161059, EPI_ISL_1161061, EPI_ISL_1161063, EPI_ISL_1161066, EPI_ISL_1161068, EPI_ISL_1161070, EPI_ISL_1161072, EPI_ISL_1161074, EPI_ISL_1161076, EPI_ISL_1161078 to 1161400, EPI_ISL_1161416 to 1162761, EPI_ISL_1162763 to 1163161, EPI_ISL_1163163 to 1163529, EPI_ISL_1255296 to 1255307, EPI_ISL_1255391 to 1255397                                                                                                                                                                                                                                                                                                                                                                             | Laboratory Corporation of America                                                                                                                 | Respiratory Viruses Branch, Division of Viral Diseases, Centers for Disease Control and Prevention                                                                                                                                                                                                                                                                                                                                                                                                                                                                                                                                                                                                                                                                                                                                                                                                                                | Alexandre Bolze; Amanda Douglas; Amanda Suchanek; Andrea Throop; Ary Ascencio; Ayla Burns; Ben L. Rambo-Martin; Bobbi Croy; Brad Sickler; Brian Krueger; Brian Norvell; Charlotte Rivera-Garcia; Christine Tran; Christos Petropoulos; Clinton R. Paden; Craig Lukasik; Dakota Howard; David Becker; Dhvani Batra; Duncan MacCannell; Efrén Sandoval; Eileen de Feo; Elizabeth Cirulli; Eric Allen; Eyad Almasri Debbie Boles; Geraint Lewis; Goran Stevovic; Howard Engler; Hrushikesh Deshmukh; Jake Humphrey; James Lu; Jan Antico; Jana Schroth; Jason Ngyuen; Jimmy Ramirez; Jingtao Liu; Joe Voshell; John Pruitt; Jonathan Meltzer; Jonathan Williams; Kelly Schiabor Barrett; Kim Gietzen; Kimberly Wagner; Lax Iyer; Lyndon Tilson; Magnus Isaksson; Manoj Jain; Marc Laurent; Marcia Eisenberg; Mary Ann Cristobal; Mary Williamson; Matthew Tolentino; Michael Levandoski; Mike Sapeta; Mindy Nye; Minoo Agarwal; Mohan Koll; Nicole L. Washington; Nuthawin Charoensri; Oren Cohen; Peter W. Cook; Phil Febbo; Prashant Gupta; Rama Ghatti; Ryan Cho; Scott Parker; Scott Ryan; Shannon Wickline; Sherry Wang; Simon White; Stanley Letovsky; Steven Ragan; Susan Galloway; Suresh Babu Selvaraju; Susan Countryman; Susan Hicks; Suxiang Tong; Suzanne Dale; Thomas Urban; Tim Kuphal; Tricia Zwiefelhofer; Tyler Cassens; Vincent Drouillon; William Lee |
| see above                                                                                                                                                                                                                                                                                                                                                                                                                                                                                                                                                                                                                                                                                                                                                                                                                                                                                                                                                                                                                                                                                                                                                                                                                                                                                                                                                                                                                                                                                                                                                                                                                                                                                                                                                                                                                                                                                                                                                                                                                                                                                                                                                                                                                     | Laboratory Corporation of America                                                                                                                 |                                                                                                                                                                                                                                                                                                                                                                                                                                                                                                                                                                                                                                                                                                                                                                                                                                                                                                                                   |                                                                                                                                                                                                                                                                                                                                                                                                                                                                                                                                                                                                                                                                                                                                                                                                                                                                                                                                                                                                                                                                                                                                                                                                                                                                                                                                                                        |
| EPI_ISL_1295168 to 1295176, EPI_ISL_1295181                                                                                                                                                                                                                                                                                                                                                                                                                                                                                                                                                                                                                                                                                                                                                                                                                                                                                                                                                                                                                                                                                                                                                                                                                                                                                                                                                                                                                                                                                                                                                                                                                                                                                                                                                                                                                                                                                                                                                                                                                                                                                                                                                                                   | Laboratory Diagnostics and Clinical Immunology of Developmental Age, Medical University of Warsaw                                                 | genXone SA, Research & Development Laboratory; The Faculty of Mathematics, Informatics and Mechanics of the University of Warsaw                                                                                                                                                                                                                                                                                                                                                                                                                                                                                                                                                                                                                                                                                                                                                                                                  | Aleksandra Gidlewicz; Anna Brylak-Blaszkow; Anna Gambin; Grzegorz Nowicki; Jakub Grabowski; Karol Szeszko; Lukasz Krych; Maciej Sykulski; Michal Kaszuba; Natalia Drwaska-Matelska; Urszula Demkow                                                                                                                                                                                                                                                                                                                                                                                                                                                                                                                                                                                                                                                                                                                                                                                                                                                                                                                                                                                                                                                                                                                                                                     |
| EPI_ISL_1017690                                                                                                                                                                                                                                                                                                                                                                                                                                                                                                                                                                                                                                                                                                                                                                                                                                                                                                                                                                                                                                                                                                                                                                                                                                                                                                                                                                                                                                                                                                                                                                                                                                                                                                                                                                                                                                                                                                                                                                                                                                                                                                                                                                                                               | Laboratory for COVID19 diagnostics, Clinical Centre of Serbia                                                                                     | Institute of microbiology and Immunology, Faculty of Medicine, University of Belgrade                                                                                                                                                                                                                                                                                                                                                                                                                                                                                                                                                                                                                                                                                                                                                                                                                                             | Jankovic, M.; Jovanovic, T.; Knezevic, A.; Milicevic, O.; Sekler, M.; Tesovic, B.; Vidanovic, D.                                                                                                                                                                                                                                                                                                                                                                                                                                                                                                                                                                                                                                                                                                                                                                                                                                                                                                                                                                                                                                                                                                                                                                                                                                                                       |
| EPI_ISL_1138899, EPI_ISL_1138969, EPI_ISL_1138983, EPI_ISL_1209407                                                                                                                                                                                                                                                                                                                                                                                                                                                                                                                                                                                                                                                                                                                                                                                                                                                                                                                                                                                                                                                                                                                                                                                                                                                                                                                                                                                                                                                                                                                                                                                                                                                                                                                                                                                                                                                                                                                                                                                                                                                                                                                                                            | Laboratory for HIV and opportunistic infections diagnosis The Republican Research and Practical Center for Epidemiology and Microbiology (RRPCEM) | Laboratory for HIV and opportunistic infections diagnosis The Republican Research and Practical Center for Epidemiology and Microbiology (RRPCEM)                                                                                                                                                                                                                                                                                                                                                                                                                                                                                                                                                                                                                                                                                                                                                                                 | Analoly Krasko; Anatoly Krasko; Artur Akhremchuk; Elena Gasich; Kirill Bulda; Leonid Valentovich; Vladimir Gorbunov                                                                                                                                                                                                                                                                                                                                                                                                                                                                                                                                                                                                                                                                                                                                                                                                                                                                                                                                                                                                                                                                                                                                                                                                                                                    |
| EPI_ISL_1224909, EPI_ISL_1224911 to 1224912, EPI_ISL_1228691 to 1228692, EPI_ISL_1228908 to 1228909, EPI_ISL_1295641, EPI_ISL_1295643 to 1295645, EPI_ISL_1315327, EPI_ISL_1315421 to 1315426, EPI_ISL_1381306 to 1381385                                                                                                                                                                                                                                                                                                                                                                                                                                                                                                                                                                                                                                                                                                                                                                                                                                                                                                                                                                                                                                                                                                                                                                                                                                                                                                                                                                                                                                                                                                                                                                                                                                                                                                                                                                                                                                                                                                                                                                                                     | Laboratory for Respiratory Viruses, Cantacuzino National                                                                                          | Cantacuzino Institute Virology                                                                                                                                                                                                                                                                                                                                                                                                                                                                                                                                                                                                                                                                                                                                                                                                                                                                                                    | Catalina Pascu; Luiza Ustea; Mihaela Lazar; Nicoleta Paraschiv; Sorin Dinu                                                                                                                                                                                                                                                                                                                                                                                                                                                                                                                                                                                                                                                                                                                                                                                                                                                                                                                                                                                                                                                                                                                                                                                                                                                                                             |
| see above                                                                                                                                                                                                                                                                                                                                                                                                                                                                                                                                                                                                                                                                                                                                                                                                                                                                                                                                                                                                                                                                                                                                                                                                                                                                                                                                                                                                                                                                                                                                                                                                                                                                                                                                                                                                                                                                                                                                                                                                                                                                                                                                                                                                                     |                                                                                                                                                   |                                                                                                                                                                                                                                                                                                                                                                                                                                                                                                                                                                                                                                                                                                                                                                                                                                                                                                                                   |                                                                                                                                                                                                                                                                                                                                                                                                                                                                                                                                                                                                                                                                                                                                                                                                                                                                                                                                                                                                                                                                                                                                                                                                                                                                                                                                                                        |

|                                                                                                                                                                                                                                                                                                                                                                                                                                                                                                                                                                                                                                                                                                                                                                                                                                           |                                                                                                                                                                                                                        |                                                                                                                                                                                                                            |                                                                                                                                                                                                                                                                                                                                                                                                         |
|-------------------------------------------------------------------------------------------------------------------------------------------------------------------------------------------------------------------------------------------------------------------------------------------------------------------------------------------------------------------------------------------------------------------------------------------------------------------------------------------------------------------------------------------------------------------------------------------------------------------------------------------------------------------------------------------------------------------------------------------------------------------------------------------------------------------------------------------|------------------------------------------------------------------------------------------------------------------------------------------------------------------------------------------------------------------------|----------------------------------------------------------------------------------------------------------------------------------------------------------------------------------------------------------------------------|---------------------------------------------------------------------------------------------------------------------------------------------------------------------------------------------------------------------------------------------------------------------------------------------------------------------------------------------------------------------------------------------------------|
|                                                                                                                                                                                                                                                                                                                                                                                                                                                                                                                                                                                                                                                                                                                                                                                                                                           | Military-Medical Institute for Research and Development                                                                                                                                                                |                                                                                                                                                                                                                            |                                                                                                                                                                                                                                                                                                                                                                                                         |
| EPI_ISL_1048805 to 1048813                                                                                                                                                                                                                                                                                                                                                                                                                                                                                                                                                                                                                                                                                                                                                                                                                | Laboratory of Clinical Microbiology, Virology and Biomergencies - Fatebenefratelli Sacco Hospital                                                                                                                      | Virology Laboratory, Scientific Department, Army Medical Center                                                                                                                                                            | Alberto Rizzo; Alessandro Mancon; Anella Monte; Anna Anselmo; Florigio Lista; Giovanni Faggioni; Maria Rita Gismondo; Riccardo De Sanctis; Silvia Filo; Valeria Micheli; Vanessa Vera Fain                                                                                                                                                                                                              |
| EPI_ISL_1098895                                                                                                                                                                                                                                                                                                                                                                                                                                                                                                                                                                                                                                                                                                                                                                                                                           | Laboratory of Communicable Diseasea                                                                                                                                                                                    | Laboratory of Communicable Diseasea                                                                                                                                                                                        | Lidia Dotsenko                                                                                                                                                                                                                                                                                                                                                                                          |
| EPI_ISL_1138519 to 1138523, EPI_ISL_1138526 to 1138536, EPI_ISL_1138538 to 1138541, EPI_ISL_1138544 to 1138546, EPI_ISL_1138548 to 1138552, EPI_ISL_1138554 to 1138556, EPI_ISL_1138568 to 1138572, EPI_ISL_1138597, EPI_ISL_1190934 to 1190938, EPI_ISL_1190940 to 1190950, EPI_ISL_1190955, EPI_ISL_1259160 to 1259160, EPI_ISL_1319359 to 1319360, EPI_ISL_1319362 to 1319363, EPI_ISL_1319365 to 1319367, EPI_ISL_1319369 to 1319370                                                                                                                                                                                                                                                                                                                                                                                                  | Laboratory of Communicable Diseases                                                                                                                                                                                    | 1. Laboratory of Communicable Diseases (Estonia); 2. Eurofins Genomics Europe Sequencing GmbH                                                                                                                              | Lidia Dotsenko; Lidia Dotsenko et al.                                                                                                                                                                                                                                                                                                                                                                   |
| see above                                                                                                                                                                                                                                                                                                                                                                                                                                                                                                                                                                                                                                                                                                                                                                                                                                 | Laboratory of Communicable Diseases                                                                                                                                                                                    |                                                                                                                                                                                                                            |                                                                                                                                                                                                                                                                                                                                                                                                         |
| EPI_ISL_1202323, EPI_ISL_1101253                                                                                                                                                                                                                                                                                                                                                                                                                                                                                                                                                                                                                                                                                                                                                                                                          | Laboratory of Communicable Diseases                                                                                                                                                                                    | Laboratory of Communicable Diseases                                                                                                                                                                                        | Lidia Dotsenko                                                                                                                                                                                                                                                                                                                                                                                          |
| EPI_ISL_1281568 to 1281569, EPI_ISL_1281571, EPI_ISL_1281573                                                                                                                                                                                                                                                                                                                                                                                                                                                                                                                                                                                                                                                                                                                                                                              | Laboratory of Extremely Dangerous Infections of Federal Budget Health Care Instute "Center of Hygiene and Epidemiology in Sakhalin region"                                                                             | Group of Genomics and Postgenomic Technologies of Central Research Institute of Epidemiology                                                                                                                               | Akimkin VG; Arutiunian AE; Bulanenko VP; Byankina MA; Golubeva AG; Kaptelova VV; Kondrasheva LV; Korneenko EV; Saenko SS; Samoilov AE; Speranskaya AS; Tivanova EV; Valdokhina AV                                                                                                                                                                                                                       |
| EPI_ISL_1081837, EPI_ISL_1096335 to 1096341, EPI_ISL_1201427 to 1201436, EPI_ISL_1249449, EPI_ISL_1249452, EPI_ISL_1249455, EPI_ISL_1249457, EPI_ISL_1249460, EPI_ISL_1249463, EPI_ISL_1249467                                                                                                                                                                                                                                                                                                                                                                                                                                                                                                                                                                                                                                            | Laboratory of Genetics and Personalized Medicine, Zan Mitrev Clinic                                                                                                                                                    | Laboratory of Genetics and Personalized Medicine, Zan Mitrev Clinic                                                                                                                                                        | Kungilovski G. et al.; Kungulovski G. et al.                                                                                                                                                                                                                                                                                                                                                            |
| see above                                                                                                                                                                                                                                                                                                                                                                                                                                                                                                                                                                                                                                                                                                                                                                                                                                 | Laboratory of Infectious Diseases, Department of Biomedical and Clinical Sciences L. Sacco, University of Milan                                                                                                        | Laboratory of Infectious Diseases, Department of Biomedical and Clinical Sciences L. Sacco, University of Milan                                                                                                            | Alessia Lai; Annalisa Bergna; Carla Della Ventura; Claudia Balotta; Gianguglielmo Zehender on behalf of SARS-CoV-2 ITALIAN RESEARCH ENTERPRISE-(SCIRE) Collaborative Group; Massimo Galli                                                                                                                                                                                                               |
| EPI_ISL_1048374, EPI_ISL_1181174 to 1181175, EPI_ISL_1250943 to 1250944                                                                                                                                                                                                                                                                                                                                                                                                                                                                                                                                                                                                                                                                                                                                                                   | Laboratory of Molecular Biology, Diagnostyka sp. z o.o.                                                                                                                                                                | genXone SA, Research & Development Laboratory                                                                                                                                                                              | Aleksandra Gidlewicz; Anna Brylak-Blaszkoz; Grzegorz Nowicki; Jakub Grabowski; Karol Szeszko; Lukasz Krych; Maciej Sykuluski; Michal Kaszuba; Micha Kaszuba; Monika Makowska-Woniak; Natalia Drwska-Matelska; Natalia Drwska-Matelska; ukasz Krych                                                                                                                                                      |
| EPI_ISL_1233875 to 1233876                                                                                                                                                                                                                                                                                                                                                                                                                                                                                                                                                                                                                                                                                                                                                                                                                | Laboratory of Parasitic Diseases, Systems Genomics Section, National Institute of Allergy and Infectious Diseases, Nathional Institutes of Health                                                                      | Laboratory of Parasitic Diseases, Systems Genomics Section, National Institute of Allergy and Infectious Diseases, Nathional Institutes of Health                                                                          | Bailin, H.; Banakis, S.; Bell, M.; Chung, M.; Das, S.; Ghedin, E.; J.-h.; Kwan, J.; McCormick-Ell, J.; Mercado, R.; Palmore, T.; Roder, A.; Wang, W.; Youn                                                                                                                                                                                                                                              |
| EPI_ISL_1363115 to 1363116                                                                                                                                                                                                                                                                                                                                                                                                                                                                                                                                                                                                                                                                                                                                                                                                                | Laboratory of Polymerase Chain Reaction of Federal Budget Institution of Science "Central Research Institute of Epidemiology" of The Federal Service on Customers' Rights Protection and Human Well-being Surveillance | Group of Genomics and Postgenomic Technologies of Central Research Institute of Epidemiology                                                                                                                               | Akimkin VG; Berlina YY; Bulanenko VP; Cherkashina AS; Golubeva AG; Kaptelova VV; Kondrasheva LY; Korneenko EV; Saenko SS; Samoilov AE; Shipulina OY; Solovyeva ED; Speranskaya AS; Tivanova EV; Valdokhina AV; Zotova MI                                                                                                                                                                                |
| EPI_ISL_1181357 to 1181361, EPI_ISL_1181363, EPI_ISL_1181366 to 1181367, EPI_ISL_1181369, EPI_ISL_1181373 to 1181377, EPI_ISL_1181381 to 1181389, EPI_ISL_1181391, EPI_ISL_1181393, EPI_ISL_1181398, EPI_ISL_1181402, EPI_ISL_1181410, EPI_ISL_1181415, EPI_ISL_1181430, EPI_ISL_1181437 to 1181439, EPI_ISL_1181442, EPI_ISL_1181446 to 1181448, EPI_ISL_1181454 to 1181467, EPI_ISL_1181470, EPI_ISL_1181475 to 1181477, EPI_ISL_1181481 to 1181483, EPI_ISL_1181486, EPI_ISL_1181488 to 1181491, EPI_ISL_1181497, EPI_ISL_1181499 to 1181515, EPI_ISL_1181518 to 1181519, EPI_ISL_1181521, EPI_ISL_1181523, EPI_ISL_1181529, EPI_ISL_1181531, EPI_ISL_1181560 to 1181562, EPI_ISL_1181571 to 1181574, EPI_ISL_1181578 to 1181579, EPI_ISL_1181587, EPI_ISL_1181589, EPI_ISL_1181594, EPI_ISL_1181597, EPI_ISL_1181599, EPI_ISL_1181608 | Laboratory of Respiratory Viruses and Measles, Oswaldo Cruz Institute, FIOCRUZ                                                                                                                                         | Alice Sampaio Rocha; Ana Carolina Mendonca; Anna Carolina Paixao; Fernando Motta; Luciana Apolinario; Marilda Siqueira on behalf of the Fiocruz COVID-19 Genomic Surveillance Network; Paola Resende; Renata Serrano Lopes |                                                                                                                                                                                                                                                                                                                                                                                                         |
| see above                                                                                                                                                                                                                                                                                                                                                                                                                                                                                                                                                                                                                                                                                                                                                                                                                                 | Laboratory of Virology and Molecular Diagnostics                                                                                                                                                                       | Laboratory of Virology and Molecular Diagnostics, Institute of Public Health of Republic of North Macedonia                                                                                                                | Boshevska Golubinka; Janchevska Elizabeta; Kuzmanovska Maja                                                                                                                                                                                                                                                                                                                                             |
| EPI_ISL_1198644                                                                                                                                                                                                                                                                                                                                                                                                                                                                                                                                                                                                                                                                                                                                                                                                                           | Laboratory of Virology of Federal Budget Health Care Institution "Center of Hygiene and Epidemiology in Arkhangelsk region"                                                                                            | Group of Genomics and Postgenomic Technologies of Central Research Institute of Epidemiology                                                                                                                               | Akimkin VG; Bulanenko VP; Cherkashina AS; Golubeva AG; Kaptelova VV; Kondrasheva LV; Kondrasheva LY; Korneenko EV; Ponomareva YA; Saenko SS; Samoilov AE; Semyina LV; Shishko LA; Speranskaya AS; Tivanova EV; Valdokhina AV                                                                                                                                                                            |
| EPI_ISL_1082298 to 1082319, EPI_ISL_1365737                                                                                                                                                                                                                                                                                                                                                                                                                                                                                                                                                                                                                                                                                                                                                                                               | Laboratory of Virology, National center of expertise                                                                                                                                                                   | Abdaliyev Askar, Tungushbayev Talgat, Sharipova Saule, Shevtsov Alexandr, Amirgazin Asylulan, Kamalova Dinara, Ramankulov Erlan, Balykbaev Kanat                                                                           | Abdaliyev Askar; Amirgazin Asylulan; Balykbaev Kanat; Kamalova Dinara; Ramankulov Erlan; Sharipova Saule; Shevtsov Alexandr; Tungushbayev Talgat                                                                                                                                                                                                                                                        |
| EPI_ISL_1365744                                                                                                                                                                                                                                                                                                                                                                                                                                                                                                                                                                                                                                                                                                                                                                                                                           | Laboratory of Virology, National center of expertise                                                                                                                                                                   | National Center for Expertise, Kazakhstan Zonal Virology Laboratory                                                                                                                                                        | Abdaliyev Askar; Amirgazin Asylulan; Balykbaev Kanat; Kamalova Dinara; Ramankulov Erlan; Sharipova Saule; Shevtsov Alexandr; Tungushbayev Talgat                                                                                                                                                                                                                                                        |
| EPI_ISL_1364614                                                                                                                                                                                                                                                                                                                                                                                                                                                                                                                                                                                                                                                                                                                                                                                                                           |                                                                                                                                                                                                                        |                                                                                                                                                                                                                            |                                                                                                                                                                                                                                                                                                                                                                                                         |
| EPI_ISL_1341149 to 1341150, EPI_ISL_1341312 to 1341313, EPI_ISL_1341378 to 1341381, EPI_ISL_1341501 to 1341505, EPI_ISL_1341641 to 1341643, EPI_ISL_1364612, EPI_ISL_1365638, EPI_ISL_1365697 to 1365698, EPI_ISL_1365734, EPI_ISL_1365736, EPI_ISL_1365740 to 1365743, EPI_ISL_1365745                                                                                                                                                                                                                                                                                                                                                                                                                                                                                                                                                   | Laboratory of Virology, National center of expertise                                                                                                                                                                   | RSE "National Center of Expertise" and RSE "National center for Biotechnology"                                                                                                                                             | Abdaliyev Askar; Amirgazin Asylulan; Balykbaev Kanat; Kamalova Dinara; Ramankulov Erlan; Sharipova Saule; Shevtsov Alexandr; Tungushbayev Talgat                                                                                                                                                                                                                                                        |
| see above                                                                                                                                                                                                                                                                                                                                                                                                                                                                                                                                                                                                                                                                                                                                                                                                                                 | Laboratory of Virology, Ribeirão Preto General Hospital, Ribeirão Preto Medical School, University of São Paulo                                                                                                        | Laboratory of Oncology, Blood Center of Ribeirão Preto, Ribeirão Preto School of Medicine, University of São Paulo                                                                                                         | A.L.P.; A.Y.; B.A.L.; BELLISSIMO-RODRIGUES, F.; CAMPOS; COLLI; FONSECA; L.M.; MR; SANTOS; YAMAMOTO                                                                                                                                                                                                                                                                                                      |
| EPI_ISL_1278274, EPI_ISL_1289956 to 1289960                                                                                                                                                                                                                                                                                                                                                                                                                                                                                                                                                                                                                                                                                                                                                                                               | Laboratory of virology and molecular diagnostics                                                                                                                                                                       | Laboratory of virology and molecular diagnostics                                                                                                                                                                           | Boshevska Golubinka; Elizabeta Janchevska; Janchevska Elizabeta; Kuzmanovska Maja                                                                                                                                                                                                                                                                                                                       |
| EPI_ISL_1165139 to 1165141, EPI_ISL_1180150, EPI_ISL_1180152 to 1180159, EPI_ISL_1191740 to 1191780                                                                                                                                                                                                                                                                                                                                                                                                                                                                                                                                                                                                                                                                                                                                       |                                                                                                                                                                                                                        |                                                                                                                                                                                                                            |                                                                                                                                                                                                                                                                                                                                                                                                         |
| EPI_ISL_1334516 to 1334517, EPI_ISL_1334569 to 1334570, EPI_ISL_1334572 to 1334576, EPI_ISL_1334580, EPI_ISL_1334600, EPI_ISL_1335044, EPI_ISL_1335390, EPI_ISL_1335758 to 1335760, EPI_ISL_1335803, EPI_ISL_1364615, EPI_ISL_1364617 to 1364619, EPI_ISL_1364621, EPI_ISL_1364863 to 1364865, EPI_ISL_1364879 to 1364880, EPI_ISL_1364991, EPI_ISL_1365036, EPI_ISL_1365363 to 1365365                                                                                                                                                                                                                                                                                                                                                                                                                                                   | Laboratory of virology, National center of expertise                                                                                                                                                                   | RSE "National Center for Biotechnology" and RSE "National Center of Expertise"                                                                                                                                             | Abdaliyev Askar; Amirgazin Asylulan; Balykbaev Kanat; Kamalova Dinara; Ramankulov Erlan; Sharipova Saule; Shevtsov Alexandr; Tungushbayev Talgat                                                                                                                                                                                                                                                        |
| see above                                                                                                                                                                                                                                                                                                                                                                                                                                                                                                                                                                                                                                                                                                                                                                                                                                 | Laboratório Central de Saúde Pública Noel Nutels                                                                                                                                                                       | Coordenação Geral de Laboratórios de Saúde Pública (CGLAB)                                                                                                                                                                 | ; Vagner Fonseca et al                                                                                                                                                                                                                                                                                                                                                                                  |
| EPI_ISL_1239111 to 1239113                                                                                                                                                                                                                                                                                                                                                                                                                                                                                                                                                                                                                                                                                                                                                                                                                | Laboratório Central de Saúde Pública do Espírito Santo                                                                                                                                                                 | Coordenação Geral de Laboratórios de Saúde Pública (CGLAB)                                                                                                                                                                 | ; Vagner Fonseca et al; Vagner Fonseca et al.                                                                                                                                                                                                                                                                                                                                                           |
| EPI_ISL_1239114 to 1239123, EPI_ISL_1239125 to 1239136, EPI_ISL_1240639 to 1240641                                                                                                                                                                                                                                                                                                                                                                                                                                                                                                                                                                                                                                                                                                                                                        | Laboratório Central de Saúde Pública do Estado de Pernambuco (LACEN-PE)                                                                                                                                                | WallauLab, Aggeu Magalhaes Institute                                                                                                                                                                                       | Alexandre Freitas da Silva; Antonio Mauro Rezende; Constância Flávia Junqueira Ayres; Cássia Docena; Duschinka Ribeiro Duarte Guedes; Elisama Helvecio; Filipe Zimmer Dezordi; Gabriel Luz Wallau on behalf of the Fiocruz COVID-19 Genomic Surveillance Network; Larissa Krokovsky; Laís Ceschini Machado; Marcelo Henrique dos Santos Paiva; Matheus Filgueira Bezerra; Sinalvino Pinto Brandão Filho |
| EPI_ISL_1239012 to 1239016                                                                                                                                                                                                                                                                                                                                                                                                                                                                                                                                                                                                                                                                                                                                                                                                                |                                                                                                                                                                                                                        |                                                                                                                                                                                                                            |                                                                                                                                                                                                                                                                                                                                                                                                         |
| EPI_ISL_1182547, EPI_ISL_1182597, EPI_ISL_1182599, EPI_ISL_1182605 to 1182606, EPI_ISL_1182608, EPI_ISL_1182610, EPI_ISL_1182616, EPI_ISL_1182619 to 1182621, EPI_ISL_1182623                                                                                                                                                                                                                                                                                                                                                                                                                                                                                                                                                                                                                                                             | Laboratório Central de Saúde Pública do Rio Grande do Sul                                                                                                                                                              | Coordenação Geral de Laboratórios de Saúde Pública (CGLAB/DAEVS/SVS/MS)                                                                                                                                                    | Vagner Fonseca; et al.                                                                                                                                                                                                                                                                                                                                                                                  |
| see above                                                                                                                                                                                                                                                                                                                                                                                                                                                                                                                                                                                                                                                                                                                                                                                                                                 |                                                                                                                                                                                                                        |                                                                                                                                                                                                                            |                                                                                                                                                                                                                                                                                                                                                                                                         |
| EPI_ISL_1182542, EPI_ISL_1182546, EPI_ISL_1182562 to 1182563, EPI_ISL_1182565, EPI_ISL_1182567 to 1182568, EPI_ISL_1182571 to 1182572, EPI_ISL_1182575 to 1182576, EPI_ISL_1182580 to 1182584, EPI_ISL_1182588 to 1182589, EPI_ISL_1182592, EPI_ISL_1182594 to 1182596, EPI_ISL_1182603 to 1182604, EPI_ISL_1182613 to 1182614, EPI_ISL_1182617, EPI_ISL_1182622, EPI_ISL_1182624                                                                                                                                                                                                                                                                                                                                                                                                                                                         | Laboratório Central do Estado do Paraná                                                                                                                                                                                | Coordenação Geral de Laboratórios de Saúde Pública (CGLAB/DAEVS/SVS/MS)                                                                                                                                                    | Vagner Fonseca; et al.                                                                                                                                                                                                                                                                                                                                                                                  |
| see above                                                                                                                                                                                                                                                                                                                                                                                                                                                                                                                                                                                                                                                                                                                                                                                                                                 | Laboratório Central do Estado do Rio de Janeiro                                                                                                                                                                        | Coordenação Geral de Laboratórios de Saúde Pública (CGLAB/DAEVS/SVS/MS)                                                                                                                                                    | Vagner Fonseca; et al.                                                                                                                                                                                                                                                                                                                                                                                  |
| EPI_ISL_1182552 to 1182554, EPI_ISL_1182556 to 1182558                                                                                                                                                                                                                                                                                                                                                                                                                                                                                                                                                                                                                                                                                                                                                                                    |                                                                                                                                                                                                                        |                                                                                                                                                                                                                            |                                                                                                                                                                                                                                                                                                                                                                                                         |
| EPI_ISL_1213148 to 1213149, EPI_ISL_1213151, EPI_ISL_1213155, EPI_ISL_1213158, EPI_ISL_1213163, EPI_ISL_1213171, EPI_ISL_1213248 to 1213249, EPI_ISL_1213270, EPI_ISL_1213272, EPI_ISL_1213307, EPI_ISL_1213309 to 1213310, EPI_ISL_1213312, EPI_ISL_1213314, EPI_ISL_1213339 to 1213340,                                                                                                                                                                                                                                                                                                                                                                                                                                                                                                                                                 |                                                                                                                                                                                                                        |                                                                                                                                                                                                                            |                                                                                                                                                                                                                                                                                                                                                                                                         |











EPI\_ISL\_1374805 to 1374808, EPI\_ISL\_1374810, EPI\_ISL\_1374812, EPI\_ISL\_1374814 to 1374815, EPI\_ISL\_1374817 to 1374821, EPI\_ISL\_1374823 to 1374830, EPI\_ISL\_1374833, EPI\_ISL\_1374835 to 1374841, EPI\_ISL\_1374844, EPI\_ISL\_1374846 to 1374857, EPI\_ISL\_1374859, EPI\_ISL\_1374861 to 1374863, EPI\_ISL\_1374865 to 1374866, EPI\_ISL\_1374868, EPI\_ISL\_1374871 to 1374872, EPI\_ISL\_1374874, EPI\_ISL\_1374876 to 1374878, EPI\_ISL\_1374883, EPI\_ISL\_1374886 to 1374887, EPI\_ISL\_1374891, EPI\_ISL\_1374893 to 1374894, EPI\_ISL\_1374896, EPI\_ISL\_1374898, EPI\_ISL\_1374900 to 1374902, EPI\_ISL\_1374904, EPI\_ISL\_1374906 to 1374907, EPI\_ISL\_1374909 to 1374915, EPI\_ISL\_1374919, EPI\_ISL\_1374921 to 1374925, EPI\_ISL\_1374931, EPI\_ISL\_1374933, EPI\_ISL\_1374936 to 1374939, EPI\_ISL\_1374942 to 1374945, EPI\_ISL\_1374947 to 1374948, EPI\_ISL\_1374950 to 1374951, EPI\_ISL\_1374956 to 1374957, EPI\_ISL\_1374959 to 1374963, EPI\_ISL\_1374965 to 1374967, EPI\_ISL\_1374969, EPI\_ISL\_1374971, EPI\_ISL\_1374974 to 1374977, EPI\_ISL\_1374979 to 1374982, EPI\_ISL\_1374984 to 1374985, EPI\_ISL\_1374988, EPI\_ISL\_1374991 to 1374994, EPI\_ISL\_1374997, EPI\_ISL\_1374999, EPI\_ISL\_1375001 to 1375002, EPI\_ISL\_1375004 to 1375008, EPI\_ISL\_1375010 to 1375011, EPI\_ISL\_1375013, EPI\_ISL\_1375018 to 1375019, EPI\_ISL\_1375023 to 1375029, EPI\_ISL\_1375031 to 1375036, EPI\_ISL\_1375039 to 1375040, EPI\_ISL\_1375045 to 1375046, EPI\_ISL\_1375048 to 1375049, EPI\_ISL\_1375054 to 1375056, EPI\_ISL\_1375058, EPI\_ISL\_1375060, EPI\_ISL\_1375062 to 1375064, EPI\_ISL\_1375073, EPI\_ISL\_1375075, EPI\_ISL\_1375079, EPI\_ISL\_1375083 to 1375086, EPI\_ISL\_1375088 to 1375089, EPI\_ISL\_1375091 to 1375094, EPI\_ISL\_1375097 to 1375104, EPI\_ISL\_1375107, EPI\_ISL\_1375109 to 1375110, EPI\_ISL\_1375112 to 1375113, EPI\_ISL\_1375115, EPI\_ISL\_1375117, EPI\_ISL\_1375119, EPI\_ISL\_1375121 to 1375122, EPI\_ISL\_1375125, EPI\_ISL\_1375129 to 1375130, EPI\_ISL\_1375132 to 1375133, EPI\_ISL\_1375136 to 1375137, EPI\_ISL\_1375140 to 1375144, EPI\_ISL\_1375148 to 1375151, EPI\_ISL\_1375154 to 1375155, EPI\_ISL\_1375157 to 1375160, EPI\_ISL\_1375166, EPI\_ISL\_1375168, EPI\_ISL\_1375171 to 1375173, EPI\_ISL\_1375175 to 1375176, EPI\_ISL\_1375180 to 1375181, EPI\_ISL\_1375184, EPI\_ISL\_1375186, EPI\_ISL\_1375188, EPI\_ISL\_1375190 to 1375192, EPI\_ISL\_1375194, EPI\_ISL\_1375196 to 1375197, EPI\_ISL\_1375200, EPI\_ISL\_1375202 to 1375203, EPI\_ISL\_1375207, EPI\_ISL\_1375209 to 1375214, EPI\_ISL\_1375217, EPI\_ISL\_1375220, EPI\_ISL\_1375222 to 1375223, EPI\_ISL\_1375225, EPI\_ISL\_1375229 to 1375231, EPI\_ISL\_1375237, EPI\_ISL\_1375239, EPI\_ISL\_1375244, EPI\_ISL\_1375247 to 1375248, EPI\_ISL\_1375250, EPI\_ISL\_1375253, EPI\_ISL\_1375256, EPI\_ISL\_1375260 to 1375261, EPI\_ISL\_1375265, EPI\_ISL\_1375268, EPI\_ISL\_1375272, EPI\_ISL\_1375274 to 1375277, EPI\_ISL\_1375282, EPI\_ISL\_1375284, EPI\_ISL\_1375288, EPI\_ISL\_1375291, EPI\_ISL\_1375295 to 1375296, EPI\_ISL\_1375298 to 1375302, EPI\_ISL\_1375304 to 1375307, EPI\_ISL\_1375310, EPI\_ISL\_1375312 to 1375314, EPI\_ISL\_1375316 to 1375318, EPI\_ISL\_1375320, EPI\_ISL\_1375322 to 1375323, EPI\_ISL\_1375326, EPI\_ISL\_1375328, EPI\_ISL\_1375331 to 1375333, EPI\_ISL\_1375335, EPI\_ISL\_1375337 to 1375340, EPI\_ISL\_1375343 to 1375344, EPI\_ISL\_1375346 to 1375347, EPI\_ISL\_1375349 to 1375351, EPI\_ISL\_1375353 to 1375355, EPI\_ISL\_1375362, EPI\_ISL\_1375365 to 1375366, EPI\_ISL\_1375368, EPI\_ISL\_1375372, EPI\_ISL\_1375374 to 1375376, EPI\_ISL\_1375381 to 1375383, EPI\_ISL\_1375385, EPI\_ISL\_1375387 to 1375388, EPI\_ISL\_1375395 to 1375396, EPI\_ISL\_1375399, EPI\_ISL\_1375401, EPI\_ISL\_1375408 to 1375411, EPI\_ISL\_1375414, EPI\_ISL\_1375417, EPI\_ISL\_1375421 to 1375423, EPI\_ISL\_1375429, EPI\_ISL\_1375433 to 1375436, EPI\_ISL\_1375444 to 1375445, EPI\_ISL\_1375447 to 1375448, EPI\_ISL\_1375450 to 1375451, EPI\_ISL\_1375456, EPI\_ISL\_1375458 to 1375459, EPI\_ISL\_1375461 to 1375462, EPI\_ISL\_1375464 to 1375466, EPI\_ISL\_1375469 to 1375472, EPI\_ISL\_1375474 to 1375480, EPI\_ISL\_1375482 to 1375483, EPI\_ISL\_1375485 to 1375486, EPI\_ISL\_1375488 to 1375491, EPI\_ISL\_1375493 to 1375499, EPI\_ISL\_1375501 to 1375506, EPI\_ISL\_1375508, EPI\_ISL\_1375511 to 1375519, EPI\_ISL\_1375523 to 1375523, EPI\_ISL\_1375531, EPI\_ISL\_1375533, EPI\_ISL\_1375542 to 1375544, EPI\_ISL\_1375548 to 1375550, EPI\_ISL\_1375552, EPI\_ISL\_1375554 to 1375556, EPI\_ISL\_1375559 to 1375563, EPI\_ISL\_1375571, EPI\_ISL\_1375573 to 1375575, EPI\_ISL\_1375577, EPI\_ISL\_1375579 to 1375581, EPI\_ISL\_1375584 to 1375586, EPI\_ISL\_1375587 to 1375589, EPI\_ISL\_1375593, EPI\_ISL\_1375595 to 1375596, EPI\_ISL\_1375598 to 1375600, EPI\_ISL\_1375602, EPI\_ISL\_1375604, EPI\_ISL\_1375606 to 1375611, EPI\_ISL\_1375613, EPI\_ISL\_1375615 to 1375619, EPI\_ISL\_1375622 to 1375624, EPI\_ISL\_1375631, EPI\_ISL\_1375633 to 1375635, EPI\_ISL\_1375637 to 1375642, EPI\_ISL\_1375644 to 1375645, EPI\_ISL\_1375647 to 1375654, EPI\_ISL\_1375656 to 1375660, EPI\_ISL\_1375662 to 1375664, EPI\_ISL\_1375668 to 1375672, EPI\_ISL\_1375674 to 1375677, EPI\_ISL\_1375679 to 1375680, EPI\_ISL\_1375682, EPI\_ISL\_1375684 to 1375685, EPI\_ISL\_1375687 to 1375689, EPI\_ISL\_1375691 to 1375697, EPI\_ISL\_1375699, EPI\_ISL\_1375702 to 1375703, EPI\_ISL\_1375706, EPI\_ISL\_1375708 to 1375711, EPI\_ISL\_1375713 to 1375715, EPI\_ISL\_1375717 to 1375719, EPI\_ISL\_1375722 to 1375725, EPI\_ISL\_1375727 to 1375728, EPI\_ISL\_1375731 to 1375739, EPI\_ISL\_1375742, EPI\_ISL\_1375744, EPI\_ISL\_1375746 to 1375759, EPI\_ISL\_1375761, EPI\_ISL\_1375763 to 1375764, EPI\_ISL\_1376243 to 1376246, EPI\_ISL\_1376250, EPI\_ISL\_1376253 to 1376254, EPI\_ISL\_1376256, EPI\_ISL\_1376260 to 1376265, EPI\_ISL\_1376273, EPI\_ISL\_1376276, EPI\_ISL\_1376278 to 1376279, EPI\_ISL\_1376283, EPI\_ISL\_1376289 to 1376292, EPI\_ISL\_1376296, EPI\_ISL\_1376300, EPI\_ISL\_1376310, EPI\_ISL\_1376312 to 1376313, EPI\_ISL\_1376316, EPI\_ISL\_1376325, EPI\_ISL\_1376332, EPI\_ISL\_1376336 to 1376337, EPI\_ISL\_1376339 to 1376341, EPI\_ISL\_1376345 to 1376346, EPI\_ISL\_1376348, EPI\_ISL\_1376351 to 1376352, EPI\_ISL\_1376355, EPI\_ISL\_1376357, EPI\_ISL\_1376371, EPI\_ISL\_1376375, EPI\_ISL\_1376378, EPI\_ISL\_1376382, EPI\_ISL\_1376384, EPI\_ISL\_1376388 to 1376389, EPI\_ISL\_1376391 to 1376396, EPI\_ISL\_1376400 to 1376401, EPI\_ISL\_1376403, EPI\_ISL\_1376405 to 1376406, EPI\_ISL\_1376408 to 1376409, EPI\_ISL\_1376412, EPI\_ISL\_1376414 to 1376417, EPI\_ISL\_1376425, EPI\_ISL\_1376429, EPI\_ISL\_1376432, EPI\_ISL\_1376434 to 1376435, EPI\_ISL\_1376440, EPI\_ISL\_1376442, EPI\_ISL\_1376446 to 1376447, EPI\_ISL\_1376454 to 1376456, EPI\_ISL\_1376460 to 1376461, EPI\_ISL\_1376463 to 1376463, EPI\_ISL\_1376468, EPI\_ISL\_1376472, EPI\_ISL\_1376484, EPI\_ISL\_1376486 to 1376487, EPI\_ISL\_1376489 to 1376490, EPI\_ISL\_1376493, EPI\_ISL\_1376498, EPI\_ISL\_1376500, EPI\_ISL\_1376502 to 1376503, EPI\_ISL\_1376504, EPI\_ISL\_1376506, EPI\_ISL\_1376511 to 1376515, EPI\_ISL\_1376517 to 1376519, EPI\_ISL\_1376521 to 1376522, EPI\_ISL\_1376524, EPI\_ISL\_1376529, EPI\_ISL\_1376531 to 1376532, EPI\_ISL\_1376534 to 1376535, EPI\_ISL\_1376538, EPI\_ISL\_1376541 to 1376542, EPI\_ISL\_1376548 to 1376549, EPI\_ISL\_1376551 to 1376552, EPI\_ISL\_1376554 to 1376556, EPI\_ISL\_1376559 to 1376563, EPI\_ISL\_1376567 to 1376571, EPI\_ISL\_1376573 to 1376575, EPI\_ISL\_1376577 to 1376581, EPI\_ISL\_1376584 to 1376586, EPI\_ISL\_1376587 to 1376589, EPI\_ISL\_1376593, EPI\_ISL\_1376595 to 1376596, EPI\_ISL\_1376598 to 1376599, EPI\_ISL\_1376600, EPI\_ISL\_1376603, EPI\_ISL\_1376611, EPI\_ISL\_1376621 to 1376623, EPI\_ISL\_1376626 to 1376627, EPI\_ISL\_1376631 to 1376632, EPI\_ISL\_1376636 to 1376641, EPI\_ISL\_1376650, EPI\_ISL\_1376654 to 1376655, EPI\_ISL\_1376657 to 1376658, EPI\_ISL\_1376660, EPI\_ISL\_1376662 to 1376666, EPI\_ISL\_1376670, EPI\_ISL\_1376673, EPI\_ISL\_1376676, EPI\_ISL\_1376688 to 1376689, EPI\_ISL\_1376695, EPI\_ISL\_1376698, EPI\_ISL\_1376700, EPI\_ISL\_1376703, EPI\_ISL\_1376708 to 1376711, EPI\_ISL\_1376713 to 1376715, EPI\_ISL\_1376718 to 1376723, EPI\_ISL\_1376727, EPI\_ISL\_1376734, EPI\_ISL\_1376737 to 1376743, EPI\_ISL\_1376745 to 1376745, EPI\_ISL\_1376752, EPI\_ISL\_1376755, EPI\_ISL\_1376757 to 1376759, EPI\_ISL\_1376769, EPI\_ISL\_1376771, EPI\_ISL\_1377208, EPI\_ISL\_1377229, EPI\_ISL\_1377257, EPI\_ISL\_1377269, EPI\_ISL\_1377286, EPI\_ISL\_1377348, EPI\_ISL\_1377357, EPI\_ISL\_1377368, EPI\_ISL\_1377386, EPI\_ISL\_1377409, EPI\_ISL\_1377414 to 1377415, EPI\_ISL\_1377417 to 1377419, EPI\_ISL\_1377422 to 1377423, EPI\_ISL\_1377427, EPI\_ISL\_1377431, EPI\_ISL\_1377440 to 1377441, EPI\_ISL\_1377450, EPI\_ISL\_1377455, EPI\_ISL\_1377460 to 1377464, EPI\_ISL\_1377468 to 1377469, EPI\_ISL\_1377473, EPI\_ISL\_1377480 to 1377481, EPI\_ISL\_1377489, EPI\_ISL\_1377491 to 1377492, EPI\_ISL\_1377494, EPI\_ISL\_1377497, EPI\_ISL\_1377506, EPI\_ISL\_1377508, EPI\_ISL\_1377511 to 1377512, EPI\_ISL\_1377515 to 1377516, EPI\_ISL\_1377523, EPI\_ISL\_1377527, EPI\_ISL\_1377530, EPI\_ISL\_1377536, EPI\_ISL\_1377544 to 1377545, EPI\_ISL\_1377551 to 1377552, EPI\_ISL\_1377554, EPI\_ISL\_1377557, EPI\_ISL\_1377559, EPI\_ISL\_1377562, EPI\_ISL\_1377564, EPI\_ISL\_1377566 to 1377569, EPI\_ISL\_1377571, EPI\_ISL\_1377578 to 1377581, EPI\_ISL\_1377584 to 1377585, EPI\_ISL\_1377588 to 1377589, EPI\_ISL\_1377591 to 1377592, EPI\_ISL\_1377594 to 1377595, EPI\_ISL\_1377597, EPI\_ISL\_1377599 to 1377600, EPI\_ISL\_1377604, EPI\_ISL\_1377606, EPI\_ISL\_1377613, EPI\_ISL\_1377618, EPI\_ISL\_1377623 to 1377624, EPI\_ISL\_1377626 to 1377627, EPI\_ISL\_1377631 to 1377632, EPI\_ISL\_1377636 to 1377637, EPI\_ISL\_1377640, EPI\_ISL\_1377643, EPI\_ISL\_1377646, EPI\_ISL\_1377652, EPI\_ISL\_1377654, EPI\_ISL\_1377665, EPI\_ISL\_1377668, EPI\_ISL\_1377673 to 1377675, EPI\_ISL\_1377677 to 1377681, EPI\_ISL\_1377683 to 1377686, EPI\_ISL\_1377690 to 1377691, EPI\_ISL\_1377694, EPI\_ISL\_1377697, EPI\_ISL\_1377700 to 1377704, EPI\_ISL\_1377706 to 1377709, EPI\_ISL\_1377712, EPI\_ISL\_1377716, EPI\_ISL\_1377720, EPI\_ISL\_1377724 to 1377725, EPI\_ISL\_1377727, EPI\_ISL\_1377730, EPI\_ISL\_1377735 to 1377736, EPI\_ISL\_1377738 to 1377738, EPI\_ISL\_1377741 to 1377745, EPI\_ISL\_1377748 to 1377755, EPI\_ISL\_1377757 to 1377758, EPI\_ISL\_1377760 to 1377766, EPI\_ISL\_1377769 to 1377770, EPI\_ISL\_1377772 to 1377773, EPI\_ISL\_1377775 to 1377776, EPI\_ISL\_1377778 to 1377781, EPI\_ISL\_1377783 to 1377783, EPI\_ISL\_1377834 to 1377835, EPI\_ISL\_1377837 to 1377837, EPI\_ISL\_1377840 to 1377841, EPI\_ISL\_1377843 to 1377843, EPI\_ISL\_1377848, EPI\_ISL\_1377852, EPI\_ISL\_1377856 to 1377858, EPI\_ISL\_1377863 to 1377865, EPI\_ISL\_1377868, EPI\_ISL\_1377871, EPI\_ISL\_1377873, EPI\_ISL\_1377875 to 1377876, EPI\_ISL\_1377878, EPI\_ISL\_1377883 to 1377887, EPI\_ISL\_1377891 to 1377892, EPI\_ISL\_1377894, EPI\_ISL\_1377897 to 1377898, EPI\_ISL\_1377901, EPI\_ISL\_1377903, EPI\_ISL\_1377905, EPI\_ISL\_1377907 to 1377909, EPI\_ISL\_1377911, EPI\_ISL\_1377914, EPI\_ISL\_1377917, EPI\_ISL\_1377920, EPI\_ISL\_1377922, EPI\_ISL\_1377924 to 1377925, EPI\_ISL\_1377927, EPI\_ISL\_1377930 to 1377931, EPI\_ISL\_1377933 to 1377938, EPI\_ISL\_1377940 to 1377941, EPI\_ISL\_1377943, EPI\_ISL\_1377945, EPI\_ISL\_1377947 to 1377949, EPI\_ISL\_1377951 to 1377954, EPI\_ISL\_1377959 to 1377960, EPI\_ISL\_1377962 to 1377963, EPI\_ISL\_1377971, EPI\_ISL\_1377974 to 1377975, EPI\_ISL\_1377977, EPI\_ISL\_1377980, EPI\_ISL\_1377982 to 1377983, EPI\_ISL\_1377985, EPI\_ISL\_1377987 to 1377988, EPI\_ISL\_1377992 to 1377996, EPI\_ISL\_1377998, EPI\_ISL\_1378450, EPI\_ISL\_1378490

see above

Lighthouse Lab in Alderley Park

Wellcome Sanger Institute for the COVID-19 Genomics UK (COG-UK) Consortium

Cordelia Langford; David K Jackson; Dominic Kwiatkowski; Ewan Harrison; Ian Johnston; Jacquelyn Wynn; Jeffrey Barrett; John Sillitoe on behalf of the Wellcome Sanger Institute COVID-19 Surveillance Team; Roberto Amato; Sonia Goncalves; The Lighthouse Lab in Alderley Park and Alex Alderton (<http://www.sanger.ac.uk/covid-team>); Mairead Hyland; John Johnston; Sonia Goncalves; The Lighthouse Lab in Alderley Park and Alex Alderton

EPI\_ISL\_1005700 to 1005717, EPI\_ISL\_1005719 to 1005726, EPI\_ISL\_1005728 to 1005730, EPI\_ISL\_1005732 to 1005740, EPI\_ISL\_1005744 to 1005745, EPI\_ISL\_1005747 to 1005752, EPI\_ISL\_1005754 to 1005759, EPI\_ISL\_1005761 to 1005774, EPI\_ISL\_1005776 to 1005777, EPI\_ISL\_1005779 to 1005781, EPI\_ISL\_1005783 to 1005784, EPI\_ISL\_1005786 to 1005798, EPI\_ISL\_1005800 to 1005803, EPI\_ISL\_1005805 to 1005806, EPI\_ISL\_1005810 to 1005815, EPI\_ISL\_1005818 to 1005830, EPI\_ISL\_1005832 to 1005835, EPI\_ISL\_1005837, EPI\_ISL\_1005839 to 1005840, EPI\_ISL\_1005842, EPI\_ISL\_1005844 to 1005856, EPI\_ISL\_1005858 to 1005861, EPI\_ISL\_1005863 to 1005872, EPI\_ISL\_1005875 to 1005882, EPI\_ISL\_1005884, EPI\_ISL\_1005886 to 1005888, EPI\_ISL\_1005890 to 1005891, EPI\_ISL\_1005893 to 1005894, EPI\_ISL\_1005896 to 1005900, EPI\_ISL\_1005904 to 1005908, EPI\_ISL\_1005910, EPI\_ISL\_1005914, EPI\_ISL\_1005915 to 1005921, EPI\_ISL\_1005923 to 1005926, EPI\_ISL\_1005928 to 1005934, EPI\_ISL\_1005936 to 1005938, EPI\_ISL\_1005941 to 1005950, EPI\_ISL\_1005953 to 1005956, EPI\_ISL\_1005959 to 1005960, EPI\_ISL\_1006186 to 1006340, EPI\_ISL\_1006548 to 1006549, EPI\_ISL\_1006552, EPI\_ISL\_1006554, EPI\_ISL\_1006557 to 1006558, EPI\_ISL\_1006561 to 1006564, EPI\_ISL\_1006567, EPI\_ISL\_1006569, EPI\_ISL\_1006571 to 1006572, EPI\_ISL\_1006575, EPI\_ISL\_1006577 to 1006578, EPI\_ISL\_1006581, EPI\_ISL\_1006585, EPI\_ISL\_1006587 to 1006588, EPI\_ISL\_1006592 to 1006593, EPI\_ISL\_1006595 to 1006600, EPI\_ISL\_1006603, EPI\_ISL\_1006608, EPI\_ISL\_1006610 to 1006612, EPI\_ISL\_1006615, EPI\_ISL\_1006618, EPI\_ISL\_1006622 to 1006623, EPI\_ISL\_1006625, EPI\_ISL\_1006626 to 1006629, EPI\_ISL\_1006631, EPI\_ISL\_1006633, EPI\_ISL\_1006635, EPI\_ISL\_1006638, EPI\_ISL\_1006640 to 1006641, EPI\_ISL\_1006643 to 1006644, EPI\_ISL\_1006647, EPI\_ISL\_1006652 to 1006655, EPI\_ISL\_1006684 to 1006696, EPI\_ISL\_1007181 to 1007433, EPI\_ISL\_1007435, EPI\_ISL\_1007445 to 1007455, EPI\_ISL\_1007458, EPI\_ISL\_1007463, EPI\_ISL\_1007465, EPI\_ISL\_1007468 to 1007470, EPI\_ISL\_1007473, EPI\_ISL\_1007475 to 1007476, EPI\_ISL\_1007478 to 1007481, EPI\_ISL\_1007483 to 1007484, EPI\_ISL\_1007486 to 1007487, EPI\_ISL\_1007489 to 1007490, EPI\_ISL\_1007492 to 1007493, EPI\_ISL\_1007495 to 1007496, EPI\_ISL\_1007498 to 1007499, EPI\_ISL\_1007501 to 1007502, EPI\_ISL\_1007504 to 1007505, EPI\_ISL\_1007507 to 1007508, EPI\_ISL\_1007510 to 1007511, EPI\_ISL\_1007513 to 1007514, EPI\_ISL\_1007516 to 1007517, EPI\_ISL\_1007519 to 1007520, EPI\_ISL\_1007522 to 1007523, EPI\_ISL\_1007525 to 1007526, EPI\_ISL\_1007528 to 1007529, EPI\_ISL\_1007531 to 1007532, EPI\_ISL\_1007534 to 1007535, EPI\_ISL\_1007537 to 1007538, EPI\_ISL\_1007540 to 1007541, EPI\_ISL\_1007543 to 1007544, EPI\_ISL\_1007546 to 1007547, EPI\_ISL\_1007549 to 1007550, EPI\_ISL\_1007552 to 1007553, EPI\_ISL\_1007555 to 1007556, EPI\_ISL\_1007558 to 1007559, EPI\_ISL\_1007561 to 1007562, EPI\_ISL\_1007564 to 1007565, EPI\_ISL\_1007567 to 1007568, EPI\_ISL\_1007570 to 1007571, EPI\_ISL\_1007573 to 1007574, EPI\_ISL\_1007576 to 1007577, EPI\_ISL\_1007579 to 1007580, EPI\_ISL\_1007582 to 1007583, EPI\_ISL\_1007585 to 1007586, EPI\_ISL\_1007588 to 1007589, EPI\_ISL\_1007591 to 1007592, EPI\_ISL\_1007594 to 1007595, EPI\_ISL\_1007597 to 1007598, EPI\_ISL\_1007599 to 1007600, EPI\_ISL\_1007602 to 1007603, EPI\_ISL\_1007605 to 1007606, EPI\_ISL\_1007608 to 1007609, EPI\_ISL\_1007611 to 1007612, EPI\_ISL\_1007614 to 1007615, EPI\_ISL\_1007617 to 1007618, EPI\_ISL\_1007620 to 1007621, EPI\_ISL\_1007623 to 1007624, EPI\_ISL\_1007626 to 1007627, EPI\_ISL\_1007629 to 1007630, EPI\_ISL\_1007632 to 1007633, EPI\_ISL\_1007635 to 1007636, EPI\_ISL\_1007638 to 1007639, EPI\_ISL\_1007641 to 1007642, EPI\_ISL\_1007644 to 1007645, EPI\_ISL\_1007647 to 1007648, EPI\_ISL\_1007650 to 1007651, EPI\_ISL\_1007653 to 1007654, EPI\_ISL\_1007656 to 1007657, EPI\_ISL\_1007659 to 1007660, EPI\_ISL\_1007662 to 1007663, EPI\_ISL\_1007665 to 1007666, EPI\_ISL\_1007668 to 1007669, EPI\_ISL\_1007671 to 1007672, EPI\_ISL\_1007674 to 1007675, EPI\_ISL\_1007677 to 1007678, EPI\_ISL\_1007680 to 1007681, EPI\_ISL\_1007683 to 1007684, EPI\_ISL\_1007686 to 1007687, EPI\_ISL\_1007689 to 1007690, EPI\_ISL\_1007692 to 1007693, EPI\_ISL\_1007695 to 1007696, EPI\_ISL\_1007698 to 1007699, EPI\_ISL\_1007701 to 1007702, EPI\_ISL\_1007704 to 1007705, EPI\_ISL\_1007707 to 1007708, EPI\_ISL\_1007710 to 1007711, EPI\_ISL\_1007713 to 1007714, EPI\_ISL\_1007716 to 1007717, EPI\_ISL\_1007719 to 1007720, EPI\_ISL\_1007722 to 1007723, EPI\_ISL\_1007725 to 1007726, EPI\_ISL\_1007728 to 1007729, EPI\_ISL\_1007731 to 1007732, EPI\_ISL\_1007734 to 1007735, EPI\_ISL\_1007737 to 1007738, EPI\_ISL\_1007740 to 1007741, EPI\_ISL\_1007743 to 1007744, EPI\_ISL\_1007746 to 1007747, EPI\_ISL\_1007749 to 1007750, EPI\_ISL\_1007752 to 1007753, EPI\_ISL\_1007755 to 1007756, EPI\_ISL\_1007758 to 1007759, EPI\_ISL\_1007761 to 1007762, EPI\_ISL\_1007764 to 1007765, EPI\_ISL\_1007767 to 1007768

























EPI\_ISL\_1376356, EPI\_ISL\_1376358 to 1376359, EPI\_ISL\_1376363 to 1376365, EPI\_ISL\_1376368 to 1376370, EPI\_ISL\_1376372, EPI\_ISL\_1376374, EPI\_ISL\_1376376, EPI\_ISL\_1376380, EPI\_ISL\_1376383, EPI\_ISL\_1376387, EPI\_ISL\_1376390, EPI\_ISL\_1376397 to 1376398, EPI\_ISL\_1376402, EPI\_ISL\_1376404, EPI\_ISL\_1376407, EPI\_ISL\_1376424, EPI\_ISL\_1376427, EPI\_ISL\_1376431, EPI\_ISL\_1376433, EPI\_ISL\_1376436 to 1376437, EPI\_ISL\_1376439, EPI\_ISL\_1376445, EPI\_ISL\_1376448, EPI\_ISL\_1376450 to 1376453, EPI\_ISL\_1376462, EPI\_ISL\_1376464, EPI\_ISL\_1376467, EPI\_ISL\_1376469, EPI\_ISL\_1376471, EPI\_ISL\_1376474, EPI\_ISL\_1376476, EPI\_ISL\_1376479 to 1376480, EPI\_ISL\_1376492, EPI\_ISL\_1376494, EPI\_ISL\_1376497, EPI\_ISL\_1376499, EPI\_ISL\_1376501, EPI\_ISL\_1376507 to 1376510, EPI\_ISL\_1376512, EPI\_ISL\_1376521, EPI\_ISL\_1376526, EPI\_ISL\_1376528, EPI\_ISL\_1376530, EPI\_ISL\_1376537, EPI\_ISL\_1376545 to 1376546, EPI\_ISL\_1376549, EPI\_ISL\_1376551, EPI\_ISL\_1376553, EPI\_ISL\_1376555 to 1376556, EPI\_ISL\_1376562 to 1376563, EPI\_ISL\_1376565 to 1376570, EPI\_ISL\_1376572, EPI\_ISL\_1376575 to 1376576, EPI\_ISL\_1376578, EPI\_ISL\_1376580, EPI\_ISL\_1376582, EPI\_ISL\_1376584, EPI\_ISL\_1376586 to 1376587, EPI\_ISL\_1376591, EPI\_ISL\_1376593, EPI\_ISL\_1376596, EPI\_ISL\_1376599, EPI\_ISL\_1376602, EPI\_ISL\_1376604, EPI\_ISL\_1376606 to 1376607, EPI\_ISL\_1376610, EPI\_ISL\_1376613 to 1376616, EPI\_ISL\_1376618 to 1376620, EPI\_ISL\_1376624, EPI\_ISL\_1376628, EPI\_ISL\_1376630, EPI\_ISL\_1376633, EPI\_ISL\_1376635 to 1376636, EPI\_ISL\_1376643 to 1376646, EPI\_ISL\_1376648 to 1376649, EPI\_ISL\_1376651 to 1376653, EPI\_ISL\_1376659, EPI\_ISL\_1376663, EPI\_ISL\_1376668 to 1376669, EPI\_ISL\_1376672, EPI\_ISL\_1376674 to 1376675, EPI\_ISL\_1376677, EPI\_ISL\_1376679 to 1376680, EPI\_ISL\_1376682, EPI\_ISL\_1376685 to 1376687, EPI\_ISL\_1376689 to 1376692 to 1376693, EPI\_ISL\_1376696 to 1376697, EPI\_ISL\_1376699, EPI\_ISL\_1376701 to 1376702, EPI\_ISL\_1376704 to 1376707, EPI\_ISL\_1376716 to 1376717, EPI\_ISL\_1376719 to 1376720, EPI\_ISL\_1376728, EPI\_ISL\_1376730, EPI\_ISL\_1376735, EPI\_ISL\_1376738, EPI\_ISL\_1376747, EPI\_ISL\_1376749 to 1376750, EPI\_ISL\_1376753 to 1376754, EPI\_ISL\_1376757, EPI\_ISL\_1376764, EPI\_ISL\_1376766 to 1376767, EPI\_ISL\_1376770, EPI\_ISL\_1376772, EPI\_ISL\_1376774 to 1376775, EPI\_ISL\_1377416, EPI\_ISL\_1377421, EPI\_ISL\_1377428, EPI\_ISL\_1377430, EPI\_ISL\_1377432, EPI\_ISL\_1377436 to 1377438, EPI\_ISL\_1377447, EPI\_ISL\_1377449, EPI\_ISL\_1377451, EPI\_ISL\_1377458 to 1377459, EPI\_ISL\_1377466 to 1377467, EPI\_ISL\_1377470, EPI\_ISL\_1377472, EPI\_ISL\_1377476, EPI\_ISL\_1377487 to 1377488, EPI\_ISL\_1377490, EPI\_ISL\_1377493, EPI\_ISL\_1377496, EPI\_ISL\_1377502 to 1377503, EPI\_ISL\_1377505, EPI\_ISL\_1377509 to 1377510, EPI\_ISL\_1377518, EPI\_ISL\_1377529, EPI\_ISL\_1377533, EPI\_ISL\_1377540, EPI\_ISL\_1377560 to 1377561, EPI\_ISL\_1377565, EPI\_ISL\_1377568 to 1377569, EPI\_ISL\_1377572, EPI\_ISL\_1377576, EPI\_ISL\_1377585, EPI\_ISL\_1377587 to 1377588, EPI\_ISL\_1377591, EPI\_ISL\_1377602, EPI\_ISL\_1377605, EPI\_ISL\_1377610, EPI\_ISL\_1377614, EPI\_ISL\_1377616, EPI\_ISL\_1377619, EPI\_ISL\_1377622, EPI\_ISL\_1377624, EPI\_ISL\_1377626, EPI\_ISL\_1377632, EPI\_ISL\_1377637, EPI\_ISL\_1377641 to 1377642, EPI\_ISL\_1377644, EPI\_ISL\_1377650, EPI\_ISL\_1377656 to 1377658, EPI\_ISL\_1377663, EPI\_ISL\_1377667, EPI\_ISL\_1377671 to 1377672, EPI\_ISL\_1377676, EPI\_ISL\_1377682, EPI\_ISL\_1377687 to 1377689, EPI\_ISL\_1377692 to 1377693, EPI\_ISL\_1377695 to 1377696, EPI\_ISL\_1377698 to 1377699, EPI\_ISL\_1377705, EPI\_ISL\_1377710 to 1377711, EPI\_ISL\_1377713 to 1377715, EPI\_ISL\_1377717 to 1377719, EPI\_ISL\_1377721 to 1377723, EPI\_ISL\_1377726, EPI\_ISL\_1377728 to 1377729, EPI\_ISL\_1377731 to 1377734, EPI\_ISL\_1377737, EPI\_ISL\_1377739 to 1377740, EPI\_ISL\_1377742 to 1377743, EPI\_ISL\_1377746 to 1377747, EPI\_ISL\_1377756, EPI\_ISL\_1377759, EPI\_ISL\_1377767 to 1377768, EPI\_ISL\_1377771, EPI\_ISL\_1377774, EPI\_ISL\_1377777, EPI\_ISL\_1377782 to 1377786, EPI\_ISL\_1377789 to 1377790, EPI\_ISL\_1377795, EPI\_ISL\_1377797, EPI\_ISL\_1377800, EPI\_ISL\_1377802 to 1377803, EPI\_ISL\_1377805 to 1377806, EPI\_ISL\_1377810 to 1377813, EPI\_ISL\_1377815, EPI\_ISL\_1377819 to 1377821, EPI\_ISL\_1377823, EPI\_ISL\_1377825 to 1377826, EPI\_ISL\_1377829 to 1377830, EPI\_ISL\_1377833, EPI\_ISL\_1377836, EPI\_ISL\_1377839 to 1377839, EPI\_ISL\_1377842, EPI\_ISL\_1377849 to 1377851, EPI\_ISL\_1377853 to 1377855, EPI\_ISL\_1377859 to 1377862, EPI\_ISL\_1377866 to 1377867, EPI\_ISL\_1377869 to 1377870, EPI\_ISL\_1377872, EPI\_ISL\_1377874, EPI\_ISL\_1377877, EPI\_ISL\_1377879 to 1377882, EPI\_ISL\_1377888 to 1377890, EPI\_ISL\_1377893, EPI\_ISL\_1377895 to 1377896, EPI\_ISL\_1377899 to 1377900, EPI\_ISL\_1377902, EPI\_ISL\_1377904, EPI\_ISL\_1377906, EPI\_ISL\_1377910, EPI\_ISL\_1377912 to 1377913, EPI\_ISL\_1377915 to 1377916, EPI\_ISL\_1377918 to 1377919, EPI\_ISL\_1377921, EPI\_ISL\_1377923, EPI\_ISL\_1377926, EPI\_ISL\_1377929, EPI\_ISL\_1377932, EPI\_ISL\_1377939, EPI\_ISL\_1377942, EPI\_ISL\_1377944, EPI\_ISL\_1377946, EPI\_ISL\_1377950, EPI\_ISL\_1377955 to 1377958, EPI\_ISL\_1377961, EPI\_ISL\_1377964 to 1377970, EPI\_ISL\_1377972 to 1377973, EPI\_ISL\_1377976, EPI\_ISL\_1377978 to 1377979, EPI\_ISL\_1377981, EPI\_ISL\_137984, EPI\_ISL\_1377986, EPI\_ISL\_1377989 to 1377991, EPI\_ISL\_1377997

see above Lighthouse Lab in Milton Keynes Wellcome Sanger Institute for the COVID-19 Genomics UK Cordelia Langford; David K. Jackson; Dominic Kwiatkowski; Ewan Harrison; Ian Johnston; Jeffrey Barrett; John Sillitoe on behalf of the Wellcome Sanger Institute COVID-19 Surveillance Team; Roberto Amato; Sonia Goncalves; The Lighthouse Lab in Milton Keynes and Alex Alderton (COG-UK) Consortium

EPI\_ISL\_1152552, EPI\_ISL\_1152604, EPI\_ISL\_1152606 Limbach - Ganzimmun Diagnostics AG Mainz Robert Koch Institute

EPI\_ISL\_1153328, EPI\_ISL\_1153336, EPI\_ISL\_1153338, EPI\_ISL\_1153342, EPI\_ISL\_1153355, EPI\_ISL\_1153440, EPI\_ISL\_1153445, EPI\_ISL\_1153966, EPI\_ISL\_1153979, EPI\_ISL\_1153982, EPI\_ISL\_1153984, EPI\_ISL\_1153988, EPI\_ISL\_1153990, EPI\_ISL\_1154038, EPI\_ISL\_1155140, EPI\_ISL\_1155157, EPI\_ISL\_1155175 to 1155176, EPI\_ISL\_1155495, EPI\_ISL\_1155502, EPI\_ISL\_1155507, EPI\_ISL\_1155522, EPI\_ISL\_1157120, EPI\_ISL\_1157122, EPI\_ISL\_1215595, EPI\_ISL\_1215605, EPI\_ISL\_1215627, EPI\_ISL\_1215650, EPI\_ISL\_1215763, EPI\_ISL\_1215764, EPI\_ISL\_1215806, EPI\_ISL\_1217006, EPI\_ISL\_1217010, EPI\_ISL\_1217019, EPI\_ISL\_1217085, EPI\_ISL\_1217099, EPI\_ISL\_1281177, EPI\_ISL\_1281193, EPI\_ISL\_1281212, EPI\_ISL\_1281226, EPI\_ISL\_1281229 to 1281230, EPI\_ISL\_1281232, EPI\_ISL\_1281234 to 1281235, EPI\_ISL\_1281239, EPI\_ISL\_1281241, EPI\_ISL\_1281244, EPI\_ISL\_1281809, EPI\_ISL\_1281812, EPI\_ISL\_1281815, EPI\_ISL\_1281818, EPI\_ISL\_1283170, EPI\_ISL\_1283213, EPI\_ISL\_1283713, EPI\_ISL\_1283722, EPI\_ISL\_1283842, EPI\_ISL\_1283847, EPI\_ISL\_1284479 to 1284480, EPI\_ISL\_1284491, EPI\_ISL\_1284495, EPI\_ISL\_1284502 to 1284503, EPI\_ISL\_1284511, EPI\_ISL\_1352297, EPI\_ISL\_1352309, EPI\_ISL\_1352312, EPI\_ISL\_1353148, EPI\_ISL\_1353155, EPI\_ISL\_1353170, EPI\_ISL\_1353178, EPI\_ISL\_1353189, EPI\_ISL\_1353200, EPI\_ISL\_1353221

see above Limbach - MVZ Gemeinschaftslabor Suhl Robert Koch Institute

EPI\_ISL\_1144166, EPI\_ISL\_1144257 to 1144258, EPI\_ISL\_1144288, EPI\_ISL\_1144358 to 1144362, EPI\_ISL\_1144389, EPI\_ISL\_1144393 to 1144394, EPI\_ISL\_1144682 to 1144683, EPI\_ISL\_1144695 to 1144694, EPI\_ISL\_1144696, EPI\_ISL\_1144785 to 1144802, EPI\_ISL\_1144817 to 1144818, EPI\_ISL\_1144890 to 1144892, EPI\_ISL\_1148594 to 1144895, EPI\_ISL\_1146985, EPI\_ISL\_1151999 to 1152002, EPI\_ISL\_1157167 to 1157169, EPI\_ISL\_1157171 to 1157203, EPI\_ISL\_1212393, EPI\_ISL\_1212395 to 1212397, EPI\_ISL\_1212401, EPI\_ISL\_1212404 to 1212408, EPI\_ISL\_1212412, EPI\_ISL\_1212415 to 1212416, EPI\_ISL\_1281583 to 1281594, EPI\_ISL\_1281596 to 1281675, EPI\_ISL\_1281677 to 1281679, EPI\_ISL\_1281681, EPI\_ISL\_1281684, EPI\_ISL\_1281687, EPI\_ISL\_1281689, EPI\_ISL\_1281691, EPI\_ISL\_1281694 to 1281717, EPI\_ISL\_1281719 to 1281747, EPI\_ISL\_1281749 to 1281758, EPI\_ISL\_1281760 to 1281776, EPI\_ISL\_1350441 to 1350482, EPI\_ISL\_1350484 to 1350530, EPI\_ISL\_1350532 to 1350579, EPI\_ISL\_1350581 to 1350616

see above Limbach - MVZ Humangenetik Ulm Robert Koch Institute  
 EPI\_ISL\_1048278, EPI\_ISL\_1048320, EPI\_ISL\_1048352 to 1048353 Limbach - MVZ Labor Dr. Limbach & Kollegen Robert Koch Institute, Influenza and respiratory viruses FG17 Aleksandar Radonic; K. Bode; Marianne Wedde; Oliver Drechsel; Ralf Duerwald; Rene Kmiecinski; Stefan Kroeger; Stephan Fuchs; Thorsten Wolff & Bioinformatics MF1, Berlin, Germany  
 EPI\_ISL\_1140186 to 1140189, EPI\_ISL\_1142097 to 1142171, EPI\_ISL\_1142173 to 1142181 Limbach - MVZ Labor Dr. Volkmann & Kollegen Robert Koch Institute

EPI\_ISL\_1152540, EPI\_ISL\_1152546, EPI\_ISL\_1152551, EPI\_ISL\_1152556, EPI\_ISL\_1152563, EPI\_ISL\_1152567, EPI\_ISL\_1152577, EPI\_ISL\_1152587, EPI\_ISL\_1152592, EPI\_ISL\_1152596, EPI\_ISL\_1152609, EPI\_ISL\_1153330 to 1153331, EPI\_ISL\_1153333, EPI\_ISL\_1153347, EPI\_ISL\_1153356, EPI\_ISL\_1153367, EPI\_ISL\_1153372, EPI\_ISL\_1153380, EPI\_ISL\_1153383, EPI\_ISL\_1153387, EPI\_ISL\_1153391, EPI\_ISL\_1153396, EPI\_ISL\_1153399 to 1153400, EPI\_ISL\_1153403, EPI\_ISL\_1153969 to 1153970, EPI\_ISL\_1153972, EPI\_ISL\_1153987, EPI\_ISL\_1153993, EPI\_ISL\_1153998, EPI\_ISL\_1154003 to 1154005, EPI\_ISL\_1154007 to 1154008, EPI\_ISL\_1154012, EPI\_ISL\_1154016 to 1154017, EPI\_ISL\_1154019, EPI\_ISL\_1154023 to 1154025, EPI\_ISL\_1154028, EPI\_ISL\_1154030, EPI\_ISL\_1154032, EPI\_ISL\_1154046, EPI\_ISL\_1155145, EPI\_ISL\_1155148, EPI\_ISL\_1155161, EPI\_ISL\_1155174, EPI\_ISL\_1155198, EPI\_ISL\_1155473, EPI\_ISL\_1155476, EPI\_ISL\_1155490, EPI\_ISL\_1155496, EPI\_ISL\_1155503, EPI\_ISL\_1155508, EPI\_ISL\_1155520, EPI\_ISL\_1155529, EPI\_ISL\_1155532, EPI\_ISL\_1155537, EPI\_ISL\_1155539, EPI\_ISL\_1155541 to 1155543, EPI\_ISL\_1155545, EPI\_ISL\_1155548, EPI\_ISL\_1155557, EPI\_ISL\_1155551 to 1155553, EPI\_ISL\_1155555, EPI\_ISL\_1157080, EPI\_ISL\_1212018, EPI\_ISL\_1215568 to 1215569, EPI\_ISL\_1215571 to 1215576, EPI\_ISL\_1215582, EPI\_ISL\_1215585, EPI\_ISL\_1215590, EPI\_ISL\_1215593, EPI\_ISL\_1215613, EPI\_ISL\_1215618, EPI\_ISL\_1215622, EPI\_ISL\_1215634, EPI\_ISL\_1215636, EPI\_ISL\_1215742, EPI\_ISL\_1215744, EPI\_ISL\_1215758, EPI\_ISL\_1215763, EPI\_ISL\_1215767, EPI\_ISL\_1215769, EPI\_ISL\_1215787, EPI\_ISL\_1215792, EPI\_ISL\_1215792, EPI\_ISL\_1215796, EPI\_ISL\_1215798, EPI\_ISL\_1215802, EPI\_ISL\_1215804, EPI\_ISL\_1217013, EPI\_ISL\_1217022, EPI\_ISL\_1217024, EPI\_ISL\_1217027, EPI\_ISL\_1217030, EPI\_ISL\_1217035, EPI\_ISL\_1217045 to 1217046, EPI\_ISL\_1217052, EPI\_ISL\_1217065, EPI\_ISL\_1217067, EPI\_ISL\_1217093, EPI\_ISL\_1217095, EPI\_ISL\_1217097, EPI\_ISL\_1217104 to 1217108, EPI\_ISL\_1280166, EPI\_ISL\_1280168, EPI\_ISL\_1280182, EPI\_ISL\_1280191, EPI\_ISL\_1280197 to 1280198, EPI\_ISL\_1280203 to 1280205, EPI\_ISL\_1280206 to 1280209, EPI\_ISL\_1280213, EPI\_ISL\_1280215, EPI\_ISL\_1280217 to 1280221, EPI\_ISL\_1280229, EPI\_ISL\_1281234, EPI\_ISL\_1283128, EPI\_ISL\_1283130, EPI\_ISL\_1283132, EPI\_ISL\_1283144, EPI\_ISL\_1283153, EPI\_ISL\_1283155, EPI\_ISL\_1283158, EPI\_ISL\_1283164, EPI\_ISL\_1283169, EPI\_ISL\_1283178, EPI\_ISL\_1283183, EPI\_ISL\_1283186 to 1283187, EPI\_ISL\_1283202, EPI\_ISL\_1283216, EPI\_ISL\_1283224, EPI\_ISL\_1283236 to 1283237, EPI\_ISL\_1283680, EPI\_ISL\_1283683, EPI\_ISL\_1283686, EPI\_ISL\_1283691, EPI\_ISL\_1283700, EPI\_ISL\_1283706, EPI\_ISL\_1283720, EPI\_ISL\_1283748, EPI\_ISL\_1283768, EPI\_ISL\_1283775, EPI\_ISL\_1283780, EPI\_ISL\_1283782, EPI\_ISL\_1283793, EPI\_ISL\_1283795, EPI\_ISL\_1283803, EPI\_ISL\_1283812, EPI\_ISL\_1283824, EPI\_ISL\_1283837, EPI\_ISL\_1283840, EPI\_ISL\_1283847, EPI\_ISL\_1283854, EPI\_ISL\_1352249, EPI\_ISL\_1352261, EPI\_ISL\_1352269, EPI\_ISL\_1352289, EPI\_ISL\_1352333, EPI\_ISL\_1353073, EPI\_ISL\_1353075, EPI\_ISL\_1353080, EPI\_ISL\_1353084, EPI\_ISL\_1353088, EPI\_ISL\_1353090, EPI\_ISL\_1353100, EPI\_ISL\_1353104, EPI\_ISL\_1353107, EPI\_ISL\_1353109, EPI\_ISL\_1353111, EPI\_ISL\_1353119 to 1353120, EPI\_ISL\_1353124 to 1353125, EPI\_ISL\_1353129, EPI\_ISL\_1353131

see above Limbach - MVZ Labor Eveld & Kollegen Essen Robert Koch Institute

EPI\_ISL\_1152545, EPI\_ISL\_1152554, EPI\_ISL\_1152588, EPI\_ISL\_1152594, EPI\_ISL\_1152602, EPI\_ISL\_1152605, EPI\_ISL\_1153334, EPI\_ISL\_1153350, EPI\_ISL\_1153424, EPI\_ISL\_1153447, EPI\_ISL\_1155154, EPI\_ISL\_1155188, EPI\_ISL\_1155499, EPI\_ISL\_1215743, EPI\_ISL\_1215747, EPI\_ISL\_1215749, EPI\_ISL\_1215801, EPI\_ISL\_1215808, EPI\_ISL\_1281176, EPI\_ISL\_1281178, EPI\_ISL\_1281180, EPI\_ISL\_1281217, EPI\_ISL\_1281225, EPI\_ISL\_1352252, EPI\_ISL\_1352284

see above Limbach - MVZ Labor Ludwigsburg Robert Koch Institute

EPI\_ISL\_1152579 Limbach - MVZ Labor Münster (Cullen) Robert Koch Institute

EPI\_ISL\_1152541, EPI\_ISL\_1152572 to 1152573, EPI\_ISL\_1152595 Limbach - MVZ Labor Ravensburg Labor Dr. Gärtner Robert Koch Institute

EPI\_ISL\_1105847 to 1105931, EPI\_ISL\_1178591 to 1178622, EPI\_ISL\_1178625 to 1178700, EPI\_ISL\_1309697 to 1309721 Lincolnshire Hospitals and DeepSeq Nottingham COVID-19 Genomics UK (COG-UK) Consortium Christopher Moore; Fei Sang; Joeseoph Chappell; Johnny Debebe; Jonathan Ball; Matthew Carlisle; Matthew Loose; Nadine Holmes; Nichola Duckworth; Patrick McClure; Sarah Walsh; Tim Sloan; Victoria Wright

EPI\_ISL\_1008713 Lister Laboratoro de Referencia S.A. de C.V. Instituto de diagnóstico y Referencia Epidemiologicos (INDRE) Departamento de Virologia Abril Rodriguez-Maldonado; Claudia Wong-Arambula; Ernesto Ramirez-Gonzalez.; Fabiola Garces-Ayala; Gisela Barrera-Badillo; Irma Lopez-Martinez; Lucia Hernandez-Rivas; Natividad Cruz-Ortiz; Tatiana Nunez-Garcia

EPI\_ISL\_1365676 to 1365685 Lithuanian University of Health Sciences Lithuanian University of Health Sciences Arnoldas Pautienius; Dovydas Gecys; Gediminas Alzbutas; Kamile Tamauskaite; Lukas Zemaits; Vaiva Lesauskaite

EPI\_ISL\_1140095 to 1140097, EPI\_ISL\_1262610 to 1262629, EPI\_ISL\_1302445, EPI\_ISL\_1302447, EPI\_ISL\_1302449, EPI\_ISL\_1302506 to 1302507, EPI\_ISL\_1302515, EPI\_ISL\_1302521, EPI\_ISL\_1302523, EPI\_ISL\_1302526 to 1302527, EPI\_ISL\_1302530 to 1302533, EPI\_ISL\_1302537, EPI\_ISL\_1302547 to 1302548, EPI\_ISL\_1357628

see above Lithuanian University of Health Sciences Hospital, Department of Laboratory Medicine Lithuanian University of Health Sciences Hospital, Department of Genetics and Molecular Medicine Astra Vitkauskienė; Astra Vitkauskienė; Darius Cereskevicius; Darius ešreškivienė; Inga Nasvytienė; Inga Nasvytienė; Mantas Šarauškas; Mantas Šarauškas; Marius Šukys; Marius Šukys; Rasa Usgienienė; Rasa Usgienienė; Renaldas Jurkevicius; Renaldas Jurkevicius; Zilvė Zemeckienė; Zilvė Zemeckienė

EPI\_ISL\_1047960 to 1047973, EPI\_ISL\_1047975 to 1047977, EPI\_ISL\_1047979 to 1047983, EPI\_ISL\_1047985 to 1047987, EPI\_ISL\_1047990 to 1047996, EPI\_ISL\_1047998 to 1048004, EPI\_ISL\_1048007, EPI\_ISL\_1048009 to 1048012, EPI\_ISL\_1048014 to 1048015, EPI\_ISL\_1048017 to 1048047, EPI\_ISL\_1050355, EPI\_ISL\_1103590 to 1103592, EPI\_ISL\_1104308 to 1104350, EPI\_ISL\_1104352 to 1104372, EPI\_ISL\_1104374 to 1104377, EPI\_ISL\_1104411, EPI\_ISL\_1104437 to 1104439, EPI\_ISL\_1104435, EPI\_ISL\_1104437 to 1104450, EPI\_ISL\_1104452 to 1104488, EPI\_ISL\_1104490, EPI\_ISL\_1104492 to 1104554, EPI\_ISL\_1104556 to 1104560, EPI\_ISL\_1104562 to 1104569, EPI\_ISL\_1104571 to 1104572, EPI\_ISL\_1105524 to 1105526, EPI\_ISL\_1105528 to 1105537, EPI\_ISL\_1105576 to 1105577, EPI\_ISL\_1105579, EPI\_ISL\_1107793 to 1107800, EPI\_ISL\_1107802 to 1107803, EPI\_ISL\_1108834, EPI\_ISL\_1177806 to 1177988, EPI\_ISL\_1247766 to 1247767, EPI\_ISL\_1247769 to 1247771, EPI\_ISL\_1247773 to 1247778, EPI\_ISL\_1247780 to 1247787, EPI\_ISL\_1247790 to 1247791, EPI\_ISL\_1247793 to 1247800, EPI\_ISL\_1247802 to 1247812, EPI\_ISL\_1247814 to 1247867, EPI\_ISL\_1247869 to 1247870, EPI\_ISL\_1247872, EPI\_ISL\_1247874 to 1247883, EPI\_ISL\_1247886 to 1247935, EPI\_ISL\_1247937 to 1247946, EPI\_ISL\_1248805 to 1248817, EPI\_ISL\_1249253 to 1249259, EPI\_ISL\_1249261, EPI\_ISL\_1249263, EPI\_ISL\_1249265 to 1249287, EPI\_ISL\_1249289 to 1249290, EPI\_ISL\_1308891 to 1308948, EPI\_ISL\_1309783 to 1309791

see above Liverpool Clinical Laboratories COVID-19 Genomics UK (COG-UK) Consortium A Alrezaihi; Alessandro Gerada; Alistair Darby; Angela Cowell; Anita Lucaci; Anu Chawla; Cassie Olateju; Catherine Hartley; Charlotte Nelson; Ecaterina Vamos; Elaine O'Toole; Eleanor G Bentley; Ghada T Shawli; Hermione Webster; Isabel Garcia-Dorival; James Johnson; James P Stewart; Jennifer Manson; Joanne Watts; Jones Benjamin; Jordan J Clark; Julian Hiscox; L Luu; Lucille Rainbow; M Almsaud; Margaret Hughes; Mark Whitehead; Matthew Gemmill; Miren Iturriza-Gomara; Muhannad Alruwaili; N.P Randle; Neil Swainston; PKF Gilmore; Parul Sharma; Rebekah Penrice-Randal; Richard Eccles; Richard Gregory; Sam Haldenby; Steve Paterson; Stuart D Armstrong; Trevor Ian Robinson; Ximeng Han

|                                                                                                                                                                                                                                                                                                                                                                                                                                                                                                                                                                                                                                                                                                                                                                                                                                                                                                                                                                                                                                                                                                                                                                                                                                                                                                                                                                                                                                                                                                                                                                                                                                                                                                                                                                                                                                                                                                                                                                                                                                                                                                                                                                                                                                                                                                                                                                                                                                                                                                                                                                                                                                                                                                                                                                                                                                                                                                                                                                                                                                                                                                                                                                                                                                                                                                                                                                                                                                                                                                                                                                                                                                                                                                                                                                                                                                                                                                                                                                                                                                                                                                                                                                                                                                                                                                                                                                                                                                                                                                                                                                                                                                                                                                                                                                                                                                                                                                                                                                                                                                                                                                                                                                                                                                                                                                                                                                                                                                                                                                                                          |                                                                                                                         |                                                                                                                            |                                                                                                                                                                                                                                                                                                                                                                                                                                                                                                                                                                                                                                                                                                               |
|------------------------------------------------------------------------------------------------------------------------------------------------------------------------------------------------------------------------------------------------------------------------------------------------------------------------------------------------------------------------------------------------------------------------------------------------------------------------------------------------------------------------------------------------------------------------------------------------------------------------------------------------------------------------------------------------------------------------------------------------------------------------------------------------------------------------------------------------------------------------------------------------------------------------------------------------------------------------------------------------------------------------------------------------------------------------------------------------------------------------------------------------------------------------------------------------------------------------------------------------------------------------------------------------------------------------------------------------------------------------------------------------------------------------------------------------------------------------------------------------------------------------------------------------------------------------------------------------------------------------------------------------------------------------------------------------------------------------------------------------------------------------------------------------------------------------------------------------------------------------------------------------------------------------------------------------------------------------------------------------------------------------------------------------------------------------------------------------------------------------------------------------------------------------------------------------------------------------------------------------------------------------------------------------------------------------------------------------------------------------------------------------------------------------------------------------------------------------------------------------------------------------------------------------------------------------------------------------------------------------------------------------------------------------------------------------------------------------------------------------------------------------------------------------------------------------------------------------------------------------------------------------------------------------------------------------------------------------------------------------------------------------------------------------------------------------------------------------------------------------------------------------------------------------------------------------------------------------------------------------------------------------------------------------------------------------------------------------------------------------------------------------------------------------------------------------------------------------------------------------------------------------------------------------------------------------------------------------------------------------------------------------------------------------------------------------------------------------------------------------------------------------------------------------------------------------------------------------------------------------------------------------------------------------------------------------------------------------------------------------------------------------------------------------------------------------------------------------------------------------------------------------------------------------------------------------------------------------------------------------------------------------------------------------------------------------------------------------------------------------------------------------------------------------------------------------------------------------------------------------------------------------------------------------------------------------------------------------------------------------------------------------------------------------------------------------------------------------------------------------------------------------------------------------------------------------------------------------------------------------------------------------------------------------------------------------------------------------------------------------------------------------------------------------------------------------------------------------------------------------------------------------------------------------------------------------------------------------------------------------------------------------------------------------------------------------------------------------------------------------------------------------------------------------------------------------------------------------------------------------------------------------------------------|-------------------------------------------------------------------------------------------------------------------------|----------------------------------------------------------------------------------------------------------------------------|---------------------------------------------------------------------------------------------------------------------------------------------------------------------------------------------------------------------------------------------------------------------------------------------------------------------------------------------------------------------------------------------------------------------------------------------------------------------------------------------------------------------------------------------------------------------------------------------------------------------------------------------------------------------------------------------------------------|
| EPI_ISL_1005557                                                                                                                                                                                                                                                                                                                                                                                                                                                                                                                                                                                                                                                                                                                                                                                                                                                                                                                                                                                                                                                                                                                                                                                                                                                                                                                                                                                                                                                                                                                                                                                                                                                                                                                                                                                                                                                                                                                                                                                                                                                                                                                                                                                                                                                                                                                                                                                                                                                                                                                                                                                                                                                                                                                                                                                                                                                                                                                                                                                                                                                                                                                                                                                                                                                                                                                                                                                                                                                                                                                                                                                                                                                                                                                                                                                                                                                                                                                                                                                                                                                                                                                                                                                                                                                                                                                                                                                                                                                                                                                                                                                                                                                                                                                                                                                                                                                                                                                                                                                                                                                                                                                                                                                                                                                                                                                                                                                                                                                                                                                          | Los Angeles Community Hospital                                                                                          | Los Angeles County PHL                                                                                                     | P. Hemarajata et al.                                                                                                                                                                                                                                                                                                                                                                                                                                                                                                                                                                                                                                                                                          |
| EPI_ISL_1005483 to 1005490, EPI_ISL_1005508 to 1005510, EPI_ISL_1040052, EPI_ISL_1040425 to 1040426, EPI_ISL_1097724 to 1097737, EPI_ISL_1097740 to 1097741, EPI_ISL_1097743, EPI_ISL_1098632 to 1098633, EPI_ISL_1098639 to 1098640, EPI_ISL_1191109                                                                                                                                                                                                                                                                                                                                                                                                                                                                                                                                                                                                                                                                                                                                                                                                                                                                                                                                                                                                                                                                                                                                                                                                                                                                                                                                                                                                                                                                                                                                                                                                                                                                                                                                                                                                                                                                                                                                                                                                                                                                                                                                                                                                                                                                                                                                                                                                                                                                                                                                                                                                                                                                                                                                                                                                                                                                                                                                                                                                                                                                                                                                                                                                                                                                                                                                                                                                                                                                                                                                                                                                                                                                                                                                                                                                                                                                                                                                                                                                                                                                                                                                                                                                                                                                                                                                                                                                                                                                                                                                                                                                                                                                                                                                                                                                                                                                                                                                                                                                                                                                                                                                                                                                                                                                                    | Los Angeles County PHL                                                                                                  | Los Angeles County PHL                                                                                                     | P. Hemarajata et al.                                                                                                                                                                                                                                                                                                                                                                                                                                                                                                                                                                                                                                                                                          |
| see above                                                                                                                                                                                                                                                                                                                                                                                                                                                                                                                                                                                                                                                                                                                                                                                                                                                                                                                                                                                                                                                                                                                                                                                                                                                                                                                                                                                                                                                                                                                                                                                                                                                                                                                                                                                                                                                                                                                                                                                                                                                                                                                                                                                                                                                                                                                                                                                                                                                                                                                                                                                                                                                                                                                                                                                                                                                                                                                                                                                                                                                                                                                                                                                                                                                                                                                                                                                                                                                                                                                                                                                                                                                                                                                                                                                                                                                                                                                                                                                                                                                                                                                                                                                                                                                                                                                                                                                                                                                                                                                                                                                                                                                                                                                                                                                                                                                                                                                                                                                                                                                                                                                                                                                                                                                                                                                                                                                                                                                                                                                                | Los Angeles County PHL                                                                                                  | Los Angeles County PHL                                                                                                     | P. Hemarajata et al.                                                                                                                                                                                                                                                                                                                                                                                                                                                                                                                                                                                                                                                                                          |
| EPI_ISL_1018060 to 1018062                                                                                                                                                                                                                                                                                                                                                                                                                                                                                                                                                                                                                                                                                                                                                                                                                                                                                                                                                                                                                                                                                                                                                                                                                                                                                                                                                                                                                                                                                                                                                                                                                                                                                                                                                                                                                                                                                                                                                                                                                                                                                                                                                                                                                                                                                                                                                                                                                                                                                                                                                                                                                                                                                                                                                                                                                                                                                                                                                                                                                                                                                                                                                                                                                                                                                                                                                                                                                                                                                                                                                                                                                                                                                                                                                                                                                                                                                                                                                                                                                                                                                                                                                                                                                                                                                                                                                                                                                                                                                                                                                                                                                                                                                                                                                                                                                                                                                                                                                                                                                                                                                                                                                                                                                                                                                                                                                                                                                                                                                                               | Los Angeles County Public Health Laboratories, Los Angeles County Public Health Lab microbial pathogen submission group | Los Angeles County Public Health Laboratories, Los Angeles County Public Health Lab microbial pathogen submission group    | Green, N.; Hemarajata, P.                                                                                                                                                                                                                                                                                                                                                                                                                                                                                                                                                                                                                                                                                     |
| EPI_ISL_1008206 to 1008209                                                                                                                                                                                                                                                                                                                                                                                                                                                                                                                                                                                                                                                                                                                                                                                                                                                                                                                                                                                                                                                                                                                                                                                                                                                                                                                                                                                                                                                                                                                                                                                                                                                                                                                                                                                                                                                                                                                                                                                                                                                                                                                                                                                                                                                                                                                                                                                                                                                                                                                                                                                                                                                                                                                                                                                                                                                                                                                                                                                                                                                                                                                                                                                                                                                                                                                                                                                                                                                                                                                                                                                                                                                                                                                                                                                                                                                                                                                                                                                                                                                                                                                                                                                                                                                                                                                                                                                                                                                                                                                                                                                                                                                                                                                                                                                                                                                                                                                                                                                                                                                                                                                                                                                                                                                                                                                                                                                                                                                                                                               | Ludwig Boltzmann Institut für Experimentelle und Klinische Traumatologie, Lorenz Böhler UKH                             | Bergthaler laboratory, CeMM Research Center for Molecular Medicine of the Austrian Academy of Sciences                     | Andreas Bergthaler; Anna Schedl; Bekir Erguner; Benedikt Agerer; Christoph Bock; Jan Laine; Lukas Endler; Maelle Le Moing; Martin Senekowitsch; Michael Schuster; Thomas Penz                                                                                                                                                                                                                                                                                                                                                                                                                                                                                                                                 |
| EPI_ISL_1069188                                                                                                                                                                                                                                                                                                                                                                                                                                                                                                                                                                                                                                                                                                                                                                                                                                                                                                                                                                                                                                                                                                                                                                                                                                                                                                                                                                                                                                                                                                                                                                                                                                                                                                                                                                                                                                                                                                                                                                                                                                                                                                                                                                                                                                                                                                                                                                                                                                                                                                                                                                                                                                                                                                                                                                                                                                                                                                                                                                                                                                                                                                                                                                                                                                                                                                                                                                                                                                                                                                                                                                                                                                                                                                                                                                                                                                                                                                                                                                                                                                                                                                                                                                                                                                                                                                                                                                                                                                                                                                                                                                                                                                                                                                                                                                                                                                                                                                                                                                                                                                                                                                                                                                                                                                                                                                                                                                                                                                                                                                                          | Lumban Rural Health Unit                                                                                                | Research Institute for Tropical Medicine                                                                                   | Catalino Demetria; Daria Manalo; Edelwisa Mercado; Francisco Gerardo Polotan; Hannah Leah Morito; Inez Andrea Medado; John Leonard Chan; Joseph Hughes; Kirstyn Brunker; Ma Angelica Tujan; Othoniel Jan Onza                                                                                                                                                                                                                                                                                                                                                                                                                                                                                                 |
| EPI_ISL_1213568                                                                                                                                                                                                                                                                                                                                                                                                                                                                                                                                                                                                                                                                                                                                                                                                                                                                                                                                                                                                                                                                                                                                                                                                                                                                                                                                                                                                                                                                                                                                                                                                                                                                                                                                                                                                                                                                                                                                                                                                                                                                                                                                                                                                                                                                                                                                                                                                                                                                                                                                                                                                                                                                                                                                                                                                                                                                                                                                                                                                                                                                                                                                                                                                                                                                                                                                                                                                                                                                                                                                                                                                                                                                                                                                                                                                                                                                                                                                                                                                                                                                                                                                                                                                                                                                                                                                                                                                                                                                                                                                                                                                                                                                                                                                                                                                                                                                                                                                                                                                                                                                                                                                                                                                                                                                                                                                                                                                                                                                                                                          | Lung Center of the Philippines (LCP)                                                                                    | Philippine Genome Center                                                                                                   | Alethea R. de Guzman; Anna Ong-Lim; Arienne A. Zamora; Asia Louisa U. Chong; Benedict A. Maralit; Candice Francheska B. Tambaoan; Carlo M. Lapid; Celia Carlos; Devon Ray Pacial; Edsel Maurice Salvaña; El King D. Morado; Eva Maria Cutiongco-de la Paz; Francis A. Tablizo; Irish Colean A. Asin; Jaime C. Montoya; Jan Michael C. Yap; Jo-Hannah S. Llames; John Q. Wong; Joshua Gregor A. Dizon; Juan Antonio R. Magalang; Karol Sophia Agape R. Padilla; Kenneth M. Kim; Kris P. Punayan; Marc Edsel C. Ayes; Marc Jerrone R. Castro; Maria Rosario Singh-Vergeire and Cynthia P. Saloma; Maria Sofia L. Yangzon; Marissa Alejandria; Razel Nikka M. Hao; Rianna Patricia S. Cruz; Sheila Mae M. Araiza |
| EPI_ISL_1027249 to 1027260, EPI_ISL_1027265 to 1027271, EPI_ISL_1027282 to 1027287, EPI_ISL_1064378, EPI_ISL_1064385, EPI_ISL_1064403 to 1064404, EPI_ISL_1064492 to 1064495, EPI_ISL_1064499 to 1064501, EPI_ISL_1064503 to 1064513, EPI_ISL_1064515 to 1064516, EPI_ISL_1064521 to 1064549, EPI_ISL_1121556, EPI_ISL_1121560 to 1121589, EPI_ISL_1121591 to 1121592, EPI_ISL_1121595 to 1121596, EPI_ISL_1121601 to 1121602, EPI_ISL_1121607, EPI_ISL_1121613, EPI_ISL_1121619, EPI_ISL_1121629, EPI_ISL_1127374 to 1132741, EPI_ISL_1132744 to 1132790, EPI_ISL_1132808 to 1132812, EPI_ISL_1137255 to 1137257, EPI_ISL_1184231 to 1184236, EPI_ISL_1184287 to 1184302, EPI_ISL_1196198 to 1196230, EPI_ISL_1224768, EPI_ISL_1224770, EPI_ISL_1224772, EPI_ISL_1224774, EPI_ISL_1224777, EPI_ISL_1224810 to 1224814, EPI_ISL_1314301 to 1314313, EPI_ISL_1365366 to 1365408, EPI_ISL_1372100, EPI_ISL_1372104 to 1372106, EPI_ISL_1372108 to 1372110, EPI_ISL_1372115, EPI_ISL_1372118 to 1372129, EPI_ISL_1372131 to 1372133, EPI_ISL_1372157, EPI_ISL_1372159 to 1372164, EPI_ISL_1372168, EPI_ISL_1372170 to 1372176, EPI_ISL_1372178 to 1372180, EPI_ISL_1372207 to 1372208, EPI_ISL_1372226 to 1372229, EPI_ISL_1372476, EPI_ISL_1372487, EPI_ISL_1372498 to 1372499, EPI_ISL_1372510, EPI_ISL_1372513 to 1372521                                                                                                                                                                                                                                                                                                                                                                                                                                                                                                                                                                                                                                                                                                                                                                                                                                                                                                                                                                                                                                                                                                                                                                                                                                                                                                                                                                                                                                                                                                                                                                                                                                                                                                                                                                                                                                                                                                                                                                                                                                                                                                                                                                                                                                                                                                                                                                                                                                                                                                                                                                                                                                                                                                                                                                                                                                                                                                                                                                                                                                                                                                                                                                                                                                                                                                                                                                                                                                                                                                                                                                                                                                                                                                                                                                                                                                                                                                                                                                                                                                                                                                                                                                                                                | Minnesota Department of Health, Public Health Laboratory                                                                | Alexandra Lorentz; Jacob Garfin; Matt Plumb; and Xiong Wang                                                                |                                                                                                                                                                                                                                                                                                                                                                                                                                                                                                                                                                                                                                                                                                               |
| see above                                                                                                                                                                                                                                                                                                                                                                                                                                                                                                                                                                                                                                                                                                                                                                                                                                                                                                                                                                                                                                                                                                                                                                                                                                                                                                                                                                                                                                                                                                                                                                                                                                                                                                                                                                                                                                                                                                                                                                                                                                                                                                                                                                                                                                                                                                                                                                                                                                                                                                                                                                                                                                                                                                                                                                                                                                                                                                                                                                                                                                                                                                                                                                                                                                                                                                                                                                                                                                                                                                                                                                                                                                                                                                                                                                                                                                                                                                                                                                                                                                                                                                                                                                                                                                                                                                                                                                                                                                                                                                                                                                                                                                                                                                                                                                                                                                                                                                                                                                                                                                                                                                                                                                                                                                                                                                                                                                                                                                                                                                                                | M Health Fairview                                                                                                       | University of Minnesota Genomics Center                                                                                    | Andy Nelson; Benjamin Auch; Corbin Dirx; Daryl M. Gohl; Jaquelyn Kuriger-Laber; John Garbe; and Sean Wang                                                                                                                                                                                                                                                                                                                                                                                                                                                                                                                                                                                                     |
| EPI_ISL_1016975, EPI_ISL_1016979, EPI_ISL_1016985 to 1016986, EPI_ISL_1016988, EPI_ISL_1017024 to 1017032                                                                                                                                                                                                                                                                                                                                                                                                                                                                                                                                                                                                                                                                                                                                                                                                                                                                                                                                                                                                                                                                                                                                                                                                                                                                                                                                                                                                                                                                                                                                                                                                                                                                                                                                                                                                                                                                                                                                                                                                                                                                                                                                                                                                                                                                                                                                                                                                                                                                                                                                                                                                                                                                                                                                                                                                                                                                                                                                                                                                                                                                                                                                                                                                                                                                                                                                                                                                                                                                                                                                                                                                                                                                                                                                                                                                                                                                                                                                                                                                                                                                                                                                                                                                                                                                                                                                                                                                                                                                                                                                                                                                                                                                                                                                                                                                                                                                                                                                                                                                                                                                                                                                                                                                                                                                                                                                                                                                                                | M Health Fairview                                                                                                       | University of Minnesota Genomics Center                                                                                    | Andy Nelson; Benjamin Auch; Corbin Dirx; Daryl M. Gohl; Jaquelyn Kuriger-Laber; John Garbe; and Sean Wang                                                                                                                                                                                                                                                                                                                                                                                                                                                                                                                                                                                                     |
| EPI_ISL_1318505 to 1318509                                                                                                                                                                                                                                                                                                                                                                                                                                                                                                                                                                                                                                                                                                                                                                                                                                                                                                                                                                                                                                                                                                                                                                                                                                                                                                                                                                                                                                                                                                                                                                                                                                                                                                                                                                                                                                                                                                                                                                                                                                                                                                                                                                                                                                                                                                                                                                                                                                                                                                                                                                                                                                                                                                                                                                                                                                                                                                                                                                                                                                                                                                                                                                                                                                                                                                                                                                                                                                                                                                                                                                                                                                                                                                                                                                                                                                                                                                                                                                                                                                                                                                                                                                                                                                                                                                                                                                                                                                                                                                                                                                                                                                                                                                                                                                                                                                                                                                                                                                                                                                                                                                                                                                                                                                                                                                                                                                                                                                                                                                               | MA State Public Health Laboratory                                                                                       | Centers for Disease Control and Prevention Division of Viral Diseases, Pathogen Discovery                                  | Anna Montmayeur; Anna Uehara; Ben L. Rambo-Martin; Clinton R. Paden; Dhvani Batra; Haibin Wang; Jasmine Padilla; Jing Zhang; Justin Lee; Katie Dillon; Krista Queen; Kristen Knipe; Kristine Lacey; Lori Rowe; Mark Burroughs; Matthew Schmerer; Mili Sheth; Peter W. Cook; Rachel Marine; Sam Shepard; Sarah Nobles; Shoshona Le; Suxiang Tong; Yan Li; Ying Tao                                                                                                                                                                                                                                                                                                                                             |
| EPI_ISL_1265693                                                                                                                                                                                                                                                                                                                                                                                                                                                                                                                                                                                                                                                                                                                                                                                                                                                                                                                                                                                                                                                                                                                                                                                                                                                                                                                                                                                                                                                                                                                                                                                                                                                                                                                                                                                                                                                                                                                                                                                                                                                                                                                                                                                                                                                                                                                                                                                                                                                                                                                                                                                                                                                                                                                                                                                                                                                                                                                                                                                                                                                                                                                                                                                                                                                                                                                                                                                                                                                                                                                                                                                                                                                                                                                                                                                                                                                                                                                                                                                                                                                                                                                                                                                                                                                                                                                                                                                                                                                                                                                                                                                                                                                                                                                                                                                                                                                                                                                                                                                                                                                                                                                                                                                                                                                                                                                                                                                                                                                                                                                          | MACON                                                                                                                   | CNR Virus des Infections Respiratoires - France SUD                                                                        | Antonin Bal; Bruno Lina; Gregory Destras; Gwendolyne Burfin; Hadrien Regue; Laurence Josset; Martine Valette; Quentin Semanas                                                                                                                                                                                                                                                                                                                                                                                                                                                                                                                                                                                 |
| EPI_ISL_1257901 to 1258421                                                                                                                                                                                                                                                                                                                                                                                                                                                                                                                                                                                                                                                                                                                                                                                                                                                                                                                                                                                                                                                                                                                                                                                                                                                                                                                                                                                                                                                                                                                                                                                                                                                                                                                                                                                                                                                                                                                                                                                                                                                                                                                                                                                                                                                                                                                                                                                                                                                                                                                                                                                                                                                                                                                                                                                                                                                                                                                                                                                                                                                                                                                                                                                                                                                                                                                                                                                                                                                                                                                                                                                                                                                                                                                                                                                                                                                                                                                                                                                                                                                                                                                                                                                                                                                                                                                                                                                                                                                                                                                                                                                                                                                                                                                                                                                                                                                                                                                                                                                                                                                                                                                                                                                                                                                                                                                                                                                                                                                                                                               | MB-Cadham Provincial laboratory                                                                                         | National Microbiology Laboratory (NML)                                                                                     | Anna Majer; Anneliese Landgraff; CanCOGen's metadata curation team; Darian Hole; David Alexander; Elsie Grudecki; Gary Van Domselaar; Grace Seo; Jared Bullard; Jennifer Tanner; Kerry Dust; Kirsten Biggar; Madison Chapel; Morag Graham; Nadine Knox; Nathalie Bastien; Paul Van Caesele; Philip Mabon; Public Health Agency of Canada CanCOGen team; Rhiannon Huzarewich; Russell Mandes; Shari Tyson; Timothy Booth; Yan Li                                                                                                                                                                                                                                                                               |
| EPI_ISL_1129631, EPI_ISL_1130710                                                                                                                                                                                                                                                                                                                                                                                                                                                                                                                                                                                                                                                                                                                                                                                                                                                                                                                                                                                                                                                                                                                                                                                                                                                                                                                                                                                                                                                                                                                                                                                                                                                                                                                                                                                                                                                                                                                                                                                                                                                                                                                                                                                                                                                                                                                                                                                                                                                                                                                                                                                                                                                                                                                                                                                                                                                                                                                                                                                                                                                                                                                                                                                                                                                                                                                                                                                                                                                                                                                                                                                                                                                                                                                                                                                                                                                                                                                                                                                                                                                                                                                                                                                                                                                                                                                                                                                                                                                                                                                                                                                                                                                                                                                                                                                                                                                                                                                                                                                                                                                                                                                                                                                                                                                                                                                                                                                                                                                                                                         | MCL Medizinische Laboratorien Hauptstandort Niederwangen                                                                | Department of Biosystems Science and Engineering, ETH Zurich                                                               | Andrea Patrignani; Andreia Cabral de Gouveia; Catharine Aquino; Chaoran Chen; Christiane Beckmann; Christoph Noppen; David Dreifuss; Doris Popovic; Griffin White; Ivan Topolsky; Jay Tracy; Katharina Jahn; Lara Fuhrmann; Laura Neff; Lennart Opitz; Maria Domenica Moccia; Maurice Redondo; Niko Beerenwinkel; Noemie Santamaria de Souza; Olivier Kobet; Philipp Jablonski; Ralph Schlapbach; Sarah Nadeau; Simon Grütter; Sophie Seidel; Tanja Stadler; Timothy Sykes                                                                                                                                                                                                                                    |
| EPI_ISL_1272896 to 1272915                                                                                                                                                                                                                                                                                                                                                                                                                                                                                                                                                                                                                                                                                                                                                                                                                                                                                                                                                                                                                                                                                                                                                                                                                                                                                                                                                                                                                                                                                                                                                                                                                                                                                                                                                                                                                                                                                                                                                                                                                                                                                                                                                                                                                                                                                                                                                                                                                                                                                                                                                                                                                                                                                                                                                                                                                                                                                                                                                                                                                                                                                                                                                                                                                                                                                                                                                                                                                                                                                                                                                                                                                                                                                                                                                                                                                                                                                                                                                                                                                                                                                                                                                                                                                                                                                                                                                                                                                                                                                                                                                                                                                                                                                                                                                                                                                                                                                                                                                                                                                                                                                                                                                                                                                                                                                                                                                                                                                                                                                                               | MD DOH Laboratories Administration                                                                                      | Centers for Disease Control and Prevention Division of Viral Diseases, Pathogen Discovery                                  | Anna Montmayeur; Anna Uehara; Ben L. Rambo-Martin; Clinton R. Paden; Dhvani Batra; Haibin Wang; Jasmine Padilla; Jing Zhang; Justin Lee; Katie Dillon; Krista Queen; Kristen Knipe; Kristine Lacey; Lori Rowe; Mark Burroughs; Matthew Schmerer; Mili Sheth; Peter W. Cook; Rachel Marine; Sam Shepard; Sarah Nobles; Shoshona Le; Suxiang Tong; Yan Li; Ying Tao                                                                                                                                                                                                                                                                                                                                             |
| EPI_ISL_1226124 to 1226143                                                                                                                                                                                                                                                                                                                                                                                                                                                                                                                                                                                                                                                                                                                                                                                                                                                                                                                                                                                                                                                                                                                                                                                                                                                                                                                                                                                                                                                                                                                                                                                                                                                                                                                                                                                                                                                                                                                                                                                                                                                                                                                                                                                                                                                                                                                                                                                                                                                                                                                                                                                                                                                                                                                                                                                                                                                                                                                                                                                                                                                                                                                                                                                                                                                                                                                                                                                                                                                                                                                                                                                                                                                                                                                                                                                                                                                                                                                                                                                                                                                                                                                                                                                                                                                                                                                                                                                                                                                                                                                                                                                                                                                                                                                                                                                                                                                                                                                                                                                                                                                                                                                                                                                                                                                                                                                                                                                                                                                                                                               | MD DOH Laboratories Administration                                                                                      | Genomics and Discovery, Respiratory Viruses Branch, Division of Viral Diseases, Centers for Disease Control and Prevention | Anna Montmayeur; Anna Uehara; Ben L. Rambo-Martin; Clinton R. Paden; Dhvani Batra; Haibin Wang; Jasmine Padilla; Jing Zhang; Justin Lee; Katie Dillon; Krista Queen; Kristen Knipe; Kristine Lacey; Lori Rowe; Mark Burroughs; Matthew Schmerer; Mili Sheth; Peter W. Cook; Rachel Marine; Sam Shepard; Sarah Nobles; Shoshona Le; Suxiang Tong; Yan Li; Ying Tao                                                                                                                                                                                                                                                                                                                                             |
| EPI_ISL_1094237, EPI_ISL_1094243, EPI_ISL_1094347, EPI_ISL_1094357, EPI_ISL_1094993 to 1095039, EPI_ISL_1095324 to 1095332                                                                                                                                                                                                                                                                                                                                                                                                                                                                                                                                                                                                                                                                                                                                                                                                                                                                                                                                                                                                                                                                                                                                                                                                                                                                                                                                                                                                                                                                                                                                                                                                                                                                                                                                                                                                                                                                                                                                                                                                                                                                                                                                                                                                                                                                                                                                                                                                                                                                                                                                                                                                                                                                                                                                                                                                                                                                                                                                                                                                                                                                                                                                                                                                                                                                                                                                                                                                                                                                                                                                                                                                                                                                                                                                                                                                                                                                                                                                                                                                                                                                                                                                                                                                                                                                                                                                                                                                                                                                                                                                                                                                                                                                                                                                                                                                                                                                                                                                                                                                                                                                                                                                                                                                                                                                                                                                                                                                               | MD DOH Laboratories Administration                                                                                      | Respiratory Viruses Branch, Division of Viral Diseases, Centers for Disease Control and Prevention                         | Anna Montmayeur; Anna Uehara; Ben L. Rambo-Martin; Clinton R. Paden; Dhvani Batra; Haibin Wang; Jasmine Padilla; Jing Zhang; Justin Lee; Krista Queen; Lori Rowe; Mark Burroughs; Mili Sheth; Peter W. Cook; Rachel Marine; Sarah Nobles; Suxiang Tong; Yan Li; Ying Tao                                                                                                                                                                                                                                                                                                                                                                                                                                      |
| EPI_ISL_1005555, EPI_ISL_1098628, EPI_ISL_1098646, EPI_ISL_1303416 to 1303423, EPI_ISL_1303483, EPI_ISL_1379976                                                                                                                                                                                                                                                                                                                                                                                                                                                                                                                                                                                                                                                                                                                                                                                                                                                                                                                                                                                                                                                                                                                                                                                                                                                                                                                                                                                                                                                                                                                                                                                                                                                                                                                                                                                                                                                                                                                                                                                                                                                                                                                                                                                                                                                                                                                                                                                                                                                                                                                                                                                                                                                                                                                                                                                                                                                                                                                                                                                                                                                                                                                                                                                                                                                                                                                                                                                                                                                                                                                                                                                                                                                                                                                                                                                                                                                                                                                                                                                                                                                                                                                                                                                                                                                                                                                                                                                                                                                                                                                                                                                                                                                                                                                                                                                                                                                                                                                                                                                                                                                                                                                                                                                                                                                                                                                                                                                                                          | MD Laboratories                                                                                                         | Los Angeles County PHL                                                                                                     | P. Hemarajata et al.                                                                                                                                                                                                                                                                                                                                                                                                                                                                                                                                                                                                                                                                                          |
| EPI_ISL_1238794 to 1238839, EPI_ISL_1272189 to 1272235, EPI_ISL_1336282 to 1336328, EPI_ISL_1373315 to 1373358                                                                                                                                                                                                                                                                                                                                                                                                                                                                                                                                                                                                                                                                                                                                                                                                                                                                                                                                                                                                                                                                                                                                                                                                                                                                                                                                                                                                                                                                                                                                                                                                                                                                                                                                                                                                                                                                                                                                                                                                                                                                                                                                                                                                                                                                                                                                                                                                                                                                                                                                                                                                                                                                                                                                                                                                                                                                                                                                                                                                                                                                                                                                                                                                                                                                                                                                                                                                                                                                                                                                                                                                                                                                                                                                                                                                                                                                                                                                                                                                                                                                                                                                                                                                                                                                                                                                                                                                                                                                                                                                                                                                                                                                                                                                                                                                                                                                                                                                                                                                                                                                                                                                                                                                                                                                                                                                                                                                                           | MD PHL                                                                                                                  | MD PHL                                                                                                                     | Maryland Department of Health Laboratories Administration                                                                                                                                                                                                                                                                                                                                                                                                                                                                                                                                                                                                                                                     |
| EPI_ISL_1292998 to 1293044                                                                                                                                                                                                                                                                                                                                                                                                                                                                                                                                                                                                                                                                                                                                                                                                                                                                                                                                                                                                                                                                                                                                                                                                                                                                                                                                                                                                                                                                                                                                                                                                                                                                                                                                                                                                                                                                                                                                                                                                                                                                                                                                                                                                                                                                                                                                                                                                                                                                                                                                                                                                                                                                                                                                                                                                                                                                                                                                                                                                                                                                                                                                                                                                                                                                                                                                                                                                                                                                                                                                                                                                                                                                                                                                                                                                                                                                                                                                                                                                                                                                                                                                                                                                                                                                                                                                                                                                                                                                                                                                                                                                                                                                                                                                                                                                                                                                                                                                                                                                                                                                                                                                                                                                                                                                                                                                                                                                                                                                                                               | MD Public Health Laboratory                                                                                             | MD Public Health Laboratory                                                                                                | Maryland Department of Health Laboratories Administration                                                                                                                                                                                                                                                                                                                                                                                                                                                                                                                                                                                                                                                     |
| EPI_ISL_1144167 to 1144169, EPI_ISL_1144171 to 1144174, EPI_ISL_1144176 to 1144179, EPI_ISL_1144181 to 1144189, EPI_ISL_1144191 to 1144196, EPI_ISL_1144198 to 1144202, EPI_ISL_1152544, EPI_ISL_1152550, EPI_ISL_1152555, EPI_ISL_1152558, EPI_ISL_1152561, EPI_ISL_1152571, EPI_ISL_1152576, EPI_ISL_1152580 to 1152581, EPI_ISL_1152585, EPI_ISL_1152589, EPI_ISL_1152593, EPI_ISL_1152600, EPI_ISL_1152603, EPI_ISL_1152607, EPI_ISL_1152610, EPI_ISL_1152613, EPI_ISL_1153325, EPI_ISL_1153329, EPI_ISL_1153343 to 1153344, EPI_ISL_1153349, EPI_ISL_1153351 to 1153352, EPI_ISL_1153354, EPI_ISL_1153357 to 1153358, EPI_ISL_1153360, EPI_ISL_1153364, EPI_ISL_1153366, EPI_ISL_1153370 to 1153371, EPI_ISL_1153373 to 1153375, EPI_ISL_1153378, EPI_ISL_1153382, EPI_ISL_1153385, EPI_ISL_1153389, EPI_ISL_1153392, EPI_ISL_1153394 to 1153395, EPI_ISL_1153402 to 1153403, EPI_ISL_1153405 to 1153406, EPI_ISL_1153408, EPI_ISL_1153410 to 1153415, EPI_ISL_1153417 to 1153423, EPI_ISL_1153426, EPI_ISL_1153428, EPI_ISL_1153431 to 1153435, EPI_ISL_1153438 to 1153439, EPI_ISL_1153441, EPI_ISL_1153444, EPI_ISL_1153967, EPI_ISL_1153974 to 1153975, EPI_ISL_1153977, EPI_ISL_1153980, EPI_ISL_1153985 to 1153986, EPI_ISL_1153991 to 1153992, EPI_ISL_1153994 to 1153997, EPI_ISL_1153999 to 1154001, EPI_ISL_1154009 to 1154011, EPI_ISL_1154013 to 1154015, EPI_ISL_1154018, EPI_ISL_1154020 to 1154021, EPI_ISL_1154023, EPI_ISL_1154026 to 1154027, EPI_ISL_1154029, EPI_ISL_1154033 to 1154037, EPI_ISL_1154039, EPI_ISL_1154041 to 1154043, EPI_ISL_1154045, EPI_ISL_1154047, EPI_ISL_1155137 to 1155138, EPI_ISL_1155142 to 1155144, EPI_ISL_1155147, EPI_ISL_1155149 to 1155153, EPI_ISL_1155155 to 1155156, EPI_ISL_1155159 to 1155160, EPI_ISL_1155163 to 1155164, EPI_ISL_1155166, EPI_ISL_1155168 to 1155172, EPI_ISL_1155177, EPI_ISL_1155179, EPI_ISL_1155181 to 1155184, EPI_ISL_1155187, EPI_ISL_1155190, EPI_ISL_1155192, EPI_ISL_1155194 to 1155195, EPI_ISL_1155197, EPI_ISL_1155199, EPI_ISL_1155472, EPI_ISL_1155474 to 1155475, EPI_ISL_1155477, EPI_ISL_1155479, EPI_ISL_1155481, EPI_ISL_1155484 to 1155486, EPI_ISL_1155489, EPI_ISL_1155491 to 1155492, EPI_ISL_1155497 to 1155498, EPI_ISL_1155501, EPI_ISL_1155504, EPI_ISL_1155506, EPI_ISL_1155510, EPI_ISL_1155512 to 1155516, EPI_ISL_1155518 to 1155519, EPI_ISL_1155521, EPI_ISL_1155523 to 1155526, EPI_ISL_1155530, EPI_ISL_1155533 to 1155534, EPI_ISL_1155536, EPI_ISL_1155538, EPI_ISL_1155540, EPI_ISL_1155544, EPI_ISL_1155546, EPI_ISL_1155548 to 1155550, EPI_ISL_1155554, EPI_ISL_1155556, EPI_ISL_1155560, EPI_ISL_1156948 to 1156951, EPI_ISL_1156954, EPI_ISL_1156956 to 1156957, EPI_ISL_1156959 to 1156962, EPI_ISL_1156964 to 1156968, EPI_ISL_1156970 to 1156973, EPI_ISL_1157058 to 1157059, EPI_ISL_1157062 to 1157067, EPI_ISL_1157117 to 1157119, EPI_ISL_1157121, EPI_ISL_1157123 to 1157126, EPI_ISL_1157129 to 1157131, EPI_ISL_1157133 to 1157134, EPI_ISL_1157136, EPI_ISL_1157138 to 1157142, EPI_ISL_1210770 to 1210771, EPI_ISL_1212010, EPI_ISL_1212016 to 1212017, EPI_ISL_1215566, EPI_ISL_1215599, EPI_ISL_1215602, EPI_ISL_1215606 to 1215609, EPI_ISL_1215612, EPI_ISL_1215620, EPI_ISL_1215624, EPI_ISL_1215628, EPI_ISL_1215640, EPI_ISL_1215750, EPI_ISL_1215766, EPI_ISL_1215770, EPI_ISL_1215795, EPI_ISL_1215797, EPI_ISL_1215805, EPI_ISL_1215809, EPI_ISL_1217012, EPI_ISL_1217014, EPI_ISL_1217016, EPI_ISL_1217032, EPI_ISL_1217044, EPI_ISL_1217050, EPI_ISL_1217068 to 1217069, EPI_ISL_1217086, EPI_ISL_1217100 to 1217102, EPI_ISL_1280207, EPI_ISL_1281183, EPI_ISL_1281185 to 1281186, EPI_ISL_1281190, EPI_ISL_1281196, EPI_ISL_1281199, EPI_ISL_1281201, EPI_ISL_1281205, EPI_ISL_1281210, EPI_ISL_1281222 to 1281223, EPI_ISL_1281248, EPI_ISL_1281249, EPI_ISL_1281286, EPI_ISL_1281789 to 1281790, EPI_ISL_1281794, EPI_ISL_1281797 to 1281798, EPI_ISL_1281801, EPI_ISL_1281806, EPI_ISL_1281814, EPI_ISL_1281817, EPI_ISL_1281821, EPI_ISL_1283684, EPI_ISL_1283765, EPI_ISL_1283829, EPI_ISL_1283846, EPI_ISL_1284510, EPI_ISL_1284512, EPI_ISL_1284514, EPI_ISL_1349528, EPI_ISL_1349557, EPI_ISL_1350221, EPI_ISL_1350225 to 1350226, EPI_ISL_1350228, EPI_ISL_1350231, EPI_ISL_1350233, EPI_ISL_1350236, EPI_ISL_1350240, EPI_ISL_1352238 to 1352248, EPI_ISL_1352250, EPI_ISL_1352253 to 1352260, EPI_ISL_1352262 to 1352265, EPI_ISL_1352267 to 1352278, EPI_ISL_1352280 to 1352283, EPI_ISL_1352285 to 1352288, EPI_ISL_1352290 to 1352291, EPI_ISL_1352293 to 1352294, EPI_ISL_1352296, EPI_ISL_1352299 to 1352305, EPI_ISL_1352307 to 1352308, EPI_ISL_1352310 to 1352311, EPI_ISL_1352313 to 1352317, EPI_ISL_1352319 to 1352332, EPI_ISL_1352334 to 1352337, EPI_ISL_1352339 to 1352344, EPI_ISL_1352346 to 1352348, EPI_ISL_1353014 to 1353016, EPI_ISL_1353018 to 1353027, EPI_ISL_1353063 to 1353064, EPI_ISL_1353066, EPI_ISL_1353079, EPI_ISL_1353082 to 1353083, EPI_ISL_1353089, EPI_ISL_1353094 to 1353095, EPI_ISL_1353098 to 1353098, EPI_ISL_1353102, EPI_ISL_1353105, EPI_ISL_1353110, EPI_ISL_1353112, EPI_ISL_1353114 to 1353115, EPI_ISL_1353117, EPI_ISL_1353121 to 1353122, EPI_ISL_1353126, EPI_ISL_1353135 to 1353136, EPI_ISL_1353140 to 1353141, EPI_ISL_1353160 to 1353161, EPI_ISL_1353164, EPI_ISL_1353167, EPI_ISL_1353169, EPI_ISL_1353174, EPI_ISL_1353179, EPI_ISL_1353181, EPI_ISL_1353185, EPI_ISL_1353190, EPI_ISL_1353196, EPI_ISL_1353206, EPI_ISL_1353214, EPI_ISL_1353218 to 1353219, EPI_ISL_1353639 to 1353640, EPI_ISL_1354470 | MD Public Health Laboratory                                                                                             | MD Public Health Laboratory                                                                                                | Maryland Department of Health Laboratories Administration                                                                                                                                                                                                                                                                                                                                                                                                                                                                                                                                                                                                                                                     |
| see above                                                                                                                                                                                                                                                                                                                                                                                                                                                                                                                                                                                                                                                                                                                                                                                                                                                                                                                                                                                                                                                                                                                                                                                                                                                                                                                                                                                                                                                                                                                                                                                                                                                                                                                                                                                                                                                                                                                                                                                                                                                                                                                                                                                                                                                                                                                                                                                                                                                                                                                                                                                                                                                                                                                                                                                                                                                                                                                                                                                                                                                                                                                                                                                                                                                                                                                                                                                                                                                                                                                                                                                                                                                                                                                                                                                                                                                                                                                                                                                                                                                                                                                                                                                                                                                                                                                                                                                                                                                                                                                                                                                                                                                                                                                                                                                                                                                                                                                                                                                                                                                                                                                                                                                                                                                                                                                                                                                                                                                                                                                                | MDI Limbach Berlin GmbH                                                                                                 | Robert Koch Institute                                                                                                      |                                                                                                                                                                                                                                                                                                                                                                                                                                                                                                                                                                                                                                                                                                               |
| EPI_ISL_1272670 to 1272673                                                                                                                                                                                                                                                                                                                                                                                                                                                                                                                                                                                                                                                                                                                                                                                                                                                                                                                                                                                                                                                                                                                                                                                                                                                                                                                                                                                                                                                                                                                                                                                                                                                                                                                                                                                                                                                                                                                                                                                                                                                                                                                                                                                                                                                                                                                                                                                                                                                                                                                                                                                                                                                                                                                                                                                                                                                                                                                                                                                                                                                                                                                                                                                                                                                                                                                                                                                                                                                                                                                                                                                                                                                                                                                                                                                                                                                                                                                                                                                                                                                                                                                                                                                                                                                                                                                                                                                                                                                                                                                                                                                                                                                                                                                                                                                                                                                                                                                                                                                                                                                                                                                                                                                                                                                                                                                                                                                                                                                                                                               | ME Health and Environmental Testing Laboratory                                                                          | Centers for Disease Control and Prevention Division of Viral Diseases, Pathogen Discovery                                  | Anna Montmayeur; Anna Uehara; Ben L. Rambo-Martin; Clinton R. Paden; Dhvani Batra; Haibin Wang; Jasmine Padilla; Jing Zhang; Justin Lee; Katie Dillon; Krista Queen; Kristen Knipe; Kristine Lacey; Lori Rowe; Mark Burroughs; Matthew Schmerer; Mili Sheth; Peter W. Cook; Rachel Marine; Sam Shepard; Sarah Nobles; Shoshona Le; Suxiang Tong; Yan Li; Ying Tao                                                                                                                                                                                                                                                                                                                                             |

|                                                                                                                                                                                                                                                                                                                                                                                                                                                                                                                                                                                                                                                                                                                                                                                                                                                                                                                                                                                                                                                                                                                                                                                                                                                                                                                                                                                                                                                                                                                                                                                                                                                                                                                                                                                                                                                                                                                                                                                                                                                                                                                                                                                                                                                                                                                                                                                                                                                                                             |                                                                                |                                                                                                                            |                                                                                                                                                                                                                                                                                                                                                                    |                                                                                                                                                                               |
|---------------------------------------------------------------------------------------------------------------------------------------------------------------------------------------------------------------------------------------------------------------------------------------------------------------------------------------------------------------------------------------------------------------------------------------------------------------------------------------------------------------------------------------------------------------------------------------------------------------------------------------------------------------------------------------------------------------------------------------------------------------------------------------------------------------------------------------------------------------------------------------------------------------------------------------------------------------------------------------------------------------------------------------------------------------------------------------------------------------------------------------------------------------------------------------------------------------------------------------------------------------------------------------------------------------------------------------------------------------------------------------------------------------------------------------------------------------------------------------------------------------------------------------------------------------------------------------------------------------------------------------------------------------------------------------------------------------------------------------------------------------------------------------------------------------------------------------------------------------------------------------------------------------------------------------------------------------------------------------------------------------------------------------------------------------------------------------------------------------------------------------------------------------------------------------------------------------------------------------------------------------------------------------------------------------------------------------------------------------------------------------------------------------------------------------------------------------------------------------------|--------------------------------------------------------------------------------|----------------------------------------------------------------------------------------------------------------------------|--------------------------------------------------------------------------------------------------------------------------------------------------------------------------------------------------------------------------------------------------------------------------------------------------------------------------------------------------------------------|-------------------------------------------------------------------------------------------------------------------------------------------------------------------------------|
|                                                                                                                                                                                                                                                                                                                                                                                                                                                                                                                                                                                                                                                                                                                                                                                                                                                                                                                                                                                                                                                                                                                                                                                                                                                                                                                                                                                                                                                                                                                                                                                                                                                                                                                                                                                                                                                                                                                                                                                                                                                                                                                                                                                                                                                                                                                                                                                                                                                                                             |                                                                                |                                                                                                                            | Shepard; Sarah Nobles; Shoshona Le; Suxiang Tong; Yan Li; Ying Tao                                                                                                                                                                                                                                                                                                 |                                                                                                                                                                               |
| EPI_ISL_1225882 to 1225884                                                                                                                                                                                                                                                                                                                                                                                                                                                                                                                                                                                                                                                                                                                                                                                                                                                                                                                                                                                                                                                                                                                                                                                                                                                                                                                                                                                                                                                                                                                                                                                                                                                                                                                                                                                                                                                                                                                                                                                                                                                                                                                                                                                                                                                                                                                                                                                                                                                                  | ME Health and Environmental Testing Laboratory                                 | Genomics and Discovery, Respiratory Viruses Branch, Division of Viral Diseases, Centers for Disease Control and Prevention | Anna Montmayeur; Anna Uehara; Ben L. Rambo-Martin; Clinton R. Paden; Dhwanii Batra; Haibin Wang; Jasmine Padilla; Jing Zhang; Justin Lee; Katie Dillon; Krista Queen; Kristen Knipe; Kristine Lacey; Lori Rowe; Mark Burroughs; Matthew Schmerer; Mili Sheth; Peter W. Cook; Rachel Marine; Sam Shepard; Sarah Nobles; Shoshona Le; Suxiang Tong; Yan Li; Ying Tao |                                                                                                                                                                               |
| EPI_ISL_1094228, EPI_ISL_1094271, EPI_ISL_1094288, EPI_ISL_1094672 to 1094684, EPI_ISL_1095222 to 1095224                                                                                                                                                                                                                                                                                                                                                                                                                                                                                                                                                                                                                                                                                                                                                                                                                                                                                                                                                                                                                                                                                                                                                                                                                                                                                                                                                                                                                                                                                                                                                                                                                                                                                                                                                                                                                                                                                                                                                                                                                                                                                                                                                                                                                                                                                                                                                                                   | ME Health and Environmental Testing Laboratory                                 | Respiratory Viruses Branch, Division of Viral Diseases, Centers for Disease Control and Prevention                         | Anna Montmayeur; Anna Uehara; Ben L. Rambo-Martin; Clinton R. Paden; Dhwanii Batra; Haibin Wang; Jasmine Padilla; Jing Zhang; Justin Lee; Krista Queen; Lori Rowe; Mark Burroughs; Mili Sheth; Peter W. Cook; Rachel Marine; Sarah Nobles; Suxiang Tong; Yan Li; Ying Tao                                                                                          |                                                                                                                                                                               |
| EPI_ISL_1034144, EPI_ISL_1251054                                                                                                                                                                                                                                                                                                                                                                                                                                                                                                                                                                                                                                                                                                                                                                                                                                                                                                                                                                                                                                                                                                                                                                                                                                                                                                                                                                                                                                                                                                                                                                                                                                                                                                                                                                                                                                                                                                                                                                                                                                                                                                                                                                                                                                                                                                                                                                                                                                                            | MEDICO COMPETENTE P.O. L'AQUILA                                                | Istituto Zooprofilattico Sperimentale dell'Abruzzo e Molise "G. Caporale"                                                  | Ancora M; Calistri P; Cammà C; Curini V; Di Domenico M; Di Pasquale A; Lorusso A; Mangone I; Maracaci M; Puglia I; Rinaldi A; Savini G; Scialabba S                                                                                                                                                                                                                |                                                                                                                                                                               |
| EPI_ISL_1312802, EPI_ISL_1312805, EPI_ISL_1312839 to 1312841, EPI_ISL_1312843, EPI_ISL_1312845, EPI_ISL_1312848, EPI_ISL_1312850, EPI_ISL_1312854, EPI_ISL_1312856, EPI_ISL_1312859 to 1312860, EPI_ISL_1312886 to 1312887, EPI_ISL_1312894, EPI_ISL_1312903 to 1312904, EPI_ISL_1312907 to 1312909, EPI_ISL_1312923                                                                                                                                                                                                                                                                                                                                                                                                                                                                                                                                                                                                                                                                                                                                                                                                                                                                                                                                                                                                                                                                                                                                                                                                                                                                                                                                                                                                                                                                                                                                                                                                                                                                                                                                                                                                                                                                                                                                                                                                                                                                                                                                                                        | see above                                                                      | MEDIPOLE CHALLES LES EAUX                                                                                                  | CNR Virus des Infections Respiratoires - France SUD                                                                                                                                                                                                                                                                                                                |                                                                                                                                                                               |
|                                                                                                                                                                                                                                                                                                                                                                                                                                                                                                                                                                                                                                                                                                                                                                                                                                                                                                                                                                                                                                                                                                                                                                                                                                                                                                                                                                                                                                                                                                                                                                                                                                                                                                                                                                                                                                                                                                                                                                                                                                                                                                                                                                                                                                                                                                                                                                                                                                                                                             | EPI_ISL_1322342                                                                | MEDIPOLE LYON VILLEURBANNE                                                                                                 | CNR Virus des Infections Respiratoires - France SUD                                                                                                                                                                                                                                                                                                                |                                                                                                                                                                               |
| EPI_ISL_1191675, EPI_ISL_1191717, EPI_ISL_1191719                                                                                                                                                                                                                                                                                                                                                                                                                                                                                                                                                                                                                                                                                                                                                                                                                                                                                                                                                                                                                                                                                                                                                                                                                                                                                                                                                                                                                                                                                                                                                                                                                                                                                                                                                                                                                                                                                                                                                                                                                                                                                                                                                                                                                                                                                                                                                                                                                                           |                                                                                | MEDIPOLE SAVOIE                                                                                                            | CNR Virus des Infections Respiratoires - France SUD                                                                                                                                                                                                                                                                                                                |                                                                                                                                                                               |
| EPI_ISL_1016337 to 1016338, EPI_ISL_1016342 to 1016343, EPI_ISL_1016402 to 1016411, EPI_ISL_1226427, EPI_ISL_1226437, EPI_ISL_1226442, EPI_ISL_1226455, EPI_ISL_1226467, EPI_ISL_1226471, EPI_ISL_1226474 to 1226475, EPI_ISL_1226481, EPI_ISL_1226494, EPI_ISL_1226504, EPI_ISL_1226522, EPI_ISL_1226525 to 1226526, EPI_ISL_1226526, EPI_ISL_1226543, EPI_ISL_1226664, EPI_ISL_1226700 to 1226701, EPI_ISL_1226710, EPI_ISL_1226725 to 1226726, EPI_ISL_1226731, EPI_ISL_1226733, EPI_ISL_1226736, EPI_ISL_1226799, EPI_ISL_1226820, EPI_ISL_1226857 to 1226858, EPI_ISL_1226861, EPI_ISL_1226907, EPI_ISL_1226910, EPI_ISL_1226980, EPI_ISL_1226986, EPI_ISL_1227033 to 1227034, EPI_ISL_1227175, EPI_ISL_1227178 to 1227180, EPI_ISL_1227211, EPI_ISL_1227214, EPI_ISL_1227230, EPI_ISL_1227236, EPI_ISL_1227242 to 1227243, EPI_ISL_1227278 to 1227282, EPI_ISL_1227284 to 1227288, EPI_ISL_1227291 to 1227292, EPI_ISL_1227468 to 1227469, EPI_ISL_1227471, EPI_ISL_1227643 to 1227662, EPI_ISL_1227791 to 1227803, EPI_ISL_1227810 to 1227812, EPI_ISL_1227814 to 1227815, EPI_ISL_1227817 to 1227818, EPI_ISL_1227827 to 1227829, EPI_ISL_1227837 to 1227838, EPI_ISL_1227843 to 1227847, EPI_ISL_1227851, EPI_ISL_1227880 to 1227894, EPI_ISL_1228032 to 1228035, EPI_ISL_1228052 to 1228113, EPI_ISL_1228117 to 1228118, EPI_ISL_1228122 to 1228129, EPI_ISL_1228131 to 1228134, EPI_ISL_1228136 to 1228138, EPI_ISL_1228141 to 1228142, EPI_ISL_1228144 to 1228146, EPI_ISL_1228224 to 1228227, EPI_ISL_1228229, EPI_ISL_1228236, EPI_ISL_1228240 to 1228251, EPI_ISL_1228254, EPI_ISL_1228307 to 1228331, EPI_ISL_1228333 to 1228341, EPI_ISL_1228346 to 1228347, EPI_ISL_1228349 to 1228355, EPI_ISL_1228360, EPI_ISL_1228368, EPI_ISL_1228484 to 1228500, EPI_ISL_1228502 to 1228503                                                                                                                                                                                                                                                                                                                                                                                                                                                                                                                                                                                                                                                                                          | see above                                                                      | MEMORIAL SLOAN KETTERING CANCER CENTER                                                                                     | Wadsworth Center, New York State Department of Health                                                                                                                                                                                                                                                                                                              | Alexis Russel; Daryl M. Lamson; Erasmus Schneider; Erica Lasek-Nesselquist; John Kelly; Jonathan Plitnick; Kirsten St. George; Matthew Shudt; Melissa A Leisner; Navjot Singh |
| EPI_ISL_1020342 to 1020408, EPI_ISL_1109945 to 1109967, EPI_ISL_1109969 to 1109989, EPI_ISL_1109991 to 1110009, EPI_ISL_1110012 to 1110022, EPI_ISL_1200638 to 1200654, EPI_ISL_1201045 to 1201046, EPI_ISL_1228665 to 1228689                                                                                                                                                                                                                                                                                                                                                                                                                                                                                                                                                                                                                                                                                                                                                                                                                                                                                                                                                                                                                                                                                                                                                                                                                                                                                                                                                                                                                                                                                                                                                                                                                                                                                                                                                                                                                                                                                                                                                                                                                                                                                                                                                                                                                                                              | see above                                                                      | MEPHI, Aix Marseille University                                                                                            | MEPHI, Aix Marseille University                                                                                                                                                                                                                                                                                                                                    |                                                                                                                                                                               |
| EPI_ISL_1272727, EPI_ISL_1318318 to 1318322                                                                                                                                                                                                                                                                                                                                                                                                                                                                                                                                                                                                                                                                                                                                                                                                                                                                                                                                                                                                                                                                                                                                                                                                                                                                                                                                                                                                                                                                                                                                                                                                                                                                                                                                                                                                                                                                                                                                                                                                                                                                                                                                                                                                                                                                                                                                                                                                                                                 | MI - Michigan Department of Health and Human Services - Bureau of Laboratories | Centers for Disease Control and Prevention Division of Viral Diseases, Pathogen Discovery                                  | Anna Montmayeur; Anna Uehara; Ben L. Rambo-Martin; Clinton R. Paden; Dhwanii Batra; Haibin Wang; Jasmine Padilla; Jing Zhang; Justin Lee; Katie Dillon; Krista Queen; Kristen Knipe; Kristine Lacey; Lori Rowe; Mark Burroughs; Matthew Schmerer; Mili Sheth; Peter W. Cook; Rachel Marine; Sam Shepard; Sarah Nobles; Shoshona Le; Suxiang Tong; Yan Li; Ying Tao |                                                                                                                                                                               |
| EPI_ISL_1169488, EPI_ISL_1226276 to 1226277, EPI_ISL_1226303 to 1226306                                                                                                                                                                                                                                                                                                                                                                                                                                                                                                                                                                                                                                                                                                                                                                                                                                                                                                                                                                                                                                                                                                                                                                                                                                                                                                                                                                                                                                                                                                                                                                                                                                                                                                                                                                                                                                                                                                                                                                                                                                                                                                                                                                                                                                                                                                                                                                                                                     | MI - Michigan Department of Health and Human Services - Bureau of Laboratories | Genomics and Discovery, Respiratory Viruses Branch, Division of Viral Diseases, Centers for Disease Control and Prevention | Anna Montmayeur; Anna Uehara; Ben L. Rambo-Martin; Clinton R. Paden; Dhwanii Batra; Haibin Wang; Jasmine Padilla; Jing Zhang; Justin Lee; Katie Dillon; Krista Queen; Kristen Knipe; Kristine Lacey; Lori Rowe; Mark Burroughs; Matthew Schmerer; Mili Sheth; Peter W. Cook; Rachel Marine; Sam Shepard; Sarah Nobles; Shoshona Le; Suxiang Tong; Yan Li; Ying Tao |                                                                                                                                                                               |
| EPI_ISL_1094283, EPI_ISL_1094292, EPI_ISL_1094350 to 1094351, EPI_ISL_1094365, EPI_ISL_1094416 to 1094424, EPI_ISL_1095074 to 1095096, EPI_ISL_1095276 to 1095286                                                                                                                                                                                                                                                                                                                                                                                                                                                                                                                                                                                                                                                                                                                                                                                                                                                                                                                                                                                                                                                                                                                                                                                                                                                                                                                                                                                                                                                                                                                                                                                                                                                                                                                                                                                                                                                                                                                                                                                                                                                                                                                                                                                                                                                                                                                           | see above                                                                      | MI - Michigan Department of Health and Human Services - Bureau of Laboratories                                             | Respiratory Viruses Branch, Division of Viral Diseases, Centers for Disease Control and Prevention                                                                                                                                                                                                                                                                 |                                                                                                                                                                               |
| EPI_ISL_1228968, EPI_ISL_1228970 to 1228971, EPI_ISL_1228973, EPI_ISL_1228977, EPI_ISL_1228979, EPI_ISL_1228982, EPI_ISL_1228985 to 1228987, EPI_ISL_1228989, EPI_ISL_1228992, EPI_ISL_1228998, EPI_ISL_1229001, EPI_ISL_1229022 to 1229023, EPI_ISL_1229025, EPI_ISL_1229036, EPI_ISL_1229038, EPI_ISL_1229040, EPI_ISL_1229042 to 1229043, EPI_ISL_1229045 to 1229046                                                                                                                                                                                                                                                                                                                                                                                                                                                                                                                                                                                                                                                                                                                                                                                                                                                                                                                                                                                                                                                                                                                                                                                                                                                                                                                                                                                                                                                                                                                                                                                                                                                                                                                                                                                                                                                                                                                                                                                                                                                                                                                     | see above                                                                      | MIRIALIS                                                                                                                   | CNR Virus des Infections Respiratoires - France SUD                                                                                                                                                                                                                                                                                                                |                                                                                                                                                                               |
| EPI_ISL_1360400 to 1360402, EPI_ISL_1360406                                                                                                                                                                                                                                                                                                                                                                                                                                                                                                                                                                                                                                                                                                                                                                                                                                                                                                                                                                                                                                                                                                                                                                                                                                                                                                                                                                                                                                                                                                                                                                                                                                                                                                                                                                                                                                                                                                                                                                                                                                                                                                                                                                                                                                                                                                                                                                                                                                                 |                                                                                | MIRIALIS CLUSE                                                                                                             | CNR Virus des Infections Respiratoires - France SUD                                                                                                                                                                                                                                                                                                                |                                                                                                                                                                               |
| EPI_ISL_1165965, EPI_ISL_1190781, EPI_ISL_1371771 to 1371778                                                                                                                                                                                                                                                                                                                                                                                                                                                                                                                                                                                                                                                                                                                                                                                                                                                                                                                                                                                                                                                                                                                                                                                                                                                                                                                                                                                                                                                                                                                                                                                                                                                                                                                                                                                                                                                                                                                                                                                                                                                                                                                                                                                                                                                                                                                                                                                                                                |                                                                                | MIRIALIS CLUSES BECHET                                                                                                     | CNR Virus des Infections Respiratoires - France SUD                                                                                                                                                                                                                                                                                                                |                                                                                                                                                                               |
| EPI_ISL_1191706                                                                                                                                                                                                                                                                                                                                                                                                                                                                                                                                                                                                                                                                                                                                                                                                                                                                                                                                                                                                                                                                                                                                                                                                                                                                                                                                                                                                                                                                                                                                                                                                                                                                                                                                                                                                                                                                                                                                                                                                                                                                                                                                                                                                                                                                                                                                                                                                                                                                             |                                                                                | MIRIALIS CLUSES SARDAGNE                                                                                                   | CNR Virus des Infections Respiratoires - France SUD                                                                                                                                                                                                                                                                                                                |                                                                                                                                                                               |
| EPI_ISL_1169487, EPI_ISL_1169491 to 1169492, EPI_ISL_1169545 to 1169548, EPI_ISL_1169550 to 1169561                                                                                                                                                                                                                                                                                                                                                                                                                                                                                                                                                                                                                                                                                                                                                                                                                                                                                                                                                                                                                                                                                                                                                                                                                                                                                                                                                                                                                                                                                                                                                                                                                                                                                                                                                                                                                                                                                                                                                                                                                                                                                                                                                                                                                                                                                                                                                                                         |                                                                                | MN PHL Division, Minnesota Department of Health                                                                            | Genomics and Discovery, Respiratory Viruses Branch, Division of Viral Diseases, Centers for Disease Control and Prevention                                                                                                                                                                                                                                         |                                                                                                                                                                               |
| EPI_ISL_1094600                                                                                                                                                                                                                                                                                                                                                                                                                                                                                                                                                                                                                                                                                                                                                                                                                                                                                                                                                                                                                                                                                                                                                                                                                                                                                                                                                                                                                                                                                                                                                                                                                                                                                                                                                                                                                                                                                                                                                                                                                                                                                                                                                                                                                                                                                                                                                                                                                                                                             |                                                                                | MN PHL Division, Minnesota Department of Health                                                                            | Respiratory Viruses Branch, Division of Viral Diseases, Centers for Disease Control and Prevention                                                                                                                                                                                                                                                                 |                                                                                                                                                                               |
| EPI_ISL_1167989 to 1167998, EPI_ISL_1168007 to 1168014, EPI_ISL_1226359 to 1226380, EPI_ISL_1226408 to 1226416                                                                                                                                                                                                                                                                                                                                                                                                                                                                                                                                                                                                                                                                                                                                                                                                                                                                                                                                                                                                                                                                                                                                                                                                                                                                                                                                                                                                                                                                                                                                                                                                                                                                                                                                                                                                                                                                                                                                                                                                                                                                                                                                                                                                                                                                                                                                                                              |                                                                                | MO State Public Health Laboratory                                                                                          | Genomics and Discovery, Respiratory Viruses Branch, Division of Viral Diseases, Centers for Disease Control and Prevention                                                                                                                                                                                                                                         |                                                                                                                                                                               |
| EPI_ISL_1373995 to 1374015                                                                                                                                                                                                                                                                                                                                                                                                                                                                                                                                                                                                                                                                                                                                                                                                                                                                                                                                                                                                                                                                                                                                                                                                                                                                                                                                                                                                                                                                                                                                                                                                                                                                                                                                                                                                                                                                                                                                                                                                                                                                                                                                                                                                                                                                                                                                                                                                                                                                  |                                                                                | MO State Public Health Laboratory                                                                                          | Pathogen Discovery, Respiratory Viruses Branch, Division of Viral Diseases, Centers for Disease Control and Prevention                                                                                                                                                                                                                                             |                                                                                                                                                                               |
| EPI_ISL_1094291, EPI_ISL_1094358, EPI_ISL_1094974 to 1094983, EPI_ISL_1095263 to 1095269                                                                                                                                                                                                                                                                                                                                                                                                                                                                                                                                                                                                                                                                                                                                                                                                                                                                                                                                                                                                                                                                                                                                                                                                                                                                                                                                                                                                                                                                                                                                                                                                                                                                                                                                                                                                                                                                                                                                                                                                                                                                                                                                                                                                                                                                                                                                                                                                    |                                                                                | MO State Public Health Laboratory                                                                                          | Respiratory Viruses Branch, Division of Viral Diseases, Centers for Disease Control and Prevention                                                                                                                                                                                                                                                                 |                                                                                                                                                                               |
| EPI_ISL_1016171 to 1016219, EPI_ISL_1226424, EPI_ISL_1226426, EPI_ISL_1226431, EPI_ISL_1226433, EPI_ISL_1226446, EPI_ISL_1226450, EPI_ISL_1226454, EPI_ISL_1226457, EPI_ISL_1226464 to 1226465, EPI_ISL_1226489, EPI_ISL_1226492 to 1226493, EPI_ISL_1226498, EPI_ISL_1226509, EPI_ISL_1226515, EPI_ISL_1226523, EPI_ISL_1226529 to 1226532, EPI_ISL_1226573, EPI_ISL_1226576, EPI_ISL_1226594, EPI_ISL_1226597, EPI_ISL_1226601, EPI_ISL_1226604 to 1226614, EPI_ISL_1226654, EPI_ISL_1226680, EPI_ISL_1226681, EPI_ISL_1226689 to 1226691, EPI_ISL_1226714 to 1226715, EPI_ISL_1226722, EPI_ISL_1226724, EPI_ISL_1226734 to 1226735, EPI_ISL_1226737 to 1226738, EPI_ISL_1226740 to 1226742, EPI_ISL_1226744 to 1226755, EPI_ISL_1226758, EPI_ISL_1226760 to 1226764, EPI_ISL_1226766 to 1226767, EPI_ISL_1226770 to 1226771, EPI_ISL_1226773 to 1226780, EPI_ISL_1226831, EPI_ISL_1226835, EPI_ISL_1226839, EPI_ISL_1226842, EPI_ISL_1226844, EPI_ISL_1226864, EPI_ISL_1226871, EPI_ISL_1226876 to 1226890, EPI_ISL_1226890, EPI_ISL_1226931, EPI_ISL_1226934, EPI_ISL_1226936 to 1226937, EPI_ISL_1226939 to 1226962, EPI_ISL_1226964 to 1226969, EPI_ISL_1226971 to 1226972, EPI_ISL_1226974 to 1226979, EPI_ISL_1227016, EPI_ISL_1227021 to 1227022, EPI_ISL_1227024 to 1227025, EPI_ISL_1227035 to 1227039, EPI_ISL_1227041 to 1227067, EPI_ISL_1227070 to 1227080, EPI_ISL_1227082 to 1227086, EPI_ISL_1227090 to 1227094, EPI_ISL_1227097 to 1227108, EPI_ISL_1227110 to 1227128, EPI_ISL_1227150, EPI_ISL_1227226 to 1227227, EPI_ISL_1227297 to 1227301, EPI_ISL_1227306 to 1227313, EPI_ISL_1227315 to 1227319, EPI_ISL_1227321 to 1227325, EPI_ISL_1227327 to 1227336, EPI_ISL_1227338 to 1227356, EPI_ISL_1227364 to 1227378, EPI_ISL_1227380 to 1227400, EPI_ISL_1227403 to 1227405, EPI_ISL_1227411 to 1227415, EPI_ISL_1227418 to 1227421, EPI_ISL_1227424 to 1227427, EPI_ISL_1227430 to 1227434, EPI_ISL_1227436 to 1227439, EPI_ISL_1227442 to 1227446, EPI_ISL_1227503, EPI_ISL_1227665, EPI_ISL_1227705, EPI_ISL_1227909, EPI_ISL_1227911 to 1227912, EPI_ISL_1227932 to 1227933, EPI_ISL_1227959, EPI_ISL_1228114, EPI_ISL_1228173, EPI_ISL_1228176, EPI_ISL_1228188, EPI_ISL_1228256, EPI_ISL_1228262, EPI_ISL_1228266, EPI_ISL_1228520, EPI_ISL_1228530 to 1228531, EPI_ISL_1228536, EPI_ISL_1228541 to 1228542, EPI_ISL_1228550, EPI_ISL_1228553, EPI_ISL_1228558 to 1228560, EPI_ISL_1228567, EPI_ISL_1228569, EPI_ISL_1228572, EPI_ISL_1228578, EPI_ISL_1228584 | see above                                                                      | MONTEFIORE MEDICAL CENTER LABORATORIES                                                                                     | Wadsworth Center, New York State Department of Health                                                                                                                                                                                                                                                                                                              |                                                                                                                                                                               |
| EPI_ISL_1216070, EPI_ISL_1216072, EPI_ISL_1216074, EPI_ISL_1216076 to 1216077, EPI_ISL_1216079, EPI_ISL_1216081, EPI_ISL_1216083, EPI_ISL_1216085, EPI_ISL_1216087 to 1216088, EPI_ISL_1216090, EPI_ISL_1216092 to 1216093, EPI_ISL_1216097, EPI_ISL_1216099 to 1216100, EPI_ISL_1216104, EPI_ISL_1216106 to 1216107, EPI_ISL_1216109 to 1216110, EPI_ISL_1216112, EPI_ISL_1216114, EPI_ISL_1216116, EPI_ISL_1216118 to 1216119, EPI_ISL_1216121, EPI_ISL_1216123 to 1216124, EPI_ISL_1216127 to 1216128, EPI_ISL_1216130, EPI_ISL_1216132 to 1216133, EPI_ISL_1234525 to 1234536                                                                                                                                                                                                                                                                                                                                                                                                                                                                                                                                                                                                                                                                                                                                                                                                                                                                                                                                                                                                                                                                                                                                                                                                                                                                                                                                                                                                                                                                                                                                                                                                                                                                                                                                                                                                                                                                                                           | see above                                                                      | MRCG at LSHTM Genomics lab                                                                                                 | MRCG at LSHTM Genomics lab                                                                                                                                                                                                                                                                                                                                         |                                                                                                                                                                               |
| EPI_ISL_1272614 to 1272637                                                                                                                                                                                                                                                                                                                                                                                                                                                                                                                                                                                                                                                                                                                                                                                                                                                                                                                                                                                                                                                                                                                                                                                                                                                                                                                                                                                                                                                                                                                                                                                                                                                                                                                                                                                                                                                                                                                                                                                                                                                                                                                                                                                                                                                                                                                                                                                                                                                                  | MS Public Health Laboratory                                                    | Centers for Disease Control and Prevention Division of Viral                                                               | Abdoulie Kanthe; Abdul Karim sesay; Bakary Sanyang; Jarra Manneh; Mariama Kujabi                                                                                                                                                                                                                                                                                   |                                                                                                                                                                               |
|                                                                                                                                                                                                                                                                                                                                                                                                                                                                                                                                                                                                                                                                                                                                                                                                                                                                                                                                                                                                                                                                                                                                                                                                                                                                                                                                                                                                                                                                                                                                                                                                                                                                                                                                                                                                                                                                                                                                                                                                                                                                                                                                                                                                                                                                                                                                                                                                                                                                                             |                                                                                |                                                                                                                            | Anna Montmayeur; Anna Uehara; Ben L. Rambo-Martin; Clinton R. Paden; Dhwanii Batra; Haibin Wang; Jasmine Padilla; Jing Zhang; Justin Lee; Katie                                                                                                                                                                                                                    |                                                                                                                                                                               |



| Diseases, Pathogen Discovery                                                                                                                                                                                                                                                                                                                                                                                                                                                                                                                                                                                                                                                                                                                                                                                                                                                                                                                                                                                                                                                                                                                                                                                                                                                                                                                                                                                                                                                                                                                                                                                                                                                                                                                                                                                                                                                                                                                                                                                                                                                                                                                                                                                                                                                                                                                                                                                                                                                                                                                                                                                                                                                                                                                                                                                                                                                                                                                                                                                                                                                                                                                                                                                                                                                                                                                                                                                                                                                                                                                                                                                                                                                                                                                                                                                                                                                                                                                                                                                                                                                                                                                                                                                                                                                                                                                                                                                                                                                                                                                                                                                                                                                                                                                                                                                                                                                                                                                                                                                                                                                                                                                                                                                                                                                                                                                                                                                                                                                                                                                                                                                                                                                                                                                                                                                                                                                                                                                                                                                                                                                                                                                                                                                                                                                                                                                                                                                                                                                                                                                                                                                                                                                                                                                                                                                                                                                                                                                                                                                                                                                                                                                                                                                                                                                                                                                                                                                                                                                                                                                                                                                                                                                                                                                                                                                                                                                                                                                                                                                                                                                                                                                                                                                                                                                                                                                                                                                                                                                                                                                                                                                                                                                                                                                                                                                                                                                                                                                                                                                                                                                                                                                                                                                                                                                                                                                                                                                                                                                                                                                                                                                                                                                                                                                                                                                                                                                                                                                                                                                                                                                                                                                                                                                                                                                                                                                                                                                                                                                                                                                                                                                                                                                                                                                                                                                                                                                                                                                                                                                                                                                                                                                                                                                                                                                                                                                                                                                                                                                                                                                                                                                                                                                                                                                                                                                                                                                                                                                                                                                                                                                                                                                                                                                                                                                                                                                                                                                                                                                                                                                                                                                                                                                                                                                                                                                                                                                                                                                                                                                                                                                                                                                                                                                                                                                                                                                                                                                                                                                                                                                                                                                                                                                                                                                                                                 |                                         |                                                                                                                            | Dillon; Krista Queen; Kristen Knipe; Kristine Lacek; Lori Rowe; Mark Burroughs; Matthew Schmerer; Mili Sheth; Peter W. Cook; Rachel Marine; Sam Shepard; Sarah Nobles; Shoshona Le; Suxiang Tong; Yan Li; Ying Tao                                                                                                                                                                                                                                                                                                                                                                                                                                                                                                                                                                                                                                                                                                                                                                                                                                                                                           |
|----------------------------------------------------------------------------------------------------------------------------------------------------------------------------------------------------------------------------------------------------------------------------------------------------------------------------------------------------------------------------------------------------------------------------------------------------------------------------------------------------------------------------------------------------------------------------------------------------------------------------------------------------------------------------------------------------------------------------------------------------------------------------------------------------------------------------------------------------------------------------------------------------------------------------------------------------------------------------------------------------------------------------------------------------------------------------------------------------------------------------------------------------------------------------------------------------------------------------------------------------------------------------------------------------------------------------------------------------------------------------------------------------------------------------------------------------------------------------------------------------------------------------------------------------------------------------------------------------------------------------------------------------------------------------------------------------------------------------------------------------------------------------------------------------------------------------------------------------------------------------------------------------------------------------------------------------------------------------------------------------------------------------------------------------------------------------------------------------------------------------------------------------------------------------------------------------------------------------------------------------------------------------------------------------------------------------------------------------------------------------------------------------------------------------------------------------------------------------------------------------------------------------------------------------------------------------------------------------------------------------------------------------------------------------------------------------------------------------------------------------------------------------------------------------------------------------------------------------------------------------------------------------------------------------------------------------------------------------------------------------------------------------------------------------------------------------------------------------------------------------------------------------------------------------------------------------------------------------------------------------------------------------------------------------------------------------------------------------------------------------------------------------------------------------------------------------------------------------------------------------------------------------------------------------------------------------------------------------------------------------------------------------------------------------------------------------------------------------------------------------------------------------------------------------------------------------------------------------------------------------------------------------------------------------------------------------------------------------------------------------------------------------------------------------------------------------------------------------------------------------------------------------------------------------------------------------------------------------------------------------------------------------------------------------------------------------------------------------------------------------------------------------------------------------------------------------------------------------------------------------------------------------------------------------------------------------------------------------------------------------------------------------------------------------------------------------------------------------------------------------------------------------------------------------------------------------------------------------------------------------------------------------------------------------------------------------------------------------------------------------------------------------------------------------------------------------------------------------------------------------------------------------------------------------------------------------------------------------------------------------------------------------------------------------------------------------------------------------------------------------------------------------------------------------------------------------------------------------------------------------------------------------------------------------------------------------------------------------------------------------------------------------------------------------------------------------------------------------------------------------------------------------------------------------------------------------------------------------------------------------------------------------------------------------------------------------------------------------------------------------------------------------------------------------------------------------------------------------------------------------------------------------------------------------------------------------------------------------------------------------------------------------------------------------------------------------------------------------------------------------------------------------------------------------------------------------------------------------------------------------------------------------------------------------------------------------------------------------------------------------------------------------------------------------------------------------------------------------------------------------------------------------------------------------------------------------------------------------------------------------------------------------------------------------------------------------------------------------------------------------------------------------------------------------------------------------------------------------------------------------------------------------------------------------------------------------------------------------------------------------------------------------------------------------------------------------------------------------------------------------------------------------------------------------------------------------------------------------------------------------------------------------------------------------------------------------------------------------------------------------------------------------------------------------------------------------------------------------------------------------------------------------------------------------------------------------------------------------------------------------------------------------------------------------------------------------------------------------------------------------------------------------------------------------------------------------------------------------------------------------------------------------------------------------------------------------------------------------------------------------------------------------------------------------------------------------------------------------------------------------------------------------------------------------------------------------------------------------------------------------------------------------------------------------------------------------------------------------------------------------------------------------------------------------------------------------------------------------------------------------------------------------------------------------------------------------------------------------------------------------------------------------------------------------------------------------------------------------------------------------------------------------------------------------------------------------------------------------------------------------------------------------------------------------------------------------------------------------------------------------------------------------------------------------------------------------------------------------------------------------------------------------------------------------------------------------------------------------------------------------------------------------------------------------------------------------------------------------------------------------------------------------------------------------------------------------------------------------------------------------------------------------------------------------------------------------------------------------------------------------------------------------------------------------------------------------------------------------------------------------------------------------------------------------------------------------------------------------------------------------------------------------------------------------------------------------------------------------------------------------------------------------------------------------------------------------------------------------------------------------------------------------------------------------------------------------------------------------------------------------------------------------------------------------------------------------------------------------------------------------------------------------------------------------------------------------------------------------------------------------------------------------------------------------------------------------------------------------------------------------------------------------------------------------------------------------------------------------------------------------------------------------------------------------------------------------------------------------------------------------------------------------------------------------------------------------------------------------------------------------------------------------------------------------------------------------------------------------------------------------------------------------------------------------------------------------------------------------------------------------------------------------------------------------------------------------------------------------------------------------------------------------------------------------------------------------------------------------------------------------------------------------------------------------------------------------------------------------------------------------------------------------------------------------------------------------------------------------------------------------------------------------------------------------------------------------------------------------------------------------------------------------------------------------------------------------------------------------------------------------------------------------------------------------------------------------------------------------------------------------------------------------------------------------------------------------------------------------------------------------------------------------------------------------------------------------------------------------------------------------------------------------------------------------------------------------------------------------------------------------------------------------------------------------------------------------------------------------------------------------------------------------------------------------------------------------------------------------------------------------------------------------------------------------------------------------------------------------------------------------------------------------------------------------------------------------------------------------------------------------------------------------------------------------------------------------------------------------------------------------------------------------------------------------------------------------------------------------------------------------------------------------------------------------------------------------------------------------------------------------------------------------------------------------------------------------------------------------------------------------------------------------------------------|-----------------------------------------|----------------------------------------------------------------------------------------------------------------------------|--------------------------------------------------------------------------------------------------------------------------------------------------------------------------------------------------------------------------------------------------------------------------------------------------------------------------------------------------------------------------------------------------------------------------------------------------------------------------------------------------------------------------------------------------------------------------------------------------------------------------------------------------------------------------------------------------------------------------------------------------------------------------------------------------------------------------------------------------------------------------------------------------------------------------------------------------------------------------------------------------------------------------------------------------------------------------------------------------------------|
| EPI_ISL_1008928 to 1008929                                                                                                                                                                                                                                                                                                                                                                                                                                                                                                                                                                                                                                                                                                                                                                                                                                                                                                                                                                                                                                                                                                                                                                                                                                                                                                                                                                                                                                                                                                                                                                                                                                                                                                                                                                                                                                                                                                                                                                                                                                                                                                                                                                                                                                                                                                                                                                                                                                                                                                                                                                                                                                                                                                                                                                                                                                                                                                                                                                                                                                                                                                                                                                                                                                                                                                                                                                                                                                                                                                                                                                                                                                                                                                                                                                                                                                                                                                                                                                                                                                                                                                                                                                                                                                                                                                                                                                                                                                                                                                                                                                                                                                                                                                                                                                                                                                                                                                                                                                                                                                                                                                                                                                                                                                                                                                                                                                                                                                                                                                                                                                                                                                                                                                                                                                                                                                                                                                                                                                                                                                                                                                                                                                                                                                                                                                                                                                                                                                                                                                                                                                                                                                                                                                                                                                                                                                                                                                                                                                                                                                                                                                                                                                                                                                                                                                                                                                                                                                                                                                                                                                                                                                                                                                                                                                                                                                                                                                                                                                                                                                                                                                                                                                                                                                                                                                                                                                                                                                                                                                                                                                                                                                                                                                                                                                                                                                                                                                                                                                                                                                                                                                                                                                                                                                                                                                                                                                                                                                                                                                                                                                                                                                                                                                                                                                                                                                                                                                                                                                                                                                                                                                                                                                                                                                                                                                                                                                                                                                                                                                                                                                                                                                                                                                                                                                                                                                                                                                                                                                                                                                                                                                                                                                                                                                                                                                                                                                                                                                                                                                                                                                                                                                                                                                                                                                                                                                                                                                                                                                                                                                                                                                                                                                                                                                                                                                                                                                                                                                                                                                                                                                                                                                                                                                                                                                                                                                                                                                                                                                                                                                                                                                                                                                                                                                                                                                                                                                                                                                                                                                                                                                                                                                                                                                                                                                   | MS Public Health Laboratory             | Pathogen Discovery, Respiratory Viruses Branch, Division of Viral Diseases, Centers for Disease Control and Prevention     | Anna Uehara; Clinton R. Paden; Sarah Wang; Jing Zhang; Krista Queen; Peter Cook; Suxiang Tong; Yan Li; Ying Tao                                                                                                                                                                                                                                                                                                                                                                                                                                                                                                                                                                                                                                                                                                                                                                                                                                                                                                                                                                                              |
| EPI_ISL_1094207, EPI_ISL_1094215, EPI_ISL_1094310, EPI_ISL_1095120 to 1095130                                                                                                                                                                                                                                                                                                                                                                                                                                                                                                                                                                                                                                                                                                                                                                                                                                                                                                                                                                                                                                                                                                                                                                                                                                                                                                                                                                                                                                                                                                                                                                                                                                                                                                                                                                                                                                                                                                                                                                                                                                                                                                                                                                                                                                                                                                                                                                                                                                                                                                                                                                                                                                                                                                                                                                                                                                                                                                                                                                                                                                                                                                                                                                                                                                                                                                                                                                                                                                                                                                                                                                                                                                                                                                                                                                                                                                                                                                                                                                                                                                                                                                                                                                                                                                                                                                                                                                                                                                                                                                                                                                                                                                                                                                                                                                                                                                                                                                                                                                                                                                                                                                                                                                                                                                                                                                                                                                                                                                                                                                                                                                                                                                                                                                                                                                                                                                                                                                                                                                                                                                                                                                                                                                                                                                                                                                                                                                                                                                                                                                                                                                                                                                                                                                                                                                                                                                                                                                                                                                                                                                                                                                                                                                                                                                                                                                                                                                                                                                                                                                                                                                                                                                                                                                                                                                                                                                                                                                                                                                                                                                                                                                                                                                                                                                                                                                                                                                                                                                                                                                                                                                                                                                                                                                                                                                                                                                                                                                                                                                                                                                                                                                                                                                                                                                                                                                                                                                                                                                                                                                                                                                                                                                                                                                                                                                                                                                                                                                                                                                                                                                                                                                                                                                                                                                                                                                                                                                                                                                                                                                                                                                                                                                                                                                                                                                                                                                                                                                                                                                                                                                                                                                                                                                                                                                                                                                                                                                                                                                                                                                                                                                                                                                                                                                                                                                                                                                                                                                                                                                                                                                                                                                                                                                                                                                                                                                                                                                                                                                                                                                                                                                                                                                                                                                                                                                                                                                                                                                                                                                                                                                                                                                                                                                                                                                                                                                                                                                                                                                                                                                                                                                                                                                                                                                                | MS Public Health Laboratory             | Respiratory Viruses Branch, Division of Viral Diseases, Centers for Disease Control and Prevention                         | Anna Montmayeur; Anna Uehara; Ben L. Rambo-Martin; Clinton R. Paden; Dhvani Batra; Haibin Wang; Jasmine Padilla; Jing Zhang; Justin Lee; Krista Queen; Lori Rowe; Mark Burroughs; Mili Sheth; Peter W. Cook; Rachel Marine; Sarah Nobles; Suxiang Tong; Yan Li; Ying Tao                                                                                                                                                                                                                                                                                                                                                                                                                                                                                                                                                                                                                                                                                                                                                                                                                                     |
| EPI_ISL_1049482, EPI_ISL_1171856, EPI_ISL_1300756 to 1301439                                                                                                                                                                                                                                                                                                                                                                                                                                                                                                                                                                                                                                                                                                                                                                                                                                                                                                                                                                                                                                                                                                                                                                                                                                                                                                                                                                                                                                                                                                                                                                                                                                                                                                                                                                                                                                                                                                                                                                                                                                                                                                                                                                                                                                                                                                                                                                                                                                                                                                                                                                                                                                                                                                                                                                                                                                                                                                                                                                                                                                                                                                                                                                                                                                                                                                                                                                                                                                                                                                                                                                                                                                                                                                                                                                                                                                                                                                                                                                                                                                                                                                                                                                                                                                                                                                                                                                                                                                                                                                                                                                                                                                                                                                                                                                                                                                                                                                                                                                                                                                                                                                                                                                                                                                                                                                                                                                                                                                                                                                                                                                                                                                                                                                                                                                                                                                                                                                                                                                                                                                                                                                                                                                                                                                                                                                                                                                                                                                                                                                                                                                                                                                                                                                                                                                                                                                                                                                                                                                                                                                                                                                                                                                                                                                                                                                                                                                                                                                                                                                                                                                                                                                                                                                                                                                                                                                                                                                                                                                                                                                                                                                                                                                                                                                                                                                                                                                                                                                                                                                                                                                                                                                                                                                                                                                                                                                                                                                                                                                                                                                                                                                                                                                                                                                                                                                                                                                                                                                                                                                                                                                                                                                                                                                                                                                                                                                                                                                                                                                                                                                                                                                                                                                                                                                                                                                                                                                                                                                                                                                                                                                                                                                                                                                                                                                                                                                                                                                                                                                                                                                                                                                                                                                                                                                                                                                                                                                                                                                                                                                                                                                                                                                                                                                                                                                                                                                                                                                                                                                                                                                                                                                                                                                                                                                                                                                                                                                                                                                                                                                                                                                                                                                                                                                                                                                                                                                                                                                                                                                                                                                                                                                                                                                                                                                                                                                                                                                                                                                                                                                                                                                                                                                                                                                                                 | MSSH Clinical Microbiology Laboratories | MSSH Pathogen Surveillance Program                                                                                         | Aaron J. Schmitz; Adolfo García-Sastre; Adriana van de Guchte; Ajay Obla; Alberto Paniz-Mondolfi; Ali H. Ellebedy; Ana Gonzalez Reichle; Ana S. Gonzalez-Reiche; Angela Amoako; Ashley Salimbandon; Betsaida Salom Melo; Bremy Alburquerque; Brianne Ciferri; Charles Gleason; Daniel C. Adelsberg; Daniel Floda; Deena R. Altman; Denise Jurczynski; Emilia Mia Sordillo; Fatima Amanat; Florian Kramerer; Gintaras Deikus; Giulio Kleiner; Gopi Patel; Goran Bajic; Hala Alshammary; Harm van Bakel; Irina Oussenko; Jackson S. Turner; Jayeta Dutta; Jan Manuel Carreno; Juan Soto; Julia Matthews; Julian Q Zhou; Katherine Beach; Kathryn Wyman; Kayla Russo; Komal Srivastava; Levy Sominia; Mahima Thapa; Mahmood Awadwa; Marta Luksza; Matthew M. Hernandez; Melissa Gitman; Michael D. Nowak; Mitchell J. Sullivan; Nancy Francoeur; Nicholas Borcherding; Robert Sebra; Sarah Schaefer; Sarah Zafar; Shaza M. Sayed Ahmed; Shelcie Fabre; Shirah Stromheier; Shwetha Hara Sridhar; The Personalized Virology Initiative; Tinting Lei; Viviana Simon; Willemijn Rijnink; Ying-Chih Wang; Zenab Khan |
| EPI_ISL_1301440                                                                                                                                                                                                                                                                                                                                                                                                                                                                                                                                                                                                                                                                                                                                                                                                                                                                                                                                                                                                                                                                                                                                                                                                                                                                                                                                                                                                                                                                                                                                                                                                                                                                                                                                                                                                                                                                                                                                                                                                                                                                                                                                                                                                                                                                                                                                                                                                                                                                                                                                                                                                                                                                                                                                                                                                                                                                                                                                                                                                                                                                                                                                                                                                                                                                                                                                                                                                                                                                                                                                                                                                                                                                                                                                                                                                                                                                                                                                                                                                                                                                                                                                                                                                                                                                                                                                                                                                                                                                                                                                                                                                                                                                                                                                                                                                                                                                                                                                                                                                                                                                                                                                                                                                                                                                                                                                                                                                                                                                                                                                                                                                                                                                                                                                                                                                                                                                                                                                                                                                                                                                                                                                                                                                                                                                                                                                                                                                                                                                                                                                                                                                                                                                                                                                                                                                                                                                                                                                                                                                                                                                                                                                                                                                                                                                                                                                                                                                                                                                                                                                                                                                                                                                                                                                                                                                                                                                                                                                                                                                                                                                                                                                                                                                                                                                                                                                                                                                                                                                                                                                                                                                                                                                                                                                                                                                                                                                                                                                                                                                                                                                                                                                                                                                                                                                                                                                                                                                                                                                                                                                                                                                                                                                                                                                                                                                                                                                                                                                                                                                                                                                                                                                                                                                                                                                                                                                                                                                                                                                                                                                                                                                                                                                                                                                                                                                                                                                                                                                                                                                                                                                                                                                                                                                                                                                                                                                                                                                                                                                                                                                                                                                                                                                                                                                                                                                                                                                                                                                                                                                                                                                                                                                                                                                                                                                                                                                                                                                                                                                                                                                                                                                                                                                                                                                                                                                                                                                                                                                                                                                                                                                                                                                                                                                                                                                                                                                                                                                                                                                                                                                                                                                                                                                                                                                                                              | MSSH Clinical Microbiology Laboratories | NBACC                                                                                                                      | Aaron Phillips; Adam Bazinet; Amanda Graham; Brian Holland; David Miller; Denise Freurburger; Elyse Abbott; Gregory Williams; Jason Yoltiz; Jennifer Biryukov; Jordan Bohannon; Karla Garcia; Katie Beck; M. J. Rosovitz; Melissa Krause; Michael Schuit; Paul Dabisch; Sean Lovett; Shanna Ratnesar-Shumate; Stewart Wood; Victoria Wahl; Wade Weaver                                                                                                                                                                                                                                                                                                                                                                                                                                                                                                                                                                                                                                                                                                                                                       |
| EPI_ISL_1272989 to 1272997, EPI_ISL_1318468 to 1318477                                                                                                                                                                                                                                                                                                                                                                                                                                                                                                                                                                                                                                                                                                                                                                                                                                                                                                                                                                                                                                                                                                                                                                                                                                                                                                                                                                                                                                                                                                                                                                                                                                                                                                                                                                                                                                                                                                                                                                                                                                                                                                                                                                                                                                                                                                                                                                                                                                                                                                                                                                                                                                                                                                                                                                                                                                                                                                                                                                                                                                                                                                                                                                                                                                                                                                                                                                                                                                                                                                                                                                                                                                                                                                                                                                                                                                                                                                                                                                                                                                                                                                                                                                                                                                                                                                                                                                                                                                                                                                                                                                                                                                                                                                                                                                                                                                                                                                                                                                                                                                                                                                                                                                                                                                                                                                                                                                                                                                                                                                                                                                                                                                                                                                                                                                                                                                                                                                                                                                                                                                                                                                                                                                                                                                                                                                                                                                                                                                                                                                                                                                                                                                                                                                                                                                                                                                                                                                                                                                                                                                                                                                                                                                                                                                                                                                                                                                                                                                                                                                                                                                                                                                                                                                                                                                                                                                                                                                                                                                                                                                                                                                                                                                                                                                                                                                                                                                                                                                                                                                                                                                                                                                                                                                                                                                                                                                                                                                                                                                                                                                                                                                                                                                                                                                                                                                                                                                                                                                                                                                                                                                                                                                                                                                                                                                                                                                                                                                                                                                                                                                                                                                                                                                                                                                                                                                                                                                                                                                                                                                                                                                                                                                                                                                                                                                                                                                                                                                                                                                                                                                                                                                                                                                                                                                                                                                                                                                                                                                                                                                                                                                                                                                                                                                                                                                                                                                                                                                                                                                                                                                                                                                                                                                                                                                                                                                                                                                                                                                                                                                                                                                                                                                                                                                                                                                                                                                                                                                                                                                                                                                                                                                                                                                                                                                                                                                                                                                                                                                                                                                                                                                                                                                                                                                                                       | MT Public Health Laboratory             | Centers for Disease Control and Prevention Division of Viral Diseases, Pathogen Discovery                                  | Anna Montmayeur; Anna Uehara; Ben L. Rambo-Martin; Clinton R. Paden; Dhvani Batra; Haibin Wang; Jasmine Padilla; Jing Zhang; Justin Lee; Katie Dillon; Krista Queen; Kristen Knipe; Kristine Lacek; Lori Rowe; Mark Burroughs; Matthew Schmerer; Mili Sheth; Peter W. Cook; Rachel Marine; Sam Shepard; Sarah Nobles; Shoshona Le; Suxiang Tong; Yan Li; Ying Tao                                                                                                                                                                                                                                                                                                                                                                                                                                                                                                                                                                                                                                                                                                                                            |
| EPI_ISL_1169503, EPI_ISL_1225885 to 1225888, EPI_ISL_1226288 to 1226302, EPI_ISL_1318253                                                                                                                                                                                                                                                                                                                                                                                                                                                                                                                                                                                                                                                                                                                                                                                                                                                                                                                                                                                                                                                                                                                                                                                                                                                                                                                                                                                                                                                                                                                                                                                                                                                                                                                                                                                                                                                                                                                                                                                                                                                                                                                                                                                                                                                                                                                                                                                                                                                                                                                                                                                                                                                                                                                                                                                                                                                                                                                                                                                                                                                                                                                                                                                                                                                                                                                                                                                                                                                                                                                                                                                                                                                                                                                                                                                                                                                                                                                                                                                                                                                                                                                                                                                                                                                                                                                                                                                                                                                                                                                                                                                                                                                                                                                                                                                                                                                                                                                                                                                                                                                                                                                                                                                                                                                                                                                                                                                                                                                                                                                                                                                                                                                                                                                                                                                                                                                                                                                                                                                                                                                                                                                                                                                                                                                                                                                                                                                                                                                                                                                                                                                                                                                                                                                                                                                                                                                                                                                                                                                                                                                                                                                                                                                                                                                                                                                                                                                                                                                                                                                                                                                                                                                                                                                                                                                                                                                                                                                                                                                                                                                                                                                                                                                                                                                                                                                                                                                                                                                                                                                                                                                                                                                                                                                                                                                                                                                                                                                                                                                                                                                                                                                                                                                                                                                                                                                                                                                                                                                                                                                                                                                                                                                                                                                                                                                                                                                                                                                                                                                                                                                                                                                                                                                                                                                                                                                                                                                                                                                                                                                                                                                                                                                                                                                                                                                                                                                                                                                                                                                                                                                                                                                                                                                                                                                                                                                                                                                                                                                                                                                                                                                                                                                                                                                                                                                                                                                                                                                                                                                                                                                                                                                                                                                                                                                                                                                                                                                                                                                                                                                                                                                                                                                                                                                                                                                                                                                                                                                                                                                                                                                                                                                                                                                                                                                                                                                                                                                                                                                                                                                                                                                                                                                                                                     | MT Public Health Laboratory             | Genomics and Discovery, Respiratory Viruses Branch, Division of Viral Diseases, Centers for Disease Control and Prevention | Anna Kelleher; Anna Montmayeur; Anna Uehara; Ben L. Rambo-Martin; Brian Lynch; Clinton R. Paden; Dhvani Batra; Haibin Wang; Han Jia Justin Ng; Jasmine Padilla; Jing Zhang; Justin Lee; Katie Dillon; Krista Queen; Kristen Knipe; Kristine Lacek; Lori Rowe; Mark Burroughs; Matthew Schmerer; Mili Sheth; Peter Cook; Peter W. Cook; Rachel Marine; Sam Shepard; Sarah Nobles; Shoshona Le; Suxiang Tong; Yan Li; Ying Tao                                                                                                                                                                                                                                                                                                                                                                                                                                                                                                                                                                                                                                                                                 |
| EPI_ISL_1196893 to 1196894                                                                                                                                                                                                                                                                                                                                                                                                                                                                                                                                                                                                                                                                                                                                                                                                                                                                                                                                                                                                                                                                                                                                                                                                                                                                                                                                                                                                                                                                                                                                                                                                                                                                                                                                                                                                                                                                                                                                                                                                                                                                                                                                                                                                                                                                                                                                                                                                                                                                                                                                                                                                                                                                                                                                                                                                                                                                                                                                                                                                                                                                                                                                                                                                                                                                                                                                                                                                                                                                                                                                                                                                                                                                                                                                                                                                                                                                                                                                                                                                                                                                                                                                                                                                                                                                                                                                                                                                                                                                                                                                                                                                                                                                                                                                                                                                                                                                                                                                                                                                                                                                                                                                                                                                                                                                                                                                                                                                                                                                                                                                                                                                                                                                                                                                                                                                                                                                                                                                                                                                                                                                                                                                                                                                                                                                                                                                                                                                                                                                                                                                                                                                                                                                                                                                                                                                                                                                                                                                                                                                                                                                                                                                                                                                                                                                                                                                                                                                                                                                                                                                                                                                                                                                                                                                                                                                                                                                                                                                                                                                                                                                                                                                                                                                                                                                                                                                                                                                                                                                                                                                                                                                                                                                                                                                                                                                                                                                                                                                                                                                                                                                                                                                                                                                                                                                                                                                                                                                                                                                                                                                                                                                                                                                                                                                                                                                                                                                                                                                                                                                                                                                                                                                                                                                                                                                                                                                                                                                                                                                                                                                                                                                                                                                                                                                                                                                                                                                                                                                                                                                                                                                                                                                                                                                                                                                                                                                                                                                                                                                                                                                                                                                                                                                                                                                                                                                                                                                                                                                                                                                                                                                                                                                                                                                                                                                                                                                                                                                                                                                                                                                                                                                                                                                                                                                                                                                                                                                                                                                                                                                                                                                                                                                                                                                                                                                                                                                                                                                                                                                                                                                                                                                                                                                                                                                                                   | MT Public Health Laboratory             | Pathogen Discovery, Respiratory Viruses Branch, Division of Viral Diseases, Centers for Disease Control and Prevention     | Anna Kelleher; Anna Uehara; Brian Lynch; Clinton R. Paden; Haibin Wang; Han Jia Justin Ng; Jing Zhang; Krista Queen; Peter Cook; Suxiang Tong; Yan Li; Ying Tao                                                                                                                                                                                                                                                                                                                                                                                                                                                                                                                                                                                                                                                                                                                                                                                                                                                                                                                                              |
| EPI_ISL_1094213, EPI_ISL_1094220, EPI_ISL_1094278 to 1094281, EPI_ISL_1094324, EPI_ISL_1094328, EPI_ISL_1094369, EPI_ISL_1094413 to 1094415, EPI_ISL_1094517 to 1094520, EPI_ISL_1094929 to 1094944, EPI_ISL_1095306                                                                                                                                                                                                                                                                                                                                                                                                                                                                                                                                                                                                                                                                                                                                                                                                                                                                                                                                                                                                                                                                                                                                                                                                                                                                                                                                                                                                                                                                                                                                                                                                                                                                                                                                                                                                                                                                                                                                                                                                                                                                                                                                                                                                                                                                                                                                                                                                                                                                                                                                                                                                                                                                                                                                                                                                                                                                                                                                                                                                                                                                                                                                                                                                                                                                                                                                                                                                                                                                                                                                                                                                                                                                                                                                                                                                                                                                                                                                                                                                                                                                                                                                                                                                                                                                                                                                                                                                                                                                                                                                                                                                                                                                                                                                                                                                                                                                                                                                                                                                                                                                                                                                                                                                                                                                                                                                                                                                                                                                                                                                                                                                                                                                                                                                                                                                                                                                                                                                                                                                                                                                                                                                                                                                                                                                                                                                                                                                                                                                                                                                                                                                                                                                                                                                                                                                                                                                                                                                                                                                                                                                                                                                                                                                                                                                                                                                                                                                                                                                                                                                                                                                                                                                                                                                                                                                                                                                                                                                                                                                                                                                                                                                                                                                                                                                                                                                                                                                                                                                                                                                                                                                                                                                                                                                                                                                                                                                                                                                                                                                                                                                                                                                                                                                                                                                                                                                                                                                                                                                                                                                                                                                                                                                                                                                                                                                                                                                                                                                                                                                                                                                                                                                                                                                                                                                                                                                                                                                                                                                                                                                                                                                                                                                                                                                                                                                                                                                                                                                                                                                                                                                                                                                                                                                                                                                                                                                                                                                                                                                                                                                                                                                                                                                                                                                                                                                                                                                                                                                                                                                                                                                                                                                                                                                                                                                                                                                                                                                                                                                                                                                                                                                                                                                                                                                                                                                                                                                                                                                                                                                                                                                                                                                                                                                                                                                                                                                                                                                                                                                                                                                                                         | see above                               | Respiratory Viruses Branch, Division of Viral Diseases, Centers for Disease Control and Prevention                         | Anna Montmayeur; Anna Uehara; Ben L. Rambo-Martin; Clinton R. Paden; Dhvani Batra; Haibin Wang; Jasmine Padilla; Jing Zhang; Justin Lee; Krista Queen; Lori Rowe; Mark Burroughs; Mili Sheth; Peter W. Cook; Rachel Marine; Sarah Nobles; Suxiang Tong; Yan Li; Ying Tao                                                                                                                                                                                                                                                                                                                                                                                                                                                                                                                                                                                                                                                                                                                                                                                                                                     |
| EPI_ISL_1181176 to 1181336                                                                                                                                                                                                                                                                                                                                                                                                                                                                                                                                                                                                                                                                                                                                                                                                                                                                                                                                                                                                                                                                                                                                                                                                                                                                                                                                                                                                                                                                                                                                                                                                                                                                                                                                                                                                                                                                                                                                                                                                                                                                                                                                                                                                                                                                                                                                                                                                                                                                                                                                                                                                                                                                                                                                                                                                                                                                                                                                                                                                                                                                                                                                                                                                                                                                                                                                                                                                                                                                                                                                                                                                                                                                                                                                                                                                                                                                                                                                                                                                                                                                                                                                                                                                                                                                                                                                                                                                                                                                                                                                                                                                                                                                                                                                                                                                                                                                                                                                                                                                                                                                                                                                                                                                                                                                                                                                                                                                                                                                                                                                                                                                                                                                                                                                                                                                                                                                                                                                                                                                                                                                                                                                                                                                                                                                                                                                                                                                                                                                                                                                                                                                                                                                                                                                                                                                                                                                                                                                                                                                                                                                                                                                                                                                                                                                                                                                                                                                                                                                                                                                                                                                                                                                                                                                                                                                                                                                                                                                                                                                                                                                                                                                                                                                                                                                                                                                                                                                                                                                                                                                                                                                                                                                                                                                                                                                                                                                                                                                                                                                                                                                                                                                                                                                                                                                                                                                                                                                                                                                                                                                                                                                                                                                                                                                                                                                                                                                                                                                                                                                                                                                                                                                                                                                                                                                                                                                                                                                                                                                                                                                                                                                                                                                                                                                                                                                                                                                                                                                                                                                                                                                                                                                                                                                                                                                                                                                                                                                                                                                                                                                                                                                                                                                                                                                                                                                                                                                                                                                                                                                                                                                                                                                                                                                                                                                                                                                                                                                                                                                                                                                                                                                                                                                                                                                                                                                                                                                                                                                                                                                                                                                                                                                                                                                                                                                                                                                                                                                                                                                                                                                                                                                                                                                                                                                                                   | MVZ Dr. Eberhard & Partner Dortmund     | Bielefeld University                                                                                                       | Alexander Sczyrba; David Brandt; Jörn Kalinowski; Levin-Joe Klages; Marina Simonovic; Markus Haak; Svenja Vinke; Tobias Busche                                                                                                                                                                                                                                                                                                                                                                                                                                                                                                                                                                                                                                                                                                                                                                                                                                                                                                                                                                               |
| EPI_ISL_1142259 to 1142260, EPI_ISL_1142262 to 1142271, EPI_ISL_1142273, EPI_ISL_1144022 to 1144036, EPI_ISL_1144039 to 1144045, EPI_ISL_1145225 to 1145229, EPI_ISL_1145231 to 1145235, EPI_ISL_1145238 to 1145246, EPI_ISL_1145248 to 1145261, EPI_ISL_1145263 to 1145265, EPI_ISL_1145267, EPI_ISL_1145269, EPI_ISL_1147256, EPI_ISL_1147258, EPI_ISL_1147261 to 1147262, EPI_ISL_1147263, EPI_ISL_1147264 to 1147265, EPI_ISL_1147267 to 1147268, EPI_ISL_1147269 to 1147270, EPI_ISL_1147271 to 1147272, EPI_ISL_1147273 to 1147274, EPI_ISL_1147275 to 1147276, EPI_ISL_1147277 to 1147278, EPI_ISL_1147279 to 1147280, EPI_ISL_1147281 to 1147282, EPI_ISL_1147283 to 1147284, EPI_ISL_1147285 to 1147286, EPI_ISL_1147287 to 1147288, EPI_ISL_1147289 to 1147290, EPI_ISL_1147291 to 1147292, EPI_ISL_1147293 to 1147294, EPI_ISL_1147295 to 1147296, EPI_ISL_1147297 to 1147298, EPI_ISL_1147299 to 1147300, EPI_ISL_1147301 to 1147302, EPI_ISL_1147303 to 1147304, EPI_ISL_1147305 to 1147306, EPI_ISL_1147307 to 1147308, EPI_ISL_1147309 to 1147310, EPI_ISL_1147311 to 1147312, EPI_ISL_1147313 to 1147314, EPI_ISL_1147315 to 1147316, EPI_ISL_1147317 to 1147318, EPI_ISL_1147319 to 1147320, EPI_ISL_1147321 to 1147322, EPI_ISL_1147323 to 1147324, EPI_ISL_1147325 to 1147326, EPI_ISL_1147327 to 1147328, EPI_ISL_1147329 to 1147330, EPI_ISL_1147331 to 1147332, EPI_ISL_1147333 to 1147334, EPI_ISL_1147335 to 1147336, EPI_ISL_1147337 to 1147338, EPI_ISL_1147339 to 1147340, EPI_ISL_1147341 to 1147342, EPI_ISL_1147343 to 1147344, EPI_ISL_1147345 to 1147346, EPI_ISL_1147347 to 1147348, EPI_ISL_1147349 to 1147350, EPI_ISL_1147351 to 1147352, EPI_ISL_1147353 to 1147354, EPI_ISL_1147355 to 1147356, EPI_ISL_1147357 to 1147358, EPI_ISL_1147359 to 1147360, EPI_ISL_1147361 to 1147362, EPI_ISL_1147363 to 1147364, EPI_ISL_1147365 to 1147366, EPI_ISL_1147367 to 1147368, EPI_ISL_1147369 to 1147370, EPI_ISL_1147371 to 1147372, EPI_ISL_1147373 to 1147374, EPI_ISL_1147375 to 1147376, EPI_ISL_1147377 to 1147378, EPI_ISL_1147379 to 1147380, EPI_ISL_1147381 to 1147382, EPI_ISL_1147383 to 1147384, EPI_ISL_1147385 to 1147386, EPI_ISL_1147387 to 1147388, EPI_ISL_1147389 to 1147390, EPI_ISL_1147391 to 1147392, EPI_ISL_1147393 to 1147394, EPI_ISL_1147395 to 1147396, EPI_ISL_1147397 to 1147398, EPI_ISL_1147399 to 1147400, EPI_ISL_1147401 to 1147402, EPI_ISL_1147403 to 1147404, EPI_ISL_1147405 to 1147406, EPI_ISL_1147407 to 1147408, EPI_ISL_1147409 to 1147410, EPI_ISL_1147411 to 1147412, EPI_ISL_1147413 to 1147414, EPI_ISL_1147415 to 1147416, EPI_ISL_1147417 to 1147418, EPI_ISL_1147419 to 1147420, EPI_ISL_1147421 to 1147422, EPI_ISL_1147423 to 1147424, EPI_ISL_1147425 to 1147426, EPI_ISL_1147427 to 1147428, EPI_ISL_1147429 to 1147430, EPI_ISL_1147431 to 1147432, EPI_ISL_1147433 to 1147434, EPI_ISL_1147435 to 1147436, EPI_ISL_1147437 to 1147438, EPI_ISL_1147439 to 1147440, EPI_ISL_1147441 to 1147442, EPI_ISL_1147443 to 1147444, EPI_ISL_1147445 to 1147446, EPI_ISL_1147447 to 1147448, EPI_ISL_1147449 to 1147450, EPI_ISL_1147451 to 1147452, EPI_ISL_1147453 to 1147454, EPI_ISL_1147455 to 1147456, EPI_ISL_1147457 to 1147458, EPI_ISL_1147459 to 1147460, EPI_ISL_1147461 to 1147462, EPI_ISL_1147463 to 1147464, EPI_ISL_1147465 to 1147466, EPI_ISL_1147467 to 1147468, EPI_ISL_1147469 to 1147470, EPI_ISL_1147471 to 1147472, EPI_ISL_1147473 to 1147474, EPI_ISL_1147475 to 1147476, EPI_ISL_1147477 to 1147478, EPI_ISL_1147479 to 1147480, EPI_ISL_1147481 to 1147482, EPI_ISL_1147483 to 1147484, EPI_ISL_1147485 to 1147486, EPI_ISL_1147487 to 1147488, EPI_ISL_1147489 to 1147490, EPI_ISL_1147491 to 1147492, EPI_ISL_1147493 to 1147494, EPI_ISL_1147495 to 1147496, EPI_ISL_1147497 to 1147498, EPI_ISL_1147499 to 1147500, EPI_ISL_1147501 to 1147502, EPI_ISL_1147503 to 1147504, EPI_ISL_1147505 to 1147506, EPI_ISL_1147507 to 1147508, EPI_ISL_1147509 to 1147510, EPI_ISL_1147511 to 1147512, EPI_ISL_1147513 to 1147514, EPI_ISL_1147515 to 1147516, EPI_ISL_1147517 to 1147518, EPI_ISL_1147519 to 1147520, EPI_ISL_1147521 to 1147522, EPI_ISL_1147523 to 1147524, EPI_ISL_1147525 to 1147526, EPI_ISL_1147527 to 1147528, EPI_ISL_1147529 to 1147530, EPI_ISL_1147531 to 1147532, EPI_ISL_1147533 to 1147534, EPI_ISL_1147535 to 1147536, EPI_ISL_1147537 to 1147538, EPI_ISL_1147539 to 1147540, EPI_ISL_1147541 to 1147542, EPI_ISL_1147543 to 1147544, EPI_ISL_1147545 to 1147546, EPI_ISL_1147547 to 1147548, EPI_ISL_1147549 to 1147550, EPI_ISL_1147551 to 1147552, EPI_ISL_1147553 to 1147554, EPI_ISL_1147555 to 1147556, EPI_ISL_1147557 to 1147558, EPI_ISL_1147559 to 1147560, EPI_ISL_1147561 to 1147562, EPI_ISL_1147563 to 1147564, EPI_ISL_1147565 to 1147566, EPI_ISL_1147567 to 1147568, EPI_ISL_1147569 to 1147570, EPI_ISL_1147571 to 1147572, EPI_ISL_1147573 to 1147574, EPI_ISL_1147575 to 1147576, EPI_ISL_1147577 to 1147578, EPI_ISL_1147579 to 1147580, EPI_ISL_1147581 to 1147582, EPI_ISL_1147583 to 1147584, EPI_ISL_1147585 to 1147586, EPI_ISL_1147587 to 1147588, EPI_ISL_1147589 to 1147590, EPI_ISL_1147591 to 1147592, EPI_ISL_1147593 to 1147594, EPI_ISL_1147595 to 1147596, EPI_ISL_1147597 to 1147598, EPI_ISL_1147599 to 1147600, EPI_ISL_1147601 to 1147602, EPI_ISL_1147603 to 1147604, EPI_ISL_1147605 to 1147606, EPI_ISL_1147607 to 1147608, EPI_ISL_1147609 to 1147610, EPI_ISL_1147611 to 1147612, EPI_ISL_1147613 to 1147614, EPI_ISL_1147615 to 1147616, EPI_ISL_1147617 to 1147618, EPI_ISL_1147619 to 1147620, EPI_ISL_1147621 to 1147622, EPI_ISL_1147623 to 1147624, EPI_ISL_1147625 to 1147626, EPI_ISL_1147627 to 1147628, EPI_ISL_1147629 to 1147630, EPI_ISL_1147631 to 1147632, EPI_ISL_1147633 to 1147634, EPI_ISL_1147635 to 1147636, EPI_ISL_1147637 to 1147638, EPI_ISL_1147639 to 1147640, EPI_ISL_1147641 to 1147642, EPI_ISL_1147643 to 1147644, EPI_ISL_1147645 to 1147646, EPI_ISL_1147647 to 1147648, EPI_ISL_1147649 to 1147650, EPI_ISL_1147651 to 1147652, EPI_ISL_1147653 to 1147654, EPI_ISL_1147655 to 1147656, EPI_ISL_1147657 to 1147658, EPI_ISL_1147659 to 1147660, EPI_ISL_1147661 to 1147662, EPI_ISL_1147663 to 1147664, EPI_ISL_1147665 to 1147666, EPI_ISL_1147667 to 1147668, EPI_ISL_1147669 to 1147670, EPI_ISL_1147671 to 1147672, EPI_ISL_1147673 to 1147674, EPI_ISL_1147675 to 1147676, EPI_ISL_1147677 to 1147678, EPI_ISL_1147679 to 1147680, EPI_ISL_1147681 to 1147682, EPI_ISL_1147683 to 1147684, EPI_ISL_1147685 to 1147686, EPI_ISL_1147687 to 1147688, EPI_ISL_1147689 to 1147690, EPI_ISL_1147691 to 1147692, EPI_ISL_1147693 to 1147694, EPI_ISL_1147695 to 1147696, EPI_ISL_1147697 to 1147698, EPI_ISL_1147699 to 1147700, EPI_ISL_1147701 to 1147702, EPI_ISL_1147703 to 1147704, EPI_ISL_1147705 to 1147706, EPI_ISL_1147707 to 1147708, EPI_ISL_1147709 to 1147710, EPI_ISL_1147711 to 1147712, EPI_ISL_1147713 to 1147714, EPI_ISL_1147715 to 1147716, EPI_ISL_1147717 to 1147718, EPI_ISL_1147719 to 1147720, EPI_ISL_1147721 to 1147722, EPI_ISL_1147723 to 1147724, EPI_ISL_1147725 to 1147726, EPI_ISL_1147727 to 1147728, EPI_ISL_1147729 to 1147730, EPI_ISL_1147731 to 1147732, EPI_ISL_1147733 to 1147734, EPI_ISL_1147735 to 1147736, EPI_ISL_1147737 to 1147738, EPI_ISL_1147739 to 1147740, EPI_ISL_1147741 to 1147742, EPI_ISL_1147743 to 1147744, EPI_ISL_1147745 to 1147746, EPI_ISL_1147747 to 1147748, EPI_ISL_1147749 to 1147750, EPI_ISL_1147751 to 1147752, EPI_ISL_1147753 to 1147754, EPI_ISL_1147755 to 1147756, EPI_ISL_1147757 to 1147758, EPI_ISL_1147759 to 1147760, EPI_ISL_1147761 to 1147762, EPI_ISL_1147763 to 1147764, EPI_ISL_1147765 to 1147766, EPI_ISL_1147767 to 1147768, EPI_ISL_1147769 to 1147770, EPI_ISL_1147771 to 1147772, EPI_ISL_1147773 to 1147774, EPI_ISL_1147775 to 1147776, EPI_ISL_1147777 to 1147778, EPI_ISL_1147779 to 1147780, EPI_ISL_1147781 to 1147782, EPI_ISL_1147783 to 1147784, EPI_ISL_1147785 to 1147786, EPI_ISL_1147787 to 1147788, EPI_ISL_1147789 to 1147790, EPI_ISL_1147791 to 1147792, EPI_ISL_1147793 to 1147794, EPI_ISL_1147795 to 1147796, EPI_ISL_1147797 to 1147798, EPI_ISL_1147799 to 1147800, EPI_ISL_1147801 to 1147802, EPI_ISL_1147803 to 1147804, EPI_ISL_1147805 to 1147806, EPI_ISL_1147807 to 1147808, EPI_ISL_1147809 to 1147810, EPI_ISL_1147811 to 1147812, EPI_ISL_1147813 to 1147814, EPI_ISL_1147815 to 1147816, EPI_ISL_1147817 to 1147818, EPI_ISL_1147819 to 1147820, EPI_ISL_1147821 to 1147822, EPI_ISL_1147823 to 1147824, EPI_ISL_1147825 to 1147826, EPI_ISL_1147827 to 1147828, EPI_ISL_1147829 to 1147830, EPI_ISL_1147831 to 1147832, EPI_ISL_1147833 to 1147834, EPI_ISL_1147835 to 1147836, EPI_ISL_1147837 to 1147838, EPI_ISL_1147839 to 1147840, EPI_ISL_1147841 to 1147842, EPI_ISL_1147843 to 1147844, EPI_ISL_1147845 to 1147846, EPI_ISL_1147847 to 1147848, EPI_ISL_1147849 to 1147850, EPI_ISL_1147851 to 1147852, EPI_ISL_1147853 to 1147854, EPI_ISL_1147855 to 1147856, EPI_ISL_1147857 to 1147858, EPI_ISL_1147859 to 1147860, EPI_ISL_1147861 to 1147862, EPI_ISL_1147863 to 1147864, EPI_ISL_1147865 to 1147866, EPI_ISL_1147867 to 1147868, EPI_ISL_1147869 to 1147870, EPI_ISL_1147871 to 1147872, EPI_ISL_1147873 to 1147874, EPI_ISL_1147875 to 1147876, EPI_ISL_1147877 to 1147878, EPI_ISL_1147879 to 1147880, EPI_ISL_1147881 to 1147882, EPI_ISL_1147883 to 1147884, EPI_ISL_1147885 to 1147886, EPI_ISL_1147887 to 1147888, EPI_ISL_1147889 to 1147890, EPI_ISL_1147891 to 1147892, EPI_ISL_1147893 to 1147894, EPI_ISL_1147895 to 1147896, EPI_ISL_1147897 to 1147898, EPI_ISL_1147899 to 1147900, EPI_ISL_1147901 to 1147902, EPI_ISL_1147903 to 1147904, EPI_ISL_1147905 to 1147906, EPI_ISL_1147907 to 1147908, EPI_ISL_1147909 to 1147910, EPI_ISL_1147911 to 1147912, EPI_ISL_1147913 to 1147914, EPI_ISL_1147915 to 1147916, EPI_ISL_1147917 to 1147918, EPI_ISL_1147919 to 1147920, EPI_ISL_1147921 to 1147922, EPI_ISL_1147923 to 1147924, EPI_ISL_1147925 to 1147926, EPI_ISL_1147927 to 1147928, EPI_ISL_1147929 to 1147930, EPI_ISL_1147931 to 1147932, EPI_ISL_1147933 to 1147934, EPI_ISL_1147935 to 1147936, EPI_ISL_1147937 to 1147938, EPI_ISL_1147939 to 1147940, EPI_ISL_1147941 to 1147942, EPI_ISL_1147943 to 1147944, EPI_ISL_1147945 to 1147946, EPI_ISL_1147947 to 1147948, EPI_ISL_1147949 to 1147950, EPI_ISL_1147951 to 1147952, EPI_ISL_1147953 to 1147954, EPI_ISL_1147955 to 1147956, EPI_ISL_1147957 to 1147958, EPI_ISL_1147959 to 1147960, EPI_ISL_1147961 to 1147962, EPI_ISL_1147963 to 1147964, EPI_ISL_1147965 to 1147966, EPI_ISL_1147967 to 1147968, EPI_ISL_1147969 to 1147970, EPI_ISL_1147971 to 1147972, EPI_ISL_1147973 to 1147974, EPI_ISL_1147975 to 1147976, EPI_ISL_1147977 to 1147978, EPI_ISL_1147979 to 1147980, EPI_ISL_1147981 to 1147982, EPI_ISL_1147983 to 1147984, EPI_ISL_1147985 to 1147986, EPI_ISL_1147987 to 1147988, EPI_ISL_1147989 to 1147990, EPI_ISL_1147991 to 1147992, EPI_ISL_1147993 to 1147994, EPI_ISL_1147995 to 1147996, EPI_ISL_1147997 to 1147998, EPI_ISL_1147999 to 1148000, EPI_ISL_1148001 to 1148002, EPI_ISL_1148003 to 1148004, EPI_ISL_1148005 to 1148006, EPI_ISL_1148007 to 1148008, EPI_ISL_1148009 to 1148010, EPI_ISL_1148011 to 1148012, EPI_ISL_1148013 to 1148014, EPI_ISL_1148015 to 1148016, EPI_ISL_1148017 to 1148018, EPI_ISL_1148019 to 1148020, EPI_ISL_1148021 to 1148022, EPI_ISL_1148023 to 1148024, EPI_ISL_1148025 to 1148026, EPI_ISL_1148027 to 1148028, EPI_ISL_1148029 to 1148030, EPI_ISL_1148031 to 1148032, EPI_ISL_1148033 to 1148034, EPI_ISL_1148035 to 1148036, EPI_ISL_1148037 to 1148038, EPI_ISL_1148039 to 1148040, EPI_ISL_1148041 to 1148042, EPI_ISL_1148043 to 1148044, EPI_ISL_1148045 to 1148046, EPI_ISL_1148047 to 1148048, EPI_ISL_1148049 to 1148050, EPI_ISL_1148051 to 1148052, EPI_ISL_1148053 to 1148054, EPI_ISL_1148055 to 1148056, EPI_ISL_1148057 to 1148058, EPI_ISL_1148059 to 1148060, EPI_ISL_1148061 to 1148062, EPI_ISL_1148063 to 1148064, EPI_ISL_1148065 to 1148066, EPI_ISL_1148067 to 1148068, EPI_ISL_1148069 to 1148070, EPI_ISL_1148071 to 1148072, EPI_ISL_1148073 to 1148074, EPI_ISL_1148075 to 1148076, EPI_ISL_1148077 to 1148078, EPI_ISL_1148079 to 1148080, EPI_ISL_1148081 to 1148082, EPI_ISL_1148083 to 1148084, EPI_ISL_1148085 to 1148086, EPI_ISL_1148087 to 1148088, EPI_ISL_1148089 to 1148090, EPI_ISL_1148091 to 1148092, EPI_ISL_1148093 to 1148094, EPI_ISL_1148095 to 1148096, EPI_ISL_1148097 to 1148098, EPI_ISL_1148099 to 1148100, EPI_ISL_1148101 to 1148102, EPI_ISL_1148103 to 1148104, EPI_ISL_1148105 to 1148106, EPI_ISL_1148107 to 1148108, EPI_ISL_1148109 to 1148110, EPI_ISL_1148111 to 1148112, EPI_ISL_1148113 to 1148114, EPI_ISL_1148115 to 1148116, EPI_ISL_1148117 to 1148118, EPI_ISL_1148119 to 1148120, EPI_ISL_1148121 to 1148122, EPI_ISL_1148123 to 1148124, EPI_ISL_1148125 to 1148126, EPI_ISL_1148127 to 1148128, EPI_ISL_1148129 to 1148130, EPI_ISL_1148131 to 1148132, EPI_ISL_1148133 to 1148134, EPI_ISL_1148135 to 1148136, EPI_ISL_1148137 to 1148138, EPI_ISL_1148139 to 1148140, EPI_ISL_1148141 to 1148142, EPI_ISL_1148143 to 1148144, EPI_ISL_1148145 to 1148146, EPI_ISL_1148147 to 1148148, EPI_ISL_1148149 to 1148150, EPI_ISL_1148151 to 1148152, EPI_ISL_1148153 to 1148154, EPI_ISL_1148155 to 1148156, EPI_ISL_1148157 to 1148158, EPI_ISL_1148159 to 1148160, EPI_ISL_1148161 to 1148162, EPI_ISL_1148163 to 1148164, EPI_ISL_1148165 to 1148166, EPI_ISL_1148167 to 1148168, EPI_ISL_1148169 to 1148170, EPI_ISL_1148171 to 1148172, EPI_ISL_1148173 to 1148174, EPI_ISL_1148175 to 1148176, EPI_ISL_1148177 to 1148178, EPI_ISL_1148179 to 1148180, EPI_ISL_1148181 to 1148182, EPI_ISL_11 |                                         |                                                                                                                            |                                                                                                                                                                                                                                                                                                                                                                                                                                                                                                                                                                                                                                                                                                                                                                                                                                                                                                                                                                                                                                                                                                              |

|                                                                                                                                                                                                                                                                                                                                                                                                                                                                                                                                                                                                                                                                                                                                                                                                                                                                                                                                                                                                                                                                                                                                                                                                                                                                                                                                                                                                                                                                                                                                                                                                                                                                                                                                                                                                                                                                                                                                                                                                                                                                                                                                                                                                                                                                                                                                                                                                                                                                                                                                                                                                                                                                                                                                                                                                                                                                                                                                                                                                                                                                                                                                                                                                                                                                                                             |                                                                                    |                                                                                                       |                                                                                                                                                                                                                                                                                                                                                                                                                                                                                                                                                                                                                                                                                                               |
|-------------------------------------------------------------------------------------------------------------------------------------------------------------------------------------------------------------------------------------------------------------------------------------------------------------------------------------------------------------------------------------------------------------------------------------------------------------------------------------------------------------------------------------------------------------------------------------------------------------------------------------------------------------------------------------------------------------------------------------------------------------------------------------------------------------------------------------------------------------------------------------------------------------------------------------------------------------------------------------------------------------------------------------------------------------------------------------------------------------------------------------------------------------------------------------------------------------------------------------------------------------------------------------------------------------------------------------------------------------------------------------------------------------------------------------------------------------------------------------------------------------------------------------------------------------------------------------------------------------------------------------------------------------------------------------------------------------------------------------------------------------------------------------------------------------------------------------------------------------------------------------------------------------------------------------------------------------------------------------------------------------------------------------------------------------------------------------------------------------------------------------------------------------------------------------------------------------------------------------------------------------------------------------------------------------------------------------------------------------------------------------------------------------------------------------------------------------------------------------------------------------------------------------------------------------------------------------------------------------------------------------------------------------------------------------------------------------------------------------------------------------------------------------------------------------------------------------------------------------------------------------------------------------------------------------------------------------------------------------------------------------------------------------------------------------------------------------------------------------------------------------------------------------------------------------------------------------------------------------------------------------------------------------------------------------|------------------------------------------------------------------------------------|-------------------------------------------------------------------------------------------------------|---------------------------------------------------------------------------------------------------------------------------------------------------------------------------------------------------------------------------------------------------------------------------------------------------------------------------------------------------------------------------------------------------------------------------------------------------------------------------------------------------------------------------------------------------------------------------------------------------------------------------------------------------------------------------------------------------------------|
| EPI_ISL_1140487, EPI_ISL_1140490, EPI_ISL_1147105, EPI_ISL_1147108, EPI_ISL_1147110 to 1147113, EPI_ISL_1147116 to 1147118, EPI_ISL_1147120 to 1147122, EPI_ISL_1147125 to 1147126, EPI_ISL_1147129, EPI_ISL_1147132 to 1147136, EPI_ISL_1147138, EPI_ISL_1147353, EPI_ISL_1147361                                                                                                                                                                                                                                                                                                                                                                                                                                                                                                                                                                                                                                                                                                                                                                                                                                                                                                                                                                                                                                                                                                                                                                                                                                                                                                                                                                                                                                                                                                                                                                                                                                                                                                                                                                                                                                                                                                                                                                                                                                                                                                                                                                                                                                                                                                                                                                                                                                                                                                                                                                                                                                                                                                                                                                                                                                                                                                                                                                                                                          |                                                                                    |                                                                                                       |                                                                                                                                                                                                                                                                                                                                                                                                                                                                                                                                                                                                                                                                                                               |
| see above                                                                                                                                                                                                                                                                                                                                                                                                                                                                                                                                                                                                                                                                                                                                                                                                                                                                                                                                                                                                                                                                                                                                                                                                                                                                                                                                                                                                                                                                                                                                                                                                                                                                                                                                                                                                                                                                                                                                                                                                                                                                                                                                                                                                                                                                                                                                                                                                                                                                                                                                                                                                                                                                                                                                                                                                                                                                                                                                                                                                                                                                                                                                                                                                                                                                                                   | MVZ Labor Dr. Quade & Kollegen GmbH                                                | Robert Koch Institute                                                                                 |                                                                                                                                                                                                                                                                                                                                                                                                                                                                                                                                                                                                                                                                                                               |
| EPI_ISL_1152533 to 1152535, EPI_ISL_1152575, EPI_ISL_1152582, EPI_ISL_1152586, EPI_ISL_1153409, EPI_ISL_1153427, EPI_ISL_1153968, EPI_ISL_1153989, EPI_ISL_1154040, EPI_ISL_1155139, EPI_ISL_1155167, EPI_ISL_1155191, EPI_ISL_1155200, EPI_ISL_1155480, EPI_ISL_1155482, EPI_ISL_1155493, EPI_ISL_1155509, EPI_ISL_1155531, EPI_ISL_1155558, EPI_ISL_1215807, EPI_ISL_1217023, EPI_ISL_1217047, EPI_ISL_1217056, EPI_ISL_1217061, EPI_ISL_1217070, EPI_ISL_1217076, EPI_ISL_1280183, EPI_ISL_1280185, EPI_ISL_1280201, EPI_ISL_1281306, EPI_ISL_1283127, EPI_ISL_1283241, EPI_ISL_1283243, EPI_ISL_1283676, EPI_ISL_1283701, EPI_ISL_1283792, EPI_ISL_1283841, EPI_ISL_1352521, EPI_ISL_1352345, EPI_ISL_1353061, EPI_ISL_1353099, EPI_ISL_1353108, EPI_ISL_1353128                                                                                                                                                                                                                                                                                                                                                                                                                                                                                                                                                                                                                                                                                                                                                                                                                                                                                                                                                                                                                                                                                                                                                                                                                                                                                                                                                                                                                                                                                                                                                                                                                                                                                                                                                                                                                                                                                                                                                                                                                                                                                                                                                                                                                                                                                                                                                                                                                                                                                                                                        |                                                                                    |                                                                                                       |                                                                                                                                                                                                                                                                                                                                                                                                                                                                                                                                                                                                                                                                                                               |
| see above                                                                                                                                                                                                                                                                                                                                                                                                                                                                                                                                                                                                                                                                                                                                                                                                                                                                                                                                                                                                                                                                                                                                                                                                                                                                                                                                                                                                                                                                                                                                                                                                                                                                                                                                                                                                                                                                                                                                                                                                                                                                                                                                                                                                                                                                                                                                                                                                                                                                                                                                                                                                                                                                                                                                                                                                                                                                                                                                                                                                                                                                                                                                                                                                                                                                                                   | MVZ Labor Dr. Reising-Ackermann und Kollegen                                       | Robert Koch Institute                                                                                 |                                                                                                                                                                                                                                                                                                                                                                                                                                                                                                                                                                                                                                                                                                               |
| EPI_ISL_1142182 to 1142228, EPI_ISL_1144119 to 1144120, EPI_ISL_1144122 to 1144165, EPI_ISL_1144958 to 1144991, EPI_ISL_1145291 to 1145335, EPI_ISL_1147145 to 1147182, EPI_ISL_1153672 to 1153689, EPI_ISL_1153691 to 1153718, EPI_ISL_1153896 to 1153905, EPI_ISL_1153907 to 1153908, EPI_ISL_1153910 to 1153920, EPI_ISL_1153922 to 1153924, EPI_ISL_1153926 to 1153934, EPI_ISL_1153936 to 1153943, EPI_ISL_1153945 to 1153961, EPI_ISL_1153963, EPI_ISL_1153965, EPI_ISL_1157827 to 1157829, EPI_ISL_1157831 to 1157838, EPI_ISL_1157840, EPI_ISL_1157842 to 1157848, EPI_ISL_1157850 to 1157851, EPI_ISL_1157853 to 1157870, EPI_ISL_1157872 to 1157893, EPI_ISL_1210678 to 1210724, EPI_ISL_1210726 to 1210769, EPI_ISL_1212301 to 1212302, EPI_ISL_1212307, EPI_ISL_1212310 to 1212313, EPI_ISL_1212315 to 1212318, EPI_ISL_1212320 to 1212321, EPI_ISL_1212325, EPI_ISL_1212330 to 1212338, EPI_ISL_1212340 to 1212343, EPI_ISL_1212345 to 1212347, EPI_ISL_1212353, EPI_ISL_1212356 to 1212357, EPI_ISL_1212359 to 1212362, EPI_ISL_1212365 to 1212367, EPI_ISL_1212370, EPI_ISL_1212372, EPI_ISL_1212375, EPI_ISL_1212377 to 1212379, EPI_ISL_1212382 to 1212385, EPI_ISL_1212387 to 1212389, EPI_ISL_1212391 to 1212392, EPI_ISL_1212870 to 1212874, EPI_ISL_1212876 to 1212885, EPI_ISL_1212888, EPI_ISL_1212890, EPI_ISL_1212892 to 1212893, EPI_ISL_1212899 to 1212909, EPI_ISL_1217704 to 1217706, EPI_ISL_1217708, EPI_ISL_1217710 to 1217711, EPI_ISL_1217713 to 1217717, EPI_ISL_1217719 to 1217722, EPI_ISL_1217724 to 1217727, EPI_ISL_1217729 to 1217737, EPI_ISL_1217739 to 1217741, EPI_ISL_1217743 to 1217746, EPI_ISL_1217748 to 1217754, EPI_ISL_1217756 to 1217757, EPI_ISL_1217760 to 1217764, EPI_ISL_1217766 to 1217773, EPI_ISL_1217775, EPI_ISL_1217778, EPI_ISL_1217782, EPI_ISL_1217785, EPI_ISL_1217789, EPI_ISL_1217792, EPI_ISL_1217829, EPI_ISL_1217831 to 1217832, EPI_ISL_1217834, EPI_ISL_1217836 to 1217839, EPI_ISL_1217842, EPI_ISL_1218551, EPI_ISL_1218553, EPI_ISL_1218555, EPI_ISL_1218559, EPI_ISL_1218561, EPI_ISL_1218563, EPI_ISL_1218565, EPI_ISL_1218567, EPI_ISL_1218572, EPI_ISL_1218574, EPI_ISL_1218577, EPI_ISL_1218581, EPI_ISL_1218583 to 1218587, EPI_ISL_1218591 to 1218595, EPI_ISL_1218598 to 1218599, EPI_ISL_1218601, EPI_ISL_1218604 to 1218605, EPI_ISL_1218607, EPI_ISL_1218609, EPI_ISL_1218612, EPI_ISL_1218615 to 1218616, EPI_ISL_1218618, EPI_ISL_1218620 to 1218622, EPI_ISL_1218624, EPI_ISL_1218626, EPI_ISL_1218628 to 1218630, EPI_ISL_1218632 to 1218634, EPI_ISL_1218636, EPI_ISL_1218638, EPI_ISL_1218640, EPI_ISL_1218642, EPI_ISL_1218644, EPI_ISL_1281822 to 1281840, EPI_ISL_1281842 to 1281910, EPI_ISL_1284529, EPI_ISL_1284546, EPI_ISL_1285385 to 1285404, EPI_ISL_1285406 to 1285428, EPI_ISL_1349149, EPI_ISL_1349155, EPI_ISL_1349159, EPI_ISL_1349162 to 1349163, EPI_ISL_1349167, EPI_ISL_1349172 to 1349175, EPI_ISL_1349179, EPI_ISL_1349181 to 1349184, EPI_ISL_1349188, EPI_ISL_1349192 to 1349194, EPI_ISL_1349197, EPI_ISL_1349201, EPI_ISL_1349206, EPI_ISL_1349211 to 1349211, EPI_ISL_1349217, EPI_ISL_1349222 to 1349224, EPI_ISL_1349496 to 1349506, EPI_ISL_1349508 to 1349509, EPI_ISL_1349511 to 1349512, EPI_ISL_1351270 to 1351287, EPI_ISL_1351289 to 1351354, EPI_ISL_1354632 to 1354686 |                                                                                    |                                                                                                       |                                                                                                                                                                                                                                                                                                                                                                                                                                                                                                                                                                                                                                                                                                               |
| see above                                                                                                                                                                                                                                                                                                                                                                                                                                                                                                                                                                                                                                                                                                                                                                                                                                                                                                                                                                                                                                                                                                                                                                                                                                                                                                                                                                                                                                                                                                                                                                                                                                                                                                                                                                                                                                                                                                                                                                                                                                                                                                                                                                                                                                                                                                                                                                                                                                                                                                                                                                                                                                                                                                                                                                                                                                                                                                                                                                                                                                                                                                                                                                                                                                                                                                   | MVZ Labor Krone GbR                                                                | Robert Koch Institute                                                                                 |                                                                                                                                                                                                                                                                                                                                                                                                                                                                                                                                                                                                                                                                                                               |
| EPI_ISL_1152536, EPI_ISL_1152547, EPI_ISL_1152562, EPI_ISL_1152564 to 1152565, EPI_ISL_1152570, EPI_ISL_1152590, EPI_ISL_1152597, EPI_ISL_1152599, EPI_ISL_1152601, EPI_ISL_1152608, EPI_ISL_1152611, EPI_ISL_1217181, EPI_ISL_1217186, EPI_ISL_1217189, EPI_ISL_1217194, EPI_ISL_1217201, EPI_ISL_1217203, EPI_ISL_1217208 to 1217209, EPI_ISL_1217211, EPI_ISL_1217213, EPI_ISL_1217219, EPI_ISL_1281181, EPI_ISL_1281184, EPI_ISL_1281188, EPI_ISL_1281204, EPI_ISL_1281293, EPI_ISL_1281298                                                                                                                                                                                                                                                                                                                                                                                                                                                                                                                                                                                                                                                                                                                                                                                                                                                                                                                                                                                                                                                                                                                                                                                                                                                                                                                                                                                                                                                                                                                                                                                                                                                                                                                                                                                                                                                                                                                                                                                                                                                                                                                                                                                                                                                                                                                                                                                                                                                                                                                                                                                                                                                                                                                                                                                                             |                                                                                    |                                                                                                       |                                                                                                                                                                                                                                                                                                                                                                                                                                                                                                                                                                                                                                                                                                               |
| see above                                                                                                                                                                                                                                                                                                                                                                                                                                                                                                                                                                                                                                                                                                                                                                                                                                                                                                                                                                                                                                                                                                                                                                                                                                                                                                                                                                                                                                                                                                                                                                                                                                                                                                                                                                                                                                                                                                                                                                                                                                                                                                                                                                                                                                                                                                                                                                                                                                                                                                                                                                                                                                                                                                                                                                                                                                                                                                                                                                                                                                                                                                                                                                                                                                                                                                   | MVZ Labor Passau GbR                                                               | Robert Koch Institute                                                                                 |                                                                                                                                                                                                                                                                                                                                                                                                                                                                                                                                                                                                                                                                                                               |
| EPI_ISL_1140478 to 1140480                                                                                                                                                                                                                                                                                                                                                                                                                                                                                                                                                                                                                                                                                                                                                                                                                                                                                                                                                                                                                                                                                                                                                                                                                                                                                                                                                                                                                                                                                                                                                                                                                                                                                                                                                                                                                                                                                                                                                                                                                                                                                                                                                                                                                                                                                                                                                                                                                                                                                                                                                                                                                                                                                                                                                                                                                                                                                                                                                                                                                                                                                                                                                                                                                                                                                  | MVZ Laborärzte Singen Labor Blessing                                               | Robert Koch Institute                                                                                 |                                                                                                                                                                                                                                                                                                                                                                                                                                                                                                                                                                                                                                                                                                               |
| EPI_ISL_1152537 to 1152539, EPI_ISL_1152543, EPI_ISL_1152548, EPI_ISL_1152553, EPI_ISL_1152557, EPI_ISL_1152559, EPI_ISL_1152568, EPI_ISL_1152583, EPI_ISL_1152591, EPI_ISL_1152598, EPI_ISL_1153341, EPI_ISL_1153348, EPI_ISL_1153365, EPI_ISL_1153377, EPI_ISL_1153379, EPI_ISL_1153437, EPI_ISL_1153442, EPI_ISL_1155180, EPI_ISL_1155201, EPI_ISL_1155478, EPI_ISL_1155487 to 1155488, EPI_ISL_1155500, EPI_ISL_1155505, EPI_ISL_1155511, EPI_ISL_1155517, EPI_ISL_1155528, EPI_ISL_1155952 to 1156953, EPI_ISL_1156955, EPI_ISL_1156958, EPI_ISL_1156969, EPI_ISL_1157068, EPI_ISL_1157127 to 1157128, EPI_ISL_1215580, EPI_ISL_1215591, EPI_ISL_1215603, EPI_ISL_1215617, EPI_ISL_1215619, EPI_ISL_1215630, EPI_ISL_1215642, EPI_ISL_1215648, EPI_ISL_1215671, EPI_ISL_1215784, EPI_ISL_1217028, EPI_ISL_1217036, EPI_ISL_1217055, EPI_ISL_1217057, EPI_ISL_1217060, EPI_ISL_1217062, EPI_ISL_1217080 to 1217081, EPI_ISL_1217084, EPI_ISL_1217092, EPI_ISL_1217098, EPI_ISL_1217103, EPI_ISL_1217178, EPI_ISL_1281179, EPI_ISL_1281182, EPI_ISL_1281197, EPI_ISL_1281200, EPI_ISL_1281208 to 1281209, EPI_ISL_1281211, EPI_ISL_1281214, EPI_ISL_1281218 to 1281220, EPI_ISL_1281224, EPI_ISL_1281236, EPI_ISL_1281238, EPI_ISL_1281245 to 1281246, EPI_ISL_1281249, EPI_ISL_1281791, EPI_ISL_1283159, EPI_ISL_1284481 to 1284483, EPI_ISL_1353144, EPI_ISL_1353146, EPI_ISL_1353150, EPI_ISL_1353152, EPI_ISL_1353172, EPI_ISL_1353184, EPI_ISL_1353191, EPI_ISL_1353197, EPI_ISL_1353199, EPI_ISL_1353202, EPI_ISL_1353207, EPI_ISL_1353211, EPI_ISL_1353215                                                                                                                                                                                                                                                                                                                                                                                                                                                                                                                                                                                                                                                                                                                                                                                                                                                                                                                                                                                                                                                                                                                                                                                                                                                                                                                                                                                                                                                                                                                                                                                                                                                                                                                                        |                                                                                    |                                                                                                       |                                                                                                                                                                                                                                                                                                                                                                                                                                                                                                                                                                                                                                                                                                               |
| see above                                                                                                                                                                                                                                                                                                                                                                                                                                                                                                                                                                                                                                                                                                                                                                                                                                                                                                                                                                                                                                                                                                                                                                                                                                                                                                                                                                                                                                                                                                                                                                                                                                                                                                                                                                                                                                                                                                                                                                                                                                                                                                                                                                                                                                                                                                                                                                                                                                                                                                                                                                                                                                                                                                                                                                                                                                                                                                                                                                                                                                                                                                                                                                                                                                                                                                   | MVZ Medizinisches Labor Hannover GmbH                                              | Robert Koch Institute                                                                                 |                                                                                                                                                                                                                                                                                                                                                                                                                                                                                                                                                                                                                                                                                                               |
| EPI_ISL_1216836, EPI_ISL_1216945, EPI_ISL_1216980, EPI_ISL_1280674, EPI_ISL_1353365, EPI_ISL_1353372, EPI_ISL_1353380, EPI_ISL_1353384, EPI_ISL_1353396                                                                                                                                                                                                                                                                                                                                                                                                                                                                                                                                                                                                                                                                                                                                                                                                                                                                                                                                                                                                                                                                                                                                                                                                                                                                                                                                                                                                                                                                                                                                                                                                                                                                                                                                                                                                                                                                                                                                                                                                                                                                                                                                                                                                                                                                                                                                                                                                                                                                                                                                                                                                                                                                                                                                                                                                                                                                                                                                                                                                                                                                                                                                                     |                                                                                    |                                                                                                       |                                                                                                                                                                                                                                                                                                                                                                                                                                                                                                                                                                                                                                                                                                               |
| see above                                                                                                                                                                                                                                                                                                                                                                                                                                                                                                                                                                                                                                                                                                                                                                                                                                                                                                                                                                                                                                                                                                                                                                                                                                                                                                                                                                                                                                                                                                                                                                                                                                                                                                                                                                                                                                                                                                                                                                                                                                                                                                                                                                                                                                                                                                                                                                                                                                                                                                                                                                                                                                                                                                                                                                                                                                                                                                                                                                                                                                                                                                                                                                                                                                                                                                   | MVZ für Laboratoriumsmedizin und Mikrobiologie Koblenz-Mittelrhein (Labor Koblenz) | Robert Koch Institute                                                                                 |                                                                                                                                                                                                                                                                                                                                                                                                                                                                                                                                                                                                                                                                                                               |
| EPI_ISL_1147247, EPI_ISL_1147249, EPI_ISL_1147251, EPI_ISL_1148063, EPI_ISL_1148065 to 1148066, EPI_ISL_1148069 to 1148071, EPI_ISL_1148073, EPI_ISL_1156121, EPI_ISL_1156126, EPI_ISL_1156131, EPI_ISL_1156135, EPI_ISL_1156142 to 1156143, EPI_ISL_1156154, EPI_ISL_1156161, EPI_ISL_1285299, EPI_ISL_1285308                                                                                                                                                                                                                                                                                                                                                                                                                                                                                                                                                                                                                                                                                                                                                                                                                                                                                                                                                                                                                                                                                                                                                                                                                                                                                                                                                                                                                                                                                                                                                                                                                                                                                                                                                                                                                                                                                                                                                                                                                                                                                                                                                                                                                                                                                                                                                                                                                                                                                                                                                                                                                                                                                                                                                                                                                                                                                                                                                                                             |                                                                                    |                                                                                                       |                                                                                                                                                                                                                                                                                                                                                                                                                                                                                                                                                                                                                                                                                                               |
| see above                                                                                                                                                                                                                                                                                                                                                                                                                                                                                                                                                                                                                                                                                                                                                                                                                                                                                                                                                                                                                                                                                                                                                                                                                                                                                                                                                                                                                                                                                                                                                                                                                                                                                                                                                                                                                                                                                                                                                                                                                                                                                                                                                                                                                                                                                                                                                                                                                                                                                                                                                                                                                                                                                                                                                                                                                                                                                                                                                                                                                                                                                                                                                                                                                                                                                                   | MVZ für Laboratoriumsmedizin und Mikrobiologie Würzburg                            | Robert Koch Institute                                                                                 |                                                                                                                                                                                                                                                                                                                                                                                                                                                                                                                                                                                                                                                                                                               |
| EPI_ISL_1048571 to 1048796, EPI_ISL_1163533 to 1163663                                                                                                                                                                                                                                                                                                                                                                                                                                                                                                                                                                                                                                                                                                                                                                                                                                                                                                                                                                                                                                                                                                                                                                                                                                                                                                                                                                                                                                                                                                                                                                                                                                                                                                                                                                                                                                                                                                                                                                                                                                                                                                                                                                                                                                                                                                                                                                                                                                                                                                                                                                                                                                                                                                                                                                                                                                                                                                                                                                                                                                                                                                                                                                                                                                                      | Maine HETL                                                                         | Tewhey Lab, The Jackson Laboratory                                                                    | Barter, M.; Dewey, H.; H. and Tewhey, R.; Iosue, F.; Lynch, R.; Matluk, N.; Munger                                                                                                                                                                                                                                                                                                                                                                                                                                                                                                                                                                                                                            |
| EPI_ISL_1372584 to 1372897                                                                                                                                                                                                                                                                                                                                                                                                                                                                                                                                                                                                                                                                                                                                                                                                                                                                                                                                                                                                                                                                                                                                                                                                                                                                                                                                                                                                                                                                                                                                                                                                                                                                                                                                                                                                                                                                                                                                                                                                                                                                                                                                                                                                                                                                                                                                                                                                                                                                                                                                                                                                                                                                                                                                                                                                                                                                                                                                                                                                                                                                                                                                                                                                                                                                                  | Maine Health and Environmental Testing Laboratory                                  | Tewhey Lab, The Jackson Laboratory                                                                    | Barter, M.; Dewey, H.; H. and Tewhey, R.; Iosue, F.; Lynch, R.; Matluk, N.; Munger                                                                                                                                                                                                                                                                                                                                                                                                                                                                                                                                                                                                                            |
| EPI_ISL_1059900 to 1059901                                                                                                                                                                                                                                                                                                                                                                                                                                                                                                                                                                                                                                                                                                                                                                                                                                                                                                                                                                                                                                                                                                                                                                                                                                                                                                                                                                                                                                                                                                                                                                                                                                                                                                                                                                                                                                                                                                                                                                                                                                                                                                                                                                                                                                                                                                                                                                                                                                                                                                                                                                                                                                                                                                                                                                                                                                                                                                                                                                                                                                                                                                                                                                                                                                                                                  | Malaysia Genome Institute                                                          | Malaysia Genome Institute                                                                             | Azrin Ahmad; Enizka Kasim; Irni Suhayu Sapian; Mohd Faizal Abu Bakar; Mohd Noor Mat Isa; Nor Azfa Johari.; Nurhezreen Md Iqbal; Shamsidar Sopia; Siti Noraini Othman; Yusuf Muhammad Noor                                                                                                                                                                                                                                                                                                                                                                                                                                                                                                                     |
| EPI_ISL_1122456, EPI_ISL_1213569                                                                                                                                                                                                                                                                                                                                                                                                                                                                                                                                                                                                                                                                                                                                                                                                                                                                                                                                                                                                                                                                                                                                                                                                                                                                                                                                                                                                                                                                                                                                                                                                                                                                                                                                                                                                                                                                                                                                                                                                                                                                                                                                                                                                                                                                                                                                                                                                                                                                                                                                                                                                                                                                                                                                                                                                                                                                                                                                                                                                                                                                                                                                                                                                                                                                            | Manila Doctors Hospital                                                            | Philippine Genome Center                                                                              | Alethea R. de Guzman; Anna Ong-Lim; Arianne A. Zamora; Asia Louisa U. Chong; Benedict A. Maralit; Candice Francheska B. Tambaoan; Carlo M. Lapid; Celia Carlos; Devon Ray Pacial; Edsel Maurice Salvaña; El King D. Morado; Eva Maria Coutongco-de la Paz; Francis A. Tablizo; Irish Coleen A. Asin; Jaime C. Montoya; Jan Michael C. Yap; Jo-Hannah S. Llamas; John Q. Wong; Joshua Gregor A. Dizon; Juan Antonio R. Magalang; Karol Sophia Agape R. Padilla; Kenneth M. Kim; Kris P. Punayan; Marc Edsel C. Ayes; Marc Jerrone R. Castro; Maria Rosario Singh-Vergeire and Cynthia P. Saloma; Maria Sofia L. Yangzon; Marissa Alejandria; Razel Nikka M. Hao; Rianna Patricia S. Cruz; Sheila Mae M. Araiza |
| EPI_ISL_1196017 to 1196018                                                                                                                                                                                                                                                                                                                                                                                                                                                                                                                                                                                                                                                                                                                                                                                                                                                                                                                                                                                                                                                                                                                                                                                                                                                                                                                                                                                                                                                                                                                                                                                                                                                                                                                                                                                                                                                                                                                                                                                                                                                                                                                                                                                                                                                                                                                                                                                                                                                                                                                                                                                                                                                                                                                                                                                                                                                                                                                                                                                                                                                                                                                                                                                                                                                                                  | Manzini RRT                                                                        | National Institute for Communicable Diseases of the National Health Laboratory Service                | Amoako DG; Bhiman JN; Ismail A; Mahlangu B; Maphalala GP; Mohale T; Ntuli N; Scheepers C                                                                                                                                                                                                                                                                                                                                                                                                                                                                                                                                                                                                                      |
| EPI_ISL_1372269 to 1372270, EPI_ISL_1372272, EPI_ISL_1372274, EPI_ISL_1372276, EPI_ISL_1372278                                                                                                                                                                                                                                                                                                                                                                                                                                                                                                                                                                                                                                                                                                                                                                                                                                                                                                                                                                                                                                                                                                                                                                                                                                                                                                                                                                                                                                                                                                                                                                                                                                                                                                                                                                                                                                                                                                                                                                                                                                                                                                                                                                                                                                                                                                                                                                                                                                                                                                                                                                                                                                                                                                                                                                                                                                                                                                                                                                                                                                                                                                                                                                                                              | Mapmygenome                                                                        | CSIR-Centre for Cellular and Molecular Biology - INSAOCG                                              | Amareshwar Vodapalli; Ara Sreenivas; B Himasri; Divya Tej Sowpati; Karthik Bharadwaj Tallapaka; Lamuk Zaveri; Onkar Kulkarni; Rakesh K Mishra; Sharath Chandra Thota; Shreekant Verma; Sofia Banu; Viswagithe S L                                                                                                                                                                                                                                                                                                                                                                                                                                                                                             |
| EPI_ISL_1255060 to 1255064, EPI_ISL_1255066 to 1255077                                                                                                                                                                                                                                                                                                                                                                                                                                                                                                                                                                                                                                                                                                                                                                                                                                                                                                                                                                                                                                                                                                                                                                                                                                                                                                                                                                                                                                                                                                                                                                                                                                                                                                                                                                                                                                                                                                                                                                                                                                                                                                                                                                                                                                                                                                                                                                                                                                                                                                                                                                                                                                                                                                                                                                                                                                                                                                                                                                                                                                                                                                                                                                                                                                                      | Marche en Famenne                                                                  | Plateforme de testing Namuroise                                                                       | ; Degosserie Jonathan; Denis Olivier; Mullier François; Otto Gaetan                                                                                                                                                                                                                                                                                                                                                                                                                                                                                                                                                                                                                                           |
| EPI_ISL_1335888, EPI_ISL_1335895                                                                                                                                                                                                                                                                                                                                                                                                                                                                                                                                                                                                                                                                                                                                                                                                                                                                                                                                                                                                                                                                                                                                                                                                                                                                                                                                                                                                                                                                                                                                                                                                                                                                                                                                                                                                                                                                                                                                                                                                                                                                                                                                                                                                                                                                                                                                                                                                                                                                                                                                                                                                                                                                                                                                                                                                                                                                                                                                                                                                                                                                                                                                                                                                                                                                            | Martha Friska Multatuli Hospital Medan                                             | Faculty of Medicine, Universitas Sumatera Utara; Institute of Tropical Disease, Universitas Airlangga | Aldise M Nastri; Franciscus Ginting; Inke N D Lubis; Irbah R Nainggolan; Jezy R Dewantari; Kazufumi Shimizu; Krisnoadi Rahardjo; Maria I Lusida; Meliani; Mirzan Hasibuan; Muhammad Ichwan; R Andika D Cahyadi; R Lia Kusumawati; Ramadhan Bestari; Rima R Prasetya; Soetjipto; Yasuko Mori                                                                                                                                                                                                                                                                                                                                                                                                                   |
| EPI_ISL_1005683                                                                                                                                                                                                                                                                                                                                                                                                                                                                                                                                                                                                                                                                                                                                                                                                                                                                                                                                                                                                                                                                                                                                                                                                                                                                                                                                                                                                                                                                                                                                                                                                                                                                                                                                                                                                                                                                                                                                                                                                                                                                                                                                                                                                                                                                                                                                                                                                                                                                                                                                                                                                                                                                                                                                                                                                                                                                                                                                                                                                                                                                                                                                                                                                                                                                                             | Martigues Hospital                                                                 | Cerba                                                                                                 | Benazra M; Haim-Boukoba S; Lecorche E; Negre V; Olivi M; Roquebert B; Trombert-Paolantoni S; Vidal B                                                                                                                                                                                                                                                                                                                                                                                                                                                                                                                                                                                                          |
| EPI_ISL_1005682                                                                                                                                                                                                                                                                                                                                                                                                                                                                                                                                                                                                                                                                                                                                                                                                                                                                                                                                                                                                                                                                                                                                                                                                                                                                                                                                                                                                                                                                                                                                                                                                                                                                                                                                                                                                                                                                                                                                                                                                                                                                                                                                                                                                                                                                                                                                                                                                                                                                                                                                                                                                                                                                                                                                                                                                                                                                                                                                                                                                                                                                                                                                                                                                                                                                                             | Martigues hospital                                                                 | Cerba                                                                                                 | Benazra M; Haim-Boukoba S; Lecorche E; Negre V; Olivi M; Roquebert B; Trombert-Paolantoni S; Vidal B                                                                                                                                                                                                                                                                                                                                                                                                                                                                                                                                                                                                          |
| EPI_ISL_1197043, EPI_ISL_1197045, EPI_ISL_1197048, EPI_ISL_1197050, EPI_ISL_1197052, EPI_ISL_1197054 to 1197057, EPI_ISL_1303414, EPI_ISL_1303439, EPI_ISL_1303447, EPI_ISL_1303482                                                                                                                                                                                                                                                                                                                                                                                                                                                                                                                                                                                                                                                                                                                                                                                                                                                                                                                                                                                                                                                                                                                                                                                                                                                                                                                                                                                                                                                                                                                                                                                                                                                                                                                                                                                                                                                                                                                                                                                                                                                                                                                                                                                                                                                                                                                                                                                                                                                                                                                                                                                                                                                                                                                                                                                                                                                                                                                                                                                                                                                                                                                         |                                                                                    |                                                                                                       |                                                                                                                                                                                                                                                                                                                                                                                                                                                                                                                                                                                                                                                                                                               |
| see above                                                                                                                                                                                                                                                                                                                                                                                                                                                                                                                                                                                                                                                                                                                                                                                                                                                                                                                                                                                                                                                                                                                                                                                                                                                                                                                                                                                                                                                                                                                                                                                                                                                                                                                                                                                                                                                                                                                                                                                                                                                                                                                                                                                                                                                                                                                                                                                                                                                                                                                                                                                                                                                                                                                                                                                                                                                                                                                                                                                                                                                                                                                                                                                                                                                                                                   | Martin Luther King Jr. Community Hospital                                          | Los Angeles County PHL                                                                                | P. Hemarajata et al.                                                                                                                                                                                                                                                                                                                                                                                                                                                                                                                                                                                                                                                                                          |
| EPI_ISL_1080334, EPI_ISL_1080348                                                                                                                                                                                                                                                                                                                                                                                                                                                                                                                                                                                                                                                                                                                                                                                                                                                                                                                                                                                                                                                                                                                                                                                                                                                                                                                                                                                                                                                                                                                                                                                                                                                                                                                                                                                                                                                                                                                                                                                                                                                                                                                                                                                                                                                                                                                                                                                                                                                                                                                                                                                                                                                                                                                                                                                                                                                                                                                                                                                                                                                                                                                                                                                                                                                                            | Mary Eliza Mahoney HC                                                              | NJ-PHEL                                                                                               | Byeong Jeong; Dana Woell; Lindsey Bodnar; Shiv Verma                                                                                                                                                                                                                                                                                                                                                                                                                                                                                                                                                                                                                                                          |
| EPI_ISL_1060768, EPI_ISL_1060797                                                                                                                                                                                                                                                                                                                                                                                                                                                                                                                                                                                                                                                                                                                                                                                                                                                                                                                                                                                                                                                                                                                                                                                                                                                                                                                                                                                                                                                                                                                                                                                                                                                                                                                                                                                                                                                                                                                                                                                                                                                                                                                                                                                                                                                                                                                                                                                                                                                                                                                                                                                                                                                                                                                                                                                                                                                                                                                                                                                                                                                                                                                                                                                                                                                                            | Mary Eliza Mahoney HC                                                              | New Jersey Public Health Environmental Laboratories (NJ-PHEL)                                         | Byeong Jeong; Dana Woell; Lindsey Bodnar; Shiv Verma                                                                                                                                                                                                                                                                                                                                                                                                                                                                                                                                                                                                                                                          |
| EPI_ISL_1121356                                                                                                                                                                                                                                                                                                                                                                                                                                                                                                                                                                                                                                                                                                                                                                                                                                                                                                                                                                                                                                                                                                                                                                                                                                                                                                                                                                                                                                                                                                                                                                                                                                                                                                                                                                                                                                                                                                                                                                                                                                                                                                                                                                                                                                                                                                                                                                                                                                                                                                                                                                                                                                                                                                                                                                                                                                                                                                                                                                                                                                                                                                                                                                                                                                                                                             | Mary Eliza Mahoney HC                                                              | New Jersey Public Health and Environmental Laboratories (NJ PHEL)                                     | Byeong Jeong; Dana Woell; Lindsey Bodnar; Shiv K. Verma                                                                                                                                                                                                                                                                                                                                                                                                                                                                                                                                                                                                                                                       |
| EPI_ISL_1113141, EPI_ISL_1113151, EPI_ISL_1113165, EPI_ISL_1113170                                                                                                                                                                                                                                                                                                                                                                                                                                                                                                                                                                                                                                                                                                                                                                                                                                                                                                                                                                                                                                                                                                                                                                                                                                                                                                                                                                                                                                                                                                                                                                                                                                                                                                                                                                                                                                                                                                                                                                                                                                                                                                                                                                                                                                                                                                                                                                                                                                                                                                                                                                                                                                                                                                                                                                                                                                                                                                                                                                                                                                                                                                                                                                                                                                          | Mary Eliza Mahoney HC                                                              | New Jersey Public Health and Environmental Laboratories (PHEL)                                        | Byeong Jeong; Dana Woell; Lindsey Bodnar; Shiv Verma                                                                                                                                                                                                                                                                                                                                                                                                                                                                                                                                                                                                                                                          |
| EPI_ISL_1196022 to 1196102, EPI_ISL_1291653 to 1291656, EPI_ISL_1292815 to 1292970, EPI_ISL_1348107, EPI_ISL_1348109 to 1348110, EPI_ISL_1348112, EPI_ISL_1348114, EPI_ISL_1348116, EPI_ISL_1348118, EPI_ISL_1348120 to 1348121, EPI_ISL_1348123, EPI_ISL_1348125, EPI_ISL_1348127, EPI_ISL_1348129 to 1348130, EPI_ISL_1348132, EPI_ISL_1348134, EPI_ISL_1348136, EPI_ISL_1348138, EPI_ISL_1348140, EPI_ISL_1348142, EPI_ISL_1348144, EPI_ISL_1348146, EPI_ISL_1348148 to 1348149, EPI_ISL_1348151, EPI_ISL_1348153, EPI_ISL_1348155, EPI_ISL_1348157 to 1348158, EPI_ISL_1348160, EPI_ISL_1348162, EPI_ISL_1348164, EPI_ISL_1348166, EPI_ISL_1348168, EPI_ISL_1348170 to 1348171, EPI_ISL_1348173, EPI_ISL_1348175, EPI_ISL_1348177, EPI_ISL_1348179 to 1348180, EPI_ISL_1348182, EPI_ISL_1348184, EPI_ISL_1348186, EPI_ISL_1348188 to 1348189, EPI_ISL_1348191, EPI_ISL_1348193, EPI_ISL_1348195, EPI_ISL_1348197 to 1348198, EPI_ISL_1348201 to 1348202, EPI_ISL_1348204, EPI_ISL_1348206, EPI_ISL_1348208, EPI_ISL_1348210 to 1348211, EPI_ISL_1348213, EPI_ISL_1348215, EPI_ISL_1348217 to 1348218, EPI_ISL_1348220, EPI_ISL_1348222, EPI_ISL_1348224, EPI_ISL_1348226, EPI_ISL_1348228 to 1348229, EPI_ISL_1348231, EPI_ISL_1348233, EPI_ISL_1348235 to 1348236, EPI_ISL_1348238, EPI_ISL_1348240, EPI_ISL_1348242, EPI_ISL_1348244 to 1348245, EPI_ISL_1348247, EPI_ISL_1348249 to 1348250, EPI_ISL_1348252, EPI_ISL_1348254, EPI_ISL_1348256, EPI_ISL_1348258 to 1348259, EPI_ISL_1348261, EPI_ISL_1348263, EPI_ISL_1348265, EPI_ISL_1348267 to 1348268, EPI_ISL_1348270, EPI_ISL_1348272, EPI_ISL_1348274, EPI_ISL_1348276, EPI_ISL_1348278 to 1348279, EPI_ISL_1348281, EPI_ISL_1348283 to 1348284, EPI_ISL_1348286, EPI_ISL_1348288, EPI_ISL_1348290, EPI_ISL_1348292, EPI_ISL_1348294 to                                                                                                                                                                                                                                                                                                                                                                                                                                                                                                                                                                                                                                                                                                                                                                                                                                                                                                                                                                                                                                                                                                                                                                                                                                                                                                                                                                                                                                                                                                       |                                                                                    |                                                                                                       |                                                                                                                                                                                                                                                                                                                                                                                                                                                                                                                                                                                                                                                                                                               |

|                                                                                                                                                                                                                                                                                                                                                                                                                                                                                                                                                                                                                                                                                                                                                                                                                                                                                                                                                                                                                                                                                                                                                                                                                                                                                                                                                                                                                                                                                                                                                                                                                                                                                                                                                                                                                                                                                                                                                                                                                                                                                                                                                                                                                                                                                                                                                                                                                                                                                            |           |                                                                                                             |                                                                                                    |                                                                                                                                                                                                                                                                                                                                                                                                                                                                                                        |
|--------------------------------------------------------------------------------------------------------------------------------------------------------------------------------------------------------------------------------------------------------------------------------------------------------------------------------------------------------------------------------------------------------------------------------------------------------------------------------------------------------------------------------------------------------------------------------------------------------------------------------------------------------------------------------------------------------------------------------------------------------------------------------------------------------------------------------------------------------------------------------------------------------------------------------------------------------------------------------------------------------------------------------------------------------------------------------------------------------------------------------------------------------------------------------------------------------------------------------------------------------------------------------------------------------------------------------------------------------------------------------------------------------------------------------------------------------------------------------------------------------------------------------------------------------------------------------------------------------------------------------------------------------------------------------------------------------------------------------------------------------------------------------------------------------------------------------------------------------------------------------------------------------------------------------------------------------------------------------------------------------------------------------------------------------------------------------------------------------------------------------------------------------------------------------------------------------------------------------------------------------------------------------------------------------------------------------------------------------------------------------------------------------------------------------------------------------------------------------------------|-----------|-------------------------------------------------------------------------------------------------------------|----------------------------------------------------------------------------------------------------|--------------------------------------------------------------------------------------------------------------------------------------------------------------------------------------------------------------------------------------------------------------------------------------------------------------------------------------------------------------------------------------------------------------------------------------------------------------------------------------------------------|
| 1348295, EPI_ISL_1348297, EPI_ISL_1348299, EPI_ISL_1348301, EPI_ISL_1348303 to 1348304, EPI_ISL_1348306, EPI_ISL_1348308, EPI_ISL_1348310 to 1348311, EPI_ISL_1348313, EPI_ISL_1348315, EPI_ISL_1348317, EPI_ISL_1348319 to 1348320, EPI_ISL_1348322, EPI_ISL_1348324, EPI_ISL_1348326, EPI_ISL_1348328 to 1348329, EPI_ISL_1348331, EPI_ISL_1348333, EPI_ISL_1348335 to 1348336, EPI_ISL_1348338, EPI_ISL_1348340, EPI_ISL_1363762 to 1363782                                                                                                                                                                                                                                                                                                                                                                                                                                                                                                                                                                                                                                                                                                                                                                                                                                                                                                                                                                                                                                                                                                                                                                                                                                                                                                                                                                                                                                                                                                                                                                                                                                                                                                                                                                                                                                                                                                                                                                                                                                             | see above | Maryland Genomics, Institute for Genome Sciences, University of Maryland School of Medicine                 | Maryland Genomics, Institute for Genome Sciences, University of Maryland School of Medicine        | Aditya; Claire M; Fraser; Holly; Humphrys; Jacques; Kranthi; Lisa D; Luke J; Mehta; Mike; Ott; Ravel; Roussey; Sadzewicz; Sandra; Tallon; Vavikolanu                                                                                                                                                                                                                                                                                                                                                   |
| EPI_ISL_1015561 to 1015652, EPI_ISL_1038797 to 1038841, EPI_ISL_1064324 to 1064369, EPI_ISL_1081219 to 1081259, EPI_ISL_1081261 to 1081266, EPI_ISL_1121234 to 1121280, EPI_ISL_1167255 to 1167297, EPI_ISL_1181967 to 1182014, EPI_ISL_1233943 to 1233952, EPI_ISL_1233954 to 1233974                                                                                                                                                                                                                                                                                                                                                                                                                                                                                                                                                                                                                                                                                                                                                                                                                                                                                                                                                                                                                                                                                                                                                                                                                                                                                                                                                                                                                                                                                                                                                                                                                                                                                                                                                                                                                                                                                                                                                                                                                                                                                                                                                                                                     | see above | Maryland Public Health Laboratory                                                                           | Maryland Public Health Laboratory                                                                  | Keller, E.; Loomis, J.; Maryland Department of Health Laboratories Administration; Moore; T.L.                                                                                                                                                                                                                                                                                                                                                                                                         |
| EPI_ISL_1226422, EPI_ISL_1226429, EPI_ISL_1226470, EPI_ISL_1226473, EPI_ISL_1226519, EPI_ISL_1227707, EPI_ISL_1227720 to 1227724, EPI_ISL_1227961, EPI_ISL_1227976 to 1227990, EPI_ISL_1228046, EPI_ISL_1228280                                                                                                                                                                                                                                                                                                                                                                                                                                                                                                                                                                                                                                                                                                                                                                                                                                                                                                                                                                                                                                                                                                                                                                                                                                                                                                                                                                                                                                                                                                                                                                                                                                                                                                                                                                                                                                                                                                                                                                                                                                                                                                                                                                                                                                                                            | see above | Masonic Care Community of NY                                                                                | Wadsworth Center, New York State Department of Health                                              | Alexis Russel; Daryl M. Lamson; Erasmus Schneider; Erica Lasek-Nesselquist; John Kelly; Jonathan Pitnick; Kirsten St. George; Matthew Shudt; Melissa A Leisner; Navjot Singh                                                                                                                                                                                                                                                                                                                           |
| EPI_ISL_1011509 to 1011597, EPI_ISL_1121703 to 1121812, EPI_ISL_1121969 to 1121971, EPI_ISL_1253707 to 1253709                                                                                                                                                                                                                                                                                                                                                                                                                                                                                                                                                                                                                                                                                                                                                                                                                                                                                                                                                                                                                                                                                                                                                                                                                                                                                                                                                                                                                                                                                                                                                                                                                                                                                                                                                                                                                                                                                                                                                                                                                                                                                                                                                                                                                                                                                                                                                                             |           | Massachusetts General Hospital                                                                              | Infectious Disease Program, Broad Institute of Harvard and MIT                                     | A.E.; Adams, G.; Anahar, M.; B.L.; B.W.; Bauer, M.; Birren; Branda, J.; Carter, A.; Cerrato, F.; Chaluviadi, S.; Chapman; Cusick, C.; D.J.; DeRuff, K.; E. and Sabeti; Flowers, K.; Gallagher, G.; Gladden-Young, A.; Gnirke, A.; Harris, J.; J.E.; K.J.; LaRoque, R.; Lagerborg, K.; Lemieux; Lin; Loreth, C.; MacInnis; Neumann, A.; Normandin, E.; P.C.; Park; Pierce, V.; Reilly, S.; Rosenberg; Rudy, M.; Ryan, E.; S.B.; Shaw, B.; Siddle; Slater, D.; Smole, S.; Tomkins-Tinch, C.; Turbett, S. |
| EPI_ISL_1009712 to 1009795, EPI_ISL_1233254 to 1233376                                                                                                                                                                                                                                                                                                                                                                                                                                                                                                                                                                                                                                                                                                                                                                                                                                                                                                                                                                                                                                                                                                                                                                                                                                                                                                                                                                                                                                                                                                                                                                                                                                                                                                                                                                                                                                                                                                                                                                                                                                                                                                                                                                                                                                                                                                                                                                                                                                     |           | Massachusetts State Public Health Laboratory                                                                | Massachusetts State Public Health Laboratory                                                       | Andrew Lang; Glen Gallagher; Sandra Smole; Timelia Fink                                                                                                                                                                                                                                                                                                                                                                                                                                                |
| EPI_ISL_1093052, EPI_ISL_1093144                                                                                                                                                                                                                                                                                                                                                                                                                                                                                                                                                                                                                                                                                                                                                                                                                                                                                                                                                                                                                                                                                                                                                                                                                                                                                                                                                                                                                                                                                                                                                                                                                                                                                                                                                                                                                                                                                                                                                                                                                                                                                                                                                                                                                                                                                                                                                                                                                                                           |           | Maya Juarez, Div. of Pulmonary, Critical Care and Sleep Medicine, UC Davis Medical Center                   | Díaz-Muñoz Lab, Department of Microbiology and Molecular Genetics, University of California, Davis | A.J. Campbell; Alexandre Tremeau-Bravard; Ana M. M. Joirez; Angela Haczku; Brandt A Robinson; Christian Sandrock; Daniel G Tompkins; David A. Coil; Greg Brennan; Ivy R. Jose; Jonathan A. Eisen; Maya Juarez; Samuel L Díaz-Muñoz; Satya Danekar; Shefali Banerjee; Stefan Rothenburg; Stuart H. Cohen; Timothy Albertson; Tracey Goldstein                                                                                                                                                           |
| EPI_ISL_1132730 to 1132731, EPI_ISL_1184238 to 1184286, EPI_ISL_1184304, EPI_ISL_1196231 to 1196278, EPI_ISL_1205381 to 1205456, EPI_ISL_1224746 to 1224767, EPI_ISL_1224769, EPI_ISL_1224771, EPI_ISL_1224773, EPI_ISL_1224775 to 1224776, EPI_ISL_1224778 to 1224780, EPI_ISL_1224869 to 1224908, EPI_ISL_1225204 to 1225240, EPI_ISL_1267300, EPI_ISL_1267302, EPI_ISL_1267304 to 1267308, EPI_ISL_1267307 to 1267308, EPI_ISL_1267310 to 1267312, EPI_ISL_1267314 to 1267315, EPI_ISL_1267317 to 1267318, EPI_ISL_1267320, EPI_ISL_1267322 to 1267323, EPI_ISL_1267325 to 1267326, EPI_ISL_1267328 to 1267329, EPI_ISL_1314314 to 1314321, EPI_ISL_1365409 to 1365448, EPI_ISL_1372191 to 1372192, EPI_ISL_1372194 to 1372196, EPI_ISL_1372198, EPI_ISL_1372201 to 1372206, EPI_ISL_1372209 to 1372218, EPI_ISL_1372230, EPI_ISL_1372232 to 1372267, EPI_ISL_1372464 to 1372466, EPI_ISL_1372468 to 1372472, EPI_ISL_1372474 to 1372475, EPI_ISL_1372477 to 1372480, EPI_ISL_1372483, EPI_ISL_1372488 to 1372495, EPI_ISL_1372501 to 1372509, EPI_ISL_1372522 to 1372535, EPI_ISL_1373584 to 1373588                                                                                                                                                                                                                                                                                                                                                                                                                                                                                                                                                                                                                                                                                                                                                                                                                                                                                                                                                                                                                                                                                                                                                                                                                                                                                                                                                                                   | see above | Mayo Clinic & Mayo Clinic Laboratories                                                                      | Minnesota Department of Health, Public Health Laboratory                                           | Alexandra Lorentz; Jacob Garfin; Matt Plumb; and Xiong Wang                                                                                                                                                                                                                                                                                                                                                                                                                                            |
| EPI_ISL_1196000                                                                                                                                                                                                                                                                                                                                                                                                                                                                                                                                                                                                                                                                                                                                                                                                                                                                                                                                                                                                                                                                                                                                                                                                                                                                                                                                                                                                                                                                                                                                                                                                                                                                                                                                                                                                                                                                                                                                                                                                                                                                                                                                                                                                                                                                                                                                                                                                                                                                            |           | Mbabane Clinic                                                                                              | National Institute for Communicable Diseases of the National Health Laboratory Service             | Amoako DG; Bhiman JN; Ismail A; Mahlangu B; Maphalala GP; Mohale T; Ntuli N; Scheepers C                                                                                                                                                                                                                                                                                                                                                                                                               |
| EPI_ISL_1196001, EPI_ISL_1196007                                                                                                                                                                                                                                                                                                                                                                                                                                                                                                                                                                                                                                                                                                                                                                                                                                                                                                                                                                                                                                                                                                                                                                                                                                                                                                                                                                                                                                                                                                                                                                                                                                                                                                                                                                                                                                                                                                                                                                                                                                                                                                                                                                                                                                                                                                                                                                                                                                                           |           | Mbabane Gov Hospital                                                                                        | National Institute for Communicable Diseases of the National Health Laboratory Service             | Amoako DG; Bhiman JN; Ismail A; Mahlangu B; Maphalala GP; Mohale T; Ntuli N; Scheepers C                                                                                                                                                                                                                                                                                                                                                                                                               |
| EPI_ISL_1196004, EPI_ISL_1196015 to 1196016                                                                                                                                                                                                                                                                                                                                                                                                                                                                                                                                                                                                                                                                                                                                                                                                                                                                                                                                                                                                                                                                                                                                                                                                                                                                                                                                                                                                                                                                                                                                                                                                                                                                                                                                                                                                                                                                                                                                                                                                                                                                                                                                                                                                                                                                                                                                                                                                                                                |           | Mbabane PHU                                                                                                 | National Institute for Communicable Diseases of the National Health Laboratory Service             | Amoako DG; Bhiman JN; Ismail A; Mahlangu B; Maphalala GP; Mohale T; Ntuli N; Scheepers C                                                                                                                                                                                                                                                                                                                                                                                                               |
| EPI_ISL_1142524 to 1142525, EPI_ISL_1142527 to 1142530, EPI_ISL_1142533 to 1142541, EPI_ISL_1142543 to 1142550, EPI_ISL_1142556, EPI_ISL_1142559 to 1142560, EPI_ISL_1147608 to 1147612, EPI_ISL_1147614 to 1147618, EPI_ISL_1147621 to 1147624, EPI_ISL_1147626 to 1147635, EPI_ISL_1147638 to 1147639, EPI_ISL_1147641 to 1147642, EPI_ISL_1147644 to 1147645, EPI_ISL_1147648, EPI_ISL_1147651 to 1147652, EPI_ISL_1147654, EPI_ISL_1150482 to 1150487, EPI_ISL_1150489 to 1150490, EPI_ISL_1150493 to 1150494, EPI_ISL_1150496 to 1150499, EPI_ISL_1150501 to 1150502, EPI_ISL_1150504 to 1150507, EPI_ISL_1150509 to 1150511, EPI_ISL_1150513 to 1150515, EPI_ISL_1150517 to 1150518, EPI_ISL_1150520 to 1150522, EPI_ISL_1150524 to 1150526, EPI_ISL_1150528 to 1150529, EPI_ISL_1155334 to 1155335, EPI_ISL_1155337 to 1155341, EPI_ISL_1155343, EPI_ISL_1155346, EPI_ISL_1155348, EPI_ISL_1155350 to 1155351, EPI_ISL_1155356 to 1155357, EPI_ISL_1155359 to 1155365, EPI_ISL_1155367 to 1155368, EPI_ISL_1155370 to 1155374, EPI_ISL_1155376 to 1155377, EPI_ISL_1155379 to 1155380, EPI_ISL_1217576 to 1217577, EPI_ISL_1217584, EPI_ISL_1217590, EPI_ISL_1217593, EPI_ISL_1217595, EPI_ISL_1217601, EPI_ISL_1284899, EPI_ISL_1353597, EPI_ISL_1353600, EPI_ISL_1353602, EPI_ISL_1353610, EPI_ISL_1353613 to 1353614, EPI_ISL_1353617, EPI_ISL_1353620, EPI_ISL_1353634 to 1353635                                                                                                                                                                                                                                                                                                                                                                                                                                                                                                                                                                                                                                                                                                                                                                                                                                                                                                                                                                                                                                                                                               | see above | Med. Labor Prof. Schenk Dr. Ansonge & Kollegen                                                              | Robert Koch Institute                                                                              |                                                                                                                                                                                                                                                                                                                                                                                                                                                                                                        |
| EPI_ISL_1098839, EPI_ISL_1109484 to 1109486, EPI_ISL_1109624 to 1109630, EPI_ISL_1141525, EPI_ISL_1165078 to 1165087, EPI_ISL_1167186, EPI_ISL_1167188 to 1167197                                                                                                                                                                                                                                                                                                                                                                                                                                                                                                                                                                                                                                                                                                                                                                                                                                                                                                                                                                                                                                                                                                                                                                                                                                                                                                                                                                                                                                                                                                                                                                                                                                                                                                                                                                                                                                                                                                                                                                                                                                                                                                                                                                                                                                                                                                                          | see above | Medical Ain Shams Research Institute (MASRI), Ain Shams University                                          | Medical Ain Shams Research Institute (MASRI), Ain Shams University                                 | Aya Mohamed; Fatma Ebied; Hagar Elshora; Hala Hafez; Hesham Elghazaly; Hoda Ezz Elarab; Iman Foda; Manal Hamdy Elsaid; Mohamed Elhadidi; Osama Mansour.; Reham Kassab; Samia Abdou Girgis; Sara Hassan Agwa; Shimaa Moustafa                                                                                                                                                                                                                                                                           |
| EPI_ISL_1255278                                                                                                                                                                                                                                                                                                                                                                                                                                                                                                                                                                                                                                                                                                                                                                                                                                                                                                                                                                                                                                                                                                                                                                                                                                                                                                                                                                                                                                                                                                                                                                                                                                                                                                                                                                                                                                                                                                                                                                                                                                                                                                                                                                                                                                                                                                                                                                                                                                                                            |           | Medical Genetics, Pamukkale University                                                                      | Medical Genetics, Pamukkale University                                                             | Tokgun, O.                                                                                                                                                                                                                                                                                                                                                                                                                                                                                             |
| EPI_ISL_1346646 to 1346647, EPI_ISL_1346649 to 1346655, EPI_ISL_1346657 to 1346665, EPI_ISL_1346668, EPI_ISL_1346670 to 1346680, EPI_ISL_1346682 to 1346692, EPI_ISL_1346694, EPI_ISL_1346698 to 1346699, EPI_ISL_1346701 to 1346708, EPI_ISL_1346710 to 1346716, EPI_ISL_1347191 to 1347200, EPI_ISL_1347202 to 1347204, EPI_ISL_1347272 to 1347275, EPI_ISL_1347277 to 1347284, EPI_ISL_1347286 to 1347287, EPI_ISL_1347289 to 1347292, EPI_ISL_1347294 to 1347297, EPI_ISL_1347399 to 1347409, EPI_ISL_1347411 to 1347443, EPI_ISL_1347471 to 1347472, EPI_ISL_1347546 to 1347548, EPI_ISL_1347682 to 1347684, EPI_ISL_1347686, EPI_ISL_1347688, EPI_ISL_1347690, EPI_ISL_1347693 to 1347697, EPI_ISL_1347752 to 1347753, EPI_ISL_1347821 to 1347825, EPI_ISL_1347827 to 1347832, EPI_ISL_1347835 to 1347839, EPI_ISL_1347841 to 1347842, EPI_ISL_1347847 to 1347850, EPI_ISL_1347852 to 1347857, EPI_ISL_1347859 to 1347864, EPI_ISL_1347866 to 1347868, EPI_ISL_1347870 to 1347877, EPI_ISL_1347949 to 1347950, EPI_ISL_1347968, EPI_ISL_1347971 to 1347986                                                                                                                                                                                                                                                                                                                                                                                                                                                                                                                                                                                                                                                                                                                                                                                                                                                                                                                                                                                                                                                                                                                                                                                                                                                                                                                                                                                                                           | see above | Medical Laboratories Duesseldorf                                                                            | Center of Medical Microbiology, Virology, and Hospital Hygiene, University of Duesseldorf          | Alexander Dilthey; Andreas Walker; Angelika Helmer; Christian Lange; Daniel Strelow; Jessica Nicola; Jörg Timen; Klaus Pfeffer; Lisanna Hülse; Malte Kohns Vasconcelos; Maximilian Dماغnez; Nadine Lübke; Tobias Wienemann; Torsten Houwaart                                                                                                                                                                                                                                                           |
| EPI_ISL_1040928 to 1040938, EPI_ISL_1040987 to 1040993, EPI_ISL_1040997 to 1041016, EPI_ISL_1096167 to 1096169, EPI_ISL_1096196 to 1096203, EPI_ISL_1096210 to 1096214                                                                                                                                                                                                                                                                                                                                                                                                                                                                                                                                                                                                                                                                                                                                                                                                                                                                                                                                                                                                                                                                                                                                                                                                                                                                                                                                                                                                                                                                                                                                                                                                                                                                                                                                                                                                                                                                                                                                                                                                                                                                                                                                                                                                                                                                                                                     |           | Medical Laboratory Bruss                                                                                    | Laboratory of Recombinant Vaccines                                                                 | Boguslaw Szewczyk; Krystyna Bienkowska-Szewczyk; Lukasz Rabalski; Maciej Grzybek; Maciej Kosinski; Pawel Pisarek                                                                                                                                                                                                                                                                                                                                                                                       |
| EPI_ISL_1013494, EPI_ISL_1034316, EPI_ISL_1034326, EPI_ISL_1034341, EPI_ISL_1034343 to 1034344, EPI_ISL_1040144, EPI_ISL_1040158, EPI_ISL_1040166, EPI_ISL_1073920, EPI_ISL_1073935 to 1073938, EPI_ISL_1110537, EPI_ISL_1118285, EPI_ISL_1118342, EPI_ISL_1118345, EPI_ISL_1118358 to 1118359, EPI_ISL_1118368 to 1118369, EPI_ISL_1118375, EPI_ISL_1118413, EPI_ISL_1118420, EPI_ISL_1118465, EPI_ISL_1118473, EPI_ISL_1118502, EPI_ISL_1118512, EPI_ISL_1118572, EPI_ISL_1118576, EPI_ISL_1118592, EPI_ISL_1118606, EPI_ISL_1118630, EPI_ISL_1118651 to 1118655, EPI_ISL_1192164, EPI_ISL_1192169, EPI_ISL_1192173, EPI_ISL_1192182, EPI_ISL_1192186 to 1192187, EPI_ISL_1192211 to 1192213, EPI_ISL_1192218, EPI_ISL_1192228, EPI_ISL_1192312, EPI_ISL_1192314, EPI_ISL_1192326 to 1192333, EPI_ISL_1251287 to 1251288, EPI_ISL_1251305, EPI_ISL_1251326 to 1251343, EPI_ISL_1251368, EPI_ISL_1251450 to 1251451, EPI_ISL_1251531, EPI_ISL_1251599 to 1251603, EPI_ISL_1251605 to 1251606, EPI_ISL_1251638 to 1251642, EPI_ISL_1251686 to 1251688, EPI_ISL_1251743, EPI_ISL_1251745 to 1251747, EPI_ISL_1251750 to 1251755, EPI_ISL_1251787 to 1251788, EPI_ISL_1251845, EPI_ISL_1251926, EPI_ISL_1251926, EPI_ISL_1251987 to 1251993, EPI_ISL_1252007 to 1252008, EPI_ISL_1252014, EPI_ISL_1252029 to 1252030, EPI_ISL_1252039, EPI_ISL_1252046, EPI_ISL_1252518 to 1252519, EPI_ISL_1252522, EPI_ISL_1252524, EPI_ISL_1254532, EPI_ISL_1254540 to 1254541, EPI_ISL_1254544, EPI_ISL_1254546, EPI_ISL_1254550, EPI_ISL_1254553, EPI_ISL_1254581, EPI_ISL_1254615, EPI_ISL_1254626, EPI_ISL_1314409, EPI_ISL_1314541, EPI_ISL_1317218, EPI_ISL_1317236 to 1317237, EPI_ISL_1317302, EPI_ISL_1317315, EPI_ISL_1317340, EPI_ISL_1317342, EPI_ISL_1317346 to 1317347, EPI_ISL_1317378, EPI_ISL_1317393, EPI_ISL_1317438 to 1317440, EPI_ISL_1317445 to 1317446, EPI_ISL_1317463, EPI_ISL_1317485, EPI_ISL_1317502, EPI_ISL_1317513 to 1317516, EPI_ISL_1317531 to 1317535, EPI_ISL_1317556 to 1317560, EPI_ISL_1317568, EPI_ISL_1317571, EPI_ISL_1317584, EPI_ISL_1317592 to 1317594, EPI_ISL_1317601, EPI_ISL_1317607, EPI_ISL_1317610, EPI_ISL_1317612, EPI_ISL_1317672 to 1317673, EPI_ISL_1317684, EPI_ISL_1317732, EPI_ISL_1317834 to 1317835, EPI_ISL_1317855 to 1317856, EPI_ISL_1317869, EPI_ISL_1317874, EPI_ISL_1317924 to 1317925, EPI_ISL_1317939, EPI_ISL_1317944, EPI_ISL_1317961, EPI_ISL_1317978, EPI_ISL_1317995 to 1317998, EPI_ISL_1318002, EPI_ISL_1323131 to 1323135 | see above | Medical Microbiology Unit, Department for Laboratory Medicine, Drammen Hospital, Vestre Viken Health Trust, | Norwegian Institute of Public Health, Department of Virology                                       | Atiya R Ali; Debec Nadia; Engebretsen Serina Beate; Engebretsen Serina Beate Atiya R Ali; Garcia Llorente Ignacio; Hilde Elshaug; Hilde Vollan; Ignacio Garcia Llorente; Jon Bråte; Kamilla Heddeland Instefjord; Karoline Bragsstad; Kathrine Stene-Johansen; Marie Paulsen Madsen; Olav Hungnes; Pedersen Benedikte Nevjen; Rasmus Riis Kopperud; Serina B Engebretsen                                                                                                                               |
| EPI_ISL_1015733                                                                                                                                                                                                                                                                                                                                                                                                                                                                                                                                                                                                                                                                                                                                                                                                                                                                                                                                                                                                                                                                                                                                                                                                                                                                                                                                                                                                                                                                                                                                                                                                                                                                                                                                                                                                                                                                                                                                                                                                                                                                                                                                                                                                                                                                                                                                                                                                                                                                            |           | Medical diagnostic laboratories (MD Laboratories)                                                           | Los Angeles County Public Health Laboratory                                                        | P. Hemarajata et al.                                                                                                                                                                                                                                                                                                                                                                                                                                                                                   |
| EPI_ISL_1302444, EPI_ISL_1302446, EPI_ISL_1302450 to 1302454, EPI_ISL_1302461 to 1302463, EPI_ISL_1302493 to 1302499, EPI_ISL_1302514, EPI_ISL_1302520, EPI_ISL_1302525, EPI_ISL_1302535, EPI_ISL_1302543, EPI_ISL_1302552 to 1302558, EPI_ISL_1302560 to 1302601, EPI_ISL_1357610, EPI_ISL_1357612, EPI_ISL_1357618, EPI_ISL_1357621, EPI_ISL_1357624, EPI_ISL_1357627, EPI_ISL_1357629 to 1357630, EPI_ISL_1357632 to 1357634, EPI_ISL_1357636, EPI_ISL_1357638 to 1357641                                                                                                                                                                                                                                                                                                                                                                                                                                                                                                                                                                                                                                                                                                                                                                                                                                                                                                                                                                                                                                                                                                                                                                                                                                                                                                                                                                                                                                                                                                                                                                                                                                                                                                                                                                                                                                                                                                                                                                                                               | see above | Medicina practica laboratorija                                                                              | Lithuanian University of Health Sciences Hospital, Department of Genetics and Molecular Medicine   | Astra Vitkauskienė; Darius Cereskevicius; Inga Nasvytiene; Mantas Saraukas; Marius Sukys; Rasa Ugenskiene; Renaldas Jurkevicius; Zivile Zemeckiene                                                                                                                                                                                                                                                                                                                                                     |
| EPI_ISL_1150470, EPI_ISL_1150472 to 1150473, EPI_ISL_1150478, EPI_ISL_1150481, EPI_ISL_1152010 to 1152011, EPI_ISL_1152014 to 1152015, EPI_ISL_1152017, EPI_ISL_1152019 to 1152020, EPI_ISL_1152023 to 1152033, EPI_ISL_1152035 to 1152041, EPI_ISL_1156974, EPI_ISL_1156978, EPI_ISL_1156983, EPI_ISL_1156990, EPI_ISL_1156992, EPI_ISL_1156995 to 1156997, EPI_ISL_1157001, EPI_ISL_1157003, EPI_ISL_1157016, EPI_ISL_1157019, EPI_ISL_1157023, EPI_ISL_1157026, EPI_ISL_1157030, EPI_ISL_1157032, EPI_ISL_1157034, EPI_ISL_1157048 to 1157050, EPI_ISL_1157053, EPI_ISL_1351367, EPI_ISL_1351366, EPI_ISL_1354699                                                                                                                                                                                                                                                                                                                                                                                                                                                                                                                                                                                                                                                                                                                                                                                                                                                                                                                                                                                                                                                                                                                                                                                                                                                                                                                                                                                                                                                                                                                                                                                                                                                                                                                                                                                                                                                                       | see above | Medizinisch-Diagnostisches Labor Kempten allgäub                                                            | Robert Koch Institute                                                                              |                                                                                                                                                                                                                                                                                                                                                                                                                                                                                                        |
| EPI_ISL_1144913 to 1144928,                                                                                                                                                                                                                                                                                                                                                                                                                                                                                                                                                                                                                                                                                                                                                                                                                                                                                                                                                                                                                                                                                                                                                                                                                                                                                                                                                                                                                                                                                                                                                                                                                                                                                                                                                                                                                                                                                                                                                                                                                                                                                                                                                                                                                                                                                                                                                                                                                                                                |           | Medizinische Hochschule Hannover Institut für Virologie                                                     | Robert Koch Institute                                                                              |                                                                                                                                                                                                                                                                                                                                                                                                                                                                                                        |



|                                                                                                                                                                                                                                                                                                                                                                                                                                                                                                                                                                                                                                                                    |           |                                                                                                                             |                                                                                                                             |                                                                                                                                                                                                                                                                                                                                                                                                                                                                                                        |
|--------------------------------------------------------------------------------------------------------------------------------------------------------------------------------------------------------------------------------------------------------------------------------------------------------------------------------------------------------------------------------------------------------------------------------------------------------------------------------------------------------------------------------------------------------------------------------------------------------------------------------------------------------------------|-----------|-----------------------------------------------------------------------------------------------------------------------------|-----------------------------------------------------------------------------------------------------------------------------|--------------------------------------------------------------------------------------------------------------------------------------------------------------------------------------------------------------------------------------------------------------------------------------------------------------------------------------------------------------------------------------------------------------------------------------------------------------------------------------------------------|
| EPI_ISL_1250500, EPI_ISL_1250503, EPI_ISL_1250506, EPI_ISL_1250508, EPI_ISL_1250510 to 1250511, EPI_ISL_1250513, EPI_ISL_1250516, EPI_ISL_1250519, EPI_ISL_1250521, EPI_ISL_1250524, EPI_ISL_1250527, EPI_ISL_1250530, EPI_ISL_1250532, EPI_ISL_1250534, EPI_ISL_1250536, EPI_ISL_1250539, EPI_ISL_1250541, EPI_ISL_1250544, EPI_ISL_1250546, EPI_ISL_1250549, EPI_ISL_1250553 to 1250573, EPI_ISL_1250575 to 1250596, EPI_ISL_1289447 to 1289784, EPI_ISL_1367595 to 1367676, EPI_ISL_1367679, EPI_ISL_1367681, EPI_ISL_1367684, EPI_ISL_1367687, EPI_ISL_1367690, EPI_ISL_1367693, EPI_ISL_1367696, EPI_ISL_1367699, EPI_ISL_1367703, EPI_ISL_1367705 to 1367917 | see above | Michigan Department of Health and Human Services, Bureau of Laboratories                                                    | Michigan Department of Health and Human Services, Bureau of Laboratories                                                    | Blankenship HM; Riner D; Soehnlen MK                                                                                                                                                                                                                                                                                                                                                                                                                                                                   |
| EPI_ISL_1068682                                                                                                                                                                                                                                                                                                                                                                                                                                                                                                                                                                                                                                                    |           | Microbiological Laboratory                                                                                                  | Microbiological Laboratory, Lu'an Center for Disease Control and Prevention                                                 | Chang Hongwei; Chen Beilei; Chen Zhichao; Gao Dawei; Li Zhaoyang; Yang Wei; Zhang Feng; Zhang Limei; Zhang Qin; Zhu Rui                                                                                                                                                                                                                                                                                                                                                                                |
| EPI_ISL_1069173                                                                                                                                                                                                                                                                                                                                                                                                                                                                                                                                                                                                                                                    |           | Microbiological Laboratory, Lu'an Center for Disease Control and Prevention                                                 | Microbiological Laboratory, Lu'an Center for Disease Control and Prevention                                                 | Chang Hongwei; Chen Beilei; Chen Zhichao; Gao Dawei; Li Zhaoyang; Yang Wei; Zhang Feng; Zhang Limei; Zhang Qin; Zhu Rui                                                                                                                                                                                                                                                                                                                                                                                |
| EPI_ISL_1069192                                                                                                                                                                                                                                                                                                                                                                                                                                                                                                                                                                                                                                                    |           | Microbiological Laboratory, Lu'an Center for Disease Control and Prevention                                                 | No.409, Gaocheng Middle Road, Lu'an City, Anhui Province                                                                    | Chang Hongwei; Chen Beilei; Chen Zhichao; Gao Dawei; Li Zhaoyang; Yang Wei; Zhang Feng; Zhang Limei; Zhang Qin; Zhu Rui                                                                                                                                                                                                                                                                                                                                                                                |
| EPI_ISL_1069193                                                                                                                                                                                                                                                                                                                                                                                                                                                                                                                                                                                                                                                    |           | Microbiology Laboratory, Lu'an Center for Disease Control and Prevention                                                    | Microbiology Laboratory, Lu'an Center for Disease Control and Prevention                                                    | Chang Hongwei; Chen Beilei; Chen Zhichao; Gao Dawei; Li Zhaoyang; Yang Wei; Zhang Feng; Zhang Limei; Zhang Qin; Zhu Rui                                                                                                                                                                                                                                                                                                                                                                                |
| EPI_ISL_1260874, EPI_ISL_1260901, EPI_ISL_1260930, EPI_ISL_1260939 to 1260940, EPI_ISL_1260949 to 1260950, EPI_ISL_1260964 to 1260965                                                                                                                                                                                                                                                                                                                                                                                                                                                                                                                              |           | Microbiologia e Virologia                                                                                                   | Istituto Zooprofilattico Sperimentale delle Venezie                                                                         | Adelaide Milani; Alessia Schivo; Alice Fusaro; Ambra Pastori; Annalisa Salviato; Antonia Ricci; Calogero Terregino; Edoardo Giussani; Erika Giorgia Quaranta; Isabella Monne; Luca Tassoni                                                                                                                                                                                                                                                                                                             |
| EPI_ISL_1033125 to 1033127, EPI_ISL_1033129, EPI_ISL_1033131 to 1033148, EPI_ISL_1033150 to 1033153, EPI_ISL_1033156 to 1033157, EPI_ISL_1055265 to 1055270, EPI_ISL_1055272 to 1055277, EPI_ISL_1055279 to 1055300, EPI_ISL_1055303, EPI_ISL_1055305 to 1055318, EPI_ISL_1055320 to 1055339, EPI_ISL_1055342 to 1055347, EPI_ISL_1055349 to 1055357, EPI_ISL_1055359 to 1055360, EPI_ISL_1061399 to 1061403, EPI_ISL_1249986, EPI_ISL_1249988, EPI_ISL_1249990, EPI_ISL_1249999, EPI_ISL_1250002, EPI_ISL_1250005                                                                                                                                                 | see above | Microbiological Diagnostic Unit - Public Health Laboratory (MDU-PHL)                                                        | MDU-PHL                                                                                                                     | M.L.; N.L.; Sait; Seemann T.; Sherry                                                                                                                                                                                                                                                                                                                                                                                                                                                                   |
| EPI_ISL_1068593                                                                                                                                                                                                                                                                                                                                                                                                                                                                                                                                                                                                                                                    |           | Microbiological Laboratory                                                                                                  | Microbiological Laboratory, Lu'an Center for Disease Control and Prevention                                                 | Chang Hongwei; Chen Beilei; Chen Zhichao; Gao Dawei; Li Zhaoyang; Yang Wei; Zhang Feng; Zhang Limei; Zhang Qin; Zhu Rui                                                                                                                                                                                                                                                                                                                                                                                |
| EPI_ISL_1372012 to 1372085, EPI_ISL_1372096                                                                                                                                                                                                                                                                                                                                                                                                                                                                                                                                                                                                                        |           | Microbiology Department, Late Shri Lakhiram Agrawal Memory Hospital & College, Raigarh, Chhattisgarh                        | Institute of Life Sciences - INSACOG                                                                                        | Ajay Parida; Amol M. Kanampalliwar; Arup Ghosh; Atimukta Jha; INSACOG Consortium; Punit Prasad; Rajeeb Swain; Rupesh Dash; Safal Wallia; Shifu Aggarwal; Sunil K. Raghav                                                                                                                                                                                                                                                                                                                               |
| EPI_ISL_1208404 to 1208480, EPI_ISL_1208482 to 1208555, EPI_ISL_1208557 to 1208664, EPI_ISL_1208666 to 1208893, EPI_ISL_1208895 to 1208947, EPI_ISL_1251118 to 1251126, EPI_ISL_1251128 to 1251129, EPI_ISL_1251131 to 1251132, EPI_ISL_1251134 to 1251150, EPI_ISL_1251152 to 1251178, EPI_ISL_1251180 to 1251205, EPI_ISL_1251207 to 1251211, EPI_ISL_1263365 to 1263457, EPI_ISL_1322109 to 1322201, EPI_ISL_1322203, EPI_ISL_1347008 to 1347010, EPI_ISL_1347012 to 1347040, EPI_ISL_1347042 to 1347058, EPI_ISL_1347061 to 1347070, EPI_ISL_1347072 to 1347074, EPI_ISL_1347076 to 1347093, EPI_ISL_1347095 to 1347099                                        | see above | Microbiology Department, Laboratori Clinic Metropolitana Nord. Hospital Universitari Germans Trias i Pujol.                 | Can Ruti SARS-CoV-2 Sequencing Hub (HUGTIP/IrsiCaixa/IGTP)                                                                  | Alba Sánchez; Anna Not; Antoni E Bordoy; Bonaventura Clotet; Carol Galvez Maria Casadellà; Cristina Casañ; Cristina Esteban; Francesc Catala-Moll; Gemma Clara; Ignacio Blanco; Irina Pey; Jordi Barretina; Jose Francisco Sánchez; Julia G Prado; Lauro Sumoy; Marc Noguera-Julian; Maria Casadellà; Mariona Parera; Mercedes Guerrero; Montserrat Giménez; Pere-Joan Cardona; Pilar Armengol; Roger Paredes; Verónica Saludes; and Elisa Martró on behalf of the Can Ruti SARS-CoV-2 Sequencing Hub. |
| EPI_ISL_1242034 to 1242038, EPI_ISL_1242041 to 1242047, EPI_ISL_1246953 to 1246957, EPI_ISL_1291549 to 1291557, EPI_ISL_1336491 to 1336510                                                                                                                                                                                                                                                                                                                                                                                                                                                                                                                         |           | Microbiology Department, University Hospital Donostia                                                                       | Microbiology Department, University Hospital Donostia                                                                       | Cilla G.; Gomez M; Marimon JM; Montes M; Piñeiro L; Sorraín A                                                                                                                                                                                                                                                                                                                                                                                                                                          |
| EPI_ISL_1055755 to 1055758                                                                                                                                                                                                                                                                                                                                                                                                                                                                                                                                                                                                                                         |           | Microbiology Department. Complejo Hospitalario Universitario de Santiago                                                    | Microbiology Department. Complejo Hospitalario Universitario de Vigo                                                        | Complejo Hospitalario Universitario de Vigo (CHUVI). Complejo Hospitalario Universitario de Santiago (CHUS).; Microbiology Department                                                                                                                                                                                                                                                                                                                                                                  |
| EPI_ISL_1055753 to 1055754                                                                                                                                                                                                                                                                                                                                                                                                                                                                                                                                                                                                                                         |           | Microbiology Department. Complejo Hospitalario Universitario de Vigo                                                        | Microbiology Department. Complejo Hospitalario Universitario de Vigo                                                        | Complejo Hospitalario Universitario de Vigo (CHUVI).; Microbiology Department                                                                                                                                                                                                                                                                                                                                                                                                                          |
| EPI_ISL_1303033 to 1303365                                                                                                                                                                                                                                                                                                                                                                                                                                                                                                                                                                                                                                         |           | Microbiology Division, South Carolina Department of Health and Environmental Control                                        | Microbiology Division, South Carolina Department of Health and Environmental Control                                        | Flores, H.; Freeman, J.                                                                                                                                                                                                                                                                                                                                                                                                                                                                                |
| EPI_ISL_1251226, EPI_ISL_1251237 to 1251238, EPI_ISL_1253706, EPI_ISL_1261541 to 1261542, EPI_ISL_1267590 to 1267591, EPI_ISL_1267593 to 1267594, EPI_ISL_1267596 to 1267597, EPI_ISL_1267599 to 1267600, EPI_ISL_1267602, EPI_ISL_1269018, EPI_ISL_1290855 to 1290856, EPI_ISL_1291652, EPI_ISL_1297197                                                                                                                                                                                                                                                                                                                                                           | see above | Microbiology Division, South Carolina Department of Health and Environmental Control Public Health Laboratory (SC DHEC PHL) | Microbiology Division, South Carolina Department of Health and Environmental Control Public Health Laboratory (SC DHEC PHL) | Haley Flores; Jessica Freeman                                                                                                                                                                                                                                                                                                                                                                                                                                                                          |
| EPI_ISL_1069198 to 1069201, EPI_ISL_1069203, EPI_ISL_1069205 to 1069208, EPI_ISL_1069210 to 1069211, EPI_ISL_1069213, EPI_ISL_1069215 to 1069216, EPI_ISL_1069218 to 1069219, EPI_ISL_1081193 to 1081199, EPI_ISL_1081260, EPI_ISL_1081291, EPI_ISL_1081310 to 1081311, EPI_ISL_1081324 to 1081326, EPI_ISL_1081331, EPI_ISL_1081340                                                                                                                                                                                                                                                                                                                               | see above | Microbiology Laboratory, Lu'an Center for Disease Control and Prevention                                                    | Microbiology Laboratory, Lu'an Center for Disease Control and Prevention                                                    | Chang Hongwei; Chen Beilei; Chen Zhichao; Gao Dawei; Li Zhaoyang; Lu'an Center for Disease Control and Prevention; Microbiology Laboratory; Yang Wei; Zhang Feng; Zhang Limei; Zhang Qin; Zhu Rui                                                                                                                                                                                                                                                                                                      |
| EPI_ISL_1303427                                                                                                                                                                                                                                                                                                                                                                                                                                                                                                                                                                                                                                                    |           | Microbiology Unit, ASST Monza - San Gerardo Hospital                                                                        | Laboratory of Clinical Microbiology, Virology and Bioemergencies, ASST Fatebenefratelli Sacco - Sacco Hospital              | Alberto Rizzo; Alessandro Mancon; Annalisa Cavallero; Fiorenza Bracchitta; Luca Rizzuto; Maria Rita Gismondo; Sergio Malandrini; Valeria Micheli                                                                                                                                                                                                                                                                                                                                                       |
| EPI_ISL_1064023 to 1064028, EPI_ISL_1064030 to 1064042, EPI_ISL_1064044 to 1064076, EPI_ISL_1064078 to 1064116, EPI_ISL_1163831 to 1163845, EPI_ISL_1173515                                                                                                                                                                                                                                                                                                                                                                                                                                                                                                        |           | Microbiology and Virology Unit, Azienda Ospedale Padova, Padova, Italy                                                      | Department of Molecular Medicine, Computational Medicine Group, University of Padova, Padova, Italy                         | Andrea Crisanti; Andrea Spitaleri; Claudia Del Vecchio; Daniela Maria Cirillo; Dejan Lazarevic; Elisa Franchin; Enrico Lavezzo; Fabio Simeoni; Federico Bianca; Francesca Saluzzo; Francesco Onelia; Giovanni Lorenzini; Giovanni Tonon; Laura Manuto; Marco Grazioli; Stefano Toppo                                                                                                                                                                                                                   |
| EPI_ISL_1195961 to 1195963                                                                                                                                                                                                                                                                                                                                                                                                                                                                                                                                                                                                                                         |           | Microbiology and Virology Unit, Florence Careggi University Hospital                                                        | Microbiology and Virology Unit, Florence Careggi University Hospital                                                        | Alberto Antonelli; Emanuele Gorì; Fabio Morecchiato; Gian Maria Rossolini; Iliaria Baccani; Marco Coppi; Nicla Giovacchini; Noemi Aiezza; Vincenzo Di Pilato                                                                                                                                                                                                                                                                                                                                           |
| EPI_ISL_1181724 to 1181737, EPI_ISL_1181739 to 1181755, EPI_ISL_1181757 to 1181818                                                                                                                                                                                                                                                                                                                                                                                                                                                                                                                                                                                 |           | Microbiology and Virology Unit, Azienda Ospedale Padova, Padova, Italy                                                      | Department of Molecular Medicine, Computational Medicine Group, University of Padova, Padova, Italy                         | Andrea Crisanti; Claudia Del Vecchio; Elisa Franchin; Enrico Lavezzo; Federico Bianca; Francesco Onelia; Laura Manuto; Marco Grazioli; Stefano Toppo                                                                                                                                                                                                                                                                                                                                                   |
| EPI_ISL_1194715 to 1194730, EPI_ISL_1279219 to 1279261, EPI_ISL_1299273 to 1299291, EPI_ISL_1311850 to 1311859                                                                                                                                                                                                                                                                                                                                                                                                                                                                                                                                                     |           | Microvida                                                                                                                   | Microvida                                                                                                                   | J. Stohr; J. Verweij; Jaco Verweij; Joep Stöhr; S.D. Pas; Suzan D. Pas                                                                                                                                                                                                                                                                                                                                                                                                                                 |
| EPI_ISL_1016844 to 1016845, EPI_ISL_1016850, EPI_ISL_1016852, EPI_ISL_1016855, EPI_ISL_1016857, EPI_ISL_1016863, EPI_ISL_1016865, EPI_ISL_1016868, EPI_ISL_1016870, EPI_ISL_1016872, EPI_ISL_1016874 to 1016876, EPI_ISL_1016879, EPI_ISL_1082256 to 1082259, EPI_ISL_1082262, EPI_ISL_1082264, EPI_ISL_1082267, EPI_ISL_1113755 to 1113756, EPI_ISL_1113758, EPI_ISL_1250696 to 1250697, EPI_ISL_1250702, EPI_ISL_1250706 to 1250707, EPI_ISL_1250712, EPI_ISL_1315311, EPI_ISL_1315315 to 1315316, EPI_ISL_1315318 to 1315319, EPI_ISL_1315325                                                                                                                   | see above | Middlemore Hospital                                                                                                         | Institute of Environmental Science and Research (ESR)                                                                       | Anja Werno; Antje van der Linden; Arlo Upton; Chris Mansell; David Hamner; Dragana Drinkovic; Erasmus Smit; Gary McAuliffe; Hana Sofia Andersson; Hermes Perez; James Ussher; Jill Sherwood; Jing Wang; Joep de Ligt; Josh Freeman; Julia Howard; Juliet Elvy; Lauren Jelly; Mary DeAlmeida; Matt                                                                                                                                                                                                      |

|                                                                                                                                                                                                                                                                                                                                                                                                                                                                                                                                                                                                                                                                                                                                                                                                                                                                                                                                                                                                                                                                                                                                                                                                                                                                                                                                                                                                                                                                                                                                                                                                                                                                                                                                                                                                                                                                                                                                                                                                                                                                                                                                                                                                                                                                                                                                                                                                                                                                                                                                                                                                                                                                                                                                                                                                                                                                                                                                                                                                                                                                                                                                                                                                                                                                                                                                                                                                                                                  |                                                                                                                                                                                                                |                                                                                                               |                                                                                                                                                                                                                                                                                                                                                                                                          |
|--------------------------------------------------------------------------------------------------------------------------------------------------------------------------------------------------------------------------------------------------------------------------------------------------------------------------------------------------------------------------------------------------------------------------------------------------------------------------------------------------------------------------------------------------------------------------------------------------------------------------------------------------------------------------------------------------------------------------------------------------------------------------------------------------------------------------------------------------------------------------------------------------------------------------------------------------------------------------------------------------------------------------------------------------------------------------------------------------------------------------------------------------------------------------------------------------------------------------------------------------------------------------------------------------------------------------------------------------------------------------------------------------------------------------------------------------------------------------------------------------------------------------------------------------------------------------------------------------------------------------------------------------------------------------------------------------------------------------------------------------------------------------------------------------------------------------------------------------------------------------------------------------------------------------------------------------------------------------------------------------------------------------------------------------------------------------------------------------------------------------------------------------------------------------------------------------------------------------------------------------------------------------------------------------------------------------------------------------------------------------------------------------------------------------------------------------------------------------------------------------------------------------------------------------------------------------------------------------------------------------------------------------------------------------------------------------------------------------------------------------------------------------------------------------------------------------------------------------------------------------------------------------------------------------------------------------------------------------------------------------------------------------------------------------------------------------------------------------------------------------------------------------------------------------------------------------------------------------------------------------------------------------------------------------------------------------------------------------------------------------------------------------------------------------------------------------|----------------------------------------------------------------------------------------------------------------------------------------------------------------------------------------------------------------|---------------------------------------------------------------------------------------------------------------|----------------------------------------------------------------------------------------------------------------------------------------------------------------------------------------------------------------------------------------------------------------------------------------------------------------------------------------------------------------------------------------------------------|
| EPI_ISL_1064700 to 1064702,<br>EPI_ISL_1064710, EPI_ISL_1168054 to<br>1168059, EPI_ISL_1231915, EPI_ISL_1231927<br>to 1231930, EPI_ISL_1232012 to 1232014                                                                                                                                                                                                                                                                                                                                                                                                                                                                                                                                                                                                                                                                                                                                                                                                                                                                                                                                                                                                                                                                                                                                                                                                                                                                                                                                                                                                                                                                                                                                                                                                                                                                                                                                                                                                                                                                                                                                                                                                                                                                                                                                                                                                                                                                                                                                                                                                                                                                                                                                                                                                                                                                                                                                                                                                                                                                                                                                                                                                                                                                                                                                                                                                                                                                                        | Microbiologen                                                                                                                                                                                                  | The Public Health Agency of Sweden                                                                            | Anna Risberg; Anna-Malin Linde; Carlo Berg; Karin Tegmark-Wisell; Maria Lind Karlberg; Mattias Haukland; Mia Brytting; Noura Walai; Oskar Karlsson Lindsjö; Petra Edquist; Petra Holmstrom; Reza Advani; Samuel Ohman; Sofia Starnouli                                                                                                                                                                   |
| EPI_ISL_1318203 to 1318219,<br>EPI_ISL_1334365                                                                                                                                                                                                                                                                                                                                                                                                                                                                                                                                                                                                                                                                                                                                                                                                                                                                                                                                                                                                                                                                                                                                                                                                                                                                                                                                                                                                                                                                                                                                                                                                                                                                                                                                                                                                                                                                                                                                                                                                                                                                                                                                                                                                                                                                                                                                                                                                                                                                                                                                                                                                                                                                                                                                                                                                                                                                                                                                                                                                                                                                                                                                                                                                                                                                                                                                                                                                   | Ministry of Health Hospitals                                                                                                                                                                                   | Institute of Health and Community Medicine                                                                    | Chan Chia Jui; Chua Hock Hin; David Perera; Ooi Mong How; Tonni Sia Loong Loong; Wong Jyn Shan; Wong Kiing Aik                                                                                                                                                                                                                                                                                           |
| EPI_ISL_1008616 to 1008656, EPI_ISL_1020411 to 1020485, EPI_ISL_1034231 to 1034259, EPI_ISL_1063916 to 1063986, EPI_ISL_1063988 to 1063992, EPI_ISL_1073641 to 1073812, EPI_ISL_1082388 to 1082448, EPI_ISL_1095517 to 1095609, EPI_ISL_1096030 to 1096119, EPI_ISL_1097030 to 1097307, EPI_ISL_1117597 to 1117660, EPI_ISL_1164466 to 1164483, EPI_ISL_1167568 to 1167663, EPI_ISL_1169975 to 1170125, EPI_ISL_1171872 to 1171965, EPI_ISL_1183603 to 1183691, EPI_ISL_1196103 to 1196197, EPI_ISL_1211609 to 1211610, EPI_ISL_1211612 to 1211617, EPI_ISL_1211619, EPI_ISL_1211621, EPI_ISL_1211623 to 1211624, EPI_ISL_1211627, EPI_ISL_1211630, EPI_ISL_1211632, EPI_ISL_1211634, EPI_ISL_1211636, EPI_ISL_1211641, EPI_ISL_1211643, EPI_ISL_1211645, EPI_ISL_1211649, EPI_ISL_1211652, EPI_ISL_1211654, EPI_ISL_1211656, EPI_ISL_1211658, EPI_ISL_1211660, EPI_ISL_1211662, EPI_ISL_1211664, EPI_ISL_1211666, EPI_ISL_1211669, EPI_ISL_1211671, EPI_ISL_1211673, EPI_ISL_1211675, EPI_ISL_1211677, EPI_ISL_1211679, EPI_ISL_1211681, EPI_ISL_1211684, EPI_ISL_1211686, EPI_ISL_1211688, EPI_ISL_1211690, EPI_ISL_1211692, EPI_ISL_1211695, EPI_ISL_1211697, EPI_ISL_1211699 to 1211700, EPI_ISL_1211703, EPI_ISL_1211705, EPI_ISL_1211707, EPI_ISL_1211710, EPI_ISL_1211712, EPI_ISL_1211714, EPI_ISL_1211716, EPI_ISL_1211719, EPI_ISL_1211721, EPI_ISL_1211723, EPI_ISL_1211725, EPI_ISL_1211728 to 1211729, EPI_ISL_1211732, EPI_ISL_1211734, EPI_ISL_1211736, EPI_ISL_1211738, EPI_ISL_1211740, EPI_ISL_1211742, EPI_ISL_1211745, EPI_ISL_1211747, EPI_ISL_1211749, EPI_ISL_1211751, EPI_ISL_1211753, EPI_ISL_1211755, EPI_ISL_1211757, EPI_ISL_1211760, EPI_ISL_1211762, EPI_ISL_1211764, EPI_ISL_1211766, EPI_ISL_1211768, EPI_ISL_1211770, EPI_ISL_1211773, EPI_ISL_1211775, EPI_ISL_1211778, EPI_ISL_1211782, EPI_ISL_1213942, EPI_ISL_1213944, EPI_ISL_1213946, EPI_ISL_1213947, EPI_ISL_1213949, EPI_ISL_1213951 to 1213952, EPI_ISL_1213954, EPI_ISL_1213956 to 1213957, EPI_ISL_1213959, EPI_ISL_1213961, EPI_ISL_1213963 to 1213964, EPI_ISL_1213966, EPI_ISL_1213968 to 1213969, EPI_ISL_1213971, EPI_ISL_1213973 to 1213974, EPI_ISL_1213976, EPI_ISL_1213978, EPI_ISL_1213980, EPI_ISL_1213982, EPI_ISL_1213984, EPI_ISL_1213986 to 1213987, EPI_ISL_1213989 to 1213990, EPI_ISL_1213992, EPI_ISL_1213994 to 1213999, EPI_ISL_1214001 to 1214002, EPI_ISL_1214004, EPI_ISL_1214006, EPI_ISL_1214008 to 1214009, EPI_ISL_1214011, EPI_ISL_1214013 to 1214014, EPI_ISL_1214016, EPI_ISL_1214018 to 1214019, EPI_ISL_1214021, EPI_ISL_1214023, EPI_ISL_1214025 to 1214026, EPI_ISL_1214028, EPI_ISL_1214030, EPI_ISL_1214032 to 1214033, EPI_ISL_1214035, EPI_ISL_1214037, EPI_ISL_1214039 to 1214040, EPI_ISL_1214042, EPI_ISL_1214044 to 1214045, EPI_ISL_1214047, EPI_ISL_1214049 to 1214050, EPI_ISL_1214052, EPI_ISL_1214054 to 1214055, EPI_ISL_1214057 to 1214058, EPI_ISL_1214060, EPI_ISL_1214062, EPI_ISL_1214064, EPI_ISL_1214066, EPI_ISL_1214068 to 1214069, EPI_ISL_1214071, EPI_ISL_1214073 to 1214074, EPI_ISL_1214076, EPI_ISL_1214078, EPI_ISL_1214081, EPI_ISL_1214083, EPI_ISL_1214085 to 1214086, EPI_ISL_1214088, EPI_ISL_1225780 to 1225871, EPI_ISL_1229415 to 1229506, EPI_ISL_1263236 to 1263318, EPI_ISL_1272095 to 1272187, EPI_ISL_1278188 to 1278273, EPI_ISL_1293236 to 1293326, EPI_ISL_1302717 to 1302787, EPI_ISL_1358323 to 1358407, EPI_ISL_1379157 to 1379195, EPI_ISL_1379944 to 1379955 | Ministry of Health Turkey                                                                                                                                                                                      | Ministry of Health Turkey                                                                                     | Aye Baak Alta; Fatma Bayraktar; Gulay Korukluoglu; Gülay Korukluolu; Süleyman Yalcin; Süleyman Yalcin; Yasemin Cosgun; Yasemin Cogun                                                                                                                                                                                                                                                                     |
| see above                                                                                                                                                                                                                                                                                                                                                                                                                                                                                                                                                                                                                                                                                                                                                                                                                                                                                                                                                                                                                                                                                                                                                                                                                                                                                                                                                                                                                                                                                                                                                                                                                                                                                                                                                                                                                                                                                                                                                                                                                                                                                                                                                                                                                                                                                                                                                                                                                                                                                                                                                                                                                                                                                                                                                                                                                                                                                                                                                                                                                                                                                                                                                                                                                                                                                                                                                                                                                                        | Minneapolis VA Health Care System                                                                                                                                                                              | Minnesota Department of Health, Public Health Laboratory                                                      | Alexandra Lorentz; Jacob Garfin; Matt Plumb; and Xiong Wang                                                                                                                                                                                                                                                                                                                                              |
| EPI_ISL_1121557 to 1121559, EPI_ISL_1121590, EPI_ISL_1121624, EPI_ISL_1121628, EPI_ISL_1224822, EPI_ISL_1339303 to 1339304, EPI_ISL_1339306 to 1339307, EPI_ISL_1339309 to 1339310, EPI_ISL_1339312 to 1339313, EPI_ISL_1339315 to 1339316, EPI_ISL_1339318 to 1339320, EPI_ISL_1339322 to 1339323, EPI_ISL_1339325 to 1339326, EPI_ISL_1339328 to 1339330, EPI_ISL_1339332 to 1339333, EPI_ISL_1339335 to 1339336, EPI_ISL_1339338 to 1339339, EPI_ISL_1339341 to 1339342, EPI_ISL_1339344 to 1339346, EPI_ISL_1339348, EPI_ISL_1339351 to 1339352, EPI_ISL_1339354, EPI_ISL_1358942 to 1358953, EPI_ISL_1372097, EPI_ISL_1372099, EPI_ISL_1372101 to 1372103, EPI_ISL_1372107, EPI_ISL_1372112 to 1372114, EPI_ISL_1372116 to 1372117, EPI_ISL_1372134 to 1372156, EPI_ISL_1372158, EPI_ISL_1372165 to 1372167, EPI_ISL_1372169, EPI_ISL_1372177, EPI_ISL_1372188, EPI_ISL_1372219 to 1372225, EPI_ISL_1372467, EPI_ISL_1372496 to 1372497, EPI_ISL_1372512                                                                                                                                                                                                                                                                                                                                                                                                                                                                                                                                                                                                                                                                                                                                                                                                                                                                                                                                                                                                                                                                                                                                                                                                                                                                                                                                                                                                                                                                                                                                                                                                                                                                                                                                                                                                                                                                                                                                                                                                                                                                                                                                                                                                                                                                                                                                                                                                                                                                                    | Missouri State Public Health Laboratory                                                                                                                                                                        | Missouri State Public Health Laboratory                                                                       | Ashley New; Joshua Barry; Matthew Sinn                                                                                                                                                                                                                                                                                                                                                                   |
| see above                                                                                                                                                                                                                                                                                                                                                                                                                                                                                                                                                                                                                                                                                                                                                                                                                                                                                                                                                                                                                                                                                                                                                                                                                                                                                                                                                                                                                                                                                                                                                                                                                                                                                                                                                                                                                                                                                                                                                                                                                                                                                                                                                                                                                                                                                                                                                                                                                                                                                                                                                                                                                                                                                                                                                                                                                                                                                                                                                                                                                                                                                                                                                                                                                                                                                                                                                                                                                                        | Mitchells Plain Hospital wc MPH                                                                                                                                                                                | NHLS/UCT                                                                                                      | Arash Iranzadeh; Bruna Galvao; Carolyn Williamson; Deelan Doolabh; Diana Hardie; Innocent Mudau; Kruger Marais; Lynn Tyers; Marvin Hsiao; Stephen Korsman                                                                                                                                                                                                                                                |
| EPI_ISL_1261137 to 1261161,<br>EPI_ISL_1312773 to 1312796                                                                                                                                                                                                                                                                                                                                                                                                                                                                                                                                                                                                                                                                                                                                                                                                                                                                                                                                                                                                                                                                                                                                                                                                                                                                                                                                                                                                                                                                                                                                                                                                                                                                                                                                                                                                                                                                                                                                                                                                                                                                                                                                                                                                                                                                                                                                                                                                                                                                                                                                                                                                                                                                                                                                                                                                                                                                                                                                                                                                                                                                                                                                                                                                                                                                                                                                                                                        | Molecular & Genomic Pathology Laboratory, Thomas Jefferson University Hospital                                                                                                                                 | Molecular & Genomic Pathology Laboratory, Thomas Jefferson University Hospital                                | Nitika Badjatia; Run Jin; Zi-xuan Wang                                                                                                                                                                                                                                                                                                                                                                   |
| EPI_ISL_1250507, EPI_ISL_1250509, EPI_ISL_1250512, EPI_ISL_1250514 to 1250515, EPI_ISL_1250517 to 1250518, EPI_ISL_1250520 to 1250521, EPI_ISL_1250522 to 1250523, EPI_ISL_1250525 to 1250526, EPI_ISL_1250528 to 1250529, EPI_ISL_1250531, EPI_ISL_1250533, EPI_ISL_1250535, EPI_ISL_1250537 to 1250538, EPI_ISL_1250540, EPI_ISL_1250542 to 1250543, EPI_ISL_1250545, EPI_ISL_1250547 to 1250548, EPI_ISL_1250550 to 1250552                                                                                                                                                                                                                                                                                                                                                                                                                                                                                                                                                                                                                                                                                                                                                                                                                                                                                                                                                                                                                                                                                                                                                                                                                                                                                                                                                                                                                                                                                                                                                                                                                                                                                                                                                                                                                                                                                                                                                                                                                                                                                                                                                                                                                                                                                                                                                                                                                                                                                                                                                                                                                                                                                                                                                                                                                                                                                                                                                                                                                   | Molecular Diagnostics Services (MDS)                                                                                                                                                                           | KRISP, KZN Research Innovation and Sequencing Platform                                                        | Emmanuel SJ; Giandhari J; Khan S; Lessells R; Maslo C; Mdalose K; Pillay S; Sitharam L; Tegally H; Wilkinson E; York D; de Oliveira T                                                                                                                                                                                                                                                                    |
| see above                                                                                                                                                                                                                                                                                                                                                                                                                                                                                                                                                                                                                                                                                                                                                                                                                                                                                                                                                                                                                                                                                                                                                                                                                                                                                                                                                                                                                                                                                                                                                                                                                                                                                                                                                                                                                                                                                                                                                                                                                                                                                                                                                                                                                                                                                                                                                                                                                                                                                                                                                                                                                                                                                                                                                                                                                                                                                                                                                                                                                                                                                                                                                                                                                                                                                                                                                                                                                                        | Molecular Laboratory, Vikash Multispecialty Hospital, Bargharh 1063861                                                                                                                                         | Immunogenomics lab, Institute of Life Sciences, Bhubaneswar                                                   | Ajay Parida; Amol M. Kanampalliwar; Arup Ghosh; Atimukta Jha; INSACOG Consortium; Kiral Hansdah; Punit Prasad; Rajeeb Swain; Rupesh Dash; Safal Waia; Shifu Aggarwal; Sunil K. Raghav                                                                                                                                                                                                                    |
| EPI_ISL_1191095, EPI_ISL_1191097 to 1191099, EPI_ISL_1191103 to 1191105                                                                                                                                                                                                                                                                                                                                                                                                                                                                                                                                                                                                                                                                                                                                                                                                                                                                                                                                                                                                                                                                                                                                                                                                                                                                                                                                                                                                                                                                                                                                                                                                                                                                                                                                                                                                                                                                                                                                                                                                                                                                                                                                                                                                                                                                                                                                                                                                                                                                                                                                                                                                                                                                                                                                                                                                                                                                                                                                                                                                                                                                                                                                                                                                                                                                                                                                                                          | Molecular Pathology Division, Department of Pathology, Hong Kong Sanatorium & Hospital                                                                                                                         | Molecular Pathology Division, Department of Pathology, Hong Kong Sanatorium & Hospital                        | Chun Hang AU; Edmond Shiu Kwan MA; Ho Yin LAM; Jonpaul Sze Tsing ZEE; Queenie Wai Ling CHAN; Raymond Wai Hung YUNG; Tsun Leung CHAN; Wai Sing CHAN                                                                                                                                                                                                                                                       |
| EPI_ISL_1133145 to 1133202,<br>EPI_ISL_1166095 to 1166108                                                                                                                                                                                                                                                                                                                                                                                                                                                                                                                                                                                                                                                                                                                                                                                                                                                                                                                                                                                                                                                                                                                                                                                                                                                                                                                                                                                                                                                                                                                                                                                                                                                                                                                                                                                                                                                                                                                                                                                                                                                                                                                                                                                                                                                                                                                                                                                                                                                                                                                                                                                                                                                                                                                                                                                                                                                                                                                                                                                                                                                                                                                                                                                                                                                                                                                                                                                        | Molecular Virology Unit, Microbiology and Virology Department, Fondazione IRCCS Policlinico San Matteo, Pavia                                                                                                  | Molecular Virology Unit, Microbiology and Virology Department, Fondazione IRCCS Policlinico San Matteo, Pavia | Antonio Piralla; Fausto Baldanti; Federica Giardina; Federica Novazzi; Gherard Batisti Biffignandi; Monica Tallarita; Stefania Paolucci; Stefano Gaiarsa                                                                                                                                                                                                                                                 |
| EPI_ISL_1363114, EPI_ISL_1363117 to 1363118                                                                                                                                                                                                                                                                                                                                                                                                                                                                                                                                                                                                                                                                                                                                                                                                                                                                                                                                                                                                                                                                                                                                                                                                                                                                                                                                                                                                                                                                                                                                                                                                                                                                                                                                                                                                                                                                                                                                                                                                                                                                                                                                                                                                                                                                                                                                                                                                                                                                                                                                                                                                                                                                                                                                                                                                                                                                                                                                                                                                                                                                                                                                                                                                                                                                                                                                                                                                      | Molecular diagnostic laboratory of Federal Budget Institution of Science "Central Research Institute of Epidemiology" of The Federal Service on Customers' Rights Protection and Human Well-being Surveillance | Group of Genomics and Postgenomic Technologies of Central Research Institute of Epidemiology                  | Akimin VG; Berlina YY; Bulanenko VP; Cherkashina AS; Golubeva AG; Kaptelova VV; Kondrasheva LY; Korneenko EV; Saenko SS; Samoilov AE; Shipulina OY; Solovyeva ED; Speranskaya AS; Tivanova EV; Valdokhina AV; Zotova MI                                                                                                                                                                                  |
| EPI_ISL_1365022 to 1365035, EPI_ISL_1367677 to 1367678, EPI_ISL_1367680, EPI_ISL_1367682 to 1367683, EPI_ISL_1367685 to 1367686, EPI_ISL_1367688 to 1367689, EPI_ISL_1367691 to 1367692, EPI_ISL_1367694 to 1367695, EPI_ISL_1367697 to 1367698, EPI_ISL_1367700 to 1367702, EPI_ISL_1367704                                                                                                                                                                                                                                                                                                                                                                                                                                                                                                                                                                                                                                                                                                                                                                                                                                                                                                                                                                                                                                                                                                                                                                                                                                                                                                                                                                                                                                                                                                                                                                                                                                                                                                                                                                                                                                                                                                                                                                                                                                                                                                                                                                                                                                                                                                                                                                                                                                                                                                                                                                                                                                                                                                                                                                                                                                                                                                                                                                                                                                                                                                                                                     | Molecular diagnostic unit for viral haemorrhagic fevers and emerging viruses, Bouaké CHU Laboratory                                                                                                            | Molecular diagnostic unit for viral haemorrhagic fevers and emerging viruses, Bouaké CHU Laboratory           | Adjaratou Traoré; Bamba Fatoumata Touré; Chantal Akoua-Koffi; Coulibaly Mbegnan; Diané Bamourou; Essia Belarbi; Etilé Anoh; Fabian Leendertz; Grit Schubert; Kra Oufoué; Monemo Pacome; Oby Woyoro; Safiatou Karidoulou; Soundélé Matié                                                                                                                                                                  |
| EPI_ISL_1290896, EPI_ISL_1290922, EPI_ISL_1290956, EPI_ISL_1291133, EPI_ISL_1291189 to 1291191, EPI_ISL_1291741 to 1291742, EPI_ISL_1291744, EPI_ISL_1291746, EPI_ISL_1291748 to 1291754, EPI_ISL_1296236, EPI_ISL_1296294, EPI_ISL_1296296, EPI_ISL_1296480, EPI_ISL_1296488, EPI_ISL_1296653, EPI_ISL_1296655, EPI_ISL_1296678 to 1296679, EPI_ISL_1296683 to 1296684, EPI_ISL_1296728, EPI_ISL_1296909, EPI_ISL_1297080, EPI_ISL_1297164, EPI_ISL_1297195 to 1297196, EPI_ISL_1297202 to 1297203, EPI_ISL_1323210, EPI_ISL_1323620 to 1323635, EPI_ISL_1323653 to 1323657                                                                                                                                                                                                                                                                                                                                                                                                                                                                                                                                                                                                                                                                                                                                                                                                                                                                                                                                                                                                                                                                                                                                                                                                                                                                                                                                                                                                                                                                                                                                                                                                                                                                                                                                                                                                                                                                                                                                                                                                                                                                                                                                                                                                                                                                                                                                                                                                                                                                                                                                                                                                                                                                                                                                                                                                                                                                     | Montana Public Health Laboratory                                                                                                                                                                               | Montana Public Health Laboratory                                                                              | Carrie Biskupiak; Deborah Gibson; Deborah Gibson.; Joy Ritter; Michelle Mozer                                                                                                                                                                                                                                                                                                                            |
| see above                                                                                                                                                                                                                                                                                                                                                                                                                                                                                                                                                                                                                                                                                                                                                                                                                                                                                                                                                                                                                                                                                                                                                                                                                                                                                                                                                                                                                                                                                                                                                                                                                                                                                                                                                                                                                                                                                                                                                                                                                                                                                                                                                                                                                                                                                                                                                                                                                                                                                                                                                                                                                                                                                                                                                                                                                                                                                                                                                                                                                                                                                                                                                                                                                                                                                                                                                                                                                                        | Monterey County Public Health Laboratory                                                                                                                                                                       | Monterey County Public Health Laboratory                                                                      | Monterey County Public Health Laboratory                                                                                                                                                                                                                                                                                                                                                                 |
| EPI_ISL_1040701, EPI_ISL_1040712                                                                                                                                                                                                                                                                                                                                                                                                                                                                                                                                                                                                                                                                                                                                                                                                                                                                                                                                                                                                                                                                                                                                                                                                                                                                                                                                                                                                                                                                                                                                                                                                                                                                                                                                                                                                                                                                                                                                                                                                                                                                                                                                                                                                                                                                                                                                                                                                                                                                                                                                                                                                                                                                                                                                                                                                                                                                                                                                                                                                                                                                                                                                                                                                                                                                                                                                                                                                                 | Mowbray Maternity Hospital wc MMH                                                                                                                                                                              | NHLS/UCT                                                                                                      | Arash Iranzadeh; Bruna Galvao; Carolyn Williamson; Deelan Doolabh; Diana Hardie; Innocent Mudau; Kruger Marais; Lynn Tyers; Marvin Hsiao; Stephen Korsman                                                                                                                                                                                                                                                |
| EPI_ISL_1117456                                                                                                                                                                                                                                                                                                                                                                                                                                                                                                                                                                                                                                                                                                                                                                                                                                                                                                                                                                                                                                                                                                                                                                                                                                                                                                                                                                                                                                                                                                                                                                                                                                                                                                                                                                                                                                                                                                                                                                                                                                                                                                                                                                                                                                                                                                                                                                                                                                                                                                                                                                                                                                                                                                                                                                                                                                                                                                                                                                                                                                                                                                                                                                                                                                                                                                                                                                                                                                  | Murni Teguh Hospital, Jakarta                                                                                                                                                                                  | Biosafety Level-3 Laboratory, Indonesian Institute of Sciences (LIPI)                                         | Ade Andriani; Anik Budhi Dharmayanthi; Asep M. Ridwanuloh; Eko Wahyu Putro; Gita Syahputra; Hariyatun; Inswasti Cahyani; Matthew W. Loose; Mohammad Ilyas; Susanti; Syam Budi Iryanto; Wien Kusharyoto                                                                                                                                                                                                   |
| EPI_ISL_1017471 to 1017584, EPI_ISL_1038994 to 1038996, EPI_ISL_1067638, EPI_ISL_1067640 to 1067641, EPI_ISL_1067645, EPI_ISL_1067648, EPI_ISL_1067650 to 1067654, EPI_ISL_1067656 to 1067659, EPI_ISL_1067668 to 1067669, EPI_ISL_1067672, EPI_ISL_1067674, EPI_ISL_1067677, EPI_ISL_1067680, EPI_ISL_1067685, EPI_ISL_1067688, EPI_ISL_1067692 to 1067695, EPI_ISL_1080454, EPI_ISL_1080456, EPI_ISL_1080460 to 1080461, EPI_ISL_1080463, EPI_ISL_1091801 to 1091803, EPI_ISL_1091806 to 1091807, EPI_ISL_1091810 to 1091812, EPI_ISL_1091814 to 1091820, EPI_ISL_1091824, EPI_ISL_1091826 to 1091827, EPI_ISL_1091830 to 1091831, EPI_ISL_1091833 to 1091834, EPI_ISL_1091836 to 1091837, EPI_ISL_1091842, EPI_ISL_1091849 to 1091853, EPI_ISL_1091858 to 1091864, EPI_ISL_1091866 to 1091868, EPI_ISL_1091870 to 1091871, EPI_ISL_1091901 to 1091902, EPI_ISL_1091916 to 1091918, EPI_ISL_1112934, EPI_ISL_1112936 to 1112937, EPI_ISL_1112939, EPI_ISL_1112944                                                                                                                                                                                                                                                                                                                                                                                                                                                                                                                                                                                                                                                                                                                                                                                                                                                                                                                                                                                                                                                                                                                                                                                                                                                                                                                                                                                                                                                                                                                                                                                                                                                                                                                                                                                                                                                                                                                                                                                                                                                                                                                                                                                                                                                                                                                                                                                                                                                                              | Murphy Medical Associates                                                                                                                                                                                      | Grubaugh Lab - Yale School of Public Health                                                                   | Anderson Brito; Anne Wyllie; Annie Watkins; Caleb Neal; Chaney Kalinich; Chantal Vogels; Isabel Ott; Joseph Fauver; Mallery Breban; Mary Petrone; Nathan Grubaugh; Steven Murphy; Tara Alpert                                                                                                                                                                                                            |
| see above                                                                                                                                                                                                                                                                                                                                                                                                                                                                                                                                                                                                                                                                                                                                                                                                                                                                                                                                                                                                                                                                                                                                                                                                                                                                                                                                                                                                                                                                                                                                                                                                                                                                                                                                                                                                                                                                                                                                                                                                                                                                                                                                                                                                                                                                                                                                                                                                                                                                                                                                                                                                                                                                                                                                                                                                                                                                                                                                                                                                                                                                                                                                                                                                                                                                                                                                                                                                                                        | Murphy Medical Association                                                                                                                                                                                     | Grubaugh Lab - Yale School of Public Health                                                                   | Anderson Brito; Annie Watkins; Caleb Neal; Chaney Kalinich; Chantal Vogels; Eva Laszlo; Isabell Ott; Jessica Rothman; Joseph Fauver; Mallery Breban; Mary Petrone; Nathan Grubaugh; Steven Murphy; Tara Alpert                                                                                                                                                                                           |
| EPI_ISL_1364884 to 1364885,<br>EPI_ISL_1364893, EPI_ISL_1364895,<br>EPI_ISL_1364913 to 1364926                                                                                                                                                                                                                                                                                                                                                                                                                                                                                                                                                                                                                                                                                                                                                                                                                                                                                                                                                                                                                                                                                                                                                                                                                                                                                                                                                                                                                                                                                                                                                                                                                                                                                                                                                                                                                                                                                                                                                                                                                                                                                                                                                                                                                                                                                                                                                                                                                                                                                                                                                                                                                                                                                                                                                                                                                                                                                                                                                                                                                                                                                                                                                                                                                                                                                                                                                   | München Klinik GmbH                                                                                                                                                                                            | Bundeswehr Institute of Microbiology                                                                          | Alexandra Rehn; Enrico Georgi; Malena Bestehorn-Willmann; Markus Antwerpen; Mathias Walter; Mike Pillukat; Roman Wölfel; Sabine Zange                                                                                                                                                                                                                                                                    |
| EPI_ISL_1272237 to 1272275                                                                                                                                                                                                                                                                                                                                                                                                                                                                                                                                                                                                                                                                                                                                                                                                                                                                                                                                                                                                                                                                                                                                                                                                                                                                                                                                                                                                                                                                                                                                                                                                                                                                                                                                                                                                                                                                                                                                                                                                                                                                                                                                                                                                                                                                                                                                                                                                                                                                                                                                                                                                                                                                                                                                                                                                                                                                                                                                                                                                                                                                                                                                                                                                                                                                                                                                                                                                                       | NB-Hôpital Georges L. Dumont                                                                                                                                                                                   | National Microbiology Laboratory (NML)                                                                        | Anna Majer; Anneliese Landgraff; CanCOGeN's metadata curation team; Darian Hole; Elsie Grudeski; Gary Van Domselaar; Grace Seo; Guillaume Desnoyers; Jennifer Tanner; Kristen Biggar; Madison Chapel; Morag Graham; Natalie Knox; Nathalie Bastien; Philip Mabon; Public Health Agency of Canada CanCOGeN team; Rhiannon Huzarewich; Richard Garceau; Russell Mandes; Shari Tyson; Timothy Booth; Yan Li |
| EPI_ISL_1318595 to 1318604,                                                                                                                                                                                                                                                                                                                                                                                                                                                                                                                                                                                                                                                                                                                                                                                                                                                                                                                                                                                                                                                                                                                                                                                                                                                                                                                                                                                                                                                                                                                                                                                                                                                                                                                                                                                                                                                                                                                                                                                                                                                                                                                                                                                                                                                                                                                                                                                                                                                                                                                                                                                                                                                                                                                                                                                                                                                                                                                                                                                                                                                                                                                                                                                                                                                                                                                                                                                                                      | NC State Laboratory of Public Health                                                                                                                                                                           | Centers for Disease Control and Prevention Division of Viral                                                  | Anna Montmayeur; Anna Uehara; Ben L. Rambo-Martin; Clinton R. Paden; Dhvani Batra; Haibin Wang; Jasmine Padilla; Jing Zhang; Justin Lee; Katie                                                                                                                                                                                                                                                           |

|                                                                                                                                                                                                                                                                                                                                                                                                                                                                                                                                                                                                                                                                                                             |                                                          |                                                                                                                            |                                                                                                                                                                                                                                                                                                                                                                                                                                                       |
|-------------------------------------------------------------------------------------------------------------------------------------------------------------------------------------------------------------------------------------------------------------------------------------------------------------------------------------------------------------------------------------------------------------------------------------------------------------------------------------------------------------------------------------------------------------------------------------------------------------------------------------------------------------------------------------------------------------|----------------------------------------------------------|----------------------------------------------------------------------------------------------------------------------------|-------------------------------------------------------------------------------------------------------------------------------------------------------------------------------------------------------------------------------------------------------------------------------------------------------------------------------------------------------------------------------------------------------------------------------------------------------|
| EPI_ISL_1318606 to 1318613                                                                                                                                                                                                                                                                                                                                                                                                                                                                                                                                                                                                                                                                                  |                                                          | Diseases, Pathogen Discovery                                                                                               | Dillon; Krista Queen; Kristen Knipe; Kristine Lacek; Lori Rowe; Mark Burroughs; Matthew Schmerer; Mili Sheth; Peter W. Cook; Rachel Marine; Sam Shepard; Sarah Nobles; Shoshona Le; Suxiang Tong; Yan Li; Ying Tao                                                                                                                                                                                                                                    |
| EPI_ISL_1225873, EPI_ISL_1225889 to 1225906, EPI_ISL_1318231, EPI_ISL_1318245                                                                                                                                                                                                                                                                                                                                                                                                                                                                                                                                                                                                                               | NC State Laboratory of Public Health                     | Genomics and Discovery, Respiratory Viruses Branch, Division of Viral Diseases, Centers for Disease Control and Prevention | Anna Kelleher; Anna Montmayeur; Anna Uehara; Ben L. Rambo-Martin; Brian Lynch; Clinton R. Paden; Dhvani Batra; Haibin Wang; Han Jia Justin Ng; Jasmine Padilla; Jing Zhang; Justin Lee; Katie Dillon; Krista Queen; Kristen Knipe; Kristine Lacek; Lori Rowe; Mark Burroughs; Matthew Schmerer; Mili Sheth; Peter Cook; Peter W. Cook; Rachel Marine; Sam Shepard; Sarah Nobles; Shoshona Le; Suxiang Tong; Yan Li; Ying Tao                          |
| EPI_ISL_1049203, EPI_ISL_1111066, EPI_ISL_1196871                                                                                                                                                                                                                                                                                                                                                                                                                                                                                                                                                                                                                                                           | NC State Laboratory of Public Health                     | Pathogen Discovery, Respiratory Viruses Branch, Division of Viral Diseases, Centers for Disease Control and Prevention     | Anna Kelleher; Anna Uehara; Brian Lynch; Clinton R. Paden; Haibin Wang; Han Jia Justin Ng; Han Jia Ng; Jing Zhang; Krista Queen; Peter Cook; Suxiang Tong; Yan Li; Ying Tao                                                                                                                                                                                                                                                                           |
| EPI_ISL_1094197, EPI_ISL_1094199, EPI_ISL_1094201, EPI_ISL_1094203, EPI_ISL_1094212, EPI_ISL_1094229, EPI_ISL_1094239, EPI_ISL_1094264, EPI_ISL_1094282, EPI_ISL_1094294, EPI_ISL_1094320, EPI_ISL_1094338, EPI_ISL_1094352, EPI_ISL_1094354, EPI_ISL_1094535, EPI_ISL_1095040 to 1095073, EPI_ISL_1095333 to 1095362                                                                                                                                                                                                                                                                                                                                                                                       | NC State Laboratory of Public Health                     | Respiratory Viruses Branch, Division of Viral Diseases, Centers for Disease Control and Prevention                         | Anna Montmayeur; Anna Uehara; Ben L. Rambo-Martin; Clinton R. Paden; Dhvani Batra; Haibin Wang; Jasmine Padilla; Jing Zhang; Justin Lee; Krista Queen; Lori Rowe; Mark Burroughs; Mili Sheth; Peter W. Cook; Rachel Marine; Sarah Nobles; Suxiang Tong; Yan Li; Ying Tao                                                                                                                                                                              |
| see above                                                                                                                                                                                                                                                                                                                                                                                                                                                                                                                                                                                                                                                                                                   | NC State Laboratory of Public Health                     | Respiratory Viruses Branch, Division of Viral Diseases, Centers for Disease Control and Prevention                         | Anna Montmayeur; Anna Uehara; Ben L. Rambo-Martin; Clinton R. Paden; Dhvani Batra; Haibin Wang; Jasmine Padilla; Jing Zhang; Justin Lee; Krista Queen; Lori Rowe; Mark Burroughs; Mili Sheth; Peter W. Cook; Rachel Marine; Sarah Nobles; Suxiang Tong; Yan Li; Ying Tao                                                                                                                                                                              |
| EPI_ISL_1036056 to 1036057, EPI_ISL_1036234, EPI_ISL_1036241 to 1036245, EPI_ISL_1036268, EPI_ISL_1036270 to 1036271, EPI_ISL_1181720, EPI_ISL_1181723, EPI_ISL_1181738, EPI_ISL_1181821, EPI_ISL_1250843, EPI_ISL_1250847 to 1250850                                                                                                                                                                                                                                                                                                                                                                                                                                                                       |                                                          | NCSLPH                                                                                                                     | Chase K; Glover W; Greene S; Miller MC                                                                                                                                                                                                                                                                                                                                                                                                                |
| see above                                                                                                                                                                                                                                                                                                                                                                                                                                                                                                                                                                                                                                                                                                   | NCSLPH                                                   | NCSLPH                                                                                                                     | Chase K; Glover W; Greene S; Miller MC                                                                                                                                                                                                                                                                                                                                                                                                                |
| EPI_ISL_1318428 to 1318445                                                                                                                                                                                                                                                                                                                                                                                                                                                                                                                                                                                                                                                                                  | ND Dept. of Health Laboratory Services-Microbiology      | Centers for Disease Control and Prevention Division of Viral Diseases, Pathogen Discovery                                  | Anna Montmayeur; Anna Uehara; Ben L. Rambo-Martin; Clinton R. Paden; Dhvani Batra; Haibin Wang; Jasmine Padilla; Jing Zhang; Justin Lee; Katie Dillon; Krista Queen; Kristen Knipe; Kristine Lacek; Lori Rowe; Mark Burroughs; Matthew Schmerer; Mili Sheth; Peter W. Cook; Rachel Marine; Sam Shepard; Sarah Nobles; Shoshona Le; Suxiang Tong; Yan Li; Ying Tao                                                                                     |
| EPI_ISL_1094302, EPI_ISL_1094377, EPI_ISL_1094907 to 1094920, EPI_ISL_1095297 to 1095305                                                                                                                                                                                                                                                                                                                                                                                                                                                                                                                                                                                                                    | ND Dept. of Health Laboratory Services-Microbiology      | Respiratory Viruses Branch, Division of Viral Diseases, Centers for Disease Control and Prevention                         | Anna Montmayeur; Anna Uehara; Ben L. Rambo-Martin; Clinton R. Paden; Dhvani Batra; Haibin Wang; Jasmine Padilla; Jing Zhang; Justin Lee; Krista Queen; Lori Rowe; Mark Burroughs; Mili Sheth; Peter W. Cook; Rachel Marine; Sarah Nobles; Suxiang Tong; Yan Li; Ying Tao                                                                                                                                                                              |
| EPI_ISL_1318681 to 1318691                                                                                                                                                                                                                                                                                                                                                                                                                                                                                                                                                                                                                                                                                  | NE Public Health Laboratory                              | Centers for Disease Control and Prevention Division of Viral Diseases, Pathogen Discovery                                  | Anna Montmayeur; Anna Uehara; Ben L. Rambo-Martin; Clinton R. Paden; Dhvani Batra; Haibin Wang; Jasmine Padilla; Jing Zhang; Justin Lee; Katie Dillon; Krista Queen; Kristen Knipe; Kristine Lacek; Lori Rowe; Mark Burroughs; Matthew Schmerer; Mili Sheth; Peter W. Cook; Rachel Marine; Sam Shepard; Sarah Nobles; Shoshona Le; Suxiang Tong; Yan Li; Ying Tao                                                                                     |
| EPI_ISL_1168017 to 1168019, EPI_ISL_1226013 to 1226015                                                                                                                                                                                                                                                                                                                                                                                                                                                                                                                                                                                                                                                      | NE Public Health Laboratory                              | Genomics and Discovery, Respiratory Viruses Branch, Division of Viral Diseases, Centers for Disease Control and Prevention | ; Anna Montmayeur; Anna Uehara; Ben L. Rambo-Martin; Brian Lynch; Clinton R. Paden; Dhvani Batra; Haibin Wang; Jasmine Padilla; Jing Zhang; Justin Lee; Katie Dillon; Krista Queen; Kristen Knipe; Kristine Lacek; Lori Rowe; Mark Burroughs; Matthew Schmerer; Mili Sheth; Peter W. Cook; Rachel Marine; Sam Shepard; Sarah Nobles; Shoshona Le; Suxiang Tong; Yan Li; Ying Tao                                                                      |
| EPI_ISL_1094205, EPI_ISL_1094335 to 1094336, EPI_ISL_1094360, EPI_ISL_1094492 to 1094494, EPI_ISL_1094736 to 1094753                                                                                                                                                                                                                                                                                                                                                                                                                                                                                                                                                                                        | NE Public Health Laboratory                              | Respiratory Viruses Branch, Division of Viral Diseases, Centers for Disease Control and Prevention                         | Anna Montmayeur; Anna Uehara; Ben L. Rambo-Martin; Clinton R. Paden; Dhvani Batra; Haibin Wang; Jasmine Padilla; Jing Zhang; Justin Lee; Krista Queen; Lori Rowe; Mark Burroughs; Mili Sheth; Peter W. Cook; Rachel Marine; Sarah Nobles; Suxiang Tong; Yan Li; Ying Tao                                                                                                                                                                              |
| EPI_ISL_1273037 to 1273042, EPI_ISL_1318420 to 1318423                                                                                                                                                                                                                                                                                                                                                                                                                                                                                                                                                                                                                                                      | NH Dept. of Health and Human Services Public Health Labs | Centers for Disease Control and Prevention Division of Viral Diseases, Pathogen Discovery                                  | Anna Montmayeur; Anna Uehara; Ben L. Rambo-Martin; Clinton R. Paden; Dhvani Batra; Haibin Wang; Jasmine Padilla; Jing Zhang; Justin Lee; Katie Dillon; Krista Queen; Kristen Knipe; Kristine Lacek; Lori Rowe; Mark Burroughs; Matthew Schmerer; Mili Sheth; Peter W. Cook; Rachel Marine; Sam Shepard; Sarah Nobles; Shoshona Le; Suxiang Tong; Yan Li; Ying Tao                                                                                     |
| EPI_ISL_1007984 to 1007991, EPI_ISL_1272300 to 1272309                                                                                                                                                                                                                                                                                                                                                                                                                                                                                                                                                                                                                                                      | NHLS Universitas Academic                                | UFS Virology                                                                                                               | D Goedhals; Emmanuel Ogunbayo; MM Nyaga; MT Mogotsi; P Nthiga; PA Bester; T de Oliveira                                                                                                                                                                                                                                                                                                                                                               |
| EPI_ISL_1034154 to 1034156, EPI_ISL_1034161 to 1034166, EPI_ISL_1034168 to 1034186, EPI_ISL_1034188 to 1034189                                                                                                                                                                                                                                                                                                                                                                                                                                                                                                                                                                                              | NIV Influenza                                            | NIV Influenza                                                                                                              | Potdar V                                                                                                                                                                                                                                                                                                                                                                                                                                              |
| EPI_ISL_1272594 to 1272598                                                                                                                                                                                                                                                                                                                                                                                                                                                                                                                                                                                                                                                                                  | NJ Public Health and Environmental Laboratories          | Centers for Disease Control and Prevention Division of Viral Diseases, Pathogen Discovery                                  | Anna Montmayeur; Anna Uehara; Ben L. Rambo-Martin; Clinton R. Paden; Dhvani Batra; Haibin Wang; Jasmine Padilla; Jing Zhang; Justin Lee; Katie Dillon; Krista Queen; Kristen Knipe; Kristine Lacek; Lori Rowe; Mark Burroughs; Matthew Schmerer; Mili Sheth; Peter W. Cook; Rachel Marine; Sam Shepard; Sarah Nobles; Shoshona Le; Suxiang Tong; Yan Li; Ying Tao                                                                                     |
| EPI_ISL_1226227 to 1226230, EPI_ISL_1226399 to 1226406                                                                                                                                                                                                                                                                                                                                                                                                                                                                                                                                                                                                                                                      | NJ Public Health and Environmental Laboratories          | Genomics and Discovery, Respiratory Viruses Branch, Division of Viral Diseases, Centers for Disease Control and Prevention | Anna Montmayeur; Anna Uehara; Ben L. Rambo-Martin; Clinton R. Paden; Dhvani Batra; Haibin Wang; Jasmine Padilla; Jing Zhang; Justin Lee; Katie Dillon; Krista Queen; Kristen Knipe; Kristine Lacek; Lori Rowe; Mark Burroughs; Matthew Schmerer; Mili Sheth; Peter W. Cook; Rachel Marine; Sam Shepard; Sarah Nobles; Shoshona Le; Suxiang Tong; Yan Li; Ying Tao                                                                                     |
| EPI_ISL_1080337, EPI_ISL_1080341, EPI_ISL_1080343 to 1080344, EPI_ISL_1080346 to 1080347, EPI_ISL_1080350                                                                                                                                                                                                                                                                                                                                                                                                                                                                                                                                                                                                   | NJ Rapid Response Teams                                  | NJ_PHEL                                                                                                                    | Byeong Jeong; Dana Woell; Lindsey Bodnar; Shiv Verma                                                                                                                                                                                                                                                                                                                                                                                                  |
| EPI_ISL_1060766 to 1060767, EPI_ISL_1060769 to 1060790, EPI_ISL_1060793, EPI_ISL_1060795, EPI_ISL_1060798 to 1060805, EPI_ISL_1060807 to 1060812                                                                                                                                                                                                                                                                                                                                                                                                                                                                                                                                                            | NJ Rapid Response Teams                                  | New Jersey Public Health Environmental Laboratories (NJ_PHEL)                                                              | Byeong Jeong; Dana Woell; Lindsey Bodnar; Shiv Verma                                                                                                                                                                                                                                                                                                                                                                                                  |
| EPI_ISL_1121357 to 1121372                                                                                                                                                                                                                                                                                                                                                                                                                                                                                                                                                                                                                                                                                  | NJ Rapid Response Teams                                  | New Jersey Public Health and Environmental Laboratories (NJ_PHEL)                                                          | Byeong Jeong; Dana Woell; Lindsey Bodnar; Shiv K. Verma                                                                                                                                                                                                                                                                                                                                                                                               |
| EPI_ISL_1113139 to 1113140, EPI_ISL_1113142 to 1113143, EPI_ISL_1113145 to 1113150, EPI_ISL_1113152 to 1113155, EPI_ISL_1113157 to 1113158, EPI_ISL_1113160 to 1113164, EPI_ISL_1113166, EPI_ISL_1113168 to 1113169, EPI_ISL_1113173 to 1113175                                                                                                                                                                                                                                                                                                                                                                                                                                                             |                                                          |                                                                                                                            |                                                                                                                                                                                                                                                                                                                                                                                                                                                       |
| see above                                                                                                                                                                                                                                                                                                                                                                                                                                                                                                                                                                                                                                                                                                   | NJ Rapid Response Teams                                  | New Jersey Public Health and Environmental Laboratories (PHEL)                                                             | Byeong Jeong; Dana Woell; Lindsey Bodnar; Shiv Verma                                                                                                                                                                                                                                                                                                                                                                                                  |
| EPI_ISL_1164757 to 1164773, EPI_ISL_1254225 to 1254226, EPI_ISL_1254228, EPI_ISL_1254230 to 1254231, EPI_ISL_1254233 to 1254234, EPI_ISL_1254236 to 1254237, EPI_ISL_1254239 to 1254240, EPI_ISL_1254242 to 1254243, EPI_ISL_1254245, EPI_ISL_1254247 to 1254248, EPI_ISL_1254250, EPI_ISL_1254252 to 1254253, EPI_ISL_1254255 to 1254256, EPI_ISL_1254258 to 1254259, EPI_ISL_1254261, EPI_ISL_1254263 to 1254264, EPI_ISL_1254266, EPI_ISL_1254268 to 1254269, EPI_ISL_1254271 to 1254272, EPI_ISL_1254274, EPI_ISL_1254276 to 1254277, EPI_ISL_1254279 to 1254280, EPI_ISL_1254282 to 1254283, EPI_ISL_1254285, EPI_ISL_1254287 to 1254289, EPI_ISL_1254291, EPI_ISL_1254293, EPI_ISL_1313542 to 1313557 | NJDOH, Public Health and Environmental Laboratories      | NJ_PHEL                                                                                                                    | Byeong Jeong; Dana Woell; Lindsey Bodnar; Shiv K. Verma                                                                                                                                                                                                                                                                                                                                                                                               |
| see above                                                                                                                                                                                                                                                                                                                                                                                                                                                                                                                                                                                                                                                                                                   | NJDOH, Public Health and Environmental Laboratories      | NJ_PHEL                                                                                                                    | Byeong Jeong; Dana Woell; Lindsey Bodnar; Shiv K. Verma                                                                                                                                                                                                                                                                                                                                                                                               |
| EPI_ISL_1340173, EPI_ISL_1340175 to 1340176, EPI_ISL_1340178 to 1340179, EPI_ISL_1340181, EPI_ISL_1340183 to 1340185, EPI_ISL_1340187, EPI_ISL_1340189 to 1340191, EPI_ISL_1340193 to 1340194, EPI_ISL_1340196, EPI_ISL_1340198 to 1340199, EPI_ISL_1340201 to 1340202, EPI_ISL_1340204 to 1340205, EPI_ISL_1340207 to 1340209, EPI_ISL_1340211 to 1340212, EPI_ISL_1340214 to 1340215, EPI_ISL_1340217, EPI_ISL_1340219 to 1340220, EPI_ISL_1340222 to 1340224, EPI_ISL_1340226 to 1340227, EPI_ISL_1340229 to 1340230, EPI_ISL_1340232 to 1340233                                                                                                                                                         | NJDOH, Public Health and Environmental Laboratories      | New Jersey Public Health and Environmental Laboratories (PHEL)                                                             | Byeong Jeong; Dana Woell; Lindsey Bodnar; Shiv K. Verma                                                                                                                                                                                                                                                                                                                                                                                               |
| see above                                                                                                                                                                                                                                                                                                                                                                                                                                                                                                                                                                                                                                                                                                   | NJDOH, Public Health and Environmental Laboratories      | New Jersey Public Health and Environmental Laboratories (PHEL)                                                             | Byeong Jeong; Dana Woell; Lindsey Bodnar; Shiv K. Verma                                                                                                                                                                                                                                                                                                                                                                                               |
| EPI_ISL_1278101 to 1278187                                                                                                                                                                                                                                                                                                                                                                                                                                                                                                                                                                                                                                                                                  | NL-Dr. Leonard A. Miller Centre for Health Services      | National Microbiology Laboratory (NML)                                                                                     | Adel Malek; Anna Majer; Anneliese Landgraff; CanCOGeN's metadata curation team; Darian Hole; Elsie Grudeski; Gary Van Domselaar; George Zahariadis; Grace Seo; Jennifer Tanner; Kerri Smith; Kirsten Biggar; Laura Gilbert; Madison Chapel; Morag Graham; Natalie Knox; Nathalie Bastien; Philip Mabon; Public Health Agency of Canada CanCOGeN team; Rhiannon Huzarewicz; Robert Needle; Russell Mandes; Shari Tyson; Timothy Booth; Yan Li; Yang Yu |
| EPI_ISL_1272599 to 1272613                                                                                                                                                                                                                                                                                                                                                                                                                                                                                                                                                                                                                                                                                  | NM Dept. Health, Scientific Laboratory Division          | Centers for Disease Control and Prevention Division of Viral Diseases, Pathogen Discovery                                  | Anna Montmayeur; Anna Uehara; Ben L. Rambo-Martin; Clinton R. Paden; Dhvani Batra; Haibin Wang; Jasmine Padilla; Jing Zhang; Justin Lee; Katie Dillon; Krista Queen; Kristen Knipe; Kristine Lacek; Lori Rowe; Mark Burroughs; Matthew Schmerer; Mili Sheth; Peter W. Cook; Rachel Marine; Sam Shepard; Sarah Nobles; Shoshona Le; Suxiang Tong; Yan Li; Ying Tao                                                                                     |
| EPI_ISL_1094382 to 1094387,                                                                                                                                                                                                                                                                                                                                                                                                                                                                                                                                                                                                                                                                                 | NM Dept. Health, Scientific Laboratory Division          | Respiratory Viruses Branch, Division of Viral Diseases,                                                                    | Anna Montmayeur; Anna Uehara; Ben L. Rambo-Martin; Clinton R. Paden; Dhvani Batra; Haibin Wang; Jasmine Padilla; Jing Zhang; Justin Lee; Krista                                                                                                                                                                                                                                                                                                       |

|                                                                                                                                                                                                                                                                                                                                                                                                                                                                                                                                                                                                                                                                                                                                                                                                                                                                                                                                                                                                                                                                                                                                                                                                                                                                                                                                                                                                                                                                                                                                                                                                                                                                                                                                                                                                                                                                                                                                                                                                                                                                                                                                                                                                                                                                                                              |                                                               |                                                                                                                                                                               |                                                                                                                                                                                                                                                                                                                                                                                                                                |
|--------------------------------------------------------------------------------------------------------------------------------------------------------------------------------------------------------------------------------------------------------------------------------------------------------------------------------------------------------------------------------------------------------------------------------------------------------------------------------------------------------------------------------------------------------------------------------------------------------------------------------------------------------------------------------------------------------------------------------------------------------------------------------------------------------------------------------------------------------------------------------------------------------------------------------------------------------------------------------------------------------------------------------------------------------------------------------------------------------------------------------------------------------------------------------------------------------------------------------------------------------------------------------------------------------------------------------------------------------------------------------------------------------------------------------------------------------------------------------------------------------------------------------------------------------------------------------------------------------------------------------------------------------------------------------------------------------------------------------------------------------------------------------------------------------------------------------------------------------------------------------------------------------------------------------------------------------------------------------------------------------------------------------------------------------------------------------------------------------------------------------------------------------------------------------------------------------------------------------------------------------------------------------------------------------------|---------------------------------------------------------------|-------------------------------------------------------------------------------------------------------------------------------------------------------------------------------|--------------------------------------------------------------------------------------------------------------------------------------------------------------------------------------------------------------------------------------------------------------------------------------------------------------------------------------------------------------------------------------------------------------------------------|
| EPI_ISL_1094661 to 1094665                                                                                                                                                                                                                                                                                                                                                                                                                                                                                                                                                                                                                                                                                                                                                                                                                                                                                                                                                                                                                                                                                                                                                                                                                                                                                                                                                                                                                                                                                                                                                                                                                                                                                                                                                                                                                                                                                                                                                                                                                                                                                                                                                                                                                                                                                   | Centers for Disease Control and Prevention                    | Queen; Lori Rowe; Mark Burroughs; Mili Sheth; Peter W. Cook; Rachel Marine; Sarah Nobles; Suxiang Tong; Yan Li; Ying Tao                                                      |                                                                                                                                                                                                                                                                                                                                                                                                                                |
| EPI_ISL_1226420, EPI_ISL_1226447, EPI_ISL_1226798, EPI_ISL_1226815, EPI_ISL_1227008, EPI_ISL_1227014, EPI_ISL_1227026, EPI_ISL_1227151, EPI_ISL_1227663, EPI_ISL_1227804, EPI_ISL_1227813, EPI_ISL_1227816, EPI_ISL_1227830, EPI_ISL_1227852, EPI_ISL_1227870, EPI_ISL_1228130, EPI_ISL_1228135, EPI_ISL_1228139 to 1228140, EPI_ISL_1228147 to 1228149, EPI_ISL_1228159 to 1228161, EPI_ISL_1228171 to 1228172, EPI_ISL_1228174 to 1228175, EPI_ISL_1228332, EPI_ISL_1228356                                                                                                                                                                                                                                                                                                                                                                                                                                                                                                                                                                                                                                                                                                                                                                                                                                                                                                                                                                                                                                                                                                                                                                                                                                                                                                                                                                                                                                                                                                                                                                                                                                                                                                                                                                                                                                | Wadsworth Center, New York State Department of Health         | Alexis Russel; Daryl M. Lamson; Erasmus Schneider; Erica Lasek-Nesselquist; John Kelly; Jonathan Plitnick; Kirsten St. George; Matthew Shudt; Melissa A Leisner; Navjot Singh |                                                                                                                                                                                                                                                                                                                                                                                                                                |
| see above                                                                                                                                                                                                                                                                                                                                                                                                                                                                                                                                                                                                                                                                                                                                                                                                                                                                                                                                                                                                                                                                                                                                                                                                                                                                                                                                                                                                                                                                                                                                                                                                                                                                                                                                                                                                                                                                                                                                                                                                                                                                                                                                                                                                                                                                                                    | NORTH SHORE UNIVERSITY HOSPITAL                               |                                                                                                                                                                               |                                                                                                                                                                                                                                                                                                                                                                                                                                |
| EPI_ISL_1016136, EPI_ISL_1016138, EPI_ISL_1016140, EPI_ISL_1016143 to 1016153, EPI_ISL_1016156 to 1016168, EPI_ISL_1016413, EPI_ISL_1016458, EPI_ISL_1226425, EPI_ISL_1226444, EPI_ISL_1226472, EPI_ISL_1226506, EPI_ISL_1226553, EPI_ISL_1226672, EPI_ISL_1226707, EPI_ISL_1226717, EPI_ISL_1226720, EPI_ISL_1226849, EPI_ISL_1226853, EPI_ISL_1226856, EPI_ISL_1226859, EPI_ISL_1226865, EPI_ISL_1226898 to 1226899, EPI_ISL_1226911 to 1226912, EPI_ISL_1227153 to 1227154, EPI_ISL_1227181, EPI_ISL_1227664, EPI_ISL_1227677 to 1227678, EPI_ISL_1227819, EPI_ISL_1227821 to 1227826, EPI_ISL_1227831 to 1227836, EPI_ISL_1227839 to 1227842, EPI_ISL_1227848 to 1227850, EPI_ISL_1227853 to 1227860, EPI_ISL_1227903, EPI_ISL_1228150 to 1228153, EPI_ISL_1228155 to 1228157, EPI_ISL_1228170, EPI_ISL_1228235, EPI_ISL_1228342 to 1228345, EPI_ISL_1228348, EPI_ISL_1228357 to 1228359, EPI_ISL_1228361                                                                                                                                                                                                                                                                                                                                                                                                                                                                                                                                                                                                                                                                                                                                                                                                                                                                                                                                                                                                                                                                                                                                                                                                                                                                                                                                                                                                | Wadsworth Center, New York State Department of Health         | Alexis Russel; Daryl M. Lamson; Erasmus Schneider; Erica Lasek-Nesselquist; John Kelly; Jonathan Plitnick; Kirsten St. George; Matthew Shudt; Melissa A Leisner; Navjot Singh |                                                                                                                                                                                                                                                                                                                                                                                                                                |
| see above                                                                                                                                                                                                                                                                                                                                                                                                                                                                                                                                                                                                                                                                                                                                                                                                                                                                                                                                                                                                                                                                                                                                                                                                                                                                                                                                                                                                                                                                                                                                                                                                                                                                                                                                                                                                                                                                                                                                                                                                                                                                                                                                                                                                                                                                                                    | NORTHWELL HEALTH LABORATORIES                                 |                                                                                                                                                                               |                                                                                                                                                                                                                                                                                                                                                                                                                                |
| EPI_ISL_1312862 to 1312876, EPI_ISL_1312888 to 1312890, EPI_ISL_1312910 to 1312913                                                                                                                                                                                                                                                                                                                                                                                                                                                                                                                                                                                                                                                                                                                                                                                                                                                                                                                                                                                                                                                                                                                                                                                                                                                                                                                                                                                                                                                                                                                                                                                                                                                                                                                                                                                                                                                                                                                                                                                                                                                                                                                                                                                                                           | NOVELAB                                                       | CNR Virus des Infections Respiratoires - France SUD                                                                                                                           | Antonin Bal; Bruno Lina; Gregory Destras; Gwendolyne Burfin; Hadrien Regue; Laurence Josset; Martine Valette; Quentin Semanas                                                                                                                                                                                                                                                                                                  |
| EPI_ISL_1241976, EPI_ISL_1241979, EPI_ISL_1241981, EPI_ISL_1253574 to 1253576                                                                                                                                                                                                                                                                                                                                                                                                                                                                                                                                                                                                                                                                                                                                                                                                                                                                                                                                                                                                                                                                                                                                                                                                                                                                                                                                                                                                                                                                                                                                                                                                                                                                                                                                                                                                                                                                                                                                                                                                                                                                                                                                                                                                                                | NOVELAB Ingels Vignon                                         | CNR Virus des Infections Respiratoires - France SUD                                                                                                                           | Antonin Bal; Bruno Lina; Gregory Destras; Gwendolyne Burfin; Hadrien Regue; Laurence Josset; Martine Valette; Quentin Semanas                                                                                                                                                                                                                                                                                                  |
| EPI_ISL_1265685, EPI_ISL_1265736                                                                                                                                                                                                                                                                                                                                                                                                                                                                                                                                                                                                                                                                                                                                                                                                                                                                                                                                                                                                                                                                                                                                                                                                                                                                                                                                                                                                                                                                                                                                                                                                                                                                                                                                                                                                                                                                                                                                                                                                                                                                                                                                                                                                                                                                             | NOVELAB Ingels-Vignon                                         | CNR Virus des Infections Respiratoires - France SUD                                                                                                                           | Antonin Bal; Bruno Lina; Gregory Destras; Gwendolyne Burfin; Hadrien Regue; Laurence Josset; Martine Valette; Quentin Semanas                                                                                                                                                                                                                                                                                                  |
| EPI_ISL_1064608 to 1064612, EPI_ISL_1168095 to 1168098, EPI_ISL_1190873 to 1190878                                                                                                                                                                                                                                                                                                                                                                                                                                                                                                                                                                                                                                                                                                                                                                                                                                                                                                                                                                                                                                                                                                                                                                                                                                                                                                                                                                                                                                                                                                                                                                                                                                                                                                                                                                                                                                                                                                                                                                                                                                                                                                                                                                                                                           | NPC                                                           | The Public Health Agency of Sweden                                                                                                                                            | Anna Risberg; Anna-Malin Linde; Carlo Berg; Karin Tegmark-Wisell; Maria Lind Karlberg; Mattias Haukland; Mia Brytting; Noura Walai; Oskar Karlsson Lindsjo; Petra Edquist; Petra Holmstrom; Reza Advani; Samuel Ohman; Sofia Stamouli                                                                                                                                                                                          |
| EPI_ISL_1272310 to 1272404                                                                                                                                                                                                                                                                                                                                                                                                                                                                                                                                                                                                                                                                                                                                                                                                                                                                                                                                                                                                                                                                                                                                                                                                                                                                                                                                                                                                                                                                                                                                                                                                                                                                                                                                                                                                                                                                                                                                                                                                                                                                                                                                                                                                                                                                                   | NS-QEII Health Sciences Centre                                | National Microbiology Laboratory (NML)                                                                                                                                        | Anna Majer; Anneliese Landgraff; CanCOGeN's metadata curation team; Dan Gaston; Darian Hale; Elsie Grudeski; Gary Van Domselaar; Grace Seo; Janice Pettipas; Jason LeBlanc; Jennifer Tanner; Kirsten Biggar; Madison Chapel; Morag Graham; Natalie Knox; Nathalie Bastien; Philip Mabon; Public Health Agency of Canada CanCOGeN team; Rhiannon Huzarewich; Russell Mandes; Shari Tyson; Timothy Booth; Todd Hatchette; Yan Li |
| EPI_ISL_1272798 to 1272807                                                                                                                                                                                                                                                                                                                                                                                                                                                                                                                                                                                                                                                                                                                                                                                                                                                                                                                                                                                                                                                                                                                                                                                                                                                                                                                                                                                                                                                                                                                                                                                                                                                                                                                                                                                                                                                                                                                                                                                                                                                                                                                                                                                                                                                                                   | NV State Public Health Laboratory                             | Centers for Disease Control and Prevention Division of Viral Diseases, Pathogen Discovery                                                                                     | Anna Montmayeur; Anna Uehara; Ben L. Rambo-Martin; Clinton R. Paden; Dhvani Batra; Haibin Wang; Jasmine Padilla; Jing Zhang; Justin Lee; Katie Dillon; Krista Queen; Kristen Knipe; Kristine Lacey; Lori Rowe; Mark Burroughs; Matthew Schmerer; Mili Sheth; Peter W. Cook; Rachel Marine; Sam Shepard; Sarah Nobles; Shoshona Le; Suxiang Tong; Yan Li; Ying Tao                                                              |
| EPI_ISL_1094196, EPI_ISL_1094389 to 1094390, EPI_ISL_1094720 to 1094722                                                                                                                                                                                                                                                                                                                                                                                                                                                                                                                                                                                                                                                                                                                                                                                                                                                                                                                                                                                                                                                                                                                                                                                                                                                                                                                                                                                                                                                                                                                                                                                                                                                                                                                                                                                                                                                                                                                                                                                                                                                                                                                                                                                                                                      | NV State Public Health Laboratory                             | Respiratory Viruses Branch, Division of Viral Diseases, Centers for Disease Control and Prevention                                                                            | Anna Montmayeur; Anna Uehara; Ben L. Rambo-Martin; Clinton R. Paden; Dhvani Batra; Haibin Wang; Jasmine Padilla; Jing Zhang; Justin Lee; Krista Queen; Lori Rowe; Mark Burroughs; Mili Sheth; Peter W. Cook; Rachel Marine; Sarah Nobles; Suxiang Tong; Yan Li; Ying Tao                                                                                                                                                       |
| EPI_ISL_1272972 to 1272988                                                                                                                                                                                                                                                                                                                                                                                                                                                                                                                                                                                                                                                                                                                                                                                                                                                                                                                                                                                                                                                                                                                                                                                                                                                                                                                                                                                                                                                                                                                                                                                                                                                                                                                                                                                                                                                                                                                                                                                                                                                                                                                                                                                                                                                                                   | NV-Southern Nevada Public Health Laboratory                   | Centers for Disease Control and Prevention Division of Viral Diseases, Pathogen Discovery                                                                                     | Anna Montmayeur; Anna Uehara; Ben L. Rambo-Martin; Clinton R. Paden; Dhvani Batra; Haibin Wang; Jasmine Padilla; Jing Zhang; Justin Lee; Katie Dillon; Krista Queen; Kristen Knipe; Kristine Lacey; Lori Rowe; Mark Burroughs; Matthew Schmerer; Mili Sheth; Peter W. Cook; Rachel Marine; Sam Shepard; Sarah Nobles; Shoshona Le; Suxiang Tong; Yan Li; Ying Tao                                                              |
| EPI_ISL_1273043 to 1273047, EPI_ISL_1318347 to 1318349                                                                                                                                                                                                                                                                                                                                                                                                                                                                                                                                                                                                                                                                                                                                                                                                                                                                                                                                                                                                                                                                                                                                                                                                                                                                                                                                                                                                                                                                                                                                                                                                                                                                                                                                                                                                                                                                                                                                                                                                                                                                                                                                                                                                                                                       | NYC Department of Health and Mental Hygiene                   | Centers for Disease Control and Prevention Division of Viral Diseases, Pathogen Discovery                                                                                     | Anna Montmayeur; Anna Uehara; Ben L. Rambo-Martin; Clinton R. Paden; Dhvani Batra; Haibin Wang; Jasmine Padilla; Jing Zhang; Justin Lee; Katie Dillon; Krista Queen; Kristen Knipe; Kristine Lacey; Lori Rowe; Mark Burroughs; Matthew Schmerer; Mili Sheth; Peter W. Cook; Rachel Marine; Sam Shepard; Sarah Nobles; Shoshona Le; Suxiang Tong; Yan Li; Ying Tao                                                              |
| EPI_ISL_1064800                                                                                                                                                                                                                                                                                                                                                                                                                                                                                                                                                                                                                                                                                                                                                                                                                                                                                                                                                                                                                                                                                                                                                                                                                                                                                                                                                                                                                                                                                                                                                                                                                                                                                                                                                                                                                                                                                                                                                                                                                                                                                                                                                                                                                                                                                              | NYC HH Elmhurst Hospital Medical Center                       | New York City Public Health Laboratory                                                                                                                                        | Jade Wang; et al.                                                                                                                                                                                                                                                                                                                                                                                                              |
| EPI_ISL_1226419, EPI_ISL_1226430, EPI_ISL_1226439 to 1226441, EPI_ISL_1226443, EPI_ISL_1226448, EPI_ISL_1226459, EPI_ISL_1226476, EPI_ISL_1226500, EPI_ISL_1226507 to 1226508, EPI_ISL_1226510, EPI_ISL_1226513, EPI_ISL_1226521, EPI_ISL_1226545 to 1226549, EPI_ISL_1226554, EPI_ISL_1226560 to 1226562, EPI_ISL_1226564 to 1226566, EPI_ISL_1226580 to 1226582, EPI_ISL_1226595, EPI_ISL_1226600, EPI_ISL_1226620 to 1226621, EPI_ISL_1226625, EPI_ISL_1226636, EPI_ISL_1226639 to 1226644, EPI_ISL_1226647 to 1226648, EPI_ISL_1226651 to 1226652, EPI_ISL_1226660 to 1226661, EPI_ISL_1226665 to 1226673, EPI_ISL_1226685, EPI_ISL_1226692, EPI_ISL_1226703, EPI_ISL_1226711, EPI_ISL_1226719 to 1226719, EPI_ISL_1226729, EPI_ISL_1226739, EPI_ISL_1226768 to 1226769, EPI_ISL_1226789 to 1226797, EPI_ISL_1226808 to 1226810, EPI_ISL_1226813 to 1226814, EPI_ISL_1226816 to 1226817, EPI_ISL_1226832 to 1226833, EPI_ISL_1226854 to 1226855, EPI_ISL_1226860, EPI_ISL_1226862, EPI_ISL_1226867, EPI_ISL_1226869, EPI_ISL_1226893 to 1226896, EPI_ISL_1226900, EPI_ISL_1226913 to 1226914, EPI_ISL_1226935, EPI_ISL_1226963, EPI_ISL_1226982 to 1226984, EPI_ISL_1226987, EPI_ISL_1226998 to 1226999, EPI_ISL_1227001, EPI_ISL_1227005 to 1227006, EPI_ISL_1227009 to 1227013, EPI_ISL_1227015, EPI_ISL_1227027 to 1227028, EPI_ISL_1227081, EPI_ISL_1227087, EPI_ISL_1227095, EPI_ISL_1227109, EPI_ISL_1227134 to 1227149, EPI_ISL_1227152, EPI_ISL_1227155 to 1227161, EPI_ISL_1227167 to 1227172, EPI_ISL_1227184, EPI_ISL_1227186 to 1227188, EPI_ISL_1227190 to 1227205, EPI_ISL_1227212 to 1227213, EPI_ISL_1227221, EPI_ISL_1227238, EPI_ISL_1227244, EPI_ISL_1227422 to 1227423, EPI_ISL_1227428 to 1227429, EPI_ISL_1227440, EPI_ISL_1227666 to 1227674, EPI_ISL_1227680 to 1227683, EPI_ISL_1227686 to 1227704, EPI_ISL_1227706, EPI_ISL_1227866 to 1227866, EPI_ISL_1227871 to 1227879, EPI_ISL_1227920, EPI_ISL_1227938 to 1227942, EPI_ISL_1227958, EPI_ISL_1228143, EPI_ISL_1228162 to 1228169, EPI_ISL_1228177 to 1228180, EPI_ISL_1228182, EPI_ISL_1228185 to 1228187, EPI_ISL_1228189 to 1228217, EPI_ISL_1228228, EPI_ISL_1228230 to 1228234, EPI_ISL_1228237 to 1228239, EPI_ISL_1228265, EPI_ISL_1228369 to 1228373, EPI_ISL_1228563, EPI_ISL_1228570, EPI_ISL_1228574 to 1228575 | Wadsworth Center, New York State Department of Health         | Alexis Russel; Daryl M. Lamson; Erasmus Schneider; Erica Lasek-Nesselquist; John Kelly; Jonathan Plitnick; Kirsten St. George; Matthew Shudt; Melissa A Leisner; Navjot Singh |                                                                                                                                                                                                                                                                                                                                                                                                                                |
| see above                                                                                                                                                                                                                                                                                                                                                                                                                                                                                                                                                                                                                                                                                                                                                                                                                                                                                                                                                                                                                                                                                                                                                                                                                                                                                                                                                                                                                                                                                                                                                                                                                                                                                                                                                                                                                                                                                                                                                                                                                                                                                                                                                                                                                                                                                                    | NYC Pandemic Response Lab                                     |                                                                                                                                                                               |                                                                                                                                                                                                                                                                                                                                                                                                                                |
| EPI_ISL_1379198 to 1379266, EPI_ISL_1379339 to 1379390                                                                                                                                                                                                                                                                                                                                                                                                                                                                                                                                                                                                                                                                                                                                                                                                                                                                                                                                                                                                                                                                                                                                                                                                                                                                                                                                                                                                                                                                                                                                                                                                                                                                                                                                                                                                                                                                                                                                                                                                                                                                                                                                                                                                                                                       | NYP-WCM                                                       | New York Genome Center                                                                                                                                                        | Andre Corvelo; Arryn Craney; Chris Mason; Dayna M. Oschwald; Hanna Rennert; Lars F Westblade; Margaret Elizabeth Ross; Melissa Cushing; Michael Zody; Olivier Elemento; Priya Velu; Samantha Fennessey; Tom Maniatis                                                                                                                                                                                                           |
| EPI_ISL_1272922 to 1272927                                                                                                                                                                                                                                                                                                                                                                                                                                                                                                                                                                                                                                                                                                                                                                                                                                                                                                                                                                                                                                                                                                                                                                                                                                                                                                                                                                                                                                                                                                                                                                                                                                                                                                                                                                                                                                                                                                                                                                                                                                                                                                                                                                                                                                                                                   | NYSDOH Wadsworth Center, Virology Lab                         | Centers for Disease Control and Prevention Division of Viral Diseases, Pathogen Discovery                                                                                     | Anna Montmayeur; Anna Uehara; Ben L. Rambo-Martin; Clinton R. Paden; Dhvani Batra; Haibin Wang; Jasmine Padilla; Jing Zhang; Justin Lee; Katie Dillon; Krista Queen; Kristen Knipe; Kristine Lacey; Lori Rowe; Mark Burroughs; Matthew Schmerer; Mili Sheth; Peter W. Cook; Rachel Marine; Sam Shepard; Sarah Nobles; Shoshona Le; Suxiang Tong; Yan Li; Ying Tao                                                              |
| EPI_ISL_1094217, EPI_ISL_1094219, EPI_ISL_1094227, EPI_ISL_1094285 to 1094286, EPI_ISL_1094307, EPI_ISL_1094322, EPI_ISL_1094359, EPI_ISL_1094368, EPI_ISL_1094370, EPI_ISL_1094378, EPI_ISL_1094433 to 1094444, EPI_ISL_1095131 to 1095168                                                                                                                                                                                                                                                                                                                                                                                                                                                                                                                                                                                                                                                                                                                                                                                                                                                                                                                                                                                                                                                                                                                                                                                                                                                                                                                                                                                                                                                                                                                                                                                                                                                                                                                                                                                                                                                                                                                                                                                                                                                                  | NYSDOH Wadsworth Center, Virology Lab                         | Respiratory Viruses Branch, Division of Viral Diseases, Centers for Disease Control and Prevention                                                                            | Anna Montmayeur; Anna Uehara; Ben L. Rambo-Martin; Clinton R. Paden; Dhvani Batra; Haibin Wang; Jasmine Padilla; Jing Zhang; Justin Lee; Krista Queen; Lori Rowe; Mark Burroughs; Mili Sheth; Peter W. Cook; Rachel Marine; Sarah Nobles; Suxiang Tong; Yan Li; Ying Tao                                                                                                                                                       |
| EPI_ISL_1016013 to 1016018, EPI_ISL_1016075, EPI_ISL_1016100, EPI_ISL_1016170, EPI_ISL_1040852 to 1040914, EPI_ISL_1050008 to 1050064, EPI_ISL_1060616 to 1060675, EPI_ISL_1085093, EPI_ISL_1085161, EPI_ISL_1085163, EPI_ISL_1085166, EPI_ISL_1085168, EPI_ISL_1085171, EPI_ISL_1085175, EPI_ISL_1087722 to 1087352, EPI_ISL_1116476 to 1116554, EPI_ISL_1195744 to 1195902, EPI_ISL_1262501 to 1262585, EPI_ISL_1300175 to 1300276, EPI_ISL_1322745 to 1322834                                                                                                                                                                                                                                                                                                                                                                                                                                                                                                                                                                                                                                                                                                                                                                                                                                                                                                                                                                                                                                                                                                                                                                                                                                                                                                                                                                                                                                                                                                                                                                                                                                                                                                                                                                                                                                             | NYU Langone Health                                            | Departments of Pathology and Medicine, New York University School of Medicine                                                                                                 | Adriana Heguy; Christian Marier; Dacia Dimartino; Emily Guzman; Gael Westby; Guiqing Wang; Paolo Cotzia; Paul Zappile; Peter Meyn; Sitharam Ramaswami; Yutong Zhang                                                                                                                                                                                                                                                            |
| EPI_ISL_1298480, EPI_ISL_1298484                                                                                                                                                                                                                                                                                                                                                                                                                                                                                                                                                                                                                                                                                                                                                                                                                                                                                                                                                                                                                                                                                                                                                                                                                                                                                                                                                                                                                                                                                                                                                                                                                                                                                                                                                                                                                                                                                                                                                                                                                                                                                                                                                                                                                                                                             | Nadvirna CRH                                                  | The Institute of Molecular Biology and Genetics of NASU                                                                                                                       | M.Tukalo et al.                                                                                                                                                                                                                                                                                                                                                                                                                |
| EPI_ISL_1372095                                                                                                                                                                                                                                                                                                                                                                                                                                                                                                                                                                                                                                                                                                                                                                                                                                                                                                                                                                                                                                                                                                                                                                                                                                                                                                                                                                                                                                                                                                                                                                                                                                                                                                                                                                                                                                                                                                                                                                                                                                                                                                                                                                                                                                                                                              | Nalanda Medical College Hospital, Patna                       | Institute of Life Sciences - INSACOG                                                                                                                                          | Ajay Parida; Amol M. Kanampalliwar; Arup Ghosh; Atimukta Jha; INSACOG Consortium; Punjit Prasad; Rajeeb Swain; Rupesh Dash; Safal Walia; Shifu Aggarwal; Sunil K. Raghav                                                                                                                                                                                                                                                       |
| EPI_ISL_1008396 to 1008397, EPI_ISL_1008399                                                                                                                                                                                                                                                                                                                                                                                                                                                                                                                                                                                                                                                                                                                                                                                                                                                                                                                                                                                                                                                                                                                                                                                                                                                                                                                                                                                                                                                                                                                                                                                                                                                                                                                                                                                                                                                                                                                                                                                                                                                                                                                                                                                                                                                                  | Narhalsan Fjallbacka VC                                       | The Public Health Agency of Sweden                                                                                                                                            | Anna Risberg; Anna-Malin Linde; Carlo Berg; Karin Tegmark-Wisell; Maria Lind Karlberg; Mattias Haukland; Mia Brytting; Noura Walai; Oskar Karlsson Lindsjo; Petra Edquist; Petra Holmstrom; Reza Advani; Sofia Stamouli                                                                                                                                                                                                        |
| EPI_ISL_1302674                                                                                                                                                                                                                                                                                                                                                                                                                                                                                                                                                                                                                                                                                                                                                                                                                                                                                                                                                                                                                                                                                                                                                                                                                                                                                                                                                                                                                                                                                                                                                                                                                                                                                                                                                                                                                                                                                                                                                                                                                                                                                                                                                                                                                                                                                              | National Center for Infectious and Parasitic Diseases         | National Center for Infectious and Parasitic Diseases                                                                                                                         | Alexiev et al                                                                                                                                                                                                                                                                                                                                                                                                                  |
| EPI_ISL_1233440 to 1233482, EPI_ISL_1233484 to 1233627                                                                                                                                                                                                                                                                                                                                                                                                                                                                                                                                                                                                                                                                                                                                                                                                                                                                                                                                                                                                                                                                                                                                                                                                                                                                                                                                                                                                                                                                                                                                                                                                                                                                                                                                                                                                                                                                                                                                                                                                                                                                                                                                                                                                                                                       | National Center for Infectious and Parasitic Diseases (NCIPD) | National Center for Infectious and Parasitic Diseases (NCIPD)                                                                                                                 | Alexiev et al                                                                                                                                                                                                                                                                                                                                                                                                                  |
| EPI_ISL_1231531 to 1231532, EPI_ISL_1231534 to 1231536, EPI_ISL_1231538 to 1231540, EPI_ISL_1231542 to 1231544, EPI_ISL_1231546 to 1231548, EPI_ISL_1231550 to 1231552, EPI_ISL_1231554 to 1231556, EPI_ISL_1231558 to 1231560, EPI_ISL_1231562 to 1231564, EPI_ISL_1231566 to 1231568, EPI_ISL_1231570 to 1231572, EPI_ISL_1231574 to 1231576, EPI_ISL_1231578 to 1231580, EPI_ISL_1231582 to 1231584, EPI_ISL_1231586 to 1231589, EPI_ISL_1231591 to 1231593, EPI_ISL_1231595 to 1231597, EPI_ISL_1231599 to 1231601, EPI_ISL_1231603 to 1231605, EPI_ISL_1231607 to 1231609, EPI_ISL_1231611 to 1231614, EPI_ISL_1231616 to 1231617, EPI_ISL_1231619 to 1231622, EPI_ISL_1231624 to 1231625, EPI_ISL_1231627 to 1231629, EPI_ISL_1231631 to 1231633, EPI_ISL_1231635 to 1231637, EPI_ISL_1231639 to 1231641, EPI_ISL_1231643 to 1231645, EPI_ISL_1231647 to 1231650, EPI_ISL_1231652 to 1231654, EPI_ISL_1231656 to 1231658, EPI_ISL_1231660 to 1231662, EPI_ISL_1231664 to 1231665, EPI_ISL_1231667 to 1231669, EPI_ISL_1231671 to 1231674, EPI_ISL_1231676 to 1231677, EPI_ISL_1231679 to 1231681, EPI_ISL_1231683 to 1231685, EPI_ISL_1231687 to 1231689, EPI_ISL_1231691 to 1231693, EPI_ISL_1231695 to 1231697, EPI_ISL_1231699 to 1231701, EPI_ISL_1231703 to 1231705, EPI_ISL_1231707 to 1231709, EPI_ISL_1231715 to 1231718, EPI_ISL_1231720 to 1231722, EPI_ISL_1231724 to 1231726, EPI_ISL_1231728 to 1231729, EPI_ISL_1231731 to 1231734, EPI_ISL_1231736 to 1231738, EPI_ISL_1231740 to 1231742, EPI_ISL_1231744 to 1231746, EPI_ISL_1231748 to 1231750, EPI_ISL_1231752 to 1231754, EPI_ISL_1231756 to 1231757, EPI_ISL_1231759 to 1231761, EPI_ISL_1231763 to 1231766, EPI_ISL_1231768 to 1231770, EPI_ISL_1231772 to 1231773                                                                                                                                                                                                                                                                                                                                                                                                                                                                                                                                                               | National Center for Infectious and Parasitic Diseases (NCIPD) | Alexiev et al                                                                                                                                                                 |                                                                                                                                                                                                                                                                                                                                                                                                                                |
| see above                                                                                                                                                                                                                                                                                                                                                                                                                                                                                                                                                                                                                                                                                                                                                                                                                                                                                                                                                                                                                                                                                                                                                                                                                                                                                                                                                                                                                                                                                                                                                                                                                                                                                                                                                                                                                                                                                                                                                                                                                                                                                                                                                                                                                                                                                                    | National Center for Infectious and Parasitic Diseases (NCIPD) |                                                                                                                                                                               |                                                                                                                                                                                                                                                                                                                                                                                                                                |



|                                                                                                                                                                                                                                                                                                                                                                                                                                                                                                                                                                                                                                                                                                                                                                                                                                                                                                                                                                                                                                                                                                                                                                                                                                                                                                                                                                                                                                                                                                                                                                                                                                                                                                                                                                                                                                                                                                                                                                                                                                                                                                                                                                                                                                                                                                                                                                                                                                                                                                                                                                                                                                                                                                                                                                                                                                                                                                                                                                                                                                                           |                                                                                                          |                                                                                                                                                                         |                                                                                                                                                                                                                                                                                                                                   |                                                                                                                                                                                                                                                                                                                                                                                                                                                                                                                                                                      |
|-----------------------------------------------------------------------------------------------------------------------------------------------------------------------------------------------------------------------------------------------------------------------------------------------------------------------------------------------------------------------------------------------------------------------------------------------------------------------------------------------------------------------------------------------------------------------------------------------------------------------------------------------------------------------------------------------------------------------------------------------------------------------------------------------------------------------------------------------------------------------------------------------------------------------------------------------------------------------------------------------------------------------------------------------------------------------------------------------------------------------------------------------------------------------------------------------------------------------------------------------------------------------------------------------------------------------------------------------------------------------------------------------------------------------------------------------------------------------------------------------------------------------------------------------------------------------------------------------------------------------------------------------------------------------------------------------------------------------------------------------------------------------------------------------------------------------------------------------------------------------------------------------------------------------------------------------------------------------------------------------------------------------------------------------------------------------------------------------------------------------------------------------------------------------------------------------------------------------------------------------------------------------------------------------------------------------------------------------------------------------------------------------------------------------------------------------------------------------------------------------------------------------------------------------------------------------------------------------------------------------------------------------------------------------------------------------------------------------------------------------------------------------------------------------------------------------------------------------------------------------------------------------------------------------------------------------------------------------------------------------------------------------------------------------------------|----------------------------------------------------------------------------------------------------------|-------------------------------------------------------------------------------------------------------------------------------------------------------------------------|-----------------------------------------------------------------------------------------------------------------------------------------------------------------------------------------------------------------------------------------------------------------------------------------------------------------------------------|----------------------------------------------------------------------------------------------------------------------------------------------------------------------------------------------------------------------------------------------------------------------------------------------------------------------------------------------------------------------------------------------------------------------------------------------------------------------------------------------------------------------------------------------------------------------|
| EPI_ISL_1139146 to 1139157                                                                                                                                                                                                                                                                                                                                                                                                                                                                                                                                                                                                                                                                                                                                                                                                                                                                                                                                                                                                                                                                                                                                                                                                                                                                                                                                                                                                                                                                                                                                                                                                                                                                                                                                                                                                                                                                                                                                                                                                                                                                                                                                                                                                                                                                                                                                                                                                                                                                                                                                                                                                                                                                                                                                                                                                                                                                                                                                                                                                                                | National Center of Disease Control and Prevention of the Republic of Armenia                             | Institute of Molecular Biology NAS RA, Republic of Armenia, Department of Bioengineering, Bioinformatics Institute and Molecular Biology IBMPH RAU, Republic of Armenia | Andranik Chavushyan; Arsen Arakelyan; Diana Avetyan; Gayane Melik-Pashayan; Gisane Khachatyan; Hovsep Ghazaryan; Maria Nikoghosyan; Nelli Muradyan; Roksana Zakharyan; Shushan Sargsyan; Siras Hakobyan; Tamara Sirunyan; Zaven Karalyan                                                                                          |                                                                                                                                                                                                                                                                                                                                                                                                                                                                                                                                                                      |
| EPI_ISL_1301979 to 1302151                                                                                                                                                                                                                                                                                                                                                                                                                                                                                                                                                                                                                                                                                                                                                                                                                                                                                                                                                                                                                                                                                                                                                                                                                                                                                                                                                                                                                                                                                                                                                                                                                                                                                                                                                                                                                                                                                                                                                                                                                                                                                                                                                                                                                                                                                                                                                                                                                                                                                                                                                                                                                                                                                                                                                                                                                                                                                                                                                                                                                                | National Center of Infectious and Parasitic Diseases                                                     | National Center of Infectious and Parasitic Diseases                                                                                                                    | Alexiev et al                                                                                                                                                                                                                                                                                                                     |                                                                                                                                                                                                                                                                                                                                                                                                                                                                                                                                                                      |
| EPI_ISL_1220880 to 1220884, EPI_ISL_1220886 to 1220893, EPI_ISL_1252671 to 1252691, EPI_ISL_1252693 to 1252695, EPI_ISL_1252702 to 1252704, EPI_ISL_1252706 to 1252722, EPI_ISL_1252724 to 1252725, EPI_ISL_1252735 to 1252738, EPI_ISL_1252740 to 1252743, EPI_ISL_1252745 to 1252804, EPI_ISL_1252810 to 1252814, EPI_ISL_1315276 to 1315304, EPI_ISL_1324385 to 1324465, EPI_ISL_1324561 to 1324562, EPI_ISL_1324564 to 1324568, EPI_ISL_1324660 to 1324664, EPI_ISL_1327552, EPI_ISL_1330166, EPI_ISL_1330176, EPI_ISL_1330183, EPI_ISL_1330224, EPI_ISL_1330232, EPI_ISL_1330240, EPI_ISL_1330248, EPI_ISL_1330251, EPI_ISL_1330254                                                                                                                                                                                                                                                                                                                                                                                                                                                                                                                                                                                                                                                                                                                                                                                                                                                                                                                                                                                                                                                                                                                                                                                                                                                                                                                                                                                                                                                                                                                                                                                                                                                                                                                                                                                                                                                                                                                                                                                                                                                                                                                                                                                                                                                                                                                                                                                                                  | see above                                                                                                | National Food and Veterinary Risk Assessment Institute                                                                                                                  | Vilnius University Hospital Santaros Klinikos, Center of Laboratory Medicine                                                                                                                                                                                                                                                      | Daniel Naumovas; Dovile Ezerskyte; Gytis Dudas; Ingrida Olendraite; Laimonas Griskevicius; Ligita Raugaite; Mindaugas Stoksus; Monika Katenaite; Rimvydas Norvilas                                                                                                                                                                                                                                                                                                                                                                                                   |
| EPI_ISL_1250424 to 1250425, EPI_ISL_1250427 to 1250428, EPI_ISL_1250430 to 1250432, EPI_ISL_1250434, EPI_ISL_1250436 to 1250437, EPI_ISL_1250439, EPI_ISL_1250441 to 1250442, EPI_ISL_1250444, EPI_ISL_1250446 to 1250448, EPI_ISL_1250452 to 1250453, EPI_ISL_1250455 to 1250456, EPI_ISL_1250458, EPI_ISL_1250460, EPI_ISL_1250462 to 1250463, EPI_ISL_1250465 to 1250466, EPI_ISL_1250468 to 1250469, EPI_ISL_1250472, EPI_ISL_1250474, EPI_ISL_1250476 to 1250477, EPI_ISL_1250479 to 1250480, EPI_ISL_1250482 to 1250483, EPI_ISL_1250485 to 1250486, EPI_ISL_1250488, EPI_ISL_1250490 to 1250491, EPI_ISL_1250493 to 1250494, EPI_ISL_1250496 to 1250497, EPI_ISL_1250499, EPI_ISL_1250501 to 1250502, EPI_ISL_1250504 to 1250505, EPI_ISL_1366754 to 1366888                                                                                                                                                                                                                                                                                                                                                                                                                                                                                                                                                                                                                                                                                                                                                                                                                                                                                                                                                                                                                                                                                                                                                                                                                                                                                                                                                                                                                                                                                                                                                                                                                                                                                                                                                                                                                                                                                                                                                                                                                                                                                                                                                                                                                                                                                       | see above                                                                                                | National Health Laboratory Service, South Africa                                                                                                                        | KRISP, KZN Research Innovation and Sequencing Platform                                                                                                                                                                                                                                                                            | Emmanuel SJ; Giandhari J; Khan S; Laguda-Akingba O; Lessells R; Maslo K; Mdlalose K; Pillay S; Sitharam L; Tegally H; Wilkinson E; York D; de Oliveira T                                                                                                                                                                                                                                                                                                                                                                                                             |
| EPI_ISL_1048431 to 1048568, EPI_ISL_1371906 to 1372006                                                                                                                                                                                                                                                                                                                                                                                                                                                                                                                                                                                                                                                                                                                                                                                                                                                                                                                                                                                                                                                                                                                                                                                                                                                                                                                                                                                                                                                                                                                                                                                                                                                                                                                                                                                                                                                                                                                                                                                                                                                                                                                                                                                                                                                                                                                                                                                                                                                                                                                                                                                                                                                                                                                                                                                                                                                                                                                                                                                                    | National Health Laboratory Service, South Africa                                                         | KRISP, Kzn Research Innovation and Sequencing Platform                                                                                                                  | Emmanuel SJ; Giandhari J; Khan S; Laguda-Akingba O; Lessells R; Maslo K; Mdlalose K; Pillay S; Sitharam L; Tegally H; Wilkinson E; York D; de Oliveira T                                                                                                                                                                          |                                                                                                                                                                                                                                                                                                                                                                                                                                                                                                                                                                      |
| EPI_ISL_1077348 to 1077349, EPI_ISL_1080931 to 1080933, EPI_ISL_1080935 to 1080937, EPI_ISL_1080939 to 1080941, EPI_ISL_1080943 to 1080945, EPI_ISL_1080947 to 1080950, EPI_ISL_1080952 to 1080954, EPI_ISL_1080956 to 1080959, EPI_ISL_1080961 to 1080963, EPI_ISL_1080965 to 1080967, EPI_ISL_1080969 to 1080972, EPI_ISL_1080974 to 1080976, EPI_ISL_1080978 to 1080979, EPI_ISL_1080981 to 1080984, EPI_ISL_1305818, EPI_ISL_1363124 to 1363150, EPI_ISL_1372562 to 1372563, EPI_ISL_1373589 to 1373601                                                                                                                                                                                                                                                                                                                                                                                                                                                                                                                                                                                                                                                                                                                                                                                                                                                                                                                                                                                                                                                                                                                                                                                                                                                                                                                                                                                                                                                                                                                                                                                                                                                                                                                                                                                                                                                                                                                                                                                                                                                                                                                                                                                                                                                                                                                                                                                                                                                                                                                                               | see above                                                                                                | National Health Laboratory Services                                                                                                                                     | National Health Laboratory Services                                                                                                                                                                                                                                                                                               | Arshad Ismail; Florette Treurnicht; Kathleen Subramoney; Mushal Ali; Thabo Mohale                                                                                                                                                                                                                                                                                                                                                                                                                                                                                    |
| EPI_ISL_1069202, EPI_ISL_1069220, EPI_ISL_1069394 to 1069396, EPI_ISL_1069686, EPI_ISL_1070401, EPI_ISL_1071111, EPI_ISL_1072960                                                                                                                                                                                                                                                                                                                                                                                                                                                                                                                                                                                                                                                                                                                                                                                                                                                                                                                                                                                                                                                                                                                                                                                                                                                                                                                                                                                                                                                                                                                                                                                                                                                                                                                                                                                                                                                                                                                                                                                                                                                                                                                                                                                                                                                                                                                                                                                                                                                                                                                                                                                                                                                                                                                                                                                                                                                                                                                          | see above                                                                                                | National Health Laboratory Services                                                                                                                                     | National Health Laboratory Services, Virology                                                                                                                                                                                                                                                                                     | Kathleen Subramoney; Mushal Ali; Thabo Mohale                                                                                                                                                                                                                                                                                                                                                                                                                                                                                                                        |
| EPI_ISL_1014676 to 1014687                                                                                                                                                                                                                                                                                                                                                                                                                                                                                                                                                                                                                                                                                                                                                                                                                                                                                                                                                                                                                                                                                                                                                                                                                                                                                                                                                                                                                                                                                                                                                                                                                                                                                                                                                                                                                                                                                                                                                                                                                                                                                                                                                                                                                                                                                                                                                                                                                                                                                                                                                                                                                                                                                                                                                                                                                                                                                                                                                                                                                                | National Influenza Center, Virology Department                                                           | National Influenza Center                                                                                                                                               | A Nejadi; F Ajaminejad; F Ajaminejad and T Mokhtari Azad; J Yavarian; K Sadeghi; N Ghavami; N Ghavami and T Mokhtari Azad; NZ Shafiei Jandaghi; V Salimi                                                                                                                                                                          |                                                                                                                                                                                                                                                                                                                                                                                                                                                                                                                                                                      |
| EPI_ISL_1239850 to 1239882                                                                                                                                                                                                                                                                                                                                                                                                                                                                                                                                                                                                                                                                                                                                                                                                                                                                                                                                                                                                                                                                                                                                                                                                                                                                                                                                                                                                                                                                                                                                                                                                                                                                                                                                                                                                                                                                                                                                                                                                                                                                                                                                                                                                                                                                                                                                                                                                                                                                                                                                                                                                                                                                                                                                                                                                                                                                                                                                                                                                                                | National Institute for Communicable Diseases, National Health Laboratory Services, Gauteng, South Africa | National Institute for Communicable Diseases of the National Health Laboratory Service                                                                                  | Amoako DG; Bhiman JN; Ismail A; Mahlangu B; Mohale T; Ntuli N; Scheepers C                                                                                                                                                                                                                                                        |                                                                                                                                                                                                                                                                                                                                                                                                                                                                                                                                                                      |
| EPI_ISL_1118206 to 1118216, EPI_ISL_1118931, EPI_ISL_1118933, EPI_ISL_1169046, EPI_ISL_1169050 to 1169060, EPI_ISL_1170948, EPI_ISL_1170955, EPI_ISL_1239143 to 1239144, EPI_ISL_1257816 to 1257817                                                                                                                                                                                                                                                                                                                                                                                                                                                                                                                                                                                                                                                                                                                                                                                                                                                                                                                                                                                                                                                                                                                                                                                                                                                                                                                                                                                                                                                                                                                                                                                                                                                                                                                                                                                                                                                                                                                                                                                                                                                                                                                                                                                                                                                                                                                                                                                                                                                                                                                                                                                                                                                                                                                                                                                                                                                       | see above                                                                                                | National Institute of Health Research and Development                                                                                                                   | National Institute of Health Research and Development                                                                                                                                                                                                                                                                             | ; Agustiniings; Arie Ardiansyah Nugraha; Asri Febriyani; Aulia Rizki; Fauzul Muna; Hana A Pawestri; Hana Apsari Pawestri; Hartanti Dian Ikawati; Herna; Holy Arif Wibowo; Irene Lorinda Indalao; Kartika Dewi Puspa; Kindi Adam; Krisna Nur Andriana Pangesti; Mursinah; Natalie Lancia Kipuw; Nelly Puspandari; Ni Ketut Susilarini; Nike Susanti; Nur Ika Hariastuti; Nurika Hariastuti; Reni Herman; Rinin Ramadhany; Subangkit; Tati Febriyani; Triyani Soekarso; Ulyi Alfi Nikmah; Uly Alfi Nikmah; Uly Setiawaty; Yuni Rukminiaty; riana Nur Andriana Pangesti |
| EPI_ISL_1114767 to 1114768, EPI_ISL_1114770 to 1114771, EPI_ISL_1116429 to 1116457, EPI_ISL_1116462 to 1116463, EPI_ISL_1184825 to 1184826, EPI_ISL_1185852, EPI_ISL_1186023 to 1186025, EPI_ISL_1186029, EPI_ISL_1186069 to 1186071, EPI_ISL_1186113, EPI_ISL_1186116, EPI_ISL_1186118 to 1186119, EPI_ISL_1186141, EPI_ISL_1186157, EPI_ISL_1186187, EPI_ISL_1186200, EPI_ISL_1186202 to 1186204, EPI_ISL_1186209 to 1186211, EPI_ISL_1186213, EPI_ISL_1186215, EPI_ISL_1186217, EPI_ISL_1258426 to 1258442, EPI_ISL_1258444 to 1258451, EPI_ISL_1258453 to 1258458, EPI_ISL_1261135 to 1261136, EPI_ISL_1279947 to 1279977                                                                                                                                                                                                                                                                                                                                                                                                                                                                                                                                                                                                                                                                                                                                                                                                                                                                                                                                                                                                                                                                                                                                                                                                                                                                                                                                                                                                                                                                                                                                                                                                                                                                                                                                                                                                                                                                                                                                                                                                                                                                                                                                                                                                                                                                                                                                                                                                                             | see above                                                                                                | National Institute of Infectious Diseases-Prof. Dr. Matei Bals Molecular Diagnostics Laboratory                                                                         | National Institute of Infectious Diseases-Prof. Dr. Matei Bals Molecular Diagnostics Laboratory                                                                                                                                                                                                                                   | Andreea Tudor; Corina Casangiu; Dan Otelea; Ionelia Nicolae; Leontina Banica; Marius Surlea; Ovidiu Vlaicu; Petre Milu; Simona Paraschiv                                                                                                                                                                                                                                                                                                                                                                                                                             |
| EPI_ISL_1033158, EPI_ISL_1034736, EPI_ISL_1034763, EPI_ISL_1034794, EPI_ISL_1035809, EPI_ISL_1036233, EPI_ISL_1036240, EPI_ISL_1036269, EPI_ISL_1036622, EPI_ISL_1036737, EPI_ISL_1036751, EPI_ISL_1036753, EPI_ISL_1040479, EPI_ISL_1040481 to 1040485, EPI_ISL_1070400, EPI_ISL_1072961, EPI_ISL_1072987 to 1072988, EPI_ISL_1081838, EPI_ISL_1082450, EPI_ISL_1084606, EPI_ISL_1084721, EPI_ISL_1084741, EPI_ISL_1084761                                                                                                                                                                                                                                                                                                                                                                                                                                                                                                                                                                                                                                                                                                                                                                                                                                                                                                                                                                                                                                                                                                                                                                                                                                                                                                                                                                                                                                                                                                                                                                                                                                                                                                                                                                                                                                                                                                                                                                                                                                                                                                                                                                                                                                                                                                                                                                                                                                                                                                                                                                                                                               | see above                                                                                                | National Institute of Laboratory Medicine and Referral Center                                                                                                           | Genomic Research Lab, BCSIR                                                                                                                                                                                                                                                                                                       | A. K. M. Shamsuzzaman; A. K. M. Shamsuzzaman; Abu Sayeed Mohammad Mahmud; Abu Sayeed Mohammad Mahmud; Arifa Akram; Asish Kumar Ghosh; Barna Goswami; Eshrar Osman; Iffat Jahan; Mahmuda Yeasmin; Mahmuda Yeasmin Asish Kumar Ghosh; Md. Ahashan Habib; Md. Maruf Ahmed Molla; Md. Murshed Hasan Sarkar; Md. Saddam Hossain; Md. Salim Khan; Md. Maruf Ahmed Molla; Mohammad Samir Uzzaman; Shahina Akter; Tanjina Akhtar Banu; Tasnim Nafisa; Tasnim Nafisa                                                                                                          |
| EPI_ISL_1036752                                                                                                                                                                                                                                                                                                                                                                                                                                                                                                                                                                                                                                                                                                                                                                                                                                                                                                                                                                                                                                                                                                                                                                                                                                                                                                                                                                                                                                                                                                                                                                                                                                                                                                                                                                                                                                                                                                                                                                                                                                                                                                                                                                                                                                                                                                                                                                                                                                                                                                                                                                                                                                                                                                                                                                                                                                                                                                                                                                                                                                           | National Institute of Laboratory Medicine and Referral Center                                            | Genomic Research Lab, BCSIR, Dr. Qudrat-E-Khuda Road, Dhaka 1205, Bangladesh                                                                                            | ; A. K. M. Shamsuzzaman; Abu Sayeed Mohammad Mahmud; Arifa Akram; Asish Kumar Ghosh; Barna Goswami; Eshrar Osman; Iffat Jahan; Mahmuda Yeasmin; Md. Ahashan Habib; Md. Maruf Ahmed Molla; Md. Murshed Hasan Sarkar; Md. Saddam Hossain; Md. Salim Khan; Mohammad Samir Uzzaman; Shahina Akter; Tanjina Akhtar Banu; Tasnim Nafisa |                                                                                                                                                                                                                                                                                                                                                                                                                                                                                                                                                                      |
| EPI_ISL_1035872                                                                                                                                                                                                                                                                                                                                                                                                                                                                                                                                                                                                                                                                                                                                                                                                                                                                                                                                                                                                                                                                                                                                                                                                                                                                                                                                                                                                                                                                                                                                                                                                                                                                                                                                                                                                                                                                                                                                                                                                                                                                                                                                                                                                                                                                                                                                                                                                                                                                                                                                                                                                                                                                                                                                                                                                                                                                                                                                                                                                                                           | National Institute of Laboratory Medicine and Referral Center                                            | Genomic Research Lab, BCSIR, Dr. Qudrat-E-Khuda Road, Dhaka-1205, Bangladesh                                                                                            | A. K. M. Shamsuzzaman; Abu Sayeed Mohammad Mahmud; Arifa Akram; Asish Kumar Ghosh; Barna Goswami; Eshrar Osman; Iffat Jahan; Mahmuda Yeasmin; Md. Ahashan Habib; Md. Maruf Ahmed Molla; Md. Murshed Hasan Sarkar; Md. Saddam Hossain; Md. Salim Khan; Mohammad Samir Uzzaman; Shahina Akter; Tanjina Akhtar Banu; Tasnim Nafisa   |                                                                                                                                                                                                                                                                                                                                                                                                                                                                                                                                                                      |
| EPI_ISL_1314970 to 1315063                                                                                                                                                                                                                                                                                                                                                                                                                                                                                                                                                                                                                                                                                                                                                                                                                                                                                                                                                                                                                                                                                                                                                                                                                                                                                                                                                                                                                                                                                                                                                                                                                                                                                                                                                                                                                                                                                                                                                                                                                                                                                                                                                                                                                                                                                                                                                                                                                                                                                                                                                                                                                                                                                                                                                                                                                                                                                                                                                                                                                                | National Institute of Public Health                                                                      | National Institute of Public Health                                                                                                                                     | Alexander Nagy; Dusan Trnka; Helena Jirincova; Jaromira Vecerova; Timotej Suri                                                                                                                                                                                                                                                    |                                                                                                                                                                                                                                                                                                                                                                                                                                                                                                                                                                      |
| EPI_ISL_1261162 to 1261182, EPI_ISL_1261184 to 1261194, EPI_ISL_1261203 to 1261292, EPI_ISL_1261303 to 1261385, EPI_ISL_1261389 to 1261393, EPI_ISL_1261395 to 1261410, EPI_ISL_1261412 to 1261424, EPI_ISL_1321356 to 1321445                                                                                                                                                                                                                                                                                                                                                                                                                                                                                                                                                                                                                                                                                                                                                                                                                                                                                                                                                                                                                                                                                                                                                                                                                                                                                                                                                                                                                                                                                                                                                                                                                                                                                                                                                                                                                                                                                                                                                                                                                                                                                                                                                                                                                                                                                                                                                                                                                                                                                                                                                                                                                                                                                                                                                                                                                            | see above                                                                                                | National Institute of Public Health                                                                                                                                     | National Reference Laboratory for Influenza and Respiratory Viruses CZE                                                                                                                                                                                                                                                           | Alexander Nagy; Dusan Trnka; Helena Jirincova; Jaromira Vecerova; Timotej Suri                                                                                                                                                                                                                                                                                                                                                                                                                                                                                       |
| EPI_ISL_1091401 to 1091486, EPI_ISL_1133204 to 1133208, EPI_ISL_1201760 to 1201778, EPI_ISL_1273827                                                                                                                                                                                                                                                                                                                                                                                                                                                                                                                                                                                                                                                                                                                                                                                                                                                                                                                                                                                                                                                                                                                                                                                                                                                                                                                                                                                                                                                                                                                                                                                                                                                                                                                                                                                                                                                                                                                                                                                                                                                                                                                                                                                                                                                                                                                                                                                                                                                                                                                                                                                                                                                                                                                                                                                                                                                                                                                                                       | National Institute of Public Health - National Institute of Hygiene                                      | 1. National Institute of Public Health - National Institute of Hygiene; 2. Eurofins Genomics Europe Sequencing GmbH                                                     | ECDC COVID-19 WGS support team; Eurofins Genomics Europe Sequencing Team; Gierczyk Rafa; Sadkowska-Todys Magorzata; Wokowicz Tomasz; Zacharczuk Katarzyna                                                                                                                                                                         |                                                                                                                                                                                                                                                                                                                                                                                                                                                                                                                                                                      |
| EPI_ISL_1033031 to 1033091, EPI_ISL_1033093 to 1033105, EPI_ISL_1033107 to 1033113, EPI_ISL_1033115 to 1033123, EPI_ISL_1055826 to 1055839, EPI_ISL_1055841 to 1055844, EPI_ISL_1055846 to 1055889, EPI_ISL_1055891 to 1055907, EPI_ISL_1055909 to 1056093, EPI_ISL_1056095 to 1056104, EPI_ISL_1056106 to 1056107, EPI_ISL_1056109 to 1056138, EPI_ISL_1056141 to 1056150, EPI_ISL_1056152 to 1056273, EPI_ISL_1056276 to 1056344, EPI_ISL_1056346 to 1056347, EPI_ISL_1056349 to 1056451, EPI_ISL_1056453 to 1056460, EPI_ISL_1056462 to 1056484, EPI_ISL_1056486 to 1056515, EPI_ISL_1056517 to 1056551, EPI_ISL_1056563 to 1056576, EPI_ISL_1056578 to 1056583, EPI_ISL_1056585 to 1056599, EPI_ISL_1064984 to 1064994, EPI_ISL_1064996 to 1065027, EPI_ISL_1065029 to 1065089, EPI_ISL_1065091 to 1065094, EPI_ISL_1082449                                                                                                                                                                                                                                                                                                                                                                                                                                                                                                                                                                                                                                                                                                                                                                                                                                                                                                                                                                                                                                                                                                                                                                                                                                                                                                                                                                                                                                                                                                                                                                                                                                                                                                                                                                                                                                                                                                                                                                                                                                                                                                                                                                                                                           | see above                                                                                                | National Laboratory for Health, Environment and Food                                                                                                                    | CISLD (Clinical Institute of Special Laboratory Diagnostics), University Children's Hospital, University Medical Center Ljubljana                                                                                                                                                                                                 | Ana Grom; Barbara Jenko Bizjan; Erna Lovšin; Jernej Kova; Katarina Kozmos; Marko Pokorn; Maruša Debeljak; Robert Šket; Tadej Battelino; Tine Tesovnik                                                                                                                                                                                                                                                                                                                                                                                                                |
| EPI_ISL_1260744 to 1260833                                                                                                                                                                                                                                                                                                                                                                                                                                                                                                                                                                                                                                                                                                                                                                                                                                                                                                                                                                                                                                                                                                                                                                                                                                                                                                                                                                                                                                                                                                                                                                                                                                                                                                                                                                                                                                                                                                                                                                                                                                                                                                                                                                                                                                                                                                                                                                                                                                                                                                                                                                                                                                                                                                                                                                                                                                                                                                                                                                                                                                | National Laboratory for Health, Environment and Food                                                     | Department for Public Health Microbiology Ljubljana, National Laboratory for Health, Environment and Food                                                               | Jose Goncalves; Katarina Prosenec Trilar; Marija Trkov; Martin Bosilj; Metka Paragi; Tom Koritnik; Verica Mioc                                                                                                                                                                                                                    |                                                                                                                                                                                                                                                                                                                                                                                                                                                                                                                                                                      |
| EPI_ISL_1111607 to 1111608, EPI_ISL_1111615 to 1111619, EPI_ISL_1111624 to 1111626, EPI_ISL_1111629, EPI_ISL_1111633, EPI_ISL_1111651, EPI_ISL_1111654, EPI_ISL_1111657, EPI_ISL_1111665, EPI_ISL_1111671, EPI_ISL_1111673, EPI_ISL_1111675, EPI_ISL_1111680 to 1111681, EPI_ISL_1111685 to 1111686, EPI_ISL_1111690, EPI_ISL_1111696 to 1111698, EPI_ISL_1111702 to 1111703, EPI_ISL_1111710, EPI_ISL_1111714, EPI_ISL_1111723, EPI_ISL_1111727, EPI_ISL_1111764 to 1111765, EPI_ISL_1111770 to 1111800, EPI_ISL_1111941 to 1111949, EPI_ISL_1112148, EPI_ISL_1112150, EPI_ISL_1112152 to 1112153, EPI_ISL_1112155, EPI_ISL_1240222 to 1240223, EPI_ISL_1240225, EPI_ISL_1240227, EPI_ISL_1240231, EPI_ISL_1240235, EPI_ISL_1240238 to 1240239, EPI_ISL_1240249, EPI_ISL_1240253, EPI_ISL_1240255 to 1240256, EPI_ISL_1240264 to 1240265, EPI_ISL_1240273, EPI_ISL_1240275, EPI_ISL_1240280, EPI_ISL_1240284, EPI_ISL_1240286, EPI_ISL_1240291 to 1240292, EPI_ISL_1240296, EPI_ISL_1240305 to 1240308, EPI_ISL_1240328 to 1240334, EPI_ISL_1240335, EPI_ISL_1240365 to 1240373, EPI_ISL_1240375, EPI_ISL_1240385 to 1240393, EPI_ISL_1240490 to 1240535, EPI_ISL_1240596, EPI_ISL_1240602, EPI_ISL_1240604 to 1240605, EPI_ISL_1240612, EPI_ISL_1240615, EPI_ISL_1240633 to 1240635, EPI_ISL_1266231, EPI_ISL_1266239 to 1266240, EPI_ISL_1266247 to 1266248, EPI_ISL_1266251, EPI_ISL_1266257, EPI_ISL_1266259, EPI_ISL_1266262, EPI_ISL_1266267 to 1266269, EPI_ISL_1266271, EPI_ISL_1266275, EPI_ISL_1266297 to 1266298, EPI_ISL_1266301 to 1266302, EPI_ISL_1266307, EPI_ISL_1266316, EPI_ISL_1266320, EPI_ISL_1266322, EPI_ISL_1266324, EPI_ISL_1266326, EPI_ISL_1266334, EPI_ISL_1266336, EPI_ISL_1266340, EPI_ISL_1266357, EPI_ISL_1266357, EPI_ISL_1266365 to 1266369, EPI_ISL_1266368 to 1266369, EPI_ISL_1266377 to 1266378, EPI_ISL_1266386 to 1266387, EPI_ISL_1266394 to 1266396, EPI_ISL_1266402 to 1266404, EPI_ISL_1266413 to 1266414, EPI_ISL_1266427, EPI_ISL_1266430, EPI_ISL_1266440, EPI_ISL_1266443, EPI_ISL_1266448, EPI_ISL_1266450 to 1266451, EPI_ISL_1266453 to 1266454, EPI_ISL_1266456, EPI_ISL_1266464, EPI_ISL_1266466 to 1266467, EPI_ISL_1266469, EPI_ISL_1266475, EPI_ISL_1266489, EPI_ISL_1266538, EPI_ISL_1266540, EPI_ISL_1266552, EPI_ISL_1266554 to 1266555, EPI_ISL_1266557 to 1266558, EPI_ISL_1266560 to 1266561, EPI_ISL_1266563 to 1266564, EPI_ISL_1266566 to 1266567, EPI_ISL_1266572, EPI_ISL_1266581 to 1266583, EPI_ISL_1266588 to 1266589, EPI_ISL_1266591, EPI_ISL_1266597, EPI_ISL_1266604, EPI_ISL_1266652 to 1266653, EPI_ISL_1266655 to 1266656, EPI_ISL_1266658 to 1266659, EPI_ISL_1266661 to 1266662, EPI_ISL_1266664, EPI_ISL_1266710 to 1266711, EPI_ISL_1266744, EPI_ISL_1266746 to 1266747, EPI_ISL_1266749 to 1266750, EPI_ISL_1266752 to 1266753, EPI_ISL_1266755 to 1266756, EPI_ISL_1266758 to 1266759, EPI_ISL_1266761 to 1266762, EPI_ISL_1266764 to 1266765, EPI_ISL_1266809, EPI_ISL_1266834, EPI_ISL_1266836 to 1266838, EPI_ISL_1266840 to 1266841, EPI_ISL_1266876 to 1266877, |                                                                                                          |                                                                                                                                                                         |                                                                                                                                                                                                                                                                                                                                   |                                                                                                                                                                                                                                                                                                                                                                                                                                                                                                                                                                      |

|                                                                                                                                                                                                                                                                                                                                                                                                                                                                                                                                                                                                                                                                                                                                                                                                                                                                                                                                                                                                                                                                                                                                                                                                                                                                                                                                                                                                                                                                                                                                                                                                                                                                                                                                                                                                                                                                                                                                                                                                                                                                                                                                                                                                                                                                                                                                                                                                                                                                                                                                                                                                                                                                                                                                                                                                                                                                                                                                                                                                                                                                                                                                                                                                                                                                                                                                                                                                                                                                                                                                                                                                                                                                                                                                                                                                                                                                                                                                                                                                                                                                                                                                                                                                                                                                                                                                                                                                                                                                                                                                                                                                                                                                                                                                                                                                                                                                                                                                                                                                                                                                                                                                                                                                                                                                                                                                                                                                                                                                                                                                                                                                                                                                                                                                                                                                                                                                                                                                                                                                                                                                                                                                                                                                                                                                                                                                                                                                                                                                                                                                                                                              |                                                                                                                                                                      |                                                                                                                                                                      |                                                                                                                                                                                                                                                                                                                                     |                                                                                                                                          |
|----------------------------------------------------------------------------------------------------------------------------------------------------------------------------------------------------------------------------------------------------------------------------------------------------------------------------------------------------------------------------------------------------------------------------------------------------------------------------------------------------------------------------------------------------------------------------------------------------------------------------------------------------------------------------------------------------------------------------------------------------------------------------------------------------------------------------------------------------------------------------------------------------------------------------------------------------------------------------------------------------------------------------------------------------------------------------------------------------------------------------------------------------------------------------------------------------------------------------------------------------------------------------------------------------------------------------------------------------------------------------------------------------------------------------------------------------------------------------------------------------------------------------------------------------------------------------------------------------------------------------------------------------------------------------------------------------------------------------------------------------------------------------------------------------------------------------------------------------------------------------------------------------------------------------------------------------------------------------------------------------------------------------------------------------------------------------------------------------------------------------------------------------------------------------------------------------------------------------------------------------------------------------------------------------------------------------------------------------------------------------------------------------------------------------------------------------------------------------------------------------------------------------------------------------------------------------------------------------------------------------------------------------------------------------------------------------------------------------------------------------------------------------------------------------------------------------------------------------------------------------------------------------------------------------------------------------------------------------------------------------------------------------------------------------------------------------------------------------------------------------------------------------------------------------------------------------------------------------------------------------------------------------------------------------------------------------------------------------------------------------------------------------------------------------------------------------------------------------------------------------------------------------------------------------------------------------------------------------------------------------------------------------------------------------------------------------------------------------------------------------------------------------------------------------------------------------------------------------------------------------------------------------------------------------------------------------------------------------------------------------------------------------------------------------------------------------------------------------------------------------------------------------------------------------------------------------------------------------------------------------------------------------------------------------------------------------------------------------------------------------------------------------------------------------------------------------------------------------------------------------------------------------------------------------------------------------------------------------------------------------------------------------------------------------------------------------------------------------------------------------------------------------------------------------------------------------------------------------------------------------------------------------------------------------------------------------------------------------------------------------------------------------------------------------------------------------------------------------------------------------------------------------------------------------------------------------------------------------------------------------------------------------------------------------------------------------------------------------------------------------------------------------------------------------------------------------------------------------------------------------------------------------------------------------------------------------------------------------------------------------------------------------------------------------------------------------------------------------------------------------------------------------------------------------------------------------------------------------------------------------------------------------------------------------------------------------------------------------------------------------------------------------------------------------------------------------------------------------------------------------------------------------------------------------------------------------------------------------------------------------------------------------------------------------------------------------------------------------------------------------------------------------------------------------------------------------------------------------------------------------------------------------------------------------------------------------------------------|----------------------------------------------------------------------------------------------------------------------------------------------------------------------|----------------------------------------------------------------------------------------------------------------------------------------------------------------------|-------------------------------------------------------------------------------------------------------------------------------------------------------------------------------------------------------------------------------------------------------------------------------------------------------------------------------------|------------------------------------------------------------------------------------------------------------------------------------------|
| EPI_ISL_1266879, EPI_ISL_1266903 to 1266905, EPI_ISL_1266907 to 1266908, EPI_ISL_1266910 to 1266911, EPI_ISL_1266913 to 1266914, EPI_ISL_1266946, EPI_ISL_1266965, EPI_ISL_1266989, EPI_ISL_1266992, EPI_ISL_1267001 to 1267002, EPI_ISL_1267022, EPI_ISL_1267026, EPI_ISL_1267029, EPI_ISL_1267040, EPI_ISL_1267047, EPI_ISL_1267049, EPI_ISL_1267062, EPI_ISL_1267076 to 1267077, EPI_ISL_1267085, EPI_ISL_1267091 to 1267092, EPI_ISL_1267094 to 1267095, EPI_ISL_1267097, EPI_ISL_1267101, EPI_ISL_1267113, EPI_ISL_1335403, EPI_ISL_1335463 to 1335474, EPI_ISL_1335479, EPI_ISL_1335486 to 1335490, EPI_ISL_1335555, EPI_ISL_1335575 to 1335579, EPI_ISL_1335594, EPI_ISL_1335596 to 1335597, EPI_ISL_1335609, EPI_ISL_1335615 to 1335619, EPI_ISL_1335693 to 1335712, EPI_ISL_1335714 to 1335717, EPI_ISL_1335723 to 1335724, EPI_ISL_1335727, EPI_ISL_1335746, EPI_ISL_1335749                                                                                                                                                                                                                                                                                                                                                                                                                                                                                                                                                                                                                                                                                                                                                                                                                                                                                                                                                                                                                                                                                                                                                                                                                                                                                                                                                                                                                                                                                                                                                                                                                                                                                                                                                                                                                                                                                                                                                                                                                                                                                                                                                                                                                                                                                                                                                                                                                                                                                                                                                                                                                                                                                                                                                                                                                                                                                                                                                                                                                                                                                                                                                                                                                                                                                                                                                                                                                                                                                                                                                                                                                                                                                                                                                                                                                                                                                                                                                                                                                                                                                                                                                                                                                                                                                                                                                                                                                                                                                                                                                                                                                                                                                                                                                                                                                                                                                                                                                                                                                                                                                                                                                                                                                                                                                                                                                                                                                                                                                                                                                                                                                                                                                                       | see above                                                                                                                                                            | National Laboratory for Health, Environment and Food, OMM, Celje                                                                                                     | CISLD (Clinical Institute of Special Laboratory Diagnostics), University Children's Hospital, University Medical Center Ljubljana                                                                                                                                                                                                   | Ana Grom; Barbara Jenko Bizjan; Jernej Kova; Katarina Kozmos; Marko Pokorn; Maruša Debeljak; Robert Šket; Tadej Battelino; Tine Tesovnik |
| EPI_ISL_1111621 to 1111622, EPI_ISL_1111630, EPI_ISL_1111634, EPI_ISL_1111640, EPI_ISL_1111646, EPI_ISL_1111648, EPI_ISL_1111650, EPI_ISL_1111656, EPI_ISL_1111659, EPI_ISL_1111662, EPI_ISL_1111676, EPI_ISL_1111684, EPI_ISL_1111692 to 1111693, EPI_ISL_1111699, EPI_ISL_1111705 to 1111708, EPI_ISL_1111713, EPI_ISL_1111717 to 1111720, EPI_ISL_1111722, EPI_ISL_1111724, EPI_ISL_1111732 to 1111743, EPI_ISL_1111766, EPI_ISL_1111801 to 1111816, EPI_ISL_1111950 to 1112093, EPI_ISL_1112137, EPI_ISL_1112141 to 1112142, EPI_ISL_1112145, EPI_ISL_1112156 to 1112158, EPI_ISL_1112179 to 1112182, EPI_ISL_1112184, EPI_ISL_1112207 to 1112212, EPI_ISL_1240236, EPI_ISL_1240241 to 1240242, EPI_ISL_1240247, EPI_ISL_1240260, EPI_ISL_1240266, EPI_ISL_1240270 to 1240271, EPI_ISL_1240276 to 1240278, EPI_ISL_1240289, EPI_ISL_1240298 to 1240299, EPI_ISL_1240309 to 1240311, EPI_ISL_1240335, EPI_ISL_1240346, EPI_ISL_1240374 to 1240376, EPI_ISL_1240536 to 1240561, EPI_ISL_1240594 to 1240595, EPI_ISL_1240603, EPI_ISL_1240636 to 1240638, EPI_ISL_1266235, EPI_ISL_1266238, EPI_ISL_1266241, EPI_ISL_1266243, EPI_ISL_1266265, EPI_ISL_1266280, EPI_ISL_1266285, EPI_ISL_1266289, EPI_ISL_1266296, EPI_ISL_1266299, EPI_ISL_1266305 to 1266306, EPI_ISL_1266308 to 1266310, EPI_ISL_1266314, EPI_ISL_1266317 to 1266318, EPI_ISL_1266321, EPI_ISL_1266327 to 1266328, EPI_ISL_1266331, EPI_ISL_1266333, EPI_ISL_1266335, EPI_ISL_1266339, EPI_ISL_1266343 to 1266349, EPI_ISL_1266351, EPI_ISL_1266354, EPI_ISL_1266359 to 1266362, EPI_ISL_1266364, EPI_ISL_1266368 to 1266370 to 1266376, EPI_ISL_1266379 to 1266380, EPI_ISL_1266388 to 1266392, EPI_ISL_1266397 to 1266401, EPI_ISL_1266405 to 1266411, EPI_ISL_1266415 to 1266417, EPI_ISL_1266421 to 1266426, EPI_ISL_1266431, EPI_ISL_1266490, EPI_ISL_1266492 to 1266493, EPI_ISL_1266495, EPI_ISL_1266498 to 1266499, EPI_ISL_1266501 to 1266502, EPI_ISL_1266505, EPI_ISL_1266508, EPI_ISL_1266511, EPI_ISL_1266517, EPI_ISL_1266519, EPI_ISL_1266522 to 1266523, EPI_ISL_1266525 to 1266526, EPI_ISL_1266528 to 1266529, EPI_ISL_1266542 to 1266543, EPI_ISL_1266545 to 1266546, EPI_ISL_1266548 to 1266549, EPI_ISL_1266551, EPI_ISL_1266570, EPI_ISL_1266573, EPI_ISL_1266575 to 1266576, EPI_ISL_1266578 to 1266579, EPI_ISL_1266585 to 1266586, EPI_ISL_1266592, EPI_ISL_1266594 to 1266595, EPI_ISL_1266598, EPI_ISL_1266600 to 1266601, EPI_ISL_1266603, EPI_ISL_1266606 to 1266607, EPI_ISL_1266609 to 1266610, EPI_ISL_1266612, EPI_ISL_1266614 to 1266615, EPI_ISL_1266617 to 1266618, EPI_ISL_1266619 to 1266620, EPI_ISL_1266622 to 1266623, EPI_ISL_1266625 to 1266627, EPI_ISL_1266629 to 1266630, EPI_ISL_1266632 to 1266633, EPI_ISL_1266635 to 1266636, EPI_ISL_1266638 to 1266639, EPI_ISL_1266641 to 1266642, EPI_ISL_1266644 to 1266645, EPI_ISL_1266647 to 1266648, EPI_ISL_1266650 to 1266651, EPI_ISL_1266653 to 1266654, EPI_ISL_1266656 to 1266657, EPI_ISL_1266660 to 1266661, EPI_ISL_1266663 to 1266664, EPI_ISL_1266666 to 1266667, EPI_ISL_1266668 to 1266669, EPI_ISL_1266671 to 1266672, EPI_ISL_1266674 to 1266675, EPI_ISL_1266677 to 1266678, EPI_ISL_1266681 to 1266682, EPI_ISL_1266684 to 1266685, EPI_ISL_1266687 to 1266688, EPI_ISL_1266689 to 1266690, EPI_ISL_1266692 to 1266693, EPI_ISL_1266695 to 1266696, EPI_ISL_1266698 to 1266699, EPI_ISL_1266701 to 1266702, EPI_ISL_1266704 to 1266705, EPI_ISL_1266707 to 1266708, EPI_ISL_1266713 to 1266714, EPI_ISL_1266716 to 1266717, EPI_ISL_1266719 to 1266720, EPI_ISL_1266722 to 1266723, EPI_ISL_1266725 to 1266727, EPI_ISL_1266729 to 1266730, EPI_ISL_1266732 to 1266733, EPI_ISL_1266735 to 1266736, EPI_ISL_1266738 to 1266739, EPI_ISL_1266742 to 1266743, EPI_ISL_1266747 to 1266748, EPI_ISL_1266751 to 1266752, EPI_ISL_1266754 to 1266755, EPI_ISL_1266757 to 1266758, EPI_ISL_1266761 to 1266762, EPI_ISL_1266764 to 1266765, EPI_ISL_1266767 to 1266768, EPI_ISL_1266770 to 1266771, EPI_ISL_1266773 to 1266774, EPI_ISL_1266776 to 1266777, EPI_ISL_1266780, EPI_ISL_1266782 to 1266783, EPI_ISL_1266785 to 1266786, EPI_ISL_1266788 to 1266789, EPI_ISL_1266791 to 1266792, EPI_ISL_1266794 to 1266795, EPI_ISL_1266797 to 1266798, EPI_ISL_1266800, EPI_ISL_1266811 to 1266812, EPI_ISL_1266814 to 1266815, EPI_ISL_1266817 to 1266818, EPI_ISL_1266820 to 1266822, EPI_ISL_1266823 to 1266824, EPI_ISL_1266826 to 1266827, EPI_ISL_1266828 to 1266829, EPI_ISL_1266831 to 1266832, EPI_ISL_1266834 to 1266835, EPI_ISL_1266837 to 1266838, EPI_ISL_1266840 to 1266841, EPI_ISL_1266843 to 1266844, EPI_ISL_1266845 to 1266846, EPI_ISL_1266848 to 1266849, EPI_ISL_1266850 to 1266851, EPI_ISL_1266852 to 1266853, EPI_ISL_1266854 to 1266855, EPI_ISL_1266857 to 1266858, EPI_ISL_1266860 to 1266861, EPI_ISL_1266863 to 1266865, EPI_ISL_1266867 to 1266868, EPI_ISL_1266870 to 1266871, EPI_ISL_1266880, EPI_ISL_1266882 to 1266883, EPI_ISL_1266885 to 1266886, EPI_ISL_1266888 to 1266889, EPI_ISL_1266891 to 1266892, EPI_ISL_1266894 to 1266895, EPI_ISL_1266900, EPI_ISL_1266902 to 1266903, EPI_ISL_1266924 to 1266926, EPI_ISL_1266928 to 1266929, EPI_ISL_1266931 to 1266932, EPI_ISL_1266934 to 1266935, EPI_ISL_1266949, EPI_ISL_1266951 to 1266952, EPI_ISL_1266954 to 1266955, EPI_ISL_1266958 to 1266959, EPI_ISL_1266961 to 1266962, EPI_ISL_1266964 to 1266965, EPI_ISL_1266968 to 1266969, EPI_ISL_1266977, EPI_ISL_1266979 to 1266980, EPI_ISL_1266982 to 1266983, EPI_ISL_1266985 to 1266986, EPI_ISL_1266988, EPI_ISL_1266990, EPI_ISL_1266992 to 1266993, EPI_ISL_1266994 to 1266996, EPI_ISL_1266998 to 1266999, EPI_ISL_1267004, EPI_ISL_1267038, EPI_ISL_1267041, EPI_ISL_1267043 to 1267044, EPI_ISL_1267046, EPI_ISL_1267050, EPI_ISL_1267052 to 1267053, EPI_ISL_1267055 to 1267057, EPI_ISL_1267060, EPI_ISL_1267063, EPI_ISL_1267065 to 1267066, EPI_ISL_1267068, EPI_ISL_1267079 to 1267080, EPI_ISL_1267082 to 1267083, EPI_ISL_1267086 to 1267089, EPI_ISL_1267098, EPI_ISL_1267103, EPI_ISL_1267107, EPI_ISL_1267109, EPI_ISL_1267116, EPI_ISL_1335404 to 1335405, EPI_ISL_1335427 to 1335448, EPI_ISL_1335459 to 1335462, EPI_ISL_1335534 to 1335542, EPI_ISL_1335584 to 1335590, EPI_ISL_1335592 to 1335593, EPI_ISL_1335603 to 1335608, EPI_ISL_1335611 to 1335613, EPI_ISL_1335613 to 1335613, EPI_ISL_1335620, EPI_ISL_1335632 to 1335673, EPI_ISL_1335691 to 1335692, EPI_ISL_1335713, EPI_ISL_1335718, EPI_ISL_1335725 to 1335726, EPI_ISL_1335728 to 1335729, EPI_ISL_1335734 to 1335737, EPI_ISL_1335747, EPI_ISL_1335753 to 1335754, EPI_ISL_1336218 | see above                                                                                                                                                            | National Laboratory for Health, Environment and Food, OMM, Koper                                                                                                     | CISLD (Clinical Institute of Special Laboratory Diagnostics), University Children's Hospital, University Medical Center Ljubljana                                                                                                                                                                                                   | Ana Grom; Barbara Jenko Bizjan; Jernej Kova; Katarina Kozmos; Marko Pokorn; Maruša Debeljak; Robert Šket; Tadej Battelino; Tine Tesovnik |
| EPI_ISL_1111611, EPI_ISL_1111632, EPI_ISL_1111635, EPI_ISL_1111637 to 1111638, EPI_ISL_1111641, EPI_ISL_1111644, EPI_ISL_1111666 to 1111670, EPI_ISL_1111672, EPI_ISL_1111679, EPI_ISL_1111691, EPI_ISL_1111695, EPI_ISL_1111700 to 1111701, EPI_ISL_1111716, EPI_ISL_1111726, EPI_ISL_1111728 to 1111730, EPI_ISL_1111749, EPI_ISL_1111756 to 1111763, EPI_ISL_1111771 to 1111780, EPI_ISL_1111795 to 1111796, EPI_ISL_1111921 to 1111940, EPI_ISL_1112146, EPI_ISL_1112146 to 1112146, EPI_ISL_1240224, EPI_ISL_1240234 to 1240234, EPI_ISL_1240240, EPI_ISL_1240246, EPI_ISL_1240248, EPI_ISL_1240250 to 1240251, EPI_ISL_1240257 to 1240258, EPI_ISL_1240263, EPI_ISL_1240281, EPI_ISL_1240283, EPI_ISL_1240285, EPI_ISL_1240288, EPI_ISL_1240295, EPI_ISL_1240312, EPI_ISL_1240327, EPI_ISL_1240339 to 1240344, EPI_ISL_1240364, EPI_ISL_1240478 to 1240489, EPI_ISL_1240599 to 1240600, EPI_ISL_1240630 to 1240632, EPI_ISL_1266228, EPI_ISL_1266232 to 1266233, EPI_ISL_1266237, EPI_ISL_1266244, EPI_ISL_1266246, EPI_ISL_1266249 to 1266250, EPI_ISL_1266253, EPI_ISL_1266256, EPI_ISL_1266258, EPI_ISL_1266260, EPI_ISL_1266263, EPI_ISL_1266266, EPI_ISL_1266270, EPI_ISL_1266272 to 1266273, EPI_ISL_1266276 to 1266277, EPI_ISL_1266279, EPI_ISL_1266281 to 1266284, EPI_ISL_1266286 to 1266288, EPI_ISL_1266291 to 1266292, EPI_ISL_1266294 to 1266295, EPI_ISL_1266300, EPI_ISL_1266311 to 1266313, EPI_ISL_1266315, EPI_ISL_1266319, EPI_ISL_1266323, EPI_ISL_1266325, EPI_ISL_1266329, EPI_ISL_1266332, EPI_ISL_1266334 to 1266342, EPI_ISL_1266353, EPI_ISL_1266356, EPI_ISL_1266356 to 1266356, EPI_ISL_1266358, EPI_ISL_1266363, EPI_ISL_1266367, EPI_ISL_1266393, EPI_ISL_1266419 to 1266420, EPI_ISL_1266429, EPI_ISL_1266437 to 1266439, EPI_ISL_1266444, EPI_ISL_1266447, EPI_ISL_1266463, EPI_ISL_1266473, EPI_ISL_1266478, EPI_ISL_1266481, EPI_ISL_1266483 to 1266484, EPI_ISL_1266486 to 1266487, EPI_ISL_1266496, EPI_ISL_1266504, EPI_ISL_1266507, EPI_ISL_1266510, EPI_ISL_1266513 to 1266514, EPI_ISL_1266516, EPI_ISL_1266520, EPI_ISL_1266531 to 1266532, EPI_ISL_1266535 to 1266535, EPI_ISL_1266537, EPI_ISL_1266620 to 1266621, EPI_ISL_1266623 to 1266624, EPI_ISL_1266626 to 1266627, EPI_ISL_1266629 to 1266630, EPI_ISL_1266632 to 1266633, EPI_ISL_1266635 to 1266636, EPI_ISL_1266638 to 1266639, EPI_ISL_1266641 to 1266642, EPI_ISL_1266644 to 1266645, EPI_ISL_1266647 to 1266648, EPI_ISL_1266644 to 1266645, EPI_ISL_1266647 to 1266648, EPI_ISL_1266650, EPI_ISL_1266657, EPI_ISL_1266659, EPI_ISL_1266694 to 1266695, EPI_ISL_1266697 to 1266698, EPI_ISL_1267005, EPI_ISL_1267017, EPI_ISL_1267059, EPI_ISL_1267069, EPI_ISL_1267071, EPI_ISL_1267074, EPI_ISL_1267100, EPI_ISL_1267106, EPI_ISL_1267110, EPI_ISL_1335402, EPI_ISL_1335410, EPI_ISL_1335449 to 1335450, EPI_ISL_1335458 to 1335459, EPI_ISL_1335485, EPI_ISL_1335492 to 1335506, EPI_ISL_1335580, EPI_ISL_1335582 to 1335583, EPI_ISL_1335591, EPI_ISL_1335598 to 1335600, EPI_ISL_1335614, EPI_ISL_1335621 to 1335623, EPI_ISL_1335719 to 1335722, EPI_ISL_1335730, EPI_ISL_1335750 to 1335751                                                                                                                                                                                                                                                                                                                                                                                                                                                                                                                                                                                                                                                                                                                                                                                                                                                                                                                                                                                                                                                                                                                                                                                                                                                                                                                                                                                                                                                                                                                                                                                                                                                                                                                                                                                                                                                                                                                                                                                                                                                                                                                                                                                                                                                                                                                                                                                                                                                                                                                                                                                                                                                                                                                                                                                                                                                                                                                                                                                                                                                                                                                                                                                                                                                                                                                                                                                                                                                                           | see above                                                                                                                                                            | National Laboratory for Health, Environment and Food, OMM, Kranj                                                                                                     | CISLD (Clinical Institute of Special Laboratory Diagnostics), University Children's Hospital, University Medical Center Ljubljana                                                                                                                                                                                                   | Ana Grom; Barbara Jenko Bizjan; Jernej Kova; Katarina Kozmos; Marko Pokorn; Maruša Debeljak; Robert Šket; Tadej Battelino; Tine Tesovnik |
| EPI_ISL_1111606, EPI_ISL_1111609 to 1111610, EPI_ISL_1111612, EPI_ISL_1111614, EPI_ISL_1111623, EPI_ISL_1111628, EPI_ISL_1111636, EPI_ISL_1111639, EPI_ISL_1111647, EPI_ISL_1111652, EPI_ISL_1111655, EPI_ISL_1111658, EPI_ISL_1111663, EPI_ISL_1111674, EPI_ISL_1111677 to 1111678, EPI_ISL_1111683, EPI_ISL_1111694, EPI_ISL_1111704, EPI_ISL_1111712, EPI_ISL_1111721, EPI_ISL_1111721 to 1111721, EPI_ISL_1111731, EPI_ISL_1111744 to 1111748, EPI_ISL_1111755, EPI_ISL_1111781 to 1111784, EPI_ISL_1111829, EPI_ISL_1112138 to 1112139, EPI_ISL_1112144, EPI_ISL_1112147, EPI_ISL_1112149, EPI_ISL_1112151, EPI_ISL_1112154, EPI_ISL_1112160, EPI_ISL_1112162 to 1112178, EPI_ISL_1112185 to 1112204, EPI_ISL_1240226, EPI_ISL_1240226, EPI_ISL_1240243, EPI_ISL_1240245, EPI_ISL_1240254, EPI_ISL_1240262, EPI_ISL_1240272, EPI_ISL_1240274, EPI_ISL_1240287, EPI_ISL_1240290, EPI_ISL_1240300, EPI_ISL_1240302 to 1240304, EPI_ISL_1240313 to 1240326, EPI_ISL_1240347 to 1240363, EPI_ISL_1240380 to 1240477, EPI_ISL_1240597 to 1240598, EPI_ISL_1240601, EPI_ISL_1240606 to 1240611, EPI_ISL_1240613 to 1240614, EPI_ISL_1240616 to 1240617, EPI_ISL_1240616 to 1240617, EPI_ISL_1266229 to 1266230, EPI_ISL_1266234, EPI_ISL_1266236, EPI_ISL_1266242, EPI_ISL_1266245, EPI_ISL_1266252, EPI_ISL_1266254 to 1266255, EPI_ISL_1266256, EPI_ISL_1266274, EPI_ISL_1266278, EPI_ISL_1266290, EPI_ISL_1266293, EPI_ISL_1266303, EPI_ISL_1266330, EPI_ISL_1266336 to 1266337, EPI_ISL_1266352, EPI_ISL_1266355, EPI_ISL_1266358, EPI_ISL_1266381, EPI_ISL_1266428, EPI_ISL_1266444, EPI_ISL_1266447, EPI_ISL_1266457, EPI_ISL_1266460 to 1266460, EPI_ISL_1266470, EPI_ISL_1266472, EPI_ISL_1266477, EPI_ISL_1266779, EPI_ISL_1266916 to 1266917, EPI_ISL_1266919, EPI_ISL_1266948, EPI_ISL_1267007 to 1267014, EPI_ISL_1267013 to 1267014, EPI_ISL_1267016, EPI_ISL_1267020, EPI_ISL_1267025, EPI_ISL_1267028, EPI_ISL_1267031 to 1267032, EPI_ISL_1267034 to 1267035, EPI_ISL_1267037, EPI_ISL_1267112, EPI_ISL_1267115, EPI_ISL_1267118, EPI_ISL_1335383 to 1335389, EPI_ISL_1335391 to 1335401, EPI_ISL_1335406, EPI_ISL_1335451 to 1335457, EPI_ISL_1335475 to 1335478, EPI_ISL_1335481 to 1335484, EPI_ISL_1335519 to 1335533, EPI_ISL_1335543 to 1335554, EPI_ISL_1335581, EPI_ISL_1335610, EPI_ISL_1335629 to 1335631, EPI_ISL_1335674 to 1335690, EPI_ISL_1335731 to 1335733, EPI_ISL_1335738 to 1335744, EPI_ISL_1335752, EPI_ISL_1335755 to 1335756, EPI_ISL_1336182 to 1336184, EPI_ISL_1336187, EPI_ISL_1336189 to 1336191, EPI_ISL_1336193 to 1336217                                                                                                                                                                                                                                                                                                                                                                                                                                                                                                                                                                                                                                                                                                                                                                                                                                                                                                                                                                                                                                                                                                                                                                                                                                                                                                                                                                                                                                                                                                                                                                                                                                                                                                                                                                                                                                                                                                                                                                                                                                                                                                                                                                                                                                                                                                                                                                                                                                                                                                                                                                                                                                                                                                                                                                                                                                                                                                                                                                                                                                                                                                                                                                                                                                                                                                                                                                                                                                                                                                                                                                                                                                                                                                                                                                                                                                                                                                                                                                                                                     | see above                                                                                                                                                            | National Laboratory for Health, Environment and Food, OMM, Maribor                                                                                                   | CISLD (Clinical Institute of Special Laboratory Diagnostics), University Children's Hospital, University Medical Center Ljubljana                                                                                                                                                                                                   | Ana Grom; Barbara Jenko Bizjan; Jernej Kova; Katarina Kozmos; Marko Pokorn; Maruša Debeljak; Robert Šket; Tadej Battelino; Tine Tesovnik |
| EPI_ISL_1111613, EPI_ISL_1111620, EPI_ISL_1111627, EPI_ISL_1111642 to 1111643, EPI_ISL_1111645, EPI_ISL_1111649, EPI_ISL_1111649, EPI_ISL_1111653, EPI_ISL_1111660 to 1111661, EPI_ISL_1111664, EPI_ISL_1111682, EPI_ISL_1111687 to 1111689, EPI_ISL_1111709, EPI_ISL_1111711, EPI_ISL_1111711, EPI_ISL_1111751 to 1111754, EPI_ISL_1111767 to 1111776, EPI_ISL_1111817 to 1111818, EPI_ISL_1112094 to 1112136, EPI_ISL_1112140, EPI_ISL_1112143, EPI_ISL_1112159, EPI_ISL_1112183, EPI_ISL_1240228, EPI_ISL_1240232, EPI_ISL_1240237, EPI_ISL_1240244, EPI_ISL_1240252, EPI_ISL_1240259, EPI_ISL_1240261, EPI_ISL_1240269, EPI_ISL_1240279, EPI_ISL_1240282, EPI_ISL_1240293 to 1240294, EPI_ISL_1240297, EPI_ISL_1240301, EPI_ISL_1240336 to 1240338, EPI_ISL_1240377 to 1240379, EPI_ISL_1240562 to 1240593, EPI_ISL_1266304, EPI_ISL_1266307, EPI_ISL_1266381 to 1266385, EPI_ISL_1266412 to 1266436, EPI_ISL_1266441 to 1266444, EPI_ISL_1266462, EPI_ISL_1266480, EPI_ISL_1266801, EPI_ISL_1266803, EPI_ISL_1266805 to 1266806, EPI_ISL_1266824 to 1266825, EPI_ISL_1266827, EPI_ISL_1266871, EPI_ISL_1266897 to 1266898, EPI_ISL_1266937 to 1266938, EPI_ISL_1266940, EPI_ISL_1267104, EPI_ISL_1335411 to 1335426, EPI_ISL_1335458, EPI_ISL_1335480, EPI_ISL_1335491, EPI_ISL_1335507 to 1335518, EPI_ISL_1335556, EPI_ISL_1335595, EPI_ISL_1335601 to 1335602, EPI_ISL_1335624 to 1335628, EPI_ISL_1335748, EPI_ISL_1336185 to 1336186, EPI_ISL_1336188, EPI_ISL_1336192, EPI_ISL_1336219 to 1336235                                                                                                                                                                                                                                                                                                                                                                                                                                                                                                                                                                                                                                                                                                                                                                                                                                                                                                                                                                                                                                                                                                                                                                                                                                                                                                                                                                                                                                                                                                                                                                                                                                                                                                                                                                                                                                                                                                                                                                                                                                                                                                                                                                                                                                                                                                                                                                                                                                                                                                                                                                                                                                                                                                                                                                                                                                                                                                                                                                                                                                                                                                                                                                                                                                                                                                                                                                                                                                                                                                                                                                                                                                                                                                                                                                                                                                                                                                                                                                                                                                                                                                                                                                                                                                                                                                                                                                                                                                                                                                                                                                                                                                                                                                                                                                                                                                                                                                                                                                                                                                                                                 | see above                                                                                                                                                            | National Laboratory for Health, Environment and Food, OMM, Novo mesto                                                                                                | CISLD (Clinical Institute of Special Laboratory Diagnostics), University Children's Hospital, University Medical Center Ljubljana                                                                                                                                                                                                   | Ana Grom; Barbara Jenko Bizjan; Jernej Kova; Katarina Kozmos; Marko Pokorn; Maruša Debeljak; Robert Šket; Tadej Battelino; Tine Tesovnik |
| EPI_ISL_1324853                                                                                                                                                                                                                                                                                                                                                                                                                                                                                                                                                                                                                                                                                                                                                                                                                                                                                                                                                                                                                                                                                                                                                                                                                                                                                                                                                                                                                                                                                                                                                                                                                                                                                                                                                                                                                                                                                                                                                                                                                                                                                                                                                                                                                                                                                                                                                                                                                                                                                                                                                                                                                                                                                                                                                                                                                                                                                                                                                                                                                                                                                                                                                                                                                                                                                                                                                                                                                                                                                                                                                                                                                                                                                                                                                                                                                                                                                                                                                                                                                                                                                                                                                                                                                                                                                                                                                                                                                                                                                                                                                                                                                                                                                                                                                                                                                                                                                                                                                                                                                                                                                                                                                                                                                                                                                                                                                                                                                                                                                                                                                                                                                                                                                                                                                                                                                                                                                                                                                                                                                                                                                                                                                                                                                                                                                                                                                                                                                                                                                                                                                                              | National Medical Research Center for Obstetrics, Gynecology and Perinatology named after Academician V.I.Kulakov of the Ministry of Healthcare of Russian Federation | National Medical Research Center for Obstetrics, Gynecology and Perinatology named after Academician V.I.Kulakov of the Ministry of Healthcare of Russian Federation | Andrey Donnikov; Andrey Goltsov; Denis Rebrikov; Dmitry Abramov; Dmitry Korostin; Dmitry Trofimov; Jekaterina Shubina; Tatiana Priputnevich; Yegor Botsmanov                                                                                                                                                                        |                                                                                                                                          |
| EPI_ISL_1257898                                                                                                                                                                                                                                                                                                                                                                                                                                                                                                                                                                                                                                                                                                                                                                                                                                                                                                                                                                                                                                                                                                                                                                                                                                                                                                                                                                                                                                                                                                                                                                                                                                                                                                                                                                                                                                                                                                                                                                                                                                                                                                                                                                                                                                                                                                                                                                                                                                                                                                                                                                                                                                                                                                                                                                                                                                                                                                                                                                                                                                                                                                                                                                                                                                                                                                                                                                                                                                                                                                                                                                                                                                                                                                                                                                                                                                                                                                                                                                                                                                                                                                                                                                                                                                                                                                                                                                                                                                                                                                                                                                                                                                                                                                                                                                                                                                                                                                                                                                                                                                                                                                                                                                                                                                                                                                                                                                                                                                                                                                                                                                                                                                                                                                                                                                                                                                                                                                                                                                                                                                                                                                                                                                                                                                                                                                                                                                                                                                                                                                                                                                              | National Medicines Institute                                                                                                                                         | DNA Sequencing and Synthesis Facility (oligo.p), Institute of Biochemistry and Biophysics PAS                                                                        | Baraniak Anna; Gawor Jan                                                                                                                                                                                                                                                                                                            |                                                                                                                                          |
| EPI_ISL_1191782 to 1191820, EPI_ISL_1191822 to 1192075, EPI_ISL_1195295 to 1195301                                                                                                                                                                                                                                                                                                                                                                                                                                                                                                                                                                                                                                                                                                                                                                                                                                                                                                                                                                                                                                                                                                                                                                                                                                                                                                                                                                                                                                                                                                                                                                                                                                                                                                                                                                                                                                                                                                                                                                                                                                                                                                                                                                                                                                                                                                                                                                                                                                                                                                                                                                                                                                                                                                                                                                                                                                                                                                                                                                                                                                                                                                                                                                                                                                                                                                                                                                                                                                                                                                                                                                                                                                                                                                                                                                                                                                                                                                                                                                                                                                                                                                                                                                                                                                                                                                                                                                                                                                                                                                                                                                                                                                                                                                                                                                                                                                                                                                                                                                                                                                                                                                                                                                                                                                                                                                                                                                                                                                                                                                                                                                                                                                                                                                                                                                                                                                                                                                                                                                                                                                                                                                                                                                                                                                                                                                                                                                                                                                                                                                           | National Microbiology Reference Laboratory                                                                                                                           | Quadram Institute Bioscience                                                                                                                                         | Agnes Juru; Ana-Victoria Gutierrez; Andrew J. Page; Andrew Tarupiwa; Charles Nyagupe; David Baker; Faustinos T Takawira; Gaetan Thilliez; Gemma Kay; Hlanai Gumbo; Justin O'Grady; Kenneth K Maeka; Leonardo de Oliveira Martins; Muchaneta Mugabe; Raiva Simbi; Robert Kingsley; Sekesai Zinyora; Tapfumaneni Mashe; Thanh Le Viet |                                                                                                                                          |
| EPI_ISL_1296654                                                                                                                                                                                                                                                                                                                                                                                                                                                                                                                                                                                                                                                                                                                                                                                                                                                                                                                                                                                                                                                                                                                                                                                                                                                                                                                                                                                                                                                                                                                                                                                                                                                                                                                                                                                                                                                                                                                                                                                                                                                                                                                                                                                                                                                                                                                                                                                                                                                                                                                                                                                                                                                                                                                                                                                                                                                                                                                                                                                                                                                                                                                                                                                                                                                                                                                                                                                                                                                                                                                                                                                                                                                                                                                                                                                                                                                                                                                                                                                                                                                                                                                                                                                                                                                                                                                                                                                                                                                                                                                                                                                                                                                                                                                                                                                                                                                                                                                                                                                                                                                                                                                                                                                                                                                                                                                                                                                                                                                                                                                                                                                                                                                                                                                                                                                                                                                                                                                                                                                                                                                                                                                                                                                                                                                                                                                                                                                                                                                                                                                                                                              | National Platform for UMONS/Jolimont                                                                                                                                 | National Platform for UMONS/Jolimont                                                                                                                                 | François Dufrasne; Gautier Detry; Guillaume Bayon-Vicente; Ruddy Wattiez                                                                                                                                                                                                                                                            |                                                                                                                                          |
| EPI_ISL_1296677, EPI_ISL_1296680, EPI_ISL_1296682, EPI_ISL_1298491 to 1298492, EPI_ISL_1324467 to 1324477, EPI_ISL_1365840, EPI_ISL_1366070, EPI_ISL_1366502, EPI_ISL_1366504, EPI_ISL_1366507, EPI_ISL_1366513 to 1366520, EPI_ISL_1366575 to 1366576, EPI_ISL_1366610 to 1366611, EPI_ISL_136661                                                                                                                                                                                                                                                                                                                                                                                                                                                                                                                                                                                                                                                                                                                                                                                                                                                                                                                                                                                                                                                                                                                                                                                                                                                                                                                                                                                                                                                                                                                                                                                                                                                                                                                                                                                                                                                                                                                                                                                                                                                                                                                                                                                                                                                                                                                                                                                                                                                                                                                                                                                                                                                                                                                                                                                                                                                                                                                                                                                                                                                                                                                                                                                                                                                                                                                                                                                                                                                                                                                                                                                                                                                                                                                                                                                                                                                                                                                                                                                                                                                                                                                                                                                                                                                                                                                                                                                                                                                                                                                                                                                                                                                                                                                                                                                                                                                                                                                                                                                                                                                                                                                                                                                                                                                                                                                                                                                                                                                                                                                                                                                                                                                                                                                                                                                                                                                                                                                                                                                                                                                                                                                                                                                                                                                                                           |                                                                                                                                                                      |                                                                                                                                                                      |                                                                                                                                                                                                                                                                                                                                     |                                                                                                                                          |

|                                                                                                                                                                                                                                                                                                                                                                                                                                                                                                                                                                                                                                                                                                                                                                                                                                                                                                                                                                                                                                                                                                                                                                                                                |                                                                               |                                                                                           |                                                                                                                                                                                                                                                                                                                                                                                                                                                                                                                                                                                                                                                                                                               |
|----------------------------------------------------------------------------------------------------------------------------------------------------------------------------------------------------------------------------------------------------------------------------------------------------------------------------------------------------------------------------------------------------------------------------------------------------------------------------------------------------------------------------------------------------------------------------------------------------------------------------------------------------------------------------------------------------------------------------------------------------------------------------------------------------------------------------------------------------------------------------------------------------------------------------------------------------------------------------------------------------------------------------------------------------------------------------------------------------------------------------------------------------------------------------------------------------------------|-------------------------------------------------------------------------------|-------------------------------------------------------------------------------------------|---------------------------------------------------------------------------------------------------------------------------------------------------------------------------------------------------------------------------------------------------------------------------------------------------------------------------------------------------------------------------------------------------------------------------------------------------------------------------------------------------------------------------------------------------------------------------------------------------------------------------------------------------------------------------------------------------------------|
| see above                                                                                                                                                                                                                                                                                                                                                                                                                                                                                                                                                                                                                                                                                                                                                                                                                                                                                                                                                                                                                                                                                                                                                                                                      | National Public Health Laboratory, National Centre for Infectious Diseases    | National Public Health Laboratory, National Centre for Infectious Diseases                | Grace Jie Yin Ngan; Lin Cui; Raymond Tzer Pin Lin; Royce Ang; Tze Minn Mak; Zhenyang Zhou                                                                                                                                                                                                                                                                                                                                                                                                                                                                                                                                                                                                                     |
| EPI_ISL_1122419 to 1122421                                                                                                                                                                                                                                                                                                                                                                                                                                                                                                                                                                                                                                                                                                                                                                                                                                                                                                                                                                                                                                                                                                                                                                                     | National Public Health Laboratory, National Centre for Infectious Diseases    | National Virology Reference Laboratory                                                    | Lin Cui; Raymond Tzer Pin Lin; Surita Taib; Tze Minn Mak; Zainun Zaini; Zhenyang Zhou                                                                                                                                                                                                                                                                                                                                                                                                                                                                                                                                                                                                                         |
| EPI_ISL_1314209 to 1314232                                                                                                                                                                                                                                                                                                                                                                                                                                                                                                                                                                                                                                                                                                                                                                                                                                                                                                                                                                                                                                                                                                                                                                                     | National Public Health Surveillance Laboratory                                | Institute of Biotechnology, Life Sciences Center, Vilnius University                      | Albertas Timinskas; Alma Gedvilaitė; Danguole Ziogiene; Emilija Vasiluonaite; Milda Norkiene                                                                                                                                                                                                                                                                                                                                                                                                                                                                                                                                                                                                                  |
| EPI_ISL_1073019                                                                                                                                                                                                                                                                                                                                                                                                                                                                                                                                                                                                                                                                                                                                                                                                                                                                                                                                                                                                                                                                                                                                                                                                | National Public Health Surveillance Laboratory                                | MB1554                                                                                    | Ana Steponkiene; B.B. Oude Munnink; DVM PhD; Danas Bakša; Lukas Žemaitis; M.P.G. Koopmans; Svajn Muralyt                                                                                                                                                                                                                                                                                                                                                                                                                                                                                                                                                                                                      |
| EPI_ISL_1273391 to 1273408                                                                                                                                                                                                                                                                                                                                                                                                                                                                                                                                                                                                                                                                                                                                                                                                                                                                                                                                                                                                                                                                                                                                                                                     | National Reference Laboratory - Ministry of Health Maseru Lesotho             | National Institute for Communicable Diseases of the National Health Laboratory Service    | Amoako DG; Banda R; Bhiman JN; Gorova V; Ismail A; Mahlangu B; Mathabo M; Mohale T; Mooko M; Ntuli N; Scheepers C                                                                                                                                                                                                                                                                                                                                                                                                                                                                                                                                                                                             |
| EPI_ISL_1082297                                                                                                                                                                                                                                                                                                                                                                                                                                                                                                                                                                                                                                                                                                                                                                                                                                                                                                                                                                                                                                                                                                                                                                                                | National Reference Laboratory, Nigeria Centre for Disease Control.            | National Reference Laboratory, Nigeria Centre for Disease Control, Gaduwa, Abuja, Nigeria | Anthony Ahumibe; Catherine Okoi; Chimaobi Chukwu; Dr Chikwe Ihekweazu; Dr Ndodo Nnaemeka; Dr Omoare Adesuyi; Grace Esebanmen; Naidoo Dhamari; Nwando Mba; Olusola Anuoluwapo Akanbi                                                                                                                                                                                                                                                                                                                                                                                                                                                                                                                           |
| EPI_ISL_1073135                                                                                                                                                                                                                                                                                                                                                                                                                                                                                                                                                                                                                                                                                                                                                                                                                                                                                                                                                                                                                                                                                                                                                                                                | National Reference Laboratory, Nigeria Centre for Disease Control.            | National Reference Laboratory, Nigeria Centre for Disease Control, Gaduwa, Abuja, Nigeria | Anthony Ahumibe; Chimaobi Chukwu; Dr Chikwe Ihekweazu; Dr Ndodo Nnaemeka; Dr Omoare Adesuyi; Esebanmen Grace; Naidoo Dhamari; Nwando Mba; Olusola Anuoluwapo Akanbi                                                                                                                                                                                                                                                                                                                                                                                                                                                                                                                                           |
| EPI_ISL_1001109 to 1001264, EPI_ISL_1007584, EPI_ISL_1055038 to 1055190, EPI_ISL_1055809 to 1055810, EPI_ISL_1055812 to 1055814, EPI_ISL_1092362 to 1092457, EPI_ISL_1092459 to 1092724, EPI_ISL_1092726 to 1093051, EPI_ISL_1096215 to 1096227, EPI_ISL_1117701 to 1117773, EPI_ISL_1118872 to 1118873, EPI_ISL_1118927, EPI_ISL_1132368 to 1132642, EPI_ISL_1132814 to 1132817, EPI_ISL_1163986 to 1164178, EPI_ISL_1166534 to 1166538, EPI_ISL_1180280 to 1180668, EPI_ISL_1181882 to 1181886, EPI_ISL_1191146 to 1191461, EPI_ISL_1193445, EPI_ISL_1193447 to 1193448, EPI_ISL_1193450 to 1193451, EPI_ISL_1193453, EPI_ISL_1193455 to 1193456, EPI_ISL_1193458 to 1193459, EPI_ISL_1193461 to 1193462, EPI_ISL_1196484 to 1196659, EPI_ISL_1196800 to 1196862, EPI_ISL_1196848 to 1198851, EPI_ISL_1252051 to 1252344, EPI_ISL_1252893 to 1252903, EPI_ISL_1299325 to 1299453, EPI_ISL_1301960 to 1301978, EPI_ISL_1323690 to 1323845, EPI_ISL_1336270 to 1336281, EPI_ISL_1357707 to 1357776, EPI_ISL_1357860 to 1358202, EPI_ISL_1358219 to 1358284, EPI_ISL_1364476 to 1364487                                                                                                                         |                                                                               |                                                                                           |                                                                                                                                                                                                                                                                                                                                                                                                                                                                                                                                                                                                                                                                                                               |
| see above                                                                                                                                                                                                                                                                                                                                                                                                                                                                                                                                                                                                                                                                                                                                                                                                                                                                                                                                                                                                                                                                                                                                                                                                      | National Virus Reference Laboratory                                           | National Virus Reference Laboratory                                                       | Calum Walsh; Charlene Bennet; Charlene Bennett; Cillian F De Gascun; Fiona Crispie; Gabriel Gonzalez; Guerrino Macori; Jonathan Dean; Michael Carr; Paul Cotter; Seamus Fanning; Zoe Yandle                                                                                                                                                                                                                                                                                                                                                                                                                                                                                                                   |
| EPI_ISL_1121057 to 1121141, EPI_ISL_1169912 to 1169918, EPI_ISL_1266114, EPI_ISL_1266116 to 1266117, EPI_ISL_1266119 to 1266120, EPI_ISL_1266122 to 1266123, EPI_ISL_1266125 to 1266126, EPI_ISL_1266128 to 1266129, EPI_ISL_1266131, EPI_ISL_1279891 to 1279902, EPI_ISL_1291542 to 1291548, EPI_ISL_1315076 to 1315091, EPI_ISL_1340040 to 1340054                                                                                                                                                                                                                                                                                                                                                                                                                                                                                                                                                                                                                                                                                                                                                                                                                                                           |                                                                               |                                                                                           |                                                                                                                                                                                                                                                                                                                                                                                                                                                                                                                                                                                                                                                                                                               |
| see above                                                                                                                                                                                                                                                                                                                                                                                                                                                                                                                                                                                                                                                                                                                                                                                                                                                                                                                                                                                                                                                                                                                                                                                                      | Nebraska Public Health Laboratory                                             | NPHL COVID-19 Response Team                                                               | NPHL COVID-19 Response Team                                                                                                                                                                                                                                                                                                                                                                                                                                                                                                                                                                                                                                                                                   |
| EPI_ISL_1234474 to 1234497                                                                                                                                                                                                                                                                                                                                                                                                                                                                                                                                                                                                                                                                                                                                                                                                                                                                                                                                                                                                                                                                                                                                                                                     | Nebraska Public Health Laboratory                                             | UNMC COVID-19 Response Team                                                               | UNMC COVID-19 Response Team                                                                                                                                                                                                                                                                                                                                                                                                                                                                                                                                                                                                                                                                                   |
| EPI_ISL_1118890                                                                                                                                                                                                                                                                                                                                                                                                                                                                                                                                                                                                                                                                                                                                                                                                                                                                                                                                                                                                                                                                                                                                                                                                | Nebraska Public Health Laboratory (NPHL)                                      | NPHL                                                                                      | NPHL COVID-19 Response Team                                                                                                                                                                                                                                                                                                                                                                                                                                                                                                                                                                                                                                                                                   |
| EPI_ISL_1213571, EPI_ISL_1213573                                                                                                                                                                                                                                                                                                                                                                                                                                                                                                                                                                                                                                                                                                                                                                                                                                                                                                                                                                                                                                                                                                                                                                               | Negros Oriental Provincial Hospital                                           | Philippine Genome Center                                                                  | Alethea R. de Guzman; Anna Ong-Lim; Arianne A. Zamora; Asia Louisa U. Chong; Benedict A. Maralit; Candice Francheska B. Tambaoan; Carlo M. Lapid; Celia Carlos; Devon Ray Pacial; Edsel Maurice Salvaña; El King D. Morado; Eva Maria Cutiongco-de la Paz; Francis A. Tablizo; Irish Coleen A. Asin; Jaime C. Montoya; Jan Michael C. Yap; Jo-Hannah S. Llames; John Q. Wong; Joshua Gregor A. Dizon; Juan Antonio R. Magalang; Karol Sophia Agape R. Padilla; Kenneth M. Kim; Kris P. Punayan; Marc Edsel C. Ayes; Marc Jerrone R. Castro; Maria Rosario Singh-Vergiera and Cynthia P. Saloma; Maria Sofia L. Yangzon; Marissa Alejandria; Razel Nikka M. Hao; Rianna Patricia S. Cruz; Sheila Mae M. Araiza |
| EPI_ISL_1085951 to 1086033, EPI_ISL_1250356, EPI_ISL_1250358 to 1250359, EPI_ISL_1250361 to 1250362, EPI_ISL_1250364, EPI_ISL_1250366 to 1250367, EPI_ISL_1250369 to 1250371, EPI_ISL_1250375 to 1250376, EPI_ISL_1250378 to 1250379, EPI_ISL_1250381, EPI_ISL_1250383, EPI_ISL_1250385 to 1250386, EPI_ISL_1250388, EPI_ISL_1250390, EPI_ISL_1250392 to 1250394, EPI_ISL_1250396 to 1250397, EPI_ISL_1250399, EPI_ISL_1250401 to 1250402, EPI_ISL_1250404 to 1250405, EPI_ISL_1250407, EPI_ISL_1250409 to 1250410, EPI_ISL_1250412 to 1250414, EPI_ISL_1250416 to 1250417, EPI_ISL_1250419 to 1250420, EPI_ISL_1250422                                                                                                                                                                                                                                                                                                                                                                                                                                                                                                                                                                                        |                                                                               |                                                                                           |                                                                                                                                                                                                                                                                                                                                                                                                                                                                                                                                                                                                                                                                                                               |
| see above                                                                                                                                                                                                                                                                                                                                                                                                                                                                                                                                                                                                                                                                                                                                                                                                                                                                                                                                                                                                                                                                                                                                                                                                      | Nectare/AMPATH                                                                | KRISP, KZN Research Innovation and Sequencing Platform                                    | Emmanuel SJ; Giandhari J; Khan S; Lessells R; Maslo C; Mdaflose K; Pillay S; Sitharam L; Tegally H; Wilkinson E; York D; de Oliveira T                                                                                                                                                                                                                                                                                                                                                                                                                                                                                                                                                                        |
| EPI_ISL_1135856 to 1136974, EPI_ISL_1137258 to 1137303, EPI_ISL_1164817 to 1164845, EPI_ISL_1169818 to 1169852, EPI_ISL_1219807 to 1219910, EPI_ISL_1220863 to 1220879, EPI_ISL_1263103 to 1263191, EPI_ISL_1270787 to 1270796, EPI_ISL_1295902 to 1295928, EPI_ISL_1315092 to 1315125, EPI_ISL_1323636 to 1323652, EPI_ISL_1324784 to 1324798, EPI_ISL_1364429 to 1364449, EPI_ISL_1378642 to 1378672                                                                                                                                                                                                                                                                                                                                                                                                                                                                                                                                                                                                                                                                                                                                                                                                         |                                                                               |                                                                                           |                                                                                                                                                                                                                                                                                                                                                                                                                                                                                                                                                                                                                                                                                                               |
| see above                                                                                                                                                                                                                                                                                                                                                                                                                                                                                                                                                                                                                                                                                                                                                                                                                                                                                                                                                                                                                                                                                                                                                                                                      | Nevada State Public Health Laboratory                                         | Nevada State Public Health Laboratory                                                     | Andrew Gorzalski; Mark Pandori                                                                                                                                                                                                                                                                                                                                                                                                                                                                                                                                                                                                                                                                                |
| EPI_ISL_1080339, EPI_ISL_1080342, EPI_ISL_1080351                                                                                                                                                                                                                                                                                                                                                                                                                                                                                                                                                                                                                                                                                                                                                                                                                                                                                                                                                                                                                                                                                                                                                              | New Jersey Department of Health, Public Health Laboratories                   | NJ_PHEL                                                                                   | Byeong Jeong; Dana Woell; Lindsey Bodnar; Shiv Verma                                                                                                                                                                                                                                                                                                                                                                                                                                                                                                                                                                                                                                                          |
| EPI_ISL_1060806                                                                                                                                                                                                                                                                                                                                                                                                                                                                                                                                                                                                                                                                                                                                                                                                                                                                                                                                                                                                                                                                                                                                                                                                | New Jersey Department of Health, Public Health Laboratories                   | New Jersey Public Health Environmental Laboratories (NJ_PHEL)                             | Byeong Jeong; Dana Woell; Lindsey Bodnar; Shiv Verma                                                                                                                                                                                                                                                                                                                                                                                                                                                                                                                                                                                                                                                          |
| EPI_ISL_1113156, EPI_ISL_1113167, EPI_ISL_1113171                                                                                                                                                                                                                                                                                                                                                                                                                                                                                                                                                                                                                                                                                                                                                                                                                                                                                                                                                                                                                                                                                                                                                              | New Jersey Department of Health, Public Health Laboratories                   | New Jersey Public Health and Environmental Laboratories (PHEL)                            | Byeong Jeong; Dana Woell; Lindsey Bodnar; Shiv Verma                                                                                                                                                                                                                                                                                                                                                                                                                                                                                                                                                                                                                                                          |
| EPI_ISL_1137492 to 1137502, EPI_ISL_1184099 to 1184112                                                                                                                                                                                                                                                                                                                                                                                                                                                                                                                                                                                                                                                                                                                                                                                                                                                                                                                                                                                                                                                                                                                                                         | New Jersey Department of Health, Public Health and Environmental Laboratories | New Jersey Public Health and Environmental Laboratories                                   | Byeong Jeong; Dana Woell; Lindsey Bodnar; Shiv K. Verma                                                                                                                                                                                                                                                                                                                                                                                                                                                                                                                                                                                                                                                       |
| EPI_ISL_1015342 to 1015352, EPI_ISL_1064200 to 1064237, EPI_ISL_1064918 to 1064921, EPI_ISL_1064923 to 1064925, EPI_ISL_1064928 to 1064956, EPI_ISL_1121488 to 1121555, EPI_ISL_1197934 to 1198003                                                                                                                                                                                                                                                                                                                                                                                                                                                                                                                                                                                                                                                                                                                                                                                                                                                                                                                                                                                                             |                                                                               |                                                                                           |                                                                                                                                                                                                                                                                                                                                                                                                                                                                                                                                                                                                                                                                                                               |
| see above                                                                                                                                                                                                                                                                                                                                                                                                                                                                                                                                                                                                                                                                                                                                                                                                                                                                                                                                                                                                                                                                                                                                                                                                      | New Mexico Department of Health Scientific Laboratory                         | Center for Global Health, University of New Mexico Health Sciences Center                 | Anastacia Griego; Darrell Dinwiddie; Daryl Domman; Joseph Hicks; Kurt Schwalm; Michael Edwards; Twila Kunde                                                                                                                                                                                                                                                                                                                                                                                                                                                                                                                                                                                                   |
| EPI_ISL_1012883 to 1012921, EPI_ISL_1038925 to 1038970, EPI_ISL_1055026 to 1055036, EPI_ISL_1097744 to 1097780, EPI_ISL_1113709 to 1113753, EPI_ISL_1114672 to 1114716, EPI_ISL_1186030 to 1186068, EPI_ISL_1196439 to 1196483, EPI_ISL_1201779 to 1201780, EPI_ISL_1255932, EPI_ISL_1255935, EPI_ISL_1255937, EPI_ISL_1255940, EPI_ISL_1255943, EPI_ISL_1255946, EPI_ISL_1255949, EPI_ISL_1255951, EPI_ISL_1255954, EPI_ISL_1255957, EPI_ISL_1255960, EPI_ISL_1255963, EPI_ISL_1255966, EPI_ISL_1255969, EPI_ISL_1255972, EPI_ISL_1255975, EPI_ISL_1255977, EPI_ISL_1255979, EPI_ISL_1255982, EPI_ISL_1255985, EPI_ISL_1255988, EPI_ISL_1255991, EPI_ISL_1255994, EPI_ISL_1255997, EPI_ISL_1255999, EPI_ISL_1256002, EPI_ISL_1256005, EPI_ISL_1256008, EPI_ISL_1256011, EPI_ISL_1256014, EPI_ISL_1256016, EPI_ISL_1256019, EPI_ISL_1256021, EPI_ISL_1256024, EPI_ISL_1256027, EPI_ISL_1256029, EPI_ISL_1256032, EPI_ISL_1256035, EPI_ISL_1256039, EPI_ISL_1256042, EPI_ISL_1256045, EPI_ISL_1256048, EPI_ISL_1256051, EPI_ISL_1256053, EPI_ISL_1261543 to 1261585, EPI_ISL_1340880 to 1340893, EPI_ISL_1340898 to 1340899, EPI_ISL_1340901 to 1340911, EPI_ISL_1340917 to 1340921, EPI_ISL_1340923 to 1340926 |                                                                               |                                                                                           |                                                                                                                                                                                                                                                                                                                                                                                                                                                                                                                                                                                                                                                                                                               |
| see above                                                                                                                                                                                                                                                                                                                                                                                                                                                                                                                                                                                                                                                                                                                                                                                                                                                                                                                                                                                                                                                                                                                                                                                                      | New Mexico Department of Health Scientific Laboratory                         | New Mexico Department of Health Scientific Laboratory                                     | Anastacia Griego-Fisher; D'eldra Malone; Ellie Johnson; Jennifer Benoit                                                                                                                                                                                                                                                                                                                                                                                                                                                                                                                                                                                                                                       |
| EPI_ISL_1010699 to 1010704, EPI_ISL_1010707 to 1010715, EPI_ISL_1033024 to 1033027, EPI_ISL_1061033 to 1061037, EPI_ISL_1121977 to 1121979, EPI_ISL_1121981 to 1121982, EPI_ISL_1121989, EPI_ISL_1184094 to 1184098, EPI_ISL_1205303, EPI_ISL_1293045, EPI_ISL_1315066 to 1315072, EPI_ISL_1341506 to 1341508                                                                                                                                                                                                                                                                                                                                                                                                                                                                                                                                                                                                                                                                                                                                                                                                                                                                                                  |                                                                               |                                                                                           |                                                                                                                                                                                                                                                                                                                                                                                                                                                                                                                                                                                                                                                                                                               |
| see above                                                                                                                                                                                                                                                                                                                                                                                                                                                                                                                                                                                                                                                                                                                                                                                                                                                                                                                                                                                                                                                                                                                                                                                                      | New South Wales Health Pathology Royal Prince Alfred Hospital                 | Microbiology RPAH                                                                         | Au, J.; Bull, R.; Deveson, I.; Foster, C.; Rawlinson, W.; Ruiz Silva, M.; Van Hal, S.                                                                                                                                                                                                                                                                                                                                                                                                                                                                                                                                                                                                                         |
| EPI_ISL_1091897 to 1091900, EPI_ISL_1091903 to 1091915, EPI_ISL_1239848                                                                                                                                                                                                                                                                                                                                                                                                                                                                                                                                                                                                                                                                                                                                                                                                                                                                                                                                                                                                                                                                                                                                        | New York Presbetyrian / Weill Cornell Medicine                                | Grubaugh Lab - Yale School of Public Health                                               | Anderson Brito; Anne Wyllie; Annie Watkins; Chaney Kalinich; Chantal Vogels; Isabel Ott; Joseph Fauver; Mallery Breban; Mary Petrone; Nathan Grubaugh; Tara Alpert                                                                                                                                                                                                                                                                                                                                                                                                                                                                                                                                            |
| EPI_ISL_1016220 to 1016248, EPI_ISL_1016258 to 1016259, EPI_ISL_1016262 to 1016266, EPI_ISL_1016269, EPI_ISL_1016271 to 1016280, EPI_ISL_1016304 to 1016310, EPI_ISL_1016335 to 1016336, EPI_ISL_1016341, EPI_ISL_1016366 to 1016372, EPI_ISL_1016381 to 1016401, EPI_ISL_1226434, EPI_ISL_1226544, EPI_ISL_1226559, EPI_ISL_1226624, EPI_ISL_1226757, EPI_ISL_1226811 to 1226812, EPI_ISL_1226843, EPI_ISL_1226850, EPI_ISL_1226915, EPI_ISL_1227000, EPI_ISL_1227164 to 1227165, EPI_ISL_1227182 to 1227183, EPI_ISL_1227185, EPI_ISL_1227410, EPI_ISL_1227417, EPI_ISL_1227679, EPI_ISL_1227684 to 1227685, EPI_ISL_1227867, EPI_ISL_1227935 to 1227937, EPI_ISL_1227943 to 1227945, EPI_ISL_1228181, EPI_ISL_1228183 to 1228184, EPI_ISL_1228564, EPI_ISL_1228568                                                                                                                                                                                                                                                                                                                                                                                                                                          |                                                                               |                                                                                           |                                                                                                                                                                                                                                                                                                                                                                                                                                                                                                                                                                                                                                                                                                               |
| see above                                                                                                                                                                                                                                                                                                                                                                                                                                                                                                                                                                                                                                                                                                                                                                                                                                                                                                                                                                                                                                                                                                                                                                                                      | New York Presbyterian Hospital                                                | Wadsworth Center, New York State Department of Health                                     | Alexis Russel; Daryl M. Lamson; Erasmus Schneider; Erica Lasek-Nesselquist; John Kelly; Jonathan Pitnick; Kirsten St. George; Matthew Shudt; Melissa A Leisner; Navjot Singh                                                                                                                                                                                                                                                                                                                                                                                                                                                                                                                                  |
| EPI_ISL_1196008 to 1196010, EPI_ISL_1196020 to 1196021                                                                                                                                                                                                                                                                                                                                                                                                                                                                                                                                                                                                                                                                                                                                                                                                                                                                                                                                                                                                                                                                                                                                                         | Nhlangano Health Centre                                                       | National Institute for Communicable Diseases of the National Health Laboratory Service    | Amoako DG; Bhiman JN; Ismail A; Mahlangu B; Maphalala GP; Mohale T; Ntuli N; Scheepers C                                                                                                                                                                                                                                                                                                                                                                                                                                                                                                                                                                                                                      |
| EPI_ISL_1350161 to 1350191, EPI_ISL_1350924 to 1350948                                                                                                                                                                                                                                                                                                                                                                                                                                                                                                                                                                                                                                                                                                                                                                                                                                                                                                                                                                                                                                                                                                                                                         | Niedersächsisches Landesgesundheitsamt (NLGA)                                 | Robert Koch Institute                                                                     |                                                                                                                                                                                                                                                                                                                                                                                                                                                                                                                                                                                                                                                                                                               |
| EPI_ISL_1040703                                                                                                                                                                                                                                                                                                                                                                                                                                                                                                                                                                                                                                                                                                                                                                                                                                                                                                                                                                                                                                                                                                                                                                                                | Nieuveveldpark Clinic wv NVP                                                  | NHLS/UCT                                                                                  | Arash Iranzadeh; Bruna Galvao; Carolyn Williamson; Deelan Doolabh; Diana Hardie; Innocent Mudau; Kruger Marais; Lynn Tyers; Marvin Hsiao; Stephen Korsman                                                                                                                                                                                                                                                                                                                                                                                                                                                                                                                                                     |
| EPI_ISL_1197041                                                                                                                                                                                                                                                                                                                                                                                                                                                                                                                                                                                                                                                                                                                                                                                                                                                                                                                                                                                                                                                                                                                                                                                                | Nigeria Centre For Disease Control                                            | National Reference Laboratory, NCDC, Gaduwa, Abuja                                        | Anthony Ahumibe; Catherine Okoi; Chimaobi Chukwu; Dr Chikwe Ihekweazu; Dr Ndodo Nnaemeka; Dr Omoare Adesuyi; Naidoo Dhamari; Nwando Mba;                                                                                                                                                                                                                                                                                                                                                                                                                                                                                                                                                                      |

| Olusola Anuoluwapo Akanbi                                                                                                                                                                                                                                                                                                                                                                                                                                                                                                                                                                                                                                                                                                                                                                                                                                                                                                                                                                                                                                                                                                                                                                                                                                                                                                                                                                                                                                                                                                                                                                                                                                                                                                                                                                                                                                                                                                                                                                                                                                                                                                                                                                                                                                                                                                                                                                           |           |                                                                                                                                                                                                                     |                                                                                                       |                                                                                                                                                                                                                                                                                                                                                                                                                                                                                                                                                                                                       |
|-----------------------------------------------------------------------------------------------------------------------------------------------------------------------------------------------------------------------------------------------------------------------------------------------------------------------------------------------------------------------------------------------------------------------------------------------------------------------------------------------------------------------------------------------------------------------------------------------------------------------------------------------------------------------------------------------------------------------------------------------------------------------------------------------------------------------------------------------------------------------------------------------------------------------------------------------------------------------------------------------------------------------------------------------------------------------------------------------------------------------------------------------------------------------------------------------------------------------------------------------------------------------------------------------------------------------------------------------------------------------------------------------------------------------------------------------------------------------------------------------------------------------------------------------------------------------------------------------------------------------------------------------------------------------------------------------------------------------------------------------------------------------------------------------------------------------------------------------------------------------------------------------------------------------------------------------------------------------------------------------------------------------------------------------------------------------------------------------------------------------------------------------------------------------------------------------------------------------------------------------------------------------------------------------------------------------------------------------------------------------------------------------------|-----------|---------------------------------------------------------------------------------------------------------------------------------------------------------------------------------------------------------------------|-------------------------------------------------------------------------------------------------------|-------------------------------------------------------------------------------------------------------------------------------------------------------------------------------------------------------------------------------------------------------------------------------------------------------------------------------------------------------------------------------------------------------------------------------------------------------------------------------------------------------------------------------------------------------------------------------------------------------|
| EPI_ISL_1073137, EPI_ISL_1073139, EPI_ISL_1073638 to 1073640, EPI_ISL_1197062 to 1197066, EPI_ISL_1197129 to 1197130, EPI_ISL_1197150, EPI_ISL_1197933, EPI_ISL_1198006, EPI_ISL_1381741 to 1381748, EPI_ISL_1381813 to 1381815, EPI_ISL_1381832                                                                                                                                                                                                                                                                                                                                                                                                                                                                                                                                                                                                                                                                                                                                                                                                                                                                                                                                                                                                                                                                                                                                                                                                                                                                                                                                                                                                                                                                                                                                                                                                                                                                                                                                                                                                                                                                                                                                                                                                                                                                                                                                                    | see above | Nigeria Centre For Disease Control                                                                                                                                                                                  | National reference Laboratory, NCDC, Gaduwa, Abuja                                                    | Anthony Ahumibe; Cahterine Okoi; Catherine Okoi; Celestina Obiekea; Chimaobi Chukwu; Chinwe Ochu; Dr Chikwe Ihekweazu; Dr Ndodo Nnaemeka; Dr Omoare Adeyeye; Esebanmen Grace; Grace Esebanmen; Naidoo Dharmari; Nwando Mba; Olusola Anuoluwapo Akanbi                                                                                                                                                                                                                                                                                                                                                 |
| EPI_ISL_1173207 to 1173246                                                                                                                                                                                                                                                                                                                                                                                                                                                                                                                                                                                                                                                                                                                                                                                                                                                                                                                                                                                                                                                                                                                                                                                                                                                                                                                                                                                                                                                                                                                                                                                                                                                                                                                                                                                                                                                                                                                                                                                                                                                                                                                                                                                                                                                                                                                                                                          |           | Nigeria Centre for Disease Control (NCDC)                                                                                                                                                                           | African Centre for Excellence for Genomics of Infectious Diseases (ACEGID), Redeemer's University     | I.B.; Olawoye; et al                                                                                                                                                                                                                                                                                                                                                                                                                                                                                                                                                                                  |
| EPI_ISL_1242009 to 1242028                                                                                                                                                                                                                                                                                                                                                                                                                                                                                                                                                                                                                                                                                                                                                                                                                                                                                                                                                                                                                                                                                                                                                                                                                                                                                                                                                                                                                                                                                                                                                                                                                                                                                                                                                                                                                                                                                                                                                                                                                                                                                                                                                                                                                                                                                                                                                                          |           | Nigeria Centre for Disease Control (NCDC)                                                                                                                                                                           | African Centre of Excellence for Genomics of Infectious Diseases (ACEGID), Redeemer's University      | Oluniyi P.E. et al                                                                                                                                                                                                                                                                                                                                                                                                                                                                                                                                                                                    |
| EPI_ISL_1093431 to 1093464, EPI_ISL_1093466 to 1093476, EPI_ISL_1235642 to 1235667                                                                                                                                                                                                                                                                                                                                                                                                                                                                                                                                                                                                                                                                                                                                                                                                                                                                                                                                                                                                                                                                                                                                                                                                                                                                                                                                                                                                                                                                                                                                                                                                                                                                                                                                                                                                                                                                                                                                                                                                                                                                                                                                                                                                                                                                                                                  |           | Nigerian Centre for Disease Control (NCDC)                                                                                                                                                                          | African Centre of Excellence for Genomics of Infectious Diseases (ACEGID), Redeemer's University      | I.B.; Olawoye; et al; et al                                                                                                                                                                                                                                                                                                                                                                                                                                                                                                                                                                           |
| EPI_ISL_1035810 to 1035827                                                                                                                                                                                                                                                                                                                                                                                                                                                                                                                                                                                                                                                                                                                                                                                                                                                                                                                                                                                                                                                                                                                                                                                                                                                                                                                                                                                                                                                                                                                                                                                                                                                                                                                                                                                                                                                                                                                                                                                                                                                                                                                                                                                                                                                                                                                                                                          |           | Nigerian Centre for Disease Control (NCDC)                                                                                                                                                                          | African Centre of Excellence for Genomics of Infectious Diseases (ACEGID), Redeemer's University, Ede | I.B.; Olawoye; et al                                                                                                                                                                                                                                                                                                                                                                                                                                                                                                                                                                                  |
| EPI_ISL_1123472 to 1123478, EPI_ISL_1124608, EPI_ISL_1124610, EPI_ISL_1124612, EPI_ISL_1124614 to 1124615, EPI_ISL_1124617, EPI_ISL_1124619, EPI_ISL_1124621 to 1124626, EPI_ISL_1124628, EPI_ISL_1124630, EPI_ISL_1124632, EPI_ISL_1124634, EPI_ISL_1124636 to 1124637, EPI_ISL_1124639, EPI_ISL_1124641 to 1124642, EPI_ISL_1124644, EPI_ISL_1124646, EPI_ISL_1124648, EPI_ISL_1124650 to 1124651, EPI_ISL_1131164 to 1131173, EPI_ISL_1131850 to 1131860                                                                                                                                                                                                                                                                                                                                                                                                                                                                                                                                                                                                                                                                                                                                                                                                                                                                                                                                                                                                                                                                                                                                                                                                                                                                                                                                                                                                                                                                                                                                                                                                                                                                                                                                                                                                                                                                                                                                         | see above | Niigata Prefectural Institute of Public Health and Environmental Sciences                                                                                                                                           | Pathogen Genomics Center, National Institute of Infectious Diseases                                   | Kentaro Itokawa; Makoto Kuroda; Masanori Hashino; Rina Tanaka; Tsuyoshi Sekizuka                                                                                                                                                                                                                                                                                                                                                                                                                                                                                                                      |
| EPI_ISL_1013475, EPI_ISL_1034320, EPI_ISL_1034328 to 1034329, EPI_ISL_1034332, EPI_ISL_1034334, EPI_ISL_1034339, EPI_ISL_1040159 to 1040160, EPI_ISL_1073932, EPI_ISL_1118284, EPI_ISL_1118292, EPI_ISL_1118296 to 1118297, EPI_ISL_1118312, EPI_ISL_1118416 to 1118417, EPI_ISL_1118422 to 1118425, EPI_ISL_1118448 to 1118458, EPI_ISL_1118475, EPI_ISL_1118477 to 1118478, EPI_ISL_1118530, EPI_ISL_1118536, EPI_ISL_1118550, EPI_ISL_1118553 to 1118554, EPI_ISL_1118556, EPI_ISL_1118597, EPI_ISL_1118605, EPI_ISL_1118619, EPI_ISL_1118636, EPI_ISL_11186085 to 11186090, EPI_ISL_1186101 to 1186105, EPI_ISL_1186122 to 1186123, EPI_ISL_1186133, EPI_ISL_1186188 to 1186191, EPI_ISL_1192178, EPI_ISL_1192231 to 1192236, EPI_ISL_1192267 to 1192271, EPI_ISL_1251289 to 1251290, EPI_ISL_1251298 to 1251303, EPI_ISL_1251363 to 1251367, EPI_ISL_1251421 to 1251439, EPI_ISL_1251513 to 1251514, EPI_ISL_1251548 to 1251567, EPI_ISL_1251712 to 1251714, EPI_ISL_1251716 to 1251717, EPI_ISL_1251720 to 1251721, EPI_ISL_1251724, EPI_ISL_1251748 to 1251749, EPI_ISL_1251756, EPI_ISL_1251769 to 1251772, EPI_ISL_1251798 to 1251800, EPI_ISL_1251812, EPI_ISL_1251829 to 1251831, EPI_ISL_1251923 to 1251930, EPI_ISL_1251997, EPI_ISL_1252032 to 1252035, EPI_ISL_1252507 to 1252511, EPI_ISL_1252549 to 1252550, EPI_ISL_1254554, EPI_ISL_1254558 to 1254559, EPI_ISL_1254563, EPI_ISL_1254566, EPI_ISL_1254569, EPI_ISL_1254582 to 1254583, EPI_ISL_1254598 to 1254599, EPI_ISL_1314538 to 1314539, EPI_ISL_1317215, EPI_ISL_1317244, EPI_ISL_1317620, EPI_ISL_1317623 to 1317624, EPI_ISL_1317626 to 1317647, EPI_ISL_1317658 to 1317665, EPI_ISL_1317669 to 1317670, EPI_ISL_1317733, EPI_ISL_1317735, EPI_ISL_1317738 to 1317739, EPI_ISL_1317741, EPI_ISL_1317743, EPI_ISL_1317745 to 1317747, EPI_ISL_1317750, EPI_ISL_1317756 to 1317757, EPI_ISL_1317789, EPI_ISL_1317822 to 1317823, EPI_ISL_1317843, EPI_ISL_1317907 to 1317908, EPI_ISL_1318042, EPI_ISL_1323136 to 1323138, EPI_ISL_1323140, EPI_ISL_1324007 to 1324016, EPI_ISL_1347594 to 1347601                                                                                                                                                                                                                                                                                                                        | see above | Nordland Hospital - Bodo, Laboratory Department, Molecular Biology Unit                                                                                                                                             | Norwegian Institute of Public Health, Department of Virology                                          | Atiya R Ali; Debec Nadia; Engebretsen Serina Beate; Engebretsen Serina Beate Atiya R Ali; Garcia Llorente Ignacio; Hilde Elshaug; Hilde Vollan; Ignacio Garcia Llorente; Jon Bråte; Kamilla Heddeland Instefjord; Karoline Bragstad; Kathrine Stene-Johansen; Marie Paulsen Madsen; Olav Hungnes; Pedersen Benedikte Nevjen; Rasmus Riis Kopperud; Serina B Engebretsen                                                                                                                                                                                                                               |
| EPI_ISL_1035828 to 1035870, EPI_ISL_1054892 to 1054939, EPI_ISL_1184305, EPI_ISL_1195618 to 1195660, EPI_ISL_1233008 to 1233053, EPI_ISL_1233694 to 1233729, EPI_ISL_1238767 to 1238786                                                                                                                                                                                                                                                                                                                                                                                                                                                                                                                                                                                                                                                                                                                                                                                                                                                                                                                                                                                                                                                                                                                                                                                                                                                                                                                                                                                                                                                                                                                                                                                                                                                                                                                                                                                                                                                                                                                                                                                                                                                                                                                                                                                                             | see above | North Dakota Department of Health, Public Health Laboratory                                                                                                                                                         | North Dakota Department of Health, Public Health Laboratory                                           | Lisa Wingert                                                                                                                                                                                                                                                                                                                                                                                                                                                                                                                                                                                          |
| EPI_ISL_1190885 to 1190888, EPI_ISL_1190893 to 1190894, EPI_ISL_1190897, EPI_ISL_1190939, EPI_ISL_1190959 to 1190963, EPI_ISL_1259026, EPI_ISL_1259155 to 1259159, EPI_ISL_1319352, EPI_ISL_1319354 to 1319356, EPI_ISL_1319358, EPI_ISL_1319440 to 1319441, EPI_ISL_1319443, EPI_ISL_1319445, EPI_ISL_1319447, EPI_ISL_1319449 to 1319450, EPI_ISL_1319452, EPI_ISL_1319454 to 1319455, EPI_ISL_1319457                                                                                                                                                                                                                                                                                                                                                                                                                                                                                                                                                                                                                                                                                                                                                                                                                                                                                                                                                                                                                                                                                                                                                                                                                                                                                                                                                                                                                                                                                                                                                                                                                                                                                                                                                                                                                                                                                                                                                                                            | see above | North Estonia Medical Centre laboratory                                                                                                                                                                             | 1. Laboratory of Communicable Diseases (Estonia); 2. Eurofins Genomics Europe Sequencing GmbH         | Liida Dotsenko et al.                                                                                                                                                                                                                                                                                                                                                                                                                                                                                                                                                                                 |
| EPI_ISL_1016848, EPI_ISL_1016866                                                                                                                                                                                                                                                                                                                                                                                                                                                                                                                                                                                                                                                                                                                                                                                                                                                                                                                                                                                                                                                                                                                                                                                                                                                                                                                                                                                                                                                                                                                                                                                                                                                                                                                                                                                                                                                                                                                                                                                                                                                                                                                                                                                                                                                                                                                                                                    |           | North Shore Hospital                                                                                                                                                                                                | Institute of Environmental Science and Research (ESR)                                                 | Anja Werno; Antje van der Linden; Arlo Upton; Chris Mansell; David Hammer; Dragana Drinkovic; Erasmus Smit; Gary McAuliffe; Hana Sofia Andersson; Hermes Perez; James Ussher; Jill Sherwood; Jing Wang; Joep de Lig; Josh Freeman; Julia Howard; Juliet Elvy; Lauren Jelly; Mary DeAlmeida; Matt Blakiston; Matt Storey; Matthew Rogers; Max Bloomfield; Michael Addide; Michelle Balm; Muhammad Faisat; Nikki Freed; Olin Slander; Sally Roberts; Sarah Jefferies; Sharmini Muttaiyah; Susan Morpeth; Susan Taylor; Timothy Blackmore; Vaní Sathyendran; Veronica Playle; Virginia Hope; Xiaoyun Ren |
| EPI_ISL_1335883, EPI_ISL_1335885, EPI_ISL_1335887, EPI_ISL_1335897                                                                                                                                                                                                                                                                                                                                                                                                                                                                                                                                                                                                                                                                                                                                                                                                                                                                                                                                                                                                                                                                                                                                                                                                                                                                                                                                                                                                                                                                                                                                                                                                                                                                                                                                                                                                                                                                                                                                                                                                                                                                                                                                                                                                                                                                                                                                  |           | North Sumatera Health Office                                                                                                                                                                                        | Faculty of Medicine, Universitas Sumatera Utara; Institute of Tropical Disease, Universitas Airlangga | Aldise M Nastri; Francisus Ginting; Inke N D Lubis; Irbah R Nainggolan; Jezy R Dewantari; Kazufumi Shimizu; Krisnoadi Rahardjo; Maria I Lusida; Meliani; Mirzan Hasibuan; Muhammad Ichwan; R Andika D Cahyadi; R Lia Kusumawati; Ramadhan Bestari; Rima R Prasetya; Soetjipto; Yasuko Mori                                                                                                                                                                                                                                                                                                            |
| EPI_ISL_1072963                                                                                                                                                                                                                                                                                                                                                                                                                                                                                                                                                                                                                                                                                                                                                                                                                                                                                                                                                                                                                                                                                                                                                                                                                                                                                                                                                                                                                                                                                                                                                                                                                                                                                                                                                                                                                                                                                                                                                                                                                                                                                                                                                                                                                                                                                                                                                                                     |           | North Sumatera Health Office                                                                                                                                                                                        | Institute of Tropical Disease, Universitas Airlangga; Faculty of Medicine, Universitas Sumatera Utara | Aldise M Nastri; Francisus Ginting; Inke N D Lubis; Irbah R Nainggolan; Jezy R Dewantari; Kazufumi Shimizu; Krisnoadi Rahardjo; Maria I Lusida; Meliani; Mirzan Hasibuan; Muhammad Ichwan; R Andika D Cahyadi; R Lia Kusumawati; Ramadhan Bestari; Rima R Prasetya; Soetjipto; Yasuko Mori                                                                                                                                                                                                                                                                                                            |
| EPI_ISL_1050916 to 1050922, EPI_ISL_1050925, EPI_ISL_1050928, EPI_ISL_1050931, EPI_ISL_1050941, EPI_ISL_1050943 to 1050946, EPI_ISL_1050949, EPI_ISL_1050951 to 1050966, EPI_ISL_1050968 to 1050970, EPI_ISL_1050974, EPI_ISL_1050990 to 1050995, EPI_ISL_1051001 to 1051005, EPI_ISL_1051007 to 1051017, EPI_ISL_1051019, EPI_ISL_1051022 to 1051027, EPI_ISL_1051031 to 1051038, EPI_ISL_1051040 to 1051041, EPI_ISL_1051043, EPI_ISL_1051045, EPI_ISL_1051048, EPI_ISL_1051050, EPI_ISL_1051052, EPI_ISL_1051054, EPI_ISL_1051056, EPI_ISL_1051058, EPI_ISL_1051060, EPI_ISL_1051062 to 1051063, EPI_ISL_1051065, EPI_ISL_1051067, EPI_ISL_1051069, EPI_ISL_1051071, EPI_ISL_1051073, EPI_ISL_1051075, EPI_ISL_1051077, EPI_ISL_1051080, EPI_ISL_1051082, EPI_ISL_1051084, EPI_ISL_1051087, EPI_ISL_1051089, EPI_ISL_1051091, EPI_ISL_1051093, EPI_ISL_1051095, EPI_ISL_1051097, EPI_ISL_1051099, EPI_ISL_1051101, EPI_ISL_1051103, EPI_ISL_1051105, EPI_ISL_1051107, EPI_ISL_1051110, EPI_ISL_1051112, EPI_ISL_1051114, EPI_ISL_1051116 to 1051175, EPI_ISL_1051177 to 1051412, EPI_ISL_1054131 to 1054257, EPI_ISL_1103949 to 1103991, EPI_ISL_1103993 to 1104024, EPI_ISL_1105473 to 1105493, EPI_ISL_1105496 to 1105510, EPI_ISL_1105513 to 1105523, EPI_ISL_1105572, EPI_ISL_1105657 to 1105670, EPI_ISL_1105713 to 1105715, EPI_ISL_1105718 to 1105719, EPI_ISL_1105721 to 1105723, EPI_ISL_1105726, EPI_ISL_1105729 to 1105813, EPI_ISL_1108441 to 1108448, EPI_ISL_1108453, EPI_ISL_1108458 to 1108459, EPI_ISL_1108461 to 1108463, EPI_ISL_1108465, EPI_ISL_1108468 to 1108469, EPI_ISL_1108472 to 1108478, EPI_ISL_1108488 to 1108498, EPI_ISL_1108569 to 1108580, EPI_ISL_1108615 to 1108629, EPI_ISL_1108629, EPI_ISL_1109045 to 1109228, EPI_ISL_1109231 to 1109236, EPI_ISL_11176902 to 11177230, EPI_ISL_1178121 to 1178421, EPI_ISL_1248818 to 1248873, EPI_ISL_1248875, EPI_ISL_1248877, EPI_ISL_1248879, EPI_ISL_1248881, EPI_ISL_1248883, EPI_ISL_1248886, EPI_ISL_1248892, EPI_ISL_1248894 to 1248933, EPI_ISL_1308184 to 1308255, EPI_ISL_1308257 to 1308273, EPI_ISL_1308354 to 1308446, EPI_ISL_1309146 to 1309313, EPI_ISL_1309432 to 1309433, EPI_ISL_1309435, EPI_ISL_1309445 to 1309446, EPI_ISL_1309446, EPI_ISL_1309450 to 1309456, EPI_ISL_1309458, EPI_ISL_1309459 to 1309478, EPI_ISL_1309480 to 1309485, EPI_ISL_1309488 to 1309633, EPI_ISL_1309635 to 1309660 | see above | Northumbria University / South Tees Hospitals NHS Foundation Trust / North Cumbria Integrated Care NHS Foundation Trust / North Tees and Hartlepool NHS Foundation Trust / Newcastle Hospitals NHS Foundation Trust | COVID-19 Genomics UK (COG-UK) Consortium                                                              | Andrew Nelson; Brendan Payne; Clive Graham; Darren L Smith; Debra Padgett; Edward Barton; Emma Swindells; Garren Scott; Gary Black; Gary Etringham; Giles S Holt; Greg R Young; Jane Greenaway; Jennifer Collins; John Allan; Joshua Lou; Lynn Dover; Matthew Bashton; Mohammad A Tariq; Paul Baker; Sarah Essex; Steve Liggitt; Wen C Yew; Yuhui Taha                                                                                                                                                                                                                                                |
| EPI_ISL_1222695 to 1222703, EPI_ISL_1222709, EPI_ISL_1229176, EPI_ISL_1234382                                                                                                                                                                                                                                                                                                                                                                                                                                                                                                                                                                                                                                                                                                                                                                                                                                                                                                                                                                                                                                                                                                                                                                                                                                                                                                                                                                                                                                                                                                                                                                                                                                                                                                                                                                                                                                                                                                                                                                                                                                                                                                                                                                                                                                                                                                                       |           | Northwest Laboratories                                                                                                                                                                                              | Seattle Flu Study                                                                                     | Amanda Adler; Barry R. Lutz; Benjamin Pelle; Brian Hiatt; Caitlin R. Wolf; Chris D. Frazier; Deborah A. Nickerson; Elisabeth Brandstetter; Erica Ryke; Geoff Melly; Helen Y. Chu; Janet A. Englund; Jay Shendure; Jover Lee; Kairsten Fay; Kristen Lacombe; Lea M. Starita; Mark J. Rieder; Matthew Richardson; Matthew Thompson; Melissa Truong; Michael Boeckh; Michael Famulare; Misja Ilcinis; Peter D. Han; Philip Dykema; Romesh Gautam; Scott Lindquist; Thomas R. Sibley; Trevor Bedford                                                                                                      |
| EPI_ISL_1114224, EPI_ISL_1114255 to 1114256, EPI_ISL_1114258, EPI_ISL_1114373, EPI_ISL_1114377 to 1114380                                                                                                                                                                                                                                                                                                                                                                                                                                                                                                                                                                                                                                                                                                                                                                                                                                                                                                                                                                                                                                                                                                                                                                                                                                                                                                                                                                                                                                                                                                                                                                                                                                                                                                                                                                                                                                                                                                                                                                                                                                                                                                                                                                                                                                                                                           |           | Northwest Laboratory                                                                                                                                                                                                | Seattle Flu Study                                                                                     | Amanda Adler; Barry R. Lutz; Benjamin Pelle; Brian Hiatt; Caitlin R. Wolf; Chris D. Frazier; Deborah A. Nickerson; Elisabeth Brandstetter; Erica Ryke; Geoff Melly; Helen Y. Chu; Janet A. Englund; Jay Shendure; Jover Lee; Kairsten Fay; Kristen Lacombe; Lea M. Starita; Mark J. Rieder; Matthew Richardson; Matthew Thompson; Melissa Truong; Michael Boeckh; Michael Famulare; Misja Ilcinis; Peter D. Han; Philip Dykema; Romesh Gautam; Scott Lindquist; Thomas R. Sibley; Trevor Bedford                                                                                                      |
| EPI_ISL_1034275 to 1034279                                                                                                                                                                                                                                                                                                                                                                                                                                                                                                                                                                                                                                                                                                                                                                                                                                                                                                                                                                                                                                                                                                                                                                                                                                                                                                                                                                                                                                                                                                                                                                                                                                                                                                                                                                                                                                                                                                                                                                                                                                                                                                                                                                                                                                                                                                                                                                          |           | Northwest Pathology                                                                                                                                                                                                 | UW Virology Lab                                                                                       | Alexander Greninger; Hong Xie; Keith R Jerome; Lasata Shrestha; Meei-Li Huang; Michelle Lin; Pavitra Roychoudhury; Shah A Mohamed Bakhsh                                                                                                                                                                                                                                                                                                                                                                                                                                                              |
| EPI_ISL_1157399, EPI_ISL_1157401 to 1157402, EPI_ISL_1157404, EPI_ISL_1157406, EPI_ISL_1157408, EPI_ISL_1157413, EPI_ISL_1157414, EPI_ISL_1157415, EPI_ISL_1157416 to 1157417, EPI_ISL_1157418, EPI_ISL_1157420, EPI_ISL_1157422 to 1157423, EPI_ISL_1157425, EPI_ISL_1157427, EPI_ISL_1157429 to 1157430, EPI_ISL_1157432, EPI_ISL_1157434, EPI_ISL_1157436 to 1157437, EPI_ISL_1157439, EPI_ISL_1157441, EPI_ISL_1157443 to 1157444, EPI_ISL_1157448, EPI_ISL_1157450, EPI_ISL_1157452, EPI_ISL_1157454 to 1157455, EPI_ISL_1157457, EPI_ISL_1157459, EPI_ISL_1157464, EPI_ISL_1157466, EPI_ISL_1157470, EPI_ISL_1157472, EPI_ISL_1157474, EPI_ISL_1157476 to 1157477, EPI_ISL_1157479, EPI_ISL_1157481 to 1157482, EPI_ISL_1157484, EPI_ISL_1157486 to 1157487, EPI_ISL_1157489, EPI_ISL_1157491, EPI_ISL_1157493 to 1157494, EPI_ISL_1157496, EPI_ISL_1157498, EPI_ISL_1157500, EPI_ISL_1157502 to 1157503, EPI_ISL_1157505, EPI_ISL_1157507, EPI_ISL_1157509 to 1157510, EPI_ISL_1157515, EPI_ISL_1157517, EPI_ISL_1157519 to 1157520, EPI_ISL_1157522, EPI_ISL_1157524 to 1157525, EPI_ISL_1157527, EPI_ISL_1157529 to 1157530, EPI_ISL_1157532, EPI_ISL_1157534, EPI_ISL_1157536 to 1157537, EPI_ISL_1157539, EPI_ISL_1157541, EPI_ISL_1157543 to 1157544, EPI_ISL_1157546, EPI_ISL_1157549, EPI_ISL_1157551, EPI_ISL_1157553, EPI_ISL_1157555 to 1157556, EPI_ISL_1157558, EPI_ISL_1157560, EPI_ISL_1157562 to 1157563, EPI_ISL_1157565, EPI_ISL_1157566, EPI_ISL_1157569 to 1157570, EPI_ISL_1157572, EPI_ISL_1157574, EPI_ISL_1157576 to 1157577, EPI_ISL_1157579, EPI_ISL_1157581, EPI_ISL_1157583, EPI_ISL_1340782 to 1340796, EPI_ISL_1340798 to 1340833, EPI_ISL_1340835 to 1340858, EPI_ISL_1340860 to 1340861                                                                                                                                                                                                                                                                                                                                                                                                                                                                                                                                                                                                                                                                       | see above | Northwestern Memorial Hospital                                                                                                                                                                                      | Northwestern University - Ozer Lab                                                                    | Chad J. Achenbach; Chao Qi; Egon A. Ozer; Judd F. Hultquist; Lucy M. Simons; Lawrence J. Jennings; Michael G. Ison; Ramon Lorenzo-Redondo; Taylor J. Dean                                                                                                                                                                                                                                                                                                                                                                                                                                             |
| EPI_ISL_1013466 to 1013467, EPI_ISL_1013469, EPI_ISL_1013493, EPI_ISL_1034322, EPI_ISL_1034335 to 1034337, EPI_ISL_1040150, EPI_ISL_1058064, EPI_ISL_1073921 to 1073922, EPI_ISL_1073939 to 1073940, EPI_ISL_1073947, EPI_ISL_1118330, EPI_ISL_1118341, EPI_ISL_1118387, EPI_ISL_1118392, EPI_ISL_1118409, EPI_ISL_1118415, EPI_ISL_1118440 to 1118441, EPI_ISL_1118441, EPI_ISL_1118479 to 1118480, EPI_ISL_1118487, EPI_ISL_1118491 to 1118494, EPI_ISL_1118526, EPI_ISL_1118539 to 1118541, EPI_ISL_1118544, EPI_ISL_1118555 to 1118556, EPI_ISL_1118568, EPI_ISL_1118575, EPI_ISL_1118581, EPI_ISL_1118586, EPI_ISL_1118603 to 1118604, EPI_ISL_1118604, EPI_ISL_1118616 to 1118617, EPI_ISL_1118623 to 1118629, EPI_ISL_1118658, EPI_ISL_11186111 to 1118612, EPI_ISL_1192181, EPI_ISL_1192183, EPI_ISL_1192199 to 1192200, EPI_ISL_1192250, EPI_ISL_1192272 to 1192273, EPI_ISL_1192285 to 1192291, EPI_ISL_1251278 to 1251284, EPI_ISL_1251317, EPI_ISL_1251369, EPI_ISL_1251458 to 1251461, EPI_ISL_1251467, EPI_ISL_1251472 to 1251474, EPI_ISL_1251485, EPI_ISL_1251488, EPI_ISL_1251495 to 1251508, EPI_ISL_1251516 to 1251527, EPI_ISL_1251533 to 1251538, EPI_ISL_1251575,                                                                                                                                                                                                                                                                                                                                                                                                                                                                                                                                                                                                                                                                                                                                                                                                                                                                                                                                                                                                                                                                                                                                                                                                             |           |                                                                                                                                                                                                                     |                                                                                                       |                                                                                                                                                                                                                                                                                                                                                                                                                                                                                                                                                                                                       |

|                                                                                                                                                                                                                                                                                                                                                                                                                                                                                                                                                                                                                                                                                                                                                                                                                                                                                                                                                                                                                                                                                                                                                                                                                                                                                                                                                                                                                                                                                            |           |                                                              |                                                                                                                            |                                                                                                                                                                                                                                                                                                                                                                                                                |
|--------------------------------------------------------------------------------------------------------------------------------------------------------------------------------------------------------------------------------------------------------------------------------------------------------------------------------------------------------------------------------------------------------------------------------------------------------------------------------------------------------------------------------------------------------------------------------------------------------------------------------------------------------------------------------------------------------------------------------------------------------------------------------------------------------------------------------------------------------------------------------------------------------------------------------------------------------------------------------------------------------------------------------------------------------------------------------------------------------------------------------------------------------------------------------------------------------------------------------------------------------------------------------------------------------------------------------------------------------------------------------------------------------------------------------------------------------------------------------------------|-----------|--------------------------------------------------------------|----------------------------------------------------------------------------------------------------------------------------|----------------------------------------------------------------------------------------------------------------------------------------------------------------------------------------------------------------------------------------------------------------------------------------------------------------------------------------------------------------------------------------------------------------|
| EPI_ISL_1251577 to 1251580, EPI_ISL_1251634 to 1251637, EPI_ISL_1251643 to 1251644, EPI_ISL_1251662 to 1251666, EPI_ISL_1251758 to 1251763, EPI_ISL_1251846, EPI_ISL_1251914 to 1251915, EPI_ISL_1251920 to 1251925, EPI_ISL_1251928, EPI_ISL_1251933 to 1251934, EPI_ISL_1251938, EPI_ISL_1251940 to 1251941, EPI_ISL_1251967, EPI_ISL_1251969, EPI_ISL_1252002, EPI_ISL_1252489, EPI_ISL_1252531, EPI_ISL_1254536, EPI_ISL_1254538, EPI_ISL_1254580, EPI_ISL_1254597, EPI_ISL_1254601 to 1254602, EPI_ISL_1254609, EPI_ISL_1254621, EPI_ISL_1254633 to 1254634, EPI_ISL_1254639, EPI_ISL_1314408, EPI_ISL_1314410 to 1314413, EPI_ISL_1317216, EPI_ISL_1317221, EPI_ISL_1317225 to 1317226, EPI_ISL_1317239, EPI_ISL_1317249 to 1317250, EPI_ISL_1317285, EPI_ISL_1317363, EPI_ISL_1317379, EPI_ISL_1317390 to 1317391, EPI_ISL_1317411, EPI_ISL_1317432, EPI_ISL_1317596, EPI_ISL_1317652, EPI_ISL_1317679, EPI_ISL_1317688 to 1317689, EPI_ISL_1317693 to 1317694, EPI_ISL_1317696 to 1317724, EPI_ISL_1317751, EPI_ISL_1317759 to 1317760, EPI_ISL_1317764 to 1317766, EPI_ISL_1317775, EPI_ISL_1317786 to 1317788, EPI_ISL_1317797, EPI_ISL_1317804, EPI_ISL_1317816 to 1317817, EPI_ISL_1317830 to 1317831, EPI_ISL_1317862, EPI_ISL_1317885 to 1317889, EPI_ISL_1317894, EPI_ISL_1317898, EPI_ISL_1317913 to 1317914, EPI_ISL_1317967, EPI_ISL_1317971, EPI_ISL_1318059, EPI_ISL_1318081, EPI_ISL_1323125, EPI_ISL_1323128 to 1323130, EPI_ISL_1347604, EPI_ISL_1347614 to 1347618 | see above | Norwegian Institute of Public Health, Department of Virology | Norwegian Institute of Public Health, Department of Virology                                                               | Atiya R Ali; Debec Nadia; Engebretsen Serina Beate; Engebretsen Serina Beate Atiya R Ali; Garcia Llorente Ignacio; Hilde Elshaug; Hilde Vollan; Ignacio Garcia Llorente; Jon Bråte; Kamilla Heddeland Instefjord; Karoline Bragstad; Kathrine Stene-Johansen; Marie Paulsen Madsen; Olav Hungnes; Pedersen Benedikte Nevjen; Rasmus Riis Kopperud; Serina B Engebretsen                                        |
| EPI_ISL_1020288, EPI_ISL_1300662 to 1300663, EPI_ISL_1301734 to 1301803, EPI_ISL_1302666 to 1302667, EPI_ISL_1302675 to 1302681                                                                                                                                                                                                                                                                                                                                                                                                                                                                                                                                                                                                                                                                                                                                                                                                                                                                                                                                                                                                                                                                                                                                                                                                                                                                                                                                                            |           | Nucleic Acid Testing, National Reference Laboratory          | GIGA Medical Genomics                                                                                                      | Bouchra Boujemla; Esperence Umumararungu; Jacob Souppgui; Keith Durkin; Léon Mutesa; Maria Artesi; Marie-Pierre Hayette; Nathalie Renotte; Patrick Tuyisenge; Robert Rutayisire; Sabin Nsanzimana; Swaibu Gatara; Sébastien Bontems; Vincent Bours; Yvan Butera                                                                                                                                                |
| EPI_ISL_1117379 to 1117449                                                                                                                                                                                                                                                                                                                                                                                                                                                                                                                                                                                                                                                                                                                                                                                                                                                                                                                                                                                                                                                                                                                                                                                                                                                                                                                                                                                                                                                                 |           | Nucleo de Pesquisa em Inovacao Terapeutica - UFPE            | LABBE, Federal University of Pernambuco                                                                                    | Bruno Sampaio; Heidi Lacerda Alves da Cruz; Maira Galdino da Rocha Pitta; Marco Katzenberger; Marcos da Silveira Requeira Neto; Michelly Cristiny Pereira; Reginaldo Goncalves de Lima Neto; Valdir de Queiroz Balbino; Wilson Jose da Silva Junior                                                                                                                                                            |
| EPI_ISL_1074743, EPI_ISL_1076023, EPI_ISL_1076306                                                                                                                                                                                                                                                                                                                                                                                                                                                                                                                                                                                                                                                                                                                                                                                                                                                                                                                                                                                                                                                                                                                                                                                                                                                                                                                                                                                                                                          |           | Nyangabwe Hospital HIV Reference Laboratory                  | Botswana Harvard HIV Reference Laboratory                                                                                  | Boitumelo Zuze; Botshelo Radibe; David Lawrence; Dorcas Maruapula; Joseph; Joseph Makhema; Legodile Kooepile; Makhema; Mosepele Mosepele; Roger Shapiro; Shahin Lockman; Sikhulile Moyo; Simani Gaseitsiwe; Wonderful T. Choga                                                                                                                                                                                 |
| EPI_ISL_1074301                                                                                                                                                                                                                                                                                                                                                                                                                                                                                                                                                                                                                                                                                                                                                                                                                                                                                                                                                                                                                                                                                                                                                                                                                                                                                                                                                                                                                                                                            |           | Nyangabwe Hospital HIV Reference Laboratory                  | Botswana Harvard HIV Reference Laboratory,                                                                                 | Boitumelo Zuze; Botshelo Radibe; David Lawrence; Dorcas Maruapula; Joseph Makhema; Mosepele Mosepele; Roger Shapiro; Shahin Lockman; Sikhulile Moyo; Simani Gaseitsiwe; Wonderful T. Choga                                                                                                                                                                                                                     |
| EPI_ISL_1018032 to 1018049, EPI_ISL_1064751 to 1064754, EPI_ISL_1064763 to 1064765, EPI_ISL_1064770, EPI_ISL_1064772 to 1064774, EPI_ISL_1064776, EPI_ISL_1064778, EPI_ISL_1064783, EPI_ISL_1064792 to 1064793, EPI_ISL_1064796 to 1064796, EPI_ISL_1064804, EPI_ISL_1064813 to 1064818, EPI_ISL_1064829, EPI_ISL_1064832 to 1064833, EPI_ISL_1064843 to 1064846, EPI_ISL_1064853 to 1064857, EPI_ISL_1064863 to 1064864, EPI_ISL_1064877 to 1064882, EPI_ISL_1064899 to 1064903, EPI_ISL_1064910 to 1064914, EPI_ISL_1114525 to 1114530, EPI_ISL_1121895 to 1121898, EPI_ISL_1200526 to 1200527, EPI_ISL_1200531 to 1200532, EPI_ISL_1200539, EPI_ISL_1200549, EPI_ISL_1200555, EPI_ISL_1200576, EPI_ISL_1200607 to 1200610, EPI_ISL_1200627, EPI_ISL_1261796 to 1261797, EPI_ISL_1261811, EPI_ISL_1261819, EPI_ISL_1261827 to 1261829, EPI_ISL_1261846, EPI_ISL_1261854, EPI_ISL_1261865, EPI_ISL_1337482, EPI_ISL_1337518 to 1337519, EPI_ISL_1337524, EPI_ISL_1337527, EPI_ISL_1337529, EPI_ISL_1337539, EPI_ISL_1337541, EPI_ISL_1337546                                                                                                                                                                                                                                                                                                                                                                                                                                              | see above | OCME Office Of Chief Medical Examiner                        | New York City Public Health Laboratory                                                                                     | Jade Wang; et al.                                                                                                                                                                                                                                                                                                                                                                                              |
| EPI_ISL_1226144 to 1226168                                                                                                                                                                                                                                                                                                                                                                                                                                                                                                                                                                                                                                                                                                                                                                                                                                                                                                                                                                                                                                                                                                                                                                                                                                                                                                                                                                                                                                                                 |           | OH Department of Health Laboratory                           | Genomics and Discovery, Respiratory Viruses Branch, Division of Viral Diseases, Centers for Disease Control and Prevention | Anna Montmayeur; Anna Uehara; Ben L. Rambo-Martin; Clinton R. Paden; Dhvani Batra; Haibin Wang; Jasmine Padilla; Jing Zhang; Justin Lee; Katie Dillon; Krista Queen; Kristen Knipe; Kristine Lacey; Lori Rowe; Mark Burroughs; Matthew Schmerer; Mili Sheth; Peter W. Cook; Rachel Marine; Sam Shepard; Sarah Nobles; Shoshona Le; Suxiang Tong; Yan Li; Ying Tao                                              |
| EPI_ISL_1094204, EPI_ISL_1094206, EPI_ISL_1094253, EPI_ISL_1094262 to 1094263, EPI_ISL_1094295, EPI_ISL_1094306, EPI_ISL_1094521 to 1094534, EPI_ISL_1094962 to 1094973                                                                                                                                                                                                                                                                                                                                                                                                                                                                                                                                                                                                                                                                                                                                                                                                                                                                                                                                                                                                                                                                                                                                                                                                                                                                                                                    | see above | OH Department of Health Laboratory                           | Respiratory Viruses Branch, Division of Viral Diseases, Centers for Disease Control and Prevention                         | Anna Montmayeur; Anna Uehara; Ben L. Rambo-Martin; Clinton R. Paden; Dhvani Batra; Haibin Wang; Jasmine Padilla; Jing Zhang; Justin Lee; Krista Queen; Lori Rowe; Mark Burroughs; Mili Sheth; Peter W. Cook; Rachel Marine; Sarah Nobles; Suxiang Tong; Yan Li; Ying Tao                                                                                                                                       |
| EPI_ISL_1170959 to 1171464                                                                                                                                                                                                                                                                                                                                                                                                                                                                                                                                                                                                                                                                                                                                                                                                                                                                                                                                                                                                                                                                                                                                                                                                                                                                                                                                                                                                                                                                 |           | OHSU Lab Services Molecular Microbiology Lab                 | Ginkgo Bioworks Clinical Laboratory                                                                                        | Alec J. Hirsch; Alex Plocik; Amanda Riccardi; Andrew C. Adey; Becky Schilling; Benjamin N. Bimber; Birgitte Simen; Brendan L. O'Connell; Brian J. O'Roak; Daniel N. Streblov; Donna Hansel; Guang Fan; James McGann; Jim Griffin; Kayla Carter; Keith Robison; Malaika McKenzie-Bennett; Martha Pierson; Michelle Spencer; Rebecca Littlefield; Ruth V. Nichols; Sally Grindstaff; William B. Messer; Xuan Qin |
| EPI_ISL_1122018 to 1122348                                                                                                                                                                                                                                                                                                                                                                                                                                                                                                                                                                                                                                                                                                                                                                                                                                                                                                                                                                                                                                                                                                                                                                                                                                                                                                                                                                                                                                                                 |           | OHSU Lab Services Molecular Microbiology Lab                 | Oregon SARS-CoV-2 Genome Sequencing Center                                                                                 | Alec J. Hirsch; Andrew C. Adey; Benjamin N. Bimber; Brendan L. O'Connell; Brian J. O'Roak; Daniel N. Streblov; Donna Hansel; Guang Fan; Kayla Carter; Qin; Ruth V. Nichols; Sally Grindstaff; William B. Messer; Xuan                                                                                                                                                                                          |
| EPI_ISL_1272808 to 1272813                                                                                                                                                                                                                                                                                                                                                                                                                                                                                                                                                                                                                                                                                                                                                                                                                                                                                                                                                                                                                                                                                                                                                                                                                                                                                                                                                                                                                                                                 |           | OK Public Health Laboratory, Oklahoma State DOH              | Centers for Disease Control and Prevention Division of Viral Diseases, Pathogen Discovery                                  | Anna Montmayeur; Anna Uehara; Ben L. Rambo-Martin; Clinton R. Paden; Dhvani Batra; Haibin Wang; Jasmine Padilla; Jing Zhang; Justin Lee; Katie Dillon; Krista Queen; Kristen Knipe; Kristine Lacey; Lori Rowe; Mark Burroughs; Matthew Schmerer; Mili Sheth; Peter W. Cook; Rachel Marine; Sam Shepard; Sarah Nobles; Shoshona Le; Suxiang Tong; Yan Li; Ying Tao                                              |
| EPI_ISL_1196869 to 1196870                                                                                                                                                                                                                                                                                                                                                                                                                                                                                                                                                                                                                                                                                                                                                                                                                                                                                                                                                                                                                                                                                                                                                                                                                                                                                                                                                                                                                                                                 |           | OK Public Health Laboratory, Oklahoma State DOH              | Pathogen Discovery, Respiratory Viruses Branch, Division of Viral Diseases, Centers for Disease Control and Prevention     | Anna Kelleher; Anna Uehara; Brian Lynch; Clinton R. Paden; Haibin Wang; Han Jia Justin Ng; Jing Zhang; Krista Queen; Peter Cook; Suxiang Tong; Yan Li; Ying Tao                                                                                                                                                                                                                                                |
| EPI_ISL_1094226, EPI_ISL_1094230, EPI_ISL_1094247, EPI_ISL_1094252, EPI_ISL_1094337, EPI_ISL_1094340, EPI_ISL_1094497 to 1094502, EPI_ISL_1094791 to 1094813                                                                                                                                                                                                                                                                                                                                                                                                                                                                                                                                                                                                                                                                                                                                                                                                                                                                                                                                                                                                                                                                                                                                                                                                                                                                                                                               | see above | OK Public Health Laboratory, Oklahoma State DOH              | Respiratory Viruses Branch, Division of Viral Diseases, Centers for Disease Control and Prevention                         | Anna Montmayeur; Anna Uehara; Ben L. Rambo-Martin; Clinton R. Paden; Dhvani Batra; Haibin Wang; Jasmine Padilla; Jing Zhang; Justin Lee; Krista Queen; Lori Rowe; Mark Burroughs; Mili Sheth; Peter W. Cook; Rachel Marine; Sarah Nobles; Suxiang Tong; Yan Li; Ying Tao                                                                                                                                       |
| EPI_ISL_1299939 to 1300030                                                                                                                                                                                                                                                                                                                                                                                                                                                                                                                                                                                                                                                                                                                                                                                                                                                                                                                                                                                                                                                                                                                                                                                                                                                                                                                                                                                                                                                                 |           | OKMI FN Brno                                                 | CEITEC MU                                                                                                                  | Bystry V.; Deissova T.; Dolejska M.; Machackova T.; Pardy F.; Zdrzilova Dubska L.                                                                                                                                                                                                                                                                                                                              |
| EPI_ISL_1293353, EPI_ISL_1293355, EPI_ISL_1294358, EPI_ISL_1299227 to 1299239, EPI_ISL_1372416 to 1372425                                                                                                                                                                                                                                                                                                                                                                                                                                                                                                                                                                                                                                                                                                                                                                                                                                                                                                                                                                                                                                                                                                                                                                                                                                                                                                                                                                                  |           | OLVZ Aalst                                                   | OLVZ Aalst                                                                                                                 | Astrid Holderbeke                                                                                                                                                                                                                                                                                                                                                                                              |
| EPI_ISL_1201748 to 1201759                                                                                                                                                                                                                                                                                                                                                                                                                                                                                                                                                                                                                                                                                                                                                                                                                                                                                                                                                                                                                                                                                                                                                                                                                                                                                                                                                                                                                                                                 |           | OM WSSE Wroclaw                                              | 1. National Institute of Public Health - National Institute of Hygiene; 2. Eurofins Genomics Europe Sequencing GmbH        | ECDC COVID-19 WGS support team; Eurofins Genomics Europe Sequencing Team; Gierczyki Rafa; Sadkowska-Todys Magorzata; Wokowicz Tomasz; Zacharczuk Katarzyna                                                                                                                                                                                                                                                     |
| EPI_ISL_1272660 to 1272669                                                                                                                                                                                                                                                                                                                                                                                                                                                                                                                                                                                                                                                                                                                                                                                                                                                                                                                                                                                                                                                                                                                                                                                                                                                                                                                                                                                                                                                                 |           | OR State PHL-Virology/Immunology Section                     | Centers for Disease Control and Prevention Division of Viral Diseases, Pathogen Discovery                                  | Anna Montmayeur; Anna Uehara; Ben L. Rambo-Martin; Clinton R. Paden; Dhvani Batra; Haibin Wang; Jasmine Padilla; Jing Zhang; Justin Lee; Katie Dillon; Krista Queen; Kristen Knipe; Kristine Lacey; Lori Rowe; Mark Burroughs; Matthew Schmerer; Mili Sheth; Peter W. Cook; Rachel Marine; Sam Shepard; Sarah Nobles; Shoshona Le; Suxiang Tong; Yan Li; Ying Tao                                              |
| EPI_ISL_1169490, EPI_ISL_1169498, EPI_ISL_1226344 to 1226358                                                                                                                                                                                                                                                                                                                                                                                                                                                                                                                                                                                                                                                                                                                                                                                                                                                                                                                                                                                                                                                                                                                                                                                                                                                                                                                                                                                                                               |           | OR State PHL-Virology/Immunology Section                     | Genomics and Discovery, Respiratory Viruses Branch, Division of Viral Diseases, Centers for Disease Control and Prevention | Anna Montmayeur; Anna Uehara; Ben L. Rambo-Martin; Clinton R. Paden; Dhvani Batra; Haibin Wang; Jasmine Padilla; Jing Zhang; Justin Lee; Katie Dillon; Krista Queen; Kristen Knipe; Kristine Lacey; Lori Rowe; Mark Burroughs; Matthew Schmerer; Mili Sheth; Peter W. Cook; Rachel Marine; Sam Shepard; Sarah Nobles; Shoshona Le; Suxiang Tong; Yan Li; Ying Tao                                              |
| EPI_ISL_1094273, EPI_ISL_1094290, EPI_ISL_1094301, EPI_ISL_1094314, EPI_ISL_1094367, EPI_ISL_1094391, EPI_ISL_1094726 to 1094735, EPI_ISL_1095235 to 1095242                                                                                                                                                                                                                                                                                                                                                                                                                                                                                                                                                                                                                                                                                                                                                                                                                                                                                                                                                                                                                                                                                                                                                                                                                                                                                                                               | see above | OR State PHL-Virology/Immunology Section                     | Respiratory Viruses Branch, Division of Viral Diseases, Centers for Disease Control and Prevention                         | Anna Montmayeur; Anna Uehara; Ben L. Rambo-Martin; Clinton R. Paden; Dhvani Batra; Haibin Wang; Jasmine Padilla; Jing Zhang; Justin Lee; Krista Queen; Lori Rowe; Mark Burroughs; Mili Sheth; Peter W. Cook; Rachel Marine; Sarah Nobles; Suxiang Tong; Yan Li; Ying Tao                                                                                                                                       |
| EPI_ISL_1229006 to 1229007, EPI_ISL_1229009, EPI_ISL_1229011, EPI_ISL_1229014, EPI_ISL_1229016, EPI_ISL_1229018 to 1229021, EPI_ISL_1229026 to 1229027, EPI_ISL_1265471                                                                                                                                                                                                                                                                                                                                                                                                                                                                                                                                                                                                                                                                                                                                                                                                                                                                                                                                                                                                                                                                                                                                                                                                                                                                                                                    | see above | ORIADE SAINT MARTIN D HERES                                  | CNR Virus des Infections Respiratoires - France SUD                                                                        | Antonin Bal; Bruno Lina; Gregory Destras; Gwendolyne Burfin; Hadrien Regue; Laurence Josset; Martine Valette; Quentin Semanas                                                                                                                                                                                                                                                                                  |
| EPI_ISL_1135058 to 1135059, EPI_ISL_1135061, EPI_ISL_1165958, EPI_ISL_1166010 to 1166040, EPI_ISL_1322371 to 1322383, EPI_ISL_1336550 to 1336551, EPI_ISL_1336610 to 1336612, EPI_ISL_1359831, EPI_ISL_1359934, EPI_ISL_1360018                                                                                                                                                                                                                                                                                                                                                                                                                                                                                                                                                                                                                                                                                                                                                                                                                                                                                                                                                                                                                                                                                                                                                                                                                                                            | see above | ORIAPOLE - BACTERIOLOGIE                                     | CNR Virus des Infections Respiratoires - France SUD                                                                        | Antonin Bal; Bruno Lina; Gregory Destras; Gwendolyne Burfin; Hadrien Regue; Laurence Josset; Martine Valette; Quentin Semanas                                                                                                                                                                                                                                                                                  |
| EPI_ISL_1359745, EPI_ISL_1359794, EPI_ISL_1359799 to 1359801, EPI_ISL_1359805                                                                                                                                                                                                                                                                                                                                                                                                                                                                                                                                                                                                                                                                                                                                                                                                                                                                                                                                                                                                                                                                                                                                                                                                                                                                                                                                                                                                              |           | ORIAPOLE SMDH                                                | CNR Virus des Infections Respiratoires - France SUD                                                                        | Antonin Bal; Bruno Lina; Gregory Destras; Gwendolyne Burfin; Hadrien Regue; Laurence Josset; Martine Valette; Quentin Semanas                                                                                                                                                                                                                                                                                  |
| EPI_ISL_1036142                                                                                                                                                                                                                                                                                                                                                                                                                                                                                                                                                                                                                                                                                                                                                                                                                                                                                                                                                                                                                                                                                                                                                                                                                                                                                                                                                                                                                                                                            |           | OSP CIV ATRI MEDICINA INT                                    | Istituto Zooprofilattico Sperimentale dell'Abruzzo e Molise "G. Caporale"                                                  | Ancora M; Calistri P; Cammà C; Curini V; Di Domenico M; Di Pasquale A; Lorusso A; Mangone I; Marcacci M; Puglia I; Rinaldi A; Savini G; Scialabba S                                                                                                                                                                                                                                                            |
| EPI_ISL_1036152, EPI_ISL_1036159                                                                                                                                                                                                                                                                                                                                                                                                                                                                                                                                                                                                                                                                                                                                                                                                                                                                                                                                                                                                                                                                                                                                                                                                                                                                                                                                                                                                                                                           |           | OSP CIV GIULIANOVA PRONTO SOCC                               | Istituto Zooprofilattico Sperimentale dell'Abruzzo e Molise "G. Caporale"                                                  | Ancora M; Calistri P; Cammà C; Curini V; Di Domenico M; Di Pasquale A; Lorusso A; Mangone I; Marcacci M; Puglia I; Rinaldi A; Savini G; Scialabba S                                                                                                                                                                                                                                                            |
| EPI_ISL_1036189                                                                                                                                                                                                                                                                                                                                                                                                                                                                                                                                                                                                                                                                                                                                                                                                                                                                                                                                                                                                                                                                                                                                                                                                                                                                                                                                                                                                                                                                            |           | OSP CIV TERAMO PNEUMOLOGIA                                   | Istituto Zooprofilattico Sperimentale dell'Abruzzo e Molise "G. Caporale"                                                  | Ancora M; Calistri P; Cammà C; Curini V; Di Domenico M; Di Pasquale A; Lorusso A; Mangone I; Marcacci M; Puglia I; Rinaldi A; Savini G; Scialabba S                                                                                                                                                                                                                                                            |
| EPI_ISL_1036161                                                                                                                                                                                                                                                                                                                                                                                                                                                                                                                                                                                                                                                                                                                                                                                                                                                                                                                                                                                                                                                                                                                                                                                                                                                                                                                                                                                                                                                                            |           | OSP CIV TERAMO RIANIMAZIONE CARDIOCHIR                       | Istituto Zooprofilattico Sperimentale dell'Abruzzo e Molise "G.                                                            | Ancora M; Calistri P; Cammà C; Curini V; Di Domenico M; Di Pasquale A; Lorusso A; Mangone I; Marcacci M; Puglia I; Rinaldi A; Savini G; Scialabba S                                                                                                                                                                                                                                                            |

|                                                                                                                                                                                                                                                                                                                                                                                                                                                                                                                                                                                                                                                                                                                                                                                                                                                                                                                                                                                                                                                                                                                                                                                                                                                                                                                                                                                                                                                                                                                                                                                                                                                                                                                                                                                                                                                                                                                                                                                                                                                                                                                                                                                                                                                                                                                                                                                                                                                                                                        |                                                             |                                                                           |                                                                                                                                                                                                                                                                                                                                                                                                                                                                                                                                                                                                                                           |  |
|--------------------------------------------------------------------------------------------------------------------------------------------------------------------------------------------------------------------------------------------------------------------------------------------------------------------------------------------------------------------------------------------------------------------------------------------------------------------------------------------------------------------------------------------------------------------------------------------------------------------------------------------------------------------------------------------------------------------------------------------------------------------------------------------------------------------------------------------------------------------------------------------------------------------------------------------------------------------------------------------------------------------------------------------------------------------------------------------------------------------------------------------------------------------------------------------------------------------------------------------------------------------------------------------------------------------------------------------------------------------------------------------------------------------------------------------------------------------------------------------------------------------------------------------------------------------------------------------------------------------------------------------------------------------------------------------------------------------------------------------------------------------------------------------------------------------------------------------------------------------------------------------------------------------------------------------------------------------------------------------------------------------------------------------------------------------------------------------------------------------------------------------------------------------------------------------------------------------------------------------------------------------------------------------------------------------------------------------------------------------------------------------------------------------------------------------------------------------------------------------------------|-------------------------------------------------------------|---------------------------------------------------------------------------|-------------------------------------------------------------------------------------------------------------------------------------------------------------------------------------------------------------------------------------------------------------------------------------------------------------------------------------------------------------------------------------------------------------------------------------------------------------------------------------------------------------------------------------------------------------------------------------------------------------------------------------------|--|
|                                                                                                                                                                                                                                                                                                                                                                                                                                                                                                                                                                                                                                                                                                                                                                                                                                                                                                                                                                                                                                                                                                                                                                                                                                                                                                                                                                                                                                                                                                                                                                                                                                                                                                                                                                                                                                                                                                                                                                                                                                                                                                                                                                                                                                                                                                                                                                                                                                                                                                        |                                                             | Caporale*                                                                 |                                                                                                                                                                                                                                                                                                                                                                                                                                                                                                                                                                                                                                           |  |
| EPI_ISL_1036143, EPI_ISL_1036149, EPI_ISL_1036158, EPI_ISL_1036186, EPI_ISL_1036223                                                                                                                                                                                                                                                                                                                                                                                                                                                                                                                                                                                                                                                                                                                                                                                                                                                                                                                                                                                                                                                                                                                                                                                                                                                                                                                                                                                                                                                                                                                                                                                                                                                                                                                                                                                                                                                                                                                                                                                                                                                                                                                                                                                                                                                                                                                                                                                                                    | OSP SAN SALVATORE MED INT                                   | Istituto Zooprofilattico Sperimentale dell'Abruzzo e Molise "G. Caporale" | Ancora M; Calistri P; Cammà C; Curini V; Di Domenico M; Di Pasquale A; Lorusso A; Mangone I; Marcacci M; Puglia I; Rinaldi A; Savini G; Scialabba S                                                                                                                                                                                                                                                                                                                                                                                                                                                                                       |  |
| EPI_ISL_1036188, EPI_ISL_1036221                                                                                                                                                                                                                                                                                                                                                                                                                                                                                                                                                                                                                                                                                                                                                                                                                                                                                                                                                                                                                                                                                                                                                                                                                                                                                                                                                                                                                                                                                                                                                                                                                                                                                                                                                                                                                                                                                                                                                                                                                                                                                                                                                                                                                                                                                                                                                                                                                                                                       | OSP SAN SALVATORE UOC MAL INF                               | Istituto Zooprofilattico Sperimentale dell'Abruzzo e Molise "G. Caporale" | Ancora M; Calistri P; Cammà C; Curini V; Di Domenico M; Di Pasquale A; Lorusso A; Mangone I; Marcacci M; Puglia I; Rinaldi A; Savini G; Scialabba S                                                                                                                                                                                                                                                                                                                                                                                                                                                                                       |  |
| EPI_ISL_1117458, EPI_ISL_1117468, EPI_ISL_1117473, EPI_ISL_1117483 to 1117484, EPI_ISL_1117493, EPI_ISL_1117501, EPI_ISL_1117504 to 1117505, EPI_ISL_1117525, EPI_ISL_1121038                                                                                                                                                                                                                                                                                                                                                                                                                                                                                                                                                                                                                                                                                                                                                                                                                                                                                                                                                                                                                                                                                                                                                                                                                                                                                                                                                                                                                                                                                                                                                                                                                                                                                                                                                                                                                                                                                                                                                                                                                                                                                                                                                                                                                                                                                                                          | OSP SAN SALVATORE, MEDICINA INTERNA                         | Istituto Zooprofilattico Sperimentale dell'Abruzzo e Molise "G. Caporale" | Ancora M; Calistri P; Cammà C; Curini V; Di Domenico M; Di Pasquale A; Lorusso A; Mangone I; Marcacci M; Puglia I; Rinaldi A; Savini G; Scialabba S                                                                                                                                                                                                                                                                                                                                                                                                                                                                                       |  |
| see above                                                                                                                                                                                                                                                                                                                                                                                                                                                                                                                                                                                                                                                                                                                                                                                                                                                                                                                                                                                                                                                                                                                                                                                                                                                                                                                                                                                                                                                                                                                                                                                                                                                                                                                                                                                                                                                                                                                                                                                                                                                                                                                                                                                                                                                                                                                                                                                                                                                                                              | OSP SAN SALVATORE, MEDICINA INTERNA                         | Istituto Zooprofilattico Sperimentale dell'Abruzzo e Molise "G. Caporale" | Ancora M; Calistri P; Cammà C; Curini V; Di Domenico M; Di Pasquale A; Lorusso A; Mangone I; Marcacci M; Puglia I; Rinaldi A; Savini G; Scialabba S                                                                                                                                                                                                                                                                                                                                                                                                                                                                                       |  |
| EPI_ISL_1063784                                                                                                                                                                                                                                                                                                                                                                                                                                                                                                                                                                                                                                                                                                                                                                                                                                                                                                                                                                                                                                                                                                                                                                                                                                                                                                                                                                                                                                                                                                                                                                                                                                                                                                                                                                                                                                                                                                                                                                                                                                                                                                                                                                                                                                                                                                                                                                                                                                                                                        | OSP SS ANNIUNZIATA CHIETI, PRONTO SOCCORSO                  | Istituto Zooprofilattico Sperimentale dell'Abruzzo e Molise "G. Caporale" | Ancora M; Calistri P; Cammà C; Curini V; Di Domenico M; Di Pasquale A; Lorusso A; Mangone I; Marcacci M; Puglia I; Rinaldi A; Savini G; Scialabba S                                                                                                                                                                                                                                                                                                                                                                                                                                                                                       |  |
| EPI_ISL_1336697                                                                                                                                                                                                                                                                                                                                                                                                                                                                                                                                                                                                                                                                                                                                                                                                                                                                                                                                                                                                                                                                                                                                                                                                                                                                                                                                                                                                                                                                                                                                                                                                                                                                                                                                                                                                                                                                                                                                                                                                                                                                                                                                                                                                                                                                                                                                                                                                                                                                                        | OSPEDALE "F. RENZETTI" LANCIANO - ORTOPEDIA E TRAUMATOLOGIA | Istituto Zooprofilattico Sperimentale dell'Abruzzo e Molise "G. Caporale" | Ancora M; Calistri P; Cammà C; Caporale M; Curini V; Di Domenico M; Di Lollo V; Di Pasquale A; Lorusso A; Mangone I; Marcacci M; Puglia I; Rinaldi A; Savini G; Scialabba S                                                                                                                                                                                                                                                                                                                                                                                                                                                               |  |
| EPI_ISL_1336900                                                                                                                                                                                                                                                                                                                                                                                                                                                                                                                                                                                                                                                                                                                                                                                                                                                                                                                                                                                                                                                                                                                                                                                                                                                                                                                                                                                                                                                                                                                                                                                                                                                                                                                                                                                                                                                                                                                                                                                                                                                                                                                                                                                                                                                                                                                                                                                                                                                                                        | OSPEDALE "SAN CAMILLO" ATESSA - MEDICINA E LUNGODEGENZA     | Istituto Zooprofilattico Sperimentale dell'Abruzzo e Molise "G. Caporale" | Ancora M; Calistri P; Cammà C; Caporale M; Curini V; Di Domenico M; Di Lollo Valeria; Di Pasquale A; Lorusso A; Mangone I; Marcacci M; Puglia I; Rinaldi A; Savini G; Scialabba S                                                                                                                                                                                                                                                                                                                                                                                                                                                         |  |
| EPI_ISL_1250955, EPI_ISL_1251013, EPI_ISL_1251024, EPI_ISL_1251045                                                                                                                                                                                                                                                                                                                                                                                                                                                                                                                                                                                                                                                                                                                                                                                                                                                                                                                                                                                                                                                                                                                                                                                                                                                                                                                                                                                                                                                                                                                                                                                                                                                                                                                                                                                                                                                                                                                                                                                                                                                                                                                                                                                                                                                                                                                                                                                                                                     | OSPEDALE CIVILE GIULIANOVA                                  | Istituto Zooprofilattico Sperimentale dell'Abruzzo e Molise "G. Caporale" | Ancora M; Calistri P; Cammà C; Curini V; Di Domenico M; Di Pasquale A; Lorusso A; Mangone I; Marcacci M; Puglia I; Rinaldi A; Savini G; Scialabba S                                                                                                                                                                                                                                                                                                                                                                                                                                                                                       |  |
| EPI_ISL_1251055                                                                                                                                                                                                                                                                                                                                                                                                                                                                                                                                                                                                                                                                                                                                                                                                                                                                                                                                                                                                                                                                                                                                                                                                                                                                                                                                                                                                                                                                                                                                                                                                                                                                                                                                                                                                                                                                                                                                                                                                                                                                                                                                                                                                                                                                                                                                                                                                                                                                                        | OSPEDALE CIVILE GIULIANOVA - MEDICINA INTERNA               | Istituto Zooprofilattico Sperimentale dell'Abruzzo e Molise "G. Caporale" | Ancora M; Calistri P; Cammà C; Curini V; Di Domenico M; Di Pasquale A; Lorusso A; Mangone I; Marcacci M; Puglia I; Rinaldi A; Savini G; Scialabba S                                                                                                                                                                                                                                                                                                                                                                                                                                                                                       |  |
| EPI_ISL_1336732, EPI_ISL_1336962                                                                                                                                                                                                                                                                                                                                                                                                                                                                                                                                                                                                                                                                                                                                                                                                                                                                                                                                                                                                                                                                                                                                                                                                                                                                                                                                                                                                                                                                                                                                                                                                                                                                                                                                                                                                                                                                                                                                                                                                                                                                                                                                                                                                                                                                                                                                                                                                                                                                       | OSPEDALE CIVILE GIULIANOVA - PRONTO SOCCORSO                | Istituto Zooprofilattico Sperimentale dell'Abruzzo e Molise "G. Caporale" | Ancora M; Calistri P; Cammà C; Caporale M; Curini V; Di Domenico M; Di Lollo V; Di Lollo Valeria; Di Pasquale A; Lorusso A; Mangone I; Marcacci M; Puglia I; Rinaldi A; Savini G; Scialabba S                                                                                                                                                                                                                                                                                                                                                                                                                                             |  |
| EPI_ISL_1336788, EPI_ISL_1336913                                                                                                                                                                                                                                                                                                                                                                                                                                                                                                                                                                                                                                                                                                                                                                                                                                                                                                                                                                                                                                                                                                                                                                                                                                                                                                                                                                                                                                                                                                                                                                                                                                                                                                                                                                                                                                                                                                                                                                                                                                                                                                                                                                                                                                                                                                                                                                                                                                                                       | OSPEDALE CIVILE SANT'OMERO - PRONTO SOCCORSO                | Istituto Zooprofilattico Sperimentale dell'Abruzzo e Molise "G. Caporale" | Ancora M; Calistri P; Cammà C; Caporale M; Curini V; Di Domenico M; Di Lollo V; Di Lollo Valeria; Di Pasquale A; Lorusso A; Mangone I; Marcacci M; Puglia I; Rinaldi A; Savini G; Scialabba S                                                                                                                                                                                                                                                                                                                                                                                                                                             |  |
| EPI_ISL_1336951                                                                                                                                                                                                                                                                                                                                                                                                                                                                                                                                                                                                                                                                                                                                                                                                                                                                                                                                                                                                                                                                                                                                                                                                                                                                                                                                                                                                                                                                                                                                                                                                                                                                                                                                                                                                                                                                                                                                                                                                                                                                                                                                                                                                                                                                                                                                                                                                                                                                                        | OSPEDALE CIVILE TERAMO - CENTRO TRASFUSIONALE               | Istituto Zooprofilattico Sperimentale dell'Abruzzo e Molise "G. Caporale" | Ancora M; Calistri P; Cammà C; Caporale M; Curini V; Di Domenico M; Di Lollo Valeria; Di Pasquale A; Lorusso A; Mangone I; Marcacci M; Puglia I; Rinaldi A; Savini G; Scialabba S                                                                                                                                                                                                                                                                                                                                                                                                                                                         |  |
| EPI_ISL_1336704                                                                                                                                                                                                                                                                                                                                                                                                                                                                                                                                                                                                                                                                                                                                                                                                                                                                                                                                                                                                                                                                                                                                                                                                                                                                                                                                                                                                                                                                                                                                                                                                                                                                                                                                                                                                                                                                                                                                                                                                                                                                                                                                                                                                                                                                                                                                                                                                                                                                                        | OSPEDALE CIVILE TERAMO - PRONTO SOCCORSO                    | Istituto Zooprofilattico Sperimentale dell'Abruzzo e Molise "G. Caporale" | Ancora M; Calistri P; Cammà C; Caporale M; Curini V; Di Domenico M; Di Lollo V; Di Pasquale A; Lorusso A; Mangone I; Marcacci M; Puglia I; Rinaldi A; Savini G; Scialabba S                                                                                                                                                                                                                                                                                                                                                                                                                                                               |  |
| EPI_ISL_1251005 to 1251007                                                                                                                                                                                                                                                                                                                                                                                                                                                                                                                                                                                                                                                                                                                                                                                                                                                                                                                                                                                                                                                                                                                                                                                                                                                                                                                                                                                                                                                                                                                                                                                                                                                                                                                                                                                                                                                                                                                                                                                                                                                                                                                                                                                                                                                                                                                                                                                                                                                                             | OSPEDALE SAN SALVATORE                                      | Istituto Zooprofilattico Sperimentale dell'Abruzzo e Molise "G. Caporale" | Ancora M; Calistri P; Cammà C; Curini V; Di Domenico M; Di Pasquale A; Lorusso A; Mangone I; Marcacci M; Puglia I; Rinaldi A; Savini G; Scialabba S                                                                                                                                                                                                                                                                                                                                                                                                                                                                                       |  |
| EPI_ISL_1336660                                                                                                                                                                                                                                                                                                                                                                                                                                                                                                                                                                                                                                                                                                                                                                                                                                                                                                                                                                                                                                                                                                                                                                                                                                                                                                                                                                                                                                                                                                                                                                                                                                                                                                                                                                                                                                                                                                                                                                                                                                                                                                                                                                                                                                                                                                                                                                                                                                                                                        | OSPEDALE SAN SALVATORE - MEDICINA DI LABORATORIO            | Istituto Zooprofilattico Sperimentale dell'Abruzzo e Molise "G. Caporale" | Ancora M; Calistri P; Cammà C; Caporale M; Curini V; Di Domenico M; Di Lollo V; Di Pasquale A; Lorusso A; Mangone I; Marcacci M; Puglia I; Rinaldi A; Savini G; Scialabba S                                                                                                                                                                                                                                                                                                                                                                                                                                                               |  |
| EPI_ISL_1251002                                                                                                                                                                                                                                                                                                                                                                                                                                                                                                                                                                                                                                                                                                                                                                                                                                                                                                                                                                                                                                                                                                                                                                                                                                                                                                                                                                                                                                                                                                                                                                                                                                                                                                                                                                                                                                                                                                                                                                                                                                                                                                                                                                                                                                                                                                                                                                                                                                                                                        | OSPEDALE SAN SALVATORE L'AQUILA UOC PNEUMOLOGIA             | Istituto Zooprofilattico Sperimentale dell'Abruzzo e Molise "G. Caporale" | Ancora M; Calistri P; Cammà C; Curini V; Di Domenico M; Di Pasquale A; Lorusso A; Mangone I; Marcacci M; Puglia I; Rinaldi A; Savini G; Scialabba S                                                                                                                                                                                                                                                                                                                                                                                                                                                                                       |  |
| EPI_ISL_1250972                                                                                                                                                                                                                                                                                                                                                                                                                                                                                                                                                                                                                                                                                                                                                                                                                                                                                                                                                                                                                                                                                                                                                                                                                                                                                                                                                                                                                                                                                                                                                                                                                                                                                                                                                                                                                                                                                                                                                                                                                                                                                                                                                                                                                                                                                                                                                                                                                                                                                        | OSPEDALE SANT'OMERO                                         | Istituto Zooprofilattico Sperimentale dell'Abruzzo e Molise "G. Caporale" | Ancora M; Calistri P; Cammà C; Curini V; Di Domenico M; Di Pasquale A; Lorusso A; Mangone I; Marcacci M; Puglia I; Rinaldi A; Savini G; Scialabba S                                                                                                                                                                                                                                                                                                                                                                                                                                                                                       |  |
| EPI_ISL_1366742 to 1366745                                                                                                                                                                                                                                                                                                                                                                                                                                                                                                                                                                                                                                                                                                                                                                                                                                                                                                                                                                                                                                                                                                                                                                                                                                                                                                                                                                                                                                                                                                                                                                                                                                                                                                                                                                                                                                                                                                                                                                                                                                                                                                                                                                                                                                                                                                                                                                                                                                                                             | OUCRU                                                       | OUCRU                                                                     | Guy Thwaites; Huynh Trung Trieu; Lam Minh Yen; Le Manh Hung; Le Nguyen Truc Nhu; Le Thi Thu Huong; Le Van Tan; Nghiem My Ngoc; Ngo Ngoc Quang Minh; Nguyen Thanh Dung; Nguyen Thanh Phong; Nguyen Thanh Truong; Nguyen Thi Thu Hong; Nguyen To Anh; Nguyen Tri Dung; Nguyen Van Vinh Chau; Tran Nguyen Hoang Tu; Tran Tan Thanh                                                                                                                                                                                                                                                                                                           |  |
| EPI_ISL_1293093, EPI_ISL_1293218, EPI_ISL_1378813                                                                                                                                                                                                                                                                                                                                                                                                                                                                                                                                                                                                                                                                                                                                                                                                                                                                                                                                                                                                                                                                                                                                                                                                                                                                                                                                                                                                                                                                                                                                                                                                                                                                                                                                                                                                                                                                                                                                                                                                                                                                                                                                                                                                                                                                                                                                                                                                                                                      | Oak Ridge                                                   | Grubaugh Lab - Yale School of Public Health                               | Anderson Brito; Annie Watkins; Chaney Kalinich; Chantal Vogels; Daniel Jones; Isabell Ott; Jessica Rothman; Joseph Fauver; Mallery Breban; Mary Petrone; Nathan Grubaugh; Tara Alpert                                                                                                                                                                                                                                                                                                                                                                                                                                                     |  |
| EPI_ISL_1151790, EPI_ISL_1157221, EPI_ISL_1157264, EPI_ISL_1157267, EPI_ISL_1210610, EPI_ISL_1217681, EPI_ISL_1354395                                                                                                                                                                                                                                                                                                                                                                                                                                                                                                                                                                                                                                                                                                                                                                                                                                                                                                                                                                                                                                                                                                                                                                                                                                                                                                                                                                                                                                                                                                                                                                                                                                                                                                                                                                                                                                                                                                                                                                                                                                                                                                                                                                                                                                                                                                                                                                                  | Oberlausitz Kliniken gGmbH                                  | Robert Koch Institute                                                     |                                                                                                                                                                                                                                                                                                                                                                                                                                                                                                                                                                                                                                           |  |
| see above                                                                                                                                                                                                                                                                                                                                                                                                                                                                                                                                                                                                                                                                                                                                                                                                                                                                                                                                                                                                                                                                                                                                                                                                                                                                                                                                                                                                                                                                                                                                                                                                                                                                                                                                                                                                                                                                                                                                                                                                                                                                                                                                                                                                                                                                                                                                                                                                                                                                                              | Obersn Health                                               | Bioinfoxperts, LLC                                                        | Amy Feehan; David J. Nolan; David Moraga Amador; Julia-Garcia-Diaz; Luke Caruso; Lydia Von Borstel; Rebecca Rose; Sissy Cross; Susanna L. Lamers; Tong Yang; Wayra Navia; Xiao Hui Zhou                                                                                                                                                                                                                                                                                                                                                                                                                                                   |  |
| EPI_ISL_1196751 to 1196763                                                                                                                                                                                                                                                                                                                                                                                                                                                                                                                                                                                                                                                                                                                                                                                                                                                                                                                                                                                                                                                                                                                                                                                                                                                                                                                                                                                                                                                                                                                                                                                                                                                                                                                                                                                                                                                                                                                                                                                                                                                                                                                                                                                                                                                                                                                                                                                                                                                                             | Ochsner Health                                              | Bioinfoxperts, LLC                                                        |                                                                                                                                                                                                                                                                                                                                                                                                                                                                                                                                                                                                                                           |  |
| EPI_ISL_1073956 to 1073957, EPI_ISL_1073959, EPI_ISL_1073961 to 1073963, EPI_ISL_1073965, EPI_ISL_1073981 to 1074024, EPI_ISL_1138830 to 1138843, EPI_ISL_1138848 to 1138877                                                                                                                                                                                                                                                                                                                                                                                                                                                                                                                                                                                                                                                                                                                                                                                                                                                                                                                                                                                                                                                                                                                                                                                                                                                                                                                                                                                                                                                                                                                                                                                                                                                                                                                                                                                                                                                                                                                                                                                                                                                                                                                                                                                                                                                                                                                           | Office of Diseases Prevention and Control Region 4 Saraburi | COVID-19 Network Investigations (CONI) Alliance                           | Angkana Huang; Anthony R. Jones; Arporn Wangwivatsin; Bhakbhoon Panthan; Chonticha Klungtong; Duangkamon Loesbanluetchai; Ekawat Pasomsub; Elizabeth Batty; Insee Sensem; Janjira Thaipadungpanit; Jutikul Kaewmalakul; Khajohn Joonlasak; Kingkan Rakmanee; Krittikorn Kumpornsin; Namfon Kotanan; Nathamon Runnachot; Pakjira Rimdusit; Payon Pengyo; Praima Moonmuang; Sataporn Hatsadichart; Sirinapa Singthong; Siriporn Lakesukthom; Siriwan Yaemimnual; Stefan Fernandez; Suttiruk Changchawai; Thanat Chookajorn; Theerarat Kochakarn; Treewat Watthanachockchai; Wasun Chantratita; Wonvimol Lemprasert; Wuditchai Manasatienkij |  |
| EPI_ISL_1321446                                                                                                                                                                                                                                                                                                                                                                                                                                                                                                                                                                                                                                                                                                                                                                                                                                                                                                                                                                                                                                                                                                                                                                                                                                                                                                                                                                                                                                                                                                                                                                                                                                                                                                                                                                                                                                                                                                                                                                                                                                                                                                                                                                                                                                                                                                                                                                                                                                                                                        | Ohio Department of Health Laboratories                      | Ohio Department of Health Laboratories                                    | Allison Black; Brent Lee; Caitlin McDonnell; Eric Brandt; Erica Leasure; Glen McGillivray; Heather Blankenship; Holmes; Jade Mowery; Jennifer; Kelsey Florek; Keoni Omura; Kirtana Ramadugu; Quanta Brown; Stephanie McCracken; Tyler Payne; and Tammy Bannerman                                                                                                                                                                                                                                                                                                                                                                          |  |
| EPI_ISL_1007745, EPI_ISL_1007809, EPI_ISL_1008389 to 1008390, EPI_ISL_1008394, EPI_ISL_1008610, EPI_ISL_1014593, EPI_ISL_1014688 to 1014689, EPI_ISL_1014937, EPI_ISL_1020332, EPI_ISL_1020338, EPI_ISL_1020340 to 1020341, EPI_ISL_1020409 to 1020410, EPI_ISL_1020486, EPI_ISL_1056953 to 1056955, EPI_ISL_1056958, EPI_ISL_1056960, EPI_ISL_1056969, EPI_ISL_1056973, EPI_ISL_1057037, EPI_ISL_1063913 to 1063914, EPI_ISL_1063987, EPI_ISL_1063997, EPI_ISL_1064017, EPI_ISL_1080046, EPI_ISL_1080603 to 1080604, EPI_ISL_1080680, EPI_ISL_1080749 to 1080750, EPI_ISL_1080854, EPI_ISL_1082452 to 1082453, EPI_ISL_1082526, EPI_ISL_1082888, EPI_ISL_1083590, EPI_ISL_1084605, EPI_ISL_1084722, EPI_ISL_1084823, EPI_ISL_1085007 to 1085008, EPI_ISL_1117700, EPI_ISL_1117774, EPI_ISL_1118086 to 1118089, EPI_ISL_1118158, EPI_ISL_1118205, EPI_ISL_1118281, EPI_ISL_1118374, EPI_ISL_1118802, EPI_ISL_1118871, EPI_ISL_1118910 to 1118914, EPI_ISL_1118920 to 1118922, EPI_ISL_1118924, EPI_ISL_1164931, EPI_ISL_1164946, EPI_ISL_1165135, EPI_ISL_1165442, EPI_ISL_1165770, EPI_ISL_1180233, EPI_ISL_1180236, EPI_ISL_1180254, EPI_ISL_1180257, EPI_ISL_1180259, EPI_ISL_1181696, EPI_ISL_1181698 to 1181699, EPI_ISL_1181721 to 1181722, EPI_ISL_1181819 to 1181820, EPI_ISL_1181865, EPI_ISL_1181881, EPI_ISL_1197236, EPI_ISL_1197691, EPI_ISL_1198004, EPI_ISL_1198008, EPI_ISL_1198793, EPI_ISL_1198797 to 1198799, EPI_ISL_1198804 to 1198805, EPI_ISL_1224944 to 1224945, EPI_ISL_1224947 to 1224948, EPI_ISL_1225075 to 1225076, EPI_ISL_1225078, EPI_ISL_1225155, EPI_ISL_1247017 to 1247018, EPI_ISL_1247359, EPI_ISL_1247746, EPI_ISL_1248090, EPI_ISL_1248476, EPI_ISL_1259311 to 1259312, EPI_ISL_1259314, EPI_ISL_1259372, EPI_ISL_1259396, EPI_ISL_1259398, EPI_ISL_1260633, EPI_ISL_1260661, EPI_ISL_1260695 to 1260696, EPI_ISL_1264247, EPI_ISL_1265066, EPI_ISL_1265142, EPI_ISL_1265162, EPI_ISL_1265670 to 1265671, EPI_ISL_1265739, EPI_ISL_1265751, EPI_ISL_1265900, EPI_ISL_1265909, EPI_ISL_1266186, EPI_ISL_1296460, EPI_ISL_1296234 to 1296235, EPI_ISL_1310797 to 1310798, EPI_ISL_1310800 to 1310801, EPI_ISL_1310803 to 1310805, EPI_ISL_1310807, EPI_ISL_1310809 to 1310810, EPI_ISL_1311849, EPI_ISL_1311864 to 1311866, EPI_ISL_1318220, EPI_ISL_1318290 to 1318292, EPI_ISL_1318408, EPI_ISL_1318605, EPI_ISL_1318658, EPI_ISL_1318692 to 1318693, EPI_ISL_1318695, EPI_ISL_1321156, EPI_ISL_1321309, EPI_ISL_1321601 to 1321603, EPI_ISL_1321807 to 1321808 |                                                             |                                                                           |                                                                                                                                                                                                                                                                                                                                                                                                                                                                                                                                                                                                                                           |  |
| see above                                                                                                                                                                                                                                                                                                                                                                                                                                                                                                                                                                                                                                                                                                                                                                                                                                                                                                                                                                                                                                                                                                                                                                                                                                                                                                                                                                                                                                                                                                                                                                                                                                                                                                                                                                                                                                                                                                                                                                                                                                                                                                                                                                                                                                                                                                                                                                                                                                                                                              | Ohio Department of Health Laboratory                        | Ohio Department of Health Laboratory                                      | 8995 East Main Street Reynoldsburg; Allison Black; Brent Lee; Caitlin McDonnell; Eric Brandt; Erica Leasure; Glen McGillivray; Heather Blankenship; Holmes; Jade Mowery; Jennifer; Kelsey Florek; Keoni Omura; Kirtana Ramadugu; Ohio 43068; Quanta Brown; Stephanie McCracken; Tyler Payne; and Tammy Bannerman                                                                                                                                                                                                                                                                                                                          |  |
| EPI_ISL_1239142                                                                                                                                                                                                                                                                                                                                                                                                                                                                                                                                                                                                                                                                                                                                                                                                                                                                                                                                                                                                                                                                                                                                                                                                                                                                                                                                                                                                                                                                                                                                                                                                                                                                                                                                                                                                                                                                                                                                                                                                                                                                                                                                                                                                                                                                                                                                                                                                                                                                                        | Ohio State University Wexner Medical Center                 | Polaris Molecular Laboratory                                              | Chang Y-S; Chappell D; Corcoran S; Jones D; Koenig S; Pancholi P; Ru P; Snyder P; Tu H                                                                                                                                                                                                                                                                                                                                                                                                                                                                                                                                                    |  |
| EPI_ISL_1139158                                                                                                                                                                                                                                                                                                                                                                                                                                                                                                                                                                                                                                                                                                                                                                                                                                                                                                                                                                                                                                                                                                                                                                                                                                                                                                                                                                                                                                                                                                                                                                                                                                                                                                                                                                                                                                                                                                                                                                                                                                                                                                                                                                                                                                                                                                                                                                                                                                                                                        | Ohio State University Wexner Medical Center                 | James Molecular Lab                                                       | D Jones; P Pancholi; P Snyder; Z Rudy                                                                                                                                                                                                                                                                                                                                                                                                                                                                                                                                                                                                     |  |
| EPI_ISL_1096137 to 1096138, EPI_ISL_1202566                                                                                                                                                                                                                                                                                                                                                                                                                                                                                                                                                                                                                                                                                                                                                                                                                                                                                                                                                                                                                                                                                                                                                                                                                                                                                                                                                                                                                                                                                                                                                                                                                                                                                                                                                                                                                                                                                                                                                                                                                                                                                                                                                                                                                                                                                                                                                                                                                                                            | Ohio State University Wexner Medical Center                 | James Molecular Laboratory                                                | Chang Y-S; Chappell D; Corcoran S; Dan Jones; Huolin Tu; Jones D; Keelie Thomas; Koenig S; Pamela Snyder; Pancholi P; Preeti Pancholi; Ru P; Sara Koenig; Saran Corcoran; Snyder P; Zachary Rudy                                                                                                                                                                                                                                                                                                                                                                                                                                          |  |
| EPI_ISL_1310787 to 1310788                                                                                                                                                                                                                                                                                                                                                                                                                                                                                                                                                                                                                                                                                                                                                                                                                                                                                                                                                                                                                                                                                                                                                                                                                                                                                                                                                                                                                                                                                                                                                                                                                                                                                                                                                                                                                                                                                                                                                                                                                                                                                                                                                                                                                                                                                                                                                                                                                                                                             | Ohio State University Wexner Medical Center                 | James Polaris Molecular Laboratory                                        | Chang Y-S; Chappell D; Corcoran S; Garee J; Jones D; Koenig S; Pancholi P; Ru P; Snyder P; Tu H                                                                                                                                                                                                                                                                                                                                                                                                                                                                                                                                           |  |
| EPI_ISL_1239140 to 1239141                                                                                                                                                                                                                                                                                                                                                                                                                                                                                                                                                                                                                                                                                                                                                                                                                                                                                                                                                                                                                                                                                                                                                                                                                                                                                                                                                                                                                                                                                                                                                                                                                                                                                                                                                                                                                                                                                                                                                                                                                                                                                                                                                                                                                                                                                                                                                                                                                                                                             | Ohio State University Wexner Medical Center                 | Polaris Molecular Laboratory                                              | Chang Y-S; Chappell D; Corcoran S; Jones D; Koenig S; Pancholi P; Ru P; Snyder P; Tu H                                                                                                                                                                                                                                                                                                                                                                                                                                                                                                                                                    |  |
| EPI_ISL_1005541, EPI_ISL_1005556                                                                                                                                                                                                                                                                                                                                                                                                                                                                                                                                                                                                                                                                                                                                                                                                                                                                                                                                                                                                                                                                                                                                                                                                                                                                                                                                                                                                                                                                                                                                                                                                                                                                                                                                                                                                                                                                                                                                                                                                                                                                                                                                                                                                                                                                                                                                                                                                                                                                       | Olive View Medical Center                                   | Los Angeles County PHL                                                    | P. Hemarajata et al.                                                                                                                                                                                                                                                                                                                                                                                                                                                                                                                                                                                                                      |  |

|                                                                                                                                                                                                                                                                                                                                                                                                                                                                                                                                                                                                                                                                                                                                                                                                                                                                                                                                                                                                                                                                                                                                                                                                                                                                                                                                                                                                                                                                                                                                                                                                                                                                                                                                                                                                                                                                                                                                                                                                                                                                                                                                                                                                                                                                                                                                                                                                                                                                                                                                                                                                                                                                                                                                                                                                                                                                                                                                                                                                                                                                                                                                                                                                                                                                                                                                                                                                                                                                                                                                                                                                                                                                                                                                                                                                                                                                                                                                                                                                                                                                                                                                                                                                                                                                                                                                                                                                                                                                                                                                                                                                                                                                                                                                                                                                                                                                                                                                                                                                                                                                                                                                                                                                                                                                                                                                                                                                                                                                                                                                                                                                                                                                                                                                                                                                                                                                                                                                                                                                                                                                                                                                                                                                                                                                                                                                                                                                                                                                                                                                                                                                                                                                                                                                                                                                                                                                                                                                                                                                                                                                                                                                                                                                                                                                                                                                                                                                                                                                                                                                                                                                                                                                                                                                                                                                                                                                                                                                                                                                                                                                                                                                                                                                                                                                                                                                                                                                                                                                                                                                                                                                                                                                                                                                                                                                                                                                                                                                                                                                                                                                                                                                                                                                                                                                                                                                                                                                                                                                                                                                                                                                                                                                                                                                                                                                                                                                                                                                                                                                                                                                                                                                                                                                                                                                                                                                                                                                                                                                                                                                                                                                                                                                                                                                                                                                                                                                                                                                                                                                                                                                                                                                                                                                                                                                                                                                                                                                                                                                                                                                                                                                                                                                                                                                                                                                                                                                                                                                                                                                                                                                                                                                                                                                                                                                                                                                                                                                                                                                                                                                                                                                                                                                                                                                                                                                                                                                  |                                                                                                                                                  |                                                 |                                                                                                                                                                                                                                                                              |
|------------------------------------------------------------------------------------------------------------------------------------------------------------------------------------------------------------------------------------------------------------------------------------------------------------------------------------------------------------------------------------------------------------------------------------------------------------------------------------------------------------------------------------------------------------------------------------------------------------------------------------------------------------------------------------------------------------------------------------------------------------------------------------------------------------------------------------------------------------------------------------------------------------------------------------------------------------------------------------------------------------------------------------------------------------------------------------------------------------------------------------------------------------------------------------------------------------------------------------------------------------------------------------------------------------------------------------------------------------------------------------------------------------------------------------------------------------------------------------------------------------------------------------------------------------------------------------------------------------------------------------------------------------------------------------------------------------------------------------------------------------------------------------------------------------------------------------------------------------------------------------------------------------------------------------------------------------------------------------------------------------------------------------------------------------------------------------------------------------------------------------------------------------------------------------------------------------------------------------------------------------------------------------------------------------------------------------------------------------------------------------------------------------------------------------------------------------------------------------------------------------------------------------------------------------------------------------------------------------------------------------------------------------------------------------------------------------------------------------------------------------------------------------------------------------------------------------------------------------------------------------------------------------------------------------------------------------------------------------------------------------------------------------------------------------------------------------------------------------------------------------------------------------------------------------------------------------------------------------------------------------------------------------------------------------------------------------------------------------------------------------------------------------------------------------------------------------------------------------------------------------------------------------------------------------------------------------------------------------------------------------------------------------------------------------------------------------------------------------------------------------------------------------------------------------------------------------------------------------------------------------------------------------------------------------------------------------------------------------------------------------------------------------------------------------------------------------------------------------------------------------------------------------------------------------------------------------------------------------------------------------------------------------------------------------------------------------------------------------------------------------------------------------------------------------------------------------------------------------------------------------------------------------------------------------------------------------------------------------------------------------------------------------------------------------------------------------------------------------------------------------------------------------------------------------------------------------------------------------------------------------------------------------------------------------------------------------------------------------------------------------------------------------------------------------------------------------------------------------------------------------------------------------------------------------------------------------------------------------------------------------------------------------------------------------------------------------------------------------------------------------------------------------------------------------------------------------------------------------------------------------------------------------------------------------------------------------------------------------------------------------------------------------------------------------------------------------------------------------------------------------------------------------------------------------------------------------------------------------------------------------------------------------------------------------------------------------------------------------------------------------------------------------------------------------------------------------------------------------------------------------------------------------------------------------------------------------------------------------------------------------------------------------------------------------------------------------------------------------------------------------------------------------------------------------------------------------------------------------------------------------------------------------------------------------------------------------------------------------------------------------------------------------------------------------------------------------------------------------------------------------------------------------------------------------------------------------------------------------------------------------------------------------------------------------------------------------------------------------------------------------------------------------------------------------------------------------------------------------------------------------------------------------------------------------------------------------------------------------------------------------------------------------------------------------------------------------------------------------------------------------------------------------------------------------------------------------------------------------------------------------------------------------------------------------------------------------------------------------------------------------------------------------------------------------------------------------------------------------------------------------------------------------------------------------------------------------------------------------------------------------------------------------------------------------------------------------------------------------------------------------------------------------------------------------------------------------------------------------------------------------------------------------------------------------------------------------------------------------------------------------------------------------------------------------------------------------------------------------------------------------------------------------------------------------------------------------------------------------------------------------------------------------------------------------------------------------------------------------------------------------------------------------------------------------------------------------------------------------------------------------------------------------------------------------------------------------------------------------------------------------------------------------------------------------------------------------------------------------------------------------------------------------------------------------------------------------------------------------------------------------------------------------------------------------------------------------------------------------------------------------------------------------------------------------------------------------------------------------------------------------------------------------------------------------------------------------------------------------------------------------------------------------------------------------------------------------------------------------------------------------------------------------------------------------------------------------------------------------------------------------------------------------------------------------------------------------------------------------------------------------------------------------------------------------------------------------------------------------------------------------------------------------------------------------------------------------------------------------------------------------------------------------------------------------------------------------------------------------------------------------------------------------------------------------------------------------------------------------------------------------------------------------------------------------------------------------------------------------------------------------------------------------------------------------------------------------------------------------------------------------------------------------------------------------------------------------------------------------------------------------------------------------------------------------------------------------------------------------------------------------------------------------------------------------------------------------------------------------------------------------------------------------------------------------------------------------------------------------------------------------------------------------------------------------------------------------------------------------------------------------------------------------------------------------------------------------------------------------------------------------------------------------------------------------------------------------------------------------------------------------------------------------------------------------------------------------------------------------------------------------------------------------------------------------------------------------------------------------------------------------------------------------------------------------------------------------------------------------------------------------------------------------------------------------------------------------------------------------------------------------------------------------------------------------------------------------------------------------------------------------------------------------------------------------------------------------------------------------------------------------------------------------------------------------------------------------------------------------------------------------------------------------------------------------------------------------------------------------------------------------------------------------------------------------------------------------------------------------------------------------------------------------------------------------------------------------------------------------------------------------------------------------------------------------------------------------------------------------------|--------------------------------------------------------------------------------------------------------------------------------------------------|-------------------------------------------------|------------------------------------------------------------------------------------------------------------------------------------------------------------------------------------------------------------------------------------------------------------------------------|
| EPI_ISL_1381300 to 1381305                                                                                                                                                                                                                                                                                                                                                                                                                                                                                                                                                                                                                                                                                                                                                                                                                                                                                                                                                                                                                                                                                                                                                                                                                                                                                                                                                                                                                                                                                                                                                                                                                                                                                                                                                                                                                                                                                                                                                                                                                                                                                                                                                                                                                                                                                                                                                                                                                                                                                                                                                                                                                                                                                                                                                                                                                                                                                                                                                                                                                                                                                                                                                                                                                                                                                                                                                                                                                                                                                                                                                                                                                                                                                                                                                                                                                                                                                                                                                                                                                                                                                                                                                                                                                                                                                                                                                                                                                                                                                                                                                                                                                                                                                                                                                                                                                                                                                                                                                                                                                                                                                                                                                                                                                                                                                                                                                                                                                                                                                                                                                                                                                                                                                                                                                                                                                                                                                                                                                                                                                                                                                                                                                                                                                                                                                                                                                                                                                                                                                                                                                                                                                                                                                                                                                                                                                                                                                                                                                                                                                                                                                                                                                                                                                                                                                                                                                                                                                                                                                                                                                                                                                                                                                                                                                                                                                                                                                                                                                                                                                                                                                                                                                                                                                                                                                                                                                                                                                                                                                                                                                                                                                                                                                                                                                                                                                                                                                                                                                                                                                                                                                                                                                                                                                                                                                                                                                                                                                                                                                                                                                                                                                                                                                                                                                                                                                                                                                                                                                                                                                                                                                                                                                                                                                                                                                                                                                                                                                                                                                                                                                                                                                                                                                                                                                                                                                                                                                                                                                                                                                                                                                                                                                                                                                                                                                                                                                                                                                                                                                                                                                                                                                                                                                                                                                                                                                                                                                                                                                                                                                                                                                                                                                                                                                                                                                                                                                                                                                                                                                                                                                                                                                                                                                                                                                                                                                                       | Omics Sciences Laboratory                                                                                                                        | Omics Sciences Laboratory                       | Darylin Amaya; Derly Andrade Molina; Emily Sulay Saitos Montalvo; Gabriel Morey León; Juan Carlos Fernández Cadena; Kathryn Sacheri Viteri; Paula Juliana Gavilanes Jarrín; Rubén Armas González                                                                             |
| EPI_ISL_1008398, EPI_ISL_1064555                                                                                                                                                                                                                                                                                                                                                                                                                                                                                                                                                                                                                                                                                                                                                                                                                                                                                                                                                                                                                                                                                                                                                                                                                                                                                                                                                                                                                                                                                                                                                                                                                                                                                                                                                                                                                                                                                                                                                                                                                                                                                                                                                                                                                                                                                                                                                                                                                                                                                                                                                                                                                                                                                                                                                                                                                                                                                                                                                                                                                                                                                                                                                                                                                                                                                                                                                                                                                                                                                                                                                                                                                                                                                                                                                                                                                                                                                                                                                                                                                                                                                                                                                                                                                                                                                                                                                                                                                                                                                                                                                                                                                                                                                                                                                                                                                                                                                                                                                                                                                                                                                                                                                                                                                                                                                                                                                                                                                                                                                                                                                                                                                                                                                                                                                                                                                                                                                                                                                                                                                                                                                                                                                                                                                                                                                                                                                                                                                                                                                                                                                                                                                                                                                                                                                                                                                                                                                                                                                                                                                                                                                                                                                                                                                                                                                                                                                                                                                                                                                                                                                                                                                                                                                                                                                                                                                                                                                                                                                                                                                                                                                                                                                                                                                                                                                                                                                                                                                                                                                                                                                                                                                                                                                                                                                                                                                                                                                                                                                                                                                                                                                                                                                                                                                                                                                                                                                                                                                                                                                                                                                                                                                                                                                                                                                                                                                                                                                                                                                                                                                                                                                                                                                                                                                                                                                                                                                                                                                                                                                                                                                                                                                                                                                                                                                                                                                                                                                                                                                                                                                                                                                                                                                                                                                                                                                                                                                                                                                                                                                                                                                                                                                                                                                                                                                                                                                                                                                                                                                                                                                                                                                                                                                                                                                                                                                                                                                                                                                                                                                                                                                                                                                                                                                                                                                                                                                                 | Omtanken Grimmered                                                                                                                               | The Public Health Agency of Sweden              | Anna Risberg; Anna-Malin Linde; Carlo Berg; Karin Tegmark-Wisell; Maria Lind Karlberg; Mattias Haukland; Mia Brytting; Noura Walai; Oskar Karlsson Lindsjö; Petra Edquist; Petra Holmstrom; Reza Advani; Samuel Ohman; Sofia Stamouli                                        |
| EPI_ISL_1027294, EPI_ISL_1027321, EPI_ISL_1027329, EPI_ISL_1027331, EPI_ISL_1027335, EPI_ISL_1027339 to 1027340, EPI_ISL_1027344, EPI_ISL_1027350 to 1027351, EPI_ISL_1027359, EPI_ISL_1027378 to 1027436, EPI_ISL_1027487, EPI_ISL_1027503 to 1027504, EPI_ISL_1027507, EPI_ISL_1027530 to 1027532, EPI_ISL_1027573, EPI_ISL_1027583 to 1027584, EPI_ISL_1027587 to 1027627, EPI_ISL_1030290 to 1030299, EPI_ISL_1030308, EPI_ISL_1030312, EPI_ISL_1030444 to 1030498, EPI_ISL_1184681 to 1184808, EPI_ISL_1184967 to 1185015, EPI_ISL_1185032, EPI_ISL_1185039 to 1185040, EPI_ISL_1185043, EPI_ISL_1185045, EPI_ISL_1185048 to 1185049, EPI_ISL_1185055, EPI_ISL_1185058, EPI_ISL_1185062, EPI_ISL_1185070, EPI_ISL_1185075 to 1185076, EPI_ISL_1185093, EPI_ISL_1185098, EPI_ISL_1185101, EPI_ISL_1185104, EPI_ISL_1185106 to 1185108, EPI_ISL_1185112 to 1185115, EPI_ISL_1185118, EPI_ISL_1185123, EPI_ISL_1185125, EPI_ISL_1185127, EPI_ISL_1185131, EPI_ISL_1185134, EPI_ISL_1185140, EPI_ISL_1185143, EPI_ISL_1185145 to 1185146, EPI_ISL_1185149, EPI_ISL_1185152, EPI_ISL_1185154, EPI_ISL_1185159 to 1185160, EPI_ISL_1185163, EPI_ISL_1185165, EPI_ISL_1185167, EPI_ISL_1185171, EPI_ISL_1185174 to 1185175, EPI_ISL_1185180, EPI_ISL_1185189, EPI_ISL_1185194, EPI_ISL_1185201, EPI_ISL_1185206, EPI_ISL_1185209, EPI_ISL_1185212, EPI_ISL_1185214, EPI_ISL_1185216 to 1185217, EPI_ISL_1185221, EPI_ISL_1185224 to 1185225, EPI_ISL_1185227 to 1185228, EPI_ISL_1185231, EPI_ISL_1185233, EPI_ISL_1185235 to 1185238, EPI_ISL_1185240 to 1185242, EPI_ISL_1185257, EPI_ISL_1185261, EPI_ISL_1185263, EPI_ISL_1185266, EPI_ISL_1185269, EPI_ISL_1185272, EPI_ISL_1185274, EPI_ISL_1185278, EPI_ISL_1185280, EPI_ISL_1234791, EPI_ISL_1234796 to 1234797, EPI_ISL_1234804, EPI_ISL_1234825, EPI_ISL_1234828, EPI_ISL_1234838, EPI_ISL_1234842, EPI_ISL_1234847, EPI_ISL_1234855, EPI_ISL_1234864, EPI_ISL_1234869, EPI_ISL_1234887, EPI_ISL_1234909, EPI_ISL_1234918, EPI_ISL_1234923, EPI_ISL_1234926, EPI_ISL_1234929, EPI_ISL_1234937, EPI_ISL_1234940, EPI_ISL_1234942 to 1234945, EPI_ISL_1234954, EPI_ISL_1234958, EPI_ISL_1234965, EPI_ISL_1234970, EPI_ISL_1234977, EPI_ISL_1235007 to 1235009, EPI_ISL_1235016, EPI_ISL_1235041, EPI_ISL_1235044, EPI_ISL_1235052, EPI_ISL_1235057 to 1235058                                                                                                                                                                                                                                                                                                                                                                                                                                                                                                                                                                                                                                                                                                                                                                                                                                                                                                                                                                                                                                                                                                                                                                                                                                                                                                                                                                                                                                                                                                                                                                                                                                                                                                                                                                                                                                                                                                                                                                                                                                                                                                                                                                                                                                                                                                                                                                                                                                                                                                                                                                                                                                                                                                                                                                                                                                                                                                                                                                                                                                                                                                                                                                                                                                                                                                                                                                                                                                                                                                                                                                                                                                                                                                                                                                                                                                                                                                                                                                                                                                                                                                                                                                                                                                                                                                                                                                                                                                                                                                                                                                                                                                                                                                                                                                                                                                                                                                                                                                                                                                                                                                                                                                                                                                                                                                                                                                                                                                                                                                                                                                                                                                                                                                                                                                                                                                                                                                                                                                                                                                                                                                                                                                                                                                                                                                                                                                                                                                                                                                                                                                                                                                                                                                                                                                                                                                                                                                                                                                                                                                                                                                                                                                                                                                                                                                                                                                                                                                                                                                                                                                                                                                                                                                                                                                                                                                                                                                                                                                                                                                                                                                                                                                                                                                                                                                                                                                                                                                                                                                                                                                                                                                                                                                                                                                                                                                                                                                                                                                                                                                                                                                                                                                                                                                                                                                                                                                                                                                                                                                                                                                                                                                                                                                                                                                                                                                                                                                                                                                                                                                                                                                                                                                                                                                                                                                                                                                                                                                                                                                                                              | Orange County Public Health Lab                                                                                                                  | Chan-Zuckerberg Biohub                          | CZB Clahub Consortium                                                                                                                                                                                                                                                        |
| EPI_ISL_1055366 to 1055382                                                                                                                                                                                                                                                                                                                                                                                                                                                                                                                                                                                                                                                                                                                                                                                                                                                                                                                                                                                                                                                                                                                                                                                                                                                                                                                                                                                                                                                                                                                                                                                                                                                                                                                                                                                                                                                                                                                                                                                                                                                                                                                                                                                                                                                                                                                                                                                                                                                                                                                                                                                                                                                                                                                                                                                                                                                                                                                                                                                                                                                                                                                                                                                                                                                                                                                                                                                                                                                                                                                                                                                                                                                                                                                                                                                                                                                                                                                                                                                                                                                                                                                                                                                                                                                                                                                                                                                                                                                                                                                                                                                                                                                                                                                                                                                                                                                                                                                                                                                                                                                                                                                                                                                                                                                                                                                                                                                                                                                                                                                                                                                                                                                                                                                                                                                                                                                                                                                                                                                                                                                                                                                                                                                                                                                                                                                                                                                                                                                                                                                                                                                                                                                                                                                                                                                                                                                                                                                                                                                                                                                                                                                                                                                                                                                                                                                                                                                                                                                                                                                                                                                                                                                                                                                                                                                                                                                                                                                                                                                                                                                                                                                                                                                                                                                                                                                                                                                                                                                                                                                                                                                                                                                                                                                                                                                                                                                                                                                                                                                                                                                                                                                                                                                                                                                                                                                                                                                                                                                                                                                                                                                                                                                                                                                                                                                                                                                                                                                                                                                                                                                                                                                                                                                                                                                                                                                                                                                                                                                                                                                                                                                                                                                                                                                                                                                                                                                                                                                                                                                                                                                                                                                                                                                                                                                                                                                                                                                                                                                                                                                                                                                                                                                                                                                                                                                                                                                                                                                                                                                                                                                                                                                                                                                                                                                                                                                                                                                                                                                                                                                                                                                                                                                                                                                                                                                                                                       | Oregon State Public Health Laboratory                                                                                                            | Oregon SARS-CoV-2 Genome Sequencing Center      | Alec J. Hirsch; Andrew C. Adery; Benjamin N. Bimber; Brendan L. O'Connell; Brian J. O'Roak; Daniel N. Streblov; Donna Hessel; Guang Fan; John Fontana; Kayla Carter; LaDonna Grenz; Qin; Ruth V. Nichols; Sally Grindstaff; Susan Acharya; William B. Messer; Xuan; Xuan Qin |
| EPI_ISL_1255052 to 1255059                                                                                                                                                                                                                                                                                                                                                                                                                                                                                                                                                                                                                                                                                                                                                                                                                                                                                                                                                                                                                                                                                                                                                                                                                                                                                                                                                                                                                                                                                                                                                                                                                                                                                                                                                                                                                                                                                                                                                                                                                                                                                                                                                                                                                                                                                                                                                                                                                                                                                                                                                                                                                                                                                                                                                                                                                                                                                                                                                                                                                                                                                                                                                                                                                                                                                                                                                                                                                                                                                                                                                                                                                                                                                                                                                                                                                                                                                                                                                                                                                                                                                                                                                                                                                                                                                                                                                                                                                                                                                                                                                                                                                                                                                                                                                                                                                                                                                                                                                                                                                                                                                                                                                                                                                                                                                                                                                                                                                                                                                                                                                                                                                                                                                                                                                                                                                                                                                                                                                                                                                                                                                                                                                                                                                                                                                                                                                                                                                                                                                                                                                                                                                                                                                                                                                                                                                                                                                                                                                                                                                                                                                                                                                                                                                                                                                                                                                                                                                                                                                                                                                                                                                                                                                                                                                                                                                                                                                                                                                                                                                                                                                                                                                                                                                                                                                                                                                                                                                                                                                                                                                                                                                                                                                                                                                                                                                                                                                                                                                                                                                                                                                                                                                                                                                                                                                                                                                                                                                                                                                                                                                                                                                                                                                                                                                                                                                                                                                                                                                                                                                                                                                                                                                                                                                                                                                                                                                                                                                                                                                                                                                                                                                                                                                                                                                                                                                                                                                                                                                                                                                                                                                                                                                                                                                                                                                                                                                                                                                                                                                                                                                                                                                                                                                                                                                                                                                                                                                                                                                                                                                                                                                                                                                                                                                                                                                                                                                                                                                                                                                                                                                                                                                                                                                                                                                                                                                                       | Oregon State Public Health Laboratory                                                                                                            | Oregon State Public Health Laboratory           | John Fontana; Karim Morey; LaDonna Grenz; Shane Sevey                                                                                                                                                                                                                        |
| EPI_ISL_1004178, EPI_ISL_1004213 to 1004217                                                                                                                                                                                                                                                                                                                                                                                                                                                                                                                                                                                                                                                                                                                                                                                                                                                                                                                                                                                                                                                                                                                                                                                                                                                                                                                                                                                                                                                                                                                                                                                                                                                                                                                                                                                                                                                                                                                                                                                                                                                                                                                                                                                                                                                                                                                                                                                                                                                                                                                                                                                                                                                                                                                                                                                                                                                                                                                                                                                                                                                                                                                                                                                                                                                                                                                                                                                                                                                                                                                                                                                                                                                                                                                                                                                                                                                                                                                                                                                                                                                                                                                                                                                                                                                                                                                                                                                                                                                                                                                                                                                                                                                                                                                                                                                                                                                                                                                                                                                                                                                                                                                                                                                                                                                                                                                                                                                                                                                                                                                                                                                                                                                                                                                                                                                                                                                                                                                                                                                                                                                                                                                                                                                                                                                                                                                                                                                                                                                                                                                                                                                                                                                                                                                                                                                                                                                                                                                                                                                                                                                                                                                                                                                                                                                                                                                                                                                                                                                                                                                                                                                                                                                                                                                                                                                                                                                                                                                                                                                                                                                                                                                                                                                                                                                                                                                                                                                                                                                                                                                                                                                                                                                                                                                                                                                                                                                                                                                                                                                                                                                                                                                                                                                                                                                                                                                                                                                                                                                                                                                                                                                                                                                                                                                                                                                                                                                                                                                                                                                                                                                                                                                                                                                                                                                                                                                                                                                                                                                                                                                                                                                                                                                                                                                                                                                                                                                                                                                                                                                                                                                                                                                                                                                                                                                                                                                                                                                                                                                                                                                                                                                                                                                                                                                                                                                                                                                                                                                                                                                                                                                                                                                                                                                                                                                                                                                                                                                                                                                                                                                                                                                                                                                                                                                                                                                                                      | Oregon State University TRACE Project                                                                                                            | Center for Genome Research and Biocomputing     | Oregon State University TRACE Project                                                                                                                                                                                                                                        |
| EPI_ISL_1232240 to 1232242, EPI_ISL_1251261, EPI_ISL_1253610 to 1253662, EPI_ISL_1254704 to 1254714, EPI_ISL_1290809 to 1290835, EPI_ISL_1364469 to 1364475                                                                                                                                                                                                                                                                                                                                                                                                                                                                                                                                                                                                                                                                                                                                                                                                                                                                                                                                                                                                                                                                                                                                                                                                                                                                                                                                                                                                                                                                                                                                                                                                                                                                                                                                                                                                                                                                                                                                                                                                                                                                                                                                                                                                                                                                                                                                                                                                                                                                                                                                                                                                                                                                                                                                                                                                                                                                                                                                                                                                                                                                                                                                                                                                                                                                                                                                                                                                                                                                                                                                                                                                                                                                                                                                                                                                                                                                                                                                                                                                                                                                                                                                                                                                                                                                                                                                                                                                                                                                                                                                                                                                                                                                                                                                                                                                                                                                                                                                                                                                                                                                                                                                                                                                                                                                                                                                                                                                                                                                                                                                                                                                                                                                                                                                                                                                                                                                                                                                                                                                                                                                                                                                                                                                                                                                                                                                                                                                                                                                                                                                                                                                                                                                                                                                                                                                                                                                                                                                                                                                                                                                                                                                                                                                                                                                                                                                                                                                                                                                                                                                                                                                                                                                                                                                                                                                                                                                                                                                                                                                                                                                                                                                                                                                                                                                                                                                                                                                                                                                                                                                                                                                                                                                                                                                                                                                                                                                                                                                                                                                                                                                                                                                                                                                                                                                                                                                                                                                                                                                                                                                                                                                                                                                                                                                                                                                                                                                                                                                                                                                                                                                                                                                                                                                                                                                                                                                                                                                                                                                                                                                                                                                                                                                                                                                                                                                                                                                                                                                                                                                                                                                                                                                                                                                                                                                                                                                                                                                                                                                                                                                                                                                                                                                                                                                                                                                                                                                                                                                                                                                                                                                                                                                                                                                                                                                                                                                                                                                                                                                                                                                                                                                                                                                                                      | Oregon State University TRACE Project                                                                                                            | OSU Center for Genome Research and Biocomputing | Oregon State University TRACE Project                                                                                                                                                                                                                                        |
| EPI_ISL_1040028 to 1040030                                                                                                                                                                                                                                                                                                                                                                                                                                                                                                                                                                                                                                                                                                                                                                                                                                                                                                                                                                                                                                                                                                                                                                                                                                                                                                                                                                                                                                                                                                                                                                                                                                                                                                                                                                                                                                                                                                                                                                                                                                                                                                                                                                                                                                                                                                                                                                                                                                                                                                                                                                                                                                                                                                                                                                                                                                                                                                                                                                                                                                                                                                                                                                                                                                                                                                                                                                                                                                                                                                                                                                                                                                                                                                                                                                                                                                                                                                                                                                                                                                                                                                                                                                                                                                                                                                                                                                                                                                                                                                                                                                                                                                                                                                                                                                                                                                                                                                                                                                                                                                                                                                                                                                                                                                                                                                                                                                                                                                                                                                                                                                                                                                                                                                                                                                                                                                                                                                                                                                                                                                                                                                                                                                                                                                                                                                                                                                                                                                                                                                                                                                                                                                                                                                                                                                                                                                                                                                                                                                                                                                                                                                                                                                                                                                                                                                                                                                                                                                                                                                                                                                                                                                                                                                                                                                                                                                                                                                                                                                                                                                                                                                                                                                                                                                                                                                                                                                                                                                                                                                                                                                                                                                                                                                                                                                                                                                                                                                                                                                                                                                                                                                                                                                                                                                                                                                                                                                                                                                                                                                                                                                                                                                                                                                                                                                                                                                                                                                                                                                                                                                                                                                                                                                                                                                                                                                                                                                                                                                                                                                                                                                                                                                                                                                                                                                                                                                                                                                                                                                                                                                                                                                                                                                                                                                                                                                                                                                                                                                                                                                                                                                                                                                                                                                                                                                                                                                                                                                                                                                                                                                                                                                                                                                                                                                                                                                                                                                                                                                                                                                                                                                                                                                                                                                                                                                                                                                       | Original detection - Virology Unit, Institut Pasteur du Cambodge; Sequencing - US National Institute of Allergy and Infectious Diseases Cambodia | Virology Unit, Institut Pasteur du Cambodge     | Chau Darapehak; Chin Savuth; Erik A Karlsson; Jennifer Bohl; Jessica Manning; Kraing Sidonn; Ly Sovann; Sophana Chea; Sreyngim Lay; Veasna Duong; Yi Sengdoeurm                                                                                                              |
| EPI_ISL_1051920, EPI_ISL_1051922 to 1051930, EPI_ISL_1051932 to 1051944, EPI_ISL_1051946 to 1051950, EPI_ISL_1051952 to 1051959, EPI_ISL_1051961 to 1051964, EPI_ISL_1051966 to 1051976, EPI_ISL_1051978 to 1051979, EPI_ISL_1051981 to 1051995, EPI_ISL_1051997 to 1052018, EPI_ISL_1052021 to 1052022, EPI_ISL_1052024 to 1052027, EPI_ISL_1052029, EPI_ISL_1052031, EPI_ISL_1052033 to 1052036, EPI_ISL_1052038 to 1052045, EPI_ISL_1052047 to 1052048, EPI_ISL_1052050 to 1052053, EPI_ISL_1052055 to 1052056, EPI_ISL_1052058, EPI_ISL_1052070 to 1052084, EPI_ISL_1052086 to 1052092, EPI_ISL_1052094 to 1052095, EPI_ISL_1052098 to 1052107, EPI_ISL_1052109 to 1052112, EPI_ISL_1052116 to 1052129, EPI_ISL_1052132 to 1052134, EPI_ISL_1052136 to 1052141, EPI_ISL_1052143, EPI_ISL_1052145 to 1052146, EPI_ISL_1052148 to 1052184, EPI_ISL_1052186 to 1052193, EPI_ISL_1052195 to 1052206, EPI_ISL_1052208 to 1052212, EPI_ISL_1052214, EPI_ISL_1052217 to 1052221, EPI_ISL_1052223 to 1052224, EPI_ISL_1052226 to 1052233, EPI_ISL_1052235 to 1052249, EPI_ISL_1052254 to 1052258, EPI_ISL_1052260 to 1052263, EPI_ISL_1052268, EPI_ISL_1052270 to 1052271, EPI_ISL_1052285 to 1052286, EPI_ISL_1052288, EPI_ISL_1052292 to 1052293, EPI_ISL_1052296, EPI_ISL_1052298 to 1052299, EPI_ISL_1052304, EPI_ISL_1052312, EPI_ISL_1052320, EPI_ISL_1052322 to 1052324, EPI_ISL_1052327 to 1052330, EPI_ISL_1052332 to 1052337, EPI_ISL_1052339 to 1052343, EPI_ISL_1052345, EPI_ISL_1052350, EPI_ISL_1052352, EPI_ISL_1052355, EPI_ISL_1052357 to 1052362, EPI_ISL_1052365 to 1052367, EPI_ISL_1052371, EPI_ISL_1052373, EPI_ISL_1052375, EPI_ISL_1052377, EPI_ISL_1052379 to 1052386, EPI_ISL_1052390, EPI_ISL_1052392 to 1052393, EPI_ISL_1052395, EPI_ISL_1052397, EPI_ISL_1052401, EPI_ISL_1052403 to 1052405, EPI_ISL_1052407, EPI_ISL_1052410 to 1052411, EPI_ISL_1052414, EPI_ISL_1052417 to 1052421, EPI_ISL_1052426 to 1052427, EPI_ISL_1052429 to 1052433, EPI_ISL_1052435, EPI_ISL_1052437 to 1052438, EPI_ISL_1052440, EPI_ISL_1052443 to 1052444, EPI_ISL_1052446 to 1052449, EPI_ISL_1052451 to 1052452, EPI_ISL_1052454, EPI_ISL_1052456 to 1052458, EPI_ISL_1052460, EPI_ISL_1052462 to 1052468, EPI_ISL_1052470, EPI_ISL_1052472 to 1052475, EPI_ISL_1052477 to 1052478, EPI_ISL_1052480 to 1052481, EPI_ISL_1052483 to 1052484, EPI_ISL_1052486 to 1052487, EPI_ISL_1052489 to 1052490, EPI_ISL_1052492 to 1052493, EPI_ISL_1052495 to 1052496, EPI_ISL_1052498 to 1052499, EPI_ISL_1052501 to 1052502, EPI_ISL_1052504 to 1052505, EPI_ISL_1052507 to 1052508, EPI_ISL_1052510 to 1052511, EPI_ISL_1052513 to 1052514, EPI_ISL_1052516 to 1052517, EPI_ISL_1052519 to 1052520, EPI_ISL_1052522 to 1052523, EPI_ISL_1052525 to 1052526, EPI_ISL_1052528 to 1052529, EPI_ISL_1052531 to 1052532, EPI_ISL_1052534 to 1052535, EPI_ISL_1052537 to 1052538, EPI_ISL_1052540 to 1052541, EPI_ISL_1052543 to 1052544, EPI_ISL_1052546 to 1052547, EPI_ISL_1052549 to 1052550, EPI_ISL_1052552 to 1052553, EPI_ISL_1052555 to 1052556, EPI_ISL_1052558 to 1052559, EPI_ISL_1052561 to 1052562, EPI_ISL_1052564 to 1052565, EPI_ISL_1052567 to 1052568, EPI_ISL_1052570 to 1052571, EPI_ISL_1052573 to 1052574, EPI_ISL_1052576 to 1052577, EPI_ISL_1052579 to 1052580, EPI_ISL_1052582 to 1052583, EPI_ISL_1052585 to 1052586, EPI_ISL_1052588 to 1052589, EPI_ISL_1052591 to 1052592, EPI_ISL_1052594 to 1052595, EPI_ISL_1052597 to 1052598, EPI_ISL_1052600 to 1052601, EPI_ISL_1052603 to 1052604, EPI_ISL_1052606 to 1052607, EPI_ISL_1052609 to 1052610, EPI_ISL_1052612 to 1052613, EPI_ISL_1052615 to 1052616, EPI_ISL_1052618 to 1052619, EPI_ISL_1052621 to 1052622, EPI_ISL_1052624 to 1052625, EPI_ISL_1052627 to 1052628, EPI_ISL_1052630 to 1052631, EPI_ISL_1052633 to 1052634, EPI_ISL_1052635 to 1052636, EPI_ISL_1052638 to 1052639, EPI_ISL_1052641 to 1052642, EPI_ISL_1052644 to 1052645, EPI_ISL_1052647 to 1052648, EPI_ISL_1052650 to 1052651, EPI_ISL_1052653 to 1052654, EPI_ISL_1052656 to 1052657, EPI_ISL_1052659 to 1052660, EPI_ISL_1052662 to 1052663, EPI_ISL_1052665 to 1052666, EPI_ISL_1052668 to 1052669, EPI_ISL_1052671 to 1052672, EPI_ISL_1052674 to 1052675, EPI_ISL_1052677 to 1052678, EPI_ISL_1052680 to 1052681, EPI_ISL_1052683 to 1052684, EPI_ISL_1052686 to 1052687, EPI_ISL_1052689 to 1052690, EPI_ISL_1052692 to 1052693, EPI_ISL_1052695 to 1052696, EPI_ISL_1052698 to 1052699, EPI_ISL_1052701 to 1052702, EPI_ISL_1052704 to 1052705, EPI_ISL_1052707 to 1052708, EPI_ISL_1052710 to 1052711, EPI_ISL_1052713 to 1052714, EPI_ISL_1052716 to 1052717, EPI_ISL_1052719 to 1052720, EPI_ISL_1052722 to 1052723, EPI_ISL_1052725 to 1052726, EPI_ISL_1052728 to 1052729, EPI_ISL_1052731 to 1052732, EPI_ISL_1052734 to 1052735, EPI_ISL_1052737 to 1052738, EPI_ISL_1052740 to 1052741, EPI_ISL_1052743 to 1052744, EPI_ISL_1052746 to 1052747, EPI_ISL_1052749 to 1052750, EPI_ISL_1052752 to 1052753, EPI_ISL_1052755 to 1052756, EPI_ISL_1052758 to 1052759, EPI_ISL_1052761 to 1052762, EPI_ISL_1052764 to 1052765, EPI_ISL_1052767 to 1052768, EPI_ISL_1052770 to 1052771, EPI_ISL_1052773 to 1052774, EPI_ISL_1052776 to 1052777, EPI_ISL_1052779 to 1052780, EPI_ISL_1052782 to 1052783, EPI_ISL_1052784 to 1052785, EPI_ISL_1052787 to 1052788, EPI_ISL_1052790 to 1052791, EPI_ISL_1052793 to 1052794, EPI_ISL_1052796 to 1052797, EPI_ISL_1052799 to 1052800, EPI_ISL_1052802 to 1052803, EPI_ISL_1052805 to 1052806, EPI_ISL_1052808 to 1052809, EPI_ISL_1052811 to 1052812, EPI_ISL_1052814 to 1052815, EPI_ISL_1052817 to 1052818, EPI_ISL_1052820 to 1052821, EPI_ISL_1052823 to 1052824, EPI_ISL_1052826 to 1052827, EPI_ISL_1052829 to 1052830, EPI_ISL_1052832 to 1052833, EPI_ISL_1052835 to 1052836, EPI_ISL_1052838 to 1052839, EPI_ISL_1052841 to 1052842, EPI_ISL_1052844 to 1052845, EPI_ISL_1052847 to 1052848, EPI_ISL_1052850 to 1052851, EPI_ISL_1052853 to 1052854, EPI_ISL_1052856 to 1052857, EPI_ISL_1052859 to 1052860, EPI_ISL_1052862 to 1052863, EPI_ISL_1052865 to 1052866, EPI_ISL_1052868 to 1052869, EPI_ISL_1052871 to 1052872, EPI_ISL_1052874 to 1052875, EPI_ISL_1052877 to 1052878, EPI_ISL_1052880 to 1052881, EPI_ISL_1052883 to 1052884, EPI_ISL_1052886 to 1052887, EPI_ISL_1052889 to 1052890, EPI_ISL_1052892 to 1052893, EPI_ISL_1052895 to 1052896, EPI_ISL_1052898 to 1052899, EPI_ISL_1052901 to 1052902, EPI_ISL_1052904 to 1052905, EPI_ISL_1052907 to 1052908, EPI_ISL_1052910 to 1052911, EPI_ISL_1052913 to 1052914, EPI_ISL_1052916 to 1052917, EPI_ISL_1052919 to 1052920, EPI_ISL_1052922 to 1052923, EPI_ISL_1052925 to 1052926, EPI_ISL_1052928 to 1052929, EPI_ISL_1052931 to 1052932, EPI_ISL_1052934 to 1052935, EPI_ISL_1052937 to 1052938, EPI_ISL_1052940 to 1052941, EPI_ISL_1052942 to 1052943, EPI_ISL_1052945 to 1052946, EPI_ISL_1052948 to 1052949, EPI_ISL_1052951 to 1052952, EPI_ISL_1052954 to 1052955, EPI_ISL_1052957 to 1052958, EPI_ISL_1052960 to 1052961, EPI_ISL_1052962 to 1052963, EPI_ISL_1052965 to 1052966, EPI_ISL_1052968 to 1052969, EPI_ISL_1052971 to 1052972, EPI_ISL_1052974 to 1052975, EPI_ISL_1052977 to 1052978, EPI_ISL_1052980 to 1052981, EPI_ISL_1052983 to 1052984, EPI_ISL_1052986 to 1052987, EPI_ISL_1052989 to 1052990, EPI_ISL_1052992 to 1052993, EPI_ISL_1052995 to 1052996, EPI_ISL_1052998 to 1052999, EPI_ISL_1053001 to 1053002, EPI_ISL_1053004 to 1053005, EPI_ISL_1053007 to 1053008, EPI_ISL_1053010 to 1053011, EPI_ISL_1053013 to 1053014, EPI_ISL_1053016 to 1053017, EPI_ISL_1053019 to 1053020, EPI_ISL_1053022 to 1053023, EPI_ISL_1053025 to 1053026, EPI_ISL_1053028 to 1053029, EPI_ISL_1053031 to 1053032, EPI_ISL_1053034 to 1053035, EPI_ISL_1053037 to 1053038, EPI_ISL_1053040 to 1053041, EPI_ISL_1053042 to 1053043, EPI_ISL_1053045 to 1053046, EPI_ISL_1053048 to 1053049, EPI_ISL_1053051 to 1053052, EPI_ISL_1053054 to 1053055, EPI_ISL_1053057 to 1053058, EPI_ISL_1053060 to 1053061, EPI_ISL_1053063 to 1053064, EPI_ISL_1053066 to 1053067, EPI_ISL_1053069 to 1053070, EPI_ISL_1053072 to 1053073, EPI_ISL_1053075 to 1053076, EPI_ISL_1053078 to 1053079, EPI_ISL_1053081 to 1053082, EPI_ISL_1053083 to 1053084, EPI_ISL_1053086 to 1053087, EPI_ISL_1053089 to 1053090, EPI_ISL_1053092 to 1053093, EPI_ISL_1053095 to 1053096, EPI_ISL_1053098 to 1053099, EPI_ISL_1053101 to 1053102, EPI_ISL_1053104 to 1053105, EPI_ISL_1053107 to 1053108, EPI_ISL_1053110 to 1053111, EPI_ISL_1053113 to 1053114, EPI_ISL_1053116 to 1053117, EPI_ISL_1053119 to 1053120, EPI_ISL_1053122 to 1053123, EPI_ISL_1053125 to 1053126, EPI_ISL_1053128 to 1053129, EPI_ISL_1053131 to 1053132, EPI_ISL_1053134 to 1053135, EPI_ISL_1053137 to 1053138, EPI_ISL_1053140 to 1053141, EPI_ISL_1053143 to 1053144, EPI_ISL_1053146 to 1053147, EPI_ISL_1053149 to 1053150, EPI_ISL_1053152 to 1053153, EPI_ISL_1053155 to 1053156, EPI_ISL_1053158 to 1053159, EPI_ISL_1053161 to 1053162, EPI_ISL_1053164 to 1053165, EPI_ISL_1053167 to 1053168, EPI_ISL_1053170 to 1053171, EPI_ISL_1053173 to 1053174, EPI_ISL_1053176 to 1053177, EPI_ISL_1053179 to 1053180, EPI_ISL_1053182 to 1053183, EPI_ISL_1053185 to 1053186, EPI_ISL_1053188 to 1053189, EPI_ISL_1053191 to 1053192, EPI_ISL_1053194 to 1053195, EPI_ISL_1053197 to 1053198, EPI_ISL_1053200 to 1053201, EPI_ISL_1053203 to 1053204, EPI_ISL_1053206 to 1053207, EPI_ISL_1053209 to 1053210, EPI_ISL_1053212 to 1053213, EPI_ISL_1053215 to 1053216, EPI_ISL_1053218 to 1053219, EPI_ISL_1053221 to 1053222, EPI_ISL_1053224 to 1053225, EPI_ISL_1053227 to 1053228, EPI_ISL_1053230 to 1053231, EPI_ISL_1053233 to 1053234, EPI_ISL_1053236 to 1053237, EPI_ISL_1053239 to 1053240, EPI_ISL_1053242 to 1053243, EPI_ISL_1053245 to 1053246, EPI_ISL_1053248 to 1053249, EPI_ISL_1053251 to 1053252, EPI_ISL_1053254 to 1053255, EPI_ISL_1053257 to 1053258, EPI_ISL_1053260 to 1053261, EPI_ISL_1053263 to 1053264, EPI_ISL_1053266 to 1053267, EPI_ISL_1053269 to 1053270, EPI_ISL_1053272 to 1053273, EPI_ISL_1053275 to 1053276, EPI_ISL_1053278 to 1053279, EPI_ISL_1053281 to 1053282, EPI_ISL_1053284 to 1053285, EPI_ISL_1053287 to 1053288, EPI_ISL_1053290 to 1053291, EPI_ISL_1053293 to 1053294, EPI_ISL_1053296 to 1053297, EPI_ISL_1053299 to 1053300, EPI_ISL_1053302 to 1053303, EPI_ISL_1053305 to 1053306, EPI_ISL_1053308 to 1053309, EPI_ISL_1053311 to 1053312, EPI_ISL_1053314 to 1053315, EPI_ISL_1053317 to 1053318, EPI_ISL_1053320 to 1053321, EPI_ISL_1053322 to 1053323, EPI_ISL_1053325 to 1053326, EPI_ISL_1053328 to 1053329, EPI_ISL_1053331 to 1053332, EPI_ISL_1053334 to 1053335, EPI_ISL_1053337 to 1053338, EPI_ISL_1053340 to 1053341, EPI_ISL_1053342 to 1053343, EPI_ISL_1053345 to 1053346, EPI_ISL_1053348 to 1053349, EPI_ISL_1053351 to 1053352, EPI_ISL_1053353 to 1053354, EPI_ISL_1053356 to 1053357, EPI_ISL_1053359 to 1053360, EPI_ISL_1053362 to 1053363, EPI_ISL_1053365 to 1053366, EPI_ISL_1053368 to 1053369, EPI_ISL_1053371 to 1053372, EPI_ISL_1053374 to 1053375, EPI_ISL_1053377 to 1053378, EPI_ISL_1053380 to 1053381, EPI_ISL_1053383 to 1053384, EPI_ISL_1053386 to 1053387, EPI_ISL_1053389 to 1053390, EPI_ISL_1053392 to 1053393, EPI_ISL_1053395 to 1053396, EPI_ISL_1053398 to 1053399, EPI_ISL_1053401 to 1053402, EPI_ISL_1053404 to 1053405, EPI_ISL_1053407 to 1053408, EPI_ISL_1053410 to 1053411, EPI_ISL_1053413 to 1053414, EPI_ISL_1053416 to 1053417, EPI_ISL_1053419 to 1053420, EPI_ISL_1053422 to 1053423, EPI_ISL_1053425 to 1053426, EPI_ISL_1053428 to 1053429, EPI_ISL_1053431 to 1053432, EPI_ISL_1053434 to 1053435, EPI_ISL_1053437 to 1053438, EPI_ISL_1053440 to 1053441, EPI_ISL_1053443 to 1053444, EPI_ISL_1053446 to 1053447, EPI_ISL_1053449 to 1053450, EPI_ISL_1053452 to 1053453, EPI_ISL_1053455 to 1053456, EPI_ISL_1053458 to 1053459, EPI_ISL_1053461 to 1053462, EPI_ISL_1053464 to 1053465, EPI_ISL_1053467 to 1053468, EPI_ISL_1053470 to 1053471, EPI_ISL_1053473 to 1053474, EPI_ISL_1053476 to 1053477, EPI_ISL_1053479 to 1053480, EPI_ISL_1053482 to 1053483, EPI_ISL_1053485 to 1053486, EPI_ISL_1053488 to 1053489, EPI_ISL_1053491 to 1053492, EPI_ISL_1053494 to 1053495, EPI_ISL_1053497 to 1053498, EPI_ISL_1053500 to 1053501, EPI_ISL_1053503 to 1053504, EPI_ISL_1053506 to 1053507, EPI_ISL_1053509 to 1053510, EPI_ISL_1053512 to 1053513, EPI_ISL_1053515 to 1053516, EPI_ISL_1053518 to 1053519, EPI_ISL_1053521 to 1053522, EPI_ISL_1053524 to 1053525, EPI_ISL_1053527 to 1053528, EPI_ISL_1053530 to 1053531, EPI_ISL_1053533 to 1053534, EPI_ISL_1053536 to 1053537, EPI_ISL_1053539 to 1053540, EPI_ISL_1053542 to 1053543, EPI_ISL_1053545 to 1053546, EPI_ISL_1053548 to 1053549, EPI_ISL_1053551 to 1053552, EPI_ISL_1053554 to 1053555, EPI_ISL_1 |                                                                                                                                                  |                                                 |                                                                                                                                                                                                                                                                              |

|                                                                                                                                                                                                                                                                                                                                                                                                                                                                                                                                                                                                                                                                                                                                                                                                                                                                                                                                                                                                                                                                                                                                                                                                                                                                                                                                                                                                                                                                                                                                                                                                                                                                                                                                                                              |                                                                                                                     |                                                                                          |                                                                                                                                                                                                                                                                                                                                                                          |
|------------------------------------------------------------------------------------------------------------------------------------------------------------------------------------------------------------------------------------------------------------------------------------------------------------------------------------------------------------------------------------------------------------------------------------------------------------------------------------------------------------------------------------------------------------------------------------------------------------------------------------------------------------------------------------------------------------------------------------------------------------------------------------------------------------------------------------------------------------------------------------------------------------------------------------------------------------------------------------------------------------------------------------------------------------------------------------------------------------------------------------------------------------------------------------------------------------------------------------------------------------------------------------------------------------------------------------------------------------------------------------------------------------------------------------------------------------------------------------------------------------------------------------------------------------------------------------------------------------------------------------------------------------------------------------------------------------------------------------------------------------------------------|---------------------------------------------------------------------------------------------------------------------|------------------------------------------------------------------------------------------|--------------------------------------------------------------------------------------------------------------------------------------------------------------------------------------------------------------------------------------------------------------------------------------------------------------------------------------------------------------------------|
| see above                                                                                                                                                                                                                                                                                                                                                                                                                                                                                                                                                                                                                                                                                                                                                                                                                                                                                                                                                                                                                                                                                                                                                                                                                                                                                                                                                                                                                                                                                                                                                                                                                                                                                                                                                                    | Osaka Institute of Public Health, Morinomiya Center                                                                 | Pathogen Genomics Center, National Institute of Infectious Diseases                      | Kentaro Itokawa; Makoto Kuroda; Masanori Hashino; Rina Tanaka; Tsuyoshi Sekizuka                                                                                                                                                                                                                                                                                         |
| EPI_ISL_1013500 to 1013507, EPI_ISL_1034323, EPI_ISL_1034333, EPI_ISL_1034342, EPI_ISL_1034365, EPI_ISL_1118321 to 1118322, EPI_ISL_1118346, EPI_ISL_1118444, EPI_ISL_1118527 to 1118529, EPI_ISL_1118549, EPI_ISL_1118551, EPI_ISL_1251475, EPI_ISL_1251477, EPI_ISL_1251479 to 1251484, EPI_ISL_1251528, EPI_ISL_1251604, EPI_ISL_1251607 to 1251609, EPI_ISL_1251667 to 1251670, EPI_ISL_1251674, EPI_ISL_1251698 to 1251699, EPI_ISL_1251801, EPI_ISL_1251803 to 1251804, EPI_ISL_1251806, EPI_ISL_1251808, EPI_ISL_1251827, EPI_ISL_1314407, EPI_ISL_1317657, EPI_ISL_1317677 to 1317678, EPI_ISL_1317686 to 1317687                                                                                                                                                                                                                                                                                                                                                                                                                                                                                                                                                                                                                                                                                                                                                                                                                                                                                                                                                                                                                                                                                                                                                    |                                                                                                                     |                                                                                          |                                                                                                                                                                                                                                                                                                                                                                          |
| see above                                                                                                                                                                                                                                                                                                                                                                                                                                                                                                                                                                                                                                                                                                                                                                                                                                                                                                                                                                                                                                                                                                                                                                                                                                                                                                                                                                                                                                                                                                                                                                                                                                                                                                                                                                    | Oslo University Hospital, Department of Medical Microbiology                                                        | Norwegian Institute of Public Health, Department of Virology                             | Atiya R Ali; Debech Nadia; Engebretsen Serina Beate; Engebretsen Serina Beate Atiya R Ali; Garcia Llorente Ignacio; Hilde Elshaug; Hilde Vollan; Ignacio Garcia Llorente; Jon Bråte; Kamilla Heddeland Instefjord; Karoline Bragstad; Kathrine Stene-Johansen; Marie Paulsen Madsen; Olav Hungnes; Pedersen Benedikte Nevjen; Rasmus Riis Kopperud; Serina B Engebretsen |
| EPI_ISL_1039785, EPI_ISL_1079360, EPI_ISL_1079398, EPI_ISL_1091794, EPI_ISL_1169888, EPI_ISL_1195953 to 1195954, EPI_ISL_1195959 to 1195960, EPI_ISL_1210499 to 1210500, EPI_ISL_1217386, EPI_ISL_1222715 to 1222719, EPI_ISL_1229136 to 1229137, EPI_ISL_1229141, EPI_ISL_1295608, EPI_ISL_1295611 to 1295612, EPI_ISL_1295614                                                                                                                                                                                                                                                                                                                                                                                                                                                                                                                                                                                                                                                                                                                                                                                                                                                                                                                                                                                                                                                                                                                                                                                                                                                                                                                                                                                                                                              |                                                                                                                     |                                                                                          |                                                                                                                                                                                                                                                                                                                                                                          |
| see above                                                                                                                                                                                                                                                                                                                                                                                                                                                                                                                                                                                                                                                                                                                                                                                                                                                                                                                                                                                                                                                                                                                                                                                                                                                                                                                                                                                                                                                                                                                                                                                                                                                                                                                                                                    | Ospedale "F. Spaziani" Frosinone                                                                                    | INMI Lazzaro Spallanzani IRCCS                                                           | A Di Caro; B Bartolini; C Gargiulo; C Sias; C. Gargiulo; C. Sias; C.E.M Gruber; CEM Gruber; E Giombini; F Messina; F Santini; G Bonfiglio; G Brocco; M Rueca; MR Capobianchi; O Butera; R Pulselli                                                                                                                                                                       |
| EPI_ISL_1254702 to 1254703                                                                                                                                                                                                                                                                                                                                                                                                                                                                                                                                                                                                                                                                                                                                                                                                                                                                                                                                                                                                                                                                                                                                                                                                                                                                                                                                                                                                                                                                                                                                                                                                                                                                                                                                                   | Ospedale Casa Sollievo della Sofferenza                                                                             | Istituto Zooprofilattico Sperimentale della Puglia e della Basilicata                    | Bianco A.; Capozzi L.; Del Sambro L.; Difato L.; Giannico A.; Parisi A.; Ridolfi D.; Simone D.                                                                                                                                                                                                                                                                           |
| EPI_ISL_1110601                                                                                                                                                                                                                                                                                                                                                                                                                                                                                                                                                                                                                                                                                                                                                                                                                                                                                                                                                                                                                                                                                                                                                                                                                                                                                                                                                                                                                                                                                                                                                                                                                                                                                                                                                              | Ospedale Civile Teramo                                                                                              | Istituto Zooprofilattico Sperimentale dell'Abruzzo e Molise "G. Caporale"                | Ancora M; Calistri P; Cammà C; Curini V; Di Domenico M; Di Pasquale A; Lorusso A; Mangone I; Marcacci M; Puglia I; Rinaldi A; Savini G; Scialabba S                                                                                                                                                                                                                      |
| EPI_ISL_1112223 to 1112226                                                                                                                                                                                                                                                                                                                                                                                                                                                                                                                                                                                                                                                                                                                                                                                                                                                                                                                                                                                                                                                                                                                                                                                                                                                                                                                                                                                                                                                                                                                                                                                                                                                                                                                                                   | Ospedale Di Venere - Carbonara                                                                                      | Istituto Zooprofilattico Sperimentale della Puglia e della Basilicata                    | Bianco A.; Capozzi L.; Del Sambro L.; Giannico A.; Parisi A.; Ridolfi D.; Simone D.                                                                                                                                                                                                                                                                                      |
| EPI_ISL_1254681 to 1254687, EPI_ISL_1261869                                                                                                                                                                                                                                                                                                                                                                                                                                                                                                                                                                                                                                                                                                                                                                                                                                                                                                                                                                                                                                                                                                                                                                                                                                                                                                                                                                                                                                                                                                                                                                                                                                                                                                                                  | Ospedale Generale Regionale F. Miulli                                                                               | Istituto Zooprofilattico Sperimentale della Puglia e della Basilicata                    | Bianco A.; Capozzi L.; Del Sambro L.; Difato L.; Giannico A.; Parisi A.; Ridolfi D.; Simone D.                                                                                                                                                                                                                                                                           |
| EPI_ISL_1260864 to 1260870, EPI_ISL_1260913 to 1260916                                                                                                                                                                                                                                                                                                                                                                                                                                                                                                                                                                                                                                                                                                                                                                                                                                                                                                                                                                                                                                                                                                                                                                                                                                                                                                                                                                                                                                                                                                                                                                                                                                                                                                                       | Ospedale Mater Salutaris                                                                                            | Istituto Zooprofilattico Sperimentale delle Venezie                                      | Adelaide Milani; Alessia Schivo; Alice Fusaro; Ambra Pastori; Annalisa Salviato; Antonia Ricci; Calogero Terregino; Edoardo Giussani; Erika Giorgia Quaranta; Isabella Monne; Luca Tassoni                                                                                                                                                                               |
| EPI_ISL_1079356, EPI_ISL_1079358, EPI_ISL_1079992 to 1079993, EPI_ISL_1091275, EPI_ISL_1091796, EPI_ISL_1299219                                                                                                                                                                                                                                                                                                                                                                                                                                                                                                                                                                                                                                                                                                                                                                                                                                                                                                                                                                                                                                                                                                                                                                                                                                                                                                                                                                                                                                                                                                                                                                                                                                                              | Ospedale S.M. Goretti di Latina - ASL Latina presidio ospedaliero Nord                                              | INMI Lazzaro Spallanzani IRCCS                                                           | A Di Caro; A Lucci; B Bartolini; CEM Gruber; E Giombini; F Messina; F Santini; G Bonfiglio; L Corso; L Di Biase; M Rueca; MR Capobianchi; O Butera; S Pignalosa                                                                                                                                                                                                          |
| EPI_ISL_1055816                                                                                                                                                                                                                                                                                                                                                                                                                                                                                                                                                                                                                                                                                                                                                                                                                                                                                                                                                                                                                                                                                                                                                                                                                                                                                                                                                                                                                                                                                                                                                                                                                                                                                                                                                              | Ospedale SS Annunziata Chieti                                                                                       | Istituto Zooprofilattico Sperimentale dell'Abruzzo e Molise "G. Caporale"                | Ancora M; Calistri P; Cammà C; Curini V; Delli Compagni E; Di Domenico M; Di Pasquale A; Lorusso A; Mangone I; Marcacci M; Puglia I; Rinaldi A; Savini G; Scialabba S                                                                                                                                                                                                    |
| EPI_ISL_1260863                                                                                                                                                                                                                                                                                                                                                                                                                                                                                                                                                                                                                                                                                                                                                                                                                                                                                                                                                                                                                                                                                                                                                                                                                                                                                                                                                                                                                                                                                                                                                                                                                                                                                                                                                              | Ospedale San Bonifacio                                                                                              | Istituto Zooprofilattico Sperimentale delle Venezie                                      | Adelaide Milani; Alessia Schivo; Alice Fusaro; Ambra Pastori; Annalisa Salviato; Antonia Ricci; Calogero Terregino; Edoardo Giussani; Erika Giorgia Quaranta; Isabella Monne; Luca Tassoni                                                                                                                                                                               |
| EPI_ISL_1023524, EPI_ISL_1079364, EPI_ISL_1079366, EPI_ISL_1229132                                                                                                                                                                                                                                                                                                                                                                                                                                                                                                                                                                                                                                                                                                                                                                                                                                                                                                                                                                                                                                                                                                                                                                                                                                                                                                                                                                                                                                                                                                                                                                                                                                                                                                           | Ospedale San Camillo De Lellis di Rieti                                                                             | INMI Lazzaro Spallanzani IRCCS                                                           | A De Luca; A Di Caro; Antonino Di Caro; B Bartolini; Barbara Bartolini; CEM Gruber; Cesare E.M. Gruber; E Giombini; Emanuela Giombini; F Messina; Francesco Messina; L Casertano; Luca Casertano; Luisa Marchioni; M Rueca; MR Capobianchi; Maria R. Capobianchi; Martina Rueca; O Butera; Ornella Butera; S Venarubea; Stefano Venarubea                                |
| EPI_ISL_1063910, EPI_ISL_1079400, EPI_ISL_1079998 to 1079999, EPI_ISL_1091290 to 1091291                                                                                                                                                                                                                                                                                                                                                                                                                                                                                                                                                                                                                                                                                                                                                                                                                                                                                                                                                                                                                                                                                                                                                                                                                                                                                                                                                                                                                                                                                                                                                                                                                                                                                     | Ospedale San Filippo Neri                                                                                           | INMI Lazzaro Spallanzani IRCCS                                                           | A Di Caro; A Tamburro; B Bartolini; CEM Gruber; E Giombini; F Messina; M Melandri; M Meledandri; M Rueca; ML Schiavone; MR Capobianchi; O Butera                                                                                                                                                                                                                         |
| EPI_ISL_1079368, EPI_ISL_1079370, EPI_ISL_1079996, EPI_ISL_1080001, EPI_ISL_1091287, EPI_ISL_1259409                                                                                                                                                                                                                                                                                                                                                                                                                                                                                                                                                                                                                                                                                                                                                                                                                                                                                                                                                                                                                                                                                                                                                                                                                                                                                                                                                                                                                                                                                                                                                                                                                                                                         | Ospedale Sandro Pertini ASL Roma2                                                                                   | INMI Lazzaro Spallanzani IRCCS                                                           | A Di Caro; B Bartolini; CEM Gruber; E Giombini; F Messina; F Santini; G Bonfiglio; G Cappiello; M Rueca; MC Cava; MR Capobianchi; O Butera; R Longo; S Romano; V Michela                                                                                                                                                                                                 |
| EPI_ISL_1091288                                                                                                                                                                                                                                                                                                                                                                                                                                                                                                                                                                                                                                                                                                                                                                                                                                                                                                                                                                                                                                                                                                                                                                                                                                                                                                                                                                                                                                                                                                                                                                                                                                                                                                                                                              | Ospedale Sandro Pertini ASL Roma3                                                                                   | INMI Lazzaro Spallanzani IRCCS                                                           | A Di Caro; B Bartolini; CEM Gruber; E Giombini; F Messina; G Cappiello; M Rueca; MR Capobianchi; O Butera; V Michela                                                                                                                                                                                                                                                     |
| EPI_ISL_1091289                                                                                                                                                                                                                                                                                                                                                                                                                                                                                                                                                                                                                                                                                                                                                                                                                                                                                                                                                                                                                                                                                                                                                                                                                                                                                                                                                                                                                                                                                                                                                                                                                                                                                                                                                              | Ospedale Sandro Pertini ASL Roma4                                                                                   | INMI Lazzaro Spallanzani IRCCS                                                           | A Di Caro; B Bartolini; CEM Gruber; E Giombini; F Messina; M Rueca; MC Cava; MR Capobianchi; O Butera; S Romano                                                                                                                                                                                                                                                          |
| EPI_ISL_1008664, EPI_ISL_1008700, EPI_ISL_1254665, EPI_ISL_1254701                                                                                                                                                                                                                                                                                                                                                                                                                                                                                                                                                                                                                                                                                                                                                                                                                                                                                                                                                                                                                                                                                                                                                                                                                                                                                                                                                                                                                                                                                                                                                                                                                                                                                                           | Ospedale Santa Caterina Novella                                                                                     | Istituto Zooprofilattico Sperimentale della Puglia e della Basilicata                    | Bianco A.; Capozzi L.; Chironna M.; Del Sambro L.; Difato L.; Giannico A.; Loconsole D.; Parisi A.; Ridolfi D.; Sallustio A.; Simone D.                                                                                                                                                                                                                                  |
| EPI_ISL_1008706, EPI_ISL_1112221 to 1112222, EPI_ISL_1254696 to 1254700                                                                                                                                                                                                                                                                                                                                                                                                                                                                                                                                                                                                                                                                                                                                                                                                                                                                                                                                                                                                                                                                                                                                                                                                                                                                                                                                                                                                                                                                                                                                                                                                                                                                                                      | Ospedale Santissima Annunziata                                                                                      | Istituto Zooprofilattico Sperimentale della Puglia e della Basilicata                    | Bianco A.; Capozzi L.; Chironna M.; Del Sambro L.; Difato L.; Giannico A.; Loconsole D.; Parisi A.; Ridolfi D.; Sallustio A.; Simone D.; Tampoia M.                                                                                                                                                                                                                      |
| EPI_ISL_1254647 to 1254651, EPI_ISL_1254666 to 1254670, EPI_ISL_1261868                                                                                                                                                                                                                                                                                                                                                                                                                                                                                                                                                                                                                                                                                                                                                                                                                                                                                                                                                                                                                                                                                                                                                                                                                                                                                                                                                                                                                                                                                                                                                                                                                                                                                                      | Ospedale di Venere                                                                                                  | Istituto Zooprofilattico Sperimentale della Puglia e della Basilicata                    | Bianco A.; Capozzi L.; Del Sambro L.; Giannico A.; Iacobellis M.; Parisi A.; Ridolfi D.; Simone D.                                                                                                                                                                                                                                                                       |
| EPI_ISL_1112235                                                                                                                                                                                                                                                                                                                                                                                                                                                                                                                                                                                                                                                                                                                                                                                                                                                                                                                                                                                                                                                                                                                                                                                                                                                                                                                                                                                                                                                                                                                                                                                                                                                                                                                                                              | Ospedali Riuniti Azienda Ospedaliera Universitaria - Foggia                                                         | Istituto Zooprofilattico Sperimentale della Puglia e della Basilicata                    | Bianco A.; Capozzi L.; Del Sambro L.; Giannico A.; Parisi A.; Ridolfi D.; Simone D.                                                                                                                                                                                                                                                                                      |
| EPI_ISL_1069184                                                                                                                                                                                                                                                                                                                                                                                                                                                                                                                                                                                                                                                                                                                                                                                                                                                                                                                                                                                                                                                                                                                                                                                                                                                                                                                                                                                                                                                                                                                                                                                                                                                                                                                                                              | Ospital ng Lipa                                                                                                     | Research Institute for Tropical Medicine                                                 | Catalino Demetria; Daria Manalo; Edelwisa Mercado; Francisco Gerardo Polotan; Hannah Leah Morito; Inez Andrea Medado; John Leonard Chan; Joseph Hughes; Kirstyn Brunker; Ma Angelica Tujan; Othoniel Jan Onza                                                                                                                                                            |
| EPI_ISL_1034319, EPI_ISL_1034362 to 1034363, EPI_ISL_1040149, EPI_ISL_1073927 to 1073929, EPI_ISL_1073946, EPI_ISL_1118309, EPI_ISL_1118314, EPI_ISL_1118323, EPI_ISL_1118325, EPI_ISL_1118328, EPI_ISL_1118332, EPI_ISL_1118343, EPI_ISL_1118348, EPI_ISL_1118351 to 1118352, EPI_ISL_1118356 to 1118357, EPI_ISL_1118360, EPI_ISL_1118363 to 1118366, EPI_ISL_1118371, EPI_ISL_1118379 to 1118380, EPI_ISL_1118383 to 1118386, EPI_ISL_1118389 to 1118390, EPI_ISL_1118445, EPI_ISL_1118470, EPI_ISL_1118472, EPI_ISL_1118484, EPI_ISL_1118495, EPI_ISL_1118517 to 1118518, EPI_ISL_1118521 to 1118524, EPI_ISL_1118532, EPI_ISL_1118573, EPI_ISL_1118611, EPI_ISL_1118622, EPI_ISL_11186121, EPI_ISL_11186134 to 11186135, EPI_ISL_11186138, EPI_ISL_11186140, EPI_ISL_11186142, EPI_ISL_11186145, EPI_ISL_11186169, EPI_ISL_1251286, EPI_ISL_1251613 to 1251614, EPI_ISL_1251616, EPI_ISL_1251618 to 1251630, EPI_ISL_1251780 to 1251785, EPI_ISL_1251953 to 1251956, EPI_ISL_1251958 to 1251965, EPI_ISL_1251973 to 1251980, EPI_ISL_1252023 to 1252024, EPI_ISL_1252492, EPI_ISL_1314471, EPI_ISL_1314478 to 1314482, EPI_ISL_1314494 to 1314523, EPI_ISL_1317223, EPI_ISL_1317227, EPI_ISL_1317232, EPI_ISL_1317248, EPI_ISL_1317296 to 1317298, EPI_ISL_1317301, EPI_ISL_1317308, EPI_ISL_1317311 to 1317313, EPI_ISL_1317319, EPI_ISL_1317333, EPI_ISL_1317335, EPI_ISL_1317352, EPI_ISL_1317364, EPI_ISL_1317449, EPI_ISL_1317465 to 1317466, EPI_ISL_1317505 to 1317506, EPI_ISL_1317517 to 1317518, EPI_ISL_1317529 to 1317530, EPI_ISL_1317547 to 1317550, EPI_ISL_1317555, EPI_ISL_1317680, EPI_ISL_1317734, EPI_ISL_1317744, EPI_ISL_1317753, EPI_ISL_1317761, EPI_ISL_1317833, EPI_ISL_1317857, EPI_ISL_1317897, EPI_ISL_1318000, EPI_ISL_1323984 to 1324000 |                                                                                                                     |                                                                                          |                                                                                                                                                                                                                                                                                                                                                                          |
| see above                                                                                                                                                                                                                                                                                                                                                                                                                                                                                                                                                                                                                                                                                                                                                                                                                                                                                                                                                                                                                                                                                                                                                                                                                                                                                                                                                                                                                                                                                                                                                                                                                                                                                                                                                                    | Ostfold Hospital Trust - Kalnes, Centre for Laboratory Medicine, Section for gene technology and infection serology | Norwegian Institute of Public Health, Department of Virology                             | Atiya R Ali; Debech Nadia; Engebretsen Serina Beate; Engebretsen Serina Beate Atiya R Ali; Garcia Llorente Ignacio; Hilde Elshaug; Hilde Vollan; Ignacio Garcia Llorente; Jon Bråte; Kamilla Heddeland Instefjord; Karoline Bragstad; Kathrine Stene-Johansen; Marie Paulsen Madsen; Olav Hungnes; Pedersen Benedikte Nevjen; Rasmus Riis Kopperud; Serina B Engebretsen |
| EPI_ISL_1181356, EPI_ISL_1181520, EPI_ISL_1181522, EPI_ISL_1181575, EPI_ISL_1181577, EPI_ISL_1181586, EPI_ISL_1181588, EPI_ISL_1181591, EPI_ISL_1181593, EPI_ISL_1181596, EPI_ISL_1181598, EPI_ISL_1181604, EPI_ISL_1181621 to 1181622                                                                                                                                                                                                                                                                                                                                                                                                                                                                                                                                                                                                                                                                                                                                                                                                                                                                                                                                                                                                                                                                                                                                                                                                                                                                                                                                                                                                                                                                                                                                       |                                                                                                                     |                                                                                          |                                                                                                                                                                                                                                                                                                                                                                          |
| see above                                                                                                                                                                                                                                                                                                                                                                                                                                                                                                                                                                                                                                                                                                                                                                                                                                                                                                                                                                                                                                                                                                                                                                                                                                                                                                                                                                                                                                                                                                                                                                                                                                                                                                                                                                    | Oswaldo Cruz Foundation, FIOCRUZ - Ceara (Fiocruz-CE)                                                               | Laboratory of Respiratory Viruses and Measles, Oswaldo Cruz Institute, FIOCRUZ           | Alice Sampaio Rocha; Ana Carolina Mendonca; Anna Carolina Paixao; Fabio Miyajima; Fernando Motta; Joaquim César do Nascimento Sousa Júnior; Luciana Appolinario; Marilda Siqueira on behalf of the Fiocruz COVID-19 Genomic Surveillance Network; Paola Resende; Renata Serrano Lopes; Thais de Oliveira Costa                                                           |
| EPI_ISL_1201526 to 1201534, EPI_ISL_1259308, EPI_ISL_1262909 to 1262913                                                                                                                                                                                                                                                                                                                                                                                                                                                                                                                                                                                                                                                                                                                                                                                                                                                                                                                                                                                                                                                                                                                                                                                                                                                                                                                                                                                                                                                                                                                                                                                                                                                                                                      | Outre Mer                                                                                                           | National Reference Center for Viruses of Respiratory Infections, Institut Pasteur, Paris | Angela Brisebarre; Camille Capel; Etienne Simon-Lorière; Marion Barbet; Maud Vanpeene; Méline Bizard; Rousset Dominique; Sylvie Behillil; Sylvie van der Werf; Vincent Enouf                                                                                                                                                                                             |
| EPI_ISL_1001384 to 1001385, EPI_ISL_1001395 to 1001402, EPI_ISL_1001408 to 1001414, EPI_ISL_1001416 to 1001449, EPI_ISL_1001452 to 1001455, EPI_ISL_1060570 to 1060571, EPI_ISL_1060577 to 1060592, EPI_ISL_1096234 to 1096235, EPI_ISL_1096262                                                                                                                                                                                                                                                                                                                                                                                                                                                                                                                                                                                                                                                                                                                                                                                                                                                                                                                                                                                                                                                                                                                                                                                                                                                                                                                                                                                                                                                                                                                              |                                                                                                                     |                                                                                          |                                                                                                                                                                                                                                                                                                                                                                          |
| see above                                                                                                                                                                                                                                                                                                                                                                                                                                                                                                                                                                                                                                                                                                                                                                                                                                                                                                                                                                                                                                                                                                                                                                                                                                                                                                                                                                                                                                                                                                                                                                                                                                                                                                                                                                    | Outre mer                                                                                                           | National Reference Center for Viruses of Respiratory Infections, Institut Pasteur, Paris | Angela Brisebarre; Camille Capel; Etienne Simon-Lorière; Marion Barbet; Maud Vanpeene; Méline Bizard; Rousset (Guy) Dominique; Rousset Dominique; Sylvie Behillil; Sylvie van der Werf; Vincent Enouf                                                                                                                                                                    |
| EPI_ISL_1273214, EPI_ISL_1293350                                                                                                                                                                                                                                                                                                                                                                                                                                                                                                                                                                                                                                                                                                                                                                                                                                                                                                                                                                                                                                                                                                                                                                                                                                                                                                                                                                                                                                                                                                                                                                                                                                                                                                                                             | Oxford University Clinical Research Unit (OUCRU)                                                                    | Oxford University Clinical Research Unit (OUCRU)                                         | Guy Thwaites; Huynh Trung Trieu; Lam Minh Yen; Le Manh Hung; Le Nguyen Truc Nhu; Le Thi Thu Huong; Le Van Tan; Nghiem My Ngoc; Ngo Ngoc Quang Minh; Nguyen Thanh Dung; Nguyen Thanh Phong; Nguyen Thanh Truong; Nguyen Thi Thu Hong; Nguyen To Anh; Nguyen Tri Dung; Nguyen Van                                                                                          |



|                                                                                                                                                                                                                                                                                                                                                                                                                                                                                                                                                                                                                                                                                                                                                                                                                                                                                                                                                                                                                                                                                                                                                                                                                                                                                                                                                                                                                                                                                                                                                                                                                                                                                                                                                                                                                                                                                                                                                                                                                                                                                                                                                                                                                                                                                                                                                                                                                                                                                                                                                                                                                                                                                                                                                                                                                                                                                                                                                                                                                                                                                                    |           |                                                                                                                    |                                                                                                                        |                                                                                                                                                                                                                                                                                                                                                                                                                                                                                                                                                                                                                                                                                                                |
|----------------------------------------------------------------------------------------------------------------------------------------------------------------------------------------------------------------------------------------------------------------------------------------------------------------------------------------------------------------------------------------------------------------------------------------------------------------------------------------------------------------------------------------------------------------------------------------------------------------------------------------------------------------------------------------------------------------------------------------------------------------------------------------------------------------------------------------------------------------------------------------------------------------------------------------------------------------------------------------------------------------------------------------------------------------------------------------------------------------------------------------------------------------------------------------------------------------------------------------------------------------------------------------------------------------------------------------------------------------------------------------------------------------------------------------------------------------------------------------------------------------------------------------------------------------------------------------------------------------------------------------------------------------------------------------------------------------------------------------------------------------------------------------------------------------------------------------------------------------------------------------------------------------------------------------------------------------------------------------------------------------------------------------------------------------------------------------------------------------------------------------------------------------------------------------------------------------------------------------------------------------------------------------------------------------------------------------------------------------------------------------------------------------------------------------------------------------------------------------------------------------------------------------------------------------------------------------------------------------------------------------------------------------------------------------------------------------------------------------------------------------------------------------------------------------------------------------------------------------------------------------------------------------------------------------------------------------------------------------------------------------------------------------------------------------------------------------------------|-----------|--------------------------------------------------------------------------------------------------------------------|------------------------------------------------------------------------------------------------------------------------|----------------------------------------------------------------------------------------------------------------------------------------------------------------------------------------------------------------------------------------------------------------------------------------------------------------------------------------------------------------------------------------------------------------------------------------------------------------------------------------------------------------------------------------------------------------------------------------------------------------------------------------------------------------------------------------------------------------|
| EPI_ISL_1051594 to 1051598, EPI_ISL_1051601, EPI_ISL_1051609 to 1051613, EPI_ISL_1051615 to 1051617, EPI_ISL_1051619, EPI_ISL_1051621 to 1051625, EPI_ISL_1051627 to 1051628, EPI_ISL_1051630 to 1051636, EPI_ISL_1051639 to 1051640, EPI_ISL_1051642 to 1051643, EPI_ISL_1051645 to 1051647, EPI_ISL_1051649, EPI_ISL_1051651 to 1051655, EPI_ISL_1051658 to 1051664, EPI_ISL_1051667 to 1051670, EPI_ISL_1051672, EPI_ISL_1051674 to 1051684, EPI_ISL_1051686 to 1051687, EPI_ISL_1051689 to 1051691, EPI_ISL_1051693 to 1051696, EPI_ISL_1051698, EPI_ISL_1051700 to 1051709, EPI_ISL_1051711, EPI_ISL_1051713 to 1051719, EPI_ISL_1051724, EPI_ISL_1051726, EPI_ISL_1051728 to 1051738, EPI_ISL_1051741 to 1051745, EPI_ISL_1051747, EPI_ISL_1051749 to 1051757, EPI_ISL_1051759 to 1051761, EPI_ISL_1051763 to 1051767, EPI_ISL_1051769 to 1051773, EPI_ISL_1051775 to 1051776, EPI_ISL_1051778, EPI_ISL_1051780 to 1051784, EPI_ISL_1051788 to 1051792, EPI_ISL_1051794, EPI_ISL_1051797 to 1051803, EPI_ISL_1051805 to 1051814, EPI_ISL_1051816, EPI_ISL_1051822, EPI_ISL_1051824 to 1051830, EPI_ISL_1051832, EPI_ISL_1051834, EPI_ISL_1051837 to 1051838, EPI_ISL_1051840 to 1051841, EPI_ISL_1051843 to 1051845, EPI_ISL_1051849, EPI_ISL_1051851 to 1051856, EPI_ISL_1051858 to 1051874, EPI_ISL_1051876 to 1051889, EPI_ISL_1051891, EPI_ISL_1051893 to 1051897, EPI_ISL_1051899 to 1051901, EPI_ISL_1051903 to 1051905, EPI_ISL_1051908 to 1051914, EPI_ISL_1051916 to 1051918, EPI_ISL_1178704 to 1178707, EPI_ISL_1178709, EPI_ISL_1178711 to 1178712, EPI_ISL_1178714, EPI_ISL_1178716 to 1178724, EPI_ISL_1178726 to 1178727, EPI_ISL_1178729, EPI_ISL_1178731 to 1178735, EPI_ISL_1178737 to 1178740, EPI_ISL_1178742, EPI_ISL_1178744, EPI_ISL_1178746 to 1178749, EPI_ISL_1178751 to 1178753, EPI_ISL_1178756, EPI_ISL_1178759 to 1178762, EPI_ISL_1178764 to 1178767, EPI_ISL_1178769 to 1178773, EPI_ISL_1178775, EPI_ISL_1178777 to 1178779, EPI_ISL_1178781, EPI_ISL_1178783 to 1178785, EPI_ISL_1178787, EPI_ISL_1178789 to 1178801, EPI_ISL_1178803, EPI_ISL_1178805 to 1178806, EPI_ISL_1178809 to 1178820, EPI_ISL_1178822 to 1178837, EPI_ISL_1178839 to 1178840, EPI_ISL_1178842 to 1178845, EPI_ISL_1178847 to 1178851, EPI_ISL_1178853 to 1178861, EPI_ISL_1178864 to 1178867, EPI_ISL_1178869 to 1178870, EPI_ISL_1249072 to 1249084, EPI_ISL_1249086 to 1249088, EPI_ISL_1249090 to 1249094, EPI_ISL_1249096 to 1249103, EPI_ISL_1249106, EPI_ISL_1249108 to 1249112, EPI_ISL_1249114 to 1249120, EPI_ISL_1249122 to 1249124, EPI_ISL_1249126 to 1249138, EPI_ISL_1249141, EPI_ISL_1249144 to 1249147, EPI_ISL_1249149 to 1249150, EPI_ISL_1249152 to 1249156, EPI_ISL_1249159 to 1249168, EPI_ISL_1249170 to 1249185, EPI_ISL_1249187 to 1249191, EPI_ISL_1249195 to 1249200, EPI_ISL_1249202 to 1249208, EPI_ISL_1249210, EPI_ISL_1249212 to 1249216, EPI_ISL_1249218 to 1249224, EPI_ISL_1249226, EPI_ISL_1249229 to 1249238, EPI_ISL_1249240 to 1249242, EPI_ISL_1249244 to 1249246, EPI_ISL_1249249 to 1249250, EPI_ISL_1249252, EPI_ISL_1309733 to 1309782 | see above | Oxford Viroomics, NDM, University of Oxford; Oxford University Hospitals; Basingstoke and North Hampshire Hospital | COVID-19 Genomics UK (COG-UK) Consortium                                                                               | Alex Mobbs; Amy Trebes; Anita Justice; Catrin Moore; Christophe Fraser; David Bonsall; David Buck; Emma Wise; George Macintyre; Jessica Lynch; John Todd; Mariateresa de Cesare; Matilde Mori; Monique Andersson; Nathan Moore; Nick Cortes; Robert Shaw; Stephen Kidd; Tanya Golubchik; Timothy Peto                                                                                                                                                                                                                                                                                                                                                                                                          |
| EPI_ISL_1036224 to 1036229, EPI_ISL_1063788                                                                                                                                                                                                                                                                                                                                                                                                                                                                                                                                                                                                                                                                                                                                                                                                                                                                                                                                                                                                                                                                                                                                                                                                                                                                                                                                                                                                                                                                                                                                                                                                                                                                                                                                                                                                                                                                                                                                                                                                                                                                                                                                                                                                                                                                                                                                                                                                                                                                                                                                                                                                                                                                                                                                                                                                                                                                                                                                                                                                                                                        |           | P.O.CARDARELLI                                                                                                     | Istituto Zooprofilattico Sperimentale dell'Abruzzo e Molise "G. Caporale"                                              | Ancora M; Calistri P; Cammà C; Curini V; Di Domenico M; Di Pasquale A; Mangone I; Marccacci M; Niro G; Puglia I; Rinaldi A; Savini G; Scialabba S; Scutellà M                                                                                                                                                                                                                                                                                                                                                                                                                                                                                                                                                  |
| EPI_ISL_1008902 to 1008903, EPI_ISL_1049204 to 1049206, EPI_ISL_1049209, EPI_ISL_1049212 to 1049219, EPI_ISL_1049221 to 1049223, EPI_ISL_1373879                                                                                                                                                                                                                                                                                                                                                                                                                                                                                                                                                                                                                                                                                                                                                                                                                                                                                                                                                                                                                                                                                                                                                                                                                                                                                                                                                                                                                                                                                                                                                                                                                                                                                                                                                                                                                                                                                                                                                                                                                                                                                                                                                                                                                                                                                                                                                                                                                                                                                                                                                                                                                                                                                                                                                                                                                                                                                                                                                   |           | PA Department of Health, Bureau of Laboratories                                                                    | Pathogen Discovery, Respiratory Viruses Branch, Division of Viral Diseases, Centers for Disease Control and Prevention | Anna Kelleher; Anna Uehara; Brian Lynch; Clinton R. Paden; Haibin Wang; Han Jia Justin Ng; Han Jia Ng; Jing Zhang; Krista Queen; Peter Cook; Suxiang Tong; Yan Li; Ying Tao                                                                                                                                                                                                                                                                                                                                                                                                                                                                                                                                    |
| EPI_ISL_1094304 to 1094305, EPI_ISL_1094379, EPI_ISL_1094445 to 1094458, EPI_ISL_1095169 to 1095185                                                                                                                                                                                                                                                                                                                                                                                                                                                                                                                                                                                                                                                                                                                                                                                                                                                                                                                                                                                                                                                                                                                                                                                                                                                                                                                                                                                                                                                                                                                                                                                                                                                                                                                                                                                                                                                                                                                                                                                                                                                                                                                                                                                                                                                                                                                                                                                                                                                                                                                                                                                                                                                                                                                                                                                                                                                                                                                                                                                                |           | PA Department of Health, Bureau of Laboratories                                                                    | Respiratory Viruses Branch, Division of Viral Diseases, Centers for Disease Control and Prevention                     | Anna Montmayer; Anna Uehara; Ben L. Rambo-Martin; Clinton R. Paden; Dhvani Batra; Haibin Wang; Jasmine Padilla; Jing Zhang; Justin Lee; Krista Queen; Lori Rowe; Mark Burroughs; Mili Sheth; Peter W. Cook; Rachel Marine; Sarah Nobles; Suxiang Tong; Yan Li; Ying Tao                                                                                                                                                                                                                                                                                                                                                                                                                                        |
| EPI_ISL_1373880 to 1373881, EPI_ISL_1379686, EPI_ISL_1379693                                                                                                                                                                                                                                                                                                                                                                                                                                                                                                                                                                                                                                                                                                                                                                                                                                                                                                                                                                                                                                                                                                                                                                                                                                                                                                                                                                                                                                                                                                                                                                                                                                                                                                                                                                                                                                                                                                                                                                                                                                                                                                                                                                                                                                                                                                                                                                                                                                                                                                                                                                                                                                                                                                                                                                                                                                                                                                                                                                                                                                       |           | PA Dept of Health, Bureau of Laboratories                                                                          | Pathogen Discovery, Respiratory Viruses Branch, Division of Viral Diseases, Centers for Disease Control and Prevention | Anna Kelleher; Anna Uehara; Brian Lynch; Clinton R. Paden; Haibin Wang; Han Jia Justin Ng; Jing Zhang; Krista Queen; Peter Cook; Suxiang Tong; Yan Li; Ying Tao                                                                                                                                                                                                                                                                                                                                                                                                                                                                                                                                                |
| EPI_ISL_1040031 to 1040049                                                                                                                                                                                                                                                                                                                                                                                                                                                                                                                                                                                                                                                                                                                                                                                                                                                                                                                                                                                                                                                                                                                                                                                                                                                                                                                                                                                                                                                                                                                                                                                                                                                                                                                                                                                                                                                                                                                                                                                                                                                                                                                                                                                                                                                                                                                                                                                                                                                                                                                                                                                                                                                                                                                                                                                                                                                                                                                                                                                                                                                                         |           | PCR Laboratory, The First Affiliated Hospital of Zhengzhou University, Zhengzhou, Henan, China                     | PCR Laboratory, The First Affiliated Hospital of Zhengzhou University, Zhengzhou, Henan, China                         | Guanglin Cui; Hao Guo; Junhu Wan; Lei Zheng; Li Sun; Lijuan Rong; Meijing Long; Shijie Zhang; Ting Sun; Xianchun Meng; Xiangbo Huang                                                                                                                                                                                                                                                                                                                                                                                                                                                                                                                                                                           |
| EPI_ISL_1091782 to 1091783                                                                                                                                                                                                                                                                                                                                                                                                                                                                                                                                                                                                                                                                                                                                                                                                                                                                                                                                                                                                                                                                                                                                                                                                                                                                                                                                                                                                                                                                                                                                                                                                                                                                                                                                                                                                                                                                                                                                                                                                                                                                                                                                                                                                                                                                                                                                                                                                                                                                                                                                                                                                                                                                                                                                                                                                                                                                                                                                                                                                                                                                         |           | PECET                                                                                                              | Universidad Nacional de Colombia - Laboratorio Genómico One Health                                                     | Andres F. Cardona-Rios; Carlos Franco-Muñoz; Daniel O. Maldonado-Perez; Diego A. Álvarez-Díaz; Idabely Betancur Ortiz; Jorge E. Osorio; Juan P. Hernandez-Ortiz; Karl A. Ciuoderis; Laura Silvana Perez; Marcela Mercado-Reyes; Sandra Ines Cano                                                                                                                                                                                                                                                                                                                                                                                                                                                               |
| EPI_ISL_1063403, EPI_ISL_1063528, EPI_ISL_1063530, EPI_ISL_1063532, EPI_ISL_1063534 to 1063536, EPI_ISL_1063627, EPI_ISL_1063774 to 1063783, EPI_ISL_1069154 to 1069156, EPI_ISL_1069172, EPI_ISL_1069195 to 1069197                                                                                                                                                                                                                                                                                                                                                                                                                                                                                                                                                                                                                                                                                                                                                                                                                                                                                                                                                                                                                                                                                                                                                                                                                                                                                                                                                                                                                                                                                                                                                                                                                                                                                                                                                                                                                                                                                                                                                                                                                                                                                                                                                                                                                                                                                                                                                                                                                                                                                                                                                                                                                                                                                                                                                                                                                                                                               | see above | PGIMER, Chandigarh                                                                                                 | ICMR-NATIONAL INSTITUTE OF VIROLOGY, MICROBIAL CONTAINMENT COMPLEX                                                     | Mini Singh; Pragna D. Yadav; Rupinder Bakshi                                                                                                                                                                                                                                                                                                                                                                                                                                                                                                                                                                                                                                                                   |
| EPI_ISL_1213574, EPI_ISL_1213576                                                                                                                                                                                                                                                                                                                                                                                                                                                                                                                                                                                                                                                                                                                                                                                                                                                                                                                                                                                                                                                                                                                                                                                                                                                                                                                                                                                                                                                                                                                                                                                                                                                                                                                                                                                                                                                                                                                                                                                                                                                                                                                                                                                                                                                                                                                                                                                                                                                                                                                                                                                                                                                                                                                                                                                                                                                                                                                                                                                                                                                                   |           | PHILIPPINE AIRPORT DIAGNOSTIC LABORATORY                                                                           | Philippine Genome Center                                                                                               | Alethea R. de Guzman; Anna Ong-Lim; Arianne A. Zamora; Asia Louisa U. Chong; Benedict A. Maralit; Candice Francheska B. Tambaoan; Carlo M. Lapid; Celia Carlos; Devon Ray Pacial; Edsel Maurice Salvaña; El King D. Morado; Eva Maria Cutiongco-de la Paz; Francis A. Tablizo; Irish Coleen A. Asin; Jaime C. Montoya; Jan Michael C. Yap; Jo-Hannah S. Llamas; John Q. Wong; Joshua Gregor A. Dizon; Juan Antonio R. Magalang; Karol Sophia Agape R. Padilla; Kenneth M. Kim; Kris P. Punayan; Marc Edsel C. Ayes; Marc Jerrone R. Castro; Maria Rosario Singh-Vergeire and Cynthia P. Saloma; Maria Sofia L. Yangzon; Marissa Alejandria; Razel Nikka M. Hao; Rianna Patricia S. Cruz; Sheila Mae M. Araiza  |
| EPI_ISL_1340914 to 1340916                                                                                                                                                                                                                                                                                                                                                                                                                                                                                                                                                                                                                                                                                                                                                                                                                                                                                                                                                                                                                                                                                                                                                                                                                                                                                                                                                                                                                                                                                                                                                                                                                                                                                                                                                                                                                                                                                                                                                                                                                                                                                                                                                                                                                                                                                                                                                                                                                                                                                                                                                                                                                                                                                                                                                                                                                                                                                                                                                                                                                                                                         |           | PHS/IHS Hospital-Jicarilla Service Unit                                                                            | New Mexico Department of Health Scientific Laboratory                                                                  | Anastacia Griego-Fisher; D'eldra Malone; Ellie Johnson; Jennifer Benoit                                                                                                                                                                                                                                                                                                                                                                                                                                                                                                                                                                                                                                        |
| EPI_ISL_1159377 to 1159380, EPI_ISL_1170949 to 1170954, EPI_ISL_1196413 to 1196420, EPI_ISL_1222761 to 1222765, EPI_ISL_1241835 to 1241842, EPI_ISL_1300523 to 1300525, EPI_ISL_1300527 to 1300528, EPI_ISL_1300531, EPI_ISL_1300534, EPI_ISL_1340868 to 1340872, EPI_ISL_1340874 to 1340879, EPI_ISL_1364538 to 1364539, EPI_ISL_1364541                                                                                                                                                                                                                                                                                                                                                                                                                                                                                                                                                                                                                                                                                                                                                                                                                                                                                                                                                                                                                                                                                                                                                                                                                                                                                                                                                                                                                                                                                                                                                                                                                                                                                                                                                                                                                                                                                                                                                                                                                                                                                                                                                                                                                                                                                                                                                                                                                                                                                                                                                                                                                                                                                                                                                          | see above | PHV-FSS                                                                                                            | PHV-FSS                                                                                                                | Son Nguyen                                                                                                                                                                                                                                                                                                                                                                                                                                                                                                                                                                                                                                                                                                     |
| EPI_ISL_1272916 to 1272919                                                                                                                                                                                                                                                                                                                                                                                                                                                                                                                                                                                                                                                                                                                                                                                                                                                                                                                                                                                                                                                                                                                                                                                                                                                                                                                                                                                                                                                                                                                                                                                                                                                                                                                                                                                                                                                                                                                                                                                                                                                                                                                                                                                                                                                                                                                                                                                                                                                                                                                                                                                                                                                                                                                                                                                                                                                                                                                                                                                                                                                                         |           | PR Public Health Lab                                                                                               | Centers for Disease Control and Prevention Division of Viral Diseases, Pathogen Discovery                              | Anna Montmayer; Anna Uehara; Ben L. Rambo-Martin; Clinton R. Paden; Dhvani Batra; Haibin Wang; Jasmine Padilla; Jing Zhang; Justin Lee; Katie Dillon; Krista Queen; Kristen Knipe; Kristine Lacek; Lori Rowe; Mark Burroughs; Matthew Schmerer; Mili Sheth; Peter W. Cook; Rachel Marine; Sam Shepard; Sarah Nobles; Shoshona Le; Suxiang Tong; Yan Li; Ying Tao                                                                                                                                                                                                                                                                                                                                               |
| EPI_ISL_1117514                                                                                                                                                                                                                                                                                                                                                                                                                                                                                                                                                                                                                                                                                                                                                                                                                                                                                                                                                                                                                                                                                                                                                                                                                                                                                                                                                                                                                                                                                                                                                                                                                                                                                                                                                                                                                                                                                                                                                                                                                                                                                                                                                                                                                                                                                                                                                                                                                                                                                                                                                                                                                                                                                                                                                                                                                                                                                                                                                                                                                                                                                    |           | PRES OSP SAN LIBERATORE                                                                                            | Istituto Zooprofilattico Sperimentale dell'Abruzzo e Molise "G. Caporale"                                              | Ancora M; Calistri P; Cammà C; Curini V; Di Domenico M; Di Pasquale A; Lorusso A; Mangone I; Marccacci M; Puglia I; Rinaldi A; Savini G; Scialabba S                                                                                                                                                                                                                                                                                                                                                                                                                                                                                                                                                           |
| EPI_ISL_1036151                                                                                                                                                                                                                                                                                                                                                                                                                                                                                                                                                                                                                                                                                                                                                                                                                                                                                                                                                                                                                                                                                                                                                                                                                                                                                                                                                                                                                                                                                                                                                                                                                                                                                                                                                                                                                                                                                                                                                                                                                                                                                                                                                                                                                                                                                                                                                                                                                                                                                                                                                                                                                                                                                                                                                                                                                                                                                                                                                                                                                                                                                    |           | PRES OSP TAGLIACCOZZO                                                                                              | Istituto Zooprofilattico Sperimentale dell'Abruzzo e Molise "G. Caporale"                                              | Ancora M; Calistri P; Cammà C; Curini V; Di Domenico M; Di Pasquale A; Lorusso A; Mangone I; Marccacci M; Puglia I; Rinaldi A; Savini G; Scialabba S                                                                                                                                                                                                                                                                                                                                                                                                                                                                                                                                                           |
| EPI_ISL_1036205                                                                                                                                                                                                                                                                                                                                                                                                                                                                                                                                                                                                                                                                                                                                                                                                                                                                                                                                                                                                                                                                                                                                                                                                                                                                                                                                                                                                                                                                                                                                                                                                                                                                                                                                                                                                                                                                                                                                                                                                                                                                                                                                                                                                                                                                                                                                                                                                                                                                                                                                                                                                                                                                                                                                                                                                                                                                                                                                                                                                                                                                                    |           | PRES TERR CASOLI                                                                                                   | Istituto Zooprofilattico Sperimentale dell'Abruzzo e Molise "G. Caporale"                                              | Ancora M; Calistri P; Cammà C; Curini V; Di Domenico M; Di Pasquale A; Lorusso A; Mangone I; Marccacci M; Puglia I; Rinaldi A; Savini G; Scialabba S                                                                                                                                                                                                                                                                                                                                                                                                                                                                                                                                                           |
| EPI_ISL_1117692                                                                                                                                                                                                                                                                                                                                                                                                                                                                                                                                                                                                                                                                                                                                                                                                                                                                                                                                                                                                                                                                                                                                                                                                                                                                                                                                                                                                                                                                                                                                                                                                                                                                                                                                                                                                                                                                                                                                                                                                                                                                                                                                                                                                                                                                                                                                                                                                                                                                                                                                                                                                                                                                                                                                                                                                                                                                                                                                                                                                                                                                                    |           | PRESIDIO OSP SAN LIBERATORE                                                                                        | Istituto Zooprofilattico Sperimentale dell'Abruzzo e Molise "G. Caporale"                                              | Ancora M; Calistri P; Cammà C; Curini V; Di Domenico M; Di Pasquale A; Lorusso A; Mangone I; Marccacci M; Puglia I; Rinaldi A; Savini G; Scialabba S                                                                                                                                                                                                                                                                                                                                                                                                                                                                                                                                                           |
| EPI_ISL_1117498, EPI_ISL_1251025, EPI_ISL_1336767                                                                                                                                                                                                                                                                                                                                                                                                                                                                                                                                                                                                                                                                                                                                                                                                                                                                                                                                                                                                                                                                                                                                                                                                                                                                                                                                                                                                                                                                                                                                                                                                                                                                                                                                                                                                                                                                                                                                                                                                                                                                                                                                                                                                                                                                                                                                                                                                                                                                                                                                                                                                                                                                                                                                                                                                                                                                                                                                                                                                                                                  |           | PRESIDIO TERRITORIALE CASOLI                                                                                       | Istituto Zooprofilattico Sperimentale dell'Abruzzo e Molise "G. Caporale"                                              | Ancora M; Calistri P; Cammà C; Caporale M; Curini V; Di Domenico M; Di Lollo V; Di Pasquale A; Lorusso A; Mangone I; Marccacci M; Puglia I; Rinaldi A; Savini G; Scialabba S                                                                                                                                                                                                                                                                                                                                                                                                                                                                                                                                   |
| EPI_ISL_1081821                                                                                                                                                                                                                                                                                                                                                                                                                                                                                                                                                                                                                                                                                                                                                                                                                                                                                                                                                                                                                                                                                                                                                                                                                                                                                                                                                                                                                                                                                                                                                                                                                                                                                                                                                                                                                                                                                                                                                                                                                                                                                                                                                                                                                                                                                                                                                                                                                                                                                                                                                                                                                                                                                                                                                                                                                                                                                                                                                                                                                                                                                    |           | PRIME CARE ALPHA COVID-19 TESTING LABORATORY                                                                       | Philippine Genome Center                                                                                               | Alethea R. de Guzman; Anna Ong-Lim; Arianne A. Zamora; Asia Louisa U. Chong; Benedict A. Maralit; Candice Francheska B. Tambaoan; Carlo M. Lapid; Celia Carlos; Cynthia P. Saloma; Devon Ray Pacial; Edsel Maurice Salvaña; El King D. Morado; Eva Maria Cutiongco-de la Paz; Francis A. Tablizo; Irish Coleen A. Asin; Jaime C. Montoya; Jan Michael C. Yap; Jo-Hannah S. Llamas; John Q. Wong; Joshua Gregor A. Dizon; Juan Antonio R. Magalang; Karol Sophia Agape R. Padilla; Kenneth M. Kim; Kris P. Punayan; Marc Edsel C. Ayes; Marc Jerrone R. Castro; Maria Sofia L. Yangzon; Marissa Alejandria; Razel Nikka M. Hao; Rianna Patricia S. Cruz; Sheila Mae M. Araiza; and Maria Rosario Singh-Vergeire |
| EPI_ISL_1312704 to 1312720, EPI_ISL_1321917 to 1321919                                                                                                                                                                                                                                                                                                                                                                                                                                                                                                                                                                                                                                                                                                                                                                                                                                                                                                                                                                                                                                                                                                                                                                                                                                                                                                                                                                                                                                                                                                                                                                                                                                                                                                                                                                                                                                                                                                                                                                                                                                                                                                                                                                                                                                                                                                                                                                                                                                                                                                                                                                                                                                                                                                                                                                                                                                                                                                                                                                                                                                             |           | PSKUS                                                                                                              | Latvian Biomedical Research and Study Centre                                                                           | David Fridmanis; Elina Dimina; Guntars Zarins; Ivars Silamikelis; Janis Meisters; Janis Klavins; Janis Pjalkovskis; Juris Pervoscikovs; Kaspars Megnis; Laila Silamikele; Lauma Freimane; Laura Ansons; Liga Birzniece; Monta Ustinova; Nikita Zrelovs; Uga Dumpis; Una Krumina; Vita Rovite; Zane Dobeles                                                                                                                                                                                                                                                                                                                                                                                                     |
| EPI_ISL_1040655, EPI_ISL_1040679, EPI_ISL_1040799                                                                                                                                                                                                                                                                                                                                                                                                                                                                                                                                                                                                                                                                                                                                                                                                                                                                                                                                                                                                                                                                                                                                                                                                                                                                                                                                                                                                                                                                                                                                                                                                                                                                                                                                                                                                                                                                                                                                                                                                                                                                                                                                                                                                                                                                                                                                                                                                                                                                                                                                                                                                                                                                                                                                                                                                                                                                                                                                                                                                                                                  |           | Pacaltsdorp Clinic w/c PAC                                                                                         | NHLS/UCT                                                                                                               | Arash Iranzadeh; Bruna Galvao; Carolyn Williamson; Deelan Doolabh; Diana Hardie; Innocent Mudau; Kruger Marais; Lynn Tyers; Marvin Hsiao; Stephen Korsman                                                                                                                                                                                                                                                                                                                                                                                                                                                                                                                                                      |
| EPI_ISL_1069181                                                                                                                                                                                                                                                                                                                                                                                                                                                                                                                                                                                                                                                                                                                                                                                                                                                                                                                                                                                                                                                                                                                                                                                                                                                                                                                                                                                                                                                                                                                                                                                                                                                                                                                                                                                                                                                                                                                                                                                                                                                                                                                                                                                                                                                                                                                                                                                                                                                                                                                                                                                                                                                                                                                                                                                                                                                                                                                                                                                                                                                                                    |           | Pagbilao Rural Health Unit                                                                                         | Research Institute for Tropical Medicine                                                                               | Catalino Demetria; Daria Manalo; Edelwisa Mercado; Francisco Gerardo Polotan; Hannah Leah Morito; Inez Andrea Medado; John Leonard Chan; Joseph Hughes; Kirstyn Brunker; Ma Angelica Tujan; Othioniel Jan Onza                                                                                                                                                                                                                                                                                                                                                                                                                                                                                                 |
| EPI_ISL_1075350                                                                                                                                                                                                                                                                                                                                                                                                                                                                                                                                                                                                                                                                                                                                                                                                                                                                                                                                                                                                                                                                                                                                                                                                                                                                                                                                                                                                                                                                                                                                                                                                                                                                                                                                                                                                                                                                                                                                                                                                                                                                                                                                                                                                                                                                                                                                                                                                                                                                                                                                                                                                                                                                                                                                                                                                                                                                                                                                                                                                                                                                                    |           | Palapye Primary Hospital Laboratory                                                                                | Botswana Harvard HIV Reference Laboratory                                                                              | Boitumelo Zuze; Botshelo Radibe; David Lawrence; Dorcas Maruapula; Joseph Makhema; Mosepele Mosepele; Roger Shapiro; Shahin Lockman; Sikhulile Moyo; Simani Gaseitsiwe; Wonderful T. Choga                                                                                                                                                                                                                                                                                                                                                                                                                                                                                                                     |
| EPI_ISL_1040480, EPI_ISL_1041213 to 1041508, EPI_ISL_1041510 to 1041930, EPI_ISL_1097781 to 1098601, EPI_ISL_1172110 to 1173158, EPI_ISL_1258466 to 1258987, EPI_ISL_1306253 to 1307176, EPI_ISL_1307178 to 1307635                                                                                                                                                                                                                                                                                                                                                                                                                                                                                                                                                                                                                                                                                                                                                                                                                                                                                                                                                                                                                                                                                                                                                                                                                                                                                                                                                                                                                                                                                                                                                                                                                                                                                                                                                                                                                                                                                                                                                                                                                                                                                                                                                                                                                                                                                                                                                                                                                                                                                                                                                                                                                                                                                                                                                                                                                                                                                | see above | Pandemic Response Lab - NYC                                                                                        | Pandemic Response Lab, R&D                                                                                             | Cybill del Castillo; Dylan Law; Haiping Hao; Henry Lee; Jon Laurent; Melissa Hopkins; Michael Hammerling; Pradeep Bugga; Shinyoung Clair Kang; Sol Rey; William Ward                                                                                                                                                                                                                                                                                                                                                                                                                                                                                                                                           |
| EPI_ISL_1069175                                                                                                                                                                                                                                                                                                                                                                                                                                                                                                                                                                                                                                                                                                                                                                                                                                                                                                                                                                                                                                                                                                                                                                                                                                                                                                                                                                                                                                                                                                                                                                                                                                                                                                                                                                                                                                                                                                                                                                                                                                                                                                                                                                                                                                                                                                                                                                                                                                                                                                                                                                                                                                                                                                                                                                                                                                                                                                                                                                                                                                                                                    |           | Pangil Rural Health Unit                                                                                           | Research Institute for Tropical Medicine                                                                               | Catalino Demetria; Daria Manalo; Edelwisa Mercado; Francisco Gerardo Polotan; Hannah Leah Morito; Inez Andrea Medado; John Leonard Chan; Joseph                                                                                                                                                                                                                                                                                                                                                                                                                                                                                                                                                                |

| EPI_ISL_1081822                                                                                                                                                                                                                                                                                                                                                                                                                                                                                                                                                                                                                                                                                                                                                                                                                                                                                                                                                                                                                                                                                                                                                                                                                                                                                                                                                                                                                                                                                                                                                                                                                                                                                                                                                                                                                                                                                                                                                                                                                                                                                                                                                                                                                                                                                                                                                                                                                                                                                                                                                                                                                                                                                                                                                                                                                                                                                                                                                                                                                                                                                                                                                                                                                                                                                                                                                                                                                                                                                                                                                                                                                                                                                                                                                                                                                                                                                                                                                                                                                                                                                                                                                                                                                                                                                                                                                                                                                                                                                                                                                                                                                                                                                                                                                                                                                                                                                                                                                                                                                                                                                                                                                                                                                                                                                                                                                                                                                                                                                                                                                                                                                                                                                                                                                                                                                                                                                                                                                                                                                                                                                                                                                                                                                                                                                                                                                                                                                                                                                                                                                                                                                                                                                                                                                                                                                                                                                                                                                                                                                                                                                                                                                                                                                                                                                                                                                                                                                                                                                                                                                                                                                                                                                                                                                                                                                                                                                                                                                                                                                                                                                                                                                                                                                                                                                                                                                                                                                                                                                                                                                                                                                                                                                                                                                                                                                                                                                                                                                                                                                                                                                                                                                                                                                                                                                                                                                                                                                                                                                                                                                                                                                                                                                                                                                                                                                                                                                                                                                                                                                                                                                                                                                                                                                                                                                                                                                                                                                                                                                                                                                                                                                                                                                                                                                                                                                                                                                                                                                                                                                                                                                                                                                                                                                                                                                                                                                                                                                                                                                                                                                                                                                                                                                                                                                                                                                                                                                                                                                                                                                                                                                                                                                                                                                                                                                                                                                                                                                                                                                                                                                                                                                                                                                                                                                                                                                                                                                                                                                                                                                                                                                                                                                                                                                                                                                                                                                                                                                                                                                                                                                                                                                                                                                                                                                                                                                                                                                                                                                                                                                                                                                                                                                                                                                                                                                                                                                                                                                                                                    | Parkway Medical and Diagnostic Center                                                                                  | Philippine Genome Center                                                                                               | Hughes; Kirstyn Brunker; Ma Angelica Tujan; Othoniel Jan Onza<br>Alethea R. de Guzman; Anna Ong-Lim; Arianne A. Zamora; Asia Louisa U. Chong; Benedict A. Maralit; Candice Francheska B. Tambaon; Carlo M. Lapid; Celia Carlos; Cynthia P. Saloma; Devon Ray Pacial; Edsel Maurice Salvaña; El King D. Morado; Eva Maria Cutiongco-de la Paz; Francis A. Tablizo; Irish Coleen A. Asin; Jaime C. Montoya; Jan Michael C. Yap; Jo-Hannah S. Llamas; John Q. Wong; Joshua Gregor A. Dizon; Juan Antonio R. Magalang; Karol Sophia Agape R. Padilla; Kenneth M. Kim; Kris P. Punayan; Marc Edsel C. Ayes; Marc Jerrone R. Castro; Maria Sofia L. Yangzon; Marissa Alejandria; Razel Nikka M. Hao; Rianna Patricia S. Cruz; Sheila Mae M. Araiza; and Maria Rosario Singh-Vergeire |
|------------------------------------------------------------------------------------------------------------------------------------------------------------------------------------------------------------------------------------------------------------------------------------------------------------------------------------------------------------------------------------------------------------------------------------------------------------------------------------------------------------------------------------------------------------------------------------------------------------------------------------------------------------------------------------------------------------------------------------------------------------------------------------------------------------------------------------------------------------------------------------------------------------------------------------------------------------------------------------------------------------------------------------------------------------------------------------------------------------------------------------------------------------------------------------------------------------------------------------------------------------------------------------------------------------------------------------------------------------------------------------------------------------------------------------------------------------------------------------------------------------------------------------------------------------------------------------------------------------------------------------------------------------------------------------------------------------------------------------------------------------------------------------------------------------------------------------------------------------------------------------------------------------------------------------------------------------------------------------------------------------------------------------------------------------------------------------------------------------------------------------------------------------------------------------------------------------------------------------------------------------------------------------------------------------------------------------------------------------------------------------------------------------------------------------------------------------------------------------------------------------------------------------------------------------------------------------------------------------------------------------------------------------------------------------------------------------------------------------------------------------------------------------------------------------------------------------------------------------------------------------------------------------------------------------------------------------------------------------------------------------------------------------------------------------------------------------------------------------------------------------------------------------------------------------------------------------------------------------------------------------------------------------------------------------------------------------------------------------------------------------------------------------------------------------------------------------------------------------------------------------------------------------------------------------------------------------------------------------------------------------------------------------------------------------------------------------------------------------------------------------------------------------------------------------------------------------------------------------------------------------------------------------------------------------------------------------------------------------------------------------------------------------------------------------------------------------------------------------------------------------------------------------------------------------------------------------------------------------------------------------------------------------------------------------------------------------------------------------------------------------------------------------------------------------------------------------------------------------------------------------------------------------------------------------------------------------------------------------------------------------------------------------------------------------------------------------------------------------------------------------------------------------------------------------------------------------------------------------------------------------------------------------------------------------------------------------------------------------------------------------------------------------------------------------------------------------------------------------------------------------------------------------------------------------------------------------------------------------------------------------------------------------------------------------------------------------------------------------------------------------------------------------------------------------------------------------------------------------------------------------------------------------------------------------------------------------------------------------------------------------------------------------------------------------------------------------------------------------------------------------------------------------------------------------------------------------------------------------------------------------------------------------------------------------------------------------------------------------------------------------------------------------------------------------------------------------------------------------------------------------------------------------------------------------------------------------------------------------------------------------------------------------------------------------------------------------------------------------------------------------------------------------------------------------------------------------------------------------------------------------------------------------------------------------------------------------------------------------------------------------------------------------------------------------------------------------------------------------------------------------------------------------------------------------------------------------------------------------------------------------------------------------------------------------------------------------------------------------------------------------------------------------------------------------------------------------------------------------------------------------------------------------------------------------------------------------------------------------------------------------------------------------------------------------------------------------------------------------------------------------------------------------------------------------------------------------------------------------------------------------------------------------------------------------------------------------------------------------------------------------------------------------------------------------------------------------------------------------------------------------------------------------------------------------------------------------------------------------------------------------------------------------------------------------------------------------------------------------------------------------------------------------------------------------------------------------------------------------------------------------------------------------------------------------------------------------------------------------------------------------------------------------------------------------------------------------------------------------------------------------------------------------------------------------------------------------------------------------------------------------------------------------------------------------------------------------------------------------------------------------------------------------------------------------------------------------------------------------------------------------------------------------------------------------------------------------------------------------------------------------------------------------------------------------------------------------------------------------------------------------------------------------------------------------------------------------------------------------------------------------------------------------------------------------------------------------------------------------------------------------------------------------------------------------------------------------------------------------------------------------------------------------------------------------------------------------------------------------------------------------------------------------------------------------------------------------------------------------------------------------------------------------------------------------------------------------------------------------------------------------------------------------------------------------------------------------------------------------------------------------------------------------------------------------------------------------------------------------------------------------------------------------------------------------------------------------------------------------------------------------------------------------------------------------------------------------------------------------------------------------------------------------------------------------------------------------------------------------------------------------------------------------------------------------------------------------------------------------------------------------------------------------------------------------------------------------------------------------------------------------------------------------------------------------------------------------------------------------------------------------------------------------------------------------------------------------------------------------------------------------------------------------------------------------------------------------------------------------------------------------------------------------------------------------------------------------------------------------------------------------------------------------------------------------------------------------------------------------------------------------------------------------------------------------------------------------------------------------------------------------------------------------------------------------------------------------------------------------------------------------------------------------------------------------------------------------------------------------------------------------------------------------------------------------------------------------------------------------------------------------------------------------------------------------------------------------------------------------------------------------------------------------------------------------------------------------------------------------------------------------------------------------------------------------------------------------------------------------------------------------------------------------------------------------------------------------------------------------------------------------------------------------------------------------------------------------------------------------------------------------------------------------------------------------------------------------------------------------------------------------------------------------------------------------------------------------------------------------------------------------------------------------------------------------------------------------------------------------------------------------------------------------------------------------------------------------------------------------------------------------------------------------------------------------------------------------------------------------------------------------------------------------------------------------------------------------------------------------------------------------------------------------------------------------------------------------------------------------------------------------------------------------------------------------------------------------------------------------------------------------------------------------------------------------------------------------------------------------------------------------------------------------------------------------------------------------------------------------------------------------------------------------------------------------------------------------------------------------------------------------------------------------------------------------------------------------------------------------------------------------------------------------------------------------------------------------------------------------------------------------------------------------------------------------------------------------------------------------------------------------------------------------------------------------------------------------------------------------------------------------------------------------------------------------------------------------------------------------------------------------------------------------------------------------------------------------------------------------|------------------------------------------------------------------------------------------------------------------------|------------------------------------------------------------------------------------------------------------------------|--------------------------------------------------------------------------------------------------------------------------------------------------------------------------------------------------------------------------------------------------------------------------------------------------------------------------------------------------------------------------------------------------------------------------------------------------------------------------------------------------------------------------------------------------------------------------------------------------------------------------------------------------------------------------------------------------------------------------------------------------------------------------------|
| EPI_ISL_1159388, EPI_ISL_1165075                                                                                                                                                                                                                                                                                                                                                                                                                                                                                                                                                                                                                                                                                                                                                                                                                                                                                                                                                                                                                                                                                                                                                                                                                                                                                                                                                                                                                                                                                                                                                                                                                                                                                                                                                                                                                                                                                                                                                                                                                                                                                                                                                                                                                                                                                                                                                                                                                                                                                                                                                                                                                                                                                                                                                                                                                                                                                                                                                                                                                                                                                                                                                                                                                                                                                                                                                                                                                                                                                                                                                                                                                                                                                                                                                                                                                                                                                                                                                                                                                                                                                                                                                                                                                                                                                                                                                                                                                                                                                                                                                                                                                                                                                                                                                                                                                                                                                                                                                                                                                                                                                                                                                                                                                                                                                                                                                                                                                                                                                                                                                                                                                                                                                                                                                                                                                                                                                                                                                                                                                                                                                                                                                                                                                                                                                                                                                                                                                                                                                                                                                                                                                                                                                                                                                                                                                                                                                                                                                                                                                                                                                                                                                                                                                                                                                                                                                                                                                                                                                                                                                                                                                                                                                                                                                                                                                                                                                                                                                                                                                                                                                                                                                                                                                                                                                                                                                                                                                                                                                                                                                                                                                                                                                                                                                                                                                                                                                                                                                                                                                                                                                                                                                                                                                                                                                                                                                                                                                                                                                                                                                                                                                                                                                                                                                                                                                                                                                                                                                                                                                                                                                                                                                                                                                                                                                                                                                                                                                                                                                                                                                                                                                                                                                                                                                                                                                                                                                                                                                                                                                                                                                                                                                                                                                                                                                                                                                                                                                                                                                                                                                                                                                                                                                                                                                                                                                                                                                                                                                                                                                                                                                                                                                                                                                                                                                                                                                                                                                                                                                                                                                                                                                                                                                                                                                                                                                                                                                                                                                                                                                                                                                                                                                                                                                                                                                                                                                                                                                                                                                                                                                                                                                                                                                                                                                                                                                                                                                                                                                                                                                                                                                                                                                                                                                                                                                                                                                                                                                                                   | Paru Hospital                                                                                                          | Institute of Tropical Disease, Universitas Airlangga                                                                   | Aldise M Nastri; Dyah Retno; Gatot Soegiarto; Jezza R Dewantari; Kazufumi Shimizu; Krisnodo Rahardjo; Laksmi Wulandari; Maria I Lusida; Resti Yudhawati; Rima R Prasetya; Soetjipto; Yasuko Mori                                                                                                                                                                                                                                                                                                                                                                                                                                                                                                                                                                               |
| EPI_ISL_1017678, EPI_ISL_1069390 to 1069393, EPI_ISL_1184507, EPI_ISL_1198800 to 1198803, EPI_ISL_1295930 to 1295937, EPI_ISL_1366739 to 1366740                                                                                                                                                                                                                                                                                                                                                                                                                                                                                                                                                                                                                                                                                                                                                                                                                                                                                                                                                                                                                                                                                                                                                                                                                                                                                                                                                                                                                                                                                                                                                                                                                                                                                                                                                                                                                                                                                                                                                                                                                                                                                                                                                                                                                                                                                                                                                                                                                                                                                                                                                                                                                                                                                                                                                                                                                                                                                                                                                                                                                                                                                                                                                                                                                                                                                                                                                                                                                                                                                                                                                                                                                                                                                                                                                                                                                                                                                                                                                                                                                                                                                                                                                                                                                                                                                                                                                                                                                                                                                                                                                                                                                                                                                                                                                                                                                                                                                                                                                                                                                                                                                                                                                                                                                                                                                                                                                                                                                                                                                                                                                                                                                                                                                                                                                                                                                                                                                                                                                                                                                                                                                                                                                                                                                                                                                                                                                                                                                                                                                                                                                                                                                                                                                                                                                                                                                                                                                                                                                                                                                                                                                                                                                                                                                                                                                                                                                                                                                                                                                                                                                                                                                                                                                                                                                                                                                                                                                                                                                                                                                                                                                                                                                                                                                                                                                                                                                                                                                                                                                                                                                                                                                                                                                                                                                                                                                                                                                                                                                                                                                                                                                                                                                                                                                                                                                                                                                                                                                                                                                                                                                                                                                                                                                                                                                                                                                                                                                                                                                                                                                                                                                                                                                                                                                                                                                                                                                                                                                                                                                                                                                                                                                                                                                                                                                                                                                                                                                                                                                                                                                                                                                                                                                                                                                                                                                                                                                                                                                                                                                                                                                                                                                                                                                                                                                                                                                                                                                                                                                                                                                                                                                                                                                                                                                                                                                                                                                                                                                                                                                                                                                                                                                                                                                                                                                                                                                                                                                                                                                                                                                                                                                                                                                                                                                                                                                                                                                                                                                                                                                                                                                                                                                                                                                                                                                                                                                                                                                                                                                                                                                                                                                                                                                                                                                                                                                                                                   | PathWest Laboratory Medicine WA                                                                                        | PathWest Laboratory Medicine WA Microbial Surveillance Unit                                                            | PathWest Laboratory Medicine WA Microbial Surveillance Unit                                                                                                                                                                                                                                                                                                                                                                                                                                                                                                                                                                                                                                                                                                                    |
| EPI_ISL_1372098                                                                                                                                                                                                                                                                                                                                                                                                                                                                                                                                                                                                                                                                                                                                                                                                                                                                                                                                                                                                                                                                                                                                                                                                                                                                                                                                                                                                                                                                                                                                                                                                                                                                                                                                                                                                                                                                                                                                                                                                                                                                                                                                                                                                                                                                                                                                                                                                                                                                                                                                                                                                                                                                                                                                                                                                                                                                                                                                                                                                                                                                                                                                                                                                                                                                                                                                                                                                                                                                                                                                                                                                                                                                                                                                                                                                                                                                                                                                                                                                                                                                                                                                                                                                                                                                                                                                                                                                                                                                                                                                                                                                                                                                                                                                                                                                                                                                                                                                                                                                                                                                                                                                                                                                                                                                                                                                                                                                                                                                                                                                                                                                                                                                                                                                                                                                                                                                                                                                                                                                                                                                                                                                                                                                                                                                                                                                                                                                                                                                                                                                                                                                                                                                                                                                                                                                                                                                                                                                                                                                                                                                                                                                                                                                                                                                                                                                                                                                                                                                                                                                                                                                                                                                                                                                                                                                                                                                                                                                                                                                                                                                                                                                                                                                                                                                                                                                                                                                                                                                                                                                                                                                                                                                                                                                                                                                                                                                                                                                                                                                                                                                                                                                                                                                                                                                                                                                                                                                                                                                                                                                                                                                                                                                                                                                                                                                                                                                                                                                                                                                                                                                                                                                                                                                                                                                                                                                                                                                                                                                                                                                                                                                                                                                                                                                                                                                                                                                                                                                                                                                                                                                                                                                                                                                                                                                                                                                                                                                                                                                                                                                                                                                                                                                                                                                                                                                                                                                                                                                                                                                                                                                                                                                                                                                                                                                                                                                                                                                                                                                                                                                                                                                                                                                                                                                                                                                                                                                                                                                                                                                                                                                                                                                                                                                                                                                                                                                                                                                                                                                                                                                                                                                                                                                                                                                                                                                                                                                                                                                                                                                                                                                                                                                                                                                                                                                                                                                                                                                                                                                    | Pathostics                                                                                                             | Minnesota Department of Health, Public Health Laboratory                                                               | Alexandra Lorentz; Jacob Garfin; Matt Plumb; and Xiong Wang                                                                                                                                                                                                                                                                                                                                                                                                                                                                                                                                                                                                                                                                                                                    |
| EPI_ISL_1379662, EPI_ISL_1379665 to 1379668, EPI_ISL_1379672 to 1379675, EPI_ISL_1379678 to 1379680, EPI_ISL_1379682, EPI_ISL_1379687 to 1379688, EPI_ISL_1379690 to 1379692, EPI_ISL_1379695, EPI_ISL_1379697 to 1379698, EPI_ISL_1379701, EPI_ISL_1379703 to 1379704, EPI_ISL_1379709 to 1379710, EPI_ISL_1379712, EPI_ISL_1379714, EPI_ISL_1379717 to 1379718                                                                                                                                                                                                                                                                                                                                                                                                                                                                                                                                                                                                                                                                                                                                                                                                                                                                                                                                                                                                                                                                                                                                                                                                                                                                                                                                                                                                                                                                                                                                                                                                                                                                                                                                                                                                                                                                                                                                                                                                                                                                                                                                                                                                                                                                                                                                                                                                                                                                                                                                                                                                                                                                                                                                                                                                                                                                                                                                                                                                                                                                                                                                                                                                                                                                                                                                                                                                                                                                                                                                                                                                                                                                                                                                                                                                                                                                                                                                                                                                                                                                                                                                                                                                                                                                                                                                                                                                                                                                                                                                                                                                                                                                                                                                                                                                                                                                                                                                                                                                                                                                                                                                                                                                                                                                                                                                                                                                                                                                                                                                                                                                                                                                                                                                                                                                                                                                                                                                                                                                                                                                                                                                                                                                                                                                                                                                                                                                                                                                                                                                                                                                                                                                                                                                                                                                                                                                                                                                                                                                                                                                                                                                                                                                                                                                                                                                                                                                                                                                                                                                                                                                                                                                                                                                                                                                                                                                                                                                                                                                                                                                                                                                                                                                                                                                                                                                                                                                                                                                                                                                                                                                                                                                                                                                                                                                                                                                                                                                                                                                                                                                                                                                                                                                                                                                                                                                                                                                                                                                                                                                                                                                                                                                                                                                                                                                                                                                                                                                                                                                                                                                                                                                                                                                                                                                                                                                                                                                                                                                                                                                                                                                                                                                                                                                                                                                                                                                                                                                                                                                                                                                                                                                                                                                                                                                                                                                                                                                                                                                                                                                                                                                                                                                                                                                                                                                                                                                                                                                                                                                                                                                                                                                                                                                                                                                                                                                                                                                                                                                                                                                                                                                                                                                                                                                                                                                                                                                                                                                                                                                                                                                                                                                                                                                                                                                                                                                                                                                                                                                                                                                                                                                                                                                                                                                                                                                                                                                                                                                                                                                                                                                                                                   | Pathogen Discovery, Respiratory Viruses Branch, Division of Viral Diseases, Centers for Disease Control and Prevention | Pathogen Discovery, Respiratory Viruses Branch, Division of Viral Diseases, Centers for Disease Control and Prevention | Anna Kelleher; Anna Uehara; Brian Lynch; Clinton R. Paden; Haibin Wang; Han Jia Justin Ng; Jing Zhang; Krista Queen; Peter Cook; Suxiang Tong; Yan Li; Ying Tao                                                                                                                                                                                                                                                                                                                                                                                                                                                                                                                                                                                                                |
| see above                                                                                                                                                                                                                                                                                                                                                                                                                                                                                                                                                                                                                                                                                                                                                                                                                                                                                                                                                                                                                                                                                                                                                                                                                                                                                                                                                                                                                                                                                                                                                                                                                                                                                                                                                                                                                                                                                                                                                                                                                                                                                                                                                                                                                                                                                                                                                                                                                                                                                                                                                                                                                                                                                                                                                                                                                                                                                                                                                                                                                                                                                                                                                                                                                                                                                                                                                                                                                                                                                                                                                                                                                                                                                                                                                                                                                                                                                                                                                                                                                                                                                                                                                                                                                                                                                                                                                                                                                                                                                                                                                                                                                                                                                                                                                                                                                                                                                                                                                                                                                                                                                                                                                                                                                                                                                                                                                                                                                                                                                                                                                                                                                                                                                                                                                                                                                                                                                                                                                                                                                                                                                                                                                                                                                                                                                                                                                                                                                                                                                                                                                                                                                                                                                                                                                                                                                                                                                                                                                                                                                                                                                                                                                                                                                                                                                                                                                                                                                                                                                                                                                                                                                                                                                                                                                                                                                                                                                                                                                                                                                                                                                                                                                                                                                                                                                                                                                                                                                                                                                                                                                                                                                                                                                                                                                                                                                                                                                                                                                                                                                                                                                                                                                                                                                                                                                                                                                                                                                                                                                                                                                                                                                                                                                                                                                                                                                                                                                                                                                                                                                                                                                                                                                                                                                                                                                                                                                                                                                                                                                                                                                                                                                                                                                                                                                                                                                                                                                                                                                                                                                                                                                                                                                                                                                                                                                                                                                                                                                                                                                                                                                                                                                                                                                                                                                                                                                                                                                                                                                                                                                                                                                                                                                                                                                                                                                                                                                                                                                                                                                                                                                                                                                                                                                                                                                                                                                                                                                                                                                                                                                                                                                                                                                                                                                                                                                                                                                                                                                                                                                                                                                                                                                                                                                                                                                                                                                                                                                                                                                                                                                                                                                                                                                                                                                                                                                                                                                                                                                                                                          | Pathogen Discovery, Respiratory Viruses Branch, Division of Viral Diseases, Centers for Disease Control and Prevention | Pathogen Discovery, Respiratory Viruses Branch, Division of Viral Diseases, Centers for Disease Control and Prevention | Anna Kelleher; Anna Uehara; Brian Lynch; Clinton R. Paden; Haibin Wang; Han Jia Justin Ng; Jing Zhang; Krista Queen; Peter Cook; Suxiang Tong; Yan Li; Ying Tao                                                                                                                                                                                                                                                                                                                                                                                                                                                                                                                                                                                                                |
| EPI_ISL_1123415 to 1123418, EPI_ISL_1123427 to 1123434, EPI_ISL_1123436, EPI_ISL_1123438 to 1123447, EPI_ISL_1123449, EPI_ISL_1123453, EPI_ISL_1123459 to 1123466, EPI_ISL_1123479 to 1123494, EPI_ISL_1123496, EPI_ISL_1123498, EPI_ISL_1123501 to 1123504, EPI_ISL_1123506, EPI_ISL_1123508 to 1123509, EPI_ISL_1123511, EPI_ISL_1123513, EPI_ISL_1123515, EPI_ISL_1123517 to 1123518, EPI_ISL_1123520, EPI_ISL_1123522, EPI_ISL_1123524, EPI_ISL_1123567, EPI_ISL_1123669, EPI_ISL_1123671, EPI_ISL_1123673 to 1123674, EPI_ISL_1123678, EPI_ISL_1123680, EPI_ISL_1123682 to 1123683, EPI_ISL_1123685, EPI_ISL_1123687, EPI_ISL_1123689, EPI_ISL_1123691 to 1123692, EPI_ISL_1123694, EPI_ISL_1123696, EPI_ISL_1123698, EPI_ISL_1123700 to 1123701, EPI_ISL_1123703, EPI_ISL_1123705, EPI_ISL_1123707, EPI_ISL_1123709, EPI_ISL_1123711 to 1123712, EPI_ISL_1123714, EPI_ISL_1123716, EPI_ISL_1123718, EPI_ISL_1123720 to 1123721, EPI_ISL_1123723, EPI_ISL_1123725 to 1123726, EPI_ISL_1123728, EPI_ISL_1123730, EPI_ISL_1123732 to 1123733, EPI_ISL_1123735, EPI_ISL_1123737, EPI_ISL_1123739, EPI_ISL_1123741, EPI_ISL_1123743 to 1123744, EPI_ISL_1123746, EPI_ISL_1123748, EPI_ISL_1123750, EPI_ISL_1123752 to 1123753, EPI_ISL_1123755, EPI_ISL_1123757, EPI_ISL_1123759, EPI_ISL_1123761 to 1123762, EPI_ISL_1123764, EPI_ISL_1123766, EPI_ISL_1123768, EPI_ISL_1123769, EPI_ISL_1123771, EPI_ISL_1123773, EPI_ISL_1123775 to 1123776, EPI_ISL_1123778, EPI_ISL_1123780, EPI_ISL_1123782 to 1123783, EPI_ISL_1123785, EPI_ISL_1123787, EPI_ISL_1123789 to 1123790, EPI_ISL_1123792, EPI_ISL_1123794 to 1123795, EPI_ISL_1123797, EPI_ISL_1123799, EPI_ISL_1123801, EPI_ISL_1123803, EPI_ISL_1123805 to 1123806, EPI_ISL_1123808, EPI_ISL_1123810, EPI_ISL_1123812, EPI_ISL_1123814 to 1123815, EPI_ISL_1123817, EPI_ISL_1123819, EPI_ISL_1123821, EPI_ISL_1123823 to 1123824, EPI_ISL_1123826, EPI_ISL_1123828, EPI_ISL_1123830, EPI_ISL_1123832, EPI_ISL_1123834, EPI_ISL_1123836, EPI_ISL_1123838, EPI_ISL_1123839, EPI_ISL_1123841, EPI_ISL_1123843, EPI_ISL_1123845 to 1123846, EPI_ISL_1123848, EPI_ISL_1123850, EPI_ISL_1123852, EPI_ISL_1123854, EPI_ISL_1123856 to 1123857, EPI_ISL_1123859, EPI_ISL_1123861, EPI_ISL_1123863 to 1123864, EPI_ISL_1123866, EPI_ISL_1123868, EPI_ISL_1123870, EPI_ISL_1123872 to 1123873, EPI_ISL_1123875, EPI_ISL_1123877, EPI_ISL_1123879, EPI_ISL_1123881 to 1123882, EPI_ISL_1123884, EPI_ISL_1123886 to 1123887, EPI_ISL_1123889, EPI_ISL_1123891, EPI_ISL_1123893, EPI_ISL_1123895, EPI_ISL_1123897 to 1123898, EPI_ISL_1123900, EPI_ISL_1123902, EPI_ISL_1123904 to 1123905, EPI_ISL_1123907, EPI_ISL_1123909, EPI_ISL_1123911, EPI_ISL_1123913, EPI_ISL_1123915 to 1123916, EPI_ISL_1123918, EPI_ISL_1123920, EPI_ISL_1123922, EPI_ISL_1123924, EPI_ISL_1123926 to 1123927, EPI_ISL_1123929, EPI_ISL_1123931, EPI_ISL_1123933, EPI_ISL_1123935, EPI_ISL_1123937 to 1123938, EPI_ISL_1123940, EPI_ISL_1123942, EPI_ISL_1123944, EPI_ISL_1123946, EPI_ISL_1123948 to 1123949, EPI_ISL_1123951, EPI_ISL_1123953, EPI_ISL_1123955, EPI_ISL_1123957 to 1123958, EPI_ISL_1123960, EPI_ISL_1123962, EPI_ISL_1123964 to 1123965, EPI_ISL_1123967, EPI_ISL_1123969, EPI_ISL_1123971 to 1123972, EPI_ISL_1123974, EPI_ISL_1123976, EPI_ISL_1123978, EPI_ISL_1123980, EPI_ISL_1123982, EPI_ISL_1123984, EPI_ISL_1123986, EPI_ISL_1123988, EPI_ISL_1123990, EPI_ISL_1123992, EPI_ISL_1123994, EPI_ISL_1123996, EPI_ISL_1123998, EPI_ISL_1124000, EPI_ISL_1124002, EPI_ISL_1124004, EPI_ISL_1124006, EPI_ISL_1124008, EPI_ISL_1124010, EPI_ISL_1124012, EPI_ISL_1124014, EPI_ISL_1124016, EPI_ISL_1124018 to 1124019, EPI_ISL_1124021, EPI_ISL_1124023, EPI_ISL_1124025 to 1124026, EPI_ISL_1124028, EPI_ISL_1124030 to 1124032, EPI_ISL_1124034, EPI_ISL_1124036, EPI_ISL_1124038, EPI_ISL_1124040, EPI_ISL_1124042, EPI_ISL_1124044, EPI_ISL_1124046, EPI_ISL_1124048, EPI_ISL_1124050, EPI_ISL_1124052, EPI_ISL_1124054, EPI_ISL_1124056 to 1124057, EPI_ISL_1124059, EPI_ISL_1124061, EPI_ISL_1124063, EPI_ISL_1124065, EPI_ISL_1124067, EPI_ISL_1124069, EPI_ISL_1124071, EPI_ISL_1124073, EPI_ISL_1124075, EPI_ISL_1124077 to 1124078, EPI_ISL_1124080, EPI_ISL_1124082, EPI_ISL_1124084, EPI_ISL_1124086, EPI_ISL_1124088, EPI_ISL_1124090, EPI_ISL_1124092, EPI_ISL_1124094, EPI_ISL_1124096, EPI_ISL_1124098, EPI_ISL_1124100, EPI_ISL_1124102, EPI_ISL_1124104, EPI_ISL_1124106, EPI_ISL_1124108, EPI_ISL_1124110, EPI_ISL_1124112, EPI_ISL_1124114, EPI_ISL_1124116, EPI_ISL_1124118, EPI_ISL_1124120, EPI_ISL_1124122, EPI_ISL_1124124, EPI_ISL_1124126, EPI_ISL_1124128, EPI_ISL_1124130, EPI_ISL_1124132, EPI_ISL_1124134, EPI_ISL_1124136, EPI_ISL_1124138, EPI_ISL_1124140, EPI_ISL_1124142, EPI_ISL_1124144, EPI_ISL_1124146, EPI_ISL_1124148, EPI_ISL_1124150, EPI_ISL_1124152, EPI_ISL_1124154, EPI_ISL_1124156, EPI_ISL_1124158, EPI_ISL_1124160, EPI_ISL_1124162, EPI_ISL_1124164, EPI_ISL_1124166, EPI_ISL_1124168, EPI_ISL_1124170, EPI_ISL_1124172, EPI_ISL_1124174, EPI_ISL_1124176, EPI_ISL_1124178, EPI_ISL_1124180, EPI_ISL_1124182, EPI_ISL_1124184, EPI_ISL_1124186, EPI_ISL_1124188, EPI_ISL_1124190, EPI_ISL_1124192, EPI_ISL_1124194, EPI_ISL_1124196, EPI_ISL_1124198, EPI_ISL_1124200, EPI_ISL_1124202, EPI_ISL_1124204, EPI_ISL_1124206, EPI_ISL_1124208, EPI_ISL_1124210, EPI_ISL_1124212, EPI_ISL_1124214, EPI_ISL_1124216, EPI_ISL_1124218, EPI_ISL_1124220, EPI_ISL_1124222, EPI_ISL_1124224, EPI_ISL_1124226 to 1124227, EPI_ISL_1124229, EPI_ISL_1124231, EPI_ISL_1124233, EPI_ISL_1124235 to 1124236, EPI_ISL_1124238, EPI_ISL_1124240, EPI_ISL_1124242, EPI_ISL_1124244, EPI_ISL_1124246, EPI_ISL_1124248, EPI_ISL_1124250, EPI_ISL_1124252 to 1124253, EPI_ISL_1124255, EPI_ISL_1124257, EPI_ISL_1124259, EPI_ISL_1124261 to 1124262, EPI_ISL_1124264, EPI_ISL_1124266, EPI_ISL_1124268, EPI_ISL_1124270, EPI_ISL_1124272, EPI_ISL_1124274, EPI_ISL_1124276, EPI_ISL_1124278, EPI_ISL_1124280, EPI_ISL_1124282, EPI_ISL_1124284, EPI_ISL_1124286, EPI_ISL_1124288, EPI_ISL_1124290, EPI_ISL_1124292, EPI_ISL_1124294, EPI_ISL_1124296, EPI_ISL_1124298, EPI_ISL_1124300, EPI_ISL_1124302, EPI_ISL_1124304, EPI_ISL_1124306, EPI_ISL_1124308, EPI_ISL_1124310, EPI_ISL_1124312, EPI_ISL_1124314, EPI_ISL_1124316, EPI_ISL_1124318, EPI_ISL_1124320, EPI_ISL_1124322, EPI_ISL_1124324, EPI_ISL_1124326, EPI_ISL_1124328, EPI_ISL_1124330, EPI_ISL_1124332, EPI_ISL_1124334, EPI_ISL_1124336, EPI_ISL_1124338, EPI_ISL_1124340, EPI_ISL_1124342, EPI_ISL_1124344, EPI_ISL_1124346, EPI_ISL_1124348, EPI_ISL_1124350, EPI_ISL_1124352, EPI_ISL_1124354, EPI_ISL_1124356, EPI_ISL_1124358, EPI_ISL_1124360, EPI_ISL_1124362, EPI_ISL_1124364 to 1124365, EPI_ISL_1124367, EPI_ISL_1124369, EPI_ISL_1124371 to 1124372, EPI_ISL_1124374, EPI_ISL_1124376, EPI_ISL_1124378, EPI_ISL_1124380, EPI_ISL_1124382, EPI_ISL_1124384, EPI_ISL_1124386, EPI_ISL_1124388, EPI_ISL_1124390, EPI_ISL_1124392, EPI_ISL_1124394, EPI_ISL_1124396, EPI_ISL_1124398, EPI_ISL_1124400, EPI_ISL_1124402, EPI_ISL_1124404, EPI_ISL_1124406, EPI_ISL_1124408, EPI_ISL_1124410, EPI_ISL_1124412, EPI_ISL_1124414, EPI_ISL_1124416, EPI_ISL_1124418, EPI_ISL_1124420, EPI_ISL_1124422, EPI_ISL_1124424, EPI_ISL_1124426, EPI_ISL_1124428, EPI_ISL_1124430, EPI_ISL_1124432, EPI_ISL_1124434, EPI_ISL_1124436, EPI_ISL_1124438, EPI_ISL_1124440, EPI_ISL_1124442, EPI_ISL_1124444, EPI_ISL_1124446, EPI_ISL_1124448, EPI_ISL_1124450, EPI_ISL_1124452, EPI_ISL_1124454, EPI_ISL_1124456, EPI_ISL_1124458, EPI_ISL_1124460, EPI_ISL_1124462, EPI_ISL_1124464, EPI_ISL_1124466, EPI_ISL_1124468, EPI_ISL_1124470, EPI_ISL_1124472, EPI_ISL_1124474, EPI_ISL_1124476, EPI_ISL_1124478, EPI_ISL_1124480, EPI_ISL_1124482, EPI_ISL_1124484, EPI_ISL_1124486, EPI_ISL_1124488, EPI_ISL_1124490, EPI_ISL_1124492, EPI_ISL_1124494, EPI_ISL_1124496, EPI_ISL_1124498, EPI_ISL_1124500, EPI_ISL_1124502, EPI_ISL_1124504, EPI_ISL_1124506, EPI_ISL_1124508, EPI_ISL_1124510, EPI_ISL_1124512, EPI_ISL_1124514, EPI_ISL_1124516, EPI_ISL_1124518, EPI_ISL_1124520, EPI_ISL_1124522, EPI_ISL_1124524, EPI_ISL_1124526, EPI_ISL_1124528, EPI_ISL_1124530, EPI_ISL_1124532, EPI_ISL_1124534, EPI_ISL_1124536, EPI_ISL_1124538, EPI_ISL_1124540, EPI_ISL_1124542, EPI_ISL_1124544, EPI_ISL_1124546, EPI_ISL_1124548, EPI_ISL_1124550, EPI_ISL_1124552, EPI_ISL_1124554, EPI_ISL_1124556, EPI_ISL_1124558, EPI_ISL_1124560, EPI_ISL_1124562, EPI_ISL_1124564, EPI_ISL_1124566, EPI_ISL_1124568, EPI_ISL_1124570, EPI_ISL_1124572, EPI_ISL_1124574, EPI_ISL_1124576, EPI_ISL_1124578, EPI_ISL_1124580, EPI_ISL_1124582, EPI_ISL_1124584, EPI_ISL_1124586, EPI_ISL_1124588, EPI_ISL_1124590, EPI_ISL_1124592, EPI_ISL_1124594, EPI_ISL_1124596, EPI_ISL_1124598, EPI_ISL_1124600, EPI_ISL_1124602, EPI_ISL_1124604, EPI_ISL_1124606, EPI_ISL_1124608, EPI_ISL_1124610, EPI_ISL_1124612, EPI_ISL_1124614, EPI_ISL_1124616, EPI_ISL_1124618, EPI_ISL_1124620, EPI_ISL_1124622, EPI_ISL_1124624, EPI_ISL_1124626, EPI_ISL_1124628, EPI_ISL_1124630, EPI_ISL_1124632, EPI_ISL_1124634, EPI_ISL_1124636, EPI_ISL_1124638, EPI_ISL_1124640, EPI_ISL_1124642, EPI_ISL_1124644, EPI_ISL_1124646, EPI_ISL_1124648, EPI_ISL_1124650, EPI_ISL_1124652, EPI_ISL_1124654, EPI_ISL_1124656, EPI_ISL_1124658, EPI_ISL_1124660, EPI_ISL_1124662, EPI_ISL_1124664, EPI_ISL_1124666, EPI_ISL_1124668, EPI_ISL_1124670, EPI_ISL_1124672, EPI_ISL_1124674, EPI_ISL_1124676, EPI_ISL_1124678, EPI_ISL_1124680, EPI_ISL_1124682, EPI_ISL_1124684, EPI_ISL_1124686, EPI_ISL_1124688, EPI_ISL_1124690, EPI_ISL_1124692, EPI_ISL_1124694, EPI_ISL_1124696, EPI_ISL_1124698, EPI_ISL_1124700, EPI_ISL_1124702, EPI_ISL_1124704, EPI_ISL_1124706, EPI_ISL_1124708, EPI_ISL_1124710, EPI_ISL_1124712, EPI_ISL_1124714, EPI_ISL_1124716, EPI_ISL_1124718, EPI_ISL_1124720, EPI_ISL_1124722, EPI_ISL_1124724, EPI_ISL_1124726, EPI_ISL_1124728, EPI_ISL_1124730, EPI_ISL_1124732, EPI_ISL_1124734, EPI_ISL_1124736, EPI_ISL_1124738, EPI_ISL_1124740, EPI_ISL_1124742, EPI_ISL_1124744, EPI_ISL_1124746, EPI_ISL_1124748, EPI_ISL_1124750, EPI_ISL_1124752, EPI_ISL_1124754, EPI_ISL_1124756, EPI_ISL_1124758, EPI_ISL_1124760, EPI_ISL_1124762, EPI_ISL_1124764, EPI_ISL_1124766, EPI_ISL_1124768, EPI_ISL_1124770, EPI_ISL_1124772, EPI_ISL_1124774, EPI_ISL_1124776, EPI_ISL_1124778, EPI_ISL_1124780, EPI_ISL_1124782, EPI_ISL_1124784, EPI_ISL_1124786, EPI_ISL_1124788, EPI_ISL_1124790, EPI_ISL_1124792, EPI_ISL_1124794, EPI_ISL_1124796, EPI_ISL_1124798, EPI_ISL_1124800, EPI_ISL_1124802, EPI_ISL_1124804, EPI_ISL_1124806, EPI_ISL_1124808, EPI_ISL_1124810, EPI_ISL_1124812, EPI_ISL_1124814, EPI_ISL_1124816, EPI_ISL_1124818, EPI_ISL_1124820, EPI_ISL_1124822, EPI_ISL_1124824, EPI_ISL_1124826, EPI_ISL_1124828, EPI_ISL_1124830, EPI_ISL_1124832, EPI_ISL_1124834, EPI_ISL_1124836, EPI_ISL_1124838, EPI_ISL_1124840, EPI_ISL_1124842, EPI_ISL_1124844, EPI_ISL_1124846, EPI_ISL_1124848, EPI_ISL_1124850, EPI_ISL_1124852, EPI_ISL_1124854, EPI_ISL_1124856, EPI_ISL_1124858, EPI_ISL_1124860, EPI_ISL_1124862, EPI_ISL_1124864, EPI_ISL_1124866, EPI_ISL_1124868, EPI_ISL_1124870, EPI_ISL_1124872, EPI_ISL_1124874, EPI_ISL_1124876, EPI_ISL_1124878, EPI_ISL_1124880, EPI_ISL_1124882, EPI_ISL_1124884, EPI_ISL_1124886, EPI_ISL_1124888, EPI_ISL_1124890, EPI_ISL_1124892, EPI_ISL_1124894, EPI_ISL_1124896, EPI_ISL_1124898, EPI_ISL_1124900, EPI_ISL_1124902, EPI_ISL_1124904, EPI_ISL_1124906, EPI_ISL_1124908, EPI_ISL_1124910, EPI_ISL_1124912, EPI_ISL_1124914, EPI_ISL_1124916, EPI_ISL_1124918, EPI_ISL_1124920, EPI_ISL_1124922, EPI_ISL_1124924, EPI_ISL_1124926, EPI_ISL_1124928, EPI_ISL_1124930, EPI_ISL_1124932, EPI_ISL_1124934, EPI_ISL_1124936, EPI_ISL_1124938, EPI_ISL_1124940, EPI_ISL_1124942, EPI_ISL_1124944, EPI_ISL_1124946, EPI_ISL_1124948, EPI_ISL_1124950, EPI_ISL_1124952, EPI_ISL_1124954, EPI_ISL_1124956, EPI_ISL_1124958, EPI_ISL_1124960, EPI_ISL_1124962, EPI_ISL_1124964, EPI_ISL_1124966, EPI_ISL_1124968, EPI_ISL_1124970, EPI_ISL_1124972, EPI_ISL_1124974, EPI_ISL_1124976, EPI_ISL_1124978, EPI_ISL_1124980, EPI_ISL_1124982, EPI_ISL_1124984, EPI_ISL_1124986, EPI_ISL_1124988, EPI_ISL_1124990, EPI_ISL_1124992, EPI_ISL_1124994, EPI_ISL_1124996, EPI_ISL_1124998, EPI_ISL_1125000, EPI_ISL_1125002, EPI_ISL_1125004, EPI_ISL_1125006, EPI_ISL_1125008, EPI_ISL_1125010, EPI_ISL_1125012, EPI_ISL_1125014, EPI_ISL_1125016, EPI_ISL_1125018, EPI_ISL_1125020, EPI_ISL_1125022, EPI_ISL_1125024, EPI_ISL_1125026, EPI_ISL_1125028, EPI_ISL_1125030, EPI_ISL_1125032, EPI_ISL_1125034, EPI_ISL_1125036, EPI_ISL_1125038, EPI_ISL_1125040, EPI_ISL_1125042, EPI_ISL_1125044, EPI_ISL_1125046, EPI_ISL_1125048, EPI_ISL_1125050, EPI_ISL_1125052, EPI_ISL_1125054, EPI_ISL_1125056, EPI_ISL_1125058 to 1125059, EPI_ISL_1125061, EPI_ISL_1125063, EPI_ISL_1125065, EPI_ISL_1125067 to 1125068, EPI_ISL_1125070, EPI_ISL_1125072, EPI_ISL_1125074, EPI_ISL_1125076 to 1125077, EPI_ISL_1125079, EPI_ISL_1125081, EPI_ISL_1125083, EPI_ISL_1125085, EPI_ISL_1125087, EPI_ISL_1125089, EPI_ISL_1125091, EPI_ISL_1125093, EPI_ISL_1125095, EPI_ISL_1125097 to 1125098, EPI_ISL_1125100, EPI_ISL_1125102, EPI_ISL_1125104, EPI_ISL_1125106, EPI_ISL_1125108, EPI_ISL_1125110, EPI_ISL_1125112, EPI_ISL_1125114, EPI_ISL_1125116, EPI_ISL_1125118, EPI_ISL_1125120, EPI_ISL_1125122, EPI_ISL_1125124, EPI_ISL_1125126, EPI_ISL_1125128, EPI_ISL_1125130, EPI_ISL_1125132, EPI_ISL_1125134, EPI_ISL_1125136, EPI_ISL_1125138, EPI_ISL_1125140, EPI_ISL_1125142, EPI_ISL_1125144, EPI_ISL_1125146, EPI_ISL_1125148, EPI_ISL_1125150, EPI_ISL_1125152, EPI_ISL_1125154, EPI_ISL_1125156, EPI_ISL_1125158, EPI_ISL_1125160, EPI_ISL_1125162, EPI_ISL_1125164, EPI_ISL_1125166, EPI_ISL_1125168, EPI_ISL_1125170, EPI_ISL_1125172, EPI_ISL_1125174, EPI_ISL_1125176, EPI_ISL_1125178, EPI_ISL_1125180, EPI_ISL_1125182, EPI_ISL_1125184, EPI_ISL_1125186, EPI_ISL_1125188, EPI_ISL_1125190, EPI_ISL_1125192, EPI_ISL_1125194, EPI_ISL_1125196, EPI_ISL_1125198, EPI_ISL_1125200, EPI_ISL_1125202, EPI_ISL_1125204, EPI_ISL_1125206, EPI_ISL_1125208, EPI_ISL_1125210, EPI_ISL_1125212, EPI_ISL_1125214, EPI_ISL_1125216, EPI_ISL_1125218, EPI_ISL_1125220, EPI_ISL_1125222, EPI_ISL_1125224, EPI_ISL_1125226, EPI_ISL_1125228, EPI_ISL_1125230, EPI_ISL_1125232, EPI_ISL_1125234, EPI_ISL_1125236, EPI_ISL_11252 |                                                                                                                        |                                                                                                                        |                                                                                                                                                                                                                                                                                                                                                                                                                                                                                                                                                                                                                                                                                                                                                                                |

|                                                                                                                                                                                                                                                                                                                                                                                                                                                                                                                                                                                                                                                                                                                                                                                                                                                                                                                                                                                                                                                                                                                                                                                                                                                                                                                                                                                                                                                                                                                                                                                                        |                                                                             |                                                                                                                     |                                                                                                                                                                                                                                                                                                                                                                                                                                                                                                                                                                                                                                                                                                                                                                    |                                                                                                                                                   |
|--------------------------------------------------------------------------------------------------------------------------------------------------------------------------------------------------------------------------------------------------------------------------------------------------------------------------------------------------------------------------------------------------------------------------------------------------------------------------------------------------------------------------------------------------------------------------------------------------------------------------------------------------------------------------------------------------------------------------------------------------------------------------------------------------------------------------------------------------------------------------------------------------------------------------------------------------------------------------------------------------------------------------------------------------------------------------------------------------------------------------------------------------------------------------------------------------------------------------------------------------------------------------------------------------------------------------------------------------------------------------------------------------------------------------------------------------------------------------------------------------------------------------------------------------------------------------------------------------------|-----------------------------------------------------------------------------|---------------------------------------------------------------------------------------------------------------------|--------------------------------------------------------------------------------------------------------------------------------------------------------------------------------------------------------------------------------------------------------------------------------------------------------------------------------------------------------------------------------------------------------------------------------------------------------------------------------------------------------------------------------------------------------------------------------------------------------------------------------------------------------------------------------------------------------------------------------------------------------------------|---------------------------------------------------------------------------------------------------------------------------------------------------|
| EPI_ISL_1081793 to 1081794                                                                                                                                                                                                                                                                                                                                                                                                                                                                                                                                                                                                                                                                                                                                                                                                                                                                                                                                                                                                                                                                                                                                                                                                                                                                                                                                                                                                                                                                                                                                                                             | Philippine Red Cross                                                        | Philippine Genome Center                                                                                            | Magalang; Karol Sophia Agape R. Padilla; Kenneth M. Kim; Kris P. Punayan; Marc Edsel C. Ayes; Marc Jerrone R. Castro; Maria Sofia L. Yangzon; Marissa Alejandria; Razel Nikka M. Hao; Rianna Patricia S. Cruz; Sheila Mae M. Araiza; and Maria Rosario Singh-Vergeire                                                                                                                                                                                                                                                                                                                                                                                                                                                                                              |                                                                                                                                                   |
| EPI_ISL_1081831                                                                                                                                                                                                                                                                                                                                                                                                                                                                                                                                                                                                                                                                                                                                                                                                                                                                                                                                                                                                                                                                                                                                                                                                                                                                                                                                                                                                                                                                                                                                                                                        | Philippine Red Cross - Clark                                                | Philippine Genome Center                                                                                            | Alethea R. de Guzman; Anna Ong-Lim; Arianne A. Zamora; Asia Louisa U. Chong; Benedict A. Maralit; Candice Francheska B. Tambaoan; Carlo M. Lapid; Celia Carlos; Cynthia P. Saloma; Devon Ray Pacial; Edsel Maurice Salvaña; El King D. Morado; Eva Maria Cutiongco-de la Paz; Francis A. Tablizo; Irish Coleen A. Asin; Jaime C. Montoya; Jan Michael C. Yap; Jo-Hannah S. Llamas; John Q. Wong; Joshua Gregor A. Dizon; Juan Antonio R. Magalang; Karol Sophia Agape R. Padilla; Kenneth M. Kim; Kris P. Punayan; Marc Edsel C. Ayes; Marc Jerrone R. Castro; Maria Sofia L. Yangzon; Marissa Alejandria; Razel Nikka M. Hao; Rianna Patricia S. Cruz; Sheila Mae M. Araiza; and Maria Rosario Singh-Vergeire                                                     |                                                                                                                                                   |
| EPI_ISL_1081810 to 1081811,<br>EPI_ISL_1081813 to 1081818,<br>EPI_ISL_1081830, EPI_ISL_1213578                                                                                                                                                                                                                                                                                                                                                                                                                                                                                                                                                                                                                                                                                                                                                                                                                                                                                                                                                                                                                                                                                                                                                                                                                                                                                                                                                                                                                                                                                                         | Philippine Red Cross - Port Area                                            | Philippine Genome Center                                                                                            | Alethea R. de Guzman; Anna Ong-Lim; Arianne A. Zamora; Asia Louisa U. Chong; Benedict A. Maralit; Candice Francheska B. Tambaoan; Carlo M. Lapid; Celia Carlos; Cynthia P. Saloma; Devon Ray Pacial; Edsel Maurice Salvaña; El King D. Morado; Eva Maria Cutiongco-de la Paz; Francis A. Tablizo; Irish Coleen A. Asin; Jaime C. Montoya; Jan Michael C. Yap; Jo-Hannah S. Llamas; John Q. Wong; Joshua Gregor A. Dizon; Juan Antonio R. Magalang; Karol Sophia Agape R. Padilla; Kenneth M. Kim; Kris P. Punayan; Marc Edsel C. Ayes; Marc Jerrone R. Castro; Maria Rosario Singh-Vergeire and Cynthia P. Saloma; Maria Sofia L. Yangzon; Marissa Alejandria; Razel Nikka M. Hao; Rianna Patricia S. Cruz; Sheila Mae M. Araiza; and Maria Rosario Singh-Vergeire |                                                                                                                                                   |
| EPI_ISL_1213580                                                                                                                                                                                                                                                                                                                                                                                                                                                                                                                                                                                                                                                                                                                                                                                                                                                                                                                                                                                                                                                                                                                                                                                                                                                                                                                                                                                                                                                                                                                                                                                        | Philippine Red Cross Logistics and Multipurpose Center                      | Philippine Genome Center                                                                                            | Alethea R. de Guzman; Anna Ong-Lim; Arianne A. Zamora; Asia Louisa U. Chong; Benedict A. Maralit; Candice Francheska B. Tambaoan; Carlo M. Lapid; Celia Carlos; Devon Ray Pacial; Edsel Maurice Salvaña; El King D. Morado; Eva Maria Cutiongco-de la Paz; Francis A. Tablizo; Irish Coleen A. Asin; Jaime C. Montoya; Jan Michael C. Yap; Jo-Hannah S. Llamas; John Q. Wong; Joshua Gregor A. Dizon; Juan Antonio R. Magalang; Karol Sophia Agape R. Padilla; Kenneth M. Kim; Kris P. Punayan; Marc Edsel C. Ayes; Marc Jerrone R. Castro; Maria Rosario Singh-Vergeire and Cynthia P. Saloma; Maria Sofia L. Yangzon; Marissa Alejandria; Razel Nikka M. Hao; Rianna Patricia S. Cruz; Sheila Mae M. Araiza                                                      |                                                                                                                                                   |
| EPI_ISL_1144896 to 1144906, EPI_ISL_1145270 to 1145280, EPI_ISL_1145282 to 1145285, EPI_ISL_1211889, EPI_ISL_1211891 to 1211893, EPI_ISL_1211895, EPI_ISL_1211897 to 1211898, EPI_ISL_1211901 to 1211902, EPI_ISL_1211934, EPI_ISL_1211936 to 1211937, EPI_ISL_1211941, EPI_ISL_1211943, EPI_ISL_1211947 to 1211948, EPI_ISL_1211952 to 1211953, EPI_ISL_1284881, EPI_ISL_1284884, EPI_ISL_1284887                                                                                                                                                                                                                                                                                                                                                                                                                                                                                                                                                                                                                                                                                                                                                                                                                                                                                                                                                                                                                                                                                                                                                                                                     | see above                                                                   | Philippis-Universität Marburg Fachbereich Medizin Institut für Virologie                                            | Robert Koch Institute                                                                                                                                                                                                                                                                                                                                                                                                                                                                                                                                                                                                                                                                                                                                              |                                                                                                                                                   |
| EPI_ISL_1173247                                                                                                                                                                                                                                                                                                                                                                                                                                                                                                                                                                                                                                                                                                                                                                                                                                                                                                                                                                                                                                                                                                                                                                                                                                                                                                                                                                                                                                                                                                                                                                                        | Piyavate Hospital                                                           | National Institute of Health, Department of Medical Sciences, Ministry of Public Health, Thailand                   | Natchaya Khadsang; Nuttida Thongpramol; Pakorn Piromtong; Pilailuk Okada; Ratana Tacharoenmuang; Siripaporn Phuygun; Sittiporn Parmmen; Sunthareeya Waicharoen.; Thanutsapa Thanadachakul; Warawan Wongboot                                                                                                                                                                                                                                                                                                                                                                                                                                                                                                                                                        |                                                                                                                                                   |
| EPI_ISL_1000012, EPI_ISL_1000014, EPI_ISL_1000016, EPI_ISL_1000018, EPI_ISL_1000020, EPI_ISL_1000022, EPI_ISL_1000024, EPI_ISL_1000026 to 1000027, EPI_ISL_1000029, EPI_ISL_1000031, EPI_ISL_1000033 to 1000034, EPI_ISL_1000036, EPI_ISL_1000038, EPI_ISL_1000040, EPI_ISL_1000042, EPI_ISL_1000044 to 1000048, EPI_ISL_1000050, EPI_ISL_1000052, EPI_ISL_1000054, EPI_ISL_1000056, EPI_ISL_1000058 to 1000059, EPI_ISL_1000061, EPI_ISL_1000063, EPI_ISL_1000065, EPI_ISL_1000067, EPI_ISL_1000069, EPI_ISL_1000071, EPI_ISL_1000073 to 1000074, EPI_ISL_1000076                                                                                                                                                                                                                                                                                                                                                                                                                                                                                                                                                                                                                                                                                                                                                                                                                                                                                                                                                                                                                                     | see above                                                                   | Plateforme BIS Namur                                                                                                | GIGA Medical Genomics                                                                                                                                                                                                                                                                                                                                                                                                                                                                                                                                                                                                                                                                                                                                              | Bouchra Boujemla; Cécile Meex; Keith Durkin; Maria Artes; Marie-Pierre Hayette; Pierrette Melin; Raphaël Boreux; Sébastien Bontems; Vincent Bours |
| EPI_ISL_1118925, EPI_ISL_1150288, EPI_ISL_1151457, EPI_ISL_1152258, EPI_ISL_1153690, EPI_ISL_1154225, EPI_ISL_1154443, EPI_ISL_1155742, EPI_ISL_1156880, EPI_ISL_1157548, EPI_ISL_1158031, EPI_ISL_1159884, EPI_ISL_1162762, EPI_ISL_1163162, EPI_ISL_1163531, EPI_ISL_1164596 to 1164601, EPI_ISL_1164625, EPI_ISL_1164655, EPI_ISL_1164752, EPI_ISL_1191054 to 1191069, EPI_ISL_1194603 to 1194612, EPI_ISL_1200628 to 1200634, EPI_ISL_1220067 to 1220093, EPI_ISL_1255078, EPI_ISL_1255080 to 1255085                                                                                                                                                                                                                                                                                                                                                                                                                                                                                                                                                                                                                                                                                                                                                                                                                                                                                                                                                                                                                                                                                              | see above                                                                   | Plateforme de testing Namuroise                                                                                     | Plateforme de testing Namuroise                                                                                                                                                                                                                                                                                                                                                                                                                                                                                                                                                                                                                                                                                                                                    | ; Bogaerts Pierre; Céline Maschietto; Degosserie Jonathan; Denis Olivier; Huang Te-Din; Maschietto Céline; Mullier François; Otto Gaetan          |
| EPI_ISL_1192384 to 1192388                                                                                                                                                                                                                                                                                                                                                                                                                                                                                                                                                                                                                                                                                                                                                                                                                                                                                                                                                                                                                                                                                                                                                                                                                                                                                                                                                                                                                                                                                                                                                                             | Plateforme de testing namuroise                                             | Plateforme de testing Namuroise                                                                                     | Céline Maschietto; Degosserie Jonathan; Denis Olivier; Mullier François; Otto Gaetan                                                                                                                                                                                                                                                                                                                                                                                                                                                                                                                                                                                                                                                                               |                                                                                                                                                   |
| EPI_ISL_1036621, EPI_ISL_1036623, EPI_ISL_1036647, EPI_ISL_1036659 to 1036660, EPI_ISL_1036729, EPI_ISL_1036732, EPI_ISL_1036747, EPI_ISL_1039161, EPI_ISL_1039213 to 1039217, EPI_ISL_1039219 to 1039220, EPI_ISL_1039255, EPI_ISL_1039518 to 1039520, EPI_ISL_1039542, EPI_ISL_1039690, EPI_ISL_1039952 to 1039953, EPI_ISL_1039956, EPI_ISL_1040470, EPI_ISL_1058023 to 1058025, EPI_ISL_1072993, EPI_ISL_1072995 to 1072996, EPI_ISL_1073000, EPI_ISL_1073035 to 1073036, EPI_ISL_1073038, EPI_ISL_1073040, EPI_ISL_1073134, EPI_ISL_1073136, EPI_ISL_1097308 to 1097312, EPI_ISL_1103565, EPI_ISL_1103567, EPI_ISL_1103570, EPI_ISL_1103572, EPI_ISL_1103574, EPI_ISL_1103585, EPI_ISL_1103587 to 1103589, EPI_ISL_1103992, EPI_ISL_1104290, EPI_ISL_1104555, EPI_ISL_1112932, EPI_ISL_1120734 to 1120737, EPI_ISL_11164847, EPI_ISL_1164850 to 1164851, EPI_ISL_1190844 to 1190851, EPI_ISL_1190853 to 1190855, EPI_ISL_1259214, EPI_ISL_1259218 to 1259236, EPI_ISL_1259238 to 1259239, EPI_ISL_1259241, EPI_ISL_1263333, EPI_ISL_1279937, EPI_ISL_1279940 to 1279943, EPI_ISL_1280090 to 1280091, EPI_ISL_1295585 to 1295605, EPI_ISL_1298178, EPI_ISL_1298180, EPI_ISL_1298183 to 1298184, EPI_ISL_1298188 to 1298189, EPI_ISL_1298192, EPI_ISL_1298194, EPI_ISL_1298434 to 1298450, EPI_ISL_1299490, EPI_ISL_1305782, EPI_ISL_1305784 to 1305785, EPI_ISL_1305789 to 1305817, EPI_ISL_1336262, EPI_ISL_1336265 to 1336266, EPI_ISL_1336269, EPI_ISL_1337447, EPI_ISL_1337454 to 1337462, EPI_ISL_1363783 to 1363786, EPI_ISL_1381259 to 1381264, EPI_ISL_1381280 to 1381282, EPI_ISL_1381289 | see above                                                                   | Platform BIS UZA/UAntwerpen                                                                                         | UAntwerp, Laboratory of Medical Microbiology                                                                                                                                                                                                                                                                                                                                                                                                                                                                                                                                                                                                                                                                                                                       | Basil Britto Xavier; Christine Lammens; Herman Goossens; Jasmine Coppens; Marie Le Mercier; Veerle Matheussen                                     |
| EPI_ISL_1112292                                                                                                                                                                                                                                                                                                                                                                                                                                                                                                                                                                                                                                                                                                                                                                                                                                                                                                                                                                                                                                                                                                                                                                                                                                                                                                                                                                                                                                                                                                                                                                                        | Platform BIS UZA/UAntwerpen                                                 | UAntwerp, Laboratory of Medical Microbiology,                                                                       | Basil Britto Xavier; Christine Lammens; Herman Goossens; Jasmine Coppens; Marie Le Mercier; Veerle Matheussen                                                                                                                                                                                                                                                                                                                                                                                                                                                                                                                                                                                                                                                      |                                                                                                                                                   |
| EPI_ISL_1379890 to 1379943                                                                                                                                                                                                                                                                                                                                                                                                                                                                                                                                                                                                                                                                                                                                                                                                                                                                                                                                                                                                                                                                                                                                                                                                                                                                                                                                                                                                                                                                                                                                                                             | Platform BIS UZA/UAntwerpen                                                 | UZA, Clinical Biology                                                                                               | Basil Britto Xavier; Christine Lammens; Herman Goossens; Jasmine Coppens; Marie Le Mercier; Veerle Matheussen                                                                                                                                                                                                                                                                                                                                                                                                                                                                                                                                                                                                                                                      |                                                                                                                                                   |
| EPI_ISL_1219002 to 1219010                                                                                                                                                                                                                                                                                                                                                                                                                                                                                                                                                                                                                                                                                                                                                                                                                                                                                                                                                                                                                                                                                                                                                                                                                                                                                                                                                                                                                                                                                                                                                                             | Platform BIS UZA/UAntwerpen (PLBIS)                                         | UAntwerp, Laboratory of Medical Microbiology                                                                        | Basil Britto Xavier; Christine Lammens; Herman Goossens; Jasmine Coppens; Marie Le Mercier; Veerle Matheussen                                                                                                                                                                                                                                                                                                                                                                                                                                                                                                                                                                                                                                                      |                                                                                                                                                   |
| EPI_ISL_1121305                                                                                                                                                                                                                                                                                                                                                                                                                                                                                                                                                                                                                                                                                                                                                                                                                                                                                                                                                                                                                                                                                                                                                                                                                                                                                                                                                                                                                                                                                                                                                                                        | Policlinica Maria Dirce                                                     | Instituto Adolfo Lutz, Interdisciplinary Procedures Center, Strategic Laboratory                                    | Caio Vinicius Dias Lopes; Claudia Regina Gonçalves; Claudio Tavares Sacchi; Erica Valessa Ramos Gomes; Karoline Rodrigues Campos                                                                                                                                                                                                                                                                                                                                                                                                                                                                                                                                                                                                                                   |                                                                                                                                                   |
| EPI_ISL_1079392, EPI_ISL_1079394                                                                                                                                                                                                                                                                                                                                                                                                                                                                                                                                                                                                                                                                                                                                                                                                                                                                                                                                                                                                                                                                                                                                                                                                                                                                                                                                                                                                                                                                                                                                                                       | Policlinico Universitario Campus Bio-Medico                                 | INMI Lazzaro Spallanzani IRCCS                                                                                      | A Di Caro; B Bartolini; CEM Gruber; E Giombini; E Riva; F Messina; L De Florio; M Fogolari; M Rueca; MR Capobianchi; O Butera; S Angeletti                                                                                                                                                                                                                                                                                                                                                                                                                                                                                                                                                                                                                         |                                                                                                                                                   |
| EPI_ISL_1069179 to 1069180                                                                                                                                                                                                                                                                                                                                                                                                                                                                                                                                                                                                                                                                                                                                                                                                                                                                                                                                                                                                                                                                                                                                                                                                                                                                                                                                                                                                                                                                                                                                                                             | Polillo Rural Health Unit                                                   | Research Institute for Tropical Medicine                                                                            | Catalino Demetria; Daria Manalo; Edelwisa Mercado; Gerardo Gerardo Polotan; Hannah Leah Morito; Inez Andrea Medado; John Leonard Chan; Joseph Hughes; Kirstyn Brunker; Ma Angelica Tujan; Othoniel Jan Onza                                                                                                                                                                                                                                                                                                                                                                                                                                                                                                                                                        |                                                                                                                                                   |
| EPI_ISL_1303404 to 1303406,<br>EPI_ISL_1303472 to 1303473                                                                                                                                                                                                                                                                                                                                                                                                                                                                                                                                                                                                                                                                                                                                                                                                                                                                                                                                                                                                                                                                                                                                                                                                                                                                                                                                                                                                                                                                                                                                              | Pomona Valley Hospital Medical Center                                       | Los Angeles County PHL                                                                                              | P. Hemarajata et al.                                                                                                                                                                                                                                                                                                                                                                                                                                                                                                                                                                                                                                                                                                                                               |                                                                                                                                                   |
| EPI_ISL_1069077, EPI_ISL_1069079                                                                                                                                                                                                                                                                                                                                                                                                                                                                                                                                                                                                                                                                                                                                                                                                                                                                                                                                                                                                                                                                                                                                                                                                                                                                                                                                                                                                                                                                                                                                                                       | Postgraduate Institute of Medical Education & Research (PGIMER), Chandigarh | ICMR-NATIONAL INSTITUTE OF VIROLOGY, MICROBIAL CONTAINMENT COMPLEX                                                  | Mini Singh; Pragya D. Yadav                                                                                                                                                                                                                                                                                                                                                                                                                                                                                                                                                                                                                                                                                                                                        |                                                                                                                                                   |
| EPI_ISL_1069081, EPI_ISL_1069083 to 1069084, EPI_ISL_1069209, EPI_ISL_1069212, EPI_ISL_1069214, EPI_ISL_1069217, EPI_ISL_1069397, EPI_ISL_1070020, EPI_ISL_1071223, EPI_ISL_1072020                                                                                                                                                                                                                                                                                                                                                                                                                                                                                                                                                                                                                                                                                                                                                                                                                                                                                                                                                                                                                                                                                                                                                                                                                                                                                                                                                                                                                    | see above                                                                   | Postgraduate Institute of Medical Education and Research (PGIMER), Chandigarh                                       | ICMR-NATIONAL INSTITUTE OF VIROLOGY, MICROBIAL CONTAINMENT COMPLEX                                                                                                                                                                                                                                                                                                                                                                                                                                                                                                                                                                                                                                                                                                 | Mini Singh; Pragya D. Yadav; Rupinder Bakshi                                                                                                      |
| EPI_ISL_1239608, EPI_ISL_1239681 to 1239684, EPI_ISL_1239710, EPI_ISL_1239759 to 1239760                                                                                                                                                                                                                                                                                                                                                                                                                                                                                                                                                                                                                                                                                                                                                                                                                                                                                                                                                                                                                                                                                                                                                                                                                                                                                                                                                                                                                                                                                                               | Pracownia Biologii Molekularnej Laboratorium Centralne SPZOW w Krotoszynie  | 1. National Institute of Public Health - National Institute of Hygiene; 2. Eurofins Genomics Europe Sequencing GmbH | ECDC COVID-19 WGS support team; Eurofins Genomics Europe Sequencing Team; Gierczyki Rafa; Sadkowska-Todys Magorzata; Wokowicz Tomasz; Zacharczuk Katarzyna                                                                                                                                                                                                                                                                                                                                                                                                                                                                                                                                                                                                         |                                                                                                                                                   |
| EPI_ISL_1148892, EPI_ISL_1148894, EPI_ISL_1148951, EPI_ISL_1151419, EPI_ISL_1151450, EPI_ISL_1151624, EPI_ISL_1151675, EPI_ISL_1151735, EPI_ISL_1151740, EPI_ISL_1151752, EPI_ISL_1152669, EPI_ISL_1152735, EPI_ISL_1154233, EPI_ISL_1154430, EPI_ISL_1155997 to 1155998, EPI_ISL_1157652, EPI_ISL_1210823, EPI_ISL_1210863, EPI_ISL_1210986, EPI_ISL_1213475, EPI_ISL_1213496, EPI_ISL_1213611, EPI_ISL_1213753, EPI_ISL_1214089, EPI_ISL_1214095, EPI_ISL_1214098, EPI_ISL_1214107, EPI_ISL_1280896, EPI_ISL_1280916, EPI_ISL_1283969, EPI_ISL_1284050, EPI_ISL_1284115, EPI_ISL_1284228, EPI_ISL_1284238, EPI_ISL_1348453, EPI_ISL_1350669, EPI_ISL_1350705, EPI_ISL_1350708                                                                                                                                                                                                                                                                                                                                                                                                                                                                                                                                                                                                                                                                                                                                                                                                                                                                                                                        | see above                                                                   | Praxisgemeinschaft für Laboratoriumsmedizin Labor Blumenstraße; Praxis Dr. E. Wietschel & Dr. F. Wietschel          | Robert Koch Institute                                                                                                                                                                                                                                                                                                                                                                                                                                                                                                                                                                                                                                                                                                                                              |                                                                                                                                                   |
| EPI_ISL_1145432, EPI_ISL_1145442, EPI_ISL_1145454, EPI_ISL_1145703, EPI_ISL_1145721, EPI_ISL_1145776, EPI_ISL_1145825, EPI_ISL_1148823, EPI_ISL_1148849, EPI_ISL_1148908, EPI_ISL_1148983, EPI_ISL_1149038, EPI_ISL_1149050, EPI_ISL_1149057, EPI_ISL_1151491, EPI_ISL_1151542, EPI_ISL_1151670, EPI_ISL_1151753, EPI_ISL_1152781, EPI_ISL_1154206, EPI_ISL_1154216, EPI_ISL_1154290, EPI_ISL_1155994 to 1155996, EPI_ISL_1155999 to 1156000, EPI_ISL_1157659, EPI_ISL_1210892, EPI_ISL_1210897, EPI_ISL_1210967, EPI_ISL_1210984, EPI_ISL_1210987, EPI_ISL_1213260, EPI_ISL_1213471, EPI_ISL_1213507, EPI_ISL_1213702, EPI_ISL_1213746, EPI_ISL_1213751, EPI_ISL_1213848, EPI_ISL_1214082, EPI_ISL_1214092, EPI_ISL_1280920, EPI_ISL_1280940, EPI_ISL_1284102, EPI_ISL_1348055, EPI_ISL_1348154, EPI_ISL_1348459, EPI_ISL_1348468, EPI_ISL_1350629, EPI_ISL_1350642, EPI_ISL_1350692, EPI_ISL_1350728, EPI_ISL_1352218, EPI_ISL_1352232, EPI_ISL_1352736, EPI_ISL_1352809, EPI_ISL_1352827, EPI_ISL_1352833                                                                                                                                                                                                                                                                                                                                                                                                                                                                                                                                                                                           | see above                                                                   | Praxisgemeinschaft für Laboratoriumsmedizin Labor Blumenstraße; Praxis Dr. Sel und Dr. Späte                        | Robert Koch Institute                                                                                                                                                                                                                                                                                                                                                                                                                                                                                                                                                                                                                                                                                                                                              |                                                                                                                                                   |
| EPI_ISL_1251096 to 1251097,                                                                                                                                                                                                                                                                                                                                                                                                                                                                                                                                                                                                                                                                                                                                                                                                                                                                                                                                                                                                                                                                                                                                                                                                                                                                                                                                                                                                                                                                                                                                                                            | Presidio Ospedaliero "San Liberatore" Atri                                  | Istituto Zooprofilattico Sperimentale dell'Abruzzo e Molise "G.                                                     | Ancora M; Calistri P; Cammà C; Caporale M; Curini V; Di Domenico M; Di Lollo V; Di Pasquale A; Lorusso A; Mangone I; Marcacci M; Puglia I; Rinaldi A;                                                                                                                                                                                                                                                                                                                                                                                                                                                                                                                                                                                                              |                                                                                                                                                   |

|                                                                                                                                                                                                                                                                                                                                                 |                                                                                                                                  |                                                                                                                                  |                                                                                                                                                                                                                                                                                                                                                                                                                                                                                                                                                                                                                                                                                                               |
|-------------------------------------------------------------------------------------------------------------------------------------------------------------------------------------------------------------------------------------------------------------------------------------------------------------------------------------------------|----------------------------------------------------------------------------------------------------------------------------------|----------------------------------------------------------------------------------------------------------------------------------|---------------------------------------------------------------------------------------------------------------------------------------------------------------------------------------------------------------------------------------------------------------------------------------------------------------------------------------------------------------------------------------------------------------------------------------------------------------------------------------------------------------------------------------------------------------------------------------------------------------------------------------------------------------------------------------------------------------|
| EPI_ISL_1336680, EPI_ISL_1336690                                                                                                                                                                                                                                                                                                                |                                                                                                                                  | Caporale*                                                                                                                        | Savini G; Scialabba S                                                                                                                                                                                                                                                                                                                                                                                                                                                                                                                                                                                                                                                                                         |
| EPI_ISL_1229140, EPI_ISL_1295610                                                                                                                                                                                                                                                                                                                | Presidio Ospedaliero G. B. Grassi ASL RM3                                                                                        | INMI Lazzaro Spallanzani IRCCS                                                                                                   | A Di Caro; B Bartolini; CEM Gruber; E Giombini; E Ristori; F Messina; F Santini; F Tabacco; G Bonfiglio; M Rucca; MR Capobianchi; O Butera                                                                                                                                                                                                                                                                                                                                                                                                                                                                                                                                                                    |
| EPI_ISL_1000969 to 1000970,<br>EPI_ISL_1008678, EPI_ISL_1008703 to<br>1008705, EPI_ISL_1008707 to 1008712,<br>EPI_ISL_1254658 to 1254664,<br>EPI_ISL_1254675 to 1254680                                                                                                                                                                         | Presidio di Brindisi Di Summa - Perrino                                                                                          | Istituto Zooprofilattico Sperimentale della Puglia e della Basilicata                                                            | Bianco A.; Capozzi L.; Chironna M.; Cipolletta D.; Del Sambro L.; Difato L.; Galante D.; Giannico A.; Loconsole D.; Manzulli V.; Pace L.; Parisi A.; Ridolfi D.; Rondinone V.; Sallustio A.; Simone D.                                                                                                                                                                                                                                                                                                                                                                                                                                                                                                        |
| EPI_ISL_1213581                                                                                                                                                                                                                                                                                                                                 | Prime Care Alpha Covid-19 Testing Laboratory                                                                                     | Philippine Genome Center                                                                                                         | Alethea R. de Guzman; Anna Ong-Lim; Arianne A. Zamora; Asia Louisa U. Chong; Benedict A. Maralit; Candice Francheska B. Tambaoan; Carlo M. Lapid; Celia Carlos; Devon Ray Pacial; Edsel Maurice Salvaña; El King D. Morado; Eva Maria Cutiongco-de la Paz; Francis A. Tablizo; Irish Coleen A. Asin; Jaime C. Montoya; Jan Michael C. Yap; Jo-Hannah S. Llames; John Q. Wong; Joshua Gregor A. Dizon; Juan Antonio R. Magalang; Karol Sophia Agape R. Padilla; Kenneth M. Kim; Kris P. Punayan; Marc Edsel C. Ayes; Marc Jerrone R. Castro; Maria Rosario Singh-Verguire and Cynthia P. Saloma; Maria Sofia L. Yangzon; Marissa Alejandria; Razel Nikka M. Hao; Rianna Patricia S. Cruz; Sheila Mae M. Araiza |
| EPI_ISL_1020179, EPI_ISL_1020181,<br>EPI_ISL_1020191                                                                                                                                                                                                                                                                                            | Primeria Clinica, Jakarta                                                                                                        | Biosafety Level-3 Laboratory, Indonesian Institute of Sciences (LIPI)                                                            | Andri Wardiana; Anik B. Dharmayanthi; Ari S. Wulandari; Indriawati; Isa Nuryana; Ratih Asmana Ningrum; Sugiyono Saputra; Syaiful Rizal; Syam Budi Iryanto                                                                                                                                                                                                                                                                                                                                                                                                                                                                                                                                                     |
| EPI_ISL_1093397                                                                                                                                                                                                                                                                                                                                 | Princess Haya Biotechnology Center/ Jordan University of Science & Technology                                                    | Princess Haya Biotechnology Center/ Jordan University of Science & Technology                                                    | Areej Alquran; Hazem Haddad; Maha Karam; Saied Jaradat; Shereen Issa; Suha Hasan                                                                                                                                                                                                                                                                                                                                                                                                                                                                                                                                                                                                                              |
| EPI_ISL_1278030, EPI_ISL_1278033 to 1278035, EPI_ISL_1278037 to 1278038, EPI_ISL_1278040 to 1278042, EPI_ISL_1278047, EPI_ISL_1278049, EPI_ISL_1278052 to 1278054                                                                                                                                                                               | see above                                                                                                                        | Private lab                                                                                                                      | Arnoldas Pautienius; Dovydas Gecys; Gediminas Alzbutas; Kamile Tamauskaite; Lukas Zemaitis; Vaiva Lesauskaite                                                                                                                                                                                                                                                                                                                                                                                                                                                                                                                                                                                                 |
| EPI_ISL_1212276, EPI_ISL_1212298, EPI_ISL_1214966, EPI_ISL_1281925, EPI_ISL_1281953, EPI_ISL_1281960, EPI_ISL_1281983, EPI_ISL_1350258, EPI_ISL_1350265, EPI_ISL_1350269, EPI_ISL_1350278, EPI_ISL_1350306, EPI_ISL_1350309                                                                                                                     | see above                                                                                                                        | Lithuanian University of Health Sciences                                                                                         |                                                                                                                                                                                                                                                                                                                                                                                                                                                                                                                                                                                                                                                                                                               |
| EPI_ISL_1092010 to 1092323                                                                                                                                                                                                                                                                                                                      | Proccmure Biotech Germany GmbH                                                                                                   | Robert Koch Institute                                                                                                            | Alexander Graf; Dieter Hoffmann; Elisabeth Esser; Eva C.Schulte; Helmut Blum; Stefan Krebs; Till Bunse; Ulrike Protzer                                                                                                                                                                                                                                                                                                                                                                                                                                                                                                                                                                                        |
| EPI_ISL_1373161 to 1373314                                                                                                                                                                                                                                                                                                                      | Protzer Lab                                                                                                                      | Protzer Lab, Laboratory for Functional Genome Analysis, Dept. Genomics, Gene Center of the LMU Munich                            |                                                                                                                                                                                                                                                                                                                                                                                                                                                                                                                                                                                                                                                                                                               |
| EPI_ISL_1017066, EPI_ISL_1017187 to 1017215                                                                                                                                                                                                                                                                                                     | Providence Alaska Medical Center                                                                                                 | Providence St. Joseph Health Molecular Genomics Laboratory                                                                       | Alexa K Dowdell; Brian D Piening; Carlo B Bifulco; Fred L Robinson; Mary Campbell                                                                                                                                                                                                                                                                                                                                                                                                                                                                                                                                                                                                                             |
| EPI_ISL_1017041 to 1017050, EPI_ISL_1017053, EPI_ISL_1017064, EPI_ISL_1017067 to 1017074, EPI_ISL_1017090, EPI_ISL_1017096, EPI_ISL_1017100 to 1017105, EPI_ISL_1017107, EPI_ISL_1017112 to 1017115, EPI_ISL_1017120 to 1017125, EPI_ISL_1017172 to 1017179, EPI_ISL_1017181 to 1017186, EPI_ISL_1017238 to 1017470, EPI_ISL_1060871 to 1060875 | see above                                                                                                                        | Providence Oregon Regional Laboratories                                                                                          | Alexa K Dowdell; Brian D Piening; Carlo B Bifulco; Fred L Robinson; Mary Campbell                                                                                                                                                                                                                                                                                                                                                                                                                                                                                                                                                                                                                             |
| EPI_ISL_1017055 to 1017057,<br>EPI_ISL_1017161 to 1017171,<br>EPI_ISL_1017180, EPI_ISL_1017237                                                                                                                                                                                                                                                  | Providence Regional Medical Center Everett                                                                                       | Providence St. Joseph Health Molecular Genomics Laboratory                                                                       | Alexa K Dowdell; Brian D Piening; Carlo B Bifulco; Fred L Robinson; Mary Campbell                                                                                                                                                                                                                                                                                                                                                                                                                                                                                                                                                                                                                             |
| EPI_ISL_1017054, EPI_ISL_1017216 to 1017236                                                                                                                                                                                                                                                                                                     | Providence Sacred Heart Medical Center                                                                                           | Providence St. Joseph Health Molecular Genomics Laboratory                                                                       | Alexa K Dowdell; Brian D Piening; Carlo B Bifulco; Fred L Robinson; Mary Campbell                                                                                                                                                                                                                                                                                                                                                                                                                                                                                                                                                                                                                             |
| EPI_ISL_1114376                                                                                                                                                                                                                                                                                                                                 | Providence Sacred Heart Medical Center-Spokane                                                                                   | Seattle Flu Study                                                                                                                | Amanda Adler; Barry R. Lutz; Benjamin Pelle; Brian Hiatt; Caitlin R. Wolf; Chris D. Frazier; Deborah A. Nickerson; Elisabeth Brandstetter; Erica Ryke; Geoff Melly; Helen Y. Chu; Janet A. Englund; Jay Shendure; Jover Lee; Kairsten Fay; Kirsten Lacombe; Lea M. Starita; Mark J. Rieder; Matthew Richardson; Matthew Thompson; Melissa Truong; Michael Boeckh; Michael Famulare; Misja Ilcisin; Peter D. Han; Philip Dykema; Romesh Gautam; Scott Lindquist; Thomas R. Sibley; Trevor Bedford                                                                                                                                                                                                              |
| EPI_ISL_1017051, EPI_ISL_1017059 to 1017063, EPI_ISL_1017065, EPI_ISL_1017097 to 1017099, EPI_ISL_1017108 to 1017111, EPI_ISL_1017116 to 1017117, EPI_ISL_1017126 to 1017132, EPI_ISL_1017147 to 1017160                                                                                                                                        | see above                                                                                                                        | Providence Saint Joseph Medical Center - Burbank                                                                                 | Alexa K Dowdell; Brian D Piening; Carlo B Bifulco; Fred L Robinson; Mary Campbell                                                                                                                                                                                                                                                                                                                                                                                                                                                                                                                                                                                                                             |
| EPI_ISL_1017052, EPI_ISL_1017058, EPI_ISL_1017075 to 1017089, EPI_ISL_1017091 to 1017095, EPI_ISL_1017106, EPI_ISL_1017118 to 1017119, EPI_ISL_1017133 to 1017146                                                                                                                                                                               | see above                                                                                                                        | Providence St. Joseph Health Orange - Chapman                                                                                    | Alexa K Dowdell; Brian D Piening; Carlo B Bifulco; Fred L Robinson; Mary Campbell                                                                                                                                                                                                                                                                                                                                                                                                                                                                                                                                                                                                                             |
| EPI_ISL_1034274                                                                                                                                                                                                                                                                                                                                 | Provincial Sanitary and Epidemiological Inspection in Gdask                                                                      | Laboratory of Recombinant Vaccines                                                                                               | Boguslaw Szweczyk; Krystyna Bienkowska-Szweczyk; Krzysztof Pyr; Lukasz Rabalski; Maciej Grzybek; Maciej Kosinski; Natalia Mazur-Panasiuk                                                                                                                                                                                                                                                                                                                                                                                                                                                                                                                                                                      |
| EPI_ISL_1180675 to 1180714,<br>EPI_ISL_1209243 to 1209262                                                                                                                                                                                                                                                                                       | Public Health Authority of the Slovak Republic                                                                                   | Bergthaler laboratory, CeMM Research Center for Molecular Medicine of the Austrian Academy of Sciences                           | Andreas Bergthaler; Anna Schedi; Bekir Erguner; Benedikt Agerer; Christoph Bock; Fabian Amman; Jan Laine; Lukas Endler; Maelle Le Moing; Martin Senekowitsch; Michael Schuster; Thomas Penz                                                                                                                                                                                                                                                                                                                                                                                                                                                                                                                   |
| EPI_ISL_1112293 to 1112339,<br>EPI_ISL_1112753                                                                                                                                                                                                                                                                                                  | Public Health Center of Ukraine                                                                                                  | Charite Universitatsmedizin Berlin, Institute of Virology                                                                        | Barbara Mühlemann; Christian Drosten; Ihor Kuzin; Iryna Demchyshyna; Julia Schneider; Jörn Beheim-Schwarzbach; Liudmyla Chernenko; Roman Rodyna; Talitha Veith; Terry Jones; Victor M Corman                                                                                                                                                                                                                                                                                                                                                                                                                                                                                                                  |
| EPI_ISL_1195661 to 1195671,<br>EPI_ISL_1229150 to 1229152                                                                                                                                                                                                                                                                                       | Public Health Institute of Dubrovnik-Neretva County                                                                              | Croatian Institute of Public Health                                                                                              | Irena Tabain; Ivana Ferenak                                                                                                                                                                                                                                                                                                                                                                                                                                                                                                                                                                                                                                                                                   |
| EPI_ISL_1109517, EPI_ISL_1109538                                                                                                                                                                                                                                                                                                                | Public Health Institute of Dubrovnik_Neretva County                                                                              | Croatian Institute of Public Health                                                                                              | Irena Tabain; Ivana Ferenak                                                                                                                                                                                                                                                                                                                                                                                                                                                                                                                                                                                                                                                                                   |
| EPI_ISL_1271987                                                                                                                                                                                                                                                                                                                                 | Public Health Institute of Istra County                                                                                          | Croatian Institute of Public Health                                                                                              | Irena Tabain; Ivana Ferenak                                                                                                                                                                                                                                                                                                                                                                                                                                                                                                                                                                                                                                                                                   |
| EPI_ISL_1109505, EPI_ISL_1109508, EPI_ISL_1109564, EPI_ISL_1195685 to 1195690, EPI_ISL_1201040 to 1201044, EPI_ISL_1306023, EPI_ISL_1306036, EPI_ISL_1306048, EPI_ISL_1306061, EPI_ISL_1306064                                                                                                                                                  | see above                                                                                                                        | Public Health Institute of Meimurje County                                                                                       | Irena Tabain; Ivana Ferenak                                                                                                                                                                                                                                                                                                                                                                                                                                                                                                                                                                                                                                                                                   |
| EPI_ISL_1195692 to 1195697                                                                                                                                                                                                                                                                                                                      | Public Health Institute of Osijek-Baranja County                                                                                 | Croatian Institute of Public Health                                                                                              | Irena Tabain; Ivana Ferenak                                                                                                                                                                                                                                                                                                                                                                                                                                                                                                                                                                                                                                                                                   |
| EPI_ISL_1110747 to 1110765,<br>EPI_ISL_1110767 to 1110779,<br>EPI_ISL_1287350 to 1287365,<br>EPI_ISL_1287367 to 1287368,<br>EPI_ISL_1312061 to 1312062                                                                                                                                                                                          | Public Health Institute of Varaždin County                                                                                       | Croatian Institute of Public Health                                                                                              | Irena Tabain; Ivana Ferenak                                                                                                                                                                                                                                                                                                                                                                                                                                                                                                                                                                                                                                                                                   |
| EPI_ISL_1195691                                                                                                                                                                                                                                                                                                                                 | Public Health Institute of Virovitica-Podravina County                                                                           | Croatian Institute of Public Health                                                                                              | Irena Tabain; Ivana Ferenak                                                                                                                                                                                                                                                                                                                                                                                                                                                                                                                                                                                                                                                                                   |
| EPI_ISL_1272028 to 1272049,<br>EPI_ISL_1311997 to 1312040                                                                                                                                                                                                                                                                                       | Public Health Institute of Zagreb County                                                                                         | Croatian Institute of Public Health                                                                                              | Irena Tabain; Ivana Ferenak                                                                                                                                                                                                                                                                                                                                                                                                                                                                                                                                                                                                                                                                                   |
| EPI_ISL_1109490 to 1109491, EPI_ISL_1109503, EPI_ISL_1109509, EPI_ISL_1109518, EPI_ISL_1109527 to 1109528, EPI_ISL_1109540 to 1109546, EPI_ISL_1109565 to 1109570, EPI_ISL_1110783 to 1110791, EPI_ISL_1110793 to 1110803, EPI_ISL_1195726 to 1195729, EPI_ISL_1201025 to 1201035, EPI_ISL_1312041 to 1312060                                   | see above                                                                                                                        | Public Health Institute of Šibenik-Knin County                                                                                   | Irena Tabain; Ivana Ferenak                                                                                                                                                                                                                                                                                                                                                                                                                                                                                                                                                                                                                                                                                   |
| EPI_ISL_1233896 to 1233897,<br>EPI_ISL_1233904                                                                                                                                                                                                                                                                                                  | Public Health Laboratory - Infectious Disease Lab, Minnesota Department of Health Infectious Disease Laboratory Submission Group | Public Health Laboratory - Infectious Disease Lab, Minnesota Department of Health Infectious Disease Laboratory Submission Group | Garfin, J.; Lorentz, A.; Plumb, M.; Wang, X.                                                                                                                                                                                                                                                                                                                                                                                                                                                                                                                                                                                                                                                                  |
| EPI_ISL_1061309 to 1061310,                                                                                                                                                                                                                                                                                                                     | Public Health Virology-Forensic and Scientific Services                                                                          | Public Health Virology-Forensic and Scientific Services                                                                          | Son Nguyen                                                                                                                                                                                                                                                                                                                                                                                                                                                                                                                                                                                                                                                                                                    |

|                                                                                                                                                                                                                                                                                                                                                                                                                                                                                                                                                                                                                                                                                                                                                                                                                                                                                                                                                                                                                                                                                                                                                                                                                                                                                                                                                                                                                                                                                                                                                                                                                                                                                                                                                                                                                                                                                                                                                                                                                                                                                                                                                                                                                                                                                                                                                                                                                                                                                                                                                                                                                                                                                                                                                                                                                                                                                                                                                                                                                                                                                                                                                                                                                                                                                                                                                                                                                                                                                                                                                                                                                                                                                                                                                                                                                                                                                                                                                                                                                                                                                                                                                                                                                                                                                                                                                                                                                                                                                                                                                                                                                                                                                                                                                                                                                                                                                                                                                                                                                                                                                                                                                                                                                                                                                                                                                                                                                                                                                                                                                                                                                                                                                                                                                                                                                                                                                                                                                                                                                                                                                                                                                                                                                                                                                                                                                                                                                                                                                                                                                                                                                                                                                                                                                                                                                                                                                                                                                                                                                                                                                                                                                                                                                                                                                                                                                                                                                                                                                                                                                                                                                                                                                                                                                                                                                                                                                                                                                                                                                                                                                                                                                                                                                                                                                                                                                                                                                                                                                                                                                                                                                                                                                                                                                                                                                                                                                                                                                                                                                                                                                                                                                                                                                                                                                                                                                                                                                                                                                                                                                                                                                                                                                                                                                                                                                                                                                                                                                                                                                                                                                                                                                                                                                                                                                                                                                                                                                                                                                                                                                                                                                                                                                                                                                                                                                                                                                                                                                                                                                                                                                                                                                                                                                                                                                                                                                                                                                                                                                                                                                                                                                                                                                                                                                                                                                                                                                                                                                                                                                                                                                                                                                                                                                                                                                                                                                                                                                                                                                                                                                                                                                                                                                                                                                                                                                                                                                                                                                  |                                                                   |                                                                                |                                                                                                                                                                                                                                                                                                                                                                                                                                             |                                                                                                                                                                                                                                                                                                                                                                                                                                                           |
|--------------------------------------------------------------------------------------------------------------------------------------------------------------------------------------------------------------------------------------------------------------------------------------------------------------------------------------------------------------------------------------------------------------------------------------------------------------------------------------------------------------------------------------------------------------------------------------------------------------------------------------------------------------------------------------------------------------------------------------------------------------------------------------------------------------------------------------------------------------------------------------------------------------------------------------------------------------------------------------------------------------------------------------------------------------------------------------------------------------------------------------------------------------------------------------------------------------------------------------------------------------------------------------------------------------------------------------------------------------------------------------------------------------------------------------------------------------------------------------------------------------------------------------------------------------------------------------------------------------------------------------------------------------------------------------------------------------------------------------------------------------------------------------------------------------------------------------------------------------------------------------------------------------------------------------------------------------------------------------------------------------------------------------------------------------------------------------------------------------------------------------------------------------------------------------------------------------------------------------------------------------------------------------------------------------------------------------------------------------------------------------------------------------------------------------------------------------------------------------------------------------------------------------------------------------------------------------------------------------------------------------------------------------------------------------------------------------------------------------------------------------------------------------------------------------------------------------------------------------------------------------------------------------------------------------------------------------------------------------------------------------------------------------------------------------------------------------------------------------------------------------------------------------------------------------------------------------------------------------------------------------------------------------------------------------------------------------------------------------------------------------------------------------------------------------------------------------------------------------------------------------------------------------------------------------------------------------------------------------------------------------------------------------------------------------------------------------------------------------------------------------------------------------------------------------------------------------------------------------------------------------------------------------------------------------------------------------------------------------------------------------------------------------------------------------------------------------------------------------------------------------------------------------------------------------------------------------------------------------------------------------------------------------------------------------------------------------------------------------------------------------------------------------------------------------------------------------------------------------------------------------------------------------------------------------------------------------------------------------------------------------------------------------------------------------------------------------------------------------------------------------------------------------------------------------------------------------------------------------------------------------------------------------------------------------------------------------------------------------------------------------------------------------------------------------------------------------------------------------------------------------------------------------------------------------------------------------------------------------------------------------------------------------------------------------------------------------------------------------------------------------------------------------------------------------------------------------------------------------------------------------------------------------------------------------------------------------------------------------------------------------------------------------------------------------------------------------------------------------------------------------------------------------------------------------------------------------------------------------------------------------------------------------------------------------------------------------------------------------------------------------------------------------------------------------------------------------------------------------------------------------------------------------------------------------------------------------------------------------------------------------------------------------------------------------------------------------------------------------------------------------------------------------------------------------------------------------------------------------------------------------------------------------------------------------------------------------------------------------------------------------------------------------------------------------------------------------------------------------------------------------------------------------------------------------------------------------------------------------------------------------------------------------------------------------------------------------------------------------------------------------------------------------------------------------------------------------------------------------------------------------------------------------------------------------------------------------------------------------------------------------------------------------------------------------------------------------------------------------------------------------------------------------------------------------------------------------------------------------------------------------------------------------------------------------------------------------------------------------------------------------------------------------------------------------------------------------------------------------------------------------------------------------------------------------------------------------------------------------------------------------------------------------------------------------------------------------------------------------------------------------------------------------------------------------------------------------------------------------------------------------------------------------------------------------------------------------------------------------------------------------------------------------------------------------------------------------------------------------------------------------------------------------------------------------------------------------------------------------------------------------------------------------------------------------------------------------------------------------------------------------------------------------------------------------------------------------------------------------------------------------------------------------------------------------------------------------------------------------------------------------------------------------------------------------------------------------------------------------------------------------------------------------------------------------------------------------------------------------------------------------------------------------------------------------------------------------------------------------------------------------------------------------------------------------------------------------------------------------------------------------------------------------------------------------------------------------------------------------------------------------------------------------------------------------------------------------------------------------------------------------------------------------------------------------------------------------------------------------------------------------------------------------------------------------------------------------------------------------------------------------------------------------------------------------------------------------------------------------------------------------------------------------------------------------------------------------------------------------------------------------------------------------------------------------------------------------------------------------------------------------------------------------------------------------------------------------------------------------------------------------------------------------------------------------------------------------------------------------------------------------------------------------------------------------------------------------------------------------------------------------------------------------------------------------------------------------------------------------------------------------------------------------------------------------------------------------------------------------------------------------------------------------------------------------------------------------------------------------------------------------------------------------------------------------------------------------------------------------------------------------------------------------------------------------------------------------------------------------------------------------------------------------------------------------------------------------------------------------------------------------------------------------------------------------------------------------------------------------------------------------------------------------------------------------------------------------------------------------------------------------------------------------------------------------------------------------------------------------------------------------------------------------------------------------------------------------------------------------------------------------------------------------------------------------------------------------------------------------------------------------------------------------------------------------------------------------------------------------------------------------------------------------------------------------------------------------------------------------------------------------------------------------------------------------------------------------------------------------------------------------------------------------------------------------------------------------------------------------------------------------------------------------------------------------------------------------------------------------------------------------------------------------------------------------------------------------------------------------------------------------------------------------------------------------------------------------------------------------------------------------------------------------------------------------------------|-------------------------------------------------------------------|--------------------------------------------------------------------------------|---------------------------------------------------------------------------------------------------------------------------------------------------------------------------------------------------------------------------------------------------------------------------------------------------------------------------------------------------------------------------------------------------------------------------------------------|-----------------------------------------------------------------------------------------------------------------------------------------------------------------------------------------------------------------------------------------------------------------------------------------------------------------------------------------------------------------------------------------------------------------------------------------------------------|
| EPI_ISL_1098644 to 1098645,<br>EPI_ISL_1121039 to 1121040,<br>EPI_ISL_1137503 to 1137505                                                                                                                                                                                                                                                                                                                                                                                                                                                                                                                                                                                                                                                                                                                                                                                                                                                                                                                                                                                                                                                                                                                                                                                                                                                                                                                                                                                                                                                                                                                                                                                                                                                                                                                                                                                                                                                                                                                                                                                                                                                                                                                                                                                                                                                                                                                                                                                                                                                                                                                                                                                                                                                                                                                                                                                                                                                                                                                                                                                                                                                                                                                                                                                                                                                                                                                                                                                                                                                                                                                                                                                                                                                                                                                                                                                                                                                                                                                                                                                                                                                                                                                                                                                                                                                                                                                                                                                                                                                                                                                                                                                                                                                                                                                                                                                                                                                                                                                                                                                                                                                                                                                                                                                                                                                                                                                                                                                                                                                                                                                                                                                                                                                                                                                                                                                                                                                                                                                                                                                                                                                                                                                                                                                                                                                                                                                                                                                                                                                                                                                                                                                                                                                                                                                                                                                                                                                                                                                                                                                                                                                                                                                                                                                                                                                                                                                                                                                                                                                                                                                                                                                                                                                                                                                                                                                                                                                                                                                                                                                                                                                                                                                                                                                                                                                                                                                                                                                                                                                                                                                                                                                                                                                                                                                                                                                                                                                                                                                                                                                                                                                                                                                                                                                                                                                                                                                                                                                                                                                                                                                                                                                                                                                                                                                                                                                                                                                                                                                                                                                                                                                                                                                                                                                                                                                                                                                                                                                                                                                                                                                                                                                                                                                                                                                                                                                                                                                                                                                                                                                                                                                                                                                                                                                                                                                                                                                                                                                                                                                                                                                                                                                                                                                                                                                                                                                                                                                                                                                                                                                                                                                                                                                                                                                                                                                                                                                                                                                                                                                                                                                                                                                                                                                                                                                                                                                                                                                         |                                                                   |                                                                                |                                                                                                                                                                                                                                                                                                                                                                                                                                             |                                                                                                                                                                                                                                                                                                                                                                                                                                                           |
| EPI_ISL_1273076 to 1273083, EPI_ISL_1300526, EPI_ISL_1300529 to 1300530, EPI_ISL_1300532 to 1300533, EPI_ISL_1306121 to 1306138, EPI_ISL_1340873, EPI_ISL_1364540                                                                                                                                                                                                                                                                                                                                                                                                                                                                                                                                                                                                                                                                                                                                                                                                                                                                                                                                                                                                                                                                                                                                                                                                                                                                                                                                                                                                                                                                                                                                                                                                                                                                                                                                                                                                                                                                                                                                                                                                                                                                                                                                                                                                                                                                                                                                                                                                                                                                                                                                                                                                                                                                                                                                                                                                                                                                                                                                                                                                                                                                                                                                                                                                                                                                                                                                                                                                                                                                                                                                                                                                                                                                                                                                                                                                                                                                                                                                                                                                                                                                                                                                                                                                                                                                                                                                                                                                                                                                                                                                                                                                                                                                                                                                                                                                                                                                                                                                                                                                                                                                                                                                                                                                                                                                                                                                                                                                                                                                                                                                                                                                                                                                                                                                                                                                                                                                                                                                                                                                                                                                                                                                                                                                                                                                                                                                                                                                                                                                                                                                                                                                                                                                                                                                                                                                                                                                                                                                                                                                                                                                                                                                                                                                                                                                                                                                                                                                                                                                                                                                                                                                                                                                                                                                                                                                                                                                                                                                                                                                                                                                                                                                                                                                                                                                                                                                                                                                                                                                                                                                                                                                                                                                                                                                                                                                                                                                                                                                                                                                                                                                                                                                                                                                                                                                                                                                                                                                                                                                                                                                                                                                                                                                                                                                                                                                                                                                                                                                                                                                                                                                                                                                                                                                                                                                                                                                                                                                                                                                                                                                                                                                                                                                                                                                                                                                                                                                                                                                                                                                                                                                                                                                                                                                                                                                                                                                                                                                                                                                                                                                                                                                                                                                                                                                                                                                                                                                                                                                                                                                                                                                                                                                                                                                                                                                                                                                                                                                                                                                                                                                                                                                                                                                                                                                                                                |                                                                   |                                                                                |                                                                                                                                                                                                                                                                                                                                                                                                                                             |                                                                                                                                                                                                                                                                                                                                                                                                                                                           |
| see above                                                                                                                                                                                                                                                                                                                                                                                                                                                                                                                                                                                                                                                                                                                                                                                                                                                                                                                                                                                                                                                                                                                                                                                                                                                                                                                                                                                                                                                                                                                                                                                                                                                                                                                                                                                                                                                                                                                                                                                                                                                                                                                                                                                                                                                                                                                                                                                                                                                                                                                                                                                                                                                                                                                                                                                                                                                                                                                                                                                                                                                                                                                                                                                                                                                                                                                                                                                                                                                                                                                                                                                                                                                                                                                                                                                                                                                                                                                                                                                                                                                                                                                                                                                                                                                                                                                                                                                                                                                                                                                                                                                                                                                                                                                                                                                                                                                                                                                                                                                                                                                                                                                                                                                                                                                                                                                                                                                                                                                                                                                                                                                                                                                                                                                                                                                                                                                                                                                                                                                                                                                                                                                                                                                                                                                                                                                                                                                                                                                                                                                                                                                                                                                                                                                                                                                                                                                                                                                                                                                                                                                                                                                                                                                                                                                                                                                                                                                                                                                                                                                                                                                                                                                                                                                                                                                                                                                                                                                                                                                                                                                                                                                                                                                                                                                                                                                                                                                                                                                                                                                                                                                                                                                                                                                                                                                                                                                                                                                                                                                                                                                                                                                                                                                                                                                                                                                                                                                                                                                                                                                                                                                                                                                                                                                                                                                                                                                                                                                                                                                                                                                                                                                                                                                                                                                                                                                                                                                                                                                                                                                                                                                                                                                                                                                                                                                                                                                                                                                                                                                                                                                                                                                                                                                                                                                                                                                                                                                                                                                                                                                                                                                                                                                                                                                                                                                                                                                                                                                                                                                                                                                                                                                                                                                                                                                                                                                                                                                                                                                                                                                                                                                                                                                                                                                                                                                                                                                                                                                                        | Public Health Virology-Forensic and Scientific Services (PHV-FSS) | Public Health Virology-Forensic and Scientific Services (PHV-FSS)              | Son Nguyen                                                                                                                                                                                                                                                                                                                                                                                                                                  |                                                                                                                                                                                                                                                                                                                                                                                                                                                           |
| EPI_ISL_1168686 to 1168696                                                                                                                                                                                                                                                                                                                                                                                                                                                                                                                                                                                                                                                                                                                                                                                                                                                                                                                                                                                                                                                                                                                                                                                                                                                                                                                                                                                                                                                                                                                                                                                                                                                                                                                                                                                                                                                                                                                                                                                                                                                                                                                                                                                                                                                                                                                                                                                                                                                                                                                                                                                                                                                                                                                                                                                                                                                                                                                                                                                                                                                                                                                                                                                                                                                                                                                                                                                                                                                                                                                                                                                                                                                                                                                                                                                                                                                                                                                                                                                                                                                                                                                                                                                                                                                                                                                                                                                                                                                                                                                                                                                                                                                                                                                                                                                                                                                                                                                                                                                                                                                                                                                                                                                                                                                                                                                                                                                                                                                                                                                                                                                                                                                                                                                                                                                                                                                                                                                                                                                                                                                                                                                                                                                                                                                                                                                                                                                                                                                                                                                                                                                                                                                                                                                                                                                                                                                                                                                                                                                                                                                                                                                                                                                                                                                                                                                                                                                                                                                                                                                                                                                                                                                                                                                                                                                                                                                                                                                                                                                                                                                                                                                                                                                                                                                                                                                                                                                                                                                                                                                                                                                                                                                                                                                                                                                                                                                                                                                                                                                                                                                                                                                                                                                                                                                                                                                                                                                                                                                                                                                                                                                                                                                                                                                                                                                                                                                                                                                                                                                                                                                                                                                                                                                                                                                                                                                                                                                                                                                                                                                                                                                                                                                                                                                                                                                                                                                                                                                                                                                                                                                                                                                                                                                                                                                                                                                                                                                                                                                                                                                                                                                                                                                                                                                                                                                                                                                                                                                                                                                                                                                                                                                                                                                                                                                                                                                                                                                                                                                                                                                                                                                                                                                                                                                                                                                                                                                                                                                       | Puerto Rico Department of Health                                  | Centers for Disease Control and Prevention, Dengue Branch                      | Betzabel Flores; Gabriela Paz-Bailey; Gilberto A. Santiago; Glenda Gonzalez; Jorge L. Munoz-Jordan; Keyla Charriez                                                                                                                                                                                                                                                                                                                          |                                                                                                                                                                                                                                                                                                                                                                                                                                                           |
| EPI_ISL_1055456 to 1055752                                                                                                                                                                                                                                                                                                                                                                                                                                                                                                                                                                                                                                                                                                                                                                                                                                                                                                                                                                                                                                                                                                                                                                                                                                                                                                                                                                                                                                                                                                                                                                                                                                                                                                                                                                                                                                                                                                                                                                                                                                                                                                                                                                                                                                                                                                                                                                                                                                                                                                                                                                                                                                                                                                                                                                                                                                                                                                                                                                                                                                                                                                                                                                                                                                                                                                                                                                                                                                                                                                                                                                                                                                                                                                                                                                                                                                                                                                                                                                                                                                                                                                                                                                                                                                                                                                                                                                                                                                                                                                                                                                                                                                                                                                                                                                                                                                                                                                                                                                                                                                                                                                                                                                                                                                                                                                                                                                                                                                                                                                                                                                                                                                                                                                                                                                                                                                                                                                                                                                                                                                                                                                                                                                                                                                                                                                                                                                                                                                                                                                                                                                                                                                                                                                                                                                                                                                                                                                                                                                                                                                                                                                                                                                                                                                                                                                                                                                                                                                                                                                                                                                                                                                                                                                                                                                                                                                                                                                                                                                                                                                                                                                                                                                                                                                                                                                                                                                                                                                                                                                                                                                                                                                                                                                                                                                                                                                                                                                                                                                                                                                                                                                                                                                                                                                                                                                                                                                                                                                                                                                                                                                                                                                                                                                                                                                                                                                                                                                                                                                                                                                                                                                                                                                                                                                                                                                                                                                                                                                                                                                                                                                                                                                                                                                                                                                                                                                                                                                                                                                                                                                                                                                                                                                                                                                                                                                                                                                                                                                                                                                                                                                                                                                                                                                                                                                                                                                                                                                                                                                                                                                                                                                                                                                                                                                                                                                                                                                                                                                                                                                                                                                                                                                                                                                                                                                                                                                                                                                                       | QEII Health Sciences Centre                                       | National Microbiology Laboratory (NML)                                         | Anna Majer; Anneliese Landgraaf; CanCOGeN's metadata curation team; Dan Gaston; Darian Hole; Elsie Grudesk; Gary Van Domselaar; Grace Seo; Janice Pettipas; Jason LeBlanc; Jennifer Tanner; Kirsten Chapel; Madison Biggar; Madson Chapel; Morag Raham; Natalie Knox; Nathalie Bastien; Philip Mabon; Public Health Agency of Canada CanCOGeN team; Rhiannon Huzarewicz; Russell Mandes; Shari Tyson; Timothy Booth; Todd Hatchette; Yan Li |                                                                                                                                                                                                                                                                                                                                                                                                                                                           |
| EPI_ISL_1305774, EPI_ISL_1310791, EPI_ISL_1311964, EPI_ISL_1311973, EPI_ISL_1312063, EPI_ISL_1312389, EPI_ISL_1312772, EPI_ISL_1357596, EPI_ISL_1357598, EPI_ISL_1357600, EPI_ISL_1357602, EPI_ISL_1357606 to 1357607, EPI_ISL_1357644 to 1357645, EPI_ISL_1366272, EPI_ISL_1366274, EPI_ISL_1366497, EPI_ISL_1366506, EPI_ISL_1366612, EPI_ISL_1366654, EPI_ISL_1366656, EPI_ISL_1366658 to 1366659, EPI_ISL_1366752 to 1366753, EPI_ISL_1366889, EPI_ISL_1366921                                                                                                                                                                                                                                                                                                                                                                                                                                                                                                                                                                                                                                                                                                                                                                                                                                                                                                                                                                                                                                                                                                                                                                                                                                                                                                                                                                                                                                                                                                                                                                                                                                                                                                                                                                                                                                                                                                                                                                                                                                                                                                                                                                                                                                                                                                                                                                                                                                                                                                                                                                                                                                                                                                                                                                                                                                                                                                                                                                                                                                                                                                                                                                                                                                                                                                                                                                                                                                                                                                                                                                                                                                                                                                                                                                                                                                                                                                                                                                                                                                                                                                                                                                                                                                                                                                                                                                                                                                                                                                                                                                                                                                                                                                                                                                                                                                                                                                                                                                                                                                                                                                                                                                                                                                                                                                                                                                                                                                                                                                                                                                                                                                                                                                                                                                                                                                                                                                                                                                                                                                                                                                                                                                                                                                                                                                                                                                                                                                                                                                                                                                                                                                                                                                                                                                                                                                                                                                                                                                                                                                                                                                                                                                                                                                                                                                                                                                                                                                                                                                                                                                                                                                                                                                                                                                                                                                                                                                                                                                                                                                                                                                                                                                                                                                                                                                                                                                                                                                                                                                                                                                                                                                                                                                                                                                                                                                                                                                                                                                                                                                                                                                                                                                                                                                                                                                                                                                                                                                                                                                                                                                                                                                                                                                                                                                                                                                                                                                                                                                                                                                                                                                                                                                                                                                                                                                                                                                                                                                                                                                                                                                                                                                                                                                                                                                                                                                                                                                                                                                                                                                                                                                                                                                                                                                                                                                                                                                                                                                                                                                                                                                                                                                                                                                                                                                                                                                                                                                                                                                                                                                                                                                                                                                                                                                                                                                                                                                                                                                                                               | see above                                                         | QUALITY CONTROL CHEMICAL BIOLOGICAL RISK, AOOD<br>Villa Sofia Cervello Palermo | QUALITY CONTROL CHEMICAL BIOLOGICAL RISK, AOOD<br>Villa Sofia Cervello Palermo                                                                                                                                                                                                                                                                                                                                                              |                                                                                                                                                                                                                                                                                                                                                                                                                                                           |
| EPI_ISL_1020206                                                                                                                                                                                                                                                                                                                                                                                                                                                                                                                                                                                                                                                                                                                                                                                                                                                                                                                                                                                                                                                                                                                                                                                                                                                                                                                                                                                                                                                                                                                                                                                                                                                                                                                                                                                                                                                                                                                                                                                                                                                                                                                                                                                                                                                                                                                                                                                                                                                                                                                                                                                                                                                                                                                                                                                                                                                                                                                                                                                                                                                                                                                                                                                                                                                                                                                                                                                                                                                                                                                                                                                                                                                                                                                                                                                                                                                                                                                                                                                                                                                                                                                                                                                                                                                                                                                                                                                                                                                                                                                                                                                                                                                                                                                                                                                                                                                                                                                                                                                                                                                                                                                                                                                                                                                                                                                                                                                                                                                                                                                                                                                                                                                                                                                                                                                                                                                                                                                                                                                                                                                                                                                                                                                                                                                                                                                                                                                                                                                                                                                                                                                                                                                                                                                                                                                                                                                                                                                                                                                                                                                                                                                                                                                                                                                                                                                                                                                                                                                                                                                                                                                                                                                                                                                                                                                                                                                                                                                                                                                                                                                                                                                                                                                                                                                                                                                                                                                                                                                                                                                                                                                                                                                                                                                                                                                                                                                                                                                                                                                                                                                                                                                                                                                                                                                                                                                                                                                                                                                                                                                                                                                                                                                                                                                                                                                                                                                                                                                                                                                                                                                                                                                                                                                                                                                                                                                                                                                                                                                                                                                                                                                                                                                                                                                                                                                                                                                                                                                                                                                                                                                                                                                                                                                                                                                                                                                                                                                                                                                                                                                                                                                                                                                                                                                                                                                                                                                                                                                                                                                                                                                                                                                                                                                                                                                                                                                                                                                                                                                                                                                                                                                                                                                                                                                                                                                                                                                                                                                                  | Qadr Hospital, Tangerang, Banten                                  | Biosafety Level-3 Laboratory, Indonesian Institute of Sciences (LIPI)          | Bonvissuto, M.; Brunacci, Brunacci, G.; Buffa, V.; Cangemi, Ciaccio, M.; Contino, Contino, F.; Cuscino, N.; Di Chiara, Di Chiara, V.; Di Gaudio, F.; F. and Brunacci, G.; G. and Brunacci, G.; G. Seidita, G.; Gallo, A.; I. and Seidita, G.; Orlando, V.; Pace, E.; Seidita, G.; Todaro, G.; Todaro, I.; V. and Seidita, G.; Vasto, S. and Brunacci, G.; and Contino, F.                                                                   |                                                                                                                                                                                                                                                                                                                                                                                                                                                           |
| EPI_ISL_1080338                                                                                                                                                                                                                                                                                                                                                                                                                                                                                                                                                                                                                                                                                                                                                                                                                                                                                                                                                                                                                                                                                                                                                                                                                                                                                                                                                                                                                                                                                                                                                                                                                                                                                                                                                                                                                                                                                                                                                                                                                                                                                                                                                                                                                                                                                                                                                                                                                                                                                                                                                                                                                                                                                                                                                                                                                                                                                                                                                                                                                                                                                                                                                                                                                                                                                                                                                                                                                                                                                                                                                                                                                                                                                                                                                                                                                                                                                                                                                                                                                                                                                                                                                                                                                                                                                                                                                                                                                                                                                                                                                                                                                                                                                                                                                                                                                                                                                                                                                                                                                                                                                                                                                                                                                                                                                                                                                                                                                                                                                                                                                                                                                                                                                                                                                                                                                                                                                                                                                                                                                                                                                                                                                                                                                                                                                                                                                                                                                                                                                                                                                                                                                                                                                                                                                                                                                                                                                                                                                                                                                                                                                                                                                                                                                                                                                                                                                                                                                                                                                                                                                                                                                                                                                                                                                                                                                                                                                                                                                                                                                                                                                                                                                                                                                                                                                                                                                                                                                                                                                                                                                                                                                                                                                                                                                                                                                                                                                                                                                                                                                                                                                                                                                                                                                                                                                                                                                                                                                                                                                                                                                                                                                                                                                                                                                                                                                                                                                                                                                                                                                                                                                                                                                                                                                                                                                                                                                                                                                                                                                                                                                                                                                                                                                                                                                                                                                                                                                                                                                                                                                                                                                                                                                                                                                                                                                                                                                                                                                                                                                                                                                                                                                                                                                                                                                                                                                                                                                                                                                                                                                                                                                                                                                                                                                                                                                                                                                                                                                                                                                                                                                                                                                                                                                                                                                                                                                                                                                                                                  | Qdx Path Alliance PC                                              | NJ_PHEL                                                                        | Byeong Jeong; Dana Woell; Lindsey Bodnar; Shiv Verma                                                                                                                                                                                                                                                                                                                                                                                        |                                                                                                                                                                                                                                                                                                                                                                                                                                                           |
| EPI_ISL_1046890 to 1046950, EPI_ISL_1051413 to 1051436, EPI_ISL_1051438 to 1051535, EPI_ISL_1051537 to 1051555, EPI_ISL_1103649 to 1103728, EPI_ISL_1105538 to 1105571, EPI_ISL_1107826 to 1107829, EPI_ISL_1107832 to 1107838, EPI_ISL_1107840 to 1108016, EPI_ISL_1108018 to 1108254, EPI_ISL_1108256 to 1108440, EPI_ISL_1108449 to 1108452, EPI_ISL_1108454 to 1108457, EPI_ISL_1108460, EPI_ISL_1108464, EPI_ISL_1108466 to 1108467, EPI_ISL_1108470 to 1108471, EPI_ISL_1108473 to 1108487, EPI_ISL_1108499 to 1108502, EPI_ISL_1108504 to 1108568, EPI_ISL_1108581 to 1108614, EPI_ISL_1178422 to 1178556, EPI_ISL_1247372 to 1247373, EPI_ISL_1247376, EPI_ISL_1247381, EPI_ISL_1247386, EPI_ISL_1247391, EPI_ISL_1247394 to 1247395, EPI_ISL_1248935 to 1249062, EPI_ISL_1308014 to 1308183, EPI_ISL_1308274 to 1308353, EPI_ISL_1309314 to 1309373, EPI_ISL_1309661 to 1309695                                                                                                                                                                                                                                                                                                                                                                                                                                                                                                                                                                                                                                                                                                                                                                                                                                                                                                                                                                                                                                                                                                                                                                                                                                                                                                                                                                                                                                                                                                                                                                                                                                                                                                                                                                                                                                                                                                                                                                                                                                                                                                                                                                                                                                                                                                                                                                                                                                                                                                                                                                                                                                                                                                                                                                                                                                                                                                                                                                                                                                                                                                                                                                                                                                                                                                                                                                                                                                                                                                                                                                                                                                                                                                                                                                                                                                                                                                                                                                                                                                                                                                                                                                                                                                                                                                                                                                                                                                                                                                                                                                                                                                                                                                                                                                                                                                                                                                                                                                                                                                                                                                                                                                                                                                                                                                                                                                                                                                                                                                                                                                                                                                                                                                                                                                                                                                                                                                                                                                                                                                                                                                                                                                                                                                                                                                                                                                                                                                                                                                                                                                                                                                                                                                                                                                                                                                                                                                                                                                                                                                                                                                                                                                                                                                                                                                                                                                                                                                                                                                                                                                                                                                                                                                                                                                                                                                                                                                                                                                                                                                                                                                                                                                                                                                                                                                                                                                                                                                                                                                                                                                                                                                                                                                                                                                                                                                                                                                                                                                                                                                                                                                                                                                                                                                                                                                                                                                                                                                                                                                                                                                                                                                                                                                                                                                                                                                                                                                                                                                                                                                                                                                                                                                                                                                                                                                                                                                                                                                                                                                                                                                                                                                                                                                                                                                                                                                                                                                                                                                                                                                                                                                                                                                                                                                                                                                                                                                                                                                                                                                                                                                                                                                                                                                                                                                                                                                                                                                                                                                                                                                                         | see above                                                         | Quadram Institute Bioscience                                                   | COVID-19 Genomics UK (COG-UK) Consortium                                                                                                                                                                                                                                                                                                                                                                                                    | Alexander J Trotter; Alison E. Mather; Alp Aydin; Ana P. Tedim; Anastasia Kolyva; Andrew Bell; Andrew J. Page; Claire Stuart; Dave J. Baker; Gemma L. Kay; John Wain; Justin O'Grady; Leonardo de Oliveira Martins; Lizzie Meadows; Maria Diaz; Mark Webber; Muhammed Yasir; Nabil-Fareed Alikhan; Ngozi Elumogo; Nicholas M. Thomson; Rachael Stanley; Rachel Gilroy; Reenesh Prakash; Samir Dervisevic; Samuel Bloomfield; Steven Reuder; Thanh Le-Viet |
| EPI_ISL_1046886 to 1046888                                                                                                                                                                                                                                                                                                                                                                                                                                                                                                                                                                                                                                                                                                                                                                                                                                                                                                                                                                                                                                                                                                                                                                                                                                                                                                                                                                                                                                                                                                                                                                                                                                                                                                                                                                                                                                                                                                                                                                                                                                                                                                                                                                                                                                                                                                                                                                                                                                                                                                                                                                                                                                                                                                                                                                                                                                                                                                                                                                                                                                                                                                                                                                                                                                                                                                                                                                                                                                                                                                                                                                                                                                                                                                                                                                                                                                                                                                                                                                                                                                                                                                                                                                                                                                                                                                                                                                                                                                                                                                                                                                                                                                                                                                                                                                                                                                                                                                                                                                                                                                                                                                                                                                                                                                                                                                                                                                                                                                                                                                                                                                                                                                                                                                                                                                                                                                                                                                                                                                                                                                                                                                                                                                                                                                                                                                                                                                                                                                                                                                                                                                                                                                                                                                                                                                                                                                                                                                                                                                                                                                                                                                                                                                                                                                                                                                                                                                                                                                                                                                                                                                                                                                                                                                                                                                                                                                                                                                                                                                                                                                                                                                                                                                                                                                                                                                                                                                                                                                                                                                                                                                                                                                                                                                                                                                                                                                                                                                                                                                                                                                                                                                                                                                                                                                                                                                                                                                                                                                                                                                                                                                                                                                                                                                                                                                                                                                                                                                                                                                                                                                                                                                                                                                                                                                                                                                                                                                                                                                                                                                                                                                                                                                                                                                                                                                                                                                                                                                                                                                                                                                                                                                                                                                                                                                                                                                                                                                                                                                                                                                                                                                                                                                                                                                                                                                                                                                                                                                                                                                                                                                                                                                                                                                                                                                                                                                                                                                                                                                                                                                                                                                                                                                                                                                                                                                                                                                                                                                                       | Queen Elizabeth Hospital                                          | Hong Kong Children's Hospital                                                  | David Christopher Lung; Garnet Kwan-Yue Choi; Herman Tse; Ka-Fai Ip; Kelvin Kai-Wang To; Kin-Hang Kok; Kwok-Yung Yuen; Sally Cheuk-Ying Wong; Tak-Chiu Wu                                                                                                                                                                                                                                                                                   |                                                                                                                                                                                                                                                                                                                                                                                                                                                           |
| EPI_ISL_1061404 to 1061405, EPI_ISL_1061407, EPI_ISL_1061409 to 1061411                                                                                                                                                                                                                                                                                                                                                                                                                                                                                                                                                                                                                                                                                                                                                                                                                                                                                                                                                                                                                                                                                                                                                                                                                                                                                                                                                                                                                                                                                                                                                                                                                                                                                                                                                                                                                                                                                                                                                                                                                                                                                                                                                                                                                                                                                                                                                                                                                                                                                                                                                                                                                                                                                                                                                                                                                                                                                                                                                                                                                                                                                                                                                                                                                                                                                                                                                                                                                                                                                                                                                                                                                                                                                                                                                                                                                                                                                                                                                                                                                                                                                                                                                                                                                                                                                                                                                                                                                                                                                                                                                                                                                                                                                                                                                                                                                                                                                                                                                                                                                                                                                                                                                                                                                                                                                                                                                                                                                                                                                                                                                                                                                                                                                                                                                                                                                                                                                                                                                                                                                                                                                                                                                                                                                                                                                                                                                                                                                                                                                                                                                                                                                                                                                                                                                                                                                                                                                                                                                                                                                                                                                                                                                                                                                                                                                                                                                                                                                                                                                                                                                                                                                                                                                                                                                                                                                                                                                                                                                                                                                                                                                                                                                                                                                                                                                                                                                                                                                                                                                                                                                                                                                                                                                                                                                                                                                                                                                                                                                                                                                                                                                                                                                                                                                                                                                                                                                                                                                                                                                                                                                                                                                                                                                                                                                                                                                                                                                                                                                                                                                                                                                                                                                                                                                                                                                                                                                                                                                                                                                                                                                                                                                                                                                                                                                                                                                                                                                                                                                                                                                                                                                                                                                                                                                                                                                                                                                                                                                                                                                                                                                                                                                                                                                                                                                                                                                                                                                                                                                                                                                                                                                                                                                                                                                                                                                                                                                                                                                                                                                                                                                                                                                                                                                                                                                                                                                                                                          | Queen Elizabeth Hospital                                          | Hong Kong Children's Hospital                                                  | David Christopher Lung; Garnet Kwan-Yue Choi; Herman Tse; Sally Cheuk-Ying Wong                                                                                                                                                                                                                                                                                                                                                             |                                                                                                                                                                                                                                                                                                                                                                                                                                                           |
| EPI_ISL_1051556 to 1051593, EPI_ISL_1054372 to 1054461, EPI_ISL_1105814 to 1105846, EPI_ISL_1108957, EPI_ISL_1108960 to 1109035, EPI_ISL_1109037 to 1109044, EPI_ISL_1177451 to 1177528, EPI_ISL_1178557 to 1178581, EPI_ISL_1178583 to 1178590, EPI_ISL_1178622 to 1178624, EPI_ISL_1248676 to 1248728, EPI_ISL_1249063 to 1249071, EPI_ISL_1309696, EPI_ISL_1309722 to 1309732                                                                                                                                                                                                                                                                                                                                                                                                                                                                                                                                                                                                                                                                                                                                                                                                                                                                                                                                                                                                                                                                                                                                                                                                                                                                                                                                                                                                                                                                                                                                                                                                                                                                                                                                                                                                                                                                                                                                                                                                                                                                                                                                                                                                                                                                                                                                                                                                                                                                                                                                                                                                                                                                                                                                                                                                                                                                                                                                                                                                                                                                                                                                                                                                                                                                                                                                                                                                                                                                                                                                                                                                                                                                                                                                                                                                                                                                                                                                                                                                                                                                                                                                                                                                                                                                                                                                                                                                                                                                                                                                                                                                                                                                                                                                                                                                                                                                                                                                                                                                                                                                                                                                                                                                                                                                                                                                                                                                                                                                                                                                                                                                                                                                                                                                                                                                                                                                                                                                                                                                                                                                                                                                                                                                                                                                                                                                                                                                                                                                                                                                                                                                                                                                                                                                                                                                                                                                                                                                                                                                                                                                                                                                                                                                                                                                                                                                                                                                                                                                                                                                                                                                                                                                                                                                                                                                                                                                                                                                                                                                                                                                                                                                                                                                                                                                                                                                                                                                                                                                                                                                                                                                                                                                                                                                                                                                                                                                                                                                                                                                                                                                                                                                                                                                                                                                                                                                                                                                                                                                                                                                                                                                                                                                                                                                                                                                                                                                                                                                                                                                                                                                                                                                                                                                                                                                                                                                                                                                                                                                                                                                                                                                                                                                                                                                                                                                                                                                                                                                                                                                                                                                                                                                                                                                                                                                                                                                                                                                                                                                                                                                                                                                                                                                                                                                                                                                                                                                                                                                                                                                                                                                                                                                                                                                                                                                                                                                                                                                                                                                                                                                                                 | see above                                                         | Queens Medical Centre, Clinical Microbiology Department / DeepSeq Nottingham   | COVID-19 Genomics UK (COG-UK) Consortium                                                                                                                                                                                                                                                                                                                                                                                                    | Christopher Moore; Emily Park; Fei Sang; Gemma Clark; Hannah Howson-Wells; Jack Hill; Jayasree Dey; Johnnie Debebe; Jonathan Ball; Joseph Chappell; Manjinder Khakh; Matthew Carlisle; Matthew Loose; Michelle M Lister; Nadine Holmes; Patrick McClure; Theocharis Tsoleridis; Timothy Byaruhanga; Vicki M Fleming; Victoria Wright; Wendy Smith                                                                                                         |
| EPI_ISL_1159233 to 1159345, EPI_ISL_1193374 to 1193397, EPI_ISL_1193400, EPI_ISL_1193403, EPI_ISL_1193405, EPI_ISL_1193408, EPI_ISL_1193411, EPI_ISL_1193413 to 1193444, EPI_ISL_1193446, EPI_ISL_1193449, EPI_ISL_1193454, EPI_ISL_1193457, EPI_ISL_1193460, EPI_ISL_1193463 to 1193557, EPI_ISL_1193559 to 1194045, EPI_ISL_1194048, EPI_ISL_1194051, EPI_ISL_1194054, EPI_ISL_1194056, EPI_ISL_1194059, EPI_ISL_1194062, EPI_ISL_1194065, EPI_ISL_1194068, EPI_ISL_1194071, EPI_ISL_1194074, EPI_ISL_1194077, EPI_ISL_1194080, EPI_ISL_1194083, EPI_ISL_1194086, EPI_ISL_1194090, EPI_ISL_1194092, EPI_ISL_1194094, EPI_ISL_1194100, EPI_ISL_1194103, EPI_ISL_1194107, EPI_ISL_1194110, EPI_ISL_1194113, EPI_ISL_1194125, EPI_ISL_1194128, EPI_ISL_1194131, EPI_ISL_1194134, EPI_ISL_1194137, EPI_ISL_1194140, EPI_ISL_1194143, EPI_ISL_1194145, EPI_ISL_1194148, EPI_ISL_1194151, EPI_ISL_1194154, EPI_ISL_1194157, EPI_ISL_1194160, EPI_ISL_1194162, EPI_ISL_1194165, EPI_ISL_1194167 to 1194496, EPI_ISL_1194498, EPI_ISL_1194501, EPI_ISL_1194504, EPI_ISL_1194506, EPI_ISL_1194509, EPI_ISL_1194512, EPI_ISL_1194515, EPI_ISL_1194518, EPI_ISL_1194521, EPI_ISL_1194524, EPI_ISL_1194527, EPI_ISL_1194538, EPI_ISL_1194540, EPI_ISL_1194543, EPI_ISL_1194546, EPI_ISL_1194559, EPI_ISL_1194561, EPI_ISL_1194564, EPI_ISL_1194567, EPI_ISL_1194570, EPI_ISL_1194573, EPI_ISL_1194575, EPI_ISL_1194578, EPI_ISL_1220350 to 1220541, EPI_ISL_1220543 to 1220861, EPI_ISL_1252917 to 1253290, EPI_ISL_1253292, EPI_ISL_1253294, EPI_ISL_1253300, EPI_ISL_1253302 to 1253398, EPI_ISL_1253400 to 1253537, EPI_ISL_1254013 to 1254224, EPI_ISL_1254227, EPI_ISL_1254229, EPI_ISL_1254232, EPI_ISL_1254235, EPI_ISL_1254238, EPI_ISL_1254241, EPI_ISL_1254244, EPI_ISL_1254246, EPI_ISL_1254249, EPI_ISL_1254251, EPI_ISL_1254254, EPI_ISL_1254257, EPI_ISL_1254260, EPI_ISL_1254262, EPI_ISL_1254265, EPI_ISL_1254267, EPI_ISL_1254270, EPI_ISL_1254273, EPI_ISL_1254275, EPI_ISL_1254278, EPI_ISL_1254281, EPI_ISL_1254284, EPI_ISL_1254286, EPI_ISL_1254290, EPI_ISL_1254292, EPI_ISL_1254294 to 1254530, EPI_ISL_1265910 to 1266113, EPI_ISL_1266115, EPI_ISL_1266118, EPI_ISL_1266121, EPI_ISL_1266124, EPI_ISL_1266127, EPI_ISL_1266130, EPI_ISL_1266132 to 1266185, EPI_ISL_1266187 to 1266227, EPI_ISL_1266446, EPI_ISL_1266449, EPI_ISL_1266452, EPI_ISL_1266455, EPI_ISL_1266458, EPI_ISL_1266461, EPI_ISL_1266465, EPI_ISL_1266468, EPI_ISL_1266471, EPI_ISL_1266474, EPI_ISL_1266477, EPI_ISL_1266479, EPI_ISL_1266482, EPI_ISL_1266485, EPI_ISL_1266488, EPI_ISL_1266491, EPI_ISL_1266494, EPI_ISL_1266497, EPI_ISL_1266500, EPI_ISL_1266503, EPI_ISL_1266505, EPI_ISL_1266508, EPI_ISL_1266512, EPI_ISL_1266515, EPI_ISL_1266518, EPI_ISL_1266521, EPI_ISL_1266524, EPI_ISL_1266527, EPI_ISL_1266530, EPI_ISL_1266533, EPI_ISL_1266536, EPI_ISL_1266539, EPI_ISL_1266541, EPI_ISL_1266544, EPI_ISL_1266547, EPI_ISL_1266550, EPI_ISL_1266553, EPI_ISL_1266556, EPI_ISL_1266559, EPI_ISL_1266562, EPI_ISL_1266565, EPI_ISL_1266568, EPI_ISL_1266571, EPI_ISL_1266574, EPI_ISL_1266577, EPI_ISL_1266580, EPI_ISL_1266584, EPI_ISL_1266587, EPI_ISL_1266590, EPI_ISL_1266593, EPI_ISL_1266596, EPI_ISL_1266599, EPI_ISL_1266602, EPI_ISL_1266605, EPI_ISL_1266608, EPI_ISL_1266611, EPI_ISL_1266613, EPI_ISL_1266616, EPI_ISL_1266619, EPI_ISL_1266622, EPI_ISL_1266625, EPI_ISL_1266628, EPI_ISL_1266631, EPI_ISL_1266634, EPI_ISL_1266637, EPI_ISL_1266640, EPI_ISL_1266643, EPI_ISL_1266646, EPI_ISL_1266649, EPI_ISL_1266652, EPI_ISL_1266655, EPI_ISL_1266658, EPI_ISL_1266661, EPI_ISL_1266664, EPI_ISL_1266667, EPI_ISL_1266670, EPI_ISL_1266673, EPI_ISL_1266676, EPI_ISL_1266679, EPI_ISL_1266682, EPI_ISL_1266685, EPI_ISL_1266688, EPI_ISL_1266691, EPI_ISL_1266694, EPI_ISL_1266697, EPI_ISL_1266700, EPI_ISL_1266703, EPI_ISL_1266706, EPI_ISL_1266709, EPI_ISL_1266712, EPI_ISL_1266715, EPI_ISL_1266718, EPI_ISL_1266721, EPI_ISL_1266724, EPI_ISL_1266727, EPI_ISL_1266730, EPI_ISL_1266733, EPI_ISL_1266736, EPI_ISL_1266739, EPI_ISL_1266742, EPI_ISL_1266745, EPI_ISL_1266748, EPI_ISL_1266751, EPI_ISL_1266754, EPI_ISL_1266757, EPI_ISL_1266760, EPI_ISL_1266763, EPI_ISL_1266766, EPI_ISL_1266769, EPI_ISL_1266772, EPI_ISL_1266775, EPI_ISL_1266778, EPI_ISL_1266781, EPI_ISL_1266784, EPI_ISL_1266787, EPI_ISL_1266790, EPI_ISL_1266793, EPI_ISL_1266796, EPI_ISL_1266799, EPI_ISL_1266802, EPI_ISL_1266805, EPI_ISL_1266808, EPI_ISL_1266811, EPI_ISL_1266814, EPI_ISL_1266816, EPI_ISL_1266819, EPI_ISL_1266822, EPI_ISL_1266825, EPI_ISL_1266828, EPI_ISL_1266831, EPI_ISL_1266834, EPI_ISL_1266837, EPI_ISL_1266840, EPI_ISL_1266843, EPI_ISL_1266846, EPI_ISL_1266849, EPI_ISL_1266852, EPI_ISL_1266855, EPI_ISL_1266858, EPI_ISL_1266861, EPI_ISL_1266864, EPI_ISL_1266867, EPI_ISL_1266870, EPI_ISL_1266873, EPI_ISL_1266876, EPI_ISL_1266879, EPI_ISL_1266882, EPI_ISL_1266885, EPI_ISL_1266888, EPI_ISL_1266891, EPI_ISL_1266894, EPI_ISL_1266897, EPI_ISL_1266900, EPI_ISL_1266903, EPI_ISL_1266906, EPI_ISL_1266909, EPI_ISL_1266912, EPI_ISL_1266915, EPI_ISL_1266918, EPI_ISL_1266921, EPI_ISL_1266924, EPI_ISL_1266927, EPI_ISL_1266930, EPI_ISL_1266933, EPI_ISL_1266936, EPI_ISL_1266939, EPI_ISL_1266942, EPI_ISL_1266945, EPI_ISL_1266948, EPI_ISL_1266951, EPI_ISL_1266954, EPI_ISL_1266957, EPI_ISL_1266960, EPI_ISL_1266963, EPI_ISL_1266966, EPI_ISL_1266969, EPI_ISL_1266972, EPI_ISL_1266975, EPI_ISL_1266978, EPI_ISL_1266981, EPI_ISL_1266984, EPI_ISL_1266987, EPI_ISL_1266990, EPI_ISL_1266993, EPI_ISL_1266997, EPI_ISL_1267000, EPI_ISL_1267003, EPI_ISL_1267006, EPI_ISL_1267009, EPI_ISL_1267012, EPI_ISL_1267015, EPI_ISL_1267018, EPI_ISL_1267021, EPI_ISL_1267024, EPI_ISL_1267027, EPI_ISL_1267030, EPI_ISL_1267033, EPI_ISL_1267036, EPI_ISL_1267039, EPI_ISL_1267042, EPI_ISL_1267045, EPI_ISL_1267048, EPI_ISL_1267051, EPI_ISL_1267054, EPI_ISL_1267057, EPI_ISL_1267060, EPI_ISL_1267063, EPI_ISL_1267066, EPI_ISL_1267069, EPI_ISL_1267072, EPI_ISL_1267075, EPI_ISL_1267078, EPI_ISL_1267081, EPI_ISL_1267084, EPI_ISL_1267087, EPI_ISL_1267090, EPI_ISL_1267093, EPI_ISL_1267096, EPI_ISL_1267099, EPI_ISL_1267102, EPI_ISL_1267105, EPI_ISL_1267108, EPI_ISL_1267111, EPI_ISL_1267114, EPI_ISL_1267117, EPI_ISL_1267120, EPI_ISL_1267123, EPI_ISL_1267126, EPI_ISL_1267129, EPI_ISL_1267132, EPI_ISL_1267135, EPI_ISL_1267138, EPI_ISL_1267141, EPI_ISL_1267144, EPI_ISL_1267147, EPI_ISL_1267150, EPI_ISL_1267153, EPI_ISL_1267156, EPI_ISL_1267159, EPI_ISL_1267162, EPI_ISL_1267165, EPI_ISL_1267168, EPI_ISL_1267171, EPI_ISL_1267174, EPI_ISL_1267177, EPI_ISL_1267180, EPI_ISL_1267183, EPI_ISL_1267186, EPI_ISL_1267189, EPI_ISL_1267192, EPI_ISL_1267195, EPI_ISL_1267198, EPI_ISL_1267201, EPI_ISL_1267204, EPI_ISL_1267207, EPI_ISL_1267210, EPI_ISL_1267213, EPI_ISL_1267216, EPI_ISL_1267219, EPI_ISL_1267222, EPI_ISL_1267225, EPI_ISL_1267228, EPI_ISL_1267231, EPI_ISL_1267234, EPI_ISL_1267237, EPI_ISL_1267240, EPI_ISL_1267243, EPI_ISL_1267246, EPI_ISL_1267249, EPI_ISL_1267252, EPI_ISL_1267255, EPI_ISL_1267258, EPI_ISL_1267261, EPI_ISL_1267264, EPI_ISL_1267267, EPI_ISL_1267270, EPI_ISL_1267273, EPI_ISL_1267276, EPI_ISL_1267279, EPI_ISL_1267282, EPI_ISL_1267285, EPI_ISL_1267288, EPI_ISL_1267291, EPI_ISL_1267294, EPI_ISL_1267297, EPI_ISL_1267300, EPI_ISL_1267303, EPI_ISL_1267306, EPI_ISL_1267309, EPI_ISL_1267312, EPI_ISL_1267315, EPI_ISL_1267318, EPI_ISL_1267321, EPI_ISL_1267324, EPI_ISL_1267327, EPI_ISL_1267330, EPI_ISL_1267333, EPI_ISL_1267336, EPI_ISL_1267339, EPI_ISL_1267342, EPI_ISL_1267345, EPI_ISL_1267348, EPI_ISL_1267351, EPI_ISL_1267354, EPI_ISL_1267357, EPI_ISL_1267360, EPI_ISL_1267363, EPI_ISL_1267366, EPI_ISL_1267369, EPI_ISL_1267372, EPI_ISL_1267375, EPI_ISL_1267378, EPI_ISL_1267381, EPI_ISL_1267384, EPI_ISL_1267387, EPI_ISL_1267390, EPI_ISL_1267393, EPI_ISL_1267396, EPI_ISL_1267399, EPI_ISL_1267402, EPI_ISL_1267405, EPI_ISL_1267408, EPI_ISL_1267411, EPI_ISL_1267414, EPI_ISL_1267417, EPI_ISL_1267420, EPI_ISL_1267423, EPI_ISL_1267426, EPI_ISL_1267429, EPI_ISL_1267432, EPI_ISL_1267435, EPI_ISL_1267438, EPI_ISL_1267441, EPI_ISL_1267444, EPI_ISL_1267447, EPI_ISL_1267450, EPI_ISL_1267453, EPI_ISL_1267456, EPI_ISL_1267459, EPI_ISL_1267462, EPI_ISL_1267465, EPI_ISL_1267468, EPI_ISL_1267471, EPI_ISL_1267474, EPI_ISL_1267477, EPI_ISL_1267480, EPI_ISL_1267483, EPI_ISL_1267486, EPI_ISL_1267489, EPI_ISL_1267492, EPI_ISL_1267495, EPI_ISL_1267498, EPI_ISL_1267501, EPI_ISL_1267504, EPI_ISL_1267507, EPI_ISL_1267510, EPI_ISL_1267513, EPI_ISL_1267516, EPI_ISL_1267519, EPI_ISL_1267522, EPI_ISL_1267525, EPI_ISL_1267528, EPI_ISL_1267531, EPI_ISL_1267534, EPI_ISL_1267537, EPI_ISL_1267540, EPI_ISL_1267543, EPI_ISL_1267546, EPI_ISL_1267549, EPI_ISL_1267552, EPI_ISL_1267555, EPI_ISL_1267558, EPI_ISL_1267561, EPI_ISL_1267564, EPI_ISL_1267567, EPI_ISL_1267570, EPI_ISL_1267573, EPI_ISL_1267576, EPI_ISL_1267579, EPI_ISL_1267582, EPI_ISL_1267585, EPI_ISL_1267588, EPI_ISL_1267591, EPI_ISL_1267594, EPI_ISL_1267597, EPI_ISL_1267600, EPI_ISL_1267603, EPI_ISL_1267606, EPI_ISL_1267609, EPI_ISL_1267612, EPI_ISL_1267615, EPI_ISL_1267618, EPI_ISL_1267621, EPI_ISL_1267624, EPI_ISL_1267627, EPI_ISL_1267630, EPI_ISL_1267633, EPI_ISL_1267636, EPI_ISL_1267639, EPI_ISL_1267642, EPI_ISL_1267645, EPI_ISL_1267648, EPI_ISL_1267651, EPI_ISL_1267654, EPI_ISL_1267657, EPI_ISL_1267660, EPI_ISL_1267663, EPI_ISL_1267666, EPI_ISL_1267669, EPI_ISL_1267672, EPI_ISL_1267675, EPI_ISL_1267678, EPI_ISL_1267681, EPI_ISL_1267684, EPI_ISL_1267687, EPI_ISL_1267690, EPI_ISL_1267693, EPI_ISL_1267696, EPI_ISL_1267699, EPI_ISL_1267702, EPI_ISL_1267705, EPI_ISL_1267708, EPI_ISL_1267711, EPI_ISL_1267714, EPI_ISL_1267717, EPI_ISL_1267720, EPI_ISL_1267723, EPI_ISL_1267726, EPI_ISL_1267729, EPI_ISL_1267732, EPI_ISL_1267735, EPI_ISL_1267738, EPI_ISL_1267741, EPI_ISL_1267744, EPI_ISL_1267747, EPI_ISL_1267750, EPI_ISL_1267753, EPI_ISL_1267756, EPI_ISL_1267759, EPI_ISL_1267762, EPI_ISL_1267765, EPI_ISL_1267768, EPI_ISL_1267771, EPI_ISL_1267774, EPI_ISL_1267777, EPI_ISL_1267780, EPI_ISL_1267783, EPI_ISL_1267786, EPI_ISL_1267789, EPI_ISL_1267792, EPI_ISL_1267795, EPI_ISL_1267798, EPI_ISL_1267801, EPI_ISL_1267804, EPI_ISL_1267807, EPI_ISL_1267810, EPI_ISL_1267813, EPI_ISL_1267816, EPI_ISL_1267819, EPI_ISL_1267822, EPI_ISL_1267825, EPI_ISL_1267828, EPI_ISL_1267831, EPI_ISL_1267834, EPI_ISL_1267837, EPI_ISL_1267840, EPI_ISL_1267843, EPI_ISL_1267846, EPI_ISL_1267849, EPI_ISL_1267852, EPI_ISL_1267855, EPI_ISL_1267858, EPI_ISL_1267861, EPI_ISL_1267864, EPI_ISL_1267867, EPI_ISL_1267870, EPI_ISL_1267873, EPI_ISL_1267876, EPI_ISL_1267879, EPI_ISL_1267882, EPI_ISL_1267885, EPI_ISL_1267888, EPI_ISL_1267891, EPI_ISL_1267894, EPI_ISL_1267897, EPI_ISL_1267900, EPI_ISL_1267903, EPI_ISL_1267906, EPI_ISL_1267909, EPI_ISL_1267912, EPI_ISL_1267915, EPI_ISL_1267918, EPI_ISL_1267921, EPI_ISL_1267924, EPI_ISL_1267927, EPI_ISL_1267930, EPI_ISL_1267933, EPI_ISL_1267936, EPI_ISL_1267939, EPI_ISL_1267942, EPI_ISL_1267945, EPI_ISL_1267948, EPI_ISL_1267951, EPI_ISL_1267954, EPI_ISL_1267957, EPI_ISL_1267960, EPI_ISL_1267963, EPI_ISL_1267966, EPI_ISL_1267969, EPI_ISL_1267972, EPI_ISL_1267975, EPI_ISL_1267978, EPI_ISL_1267981, EPI_ISL_1267984, EPI_ISL_1267987, EPI_ISL_1267990, EPI_ISL_1267993, EPI_ISL_1267996, EPI_ISL_1267999, EPI_ISL_1268002, EPI_ISL_1268005, EPI_ISL_1268008, EPI_ISL_1268011, EPI_ISL_1268014, EPI_ISL_1268017, EPI_ISL_1268020, EPI_ISL_1268023, EPI_ISL_1268026, EPI_ISL_1268029, EPI_ISL_1268032, EPI_ISL_1268035, EPI_ISL_1268038, EPI_ISL_1268041, EPI_ISL_1268044, EPI_ISL_1268047, EPI_ISL_1268050, EPI_ISL_1268053, EPI_ISL_1268056, EPI_ISL_1268059, EPI_ISL_1268062, EPI_ISL_1268065, EPI_ISL_1268068, EPI_ISL_1268071, EPI_ISL_1268074, EPI_ISL_1268077, EPI_ISL_1268080, EPI_ISL_1268083, EPI_ISL_1268086, EPI_ISL_1268089, EPI_ISL_1268092, EPI_ISL_1268095, EPI_ISL_1268098, EPI_ISL_1268101, EPI_ISL_1268104, EPI_ISL_1268107, EPI_ISL_1268110, EPI_ISL_1268113, EPI_ISL_1268116, EPI_ISL_1268119, EPI_ISL_1268122, EPI_ISL_1268125, EPI_ISL_1268128, EPI_ISL_1268131, EPI_ISL_1268134, EPI_ISL_1268137, EPI_ISL_1268140, EPI_ISL_1268143, EPI_ISL_1268146, EPI_ISL_1268149, EPI_ISL_1268152, EPI_ISL_1268155, EPI_ISL_1268158, EPI_ISL_1268161, EPI_ISL_1268164, EPI_ISL_1268167, EPI_ISL_1268170, EPI_ISL_1268173, EPI_ISL_1268176, EPI_ISL_1268179, EPI_ISL_1268182, EPI_ISL_1268185, EPI_ISL_1268188, EPI_ISL_1268191, EPI_ISL_1268194, EPI_ISL_1268197, EPI_ISL_1268200, EPI_ISL_1268203, EPI_ISL_1268206, EPI_ISL_1268209, EPI_ISL_1268212, EPI_ISL_1268215, EPI_ISL_1268218, EPI_ISL_1268221, EPI_ISL_1268224, EPI_ISL_1268227, EPI_ISL_1268230, EPI_ISL_1268233, EPI_ISL_1268236, EPI_ISL_1268239, EPI_ISL_1268242, EPI_ISL_1268245, |                                                                   |                                                                                |                                                                                                                                                                                                                                                                                                                                                                                                                                             |                                                                                                                                                                                                                                                                                                                                                                                                                                                           |

|                                                                                                                                                                                                                                                                                                            |                                    |                                                                                                                            |                                                                                                                                                                                                                                                                                                                                                                                                                                       |
|------------------------------------------------------------------------------------------------------------------------------------------------------------------------------------------------------------------------------------------------------------------------------------------------------------|------------------------------------|----------------------------------------------------------------------------------------------------------------------------|---------------------------------------------------------------------------------------------------------------------------------------------------------------------------------------------------------------------------------------------------------------------------------------------------------------------------------------------------------------------------------------------------------------------------------------|
| EPI_ISL_1272674 to 1272680,<br>EPI_ISL_1318449 to 1318464                                                                                                                                                                                                                                                  | RI State Health Laboratories       | Centers for Disease Control and Prevention Division of Viral Diseases, Pathogen Discovery                                  | Anna Montmayeur; Anna Uehara; Ben L. Rambo-Martin; Clinton R. Paden; Dhvani Batra; Haibin Wang; Jasmine Padilla; Jing Zhang; Justin Lee; Katie Dillon; Krista Queen; Kristen Knipe; Kristine Lacey; Lori Rowe; Mark Burroughs; Matthew Schmerer; Mili Sheth; Peter W. Cook; Rachel Marine; Sam Shepard; Sarah Nobles; Shoshona Le; Suxiang Tong; Yan Li; Ying Tao                                                                     |
| EPI_ISL_1225907                                                                                                                                                                                                                                                                                            | RI State Health Laboratories       | Genomics and Discovery, Respiratory Viruses Branch, Division of Viral Diseases, Centers for Disease Control and Prevention | Anna Montmayeur; Anna Uehara; Ben L. Rambo-Martin; Clinton R. Paden; Dhvani Batra; Haibin Wang; Jasmine Padilla; Jing Zhang; Justin Lee; Katie Dillon; Krista Queen; Kristen Knipe; Kristine Lacey; Lori Rowe; Mark Burroughs; Matthew Schmerer; Mili Sheth; Peter W. Cook; Rachel Marine; Sam Shepard; Sarah Nobles; Shoshona Le; Suxiang Tong; Yan Li; Ying Tao                                                                     |
| EPI_ISL_1196888 to 1196890                                                                                                                                                                                                                                                                                 | RI State Health Laboratories       | Pathogen Discovery, Respiratory Viruses Branch, Division of Viral Diseases, Centers for Disease Control and Prevention     | Anna Kelleher; Anna Uehara; Brian Lynch; Clinton R. Paden; Haibin Wang; Han Jia Justin Ng; Jing Zhang; Krista Queen; Peter Cook; Suxiang Tong; Yan Li; Ying Tao                                                                                                                                                                                                                                                                       |
| EPI_ISL_1094218, EPI_ISL_1094287,<br>EPI_ISL_1094355, EPI_ISL_1094657 to<br>1094660, EPI_ISL_1095215 to 1095220                                                                                                                                                                                            | RI State Health Laboratories       | Respiratory Viruses Branch, Division of Viral Diseases, Centers for Disease Control and Prevention                         | Anna Montmayeur; Anna Uehara; Ben L. Rambo-Martin; Clinton R. Paden; Dhvani Batra; Haibin Wang; Jasmine Padilla; Jing Zhang; Justin Lee; Krista Queen; Lori Rowe; Mark Burroughs; Mili Sheth; Peter W. Cook; Rachel Marine; Sarah Nobles; Suxiang Tong; Yan Li; Ying Tao                                                                                                                                                              |
| EPI_ISL_1283960                                                                                                                                                                                                                                                                                            | RS Asy-Syifaa Leuwiliang           | Eijkman Institute for Molecular Biology, Ministry of Research and Technology/National Agency for Research and Innovation   | Amin Soebandrio; Edison Johar; Frilasita A Yudhaputri; Hidayat Trimarsanto; Iskandar Adnan; Khin Saw Myint; Lydia V. Panggalo; Safarina G Malik; Sukma Oktavianthi; Willy Agustine                                                                                                                                                                                                                                                    |
| EPI_ISL_1284044, EPI_ISL_1284048,<br>EPI_ISL_1284201, EPI_ISL_1284310                                                                                                                                                                                                                                      | RS Bhakti Husada Cikarang          | Eijkman Institute for Molecular Biology, Ministry of Research and Technology/National Agency for Research and Innovation   | Amin Soebandrio; Edison Johar; Frilasita A Yudhaputri; Hidayat Trimarsanto; Iskandar Adnan; Khin Saw Myint; Lydia V. Panggalo; Safarina G Malik; Sukma Oktavianthi; Willy Agustine                                                                                                                                                                                                                                                    |
| EPI_ISL_1283991, EPI_ISL_1284121,<br>EPI_ISL_1284125                                                                                                                                                                                                                                                       | RS Bhakti Mulia                    | Eijkman Institute for Molecular Biology, Ministry of Research and Technology/National Agency for Research and Innovation   | Amin Soebandrio; Edison Johar; Frilasita A Yudhaputri; Hidayat Trimarsanto; Iskandar Adnan; Khin Saw Myint; Lydia V. Panggalo; Safarina G Malik; Sukma Oktavianthi; Willy Agustine                                                                                                                                                                                                                                                    |
| EPI_ISL_1283967                                                                                                                                                                                                                                                                                            | RS Bina Husada Bogor               | Eijkman Institute for Molecular Biology, Ministry of Research and Technology/National Agency for Research and Innovation   | Amin Soebandrio; Edison Johar; Frilasita A Yudhaputri; Hidayat Trimarsanto; Iskandar Adnan; Khin Saw Myint; Lydia V. Panggalo; Safarina G Malik; Sukma Oktavianthi; Willy Agustine                                                                                                                                                                                                                                                    |
| EPI_ISL_1284069, EPI_ISL_1284072                                                                                                                                                                                                                                                                           | RS Bina Sehat Mandiri              | Eijkman Institute for Molecular Biology, Ministry of Research and Technology/National Agency for Research and Innovation   | Amin Soebandrio; Edison Johar; Frilasita A Yudhaputri; Hidayat Trimarsanto; Iskandar Adnan; Khin Saw Myint; Lydia V. Panggalo; Safarina G Malik; Sukma Oktavianthi; Willy Agustine                                                                                                                                                                                                                                                    |
| EPI_ISL_1283979, EPI_ISL_1284058,<br>EPI_ISL_1284186                                                                                                                                                                                                                                                       | RS Cendana                         | Eijkman Institute for Molecular Biology, Ministry of Research and Technology/National Agency for Research and Innovation   | Amin Soebandrio; Edison Johar; Frilasita A Yudhaputri; Hidayat Trimarsanto; Iskandar Adnan; Khin Saw Myint; Lydia V. Panggalo; Safarina G Malik; Sukma Oktavianthi; Willy Agustine                                                                                                                                                                                                                                                    |
| EPI_ISL_1284303                                                                                                                                                                                                                                                                                            | RS Grha Kedoya                     | Eijkman Institute for Molecular Biology, Ministry of Research and Technology/National Agency for Research and Innovation   | Amin Soebandrio; Edison Johar; Frilasita A Yudhaputri; Hidayat Trimarsanto; Iskandar Adnan; Khin Saw Myint; Lydia V. Panggalo; Safarina G Malik; Sukma Oktavianthi; Willy Agustine                                                                                                                                                                                                                                                    |
| EPI_ISL_1284176, EPI_ISL_1284240                                                                                                                                                                                                                                                                           | RS Harapan Mulia Cibirusah         | Eijkman Institute for Molecular Biology, Ministry of Research and Technology/National Agency for Research and Innovation   | Amin Soebandrio; Edison Johar; Frilasita A Yudhaputri; Hidayat Trimarsanto; Iskandar Adnan; Khin Saw Myint; Lydia V. Panggalo; Safarina G Malik; Sukma Oktavianthi; Willy Agustine                                                                                                                                                                                                                                                    |
| EPI_ISL_1283987, EPI_ISL_1284322                                                                                                                                                                                                                                                                           | RS Islam Sari Asih Ar-Rahmah       | Eijkman Institute for Molecular Biology, Ministry of Research and Technology/National Agency for Research and Innovation   | Amin Soebandrio; Edison Johar; Frilasita A Yudhaputri; Hidayat Trimarsanto; Iskandar Adnan; Khin Saw Myint; Lydia V. Panggalo; Safarina G Malik; Sukma Oktavianthi; Willy Agustine                                                                                                                                                                                                                                                    |
| EPI_ISL_1284244, EPI_ISL_1284247                                                                                                                                                                                                                                                                           | RS Masmitra                        | Eijkman Institute for Molecular Biology, Ministry of Research and Technology/National Agency for Research and Innovation   | Amin Soebandrio; Edison Johar; Frilasita A Yudhaputri; Hidayat Trimarsanto; Iskandar Adnan; Khin Saw Myint; Lydia V. Panggalo; Safarina G Malik; Sukma Oktavianthi; Willy Agustine                                                                                                                                                                                                                                                    |
| EPI_ISL_1284129                                                                                                                                                                                                                                                                                            | RS Medika Permata Hijau            | Eijkman Institute for Molecular Biology, Ministry of Research and Technology/National Agency for Research and Innovation   | Amin Soebandrio; Edison Johar; Frilasita A Yudhaputri; Hidayat Trimarsanto; Iskandar Adnan; Khin Saw Myint; Lydia V. Panggalo; Safarina G Malik; Sukma Oktavianthi; Willy Agustine                                                                                                                                                                                                                                                    |
| EPI_ISL_1284215, EPI_ISL_1284273,<br>EPI_ISL_1284277                                                                                                                                                                                                                                                       | RS Medirossa Cikarang              | Eijkman Institute for Molecular Biology, Ministry of Research and Technology/National Agency for Research and Innovation   | Amin Soebandrio; Edison Johar; Frilasita A Yudhaputri; Hidayat Trimarsanto; Iskandar Adnan; Khin Saw Myint; Lydia V. Panggalo; Safarina G Malik; Sukma Oktavianthi; Willy Agustine                                                                                                                                                                                                                                                    |
| EPI_ISL_1284210                                                                                                                                                                                                                                                                                            | RS Mitra Husada Pringsewu          | Eijkman Institute for Molecular Biology, Ministry of Research and Technology/National Agency for Research and Innovation   | Amin Soebandrio; Edison Johar; Frilasita A Yudhaputri; Hidayat Trimarsanto; Iskandar Adnan; Khin Saw Myint; Lydia V. Panggalo; Safarina G Malik; Sukma Oktavianthi; Willy Agustine                                                                                                                                                                                                                                                    |
| EPI_ISL_1284105                                                                                                                                                                                                                                                                                            | RS Mitra Husada Tangerang          | Eijkman Institute for Molecular Biology, Ministry of Research and Technology/National Agency for Research and Innovation   | Amin Soebandrio; Edison Johar; Frilasita A Yudhaputri; Hidayat Trimarsanto; Iskandar Adnan; Khin Saw Myint; Lydia V. Panggalo; Safarina G Malik; Sukma Oktavianthi; Willy Agustine                                                                                                                                                                                                                                                    |
| EPI_ISL_1284269                                                                                                                                                                                                                                                                                            | RS Mitra Keluarga Bekasi Barat     | Eijkman Institute for Molecular Biology, Ministry of Research and Technology/National Agency for Research and Innovation   | Amin Soebandrio; Edison Johar; Frilasita A Yudhaputri; Hidayat Trimarsanto; Iskandar Adnan; Khin Saw Myint; Lydia V. Panggalo; Safarina G Malik; Sukma Oktavianthi; Willy Agustine                                                                                                                                                                                                                                                    |
| EPI_ISL_1284207                                                                                                                                                                                                                                                                                            | RS Mitra Keluarga Cibubur          | Eijkman Institute for Molecular Biology, Ministry of Research and Technology/National Agency for Research and Innovation   | Amin Soebandrio; Edison Johar; Frilasita A Yudhaputri; Hidayat Trimarsanto; Iskandar Adnan; Khin Saw Myint; Lydia V. Panggalo; Safarina G Malik; Sukma Oktavianthi; Willy Agustine                                                                                                                                                                                                                                                    |
| EPI_ISL_1283933, EPI_ISL_1283941, EPI_ISL_1283945, EPI_ISL_1283949, EPI_ISL_1283953, EPI_ISL_1283964, EPI_ISL_1283982, EPI_ISL_1283984, EPI_ISL_1284007 to 1284008, EPI_ISL_1284021, EPI_ISL_1284025, EPI_ISL_1284063, EPI_ISL_1284133, EPI_ISL_1284136, EPI_ISL_1284251, EPI_ISL_1284254, EPI_ISL_1284307 | see above                          | RS Mitra Keluarga Gading Serpong                                                                                           | Eijkman Institute for Molecular Biology, Ministry of Research and Technology/National Agency for Research and Innovation                                                                                                                                                                                                                                                                                                              |
| EPI_ISL_1283998, EPI_ISL_1284017, EPI_ISL_1284101, EPI_ISL_1284163, EPI_ISL_1284165, EPI_ISL_1284219, EPI_ISL_1284223, EPI_ISL_1284284, EPI_ISL_1284288, EPI_ISL_1284292, EPI_ISL_1284314, EPI_ISL_1284327, EPI_ISL_1284331, EPI_ISL_1284335                                                               | see above                          | RS Mitra Keluarga Kalideres                                                                                                | Eijkman Institute for Molecular Biology, Ministry of Research and Technology/National Agency for Research and Innovation                                                                                                                                                                                                                                                                                                              |
| EPI_ISL_1283929, EPI_ISL_1283994                                                                                                                                                                                                                                                                           | RS Mitra Keluarga Kelapa Gading    | Eijkman Institute for Molecular Biology, Ministry of Research and Technology/National Agency for Research and Innovation   | Amin Soebandrio; Edison Johar; Frilasita A Yudhaputri; Hidayat Trimarsanto; Iskandar Adnan; Khin Saw Myint; Lydia V. Panggalo; Safarina G Malik; Sukma Oktavianthi; Willy Agustine                                                                                                                                                                                                                                                    |
| EPI_ISL_1284067, EPI_ISL_1284197                                                                                                                                                                                                                                                                           | RS Mitra Keluarga Pratama Jatiasih | Eijkman Institute for Molecular Biology, Ministry of Research and Technology/National Agency for Research and Innovation   | Amin Soebandrio; Edison Johar; Frilasita A Yudhaputri; Hidayat Trimarsanto; Iskandar Adnan; Khin Saw Myint; Lydia V. Panggalo; Safarina G Malik; Sukma Oktavianthi; Willy Agustine                                                                                                                                                                                                                                                    |
| EPI_ISL_1284258                                                                                                                                                                                                                                                                                            | RS Mulia Pajajaran                 | Eijkman Institute for Molecular Biology, Ministry of Research and Technology/National Agency for Research and Innovation   | Amin Soebandrio; Edison Johar; Frilasita A Yudhaputri; Hidayat Trimarsanto; Iskandar Adnan; Khin Saw Myint; Lydia V. Panggalo; Safarina G Malik; Sukma Oktavianthi; Willy Agustine                                                                                                                                                                                                                                                    |
| EPI_ISL_1283932, EPI_ISL_1284266                                                                                                                                                                                                                                                                           | RS Mulya Tangerang                 | Eijkman Institute for Molecular Biology, Ministry of Research and Technology/National Agency for Research and Innovation   | Amin Soebandrio; Edison Johar; Frilasita A Yudhaputri; Hidayat Trimarsanto; Iskandar Adnan; Khin Saw Myint; Lydia V. Panggalo; Safarina G Malik; Sukma Oktavianthi; Willy Agustine                                                                                                                                                                                                                                                    |
| EPI_ISL_1284031, EPI_ISL_1284262                                                                                                                                                                                                                                                                           | RS OMNI Alam Sutera                | Eijkman Institute for Molecular Biology, Ministry of Research and Technology/National Agency for Research and Innovation   | Amin Soebandrio; Edison Johar; Frilasita A Yudhaputri; Hidayat Trimarsanto; Iskandar Adnan; Khin Saw Myint; Lydia V. Panggalo; Safarina G Malik; Sukma Oktavianthi; Willy Agustine                                                                                                                                                                                                                                                    |
| EPI_ISL_1284002                                                                                                                                                                                                                                                                                            | RS Omni Pulomas                    | Eijkman Institute for Molecular Biology, Ministry of Research and Technology/National Agency for Research and Innovation   | Amin Soebandrio; Edison Johar; Frilasita A Yudhaputri; Hidayat Trimarsanto; Iskandar Adnan; Khin Saw Myint; Lydia V. Panggalo; Safarina G Malik; Sukma Oktavianthi; Willy Agustine                                                                                                                                                                                                                                                    |
| EPI_ISL_1020175, EPI_ISL_1020180, EPI_ISL_1020184, EPI_ISL_1020193, EPI_ISL_1020196, EPI_ISL_1117451, EPI_ISL_1117589, EPI_ISL_1137601                                                                                                                                                                     | see above                          | RS PMI, Bogor, West Java                                                                                                   | Biosafety Level-3 Laboratory, Indonesian Institute of Sciences (LIPI)                                                                                                                                                                                                                                                                                                                                                                 |
| EPI_ISL_1284190, EPI_ISL_1284193                                                                                                                                                                                                                                                                           | RS Permata Cibubur                 | Eijkman Institute for Molecular Biology, Ministry of Research and Technology/National Agency for Research and Innovation   | Amin Soebandrio; Edison Johar; Frilasita A Yudhaputri; Hidayat Trimarsanto; Iskandar Adnan; Khin Saw Myint; Lydia V. Panggalo; Safarina G Malik; Sukma Oktavianthi; Willy Agustine                                                                                                                                                                                                                                                    |
| EPI_ISL_1284057                                                                                                                                                                                                                                                                                            | RS Primaya Tangerang               | Eijkman Institute for Molecular Biology, Ministry of Research and Technology/National Agency for Research and Innovation   | Amin Soebandrio; Edison Johar; Frilasita A Yudhaputri; Hidayat Trimarsanto; Iskandar Adnan; Khin Saw Myint; Lydia V. Panggalo; Safarina G Malik; Sukma Oktavianthi; Willy Agustine                                                                                                                                                                                                                                                    |
|                                                                                                                                                                                                                                                                                                            |                                    |                                                                                                                            | Ade Andriani; Andri Wardiana; Anggia Prasetyoputri; Anik B. Dharmayanthi; Anik Budhi Dharmayanthi; Ari S. Wulandari; Asep M. Ridwanuloh; Eko Wahyu Putro; Eko Wahyu Putro; Fahrurrozi; Gita Syahputra; Hariyatu; Indriawati; Inswasti Cahyani; Isa Nuryana; Matthew W. Loose; Mohammad Ilyas; Ratih Asmana Ningrum; Sri Swasthikawati; Sugiyono Saputra; Sugiyono Saputra; Susanti; Syaiful Rizal; Syam Budi Iryanto; Wien Kusharyoto |

|                                                                                                                                                                                                                           |                              |                                                                                                                                                                                                                                                                                                                                                                                                                                                                                                                                                          |                                                                                                                                                                                                                                                                                                                                                                                                                                           |
|---------------------------------------------------------------------------------------------------------------------------------------------------------------------------------------------------------------------------|------------------------------|----------------------------------------------------------------------------------------------------------------------------------------------------------------------------------------------------------------------------------------------------------------------------------------------------------------------------------------------------------------------------------------------------------------------------------------------------------------------------------------------------------------------------------------------------------|-------------------------------------------------------------------------------------------------------------------------------------------------------------------------------------------------------------------------------------------------------------------------------------------------------------------------------------------------------------------------------------------------------------------------------------------|
| EPI_ISL_1284281                                                                                                                                                                                                           | RS Royal Taruma              | Eijkman Institute for Molecular Biology, Ministry of Research and Technology/National Agency for Research and Innovation                                                                                                                                                                                                                                                                                                                                                                                                                                 | Amin Soebandrio; Edison Johar; Frilasita A Yudhaputri; Hidayat Trimarsanto; Iskandar Adnan; Khin Saw Myint; Lydia V. Panggalo; Safarina G Malik; Sukma Oktavianthi; Willy Agustine                                                                                                                                                                                                                                                        |
| EPI_ISL_1284052, EPI_ISL_1284078                                                                                                                                                                                          | RS Rumah Indonesia Sehat     | Eijkman Institute for Molecular Biology, Ministry of Research and Technology/National Agency for Research and Innovation                                                                                                                                                                                                                                                                                                                                                                                                                                 | Amin Soebandrio; Edison Johar; Frilasita A Yudhaputri; Hidayat Trimarsanto; Iskandar Adnan; Khin Saw Myint; Lydia V. Panggalo; Safarina G Malik; Sukma Oktavianthi; Willy Agustine                                                                                                                                                                                                                                                        |
| EPI_ISL_1283936, EPI_ISL_1284027, EPI_ISL_1284029, EPI_ISL_1284156, EPI_ISL_1284160, EPI_ISL_1284318, EPI_ISL_1284340                                                                                                     | see above                    | RS Sentra Medika Cikarang                                                                                                                                                                                                                                                                                                                                                                                                                                                                                                                                | Eijkman Institute for Molecular Biology, Ministry of Research and Technology/National Agency for Research and Innovation                                                                                                                                                                                                                                                                                                                  |
| EPI_ISL_1284034 to 1284035                                                                                                                                                                                                | RS Taman Harapan Baru        | Eijkman Institute for Molecular Biology, Ministry of Research and Technology/National Agency for Research and Innovation                                                                                                                                                                                                                                                                                                                                                                                                                                 | Amin Soebandrio; Edison Johar; Frilasita A Yudhaputri; Hidayat Trimarsanto; Iskandar Adnan; Khin Saw Myint; Lydia V. Panggalo; Safarina G Malik; Sukma Oktavianthi; Willy Agustine                                                                                                                                                                                                                                                        |
| EPI_ISL_1020176 to 1020178, EPI_ISL_1020182 to 1020183, EPI_ISL_1020185, EPI_ISL_1020187 to 1020190, EPI_ISL_1020198, EPI_ISL_1020200 to 1020202, EPI_ISL_1117452 to 1117455, EPI_ISL_1117590, EPI_ISL_1137602 to 1137603 | see above                    | RS Trimitra, Bogor, West Java                                                                                                                                                                                                                                                                                                                                                                                                                                                                                                                            | Biosafety Level-3 Laboratory, Indonesian Institute of Sciences (LIPI)                                                                                                                                                                                                                                                                                                                                                                     |
| EPI_ISL_1284083                                                                                                                                                                                                           | RS Umum Harapan Bunda        | Eijkman Institute for Molecular Biology, Ministry of Research and Technology/National Agency for Research and Innovation                                                                                                                                                                                                                                                                                                                                                                                                                                 | Amin Soebandrio; Edison Johar; Frilasita A Yudhaputri; Hidayat Trimarsanto; Iskandar Adnan; Khin Saw Myint; Lydia V. Panggalo; Safarina G Malik; Sukma Oktavianthi; Willy Agustine                                                                                                                                                                                                                                                        |
| EPI_ISL_1251079, EPI_ISL_1251114, EPI_ISL_1336659, EPI_ISL_1336679, EPI_ISL_1336743, EPI_ISL_1336776 to 1336777                                                                                                           | RSA GIULIANOVA               | Istituto Zooprofilattico Sperimentale dell'Abruzzo e Molise "G. Caporale"                                                                                                                                                                                                                                                                                                                                                                                                                                                                                | Ancora M; Calistri P; Cammà C; Caporale M; Curini V; Di Domenico M; Di Lollo V; Di Pasquale A; Lorusso A; Mangone I; Marcacci M; Puglia I; Rinaldi A; Savini G; Scialabba S                                                                                                                                                                                                                                                               |
| EPI_ISL_1284140, EPI_ISL_1284145                                                                                                                                                                                          | RSAB Harapan Kita            | Eijkman Institute for Molecular Biology, Ministry of Research and Technology/National Agency for Research and Innovation                                                                                                                                                                                                                                                                                                                                                                                                                                 | Amin Soebandrio; Edison Johar; Frilasita A Yudhaputri; Hidayat Trimarsanto; Iskandar Adnan; Khin Saw Myint; Lydia V. Panggalo; Safarina G Malik; Sukma Oktavianthi; Willy Agustine                                                                                                                                                                                                                                                        |
| EPI_ISL_1283996, EPI_ISL_1284149, EPI_ISL_1284152                                                                                                                                                                         | RSIA Bunda Sejahtera         | Eijkman Institute for Molecular Biology, Ministry of Research and Technology/National Agency for Research and Innovation                                                                                                                                                                                                                                                                                                                                                                                                                                 | Amin Soebandrio; Edison Johar; Frilasita A Yudhaputri; Hidayat Trimarsanto; Iskandar Adnan; Khin Saw Myint; Lydia V. Panggalo; Safarina G Malik; Sukma Oktavianthi; Willy Agustine                                                                                                                                                                                                                                                        |
| EPI_ISL_1284074, EPI_ISL_1284076                                                                                                                                                                                          | RSIA PKU Muhammadiyah        | Eijkman Institute for Molecular Biology, Ministry of Research and Technology/National Agency for Research and Innovation                                                                                                                                                                                                                                                                                                                                                                                                                                 | Amin Soebandrio; Edison Johar; Frilasita A Yudhaputri; Hidayat Trimarsanto; Iskandar Adnan; Khin Saw Myint; Lydia V. Panggalo; Safarina G Malik; Sukma Oktavianthi; Willy Agustine                                                                                                                                                                                                                                                        |
| EPI_ISL_1283923 to 1283924                                                                                                                                                                                                | RSIA Sayyidah                | Eijkman Institute for Molecular Biology, Ministry of Research and Technology/National Agency for Research and Innovation                                                                                                                                                                                                                                                                                                                                                                                                                                 | Amin Soebandrio; Edison Johar; Frilasita A Yudhaputri; Hidayat Trimarsanto; Iskandar Adnan; Khin Saw Myint; Lydia V. Panggalo; Safarina G Malik; Sukma Oktavianthi; Willy Agustine                                                                                                                                                                                                                                                        |
| EPI_ISL_1283957, EPI_ISL_1283970, EPI_ISL_1284178                                                                                                                                                                         | RSIA Selasih Medika          | Eijkman Institute for Molecular Biology, Ministry of Research and Technology/National Agency for Research and Innovation                                                                                                                                                                                                                                                                                                                                                                                                                                 | Amin Soebandrio; Edison Johar; Frilasita A Yudhaputri; Hidayat Trimarsanto; Iskandar Adnan; Khin Saw Myint; Lydia V. Panggalo; Safarina G Malik; Sukma Oktavianthi; Willy Agustine                                                                                                                                                                                                                                                        |
| EPI_ISL_1284087, EPI_ISL_1284182, EPI_ISL_1284296                                                                                                                                                                         | RSJ Dr. Soeharto Heerdjan    | Eijkman Institute for Molecular Biology, Ministry of Research and Technology/National Agency for Research and Innovation                                                                                                                                                                                                                                                                                                                                                                                                                                 | Amin Soebandrio; Edison Johar; Frilasita A Yudhaputri; Hidayat Trimarsanto; Iskandar Adnan; Khin Saw Myint; Lydia V. Panggalo; Safarina G Malik; Sukma Oktavianthi; Willy Agustine                                                                                                                                                                                                                                                        |
| EPI_ISL_1196005, EPI_ISL_1196019                                                                                                                                                                                          | RSP Clinic                   | National Institute for Communicable Diseases of the National Health Laboratory Service                                                                                                                                                                                                                                                                                                                                                                                                                                                                   | Amoako DG; Bhiman JN; Ismail A; Mahlangu B; Maphalala GP; Mohale T; Ntuli N; Scheepers C                                                                                                                                                                                                                                                                                                                                                  |
| EPI_ISL_1257847 to 1257850                                                                                                                                                                                                | RSPi Prof.Dr.Sulianti Saroso | National Institute of Health Research and Development                                                                                                                                                                                                                                                                                                                                                                                                                                                                                                    | Arie Ardiansyah Nugraha; Hana Apsari Pawestri; Hartanti Dian Ikawati; Kartika Dewi Puspa; Krisna Pangesti; Nelly Puspandari; Subangkit; Vivi Setiawaty                                                                                                                                                                                                                                                                                    |
| EPI_ISL_1284040, EPI_ISL_1284169, EPI_ISL_1284172                                                                                                                                                                         | RSU Azra                     | Eijkman Institute for Molecular Biology, Ministry of Research and Technology/National Agency for Research and Innovation                                                                                                                                                                                                                                                                                                                                                                                                                                 | Amin Soebandrio; Edison Johar; Frilasita A Yudhaputri; Hidayat Trimarsanto; Iskandar Adnan; Khin Saw Myint; Lydia V. Panggalo; Safarina G Malik; Sukma Oktavianthi; Willy Agustine                                                                                                                                                                                                                                                        |
| EPI_ISL_1283973                                                                                                                                                                                                           | RSU Bunda Mulia Cikarang     | Eijkman Institute for Molecular Biology, Ministry of Research and Technology/National Agency for Research and Innovation                                                                                                                                                                                                                                                                                                                                                                                                                                 | Amin Soebandrio; Edison Johar; Frilasita A Yudhaputri; Hidayat Trimarsanto; Iskandar Adnan; Khin Saw Myint; Lydia V. Panggalo; Safarina G Malik; Sukma Oktavianthi; Willy Agustine                                                                                                                                                                                                                                                        |
| EPI_ISL_1284000, EPI_ISL_1284064, EPI_ISL_1284109, EPI_ISL_1284114, EPI_ISL_1284118, EPI_ISL_1284299                                                                                                                      | RSU HGA Depok                | Eijkman Institute for Molecular Biology, Ministry of Research and Technology/National Agency for Research and Innovation                                                                                                                                                                                                                                                                                                                                                                                                                                 | Amin Soebandrio; Edison Johar; Frilasita A Yudhaputri; Hidayat Trimarsanto; Iskandar Adnan; Khin Saw Myint; Lydia V. Panggalo; Safarina G Malik; Sukma Oktavianthi; Willy Agustine                                                                                                                                                                                                                                                        |
| EPI_ISL_1283927, EPI_ISL_1284049, EPI_ISL_1284168, EPI_ISL_1284226, EPI_ISL_1284230, EPI_ISL_1284234, EPI_ISL_1284237                                                                                                     | see above                    | RSU Harapan Bunda                                                                                                                                                                                                                                                                                                                                                                                                                                                                                                                                        | Eijkman Institute for Molecular Biology, Ministry of Research and Technology/National Agency for Research and Innovation                                                                                                                                                                                                                                                                                                                  |
| EPI_ISL_1284212                                                                                                                                                                                                           | RSU Medirossa                | Eijkman Institute for Molecular Biology, Ministry of Research and Technology/National Agency for Research and Innovation                                                                                                                                                                                                                                                                                                                                                                                                                                 | Amin Soebandrio; Edison Johar; Frilasita A Yudhaputri; Hidayat Trimarsanto; Iskandar Adnan; Khin Saw Myint; Lydia V. Panggalo; Safarina G Malik; Sukma Oktavianthi; Willy Agustine                                                                                                                                                                                                                                                        |
| EPI_ISL_1284004, EPI_ISL_1284090, EPI_ISL_1284093, EPI_ISL_1284096, EPI_ISL_1284174, EPI_ISL_1284344                                                                                                                      | RSU Sumber Waras             | Eijkman Institute for Molecular Biology, Ministry of Research and Technology/National Agency for Research and Innovation                                                                                                                                                                                                                                                                                                                                                                                                                                 | Amin Soebandrio; Edison Johar; Frilasita A Yudhaputri; Hidayat Trimarsanto; Iskandar Adnan; Khin Saw Myint; Lydia V. Panggalo; Safarina G Malik; Sukma Oktavianthi; Willy Agustine                                                                                                                                                                                                                                                        |
| EPI_ISL_1283938, EPI_ISL_1283988, EPI_ISL_1284014, EPI_ISL_1284061                                                                                                                                                        | RSUD Cileungsi               | Eijkman Institute for Molecular Biology, Ministry of Research and Technology/National Agency for Research and Innovation                                                                                                                                                                                                                                                                                                                                                                                                                                 | Amin Soebandrio; Edison Johar; Frilasita A Yudhaputri; Hidayat Trimarsanto; Iskandar Adnan; Khin Saw Myint; Lydia V. Panggalo; Safarina G Malik; Sukma Oktavianthi; Willy Agustine                                                                                                                                                                                                                                                        |
| EPI_ISL_1005695                                                                                                                                                                                                           | RSUD Dr. Soedirman           | Genetics Working Group (Pokja Genetik) Faculty of Medicine, Public Health and Nursing Universitas Gadjah Mada (FK-KMK UGM); Disease Investigation Center Wates Ministry of Agriculture Indonesia; Department of Microbiology FK-KMK UGM; Laboratorium Diagnostik Yayasan Tahija World Mosquito Program (WMP) Yogyakarta Center for Tropical Medicine FK-KMK UGM; Integrated Research Center FK-KMK UGM; Department of Computer Science and Electronics FMIPA UGM; Balai Besar Teknik Kesehatan Lingkungan dan Pengendalian Penyakit (BBTKLPP) Yogyakarta | Afiahayati; Arry Setyowati; Audric Kenny Tedja; Chusni Mubarak; Dwi AA Nugrahaningsih; Edwin W. Daniwijaya; Eggi Arguni; Endah Supriyati; Gunadi; Havid Setyawan; Hendra Wibawa; Indaryati; Irene; Kristy Iskandar; Ludhang P. Rizki; Marcellus; Maria Patricia Inggriani; Mohamad S. Hakim; Nungki Anggorowati; Siswanto; Titik Nuryastuti; Tri Wibawa; Try Nirmala Sari                                                                 |
| EPI_ISL_1005696 to 1005698                                                                                                                                                                                                | RSUD Dr. Tjitrowardjo        | Genetics Working Group (Pokja Genetik) Faculty of Medicine, Public Health and Nursing Universitas Gadjah Mada (FK-KMK UGM); Disease Investigation Center Wates Ministry of Agriculture Indonesia; Department of Microbiology FK-KMK UGM; Laboratorium Diagnostik Yayasan Tahija World Mosquito Program (WMP) Yogyakarta Center for Tropical Medicine FK-KMK UGM; Integrated Research Center FK-KMK UGM; Department of Computer Science and Electronics FMIPA UGM; Balai Besar Teknik Kesehatan Lingkungan dan Pengendalian Penyakit (BBTKLPP) Yogyakarta | Aditya Rifqi Fauzi; Afiahayati; Alvin Santoso Kalim; Arry Setyowati; Chusni Mubarak; Dwi AA Nugrahaningsih; Dyah Ayu Puspitarani; Edwin W. Daniwijaya; Eggi Arguni; Endah Supriyati; Fadil Fahri; Gunadi; Havid Setyawan; Hendra Wibawa; Indaryati; Irene; Kemala Athollah; Kristy Iskandar; Ludhang P. Rizki; Marcellus; Mohamad S. Hakim; Nungki Anggorowati; Siswanto; Susan Simanjaya; Titik Nuryastuti; Tri Wibawa; Try Nirmala Sari |
| EPI_ISL_1300521                                                                                                                                                                                                           | RSUD Pasaringgu              | Stem Cell Lab, Universitas Pembangunan Nasional Veteran Jakarta                                                                                                                                                                                                                                                                                                                                                                                                                                                                                          | Andri Pramesyanti Pramono; Megadianty Mokoginta; Ria Maria Theresa; Yudi Nugraha; Yudi Amiarso                                                                                                                                                                                                                                                                                                                                            |

|                                                                                                                                       |                                                     |                                                                         |                                                                                                                                                                                                                                                                                                                                                                                                              |
|---------------------------------------------------------------------------------------------------------------------------------------|-----------------------------------------------------|-------------------------------------------------------------------------|--------------------------------------------------------------------------------------------------------------------------------------------------------------------------------------------------------------------------------------------------------------------------------------------------------------------------------------------------------------------------------------------------------------|
| EPI_ISL_1300496, EPI_ISL_1300522, EPI_ISL_1300535, EPI_ISL_1300540, EPI_ISL_1300644, EPI_ISL_1300660 to 1300661                       | RSUD Pasarminggu                                    | Stem Cell Lab, Universitas Pembangunan Nasional Veteran Jakarta (UPNVJ) | Andri Pramesyanti Pramono; Megadianty Mokoginta; Ria Maria Theresa; Yudhi Nugraha; Yudi Amiaro                                                                                                                                                                                                                                                                                                               |
| EPI_ISL_1297194                                                                                                                       | RSUD Pasarminggu                                    | Stem Cell Lab, Universitas Pembangunan Nasional Veteran Jakarta (UPNVJ) | Andri Pramesyanti Pramono; Megadianty Mokoginta; Ria Maria Theresa; Yudhi Nugraha; Yudi Amiaro                                                                                                                                                                                                                                                                                                               |
| EPI_ISL_1257865 to 1257866                                                                                                            | RSUP Adam Malik                                     | National Institute of Health Research and Development                   | Ade Rahmaini; Arie Ardiansyah Nugraha; Hartanti Dian Ikawati; Kartika Dewi Puspa; Krisna Pangesti; Maliana; Nelly Elfrida Samosir; Nelly Puspandari; Rina Yunita; Subangkit; Vivi Setiawaty                                                                                                                                                                                                                  |
| EPI_ISL_1169049                                                                                                                       | RSUP Adam Malik Medan Sumatera Utara                | National Institute of Health Research and Development                   | Arie Ardiansyah Nugraha; Hana Apsari Pawestri; Hartanti Dian Ikawati; Kartika Dewi Puspa; Nelly Puspandari; Subangkit; Vivi Setiawaty                                                                                                                                                                                                                                                                        |
| EPI_ISL_1257823 to 1257826                                                                                                            | RSUP DR Mohammad Hoesin                             | National Institute of Health Research and Development                   | Arie Ardiansyah Nugraha; Eny Rahmawati; Hana Apsari Pawestri; Hartanti Dian Ikawati; Kartika Dewi Puspa; Krisna Pangesti; Nelly Puspandari; Rogaya; Subangkit; Vivi Setiawaty                                                                                                                                                                                                                                |
| EPI_ISL_1169047                                                                                                                       | RSUP Dr. Mohammad Hoesin Palembang Sumatera Selatan | National Institute of Health Research and Development                   | Arie Ardiansyah Nugraha; Hana Apsari Pawestri; Hartanti Dian Ikawati; Kartika Dewi Puspa; Nelly Puspandari; Subangkit; Vivi Setiawaty                                                                                                                                                                                                                                                                        |
| EPI_ISL_1257827 to 1257829                                                                                                            | RSUP Dr. Sardjito                                   | National Institute of Health Research and Development                   | Arie Ardiansyah Nugraha; Hana Apsari Pawestri; Hartanti Dian Ikawati; Kartika Dewi Puspa; Krisna Pangesti; Nelly Puspandari; Subangkit; Vivi Setiawaty                                                                                                                                                                                                                                                       |
| EPI_ISL_1257842 to 1257846                                                                                                            | RSUP Fatmawati                                      | National Institute of Health Research and Development                   | Arie Ardiansyah Nugraha; Hana Apsari Pawestri; Hartanti Dian Ikawati; Kartika Dewi Puspa; Krisna Pangesti; Lidya Utami; Luci Liana; Lusiyana Ningsih; Nelly Puspandari; Subangkit; Vivi Setiawaty                                                                                                                                                                                                            |
| EPI_ISL_1257833 to 1257841                                                                                                            | RSUP Sanglah                                        | National Institute of Health Research and Development                   | Arie Ardiansyah Nugraha; Hana Apsari Pawestri; Hartanti Dian Ikawati; I Gede Ketut Sajinidiyasa; I Nengah Tony Rustawan; Kartika Dewi Puspa; Krisna Pangesti; Nelly Puspandari; Subangkit; Vivi Setiawaty                                                                                                                                                                                                    |
| EPI_ISL_1113144                                                                                                                       | RWJ Univ. Hospital-New Brunswi                      | New Jersey Public Health and Environmental Laboratories (PHEL)          | Byeong Jeong; Dana Woell; Lindsey Bodnar; Shiv Verma                                                                                                                                                                                                                                                                                                                                                         |
| EPI_ISL_1080336                                                                                                                       | RWJ University Hospital-New Brunswick               | NJ_PHEL                                                                 | Byeong Jeong; Dana Woell; Lindsey Bodnar; Shiv Verma                                                                                                                                                                                                                                                                                                                                                         |
| EPI_ISL_1113172                                                                                                                       | RWJ University Hospital-Rahway                      | New Jersey Public Health and Environmental Laboratories (PHEL)          | Byeong Jeong; Dana Woell; Lindsey Bodnar; Shiv Verma                                                                                                                                                                                                                                                                                                                                                         |
| EPI_ISL_1295796 to 1295814                                                                                                            | Rady Children's Hospital - San Diego                | Andersen lab at Scripps Research                                        | Christina Clarke; David Dimmock; Denise Malicki; Kathryn Bouic; Linda Luo; SEARCH Alliance San Diego with Nanda Radamchar; Teresa Mueller                                                                                                                                                                                                                                                                    |
| EPI_ISL_1081571 to 1081597                                                                                                            | Rady's Childrens Hospital                           | Andersen lab at Scripps Research                                        | Christina Clarke; David Dimmock; Denise Malicki; Kathryn Bouic; Linda Luo; SEARCH Alliance San Diego with Nanda Radamchar; Teresa Mueller                                                                                                                                                                                                                                                                    |
| EPI_ISL_1165076                                                                                                                       | Rahman Rahim Hospital                               | Institute of Tropical Disease, Universitas Airlangga                    | Aldise M Nasrri; Gatot Soegiarto; Jezzy R Dewantari; Kazufumi Shimizu; Krisnoadi Rahardjo; Laksmi Wulandari; Maria I Lusida; Rendra E Febrianto; Resti Yudhawati; Rima R Prasetya; Soetjipto; Yasuko Mori                                                                                                                                                                                                    |
| EPI_ISL_1138847                                                                                                                       | Ramathibodi Chakri Naruebodindra Hospital           | COVID-19 Network Investigations (CONI) Alliance                         | Angkana Huang; Anthony R. Jones; Arporn Wangwiwatsin; Bhakbhoon Panthan; Chonticha Klungtong; Duangkamon Loesbanluetchai; Ekawat Pasomsub; Elizabeth Batty; Insee Sensorn; Janjira Thaipadungpanit; Khajohn Joonalak; Khajohn Rakmanee; Krittikorn Kumpornis; Namfon Kotanan; Stefan Fernandez; Thanat Chookajorn; Theerarat Kochakarn; Treewat Watthanachockchai; Wasun Chantraita; Wudtichai Manasatienkij |
| EPI_ISL_1073953 to 1073955, EPI_ISL_1073958, EPI_ISL_1073960, EPI_ISL_1073964, EPI_ISL_1073966 to 1073980, EPI_ISL_1138844 to 1138846 | Ramathibodi Hospital                                | COVID-19 Network Investigations (CONI) Alliance                         | Angkana Huang; Anthony R. Jones; Arporn Wangwiwatsin; Bhakbhoon Panthan; Chonticha Klungtong; Duangkamon Loesbanluetchai; Ekawat Pasomsub; Elizabeth Batty; Insee Sensorn; Janjira Thaipadungpanit; Khajohn Joonalak; Khajohn Rakmanee; Krittikorn Kumpornis; Namfon Kotanan; Stefan Fernandez; Thanat Chookajorn; Theerarat Kochakarn; Treewat Watthanachockchai; Wasun Chantraita; Wudtichai Manasatienkij |

EPI\_ISL\_1042002, EPI\_ISL\_1042004 to 1042007, EPI\_ISL\_1042009 to 1042010, EPI\_ISL\_1042012 to 1042013, EPI\_ISL\_1042015, EPI\_ISL\_1042021 to 1042022, EPI\_ISL\_1042025 to 1042027, EPI\_ISL\_1042029, EPI\_ISL\_1042032, EPI\_ISL\_1042034, EPI\_ISL\_1042038 to 1042039, EPI\_ISL\_1042041, EPI\_ISL\_1042044, EPI\_ISL\_1042052, EPI\_ISL\_1042054 to 1042056, EPI\_ISL\_1042058, EPI\_ISL\_1042061, EPI\_ISL\_1042063, EPI\_ISL\_1042068, EPI\_ISL\_1042070, EPI\_ISL\_1042072, EPI\_ISL\_1042078 to 1042079, EPI\_ISL\_1042083, EPI\_ISL\_1042086 to 1042090, EPI\_ISL\_1042095, EPI\_ISL\_1042099, EPI\_ISL\_1042104 to 1042107, EPI\_ISL\_1042110 to 1042111, EPI\_ISL\_1042114, EPI\_ISL\_1042116, EPI\_ISL\_1042118 to 1042119, EPI\_ISL\_1042121, EPI\_ISL\_1042124 to 1042129, EPI\_ISL\_1042131 to 1042133, EPI\_ISL\_1042136 to 1042139, EPI\_ISL\_1042142, EPI\_ISL\_1042144 to 1042148, EPI\_ISL\_1042151, EPI\_ISL\_1042154 to 1042156, EPI\_ISL\_1042159, EPI\_ISL\_1042161, EPI\_ISL\_1042166 to 1042167, EPI\_ISL\_1042169 to 1042171, EPI\_ISL\_1042173, EPI\_ISL\_1042178, EPI\_ISL\_1042180, EPI\_ISL\_1042183, EPI\_ISL\_1042185 to 1042186, EPI\_ISL\_1042188, EPI\_ISL\_1042192 to 1042193, EPI\_ISL\_1042195, EPI\_ISL\_1042197 to 1042201, EPI\_ISL\_1042203 to 1042205, EPI\_ISL\_1042207, EPI\_ISL\_1042209 to 1042212, EPI\_ISL\_1042217, EPI\_ISL\_1042219 to 1042221, EPI\_ISL\_1042224, EPI\_ISL\_1042229 to 1042230, EPI\_ISL\_1042235 to 1042237, EPI\_ISL\_1042239, EPI\_ISL\_1042244, EPI\_ISL\_1042246 to 1042247, EPI\_ISL\_1042251, EPI\_ISL\_1042254 to 1042258, EPI\_ISL\_1042261 to 1042263, EPI\_ISL\_1042265, EPI\_ISL\_1042268, EPI\_ISL\_1042270, EPI\_ISL\_1042273, EPI\_ISL\_1042275 to 1042278, EPI\_ISL\_1042283, EPI\_ISL\_1042287, EPI\_ISL\_1042290, EPI\_ISL\_1042294, EPI\_ISL\_1042296, EPI\_ISL\_1042301 to 1042305, EPI\_ISL\_1042309, EPI\_ISL\_1042311, EPI\_ISL\_1042313, EPI\_ISL\_1042316, EPI\_ISL\_1042318 to 1042319, EPI\_ISL\_1042323 to 1042324, EPI\_ISL\_1042327 to 1042328, EPI\_ISL\_1042330 to 1042332, EPI\_ISL\_1042336 to 1042341, EPI\_ISL\_1042343, EPI\_ISL\_1042346 to 1042349, EPI\_ISL\_1042351 to 1042355, EPI\_ISL\_1042367, EPI\_ISL\_1042381, EPI\_ISL\_1042586, EPI\_ISL\_1042596, EPI\_ISL\_1042598 to 1042599, EPI\_ISL\_1042601, EPI\_ISL\_1042603 to 1042604, EPI\_ISL\_1042606, EPI\_ISL\_1042609, EPI\_ISL\_1042614 to 1042615, EPI\_ISL\_1042617, EPI\_ISL\_1042619, EPI\_ISL\_1042621, EPI\_ISL\_1042626 to 1042627, EPI\_ISL\_1042631, EPI\_ISL\_1042637, EPI\_ISL\_1042640, EPI\_ISL\_1042643, EPI\_ISL\_1042647, EPI\_ISL\_1042659, EPI\_ISL\_1042661, EPI\_ISL\_1042666, EPI\_ISL\_1042673 to 1042674, EPI\_ISL\_1042677, EPI\_ISL\_1042684, EPI\_ISL\_1042691, EPI\_ISL\_1042696, EPI\_ISL\_1042720 to 1042721, EPI\_ISL\_1042730 to 1042731, EPI\_ISL\_1042734, EPI\_ISL\_1042742, EPI\_ISL\_1042744, EPI\_ISL\_1042756, EPI\_ISL\_1042765, EPI\_ISL\_1042769, EPI\_ISL\_1042774, EPI\_ISL\_1042777, EPI\_ISL\_1042779, EPI\_ISL\_1042782 to 1042784, EPI\_ISL\_1042786, EPI\_ISL\_1042789, EPI\_ISL\_1042793, EPI\_ISL\_1042800 to 1042801, EPI\_ISL\_1042803, EPI\_ISL\_1042807, EPI\_ISL\_1042809, EPI\_ISL\_1042813, EPI\_ISL\_1042815, EPI\_ISL\_1042819, EPI\_ISL\_1042821, EPI\_ISL\_1042824, EPI\_ISL\_1042828, EPI\_ISL\_1043177 to 1043178, EPI\_ISL\_1043187, EPI\_ISL\_1043191, EPI\_ISL\_1043198, EPI\_ISL\_1043200, EPI\_ISL\_1043202, EPI\_ISL\_1043212, EPI\_ISL\_1043220, EPI\_ISL\_1043227, EPI\_ISL\_1043239, EPI\_ISL\_1043245, EPI\_ISL\_1043266, EPI\_ISL\_1043268, EPI\_ISL\_1043277, EPI\_ISL\_1043280, EPI\_ISL\_1043282, EPI\_ISL\_1043291, EPI\_ISL\_1043301, EPI\_ISL\_1043307, EPI\_ISL\_1043310, EPI\_ISL\_1043315, EPI\_ISL\_1043317, EPI\_ISL\_1043319, EPI\_ISL\_1043327, EPI\_ISL\_1043342, EPI\_ISL\_1043346, EPI\_ISL\_1043349, EPI\_ISL\_1043351 to 1043352, EPI\_ISL\_1043354, EPI\_ISL\_1043357, EPI\_ISL\_1043359, EPI\_ISL\_1043361 to 1043362, EPI\_ISL\_1043364, EPI\_ISL\_1043368 to 1043371, EPI\_ISL\_1043376 to 1043379, EPI\_ISL\_1043381, EPI\_ISL\_1043383, EPI\_ISL\_1043387, EPI\_ISL\_1043390 to 1043393, EPI\_ISL\_1043395, EPI\_ISL\_1043397, EPI\_ISL\_1043401, EPI\_ISL\_1043404, EPI\_ISL\_1043406, EPI\_ISL\_1043408, EPI\_ISL\_1043410, EPI\_ISL\_1043412, EPI\_ISL\_1043415, EPI\_ISL\_1043418, EPI\_ISL\_1043420, EPI\_ISL\_1043423 to 1043425, EPI\_ISL\_1043428, EPI\_ISL\_1043430, EPI\_ISL\_1043432 to 1043434, EPI\_ISL\_1043436 to 1043437, EPI\_ISL\_1043440, EPI\_ISL\_1043442, EPI\_ISL\_1043446 to 1043448, EPI\_ISL\_1043450, EPI\_ISL\_1043452, EPI\_ISL\_1043454 to 1043456, EPI\_ISL\_1043458, EPI\_ISL\_1043460 to 1043462, EPI\_ISL\_1043466 to 1043467, EPI\_ISL\_1043469 to 1043470, EPI\_ISL\_1043473 to 1043475, EPI\_ISL\_1043478 to 1043480, EPI\_ISL\_1043484, EPI\_ISL\_1043486 to 1043487, EPI\_ISL\_1043489 to 1043490, EPI\_ISL\_1043492, EPI\_ISL\_1043498 to 1043499, EPI\_ISL\_1043502 to 1043503, EPI\_ISL\_1043505 to 1043508, EPI\_ISL\_1043510 to 1043511, EPI\_ISL\_1043513 to 1043514, EPI\_ISL\_1043516 to 1043520, EPI\_ISL\_1043523, EPI\_ISL\_1043525, EPI\_ISL\_1043528, EPI\_ISL\_1043530, EPI\_ISL\_1043532 to 1043534, EPI\_ISL\_1043536, EPI\_ISL\_1043538, EPI\_ISL\_1043540, EPI\_ISL\_1043542, EPI\_ISL\_1043544 to 1043546, EPI\_ISL\_1043548, EPI\_ISL\_1043550, EPI\_ISL\_1043552 to 1043554, EPI\_ISL\_1043556, EPI\_ISL\_1043558, EPI\_ISL\_1043560 to 1043562, EPI\_ISL\_1043564, EPI\_ISL\_1043566, EPI\_ISL\_1043568, EPI\_ISL\_1043570 to 1043572, EPI\_ISL\_1043574, EPI\_ISL\_1043576, EPI\_ISL\_1043578, EPI\_ISL\_1043580, EPI\_ISL\_1043582 to 1043584, EPI\_ISL\_1043586, EPI\_ISL\_1043588, EPI\_ISL\_1043590 to 1043592, EPI\_ISL\_1043594, EPI\_ISL\_1043596, EPI\_ISL\_1043598, EPI\_ISL\_1043600 to 1043602, EPI\_ISL\_1043604, EPI\_ISL\_1043606 to 1043608, EPI\_ISL\_1043610, EPI\_ISL\_1043612 to 1043614, EPI\_ISL\_1043616 to 1043618, EPI\_ISL\_1043620 to 1043622, EPI\_ISL\_1043624, EPI\_ISL\_1043626 to 1043628, EPI\_ISL\_1043630 to 1043632, EPI\_ISL\_1043634, EPI\_ISL\_1043636 to 1043638, EPI\_ISL\_1043640 to 1043642, EPI\_ISL\_1043644 to 1043646, EPI\_ISL\_1043648 to 1043650, EPI\_ISL\_1043652 to 1043654, EPI\_ISL\_1043656 to 1043658, EPI\_ISL\_1043660 to 1043662, EPI\_ISL\_1043664 to 1043666, EPI\_ISL\_1043668 to 1043670, EPI\_ISL\_1043672 to 1043674, EPI\_ISL\_1043676 to 1043678, EPI\_ISL\_1043680 to 1043682, EPI\_ISL\_1043684 to 1043686, EPI\_ISL\_1043688 to 1043690, EPI\_ISL\_1043692 to 1043694, EPI\_ISL\_1043696 to 1043698, EPI\_ISL\_1043700 to 1043702, EPI\_ISL\_1043704 to 1043706, EPI\_ISL\_1043708 to 1043710, EPI\_ISL\_1043712 to 1043714, EPI\_ISL\_1043716 to 1043718, EPI\_ISL\_1043720 to 1043722, EPI\_ISL\_1043724 to 1043726, EPI\_ISL\_1043728 to 1043730, EPI\_ISL\_1043732 to 1043734, EPI\_ISL\_1043736 to 1043738, EPI\_ISL\_1043740 to 1043742, EPI\_ISL\_1043744 to 1043746, EPI\_ISL\_1043748 to 1043750, EPI\_ISL\_1043752 to 1043754, EPI\_ISL\_1043756 to 1043758, EPI\_ISL\_1043760 to 1043762, EPI\_ISL\_1043764 to 1043766, EPI\_ISL\_1043768 to 1043770, EPI\_ISL\_1043772 to 1043774, EPI\_ISL\_1043776 to 1043778, EPI\_ISL\_1043780 to 1043782, EPI\_ISL\_1043784 to 1043786, EPI\_ISL\_1043788 to 1043790, EPI\_ISL\_1043792 to 1043794, EPI\_ISL\_1043796 to 1043798, EPI\_ISL\_1043800 to 1043802, EPI\_ISL\_1043804 to 1043806, EPI\_ISL\_1043808 to 1043810, EPI\_ISL\_1043812 to 1043814, EPI\_ISL\_1043816 to 1043818, EPI\_ISL\_1043820 to 1043822, EPI\_ISL\_1043824 to 1043826, EPI\_ISL\_1043828 to 1043830, EPI\_ISL\_1043832 to 1043834, EPI\_ISL\_1043836 to 1043838, EPI\_ISL\_1043840 to 1043842, EPI\_ISL\_1043844 to 1043846, EPI\_ISL\_1043848 to 1043850, EPI\_ISL\_1043852 to 1043854, EPI\_ISL\_1043856 to 1043858, EPI\_ISL\_1043860 to 1043862, EPI\_ISL\_1043864 to 1043866, EPI\_ISL\_1043868 to 1043870, EPI\_ISL\_1043872 to 1043874, EPI\_ISL\_1043876 to 1043878, EPI\_ISL\_1043880 to 1043882, EPI\_ISL\_1043884 to 1043886, EPI\_ISL\_1043888 to 1043890, EPI\_ISL\_1043892 to 1043894, EPI\_ISL\_1043896 to 1043898, EPI\_ISL\_1043900 to 1043902, EPI\_ISL\_1043904 to 1043906, EPI\_ISL\_1043908 to 1043910, EPI\_ISL\_1043912 to 1043914, EPI\_ISL\_1043916 to 1043918, EPI\_ISL\_1043920 to 1043922, EPI\_ISL\_1043924 to 1043926, EPI\_ISL\_1043928 to 1043930, EPI\_ISL\_1043932 to 1043934, EPI\_ISL\_1043936 to 1043938, EPI\_ISL\_1043940 to 1043942, EPI\_ISL\_1043944 to 1043946, EPI\_ISL\_1043948 to 1043950, EPI\_ISL\_1043952 to 1043954, EPI\_ISL\_1043956 to 1043958, EPI\_ISL\_1043960 to 1043962, EPI\_ISL\_1043964 to 1043966, EPI\_ISL\_1043968 to 1043970, EPI\_ISL\_1043972 to 1043974, EPI\_ISL\_1043976 to 1043978, EPI\_ISL\_1043980 to 1043982, EPI\_ISL\_1043984 to 1043986, EPI\_ISL\_1043988 to 1043990, EPI\_ISL\_1043992 to 1043994, EPI\_ISL\_1043996 to 1043998, EPI\_ISL\_1044000 to 1044002, EPI\_ISL\_1044004 to 1044006, EPI\_ISL\_1044008 to 1044010, EPI\_ISL\_1044012 to 1044014, EPI\_ISL\_1044016 to 1044018, EPI\_ISL\_1044020 to 1044022, EPI\_ISL\_1044024 to 1044026, EPI\_ISL\_1044028 to 1044030, EPI\_ISL\_1044032 to 1044034, EPI\_ISL\_1044036 to 1044038, EPI\_ISL\_1044040 to 1044042, EPI\_ISL\_1044044 to 1044046, EPI\_ISL\_1044048 to 1044050, EPI\_ISL\_1044052 to 1044054, EPI\_ISL\_1044056 to 1044058, EPI\_ISL\_1044060 to 1044062, EPI\_ISL\_1044064 to 1044066, EPI\_ISL\_1044068 to 1044070, EPI\_ISL\_1044072 to 1044074, EPI\_ISL\_1044076 to 1044078, EPI\_ISL\_1044080 to 1044082, EPI\_ISL\_1044084 to 1044086, EPI\_ISL\_1044088 to 1044090, EPI\_ISL\_1044092 to 1044094, EPI\_ISL\_1044096 to 1044098, EPI\_ISL\_1044100 to 1044102, EPI\_ISL\_1044104 to 1044106, EPI\_ISL\_1044108 to 1044110, EPI\_ISL\_1044112 to 1044114, EPI\_ISL\_1044116 to 1044118, EPI\_ISL\_1044120 to 1044122, EPI\_ISL\_1044124 to 1044126, EPI\_ISL\_1044128 to 1044130, EPI\_ISL\_1044132 to 1044134, EPI\_ISL\_1044136 to 1044138, EPI\_ISL\_1044140 to 1044142, EPI\_ISL\_1044144 to 1044146, EPI\_ISL\_1044148 to 1044150, EPI\_ISL\_1044152 to 1044154, EPI\_ISL\_1044156 to 1044158, EPI\_ISL\_1044160 to 1044162, EPI\_ISL\_1044164 to 1044166, EPI\_ISL\_1044168 to 1044170, EPI\_ISL\_1044172 to 1044174, EPI\_ISL\_1044176 to 1044178, EPI\_ISL\_1044180 to 1044182, EPI\_ISL\_1044184 to 1044186, EPI\_ISL\_1044188 to 1044190, EPI\_ISL\_1044192 to 1044194, EPI\_ISL\_1044196 to 1044198, EPI\_ISL\_1044200 to 1044202, EPI\_ISL\_1044204 to 1044206, EPI\_ISL\_1044208 to 1044210, EPI\_ISL\_1044212 to 1044214, EPI\_ISL\_1044216 to 1044218, EPI\_ISL\_1044220 to 1044222, EPI\_ISL\_1044224 to 1044226, EPI\_ISL\_1044228 to 1044230, EPI\_ISL\_1044232 to 1044234, EPI\_ISL\_1044236 to 1044238, EPI\_ISL\_1044240 to 1044242, EPI\_ISL\_1044244 to 1044246, EPI\_ISL\_1044248 to 1044250, EPI\_ISL\_1044252 to 1044254, EPI\_ISL\_1044256 to 1044258, EPI\_ISL\_1044260 to 1044262, EPI\_ISL\_1044264 to 1044266, EPI\_ISL\_1044268 to 1044270, EPI\_ISL\_1044272 to 1044274, EPI\_ISL\_1044276 to 1044278, EPI\_ISL\_1044280 to 1044282, EPI\_ISL\_1044284 to 1044286, EPI\_ISL\_1044288 to 1044290, EPI\_ISL\_1044292 to 1044294, EPI\_ISL\_1044296 to 1044298, EPI\_ISL\_1044300 to 1044302, EPI\_ISL\_1044304 to 1044306, EPI\_ISL\_1044308 to 1044310, EPI\_ISL\_1044312 to 1044314, EPI\_ISL\_1044316 to 1044318, EPI\_ISL\_1044320 to 1044322, EPI\_ISL\_1044324 to 1044326, EPI\_ISL\_1044328 to 1044330, EPI\_ISL\_1044332 to 1044334, EPI\_ISL\_1044336 to 1044338, EPI\_ISL\_1044340 to 1044342, EPI\_ISL\_1044344 to 1044346, EPI\_ISL\_1044348 to 1044350, EPI\_ISL\_1044352 to 1044354, EPI\_ISL\_1044356 to 1044358, EPI\_ISL\_1044360 to 1044362, EPI\_ISL\_1044364 to 1044366, EPI\_ISL\_1044368 to 1044370, EPI\_ISL\_1044372 to 1044374, EPI\_ISL\_1044376 to 1044378, EPI\_ISL\_1044380 to 1044382, EPI\_ISL\_1044384 to 1044386, EPI\_ISL\_1044388 to 1044390, EPI\_ISL\_1044392 to 1044394, EPI\_ISL\_1044396 to 1044398, EPI\_ISL\_1044400 to 1044402, EPI\_ISL\_1044404 to 1044406, EPI\_ISL\_1044408 to 1044410, EPI\_ISL\_1044412 to 1044414, EPI\_ISL\_1044416 to 1044418, EPI\_ISL\_1044420 to 1044422, EPI\_ISL\_1044424 to 1044426, EPI\_ISL\_1044428 to 1044430, EPI\_ISL\_1044432 to 1044434, EPI\_ISL\_1044436 to 1044438, EPI\_ISL\_1044440 to 1044442, EPI\_ISL\_1044444 to 1044446, EPI\_ISL\_1044448 to 1044450, EPI\_ISL\_1044452 to 1044454, EPI\_ISL\_1044456 to 1044458, EPI\_ISL\_1044460 to 1044462, EPI\_ISL\_1044464 to 1044466, EPI\_ISL\_1044468 to 1044470, EPI\_ISL\_1044472 to 1044474, EPI\_ISL\_1044476 to 1044478, EPI\_ISL\_1044480 to 1044482, EPI\_ISL\_1044484 to 1044486, EPI\_ISL\_1044488 to 1044490, EPI\_ISL\_1044492 to 1044494, EPI\_ISL\_1044496 to 1044498, EPI\_ISL\_1044500 to 1044502, EPI\_ISL\_1044504 to 1044506, EPI\_ISL\_1044508 to 1044510, EPI\_ISL\_1044512 to 1044514, EPI\_ISL\_1044516 to 1044518, EPI\_ISL\_1044520 to 1044522, EPI\_ISL\_1044524 to 1044526, EPI\_ISL\_1044528 to 1044530, EPI\_ISL\_1044532 to 1044534, EPI\_ISL\_1044536 to 1044538, EPI\_ISL\_1044540 to 1044542, EPI\_ISL\_1044544 to 1044546, EPI\_ISL\_1044548 to 1044550, EPI\_ISL\_1044552 to 1044554, EPI\_ISL\_1044556 to 1044558, EPI\_ISL\_1044560 to 1044562, EPI\_ISL\_1044564 to 1044566, EPI\_ISL\_1044568 to 1044570, EPI\_ISL\_1044572 to 1044574, EPI\_ISL\_1044576 to 1044578, EPI\_ISL\_1044580 to 1044582, EPI\_ISL\_1044584 to 1044586, EPI\_ISL\_1044588 to 1044590, EPI\_ISL\_1044592 to 1044594, EPI\_ISL\_1044596 to 1044598, EPI\_ISL\_1044600 to 1044602, EPI\_ISL\_1044604 to 1044606, EPI\_ISL\_1044608 to 1044610, EPI\_ISL\_1044612 to 1044614, EPI\_ISL\_1044616 to 1044618, EPI\_ISL\_1044620 to 1044622, EPI\_ISL\_1044624 to 1044626, EPI\_ISL\_1044628 to 1044630, EPI\_ISL\_1044632 to 1044634, EPI\_ISL\_1044636 to 1044638, EPI\_ISL\_1044640 to 1044642, EPI\_ISL\_1044644 to 1044646, EPI\_ISL\_1044648 to 1044650, EPI\_ISL\_1044652 to 1044654, EPI\_ISL\_1044656 to 1044658, EPI\_ISL\_1044660 to 1044662, EPI\_ISL\_1044664 to 1044666, EPI\_ISL\_1044668 to 1044670, EPI\_ISL\_1044672 to 1044674, EPI\_ISL\_1044676 to 1044678, EPI\_ISL\_1044680 to 1044682, EPI\_ISL\_1044684 to 1044686, EPI\_ISL\_1044688 to 1044690, EPI\_ISL\_1044692 to 1044694, EPI\_ISL\_1044696 to 1044698, EPI\_ISL\_1044700 to 1044702, EPI\_ISL\_1044704 to 1044706, EPI\_ISL\_1044708 to 1044710, EPI\_ISL\_1044712 to 1044714, EPI\_ISL\_1044716 to 1044718, EPI\_ISL\_1044720 to 1044722, EPI\_ISL\_1044724 to 1044726, EPI\_ISL\_1044728 to 10447





|                                                                                                                                                                                                                                                                        |                                                                                                                     |                                                                                                                        |                                                                                                                                                                                                                                                                                                                                                                                                                                                                                                                                                                                                                                                                                                               |
|------------------------------------------------------------------------------------------------------------------------------------------------------------------------------------------------------------------------------------------------------------------------|---------------------------------------------------------------------------------------------------------------------|------------------------------------------------------------------------------------------------------------------------|---------------------------------------------------------------------------------------------------------------------------------------------------------------------------------------------------------------------------------------------------------------------------------------------------------------------------------------------------------------------------------------------------------------------------------------------------------------------------------------------------------------------------------------------------------------------------------------------------------------------------------------------------------------------------------------------------------------|
|                                                                                                                                                                                                                                                                        |                                                                                                                     | Ministry of Public Health, Thailand                                                                                    | Sittiporn Parnmen; Sunthareeya Waicharoen.; Thanutsapa Thanadachakul                                                                                                                                                                                                                                                                                                                                                                                                                                                                                                                                                                                                                                          |
| EPI_ISL_1201561 to 1201645, EPI_ISL_1273808 to 1273818                                                                                                                                                                                                                 | Regionalne Centrum Krwiodawstwa i Krwiolecznictwa w Biarmstoku Pracownia Diagnostyki Molekularnej wirusa SARS-CoV-2 | 1. National Institute of Public Health - National Institute of Hygiene; 2. Eurofins Genomics Europe Sequencing GmbH    | ECDC COVID-19 WGS support team; Eurofins Genomics Europe Sequencing Team; Gierczyki Rafa; Sadkowska-Todys Magorzata; Wokowicz Tomasz; Zacharczuk Katarzyna                                                                                                                                                                                                                                                                                                                                                                                                                                                                                                                                                    |
| EPI_ISL_1314299                                                                                                                                                                                                                                                        | Regions Hospital                                                                                                    | Minnesota Department of Health, Public Health Laboratory                                                               | Alexandra Lorentz; Jacob Garfin; Matt Plumb; and Xiong Wang                                                                                                                                                                                                                                                                                                                                                                                                                                                                                                                                                                                                                                                   |
| EPI_ISL_1096236 to 1096241, EPI_ISL_1096263, EPI_ISL_1096267, EPI_ISL_1096321 to 1096330, EPI_ISL_1096332 to 1096333, EPI_ISL_1118896 to 1118897, EPI_ISL_1301817 to 1301819, EPI_ISL_1301863 to 1301864, EPI_ISL_1301883, EPI_ISL_1301944, EPI_ISL_1301957 to 1301958 | see above                                                                                                           | Research                                                                                                               | Angela Brisebarre; Camille Capel; Etienne Simon-Lorière; Leruez-Ville Marianne; Louise Lefrançois; Marion Barbet; Maud Vanpeene; Méline Bizard; Sylvie Behilli; Sylvie van der Werf; Vincent Enouf                                                                                                                                                                                                                                                                                                                                                                                                                                                                                                            |
| EPI_ISL_1069190 to 1069191                                                                                                                                                                                                                                             | Research Institute for Tropical Medicine                                                                            | Research Institute for Tropical Medicine                                                                               | Catalino Demetria; Daria Manalo; Edelwisa Mercado; Francisco Gerardo Polotan; Hannah Leah Morito; Inez Andrea Medado; John Leonard Chan; Joseph Hughes; Kirstyn Brunker; Ma Angelica Tujan; Othoniel Jan Onza                                                                                                                                                                                                                                                                                                                                                                                                                                                                                                 |
| EPI_ISL_1081829                                                                                                                                                                                                                                                        | Research Institute for Tropical Medicine                                                                            | Philippine Genome Center                                                                                               | Alethea R. de Guzman; Anna Ong-Lim; Arianne A. Zamora; Asia Louisa U. Chong; Benedict A. Maralit; Candice Francheska B. Tamboan; Carlo M. Lapid; Celia Carlos; Cynthia P. Saloma; Devon Ray Pacial; Edsel Maurice Salvaña; El King D. Morado; Eva Maria Cutiongco-de la Paz; Francis A. Tablizo; Irish Coleen A. Asin; Jaime C. Montoya; Jan Michael C. Yap; Jo-Hannah S. Llamas; John Q. Wong; Joshua Gregor A. Dizon; Juan Antonio R. Magalang; Karol Sophia Agape R. Padilla; Kenneth M. Kim; Kris P. Punayan; Marc Edsel C. Ayes; Marc Jerrone R. Castro; Maria Sofia L. Yangzon; Marissa Alejandria; Razel Nikka M. Hao; Rianna Patricia S. Cruz; Sheila Mae M. Araiza; and Maria Rosario Singh-Vergeire |
| EPI_ISL_1008901, EPI_ISL_1008907 to 1008909                                                                                                                                                                                                                            | Resolve Diagnostics                                                                                                 | Pathogen Discovery, Respiratory Viruses Branch, Division of Viral Diseases, Centers for Disease Control and Prevention | Anna Uehara; Clinton R. Paden; Haibin Wang; Jing Zhang; Krista Queen; Peter Cook; Suxiang Tong; Yan Li; Ying Tao                                                                                                                                                                                                                                                                                                                                                                                                                                                                                                                                                                                              |
| EPI_ISL_1296492 to 1296626, EPI_ISL_1296628 to 1296652                                                                                                                                                                                                                 | Respiratory Virus Unit, National Infection Service, Public Health England                                           | COVID-19 Genomics UK (COG-UK) Consortium                                                                               | PHE Covid Sequencing Team                                                                                                                                                                                                                                                                                                                                                                                                                                                                                                                                                                                                                                                                                     |
| EPI_ISL_1233879 to 1233890, EPI_ISL_1233899, EPI_ISL_1233925 to 1233935, EPI_ISL_1233938 to 1233942                                                                                                                                                                    | Respiratory Viruses Branch, Centers for Disease Control and Prevention                                              | Respiratory Viruses Branch, Centers for Disease Control and Prevention                                                 | Allen, E.; Antico, J.; Ascencio, A.; B.L.; Barret; Barrett; Batra, D.; Becker, D.; Bolze, A.; C.R.; Cassens, T.; Cho, R.; Cirulli, E.; Cook, Cook, P.; D.T.; Febbo, P.; Galloway, S.; Gietzen, K.; Howard; Isaksson, M.; K.S.; Laurent, M.; Lee, J.; Lee, W.; Levay, G.; Li, Y.; Liu, J.; Lu, J.; Lynch, B.; MacCannell, D.; Marine, R.; Montmayeur, A.; N.L.; Nguyen, J.; P.W.; Paden; Queen, K.; Rambo-Martin; Ramirez, J.; Rivera-Garcia, C.; Sandoval, E.; Sheth, M.; Sickler, B.; Tao, Y.; Tolentino, M.; Tong, S.; Tran, C.; Uehara, A.; Wang, H.; Wang, S.; Washington; White, S.; Wickline, S.; Zhang, J.; de Feo, E.                                                                                 |
| EPI_ISL_1302617, EPI_ISL_1302619, EPI_ISL_1302621, EPI_ISL_1302625 to 1302626, EPI_ISL_1302630, EPI_ISL_1302633 to 1302635, EPI_ISL_1302638 to 1302641, EPI_ISL_1302643, EPI_ISL_1302645, EPI_ISL_1302648, EPI_ISL_1302650                                             | see above                                                                                                           | Respublikine Siauliu Igonine                                                                                           | Astra Vitkauskienė; Darius Cereskevicius; Inga Nasvytiene; Mantas Saraukas; Marius Sukys; Rasa Ugenskiene; Renaldas Jurkevicius; Zivile Zemeckiene                                                                                                                                                                                                                                                                                                                                                                                                                                                                                                                                                            |
| EPI_ISL_1040778                                                                                                                                                                                                                                                        | Retreat CHC wc RHC                                                                                                  | NHLS/UCT                                                                                                               | Arash Iranzadeh; Bruna Galvao; Carolyn Williamson; Deelan Doolabh; Diana Hardie; Innocent Mudau; Kruger Marais; Lynn Tyers; Marvin Hsiao; Stephen Korsman                                                                                                                                                                                                                                                                                                                                                                                                                                                                                                                                                     |
| EPI_ISL_1011706 to 1011750, EPI_ISL_1121813 to 1121878, EPI_ISL_1121972, EPI_ISL_1137081, EPI_ISL_1253941 to 1254008                                                                                                                                                   | Rhode Island Department of Health                                                                                   | Infectious Disease Program, Broad Institute of Harvard and MIT                                                         | Adams, G.; Azevedo, K.; B.L.; B.W.; Bauer, M.; Birren; Carter, A.; Chaluvadi, S.; D.J.; DeRuff, K.; Gallagher, G.; Gladden-Young, A.; Huard, R.; J.E.; K.J.; King, E.; Lagerborg, K.; Lemieux; Loreth, C.; MacInnis; Miller, A.; Normandin, E.; P.C.; Park; Reilly, S.; Rudy, M.; Siddle; Smole, S.; Tomkins-Tinch, C.; and Sabeti                                                                                                                                                                                                                                                                                                                                                                            |
| EPI_ISL_1239479, EPI_ISL_1239484, EPI_ISL_1239487, EPI_ISL_1239490, EPI_ISL_1239493, EPI_ISL_1239502, EPI_ISL_1239509, EPI_ISL_1239515, EPI_ISL_1239524, EPI_ISL_1239528, EPI_ISL_1239530                                                                              | see above                                                                                                           | Rob Ferreira Hospital, National Health Laboratory Services, Mpumalanga, South Africa                                   | Amoako DG; Bhiman JN; Ismail A; Mahlangu B; Mohale T; Ntuli N; Scheepers C                                                                                                                                                                                                                                                                                                                                                                                                                                                                                                                                                                                                                                    |
| EPI_ISL_1285547, EPI_ISL_1353647, EPI_ISL_1353704, EPI_ISL_1353748, EPI_ISL_1353843, EPI_ISL_1353911, EPI_ISL_1353918, EPI_ISL_1353946, EPI_ISL_1354075, EPI_ISL_1354107, EPI_ISL_1354226                                                                              | see above                                                                                                           | Robert-Bosch-Krankenhaus                                                                                               | Robert Koch Institute                                                                                                                                                                                                                                                                                                                                                                                                                                                                                                                                                                                                                                                                                         |
| EPI_ISL_1184113 to 1184114, EPI_ISL_1184135 to 1184137                                                                                                                                                                                                                 | Rochester Regional Hospital                                                                                         | Multidrug-Resistant Organism Repository and Surveillance Network (MRSN)                                                | Ana C. Ong; Brendan Corey; Brett E. Swierczewski; Edward E. Walsh; Emil Lesho; Francisco Lebreton; Jason W. Bennett; and Patrick Mc Gann                                                                                                                                                                                                                                                                                                                                                                                                                                                                                                                                                                      |
| EPI_ISL_1200561                                                                                                                                                                                                                                                        | Rockefeller University Hospital                                                                                     | New York City Public Health Laboratory                                                                                 | Jade Wang; et al.                                                                                                                                                                                                                                                                                                                                                                                                                                                                                                                                                                                                                                                                                             |
| EPI_ISL_1113137 to 1113138                                                                                                                                                                                                                                             | Rocky Mountain Laboratories                                                                                         | Rocky Mountain Laboratories                                                                                            | Barbian; Bushmaker, C.; Bushmaker, T.; C.A. and Munster; Holbrook; K.D.; M.G.; Martens; V.J.; van Doremalen, N.                                                                                                                                                                                                                                                                                                                                                                                                                                                                                                                                                                                               |
| EPI_ISL_1159391                                                                                                                                                                                                                                                        | Royal Hospital                                                                                                      | Institute of Tropical Disease, Universitas Airlangga                                                                   | Aldise M Nasri; Gatot Soegiarto; Henny P Margastuti; Jezy R Dewantari; Kazufumi Shimizu; Krisnadi Rahardjo; Laksmi Wulandari; Maria I Lusida; Resti Yudhawati; Rima R Prasetya; Soetjito; Yasuko Mori                                                                                                                                                                                                                                                                                                                                                                                                                                                                                                         |
| EPI_ISL_1048373                                                                                                                                                                                                                                                        | Rumah Sakit Umum Pusat Dr. Kariadi Semarang                                                                         | National Institute of Health Research and Development                                                                  | Arie Ardiansyah Nugraha; Hana Apsari Pawestri; Hartanti Dian Ikawati; Iva Puspitasari; Kartika Dewi Puspa; Krisna Nur Andriana Pangesti; Nelly Puspandari; Subangkit; Vivi Setiawaty.                                                                                                                                                                                                                                                                                                                                                                                                                                                                                                                         |
| EPI_ISL_1265171                                                                                                                                                                                                                                                        | Rumah Sakit Umum Pusat Fatmawati                                                                                    | National Institute of Health Research and Development                                                                  | Arie Ardiansyah Nugraha; Hana Apsari Pawestri; Hartanti Dian Ikawati; Kartika Dewi Puspa; Krisna Pangesti; Lidya Utami; Luci Liana; Lusiya Ningsih; Nelly Puspandari; Subangkit; Vivi Setiawaty                                                                                                                                                                                                                                                                                                                                                                                                                                                                                                               |
| EPI_ISL_1265273                                                                                                                                                                                                                                                        | Rumah Sakit Umum Pusat H. Adam Malik                                                                                | National Institute of Health Research and Development                                                                  | Ade Rahmaini; Arie Ardiansyah Nugraha; Hana Apsari Pawestri; Hartanti Dian Ikawati; Kartika Dewi Puspa; Krisna Pangesti; Maliana; Nelly Elfrida Samsosir; Nelly Puspandari; Rina Yunita; Subangkit; Vivi Setiawaty                                                                                                                                                                                                                                                                                                                                                                                                                                                                                            |
| EPI_ISL_1265168                                                                                                                                                                                                                                                        | Rumah Sakit Umum Pusat Sanglah                                                                                      | National Institute of Health Research and Development                                                                  | Arie Ardiansyah Nugraha; Hana Apsari Pawestri; Hartanti Dian Ikawati; I Gede Ketut Sajinadiyasa; I Nengah Tony Rustawan; Kartika Dewi Puspa; Krisna Pangesti; Nelly Puspandari; Subangkit; Vivi Setiawaty                                                                                                                                                                                                                                                                                                                                                                                                                                                                                                     |
| EPI_ISL_1064171                                                                                                                                                                                                                                                        | Rwanda National Reference Laboratory                                                                                | Rwanda National Laboratory                                                                                             | Enatha Mukantwari; UMuringa Jeanne d'Arc                                                                                                                                                                                                                                                                                                                                                                                                                                                                                                                                                                                                                                                                      |
| EPI_ISL_1063900 to 1063901, EPI_ISL_1063905, EPI_ISL_1063915, EPI_ISL_1063994, EPI_ISL_1064022, EPI_ISL_1064147 to 1064149, EPI_ISL_1064152 to 1064154, EPI_ISL_1064163 to 1064166, EPI_ISL_1064168, EPI_ISL_1064170                                                   | see above                                                                                                           | Rwanda National Reference Laboratory                                                                                   | ENatha MUKantwari; ENatha Mukantwari; Enatha MUKantwari; Enatha Mukantwari; UMuringa Jeanne d'Arc; Umuringa Jeanne d'Arc; Umurunga Jeanne d'Arc                                                                                                                                                                                                                                                                                                                                                                                                                                                                                                                                                               |
| EPI_ISL_1347549                                                                                                                                                                                                                                                        | S.C. ANALISI CLINICHE - Settore Biologia Molecolare                                                                 | S.S. Genetica e Tecniche Omiche Avanzate Istituto Zooprofilattico Sperimentale del Piemonte, Liguria e Valle d'Aosta   | Chiara Beltramo; Elena Bozzetta; Maria Goria; Pier Luigi Acutis; Simone Peletto                                                                                                                                                                                                                                                                                                                                                                                                                                                                                                                                                                                                                               |
| EPI_ISL_1347505                                                                                                                                                                                                                                                        | S.C. ANALISI CLINICHE - Settore Biologia Molecolare AUSL Valle d'Aosta                                              | S.S. Genetica e Tecniche Omiche Avanzate Istituto Zooprofilattico Sperimentale del Piemonte, Liguria e Valle d'Aosta   | Chiara Beltramo; Elena Bozzetta; Maria Goria; Pier Luigi Acutis; Simone Peletto                                                                                                                                                                                                                                                                                                                                                                                                                                                                                                                                                                                                                               |
| EPI_ISL_1372008                                                                                                                                                                                                                                                        | S.L.N MEDICAL COLLEGE & HOSPITAL, KORAPUT                                                                           | Institute of Life Sciences - INSACOG                                                                                   | Ajay Parida; Amol M. Kanampalliwar; Arup Ghosh; Atimukta Jha; INSACOG Consortium; Punit Prasad; Rajeeb Swain; Rupesh Dash; Safal Walia; Shifu Aggarwal; Sunil K. Raghav                                                                                                                                                                                                                                                                                                                                                                                                                                                                                                                                       |
| EPI_ISL_1029956, EPI_ISL_1229177 to 1229178                                                                                                                                                                                                                            | SA Pathology                                                                                                        | SA Pathology                                                                                                           | Chuan Kok Lim; Geoff Higgins; Ivan Bastian; Julien Soubrier; Karin Kassahn; Lex Leong; Mark Turra; Song Gao                                                                                                                                                                                                                                                                                                                                                                                                                                                                                                                                                                                                   |
| EPI_ISL_1138512 to 1138518, EPI_ISL_1138524 to 1138525, EPI_ISL_1138537, EPI_ISL_1138542 to 1138543, EPI_ISL_1138547, EPI_ISL_1138553, EPI_ISL_1138567                                                                                                                 | see above                                                                                                           | SA Pärnu Hospital Laboratory                                                                                           | 1. Laboratory of Communicable Diseases (Estonia); 2. Eurofins Genomics Europe Sequencing GmbH                                                                                                                                                                                                                                                                                                                                                                                                                                                                                                                                                                                                                 |
| EPI_ISL_1227245, EPI_ISL_1228278                                                                                                                                                                                                                                       | SARATOGA HOSPITAL LABORATORY                                                                                        | Wadsworth Center, New York State Department of Health                                                                  | Lidia Dotsenko                                                                                                                                                                                                                                                                                                                                                                                                                                                                                                                                                                                                                                                                                                |
|                                                                                                                                                                                                                                                                        |                                                                                                                     |                                                                                                                        | Alexis Russel; Daryl M. Lamson; Erasmus Schneider; Erica Lasek-Nesselquist; John Kelly; Jonathan Plitnick; Kirsten St. George; Matthew Shudt; Melissa A Leisner; Navjot Singh                                                                                                                                                                                                                                                                                                                                                                                                                                                                                                                                 |

EPI\_ISL\_1214235, EPI\_ISL\_1214237, EPI\_ISL\_1214239, EPI\_ISL\_1214241 to 1214242, EPI\_ISL\_1214244 to 1214245, EPI\_ISL\_1214247, EPI\_ISL\_1214249 to 1214250, EPI\_ISL\_1214252, EPI\_ISL\_1214254, EPI\_ISL\_1214256 to 1214257, EPI\_ISL\_1214259, EPI\_ISL\_1214261, EPI\_ISL\_1214263, EPI\_ISL\_1214265 to 1214266, EPI\_ISL\_1214268, EPI\_ISL\_1214270, EPI\_ISL\_1214272 to 1214273, EPI\_ISL\_1214275, EPI\_ISL\_1214277 to 1214278, EPI\_ISL\_1214280, EPI\_ISL\_1214282, EPI\_ISL\_1214284 to 1214285, EPI\_ISL\_1214287 to 1214288, EPI\_ISL\_1214290, EPI\_ISL\_1214292 to 1214293, EPI\_ISL\_1214295, EPI\_ISL\_1214297, EPI\_ISL\_1214299 to 1214300, EPI\_ISL\_1214302 to 1214303, EPI\_ISL\_1214305, EPI\_ISL\_1214307 to 1214308, EPI\_ISL\_1214310, EPI\_ISL\_1214312 to 1214313, EPI\_ISL\_1214315, EPI\_ISL\_1214317, EPI\_ISL\_1214319, EPI\_ISL\_1214321 to 1214322, EPI\_ISL\_1214324, EPI\_ISL\_1214326 to 1214327, EPI\_ISL\_1214329, EPI\_ISL\_1214331, EPI\_ISL\_1214333 to 1214334, EPI\_ISL\_1214336, EPI\_ISL\_1214338, EPI\_ISL\_1214340, EPI\_ISL\_1214342 to 1214343, EPI\_ISL\_1214345, EPI\_ISL\_1214347, EPI\_ISL\_1214349, EPI\_ISL\_1214351, EPI\_ISL\_1214353 to 1214354, EPI\_ISL\_1214356, EPI\_ISL\_1214358 to 1214359, EPI\_ISL\_1214361, EPI\_ISL\_1214363 to 1214364, EPI\_ISL\_1214366, EPI\_ISL\_1214368, EPI\_ISL\_1214370 to 1214371, EPI\_ISL\_1214373, EPI\_ISL\_1214375 to 1214376, EPI\_ISL\_1214378, EPI\_ISL\_1214380, EPI\_ISL\_1214382, EPI\_ISL\_1214384 to 1214385, EPI\_ISL\_1214387, EPI\_ISL\_1214389, EPI\_ISL\_1214391 to 1214393, EPI\_ISL\_1214395 to 1214396, EPI\_ISL\_1214398 to 1214399, EPI\_ISL\_1214401, EPI\_ISL\_1214404, EPI\_ISL\_1214406 to 1214407, EPI\_ISL\_1214409, EPI\_ISL\_1214411 to 1214412, EPI\_ISL\_1214414, EPI\_ISL\_1214417, EPI\_ISL\_1214419, EPI\_ISL\_1214421, EPI\_ISL\_1214423 to 1214424, EPI\_ISL\_1214426, EPI\_ISL\_1214428, EPI\_ISL\_1214430, EPI\_ISL\_1214432 to 1214433, EPI\_ISL\_1214435, EPI\_ISL\_1214437 to 1214438, EPI\_ISL\_1214440, EPI\_ISL\_1214442, EPI\_ISL\_1214444 to 1214445, EPI\_ISL\_1214447, EPI\_ISL\_1214449, EPI\_ISL\_1214451, EPI\_ISL\_1214453 to 1214454, EPI\_ISL\_1214456, EPI\_ISL\_1214458, EPI\_ISL\_1214460 to 1214461, EPI\_ISL\_1214463, EPI\_ISL\_1214465, EPI\_ISL\_1214467, EPI\_ISL\_1214469, EPI\_ISL\_1214471 to 1214472, EPI\_ISL\_1214474, EPI\_ISL\_1214476, EPI\_ISL\_1214478, EPI\_ISL\_1214480 to 1214481, EPI\_ISL\_1214483, EPI\_ISL\_1214485, EPI\_ISL\_1214487, EPI\_ISL\_1214489, EPI\_ISL\_1214491, EPI\_ISL\_1214493 to 1214494, EPI\_ISL\_1214496, EPI\_ISL\_1214498 to 1214499, EPI\_ISL\_1214501, EPI\_ISL\_1214503, EPI\_ISL\_1214505 to 1214506, EPI\_ISL\_1214508, EPI\_ISL\_1214510 to 1214511, EPI\_ISL\_1214513, EPI\_ISL\_1214515, EPI\_ISL\_1214517 to 1214518, EPI\_ISL\_1214520, EPI\_ISL\_1214522 to 1214523, EPI\_ISL\_1214525, EPI\_ISL\_1214527 to 1214528, EPI\_ISL\_1214530 to 1214531, EPI\_ISL\_1214533, EPI\_ISL\_1214535 to 1214536, EPI\_ISL\_1214538 to 1214539, EPI\_ISL\_1214541, EPI\_ISL\_1214543, EPI\_ISL\_1214545 to 1214546, EPI\_ISL\_1214548, EPI\_ISL\_1214550, EPI\_ISL\_1214552 to 1214553, EPI\_ISL\_1214555, EPI\_ISL\_1214557 to 1214558, EPI\_ISL\_1214560, EPI\_ISL\_1214562, EPI\_ISL\_1214564, EPI\_ISL\_1214566, EPI\_ISL\_1214568 to 1214569, EPI\_ISL\_1214571, EPI\_ISL\_1214573, EPI\_ISL\_1214575, EPI\_ISL\_1214577 to 1214578, EPI\_ISL\_1214580, EPI\_ISL\_1214582, EPI\_ISL\_1214584, EPI\_ISL\_1214586, EPI\_ISL\_1214588 to 1214589, EPI\_ISL\_1214591, EPI\_ISL\_1214593 to 1214594, EPI\_ISL\_1214597 to 1214598, EPI\_ISL\_1214600 to 1214601, EPI\_ISL\_1214603 to 1214604, EPI\_ISL\_1214606, EPI\_ISL\_1214608 to 1214609, EPI\_ISL\_1214611, EPI\_ISL\_1214613, EPI\_ISL\_1214615 to 1214616, EPI\_ISL\_1214618, EPI\_ISL\_1214620, EPI\_ISL\_1214622, EPI\_ISL\_1214624 to 1214625, EPI\_ISL\_1214627, EPI\_ISL\_1214629, EPI\_ISL\_1214631 to 1214632, EPI\_ISL\_1214634, EPI\_ISL\_1214636 to 1214637, EPI\_ISL\_1214639, EPI\_ISL\_1214641, EPI\_ISL\_1214643 to 1214644, EPI\_ISL\_1214646, EPI\_ISL\_1214648, EPI\_ISL\_1214650 to 1214651, EPI\_ISL\_1214653, EPI\_ISL\_1214655, EPI\_ISL\_1214657 to 1214658, EPI\_ISL\_1214660, EPI\_ISL\_1214662 to 1214663, EPI\_ISL\_1214665, EPI\_ISL\_1214667 to 1214668, EPI\_ISL\_1214670, EPI\_ISL\_1214672 to 1214673, EPI\_ISL\_1214675 to 1214676, EPI\_ISL\_1214678, EPI\_ISL\_1214680, EPI\_ISL\_1214682 to 1214683, EPI\_ISL\_1214685, EPI\_ISL\_1214687, EPI\_ISL\_1214689 to 1214690, EPI\_ISL\_1214693, EPI\_ISL\_1214696, EPI\_ISL\_1214698 to 1214699, EPI\_ISL\_1214701, EPI\_ISL\_1214703, EPI\_ISL\_1214705 to 1214706, EPI\_ISL\_1214708, EPI\_ISL\_1214710, EPI\_ISL\_1214712 to 1214713, EPI\_ISL\_1214715, EPI\_ISL\_1214717, EPI\_ISL\_1214719 to 1214720, EPI\_ISL\_1214722, EPI\_ISL\_1214724, EPI\_ISL\_1214726, EPI\_ISL\_1214728 to 1214729, EPI\_ISL\_1214731, EPI\_ISL\_1214733 to 1214734, EPI\_ISL\_1214736, EPI\_ISL\_1214738, EPI\_ISL\_1214740 to 1214741, EPI\_ISL\_1214743 to 1214744, EPI\_ISL\_1214746, EPI\_ISL\_1214748 to 1214749, EPI\_ISL\_1214751, EPI\_ISL\_1214753 to 1214754, EPI\_ISL\_1214756, EPI\_ISL\_1214758, EPI\_ISL\_1214760, EPI\_ISL\_1214762 to 1214763, EPI\_ISL\_1214765, EPI\_ISL\_1214767 to 1214768, EPI\_ISL\_1214770, EPI\_ISL\_1214772, EPI\_ISL\_1214774 to 1214775, EPI\_ISL\_1214777, EPI\_ISL\_1214779, EPI\_ISL\_1214781 to 1214782, EPI\_ISL\_1214784, EPI\_ISL\_1214786, EPI\_ISL\_1214788 to 1214789, EPI\_ISL\_1214791, EPI\_ISL\_1214793, EPI\_ISL\_1214795 to 1214796, EPI\_ISL\_1214798, EPI\_ISL\_1214800, EPI\_ISL\_1214802 to 1214803, EPI\_ISL\_1214805, EPI\_ISL\_1214807 to 1214808, EPI\_ISL\_1214810, EPI\_ISL\_1214812, EPI\_ISL\_1214814 to 1214815, EPI\_ISL\_1214818, EPI\_ISL\_1214820 to 1214821, EPI\_ISL\_1214822, EPI\_ISL\_1214824, EPI\_ISL\_1214826 to 1214827, EPI\_ISL\_1214829, EPI\_ISL\_1214831, EPI\_ISL\_1214833, EPI\_ISL\_1214835 to 1214836, EPI\_ISL\_1214838, EPI\_ISL\_1214840 to 1214841, EPI\_ISL\_1214843, EPI\_ISL\_1214845, EPI\_ISL\_1214848, EPI\_ISL\_1214850 to 1214851, EPI\_ISL\_1214853, EPI\_ISL\_1214855, EPI\_ISL\_1214857, EPI\_ISL\_1214859 to 1214860, EPI\_ISL\_1214862, EPI\_ISL\_1214864 to 1214865, EPI\_ISL\_1214867, EPI\_ISL\_1214869, EPI\_ISL\_1214871 to 1214872, EPI\_ISL\_1214874, EPI\_ISL\_1214876, EPI\_ISL\_1214878 to 1214879, EPI\_ISL\_1214881, EPI\_ISL\_1214883 to 1214884, EPI\_ISL\_1214887, EPI\_ISL\_1214889, EPI\_ISL\_1214892, EPI\_ISL\_1214894, EPI\_ISL\_1214897, EPI\_ISL\_1214899, EPI\_ISL\_1214901, EPI\_ISL\_1214902, EPI\_ISL\_1214904, EPI\_ISL\_1214907, EPI\_ISL\_1214909, EPI\_ISL\_1214912, EPI\_ISL\_1214914, EPI\_ISL\_1214917, EPI\_ISL\_1214919, EPI\_ISL\_1214922, EPI\_ISL\_1214924, EPI\_ISL\_1214926, EPI\_ISL\_1214928, EPI\_ISL\_1214930, EPI\_ISL\_1214933, EPI\_ISL\_1214935, EPI\_ISL\_1214938, EPI\_ISL\_1214941, EPI\_ISL\_1214943, EPI\_ISL\_1214946, EPI\_ISL\_1214948, EPI\_ISL\_1214951, EPI\_ISL\_1214954, EPI\_ISL\_1214956, EPI\_ISL\_1214958 to 1214960, EPI\_ISL\_1214962, EPI\_ISL\_1214965, EPI\_ISL\_1214968, EPI\_ISL\_1214970, EPI\_ISL\_1214973, EPI\_ISL\_1214976, EPI\_ISL\_1214978, EPI\_ISL\_1214981, EPI\_ISL\_1214983, EPI\_ISL\_1214985, EPI\_ISL\_1214988, EPI\_ISL\_1214991, EPI\_ISL\_1214993, EPI\_ISL\_1214996, EPI\_ISL\_1215001, EPI\_ISL\_1215003, EPI\_ISL\_1215006, EPI\_ISL\_1215008, EPI\_ISL\_1215011, EPI\_ISL\_1215013, EPI\_ISL\_1215016, EPI\_ISL\_1215018, EPI\_ISL\_1215021, EPI\_ISL\_1215024, EPI\_ISL\_1215026, EPI\_ISL\_1215028, EPI\_ISL\_1215031, EPI\_ISL\_1215034, EPI\_ISL\_1215036, EPI\_ISL\_1215038, EPI\_ISL\_1215039, EPI\_ISL\_1215041, EPI\_ISL\_1215044, EPI\_ISL\_1215046, EPI\_ISL\_1215048, EPI\_ISL\_1215050, EPI\_ISL\_1215052, EPI\_ISL\_1215054, EPI\_ISL\_1215056, EPI\_ISL\_1215058, EPI\_ISL\_1215060, EPI\_ISL\_1215063, EPI\_ISL\_1215065, EPI\_ISL\_1215068, EPI\_ISL\_1215070, EPI\_ISL\_1215073, EPI\_ISL\_1215076, EPI\_ISL\_1215078, EPI\_ISL\_1215081, EPI\_ISL\_1215084, EPI\_ISL\_1215087, EPI\_ISL\_1215089, EPI\_ISL\_1215092, EPI\_ISL\_1215094, EPI\_ISL\_1215097, EPI\_ISL\_1215100, EPI\_ISL\_1215102, EPI\_ISL\_1215105, EPI\_ISL\_1215108, EPI\_ISL\_1215110, EPI\_ISL\_1215112, EPI\_ISL\_1215115, EPI\_ISL\_1215118, EPI\_ISL\_1215120, EPI\_ISL\_1215123, EPI\_ISL\_1215125, EPI\_ISL\_1215128, EPI\_ISL\_1215130, EPI\_ISL\_1215133, EPI\_ISL\_1215135, EPI\_ISL\_1215138, EPI\_ISL\_1215140, EPI\_ISL\_1215143, EPI\_ISL\_1215145, EPI\_ISL\_1215148 to 1215149, EPI\_ISL\_1215151, EPI\_ISL\_1215153, EPI\_ISL\_1215156, EPI\_ISL\_1215158, EPI\_ISL\_1215160, EPI\_ISL\_1215163, EPI\_ISL\_1215167, EPI\_ISL\_1215169, EPI\_ISL\_1215171, EPI\_ISL\_1215174, EPI\_ISL\_1215176, EPI\_ISL\_1215179, EPI\_ISL\_1215182, EPI\_ISL\_1215184, EPI\_ISL\_1215186, EPI\_ISL\_1215189, EPI\_ISL\_1215192, EPI\_ISL\_1215194, EPI\_ISL\_1215196, EPI\_ISL\_1215199, EPI\_ISL\_1215200, EPI\_ISL\_1215204, EPI\_ISL\_1215207, EPI\_ISL\_1215210, EPI\_ISL\_1215212, EPI\_ISL\_1215216, EPI\_ISL\_1215217, EPI\_ISL\_1215219, EPI\_ISL\_1215222, EPI\_ISL\_1215224, EPI\_ISL\_1215226, EPI\_ISL\_1215229, EPI\_ISL\_1215232, EPI\_ISL\_1215235, EPI\_ISL\_1215237, EPI\_ISL\_1215239, EPI\_ISL\_1215242, EPI\_ISL\_1215244, EPI\_ISL\_1215246, EPI\_ISL\_1215248, EPI\_ISL\_1215251, EPI\_ISL\_1215254, EPI\_ISL\_1215256, EPI\_ISL\_1215259, EPI\_ISL\_1215261, EPI\_ISL\_1215264, EPI\_ISL\_1215266, EPI\_ISL\_1215268, EPI\_ISL\_1215271, EPI\_ISL\_1215273, EPI\_ISL\_1215276, EPI\_ISL\_1215279, EPI\_ISL\_1215281, EPI\_ISL\_1215284, EPI\_ISL\_1215286, EPI\_ISL\_1215289, EPI\_ISL\_1215291, EPI\_ISL\_1215294, EPI\_ISL\_1215296, EPI\_ISL\_1215299, EPI\_ISL\_1215302, EPI\_ISL\_1215305, EPI\_ISL\_1215307, EPI\_ISL\_1215310, EPI\_ISL\_1215313, EPI\_ISL\_1215315, EPI\_ISL\_1215318, EPI\_ISL\_1215321, EPI\_ISL\_1215323, EPI\_ISL\_1215326, EPI\_ISL\_1215328, EPI\_ISL\_1215330, EPI\_ISL\_1215333, EPI\_ISL\_1215335, EPI\_ISL\_1215337, EPI\_ISL\_1215340, EPI\_ISL\_1215342, EPI\_ISL\_1215345, EPI\_ISL\_1215347, EPI\_ISL\_1215350, EPI\_ISL\_1215352, EPI\_ISL\_1215354, EPI\_ISL\_1215357, EPI\_ISL\_1215359, EPI\_ISL\_1215362, EPI\_ISL\_1215364, EPI\_ISL\_1215366, EPI\_ISL\_1215369, EPI\_ISL\_1215371, EPI\_ISL\_1215374, EPI\_ISL\_1215376, EPI\_ISL\_1215378, EPI\_ISL\_1215381, EPI\_ISL\_1215384, EPI\_ISL\_1215386, EPI\_ISL\_1215389 to 1215390, EPI\_ISL\_1215392, EPI\_ISL\_1215394, EPI\_ISL\_1215396, EPI\_ISL\_1215397, EPI\_ISL\_1215399, EPI\_ISL\_1215399, EPI\_ISL\_1215401, EPI\_ISL\_1215403 to 1215404, EPI\_ISL\_1215406, EPI\_ISL\_1215408 to 1215409, EPI\_ISL\_1215411, EPI\_ISL\_1215413, EPI\_ISL\_1215415, EPI\_ISL\_1215417 to 1215418, EPI\_ISL\_1215420, EPI\_ISL\_1215422, EPI\_ISL\_1215424, EPI\_ISL\_1215426, EPI\_ISL\_1215428 to 1215429

see above SARS-CoV-2 Sequencing Castilla y Leon-Spain Consortium SARS-CoV-2 Sequencing Castilla y Leon-Spain Consortium Antonio Orduña-Domingo; Carlos Fuster Foz; Carmen Aldea-Mansilla; Carmen Gimeno Crespo; David Abad; Gregoria Megias Lobón; Jose María Eiros Bouza; Laura Sánchez de Prada; M. Isabel Fernandez-Natal; Marta Dominguez-Gil; Marta Hernandez; María Antonia García Castro; Mª Fe Bрезmes-Valdivieso; Noelia Arenal Andrés; Silvia Rojo; Sonsoles Garcinúñez Pérez

EPI\_ISL\_1046761 to 1046790, EPI\_ISL\_1123420 to 1123426, EPI\_ISL\_1123448, EPI\_ISL\_1123458, EPI\_ISL\_1123468 to 1123471, EPI\_ISL\_1124586, EPI\_ISL\_1124588, EPI\_ISL\_1124590, EPI\_ISL\_1124592 to 1124593, EPI\_ISL\_1124595, EPI\_ISL\_1124597, EPI\_ISL\_1124599, EPI\_ISL\_1124601 to 1124602, EPI\_ISL\_1124604, EPI\_ISL\_1124606, EPI\_ISL\_1127121 to 1127123, EPI\_ISL\_1127876, EPI\_ISL\_1128140 to 1128144, EPI\_ISL\_1128167, EPI\_ISL\_1128175, EPI\_ISL\_1128177 to 1128179, EPI\_ISL\_1128191 to 1128192, EPI\_ISL\_1131130 to 1131135, EPI\_ISL\_1131142, EPI\_ISL\_1131161 to 1131163, EPI\_ISL\_1131801 to 1131802, EPI\_ISL\_1132078 to 1132129, EPI\_ISL\_1198807 to 1198847, EPI\_ISL\_1203816

see above SARS-CoV-2 testing team, National Institute of Infectious Diseases Pathogen Genomics Center, National Institute of Infectious Diseases Ai Kawana-Tachikawa; Chang-Kweng Lin; Chikako Shimokawa; Daisuke Kobayashi; Eri Nakayama; Eunsil Park; Hidemasa Izumiya; Hideyuki Takahashi; Hussein H Aly; Hussein H. Aly; Ken Miyazawa; Ken Shimuta; Kentaro Ito-kawa; Kento Fukano; Koichi Ishikawa; Kousho Wakae; Kyoko Saito; Lucky Ronald Runtuwene; Makoto Kuroda; Masatoshi Hashino; Masatomo Morita; Midori Nakamura-Hoshi; Minoru Naga; Motohiko Ogawa; Nobuo Koizumi; Nozomu Hanaoka; Rina Tanaka; Saori Matsunori; Shigeru Kusagawa; Shigeru Tanjima; Shigeru Tanjima; Shoji Miki; Sunao Iyoda; Tadashi Kikuchi; Takahiro Maeki; Takanobu Kato; Takashi Sakudoh; Tsuguto Fujimoto; Tsuyoshi Sekizuka; Yasutaka Hoshino; Yoshihiro Kaku

EPI\_ISL\_1251239 to 1251259 SC (UCO) Igiene e Sanità Pubblica ARGO Laboratorio Genomica ed Epigenomica D'Agaro P; Dal Monego S; Degasperri M; Licastro D; Lombardo F; Marcello A; Pisan C; Piscianz E; Segat L  
EPI\_ISL\_1109574, EPI\_ISL\_1109576 to 1109577, EPI\_ISL\_1109582, EPI\_ISL\_1109588, EPI\_ISL\_1109591 to 1109593, EPI\_ISL\_1109600, EPI\_ISL\_1109608 to 1109609, EPI\_ISL\_1109620  
see above SC (UCO) Igiene e Sanità Pubblica (funzione integrata con SC Microbiologia e Virologia) ARGO Laboratorio Genomica ed Epigenomica D'Agaro P; Dal Monego S; Degasperri M; Licastro D; Lombardo F; Marcello A; Pisan C; Piscianz E; Segat L

EPI\_ISL\_1109578 to 1109581, EPI\_ISL\_1109583 to 1109586, EPI\_ISL\_1109589 to 1109590, EPI\_ISL\_1109595 to 1109599, EPI\_ISL\_1109601 to 1109607, EPI\_ISL\_1109613, EPI\_ISL\_1109616 to 1109619, EPI\_ISL\_1109621  
see above SC (UCO) Igiene e Sanità Pubblica (funzione integrata con SC Microbiologia e Virologia) e Az. Ospedale-Universitaria Udine ARGO Laboratorio Genomica ed Epigenomica D'Agaro P; Dal Monego S; Degasperri M; Licastro D; Marcello A; Pipan C

EPI\_ISL\_1109575, EPI\_ISL\_1109587, EPI\_ISL\_1109594, EPI\_ISL\_1109610 to 1109612, EPI\_ISL\_1109614 to 1109615 SC (UCO) Igiene e Sanità Pubblica (funzione integrata con SC Microbiologia e Virologia) e Azienda Ospedaliera Pordenone ARGO Laboratorio Genomica ed Epigenomica D'Agaro P; Dal Monego S; De Rosa R; Degasperri M; Licastro D; Marcello A

EPI\_ISL\_1272756 to 1272774, EPI\_ISL\_1318369 to 1318376 SC Dept of Health and Env. Control-Bureau of Laboratories Centers for Disease Control and Prevention Division of Viral Diseases, Pathogen Discovery Anna Montmayeur; Anna Uehara; Ben L. Rambo-Martin; Clinton R. Paden; Dhvani Batra; Haibin Wang; Jasmine Padilla; Jing Zhang; Justin Lee; Katie Dillon; Krista Queen; Kristen Knipe; Kristine Lacek; Lori Rowe; Mark Burroughs; Matthew Schmerer; Mili Sheth; Peter W. Cook; Rachel Marine; Sam Shepard; Sarah Nobles; Shoshona Le; Suxiang Tong; Yan Li; Ying Tao

EPI\_ISL\_1169501, EPI\_ISL\_1225908 to 1225930, EPI\_ISL\_1226039 to 1226047 SC Dept of Health and Env. Control-Bureau of Laboratories Genomics and Discovery, Respiratory Viruses Branch, Division of Viral Diseases, Centers for Disease Control and Prevention Anna Montmayeur; Anna Uehara; Ben L. Rambo-Martin; Clinton R. Paden; Dhvani Batra; Haibin Wang; Jasmine Padilla; Jing Zhang; Justin Lee; Katie Dillon; Krista Queen; Kristen Knipe; Kristine Lacek; Lori Rowe; Mark Burroughs; Matthew Schmerer; Mili Sheth; Peter W. Cook; Rachel Marine; Sam Shepard; Sarah Nobles; Shoshona Le; Suxiang Tong; Yan Li; Ying Tao

EPI\_ISL\_1094244, EPI\_ISL\_1094547 to 1094555, EPI\_ISL\_1095307 to 1095316 SC Dept of Health and Env. Control-Bureau of Laboratories Respiratory Viruses Branch, Division of Viral Diseases, Centers for Disease Control and Prevention Anna Montmayeur; Anna Uehara; Ben L. Rambo-Martin; Clinton R. Paden; Dhvani Batra; Haibin Wang; Jasmine Padilla; Jing Zhang; Justin Lee; Krista Queen; Lori Rowe; Mark Burroughs; Mili Sheth; Peter W. Cook; Rachel Marine; Sarah Nobles; Suxiang Tong; Yan Li; Ying Tao  
EPI\_ISL\_1195427 to 1195476 SC Microbiologia e Virologia AOUSS AMES Centro Poldiagnostico Strumentale S.r.l. Flavia Angioi; Gabriele Ibbia; Marcello Abbondio; Rosangela Sau; Salvatore Rubino; Sergio Uzzau  
EPI\_ISL\_1372541 to 1372545, EPI\_ISL\_1372547 to 1372549 SC Microbiologia e Virologia AOUSS Laboratorio specialistico UOC Ematologia - Ospedale "San Francesco" - ATS-ASSL Nuoro Anna Puggioni; Asproni Rosanna; Bianca Paglietti; Caterina Serra; Claudia Piu; Elena Rimini; Erica Mura; Fiamma Maura; Flavia Angioi; Gabriele Ibbia; Giulia Rocca; Laura Firino; Lo Maglio Iana; Malune Paolo; Mamei Giuseppe Salvatore Rubino; Marcello Abbondio; Monna Maria Itria; Palmas Angelo Domenico; Piras Giovanna; Rosalba Govoni; Rosangela Sau; Sergio Uzzau.; Vincenzo Lai

EPI\_ISL\_1322360, EPI\_ISL\_1322400 to 1322401, EPI\_ISL\_1360405 SCM B12 CNR Virus des Infections Respiratoires - France SUD Antonin Bal; Bruno Lina; Gregory Destras; Gwendolynne Burfin; Hadrien Regue; Laurence Josset; Martine Valette; Quentin Semanas  
EPI\_ISL\_1318501 to 1318504 SD Public Health Laboratory Centers for Disease Control and Prevention Division of Viral Diseases, Pathogen Discovery Anna Montmayeur; Anna Uehara; Ben L. Rambo-Martin; Clinton R. Paden; Dhvani Batra; Haibin Wang; Jasmine Padilla; Jing Zhang; Justin Lee; Katie Dillon; Krista Queen; Kristen Knipe; Kristine Lacek; Lori Rowe; Mark Burroughs; Matthew Schmerer; Mili Sheth; Peter W. Cook; Rachel Marine; Sam Shepard; Sarah Nobles; Shoshona Le; Suxiang Tong; Yan Li; Ying Tao

EPI\_ISL\_1225881, EPI\_ISL\_1226278 to 1226280, EPI\_ISL\_1318248 SD Public Health Laboratory Genomics and Discovery, Respiratory Viruses Branch, Division of Viral Diseases, Centers for Disease Control and Prevention Anna Kelleher; Anna Montmayeur; Anna Uehara; Ben L. Rambo-Martin; Brian Lynch; Clinton R. Paden; Dhvani Batra; Haibin Wang; Han Jia Justin Ng; Jasmine Padilla; Jing Zhang; Justin Lee; Katie Dillon; Krista Queen; Kristen Knipe; Kristine Lacek; Lori Rowe; Mark Burroughs; Matthew Schmerer; Mili Sheth; Peter Cook; Peter W. Cook; Rachel Marine; Sam Shepard; Sarah Nobles; Shoshona Le; Suxiang Tong; Yan Li; Ying Tao  
EPI\_ISL\_1094374, EPI\_ISL\_1094542 to 1094544 SD Public Health Laboratory Respiratory Viruses Branch, Division of Viral Diseases, Centers for Disease Control and Prevention Anna Montmayeur; Anna Uehara; Ben L. Rambo-Martin; Clinton R. Paden; Dhvani Batra; Haibin Wang; Jasmine Padilla; Jing Zhang; Justin Lee; Krista Queen; Lori Rowe; Mark Burroughs; Mili Sheth; Peter W. Cook; Rachel Marine; Sarah Nobles; Suxiang Tong; Yan Li; Ying Tao

EPI\_ISL\_1195280 SECRETARIA MUNICIPAL DE SAUDE DE ARARICA Epiclin Ana Paula Muterle; Carolina Comerlato; Eliana Márcia Da Ros Wendland; Fernando Hayashi Sant'Anna; Janira Pichula; Juliana Comerlato

|                                                                                                                                                                                                                                                                                                                                                                                                                                 |                                                                                           |                                                                                                                                            |                                                                                                                                                                                               |
|---------------------------------------------------------------------------------------------------------------------------------------------------------------------------------------------------------------------------------------------------------------------------------------------------------------------------------------------------------------------------------------------------------------------------------|-------------------------------------------------------------------------------------------|--------------------------------------------------------------------------------------------------------------------------------------------|-----------------------------------------------------------------------------------------------------------------------------------------------------------------------------------------------|
| EPI_ISL_1195287, EPI_ISL_1195289<br>EPI_ISL_1195293                                                                                                                                                                                                                                                                                                                                                                             | SECRETARIA MUNICIPAL DE SAUDE DE SAO LEOPOLDO<br>SECRETARIA MUNICIPAL DE SAUDE DE TAQUARA | Epiclín                                                                                                                                    | Ana Paula Muterle; Carolina Comerlato; Eliana Márcia Da Ros Wendland; Fernando Hayashi Sant'Anna; Janira Prichula; Juliana Comerlato                                                          |
| EPI_ISL_1195274, EPI_ISL_1195283,<br>EPI_ISL_1195285 to 1195286,<br>EPI_ISL_1195290, EPI_ISL_1195292                                                                                                                                                                                                                                                                                                                            | SECRETARIA MUNICIPAL DE SAUDE DE TRES COROAS                                              | Epiclín                                                                                                                                    | Ana Paula Muterle; Carolina Comerlato; Eliana Márcia Da Ros Wendland; Fernando Hayashi Sant'Anna; Janira Prichula; Juliana Comerlato                                                          |
| EPI_ISL_1265473                                                                                                                                                                                                                                                                                                                                                                                                                 | SELARL MIRIALIS CLUSES                                                                    | CNR Virus des Infections Respiratoires - France SUD                                                                                        | Antonin Bal; Bruno Lina; Gregory Destras; Gwendolyne Burfin; Hadrien Regue; Laurence Josset; Martine Valette; Quentin Semanas                                                                 |
| EPI_ISL_1241884, EPI_ISL_1265694                                                                                                                                                                                                                                                                                                                                                                                                | SELARL MIRIALIS CLUSES                                                                    | CNR Virus des Infections Respiratoires - France SUD                                                                                        | Antonin Bal; Bruno Lina; Gregory Destras; Gwendolyne Burfin; Hadrien Regue; Laurence Josset; Martine Valette; Quentin Semanas                                                                 |
| EPI_ISL_1220327 to 1220329,<br>EPI_ISL_1265790 to 1265791                                                                                                                                                                                                                                                                                                                                                                       | SELAS ASTRALAB                                                                            | CNR Virus des Infections Respiratoires - France SUD                                                                                        | Antonin Bal; Bruno Lina; Gregory Destras; Gwendolyne Burfin; Hadrien Regue; Laurence Josset; Martine Valette; Quentin Semanas                                                                 |
| EPI_ISL_1085236, EPI_ISL_1085836,<br>EPI_ISL_1085848, EPI_ISL_1085930 to<br>1085931                                                                                                                                                                                                                                                                                                                                             | SELAS BC-LAB                                                                              | Department of Virology, Henri Mondor University Hospital, Assistance Publique Hôpitaux de Paris, Université Paris-Est Créteil, INSERM U955 | Alexandre Soulier; Christophe Rodríguez; Elisabeth Trawinski; Guillaume Gricourt; Jean-Michel Pawlotsky; Melissa N'Debi; Slim Fourati; Vanessa Demontant                                      |
| EPI_ISL_1265795 to 1265796,<br>EPI_ISL_1265895, EPI_ISL_1287739                                                                                                                                                                                                                                                                                                                                                                 | SELAS BIOLAB AVENIR - CLINIQUE PASTEUR                                                    | CNR Virus des Infections Respiratoires - France SUD                                                                                        | Antonin Bal; Bruno Lina; Gregory Destras; Gwendolyne Burfin; Hadrien Regue; Laurence Josset; Martine Valette; Quentin Semanas                                                                 |
| EPI_ISL_1265774 to 1265775,<br>EPI_ISL_1265845, EPI_ISL_1287754                                                                                                                                                                                                                                                                                                                                                                 | SELAS MIRIALIS                                                                            | CNR Virus des Infections Respiratoires - France SUD                                                                                        | Antonin Bal; Bruno Lina; Gregory Destras; Gwendolyne Burfin; Hadrien Regue; Laurence Josset; Martine Valette; Quentin Semanas                                                                 |
| EPI_ISL_1041970, EPI_ISL_1041974                                                                                                                                                                                                                                                                                                                                                                                                | SFZ                                                                                       | Jessa                                                                                                                                      | Cruys et al. on behalf of the Jessa_cmdLab                                                                                                                                                    |
| EPI_ISL_1036153, EPI_ISL_1036206                                                                                                                                                                                                                                                                                                                                                                                                | SIESP AQ                                                                                  | Istituto Zooprofilattico Sperimentale dell'Abruzzo e Molise "G. Caporale"                                                                  | Ancora M; Calistri P; Cammà C; Curini V; Di Domenico M; Di Pasquale A; Lorusso A; Mangone I; Marcacci M; Puglia I; Rinaldi A; Savini G; Scialabba S                                           |
| EPI_ISL_1036146, EPI_ISL_1036150, EPI_ISL_1036163 to 1036164, EPI_ISL_1036166 to 1036167, EPI_ISL_1036170 to 1036171, EPI_ISL_1036173 to 1036176, EPI_ISL_1036182, EPI_ISL_1036190, EPI_ISL_1036193 to 1036197, EPI_ISL_1036199 to 1036201, EPI_ISL_1036203 to 1036204                                                                                                                                                          | see above                                                                                 | SIESP CH                                                                                                                                   | Istituto Zooprofilattico Sperimentale dell'Abruzzo e Molise "G. Caporale"                                                                                                                     |
| EPI_ISL_1036179                                                                                                                                                                                                                                                                                                                                                                                                                 | SIESP CH DISTRETTO SANITARIO CHIETI                                                       | Istituto Zooprofilattico Sperimentale dell'Abruzzo e Molise "G. Caporale"                                                                  | Ancora M; Calistri P; Cammà C; Curini V; Di Domenico M; Di Pasquale A; Lorusso A; Mangone I; Marcacci M; Puglia I; Rinaldi A; Savini G; Scialabba S                                           |
| EPI_ISL_1110598 to 1110600                                                                                                                                                                                                                                                                                                                                                                                                      | SIESP CH-Drive in VASTO                                                                   | Istituto Zooprofilattico Sperimentale dell'Abruzzo e Molise "G. Caporale"                                                                  | Ancora M; Calistri P; Cammà C; Curini V; Di Domenico M; Di Pasquale A; Lorusso A; Mangone I; Marcacci M; Puglia I; Rinaldi A; Savini G; Scialabba S                                           |
| EPI_ISL_1058041                                                                                                                                                                                                                                                                                                                                                                                                                 | SIESP CHIETI                                                                              | Istituto Zooprofilattico Sperimentale dell'Abruzzo e Molise "G. Caporale"                                                                  | Ancora M; Calistri P; Cammà C; Curini V; Di Domenico M; Di Pasquale A; Lorusso A; Mangone I; Marcacci M; Puglia I; Rinaldi A; Savini G; Scialabba S                                           |
| EPI_ISL_1336892                                                                                                                                                                                                                                                                                                                                                                                                                 | SIESP CHIETI - DRIVE IN ATESSA                                                            | Istituto Zooprofilattico Sperimentale dell'Abruzzo e Molise "G. Caporale"                                                                  | Ancora M; Calistri P; Cammà C; Caporale M; Curini V; Di Domenico M; Di Lollo Valeria; Di Pasquale A; Lorusso A; Mangone I; Marcacci M; Puglia I; Rinaldi A; Savini G; Scialabba S             |
| EPI_ISL_1251003                                                                                                                                                                                                                                                                                                                                                                                                                 | SIESP CHIETI - DRIVE IN CHIETI                                                            | Istituto Zooprofilattico Sperimentale dell'Abruzzo e Molise "G. Caporale"                                                                  | Ancora M; Calistri P; Cammà C; Curini V; Di Domenico M; Di Pasquale A; Lorusso A; Mangone I; Marcacci M; Puglia I; Rinaldi A; Savini G; Scialabba S                                           |
| EPI_ISL_1058030, EPI_ISL_1058043, EPI_ISL_1251056, EPI_ISL_1251081, EPI_ISL_1251083, EPI_ISL_1251095, EPI_ISL_1336674 to 1336675, EPI_ISL_1336683, EPI_ISL_1336692 to 1336693, EPI_ISL_1336696, EPI_ISL_1336712, EPI_ISL_1336714, EPI_ISL_1336736, EPI_ISL_1336740 to 1336741, EPI_ISL_1336751, EPI_ISL_1336910, EPI_ISL_1336926, EPI_ISL_1336933, EPI_ISL_1336955, EPI_ISL_1336961                                             | see above                                                                                 | SIESP CHIETI - DRIVE IN CHIETI                                                                                                             | Istituto Zooprofilattico Sperimentale dell'Abruzzo e Molise "G. Caporale"                                                                                                                     |
| EPI_ISL_1251113, EPI_ISL_1336700, EPI_ISL_1336883, EPI_ISL_1336897, EPI_ISL_1336902, EPI_ISL_1336937                                                                                                                                                                                                                                                                                                                            | SIESP CHIETI - DRIVE IN GISSI                                                             | Istituto Zooprofilattico Sperimentale dell'Abruzzo e Molise "G. Caporale"                                                                  | Ancora M; Calistri P; Cammà C; Caporale M; Curini V; Di Domenico M; Di Lollo V; Di Lollo Valeria; Di Pasquale A; Lorusso A; Mangone I; Marcacci M; Puglia I; Rinaldi A; Savini G; Scialabba S |
| EPI_ISL_1336670, EPI_ISL_1336672, EPI_ISL_1336759, EPI_ISL_1336762 to 1336765, EPI_ISL_1336772 to 1336773, EPI_ISL_1336780, EPI_ISL_1336792, EPI_ISL_1336794 to 1336795, EPI_ISL_1336884, EPI_ISL_1336887, EPI_ISL_1336903, EPI_ISL_1336915, EPI_ISL_1336935, EPI_ISL_1336938, EPI_ISL_1336950                                                                                                                                  | see above                                                                                 | SIESP CHIETI - DRIVE IN LANCIANO                                                                                                           | Istituto Zooprofilattico Sperimentale dell'Abruzzo e Molise "G. Caporale"                                                                                                                     |
| EPI_ISL_1058031 to 1058033, EPI_ISL_1058042, EPI_ISL_1058044 to 1058045, EPI_ISL_1063785 to 1063787, EPI_ISL_1250989, EPI_ISL_1250993, EPI_ISL_1251001, EPI_ISL_1251038, EPI_ISL_1251068 to 1251071, EPI_ISL_1251107 to 1251108, EPI_ISL_1336669, EPI_ISL_1336703, EPI_ISL_1336707, EPI_ISL_1336719 to 1336720, EPI_ISL_1336747 to 1336748, EPI_ISL_1336787, EPI_ISL_1336904, EPI_ISL_1336936, EPI_ISL_1336958, EPI_ISL_1336963 | see above                                                                                 | SIESP CHIETI - DRIVE IN ORTONA                                                                                                             | Istituto Zooprofilattico Sperimentale dell'Abruzzo e Molise "G. Caporale"                                                                                                                     |
| EPI_ISL_1251029 to 1251030, EPI_ISL_1251032, EPI_ISL_1336701, EPI_ISL_1336725, EPI_ISL_1336754, EPI_ISL_1336793, EPI_ISL_1336920, EPI_ISL_1336928, EPI_ISL_1336934, EPI_ISL_1336943, EPI_ISL_1336957, EPI_ISL_1336959                                                                                                                                                                                                           | see above                                                                                 | SIESP CHIETI - DRIVE IN VASTO                                                                                                              | Istituto Zooprofilattico Sperimentale dell'Abruzzo e Molise "G. Caporale"                                                                                                                     |
| EPI_ISL_1250967 to 1250968, EPI_ISL_1250970 to 1250971, EPI_ISL_1250974, EPI_ISL_1250984, EPI_ISL_1250990, EPI_ISL_1250999 to 1251000, EPI_ISL_1251043, EPI_ISL_1251094, EPI_ISL_1251101, EPI_ISL_1251109 to 1251112                                                                                                                                                                                                            | see above                                                                                 | SIESP CHIETI - LANCIANO                                                                                                                    | Istituto Zooprofilattico Sperimentale dell'Abruzzo e Molise "G. Caporale"                                                                                                                     |
| EPI_ISL_1058040                                                                                                                                                                                                                                                                                                                                                                                                                 | SIESP CHIETI DRIVE IN LANCIANO                                                            | Istituto Zooprofilattico Sperimentale dell'Abruzzo e Molise "G. Caporale"                                                                  | Ancora M; Calistri P; Cammà C; Curini V; Di Domenico M; Di Pasquale A; Lorusso A; Mangone I; Marcacci M; Puglia I; Rinaldi A; Savini G; Scialabba S                                           |
| EPI_ISL_1117462, EPI_ISL_1117464, EPI_ISL_1117476 to 1117477, EPI_ISL_1117519, EPI_ISL_1117669, EPI_ISL_1117674, EPI_ISL_1117681                                                                                                                                                                                                                                                                                                | see above                                                                                 | SIESP CHIETI, DRIVE IN CHIETI                                                                                                              | Istituto Zooprofilattico Sperimentale dell'Abruzzo e Molise "G. Caporale"                                                                                                                     |
| EPI_ISL_1117463, EPI_ISL_1117479, EPI_ISL_1117507 to 1117508, EPI_ISL_1117516, EPI_ISL_1117676, EPI_ISL_1117682, EPI_ISL_1117689, EPI_ISL_1117694 to 1117695, EPI_ISL_1117698, EPI_ISL_1121032                                                                                                                                                                                                                                  | see above                                                                                 | SIESP CHIETI, DRIVE IN LANCIANO                                                                                                            | Istituto Zooprofilattico Sperimentale dell'Abruzzo e Molise "G. Caporale"                                                                                                                     |
| EPI_ISL_1117478, EPI_ISL_1117497, EPI_ISL_1117500, EPI_ISL_1117517, EPI_ISL_1117663, EPI_ISL_1117667, EPI_ISL_1117687                                                                                                                                                                                                                                                                                                           | see above                                                                                 | SIESP CHIETI, DRIVE IN ORTONA                                                                                                              | Istituto Zooprofilattico Sperimentale dell'Abruzzo e Molise "G. Caporale"                                                                                                                     |
| EPI_ISL_1117490, EPI_ISL_1117499, EPI_ISL_1117678 to 1117679, EPI_ISL_1117696, EPI_ISL_1117699                                                                                                                                                                                                                                                                                                                                  | SIESP CHIETI, DRIVE IN VASTO                                                              | Istituto Zooprofilattico Sperimentale dell'Abruzzo e Molise "G. Caporale"                                                                  | Ancora M; Calistri P; Cammà C; Curini V; Di Domenico M; Di Pasquale A; Lorusso A; Mangone I; Marcacci M; Puglia I; Rinaldi A; Savini G; Scialabba S                                           |
| EPI_ISL_1117461                                                                                                                                                                                                                                                                                                                                                                                                                 | SIESP CHIETI, DRIVE IN CHIETI                                                             | Istituto Zooprofilattico Sperimentale dell'Abruzzo e Molise "G. Caporale"                                                                  | Ancora M; Calistri P; Cammà C; Curini V; Di Domenico M; Di Pasquale A; Lorusso A; Mangone I; Marcacci M; Puglia I; Rinaldi A; Savini G; Scialabba S                                           |

|                                                                                                                                                                                                                                                                                                                                                                                                                                                                                                                                                                                                                                                                                                                                                                                                                                                                                                                                                                                                                                       |                                                                 |                                                                                                                     |                                                                                                                                                                                                                                                                                                                                                                                                                                                                                                                                                                                                                                                                                                               |
|---------------------------------------------------------------------------------------------------------------------------------------------------------------------------------------------------------------------------------------------------------------------------------------------------------------------------------------------------------------------------------------------------------------------------------------------------------------------------------------------------------------------------------------------------------------------------------------------------------------------------------------------------------------------------------------------------------------------------------------------------------------------------------------------------------------------------------------------------------------------------------------------------------------------------------------------------------------------------------------------------------------------------------------|-----------------------------------------------------------------|---------------------------------------------------------------------------------------------------------------------|---------------------------------------------------------------------------------------------------------------------------------------------------------------------------------------------------------------------------------------------------------------------------------------------------------------------------------------------------------------------------------------------------------------------------------------------------------------------------------------------------------------------------------------------------------------------------------------------------------------------------------------------------------------------------------------------------------------|
| EPI_ISL_1110597                                                                                                                                                                                                                                                                                                                                                                                                                                                                                                                                                                                                                                                                                                                                                                                                                                                                                                                                                                                                                       | SIESP CHIETI-Drive in Chieti                                    | Istituto Zooprofilattico Sperimentale dell'Abruzzo e Molise "G. Caporale"                                           | Ancora M; Calistri P; Cammà C; Curini V; Di Domenico M; Di Pasquale A; Lorusso A; Mangone I; Marcacci M; Puglia I; Rinaldi A; Savini G; Scialabba S                                                                                                                                                                                                                                                                                                                                                                                                                                                                                                                                                           |
| EPI_ISL_1036147, EPI_ISL_1036156, EPI_ISL_1036177, EPI_ISL_1036185, EPI_ISL_1036209, EPI_ISL_1117460, EPI_ISL_1117465, EPI_ISL_1117474, EPI_ISL_1117486 to 1117487, EPI_ISL_1117491 to 1117492, EPI_ISL_1117494, EPI_ISL_1117502, EPI_ISL_1117506, EPI_ISL_1117509 to 1117513, EPI_ISL_1117664, EPI_ISL_1117672, EPI_ISL_1117688                                                                                                                                                                                                                                                                                                                                                                                                                                                                                                                                                                                                                                                                                                      |                                                                 |                                                                                                                     |                                                                                                                                                                                                                                                                                                                                                                                                                                                                                                                                                                                                                                                                                                               |
| see above                                                                                                                                                                                                                                                                                                                                                                                                                                                                                                                                                                                                                                                                                                                                                                                                                                                                                                                                                                                                                             | SIESP DIP PREV CHIETI                                           | Istituto Zooprofilattico Sperimentale dell'Abruzzo e Molise "G. Caporale"                                           | Ancora M; Calistri P; Cammà C; Curini V; Di Domenico M; Di Pasquale A; Lorusso A; Mangone I; Marcacci M; Puglia I; Rinaldi A; Savini G; Scialabba S                                                                                                                                                                                                                                                                                                                                                                                                                                                                                                                                                           |
| EPI_ISL_1117466 to 1117471, EPI_ISL_1117469 to 1117472, EPI_ISL_1117480 to 1117482, EPI_ISL_1117485, EPI_ISL_1117489, EPI_ISL_1117495, EPI_ISL_1117503, EPI_ISL_1117515, EPI_ISL_1117518, EPI_ISL_1117522 to 1117524, EPI_ISL_1117661 to 1117662, EPI_ISL_1117665 to 1117666, EPI_ISL_1117668, EPI_ISL_1117670 to 1117671, EPI_ISL_1117673, EPI_ISL_1117680, EPI_ISL_1117685, EPI_ISL_1117691, EPI_ISL_1117693, EPI_ISL_1121037                                                                                                                                                                                                                                                                                                                                                                                                                                                                                                                                                                                                       |                                                                 |                                                                                                                     |                                                                                                                                                                                                                                                                                                                                                                                                                                                                                                                                                                                                                                                                                                               |
| see above                                                                                                                                                                                                                                                                                                                                                                                                                                                                                                                                                                                                                                                                                                                                                                                                                                                                                                                                                                                                                             | SIESP DIP PREV TERAMO                                           | Istituto Zooprofilattico Sperimentale dell'Abruzzo e Molise "G. Caporale"                                           | Ancora M; Calistri P; Cammà C; Curini V; Di Domenico M; Di Pasquale A; Lorusso A; Mangone I; Marcacci M; Puglia I; Rinaldi A; Savini G; Scialabba S                                                                                                                                                                                                                                                                                                                                                                                                                                                                                                                                                           |
| EPI_ISL_1055817, EPI_ISL_1336662, EPI_ISL_1336666, EPI_ISL_1336668, EPI_ISL_1336678, EPI_ISL_1336686 to 1336689, EPI_ISL_1336691, EPI_ISL_1336694, EPI_ISL_1336699, EPI_ISL_1336782, EPI_ISL_1336906, EPI_ISL_1336929 to 1336930, EPI_ISL_1336945                                                                                                                                                                                                                                                                                                                                                                                                                                                                                                                                                                                                                                                                                                                                                                                     |                                                                 |                                                                                                                     |                                                                                                                                                                                                                                                                                                                                                                                                                                                                                                                                                                                                                                                                                                               |
| see above                                                                                                                                                                                                                                                                                                                                                                                                                                                                                                                                                                                                                                                                                                                                                                                                                                                                                                                                                                                                                             | SIESP DIPARTIMENTO DI PREVENZIONE CHIETI                        | Istituto Zooprofilattico Sperimentale dell'Abruzzo e Molise "G. Caporale"                                           | Ancora M; Calistri P; Cammà C; Caporale M; Curini V; Delli Compagni E; Di Domenico M; Di Lollo V; Di Lollo Valeria; Di Pasquale A; Lorusso A; Mangone I; Marcacci M; Puglia I; Rinaldi A; Savini G; Scialabba S                                                                                                                                                                                                                                                                                                                                                                                                                                                                                               |
| EPI_ISL_1055819                                                                                                                                                                                                                                                                                                                                                                                                                                                                                                                                                                                                                                                                                                                                                                                                                                                                                                                                                                                                                       | SIESP DIPARTIMENTO DI PREVENZIONE SULMONA                       | Istituto Zooprofilattico Sperimentale dell'Abruzzo e Molise "G. Caporale"                                           | Ancora M; Calistri P; Cammà C; Curini V; Delli Compagni E; Di Domenico M; Di Pasquale A; Lorusso A; Mangone I; Marcacci M; Puglia I; Rinaldi A; Savini G; Scialabba S                                                                                                                                                                                                                                                                                                                                                                                                                                                                                                                                         |
| EPI_ISL_1336083 to 1336084, EPI_ISL_1336664 to 1336665, EPI_ISL_1336684 to 1336685, EPI_ISL_1336685, EPI_ISL_1336695, EPI_ISL_1336705, EPI_ISL_1336709 to 1336711, EPI_ISL_1336713, EPI_ISL_1336718, EPI_ISL_1336723, EPI_ISL_1336728 to 1336729, EPI_ISL_1336733 to 1336734, EPI_ISL_1336738 to 1336739, EPI_ISL_1336746, EPI_ISL_1336755, EPI_ISL_1336757 to 1336758, EPI_ISL_1336760, EPI_ISL_1336766, EPI_ISL_1336768 to 1336771, EPI_ISL_1336774 to 1336775, EPI_ISL_1336778 to 1336779, EPI_ISL_1336781, EPI_ISL_1336783 to 1336784, EPI_ISL_1336789 to 1336791, EPI_ISL_1336796, EPI_ISL_1336881, EPI_ISL_1336885, EPI_ISL_1336889 to 1336891, EPI_ISL_1336893 to 1336894, EPI_ISL_1336899, EPI_ISL_1336905, EPI_ISL_1336912, EPI_ISL_1336914, EPI_ISL_1336916 to 1336919, EPI_ISL_1336921, EPI_ISL_1336942, EPI_ISL_1336946, EPI_ISL_1336948 to 1336949, EPI_ISL_1336952 to 1336954, EPI_ISL_1336956, EPI_ISL_1336960                                                                                                         |                                                                 |                                                                                                                     |                                                                                                                                                                                                                                                                                                                                                                                                                                                                                                                                                                                                                                                                                                               |
| see above                                                                                                                                                                                                                                                                                                                                                                                                                                                                                                                                                                                                                                                                                                                                                                                                                                                                                                                                                                                                                             | SIESP DIPARTIMENTO DI PREVENZIONE TERAMO                        | Istituto Zooprofilattico Sperimentale dell'Abruzzo e Molise "G. Caporale"                                           | Ancora M; Calistri P; Cammà C; Caporale M; Curini V; Di Domenico M; Di Lollo V; Di Lollo Valeria; Di Pasquale A; Lorusso A; Mangone I; Marcacci M; Puglia I; Rinaldi A; Savini G; Scialabba S                                                                                                                                                                                                                                                                                                                                                                                                                                                                                                                 |
| EPI_ISL_1110602                                                                                                                                                                                                                                                                                                                                                                                                                                                                                                                                                                                                                                                                                                                                                                                                                                                                                                                                                                                                                       | SIESP Dip. Prev Teramo                                          | Istituto Zooprofilattico Sperimentale dell'Abruzzo e Molise "G. Caporale"                                           | Ancora M; Calistri P; Cammà C; Curini V; Di Domenico M; Di Pasquale A; Lorusso A; Mangone I; Marcacci M; Puglia I; Rinaldi A; Savini G; Scialabba S                                                                                                                                                                                                                                                                                                                                                                                                                                                                                                                                                           |
| EPI_ISL_1251040, EPI_ISL_1251073 to 1251075, EPI_ISL_1251093, EPI_ISL_1251103, EPI_ISL_1251115 to 1251117, EPI_ISL_1290808, EPI_ISL_1336667                                                                                                                                                                                                                                                                                                                                                                                                                                                                                                                                                                                                                                                                                                                                                                                                                                                                                           |                                                                 |                                                                                                                     |                                                                                                                                                                                                                                                                                                                                                                                                                                                                                                                                                                                                                                                                                                               |
| see above                                                                                                                                                                                                                                                                                                                                                                                                                                                                                                                                                                                                                                                                                                                                                                                                                                                                                                                                                                                                                             | SIESP L'AQUILA                                                  | Istituto Zooprofilattico Sperimentale dell'Abruzzo e Molise "G. Caporale"                                           | Ancora M; Calistri P; Cammà C; Caporale M; Curini V; Di Domenico M; Di Lollo V; Di Pasquale A; Lorusso A; Mangone I; Marcacci M; Puglia I; Rinaldi A; Savini G; Scialabba S                                                                                                                                                                                                                                                                                                                                                                                                                                                                                                                                   |
| EPI_ISL_1117459                                                                                                                                                                                                                                                                                                                                                                                                                                                                                                                                                                                                                                                                                                                                                                                                                                                                                                                                                                                                                       | SIESP L'AQUILA,                                                 | Istituto Zooprofilattico Sperimentale dell'Abruzzo e Molise "G. Caporale"                                           | Ancora M; Calistri P; Cammà C; Curini V; Di Domenico M; Di Pasquale A; Lorusso A; Mangone I; Marcacci M; Puglia I; Rinaldi A; Savini G; Scialabba S                                                                                                                                                                                                                                                                                                                                                                                                                                                                                                                                                           |
| EPI_ISL_1110596, EPI_ISL_1114766                                                                                                                                                                                                                                                                                                                                                                                                                                                                                                                                                                                                                                                                                                                                                                                                                                                                                                                                                                                                      | SIESP L'Aquila                                                  | Istituto Zooprofilattico Sperimentale dell'Abruzzo e Molise "G. Caporale"                                           | Ancora M; Calistri P; Cammà C; Curini V; Di Domenico M; Di Pasquale A; Lorusso A; Mangone I; Marcacci M; Puglia I; Rinaldi A; Savini G; Scialabba S                                                                                                                                                                                                                                                                                                                                                                                                                                                                                                                                                           |
| EPI_ISL_1036141, EPI_ISL_1036144 to 1036145, EPI_ISL_1036160, EPI_ISL_1036178, EPI_ISL_1036183 to 1036184, EPI_ISL_1036191                                                                                                                                                                                                                                                                                                                                                                                                                                                                                                                                                                                                                                                                                                                                                                                                                                                                                                            | SIESP SULM                                                      | Istituto Zooprofilattico Sperimentale dell'Abruzzo e Molise "G. Caporale"                                           | Ancora M; Calistri P; Cammà C; Curini V; Di Domenico M; Di Pasquale A; Lorusso A; Mangone I; Marcacci M; Puglia I; Rinaldi A; Savini G; Scialabba S                                                                                                                                                                                                                                                                                                                                                                                                                                                                                                                                                           |
| EPI_ISL_1117475, EPI_ISL_1250960, EPI_ISL_1251037, EPI_ISL_1251052, EPI_ISL_1251076, EPI_ISL_1336677, EPI_ISL_1336681, EPI_ISL_1336886, EPI_ISL_1336907 to 1336909, EPI_ISL_1336924                                                                                                                                                                                                                                                                                                                                                                                                                                                                                                                                                                                                                                                                                                                                                                                                                                                   |                                                                 |                                                                                                                     |                                                                                                                                                                                                                                                                                                                                                                                                                                                                                                                                                                                                                                                                                                               |
| see above                                                                                                                                                                                                                                                                                                                                                                                                                                                                                                                                                                                                                                                                                                                                                                                                                                                                                                                                                                                                                             | SIESP SULMONA                                                   | Istituto Zooprofilattico Sperimentale dell'Abruzzo e Molise "G. Caporale"                                           | Ancora M; Calistri P; Cammà C; Caporale M; Curini V; Di Domenico M; Di Lollo V; Di Lollo Valeria; Di Pasquale A; Lorusso A; Mangone I; Marcacci M; Puglia I; Rinaldi A; Savini G; Scialabba S                                                                                                                                                                                                                                                                                                                                                                                                                                                                                                                 |
| EPI_ISL_1036140, EPI_ISL_1036154 to 1036155, EPI_ISL_1036157, EPI_ISL_1036162, EPI_ISL_1036165, EPI_ISL_1036168 to 1036169, EPI_ISL_1036172, EPI_ISL_1036180 to 1036181, EPI_ISL_1036187, EPI_ISL_1036192, EPI_ISL_1036202, EPI_ISL_1036207 to 1036208, EPI_ISL_1036210, EPI_ISL_1036212 to 1036216, EPI_ISL_1036218 to 1036220, EPI_ISL_1036222                                                                                                                                                                                                                                                                                                                                                                                                                                                                                                                                                                                                                                                                                      |                                                                 |                                                                                                                     |                                                                                                                                                                                                                                                                                                                                                                                                                                                                                                                                                                                                                                                                                                               |
| see above                                                                                                                                                                                                                                                                                                                                                                                                                                                                                                                                                                                                                                                                                                                                                                                                                                                                                                                                                                                                                             | SIESP TERAMO                                                    | Istituto Zooprofilattico Sperimentale dell'Abruzzo e Molise "G. Caporale"                                           | Ancora M; Calistri P; Cammà C; Curini V; Di Domenico M; Di Pasquale A; Lorusso A; Mangone I; Marcacci M; Puglia I; Rinaldi A; Savini G; Scialabba S                                                                                                                                                                                                                                                                                                                                                                                                                                                                                                                                                           |
| EPI_ISL_1281221, EPI_ISL_1281787, EPI_ISL_1284473, EPI_ISL_1284506, EPI_ISL_1353177                                                                                                                                                                                                                                                                                                                                                                                                                                                                                                                                                                                                                                                                                                                                                                                                                                                                                                                                                   | SLK-Kliniken Heilbronn GmbH - Institut für Laboratoriumsmedizin | Robert Koch Institute                                                                                               |                                                                                                                                                                                                                                                                                                                                                                                                                                                                                                                                                                                                                                                                                                               |
| EPI_ISL_1139069                                                                                                                                                                                                                                                                                                                                                                                                                                                                                                                                                                                                                                                                                                                                                                                                                                                                                                                                                                                                                       | SMS Aruja                                                       | Instituto Adolfo Lutz, Interdisciplinary Procedures Center, Strategic Laboratory                                    | Caio Vinicius Dias Lopes; Claudia Regina Gonçalves; Claudio Tavares Sacchi; Erica Valesa Ramos Gomes; Karoline Rodrigues Campos                                                                                                                                                                                                                                                                                                                                                                                                                                                                                                                                                                               |
| EPI_ISL_1372511                                                                                                                                                                                                                                                                                                                                                                                                                                                                                                                                                                                                                                                                                                                                                                                                                                                                                                                                                                                                                       | SOUTH LAKE PEDIATRICS                                           | Minnesota Department of Health, Public Health Laboratory                                                            | Alexandra Lorentz; Jacob Garfin; Matt Plumb; and Xiong Wang                                                                                                                                                                                                                                                                                                                                                                                                                                                                                                                                                                                                                                                   |
| EPI_ISL_1081795                                                                                                                                                                                                                                                                                                                                                                                                                                                                                                                                                                                                                                                                                                                                                                                                                                                                                                                                                                                                                       | SOUTH SUPER HI-WAY                                              | Philippine Genome Center                                                                                            | Alethea R. de Guzman; Anna Ong-Lim; Arianne A. Zamora; Asia Louisa U. Chong; Benedict A. Maralit; Candice Francheska B. Tambaoan; Carlo M. Lapid; Celia Carlos; Cynthia P. Saloma; Devon Ray Pacial; Edsel Maurice Salvaña; El King D. Morado; Eva Maria Cutiongco-de la Paz; Francis A. Tablizo; Irish Coleen A. Asin; Jaime C. Montoya; Jan Michael C. Yap; Jo-Hannah S. Llamas; John Q. Wong; Joshua Gregor A. Dizon; Juan Antonio R. Magalang; Karol Sophia Agape R. Padilla; Kenneth M. Kim; Kris P. Punayan; Marc Edsel C. Ayes; Marc Jerrone R. Castro; Maria Sofia L. Yangzon; Marissa Alejandria; Razel Nikka M. Hao; Rianna Patricia S. Cruz; Sheila Mae M. Araiza; and Maria Rosano Singh-Vergeire |
| EPI_ISL_1239706, EPI_ISL_1239727                                                                                                                                                                                                                                                                                                                                                                                                                                                                                                                                                                                                                                                                                                                                                                                                                                                                                                                                                                                                      | SPZOZ K-KOLE                                                    | 1. National Institute of Public Health - National Institute of Hygiene; 2. Eurofins Genomics Europe Sequencing GmbH | ECDC COVID-19 WGS support team; Eurofins Genomics Europe Sequencing Team; Gierczyki Rafa; Sadkowska-Todys Magorzata; Wokowicz Tomasz; Zacharczuk Katarzyna                                                                                                                                                                                                                                                                                                                                                                                                                                                                                                                                                    |
| EPI_ISL_1016412, EPI_ISL_1016416, EPI_ISL_1016459 to 1016467, EPI_ISL_1016476 to 1016478                                                                                                                                                                                                                                                                                                                                                                                                                                                                                                                                                                                                                                                                                                                                                                                                                                                                                                                                              | STONY BROOK UNIVERSITY HOSPITAL                                 | Wadsworth Center, New York State Department of Health                                                               | Alexis Russel; Daryl M. Lamson; Erasmus Schneider; Erica Lasek-Nesselquist; John Kelly; Jonathan Plitnick; Kirsten St. George; Matthew Shudt; Melissa A Leisner; Navjot Singh                                                                                                                                                                                                                                                                                                                                                                                                                                                                                                                                 |
| EPI_ISL_1016285 to 1016286, EPI_ISL_1016298 to 1016303, EPI_ISL_1016311 to 1016322, EPI_ISL_1016327, EPI_ISL_1226593, EPI_ISL_1226683, EPI_ISL_1226732, EPI_ISL_1226872 to 1226873, EPI_ISL_1226981, EPI_ISL_1227129, EPI_ISL_1227173, EPI_ISL_1227239 to 1227241, EPI_ISL_1227447, EPI_ISL_1227463 to 1227465, EPI_ISL_1227641 to 1227642, EPI_ISL_1227708, EPI_ISL_1227725 to 1227727, EPI_ISL_1227991 to 1228022, EPI_ISL_1228047 to 1228048, EPI_ISL_1228293, EPI_ISL_1228380                                                                                                                                                                                                                                                                                                                                                                                                                                                                                                                                                     |                                                                 |                                                                                                                     |                                                                                                                                                                                                                                                                                                                                                                                                                                                                                                                                                                                                                                                                                                               |
| see above                                                                                                                                                                                                                                                                                                                                                                                                                                                                                                                                                                                                                                                                                                                                                                                                                                                                                                                                                                                                                             | SUNY UPSTATE MEDICAL UNIVERSITY                                 | Wadsworth Center, New York State Department of Health                                                               | Alexis Russel; Daryl M. Lamson; Erasmus Schneider; Erica Lasek-Nesselquist; John Kelly; Jonathan Plitnick; Kirsten St. George; Matthew Shudt; Melissa A Leisner; Navjot Singh                                                                                                                                                                                                                                                                                                                                                                                                                                                                                                                                 |
| EPI_ISL_1171474 to 1171478, EPI_ISL_1171492 to 1171511, EPI_ISL_1171527 to 1171560, EPI_ISL_1171587 to 1171617, EPI_ISL_1241709 to 1241740, EPI_ISL_1241763 to 1241772, EPI_ISL_1241774 to 1241818, EPI_ISL_1249262, EPI_ISL_1249264, EPI_ISL_1318099, EPI_ISL_1318102 to 1318103, EPI_ISL_1318105, EPI_ISL_1318109 to 1318111, EPI_ISL_1318123 to 1318131, EPI_ISL_1318135 to 1318136, EPI_ISL_1318139 to 1318142, EPI_ISL_1318156 to 1318157, EPI_ISL_1318161 to 1318163, EPI_ISL_1318165 to 1318167, EPI_ISL_1318176 to 1318182, EPI_ISL_1318185, EPI_ISL_1318187, EPI_ISL_1318192, EPI_ISL_1360055 to 1360073, EPI_ISL_1360075 to 1360088, EPI_ISL_1360090 to 1360104, EPI_ISL_1360106 to 1360107, EPI_ISL_1381949 to 1381950, EPI_ISL_1381953 to 1381966, EPI_ISL_1381968 to 1381970, EPI_ISL_1381991, EPI_ISL_1381993 to 1381996, EPI_ISL_1382002 to 1382008, EPI_ISL_1382041 to 1382048, EPI_ISL_1382051, EPI_ISL_1382054, EPI_ISL_1382058 to 1382061, EPI_ISL_1382063 to 1382065, EPI_ISL_1382068 to 1382070, EPI_ISL_1382077 |                                                                 |                                                                                                                     |                                                                                                                                                                                                                                                                                                                                                                                                                                                                                                                                                                                                                                                                                                               |
| see above                                                                                                                                                                                                                                                                                                                                                                                                                                                                                                                                                                                                                                                                                                                                                                                                                                                                                                                                                                                                                             | SYNLAB                                                          | GIGA Medical Genomics                                                                                               | Bouchra Boujemla; Cécile Meex; Keith Durkin; Maria Artesi; Marie-Pierre Hayette; Nathalie Renotte; Pierrette Melin; Raphaël Boreux; Sébastien Bontems; Vincent Bours                                                                                                                                                                                                                                                                                                                                                                                                                                                                                                                                          |
| EPI_ISL_1059066 to 1059069, EPI_ISL_1076356, EPI_ISL_1076359, EPI_ISL_1076364, EPI_ISL_1076366, EPI_ISL_1076371, EPI_ISL_1076373 to 1076374, EPI_ISL_1076376 to 1076377, EPI_ISL_1076383 to 1076385, EPI_ISL_1076387 to 1076388, EPI_ISL_1076390 to 1076392, EPI_ISL_1076394 to 1076395, EPI_ISL_1076401 to 1076402, EPI_ISL_1076404 to 1076405, EPI_ISL_1076407 to 1076408, EPI_ISL_1076417 to 1076418, EPI_ISL_1076422, EPI_ISL_1076424 to 1076426, EPI_ISL_1076428 to 1076429, EPI_ISL_1076441 to 1076443, EPI_ISL_1076445, EPI_ISL_1081137, EPI_ISL_1081139 to 1081140, EPI_ISL_1081142 to 1081147, EPI_ISL_1113111 to 1113136, EPI_ISL_1114739, EPI_ISL_1121146 to 1121152, EPI_ISL_1121154 to 1121169, EPI_ISL_1121172, EPI_ISL_1121174 to 1121177, EPI_ISL_1121185 to 1121189, EPI_ISL_1121191 to 1121195, EPI_ISL_1121198, EPI_ISL_1121200 to 1121202, EPI_ISL_1121205 to 1121206, EPI_ISL_1121218 to 1121219, EPI_ISL_1123365 to 1123369, EPI_ISL_1165835 to 1165840, EPI_ISL_1165879 to 1165898                             |                                                                 |                                                                                                                     |                                                                                                                                                                                                                                                                                                                                                                                                                                                                                                                                                                                                                                                                                                               |
| see above                                                                                                                                                                                                                                                                                                                                                                                                                                                                                                                                                                                                                                                                                                                                                                                                                                                                                                                                                                                                                             | SYNLAB - Laboratoire J. Collard                                 | GIGA Medical Genomics                                                                                               | Bouchra Boujemla; Cécile Meex; Keith Durkin; Maria Artesi; Marie-Pierre Hayette; Nathalie Renotte; Pierrette Melin; Raphaël Boreux; Sébastien Bontems;                                                                                                                                                                                                                                                                                                                                                                                                                                                                                                                                                        |

Vincent Bours

EPI\_ISL\_1058441 to 1058442, EPI\_ISL\_1058463 to 1058514, EPI\_ISL\_1058520 to 1058526, EPI\_ISL\_1058528 to 1058532, EPI\_ISL\_1058560 to 1058565, EPI\_ISL\_1058567 to 1058570, EPI\_ISL\_1058572 to 1058573, EPI\_ISL\_1058584, EPI\_ISL\_1058587 to 1058601

see above

SYNLAB - Laboratoire J. Collard

GIGA Medical Genomics

Bouchra Boujemla; Cécile Meex; Keith Durkin; Maria Artesi; Marie-Pierre Hayette; Nathalie Renotte; Pierrette Melin; Raphaël Boreux; Sébastien Bontems; Vincent Bours

EPI\_ISL\_1359990 to 1359991, EPI\_ISL\_1371816

SYNLAB CHARENTES

CNR Virus des Infections Respiratoires - France SUD

Antonin Bal; Bruno Lina; Gregory Destras; Gwendolyne Burfin; Hadrien Regue; Laurence Josset; Martine Valette; Quentin Semanas

EPI\_ISL\_1141939 to 1141982, EPI\_ISL\_1141984 to 1141992, EPI\_ISL\_1141994 to 1142006, EPI\_ISL\_1142008 to 1142024, EPI\_ISL\_1142026 to 1142080, EPI\_ISL\_1145336 to 1145352, EPI\_ISL\_1145354 to 1145357, EPI\_ISL\_1145359 to 1145364, EPI\_ISL\_1145366 to 1145377, EPI\_ISL\_1145379 to 1145383, EPI\_ISL\_1145386, EPI\_ISL\_1145388 to 1145389, EPI\_ISL\_1145391, EPI\_ISL\_1145393, EPI\_ISL\_1145395, EPI\_ISL\_1145397 to 1145398, EPI\_ISL\_1145400, EPI\_ISL\_1145402, EPI\_ISL\_1145404, EPI\_ISL\_1145406, EPI\_ISL\_1145408 to 1145409, EPI\_ISL\_1145411, EPI\_ISL\_1145413, EPI\_ISL\_1145414, EPI\_ISL\_1145415 to 1145419, EPI\_ISL\_1145421, EPI\_ISL\_1145425 to 1145426, EPI\_ISL\_1145428, EPI\_ISL\_1145433, EPI\_ISL\_1145435, EPI\_ISL\_1145437, EPI\_ISL\_1145441, EPI\_ISL\_1145443 to 1145448, EPI\_ISL\_1145450, EPI\_ISL\_1145452 to 1145453, EPI\_ISL\_1145456 to 1145457, EPI\_ISL\_1145460 to 1145461, EPI\_ISL\_1145463 to 1145465, EPI\_ISL\_1145468, EPI\_ISL\_1145472, EPI\_ISL\_1145476 to 1145482, EPI\_ISL\_1145484, EPI\_ISL\_1145488 to 1145489, EPI\_ISL\_1145492 to 1145493, EPI\_ISL\_1145496 to 1145702, EPI\_ISL\_1145704 to 1145720, EPI\_ISL\_1145722 to 1145724, EPI\_ISL\_1145726 to 1145759, EPI\_ISL\_1145761 to 1145775, EPI\_ISL\_1145777 to 1145808, EPI\_ISL\_1145811 to 1145824, EPI\_ISL\_1145826 to 1145841, EPI\_ISL\_1145843 to 1145851, EPI\_ISL\_1145853 to 1145858, EPI\_ISL\_1145861 to 1145872, EPI\_ISL\_1145874 to 1145910, EPI\_ISL\_1148774, EPI\_ISL\_1148787, EPI\_ISL\_1148802, EPI\_ISL\_1148818 to 1148819, EPI\_ISL\_1148827, EPI\_ISL\_1148835, EPI\_ISL\_1148874, EPI\_ISL\_1148881, EPI\_ISL\_1148885, EPI\_ISL\_1148895, EPI\_ISL\_1148911, EPI\_ISL\_1148920, EPI\_ISL\_1148922, EPI\_ISL\_1148991, EPI\_ISL\_1148996, EPI\_ISL\_1149003, EPI\_ISL\_1149036, EPI\_ISL\_1149046, EPI\_ISL\_1151423, EPI\_ISL\_1151427 to 1151428, EPI\_ISL\_1151444, EPI\_ISL\_1151447 to 1151448, EPI\_ISL\_1151458, EPI\_ISL\_1151467 to 1151468, EPI\_ISL\_1151474, EPI\_ISL\_1151479, EPI\_ISL\_1151499, EPI\_ISL\_1151502 to 1151503, EPI\_ISL\_1151509, EPI\_ISL\_1151528, EPI\_ISL\_1151533 to 1151534, EPI\_ISL\_1151536, EPI\_ISL\_1151538, EPI\_ISL\_1151540, EPI\_ISL\_1151543, EPI\_ISL\_1151548, EPI\_ISL\_1151552, EPI\_ISL\_1151556, EPI\_ISL\_1151559, EPI\_ISL\_1151578, EPI\_ISL\_1151583, EPI\_ISL\_1151587 to 1151588, EPI\_ISL\_1151602 to 1151603, EPI\_ISL\_1151611, EPI\_ISL\_1151618, EPI\_ISL\_1151626, EPI\_ISL\_1151638, EPI\_ISL\_1151640 to 1151641, EPI\_ISL\_1151646, EPI\_ISL\_1151652, EPI\_ISL\_1151654 to 1151655, EPI\_ISL\_1151657, EPI\_ISL\_1151665, EPI\_ISL\_1151667, EPI\_ISL\_1151679, EPI\_ISL\_1151697, EPI\_ISL\_1151707, EPI\_ISL\_1151709, EPI\_ISL\_1151738, EPI\_ISL\_1151744, EPI\_ISL\_1151747, EPI\_ISL\_1151749, EPI\_ISL\_1151757, EPI\_ISL\_1151766, EPI\_ISL\_1152614, EPI\_ISL\_1152616, EPI\_ISL\_1152620, EPI\_ISL\_1152629, EPI\_ISL\_1152635, EPI\_ISL\_1152643, EPI\_ISL\_1152645, EPI\_ISL\_1152651, EPI\_ISL\_1152662, EPI\_ISL\_1152674 to 1152676, EPI\_ISL\_1152681, EPI\_ISL\_1152683, EPI\_ISL\_1152695, EPI\_ISL\_1152697 to 1152698, EPI\_ISL\_1152724, EPI\_ISL\_1152731, EPI\_ISL\_1152746 to 1152747, EPI\_ISL\_1152755, EPI\_ISL\_1152759, EPI\_ISL\_1152766, EPI\_ISL\_1152768, EPI\_ISL\_1152787, EPI\_ISL\_1152796, EPI\_ISL\_1152807, EPI\_ISL\_1152809, EPI\_ISL\_1152812, EPI\_ISL\_1152815, EPI\_ISL\_1152825 to 1152826, EPI\_ISL\_1152831 to 1152833, EPI\_ISL\_1152838, EPI\_ISL\_1152841, EPI\_ISL\_1152844 to 1152845, EPI\_ISL\_1152849, EPI\_ISL\_1152851, EPI\_ISL\_1152853, EPI\_ISL\_1152855, EPI\_ISL\_1152857, EPI\_ISL\_1154198, EPI\_ISL\_1154202, EPI\_ISL\_1154221, EPI\_ISL\_1154414, EPI\_ISL\_1154428, EPI\_ISL\_1154478, EPI\_ISL\_1154538, EPI\_ISL\_1154578, EPI\_ISL\_1154730, EPI\_ISL\_1154738, EPI\_ISL\_1154744, EPI\_ISL\_1154774, EPI\_ISL\_1154779, EPI\_ISL\_1154780, EPI\_ISL\_1154789, EPI\_ISL\_1154793, EPI\_ISL\_1154919, EPI\_ISL\_1155009, EPI\_ISL\_1155020, EPI\_ISL\_1155022, EPI\_ISL\_1155024, EPI\_ISL\_1155026, EPI\_ISL\_1155028, EPI\_ISL\_1155030, EPI\_ISL\_1155032, EPI\_ISL\_1155034, EPI\_ISL\_1155036, EPI\_ISL\_1155038, EPI\_ISL\_1155040, EPI\_ISL\_1155042, EPI\_ISL\_1155044, EPI\_ISL\_1155046, EPI\_ISL\_1155048, EPI\_ISL\_1155050, EPI\_ISL\_1155052, EPI\_ISL\_1155054, EPI\_ISL\_1155056, EPI\_ISL\_1155058, EPI\_ISL\_1155060, EPI\_ISL\_1155062, EPI\_ISL\_1155064, EPI\_ISL\_1155066, EPI\_ISL\_1155068, EPI\_ISL\_1155070, EPI\_ISL\_1155072, EPI\_ISL\_1155074, EPI\_ISL\_1155076, EPI\_ISL\_1155078, EPI\_ISL\_1155080, EPI\_ISL\_1155082, EPI\_ISL\_1155084, EPI\_ISL\_1155086, EPI\_ISL\_1155088, EPI\_ISL\_1155090, EPI\_ISL\_1155092, EPI\_ISL\_1155094, EPI\_ISL\_1155096, EPI\_ISL\_1155098, EPI\_ISL\_1155100, EPI\_ISL\_1155102, EPI\_ISL\_1155104, EPI\_ISL\_1155106, EPI\_ISL\_1155108, EPI\_ISL\_1155110, EPI\_ISL\_1155112, EPI\_ISL\_1155114, EPI\_ISL\_1155116, EPI\_ISL\_1155118, EPI\_ISL\_1155120, EPI\_ISL\_1155122, EPI\_ISL\_1155124, EPI\_ISL\_1155126, EPI\_ISL\_1155128, EPI\_ISL\_1155130, EPI\_ISL\_1155132, EPI\_ISL\_1155134, EPI\_ISL\_1155136, EPI\_ISL\_1155138, EPI\_ISL\_1155140, EPI\_ISL\_1155142, EPI\_ISL\_1155144, EPI\_ISL\_1155146, EPI\_ISL\_1155148, EPI\_ISL\_1155150, EPI\_ISL\_1155152, EPI\_ISL\_1155154, EPI\_ISL\_1155156, EPI\_ISL\_1155158, EPI\_ISL\_1155160, EPI\_ISL\_1155162, EPI\_ISL\_1155164, EPI\_ISL\_1155166, EPI\_ISL\_1155168, EPI\_ISL\_1155170, EPI\_ISL\_1155172, EPI\_ISL\_1155174, EPI\_ISL\_1155176, EPI\_ISL\_1155178, EPI\_ISL\_1155180, EPI\_ISL\_1155182, EPI\_ISL\_1155184, EPI\_ISL\_1155186, EPI\_ISL\_1155188, EPI\_ISL\_1155190, EPI\_ISL\_1155192, EPI\_ISL\_1155194, EPI\_ISL\_1155196, EPI\_ISL\_1155198, EPI\_ISL\_1155200, EPI\_ISL\_1155202, EPI\_ISL\_1155204, EPI\_ISL\_1155206, EPI\_ISL\_1155208, EPI\_ISL\_1155210, EPI\_ISL\_1155212, EPI\_ISL\_1155214, EPI\_ISL\_1155216, EPI\_ISL\_1155218, EPI\_ISL\_1155220, EPI\_ISL\_1155222, EPI\_ISL\_1155224, EPI\_ISL\_1155226, EPI\_ISL\_1155228, EPI\_ISL\_1155230, EPI\_ISL\_1155232, EPI\_ISL\_1155234, EPI\_ISL\_1155236, EPI\_ISL\_1155238, EPI\_ISL\_1155240, EPI\_ISL\_1155242, EPI\_ISL\_1155244, EPI\_ISL\_1155246, EPI\_ISL\_1155248, EPI\_ISL\_1155250, EPI\_ISL\_1155252, EPI\_ISL\_1155254, EPI\_ISL\_1155256, EPI\_ISL\_1155258, EPI\_ISL\_1155260, EPI\_ISL\_1155262, EPI\_ISL\_1155264, EPI\_ISL\_1155266, EPI\_ISL\_1155268, EPI\_ISL\_1155270, EPI\_ISL\_1155272, EPI\_ISL\_1155274, EPI\_ISL\_1155276, EPI\_ISL\_1155278, EPI\_ISL\_1155280, EPI\_ISL\_1155282, EPI\_ISL\_1155284, EPI\_ISL\_1155286, EPI\_ISL\_1155288, EPI\_ISL\_1155290, EPI\_ISL\_1155292, EPI\_ISL\_1155294, EPI\_ISL\_1155296, EPI\_ISL\_1155298, EPI\_ISL\_1155300, EPI\_ISL\_1155302, EPI\_ISL\_1155304, EPI\_ISL\_1155306, EPI\_ISL\_1155308, EPI\_ISL\_1155310, EPI\_ISL\_1155312, EPI\_ISL\_1155314, EPI\_ISL\_1155316, EPI\_ISL\_1155318, EPI\_ISL\_1155320, EPI\_ISL\_1155322, EPI\_ISL\_1155324, EPI\_ISL\_1155326, EPI\_ISL\_1155328, EPI\_ISL\_1155330, EPI\_ISL\_1155332, EPI\_ISL\_1155334, EPI\_ISL\_1155336, EPI\_ISL\_1155338, EPI\_ISL\_1155340, EPI\_ISL\_1155342, EPI\_ISL\_1155344, EPI\_ISL\_1155346, EPI\_ISL\_1155348, EPI\_ISL\_1155350, EPI\_ISL\_1155352, EPI\_ISL\_1155354, EPI\_ISL\_1155356, EPI\_ISL\_1155358, EPI\_ISL\_1155360, EPI\_ISL\_1155362, EPI\_ISL\_1155364, EPI\_ISL\_1155366, EPI\_ISL\_1155368, EPI\_ISL\_1155370, EPI\_ISL\_1155372, EPI\_ISL\_1155374, EPI\_ISL\_1155376, EPI\_ISL\_1155378, EPI\_ISL\_1155380, EPI\_ISL\_1155382, EPI\_ISL\_1155384, EPI\_ISL\_1155386, EPI\_ISL\_1155388, EPI\_ISL\_1155390, EPI\_ISL\_1155392, EPI\_ISL\_1155394, EPI\_ISL\_1155396, EPI\_ISL\_1155398, EPI\_ISL\_1155400, EPI\_ISL\_1155402, EPI\_ISL\_1155404, EPI\_ISL\_1155406, EPI\_ISL\_1155408, EPI\_ISL\_1155410, EPI\_ISL\_1155412, EPI\_ISL\_1155414, EPI\_ISL\_1155416, EPI\_ISL\_1155418, EPI\_ISL\_1155420, EPI\_ISL\_1155422, EPI\_ISL\_1155424, EPI\_ISL\_1155426, EPI\_ISL\_1155428, EPI\_ISL\_1155430, EPI\_ISL\_1155432, EPI\_ISL\_1155434, EPI\_ISL\_1155436, EPI\_ISL\_1155438, EPI\_ISL\_1155440, EPI\_ISL\_1155442, EPI\_ISL\_1155444, EPI\_ISL\_1155446, EPI\_ISL\_1155448, EPI\_ISL\_1155450, EPI\_ISL\_1155452, EPI\_ISL\_1155454, EPI\_ISL\_1155456, EPI\_ISL\_1155458, EPI\_ISL\_1155460, EPI\_ISL\_1155462, EPI\_ISL\_1155464, EPI\_ISL\_1155466, EPI\_ISL\_1155468, EPI\_ISL\_1155470, EPI\_ISL\_1155472, EPI\_ISL\_1155474, EPI\_ISL\_1155476, EPI\_ISL\_1155478, EPI\_ISL\_1155480, EPI\_ISL\_1155482, EPI\_ISL\_1155484, EPI\_ISL\_1155486, EPI\_ISL\_1155488, EPI\_ISL\_1155490, EPI\_ISL\_1155492, EPI\_ISL\_1155494, EPI\_ISL\_1155496, EPI\_ISL\_1155498, EPI\_ISL\_1155500, EPI\_ISL\_1155502, EPI\_ISL\_1155504, EPI\_ISL\_1155506, EPI\_ISL\_1155508, EPI\_ISL\_1155510, EPI\_ISL\_1155512, EPI\_ISL\_1155514, EPI\_ISL\_1155516, EPI\_ISL\_1155518, EPI\_ISL\_1155520, EPI\_ISL\_1155522, EPI\_ISL\_1155524, EPI\_ISL\_1155526, EPI\_ISL\_1155528, EPI\_ISL\_1155530, EPI\_ISL\_1155532, EPI\_ISL\_1155534, EPI\_ISL\_1155536, EPI\_ISL\_1155538, EPI\_ISL\_1155540, EPI\_ISL\_1155542, EPI\_ISL\_1155544, EPI\_ISL\_1155546, EPI\_ISL\_1155548, EPI\_ISL\_1155550, EPI\_ISL\_1155552, EPI\_ISL\_1155554, EPI\_ISL\_1155556, EPI\_ISL\_1155558, EPI\_ISL\_1155560, EPI\_ISL\_1155562, EPI\_ISL\_1155564, EPI\_ISL\_1155566, EPI\_ISL\_1155568, EPI\_ISL\_1155570, EPI\_ISL\_1155572, EPI\_ISL\_1155574, EPI\_ISL\_1155576, EPI\_ISL\_1155578, EPI\_ISL\_1155580, EPI\_ISL\_1155582, EPI\_ISL\_1155584, EPI\_ISL\_1155586, EPI\_ISL\_1155588, EPI\_ISL\_1155590, EPI\_ISL\_1155592, EPI\_ISL\_1155594, EPI\_ISL\_1155596, EPI\_ISL\_1155598, EPI\_ISL\_1155600, EPI\_ISL\_1155602, EPI\_ISL\_1155604, EPI\_ISL\_1155606, EPI\_ISL\_1155608, EPI\_ISL\_1155610, EPI\_ISL\_1155612, EPI\_ISL\_1155614, EPI\_ISL\_1155616, EPI\_ISL\_1155618, EPI\_ISL\_1155620, EPI\_ISL\_1155622, EPI\_ISL\_1155624, EPI\_ISL\_1155626, EPI\_ISL\_1155628, EPI\_ISL\_1155630, EPI\_ISL\_1155632, EPI\_ISL\_1155634, EPI\_ISL\_1155636, EPI\_ISL\_1155638, EPI\_ISL\_1155640, EPI\_ISL\_1155642, EPI\_ISL\_1155644, EPI\_ISL\_1155646, EPI\_ISL\_1155648, EPI\_ISL\_1155650, EPI\_ISL\_1155652, EPI\_ISL\_1155654, EPI\_ISL\_1155656, EPI\_ISL\_1155658, EPI\_ISL\_1155660, EPI\_ISL\_1155662, EPI\_ISL\_1155664, EPI\_ISL\_1155666, EPI\_ISL\_1155668, EPI\_ISL\_1155670, EPI\_ISL\_1155672, EPI\_ISL\_1155674, EPI\_ISL\_1155676, EPI\_ISL\_1155678, EPI\_ISL\_1155680, EPI\_ISL\_1155682, EPI\_ISL\_1155684, EPI\_ISL\_1155686, EPI\_ISL\_1155688, EPI\_ISL\_1155690, EPI\_ISL\_1155692, EPI\_ISL\_1155694, EPI\_ISL\_1155696, EPI\_ISL\_1155698, EPI\_ISL\_1155700, EPI\_ISL\_1155702, EPI\_ISL\_1155704, EPI\_ISL\_1155706, EPI\_ISL\_1155708, EPI\_ISL\_1155710, EPI\_ISL\_1155712, EPI\_ISL\_1155714, EPI\_ISL\_1155716, EPI\_ISL\_1155718, EPI\_ISL\_1155720, EPI\_ISL\_1155722, EPI\_ISL\_1155724, EPI\_ISL\_1155726, EPI\_ISL\_1155728, EPI\_ISL\_1155730, EPI\_ISL\_1155732, EPI\_ISL\_1155734, EPI\_ISL\_1155736, EPI\_ISL\_1155738, EPI\_ISL\_1155740, EPI\_ISL\_1155742, EPI\_ISL\_1155744, EPI\_ISL\_1155746, EPI\_ISL\_1155748, EPI\_ISL\_1155750, EPI\_ISL\_1155752, EPI\_ISL\_1155754, EPI\_ISL\_1155756, EPI\_ISL\_1155758, EPI\_ISL\_1155760, EPI\_ISL\_1155762, EPI\_ISL\_1155764, EPI\_ISL\_1155766, EPI\_ISL\_1155768, EPI\_ISL\_1155770, EPI\_ISL\_1155772, EPI\_ISL\_1155774, EPI\_ISL\_1155776, EPI\_ISL\_1155778, EPI\_ISL\_1155780, EPI\_ISL\_1155782, EPI\_ISL\_1155784, EPI\_ISL\_1155786, EPI\_ISL\_1155788, EPI\_ISL\_1155790, EPI\_ISL\_1155792, EPI\_ISL\_1155794, EPI\_ISL\_1155796, EPI\_ISL\_1155798, EPI\_ISL\_1155800, EPI\_ISL\_1155802, EPI\_ISL\_1155804, EPI\_ISL\_1155806, EPI\_ISL\_1155808, EPI\_ISL\_1155810, EPI\_ISL\_1155812, EPI\_ISL\_1155814, EPI\_ISL\_1155816, EPI\_ISL\_1155818, EPI\_ISL\_1155820, EPI\_ISL\_1155822, EPI\_ISL\_1155824, EPI\_ISL\_1155826, EPI\_ISL\_1155828, EPI\_ISL\_1155830, EPI\_ISL\_1155832, EPI\_ISL\_1155834, EPI\_ISL\_1155836, EPI\_ISL\_1155838, EPI\_ISL\_1155840, EPI\_ISL\_1155842, EPI\_ISL\_1155844, EPI\_ISL\_1155846, EPI\_ISL\_1155848, EPI\_ISL\_1155850, EPI\_ISL\_1155852, EPI\_ISL\_1155854, EPI\_ISL\_1155856, EPI\_ISL\_1155858, EPI\_ISL\_1155860, EPI\_ISL\_1155862, EPI\_ISL\_1155864, EPI\_ISL\_1155866, EPI\_ISL\_1155868, EPI\_ISL\_1155870, EPI\_ISL\_1155872, EPI\_ISL\_1155874, EPI\_ISL\_1155876, EPI\_ISL\_1155878, EPI\_ISL\_1155880, EPI\_ISL\_1155882, EPI\_ISL\_1155884, EPI\_ISL\_1155886, EPI\_ISL\_1155888, EPI\_ISL\_1155890, EPI\_ISL\_1155892, EPI\_ISL\_1155894, EPI\_ISL\_1155896, EPI\_ISL\_1155898, EPI\_ISL\_1155900, EPI\_ISL\_1155902, EPI\_ISL\_1155904, EPI\_ISL\_1155906, EPI\_ISL\_1155908, EPI\_ISL\_1155910, EPI\_ISL\_1155912, EPI\_ISL\_1155914, EPI\_ISL\_1155916, EPI\_ISL\_1155918, EPI\_ISL\_1155920, EPI\_ISL\_1155922, EPI\_ISL\_1155924, EPI\_ISL\_1155926, EPI\_ISL\_1155928, EPI\_ISL\_1155930, EPI\_ISL\_1155932, EPI\_ISL\_1155934, EPI\_ISL\_1155936, EPI\_ISL\_1155938, EPI\_ISL\_1155940, EPI\_ISL\_1155942, EPI\_ISL\_1155944, EPI\_ISL\_1155946, EPI\_ISL\_1155948, EPI\_ISL\_1155950, EPI\_ISL\_1155952, EPI\_ISL\_1155954, EPI\_ISL\_1155956, EPI\_ISL\_1155958, EPI\_ISL\_1155960, EPI\_ISL\_1155962, EPI\_ISL\_1155964, EPI\_ISL\_1155966, EPI\_ISL\_1155968, EPI\_ISL\_1155970, EPI\_ISL\_1155972, EPI\_ISL\_1155974, EPI\_ISL\_1155976, EPI\_ISL\_1155978, EPI\_ISL\_1155980, EPI\_ISL\_1155982, EPI\_ISL\_1155984, EPI\_ISL\_1155986, EPI\_ISL\_1155988, EPI\_ISL\_1155990, EPI\_ISL\_1155992, EPI\_ISL\_1155994, EPI\_ISL\_1155996, EPI\_ISL\_1155998, EPI\_ISL\_1160000

see above

SYNLAB Jena Oncoscreen

Robert Koch Institute

EPI\_ISL\_1150767 to 1150768, EPI\_ISL\_1150779, EPI\_ISL\_1150785, EPI\_ISL\_1150803, EPI\_ISL\_1150812, EPI\_ISL\_1150821, EPI\_ISL\_1150926, EPI\_ISL\_1150928, EPI\_ISL\_1150929, EPI\_ISL\_1150950, EPI\_ISL\_1151002, EPI\_ISL\_1151067, EPI\_ISL\_1151225, EPI\_ISL\_1151296, EPI\_ISL\_1151369, EPI\_ISL\_1151385, EPI\_ISL\_1155822, EPI\_ISL\_1213896, EPI\_ISL\_1213912, EPI\_ISL\_1213922, EPI\_ISL\_1215652, EPI\_ISL\_1215656, EPI\_ISL\_1215685, EPI\_ISL\_1215710, EPI\_ISL\_1215714, EPI\_ISL\_1215717, EPI\_ISL\_1215722, EPI\_ISL\_1215724, EPI\_ISL\_1215730, EPI\_ISL\_1215732 to 1215739, EPI\_ISL\_1215737, EPI\_ISL\_1215739, EPI\_ISL\_1280778, EPI\_ISL\_1280793 to 1280794, EPI\_ISL\_1280796, EPI\_ISL\_1280801, EPI\_ISL\_1280813, EPI\_ISL\_1280817, EPI\_ISL\_1280822, EPI\_ISL\_1280834, EPI\_ISL\_1280854, EPI\_ISL\_1280855, EPI\_ISL\_1280895, EPI\_ISL\_1280926, EPI\_ISL\_1280929, EPI\_ISL\_1348041, EPI\_ISL\_1348372, EPI\_ISL\_1348413, EPI\_ISL\_1348417, EPI\_ISL\_1348441, EPI\_ISL\_1348451, EPI\_ISL\_1348457 to 1348458, EPI\_ISL\_1348460 to 1348461, EPI\_ISL\_1348483, EPI\_ISL\_1350651, EPI\_ISL\_1350665, EPI\_ISL\_1350683, EPI\_ISL\_1350689, EPI\_ISL\_1350698, EPI\_ISL\_1350723, EPI\_ISL\_1351877, EPI\_ISL\_1351906, EPI\_ISL\_1351918, EPI\_ISL\_1351974, EPI\_ISL\_1352016, EPI\_ISL\_1352054, EPI\_ISL\_1352143, EPI\_ISL\_1352739, EPI\_ISL\_1357511, EPI\_ISL\_1357516, EPI\_ISL\_1357527, EPI\_ISL\_1357536, EPI\_ISL\_1357562











|                                                                                                                                                                                                                                                                                                                                                                                                                                                                                                                                                                                                                                                                                                            |                                                                                                                                                                                                                                |                                                                                                                                          |                                                                                                                                                                                                                                                                                                                                                                                                                                                                       |
|------------------------------------------------------------------------------------------------------------------------------------------------------------------------------------------------------------------------------------------------------------------------------------------------------------------------------------------------------------------------------------------------------------------------------------------------------------------------------------------------------------------------------------------------------------------------------------------------------------------------------------------------------------------------------------------------------------|--------------------------------------------------------------------------------------------------------------------------------------------------------------------------------------------------------------------------------|------------------------------------------------------------------------------------------------------------------------------------------|-----------------------------------------------------------------------------------------------------------------------------------------------------------------------------------------------------------------------------------------------------------------------------------------------------------------------------------------------------------------------------------------------------------------------------------------------------------------------|
| see above                                                                                                                                                                                                                                                                                                                                                                                                                                                                                                                                                                                                                                                                                                  | School of Pharmacy                                                                                                                                                                                                             | School of Pharmacy                                                                                                                       | Ahmed Kandeil; Ghazi Kayali; Mina Nabil Kamel; Mohamed A Ali; Rabeh El-Shesheny; Walid Abi Habib                                                                                                                                                                                                                                                                                                                                                                      |
| EPI_ISL_1009619 to 1009625,<br>EPI_ISL_1058026 to 1058029,<br>EPI_ISL_1164774 to 1164781,<br>EPI_ISL_1168766 to 1168768,<br>EPI_ISL_1219703 to 1219706                                                                                                                                                                                                                                                                                                                                                                                                                                                                                                                                                     | School of Pharmacy, Shenandoah University                                                                                                                                                                                      | School of Pharmacy, Shenandoah University                                                                                                | A.F.; Adams; G.W.; Harralson; Kidd; R.S.; S.M.; Sawyer                                                                                                                                                                                                                                                                                                                                                                                                                |
| EPI_ISL_1081550 to 1081567, EPI_ISL_1081598 to 1081618, EPI_ISL_1081628 to 1081741, EPI_ISL_1185854 to 1185890, EPI_ISL_1366275, EPI_ISL_1366278, EPI_ISL_1366282, EPI_ISL_1366285, EPI_ISL_1366297, EPI_ISL_1366318, EPI_ISL_1366320, EPI_ISL_1366322, EPI_ISL_1366379 to 1366423                                                                                                                                                                                                                                                                                                                                                                                                                         | see above                                                                                                                                                                                                                      | Scripps Medical Laboratory                                                                                                               | Andersen lab at Scripps Research                                                                                                                                                                                                                                                                                                                                                                                                                                      |
| EPI_ISL_1015736 to 1015756, EPI_ISL_1015877 to 1015886, EPI_ISL_1016004 to 1016007, EPI_ISL_1049513 to 1049541, EPI_ISL_1049597 to 1049602, EPI_ISL_1049604 to 1049609, EPI_ISL_1049647 to 1049648, EPI_ISL_1049665, EPI_ISL_1114152 to 1114203, EPI_ISL_1114223, EPI_ISL_1114225 to 1114233, EPI_ISL_1114259 to 1114290, EPI_ISL_1114352, EPI_ISL_1114381 to 1114384, EPI_ISL_1222445 to 1222455, EPI_ISL_1222609 to 1222612                                                                                                                                                                                                                                                                              | see above                                                                                                                                                                                                                      | Seattle Flu Study                                                                                                                        | Seattle Flu Study                                                                                                                                                                                                                                                                                                                                                                                                                                                     |
| see above                                                                                                                                                                                                                                                                                                                                                                                                                                                                                                                                                                                                                                                                                                  | Seattle Flu Study                                                                                                                                                                                                              | Seattle Flu Study                                                                                                                        | Amanda Adler; Barry R. Lutz; Benjamin Pelle; Caitlin R. Wolf; Chris D. Frazar; Deborah A. Nickerson; Elisabeth Brandstetter; Erica Ryke; Helen Y. Chu; Janet A. Englund; Jay Shendure; Jeff Duchin; Jover Lee; Kairsten Fay; Karen Cowgill; Kirsten Lacombe; Lea M. Starita; Mark J. Rieder; Matthew Richardson; Matthew Thompson; Melissa Truong; Michael Boeckh; Michael Famulare; Misja Ilicisin; Peter D. Han; Stephanie Schrag; Thomas R. Sibley; Trevor Bedford |
| EPI_ISL_1040823                                                                                                                                                                                                                                                                                                                                                                                                                                                                                                                                                                                                                                                                                            | Secretaria Municipal de Saude de Piracai                                                                                                                                                                                       | Instituto Adolfo Lutz, Interdisciplinary Procedures Center, Strategic Laboratory                                                         | Claudia Regina Gonçalves; Claudio Tavares Sacchi; Erica Valessa Ramos Gomes; Karoline Rodrigues Campos                                                                                                                                                                                                                                                                                                                                                                |
| EPI_ISL_1020295                                                                                                                                                                                                                                                                                                                                                                                                                                                                                                                                                                                                                                                                                            | Section of Infectious Diseases and Tropical Medicine                                                                                                                                                                           | Center for Virology                                                                                                                      | Irene Goerzer; Jeremy V. Camp; Monika Redlberger-Fritz; Stephan W. Aberle                                                                                                                                                                                                                                                                                                                                                                                             |
| EPI_ISL_1159390                                                                                                                                                                                                                                                                                                                                                                                                                                                                                                                                                                                                                                                                                            | Semen Gresik Hospital                                                                                                                                                                                                          | Institute of Tropical Disease, Universitas Airlangga                                                                                     | Aldise M Nastri; Gatot Soegiarto; Jezzy R Dewantari; Kazufumi Shimizu; Krisnadi Rahardjo; Laksmi Wulandari; Maria I Lusida; Muchdor; Resti Yudhawati; Rima R Prasetya; Soetjpto; Yasuko Mori                                                                                                                                                                                                                                                                          |
| EPI_ISL_1013241                                                                                                                                                                                                                                                                                                                                                                                                                                                                                                                                                                                                                                                                                            | Sentinelles Idf                                                                                                                                                                                                                | National Reference Center for Viruses of Respiratory Infections, Institut Pasteur, Paris                                                 | Angela Brisebarre; Camille Capel; Etienne Simon-Lorière; Marion Barbet; Maud Vanpeene; Méline Bizard; Sylvie Behillil; Sylvie van der Werf; Vincent Enouf; Watremez Claire                                                                                                                                                                                                                                                                                            |
| EPI_ISL_1381214                                                                                                                                                                                                                                                                                                                                                                                                                                                                                                                                                                                                                                                                                            | Sentinelles Paris                                                                                                                                                                                                              | National Reference Center for Viruses of Respiratory Infections, Institut Pasteur, Paris                                                 | Angela Brisebarre; Camille Capel; Etienne Simon-Lorière; Louise Lefrançois; Marion Barbet; Maud Vanpeene; Méline Bizard; Rousset Dominique; Sylvie Behillil; Sylvie van der Werf; Vincent Enouf                                                                                                                                                                                                                                                                       |
| EPI_ISL_1381209                                                                                                                                                                                                                                                                                                                                                                                                                                                                                                                                                                                                                                                                                            | Sentinelles Province                                                                                                                                                                                                           | National Reference Center for Viruses of Respiratory Infections, Institut Pasteur, Paris                                                 | Angela Brisebarre; Camille Capel; Etienne Simon-Lorière; Louise Lefrançois; Marion Barbet; Maud Vanpeene; Méline Bizard; Sylvie Behillil; Sylvie van der Werf; Vincent Enouf                                                                                                                                                                                                                                                                                          |
| EPI_ISL_1013222 to 1013223                                                                                                                                                                                                                                                                                                                                                                                                                                                                                                                                                                                                                                                                                 | Service Biologie                                                                                                                                                                                                               | National Reference Center for Viruses of Respiratory Infections, Institut Pasteur, Paris                                                 | Angela Brisebarre; Camille Capel; Etienne Simon-Lorière; Marion Barbet; Marque Juillet StéPhanie; Maud Vanpeene; Méline Bizard; Sylvie Behillil; Sylvie van der Werf; Vincent Enouf                                                                                                                                                                                                                                                                                   |
| EPI_ISL_1382879 to 1383232                                                                                                                                                                                                                                                                                                                                                                                                                                                                                                                                                                                                                                                                                 | Servicio de Microbiología Clínica (Complejo Hospitalario de Navarra, Pamplona)                                                                                                                                                 | Centro de Secuenciación NASERTIC                                                                                                         | Ana Miqueleiz; Ana Navascués; Carmen Ezpeleta Baquedano                                                                                                                                                                                                                                                                                                                                                                                                               |
| EPI_ISL_1007713 to 1007744, EPI_ISL_1009068 to 1009084, EPI_ISL_1009086 to 1009122, EPI_ISL_1082270 to 1082289, EPI_ISL_1179682, EPI_ISL_1179684, EPI_ISL_1179686, EPI_ISL_1179688, EPI_ISL_1179690, EPI_ISL_1179693, EPI_ISL_1179696, EPI_ISL_1179698, EPI_ISL_1179701, EPI_ISL_1179703, EPI_ISL_1179706, EPI_ISL_1179708, EPI_ISL_1179710, EPI_ISL_1179713, EPI_ISL_1179715, EPI_ISL_1179718, EPI_ISL_1179720, EPI_ISL_1179723, EPI_ISL_1179725, EPI_ISL_1179727, EPI_ISL_1179730, EPI_ISL_1179732, EPI_ISL_1179735, EPI_ISL_1179737, EPI_ISL_1179740, EPI_ISL_1179742, EPI_ISL_1179745, EPI_ISL_1179747, EPI_ISL_1179749, EPI_ISL_1179752, EPI_ISL_1179754, EPI_ISL_1179757, EPI_ISL_1273215 to 1273225 | see above                                                                                                                                                                                                                      | Servicio de Microbiología Clínica (Complejo Hospitalario de Navarra, Pamplona), Instituto de Investigación Sanitaria de Navarra (IdISNA) |                                                                                                                                                                                                                                                                                                                                                                                                                                                                       |
| see above                                                                                                                                                                                                                                                                                                                                                                                                                                                                                                                                                                                                                                                                                                  | Servicio de Microbiología Clínica (Complejo Hospitalario de Navarra, Pamplona), Instituto de Investigación Sanitaria de Navarra (IdISNA)                                                                                       | SeqCOVID-SPAIN consortium/IBV(CSIC)                                                                                                      | Ana Miqueleiz and SeqCOVID-SPAIN consortium; Ana Navascués; Carmen Ezpeleta Baquedano                                                                                                                                                                                                                                                                                                                                                                                 |
| EPI_ISL_1225109 to 1225135                                                                                                                                                                                                                                                                                                                                                                                                                                                                                                                                                                                                                                                                                 | Servicio de Microbiología, Hospital Miguel Servet, Zaragoza                                                                                                                                                                    | SeqCOVID-SPAIN consortium/IBV(CSIC)                                                                                                      | Alexander Tristancho Baró; Ana Milagro; Antonio Rezusta López; Nieves Martínez Cameo and SeqCOVID-SPAIN consortium; Yolanda Gracia Grataloup                                                                                                                                                                                                                                                                                                                          |
| EPI_ISL_1007833 to 1007857, EPI_ISL_1225091 to 1225108                                                                                                                                                                                                                                                                                                                                                                                                                                                                                                                                                                                                                                                     | Servicio de Microbiología, Hospital Universitario Central de Asturias                                                                                                                                                          | SeqCOVID-SPAIN consortium/IBV(CSIC)                                                                                                      | Cristián Castelló Abietar; Jose A. Boga; Marta Elena Álvarez-Argüelles; Santiago Melón and SeqCOVID-SPAIN consortium; Susana Rojo-Alba                                                                                                                                                                                                                                                                                                                                |
| EPI_ISL_1056600 to 1056654, EPI_ISL_1219746 to 1219801                                                                                                                                                                                                                                                                                                                                                                                                                                                                                                                                                                                                                                                     | Servicio de Microbiología, Hospital Universitario Son Espases                                                                                                                                                                  | SeqCOVID-SPAIN consortium/IBV(CSIC)                                                                                                      | Antonio Oliver and SeqCOVID-SPAIN consortium; Carla López-Causapé; Jordi Reina                                                                                                                                                                                                                                                                                                                                                                                        |
| EPI_ISL_1012926 to 1013093, EPI_ISL_1046794 to 1046885                                                                                                                                                                                                                                                                                                                                                                                                                                                                                                                                                                                                                                                     | Servicio de Microbiología, Laboratori Clínic Metropolitana Nord. Hospital Universitari Germans Trias i Pujol. Institut d'Investigació en Ciències de la Salut Germans Trias i Pujol (IGTP)                                     | IrsiCaixa - Can Ruti CovidSeq                                                                                                            | Adrián Antuori; Ana Pérez; Anna Not; Antoni E. Bordoy; Bonaventura Clotet Elisa Martró; Cristina Casañ; Cristina Esteban; Francesc Catala-Moll; Ignacio Blanco; Marc Noguera-Julian; Maria Casadellà; Mariona Parera; Montserrat Giménez; Pilar Armengol; Roger Paredes; Verónica Saludes                                                                                                                                                                             |
| EPI_ISL_1008934 to 1008980                                                                                                                                                                                                                                                                                                                                                                                                                                                                                                                                                                                                                                                                                 | Servicio de Microbiología, Laboratori Clínic Metropolitana Nord. Hospital Universitari Germans Trias i Pujol. Institut d'Investigació en Ciències de la Salut Germans Trias i Pujol (IGTP)                                     | SeqCOVID-SPAIN consortium/IBV(CSIC)                                                                                                      | Adrián Antuori; Anabel Fernández; Anna Not; Antoni E. Bordoy; Cristina Casañ and SeqCOVID-SPAIN consortium; Elisa Martró; Nona Romani; Verónica Saludes                                                                                                                                                                                                                                                                                                               |
| EPI_ISL_1007858, EPI_ISL_1194579 to 1194602, EPI_ISL_1225080 to 1225090                                                                                                                                                                                                                                                                                                                                                                                                                                                                                                                                                                                                                                    | Servicio de Microbiología. HRU de Málaga. Servicio Andaluz de Salud                                                                                                                                                            | SeqCOVID-SPAIN consortium/IBV(CSIC)                                                                                                      | Begoña Palop Borrás; Inmaculada de Toro Peinado; Inmaculada de Toro Peinado. M <sup>o</sup> Concepción Mediavilla Gradolph. Begoña Palop Borrás and SeqCOVID-SPAIN consortium; Mercedes Pérez Ruiz and SeqCOVID-SPAIN consortium; M <sup>o</sup> Concepción Mediavilla Gradolph                                                                                                                                                                                       |
| EPI_ISL_1109730 to 1109735                                                                                                                                                                                                                                                                                                                                                                                                                                                                                                                                                                                                                                                                                 | Servicio de Microbiología. Hospital Arnau de Vilanova                                                                                                                                                                          | SeqCOVID-SPAIN consortium/IBV(CSIC)                                                                                                      | Amparo Farga and SeqCOVID-SPAIN consortium; Rocío Falcón; Victoria Domínguez                                                                                                                                                                                                                                                                                                                                                                                          |
| EPI_ISL_1060492 to 1060519, EPI_ISL_1109647 to 1109729                                                                                                                                                                                                                                                                                                                                                                                                                                                                                                                                                                                                                                                     | Servicio de Microbiología. Hospital Clínico Universitario de Valencia                                                                                                                                                          | SeqCOVID-SPAIN consortium/IBV(CSIC)                                                                                                      | David Navarro Ortega; Eliseo Albert Vicent; Ignacio Torres and SeqCOVID-SPAIN consortium                                                                                                                                                                                                                                                                                                                                                                              |
| EPI_ISL_1008930 to 1008933, EPI_ISL_1009032 to 1009067, EPI_ISL_1014706 to 1014761                                                                                                                                                                                                                                                                                                                                                                                                                                                                                                                                                                                                                         | Servicio de Microbiología. Hospital Ramón y Cajal. (CIBERESP)                                                                                                                                                                  | SeqCOVID-SPAIN consortium/IBV(CSIC)                                                                                                      | Jose M <sup>o</sup> González-Alba; Juan C Galán and SeqCOVID-SPAIN consortium; L. Olavarrieta; Val Fernández                                                                                                                                                                                                                                                                                                                                                          |
| EPI_ISL_1192389 to 1192423                                                                                                                                                                                                                                                                                                                                                                                                                                                                                                                                                                                                                                                                                 | Servicio de Microbiología. Hospital Universitario Donostia. OSI Donostialdea. Área de Enfermedades Infecciosas, Grupo de Infección Respiratoria y Resistencia Antimicrobiana. Instituto de Investigación Sanitaria Biodonostia | SeqCOVID-SPAIN consortium/IBV(CSIC)                                                                                                      | Ane Sorrairain; Gustavo Cilla Eguluz; Jose Maria Marimón and SeqCOVID-SPAIN consortium; Luis Piñeiro Vázquez; Milagrosa Montes Ros                                                                                                                                                                                                                                                                                                                                    |
| EPI_ISL_1058034                                                                                                                                                                                                                                                                                                                                                                                                                                                                                                                                                                                                                                                                                            | Servizio di Igiene Epidemiologia e Sanità Pubblica (SIESP) CHIETI - DRIVE IN LANCIANO                                                                                                                                          | Istituto Zooprofilattico Sperimentale dell'Abruzzo e Molise "G. Caporale"                                                                | Ancora M; Calistri P; Cammà C; Curini V; Delli Compagni E; Di Domenico M; Di Pasquale A; Lorusso A; Mangone I; Marcacci M; Puglia I; Rinaldi A; Savini G; Scialabba S                                                                                                                                                                                                                                                                                                 |
| EPI_ISL_1190748                                                                                                                                                                                                                                                                                                                                                                                                                                                                                                                                                                                                                                                                                            | Servizo de Microbioloxía. Complexo Hospitalario de Santiago de Compostela.                                                                                                                                                     | Servizo de Microbioloxía. Complexo Hospitalario de Santiago de Compostela.                                                               | Amparo Coira; Antonio Aguilera; Gema Barbeito; Iria Roca; José Costa; María Luisa Pérez del Molino; Rocío Trastoy                                                                                                                                                                                                                                                                                                                                                     |
| EPI_ISL_1081373 to 1081422, EPI_ISL_1081496 to 1081549, EPI_ISL_1081568 to 1081570, EPI_ISL_1185891 to 1185959, EPI_ISL_1295646 to 1295795, EPI_ISL_1295818 to 1295900, EPI_ISL_1366276 to 1366277, EPI_ISL_1366279 to 1366281, EPI_ISL_1366283 to 1366284, EPI_ISL_1366286 to 1366296, EPI_ISL_1366298 to 1366317, EPI_ISL_1366319, EPI_ISL_1366321, EPI_ISL_1366323 to 1366325, EPI_ISL_1366335 to 1366376, EPI_ISL_1366424 to 1366496                                                                                                                                                                                                                                                                   | see above                                                                                                                                                                                                                      | Sharp HealthCare Laboratory                                                                                                              | Andersen lab at Scripps Research                                                                                                                                                                                                                                                                                                                                                                                                                                      |
| see above                                                                                                                                                                                                                                                                                                                                                                                                                                                                                                                                                                                                                                                                                                  | Sharp HealthCare Laboratory                                                                                                                                                                                                    | Andersen lab at Scripps Research                                                                                                         | Art Mendoza; Cathy Woerle; Jacquelyn Berumen; Liam McGinnis; Omid Bakhtar; SEARCH Alliance San Diego with Aaron Harding                                                                                                                                                                                                                                                                                                                                               |
| EPI_ISL_1360433 to 1360445                                                                                                                                                                                                                                                                                                                                                                                                                                                                                                                                                                                                                                                                                 | Shimantik Pathology and Diagnostic Center                                                                                                                                                                                      | Child Health Research Foundation                                                                                                         | CHRF Bangladesh Genomics Team; Md. Mobarok Karim; Md. Parvej Alam                                                                                                                                                                                                                                                                                                                                                                                                     |
| EPI_ISL_1250945, EPI_ISL_1250949, EPI_ISL_1250956 to 1250957, EPI_ISL_1250962 to 1250966, EPI_ISL_1250969, EPI_ISL_1250975 to 1250980, EPI_ISL_1250983, EPI_ISL_1250988, EPI_ISL_1250991 to 1250992, EPI_ISL_1250994 to 1250998, EPI_ISL_1251008 to 1251012, EPI_ISL_1251014 to 1251017, EPI_ISL_1251020, EPI_ISL_1251031, EPI_ISL_1251033 to 1251036, EPI_ISL_1251041 to 1251042, EPI_ISL_1251046 to 1251051, EPI_ISL_1251053, EPI_ISL_1251057 to 1251060, EPI_ISL_1251063 to 1251065, EPI_ISL_1251080, EPI_ISL_1251082, EPI_ISL_1251084 to 1251092, EPI_ISL_1251098 to 1251100, EPI_ISL_1251102, EPI_ISL_1251104 to 1251106, EPI_ISL_1290807                                                             | see above                                                                                                                                                                                                                      | Seattle Flu Study                                                                                                                        |                                                                                                                                                                                                                                                                                                                                                                                                                                                                       |





|                                                                                                                                                                                                                                                                                                                                                                                                                                                                                                                                                                                                                                                                                                                                                                                                                                                                                                                                                                                                                                                                                                |                                                                                                        |                                                                                                                                                 |                                                                                                                                                                                                                                                                                                                                                                                                                                                                                                                                                                                                                                                                                                                |                                                                                                                                                                                                                     |
|------------------------------------------------------------------------------------------------------------------------------------------------------------------------------------------------------------------------------------------------------------------------------------------------------------------------------------------------------------------------------------------------------------------------------------------------------------------------------------------------------------------------------------------------------------------------------------------------------------------------------------------------------------------------------------------------------------------------------------------------------------------------------------------------------------------------------------------------------------------------------------------------------------------------------------------------------------------------------------------------------------------------------------------------------------------------------------------------|--------------------------------------------------------------------------------------------------------|-------------------------------------------------------------------------------------------------------------------------------------------------|----------------------------------------------------------------------------------------------------------------------------------------------------------------------------------------------------------------------------------------------------------------------------------------------------------------------------------------------------------------------------------------------------------------------------------------------------------------------------------------------------------------------------------------------------------------------------------------------------------------------------------------------------------------------------------------------------------------|---------------------------------------------------------------------------------------------------------------------------------------------------------------------------------------------------------------------|
| EPI_ISL_1098647 to 1098652,<br>EPI_ISL_1383235 to 1383245,<br>EPI_ISL_1383247 to 1383248                                                                                                                                                                                                                                                                                                                                                                                                                                                                                                                                                                                                                                                                                                                                                                                                                                                                                                                                                                                                       | Department of Health<br>South Eastern Area Laboratory Services (SEALS)                                 | Department of Health<br>NSW Health Pathology - Institute of Clinical Pathology and<br>Medical Research; Westmead Hospital; University of Sydney | CIDM-PH et al.                                                                                                                                                                                                                                                                                                                                                                                                                                                                                                                                                                                                                                                                                                 |                                                                                                                                                                                                                     |
| EPI_ISL_1122455                                                                                                                                                                                                                                                                                                                                                                                                                                                                                                                                                                                                                                                                                                                                                                                                                                                                                                                                                                                                                                                                                | Southern Philippines Medical Center                                                                    | Philippine Genome Center                                                                                                                        | Alethea R. de Guzman; Anna Ong-Lim; Arianne A. Zamora; Asia Louisa U. Chong; Benedict A. Maralit; Candice Francheska B. Tambaoan; Carlo M. Lapid; Celia Carlos; Devon Ray Pacial; Edsel Maurice Salvaña; El King D. Morado; Eva Maria Cutiongco-de la Paz; Francis A. Tablizo; Irish Coleen A. Asin; Jaime C. Montoya; Jan Michael C. Yap; Jo-Hannah S. Llamas; John Q. Wong; Joshua Gregor A. Dizon; Juan Antonio R. Magalang; Karol Sophia Agape R. Padilla; Kenneth M. Kim; Kris P. Punayan; Marc Edsel C. Ayes; Marc Jerrone R. Castro; Maria Rosario Singh-Vergeire and Cynthia P. Saloma; Maria Sofia L. Yangzon; Marissa Alejandria; Razel Nikka M. Hao; Rianna Patricia S. Cruz; Sheila Mae M. Araiza  |                                                                                                                                                                                                                     |
| EPI_ISL_1081827                                                                                                                                                                                                                                                                                                                                                                                                                                                                                                                                                                                                                                                                                                                                                                                                                                                                                                                                                                                                                                                                                | Southern Philippines Medical Center (Davao)                                                            | Philippine Genome Center                                                                                                                        | Alethea R. de Guzman; Anna Ong-Lim; Arianne A. Zamora; Asia Louisa U. Chong; Benedict A. Maralit; Candice Francheska B. Tambaoan; Carlo M. Lapid; Celia Carlos; Cynthia P. Saloma; Devon Ray Pacial; Edsel Maurice Salvaña; El King D. Morado; Eva Maria Cutiongco-de la Paz; Francis A. Tablizo; Irish Coleen A. Asin; Jaime C. Montoya; Jan Michael C. Yap; Jo-Hannah S. Llamas; John Q. Wong; Joshua Gregor A. Dizon; Juan Antonio R. Magalang; Karol Sophia Agape R. Padilla; Kenneth M. Kim; Kris P. Punayan; Marc Edsel C. Ayes; Marc Jerrone R. Castro; Maria Sofia L. Yangzon; Marissa Alejandria; Razel Nikka M. Hao; Rianna Patricia S. Cruz; Sheila Mae M. Araiza; and Maria Rosario Singh-Vergeire |                                                                                                                                                                                                                     |
| EPI_ISL_1039790, EPI_ISL_1039797, EPI_ISL_1039811 to 1039816, EPI_ISL_1039818 to 1039819, EPI_ISL_1039821 to 1039824, EPI_ISL_1039826, EPI_ISL_1082321, EPI_ISL_1082323, EPI_ISL_1082325 to 1082328, EPI_ISL_1082334, EPI_ISL_1082337, EPI_ISL_1082349, EPI_ISL_1082356, EPI_ISL_1082358 to 1082360, EPI_ISL_1082364, EPI_ISL_1082366, EPI_ISL_1082368, EPI_ISL_1082370, EPI_ISL_1082373, EPI_ISL_1082378, EPI_ISL_1082381, EPI_ISL_1082384                                                                                                                                                                                                                                                                                                                                                                                                                                                                                                                                                                                                                                                    | see above                                                                                              | Spital Limmattal                                                                                                                                | Institute of Medical Virology, University of Zurich                                                                                                                                                                                                                                                                                                                                                                                                                                                                                                                                                                                                                                                            | Alexandra Trkola; Annette Audigé; Cyril Shah; Gabriela Ziltener; Guido Bloemberg; Jon Huder; Jürg Böni; Kevin Steiner; Maria Grünberg; Maryam Zaheri; Michael Huber; Riccarda Capaul; Stefan Schmutz; Verena Kufner |
| EPI_ISL_1039787, EPI_ISL_1039789, EPI_ISL_1039793 to 1039796, EPI_ISL_1039798 to 1039800, EPI_ISL_1039817, EPI_ISL_1039820, EPI_ISL_1039825, EPI_ISL_1039827, EPI_ISL_1082320, EPI_ISL_1082322, EPI_ISL_1082324, EPI_ISL_1082329, EPI_ISL_1082332 to 1082333, EPI_ISL_1082335 to 1082336, EPI_ISL_1082339 to 1082341, EPI_ISL_1082344 to 1082345, EPI_ISL_1082348, EPI_ISL_1082351 to 1082354, EPI_ISL_1082357, EPI_ISL_1082361, EPI_ISL_1082363, EPI_ISL_1082365, EPI_ISL_1082367, EPI_ISL_1082369, EPI_ISL_1082371 to 1082372, EPI_ISL_1082374 to 1082377, EPI_ISL_1082379, EPI_ISL_1082386 to 1082387                                                                                                                                                                                                                                                                                                                                                                                                                                                                                       | see above                                                                                              | Spital Männedorf AG                                                                                                                             | Institute of Medical Virology, University of Zurich                                                                                                                                                                                                                                                                                                                                                                                                                                                                                                                                                                                                                                                            | Alexandra Trkola; Annette Audigé; Cyril Shah; Gabriela Ziltener; Guido Bloemberg; Jon Huder; Jürg Böni; Kevin Steiner; Maria Grünberg; Maryam Zaheri; Michael Huber; Riccarda Capaul; Stefan Schmutz; Verena Kufner |
| EPI_ISL_1373756                                                                                                                                                                                                                                                                                                                                                                                                                                                                                                                                                                                                                                                                                                                                                                                                                                                                                                                                                                                                                                                                                | Springfield-Greene Co. Health Dept.                                                                    | Genomics and Discovery, Respiratory Viruses Branch, Division of Viral Diseases, Centers for Disease Control and Prevention                      | Anna Kelleher; Anna Uehara; Brian Lynch; Clinton R. Paden; Haibin Wang; Han Jia Justin Ng; Jing Zhang; Krista Queen; Peter Cook; Suxiang Tong; Yan Li; Ying Tao                                                                                                                                                                                                                                                                                                                                                                                                                                                                                                                                                |                                                                                                                                                                                                                     |
| EPI_ISL_1374017 to 1374050,<br>EPI_ISL_1379635 to 1379661,<br>EPI_ISL_1379689, EPI_ISL_1379716                                                                                                                                                                                                                                                                                                                                                                                                                                                                                                                                                                                                                                                                                                                                                                                                                                                                                                                                                                                                 | Springfield-Greene Co. Health Dept.                                                                    | Pathogen Discovery, Respiratory Viruses Branch, Division of Viral Diseases, Centers for Disease Control and Prevention                          | Anna Kelleher; Anna Uehara; Brian Lynch; Clinton R. Paden; Haibin Wang; Han Jia Justin Ng; Jing Zhang; Krista Queen; Peter Cook; Suxiang Tong; Yan Li; Ying Tao                                                                                                                                                                                                                                                                                                                                                                                                                                                                                                                                                |                                                                                                                                                                                                                     |
| EPI_ISL_1322744                                                                                                                                                                                                                                                                                                                                                                                                                                                                                                                                                                                                                                                                                                                                                                                                                                                                                                                                                                                                                                                                                | Springhill Medical Center Clinical Laboratory                                                          | Synergy Laboratories                                                                                                                            | Megan Cornwell                                                                                                                                                                                                                                                                                                                                                                                                                                                                                                                                                                                                                                                                                                 |                                                                                                                                                                                                                     |
| EPI_ISL_1322465                                                                                                                                                                                                                                                                                                                                                                                                                                                                                                                                                                                                                                                                                                                                                                                                                                                                                                                                                                                                                                                                                | Springhill Medical Center Laboratories                                                                 | Synergy Laboratories                                                                                                                            | Megan Cornwell                                                                                                                                                                                                                                                                                                                                                                                                                                                                                                                                                                                                                                                                                                 |                                                                                                                                                                                                                     |
| EPI_ISL_1150146, EPI_ISL_1150264,<br>EPI_ISL_1150352, EPI_ISL_1156510                                                                                                                                                                                                                                                                                                                                                                                                                                                                                                                                                                                                                                                                                                                                                                                                                                                                                                                                                                                                                          | St. Georg Klinikum Eisenach gGmbH                                                                      | Robert Koch Institute                                                                                                                           |                                                                                                                                                                                                                                                                                                                                                                                                                                                                                                                                                                                                                                                                                                                |                                                                                                                                                                                                                     |
| EPI_ISL_1147255, EPI_ISL_1149268,<br>EPI_ISL_1285330                                                                                                                                                                                                                                                                                                                                                                                                                                                                                                                                                                                                                                                                                                                                                                                                                                                                                                                                                                                                                                           | St. Marien-Hospital Hamm                                                                               | Robert Koch Institute                                                                                                                           |                                                                                                                                                                                                                                                                                                                                                                                                                                                                                                                                                                                                                                                                                                                |                                                                                                                                                                                                                     |
| EPI_ISL_1036608, EPI_ISL_1036613 to 1036615, EPI_ISL_1058437 to 1058440, EPI_ISL_1058443 to 1058444, EPI_ISL_1058575, EPI_ISL_1076370, EPI_ISL_1076379 to 1076380, EPI_ISL_1076399, EPI_ISL_1076415, EPI_ISL_1076438 to 1076439, EPI_ISL_1081148, EPI_ISL_1121153, EPI_ISL_1121196, EPI_ISL_1121199, EPI_ISL_1121220, EPI_ISL_1165843 to 1165845, EPI_ISL_1171491, EPI_ISL_1171585 to 1171586, EPI_ISL_1171618, EPI_ISL_1241690 to 1241691, EPI_ISL_1241701 to 1241702, EPI_ISL_1241705, EPI_ISL_1241760 to 1241762, EPI_ISL_1360074, EPI_ISL_1360089, EPI_ISL_1382052, EPI_ISL_1382076                                                                                                                                                                                                                                                                                                                                                                                                                                                                                                        | see above                                                                                              | St. Nikolaus-Hospital Eupen                                                                                                                     | GIGA Medical Genomics                                                                                                                                                                                                                                                                                                                                                                                                                                                                                                                                                                                                                                                                                          | Bouchra Boujemla; Cécile Meex; Keith Durkin; Maria Artesi; Marie-Pierre Hayette; Nathalie Renotte; Pierrette Melin; Raphaël Boreux; Sébastien Bontems; Vincent Bours                                                |
| EPI_ISL_1335871 to 1335872                                                                                                                                                                                                                                                                                                                                                                                                                                                                                                                                                                                                                                                                                                                                                                                                                                                                                                                                                                                                                                                                     | Stanford Health Care                                                                                   | Clinical Virology Laboratory, Stanford University School of Medicine                                                                            | ChunHong Huang; Daniel Solis; Fumiko Yamamoto; James Zehnder; Malaya K. Sahoo; Mamdouh Sibai; Michelle Vergese; and Benjamin A. Pinsky                                                                                                                                                                                                                                                                                                                                                                                                                                                                                                                                                                         |                                                                                                                                                                                                                     |
| EPI_ISL_1159373                                                                                                                                                                                                                                                                                                                                                                                                                                                                                                                                                                                                                                                                                                                                                                                                                                                                                                                                                                                                                                                                                | Stanford Health Care                                                                                   | Clinical virology Laboratory, Stanford University School of Medicine                                                                            | ChunHong Huang; Daniel Solis; Fumiko Yamamoto; James Zehnder; Malaya K. Sahoo; Mamdouh Sibai; Michelle Verghese; and Benjamin A. Pinsky                                                                                                                                                                                                                                                                                                                                                                                                                                                                                                                                                                        |                                                                                                                                                                                                                     |
| EPI_ISL_1364488 to 1364526,<br>EPI_ISL_1379719 to 1379889                                                                                                                                                                                                                                                                                                                                                                                                                                                                                                                                                                                                                                                                                                                                                                                                                                                                                                                                                                                                                                      | Stanford Health Care                                                                                   | Stanford University School of Medicine, Clinical Virology Laboratory                                                                            | Becky Jiang; ChunHong Huang; Daniel Solis; Fumiko Yamamoto; Hannah Wang; Jacob Miller; James Zehnder; Kenji O. Mfuh; Malaya K. Sahoo; Mamdouh Sibai; Marilyn Mar; Michelle Vergese; Michelle Verghese; Naomi Iwai; and Benjamin A. Pinsky                                                                                                                                                                                                                                                                                                                                                                                                                                                                      |                                                                                                                                                                                                                     |
| EPI_ISL_1261775 to 1261776,<br>EPI_ISL_1261778 to 1261779,<br>EPI_ISL_1261781 to 1261789                                                                                                                                                                                                                                                                                                                                                                                                                                                                                                                                                                                                                                                                                                                                                                                                                                                                                                                                                                                                       | State Hygienic Laboratory at the University of Iowa                                                    | State Hygienic Laboratory at the University of Iowa                                                                                             | Alankar Kamppowale; Erik Twait; Valerie Reeb; Wes Hottel                                                                                                                                                                                                                                                                                                                                                                                                                                                                                                                                                                                                                                                       |                                                                                                                                                                                                                     |
| EPI_ISL_1292425 to 1292445, EPI_ISL_1292448 to 1292452, EPI_ISL_1292454 to 1292465, EPI_ISL_1292467 to 1292469, EPI_ISL_1292471 to 1292492, EPI_ISL_1292494, EPI_ISL_1292496 to 1292497, EPI_ISL_1292499 to 1292504, EPI_ISL_1292506 to 1292509, EPI_ISL_1292511 to 1292518, EPI_ISL_1292520, EPI_ISL_1292522 to 1292534, EPI_ISL_1292536 to 1292545, EPI_ISL_1292548 to 1292551, EPI_ISL_1292554 to 1292560, EPI_ISL_1292562 to 1292564, EPI_ISL_1292566 to 1292609, EPI_ISL_1292611 to 1292650, EPI_ISL_1292652 to 1292659, EPI_ISL_1292661 to 1292711, EPI_ISL_1292713 to 1292717, EPI_ISL_1292720 to 1292742, EPI_ISL_1292744 to 1292752, EPI_ISL_1292754 to 1292780, EPI_ISL_1292782 to 1292783, EPI_ISL_1292785 to 1292806                                                                                                                                                                                                                                                                                                                                                               | see above                                                                                              | State Laboratories Division, Hawaii State Department of Health                                                                                  | State Laboratories Division, Hawaii State Department of Health                                                                                                                                                                                                                                                                                                                                                                                                                                                                                                                                                                                                                                                 | Ayana Garnet; Drew Kuwazaki; Edward Desmond; Pamela O'Brien; Razvan Sultana                                                                                                                                         |
| EPI_ISL_1242008                                                                                                                                                                                                                                                                                                                                                                                                                                                                                                                                                                                                                                                                                                                                                                                                                                                                                                                                                                                                                                                                                | State Research Center of Virology and Biotechnology VECTOR, Department of Collection of Microorganisms | State Research Center of Virology and Biotechnology VECTOR, Department of Collection of Microorganisms                                          | Alexander N. Shvalov; Anastasiya A. Nazarenko; Anastasiya M. Smirnova; Elena V. Gavrilova; Oleg V. Pyankov; Rinat A. Maksyutov; Sergey A. Bodnev; Tatyana V. Tregubchak                                                                                                                                                                                                                                                                                                                                                                                                                                                                                                                                        |                                                                                                                                                                                                                     |
| EPI_ISL_1156103, EPI_ISL_1285305,<br>EPI_ISL_1285335, EPI_ISL_1353293,<br>EPI_ISL_1353301                                                                                                                                                                                                                                                                                                                                                                                                                                                                                                                                                                                                                                                                                                                                                                                                                                                                                                                                                                                                      | Stiftung Krankenhaus Bethanien für die Grafschaft Moers                                                | Robert Koch Institute                                                                                                                           |                                                                                                                                                                                                                                                                                                                                                                                                                                                                                                                                                                                                                                                                                                                |                                                                                                                                                                                                                     |
| EPI_ISL_1049260, EPI_ISL_1164816, EPI_ISL_1164853 to 1164854, EPI_ISL_1164930, EPI_ISL_1164969, EPI_ISL_1165000, EPI_ISL_1165066, EPI_ISL_1165077, EPI_ISL_1165138, EPI_ISL_1165143, EPI_ISL_1165899, EPI_ISL_1166083, EPI_ISL_1252892, EPI_ISL_1252904, EPI_ISL_1253399                                                                                                                                                                                                                                                                                                                                                                                                                                                                                                                                                                                                                                                                                                                                                                                                                       | see above                                                                                              | Struttura Semplice Dipartimentale di Virologia e Microbiologia molecolare, Azienda Ospedaliero-Universitaria, Policlinico di Modena             | U.O. Microbiologia, Laboratorio Unico Centro Servizi - AUSL della Romagna                                                                                                                                                                                                                                                                                                                                                                                                                                                                                                                                                                                                                                      | Fregni Serpini Giulia; Gennari William; Giorgio Dirani; Pecorari Monica; Silvia Zannoli; Vittorio Sambri                                                                                                            |
| EPI_ISL_1147436 to 1147451, EPI_ISL_1151773, EPI_ISL_1151775, EPI_ISL_1151777, EPI_ISL_1151782, EPI_ISL_1151788, EPI_ISL_1151792, EPI_ISL_1151794 to 1151795, EPI_ISL_1151797, EPI_ISL_1151801, EPI_ISL_1151805 to 1151807, EPI_ISL_1151809, EPI_ISL_1157204, EPI_ISL_1157213 to 1157214, EPI_ISL_1157216 to 1157217, EPI_ISL_1157225, EPI_ISL_1157228, EPI_ISL_1157238, EPI_ISL_1157240, EPI_ISL_1157242 to 1157243, EPI_ISL_1157253, EPI_ISL_1157263, EPI_ISL_1157276, EPI_ISL_1217627, EPI_ISL_1217653, EPI_ISL_1217656, EPI_ISL_1217666 to 1217667, EPI_ISL_1217670, EPI_ISL_1217683 to 1217684, EPI_ISL_1217689 to 1217691, EPI_ISL_1217693, EPI_ISL_1217697 to 1217698, EPI_ISL_1285056, EPI_ISL_1285072, EPI_ISL_1285103, EPI_ISL_1285112, EPI_ISL_1285116, EPI_ISL_1285118, EPI_ISL_1285121, EPI_ISL_1285124, EPI_ISL_1285126, EPI_ISL_1285132, EPI_ISL_1285136, EPI_ISL_1285144, EPI_ISL_1285151, EPI_ISL_1285160 to 1285162, EPI_ISL_1354403, EPI_ISL_1354410, EPI_ISL_1354432, EPI_ISL_1354442, EPI_ISL_1354450, EPI_ISL_1354454, EPI_ISL_1354458, EPI_ISL_1354462, EPI_ISL_1354465 | see above                                                                                              | Städtisches Klinikum Dresden                                                                                                                    | Robert Koch Institute                                                                                                                                                                                                                                                                                                                                                                                                                                                                                                                                                                                                                                                                                          |                                                                                                                                                                                                                     |
| EPI_ISL_1341802, EPI_ISL_1341907,<br>EPI_ISL_1343818                                                                                                                                                                                                                                                                                                                                                                                                                                                                                                                                                                                                                                                                                                                                                                                                                                                                                                                                                                                                                                           | Subang Public Health                                                                                   | West Java Health Laboratory; School of Life Sciences and Technology, Institut Teknologi Bandung                                                 | Azzania Fibrani; Cut Nur Cynthia Alamanda; Ema Rahmawati; Isak Solihin; Karimatu Khoirunnisa; Miftahul Faridi; Rifky Waluyajati Rachman; Rini Robiani; Ryan Bayusantika Ristandi                                                                                                                                                                                                                                                                                                                                                                                                                                                                                                                               |                                                                                                                                                                                                                     |
| EPI_ISL_1341801                                                                                                                                                                                                                                                                                                                                                                                                                                                                                                                                                                                                                                                                                                                                                                                                                                                                                                                                                                                                                                                                                | Sukabumi Health Laboratory                                                                             | West Java Health Laboratory; School of Life Sciences and Technology, Institut Teknologi Bandung                                                 | Azzania Fibrani; Cut Nur Cynthia Alamanda; Ema Rahmawati; Isak Solihin; Karimatu Khoirunnisa; Miftahul Faridi; Rifky Waluyajati Rachman; Rini Robiani; Ryan Bayusantika Ristandi                                                                                                                                                                                                                                                                                                                                                                                                                                                                                                                               |                                                                                                                                                                                                                     |
| EPI_ISL_1335886                                                                                                                                                                                                                                                                                                                                                                                                                                                                                                                                                                                                                                                                                                                                                                                                                                                                                                                                                                                                                                                                                | Sundari Hospital Medan                                                                                 | Faculty of Medicine, Universitas Sumatera Utara; Institute of Tropical Disease, Universitas Airlangga                                           | Aldise M Nastri; Franciscus Ginting; Inke N D Lubis; Irbah R Nainggolan; Jezzy R Dewantari; Kazufumi Shimizu; Krisnoadi Rahardjo; Maria I Lusida; Meiliani; Mirzan Hasibuan; Muhammad Ichwan; R Andika D Cahyadi; R Lia Kusumawati; Ramadhan Bestari; Rima R Prasetya; Soetjipto; Yasuko Mori                                                                                                                                                                                                                                                                                                                                                                                                                  |                                                                                                                                                                                                                     |

|                                                                                                                                                                                                                                                                                                                                                                                                                                                                                                                                                                                                                                                                                                                                                                                                                                                                                                                                                                                                                                                                                                                                                                                                                                                                                                                                                                                                                                                                                                                                                                                                                                                                                                                                                                                                                                                                                                                                                                                                                                                                                                                                                                                                                                                                                                                                                                                                                                                                                                                                                                                                                                                                                                                                                                                                                                                                                                                                                                                                                                                                                                                                                                                                                                                                                                                                                                                                                                                                                                                                                                                                                          |                                                                                                   |                                                                                                                            |                                                                                                                                                                                                                                                                                                                                                                   |
|--------------------------------------------------------------------------------------------------------------------------------------------------------------------------------------------------------------------------------------------------------------------------------------------------------------------------------------------------------------------------------------------------------------------------------------------------------------------------------------------------------------------------------------------------------------------------------------------------------------------------------------------------------------------------------------------------------------------------------------------------------------------------------------------------------------------------------------------------------------------------------------------------------------------------------------------------------------------------------------------------------------------------------------------------------------------------------------------------------------------------------------------------------------------------------------------------------------------------------------------------------------------------------------------------------------------------------------------------------------------------------------------------------------------------------------------------------------------------------------------------------------------------------------------------------------------------------------------------------------------------------------------------------------------------------------------------------------------------------------------------------------------------------------------------------------------------------------------------------------------------------------------------------------------------------------------------------------------------------------------------------------------------------------------------------------------------------------------------------------------------------------------------------------------------------------------------------------------------------------------------------------------------------------------------------------------------------------------------------------------------------------------------------------------------------------------------------------------------------------------------------------------------------------------------------------------------------------------------------------------------------------------------------------------------------------------------------------------------------------------------------------------------------------------------------------------------------------------------------------------------------------------------------------------------------------------------------------------------------------------------------------------------------------------------------------------------------------------------------------------------------------------------------------------------------------------------------------------------------------------------------------------------------------------------------------------------------------------------------------------------------------------------------------------------------------------------------------------------------------------------------------------------------------------------------------------------------------------------------------------------|---------------------------------------------------------------------------------------------------|----------------------------------------------------------------------------------------------------------------------------|-------------------------------------------------------------------------------------------------------------------------------------------------------------------------------------------------------------------------------------------------------------------------------------------------------------------------------------------------------------------|
| EPI_ISL_1159381                                                                                                                                                                                                                                                                                                                                                                                                                                                                                                                                                                                                                                                                                                                                                                                                                                                                                                                                                                                                                                                                                                                                                                                                                                                                                                                                                                                                                                                                                                                                                                                                                                                                                                                                                                                                                                                                                                                                                                                                                                                                                                                                                                                                                                                                                                                                                                                                                                                                                                                                                                                                                                                                                                                                                                                                                                                                                                                                                                                                                                                                                                                                                                                                                                                                                                                                                                                                                                                                                                                                                                                                          | Surabaya Public Health Office                                                                     | Institute of Tropical Disease, Universitas Airlangga                                                                       | Alidse M Nastri; Febria Rachmanita; Gatot Soegiarto; Jezzy R Dewantari; Kazufumi Shimizu; Krisnoadi Rahardjo; Laksmi Wulandari; Maria I Lusida; Resti Yudhawati; Rima R Prasetya; Soetijito; Yasuko Mori                                                                                                                                                          |
| EPI_ISL_1169562 to 1169578,<br>EPI_ISL_1222759, EPI_ISL_1233187,<br>EPI_ISL_1233222                                                                                                                                                                                                                                                                                                                                                                                                                                                                                                                                                                                                                                                                                                                                                                                                                                                                                                                                                                                                                                                                                                                                                                                                                                                                                                                                                                                                                                                                                                                                                                                                                                                                                                                                                                                                                                                                                                                                                                                                                                                                                                                                                                                                                                                                                                                                                                                                                                                                                                                                                                                                                                                                                                                                                                                                                                                                                                                                                                                                                                                                                                                                                                                                                                                                                                                                                                                                                                                                                                                                      | Swedish Medical Center, Seattle, WA, USA                                                          | Institute for Systems Biology                                                                                              | Chris Lausted; James R. Heath; Jared C. Roach; Jason D. Goldman; Julie A. Wallick; Kai Wang                                                                                                                                                                                                                                                                       |
| EPI_ISL_1191588 to 1191596, EPI_ISL_1192468 to 1193259, EPI_ISL_1197151 to 1197235, EPI_ISL_1197237 to 1197690, EPI_ISL_1197692 to 1197932, EPI_ISL_1198009 to 1198643, EPI_ISL_1198645 to 1198697, EPI_ISL_1198699 to 1198792, EPI_ISL_1198852 to 1198917, EPI_ISL_1198919 to 1199385, EPI_ISL_1199387 to 1199632, EPI_ISL_1199637 to 1199706, EPI_ISL_1199708 to 1200003, EPI_ISL_1200005 to 1200085, EPI_ISL_1200087 to 1200514, EPI_ISL_1289961 to 1290801, EPI_ISL_1361935 to 1362551, EPI_ISL_1363803 to 1364428                                                                                                                                                                                                                                                                                                                                                                                                                                                                                                                                                                                                                                                                                                                                                                                                                                                                                                                                                                                                                                                                                                                                                                                                                                                                                                                                                                                                                                                                                                                                                                                                                                                                                                                                                                                                                                                                                                                                                                                                                                                                                                                                                                                                                                                                                                                                                                                                                                                                                                                                                                                                                                                                                                                                                                                                                                                                                                                                                                                                                                                                                                   | Swedish national genomic surveillance program of SARS-CoV-2                                       | The Public Health Agency of Sweden                                                                                         | Swedish national genomic surveillance program of SARS-CoV-2                                                                                                                                                                                                                                                                                                       |
| see above                                                                                                                                                                                                                                                                                                                                                                                                                                                                                                                                                                                                                                                                                                                                                                                                                                                                                                                                                                                                                                                                                                                                                                                                                                                                                                                                                                                                                                                                                                                                                                                                                                                                                                                                                                                                                                                                                                                                                                                                                                                                                                                                                                                                                                                                                                                                                                                                                                                                                                                                                                                                                                                                                                                                                                                                                                                                                                                                                                                                                                                                                                                                                                                                                                                                                                                                                                                                                                                                                                                                                                                                                | Swedish national genomic surveillance program of SARS-CoV-2                                       | The Public Health Agency of Sweden                                                                                         | Swedish national genomic surveillance program of SARS-CoV-2                                                                                                                                                                                                                                                                                                       |
| EPI_ISL_1040647                                                                                                                                                                                                                                                                                                                                                                                                                                                                                                                                                                                                                                                                                                                                                                                                                                                                                                                                                                                                                                                                                                                                                                                                                                                                                                                                                                                                                                                                                                                                                                                                                                                                                                                                                                                                                                                                                                                                                                                                                                                                                                                                                                                                                                                                                                                                                                                                                                                                                                                                                                                                                                                                                                                                                                                                                                                                                                                                                                                                                                                                                                                                                                                                                                                                                                                                                                                                                                                                                                                                                                                                          | Swellendam PHC                                                                                    | NHLS/UCT                                                                                                                   | Arash Iranzadeh; Bruna Galvao; Carolyn Williamson; Deelan Doolabh; Diana Hardie; Innocent Mudau; Kruger Marais; Lynn Tyers; Marvin Hsiao; Stephen Korsman                                                                                                                                                                                                         |
| EPI_ISL_1383246                                                                                                                                                                                                                                                                                                                                                                                                                                                                                                                                                                                                                                                                                                                                                                                                                                                                                                                                                                                                                                                                                                                                                                                                                                                                                                                                                                                                                                                                                                                                                                                                                                                                                                                                                                                                                                                                                                                                                                                                                                                                                                                                                                                                                                                                                                                                                                                                                                                                                                                                                                                                                                                                                                                                                                                                                                                                                                                                                                                                                                                                                                                                                                                                                                                                                                                                                                                                                                                                                                                                                                                                          | Sydney South West Pathology Service (SSWPS) - Royal Prince Alfred Hospital - NSW Health Pathology | NSW Health Pathology - Institute of Clinical Pathology and Medical Research; Westmead Hospital; University of Sydney       | CIDM-PH et al.                                                                                                                                                                                                                                                                                                                                                    |
| EPI_ISL_1159230                                                                                                                                                                                                                                                                                                                                                                                                                                                                                                                                                                                                                                                                                                                                                                                                                                                                                                                                                                                                                                                                                                                                                                                                                                                                                                                                                                                                                                                                                                                                                                                                                                                                                                                                                                                                                                                                                                                                                                                                                                                                                                                                                                                                                                                                                                                                                                                                                                                                                                                                                                                                                                                                                                                                                                                                                                                                                                                                                                                                                                                                                                                                                                                                                                                                                                                                                                                                                                                                                                                                                                                                          | Synergy Laboratories                                                                              | Synergy Laboratories                                                                                                       | Megan Cornwell                                                                                                                                                                                                                                                                                                                                                    |
| EPI_ISL_1015531, EPI_ISL_1036591, EPI_ISL_1036594 to 1036602, EPI_ISL_1036605 to 1036607, EPI_ISL_1036610 to 1036611, EPI_ISL_1036616, EPI_ISL_1036618 to 1036620, EPI_ISL_1040452 to 1040458, EPI_ISL_1040468 to 1040469, EPI_ISL_1058615 to 1058618, EPI_ISL_1059071                                                                                                                                                                                                                                                                                                                                                                                                                                                                                                                                                                                                                                                                                                                                                                                                                                                                                                                                                                                                                                                                                                                                                                                                                                                                                                                                                                                                                                                                                                                                                                                                                                                                                                                                                                                                                                                                                                                                                                                                                                                                                                                                                                                                                                                                                                                                                                                                                                                                                                                                                                                                                                                                                                                                                                                                                                                                                                                                                                                                                                                                                                                                                                                                                                                                                                                                                   | Synlab                                                                                            | GIGA Medical Genomics                                                                                                      | Bouchra Boujemla; Cécile Meex; Keith Durkin; Maria Artesi; Marie-Pierre Hayette; Nathalie Renotte; Pierrette Melin; Raphaël Boreux; Sébastien Bontems; Vincent Bours                                                                                                                                                                                              |
| see above                                                                                                                                                                                                                                                                                                                                                                                                                                                                                                                                                                                                                                                                                                                                                                                                                                                                                                                                                                                                                                                                                                                                                                                                                                                                                                                                                                                                                                                                                                                                                                                                                                                                                                                                                                                                                                                                                                                                                                                                                                                                                                                                                                                                                                                                                                                                                                                                                                                                                                                                                                                                                                                                                                                                                                                                                                                                                                                                                                                                                                                                                                                                                                                                                                                                                                                                                                                                                                                                                                                                                                                                                | Synlab                                                                                            | GIGA Medical Genomics                                                                                                      | Bouchra Boujemla; Cécile Meex; Keith Durkin; Maria Artesi; Marie-Pierre Hayette; Nathalie Renotte; Pierrette Melin; Raphaël Boreux; Sébastien Bontems; Vincent Bours                                                                                                                                                                                              |
| EPI_ISL_1190898 to 1190933, EPI_ISL_1259027 to 1259154, EPI_ISL_1319254 to 1319256, EPI_ISL_1319258 to 1319260, EPI_ISL_1319262 to 1319263, EPI_ISL_1319265 to 1319267, EPI_ISL_1319269 to 1319272, EPI_ISL_1319274 to 1319277, EPI_ISL_1319279 to 1319281, EPI_ISL_1319283 to 1319284, EPI_ISL_1319286 to 1319288, EPI_ISL_1319290 to 1319292, EPI_ISL_1319294 to 1319295, EPI_ISL_1319297 to 1319300, EPI_ISL_1319302 to 1319303, EPI_ISL_1319305 to 1319306, EPI_ISL_1319308 to 1319310, EPI_ISL_1319312 to 1319314, EPI_ISL_1319316 to 1319319, EPI_ISL_1319322 to 1319323, EPI_ISL_1319324 to 1319325, EPI_ISL_1319327 to 1319329, EPI_ISL_1319331 to 1319333, EPI_ISL_1319335 to 1319337, EPI_ISL_1319339 to 1319341, EPI_ISL_1319343 to 1319345, EPI_ISL_1319347 to 1319348, EPI_ISL_1319350 to 1319351, EPI_ISL_1319371 to 1319375, EPI_ISL_1319377 to 1319380, EPI_ISL_1319382 to 1319385, EPI_ISL_1319387 to 1319388, EPI_ISL_1319390, EPI_ISL_1319392 to 1319393, EPI_ISL_1319395, EPI_ISL_1319397, EPI_ISL_1319399 to 1319401, EPI_ISL_1319403 to 1319404, EPI_ISL_1319406 to 1319407, EPI_ISL_1319409, EPI_ISL_1319411 to 1319413, EPI_ISL_1319415 to 1319417, EPI_ISL_1319419 to 1319420, EPI_ISL_1319422 to 1319424, EPI_ISL_1319426 to 1319427, EPI_ISL_1319429 to 1319434, EPI_ISL_1319436 to 1319438                                                                                                                                                                                                                                                                                                                                                                                                                                                                                                                                                                                                                                                                                                                                                                                                                                                                                                                                                                                                                                                                                                                                                                                                                                                                                                                                                                                                                                                                                                                                                                                                                                                                                                                                                                                                                                                                                                                                                                                                                                                                                                                                                                                                                                                                                                   | Synlab Eesti OÜ                                                                                   | 1. Laboratory of Communicable Diseases (Estonia); 2. Eurofins Genomics Europe Sequencing GmbH                              | Liida Dotsenko et al.                                                                                                                                                                                                                                                                                                                                             |
| EPI_ISL_1091798, EPI_ISL_1169891                                                                                                                                                                                                                                                                                                                                                                                                                                                                                                                                                                                                                                                                                                                                                                                                                                                                                                                                                                                                                                                                                                                                                                                                                                                                                                                                                                                                                                                                                                                                                                                                                                                                                                                                                                                                                                                                                                                                                                                                                                                                                                                                                                                                                                                                                                                                                                                                                                                                                                                                                                                                                                                                                                                                                                                                                                                                                                                                                                                                                                                                                                                                                                                                                                                                                                                                                                                                                                                                                                                                                                                         | Synlab Lazio S.r.l.                                                                               | INMI Lazzaro Spallanzani IRCCS                                                                                             | A Di Caro; B Bartolini; CEM Gruber; E Giombini; E Trappolini; F Messina; M Rueca; MR Capobianchi; O Butera; SA Santini                                                                                                                                                                                                                                            |
| EPI_ISL_1150719, EPI_ISL_1150750, EPI_ISL_1150753, EPI_ISL_1150782, EPI_ISL_1150814, EPI_ISL_1150817, EPI_ISL_1150835, EPI_ISL_1150862, EPI_ISL_1150936, EPI_ISL_1150979, EPI_ISL_1151003, EPI_ISL_1151026, EPI_ISL_1151043, EPI_ISL_1151095, EPI_ISL_1151106, EPI_ISL_1151127, EPI_ISL_1151162, EPI_ISL_1151175, EPI_ISL_1151196, EPI_ISL_1151205, EPI_ISL_1151250, EPI_ISL_1151261, EPI_ISL_1151298, EPI_ISL_1151348, EPI_ISL_1151436, EPI_ISL_1151462, EPI_ISL_1151490, EPI_ISL_1151501, EPI_ISL_1151505, EPI_ISL_1151513, EPI_ISL_1151517, EPI_ISL_1151519, EPI_ISL_1151546, EPI_ISL_1151551, EPI_ISL_1151557, EPI_ISL_1151705, EPI_ISL_1151725, EPI_ISL_1151751, EPI_ISL_1152628, EPI_ISL_1152879, EPI_ISL_1152940, EPI_ISL_1152952, EPI_ISL_1152963, EPI_ISL_1153024, EPI_ISL_1153027, EPI_ISL_1153067, EPI_ISL_1153074, EPI_ISL_1153090, EPI_ISL_1153551, EPI_ISL_1153571, EPI_ISL_1153595, EPI_ISL_1153623, EPI_ISL_1154247, EPI_ISL_1155579, EPI_ISL_1155752, EPI_ISL_1155786, EPI_ISL_1155788, EPI_ISL_1155793, EPI_ISL_1155802, EPI_ISL_1155807, EPI_ISL_1155820, EPI_ISL_1155826, EPI_ISL_1155830, EPI_ISL_1155839, EPI_ISL_1157411, EPI_ISL_1157426, EPI_ISL_1157545, EPI_ISL_1157610, EPI_ISL_1157620, EPI_ISL_1157662, EPI_ISL_1157676, EPI_ISL_1157678, EPI_ISL_1157727, EPI_ISL_1157730, EPI_ISL_1157733, EPI_ISL_1157736, EPI_ISL_1157785 to 1157786, EPI_ISL_1157790, EPI_ISL_1210817, EPI_ISL_1210819, EPI_ISL_1210834, EPI_ISL_1210841 to 1210843, EPI_ISL_1210879, EPI_ISL_1210952, EPI_ISL_1210974, EPI_ISL_1211033, EPI_ISL_1213861, EPI_ISL_1214112, EPI_ISL_1214140, EPI_ISL_1214146, EPI_ISL_1214148, EPI_ISL_1214183 to 1214184, EPI_ISL_1214194, EPI_ISL_1214199, EPI_ISL_1214213, EPI_ISL_1214219 to 1214220, EPI_ISL_1214226, EPI_ISL_1214234, EPI_ISL_1214240, EPI_ISL_1214253, EPI_ISL_1214309, EPI_ISL_1215007, EPI_ISL_1215045, EPI_ISL_1215054, EPI_ISL_1215085, EPI_ISL_1215088, EPI_ISL_1215095, EPI_ISL_1215101, EPI_ISL_1215116, EPI_ISL_1215119, EPI_ISL_1215122, EPI_ISL_1215126, EPI_ISL_1215136, EPI_ISL_1215139, EPI_ISL_1215150, EPI_ISL_1215188, EPI_ISL_1215223, EPI_ISL_1215236, EPI_ISL_1215257, EPI_ISL_1215263, EPI_ISL_1280957, EPI_ISL_1280960, EPI_ISL_1280963, EPI_ISL_1280967 to 1280969, EPI_ISL_1280973 to 1280974, EPI_ISL_1280978, EPI_ISL_1280981 to 1280983, EPI_ISL_1280986, EPI_ISL_1281000, EPI_ISL_1281005 to 1281006, EPI_ISL_1281010, EPI_ISL_1281012, EPI_ISL_1281015, EPI_ISL_1281020, EPI_ISL_1281026, EPI_ISL_1281037, EPI_ISL_1281049, EPI_ISL_1281061, EPI_ISL_1281066, EPI_ISL_1284245, EPI_ISL_1284250, EPI_ISL_1284263, EPI_ISL_1284274, EPI_ISL_1284290, EPI_ISL_1284313, EPI_ISL_1284315, EPI_ISL_1284345, EPI_ISL_1284350, EPI_ISL_1284352, EPI_ISL_1284365, EPI_ISL_1284369, EPI_ISL_1284374, EPI_ISL_1284404, EPI_ISL_1284450, EPI_ISL_1284461, EPI_ISL_1284466, EPI_ISL_1286770, EPI_ISL_1286779, EPI_ISL_1286796, EPI_ISL_1286799, EPI_ISL_1286805, EPI_ISL_1286815, EPI_ISL_1286823, EPI_ISL_1286876, EPI_ISL_1286878, EPI_ISL_1286882, EPI_ISL_1350785, EPI_ISL_1350793, EPI_ISL_1350795, EPI_ISL_1350799, EPI_ISL_1350805, EPI_ISL_1350818, EPI_ISL_1350822, EPI_ISL_1350826, EPI_ISL_1350832, EPI_ISL_1350842, EPI_ISL_1350870, EPI_ISL_1350878, EPI_ISL_1350883, EPI_ISL_1350895, EPI_ISL_1350914, EPI_ISL_1352866, EPI_ISL_1352868, EPI_ISL_1352872, EPI_ISL_1352874, EPI_ISL_1352876, EPI_ISL_1352878, EPI_ISL_1352882, EPI_ISL_1352888, EPI_ISL_1352910, EPI_ISL_1352927, EPI_ISL_1352943, EPI_ISL_1352949, EPI_ISL_1352968, EPI_ISL_1352973, EPI_ISL_1352993, EPI_ISL_1352995, EPI_ISL_1352999, EPI_ISL_1353006 to 1353007 | Synlab MVZ Augsburg                                                                               | Robert Koch Institute                                                                                                      | Anna Risberg; Anna-Malin Linde; Carlo Berg; Karin Tegmark-Wisell; Maria Lind Karlberg; Mattias Haukland; Mia Brytting; Noura Walai; Oskar Karlsson Lindsjö; Petra Edquist; Petra Holmstrom; Reza Advani; Samuel Ohman; Sofia Stamouli                                                                                                                             |
| see above                                                                                                                                                                                                                                                                                                                                                                                                                                                                                                                                                                                                                                                                                                                                                                                                                                                                                                                                                                                                                                                                                                                                                                                                                                                                                                                                                                                                                                                                                                                                                                                                                                                                                                                                                                                                                                                                                                                                                                                                                                                                                                                                                                                                                                                                                                                                                                                                                                                                                                                                                                                                                                                                                                                                                                                                                                                                                                                                                                                                                                                                                                                                                                                                                                                                                                                                                                                                                                                                                                                                                                                                                | Synlab Medilab, Mikrobiologi                                                                      | The Public Health Agency of Sweden                                                                                         | Anna Risberg; Anna-Malin Linde; Carlo Berg; Karin Tegmark-Wisell; Maria Lind Karlberg; Mattias Haukland; Mia Brytting; Noura Walai; Oskar Karlsson Lindsjö; Petra Edquist; Petra Holmstrom; Reza Advani; Sofia Stamouli                                                                                                                                           |
| EPI_ISL_1008451 to 1008454,<br>EPI_ISL_1008596, EPI_ISL_1064623,<br>EPI_ISL_1168037 to 1168038,<br>EPI_ISL_1168047                                                                                                                                                                                                                                                                                                                                                                                                                                                                                                                                                                                                                                                                                                                                                                                                                                                                                                                                                                                                                                                                                                                                                                                                                                                                                                                                                                                                                                                                                                                                                                                                                                                                                                                                                                                                                                                                                                                                                                                                                                                                                                                                                                                                                                                                                                                                                                                                                                                                                                                                                                                                                                                                                                                                                                                                                                                                                                                                                                                                                                                                                                                                                                                                                                                                                                                                                                                                                                                                                                       | TAMAJAJE COMUNITARIO - PASO CANOAS                                                                | Incienza, Instituto Costarricense de Investigación y Enseñanza en Nutrición y Salud                                        | Adriana Godínez; Claudio Soto-Garita; Estela Cordero; Francisco Duarte; Hebleen Porras; Melany Calderón & Mariel López; Melany Calderón & Mónica Charpentier-Artavia                                                                                                                                                                                              |
| EPI_ISL_1067595, EPI_ISL_1067600                                                                                                                                                                                                                                                                                                                                                                                                                                                                                                                                                                                                                                                                                                                                                                                                                                                                                                                                                                                                                                                                                                                                                                                                                                                                                                                                                                                                                                                                                                                                                                                                                                                                                                                                                                                                                                                                                                                                                                                                                                                                                                                                                                                                                                                                                                                                                                                                                                                                                                                                                                                                                                                                                                                                                                                                                                                                                                                                                                                                                                                                                                                                                                                                                                                                                                                                                                                                                                                                                                                                                                                         | TATAA Biocenter                                                                                   | The Public Health Agency of Sweden                                                                                         | Anna Risberg; Anna-Malin Linde; Carlo Berg; Karin Tegmark-Wisell; Maria Lind Karlberg; Mattias Haukland; Mia Brytting; Noura Walai; Oskar Karlsson Lindsjö; Petra Edquist; Petra Holmstrom; Reza Advani; Sofia Stamouli                                                                                                                                           |
| EPI_ISL_1008558                                                                                                                                                                                                                                                                                                                                                                                                                                                                                                                                                                                                                                                                                                                                                                                                                                                                                                                                                                                                                                                                                                                                                                                                                                                                                                                                                                                                                                                                                                                                                                                                                                                                                                                                                                                                                                                                                                                                                                                                                                                                                                                                                                                                                                                                                                                                                                                                                                                                                                                                                                                                                                                                                                                                                                                                                                                                                                                                                                                                                                                                                                                                                                                                                                                                                                                                                                                                                                                                                                                                                                                                          | TATAA Biocenter                                                                                   | The Public Health Agency of Sweden                                                                                         | Anna Risberg; Anna-Malin Linde; Carlo Berg; Karin Tegmark-Wisell; Maria Lind Karlberg; Mattias Haukland; Mia Brytting; Noura Walai; Oskar Karlsson Lindsjö; Petra Edquist; Petra Holmstrom; Reza Advani; Sofia Stamouli                                                                                                                                           |
| EPI_ISL_1016169, EPI_ISL_1016249 to 1016256, EPI_ISL_1226449, EPI_ISL_1226487, EPI_ISL_1226495, EPI_ISL_1226501, EPI_ISL_1226533 to 1226537, EPI_ISL_1226550, EPI_ISL_1226555, EPI_ISL_1226557, EPI_ISL_1226567, EPI_ISL_1226569 to 1226570, EPI_ISL_1226575, EPI_ISL_1226578 to 1226579, EPI_ISL_1226584 to 1226586, EPI_ISL_1226589, EPI_ISL_1226592, EPI_ISL_1226603, EPI_ISL_1226618 to 1226619, EPI_ISL_1226626 to 1226635, EPI_ISL_1226649 to 1226650, EPI_ISL_1226653, EPI_ISL_1226659, EPI_ISL_1226666 to 1226667, EPI_ISL_1226670, EPI_ISL_1226709, EPI_ISL_1226712, EPI_ISL_1227162                                                                                                                                                                                                                                                                                                                                                                                                                                                                                                                                                                                                                                                                                                                                                                                                                                                                                                                                                                                                                                                                                                                                                                                                                                                                                                                                                                                                                                                                                                                                                                                                                                                                                                                                                                                                                                                                                                                                                                                                                                                                                                                                                                                                                                                                                                                                                                                                                                                                                                                                                                                                                                                                                                                                                                                                                                                                                                                                                                                                                            | TEMPUS LABS INC                                                                                   | Wadsworth Center, New York State Department of Health                                                                      | Alexis Russel; Daryl M. Lamson; Erasmus Schneider; Erica Lasek-Nesselquist; John Kelly; Jonathan Plitnick; Kirsten St. George; Matthew Shudt; Melissa A Leisner; Navjot Singh                                                                                                                                                                                     |
| see above                                                                                                                                                                                                                                                                                                                                                                                                                                                                                                                                                                                                                                                                                                                                                                                                                                                                                                                                                                                                                                                                                                                                                                                                                                                                                                                                                                                                                                                                                                                                                                                                                                                                                                                                                                                                                                                                                                                                                                                                                                                                                                                                                                                                                                                                                                                                                                                                                                                                                                                                                                                                                                                                                                                                                                                                                                                                                                                                                                                                                                                                                                                                                                                                                                                                                                                                                                                                                                                                                                                                                                                                                | TEMPUS LABS INC                                                                                   | Wadsworth Center, New York State Department of Health                                                                      | Alexis Russel; Daryl M. Lamson; Erasmus Schneider; Erica Lasek-Nesselquist; John Kelly; Jonathan Plitnick; Kirsten St. George; Matthew Shudt; Melissa A Leisner; Navjot Singh                                                                                                                                                                                     |
| EPI_ISL_1036555 to 1036590, EPI_ISL_1113569 to 1113570, EPI_ISL_1119868, EPI_ISL_1119871, EPI_ISL_1182445 to 1182465, EPI_ISL_1182532 to 1182540, EPI_ISL_1254640 to 1254642, EPI_ISL_1292360 to 1292361, EPI_ISL_1292367, EPI_ISL_1292369 to 1292370, EPI_ISL_1292372, EPI_ISL_1292378 to 1292379, EPI_ISL_1292384, EPI_ISL_1292386 to 1292389, EPI_ISL_1292395, EPI_ISL_1292397 to 1292398, EPI_ISL_1292403 to 1292404, EPI_ISL_1292413, EPI_ISL_1292418, EPI_ISL_1292420, EPI_ISL_1292423, EPI_ISL_1296703, EPI_ISL_1296724, EPI_ISL_1296727, EPI_ISL_1296738, EPI_ISL_1296742, EPI_ISL_1296774, EPI_ISL_1296783, EPI_ISL_1296786, EPI_ISL_1296791, EPI_ISL_1296799, EPI_ISL_1296815 to 1296816, EPI_ISL_1296823, EPI_ISL_1296827, EPI_ISL_1296872, EPI_ISL_1296897 to 1296898, EPI_ISL_1296926, EPI_ISL_1296943, EPI_ISL_1296955, EPI_ISL_1296958 to 1296959, EPI_ISL_1296968, EPI_ISL_1296974, EPI_ISL_1296987, EPI_ISL_1296993, EPI_ISL_1297041, EPI_ISL_1297041, EPI_ISL_1297050, EPI_ISL_1297056, EPI_ISL_1297067, EPI_ISL_1297077, EPI_ISL_1297082, EPI_ISL_1297118, EPI_ISL_1297118, EPI_ISL_1363223, EPI_ISL_1363225, EPI_ISL_1363274, EPI_ISL_1363314, EPI_ISL_1363319, EPI_ISL_1363330, EPI_ISL_1363365, EPI_ISL_1363368, EPI_ISL_1363403, EPI_ISL_1363436, EPI_ISL_1363447, EPI_ISL_1363454, EPI_ISL_1363502 to 1363503, EPI_ISL_1363543, EPI_ISL_1363550, EPI_ISL_1363576, EPI_ISL_1363579, EPI_ISL_1363594, EPI_ISL_1363608, EPI_ISL_1363627, EPI_ISL_1363659, EPI_ISL_1363674, EPI_ISL_1363702, EPI_ISL_1363707, EPI_ISL_1363714, EPI_ISL_1363750, EPI_ISL_1363756                                                                                                                                                                                                                                                                                                                                                                                                                                                                                                                                                                                                                                                                                                                                                                                                                                                                                                                                                                                                                                                                                                                                                                                                                                                                                                                                                                                                                                                                                                                                                                                                                                                                                                                                                                                                                                                                                                                                                                                                                                      | TGen North                                                                                        | TGen North                                                                                                                 | *Jolene Bowers; Ashlyn Pfeiffer; Chris French; Darrin Lemmer; Dave Engelthaler; Hayley Yaglom; Heather Centner; Jolene Bowers; Megan Folkerts; The Arizona COVID Genomics Union (ACGU); The Arizona COVID Genomics Union (ACGU)                                                                                                                                   |
| EPI_ISL_1016127 to 1016135, EPI_ISL_1016137, EPI_ISL_1016139, EPI_ISL_1016141 to 1016142, EPI_ISL_1016154 to 1016155, EPI_ISL_1016257, EPI_ISL_1226423, EPI_ISL_1226490, EPI_ISL_1226524, EPI_ISL_1226568, EPI_ISL_1227210, EPI_ISL_1227456 to 1227457, EPI_ISL_1227466, EPI_ISL_1227541 to 1227545, EPI_ISL_1227617 to 1227640, EPI_ISL_1227962 to 1227964, EPI_ISL_1227974 to 1227975, EPI_ISL_1228049 to 1228051, EPI_ISL_1228284 to 1228291, EPI_ISL_1228453                                                                                                                                                                                                                                                                                                                                                                                                                                                                                                                                                                                                                                                                                                                                                                                                                                                                                                                                                                                                                                                                                                                                                                                                                                                                                                                                                                                                                                                                                                                                                                                                                                                                                                                                                                                                                                                                                                                                                                                                                                                                                                                                                                                                                                                                                                                                                                                                                                                                                                                                                                                                                                                                                                                                                                                                                                                                                                                                                                                                                                                                                                                                                         | THE MARY IMOGENE BASSETT HOSPITAL                                                                 | Wadsworth Center, New York State Department of Health                                                                      | Alexis Russel; Daryl M. Lamson; Erasmus Schneider; Erica Lasek-Nesselquist; John Kelly; Jonathan Plitnick; Kirsten St. George; Matthew Shudt; Melissa A Leisner; Navjot Singh                                                                                                                                                                                     |
| see above                                                                                                                                                                                                                                                                                                                                                                                                                                                                                                                                                                                                                                                                                                                                                                                                                                                                                                                                                                                                                                                                                                                                                                                                                                                                                                                                                                                                                                                                                                                                                                                                                                                                                                                                                                                                                                                                                                                                                                                                                                                                                                                                                                                                                                                                                                                                                                                                                                                                                                                                                                                                                                                                                                                                                                                                                                                                                                                                                                                                                                                                                                                                                                                                                                                                                                                                                                                                                                                                                                                                                                                                                | THE MARY IMOGENE BASSETT HOSPITAL                                                                 | Wadsworth Center, New York State Department of Health                                                                      | Alexis Russel; Daryl M. Lamson; Erasmus Schneider; Erica Lasek-Nesselquist; John Kelly; Jonathan Plitnick; Kirsten St. George; Matthew Shudt; Melissa A Leisner; Navjot Singh                                                                                                                                                                                     |
| EPI_ISL_1196006                                                                                                                                                                                                                                                                                                                                                                                                                                                                                                                                                                                                                                                                                                                                                                                                                                                                                                                                                                                                                                                                                                                                                                                                                                                                                                                                                                                                                                                                                                                                                                                                                                                                                                                                                                                                                                                                                                                                                                                                                                                                                                                                                                                                                                                                                                                                                                                                                                                                                                                                                                                                                                                                                                                                                                                                                                                                                                                                                                                                                                                                                                                                                                                                                                                                                                                                                                                                                                                                                                                                                                                                          | TLC Clinic                                                                                        | National Institute for Communicable Diseases of the National Health Laboratory Service                                     | Amoako DG; Bhiman JN; Ismail A; Mahlangu B; Maphalala GP; Mohale T; Ntuli N; Scheepers C                                                                                                                                                                                                                                                                          |
| EPI_ISL_1318293 to 1318317                                                                                                                                                                                                                                                                                                                                                                                                                                                                                                                                                                                                                                                                                                                                                                                                                                                                                                                                                                                                                                                                                                                                                                                                                                                                                                                                                                                                                                                                                                                                                                                                                                                                                                                                                                                                                                                                                                                                                                                                                                                                                                                                                                                                                                                                                                                                                                                                                                                                                                                                                                                                                                                                                                                                                                                                                                                                                                                                                                                                                                                                                                                                                                                                                                                                                                                                                                                                                                                                                                                                                                                               | TN Division of Laboratory Services                                                                | Centers for Disease Control and Prevention Division of Viral Diseases, Pathogen Discovery                                  | Anna Montmayeur; Anna Uehara; Ben L. Rambo-Martin; Clinton R. Paden; Dhvani Batra; Haibin Wang; Jasmine Padilla; Jing Zhang; Justin Lee; Katie Dillon; Krista Queen; Kristen Knipe; Kristine Lacey; Lori Rowe; Mark Burroughs; Matthew Schmerer; Mili Sheth; Peter W. Cook; Rachel Marine; Sam Shepard; Sarah Nobles; Shoshona Le; Suxiang Tong; Yan Li; Ying Tao |
| EPI_ISL_1318233, EPI_ISL_1318247,<br>EPI_ISL_1318252, EPI_ISL_1318257                                                                                                                                                                                                                                                                                                                                                                                                                                                                                                                                                                                                                                                                                                                                                                                                                                                                                                                                                                                                                                                                                                                                                                                                                                                                                                                                                                                                                                                                                                                                                                                                                                                                                                                                                                                                                                                                                                                                                                                                                                                                                                                                                                                                                                                                                                                                                                                                                                                                                                                                                                                                                                                                                                                                                                                                                                                                                                                                                                                                                                                                                                                                                                                                                                                                                                                                                                                                                                                                                                                                                    | TN Division of Laboratory Services                                                                | Genomics and Discovery, Respiratory Viruses Branch, Division of Viral Diseases, Centers for Disease Control and Prevention | Anna Kelleher; Anna Uehara; Brian Lynch; Clinton R. Paden; Haibin Wang; Han Jia Justin Ng; Jing Zhang; Krista Queen; Peter Cook; Suxiang Tong; Yan Li; Ying Tao                                                                                                                                                                                                   |
| EPI_ISL_1008904 to 1008906,<br>EPI_ISL_1049224 to 1049225,<br>EPI_ISL_1196891 to 1196892                                                                                                                                                                                                                                                                                                                                                                                                                                                                                                                                                                                                                                                                                                                                                                                                                                                                                                                                                                                                                                                                                                                                                                                                                                                                                                                                                                                                                                                                                                                                                                                                                                                                                                                                                                                                                                                                                                                                                                                                                                                                                                                                                                                                                                                                                                                                                                                                                                                                                                                                                                                                                                                                                                                                                                                                                                                                                                                                                                                                                                                                                                                                                                                                                                                                                                                                                                                                                                                                                                                                 | TN Division of Laboratory Services                                                                | Pathogen Discovery, Respiratory Viruses Branch, Division of Viral Diseases, Centers for Disease Control and Prevention     | Anna Kelleher; Anna Uehara; Brian Lynch; Clinton R. Paden; Haibin Wang; Han Jia Justin Ng; Han Jia Ng; Jing Zhang; Krista Queen; Peter Cook; Suxiang Tong; Yan Li; Ying Tao                                                                                                                                                                                       |

|                                                                                                                                                                                                                                                                                                                                                                                                                                                                                                                                                                                                                                                                                                                                                                                            |                                                                                                                                                |                                                                                                                        |                                                                                                                                                                                                                                                                                                                                                                                                                                                                                                                                                                                                                                                                                                                                                                    |                                                                                                                                                                                                                                                                                                                    |
|--------------------------------------------------------------------------------------------------------------------------------------------------------------------------------------------------------------------------------------------------------------------------------------------------------------------------------------------------------------------------------------------------------------------------------------------------------------------------------------------------------------------------------------------------------------------------------------------------------------------------------------------------------------------------------------------------------------------------------------------------------------------------------------------|------------------------------------------------------------------------------------------------------------------------------------------------|------------------------------------------------------------------------------------------------------------------------|--------------------------------------------------------------------------------------------------------------------------------------------------------------------------------------------------------------------------------------------------------------------------------------------------------------------------------------------------------------------------------------------------------------------------------------------------------------------------------------------------------------------------------------------------------------------------------------------------------------------------------------------------------------------------------------------------------------------------------------------------------------------|--------------------------------------------------------------------------------------------------------------------------------------------------------------------------------------------------------------------------------------------------------------------------------------------------------------------|
| EPI_ISL_1094223, EPI_ISL_1094232, EPI_ISL_1094601 to 1094621, EPI_ISL_1095317                                                                                                                                                                                                                                                                                                                                                                                                                                                                                                                                                                                                                                                                                                              | TN Division of Laboratory Services                                                                                                             | Respiratory Viruses Branch, Division of Viral Diseases, Centers for Disease Control and Prevention                     | Anna Montmayeur; Anna Uehara; Ben L. Rambo-Martin; Clinton R. Paden; Dhvani Batra; Haibin Wang; Jasmine Padilla; Jing Zhang; Justin Lee; Krista Queen; Lori Rowe; Mark Burroughs; Mili Sheth; Peter W. Cook; Rachel Marine; Sarah Nobles; Suxiang Tong; Yan Li; Ying Tao                                                                                                                                                                                                                                                                                                                                                                                                                                                                                           |                                                                                                                                                                                                                                                                                                                    |
| EPI_ISL_1272689 to 1272696                                                                                                                                                                                                                                                                                                                                                                                                                                                                                                                                                                                                                                                                                                                                                                 | TX DSHS, Lab Services Section MC 1947                                                                                                          | Centers for Disease Control and Prevention Division of Viral Diseases, Pathogen Discovery                              | Anna Montmayeur; Anna Uehara; Ben L. Rambo-Martin; Clinton R. Paden; Dhvani Batra; Haibin Wang; Jasmine Padilla; Jing Zhang; Justin Lee; Katie Dillon; Krista Queen; Kristen Knipe; Kristine Lacey; Lori Rowe; Mark Burroughs; Matthew Schmerer; Mili Sheth; Peter W. Cook; Rachel Marine; Sam Shepard; Sarah Nobles; Shoshona Le; Suxiang Tong; Yan Li; Ying Tao                                                                                                                                                                                                                                                                                                                                                                                                  |                                                                                                                                                                                                                                                                                                                    |
| EPI_ISL_1094277, EPI_ISL_1094921 to 1094928                                                                                                                                                                                                                                                                                                                                                                                                                                                                                                                                                                                                                                                                                                                                                | TX DSHS, Lab Services Section MC 1947                                                                                                          | Respiratory Viruses Branch, Division of Viral Diseases, Centers for Disease Control and Prevention                     | Anna Montmayeur; Anna Uehara; Ben L. Rambo-Martin; Clinton R. Paden; Dhvani Batra; Haibin Wang; Jasmine Padilla; Jing Zhang; Justin Lee; Krista Queen; Lori Rowe; Mark Burroughs; Mili Sheth; Peter W. Cook; Rachel Marine; Sarah Nobles; Suxiang Tong; Yan Li; Ying Tao                                                                                                                                                                                                                                                                                                                                                                                                                                                                                           |                                                                                                                                                                                                                                                                                                                    |
| EPI_ISL_1272775 to 1272781, EPI_ISL_1318425 to 1318427                                                                                                                                                                                                                                                                                                                                                                                                                                                                                                                                                                                                                                                                                                                                     | TX-Houston Health Department Laboratory                                                                                                        | Centers for Disease Control and Prevention Division of Viral Diseases, Pathogen Discovery                              | Anna Montmayeur; Anna Uehara; Ben L. Rambo-Martin; Clinton R. Paden; Dhvani Batra; Haibin Wang; Jasmine Padilla; Jing Zhang; Justin Lee; Katie Dillon; Krista Queen; Kristen Knipe; Kristine Lacey; Lori Rowe; Mark Burroughs; Matthew Schmerer; Mili Sheth; Peter W. Cook; Rachel Marine; Sam Shepard; Sarah Nobles; Shoshona Le; Suxiang Tong; Yan Li; Ying Tao                                                                                                                                                                                                                                                                                                                                                                                                  |                                                                                                                                                                                                                                                                                                                    |
| EPI_ISL_1168221 to 1168288, EPI_ISL_1252588 to 1252670, EPI_ISL_1261586 to 1261672, EPI_ISL_1291307 to 1291376, EPI_ISL_1321810 to 1321897, EPI_ISL_1322835 to 1322925, EPI_ISL_1337669 to 1337762, EPI_ISL_1362994 to 1363081, EPI_ISL_1366071 to 1366082, EPI_ISL_1366084 to 1366156                                                                                                                                                                                                                                                                                                                                                                                                                                                                                                     | see above                                                                                                                                      | TXDSHS                                                                                                                 | Anita Pokharel; Bonnie Oh; Chun Wang; Grace Kubin; Jenny Zhang; Loarraine Rodriguez; Maliha Rahman; Mayela Pedrueza; Myong Koag; Rachel Lee; Rashmi Tuladhar                                                                                                                                                                                                                                                                                                                                                                                                                                                                                                                                                                                                       |                                                                                                                                                                                                                                                                                                                    |
| EPI_ISL_1063904, EPI_ISL_1063907, EPI_ISL_1379444 to 1379590                                                                                                                                                                                                                                                                                                                                                                                                                                                                                                                                                                                                                                                                                                                               | Tampa General Hospital Esoteric Lab                                                                                                            | Tampa General Hospital Esoteric Research & Development Lab                                                             | Amorce Lima; Deanna Becker; Dominic Uy; Grant Vestal; Suzane Silbert; Vicki Healer                                                                                                                                                                                                                                                                                                                                                                                                                                                                                                                                                                                                                                                                                 |                                                                                                                                                                                                                                                                                                                    |
| EPI_ISL_1250844 to 1250846, EPI_ISL_1250851, EPI_ISL_1250859                                                                                                                                                                                                                                                                                                                                                                                                                                                                                                                                                                                                                                                                                                                               | Tanjungpura University Hospital                                                                                                                | Tanjungpura University Hospital                                                                                        | Ambar Rialita; Andriani; Arie Ardiansyah Nugraha; Delima Fajar Liana; Eka Ardiani Putri; Hana Apsari Pawestri; Hartanti Dian Ikawati; Helmi Sastriarwan; Kartika Dewi Puspa; Mahyarudin; Muhammad Ibnu Kahtan; Puji Astuti; Rini Andriani; Sofi Siti Shofiyah; Virhan Noveriani; Vivi Setiawaty                                                                                                                                                                                                                                                                                                                                                                                                                                                                    |                                                                                                                                                                                                                                                                                                                    |
| EPI_ISL_1341799 to 1341800                                                                                                                                                                                                                                                                                                                                                                                                                                                                                                                                                                                                                                                                                                                                                                 | Tasikmalaya Public Health                                                                                                                      | West Java Health Laboratory; School of Life Sciences and Technology, Institut Teknologi Bandung                        | Azzania Fibriani; Cut Nur Cinthia Alamanda; Ema Rahmawati; Isak Solihin; Karimatu Khoirunnisa; Miftahul Farid; Ritky Waluyajati Rachman; Rini Robiani; Ryan Bayusantika Ristandi                                                                                                                                                                                                                                                                                                                                                                                                                                                                                                                                                                                   |                                                                                                                                                                                                                                                                                                                    |
| EPI_ISL_1117873, EPI_ISL_1117875, EPI_ISL_1117890, EPI_ISL_1117906, EPI_ISL_1117924                                                                                                                                                                                                                                                                                                                                                                                                                                                                                                                                                                                                                                                                                                        | Tauernklinikum - Standort Zell am See                                                                                                          | Berghaler laboratory, CeMM Research Center for Molecular Medicine of the Austrian Academy of Sciences                  | Andreas Berghaler; Anna Schedl; Bekir Erguner; Benedikt Agerer; Christoph Bock; Jan Laine; Lukas Endler; Maelle Le Moing; Martin Senekowitsch; Michael Schuster; Thomas Penz                                                                                                                                                                                                                                                                                                                                                                                                                                                                                                                                                                                       |                                                                                                                                                                                                                                                                                                                    |
| EPI_ISL_1195700 to 1195717, EPI_ISL_1201002 to 1201020, EPI_ISL_1229155                                                                                                                                                                                                                                                                                                                                                                                                                                                                                                                                                                                                                                                                                                                    | Teaching Institute of Public Health of Split-Dalmatia County                                                                                   | Croatian Institute of Public Health                                                                                    | Irena Tabain; Ivana Ferenak                                                                                                                                                                                                                                                                                                                                                                                                                                                                                                                                                                                                                                                                                                                                        |                                                                                                                                                                                                                                                                                                                    |
| EPI_ISL_1009124, EPI_ISL_1038971 to 1038981, EPI_ISL_1091872 to 1091881, EPI_ISL_1091891 to 1091896, EPI_ISL_1163664 to 1163666, EPI_ISL_1168738 to 1168761, EPI_ISL_1182031 to 1182087, EPI_ISL_1201880 to 1201882, EPI_ISL_1225593, EPI_ISL_1225595, EPI_ISL_1225599 to 1225600, EPI_ISL_1225604 to 1225606, EPI_ISL_1225611, EPI_ISL_1225614, EPI_ISL_1225618 to 1225619, EPI_ISL_1225622, EPI_ISL_1225625 to 1225639, EPI_ISL_1225641 to 1225647, EPI_ISL_1225655 to 1225657, EPI_ISL_1225667, EPI_ISL_1225675 to 1225676, EPI_ISL_1225688, EPI_ISL_1225695, EPI_ISL_1225707, EPI_ISL_1225715, EPI_ISL_1225717 to 1225720, EPI_ISL_1225723, EPI_ISL_1293082 to 1293088, EPI_ISL_1293094 to 1293128, EPI_ISL_1293142 to 1293143, EPI_ISL_1378694 to 1378696, EPI_ISL_1378765 to 1378812 | see above                                                                                                                                      | Tempus                                                                                                                 | Grubaugh Lab - Yale School of Public Health                                                                                                                                                                                                                                                                                                                                                                                                                                                                                                                                                                                                                                                                                                                        | Anderson Brito; Anne Wylie; Annie Watkins; Chaney Kalinich; Chantal Vogels; Christopher E. Mason; Gaurav Khullar; Isabel Ott; Isabella Ott; Jessica Mett; Jessica Rothman; Joel T. Dudley; Joseph Fauver; Mallery Breban; Mary Petrone; Matthew J. MacKay; Megan Nash; Nathan Grubaugh; Nike Beaubier; Tara Alpert |
| EPI_ISL_1213583                                                                                                                                                                                                                                                                                                                                                                                                                                                                                                                                                                                                                                                                                                                                                                            | Teresita Jalandoni Provincial Hospital                                                                                                         | Philippine Genome Center                                                                                               | Alethea R. de Guzman; Anna Ong-Lim; Arianne A. Zamora; Asia Louisa U. Chong; Benedict A. Maralit; Candice Francheska B. Tambaoan; Carlo M. Lapid; Celia Carlos; Devon Ray Pacial; Edsel Maurice Salvaña; El King D. Morado; Eva Maria Cutiongco-de la Paz; Francis A. Tablizo; Irish Coleen A. Asin; Jaime C. Montoya; Jan Michael C. Yap; Jo-Hannah S. Llamas; John Q. Wong; Joshua Gregor A. Dizon; Juan Antonio R. Magalang; Karol Sophia Agape R. Padilla; Kenneth M. Kim; Kris P. Punayan; Marc Edsel C. Ayes; Marc Jerrone R. Castro; Maria Rosario Singh-Vergeire and Cynthia P. Saloma; Maria Sofia L. Yangzon; Marissa Alejandria; Razel Nikka M. Hao; Rianna Patricia S. Cruz; Sheila Mae M. Araiza                                                      |                                                                                                                                                                                                                                                                                                                    |
| EPI_ISL_1261777, EPI_ISL_1261780                                                                                                                                                                                                                                                                                                                                                                                                                                                                                                                                                                                                                                                                                                                                                           | Test Iowa                                                                                                                                      | State Hygienic Laboratory at the University of Iowa                                                                    | Alankar Kampoowale; Valerie Reeb; Wes Hottel                                                                                                                                                                                                                                                                                                                                                                                                                                                                                                                                                                                                                                                                                                                       |                                                                                                                                                                                                                                                                                                                    |
| EPI_ISL_1315074 to 1315075                                                                                                                                                                                                                                                                                                                                                                                                                                                                                                                                                                                                                                                                                                                                                                 | Texas A&M College of Veterinary Medicine & Biomedical Sciences via Wisconsin Veterinary Diagnostic Laboratory, University of Wisconsin-Madison | Diagnostic Virology Laboratory, National Veterinary Services Laboratories, USDA1920 Dayton Avenue, Ames, IA 50010, USA | Ailam Lim; Casey Barton Behravesh; Emily R. Love; Gabriel L. Hamer; Kerrie M. Franzen; Mary L. Killian; Ria R. Ghai; Sarah A. Hamer                                                                                                                                                                                                                                                                                                                                                                                                                                                                                                                                                                                                                                |                                                                                                                                                                                                                                                                                                                    |
| EPI_ISL_1015418 to 1015459, EPI_ISL_1184306 to 1184468, EPI_ISL_1196306 to 1196389, EPI_ISL_1201321 to 1201408, EPI_ISL_1219964 to 1220044, EPI_ISL_1224991 to 1225074                                                                                                                                                                                                                                                                                                                                                                                                                                                                                                                                                                                                                     | Texas Department of State Health Services                                                                                                      | Texas Department of State Health Services                                                                              | Anita Pokharel; Bonnie Oh; Chun Wang; Chung Wang; Grace Kubin; James Daniel Bonser; Jenny Zhang; Maliha Rahman; Mayela Pedrueza; Myong Koag; Rachel Lee; Rashmi Tuladhar                                                                                                                                                                                                                                                                                                                                                                                                                                                                                                                                                                                           |                                                                                                                                                                                                                                                                                                                    |
| EPI_ISL_1137170, EPI_ISL_1273227 to 1273305                                                                                                                                                                                                                                                                                                                                                                                                                                                                                                                                                                                                                                                                                                                                                | Texas Department of State Health Services (TXDSHS)                                                                                             | Texas Department of State Health Services (TXDSHS)                                                                     | Anita Pokharel; Bonnie Oh; Chun Wang; Chung Wang; Grace Kubin; James Daniel Bonser; Jenny Zhang; Maliha Rahman; Mayela Pedrueza; Myong Koag; Rachel Lee; Rashmi Tuladhar                                                                                                                                                                                                                                                                                                                                                                                                                                                                                                                                                                                           |                                                                                                                                                                                                                                                                                                                    |
| EPI_ISL_1273226                                                                                                                                                                                                                                                                                                                                                                                                                                                                                                                                                                                                                                                                                                                                                                            | Texas Department of State Health Services (Texas Department of State Health Services (TXDSHS))                                                 | Texas Department of State Health Services (TXDSHS)                                                                     | Anita Pokharel; Bonnie Oh; Chun Wang; Grace Kubin; Jenny Zhang; Maliha Rahman; Mayela Pedrueza; Myong Koag; Rachel Lee; Rashmi Tuladhar                                                                                                                                                                                                                                                                                                                                                                                                                                                                                                                                                                                                                            |                                                                                                                                                                                                                                                                                                                    |
| EPI_ISL_1300335 to 1300424                                                                                                                                                                                                                                                                                                                                                                                                                                                                                                                                                                                                                                                                                                                                                                 | Texas Department of State Health Services - TXDSHS                                                                                             | Texas Department of State Health Services - TXDSHS                                                                     | Anita Pokharel; Bonnie Oh; Chun Wang; Grace Kubin; Jenny Zhang; Maliha Rahman; Mayela Pedrueza; Myong Koag; Rachel Lee; Rashmi Tuladhar                                                                                                                                                                                                                                                                                                                                                                                                                                                                                                                                                                                                                            |                                                                                                                                                                                                                                                                                                                    |
| EPI_ISL_1007658 to 1007659, EPI_ISL_1117527 to 1117528, EPI_ISL_1278368 to 1278372, EPI_ISL_1296442 to 1296462                                                                                                                                                                                                                                                                                                                                                                                                                                                                                                                                                                                                                                                                             | Thai Red Cross Emerging Infectious Diseases Health Science Centre, Chulalongkorn Hospital, Faculty of Medicine, Chulalongkorn University       | Thai Red Cross Emerging Infectious Diseases Center and Faculty of Medicine, Chulalongkorn University                   | Apaporn Rodpan; Chaniya Jamsaim; Duangtip Singhakun; Gompol Suwanpimokul; Kamolthip Atsawawaranunt; Leilani Paitoonpong; M.D.; Non Chindavech; Opass Pucharoen; Pattama Torvorapanit; Pornvimol Leethong; Ratchada Kitsommart; Rome Buathong; Sininat Petcharat; Sininat Petcharat; Sopon Iamsirithaworn; Supaporn Wacharapluesadee; Thiravat Hemachudha; Vichan Pawun; Watsamon Jantarabenjakul; Weenassarin Ampoot; Yuthana Joyjinda; Yuthana Joyjinda                                                                                                                                                                                                                                                                                                           |                                                                                                                                                                                                                                                                                                                    |
| EPI_ISL_1203819 to 1203842, EPI_ISL_1273306 to 1273378, EPI_ISL_1289785 to 1289788, EPI_ISL_1315126 to 1315223                                                                                                                                                                                                                                                                                                                                                                                                                                                                                                                                                                                                                                                                             | The Jackson Laboratory                                                                                                                         | The Jackson Laboratory                                                                                                 | Adams M; Bergeron D; Kelly K; Li L; Lloyd M; Maurya R; Omerza G; Renzette N; Sanderson B; Srivastava A; Wei C L                                                                                                                                                                                                                                                                                                                                                                                                                                                                                                                                                                                                                                                    |                                                                                                                                                                                                                                                                                                                    |
| EPI_ISL_1081832 to 1081833, EPI_ISL_1081839, EPI_ISL_1081841, EPI_ISL_1122458, EPI_ISL_1213585 to 1213586, EPI_ISL_1219701                                                                                                                                                                                                                                                                                                                                                                                                                                                                                                                                                                                                                                                                 | The Lord's Grace Medical and Industrial Clinic                                                                                                 | Philippine Genome Center                                                                                               | Alethea R. de Guzman; Anna Ong-Lim; Arianne A. Zamora; Asia Louisa U. Chong; Benedict A. Maralit; Candice Francheska B. Tambaoan; Carlo M. Lapid; Celia Carlos; Cynthia P. Saloma; Devon Ray Pacial; Edsel Maurice Salvaña; El King D. Morado; Eva Maria Cutiongco-de la Paz; Francis A. Tablizo; Irish Coleen A. Asin; Jaime C. Montoya; Jan Michael C. Yap; Jo-Hannah S. Llamas; John Q. Wong; Joshua Gregor A. Dizon; Juan Antonio R. Magalang; Karol Sophia Agape R. Padilla; Kenneth M. Kim; Kris P. Punayan; Marc Edsel C. Ayes; Marc Jerrone R. Castro; Maria Rosario Singh-Vergeire and Cynthia P. Saloma; Maria Sofia L. Yangzon; Marissa Alejandria; Razel Nikka M. Hao; Rianna Patricia S. Cruz; Sheila Mae M. Araiza; and Maria Rosario Singh-Vergeire |                                                                                                                                                                                                                                                                                                                    |
| EPI_ISL_1213588                                                                                                                                                                                                                                                                                                                                                                                                                                                                                                                                                                                                                                                                                                                                                                            | The Medical City - Ortigas                                                                                                                     | Philippine Genome Center                                                                                               | Alethea R. de Guzman; Anna Ong-Lim; Arianne A. Zamora; Asia Louisa U. Chong; Benedict A. Maralit; Candice Francheska B. Tambaoan; Carlo M. Lapid; Celia Carlos; Cynthia P. Saloma; Devon Ray Pacial; Edsel Maurice Salvaña; El King D. Morado; Eva Maria Cutiongco-de la Paz; Francis A. Tablizo; Irish Coleen A. Asin; Jaime C. Montoya; Jan Michael C. Yap; Jo-Hannah S. Llamas; John Q. Wong; Joshua Gregor A. Dizon; Juan Antonio R. Magalang; Karol Sophia Agape R. Padilla; Kenneth M. Kim; Kris P. Punayan; Marc Edsel C. Ayes; Marc Jerrone R. Castro; Maria Rosario Singh-Vergeire and Cynthia P. Saloma; Maria Sofia L. Yangzon; Marissa Alejandria; Razel Nikka M. Hao; Rianna Patricia S. Cruz; Sheila Mae M. Araiza                                   |                                                                                                                                                                                                                                                                                                                    |
| EPI_ISL_1311965                                                                                                                                                                                                                                                                                                                                                                                                                                                                                                                                                                                                                                                                                                                                                                            | The Ohio State University Applied Microbiology Services Laboratory                                                                             | The Ohio State University Applied Microbiology Services Laboratory                                                     | Seth A. Faith PhD                                                                                                                                                                                                                                                                                                                                                                                                                                                                                                                                                                                                                                                                                                                                                  |                                                                                                                                                                                                                                                                                                                    |
| EPI_ISL_1000967                                                                                                                                                                                                                                                                                                                                                                                                                                                                                                                                                                                                                                                                                                                                                                            | The Ohio State University Wexner Medical Center                                                                                                | James Molecular Lab                                                                                                    | Dan Jones; Huolin Tu; Jason Garee; Keelie Thomas; Laura Kubatko; Matthew Hunt; Matthew R Avenarius; Peng Ru; Peter Mohler; Preeti Pancholi; Xiaokang Pan                                                                                                                                                                                                                                                                                                                                                                                                                                                                                                                                                                                                           |                                                                                                                                                                                                                                                                                                                    |



|                                                                                                                                                                                                                                                                                                                                                                                                                                                                                                                                                                                                                                                                                                                                                                                                                                                                                                                                                                                                                                  |                                                                                  |                                                                                                                                |                                                                                                                                                                                                                                                                                                                                                       |
|----------------------------------------------------------------------------------------------------------------------------------------------------------------------------------------------------------------------------------------------------------------------------------------------------------------------------------------------------------------------------------------------------------------------------------------------------------------------------------------------------------------------------------------------------------------------------------------------------------------------------------------------------------------------------------------------------------------------------------------------------------------------------------------------------------------------------------------------------------------------------------------------------------------------------------------------------------------------------------------------------------------------------------|----------------------------------------------------------------------------------|--------------------------------------------------------------------------------------------------------------------------------|-------------------------------------------------------------------------------------------------------------------------------------------------------------------------------------------------------------------------------------------------------------------------------------------------------------------------------------------------------|
| EPI_ISL_1064682 to 1064684,<br>EPI_ISL_1064708, EPI_ISL_1300286                                                                                                                                                                                                                                                                                                                                                                                                                                                                                                                                                                                                                                                                                                                                                                                                                                                                                                                                                                  | The Public Health Agency of Sweden                                               | The Public Health Agency of Sweden                                                                                             | Anna Risberg; Anna-Malin Linde; Carlo Berg; Karin Tegmark-Wisell; Maria Lind Karlberg; Mattias Haukland; Mia Brytting; Noura Walai; Oskar Karlsson<br>Lindsjo; Petra Edquist; Petra Holmstrom; Reza Advani; Samuel Ohman; Sofia Stamouli                                                                                                              |
| EPI_ISL_1141160, EPI_ISL_1141162, EPI_ISL_1141164, EPI_ISL_1141166 to 1141169, EPI_ISL_1141173 to 1141174, EPI_ISL_1143928, EPI_ISL_1143931, EPI_ISL_1143933 to 1143938, EPI_ISL_1143942, EPI_ISL_1151397 to 1151413, EPI_ISL_1157362 to 1157377, EPI_ISL_1217566, EPI_ISL_1217568 to 1217575,<br>EPI_ISL_1285719 to 1285724, EPI_ISL_1285726, EPI_ISL_1353266 to 1353275, EPI_ISL_1353277                                                                                                                                                                                                                                                                                                                                                                                                                                                                                                                                                                                                                                       |                                                                                  |                                                                                                                                |                                                                                                                                                                                                                                                                                                                                                       |
| see above                                                                                                                                                                                                                                                                                                                                                                                                                                                                                                                                                                                                                                                                                                                                                                                                                                                                                                                                                                                                                        | Thüringer Landesamt für Verbraucherschutz                                        | Robert Koch Institute                                                                                                          |                                                                                                                                                                                                                                                                                                                                                       |
| EPI_ISL_1123419, EPI_ISL_1131133                                                                                                                                                                                                                                                                                                                                                                                                                                                                                                                                                                                                                                                                                                                                                                                                                                                                                                                                                                                                 | Tokyo Metropolitan Institute of Public Health                                    | Pathogen Genomics Center, National Institute of Infectious Diseases                                                            | Kentaro Itokawa; Makoto Kuroda; Masanori Hashino; Rina Tanaka; Tsuyoshi Sekizuka                                                                                                                                                                                                                                                                      |
| EPI_ISL_1124095, EPI_ISL_1124097, EPI_ISL_1124099, EPI_ISL_1124101 to 1124102, EPI_ISL_1124104, EPI_ISL_1124106, EPI_ISL_1124108 to 1124109, EPI_ISL_1124111, EPI_ISL_1124113, EPI_ISL_1124115, EPI_ISL_1124117 to 1124118, EPI_ISL_1124120, EPI_ISL_1124122, EPI_ISL_1124124, EPI_ISL_1124126 to 1124127, EPI_ISL_1124129, EPI_ISL_1124131, EPI_ISL_1124133, EPI_ISL_1124135, EPI_ISL_1124137 to 1124138, EPI_ISL_1124140, EPI_ISL_1124142, EPI_ISL_1124144, EPI_ISL_1124146, EPI_ISL_1124148 to 1124149, EPI_ISL_1124151, EPI_ISL_1124153, EPI_ISL_1124155, EPI_ISL_1124157, EPI_ISL_1124159, EPI_ISL_1124161 to 1124162, EPI_ISL_1124164, EPI_ISL_1124166, EPI_ISL_1124168, EPI_ISL_1124170, EPI_ISL_1124172, EPI_ISL_1124174 to 1124175, EPI_ISL_1124177, EPI_ISL_1124179, EPI_ISL_1124181 to 1124182, EPI_ISL_1124184, EPI_ISL_1124186, EPI_ISL_1124188, EPI_ISL_1124190, EPI_ISL_1124192, EPI_ISL_1124194, EPI_ISL_1124196 to 1124197, EPI_ISL_1124199, EPI_ISL_1124201, EPI_ISL_1124203, EPI_ISL_1124205, EPI_ISL_1124207 |                                                                                  |                                                                                                                                |                                                                                                                                                                                                                                                                                                                                                       |
| see above                                                                                                                                                                                                                                                                                                                                                                                                                                                                                                                                                                                                                                                                                                                                                                                                                                                                                                                                                                                                                        | Toyama Institute of Health                                                       | Pathogen Genomics Center, National Institute of Infectious Diseases                                                            | Kentaro Itokawa; Makoto Kuroda; Masanori Hashino; Rina Tanaka; Tsuyoshi Sekizuka                                                                                                                                                                                                                                                                      |
| EPI_ISL_1225241 to 1225261,<br>EPI_ISL_1225263 to 1225319                                                                                                                                                                                                                                                                                                                                                                                                                                                                                                                                                                                                                                                                                                                                                                                                                                                                                                                                                                        | TriCore Reference Laboratories                                                   | Center for Global Health, University of New Mexico Health Sciences Center                                                      | Cecilia Thompson; Darrell Dinwiddie; Daryl Domman; Karissa Culbreath; Kendra Pesko; Kurt Schwalm                                                                                                                                                                                                                                                      |
| EPI_ISL_1340894 to 1340897                                                                                                                                                                                                                                                                                                                                                                                                                                                                                                                                                                                                                                                                                                                                                                                                                                                                                                                                                                                                       | TriCore Reference Laboratory Inc.                                                | New Mexico Department of Health Scientific Laboratory                                                                          | Anastacia Griego-Fisher; D'eldra Malone; Ellie Johnson; Jennifer Benoit                                                                                                                                                                                                                                                                               |
| EPI_ISL_1225262, EPI_ISL_1239769 to 1239846                                                                                                                                                                                                                                                                                                                                                                                                                                                                                                                                                                                                                                                                                                                                                                                                                                                                                                                                                                                      | TriCore Reference Laboratories                                                   | Center for Global Health, University of New Mexico Health Sciences Center                                                      | Cecilia Thompson; Darrell Dinwiddie; Daryl Domman; Karissa Culbreath; Kendra Pesko; Kurt Schwalm                                                                                                                                                                                                                                                      |
| EPI_ISL_1239459, EPI_ISL_1239462, EPI_ISL_1239464 to 1239465, EPI_ISL_1239469 to 1239470, EPI_ISL_1239472 to 1239473, EPI_ISL_1239482, EPI_ISL_1239491 to 1239492, EPI_ISL_1239494 to 1239501, EPI_ISL_1239503 to 1239507, EPI_ISL_1239510 to 1239511, EPI_ISL_1239513 to 1239514, EPI_ISL_1239516 to 1239517, EPI_ISL_1239521, EPI_ISL_1239523, EPI_ISL_1239525 to 1239526                                                                                                                                                                                                                                                                                                                                                                                                                                                                                                                                                                                                                                                      |                                                                                  |                                                                                                                                |                                                                                                                                                                                                                                                                                                                                                       |
| see above                                                                                                                                                                                                                                                                                                                                                                                                                                                                                                                                                                                                                                                                                                                                                                                                                                                                                                                                                                                                                        | Tshepong Hospital, National Health Laboratory Services, North West, South Africa | National Institute for Communicable Diseases of the National Health Laboratory Service                                         | Amoako DG; Bhiman JN; Ismail A; Mahlangu B; Mohale T; Ntuli N; Scheepers C                                                                                                                                                                                                                                                                            |
| EPI_ISL_1224941, EPI_ISL_1225156 to 1225161                                                                                                                                                                                                                                                                                                                                                                                                                                                                                                                                                                                                                                                                                                                                                                                                                                                                                                                                                                                      | Turkish Society of Internal Medicine                                             | Gen Era Diagnostics Corporation Life Science Research and Molecular Diagnostics                                                | Serhat Ünal                                                                                                                                                                                                                                                                                                                                           |
| EPI_ISL_1036658                                                                                                                                                                                                                                                                                                                                                                                                                                                                                                                                                                                                                                                                                                                                                                                                                                                                                                                                                                                                                  | Tyler Radniecki                                                                  | Center for Genome Research and Biocomputing                                                                                    | Oregon State University TRACE Project                                                                                                                                                                                                                                                                                                                 |
| EPI_ISL_1298482                                                                                                                                                                                                                                                                                                                                                                                                                                                                                                                                                                                                                                                                                                                                                                                                                                                                                                                                                                                                                  | Tysmenytsia CH                                                                   | The Institute of Molecular Biology and Genetics of NASU                                                                        | M.Tukalo et al.                                                                                                                                                                                                                                                                                                                                       |
| EPI_ISL_1049261                                                                                                                                                                                                                                                                                                                                                                                                                                                                                                                                                                                                                                                                                                                                                                                                                                                                                                                                                                                                                  | U.O. Microbiologia Laboratorio Unico Centro Servizi AUSL della Romagna           | U.O. Microbiologia Laboratorio Unico Centro Servizi AUSL della Romagna                                                         | Giorgio Dirani; Silvia Zannoli; Vittorio Sambri                                                                                                                                                                                                                                                                                                       |
| EPI_ISL_1363195 to 1363218                                                                                                                                                                                                                                                                                                                                                                                                                                                                                                                                                                                                                                                                                                                                                                                                                                                                                                                                                                                                       | UAB Diagnostikos laboratorija                                                    | Institute of Biotechnology, Life Sciences Center, Vilnius University                                                           | Albertas Timinskas; Alma Gedvilaite; Danguole Zigiene; Emilija Vasiluinaite; Milda Norkiene                                                                                                                                                                                                                                                           |
| EPI_ISL_1302458 to 1302459, EPI_ISL_1302500 to 1302505, EPI_ISL_1302508 to 1302513, EPI_ISL_1302516 to 1302519, EPI_ISL_1302522, EPI_ISL_1302524, EPI_ISL_1302528 to 1302529, EPI_ISL_1302534, EPI_ISL_1302536, EPI_ISL_1302538 to 1302542, EPI_ISL_1302544 to 1302546, EPI_ISL_1302549 to 1302551, EPI_ISL_1302559, EPI_ISL_1357609, EPI_ISL_1357611, EPI_ISL_1357635, EPI_ISL_1357637, EPI_ISL_1357642 to 1357643                                                                                                                                                                                                                                                                                                                                                                                                                                                                                                                                                                                                              |                                                                                  |                                                                                                                                |                                                                                                                                                                                                                                                                                                                                                       |
| see above                                                                                                                                                                                                                                                                                                                                                                                                                                                                                                                                                                                                                                                                                                                                                                                                                                                                                                                                                                                                                        | UAB Diagnostikos laboratorija Antėja                                             | Lithuanian University of Health Sciences Hospital, Department of Genetics and Molecular Medicine                               | Astra Vitkauskienė; Darius Cereskevicius; Inga Nasvytiene; Mantas Sarauskas; Marius Sukys; Rasa Ugenskiene; Renaldas Jurkevicius; Zivile Zemeckiene                                                                                                                                                                                                   |
| EPI_ISL_1324514 to 1324515, EPI_ISL_1324517 to 1324526, EPI_ISL_1324528 to 1324534, EPI_ISL_1324536 to 1324545, EPI_ISL_1324547 to 1324554, EPI_ISL_1324556 to 1324560, EPI_ISL_1324657 to 1324659, EPI_ISL_1324728 to 1324730                                                                                                                                                                                                                                                                                                                                                                                                                                                                                                                                                                                                                                                                                                                                                                                                   |                                                                                  |                                                                                                                                |                                                                                                                                                                                                                                                                                                                                                       |
| see above                                                                                                                                                                                                                                                                                                                                                                                                                                                                                                                                                                                                                                                                                                                                                                                                                                                                                                                                                                                                                        | UAB InMedica                                                                     | Vilnius University Hospital Santaros Klinikos, Center of Laboratory Medicine                                                   | Daniel Naumovas; Dovile Ezerskyte; Gytis Dudas; Ingrida Olendraite; Laimonas Griskevicius; Ligita Raugaite; Mindaugas Stoskus; Monika Katenaite; Rimvydas Norvilas                                                                                                                                                                                    |
| EPI_ISL_1121309                                                                                                                                                                                                                                                                                                                                                                                                                                                                                                                                                                                                                                                                                                                                                                                                                                                                                                                                                                                                                  | UBS Jose Francisco Rezende                                                       | Instituto Adolfo Lutz, Interdisciplinary Procedures Center, Strategic Laboratory                                               | Caio Vinicius Dias Lopes; Claudia Regina Gonçalves; Claudio Tavares Sacchi; Erica Valessa Ramos Gomes; Karoline Rodrigues Campos                                                                                                                                                                                                                      |
| EPI_ISL_1196295                                                                                                                                                                                                                                                                                                                                                                                                                                                                                                                                                                                                                                                                                                                                                                                                                                                                                                                                                                                                                  | UBS Otacilio Firmino Lopes                                                       | Instituto Adolfo Lutz, Interdisciplinary Procedures Center, Strategic Laboratory                                               | Caio Vinicius Dias Lopes; Claudia Regina Gonçalves; Claudio Tavares Sacchi; Erica Valessa Ramos Gomes; Karoline Rodrigues Campos                                                                                                                                                                                                                      |
| EPI_ISL_1009813, EPI_ISL_1009827                                                                                                                                                                                                                                                                                                                                                                                                                                                                                                                                                                                                                                                                                                                                                                                                                                                                                                                                                                                                 | UC Davis Genome Center and Healthy Davis Together                                | UC Davis Genome Center                                                                                                         | Sam Diaz-Muñoz and AJ Campbell                                                                                                                                                                                                                                                                                                                        |
| EPI_ISL_1201695 to 1201710, EPI_ISL_1239546, EPI_ISL_1239597 to 1239598, EPI_ISL_1239676 to 1239677, EPI_ISL_1239713, EPI_ISL_1239741, EPI_ISL_1273823 to 1273824                                                                                                                                                                                                                                                                                                                                                                                                                                                                                                                                                                                                                                                                                                                                                                                                                                                                |                                                                                  |                                                                                                                                |                                                                                                                                                                                                                                                                                                                                                       |
| see above                                                                                                                                                                                                                                                                                                                                                                                                                                                                                                                                                                                                                                                                                                                                                                                                                                                                                                                                                                                                                        | UCK                                                                              | 1. National Institute of Public Health - National Institute of Hygiene; 2. Eurofins Genomics Europe Sequencing GmbH            | ECDC COVID-19 WGS support team; Eurofins Genomics Europe Sequencing Team; Gierczyk Rafa; Sadkowska-Todys Magorzata; Wokowicz Tomasz; Zacharczuk Katarzyna                                                                                                                                                                                             |
| EPI_ISL_1005511 to 1005521, EPI_ISL_1005542 to 1005554, EPI_ISL_1040053 to 1040071, EPI_ISL_1097742, EPI_ISL_1098609 to 1098627, EPI_ISL_1098629, EPI_ISL_1098631, EPI_ISL_1191110 to 1191131, EPI_ISL_1197149, EPI_ISL_1303432 to 1303437, EPI_ISL_1303449 to 1303461, EPI_ISL_1379958 to 1379975                                                                                                                                                                                                                                                                                                                                                                                                                                                                                                                                                                                                                                                                                                                               |                                                                                  |                                                                                                                                |                                                                                                                                                                                                                                                                                                                                                       |
| see above                                                                                                                                                                                                                                                                                                                                                                                                                                                                                                                                                                                                                                                                                                                                                                                                                                                                                                                                                                                                                        | UCLA Clinical Micro Lab                                                          | Los Angeles County PHL                                                                                                         | P. Hemarajata et al.                                                                                                                                                                                                                                                                                                                                  |
| EPI_ISL_1301442 to 1301443                                                                                                                                                                                                                                                                                                                                                                                                                                                                                                                                                                                                                                                                                                                                                                                                                                                                                                                                                                                                       | UCSD EXCITE                                                                      | NBACC                                                                                                                          | Aaron Phillips; Adam Bazinet; Amanda Graham; Brian Holland; David Miller; Denise Freeburger; Elyse Abbott; Gregory Williams; Jason Yoltitz; Jennifer Biryukov; Jordan Bohannon; Karla Garcia; Katie Beck; M.J. Rosovitz; Melissa Krause; Michael Schuit; Paul Dabisch; Sean Lovett; Shanna Ratnesar-Shumate; Stewart Wood; Victoria Wahl; Wade Weaver |
| EPI_ISL_1068996 to 1068999,<br>EPI_ISL_1069076, EPI_ISL_1069078                                                                                                                                                                                                                                                                                                                                                                                                                                                                                                                                                                                                                                                                                                                                                                                                                                                                                                                                                                  | UCSI University                                                                  | Institute for Medical Research, Infectious Disease Research Centre, National Institutes of Health, Ministry of Health Malaysia | Azizan MA; Kamel K; Sekaran SD; Suppiah J; Thayan R                                                                                                                                                                                                                                                                                                   |
| EPI_ISL_1310832                                                                                                                                                                                                                                                                                                                                                                                                                                                                                                                                                                                                                                                                                                                                                                                                                                                                                                                                                                                                                  | UHTL                                                                             | UHTL                                                                                                                           | Xiao Song                                                                                                                                                                                                                                                                                                                                             |
| EPI_ISL_1260902, EPI_ISL_1260917 to 1260928, EPI_ISL_1260937, EPI_ISL_1260946 to 1260948, EPI_ISL_1260951 to 1260953                                                                                                                                                                                                                                                                                                                                                                                                                                                                                                                                                                                                                                                                                                                                                                                                                                                                                                             | ULSS 03 Venezia                                                                  | Istituto Zooprofilattico Sperimentale delle Venezie                                                                            | Adelaide Milani; Alessia Schivo; Alice Fusaro; Ambra Pastori; Annalisa Salviato; Antonia Ricci; Calogero Terregino; Edoardo Giussani; Erika Giorgia Quaranta; Isabella Monne; Luca Tassoni                                                                                                                                                            |
| EPI_ISL_1260941, EPI_ISL_1260963                                                                                                                                                                                                                                                                                                                                                                                                                                                                                                                                                                                                                                                                                                                                                                                                                                                                                                                                                                                                 | ULSS 04 Veneto Orientale                                                         | Istituto Zooprofilattico Sperimentale delle Venezie                                                                            | Adelaide Milani; Alessia Schivo; Alice Fusaro; Ambra Pastori; Annalisa Salviato; Antonia Ricci; Calogero Terregino; Edoardo Giussani; Erika Giorgia Quaranta; Isabella Monne; Luca Tassoni                                                                                                                                                            |
| EPI_ISL_1260929, EPI_ISL_1260938,<br>EPI_ISL_1260954                                                                                                                                                                                                                                                                                                                                                                                                                                                                                                                                                                                                                                                                                                                                                                                                                                                                                                                                                                             | ULSS 1 Dolomiti                                                                  | Istituto Zooprofilattico Sperimentale delle Venezie                                                                            | Adelaide Milani; Alessia Schivo; Alice Fusaro; Ambra Pastori; Annalisa Salviato; Antonia Ricci; Calogero Terregino; Edoardo Giussani; Erika Giorgia Quaranta; Isabella Monne; Luca Tassoni                                                                                                                                                            |
| EPI_ISL_1260875 to 1260894,<br>EPI_ISL_1260903, EPI_ISL_1260956                                                                                                                                                                                                                                                                                                                                                                                                                                                                                                                                                                                                                                                                                                                                                                                                                                                                                                                                                                  | ULSS 2 Treviso                                                                   | Istituto Zooprofilattico Sperimentale delle Venezie                                                                            | Adelaide Milani; Alessia Schivo; Alice Fusaro; Ambra Pastori; Annalisa Salviato; Antonia Ricci; Calogero Terregino; Edoardo Giussani; Erika Giorgia Quaranta; Isabella Monne; Luca Tassoni                                                                                                                                                            |
| EPI_ISL_1260872 to 1260873,<br>EPI_ISL_1260932 to 1260936,<br>EPI_ISL_1260943                                                                                                                                                                                                                                                                                                                                                                                                                                                                                                                                                                                                                                                                                                                                                                                                                                                                                                                                                    | ULSS 5 Polesana                                                                  | Istituto Zooprofilattico Sperimentale delle Venezie                                                                            | Adelaide Milani; Alessia Schivo; Alice Fusaro; Ambra Pastori; Annalisa Salviato; Antonia Ricci; Calogero Terregino; Edoardo Giussani; Erika Giorgia Quaranta; Isabella Monne; Luca Tassoni                                                                                                                                                            |
| EPI_ISL_1260904 to 1260912,<br>EPI_ISL_1260931                                                                                                                                                                                                                                                                                                                                                                                                                                                                                                                                                                                                                                                                                                                                                                                                                                                                                                                                                                                   | ULSS 6 Euganea                                                                   | Istituto Zooprofilattico Sperimentale delle Venezie                                                                            | Adelaide Milani; Alessia Schivo; Alice Fusaro; Ambra Pastori; Annalisa Salviato; Antonia Ricci; Calogero Terregino; Edoardo Giussani; Erika Giorgia Quaranta; Isabella Monne; Luca Tassoni                                                                                                                                                            |
| EPI_ISL_1260895 to 1260896,<br>EPI_ISL_1260944 to 1260945                                                                                                                                                                                                                                                                                                                                                                                                                                                                                                                                                                                                                                                                                                                                                                                                                                                                                                                                                                        | ULSS 7 Pedemontana - Distretto 1                                                 | Istituto Zooprofilattico Sperimentale delle Venezie                                                                            | Adelaide Milani; Alessia Schivo; Alice Fusaro; Ambra Pastori; Annalisa Salviato; Antonia Ricci; Calogero Terregino; Edoardo Giussani; Erika Giorgia Quaranta; Isabella Monne; Luca Tassoni                                                                                                                                                            |

|                                                                                                                                                                                                                                                                                                                                                                                                                                                                                                                                                                                                                                                                                                                                                                                                                                                                                                                                                                                                                              |                                                                                       |                                                                                                                                        |                                                                                                                                                                                                                                                                                                                                                                                                                                     |
|------------------------------------------------------------------------------------------------------------------------------------------------------------------------------------------------------------------------------------------------------------------------------------------------------------------------------------------------------------------------------------------------------------------------------------------------------------------------------------------------------------------------------------------------------------------------------------------------------------------------------------------------------------------------------------------------------------------------------------------------------------------------------------------------------------------------------------------------------------------------------------------------------------------------------------------------------------------------------------------------------------------------------|---------------------------------------------------------------------------------------|----------------------------------------------------------------------------------------------------------------------------------------|-------------------------------------------------------------------------------------------------------------------------------------------------------------------------------------------------------------------------------------------------------------------------------------------------------------------------------------------------------------------------------------------------------------------------------------|
| EPI_ISL_1260897 to 1260900                                                                                                                                                                                                                                                                                                                                                                                                                                                                                                                                                                                                                                                                                                                                                                                                                                                                                                                                                                                                   | ULSS 7 Pedemontana - Distretto 2                                                      | Istituto Zooprofilattico Sperimentale delle Venezie                                                                                    | Adelaide Milani; Alessia Schivo; Alice Fusaro; Ambra Pastori; Annalisa Salviato; Antonia Ricci; Calogero Terregino; Edoardo Giussani; Erika Giorgia Quaranta; Isabella Monne; Luca Tassoni                                                                                                                                                                                                                                          |
| EPI_ISL_1260942                                                                                                                                                                                                                                                                                                                                                                                                                                                                                                                                                                                                                                                                                                                                                                                                                                                                                                                                                                                                              | ULSS 8 Berica                                                                         | Istituto Zooprofilattico Sperimentale delle Venezie                                                                                    | Adelaide Milani; Alessia Schivo; Alice Fusaro; Ambra Pastori; Annalisa Salviato; Antonia Ricci; Calogero Terregino; Edoardo Giussani; Erika Giorgia Quaranta; Isabella Monne; Luca Tassoni                                                                                                                                                                                                                                          |
| EPI_ISL_1020194                                                                                                                                                                                                                                                                                                                                                                                                                                                                                                                                                                                                                                                                                                                                                                                                                                                                                                                                                                                                              | UMMI Hospital, Bogor, West Java                                                       | Biosafety Level-3 Laboratory, Indonesian Institute of Sciences (LIPI)                                                                  | Anggia Prasetyoputri; Gita Syahputra; Isa Nuryana; Rath Asmana Ningrum; Sri Swasthikawati; Sugiyono Saputra; Syam Budi Iryanto                                                                                                                                                                                                                                                                                                      |
| EPI_ISL_1261871 to 1261894, EPI_ISL_1373441 to 1373447, EPI_ISL_1373449, EPI_ISL_1373453 to 1373460, EPI_ISL_1382112 to 1382115                                                                                                                                                                                                                                                                                                                                                                                                                                                                                                                                                                                                                                                                                                                                                                                                                                                                                              | UNC-CH COVID Surveillance Lab                                                         | Jeremy Wang                                                                                                                            | Alexander Rubinsteyn; Amir Barzin; Amy James Loftis; Corbin Jones; Jeremy Wang; Melissa Miller; Susan Fiscus                                                                                                                                                                                                                                                                                                                        |
| EPI_ISL_1290838, EPI_ISL_1312895                                                                                                                                                                                                                                                                                                                                                                                                                                                                                                                                                                                                                                                                                                                                                                                                                                                                                                                                                                                             | UNIBIO                                                                                | CNR Virus des Infections Respiratoires - France SUD                                                                                    | Antonin Bal; Bruno Lina; Gregory Destras; Gwendolynne Burfin; Hadrien Regue; Laurence Josset; Martine Valette; Quentin Semanas                                                                                                                                                                                                                                                                                                      |
| EPI_ISL_1371784                                                                                                                                                                                                                                                                                                                                                                                                                                                                                                                                                                                                                                                                                                                                                                                                                                                                                                                                                                                                              | UNIBIO LYON BELLECOUR                                                                 | CNR Virus des Infections Respiratoires - France SUD                                                                                    | Antonin Bal; Bruno Lina; Gregory Destras; Gwendolynne Burfin; Hadrien Regue; Laurence Josset; Martine Valette; Quentin Semanas                                                                                                                                                                                                                                                                                                      |
| EPI_ISL_1195282                                                                                                                                                                                                                                                                                                                                                                                                                                                                                                                                                                                                                                                                                                                                                                                                                                                                                                                                                                                                              | UNIDADE SANITARIA DE IGREJINHA                                                        | Epiclin                                                                                                                                | Ana Paula Muterle; Carolina Comerlato; Eliana Márcia Da Ros Wendland; Fernando Hayashi Sant'Anna; Janira Prichula; Juliana Comerlato                                                                                                                                                                                                                                                                                                |
| EPI_ISL_1015353 to 1015357                                                                                                                                                                                                                                                                                                                                                                                                                                                                                                                                                                                                                                                                                                                                                                                                                                                                                                                                                                                                   | UNIGEM                                                                                | Universidad Nacional de Colombia - Laboratorio Genómico One Health                                                                     | Andres F. Cardona-Rios; Carlos Franco-Muñoz; Daniel O. Maldonado-Perez; Diego A. Álvarez-Díaz; Idabely Betancur Ortiz; Jorge E. Osorio; Juan P. Hernandez-Ortiz; Karl A. Ciuoderis; Laura Silvana Perez; Marcela Mercado-Reyes; Sandra Ines Cano                                                                                                                                                                                    |
| EPI_ISL_1007604, EPI_ISL_1120843 to 1120844                                                                                                                                                                                                                                                                                                                                                                                                                                                                                                                                                                                                                                                                                                                                                                                                                                                                                                                                                                                  | UNILABS - COPPET                                                                      | Laboratory of genomics and metagenomics, Institute of Microbiology, University Hospital Centre and University of Lausanne, Switzerland | Claire Bertelli; Damien Jacot; Gilbert Greub; Sébastien Aebly; Trestan Pillonel                                                                                                                                                                                                                                                                                                                                                     |
| EPI_ISL_1120856                                                                                                                                                                                                                                                                                                                                                                                                                                                                                                                                                                                                                                                                                                                                                                                                                                                                                                                                                                                                              | UNILABS - LAUSANNE                                                                    | Laboratory of genomics and metagenomics, Institute of Microbiology, University Hospital Centre and University of Lausanne, Switzerland | Claire Bertelli; Damien Jacot; Gilbert Greub; Sébastien Aebly; Trestan Pillonel                                                                                                                                                                                                                                                                                                                                                     |
| EPI_ISL_1229037, EPI_ISL_1229041, EPI_ISL_1229044, EPI_ISL_1229047 to 1229050, EPI_ISL_1229052 to 1229053, EPI_ISL_1229114 to 1229129                                                                                                                                                                                                                                                                                                                                                                                                                                                                                                                                                                                                                                                                                                                                                                                                                                                                                        | UNILIANS DECINES                                                                      | CNR Virus des Infections Respiratoires - France SUD                                                                                    | Antonin Bal; Bruno Lina; Gregory Destras; Gwendolynne Burfin; Hadrien Regue; Laurence Josset; Martine Valette; Quentin Semanas                                                                                                                                                                                                                                                                                                      |
| EPI_ISL_1190782                                                                                                                                                                                                                                                                                                                                                                                                                                                                                                                                                                                                                                                                                                                                                                                                                                                                                                                                                                                                              | UNILIANS LYON SAXE                                                                    | CNR Virus des Infections Respiratoires - France SUD                                                                                    | Antonin Bal; Bruno Lina; Gregory Destras; Gwendolynne Burfin; Hadrien Règue; Laurence Josset; Martine Valette; Quentin Semanas                                                                                                                                                                                                                                                                                                      |
| EPI_ISL_1007636                                                                                                                                                                                                                                                                                                                                                                                                                                                                                                                                                                                                                                                                                                                                                                                                                                                                                                                                                                                                              | UNISANTE                                                                              | Laboratory of genomics and metagenomics, Institute of Microbiology, University Hospital Centre and University of Lausanne, Switzerland | Claire Bertelli; Damien Jacot; Gilbert Greub; Sébastien Aebly; Trestan Pillonel                                                                                                                                                                                                                                                                                                                                                     |
| EPI_ISL_1303369 to 1303370, EPI_ISL_1303375                                                                                                                                                                                                                                                                                                                                                                                                                                                                                                                                                                                                                                                                                                                                                                                                                                                                                                                                                                                  | UNIVERSIDAD DE CORDOBA - INSTITUTO DE INVESTIGACIONES BIOLÓGICAS DEL TRÓPICO IIBT     | Instituto Nacional de Salud- Dirección de Investigación en Salud Pública                                                               | Carlos Franco-Muñoz; Carmen Osorio; Diana Malo; Diego A. Álvarez-Díaz; Diego Andrés Prada; Gerardo Santamaría; Hector Alejandro Ruiz-Moreno; Jhonnatan Reales-González; Juan Camilo Martínez; Julian Naizaque; Katherine Laiton-Donato; Lisseth Pardo; Magdalena Wiesner; Marcela Mercado-Reyes; Maria T. Herrera-Sepúlveda; Marta Lopez Blanco; Martha Lucia Ospina Martinez; Sergio Gomez; Sheryll Corchuelo; Ángela Alarcon Cruz |
| EPI_ISL_1016947 to 1016967                                                                                                                                                                                                                                                                                                                                                                                                                                                                                                                                                                                                                                                                                                                                                                                                                                                                                                                                                                                                   | UNMC Emerging Pathogens Laboratory                                                    | UNMC COVID-19 Response Team                                                                                                            | UNMC COVID-19 Response Team                                                                                                                                                                                                                                                                                                                                                                                                         |
| EPI_ISL_1171675 to 1171705                                                                                                                                                                                                                                                                                                                                                                                                                                                                                                                                                                                                                                                                                                                                                                                                                                                                                                                                                                                                   | UOC LAB ANALISI PO CARDARELLI CAMPOBASSO                                              | Istituto Zooprofilattico Sperimentale dell'Abruzzo e Molise "G. Caporale"                                                              | Ancora M; Calistri P; Cammà C; Curini V; Di Domenico M; Di Pasquale A; Felice V. Lorusso A; Mangone I; Marcacci M; Niro G; Puglia I; Rinaldi A; Savini G; Scialabba S; Scutellà M                                                                                                                                                                                                                                                   |
| EPI_ISL_1163688 to 1163692, EPI_ISL_1169905 to 1169911                                                                                                                                                                                                                                                                                                                                                                                                                                                                                                                                                                                                                                                                                                                                                                                                                                                                                                                                                                       | UOC Microbiologia e Virologia, Azienda Ospedaliera Universitaria Senese, Siena, Italy | Dipartimento di Biotecnologie Mediche                                                                                                  | Claudia Gandolfo; David Pinzauti; Francesco Santoro; Gabriele Anichini; Gianni Gori Savellini; Gianni Pozzi; Maria Grazia Cusi                                                                                                                                                                                                                                                                                                      |
| EPI_ISL_1123372                                                                                                                                                                                                                                                                                                                                                                                                                                                                                                                                                                                                                                                                                                                                                                                                                                                                                                                                                                                                              | UPA I Santa Isabel                                                                    | Instituto Adolfo Lutz, Interdisciplinary Procedures Center, Strategic Laboratory                                                       | Caio Vinicius Dias Lopes; Claudia Regina Gonçalves; Claudio Tavares Sacchi; Erica Valessa Ramos Gomes; Karoline Rodrigues Campos                                                                                                                                                                                                                                                                                                    |
| EPI_ISL_1303546 to 1303549, EPI_ISL_1358318 to 1358322                                                                                                                                                                                                                                                                                                                                                                                                                                                                                                                                                                                                                                                                                                                                                                                                                                                                                                                                                                       | UPA Vila Santa Catarina                                                               | Instituto Adolfo Lutz, Interdisciplinary Procedures Center, Strategic Laboratory                                                       | Caio Vinicius Dias Lopes; Claudia Regina Gonçalves; Claudio Tavares Sacchi; Erica Valessa Ramos Gomes; Karoline Rodrigues Campos                                                                                                                                                                                                                                                                                                    |
| EPI_ISL_1373725, EPI_ISL_1373727 to 1373728, EPI_ISL_1373731, EPI_ISL_1373738, EPI_ISL_1373743, EPI_ISL_1373748 to 1373749, EPI_ISL_1373753, EPI_ISL_1373755, EPI_ISL_1373757, EPI_ISL_1373764, EPI_ISL_1373766 to 1373767, EPI_ISL_1373774, EPI_ISL_1373785, EPI_ISL_1373788 to 1373791, EPI_ISL_1373802, EPI_ISL_1373805 to 1373808, EPI_ISL_1373810, EPI_ISL_1373817 to 1373818, EPI_ISL_1373827, EPI_ISL_1373832, EPI_ISL_1373836, EPI_ISL_1373838                                                                                                                                                                                                                                                                                                                                                                                                                                                                                                                                                                       | UPMC Children's Hospital of Pittsburgh                                                | Genomics and Discovery, Respiratory Viruses Branch, Division of Viral Diseases, Centers for Disease Control and Prevention             | Anna Kelleher; Anna Uehara; Brian Lynch; Clinton R. Paden; Haibin Wang; Han Jia Justin Ng; Jing Zhang; Krista Queen; Peter Cook; Suxiang Tong; Yan Li; Ying Tao                                                                                                                                                                                                                                                                     |
| see above                                                                                                                                                                                                                                                                                                                                                                                                                                                                                                                                                                                                                                                                                                                                                                                                                                                                                                                                                                                                                    | UPMC Children's Hospital of Pittsburgh                                                | Genomics and Discovery, Respiratory Viruses Branch, Division of Viral Diseases, Centers for Disease Control and Prevention             | Anna Kelleher; Anna Uehara; Brian Lynch; Clinton R. Paden; Haibin Wang; Han Jia Justin Ng; Jing Zhang; Krista Queen; Peter Cook; Suxiang Tong; Yan Li; Ying Tao                                                                                                                                                                                                                                                                     |
| EPI_ISL_1137171 to 1137254, EPI_ISL_1373602 to 1373724                                                                                                                                                                                                                                                                                                                                                                                                                                                                                                                                                                                                                                                                                                                                                                                                                                                                                                                                                                       | UPMC Clinical Microbiology Laboratory                                                 | Microbial Genome Sequencing Center; Microbial Genomic Epidemiology Laboratory, University of Pittsburgh                                | Daniel J. Snyder; Jane W. Marsh; Kady D. Waggle; Lee H. Harrison; Marissa P. Griffith; Stephanie L. Mitchell; Vatsala R. Srinivasa; Vaughn S. Cooper                                                                                                                                                                                                                                                                                |
| EPI_ISL_1016101 to 1016110, EPI_ISL_1016118 to 1016126, EPI_ISL_1016333 to 1016334, EPI_ISL_1016339, EPI_ISL_1016347 to 1016364, EPI_ISL_1016414 to 1016415, EPI_ISL_1016418 to 1016457, EPI_ISL_1226421, EPI_ISL_1226428, EPI_ISL_1226432, EPI_ISL_1226435, EPI_ISL_1226445, EPI_ISL_1226451, EPI_ISL_1226460, EPI_ISL_1226477 to 1226480, EPI_ISL_1226486, EPI_ISL_1226505, EPI_ISL_1226514, EPI_ISL_1226516 to 1226517, EPI_ISL_1226520, EPI_ISL_1226552, EPI_ISL_1226598, EPI_ISL_1226602, EPI_ISL_1226615, EPI_ISL_1226623, EPI_ISL_1226662 to 1226663, EPI_ISL_1226675 to 1226677, EPI_ISL_1226713, EPI_ISL_1226851 to 1226852, EPI_ISL_1226866, EPI_ISL_1226897, EPI_ISL_1227231, EPI_ISL_1227272 to 1227277, EPI_ISL_1227448 to 1227455, EPI_ISL_1227560 to 1227563, EPI_ISL_1227709 to 1227719, EPI_ISL_1227728 to 1227789, EPI_ISL_1227973, EPI_ISL_1228023 to 1228031, EPI_ISL_1228040 to 1228041, EPI_ISL_1228043 to 1228045, EPI_ISL_1228115 to 1228116, EPI_ISL_1228296 to 1228306, EPI_ISL_1228480 to 1228483 | URMC LABS                                                                             | Wadsworth Center, New York State Department of Health                                                                                  |                                                                                                                                                                                                                                                                                                                                                                                                                                     |
| see above                                                                                                                                                                                                                                                                                                                                                                                                                                                                                                                                                                                                                                                                                                                                                                                                                                                                                                                                                                                                                    | URMC LABS                                                                             | Wadsworth Center, New York State Department of Health                                                                                  | Alexis Russel; Daryl M. Lamson; Erasmus Schneider; Erica Lasek-Nesselquist; John Kelly; Jonathan Pitnick; Kirsten St. George; Matthew Shudt; Melissa A Leisner; Navjot Singh                                                                                                                                                                                                                                                        |
| EPI_ISL_1036792 to 1036936, EPI_ISL_1038791 to 1038792, EPI_ISL_1038796, EPI_ISL_1091578 to 1091604, EPI_ISL_1091606 to 1091607, EPI_ISL_1091611, EPI_ISL_1091619 to 1091670, EPI_ISL_1091672 to 1091716, EPI_ISL_1091720 to 1091776, EPI_ISL_1260697 to 1260718, EPI_ISL_1261425 to 1261456, EPI_ISL_1372965 to 1372973, EPI_ISL_1372975 to 1373013                                                                                                                                                                                                                                                                                                                                                                                                                                                                                                                                                                                                                                                                         | US Air Force School of Aerospace Medicine                                             | US Air Force School of Aerospace Medicine                                                                                              | Amanda Javorina; Anthony Fries; Clarise Starr; Elizabeth Macias; Jennifer Meyer; Sarah Purves; William Buggele; William Gruner                                                                                                                                                                                                                                                                                                      |
| see above                                                                                                                                                                                                                                                                                                                                                                                                                                                                                                                                                                                                                                                                                                                                                                                                                                                                                                                                                                                                                    | US Air Force School of Aerospace Medicine                                             | US Air Force School of Aerospace Medicine                                                                                              | Amanda Javorina; Anthony Fries; Clarise Starr; Elizabeth Macias; Jennifer Meyer; Sarah Purves; William Buggele; William Gruner                                                                                                                                                                                                                                                                                                      |
| EPI_ISL_1005491 to 1005507, EPI_ISL_1005522 to 1005535, EPI_ISL_1005558, EPI_ISL_1040051, EPI_ISL_1040167 to 1040180, EPI_ISL_1040427 to 1040437, EPI_ISL_1192367 to 1192368, EPI_ISL_1197042, EPI_ISL_1197044, EPI_ISL_1197046 to 1197047, EPI_ISL_1197049, EPI_ISL_1197051, EPI_ISL_1197053, EPI_ISL_1197131 to 1197148, EPI_ISL_1201558 to 1201560, EPI_ISL_1303407 to 1303413, EPI_ISL_1303415, EPI_ISL_1303424 to 1303425, EPI_ISL_1303438, EPI_ISL_1303440 to 1303446, EPI_ISL_1303448, EPI_ISL_1303462, EPI_ISL_1303464 to 1303470, EPI_ISL_1303480 to 1303481, EPI_ISL_1303489 to 1303498, EPI_ISL_1379977                                                                                                                                                                                                                                                                                                                                                                                                           | USC Clinical Lab                                                                      | Los Angeles County PHL                                                                                                                 | P. Hemarajata et al.                                                                                                                                                                                                                                                                                                                                                                                                                |
| see above                                                                                                                                                                                                                                                                                                                                                                                                                                                                                                                                                                                                                                                                                                                                                                                                                                                                                                                                                                                                                    | USC Clinical Lab                                                                      | Los Angeles County PHL                                                                                                                 | P. Hemarajata et al.                                                                                                                                                                                                                                                                                                                                                                                                                |
| EPI_ISL_1036148, EPI_ISL_1117520                                                                                                                                                                                                                                                                                                                                                                                                                                                                                                                                                                                                                                                                                                                                                                                                                                                                                                                                                                                             | USCA AVEZZANO                                                                         | Istituto Zooprofilattico Sperimentale dell'Abruzzo e Molise "G. Caporale"                                                              | Ancora M; Calistri P; Cammà C; Curini V; Di Domenico M; Di Pasquale A; Lorusso A; Mangone I; Marcacci M; Puglia I; Rinaldi A; Savini G; Scialabba S                                                                                                                                                                                                                                                                                 |
| EPI_ISL_1251044, EPI_ISL_1336786, EPI_ISL_1336941                                                                                                                                                                                                                                                                                                                                                                                                                                                                                                                                                                                                                                                                                                                                                                                                                                                                                                                                                                            | USCA Avezzano                                                                         | Istituto Zooprofilattico Sperimentale dell'Abruzzo e Molise "G. Caporale"                                                              | Ancora M; Calistri P; Cammà C; Caporale M; Curini V; Di Domenico M; Di Lollo V; Di Lollo Valeria; Di Pasquale A; Lorusso A; Mangone I; Marcacci M; Puglia I; Rinaldi A; Savini G; Scialabba S                                                                                                                                                                                                                                       |
| EPI_ISL_1117677, EPI_ISL_1117683 to 1117684, EPI_ISL_1121033                                                                                                                                                                                                                                                                                                                                                                                                                                                                                                                                                                                                                                                                                                                                                                                                                                                                                                                                                                 | USCA CASTEL DI SANGRO                                                                 | Istituto Zooprofilattico Sperimentale dell'Abruzzo e Molise "G. Caporale"                                                              | Ancora M; Calistri P; Cammà C; Curini V; Di Domenico M; Di Pasquale A; Lorusso A; Mangone I; Marcacci M; Puglia I; Rinaldi A; Savini G; Scialabba S                                                                                                                                                                                                                                                                                 |
| EPI_ISL_1251066 to 1251067, EPI_ISL_1251072, EPI_ISL_1336715 to 1336717, EPI_ISL_1336722, EPI_ISL_1336724, EPI_ISL_1336742, EPI_ISL_1336744 to 1336745, EPI_ISL_1336752 to 1336753, EPI_ISL_1336882, EPI_ISL_1336896, EPI_ISL_1336927, EPI_ISL_1336939 to 1336940                                                                                                                                                                                                                                                                                                                                                                                                                                                                                                                                                                                                                                                                                                                                                            | USCA Castel di Sangro                                                                 | Istituto Zooprofilattico Sperimentale dell'Abruzzo e Molise "G. Caporale"                                                              | Ancora M; Calistri P; Cammà C; Caporale M; Curini V; Di Domenico M; Di Lollo V; Di Lollo Valeria; Di Pasquale A; Lorusso A; Mangone I; Marcacci M; Puglia I; Rinaldi A; Savini G; Scialabba S                                                                                                                                                                                                                                       |
| see above                                                                                                                                                                                                                                                                                                                                                                                                                                                                                                                                                                                                                                                                                                                                                                                                                                                                                                                                                                                                                    | USCA Castel di Sangro                                                                 | Istituto Zooprofilattico Sperimentale dell'Abruzzo e Molise "G. Caporale"                                                              | Ancora M; Calistri P; Cammà C; Caporale M; Curini V; Di Domenico M; Di Lollo V; Di Lollo Valeria; Di Pasquale A; Lorusso A; Mangone I; Marcacci M; Puglia I; Rinaldi A; Savini G; Scialabba S                                                                                                                                                                                                                                       |

|                                                                                                                                                                                                                                                                                                                                                                                                                                                                                                                                                                                                                                                                                                                                                                                                                                                                                                                                                                                                                                                                                                                                                                                                                                                                                                                                                                                                                                                                                                                                                                             |                                                                         |                                                                                                                            |                                                                                                                                                                                                                                                                                                                                                                                                                                                                                                                                                                                                                                                                                                                                                                                                                                                                                                                                                                                                                                |
|-----------------------------------------------------------------------------------------------------------------------------------------------------------------------------------------------------------------------------------------------------------------------------------------------------------------------------------------------------------------------------------------------------------------------------------------------------------------------------------------------------------------------------------------------------------------------------------------------------------------------------------------------------------------------------------------------------------------------------------------------------------------------------------------------------------------------------------------------------------------------------------------------------------------------------------------------------------------------------------------------------------------------------------------------------------------------------------------------------------------------------------------------------------------------------------------------------------------------------------------------------------------------------------------------------------------------------------------------------------------------------------------------------------------------------------------------------------------------------------------------------------------------------------------------------------------------------|-------------------------------------------------------------------------|----------------------------------------------------------------------------------------------------------------------------|--------------------------------------------------------------------------------------------------------------------------------------------------------------------------------------------------------------------------------------------------------------------------------------------------------------------------------------------------------------------------------------------------------------------------------------------------------------------------------------------------------------------------------------------------------------------------------------------------------------------------------------------------------------------------------------------------------------------------------------------------------------------------------------------------------------------------------------------------------------------------------------------------------------------------------------------------------------------------------------------------------------------------------|
| EPI_ISL_1117496                                                                                                                                                                                                                                                                                                                                                                                                                                                                                                                                                                                                                                                                                                                                                                                                                                                                                                                                                                                                                                                                                                                                                                                                                                                                                                                                                                                                                                                                                                                                                             | USCA PESCINA                                                            | Istituto Zooprofilattico Sperimentale dell'Abruzzo e Molise "G. Caporale"                                                  | Ancora M; Calistri P; Cammà C; Curini V; Di Domenico M; Di Pasquale A; Lorusso A; Mangone I; Marccacci M; Puglia I; Rinaldi A; Savini G; Scialabba S                                                                                                                                                                                                                                                                                                                                                                                                                                                                                                                                                                                                                                                                                                                                                                                                                                                                           |
| EPI_ISL_1250986, EPI_ISL_1251023, EPI_ISL_1251062, EPI_ISL_1336708, EPI_ISL_1336721, EPI_ISL_1336750, EPI_ISL_1336895, EPI_ISL_1336947                                                                                                                                                                                                                                                                                                                                                                                                                                                                                                                                                                                                                                                                                                                                                                                                                                                                                                                                                                                                                                                                                                                                                                                                                                                                                                                                                                                                                                      | USCA Pescina                                                            | Istituto Zooprofilattico Sperimentale dell'Abruzzo e Molise "G. Caporale"                                                  | Ancora M; Calistri P; Cammà C; Caporale M; Curini V; Di Domenico M; Di Lollo V; Di Lollo Valeria; Di Pasquale A; Lorusso A; Mangone I; Marccacci M; Puglia I; Rinaldi A; Savini G; Scialabba S                                                                                                                                                                                                                                                                                                                                                                                                                                                                                                                                                                                                                                                                                                                                                                                                                                 |
| see above                                                                                                                                                                                                                                                                                                                                                                                                                                                                                                                                                                                                                                                                                                                                                                                                                                                                                                                                                                                                                                                                                                                                                                                                                                                                                                                                                                                                                                                                                                                                                                   | USCA Sulmona                                                            | Istituto Zooprofilattico Sperimentale dell'Abruzzo e Molise "G. Caporale"                                                  | Ancora M; Calistri P; Cammà C; Caporale M; Curini V; Di Domenico M; Di Lollo V; Di Lollo Valeria; Di Pasquale A; Lorusso A; Mangone I; Marccacci M; Puglia I; Rinaldi A; Savini G; Scialabba S                                                                                                                                                                                                                                                                                                                                                                                                                                                                                                                                                                                                                                                                                                                                                                                                                                 |
| EPI_ISL_1336663, EPI_ISL_1336671, EPI_ISL_1336673, EPI_ISL_1336682, EPI_ISL_1336698, EPI_ISL_1336702, EPI_ISL_1336898, EPI_ISL_1336931                                                                                                                                                                                                                                                                                                                                                                                                                                                                                                                                                                                                                                                                                                                                                                                                                                                                                                                                                                                                                                                                                                                                                                                                                                                                                                                                                                                                                                      | USCA Tagliacozzo                                                        | Istituto Zooprofilattico Sperimentale dell'Abruzzo e Molise "G. Caporale"                                                  | Ancora M; Calistri P; Cammà C; Caporale M; Curini V; Di Domenico M; Di Lollo V; Di Lollo Valeria; Di Pasquale A; Lorusso A; Mangone I; Marccacci M; Puglia I; Rinaldi A; Savini G; Scialabba S                                                                                                                                                                                                                                                                                                                                                                                                                                                                                                                                                                                                                                                                                                                                                                                                                                 |
| see above                                                                                                                                                                                                                                                                                                                                                                                                                                                                                                                                                                                                                                                                                                                                                                                                                                                                                                                                                                                                                                                                                                                                                                                                                                                                                                                                                                                                                                                                                                                                                                   | USZ Flughafen                                                           | Institute of Medical Virology, University of Zurich                                                                        | Alexandra Trkola; Annette Audigé; Cyril Shah; Gabriela Ziltener; Guido Bloemberg; Jon Huder; Jürg Böni; Kevin Steiner; Maria Grünberg; Maryam Zahreri; Michael Huber; Riccarda Capaul; Stefan Schmutz; Verena Kufner                                                                                                                                                                                                                                                                                                                                                                                                                                                                                                                                                                                                                                                                                                                                                                                                           |
| EPI_ISL_1272823 to 1272841, EPI_ISL_1318323 to 1318327                                                                                                                                                                                                                                                                                                                                                                                                                                                                                                                                                                                                                                                                                                                                                                                                                                                                                                                                                                                                                                                                                                                                                                                                                                                                                                                                                                                                                                                                                                                      | UT-Unified State Labs: Public Health Utah DOH                           | Centers for Disease Control and Prevention Division of Viral Diseases, Pathogen Discovery                                  | Anna Montmayeur; Anna Uehara; Ben L. Rambo-Martin; Clinton R. Paden; Dhvani Batra; Haibin Wang; Jasmine Padilla; Jing Zhang; Justin Lee; Katie Dillon; Krista Queen; Kristen Knipe; Kristine Lacek; Lori Rowe; Mark Burroughs; Matthew Schmerer; Mili Sheth; Peter W. Cook; Rachel Marine; Sam Shepard; Sarah Nobles; Shoshona Le; Suxiang Tong; Yan Li; Ying Tao                                                                                                                                                                                                                                                                                                                                                                                                                                                                                                                                                                                                                                                              |
| EPI_ISL_1225936 to 1225940, EPI_ISL_1226307 to 1226325                                                                                                                                                                                                                                                                                                                                                                                                                                                                                                                                                                                                                                                                                                                                                                                                                                                                                                                                                                                                                                                                                                                                                                                                                                                                                                                                                                                                                                                                                                                      | UT-Unified State Labs: Public Health Utah DOH                           | Genomics and Discovery, Respiratory Viruses Branch, Division of Viral Diseases, Centers for Disease Control and Prevention | Anna Montmayeur; Anna Uehara; Ben L. Rambo-Martin; Clinton R. Paden; Dhvani Batra; Haibin Wang; Jasmine Padilla; Jing Zhang; Justin Lee; Katie Dillon; Krista Queen; Kristen Knipe; Kristine Lacek; Lori Rowe; Mark Burroughs; Matthew Schmerer; Mili Sheth; Peter W. Cook; Rachel Marine; Sam Shepard; Sarah Nobles; Shoshona Le; Suxiang Tong; Yan Li; Ying Tao                                                                                                                                                                                                                                                                                                                                                                                                                                                                                                                                                                                                                                                              |
| EPI_ISL_1094214, EPI_ISL_1094259 to 1094260, EPI_ISL_1094503 to 1094510, EPI_ISL_1094834 to 1094850                                                                                                                                                                                                                                                                                                                                                                                                                                                                                                                                                                                                                                                                                                                                                                                                                                                                                                                                                                                                                                                                                                                                                                                                                                                                                                                                                                                                                                                                         | UT-Unified State Labs: Public Health Utah DOH                           | Respiratory Viruses Branch, Division of Viral Diseases, Centers for Disease Control and Prevention                         | Anna Montmayeur; Anna Uehara; Ben L. Rambo-Martin; Clinton R. Paden; Dhvani Batra; Haibin Wang; Jasmine Padilla; Jing Zhang; Justin Lee; Krista Queen; Lori Rowe; Mark Burroughs; Mili Sheth; Peter W. Cook; Rachel Marine; Sarah Nobles; Suxiang Tong; Yan Li; Ying Tao                                                                                                                                                                                                                                                                                                                                                                                                                                                                                                                                                                                                                                                                                                                                                       |
| EPI_ISL_1039999 to 1040027, EPI_ISL_1041054, EPI_ISL_1069221 to 1069389, EPI_ISL_1110029 to 1110137, EPI_ISL_1167200 to 1167254, EPI_ISL_1180936 to 1180957, EPI_ISL_1180959 to 1181115, EPI_ISL_1201132 to 1201202, EPI_ISL_1209030 to 1209242, EPI_ISL_1233139 to 1233167, EPI_ISL_1233169 to 1233186, EPI_ISL_1263461 to 1263539, EPI_ISL_1297495 to 1297496, EPI_ISL_1306092, EPI_ISL_1324121 to 1324152, EPI_ISL_1341151 to 1341311, EPI_ISL_1341314 to 1341376, EPI_ISL_1341382 to 1341500, EPI_ISL_1341509 to 1341640, EPI_ISL_1341644 to 1341782, EPI_ISL_1346490 to 1346622, EPI_ISL_1366157 to 1366237                                                                                                                                                                                                                                                                                                                                                                                                                                                                                                                                                                                                                                                                                                                                                                                                                                                                                                                                                            | UW Virology Lab                                                         | UW Virology Lab                                                                                                            | Alexander Greninger; Hong Xie; Keith R Jerome; Lasata Shrestha; Margaret Mills; Meeli-Li Huang; Michelle Lin; Noah Baker; Noah R. Baker; Pavitra Roychoudhury; Robert Livingston; Saraswathi Sathees; Sean Ellis; Shah Mohamed Bakhash                                                                                                                                                                                                                                                                                                                                                                                                                                                                                                                                                                                                                                                                                                                                                                                         |
| see above                                                                                                                                                                                                                                                                                                                                                                                                                                                                                                                                                                                                                                                                                                                                                                                                                                                                                                                                                                                                                                                                                                                                                                                                                                                                                                                                                                                                                                                                                                                                                                   | Unidad de Investigación Biomédica de Zacatecas (UIBZ)                   | Unidad de Genómica Avanzada                                                                                                | Alejandro Sanchez-Flores; Alfredo Herrera-Estrella; Alicia Ocaña-Mondragón; Angel Gustavo Salas-Lais; Bernardo Martínez-Miguel; Blanca Taboada; Brenda Irasema Maldonado-Meza; Carla Ivon Herrera-Najera; Carlos F. Arias; Celia Boukadida; Clara Esperanza Santacruz-Tinoco; Concepción Grajales-Muniz; Consorcio Mexicano de Vigilancia Genómica (CoViGen-Mex). Authors (in alphabetical order): Julio Elias Alvarado-Yaah; Fernando Fontove-Herrera; Francisco Pulido; Gloria Elena Espinoza-Ayala; Gloria María Molina-Salinas; Gloria Vazquez; Hector Esteban Paz-Juárez; Hector Montoya-Fuentes; Helen Haydee Fernanda Ramírez-Plascencia; Jorge Ivan Salinal-Navarez; José Antonio Enciso-Moreno; José Esteban Muñoz-Medina; José de Jesús Nunez-Contreras; Juan Bautista Chale-Dzul; Luis Alberto Ochoa-Carrera; Margarita Matias-Florentino; María Guadalupe Santiago-Mauricio; María Guadalupe de Jesús Mireles-Rivera; Nelly Selem-Mojica; Pavel Isa; Ricardo Grande; Santiago Ávila-Ríos; Victor Hugo Borja-Aburto |
| EPI_ISL_1351465, EPI_ISL_1351468, EPI_ISL_1351471, EPI_ISL_1351474, EPI_ISL_1351477, EPI_ISL_1351480, EPI_ISL_1351483, EPI_ISL_1351486, EPI_ISL_1351489, EPI_ISL_1351492, EPI_ISL_1351494, EPI_ISL_1351498, EPI_ISL_1351500, EPI_ISL_1351506, EPI_ISL_1351509                                                                                                                                                                                                                                                                                                                                                                                                                                                                                                                                                                                                                                                                                                                                                                                                                                                                                                                                                                                                                                                                                                                                                                                                                                                                                                               | Unidad de Investigación Biomédica de Yucatán (UIMY)                     | Unidad de Genómica Avanzada                                                                                                | Alejandro Sanchez-Flores; Alfredo Herrera-Estrella; Alicia Ocaña-Mondragón; Angel Gustavo Salas-Lais; Bernardo Martínez-Miguel; Blanca Taboada; Brenda Irasema Maldonado-Meza; Carla Ivon Herrera-Najera; Carlos F. Arias; Celia Boukadida; Clara Esperanza Santacruz-Tinoco; Concepción Grajales-Muniz; Consorcio Mexicano de Vigilancia Genómica (CoViGen-Mex). Authors (in alphabetical order): Julio Elias Alvarado-Yaah; Fernando Fontove-Herrera; Francisco Pulido; Gloria Elena Espinoza-Ayala; Gloria María Molina-Salinas; Gloria Vazquez; Hector Esteban Paz-Juárez; Hector Montoya-Fuentes; Helen Haydee Fernanda Ramírez-Plascencia; Jorge Ivan Salinal-Navarez; José Antonio Enciso-Moreno; José Esteban Muñoz-Medina; José de Jesús Nunez-Contreras; Juan Bautista Chale-Dzul; Luis Alberto Ochoa-Carrera; Margarita Matias-Florentino; María Guadalupe Santiago-Mauricio; María Guadalupe de Jesús Mireles-Rivera; Nelly Selem-Mojica; Pavel Isa; Ricardo Grande; Santiago Ávila-Ríos; Victor Hugo Borja-Aburto |
| see above                                                                                                                                                                                                                                                                                                                                                                                                                                                                                                                                                                                                                                                                                                                                                                                                                                                                                                                                                                                                                                                                                                                                                                                                                                                                                                                                                                                                                                                                                                                                                                   | Unidad de Investigación Biomédica de Zacatecas (UIBZ)                   | Instituto Nacional de Enfermedades Respiratorias (INER): Centro de Investigación en Enfermedades Infecciosas (CIENI)       | Alejandro Sanchez-Flores; Alfredo Herrera-Estrella; Alicia Ocaña-Mondragón; Angel Gustavo Salas-Lais; Bernardo Martínez-Miguel; Blanca Taboada; Brenda Irasema Maldonado-Meza; Carla Ivon Herrera-Najera; Carlos F. Arias; Celia Boukadida; Clara Esperanza Santacruz-Tinoco; Concepción Grajales-Muniz; Consorcio Mexicano de Vigilancia Genómica (CoViGen-Mex). Authors (in alphabetical order): Julio Elias Alvarado-Yaah; Fernando Fontove-Herrera; Francisco Pulido; Gloria Elena Espinoza-Ayala; Gloria María Molina-Salinas; Gloria Vazquez; Hector Esteban Paz-Juárez; Hector Montoya-Fuentes; Helen Haydee Fernanda Ramírez-Plascencia; Jorge Ivan Salinal-Navarez; José Antonio Enciso-Moreno; José Esteban Muñoz-Medina; José de Jesús Nunez-Contreras; Juan Bautista Chale-Dzul; Luis Alberto Ochoa-Carrera; Margarita Matias-Florentino; María Guadalupe Santiago-Mauricio; María Guadalupe de Jesús Mireles-Rivera; Nelly Selem-Mojica; Pavel Isa; Ricardo Grande; Santiago Ávila-Ríos; Victor Hugo Borja-Aburto |
| EPI_ISL_1279265, EPI_ISL_1279270 to 1279273, EPI_ISL_1279279 to 1279281, EPI_ISL_1279295, EPI_ISL_1279300 to 1279301, EPI_ISL_1279304 to 1279382, EPI_ISL_1287761 to 1287767                                                                                                                                                                                                                                                                                                                                                                                                                                                                                                                                                                                                                                                                                                                                                                                                                                                                                                                                                                                                                                                                                                                                                                                                                                                                                                                                                                                                | Unidad de Investigación Médica de Yucatán (UIMY)                        | Instituto Nacional de Enfermedades Respiratorias (INER): Centro de Investigación en Enfermedades Infecciosas (CIENI)       | Alejandro Sanchez-Flores; Alfredo Herrera-Estrella; Alicia Ocaña-Mondragón; Angel Gustavo Salas-Lais; Bernardo Martínez-Miguel; Blanca Taboada; Brenda Irasema Maldonado-Meza; Carla Ivon Herrera-Najera; Carlos F. Arias; Celia Boukadida; Clara Esperanza Santacruz-Tinoco; Concepción Grajales-Muniz; Consorcio Mexicano de Vigilancia Genómica (CoViGen-Mex). Authors (in alphabetical order): Julio Elias Alvarado-Yaah; Fernando Fontove-Herrera; Francisco Pulido; Gloria Elena Espinoza-Ayala; Gloria María Molina-Salinas; Gloria Vazquez; Hector Esteban Paz-Juárez; Hector Montoya-Fuentes; Helen Haydee Fernanda Ramírez-Plascencia; Jorge Ivan Salinal-Navarez; José Antonio Enciso-Moreno; José Esteban Muñoz-Medina; José de Jesús Nunez-Contreras; Juan Bautista Chale-Dzul; Luis Alberto Ochoa-Carrera; Margarita Matias-Florentino; María Guadalupe Santiago-Mauricio; María Guadalupe de Jesús Mireles-Rivera; Nelly Selem-Mojica; Pavel Isa; Ricardo Grande; Santiago Ávila-Ríos; Victor Hugo Borja-Aburto |
| EPI_ISL_1279282, EPI_ISL_1279294, EPI_ISL_1279400, EPI_ISL_1279604 to 1279614                                                                                                                                                                                                                                                                                                                                                                                                                                                                                                                                                                                                                                                                                                                                                                                                                                                                                                                                                                                                                                                                                                                                                                                                                                                                                                                                                                                                                                                                                               | Unidad de Patología Clínica                                             | Instituto de diagnóstico y Referencia Epidemiológicos (INDRE) Departamento de Virología                                    | Abril Rodríguez-Maldonado; Claudia Wong-Arambula; Ernesto Ramirez-Gonzalez.; Fabiola Garces-Ayala; Gisela Barrera-Badillo; Irma Lopez-Martinez; Lucia Hernandez-Rivas; Natividad Cruz-Ortiz; Tatiana Nunez-Garcia                                                                                                                                                                                                                                                                                                                                                                                                                                                                                                                                                                                                                                                                                                                                                                                                              |
| EPI_ISL_1008714                                                                                                                                                                                                                                                                                                                                                                                                                                                                                                                                                                                                                                                                                                                                                                                                                                                                                                                                                                                                                                                                                                                                                                                                                                                                                                                                                                                                                                                                                                                                                             | Unidade de Atendimento DST AIDS TB e Han                                | Epiclin                                                                                                                    | Ana Paula Muterle; Carolina Comerlato; Eliana Márcia Da Ros Wendland; Fernando Hayashi Sant'Anna; Janira Prichula; Juliana Comerlato                                                                                                                                                                                                                                                                                                                                                                                                                                                                                                                                                                                                                                                                                                                                                                                                                                                                                           |
| EPI_ISL_1195277                                                                                                                                                                                                                                                                                                                                                                                                                                                                                                                                                                                                                                                                                                                                                                                                                                                                                                                                                                                                                                                                                                                                                                                                                                                                                                                                                                                                                                                                                                                                                             | Uniwersytecki Szpital Kliniczny nr 1 im. Barlickiego w odzi             | 1. National Institute of Public Health - National Institute of Hygiene; 2. Eurofins Genomics Europe Sequencing GmbH        | ECDC COVID-19 WGS support team; Eurofins Genomics Europe Sequencing Team; Gierczyki Rafa; Sadkowska-Todys Magorzata; Wokowicz Tomasz; Zacharczuk Katarzyna                                                                                                                                                                                                                                                                                                                                                                                                                                                                                                                                                                                                                                                                                                                                                                                                                                                                     |
| EPI_ISL_1239545                                                                                                                                                                                                                                                                                                                                                                                                                                                                                                                                                                                                                                                                                                                                                                                                                                                                                                                                                                                                                                                                                                                                                                                                                                                                                                                                                                                                                                                                                                                                                             | Uniklinikum Carl Gustav Carus an der TU Dresden; Institut für Virologie | Robert Koch Institute                                                                                                      |                                                                                                                                                                                                                                                                                                                                                                                                                                                                                                                                                                                                                                                                                                                                                                                                                                                                                                                                                                                                                                |
| EPI_ISL_1142081 to 1142086, EPI_ISL_1142088 to 1142096, EPI_ISL_1143390 to 1143400, EPI_ISL_1143402 to 1143408, EPI_ISL_1143410 to 1143417, EPI_ISL_1147529 to 1147544, EPI_ISL_1147546 to 1147554, EPI_ISL_1147557 to 1147564, EPI_ISL_1151772, EPI_ISL_1151774, EPI_ISL_1151776, EPI_ISL_1151778 to 1151780, EPI_ISL_1151783 to 1151787, EPI_ISL_1151789, EPI_ISL_1151791, EPI_ISL_1151793, EPI_ISL_1151796, EPI_ISL_1151798 to 1151800, EPI_ISL_1151802 to 1151804, EPI_ISL_1151808, EPI_ISL_1157205 to 1157208, EPI_ISL_1157211 to 1157212, EPI_ISL_1157215, EPI_ISL_1157218, EPI_ISL_1157220, EPI_ISL_1157223, EPI_ISL_1157226, EPI_ISL_1157229 to 1157230, EPI_ISL_1157232, EPI_ISL_1157234 to 1157235, EPI_ISL_1157237, EPI_ISL_1157239, EPI_ISL_1157244 to 1157248, EPI_ISL_1157250, EPI_ISL_1157252, EPI_ISL_1157256 to 1157259, EPI_ISL_1157265, EPI_ISL_1157268 to 1157270, EPI_ISL_1157275, EPI_ISL_1217617, EPI_ISL_1217629, EPI_ISL_1217634, EPI_ISL_1217637, EPI_ISL_1217639, EPI_ISL_1217642, EPI_ISL_1217647, EPI_ISL_1217651, EPI_ISL_1217654, EPI_ISL_1217663, EPI_ISL_1217674, EPI_ISL_1217680, EPI_ISL_1217682, EPI_ISL_1285045, EPI_ISL_1285050, EPI_ISL_1285057, EPI_ISL_1285074, EPI_ISL_1285078, EPI_ISL_1285104, EPI_ISL_1285106 to 1285107, EPI_ISL_1285125, EPI_ISL_1285137, EPI_ISL_1285139, EPI_ISL_1354392, EPI_ISL_1354394, EPI_ISL_1354399, EPI_ISL_1354404, EPI_ISL_1354408, EPI_ISL_1354411, EPI_ISL_1354419, EPI_ISL_1354425, EPI_ISL_1354441, EPI_ISL_1354444 to 1354445, EPI_ISL_1354453, EPI_ISL_1354460 to 1354461, EPI_ISL_1354464 |                                                                         |                                                                                                                            |                                                                                                                                                                                                                                                                                                                                                                                                                                                                                                                                                                                                                                                                                                                                                                                                                                                                                                                                                                                                                                |
| see above                                                                                                                                                                                                                                                                                                                                                                                                                                                                                                                                                                                                                                                                                                                                                                                                                                                                                                                                                                                                                                                                                                                                                                                                                                                                                                                                                                                                                                                                                                                                                                   |                                                                         |                                                                                                                            |                                                                                                                                                                                                                                                                                                                                                                                                                                                                                                                                                                                                                                                                                                                                                                                                                                                                                                                                                                                                                                |
| EPI_ISL_1141155 to 1141159, EPI_ISL_1141161, EPI_ISL_1141163, EPI_ISL_1141165, EPI_ISL_1141170 to 1141172, EPI_ISL_1143927, EPI_ISL_1143929 to 1143930, EPI_ISL_1143932, EPI_ISL_1143940, EPI_ISL_1143943, EPI_ISL_1147655 to 1147660, EPI_ISL_1147662, EPI_ISL_1147664 to 1147665, EPI_ISL_1147667, EPI_ISL_1212011 to 1212014, EPI_ISL_1217562 to 1217565, EPI_ISL_1217567, EPI_ISL_1353265, EPI_ISL_1353276, EPI_ISL_1353423, EPI_ISL_1355236 to 1355242, EPI_ISL_1355286 to 1355290, EPI_ISL_1355293                                                                                                                                                                                                                                                                                                                                                                                                                                                                                                                                                                                                                                                                                                                                                                                                                                                                                                                                                                                                                                                                    |                                                                         |                                                                                                                            |                                                                                                                                                                                                                                                                                                                                                                                                                                                                                                                                                                                                                                                                                                                                                                                                                                                                                                                                                                                                                                |

|                                                                                                                                                                                                                                                                                                                                                                                                                                                                                                                                                                                                                                                                                                                                                                                                                                                                                                                                                                                                                                                                                                                                                                                                                                                                                                                                                                                                                                                                                                                                                                                                                                                                                     |                                                                                                                                  |                                                                                                                                                                                                                                                                                   |                                                                                                                                                                                                                                                                                                                                                                        |
|-------------------------------------------------------------------------------------------------------------------------------------------------------------------------------------------------------------------------------------------------------------------------------------------------------------------------------------------------------------------------------------------------------------------------------------------------------------------------------------------------------------------------------------------------------------------------------------------------------------------------------------------------------------------------------------------------------------------------------------------------------------------------------------------------------------------------------------------------------------------------------------------------------------------------------------------------------------------------------------------------------------------------------------------------------------------------------------------------------------------------------------------------------------------------------------------------------------------------------------------------------------------------------------------------------------------------------------------------------------------------------------------------------------------------------------------------------------------------------------------------------------------------------------------------------------------------------------------------------------------------------------------------------------------------------------|----------------------------------------------------------------------------------------------------------------------------------|-----------------------------------------------------------------------------------------------------------------------------------------------------------------------------------------------------------------------------------------------------------------------------------|------------------------------------------------------------------------------------------------------------------------------------------------------------------------------------------------------------------------------------------------------------------------------------------------------------------------------------------------------------------------|
| see above                                                                                                                                                                                                                                                                                                                                                                                                                                                                                                                                                                                                                                                                                                                                                                                                                                                                                                                                                                                                                                                                                                                                                                                                                                                                                                                                                                                                                                                                                                                                                                                                                                                                           | Uniklinikum Jena                                                                                                                 | Robert Koch Institute                                                                                                                                                                                                                                                             |                                                                                                                                                                                                                                                                                                                                                                        |
| EPI_ISL_1142566 to 1142568, EPI_ISL_1142571 to 1142572, EPI_ISL_1142574, EPI_ISL_1142576 to 1142579, EPI_ISL_1143916 to 1143922, EPI_ISL_1143924 to 1143926, EPI_ISL_1145205 to 1145210, EPI_ISL_1148460 to 1148461, EPI_ISL_1148463, EPI_ISL_1148465 to 1148466, EPI_ISL_1155329 to 1155333, EPI_ISL_1217510 to 1217518, EPI_ISL_1285728 to 1285732, EPI_ISL_1357265 to 1357274, EPI_ISL_1357276                                                                                                                                                                                                                                                                                                                                                                                                                                                                                                                                                                                                                                                                                                                                                                                                                                                                                                                                                                                                                                                                                                                                                                                                                                                                                   |                                                                                                                                  |                                                                                                                                                                                                                                                                                   |                                                                                                                                                                                                                                                                                                                                                                        |
| see above                                                                                                                                                                                                                                                                                                                                                                                                                                                                                                                                                                                                                                                                                                                                                                                                                                                                                                                                                                                                                                                                                                                                                                                                                                                                                                                                                                                                                                                                                                                                                                                                                                                                           | Uniklinikum Regensburg; Institut für Mikrobiologie                                                                               | Robert Koch Institute                                                                                                                                                                                                                                                             |                                                                                                                                                                                                                                                                                                                                                                        |
| EPI_ISL_1008446, EPI_ISL_1008540 to 1008547, EPI_ISL_1008549 to 1008551, EPI_ISL_1008557, EPI_ISL_1064575, EPI_ISL_1190868, EPI_ISL_1190880                                                                                                                                                                                                                                                                                                                                                                                                                                                                                                                                                                                                                                                                                                                                                                                                                                                                                                                                                                                                                                                                                                                                                                                                                                                                                                                                                                                                                                                                                                                                         |                                                                                                                                  |                                                                                                                                                                                                                                                                                   |                                                                                                                                                                                                                                                                                                                                                                        |
| see above                                                                                                                                                                                                                                                                                                                                                                                                                                                                                                                                                                                                                                                                                                                                                                                                                                                                                                                                                                                                                                                                                                                                                                                                                                                                                                                                                                                                                                                                                                                                                                                                                                                                           | Unilabs AB, Klinisk mikrobiologi                                                                                                 | The Public Health Agency of Sweden                                                                                                                                                                                                                                                | Anna Risberg; Anna-Malin Linde; Carlo Berg; Karin Tegmark-Wisell; Maria Lind Karlberg; Mattias Haukland; Mia Brytting; Noura Walai; Oskar Karlsson Lindsjo; Petra Edquist; Petra Holmstrom; Reza Advani; Samuel Ohman; Sofia Stamouli                                                                                                                                  |
| EPI_ISL_1064550, EPI_ISL_1064677                                                                                                                                                                                                                                                                                                                                                                                                                                                                                                                                                                                                                                                                                                                                                                                                                                                                                                                                                                                                                                                                                                                                                                                                                                                                                                                                                                                                                                                                                                                                                                                                                                                    | Unilabs AB, Klinisk mikrobiologi,                                                                                                | The Public Health Agency of Sweden                                                                                                                                                                                                                                                | Anna Risberg; Anna-Malin Linde; Carlo Berg; Karin Tegmark-Wisell; Maria Lind Karlberg; Mattias Haukland; Mia Brytting; Noura Walai; Oskar Karlsson Lindsjo; Petra Edquist; Petra Holmstrom; Reza Advani; Samuel Ohman; Sofia Stamouli                                                                                                                                  |
| EPI_ISL_1231924 to 1231925, EPI_ISL_1231945 to 1231946, EPI_ISL_1231952, EPI_ISL_1231981, EPI_ISL_1232004 to 1232006                                                                                                                                                                                                                                                                                                                                                                                                                                                                                                                                                                                                                                                                                                                                                                                                                                                                                                                                                                                                                                                                                                                                                                                                                                                                                                                                                                                                                                                                                                                                                                | Unilabs Klinisk kemi, akutlaboratoriet                                                                                           | The Public Health Agency of Sweden                                                                                                                                                                                                                                                | Anna Risberg; Anna-Malin Linde; Carlo Berg; Karin Tegmark-Wisell; Maria Lind Karlberg; Mattias Haukland; Mia Brytting; Noura Walai; Oskar Karlsson Lindsjo; Petra Edquist; Petra Holmstrom; Reza Advani; Sofia Stamouli                                                                                                                                                |
| EPI_ISL_1064685 to 1064690                                                                                                                                                                                                                                                                                                                                                                                                                                                                                                                                                                                                                                                                                                                                                                                                                                                                                                                                                                                                                                                                                                                                                                                                                                                                                                                                                                                                                                                                                                                                                                                                                                                          | Unilabs Laboratoriemedicin                                                                                                       | The Public Health Agency of Sweden                                                                                                                                                                                                                                                | Anna Risberg; Anna-Malin Linde; Carlo Berg; Karin Tegmark-Wisell; Maria Lind Karlberg; Mattias Haukland; Mia Brytting; Noura Walai; Oskar Karlsson Lindsjo; Petra Edquist; Petra Holmstrom; Reza Advani; Samuel Ohman; Sofia Stamouli                                                                                                                                  |
| EPI_ISL_1013460 to 1013465, EPI_ISL_1034338, EPI_ISL_1034340, EPI_ISL_1118485 to 1118486, EPI_ISL_1118501, EPI_ISL_1118511, EPI_ISL_1118608, EPI_ISL_1118613, EPI_ISL_1118620 to 1118621, EPI_ISL_1118624, EPI_ISL_1192305, EPI_ISL_1251307 to 1251312, EPI_ISL_1251400 to 1251407, EPI_ISL_1251489 to 1251492, EPI_ISL_1251773 to 1251775, EPI_ISL_1317595, EPI_ISL_1317650, EPI_ISL_1317674, EPI_ISL_1317690 to 1317692, EPI_ISL_1317748, EPI_ISL_1317893                                                                                                                                                                                                                                                                                                                                                                                                                                                                                                                                                                                                                                                                                                                                                                                                                                                                                                                                                                                                                                                                                                                                                                                                                         |                                                                                                                                  |                                                                                                                                                                                                                                                                                   |                                                                                                                                                                                                                                                                                                                                                                        |
| see above                                                                                                                                                                                                                                                                                                                                                                                                                                                                                                                                                                                                                                                                                                                                                                                                                                                                                                                                                                                                                                                                                                                                                                                                                                                                                                                                                                                                                                                                                                                                                                                                                                                                           | Unilabs Laboratory Medicine                                                                                                      | Norwegian Institute of Public Health, Department of Virology                                                                                                                                                                                                                      | Atiya R Ali; Debec Nadia; Engebretsen Serina Beate; Engebretsen Serina Beate Atiya R Ali; Garcia Llorente Ignacio; Hilde Elshaug; Hilde Vollan; Ignacio Garcia Llorente; Jon Bråte; Kamilla Heddeland Instejord; Karoline Bragstad; Kathrine Stene-Johansen; Marie Paulsen Madsen; Olav Hungnes; Pedersen Benedikte Nevjen; Rasmus Riis Kopperud; Serina B Engebretsen |
| EPI_ISL_1299856 to 1299884                                                                                                                                                                                                                                                                                                                                                                                                                                                                                                                                                                                                                                                                                                                                                                                                                                                                                                                                                                                                                                                                                                                                                                                                                                                                                                                                                                                                                                                                                                                                                                                                                                                          | Unit of lab surveillance of viral emerging diseases, National Lab of Influenza                                                   | Respiratory Virus Unit, National Infection Service, Public Health England                                                                                                                                                                                                         | Iris Hasibra; PHE Covid Sequencing Team; Prof Albana Fico; Prof Silvia Bino                                                                                                                                                                                                                                                                                            |
| EPI_ISL_1260719 to 1260743                                                                                                                                                                                                                                                                                                                                                                                                                                                                                                                                                                                                                                                                                                                                                                                                                                                                                                                                                                                                                                                                                                                                                                                                                                                                                                                                                                                                                                                                                                                                                                                                                                                          | United States Air Force Academy                                                                                                  | US Air Force School of Aerospace Medicine                                                                                                                                                                                                                                         | Amanda Javorina; Anthony Fries; Clarise Starr; Elizabeth Macias; Jennifer Meyer; Sarah Purves; William Buggele; William Gruner                                                                                                                                                                                                                                         |
| EPI_ISL_1248874, EPI_ISL_1248876, EPI_ISL_1248878, EPI_ISL_1248880, EPI_ISL_1248882, EPI_ISL_1248884 to 1248885, EPI_ISL_1248887 to 1248891, EPI_ISL_1248893                                                                                                                                                                                                                                                                                                                                                                                                                                                                                                                                                                                                                                                                                                                                                                                                                                                                                                                                                                                                                                                                                                                                                                                                                                                                                                                                                                                                                                                                                                                        |                                                                                                                                  |                                                                                                                                                                                                                                                                                   |                                                                                                                                                                                                                                                                                                                                                                        |
| see above                                                                                                                                                                                                                                                                                                                                                                                                                                                                                                                                                                                                                                                                                                                                                                                                                                                                                                                                                                                                                                                                                                                                                                                                                                                                                                                                                                                                                                                                                                                                                                                                                                                                           | Unity Health Toronto                                                                                                             | Ontario Institute for Cancer Research                                                                                                                                                                                                                                             | Bernard Lam; Felicia Vincelli; Ilina Lungu; Jared T. Simpson; Jeremy Johns; Karel Boissinot; Larissa M. Matukas; Le Luu; Mark Downing; Paul Krzyzanowski; Philip Zuzarte; Ramzi Fattouh; Richard de Borja; Samira Mubareka; TIBDN; Trina Otterman; Yan Chen                                                                                                            |
| EPI_ISL_1199636, EPI_ISL_1200086                                                                                                                                                                                                                                                                                                                                                                                                                                                                                                                                                                                                                                                                                                                                                                                                                                                                                                                                                                                                                                                                                                                                                                                                                                                                                                                                                                                                                                                                                                                                                                                                                                                    | Unità Operativa di Microbiologia e Virologia, Ospedale Civico e Di Cristina, ARNAS, Palermo, Italy                               | Tumor Immunology Unit, Department of Health Sciences, University of Palermo School of Medicine; Section of Microbiology, University of Palermo School of Medicine; National Research Council of Italy - High Performance Computing and Networking Institute (CNR-ICAR) of Palermo | Alfonso Maurizio Urso; Bonura Celestino; Bonura Floriana; Cancila Valeria; Craxi Antonio; Di Bernardo Francesca; Fiannacca Antonino; Giammanco Maurizio Giovanni; La Paglia Laura; Massimo La Rosa; Morello Gaia; Tripodo Claudio; Vacca Davide; Vitale Francesco                                                                                                      |
| EPI_ISL_1209466 to 1209468                                                                                                                                                                                                                                                                                                                                                                                                                                                                                                                                                                                                                                                                                                                                                                                                                                                                                                                                                                                                                                                                                                                                                                                                                                                                                                                                                                                                                                                                                                                                                                                                                                                          | Unità Operativa di Microbiologia e Virologia, Ospedale Civico e Di Cristina, ARNAS, Palermo, Italy                               | Tumor Immunology Unit, Department of Health Sciences, University of Palermo School of Medicine; Section of Microbiology, University of Palermo School of Medicine; National Research Council of Italy - High Performance Computing and Networking Institute (CNR-ICAR) of Palermo | Alfonso Maurizio; Antonino; Antonio; Bonura; Cancila; Celestino; Claudio; Craxi; Davide; Di Bernardo; Fiannacca; Floriana; Francesca; Francesco; Gaia; Giammanco; La Paglia; La Rosa; Laura; Massimo; Maurizio Giovanni.; Morello; Tripodo; Urso; Vacca; Valeria; Vitale                                                                                               |
| EPI_ISL_1158846                                                                                                                                                                                                                                                                                                                                                                                                                                                                                                                                                                                                                                                                                                                                                                                                                                                                                                                                                                                                                                                                                                                                                                                                                                                                                                                                                                                                                                                                                                                                                                                                                                                                     | Unità Operativa di Microbiologia, IRCCS Policlinico di Sant'Orsola, Azienda Ospedaliero-Universitaria di Bologna                 | U.O. Microbiologia Laboratorio Unico Centro Servizi AUSL della Romagna                                                                                                                                                                                                            | Giada Rossini; Giorgio Dirani; Giuliano Furlini; Silvia Zannoli; Tiziana Lazzarotto; Vittorio Sambri                                                                                                                                                                                                                                                                   |
| EPI_ISL_1036755                                                                                                                                                                                                                                                                                                                                                                                                                                                                                                                                                                                                                                                                                                                                                                                                                                                                                                                                                                                                                                                                                                                                                                                                                                                                                                                                                                                                                                                                                                                                                                                                                                                                     | Unità Operativa di Microbiologia, IRCCS Policlinico di Sant'Orsola, Azienda Ospedaliero-Universitaria di Bologna                 | Unità di Analisi del Rischio ed Epidemiologia Genomica, Istituto Zooprofilattico Sperimentale dell'Emilia Romagna e della Lombardia (IZSLER)                                                                                                                                      | Erika Scaltriti; Giada Rossini; Giuliano Furlini; Ilaria Menozzi; Marina Morganti; Stefano Pongolini; Tiziana Lazzarotto                                                                                                                                                                                                                                               |
| EPI_ISL_1015335 to 1015341, EPI_ISL_1064915 to 1064917, EPI_ISL_1064922, EPI_ISL_1064926 to 1064927, EPI_ISL_1064957 to 1064983, EPI_ISL_1209453 to 1209465, EPI_ISL_1291607 to 1291651                                                                                                                                                                                                                                                                                                                                                                                                                                                                                                                                                                                                                                                                                                                                                                                                                                                                                                                                                                                                                                                                                                                                                                                                                                                                                                                                                                                                                                                                                             |                                                                                                                                  |                                                                                                                                                                                                                                                                                   |                                                                                                                                                                                                                                                                                                                                                                        |
| see above                                                                                                                                                                                                                                                                                                                                                                                                                                                                                                                                                                                                                                                                                                                                                                                                                                                                                                                                                                                                                                                                                                                                                                                                                                                                                                                                                                                                                                                                                                                                                                                                                                                                           | Univeristy of New Mexico Hospital                                                                                                | Center for Global Health, University of New Mexico Health Sciences Center                                                                                                                                                                                                         | Darrell Dinwiddie; Daryl Domman; Jon Femling; Justin Bacca; Kurt Schwalm                                                                                                                                                                                                                                                                                               |
| EPI_ISL_1039241, EPI_ISL_1337442 to 1337446                                                                                                                                                                                                                                                                                                                                                                                                                                                                                                                                                                                                                                                                                                                                                                                                                                                                                                                                                                                                                                                                                                                                                                                                                                                                                                                                                                                                                                                                                                                                                                                                                                         | Univeritair Ziekenhuis Antwerpen (UZA)                                                                                           | UAntwerp, Laboratory of Medical Microbiology                                                                                                                                                                                                                                      | Basil Britto Xavier; Christine Lammens; Herman Goossens; Jasmine Coppens; Marie Le Mercier; Veerle Matheusssen                                                                                                                                                                                                                                                         |
| EPI_ISL_1035967 to 1036055, EPI_ISL_1194630 to 1194702                                                                                                                                                                                                                                                                                                                                                                                                                                                                                                                                                                                                                                                                                                                                                                                                                                                                                                                                                                                                                                                                                                                                                                                                                                                                                                                                                                                                                                                                                                                                                                                                                              | Universidad de León                                                                                                              | SeqCOVID-SPAIN consortium/IBV(CSIC)                                                                                                                                                                                                                                               | Ana Carvajal; Antonio J. Molina and SeqCOVID-SPAIN consortium; Héctor Argüello; Juan M. Fregeneda; Tania Fernández-Villa; Vicente Martín                                                                                                                                                                                                                               |
| EPI_ISL_1220045                                                                                                                                                                                                                                                                                                                                                                                                                                                                                                                                                                                                                                                                                                                                                                                                                                                                                                                                                                                                                                                                                                                                                                                                                                                                                                                                                                                                                                                                                                                                                                                                                                                                     | Universidad de Magdalena                                                                                                         | Instituto Nacional de Salud- Dirección de Investigación en Salud Pública                                                                                                                                                                                                          | Carlos Franco-Muñoz; Diego A. Álvarez-Díaz; Diego Andrés Prada; Gerardo Santamaría; Hector Alejandro Ruiz-Moreno; Jhonnatan Reales-González; Julian Naizaque; Katherine Laiton-Donato; Magdalena Wiesner; Marcela Mercado-Reyes.; Maria T. Herrera-Sepúlveda; Martha Lucia Ospina Martínez; Sheryll Corchuelo                                                          |
| EPI_ISL_1271944, EPI_ISL_1272074, EPI_ISL_1272076, EPI_ISL_1272188, EPI_ISL_1272236                                                                                                                                                                                                                                                                                                                                                                                                                                                                                                                                                                                                                                                                                                                                                                                                                                                                                                                                                                                                                                                                                                                                                                                                                                                                                                                                                                                                                                                                                                                                                                                                 | Universidade Federal do Norte do Tocantins (UFNT)                                                                                | Laboratório de Bioinformática e Biotecnologia (Labinfect/UFT)                                                                                                                                                                                                                     | Bergmann Morais Ribeiro; Fabrício Souza Campos; Fernando Lucas Melo; José Carlos Ribeiro Júnior; Monike da Silva Oliveira; Raissa Nunes dos Santos; Rogério Fernandes Carvalho; Ueric José Borges de Souza                                                                                                                                                             |
| EPI_ISL_1259266                                                                                                                                                                                                                                                                                                                                                                                                                                                                                                                                                                                                                                                                                                                                                                                                                                                                                                                                                                                                                                                                                                                                                                                                                                                                                                                                                                                                                                                                                                                                                                                                                                                                     | Univeritair Ziekenhuis Antwerpen (UZA)                                                                                           | UAntwerp, Laboratory of Medical Microbiology                                                                                                                                                                                                                                      | Basil Britto Xavier; Christine Lammens; Herman Goossens; Jasmine Coppens; Marie Le Mercier; Veerle Matheusssen                                                                                                                                                                                                                                                         |
| EPI_ISL_1020131, EPI_ISL_1020134, EPI_ISL_1020138, EPI_ISL_1020141, EPI_ISL_1020143, EPI_ISL_1020146                                                                                                                                                                                                                                                                                                                                                                                                                                                                                                                                                                                                                                                                                                                                                                                                                                                                                                                                                                                                                                                                                                                                                                                                                                                                                                                                                                                                                                                                                                                                                                                | University Clinic of Nephrology- Skopje                                                                                          | Research Center for Genetic Engineering and Biotechnology "Georgi D. Efremov", Macedonian Academy of Sciences and Arts                                                                                                                                                            | Aleksandar J. Dimovski; Dijana Plasheska-Karanfilska; Gjorgji Bozinovski; Milena Jakimovska; Predrag Noveski; Ileksandar J. Dimovski                                                                                                                                                                                                                                   |
| EPI_ISL_1104771 to 1104774, EPI_ISL_1104776 to 1104780, EPI_ISL_1104784 to 1104792, EPI_ISL_1104794 to 1104905, EPI_ISL_1104907 to 1104908, EPI_ISL_1104910, EPI_ISL_1104912 to 1104943, EPI_ISL_1104945 to 1104993, EPI_ISL_1104995 to 1105030, EPI_ISL_1105032 to 1105045, EPI_ISL_1105047 to 1105093, EPI_ISL_1105095 to 1105113, EPI_ISL_1105115 to 1105125, EPI_ISL_1105127 to 1105174, EPI_ISL_1105176 to 1105177, EPI_ISL_1105179 to 1105214, EPI_ISL_1105216 to 1105231, EPI_ISL_1105233 to 1105245, EPI_ISL_1105247 to 1105255, EPI_ISL_1105257 to 1105272, EPI_ISL_1105274 to 1105299, EPI_ISL_1105301 to 1105342, EPI_ISL_1105344 to 1105347, EPI_ISL_1248367 to 1248475, EPI_ISL_1248477 to 1248499                                                                                                                                                                                                                                                                                                                                                                                                                                                                                                                                                                                                                                                                                                                                                                                                                                                                                                                                                                     |                                                                                                                                  |                                                                                                                                                                                                                                                                                   |                                                                                                                                                                                                                                                                                                                                                                        |
| see above                                                                                                                                                                                                                                                                                                                                                                                                                                                                                                                                                                                                                                                                                                                                                                                                                                                                                                                                                                                                                                                                                                                                                                                                                                                                                                                                                                                                                                                                                                                                                                                                                                                                           | University College London Hospital                                                                                               | COVID-19 Genomics UK (COG-UK) Consortium                                                                                                                                                                                                                                          | Catherine Houllihan; Dan Frampton; Dr Catherine Houllihan; Dr Daniel Frampton; Dr Judith Heaney; Dr Moira Spyer; Dr Paul Grant and Dr Eleni Nastouli; Judith Heaney; Matthew Byott; Moira Spyer and Eleni Nastouli; Stuart Kirk                                                                                                                                        |
| EPI_ISL_1048048 to 1048052, EPI_ISL_1048136 to 1048237, EPI_ISL_1050357, EPI_ISL_1050369, EPI_ISL_1050392, EPI_ISL_1050417 to 1050501, EPI_ISL_1050503 to 1050604, EPI_ISL_1050607 to 1050609, EPI_ISL_1050611 to 1050613, EPI_ISL_1050615 to 1050618, EPI_ISL_1050620 to 1050631, EPI_ISL_1050676 to 1050684, EPI_ISL_1050723 to 1050747, EPI_ISL_1104573 to 1104644, EPI_ISL_1104646, EPI_ISL_1104648, EPI_ISL_1104651, EPI_ISL_1104653, EPI_ISL_1104655, EPI_ISL_1104657 to 1104770, EPI_ISL_1105348 to 1105472, EPI_ISL_1178009 to 1178067, EPI_ISL_1247948 to 1248089, EPI_ISL_1248091 to 1248237, EPI_ISL_1248239 to 1248240, EPI_ISL_1248242, EPI_ISL_1248244, EPI_ISL_1248246 to 1248247, EPI_ISL_1248249, EPI_ISL_1248251, EPI_ISL_1248253, EPI_ISL_1248255, EPI_ISL_1248257 to 1248258, EPI_ISL_1248260, EPI_ISL_1248262, EPI_ISL_1248264, EPI_ISL_1248266, EPI_ISL_1248268 to 1248269, EPI_ISL_1248271, EPI_ISL_1248273, EPI_ISL_1248275 to 1248276, EPI_ISL_1248278, EPI_ISL_1248280, EPI_ISL_1248282, EPI_ISL_1248284 to 1248285, EPI_ISL_1248287, EPI_ISL_1248289, EPI_ISL_1248291 to 1248292, EPI_ISL_1248294, EPI_ISL_1248296, EPI_ISL_1248298, EPI_ISL_1248300, EPI_ISL_1248302 to 1248303, EPI_ISL_1248305, EPI_ISL_1248307, EPI_ISL_1248309 to 1248310, EPI_ISL_1248312, EPI_ISL_1248314, EPI_ISL_1248316, EPI_ISL_1248318 to 1248319, EPI_ISL_1248321, EPI_ISL_1248323, EPI_ISL_1248325 to 1248326, EPI_ISL_1248328, EPI_ISL_1248330, EPI_ISL_1248332, EPI_ISL_1248334 to 1248335, EPI_ISL_1248337, EPI_ISL_1248339, EPI_ISL_1248341 to 1248366, EPI_ISL_1248500 to 1248544, EPI_ISL_1250223 to 1250257, EPI_ISL_1308951 to 1309145, EPI_ISL_1310702 to 1310703 |                                                                                                                                  |                                                                                                                                                                                                                                                                                   |                                                                                                                                                                                                                                                                                                                                                                        |
| see above                                                                                                                                                                                                                                                                                                                                                                                                                                                                                                                                                                                                                                                                                                                                                                                                                                                                                                                                                                                                                                                                                                                                                                                                                                                                                                                                                                                                                                                                                                                                                                                                                                                                           | University College London, Great Ormond Street Hospital for Children NHS Foundation Trust, Imperial College Healthcare NHS Trust | COVID-19 Genomics UK (COG-UK) Consortium                                                                                                                                                                                                                                          | Alison Holmes; Charlotte Williams; Helena Tutill; Jacqueline Findlay; James Price; Judith Breuer; Julianne Brown; Kathryn Harris; Leysa Forrest; Mark Kristiansen; Paola Niola; Paola Resende Silva; Patricia Dyal; Paul Randell; Rachel Williams; Samuel Weeks; Sergi Castellano; Sunando Roy; Tony Brooks; Yasmin Panchbhaya                                         |
| EPI_ISL_1014691 to 1014702, EPI_ISL_1034152, EPI_ISL_1036230 to 1036232, EPI_ISL_1273445 to 1273769, EPI_ISL_1296819, EPI_ISL_1296821 to 1296822, EPI_ISL_1296824 to 1296826, EPI_ISL_1296828 to 1296830, EPI_ISL_1296832 to 1296834, EPI_ISL_1296836 to 1296838, EPI_ISL_1296840 to 1296841,                                                                                                                                                                                                                                                                                                                                                                                                                                                                                                                                                                                                                                                                                                                                                                                                                                                                                                                                                                                                                                                                                                                                                                                                                                                                                                                                                                                       |                                                                                                                                  |                                                                                                                                                                                                                                                                                   |                                                                                                                                                                                                                                                                                                                                                                        |

|                                                                                                                                                                                                                                                                                                                                                                                                                                                                                                                                                                                                                                                                                                                                                                                                                                                                                                                                                                                                                                                                                                                                                                                                                                                                                                                                                                                                                                                                                                                                                                                                                                                                                                                                                                                                                                                                                              |           |                                                                                                         |                                                                                                         |                                                                                                                                                                                                                                                                                                                                                                                                                                         |
|----------------------------------------------------------------------------------------------------------------------------------------------------------------------------------------------------------------------------------------------------------------------------------------------------------------------------------------------------------------------------------------------------------------------------------------------------------------------------------------------------------------------------------------------------------------------------------------------------------------------------------------------------------------------------------------------------------------------------------------------------------------------------------------------------------------------------------------------------------------------------------------------------------------------------------------------------------------------------------------------------------------------------------------------------------------------------------------------------------------------------------------------------------------------------------------------------------------------------------------------------------------------------------------------------------------------------------------------------------------------------------------------------------------------------------------------------------------------------------------------------------------------------------------------------------------------------------------------------------------------------------------------------------------------------------------------------------------------------------------------------------------------------------------------------------------------------------------------------------------------------------------------|-----------|---------------------------------------------------------------------------------------------------------|---------------------------------------------------------------------------------------------------------|-----------------------------------------------------------------------------------------------------------------------------------------------------------------------------------------------------------------------------------------------------------------------------------------------------------------------------------------------------------------------------------------------------------------------------------------|
| EPI_ISL_1296843                                                                                                                                                                                                                                                                                                                                                                                                                                                                                                                                                                                                                                                                                                                                                                                                                                                                                                                                                                                                                                                                                                                                                                                                                                                                                                                                                                                                                                                                                                                                                                                                                                                                                                                                                                                                                                                                              | see above | University Hospital Basel, Clinical Virology                                                            | University Hospital Basel, Clinical Bacteriology                                                        | Adrian Egli; Alfredo Mari; Hans Hirsch; Helena MB Seth-Smith; Julia Bielicki; Karoline Leuzinger; Madlen Stange; Manuel Battegay; Tim Roloff                                                                                                                                                                                                                                                                                            |
| EPI_ISL_1195698 to 1195699                                                                                                                                                                                                                                                                                                                                                                                                                                                                                                                                                                                                                                                                                                                                                                                                                                                                                                                                                                                                                                                                                                                                                                                                                                                                                                                                                                                                                                                                                                                                                                                                                                                                                                                                                                                                                                                                   |           | University Hospital Centre Osijek                                                                       | Croatian Institute of Public Health                                                                     | Irena Tabain; Ivana Ferenak                                                                                                                                                                                                                                                                                                                                                                                                             |
| EPI_ISL_1195718 to 1195725,<br>EPI_ISL_1201021 to 1201024                                                                                                                                                                                                                                                                                                                                                                                                                                                                                                                                                                                                                                                                                                                                                                                                                                                                                                                                                                                                                                                                                                                                                                                                                                                                                                                                                                                                                                                                                                                                                                                                                                                                                                                                                                                                                                    |           | University Hospital Centre Split                                                                        | Croatian Institute of Public Health                                                                     | Irena Tabain; Ivana Ferenak                                                                                                                                                                                                                                                                                                                                                                                                             |
| EPI_ISL_1272014 to 1272027, EPI_ISL_1306014, EPI_ISL_1306019, EPI_ISL_1306024, EPI_ISL_1306035, EPI_ISL_1306059 to 1306060, EPI_ISL_1306065 to 1306069, EPI_ISL_1306071, EPI_ISL_1306076 to 1306082, EPI_ISL_1306091                                                                                                                                                                                                                                                                                                                                                                                                                                                                                                                                                                                                                                                                                                                                                                                                                                                                                                                                                                                                                                                                                                                                                                                                                                                                                                                                                                                                                                                                                                                                                                                                                                                                         | see above | University Hospital Centre Zagreb                                                                       | Croatian Institute of Public Health                                                                     | Irena Tabain; Ivana Ferenak                                                                                                                                                                                                                                                                                                                                                                                                             |
| EPI_ISL_1299456                                                                                                                                                                                                                                                                                                                                                                                                                                                                                                                                                                                                                                                                                                                                                                                                                                                                                                                                                                                                                                                                                                                                                                                                                                                                                                                                                                                                                                                                                                                                                                                                                                                                                                                                                                                                                                                                              |           | University Hospital Laboratory of Brussels Universitair Laboratorium van Brussel (LHUB-ULB)             | UAntwerp, Laboratory of Medical Microbiology                                                            | Basil Britto Xavier; Christine Lammens; Herman Goossens; Jasmine Coppens; Marie Le Mercier; Veerle Matheeußen                                                                                                                                                                                                                                                                                                                           |
| EPI_ISL_1079388, EPI_ISL_1229138                                                                                                                                                                                                                                                                                                                                                                                                                                                                                                                                                                                                                                                                                                                                                                                                                                                                                                                                                                                                                                                                                                                                                                                                                                                                                                                                                                                                                                                                                                                                                                                                                                                                                                                                                                                                                                                             |           | University Hospital Sant'Andrea-Sapienza                                                                | INMI Lazzaro Spallanzani IRCCS                                                                          | A Di Caro; B Bartolini; CEM Gruber; E Giombini; F Messina; I Santino; M Rueca; M Simmaco; MR Capobianchi; O Butera                                                                                                                                                                                                                                                                                                                      |
| EPI_ISL_1310789 to 1310790                                                                                                                                                                                                                                                                                                                                                                                                                                                                                                                                                                                                                                                                                                                                                                                                                                                                                                                                                                                                                                                                                                                                                                                                                                                                                                                                                                                                                                                                                                                                                                                                                                                                                                                                                                                                                                                                   |           | University Hospital Zürich                                                                              | Institute of Medical Virology, University of Zurich                                                     | Alexandra Trkova; Annette Audigé; Cyril Shah; Frey Andrea Christina; Gabriela Ziltener; Guido Bloemberg; Jon Huder; Jürg Böni; Kevin Steiner; Maria Grünberg; Maryam Zaheri; Michael Huber; Riccarda Capaul; Schärer Verena; Stefan Schmutz; Verena Kufner; Wolfensberger Aline                                                                                                                                                         |
| EPI_ISL_1109488, EPI_ISL_1109492 to 1109494, EPI_ISL_1109500 to 1109502, EPI_ISL_1109506 to 1109507, EPI_ISL_1109512 to 1109514, EPI_ISL_1109521 to 1109524, EPI_ISL_1109530 to 1109536, EPI_ISL_1109558 to 1109562, EPI_ISL_1180209, EPI_ISL_1195677 to 1195684, EPI_ISL_1229153 to 1229154, EPI_ISL_1271996 to 1272013, EPI_ISL_1306013, EPI_ISL_1306015 to 1306018, EPI_ISL_1306020 to 1306022, EPI_ISL_1306025 to 1306034, EPI_ISL_1306037 to 1306047, EPI_ISL_1306049 to 1306058, EPI_ISL_1306062 to 1306063, EPI_ISL_1306070, EPI_ISL_1306072 to 1306075, EPI_ISL_1306083 to 1306090, EPI_ISL_1311974 to 1311975                                                                                                                                                                                                                                                                                                                                                                                                                                                                                                                                                                                                                                                                                                                                                                                                                                                                                                                                                                                                                                                                                                                                                                                                                                                                       | see above | University Hospital for Infectious Diseases                                                             | Croatian Institute of Public Health                                                                     | Irena Tabain; Ivana Ferenak                                                                                                                                                                                                                                                                                                                                                                                                             |
| EPI_ISL_1013489 to 1013492, EPI_ISL_1034345, EPI_ISL_1073917, EPI_ISL_1118298 to 1118302, EPI_ISL_1118324, EPI_ISL_1118344, EPI_ISL_1118414, EPI_ISL_1118481 to 1118483, EPI_ISL_1118585, EPI_ISL_1118591, EPI_ISL_1192174, EPI_ISL_1192191, EPI_ISL_1192237, EPI_ISL_1192256, EPI_ISL_1192297 to 1192298, EPI_ISL_1251319, EPI_ISL_1251377 to 1251379, EPI_ISL_1251464 to 1251466, EPI_ISL_1251515, EPI_ISL_1251764, EPI_ISL_1252006, EPI_ISL_1252502 to 1252506, EPI_ISL_1252537 to 1252545, EPI_ISL_1254548, EPI_ISL_1254551, EPI_ISL_1254560, EPI_ISL_1254572 to 1254573, EPI_ISL_1254587 to 1254589, EPI_ISL_1254600, EPI_ISL_1254605, EPI_ISL_1254610 to 1254611, EPI_ISL_1317464, EPI_ISL_1317512, EPI_ISL_1317524, EPI_ISL_1317554, EPI_ISL_1317561, EPI_ISL_1317695, EPI_ISL_1323139, EPI_ISL_1323141 to 1323154, EPI_ISL_1323171                                                                                                                                                                                                                                                                                                                                                                                                                                                                                                                                                                                                                                                                                                                                                                                                                                                                                                                                                                                                                                                   | see above | University Hospital of Northern Norway, Department for Microbiology and Infectious Disease Control      | Norwegian Institute of Public Health, Department of Virology                                            | Atiya R Ali; Debec Nadia; Engebretsen Serina Beate; Engebretsen Serina Beate Atiya R Ali; Garcia Llorente Ignacio; Hilde Elshaug; Hilde Vollan; Ignacio Garcia Llorente; Jon Bråte; Kamilla Heddeland Instefjord; Karoline Bragstad; Kathrine Stene-Johansen; Marie Paulsen Madsen; Olav Hungnes; Pedersen Benedikte Nevjen; Rasmus Riis Kopperud; Serina B Engebretsen                                                                 |
| EPI_ISL_1047914 to 1047959,<br>EPI_ISL_1050352 to 1050354,<br>EPI_ISL_1104291 to 1104307,<br>EPI_ISL_1177786 to 1177805,<br>EPI_ISL_1247749 to 1247765,<br>EPI_ISL_1308868 to 1308890                                                                                                                                                                                                                                                                                                                                                                                                                                                                                                                                                                                                                                                                                                                                                                                                                                                                                                                                                                                                                                                                                                                                                                                                                                                                                                                                                                                                                                                                                                                                                                                                                                                                                                        |           | University Hospitals Of Leicester NHS Trust and DeepSeq Nottingham                                      | COVID-19 Genomics UK (COG-UK) Consortium                                                                | Christopher Holmes; Christopher Moore; Fei Sang; Joseph Chappell; Johnny Debebe; Jonathan Ball; Julian Tang; Karlie Fallon; Matthew Carlisle; Matthew Loose; Nadine Holmes; Patrick McClure; Paul Bird; Thomas Helmer; Victoria Wright                                                                                                                                                                                                  |
| EPI_ISL_1018059, EPI_ISL_1240726 to 1240794                                                                                                                                                                                                                                                                                                                                                                                                                                                                                                                                                                                                                                                                                                                                                                                                                                                                                                                                                                                                                                                                                                                                                                                                                                                                                                                                                                                                                                                                                                                                                                                                                                                                                                                                                                                                                                                  |           | University Hospitals Translational Laboratory (UHTL), University Hospitals                              | University Hospitals Translational Laboratory (UHTL), University Hospitals                              | Alouani; Alouani, D.; D. and Song, X.; Sadri, N.; Song, X.                                                                                                                                                                                                                                                                                                                                                                              |
| EPI_ISL_1040181 to 1040424, EPI_ISL_1084762 to 1084822, EPI_ISL_1084824 to 1085005, EPI_ISL_1166652 to 1166861, EPI_ISL_1228693 to 1228907, EPI_ISL_1295978 to 1296233, EPI_ISL_1369470 to 1369720, EPI_ISL_1372427 to 1372428, EPI_ISL_1372433, EPI_ISL_1372436 to 1372437, EPI_ISL_1372439 to 1372463                                                                                                                                                                                                                                                                                                                                                                                                                                                                                                                                                                                                                                                                                                                                                                                                                                                                                                                                                                                                                                                                                                                                                                                                                                                                                                                                                                                                                                                                                                                                                                                      | see above | University Hospitals of Geneva, Laboratory of Virology                                                  | HUG, Laboratory of Virology and the Health2030 Genome Center                                            | Ana Rita Goncalves; Deborah Penet; Emmanouil Dermitzakis; Henri Pegeot; Ioannis Xenarios; Keith Harshman; Laurent Kaiser; Lorenzo Cerutti; Melyssa Elies; Samuel Cordey                                                                                                                                                                                                                                                                 |
| EPI_ISL_1072985                                                                                                                                                                                                                                                                                                                                                                                                                                                                                                                                                                                                                                                                                                                                                                                                                                                                                                                                                                                                                                                                                                                                                                                                                                                                                                                                                                                                                                                                                                                                                                                                                                                                                                                                                                                                                                                                              |           | University of Balamand                                                                                  | Microbial Genomics Lab, Lebanese American University, Byblos                                            | Mira El Chaar; Sima Tokajian; Youssef Bassim                                                                                                                                                                                                                                                                                                                                                                                            |
| EPI_ISL_1007642, EPI_ISL_1014237, EPI_ISL_1014690, EPI_ISL_1209014, EPI_ISL_1209020, EPI_ISL_1209025                                                                                                                                                                                                                                                                                                                                                                                                                                                                                                                                                                                                                                                                                                                                                                                                                                                                                                                                                                                                                                                                                                                                                                                                                                                                                                                                                                                                                                                                                                                                                                                                                                                                                                                                                                                         |           | University of Bari Biomedical Sciences and Human Oncology                                               | University of Bari Biomedical Sciences and Human Oncology                                               | Accogli M.; Chironna M.; Loconsolo D.; Parisi A.; Sallustio A.                                                                                                                                                                                                                                                                                                                                                                          |
| EPI_ISL_1046951 to 1046955, EPI_ISL_1046957, EPI_ISL_1046959 to 1046978, EPI_ISL_1046980 to 1047041, EPI_ISL_1047043, EPI_ISL_1047045 to 1047068, EPI_ISL_1103729 to 1103753, EPI_ISL_1103755 to 1103756, EPI_ISL_1177529 to 1177635, EPI_ISL_1308471 to 1308479, EPI_ISL_1308481 to 1308527, EPI_ISL_1308529 to 1308530, EPI_ISL_1308532 to 1308534                                                                                                                                                                                                                                                                                                                                                                                                                                                                                                                                                                                                                                                                                                                                                                                                                                                                                                                                                                                                                                                                                                                                                                                                                                                                                                                                                                                                                                                                                                                                         | see above | University of Birmingham                                                                                | COVID-19 Genomics UK (COG-UK) Consortium                                                                | Alex Richter; Andrew Bosworth; Andrew Bosworth. Queen Elizabeth Hospital: Anna Casey; Andrew D Beggs PHE Heartlands Lab: Husam Osman; Charlotte Poxon; Institute of Microbiology; Joanne Stockton; Josh Quick; Kasun Wanigasooriya; Mike Kidd; Nicholas Loman. University of Birmingham Testing Laboratory: Celina M Whalley; Oliver Pickles; Radoslaw Poplawski; Samuel Nicholls; University of Birmingham: Claire McMurray; Will Rowe |
| EPI_ISL_1123290 to 1123292, EPI_ISL_1133253 to 1133254                                                                                                                                                                                                                                                                                                                                                                                                                                                                                                                                                                                                                                                                                                                                                                                                                                                                                                                                                                                                                                                                                                                                                                                                                                                                                                                                                                                                                                                                                                                                                                                                                                                                                                                                                                                                                                       |           | University of Chittagong                                                                                | Central Biological Research Laboratory and Department of Biochemistry and Molecular Biology             | H. M. Abdullah Al Masud; Imam Hossen; Md. Arif Hossain; Md. Imranul Hoq; Md. Khondakar Raziur Rahman; Md. Omer Faruq; Mohammad Omar Faruque; Robiul Hasan Bhuiyan; Sajib Rudra; Shanta Paul                                                                                                                                                                                                                                             |
| EPI_ISL_1050068 to 1050074, EPI_ISL_1050293 to 1050306, EPI_ISL_1050323 to 1050324, EPI_ISL_1050326 to 1050333, EPI_ISL_1050335 to 1050345, EPI_ISL_1053977 to 1053980, EPI_ISL_1053982 to 1053987, EPI_ISL_1053989 to 1053996, EPI_ISL_1053998 to 1053999, EPI_ISL_1054001 to 1054002, EPI_ISL_1054004 to 1054007, EPI_ISL_1054009 to 1054010, EPI_ISL_1054012 to 1054016, EPI_ISL_1054018 to 1054020, EPI_ISL_1054022 to 1054037, EPI_ISL_1054040, EPI_ISL_1054042 to 1054051, EPI_ISL_1054053 to 1054060, EPI_ISL_1054065 to 1054067, EPI_ISL_1054069 to 1054079, EPI_ISL_1054081 to 1054094, EPI_ISL_1054096 to 1054107, EPI_ISL_1054110 to 1054112, EPI_ISL_1054114 to 1054118, EPI_ISL_1054120 to 1054123, EPI_ISL_1054125 to 1054128, EPI_ISL_1054130, EPI_ISL_1054462 to 1054467, EPI_ISL_1054469 to 1054470, EPI_ISL_1054472 to 1054476, EPI_ISL_1054478 to 1054508, EPI_ISL_1054510 to 1054541, EPI_ISL_1103757 to 1103761, EPI_ISL_1103763 to 1103764, EPI_ISL_1103766, EPI_ISL_1103768 to 1103773, EPI_ISL_1103775 to 1103778, EPI_ISL_1103780 to 1103803, EPI_ISL_1103805 to 1103831, EPI_ISL_1103833 to 1103846, EPI_ISL_1103848 to 1103858, EPI_ISL_1103860, EPI_ISL_1103862 to 1103864, EPI_ISL_1103866 to 1103870, EPI_ISL_1103872, EPI_ISL_1103874, EPI_ISL_1103876 to 1103877, EPI_ISL_1177751 to 1177784, EPI_ISL_1247433 to 1247462, EPI_ISL_1247464 to 1247474, EPI_ISL_1247476 to 1247483, EPI_ISL_1247485 to 1247488, EPI_ISL_1247490 to 1247494, EPI_ISL_1247496, EPI_ISL_1247498 to 1247499, EPI_ISL_1247501 to 1247524, EPI_ISL_1247526 to 1247549, EPI_ISL_1247551 to 1247570, EPI_ISL_1250123, EPI_ISL_1308535 to 1308546, EPI_ISL_1308548 to 1308558, EPI_ISL_1308560 to 1308562, EPI_ISL_1308564 to 1308587, EPI_ISL_1308589 to 1308607, EPI_ISL_1308609 to 1308618, EPI_ISL_1308620, EPI_ISL_1308622 to 1308627, EPI_ISL_1308651, EPI_ISL_1308653 to 1308675 | see above | University of Exeter                                                                                    | COVID-19 Genomics UK (COG-UK) Consortium                                                                | Aaron Jeffries; Audrey Farbos; Ben Temperton; Jane Masoli; Joanna Warwick-Dugdale; Michelle Michelsen; Robyn Manley; Stephen Michell                                                                                                                                                                                                                                                                                                    |
| EPI_ISL_1010732 to 1010736                                                                                                                                                                                                                                                                                                                                                                                                                                                                                                                                                                                                                                                                                                                                                                                                                                                                                                                                                                                                                                                                                                                                                                                                                                                                                                                                                                                                                                                                                                                                                                                                                                                                                                                                                                                                                                                                   |           | University of Iowa Hospitals & Clinics, Microbiology Laboratory                                         | University of Iowa, Lung Biology and Cystic Fibrosis Research Center, Pezzulo Lab                       | Alejandro A Pezzulo; Miguel E Ortiz                                                                                                                                                                                                                                                                                                                                                                                                     |
| EPI_ISL_1040486 to 1040534, EPI_ISL_1058623 to 1058687, EPI_ISL_1059072, EPI_ISL_1113056 to 1113065, EPI_ISL_1113075 to 1113083, EPI_ISL_1121170 to 1121171, EPI_ISL_1121178 to 1121181, EPI_ISL_1121183, EPI_ISL_1121204, EPI_ISL_1121207 to 1121216, EPI_ISL_1165858 to 1165878, EPI_ISL_1241680 to 1241687, EPI_ISL_1241741 to 1241753, EPI_ISL_1241831 to 1241834, EPI_ISL_1249260, EPI_ISL_1318097 to 1318098, EPI_ISL_1318101, EPI_ISL_1318104, EPI_ISL_1318106, EPI_ISL_1318112 to 1318121, EPI_ISL_1318144 to 1318154, EPI_ISL_1318164, EPI_ISL_1318168 to 1318174, EPI_ISL_1318188 to 1318191, EPI_ISL_1318194, EPI_ISL_1318199 to 1318201, EPI_ISL_1322106 to 1322108, EPI_ISL_1381948, EPI_ISL_1381951, EPI_ISL_1381976 to 1381986, EPI_ISL_1381992, EPI_ISL_1381997 to 1382001, EPI_ISL_1382011 to 1382036, EPI_ISL_1382049, EPI_ISL_1382055 to 1382056, EPI_ISL_1382066, EPI_ISL_1382072, EPI_ISL_1382074 to 1382075                                                                                                                                                                                                                                                                                                                                                                                                                                                                                                                                                                                                                                                                                                                                                                                                                                                                                                                                                            | see above | University of Liège COVID-19 testing center                                                             | GIGA Medical Genomics                                                                                   | Bouchra Boujmla; Cécile Mexx; Fabrice Bureau; Keith Durkin; Laurent Gillet; Maria Artesi; Marie-Pierre Hayette; Nathalie Renotte; Pierrette Melin; Raphaël Boreux; Sébastien Bontems; Vincent Bours; Wouter Coppieters                                                                                                                                                                                                                  |
| EPI_ISL_1016479 to 1016507                                                                                                                                                                                                                                                                                                                                                                                                                                                                                                                                                                                                                                                                                                                                                                                                                                                                                                                                                                                                                                                                                                                                                                                                                                                                                                                                                                                                                                                                                                                                                                                                                                                                                                                                                                                                                                                                   |           | University of Miami Immunology and Histocompatibility Laboratory                                        | University of Miami Immunology and Histocompatibility Laboratory                                        | Emilio Margolles-Clark; MD; PhD; PhD and Phillip Ruiz                                                                                                                                                                                                                                                                                                                                                                                   |
| EPI_ISL_1001265 to 1001298, EPI_ISL_1014767 to 1014903, EPI_ISL_1014988 to 1014992, EPI_ISL_1058982 to 1059021, EPI_ISL_1059073 to 1059238, EPI_ISL_1060764 to 1060765, EPI_ISL_1118690 to 1118801, EPI_ISL_1118803 to 1118817, EPI_ISL_1118915 to 1118919, EPI_ISL_1132971 to 1133099, EPI_ISL_1196897 to 1196929, EPI_ISL_1200860 to 1201001, EPI_ISL_1201287, EPI_ISL_1260966 to 1261121, EPI_ISL_1262455 to 1262458, EPI_ISL_1291583 to 1291606, EPI_ISL_1293327 to 1293330, EPI_ISL_1314264 to 1314296                                                                                                                                                                                                                                                                                                                                                                                                                                                                                                                                                                                                                                                                                                                                                                                                                                                                                                                                                                                                                                                                                                                                                                                                                                                                                                                                                                                  | see above | University of Michigan Clinical Microbiology Laboratory                                                 | Lauring Lab, University of Michigan, Department of Microbiology and Immunology                          | Valesano                                                                                                                                                                                                                                                                                                                                                                                                                                |
| EPI_ISL_1016508, EPI_ISL_1016690, EPI_ISL_1016822, EPI_ISL_1016842 to 1016843, EPI_ISL_1016884 to 1016885, EPI_ISL_1016968 to 1016970                                                                                                                                                                                                                                                                                                                                                                                                                                                                                                                                                                                                                                                                                                                                                                                                                                                                                                                                                                                                                                                                                                                                                                                                                                                                                                                                                                                                                                                                                                                                                                                                                                                                                                                                                        |           | University of Sarajevo, Veterinary Faculty, Laboratory for Molecular Diagnostic and Research Laboratory | University of Sarajevo, Veterinary Faculty, Laboratory for Molecular Diagnostic and Research Laboratory | Alic-Seho A.; Alic-Šeho A.; Goletic S.; Goletic T.; Goletic Š.; Hodžić A.; Hodžić A.; Jazić A.; Jazić A.; Nicević M.; Sabić E.; Softić A.; Terzić I.; Terzić I.; Šabić E.                                                                                                                                                                                                                                                               |
| EPI_ISL_1379956 to 1379957,                                                                                                                                                                                                                                                                                                                                                                                                                                                                                                                                                                                                                                                                                                                                                                                                                                                                                                                                                                                                                                                                                                                                                                                                                                                                                                                                                                                                                                                                                                                                                                                                                                                                                                                                                                                                                                                                  |           | University of Vermont Medical Center                                                                    | UW Virology Lab                                                                                         | Alexander Greninger; Allison L. Unger; Beth D. Kirkpatrick; Emily A. Bruce; Hong Xie; Jessica W. Crothers; Keith R. Jerome; Lasata Shrestha; Margaret                                                                                                                                                                                                                                                                                   |

|                                                                                                                                                                                                                                                                                                                                                                                                                                                                                                                                                                                                                                                                                                                                                                                                                                                                                                                                                                                                                                                                                                                                                                                                                                                                                                                                                                                                                                                                                                                                                                                                                                                                                                                                                                                                                                                                                                                                                                                                                                                                                                                                                                                                                                                                                                                                                                                                                                                                                                                                                                                                                                                                                                                                                                                                                                                                                                                                                                                                                                                                                                                                                                                                                                                                                                                                                                                                                                                                                                                                                                                                                                                                                                                                                                                                                                                                                                                                                                                                                                                                                                                                                                                                                                                                                                                                                                                                                                                                                                                                                                                                                                                                                                                                                                                                                                                                                                                                                                                                                                                                                                                                                                                                                                                                                                                                                                                                                                                                                                                                                                                                                                                                                                                                                                                                                                                                                                                                                                                                                                                                                                                                                                                                                                                                                                                                                                                                                                                                                                                                                                                                                                                                                                                                                                                                                                                                                                                                                                                                                                                                                                                                                                                                                                                                                                                                                                                                                                                                                                                                                                                                                                                                                                                                                                                                                                                                                                                                                                                                                                                                                                                                                                                                                                                                                                                                                                                                                                                                                                                                                                                                                                                                                                                                                                                                                                                                                                                                                                                                                                                                                                                                                                                                                                                                                                                                                                                                                                                                                                                                                                                                                                                                                                                                                                                                                                                                                                                                                                                                                                                                                                                                                                                                                                                                                                                                                                                                                                                                                                                                                                                                                                                                                                                                                                                                                                                                                                                                                                                                                                                                                                                                                                                                                                                                                                                                                                                                                                                                                                                                                                                                                                                                                                                                                                                                                                                                                                                                                                                                                                                                                                                                                                                                                                                                                                                                                                                                                                                                                                                                                                                                                                                                                                                                                                                                                                                                                                                                                                                                                                                                                                                                                                                                                                                                                                                                                                                                                                                                                                                                                                                                                                                                                                                |                                                                                 |                                                                    |                                                                                                                                                                                                                                                                                                                                                                                                                                                                                                                                                                                                                                                                                                                |
|----------------------------------------------------------------------------------------------------------------------------------------------------------------------------------------------------------------------------------------------------------------------------------------------------------------------------------------------------------------------------------------------------------------------------------------------------------------------------------------------------------------------------------------------------------------------------------------------------------------------------------------------------------------------------------------------------------------------------------------------------------------------------------------------------------------------------------------------------------------------------------------------------------------------------------------------------------------------------------------------------------------------------------------------------------------------------------------------------------------------------------------------------------------------------------------------------------------------------------------------------------------------------------------------------------------------------------------------------------------------------------------------------------------------------------------------------------------------------------------------------------------------------------------------------------------------------------------------------------------------------------------------------------------------------------------------------------------------------------------------------------------------------------------------------------------------------------------------------------------------------------------------------------------------------------------------------------------------------------------------------------------------------------------------------------------------------------------------------------------------------------------------------------------------------------------------------------------------------------------------------------------------------------------------------------------------------------------------------------------------------------------------------------------------------------------------------------------------------------------------------------------------------------------------------------------------------------------------------------------------------------------------------------------------------------------------------------------------------------------------------------------------------------------------------------------------------------------------------------------------------------------------------------------------------------------------------------------------------------------------------------------------------------------------------------------------------------------------------------------------------------------------------------------------------------------------------------------------------------------------------------------------------------------------------------------------------------------------------------------------------------------------------------------------------------------------------------------------------------------------------------------------------------------------------------------------------------------------------------------------------------------------------------------------------------------------------------------------------------------------------------------------------------------------------------------------------------------------------------------------------------------------------------------------------------------------------------------------------------------------------------------------------------------------------------------------------------------------------------------------------------------------------------------------------------------------------------------------------------------------------------------------------------------------------------------------------------------------------------------------------------------------------------------------------------------------------------------------------------------------------------------------------------------------------------------------------------------------------------------------------------------------------------------------------------------------------------------------------------------------------------------------------------------------------------------------------------------------------------------------------------------------------------------------------------------------------------------------------------------------------------------------------------------------------------------------------------------------------------------------------------------------------------------------------------------------------------------------------------------------------------------------------------------------------------------------------------------------------------------------------------------------------------------------------------------------------------------------------------------------------------------------------------------------------------------------------------------------------------------------------------------------------------------------------------------------------------------------------------------------------------------------------------------------------------------------------------------------------------------------------------------------------------------------------------------------------------------------------------------------------------------------------------------------------------------------------------------------------------------------------------------------------------------------------------------------------------------------------------------------------------------------------------------------------------------------------------------------------------------------------------------------------------------------------------------------------------------------------------------------------------------------------------------------------------------------------------------------------------------------------------------------------------------------------------------------------------------------------------------------------------------------------------------------------------------------------------------------------------------------------------------------------------------------------------------------------------------------------------------------------------------------------------------------------------------------------------------------------------------------------------------------------------------------------------------------------------------------------------------------------------------------------------------------------------------------------------------------------------------------------------------------------------------------------------------------------------------------------------------------------------------------------------------------------------------------------------------------------------------------------------------------------------------------------------------------------------------------------------------------------------------------------------------------------------------------------------------------------------------------------------------------------------------------------------------------------------------------------------------------------------------------------------------------------------------------------------------------------------------------------------------------------------------------------------------------------------------------------------------------------------------------------------------------------------------------------------------------------------------------------------------------------------------------------------------------------------------------------------------------------------------------------------------------------------------------------------------------------------------------------------------------------------------------------------------------------------------------------------------------------------------------------------------------------------------------------------------------------------------------------------------------------------------------------------------------------------------------------------------------------------------------------------------------------------------------------------------------------------------------------------------------------------------------------------------------------------------------------------------------------------------------------------------------------------------------------------------------------------------------------------------------------------------------------------------------------------------------------------------------------------------------------------------------------------------------------------------------------------------------------------------------------------------------------------------------------------------------------------------------------------------------------------------------------------------------------------------------------------------------------------------------------------------------------------------------------------------------------------------------------------------------------------------------------------------------------------------------------------------------------------------------------------------------------------------------------------------------------------------------------------------------------------------------------------------------------------------------------------------------------------------------------------------------------------------------------------------------------------------------------------------------------------------------------------------------------------------------------------------------------------------------------------------------------------------------------------------------------------------------------------------------------------------------------------------------------------------------------------------------------------------------------------------------------------------------------------------------------------------------------------------------------------------------------------------------------------------------------------------------------------------------------------------------------------------------------------------------------------------------------------------------------------------------------------------------------------------------------------------------------------------------------------------------------------------------------------------------------------------------------------------------------------------------------------------------------------------------------------------------------------------------------------------------------------------------------------------------------------------------------------------------------------------------------------------------------------------------------------------------------------------------------------------------------------------------------------------------------------------------------------------------------------------------------------------------------------------------------------------------------------------------------------------------------------------------------------------------------------------------------------------------------------------------------------------------------------------------------------------------------------------------------------------------------------------------------------------------------------------------------------------------------------------------------------------------------------------------------------------------------------------------------------------------------------------------------------------------------------------------------------------------------------------------------------------------------------------------------------------------------------------------------------------------------------------------------------------------------------------------------------------------------------------------------------------------------------------------------------------------------------------------------------------------------------------------------------------------------------------------------------------------------------------------------------------------------------------------------------------------------------------------------------------------------------------------------------------------------------------------------------------------------------------------------------------------------------------------------------------------------------------------------------------------------------------------------------------|---------------------------------------------------------------------------------|--------------------------------------------------------------------|----------------------------------------------------------------------------------------------------------------------------------------------------------------------------------------------------------------------------------------------------------------------------------------------------------------------------------------------------------------------------------------------------------------------------------------------------------------------------------------------------------------------------------------------------------------------------------------------------------------------------------------------------------------------------------------------------------------|
| EPI_ISL_1380499                                                                                                                                                                                                                                                                                                                                                                                                                                                                                                                                                                                                                                                                                                                                                                                                                                                                                                                                                                                                                                                                                                                                                                                                                                                                                                                                                                                                                                                                                                                                                                                                                                                                                                                                                                                                                                                                                                                                                                                                                                                                                                                                                                                                                                                                                                                                                                                                                                                                                                                                                                                                                                                                                                                                                                                                                                                                                                                                                                                                                                                                                                                                                                                                                                                                                                                                                                                                                                                                                                                                                                                                                                                                                                                                                                                                                                                                                                                                                                                                                                                                                                                                                                                                                                                                                                                                                                                                                                                                                                                                                                                                                                                                                                                                                                                                                                                                                                                                                                                                                                                                                                                                                                                                                                                                                                                                                                                                                                                                                                                                                                                                                                                                                                                                                                                                                                                                                                                                                                                                                                                                                                                                                                                                                                                                                                                                                                                                                                                                                                                                                                                                                                                                                                                                                                                                                                                                                                                                                                                                                                                                                                                                                                                                                                                                                                                                                                                                                                                                                                                                                                                                                                                                                                                                                                                                                                                                                                                                                                                                                                                                                                                                                                                                                                                                                                                                                                                                                                                                                                                                                                                                                                                                                                                                                                                                                                                                                                                                                                                                                                                                                                                                                                                                                                                                                                                                                                                                                                                                                                                                                                                                                                                                                                                                                                                                                                                                                                                                                                                                                                                                                                                                                                                                                                                                                                                                                                                                                                                                                                                                                                                                                                                                                                                                                                                                                                                                                                                                                                                                                                                                                                                                                                                                                                                                                                                                                                                                                                                                                                                                                                                                                                                                                                                                                                                                                                                                                                                                                                                                                                                                                                                                                                                                                                                                                                                                                                                                                                                                                                                                                                                                                                                                                                                                                                                                                                                                                                                                                                                                                                                                                                                                                                                                                                                                                                                                                                                                                                                                                                                                                                                                                                                                                                |                                                                                 |                                                                    | Mills; Marya P. Carmolli; Meei-Li Huang; Michelle Lin; Noah R. Baker; Pavitra Roychoudhury; Saraswathi Sathees; Sean Ellis; Shah Mohamed Bakhsh                                                                                                                                                                                                                                                                                                                                                                                                                                                                                                                                                                |
| EPI_ISL_1017713 to 1017834, EPI_ISL_1039839 to 1039925, EPI_ISL_1039957 to 1039958, EPI_ISL_1064239 to 1064323, EPI_ISL_1095452, EPI_ISL_1095458 to 1095492, EPI_ISL_1110603 to 1110649, EPI_ISL_1121213 to 1122220, EPI_ISL_1132367, EPI_ISL_1159392 to 1159399, EPI_ISL_1166109 to 1166146, EPI_ISL_1166189 to 1166220, EPI_ISL_1182657 to 1182691, EPI_ISL_1205457 to 1205460, EPI_ISL_1236513 to 1236532, EPI_ISL_1252345 to 1252365, EPI_ISL_1252456 to 1252473, EPI_ISL_1252556 to 1252587, EPI_ISL_1252847 to 1252891, EPI_ISL_1252905 to 1252916, EPI_ISL_1253291, EPI_ISL_1253293, EPI_ISL_1253295 to 1253296, EPI_ISL_1253298 to 1253299, EPI_ISL_1253301 to 1253302, EPI_ISL_1253304 to 1253305, EPI_ISL_1253580 to 1253608, EPI_ISL_1314070 to 1314088, EPI_ISL_1314144 to 1314167, EPI_ISL_1314208, EPI_ISL_1314233 to 1314257                                                                                                                                                                                                                                                                                                                                                                                                                                                                                                                                                                                                                                                                                                                                                                                                                                                                                                                                                                                                                                                                                                                                                                                                                                                                                                                                                                                                                                                                                                                                                                                                                                                                                                                                                                                                                                                                                                                                                                                                                                                                                                                                                                                                                                                                                                                                                                                                                                                                                                                                                                                                                                                                                                                                                                                                                                                                                                                                                                                                                                                                                                                                                                                                                                                                                                                                                                                                                                                                                                                                                                                                                                                                                                                                                                                                                                                                                                                                                                                                                                                                                                                                                                                                                                                                                                                                                                                                                                                                                                                                                                                                                                                                                                                                                                                                                                                                                                                                                                                                                                                                                                                                                                                                                                                                                                                                                                                                                                                                                                                                                                                                                                                                                                                                                                                                                                                                                                                                                                                                                                                                                                                                                                                                                                                                                                                                                                                                                                                                                                                                                                                                                                                                                                                                                                                                                                                                                                                                                                                                                                                                                                                                                                                                                                                                                                                                                                                                                                                                                                                                                                                                                                                                                                                                                                                                                                                                                                                                                                                                                                                                                                                                                                                                                                                                                                                                                                                                                                                                                                                                                                                                                                                                                                                                                                                                                                                                                                                                                                                                                                                                                                                                                                                                                                                                                                                                                                                                                                                                                                                                                                                                                                                                                                                                                                                                                                                                                                                                                                                                                                                                                                                                                                                                                                                                                                                                                                                                                                                                                                                                                                                                                                                                                                                                                                                                                                                                                                                                                                                                                                                                                                                                                                                                                                                                                                                                                                                                                                                                                                                                                                                                                                                                                                                                                                                                                                                                                                                                                                                                                                                                                                                                                                                                                                                                                                                                                                                                                                                                                                                                                                                                                                                                                                                                                                                                                                                                    | University of Wisconsin-Madison AIDS Vaccine Research Laboratories              | University of Wisconsin-Madison AIDS Vaccine Research Laboratories | Gage Moreno; Katarina Braun; et al. AIDS Vaccine Research Laboratories                                                                                                                                                                                                                                                                                                                                                                                                                                                                                                                                                                                                                                         |
| see above                                                                                                                                                                                                                                                                                                                                                                                                                                                                                                                                                                                                                                                                                                                                                                                                                                                                                                                                                                                                                                                                                                                                                                                                                                                                                                                                                                                                                                                                                                                                                                                                                                                                                                                                                                                                                                                                                                                                                                                                                                                                                                                                                                                                                                                                                                                                                                                                                                                                                                                                                                                                                                                                                                                                                                                                                                                                                                                                                                                                                                                                                                                                                                                                                                                                                                                                                                                                                                                                                                                                                                                                                                                                                                                                                                                                                                                                                                                                                                                                                                                                                                                                                                                                                                                                                                                                                                                                                                                                                                                                                                                                                                                                                                                                                                                                                                                                                                                                                                                                                                                                                                                                                                                                                                                                                                                                                                                                                                                                                                                                                                                                                                                                                                                                                                                                                                                                                                                                                                                                                                                                                                                                                                                                                                                                                                                                                                                                                                                                                                                                                                                                                                                                                                                                                                                                                                                                                                                                                                                                                                                                                                                                                                                                                                                                                                                                                                                                                                                                                                                                                                                                                                                                                                                                                                                                                                                                                                                                                                                                                                                                                                                                                                                                                                                                                                                                                                                                                                                                                                                                                                                                                                                                                                                                                                                                                                                                                                                                                                                                                                                                                                                                                                                                                                                                                                                                                                                                                                                                                                                                                                                                                                                                                                                                                                                                                                                                                                                                                                                                                                                                                                                                                                                                                                                                                                                                                                                                                                                                                                                                                                                                                                                                                                                                                                                                                                                                                                                                                                                                                                                                                                                                                                                                                                                                                                                                                                                                                                                                                                                                                                                                                                                                                                                                                                                                                                                                                                                                                                                                                                                                                                                                                                                                                                                                                                                                                                                                                                                                                                                                                                                                                                                                                                                                                                                                                                                                                                                                                                                                                                                                                                                                                                                                                                                                                                                                                                                                                                                                                                                                                                                                                                                                                                      | University of Wisconsin-Madison AIDS Vaccine Research Laboratories              | University of Wisconsin-Madison AIDS Vaccine Research Laboratories | Gage Moreno; Katarina Braun; et al. AIDS Vaccine Research Laboratories                                                                                                                                                                                                                                                                                                                                                                                                                                                                                                                                                                                                                                         |
| EPI_ISL_1081819                                                                                                                                                                                                                                                                                                                                                                                                                                                                                                                                                                                                                                                                                                                                                                                                                                                                                                                                                                                                                                                                                                                                                                                                                                                                                                                                                                                                                                                                                                                                                                                                                                                                                                                                                                                                                                                                                                                                                                                                                                                                                                                                                                                                                                                                                                                                                                                                                                                                                                                                                                                                                                                                                                                                                                                                                                                                                                                                                                                                                                                                                                                                                                                                                                                                                                                                                                                                                                                                                                                                                                                                                                                                                                                                                                                                                                                                                                                                                                                                                                                                                                                                                                                                                                                                                                                                                                                                                                                                                                                                                                                                                                                                                                                                                                                                                                                                                                                                                                                                                                                                                                                                                                                                                                                                                                                                                                                                                                                                                                                                                                                                                                                                                                                                                                                                                                                                                                                                                                                                                                                                                                                                                                                                                                                                                                                                                                                                                                                                                                                                                                                                                                                                                                                                                                                                                                                                                                                                                                                                                                                                                                                                                                                                                                                                                                                                                                                                                                                                                                                                                                                                                                                                                                                                                                                                                                                                                                                                                                                                                                                                                                                                                                                                                                                                                                                                                                                                                                                                                                                                                                                                                                                                                                                                                                                                                                                                                                                                                                                                                                                                                                                                                                                                                                                                                                                                                                                                                                                                                                                                                                                                                                                                                                                                                                                                                                                                                                                                                                                                                                                                                                                                                                                                                                                                                                                                                                                                                                                                                                                                                                                                                                                                                                                                                                                                                                                                                                                                                                                                                                                                                                                                                                                                                                                                                                                                                                                                                                                                                                                                                                                                                                                                                                                                                                                                                                                                                                                                                                                                                                                                                                                                                                                                                                                                                                                                                                                                                                                                                                                                                                                                                                                                                                                                                                                                                                                                                                                                                                                                                                                                                                                                                                                                                                                                                                                                                                                                                                                                                                                                                                                                                                                                                                | University of the East Ramon Magsaysay Memorial Medical Center                  | Philippine Genome Center                                           | Alethea R. de Guzman; Anna Ong-Lim; Arianne A. Zamora; Asia Louisa U. Chong; Benedict A. Maralit; Candice Francheska B. Tambaoan; Carlo M. Lapid; Celia Carlos; Cynthia P. Saloma; Devon Ray Pacial; Edsel Maurice Salvaña; El King D. Morado; Eva Maria Cutiongco-de la Paz; Francis A. Tablizo; Irish Coleen A. Asin; Jaime C. Montoya; Jan Michael C. Yap; Jo-Hannah S. Llamas; John Q. Wong; Joshua Gregor A. Dizon; Juan Antonio R. Magalang; Karol Sophia Agape R. Padilla; Kenneth M. Kim; Kris P. Punayan; Marc Edsel C. Ayes; Marc Jerrone R. Castro; Maria Sofia L. Yangzon; Marissa Alejandria; Razel Nikka M. Hao; Rianna Patricia S. Cruz; Sheila Mae M. Araiza; and Maria Rosario Singh-Vergeire |
| EPI_ISL_1173769 to 1173781, EPI_ISL_1173784, EPI_ISL_1173787, EPI_ISL_1173789, EPI_ISL_1173792, EPI_ISL_1173795, EPI_ISL_1173798, EPI_ISL_1173801, EPI_ISL_1173804, EPI_ISL_1173808, EPI_ISL_1173811, EPI_ISL_1173814, EPI_ISL_1173817, EPI_ISL_1173820, EPI_ISL_1173822, EPI_ISL_1173825, EPI_ISL_1173828, EPI_ISL_1173832, EPI_ISL_1173835, EPI_ISL_1173838, EPI_ISL_1173840, EPI_ISL_1173843, EPI_ISL_1173847, EPI_ISL_1173850, EPI_ISL_1173853, EPI_ISL_1173856, EPI_ISL_1173859, EPI_ISL_1173862, EPI_ISL_1173865, EPI_ISL_1173868, EPI_ISL_1173871, EPI_ISL_1173874, EPI_ISL_1173876, EPI_ISL_1173879, EPI_ISL_1173882, EPI_ISL_1173886, EPI_ISL_1173889, EPI_ISL_1173891, EPI_ISL_1173895, EPI_ISL_1173897, EPI_ISL_1173901, EPI_ISL_1173904, EPI_ISL_1173907, EPI_ISL_1173910, EPI_ISL_1173914, EPI_ISL_1173916, EPI_ISL_1173919, EPI_ISL_1173922, EPI_ISL_1173925, EPI_ISL_1173928, EPI_ISL_1173931, EPI_ISL_1173935, EPI_ISL_1173938, EPI_ISL_1173940, EPI_ISL_1173943, EPI_ISL_1173946, EPI_ISL_1173950, EPI_ISL_1173953, EPI_ISL_1173956, EPI_ISL_1173959, EPI_ISL_1173962, EPI_ISL_1173965, EPI_ISL_1173968, EPI_ISL_1173971, EPI_ISL_1173974, EPI_ISL_1173979, EPI_ISL_1173982, EPI_ISL_1173985, EPI_ISL_1173988, EPI_ISL_1173991, EPI_ISL_1173994, EPI_ISL_1173998, EPI_ISL_1174000, EPI_ISL_1174004, EPI_ISL_1174007, EPI_ISL_1174010, EPI_ISL_1175968                                                                                                                                                                                                                                                                                                                                                                                                                                                                                                                                                                                                                                                                                                                                                                                                                                                                                                                                                                                                                                                                                                                                                                                                                                                                                                                                                                                                                                                                                                                                                                                                                                                                                                                                                                                                                                                                                                                                                                                                                                                                                                                                                                                                                                                                                                                                                                                                                                                                                                                                                                                                                                                                                                                                                                                                                                                                                                                                                                                                                                                                                                                                                                                                                                                                                                                                                                                                                                                                                                                                                                                                                                                                                                                                                                                                                                                                                                                                                                                                                                                                                                                                                                                                                                                                                                                                                                                                                                                                                                                                                                                                                                                                                                                                                                                                                                                                                                                                                                                                                                                                                                                                                                                                                                                                                                                                                                                                                                                                                                                                                                                                                                                                                                                                                                                                                                                                                                                                                                                                                                                                                                                                                                                                                                                                                                                                                                                                                                                                                                                                                                                                                                                                                                                                                                                                                                                                                                                                                                                                                                                                                                                                                                                                                                                                                                                                                                                                                                                                                                                                                                                                                                                                                                                                                                                                                                                                                                                                                                                                                                                                                                                                                                                                                                                                                                                                                                                                                                                                                                                                                                                                                                                                                                                                                                                                                                                                                                                                                                                                                                                                                                                                                                                                                                                                                                                                                                                                                                                                                                                                                                                                                                                                                                                                                                                                                                                                                                                                                                                                                                                                                                                                                                                                                                                                                                                                                                                                                                                                                                                                                                                                                                                                                                                                                                                                                                                                                                                                                                                                                                                                                                                                                                                                                                                                                                                                                                                                                                                                                                                                                                                                                                                                                                                                                                                                                                                                                                                                                                                                                                                                                                                                                                                                                                                                                                                                         |                                                                                 |                                                                    |                                                                                                                                                                                                                                                                                                                                                                                                                                                                                                                                                                                                                                                                                                                |
| see above                                                                                                                                                                                                                                                                                                                                                                                                                                                                                                                                                                                                                                                                                                                                                                                                                                                                                                                                                                                                                                                                                                                                                                                                                                                                                                                                                                                                                                                                                                                                                                                                                                                                                                                                                                                                                                                                                                                                                                                                                                                                                                                                                                                                                                                                                                                                                                                                                                                                                                                                                                                                                                                                                                                                                                                                                                                                                                                                                                                                                                                                                                                                                                                                                                                                                                                                                                                                                                                                                                                                                                                                                                                                                                                                                                                                                                                                                                                                                                                                                                                                                                                                                                                                                                                                                                                                                                                                                                                                                                                                                                                                                                                                                                                                                                                                                                                                                                                                                                                                                                                                                                                                                                                                                                                                                                                                                                                                                                                                                                                                                                                                                                                                                                                                                                                                                                                                                                                                                                                                                                                                                                                                                                                                                                                                                                                                                                                                                                                                                                                                                                                                                                                                                                                                                                                                                                                                                                                                                                                                                                                                                                                                                                                                                                                                                                                                                                                                                                                                                                                                                                                                                                                                                                                                                                                                                                                                                                                                                                                                                                                                                                                                                                                                                                                                                                                                                                                                                                                                                                                                                                                                                                                                                                                                                                                                                                                                                                                                                                                                                                                                                                                                                                                                                                                                                                                                                                                                                                                                                                                                                                                                                                                                                                                                                                                                                                                                                                                                                                                                                                                                                                                                                                                                                                                                                                                                                                                                                                                                                                                                                                                                                                                                                                                                                                                                                                                                                                                                                                                                                                                                                                                                                                                                                                                                                                                                                                                                                                                                                                                                                                                                                                                                                                                                                                                                                                                                                                                                                                                                                                                                                                                                                                                                                                                                                                                                                                                                                                                                                                                                                                                                                                                                                                                                                                                                                                                                                                                                                                                                                                                                                                                                                                                                                                                                                                                                                                                                                                                                                                                                                                                                                                                                                                      | Università Federico II - Dipartimento di scienze mediche traslazionali - Napoli | TIGEM                                                              | Antonio Grimaldi Patrizia Annunziata Francesco Panariello Michele Cennamo Valentina Bouche Chiara Colantuono Lucio Di Filippo Mariano Fiorenza Anna Manfredi Marcello Salvi Giuseppe Portella Andrea Ballabio Davide Cacchiarelli                                                                                                                                                                                                                                                                                                                                                                                                                                                                              |
| EPI_ISL_1163798 to 1163828, EPI_ISL_1166149 to 1166171, EPI_ISL_1169892 to 1169893, EPI_ISL_1212619, EPI_ISL_1212621, EPI_ISL_1212623, EPI_ISL_1212626, EPI_ISL_1212628, EPI_ISL_1212630, EPI_ISL_1212632, EPI_ISL_1212634, EPI_ISL_1212636, EPI_ISL_1212638, EPI_ISL_1212641, EPI_ISL_1212643, EPI_ISL_1212645, EPI_ISL_1212647, EPI_ISL_1212650, EPI_ISL_1212652, EPI_ISL_1212654, EPI_ISL_1212656, EPI_ISL_1212659, EPI_ISL_1212661, EPI_ISL_1212664, EPI_ISL_1212666, EPI_ISL_1212668, EPI_ISL_1212670, EPI_ISL_1212672, EPI_ISL_1212674, EPI_ISL_1212676, EPI_ISL_1212678, EPI_ISL_1212680, EPI_ISL_1212682, EPI_ISL_1212684, EPI_ISL_1212686, EPI_ISL_1212688, EPI_ISL_1212690, EPI_ISL_1212692, EPI_ISL_1212694, EPI_ISL_1212696, EPI_ISL_1212698, EPI_ISL_1212700, EPI_ISL_1212702, EPI_ISL_1212704, EPI_ISL_1212706, EPI_ISL_1212708, EPI_ISL_1212710, EPI_ISL_1212712, EPI_ISL_1212714, EPI_ISL_1212716, EPI_ISL_1212718, EPI_ISL_1212720, EPI_ISL_1212722, EPI_ISL_1212724, EPI_ISL_1212726, EPI_ISL_1212728, EPI_ISL_1212730, EPI_ISL_1212732, EPI_ISL_1212734, EPI_ISL_1212736, EPI_ISL_1212738, EPI_ISL_1212740, EPI_ISL_1212742, EPI_ISL_1212744, EPI_ISL_1212746, EPI_ISL_1212748, EPI_ISL_1212750, EPI_ISL_1212752, EPI_ISL_1212754, EPI_ISL_1212756, EPI_ISL_1212758, EPI_ISL_1212760, EPI_ISL_1212762, EPI_ISL_1212764, EPI_ISL_1212766, EPI_ISL_1212768, EPI_ISL_1212770, EPI_ISL_1212772, EPI_ISL_1212774, EPI_ISL_1212776, EPI_ISL_1212778, EPI_ISL_1212780, EPI_ISL_1212782, EPI_ISL_1212784, EPI_ISL_1212786, EPI_ISL_1212788, EPI_ISL_1212790, EPI_ISL_1212792, EPI_ISL_1212794, EPI_ISL_1212796, EPI_ISL_1212798, EPI_ISL_1212800, EPI_ISL_1212802, EPI_ISL_1212804, EPI_ISL_1212806, EPI_ISL_1212808, EPI_ISL_1212810, EPI_ISL_1212812, EPI_ISL_1212814, EPI_ISL_1212816, EPI_ISL_1212818, EPI_ISL_1212820, EPI_ISL_1212822, EPI_ISL_1212824, EPI_ISL_1212826, EPI_ISL_1212828, EPI_ISL_1212830, EPI_ISL_1212832, EPI_ISL_1212834, EPI_ISL_1212836, EPI_ISL_1212838, EPI_ISL_1212840, EPI_ISL_1212842, EPI_ISL_1212844, EPI_ISL_1212846, EPI_ISL_1212848, EPI_ISL_1212850, EPI_ISL_1212852, EPI_ISL_1212854, EPI_ISL_1212856, EPI_ISL_1212858, EPI_ISL_1212860, EPI_ISL_1212862, EPI_ISL_1212864, EPI_ISL_1212866, EPI_ISL_1212868, EPI_ISL_1212870, EPI_ISL_1212872, EPI_ISL_1212874, EPI_ISL_1212876, EPI_ISL_1212878, EPI_ISL_1212880, EPI_ISL_1212882, EPI_ISL_1212884, EPI_ISL_1212886, EPI_ISL_1212888, EPI_ISL_1212890, EPI_ISL_1212892, EPI_ISL_1212894, EPI_ISL_1212896, EPI_ISL_1212898, EPI_ISL_1212900, EPI_ISL_1212902, EPI_ISL_1212904, EPI_ISL_1212906, EPI_ISL_1212908, EPI_ISL_1212910, EPI_ISL_1212912, EPI_ISL_1212914, EPI_ISL_1212916, EPI_ISL_1212918, EPI_ISL_1212920, EPI_ISL_1212922, EPI_ISL_1212924, EPI_ISL_1212926, EPI_ISL_1212928, EPI_ISL_1212930, EPI_ISL_1212932, EPI_ISL_1212934, EPI_ISL_1212936, EPI_ISL_1212938, EPI_ISL_1212940, EPI_ISL_1212942, EPI_ISL_1212944, EPI_ISL_1212946, EPI_ISL_1212948, EPI_ISL_1212950, EPI_ISL_1212952, EPI_ISL_1212954, EPI_ISL_1212956, EPI_ISL_1212958, EPI_ISL_1212960, EPI_ISL_1212962, EPI_ISL_1212964, EPI_ISL_1212966, EPI_ISL_1212968, EPI_ISL_1212970, EPI_ISL_1212972, EPI_ISL_1212974, EPI_ISL_1212976, EPI_ISL_1212978, EPI_ISL_1212980, EPI_ISL_1212982, EPI_ISL_1212984, EPI_ISL_1212986, EPI_ISL_1212988, EPI_ISL_1212990, EPI_ISL_1212992, EPI_ISL_1212994, EPI_ISL_1212996, EPI_ISL_1212998, EPI_ISL_1321734 to 1321755, EPI_ISL_1321757, EPI_ISL_1321759, EPI_ISL_1321761, EPI_ISL_1321763, EPI_ISL_1321765, EPI_ISL_1321767, EPI_ISL_1321769, EPI_ISL_1321771, EPI_ISL_1321773, EPI_ISL_1321775, EPI_ISL_1321777, EPI_ISL_1321779, EPI_ISL_1321781, EPI_ISL_1321783, EPI_ISL_1321785, EPI_ISL_1321787, EPI_ISL_1321789, EPI_ISL_1321791, EPI_ISL_1321793, EPI_ISL_1321795, EPI_ISL_1321797, EPI_ISL_1321799, EPI_ISL_1321801, EPI_ISL_1321803, EPI_ISL_1321805, EPI_ISL_1321807, EPI_ISL_1321809, EPI_ISL_1321811, EPI_ISL_1321813, EPI_ISL_1321815, EPI_ISL_1321817, EPI_ISL_1321819, EPI_ISL_1321821, EPI_ISL_1321823, EPI_ISL_1321825, EPI_ISL_1321827, EPI_ISL_1321829, EPI_ISL_1321831, EPI_ISL_1321833, EPI_ISL_1321835, EPI_ISL_1321837, EPI_ISL_1321839, EPI_ISL_1321841, EPI_ISL_1321843, EPI_ISL_1321845, EPI_ISL_1321847, EPI_ISL_1321849, EPI_ISL_1321851, EPI_ISL_1321853, EPI_ISL_1321855, EPI_ISL_1321857, EPI_ISL_1321859, EPI_ISL_1321861, EPI_ISL_1321863, EPI_ISL_1321865, EPI_ISL_1321867, EPI_ISL_1321869, EPI_ISL_1321871, EPI_ISL_1321873, EPI_ISL_1321875, EPI_ISL_1321877, EPI_ISL_1321879, EPI_ISL_1321881, EPI_ISL_1321883, EPI_ISL_1321885, EPI_ISL_1321887, EPI_ISL_1321889, EPI_ISL_1321891, EPI_ISL_1321893, EPI_ISL_1321895, EPI_ISL_1321897, EPI_ISL_1321899, EPI_ISL_1321901, EPI_ISL_1321903, EPI_ISL_1321905, EPI_ISL_1321907, EPI_ISL_1321909, EPI_ISL_1321911, EPI_ISL_1321913, EPI_ISL_1321915, EPI_ISL_1321917, EPI_ISL_1321919, EPI_ISL_1321921, EPI_ISL_1321923, EPI_ISL_1321925, EPI_ISL_1321927, EPI_ISL_1321929, EPI_ISL_1321931, EPI_ISL_1321933, EPI_ISL_1321935, EPI_ISL_1321937, EPI_ISL_1321939, EPI_ISL_1321941, EPI_ISL_1321943, EPI_ISL_1321945, EPI_ISL_1321947, EPI_ISL_1321949, EPI_ISL_1321951, EPI_ISL_1321953, EPI_ISL_1321955, EPI_ISL_1321957, EPI_ISL_1321959, EPI_ISL_1321961, EPI_ISL_1321963, EPI_ISL_1321965, EPI_ISL_1321967, EPI_ISL_1321969, EPI_ISL_1321971, EPI_ISL_1321973, EPI_ISL_1321975, EPI_ISL_1321977, EPI_ISL_1321979, EPI_ISL_1321981, EPI_ISL_1321983, EPI_ISL_1321985, EPI_ISL_1321987, EPI_ISL_1321989, EPI_ISL_1321991, EPI_ISL_1321993, EPI_ISL_1321995, EPI_ISL_1321997, EPI_ISL_1321999, EPI_ISL_1336650, EPI_ISL_1336652, EPI_ISL_1336654, EPI_ISL_1336656, EPI_ISL_1336658, EPI_ISL_1336660, EPI_ISL_1336662, EPI_ISL_1336664, EPI_ISL_1336666, EPI_ISL_1336668, EPI_ISL_1336670, EPI_ISL_1336672, EPI_ISL_1336674, EPI_ISL_1336676, EPI_ISL_1336678, EPI_ISL_1336680, EPI_ISL_1336682, EPI_ISL_1336684, EPI_ISL_1336686, EPI_ISL_1336688, EPI_ISL_1336690, EPI_ISL_1336692, EPI_ISL_1336694, EPI_ISL_1336696, EPI_ISL_1336698, EPI_ISL_1336700, EPI_ISL_1336702, EPI_ISL_1336704, EPI_ISL_1336706, EPI_ISL_1336708, EPI_ISL_1336710, EPI_ISL_1336712, EPI_ISL_1336714, EPI_ISL_1336716, EPI_ISL_1336718, EPI_ISL_1336720, EPI_ISL_1336722, EPI_ISL_1336724, EPI_ISL_1336726, EPI_ISL_1336728, EPI_ISL_1336730, EPI_ISL_1336732, EPI_ISL_1336734, EPI_ISL_1336736, EPI_ISL_1336738, EPI_ISL_1336740, EPI_ISL_1336742, EPI_ISL_1336744, EPI_ISL_1336746, EPI_ISL_1336748, EPI_ISL_1336750, EPI_ISL_1336752, EPI_ISL_1336754, EPI_ISL_1336756, EPI_ISL_1336758, EPI_ISL_1336760, EPI_ISL_1336762, EPI_ISL_1336764, EPI_ISL_1336766, EPI_ISL_1336768, EPI_ISL_1336770, EPI_ISL_1336772, EPI_ISL_1336774, EPI_ISL_1336776, EPI_ISL_1336778, EPI_ISL_1336780, EPI_ISL_1336782, EPI_ISL_1336784, EPI_ISL_1336786, EPI_ISL_1336788, EPI_ISL_1336790, EPI_ISL_1336792, EPI_ISL_1336794, EPI_ISL_1336796, EPI_ISL_1336798, EPI_ISL_1336800, EPI_ISL_1336802, EPI_ISL_1336804, EPI_ISL_1336806, EPI_ISL_1336808, EPI_ISL_1336810, EPI_ISL_1336812, EPI_ISL_1336814, EPI_ISL_1336816, EPI_ISL_1336818, EPI_ISL_1336820, EPI_ISL_1336822, EPI_ISL_1336824, EPI_ISL_1336826, EPI_ISL_1336828, EPI_ISL_1336830, EPI_ISL_1336832, EPI_ISL_1336834, EPI_ISL_1336836, EPI_ISL_1336838, EPI_ISL_1336840, EPI_ISL_1336842, EPI_ISL_1336844, EPI_ISL_1336846, EPI_ISL_1336848, EPI_ISL_1336850, EPI_ISL_1336852, EPI_ISL_1336854, EPI_ISL_1336856, EPI_ISL_1336858, EPI_ISL_1336860, EPI_ISL_1336862, EPI_ISL_1336864, EPI_ISL_1336866, EPI_ISL_1336868, EPI_ISL_1336870, EPI_ISL_1336872, EPI_ISL_1336874, EPI_ISL_1336876, EPI_ISL_1336878, EPI_ISL_1336880, EPI_ISL_1336882, EPI_ISL_1336884, EPI_ISL_1336886, EPI_ISL_1336888, EPI_ISL_1336890, EPI_ISL_1336892, EPI_ISL_1336894, EPI_ISL_1336896, EPI_ISL_1336898, EPI_ISL_1336900, EPI_ISL_1336902, EPI_ISL_1336904, EPI_ISL_1336906, EPI_ISL_1336908, EPI_ISL_1336910, EPI_ISL_1336912, EPI_ISL_1336914, EPI_ISL_1336916, EPI_ISL_1336918, EPI_ISL_1336920, EPI_ISL_1336922, EPI_ISL_1336924, EPI_ISL_1336926, EPI_ISL_1336928, EPI_ISL_1336930, EPI_ISL_1336932, EPI_ISL_1336934, EPI_ISL_1336936, EPI_ISL_1336938, EPI_ISL_1336940, EPI_ISL_1336942, EPI_ISL_1336944, EPI_ISL_1336946, EPI_ISL_1336948, EPI_ISL_1336950, EPI_ISL_1336952, EPI_ISL_1336954, EPI_ISL_1336956, EPI_ISL_1336958, EPI_ISL_1336960, EPI_ISL_1336962, EPI_ISL_1336964, EPI_ISL_1336966, EPI_ISL_1336968, EPI_ISL_1336970, EPI_ISL_1336972, EPI_ISL_1336974, EPI_ISL_1336976, EPI_ISL_1336978, EPI_ISL_1336980, EPI_ISL_1336982, EPI_ISL_1336984, EPI_ISL_1336986, EPI_ISL_1336988, EPI_ISL_1336990, EPI_ISL_1336992, EPI_ISL_1336994, EPI_ISL_1336996, EPI_ISL_1336998, EPI_ISL_1337000, EPI_ISL_1337002, EPI_ISL_1337004, EPI_ISL_1337006, EPI_ISL_1337008, EPI_ISL_1337010, EPI_ISL_1337012, EPI_ISL_1337014, EPI_ISL_1337016, EPI_ISL_1337018, EPI_ISL_1337020, EPI_ISL_1337022, EPI_ISL_1337024, EPI_ISL_1337026, EPI_ISL_1337028, EPI_ISL_1337030, EPI_ISL_1337032, EPI_ISL_1337034, EPI_ISL_1337036, EPI_ISL_1337038, EPI_ISL_1337040, EPI_ISL_1337042, EPI_ISL_1337044, EPI_ISL_1337046, EPI_ISL_1337048, EPI_ISL_1337050, EPI_ISL_1337052, EPI_ISL_1337054, EPI_ISL_1337056, EPI_ISL_1337058, EPI_ISL_1337060, EPI_ISL_1337062, EPI_ISL_1337064, EPI_ISL_1337066, EPI_ISL_1337068, EPI_ISL_1337070, EPI_ISL_1337072, EPI_ISL_1337074, EPI_ISL_1337076, EPI_ISL_1337078, EPI_ISL_1337080, EPI_ISL_1337082, EPI_ISL_1337084, EPI_ISL_1337086, EPI_ISL_1337088, EPI_ISL_1337090, EPI_ISL_1337092, EPI_ISL_1337094, EPI_ISL_1337096, EPI_ISL_1337098, EPI_ISL_1337100, EPI_ISL_1337102, EPI_ISL_1337104, EPI_ISL_1337106, EPI_ISL_1337108, EPI_ISL_1337110, EPI_ISL_1337112, EPI_ISL_1337114, EPI_ISL_1337116, EPI_ISL_1337118, EPI_ISL_1337120, EPI_ISL_1337122, EPI_ISL_1337124, EPI_ISL_1337126, EPI_ISL_1337128, EPI_ISL_1337130, EPI_ISL_1337132, EPI_ISL_1337134, EPI_ISL_1337136, EPI_ISL_1337138, EPI_ISL_1337140, EPI_ISL_1337142, EPI_ISL_1337144, EPI_ISL_1337146, EPI_ISL_1337148, EPI_ISL_1337150, EPI_ISL_1337152, EPI_ISL_1337154, EPI_ISL_1337156, EPI_ISL_1337158, EPI_ISL_1337160, EPI_ISL_1337162, EPI_ISL_1337164, EPI_ISL_1337166, EPI_ISL_1337168, EPI_ISL_1337170, EPI_ISL_1337172, EPI_ISL_1337174, EPI_ISL_1337176, EPI_ISL_1337178, EPI_ISL_1337180, EPI_ISL_1337182, EPI_ISL_1337184, EPI_ISL_1337186, EPI_ISL_1337188, EPI_ISL_1337190, EPI_ISL_1337192, EPI_ISL_1337194, EPI_ISL_1337196, EPI_ISL_1337198, EPI_ISL_1337200, EPI_ISL_1337202, EPI_ISL_1337204, EPI_ISL_1337206, EPI_ISL_1337208, EPI_ISL_1337210, EPI_ISL_1337212, EPI_ISL_1337214, EPI_ISL_1337216, EPI_ISL_1337218, EPI_ISL_1337220, EPI_ISL_1337222, EPI_ISL_1337224, EPI_ISL_1337226, EPI_ISL_1337228, EPI_ISL_1337230, EPI_ISL_1337232, EPI_ISL_1337234, EPI_ISL_1337236, EPI_ISL_1337238, EPI_ISL_1337240, EPI_ISL_1337242, EPI_ISL_1337244, EPI_ISL_1337246, EPI_ISL_1337248, EPI_ISL_1337250, EPI_ISL_1337252, EPI_ISL_1337254, EPI_ISL_1337256, EPI_ISL_1337258, EPI_ISL_1337260, EPI_ISL_1337262, EPI_ISL_1337264, EPI_ISL_1337266, EPI_ISL_1337268, EPI_ISL_1337270, EPI_ISL_1337272, EPI_ISL_1337274, EPI_ISL_1337276, EPI_ISL_1337278, EPI_ISL_1337280, EPI_ISL_1337282, EPI_ISL_1337284, EPI_ISL_1337286, EPI_ISL_1337288, EPI_ISL_1337290, EPI_ISL_1337292, EPI_ISL_1337294, EPI_ISL_1337296, EPI_ISL_1337298, EPI_ISL_1337300, EPI_ISL_1337302, EPI_ISL_1337304, EPI_ISL_1337306, EPI_ISL_1337308, EPI_ISL_1337310, EPI_ISL_1337312, EPI_ISL_1337314, EPI_ISL_1337316, EPI_ISL_1337318, EPI_ISL_1337320, EPI_ISL_1337322, EPI_ISL_1337324, EPI_ISL_1337326, EPI_ISL_1337328, EPI_ISL_1337330, EPI_ISL_1337332, EPI_ISL_1337334, EPI_ISL_1337336, EPI_ISL_1337338, EPI_ISL_1337340, EPI_ISL_1337342, EPI_ISL_1337344, EPI_ISL_1337346, EPI_ISL_1337348, EPI_ISL_1337350, EPI_ISL_1337352, EPI_ISL_1337354, EPI_ISL_1337356, EPI_ISL_1337358, EPI_ISL_1337360, EPI_ISL_1337362, EPI_ISL_1337364, EPI_ISL_1337366, EPI_ISL_1337368, EPI_ISL_1337370, EPI_ISL_1337372, EPI_ISL_1337374, EPI_ISL_1337376, EPI_ISL_1337378, EPI_ISL_1337380, EPI_ISL_1337382, EPI_ISL_1337384, EPI_ISL_1337386, EPI_ISL_1337388, EPI_ISL_1337390, EPI_ISL_1337392, EPI_ISL_1337394, EPI_ISL_1337396, EPI_ISL_1337398, EPI_ISL_1337400, EPI_ISL_1337402, EPI_ISL_1337404, EPI_ISL_1337406, EPI_ISL_1337408, EPI_ISL_1337410, EPI_ISL_1337412, EPI_ISL_1337414, EPI_ISL_1337416, EPI_ISL_1337418, EPI_ISL_1337420, EPI_ISL_1337422, EPI_ISL_1337424, EPI_ISL_1337426, EPI_ISL_1337428, EPI_ISL_1337430, EPI_ISL_1337432, EPI_ISL_1337434, EPI_ISL_1337436, EPI_ISL_1337438, EPI_ISL_1337440, EPI_ISL_1337442, EPI_ISL_1337444, EPI_ISL_1337446, EPI_ISL_1337448, EPI_ISL_1337450, EPI_ISL_1337452, EPI_ISL_1337454, EPI_ISL_1337456, EPI_ISL_1337458, EPI_ISL_1337460, EPI_ISL_1337462, EPI_ISL_1337464, EPI_ISL_1337466, EPI_ISL_1337468, EPI_ISL_1337470, EPI_ISL_1337472, EPI_ISL_1337474, EPI_ISL_1337476, EPI_ISL_1337478, EPI_ISL_1337480, EPI_ISL_1337482, EPI_ISL_1337484, EPI_ISL_1337486, EPI_ISL_1337488, EPI_ISL_1337490, EPI_ISL_1337492, EPI_ISL_1337494, EPI_ISL_1337496, EPI_ISL_1337498, EPI_ISL_1337500, EPI_ISL_1337502, EPI_ISL_1337504, EPI_ISL_1337506, EPI_ISL_1337508, EPI_ISL_1337510, EPI_ISL_1337512, EPI_ISL_1337514, EPI_ISL_1337516, EPI_ISL_1337518, EPI_ISL_1337520, EPI_ISL_1337522, EPI_ISL_1337524, EPI_ISL_1337526, EPI_ISL_1337528, EPI_ISL_1337530, EPI_ISL_1337532, EPI_ISL_1337534, EPI_ISL_1337536, EPI_ISL_1337538, EPI_ISL_1337540, EPI_ISL_1337542, EPI_ISL_1337544, EPI_ISL_1337546, EPI_ISL_1337548, EPI_ISL_1337550, EPI_ISL_1337552, EPI_ISL_1337554, EPI_ISL_1337556, EPI_ISL_1337558, EPI_ISL_1337560, EPI_ISL_1337562, EPI_ISL_1337564 |                                                                                 |                                                                    |                                                                                                                                                                                                                                                                                                                                                                                                                                                                                                                                                                                                                                                                                                                |

EPI\_ISL\_1146797 to 1146858, EPI\_ISL\_1147934 to 1147943, EPI\_ISL\_1147945 to 1147961, EPI\_ISL\_1147963 to 1147970, EPI\_ISL\_1152363 to 1152379, EPI\_ISL\_1152381 to 1152419, EPI\_ISL\_1153120 to 1153162, EPI\_ISL\_1155908 to 1155920, EPI\_ISL\_1155922 to 1155940, EPI\_ISL\_1155942 to 1155954, EPI\_ISL\_1155956 to 1155960, EPI\_ISL\_1155962 to 1155975, EPI\_ISL\_1155977 to 1155981, EPI\_ISL\_1217844, EPI\_ISL\_1217847, EPI\_ISL\_1217849 to 1217850, EPI\_ISL\_1217852 to 1217853, EPI\_ISL\_1217855, EPI\_ISL\_1217857 to 1217858, EPI\_ISL\_1217860, EPI\_ISL\_1217862 to 1217863, EPI\_ISL\_1217865 to 1217866, EPI\_ISL\_1217870, EPI\_ISL\_1217872 to 1217873, EPI\_ISL\_1217875, EPI\_ISL\_1217877 to 1217878, EPI\_ISL\_1217880 to 1217881, EPI\_ISL\_1217883 to 1217884, EPI\_ISL\_1217886 to 1217887, EPI\_ISL\_1217890, EPI\_ISL\_1217892 to 1217893, EPI\_ISL\_1217895 to 1217896, EPI\_ISL\_1217901, EPI\_ISL\_1217904, EPI\_ISL\_1217906 to 1217907, EPI\_ISL\_1217909 to 1217910, EPI\_ISL\_1217912 to 1217913, EPI\_ISL\_1217915, EPI\_ISL\_1217917 to 1217918, EPI\_ISL\_1217920 to 1217921, EPI\_ISL\_1217925 to 1217927, EPI\_ISL\_1217929, EPI\_ISL\_1217931 to 1217947, EPI\_ISL\_1217949 to 1217954, EPI\_ISL\_1217956 to 1217957, EPI\_ISL\_1217960 to 1217963, EPI\_ISL\_1349647 to 1349657, EPI\_ISL\_1349659 to 1349675, EPI\_ISL\_1349677 to 1349698, EPI\_ISL\_1349700 to 1349710, EPI\_ISL\_1349712 to 1349717, EPI\_ISL\_1349719 to 1349725, EPI\_ISL\_1355243 to 1355245, EPI\_ISL\_1355247 to 1355248, EPI\_ISL\_1355250 to 1355258, EPI\_ISL\_1355260 to 1355270, EPI\_ISL\_1355273 to 1355284, EPI\_ISL\_1356616 to 1356617

|                                                                                                                                                                                                                                                                                                                                                                                                                                                                                                                                                                                                                                                                                                                                                                                                                                                                                                                                                                                                                                                                                                                                                                                                                                                                                                                                                                                                                                                                                                                                                                                                                                                                                                                                                                                                                                                                                                                                                                                                                                                                                                                                                                                                                                                                                                                                                                                                                               |                                                                                                                                       |                                                                                                                                        |                                                                                                                                                                                                                                                                                                                                                                   |
|-------------------------------------------------------------------------------------------------------------------------------------------------------------------------------------------------------------------------------------------------------------------------------------------------------------------------------------------------------------------------------------------------------------------------------------------------------------------------------------------------------------------------------------------------------------------------------------------------------------------------------------------------------------------------------------------------------------------------------------------------------------------------------------------------------------------------------------------------------------------------------------------------------------------------------------------------------------------------------------------------------------------------------------------------------------------------------------------------------------------------------------------------------------------------------------------------------------------------------------------------------------------------------------------------------------------------------------------------------------------------------------------------------------------------------------------------------------------------------------------------------------------------------------------------------------------------------------------------------------------------------------------------------------------------------------------------------------------------------------------------------------------------------------------------------------------------------------------------------------------------------------------------------------------------------------------------------------------------------------------------------------------------------------------------------------------------------------------------------------------------------------------------------------------------------------------------------------------------------------------------------------------------------------------------------------------------------------------------------------------------------------------------------------------------------|---------------------------------------------------------------------------------------------------------------------------------------|----------------------------------------------------------------------------------------------------------------------------------------|-------------------------------------------------------------------------------------------------------------------------------------------------------------------------------------------------------------------------------------------------------------------------------------------------------------------------------------------------------------------|
| see above                                                                                                                                                                                                                                                                                                                                                                                                                                                                                                                                                                                                                                                                                                                                                                                                                                                                                                                                                                                                                                                                                                                                                                                                                                                                                                                                                                                                                                                                                                                                                                                                                                                                                                                                                                                                                                                                                                                                                                                                                                                                                                                                                                                                                                                                                                                                                                                                                     | Universitätsklinikum Leipzig - Institut für Medizinische Mikrobiologie und Virologie virologisches Labor                              | Robert Koch Institute                                                                                                                  |                                                                                                                                                                                                                                                                                                                                                                   |
| EPI_ISL_1353424 to 1353427, EPI_ISL_1353430 to 1353442, EPI_ISL_1353444 to 1353453, EPI_ISL_1353455 to 1353458, EPI_ISL_1353460 to 1353465, EPI_ISL_1353467 to 1353475                                                                                                                                                                                                                                                                                                                                                                                                                                                                                                                                                                                                                                                                                                                                                                                                                                                                                                                                                                                                                                                                                                                                                                                                                                                                                                                                                                                                                                                                                                                                                                                                                                                                                                                                                                                                                                                                                                                                                                                                                                                                                                                                                                                                                                                        | Universitätsklinikum Münster Institut für Virologie                                                                                   | Robert Koch Institute                                                                                                                  |                                                                                                                                                                                                                                                                                                                                                                   |
| EPI_ISL_1141011 to 1141012, EPI_ISL_1141153 to 1141154, EPI_ISL_1148452, EPI_ISL_1148456, EPI_ISL_1211880, EPI_ISL_1211882                                                                                                                                                                                                                                                                                                                                                                                                                                                                                                                                                                                                                                                                                                                                                                                                                                                                                                                                                                                                                                                                                                                                                                                                                                                                                                                                                                                                                                                                                                                                                                                                                                                                                                                                                                                                                                                                                                                                                                                                                                                                                                                                                                                                                                                                                                    | Universitätsklinikum Schleswig-Holstein (standortübergreifend inkl. Kiel) - Institut für Klinische Chemie und Laboratoriumsdiagnostik | Robert Koch Institute                                                                                                                  |                                                                                                                                                                                                                                                                                                                                                                   |
| EPI_ISL_1048288, EPI_ISL_1048359 to 1048361                                                                                                                                                                                                                                                                                                                                                                                                                                                                                                                                                                                                                                                                                                                                                                                                                                                                                                                                                                                                                                                                                                                                                                                                                                                                                                                                                                                                                                                                                                                                                                                                                                                                                                                                                                                                                                                                                                                                                                                                                                                                                                                                                                                                                                                                                                                                                                                   | Universitätsmedizin Mainz, Institut für Med.Mikrobiologie und Hygiene                                                                 | Robert Koch Institute, Influenza and respiratory viruses FG17 & Bioinformatics MF1, Berlin, Germany                                    | Aleksandar Radonic; Marianne Wedde; Oliver Drechsel; Ralf Duerwald; Rene Kmiecinski; Stefan Kroeger; Stephan Fuchs; T. Schwanz; Thorsten Wolff                                                                                                                                                                                                                    |
| EPI_ISL_1355294 to 1355300, EPI_ISL_1355302 to 1355309, EPI_ISL_1355311 to 1355316, EPI_ISL_1355319 to 1355341, EPI_ISL_1355343 to 1355373, EPI_ISL_1355375 to 1355378, EPI_ISL_1355380 to 1355381, EPI_ISL_1355383 to 1355387, EPI_ISL_1355389 to 1355390, EPI_ISL_1355392 to 1355394, EPI_ISL_1355396 to 1355397, EPI_ISL_1355399, EPI_ISL_1355401, EPI_ISL_1355403 to 1355411, EPI_ISL_1355413 to 1355414, EPI_ISL_1355416 to 1355420, EPI_ISL_1355422 to 1355425, EPI_ISL_1355427 to 1355447, EPI_ISL_1355449 to 1355455, EPI_ISL_1355457, EPI_ISL_1355459 to 1355461, EPI_ISL_1355463 to 1355468, EPI_ISL_1355470 to 1355471, EPI_ISL_1355473 to 1355486, EPI_ISL_1355488 to 1355490, EPI_ISL_1355492 to 1355493, EPI_ISL_1355495, EPI_ISL_1355497 to 1355507, EPI_ISL_1355509 to 1355529, EPI_ISL_1355531 to 1355532, EPI_ISL_1355534 to 1355543, EPI_ISL_1355545, EPI_ISL_1355549 to 1355554, EPI_ISL_1355556 to 1355564, EPI_ISL_1355566 to 1355583, EPI_ISL_1355585 to 1355590, EPI_ISL_1355592 to 1355596, EPI_ISL_1355598 to 1355600, EPI_ISL_1355602 to 1355606, EPI_ISL_1355608 to 1355610, EPI_ISL_1355612 to 1355618, EPI_ISL_1355620 to 1355626, EPI_ISL_1355628 to 1355631, EPI_ISL_1355634 to 1355636, EPI_ISL_1355640, EPI_ISL_1355642 to 1355649, EPI_ISL_1355651 to 1355652, EPI_ISL_1355655 to 1355660, EPI_ISL_1355662 to 1355664, EPI_ISL_1355666, EPI_ISL_1355668, EPI_ISL_1355672 to 1355674, EPI_ISL_1355674, EPI_ISL_1355676, EPI_ISL_1355679, EPI_ISL_1355681 to 1355683, EPI_ISL_1355687, EPI_ISL_1355690 to 1355691, EPI_ISL_1355693 to 1355696, EPI_ISL_1355699 to 1355709, EPI_ISL_1355713 to 1355716, EPI_ISL_1355719 to 1355723, EPI_ISL_1355726 to 1355728, EPI_ISL_1355730, EPI_ISL_1355732 to 1355734, EPI_ISL_1355736 to 1355738, EPI_ISL_1355743 to 1355745, EPI_ISL_1355747 to 1355748, EPI_ISL_1355751, EPI_ISL_1355754 to 1355757, EPI_ISL_1355760, EPI_ISL_1355762 to 1355764, EPI_ISL_1355772, EPI_ISL_1355776 to 1355779, EPI_ISL_1355782, EPI_ISL_1355784, EPI_ISL_1355786, EPI_ISL_1355789 to 1355790, EPI_ISL_1355792, EPI_ISL_1355794 to 1355797, EPI_ISL_1355799 to 1355800, EPI_ISL_1355803 to 1355805, EPI_ISL_1355826, EPI_ISL_1355830, EPI_ISL_1355832, EPI_ISL_1355841 to 1355843, EPI_ISL_1355846, EPI_ISL_1355852 to 1355854, EPI_ISL_1355859 to 1355860, EPI_ISL_1355866 to 1355869, EPI_ISL_1355876, EPI_ISL_1355887, EPI_ISL_1355891 to 1355892, EPI_ISL_1355896 | Robert Koch Institute                                                                                                                 |                                                                                                                                        |                                                                                                                                                                                                                                                                                                                                                                   |
| see above                                                                                                                                                                                                                                                                                                                                                                                                                                                                                                                                                                                                                                                                                                                                                                                                                                                                                                                                                                                                                                                                                                                                                                                                                                                                                                                                                                                                                                                                                                                                                                                                                                                                                                                                                                                                                                                                                                                                                                                                                                                                                                                                                                                                                                                                                                                                                                                                                     | Universitätsmedizin Mannheim                                                                                                          | Robert Koch Institute                                                                                                                  |                                                                                                                                                                                                                                                                                                                                                                   |
| EPI_ISL_1366655, EPI_ISL_1366657                                                                                                                                                                                                                                                                                                                                                                                                                                                                                                                                                                                                                                                                                                                                                                                                                                                                                                                                                                                                                                                                                                                                                                                                                                                                                                                                                                                                                                                                                                                                                                                                                                                                                                                                                                                                                                                                                                                                                                                                                                                                                                                                                                                                                                                                                                                                                                                              | Usansolo-Galdakao University Hospital                                                                                                 | Cruces University Hospital                                                                                                             | Ana Belén de la Hoz; Ana Belén de la Oz; Ana Gual-de-Torrella; Izaskun Alejo-Cancho; Mikel Gallego; mikel Gallego                                                                                                                                                                                                                                                 |
| EPI_ISL_1250946, EPI_ISL_1250948, EPI_ISL_1250985, EPI_ISL_1251019, EPI_ISL_1251021 to 1251022                                                                                                                                                                                                                                                                                                                                                                                                                                                                                                                                                                                                                                                                                                                                                                                                                                                                                                                                                                                                                                                                                                                                                                                                                                                                                                                                                                                                                                                                                                                                                                                                                                                                                                                                                                                                                                                                                                                                                                                                                                                                                                                                                                                                                                                                                                                                | Usca castel di sangro                                                                                                                 | Istituto Zooprofilattico Sperimentale dell'Abruzzo e Molise "G. Caporale"                                                              | Ancora M; Calistri P; Cammà C; Curini V; Di Domenico M; Di Pasquale A; Lorusso A; Mangone I; Marccaci M; Puglia I; Rinaldi A; Savini G; Scialabba S                                                                                                                                                                                                               |
| EPI_ISL_1036754, EPI_ISL_1040915, EPI_ISL_1049226 to 1049259, EPI_ISL_1060813 to 1060870, EPI_ISL_1068025 to 1068077, EPI_ISL_1114424 to 1114468, EPI_ISL_1183692 to 1183765, EPI_ISL_1205162 to 1205202, EPI_ISL_1205304 to 1205355, EPI_ISL_1233892, EPI_ISL_1238840 to 1238901, EPI_ISL_1300541 to 1300643, EPI_ISL_1313714 to 1313885                                                                                                                                                                                                                                                                                                                                                                                                                                                                                                                                                                                                                                                                                                                                                                                                                                                                                                                                                                                                                                                                                                                                                                                                                                                                                                                                                                                                                                                                                                                                                                                                                                                                                                                                                                                                                                                                                                                                                                                                                                                                                     |                                                                                                                                       |                                                                                                                                        |                                                                                                                                                                                                                                                                                                                                                                   |
| see above                                                                                                                                                                                                                                                                                                                                                                                                                                                                                                                                                                                                                                                                                                                                                                                                                                                                                                                                                                                                                                                                                                                                                                                                                                                                                                                                                                                                                                                                                                                                                                                                                                                                                                                                                                                                                                                                                                                                                                                                                                                                                                                                                                                                                                                                                                                                                                                                                     | Utah Public Health Laboratory                                                                                                         | Utah Public Health Laboratory                                                                                                          | E.L.; Erin L. Young; Gallagher, T.; K.F.; K.F. and Gallagher, T.; Kelly F. Oakeson; Oakeson; Tara Gallagher; Young                                                                                                                                                                                                                                                |
| EPI_ISL_1168354 to 1168441                                                                                                                                                                                                                                                                                                                                                                                                                                                                                                                                                                                                                                                                                                                                                                                                                                                                                                                                                                                                                                                                                                                                                                                                                                                                                                                                                                                                                                                                                                                                                                                                                                                                                                                                                                                                                                                                                                                                                                                                                                                                                                                                                                                                                                                                                                                                                                                                    | VA Connecticut Healthcare System                                                                                                      | Grubaugh Lab - Yale School of Public Health                                                                                            | Chantal Vogels; Danielle Plank; Isabel Ott; Joseph Fauver; Mary Petrone; Nathan Grubaugh; Shaili Gupta; Tara Alpert                                                                                                                                                                                                                                               |
| EPI_ISL_1340900                                                                                                                                                                                                                                                                                                                                                                                                                                                                                                                                                                                                                                                                                                                                                                                                                                                                                                                                                                                                                                                                                                                                                                                                                                                                                                                                                                                                                                                                                                                                                                                                                                                                                                                                                                                                                                                                                                                                                                                                                                                                                                                                                                                                                                                                                                                                                                                                               | VA Hospital Path & Lab                                                                                                                | New Mexico Department of Health Scientific Laboratory                                                                                  | Anastacia Griego-Fisher; D'eldra Malone; Ellie Johnson; Jennifer Benoit                                                                                                                                                                                                                                                                                           |
| EPI_ISL_1307638                                                                                                                                                                                                                                                                                                                                                                                                                                                                                                                                                                                                                                                                                                                                                                                                                                                                                                                                                                                                                                                                                                                                                                                                                                                                                                                                                                                                                                                                                                                                                                                                                                                                                                                                                                                                                                                                                                                                                                                                                                                                                                                                                                                                                                                                                                                                                                                                               | VA Medical Center                                                                                                                     | Los Angeles County PHL                                                                                                                 | P. Hemarajata et al.                                                                                                                                                                                                                                                                                                                                              |
| EPI_ISL_1272728 to 1272732, EPI_ISL_1318356 to 1318368                                                                                                                                                                                                                                                                                                                                                                                                                                                                                                                                                                                                                                                                                                                                                                                                                                                                                                                                                                                                                                                                                                                                                                                                                                                                                                                                                                                                                                                                                                                                                                                                                                                                                                                                                                                                                                                                                                                                                                                                                                                                                                                                                                                                                                                                                                                                                                        | VA-Division of Consolidated Laboratory Services                                                                                       | Centers for Disease Control and Prevention Division of Viral Diseases, Pathogen Discovery                                              | Anna Montmayeur; Anna Uehara; Ben L. Rambo-Martin; Clinton R. Paden; Dhvani Batra; Haibin Wang; Jasmine Padilla; Jing Zhang; Justin Lee; Katie Dillon; Krista Queen; Kristen Knipe; Kristine Lacek; Lori Rowe; Mark Burroughs; Matthew Schmerer; Mili Sheth; Peter W. Cook; Rachel Marine; Sam Shepard; Sarah Nobles; Shoshona Le; Suxiang Tong; Yan Li; Ying Tao |
| EPI_ISL_1226106 to 1226123                                                                                                                                                                                                                                                                                                                                                                                                                                                                                                                                                                                                                                                                                                                                                                                                                                                                                                                                                                                                                                                                                                                                                                                                                                                                                                                                                                                                                                                                                                                                                                                                                                                                                                                                                                                                                                                                                                                                                                                                                                                                                                                                                                                                                                                                                                                                                                                                    | VA-Division of Consolidated Laboratory Services                                                                                       | Genomics and Discovery, Respiratory Viruses Branch, Division of Viral Diseases, Centers for Disease Control and Prevention             | Anna Montmayeur; Anna Uehara; Ben L. Rambo-Martin; Clinton R. Paden; Dhvani Batra; Haibin Wang; Jasmine Padilla; Jing Zhang; Justin Lee; Katie Dillon; Krista Queen; Kristen Knipe; Kristine Lacek; Lori Rowe; Mark Burroughs; Matthew Schmerer; Mili Sheth; Peter W. Cook; Rachel Marine; Sam Shepard; Sarah Nobles; Shoshona Le; Suxiang Tong; Yan Li; Ying Tao |
| EPI_ISL_1094323, EPI_ISL_1094381, EPI_ISL_1094572 to 1094576, EPI_ISL_1095295 to 1095296                                                                                                                                                                                                                                                                                                                                                                                                                                                                                                                                                                                                                                                                                                                                                                                                                                                                                                                                                                                                                                                                                                                                                                                                                                                                                                                                                                                                                                                                                                                                                                                                                                                                                                                                                                                                                                                                                                                                                                                                                                                                                                                                                                                                                                                                                                                                      | VA-Division of Consolidated Laboratory Services                                                                                       | Respiratory Viruses Branch, Division of Viral Diseases, Centers for Disease Control and Prevention                                     | Anna Montmayeur; Anna Uehara; Ben L. Rambo-Martin; Clinton R. Paden; Dhvani Batra; Haibin Wang; Jasmine Padilla; Jing Zhang; Justin Lee; Krista Queen; Lori Rowe; Mark Burroughs; Mili Sheth; Peter W. Cook; Rachel Marine; Sarah Nobles; Suxiang Tong; Yan Li; Ying Tao                                                                                          |
| EPI_ISL_1007624, EPI_ISL_1007640, EPI_ISL_1120826 to 1120827, EPI_ISL_1370150, EPI_ISL_1370152, EPI_ISL_1370286, EPI_ISL_1370290, EPI_ISL_1370323, EPI_ISL_1370332, EPI_ISL_1370399                                                                                                                                                                                                                                                                                                                                                                                                                                                                                                                                                                                                                                                                                                                                                                                                                                                                                                                                                                                                                                                                                                                                                                                                                                                                                                                                                                                                                                                                                                                                                                                                                                                                                                                                                                                                                                                                                                                                                                                                                                                                                                                                                                                                                                           |                                                                                                                                       |                                                                                                                                        |                                                                                                                                                                                                                                                                                                                                                                   |
| see above                                                                                                                                                                                                                                                                                                                                                                                                                                                                                                                                                                                                                                                                                                                                                                                                                                                                                                                                                                                                                                                                                                                                                                                                                                                                                                                                                                                                                                                                                                                                                                                                                                                                                                                                                                                                                                                                                                                                                                                                                                                                                                                                                                                                                                                                                                                                                                                                                     | VIDYMED EPALINGES                                                                                                                     | Laboratory of genomics and metagenomics, Institute of Microbiology, University Hospital Centre and University of Lausanne, Switzerland | Claire Bertelli; Damien Jacot; Gilbert Greub; Sébastien Aeby; Trestan Pillonel                                                                                                                                                                                                                                                                                    |
| EPI_ISL_1007618                                                                                                                                                                                                                                                                                                                                                                                                                                                                                                                                                                                                                                                                                                                                                                                                                                                                                                                                                                                                                                                                                                                                                                                                                                                                                                                                                                                                                                                                                                                                                                                                                                                                                                                                                                                                                                                                                                                                                                                                                                                                                                                                                                                                                                                                                                                                                                                                               | VIDYMED LA SOURCE                                                                                                                     | Laboratory of genomics and metagenomics, Institute of Microbiology, University Hospital Centre and University of Lausanne, Switzerland | Claire Bertelli; Damien Jacot; Gilbert Greub; Sébastien Aeby; Trestan Pillonel                                                                                                                                                                                                                                                                                    |
| EPI_ISL_1007588 to 1007589, EPI_ISL_1007596, EPI_ISL_1007616, EPI_ISL_1120872 to 1120873, EPI_ISL_1370050, EPI_ISL_1370242, EPI_ISL_1370319, EPI_ISL_1370424                                                                                                                                                                                                                                                                                                                                                                                                                                                                                                                                                                                                                                                                                                                                                                                                                                                                                                                                                                                                                                                                                                                                                                                                                                                                                                                                                                                                                                                                                                                                                                                                                                                                                                                                                                                                                                                                                                                                                                                                                                                                                                                                                                                                                                                                  |                                                                                                                                       |                                                                                                                                        |                                                                                                                                                                                                                                                                                                                                                                   |
| see above                                                                                                                                                                                                                                                                                                                                                                                                                                                                                                                                                                                                                                                                                                                                                                                                                                                                                                                                                                                                                                                                                                                                                                                                                                                                                                                                                                                                                                                                                                                                                                                                                                                                                                                                                                                                                                                                                                                                                                                                                                                                                                                                                                                                                                                                                                                                                                                                                     | VIDYMED LAUSANNE                                                                                                                      | Laboratory of genomics and metagenomics, Institute of Microbiology, University Hospital Centre and University of Lausanne, Switzerland | Claire Bertelli; Damien Jacot; Gilbert Greub; Sébastien Aeby; Trestan Pillonel                                                                                                                                                                                                                                                                                    |
| EPI_ISL_1072990 to 1072992, EPI_ISL_1072994, EPI_ISL_1072997, EPI_ISL_1072999, EPI_ISL_1073002 to 1073003, EPI_ISL_1073005 to 1073007, EPI_ISL_1073009 to 1073011, EPI_ISL_1073013 to 1073014, EPI_ISL_1073016 to 1073018, EPI_ISL_1073020, EPI_ISL_1073022                                                                                                                                                                                                                                                                                                                                                                                                                                                                                                                                                                                                                                                                                                                                                                                                                                                                                                                                                                                                                                                                                                                                                                                                                                                                                                                                                                                                                                                                                                                                                                                                                                                                                                                                                                                                                                                                                                                                                                                                                                                                                                                                                                   |                                                                                                                                       |                                                                                                                                        |                                                                                                                                                                                                                                                                                                                                                                   |
| see above                                                                                                                                                                                                                                                                                                                                                                                                                                                                                                                                                                                                                                                                                                                                                                                                                                                                                                                                                                                                                                                                                                                                                                                                                                                                                                                                                                                                                                                                                                                                                                                                                                                                                                                                                                                                                                                                                                                                                                                                                                                                                                                                                                                                                                                                                                                                                                                                                     | VRDL, Sher-I-Kashmir Institute of Medical Sciences, Srinagar, Jammu & Kashmir                                                         | Indian Council of Medical Research-National Institute of Virology, Microbial Containment Complex                                       | Bashir Fonda; Pragya D. Yadav                                                                                                                                                                                                                                                                                                                                     |
| EPI_ISL_1272869 to 1272872                                                                                                                                                                                                                                                                                                                                                                                                                                                                                                                                                                                                                                                                                                                                                                                                                                                                                                                                                                                                                                                                                                                                                                                                                                                                                                                                                                                                                                                                                                                                                                                                                                                                                                                                                                                                                                                                                                                                                                                                                                                                                                                                                                                                                                                                                                                                                                                                    | VT Dept. of Health Laboratory                                                                                                         | Centers for Disease Control and Prevention Division of Viral Diseases, Pathogen Discovery                                              | Anna Montmayeur; Anna Uehara; Ben L. Rambo-Martin; Clinton R. Paden; Dhvani Batra; Haibin Wang; Jasmine Padilla; Jing Zhang; Justin Lee; Katie Dillon; Krista Queen; Kristen Knipe; Kristine Lacek; Lori Rowe; Mark Burroughs; Matthew Schmerer; Mili Sheth; Peter W. Cook; Rachel Marine; Sam Shepard; Sarah Nobles; Shoshona Le; Suxiang Tong; Yan Li; Ying Tao |
| EPI_ISL_1225941 to 1225945, EPI_ISL_1226231 to 1226236                                                                                                                                                                                                                                                                                                                                                                                                                                                                                                                                                                                                                                                                                                                                                                                                                                                                                                                                                                                                                                                                                                                                                                                                                                                                                                                                                                                                                                                                                                                                                                                                                                                                                                                                                                                                                                                                                                                                                                                                                                                                                                                                                                                                                                                                                                                                                                        | VT Dept. of Health Laboratory                                                                                                         | Genomics and Discovery, Respiratory Viruses Branch, Division of Viral Diseases, Centers for Disease Control and Prevention             | Anna Montmayeur; Anna Uehara; Ben L. Rambo-Martin; Clinton R. Paden; Dhvani Batra; Haibin Wang; Jasmine Padilla; Jing Zhang; Justin Lee; Katie Dillon; Krista Queen; Kristen Knipe; Kristine Lacek; Lori Rowe; Mark Burroughs; Matthew Schmerer; Mili Sheth; Peter W. Cook; Rachel Marine; Sam Shepard; Sarah Nobles; Shoshona Le; Suxiang Tong; Yan Li; Ying Tao |
| EPI_ISL_1094200, EPI_ISL_1094245, EPI_ISL_1094266 to 1094267, EPI_ISL_1094556 to 1094558, EPI_ISL_1095187 to 1095189                                                                                                                                                                                                                                                                                                                                                                                                                                                                                                                                                                                                                                                                                                                                                                                                                                                                                                                                                                                                                                                                                                                                                                                                                                                                                                                                                                                                                                                                                                                                                                                                                                                                                                                                                                                                                                                                                                                                                                                                                                                                                                                                                                                                                                                                                                          | VT Dept. of Health Laboratory                                                                                                         | Respiratory Viruses Branch, Division of Viral Diseases, Centers for Disease Control and Prevention                                     | Anna Montmayeur; Anna Uehara; Ben L. Rambo-Martin; Clinton R. Paden; Dhvani Batra; Haibin Wang; Jasmine Padilla; Jing Zhang; Justin Lee; Krista Queen; Lori Rowe; Mark Burroughs; Mili Sheth; Peter W. Cook; Rachel Marine; Sarah Nobles; Suxiang Tong; Yan Li; Ying Tao                                                                                          |
| EPI_ISL_1132669 to 1132728                                                                                                                                                                                                                                                                                                                                                                                                                                                                                                                                                                                                                                                                                                                                                                                                                                                                                                                                                                                                                                                                                                                                                                                                                                                                                                                                                                                                                                                                                                                                                                                                                                                                                                                                                                                                                                                                                                                                                                                                                                                                                                                                                                                                                                                                                                                                                                                                    | Vaccines and Infectious Diseases Analytics Research Unit                                                                              | KRISP, KZn Research Innovation and Sequencing Platform                                                                                 | Baillie Vicky; Giandhari Jennifer; Madhi Shahir; Naidoo Yeshee; Pillay Sureshnee; Tegally Houriyah; de Oliveira Tulio; du Plessis Jeanine                                                                                                                                                                                                                         |

| (VIDA)                                                                                                                                                                                                                                                                                                                                                                                                                                                                                                                                                                                                                                                                                                                                                                                                                                                                                                                                                                                                                                                                                                                                                                                                                                                                                                                                                                                                                                                                                                                                                                                                                                                                                                                                                                                                                                                                                                                                                                                                                                                                                                                                                                                                                                                                                                                                                                                                                                                                                                                                                                                                                                                                                                                          |                                                                                                     |                                                                                                                                        |                                                                                                                                                                                                                                                                                                                                                                                                                                                                                                 |
|---------------------------------------------------------------------------------------------------------------------------------------------------------------------------------------------------------------------------------------------------------------------------------------------------------------------------------------------------------------------------------------------------------------------------------------------------------------------------------------------------------------------------------------------------------------------------------------------------------------------------------------------------------------------------------------------------------------------------------------------------------------------------------------------------------------------------------------------------------------------------------------------------------------------------------------------------------------------------------------------------------------------------------------------------------------------------------------------------------------------------------------------------------------------------------------------------------------------------------------------------------------------------------------------------------------------------------------------------------------------------------------------------------------------------------------------------------------------------------------------------------------------------------------------------------------------------------------------------------------------------------------------------------------------------------------------------------------------------------------------------------------------------------------------------------------------------------------------------------------------------------------------------------------------------------------------------------------------------------------------------------------------------------------------------------------------------------------------------------------------------------------------------------------------------------------------------------------------------------------------------------------------------------------------------------------------------------------------------------------------------------------------------------------------------------------------------------------------------------------------------------------------------------------------------------------------------------------------------------------------------------------------------------------------------------------------------------------------------------|-----------------------------------------------------------------------------------------------------|----------------------------------------------------------------------------------------------------------------------------------------|-------------------------------------------------------------------------------------------------------------------------------------------------------------------------------------------------------------------------------------------------------------------------------------------------------------------------------------------------------------------------------------------------------------------------------------------------------------------------------------------------|
| EPI_ISL_1114371 to 1114372                                                                                                                                                                                                                                                                                                                                                                                                                                                                                                                                                                                                                                                                                                                                                                                                                                                                                                                                                                                                                                                                                                                                                                                                                                                                                                                                                                                                                                                                                                                                                                                                                                                                                                                                                                                                                                                                                                                                                                                                                                                                                                                                                                                                                                                                                                                                                                                                                                                                                                                                                                                                                                                                                                      | Vancouver Clinic                                                                                    | Seattle Flu Study                                                                                                                      | Amanda Adler; Barry R. Lutz; Benjamin Pelle; Brian Hiatt; Caitlin R. Wolf; Chris D. Frazar; Deborah A. Nickerson; Elisabeth Brandstetter; Erica Ryke; Geoff Melly; Helen Y. Chu; Janet A. Englund; Jay Shendure; Jover Lee; Kairsten Fay; Kristen Lacombe; Lea M. Starita; Mark J. Rieder; Matthew Richardson; Matthew Thompson; Melissa Truong; Michael Boeckh; Michael Famulare; Misja Ilcinis; Peter D. Han; Philip Dykema; Romesh Gautom; Scott Lindquist; Thomas R. Sibley; Trevor Bedford |
| EPI_ISL_1379663 to 1379664, EPI_ISL_1379669 to 1379671, EPI_ISL_1379676 to 1379677, EPI_ISL_1379681, EPI_ISL_1379683 to 1379685, EPI_ISL_1379694, EPI_ISL_1379696, EPI_ISL_1379699 to 1379700, EPI_ISL_1379702, EPI_ISL_1379705 to 1379708, EPI_ISL_1379711, EPI_ISL_1379713, EPI_ISL_1379715                                                                                                                                                                                                                                                                                                                                                                                                                                                                                                                                                                                                                                                                                                                                                                                                                                                                                                                                                                                                                                                                                                                                                                                                                                                                                                                                                                                                                                                                                                                                                                                                                                                                                                                                                                                                                                                                                                                                                                                                                                                                                                                                                                                                                                                                                                                                                                                                                                   | see above                                                                                           | Vanderbilt University                                                                                                                  | Pathogen Discovery, Respiratory Viruses Branch, Division of Viral Diseases, Centers for Disease Control and Prevention                                                                                                                                                                                                                                                                                                                                                                          |
| EPI_ISL_1373882 to 1373994                                                                                                                                                                                                                                                                                                                                                                                                                                                                                                                                                                                                                                                                                                                                                                                                                                                                                                                                                                                                                                                                                                                                                                                                                                                                                                                                                                                                                                                                                                                                                                                                                                                                                                                                                                                                                                                                                                                                                                                                                                                                                                                                                                                                                                                                                                                                                                                                                                                                                                                                                                                                                                                                                                      | Vanderbilt University Medical Center                                                                | Pathogen Discovery, Respiratory Viruses Branch, Division of Viral Diseases, Centers for Disease Control and Prevention                 | Anna Kelleher; Anna Uehara; Brian Lynch; Clinton R. Paden; Haibin Wang; Han Jia Justin Ng; Jing Zhang; Krista Queen; Peter Cook; Suxiang Tong; Yan Li; Ying Tao                                                                                                                                                                                                                                                                                                                                 |
| EPI_ISL_1040677                                                                                                                                                                                                                                                                                                                                                                                                                                                                                                                                                                                                                                                                                                                                                                                                                                                                                                                                                                                                                                                                                                                                                                                                                                                                                                                                                                                                                                                                                                                                                                                                                                                                                                                                                                                                                                                                                                                                                                                                                                                                                                                                                                                                                                                                                                                                                                                                                                                                                                                                                                                                                                                                                                                 | Vanguard CHC wc VGC                                                                                 | NHLS/UCT                                                                                                                               | Arash Iranzadeh; Bruna Galvao; Carolyn Williamson; Deelan Doolabh; Diana Hardie; Innocent Mudau; Kruger Marais; Lynn Tyers; Marvin Hsiao; Stephen Korsman                                                                                                                                                                                                                                                                                                                                       |
| EPI_ISL_1027261 to 1027264, EPI_ISL_1027272 to 1027281, EPI_ISL_1027288 to 1027292, EPI_ISL_1027667, EPI_ISL_1064370 to 1064377, EPI_ISL_1064379 to 1064384, EPI_ISL_1064386 to 1064402, EPI_ISL_1064491, EPI_ISL_1064496 to 1064498, EPI_ISL_1064502, EPI_ISL_1064514, EPI_ISL_1064517 to 1064520, EPI_ISL_1121593 to 1121594, EPI_ISL_1121597 to 1121600, EPI_ISL_1121603 to 1121606, EPI_ISL_1121608 to 1121612, EPI_ISL_1121614 to 1121618, EPI_ISL_1121620 to 1121623, EPI_ISL_1121625 to 1121627, EPI_ISL_1121630 to 1121632, EPI_ISL_1132732 to 1132733, EPI_ISL_1132742, EPI_ISL_1132791 to 1132807, EPI_ISL_1164484 to 1164485, EPI_ISL_1164487 to 1164489, EPI_ISL_1164492 to 1164496, EPI_ISL_1164498 to 1164516, EPI_ISL_1164518 to 1164521, EPI_ISL_1167667, EPI_ISL_1184220 to 1184230, EPI_ISL_1184237, EPI_ISL_1184303, EPI_ISL_1224815 to 1224821, EPI_ISL_1224824 to 1224868, EPI_ISL_1225162 to 1225203, EPI_ISL_1267218, EPI_ISL_1267220 to 1267221, EPI_ISL_1267223 to 1267225, EPI_ISL_1267227 to 1267228, EPI_ISL_1267231, EPI_ISL_1267233 to 1267234, EPI_ISL_1267236 to 1267237, EPI_ISL_1267239 to 1267240, EPI_ISL_1267242 to 1267243, EPI_ISL_1267245 to 1267246, EPI_ISL_1267248 to 1267249, EPI_ISL_1267251 to 1267252, EPI_ISL_1267254 to 1267255, EPI_ISL_1267257 to 1267258, EPI_ISL_1267260 to 1267261, EPI_ISL_1267263 to 1267264, EPI_ISL_1267266 to 1267267, EPI_ISL_1267269 to 1267270, EPI_ISL_1267272 to 1267273, EPI_ISL_1267275 to 1267276, EPI_ISL_1267278 to 1267279, EPI_ISL_1267281 to 1267282, EPI_ISL_1267284 to 1267285, EPI_ISL_1267287 to 1267288, EPI_ISL_1267290 to 1267291, EPI_ISL_1267293 to 1267294, EPI_ISL_1267296 to 1267297, EPI_ISL_1267299, EPI_ISL_1267331 to 1267332, EPI_ISL_1267335, EPI_ISL_1267337, EPI_ISL_1314297 to 1314298, EPI_ISL_1314322 to 1314363, EPI_ISL_1339355, EPI_ISL_1339357 to 1339359, EPI_ISL_1339361 to 1339362, EPI_ISL_1339364 to 1339365, EPI_ISL_1339367 to 1339369, EPI_ISL_1339371 to 1339372, EPI_ISL_1339374 to 1339375, EPI_ISL_1339377 to 1339378, EPI_ISL_1339380 to 1339381, EPI_ISL_1339383, EPI_ISL_1339385 to 1339386, EPI_ISL_1339388 to 1339389, EPI_ISL_1339391 to 1339392, EPI_ISL_1339396 to 1339396, EPI_ISL_1339398 to 1339399, EPI_ISL_1339401 to 1339402, EPI_ISL_1339404 to 1339405, EPI_ISL_1339407 to 1339408, EPI_ISL_1339410 to 1339411, EPI_ISL_1339413 to 1339414, EPI_ISL_1339416 to 1339417, EPI_ISL_1339419 to 1339420, EPI_ISL_1358960 to 1359019, EPI_ISL_1372189 to 1372190, EPI_ISL_1372193, EPI_ISL_1372197, EPI_ISL_1372200, EPI_ISL_1372231, EPI_ISL_1372473, EPI_ISL_1372481 to 1372482, EPI_ISL_1372484 to 1372485, EPI_ISL_1372500, EPI_ISL_1372536 to 1372539, EPI_ISL_1373512 to 1373583 | see above                                                                                           | Vault Health                                                                                                                           | Minnesota Department of Health, Public Health Laboratory                                                                                                                                                                                                                                                                                                                                                                                                                                        |
| EPI_ISL_1110511, EPI_ISL_1110515, EPI_ISL_1110534 to 1110535, EPI_ISL_1118316 to 1118319, EPI_ISL_1118503, EPI_ISL_1118515, EPI_ISL_1118525, EPI_ISL_1118534, EPI_ISL_1118542 to 1118543, EPI_ISL_1118590, EPI_ISL_1118595, EPI_ISL_1118631 to 1118632, EPI_ISL_1118647, EPI_ISL_1118616, EPI_ISL_1186170, EPI_ISL_1186172, EPI_ISL_1186176, EPI_ISL_1192192 to 1192196, EPI_ISL_1192207 to 1192209, EPI_ISL_1192306, EPI_ISL_1252532 to 1252536, EPI_ISL_1254561, EPI_ISL_1314466 to 1314470, EPI_ISL_1314472 to 1314477, EPI_ISL_1314485 to 1314493, EPI_ISL_1314535, EPI_ISL_1317235, EPI_ISL_1317310, EPI_ISL_1317341, EPI_ISL_1317356, EPI_ISL_1317365, EPI_ISL_1317384, EPI_ISL_1317408 to 1317410, EPI_ISL_1317433 to 1317436, EPI_ISL_1317443, EPI_ISL_1317468 to 1317469, EPI_ISL_1317480 to 1317481, EPI_ISL_1317497 to 1317501, EPI_ISL_1317508 to 1317510, EPI_ISL_1317520, EPI_ISL_1317528, EPI_ISL_1317545 to 1317546, EPI_ISL_1317590, EPI_ISL_1317668, EPI_ISL_1317754, EPI_ISL_1317853 to 1317854, EPI_ISL_1317915, EPI_ISL_1317955, EPI_ISL_1318050 to 1318051, EPI_ISL_1318058, EPI_ISL_1318077 to 1318078, EPI_ISL_1318080, EPI_ISL_1318086, EPI_ISL_1318089, EPI_ISL_1323120 to 1323123, EPI_ISL_1323169, EPI_ISL_1347628, EPI_ISL_1347630, EPI_ISL_1347632                                                                                                                                                                                                                                                                                                                                                                                                                                                                                                                                                                                                                                                                                                                                                                                                                                                                                                                                                                                                                                                                                                                                                                                                                                                                                                                                                                                                                                                | see above                                                                                           | Vestfold Hospital, Toensberg Department of Microbiology                                                                                | Norwegian Institute of Public Health, Department of Virology                                                                                                                                                                                                                                                                                                                                                                                                                                    |
| EPI_ISL_1013459, EPI_ISL_1013496 to 1013497, EPI_ISL_1251291 to 1251295, EPI_ISL_1251380 to 1251397, EPI_ISL_1251443 to 1251444, EPI_ISL_1251476, EPI_ISL_1251478, EPI_ISL_1251581 to 1251584, EPI_ISL_1251586, EPI_ISL_1251588, EPI_ISL_1251590 to 1251593, EPI_ISL_1251645 to 1251646, EPI_ISL_1251689 to 1251697, EPI_ISL_1251927, EPI_ISL_1251935, EPI_ISL_1252045                                                                                                                                                                                                                                                                                                                                                                                                                                                                                                                                                                                                                                                                                                                                                                                                                                                                                                                                                                                                                                                                                                                                                                                                                                                                                                                                                                                                                                                                                                                                                                                                                                                                                                                                                                                                                                                                                                                                                                                                                                                                                                                                                                                                                                                                                                                                                          | see above                                                                                           | Vestfold Hospital, Toensberg Department of Microbiology                                                                                | Norwegian Institute of Public Health, Department of Virology                                                                                                                                                                                                                                                                                                                                                                                                                                    |
| EPI_ISL_1040746, EPI_ISL_1040774, EPI_ISL_1040776, EPI_ISL_1040784, EPI_ISL_1040788, EPI_ISL_1040814                                                                                                                                                                                                                                                                                                                                                                                                                                                                                                                                                                                                                                                                                                                                                                                                                                                                                                                                                                                                                                                                                                                                                                                                                                                                                                                                                                                                                                                                                                                                                                                                                                                                                                                                                                                                                                                                                                                                                                                                                                                                                                                                                                                                                                                                                                                                                                                                                                                                                                                                                                                                                            | Victoria Hospital wc VHW                                                                            | NHLS/UCT                                                                                                                               | Arash Iranzadeh; Bruna Galvao; Carolyn Williamson; Deelan Doolabh; Diana Hardie; Innocent Mudau; Kruger Marais; Lynn Tyers; Marvin Hsiao; Stephen Korsman                                                                                                                                                                                                                                                                                                                                       |
| EPI_ISL_1033154 to 1033155, EPI_ISL_1055278, EPI_ISL_1055301 to 1055302, EPI_ISL_1055340 to 1055341, EPI_ISL_1055348, EPI_ISL_1055358, EPI_ISL_1249993, EPI_ISL_1249996                                                                                                                                                                                                                                                                                                                                                                                                                                                                                                                                                                                                                                                                                                                                                                                                                                                                                                                                                                                                                                                                                                                                                                                                                                                                                                                                                                                                                                                                                                                                                                                                                                                                                                                                                                                                                                                                                                                                                                                                                                                                                                                                                                                                                                                                                                                                                                                                                                                                                                                                                         | see above                                                                                           | Victorian Infectious Diseases Reference Laboratory (VIDRL)                                                                             | VIDRL and MDU-PHL                                                                                                                                                                                                                                                                                                                                                                                                                                                                               |
| EPI_ISL_1007619                                                                                                                                                                                                                                                                                                                                                                                                                                                                                                                                                                                                                                                                                                                                                                                                                                                                                                                                                                                                                                                                                                                                                                                                                                                                                                                                                                                                                                                                                                                                                                                                                                                                                                                                                                                                                                                                                                                                                                                                                                                                                                                                                                                                                                                                                                                                                                                                                                                                                                                                                                                                                                                                                                                 | Vidy-UP                                                                                             | Laboratory of genomics and metagenomics, Institute of Microbiology, University Hospital Centre and University of Lausanne, Switzerland | Caly L.; Druce J.; M.L.; N.L.; Sait; Seemann T.; Sherry<br>Claire Bertelli; Damien Jacot; Gilbert Greub; Sébastien Aeby; Trestan Pillonel                                                                                                                                                                                                                                                                                                                                                       |
| EPI_ISL_1364620                                                                                                                                                                                                                                                                                                                                                                                                                                                                                                                                                                                                                                                                                                                                                                                                                                                                                                                                                                                                                                                                                                                                                                                                                                                                                                                                                                                                                                                                                                                                                                                                                                                                                                                                                                                                                                                                                                                                                                                                                                                                                                                                                                                                                                                                                                                                                                                                                                                                                                                                                                                                                                                                                                                 | Villa Tiberia Hospital                                                                              | INMI Lazzaro Spallanzani IRCCS                                                                                                         | A Di Caro; B Bartolini; CEM Gruber; E Giombini; F Messina; F Santini; G Bonfiglio; M Rueca; MR Capobianchi; O Butera                                                                                                                                                                                                                                                                                                                                                                            |
| EPI_ISL_1220885, EPI_ISL_1315272 to 1315275                                                                                                                                                                                                                                                                                                                                                                                                                                                                                                                                                                                                                                                                                                                                                                                                                                                                                                                                                                                                                                                                                                                                                                                                                                                                                                                                                                                                                                                                                                                                                                                                                                                                                                                                                                                                                                                                                                                                                                                                                                                                                                                                                                                                                                                                                                                                                                                                                                                                                                                                                                                                                                                                                     | Vilnius University Hospital Santaros Klinikos                                                       | Vilnius University Hospital Santaros Klinikos, Center of Laboratory Medicine                                                           | Daniel Naumovas; Dovile Ezerskyte; Gytis Dudas; Ingrida Olendraite; Laimonas Griskevicius; Ligita Raugaite; Mindaugas Stoskus; Monika Katenaite; Rimvydas Norvilas                                                                                                                                                                                                                                                                                                                              |
| EPI_ISL_1324569 to 1324571, EPI_ISL_1324573 to 1324575                                                                                                                                                                                                                                                                                                                                                                                                                                                                                                                                                                                                                                                                                                                                                                                                                                                                                                                                                                                                                                                                                                                                                                                                                                                                                                                                                                                                                                                                                                                                                                                                                                                                                                                                                                                                                                                                                                                                                                                                                                                                                                                                                                                                                                                                                                                                                                                                                                                                                                                                                                                                                                                                          | Vilnius University Hospital Santaros Klinikos, Center of Laboratory Medicine                        | Vilnius University Hospital Santaros Klinikos, Center of Laboratory Medicine                                                           | Daniel Naumovas; Dovile Ezerskyte; Gytis Dudas; Ingrida Olendraite; Laimonas Griskevicius; Ligita Raugaite; Mindaugas Stoskus; Monika Katenaite; Rimvydas Norvilas                                                                                                                                                                                                                                                                                                                              |
| EPI_ISL_1005223 to 1005482                                                                                                                                                                                                                                                                                                                                                                                                                                                                                                                                                                                                                                                                                                                                                                                                                                                                                                                                                                                                                                                                                                                                                                                                                                                                                                                                                                                                                                                                                                                                                                                                                                                                                                                                                                                                                                                                                                                                                                                                                                                                                                                                                                                                                                                                                                                                                                                                                                                                                                                                                                                                                                                                                                      | Vilnius university hospital Santaros Klinikos, Center of Laboratory Medicine                        | Vilnius university hospital Santaros Klinikos, Center of Laboratory Medicine                                                           | Daniel Naumovas; Dovile Ezerskyte; Gytis Dudas; Ingrida Olendraite; Justinas Slikas; Laimonas Griskevicius; Rimvydas Norvilas                                                                                                                                                                                                                                                                                                                                                                   |
| EPI_ISL_1001468 to 1001572, EPI_ISL_1001574 to 1002709, EPI_ISL_1002711 to 1003768, EPI_ISL_1003770 to 1004173, EPI_ISL_1004243 to 1005217, EPI_ISL_1059296 to 1059899, EPI_ISL_1080496 to 1080578, EPI_ISL_1118935 to 1118956, EPI_ISL_1119568 to 1119867, EPI_ISL_1119869 to 1119870, EPI_ISL_1119872 to 1120107, EPI_ISL_1129279 to 1129630, EPI_ISL_1129632 to 1130709, EPI_ISL_1130711 to 1130783, EPI_ISL_1130785 to 1131132, EPI_ISL_1194866 to 1195191, EPI_ISL_1259416 to 1260609, EPI_ISL_1360453 to 1361509                                                                                                                                                                                                                                                                                                                                                                                                                                                                                                                                                                                                                                                                                                                                                                                                                                                                                                                                                                                                                                                                                                                                                                                                                                                                                                                                                                                                                                                                                                                                                                                                                                                                                                                                                                                                                                                                                                                                                                                                                                                                                                                                                                                                          | see above                                                                                           | Viollier AG                                                                                                                            | Department of Biosystems Science and Engineering, ETH Zürich                                                                                                                                                                                                                                                                                                                                                                                                                                    |
| EPI_ISL_1014703 to 1014705                                                                                                                                                                                                                                                                                                                                                                                                                                                                                                                                                                                                                                                                                                                                                                                                                                                                                                                                                                                                                                                                                                                                                                                                                                                                                                                                                                                                                                                                                                                                                                                                                                                                                                                                                                                                                                                                                                                                                                                                                                                                                                                                                                                                                                                                                                                                                                                                                                                                                                                                                                                                                                                                                                      | Viollier AG                                                                                         | University Hospital Basel, Clinical Bacteriology                                                                                       | Adrian Egli; Alfredo Mari; Christiane Beckmann; Hans Hirsch; Helena MB Seth-Smith; Julia Bielicki; Karoline Leuzinger; Madlen Stange; Manuel Battegay; Tim Roloff                                                                                                                                                                                                                                                                                                                               |
| EPI_ISL_1095408 to 1095448, EPI_ISL_1110834 to 1110874, EPI_ISL_1111506 to 1111530, EPI_ISL_1111549 to 1111605, EPI_ISL_1118875, EPI_ISL_1157002, EPI_ISL_1157004, EPI_ISL_1157006, EPI_ISL_1157008 to 1157009, EPI_ISL_1157011, EPI_ISL_1157013, EPI_ISL_1157015, EPI_ISL_1157017 to 1157018, EPI_ISL_1157020, EPI_ISL_1157022, EPI_ISL_1157024 to 1157025, EPI_ISL_1157027, EPI_ISL_1157029, EPI_ISL_1157031, EPI_ISL_1157033, EPI_ISL_1157035 to 1157036, EPI_ISL_1157038, EPI_ISL_1157040, EPI_ISL_1157042 to 1157043, EPI_ISL_1157045, EPI_ISL_1157047, EPI_ISL_1184138 to 1184168, EPI_ISL_1364542 to 1364611, EPI_ISL_1365699 to 1365732, EPI_ISL_1371707 to 1371760, EPI_ISL_1381880 to 1381946, EPI_ISL_1382078 to 1382111                                                                                                                                                                                                                                                                                                                                                                                                                                                                                                                                                                                                                                                                                                                                                                                                                                                                                                                                                                                                                                                                                                                                                                                                                                                                                                                                                                                                                                                                                                                                                                                                                                                                                                                                                                                                                                                                                                                                                                                             | see above                                                                                           | Virginia Division of Consolidated Laboratory Services                                                                                  | Virginia DCLS                                                                                                                                                                                                                                                                                                                                                                                                                                                                                   |
| EPI_ISL_1034793                                                                                                                                                                                                                                                                                                                                                                                                                                                                                                                                                                                                                                                                                                                                                                                                                                                                                                                                                                                                                                                                                                                                                                                                                                                                                                                                                                                                                                                                                                                                                                                                                                                                                                                                                                                                                                                                                                                                                                                                                                                                                                                                                                                                                                                                                                                                                                                                                                                                                                                                                                                                                                                                                                                 | Virologia Dipartimento di Scienze Biomediche Università di Sassari Viale San Pietro, 43/B - Sassari | Laboratorio Specialistico di Ematologia, Ospedale "San Francesco", via Mannironi 1, 08100 Nuoro                                        | Caterina Serra; Elena Rimini; Giovanna Piras; Maria Monne; Rosanna Asproni; Salvatore Rubino; Tatiana Fancello                                                                                                                                                                                                                                                                                                                                                                                  |
| EPI_ISL_1082254, EPI_ISL_1104645, EPI_ISL_1104647, EPI_ISL_1104652, EPI_ISL_1104654, EPI_ISL_1104656                                                                                                                                                                                                                                                                                                                                                                                                                                                                                                                                                                                                                                                                                                                                                                                                                                                                                                                                                                                                                                                                                                                                                                                                                                                                                                                                                                                                                                                                                                                                                                                                                                                                                                                                                                                                                                                                                                                                                                                                                                                                                                                                                                                                                                                                                                                                                                                                                                                                                                                                                                                                                            | see above                                                                                           | Virologia, Dipartimento di Scienze Biomediche, Università di Sassari, Viale San Pietro, 43/B - Sassari                                 | Laboratorio specialistico UOC Ematologia - Ospedale "San Francesco" - ATS-ASSL Nuoro                                                                                                                                                                                                                                                                                                                                                                                                            |
| EPI_ISL_1363082 to 1363113                                                                                                                                                                                                                                                                                                                                                                                                                                                                                                                                                                                                                                                                                                                                                                                                                                                                                                                                                                                                                                                                                                                                                                                                                                                                                                                                                                                                                                                                                                                                                                                                                                                                                                                                                                                                                                                                                                                                                                                                                                                                                                                                                                                                                                                                                                                                                                                                                                                                                                                                                                                                                                                                                                      | Virological laboratory FBH "The Center for Hygiene and Epidemiology in the Khabarovsk Region"       | Group of Genomics and Postgenomic Technologies of Central Research Institute of Epidemiology                                           | Angelo Domenico Palmas; Asproni Rosanna; Caterina Serra; Elena Rimini; Giovanna Piras; Maria Itria Monne; Paolo Malune; Salvatore Rubino<br>Akimkin VG; Bulanenko VP; Golubeva AG; Kaptelova VV; Kondrasheva LY; Korneenko EV; Lebedeva LA; Lukyanov AV; Saenko SS; Samoilov AE; Savosina LV; Shubina YA; Speranskaya AS; Tivanova EV; Valdokhina AV; Zhaleyko ZP                                                                                                                               |
| EPI_ISL_1153243 to 1153245, EPI_ISL_1153247 to 1153248, EPI_ISL_1354265, EPI_ISL_1354267 to 1354271, EPI_ISL_1354273, EPI_ISL_1354275 to 1354277, EPI_ISL_1354279 to 1354280                                                                                                                                                                                                                                                                                                                                                                                                                                                                                                                                                                                                                                                                                                                                                                                                                                                                                                                                                                                                                                                                                                                                                                                                                                                                                                                                                                                                                                                                                                                                                                                                                                                                                                                                                                                                                                                                                                                                                                                                                                                                                                                                                                                                                                                                                                                                                                                                                                                                                                                                                    | see above                                                                                           | Virologisches Institut des Universitätsklinikums Erlangen                                                                              | Robert Koch Institute                                                                                                                                                                                                                                                                                                                                                                                                                                                                           |





|                                                                                                                                                                                                                                                                                                                                                                                                                                                                                                                                                                                                                                                                                                                                                                                                                                                                                                                                                                                                                                                                                                                                                                                                                                                                                                                                                                                                                                                                                                                                                                                                                                                                                                                                                                                                                                                                                                                                                                                                                                                                                                                                                                                                                                                                                                                                                                                                                                                                                                                                                                                                                                                                                                                                                                                                                                                                                                                                                                                                                                                                                                                                                                                                                                                                      |                                                       |                                                                                                                            |                                                                                                                                                                                                                                                                                                                                                                                                                                                                                                                                                                                                                                                           |                                                                                                                                                            |
|----------------------------------------------------------------------------------------------------------------------------------------------------------------------------------------------------------------------------------------------------------------------------------------------------------------------------------------------------------------------------------------------------------------------------------------------------------------------------------------------------------------------------------------------------------------------------------------------------------------------------------------------------------------------------------------------------------------------------------------------------------------------------------------------------------------------------------------------------------------------------------------------------------------------------------------------------------------------------------------------------------------------------------------------------------------------------------------------------------------------------------------------------------------------------------------------------------------------------------------------------------------------------------------------------------------------------------------------------------------------------------------------------------------------------------------------------------------------------------------------------------------------------------------------------------------------------------------------------------------------------------------------------------------------------------------------------------------------------------------------------------------------------------------------------------------------------------------------------------------------------------------------------------------------------------------------------------------------------------------------------------------------------------------------------------------------------------------------------------------------------------------------------------------------------------------------------------------------------------------------------------------------------------------------------------------------------------------------------------------------------------------------------------------------------------------------------------------------------------------------------------------------------------------------------------------------------------------------------------------------------------------------------------------------------------------------------------------------------------------------------------------------------------------------------------------------------------------------------------------------------------------------------------------------------------------------------------------------------------------------------------------------------------------------------------------------------------------------------------------------------------------------------------------------------------------------------------------------------------------------------------------------|-------------------------------------------------------|----------------------------------------------------------------------------------------------------------------------------|-----------------------------------------------------------------------------------------------------------------------------------------------------------------------------------------------------------------------------------------------------------------------------------------------------------------------------------------------------------------------------------------------------------------------------------------------------------------------------------------------------------------------------------------------------------------------------------------------------------------------------------------------------------|------------------------------------------------------------------------------------------------------------------------------------------------------------|
| EPI_ISL_1201671 to 1201679                                                                                                                                                                                                                                                                                                                                                                                                                                                                                                                                                                                                                                                                                                                                                                                                                                                                                                                                                                                                                                                                                                                                                                                                                                                                                                                                                                                                                                                                                                                                                                                                                                                                                                                                                                                                                                                                                                                                                                                                                                                                                                                                                                                                                                                                                                                                                                                                                                                                                                                                                                                                                                                                                                                                                                                                                                                                                                                                                                                                                                                                                                                                                                                                                                           | WSSE                                                  | 1. National Institute of Public Health - National Institute of Hygiene; 2. Eurofins Genomics Europe Sequencing GmbH        | ECDC COVID-19 WGS support team; Eurofins Genomics Europe Sequencing Team; Gierczyki Rafa; Sadkowska-Todys Magorzata; Wokowicz Tomasz; Zacharczuk Katarzyna                                                                                                                                                                                                                                                                                                                                                                                                                                                                                                |                                                                                                                                                            |
| EPI_ISL_1201646 to 1201655, EPI_ISL_1273819                                                                                                                                                                                                                                                                                                                                                                                                                                                                                                                                                                                                                                                                                                                                                                                                                                                                                                                                                                                                                                                                                                                                                                                                                                                                                                                                                                                                                                                                                                                                                                                                                                                                                                                                                                                                                                                                                                                                                                                                                                                                                                                                                                                                                                                                                                                                                                                                                                                                                                                                                                                                                                                                                                                                                                                                                                                                                                                                                                                                                                                                                                                                                                                                                          | WSSE Biaystok                                         | 1. National Institute of Public Health - National Institute of Hygiene; 2. Eurofins Genomics Europe Sequencing GmbH        | ECDC COVID-19 WGS support team; Eurofins Genomics Europe Sequencing Team; Gierczyki Rafa; Sadkowska-Todys Magorzata; Wokowicz Tomasz; Zacharczuk Katarzyna                                                                                                                                                                                                                                                                                                                                                                                                                                                                                                |                                                                                                                                                            |
| EPI_ISL_1273770 to 1273807                                                                                                                                                                                                                                                                                                                                                                                                                                                                                                                                                                                                                                                                                                                                                                                                                                                                                                                                                                                                                                                                                                                                                                                                                                                                                                                                                                                                                                                                                                                                                                                                                                                                                                                                                                                                                                                                                                                                                                                                                                                                                                                                                                                                                                                                                                                                                                                                                                                                                                                                                                                                                                                                                                                                                                                                                                                                                                                                                                                                                                                                                                                                                                                                                                           | WSSE Gdask                                            | 1. National Institute of Public Health - National Institute of Hygiene; 2. Eurofins Genomics Europe Sequencing GmbH        | ECDC COVID-19 WGS support team; Eurofins Genomics Europe Sequencing Team; Gierczyki Rafa; Sadkowska-Todys Magorzata; Wokowicz Tomasz; Zacharczuk Katarzyna                                                                                                                                                                                                                                                                                                                                                                                                                                                                                                |                                                                                                                                                            |
| EPI_ISL_1239557, EPI_ISL_1239565 to 1239569, EPI_ISL_1239625 to 1239626, EPI_ISL_1239699 to 1239704, EPI_ISL_1239714 to 1239715                                                                                                                                                                                                                                                                                                                                                                                                                                                                                                                                                                                                                                                                                                                                                                                                                                                                                                                                                                                                                                                                                                                                                                                                                                                                                                                                                                                                                                                                                                                                                                                                                                                                                                                                                                                                                                                                                                                                                                                                                                                                                                                                                                                                                                                                                                                                                                                                                                                                                                                                                                                                                                                                                                                                                                                                                                                                                                                                                                                                                                                                                                                                      | WSSE Katowice                                         | 1. National Institute of Public Health - National Institute of Hygiene; 2. Eurofins Genomics Europe Sequencing GmbH        | ECDC COVID-19 WGS support team; Eurofins Genomics Europe Sequencing Team; Gierczyki Rafa; Sadkowska-Todys Magorzata; Wokowicz Tomasz; Zacharczuk Katarzyna                                                                                                                                                                                                                                                                                                                                                                                                                                                                                                |                                                                                                                                                            |
| EPI_ISL_1239542, EPI_ISL_1239678                                                                                                                                                                                                                                                                                                                                                                                                                                                                                                                                                                                                                                                                                                                                                                                                                                                                                                                                                                                                                                                                                                                                                                                                                                                                                                                                                                                                                                                                                                                                                                                                                                                                                                                                                                                                                                                                                                                                                                                                                                                                                                                                                                                                                                                                                                                                                                                                                                                                                                                                                                                                                                                                                                                                                                                                                                                                                                                                                                                                                                                                                                                                                                                                                                     | WSSE Kielce                                           | 1. National Institute of Public Health - National Institute of Hygiene; 2. Eurofins Genomics Europe Sequencing GmbH        | ECDC COVID-19 WGS support team; Eurofins Genomics Europe Sequencing Team; Gierczyki Rafa; Sadkowska-Todys Magorzata; Wokowicz Tomasz; Zacharczuk Katarzyna                                                                                                                                                                                                                                                                                                                                                                                                                                                                                                |                                                                                                                                                            |
| EPI_ISL_1201711 to 1201747, EPI_ISL_1239582, EPI_ISL_1239632 to 1239655, EPI_ISL_1239720 to 1239723, EPI_ISL_1273825 to 1273826, EPI_ISL_1273836                                                                                                                                                                                                                                                                                                                                                                                                                                                                                                                                                                                                                                                                                                                                                                                                                                                                                                                                                                                                                                                                                                                                                                                                                                                                                                                                                                                                                                                                                                                                                                                                                                                                                                                                                                                                                                                                                                                                                                                                                                                                                                                                                                                                                                                                                                                                                                                                                                                                                                                                                                                                                                                                                                                                                                                                                                                                                                                                                                                                                                                                                                                     | WSSE Olsztyn                                          | 1. National Institute of Public Health - National Institute of Hygiene; 2. Eurofins Genomics Europe Sequencing GmbH        | ECDC COVID-19 WGS support team; Eurofins Genomics Europe Sequencing Team; Gierczyki Rafa; Sadkowska-Todys Magorzata; Wokowicz Tomasz; Zacharczuk Katarzyna                                                                                                                                                                                                                                                                                                                                                                                                                                                                                                |                                                                                                                                                            |
| EPI_ISL_1239555, EPI_ISL_1239564, EPI_ISL_1239613 to 1239617, EPI_ISL_1239685 to 1239688, EPI_ISL_1239694 to 1239695, EPI_ISL_1239711, EPI_ISL_1239763                                                                                                                                                                                                                                                                                                                                                                                                                                                                                                                                                                                                                                                                                                                                                                                                                                                                                                                                                                                                                                                                                                                                                                                                                                                                                                                                                                                                                                                                                                                                                                                                                                                                                                                                                                                                                                                                                                                                                                                                                                                                                                                                                                                                                                                                                                                                                                                                                                                                                                                                                                                                                                                                                                                                                                                                                                                                                                                                                                                                                                                                                                               | see above                                             | WSSE Rzeszów LDM                                                                                                           | 1. National Institute of Public Health - National Institute of Hygiene; 2. Eurofins Genomics Europe Sequencing GmbH                                                                                                                                                                                                                                                                                                                                                                                                                                                                                                                                       | ECDC COVID-19 WGS support team; Eurofins Genomics Europe Sequencing Team; Gierczyki Rafa; Sadkowska-Todys Magorzata; Wokowicz Tomasz; Zacharczuk Katarzyna |
| EPI_ISL_1239539, EPI_ISL_1239541, EPI_ISL_1239551 to 1239552, EPI_ISL_1239562, EPI_ISL_1239599, EPI_ISL_1239679, EPI_ISL_1239693, EPI_ISL_1239742 to 1239746, EPI_ISL_1273839                                                                                                                                                                                                                                                                                                                                                                                                                                                                                                                                                                                                                                                                                                                                                                                                                                                                                                                                                                                                                                                                                                                                                                                                                                                                                                                                                                                                                                                                                                                                                                                                                                                                                                                                                                                                                                                                                                                                                                                                                                                                                                                                                                                                                                                                                                                                                                                                                                                                                                                                                                                                                                                                                                                                                                                                                                                                                                                                                                                                                                                                                        | see above                                             | WSSE w Bydgoszczy-laboratorium                                                                                             | 1. National Institute of Public Health - National Institute of Hygiene; 2. Eurofins Genomics Europe Sequencing GmbH                                                                                                                                                                                                                                                                                                                                                                                                                                                                                                                                       | ECDC COVID-19 WGS support team; Eurofins Genomics Europe Sequencing Team; Gierczyki Rafa; Sadkowska-Todys Magorzata; Wokowicz Tomasz; Zacharczuk Katarzyna |
| EPI_ISL_1239534 to 1239535, EPI_ISL_1239538, EPI_ISL_1239543 to 1239544, EPI_ISL_1239558, EPI_ISL_1239570 to 1239573, EPI_ISL_1239627 to 1239630, EPI_ISL_1239696 to 1239697, EPI_ISL_1239716, EPI_ISL_1273828                                                                                                                                                                                                                                                                                                                                                                                                                                                                                                                                                                                                                                                                                                                                                                                                                                                                                                                                                                                                                                                                                                                                                                                                                                                                                                                                                                                                                                                                                                                                                                                                                                                                                                                                                                                                                                                                                                                                                                                                                                                                                                                                                                                                                                                                                                                                                                                                                                                                                                                                                                                                                                                                                                                                                                                                                                                                                                                                                                                                                                                       | see above                                             | WSSE w Krakowie                                                                                                            | 1. National Institute of Public Health - National Institute of Hygiene; 2. Eurofins Genomics Europe Sequencing GmbH                                                                                                                                                                                                                                                                                                                                                                                                                                                                                                                                       | ECDC COVID-19 WGS support team; Eurofins Genomics Europe Sequencing Team; Gierczyki Rafa; Sadkowska-Todys Magorzata; Wokowicz Tomasz; Zacharczuk Katarzyna |
| EPI_ISL_1239585 to 1239586, EPI_ISL_1239661 to 1239664, EPI_ISL_1239690                                                                                                                                                                                                                                                                                                                                                                                                                                                                                                                                                                                                                                                                                                                                                                                                                                                                                                                                                                                                                                                                                                                                                                                                                                                                                                                                                                                                                                                                                                                                                                                                                                                                                                                                                                                                                                                                                                                                                                                                                                                                                                                                                                                                                                                                                                                                                                                                                                                                                                                                                                                                                                                                                                                                                                                                                                                                                                                                                                                                                                                                                                                                                                                              | see above                                             | WSSE w Warszawie                                                                                                           | 1. National Institute of Public Health - National Institute of Hygiene; 2. Eurofins Genomics Europe Sequencing GmbH                                                                                                                                                                                                                                                                                                                                                                                                                                                                                                                                       | ECDC COVID-19 WGS support team; Eurofins Genomics Europe Sequencing Team; Gierczyki Rafa; Sadkowska-Todys Magorzata; Wokowicz Tomasz; Zacharczuk Katarzyna |
| EPI_ISL_1239719, EPI_ISL_1273833                                                                                                                                                                                                                                                                                                                                                                                                                                                                                                                                                                                                                                                                                                                                                                                                                                                                                                                                                                                                                                                                                                                                                                                                                                                                                                                                                                                                                                                                                                                                                                                                                                                                                                                                                                                                                                                                                                                                                                                                                                                                                                                                                                                                                                                                                                                                                                                                                                                                                                                                                                                                                                                                                                                                                                                                                                                                                                                                                                                                                                                                                                                                                                                                                                     | see above                                             | WSSE w odzi - laboratorium                                                                                                 | 1. National Institute of Public Health - National Institute of Hygiene; 2. Eurofins Genomics Europe Sequencing GmbH                                                                                                                                                                                                                                                                                                                                                                                                                                                                                                                                       | ECDC COVID-19 WGS support team; Eurofins Genomics Europe Sequencing Team; Gierczyki Rafa; Sadkowska-Todys Magorzata; Wokowicz Tomasz; Zacharczuk Katarzyna |
| EPI_ISL_1338612 to 1338613, EPI_ISL_1338615 to 1338616                                                                                                                                                                                                                                                                                                                                                                                                                                                                                                                                                                                                                                                                                                                                                                                                                                                                                                                                                                                                                                                                                                                                                                                                                                                                                                                                                                                                                                                                                                                                                                                                                                                                                                                                                                                                                                                                                                                                                                                                                                                                                                                                                                                                                                                                                                                                                                                                                                                                                                                                                                                                                                                                                                                                                                                                                                                                                                                                                                                                                                                                                                                                                                                                               | WSU Molecular Diagnostics Laboratory                  | Kansas Health and Environmental Lab                                                                                        | Ben Olsen; Jonathan Barnell; Mike Grose; and Phil Adam                                                                                                                                                                                                                                                                                                                                                                                                                                                                                                                                                                                                    |                                                                                                                                                            |
| EPI_ISL_1272920 to 1272921, EPI_ISL_1318478                                                                                                                                                                                                                                                                                                                                                                                                                                                                                                                                                                                                                                                                                                                                                                                                                                                                                                                                                                                                                                                                                                                                                                                                                                                                                                                                                                                                                                                                                                                                                                                                                                                                                                                                                                                                                                                                                                                                                                                                                                                                                                                                                                                                                                                                                                                                                                                                                                                                                                                                                                                                                                                                                                                                                                                                                                                                                                                                                                                                                                                                                                                                                                                                                          | WVDHHR - Office of Laboratory Services                | Centers for Disease Control and Prevention Division of Viral Diseases, Pathogen Discovery                                  | Anna Montmayeur; Anna Uehara; Ben L. Rambo-Martin; Clinton R. Paden; Dhvani Batra; Haibin Wang; Jasmine Padilla; Jing Zhang; Justin Lee; Katie Dillon; Krista Queen; Kristen Knipe; Kristine Lacey; Lori Rowe; Mark Burroughs; Matthew Schmerer; Mili Sheth; Peter W. Cook; Rachel Marine; Sam Shepard; Sarah Nobles; Shoshona Le; Suxiang Tong; Yan Li; Ying Tao                                                                                                                                                                                                                                                                                         |                                                                                                                                                            |
| EPI_ISL_1225946 to 1225948                                                                                                                                                                                                                                                                                                                                                                                                                                                                                                                                                                                                                                                                                                                                                                                                                                                                                                                                                                                                                                                                                                                                                                                                                                                                                                                                                                                                                                                                                                                                                                                                                                                                                                                                                                                                                                                                                                                                                                                                                                                                                                                                                                                                                                                                                                                                                                                                                                                                                                                                                                                                                                                                                                                                                                                                                                                                                                                                                                                                                                                                                                                                                                                                                                           | WVDHHR - Office of Laboratory Services                | Genomics and Discovery, Respiratory Viruses Branch, Division of Viral Diseases, Centers for Disease Control and Prevention | Anna Montmayeur; Anna Uehara; Ben L. Rambo-Martin; Clinton R. Paden; Dhvani Batra; Haibin Wang; Jasmine Padilla; Jing Zhang; Justin Lee; Katie Dillon; Krista Queen; Kristen Knipe; Kristine Lacey; Lori Rowe; Mark Burroughs; Matthew Schmerer; Mili Sheth; Peter W. Cook; Rachel Marine; Sam Shepard; Sarah Nobles; Shoshona Le; Suxiang Tong; Yan Li; Ying Tao                                                                                                                                                                                                                                                                                         |                                                                                                                                                            |
| EPI_ISL_1094666 to 1094671, EPI_ISL_1095221                                                                                                                                                                                                                                                                                                                                                                                                                                                                                                                                                                                                                                                                                                                                                                                                                                                                                                                                                                                                                                                                                                                                                                                                                                                                                                                                                                                                                                                                                                                                                                                                                                                                                                                                                                                                                                                                                                                                                                                                                                                                                                                                                                                                                                                                                                                                                                                                                                                                                                                                                                                                                                                                                                                                                                                                                                                                                                                                                                                                                                                                                                                                                                                                                          | WVDHHR - Office of Laboratory Services                | Respiratory Viruses Branch, Division of Viral Diseases, Centers for Disease Control and Prevention                         | Anna Montmayeur; Anna Uehara; Ben L. Rambo-Martin; Clinton R. Paden; Dhvani Batra; Haibin Wang; Jasmine Padilla; Jing Zhang; Justin Lee; Krista Queen; Lori Rowe; Mark Burroughs; Mili Sheth; Peter W. Cook; Rachel Marine; Sarah Nobles; Suxiang Tong; Yan Li; Ying Tao                                                                                                                                                                                                                                                                                                                                                                                  |                                                                                                                                                            |
| EPI_ISL_1201297, EPI_ISL_1205219 to 1205302                                                                                                                                                                                                                                                                                                                                                                                                                                                                                                                                                                                                                                                                                                                                                                                                                                                                                                                                                                                                                                                                                                                                                                                                                                                                                                                                                                                                                                                                                                                                                                                                                                                                                                                                                                                                                                                                                                                                                                                                                                                                                                                                                                                                                                                                                                                                                                                                                                                                                                                                                                                                                                                                                                                                                                                                                                                                                                                                                                                                                                                                                                                                                                                                                          | WVU Rapid Development Laboratory                      | WVU and Marshall University Combined Genomics Core Facilities                                                              | James Denvir; Peter Perrotta; Peter Stoilov; Ryan Percifield; Wesley Kimble                                                                                                                                                                                                                                                                                                                                                                                                                                                                                                                                                                               |                                                                                                                                                            |
| EPI_ISL_1272942 to 1272970                                                                                                                                                                                                                                                                                                                                                                                                                                                                                                                                                                                                                                                                                                                                                                                                                                                                                                                                                                                                                                                                                                                                                                                                                                                                                                                                                                                                                                                                                                                                                                                                                                                                                                                                                                                                                                                                                                                                                                                                                                                                                                                                                                                                                                                                                                                                                                                                                                                                                                                                                                                                                                                                                                                                                                                                                                                                                                                                                                                                                                                                                                                                                                                                                                           | WY Public Health Laboratory                           | Centers for Disease Control and Prevention Division of Viral Diseases, Pathogen Discovery                                  | Anna Montmayeur; Anna Uehara; Ben L. Rambo-Martin; Clinton R. Paden; Dhvani Batra; Haibin Wang; Jasmine Padilla; Jing Zhang; Justin Lee; Katie Dillon; Krista Queen; Kristen Knipe; Kristine Lacey; Lori Rowe; Mark Burroughs; Matthew Schmerer; Mili Sheth; Peter W. Cook; Rachel Marine; Sam Shepard; Sarah Nobles; Shoshona Le; Suxiang Tong; Yan Li; Ying Tao                                                                                                                                                                                                                                                                                         |                                                                                                                                                            |
| EPI_ISL_1169500                                                                                                                                                                                                                                                                                                                                                                                                                                                                                                                                                                                                                                                                                                                                                                                                                                                                                                                                                                                                                                                                                                                                                                                                                                                                                                                                                                                                                                                                                                                                                                                                                                                                                                                                                                                                                                                                                                                                                                                                                                                                                                                                                                                                                                                                                                                                                                                                                                                                                                                                                                                                                                                                                                                                                                                                                                                                                                                                                                                                                                                                                                                                                                                                                                                      | WY Public Health Laboratory                           | Genomics and Discovery, Respiratory Viruses Branch, Division of Viral Diseases, Centers for Disease Control and Prevention | Anna Montmayeur; Anna Uehara; Ben L. Rambo-Martin; Clinton R. Paden; Dhvani Batra; Haibin Wang; Jasmine Padilla; Jing Zhang; Justin Lee; Krista Queen; Lori Rowe; Mark Burroughs; Mili Sheth; Peter W. Cook; Rachel Marine; Sarah Nobles; Suxiang Tong; Yan Li; Ying Tao                                                                                                                                                                                                                                                                                                                                                                                  |                                                                                                                                                            |
| EPI_ISL_1094303, EPI_ISL_1094855 to 1094870, EPI_ISL_1095254 to 1095259                                                                                                                                                                                                                                                                                                                                                                                                                                                                                                                                                                                                                                                                                                                                                                                                                                                                                                                                                                                                                                                                                                                                                                                                                                                                                                                                                                                                                                                                                                                                                                                                                                                                                                                                                                                                                                                                                                                                                                                                                                                                                                                                                                                                                                                                                                                                                                                                                                                                                                                                                                                                                                                                                                                                                                                                                                                                                                                                                                                                                                                                                                                                                                                              | WY Public Health Laboratory                           | Respiratory Viruses Branch, Division of Viral Diseases, Centers for Disease Control and Prevention                         | Anna Montmayeur; Anna Uehara; Ben L. Rambo-Martin; Clinton R. Paden; Dhvani Batra; Haibin Wang; Jasmine Padilla; Jing Zhang; Justin Lee; Krista Queen; Lori Rowe; Mark Burroughs; Mili Sheth; Peter W. Cook; Rachel Marine; Sarah Nobles; Suxiang Tong; Yan Li; Ying Tao                                                                                                                                                                                                                                                                                                                                                                                  |                                                                                                                                                            |
| EPI_ISL_1226468 to 1226469, EPI_ISL_1226482 to 1226484, EPI_ISL_1226527 to 1226528, EPI_ISL_1226698, EPI_ISL_1226716, EPI_ISL_1226933, EPI_ISL_1226938, EPI_ISL_1227030, EPI_ISL_1227234, EPI_ISL_1227246, EPI_ISL_1227254 to 1227255, EPI_ISL_1227257 to 1227258, EPI_ISL_1227359, EPI_ISL_1227379, EPI_ISL_1227557, EPI_ISL_1227559, EPI_ISL_1227566 to 1227568, EPI_ISL_1227570 to 1227571, EPI_ISL_1227574 to 1227616, EPI_ISL_1227960, EPI_ISL_1228222 to 1228223, EPI_ISL_1228260, EPI_ISL_1228271, EPI_ISL_1228281, EPI_ISL_1228294 to 1228295, EPI_ISL_1228444 to 1228446, EPI_ISL_1228450, EPI_ISL_1228452, EPI_ISL_1228460 to 1228462, EPI_ISL_1228465 to 1228466, EPI_ISL_1228469, EPI_ISL_1228474 to 1228475                                                                                                                                                                                                                                                                                                                                                                                                                                                                                                                                                                                                                                                                                                                                                                                                                                                                                                                                                                                                                                                                                                                                                                                                                                                                                                                                                                                                                                                                                                                                                                                                                                                                                                                                                                                                                                                                                                                                                                                                                                                                                                                                                                                                                                                                                                                                                                                                                                                                                                                                             | see above                                             | Wadsworth Center, New York State Department of Health                                                                      | Alexis Russel; Daryl M. Lamson; Erasmus Schneider; Erica Lasek-Nesselquist; John Kelly; Jonathan Plitnick; Kirsten St. George; Matthew Shudt; Melissa A Leisner; Navjot Singh                                                                                                                                                                                                                                                                                                                                                                                                                                                                             |                                                                                                                                                            |
| EPI_ISL_1049338 to 1049339                                                                                                                                                                                                                                                                                                                                                                                                                                                                                                                                                                                                                                                                                                                                                                                                                                                                                                                                                                                                                                                                                                                                                                                                                                                                                                                                                                                                                                                                                                                                                                                                                                                                                                                                                                                                                                                                                                                                                                                                                                                                                                                                                                                                                                                                                                                                                                                                                                                                                                                                                                                                                                                                                                                                                                                                                                                                                                                                                                                                                                                                                                                                                                                                                                           | Wadsworth Center, New York State Department of Health | Wadsworth Center, New York State Department of Health                                                                      | Alexis Russel; Daryl M. Lamson; Erasmus Schneider; Erica Lasek-Nesselquist; John Kelly; Jonathan Plitnick; Kirsten St. George; Matthew Shudt; Melissa A Leisner; Navjot Singh                                                                                                                                                                                                                                                                                                                                                                                                                                                                             |                                                                                                                                                            |
| EPI_ISL_1315310, EPI_ISL_1315313                                                                                                                                                                                                                                                                                                                                                                                                                                                                                                                                                                                                                                                                                                                                                                                                                                                                                                                                                                                                                                                                                                                                                                                                                                                                                                                                                                                                                                                                                                                                                                                                                                                                                                                                                                                                                                                                                                                                                                                                                                                                                                                                                                                                                                                                                                                                                                                                                                                                                                                                                                                                                                                                                                                                                                                                                                                                                                                                                                                                                                                                                                                                                                                                                                     | Waikato Hospital                                      | Institute of Environmental Science and Research (ESR)                                                                      | Anja Werno; Antje van der Linden; Arlo Upton; Chris Mansell; David Hammer; Dragana Drinkovic; Erasmus Smit; Gary McAuliffe; Hana Sofia Andersson; Hermes Perez; James Ussher; Jill Sherwood; Jing Wang; Joep de Light; Josh Freeman; Julia Howard; Juliet Elvy; Lauren Jelly; Mary DeAlmeida; Matt Blakiston; Matt Storey; Matthew Rogers; Max Bloomfield; Michael Addide; Michelle Balm; Muhammad Faisal; Nikki Freed; Olin Slander; Olivia Stroeven; Rachel Boyle; Sally Roberts; SallyAnn Harbison; Sarah Jefferies; Sharmini Muttaiyah; Susan Morpeth; Susan Taylor; Timothy Blackmore; Vani Sathyendran; Veronica Playle; Virginia Hope; Xiaoyun Ren |                                                                                                                                                            |
| EPI_ISL_1000000 to 1000001, EPI_ISL_1000007, EPI_ISL_1000010 to 1000011, EPI_ISL_1000017, EPI_ISL_1000025, EPI_ISL_1000028, EPI_ISL_1000035, EPI_ISL_1000039, EPI_ISL_1000043, EPI_ISL_1000049, EPI_ISL_1000051, EPI_ISL_1000057, EPI_ISL_1000064, EPI_ISL_1000066, EPI_ISL_1000068, EPI_ISL_1000070, EPI_ISL_1000078 to 1000085, EPI_ISL_1000087 to 1000088, EPI_ISL_1000092 to 1000098, EPI_ISL_1000102 to 1000105, EPI_ISL_1000109, EPI_ISL_1000111 to 1000113, EPI_ISL_1000115, EPI_ISL_1000117 to 1000118, EPI_ISL_1000122 to 1000127, EPI_ISL_1000129 to 1000131, EPI_ISL_1000133 to 1000135, EPI_ISL_1000137 to 1000138, EPI_ISL_1000140, EPI_ISL_1000142 to 1000144, EPI_ISL_1000146, EPI_ISL_1000151 to 1000168, EPI_ISL_1000171, EPI_ISL_1000173 to 1000174, EPI_ISL_1000179, EPI_ISL_1000181 to 1000186, EPI_ISL_1105933 to 1105935, EPI_ISL_1105937 to 1105945, EPI_ISL_1105947, EPI_ISL_1105949 to 1105952, EPI_ISL_1105954 to 1105973, EPI_ISL_1105977, EPI_ISL_1105980 to 1105982, EPI_ISL_1105984 to 1105985, EPI_ISL_1105987 to 1105994, EPI_ISL_1105997 to 1105999, EPI_ISL_1106002 to 1106003, EPI_ISL_1106006, EPI_ISL_1106008 to 1106010, EPI_ISL_1106012 to 1106017, EPI_ISL_1106019 to 1106030, EPI_ISL_1106032 to 1106042, EPI_ISL_1106044 to 1106054, EPI_ISL_1106057 to 1106069, EPI_ISL_1106071 to 1106076, EPI_ISL_1106080, EPI_ISL_1106089, EPI_ISL_1106101, EPI_ISL_1106113 to 1106119, EPI_ISL_1106121 to 1106124, EPI_ISL_1106126 to 1106130, EPI_ISL_1106132 to 1106137, EPI_ISL_1106139 to 1106155, EPI_ISL_1106157 to 1106174, EPI_ISL_1106176 to 1106199, EPI_ISL_1106201 to 1106209, EPI_ISL_1106712, EPI_ISL_1106715 to 1106716, EPI_ISL_1106719, EPI_ISL_1106721, EPI_ISL_1106723, EPI_ISL_1106725 to 1106726, EPI_ISL_1106730, EPI_ISL_1106733 to 1106738, EPI_ISL_1106742 to 1106745, EPI_ISL_1106747, EPI_ISL_1106749 to 1106751, EPI_ISL_1106754 to 1106755, EPI_ISL_1106759, EPI_ISL_1106762, EPI_ISL_1106765 to 1106768, EPI_ISL_1106771 to 1106782, EPI_ISL_1106784 to 1106785, EPI_ISL_1106789 to 1106793, EPI_ISL_1106795, EPI_ISL_1106797 to 1106799, EPI_ISL_1106802 to 1106807, EPI_ISL_1106809 to 1106810, EPI_ISL_1106813 to 1106825, EPI_ISL_1106827 to 1106838, EPI_ISL_1106841 to 1106842, EPI_ISL_1106844, EPI_ISL_1106846 to 1106847, EPI_ISL_1106850, EPI_ISL_1106852 to 1106855, EPI_ISL_1106857 to 1106858, EPI_ISL_1106863 to 1106868, EPI_ISL_1106870 to 1106873, EPI_ISL_1106875 to 1106882, EPI_ISL_1106884, EPI_ISL_1106889 to 1106892, EPI_ISL_1106895, EPI_ISL_1106897 to 1106901, EPI_ISL_1106903, EPI_ISL_1106905 to 1106906, EPI_ISL_1106908 to 1106909, EPI_ISL_1106911, EPI_ISL_1106913 to 1106914, EPI_ISL_1106916 to 1106917, EPI_ISL_1106920 to 1106922, EPI_ISL_1106925 to 1106931, EPI_ISL_1106934 to 1106941, EPI_ISL_1106943 to 1106945, EPI_ISL_1106948 to 1106951, EPI_ISL_1106954, EPI_ISL_1106956, EPI_ISL_1106958, EPI_ISL_1106960, EPI_ISL_1106962 to 1106967, EPI_ISL_1106969, EPI_ISL_1106971, EPI_ISL_1106974, EPI_ISL_1106979, EPI_ISL_1106991, EPI_ISL_1106993 to 1106997, EPI_ISL_1106999, EPI_ISL_1107002 to 1107006, EPI_ISL_1107008 to 1107013, EPI_ISL_1107016 to 1107017, EPI_ISL_1107019, EPI_ISL_1107021 to 1107027, EPI_ISL_1107029 to 1107032, EPI_ISL_1107034, |                                                       |                                                                                                                            |                                                                                                                                                                                                                                                                                                                                                                                                                                                                                                                                                                                                                                                           |                                                                                                                                                            |

|                                                                                                                                                                                                                                                                                                                                                                                                                                                                                                                                                                                                                                                                                                                                                                                                                                                                                                                                                                                                                                                                                                                                                                                                                                                                                                                                                                                                                                                                                                                                                                                                                                                                                                                                                                                                                                                                                                                                                                                                                                                                                                                                                                                                                                                                                                                                                                                                                                                                                                                                                                                                                                                                                                                                                                                                                                                                                                                                                                                                                                                                                                                                                                                                                                                                                                                                                                                                                                                                                                                                                                                                                                                                                                                                                                                                                                                                                                                                                                                                                                                                                                                                                                                                                                                                                                                                                                                                                                                                                                                                                                                                                                                                                                                                                                                                                                                                                                                                                                                                                                                                                                                                                                                                                                                                                                                                                                                                                                                                                                                                                                                                                                                                                                                                              |           |                                                                                                                             |                                                                                                                             |                                                                                                                                                                                                                                                                                                                                                                                                                                                                                                                                                                                                                                                          |
|----------------------------------------------------------------------------------------------------------------------------------------------------------------------------------------------------------------------------------------------------------------------------------------------------------------------------------------------------------------------------------------------------------------------------------------------------------------------------------------------------------------------------------------------------------------------------------------------------------------------------------------------------------------------------------------------------------------------------------------------------------------------------------------------------------------------------------------------------------------------------------------------------------------------------------------------------------------------------------------------------------------------------------------------------------------------------------------------------------------------------------------------------------------------------------------------------------------------------------------------------------------------------------------------------------------------------------------------------------------------------------------------------------------------------------------------------------------------------------------------------------------------------------------------------------------------------------------------------------------------------------------------------------------------------------------------------------------------------------------------------------------------------------------------------------------------------------------------------------------------------------------------------------------------------------------------------------------------------------------------------------------------------------------------------------------------------------------------------------------------------------------------------------------------------------------------------------------------------------------------------------------------------------------------------------------------------------------------------------------------------------------------------------------------------------------------------------------------------------------------------------------------------------------------------------------------------------------------------------------------------------------------------------------------------------------------------------------------------------------------------------------------------------------------------------------------------------------------------------------------------------------------------------------------------------------------------------------------------------------------------------------------------------------------------------------------------------------------------------------------------------------------------------------------------------------------------------------------------------------------------------------------------------------------------------------------------------------------------------------------------------------------------------------------------------------------------------------------------------------------------------------------------------------------------------------------------------------------------------------------------------------------------------------------------------------------------------------------------------------------------------------------------------------------------------------------------------------------------------------------------------------------------------------------------------------------------------------------------------------------------------------------------------------------------------------------------------------------------------------------------------------------------------------------------------------------------------------------------------------------------------------------------------------------------------------------------------------------------------------------------------------------------------------------------------------------------------------------------------------------------------------------------------------------------------------------------------------------------------------------------------------------------------------------------------------------------------------------------------------------------------------------------------------------------------------------------------------------------------------------------------------------------------------------------------------------------------------------------------------------------------------------------------------------------------------------------------------------------------------------------------------------------------------------------------------------------------------------------------------------------------------------------------------------------------------------------------------------------------------------------------------------------------------------------------------------------------------------------------------------------------------------------------------------------------------------------------------------------------------------------------------------------------------------------------------------------------------------------------------------|-----------|-----------------------------------------------------------------------------------------------------------------------------|-----------------------------------------------------------------------------------------------------------------------------|----------------------------------------------------------------------------------------------------------------------------------------------------------------------------------------------------------------------------------------------------------------------------------------------------------------------------------------------------------------------------------------------------------------------------------------------------------------------------------------------------------------------------------------------------------------------------------------------------------------------------------------------------------|
| EPI_ISL_1107036 to 1107038, EPI_ISL_1107040 to 1107042, EPI_ISL_1107044 to 1107048, EPI_ISL_1107051 to 1107054, EPI_ISL_1107056, EPI_ISL_1107060 to 1107062, EPI_ISL_1107064 to 1107073, EPI_ISL_1107076 to 1107077, EPI_ISL_1107079 to 1107086, EPI_ISL_1107090 to 1107094, EPI_ISL_1107097, EPI_ISL_1107099 to 1107106, EPI_ISL_1107109, EPI_ISL_1107111, EPI_ISL_1107113 to 1107114, EPI_ISL_1107116 to 1107119, EPI_ISL_1107126 to 1107134, EPI_ISL_1107136 to 1107138, EPI_ISL_1107140 to 1107149, EPI_ISL_1107151 to 1107152, EPI_ISL_1107155 to 1107158, EPI_ISL_1107160 to 1107161, EPI_ISL_1107167, EPI_ISL_1107172, EPI_ISL_1107175 to 1107177, EPI_ISL_1107179, EPI_ISL_1107181 to 1107187, EPI_ISL_1107190 to 1107192, EPI_ISL_1107195 to 1107198, EPI_ISL_1107200, EPI_ISL_1107203 to 1107205, EPI_ISL_1107207 to 1107210                                                                                                                                                                                                                                                                                                                                                                                                                                                                                                                                                                                                                                                                                                                                                                                                                                                                                                                                                                                                                                                                                                                                                                                                                                                                                                                                                                                                                                                                                                                                                                                                                                                                                                                                                                                                                                                                                                                                                                                                                                                                                                                                                                                                                                                                                                                                                                                                                                                                                                                                                                                                                                                                                                                                                                                                                                                                                                                                                                                                                                                                                                                                                                                                                                                                                                                                                                                                                                                                                                                                                                                                                                                                                                                                                                                                                                                                                                                                                                                                                                                                                                                                                                                                                                                                                                                                                                                                                                                                                                                                                                                                                                                                                                                                                                                                                                                                                                       | see above | Wales Specialist Virology Centre Sequencing lab: Pathogen Genomics Unit                                                     | Public Health Wales Microbiology Cardiff Wales Specialist Virology Centre                                                   | Alec Birchley; Alexander Adams; Amy Gaskin; Angela Marchbank; Bree Gatica-Wilcox; Catherine Moore; Jason Coombes; Joanne Watkins; Joel Southgate; Johnathan Evans; Laura Gifford; Lauren Gilbert; Lee Graham; Malorie Perry; Matthew Bull; Nicole Paachibari; Sally Connor; Sara Kumziene-Summerhayes; Sara Rey; Sarah Taylor; Simon Cottrell; Sophie Jones; Tom Connor                                                                                                                                                                                                                                                                                  |
| EPI_ISL_1011598 to 1011677, EPI_ISL_1253885 to 1253940                                                                                                                                                                                                                                                                                                                                                                                                                                                                                                                                                                                                                                                                                                                                                                                                                                                                                                                                                                                                                                                                                                                                                                                                                                                                                                                                                                                                                                                                                                                                                                                                                                                                                                                                                                                                                                                                                                                                                                                                                                                                                                                                                                                                                                                                                                                                                                                                                                                                                                                                                                                                                                                                                                                                                                                                                                                                                                                                                                                                                                                                                                                                                                                                                                                                                                                                                                                                                                                                                                                                                                                                                                                                                                                                                                                                                                                                                                                                                                                                                                                                                                                                                                                                                                                                                                                                                                                                                                                                                                                                                                                                                                                                                                                                                                                                                                                                                                                                                                                                                                                                                                                                                                                                                                                                                                                                                                                                                                                                                                                                                                                                                                                                                       |           | Warrior Diagnostics Laboratory                                                                                              | Infectious Disease Program, Broad Institute of Harvard and MIT                                                              | Adams, G.; B.L.; B.W.; Bauer, M.; Birren; Bronson, A.; Carter, A.; Chaluvadi, S.; D.J.; DeRuff, K.; Gallagher, G.; Gladden-Young, A.; J.E.; K.J.; Lagerborg, K.; Lemieux; Loreth, C.; MacInnis; Marshall, J.; Normandin, E.; ONEill, M.; P.C.; Park; Reilly, S.; Rudy, M.; S.; Sliddle; Smole, S.; Tomkins-Tinch, C.; and Sabeti                                                                                                                                                                                                                                                                                                                         |
| EPI_ISL_1049542 to 1049596, EPI_ISL_1049610 to 1049646, EPI_ISL_1049649 to 1049664, EPI_ISL_1114204 to 1114222, EPI_ISL_1114234 to 1114254, EPI_ISL_1114353 to 1114368                                                                                                                                                                                                                                                                                                                                                                                                                                                                                                                                                                                                                                                                                                                                                                                                                                                                                                                                                                                                                                                                                                                                                                                                                                                                                                                                                                                                                                                                                                                                                                                                                                                                                                                                                                                                                                                                                                                                                                                                                                                                                                                                                                                                                                                                                                                                                                                                                                                                                                                                                                                                                                                                                                                                                                                                                                                                                                                                                                                                                                                                                                                                                                                                                                                                                                                                                                                                                                                                                                                                                                                                                                                                                                                                                                                                                                                                                                                                                                                                                                                                                                                                                                                                                                                                                                                                                                                                                                                                                                                                                                                                                                                                                                                                                                                                                                                                                                                                                                                                                                                                                                                                                                                                                                                                                                                                                                                                                                                                                                                                                                       |           | Washington State Department of Health                                                                                       | Seattle Flu Study                                                                                                           | Amanda Adler; Barry R. Lutz; Benjamin Pelle; Brian Hiatt; Caitlin R. Wolf; Chris D. Frazier; Deborah A. Nickerson; Elisabeth Brandstetter; Erica Ryke; Geoff Melly; Helen Y. Chu; Janet A. Englund; Jay Shendure; Jover Lee; Karsten Fawc; Kirsten Lacombe; Lea M. Starita; Mark J. Rieder; Matthew Richardson; Matthew Thompson; Melissa Truong; Michael Boeckh; Michael Famulare; Misja Ilcinis; Peter D. Han; Philip Dykema; Romesh Gautom; Scott Lindquist; Thomas R. Sibley; Trevor Bedford                                                                                                                                                         |
| EPI_ISL_1263334 to 1263363, EPI_ISL_1334366 to 1334379                                                                                                                                                                                                                                                                                                                                                                                                                                                                                                                                                                                                                                                                                                                                                                                                                                                                                                                                                                                                                                                                                                                                                                                                                                                                                                                                                                                                                                                                                                                                                                                                                                                                                                                                                                                                                                                                                                                                                                                                                                                                                                                                                                                                                                                                                                                                                                                                                                                                                                                                                                                                                                                                                                                                                                                                                                                                                                                                                                                                                                                                                                                                                                                                                                                                                                                                                                                                                                                                                                                                                                                                                                                                                                                                                                                                                                                                                                                                                                                                                                                                                                                                                                                                                                                                                                                                                                                                                                                                                                                                                                                                                                                                                                                                                                                                                                                                                                                                                                                                                                                                                                                                                                                                                                                                                                                                                                                                                                                                                                                                                                                                                                                                                       |           | Washington State Department of Health Public Health Laboratories                                                            | Washington State Department of Health Public Health Laboratories                                                            | Avi Singh; Darren Lucas; Denny Russell; Drew MacKellar; Geoff Melly; Joenice Gonzalez; JohnAric Peterson; Philip Dykema; Rebecca Cao; Vanessa De Los Santos                                                                                                                                                                                                                                                                                                                                                                                                                                                                                              |
| EPI_ISL_1373732 to 1373736, EPI_ISL_1373740, EPI_ISL_1373742, EPI_ISL_1373744 to 1373747, EPI_ISL_1373750, EPI_ISL_1373760 to 1373763, EPI_ISL_1373765, EPI_ISL_1373769, EPI_ISL_1373771, EPI_ISL_1373773, EPI_ISL_1373775, EPI_ISL_1373779, EPI_ISL_1373792, EPI_ISL_1373794 to 1373796, EPI_ISL_1373798, EPI_ISL_1373800, EPI_ISL_1373803, EPI_ISL_1373809, EPI_ISL_1373815, EPI_ISL_1373819 to 1373820, EPI_ISL_1373822 to 1373826, EPI_ISL_1373829 to 1373831, EPI_ISL_1373833 to 1373835                                                                                                                                                                                                                                                                                                                                                                                                                                                                                                                                                                                                                                                                                                                                                                                                                                                                                                                                                                                                                                                                                                                                                                                                                                                                                                                                                                                                                                                                                                                                                                                                                                                                                                                                                                                                                                                                                                                                                                                                                                                                                                                                                                                                                                                                                                                                                                                                                                                                                                                                                                                                                                                                                                                                                                                                                                                                                                                                                                                                                                                                                                                                                                                                                                                                                                                                                                                                                                                                                                                                                                                                                                                                                                                                                                                                                                                                                                                                                                                                                                                                                                                                                                                                                                                                                                                                                                                                                                                                                                                                                                                                                                                                                                                                                                                                                                                                                                                                                                                                                                                                                                                                                                                                                                                | see above | Washington University School of Medicine                                                                                    | Genomics and Discovery, Respiratory Viruses Branch, Division of Viral Diseases, Centers for Disease Control and Prevention  | Anna Kelleher; Anna Uehara; Brian Lynch; Clinton R. Paden; Haibin Wang; Han Jia Justin Ng; Jing Zhang; Krista Queen; Peter Cook; Suxiang Tong; Yan Li; Ying Tao                                                                                                                                                                                                                                                                                                                                                                                                                                                                                          |
| EPI_ISL_1016878, EPI_ISL_1250695                                                                                                                                                                                                                                                                                                                                                                                                                                                                                                                                                                                                                                                                                                                                                                                                                                                                                                                                                                                                                                                                                                                                                                                                                                                                                                                                                                                                                                                                                                                                                                                                                                                                                                                                                                                                                                                                                                                                                                                                                                                                                                                                                                                                                                                                                                                                                                                                                                                                                                                                                                                                                                                                                                                                                                                                                                                                                                                                                                                                                                                                                                                                                                                                                                                                                                                                                                                                                                                                                                                                                                                                                                                                                                                                                                                                                                                                                                                                                                                                                                                                                                                                                                                                                                                                                                                                                                                                                                                                                                                                                                                                                                                                                                                                                                                                                                                                                                                                                                                                                                                                                                                                                                                                                                                                                                                                                                                                                                                                                                                                                                                                                                                                                                             |           | Wellington SCL (WN)                                                                                                         | Institute of Environmental Science and Research (ESR)                                                                       | Anja Werno; Antje van der Linden; Arlo Upton; Chris Mansell; David Hammer; Dragana Drinkovic; Erasmus Smit; Gary McAuliffe; Hana Sofia Andersson; Hermes Perez; James Usher; Jill Sherwood; Jing Wang; Joep de Lig; Josh Freeman; Julia Howard; Juliet Elvy; Lauren Jelly; Mary DeAlmeida; Matt Blakiston; Matt Storey; Matthew Rogers; Max Bloomfield; Michael Addidle; Michelle Balm; Muhammad Faisal; Nikki Freed; Olin Silander; Olivia Stroeven; Rachel Boyle; Sally Roberts; SallyAnn Harbison; Sarah Jefferies; Sharmini Muttaiyah; Susan Morpeth; Susan Taylor; Timothy Blackmore; Vani Sathyendran; Veronica Playle; Virginia Hope; Xiaoyun Ren |
| EPI_ISL_1255106 to 1255277                                                                                                                                                                                                                                                                                                                                                                                                                                                                                                                                                                                                                                                                                                                                                                                                                                                                                                                                                                                                                                                                                                                                                                                                                                                                                                                                                                                                                                                                                                                                                                                                                                                                                                                                                                                                                                                                                                                                                                                                                                                                                                                                                                                                                                                                                                                                                                                                                                                                                                                                                                                                                                                                                                                                                                                                                                                                                                                                                                                                                                                                                                                                                                                                                                                                                                                                                                                                                                                                                                                                                                                                                                                                                                                                                                                                                                                                                                                                                                                                                                                                                                                                                                                                                                                                                                                                                                                                                                                                                                                                                                                                                                                                                                                                                                                                                                                                                                                                                                                                                                                                                                                                                                                                                                                                                                                                                                                                                                                                                                                                                                                                                                                                                                                   |           | West African Centre for Cell Biology of Infectious Pathogens (WACCBIP), University of Ghana, Accra, Ghana                   | West African Centre for Cell Biology of Infectious Pathogens (WACCBIP), University of Ghana, Volta Road, Legon-Accra, Ghana | ; Abdoulaye B Diallo; Abdul-Karim Abass; Aisha Mohammed; Benjamin Demah Nuertey; Collins M. Morang'a; Dam Kenneth Mibut; Dominic S.Y. Amuzu; Emmanuela Amoako4; Evelyn B. Quansah; Frederick Kumi-Ansah; Frederick Tei-Maya; Gordon A Awandare; Joyce M. Ngoi; Kesego Tapela; Lucas N. Amenga-Etego; Nelson Kibinge; Oliver D Boakye5; Peter K Quashie; Philip M. Soglo; Samirah Said; Samuel Kaba Akoriyea; Theophilus Odoom; Vanessa Magnusson; Vincent Appiah; Yaw Bediako                                                                                                                                                                            |
| EPI_ISL_1255105                                                                                                                                                                                                                                                                                                                                                                                                                                                                                                                                                                                                                                                                                                                                                                                                                                                                                                                                                                                                                                                                                                                                                                                                                                                                                                                                                                                                                                                                                                                                                                                                                                                                                                                                                                                                                                                                                                                                                                                                                                                                                                                                                                                                                                                                                                                                                                                                                                                                                                                                                                                                                                                                                                                                                                                                                                                                                                                                                                                                                                                                                                                                                                                                                                                                                                                                                                                                                                                                                                                                                                                                                                                                                                                                                                                                                                                                                                                                                                                                                                                                                                                                                                                                                                                                                                                                                                                                                                                                                                                                                                                                                                                                                                                                                                                                                                                                                                                                                                                                                                                                                                                                                                                                                                                                                                                                                                                                                                                                                                                                                                                                                                                                                                                              |           | West African Centre for Cell Biology of Infectious Pathogens (WACCBIP), University of Ghana, Volta Road, Legon-Accra, Ghana | West African Centre for Cell Biology of Infectious Pathogens (WACCBIP), University of Ghana, Volta Road, Legon-Accra, Ghana | ; Abdoulaye B Diallo; Abdul-Karim Abass; Aisha Mohammed; Benjamin Demah Nuertey; Collins M. Morang'a; Dam Kenneth Mibut; Dominic S.Y. Amuzu; Emmanuela Amoako4; Evelyn B. Quansah; Frederick Kumi-Ansah; Frederick Tei-Maya; Gordon A Awandare; Joyce M. Ngoi; Kesego Tapela; Lucas N. Amenga-Etego; Nelson Kibinge; Oliver D Boakye5; Peter K Quashie; Philip M. Soglo; Samirah Said; Samuel Kaba Akoriyea; Theophilus Odoom; Vanessa Magnusson; Vincent Appiah; Yaw Bediako                                                                                                                                                                            |
| EPI_ISL_1340862 to 1340867, EPI_ISL_1341792 to 1341797, EPI_ISL_1345232, EPI_ISL_1346484                                                                                                                                                                                                                                                                                                                                                                                                                                                                                                                                                                                                                                                                                                                                                                                                                                                                                                                                                                                                                                                                                                                                                                                                                                                                                                                                                                                                                                                                                                                                                                                                                                                                                                                                                                                                                                                                                                                                                                                                                                                                                                                                                                                                                                                                                                                                                                                                                                                                                                                                                                                                                                                                                                                                                                                                                                                                                                                                                                                                                                                                                                                                                                                                                                                                                                                                                                                                                                                                                                                                                                                                                                                                                                                                                                                                                                                                                                                                                                                                                                                                                                                                                                                                                                                                                                                                                                                                                                                                                                                                                                                                                                                                                                                                                                                                                                                                                                                                                                                                                                                                                                                                                                                                                                                                                                                                                                                                                                                                                                                                                                                                                                                     |           | West Bandung Public Health                                                                                                  | West Java Health Laboratory; School of Life Sciences and Technology, Institut Teknologi Bandung                             | Azzania Fibriani; Cut Nur Cinthia Alamanda; Ema Rahmawati; Isak Solihin; Karimatu Khoirunnisa; Miftahul Faridi; Rifky Waluyajati Rachman; Rini Robiani; Ryan Bayusantika Ristandi                                                                                                                                                                                                                                                                                                                                                                                                                                                                        |
| EPI_ISL_1343218, EPI_ISL_1344587, EPI_ISL_1346047                                                                                                                                                                                                                                                                                                                                                                                                                                                                                                                                                                                                                                                                                                                                                                                                                                                                                                                                                                                                                                                                                                                                                                                                                                                                                                                                                                                                                                                                                                                                                                                                                                                                                                                                                                                                                                                                                                                                                                                                                                                                                                                                                                                                                                                                                                                                                                                                                                                                                                                                                                                                                                                                                                                                                                                                                                                                                                                                                                                                                                                                                                                                                                                                                                                                                                                                                                                                                                                                                                                                                                                                                                                                                                                                                                                                                                                                                                                                                                                                                                                                                                                                                                                                                                                                                                                                                                                                                                                                                                                                                                                                                                                                                                                                                                                                                                                                                                                                                                                                                                                                                                                                                                                                                                                                                                                                                                                                                                                                                                                                                                                                                                                                                            |           | West Java Health Laboratory                                                                                                 | West Java Health Laboratory; School of Life Sciences and Technology, Institut Teknologi Bandung                             | Azzania Fibriani; Cut Nur Cinthia Alamanda; Ema Rahmawati; Isak Solihin; Karimatu Khoirunnisa; Miftahul Faridi; Rifky Waluyajati Rachman; Rini Robiani; Ryan Bayusantika Ristandi                                                                                                                                                                                                                                                                                                                                                                                                                                                                        |
| EPI_ISL_1190889 to 1190892, EPI_ISL_1190895 to 1190896, EPI_ISL_1190951 to 1190954, EPI_ISL_1190956 to 1190958                                                                                                                                                                                                                                                                                                                                                                                                                                                                                                                                                                                                                                                                                                                                                                                                                                                                                                                                                                                                                                                                                                                                                                                                                                                                                                                                                                                                                                                                                                                                                                                                                                                                                                                                                                                                                                                                                                                                                                                                                                                                                                                                                                                                                                                                                                                                                                                                                                                                                                                                                                                                                                                                                                                                                                                                                                                                                                                                                                                                                                                                                                                                                                                                                                                                                                                                                                                                                                                                                                                                                                                                                                                                                                                                                                                                                                                                                                                                                                                                                                                                                                                                                                                                                                                                                                                                                                                                                                                                                                                                                                                                                                                                                                                                                                                                                                                                                                                                                                                                                                                                                                                                                                                                                                                                                                                                                                                                                                                                                                                                                                                                                               |           | West Tallinn Central Hospital laboratory                                                                                    | 1. Laboratory of Communicable Diseases (Estonia); 2. Eurofins Genomics Europe Sequencing GmbH                               | Liidia Dotsenko et al.                                                                                                                                                                                                                                                                                                                                                                                                                                                                                                                                                                                                                                   |
| EPI_ISL_1047804 to 1047854, EPI_ISL_1050174 to 1050222, EPI_ISL_1050233 to 1050238, EPI_ISL_1050240 to 1050242, EPI_ISL_1104103, EPI_ISL_1104123 to 1104196, EPI_ISL_1177688 to 1177689, EPI_ISL_1247673 to 1247685                                                                                                                                                                                                                                                                                                                                                                                                                                                                                                                                                                                                                                                                                                                                                                                                                                                                                                                                                                                                                                                                                                                                                                                                                                                                                                                                                                                                                                                                                                                                                                                                                                                                                                                                                                                                                                                                                                                                                                                                                                                                                                                                                                                                                                                                                                                                                                                                                                                                                                                                                                                                                                                                                                                                                                                                                                                                                                                                                                                                                                                                                                                                                                                                                                                                                                                                                                                                                                                                                                                                                                                                                                                                                                                                                                                                                                                                                                                                                                                                                                                                                                                                                                                                                                                                                                                                                                                                                                                                                                                                                                                                                                                                                                                                                                                                                                                                                                                                                                                                                                                                                                                                                                                                                                                                                                                                                                                                                                                                                                                          | see above | West of Scotland Specialist Virology Centre, NHSGGC / MRC-University of Glasgow Centre for Virus Research                   | COVID-19 Genomics UK (COG-UK) Consortium                                                                                    | Alasdair MacLean; Alice Broos; Ana da Silva Filipe; Antonia Ho; Daniel Mair; David L Robertson; Emma Thomson; Guy Mollet; James Shepherd; Jenna Nichols; Joseph Hughes; Kathy Li; Kathy Smollett; Kyriaki Nomikou; Lily Tong; Matthew Holden; Natasha Johnson; Rachel Blacow; Richard Orton; Rory Gunson; Sarah McDonald; Sharif Shaaban; Sreenu Vattipally; Stephen Carmichael                                                                                                                                                                                                                                                                          |
| EPI_ISL_1014941 to 1014987                                                                                                                                                                                                                                                                                                                                                                                                                                                                                                                                                                                                                                                                                                                                                                                                                                                                                                                                                                                                                                                                                                                                                                                                                                                                                                                                                                                                                                                                                                                                                                                                                                                                                                                                                                                                                                                                                                                                                                                                                                                                                                                                                                                                                                                                                                                                                                                                                                                                                                                                                                                                                                                                                                                                                                                                                                                                                                                                                                                                                                                                                                                                                                                                                                                                                                                                                                                                                                                                                                                                                                                                                                                                                                                                                                                                                                                                                                                                                                                                                                                                                                                                                                                                                                                                                                                                                                                                                                                                                                                                                                                                                                                                                                                                                                                                                                                                                                                                                                                                                                                                                                                                                                                                                                                                                                                                                                                                                                                                                                                                                                                                                                                                                                                   |           | Wisconsin Department of Agriculture, Trade, and Consumer Protection                                                         | Pathogen Discovery, Respiratory Viruses Branch, Division of Viral Diseases, Centers for Disease Control and Prevention      | Anna Montmayeur; Anna Uehara; Brian Lynch; Clinton R. Paden; Haibin Wang; Han Jia Ng; Jing Zhang; Krista Queen; Peter Cook; Rachel Marine; Suxiang Tong; Yan Li; Ying Tao                                                                                                                                                                                                                                                                                                                                                                                                                                                                                |
| EPI_ISL_1269314 to 1269315, EPI_ISL_1269317 to 1269319, EPI_ISL_1269321 to 1269322, EPI_ISL_1269324 to 1269325, EPI_ISL_1269327 to 1269328, EPI_ISL_1269330 to 1269331, EPI_ISL_1269333 to 1269334, EPI_ISL_1269336 to 1269338, EPI_ISL_1269340 to 1269341, EPI_ISL_1269343 to 1269344, EPI_ISL_1269346 to 1269348, EPI_ISL_1269350 to 1269351, EPI_ISL_1269353 to 1269354, EPI_ISL_1269356 to 1269357, EPI_ISL_1269359 to 1269360, EPI_ISL_1269362 to 1269363, EPI_ISL_1269365 to 1269367, EPI_ISL_1269369 to 1269370, EPI_ISL_1269372 to 1269373, EPI_ISL_1269375 to 1269376, EPI_ISL_1269378 to 1269379, EPI_ISL_1269381 to 1269382, EPI_ISL_1269384 to 1269385, EPI_ISL_1269387 to 1269388, EPI_ISL_1269390 to 1269391, EPI_ISL_1269393 to 1269394, EPI_ISL_1269396 to 1269398, EPI_ISL_1269400 to 1269401, EPI_ISL_1269403 to 1269404, EPI_ISL_1269406 to 1269407, EPI_ISL_1269409 to 1269411, EPI_ISL_1269413 to 1269414, EPI_ISL_1269416 to 1269417, EPI_ISL_1269419 to 1269421, EPI_ISL_1269423 to 1269424, EPI_ISL_1269426 to 1269427, EPI_ISL_1269429 to 1269430, EPI_ISL_1269432 to 1269433, EPI_ISL_1269435 to 1269436, EPI_ISL_1269438 to 1269440, EPI_ISL_1269442 to 1269443, EPI_ISL_1269445 to 1269446, EPI_ISL_1269448 to 1269449, EPI_ISL_1269451 to 1269452, EPI_ISL_1269454 to 1269456, EPI_ISL_1269458 to 1269459, EPI_ISL_1269461 to 1269462, EPI_ISL_1269464 to 1269465, EPI_ISL_1269467 to 1269469, EPI_ISL_1269471 to 1269472, EPI_ISL_1269474 to 1269475, EPI_ISL_1269478 to 1269479, EPI_ISL_1269481 to 1269483, EPI_ISL_1269484, EPI_ISL_1269486 to 1269487, EPI_ISL_1269489 to 1269490, EPI_ISL_1269492 to 1269494, EPI_ISL_1269496 to 1269497, EPI_ISL_1269499 to 1269502, EPI_ISL_1269504 to 1269506, EPI_ISL_1269510 to 1269512, EPI_ISL_1269514 to 1269515, EPI_ISL_1269517 to 1269518, EPI_ISL_1269520 to 1269521, EPI_ISL_1269523 to 1269524, EPI_ISL_1269526 to 1269527, EPI_ISL_1269529 to 1269531, EPI_ISL_1269533, EPI_ISL_1269535 to 1269537, EPI_ISL_1269539 to 1269540, EPI_ISL_1269542 to 1269543, EPI_ISL_1269545 to 1269546, EPI_ISL_1269548 to 1269550, EPI_ISL_1269552 to 1269553, EPI_ISL_1269555 to 1269556, EPI_ISL_1269558 to 1269559, EPI_ISL_1269561 to 1269563, EPI_ISL_1269565 to 1269566, EPI_ISL_1269568 to 1269569, EPI_ISL_1269571 to 1269572, EPI_ISL_1269574 to 1269575, EPI_ISL_1269577 to 1269578, EPI_ISL_1269580 to 1269581, EPI_ISL_1269583 to 1269584, EPI_ISL_1269586 to 1269587, EPI_ISL_1269589 to 1269590, EPI_ISL_1269592, EPI_ISL_1269594 to 1269595, EPI_ISL_1269597 to 1269598, EPI_ISL_1269600 to 1269602, EPI_ISL_1269605, EPI_ISL_1269607 to 1269608, EPI_ISL_1269610, EPI_ISL_1269612 to 1269614, EPI_ISL_1269616 to 1269617, EPI_ISL_1269619 to 1269620, EPI_ISL_1269622 to 1269623, EPI_ISL_1269625 to 1269626, EPI_ISL_1269628 to 1269629, EPI_ISL_1269631 to 1269632, EPI_ISL_1269634 to 1269635, EPI_ISL_1269637 to 1269638, EPI_ISL_1269640 to 1269641, EPI_ISL_1269643 to 1269645, EPI_ISL_1269647 to 1269648, EPI_ISL_1269650 to 1269652, EPI_ISL_1269653, EPI_ISL_1269655 to 1269656, EPI_ISL_1269658 to 1269659, EPI_ISL_1269661 to 1269662, EPI_ISL_1269664 to 1269665, EPI_ISL_1269667 to 1269669, EPI_ISL_1269671 to 1269672, EPI_ISL_1269674 to 1269675, EPI_ISL_1269677 to 1269678, EPI_ISL_1269680 to 1269681, EPI_ISL_1269683 to 1269684, EPI_ISL_1269686 to 1269687, EPI_ISL_1269689 to 1269690, EPI_ISL_1269692 to 1269693, EPI_ISL_1269695 to 1269696, EPI_ISL_1269698 to 1269699, EPI_ISL_1269701 to 1269703, EPI_ISL_1269705 to 1269706, EPI_ISL_1269708 to 1269709, EPI_ISL_1269711 to 1269712, EPI_ISL_1269714 to 1269715, EPI_ISL_1269717 to 1269719 to 1269721, EPI_ISL_1269723, EPI_ISL_1269725 to 1269726, EPI_ISL_1269728 to 1269729, EPI_ISL_1269731 to 1269732, EPI_ISL_1269734 to 1269735, EPI_ISL_1269737 to 1269738, EPI_ISL_1269740 to 1269741, EPI_ISL_1269743 to 1269744, EPI_ISL_1269746 to 1269748, EPI_ISL_1269750 to 1269751, EPI_ISL_1269753 to 1269754, EPI_ISL_1269756 to 1269758, EPI_ISL_1269760 to 1269761, EPI_ISL_1269763, EPI_ISL_1269765 to 1269766, EPI_ISL_1269768 to 1269769, EPI_ISL_1269771 to 1269773, EPI_ISL_1269775 to 1269776, EPI_ISL_1269778 to 1269779, EPI_ISL_1269781 to 1269782, EPI_ISL_1269783 to 1269785, EPI_ISL_1269787 to 1269788, EPI_ISL_1269790 to 1269791, EPI_ISL_1269793 to 1269794, EPI_ISL_1269796 to 1269797, EPI_ISL_1269799 to 1269800, EPI_ISL_1269802 to 1269803, EPI_ISL_1269805 to 1269807, EPI_ISL_1269810, EPI_ISL_1269812 to 1269813, EPI_ISL_1269815 to 1269816, EPI_ISL_1269818 to 1269819, EPI_ISL_1269821 to 1269822, EPI_ISL_1269824 to 1269825, EPI_ISL_1269827 to 1269828, EPI_ISL_1269830 to 1269831, EPI_ISL_1269833 to 1269835, EPI_ISL_1269837 to 1269838, EPI_ISL_1269840 to 1269841, EPI_ISL_1269843 to 1269845, EPI_ISL_1269847 to 1269848, EPI_ISL_1269850 to 1269851, EPI_ISL_1269853 to 1269854, EPI_ISL_1269856 to 1269857, EPI_ISL_1269859 to 1269860, EPI_ISL_1269862 to 1269863, EPI_ISL_1269865 to 1269866, EPI_ISL_1269868 to 1269869, EPI_ISL_1269871 to 1269872, EPI_ISL_1269874 to 1269875, EPI_ISL_1269877 to 1269878, EPI_ISL_1269880 to 1269881, EPI_ISL_1269883 to 1269884, EPI_ISL_1269886 to 1269888, EPI_ISL_1269890 to 1269891, EPI_ISL_1269893, EPI_ISL_1269895 to 1269896, EPI_ISL_1269898 to 1269899, EPI_ISL_1269901 to 1269902, EPI_ISL_1269904 to 1269906, EPI_ISL_1269908 to 1269909, EPI_ISL_1269911 to 1269912, EPI_ISL_1269914 to 1269915, EPI_ISL_1269917 to 1269918, EPI_ISL_1269920 to 1269921, EPI_ISL_1269923 to 1269924, EPI_ISL_1269926 to 1269927, EPI_ISL_1269929 to 1269930, EPI_ISL_1269932 to 1269933, EPI_ISL_1269935 to 1269937, EPI_ISL_1269939 to 1269941, EPI_ISL_1269944 to 1269945, EPI_ISL_1269947 |           |                                                                                                                             |                                                                                                                             |                                                                                                                                                                                                                                                                                                                                                                                                                                                                                                                                                                                                                                                          |
| see above                                                                                                                                                                                                                                                                                                                                                                                                                                                                                                                                                                                                                                                                                                                                                                                                                                                                                                                                                                                                                                                                                                                                                                                                                                                                                                                                                                                                                                                                                                                                                                                                                                                                                                                                                                                                                                                                                                                                                                                                                                                                                                                                                                                                                                                                                                                                                                                                                                                                                                                                                                                                                                                                                                                                                                                                                                                                                                                                                                                                                                                                                                                                                                                                                                                                                                                                                                                                                                                                                                                                                                                                                                                                                                                                                                                                                                                                                                                                                                                                                                                                                                                                                                                                                                                                                                                                                                                                                                                                                                                                                                                                                                                                                                                                                                                                                                                                                                                                                                                                                                                                                                                                                                                                                                                                                                                                                                                                                                                                                                                                                                                                                                                                                                                                    |           | Wisconsin State Laboratory of Hygiene Communicable Disease Division                                                         | Ginkgo Bioworks Clinical Laboratory                                                                                         | Abigail C. Shockey; Alex Plocik; Amanda Riccardi; Becky Schilling; Birgitte Simen; James McGann; Jim Griffin; Keith Robison; Kelsey R. Florek; Malaika McKenzie-Bennett; Martha Pierson; Michelle Spencer; Rebecca Littlefield                                                                                                                                                                                                                                                                                                                                                                                                                           |
| EPI_ISL_1067818 to 1067984, EPI_ISL_1159730 to 1159767, EPI_ISL_1159769 to 1159883, EPI_ISL_1295182 to 1295533, EPI_ISL_1295535 to 1295563                                                                                                                                                                                                                                                                                                                                                                                                                                                                                                                                                                                                                                                                                                                                                                                                                                                                                                                                                                                                                                                                                                                                                                                                                                                                                                                                                                                                                                                                                                                                                                                                                                                                                                                                                                                                                                                                                                                                                                                                                                                                                                                                                                                                                                                                                                                                                                                                                                                                                                                                                                                                                                                                                                                                                                                                                                                                                                                                                                                                                                                                                                                                                                                                                                                                                                                                                                                                                                                                                                                                                                                                                                                                                                                                                                                                                                                                                                                                                                                                                                                                                                                                                                                                                                                                                                                                                                                                                                                                                                                                                                                                                                                                                                                                                                                                                                                                                                                                                                                                                                                                                                                                                                                                                                                                                                                                                                                                                                                                                                                                                                                                   |           | Wisconsin State Laboratory of Hygiene Communicable Disease Division                                                         | Wisconsin State Laboratory of Hygiene Communicable Disease Division                                                         | Abigail C. Shockey; Kelsey R. Florek                                                                                                                                                                                                                                                                                                                                                                                                                                                                                                                                                                                                                     |
| EPI_ISL_1251228                                                                                                                                                                                                                                                                                                                                                                                                                                                                                                                                                                                                                                                                                                                                                                                                                                                                                                                                                                                                                                                                                                                                                                                                                                                                                                                                                                                                                                                                                                                                                                                                                                                                                                                                                                                                                                                                                                                                                                                                                                                                                                                                                                                                                                                                                                                                                                                                                                                                                                                                                                                                                                                                                                                                                                                                                                                                                                                                                                                                                                                                                                                                                                                                                                                                                                                                                                                                                                                                                                                                                                                                                                                                                                                                                                                                                                                                                                                                                                                                                                                                                                                                                                                                                                                                                                                                                                                                                                                                                                                                                                                                                                                                                                                                                                                                                                                                                                                                                                                                                                                                                                                                                                                                                                                                                                                                                                                                                                                                                                                                                                                                                                                                                                                              |           | Wiset Chai Chan Hospital                                                                                                    | National Institute of Health, Department of Medical Sciences, Ministry of Public Health, Thailand                           | Hathaikan Tanchai; Natchaya Khiahsang; Nuttida Thongpramol; Pakorn Piromtong; Pilailuk Okada; Ratana Tacharoenuang; Siripaporn Phuyung; Sittiporn Parmmen; Sunthareeya Waicharoen.; Thanutsapa Thanadachakul                                                                                                                                                                                                                                                                                                                                                                                                                                             |





|                                                                                                                                                                                                                                                                                                                                                                                                                                                                                                                                                                                                                                                                                                                                                                                                                                                                                                                                                                                                                                                                                                                                                                                                                                                                                                                                                                                                                                                                                                                                                                                                                                                                                                                                                                                                                                                                                                                                               |                                                         |                                                                                                                                            |                                                                                                                                                                                                                                                                                                                   |
|-----------------------------------------------------------------------------------------------------------------------------------------------------------------------------------------------------------------------------------------------------------------------------------------------------------------------------------------------------------------------------------------------------------------------------------------------------------------------------------------------------------------------------------------------------------------------------------------------------------------------------------------------------------------------------------------------------------------------------------------------------------------------------------------------------------------------------------------------------------------------------------------------------------------------------------------------------------------------------------------------------------------------------------------------------------------------------------------------------------------------------------------------------------------------------------------------------------------------------------------------------------------------------------------------------------------------------------------------------------------------------------------------------------------------------------------------------------------------------------------------------------------------------------------------------------------------------------------------------------------------------------------------------------------------------------------------------------------------------------------------------------------------------------------------------------------------------------------------------------------------------------------------------------------------------------------------|---------------------------------------------------------|--------------------------------------------------------------------------------------------------------------------------------------------|-------------------------------------------------------------------------------------------------------------------------------------------------------------------------------------------------------------------------------------------------------------------------------------------------------------------|
| see above                                                                                                                                                                                                                                                                                                                                                                                                                                                                                                                                                                                                                                                                                                                                                                                                                                                                                                                                                                                                                                                                                                                                                                                                                                                                                                                                                                                                                                                                                                                                                                                                                                                                                                                                                                                                                                                                                                                                     | amedes Medizinisches Labor Mülhausen                    | Robert Koch Institute                                                                                                                      |                                                                                                                                                                                                                                                                                                                   |
| EPI_ISL_1281319, EPI_ISL_1281321, EPI_ISL_1281343, EPI_ISL_1281428, EPI_ISL_1281449, EPI_ISL_1281486, EPI_ISL_1281529, EPI_ISL_1351392, EPI_ISL_1351421, EPI_ISL_1351442, EPI_ISL_1351459                                                                                                                                                                                                                                                                                                                                                                                                                                                                                                                                                                                                                                                                                                                                                                                                                                                                                                                                                                                                                                                                                                                                                                                                                                                                                                                                                                                                                                                                                                                                                                                                                                                                                                                                                     |                                                         |                                                                                                                                            |                                                                                                                                                                                                                                                                                                                   |
| see above                                                                                                                                                                                                                                                                                                                                                                                                                                                                                                                                                                                                                                                                                                                                                                                                                                                                                                                                                                                                                                                                                                                                                                                                                                                                                                                                                                                                                                                                                                                                                                                                                                                                                                                                                                                                                                                                                                                                     | amedes Medlab Arnold Analytik MVZ GmbH                  | Robert Koch Institute                                                                                                                      |                                                                                                                                                                                                                                                                                                                   |
| EPI_ISL_1192372 to 1192383                                                                                                                                                                                                                                                                                                                                                                                                                                                                                                                                                                                                                                                                                                                                                                                                                                                                                                                                                                                                                                                                                                                                                                                                                                                                                                                                                                                                                                                                                                                                                                                                                                                                                                                                                                                                                                                                                                                    | arlion                                                  | Plateforme de testing Namuroise                                                                                                            | Céline Maschietto; Degosserie Jonathan; Denis Olivier; Mullier François; Otto Gaetan                                                                                                                                                                                                                              |
| EPI_ISL_1250953, EPI_ISL_1250958                                                                                                                                                                                                                                                                                                                                                                                                                                                                                                                                                                                                                                                                                                                                                                                                                                                                                                                                                                                                                                                                                                                                                                                                                                                                                                                                                                                                                                                                                                                                                                                                                                                                                                                                                                                                                                                                                                              | dip prev avezzano                                       | Istituto Zooprofilattico Sperimentale dell'Abruzzo e Molise "G. Caporale"                                                                  | Ancora M; Calistri P; Cammà C; Curini V; Di Domenico M; Di Pasquale A; Lorusso A; Mangone I; Marcacci M; Puglia I; Rinaldi A; Savini G; Scialabba S                                                                                                                                                               |
| EPI_ISL_1007940 to 1007962, EPI_ISL_1007964 to 1007977, EPI_ISL_1007979 to 1007980, EPI_ISL_1007982 to 1007983, EPI_ISL_1008715 to 1008734, EPI_ISL_1008736 to 1008750, EPI_ISL_1008752 to 1008760, EPI_ISL_1058035 to 1058039, EPI_ISL_1062935 to 1062936, EPI_ISL_1181116, EPI_ISL_1181118 to 1181139, EPI_ISL_1181141 to 1181147, EPI_ISL_1181149 to 1181173, EPI_ISL_1250860 to 1250942                                                                                                                                                                                                                                                                                                                                                                                                                                                                                                                                                                                                                                                                                                                                                                                                                                                                                                                                                                                                                                                                                                                                                                                                                                                                                                                                                                                                                                                                                                                                                   |                                                         |                                                                                                                                            |                                                                                                                                                                                                                                                                                                                   |
| see above                                                                                                                                                                                                                                                                                                                                                                                                                                                                                                                                                                                                                                                                                                                                                                                                                                                                                                                                                                                                                                                                                                                                                                                                                                                                                                                                                                                                                                                                                                                                                                                                                                                                                                                                                                                                                                                                                                                                     | genXone SA, Molecular Diagnostics Laboratory / NZOZ     | genXone SA, Research & Development Laboratory                                                                                              | Aleksandra Gidlewicz; Anna Brylak-Blaszkow; Anna Brylak-Baszków; Grzegorz Nowicki; Jakub Grabowski; Karol Szeszko; Lukasz Krych; Maciej Sykulski; Michal Kaszuba; Micha Kaszuba; Natalia Drweska-Matelska; Natalia Drwska-Matelska; ukasz Krych                                                                   |
| EPI_ISL_1001299, EPI_ISL_1001311, EPI_ISL_1001326 to 1001327, EPI_ISL_1001331 to 1001335, EPI_ISL_1001338 to 1001351, EPI_ISL_1001368 to 1001371, EPI_ISL_1001374 to 1001375, EPI_ISL_1001381 to 1001383, EPI_ISL_1001389, EPI_ISL_1262813, EPI_ISL_1262819 to 1262880, EPI_ISL_1301816, EPI_ISL_1301820, EPI_ISL_1301823 to 1301828, EPI_ISL_1301833, EPI_ISL_1301859, EPI_ISL_1301866 to 1301876, EPI_ISL_1301888, EPI_ISL_1301938 to 1301943, EPI_ISL_1301948 to 1301956, EPI_ISL_1336335 to 1336340                                                                                                                                                                                                                                                                                                                                                                                                                                                                                                                                                                                                                                                                                                                                                                                                                                                                                                                                                                                                                                                                                                                                                                                                                                                                                                                                                                                                                                       |                                                         |                                                                                                                                            |                                                                                                                                                                                                                                                                                                                   |
| see above                                                                                                                                                                                                                                                                                                                                                                                                                                                                                                                                                                                                                                                                                                                                                                                                                                                                                                                                                                                                                                                                                                                                                                                                                                                                                                                                                                                                                                                                                                                                                                                                                                                                                                                                                                                                                                                                                                                                     | hopital                                                 | National Reference Center for Viruses of Respiratory Infections, Institut Pasteur, Paris                                                   | Angela Brisebarre; Camille Capel; Descamps Dominique; Etienne Simon-Lorière; Gastil Nabil; Guigon AuréLie; Guigon AuréLie; Leruez-Ville Marianne; Louise Lefrançois; Marion Barbet; Maud Vanpeene; Méline Bizard; Paluch Maxime; Stoessel-Thouvenin Patricia; Sylvie Behillil; Sylvie van der Werf; Vincent Enouf |
| EPI_ISL_1036376 to 1036397                                                                                                                                                                                                                                                                                                                                                                                                                                                                                                                                                                                                                                                                                                                                                                                                                                                                                                                                                                                                                                                                                                                                                                                                                                                                                                                                                                                                                                                                                                                                                                                                                                                                                                                                                                                                                                                                                                                    | hopital Centre de Biologie humaine CHU Amiens           | National Reference Center for Viruses of Respiratory Infections, Institut Pasteur, Paris                                                   | Angela Brisebarre; Camille Capel; Castelain Sandrine; Etienne Simon-Lorière; Marion Barbet; Maud Vanpeene; Méline Bizard; Sylvie Behillil; Sylvie van der Werf; Vincent Enouf                                                                                                                                     |
| EPI_ISL_1036408                                                                                                                                                                                                                                                                                                                                                                                                                                                                                                                                                                                                                                                                                                                                                                                                                                                                                                                                                                                                                                                                                                                                                                                                                                                                                                                                                                                                                                                                                                                                                                                                                                                                                                                                                                                                                                                                                                                               | hopital Hôpital Necker                                  | National Reference Center for Viruses of Respiratory Infections, Institut Pasteur, Paris                                                   | Angela Brisebarre; Camille Capel; Etienne Simon-Lorière; Leruez-Ville Marianne; Marion Barbet; Maud Vanpeene; Méline Bizard; Sylvie Behillil; Sylvie van der Werf; Vincent Enouf                                                                                                                                  |
| EPI_ISL_1035917 to 1035918, EPI_ISL_1035928                                                                                                                                                                                                                                                                                                                                                                                                                                                                                                                                                                                                                                                                                                                                                                                                                                                                                                                                                                                                                                                                                                                                                                                                                                                                                                                                                                                                                                                                                                                                                                                                                                                                                                                                                                                                                                                                                                   | hopital Laboratoire de Virologie du CHU de Lille        | National Reference Center for Viruses of Respiratory Infections, Institut Pasteur, Paris                                                   | Angela Brisebarre; Camille Capel; Etienne Simon-Lorière; Guigon Aurélie; Marion Barbet; Maud Vanpeene; Méline Bizard; Sylvie Behillil; Sylvie van der Werf; Vincent Enouf                                                                                                                                         |
| EPI_ISL_1259025                                                                                                                                                                                                                                                                                                                                                                                                                                                                                                                                                                                                                                                                                                                                                                                                                                                                                                                                                                                                                                                                                                                                                                                                                                                                                                                                                                                                                                                                                                                                                                                                                                                                                                                                                                                                                                                                                                                               | hôpital                                                 | National Reference Center for Viruses of Respiratory Infections, Institut Pasteur, Paris                                                   | Angela Brisebarre; Camille Capel; Etienne Simon-Lorière; Karl Stefic; Marion Barbet; Maud Vanpeene; Méline Bizard; Sylvie Behillil; Sylvie van der Werf; Vincent Enouf                                                                                                                                            |
| EPI_ISL_1063852 to 1063854                                                                                                                                                                                                                                                                                                                                                                                                                                                                                                                                                                                                                                                                                                                                                                                                                                                                                                                                                                                                                                                                                                                                                                                                                                                                                                                                                                                                                                                                                                                                                                                                                                                                                                                                                                                                                                                                                                                    | inDNA Life Sciences Private Limited, Bhubaneswar        | Immunogenomics lab, Institute of Life Sciences, Bhubaneswar                                                                                | Ajay Parida; Amol M. Kanampalliwar; Arup Ghosh; Atimukta Jha; INSACOG Consortium; Kirtal Hansdah; Punit Prasad; Rajeeb Swain; Rupesh Dash; Safal Walia; Shifu Aggarwal; Sunil K. Raghav                                                                                                                           |
| EPI_ISL_1214792, EPI_ISL_1214797, EPI_ISL_1214801, EPI_ISL_1214809, EPI_ISL_1282968, EPI_ISL_1282980, EPI_ISL_1282982, EPI_ISL_1351768, EPI_ISL_1351772 to 1351773                                                                                                                                                                                                                                                                                                                                                                                                                                                                                                                                                                                                                                                                                                                                                                                                                                                                                                                                                                                                                                                                                                                                                                                                                                                                                                                                                                                                                                                                                                                                                                                                                                                                                                                                                                            |                                                         |                                                                                                                                            |                                                                                                                                                                                                                                                                                                                   |
| see above                                                                                                                                                                                                                                                                                                                                                                                                                                                                                                                                                                                                                                                                                                                                                                                                                                                                                                                                                                                                                                                                                                                                                                                                                                                                                                                                                                                                                                                                                                                                                                                                                                                                                                                                                                                                                                                                                                                                     | labopart - Medizinische Laboratorien Dresden            | Robert Koch Institute                                                                                                                      |                                                                                                                                                                                                                                                                                                                   |
| EPI_ISL_1085318, EPI_ISL_1085359, EPI_ISL_1085820, EPI_ISL_1085832, EPI_ISL_1085847                                                                                                                                                                                                                                                                                                                                                                                                                                                                                                                                                                                                                                                                                                                                                                                                                                                                                                                                                                                                                                                                                                                                                                                                                                                                                                                                                                                                                                                                                                                                                                                                                                                                                                                                                                                                                                                           | laboratoire Belle Epine                                 | Department of Virology, Henri Mondor University Hospital, Assistance Publique Hôpitaux de Paris, Université Paris-Est Créteil, INSERM U955 | Alexandre Soulier; Christophe Rodriguez; Elisabeth Trawinski; Guillaume Gricourt; Jean-Michel Pawlowsky; Melissa N'Debi; Slim Fourati; Vanessa Demontant                                                                                                                                                          |
| EPI_ISL_1235687                                                                                                                                                                                                                                                                                                                                                                                                                                                                                                                                                                                                                                                                                                                                                                                                                                                                                                                                                                                                                                                                                                                                                                                                                                                                                                                                                                                                                                                                                                                                                                                                                                                                                                                                                                                                                                                                                                                               | laboratorio de salud pública (Bogotá)                   | Gencore- Universidad de los Andes                                                                                                          | Alejandro Gómez; David González; Johana Hernandez Gabriela Delgado; Luisa Sacristán; Marcela Guevara-Suarez; Silvia Restrepo                                                                                                                                                                                      |
| EPI_ISL_1281309, EPI_ISL_1281313, EPI_ISL_1281333, EPI_ISL_1281346, EPI_ISL_1281351, EPI_ISL_1281355, EPI_ISL_1281358, EPI_ISL_1281360, EPI_ISL_1281363, EPI_ISL_1281366, EPI_ISL_1281371, EPI_ISL_1281380, EPI_ISL_1281383, EPI_ISL_1281386, EPI_ISL_1281390, EPI_ISL_1281394, EPI_ISL_1281403, EPI_ISL_1281407, EPI_ISL_1281413, EPI_ISL_1281418, EPI_ISL_1281425, EPI_ISL_1281431 to 1281433, EPI_ISL_1281447, EPI_ISL_1281459, EPI_ISL_1281465 to 1281466, EPI_ISL_1281468, EPI_ISL_1281473, EPI_ISL_1281476, EPI_ISL_1281478, EPI_ISL_1281485, EPI_ISL_1281490, EPI_ISL_1281495, EPI_ISL_1281508, EPI_ISL_1281511, EPI_ISL_1281513, EPI_ISL_1281522, EPI_ISL_1281528, EPI_ISL_1281535 to 1281536, EPI_ISL_1281540, EPI_ISL_1281551, EPI_ISL_1281558 to 1281559, EPI_ISL_1281567, EPI_ISL_1281570, EPI_ISL_1281581, EPI_ISL_1351373 to 1351375, EPI_ISL_1351377 to 1351379, EPI_ISL_1351382, EPI_ISL_1351385, EPI_ISL_1351397, EPI_ISL_1351401, EPI_ISL_1351405, EPI_ISL_1351411, EPI_ISL_1351414, EPI_ISL_1351431, EPI_ISL_1351434, EPI_ISL_1351453, EPI_ISL_1351466, EPI_ISL_1351485, EPI_ISL_1351497, EPI_ISL_1351502, EPI_ISL_1351513, EPI_ISL_1351516, EPI_ISL_1351527, EPI_ISL_1351531, EPI_ISL_1351545, EPI_ISL_1351559 to 1351560, EPI_ISL_1351566, EPI_ISL_1351579, EPI_ISL_1351593, EPI_ISL_1351596, EPI_ISL_1351602 to 1351603, EPI_ISL_1351609, EPI_ISL_1351612, EPI_ISL_1351615 to 1351616, EPI_ISL_1351619, EPI_ISL_1351631, EPI_ISL_1351637, EPI_ISL_1351653, EPI_ISL_1351661, EPI_ISL_1351671, EPI_ISL_1351677 to 1351678, EPI_ISL_1351683, EPI_ISL_1351686, EPI_ISL_1351690, EPI_ISL_1351693, EPI_ISL_1351699, EPI_ISL_1351702, EPI_ISL_1351705, EPI_ISL_1351710, EPI_ISL_1351712, EPI_ISL_1351717 to 1351718, EPI_ISL_1351721 to 1351722, EPI_ISL_1351726, EPI_ISL_1351729 to 1351730, EPI_ISL_1351732, EPI_ISL_1351738, EPI_ISL_1351740, EPI_ISL_1351748, EPI_ISL_1351751, EPI_ISL_1351753, EPI_ISL_1351755 to 1351756 |                                                         |                                                                                                                                            |                                                                                                                                                                                                                                                                                                                   |
| see above                                                                                                                                                                                                                                                                                                                                                                                                                                                                                                                                                                                                                                                                                                                                                                                                                                                                                                                                                                                                                                                                                                                                                                                                                                                                                                                                                                                                                                                                                                                                                                                                                                                                                                                                                                                                                                                                                                                                     | nordlab - Partnerschafspraxis fu?r Laboratoriumsmedizin | Robert Koch Institute                                                                                                                      |                                                                                                                                                                                                                                                                                                                   |
| EPI_ISL_1250952                                                                                                                                                                                                                                                                                                                                                                                                                                                                                                                                                                                                                                                                                                                                                                                                                                                                                                                                                                                                                                                                                                                                                                                                                                                                                                                                                                                                                                                                                                                                                                                                                                                                                                                                                                                                                                                                                                                               | ospedale civile teramo                                  | Istituto Zooprofilattico Sperimentale dell'Abruzzo e Molise "G. Caporale"                                                                  | Ancora M; Calistri P; Cammà C; Curini V; Di Domenico M; Di Pasquale A; Lorusso A; Mangone I; Marcacci M; Puglia I; Rinaldi A; Savini G; Scialabba S                                                                                                                                                               |
| EPI_ISL_1015377, EPI_ISL_1015381, EPI_ISL_1015388, EPI_ISL_1015401 to 1015407                                                                                                                                                                                                                                                                                                                                                                                                                                                                                                                                                                                                                                                                                                                                                                                                                                                                                                                                                                                                                                                                                                                                                                                                                                                                                                                                                                                                                                                                                                                                                                                                                                                                                                                                                                                                                                                                 | place General Valerie Andre                             | IRBA, 2MI                                                                                                                                  | GORGE O.; JALADY A.-M.; NOLENT F.; SARILAR V.                                                                                                                                                                                                                                                                     |
| EPI_ISL_1250947, EPI_ISL_1250954, EPI_ISL_1250959, EPI_ISL_1250961, EPI_ISL_1250973, EPI_ISL_1250987, EPI_ISL_1251004, EPI_ISL_1251026, EPI_ISL_1251028, EPI_ISL_1251077, EPI_ISL_1290806                                                                                                                                                                                                                                                                                                                                                                                                                                                                                                                                                                                                                                                                                                                                                                                                                                                                                                                                                                                                                                                                                                                                                                                                                                                                                                                                                                                                                                                                                                                                                                                                                                                                                                                                                     |                                                         |                                                                                                                                            |                                                                                                                                                                                                                                                                                                                   |
| see above                                                                                                                                                                                                                                                                                                                                                                                                                                                                                                                                                                                                                                                                                                                                                                                                                                                                                                                                                                                                                                                                                                                                                                                                                                                                                                                                                                                                                                                                                                                                                                                                                                                                                                                                                                                                                                                                                                                                     | siesp Chieti                                            | Istituto Zooprofilattico Sperimentale dell'Abruzzo e Molise "G. Caporale"                                                                  | Ancora M; Calistri P; Cammà C; Curini V; Di Domenico M; Di Pasquale A; Lorusso A; Mangone I; Marcacci M; Puglia I; Rinaldi A; Savini G; Scialabba S                                                                                                                                                               |
| EPI_ISL_1250950 to 1250951                                                                                                                                                                                                                                                                                                                                                                                                                                                                                                                                                                                                                                                                                                                                                                                                                                                                                                                                                                                                                                                                                                                                                                                                                                                                                                                                                                                                                                                                                                                                                                                                                                                                                                                                                                                                                                                                                                                    | siesp dipartimento di prevenzione                       | Istituto Zooprofilattico Sperimentale dell'Abruzzo e Molise "G. Caporale"                                                                  | Ancora M; Calistri P; Cammà C; Curini V; Di Domenico M; Di Pasquale A; Lorusso A; Mangone I; Marcacci M; Puglia I; Rinaldi A; Savini G; Scialabba S                                                                                                                                                               |
| EPI_ISL_1067608                                                                                                                                                                                                                                                                                                                                                                                                                                                                                                                                                                                                                                                                                                                                                                                                                                                                                                                                                                                                                                                                                                                                                                                                                                                                                                                                                                                                                                                                                                                                                                                                                                                                                                                                                                                                                                                                                                                               | unknown                                                 | Incienza, Instituto Costarricense de Investigación y Enseñanza en Nutrición y Salud                                                        | Adriana Godínez; Caterina Guzmán; Claudio Soto-Garita; Estela Cordero; Francisco Duarte; Hebleen Porras; Melany Calderón; Nazareth Ruiz & Adriana Bermúdez-Espinoza                                                                                                                                               |
| EPI_ISL_1054997 to 1055004                                                                                                                                                                                                                                                                                                                                                                                                                                                                                                                                                                                                                                                                                                                                                                                                                                                                                                                                                                                                                                                                                                                                                                                                                                                                                                                                                                                                                                                                                                                                                                                                                                                                                                                                                                                                                                                                                                                    | unknown                                                 | Instituto Nacional de Saude (INSA)                                                                                                         | Borges et al                                                                                                                                                                                                                                                                                                      |
| EPI_ISL_1302455, EPI_ISL_1302457, EPI_ISL_1302602 to 1302612, EPI_ISL_1302614 to 1302616, EPI_ISL_1302620, EPI_ISL_1302622 to 1302623, EPI_ISL_1302627 to 1302629, EPI_ISL_1302631 to 1302632, EPI_ISL_1302636 to 1302637, EPI_ISL_1302646, EPI_ISL_1302649                                                                                                                                                                                                                                                                                                                                                                                                                                                                                                                                                                                                                                                                                                                                                                                                                                                                                                                                                                                                                                                                                                                                                                                                                                                                                                                                                                                                                                                                                                                                                                                                                                                                                   |                                                         |                                                                                                                                            |                                                                                                                                                                                                                                                                                                                   |
| see above                                                                                                                                                                                                                                                                                                                                                                                                                                                                                                                                                                                                                                                                                                                                                                                                                                                                                                                                                                                                                                                                                                                                                                                                                                                                                                                                                                                                                                                                                                                                                                                                                                                                                                                                                                                                                                                                                                                                     | "Rezus.lt"                                              | Lithuanian University of Health Sciences Hospital, Department of Genetics and Molecular Medicine                                           | Astra Vitkauskienė; Darius Cereskevicius; Inga Nasvytiene; Mantas Saraukas; Marius Skukys; Rasa Ugeniskiene; Renaldas Jurkevicius; Zivile Zemeckiene                                                                                                                                                              |
